# Supplementary material for: Insights into p53 transcriptional function via genome-wide chromatin occupancy and gene expression analysis
Source: PubMed Central journal article supplement — Cell Death Differ. 2012 Jul 13;19(12):1992–2002. doi: 10.1038/cdd.2012.89 (PMC3504713; doi:10.1038/cdd.2012.89), 2012-07-13
Supplement: cdd201289x1.pdf [file cdd201289x1.pdf]

Figure S1

A

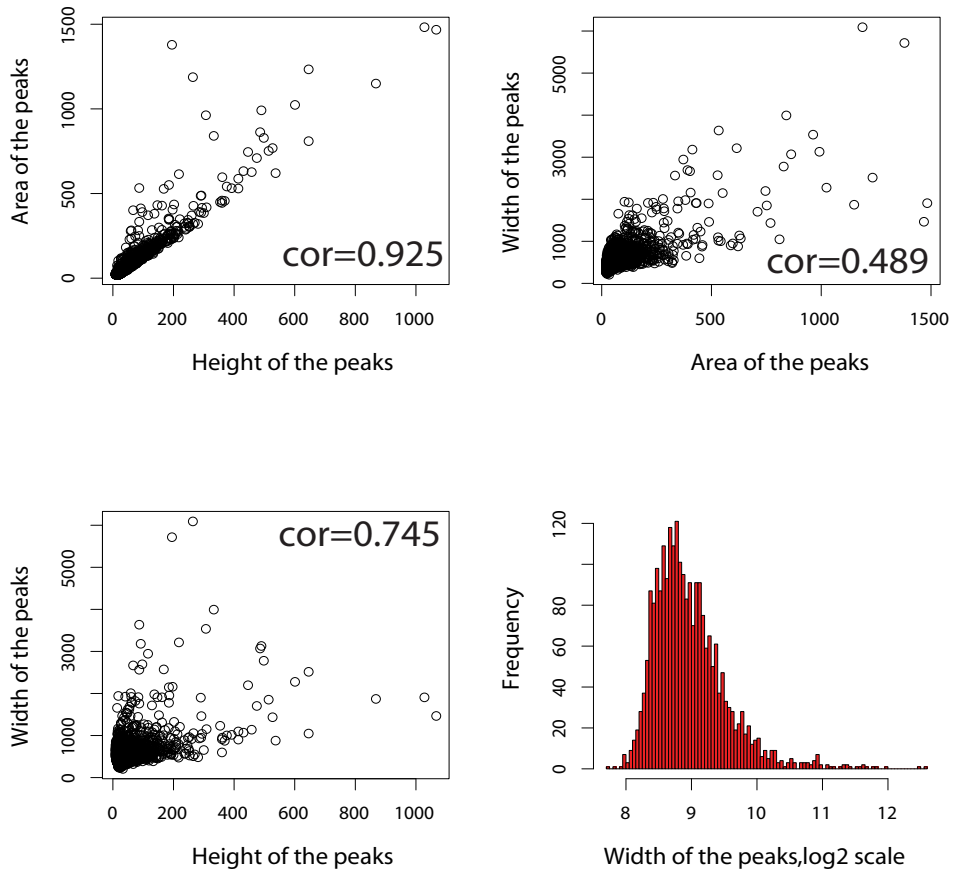

B

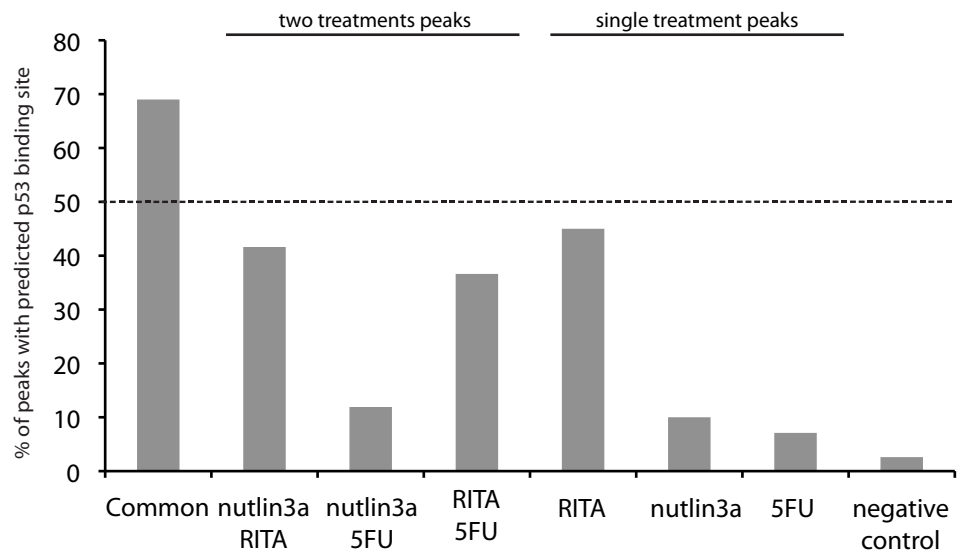

Figure S2

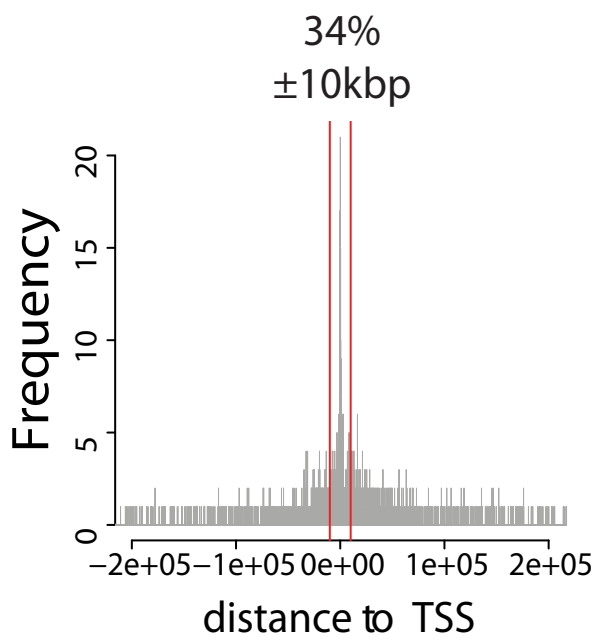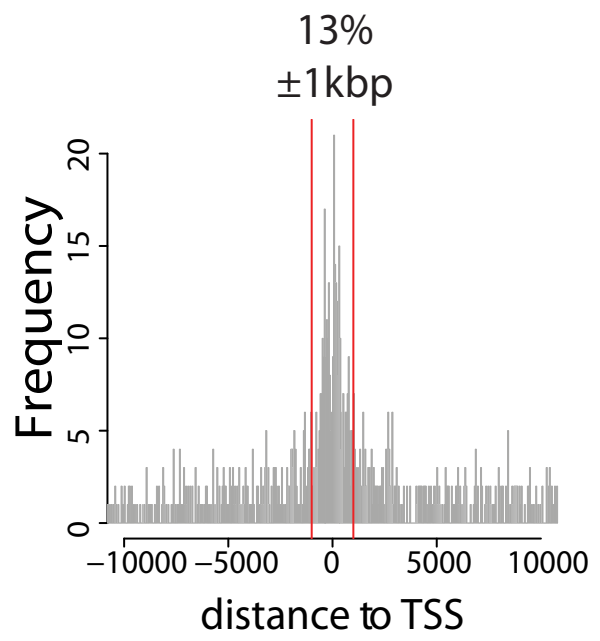

Figure S3

A

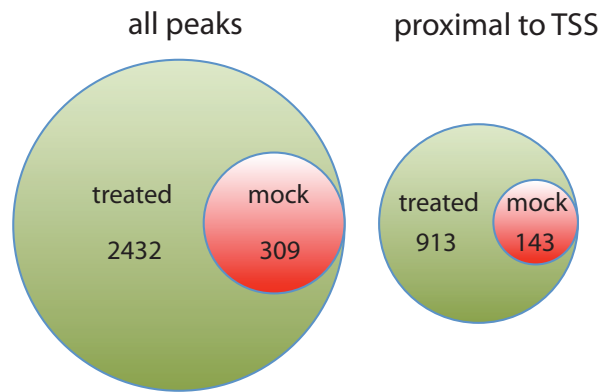

B

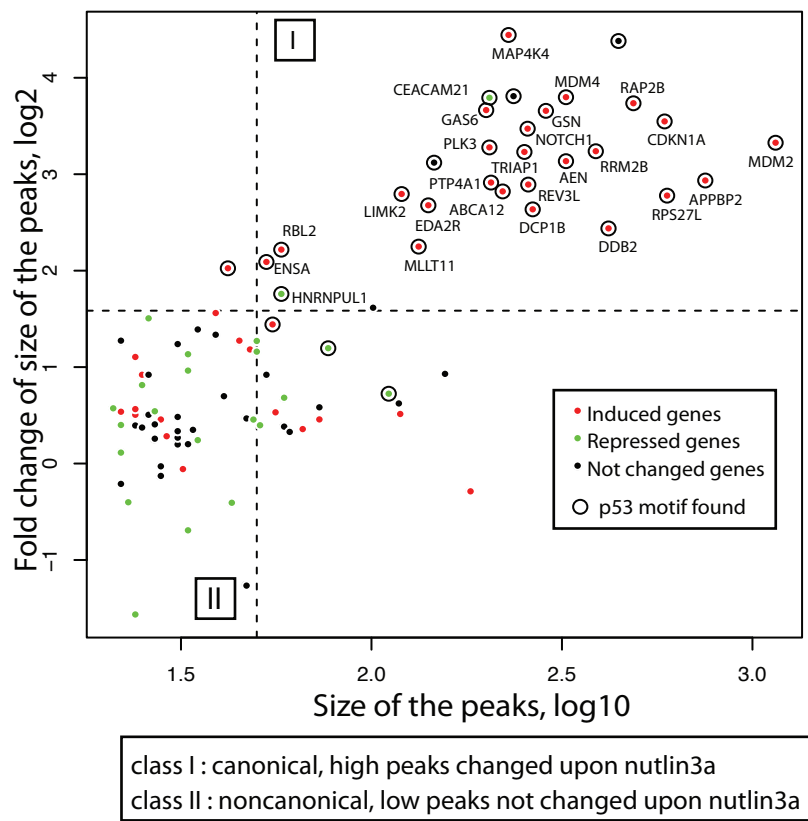

Figure S4

A

class I, noncanonical peaks

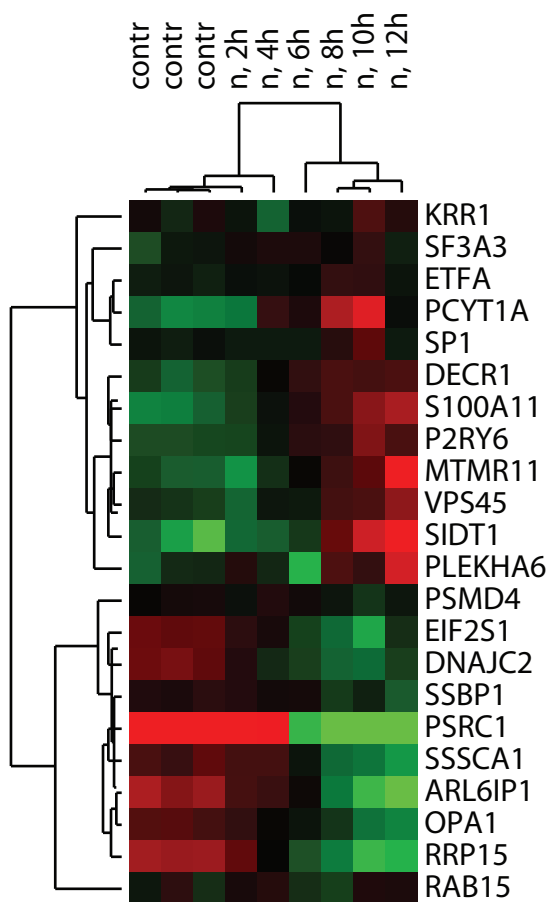

B

class I, noncanonical peaks

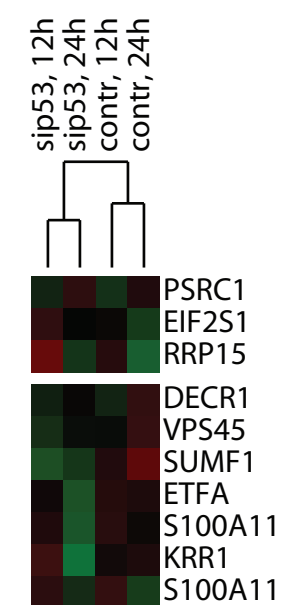

C

class II, canonical peaks

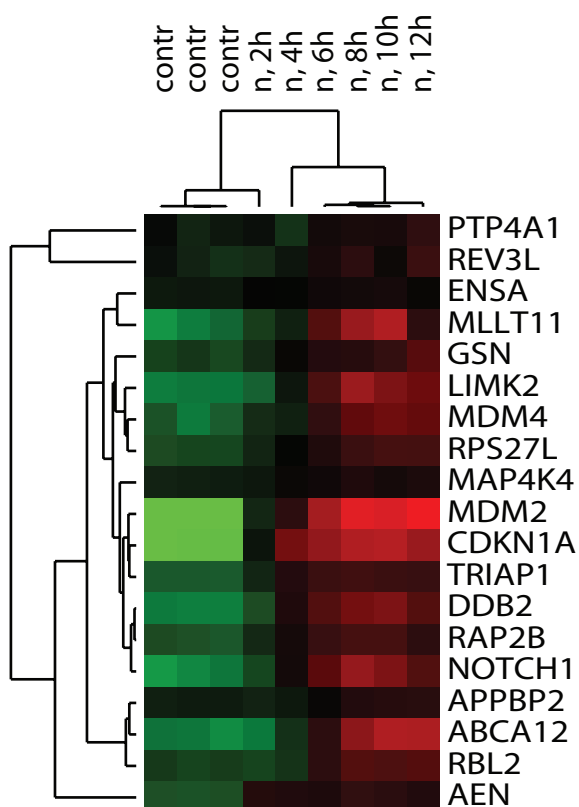

D

class II, canonical peaks

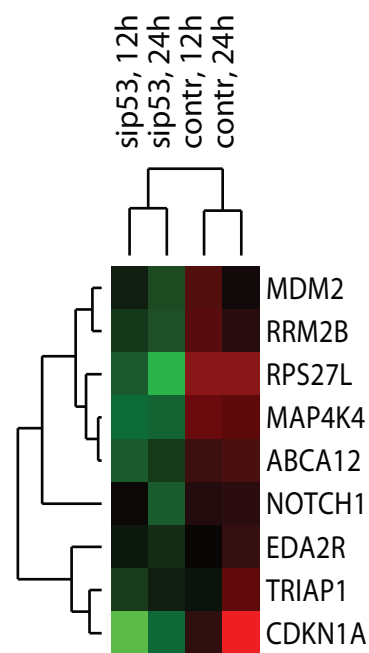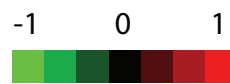

Figure S5

A

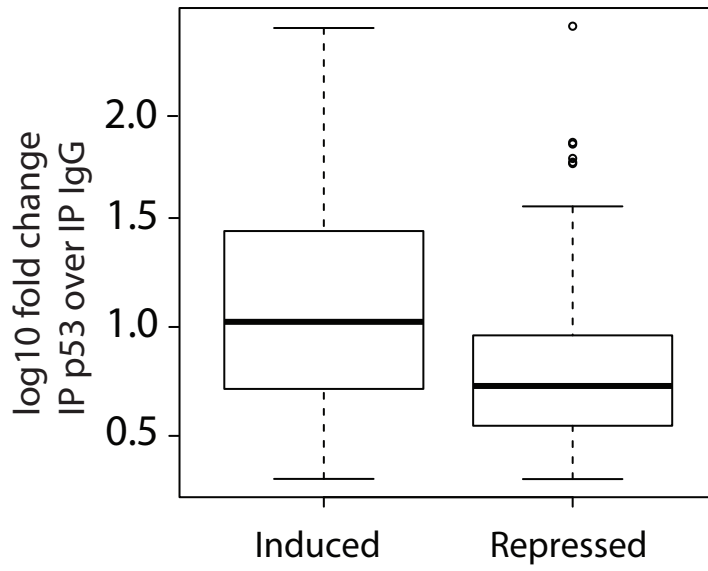

B

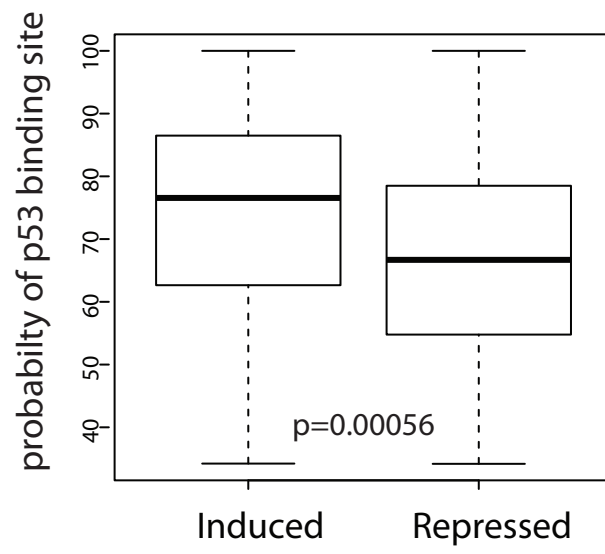

Figure S6

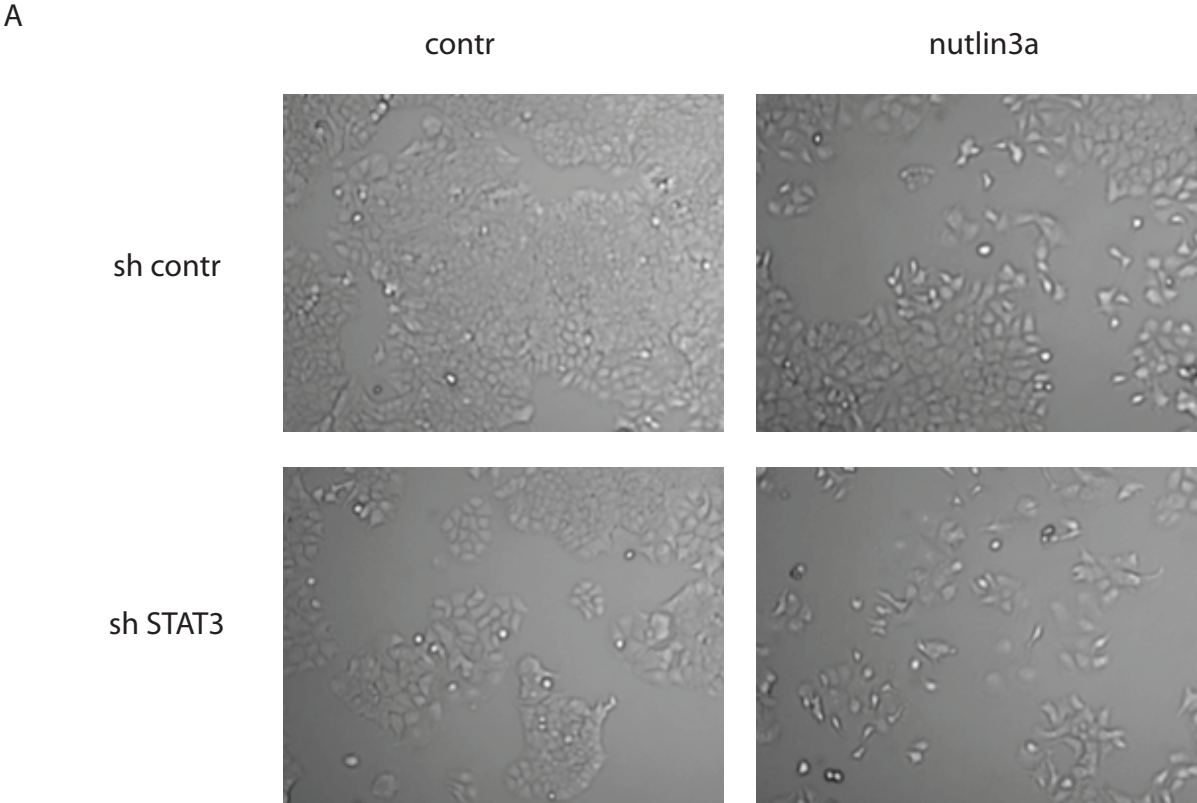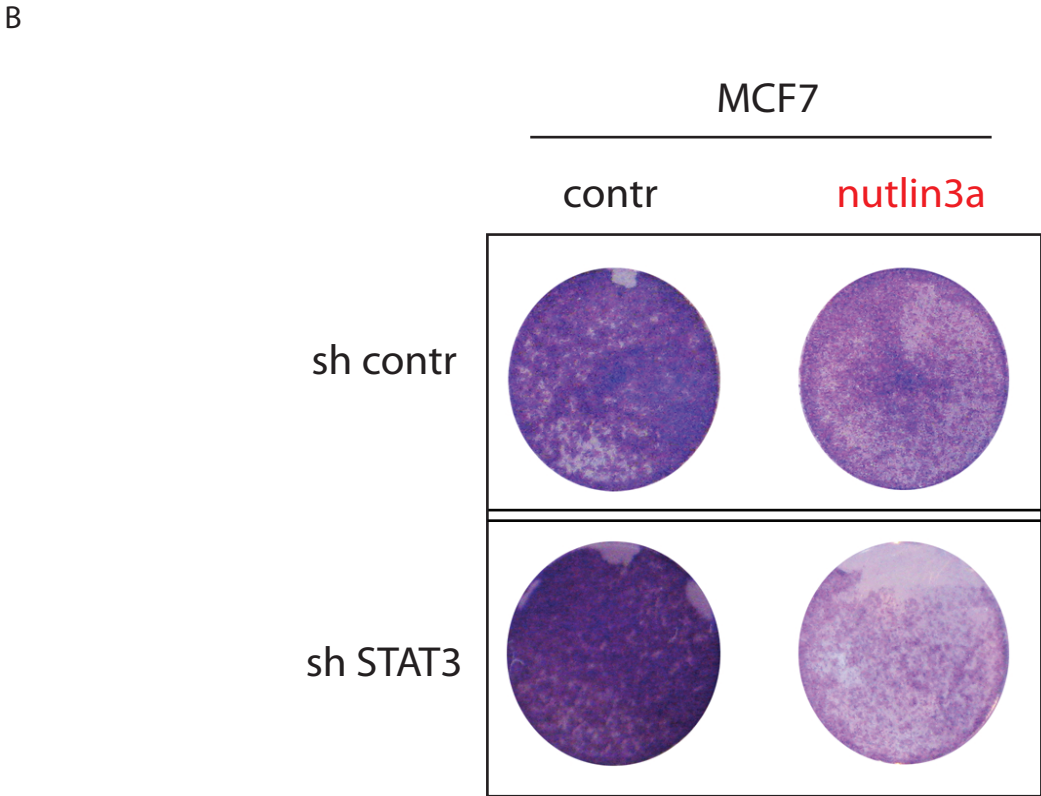

Figure S7

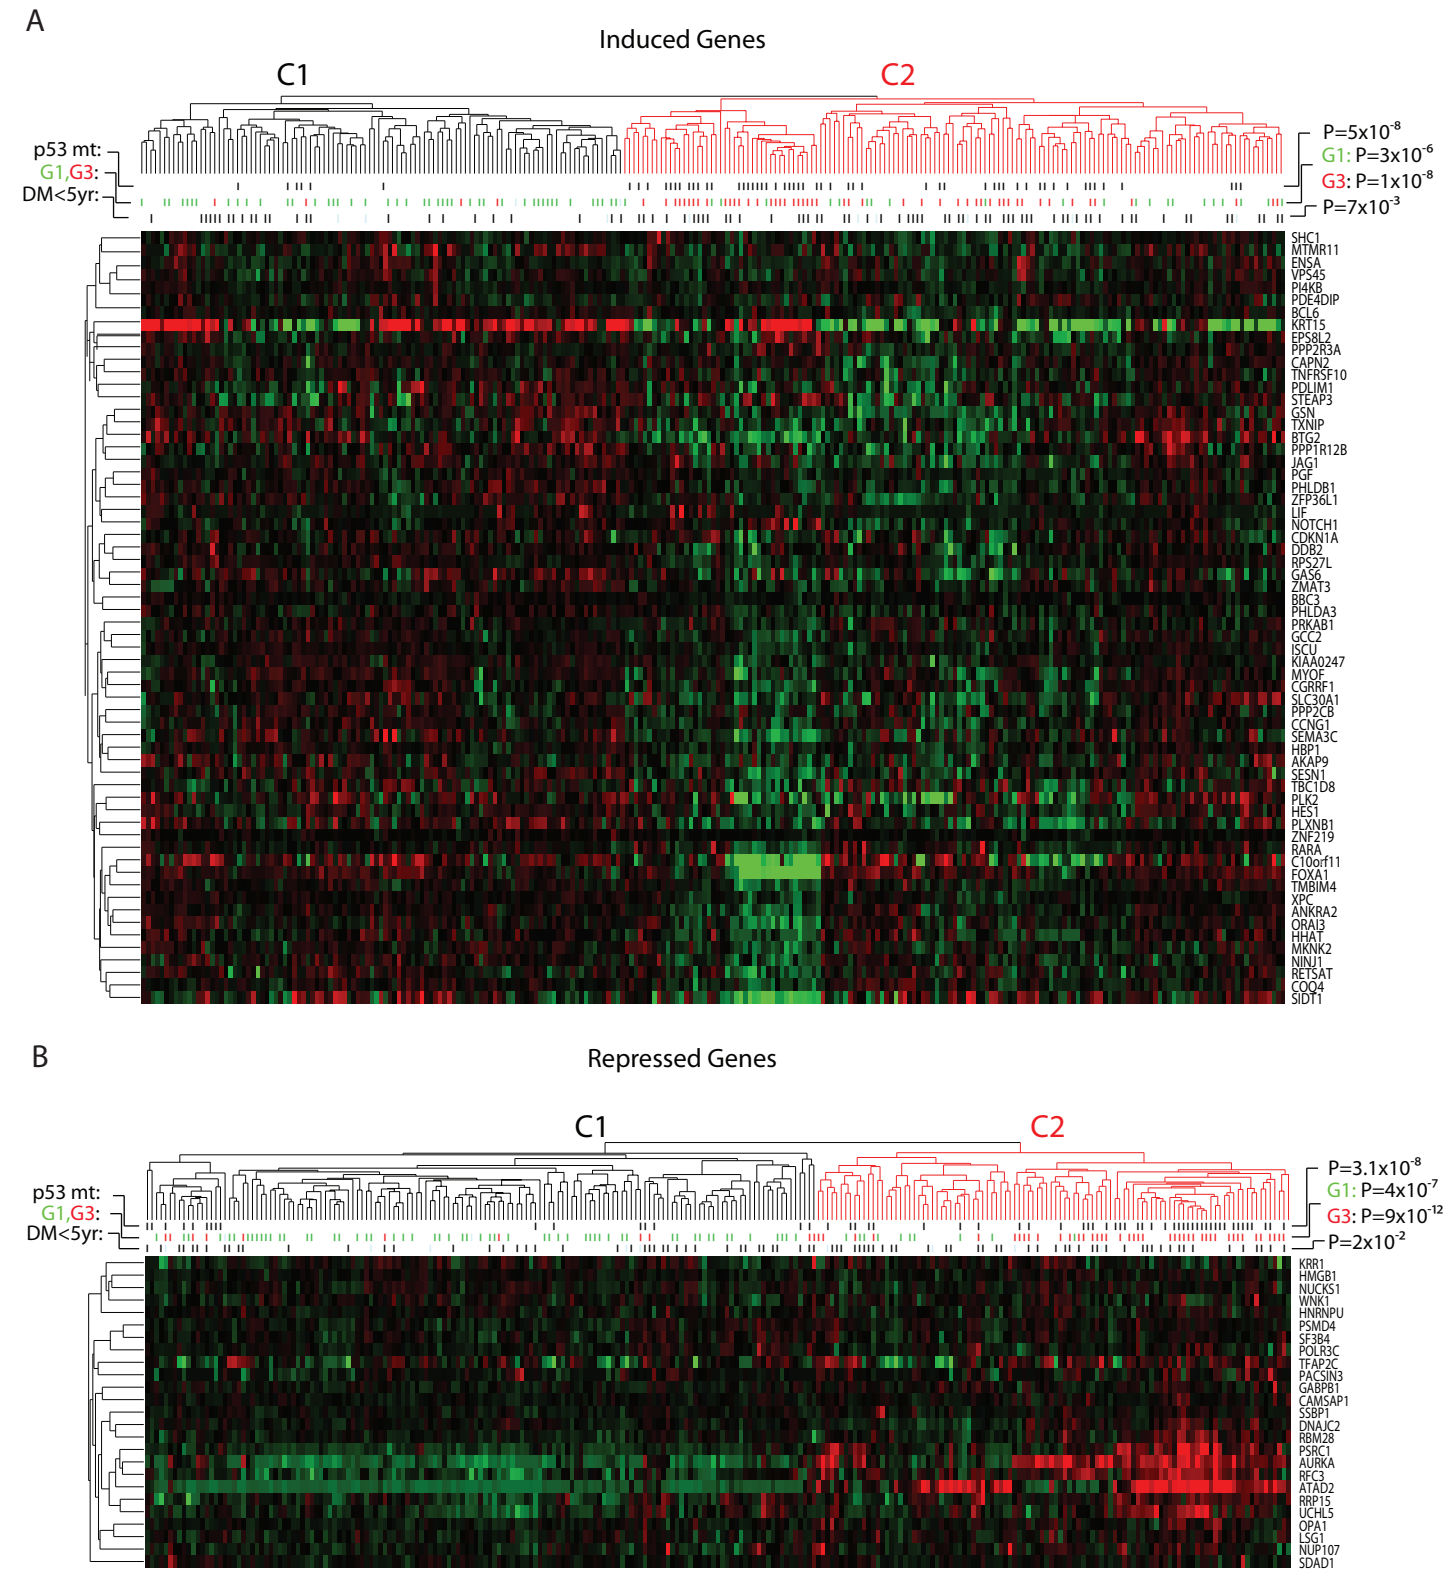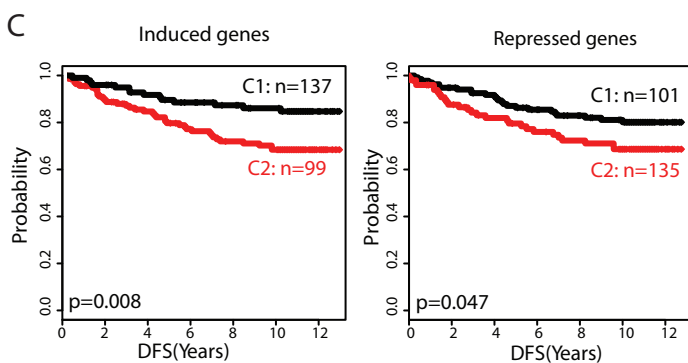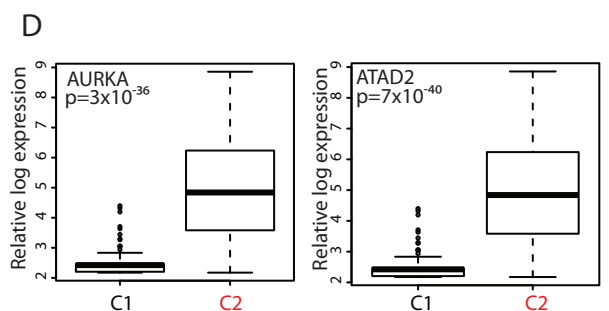

**Table S5, related to Figure 1. Known p53 target genes bound by p53 upon all three treatments (46 genes)**

| GeneSymbol | EnsName         | chr   | start     | end       | Width | Dist_to_TSS |
|------------|-----------------|-------|-----------|-----------|-------|-------------|
| AEN        | ENSG00000181026 | chr15 | 86965199  | 86966090  | 891   | 65          |
| ARID3A     | ENSG00000116017 | chr19 | 884381    | 884949    | 568   | 7560        |
| BAX        | ENSG00000087088 | chr19 | 54150064  | 54150490  | 426   | 331         |
| BBC3       | ENSG00000105327 | chr19 | 52427444  | 52427946  | 502   | 25          |
| BBC3       | ENSG00000105327 | chr19 | 52426312  | 52427062  | 750   | 189         |
| BCL6       | ENSG00000113916 | chr3  | 188950368 | 188951186 | 818   | 4884        |
| BTG2       | ENSG00000159388 | chr1  | 201541130 | 201541514 | 384   | 34          |
| BTG2       | ENSG00000159388 | chr1  | 201542096 | 201542925 | 829   | 1182        |
| C12orf5    | ENSG00000078237 | chr12 | 4300582   | 4301303   | 721   | 470         |
| CCNG1      | ENSG00000113328 | chr5  | 162796907 | 162797782 | 875   | 301         |
| CDKN1A     | ENSG00000124762 | chr6  | 36754039  | 36754835  | 796   | 228         |
| CDKN1A     | ENSG00000124762 | chr6  | 36752718  | 36753353  | 635   | 1345        |
| CDKN1A     | ENSG00000124762 | chr6  | 36751718  | 36752623  | 905   | 2254        |
| CDKN1A     | ENSG00000124762 | chr6  | 36753364  | 36753907  | 543   | 737         |
| CDKN1A     | ENSG00000124762 | chr6  | 36758203  | 36758619  | 416   | 3903        |
| DDB2       | ENSG00000134574 | chr11 | 47192787  | 47193941  | 1154  | 6           |
| DDIT4      | ENSG00000168209 | chr10 | 73700292  | 73700778  | 486   | 3125        |
| EDA2R      | ENSG00000131080 | chrX  | 65774949  | 65775589  | 640   | 345         |
| EDN2       | ENSG00000127129 | chr1  | 41720503  | 41720880  | 377   | 2183        |
| FAS        | ENSG00000026103 | chr10 | 90740809  | 90741482  | 673   | 700         |
| GADD45A    | ENSG00000116717 | chr1  | 67924610  | 67925301  | 691   | 1578        |
| GDF15      | ENSG00000130513 | chr19 | 18357779  | 18358224  | 445   | 41          |
| KRT8       | ENSG00000170421 | chr12 | 51585028  | 51585630  | 602   | 141         |
| KRT8       | ENSG00000170421 | chr12 | 51575260  | 51576001  | 741   | 9648        |
| LIF        | ENSG00000128342 | chr22 | 28971553  | 28972500  | 947   | 838         |
| LRDD       | ENSG00000177595 | chr11 | 794218    | 794701    | 483   | 864         |
| MDM2       | ENSG00000135679 | chr12 | 67487558  | 67489430  | 1872  | 251         |
| MDM2       | ENSG00000135679 | chr12 | 67480354  | 67480656  | 302   | 7714        |
| NOTCH1     | ENSG00000148400 | chr9  | 138564427 | 138565369 | 942   | 4751        |
| PCNA       | ENSG00000132646 | chr20 | 5048591   | 5049089   | 498   | 236         |
| PLK2       | ENSG00000145632 | chr5  | 57793547  | 57794083  | 536   | 2193        |
| PLK3       | ENSG00000173846 | chr1  | 45037929  | 45038630  | 701   | 454         |



|           |                 |       |           |           |      |      |
|-----------|-----------------|-------|-----------|-----------|------|------|
| PMAIP1    | ENSG00000141682 | chr18 | 55717715  | 55718339  | 624  | 264  |
| PPM1D     | ENSG00000170836 | chr17 | 56031318  | 56033835  | 2517 | 66   |
| PRDM1     | ENSG00000057657 | chr6  | 106652740 | 106653507 | 767  | 342  |
| PRKAB1    | ENSG00000111725 | chr12 | 118590023 | 118590430 | 407  | 58   |
| PTEN      | ENSG00000171862 | chr10 | 89611808  | 89612324  | 516  | 1021 |
| PTEN      | ENSG00000171862 | chr10 | 89612779  | 89613219  | 440  | 133  |
| RABGGTA   | ENSG00000100949 | chr14 | 23810165  | 23810539  | 374  | 223  |
| RPS27L    | ENSG00000185088 | chr15 | 61236036  | 61236987  | 951  | 172  |
| RRM2B     | ENSG00000048392 | chr8  | 103317817 | 103318767 | 950  | 2042 |
| S100A2    | ENSG00000196754 | chr1  | 151806616 | 151807052 | 436  | 179  |
| S100A2    | ENSG00000196754 | chr1  | 151805626 | 151806045 | 419  | 50   |
| SERPINB5  | ENSG00000206075 | chr18 | 59294721  | 59295344  | 623  | 225  |
| SESN1     | ENSG00000080546 | chr6  | 109436630 | 109437343 | 713  | 14   |
| SESN2     | ENSG00000130766 | chr1  | 28459225  | 28459768  | 543  | 811  |
| SFN       | ENSG00000175793 | chr1  | 27060320  | 27060757  | 437  | 1681 |
| STEAP3    | ENSG00000115107 | chr2  | 119691105 | 119691660 | 555  | 6570 |
| STEAP3    | ENSG00000115107 | chr2  | 119692116 | 119693157 | 1041 | 5291 |
| TNFRSF10B | ENSG00000120889 | chr8  | 22981900  | 22982651  | 751  | 561  |
| TP53I3    | ENSG00000115129 | chr2  | 24160532  | 24160964  | 432  | 11   |
| TP53INP1  | ENSG00000164938 | chr8  | 96030700  | 96031500  | 800  | 233  |
| TP53INP1  | ENSG00000164938 | chr8  | 96032625  | 96033168  | 543  | 2219 |
| TP53TG1   | ENSG00000182165 | chr7  | 86811647  | 86813187  | 1540 | 795  |
| TRAF4     | ENSG00000076604 | chr17 | 24094086  | 24095083  | 997  | 810  |
| TRIAP1    | ENSG00000170855 | chr12 | 119368069 | 119368802 | 733  | 66   |
| TRIM22    | ENSG00000132274 | chr11 | 5668208   | 5668692   | 484  | 914  |
| ZMAT3     | ENSG00000172667 | chr3  | 180270323 | 180271040 | 717  | 1602 |

**Table S6, related to Figure 2. Known p53 target genes bound upon all three treatments within TSS and differentially expressed upon mult3a (40 genes)**

| GeneSymbol | EnsName         | chr   | start     | end       | Dist_to_TSS | log2FC      | Adj.p.Val   |
|------------|-----------------|-------|-----------|-----------|-------------|-------------|-------------|
| AEN        | ENSG00000181026 | chr15 | 86965199  | 86966090  | 65          | 1.550570094 | 0.001552165 |
| BAX        | ENSG00000087088 | chr19 | 54150064  | 54150490  | 331         | 1.904904918 | 0.000828345 |
| BBC3       | ENSG00000105327 | chr19 | 52427444  | 52427946  | 25          | 3.637337604 | 0.000654262 |
| BBC3       | ENSG00000105327 | chr19 | 52426312  | 52427062  | 189         | 3.637337604 | 0.000654262 |
| BCL6       | ENSG00000113916 | chr3  | 188950368 | 188951186 | 4884        | 0.510369276 | 0.00390297  |
| BTG2       | ENSG00000159388 | chr1  | 201541130 | 201541514 | 34          | 3.893063308 | 0.000536459 |
| BTG2       | ENSG00000159388 | chr1  | 201542096 | 201542925 | 1182        | 3.893063308 | 0.000536459 |
| C12orf5    | ENSG00000078237 | chr12 | 4300582   | 4301303   | 470         | 2.896713365 | 0.000605846 |
| CCNG1      | ENSG00000113328 | chr5  | 162796907 | 162797782 | 301         | 2.105432347 | 0.000725985 |
| CDKN1A     | ENSG00000124762 | chr6  | 36754039  | 36754835  | 228         | 4.498903377 | 0.000224292 |
| CDKN1A     | ENSG00000124762 | chr6  | 36758203  | 36758619  | 3903        | 4.498903377 | 0.000224292 |
| CDKN1A     | ENSG00000124762 | chr6  | 36752718  | 36753353  | 1345        | 4.498903377 | 0.000224292 |
| CDKN1A     | ENSG00000124762 | chr6  | 36753364  | 36753907  | 737         | 4.498903377 | 0.000224292 |
| CDKN1A     | ENSG00000124762 | chr6  | 36751718  | 36752623  | 2254        | 4.498903377 | 0.000224292 |
| DDB2       | ENSG00000134574 | chr11 | 47192787  | 47193941  | 6           | 2.633809302 | 0.000694746 |
| DDIT4      | ENSG00000168209 | chr10 | 73700292  | 73700778  | 3125        | 2.417346415 | 0.005471575 |
| EDA2R      | ENSG00000131080 | chrX  | 65774949  | 65775589  | 345         | 3.586689218 | 0.00088897  |
| EDN2       | ENSG00000127129 | chr1  | 41720503  | 41720880  | 2183        | 1.587525469 | 0.005850992 |
| FAS        | ENSG00000026103 | chr10 | 90740809  | 90741482  | 700         | 4.67929599  | 0.000224292 |
| GADD45A    | ENSG00000116717 | chr1  | 67924610  | 67925301  | 1578        | 4.204589468 | 0.000511021 |
| GDF15      | ENSG00000130513 | chr19 | 18357779  | 18358224  | 41          | 4.397483463 | 0.000387554 |
| LIF        | ENSG00000128342 | chr22 | 28971553  | 28972500  | 838         | 4.27315573  | 0.001341969 |
| LRDD       | ENSG00000177595 | chr11 | 794218    | 794701    | 864         | 2.732433409 | 0.000654262 |
| MDM2       | ENSG00000135679 | chr12 | 67487558  | 67489430  | 251         | 3.828128003 | 0.000224292 |
| MDM2       | ENSG00000135679 | chr12 | 67480354  | 67480656  | 7714        | 3.828128003 | 0.000224292 |
| NOTCH1     | ENSG00000148400 | chr9  | 138564427 | 138565369 | 4751        | 2.27828332  | 0.001969558 |
| PLK2       | ENSG00000145632 | chr5  | 57793547  | 57794083  | 2193        | 0.724515053 | 0.039376607 |
| PLK3       | ENSG00000173846 | chr1  | 45037929  | 45038630  | 454         | 1.785887018 | 0.003838996 |
| PMAIP1     | ENSG00000141682 | chr18 | 55717715  | 55718339  | 264         | 2.095062157 | 0.000798855 |
| PPM1D      | ENSG00000170836 | chr17 | 56031318  | 56033835  | 66          | 1.773431548 | 0.000654262 |

|           |                 |       |           |           |      |             |             |
|-----------|-----------------|-------|-----------|-----------|------|-------------|-------------|
| PRKAB1    | ENSG00000111725 | chr12 | 118590023 | 118590430 | 58   | 1.260939441 | 0.000870445 |
| RABGGTA   | ENSG00000100949 | chr14 | 23810165  | 23810539  | 223  | 1.195155194 | 0.004609675 |
| RPS27L    | ENSG00000185088 | chr15 | 61236036  | 61236987  | 172  | 1.120976604 | 0.000487023 |
| RRM2B     | ENSG00000048392 | chr8  | 103317817 | 103318767 | 2042 | 2.241792759 | 0.000654262 |
| S100A2    | ENSG00000196754 | chr1  | 151806616 | 151807052 | 179  | 0.886348145 | 0.017289683 |
| S100A2    | ENSG00000196754 | chr1  | 151805626 | 151806045 | 50   | 0.886348145 | 0.017289683 |
| SERPINB5  | ENSG00000206075 | chr18 | 59294721  | 59295344  | 225  | 6.665376191 | 0.000654262 |
| SESN1     | ENSG00000080546 | chr6  | 109436630 | 109437343 | 14   | 3.92247604  | 0.000605846 |
| SESN2     | ENSG00000130766 | chr1  | 28459225  | 28459768  | 811  | 3.275818504 | 0.000654262 |
| SFN       | ENSG00000175793 | chr1  | 27060320  | 27060757  | 1681 | 1.22107711  | 0.000731682 |
| STEAP3    | ENSG00000115107 | chr2  | 119691105 | 119691660 | 6570 | 1.592503152 | 0.002712565 |
| STEAP3    | ENSG00000115107 | chr2  | 119692116 | 119693157 | 5291 | 1.592503152 | 0.002712565 |
| TNFRSF10B | ENSG00000120889 | chr8  | 22981900  | 22982651  | 561  | 2.948796335 | 0.000224292 |
| TP53I3    | ENSG00000115129 | chr2  | 24160532  | 24160964  | 11   | 4.932967764 | 0.000914134 |
| TP53INP1  | ENSG00000164938 | chr8  | 96032625  | 96033168  | 2219 | 4.031139404 | 0.000319425 |
| TP53INP1  | ENSG00000164938 | chr8  | 96030700  | 96031500  | 233  | 4.031139404 | 0.000319425 |
| TP53TG1   | ENSG00000182165 | chr7  | 86811647  | 86813187  | 795  | 2.080384743 | 0.002011979 |
| TRAF4     | ENSG00000076604 | chr17 | 24094086  | 24095083  | 810  | 2.27566303  | 0.002811158 |
| TRIAP1    | ENSG00000170855 | chr12 | 119368069 | 119368802 | 66   | 1.407088038 | 0.000654262 |
| ZMAT3     | ENSG00000172667 | chr3  | 180270323 | 180271040 | 1602 | 3.155926856 | 0.001341969 |

**Table S7, related to Figure 2. All known p53 target genes bound upon mult3a and differentially expressed upon mult3a (67 genes)**

| GeneSymbol | EnsName         | chr   | start     | end       | Dist_to_TSS | log2FC       | Adj.p.Val   |
|------------|-----------------|-------|-----------|-----------|-------------|--------------|-------------|
| AEN        | ENSG00000181026 | chr15 | 86966306  | 86966542  | 867         | 1.550570094  | 0.001552165 |
| AEN        | ENSG00000181026 | chr15 | 86965199  | 86966090  | 65          | 1.550570094  | 0.001552165 |
| ANLN       | ENSG00000011426 | chr7  | 36396454  | 36396672  | 497         | -1.830921001 | 0.000725985 |
| ATF3       | ENSG00000162772 | chr1  | 210848321 | 210848799 | 39          | 2.631358307  | 0.004619785 |
| ATF3       | ENSG00000162772 | chr1  | 210835901 | 210836731 | 12121       | 2.631358307  | 0.004619785 |
| BAX        | ENSG00000087088 | chr19 | 54150064  | 54150490  | 331         | 1.904904918  | 0.000828345 |
| BAX        | ENSG00000087088 | chr19 | 54149562  | 54149958  | 128         | 1.904904918  | 0.000828345 |
| BBC3       | ENSG00000105327 | chr19 | 52439368  | 52439606  | 11788       | 3.637337604  | 0.000654262 |
| BBC3       | ENSG00000105327 | chr19 | 52436116  | 52436527  | 8596        | 3.637337604  | 0.000654262 |
| BBC3       | ENSG00000105327 | chr19 | 52427444  | 52427946  | 25          | 3.637337604  | 0.000654262 |
| BBC3       | ENSG00000105327 | chr19 | 52426312  | 52427062  | 189         | 3.637337604  | 0.000654262 |
| BBC3       | ENSG00000105327 | chr19 | 52432217  | 52432535  | 4677        | 3.637337604  | 0.000654262 |
| BCL6       | ENSG00000113916 | chr3  | 188950368 | 188951186 | 4884        | 0.510369276  | 0.00390297  |
| BCL6       | ENSG00000113916 | chr3  | 188964875 | 188965165 | 18851       | 0.510369276  | 0.00390297  |
| BCL6       | ENSG00000113916 | chr3  | 189114634 | 189114924 | 168606      | 0.510369276  | 0.00390297  |
| BCL6       | ENSG00000113916 | chr3  | 188942664 | 188943099 | 3238        | 0.510369276  | 0.00390297  |
| BCL6       | ENSG00000113916 | chr3  | 188946093 | 188946411 | 109         | 0.510369276  | 0.00390297  |
| BCL6       | ENSG00000113916 | chr3  | 188944329 | 188944508 | 1751        | 0.510369276  | 0.00390297  |
| BCL6       | ENSG00000113916 | chr3  | 188948536 | 188948825 | 2511        | 0.510369276  | 0.00390297  |
| BCL6       | ENSG00000113916 | chr3  | 189009421 | 189009800 | 63431       | 0.510369276  | 0.00390297  |
| BTG2       | ENSG00000159388 | chr1  | 201542096 | 201542925 | 1182        | 3.893063308  | 0.000536459 |
| BTG2       | ENSG00000159388 | chr1  | 201516908 | 201517224 | 24238       | 3.893063308  | 0.000536459 |
| BTG2       | ENSG00000159388 | chr1  | 201541130 | 201541514 | 34          | 3.893063308  | 0.000536459 |
| BTG2       | ENSG00000159388 | chr1  | 201517994 | 201518314 | 23144       | 3.893063308  | 0.000536459 |
| C12orf5    | ENSG00000078237 | chr12 | 4300582   | 4301303   | 470         | 2.896713365  | 0.000605846 |
| C12orf5    | ENSG00000078237 | chr12 | 4287281   | 4287664   | 13169       | 2.896713365  | 0.000605846 |
| CCNG1      | ENSG00000113328 | chr5  | 162796907 | 162797782 | 301         | 2.105432347  | 0.000725985 |
| CCNK       | ENSG00000090061 | chr14 | 99020289  | 99020578  | 2928        | 0.697329995  | 0.001438117 |
| CCNK       | ENSG00000090061 | chr14 | 99054545  | 99054920  | 37233       | 0.697329995  | 0.001438117 |
| CCNK       | ENSG00000090061 | chr14 | 99061003  | 99061271  | 43617       | 0.697329995  | 0.001438117 |
| CCNK       | ENSG00000090061 | chr14 | 99017134  | 99017444  | 192         | 0.697329995  | 0.001438117 |
| CCNK       | ENSG00000090061 | chr14 | 99018103  | 99018308  | 732         | 0.697329995  | 0.001438117 |

|        |                 |       |           |           |        |              |             |
|--------|-----------------|-------|-----------|-----------|--------|--------------|-------------|
| CCNK   | ENSG00000090061 | chr14 | 99017501  | 99017854  | 150    | 0.697329995  | 0.001438117 |
| CCNK   | ENSG00000090061 | chr14 | 99055020  | 99055339  | 37687  | 0.697329995  | 0.001438117 |
| CD82   | ENSG00000085117 | chr11 | 44542774  | 44543097  | 774    | 1.133927974  | 0.001779423 |
| CDC25C | ENSG00000158402 | chr5  | 137669357 | 137669755 | 25821  | -1.018733472 | 0.016889923 |
| CDKN1A | ENSG00000124762 | chr6  | 36752718  | 36753353  | 1345   | 4.498903377  | 0.000224292 |
| CDKN1A | ENSG00000124762 | chr6  | 36754039  | 36754835  | 228    | 4.498903377  | 0.000224292 |
| CDKN1A | ENSG00000124762 | chr6  | 36754926  | 36755405  | 620    | 4.498903377  | 0.000224292 |
| CDKN1A | ENSG00000124762 | chr6  | 36758203  | 36758619  | 3903   | 4.498903377  | 0.000224292 |
| CDKN1A | ENSG00000124762 | chr6  | 36756214  | 36756627  | 1917   | 4.498903377  | 0.000224292 |
| CDKN1A | ENSG00000124762 | chr6  | 36753364  | 36753907  | 737    | 4.498903377  | 0.000224292 |
| CDKN1A | ENSG00000124762 | chr6  | 36751718  | 36752623  | 2254   | 4.498903377  | 0.000224292 |
| CTSD   | ENSG00000117984 | chr11 | 1740237   | 1740445   | 1313   | 0.853293689  | 0.037278425 |
| DDB2   | ENSG00000134574 | chr11 | 47192787  | 47193941  | 6      | 2.633809302  | 0.000694746 |
| DDB2   | ENSG00000134574 | chr11 | 47194328  | 47194693  | 1362   | 2.633809302  | 0.000694746 |
| DDB2   | ENSG00000134574 | chr11 | 47192413  | 47192742  | 465    | 2.633809302  | 0.000694746 |
| DDB2   | ENSG00000134574 | chr11 | 47208350  | 47208529  | 15320  | 2.633809302  | 0.000694746 |
| DDIT4  | ENSG00000168209 | chr10 | 73703883  | 73704071  | 301    | 2.417346415  | 0.005471575 |
| DDIT4  | ENSG00000168209 | chr10 | 73700292  | 73700778  | 3125   | 2.417346415  | 0.005471575 |
| DDIT4  | ENSG00000168209 | chr10 | 73740448  | 73740718  | 36916  | 2.417346415  | 0.005471575 |
| DDIT4  | ENSG00000168209 | chr10 | 73690446  | 73690631  | 13154  | 2.417346415  | 0.005471575 |
| DDIT4  | ENSG00000168209 | chr10 | 73703256  | 73703523  | 294    | 2.417346415  | 0.005471575 |
| DDIT4  | ENSG00000168209 | chr10 | 73727654  | 73728604  | 24446  | 2.417346415  | 0.005471575 |
| DKK1   | ENSG00000107984 | chr10 | 53743400  | 53743693  | 501    | 0.772883649  | 0.001415917 |
| DKK1   | ENSG00000107984 | chr10 | 53743983  | 53744410  | 115    | 0.772883649  | 0.001415917 |
| DSCC1  | ENSG00000136982 | chr8  | 120937218 | 120937516 | 9      | -1.749281667 | 0.003647277 |
| EDA2R  | ENSG00000131080 | chrX  | 65774949  | 65775589  | 345    | 3.586689218  | 0.00088897  |
| EDN2   | ENSG00000127129 | chr1  | 41720503  | 41720880  | 2183   | 1.587525469  | 0.005850992 |
| EOMES  | ENSG00000163508 | chr3  | 27858774  | 27858988  | 120116 | 0.969445547  | 0.009558085 |
| EOMES  | ENSG00000163508 | chr3  | 27769452  | 27769682  | 30830  | 0.969445547  | 0.009558085 |
| EOMES  | ENSG00000163508 | chr3  | 27784701  | 27784890  | 46006  | 0.969445547  | 0.009558085 |
| EPHA2  | ENSG00000142627 | chr1  | 16351580  | 16351825  | 3430   | 2.186795297  | 0.001890249 |
| FAS    | ENSG00000026103 | chr10 | 90740371  | 90740710  | 172    | 4.67929599   | 0.000224292 |
| FAS    | ENSG00000026103 | chr10 | 90740809  | 90741482  | 700    | 4.67929599   | 0.000224292 |
| FDXR   | ENSG00000161513 | chr17 | 70380879  | 70381364  | 282    | 3.06329354   | 0.000798855 |

|         |                 |       |           |           |       |              |             |
|---------|-----------------|-------|-----------|-----------|-------|--------------|-------------|
| FDXR    | ENSG00000161513 | chr17 | 70380491  | 70380780  | 116   | 3.06329354   | 0.000798855 |
| FOS     | ENSG00000170345 | chr14 | 74791448  | 74791867  | 23627 | 1.55356939   | 0.008049253 |
| FOS     | ENSG00000170345 | chr14 | 74795362  | 74796057  | 19489 | 1.55356939   | 0.008049253 |
| FOS     | ENSG00000170345 | chr14 | 74814514  | 74815371  | 514   | 1.55356939   | 0.008049253 |
| FOS     | ENSG00000170345 | chr14 | 74796408  | 74797013  | 18653 | 1.55356939   | 0.008049253 |
| FOS     | ENSG00000170345 | chr14 | 74813624  | 74813845  | 1550  | 1.55356939   | 0.008049253 |
| FOS     | ENSG00000170345 | chr14 | 74811652  | 74811888  | 3489  | 1.55356939   | 0.008049253 |
| GADD45A | ENSG00000116717 | chr1  | 67963411  | 67963750  | 40166 | 4.204589468  | 0.000511021 |
| GADD45A | ENSG00000116717 | chr1  | 67923944  | 67924149  | 531   | 4.204589468  | 0.000511021 |
| GADD45A | ENSG00000116717 | chr1  | 67976744  | 67977029  | 53421 | 4.204589468  | 0.000511021 |
| GADD45A | ENSG00000116717 | chr1  | 67924610  | 67925301  | 1578  | 4.204589468  | 0.000511021 |
| GDF15   | ENSG00000130513 | chr19 | 18351903  | 18352386  | 5914  | 4.397483463  | 0.000387554 |
| GDF15   | ENSG00000130513 | chr19 | 18336304  | 18337308  | 21162 | 4.397483463  | 0.000387554 |
| GDF15   | ENSG00000130513 | chr19 | 18357779  | 18358224  | 41    | 4.397483463  | 0.000387554 |
| GDF15   | ENSG00000130513 | chr19 | 18345327  | 18346260  | 12201 | 4.397483463  | 0.000387554 |
| GDF15   | ENSG00000130513 | chr19 | 18360317  | 18360558  | 2469  | 4.397483463  | 0.000387554 |
| HRAS    | ENSG00000174775 | chr11 | 524656    | 524872    | 444   | 0.874067876  | 0.00407934  |
| HSPA8   | ENSG00000109971 | chr11 | 122438147 | 122438380 | 209   | -0.064049848 | 0.014000971 |
| LIF     | ENSG00000128342 | chr22 | 28971553  | 28972500  | 838   | 4.27315573   | 0.001341969 |
| LIF     | ENSG00000128342 | chr22 | 28982065  | 28982259  | 9414  | 4.27315573   | 0.001341969 |
| LRDD    | ENSG00000177595 | chr11 | 794218    | 794701    | 864   | 2.732433409  | 0.000654262 |
| MAD1L1  | ENSG00000002822 | chr7  | 2174739   | 2174933   | 61508 | 1.302960548  | 0.004514853 |
| MAD1L1  | ENSG00000002822 | chr7  | 2176071   | 2176842   | 59981 | 1.302960548  | 0.004514853 |
| MAD1L1  | ENSG00000002822 | chr7  | 2178980   | 2179341   | 57142 | 1.302960548  | 0.004514853 |
| MDM2    | ENSG00000135679 | chr12 | 67548427  | 67548708  | 59285 | 3.828128003  | 0.000224292 |
| MDM2    | ENSG00000135679 | chr12 | 67480354  | 67480656  | 7714  | 3.828128003  | 0.000224292 |
| MDM2    | ENSG00000135679 | chr12 | 67467146  | 67467336  | 21006 | 3.828128003  | 0.000224292 |
| MDM2    | ENSG00000135679 | chr12 | 67487558  | 67489430  | 251   | 3.828128003  | 0.000224292 |
| MDM2    | ENSG00000135679 | chr12 | 67467391  | 67467971  | 20454 | 3.828128003  | 0.000224292 |
| MDM2    | ENSG00000135679 | chr12 | 67480043  | 67480351  | 8050  | 3.828128003  | 0.000224292 |
| MDM2    | ENSG00000135679 | chr12 | 67534100  | 67534306  | 44971 | 3.828128003  | 0.000224292 |
| MDM2    | ENSG00000135679 | chr12 | 67461342  | 67461691  | 26711 | 3.828128003  | 0.000224292 |
| MET     | ENSG00000105976 | chr7  | 116157839 | 116158236 | 58390 | 0.427145699  | 0.018941497 |
| MSH2    | ENSG00000095002 | chr2  | 47556994  | 47557202  | 73312 | -1.171012775 | 0.002839641 |

|         |                 |       |           |           |        |             |             |
|---------|-----------------|-------|-----------|-----------|--------|-------------|-------------|
| NOTCH1  | ENSG00000148400 | chr9  | 138565600 | 138565959 | 5637   | 2.27828332  | 0.001969558 |
| NOTCH1  | ENSG00000148400 | chr9  | 138559035 | 138559276 | 904    | 2.27828332  | 0.001969558 |
| NOTCH1  | ENSG00000148400 | chr9  | 138564427 | 138565369 | 4751   | 2.27828332  | 0.001969558 |
| PERP    | ENSG00000112378 | chr6  | 138451115 | 138451377 | 19034  | 0.603508084 | 0.013116389 |
| PERP    | ENSG00000112378 | chr6  | 138449397 | 138449626 | 20773  | 0.603508084 | 0.013116389 |
| PLK2    | ENSG00000145632 | chr5  | 57630918  | 57631167  | 160670 | 0.724515053 | 0.039376607 |
| PLK2    | ENSG00000145632 | chr5  | 57785880  | 57786129  | 5707   | 0.724515053 | 0.039376607 |
| PLK2    | ENSG00000145632 | chr5  | 57791388  | 57791760  | 106    | 0.724515053 | 0.039376607 |
| PLK2    | ENSG00000145632 | chr5  | 57793547  | 57794083  | 2193   | 0.724515053 | 0.039376607 |
| PLK2    | ENSG00000145632 | chr5  | 57792550  | 57792742  | 989    | 0.724515053 | 0.039376607 |
| PLK3    | ENSG00000173846 | chr1  | 45037929  | 45038630  | 454    | 1.785887018 | 0.003838996 |
| PMAIP1  | ENSG00000141682 | chr18 | 55736668  | 55736883  | 18569  | 2.095062157 | 0.000798855 |
| PMAIP1  | ENSG00000141682 | chr18 | 55717715  | 55718339  | 264    | 2.095062157 | 0.000798855 |
| PMAIP1  | ENSG00000141682 | chr18 | 55750942  | 55751121  | 32777  | 2.095062157 | 0.000798855 |
| PML     | ENSG00000140464 | chr15 | 72074451  | 72074897  | 663    | 0.555931394 | 0.027024642 |
| PML     | ENSG00000140464 | chr15 | 72073906  | 72074193  | 12     | 0.555931394 | 0.027024642 |
| PPM1D   | ENSG00000170836 | chr17 | 56001643  | 56002335  | 30303  | 1.773431548 | 0.000654262 |
| PPM1D   | ENSG00000170836 | chr17 | 56031318  | 56033835  | 66     | 1.773431548 | 0.000654262 |
| PPM1D   | ENSG00000170836 | chr17 | 56014914  | 56015437  | 17208  | 1.773431548 | 0.000654262 |
| PPM1D   | ENSG00000170836 | chr17 | 55996836  | 55997070  | 35383  | 1.773431548 | 0.000654262 |
| PPM1D   | ENSG00000170836 | chr17 | 56018196  | 56019014  | 13684  | 1.773431548 | 0.000654262 |
| PPM1D   | ENSG00000170836 | chr17 | 56051162  | 56051445  | 18943  | 1.773431548 | 0.000654262 |
| PPM1D   | ENSG00000170836 | chr17 | 55997478  | 55997787  | 34723  | 1.773431548 | 0.000654262 |
| PPM1D   | ENSG00000170836 | chr17 | 56025082  | 56025400  | 7095   | 1.773431548 | 0.000654262 |
| PPM1D   | ENSG00000170836 | chr17 | 56056107  | 56056351  | 23883  | 1.773431548 | 0.000654262 |
| PRKAB1  | ENSG00000111725 | chr12 | 118590023 | 118590430 | 58     | 1.260939441 | 0.000870445 |
| RABGGTA | ENSG00000100949 | chr14 | 23810165  | 23810539  | 223    | 1.195155194 | 0.004609675 |
| RNF144B | ENSG00000137393 | chr6  | 18495211  | 18495869  | 20     | 0.861100752 | 0.019461772 |
| RPS27L  | ENSG00000185088 | chr15 | 61236036  | 61236987  | 172    | 1.120976604 | 0.000487023 |
| RRM2B   | ENSG00000048392 | chr8  | 103317817 | 103318767 | 2042   | 2.241792759 | 0.000654262 |
| RRM2B   | ENSG00000048392 | chr8  | 103319870 | 103321048 | 57     | 2.241792759 | 0.000654262 |
| RRM2B   | ENSG00000048392 | chr8  | 103369496 | 103369675 | 49063  | 2.241792759 | 0.000654262 |
| RRM2B   | ENSG00000048392 | chr8  | 103318924 | 103319120 | 1295   | 2.241792759 | 0.000654262 |
| RRM2B   | ENSG00000048392 | chr8  | 103312710 | 103313040 | 7437   | 2.241792759 | 0.000654262 |

|           |                 |       |           |           |        |              |             |
|-----------|-----------------|-------|-----------|-----------|--------|--------------|-------------|
| S100A2    | ENSG00000196754 | chr1  | 151811694 | 151812012 | 4863   | 0.886348145  | 0.017289683 |
| S100A2    | ENSG00000196754 | chr1  | 151805626 | 151806045 | 50     | 0.886348145  | 0.017289683 |
| S100A2    | ENSG00000196754 | chr1  | 151806616 | 151807052 | 179    | 0.886348145  | 0.017289683 |
| SEMA3B    | ENSG00000012171 | chr3  | 50281267  | 50281669  | 231    | 0.872297762  | 0.003377235 |
| SERPINB5  | ENSG00000206075 | chr18 | 59294721  | 59295344  | 225    | 6.665376191  | 0.000654262 |
| SERPINE1  | ENSG00000106366 | chr7  | 100556853 | 100557045 | 223    | 1.401129249  | 0.019078748 |
| SESN1     | ENSG00000080546 | chr6  | 109437470 | 109437796 | 189    | 3.92247604   | 0.000605846 |
| SESN1     | ENSG00000080546 | chr6  | 109436630 | 109437343 | 14     | 3.92247604   | 0.000605846 |
| SESN2     | ENSG00000130766 | chr1  | 28459225  | 28459768  | 811    | 3.275818504  | 0.000654262 |
| SFN       | ENSG00000175793 | chr1  | 27064072  | 27064520  | 1948   | 1.22107711   | 0.000731682 |
| SFN       | ENSG00000175793 | chr1  | 27061920  | 27062151  | 178    | 1.22107711   | 0.000731682 |
| SFN       | ENSG00000175793 | chr1  | 27060320  | 27060757  | 1681   | 1.22107711   | 0.000731682 |
| SLC38A2   | ENSG00000134294 | chr12 | 45130657  | 45130836  | 69998  | 0.628680691  | 0.003537404 |
| SLC38A2   | ENSG00000134294 | chr12 | 45189247  | 45189451  | 128683 | 0.628680691  | 0.003537404 |
| SLC38A2   | ENSG00000134294 | chr12 | 45022526  | 45022850  | 30118  | 0.628680691  | 0.003537404 |
| SLC38A2   | ENSG00000134294 | chr12 | 45173717  | 45173971  | 113167 | 0.628680691  | 0.003537404 |
| SLC38A2   | ENSG00000134294 | chr12 | 45153726  | 45154082  | 93270  | 0.628680691  | 0.003537404 |
| SLC38A2   | ENSG00000134294 | chr12 | 45063283  | 45063725  | 2856   | 0.628680691  | 0.003537404 |
| SLC38A2   | ENSG00000134294 | chr12 | 45257517  | 45257873  | 197019 | 0.628680691  | 0.003537404 |
| SLC38A2   | ENSG00000134294 | chr12 | 45135794  | 45136176  | 75382  | 0.628680691  | 0.003537404 |
| SLC38A2   | ENSG00000134294 | chr12 | 45052629  | 45052881  | 59     | 0.628680691  | 0.003537404 |
| STAG1     | ENSG00000118007 | chr3  | 137954385 | 137954580 | 541    | -0.801906214 | 0.007496244 |
| STAG1     | ENSG00000118007 | chr3  | 137953807 | 137953996 | 43     | -0.801906214 | 0.007496244 |
| STEAP3    | ENSG00000115107 | chr2  | 119692116 | 119693157 | 5291   | 1.592503152  | 0.002712565 |
| STEAP3    | ENSG00000115107 | chr2  | 119764992 | 119765187 | 67206  | 1.592503152  | 0.002712565 |
| STEAP3    | ENSG00000115107 | chr2  | 119691866 | 119692056 | 5961   | 1.592503152  | 0.002712565 |
| STEAP3    | ENSG00000115107 | chr2  | 119714369 | 119715191 | 16830  | 1.592503152  | 0.002712565 |
| STEAP3    | ENSG00000115107 | chr2  | 119757820 | 119758045 | 60058  | 1.592503152  | 0.002712565 |
| STEAP3    | ENSG00000115107 | chr2  | 119691105 | 119691660 | 6570   | 1.592503152  | 0.002712565 |
| TNFRSF10A | ENSG00000104689 | chr8  | 23137995  | 23138281  | 444    | 1.663862681  | 0.01155546  |
| TNFRSF10B | ENSG00000120889 | chr8  | 22981900  | 22982651  | 561    | 2.948796335  | 0.000224292 |
| TNFRSF10B | ENSG00000120889 | chr8  | 22955534  | 22955762  | 26998  | 2.948796335  | 0.000224292 |
| TP53      | ENSG00000141510 | chr17 | 7529938   | 7530142   | 1436   | -0.340229074 | 0.020917367 |
| TP53I3    | ENSG00000115129 | chr2  | 24160532  | 24160964  | 11     | 4.932967764  | 0.000914134 |



|          |                 |       |           |           |       |              |             |
|----------|-----------------|-------|-----------|-----------|-------|--------------|-------------|
| TP53I3   | ENSG00000115129 | chr2  | 24161096  | 24161283  | 35    | 4.932967764  | 0.000914134 |
| TP53INP1 | ENSG00000164938 | chr8  | 96028568  | 96028792  | 2053  | 4.031139404  | 0.000319425 |
| TP53INP1 | ENSG00000164938 | chr8  | 96030700  | 96031500  | 233   | 4.031139404  | 0.000319425 |
| TP53INP1 | ENSG00000164938 | chr8  | 96032625  | 96033168  | 2219  | 4.031139404  | 0.000319425 |
| TP53TG1  | ENSG00000182165 | chr7  | 86784062  | 86784760  | 28497 | 2.080384743  | 0.002011979 |
| TP53TG1  | ENSG00000182165 | chr7  | 86798182  | 86798649  | 14341 | 2.080384743  | 0.002011979 |
| TP53TG1  | ENSG00000182165 | chr7  | 86790307  | 86790641  | 22268 | 2.080384743  | 0.002011979 |
| TP53TG1  | ENSG00000182165 | chr7  | 86811647  | 86813187  | 795   | 2.080384743  | 0.002011979 |
| TRAF4    | ENSG00000076604 | chr17 | 24101283  | 24101561  | 6192  | 2.27566303   | 0.002811158 |
| TRAF4    | ENSG00000076604 | chr17 | 24097531  | 24097747  | 2351  | 2.27566303   | 0.002811158 |
| TRAF4    | ENSG00000076604 | chr17 | 24094086  | 24095083  | 810   | 2.27566303   | 0.002811158 |
| TRAF4    | ENSG00000076604 | chr17 | 24097993  | 24098239  | 2887  | 2.27566303   | 0.002811158 |
| TRIAP1   | ENSG00000170855 | chr12 | 119368069 | 119368802 | 66    | 1.407088038  | 0.000654262 |
| VDR      | ENSG00000111424 | chr12 | 46584671  | 46585041  | 169   | -0.835575012 | 0.043652901 |
| ZMAT3    | ENSG00000172667 | chr3  | 180270323 | 180271040 | 1602  | 3.155926856  | 0.001341969 |
| ZMAT3    | ENSG00000172667 | chr3  | 180269666 | 180269954 | 2468  | 3.155926856  | 0.001341969 |
| ZMAT3    | ENSG00000172667 | chr3  | 180272174 | 180272361 | 18    | 3.155926856  | 0.001341969 |
| ZMAT3    | ENSG00000172667 | chr3  | 180271430 | 180272114 | 507   | 3.155926856  | 0.001341969 |
| ZMAT3    | ENSG00000172667 | chr3  | 180271087 | 180271377 | 1079  | 3.155926856  | 0.001341969 |

**Table S8, related to Figure 2. Known p53 target genes bound upon nutlin3a treatment , but not differentially expressed**

| GeneSymbol | EnsName         | chr | start     | end       | Width     | Dist_to_TSS | log2FC      | Adj.p.Val   |
|------------|-----------------|-----|-----------|-----------|-----------|-------------|-------------|-------------|
| ABCB1      | ENSG00000085563 | 7   | 87169593  | 87169868  | 87169762  | 10738       | -0.05923023 | 0.778407298 |
| ABCB1      | ENSG00000085563 | 7   | 87234894  | 87235360  | 87235127  | 54621       | -0.05923023 | 0.778407298 |
| ADARB1     | ENSG00000197381 | 21  | 45369742  | 45369978  | 45369866  | 46119       | -0.22774874 | 0.142041533 |
| ADARB1     | ENSG00000197381 | 21  | 45317782  | 45318035  | 45317917  | 279         | -0.22774874 | 0.142041533 |
| AIFM2      | ENSG00000042286 | 10  | 71549961  | 71550237  | 71550072  | 3792        | 0.230238508 | 0.125603992 |
| APAF1      | ENSG00000120868 | 12  | 97616864  | 97617061  | 97616948  | 53739       | NA          | NA          |
| APC        | ENSG00000134982 | 5   | 111999993 | 112000265 | 112000150 | 101333      | 0.516185448 | 0.07627362  |
| ARID3A     | ENSG00000116017 | 19  | 884381    | 884949    | 884597    | 7560        | 0.220820692 | 0.096130488 |
| BAI1       | ENSG00000181790 | 8   | 143525769 | 143526127 | 143525944 | 16435       | 0.191460331 | 0.232465125 |
| BAI1       | ENSG00000181790 | 8   | 143550242 | 143550579 | 143550403 | 8024        | 0.191460331 | 0.232465125 |
| BAI1       | ENSG00000181790 | 8   | 143559698 | 143560012 | 143559865 | 17486       | 0.191460331 | 0.232465125 |
| BAI1       | ENSG00000181790 | 8   | 143588325 | 143588775 | 143588639 | 46260       | 0.191460331 | 0.232465125 |
| BCL2L14    | ENSG00000121380 | 12  | 12077571  | 12077813  | 12077730  | 37415       | NA          | NA          |
| BCL2L14    | ENSG00000121380 | 12  | 12090634  | 12090958  | 12090796  | 24349       | NA          | NA          |
| BCL2L14    | ENSG00000121380 | 12  | 12091325  | 12091892  | 12091500  | 23645       | NA          | NA          |
| BCL2L14    | ENSG00000121380 | 12  | 12115153  | 12115345  | 12115260  | 115         | NA          | NA          |
| BDKRB2     | ENSG00000168398 | 14  | 95619046  | 95619307  | 95619188  | 121762      | NA          | NA          |
| BDKRB2     | ENSG00000168398 | 14  | 95601612  | 95602204  | 95601834  | 139116      | NA          | NA          |
| BDKRB2     | ENSG00000168398 | 14  | 95575937  | 95576129  | 95576075  | 164875      | NA          | NA          |
| BDKRB2     | ENSG00000168398 | 14  | 95752167  | 95752677  | 95752282  | 11332       | NA          | NA          |
| BDKRB2     | ENSG00000168398 | 14  | 95622261  | 95622460  | 95622360  | 118590      | NA          | NA          |
| BDKRB2     | ENSG00000168398 | 14  | 95634773  | 95635188  | 95635048  | 105902      | NA          | NA          |
| BDKRB2     | ENSG00000168398 | 14  | 95633103  | 95633392  | 95633265  | 107685      | NA          | NA          |
| BDKRB2     | ENSG00000168398 | 14  | 95619716  | 95620226  | 95619956  | 120994      | NA          | NA          |
| BDKRB2     | ENSG00000168398 | 14  | 95631790  | 95632531  | 95632134  | 108816      | NA          | NA          |
| BDKRB2     | ENSG00000168398 | 14  | 95590857  | 95591113  | 95590985  | 149965      | NA          | NA          |
| BDKRB2     | ENSG00000168398 | 14  | 95740669  | 95740940  | 95740798  | 152         | NA          | NA          |
| BDKRB2     | ENSG00000168398 | 14  | 95587968  | 95588166  | 95588036  | 152914      | NA          | NA          |
| BDKRB2     | ENSG00000168398 | 14  | 95636593  | 95637032  | 95636772  | 104178      | NA          | NA          |
| C13orf15   | ENSG00000102760 | 13  | 40931179  | 40931376  | 40931277  | 1735        | NA          | NA          |
| CHMP4C     | ENSG00000164695 | 8   | 82807382  | 82807663  | 82807512  | 269         | 0.312120987 | 0.341984243 |
| CHMP4C     | ENSG00000164695 | 8   | 82806955  | 82807292  | 82807123  | 120         | 0.312120987 | 0.341984243 |

|          |                 |       |           |           |           |        |             |             |
|----------|-----------------|-------|-----------|-----------|-----------|--------|-------------|-------------|
| COL18A1  | ENSG00000182871 | 21    | 45652307  | 45652494  | 45652400  | 2884   | 0.282366527 | 0.118547506 |
| COL18A1  | ENSG00000182871 | 21    | 45699690  | 45700002  | 45699846  | 15     | 0.282366527 | 0.118547506 |
| EEF1A1   | ENSG00000156508 | 6     | 74287245  | 74287751  | 74287422  | 40     | 0.245871063 | 0.059011869 |
| GML      | ENSG00000104499 | 8     | 143893622 | 143895059 | 143894282 | 18937  | NA          | NA          |
| HGF      | ENSG00000019991 | 7     | 81157593  | 81157772  | 81157688  | 79697  | NA          | NA          |
| HGF      | ENSG00000019991 | 7     | 81090456  | 81091034  | 81090737  | 146648 | NA          | NA          |
| HSP90AB1 | ENSG00000096384 | 6     | 44322656  | 44322897  | 44322726  | 76     | 0.035125732 | 0.720371153 |
| HTT      | ENSG00000197386 | 4     | 3078081   | 3078297   | 3078189   | 31983  | 0.40553749  | 0.060502662 |
| IGFBP3   | ENSG00000146674 | 7     | 46160219  | 46160463  | 46160353  | 232957 | 0.298986101 | 0.223137554 |
| IGFBP3   | ENSG00000146674 | 7     | 45923771  | 45923973  | 45923872  | 3524   | 0.298986101 | 0.223137554 |
| IGFBP3   | ENSG00000146674 | 7     | 46358596  | 46358903  | 46358751  | 431355 | 0.298986101 | 0.223137554 |
| IGFBP3   | ENSG00000146674 | 7     | 45984259  | 45984813  | 45984438  | 57042  | 0.298986101 | 0.223137554 |
| KRT8     | ENSG00000170421 | 12    | 51559460  | 51559815  | 51559637  | 25490  | -0.06904923 | 0.298815529 |
| KRT8     | ENSG00000170421 | 12    | 51575260  | 51576001  | 51575479  | 9648   | -0.06904923 | 0.298815529 |
| KRT8     | ENSG00000170421 | 12    | 51564960  | 51565319  | 51565140  | 19987  | -0.06904923 | 0.298815529 |
| KRT8     | ENSG00000170421 | 12    | 51587136  | 51587564  | 51587374  | 2247   | -0.06904923 | 0.298815529 |
| KRT8     | ENSG00000170421 | 12    | 51585028  | 51585630  | 51585268  | 141    | -0.06904923 | 0.298815529 |
| KRT8     | ENSG00000170421 | 12    | 51576173  | 51576915  | 51576285  | 8842   | -0.06904923 | 0.298815529 |
| KRT8     | ENSG00000170421 | 12    | 51559987  | 51560326  | 51560156  | 24971  | -0.06904923 | 0.298815529 |
| MLH1     | ENSG00000076242 | 3     | 37009924  | 37010167  | 37010045  | 23     | 0.175695828 | 0.140599034 |
| NDRG1    | ENSG00000104419 | 8     | 134331224 | 134331486 | 134331394 | 47286  | 0.596170486 | 0.107823445 |
| NDRG1    | ENSG00000104419 | 8     | 134378975 | 134379298 | 134379149 | 469    | 0.596170486 | 0.107823445 |
| NDRG1    | ENSG00000104419 | 8     | 134355576 | 134355779 | 134355677 | 23003  | 0.596170486 | 0.107823445 |
| NOS3     | ENSG00000164867 | 7     | 150328743 | 150329022 | 150328863 | 7058   | NA          | NA          |
| P2RX6    | ENSG00000099957 | chr22 | 19711671  | 19711941  | 271       | 1178   | NA          | NA          |
| PCNA     | ENSG00000132646 | 20    | 5048591   | 5049089   | 5048836   | 236    | -0.04983721 | 0.544290598 |
| PDGFC    | ENSG00000145431 | 4     | 157911863 | 157912461 | 157912219 | 199777 | 0.228341986 | 0.614416293 |
| PPM1J    | ENSG00000155367 | 1     | 113058182 | 113058456 | 113058319 | 1154   | 0.087569186 | 0.733788041 |
| PRDM1    | ENSG00000057657 | 6     | 106652740 | 106653507 | 106653166 | 342    | NA          | NA          |
| PTEN     | ENSG00000171862 | 10    | 89612779  | 89613219  | 89613042  | 133    | 0.25163383  | 0.188909823 |
| PTEN     | ENSG00000171862 | 10    | 89611808  | 89612324  | 89612154  | 1021   | 0.25163383  | 0.188909823 |
| RBM38    | ENSG00000132819 | 20    | 55444184  | 55444465  | 55444323  | 43459  | -0.26733762 | 0.092568847 |
| RFWD2    | ENSG00000143207 | 1     | 174443054 | 174443392 | 174443214 | 221    | -0.08264251 | 0.125488802 |
| SCD      | ENSG00000099194 | 10    | 102114619 | 102114920 | 102114769 | 18007  | 0.392884353 | 0.246037315 |

|         |                 |    |           |           |           |       |             |             |
|---------|-----------------|----|-----------|-----------|-----------|-------|-------------|-------------|
| SCGB1D2 | ENSG00000124935 | 11 | 61766099  | 61766338  | 61766250  | 50    | NA          | NA          |
| SLC6A6  | ENSG00000131389 | 3  | 14455904  | 14456242  | 14456073  | 36963 | -0.41945328 | 0.107095447 |
| SLC6A6  | ENSG00000131389 | 3  | 14427685  | 14427923  | 14427749  | 8639  | -0.41945328 | 0.107095447 |
| SLC6A6  | ENSG00000131389 | 3  | 14477832  | 14478051  | 14477912  | 58802 | -0.41945328 | 0.107095447 |
| SLC6A6  | ENSG00000131389 | 3  | 14448732  | 14449043  | 14448871  | 29761 | -0.41945328 | 0.107095447 |
| SLC6A6  | ENSG00000131389 | 3  | 14478298  | 14478540  | 14478363  | 59253 | -0.41945328 | 0.107095447 |
| SLC6A6  | ENSG00000131389 | 3  | 14422513  | 14422714  | 14422613  | 3503  | -0.41945328 | 0.107095447 |
| SLC6A6  | ENSG00000131389 | 3  | 14418648  | 14419157  | 14418928  | 182   | -0.41945328 | 0.107095447 |
| TGFA    | ENSG00000163235 | 2  | 70696984  | 70697183  | 70697043  | 62430 | 0.673855821 | 0.081341849 |
| TGFA    | ENSG00000163235 | 2  | 70677355  | 70678060  | 70677724  | 43111 | 0.673855821 | 0.081341849 |
| TP63    | ENSG00000073282 | 3  | 190842366 | 190842545 | 190842455 | 10545 | NA          | NA          |
| TP63    | ENSG00000073282 | 3  | 190957054 | 190957322 | 190957200 | 33084 | NA          | NA          |
| TP63    | ENSG00000073282 | 3  | 190966925 | 190967209 | 190967079 | 23205 | NA          | NA          |
| TP63    | ENSG00000073282 | 3  | 190921542 | 190921827 | 190921673 | 68611 | NA          | NA          |
| TP73    | ENSG00000078900 | 1  | 3575269   | 3575556   | 3575412   | 16423 | NA          | NA          |
| TRIM22  | ENSG00000132274 | 11 | 5668208   | 5668692   | 5668409   | 914   | NA          | NA          |
| VCAN    | ENSG00000038427 | 5  | 82762004  | 82762249  | 82762088  | 41251 | NA          | NA          |
| VCAN    | ENSG00000038427 | 5  | 82839113  | 82839444  | 82839228  | 35889 | NA          | NA          |
| VCAN    | ENSG00000038427 | 5  | 82841061  | 82841289  | 82841152  | 37813 | NA          | NA          |
| VCAN    | ENSG00000038427 | 5  | 82805932  | 82806249  | 82806090  | 2751  | NA          | NA          |
| VCAN    | ENSG00000038427 | 5  | 82895251  | 82895490  | 82895370  | 92031 | NA          | NA          |
| XRCC5   | ENSG00000079246 | 2  | 216682091 | 216682489 | 216682310 | 69    | -0.23353927 | 0.144210036 |

**Table S9, related to Figure 2. Known p53 target genes differentially expressed upon nutlin3a, but not bound by p53**

| GeneSymbol | log2FC      | Adj.p.Val   |
|------------|-------------|-------------|
| ACTA2      | 4.618197326 | 0.000939333 |
| BID        | -0.42996598 | 0.009178768 |
| BIRC5      | -2.26473532 | 0.003039412 |
| CAV1       | 0.5559529   | 0.014328264 |
| DDR1       | 0.191792896 | 0.040879189 |
| DNMT1      | -0.68901352 | 0.004310653 |
| DUSP1      | 0.789974754 | 0.013488933 |
| FANCC      | -0.61824304 | 0.022860606 |
| IER3       | 0.640735224 | 0.003328402 |
| LASP1      | -0.34446881 | 0.011886518 |
| LGALS3     | 0.484793723 | 0.022604826 |
| PCBP4      | 1.447297126 | 0.003936187 |
| POLD1      | -0.58273956 | 0.010169069 |
| PYCARD     | 0.453087054 | 0.016343987 |
| RAD51      | -1.86483463 | 0.003403004 |
| SOD2       | -0.39457006 | 0.042399332 |
| TAP1       | 2.473277129 | 0.001155708 |
| UBTD1      | 0.798311698 | 0.02657989  |



**Table S11, related to Figure 2. Class II noncanonical genes bound by p53 in the absence of p53 consensus site and activation stimuli. Genes induced upon nutlin 3a are in red, repressed – in green.**

| Gene     | Ensemble        | Chr   | Start     | End       | Dist To TSS | Description                                                                                                                                                                               | Log2FC | Adj.p.Val |
|----------|-----------------|-------|-----------|-----------|-------------|-------------------------------------------------------------------------------------------------------------------------------------------------------------------------------------------|--------|-----------|
| ARL6IP1  | ENSG00000170540 | chr16 | 18720319  | 18720908  | 303         | ADP-ribosylation factor-like protein 6-interacting protein 1 (ARL-6-interacting protein 1)(Aip-1) [Source:UniProtKB/Swiss-Prot;Acc:Q15041]                                                | -0.77  | 0.01      |
| ATP6V1D  | ENSG00000100554 | chr14 | 66896103  | 66896966  | 241         | ATPase, H <sup>+</sup> transporting, lysosomal 34kDa, V1 subunit D [Source:HGNC Symbol;Acc:13527]                                                                                         | 0.14   | 0.04      |
| C14orf43 | ENSG00000156030 | chr14 | 73289014  | 73289577  | 7349        | Uncharacterized protein C14orf43 [Source:UniProtKB/Swiss-Prot;Acc:Q6PJG2]                                                                                                                 | -0.57  | 0.03      |
| CELSR2   | ENSG00000143126 | chr1  | 109618924 | 109619535 | 366         | cadherin, EGF LAG seven-pass G-type receptor 2 (flamingo homolog, Drosophila) [Source:HGNC Symbol;Acc:3231]                                                                               | 0.3    | 0.04      |
| CGN      | ENSG00000143375 | chr1  | 149752139 | 149752544 | 1870        | Cingulin [Source:UniProtKB/Swiss-Prot;Acc:Q9P2M7]                                                                                                                                         | -0.93  | 0.01      |
| DDX59    | ENSG00000118197 | chr1  | 198905237 | 198906075 | 182         | Probable ATP-dependent RNA helicase DDX59 (EC 3.6.1.-)(DEAD box protein 59)(Zinc finger HIT domain-containing protein 5) [Source:UniProtKB/Swiss-Prot;Acc:Q5T1V6]                         | 0.57   | 0.01      |
| DECRI1   | ENSG00000104325 | chr8  | 91082226  | 91082731  | 195         | 2,4-dienoyl-CoA reductase, mitochondrial Precursor (EC 1.3.1.34)(2,4-dienoyl-CoA reductase [NADPH])(4-enoyl-CoA reductase [NADPH]) [Source:UniProtKB/Swiss-Prot;Acc:Q16698]               | 0.26   | 0.01      |
| DNAJC2   | ENSG00000105821 | chr7  | 102772406 | 102772734 | 0           | DnaJ homolog subfamily C member 2 (Zuotin-related factor 1)(M-phase phosphoprotein 11) [Source:UniProtKB/Swiss-Prot;Acc:Q99543]                                                           | -0.5   | 0         |
| EIF2S1   | ENSG00000134001 | chr14 | 66896103  | 66896966  | 101         | Eukaryotic translation initiation factor 2 subunit 1 (Eukaryotic translation initiation factor 2 subunit alpha)(eIF-2-alpha)(EIF-2alpha)(EIF-2A) [Source:UniProtKB/Swiss-Prot;Acc:P05198] | -0.31  | 0         |
| ETFA     | ENSG00000140374 | chr15 | 74392190  | 74392509  | 1484        | Electron transfer flavoprotein subunit alpha, mitochondrial Precursor (Alpha-ETF) [Source:UniProtKB/Swiss-Prot;Acc:P13804]                                                                | 0.18   | 0.04      |
| KIAA1429 | ENSG00000164944 | chr8  | 95634726  | 95635216  | 151         | Protein virilizer homolog [Source:UniProtKB/Swiss-Prot;Acc:Q69YN4]                                                                                                                        | 0.66   | 0         |
| KRR1     | ENSG00000111615 | chr12 | 74191530  | 74191965  | 101         | KRR1 small subunit processome component homolog (HIV-1 Rev-binding protein 2)(Rev-interacting protein 1)(Rip-1) [Source:UniProtKB/Swiss-Prot;Acc:Q13601]                                  | -0.23  | 0.04      |
| MRPS23   | ENSG00000181610 | chr17 | 53282309  | 53283024  | 108         | 28S ribosomal protein S23, mitochondrial (S23mt)(MRP-S23) [Source:UniProtKB/Swiss-Prot;Acc:Q9Y3D9]                                                                                        | -0.23  | 0.04      |
| MTMR11   | ENSG0000014914  | chr1  | 148177519 | 148178193 | 1139        | Myotubularin-related protein 11 (Cisplatin resistance-associated protein)(hCRA) [Source:UniProtKB/Swiss-Prot;Acc:A4FU01]                                                                  | 0.63   | 0.02      |

|         |                 |       |           |           |      |                                                                                                                                                                                                               |       |      |
|---------|-----------------|-------|-----------|-----------|------|---------------------------------------------------------------------------------------------------------------------------------------------------------------------------------------------------------------|-------|------|
| OPA1    | ENSG00000198836 | chr3  | 194793296 | 194793788 | 87   | Dynamin-like 120 kDa protein, mitochondrial Precursor (Optic atrophy protein 1) [Contains Dynamin-like 120 kDa protein, form S1] [Source:UniProtKB/Swiss-Prot;Acc:O60313]                                     | -0.47 | 0.04 |
| P2RY6   | ENSG00000171631 | chr11 | 72660631  | 72661188  | 66   | P2Y purinoceptor 6 (P2Y6) [Source:UniProtKB/Swiss-Prot;Acc:Q15077]                                                                                                                                            | 1.05  | 0.01 |
| PCYT1A  | ENSG00000161217 | chr3  | 197498852 | 197499207 | 48   | Choline-phosphate cytidylyltransferase A (EC 2.7.7.15)(Phosphorylcholine transferase A)(CTP:phosphocholine cytidylyltransferase A)(CCT A)(CT A)(CCT-alpha) [Source:UniProtKB/Swiss-Prot;Acc:P49585]           | 0.38  | 0.05 |
| PLEKHA6 | ENSG00000143850 | chr1  | 202599283 | 202599748 | 3875 | Pleckstrin homology domain-containing family A member 6 (Phosphoinositol 3-phosphate-binding protein 3)(PEPP-3) [Source:UniProtKB/Swiss-Prot;Acc:Q9Y2H5]                                                      | 0.41  | 0.01 |
| PPP6R1  | ENSG00000105063 | chr19 | 60462352  | 60462774  | 177  | protein phosphatase 6, regulatory subunit 1 [Source:HGNC Symbol;Acc:29195]                                                                                                                                    | -0.33 | 0.01 |
| PSMD4   | ENSG00000159352 | chr1  | 149493524 | 149493924 | 64   | 26S proteasome non-ATPase regulatory subunit 4 (26S proteasome regulatory subunit S5A)(Rpn10)(Multiubiquitin chain-binding protein)(Antisecretory factor 1)(ASF)(AF) [Source:UniProtKB/Swiss-Prot;Acc:P55036] | -0.19 | 0.02 |
| PSRC1   | ENSG00000134222 | chr1  | 109618924 | 109619535 | 8134 | Proline/serine-rich coiled-coil protein 1 [Source:UniProtKB/Swiss-Prot;Acc:Q6PGN9]                                                                                                                            | -2.44 | 0    |
| RAB15   | ENSG00000139998 | chr14 | 64503539  | 64503818  | 4873 | RAB15, member RAS oncogene family [Source:RefSeq peptide;Acc:NP_941959]                                                                                                                                       | -0.49 | 0.01 |
| RRP15   | ENSG00000067533 | chr1  | 216524920 | 216525501 | 55   | RRP15-like protein (Ribosomal RNA-processing protein 15) [Source:UniProtKB/Swiss-Prot;Acc:Q9Y3B9]                                                                                                             | -1.05 | 0.02 |
| S100A11 | ENSG00000163191 | chr1  | 150275977 | 150276313 | 10   | Protein S100-A11 (S100 calcium-binding protein A11)(Protein S100C)(Calgizzarin)(MLN 70) [Source:UniProtKB/Swiss-Prot;Acc:P31949]                                                                              | 0.36  | 0.01 |
| S100A11 | ENSG00000163191 | chr1  | 150275977 | 150276313 | 10   | Protein S100-A11 (S100 calcium-binding protein A11)(Protein S100C)(Calgizzarin)(MLN 70) [Source:UniProtKB/Swiss-Prot;Acc:P31949]                                                                              | 0.36  | 0.01 |
| S100A11 | ENSG00000163191 | chr1  | 150275977 | 150276313 | 10   | Protein S100-A11 (S100 calcium-binding protein A11)(Protein S100C)(Calgizzarin)(MLN 70) [Source:UniProtKB/Swiss-Prot;Acc:P31949]                                                                              | 0.36  | 0.01 |
| SF3A3   | ENSG00000183431 | chr1  | 38228134  | 38228644  | 85   | Splicing factor 3A subunit 3 (Spliceosome-associated protein 61)(SAP 61)(SF3a60) [Source:UniProtKB/Swiss-Prot;Acc:Q12874]                                                                                     | 0.27  | 0.05 |
| SIDT1   | ENSG00000072858 | chr3  | 114738193 | 114738711 | 4424 | SID1 transmembrane family member 1 Precursor [Source:UniProtKB/Swiss-Prot;Acc:Q9NXL6]                                                                                                                         | 0.63  | 0.01 |



|        |                 |       |           |           |      |                                                                                                                                                    |       |      |
|--------|-----------------|-------|-----------|-----------|------|----------------------------------------------------------------------------------------------------------------------------------------------------|-------|------|
| SP1    | ENSG00000185591 | chr12 | 52050891  | 52051428  | 9093 | Transcription factor Sp1 [Source:UniProtKB/Swiss-Prot;Acc:P08047]                                                                                  | -0.25 | 0.04 |
| SSBP1  | ENSG00000106028 | chr7  | 141084284 | 141084827 | 158  | Single-stranded DNA-binding protein, mitochondrial Precursor (Mt-SSB)(MtSSB)(PWP1-interacting protein 17) [Source:UniProtKB/Swiss-Prot;Acc:Q04837] | -0.28 | 0.04 |
| SSSCA1 | ENSG00000173465 | chr11 | 65094071  | 65094643  | 162  | Sjogren syndrome/scleroderma autoantigen 1 (Autoantigen p27) [Source:UniProtKB/Swiss-Prot;Acc:O60232]                                              | -0.35 | 0.04 |
| SUMF1  | ENSG00000144455 | chr3  | 4483679   | 4484079   | 26   | Sulfatase-modifying factor 1 Precursor (EC 1.8.99.-)(C-alpha-formylglycine-generating enzyme 1) [Source:UniProtKB/Swiss-Prot;Acc:Q8NBK3]           | 0.28  | 0.02 |
| VPS45  | ENSG00000136631 | chr1  | 148306014 | 148306613 | 54   | Vacuolar protein sorting-associated protein 45 (h-VPS45)(hVps45) [Source:UniProtKB/Swiss-Prot;Acc:Q9NRW7]                                          | 0.37  | 0.04 |
| ZNF398 | ENSG00000197024 | chr7  | 148472992 | 148473347 | 2582 | Zinc finger protein 398 (Zinc finger DNA-binding protein p52/p71) [Source:UniProtKB/Swiss-Prot;Acc:Q8TD17]                                         | -0.31 | 0    |

**Table S12. Genes differentially expressed and bound by p53 only upon RITA treatment**

| Gene Name    | RITA treatment      |                  | Nutlin treatment    |                    |
|--------------|---------------------|------------------|---------------------|--------------------|
|              | log2 Fold Change    | p-value          | log2 Fold Change    | p-value            |
| AMBN         | 0.278856978         | 0.10057385       | 0.003075391         | 0.991282475        |
| <b>ARMC1</b> | <b>-0.706986503</b> | <b>3.52E-05</b>  | -0.179833845        | 0.261756425        |
| ATP8B4       | 0.128262863         | 0.35567249       | 0.248321976         | 0.119857744        |
| BMS1         | -0.2016932          | 0.1454742        | -0.185450937        | 0.271067583        |
| CALD1        | 0.386333984         | 0.11217968       | <b>1.988191856</b>  | <b>5.04E-07</b>    |
| CHD2         | 0.267733202         | 0.15492051       | -0.029552402        | 0.928231744        |
| <b>CLIP2</b> | <b>0.353766425</b>  | <b>0.040632</b>  | 0.225247603         | 0.273732626        |
| CSDA         | <b>0.494719951</b>  | <b>0.0009933</b> | <b>0.318886686</b>  | <b>0.032241381</b> |
| CYP19A1      | 0.096261026         | 0.47405373       | -0.012602735        | 0.957344448        |
| DUSP11       | <b>-0.779571065</b> | <b>6.98E-05</b>  | <b>0.409846915</b>  | <b>0.020152821</b> |
| DYNC1H1      | -0.14095894         | 0.38935027       | <b>0.803977978</b>  | <b>0.000103971</b> |
| GCH1         | <b>-0.393699055</b> | <b>0.0170704</b> | <b>-1.044834198</b> | <b>4.19E-06</b>    |
| GNAI1        | 0.055426682         | 0.7738798        | <b>1.086085275</b>  | <b>1.33E-05</b>    |
| HSPA4        | <b>-1.422757937</b> | <b>1.21E-07</b>  | <b>-0.399025523</b> | <b>0.004649012</b> |
| JUND         | 0.248039621         | 0.14821921       | <b>0.866288148</b>  | <b>8.28E-05</b>    |
| MTMR4        | <b>-0.450828205</b> | <b>0.0079146</b> | <b>-0.918611512</b> | <b>1.88E-05</b>    |
| NLRX1        | 0.245092566         | 0.13372972       | <b>0.997150379</b>  | <b>1.03E-05</b>    |
| PCDHGC3      | 0.23746931          | 0.16984533       | -0.135504579        | 0.567040692        |
| PDE2A        | <b>0.466469516</b>  | <b>0.0165522</b> | <b>0.598208239</b>  | <b>0.005227077</b> |
| PFDN1        | -0.054372753        | 0.56944701       | 0.158574026         | 0.144055793        |
| PI4K2A       | <b>0.304292274</b>  | <b>0.0464043</b> | <b>1.652129883</b>  | <b>1.95E-06</b>    |
| PMS2L3       | <b>0.311233732</b>  | <b>0.0122766</b> | <b>0.408856592</b>  | <b>0.002873422</b> |
| <b>PTRF</b>  | <b>0.614724244</b>  | <b>3.51E-05</b>  | -0.203227087        | 0.125900918        |
| <b>SEC62</b> | <b>-0.612189403</b> | <b>0.0001858</b> | -0.230916531        | 0.140831244        |
| TMOD2        | -0.156342809        | 0.35465509       | <b>0.384612125</b>  | <b>0.043437348</b> |
| <b>TMOD3</b> | <b>-0.482843464</b> | <b>0.01232</b>   | 0.346279575         | 0.09871321         |
| <b>TNPO3</b> | <b>-0.283455778</b> | <b>0.0131773</b> | -0.11355267         | 0.414983856        |
| UHRF1BP1L    | <b>-1.274229428</b> | <b>2.19E-06</b>  | <b>-0.518505971</b> | <b>0.012868404</b> |
| WRAP53       | 0.112857913         | 0.35268955       | <b>-0.72140922</b>  | <b>1.34E-05</b>    |
| ZNF12        | -0.224567226        | 0.15763717       | <b>0.396929911</b>  | <b>0.027288964</b> |

**Table 13. List of the primers used for RT-PCR, ChIP-PCR and cloning experiments**

## RT-PCR primers

|             |                        |
|-------------|------------------------|
| CDKN1A_f:   | GTACCACCCAGCGGA        |
| CDKN1A_r:   | CCTCATCCCGTGTTCC       |
| ANKRA2_f:   | AGATGCTCTTAGAAAAGTGGG  |
| ANKRA2_r:   | AGCTTCAACAAATGTGACTC   |
| HES2_f:     | GACCTCATTTTCGGACCTC    |
| HES2_r:     | CTGCCTTCTCTAGCTTCG     |
| KCNN4_f:    | GTATACCAAAGAGATGAAGGAG |
| KCNN4_r:    | TGTCAATCTGTTTCTCCAGG   |
| MLLT11_f:   | TTGATAACAGGAAGCTATGAGG |
| MLLT11_r:   | TGTCTTTGACCTTGTAGGTG   |
| FOSL1_f:    | GATGGTACAGCCTCATTTCC   |
| FOSL1_r:    | AGTCGGTCAGTTCCTTCC     |
| C1orf183_f: | TCGCCTCAAACAGGAGC      |
| C1orf183_r: | TCATGCAGTTCATCTGATCC   |
| CMBL_f:     | GGATACACAACCATTGTTCC   |
| CMBL_r:     | CTTCAAGATAGCACTGATCTC  |
| MKNK2_f:    | CAGGTTTGAAGACGTCTACC   |
| MKNK2_r:    | GCATCTTCTCAAACACCAGG   |
| PROM2_f:    | TGAGGAATGTGAGTGAGTG    |
| PROM2_r:    | GGACGGAAGTATTTGGAGG    |
| CEL_f:      | TCTGTGGACATCTTCAAGG    |
| CEL_r:      | GTACAGGCAGTCTTCATCC    |
| SEI1_f:     | CGTTTCCTGATTGGTTGTG    |
| SEI1_r:     | CACTGAGAGGTCAAAGAGG    |
| TXNIP_f:    | GTGAAGGTGATGAGATTTCC   |
| TXNIP_r:    | ACGCTAACATAGATCAGTAAGG |
| ORAI3_f:    | CCAAGCTCAAAGCTTCC      |
| ORAI3_r:    | GGTGGACAGAGTTGAGG      |
| ZNF219_f:   | CAGTCTTTGCTGGTCCATAG   |
| ZNF219_r:   | AGGGATGACAGGAATCGTAC   |
| AURKA_f:    | TGTTAAGGCTACAGCTCC     |
| AURKA_r:    | GGGAAGAATTTGAAGGACAC   |
| ATAD2_f:    | GAGAGAAGATGGTGGTTCTCC  |
| ATAD2_r:    | AAGATCTTAAAGCACGTGTCC  |
| DNAJC2_f:   | GTGCTTACTGGTCGTCTCC    |
| DNAJC2_r:   | ACAGAGTGTAGAGGCAGAGG   |
| RRP15_f:    | AAATGGTAACTGGAGCCG     |
| RRP15_r:    | TCACTGTCAGCTTCTATTGC   |

## ChIP-PCR primers

|           |                       |
|-----------|-----------------------|
| CDKN1A_f: | GTGGCTCTGATTGGCTTTCTG |
| CDKN1A_r: | CTGAAAACAGGCAGCCCAAG  |
| ANKRA2_f: | TTTCTTCTTTTCGCCTTCTGG |
| ANKRA2_r: | CCCTGTCTGTGTAGTACTCC  |
| HES2_f:   | CCATTATTGAGCCTTACAGC  |
| HES2_r:   | GCCAATGATGTTGTTTCTGC  |
| KCNN4_f:  | CTGAACTGGTGACACTGC    |
| KCNN4_r:  | TGTCCATGTGTATGGTTTGG  |
| MLLT11_f: | AAATATGGAACCGGGAAAGC  |
| MLLT11_r: | CTTTCTTTCTCTCCAGCTGC  |
| FOSL1_f:  | GATGAGGTCTTCGATTCCG   |
| FOSL1_r:  | GCTGATAGAATGGGAACAGG  |

C1orf183\_f: TCAAAGTTTCTTCGTGGTCC  
C1orf183\_r: GGAAATGGACTGCTATCTCC  
CMBL\_f: TGTTCTGCAAGGACAACG  
CMBL\_r: TCTGACTATGGCAAAGAAGG  
MKNK2\_f: CCCACCATGAGACTCCAG  
MKNK2\_r: CTCTACAGATTGAGGAAGCG  
PROM2\_f: CACGTTTCTGGTCATATCC  
PROM2\_r: CCAATCCTGAACAGAGGC  
CEL\_f: ACACTGGCTGAGCTTAAAGG  
CEL\_r: TTTCCCTGTGGAAACAAAGG  
SEI1\_f: AAGCTTCTTACACATCCAGC  
SEI1\_r: ATGTGATTCCGTTGGTATCG  
TXNIP\_f: CAATGGGAGGGATGTGC  
TXNIP\_r: GGTTAGTTTCAAGCAGGAGG  
ORAI3\_f: AGTCTCAAGCTGATAAACCC  
ORAI3\_r: CTCCATGATCTCAGTTTCCC  
AURKA\_f: GTCCAAGGAGGTGAACTAAC  
AURKA\_r: CTCTCCTGGAAAAATGGAGG  
ATAD2\_f: CATTGTAGAGCGAAGGAGG  
ATAD2\_r: AAATTCCAAACGGGCTACG  
DNAJC2\_f: TATACTGACTGAGATCCGGC  
DNAJC2\_r: CTATGTATTGCACTGGGACG  
RRP15\_f: AAATGCAGAAGTTCCTCTGG  
RRP15\_r: CTATCAGAAGTGTCTGTGGC  
ZNF219\_f: TTAAGTGGAGCTGACCCTAG  
ZNF219\_r: CAGGTCCTACCCTACTTAGC  
c-MYC\_f: ATCCTCTCTCGCTAATCTCC  
c-MYC\_r: ACAGCGAGTTAGATAAAGCC  
Cloning primers  
SEI1\_f: CAGAGATCTCAGACAGCACGTAGAGGT  
SEI1\_r: GAGACGCGTGATGTGATTCCGTTGGTATC  
AURKA\_f: GCGAGATCTACAAGCAGTATCCTACAGGG  
AURKA\_r: GTGACGCGTTGCTAACTCTCGACTCTTC
