# Supplementary material for: Insights into p53 transcriptional function via genome-wide chromatin occupancy and gene expression analysis
Source: PubMed Central journal article supplement — Cell Death Differ. 2012 Jul 13;19(12):1992–2002. doi: 10.1038/cdd.2012.89 (PMC3504713; doi:10.1038/cdd.2012.89), 2012-07-13
Supplement: cdd201289x5.pdf [file cdd201289x5.pdf]

| chr | start    | end      | maximum  | p53<br>Height | p53<br>Area | IgG | Ratio p53/IgG | P-Value     | Gene<br>Symbol | Ensemble<br>name |
|-----|----------|----------|----------|---------------|-------------|-----|---------------|-------------|----------------|------------------|
| 1   | 557268   | 557602   | 557435   | 13            | 13          | 28  | 0.462921438   | 0.99326     |                | ENSG00000209350  |
| 1   | 559616   | 559955   | 559788   | 39            | 39          | 57  | 0.66131634    | 0.979222    |                | ENSG00000212678  |
| 1   | 1143125  | 1143357  | 1143241  | 10            | 10          | 0   | 10.54799562   | 0.000613541 | TNFRSF4        | ENSG00000186827  |
| 1   | 1176208  | 1176524  | 1176347  | 15            | 18          | 3   | 4.554816292   | 0.000599415 | FAM132A        | ENSG00000184163  |
| 1   | 1324858  | 1325040  | 1324966  | 8             | 8           | 1   | 4.315089119   | 0.0127267   |                | ENSG00000221978  |
| 1   | 1828729  | 1829056  | 1828885  | 17            | 21          | 1   | 10.54799562   | 4.43E-06    | CALML6         | ENSG00000169885  |
| 1   | 4302971  | 4303155  | 4303050  | 8             | 8           | 0   | 8.630178238   | 0.00235436  |                | ENSG00000220404  |
| 1   | 5043738  | 5044008  | 5043857  | 14            | 16          | 0   | 16.30144778   | 1.09E-05    | AJAP1          | ENSG00000196581  |
| 1   | 5580746  | 5580936  | 5580854  | 8             | 8           | 0   | 8.630178238   | 0.00235436  |                | ENSG00000216045  |
| 1   | 6056847  | 6057217  | 6057025  | 23            | 29          | 1   | 14.3836304    | 2.72E-08    | KCNAB2         | ENSG00000069424  |
| 1   | 6144561  | 6144877  | 6144719  | 8             | 9           | 0   | 9.589086931   | 0.00120187  | CHD5           | ENSG00000116254  |
| 1   | 6396968  | 6397646  | 6397318  | 71            | 109         | 0   | 105.4799562   | 7.56E-33    | HES2           | ENSG00000069812  |
| 1   | 6469179  | 6469382  | 6469280  | 8             | 8           | 1   | 4.315089119   | 0.0127267   | PLEKHG5        | ENSG00000171680  |
| 1   | 8000192  | 8000541  | 8000363  | 8             | 12          | 3   | 3.116453252   | 0.0131971   | ERRFI1         | ENSG00000116285  |
| 1   | 8053065  | 8053297  | 8053185  | 8             | 8           | 2   | 2.876726079   | 0.0381137   |                | ENSG00000219182  |
| 1   | 8164899  | 8165361  | 8165169  | 10            | 19          | 2   | 6.39272462    | 8.83E-05    |                | ENSG00000217234  |
| 1   | 8653347  | 8653620  | 8653451  | 8             | 10          | 2   | 3.515998541   | 0.0136204   |                | ENSG00000218821  |
| 1   | 9164032  | 9165175  | 9164816  | 89            | 185         | 5   | 29.72616948   | 2.81E-47    |                | ENSG00000207865  |
| 1   | 9411568  | 9411762  | 9411665  | 8             | 9           | 5   | 1.598181155   | 0.170911    |                | ENSG00000209395  |
| 1   | 10065787 | 10066055 | 10065921 | 14            | 16          | 0   | 16.30144778   | 1.09E-05    | UBE4B          | ENSG00000130939  |
| 1   | 10726836 | 10727155 | 10726995 | 25            | 27          | 0   | 26.84944341   | 6.66E-09    | CASZ1          | ENSG00000130940  |
| 1   | 10727204 | 10727555 | 10727379 | 31            | 34          | 0   | 33.56180426   | 6.02E-11    | CASZ1          | ENSG00000130940  |
| 1   | 10892478 | 10892707 | 10892592 | 9             | 10          | 2   | 3.515998541   | 0.0136204   |                | ENSG00000217499  |
| 1   | 11541674 | 11542203 | 11542016 | 22            | 37          | 0   | 36.43853034   | 8.01E-12    | PTCHD2         | ENSG00000204624  |
| 1   | 11962512 | 11962697 | 11962604 | 8             | 8           | 0   | 8.630178238   | 0.00235436  | MFN2           | ENSG00000116688  |
| 1   | 11964346 | 11964693 | 11964494 | 11            | 15          | 1   | 7.671269544   | 0.000187863 | MFN2           | ENSG00000116688  |
| 1   | 12189765 | 12190146 | 12189943 | 28            | 34          | 0   | 33.56180426   | 6.02E-11    |                | ENSG00000219226  |
| 1   | 12600896 | 12601404 | 12601107 | 25            | 42          | 1   | 20.6165369    | 6.12E-12    | DHRS3          | ENSG00000162496  |
| 1   | 12623193 | 12623424 | 12623316 | 13            | 14          | 0   | 14.3836304    | 4.17E-05    | AADA4L4        | ENSG00000204518  |
| 1   | 14932185 | 14932506 | 14932347 | 17            | 22          | 1   | 11.02744997   | 2.36E-06    |                | ENSG00000203390  |
| 1   | 15106529 | 15106882 | 15106705 | 21            | 26          | 0   | 25.89053471   | 1.31E-08    |                | ENSG00000189337  |
| 1   | 15245529 | 15245902 | 15245705 | 24            | 31          | 0   | 30.68507818   | 4.52E-10    |                | ENSG00000189337  |

|   |          |          |          |    |    |   |             |             |          |                 |
|---|----------|----------|----------|----|----|---|-------------|-------------|----------|-----------------|
| 1 | 16351503 | 16351782 | 16351642 | 10 | 12 | 2 | 4.155271003 | 0.0046638   | EPHA2    | ENSG00000142627 |
| 1 | 16383722 | 16384071 | 16383896 | 27 | 33 | 1 | 16.30144778 | 2.08E-09    | ARHGEF19 | ENSG00000142632 |
| 1 | 16758730 | 16759374 | 16758980 | 37 | 56 | 0 | 54.6577955  | 2.27E-17    |          | ENSG00000209524 |
| 1 | 16811697 | 16811946 | 16811800 | 12 | 15 | 7 | 1.917817386 | 0.0572317   | NBPF1    | ENSG00000179571 |
| 1 | 16816540 | 16816765 | 16816652 | 8  | 8  | 4 | 1.726035648 | 0.150596    | NBPF1    | ENSG00000179571 |
| 1 | 16820093 | 16820465 | 16820230 | 18 | 23 | 6 | 3.287686948 | 0.00104919  | NBPF1    | ENSG00000179571 |
| 1 | 16926376 | 16926729 | 16926552 | 11 | 16 | 6 | 2.328778255 | 0.0221113   |          | ENSG00000209530 |
| 1 | 17432983 | 17433162 | 17433018 | 8  | 8  | 1 | 4.315089119 | 0.0127267   | PADI3    | ENSG00000142619 |
| 1 | 17497155 | 17497336 | 17497223 | 8  | 8  | 1 | 4.315089119 | 0.0127267   | PADI4    | ENSG00000159339 |
| 1 | 17503691 | 17503895 | 17503793 | 9  | 10 | 1 | 5.273997812 | 0.00391723  | PADI4    | ENSG00000159339 |
| 1 | 17508804 | 17509157 | 17508980 | 23 | 29 | 2 | 9.589086931 | 2.21E-07    | PADI4    | ENSG00000159339 |
| 1 | 17611330 | 17611549 | 17611450 | 10 | 12 | 1 | 6.232906505 | 0.00117736  | RCC2     | ENSG00000179051 |
| 1 | 17781042 | 17781288 | 17781217 | 8  | 10 | 1 | 5.273997812 | 0.00391723  | ARHGEF10 | ENSG00000074964 |
| 1 | 18156890 | 18157318 | 18157158 | 12 | 20 | 3 | 5.034270639 | 0.000202317 | ACTL8    | ENSG00000117148 |
| 1 | 18392100 | 18392321 | 18392210 | 12 | 13 | 0 | 13.4247217  | 8.16E-05    | IGSF21   | ENSG00000117154 |
| 1 | 18867872 | 18868179 | 18868024 | 17 | 19 | 4 | 3.835634772 | 0.00108365  | PAX7     | ENSG00000009709 |
| 1 | 19197352 | 19197729 | 19197564 | 21 | 26 | 1 | 12.94526736 | 1.86E-07    | IFFO2    | ENSG00000169991 |
| 1 | 20332745 | 20333097 | 20332921 | 11 | 16 | 0 | 16.30144778 | 1.09E-05    | PLA2G2F  | ENSG00000158786 |
| 1 | 20693017 | 20693212 | 20693115 | 8  | 9  | 1 | 4.794543465 | 0.00708517  | CAMK2N1  | ENSG00000162545 |
| 1 | 21082878 | 21083206 | 21083035 | 14 | 17 | 0 | 17.26035648 | 5.54E-06    | EIF4G3   | ENSG00000075151 |
| 1 | 21484440 | 21484620 | 21484541 | 8  | 8  | 1 | 4.315089119 | 0.0127267   | ECE1     | ENSG00000117298 |
| 1 | 21567612 | 21567832 | 21567684 | 9  | 9  | 2 | 3.19636231  | 0.0229249   | ECE1     | ENSG00000117298 |
| 1 | 21987168 | 21987382 | 21987275 | 10 | 12 | 1 | 6.232906505 | 0.00117736  | USP48    | ENSG00000090686 |
| 1 | 22033051 | 22033354 | 22033202 | 9  | 13 | 0 | 13.4247217  | 8.16E-05    | HSPG2    | ENSG00000142798 |
| 1 | 22154982 | 22155286 | 22155110 | 17 | 20 | 0 | 20.13708255 | 7.37E-07    | HSPG2    | ENSG00000142798 |
| 1 | 22155879 | 22156262 | 22156117 | 14 | 21 | 5 | 3.515998541 | 0.00108602  | HSPG2    | ENSG00000142798 |
| 1 | 22173815 | 22174164 | 22173989 | 19 | 25 | 0 | 24.93162602 | 2.56E-08    | ELA3B    | ENSG00000219073 |
| 1 | 22242253 | 22242616 | 22242453 | 15 | 21 | 5 | 3.515998541 | 0.00108602  | CDC42    | ENSG00000070831 |
| 1 | 22474485 | 22474717 | 22474648 | 8  | 10 | 0 | 10.54799562 | 0.000613541 |          | ENSG00000198137 |
| 1 | 23016471 | 23017044 | 23016745 | 27 | 41 | 2 | 13.4247217  | 1.29E-10    | EPHB2    | ENSG00000133216 |
| 1 | 23218335 | 23218525 | 23218430 | 8  | 8  | 8 | 0.958908693 | 0.534974    | AOF2     | ENSG00000004487 |
| 1 | 23576219 | 23576871 | 23576699 | 30 | 54 | 6 | 7.534282588 | 7.46E-11    |          | ENSG00000201405 |
| 1 | 23651064 | 23651373 | 23651232 | 12 | 16 | 3 | 4.075361945 | 0.00173346  | TCEA3    | ENSG00000204219 |
| 1 | 23696235 | 23696414 | 23696354 | 8  | 8  | 1 | 4.315089119 | 0.0127267   |          | ENSG00000203345 |

|   |          |          |          |     |     |   |             |             |          |                 |
|---|----------|----------|----------|-----|-----|---|-------------|-------------|----------|-----------------|
| 1 | 23784732 | 23785051 | 23784909 | 10  | 14  | 1 | 7.191815198 | 0.00034761  | ID3      | ENSG00000117318 |
| 1 | 23791415 | 23792487 | 23791855 | 106 | 158 | 7 | 19.05831027 | 1.59E-37    | ID3      | ENSG00000117318 |
| 1 | 23792655 | 23792927 | 23792767 | 17  | 20  | 1 | 10.06854128 | 8.32E-06    | MDS2     | ENSG00000197880 |
| 1 | 24328314 | 24328554 | 24328446 | 12  | 14  | 1 | 7.191815198 | 0.00034761  | IL22RA1  | ENSG00000142677 |
| 1 | 24518569 | 24519038 | 24518775 | 17  | 26  | 6 | 3.698647816 | 0.00025253  | GRHL3    | ENSG00000158055 |
| 1 | 24618032 | 24618252 | 24618129 | 10  | 12  | 4 | 2.493162602 | 0.0299057   | NPAL3    | ENSG00000001461 |
| 1 | 24793257 | 24793533 | 24793400 | 13  | 14  | 3 | 3.595907599 | 0.00486913  | C1orf130 | ENSG00000184454 |
| 1 | 24796969 | 24797206 | 24797097 | 9   | 11  | 1 | 5.753452158 | 0.00215302  | C1orf130 | ENSG00000184454 |
| 1 | 25171362 | 25171786 | 25171572 | 47  | 60  | 3 | 14.62335757 | 7.91E-15    | RUNX3    | ENSG00000020633 |
| 1 | 25767465 | 25767659 | 25767562 | 8   | 8   | 5 | 1.43836304  | 0.235762    |          | ENSG00000203342 |
| 1 | 26197176 | 26197520 | 26197348 | 8   | 12  | 1 | 6.232906505 | 0.00117736  | PAFAH2   | ENSG00000158006 |
| 1 | 26328417 | 26328727 | 26328572 | 11  | 12  | 6 | 1.78083043  | 0.0985525   | PDIK1L   | ENSG00000175087 |
| 1 | 26730328 | 26730565 | 26730447 | 9   | 11  | 4 | 2.301380863 | 0.0459276   | RPS6KA1  | ENSG00000117676 |
| 1 | 26891490 | 26891837 | 26891606 | 13  | 17  | 4 | 3.452071295 | 0.00292757  | ARID1A   | ENSG00000117713 |
| 1 | 26891995 | 26892336 | 26892165 | 11  | 17  | 5 | 2.876726079 | 0.00703033  | ARID1A   | ENSG00000117713 |
| 1 | 27052227 | 27052500 | 27052365 | 9   | 10  | 4 | 2.109599125 | 0.0694668   | SFN      | ENSG00000175793 |
| 1 | 27060280 | 27060778 | 27060616 | 12  | 21  | 1 | 10.54799562 | 4.43E-06    | SFN      | ENSG00000175793 |
| 1 | 27061927 | 27062131 | 27062029 | 12  | 12  | 1 | 6.232906505 | 0.00117736  | SFN      | ENSG00000175793 |
| 1 | 27066943 | 27067167 | 27067037 | 9   | 10  | 2 | 3.515998541 | 0.0136204   | SFN      | ENSG00000175793 |
| 1 | 27343470 | 27343808 | 27343639 | 12  | 16  | 4 | 3.260289556 | 0.00475414  | SLC9A1   | ENSG00000090020 |
| 1 | 27365882 | 27366098 | 27365971 | 8   | 9   | 0 | 9.589086931 | 0.00120187  | SLC9A1   | ENSG00000090020 |
| 1 | 27590713 | 27590990 | 27590856 | 12  | 15  | 1 | 7.671269544 | 0.000187863 | GPR3     | ENSG00000181773 |
| 1 | 28440956 | 28441210 | 28441083 | 13  | 13  | 0 | 13.4247217  | 8.16E-05    | ATPIF1   | ENSG00000130770 |
| 1 | 28459072 | 28459660 | 28459423 | 38  | 58  | 3 | 14.14390322 | 2.76E-14    | SESN2    | ENSG00000130766 |
| 1 | 28551410 | 28551763 | 28551586 | 48  | 53  | 0 | 51.78106943 | 1.70E-16    | PHACTR4  | ENSG00000204138 |
| 1 | 29003127 | 29003556 | 29003297 | 11  | 20  | 2 | 6.712360851 | 4.91E-05    | OPRD1    | ENSG00000116329 |
| 1 | 29401940 | 29402185 | 29402062 | 9   | 12  | 8 | 1.385090334 | 0.219216    | SFRS4    | ENSG00000116350 |
| 1 | 29438193 | 29438706 | 29438449 | 21  | 36  | 0 | 35.47962164 | 1.57E-11    | PTPRU    | ENSG00000060656 |
| 1 | 29547046 | 29547232 | 29547139 | 8   | 8   | 3 | 2.157544559 | 0.0836802   | PTPRU    | ENSG00000060656 |
| 1 | 29954833 | 29955050 | 29954941 | 8   | 9   | 0 | 9.589086931 | 0.00120187  |          | ENSG00000221126 |
| 1 | 29955223 | 29955777 | 29955402 | 28  | 41  | 3 | 10.06854128 | 9.74E-10    |          | ENSG00000221126 |
| 1 | 30233186 | 30233435 | 30233324 | 16  | 17  | 1 | 8.630178238 | 5.44E-05    |          | ENSG00000222787 |
| 1 | 30663950 | 30664219 | 30664115 | 8   | 10  | 1 | 5.273997812 | 0.00391723  |          | ENSG00000217351 |
| 1 | 30666086 | 30666411 | 30666248 | 23  | 28  | 0 | 27.8083521  | 3.40E-09    |          | ENSG00000217351 |

|   |          |          |          |    |    |   |             |             |          |                 |
|---|----------|----------|----------|----|----|---|-------------|-------------|----------|-----------------|
| 1 | 30993533 | 30993988 | 30993735 | 47 | 60 | 2 | 19.49781009 | 7.45E-16    | LPTM5    | ENSG00000162511 |
| 1 | 31293117 | 31293340 | 31293228 | 9  | 10 | 0 | 10.54799562 | 0.000613541 |          | ENSG00000218782 |
| 1 | 31310762 | 31311128 | 31311049 | 8  | 13 | 5 | 2.237453617 | 0.038866    | PUM1     | ENSG00000134644 |
| 1 | 31474348 | 31474640 | 31474494 | 8  | 10 | 0 | 10.54799562 | 0.000613541 | NKAIN1   | ENSG00000084628 |
| 1 | 31712200 | 31712469 | 31712343 | 10 | 12 | 0 | 12.46581301 | 0.000159888 |          | ENSG00000215899 |
| 1 | 31857969 | 31858319 | 31858124 | 12 | 16 | 0 | 16.30144778 | 1.09E-05    | HCRT1    | ENSG00000121764 |
| 1 | 32026269 | 32026583 | 32026441 | 16 | 20 | 1 | 10.06854128 | 8.32E-06    | SPOCD1   | ENSG00000134668 |
| 1 | 32191138 | 32191385 | 32191261 | 12 | 15 | 3 | 3.835634772 | 0.00291691  | PTP4A2   | ENSG00000184007 |
| 1 | 32732415 | 32732753 | 32732584 | 8  | 13 | 0 | 13.4247217  | 8.16E-05    |          | ENSG00000215897 |
| 1 | 32888558 | 32888788 | 32888725 | 10 | 10 | 3 | 2.636998906 | 0.034203    | ZBTB8OS  | ENSG00000176261 |
| 1 | 33011307 | 33011565 | 33011442 | 8  | 11 | 4 | 2.301380863 | 0.0459276   | KIAA1522 | ENSG00000162522 |
| 1 | 33055523 | 33055750 | 33055636 | 8  | 11 | 5 | 1.917817386 | 0.0843804   | S100PBP  | ENSG00000116497 |
| 1 | 33172313 | 33172506 | 33172409 | 10 | 10 | 5 | 1.757999271 | 0.121253    |          | ENSG00000221423 |
| 1 | 33201965 | 33202185 | 33202070 | 12 | 13 | 0 | 13.4247217  | 8.16E-05    | RNF19B   | ENSG00000116514 |
| 1 | 33275141 | 33275374 | 33275232 | 8  | 9  | 0 | 9.589086931 | 0.00120187  | AK2      | ENSG00000004455 |
| 1 | 34645412 | 34645629 | 34645520 | 9  | 10 | 0 | 10.54799562 | 0.000613541 | C1orf94  | ENSG00000142698 |
| 1 | 35744138 | 35744409 | 35744279 | 8  | 9  | 1 | 4.794543465 | 0.00708517  |          | ENSG00000216751 |
| 1 | 35879652 | 35879921 | 35879813 | 10 | 12 | 7 | 1.558226626 | 0.152813    | PSMB2    | ENSG00000126067 |
| 1 | 36675185 | 36675432 | 36675308 | 8  | 10 | 0 | 10.54799562 | 0.000613541 | C1orf102 | ENSG00000116885 |
| 1 | 36702455 | 36702698 | 36702576 | 10 | 12 | 2 | 4.155271003 | 0.0046638   | MRPS15   | ENSG00000116898 |
| 1 | 36955343 | 36955563 | 36955444 | 9  | 11 | 2 | 3.835634772 | 0.00800699  |          | ENSG00000220821 |
| 1 | 36989764 | 36990009 | 36989901 | 8  | 10 | 0 | 10.54799562 | 0.000613541 |          | ENSG00000220821 |
| 1 | 37276538 | 37276807 | 37276683 | 8  | 10 | 2 | 3.515998541 | 0.0136204   | GRIK3    | ENSG00000163873 |
| 1 | 37338573 | 37339008 | 37338793 | 40 | 57 | 0 | 55.6167042  | 1.16E-17    | GRIK3    | ENSG00000163873 |
| 1 | 37772626 | 37772875 | 37772763 | 10 | 12 | 0 | 12.46581301 | 0.000159888 |          | ENSG00000219042 |
| 1 | 37920522 | 37920799 | 37920660 | 8  | 10 | 1 | 5.273997812 | 0.00391723  | C1orf109 | ENSG00000116922 |
| 1 | 38072882 | 38073330 | 38073083 | 18 | 29 | 1 | 14.3836304  | 2.72E-08    |          | ENSG00000217771 |
| 1 | 38185195 | 38185555 | 38185367 | 26 | 31 | 0 | 30.68507818 | 4.52E-10    | INPP5B   | ENSG00000204084 |
| 1 | 38228298 | 38228514 | 38228460 | 8  | 10 | 2 | 3.515998541 | 0.0136204   | SF3A3    | ENSG00000183431 |
| 1 | 38496365 | 38496651 | 38496504 | 11 | 11 | 1 | 5.753452158 | 0.00215302  |          | ENSG00000200796 |
| 1 | 38525521 | 38525761 | 38525660 | 9  | 12 | 4 | 2.493162602 | 0.0299057   |          | ENSG00000200796 |
| 1 | 38752896 | 38753103 | 38752999 | 8  | 9  | 1 | 4.794543465 | 0.00708517  |          | ENSG00000200796 |
| 1 | 39355129 | 39355339 | 39355234 | 8  | 8  | 2 | 2.876726079 | 0.0381137   |          | ENSG00000206654 |
| 1 | 39381097 | 39381312 | 39381246 | 8  | 8  | 4 | 1.726035648 | 0.150596    |          | ENSG00000210142 |

|   |          |          |          |    |     |   |             |             |          |                 |
|---|----------|----------|----------|----|-----|---|-------------|-------------|----------|-----------------|
| 1 | 39422096 | 39422311 | 39422203 | 9  | 9   | 0 | 9.589086931 | 0.00120187  |          | ENSG00000210142 |
| 1 | 39585150 | 39585481 | 39585315 | 23 | 28  | 0 | 27.8083521  | 3.40E-09    | MACF1    | ENSG00000127603 |
| 1 | 39977038 | 39977293 | 39977185 | 10 | 11  | 4 | 2.301380863 | 0.0459276   | PPIE     | ENSG00000084072 |
| 1 | 40090565 | 40090875 | 40090720 | 9  | 11  | 5 | 1.917817386 | 0.0843804   | TRIT1    | ENSG00000043514 |
| 1 | 40215123 | 40215663 | 40215345 | 18 | 30  | 2 | 9.908723162 | 1.20E-07    |          | ENSG00000217900 |
| 1 | 40496252 | 40496448 | 40496350 | 9  | 10  | 2 | 3.515998541 | 0.0136204   | ZMPSTE24 | ENSG00000084073 |
| 1 | 40830354 | 40830535 | 40830458 | 9  | 9   | 3 | 2.397271733 | 0.0539397   |          | ENSG00000219028 |
| 1 | 40949678 | 40950215 | 40949857 | 32 | 44  | 2 | 14.3836304  | 1.96E-11    | NFYC     | ENSG00000066136 |
| 1 | 40950689 | 40950927 | 40950811 | 10 | 10  | 1 | 5.273997812 | 0.00391723  | NFYC     | ENSG00000066136 |
| 1 | 41008056 | 41008353 | 41008188 | 13 | 18  | 1 | 9.109632584 | 2.91E-05    |          | ENSG00000207962 |
| 1 | 41088326 | 41088505 | 41088364 | 8  | 8   | 3 | 2.157544559 | 0.0836802   | CITED4   | ENSG00000179862 |
| 1 | 41245218 | 41245557 | 41245387 | 12 | 18  | 1 | 9.109632584 | 2.91E-05    | SLFNL1   | ENSG00000171790 |
| 1 | 41650945 | 41651257 | 41651081 | 10 | 13  | 0 | 13.4247217  | 8.16E-05    | FOXO6    | ENSG00000204060 |
| 1 | 41720483 | 41721085 | 41720709 | 34 | 55  | 8 | 5.966542979 | 7.56E-10    | EDN2     | ENSG00000127129 |
| 1 | 41854411 | 41854730 | 41854590 | 12 | 16  | 1 | 8.150723891 | 0.000101217 |          | ENSG00000217547 |
| 1 | 41903549 | 41903820 | 41903712 | 9  | 11  | 4 | 2.301380863 | 0.0459276   | HIVEP3   | ENSG00000127124 |
| 1 | 42028125 | 42028432 | 42028280 | 8  | 12  | 7 | 1.558226626 | 0.152813    | HIVEP3   | ENSG00000127124 |
| 1 | 42404088 | 42404356 | 42404230 | 9  | 9   | 2 | 3.19636231  | 0.0229249   | GUCA2A   | ENSG00000197273 |
| 1 | 42412256 | 42412483 | 42412369 | 11 | 12  | 1 | 6.232906505 | 0.00117736  | GUCA2A   | ENSG00000197273 |
| 1 | 42578416 | 42578663 | 42578539 | 12 | 13  | 4 | 2.684944341 | 0.01921     | FOXJ3    | ENSG00000198815 |
| 1 | 42771356 | 42771950 | 42771602 | 27 | 44  | 4 | 8.630178238 | 9.65E-10    |          | ENSG00000186409 |
| 1 | 43179383 | 43179583 | 43179483 | 9  | 9   | 1 | 4.794543465 | 0.00708517  | SLC2A1   | ENSG00000117394 |
| 1 | 43391058 | 43391483 | 43391300 | 55 | 70  | 0 | 68.08251721 | 1.85E-21    | FAM183A  | ENSG00000186973 |
| 1 | 43820489 | 43820804 | 43820646 | 14 | 17  | 0 | 17.26035648 | 5.54E-06    | PTPRF    | ENSG00000142949 |
| 1 | 44566035 | 44566480 | 44566301 | 15 | 24  | 4 | 4.794543465 | 8.06E-05    | PRNPIP   | ENSG00000117419 |
| 1 | 44969540 | 44969781 | 44969660 | 9  | 10  | 2 | 3.515998541 | 0.0136204   |          | ENSG00000200169 |
| 1 | 45037940 | 45038596 | 45038201 | 98 | 164 | 4 | 31.64398687 | 1.27E-42    | PLK3     | ENSG00000173846 |
| 1 | 45795754 | 45796096 | 45795894 | 14 | 18  | 0 | 18.21926517 | 2.83E-06    | AKR1A1   | ENSG00000117448 |
| 1 | 45926275 | 45926454 | 45926319 | 8  | 8   | 5 | 1.43836304  | 0.235762    | TMEM69   | ENSG00000159596 |
| 1 | 46195779 | 46195974 | 46195882 | 8  | 9   | 0 | 9.589086931 | 0.00120187  | MAST2    | ENSG00000086015 |
| 1 | 46310180 | 46310418 | 46310299 | 11 | 13  | 0 | 13.4247217  | 8.16E-05    |          | ENSG00000216741 |
| 1 | 46370774 | 46370974 | 46370841 | 8  | 8   | 4 | 1.726035648 | 0.150596    | PIK3R3   | ENSG00000117461 |
| 1 | 46373337 | 46373573 | 46373484 | 10 | 10  | 2 | 3.515998541 | 0.0136204   | PIK3R3   | ENSG00000117461 |
| 1 | 46421534 | 46421818 | 46421689 | 22 | 24  | 0 | 23.97271733 | 5.01E-08    | TSPAN1   | ENSG00000117472 |

|   |          |          |          |    |    |    |             |             |         |                 |
|---|----------|----------|----------|----|----|----|-------------|-------------|---------|-----------------|
| 1 | 46456772 | 46457082 | 46456936 | 12 | 15 | 1  | 7.671269544 | 0.000187863 | POMGNT1 | ENSG00000085998 |
| 1 | 46578780 | 46579132 | 46579043 | 12 | 16 | 2  | 5.433815927 | 0.000499302 | NSUN4   | ENSG00000117481 |
| 1 | 46608514 | 46608842 | 46608684 | 15 | 18 | 1  | 9.109632584 | 2.91E-05    |         | ENSG00000119916 |
| 1 | 47269369 | 47269593 | 47269474 | 9  | 10 | 4  | 2.109599125 | 0.0694668   | CYP4X1  | ENSG00000186377 |
| 1 | 47970855 | 47971074 | 47970964 | 8  | 9  | 1  | 4.794543465 | 0.00708517  |         | ENSG00000204018 |
| 1 | 48332051 | 48332286 | 48332168 | 8  | 11 | 5  | 1.917817386 | 0.0843804   |         | ENSG00000204015 |
| 1 | 48769104 | 48769321 | 48769264 | 8  | 9  | 1  | 4.794543465 | 0.00708517  |         | ENSG00000220052 |
| 1 | 50377465 | 50377677 | 50377577 | 10 | 11 | 0  | 11.50690432 | 0.000313206 | ELAVL4  | ENSG00000162374 |
| 1 | 50841842 | 50842222 | 50842044 | 28 | 34 | 1  | 16.78090213 | 1.09E-09    |         | ENSG00000207194 |
| 1 | 50848818 | 50849155 | 50848985 | 10 | 15 | 2  | 5.114179696 | 0.00088103  |         | ENSG00000207194 |
| 1 | 50942432 | 50942618 | 50942525 | 8  | 8  | 2  | 2.876726079 | 0.0381137   |         | ENSG00000210528 |
| 1 | 51808064 | 51808329 | 51808196 | 13 | 14 | 10 | 1.307602763 | 0.244096    | OSBPL9  | ENSG00000117859 |
| 1 | 51930514 | 51930870 | 51930692 | 13 | 18 | 0  | 18.21926517 | 2.83E-06    |         | ENSG00000219625 |
| 1 | 53439593 | 53439898 | 53439725 | 9  | 10 | 1  | 5.273997812 | 0.00391723  | CPT2    | ENSG00000157184 |
| 1 | 56653078 | 56653294 | 56653186 | 9  | 11 | 1  | 5.753452158 | 0.00215302  |         | ENSG00000216893 |
| 1 | 56677880 | 56678203 | 56678082 | 12 | 16 | 1  | 8.150723891 | 0.000101217 |         | ENSG00000216893 |
| 1 | 58062780 | 58063019 | 58062848 | 9  | 12 | 3  | 3.116453252 | 0.0131971   |         | ENSG00000127266 |
| 1 | 58445142 | 58445450 | 58445268 | 17 | 21 | 0  | 21.09599125 | 3.76E-07    |         | ENSG00000216719 |
| 1 | 58859338 | 58859582 | 58859483 | 8  | 10 | 3  | 2.636998906 | 0.034203    |         | ENSG00000185839 |
| 1 | 59665387 | 59665651 | 59665528 | 8  | 10 | 2  | 3.515998541 | 0.0136204   | FGGY    | ENSG00000172456 |
| 1 | 59870059 | 59870252 | 59870155 | 9  | 11 | 1  | 5.753452158 | 0.00215302  | FGGY    | ENSG00000172456 |
| 1 | 60185695 | 60185881 | 60185788 | 10 | 10 | 5  | 1.757999271 | 0.121253    |         | ENSG00000203270 |
| 1 | 61377711 | 61378046 | 61377878 | 9  | 13 | 2  | 4.474907234 | 0.00269459  | NFIA    | ENSG00000162599 |
| 1 | 61576817 | 61577014 | 61576908 | 8  | 9  | 4  | 1.917817386 | 0.103282    | NFIA    | ENSG00000162599 |
| 1 | 62111978 | 62112203 | 62112060 | 9  | 9  | 0  | 9.589086931 | 0.00120187  |         | ENSG00000212360 |
| 1 | 63761410 | 63761687 | 63761542 | 8  | 10 | 3  | 2.636998906 | 0.034203    | EFCAB7  | ENSG00000203965 |
| 1 | 63785976 | 63786239 | 63786129 | 8  | 9  | 2  | 3.19636231  | 0.0229249   | DLEU2   | ENSG00000116652 |
| 1 | 64216872 | 64217153 | 64217004 | 9  | 12 | 2  | 4.155271003 | 0.0046638   |         | ENSG00000207190 |
| 1 | 64581887 | 64582127 | 64581992 | 12 | 13 | 3  | 3.356180426 | 0.00805599  | CACHD1  | ENSG00000158966 |
| 1 | 65233585 | 65233883 | 65233754 | 18 | 21 | 1  | 10.54799562 | 4.43E-06    |         | ENSG00000185031 |
| 1 | 66509646 | 66509877 | 66509744 | 10 | 10 | 0  | 10.54799562 | 0.000613541 | PDE4B   | ENSG00000184588 |
| 1 | 66638939 | 66639254 | 66639096 | 18 | 21 | 0  | 21.09599125 | 3.76E-07    | PDE4B   | ENSG00000184588 |
| 1 | 66674655 | 66674890 | 66674785 | 8  | 9  | 3  | 2.397271733 | 0.0539397   | SGIP1   | ENSG00000118473 |
| 1 | 67291384 | 67291617 | 67291508 | 10 | 10 | 4  | 2.109599125 | 0.0694668   | SLC35D1 | ENSG00000116704 |

|   |          |          |          |     |     |     |             |             |           |                 |
|---|----------|----------|----------|-----|-----|-----|-------------|-------------|-----------|-----------------|
| 1 | 67384878 | 67385260 | 67385078 | 16  | 24  | 0   | 23.97271733 | 5.01E-08    | C1orf141  | ENSG00000203963 |
| 1 | 67428433 | 67428647 | 67428516 | 10  | 10  | 1   | 5.273997812 | 0.00391723  |           | ENSG00000210928 |
| 1 | 67605250 | 67605511 | 67605369 | 17  | 17  | 1   | 8.630178238 | 5.44E-05    |           | ENSG00000223263 |
| 1 | 67614687 | 67614986 | 67614836 | 8   | 13  | 7   | 1.678090213 | 0.11195     |           | ENSG00000223263 |
| 1 | 67924673 | 67925467 | 67925067 | 141 | 186 | 7   | 22.4144907  | 3.19E-45    | GADD45A   | ENSG00000116717 |
| 1 | 67963418 | 67963824 | 67963581 | 19  | 25  | 1   | 12.46581301 | 3.51E-07    | GADD45A   | ENSG00000116717 |
| 1 | 69293174 | 69294038 | 69293720 | 90  | 136 | 1   | 65.68524547 | 6.71E-39    |           |                 |
| 1 | 72239013 | 72239587 | 72239265 | 103 | 135 | 1   | 65.20579113 | 1.31E-38    | NEGR1     | ENSG00000172260 |
| 1 | 74398376 | 74398659 | 74398504 | 20  | 22  | 0   | 22.05489994 | 1.92E-07    | LRRIQ3    | ENSG00000162620 |
| 1 | 75330423 | 75330771 | 75330598 | 36  | 41  | 2   | 13.4247217  | 1.29E-10    | LHX8      | ENSG00000162624 |
| 1 | 75331045 | 75331224 | 75331134 | 10  | 10  | 1   | 5.273997812 | 0.00391723  | LHX8      | ENSG00000162624 |
| 1 | 76429348 | 76429607 | 76429442 | 13  | 15  | 4   | 3.068507818 | 0.0076507   | ST6GALNA1 | ENSG00000184005 |
| 1 | 77157580 | 77157951 | 77157782 | 10  | 16  | 0   | 16.30144778 | 1.09E-05    | ST6GALNA1 | ENSG00000117069 |
| 1 | 78187332 | 78187650 | 78187491 | 18  | 22  | 1   | 11.02744997 | 2.36E-06    | FUBP1     | ENSG00000162613 |
| 1 | 80906268 | 80906466 | 80906331 | 8   | 9   | 2   | 3.19636231  | 0.0229249   |           | ENSG00000217175 |
| 1 | 82112717 | 82113053 | 82112885 | 45  | 48  | 0   | 46.98652596 | 4.91E-15    | LPHN2     | ENSG00000117114 |
| 1 | 82119036 | 82119245 | 82119197 | 9   | 12  | 0   | 12.46581301 | 0.000159888 | LPHN2     | ENSG00000117114 |
| 1 | 82464461 | 82464747 | 82464604 | 17  | 19  | 0   | 19.17817386 | 1.44E-06    | LPHN2     | ENSG00000117114 |
| 1 | 83249561 | 83250106 | 83249693 | 21  | 36  | 1   | 17.73981082 | 3.00E-10    |           |                 |
| 1 | 84824053 | 84824394 | 84824223 | 23  | 27  | 0   | 26.84944341 | 6.66E-09    | CTBS      | ENSG00000117151 |
| 1 | 85515036 | 85515294 | 85515165 | 15  | 17  | 4   | 3.452071295 | 0.00292757  | BCL10     | ENSG00000142867 |
| 1 | 85536012 | 85536427 | 85536191 | 9   | 17  | 1   | 8.630178238 | 5.44E-05    | BCL10     | ENSG00000142867 |
| 1 | 86392828 | 86393052 | 86392924 | 8   | 8   | 4   | 1.726035648 | 0.150596    | COL24A1   | ENSG00000171502 |
| 1 | 86662225 | 86662493 | 86662351 | 10  | 12  | 1   | 6.232906505 | 0.00117736  | CLCA2     | ENSG00000137975 |
| 1 | 87088339 | 87088607 | 87088454 | 8   | 10  | 0   | 10.54799562 | 0.000613541 |           | ENSG00000183291 |
| 1 | 87413042 | 87413350 | 87413209 | 28  | 31  | 1   | 15.34253909 | 7.54E-09    |           | ENSG00000221222 |
| 1 | 88273881 | 88274152 | 88274030 | 17  | 18  | 0   | 18.21926517 | 2.83E-06    |           | ENSG00000222435 |
| 1 | 88885617 | 88885827 | 88885737 | 10  | 12  | 1   | 6.232906505 | 0.00117736  | PKN2      | ENSG00000065243 |
| 1 | 89040164 | 89040559 | 89040349 | 33  | 45  | 0   | 44.10979988 | 3.69E-14    |           | ENSG00000207234 |
| 1 | 89544482 | 89544894 | 89544715 | 16  | 24  | 2   | 7.990905775 | 4.56E-06    |           | ENSG00000219841 |
| 1 | 90128332 | 90128840 | 90128511 | 14  | 24  | 1   | 11.98635866 | 6.63E-07    | LRRC8D    | ENSG00000171492 |
| 1 | 91625222 | 91625828 | 91625518 | 260 | 420 | 312 | 1.289778146 | 0.000303027 |           | ENSG00000211233 |
| 1 | 91768029 | 91768622 | 91768235 | 70  | 91  | 1   | 44.10979988 | 6.28E-26    |           | ENSG00000185636 |
| 1 | 91843091 | 91843413 | 91843252 | 16  | 17  | 0   | 17.26035648 | 5.54E-06    |           | ENSG00000218593 |

|   |           |           |           |    |    |    |             |             |         |                 |
|---|-----------|-----------|-----------|----|----|----|-------------|-------------|---------|-----------------|
| 1 | 93317084  | 93317364  | 93317190  | 10 | 12 | 5  | 2.077635502 | 0.0577144   | MTF2    | ENSG00000143033 |
| 1 | 93461506  | 93461952  | 93461604  | 13 | 20 | 0  | 20.13708255 | 7.37E-07    |         | ENSG00000220257 |
| 1 | 93867521  | 93867871  | 93867696  | 19 | 24 | 0  | 23.97271733 | 5.01E-08    | BCAR3   | ENSG00000137936 |
| 1 | 94085625  | 94085986  | 94085763  | 10 | 15 | 5  | 2.557089848 | 0.0169197   | BCAR3   | ENSG00000137936 |
| 1 | 94574091  | 94574300  | 94574142  | 9  | 9  | 1  | 4.794543465 | 0.00708517  |         | ENSG00000178596 |
| 1 | 94660055  | 94660403  | 94660207  | 12 | 16 | 1  | 8.150723891 | 0.000101217 | ABCD3   | ENSG00000117528 |
| 1 | 95074997  | 95075387  | 95075208  | 23 | 30 | 2  | 9.908723162 | 1.20E-07    | SLC44A3 | ENSG00000143036 |
| 1 | 95354854  | 95355053  | 95354992  | 8  | 8  | 1  | 4.315089119 | 0.0127267   | TMEM56  | ENSG00000152078 |
| 1 | 96023266  | 96023482  | 96023356  | 12 | 12 | 3  | 3.116453252 | 0.0131971   |         | ENSG00000221798 |
| 1 | 97299847  | 97300062  | 97299954  | 12 | 14 | 0  | 14.3836304  | 4.17E-05    |         | ENSG00000212039 |
| 1 | 98754476  | 98754825  | 98754650  | 30 | 35 | 0  | 34.52071295 | 3.07E-11    |         | ENSG00000221777 |
| 1 | 98915566  | 98915861  | 98915713  | 14 | 15 | 0  | 15.34253909 | 2.13E-05    | SNX7    | ENSG00000162627 |
| 1 | 99811679  | 99812166  | 99811925  | 13 | 23 | 0  | 23.01380863 | 9.81E-08    | PALMD   | ENSG00000099260 |
| 1 | 100046914 | 100047175 | 100047044 | 9  | 10 | 3  | 2.636998906 | 0.034203    |         | ENSG00000202254 |
| 1 | 100203853 | 100204136 | 100204003 | 10 | 12 | 1  | 6.232906505 | 0.00117736  | SLC35A3 | ENSG00000117620 |
| 1 | 100668443 | 100668884 | 100668664 | 56 | 72 | 4  | 14.00006692 | 3.96E-17    |         | ENSG00000216398 |
| 1 | 101073915 | 101074346 | 101074171 | 12 | 18 | 1  | 9.109632584 | 2.91E-05    | EXTL2   | ENSG00000162694 |
| 1 | 101764932 | 101765369 | 101765110 | 32 | 46 | 0  | 45.06870857 | 1.89E-14    |         | ENSG00000173810 |
| 1 | 103262224 | 103262475 | 103262349 | 9  | 9  | 0  | 9.589086931 | 0.00120187  |         | ENSG00000216948 |
| 1 | 106546359 | 106546613 | 106546481 | 11 | 11 | 8  | 1.278544924 | 0.28289     |         | ENSG00000217439 |
| 1 | 106554184 | 106554402 | 106554254 | 8  | 10 | 9  | 1.054799562 | 0.4492      |         | ENSG00000217439 |
| 1 | 106576195 | 106576500 | 106576359 | 9  | 14 | 5  | 2.397271733 | 0.0258078   |         | ENSG00000217439 |
| 1 | 106602082 | 106602342 | 106602212 | 10 | 12 | 5  | 2.077635502 | 0.0577144   |         | ENSG00000217439 |
| 1 | 106605323 | 106605535 | 106605431 | 8  | 8  | 2  | 2.876726079 | 0.0381137   |         | ENSG00000217439 |
| 1 | 106605626 | 106605907 | 106605763 | 8  | 10 | 7  | 1.318499453 | 0.269217    |         | ENSG00000217439 |
| 1 | 106608071 | 106608463 | 106608284 | 8  | 16 | 5  | 2.716907964 | 0.0109645   |         | ENSG00000217439 |
| 1 | 106612376 | 106612682 | 106612541 | 10 | 12 | 13 | 0.890415215 | 0.619237    |         | ENSG00000217439 |
| 1 | 106639928 | 106640257 | 106640089 | 10 | 14 | 4  | 2.876726079 | 0.01219     |         | ENSG00000217439 |
| 1 | 106646623 | 106646853 | 106646730 | 12 | 12 | 3  | 3.116453252 | 0.0131971   |         | ENSG00000217439 |
| 1 | 106737823 | 106738002 | 106737850 | 8  | 8  | 2  | 2.876726079 | 0.0381137   |         | ENSG00000217439 |
| 1 | 106743978 | 106744248 | 106744118 | 9  | 11 | 2  | 3.835634772 | 0.00800699  |         | ENSG00000217439 |
| 1 | 106768149 | 106768358 | 106768242 | 9  | 10 | 4  | 2.109599125 | 0.0694668   |         | ENSG00000217439 |
| 1 | 106828777 | 106828970 | 106828873 | 8  | 9  | 2  | 3.19636231  | 0.0229249   |         | ENSG00000220633 |
| 1 | 106833254 | 106833780 | 106833483 | 31 | 50 | 11 | 4.075361945 | 3.20E-07    |         | ENSG00000220633 |



|   |           |           |           |    |    |    |             |             |                 |
|---|-----------|-----------|-----------|----|----|----|-------------|-------------|-----------------|
| 1 | 106834452 | 106834692 | 106834572 | 8  | 10 | 2  | 3.515998541 | 0.0136204   | ENSG00000220633 |
| 1 | 106865275 | 106865454 | 106865382 | 8  | 8  | 2  | 2.876726079 | 0.0381137   | ENSG00000220633 |
| 1 | 106867726 | 106867979 | 106867852 | 11 | 14 | 7  | 1.797953799 | 0.0806593   | ENSG00000220633 |
| 1 | 106875967 | 106876191 | 106876051 | 10 | 11 | 8  | 1.278544924 | 0.28289     | ENSG00000220633 |
| 1 | 106876276 | 106876521 | 106876358 | 12 | 13 | 11 | 1.118726809 | 0.38479     | ENSG00000220633 |
| 1 | 106877811 | 106878073 | 106877952 | 9  | 11 | 3  | 2.876726079 | 0.0213797   | ENSG00000220633 |
| 1 | 106878823 | 106879112 | 106878967 | 13 | 16 | 13 | 1.164389127 | 0.333296    | ENSG00000220633 |
| 1 | 106885307 | 106885582 | 106885444 | 9  | 9  | 7  | 1.198635866 | 0.346278    | ENSG00000220633 |
| 1 | 106885716 | 106885940 | 106885828 | 9  | 10 | 5  | 1.757999271 | 0.121253    | ENSG00000220633 |
| 1 | 106892634 | 106892911 | 106892747 | 8  | 11 | 10 | 1.046082211 | 0.455063    | ENSG00000220633 |
| 1 | 106894334 | 106894578 | 106894457 | 9  | 11 | 5  | 1.917817386 | 0.0843804   | ENSG00000220633 |
| 1 | 106899809 | 106900210 | 106899981 | 11 | 20 | 15 | 1.25856766  | 0.240048    | ENSG00000220633 |
| 1 | 106908474 | 106908811 | 106908637 | 9  | 14 | 15 | 0.8989769   | 0.617119    | ENSG00000220633 |
| 1 | 106912455 | 106912733 | 106912591 | 13 | 16 | 7  | 2.037680973 | 0.0400399   | ENSG00000220633 |
| 1 | 106917701 | 106918036 | 106917875 | 11 | 14 | 9  | 1.43836304  | 0.179537    | ENSG00000220633 |
| 1 | 106919283 | 106919462 | 106919341 | 8  | 8  | 2  | 2.876726079 | 0.0381137   | ENSG00000220633 |
| 1 | 106921476 | 106921655 | 106921544 | 8  | 8  | 13 | 0.616441303 | 0.878084    | ENSG00000220633 |
| 1 | 106925484 | 106925758 | 106925583 | 8  | 10 | 5  | 1.757999271 | 0.121253    | ENSG00000220633 |
| 1 | 106953889 | 106954311 | 106954073 | 10 | 18 | 16 | 1.07172148  | 0.415914    | ENSG00000220633 |
| 1 | 106958736 | 106958928 | 106958832 | 9  | 9  | 7  | 1.198635866 | 0.346278    | ENSG00000220633 |
| 1 | 106959676 | 106959904 | 106959790 | 10 | 11 | 2  | 3.835634772 | 0.00800699  | ENSG00000220633 |
| 1 | 106962385 | 106962749 | 106962610 | 11 | 17 | 6  | 2.465765211 | 0.014729    | ENSG00000220633 |
| 1 | 106965453 | 106965780 | 106965616 | 8  | 12 | 12 | 0.958908693 | 0.542188    | ENSG00000220633 |
| 1 | 106973718 | 106974004 | 106973865 | 8  | 12 | 7  | 1.558226626 | 0.152813    | ENSG00000220633 |
| 1 | 106985315 | 106985494 | 106985438 | 8  | 9  | 4  | 1.917817386 | 0.103282    | ENSG00000220633 |
| 1 | 106986384 | 106986643 | 106986531 | 8  | 10 | 3  | 2.636998906 | 0.034203    | ENSG00000220633 |
| 1 | 106990341 | 106990531 | 106990436 | 8  | 8  | 4  | 1.726035648 | 0.150596    | ENSG00000220633 |
| 1 | 106995630 | 106995941 | 106995785 | 8  | 12 | 9  | 1.246581301 | 0.295061    | ENSG00000220633 |
| 1 | 106996558 | 106996845 | 106996701 | 9  | 11 | 0  | 11.50690432 | 0.000313206 | ENSG00000220633 |
| 1 | 107024252 | 107024450 | 107024366 | 9  | 9  | 4  | 1.917817386 | 0.103282    | ENSG00000220633 |
| 1 | 107024491 | 107024696 | 107024538 | 8  | 10 | 4  | 2.109599125 | 0.0694668   | ENSG00000220633 |
| 1 | 107025010 | 107025239 | 107025125 | 10 | 13 | 4  | 2.684944341 | 0.01921     | ENSG00000220633 |
| 1 | 107037390 | 107037628 | 107037509 | 10 | 10 | 3  | 2.636998906 | 0.034203    | ENSG00000220633 |
| 1 | 107051058 | 107051282 | 107051170 | 10 | 10 | 5  | 1.757999271 | 0.121253    | ENSG00000220633 |

|   |           |           |           |    |    |    |             |            |                 |
|---|-----------|-----------|-----------|----|----|----|-------------|------------|-----------------|
| 1 | 107062095 | 107062380 | 107062235 | 8  | 11 | 6  | 1.643843474 | 0.137712   | ENSG00000220633 |
| 1 | 107062692 | 107062916 | 107062785 | 10 | 12 | 3  | 3.116453252 | 0.0131971  | ENSG00000220633 |
| 1 | 107064766 | 107065062 | 107064914 | 8  | 11 | 2  | 3.835634772 | 0.00800699 | ENSG00000220633 |
| 1 | 107065592 | 107065856 | 107065771 | 9  | 12 | 7  | 1.558226626 | 0.152813   | ENSG00000220633 |
| 1 | 107065998 | 107066325 | 107066161 | 13 | 17 | 5  | 2.876726079 | 0.00703033 | ENSG00000220633 |
| 1 | 107071426 | 107071737 | 107071581 | 8  | 12 | 7  | 1.558226626 | 0.152813   | ENSG00000220633 |
| 1 | 107080814 | 107081172 | 107080993 | 9  | 14 | 7  | 1.797953799 | 0.0806593  | ENSG00000220633 |
| 1 | 107081939 | 107082118 | 107082028 | 8  | 8  | 7  | 1.07877228  | 0.435076   | ENSG00000220633 |
| 1 | 107082439 | 107082642 | 107082533 | 8  | 9  | 1  | 4.794543465 | 0.00708517 | ENSG00000220633 |
| 1 | 107084612 | 107084959 | 107084786 | 10 | 14 | 4  | 2.876726079 | 0.01219    | ENSG00000220633 |
| 1 | 107090898 | 107091090 | 107091041 | 8  | 10 | 8  | 1.171999514 | 0.35773    | ENSG00000220633 |
| 1 | 107093808 | 107094036 | 107093922 | 10 | 10 | 7  | 1.318499453 | 0.269217   | ENSG00000220633 |
| 1 | 107094067 | 107094753 | 107094246 | 30 | 52 | 14 | 3.388144049 | 2.01E-06   | ENSG00000220633 |
| 1 | 107096613 | 107096885 | 107096749 | 10 | 11 | 3  | 2.876726079 | 0.0213797  | ENSG00000220633 |
| 1 | 107098596 | 107098863 | 107098702 | 10 | 12 | 11 | 1.038817751 | 0.460341   | ENSG00000220633 |
| 1 | 107116551 | 107116737 | 107116677 | 8  | 8  | 7  | 1.07877228  | 0.435076   | ENSG00000220633 |
| 1 | 107116943 | 107117228 | 107117102 | 9  | 12 | 5  | 2.077635502 | 0.0577144  | ENSG00000220633 |
| 1 | 107128522 | 107128755 | 107128615 | 8  | 9  | 7  | 1.198635866 | 0.346278   | ENSG00000220633 |
| 1 | 107129352 | 107129689 | 107129520 | 11 | 15 | 8  | 1.704726565 | 0.0916153  | ENSG00000220633 |
| 1 | 107129914 | 107130110 | 107130007 | 9  | 10 | 5  | 1.757999271 | 0.121253   | ENSG00000220633 |
| 1 | 107131639 | 107131848 | 107131743 | 9  | 10 | 8  | 1.171999514 | 0.35773    | ENSG00000220633 |
| 1 | 107133806 | 107134062 | 107133889 | 8  | 11 | 2  | 3.835634772 | 0.00800699 | ENSG00000220633 |
| 1 | 107136492 | 107136850 | 107136671 | 11 | 17 | 10 | 1.569123316 | 0.112309   | ENSG00000220633 |
| 1 | 107137595 | 107138091 | 107137760 | 12 | 20 | 14 | 1.34247217  | 0.186867   | ENSG00000220633 |
| 1 | 107138298 | 107138515 | 107138406 | 8  | 11 | 3  | 2.876726079 | 0.0213797  | ENSG00000220633 |
| 1 | 107140752 | 107141066 | 107140909 | 8  | 12 | 9  | 1.246581301 | 0.295061   | ENSG00000220633 |
| 1 | 107143234 | 107143476 | 107143342 | 13 | 15 | 9  | 1.534253909 | 0.136498   | ENSG00000220633 |
| 1 | 107157891 | 107158095 | 107157991 | 8  | 8  | 3  | 2.157544559 | 0.0836802  | ENSG00000216572 |
| 1 | 107158768 | 107158999 | 107158878 | 8  | 10 | 7  | 1.318499453 | 0.269217   | ENSG00000216572 |
| 1 | 107164503 | 107164787 | 107164682 | 12 | 15 | 16 | 0.902502299 | 0.616352   | ENSG00000216572 |
| 1 | 107176324 | 107176611 | 107176467 | 8  | 10 | 13 | 0.753428259 | 0.762589   | ENSG00000216572 |
| 1 | 107183406 | 107184026 | 107183659 | 8  | 23 | 22 | 1.000600375 | 0.498356   | ENSG00000216572 |
| 1 | 107187539 | 107187985 | 107187806 | 10 | 20 | 5  | 3.356180426 | 0.0017534  | ENSG00000216572 |
| 1 | 107204663 | 107204902 | 107204820 | 8  | 10 | 2  | 3.515998541 | 0.0136204  | ENSG00000216572 |

|   |           |           |           |    |    |    |             |            |                       |
|---|-----------|-----------|-----------|----|----|----|-------------|------------|-----------------------|
| 1 | 107214256 | 107214766 | 107214587 | 32 | 44 | 1  | 21.57544559 | 1.67E-12   | ENSG00000216572       |
| 1 | 107219249 | 107219521 | 107219371 | 8  | 10 | 8  | 1.171999514 | 0.35773    | ENSG00000216572       |
| 1 | 107227586 | 107227776 | 107227599 | 9  | 10 | 1  | 5.273997812 | 0.00391723 | ENSG00000216572       |
| 1 | 107237311 | 107237514 | 107237359 | 8  | 9  | 2  | 3.19636231  | 0.0229249  | ENSG00000216572       |
| 1 | 107244597 | 107244832 | 107244714 | 10 | 11 | 5  | 1.917817386 | 0.0843804  | ENSG00000216572       |
| 1 | 107257049 | 107257339 | 107257194 | 10 | 15 | 4  | 3.068507818 | 0.0076507  | ENSG00000216572       |
| 1 | 107273612 | 107273943 | 107273770 | 11 | 15 | 5  | 2.557089848 | 0.0169197  | ENSG00000216572       |
| 1 | 107281435 | 107281698 | 107281568 | 8  | 10 | 4  | 2.109599125 | 0.0694668  | PRMT6 ENSG00000198890 |
| 1 | 107316734 | 107316958 | 107316846 | 8  | 10 | 11 | 0.878999635 | 0.622439   | PRMT6 ENSG00000198890 |
| 1 | 107320105 | 107320416 | 107320260 | 12 | 17 | 8  | 1.917817386 | 0.0474153  | PRMT6 ENSG00000198890 |
| 1 | 107327186 | 107327518 | 107327351 | 8  | 13 | 6  | 1.917817386 | 0.0693353  | PRMT6 ENSG00000198890 |
| 1 | 107333107 | 107333299 | 107333197 | 8  | 8  | 2  | 2.876726079 | 0.0381137  | PRMT6 ENSG00000198890 |
| 1 | 107345841 | 107346126 | 107345983 | 9  | 10 | 4  | 2.109599125 | 0.0694668  | PRMT6 ENSG00000198890 |
| 1 | 107350264 | 107350636 | 107350443 | 10 | 17 | 15 | 1.07877228  | 0.410615   | PRMT6 ENSG00000198890 |
| 1 | 107355715 | 107355895 | 107355780 | 8  | 8  | 5  | 1.43836304  | 0.235762   | PRMT6 ENSG00000198890 |
| 1 | 107368604 | 107369041 | 107368761 | 12 | 19 | 9  | 1.917817386 | 0.0394029  | PRMT6 ENSG00000198890 |
| 1 | 107374817 | 107375117 | 107374964 | 10 | 10 | 8  | 1.171999514 | 0.35773    | PRMT6 ENSG00000198890 |
| 1 | 107390901 | 107391176 | 107391060 | 8  | 8  | 7  | 1.07877228  | 0.435076   | PRMT6 ENSG00000198890 |
| 1 | 107391483 | 107391730 | 107391581 | 8  | 9  | 6  | 1.369869562 | 0.253675   | PRMT6 ENSG00000198890 |
| 1 | 107400822 | 107401804 | 107401260 | 11 | 42 | 18 | 2.170161779 | 0.00159802 | PRMT6 ENSG00000198890 |
| 1 | 107404343 | 107404657 | 107404482 | 9  | 13 | 10 | 1.220429246 | 0.306001   | PRMT6 ENSG00000198890 |
| 1 | 107405596 | 107405843 | 107405731 | 8  | 10 | 5  | 1.757999271 | 0.121253   | PRMT6 ENSG00000198890 |
| 1 | 107410442 | 107410755 | 107410577 | 12 | 14 | 4  | 2.876726079 | 0.01219    | PRMT6 ENSG00000198890 |
| 1 | 107415297 | 107415487 | 107415347 | 8  | 8  | 5  | 1.43836304  | 0.235762   | PRMT6 ENSG00000198890 |
| 1 | 107416019 | 107416214 | 107416123 | 11 | 11 | 3  | 2.876726079 | 0.0213797  | PRMT6 ENSG00000198890 |
| 1 | 107416715 | 107417140 | 107416894 | 9  | 17 | 10 | 1.569123316 | 0.112309   | PRMT6 ENSG00000198890 |
| 1 | 107435736 | 107435927 | 107435831 | 8  | 10 | 4  | 2.109599125 | 0.0694668  | PRMT6 ENSG00000198890 |
| 1 | 107439780 | 107440063 | 107439921 | 10 | 12 | 7  | 1.558226626 | 0.152813   | PRMT6 ENSG00000198890 |
| 1 | 107443137 | 107443413 | 107443275 | 8  | 11 | 9  | 1.150690432 | 0.367789   | NTNG1 ENSG00000162631 |
| 1 | 107446505 | 107446852 | 107446678 | 8  | 12 | 8  | 1.385090334 | 0.219216   | NTNG1 ENSG00000162631 |
| 1 | 107450068 | 107450356 | 107450212 | 11 | 12 | 9  | 1.246581301 | 0.295061   | NTNG1 ENSG00000162631 |
| 1 | 107454063 | 107454301 | 107454206 | 9  | 10 | 4  | 2.109599125 | 0.0694668  | NTNG1 ENSG00000162631 |
| 1 | 107454551 | 107454797 | 107454632 | 8  | 10 | 7  | 1.318499453 | 0.269217   | NTNG1 ENSG00000162631 |
| 1 | 107456367 | 107456644 | 107456495 | 9  | 11 | 9  | 1.150690432 | 0.367789   | NTNG1 ENSG00000162631 |

|   |           |           |           |    |    |    |             |            |       |                 |
|---|-----------|-----------|-----------|----|----|----|-------------|------------|-------|-----------------|
| 1 | 107462330 | 107462629 | 107462493 | 9  | 12 | 5  | 2.077635502 | 0.0577144  | NTNG1 | ENSG00000162631 |
| 1 | 107466066 | 107466270 | 107466229 | 9  | 11 | 11 | 0.958908693 | 0.540507   | NTNG1 | ENSG00000162631 |
| 1 | 107468885 | 107469110 | 107468997 | 8  | 10 | 12 | 0.811384279 | 0.697544   | NTNG1 | ENSG00000162631 |
| 1 | 107469799 | 107470138 | 107469968 | 9  | 14 | 8  | 1.598181155 | 0.124586   | NTNG1 | ENSG00000162631 |
| 1 | 107470512 | 107470750 | 107470631 | 9  | 12 | 6  | 1.78083043  | 0.0985525  | NTNG1 | ENSG00000162631 |
| 1 | 107471675 | 107471915 | 107471753 | 10 | 13 | 6  | 1.917817386 | 0.0693353  | NTNG1 | ENSG00000162631 |
| 1 | 107475087 | 107475297 | 107475185 | 9  | 11 | 4  | 2.301380863 | 0.0459276  | NTNG1 | ENSG00000162631 |
| 1 | 107477567 | 107477913 | 107477733 | 9  | 13 | 5  | 2.237453617 | 0.038866   | NTNG1 | ENSG00000162631 |
| 1 | 107482162 | 107482614 | 107482387 | 11 | 22 | 13 | 1.575349996 | 0.0840573  | NTNG1 | ENSG00000162631 |
| 1 | 107484656 | 107484905 | 107484780 | 9  | 12 | 8  | 1.385090334 | 0.219216   | NTNG1 | ENSG00000162631 |
| 1 | 107485906 | 107486138 | 107486022 | 8  | 10 | 20 | 0.502285506 | 0.972812   | NTNG1 | ENSG00000162631 |
| 1 | 107486273 | 107486858 | 107486452 | 13 | 29 | 31 | 0.8989769   | 0.662851   | NTNG1 | ENSG00000162631 |
| 1 | 107486985 | 107487229 | 107487107 | 9  | 12 | 14 | 0.831054201 | 0.689281   | NTNG1 | ENSG00000162631 |
| 1 | 107491429 | 107491836 | 107491727 | 9  | 14 | 7  | 1.797953799 | 0.0806593  | NTNG1 | ENSG00000162631 |
| 1 | 107494718 | 107495083 | 107494897 | 9  | 15 | 20 | 0.730597099 | 0.831283   | NTNG1 | ENSG00000162631 |
| 1 | 107496311 | 107496922 | 107496490 | 10 | 25 | 14 | 1.662108401 | 0.053254   | NTNG1 | ENSG00000162631 |
| 1 | 107497228 | 107497563 | 107497395 | 12 | 16 | 10 | 1.481949798 | 0.147733   | NTNG1 | ENSG00000162631 |
| 1 | 107497712 | 107498031 | 107497871 | 8  | 13 | 14 | 0.894981447 | 0.618069   | NTNG1 | ENSG00000162631 |
| 1 | 107500669 | 107500924 | 107500821 | 9  | 9  | 6  | 1.369869562 | 0.253675   | NTNG1 | ENSG00000162631 |
| 1 | 107502024 | 107502250 | 107502137 | 10 | 11 | 1  | 5.753452158 | 0.00215302 | NTNG1 | ENSG00000162631 |
| 1 | 107503201 | 107503565 | 107503364 | 8  | 13 | 5  | 2.237453617 | 0.038866   | NTNG1 | ENSG00000162631 |
| 1 | 107506581 | 107506966 | 107506758 | 10 | 17 | 11 | 1.43836304  | 0.15834    | NTNG1 | ENSG00000162631 |
| 1 | 107507535 | 107507810 | 107507665 | 11 | 13 | 8  | 1.491635745 | 0.166708   | NTNG1 | ENSG00000162631 |
| 1 | 107508257 | 107508468 | 107508362 | 8  | 10 | 8  | 1.171999514 | 0.35773    | NTNG1 | ENSG00000162631 |
| 1 | 107513844 | 107514025 | 107513934 | 8  | 8  | 10 | 0.784561658 | 0.708731   | NTNG1 | ENSG00000162631 |
| 1 | 107519397 | 107519625 | 107519522 | 12 | 14 | 9  | 1.43836304  | 0.179537   | NTNG1 | ENSG00000162631 |
| 1 | 107523914 | 107524311 | 107524132 | 9  | 15 | 5  | 2.557089848 | 0.0169197  | NTNG1 | ENSG00000162631 |
| 1 | 107526665 | 107527015 | 107526896 | 8  | 13 | 7  | 1.678090213 | 0.11195    | NTNG1 | ENSG00000162631 |
| 1 | 107529048 | 107529276 | 107529162 | 8  | 11 | 6  | 1.643843474 | 0.137712   | NTNG1 | ENSG00000162631 |
| 1 | 107529458 | 107529792 | 107529625 | 9  | 14 | 11 | 1.198635866 | 0.315918   | NTNG1 | ENSG00000162631 |
| 1 | 107531799 | 107532003 | 107531949 | 9  | 9  | 6  | 1.369869562 | 0.253675   | NTNG1 | ENSG00000162631 |
| 1 | 107540967 | 107541393 | 107541230 | 9  | 19 | 9  | 1.917817386 | 0.0394029  | NTNG1 | ENSG00000162631 |
| 1 | 107541633 | 107541868 | 107541750 | 9  | 11 | 4  | 2.301380863 | 0.0459276  | NTNG1 | ENSG00000162631 |
| 1 | 107542735 | 107543041 | 107542888 | 8  | 10 | 10 | 0.958908693 | 0.538751   | NTNG1 | ENSG00000162631 |

|   |           |           |           |    |    |    |             |           |       |                 |
|---|-----------|-----------|-----------|----|----|----|-------------|-----------|-------|-----------------|
| 1 | 107544581 | 107544771 | 107544692 | 8  | 8  | 5  | 1.43836304  | 0.235762  | NTNG1 | ENSG00000162631 |
| 1 | 107545433 | 107545773 | 107545603 | 8  | 14 | 11 | 1.198635866 | 0.315918  | NTNG1 | ENSG00000162631 |
| 1 | 107553074 | 107553344 | 107553191 | 8  | 13 | 4  | 2.684944341 | 0.01921   | NTNG1 | ENSG00000162631 |
| 1 | 107555540 | 107555732 | 107555596 | 8  | 10 | 3  | 2.636998906 | 0.034203  | NTNG1 | ENSG00000162631 |
| 1 | 107565478 | 107565684 | 107565603 | 8  | 10 | 7  | 1.318499453 | 0.269217  | NTNG1 | ENSG00000162631 |
| 1 | 107565990 | 107566506 | 107566234 | 8  | 18 | 19 | 0.910963258 | 0.614871  | NTNG1 | ENSG00000162631 |
| 1 | 107569591 | 107569857 | 107569719 | 10 | 10 | 4  | 2.109599125 | 0.0694668 | NTNG1 | ENSG00000162631 |
| 1 | 107569999 | 107570198 | 107570103 | 9  | 10 | 7  | 1.318499453 | 0.269217  | NTNG1 | ENSG00000162631 |
| 1 | 107573154 | 107573333 | 107573308 | 8  | 8  | 4  | 1.726035648 | 0.150596  | NTNG1 | ENSG00000162631 |
| 1 | 107577928 | 107578167 | 107578044 | 10 | 12 | 8  | 1.385090334 | 0.219216  | NTNG1 | ENSG00000162631 |
| 1 | 107578941 | 107579148 | 107579048 | 9  | 9  | 7  | 1.198635866 | 0.346278  | NTNG1 | ENSG00000162631 |
| 1 | 107587418 | 107587704 | 107587529 | 9  | 13 | 9  | 1.34247217  | 0.232231  | NTNG1 | ENSG00000162631 |
| 1 | 107588504 | 107588720 | 107588612 | 9  | 10 | 11 | 0.878999635 | 0.622439  | NTNG1 | ENSG00000162631 |
| 1 | 107588834 | 107589215 | 107588990 | 9  | 14 | 20 | 0.684934781 | 0.872628  | NTNG1 | ENSG00000162631 |
| 1 | 107591275 | 107591558 | 107591416 | 8  | 11 | 7  | 1.43836304  | 0.204844  | NTNG1 | ENSG00000162631 |
| 1 | 107597110 | 107597445 | 107597272 | 10 | 15 | 9  | 1.534253909 | 0.136498  | NTNG1 | ENSG00000162631 |
| 1 | 107599328 | 107599616 | 107599472 | 9  | 10 | 9  | 1.054799562 | 0.4492    | NTNG1 | ENSG00000162631 |
| 1 | 107607069 | 107607349 | 107607219 | 9  | 12 | 13 | 0.890415215 | 0.619237  | NTNG1 | ENSG00000162631 |
| 1 | 107608144 | 107608380 | 107608226 | 9  | 12 | 10 | 1.133255728 | 0.37674   | NTNG1 | ENSG00000162631 |
| 1 | 107608903 | 107609278 | 107609082 | 9  | 17 | 11 | 1.43836304  | 0.15834   | NTNG1 | ENSG00000162631 |
| 1 | 107610380 | 107610580 | 107610498 | 8  | 8  | 5  | 1.43836304  | 0.235762  | NTNG1 | ENSG00000162631 |
| 1 | 107610991 | 107611344 | 107611167 | 8  | 14 | 9  | 1.43836304  | 0.179537  | NTNG1 | ENSG00000162631 |
| 1 | 107613890 | 107614243 | 107614003 | 8  | 13 | 8  | 1.491635745 | 0.166708  | NTNG1 | ENSG00000162631 |
| 1 | 107618389 | 107618579 | 107618494 | 8  | 9  | 8  | 1.065454103 | 0.442605  | NTNG1 | ENSG00000162631 |
| 1 | 107621216 | 107621615 | 107621348 | 12 | 19 | 26 | 0.710302736 | 0.88      | NTNG1 | ENSG00000162631 |
| 1 | 107632340 | 107632617 | 107632486 | 8  | 13 | 6  | 1.917817386 | 0.0693353 | NTNG1 | ENSG00000162631 |
| 1 | 107642922 | 107643140 | 107642990 | 9  | 11 | 8  | 1.278544924 | 0.28289   | NTNG1 | ENSG00000162631 |
| 1 | 107644530 | 107644730 | 107644630 | 8  | 10 | 14 | 0.703199708 | 0.817173  | NTNG1 | ENSG00000162631 |
| 1 | 107646160 | 107646365 | 107646254 | 9  | 10 | 10 | 0.958908693 | 0.538751  | NTNG1 | ENSG00000162631 |
| 1 | 107659287 | 107659573 | 107659430 | 11 | 13 | 12 | 1.0326709   | 0.46514   | NTNG1 | ENSG00000162631 |
| 1 | 107660676 | 107660968 | 107660802 | 8  | 13 | 6  | 1.917817386 | 0.0693353 | NTNG1 | ENSG00000162631 |
| 1 | 107663032 | 107663431 | 107663211 | 12 | 20 | 10 | 1.830643869 | 0.0454769 | NTNG1 | ENSG00000162631 |
| 1 | 107663501 | 107663784 | 107663623 | 14 | 16 | 13 | 1.164389127 | 0.333296  | NTNG1 | ENSG00000162631 |
| 1 | 107665305 | 107665703 | 107665538 | 9  | 17 | 10 | 1.569123316 | 0.112309  | NTNG1 | ENSG00000162631 |

|   |           |           |           |    |     |    |             |             |          |                 |
|---|-----------|-----------|-----------|----|-----|----|-------------|-------------|----------|-----------------|
| 1 | 107668362 | 107668646 | 107668502 | 8  | 10  | 13 | 0.753428259 | 0.762589    | NTNG1    | ENSG00000162631 |
| 1 | 107668683 | 107668899 | 107668842 | 8  | 10  | 12 | 0.811384279 | 0.697544    | NTNG1    | ENSG00000162631 |
| 1 | 107670203 | 107670448 | 107670353 | 12 | 15  | 12 | 1.180195315 | 0.324974    | NTNG1    | ENSG00000162631 |
| 1 | 107671034 | 107672482 | 107671775 | 54 | 102 | 20 | 4.703218828 | 3.28E-14    | NTNG1    | ENSG00000162631 |
| 1 | 107674408 | 107674710 | 107674595 | 8  | 12  | 14 | 0.831054201 | 0.689281    | NTNG1    | ENSG00000162631 |
| 1 | 107682086 | 107682304 | 107682195 | 8  | 9   | 9  | 0.958908693 | 0.536911    | NTNG1    | ENSG00000162631 |
| 1 | 107684404 | 107684776 | 107684524 | 9  | 14  | 8  | 1.598181155 | 0.124586    | NTNG1    | ENSG00000162631 |
| 1 | 107688517 | 107688775 | 107688646 | 9  | 10  | 10 | 0.958908693 | 0.538751    | NTNG1    | ENSG00000162631 |
| 1 | 107698633 | 107699042 | 107698902 | 8  | 14  | 17 | 0.799090578 | 0.74177     | NTNG1    | ENSG00000162631 |
| 1 | 107710111 | 107710334 | 107710222 | 8  | 10  | 10 | 0.958908693 | 0.538751    | NTNG1    | ENSG00000162631 |
| 1 | 107712676 | 107712926 | 107712801 | 11 | 13  | 5  | 2.237453617 | 0.038866    | NTNG1    | ENSG00000162631 |
| 1 | 107721196 | 107721485 | 107721328 | 8  | 10  | 11 | 0.878999635 | 0.622439    | NTNG1    | ENSG00000162631 |
| 1 | 107723642 | 107723821 | 107723731 | 8  | 8   | 8  | 0.958908693 | 0.534974    | NTNG1    | ENSG00000162631 |
| 1 | 107726350 | 107726660 | 107726505 | 9  | 13  | 8  | 1.491635745 | 0.166708    | NTNG1    | ENSG00000162631 |
| 1 | 107727932 | 107728293 | 107728163 | 9  | 15  | 12 | 1.180195315 | 0.324974    | NTNG1    | ENSG00000162631 |
| 1 | 107731671 | 107731874 | 107731778 | 8  | 10  | 3  | 2.636998906 | 0.034203    | NTNG1    | ENSG00000162631 |
| 1 | 107873875 | 107874094 | 107873989 | 9  | 10  | 2  | 3.515998541 | 0.0136204   |          | ENSG00000220034 |
| 1 | 107914472 | 107914803 | 107914637 | 12 | 14  | 12 | 1.106433107 | 0.392094    |          | ENSG00000211552 |
| 1 | 107939015 | 107939228 | 107939187 | 9  | 10  | 3  | 2.636998906 | 0.034203    |          | ENSG00000211552 |
| 1 | 108021878 | 108022195 | 108022053 | 18 | 23  | 5  | 3.835634772 | 0.000408054 |          | ENSG00000211552 |
| 1 | 108083119 | 108083331 | 108083206 | 8  | 10  | 4  | 2.109599125 | 0.0694668   | VAV3     | ENSG00000134215 |
| 1 | 108085417 | 108085693 | 108085583 | 10 | 11  | 1  | 5.753452158 | 0.00215302  | VAV3     | ENSG00000134215 |
| 1 | 108088484 | 108088685 | 108088591 | 8  | 8   | 2  | 2.876726079 | 0.0381137   | VAV3     | ENSG00000134215 |
| 1 | 108092840 | 108093039 | 108092894 | 8  | 9   | 5  | 1.598181155 | 0.170911    | VAV3     | ENSG00000134215 |
| 1 | 108208780 | 108208981 | 108208880 | 8  | 8   | 4  | 1.726035648 | 0.150596    | VAV3     | ENSG00000134215 |
| 1 | 108280635 | 108281024 | 108280814 | 9  | 17  | 7  | 2.157544559 | 0.0276499   | VAV3     | ENSG00000134215 |
| 1 | 108378472 | 108378880 | 108378651 | 11 | 20  | 5  | 3.356180426 | 0.0017534   | VAV3     | ENSG00000134215 |
| 1 | 108462262 | 108462516 | 108462349 | 9  | 11  | 5  | 1.917817386 | 0.0843804   | SLC25A24 | ENSG00000085491 |
| 1 | 108544934 | 108545309 | 108545111 | 17 | 23  | 8  | 2.557089848 | 0.00494559  | SLC25A24 | ENSG00000085491 |
| 1 | 108877625 | 108877919 | 108877759 | 9  | 12  | 8  | 1.385090334 | 0.219216    |          | ENSG00000217136 |
| 1 | 108902997 | 108903189 | 108903095 | 9  | 10  | 1  | 5.273997812 | 0.00391723  | FAM102B  | ENSG00000162636 |
| 1 | 108905917 | 108906204 | 108906040 | 12 | 15  | 6  | 2.191791298 | 0.0328001   | FAM102B  | ENSG00000162636 |
| 1 | 108914278 | 108914637 | 108914457 | 19 | 26  | 5  | 4.315089119 | 8.98E-05    | FAM102B  | ENSG00000162636 |
| 1 | 109037531 | 109037738 | 109037611 | 8  | 8   | 3  | 2.157544559 | 0.0836802   | PRPF38B  | ENSG00000134186 |

|   |           |           |           |    |     |   |             |             |          |                 |
|---|-----------|-----------|-----------|----|-----|---|-------------|-------------|----------|-----------------|
| 1 | 109189765 | 109190558 | 109190288 | 51 | 88  | 1 | 42.67143684 | 4.57E-25    | C1orf62  | ENSG00000162641 |
| 1 | 109190835 | 109191049 | 109190934 | 9  | 9   | 1 | 4.794543465 | 0.00708517  | C1orf62  | ENSG00000162641 |
| 1 | 109410540 | 109410727 | 109410676 | 8  | 10  | 5 | 1.757999271 | 0.121253    | TAF13    | ENSG00000197780 |
| 1 | 109419963 | 109420377 | 109420125 | 11 | 16  | 5 | 2.716907964 | 0.0109645   | TAF13    | ENSG00000197780 |
| 1 | 109433422 | 109433767 | 109433594 | 13 | 17  | 3 | 4.315089119 | 0.00102271  | TMEM167B | ENSG00000162647 |
| 1 | 109440402 | 109440653 | 109440527 | 12 | 14  | 4 | 2.876726079 | 0.01219     | TMEM167B | ENSG00000162647 |
| 1 | 109444063 | 109444403 | 109444233 | 23 | 28  | 6 | 3.972621728 | 9.48E-05    |          | ENSG00000219444 |
| 1 | 109456933 | 109457132 | 109457032 | 8  | 9   | 1 | 4.794543465 | 0.00708517  | C1orf194 | ENSG00000179902 |
| 1 | 109460499 | 109460693 | 109460637 | 8  | 9   | 6 | 1.369869562 | 0.253675    | KIAA1324 | ENSG00000116299 |
| 1 | 109542198 | 109542535 | 109542366 | 15 | 21  | 4 | 4.219198249 | 0.000390041 | KIAA1324 | ENSG00000116299 |
| 1 | 109558305 | 109559450 | 109558595 | 36 | 92  | 7 | 11.14731356 | 8.13E-20    | SARS     | ENSG00000031698 |
| 1 | 109607216 | 109607836 | 109607585 | 19 | 36  | 2 | 11.82654055 | 2.94E-09    | CELSR2   | ENSG00000143126 |
| 1 | 109618967 | 109619309 | 109619138 | 12 | 18  | 0 | 18.21926517 | 2.83E-06    | PSRC1    | ENSG00000134222 |
| 1 | 109619326 | 109619663 | 109619544 | 12 | 16  | 4 | 3.260289556 | 0.00475414  | PSRC1    | ENSG00000134222 |
| 1 | 109640996 | 109641338 | 109641166 | 14 | 18  | 3 | 4.554816292 | 0.000599415 | MYBPHL   | ENSG00000221986 |
| 1 | 109770351 | 109770943 | 109770679 | 9  | 23  | 8 | 2.557089848 | 0.00494559  | PSMA5    | ENSG00000143106 |
| 1 | 109834852 | 109835053 | 109834921 | 8  | 9   | 2 | 3.19636231  | 0.0229249   | ATXN7L2  | ENSG00000162650 |
| 1 | 109838153 | 109838423 | 109838288 | 10 | 11  | 0 | 11.50690432 | 0.000313206 | CYB561D1 | ENSG00000174151 |
| 1 | 109890534 | 109890776 | 109890655 | 10 | 12  | 3 | 3.116453252 | 0.0131971   | GNAI3    | ENSG00000065135 |
| 1 | 109892679 | 109892869 | 109892786 | 8  | 8   | 4 | 1.726035648 | 0.150596    | GNAI3    | ENSG00000065135 |
| 1 | 109910387 | 109910618 | 109910470 | 11 | 11  | 1 | 5.753452158 | 0.00215302  | GNAI3    | ENSG00000065135 |
| 1 | 109914697 | 109915005 | 109914851 | 8  | 13  | 2 | 4.474907234 | 0.00269459  |          | ENSG00000206832 |
| 1 | 110164720 | 110165045 | 110164838 | 12 | 16  | 0 | 16.30144778 | 1.09E-05    |          | ENSG00000219071 |
| 1 | 110261056 | 110261333 | 110261194 | 9  | 11  | 0 | 11.50690432 | 0.000313206 | CSF1     | ENSG00000184371 |
| 1 | 110292110 | 110292315 | 110292220 | 10 | 10  | 4 | 2.109599125 | 0.0694668   | AHCYL1   | ENSG00000168710 |
| 1 | 110328657 | 110328996 | 110328823 | 12 | 15  | 7 | 1.917817386 | 0.0572317   | AHCYL1   | ENSG00000168710 |
| 1 | 110547361 | 110547542 | 110547411 | 8  | 8   | 2 | 2.876726079 | 0.0381137   | KCNC4    | ENSG00000116396 |
| 1 | 110656807 | 110657020 | 110656866 | 9  | 10  | 3 | 2.636998906 | 0.034203    | RBM15    | ENSG00000162775 |
| 1 | 110751769 | 110752062 | 110751915 | 10 | 13  | 7 | 1.678090213 | 0.11195     | HBXIP    | ENSG00000134248 |
| 1 | 111248726 | 111249057 | 111248880 | 9  | 13  | 0 | 13.4247217  | 8.16E-05    | CD53     | ENSG00000143119 |
| 1 | 111558574 | 111559144 | 111558783 | 86 | 129 | 1 | 62.32906505 | 7.06E-37    | DENND2D  | ENSG00000162777 |
| 1 | 111708063 | 111708477 | 111708298 | 8  | 15  | 5 | 2.557089848 | 0.0169197   |          | ENSG00000213336 |
| 1 | 111708759 | 111709534 | 111709134 | 99 | 148 | 4 | 28.57547905 | 4.00E-38    |          | ENSG00000217967 |
| 1 | 111710475 | 111710790 | 111710642 | 8  | 11  | 1 | 5.753452158 | 0.00215302  |          | ENSG00000217967 |

|   |           |           |           |    |    |    |             |            |          |                 |
|---|-----------|-----------|-----------|----|----|----|-------------|------------|----------|-----------------|
| 1 | 111852376 | 111852646 | 111852511 | 9  | 14 | 9  | 1.43836304  | 0.179537   | ADORA3   | ENSG00000121933 |
| 1 | 111880621 | 111880865 | 111880729 | 8  | 8  | 3  | 2.157544559 | 0.0836802  | RAP1A    | ENSG00000116473 |
| 1 | 111941949 | 111942128 | 111942052 | 8  | 8  | 0  | 8.630178238 | 0.00235436 | RAP1A    | ENSG00000116473 |
| 1 | 112000537 | 112000747 | 112000642 | 8  | 9  | 8  | 1.065454103 | 0.442605   |          | ENSG00000201028 |
| 1 | 112082479 | 112082940 | 112082783 | 26 | 34 | 1  | 16.78090213 | 1.09E-09   | C1orf183 | ENSG00000197852 |
| 1 | 112082971 | 112083460 | 112083215 | 10 | 21 | 7  | 2.636998906 | 0.00562102 | C1orf183 | ENSG00000197852 |
| 1 | 112091452 | 112091711 | 112091592 | 12 | 14 | 6  | 2.054804342 | 0.0480281  | C1orf183 | ENSG00000197852 |
| 1 | 112099816 | 112100135 | 112099976 | 12 | 14 | 5  | 2.397271733 | 0.0258078  | DDX20    | ENSG00000064703 |
| 1 | 112168513 | 112168722 | 112168617 | 8  | 10 | 3  | 2.636998906 | 0.034203   | DDX20    | ENSG00000064703 |
| 1 | 112177435 | 112177768 | 112177602 | 8  | 12 | 4  | 2.493162602 | 0.0299057  | DDX20    | ENSG00000064703 |
| 1 | 112178193 | 112178472 | 112178337 | 8  | 10 | 5  | 1.757999271 | 0.121253   | DDX20    | ENSG00000064703 |
| 1 | 112191166 | 112191476 | 112191334 | 8  | 11 | 2  | 3.835634772 | 0.00800699 | DDX20    | ENSG00000064703 |
| 1 | 112207861 | 112208053 | 112207957 | 8  | 10 | 10 | 0.958908693 | 0.538751   | DDX20    | ENSG00000064703 |
| 1 | 112240195 | 112240574 | 112240418 | 8  | 14 | 8  | 1.598181155 | 0.124586   | KCND3    | ENSG00000171385 |
| 1 | 112245620 | 112245890 | 112245755 | 9  | 11 | 5  | 1.917817386 | 0.0843804  | KCND3    | ENSG00000171385 |
| 1 | 112246308 | 112246609 | 112246479 | 9  | 13 | 3  | 3.356180426 | 0.00805599 | KCND3    | ENSG00000171385 |
| 1 | 112252296 | 112252601 | 112252474 | 11 | 14 | 3  | 3.595907599 | 0.00486913 | KCND3    | ENSG00000171385 |
| 1 | 112258441 | 112258713 | 112258592 | 8  | 11 | 3  | 2.876726079 | 0.0213797  | KCND3    | ENSG00000171385 |
| 1 | 112262522 | 112262744 | 112262652 | 9  | 13 | 9  | 1.34247217  | 0.232231   | KCND3    | ENSG00000171385 |
| 1 | 112263163 | 112263395 | 112263265 | 9  | 11 | 3  | 2.876726079 | 0.0213797  | KCND3    | ENSG00000171385 |
| 1 | 112279327 | 112279512 | 112279419 | 9  | 9  | 4  | 1.917817386 | 0.103282   | KCND3    | ENSG00000171385 |
| 1 | 112280883 | 112281073 | 112280924 | 8  | 10 | 5  | 1.757999271 | 0.121253   | KCND3    | ENSG00000171385 |
| 1 | 112302824 | 112303046 | 112302880 | 8  | 8  | 5  | 1.43836304  | 0.235762   | KCND3    | ENSG00000171385 |
| 1 | 112304632 | 112304811 | 112304721 | 8  | 8  | 0  | 8.630178238 | 0.00235436 | KCND3    | ENSG00000171385 |
| 1 | 112320907 | 112321395 | 112321194 | 15 | 27 | 17 | 1.491635745 | 0.0879967  | KCND3    | ENSG00000171385 |
| 1 | 112334252 | 112334455 | 112334384 | 8  | 8  | 9  | 0.863017824 | 0.627343   | KCND3    | ENSG00000171385 |
| 1 | 112335505 | 112335896 | 112335668 | 15 | 21 | 12 | 1.622768557 | 0.076896   | KCND3    | ENSG00000171385 |
| 1 | 112339582 | 112339856 | 112339719 | 8  | 13 | 5  | 2.237453617 | 0.038866   | KCND3    | ENSG00000171385 |
| 1 | 112358712 | 112358896 | 112358776 | 8  | 9  | 2  | 3.19636231  | 0.0229249  | KCND3    | ENSG00000171385 |
| 1 | 112702861 | 112703200 | 112703075 | 17 | 21 | 5  | 3.515998541 | 0.00108602 |          | ENSG00000217202 |
| 1 | 112846032 | 112846308 | 112846170 | 8  | 11 | 1  | 5.753452158 | 0.00215302 | WNT2B    | ENSG00000134245 |
| 1 | 112963950 | 112964166 | 112964056 | 9  | 10 | 2  | 3.515998541 | 0.0136204  | ST7L     | ENSG00000007341 |
| 1 | 112990380 | 112990716 | 112990539 | 10 | 13 | 2  | 4.474907234 | 0.00269459 |          | ENSG00000209307 |
| 1 | 113031488 | 113031930 | 113031712 | 53 | 71 | 0  | 69.0414259  | 9.44E-22   | MOV10    | ENSG00000155363 |



|   |           |           |           |    |     |    |             |             |          |                 |
|---|-----------|-----------|-----------|----|-----|----|-------------|-------------|----------|-----------------|
| 1 | 113045135 | 113045407 | 113045280 | 8  | 10  | 1  | 5.273997812 | 0.00391723  | RHOC     | ENSG00000155366 |
| 1 | 113047922 | 113048182 | 113048052 | 11 | 12  | 1  | 6.232906505 | 0.00117736  | RHOC     | ENSG00000155366 |
| 1 | 113106964 | 113107605 | 113107391 | 60 | 84  | 0  | 81.50723891 | 1.51E-25    |          | ENSG00000198789 |
| 1 | 113416913 | 113417131 | 113417022 | 12 | 13  | 5  | 2.237453617 | 0.038866    | LRIG2    | ENSG00000198799 |
| 1 | 113801177 | 113801393 | 113801285 | 8  | 9   | 1  | 4.794543465 | 0.00708517  |          | ENSG00000213300 |
| 1 | 113886534 | 113886740 | 113886637 | 8  | 8   | 5  | 1.43836304  | 0.235762    |          | ENSG00000217056 |
| 1 | 113888217 | 113888424 | 113888320 | 8  | 8   | 0  | 8.630178238 | 0.00235436  |          | ENSG00000217056 |
| 1 | 114087998 | 114088246 | 114088122 | 8  | 10  | 4  | 2.109599125 | 0.0694668   | PHTF1    | ENSG00000116793 |
| 1 | 114102431 | 114102704 | 114102567 | 10 | 12  | 2  | 4.155271003 | 0.0046638   | PHTF1    | ENSG00000116793 |
| 1 | 114148883 | 114149212 | 114149047 | 10 | 15  | 5  | 2.557089848 | 0.0169197   | RSBN1    | ENSG00000081019 |
| 1 | 114152795 | 114153037 | 114152914 | 8  | 10  | 6  | 1.506856518 | 0.188853    | RSBN1    | ENSG00000081019 |
| 1 | 114154101 | 114154525 | 114154261 | 10 | 18  | 12 | 1.401481936 | 0.168368    | RSBN1    | ENSG00000081019 |
| 1 | 114155413 | 114155811 | 114155643 | 18 | 25  | 18 | 1.312190843 | 0.179876    | RSBN1    | ENSG00000081019 |
| 1 | 114155919 | 114156181 | 114156050 | 9  | 11  | 18 | 0.605626543 | 0.918575    | RSBN1    | ENSG00000081019 |
| 1 | 114156326 | 114156937 | 114156676 | 22 | 44  | 20 | 2.054804342 | 0.00225076  | RSBN1    | ENSG00000081019 |
| 1 | 114167486 | 114167764 | 114167593 | 9  | 12  | 2  | 4.155271003 | 0.0046638   | RSBN1    | ENSG00000081019 |
| 1 | 114209093 | 114209385 | 114209262 | 9  | 11  | 11 | 0.958908693 | 0.540507    | HIPK1    | ENSG00000163349 |
| 1 | 114212719 | 114212952 | 114212807 | 9  | 9   | 5  | 1.598181155 | 0.170911    | PTPN22   | ENSG00000134242 |
| 1 | 114216804 | 114216993 | 114216904 | 8  | 9   | 10 | 0.871735176 | 0.624623    | PTPN22   | ENSG00000134242 |
| 1 | 114218548 | 114218816 | 114218682 | 10 | 14  | 10 | 1.307602763 | 0.244096    | PTPN22   | ENSG00000134242 |
| 1 | 114220362 | 114220563 | 114220475 | 9  | 11  | 3  | 2.876726079 | 0.0213797   | PTPN22   | ENSG00000134242 |
| 1 | 114222507 | 114222716 | 114222606 | 13 | 14  | 9  | 1.43836304  | 0.179537    | PTPN22   | ENSG00000134242 |
| 1 | 114229394 | 114229597 | 114229497 | 9  | 9   | 5  | 1.598181155 | 0.170911    | C1orf178 | ENSG00000188761 |
| 1 | 114244303 | 114244499 | 114244394 | 8  | 10  | 4  | 2.109599125 | 0.0694668   | AP4B1    | ENSG00000134262 |
| 1 | 114245250 | 114245543 | 114245380 | 9  | 11  | 3  | 2.876726079 | 0.0213797   | AP4B1    | ENSG00000134262 |
| 1 | 114248409 | 114248775 | 114248583 | 9  | 16  | 11 | 1.358453982 | 0.20248     | AP4B1    | ENSG00000134262 |
| 1 | 114248781 | 114250204 | 114249422 | 38 | 111 | 39 | 2.684944341 | 5.19E-09    | AP4B1    | ENSG00000134262 |
| 1 | 114252134 | 114252419 | 114252310 | 8  | 11  | 5  | 1.917817386 | 0.0843804   | DCLRE1B  | ENSG00000118655 |
| 1 | 114258556 | 114258756 | 114258656 | 8  | 9   | 2  | 3.19636231  | 0.0229249   | DCLRE1B  | ENSG00000118655 |
| 1 | 114260330 | 114260673 | 114260532 | 8  | 12  | 2  | 4.155271003 | 0.0046638   | DCLRE1B  | ENSG00000118655 |
| 1 | 114261278 | 114261619 | 114261448 | 27 | 33  | 11 | 2.716907964 | 0.000672572 | DCLRE1B  | ENSG00000118655 |
| 1 | 114262016 | 114262238 | 114262127 | 8  | 10  | 2  | 3.515998541 | 0.0136204   | HIPK1    | ENSG00000163349 |
| 1 | 114262776 | 114262979 | 114262877 | 8  | 8   | 7  | 1.07877228  | 0.435076    | HIPK1    | ENSG00000163349 |
| 1 | 114266274 | 114266649 | 114266476 | 8  | 14  | 4  | 2.876726079 | 0.01219     | HIPK1    | ENSG00000163349 |

|   |           |           |           |    |    |    |             |            |        |                 |
|---|-----------|-----------|-----------|----|----|----|-------------|------------|--------|-----------------|
| 1 | 114270589 | 114270805 | 114270677 | 8  | 11 | 8  | 1.278544924 | 0.28289    | HIPK1  | ENSG00000163349 |
| 1 | 114271945 | 114272137 | 114272048 | 8  | 9  | 6  | 1.369869562 | 0.253675   | HIPK1  | ENSG00000163349 |
| 1 | 114272752 | 114272985 | 114272907 | 13 | 14 | 17 | 0.799090578 | 0.74177    | HIPK1  | ENSG00000163349 |
| 1 | 114272988 | 114273799 | 114273623 | 20 | 56 | 32 | 1.656296833 | 0.00913243 | HIPK1  | ENSG00000163349 |
| 1 | 114274197 | 114275044 | 114274358 | 12 | 39 | 23 | 1.598181155 | 0.0315891  | HIPK1  | ENSG00000163349 |
| 1 | 114275150 | 114275367 | 114275258 | 9  | 10 | 6  | 1.506856518 | 0.188853   | HIPK1  | ENSG00000163349 |
| 1 | 114275686 | 114276492 | 114276058 | 8  | 25 | 14 | 1.662108401 | 0.053254   | HIPK1  | ENSG00000163349 |
| 1 | 114280018 | 114280334 | 114280173 | 8  | 10 | 4  | 2.109599125 | 0.0694668  | HIPK1  | ENSG00000163349 |
| 1 | 114284237 | 114284486 | 114284361 | 8  | 11 | 4  | 2.301380863 | 0.0459276  | HIPK1  | ENSG00000163349 |
| 1 | 114284657 | 114284880 | 114284768 | 9  | 11 | 4  | 2.301380863 | 0.0459276  | HIPK1  | ENSG00000163349 |
| 1 | 114290396 | 114290664 | 114290554 | 12 | 15 | 6  | 2.191791298 | 0.0328001  | HIPK1  | ENSG00000163349 |
| 1 | 114294080 | 114294369 | 114294228 | 8  | 12 | 3  | 3.116453252 | 0.0131971  | HIPK1  | ENSG00000163349 |
| 1 | 114310240 | 114310481 | 114310360 | 10 | 12 | 8  | 1.385090334 | 0.219216   | HIPK1  | ENSG00000163349 |
| 1 | 114322843 | 114323333 | 114323022 | 9  | 20 | 16 | 1.184534268 | 0.298622   | OLFML3 | ENSG00000116774 |
| 1 | 114342403 | 114342597 | 114342516 | 9  | 10 | 5  | 1.757999271 | 0.121253   |        | ENSG00000216343 |
| 1 | 114342979 | 114343188 | 114343105 | 9  | 9  | 3  | 2.397271733 | 0.0539397  |        | ENSG00000216343 |
| 1 | 114354533 | 114354751 | 114354638 | 8  | 8  | 3  | 2.157544559 | 0.0836802  |        | ENSG00000216343 |
| 1 | 114377004 | 114377367 | 114377183 | 10 | 17 | 12 | 1.327719729 | 0.212795   |        | ENSG00000216343 |
| 1 | 114377663 | 114377920 | 114377791 | 9  | 12 | 13 | 0.890415215 | 0.619237   |        | ENSG00000216343 |
| 1 | 114378844 | 114379118 | 114378981 | 10 | 12 | 1  | 6.232906505 | 0.00117736 |        | ENSG00000216343 |
| 1 | 114382367 | 114382565 | 114382505 | 8  | 10 | 7  | 1.318499453 | 0.269217   |        | ENSG00000216343 |
| 1 | 114387410 | 114387695 | 114387552 | 8  | 8  | 6  | 1.232882605 | 0.333038   |        | ENSG00000216343 |
| 1 | 114398060 | 114398289 | 114398150 | 8  | 10 | 2  | 3.515998541 | 0.0136204  |        | ENSG00000216343 |
| 1 | 114406941 | 114407236 | 114407088 | 12 | 14 | 15 | 0.8989769   | 0.617119   |        | ENSG00000216343 |
| 1 | 114413666 | 114413845 | 114413785 | 8  | 9  | 2  | 3.19636231  | 0.0229249  |        | ENSG00000216343 |
| 1 | 114416642 | 114416892 | 114416762 | 8  | 12 | 1  | 6.232906505 | 0.00117736 |        | ENSG00000216343 |
| 1 | 114418043 | 114418292 | 114418167 | 8  | 9  | 8  | 1.065454103 | 0.442605   |        | ENSG00000216343 |
| 1 | 114419185 | 114419525 | 114419351 | 9  | 14 | 11 | 1.198635866 | 0.315918   |        | ENSG00000216343 |
| 1 | 114427152 | 114427596 | 114427418 | 12 | 21 | 7  | 2.636998906 | 0.00562102 | SYT6   | ENSG00000134207 |
| 1 | 114433828 | 114434055 | 114433941 | 8  | 11 | 20 | 0.547947825 | 0.956941   | SYT6   | ENSG00000134207 |
| 1 | 114434285 | 114434624 | 114434454 | 12 | 18 | 6  | 2.602752167 | 0.00970422 | SYT6   | ENSG00000134207 |
| 1 | 114437127 | 114437473 | 114437299 | 8  | 12 | 12 | 0.958908693 | 0.542188   | SYT6   | ENSG00000134207 |
| 1 | 114437809 | 114438161 | 114437985 | 9  | 15 | 8  | 1.704726565 | 0.0916153  | SYT6   | ENSG00000134207 |
| 1 | 114441072 | 114441409 | 114441282 | 8  | 12 | 9  | 1.246581301 | 0.295061   | SYT6   | ENSG00000134207 |

|   |           |           |           |    |    |    |             |             |      |                 |
|---|-----------|-----------|-----------|----|----|----|-------------|-------------|------|-----------------|
| 1 | 114443273 | 114443505 | 114443389 | 8  | 8  | 7  | 1.07877228  | 0.435076    | SYT6 | ENSG00000134207 |
| 1 | 114445501 | 114445680 | 114445589 | 8  | 8  | 3  | 2.157544559 | 0.0836802   | SYT6 | ENSG00000134207 |
| 1 | 114448052 | 114448468 | 114448231 | 9  | 16 | 8  | 1.811271976 | 0.0663685   | SYT6 | ENSG00000134207 |
| 1 | 114450218 | 114450438 | 114450370 | 9  | 12 | 7  | 1.558226626 | 0.152813    | SYT6 | ENSG00000134207 |
| 1 | 114452260 | 114452733 | 114452554 | 10 | 19 | 8  | 2.130908207 | 0.0233014   | SYT6 | ENSG00000134207 |
| 1 | 114455397 | 114455631 | 114455507 | 9  | 9  | 4  | 1.917817386 | 0.103282    | SYT6 | ENSG00000134207 |
| 1 | 114457557 | 114457864 | 114457710 | 12 | 17 | 11 | 1.43836304  | 0.15834     | SYT6 | ENSG00000134207 |
| 1 | 114460179 | 114460487 | 114460352 | 8  | 12 | 10 | 1.133255728 | 0.37674     | SYT6 | ENSG00000134207 |
| 1 | 114460489 | 114460740 | 114460586 | 9  | 11 | 11 | 0.958908693 | 0.540507    | SYT6 | ENSG00000134207 |
| 1 | 114463232 | 114463485 | 114463358 | 9  | 10 | 11 | 0.878999635 | 0.622439    | SYT6 | ENSG00000134207 |
| 1 | 114473249 | 114473447 | 114473348 | 8  | 8  | 10 | 0.784561658 | 0.708731    | SYT6 | ENSG00000134207 |
| 1 | 114476446 | 114476776 | 114476647 | 8  | 12 | 6  | 1.78083043  | 0.0985525   | SYT6 | ENSG00000134207 |
| 1 | 114481199 | 114481548 | 114481373 | 8  | 13 | 6  | 1.917817386 | 0.0693353   | SYT6 | ENSG00000134207 |
| 1 | 114483578 | 114483823 | 114483659 | 9  | 12 | 12 | 0.958908693 | 0.542188    | SYT6 | ENSG00000134207 |
| 1 | 114492936 | 114493187 | 114493023 | 10 | 10 | 10 | 0.958908693 | 0.538751    | SYT6 | ENSG00000134207 |
| 1 | 114507449 | 114508097 | 114507628 | 8  | 25 | 10 | 2.266511456 | 0.00802978  | SYT6 | ENSG00000134207 |
| 1 | 114508276 | 114508527 | 114508401 | 10 | 12 | 3  | 3.116453252 | 0.0131971   | SYT6 | ENSG00000134207 |
| 1 | 114509234 | 114509572 | 114509408 | 8  | 13 | 8  | 1.491635745 | 0.166708    | SYT6 | ENSG00000134207 |
| 1 | 114513419 | 114513653 | 114513501 | 9  | 11 | 6  | 1.643843474 | 0.137712    | SYT6 | ENSG00000134207 |
| 1 | 114515721 | 114516143 | 114515895 | 9  | 16 | 10 | 1.481949798 | 0.147733    | SYT6 | ENSG00000134207 |
| 1 | 114516349 | 114516587 | 114516438 | 9  | 11 | 12 | 0.885146486 | 0.620672    | SYT6 | ENSG00000134207 |
| 1 | 114517037 | 114517226 | 114517088 | 8  | 10 | 2  | 3.515998541 | 0.0136204   | SYT6 | ENSG00000134207 |
| 1 | 114518148 | 114518343 | 114518264 | 8  | 10 | 8  | 1.171999514 | 0.35773     | SYT6 | ENSG00000134207 |
| 1 | 114519897 | 114520154 | 114520022 | 8  | 11 | 11 | 0.958908693 | 0.540507    | SYT6 | ENSG00000134207 |
| 1 | 114525458 | 114525745 | 114525631 | 8  | 12 | 7  | 1.558226626 | 0.152813    | SYT6 | ENSG00000134207 |
| 1 | 114525919 | 114526158 | 114526038 | 9  | 11 | 9  | 1.150690432 | 0.367789    | SYT6 | ENSG00000134207 |
| 1 | 114533914 | 114534219 | 114534024 | 8  | 12 | 7  | 1.558226626 | 0.152813    | SYT6 | ENSG00000134207 |
| 1 | 114534732 | 114534944 | 114534828 | 8  | 9  | 6  | 1.369869562 | 0.253675    | SYT6 | ENSG00000134207 |
| 1 | 114536482 | 114536754 | 114536618 | 8  | 10 | 4  | 2.109599125 | 0.0694668   | SYT6 | ENSG00000134207 |
| 1 | 114540262 | 114540562 | 114540400 | 8  | 12 | 3  | 3.116453252 | 0.0131971   | SYT6 | ENSG00000134207 |
| 1 | 114541061 | 114541329 | 114541216 | 8  | 10 | 0  | 10.54799562 | 0.000613541 | SYT6 | ENSG00000134207 |
| 1 | 114546611 | 114546820 | 114546715 | 8  | 10 | 3  | 2.636998906 | 0.034203    | SYT6 | ENSG00000134207 |
| 1 | 114550422 | 114550697 | 114550577 | 8  | 11 | 5  | 1.917817386 | 0.0843804   | SYT6 | ENSG00000134207 |
| 1 | 114552409 | 114552633 | 114552583 | 8  | 10 | 2  | 3.515998541 | 0.0136204   | SYT6 | ENSG00000134207 |

|   |           |           |           |    |     |    |             |             |      |                 |
|---|-----------|-----------|-----------|----|-----|----|-------------|-------------|------|-----------------|
| 1 | 114553022 | 114553247 | 114553134 | 8  | 10  | 7  | 1.318499453 | 0.269217    | SYT6 | ENSG00000134207 |
| 1 | 114553997 | 114554342 | 114554169 | 8  | 14  | 9  | 1.43836304  | 0.179537    | SYT6 | ENSG00000134207 |
| 1 | 114559629 | 114560048 | 114559822 | 12 | 21  | 14 | 1.406399416 | 0.148881    | SYT6 | ENSG00000134207 |
| 1 | 114561989 | 114562320 | 114562154 | 8  | 12  | 13 | 0.890415215 | 0.619237    | SYT6 | ENSG00000134207 |
| 1 | 114562771 | 114563103 | 114562937 | 8  | 13  | 8  | 1.491635745 | 0.166708    | SYT6 | ENSG00000134207 |
| 1 | 114563722 | 114564009 | 114563846 | 9  | 12  | 14 | 0.831054201 | 0.689281    | SYT6 | ENSG00000134207 |
| 1 | 114564020 | 114564291 | 114564146 | 11 | 15  | 4  | 3.068507818 | 0.0076507   | SYT6 | ENSG00000134207 |
| 1 | 114565099 | 114565514 | 114565278 | 9  | 16  | 13 | 1.164389127 | 0.333296    | SYT6 | ENSG00000134207 |
| 1 | 114566924 | 114567143 | 114567040 | 9  | 10  | 4  | 2.109599125 | 0.0694668   | SYT6 | ENSG00000134207 |
| 1 | 114567493 | 114567684 | 114567611 | 10 | 10  | 7  | 1.318499453 | 0.269217    | SYT6 | ENSG00000134207 |
| 1 | 114570242 | 114570764 | 114570391 | 9  | 20  | 10 | 1.830643869 | 0.0454769   | SYT6 | ENSG00000134207 |
| 1 | 114575534 | 114575751 | 114575711 | 10 | 13  | 7  | 1.678090213 | 0.11195     | SYT6 | ENSG00000134207 |
| 1 | 114577440 | 114577810 | 114577642 | 8  | 14  | 8  | 1.598181155 | 0.124586    | SYT6 | ENSG00000134207 |
| 1 | 114579072 | 114579374 | 114579224 | 11 | 14  | 4  | 2.876726079 | 0.01219     | SYT6 | ENSG00000134207 |
| 1 | 114601210 | 114601668 | 114601491 | 8  | 14  | 11 | 1.198635866 | 0.315918    | SYT6 | ENSG00000134207 |
| 1 | 114606600 | 114606793 | 114606696 | 9  | 10  | 4  | 2.109599125 | 0.0694668   | SYT6 | ENSG00000134207 |
| 1 | 114607246 | 114607438 | 114607337 | 8  | 10  | 8  | 1.171999514 | 0.35773     | SYT6 | ENSG00000134207 |
| 1 | 114610096 | 114610518 | 114610275 | 9  | 17  | 12 | 1.327719729 | 0.212795    | SYT6 | ENSG00000134207 |
| 1 | 114610579 | 114610793 | 114610686 | 8  | 8   | 4  | 1.726035648 | 0.150596    | SYT6 | ENSG00000134207 |
| 1 | 114611352 | 114611650 | 114611501 | 8  | 12  | 8  | 1.385090334 | 0.219216    | SYT6 | ENSG00000134207 |
| 1 | 114614698 | 114615019 | 114614909 | 9  | 13  | 10 | 1.220429246 | 0.306001    | SYT6 | ENSG00000134207 |
| 1 | 114626849 | 114627088 | 114627023 | 8  | 11  | 14 | 0.767126954 | 0.756447    | SYT6 | ENSG00000134207 |
| 1 | 114632883 | 114633076 | 114632989 | 8  | 8   | 2  | 2.876726079 | 0.0381137   | SYT6 | ENSG00000134207 |
| 1 | 114640560 | 114640905 | 114640732 | 9  | 14  | 5  | 2.397271733 | 0.0258078   | SYT6 | ENSG00000134207 |
| 1 | 114644670 | 114645075 | 114644910 | 9  | 15  | 7  | 1.917817386 | 0.0572317   | SYT6 | ENSG00000134207 |
| 1 | 114654938 | 114655497 | 114655217 | 12 | 23  | 11 | 1.917817386 | 0.0274129   |      | ENSG00000216325 |
| 1 | 114664975 | 114665195 | 114665072 | 9  | 10  | 7  | 1.318499453 | 0.269217    |      | ENSG00000216325 |
| 1 | 114672462 | 114672694 | 114672564 | 8  | 9   | 4  | 1.917817386 | 0.103282    |      | ENSG00000216325 |
| 1 | 114680263 | 114680916 | 114680674 | 94 | 127 | 15 | 7.671269544 | 8.08E-23    |      | ENSG00000216325 |
| 1 | 114682389 | 114682591 | 114682452 | 8  | 9   | 8  | 1.065454103 | 0.442605    |      | ENSG00000216325 |
| 1 | 114686732 | 114687044 | 114686874 | 8  | 12  | 13 | 0.890415215 | 0.619237    |      | ENSG00000216325 |
| 1 | 114690499 | 114691163 | 114690831 | 22 | 49  | 21 | 2.179337939 | 0.000712264 |      | ENSG00000216325 |
| 1 | 114691167 | 114691505 | 114691340 | 10 | 14  | 10 | 1.307602763 | 0.244096    |      | ENSG00000216325 |
| 1 | 114696384 | 114696597 | 114696482 | 11 | 12  | 5  | 2.077635502 | 0.0577144   |      | ENSG00000216325 |

|   |           |           |           |    |    |    |             |            |        |                 |
|---|-----------|-----------|-----------|----|----|----|-------------|------------|--------|-----------------|
| 1 | 114730863 | 114731119 | 114730991 | 10 | 11 | 6  | 1.643843474 | 0.137712   |        | ENSG00000216325 |
| 1 | 114736896 | 114737173 | 114737003 | 9  | 12 | 1  | 6.232906505 | 0.00117736 |        | ENSG00000216325 |
| 1 | 114760602 | 114760855 | 114760749 | 8  | 9  | 0  | 9.589086931 | 0.00120187 |        | ENSG00000216325 |
| 1 | 114765611 | 114765889 | 114765744 | 9  | 14 | 8  | 1.598181155 | 0.124586   |        | ENSG00000216325 |
| 1 | 114772309 | 114772726 | 114772469 | 9  | 17 | 10 | 1.569123316 | 0.112309   |        | ENSG00000216325 |
| 1 | 114778807 | 114779720 | 114779025 | 50 | 94 | 8  | 10.12181398 | 1.56E-19   |        | ENSG00000216325 |
| 1 | 114784943 | 114785132 | 114785018 | 8  | 9  | 8  | 1.065454103 | 0.442605   |        | ENSG00000216325 |
| 1 | 114793377 | 114793577 | 114793410 | 8  | 10 | 5  | 1.757999271 | 0.121253   |        | ENSG00000216325 |
| 1 | 114802648 | 114803058 | 114802781 | 9  | 14 | 11 | 1.198635866 | 0.315918   |        | ENSG00000216325 |
| 1 | 114803179 | 114803497 | 114803338 | 9  | 14 | 11 | 1.198635866 | 0.315918   |        | ENSG00000216325 |
| 1 | 114803770 | 114803951 | 114803905 | 8  | 8  | 4  | 1.726035648 | 0.150596   |        | ENSG00000216325 |
| 1 | 114810489 | 114810790 | 114810624 | 9  | 12 | 7  | 1.558226626 | 0.152813   |        | ENSG00000217263 |
| 1 | 114838602 | 114838901 | 114838764 | 9  | 11 | 7  | 1.43836304  | 0.204844   |        | ENSG00000201114 |
| 1 | 114840307 | 114840486 | 114840396 | 8  | 9  | 12 | 0.737622072 | 0.769563   |        | ENSG00000201114 |
| 1 | 114849211 | 114849796 | 114849508 | 13 | 32 | 14 | 2.109599125 | 0.00600552 | TRIM33 | ENSG00000197323 |
| 1 | 114851263 | 114851514 | 114851421 | 8  | 10 | 10 | 0.958908693 | 0.538751   | TRIM33 | ENSG00000197323 |
| 1 | 114852960 | 114853433 | 114853254 | 10 | 19 | 12 | 1.475244143 | 0.131365   | TRIM33 | ENSG00000197323 |
| 1 | 114853769 | 114854677 | 114854250 | 13 | 43 | 29 | 1.406399416 | 0.0718029  | TRIM33 | ENSG00000197323 |
| 1 | 114855356 | 114856200 | 114855535 | 22 | 46 | 38 | 1.155607912 | 0.250256   | TRIM33 | ENSG00000197323 |
| 1 | 114856471 | 114856727 | 114856621 | 13 | 16 | 7  | 2.037680973 | 0.0400399  | TRIM33 | ENSG00000197323 |
| 1 | 114857727 | 114858145 | 114857975 | 10 | 15 | 9  | 1.534253909 | 0.136498   | TRIM33 | ENSG00000197323 |
| 1 | 114862621 | 114862984 | 114862843 | 11 | 16 | 6  | 2.328778255 | 0.0221113  | TRIM33 | ENSG00000197323 |
| 1 | 114868585 | 114868993 | 114868742 | 11 | 16 | 5  | 2.716907964 | 0.0109645  |        | ENSG00000216823 |
| 1 | 114869026 | 114869428 | 114869205 | 10 | 18 | 10 | 1.656296833 | 0.0841786  |        | ENSG00000216823 |
| 1 | 114873177 | 114873924 | 114873435 | 15 | 38 | 7  | 4.674679879 | 1.79E-06   |        | ENSG00000216823 |
| 1 | 114883279 | 114883559 | 114883453 | 11 | 15 | 11 | 1.278544924 | 0.254978   |        | ENSG00000216823 |
| 1 | 114894759 | 114895020 | 114894910 | 9  | 11 | 13 | 0.821921737 | 0.693119   |        | ENSG00000216823 |
| 1 | 114898595 | 114899128 | 114898961 | 14 | 24 | 11 | 1.997726444 | 0.0196649  |        | ENSG00000216823 |
| 1 | 114900312 | 114900491 | 114900401 | 8  | 8  | 3  | 2.157544559 | 0.0836802  |        | ENSG00000216823 |
| 1 | 114900764 | 114900958 | 114900852 | 9  | 10 | 2  | 3.515998541 | 0.0136204  |        | ENSG00000216823 |
| 1 | 114902812 | 114903230 | 114902991 | 10 | 19 | 9  | 1.917817386 | 0.0394029  | BCAS2  | ENSG00000116752 |
| 1 | 114910211 | 114910455 | 114910306 | 8  | 8  | 6  | 1.232882605 | 0.333038   | BCAS2  | ENSG00000116752 |
| 1 | 114916201 | 114916458 | 114916329 | 9  | 12 | 3  | 3.116453252 | 0.0131971  | BCAS2  | ENSG00000116752 |
| 1 | 114925170 | 114926180 | 114925603 | 27 | 72 | 39 | 1.750008365 | 0.00175951 | BCAS2  | ENSG00000116752 |

|   |           |           |           |    |    |    |             |             |         |                 |
|---|-----------|-----------|-----------|----|----|----|-------------|-------------|---------|-----------------|
| 1 | 114926248 | 114926797 | 114926618 | 9  | 22 | 10 | 2.004990904 | 0.023438    | BCAS2   | ENSG00000116752 |
| 1 | 114926985 | 114927281 | 114927134 | 13 | 17 | 5  | 2.876726079 | 0.00703033  | BCAS2   | ENSG00000116752 |
| 1 | 114929935 | 114930239 | 114930109 | 8  | 12 | 8  | 1.385090334 | 0.219216    | BCAS2   | ENSG00000116752 |
| 1 | 114950813 | 114951117 | 114950974 | 8  | 11 | 9  | 1.150690432 | 0.367789    | BCAS2   | ENSG00000116752 |
| 1 | 114953182 | 114953393 | 114953302 | 9  | 9  | 4  | 1.917817386 | 0.103282    | BCAS2   | ENSG00000116752 |
| 1 | 114954000 | 114954309 | 114954130 | 11 | 15 | 16 | 0.902502299 | 0.616352    | BCAS2   | ENSG00000116752 |
| 1 | 114954772 | 114955508 | 114954949 | 47 | 78 | 14 | 5.05025245  | 6.99E-12    | BCAS2   | ENSG00000116752 |
| 1 | 114964550 | 114964847 | 114964691 | 8  | 13 | 8  | 1.491635745 | 0.166708    | BCAS2   | ENSG00000116752 |
| 1 | 114972966 | 114973257 | 114973111 | 14 | 17 | 6  | 2.465765211 | 0.014729    | DENND2C | ENSG00000175984 |
| 1 | 114976662 | 114976984 | 114976873 | 8  | 12 | 5  | 2.077635502 | 0.0577144   | DENND2C | ENSG00000175984 |
| 1 | 114984029 | 114984287 | 114984158 | 9  | 12 | 14 | 0.831054201 | 0.689281    | DENND2C | ENSG00000175984 |
| 1 | 115012783 | 115013250 | 115012962 | 9  | 17 | 14 | 1.150690432 | 0.340986    | DENND2C | ENSG00000175984 |
| 1 | 115013355 | 115014218 | 115013658 | 16 | 47 | 20 | 2.191791298 | 0.000831919 | DENND2C | ENSG00000175984 |
| 1 | 115014320 | 115014905 | 115014499 | 12 | 25 | 18 | 1.312190843 | 0.179876    | DENND2C | ENSG00000175984 |
| 1 | 115014956 | 115015386 | 115015094 | 10 | 18 | 6  | 2.602752167 | 0.00970422  | DENND2C | ENSG00000175984 |
| 1 | 115030505 | 115030937 | 115030631 | 8  | 15 | 7  | 1.917817386 | 0.0572317   | AMPD1   | ENSG00000116748 |
| 1 | 115031503 | 115031941 | 115031649 | 9  | 16 | 15 | 1.018840486 | 0.477384    | AMPD1   | ENSG00000116748 |
| 1 | 115033224 | 115033568 | 115033453 | 11 | 16 | 6  | 2.328778255 | 0.0221113   | AMPD1   | ENSG00000116748 |
| 1 | 115050662 | 115051140 | 115050986 | 8  | 16 | 7  | 2.037680973 | 0.0400399   |         | ENSG00000223048 |
| 1 | 115055841 | 115056068 | 115055947 | 8  | 8  | 2  | 2.876726079 | 0.0381137   | NRAS    | ENSG00000213281 |
| 1 | 115060250 | 115060495 | 115060368 | 8  | 11 | 7  | 1.43836304  | 0.204844    | NRAS    | ENSG00000213281 |
| 1 | 115060577 | 115061194 | 115060885 | 11 | 28 | 32 | 0.842677336 | 0.750511    | NRAS    | ENSG00000213281 |
| 1 | 115067882 | 115068263 | 115068092 | 9  | 15 | 4  | 3.068507818 | 0.0076507   |         | ENSG00000201900 |
| 1 | 115082190 | 115082436 | 115082313 | 8  | 10 | 7  | 1.318499453 | 0.269217    | CSDE1   | ENSG00000009307 |
| 1 | 115084608 | 115084795 | 115084739 | 8  | 8  | 2  | 2.876726079 | 0.0381137   | CSDE1   | ENSG00000009307 |
| 1 | 115092797 | 115093166 | 115092996 | 10 | 16 | 6  | 2.328778255 | 0.0221113   | CSDE1   | ENSG00000009307 |
| 1 | 115095773 | 115096148 | 115096011 | 9  | 15 | 9  | 1.534253909 | 0.136498    | CSDE1   | ENSG00000009307 |
| 1 | 115097585 | 115097815 | 115097722 | 10 | 11 | 6  | 1.643843474 | 0.137712    | CSDE1   | ENSG00000009307 |
| 1 | 115100722 | 115101204 | 115100901 | 14 | 26 | 12 | 1.991579593 | 0.0165204   | CSDE1   | ENSG00000009307 |
| 1 | 115101255 | 115102658 | 115102351 | 22 | 86 | 48 | 1.702552169 | 0.00115097  | CSDE1   | ENSG00000009307 |
| 1 | 115112770 | 115113258 | 115112949 | 9  | 19 | 11 | 1.598181155 | 0.0927758   | CSDE1   | ENSG00000009307 |
| 1 | 115119345 | 115119532 | 115119439 | 9  | 9  | 4  | 1.917817386 | 0.103282    |         | ENSG00000052723 |
| 1 | 115124298 | 115124546 | 115124458 | 9  | 12 | 7  | 1.558226626 | 0.152813    |         | ENSG00000052723 |
| 1 | 115124560 | 115125082 | 115124802 | 13 | 27 | 15 | 1.678090213 | 0.0444653   |         | ENSG00000052723 |

|   |           |           |           |    |     |    |             |             |          |                 |
|---|-----------|-----------|-----------|----|-----|----|-------------|-------------|----------|-----------------|
| 1 | 115137523 | 115137702 | 115137630 | 9  | 9   | 8  | 1.065454103 | 0.442605    |          | ENSG00000052723 |
| 1 | 115147120 | 115147627 | 115147448 | 17 | 29  | 8  | 3.19636231  | 0.000376248 |          | ENSG00000052723 |
| 1 | 115236038 | 115236271 | 115236185 | 8  | 10  | 1  | 5.273997812 | 0.00391723  | SYCP1    | ENSG00000198765 |
| 1 | 115380892 | 115381097 | 115381030 | 8  | 9   | 7  | 1.198635866 | 0.346278    | TSHB     | ENSG00000134200 |
| 1 | 115381224 | 115381590 | 115381421 | 27 | 34  | 9  | 3.356180426 | 9.18E-05    | TSHB     | ENSG00000134200 |
| 1 | 115385301 | 115385540 | 115385440 | 10 | 10  | 1  | 5.273997812 | 0.00391723  | TSHB     | ENSG00000134200 |
| 1 | 115385916 | 115386095 | 115386007 | 8  | 8   | 7  | 1.07877228  | 0.435076    | TSHB     | ENSG00000134200 |
| 1 | 115396707 | 115396954 | 115396823 | 11 | 14  | 5  | 2.397271733 | 0.0258078   | TSHB     | ENSG00000134200 |
| 1 | 115399219 | 115399398 | 115399280 | 8  | 8   | 3  | 2.157544559 | 0.0836802   | TSHB     | ENSG00000134200 |
| 1 | 115644652 | 115644967 | 115644793 | 18 | 22  | 0  | 22.05489994 | 1.92E-07    | NGF      | ENSG00000134259 |
| 1 | 115803001 | 115803192 | 115803096 | 10 | 11  | 3  | 2.876726079 | 0.0213797   |          | ENSG00000216304 |
| 1 | 115814100 | 115814346 | 115814228 | 10 | 13  | 2  | 4.474907234 | 0.00269459  |          | ENSG00000216304 |
| 1 | 115952319 | 115952640 | 115952479 | 9  | 13  | 4  | 2.684944341 | 0.01921     |          | ENSG00000222797 |
| 1 | 115986904 | 115987164 | 115987033 | 10 | 12  | 3  | 3.116453252 | 0.0131971   | VANGL1   | ENSG00000173218 |
| 1 | 116058855 | 116059365 | 116059108 | 13 | 24  | 11 | 1.997726444 | 0.0196649   | CASQ2    | ENSG00000118729 |
| 1 | 116112989 | 116113168 | 116113111 | 8  | 8   | 5  | 1.43836304  | 0.235762    | CASQ2    | ENSG00000118729 |
| 1 | 116115889 | 116116429 | 116116079 | 43 | 64  | 1  | 31.16453252 | 3.43E-18    | CASQ2    | ENSG00000118729 |
| 1 | 116173527 | 116173733 | 116173630 | 8  | 8   | 4  | 1.726035648 | 0.150596    | NHLH2    | ENSG00000177551 |
| 1 | 116182765 | 116182981 | 116182871 | 8  | 8   | 1  | 4.315089119 | 0.0127267   | NHLH2    | ENSG00000177551 |
| 1 | 116183138 | 116184229 | 116183604 | 71 | 154 | 5  | 24.7718079  | 1.30E-38    | NHLH2    | ENSG00000177551 |
| 1 | 116221614 | 116221976 | 116221835 | 30 | 36  | 1  | 17.73981082 | 3.00E-10    |          | ENSG00000219640 |
| 1 | 116345995 | 116346339 | 116346167 | 10 | 14  | 3  | 3.595907599 | 0.00486913  | SLC22A15 | ENSG00000163393 |
| 1 | 116478463 | 116478677 | 116478551 | 8  | 8   | 1  | 4.315089119 | 0.0127267   | C1orf161 | ENSG00000173212 |
| 1 | 116720253 | 116720794 | 116720628 | 16 | 29  | 7  | 3.595907599 | 0.000155266 | ATP1A1   | ENSG00000163399 |
| 1 | 116762965 | 116763145 | 116763055 | 8  | 8   | 2  | 2.876726079 | 0.0381137   |          | ENSG00000203865 |
| 1 | 116777187 | 116777366 | 116777306 | 8  | 8   | 4  | 1.726035648 | 0.150596    |          | ENSG00000203865 |
| 1 | 116797512 | 116798088 | 116797806 | 14 | 27  | 16 | 1.579379024 | 0.0636678   |          | ENSG00000200547 |
| 1 | 116815545 | 116815724 | 116815679 | 8  | 8   | 11 | 0.71918152  | 0.777546    |          | ENSG00000200547 |
| 1 | 116818455 | 116818724 | 116818576 | 8  | 11  | 6  | 1.643843474 | 0.137712    |          | ENSG00000200547 |
| 1 | 116843199 | 116843541 | 116843370 | 18 | 22  | 10 | 2.004990904 | 0.023438    |          | ENSG00000177173 |
| 1 | 116881718 | 116881974 | 116881860 | 11 | 13  | 5  | 2.237453617 | 0.038866    |          | ENSG00000177173 |
| 1 | 116914293 | 116914553 | 116914442 | 9  | 10  | 2  | 3.515998541 | 0.0136204   | CD58     | ENSG00000116815 |
| 1 | 116918982 | 116919195 | 116919038 | 8  | 9   | 8  | 1.065454103 | 0.442605    | CD58     | ENSG00000116815 |
| 1 | 117018838 | 117019203 | 117019064 | 12 | 17  | 6  | 2.465765211 | 0.014729    |          | ENSG00000211543 |

|   |           |           |           |     |     |    |             |             |          |                 |
|---|-----------|-----------|-----------|-----|-----|----|-------------|-------------|----------|-----------------|
| 1 | 117038003 | 117038234 | 117038130 | 9   | 11  | 0  | 11.50690432 | 0.000313206 | C1orf137 | ENSG00000203864 |
| 1 | 117050450 | 117050766 | 117050594 | 9   | 12  | 9  | 1.246581301 | 0.295061    |          | ENSG00000219018 |
| 1 | 117064712 | 117064983 | 117064887 | 9   | 12  | 3  | 3.116453252 | 0.0131971   |          | ENSG00000219018 |
| 1 | 117143424 | 117143673 | 117143548 | 8   | 10  | 0  | 10.54799562 | 0.000613541 |          | ENSG00000220126 |
| 1 | 117197839 | 117198195 | 117198017 | 12  | 18  | 3  | 4.554816292 | 0.000599415 |          | ENSG00000221425 |
| 1 | 117222108 | 117224245 | 117223435 | 145 | 333 | 20 | 15.25121445 | 4.43E-72    |          | ENSG00000221425 |
| 1 | 117306500 | 117306680 | 117306590 | 8   | 8   | 4  | 1.726035648 | 0.150596    |          | ENSG00000209147 |
| 1 | 117357430 | 117357793 | 117357699 | 10  | 16  | 8  | 1.811271976 | 0.0663685   | IGSF2    | ENSG00000134256 |
| 1 | 117404223 | 117404429 | 117404302 | 8   | 10  | 6  | 1.506856518 | 0.188853    | TTF2     | ENSG00000116830 |
| 1 | 117404438 | 117404866 | 117404561 | 8   | 18  | 9  | 1.821926517 | 0.0548428   | TTF2     | ENSG00000116830 |
| 1 | 117411919 | 117412286 | 117412084 | 10  | 15  | 6  | 2.191791298 | 0.0328001   | TTF2     | ENSG00000116830 |
| 1 | 117466227 | 117466414 | 117466378 | 8   | 8   | 4  | 1.726035648 | 0.150596    | TRIM45   | ENSG00000134253 |
| 1 | 117472868 | 117473163 | 117472996 | 9   | 10  | 4  | 2.109599125 | 0.0694668   | TRIM45   | ENSG00000134253 |
| 1 | 117555052 | 117555239 | 117555179 | 8   | 9   | 7  | 1.198635866 | 0.346278    | VTCN1    | ENSG00000134258 |
| 1 | 117612946 | 117613161 | 117613022 | 8   | 9   | 9  | 0.958908693 | 0.536911    |          | ENSG00000223204 |
| 1 | 117613290 | 117613483 | 117613360 | 8   | 9   | 8  | 1.065454103 | 0.442605    |          | ENSG00000223204 |
| 1 | 117677243 | 117677446 | 117677344 | 8   | 8   | 5  | 1.43836304  | 0.235762    | MAN1A2   | ENSG00000198162 |
| 1 | 117947016 | 117947233 | 117947152 | 8   | 9   | 3  | 2.397271733 | 0.0539397   | FAM46C   | ENSG00000183508 |
| 1 | 117971763 | 117972258 | 117972088 | 16  | 28  | 6  | 3.972621728 | 9.48E-05    |          | ENSG00000213262 |
| 1 | 118018770 | 118019003 | 118018924 | 9   | 12  | 4  | 2.493162602 | 0.0299057   |          | ENSG00000212266 |
| 1 | 118076163 | 118076455 | 118076331 | 10  | 11  | 4  | 2.301380863 | 0.0459276   |          | ENSG00000212266 |
| 1 | 118102987 | 118103453 | 118103166 | 9   | 21  | 3  | 5.273997812 | 0.00011662  |          | ENSG00000218616 |
| 1 | 118239754 | 118240000 | 118239864 | 10  | 11  | 4  | 2.301380863 | 0.0459276   | GDAP2    | ENSG00000196505 |
| 1 | 118980045 | 118980261 | 118980153 | 8   | 9   | 1  | 4.794543465 | 0.00708517  |          | ENSG00000218441 |
| 1 | 119640951 | 119641201 | 119641072 | 10  | 10  | 0  | 10.54799562 | 0.000613541 |          | ENSG00000194297 |
| 1 | 119685591 | 119685841 | 119685733 | 10  | 12  | 2  | 4.155271003 | 0.0046638   |          | ENSG00000194297 |
| 1 | 119702916 | 119703167 | 119703006 | 15  | 18  | 4  | 3.643853034 | 0.00178791  | HAO2     | ENSG00000116882 |
| 1 | 119732687 | 119732887 | 119732763 | 8   | 9   | 3  | 2.397271733 | 0.0539397   | HAO2     | ENSG00000116882 |
| 1 | 119949351 | 119949535 | 119949414 | 8   | 9   | 1  | 4.794543465 | 0.00708517  |          | ENSG00000198857 |
| 1 | 119955774 | 119955974 | 119955874 | 8   | 9   | 1  | 4.794543465 | 0.00708517  |          | ENSG00000198857 |
| 1 | 120018944 | 120019161 | 120019052 | 9   | 10  | 2  | 3.515998541 | 0.0136204   | PHGDH    | ENSG00000092621 |
| 1 | 120088338 | 120088541 | 120088439 | 8   | 9   | 11 | 0.799090578 | 0.702688    | HMGCS2   | ENSG00000134240 |
| 1 | 120110507 | 120110754 | 120110641 | 8   | 9   | 6  | 1.369869562 | 0.253675    | HMGCS2   | ENSG00000134240 |
| 1 | 120124135 | 120124398 | 120124255 | 8   | 10  | 12 | 0.811384279 | 0.697544    | HMGCS2   | ENSG00000134240 |



|   |           |           |           |     |      |      |             |             |         |                 |
|---|-----------|-----------|-----------|-----|------|------|-------------|-------------|---------|-----------------|
| 1 | 120135018 | 120135232 | 120135145 | 8   | 8    | 0    | 8.630178238 | 0.00235436  | REG4    | ENSG00000134193 |
| 1 | 120261545 | 120261990 | 120261724 | 18  | 25   | 3    | 6.232906505 | 1.23E-05    | ADAM30  | ENSG00000134249 |
| 1 | 120292703 | 120292953 | 120292828 | 8   | 10   | 4    | 2.109599125 | 0.0694668   | ADAM30  | ENSG00000134249 |
| 1 | 120987267 | 120987613 | 120987439 | 24  | 28   | 0    | 27.8083521  | 3.40E-09    |         | ENSG00000216725 |
| 1 | 121053434 | 121053906 | 121053613 | 11  | 15   | 11   | 1.278544924 | 0.254978    |         | ENSG00000216725 |
| 1 | 121185506 | 121187107 | 121186577 | 660 | 2736 | 2746 | 0.955417944 | 0.954348    |         | ENSG00000216725 |
| 1 | 141477425 | 141477804 | 141477604 | 9   | 16   | 9    | 1.630144778 | 0.102169    |         | ENSG00000221652 |
| 1 | 141479060 | 141479308 | 141479184 | 8   | 10   | 3    | 2.636998906 | 0.034203    |         | ENSG00000221652 |
| 1 | 141775739 | 141775922 | 141775894 | 11  | 12   | 0    | 12.46581301 | 0.000159888 |         | ENSG00000217764 |
| 1 | 142309118 | 142309343 | 142309230 | 9   | 10   | 3    | 2.636998906 | 0.034203    |         | ENSG00000222289 |
| 1 | 142719409 | 142719812 | 142719702 | 10  | 17   | 15   | 1.07877228  | 0.410615    |         | ENSG00000196369 |
| 1 | 142720859 | 142721251 | 142720999 | 11  | 17   | 10   | 1.569123316 | 0.112309    |         | ENSG00000196369 |
| 1 | 142721409 | 142721766 | 142721587 | 12  | 18   | 11   | 1.518272097 | 0.122037    |         | ENSG00000196369 |
| 1 | 142721807 | 142722852 | 142722182 | 343 | 497  | 34   | 13.64390083 | 6.36E-103   |         | ENSG00000196369 |
| 1 | 142723975 | 142724420 | 142724253 | 10  | 20   | 17   | 1.118726809 | 0.361026    |         | ENSG00000196369 |
| 1 | 142727196 | 142727582 | 142727409 | 10  | 16   | 12   | 1.253957522 | 0.265012    |         | ENSG00000196369 |
| 1 | 143240525 | 143240819 | 143240672 | 12  | 14   | 4    | 2.876726079 | 0.01219     |         | ENSG00000201699 |
| 1 | 143245208 | 143245632 | 143245354 | 9   | 16   | 23   | 0.679226991 | 0.892598    |         | ENSG00000201699 |
| 1 | 143246532 | 143246929 | 143246662 | 9   | 16   | 8    | 1.811271976 | 0.0663685   |         | ENSG00000201699 |
| 1 | 143250536 | 143250717 | 143250623 | 9   | 9    | 9    | 0.958908693 | 0.536911    |         | ENSG00000201699 |
| 1 | 143579906 | 143580085 | 143580048 | 8   | 8    | 2    | 2.876726079 | 0.0381137   |         | ENSG00000168614 |
| 1 | 143581149 | 143581403 | 143581276 | 9   | 10   | 7    | 1.318499453 | 0.269217    |         | ENSG00000168614 |
| 1 | 143628554 | 143628741 | 143628667 | 8   | 8    | 0    | 8.630178238 | 0.00235436  | PDE4DIP | ENSG00000178104 |
| 1 | 143628780 | 143628983 | 143628881 | 8   | 10   | 4    | 2.109599125 | 0.0694668   | PDE4DIP | ENSG00000178104 |
| 1 | 143634964 | 143635222 | 143635096 | 9   | 10   | 4    | 2.109599125 | 0.0694668   | PDE4DIP | ENSG00000178104 |
| 1 | 143643226 | 143644581 | 143643989 | 25  | 85   | 49   | 1.649322952 | 0.00203526  | PDE4DIP | ENSG00000178104 |
| 1 | 143647020 | 143647215 | 143647067 | 8   | 8    | 3    | 2.157544559 | 0.0836802   | PDE4DIP | ENSG00000178104 |
| 1 | 143697903 | 143698098 | 143697955 | 8   | 9    | 5    | 1.598181155 | 0.170911    | PDE4DIP | ENSG00000178104 |
| 1 | 143698177 | 143698627 | 143698336 | 16  | 26   | 11   | 2.157544559 | 0.00983179  | PDE4DIP | ENSG00000178104 |
| 1 | 143699096 | 143699289 | 143699192 | 8   | 8    | 9    | 0.863017824 | 0.627343    | PDE4DIP | ENSG00000178104 |
| 1 | 143700532 | 143701391 | 143700918 | 13  | 45   | 28   | 1.521027582 | 0.0357281   | PDE4DIP | ENSG00000178104 |
| 1 | 143702935 | 143703176 | 143703079 | 8   | 12   | 4    | 2.493162602 | 0.0299057   | PDE4DIP | ENSG00000178104 |
| 1 | 143703752 | 143704077 | 143703886 | 15  | 19   | 15   | 1.198635866 | 0.291044    | PDE4DIP | ENSG00000178104 |
| 1 | 143706364 | 143706765 | 143706608 | 9   | 17   | 15   | 1.07877228  | 0.410615    | PDE4DIP | ENSG00000178104 |

|   |           |           |           |    |    |    |             |             |         |                 |
|---|-----------|-----------|-----------|----|----|----|-------------|-------------|---------|-----------------|
| 1 | 143707416 | 143707615 | 143707479 | 8  | 10 | 7  | 1.318499453 | 0.269217    | PDE4DIP | ENSG00000178104 |
| 1 | 143708938 | 143709127 | 143709032 | 9  | 11 | 13 | 0.821921737 | 0.693119    | PDE4DIP | ENSG00000178104 |
| 1 | 143711799 | 143712018 | 143711908 | 10 | 11 | 6  | 1.643843474 | 0.137712    | PDE4DIP | ENSG00000178104 |
| 1 | 143713341 | 143713711 | 143713504 | 9  | 14 | 5  | 2.397271733 | 0.0258078   | PDE4DIP | ENSG00000178104 |
| 1 | 143713734 | 143714344 | 143714054 | 10 | 22 | 16 | 1.297347055 | 0.203559    | PDE4DIP | ENSG00000178104 |
| 1 | 143715561 | 143715882 | 143715721 | 11 | 17 | 23 | 0.71918152  | 0.858071    | PDE4DIP | ENSG00000178104 |
| 1 | 143715956 | 143716198 | 143716033 | 8  | 10 | 3  | 2.636998906 | 0.034203    | PDE4DIP | ENSG00000178104 |
| 1 | 143716851 | 143717059 | 143716943 | 9  | 9  | 7  | 1.198635866 | 0.346278    | PDE4DIP | ENSG00000178104 |
| 1 | 143717418 | 143717967 | 143717592 | 13 | 24 | 25 | 0.922027589 | 0.614196    | PDE4DIP | ENSG00000178104 |
| 1 | 143720432 | 143720623 | 143720569 | 10 | 11 | 9  | 1.150690432 | 0.367789    | PDE4DIP | ENSG00000178104 |
| 1 | 143723771 | 143724076 | 143723923 | 9  | 12 | 12 | 0.958908693 | 0.542188    | PDE4DIP | ENSG00000178104 |
| 1 | 143724956 | 143725216 | 143725118 | 11 | 14 | 5  | 2.397271733 | 0.0258078   | PDE4DIP | ENSG00000178104 |
| 1 | 143725316 | 143725694 | 143725495 | 14 | 21 | 4  | 4.219198249 | 0.000390041 | PDE4DIP | ENSG00000178104 |
| 1 | 143727022 | 143727434 | 143727289 | 10 | 15 | 13 | 1.095895649 | 0.398774    | PDE4DIP | ENSG00000178104 |
| 1 | 143735437 | 143735777 | 143735570 | 13 | 18 | 4  | 3.643853034 | 0.00178791  | PDE4DIP | ENSG00000178104 |
| 1 | 143736551 | 143737127 | 143736726 | 8  | 20 | 18 | 1.05984645  | 0.425516    | PDE4DIP | ENSG00000178104 |
| 1 | 143739164 | 143739612 | 143739433 | 10 | 20 | 15 | 1.25856766  | 0.240048    | PDE4DIP | ENSG00000178104 |
| 1 | 143740052 | 143740460 | 143740205 | 8  | 17 | 8  | 1.917817386 | 0.0474153   | PDE4DIP | ENSG00000178104 |
| 1 | 143741071 | 143741869 | 143741519 | 14 | 37 | 32 | 1.104197889 | 0.336845    | PDE4DIP | ENSG00000178104 |
| 1 | 143742276 | 143742566 | 143742419 | 10 | 15 | 11 | 1.278544924 | 0.254978    | PDE4DIP | ENSG00000178104 |
| 1 | 143743839 | 143744427 | 143743988 | 10 | 21 | 14 | 1.406399416 | 0.148881    | PDE4DIP | ENSG00000178104 |
| 1 | 143746168 | 143746668 | 143746319 | 9  | 17 | 22 | 0.750450282 | 0.822065    | PDE4DIP | ENSG00000178104 |
| 1 | 143748577 | 143749018 | 143748756 | 9  | 18 | 9  | 1.821926517 | 0.0548428   | PDE4DIP | ENSG00000178104 |
| 1 | 143749644 | 143750085 | 143749886 | 11 | 21 | 12 | 1.622768557 | 0.076896    | PDE4DIP | ENSG00000178104 |
| 1 | 143750293 | 143750742 | 143750463 | 13 | 23 | 15 | 1.43836304  | 0.12479     | PDE4DIP | ENSG00000178104 |
| 1 | 143750884 | 143751995 | 143751205 | 21 | 68 | 45 | 1.43836304  | 0.0264147   | PDE4DIP | ENSG00000178104 |
| 1 | 143752617 | 143752814 | 143752671 | 9  | 11 | 9  | 1.150690432 | 0.367789    | PDE4DIP | ENSG00000178104 |
| 1 | 143753781 | 143754074 | 143753910 | 9  | 12 | 8  | 1.385090334 | 0.219216    | PDE4DIP | ENSG00000178104 |
| 1 | 143755403 | 143755686 | 143755511 | 13 | 16 | 6  | 2.328778255 | 0.0221113   | PDE4DIP | ENSG00000178104 |
| 1 | 143755987 | 143756484 | 143756166 | 15 | 27 | 24 | 1.073977736 | 0.396082    | PDE4DIP | ENSG00000178104 |
| 1 | 143756993 | 143757308 | 143757150 | 9  | 14 | 13 | 1.027402171 | 0.469541    | PDE4DIP | ENSG00000178104 |
| 1 | 143757576 | 143757948 | 143757755 | 13 | 20 | 18 | 1.05984645  | 0.425516    | PDE4DIP | ENSG00000178104 |
| 1 | 143758870 | 143759060 | 143758949 | 10 | 10 | 7  | 1.318499453 | 0.269217    | PDE4DIP | ENSG00000178104 |
| 1 | 143765246 | 143765676 | 143765458 | 13 | 21 | 9  | 2.109599125 | 0.0196396   | PDE4DIP | ENSG00000178104 |

|   |           |           |           |    |    |    |             |             |          |                 |
|---|-----------|-----------|-----------|----|----|----|-------------|-------------|----------|-----------------|
| 1 | 143766787 | 143767022 | 143766922 | 8  | 10 | 19 | 0.527399781 | 0.961307    | PDE4DIP  | ENSG00000178104 |
| 1 | 143767215 | 143767402 | 143767290 | 9  | 9  | 6  | 1.369869562 | 0.253675    | PDE4DIP  | ENSG00000178104 |
| 1 | 143769318 | 143769637 | 143769466 | 10 | 13 | 13 | 0.958908693 | 0.543805    | PDE4DIP  | ENSG00000178104 |
| 1 | 143770052 | 143770667 | 143770430 | 24 | 44 | 35 | 1.198635866 | 0.206612    | PDE4DIP  | ENSG00000178104 |
| 1 | 143770703 | 143770956 | 143770829 | 9  | 13 | 13 | 0.958908693 | 0.543805    | PDE4DIP  | ENSG00000178104 |
| 1 | 143770964 | 143771352 | 143771143 | 8  | 15 | 4  | 3.068507818 | 0.0076507   | PDE4DIP  | ENSG00000178104 |
| 1 | 143772965 | 143773241 | 143773144 | 9  | 12 | 13 | 0.890415215 | 0.619237    | PDE4DIP  | ENSG00000178104 |
| 1 | 143774344 | 143774577 | 143774460 | 9  | 10 | 6  | 1.506856518 | 0.188853    | PDE4DIP  | ENSG00000178104 |
| 1 | 143776913 | 143777115 | 143777014 | 9  | 10 | 10 | 0.958908693 | 0.538751    | PDE4DIP  | ENSG00000178104 |
| 1 | 143782981 | 143783218 | 143783099 | 9  | 10 | 17 | 0.585999757 | 0.924668    | PDE4DIP  | ENSG00000178104 |
| 1 | 143790754 | 143790978 | 143790842 | 8  | 9  | 3  | 2.397271733 | 0.0539397   | PDE4DIP  | ENSG00000178104 |
| 1 | 143792230 | 143792419 | 143792326 | 8  | 9  | 4  | 1.917817386 | 0.103282    | PDE4DIP  | ENSG00000178104 |
| 1 | 143793952 | 143794210 | 143794081 | 9  | 11 | 11 | 0.958908693 | 0.540507    | PDE4DIP  | ENSG00000178104 |
| 1 | 143798644 | 143798864 | 143798776 | 9  | 10 | 6  | 1.506856518 | 0.188853    |          | ENSG00000218759 |
| 1 | 143803823 | 143804016 | 143803919 | 11 | 12 | 15 | 0.779113313 | 0.750998    |          | ENSG00000218759 |
| 1 | 143807521 | 143807816 | 143807691 | 15 | 17 | 15 | 1.07877228  | 0.410615    |          | ENSG00000218759 |
| 1 | 143810120 | 143810537 | 143810358 | 8  | 16 | 8  | 1.811271976 | 0.0663685   |          | ENSG00000218759 |
| 1 | 143810939 | 143811231 | 143811104 | 11 | 14 | 11 | 1.198635866 | 0.315918    |          | ENSG00000218759 |
| 1 | 143812988 | 143813183 | 143813085 | 8  | 8  | 13 | 0.616441303 | 0.878084    |          | ENSG00000218759 |
| 1 | 143815256 | 143815478 | 143815370 | 9  | 9  | 11 | 0.799090578 | 0.702688    |          | ENSG00000218759 |
| 1 | 143818782 | 143819003 | 143818900 | 9  | 9  | 13 | 0.684934781 | 0.824961    |          | ENSG00000218759 |
| 1 | 143822189 | 143822490 | 143822355 | 12 | 15 | 9  | 1.534253909 | 0.136498    |          | ENSG00000218759 |
| 1 | 143822716 | 143823056 | 143822886 | 9  | 14 | 3  | 3.595907599 | 0.00486913  |          | ENSG00000218759 |
| 1 | 143826633 | 143827366 | 143826812 | 10 | 29 | 27 | 1.027402171 | 0.457998    |          | ENSG00000218759 |
| 1 | 143827974 | 143828217 | 143828095 | 9  | 11 | 8  | 1.278544924 | 0.28289     |          | ENSG00000218759 |
| 1 | 143828966 | 143829268 | 143829117 | 8  | 12 | 15 | 0.779113313 | 0.750998    |          | ENSG00000218759 |
| 1 | 143920300 | 143920489 | 143920321 | 11 | 11 | 0  | 11.50690432 | 0.000313206 | NOTCH2NL | ENSG00000213240 |
| 1 | 143988665 | 143988845 | 143988817 | 9  | 9  | 7  | 1.198635866 | 0.346278    |          | ENSG00000208961 |
| 1 | 144094040 | 144094368 | 144094196 | 9  | 12 | 16 | 0.733283118 | 0.803868    |          | ENSG00000201558 |
| 1 | 144106835 | 144107137 | 144107003 | 13 | 16 | 22 | 0.708758599 | 0.862621    |          | ENSG00000201558 |
| 1 | 144107194 | 144107508 | 144107341 | 11 | 14 | 9  | 1.43836304  | 0.179537    |          | ENSG00000201558 |
| 1 | 144107967 | 144108808 | 144108377 | 18 | 52 | 28 | 1.752488301 | 0.00627876  |          | ENSG00000201558 |
| 1 | 144108977 | 144109470 | 144109291 | 16 | 26 | 15 | 1.61815842  | 0.0584619   |          | ENSG00000201558 |
| 1 | 144110167 | 144110908 | 144110700 | 28 | 53 | 31 | 1.61815842  | 0.0137388   | HFE2     | ENSG00000168509 |

|   |           |           |           |    |    |    |             |             |         |                 |
|---|-----------|-----------|-----------|----|----|----|-------------|-------------|---------|-----------------|
| 1 | 144110947 | 144111182 | 144111064 | 11 | 14 | 6  | 2.054804342 | 0.0480281   | HFE2    | ENSG00000168509 |
| 1 | 144132988 | 144133284 | 144133117 | 13 | 16 | 11 | 1.358453982 | 0.20248     | HFE2    | ENSG00000168509 |
| 1 | 144149175 | 144149508 | 144149351 | 12 | 16 | 7  | 2.037680973 | 0.0400399   | TXNIP   | ENSG00000117289 |
| 1 | 144149548 | 144150215 | 144149727 | 10 | 29 | 15 | 1.797953799 | 0.0249937   | TXNIP   | ENSG00000117289 |
| 1 | 144152066 | 144152278 | 144152172 | 8  | 9  | 5  | 1.598181155 | 0.170911    | TXNIP   | ENSG00000117289 |
| 1 | 144166561 | 144167103 | 144166832 | 27 | 52 | 36 | 1.373571912 | 0.0666625   | POLR3GL | ENSG00000121851 |
| 1 | 144167238 | 144167601 | 144167352 | 10 | 16 | 10 | 1.481949798 | 0.147733    | POLR3GL | ENSG00000121851 |
| 1 | 144168496 | 144168986 | 144168803 | 14 | 24 | 16 | 1.410159843 | 0.132195    | POLR3GL | ENSG00000121851 |
| 1 | 144181467 | 144182076 | 144181711 | 13 | 26 | 15 | 1.61815842  | 0.0584619   | POLR3GL | ENSG00000121851 |
| 1 | 144227618 | 144227997 | 144227797 | 10 | 17 | 16 | 1.015315087 | 0.480915    | PEX11B  | ENSG00000131779 |
| 1 | 144236148 | 144236500 | 144236324 | 15 | 20 | 10 | 1.830643869 | 0.0454769   | ITGA10  | ENSG00000143127 |
| 1 | 144253851 | 144254920 | 144254185 | 17 | 71 | 35 | 1.917817386 | 0.00048968  | ANKRD35 | ENSG00000198483 |
| 1 | 144255101 | 144255399 | 144255229 | 12 | 14 | 7  | 1.797953799 | 0.0806593   | ANKRD35 | ENSG00000198483 |
| 1 | 144260279 | 144260500 | 144260419 | 8  | 11 | 5  | 1.917817386 | 0.0843804   | ANKRD35 | ENSG00000198483 |
| 1 | 144286732 | 144287303 | 144287039 | 9  | 24 | 11 | 1.997726444 | 0.0196649   | PIAS3   | ENSG00000131788 |
| 1 | 144287423 | 144287606 | 144287517 | 8  | 9  | 4  | 1.917817386 | 0.103282    | PIAS3   | ENSG00000131788 |
| 1 | 144290675 | 144290886 | 144290780 | 10 | 11 | 0  | 11.50690432 | 0.000313206 | PIAS3   | ENSG00000131788 |
| 1 | 144293278 | 144293618 | 144293453 | 10 | 13 | 5  | 2.237453617 | 0.038866    | PIAS3   | ENSG00000131788 |
| 1 | 144313759 | 144314027 | 144313881 | 8  | 10 | 1  | 5.273997812 | 0.00391723  | POLR3C  | ENSG00000186141 |
| 1 | 144321847 | 144322395 | 144322197 | 10 | 23 | 11 | 1.917817386 | 0.0274129   | POLR3C  | ENSG00000186141 |
| 1 | 144388000 | 144388179 | 144388089 | 8  | 8  | 4  | 1.726035648 | 0.150596    | CD160   | ENSG00000117281 |
| 1 | 144401716 | 144401930 | 144401874 | 8  | 8  | 6  | 1.232882605 | 0.333038    | CD160   | ENSG00000117281 |
| 1 | 144424848 | 144425176 | 144425019 | 8  | 13 | 4  | 2.684944341 | 0.01921     | CD160   | ENSG00000117281 |
| 1 | 144426376 | 144426588 | 144426482 | 9  | 10 | 3  | 2.636998906 | 0.034203    | CD160   | ENSG00000117281 |
| 1 | 145109279 | 145109528 | 145109403 | 11 | 13 | 12 | 1.0326709   | 0.46514     | PRKAB2  | ENSG00000131791 |
| 1 | 145109849 | 145110046 | 145109947 | 8  | 9  | 4  | 1.917817386 | 0.103282    | PRKAB2  | ENSG00000131791 |
| 1 | 145110520 | 145110799 | 145110654 | 12 | 13 | 5  | 2.237453617 | 0.038866    | PRKAB2  | ENSG00000131791 |
| 1 | 145110893 | 145111160 | 145111026 | 10 | 12 | 6  | 1.78083043  | 0.0985525   | PRKAB2  | ENSG00000131791 |
| 1 | 145137380 | 145137584 | 145137482 | 8  | 9  | 5  | 1.598181155 | 0.170911    |         | ENSG00000219174 |
| 1 | 145163416 | 145163663 | 145163533 | 8  | 10 | 5  | 1.757999271 | 0.121253    | FMO5    | ENSG00000131781 |
| 1 | 145175941 | 145176170 | 145176081 | 9  | 10 | 3  | 2.636998906 | 0.034203    | CHD1L   | ENSG00000131778 |
| 1 | 145180420 | 145180631 | 145180530 | 9  | 10 | 10 | 0.958908693 | 0.538751    | CHD1L   | ENSG00000131778 |
| 1 | 145180749 | 145180949 | 145180862 | 10 | 11 | 8  | 1.278544924 | 0.28289     | CHD1L   | ENSG00000131778 |
| 1 | 145181613 | 145181806 | 145181632 | 8  | 10 | 9  | 1.054799562 | 0.4492      | CHD1L   | ENSG00000131778 |

|   |           |           |           |    |    |    |             |            |        |                 |
|---|-----------|-----------|-----------|----|----|----|-------------|------------|--------|-----------------|
| 1 | 145212040 | 145212268 | 145212154 | 8  | 9  | 4  | 1.917817386 | 0.103282   | CHD1L  | ENSG00000131778 |
| 1 | 145328375 | 145328597 | 145328434 | 8  | 11 | 3  | 2.876726079 | 0.0213797  |        | ENSG00000207209 |
| 1 | 145372435 | 145372618 | 145372526 | 8  | 8  | 0  | 8.630178238 | 0.00235436 |        | ENSG00000207209 |
| 1 | 145430054 | 145430329 | 145430198 | 8  | 10 | 2  | 3.515998541 | 0.0136204  |        | ENSG00000221166 |
| 1 | 145433505 | 145433692 | 145433548 | 9  | 10 | 3  | 2.636998906 | 0.034203   |        | ENSG00000221166 |
| 1 | 145453949 | 145454276 | 145454108 | 12 | 16 | 10 | 1.481949798 | 0.147733   | BCL9   | ENSG00000116128 |
| 1 | 145459188 | 145459479 | 145459312 | 8  | 11 | 3  | 2.876726079 | 0.0213797  | BCL9   | ENSG00000116128 |
| 1 | 145499782 | 145499976 | 145499879 | 8  | 8  | 5  | 1.43836304  | 0.235762   | BCL9   | ENSG00000116128 |
| 1 | 145550808 | 145551298 | 145550987 | 14 | 22 | 7  | 2.756862493 | 0.003684   | ACP6   | ENSG00000162836 |
| 1 | 145608150 | 145608455 | 145608282 | 9  | 12 | 4  | 2.493162602 | 0.0299057  | ACP6   | ENSG00000162836 |
| 1 | 145609139 | 145609614 | 145609285 | 8  | 15 | 15 | 0.958908693 | 0.546868   | ACP6   | ENSG00000162836 |
| 1 | 145638654 | 145638953 | 145638803 | 13 | 16 | 6  | 2.328778255 | 0.0221113  |        | ENSG00000208881 |
| 1 | 145655731 | 145656085 | 145655908 | 27 | 31 | 19 | 1.534253909 | 0.0623199  |        | ENSG00000208881 |
| 1 | 145684088 | 145684322 | 145684196 | 11 | 13 | 5  | 2.237453617 | 0.038866   | GJA5   | ENSG00000143140 |
| 1 | 145779693 | 145779929 | 145779819 | 8  | 9  | 2  | 3.19636231  | 0.0229249  |        | ENSG00000216883 |
| 1 | 145781371 | 145781579 | 145781475 | 8  | 9  | 3  | 2.397271733 | 0.0539397  |        | ENSG00000216883 |
| 1 | 145784372 | 145784581 | 145784476 | 8  | 8  | 5  | 1.43836304  | 0.235762   |        | ENSG00000216883 |
| 1 | 145787918 | 145788099 | 145788013 | 8  | 8  | 2  | 2.876726079 | 0.0381137  |        | ENSG00000216883 |
| 1 | 145810429 | 145810713 | 145810571 | 8  | 9  | 4  | 1.917817386 | 0.103282   |        | ENSG00000216883 |
| 1 | 145829077 | 145829281 | 145829209 | 9  | 11 | 5  | 1.917817386 | 0.0843804  | GJA8   | ENSG00000121634 |
| 1 | 146192589 | 146192771 | 146192753 | 8  | 9  | 7  | 1.198635866 | 0.346278   |        | ENSG00000219731 |
| 1 | 146193734 | 146194174 | 146193978 | 14 | 23 | 14 | 1.534253909 | 0.0910901  |        | ENSG00000199879 |
| 1 | 146195128 | 146195330 | 146195247 | 10 | 10 | 8  | 1.171999514 | 0.35773    |        | ENSG00000199879 |
| 1 | 146203779 | 146204066 | 146203930 | 9  | 11 | 11 | 0.958908693 | 0.540507   |        | ENSG00000199879 |
| 1 | 146273366 | 146273572 | 146273446 | 8  | 9  | 10 | 0.871735176 | 0.624623   |        | ENSG00000202408 |
| 1 | 146614664 | 146614977 | 146614820 | 8  | 9  | 0  | 9.589086931 | 0.00120187 |        | ENSG00000207501 |
| 1 | 146816409 | 146816617 | 146816558 | 9  | 10 | 4  | 2.109599125 | 0.0694668  |        | ENSG00000220809 |
| 1 | 146817356 | 146817631 | 146817493 | 10 | 12 | 3  | 3.116453252 | 0.0131971  |        | ENSG00000220809 |
| 1 | 146818741 | 146818932 | 146818836 | 8  | 9  | 3  | 2.397271733 | 0.0539397  | NBPF15 | ENSG00000219481 |
| 1 | 146819193 | 146819372 | 146819282 | 9  | 9  | 7  | 1.198635866 | 0.346278   | NBPF15 | ENSG00000219481 |
| 1 | 147490036 | 147490337 | 147490168 | 9  | 13 | 13 | 0.958908693 | 0.543805   |        | ENSG00000206737 |
| 1 | 147491203 | 147491423 | 147491312 | 10 | 12 | 9  | 1.246581301 | 0.295061   |        | ENSG00000206737 |
| 1 | 147561143 | 147561441 | 147561292 | 8  | 9  | 4  | 1.917817386 | 0.103282   |        | ENSG00000208696 |
| 1 | 147950705 | 147950914 | 147950809 | 11 | 11 | 4  | 2.301380863 | 0.0459276  |        | ENSG00000208670 |

|   |           |           |           |    |    |    |             |             |           |                 |
|---|-----------|-----------|-----------|----|----|----|-------------|-------------|-----------|-----------------|
| 1 | 148123339 | 148123586 | 148123450 | 9  | 10 | 8  | 1.171999514 | 0.35773     | HIST2H2BE | ENSG00000184678 |
| 1 | 148123849 | 148124192 | 148124022 | 8  | 13 | 11 | 1.118726809 | 0.38479     | HIST2H2BE | ENSG00000184678 |
| 1 | 148124706 | 148125020 | 148124863 | 11 | 15 | 9  | 1.534253909 | 0.136498    | HIST2H2BE | ENSG00000184678 |
| 1 | 148126318 | 148126929 | 148126679 | 14 | 31 | 18 | 1.615004115 | 0.044781    | HIST2H2AE | ENSG00000184270 |
| 1 | 148127183 | 148127373 | 148127300 | 9  | 10 | 6  | 1.506856518 | 0.188853    | HIST2H2AE | ENSG00000184270 |
| 1 | 148137570 | 148137877 | 148137723 | 9  | 14 | 14 | 0.958908693 | 0.545362    | BOLA1     | ENSG00000178096 |
| 1 | 148166091 | 148166762 | 148166488 | 10 | 28 | 16 | 1.635785418 | 0.0488966   | SF3B4     | ENSG00000143368 |
| 1 | 148166824 | 148167073 | 148166968 | 11 | 13 | 11 | 1.118726809 | 0.38479     | SF3B4     | ENSG00000143368 |
| 1 | 148175299 | 148176167 | 148175711 | 9  | 32 | 18 | 1.665472993 | 0.0343673   | MTMR11    | ENSG00000014914 |
| 1 | 148177399 | 148178307 | 148177990 | 23 | 54 | 10 | 4.794543465 | 1.50E-08    | MTMR11    | ENSG00000014914 |
| 1 | 148180863 | 148181164 | 148181013 | 10 | 13 | 3  | 3.356180426 | 0.00805599  | MTMR11    | ENSG00000014914 |
| 1 | 148200690 | 148201038 | 148200864 | 9  | 15 | 9  | 1.534253909 | 0.136498    | MTMR11    | ENSG00000014914 |
| 1 | 148248220 | 148248526 | 148248357 | 14 | 18 | 6  | 2.602752167 | 0.00970422  | OTUD7B    | ENSG00000163113 |
| 1 | 148249174 | 148249675 | 148249333 | 16 | 27 | 4  | 5.369888681 | 1.60E-05    | OTUD7B    | ENSG00000163113 |
| 1 | 148260517 | 148260721 | 148260619 | 8  | 8  | 1  | 4.315089119 | 0.0127267   | OTUD7B    | ENSG00000163113 |
| 1 | 148302058 | 148302306 | 148302182 | 8  | 11 | 1  | 5.753452158 | 0.00215302  | VPS45     | ENSG00000136631 |
| 1 | 148305622 | 148306101 | 148305759 | 8  | 17 | 11 | 1.43836304  | 0.15834     | VPS45     | ENSG00000136631 |
| 1 | 148306225 | 148306826 | 148306430 | 19 | 34 | 11 | 2.796817021 | 0.000446021 | VPS45     | ENSG00000136631 |
| 1 | 148330076 | 148330413 | 148330244 | 8  | 12 | 3  | 3.116453252 | 0.0131971   | VPS45     | ENSG00000136631 |
| 1 | 148422803 | 148423042 | 148422922 | 12 | 13 | 3  | 3.356180426 | 0.00805599  |           | ENSG00000222828 |
| 1 | 148452740 | 148453114 | 148452919 | 13 | 21 | 14 | 1.406399416 | 0.148881    |           | ENSG00000222828 |
| 1 | 148474877 | 148475254 | 148475084 | 12 | 20 | 13 | 1.43836304  | 0.140307    | ANP32E    | ENSG00000143401 |
| 1 | 148494473 | 148494700 | 148494592 | 9  | 10 | 10 | 0.958908693 | 0.538751    | CA14      | ENSG00000118298 |
| 1 | 148494975 | 148495429 | 148495154 | 9  | 18 | 13 | 1.301376083 | 0.22245     | CA14      | ENSG00000118298 |
| 1 | 148498917 | 148499640 | 148499461 | 10 | 28 | 12 | 2.139104008 | 0.0083421   |           | ENSG00000208660 |
| 1 | 148501008 | 148501245 | 148501177 | 8  | 10 | 8  | 1.171999514 | 0.35773     |           | ENSG00000208660 |
| 1 | 148507374 | 148507761 | 148507601 | 8  | 14 | 4  | 2.876726079 | 0.01219     | C1orf54   | ENSG00000118292 |
| 1 | 148507955 | 148508136 | 148508045 | 9  | 10 | 9  | 1.054799562 | 0.4492      | APH1A     | ENSG00000117362 |
| 1 | 148521390 | 148521752 | 148521569 | 10 | 17 | 14 | 1.150690432 | 0.340986    | C1orf51   | ENSG00000159208 |
| 1 | 148532590 | 148533104 | 148532925 | 8  | 20 | 18 | 1.05984645  | 0.425516    |           | ENSG00000187145 |
| 1 | 148560593 | 148560790 | 148560688 | 9  | 10 | 5  | 1.757999271 | 0.121253    | PRPF3     | ENSG00000117360 |
| 1 | 148602301 | 148602526 | 148602413 | 8  | 9  | 6  | 1.369869562 | 0.253675    | RPRD2     | ENSG00000163125 |
| 1 | 148602757 | 148603606 | 148603187 | 11 | 36 | 22 | 1.542592245 | 0.0476873   | RPRD2     | ENSG00000163125 |
| 1 | 148603790 | 148604125 | 148603962 | 12 | 17 | 12 | 1.327719729 | 0.212795    | RPRD2     | ENSG00000163125 |

|   |           |           |           |    |    |    |             |             |          |                 |
|---|-----------|-----------|-----------|----|----|----|-------------|-------------|----------|-----------------|
| 1 | 148669127 | 148669325 | 148669226 | 9  | 10 | 2  | 3.515998541 | 0.0136204   | TARS2    | ENSG00000143374 |
| 1 | 148679479 | 148679720 | 148679624 | 10 | 11 | 5  | 1.917817386 | 0.0843804   | TARS2    | ENSG00000143374 |
| 1 | 148722384 | 148722585 | 148722521 | 8  | 9  | 1  | 4.794543465 | 0.00708517  | TARS2    | ENSG00000143374 |
| 1 | 148726157 | 148726680 | 148726392 | 17 | 27 | 14 | 1.789962894 | 0.029869    | TARS2    | ENSG00000143374 |
| 1 | 148749687 | 148749873 | 148749734 | 8  | 9  | 3  | 2.397271733 | 0.0539397   | ECM1     | ENSG00000143369 |
| 1 | 148754431 | 148754618 | 148754545 | 10 | 10 | 7  | 1.318499453 | 0.269217    | ECM1     | ENSG00000143369 |
| 1 | 148755351 | 148755567 | 148755432 | 8  | 9  | 6  | 1.369869562 | 0.253675    | ECM1     | ENSG00000143369 |
| 1 | 148795062 | 148795352 | 148795232 | 8  | 11 | 1  | 5.753452158 | 0.00215302  | ADAMTSL4 | ENSG00000143382 |
| 1 | 148800098 | 148800821 | 148800273 | 14 | 34 | 21 | 1.525536557 | 0.0564211   | C1orf138 | ENSG00000203804 |
| 1 | 148801538 | 148801853 | 148801695 | 8  | 12 | 6  | 1.78083043  | 0.0985525   | C1orf138 | ENSG00000203804 |
| 1 | 148816240 | 148816419 | 148816272 | 9  | 10 | 6  | 1.506856518 | 0.188853    | MCL1     | ENSG00000143384 |
| 1 | 148817409 | 148817678 | 148817522 | 9  | 11 | 5  | 1.917817386 | 0.0843804   | MCL1     | ENSG00000143384 |
| 1 | 148843825 | 148844150 | 148843987 | 16 | 22 | 9  | 2.205489994 | 0.0136443   |          | ENSG00000208652 |
| 1 | 148858830 | 148859249 | 148859070 | 10 | 18 | 11 | 1.518272097 | 0.122037    | ENSA     | ENSG00000143420 |
| 1 | 148860990 | 148861200 | 148861076 | 9  | 10 | 3  | 2.636998906 | 0.034203    | ENSA     | ENSG00000143420 |
| 1 | 148863320 | 148863793 | 148863452 | 56 | 70 | 5  | 11.3470862  | 1.03E-15    | ENSA     | ENSG00000143420 |
| 1 | 148867814 | 148868275 | 148868096 | 12 | 21 | 14 | 1.406399416 | 0.148881    | ENSA     | ENSG00000143420 |
| 1 | 148868461 | 148868717 | 148868588 | 11 | 14 | 12 | 1.106433107 | 0.392094    | ENSA     | ENSG00000143420 |
| 1 | 148868739 | 148869194 | 148868918 | 10 | 19 | 9  | 1.917817386 | 0.0394029   | ENSA     | ENSG00000143420 |
| 1 | 148900372 | 148900603 | 148900433 | 13 | 14 | 4  | 2.876726079 | 0.01219     | ENSA     | ENSG00000143420 |
| 1 | 148936055 | 148936637 | 148936362 | 13 | 26 | 9  | 2.589053471 | 0.00289627  | GOLPH3L  | ENSG00000143457 |
| 1 | 148985517 | 148985699 | 148985605 | 8  | 8  | 6  | 1.232882605 | 0.333038    | CTSS     | ENSG00000163131 |
| 1 | 148986923 | 148987254 | 148987102 | 16 | 19 | 1  | 9.589086931 | 1.56E-05    | CTSS     | ENSG00000163131 |
| 1 | 148991104 | 148991316 | 148991210 | 9  | 9  | 4  | 1.917817386 | 0.103282    | CTSS     | ENSG00000163131 |
| 1 | 149052164 | 149052500 | 149052332 | 16 | 19 | 9  | 1.917817386 | 0.0394029   |          | ENSG00000200175 |
| 1 | 149115641 | 149116157 | 149115820 | 16 | 31 | 12 | 2.360390629 | 0.0028142   | ARNT     | ENSG00000143437 |
| 1 | 149145433 | 149145814 | 149145595 | 16 | 22 | 9  | 2.205489994 | 0.0136443   |          | ENSG00000198962 |
| 1 | 149145912 | 149146093 | 149146002 | 8  | 8  | 3  | 2.157544559 | 0.0836802   |          | ENSG00000198962 |
| 1 | 149161568 | 149161904 | 149161734 | 13 | 17 | 11 | 1.43836304  | 0.15834     | SETDB1   | ENSG00000143379 |
| 1 | 149165279 | 149165681 | 149165474 | 11 | 19 | 20 | 0.913246374 | 0.614587    | SETDB1   | ENSG00000143379 |
| 1 | 149212956 | 149213146 | 149213038 | 9  | 9  | 7  | 1.198635866 | 0.346278    | LASS2    | ENSG00000143418 |
| 1 | 149220231 | 149220454 | 149220346 | 9  | 10 | 6  | 1.506856518 | 0.188853    | ANXA9    | ENSG00000143412 |
| 1 | 149234847 | 149235276 | 149235114 | 13 | 20 | 3  | 5.034270639 | 0.000202317 | FAM63A   | ENSG00000143409 |
| 1 | 149245757 | 149246066 | 149245936 | 8  | 13 | 6  | 1.917817386 | 0.0693353   | FAM63A   | ENSG00000143409 |

|   |           |           |           |    |     |    |             |             |           |                 |
|---|-----------|-----------|-----------|----|-----|----|-------------|-------------|-----------|-----------------|
| 1 | 149247334 | 149247682 | 149247508 | 9  | 15  | 9  | 1.534253909 | 0.136498    | PRUNE     | ENSG00000143363 |
| 1 | 149263660 | 149263965 | 149263791 | 11 | 15  | 8  | 1.704726565 | 0.0916153   | PRUNE     | ENSG00000143363 |
| 1 | 149287666 | 149287881 | 149287815 | 9  | 10  | 9  | 1.054799562 | 0.4492      | C1orf56   | ENSG00000143443 |
| 1 | 149297690 | 149298369 | 149297958 | 97 | 137 | 18 | 6.964705244 | 2.55E-23    | MLLT11    | ENSG00000213190 |
| 1 | 149302127 | 149302350 | 149302225 | 8  | 11  | 2  | 3.835634772 | 0.00800699  | CDC42SE1  | ENSG00000197622 |
| 1 | 149309399 | 149310271 | 149309684 | 18 | 41  | 20 | 1.917817386 | 0.0057734   |           | ENSG00000143458 |
| 1 | 149310377 | 149310572 | 149310462 | 8  | 9   | 5  | 1.598181155 | 0.170911    |           | ENSG00000143458 |
| 1 | 149338919 | 149339126 | 149339022 | 9  | 10  | 2  | 3.515998541 | 0.0136204   |           | ENSG00000143458 |
| 1 | 149385914 | 149386141 | 149385992 | 11 | 13  | 5  | 2.237453617 | 0.038866    | SEMA6C    | ENSG00000143434 |
| 1 | 149395171 | 149395432 | 149395288 | 15 | 18  | 4  | 3.643853034 | 0.00178791  | TNFAIP8L2 | ENSG00000163154 |
| 1 | 149401079 | 149401286 | 149401221 | 10 | 10  | 1  | 5.273997812 | 0.00391723  | LYSMD1    | ENSG00000163155 |
| 1 | 149404841 | 149405726 | 149405242 | 20 | 43  | 15 | 2.636998906 | 0.000188358 | SCNM1     | ENSG00000163156 |
| 1 | 149429187 | 149429523 | 149429353 | 16 | 20  | 11 | 1.678090213 | 0.0696225   | VPS72     | ENSG00000163159 |
| 1 | 149434257 | 149434767 | 149434483 | 49 | 77  | 9  | 7.479487806 | 1.57E-14    | PIP5K1A   | ENSG00000143398 |
| 1 | 149435195 | 149435687 | 149435552 | 12 | 23  | 9  | 2.301380863 | 0.00938618  | PIP5K1A   | ENSG00000143398 |
| 1 | 149437072 | 149437896 | 149437503 | 10 | 35  | 18 | 1.816879629 | 0.0147786   | PIP5K1A   | ENSG00000143398 |
| 1 | 149438046 | 149438544 | 149438398 | 10 | 19  | 8  | 2.130908207 | 0.0233014   | PIP5K1A   | ENSG00000143398 |
| 1 | 149438791 | 149439174 | 149438945 | 9  | 14  | 4  | 2.876726079 | 0.01219     | PIP5K1A   | ENSG00000143398 |
| 1 | 149439560 | 149439810 | 149439685 | 9  | 9   | 4  | 1.917817386 | 0.103282    | PIP5K1A   | ENSG00000143398 |
| 1 | 149477115 | 149477298 | 149477206 | 9  | 9   | 4  | 1.917817386 | 0.103282    | PSMD4     | ENSG00000159352 |
| 1 | 149490893 | 149491088 | 149490964 | 10 | 11  | 2  | 3.835634772 | 0.00800699  | PSMD4     | ENSG00000159352 |
| 1 | 149493486 | 149494082 | 149493828 | 12 | 27  | 6  | 3.835634772 | 0.000155182 | PSMD4     | ENSG00000159352 |
| 1 | 149494454 | 149494646 | 149494549 | 8  | 8   | 9  | 0.863017824 | 0.627343    | PSMD4     | ENSG00000159352 |
| 1 | 149506932 | 149507162 | 149506993 | 9  | 11  | 6  | 1.643843474 | 0.137712    | PSMD4     | ENSG00000159352 |
| 1 | 149520365 | 149521792 | 149521146 | 13 | 62  | 21 | 2.745965803 | 6.00E-06    | ZNF687    | ENSG00000143373 |
| 1 | 149539944 | 149540286 | 149540117 | 9  | 13  | 5  | 2.237453617 | 0.038866    |           | ENSG00000222803 |
| 1 | 149548897 | 149549095 | 149548985 | 8  | 9   | 3  | 2.397271733 | 0.0539397   |           | ENSG00000222803 |
| 1 | 149550608 | 149550952 | 149550780 | 21 | 26  | 10 | 2.353684974 | 0.00551687  |           | ENSG00000222803 |
| 1 | 149565131 | 149565336 | 149565233 | 8  | 9   | 1  | 4.794543465 | 0.00708517  | PI4KB     | ENSG00000143393 |
| 1 | 149565738 | 149566068 | 149565907 | 8  | 12  | 12 | 0.958908693 | 0.542188    | PI4KB     | ENSG00000143393 |
| 1 | 149566533 | 149567279 | 149566888 | 19 | 42  | 23 | 1.718044742 | 0.0145358   | PI4KB     | ENSG00000143393 |
| 1 | 149579956 | 149580252 | 149580106 | 11 | 14  | 13 | 1.027402171 | 0.469541    | RFX5      | ENSG00000143390 |
| 1 | 149580636 | 149580877 | 149580764 | 10 | 11  | 8  | 1.278544924 | 0.28289     | RFX5      | ENSG00000143390 |
| 1 | 149585861 | 149586358 | 149586182 | 10 | 20  | 6  | 2.876726079 | 0.00408924  | RFX5      | ENSG00000143390 |



|   |           |           |           |    |    |    |             |             |          |                 |
|---|-----------|-----------|-----------|----|----|----|-------------|-------------|----------|-----------------|
| 1 | 149624061 | 149624347 | 149624193 | 10 | 12 | 2  | 4.155271003 | 0.0046638   | SELENBP1 | ENSG00000143416 |
| 1 | 149638354 | 149638703 | 149638528 | 16 | 22 | 7  | 2.756862493 | 0.003684    | PSMB4    | ENSG00000159377 |
| 1 | 149682954 | 149683325 | 149683146 | 13 | 20 | 5  | 3.356180426 | 0.0017534   | POGZ     | ENSG00000143442 |
| 1 | 149696155 | 149696408 | 149696281 | 8  | 8  | 7  | 1.07877228  | 0.435076    | POGZ     | ENSG00000143442 |
| 1 | 149697152 | 149697671 | 149697452 | 11 | 22 | 6  | 3.150699991 | 0.00166398  | POGZ     | ENSG00000143442 |
| 1 | 149712335 | 149712585 | 149712498 | 11 | 12 | 4  | 2.493162602 | 0.0299057   | POGZ     | ENSG00000143442 |
| 1 | 149733949 | 149734179 | 149734029 | 8  | 9  | 3  | 2.397271733 | 0.0539397   | CGN      | ENSG00000143375 |
| 1 | 149750767 | 149750964 | 149750865 | 9  | 10 | 4  | 2.109599125 | 0.0694668   | CGN      | ENSG00000143375 |
| 1 | 149752179 | 149752651 | 149752395 | 20 | 29 | 8  | 3.19636231  | 0.000376248 | CGN      | ENSG00000143375 |
| 1 | 149773860 | 149774065 | 149773962 | 8  | 9  | 6  | 1.369869562 | 0.253675    | TUFT1    | ENSG00000143367 |
| 1 | 149774337 | 149774530 | 149774454 | 8  | 9  | 4  | 1.917817386 | 0.103282    | TUFT1    | ENSG00000143367 |
| 1 | 149778586 | 149779689 | 149778859 | 15 | 50 | 21 | 2.222924698 | 0.000506996 | TUFT1    | ENSG00000143367 |
| 1 | 149784669 | 149785012 | 149784833 | 9  | 13 | 5  | 2.237453617 | 0.038866    |          | ENSG00000207606 |
| 1 | 149787828 | 149788277 | 149788155 | 14 | 25 | 15 | 1.558226626 | 0.0760878   |          | ENSG00000207606 |
| 1 | 149807364 | 149807568 | 149807464 | 8  | 8  | 4  | 1.726035648 | 0.150596    |          | ENSG00000219893 |
| 1 | 149824798 | 149825010 | 149824913 | 8  | 8  | 7  | 1.07877228  | 0.435076    | SNX27    | ENSG00000143376 |
| 1 | 149825025 | 149825262 | 149825143 | 8  | 11 | 11 | 0.958908693 | 0.540507    | SNX27    | ENSG00000143376 |
| 1 | 149833283 | 149833713 | 149833536 | 12 | 19 | 12 | 1.475244143 | 0.131365    | SNX27    | ENSG00000143376 |
| 1 | 149850841 | 149851116 | 149850986 | 16 | 17 | 7  | 2.157544559 | 0.0276499   | SNX27    | ENSG00000143376 |
| 1 | 149864016 | 149864370 | 149864242 | 8  | 13 | 12 | 1.0326709   | 0.46514     |          | ENSG00000206635 |
| 1 | 149952960 | 149953478 | 149953139 | 17 | 31 | 7  | 3.835634772 | 5.95E-05    | TNRC4    | ENSG00000159409 |
| 1 | 149955943 | 149956236 | 149956085 | 10 | 15 | 4  | 3.068507818 | 0.0076507   | TNRC4    | ENSG00000159409 |
| 1 | 149956626 | 149956867 | 149956775 | 10 | 12 | 7  | 1.558226626 | 0.152813    | TNRC4    | ENSG00000159409 |
| 1 | 149965049 | 149965355 | 149965202 | 9  | 12 | 7  | 1.558226626 | 0.152813    | TNRC4    | ENSG00000159409 |
| 1 | 149974058 | 149974584 | 149974284 | 9  | 20 | 8  | 2.237453617 | 0.0160557   |          | ENSG00000206980 |
| 1 | 149979067 | 149979392 | 149979229 | 22 | 27 | 7  | 3.356180426 | 0.000396559 |          | ENSG00000206980 |
| 1 | 150002520 | 150003074 | 150002822 | 10 | 24 | 15 | 1.498294833 | 0.0979832   | MRPL9    | ENSG00000143436 |
| 1 | 150029022 | 150029214 | 150029118 | 8  | 9  | 5  | 1.598181155 | 0.170911    | TDRKH    | ENSG00000182134 |
| 1 | 150029285 | 150029782 | 150029470 | 10 | 20 | 14 | 1.34247217  | 0.186867    | TDRKH    | ENSG00000182134 |
| 1 | 150030185 | 150030394 | 150030288 | 10 | 11 | 5  | 1.917817386 | 0.0843804   | TDRKH    | ENSG00000182134 |
| 1 | 150039538 | 150039765 | 150039620 | 9  | 10 | 2  | 3.515998541 | 0.0136204   | LINGO4   | ENSG00000213171 |
| 1 | 150043283 | 150043583 | 150043436 | 8  | 11 | 6  | 1.643843474 | 0.137712    | LINGO4   | ENSG00000213171 |
| 1 | 150068861 | 150069080 | 150068970 | 9  | 9  | 9  | 0.958908693 | 0.536911    | RORC     | ENSG00000143365 |
| 1 | 150075597 | 150075865 | 150075724 | 12 | 15 | 10 | 1.394776281 | 0.191426    | RORC     | ENSG00000143365 |

|   |           |           |           |    |     |    |             |             |         |                 |
|---|-----------|-----------|-----------|----|-----|----|-------------|-------------|---------|-----------------|
| 1 | 150076020 | 150076265 | 150076180 | 11 | 13  | 7  | 1.678090213 | 0.11195     |         | ENSG00000201134 |
| 1 | 150076316 | 150076523 | 150076454 | 8  | 9   | 9  | 0.958908693 | 0.536911    |         | ENSG00000201134 |
| 1 | 150078308 | 150078623 | 150078465 | 10 | 12  | 7  | 1.558226626 | 0.152813    |         | ENSG00000201134 |
| 1 | 150079365 | 150079689 | 150079529 | 9  | 13  | 8  | 1.491635745 | 0.166708    |         | ENSG00000201134 |
| 1 | 150081269 | 150081482 | 150081375 | 10 | 10  | 0  | 10.54799562 | 0.000613541 |         | ENSG00000201134 |
| 1 | 150097204 | 150097414 | 150097309 | 8  | 8   | 7  | 1.07877228  | 0.435076    | THEM5   | ENSG00000196407 |
| 1 | 150097479 | 150097762 | 150097633 | 8  | 10  | 5  | 1.757999271 | 0.121253    | THEM5   | ENSG00000196407 |
| 1 | 150110515 | 150110859 | 150110734 | 10 | 14  | 14 | 0.958908693 | 0.545362    | THEM5   | ENSG00000196407 |
| 1 | 150116504 | 150116720 | 150116666 | 8  | 8   | 1  | 4.315089119 | 0.0127267   | THEM5   | ENSG00000196407 |
| 1 | 150147491 | 150147710 | 150147606 | 9  | 11  | 3  | 2.876726079 | 0.0213797   | THEM4   | ENSG00000159445 |
| 1 | 150148217 | 150148525 | 150148390 | 8  | 11  | 3  | 2.876726079 | 0.0213797   | THEM4   | ENSG00000159445 |
| 1 | 150148639 | 150148967 | 150148803 | 11 | 16  | 14 | 1.086763185 | 0.404922    | THEM4   | ENSG00000159445 |
| 1 | 150173144 | 150173397 | 150173243 | 9  | 12  | 10 | 1.133255728 | 0.37674     |         | ENSG00000215843 |
| 1 | 150180647 | 150180900 | 150180773 | 8  | 11  | 2  | 3.835634772 | 0.00800699  |         | ENSG00000215843 |
| 1 | 150184902 | 150185178 | 150185025 | 13 | 16  | 10 | 1.481949798 | 0.147733    |         | ENSG00000215843 |
| 1 | 150205136 | 150205679 | 150205536 | 10 | 23  | 10 | 2.092164421 | 0.0165595   |         | ENSG00000215843 |
| 1 | 150206152 | 150206350 | 150206237 | 9  | 10  | 4  | 2.109599125 | 0.0694668   |         | ENSG00000215843 |
| 1 | 150211716 | 150211939 | 150211816 | 8  | 9   | 9  | 0.958908693 | 0.536911    | S100A10 | ENSG00000197747 |
| 1 | 150212123 | 150212337 | 150212230 | 11 | 12  | 7  | 1.558226626 | 0.152813    | S100A10 | ENSG00000197747 |
| 1 | 150215996 | 150216256 | 150216165 | 8  | 10  | 0  | 10.54799562 | 0.000613541 | S100A10 | ENSG00000197747 |
| 1 | 150217053 | 150217379 | 150217216 | 8  | 13  | 7  | 1.678090213 | 0.11195     | S100A10 | ENSG00000197747 |
| 1 | 150227571 | 150228235 | 150227754 | 21 | 47  | 20 | 2.191791298 | 0.000831919 | S100A10 | ENSG00000197747 |
| 1 | 150228536 | 150229818 | 150229530 | 39 | 121 | 26 | 4.332846687 | 1.67E-15    | S100A10 | ENSG00000197747 |
| 1 | 150229821 | 150230299 | 150230080 | 23 | 39  | 17 | 2.130908207 | 0.00262924  | S100A10 | ENSG00000197747 |
| 1 | 150231132 | 150231979 | 150231657 | 27 | 55  | 22 | 2.334734209 | 0.000153635 | S100A10 | ENSG00000197747 |
| 1 | 150234098 | 150234559 | 150234229 | 11 | 20  | 13 | 1.43836304  | 0.140307    | S100A10 | ENSG00000197747 |
| 1 | 150240716 | 150241142 | 150240933 | 21 | 34  | 14 | 2.237453617 | 0.00299075  | S100A10 | ENSG00000197747 |
| 1 | 150242036 | 150242420 | 150242202 | 8  | 13  | 5  | 2.237453617 | 0.038866    | S100A10 | ENSG00000197747 |
| 1 | 150251324 | 150251560 | 150251392 | 8  | 9   | 1  | 4.794543465 | 0.00708517  |         | ENSG00000216988 |
| 1 | 150252700 | 150253050 | 150252875 | 12 | 18  | 7  | 2.277408146 | 0.0188653   |         | ENSG00000216988 |
| 1 | 150253337 | 150253534 | 150253456 | 8  | 8   | 4  | 1.726035648 | 0.150596    |         | ENSG00000216988 |
| 1 | 150262853 | 150263114 | 150262983 | 8  | 9   | 5  | 1.598181155 | 0.170911    |         | ENSG00000216988 |
| 1 | 150265760 | 150266098 | 150265930 | 13 | 16  | 6  | 2.328778255 | 0.0221113   |         | ENSG00000216988 |
| 1 | 150273486 | 150274993 | 150274319 | 83 | 186 | 43 | 4.075361945 | 1.33E-21    | S100A11 | ENSG00000163191 |

|   |           |           |           |    |    |    |             |             |         |                 |
|---|-----------|-----------|-----------|----|----|----|-------------|-------------|---------|-----------------|
| 1 | 150275125 | 150276103 | 150275304 | 15 | 51 | 23 | 2.077635502 | 0.00100431  | S100A11 | ENSG00000163191 |
| 1 | 150286783 | 150287910 | 150287059 | 16 | 63 | 33 | 1.805004599 | 0.00209745  | S100A11 | ENSG00000163191 |
| 1 | 150291391 | 150291570 | 150291480 | 8  | 8  | 7  | 1.07877228  | 0.435076    | S100A11 | ENSG00000163191 |
| 1 | 150291717 | 150291995 | 150291845 | 10 | 12 | 15 | 0.779113313 | 0.750998    | S100A11 | ENSG00000163191 |
| 1 | 150314430 | 150314740 | 150314589 | 8  | 11 | 5  | 1.917817386 | 0.0843804   |         | ENSG00000219550 |
| 1 | 150316556 | 150316749 | 150316650 | 8  | 9  | 0  | 9.589086931 | 0.00120187  |         | ENSG00000219550 |
| 1 | 150381123 | 150381551 | 150381275 | 10 | 18 | 14 | 1.214617678 | 0.282961    | RPTN    | ENSG00000215853 |
| 1 | 150406918 | 150407120 | 150407019 | 9  | 10 | 4  | 2.109599125 | 0.0694668   | RPTN    | ENSG00000215853 |
| 1 | 150424619 | 150424993 | 150424852 | 12 | 19 | 5  | 3.19636231  | 0.00280933  | RPTN    | ENSG00000215853 |
| 1 | 150586357 | 150586670 | 150586514 | 9  | 14 | 5  | 2.397271733 | 0.0258078   | FLG2    | ENSG00000143520 |
| 1 | 150606563 | 150606845 | 150606704 | 16 | 19 | 7  | 2.397271733 | 0.0127287   | FLG2    | ENSG00000143520 |
| 1 | 150650482 | 150650692 | 150650587 | 8  | 8  | 1  | 4.315089119 | 0.0127267   | CRNN    | ENSG00000143536 |
| 1 | 150679981 | 150680394 | 150680139 | 16 | 22 | 14 | 1.470326663 | 0.117149    | CRNN    | ENSG00000143536 |
| 1 | 150697677 | 150697910 | 150697734 | 8  | 11 | 4  | 2.301380863 | 0.0459276   | CRNN    | ENSG00000143536 |
| 1 | 150716588 | 150717029 | 150716850 | 29 | 38 | 0  | 37.39743903 | 4.09E-12    | LCE5A   | ENSG00000186207 |
| 1 | 150719367 | 150719693 | 150719545 | 9  | 12 | 2  | 4.155271003 | 0.0046638   | LCE5A   | ENSG00000186207 |
| 1 | 150725586 | 150725826 | 150725741 | 8  | 10 | 4  | 2.109599125 | 0.0694668   | LCE5A   | ENSG00000186207 |
| 1 | 150734245 | 150734447 | 150734381 | 8  | 8  | 3  | 2.157544559 | 0.0836802   | LCE5A   | ENSG00000186207 |
| 1 | 151025133 | 151025557 | 151025312 | 25 | 32 | 0  | 31.64398687 | 2.31E-10    | LCE1E   | ENSG00000186226 |
| 1 | 151272124 | 151272318 | 151272218 | 9  | 10 | 1  | 5.273997812 | 0.00391723  | SPRR1B  | ENSG00000169469 |
| 1 | 151362074 | 151362272 | 151362239 | 8  | 10 | 1  | 5.273997812 | 0.00391723  | SPRR2F  | ENSG00000213163 |
| 1 | 151594630 | 151594901 | 151594765 | 8  | 11 | 8  | 1.278544924 | 0.28289     | S100A9  | ENSG00000163220 |
| 1 | 151604352 | 151604534 | 151604470 | 8  | 10 | 2  | 3.515998541 | 0.0136204   | S100A9  | ENSG00000163220 |
| 1 | 151629940 | 151630224 | 151630082 | 10 | 14 | 6  | 2.054804342 | 0.0480281   | S100A8  | ENSG00000143546 |
| 1 | 151639346 | 151639646 | 151639499 | 9  | 10 | 3  | 2.636998906 | 0.034203    |         | ENSG00000218387 |
| 1 | 151765255 | 151765632 | 151765453 | 15 | 22 | 2  | 7.351633313 | 1.51E-05    | S100A6  | ENSG00000197956 |
| 1 | 151805623 | 151806106 | 151805846 | 17 | 28 | 3  | 6.952088025 | 2.20E-06    | S100A2  | ENSG00000196754 |
| 1 | 151806579 | 151807077 | 151806804 | 51 | 67 | 2  | 21.73526371 | 8.29E-18    | S100A2  | ENSG00000196754 |
| 1 | 151866551 | 151866803 | 151866686 | 11 | 12 | 2  | 4.155271003 | 0.0046638   | S100A13 | ENSG00000189171 |
| 1 | 151872947 | 151873388 | 151873137 | 9  | 18 | 12 | 1.401481936 | 0.168368    | C1orf77 | ENSG00000160679 |
| 1 | 151910177 | 151910505 | 151910344 | 13 | 16 | 15 | 1.018840486 | 0.477384    | ILF2    | ENSG00000143621 |
| 1 | 152013891 | 152014199 | 152013990 | 9  | 13 | 1  | 6.712360851 | 0.000640982 |         | ENSG00000216243 |
| 1 | 152036259 | 152036613 | 152036436 | 11 | 16 | 1  | 8.150723891 | 0.000101217 |         | ENSG00000219979 |
| 1 | 152162243 | 152162532 | 152162355 | 9  | 11 | 12 | 0.885146486 | 0.620672    | GATAD2B | ENSG00000143614 |

|   |           |           |           |    |    |    |             |             |         |                 |
|---|-----------|-----------|-----------|----|----|----|-------------|-------------|---------|-----------------|
| 1 | 152162598 | 152162822 | 152162736 | 8  | 10 | 6  | 1.506856518 | 0.188853    | GATAD2B | ENSG00000143614 |
| 1 | 152198006 | 152198239 | 152198102 | 9  | 9  | 2  | 3.19636231  | 0.0229249   | CRTC2   | ENSG00000160741 |
| 1 | 152206227 | 152206582 | 152206404 | 10 | 16 | 8  | 1.811271976 | 0.0663685   | SLC39A1 | ENSG00000143570 |
| 1 | 152217023 | 152217230 | 152217102 | 9  | 10 | 5  | 1.757999271 | 0.121253    | JTB     | ENSG00000143543 |
| 1 | 152225845 | 152226181 | 152226019 | 11 | 16 | 5  | 2.716907964 | 0.0109645   | RAB13   | ENSG00000143545 |
| 1 | 152229635 | 152230337 | 152229764 | 12 | 28 | 10 | 2.528032009 | 0.00254104  | RPS27   | ENSG00000177954 |
| 1 | 152436037 | 152436488 | 152436259 | 11 | 19 | 1  | 9.589086931 | 1.56E-05    |         | ENSG00000215938 |
| 1 | 152511430 | 152511703 | 152511566 | 8  | 10 | 8  | 1.171999514 | 0.35773     | HAX1    | ENSG00000143575 |
| 1 | 152630523 | 152630724 | 152630623 | 8  | 9  | 3  | 2.397271733 | 0.0539397   |         | ENSG00000217960 |
| 1 | 152666424 | 152666736 | 152666564 | 9  | 13 | 3  | 3.356180426 | 0.00805599  |         | ENSG00000219049 |
| 1 | 152908983 | 152909281 | 152909132 | 10 | 13 | 2  | 4.474907234 | 0.00269459  | ADAR    | ENSG00000160710 |
| 1 | 152988160 | 152988353 | 152988257 | 8  | 8  | 3  | 2.157544559 | 0.0836802   | KCNN3   | ENSG00000143603 |
| 1 | 153052390 | 153053067 | 153052730 | 47 | 78 | 7  | 9.469223344 | 3.39E-16    | KCNN3   | ENSG00000143603 |
| 1 | 153098838 | 153099294 | 153099115 | 11 | 20 | 0  | 20.13708255 | 7.37E-07    | KCNN3   | ENSG00000143603 |
| 1 | 153101479 | 153101750 | 153101614 | 8  | 11 | 3  | 2.876726079 | 0.0213797   | KCNN3   | ENSG00000143603 |
| 1 | 153125544 | 153125755 | 153125618 | 9  | 9  | 4  | 1.917817386 | 0.103282    | KCNN3   | ENSG00000143603 |
| 1 | 153143020 | 153143361 | 153143192 | 18 | 23 | 4  | 4.602761727 | 0.000137072 | PMVK    | ENSG00000163344 |
| 1 | 153175606 | 153176578 | 153176406 | 12 | 41 | 15 | 2.517135319 | 0.000408497 | PMVK    | ENSG00000163344 |
| 1 | 153176605 | 153176985 | 153176806 | 14 | 21 | 3  | 5.273997812 | 0.00011662  | PMVK    | ENSG00000163344 |
| 1 | 153201245 | 153201452 | 153201341 | 8  | 9  | 1  | 4.794543465 | 0.00708517  | PYGO2   | ENSG00000163348 |
| 1 | 153211745 | 153212220 | 153211924 | 15 | 25 | 4  | 4.986325204 | 4.72E-05    | SHC1    | ENSG00000160691 |
| 1 | 153212698 | 153213087 | 153212877 | 11 | 18 | 2  | 6.073088389 | 0.000157975 | SHC1    | ENSG00000160691 |
| 1 | 153222222 | 153222456 | 153222308 | 10 | 12 | 5  | 2.077635502 | 0.0577144   | FLAD1   | ENSG00000160688 |
| 1 | 153240086 | 153240456 | 153240265 | 13 | 20 | 7  | 2.517135319 | 0.00849957  | ZBTB7B  | ENSG00000160685 |
| 1 | 153242690 | 153243559 | 153243071 | 15 | 42 | 7  | 5.154134225 | 2.23E-07    | ZBTB7B  | ENSG00000160685 |
| 1 | 153246044 | 153246229 | 153246136 | 9  | 9  | 1  | 4.794543465 | 0.00708517  | ZBTB7B  | ENSG00000160685 |
| 1 | 153256600 | 153256876 | 153256738 | 11 | 14 | 1  | 7.191815198 | 0.00034761  | ZBTB7B  | ENSG00000160685 |
| 1 | 153284016 | 153284205 | 153284110 | 8  | 9  | 2  | 3.19636231  | 0.0229249   | ADAM15  | ENSG00000143537 |
| 1 | 153302873 | 153303083 | 153302978 | 9  | 9  | 1  | 4.794543465 | 0.00708517  | EFNA4   | ENSG00000143620 |
| 1 | 153324618 | 153324895 | 153324756 | 11 | 11 | 3  | 2.876726079 | 0.0213797   | EFNA3   | ENSG00000143590 |
| 1 | 153407029 | 153407241 | 153407072 | 9  | 11 | 2  | 3.835634772 | 0.00800699  | KRTCAP2 | ENSG00000163463 |
| 1 | 153412319 | 153412603 | 153412461 | 12 | 17 | 8  | 1.917817386 | 0.0474153   | KRTCAP2 | ENSG00000163463 |
| 1 | 153416391 | 153416620 | 153416505 | 8  | 10 | 6  | 1.506856518 | 0.188853    | TRIM46  | ENSG00000163462 |
| 1 | 153425246 | 153425511 | 153425378 | 8  | 10 | 0  | 10.54799562 | 0.000613541 | MUC1    | ENSG00000185499 |

|   |           |           |           |     |     |     |             |            |          |                 |
|---|-----------|-----------|-----------|-----|-----|-----|-------------|------------|----------|-----------------|
| 1 | 153429816 | 153430151 | 153429979 | 9   | 13  | 3   | 3.356180426 | 0.00805599 | MUC1     | ENSG00000185499 |
| 1 | 153477543 | 153477805 | 153477674 | 9   | 11  | 5   | 1.917817386 | 0.0843804  | GBA      | ENSG00000177628 |
| 1 | 153513422 | 153513739 | 153513577 | 10  | 14  | 0   | 14.3836304  | 4.17E-05   | HCN3     | ENSG00000143630 |
| 1 | 153559684 | 153559911 | 153559821 | 8   | 10  | 2   | 3.515998541 | 0.0136204  | RUSC1    | ENSG00000160753 |
| 1 | 153887827 | 153888144 | 153887966 | 10  | 15  | 3   | 3.835634772 | 0.00291691 | ERVK5    | ENSG00000198358 |
| 1 | 154128094 | 154128356 | 154128209 | 8   | 8   | 0   | 8.630178238 | 0.00235436 |          | ENSG00000201614 |
| 1 | 154170149 | 154170405 | 154170268 | 9   | 11  | 3   | 2.876726079 | 0.0213797  | KIAA0907 | ENSG00000132680 |
| 1 | 154170984 | 154171167 | 154171080 | 8   | 9   | 3   | 2.397271733 | 0.0539397  | KIAA0907 | ENSG00000132680 |
| 1 | 154262341 | 154262615 | 154262481 | 9   | 10  | 3   | 2.636998906 | 0.034203   | SSR2     | ENSG00000163479 |
| 1 | 154289595 | 154289820 | 154289663 | 8   | 11  | 1   | 5.753452158 | 0.00215302 | UBQLN4   | ENSG00000160803 |
| 1 | 154291034 | 154291609 | 154291434 | 8   | 22  | 15  | 1.378431246 | 0.157106   | ROBLD3   | ENSG00000116586 |
| 1 | 154297418 | 154297739 | 154297578 | 12  | 17  | 6   | 2.465765211 | 0.014729   | RAB25    | ENSG00000132698 |
| 1 | 154327224 | 154327420 | 154327304 | 10  | 11  | 4   | 2.301380863 | 0.0459276  | LMNA     | ENSG00000160789 |
| 1 | 154341986 | 154342233 | 154342109 | 11  | 13  | 2   | 4.474907234 | 0.00269459 | LMNA     | ENSG00000160789 |
| 1 | 154359631 | 154360659 | 154360309 | 118 | 168 | 11  | 13.50463076 | 2.18E-36   |          | ENSG00000203263 |
| 1 | 154430250 | 154430664 | 154430429 | 10  | 18  | 4   | 3.643853034 | 0.00178791 | SLC25A44 | ENSG00000160785 |
| 1 | 154448849 | 154449029 | 154448939 | 8   | 10  | 3   | 2.636998906 | 0.034203   | PMF1     | ENSG00000160783 |
| 1 | 154452705 | 154453420 | 154452882 | 111 | 193 | 154 | 1.200182493 | 0.0444563  |          | ENSG00000203262 |
| 1 | 154519236 | 154519604 | 154519425 | 11  | 18  | 5   | 3.036544195 | 0.0044641  | TMEM79   | ENSG00000163472 |
| 1 | 154593416 | 154593712 | 154593577 | 9   | 13  | 7   | 1.678090213 | 0.11195    | CCT3     | ENSG00000163468 |
| 1 | 154619440 | 154619703 | 154619571 | 8   | 9   | 2   | 3.19636231  | 0.0229249  | RHBG     | ENSG00000132677 |
| 1 | 154644733 | 154645028 | 154644859 | 9   | 11  | 2   | 3.835634772 | 0.00800699 | C1orf61  | ENSG00000125462 |
| 1 | 154693259 | 154693440 | 154693322 | 8   | 8   | 2   | 2.876726079 | 0.0381137  |          | ENSG00000206651 |
| 1 | 154711409 | 154711593 | 154711500 | 8   | 9   | 4   | 1.917817386 | 0.103282   |          | ENSG00000206651 |
| 1 | 154837384 | 154837688 | 154837516 | 11  | 13  | 4   | 2.684944341 | 0.01921    | GPATCH4  | ENSG00000160818 |
| 1 | 154837850 | 154838150 | 154838004 | 9   | 11  | 6   | 1.643843474 | 0.137712   | GPATCH4  | ENSG00000160818 |
| 1 | 154896503 | 154896872 | 154896709 | 8   | 13  | 7   | 1.678090213 | 0.11195    | NES      | ENSG00000132688 |
| 1 | 154914477 | 154914688 | 154914582 | 9   | 9   | 3   | 2.397271733 | 0.0539397  | NES      | ENSG00000132688 |
| 1 | 154940236 | 154940432 | 154940334 | 8   | 9   | 1   | 4.794543465 | 0.00708517 | CRABP2   | ENSG00000143320 |
| 1 | 154962238 | 154962535 | 154962401 | 9   | 11  | 4   | 2.301380863 | 0.0459276  | ISG20L2  | ENSG00000143319 |
| 1 | 154977450 | 154977759 | 154977604 | 8   | 11  | 17  | 0.639272462 | 0.890352   | MRPL24   | ENSG00000143314 |
| 1 | 155003640 | 155004019 | 155003818 | 8   | 15  | 16  | 0.902502299 | 0.616352   | PRCC     | ENSG00000143294 |
| 1 | 155004023 | 155004202 | 155004097 | 8   | 9   | 10  | 0.871735176 | 0.624623   | PRCC     | ENSG00000143294 |
| 1 | 155147148 | 155147330 | 155147218 | 8   | 8   | 2   | 2.876726079 | 0.0381137  | C1orf92  | ENSG00000160838 |

|   |           |           |           |    |    |   |             |             |          |                 |
|---|-----------|-----------|-----------|----|----|---|-------------|-------------|----------|-----------------|
| 1 | 155279226 | 155279405 | 155279317 | 8  | 8  | 2 | 2.876726079 | 0.0381137   | ARHGEF11 | ENSG00000132694 |
| 1 | 155281705 | 155281910 | 155281807 | 9  | 10 | 3 | 2.636998906 | 0.034203    | ARHGEF11 | ENSG00000132694 |
| 1 | 155310656 | 155310848 | 155310752 | 11 | 11 | 2 | 3.835634772 | 0.00800699  |          | ENSG00000220759 |
| 1 | 155356518 | 155356713 | 155356615 | 8  | 10 | 3 | 2.636998906 | 0.034203    |          | ENSG00000219338 |
| 1 | 155368962 | 155369384 | 155369189 | 14 | 23 | 6 | 3.287686948 | 0.00104919  |          | ENSG00000219338 |
| 1 | 155394096 | 155394333 | 155394227 | 8  | 10 | 0 | 10.54799562 | 0.000613541 | ETV3     | ENSG00000117036 |
| 1 | 155427256 | 155427435 | 155427361 | 8  | 8  | 3 | 2.157544559 | 0.0836802   | ETV3     | ENSG00000117036 |
| 1 | 155816562 | 155816851 | 155816706 | 10 | 11 | 2 | 3.835634772 | 0.00800699  | FCRL4    | ENSG00000163518 |
| 1 | 157152577 | 157152835 | 157152713 | 11 | 13 | 1 | 6.712360851 | 0.000640982 | PYHIN1   | ENSG00000163564 |
| 1 | 157397496 | 157397764 | 157397630 | 8  | 11 | 3 | 2.876726079 | 0.0213797   | CADM3    | ENSG00000162706 |
| 1 | 158136850 | 158137109 | 158136992 | 11 | 13 | 6 | 1.917817386 | 0.0693353   | CCDC19   | ENSG00000213085 |
| 1 | 158152724 | 158152937 | 158152830 | 9  | 11 | 3 | 2.876726079 | 0.0213797   | TAGLN2   | ENSG00000158710 |
| 1 | 158521407 | 158521625 | 158521518 | 9  | 9  | 3 | 2.397271733 | 0.0539397   | PEX19    | ENSG00000162735 |
| 1 | 158561937 | 158562172 | 158562026 | 10 | 11 | 4 | 2.301380863 | 0.0459276   |          | ENSG00000202078 |
| 1 | 158640599 | 158640884 | 158640759 | 10 | 11 | 1 | 5.753452158 | 0.00215302  | VANGL2   | ENSG00000162738 |
| 1 | 158665063 | 158665250 | 158665188 | 8  | 8  | 5 | 1.43836304  | 0.235762    | VANGL2   | ENSG00000162738 |
| 1 | 158860477 | 158860664 | 158860557 | 8  | 8  | 2 | 2.876726079 | 0.0381137   | SLAMF1   | ENSG00000117090 |
| 1 | 158963353 | 158963558 | 158963455 | 8  | 9  | 0 | 9.589086931 | 0.00120187  | SLAMF7   | ENSG00000026751 |
| 1 | 159311033 | 159311408 | 159311235 | 26 | 33 | 1 | 16.30144778 | 2.08E-09    | ARHGAP30 | ENSG00000186517 |
| 1 | 159334069 | 159334430 | 159334245 | 8  | 14 | 1 | 7.191815198 | 0.00034761  | KLHDC9   | ENSG00000162755 |
| 1 | 159390566 | 159390746 | 159390656 | 8  | 9  | 3 | 2.397271733 | 0.0539397   | UFC1     | ENSG00000143222 |
| 1 | 159634574 | 159634766 | 159634700 | 9  | 9  | 7 | 1.198635866 | 0.346278    |          | ENSG00000206921 |
| 1 | 159718164 | 159718451 | 159718307 | 8  | 11 | 1 | 5.753452158 | 0.00215302  | FCGR2A   | ENSG00000143226 |
| 1 | 159776554 | 159776800 | 159776658 | 8  | 10 | 4 | 2.109599125 | 0.0694668   |          | ENSG00000219527 |
| 1 | 159802641 | 159802834 | 159802737 | 8  | 8  | 0 | 8.630178238 | 0.00235436  | FCGR3A   | ENSG00000203747 |
| 1 | 159849017 | 159849284 | 159849136 | 8  | 11 | 3 | 2.876726079 | 0.0213797   |          | ENSG00000203745 |
| 1 | 159928272 | 159928555 | 159928413 | 8  | 12 | 3 | 3.116453252 | 0.0131971   |          | ENSG00000213075 |
| 1 | 159962393 | 159962678 | 159962535 | 9  | 11 | 3 | 2.876726079 | 0.0213797   | FCRLB    | ENSG00000162746 |
| 1 | 160002569 | 160002919 | 160002744 | 13 | 18 | 6 | 2.602752167 | 0.00970422  | ATF6     | ENSG00000118217 |
| 1 | 160203494 | 160203673 | 160203569 | 8  | 8  | 1 | 4.315089119 | 0.0127267   | OLFML2B  | ENSG00000162745 |
| 1 | 160330828 | 160331172 | 160331030 | 20 | 25 | 6 | 3.56166086  | 0.000408555 | NOS1AP   | ENSG00000198929 |
| 1 | 160520999 | 160521189 | 160521072 | 8  | 8  | 2 | 2.876726079 | 0.0381137   |          | ENSG00000207729 |
| 1 | 160781781 | 160782041 | 160781945 | 10 | 13 | 2 | 4.474907234 | 0.00269459  |          | ENSG00000219168 |
| 1 | 160927298 | 160927667 | 160927477 | 12 | 19 | 1 | 9.589086931 | 1.56E-05    | DDR2     | ENSG00000162733 |

|   |           |           |           |    |    |    |             |             |        |                 |
|---|-----------|-----------|-----------|----|----|----|-------------|-------------|--------|-----------------|
| 1 | 161454320 | 161454505 | 161454467 | 8  | 9  | 2  | 3.19636231  | 0.0229249   | RGS5   | ENSG00000143248 |
| 1 | 161558096 | 161558559 | 161558275 | 10 | 21 | 8  | 2.343999027 | 0.0109478   | NUF2   | ENSG00000143228 |
| 1 | 162059939 | 162060350 | 162060104 | 16 | 21 | 0  | 21.09599125 | 3.76E-07    |        | ENSG00000219510 |
| 1 | 162847622 | 162847918 | 162847770 | 11 | 15 | 6  | 2.191791298 | 0.0328001   |        | ENSG00000215839 |
| 1 | 162937109 | 162937334 | 162937255 | 8  | 9  | 0  | 9.589086931 | 0.00120187  |        | ENSG00000208426 |
| 1 | 162947474 | 162947728 | 162947623 | 11 | 14 | 0  | 14.3836304  | 4.17E-05    |        | ENSG00000208426 |
| 1 | 163023134 | 163023581 | 163023300 | 8  | 13 | 6  | 1.917817386 | 0.0693353   |        | ENSG00000201987 |
| 1 | 163350213 | 163350450 | 163350331 | 9  | 12 | 6  | 1.78083043  | 0.0985525   | LMX1A  | ENSG00000162761 |
| 1 | 163775252 | 163775568 | 163775410 | 11 | 16 | 2  | 5.433815927 | 0.000499302 | LRRC52 | ENSG00000162763 |
| 1 | 163840994 | 163841243 | 163841146 | 8  | 10 | 1  | 5.273997812 | 0.00391723  |        | ENSG00000208402 |
| 1 | 163866686 | 163866955 | 163866820 | 10 | 14 | 11 | 1.198635866 | 0.315918    | MGST3  | ENSG00000143198 |
| 1 | 164004361 | 164004611 | 164004486 | 8  | 11 | 2  | 3.835634772 | 0.00800699  | TMCO1  | ENSG00000143183 |
| 1 | 164123848 | 164124057 | 164123993 | 9  | 10 | 1  | 5.273997812 | 0.00391723  | UCK2   | ENSG00000143179 |
| 1 | 164381366 | 164381700 | 164381533 | 8  | 11 | 1  | 5.753452158 | 0.00215302  |        | ENSG00000215952 |
| 1 | 164439130 | 164439371 | 164439257 | 12 | 13 | 1  | 6.712360851 | 0.000640982 | FAM78B | ENSG00000188859 |
| 1 | 164582116 | 164582295 | 164582205 | 8  | 8  | 0  | 8.630178238 | 0.00235436  |        | ENSG00000215835 |
| 1 | 164839317 | 164839521 | 164839399 | 8  | 8  | 0  | 8.630178238 | 0.00235436  | FMO9P  | ENSG00000215834 |
| 1 | 165112262 | 165112645 | 165112353 | 8  | 13 | 2  | 4.474907234 | 0.00269459  | TADA1L | ENSG00000152382 |
| 1 | 165249014 | 165249278 | 165249159 | 10 | 11 | 1  | 5.753452158 | 0.00215302  |        | ENSG00000200036 |
| 1 | 165259090 | 165259277 | 165259183 | 9  | 9  | 0  | 9.589086931 | 0.00120187  |        | ENSG00000200036 |
| 1 | 165279694 | 165279883 | 165279819 | 8  | 8  | 0  | 8.630178238 | 0.00235436  |        | ENSG00000208384 |
| 1 | 165293150 | 165293397 | 165293257 | 9  | 10 | 3  | 2.636998906 | 0.034203    |        | ENSG00000208384 |
| 1 | 165341802 | 165342110 | 165341956 | 8  | 11 | 1  | 5.753452158 | 0.00215302  | DUSP27 | ENSG00000198842 |
| 1 | 165455843 | 165456175 | 165456009 | 9  | 13 | 7  | 1.678090213 | 0.11195     | POU2F1 | ENSG00000143190 |
| 1 | 165458059 | 165458381 | 165458220 | 11 | 15 | 2  | 5.114179696 | 0.00088103  | POU2F1 | ENSG00000143190 |
| 1 | 165637207 | 165637447 | 165637327 | 9  | 9  | 2  | 3.19636231  | 0.0229249   | POU2F1 | ENSG00000143190 |
| 1 | 165678048 | 165678227 | 165678146 | 8  | 9  | 0  | 9.589086931 | 0.00120187  | CD247  | ENSG00000198821 |
| 1 | 165923942 | 165924191 | 165924048 | 9  | 9  | 4  | 1.917817386 | 0.103282    | MPZL1  | ENSG00000197965 |
| 1 | 165951139 | 165951618 | 165951439 | 10 | 20 | 5  | 3.356180426 | 0.0017534   | MPZL1  | ENSG00000197965 |
| 1 | 166039149 | 166039347 | 166039287 | 9  | 11 | 6  | 1.643843474 | 0.137712    |        | ENSG00000216870 |
| 1 | 166172085 | 166172507 | 166172356 | 9  | 18 | 5  | 3.036544195 | 0.0044641   | IQWD1  | ENSG00000143164 |
| 1 | 166644783 | 166645104 | 166644957 | 12 | 15 | 6  | 2.191791298 | 0.0328001   |        | ENSG00000207974 |
| 1 | 166839448 | 166839679 | 166839527 | 10 | 13 | 0  | 13.4247217  | 8.16E-05    |        | ENSG00000216686 |
| 1 | 166945937 | 166946151 | 166946104 | 9  | 11 | 1  | 5.753452158 | 0.00215302  | DPT    | ENSG00000143196 |

|   |           |           |           |    |    |    |             |             |          |                 |
|---|-----------|-----------|-----------|----|----|----|-------------|-------------|----------|-----------------|
| 1 | 167227434 | 167228087 | 167227791 | 49 | 73 | 8  | 7.884360365 | 3.25E-14    |          | ENSG00000213063 |
| 1 | 167343096 | 167343327 | 167343196 | 10 | 11 | 1  | 5.753452158 | 0.00215302  | ATP1B1   | ENSG00000143153 |
| 1 | 167438746 | 167439140 | 167438981 | 15 | 22 | 0  | 22.05489994 | 1.92E-07    | ATP1B1   | ENSG00000143153 |
| 1 | 167722134 | 167722327 | 167722230 | 8  | 11 | 6  | 1.643843474 | 0.137712    |          | ENSG00000213062 |
| 1 | 167765138 | 167765548 | 167765407 | 13 | 19 | 10 | 1.743470351 | 0.0622604   |          | ENSG00000213062 |
| 1 | 167820356 | 167820819 | 167820526 | 23 | 37 | 4  | 7.287706067 | 5.74E-08    | F5       | ENSG00000198734 |
| 1 | 168017114 | 168017463 | 168017285 | 16 | 20 | 9  | 2.013708255 | 0.0279742   | C1orf156 | ENSG00000171806 |
| 1 | 168030536 | 168030944 | 168030685 | 12 | 19 | 5  | 3.19636231  | 0.00280933  | C1orf156 | ENSG00000171806 |
| 1 | 168129814 | 168130290 | 168129993 | 9  | 19 | 9  | 1.917817386 | 0.0394029   | SCYL3    | ENSG00000000457 |
| 1 | 168767636 | 168767954 | 168767795 | 16 | 20 | 10 | 1.830643869 | 0.0454769   | SCYL1BP1 | ENSG00000120370 |
| 1 | 168885463 | 168885689 | 168885576 | 9  | 9  | 0  | 9.589086931 | 0.00120187  | PRRX1    | ENSG00000116132 |
| 1 | 169549636 | 169550129 | 169549866 | 11 | 21 | 13 | 1.506856518 | 0.109266    | FMO4     | ENSG00000076258 |
| 1 | 169557945 | 169558182 | 169558063 | 14 | 16 | 3  | 4.075361945 | 0.00173346  | FMO4     | ENSG00000076258 |
| 1 | 169721132 | 169721523 | 169721344 | 8  | 15 | 4  | 3.068507818 | 0.0076507   | BAT2D1   | ENSG00000117523 |
| 1 | 169977019 | 169977218 | 169977161 | 8  | 9  | 5  | 1.598181155 | 0.170911    | VAMP4    | ENSG00000117533 |
| 1 | 169977854 | 169978103 | 169977956 | 10 | 10 | 6  | 1.506856518 | 0.188853    | VAMP4    | ENSG00000117533 |
| 1 | 169990168 | 169990440 | 169990304 | 10 | 12 | 1  | 6.232906505 | 0.00117736  |          | ENSG00000218993 |
| 1 | 170016886 | 170017267 | 170017065 | 10 | 17 | 13 | 1.232882605 | 0.274309    | KIAA0859 | ENSG00000010165 |
| 1 | 170120213 | 170120694 | 170120476 | 8  | 16 | 5  | 2.716907964 | 0.0109645   | DNM3     | ENSG00000197959 |
| 1 | 170138215 | 170138700 | 170138475 | 17 | 26 | 0  | 25.89053471 | 1.31E-08    | DNM3     | ENSG00000197959 |
| 1 | 170307149 | 170307378 | 170307248 | 8  | 9  | 0  | 9.589086931 | 0.00120187  |          | ENSG00000207949 |
| 1 | 170413704 | 170413938 | 170413821 | 12 | 14 | 2  | 4.794543465 | 0.00154571  |          | ENSG00000208024 |
| 1 | 170442720 | 170443091 | 170442905 | 31 | 39 | 4  | 7.671269544 | 1.80E-08    |          | ENSG00000208024 |
| 1 | 170659150 | 170659503 | 170659329 | 19 | 23 | 1  | 11.50690432 | 1.25E-06    | C1orf105 | ENSG00000180999 |
| 1 | 170665220 | 170665491 | 170665336 | 9  | 11 | 3  | 2.876726079 | 0.0213797   | C1orf105 | ENSG00000180999 |
| 1 | 170711952 | 170712360 | 170712178 | 32 | 41 | 1  | 20.13708255 | 1.17E-11    | C1orf105 | ENSG00000180999 |
| 1 | 170955467 | 170955653 | 170955579 | 8  | 8  | 3  | 2.157544559 | 0.0836802   |          | ENSG00000219740 |
| 1 | 170978434 | 170978638 | 170978527 | 8  | 10 | 4  | 2.109599125 | 0.0694668   |          | ENSG00000219740 |
| 1 | 171169664 | 171169858 | 171169761 | 9  | 9  | 3  | 2.397271733 | 0.0539397   |          | ENSG00000220611 |
| 1 | 171873030 | 171873393 | 171873303 | 19 | 25 | 0  | 24.93162602 | 2.56E-08    |          | ENSG00000208338 |
| 1 | 171878240 | 171878589 | 171878410 | 18 | 22 | 1  | 11.02744997 | 2.36E-06    |          | ENSG00000208338 |
| 1 | 171950514 | 171950807 | 171950660 | 14 | 17 | 6  | 2.465765211 | 0.014729    | KLHL20   | ENSG00000076321 |
| 1 | 172060076 | 172060383 | 172060238 | 11 | 16 | 1  | 8.150723891 | 0.000101217 | CENPL    | ENSG00000120334 |
| 1 | 172129933 | 172130275 | 172130103 | 18 | 22 | 1  | 11.02744997 | 2.36E-06    | SERPINC1 | ENSG00000117601 |



|   |           |           |           |    |    |    |             |             |          |                 |
|---|-----------|-----------|-----------|----|----|----|-------------|-------------|----------|-----------------|
| 1 | 172256956 | 172257157 | 172257056 | 9  | 9  | 1  | 4.794543465 | 0.00708517  | RC3H1    | ENSG00000135870 |
| 1 | 172350664 | 172350912 | 172350826 | 8  | 11 | 2  | 3.835634772 | 0.00800699  |          | ENSG00000218626 |
| 1 | 172389425 | 172389632 | 172389528 | 10 | 11 | 5  | 1.917817386 | 0.0843804   | RABGAP1L | ENSG00000152061 |
| 1 | 172687094 | 172687300 | 172687222 | 8  | 9  | 4  | 1.917817386 | 0.103282    | GPR52    | ENSG00000203737 |
| 1 | 173259104 | 173259517 | 173259381 | 12 | 19 | 6  | 2.739739123 | 0.00632909  | MRPS14   | ENSG00000120333 |
| 1 | 173766537 | 173766883 | 173766713 | 12 | 16 | 5  | 2.716907964 | 0.0109645   | TNR      | ENSG00000116147 |
| 1 | 173972475 | 173972814 | 173972644 | 8  | 13 | 0  | 13.4247217  | 8.16E-05    | TNR      | ENSG00000116147 |
| 1 | 174030404 | 174030677 | 174030540 | 9  | 12 | 1  | 6.232906505 | 0.00117736  | TNR      | ENSG00000116147 |
| 1 | 174610807 | 174611042 | 174610942 | 8  | 11 | 5  | 1.917817386 | 0.0843804   |          | ENSG00000218601 |
| 1 | 174751367 | 174751550 | 174751435 | 8  | 9  | 3  | 2.397271733 | 0.0539397   | PAPPA2   | ENSG00000116183 |
| 1 | 174793306 | 174793609 | 174793453 | 8  | 12 | 5  | 2.077635502 | 0.0577144   |          | ENSG00000172760 |
| 1 | 174808743 | 174808939 | 174808892 | 8  | 9  | 3  | 2.397271733 | 0.0539397   |          | ENSG00000172760 |
| 1 | 175058927 | 175059197 | 175059084 | 13 | 14 | 1  | 7.191815198 | 0.00034761  |          | ENSG00000202609 |
| 1 | 175133160 | 175133379 | 175133290 | 8  | 9  | 1  | 4.794543465 | 0.00708517  |          | ENSG00000202609 |
| 1 | 175153254 | 175153460 | 175153357 | 8  | 8  | 1  | 4.315089119 | 0.0127267   |          | ENSG00000202609 |
| 1 | 175406715 | 175406995 | 175406865 | 8  | 10 | 1  | 5.273997812 | 0.00391723  | FAM5B    | ENSG00000198797 |
| 1 | 175408678 | 175408969 | 175408802 | 13 | 16 | 1  | 8.150723891 | 0.000101217 | FAM5B    | ENSG00000198797 |
| 1 | 175492046 | 175492434 | 175492244 | 10 | 19 | 3  | 4.794543465 | 0.000349205 |          | ENSG00000222749 |
| 1 | 175570046 | 175570283 | 175570178 | 8  | 8  | 1  | 4.315089119 | 0.0127267   |          | ENSG00000222749 |
| 1 | 175591488 | 175591699 | 175591593 | 8  | 8  | 3  | 2.157544559 | 0.0836802   |          | ENSG00000222749 |
| 1 | 175684475 | 175684907 | 175684691 | 9  | 18 | 12 | 1.401481936 | 0.168368    |          | ENSG00000222749 |
| 1 | 175708278 | 175708571 | 175708453 | 8  | 11 | 4  | 2.301380863 | 0.0459276   |          | ENSG00000222749 |
| 1 | 175790961 | 175791149 | 175791074 | 8  | 9  | 1  | 4.794543465 | 0.00708517  |          | ENSG00000222749 |
| 1 | 175803190 | 175803426 | 175803308 | 9  | 9  | 0  | 9.589086931 | 0.00120187  | SEC16B   | ENSG00000120341 |
| 1 | 175805621 | 175805932 | 175805767 | 10 | 12 | 3  | 3.116453252 | 0.0131971   | SEC16B   | ENSG00000120341 |
| 1 | 175821323 | 175821756 | 175821461 | 21 | 31 | 17 | 1.704726565 | 0.0311659   | SEC16B   | ENSG00000120341 |
| 1 | 176015885 | 176016176 | 176016041 | 9  | 12 | 8  | 1.385090334 | 0.219216    | SEC16B   | ENSG00000120341 |
| 1 | 176049034 | 176049426 | 176049213 | 17 | 24 | 0  | 23.97271733 | 5.01E-08    | SEC16B   | ENSG00000120341 |
| 1 | 176142219 | 176142431 | 176142287 | 8  | 9  | 5  | 1.598181155 | 0.170911    | SEC16B   | ENSG00000120341 |
| 1 | 176150584 | 176150993 | 176150728 | 14 | 23 | 2  | 7.671269544 | 8.30E-06    | SEC16B   | ENSG00000120341 |
| 1 | 176181756 | 176182010 | 176181913 | 13 | 15 | 5  | 2.557089848 | 0.0169197   | SEC16B   | ENSG00000120341 |
| 1 | 176184191 | 176184393 | 176184292 | 9  | 9  | 4  | 1.917817386 | 0.103282    | SEC16B   | ENSG00000120341 |
| 1 | 176220006 | 176220260 | 176220130 | 15 | 15 | 6  | 2.191791298 | 0.0328001   | SEC16B   | ENSG00000120341 |
| 1 | 176267636 | 176267965 | 176267810 | 9  | 14 | 6  | 2.054804342 | 0.0480281   |          | ENSG00000215831 |

|   |           |           |           |     |     |    |             |             |          |                 |
|---|-----------|-----------|-----------|-----|-----|----|-------------|-------------|----------|-----------------|
| 1 | 176290976 | 176291285 | 176291130 | 8   | 11  | 7  | 1.43836304  | 0.204844    |          | ENSG00000215831 |
| 1 | 176474519 | 176474764 | 176474641 | 10  | 11  | 0  | 11.50690432 | 0.000313206 | RASAL2   | ENSG00000075391 |
| 1 | 176633556 | 176633742 | 176633652 | 10  | 10  | 1  | 5.273997812 | 0.00391723  |          | ENSG00000213058 |
| 1 | 176653819 | 176653998 | 176653908 | 8   | 8   | 2  | 2.876726079 | 0.0381137   |          | ENSG00000213058 |
| 1 | 176768142 | 176768443 | 176768310 | 8   | 11  | 2  | 3.835634772 | 0.00800699  |          | ENSG00000135820 |
| 1 | 176891587 | 176892038 | 176891740 | 12  | 19  | 9  | 1.917817386 | 0.0394029   | RALGPS2  | ENSG00000116191 |
| 1 | 177252713 | 177253076 | 177252962 | 9   | 15  | 5  | 2.557089848 | 0.0169197   | FAM20B   | ENSG00000116199 |
| 1 | 177261292 | 177261512 | 177261400 | 9   | 10  | 3  | 2.636998906 | 0.034203    | FAM20B   | ENSG00000116199 |
| 1 | 177274772 | 177275142 | 177274951 | 28  | 35  | 5  | 5.753452158 | 7.49E-07    |          | ENSG00000217530 |
| 1 | 177315007 | 177315263 | 177315131 | 13  | 14  | 10 | 1.307602763 | 0.244096    | TOR3A    | ENSG00000186283 |
| 1 | 177341150 | 177341390 | 177341268 | 9   | 11  | 4  | 2.301380863 | 0.0459276   | TOR3A    | ENSG00000186283 |
| 1 | 177357065 | 177357251 | 177357172 | 8   | 8   | 5  | 1.43836304  | 0.235762    | ABL2     | ENSG00000143322 |
| 1 | 177391946 | 177392125 | 177392049 | 8   | 8   | 4  | 1.726035648 | 0.150596    | ABL2     | ENSG00000143322 |
| 1 | 177605616 | 177605847 | 177605731 | 10  | 11  | 2  | 3.835634772 | 0.00800699  | C1orf125 | ENSG00000162779 |
| 1 | 177827032 | 177827241 | 177827136 | 8   | 9   | 6  | 1.369869562 | 0.253675    | TDRD5    | ENSG00000162782 |
| 1 | 178016571 | 178016856 | 178016713 | 8   | 9   | 0  | 9.589086931 | 0.00120187  | FAM163A  | ENSG00000143340 |
| 1 | 178112087 | 178112283 | 178112185 | 8   | 8   | 2  | 2.876726079 | 0.0381137   |          | ENSG00000218839 |
| 1 | 178113607 | 178113980 | 178113764 | 9   | 15  | 10 | 1.394776281 | 0.191426    | TOR1AIP2 | ENSG00000169905 |
| 1 | 178118169 | 178118649 | 178118487 | 15  | 23  | 8  | 2.557089848 | 0.00494559  | TOR1AIP1 | ENSG00000143337 |
| 1 | 178189749 | 178190064 | 178189894 | 8   | 13  | 9  | 1.34247217  | 0.232231    | CEP350   | ENSG00000135837 |
| 1 | 178190202 | 178190567 | 178190389 | 11  | 17  | 14 | 1.150690432 | 0.340986    | CEP350   | ENSG00000135837 |
| 1 | 178404644 | 178404862 | 178404758 | 8   | 11  | 5  | 1.917817386 | 0.0843804   | QSOX1    | ENSG00000116260 |
| 1 | 178516159 | 178516409 | 178516284 | 8   | 9   | 0  | 9.589086931 | 0.00120187  | LHX4     | ENSG00000121454 |
| 1 | 178735664 | 178735916 | 178735808 | 16  | 19  | 4  | 3.835634772 | 0.00108365  | ACBD6    | ENSG00000135847 |
| 1 | 178738560 | 178738759 | 178738648 | 9   | 9   | 4  | 1.917817386 | 0.103282    | ACBD6    | ENSG00000135847 |
| 1 | 178743653 | 178743912 | 178743778 | 11  | 13  | 2  | 4.474907234 | 0.00269459  | ACBD6    | ENSG00000135847 |
| 1 | 178751500 | 178752272 | 178751840 | 111 | 231 | 10 | 20.22425607 | 2.33E-54    |          | ENSG00000206905 |
| 1 | 178757761 | 178758355 | 178757940 | 38  | 74  | 2  | 23.97271733 | 9.05E-20    |          | ENSG00000206905 |
| 1 | 178777675 | 178777886 | 178777803 | 8   | 8   | 0  | 8.630178238 | 0.00235436  |          | ENSG00000206905 |
| 1 | 178790299 | 178790506 | 178790372 | 10  | 10  | 2  | 3.515998541 | 0.0136204   |          | ENSG00000206905 |
| 1 | 178791241 | 178791471 | 178791332 | 8   | 11  | 7  | 1.43836304  | 0.204844    |          | ENSG00000206905 |
| 1 | 178821233 | 178821687 | 178821490 | 24  | 35  | 8  | 3.835634772 | 2.29E-05    | XPR1     | ENSG00000143324 |
| 1 | 179014606 | 179014909 | 179014766 | 11  | 13  | 0  | 13.4247217  | 8.16E-05    |          | ENSG00000206753 |
| 1 | 179036756 | 179037022 | 179036919 | 10  | 11  | 2  | 3.835634772 | 0.00800699  |          | ENSG00000206753 |

|   |           |           |           |     |      |    |             |             |          |                 |
|---|-----------|-----------|-----------|-----|------|----|-------------|-------------|----------|-----------------|
| 1 | 179098980 | 179099249 | 179099144 | 9   | 13   | 12 | 1.0326709   | 0.46514     | KIAA1614 | ENSG00000135835 |
| 1 | 179153246 | 179153472 | 179153340 | 8   | 9    | 1  | 4.794543465 | 0.00708517  | KIAA1614 | ENSG00000135835 |
| 1 | 179224389 | 179224702 | 179224558 | 9   | 13   | 2  | 4.474907234 | 0.00269459  |          | ENSG00000215828 |
| 1 | 179227339 | 179227560 | 179227449 | 8   | 10   | 2  | 3.515998541 | 0.0136204   |          | ENSG00000215828 |
| 1 | 179247594 | 179247808 | 179247663 | 8   | 9    | 1  | 4.794543465 | 0.00708517  | STX6     | ENSG00000135823 |
| 1 | 179257495 | 179258438 | 179257674 | 10  | 38   | 22 | 1.62597561  | 0.0290977   | STX6     | ENSG00000135823 |
| 1 | 179270022 | 179270227 | 179270060 | 8   | 10   | 1  | 5.273997812 | 0.00391723  | MR1      | ENSG00000153029 |
| 1 | 179270277 | 179270522 | 179270399 | 8   | 10   | 1  | 5.273997812 | 0.00391723  | MR1      | ENSG00000153029 |
| 1 | 179273944 | 179274185 | 179274064 | 9   | 11   | 8  | 1.278544924 | 0.28289     | MR1      | ENSG00000153029 |
| 1 | 179274234 | 179274483 | 179274349 | 9   | 13   | 9  | 1.34247217  | 0.232231    | MR1      | ENSG00000153029 |
| 1 | 179274971 | 179275172 | 179275036 | 8   | 8    | 4  | 1.726035648 | 0.150596    | MR1      | ENSG00000153029 |
| 1 | 179320026 | 179320428 | 179320249 | 15  | 24   | 9  | 2.397271733 | 0.00639731  | IER5     | ENSG00000162783 |
| 1 | 179322840 | 179323187 | 179323009 | 8   | 13   | 6  | 1.917817386 | 0.0693353   | IER5     | ENSG00000162783 |
| 1 | 179324361 | 179324759 | 179324515 | 16  | 25   | 10 | 2.266511456 | 0.00802978  | IER5     | ENSG00000162783 |
| 1 | 179325440 | 179325690 | 179325565 | 8   | 11   | 2  | 3.835634772 | 0.00800699  | IER5     | ENSG00000162783 |
| 1 | 179325733 | 179326336 | 179326034 | 13  | 28   | 9  | 2.78083521  | 0.00127094  | IER5     | ENSG00000162783 |
| 1 | 179332133 | 179332459 | 179332293 | 9   | 14   | 3  | 3.595907599 | 0.00486913  | IER5     | ENSG00000162783 |
| 1 | 179333524 | 179333794 | 179333659 | 10  | 13   | 2  | 4.474907234 | 0.00269459  | IER5     | ENSG00000162783 |
| 1 | 179334964 | 179336575 | 179335521 | 96  | 205  | 18 | 10.39658899 | 3.13E-40    | IER5     | ENSG00000162783 |
| 1 | 179336610 | 179337005 | 179336842 | 10  | 15   | 5  | 2.557089848 | 0.0169197   | IER5     | ENSG00000162783 |
| 1 | 179340343 | 179340620 | 179340483 | 10  | 12   | 0  | 12.46581301 | 0.000159888 | IER5     | ENSG00000162783 |
| 1 | 179340685 | 179340965 | 179340790 | 8   | 11   | 5  | 1.917817386 | 0.0843804   | IER5     | ENSG00000162783 |
| 1 | 179348213 | 179348573 | 179348392 | 26  | 33   | 7  | 4.075361945 | 2.23E-05    | IER5     | ENSG00000162783 |
| 1 | 179353373 | 179353748 | 179353569 | 17  | 24   | 6  | 3.424673904 | 0.000656885 | IER5     | ENSG00000162783 |
| 1 | 179354907 | 179355465 | 179355236 | 19  | 32   | 12 | 2.434152836 | 0.00192998  | IER5     | ENSG00000162783 |
| 1 | 179362122 | 179362325 | 179362188 | 9   | 11   | 4  | 2.301380863 | 0.0459276   | IER5     | ENSG00000162783 |
| 1 | 179362894 | 179363329 | 179363073 | 11  | 18   | 13 | 1.301376083 | 0.22245     | IER5     | ENSG00000162783 |
| 1 | 179369461 | 179369931 | 179369548 | 9   | 18   | 8  | 2.024362796 | 0.0334397   | IER5     | ENSG00000162783 |
| 1 | 179370239 | 179372149 | 179370892 | 753 | 1171 | 30 | 36.25293511 | 1.90E-292   | IER5     | ENSG00000162783 |
| 1 | 179378323 | 179378611 | 179378474 | 8   | 12   | 10 | 1.133255728 | 0.37674     | IER5     | ENSG00000162783 |
| 1 | 179402355 | 179402589 | 179402482 | 8   | 11   | 3  | 2.876726079 | 0.0213797   |          | ENSG00000179452 |
| 1 | 179416180 | 179416364 | 179416313 | 8   | 9    | 2  | 3.19636231  | 0.0229249   |          | ENSG00000179452 |
| 1 | 179523343 | 179523567 | 179523455 | 8   | 9    | 4  | 1.917817386 | 0.103282    |          | ENSG00000179452 |
| 1 | 179595556 | 179595794 | 179595672 | 8   | 9    | 1  | 4.794543465 | 0.00708517  | CACNA1E  | ENSG00000198216 |

|   |           |           |           |     |     |    |             |             |         |                 |
|---|-----------|-----------|-----------|-----|-----|----|-------------|-------------|---------|-----------------|
| 1 | 179659220 | 179659626 | 179659399 | 11  | 19  | 8  | 2.130908207 | 0.0233014   |         | ENSG00000208272 |
| 1 | 179660566 | 179660926 | 179660767 | 27  | 32  | 7  | 3.955498359 | 3.65E-05    |         | ENSG00000208272 |
| 1 | 179705431 | 179705913 | 179705734 | 11  | 21  | 4  | 4.219198249 | 0.000390041 | CACNA1E | ENSG00000198216 |
| 1 | 179716304 | 179716530 | 179716408 | 8   | 10  | 1  | 5.273997812 | 0.00391723  | CACNA1E | ENSG00000198216 |
| 1 | 179757332 | 179758124 | 179757748 | 130 | 192 | 10 | 16.82448889 | 9.55E-44    | CACNA1E | ENSG00000198216 |
| 1 | 179822424 | 179822654 | 179822513 | 9   | 10  | 2  | 3.515998541 | 0.0136204   | CACNA1E | ENSG00000198216 |
| 1 | 180003977 | 180004284 | 180004142 | 13  | 16  | 3  | 4.075361945 | 0.00173346  |         | ENSG00000208267 |
| 1 | 180381946 | 180382433 | 180382254 | 30  | 40  | 4  | 7.863051283 | 1.01E-08    |         | ENSG00000217074 |
| 1 | 180422192 | 180422480 | 180422348 | 8   | 11  | 3  | 2.876726079 | 0.0213797   |         | ENSG00000217074 |
| 1 | 180681866 | 180682102 | 180681934 | 9   | 10  | 9  | 1.054799562 | 0.4492      | RGSL1   | ENSG00000121446 |
| 1 | 180831547 | 180831809 | 180831678 | 9   | 12  | 10 | 1.133255728 | 0.37674     | RNASEL  | ENSG00000135828 |
| 1 | 180837220 | 180837402 | 180837319 | 8   | 9   | 4  | 1.917817386 | 0.103282    | RGS16   | ENSG00000143333 |
| 1 | 180837700 | 180838003 | 180837851 | 8   | 10  | 2  | 3.515998541 | 0.0136204   | RGS16   | ENSG00000143333 |
| 1 | 180839488 | 180839679 | 180839642 | 8   | 10  | 7  | 1.318499453 | 0.269217    | RGS16   | ENSG00000143333 |
| 1 | 180840274 | 180840519 | 180840402 | 8   | 9   | 2  | 3.19636231  | 0.0229249   | RGS16   | ENSG00000143333 |
| 1 | 180845189 | 180845395 | 180845278 | 8   | 10  | 3  | 2.636998906 | 0.034203    | RGS16   | ENSG00000143333 |
| 1 | 180851760 | 180852129 | 180851950 | 8   | 14  | 5  | 2.397271733 | 0.0258078   | RGS16   | ENSG00000143333 |
| 1 | 180869525 | 180869866 | 180869695 | 8   | 14  | 10 | 1.307602763 | 0.244096    | RGS16   | ENSG00000143333 |
| 1 | 180879246 | 180880101 | 180879673 | 163 | 232 | 9  | 22.34257255 | 1.04E-55    | RGS8    | ENSG00000135824 |
| 1 | 180880210 | 180880435 | 180880343 | 8   | 9   | 5  | 1.598181155 | 0.170911    | RGS8    | ENSG00000135824 |
| 1 | 180890989 | 180891193 | 180891147 | 8   | 9   | 0  | 9.589086931 | 0.00120187  | RGS8    | ENSG00000135824 |
| 1 | 180923129 | 180923451 | 180923290 | 10  | 12  | 2  | 4.155271003 | 0.0046638   | RGS8    | ENSG00000135824 |
| 1 | 180967948 | 180968168 | 180968065 | 8   | 10  | 2  | 3.515998541 | 0.0136204   | RGS8    | ENSG00000135824 |
| 1 | 180996696 | 180996913 | 180996808 | 9   | 11  | 0  | 11.50690432 | 0.000313206 | NPL     | ENSG00000135838 |
| 1 | 180997077 | 180997714 | 180997285 | 119 | 175 | 0  | 168.76793   | 4.03E-52    | NPL     | ENSG00000135838 |
| 1 | 181018166 | 181018476 | 181018325 | 10  | 15  | 2  | 5.114179696 | 0.00088103  | NPL     | ENSG00000135838 |
| 1 | 181074636 | 181074930 | 181074784 | 9   | 12  | 6  | 1.78083043  | 0.0985525   | DHX9    | ENSG00000135829 |
| 1 | 181198292 | 181198787 | 181198533 | 56  | 75  | 5  | 12.14617678 | 4.95E-17    |         | ENSG00000176855 |
| 1 | 181294179 | 181294460 | 181294295 | 8   | 10  | 2  | 3.515998541 | 0.0136204   | LAMC1   | ENSG00000135862 |
| 1 | 181322907 | 181323144 | 181323025 | 10  | 12  | 6  | 1.78083043  | 0.0985525   | LAMC1   | ENSG00000135862 |
| 1 | 181336203 | 181336388 | 181336334 | 8   | 8   | 1  | 4.315089119 | 0.0127267   | LAMC1   | ENSG00000135862 |
| 1 | 181395772 | 181396037 | 181395904 | 17  | 19  | 9  | 1.917817386 | 0.0394029   | LAMC2   | ENSG00000058085 |
| 1 | 181421831 | 181422029 | 181421955 | 8   | 9   | 4  | 1.917817386 | 0.103282    | LAMC2   | ENSG00000058085 |
| 1 | 181426877 | 181427087 | 181427030 | 8   | 8   | 0  | 8.630178238 | 0.00235436  | LAMC2   | ENSG00000058085 |

|   |           |           |           |    |    |    |             |            |          |                 |
|---|-----------|-----------|-----------|----|----|----|-------------|------------|----------|-----------------|
| 1 | 181517277 | 181517475 | 181517351 | 9  | 9  | 3  | 2.397271733 | 0.0539397  |          | ENSG00000219772 |
| 1 | 181697200 | 181697531 | 181697379 | 11 | 15 | 6  | 2.191791298 | 0.0328001  | SMG7     | ENSG00000116698 |
| 1 | 181706164 | 181706386 | 181706275 | 8  | 9  | 5  | 1.598181155 | 0.170911   | SMG7     | ENSG00000116698 |
| 1 | 181707591 | 181707865 | 181707728 | 15 | 19 | 13 | 1.369869562 | 0.177863   | SMG7     | ENSG00000116698 |
| 1 | 181753307 | 181753609 | 181753458 | 10 | 13 | 2  | 4.474907234 | 0.00269459 | SMG7     | ENSG00000116698 |
| 1 | 181816112 | 181816301 | 181816287 | 9  | 9  | 5  | 1.598181155 | 0.170911   | NCF2     | ENSG00000116701 |
| 1 | 181870899 | 181871157 | 181871028 | 9  | 10 | 3  | 2.636998906 | 0.034203   | ARPC5    | ENSG00000162704 |
| 1 | 181871824 | 181872011 | 181871888 | 8  | 9  | 2  | 3.19636231  | 0.0229249  | RGL1     | ENSG00000143344 |
| 1 | 181891413 | 181891639 | 181891527 | 9  | 9  | 4  | 1.917817386 | 0.103282   | APOBEC4  | ENSG00000173627 |
| 1 | 181920882 | 181921180 | 181921024 | 10 | 11 | 12 | 0.885146486 | 0.620672   | APOBEC4  | ENSG00000173627 |
| 1 | 182005710 | 182006092 | 182005849 | 9  | 16 | 6  | 2.328778255 | 0.0221113  | RGL1     | ENSG00000143344 |
| 1 | 182040631 | 182040833 | 182040704 | 8  | 9  | 4  | 1.917817386 | 0.103282   | RGL1     | ENSG00000143344 |
| 1 | 182654364 | 182654592 | 182654478 | 9  | 10 | 4  | 2.109599125 | 0.0694668  |          | ENSG00000221414 |
| 1 | 182659975 | 182660277 | 182660139 | 12 | 15 | 2  | 5.114179696 | 0.00088103 |          | ENSG00000221414 |
| 1 | 182661665 | 182661905 | 182661792 | 12 | 12 | 4  | 2.493162602 | 0.0299057  |          | ENSG00000221414 |
| 1 | 182709386 | 182709659 | 182709522 | 9  | 12 | 6  | 1.78083043  | 0.0985525  |          | ENSG00000221414 |
| 1 | 182781496 | 182781681 | 182781562 | 8  | 9  | 5  | 1.598181155 | 0.170911   |          | ENSG00000217919 |
| 1 | 182826204 | 182826525 | 182826364 | 11 | 12 | 3  | 3.116453252 | 0.0131971  | C1orf21  | ENSG00000116667 |
| 1 | 182922320 | 182922633 | 182922476 | 8  | 12 | 3  | 3.116453252 | 0.0131971  | EDEM3    | ENSG00000116406 |
| 1 | 183074446 | 183074740 | 183074593 | 10 | 12 | 6  | 1.78083043  | 0.0985525  | FAM129A  | ENSG00000135842 |
| 1 | 183141351 | 183141678 | 183141554 | 17 | 21 | 0  | 21.09599125 | 3.76E-07   | FAM129A  | ENSG00000135842 |
| 1 | 183165667 | 183165957 | 183165812 | 15 | 17 | 6  | 2.465765211 | 0.014729   | FAM129A  | ENSG00000135842 |
| 1 | 183217971 | 183218177 | 183218045 | 10 | 11 | 3  | 2.876726079 | 0.0213797  | FAM129A  | ENSG00000135842 |
| 1 | 183222260 | 183222461 | 183222360 | 8  | 9  | 1  | 4.794543465 | 0.00708517 | FAM129A  | ENSG00000135842 |
| 1 | 183228170 | 183228443 | 183228335 | 11 | 14 | 7  | 1.797953799 | 0.0806593  | FAM129A  | ENSG00000135842 |
| 1 | 183552508 | 183552951 | 183552676 | 10 | 17 | 5  | 2.876726079 | 0.00703033 | IVNS1ABP | ENSG00000116679 |
| 1 | 183636919 | 183637109 | 183637010 | 8  | 9  | 3  | 2.397271733 | 0.0539397  | IVNS1ABP | ENSG00000116679 |
| 1 | 183881961 | 183882345 | 183882183 | 17 | 24 | 3  | 5.993179332 | 2.17E-05   |          | ENSG00000201596 |
| 1 | 183932470 | 183932863 | 183932696 | 13 | 19 | 5  | 3.19636231  | 0.00280933 | HMCN1    | ENSG00000143341 |
| 1 | 183936052 | 183936231 | 183936141 | 8  | 8  | 3  | 2.157544559 | 0.0836802  | HMCN1    | ENSG00000143341 |
| 1 | 184144150 | 184144372 | 184144261 | 9  | 9  | 0  | 9.589086931 | 0.00120187 | HMCN1    | ENSG00000143341 |
| 1 | 184145144 | 184145340 | 184145260 | 8  | 9  | 0  | 9.589086931 | 0.00120187 | HMCN1    | ENSG00000143341 |
| 1 | 184174999 | 184175233 | 184175100 | 9  | 9  | 1  | 4.794543465 | 0.00708517 | HMCN1    | ENSG00000143341 |
| 1 | 184318102 | 184318410 | 184318256 | 8  | 10 | 8  | 1.171999514 | 0.35773    | PRG4     | ENSG00000116690 |

|   |           |           |           |     |     |    |             |             |         |                 |
|---|-----------|-----------|-----------|-----|-----|----|-------------|-------------|---------|-----------------|
| 1 | 184388445 | 184388788 | 184388619 | 14  | 19  | 7  | 2.397271733 | 0.0127287   | PRG4    | ENSG00000116690 |
| 1 | 184388805 | 184388999 | 184388895 | 9   | 9   | 5  | 1.598181155 | 0.170911    | PRG4    | ENSG00000116690 |
| 1 | 184611085 | 184611823 | 184611256 | 13  | 33  | 17 | 1.811271976 | 0.0175837   | TPR     | ENSG00000047410 |
| 1 | 184640321 | 184640500 | 184640410 | 9   | 9   | 2  | 3.19636231  | 0.0229249   | C1orf27 | ENSG00000157181 |
| 1 | 184975307 | 184975717 | 184975528 | 13  | 26  | 1  | 12.94526736 | 1.86E-07    | PTGS2   | ENSG00000073756 |
| 1 | 185001072 | 185001361 | 185001198 | 8   | 10  | 4  | 2.109599125 | 0.0694668   | PLA2G4A | ENSG00000116711 |
| 1 | 185117463 | 185117642 | 185117552 | 8   | 8   | 2  | 2.876726079 | 0.0381137   | PLA2G4A | ENSG00000116711 |
| 1 | 185163653 | 185163967 | 185163806 | 10  | 13  | 7  | 1.678090213 | 0.11195     | PLA2G4A | ENSG00000116711 |
| 1 | 185498535 | 185498832 | 185498691 | 12  | 13  | 0  | 13.4247217  | 8.16E-05    |         | ENSG00000203918 |
| 1 | 185500816 | 185501072 | 185500972 | 9   | 11  | 1  | 5.753452158 | 0.00215302  |         | ENSG00000203918 |
| 1 | 185643866 | 185644324 | 185644129 | 40  | 58  | 2  | 18.85853763 | 2.68E-15    |         | ENSG00000203918 |
| 1 | 185742489 | 185742740 | 185742612 | 9   | 11  | 0  | 11.50690432 | 0.000313206 |         | ENSG00000203918 |
| 1 | 185866360 | 185866934 | 185866559 | 69  | 88  | 0  | 85.34287368 | 1.03E-26    |         | ENSG00000217211 |
| 1 | 185874084 | 185875135 | 185874695 | 101 | 163 | 5  | 26.21017094 | 4.04E-41    |         | ENSG00000217712 |
| 1 | 185891021 | 185891223 | 185891122 | 8   | 9   | 0  | 9.589086931 | 0.00120187  |         | ENSG00000217712 |
| 1 | 186098373 | 186098552 | 186098465 | 8   | 8   | 4  | 1.726035648 | 0.150596    |         | ENSG00000216876 |
| 1 | 186424145 | 186424396 | 186424310 | 8   | 11  | 2  | 3.835634772 | 0.00800699  |         | ENSG00000222240 |
| 1 | 186585903 | 186586206 | 186586098 | 9   | 13  | 1  | 6.712360851 | 0.000640982 |         | ENSG00000219094 |
| 1 | 186906734 | 186906938 | 186906887 | 9   | 11  | 2  | 3.835634772 | 0.00800699  |         | ENSG00000217509 |
| 1 | 187018031 | 187018269 | 187018154 | 8   | 9   | 1  | 4.794543465 | 0.00708517  |         | ENSG00000218573 |
| 1 | 187385469 | 187385699 | 187385541 | 10  | 12  | 3  | 3.116453252 | 0.0131971   |         | ENSG00000219973 |
| 1 | 187387594 | 187387797 | 187387636 | 8   | 9   | 2  | 3.19636231  | 0.0229249   |         | ENSG00000219973 |
| 1 | 188010515 | 188010823 | 188010680 | 16  | 18  | 5  | 3.036544195 | 0.0044641   |         | ENSG00000217253 |
| 1 | 188688317 | 188688815 | 188688695 | 11  | 20  | 1  | 10.06854128 | 8.32E-06    | FAM5C   | ENSG00000162670 |
| 1 | 188714882 | 188715074 | 188714918 | 8   | 10  | 2  | 3.515998541 | 0.0136204   | FAM5C   | ENSG00000162670 |
| 1 | 188905508 | 188905710 | 188905609 | 9   | 9   | 4  | 1.917817386 | 0.103282    |         | ENSG00000218693 |
| 1 | 188990677 | 188990859 | 188990761 | 8   | 9   | 0  | 9.589086931 | 0.00120187  |         | ENSG00000218693 |
| 1 | 189108154 | 189108515 | 189108403 | 13  | 17  | 1  | 8.630178238 | 5.44E-05    |         | ENSG00000219198 |
| 1 | 189390817 | 189391174 | 189391052 | 9   | 14  | 6  | 2.054804342 | 0.0480281   |         | ENSG00000217637 |
| 1 | 189945903 | 189946107 | 189945991 | 12  | 12  | 1  | 6.232906505 | 0.00117736  | RGS18   | ENSG00000150681 |
| 1 | 190137329 | 190137790 | 190137556 | 28  | 43  | 2  | 14.06399416 | 3.68E-11    | RGS18   | ENSG00000150681 |
| 1 | 190745474 | 190745682 | 190745578 | 8   | 8   | 0  | 8.630178238 | 0.00235436  |         | ENSG00000221145 |
| 1 | 191044758 | 191045069 | 191044932 | 9   | 14  | 5  | 2.397271733 | 0.0258078   | RGS2    | ENSG00000116741 |
| 1 | 191137291 | 191137623 | 191137456 | 32  | 37  | 2  | 12.14617678 | 1.58E-09    |         | ENSG00000223075 |

|   |           |           |           |    |    |    |             |             |          |                 |
|---|-----------|-----------|-----------|----|----|----|-------------|-------------|----------|-----------------|
| 1 | 191294988 | 191295422 | 191295223 | 24 | 34 | 12 | 2.581677251 | 0.000889352 | UCHL5    | ENSG00000116750 |
| 1 | 191295640 | 191295845 | 191295742 | 9  | 11 | 4  | 2.301380863 | 0.0459276   | UCHL5    | ENSG00000116750 |
| 1 | 191296185 | 191296483 | 191296334 | 8  | 11 | 4  | 2.301380863 | 0.0459276   | TROVE2   | ENSG00000116747 |
| 1 | 191358070 | 191358251 | 191358160 | 9  | 10 | 5  | 1.757999271 | 0.121253    | CDC73    | ENSG00000134371 |
| 1 | 192172788 | 192172976 | 192172912 | 8  | 9  | 1  | 4.794543465 | 0.00708517  |          | ENSG00000219380 |
| 1 | 192770788 | 192771002 | 192770895 | 8  | 10 | 2  | 3.515998541 | 0.0136204   |          | ENSG00000208230 |
| 1 | 192771044 | 192771518 | 192771288 | 69 | 87 | 2  | 28.12798833 | 1.97E-23    |          | ENSG00000208230 |
| 1 | 193554290 | 193554727 | 193554403 | 11 | 18 | 0  | 18.21926517 | 2.83E-06    |          |                 |
| 1 | 193650764 | 193650943 | 193650859 | 8  | 8  | 0  | 8.630178238 | 0.00235436  |          |                 |
| 1 | 194368651 | 194368961 | 194368806 | 17 | 18 | 1  | 9.109632584 | 2.91E-05    | KCNT2    | ENSG00000162687 |
| 1 | 194732897 | 194733100 | 194732998 | 9  | 11 | 1  | 5.753452158 | 0.00215302  | KCNT2    | ENSG00000162687 |
| 1 | 194959171 | 194959494 | 194959332 | 8  | 10 | 7  | 1.318499453 | 0.269217    | CFHR3    | ENSG00000116785 |
| 1 | 195381770 | 195382018 | 195381848 | 8  | 11 | 4  | 2.301380863 | 0.0459276   | ASPM     | ENSG00000066279 |
| 1 | 195382201 | 195382482 | 195382341 | 9  | 12 | 4  | 2.493162602 | 0.0299057   | ASPM     | ENSG00000066279 |
| 1 | 195382574 | 195382795 | 195382712 | 10 | 11 | 4  | 2.301380863 | 0.0459276   | ASPM     | ENSG00000066279 |
| 1 | 195721617 | 195722055 | 195721876 | 9  | 17 | 6  | 2.465765211 | 0.014729    | CRB1     | ENSG00000134376 |
| 1 | 195978486 | 195978665 | 195978569 | 8  | 9  | 7  | 1.198635866 | 0.346278    |          | ENSG00000218118 |
| 1 | 195996569 | 195996895 | 195996732 | 9  | 14 | 2  | 4.794543465 | 0.00154571  | DENND1B  | ENSG00000162701 |
| 1 | 196151501 | 196151918 | 196151728 | 14 | 22 | 7  | 2.756862493 | 0.003684    | LHX9     | ENSG00000143355 |
| 1 | 196439752 | 196440007 | 196439879 | 10 | 11 | 0  | 11.50690432 | 0.000313206 |          | ENSG00000220810 |
| 1 | 196581992 | 196582363 | 196582186 | 12 | 19 | 6  | 2.739739123 | 0.00632909  | NEK7     | ENSG00000151414 |
| 1 | 196659409 | 196659742 | 196659577 | 10 | 13 | 2  | 4.474907234 | 0.00269459  | ATP6V1G3 | ENSG00000151418 |
| 1 | 196751672 | 196751952 | 196751785 | 8  | 11 | 6  | 1.643843474 | 0.137712    | ATP6V1G3 | ENSG00000151418 |
| 1 | 196809185 | 196809378 | 196809263 | 8  | 8  | 2  | 2.876726079 | 0.0381137   | ATP6V1G3 | ENSG00000151418 |
| 1 | 196904946 | 196905203 | 196905088 | 9  | 10 | 7  | 1.318499453 | 0.269217    |          | ENSG00000219393 |
| 1 | 197126378 | 197126673 | 197126545 | 9  | 14 | 5  | 2.397271733 | 0.0258078   |          | ENSG00000207759 |
| 1 | 197139153 | 197139337 | 197139185 | 8  | 9  | 6  | 1.369869562 | 0.253675    |          | ENSG00000207759 |
| 1 | 197168539 | 197168853 | 197168696 | 14 | 17 | 8  | 1.917817386 | 0.0474153   |          | ENSG00000177287 |
| 1 | 197171190 | 197171693 | 197171369 | 9  | 20 | 10 | 1.830643869 | 0.0454769   |          | ENSG00000177287 |
| 1 | 197175108 | 197175445 | 197175276 | 9  | 15 | 7  | 1.917817386 | 0.0572317   |          | ENSG00000177287 |
| 1 | 197206586 | 197206968 | 197206810 | 8  | 13 | 5  | 2.237453617 | 0.038866    |          | ENSG00000177287 |
| 1 | 197349047 | 197349330 | 197349176 | 9  | 13 | 14 | 0.894981447 | 0.618069    |          | ENSG00000177287 |
| 1 | 197444488 | 197444712 | 197444600 | 10 | 10 | 4  | 2.109599125 | 0.0694668   |          | ENSG00000220028 |
| 1 | 197479263 | 197479459 | 197479339 | 9  | 9  | 0  | 9.589086931 | 0.00120187  |          | ENSG00000220028 |

|   |           |           |           |     |     |    |             |            |          |                 |
|---|-----------|-----------|-----------|-----|-----|----|-------------|------------|----------|-----------------|
| 1 | 197508458 | 197508714 | 197508586 | 9   | 11  | 7  | 1.43836304  | 0.204844   |          | ENSG00000220028 |
| 1 | 197787768 | 197787975 | 197787884 | 8   | 9   | 2  | 3.19636231  | 0.0229249  |          | ENSG00000208226 |
| 1 | 197865375 | 197865625 | 197865476 | 11  | 12  | 4  | 2.493162602 | 0.0299057  |          | ENSG00000208226 |
| 1 | 197994809 | 197995292 | 197995145 | 14  | 24  | 11 | 1.997726444 | 0.0196649  |          | ENSG00000218096 |
| 1 | 198057115 | 198057323 | 198057181 | 8   | 9   | 6  | 1.369869562 | 0.253675   |          | ENSG00000219067 |
| 1 | 198144557 | 198145241 | 198145029 | 56  | 87  | 5  | 14.06399416 | 3.11E-20   |          | ENSG00000216458 |
| 1 | 198184656 | 198185189 | 198184889 | 234 | 323 | 5  | 51.78106943 | 2.17E-86   |          | ENSG00000216458 |
| 1 | 198185199 | 198185449 | 198185302 | 9   | 10  | 4  | 2.109599125 | 0.0694668  |          | ENSG00000216458 |
| 1 | 198330931 | 198331163 | 198331049 | 9   | 10  | 5  | 1.757999271 | 0.121253   |          | ENSG00000208220 |
| 1 | 198343115 | 198343304 | 198343197 | 8   | 8   | 3  | 2.157544559 | 0.0836802  |          | ENSG00000221403 |
| 1 | 198375457 | 198375679 | 198375556 | 8   | 9   | 3  | 2.397271733 | 0.0539397  |          | ENSG00000221403 |
| 1 | 198386440 | 198386826 | 198386617 | 16  | 23  | 8  | 2.557089848 | 0.00494559 |          | ENSG00000220390 |
| 1 | 198397551 | 198397978 | 198397767 | 12  | 20  | 7  | 2.517135319 | 0.00849957 |          | ENSG00000220390 |
| 1 | 198420026 | 198420416 | 198420174 | 8   | 12  | 7  | 1.558226626 | 0.152813   |          | ENSG00000217193 |
| 1 | 198463710 | 198463897 | 198463815 | 8   | 8   | 4  | 1.726035648 | 0.150596   |          | ENSG00000217193 |
| 1 | 198494258 | 198494503 | 198494424 | 8   | 11  | 5  | 1.917817386 | 0.0843804  |          | ENSG00000217193 |
| 1 | 198515564 | 198515852 | 198515708 | 10  | 14  | 3  | 3.595907599 | 0.00486913 |          | ENSG00000213045 |
| 1 | 198538299 | 198538672 | 198538470 | 10  | 17  | 4  | 3.452071295 | 0.00292757 |          | ENSG00000213045 |
| 1 | 198612391 | 198612685 | 198612530 | 10  | 12  | 4  | 2.493162602 | 0.0299057  | C1orf98  | ENSG00000203721 |
| 1 | 198646440 | 198646748 | 198646494 | 8   | 12  | 6  | 1.78083043  | 0.0985525  | ZNF281   | ENSG00000162702 |
| 1 | 198668352 | 198668601 | 198668486 | 9   | 11  | 3  | 2.876726079 | 0.0213797  | ZNF281   | ENSG00000162702 |
| 1 | 198676947 | 198677150 | 198677029 | 9   | 9   | 2  | 3.19636231  | 0.0229249  | ZNF281   | ENSG00000162702 |
| 1 | 198724506 | 198724875 | 198724685 | 10  | 17  | 8  | 1.917817386 | 0.0474153  | ZNF281   | ENSG00000162702 |
| 1 | 198745979 | 198746273 | 198746126 | 10  | 13  | 6  | 1.917817386 | 0.0693353  | ZNF281   | ENSG00000162702 |
| 1 | 198771459 | 198771648 | 198771543 | 8   | 8   | 1  | 4.315089119 | 0.0127267  | KIF14    | ENSG00000118193 |
| 1 | 198834652 | 198834847 | 198834749 | 9   | 9   | 4  | 1.917817386 | 0.103282   | KIF14    | ENSG00000118193 |
| 1 | 198899741 | 198899982 | 198899861 | 9   | 10  | 1  | 5.273997812 | 0.00391723 | DDX59    | ENSG00000118197 |
| 1 | 198905466 | 198905667 | 198905566 | 8   | 9   | 7  | 1.198635866 | 0.346278   | DDX59    | ENSG00000118197 |
| 1 | 198905745 | 198906084 | 198905912 | 13  | 17  | 5  | 2.876726079 | 0.00703033 | DDX59    | ENSG00000118197 |
| 1 | 198980307 | 198980643 | 198980486 | 8   | 11  | 3  | 2.876726079 | 0.0213797  | CAMSAP1L | ENSG00000118200 |
| 1 | 199038589 | 199039055 | 199038876 | 12  | 21  | 11 | 1.757999271 | 0.0516118  | RPL34P1  | ENSG00000218506 |
| 1 | 199056336 | 199056529 | 199056445 | 8   | 8   | 1  | 4.315089119 | 0.0127267  | RPL34P1  | ENSG00000218506 |
| 1 | 199153270 | 199153538 | 199153404 | 8   | 8   | 3  | 2.157544559 | 0.0836802  |          | ENSG00000201032 |
| 1 | 199207816 | 199208049 | 199207946 | 13  | 16  | 5  | 2.716907964 | 0.0109645  |          | ENSG00000201032 |



|   |           |           |           |    |     |    |             |             |                        |
|---|-----------|-----------|-----------|----|-----|----|-------------|-------------|------------------------|
| 1 | 199349903 | 199350119 | 199350038 | 10 | 11  | 3  | 2.876726079 | 0.0213797   | ENSG00000217218        |
| 1 | 199354826 | 199355252 | 199355109 | 10 | 15  | 5  | 2.557089848 | 0.0169197   | ENSG00000217218        |
| 1 | 199406124 | 199406549 | 199406380 | 11 | 18  | 2  | 6.073088389 | 0.000157975 | TMEM9 ENSG00000116857  |
| 1 | 199406613 | 199406856 | 199406734 | 10 | 11  | 2  | 3.835634772 | 0.00800699  | TMEM9 ENSG00000116857  |
| 1 | 199420711 | 199420981 | 199420824 | 13 | 16  | 3  | 4.075361945 | 0.00173346  | TMEM9 ENSG00000116857  |
| 1 | 199453197 | 199453428 | 199453346 | 9  | 10  | 2  | 3.515998541 | 0.0136204   | IGFN1 ENSG00000163395  |
| 1 | 199458707 | 199458945 | 199458799 | 12 | 14  | 5  | 2.397271733 | 0.0258078   | IGFN1 ENSG00000163395  |
| 1 | 199524433 | 199524733 | 199524583 | 15 | 19  | 1  | 9.589086931 | 1.56E-05    | PKP1 ENSG00000081277   |
| 1 | 199525674 | 199525853 | 199525753 | 8  | 8   | 3  | 2.157544559 | 0.0836802   | PKP1 ENSG00000081277   |
| 1 | 199543531 | 199543823 | 199543677 | 11 | 15  | 10 | 1.394776281 | 0.191426    | PKP1 ENSG00000081277   |
| 1 | 199545206 | 199545562 | 199545384 | 13 | 19  | 8  | 2.130908207 | 0.0233014   | PKP1 ENSG00000081277   |
| 1 | 199612722 | 199612982 | 199612852 | 10 | 11  | 6  | 1.643843474 | 0.137712    | TNNT2 ENSG00000118194  |
| 1 | 199616945 | 199617148 | 199617124 | 8  | 10  | 7  | 1.318499453 | 0.269217    | TNNT2 ENSG00000118194  |
| 1 | 199621006 | 199621388 | 199621134 | 8  | 15  | 10 | 1.394776281 | 0.191426    | TNNT2 ENSG00000118194  |
| 1 | 199671468 | 199671908 | 199671647 | 17 | 27  | 4  | 5.369888681 | 1.60E-05    | TNNI1 ENSG00000159173  |
| 1 | 199683988 | 199684167 | 199684061 | 8  | 8   | 3  | 2.157544559 | 0.0836802   | TNNI1 ENSG00000159173  |
| 1 | 199696903 | 199697306 | 199697013 | 15 | 22  | 4  | 4.410979988 | 0.000231863 | PHLDA3 ENSG00000174307 |
| 1 | 199703647 | 199704368 | 199704036 | 13 | 33  | 10 | 2.963899597 | 0.000322893 | PHLDA3 ENSG00000174307 |
| 1 | 199704705 | 199705213 | 199704884 | 97 | 112 | 6  | 15.47952605 | 5.08E-26    | PHLDA3 ENSG00000174307 |
| 1 | 199715931 | 199716633 | 199716457 | 15 | 34  | 9  | 3.356180426 | 9.18E-05    | PHLDA3 ENSG00000174307 |
| 1 | 199748670 | 199748981 | 199748844 | 15 | 18  | 11 | 1.518272097 | 0.122037    | CSRP1 ENSG00000159176  |
| 1 | 199758940 | 199759233 | 199759097 | 9  | 10  | 3  | 2.636998906 | 0.034203    | ENSG00000218820        |
| 1 | 199766613 | 199766833 | 199766742 | 11 | 13  | 1  | 6.712360851 | 0.000640982 | ENSG00000218820        |
| 1 | 199776066 | 199776316 | 199776194 | 8  | 11  | 7  | 1.43836304  | 0.204844    | ENSG00000218820        |
| 1 | 199795320 | 199795685 | 199795478 | 10 | 16  | 8  | 1.811271976 | 0.0663685   | ENSG00000218820        |
| 1 | 199806330 | 199806520 | 199806414 | 8  | 9   | 2  | 3.19636231  | 0.0229249   | ENSG00000218820        |
| 1 | 199829111 | 199829379 | 199829286 | 11 | 14  | 3  | 3.595907599 | 0.00486913  | NAV1 ENSG00000134369   |
| 1 | 199833586 | 199834039 | 199833819 | 12 | 21  | 13 | 1.506856518 | 0.109266    | NAV1 ENSG00000134369   |
| 1 | 199840561 | 199841043 | 199840740 | 9  | 17  | 2  | 5.753452158 | 0.000281509 | NAV1 ENSG00000134369   |
| 1 | 199844747 | 199844962 | 199844854 | 8  | 9   | 1  | 4.794543465 | 0.00708517  | NAV1 ENSG00000134369   |
| 1 | 199855709 | 199855974 | 199855846 | 11 | 11  | 3  | 2.876726079 | 0.0213797   | NAV1 ENSG00000134369   |
| 1 | 199886235 | 199886487 | 199886414 | 11 | 14  | 2  | 4.794543465 | 0.00154571  | NAV1 ENSG00000134369   |
| 1 | 199903437 | 199903669 | 199903509 | 8  | 10  | 2  | 3.515998541 | 0.0136204   | NAV1 ENSG00000134369   |
| 1 | 199940003 | 199940343 | 199940176 | 10 | 14  | 3  | 3.595907599 | 0.00486913  | ENSG00000184965        |

|   |           |           |           |     |     |    |             |             |          |                 |
|---|-----------|-----------|-----------|-----|-----|----|-------------|-------------|----------|-----------------|
| 1 | 199950385 | 199950736 | 199950560 | 10  | 16  | 2  | 5.433815927 | 0.000499302 |          | ENSG00000184965 |
| 1 | 199987429 | 199987680 | 199987554 | 14  | 14  | 3  | 3.595907599 | 0.00486913  | NAV1     | ENSG00000134369 |
| 1 | 200222811 | 200223006 | 200222866 | 9   | 9   | 0  | 9.589086931 | 0.00120187  | RNPEP    | ENSG00000176393 |
| 1 | 200254316 | 200254691 | 200254540 | 8   | 15  | 13 | 1.095895649 | 0.398774    | ELF3     | ENSG00000163435 |
| 1 | 200254698 | 200255038 | 200254876 | 9   | 13  | 11 | 1.118726809 | 0.38479     | ELF3     | ENSG00000163435 |
| 1 | 200258775 | 200259357 | 200259033 | 11  | 24  | 18 | 1.261721965 | 0.218718    |          | ENSG00000220486 |
| 1 | 200264787 | 200265143 | 200264965 | 9   | 14  | 0  | 14.3836304  | 4.17E-05    |          | ENSG00000220486 |
| 1 | 200265671 | 200265873 | 200265809 | 9   | 9   | 2  | 3.19636231  | 0.0229249   |          | ENSG00000220486 |
| 1 | 200270634 | 200270869 | 200270710 | 10  | 13  | 10 | 1.220429246 | 0.306001    |          | ENSG00000217849 |
| 1 | 200281940 | 200282498 | 200282219 | 20  | 33  | 27 | 1.164389127 | 0.273121    |          | ENSG00000217849 |
| 1 | 200282913 | 200283147 | 200283036 | 8   | 10  | 9  | 1.054799562 | 0.4492      |          | ENSG00000217849 |
| 1 | 200291791 | 200292058 | 200291930 | 8   | 11  | 3  | 2.876726079 | 0.0213797   |          | ENSG00000217849 |
| 1 | 200292300 | 200293232 | 200292553 | 71  | 141 | 22 | 5.920218888 | 6.60E-22    |          | ENSG00000217849 |
| 1 | 200354702 | 200355012 | 200354857 | 14  | 18  | 6  | 2.602752167 | 0.00970422  | GPR37L1  | ENSG00000170075 |
| 1 | 200367901 | 200368249 | 200368075 | 12  | 18  | 13 | 1.301376083 | 0.22245     | GPR37L1  | ENSG00000170075 |
| 1 | 200379416 | 200379666 | 200379541 | 8   | 9   | 7  | 1.198635866 | 0.346278    | ARL8A    | ENSG00000143862 |
| 1 | 200420552 | 200420888 | 200420725 | 8   | 13  | 8  | 1.491635745 | 0.166708    | LGR6     | ENSG00000133067 |
| 1 | 200436042 | 200436366 | 200436206 | 15  | 18  | 3  | 4.554816292 | 0.000599415 |          | ENSG00000208212 |
| 1 | 200464978 | 200465258 | 200465118 | 8   | 9   | 0  | 9.589086931 | 0.00120187  |          | ENSG00000208209 |
| 1 | 200470520 | 200470718 | 200470581 | 8   | 8   | 2  | 2.876726079 | 0.0381137   |          | ENSG00000208209 |
| 1 | 200472111 | 200472491 | 200472287 | 17  | 23  | 13 | 1.643843474 | 0.0639146   |          | ENSG00000208209 |
| 1 | 200472756 | 200473641 | 200473092 | 101 | 144 | 10 | 12.64016004 | 6.34E-31    |          | ENSG00000208209 |
| 1 | 200528218 | 200528508 | 200528335 | 9   | 10  | 7  | 1.318499453 | 0.269217    | UBE2T    | ENSG00000077152 |
| 1 | 200551355 | 200551664 | 200551509 | 11  | 13  | 9  | 1.34247217  | 0.232231    | UBE2T    | ENSG00000077152 |
| 1 | 200576783 | 200577060 | 200576921 | 8   | 11  | 3  | 2.876726079 | 0.0213797   | UBE2T    | ENSG00000077152 |
| 1 | 200577500 | 200577826 | 200577663 | 9   | 13  | 9  | 1.34247217  | 0.232231    | UBE2T    | ENSG00000077152 |
| 1 | 200589961 | 200590333 | 200590106 | 12  | 18  | 7  | 2.277408146 | 0.0188653   | PPP1R12B | ENSG00000077157 |
| 1 | 200598256 | 200598454 | 200598320 | 9   | 9   | 3  | 2.397271733 | 0.0539397   |          | ENSG00000220897 |
| 1 | 200615826 | 200616163 | 200615994 | 9   | 12  | 6  | 1.78083043  | 0.0985525   |          | ENSG00000220897 |
| 1 | 200807554 | 200807807 | 200807658 | 10  | 12  | 2  | 4.155271003 | 0.0046638   |          | ENSG00000212880 |
| 1 | 200814509 | 200814807 | 200814659 | 9   | 11  | 1  | 5.753452158 | 0.00215302  |          | ENSG00000212880 |
| 1 | 200897724 | 200897979 | 200897851 | 8   | 11  | 6  | 1.643843474 | 0.137712    | SYT2     | ENSG00000143858 |
| 1 | 200928786 | 200929148 | 200928977 | 9   | 14  | 5  | 2.397271733 | 0.0258078   | SYT2     | ENSG00000143858 |
| 1 | 200955371 | 200955651 | 200955511 | 8   | 13  | 6  | 1.917817386 | 0.0693353   | SYT2     | ENSG00000143858 |

|   |           |           |           |    |     |    |             |             |          |                 |
|---|-----------|-----------|-----------|----|-----|----|-------------|-------------|----------|-----------------|
| 1 | 201044186 | 201044390 | 201044330 | 9  | 10  | 5  | 1.757999271 | 0.121253    | JARID1B  | ENSG00000117139 |
| 1 | 201046259 | 201046535 | 201046369 | 11 | 12  | 6  | 1.78083043  | 0.0985525   | JARID1B  | ENSG00000117139 |
| 1 | 201047893 | 201048128 | 201047992 | 8  | 9   | 4  | 1.917817386 | 0.103282    | JARID1B  | ENSG00000117139 |
| 1 | 201050522 | 201050856 | 201050701 | 8  | 10  | 7  | 1.318499453 | 0.269217    |          | ENSG00000184774 |
| 1 | 201068992 | 201069209 | 201069090 | 8  | 8   | 5  | 1.43836304  | 0.235762    |          | ENSG00000184774 |
| 1 | 201070721 | 201070909 | 201070781 | 8  | 8   | 2  | 2.876726079 | 0.0381137   |          | ENSG00000184774 |
| 1 | 201072332 | 201072693 | 201072522 | 13 | 19  | 13 | 1.369869562 | 0.177863    |          | ENSG00000184774 |
| 1 | 201080078 | 201080318 | 201080198 | 12 | 14  | 2  | 4.794543465 | 0.00154571  |          | ENSG00000220471 |
| 1 | 201088043 | 201088289 | 201088160 | 8  | 10  | 3  | 2.636998906 | 0.034203    |          | ENSG00000220471 |
| 1 | 201094519 | 201094743 | 201094683 | 8  | 9   | 3  | 2.397271733 | 0.0539397   |          | ENSG00000220471 |
| 1 | 201096548 | 201096785 | 201096662 | 10 | 12  | 7  | 1.558226626 | 0.152813    |          | ENSG00000220471 |
| 1 | 201115616 | 201115836 | 201115727 | 8  | 10  | 4  | 2.109599125 | 0.0694668   |          | ENSG00000217627 |
| 1 | 201124715 | 201124989 | 201124824 | 8  | 10  | 10 | 0.958908693 | 0.538751    | RABIF    | ENSG00000183155 |
| 1 | 201162399 | 201163268 | 201162743 | 17 | 43  | 15 | 2.636998906 | 0.000188358 | KLHL12   | ENSG00000117153 |
| 1 | 201200423 | 201200762 | 201200595 | 11 | 15  | 10 | 1.394776281 | 0.191426    | CYB5R1   | ENSG00000159348 |
| 1 | 201204630 | 201204865 | 201204736 | 8  | 11  | 8  | 1.278544924 | 0.28289     | CYB5R1   | ENSG00000159348 |
| 1 | 201211526 | 201211856 | 201211680 | 14 | 18  | 0  | 18.21926517 | 2.83E-06    | CYB5R1   | ENSG00000159348 |
| 1 | 201238172 | 201238778 | 201238428 | 71 | 115 | 5  | 18.5389014  | 7.82E-28    |          | ENSG00000218804 |
| 1 | 201242700 | 201242990 | 201242825 | 11 | 14  | 12 | 1.106433107 | 0.392094    | TMEM183B | ENSG00000163444 |
| 1 | 201244534 | 201244727 | 201244630 | 8  | 9   | 2  | 3.19636231  | 0.0229249   | TMEM183B | ENSG00000163444 |
| 1 | 201275071 | 201275427 | 201275249 | 16 | 20  | 6  | 2.876726079 | 0.00408924  | PPFIA4   | ENSG00000143847 |
| 1 | 201324816 | 201325100 | 201324958 | 11 | 15  | 3  | 3.835634772 | 0.00291691  | ADORA1   | ENSG00000163485 |
| 1 | 201336508 | 201336687 | 201336528 | 8  | 8   | 3  | 2.157544559 | 0.0836802   | ADORA1   | ENSG00000163485 |
| 1 | 201362126 | 201362479 | 201362302 | 8  | 13  | 7  | 1.678090213 | 0.11195     | ADORA1   | ENSG00000163485 |
| 1 | 201413516 | 201413695 | 201413605 | 8  | 8   | 0  | 8.630178238 | 0.00235436  | MYBPH    | ENSG00000133055 |
| 1 | 201451735 | 201452242 | 201452063 | 13 | 23  | 20 | 1.095895649 | 0.377643    | CHIT1    | ENSG00000133063 |
| 1 | 201463745 | 201464019 | 201463882 | 9  | 9   | 5  | 1.598181155 | 0.170911    | CHIT1    | ENSG00000133063 |
| 1 | 201487252 | 201487641 | 201487428 | 9  | 15  | 1  | 7.671269544 | 0.000187863 | NECAP1   | ENSG00000219801 |
| 1 | 201488615 | 201488845 | 201488725 | 10 | 10  | 0  | 10.54799562 | 0.000613541 | NECAP1   | ENSG00000219801 |
| 1 | 201502987 | 201503250 | 201503118 | 10 | 12  | 12 | 0.958908693 | 0.542188    | NECAP1   | ENSG00000219801 |
| 1 | 201504789 | 201505141 | 201504965 | 9  | 14  | 7  | 1.797953799 | 0.0806593   | NECAP1   | ENSG00000219801 |
| 1 | 201508890 | 201509427 | 201509064 | 17 | 29  | 9  | 2.876726079 | 0.000832979 | NECAP1   | ENSG00000219801 |
| 1 | 201513139 | 201513324 | 201513231 | 8  | 8   | 1  | 4.315089119 | 0.0127267   | NECAP1   | ENSG00000219801 |
| 1 | 201539191 | 201539570 | 201539394 | 13 | 20  | 8  | 2.237453617 | 0.0160557   | BTG2     | ENSG00000159388 |

|   |           |           |           |     |     |    |             |             |         |                 |
|---|-----------|-----------|-----------|-----|-----|----|-------------|-------------|---------|-----------------|
| 1 | 201541174 | 201541533 | 201541304 | 19  | 25  | 6  | 3.56166086  | 0.000408555 | BTG2    | ENSG00000159388 |
| 1 | 201541804 | 201542900 | 201542482 | 135 | 213 | 9  | 20.52064603 | 1.74E-50    | BTG2    | ENSG00000159388 |
| 1 | 201552380 | 201552831 | 201552527 | 12  | 20  | 9  | 2.013708255 | 0.0279742   |         | ENSG00000202300 |
| 1 | 201552844 | 201553094 | 201553007 | 8   | 11  | 6  | 1.643843474 | 0.137712    |         | ENSG00000202300 |
| 1 | 201563455 | 201563759 | 201563607 | 10  | 13  | 6  | 1.917817386 | 0.0693353   |         | ENSG00000202300 |
| 1 | 201575818 | 201576252 | 201575997 | 12  | 21  | 13 | 1.506856518 | 0.109266    | FMOD    | ENSG00000122176 |
| 1 | 201646018 | 201646235 | 201646176 | 8   | 9   | 4  | 1.917817386 | 0.103282    |         | ENSG00000219588 |
| 1 | 201646310 | 201646554 | 201646472 | 10  | 12  | 2  | 4.155271003 | 0.0046638   |         | ENSG00000219588 |
| 1 | 201721991 | 201722210 | 201722094 | 8   | 9   | 4  | 1.917817386 | 0.103282    | OPTC    | ENSG00000188770 |
| 1 | 201723179 | 201723397 | 201723258 | 8   | 11  | 3  | 2.876726079 | 0.0213797   | OPTC    | ENSG00000188770 |
| 1 | 201731344 | 201731600 | 201731487 | 10  | 11  | 5  | 1.917817386 | 0.0843804   | OPTC    | ENSG00000188770 |
| 1 | 201785700 | 201785879 | 201785789 | 9   | 9   | 1  | 4.794543465 | 0.00708517  | OPTC    | ENSG00000188770 |
| 1 | 201836985 | 201837256 | 201837120 | 8   | 10  | 4  | 2.109599125 | 0.0694668   | ATP2B4  | ENSG00000058668 |
| 1 | 201861376 | 201861778 | 201861555 | 13  | 20  | 8  | 2.237453617 | 0.0160557   | ATP2B4  | ENSG00000058668 |
| 1 | 201921048 | 201921254 | 201921151 | 9   | 9   | 2  | 3.19636231  | 0.0229249   | ATP2B4  | ENSG00000058668 |
| 1 | 201941865 | 201942181 | 201942023 | 10  | 13  | 6  | 1.917817386 | 0.0693353   |         | ENSG00000221643 |
| 1 | 202074677 | 202075145 | 202074996 | 15  | 26  | 5  | 4.315089119 | 8.98E-05    |         | ENSG00000216908 |
| 1 | 202097107 | 202097560 | 202097381 | 16  | 28  | 5  | 4.63472535  | 3.19E-05    | SNRPEL1 | ENSG00000182004 |
| 1 | 202106760 | 202107056 | 202106909 | 9   | 12  | 8  | 1.385090334 | 0.219216    |         | ENSG00000216997 |
| 1 | 202124431 | 202124623 | 202124527 | 8   | 9   | 2  | 3.19636231  | 0.0229249   |         | ENSG00000216997 |
| 1 | 202142698 | 202143070 | 202142891 | 12  | 18  | 4  | 3.643853034 | 0.00178791  |         | ENSG00000184655 |
| 1 | 202165422 | 202165650 | 202165488 | 10  | 11  | 8  | 1.278544924 | 0.28289     |         | ENSG00000218299 |
| 1 | 202231948 | 202232142 | 202232012 | 8   | 8   | 4  | 1.726035648 | 0.150596    |         | ENSG00000211554 |
| 1 | 202237340 | 202237552 | 202237472 | 8   | 11  | 5  | 1.917817386 | 0.0843804   |         | ENSG00000211554 |
| 1 | 202360063 | 202360275 | 202360168 | 8   | 8   | 4  | 1.726035648 | 0.150596    | ETNK2   | ENSG00000143845 |
| 1 | 202363372 | 202363717 | 202363542 | 9   | 13  | 10 | 1.220429246 | 0.306001    | ETNK2   | ENSG00000143845 |
| 1 | 202366785 | 202367307 | 202367062 | 11  | 22  | 12 | 1.696530765 | 0.057768    | ETNK2   | ENSG00000143845 |
| 1 | 202384905 | 202385207 | 202385056 | 11  | 15  | 7  | 1.917817386 | 0.0572317   | ETNK2   | ENSG00000143845 |
| 1 | 202419794 | 202420083 | 202419945 | 11  | 12  | 0  | 12.46581301 | 0.000159888 |         | ENSG00000218951 |
| 1 | 202431772 | 202432010 | 202431906 | 8   | 9   | 0  | 9.589086931 | 0.00120187  | KISS1   | ENSG00000170498 |
| 1 | 202450065 | 202450296 | 202450180 | 8   | 11  | 9  | 1.150690432 | 0.367789    | GOLT1A  | ENSG00000174567 |
| 1 | 202462315 | 202462548 | 202462494 | 8   | 11  | 5  | 1.917817386 | 0.0843804   | GOLT1A  | ENSG00000174567 |
| 1 | 202494288 | 202494493 | 202494388 | 9   | 10  | 3  | 2.636998906 | 0.034203    | GOLT1A  | ENSG00000174567 |
| 1 | 202522782 | 202523200 | 202523021 | 9   | 18  | 14 | 1.214617678 | 0.282961    |         | ENSG00000219133 |

|   |           |           |           |     |     |    |             |             |          |                 |
|---|-----------|-----------|-----------|-----|-----|----|-------------|-------------|----------|-----------------|
| 1 | 202523859 | 202524301 | 202524122 | 9   | 18  | 9  | 1.821926517 | 0.0548428   |          | ENSG00000219133 |
| 1 | 202530125 | 202530356 | 202530240 | 10  | 10  | 4  | 2.109599125 | 0.0694668   |          | ENSG00000219133 |
| 1 | 202537312 | 202537603 | 202537457 | 10  | 14  | 10 | 1.307602763 | 0.244096    |          | ENSG00000219133 |
| 1 | 202549787 | 202550434 | 202550089 | 8   | 23  | 9  | 2.301380863 | 0.00938618  |          | ENSG00000219133 |
| 1 | 202555216 | 202555622 | 202555398 | 13  | 22  | 11 | 1.837908328 | 0.0378204   |          | ENSG00000219133 |
| 1 | 202557107 | 202557348 | 202557202 | 9   | 12  | 5  | 2.077635502 | 0.0577144   |          | ENSG00000219133 |
| 1 | 202599351 | 202599797 | 202599530 | 13  | 21  | 8  | 2.343999027 | 0.0109478   | PLEKHA6  | ENSG00000143850 |
| 1 | 202613651 | 202613880 | 202613781 | 8   | 9   | 9  | 0.958908693 | 0.536911    |          | ENSG00000220782 |
| 1 | 202613882 | 202614095 | 202614002 | 8   | 10  | 8  | 1.171999514 | 0.35773     |          | ENSG00000220782 |
| 1 | 202614753 | 202615099 | 202614926 | 8   | 11  | 3  | 2.876726079 | 0.0213797   |          | ENSG00000220782 |
| 1 | 202616165 | 202616686 | 202616344 | 18  | 32  | 9  | 3.164398687 | 0.000225664 |          | ENSG00000220782 |
| 1 | 202647595 | 202647832 | 202647713 | 10  | 12  | 4  | 2.493162602 | 0.0299057   | PPP1R15B | ENSG00000158615 |
| 1 | 202652892 | 202653262 | 202653079 | 15  | 23  | 12 | 1.770292972 | 0.0429088   | PPP1R15B | ENSG00000158615 |
| 1 | 202667163 | 202667353 | 202667297 | 8   | 8   | 9  | 0.863017824 | 0.627343    | PIK3C2B  | ENSG00000133056 |
| 1 | 202679083 | 202679452 | 202679273 | 12  | 19  | 8  | 2.130908207 | 0.0233014   | PIK3C2B  | ENSG00000133056 |
| 1 | 202715469 | 202715689 | 202715576 | 10  | 11  | 12 | 0.885146486 | 0.620672    | PIK3C2B  | ENSG00000133056 |
| 1 | 202728767 | 202728946 | 202728856 | 8   | 8   | 7  | 1.07877228  | 0.435076    | PIK3C2B  | ENSG00000133056 |
| 1 | 202729534 | 202729911 | 202729733 | 9   | 16  | 9  | 1.630144778 | 0.102169    | PIK3C2B  | ENSG00000133056 |
| 1 | 202742216 | 202743092 | 202742396 | 19  | 46  | 44 | 1.001526857 | 0.496486    | MDM4     | ENSG00000198625 |
| 1 | 202743768 | 202743959 | 202743834 | 8   | 9   | 3  | 2.397271733 | 0.0539397   | MDM4     | ENSG00000198625 |
| 1 | 202744987 | 202745524 | 202745319 | 69  | 86  | 2  | 27.8083521  | 3.78E-23    | MDM4     | ENSG00000198625 |
| 1 | 202751703 | 202751922 | 202751820 | 8   | 9   | 5  | 1.598181155 | 0.170911    | MDM4     | ENSG00000198625 |
| 1 | 202751934 | 202752467 | 202752113 | 9   | 22  | 10 | 2.004990904 | 0.023438    | MDM4     | ENSG00000198625 |
| 1 | 202760110 | 202760356 | 202760239 | 8   | 10  | 2  | 3.515998541 | 0.0136204   | MDM4     | ENSG00000198625 |
| 1 | 202760558 | 202761247 | 202760826 | 156 | 212 | 13 | 14.58911083 | 2.84E-46    | MDM4     | ENSG00000198625 |
| 1 | 202782409 | 202782748 | 202782467 | 8   | 13  | 2  | 4.474907234 | 0.00269459  | MDM4     | ENSG00000198625 |
| 1 | 202796782 | 202796988 | 202796885 | 9   | 9   | 1  | 4.794543465 | 0.00708517  |          | ENSG00000200408 |
| 1 | 202801443 | 202801855 | 202801676 | 9   | 17  | 8  | 1.917817386 | 0.0474153   |          | ENSG00000200408 |
| 1 | 202834933 | 202835128 | 202835030 | 8   | 10  | 3  | 2.636998906 | 0.034203    | LRRN2    | ENSG00000170382 |
| 1 | 202848313 | 202848502 | 202848404 | 10  | 10  | 2  | 3.515998541 | 0.0136204   | LRRN2    | ENSG00000170382 |
| 1 | 202849421 | 202849692 | 202849573 | 9   | 10  | 2  | 3.515998541 | 0.0136204   | LRRN2    | ENSG00000170382 |
| 1 | 202859052 | 202859260 | 202859170 | 8   | 9   | 4  | 1.917817386 | 0.103282    | LRRN2    | ENSG00000170382 |
| 1 | 202944237 | 202944512 | 202944343 | 8   | 11  | 2  | 3.835634772 | 0.00800699  |          | ENSG00000208201 |
| 1 | 202999625 | 202999821 | 202999697 | 10  | 11  | 7  | 1.43836304  | 0.204844    |          | ENSG00000221071 |

|   |           |           |           |    |    |    |             |             |         |                 |
|---|-----------|-----------|-----------|----|----|----|-------------|-------------|---------|-----------------|
| 1 | 203027678 | 203027880 | 203027772 | 9  | 10 | 4  | 2.109599125 | 0.0694668   | NFASC   | ENSG00000163531 |
| 1 | 203102316 | 203102596 | 203102450 | 9  | 11 | 3  | 2.876726079 | 0.0213797   | NFASC   | ENSG00000163531 |
| 1 | 203114567 | 203114797 | 203114682 | 8  | 9  | 4  | 1.917817386 | 0.103282    | NFASC   | ENSG00000163531 |
| 1 | 203125859 | 203126136 | 203125997 | 11 | 13 | 2  | 4.474907234 | 0.00269459  | NFASC   | ENSG00000163531 |
| 1 | 203153378 | 203153585 | 203153481 | 9  | 9  | 0  | 9.589086931 | 0.00120187  | NFASC   | ENSG00000163531 |
| 1 | 203225039 | 203225485 | 203225218 | 9  | 17 | 16 | 1.015315087 | 0.480915    | NFASC   | ENSG00000163531 |
| 1 | 203249832 | 203250198 | 203250032 | 26 | 33 | 5  | 5.433815927 | 2.23E-06    | CNTN2   | ENSG00000184144 |
| 1 | 203281292 | 203281554 | 203281423 | 8  | 11 | 2  | 3.835634772 | 0.00800699  | CNTN2   | ENSG00000184144 |
| 1 | 203357546 | 203358344 | 203358022 | 34 | 70 | 13 | 4.863036943 | 1.32E-10    | RBBP5   | ENSG00000117222 |
| 1 | 203446904 | 203447179 | 203447047 | 10 | 12 | 2  | 4.155271003 | 0.0046638   | RIPK5   | ENSG00000133059 |
| 1 | 203447347 | 203447708 | 203447532 | 16 | 21 | 8  | 2.343999027 | 0.0109478   | RIPK5   | ENSG00000133059 |
| 1 | 203461317 | 203461718 | 203461572 | 8  | 13 | 7  | 1.678090213 | 0.11195     | TMCC2   | ENSG00000133069 |
| 1 | 203498591 | 203498772 | 203498715 | 8  | 8  | 4  | 1.726035648 | 0.150596    | TMCC2   | ENSG00000133069 |
| 1 | 203571389 | 203571672 | 203571540 | 13 | 16 | 12 | 1.253957522 | 0.265012    | NUAK2   | ENSG00000163545 |
| 1 | 203632849 | 203633222 | 203632948 | 14 | 20 | 6  | 2.876726079 | 0.00408924  | LEMD1   | ENSG00000186007 |
| 1 | 203713549 | 203714010 | 203713869 | 11 | 20 | 5  | 3.356180426 | 0.0017534   | PCTK3   | ENSG00000117266 |
| 1 | 203760169 | 203760389 | 203760279 | 10 | 11 | 6  | 1.643843474 | 0.137712    | PCTK3   | ENSG00000117266 |
| 1 | 203799501 | 203799945 | 203799733 | 16 | 27 | 12 | 2.0653418   | 0.0117911   | MFSD4   | ENSG00000174514 |
| 1 | 203801454 | 203801794 | 203801660 | 10 | 14 | 7  | 1.797953799 | 0.0806593   | MFSD4   | ENSG00000174514 |
| 1 | 203827674 | 203828125 | 203827977 | 20 | 28 | 10 | 2.528032009 | 0.00254104  |         | ENSG00000206762 |
| 1 | 203832359 | 203832538 | 203832470 | 8  | 8  | 4  | 1.726035648 | 0.150596    |         | ENSG00000206762 |
| 1 | 203867711 | 203868002 | 203867837 | 12 | 14 | 4  | 2.876726079 | 0.01219     | ELK4    | ENSG00000158711 |
| 1 | 203871216 | 203871896 | 203871679 | 40 | 61 | 3  | 14.86308474 | 4.23E-15    | ELK4    | ENSG00000158711 |
| 1 | 203894666 | 203894962 | 203894814 | 10 | 14 | 8  | 1.598181155 | 0.124586    | SLC45A3 | ENSG00000158715 |
| 1 | 203924016 | 203924245 | 203924121 | 8  | 9  | 2  | 3.19636231  | 0.0229249   | SLC45A3 | ENSG00000158715 |
| 1 | 203938729 | 203938916 | 203938822 | 9  | 10 | 5  | 1.757999271 | 0.121253    | SLC45A3 | ENSG00000158715 |
| 1 | 203946816 | 203947273 | 203947101 | 13 | 21 | 8  | 2.343999027 | 0.0109478   |         | ENSG00000201944 |
| 1 | 203984616 | 203984819 | 203984725 | 10 | 11 | 10 | 1.046082211 | 0.455063    | NUCKS1  | ENSG00000069275 |
| 1 | 203984833 | 203985012 | 203984863 | 8  | 8  | 8  | 0.958908693 | 0.534974    | NUCKS1  | ENSG00000069275 |
| 1 | 203985068 | 203985462 | 203985306 | 12 | 18 | 6  | 2.602752167 | 0.00970422  | NUCKS1  | ENSG00000069275 |
| 1 | 203985537 | 203986512 | 203985699 | 28 | 87 | 9  | 8.438396499 | 5.17E-17    | NUCKS1  | ENSG00000069275 |
| 1 | 204011023 | 204011798 | 204011173 | 9  | 25 | 5  | 4.155271003 | 0.000149583 | RAB7L1  | ENSG00000117280 |
| 1 | 204038029 | 204038231 | 204038130 | 8  | 8  | 0  | 8.630178238 | 0.00235436  | SLC41A1 | ENSG00000133065 |
| 1 | 204062663 | 204062872 | 204062817 | 9  | 10 | 3  | 2.636998906 | 0.034203    | SLC41A1 | ENSG00000133065 |

|   |           |           |           |    |    |    |             |             |          |                 |
|---|-----------|-----------|-----------|----|----|----|-------------|-------------|----------|-----------------|
| 1 | 204154833 | 204155078 | 204154955 | 9  | 11 | 9  | 1.150690432 | 0.367789    | SLC26A9  | ENSG00000174502 |
| 1 | 204175462 | 204175749 | 204175605 | 8  | 13 | 5  | 2.237453617 | 0.038866    | SLC26A9  | ENSG00000174502 |
| 1 | 204182599 | 204183073 | 204182948 | 16 | 27 | 7  | 3.356180426 | 0.000396559 | SLC26A9  | ENSG00000174502 |
| 1 | 204186792 | 204186971 | 204186889 | 8  | 8  | 2  | 2.876726079 | 0.0381137   | SLC26A9  | ENSG00000174502 |
| 1 | 204401035 | 204401319 | 204401174 | 13 | 15 | 8  | 1.704726565 | 0.0916153   | AVPR1B   | ENSG00000198049 |
| 1 | 204456952 | 204457138 | 204457045 | 9  | 9  | 2  | 3.19636231  | 0.0229249   | C1orf186 | ENSG00000196533 |
| 1 | 204477021 | 204477291 | 204477162 | 16 | 18 | 5  | 3.036544195 | 0.0044641   | CTSE     | ENSG00000196188 |
| 1 | 204688537 | 204688762 | 204688646 | 10 | 10 | 9  | 1.054799562 | 0.4492      | IKBKE    | ENSG00000143466 |
| 1 | 204689664 | 204689845 | 204689756 | 8  | 8  | 7  | 1.07877228  | 0.435076    | IKBKE    | ENSG00000143466 |
| 1 | 204722611 | 204722962 | 204722769 | 12 | 17 | 7  | 2.157544559 | 0.0276499   | IKBKE    | ENSG00000143466 |
| 1 | 204730059 | 204730283 | 204730203 | 9  | 11 | 3  | 2.876726079 | 0.0213797   | C1orf147 | ENSG00000162888 |
| 1 | 204754852 | 204755054 | 204754953 | 8  | 9  | 7  | 1.198635866 | 0.346278    | RASSF5   | ENSG00000136653 |
| 1 | 204814195 | 204814392 | 204814246 | 9  | 9  | 5  | 1.598181155 | 0.170911    | RASSF5   | ENSG00000136653 |
| 1 | 204823609 | 204823871 | 204823752 | 8  | 10 | 5  | 1.757999271 | 0.121253    | RASSF5   | ENSG00000136653 |
| 1 | 204826728 | 204827092 | 204826897 | 13 | 18 | 11 | 1.518272097 | 0.122037    | LGTN     | ENSG00000143486 |
| 1 | 204845990 | 204846210 | 204846085 | 9  | 10 | 2  | 3.515998541 | 0.0136204   | LGTN     | ENSG00000143486 |
| 1 | 204846850 | 204847082 | 204846947 | 8  | 9  | 3  | 2.397271733 | 0.0539397   | LGTN     | ENSG00000143486 |
| 1 | 204852276 | 204852619 | 204852442 | 12 | 16 | 10 | 1.481949798 | 0.147733    | LGTN     | ENSG00000143486 |
| 1 | 204874305 | 204874632 | 204874416 | 9  | 14 | 9  | 1.43836304  | 0.179537    | DYRK3    | ENSG00000143479 |
| 1 | 204887044 | 204887582 | 204887267 | 24 | 43 | 2  | 14.06399416 | 3.68E-11    | DYRK3    | ENSG00000143479 |
| 1 | 204925830 | 204926035 | 204925884 | 10 | 11 | 2  | 3.835634772 | 0.00800699  | MAPKAPK2 | ENSG00000162889 |
| 1 | 204926712 | 204926922 | 204926817 | 8  | 8  | 5  | 1.43836304  | 0.235762    | MAPKAPK2 | ENSG00000162889 |
| 1 | 204954747 | 204955031 | 204954882 | 14 | 15 | 5  | 2.557089848 | 0.0169197   |          | ENSG00000216783 |
| 1 | 204965499 | 204965909 | 204965821 | 10 | 17 | 2  | 5.753452158 | 0.000281509 |          | ENSG00000199349 |
| 1 | 204978917 | 204979185 | 204979032 | 10 | 12 | 5  | 2.077635502 | 0.0577144   |          | ENSG00000199349 |
| 1 | 204979971 | 204980231 | 204980102 | 8  | 11 | 4  | 2.301380863 | 0.0459276   |          | ENSG00000199349 |
| 1 | 205038186 | 205038433 | 205038343 | 13 | 13 | 10 | 1.220429246 | 0.306001    | IL19     | ENSG00000142224 |
| 1 | 205046012 | 205046235 | 205046131 | 8  | 9  | 6  | 1.369869562 | 0.253675    | IL19     | ENSG00000142224 |
| 1 | 205048399 | 205048614 | 205048507 | 9  | 10 | 4  | 2.109599125 | 0.0694668   | IL19     | ENSG00000142224 |
| 1 | 205049493 | 205049719 | 205049606 | 11 | 13 | 6  | 1.917817386 | 0.0693353   | IL19     | ENSG00000142224 |
| 1 | 205066397 | 205066939 | 205066668 | 37 | 64 | 4  | 12.46581301 | 5.53E-15    | IL19     | ENSG00000142224 |
| 1 | 205083690 | 205083925 | 205083807 | 9  | 11 | 2  | 3.835634772 | 0.00800699  | IL19     | ENSG00000142224 |
| 1 | 205088085 | 205088296 | 205088190 | 8  | 9  | 5  | 1.598181155 | 0.170911    | IL20     | ENSG00000162891 |
| 1 | 205104889 | 205105566 | 205105363 | 20 | 51 | 33 | 1.466566236 | 0.0388124   | IL20     | ENSG00000162891 |

|   |           |           |           |    |    |    |             |             |          |                 |
|---|-----------|-----------|-----------|----|----|----|-------------|-------------|----------|-----------------|
| 1 | 205105830 | 205106023 | 205105938 | 8  | 8  | 5  | 1.43836304  | 0.235762    | IL20     | ENSG00000162891 |
| 1 | 205112697 | 205112876 | 205112786 | 8  | 9  | 4  | 1.917817386 | 0.103282    | IL20     | ENSG00000162891 |
| 1 | 205113776 | 205114105 | 205113930 | 11 | 16 | 4  | 3.260289556 | 0.00475414  | IL20     | ENSG00000162891 |
| 1 | 205125618 | 205125885 | 205125751 | 14 | 16 | 2  | 5.433815927 | 0.000499302 | IL24     | ENSG00000162892 |
| 1 | 205130327 | 205130535 | 205130461 | 8  | 8  | 8  | 0.958908693 | 0.534974    | IL24     | ENSG00000162892 |
| 1 | 205135352 | 205135796 | 205135516 | 14 | 23 | 17 | 1.278544924 | 0.211315    | IL24     | ENSG00000162892 |
| 1 | 205135818 | 205136071 | 205135929 | 13 | 14 | 4  | 2.876726079 | 0.01219     | IL24     | ENSG00000162892 |
| 1 | 205143631 | 205144017 | 205143783 | 12 | 17 | 25 | 0.663859864 | 0.912943    |          | ENSG00000217798 |
| 1 | 205145303 | 205145755 | 205145508 | 12 | 21 | 6  | 3.013713035 | 0.00261913  |          | ENSG00000217798 |
| 1 | 205149115 | 205149303 | 205149209 | 8  | 8  | 4  | 1.726035648 | 0.150596    |          | ENSG00000217798 |
| 1 | 205151053 | 205151326 | 205151191 | 10 | 13 | 7  | 1.678090213 | 0.11195     |          | ENSG00000217798 |
| 1 | 205152522 | 205152819 | 205152675 | 13 | 15 | 6  | 2.191791298 | 0.0328001   |          | ENSG00000217798 |
| 1 | 205193714 | 205193933 | 205193823 | 8  | 9  | 5  | 1.598181155 | 0.170911    | PIGR     | ENSG00000162896 |
| 1 | 205200829 | 205201017 | 205200983 | 8  | 8  | 3  | 2.157544559 | 0.0836802   | FCAMR    | ENSG00000162897 |
| 1 | 205201616 | 205202225 | 205201856 | 39 | 57 | 8  | 6.1796338   | 2.54E-10    | FCAMR    | ENSG00000162897 |
| 1 | 205272747 | 205273046 | 205272898 | 9  | 11 | 4  | 2.301380863 | 0.0459276   | C1orf116 | ENSG00000182795 |
| 1 | 205292729 | 205293063 | 205292902 | 8  | 13 | 7  | 1.678090213 | 0.11195     | YOD1     | ENSG00000180667 |
| 1 | 205329489 | 205329697 | 205329626 | 8  | 8  | 4  | 1.726035648 | 0.150596    | C4BPB    | ENSG00000123843 |
| 1 | 205421917 | 205422113 | 205422042 | 8  | 9  | 5  | 1.598181155 | 0.170911    |          | ENSG00000216816 |
| 1 | 205472727 | 205472918 | 205472807 | 8  | 11 | 4  | 2.301380863 | 0.0459276   |          | ENSG00000218808 |
| 1 | 205480638 | 205481080 | 205480859 | 57 | 72 | 3  | 17.50008365 | 4.15E-18    |          | ENSG00000218808 |
| 1 | 205556036 | 205556951 | 205556601 | 15 | 50 | 17 | 2.716907964 | 4.56E-05    | CD55     | ENSG00000196352 |
| 1 | 205560991 | 205561659 | 205561480 | 17 | 35 | 5  | 5.753452158 | 7.49E-07    | CD55     | ENSG00000196352 |
| 1 | 205663951 | 205664158 | 205664054 | 10 | 10 | 2  | 3.515998541 | 0.0136204   | CR2      | ENSG00000117322 |
| 1 | 205672178 | 205672439 | 205672269 | 9  | 12 | 3  | 3.116453252 | 0.0131971   | CR2      | ENSG00000117322 |
| 1 | 205694001 | 205694300 | 205694130 | 8  | 11 | 6  | 1.643843474 | 0.137712    | CR2      | ENSG00000117322 |
| 1 | 205860345 | 205860547 | 205860436 | 9  | 9  | 2  | 3.19636231  | 0.0229249   |          | ENSG00000217573 |
| 1 | 205868093 | 205868296 | 205868184 | 8  | 8  | 0  | 8.630178238 | 0.00235436  |          | ENSG00000217573 |
| 1 | 205912372 | 205912824 | 205912680 | 8  | 15 | 2  | 5.114179696 | 0.00088103  | CR1L     | ENSG00000197721 |
| 1 | 205947235 | 205947690 | 205947327 | 17 | 33 | 0  | 32.60289556 | 1.18E-10    | CR1L     | ENSG00000197721 |
| 1 | 205990943 | 205991241 | 205991106 | 9  | 11 | 0  | 11.50690432 | 0.000313206 | CD46     | ENSG00000117335 |
| 1 | 206029878 | 206030135 | 206030013 | 8  | 8  | 2  | 2.876726079 | 0.0381137   |          | ENSG00000207966 |
| 1 | 206294837 | 206295105 | 206294983 | 8  | 9  | 2  | 3.19636231  | 0.0229249   |          | ENSG00000216137 |
| 1 | 206453689 | 206454096 | 206453858 | 22 | 29 | 0  | 28.76726079 | 1.74E-09    | PLXNA2   | ENSG00000076356 |



|   |           |           |           |     |     |    |             |             |                         |
|---|-----------|-----------|-----------|-----|-----|----|-------------|-------------|-------------------------|
| 1 | 206736349 | 206736701 | 206736525 | 8   | 14  | 2  | 4.794543465 | 0.00154571  | ENSG00000217293         |
| 1 | 207623817 | 207624308 | 207624001 | 36  | 50  | 3  | 12.22608584 | 3.96E-12    | ENSG00000207623         |
| 1 | 207651720 | 207651929 | 207651843 | 9   | 11  | 0  | 11.50690432 | 0.000313206 | ENSG00000207623         |
| 1 | 207673262 | 207673511 | 207673441 | 9   | 12  | 4  | 2.493162602 | 0.0299057   | ENSG00000207623         |
| 1 | 207753404 | 207753607 | 207753542 | 8   | 8   | 0  | 8.630178238 | 0.00235436  | CAMK1G ENSG00000008118  |
| 1 | 207834498 | 207834723 | 207834610 | 8   | 8   | 2  | 2.876726079 | 0.0381137   | CAMK1G ENSG00000008118  |
| 1 | 208056206 | 208056395 | 208056250 | 10  | 10  | 0  | 10.54799562 | 0.000613541 | IRF6 ENSG00000117595    |
| 1 | 208561110 | 208561463 | 208561308 | 9   | 14  | 2  | 4.794543465 | 0.00154571  | HHAT ENSG00000054392    |
| 1 | 208561490 | 208561990 | 208561669 | 95  | 113 | 2  | 36.43853034 | 8.35E-31    | HHAT ENSG00000054392    |
| 1 | 208651646 | 208651945 | 208651795 | 9   | 11  | 2  | 3.835634772 | 0.00800699  | HHAT ENSG00000054392    |
| 1 | 209817150 | 209817801 | 209817374 | 42  | 73  | 1  | 35.47962164 | 9.16E-21    | SLC30A1 ENSG00000170385 |
| 1 | 210168138 | 210168492 | 210168344 | 16  | 21  | 1  | 10.54799562 | 4.43E-06    | ENSG00000218132         |
| 1 | 210275082 | 210275324 | 210275258 | 9   | 12  | 0  | 12.46581301 | 0.000159888 | INTS7 ENSG00000143493   |
| 1 | 210807062 | 210807284 | 210807160 | 8   | 9   | 2  | 3.19636231  | 0.0229249   | ATF3 ENSG00000162772    |
| 1 | 210835906 | 210836804 | 210836549 | 174 | 259 | 4  | 49.86325204 | 1.38E-69    | ATF3 ENSG00000162772    |
| 1 | 210836806 | 210837005 | 210836890 | 8   | 9   | 1  | 4.794543465 | 0.00708517  | ATF3 ENSG00000162772    |
| 1 | 210848300 | 210848541 | 210848420 | 11  | 12  | 2  | 4.155271003 | 0.0046638   | ATF3 ENSG00000162772    |
| 1 | 212456789 | 212457026 | 212456907 | 9   | 10  | 3  | 2.636998906 | 0.034203    | SMYD2 ENSG00000143499   |
| 1 | 212677919 | 212678172 | 212678054 | 8   | 9   | 0  | 9.589086931 | 0.00120187  | ENSG00000213036         |
| 1 | 212679222 | 212680074 | 212679616 | 279 | 340 | 3  | 81.74696608 | 2.11E-94    | ENSG00000213036         |
| 1 | 212898784 | 212899049 | 212898922 | 9   | 11  | 5  | 1.917817386 | 0.0843804   | CENPF ENSG00000117724   |
| 1 | 212906766 | 212906994 | 212906842 | 8   | 9   | 2  | 3.19636231  | 0.0229249   | CENPF ENSG00000117724   |
| 1 | 212919070 | 212919288 | 212919179 | 8   | 9   | 5  | 1.598181155 | 0.170911    | CENPF ENSG00000117724   |
| 1 | 212934855 | 212935204 | 212935029 | 9   | 13  | 5  | 2.237453617 | 0.038866    | CENPF ENSG00000117724   |
| 1 | 213241564 | 213242112 | 213241825 | 21  | 35  | 4  | 6.90414259  | 1.81E-07    | KCNK2 ENSG00000082482   |
| 1 | 213354133 | 213354581 | 213354312 | 16  | 23  | 7  | 2.876726079 | 0.00239423  | KCNK2 ENSG00000082482   |
| 1 | 213492162 | 213492366 | 213492264 | 8   | 9   | 5  | 1.598181155 | 0.170911    | ENSG00000217162         |
| 1 | 213562265 | 213562457 | 213562373 | 8   | 9   | 4  | 1.917817386 | 0.103282    | ENSG00000217162         |
| 1 | 213722108 | 213722435 | 213722271 | 16  | 20  | 8  | 2.237453617 | 0.0160557   | KCTD3 ENSG00000136636   |
| 1 | 213729894 | 213730194 | 213730031 | 8   | 10  | 6  | 1.506856518 | 0.188853    | KCTD3 ENSG00000136636   |
| 1 | 213806756 | 213807402 | 213807083 | 10  | 25  | 12 | 1.917817386 | 0.0229342   | KCTD3 ENSG00000136636   |
| 1 | 213809522 | 213809810 | 213809689 | 8   | 11  | 1  | 5.753452158 | 0.00215302  | KCTD3 ENSG00000136636   |
| 1 | 213950378 | 213950613 | 213950497 | 8   | 11  | 4  | 2.301380863 | 0.0459276   | ENSG00000202498         |
| 1 | 214163401 | 214163596 | 214163514 | 8   | 9   | 2  | 3.19636231  | 0.0229249   | ENSG00000216335         |

|   |           |           |           |    |    |    |             |             |         |                 |
|---|-----------|-----------|-----------|----|----|----|-------------|-------------|---------|-----------------|
| 1 | 214236771 | 214236960 | 214236876 | 9  | 10 | 2  | 3.515998541 | 0.0136204   |         | ENSG00000216335 |
| 1 | 214277269 | 214277448 | 214277352 | 8  | 8  | 2  | 2.876726079 | 0.0381137   |         | ENSG00000216335 |
| 1 | 214434581 | 214434772 | 214434667 | 10 | 10 | 3  | 2.636998906 | 0.034203    |         | ENSG00000216335 |
| 1 | 214461105 | 214461431 | 214461260 | 9  | 11 | 6  | 1.643843474 | 0.137712    |         | ENSG00000216335 |
| 1 | 214548272 | 214548454 | 214548359 | 10 | 10 | 0  | 10.54799562 | 0.000613541 |         | ENSG00000216335 |
| 1 | 214704639 | 214704879 | 214704756 | 9  | 9  | 1  | 4.794543465 | 0.00708517  | USH2A   | ENSG00000042781 |
| 1 | 214807099 | 214807358 | 214807235 | 8  | 9  | 1  | 4.794543465 | 0.00708517  | USH2A   | ENSG00000042781 |
| 1 | 214855245 | 214855551 | 214855317 | 8  | 12 | 9  | 1.246581301 | 0.295061    | ESRRG   | ENSG00000196482 |
| 1 | 215018807 | 215018992 | 215018893 | 9  | 9  | 5  | 1.598181155 | 0.170911    | ESRRG   | ENSG00000196482 |
| 1 | 215062517 | 215062752 | 215062634 | 9  | 9  | 3  | 2.397271733 | 0.0539397   | ESRRG   | ENSG00000196482 |
| 1 | 215124392 | 215124615 | 215124519 | 8  | 8  | 1  | 4.315089119 | 0.0127267   | ESRRG   | ENSG00000196482 |
| 1 | 215346518 | 215346726 | 215346660 | 8  | 9  | 2  | 3.19636231  | 0.0229249   | ESRRG   | ENSG00000196482 |
| 1 | 215502231 | 215502410 | 215502320 | 8  | 8  | 4  | 1.726035648 | 0.150596    |         | ENSG00000201753 |
| 1 | 215563823 | 215564132 | 215563977 | 12 | 17 | 8  | 1.917817386 | 0.0474153   |         | ENSG00000201753 |
| 1 | 215572503 | 215572765 | 215572644 | 9  | 10 | 3  | 2.636998906 | 0.034203    |         | ENSG00000201753 |
| 1 | 215574005 | 215574196 | 215574114 | 8  | 9  | 6  | 1.369869562 | 0.253675    |         | ENSG00000201753 |
| 1 | 215733344 | 215733537 | 215733446 | 8  | 9  | 5  | 1.598181155 | 0.170911    | GPATCH2 | ENSG00000092978 |
| 1 | 215756346 | 215756580 | 215756448 | 9  | 11 | 8  | 1.278544924 | 0.28289     | GPATCH2 | ENSG00000092978 |
| 1 | 215814281 | 215814510 | 215814371 | 8  | 10 | 5  | 1.757999271 | 0.121253    | GPATCH2 | ENSG00000092978 |
| 1 | 215814653 | 215814918 | 215814809 | 10 | 13 | 7  | 1.678090213 | 0.11195     | GPATCH2 | ENSG00000092978 |
| 1 | 215870663 | 215870970 | 215870816 | 9  | 13 | 10 | 1.220429246 | 0.306001    | GPATCH2 | ENSG00000092978 |
| 1 | 215871000 | 215871411 | 215871232 | 10 | 19 | 14 | 1.278544924 | 0.231514    | SPATA17 | ENSG00000162814 |
| 1 | 215947788 | 215948034 | 215947913 | 8  | 11 | 2  | 3.835634772 | 0.00800699  | SPATA17 | ENSG00000162814 |
| 1 | 215952600 | 215952829 | 215952714 | 9  | 11 | 2  | 3.835634772 | 0.00800699  | SPATA17 | ENSG00000162814 |
| 1 | 215953278 | 215953534 | 215953388 | 9  | 12 | 3  | 3.116453252 | 0.0131971   | SPATA17 | ENSG00000162814 |
| 1 | 216111668 | 216111848 | 216111819 | 8  | 8  | 1  | 4.315089119 | 0.0127267   | UBBP2   | ENSG00000220297 |
| 1 | 216121998 | 216122226 | 216122088 | 8  | 9  | 4  | 1.917817386 | 0.103282    | UBBP2   | ENSG00000220297 |
| 1 | 216123697 | 216123925 | 216123811 | 8  | 9  | 2  | 3.19636231  | 0.0229249   | UBBP2   | ENSG00000220297 |
| 1 | 216133792 | 216134031 | 216133911 | 13 | 16 | 4  | 3.260289556 | 0.00475414  | UBBP2   | ENSG00000220297 |
| 1 | 216193261 | 216193613 | 216193499 | 15 | 20 | 15 | 1.25856766  | 0.240048    | UBBP2   | ENSG00000220297 |
| 1 | 216193974 | 216194187 | 216194071 | 10 | 10 | 5  | 1.757999271 | 0.121253    | UBBP2   | ENSG00000220297 |
| 1 | 216309415 | 216309634 | 216309520 | 8  | 9  | 4  | 1.917817386 | 0.103282    |         | ENSG00000201493 |
| 1 | 216470492 | 216470685 | 216470533 | 8  | 8  | 1  | 4.315089119 | 0.0127267   | RRP15   | ENSG00000067533 |
| 1 | 216499618 | 216499821 | 216499706 | 8  | 9  | 6  | 1.369869562 | 0.253675    | RRP15   | ENSG00000067533 |

|   |           |           |           |     |     |    |             |             |         |                 |
|---|-----------|-----------|-----------|-----|-----|----|-------------|-------------|---------|-----------------|
| 1 | 216525018 | 216525366 | 216525193 | 19  | 24  | 10 | 2.179337939 | 0.011585    | RRP15   | ENSG00000067533 |
| 1 | 216601365 | 216601637 | 216601501 | 13  | 14  | 8  | 1.598181155 | 0.124586    | TGFB2   | ENSG00000092969 |
| 1 | 216614278 | 216614597 | 216614437 | 9   | 12  | 2  | 4.155271003 | 0.0046638   | TGFB2   | ENSG00000092969 |
| 1 | 216620278 | 216620852 | 216620457 | 10  | 23  | 14 | 1.534253909 | 0.0910901   | TGFB2   | ENSG00000092969 |
| 1 | 216638075 | 216638396 | 216638235 | 8   | 13  | 7  | 1.678090213 | 0.11195     | TGFB2   | ENSG00000092969 |
| 1 | 216676977 | 216677174 | 216677058 | 10  | 10  | 1  | 5.273997812 | 0.00391723  |         | ENSG00000222824 |
| 1 | 216699869 | 216700290 | 216700024 | 22  | 30  | 8  | 3.302907721 | 0.000239229 |         | ENSG00000222824 |
| 1 | 216720666 | 216720980 | 216720823 | 12  | 16  | 2  | 5.433815927 | 0.000499302 |         | ENSG00000222824 |
| 1 | 216736523 | 216736837 | 216736680 | 13  | 18  | 3  | 4.554816292 | 0.000599415 |         | ENSG00000222824 |
| 1 | 216761596 | 216761872 | 216761731 | 13  | 15  | 11 | 1.278544924 | 0.254978    |         | ENSG00000222824 |
| 1 | 216793075 | 216793619 | 216793347 | 10  | 22  | 11 | 1.837908328 | 0.0378204   |         | ENSG00000212610 |
| 1 | 216830516 | 216830746 | 216830641 | 9   | 10  | 3  | 2.636998906 | 0.034203    |         | ENSG00000212610 |
| 1 | 216840673 | 216841601 | 216841169 | 261 | 357 | 6  | 49.0413303  | 1.25E-94    |         | ENSG00000212610 |
| 1 | 216874160 | 216874461 | 216874310 | 11  | 15  | 0  | 15.34253909 | 2.13E-05    |         | ENSG00000212610 |
| 1 | 216920659 | 216920838 | 216920748 | 8   | 8   | 5  | 1.43836304  | 0.235762    |         | ENSG00000212610 |
| 1 | 217055805 | 217056008 | 217055856 | 9   | 9   | 1  | 4.794543465 | 0.00708517  |         | ENSG00000218763 |
| 1 | 217198055 | 217198290 | 217198229 | 8   | 10  | 8  | 1.171999514 | 0.35773     |         | ENSG00000218763 |
| 1 | 217255679 | 217255955 | 217255817 | 9   | 10  | 2  | 3.515998541 | 0.0136204   |         | ENSG00000218763 |
| 1 | 217519426 | 217519700 | 217519567 | 8   | 10  | 7  | 1.318499453 | 0.269217    |         | ENSG00000220015 |
| 1 | 217667135 | 217667314 | 217667238 | 9   | 9   | 0  | 9.589086931 | 0.00120187  |         | ENSG00000222634 |
| 1 | 217732049 | 217732252 | 217732220 | 9   | 9   | 1  | 4.794543465 | 0.00708517  |         | ENSG00000222634 |
| 1 | 217771039 | 217771294 | 217771180 | 13  | 14  | 8  | 1.598181155 | 0.124586    | ZC3H11B | ENSG00000215817 |
| 1 | 217793835 | 217794194 | 217794051 | 8   | 12  | 5  | 2.077635502 | 0.0577144   | ZC3H11B | ENSG00000215817 |
| 1 | 217806379 | 217806635 | 217806507 | 11  | 11  | 3  | 2.876726079 | 0.0213797   | ZC3H11B | ENSG00000215817 |
| 1 | 217807265 | 217807623 | 217807444 | 8   | 14  | 9  | 1.43836304  | 0.179537    | ZC3H11B | ENSG00000215817 |
| 1 | 217825762 | 217826217 | 217825980 | 27  | 39  | 6  | 5.479478246 | 3.16E-07    | ZC3H11B | ENSG00000215817 |
| 1 | 218286611 | 218286890 | 218286750 | 8   | 10  | 2  | 3.515998541 | 0.0136204   | EPRS    | ENSG00000136628 |
| 1 | 218576309 | 218576677 | 218576493 | 24  | 32  | 1  | 15.82199344 | 3.96E-09    |         | ENSG00000218105 |
| 1 | 218577298 | 218577607 | 218577453 | 11  | 14  | 0  | 14.3836304  | 4.17E-05    |         | ENSG00000218105 |
| 1 | 219148665 | 219148871 | 219148768 | 9   | 9   | 3  | 2.397271733 | 0.0539397   | HLX     | ENSG00000136630 |
| 1 | 220705221 | 220705426 | 220705302 | 9   | 9   | 0  | 9.589086931 | 0.00120187  |         | ENSG00000220092 |
| 1 | 221045717 | 221046161 | 221046005 | 24  | 31  | 0  | 30.68507818 | 4.52E-10    | DISP1   | ENSG00000154309 |
| 1 | 221661777 | 221662006 | 221661891 | 9   | 10  | 0  | 10.54799562 | 0.000613541 | C1orf65 | ENSG00000178395 |
| 1 | 221952622 | 221952849 | 221952745 | 8   | 10  | 0  | 10.54799562 | 0.000613541 |         | ENSG00000212398 |

|   |           |           |           |    |     |   |             |             |         |                 |
|---|-----------|-----------|-----------|----|-----|---|-------------|-------------|---------|-----------------|
| 1 | 221960890 | 221961088 | 221960989 | 8  | 8   | 7 | 1.07877228  | 0.435076    | CAPN2   | ENSG00000162909 |
| 1 | 221961597 | 221961805 | 221961675 | 10 | 11  | 1 | 5.753452158 | 0.00215302  | CAPN2   | ENSG00000162909 |
| 1 | 221962404 | 221962707 | 221962555 | 15 | 18  | 1 | 9.109632584 | 2.91E-05    | CAPN2   | ENSG00000162909 |
| 1 | 224031801 | 224032069 | 224031933 | 9  | 9   | 9 | 0.958908693 | 0.536911    | SRP9    | ENSG00000143742 |
| 1 | 224075126 | 224075481 | 224075303 | 63 | 69  | 2 | 22.37453617 | 2.28E-18    | EPHX1   | ENSG00000143819 |
| 1 | 224080746 | 224081005 | 224080875 | 14 | 14  | 2 | 4.794543465 | 0.00154571  | EPHX1   | ENSG00000143819 |
| 1 | 224230338 | 224230615 | 224230476 | 12 | 14  | 4 | 2.876726079 | 0.01219     |         | ENSG00000213032 |
| 1 | 224678912 | 224679126 | 224679019 | 9  | 9   | 1 | 4.794543465 | 0.00708517  |         | ENSG00000208160 |
| 1 | 224733778 | 224734251 | 224733957 | 17 | 26  | 4 | 5.178106943 | 2.75E-05    |         | ENSG00000177770 |
| 1 | 225977813 | 225978244 | 225978003 | 26 | 39  | 1 | 19.17817386 | 4.29E-11    | SNAP47  | ENSG00000143740 |
| 1 | 227105538 | 227105790 | 227105656 | 9  | 12  | 9 | 1.246581301 | 0.295061    |         | ENSG00000181413 |
| 1 | 227240453 | 227240765 | 227240589 | 10 | 15  | 3 | 3.835634772 | 0.00291691  |         | ENSG00000181413 |
| 1 | 227433739 | 227434086 | 227433897 | 15 | 19  | 2 | 6.39272462  | 8.83E-05    | TMEM78  | ENSG00000177800 |
| 1 | 227441010 | 227441339 | 227441174 | 18 | 22  | 0 | 22.05489994 | 1.92E-07    | TMEM78  | ENSG00000177800 |
| 1 | 228051498 | 228051689 | 228051566 | 8  | 9   | 1 | 4.794543465 | 0.00708517  |         | ENSG00000219709 |
| 1 | 228830146 | 228830508 | 228830331 | 36 | 43  | 1 | 21.09599125 | 3.19E-12    | COG2    | ENSG00000135775 |
| 1 | 229373977 | 229374323 | 229374214 | 15 | 20  | 3 | 5.034270639 | 0.000202317 | TRIM67  | ENSG00000119283 |
| 1 | 230216950 | 230217130 | 230216956 | 8  | 9   | 1 | 4.794543465 | 0.00708517  |         | ENSG00000217276 |
| 1 | 230537286 | 230537557 | 230537394 | 10 | 12  | 3 | 3.116453252 | 0.0131971   |         | ENSG00000208119 |
| 1 | 230921734 | 230921922 | 230921787 | 8  | 9   | 0 | 9.589086931 | 0.00120187  |         | ENSG00000208118 |
| 1 | 230951284 | 230951571 | 230951427 | 15 | 16  | 1 | 8.150723891 | 0.000101217 |         | ENSG00000208118 |
| 1 | 231155126 | 231155694 | 231155411 | 74 | 97  | 1 | 46.98652596 | 1.18E-27    | C1orf57 | ENSG00000135778 |
| 1 | 231227855 | 231228220 | 231228034 | 8  | 13  | 0 | 13.4247217  | 8.16E-05    | PCNXL2  | ENSG00000135749 |
| 1 | 231381967 | 231382311 | 231382139 | 14 | 17  | 0 | 17.26035648 | 5.54E-06    | PCNXL2  | ENSG00000135749 |
| 1 | 231910877 | 231911088 | 231910921 | 8  | 10  | 0 | 10.54799562 | 0.000613541 | KCNK1   | ENSG00000135750 |
| 1 | 232595535 | 232595900 | 232595732 | 21 | 26  | 7 | 3.236316839 | 0.000628017 | C1orf31 | ENSG00000168275 |
| 1 | 232767110 | 232767344 | 232767216 | 8  | 8   | 3 | 2.157544559 | 0.0836802   |         | ENSG00000212144 |
| 1 | 232820750 | 232821385 | 232820956 | 94 | 118 | 0 | 114.1101345 | 1.78E-35    | IRF2BP2 | ENSG00000168264 |
| 1 | 232926312 | 232926625 | 232926468 | 12 | 16  | 5 | 2.716907964 | 0.0109645   |         | ENSG00000201638 |
| 1 | 232983994 | 232984180 | 232984098 | 9  | 9   | 1 | 4.794543465 | 0.00708517  |         | ENSG00000201638 |
| 1 | 233597102 | 233597307 | 233597204 | 10 | 10  | 1 | 5.273997812 | 0.00391723  | TBCE    | ENSG00000116957 |
| 1 | 233899848 | 233900205 | 233900027 | 25 | 30  | 3 | 7.431542371 | 6.87E-07    | GNG4    | ENSG00000168243 |
| 1 | 233904895 | 233905350 | 233905171 | 66 | 89  | 0 | 86.30178238 | 5.23E-27    | GNG4    | ENSG00000168243 |
| 1 | 234978620 | 234978811 | 234978715 | 8  | 8   | 0 | 8.630178238 | 0.00235436  | MTR     | ENSG00000116984 |

|    |           |           |           |    |     |   |             |             |           |                 |
|----|-----------|-----------|-----------|----|-----|---|-------------|-------------|-----------|-----------------|
| 1  | 236549959 | 236550219 | 236550089 | 9  | 10  | 0 | 10.54799562 | 0.000613541 |           | ENSG00000208075 |
| 1  | 239166825 | 239167161 | 239167001 | 29 | 33  | 0 | 32.60289556 | 1.18E-10    |           | ENSG00000220141 |
| 1  | 239979089 | 239979381 | 239979235 | 9  | 11  | 4 | 2.301380863 | 0.0459276   |           | ENSG00000220413 |
| 1  | 240430028 | 240430392 | 240430230 | 17 | 22  | 0 | 22.05489994 | 1.92E-07    |           | ENSG00000222120 |
| 1  | 242469141 | 242469698 | 242469487 | 51 | 71  | 1 | 34.52071295 | 3.42E-20    | C1orf100  | ENSG00000173728 |
| 1  | 242553103 | 242553299 | 242553201 | 9  | 10  | 0 | 10.54799562 | 0.000613541 | C1orf100  | ENSG00000173728 |
| 1  | 242965190 | 242965792 | 242965501 | 89 | 118 | 0 | 114.1101345 | 1.78E-35    |           | ENSG00000218614 |
| 1  | 243719752 | 243720043 | 243719890 | 21 | 24  | 2 | 7.990905775 | 4.56E-06    | KIF26B    | ENSG00000162849 |
| 1  | 244231083 | 244231439 | 244231261 | 23 | 28  | 0 | 27.8083521  | 3.40E-09    | SMYD3     | ENSG00000185420 |
| 1  | 245343130 | 245343372 | 245343238 | 9  | 12  | 1 | 6.232906505 | 0.00117736  |           | ENSG00000216290 |
| 1  | 247134984 | 247135233 | 247135116 | 11 | 12  | 3 | 3.116453252 | 0.0131971   | ZNF692    | ENSG00000171163 |
| 10 | 266707    | 267019    | 266862    | 8  | 12  | 8 | 1.385090334 | 0.219216    | ZMYND11   | ENSG00000015171 |
| 10 | 270717    | 270921    | 270820    | 11 | 14  | 3 | 3.595907599 | 0.00486913  |           | ENSG00000201861 |
| 10 | 275141    | 275362    | 275248    | 9  | 9   | 3 | 2.397271733 | 0.0539397   |           | ENSG00000201861 |
| 10 | 365359    | 365616    | 365487    | 10 | 13  | 1 | 6.712360851 | 0.000640982 | DIP2C     | ENSG00000151240 |
| 10 | 409138    | 409374    | 409252    | 8  | 12  | 2 | 4.155271003 | 0.0046638   | DIP2C     | ENSG00000151240 |
| 10 | 409397    | 409776    | 409620    | 17 | 23  | 2 | 7.671269544 | 8.30E-06    | DIP2C     | ENSG00000151240 |
| 10 | 490893    | 491112    | 490984    | 9  | 10  | 4 | 2.109599125 | 0.0694668   |           | ENSG00000209361 |
| 10 | 546995    | 547434    | 547150    | 16 | 22  | 8 | 2.450544438 | 0.0073921   | DIP2C     | ENSG00000151240 |
| 10 | 556332    | 556782    | 556609    | 25 | 35  | 5 | 5.753452158 | 7.49E-07    | DIP2C     | ENSG00000151240 |
| 10 | 649291    | 649534    | 649412    | 17 | 17  | 9 | 1.726035648 | 0.0753664   | C10orf108 | ENSG00000180525 |
| 10 | 1085108   | 1085494   | 1085316   | 9  | 15  | 8 | 1.704726565 | 0.0916153   | WDR37     | ENSG00000047056 |
| 10 | 1322329   | 1322546   | 1322433   | 9  | 12  | 2 | 4.155271003 | 0.0046638   | ADARB2    | ENSG00000185736 |
| 10 | 1391560   | 1391751   | 1391694   | 9  | 9   | 2 | 3.19636231  | 0.0229249   | ADARB2    | ENSG00000185736 |
| 10 | 1497812   | 1498105   | 1497959   | 8  | 11  | 1 | 5.753452158 | 0.00215302  |           | ENSG00000205696 |
| 10 | 1538572   | 1538871   | 1538721   | 9  | 13  | 2 | 4.474907234 | 0.00269459  |           | ENSG00000205696 |
| 10 | 1757017   | 1757591   | 1757345   | 55 | 84  | 3 | 20.37680973 | 2.02E-21    | ADARB2    | ENSG00000185736 |
| 10 | 2149990   | 2150254   | 2150122   | 18 | 19  | 1 | 9.589086931 | 1.56E-05    |           | ENSG00000212156 |
| 10 | 3127582   | 3127767   | 3127673   | 8  | 8   | 1 | 4.315089119 | 0.0127267   | PFKP      | ENSG00000067057 |
| 10 | 3159485   | 3159686   | 3159595   | 9  | 10  | 0 | 10.54799562 | 0.000613541 | PFKP      | ENSG00000067057 |
| 10 | 3809190   | 3809548   | 3809369   | 10 | 16  | 6 | 2.328778255 | 0.0221113   | KLF6      | ENSG00000067082 |
| 10 | 3816099   | 3816536   | 3816264   | 8  | 16  | 7 | 2.037680973 | 0.0400399   | KLF6      | ENSG00000067082 |
| 10 | 3838054   | 3838242   | 3838136   | 9  | 10  | 1 | 5.273997812 | 0.00391723  | KLF6      | ENSG00000067082 |
| 10 | 4695389   | 4695579   | 4695484   | 8  | 9   | 4 | 1.917817386 | 0.103282    |           | ENSG00000207124 |

|    |         |         |         |    |    |    |             |             |          |                 |
|----|---------|---------|---------|----|----|----|-------------|-------------|----------|-----------------|
| 10 | 4943333 | 4943705 | 4943532 | 16 | 20 | 1  | 10.06854128 | 8.32E-06    |          | ENSG00000151631 |
| 10 | 4948238 | 4948560 | 4948406 | 11 | 15 | 2  | 5.114179696 | 0.00088103  |          | ENSG00000151631 |
| 10 | 4950447 | 4950760 | 4950597 | 12 | 15 | 1  | 7.671269544 | 0.000187863 |          | ENSG00000151631 |
| 10 | 5315485 | 5315774 | 5315595 | 11 | 15 | 1  | 7.671269544 | 0.000187863 |          | ENSG00000215267 |
| 10 | 5416046 | 5416380 | 5416209 | 8  | 11 | 0  | 11.50690432 | 0.000313206 | UCN3     | ENSG00000178473 |
| 10 | 5498548 | 5498875 | 5498714 | 10 | 14 | 10 | 1.307602763 | 0.244096    | NET1     | ENSG00000173848 |
| 10 | 5525607 | 5525932 | 5525780 | 9  | 12 | 14 | 0.831054201 | 0.689281    | CALML5   | ENSG00000178372 |
| 10 | 5535434 | 5535745 | 5535581 | 14 | 19 | 3  | 4.794543465 | 0.000349205 | CALML5   | ENSG00000178372 |
| 10 | 5576768 | 5576951 | 5576895 | 8  | 8  | 1  | 4.315089119 | 0.0127267   | CALML3   | ENSG00000178363 |
| 10 | 5579851 | 5580082 | 5580007 | 11 | 14 | 2  | 4.794543465 | 0.00154571  | CALML3   | ENSG00000178363 |
| 10 | 5583047 | 5583370 | 5583208 | 12 | 16 | 3  | 4.075361945 | 0.00173346  | CALML3   | ENSG00000178363 |
| 10 | 5700170 | 5700368 | 5700269 | 8  | 8  | 2  | 2.876726079 | 0.0381137   |          | ENSG00000216230 |
| 10 | 5711842 | 5712030 | 5711936 | 9  | 9  | 3  | 2.397271733 | 0.0539397   |          | ENSG00000222233 |
| 10 | 5767423 | 5767751 | 5767581 | 9  | 13 | 5  | 2.237453617 | 0.038866    | C10orf18 | ENSG00000108021 |
| 10 | 6104641 | 6104956 | 6104792 | 12 | 15 | 1  | 7.671269544 | 0.000187863 |          | ENSG00000209380 |
| 10 | 6197826 | 6198040 | 6197929 | 8  | 8  | 2  | 2.876726079 | 0.0381137   | RBM17    | ENSG00000134453 |
| 10 | 6286602 | 6286852 | 6286716 | 8  | 10 | 1  | 5.273997812 | 0.00391723  |          | ENSG00000213994 |
| 10 | 6321198 | 6321501 | 6321349 | 10 | 14 | 6  | 2.054804342 | 0.0480281   |          | ENSG00000213994 |
| 10 | 6655218 | 6655795 | 6655516 | 28 | 48 | 1  | 23.49326298 | 1.23E-13    | PRKCQ    | ENSG00000065675 |
| 10 | 7002530 | 7002879 | 7002733 | 9  | 13 | 0  | 13.4247217  | 8.16E-05    | PRKCQ    | ENSG00000065675 |
| 10 | 7073410 | 7073768 | 7073589 | 16 | 21 | 0  | 21.09599125 | 3.76E-07    |          | ENSG00000220641 |
| 10 | 7315658 | 7315991 | 7315843 | 9  | 13 | 3  | 3.356180426 | 0.00805599  |          | ENSG00000220641 |
| 10 | 7869713 | 7869952 | 7869810 | 9  | 10 | 5  | 1.757999271 | 0.121253    | KIN      | ENSG00000151657 |
| 10 | 7900329 | 7900817 | 7900576 | 10 | 19 | 5  | 3.19636231  | 0.00280933  | TAF3     | ENSG00000165632 |
| 10 | 7901087 | 7901374 | 7901243 | 10 | 14 | 2  | 4.794543465 | 0.00154571  | TAF3     | ENSG00000165632 |
| 10 | 8108709 | 8109053 | 8108888 | 8  | 11 | 4  | 2.301380863 | 0.0459276   |          | ENSG00000197308 |
| 10 | 8127666 | 8127897 | 8127817 | 9  | 10 | 7  | 1.318499453 | 0.269217    |          | ENSG00000197308 |
| 10 | 8136579 | 8136831 | 8136705 | 10 | 11 | 7  | 1.43836304  | 0.204844    | GATA3    | ENSG00000107485 |
| 10 | 8489563 | 8489847 | 8489705 | 8  | 10 | 1  | 5.273997812 | 0.00391723  |          | ENSG00000220584 |
| 10 | 8698325 | 8698518 | 8698412 | 9  | 9  | 7  | 1.198635866 | 0.346278    |          | ENSG00000219750 |
| 10 | 8710307 | 8710608 | 8710457 | 12 | 17 | 7  | 2.157544559 | 0.0276499   |          | ENSG00000219750 |
| 10 | 8846077 | 8846540 | 8846334 | 44 | 62 | 2  | 20.13708255 | 2.06E-16    |          | ENSG00000212505 |
| 10 | 9055418 | 9055610 | 9055513 | 8  | 8  | 4  | 1.726035648 | 0.150596    |          | ENSG00000212505 |
| 10 | 9057619 | 9057865 | 9057742 | 9  | 11 | 6  | 1.643843474 | 0.137712    |          | ENSG00000212505 |

|    |          |          |          |    |     |    |             |             |         |                 |
|----|----------|----------|----------|----|-----|----|-------------|-------------|---------|-----------------|
| 10 | 9144234  | 9144433  | 9144296  | 8  | 9   | 1  | 4.794543465 | 0.00708517  |         | ENSG00000212505 |
| 10 | 9270023  | 9270282  | 9270152  | 8  | 12  | 2  | 4.155271003 | 0.0046638   |         |                 |
| 10 | 9270348  | 9270931  | 9270647  | 19 | 34  | 16 | 1.97422378  | 0.00831751  |         |                 |
| 10 | 9907451  | 9907658  | 9907542  | 11 | 11  | 0  | 11.50690432 | 0.000313206 |         | ENSG00000203336 |
| 10 | 10039598 | 10039777 | 10039747 | 9  | 9   | 5  | 1.598181155 | 0.170911    |         | ENSG00000218997 |
| 10 | 10820316 | 10820637 | 10820475 | 22 | 26  | 4  | 5.178106943 | 2.75E-05    |         | ENSG00000220885 |
| 10 | 11118507 | 11118703 | 11118556 | 8  | 8   | 6  | 1.232882605 | 0.333038    | CUGBP2  | ENSG00000048740 |
| 10 | 11153439 | 11154078 | 11153832 | 40 | 66  | 6  | 9.178126062 | 7.01E-14    | CUGBP2  | ENSG00000048740 |
| 10 | 11554246 | 11554551 | 11554398 | 9  | 13  | 4  | 2.684944341 | 0.01921     |         | ENSG00000181437 |
| 10 | 11839980 | 11840439 | 11840134 | 10 | 17  | 3  | 4.315089119 | 0.00102271  | ECHDC3  | ENSG00000134463 |
| 10 | 12278049 | 12278232 | 12278140 | 9  | 10  | 5  | 1.757999271 | 0.121253    | NUDT5   | ENSG00000165609 |
| 10 | 12403766 | 12404022 | 12403923 | 9  | 10  | 0  | 10.54799562 | 0.000613541 | CAMK1D  | ENSG00000183049 |
| 10 | 12687812 | 12688034 | 12687923 | 11 | 11  | 4  | 2.301380863 | 0.0459276   |         | ENSG00000221331 |
| 10 | 12713249 | 12713473 | 12713361 | 17 | 17  | 3  | 4.315089119 | 0.00102271  |         | ENSG00000221331 |
| 10 | 12747710 | 12748069 | 12747890 | 8  | 15  | 4  | 3.068507818 | 0.0076507   |         | ENSG00000221331 |
| 10 | 12802384 | 12802656 | 12802536 | 9  | 11  | 5  | 1.917817386 | 0.0843804   |         | ENSG00000221331 |
| 10 | 12812047 | 12812258 | 12812162 | 8  | 10  | 0  | 10.54799562 | 0.000613541 |         | ENSG00000221331 |
| 10 | 13369419 | 13369700 | 13369566 | 8  | 11  | 1  | 5.753452158 | 0.00215302  | PHYH    | ENSG00000107537 |
| 10 | 13668731 | 13669084 | 13668907 | 13 | 19  | 11 | 1.598181155 | 0.0927758   | PRPF18  | ENSG00000165630 |
| 10 | 13840245 | 13840808 | 13840536 | 99 | 127 | 3  | 30.68507818 | 1.84E-33    |         | ENSG00000199407 |
| 10 | 13953067 | 13953316 | 13953191 | 11 | 12  | 3  | 3.116453252 | 0.0131971   |         | ENSG00000215227 |
| 10 | 14074089 | 14074405 | 14074236 | 17 | 21  | 2  | 7.031997082 | 2.73E-05    | FRMD4A  | ENSG00000151474 |
| 10 | 14735915 | 14736171 | 14736013 | 10 | 10  | 4  | 2.109599125 | 0.0694668   |         | ENSG00000201766 |
| 10 | 14958154 | 14958335 | 14958244 | 8  | 8   | 0  | 8.630178238 | 0.00235436  | SUV39H2 | ENSG00000152455 |
| 10 | 15205655 | 15206360 | 15206058 | 40 | 59  | 0  | 57.53452158 | 3.01E-18    | RPP38   | ENSG00000152464 |
| 10 | 15254546 | 15254737 | 15254665 | 9  | 11  | 4  | 2.301380863 | 0.0459276   |         | ENSG00000216981 |
| 10 | 16278894 | 16279282 | 16279103 | 18 | 24  | 1  | 11.98635866 | 6.63E-07    |         | ENSG00000201260 |
| 10 | 16975731 | 16975999 | 16975886 | 8  | 11  | 4  | 2.301380863 | 0.0459276   | RSU1    | ENSG00000148484 |
| 10 | 17282874 | 17283053 | 17282986 | 8  | 8   | 0  | 8.630178238 | 0.00235436  | TRDMT1  | ENSG00000107614 |
| 10 | 17312722 | 17312933 | 17312827 | 10 | 11  | 8  | 1.278544924 | 0.28289     | VIM     | ENSG00000026025 |
| 10 | 17329277 | 17329874 | 17329477 | 29 | 50  | 1  | 24.45217167 | 3.32E-14    | VIM     | ENSG00000026025 |
| 10 | 17469915 | 17470548 | 17470369 | 20 | 36  | 5  | 5.913270274 | 4.32E-07    |         | ENSG00000204832 |
| 10 | 18448669 | 18449022 | 18448845 | 20 | 25  | 1  | 12.46581301 | 3.51E-07    | CACNB2  | ENSG00000165995 |
| 10 | 18555408 | 18555630 | 18555510 | 8  | 9   | 1  | 4.794543465 | 0.00708517  | CACNB2  | ENSG00000165995 |

|    |          |          |          |     |     |    |             |             |                          |
|----|----------|----------|----------|-----|-----|----|-------------|-------------|--------------------------|
| 10 | 19534629 | 19534856 | 19534742 | 10  | 10  | 7  | 1.318499453 | 0.269217    | ENSG00000204741          |
| 10 | 19538386 | 19538626 | 19538535 | 9   | 12  | 10 | 1.133255728 | 0.37674     | ENSG00000204741          |
| 10 | 19575296 | 19575518 | 19575407 | 11  | 12  | 10 | 1.133255728 | 0.37674     | ENSG00000204741          |
| 10 | 20951976 | 20952166 | 20952062 | 8   | 8   | 2  | 2.876726079 | 0.0381137   | ENSG00000220963          |
| 10 | 20991285 | 20991490 | 20991388 | 8   | 8   | 2  | 2.876726079 | 0.0381137   | ENSG00000220963          |
| 10 | 21513263 | 21513658 | 21513422 | 9   | 16  | 3  | 4.075361945 | 0.00173346  | NEBL ENSG00000078114     |
| 10 | 21524410 | 21524606 | 21524508 | 11  | 11  | 4  | 2.301380863 | 0.0459276   | NEBL ENSG00000078114     |
| 10 | 21665884 | 21666072 | 21666028 | 9   | 10  | 4  | 2.109599125 | 0.0694668   | ENSG00000207264          |
| 10 | 21678650 | 21678832 | 21678741 | 8   | 8   | 1  | 4.315089119 | 0.0127267   | ENSG00000207264          |
| 10 | 21693396 | 21693795 | 21693555 | 11  | 16  | 3  | 4.075361945 | 0.00173346  | ENSG00000216589          |
| 10 | 21756584 | 21757131 | 21756867 | 60  | 85  | 1  | 41.2330738  | 3.32E-24    | ENSG00000216589          |
| 10 | 21864560 | 21864760 | 21864656 | 9   | 9   | 1  | 4.794543465 | 0.00708517  | MLLT10 ENSG00000078403   |
| 10 | 22056693 | 22056898 | 22056799 | 8   | 9   | 2  | 3.19636231  | 0.0229249   | MLLT10 ENSG00000078403   |
| 10 | 22415697 | 22415978 | 22415820 | 8   | 12  | 3  | 3.116453252 | 0.0131971   | ENSG00000218554          |
| 10 | 22426187 | 22426468 | 22426354 | 11  | 14  | 2  | 4.794543465 | 0.00154571  | ENSG00000218554          |
| 10 | 22558190 | 22558404 | 22558297 | 10  | 12  | 4  | 2.493162602 | 0.0299057   | ENSG00000218957          |
| 10 | 22757020 | 22757302 | 22757171 | 10  | 13  | 5  | 2.237453617 | 0.038866    | SPAG6 ENSG00000077327    |
| 10 | 23256996 | 23257217 | 23257100 | 8   | 10  | 2  | 3.515998541 | 0.0136204   | ARMC3 ENSG00000165309    |
| 10 | 23326132 | 23326356 | 23326228 | 9   | 9   | 2  | 3.19636231  | 0.0229249   | ENSG00000209509          |
| 10 | 23622105 | 23622334 | 23622245 | 9   | 10  | 7  | 1.318499453 | 0.269217    | ENSG00000216784          |
| 10 | 23854456 | 23854655 | 23854544 | 10  | 11  | 2  | 3.835634772 | 0.00800699  | OTUD1 ENSG00000165312    |
| 10 | 24567478 | 24567685 | 24567581 | 9   | 9   | 3  | 2.397271733 | 0.0539397   | KIAA1217 ENSG00000120549 |
| 10 | 24578636 | 24579004 | 24578767 | 12  | 17  | 4  | 3.452071295 | 0.00292757  | ENSG00000207930          |
| 10 | 24580618 | 24580909 | 24580766 | 9   | 12  | 7  | 1.558226626 | 0.152813    | ENSG00000207930          |
| 10 | 24584862 | 24585463 | 24585132 | 157 | 200 | 9  | 19.27406473 | 6.28E-47    | ENSG00000207930          |
| 10 | 24617555 | 24618164 | 24617950 | 16  | 35  | 4  | 6.90414259  | 1.81E-07    | ENSG00000207930          |
| 10 | 24678545 | 24678754 | 24678609 | 11  | 11  | 0  | 11.50690432 | 0.000313206 | ENSG00000207930          |
| 10 | 24793483 | 24793748 | 24793602 | 9   | 12  | 1  | 6.232906505 | 0.00117736  | KIAA1217 ENSG00000120549 |
| 10 | 25085242 | 25085657 | 25085403 | 29  | 36  | 1  | 17.73981082 | 3.00E-10    | ARHGAP21 ENSG00000107863 |
| 10 | 25178597 | 25178810 | 25178663 | 8   | 9   | 0  | 9.589086931 | 0.00120187  | ENSG00000216235          |
| 10 | 25503171 | 25503350 | 25503260 | 8   | 8   | 1  | 4.315089119 | 0.0127267   | GPR158 ENSG00000151025   |
| 10 | 25503513 | 25503727 | 25503630 | 9   | 9   | 2  | 3.19636231  | 0.0229249   | GPR158 ENSG00000151025   |
| 10 | 26752696 | 26752916 | 26752809 | 8   | 8   | 0  | 8.630178238 | 0.00235436  | APBB1IP ENSG00000077420  |
| 10 | 27188375 | 27188566 | 27188499 | 9   | 9   | 1  | 4.794543465 | 0.00708517  | ABI1 ENSG00000136754     |



|    |          |          |          |    |    |   |             |             |          |                 |
|----|----------|----------|----------|----|----|---|-------------|-------------|----------|-----------------|
| 10 | 27219891 | 27220145 | 27219998 | 8  | 10 | 3 | 2.636998906 | 0.034203    |          | ENSG00000209570 |
| 10 | 27571815 | 27572255 | 27572078 | 11 | 18 | 5 | 3.036544195 | 0.0044641   | ACBD5    | ENSG00000107897 |
| 10 | 27689539 | 27689743 | 27689641 | 9  | 9  | 4 | 1.917817386 | 0.103282    |          | ENSG00000213770 |
| 10 | 28194157 | 28194552 | 28194343 | 37 | 47 | 5 | 7.671269544 | 8.66E-10    |          | ENSG00000219432 |
| 10 | 28656540 | 28656725 | 28656631 | 8  | 8  | 0 | 8.630178238 | 0.00235436  |          | ENSG00000220364 |
| 10 | 28704547 | 28704758 | 28704605 | 8  | 10 | 4 | 2.109599125 | 0.0694668   |          | ENSG00000209609 |
| 10 | 29014203 | 29014399 | 29014320 | 8  | 9  | 5 | 1.598181155 | 0.170911    | BAMBI    | ENSG00000095739 |
| 10 | 29298782 | 29299099 | 29298924 | 16 | 20 | 1 | 10.06854128 | 8.32E-06    |          | ENSG00000216946 |
| 10 | 29421029 | 29421581 | 29421257 | 24 | 38 | 2 | 12.46581301 | 8.46E-10    |          | ENSG00000216946 |
| 10 | 29434140 | 29434363 | 29434279 | 8  | 11 | 6 | 1.643843474 | 0.137712    | LYZL1    | ENSG00000120563 |
| 10 | 29435198 | 29435410 | 29435304 | 10 | 10 | 3 | 2.636998906 | 0.034203    | LYZL1    | ENSG00000120563 |
| 10 | 29453751 | 29454018 | 29453884 | 9  | 12 | 6 | 1.78083043  | 0.0985525   | LYZL1    | ENSG00000120563 |
| 10 | 29460691 | 29460888 | 29460789 | 8  | 8  | 3 | 2.157544559 | 0.0836802   | LYZL1    | ENSG00000120563 |
| 10 | 29773155 | 29773412 | 29773290 | 14 | 16 | 0 | 16.30144778 | 1.09E-05    |          | ENSG00000207612 |
| 10 | 29774382 | 29774619 | 29774500 | 9  | 10 | 2 | 3.515998541 | 0.0136204   |          | ENSG00000207612 |
| 10 | 30113371 | 30113642 | 30113534 | 10 | 13 | 2 | 4.474907234 | 0.00269459  | SVIL     | ENSG00000197321 |
| 10 | 30280662 | 30280994 | 30280860 | 9  | 13 | 1 | 6.712360851 | 0.000640982 |          | ENSG00000220159 |
| 10 | 30558890 | 30559453 | 30559274 | 50 | 68 | 1 | 33.08234991 | 2.47E-19    |          | ENSG00000200887 |
| 10 | 30910850 | 30911093 | 30910962 | 8  | 9  | 5 | 1.598181155 | 0.170911    |          | ENSG00000222075 |
| 10 | 30967139 | 30967344 | 30967232 | 8  | 8  | 0 | 8.630178238 | 0.00235436  | LYZL2    | ENSG00000151033 |
| 10 | 31361396 | 31361579 | 31361534 | 8  | 9  | 1 | 4.794543465 | 0.00708517  | ZNF438   | ENSG00000183621 |
| 10 | 31412718 | 31412927 | 31412822 | 9  | 10 | 2 | 3.515998541 | 0.0136204   | ZNF438   | ENSG00000183621 |
| 10 | 31682640 | 31682865 | 31682752 | 9  | 10 | 0 | 10.54799562 | 0.000613541 |          | ENSG00000219868 |
| 10 | 32165860 | 32166078 | 32166008 | 9  | 11 | 3 | 2.876726079 | 0.0213797   | ARHGAP12 | ENSG00000165322 |
| 10 | 32269802 | 32270181 | 32269978 | 9  | 17 | 1 | 8.630178238 | 5.44E-05    | ARHGAP12 | ENSG00000165322 |
| 10 | 32271849 | 32272083 | 32271908 | 10 | 12 | 2 | 4.155271003 | 0.0046638   | ARHGAP12 | ENSG00000165322 |
| 10 | 32500177 | 32500663 | 32500356 | 9  | 17 | 2 | 5.753452158 | 0.000281509 |          | ENSG00000217094 |
| 10 | 32706563 | 32706803 | 32706683 | 9  | 10 | 1 | 5.273997812 | 0.00391723  | EPC1     | ENSG00000120616 |
| 10 | 33269773 | 33270078 | 33269918 | 9  | 13 | 1 | 6.712360851 | 0.000640982 |          | ENSG00000218547 |
| 10 | 33593274 | 33593490 | 33593382 | 8  | 8  | 1 | 4.315089119 | 0.0127267   |          | ENSG00000209716 |
| 10 | 33620196 | 33620488 | 33620342 | 17 | 17 | 2 | 5.753452158 | 0.000281509 |          | ENSG00000209716 |
| 10 | 33838308 | 33838558 | 33838455 | 14 | 15 | 2 | 5.114179696 | 0.00088103  | NRP1     | ENSG00000099250 |
| 10 | 33913209 | 33913398 | 33913303 | 8  | 9  | 0 | 9.589086931 | 0.00120187  | NRP1     | ENSG00000099250 |
| 10 | 34033249 | 34033740 | 34033561 | 18 | 27 | 2 | 8.949814469 | 7.46E-07    |          | ENSG00000219446 |

|    |          |          |          |     |     |     |             |             |       |                 |
|----|----------|----------|----------|-----|-----|-----|-------------|-------------|-------|-----------------|
| 10 | 35027771 | 35028264 | 35028108 | 11  | 20  | 3   | 5.034270639 | 0.000202317 |       | ENSG00000215184 |
| 10 | 35040638 | 35040829 | 35040746 | 10  | 10  | 1   | 5.273997812 | 0.00391723  |       | ENSG00000215184 |
| 10 | 35042920 | 35043202 | 35043061 | 11  | 11  | 3   | 2.876726079 | 0.0213797   |       | ENSG00000215184 |
| 10 | 35048373 | 35048630 | 35048501 | 15  | 15  | 5   | 2.557089848 | 0.0169197   |       | ENSG00000215184 |
| 10 | 35234943 | 35235321 | 35235120 | 31  | 36  | 4   | 7.095924329 | 1.02E-07    |       | ENSG00000223047 |
| 10 | 35283200 | 35283421 | 35283310 | 14  | 14  | 3   | 3.595907599 | 0.00486913  |       | ENSG00000213724 |
| 10 | 35350416 | 35350601 | 35350508 | 8   | 10  | 6   | 1.506856518 | 0.188853    | CUL2  | ENSG00000108094 |
| 10 | 35635810 | 35636088 | 35635972 | 9   | 11  | 4   | 2.301380863 | 0.0459276   | CCNY  | ENSG00000108100 |
| 10 | 35875721 | 35876073 | 35875897 | 9   | 15  | 6   | 2.191791298 | 0.0328001   | GJD4  | ENSG00000177291 |
| 10 | 36150120 | 36150505 | 36150326 | 20  | 27  | 5   | 4.474907234 | 5.37E-05    |       | ENSG00000218744 |
| 10 | 36216732 | 36216964 | 36216817 | 8   | 8   | 0   | 8.630178238 | 0.00235436  |       | ENSG00000218744 |
| 10 | 36303781 | 36304185 | 36303918 | 17  | 22  | 1   | 11.02744997 | 2.36E-06    |       | ENSG00000218744 |
| 10 | 36402817 | 36403028 | 36402923 | 8   | 9   | 0   | 9.589086931 | 0.00120187  |       | ENSG00000218688 |
| 10 | 37747793 | 37748020 | 37747906 | 9   | 11  | 0   | 11.50690432 | 0.000313206 |       | ENSG00000218882 |
| 10 | 38305614 | 38305863 | 38305698 | 14  | 14  | 2   | 4.794543465 | 0.00154571  | ZNF25 | ENSG00000175395 |
| 10 | 38626393 | 38626629 | 38626510 | 8   | 9   | 0   | 9.589086931 | 0.00120187  |       | ENSG00000220969 |
| 10 | 38841081 | 38841411 | 38841246 | 9   | 12  | 5   | 2.077635502 | 0.0577144   |       | ENSG00000219057 |
| 10 | 38912071 | 38912328 | 38912178 | 10  | 10  | 5   | 1.757999271 | 0.121253    |       | ENSG00000215151 |
| 10 | 39122205 | 39122534 | 39122375 | 19  | 19  | 26  | 0.710302736 | 0.88        |       | ENSG00000217685 |
| 10 | 39123235 | 39123561 | 39123398 | 8   | 8   | 0   | 8.630178238 | 0.00235436  |       | ENSG00000217685 |
| 10 | 39134174 | 39134504 | 39134342 | 22  | 22  | 23  | 0.918954164 | 0.614181    |       | ENSG00000217685 |
| 10 | 39150066 | 39150245 | 39150216 | 9   | 10  | 2   | 3.515998541 | 0.0136204   |       | ENSG00000217685 |
| 10 | 39160359 | 39160687 | 39160523 | 13  | 13  | 11  | 1.118726809 | 0.38479     |       | ENSG00000217685 |
| 10 | 39163429 | 39163759 | 39163594 | 11  | 13  | 17  | 0.745817872 | 0.798145    |       | ENSG00000217685 |
| 10 | 39168754 | 39169080 | 39168917 | 9   | 9   | 6   | 1.369869562 | 0.253675    |       | ENSG00000217685 |
| 10 | 39186632 | 39186811 | 39186782 | 8   | 8   | 13  | 0.616441303 | 0.878084    |       | ENSG00000217685 |
| 10 | 39193861 | 39194044 | 39194011 | 9   | 10  | 5   | 1.757999271 | 0.121253    |       | ENSG00000217685 |
| 10 | 41675249 | 41675432 | 41675339 | 8   | 8   | 9   | 0.863017824 | 0.627343    |       | ENSG00000220883 |
| 10 | 41677693 | 41678163 | 41677984 | 19  | 29  | 17  | 1.598181155 | 0.0533584   |       | ENSG00000220883 |
| 10 | 41678196 | 41678383 | 41678211 | 10  | 12  | 8   | 1.385090334 | 0.219216    |       | ENSG00000220883 |
| 10 | 41695814 | 41696064 | 41695914 | 11  | 12  | 4   | 2.493162602 | 0.0299057   |       | ENSG00000220883 |
| 10 | 41699742 | 41700090 | 41699916 | 230 | 232 | 208 | 1.06902261  | 0.241257    |       | ENSG00000220883 |
| 10 | 41700102 | 41700438 | 41700270 | 24  | 25  | 26  | 0.923393556 | 0.614269    |       | ENSG00000220883 |
| 10 | 41704536 | 41704728 | 41704689 | 10  | 12  | 7   | 1.558226626 | 0.152813    |       | ENSG00000220883 |

|    |          |          |          |     |     |     |             |             |                           |
|----|----------|----------|----------|-----|-----|-----|-------------|-------------|---------------------------|
| 10 | 41705027 | 41705372 | 41705199 | 76  | 78  | 80  | 0.935231935 | 0.664028    | ENSG00000220883           |
| 10 | 41705544 | 41705724 | 41705576 | 8   | 8   | 9   | 0.863017824 | 0.627343    | ENSG00000220883           |
| 10 | 41710953 | 41711166 | 41711012 | 12  | 15  | 8   | 1.704726565 | 0.0916153   | ENSG00000220883           |
| 10 | 41714340 | 41714666 | 41714503 | 15  | 16  | 10  | 1.481949798 | 0.147733    | ENSG00000220883           |
| 10 | 41716007 | 41716186 | 41716155 | 10  | 10  | 5   | 1.757999271 | 0.121253    | ENSG00000220883           |
| 10 | 41716286 | 41716710 | 41716465 | 17  | 24  | 30  | 0.773313462 | 0.832666    | ENSG00000220883           |
| 10 | 41716715 | 41717068 | 41716891 | 108 | 109 | 105 | 0.995093927 | 0.51406     | ENSG00000220883           |
| 10 | 41718211 | 41718886 | 41718707 | 39  | 68  | 58  | 1.12143559  | 0.257686    | ENSG00000220883           |
| 10 | 41719075 | 41719537 | 41719358 | 24  | 30  | 38  | 0.762209474 | 0.872381    | ENSG00000220883           |
| 10 | 41719544 | 41719966 | 41719721 | 29  | 36  | 32  | 1.07514005  | 0.379706    | ENSG00000220883           |
| 10 | 41721688 | 41722290 | 41722011 | 18  | 29  | 28  | 0.99197451  | 0.511702    | ENSG00000220883           |
| 10 | 41722972 | 41723308 | 41723147 | 38  | 38  | 25  | 1.43836304  | 0.0720575   | ENSG00000220883           |
| 10 | 41725296 | 41725479 | 41725326 | 10  | 10  | 11  | 0.878999635 | 0.622439    | ENSG00000220883           |
| 10 | 41727224 | 41727612 | 41727438 | 10  | 18  | 27  | 0.650688042 | 0.929412    | ENSG00000220883           |
| 10 | 41849293 | 41850097 | 41849600 | 72  | 111 | 120 | 0.887584906 | 0.818749    | ENSG00000220883           |
| 10 | 41850493 | 41850826 | 41850659 | 24  | 27  | 36  | 0.725660633 | 0.902101    | ENSG00000220883           |
| 10 | 41850908 | 41851247 | 41851086 | 40  | 41  | 32  | 1.220429246 | 0.193382    | ENSG00000220883           |
| 10 | 41851313 | 41851646 | 41851479 | 16  | 17  | 8   | 1.917817386 | 0.0474153   | ENSG00000220883           |
| 10 | 41851776 | 41852125 | 41851950 | 84  | 86  | 64  | 1.283462405 | 0.0624133   | ENSG00000220883           |
| 10 | 41852436 | 41852925 | 41852615 | 26  | 33  | 18  | 1.715941872 | 0.0261515   | ENSG00000220883           |
| 10 | 42117144 | 42117479 | 42117311 | 29  | 30  | 28  | 1.025040327 | 0.460877    | ENSG00000219859           |
| 10 | 42119843 | 42120173 | 42120008 | 14  | 14  | 11  | 1.198635866 | 0.315918    | ENSG00000219859           |
| 10 | 42137067 | 42137396 | 42137231 | 16  | 17  | 12  | 1.327719729 | 0.212795    | ENSG00000215146           |
| 10 | 42137559 | 42137746 | 42137583 | 12  | 12  | 15  | 0.779113313 | 0.750998    | ENSG00000215146           |
| 10 | 42456262 | 42456680 | 42456480 | 46  | 61  | 1   | 29.72616948 | 2.46E-17    | ZNF33B ENSG00000196693    |
| 10 | 42462224 | 42462421 | 42462349 | 10  | 10  | 0   | 10.54799562 | 0.000613541 | ZNF33B ENSG00000196693    |
| 10 | 42597778 | 42598267 | 42598108 | 13  | 23  | 7   | 2.876726079 | 0.00239423  | BMS1 ENSG00000165733      |
| 10 | 42841577 | 42842054 | 42841815 | 15  | 24  | 4   | 4.794543465 | 8.06E-05    | RET ENSG00000165731       |
| 10 | 43669619 | 43669805 | 43669704 | 9   | 9   | 0   | 9.589086931 | 0.00120187  | C10orf136 ENSG00000204187 |
| 10 | 43727986 | 43728507 | 43728315 | 31  | 41  | 5   | 6.712360851 | 2.66E-08    | C10orf136 ENSG00000204187 |
| 10 | 43946078 | 43946363 | 43946215 | 9   | 10  | 0   | 10.54799562 | 0.000613541 | CXCL12 ENSG00000107562    |
| 10 | 44116491 | 44117041 | 44116720 | 10  | 20  | 10  | 1.830643869 | 0.0454769   | CXCL12 ENSG00000107562    |
| 10 | 45190295 | 45190477 | 45190386 | 9   | 9   | 0   | 9.589086931 | 0.00120187  | ENSG00000215136           |
| 10 | 45253654 | 45254570 | 45254017 | 220 | 311 | 0   | 299.1795122 | 7.79E-92    | 8-Mar ENSG00000165406     |

|    |          |          |          |     |     |    |             |             |          |                 |
|----|----------|----------|----------|-----|-----|----|-------------|-------------|----------|-----------------|
| 10 | 45286126 | 45286347 | 45286236 | 9   | 10  | 9  | 1.054799562 | 0.4492      | 8-Mar    | ENSG00000165406 |
| 10 | 45350763 | 45350999 | 45350876 | 17  | 19  | 2  | 6.39272462  | 8.83E-05    | 8-Mar    | ENSG00000165406 |
| 10 | 46403287 | 46403503 | 46403402 | 10  | 10  | 4  | 2.109599125 | 0.0694668   | GPRIN2   | ENSG00000204175 |
| 10 | 46403661 | 46404053 | 46403874 | 13  | 20  | 11 | 1.678090213 | 0.0696225   | GPRIN2   | ENSG00000204175 |
| 10 | 47097389 | 47097654 | 47097521 | 10  | 10  | 4  | 2.109599125 | 0.0694668   |          | ENSG00000219661 |
| 10 | 47952189 | 47952565 | 47952368 | 18  | 25  | 4  | 4.986325204 | 4.72E-05    | ZNF488   | ENSG00000165388 |
| 10 | 47962520 | 47963263 | 47962938 | 102 | 154 | 5  | 24.7718079  | 1.30E-38    | ZNF488   | ENSG00000165388 |
| 10 | 47981693 | 47981922 | 47981793 | 9   | 10  | 0  | 10.54799562 | 0.000613541 | ZNF488   | ENSG00000165388 |
| 10 | 48046900 | 48047162 | 48047060 | 9   | 11  | 1  | 5.753452158 | 0.00215302  | GDF2     | ENSG00000128802 |
| 10 | 49093686 | 49093891 | 49093788 | 8   | 9   | 4  | 1.917817386 | 0.103282    | FRMPD2   | ENSG00000170324 |
| 10 | 49129607 | 49130279 | 49129794 | 38  | 61  | 9  | 5.945233897 | 1.11E-10    | FRMPD2   | ENSG00000170324 |
| 10 | 49295415 | 49295845 | 49295613 | 92  | 107 | 4  | 20.71242777 | 1.08E-26    | MAPK8    | ENSG00000107643 |
| 10 | 49322453 | 49322697 | 49322568 | 10  | 12  | 6  | 1.78083043  | 0.0985525   | MAPK8    | ENSG00000107643 |
| 10 | 49467506 | 49467840 | 49467673 | 13  | 17  | 1  | 8.630178238 | 5.44E-05    | ARHGAP22 | ENSG00000128805 |
| 10 | 49605247 | 49605570 | 49605408 | 15  | 19  | 2  | 6.39272462  | 8.83E-05    | WDFY4    | ENSG00000128815 |
| 10 | 49666687 | 49666942 | 49666814 | 11  | 11  | 3  | 2.876726079 | 0.0213797   | WDFY4    | ENSG00000128815 |
| 10 | 49693077 | 49693303 | 49693198 | 8   | 8   | 7  | 1.07877228  | 0.435076    | WDFY4    | ENSG00000128815 |
| 10 | 49826737 | 49826985 | 49826861 | 11  | 12  | 1  | 6.232906505 | 0.00117736  | LRRC18   | ENSG00000165383 |
| 10 | 50028322 | 50028531 | 50028387 | 9   | 9   | 1  | 4.794543465 | 0.00708517  | FAM170B  | ENSG00000172538 |
| 10 | 50430271 | 50430450 | 50430365 | 8   | 8   | 0  | 8.630178238 | 0.00235436  | PGBD3    | ENSG00000222049 |
| 10 | 50706027 | 50706216 | 50706048 | 9   | 11  | 0  | 11.50690432 | 0.000313206 | PARG     | ENSG00000214982 |
| 10 | 51740522 | 51740781 | 51740651 | 8   | 11  | 1  | 5.753452158 | 0.00215302  |          | ENSG00000217121 |
| 10 | 53873163 | 53873890 | 53873402 | 56  | 97  | 6  | 13.4247217  | 5.37E-22    |          | ENSG00000216209 |
| 10 | 53918461 | 53918656 | 53918558 | 9   | 9   | 3  | 2.397271733 | 0.0539397   |          | ENSG00000216209 |
| 10 | 54171716 | 54172062 | 54171893 | 11  | 16  | 0  | 16.30144778 | 1.09E-05    | MBL2     | ENSG00000165471 |
| 10 | 55049473 | 55049943 | 55049658 | 105 | 132 | 2  | 42.51161873 | 3.20E-36    |          | ENSG00000217935 |
| 10 | 58013186 | 58013414 | 58013285 | 16  | 16  | 0  | 16.30144778 | 1.09E-05    | ZWINT    | ENSG00000122952 |
| 10 | 58175253 | 58175549 | 58175401 | 14  | 18  | 1  | 9.109632584 | 2.91E-05    | ZWINT    | ENSG00000122952 |
| 10 | 59053832 | 59054183 | 59054007 | 34  | 39  | 0  | 38.35634772 | 2.09E-12    |          | ENSG00000218583 |
| 10 | 59619158 | 59619413 | 59619277 | 12  | 12  | 3  | 3.116453252 | 0.0131971   |          | ENSG00000180221 |
| 10 | 60211608 | 60211936 | 60211772 | 10  | 14  | 0  | 14.3836304  | 4.17E-05    | BICC1    | ENSG00000122870 |
| 10 | 60732943 | 60733240 | 60733070 | 9   | 13  | 1  | 6.712360851 | 0.000640982 | FAM13C1  | ENSG00000148541 |
| 10 | 60766952 | 60767416 | 60767174 | 75  | 95  | 3  | 23.01380863 | 1.76E-24    | FAM13C1  | ENSG00000148541 |
| 10 | 60780241 | 60780530 | 60780385 | 8   | 10  | 4  | 2.109599125 | 0.0694668   | FAM13C1  | ENSG00000148541 |

|    |          |          |          |     |     |   |             |             |          |                 |
|----|----------|----------|----------|-----|-----|---|-------------|-------------|----------|-----------------|
| 10 | 61260468 | 61260741 | 61260604 | 9   | 12  | 7 | 1.558226626 | 0.152813    | CCDC6    | ENSG00000108091 |
| 10 | 61337704 | 61337992 | 61337842 | 8   | 10  | 3 | 2.636998906 | 0.034203    | CCDC6    | ENSG00000108091 |
| 10 | 61395152 | 61395582 | 61395362 | 64  | 84  | 6 | 11.64389127 | 1.49E-18    | CCDC6    | ENSG00000108091 |
| 10 | 61396961 | 61397200 | 61397080 | 10  | 12  | 2 | 4.155271003 | 0.0046638   | CCDC6    | ENSG00000108091 |
| 10 | 61712597 | 61712937 | 61712700 | 12  | 16  | 4 | 3.260289556 | 0.00475414  | ANK3     | ENSG00000151150 |
| 10 | 61858541 | 61858794 | 61858634 | 12  | 13  | 2 | 4.474907234 | 0.00269459  | ANK3     | ENSG00000151150 |
| 10 | 61917862 | 61918303 | 61918040 | 51  | 62  | 0 | 60.41124766 | 4.01E-19    | ANK3     | ENSG00000151150 |
| 10 | 61924713 | 61924957 | 61924832 | 11  | 13  | 0 | 13.4247217  | 8.16E-05    | ANK3     | ENSG00000151150 |
| 10 | 62190395 | 62191053 | 62190679 | 168 | 208 | 4 | 40.08238337 | 4.55E-55    | CDC2     | ENSG00000170312 |
| 10 | 62198642 | 62198954 | 62198796 | 9   | 13  | 4 | 2.684944341 | 0.01921     | CDC2     | ENSG00000170312 |
| 10 | 62208258 | 62208573 | 62208415 | 8   | 12  | 4 | 2.493162602 | 0.0299057   | CDC2     | ENSG00000170312 |
| 10 | 62322571 | 62322773 | 62322672 | 9   | 9   | 0 | 9.589086931 | 0.00120187  |          | ENSG00000223107 |
| 10 | 62393987 | 62394190 | 62394088 | 10  | 11  | 4 | 2.301380863 | 0.0459276   | RHOBTB1  | ENSG00000072422 |
| 10 | 62701350 | 62701550 | 62701450 | 9   | 9   | 2 | 3.19636231  | 0.0229249   | TMEM26   | ENSG00000196932 |
| 10 | 63766182 | 63766542 | 63766354 | 52  | 58  | 0 | 56.57561289 | 5.90E-18    |          | ENSG00000223151 |
| 10 | 64234269 | 64234569 | 64234419 | 8   | 11  | 6 | 1.643843474 | 0.137712    | ADO      | ENSG00000181915 |
| 10 | 64524416 | 64524725 | 64524559 | 10  | 11  | 0 | 11.50690432 | 0.000313206 |          | ENSG00000199446 |
| 10 | 65137059 | 65137416 | 65137269 | 9   | 13  | 2 | 4.474907234 | 0.00269459  |          | ENSG00000220039 |
| 10 | 65141987 | 65142212 | 65142127 | 9   | 10  | 2 | 3.515998541 | 0.0136204   |          | ENSG00000220039 |
| 10 | 65296609 | 65296904 | 65296756 | 15  | 17  | 2 | 5.753452158 | 0.000281509 |          | ENSG00000213609 |
| 10 | 66849064 | 66849424 | 66849213 | 22  | 27  | 0 | 26.84944341 | 6.66E-09    |          | ENSG00000219519 |
| 10 | 66849539 | 66849739 | 66849639 | 9   | 10  | 1 | 5.273997812 | 0.00391723  |          | ENSG00000219519 |
| 10 | 67045013 | 67045547 | 67045265 | 12  | 25  | 2 | 8.310542006 | 2.50E-06    |          | ENSG00000219519 |
| 10 | 68057027 | 68057267 | 68057147 | 11  | 12  | 3 | 3.116453252 | 0.0131971   |          | ENSG00000210060 |
| 10 | 69248037 | 69248426 | 69248247 | 8   | 15  | 0 | 15.34253909 | 2.13E-05    |          | ENSG00000223097 |
| 10 | 69313928 | 69314120 | 69314024 | 9   | 11  | 6 | 1.643843474 | 0.137712    | SIRT1    | ENSG00000096717 |
| 10 | 69523777 | 69523956 | 69523930 | 8   | 8   | 0 | 8.630178238 | 0.00235436  | MYPN     | ENSG00000138347 |
| 10 | 69583472 | 69583725 | 69583583 | 15  | 16  | 5 | 2.716907964 | 0.0109645   |          | ENSG00000222371 |
| 10 | 69762705 | 69762940 | 69762762 | 8   | 11  | 2 | 3.835634772 | 0.00800699  | PBLD     | ENSG00000108187 |
| 10 | 70061231 | 70061556 | 70061393 | 16  | 19  | 3 | 4.794543465 | 0.000349205 |          | ENSG00000216826 |
| 10 | 70151028 | 70151341 | 70151184 | 9   | 12  | 1 | 6.232906505 | 0.00117736  | CCAR1    | ENSG00000060339 |
| 10 | 70256775 | 70256954 | 70256813 | 8   | 8   | 0 | 8.630178238 | 0.00235436  | STOX1    | ENSG00000165730 |
| 10 | 70385983 | 70386182 | 70386124 | 11  | 12  | 6 | 1.78083043  | 0.0985525   | DDX21    | ENSG00000165732 |
| 10 | 70418406 | 70418709 | 70418585 | 11  | 15  | 2 | 5.114179696 | 0.00088103  | KIAA1279 | ENSG00000198954 |

|    |          |          |          |    |    |    |             |             |          |                 |
|----|----------|----------|----------|----|----|----|-------------|-------------|----------|-----------------|
| 10 | 70434657 | 70434844 | 70434786 | 8  | 9  | 1  | 4.794543465 | 0.00708517  |          | ENSG00000210185 |
| 10 | 70763012 | 70763361 | 70763186 | 10 | 16 | 8  | 1.811271976 | 0.0663685   | HK1      | ENSG00000156515 |
| 10 | 70822399 | 70822606 | 70822502 | 8  | 8  | 0  | 8.630178238 | 0.00235436  | TACR2    | ENSG00000075073 |
| 10 | 70868435 | 70868641 | 70868579 | 8  | 10 | 1  | 5.273997812 | 0.00391723  |          | ENSG00000217700 |
| 10 | 70876441 | 70876724 | 70876597 | 11 | 14 | 12 | 1.106433107 | 0.392094    | TSPAN15  | ENSG00000099282 |
| 10 | 70879676 | 70879907 | 70879779 | 12 | 12 | 6  | 1.78083043  | 0.0985525   | TSPAN15  | ENSG00000099282 |
| 10 | 70888599 | 70888853 | 70888743 | 9  | 11 | 1  | 5.753452158 | 0.00215302  | TSPAN15  | ENSG00000099282 |
| 10 | 71030742 | 71031169 | 71030921 | 14 | 23 | 2  | 7.671269544 | 8.30E-06    |          | ENSG00000220737 |
| 10 | 71398671 | 71398912 | 71398791 | 10 | 12 | 1  | 6.232906505 | 0.00117736  | H2AFY2   | ENSG00000099284 |
| 10 | 71482187 | 71482415 | 71482301 | 8  | 10 | 0  | 10.54799562 | 0.000613541 | H2AFY2   | ENSG00000099284 |
| 10 | 71561908 | 71562148 | 71562047 | 9  | 10 | 0  | 10.54799562 | 0.000613541 | AIFM2    | ENSG00000042286 |
| 10 | 71576488 | 71576962 | 71576667 | 10 | 20 | 5  | 3.356180426 | 0.0017534   | TYSND1   | ENSG00000156521 |
| 10 | 72506847 | 72507090 | 72506993 | 10 | 12 | 3  | 3.116453252 | 0.0131971   | UNC5B    | ENSG00000107731 |
| 10 | 72642004 | 72642222 | 72642114 | 8  | 8  | 3  | 2.157544559 | 0.0836802   | UNC5B    | ENSG00000107731 |
| 10 | 72647205 | 72647450 | 72647354 | 10 | 13 | 0  | 13.4247217  | 8.16E-05    |          | ENSG00000216004 |
| 10 | 72942539 | 72942942 | 72942763 | 11 | 19 | 2  | 6.39272462  | 8.83E-05    | CDH23    | ENSG00000107736 |
| 10 | 73360533 | 73360894 | 73360712 | 8  | 15 | 2  | 5.114179696 | 0.00088103  | CHST3    | ENSG00000122863 |
| 10 | 73438487 | 73438693 | 73438599 | 8  | 8  | 5  | 1.43836304  | 0.235762    | CHST3    | ENSG00000122863 |
| 10 | 73478357 | 73478612 | 73478487 | 8  | 9  | 9  | 0.958908693 | 0.536911    | SPOCK2   | ENSG00000107742 |
| 10 | 73600992 | 73601207 | 73601099 | 10 | 11 | 1  | 5.753452158 | 0.00215302  |          | ENSG00000200294 |
| 10 | 73700318 | 73700754 | 73700536 | 19 | 29 | 4  | 5.753452158 | 5.31E-06    | DDIT4    | ENSG00000168209 |
| 10 | 73727779 | 73728338 | 73728147 | 65 | 94 | 4  | 18.21926517 | 4.10E-23    | DDIT4    | ENSG00000168209 |
| 10 | 73728443 | 73728710 | 73728565 | 8  | 10 | 2  | 3.515998541 | 0.0136204   | DDIT4    | ENSG00000168209 |
| 10 | 73761408 | 73761602 | 73761467 | 9  | 9  | 2  | 3.19636231  | 0.0229249   | DNAJB12  | ENSG00000148719 |
| 10 | 74118004 | 74118189 | 74118099 | 8  | 9  | 0  | 9.589086931 | 0.00120187  | CCDC109A | ENSG00000156026 |
| 10 | 74540025 | 74540382 | 74540203 | 9  | 14 | 3  | 3.595907599 | 0.00486913  | NUDT13   | ENSG00000166321 |
| 10 | 74682381 | 74682660 | 74682503 | 8  | 12 | 1  | 6.232906505 | 0.00117736  | MRPS16   | ENSG00000182180 |
| 10 | 74788409 | 74788816 | 74788670 | 9  | 16 | 4  | 3.260289556 | 0.00475414  | TTC18    | ENSG00000156042 |
| 10 | 74843780 | 74844075 | 74843931 | 8  | 12 | 6  | 1.78083043  | 0.0985525   | ANXA7    | ENSG00000138279 |
| 10 | 75031316 | 75031564 | 75031440 | 11 | 13 | 2  | 4.474907234 | 0.00269459  | USP54    | ENSG00000166348 |
| 10 | 75305893 | 75306131 | 75306012 | 17 | 18 | 1  | 9.109632584 | 2.91E-05    | CAMK2G   | ENSG00000148660 |
| 10 | 75315934 | 75316168 | 75316054 | 8  | 10 | 5  | 1.757999271 | 0.121253    | CAMK2G   | ENSG00000148660 |
| 10 | 75317016 | 75317900 | 75317695 | 45 | 92 | 10 | 8.107137132 | 1.46E-17    | CAMK2G   | ENSG00000148660 |
| 10 | 75318259 | 75318695 | 75318404 | 19 | 28 | 5  | 4.63472535  | 3.19E-05    | CAMK2G   | ENSG00000148660 |

|    |          |          |          |    |    |   |             |             |          |                 |
|----|----------|----------|----------|----|----|---|-------------|-------------|----------|-----------------|
| 10 | 75318717 | 75319032 | 75318876 | 12 | 17 | 1 | 8.630178238 | 5.44E-05    | CAMK2G   | ENSG00000148660 |
| 10 | 75349865 | 75350118 | 75350001 | 11 | 11 | 0 | 11.50690432 | 0.000313206 | C10orf55 | ENSG00000222047 |
| 10 | 75429093 | 75429444 | 75429268 | 9  | 15 | 3 | 3.835634772 | 0.00291691  | VCL      | ENSG00000035403 |
| 10 | 75619831 | 75620212 | 75620002 | 20 | 25 | 2 | 8.310542006 | 2.50E-06    | ADK      | ENSG00000156110 |
| 10 | 76101674 | 76101908 | 76101789 | 9  | 9  | 3 | 2.397271733 | 0.0539397   |          | ENSG00000214626 |
| 10 | 76509566 | 76509866 | 76509716 | 9  | 14 | 0 | 14.3836304  | 4.17E-05    |          | ENSG00000217937 |
| 10 | 76542101 | 76542280 | 76542183 | 8  | 8  | 2 | 2.876726079 | 0.0381137   | SAMD8    | ENSG00000156671 |
| 10 | 77842623 | 77842822 | 77842783 | 8  | 8  | 1 | 4.315089119 | 0.0127267   |          | ENSG00000201954 |
| 10 | 78822761 | 78822947 | 78822856 | 8  | 8  | 2 | 2.876726079 | 0.0381137   | KCNMA1   | ENSG00000156113 |
| 10 | 78969075 | 78969387 | 78969232 | 9  | 12 | 1 | 6.232906505 | 0.00117736  |          | ENSG00000199592 |
| 10 | 79012387 | 79012757 | 79012578 | 15 | 22 | 3 | 5.513724985 | 6.69E-05    |          | ENSG00000199592 |
| 10 | 79036689 | 79037057 | 79036879 | 11 | 16 | 6 | 2.328778255 | 0.0221113   |          | ENSG00000199592 |
| 10 | 79089049 | 79089631 | 79089293 | 18 | 35 | 2 | 11.50690432 | 5.48E-09    | KCNMA1   | ENSG00000156113 |
| 10 | 79276490 | 79276705 | 79276597 | 8  | 10 | 2 | 3.515998541 | 0.0136204   |          | ENSG00000204049 |
| 10 | 79319125 | 79319425 | 79319275 | 12 | 14 | 3 | 3.595907599 | 0.00486913  |          | ENSG00000204049 |
| 10 | 79459251 | 79459593 | 79459422 | 12 | 17 | 4 | 3.452071295 | 0.00292757  | POLR3A   | ENSG00000148606 |
| 10 | 79463656 | 79463909 | 79463761 | 10 | 12 | 2 | 4.155271003 | 0.0046638   | RPS24    | ENSG00000138326 |
| 10 | 79888739 | 79889080 | 79888891 | 11 | 15 | 2 | 5.114179696 | 0.00088103  |          | ENSG00000201393 |
| 10 | 79950909 | 79951099 | 79951004 | 8  | 8  | 1 | 4.315089119 | 0.0127267   |          | ENSG00000201393 |
| 10 | 80349785 | 80350151 | 80349982 | 35 | 41 | 5 | 6.712360851 | 2.66E-08    | ZMIZ1    | ENSG00000108175 |
| 10 | 80377613 | 80377916 | 80377765 | 17 | 20 | 1 | 10.06854128 | 8.32E-06    | ZMIZ1    | ENSG00000108175 |
| 10 | 80529758 | 80530073 | 80529915 | 22 | 24 | 0 | 23.97271733 | 5.01E-08    | ZMIZ1    | ENSG00000108175 |
| 10 | 80587450 | 80587637 | 80587536 | 8  | 9  | 6 | 1.369869562 | 0.253675    | ZMIZ1    | ENSG00000108175 |
| 10 | 80625280 | 80625466 | 80625350 | 8  | 8  | 2 | 2.876726079 | 0.0381137   | ZMIZ1    | ENSG00000108175 |
| 10 | 80694633 | 80694954 | 80694809 | 13 | 15 | 5 | 2.557089848 | 0.0169197   | ZMIZ1    | ENSG00000108175 |
| 10 | 80749286 | 80749588 | 80749434 | 8  | 8  | 3 | 2.157544559 | 0.0836802   | PPIF     | ENSG00000108179 |
| 10 | 81808688 | 81808867 | 81808765 | 8  | 8  | 6 | 1.232882605 | 0.333038    |          | ENSG00000217279 |
| 10 | 81851142 | 81851337 | 81851238 | 8  | 9  | 5 | 1.598181155 | 0.170911    |          | ENSG00000133678 |
| 10 | 81908333 | 81908599 | 81908499 | 8  | 10 | 5 | 1.757999271 | 0.121253    | PLAC9    | ENSG00000189129 |
| 10 | 81953312 | 81953599 | 81953452 | 8  | 12 | 2 | 4.155271003 | 0.0046638   | ANXA11   | ENSG00000122359 |
| 10 | 82127987 | 82128243 | 82128096 | 8  | 11 | 1 | 5.753452158 | 0.00215302  | DYDC2    | ENSG00000133665 |
| 10 | 82179536 | 82179782 | 82179650 | 12 | 12 | 0 | 12.46581301 | 0.000159888 | C10orf57 | ENSG00000122378 |
| 10 | 82194497 | 82194774 | 82194642 | 10 | 12 | 4 | 2.493162602 | 0.0299057   | TSPAN14  | ENSG00000108219 |
| 10 | 82210539 | 82210812 | 82210686 | 13 | 14 | 4 | 2.876726079 | 0.01219     | TSPAN14  | ENSG00000108219 |

|    |          |          |          |     |     |    |             |             |           |                 |
|----|----------|----------|----------|-----|-----|----|-------------|-------------|-----------|-----------------|
| 10 | 82220887 | 82221171 | 82221018 | 11  | 13  | 2  | 4.474907234 | 0.00269459  | TSPAN14   | ENSG00000108219 |
| 10 | 82368761 | 82369236 | 82369004 | 29  | 44  | 2  | 14.3836304  | 1.96E-11    | SH2D4B    | ENSG00000178217 |
| 10 | 82413791 | 82414081 | 82413936 | 10  | 13  | 3  | 3.356180426 | 0.00805599  | SH2D4B    | ENSG00000178217 |
| 10 | 82497183 | 82497558 | 82497389 | 26  | 32  | 2  | 10.54799562 | 3.50E-08    |           | ENSG00000217745 |
| 10 | 82555062 | 82555364 | 82555209 | 16  | 18  | 0  | 18.21926517 | 2.83E-06    |           | ENSG00000218551 |
| 10 | 82716103 | 82716436 | 82716237 | 10  | 14  | 11 | 1.198635866 | 0.315918    |           | ENSG00000220859 |
| 10 | 82865901 | 82866418 | 82866240 | 12  | 25  | 2  | 8.310542006 | 2.50E-06    |           | ENSG00000219745 |
| 10 | 82927654 | 82928073 | 82927872 | 52  | 69  | 0  | 67.12360851 | 3.62E-21    |           | ENSG00000219745 |
| 10 | 83193942 | 83194336 | 83194153 | 21  | 30  | 2  | 9.908723162 | 1.20E-07    |           | ENSG00000219745 |
| 10 | 84442318 | 84442636 | 84442495 | 20  | 24  | 0  | 23.97271733 | 5.01E-08    |           | ENSG00000207275 |
| 10 | 85551950 | 85552132 | 85551974 | 8   | 8   | 1  | 4.315089119 | 0.0127267   |           | ENSG00000212324 |
| 10 | 85610791 | 85611088 | 85610935 | 9   | 9   | 0  | 9.589086931 | 0.00120187  |           | ENSG00000212324 |
| 10 | 85733284 | 85733789 | 85733537 | 77  | 102 | 2  | 32.92253179 | 1.12E-27    |           | ENSG00000200789 |
| 10 | 85889065 | 85889330 | 85889188 | 8   | 10  | 5  | 1.757999271 | 0.121253    | GHITM     | ENSG00000165678 |
| 10 | 86274761 | 86275170 | 86274951 | 56  | 72  | 3  | 17.50008365 | 4.15E-18    |           | ENSG00000178429 |
| 10 | 86363145 | 86363418 | 86363265 | 9   | 10  | 6  | 1.506856518 | 0.188853    |           | ENSG00000178429 |
| 10 | 86415624 | 86415941 | 86415799 | 9   | 12  | 1  | 6.232906505 | 0.00117736  |           | ENSG00000178429 |
| 10 | 86742674 | 86742913 | 86742787 | 10  | 10  | 0  | 10.54799562 | 0.000613541 |           | ENSG00000178429 |
| 10 | 87297856 | 87298274 | 87298063 | 42  | 57  | 2  | 18.5389014  | 5.08E-15    |           | ENSG00000210526 |
| 10 | 87392251 | 87392505 | 87392378 | 10  | 13  | 3  | 3.356180426 | 0.00805599  |           | ENSG00000210532 |
| 10 | 87392556 | 87392846 | 87392700 | 8   | 12  | 2  | 4.155271003 | 0.0046638   |           | ENSG00000210532 |
| 10 | 87634941 | 87635120 | 87635045 | 8   | 8   | 1  | 4.315089119 | 0.0127267   |           | ENSG00000200487 |
| 10 | 87745685 | 87745887 | 87745788 | 9   | 9   | 2  | 3.19636231  | 0.0229249   |           | ENSG00000200487 |
| 10 | 87944147 | 87944334 | 87944219 | 8   | 8   | 1  | 4.315089119 | 0.0127267   |           | ENSG00000199104 |
| 10 | 87970185 | 87970643 | 87970398 | 24  | 40  | 0  | 39.31525642 | 1.07E-12    |           | ENSG00000199104 |
| 10 | 88397564 | 88397894 | 88397722 | 10  | 13  | 2  | 4.474907234 | 0.00269459  | OPN4      | ENSG00000122375 |
| 10 | 88524923 | 88525236 | 88525079 | 14  | 17  | 0  | 17.26035648 | 5.54E-06    | BMP1A     | ENSG00000107779 |
| 10 | 88710253 | 88710436 | 88710311 | 9   | 9   | 2  | 3.19636231  | 0.0229249   | SNCG      | ENSG00000173267 |
| 10 | 88718114 | 88718330 | 88718239 | 10  | 11  | 4  | 2.301380863 | 0.0459276   | C10orf116 | ENSG00000148671 |
| 10 | 89592095 | 89592445 | 89592260 | 18  | 23  | 3  | 5.753452158 | 3.82E-05    |           | ENSG00000213478 |
| 10 | 89592650 | 89593258 | 89593019 | 147 | 182 | 5  | 29.24671514 | 1.95E-46    |           | ENSG00000213478 |
| 10 | 89600584 | 89600805 | 89600741 | 10  | 11  | 7  | 1.43836304  | 0.204844    |           | ENSG00000213478 |
| 10 | 89611859 | 89612339 | 89612003 | 12  | 19  | 6  | 2.739739123 | 0.00632909  | PTENP1    | ENSG00000171862 |
| 10 | 89612827 | 89613076 | 89612994 | 12  | 14  | 2  | 4.794543465 | 0.00154571  | PTENP1    | ENSG00000171862 |



|    |          |          |          |    |     |   |             |             |                         |
|----|----------|----------|----------|----|-----|---|-------------|-------------|-------------------------|
| 10 | 89728769 | 89729034 | 89728899 | 11 | 14  | 1 | 7.191815198 | 0.00034761  | ENSG00000200891         |
| 10 | 89881352 | 89881683 | 89881456 | 10 | 15  | 7 | 1.917817386 | 0.0572317   | ENSG00000216533         |
| 10 | 90003931 | 90004288 | 90004109 | 9  | 14  | 8 | 1.598181155 | 0.124586    | ENSG00000216533         |
| 10 | 90010489 | 90010810 | 90010649 | 19 | 20  | 2 | 6.712360851 | 4.91E-05    | ENSG00000216533         |
| 10 | 90457575 | 90457773 | 90457700 | 8  | 9   | 1 | 4.794543465 | 0.00708517  | LIPK ENSG00000204021    |
| 10 | 90601484 | 90601721 | 90601600 | 9  | 11  | 5 | 1.917817386 | 0.0843804   | ANKRD22 ENSG00000152766 |
| 10 | 90740352 | 90740774 | 90740565 | 14 | 25  | 4 | 4.986325204 | 4.72E-05    | FAS ENSG00000026103     |
| 10 | 90740816 | 90741331 | 90741038 | 94 | 137 | 1 | 66.16469982 | 3.45E-39    | FAS ENSG00000026103     |
| 10 | 90991298 | 90991826 | 90991649 | 14 | 24  | 0 | 23.97271733 | 5.01E-08    | LIPA ENSG00000107798    |
| 10 | 91028076 | 91028307 | 91028191 | 11 | 13  | 2 | 4.474907234 | 0.00269459  | IFIT2 ENSG00000119922   |
| 10 | 91394873 | 91395579 | 91395014 | 14 | 32  | 5 | 5.273997812 | 3.82E-06    | PANK1 ENSG00000152782   |
| 10 | 91451321 | 91451668 | 91451493 | 12 | 16  | 7 | 2.037680973 | 0.0400399   | KIF20B ENSG00000138182  |
| 10 | 91801301 | 91801744 | 91801480 | 11 | 17  | 1 | 8.630178238 | 5.44E-05    | ENSG00000148667         |
| 10 | 92069291 | 92069517 | 92069445 | 10 | 11  | 2 | 3.835634772 | 0.00800699  | ENSG00000210646         |
| 10 | 92132042 | 92132271 | 92132156 | 10 | 10  | 2 | 3.515998541 | 0.0136204   | ENSG00000210646         |
| 10 | 92727107 | 92727485 | 92727306 | 28 | 36  | 2 | 11.82654055 | 2.94E-09    | ENSG00000201604         |
| 10 | 92756149 | 92756347 | 92756248 | 9  | 10  | 5 | 1.757999271 | 0.121253    | ENSG00000186773         |
| 10 | 92946367 | 92946602 | 92946436 | 9  | 12  | 1 | 6.232906505 | 0.00117736  | PCGF5 ENSG00000180628   |
| 10 | 92988027 | 92988274 | 92988157 | 10 | 13  | 0 | 13.4247217  | 8.16E-05    | PCGF5 ENSG00000180628   |
| 10 | 93016556 | 93016866 | 93016700 | 13 | 16  | 2 | 5.433815927 | 0.000499302 | PCGF5 ENSG00000180628   |
| 10 | 93101123 | 93101307 | 93101215 | 8  | 8   | 0 | 8.630178238 | 0.00235436  | HECTD2 ENSG00000165338  |
| 10 | 93494943 | 93495188 | 93495077 | 8  | 9   | 1 | 4.794543465 | 0.00708517  | ENSG00000216994         |
| 10 | 93837520 | 93837842 | 93837681 | 11 | 15  | 6 | 2.191791298 | 0.0328001   | ENSG00000214549         |
| 10 | 94079866 | 94080164 | 94080011 | 13 | 18  | 4 | 3.643853034 | 0.00178791  | ENSG00000202297         |
| 10 | 94295301 | 94295496 | 94295398 | 8  | 8   | 3 | 2.157544559 | 0.0836802   | IDE ENSG00000119912     |
| 10 | 94402912 | 94403186 | 94403063 | 10 | 11  | 1 | 5.753452158 | 0.00215302  | ENSG00000174681         |
| 10 | 94887829 | 94888282 | 94888103 | 42 | 56  | 2 | 18.21926517 | 9.63E-15    | ENSG00000218488         |
| 10 | 95188547 | 95188832 | 95188689 | 8  | 11  | 8 | 1.278544924 | 0.28289     | FER1L3 ENSG00000138119  |
| 10 | 95195381 | 95195582 | 95195478 | 8  | 8   | 7 | 1.07877228  | 0.435076    | FER1L3 ENSG00000138119  |
| 10 | 95215930 | 95216185 | 95216068 | 11 | 13  | 2 | 4.474907234 | 0.00269459  | FER1L3 ENSG00000138119  |
| 10 | 95231648 | 95231891 | 95231769 | 8  | 11  | 3 | 2.876726079 | 0.0213797   | FER1L3 ENSG00000138119  |
| 10 | 95232085 | 95232529 | 95232295 | 9  | 17  | 3 | 4.315089119 | 0.00102271  | FER1L3 ENSG00000138119  |
| 10 | 95296233 | 95296428 | 95296305 | 8  | 8   | 2 | 2.876726079 | 0.0381137   | GPR120 ENSG00000186188  |
| 10 | 95451767 | 95451997 | 95451934 | 8  | 10  | 8 | 1.171999514 | 0.35773     | C10orf4 ENSG00000148690 |

|    |           |           |           |     |     |    |             |             |          |                 |
|----|-----------|-----------|-----------|-----|-----|----|-------------|-------------|----------|-----------------|
| 10 | 95452255  | 95452633  | 95452454  | 15  | 23  | 6  | 3.287686948 | 0.00104919  | C10orf4  | ENSG00000148690 |
| 10 | 95512903  | 95513178  | 95513050  | 11  | 14  | 4  | 2.876726079 | 0.01219     | LGI1     | ENSG00000108231 |
| 10 | 96295230  | 96295413  | 96295321  | 9   | 10  | 2  | 3.515998541 | 0.0136204   | HELLS    | ENSG00000119969 |
| 10 | 96336030  | 96336265  | 96336183  | 11  | 11  | 0  | 11.50690432 | 0.000313206 | HELLS    | ENSG00000119969 |
| 10 | 96484312  | 96484744  | 96484550  | 15  | 26  | 2  | 8.630178238 | 1.37E-06    | CYP2C19  | ENSG00000165841 |
| 10 | 96737995  | 96738180  | 96738087  | 8   | 9   | 1  | 4.794543465 | 0.00708517  |          | ENSG00000218402 |
| 10 | 97044722  | 97045135  | 97044968  | 21  | 29  | 2  | 9.589086931 | 2.21E-07    | PDLIM1   | ENSG00000107438 |
| 10 | 97088901  | 97089309  | 97089080  | 16  | 23  | 1  | 11.50690432 | 1.25E-06    |          | ENSG00000210773 |
| 10 | 97262076  | 97262386  | 97262232  | 16  | 17  | 1  | 8.630178238 | 5.44E-05    | SORBS1   | ENSG00000095637 |
| 10 | 97406730  | 97406930  | 97406839  | 8   | 9   | 4  | 1.917817386 | 0.103282    | ALDH18A1 | ENSG00000059573 |
| 10 | 98492452  | 98492666  | 98492529  | 9   | 9   | 1  | 4.794543465 | 0.00708517  |          | ENSG00000207287 |
| 10 | 98551322  | 98551689  | 98551510  | 16  | 26  | 16 | 1.52297263  | 0.0820811   |          | ENSG00000207976 |
| 10 | 98613937  | 98614209  | 98614073  | 10  | 12  | 5  | 2.077635502 | 0.0577144   | LCOR     | ENSG00000196233 |
| 10 | 98886278  | 98886710  | 98886457  | 8   | 17  | 4  | 3.452071295 | 0.00292757  | SLIT1    | ENSG00000187122 |
| 10 | 98891281  | 98891610  | 98891445  | 9   | 11  | 2  | 3.835634772 | 0.00800699  | SLIT1    | ENSG00000187122 |
| 10 | 99077711  | 99077978  | 99077835  | 8   | 10  | 5  | 1.757999271 | 0.121253    | FRAT2    | ENSG00000181274 |
| 10 | 99299695  | 99300131  | 99299926  | 39  | 56  | 4  | 10.9315591  | 7.30E-13    | ANKRD2   | ENSG00000165887 |
| 10 | 99303236  | 99303520  | 99303378  | 8   | 12  | 5  | 2.077635502 | 0.0577144   | ANKRD2   | ENSG00000165887 |
| 10 | 99316155  | 99316334  | 99316244  | 8   | 8   | 2  | 2.876726079 | 0.0381137   | ANKRD2   | ENSG00000165887 |
| 10 | 99324376  | 99324719  | 99324547  | 9   | 15  | 4  | 3.068507818 | 0.0076507   | ANKRD2   | ENSG00000165887 |
| 10 | 99398739  | 99399179  | 99398918  | 15  | 23  | 8  | 2.557089848 | 0.00494559  | PI4K2A   | ENSG00000043822 |
| 10 | 99401249  | 99401923  | 99401669  | 173 | 217 | 2  | 69.68069836 | 1.28E-60    | PI4K2A   | ENSG00000043822 |
| 10 | 99451236  | 99451511  | 99451370  | 19  | 23  | 1  | 11.50690432 | 1.25E-06    | MARVELD1 | ENSG00000155254 |
| 10 | 99468516  | 99468695  | 99468579  | 8   | 9   | 0  | 9.589086931 | 0.00120187  | MARVELD1 | ENSG00000155254 |
| 10 | 100332086 | 100332406 | 100332255 | 10  | 14  | 2  | 4.794543465 | 0.00154571  | HPS1     | ENSG00000107521 |
| 10 | 100491120 | 100491310 | 100491200 | 8   | 8   | 0  | 8.630178238 | 0.00235436  |          | ENSG00000217480 |
| 10 | 100666738 | 100666925 | 100666808 | 8   | 9   | 3  | 2.397271733 | 0.0539397   |          | ENSG00000217480 |
| 10 | 100758840 | 100759393 | 100759034 | 32  | 47  | 2  | 15.34253909 | 2.95E-12    |          | ENSG00000217480 |
| 10 | 101370251 | 101370448 | 101370355 | 9   | 10  | 6  | 1.506856518 | 0.188853    | SLC25A28 | ENSG00000155287 |
| 10 | 101404637 | 101404886 | 101404736 | 15  | 15  | 1  | 7.671269544 | 0.000187863 | ENTPD7   | ENSG00000198018 |
| 10 | 101770143 | 101770366 | 101770254 | 8   | 9   | 4  | 1.917817386 | 0.103282    |          | ENSG00000210837 |
| 10 | 101793135 | 101793537 | 101793297 | 64  | 70  | 1  | 34.0412586  | 6.61E-20    |          | ENSG00000210842 |
| 10 | 102017413 | 102017612 | 102017512 | 8   | 9   | 5  | 1.598181155 | 0.170911    | CWF19L1  | ENSG00000095485 |
| 10 | 102035689 | 102036447 | 102035873 | 59  | 94  | 6  | 13.01376083 | 3.38E-21    | BLOC1S2  | ENSG00000196072 |

|    |           |           |           |    |    |   |             |             |          |                 |
|----|-----------|-----------|-----------|----|----|---|-------------|-------------|----------|-----------------|
| 10 | 102406212 | 102406421 | 102406316 | 13 | 13 | 1 | 6.712360851 | 0.000640982 | PAX2     | ENSG00000075891 |
| 10 | 102588415 | 102588632 | 102588517 | 8  | 9  | 0 | 9.589086931 | 0.00120187  | PAX2     | ENSG00000075891 |
| 10 | 102940876 | 102941096 | 102940986 | 8  | 8  | 1 | 4.315089119 | 0.0127267   |          | ENSG00000223121 |
| 10 | 102971232 | 102971710 | 102971531 | 39 | 49 | 6 | 6.849347808 | 1.27E-09    | LBX1     | ENSG00000138136 |
| 10 | 103057887 | 103058135 | 103058011 | 11 | 14 | 0 | 14.3836304  | 4.17E-05    |          | ENSG00000222238 |
| 10 | 103308000 | 103308314 | 103308167 | 9  | 14 | 2 | 4.794543465 | 0.00154571  | POLL     | ENSG00000166169 |
| 10 | 103639998 | 103640327 | 103640172 | 15 | 18 | 1 | 9.109632584 | 2.91E-05    | KCNIP2   | ENSG00000120049 |
| 10 | 103643780 | 103644070 | 103643925 | 8  | 11 | 6 | 1.643843474 | 0.137712    | KCNIP2   | ENSG00000120049 |
| 10 | 103736552 | 103736731 | 103736673 | 8  | 8  | 4 | 1.726035648 | 0.150596    | C10orf76 | ENSG00000120029 |
| 10 | 103862931 | 103863299 | 103863138 | 12 | 17 | 1 | 8.630178238 | 5.44E-05    | LDB1     | ENSG00000198728 |
| 10 | 103871731 | 103871923 | 103871827 | 8  | 8  | 0 | 8.630178238 | 0.00235436  | LDB1     | ENSG00000198728 |
| 10 | 103901730 | 103901954 | 103901901 | 9  | 12 | 1 | 6.232906505 | 0.00117736  | NOLC1    | ENSG00000166197 |
| 10 | 104170638 | 104171074 | 104170803 | 14 | 21 | 8 | 2.343999027 | 0.0109478   | FBXL15   | ENSG00000107872 |
| 10 | 104251089 | 104251291 | 104251139 | 9  | 9  | 5 | 1.598181155 | 0.170911    | ACTR1A   | ENSG00000138107 |
| 10 | 104251679 | 104252000 | 104251848 | 8  | 12 | 1 | 6.232906505 | 0.00117736  | ACTR1A   | ENSG00000138107 |
| 10 | 104252584 | 104252868 | 104252705 | 10 | 13 | 6 | 1.917817386 | 0.0693353   | ACTR1A   | ENSG00000138107 |
| 10 | 104253311 | 104253609 | 104253460 | 10 | 13 | 5 | 2.237453617 | 0.038866    | SUFU     | ENSG00000107882 |
| 10 | 104342253 | 104342455 | 104342364 | 8  | 9  | 9 | 0.958908693 | 0.536911    |          | ENSG00000207029 |
| 10 | 104470068 | 104470287 | 104470232 | 11 | 11 | 0 | 11.50690432 | 0.000313206 | SFXN2    | ENSG00000156398 |
| 10 | 104519134 | 104519352 | 104519241 | 9  | 11 | 3 | 2.876726079 | 0.0213797   | C10orf26 | ENSG00000166272 |
| 10 | 104519566 | 104519967 | 104519788 | 16 | 23 | 3 | 5.753452158 | 3.82E-05    | C10orf26 | ENSG00000166272 |
| 10 | 104792147 | 104792353 | 104792241 | 10 | 11 | 0 | 11.50690432 | 0.000313206 |          | ENSG00000210987 |
| 10 | 104991112 | 104991408 | 104991265 | 12 | 16 | 1 | 8.150723891 | 0.000101217 |          | ENSG00000213276 |
| 10 | 105568889 | 105569068 | 105569002 | 8  | 8  | 2 | 2.876726079 | 0.0381137   | SH3PXD2A | ENSG00000107957 |
| 10 | 105573992 | 105574368 | 105574163 | 11 | 16 | 2 | 5.433815927 | 0.000499302 | SH3PXD2A | ENSG00000107957 |
| 10 | 105634382 | 105634716 | 105634544 | 11 | 14 | 5 | 2.397271733 | 0.0258078   | SH3PXD2A | ENSG00000107957 |
| 10 | 105639943 | 105640321 | 105640113 | 14 | 20 | 8 | 2.237453617 | 0.0160557   | OBFC1    | ENSG00000107960 |
| 10 | 105871313 | 105871650 | 105871481 | 11 | 17 | 5 | 2.876726079 | 0.00703033  | C10orf78 | ENSG00000156384 |
| 10 | 106018571 | 106019100 | 106018929 | 10 | 21 | 2 | 7.031997082 | 2.73E-05    | GSTO2    | ENSG00000065621 |
| 10 | 106041164 | 106041515 | 106041339 | 10 | 15 | 4 | 3.068507818 | 0.0076507   | GSTO2    | ENSG00000065621 |
| 10 | 106222251 | 106222556 | 106222394 | 13 | 16 | 7 | 2.037680973 | 0.0400399   | CCDC147  | ENSG00000120051 |
| 10 | 106222561 | 106222792 | 106222630 | 8  | 9  | 4 | 1.917817386 | 0.103282    | CCDC147  | ENSG00000120051 |
| 10 | 106558963 | 106559629 | 106559138 | 29 | 56 | 2 | 18.21926517 | 9.63E-15    | SORCS3   | ENSG00000156395 |
| 10 | 106960274 | 106960566 | 106960421 | 8  | 11 | 1 | 5.753452158 | 0.00215302  | SORCS3   | ENSG00000156395 |

|    |           |           |           |    |    |   |             |             |          |                 |
|----|-----------|-----------|-----------|----|----|---|-------------|-------------|----------|-----------------|
| 10 | 107701967 | 107702250 | 107702079 | 18 | 20 | 3 | 5.034270639 | 0.000202317 |          | ENSG00000213260 |
| 10 | 108189163 | 108189423 | 108189290 | 11 | 13 | 4 | 2.684944341 | 0.01921     |          | ENSG00000213257 |
| 10 | 108263277 | 108263517 | 108263396 | 8  | 8  | 0 | 8.630178238 | 0.00235436  |          | ENSG00000213257 |
| 10 | 108315303 | 108315586 | 108315470 | 9  | 10 | 3 | 2.636998906 | 0.034203    |          | ENSG00000213257 |
| 10 | 109335335 | 109335585 | 109335500 | 15 | 17 | 0 | 17.26035648 | 5.54E-06    |          | ENSG00000200079 |
| 10 | 109789340 | 109790010 | 109789732 | 56 | 83 | 2 | 26.84944341 | 2.65E-22    |          | ENSG00000217870 |
| 10 | 111925200 | 111925422 | 111925337 | 10 | 11 | 0 | 11.50690432 | 0.000313206 | MXI1     | ENSG00000119950 |
| 10 | 111960704 | 111961002 | 111960870 | 8  | 11 | 5 | 1.917817386 | 0.0843804   | MXI1     | ENSG00000119950 |
| 10 | 111966986 | 111967379 | 111967189 | 26 | 34 | 5 | 5.593634043 | 1.29E-06    | MXI1     | ENSG00000119950 |
| 10 | 112148388 | 112148713 | 112148550 | 10 | 14 | 3 | 3.595907599 | 0.00486913  |          | ENSG00000221359 |
| 10 | 112318047 | 112318461 | 112318209 | 8  | 15 | 3 | 3.835634772 | 0.00291691  | SMC3     | ENSG00000108055 |
| 10 | 112806687 | 112807057 | 112806878 | 17 | 24 | 0 | 23.97271733 | 5.01E-08    | ADRA2A   | ENSG00000150594 |
| 10 | 113506278 | 113506574 | 113506443 | 11 | 12 | 2 | 4.155271003 | 0.0046638   |          | ENSG00000220136 |
| 10 | 114196516 | 114196907 | 114196816 | 10 | 16 | 2 | 5.433815927 | 0.000499302 | VTI1A    | ENSG00000151532 |
| 10 | 114465861 | 114466315 | 114466040 | 11 | 20 | 1 | 10.06854128 | 8.32E-06    |          | ENSG00000203854 |
| 10 | 114561752 | 114561948 | 114561850 | 8  | 10 | 2 | 3.515998541 | 0.0136204   |          | ENSG00000203854 |
| 10 | 114817322 | 114817560 | 114817441 | 14 | 14 | 0 | 14.3836304  | 4.17E-05    |          | ENSG00000179487 |
| 10 | 114843255 | 114843451 | 114843396 | 8  | 9  | 3 | 2.397271733 | 0.0539397   |          | ENSG00000179487 |
| 10 | 115271037 | 115271220 | 115271128 | 9  | 9  | 3 | 2.397271733 | 0.0539397   | HABP2    | ENSG00000148702 |
| 10 | 115549385 | 115549573 | 115549475 | 9  | 10 | 2 | 3.515998541 | 0.0136204   |          | ENSG00000212589 |
| 10 | 115844485 | 115844669 | 115844588 | 8  | 8  | 1 | 4.315089119 | 0.0127267   |          | ENSG00000211087 |
| 10 | 116016274 | 116016677 | 116016498 | 17 | 24 | 5 | 3.995452888 | 0.00024777  |          | ENSG00000219906 |
| 10 | 116053657 | 116054104 | 116053826 | 10 | 17 | 4 | 3.452071295 | 0.00292757  | AFAP1L2  | ENSG00000169129 |
| 10 | 116373658 | 116373918 | 116373742 | 13 | 15 | 1 | 7.671269544 | 0.000187863 | ABLIM1   | ENSG00000099204 |
| 10 | 116529472 | 116529756 | 116529600 | 11 | 13 | 2 | 4.474907234 | 0.00269459  |          | ENSG00000220318 |
| 10 | 116569214 | 116569426 | 116569320 | 8  | 10 | 0 | 10.54799562 | 0.000613541 | FAM160B1 | ENSG00000151553 |
| 10 | 116688228 | 116688539 | 116688383 | 12 | 17 | 0 | 17.26035648 | 5.54E-06    | TRUB1    | ENSG00000165832 |
| 10 | 117194922 | 117195127 | 117195024 | 10 | 12 | 0 | 12.46581301 | 0.000159888 | ATRNL1   | ENSG00000107518 |
| 10 | 117548929 | 117549179 | 117549054 | 8  | 10 | 4 | 2.109599125 | 0.0694668   |          | ENSG00000203279 |
| 10 | 117800116 | 117800346 | 117800237 | 8  | 8  | 2 | 2.876726079 | 0.0381137   |          | ENSG00000222696 |
| 10 | 117995437 | 117995676 | 117995526 | 8  | 11 | 2 | 3.835634772 | 0.00800699  | GFRA1    | ENSG00000151892 |
| 10 | 117998518 | 117998754 | 117998636 | 8  | 10 | 2 | 3.515998541 | 0.0136204   | GFRA1    | ENSG00000151892 |
| 10 | 118383972 | 118384392 | 118384219 | 19 | 26 | 5 | 4.315089119 | 8.98E-05    | PNLIPRP2 | ENSG00000165862 |
| 10 | 118431744 | 118432167 | 118432010 | 8  | 15 | 3 | 3.835634772 | 0.00291691  | C10orf82 | ENSG00000165863 |

|    |           |           |           |    |    |    |             |             |           |                 |
|----|-----------|-----------|-----------|----|----|----|-------------|-------------|-----------|-----------------|
| 10 | 118717860 | 118718152 | 118718011 | 9  | 11 | 0  | 11.50690432 | 0.000313206 | KIAA1598  | ENSG00000187164 |
| 10 | 118966150 | 118966755 | 118966576 | 22 | 50 | 4  | 9.780868669 | 2.72E-11    | KCNK18    | ENSG00000186795 |
| 10 | 120265035 | 120265235 | 120265135 | 8  | 8  | 3  | 2.157544559 | 0.0836802   |           | ENSG00000203278 |
| 10 | 120599978 | 120600320 | 120600149 | 9  | 14 | 2  | 4.794543465 | 0.00154571  |           | ENSG00000217638 |
| 10 | 120746190 | 120746491 | 120746332 | 10 | 12 | 6  | 1.78083043  | 0.0985525   |           | ENSG00000215925 |
| 10 | 120753165 | 120753510 | 120753337 | 19 | 22 | 1  | 11.02744997 | 2.36E-06    |           | ENSG00000215925 |
| 10 | 120756454 | 120756703 | 120756578 | 10 | 12 | 2  | 4.155271003 | 0.0046638   |           | ENSG00000215925 |
| 10 | 121066274 | 121066581 | 121066427 | 9  | 12 | 0  | 12.46581301 | 0.000159888 |           | ENSG00000211177 |
| 10 | 121074624 | 121074931 | 121074777 | 18 | 22 | 5  | 3.675816657 | 0.000667901 |           | ENSG00000211177 |
| 10 | 121413683 | 121413953 | 121413816 | 8  | 9  | 11 | 0.799090578 | 0.702688    | BAG3      | ENSG00000151929 |
| 10 | 121621204 | 121621392 | 121621298 | 8  | 8  | 3  | 2.157544559 | 0.0836802   | C10orf119 | ENSG00000197771 |
| 10 | 121955330 | 121955517 | 121955406 | 8  | 9  | 2  | 3.19636231  | 0.0229249   |           | ENSG00000221402 |
| 10 | 121971522 | 121971701 | 121971620 | 8  | 8  | 3  | 2.157544559 | 0.0836802   |           | ENSG00000221402 |
| 10 | 122002751 | 122002989 | 122002870 | 10 | 13 | 1  | 6.712360851 | 0.000640982 |           | ENSG00000220842 |
| 10 | 122145548 | 122146136 | 122145908 | 20 | 34 | 0  | 33.56180426 | 6.02E-11    |           | ENSG00000218859 |
| 10 | 122253843 | 122254593 | 122254015 | 16 | 35 | 0  | 34.52071295 | 3.07E-11    | PPAPDC1A  | ENSG00000203805 |
| 10 | 122600661 | 122600878 | 122600761 | 8  | 9  | 6  | 1.369869562 | 0.253675    | BRWD2     | ENSG00000120008 |
| 10 | 122819066 | 122819245 | 122819155 | 8  | 8  | 1  | 4.315089119 | 0.0127267   |           | ENSG00000220021 |
| 10 | 122820054 | 122820243 | 122820148 | 8  | 8  | 2  | 2.876726079 | 0.0381137   |           | ENSG00000220021 |
| 10 | 122909256 | 122909524 | 122909414 | 9  | 11 | 2  | 3.835634772 | 0.00800699  |           | ENSG00000220021 |
| 10 | 123082383 | 123082686 | 123082534 | 12 | 16 | 2  | 5.433815927 | 0.000499302 |           | ENSG00000222979 |
| 10 | 123359467 | 123359683 | 123359577 | 8  | 9  | 2  | 3.19636231  | 0.0229249   | FGFR2     | ENSG00000066468 |
| 10 | 123360374 | 123360908 | 123360620 | 42 | 63 | 0  | 61.37015636 | 2.05E-19    | FGFR2     | ENSG00000066468 |
| 10 | 123812735 | 123812984 | 123812840 | 12 | 12 | 2  | 4.155271003 | 0.0046638   | TACC2     | ENSG00000138162 |
| 10 | 124707022 | 124707299 | 124707139 | 15 | 15 | 0  | 15.34253909 | 2.13E-05    | C10orf88  | ENSG00000119965 |
| 10 | 125194943 | 125195179 | 125195061 | 9  | 10 | 2  | 3.515998541 | 0.0136204   | GPR26     | ENSG00000154478 |
| 10 | 125288160 | 125288782 | 125288556 | 52 | 77 | 4  | 14.95897561 | 1.77E-18    | GPR26     | ENSG00000154478 |
| 10 | 125371017 | 125371277 | 125371120 | 8  | 9  | 2  | 3.19636231  | 0.0229249   | GPR26     | ENSG00000154478 |
| 10 | 125592328 | 125592544 | 125592436 | 9  | 9  | 2  | 3.19636231  | 0.0229249   | CPXM2     | ENSG00000121898 |
| 10 | 126743288 | 126743655 | 126743426 | 9  | 14 | 5  | 2.397271733 | 0.0258078   | CTBP2     | ENSG00000175029 |
| 10 | 126766173 | 126766456 | 126766286 | 11 | 14 | 0  | 14.3836304  | 4.17E-05    | CTBP2     | ENSG00000175029 |
| 10 | 126972756 | 126972939 | 126972847 | 8  | 9  | 1  | 4.794543465 | 0.00708517  |           | ENSG00000212946 |
| 10 | 126975155 | 126975512 | 126975333 | 14 | 20 | 4  | 4.027416511 | 0.000652226 |           | ENSG00000212946 |
| 10 | 127209069 | 127209248 | 127209145 | 8  | 8  | 1  | 4.315089119 | 0.0127267   |           | ENSG00000220396 |

|    |           |           |           |     |     |    |             |             |          |                 |
|----|-----------|-----------|-----------|-----|-----|----|-------------|-------------|----------|-----------------|
| 10 | 127340708 | 127340921 | 127340814 | 8   | 8   | 2  | 2.876726079 | 0.0381137   |          | ENSG00000214297 |
| 10 | 127519525 | 127519819 | 127519682 | 14  | 16  | 1  | 8.150723891 | 0.000101217 |          | ENSG00000215972 |
| 10 | 127565003 | 127565189 | 127565096 | 8   | 8   | 8  | 0.958908693 | 0.534974    |          | ENSG00000222629 |
| 10 | 127565288 | 127565472 | 127565399 | 8   | 9   | 11 | 0.799090578 | 0.702688    |          | ENSG00000222629 |
| 10 | 127570879 | 127571223 | 127571051 | 8   | 12  | 5  | 2.077635502 | 0.0577144   |          | ENSG00000222629 |
| 10 | 127572890 | 127573228 | 127573059 | 8   | 14  | 9  | 1.43836304  | 0.179537    | FANK1    | ENSG00000203780 |
| 10 | 127573992 | 127574404 | 127574225 | 10  | 17  | 6  | 2.465765211 | 0.014729    | FANK1    | ENSG00000203780 |
| 10 | 127645912 | 127646537 | 127646316 | 35  | 57  | 2  | 18.5389014  | 5.08E-15    | FANK1    | ENSG00000203780 |
| 10 | 128147066 | 128147294 | 128147200 | 10  | 13  | 0  | 13.4247217  | 8.16E-05    |          | ENSG00000203779 |
| 10 | 128344794 | 128344981 | 128344870 | 8   | 9   | 1  | 4.794543465 | 0.00708517  |          | ENSG00000221717 |
| 10 | 129263005 | 129263503 | 129263253 | 19  | 31  | 1  | 15.34253909 | 7.54E-09    | NPS      | ENSG00000214285 |
| 10 | 129551393 | 129552049 | 129551624 | 106 | 141 | 0  | 136.1650344 | 3.42E-42    | CLRN3    | ENSG00000180745 |
| 10 | 129627734 | 129628500 | 129628196 | 112 | 185 | 1  | 89.17850845 | 4.46E-53    | PTPRE    | ENSG00000132334 |
| 10 | 131378151 | 131378341 | 131378248 | 8   | 9   | 4  | 1.917817386 | 0.103282    | MGMT     | ENSG00000170430 |
| 10 | 131406882 | 131407271 | 131407071 | 18  | 26  | 4  | 5.178106943 | 2.75E-05    | EBF3     | ENSG00000108001 |
| 10 | 132078214 | 132078601 | 132078393 | 19  | 25  | 0  | 24.93162602 | 2.56E-08    |          | ENSG00000222997 |
| 10 | 132782729 | 132783412 | 132783115 | 135 | 172 | 2  | 55.29706797 | 1.12E-47    | TCERG1L  | ENSG00000176769 |
| 10 | 132803015 | 132803214 | 132803135 | 8   | 9   | 2  | 3.19636231  | 0.0229249   | TCERG1L  | ENSG00000176769 |
| 10 | 132817904 | 132818106 | 132818019 | 11  | 12  | 7  | 1.558226626 | 0.152813    | TCERG1L  | ENSG00000176769 |
| 10 | 133459794 | 133460171 | 133459984 | 51  | 59  | 2  | 19.17817386 | 1.41E-15    |          | ENSG00000189275 |
| 10 | 134045172 | 134045524 | 134045311 | 17  | 22  | 1  | 11.02744997 | 2.36E-06    | PWWP2B   | ENSG00000171813 |
| 10 | 134087842 | 134088135 | 134087988 | 17  | 18  | 3  | 4.554816292 | 0.000599415 |          | ENSG00000197735 |
| 10 | 134526964 | 134527243 | 134527103 | 10  | 10  | 0  | 10.54799562 | 0.000613541 | C10orf92 | ENSG00000108046 |
| 10 | 134908486 | 134909006 | 134908676 | 17  | 29  | 0  | 28.76726079 | 1.74E-09    |          | ENSG00000199089 |
| 10 | 135349256 | 135349435 | 135349286 | 9   | 9   | 8  | 1.065454103 | 0.442605    |          | ENSG00000203766 |
| 11 | 273882    | 274135    | 274008    | 10  | 12  | 0  | 12.46581301 | 0.000159888 | ATHL1    | ENSG00000142102 |
| 11 | 406995    | 407174    | 407084    | 8   | 8   | 5  | 1.43836304  | 0.235762    | SIGIRR   | ENSG00000185187 |
| 11 | 429940    | 430239    | 430083    | 10  | 11  | 2  | 3.835634772 | 0.00800699  |          | ENSG00000209358 |
| 11 | 524560    | 524967    | 524739    | 36  | 44  | 3  | 10.7877228  | 1.57E-10    | HRAS     | ENSG00000174775 |
| 11 | 696802    | 697191    | 697012    | 17  | 24  | 3  | 5.993179332 | 2.17E-05    | EPS8L2   | ENSG00000177106 |
| 11 | 794110    | 794615    | 794450    | 52  | 65  | 3  | 15.82199344 | 3.44E-16    | LRDD     | ENSG00000177595 |
| 11 | 1063549   | 1063749   | 1063628   | 9   | 9   | 1  | 4.794543465 | 0.00708517  | MUC2     | ENSG00000198788 |
| 11 | 1098753   | 1099087   | 1098921   | 13  | 16  | 1  | 8.150723891 | 0.000101217 | MUC2     | ENSG00000198788 |
| 11 | 1633113   | 1633491   | 1633301   | 32  | 41  | 0  | 40.27416511 | 5.44E-13    | FAM99A   | ENSG00000205866 |

|    |          |          |          |     |     |   |             |             |          |                 |
|----|----------|----------|----------|-----|-----|---|-------------|-------------|----------|-----------------|
| 11 | 1808350  | 1809056  | 1808685  | 63  | 97  | 1 | 46.98652596 | 1.18E-27    | SYT8     | ENSG00000149043 |
| 11 | 3593711  | 3594192  | 3594025  | 35  | 49  | 1 | 23.97271733 | 6.39E-14    | TRPC2    | ENSG00000215103 |
| 11 | 3723020  | 3723268  | 3723165  | 11  | 12  | 4 | 2.493162602 | 0.0299057   |          | ENSG00000209091 |
| 11 | 3785665  | 3785898  | 3785821  | 8   | 10  | 1 | 5.273997812 | 0.00391723  |          | ENSG00000148985 |
| 11 | 4072344  | 4072900  | 4072523  | 12  | 24  | 3 | 5.993179332 | 2.17E-05    | RRM1     | ENSG00000167325 |
| 11 | 4371484  | 4371713  | 4371593  | 8   | 9   | 1 | 4.794543465 | 0.00708517  | TRIM21   | ENSG00000132109 |
| 11 | 4431888  | 4432190  | 4432064  | 23  | 23  | 0 | 23.01380863 | 9.81E-08    | OR52K2   | ENSG00000181963 |
| 11 | 4441689  | 4441951  | 4441820  | 8   | 10  | 5 | 1.757999271 | 0.121253    | OR52K3P  | ENSG00000205512 |
| 11 | 4441990  | 4442654  | 4442252  | 179 | 232 | 5 | 37.23762091 | 1.60E-60    | OR52K3P  | ENSG00000205512 |
| 11 | 5269112  | 5269314  | 5269182  | 8   | 9   | 2 | 3.19636231  | 0.0229249   | OR51AB1P | ENSG00000219058 |
| 11 | 5668073  | 5668606  | 5668372  | 26  | 45  | 0 | 44.10979988 | 3.69E-14    | TRIM22   | ENSG00000132274 |
| 11 | 5785431  | 5785781  | 5785610  | 28  | 33  | 3 | 8.150723891 | 1.18E-07    | OR52N2   | ENSG00000180988 |
| 11 | 5843707  | 5843903  | 5843805  | 11  | 11  | 0 | 11.50690432 | 0.000313206 | TRIM5    | ENSG00000132256 |
| 11 | 6367847  | 6368026  | 6367936  | 8   | 9   | 1 | 4.794543465 | 0.00708517  | SMPD1    | ENSG00000166311 |
| 11 | 6581294  | 6581544  | 6581419  | 11  | 12  | 6 | 1.78083043  | 0.0985525   | KIAA0409 | ENSG00000132275 |
| 11 | 6782441  | 6782659  | 6782550  | 13  | 13  | 0 | 13.4247217  | 8.16E-05    | OR6A2    | ENSG00000184933 |
| 11 | 7575621  | 7575900  | 7575760  | 10  | 11  | 5 | 1.917817386 | 0.0843804   | CYB5R2   | ENSG00000166394 |
| 11 | 7578154  | 7578462  | 7578305  | 13  | 16  | 6 | 2.328778255 | 0.0221113   | CYB5R2   | ENSG00000166394 |
| 11 | 7965119  | 7965373  | 7965254  | 11  | 13  | 7 | 1.678090213 | 0.11195     | EIF3F    | ENSG00000175390 |
| 11 | 9117024  | 9117391  | 9117199  | 26  | 32  | 2 | 10.54799562 | 3.50E-08    |          | ENSG00000212788 |
| 11 | 9453651  | 9453850  | 9453737  | 9   | 9   | 0 | 9.589086931 | 0.00120187  | ZNF143   | ENSG00000166478 |
| 11 | 9546972  | 9547196  | 9547094  | 10  | 11  | 3 | 2.876726079 | 0.0213797   | WEE1     | ENSG00000166483 |
| 11 | 9588049  | 9588509  | 9588286  | 29  | 48  | 1 | 23.49326298 | 1.23E-13    |          | ENSG00000209446 |
| 11 | 9780369  | 9780894  | 9780604  | 29  | 42  | 2 | 13.74435793 | 6.90E-11    |          | ENSG00000201564 |
| 11 | 9968749  | 9969075  | 9968912  | 10  | 12  | 0 | 12.46581301 | 0.000159888 |          | ENSG00000215043 |
| 11 | 10022626 | 10023198 | 10022880 | 63  | 82  | 0 | 79.58942152 | 5.79E-25    |          | ENSG00000215043 |
| 11 | 10478522 | 10478724 | 10478623 | 9   | 9   | 2 | 3.19636231  | 0.0229249   |          | ENSG00000209455 |
| 11 | 10611456 | 10611697 | 10611567 | 11  | 11  | 0 | 11.50690432 | 0.000313206 | MRVI1    | ENSG00000072952 |
| 11 | 10877618 | 10877882 | 10877750 | 11  | 13  | 1 | 6.712360851 | 0.000640982 |          | ENSG00000222048 |
| 11 | 11651365 | 11651544 | 11651454 | 8   | 8   | 1 | 4.315089119 | 0.0127267   | GALNTL4  | ENSG00000110328 |
| 11 | 12044102 | 12044485 | 12044281 | 12  | 20  | 0 | 20.13708255 | 7.37E-07    | MICAL2   | ENSG00000133816 |
| 11 | 12226593 | 12226857 | 12226725 | 9   | 11  | 4 | 2.301380863 | 0.0459276   | MICALCL  | ENSG00000133808 |
| 11 | 13322347 | 13322576 | 13322493 | 8   | 11  | 1 | 5.753452158 | 0.00215302  |          | ENSG00000222162 |
| 11 | 16753583 | 16753931 | 16753757 | 8   | 14  | 1 | 7.191815198 | 0.00034761  | PLEKHA7  | ENSG00000166689 |

|    |          |          |          |    |     |    |             |             |                          |
|----|----------|----------|----------|----|-----|----|-------------|-------------|--------------------------|
| 11 | 16798388 | 16798656 | 16798519 | 9  | 11  | 2  | 3.835634772 | 0.00800699  | ENSG00000199883          |
| 11 | 16896843 | 16897044 | 16896981 | 8  | 8   | 5  | 1.43836304  | 0.235762    | ENSG00000209522          |
| 11 | 16935028 | 16935290 | 16935173 | 10 | 11  | 10 | 1.046082211 | 0.455063    | ENSG00000209522          |
| 11 | 16965330 | 16965569 | 16965474 | 8  | 9   | 6  | 1.369869562 | 0.253675    | ENSG00000209522          |
| 11 | 17055638 | 17056199 | 17055929 | 9  | 19  | 8  | 2.130908207 | 0.0233014   | RPS13 ENSG00000110700    |
| 11 | 17090814 | 17091156 | 17090985 | 19 | 24  | 0  | 23.97271733 | 5.01E-08    | ENSG00000201586          |
| 11 | 17150311 | 17150577 | 17150444 | 8  | 10  | 3  | 2.636998906 | 0.034203    | PIK3C2A ENSG00000011405  |
| 11 | 17347980 | 17348284 | 17348127 | 14 | 17  | 0  | 17.26035648 | 5.54E-06    | KCNJ11 ENSG00000187486   |
| 11 | 17356860 | 17357285 | 17357062 | 12 | 20  | 2  | 6.712360851 | 4.91E-05    | KCNJ11 ENSG00000187486   |
| 11 | 19973287 | 19973558 | 19973422 | 9  | 10  | 6  | 1.506856518 | 0.188853    | NAV2 ENSG00000166833     |
| 11 | 20013898 | 20014133 | 20014015 | 13 | 15  | 2  | 5.114179696 | 0.00088103  | NAV2 ENSG00000166833     |
| 11 | 20462079 | 20462450 | 20462271 | 13 | 20  | 2  | 6.712360851 | 4.91E-05    | PRMT3 ENSG00000185238    |
| 11 | 28117948 | 28118382 | 28118127 | 23 | 32  | 2  | 10.54799562 | 3.50E-08    | METT5D1 ENSG00000169519  |
| 11 | 28118840 | 28119455 | 28118989 | 17 | 30  | 1  | 14.86308474 | 1.43E-08    | METT5D1 ENSG00000169519  |
| 11 | 28499222 | 28499822 | 28499417 | 98 | 125 | 4  | 24.16449907 | 1.08E-31    | ENSG00000216849          |
| 11 | 30175860 | 30176402 | 30176102 | 17 | 30  | 2  | 9.908723162 | 1.20E-07    | FSHB ENSG00000131808     |
| 11 | 30665300 | 30665519 | 30665400 | 8  | 9   | 0  | 9.589086931 | 0.00120187  | MPPED2 ENSG00000066382   |
| 11 | 33039587 | 33039931 | 33039764 | 45 | 47  | 0  | 46.02761727 | 9.62E-15    | ENSG00000213713          |
| 11 | 33138147 | 33138460 | 33138289 | 12 | 16  | 0  | 16.30144778 | 1.09E-05    | CSTF3 ENSG00000176102    |
| 11 | 33786372 | 33786551 | 33786482 | 8  | 8   | 1  | 4.315089119 | 0.0127267   | FBXO3 ENSG00000110429    |
| 11 | 34008593 | 34008877 | 34008735 | 13 | 15  | 0  | 15.34253909 | 2.13E-05    | CAPRIN1 ENSG00000135387  |
| 11 | 34241474 | 34241817 | 34241645 | 10 | 15  | 6  | 2.191791298 | 0.0328001   | ENSG00000201867          |
| 11 | 34252796 | 34253216 | 34252975 | 14 | 23  | 7  | 2.876726079 | 0.00239423  | ABTB2 ENSG00000166016    |
| 11 | 34374338 | 34374525 | 34374431 | 8  | 9   | 1  | 4.794543465 | 0.00708517  | ENSG00000220204          |
| 11 | 34491825 | 34492031 | 34491944 | 9  | 11  | 4  | 2.301380863 | 0.0459276   | ELF5 ENSG00000135374     |
| 11 | 34548723 | 34549002 | 34548862 | 10 | 13  | 7  | 1.678090213 | 0.11195     | EHF ENSG00000135373      |
| 11 | 34610039 | 34610318 | 34610178 | 9  | 11  | 4  | 2.301380863 | 0.0459276   | EHF ENSG00000135373      |
| 11 | 34614341 | 34614590 | 34614465 | 8  | 9   | 2  | 3.19636231  | 0.0229249   | EHF ENSG00000135373      |
| 11 | 34646320 | 34646506 | 34646451 | 8  | 9   | 0  | 9.589086931 | 0.00120187  | EHF ENSG00000135373      |
| 11 | 34663435 | 34663984 | 34663706 | 67 | 89  | 4  | 17.26035648 | 9.60E-22    | EHF ENSG00000135373      |
| 11 | 35463734 | 35464034 | 35463887 | 9  | 12  | 4  | 2.493162602 | 0.0299057   | ENSG00000149090          |
| 11 | 36572427 | 36572667 | 36572547 | 8  | 9   | 4  | 1.917817386 | 0.103282    | C11orf74 ENSG00000166352 |
| 11 | 38439124 | 38439315 | 38439219 | 9  | 9   | 4  | 1.917817386 | 0.103282    |                          |
| 11 | 38573092 | 38573353 | 38573222 | 10 | 12  | 0  | 12.46581301 | 0.000159888 |                          |



|    |          |          |          |     |     |    |             |             |          |                 |
|----|----------|----------|----------|-----|-----|----|-------------|-------------|----------|-----------------|
| 11 | 42750015 | 42750376 | 42750166 | 23  | 27  | 0  | 26.84944341 | 6.66E-09    |          |                 |
| 11 | 44122175 | 44122360 | 44122267 | 8   | 8   | 2  | 2.876726079 | 0.0381137   | EXT2     | ENSG00000151348 |
| 11 | 44542818 | 44543094 | 44542931 | 11  | 13  | 6  | 1.917817386 | 0.0693353   | CD82     | ENSG00000085117 |
| 11 | 45714559 | 45714929 | 45714738 | 30  | 37  | 7  | 4.554816292 | 2.99E-06    |          | ENSG00000205106 |
| 11 | 45821275 | 45821546 | 45821410 | 14  | 18  | 6  | 2.602752167 | 0.00970422  | CRY2     | ENSG00000121671 |
| 11 | 45826748 | 45826946 | 45826833 | 8   | 9   | 1  | 4.794543465 | 0.00708517  | CRY2     | ENSG00000121671 |
| 11 | 45859884 | 45860151 | 45860019 | 9   | 9   | 3  | 2.397271733 | 0.0539397   | MAPK8IP1 | ENSG00000121653 |
| 11 | 46097285 | 46097593 | 46097452 | 11  | 14  | 2  | 4.794543465 | 0.00154571  | PHF21A   | ENSG00000135365 |
| 11 | 46323190 | 46323513 | 46323345 | 9   | 12  | 0  | 12.46581301 | 0.000159888 | DGKZ     | ENSG00000149091 |
| 11 | 46345784 | 46345963 | 46345905 | 8   | 8   | 0  | 8.630178238 | 0.00235436  | DGKZ     | ENSG00000149091 |
| 11 | 46391905 | 46392097 | 46392001 | 9   | 9   | 2  | 3.19636231  | 0.0229249   |          | ENSG00000222006 |
| 11 | 46460263 | 46460562 | 46460386 | 8   | 11  | 2  | 3.835634772 | 0.00800699  |          | ENSG00000222006 |
| 11 | 46572131 | 46572320 | 46572257 | 9   | 10  | 5  | 1.757999271 | 0.121253    | AMBRA1   | ENSG00000110497 |
| 11 | 46635839 | 46636179 | 46636009 | 12  | 18  | 5  | 3.036544195 | 0.0044641   | KIAA0652 | ENSG00000175224 |
| 11 | 46678870 | 46679116 | 46678982 | 8   | 9   | 10 | 0.871735176 | 0.624623    | ZNF408   | ENSG00000175213 |
| 11 | 46804488 | 46804992 | 46804667 | 12  | 25  | 3  | 6.232906505 | 1.23E-05    | CKAP5    | ENSG00000175216 |
| 11 | 46914657 | 46914959 | 46914807 | 16  | 20  | 3  | 5.034270639 | 0.000202317 | C11orf49 | ENSG00000149179 |
| 11 | 46965333 | 46965738 | 46965535 | 22  | 32  | 2  | 10.54799562 | 3.50E-08    | C11orf49 | ENSG00000149179 |
| 11 | 47034102 | 47034320 | 47034211 | 8   | 8   | 1  | 4.315089119 | 0.0127267   | C11orf49 | ENSG00000149179 |
| 11 | 47121611 | 47121843 | 47121727 | 10  | 11  | 4  | 2.301380863 | 0.0459276   | ARFGAP2  | ENSG00000149182 |
| 11 | 47139327 | 47139565 | 47139484 | 8   | 12  | 5  | 2.077635502 | 0.0577144   | ARFGAP2  | ENSG00000149182 |
| 11 | 47155468 | 47155656 | 47155574 | 10  | 10  | 2  | 3.515998541 | 0.0136204   | ARFGAP2  | ENSG00000149182 |
| 11 | 47192548 | 47192743 | 47192679 | 8   | 9   | 5  | 1.598181155 | 0.170911    | DDB2     | ENSG00000134574 |
| 11 | 47192751 | 47193683 | 47193143 | 287 | 379 | 9  | 36.43853034 | 9.17E-97    | DDB2     | ENSG00000134574 |
| 11 | 47194138 | 47194556 | 47194278 | 9   | 17  | 2  | 5.753452158 | 0.000281509 | DDB2     | ENSG00000134574 |
| 11 | 47226799 | 47227117 | 47226960 | 10  | 15  | 10 | 1.394776281 | 0.191426    | ACP2     | ENSG00000134575 |
| 11 | 47237566 | 47237779 | 47237699 | 8   | 9   | 4  | 1.917817386 | 0.103282    | NR1H3    | ENSG00000025434 |
| 11 | 47333452 | 47333680 | 47333566 | 13  | 14  | 5  | 2.397271733 | 0.0258078   |          | ENSG00000203453 |
| 11 | 47352097 | 47352383 | 47352274 | 8   | 11  | 7  | 1.43836304  | 0.204844    | SPI1     | ENSG00000066336 |
| 11 | 47556981 | 47557296 | 47557120 | 14  | 18  | 10 | 1.656296833 | 0.0841786   | KBTBD4   | ENSG00000123444 |
| 11 | 47703988 | 47704172 | 47704082 | 8   | 8   | 1  | 4.315089119 | 0.0127267   |          | ENSG00000200090 |
| 11 | 47745773 | 47746035 | 47745904 | 8   | 11  | 2  | 3.835634772 | 0.00800699  | FNBP4    | ENSG00000109920 |
| 11 | 47912636 | 47912815 | 47912725 | 9   | 9   | 0  | 9.589086931 | 0.00120187  | PTPRJ    | ENSG00000149177 |
| 11 | 48028089 | 48028355 | 48028225 | 11  | 14  | 1  | 7.191815198 | 0.00034761  | PTPRJ    | ENSG00000149177 |

|    |          |          |          |    |     |    |             |             |          |                 |
|----|----------|----------|----------|----|-----|----|-------------|-------------|----------|-----------------|
| 11 | 48028453 | 48028717 | 48028585 | 8  | 11  | 0  | 11.50690432 | 0.000313206 | PTPRJ    | ENSG00000149177 |
| 11 | 48072044 | 48072235 | 48072146 | 10 | 10  | 2  | 3.515998541 | 0.0136204   | PTPRJ    | ENSG00000149177 |
| 11 | 48674575 | 48674755 | 48674726 | 9  | 9   | 13 | 0.684934781 | 0.824961    |          | ENSG00000213607 |
| 11 | 48772738 | 48773068 | 48772903 | 12 | 12  | 15 | 0.779113313 | 0.750998    |          | ENSG00000214907 |
| 11 | 48815784 | 48815964 | 48815934 | 8  | 8   | 19 | 0.431508912 | 0.986481    |          | ENSG00000214907 |
| 11 | 48820165 | 48820498 | 48820331 | 48 | 50  | 47 | 1.018840486 | 0.462307    |          | ENSG00000214907 |
| 11 | 48823245 | 48823424 | 48823396 | 8  | 8   | 11 | 0.71918152  | 0.777546    |          | ENSG00000214907 |
| 11 | 48838307 | 48838635 | 48838471 | 11 | 11  | 7  | 1.43836304  | 0.204844    |          | ENSG00000214907 |
| 11 | 48914374 | 48914705 | 48914539 | 31 | 31  | 18 | 1.615004115 | 0.044781    |          | ENSG00000214907 |
| 11 | 50726273 | 50726602 | 50726437 | 12 | 12  | 6  | 1.78083043  | 0.0985525   |          | ENSG00000214883 |
| 11 | 50737885 | 50738214 | 50738049 | 9  | 10  | 11 | 0.878999635 | 0.622439    |          | ENSG00000214883 |
| 11 | 51429130 | 51429310 | 51429281 | 8  | 8   | 3  | 2.157544559 | 0.0836802   | OR4C46   | ENSG00000185926 |
| 11 | 51429930 | 51430113 | 51429961 | 11 | 13  | 8  | 1.491635745 | 0.166708    | OR4C46   | ENSG00000185926 |
| 11 | 51433010 | 51433192 | 51433041 | 11 | 11  | 4  | 2.301380863 | 0.0459276   | OR4C46   | ENSG00000185926 |
| 11 | 51435325 | 51435506 | 51435475 | 8  | 8   | 8  | 0.958908693 | 0.534974    | OR4C46   | ENSG00000185926 |
| 11 | 51435885 | 51436217 | 51436051 | 28 | 31  | 23 | 1.278544924 | 0.178011    | OR4C46   | ENSG00000185926 |
| 11 | 51437367 | 51437546 | 51437518 | 10 | 10  | 6  | 1.506856518 | 0.188853    | OR4C46   | ENSG00000185926 |
| 11 | 55795102 | 55795296 | 55795223 | 9  | 9   | 0  | 9.589086931 | 0.00120187  | OR5T1    | ENSG00000181698 |
| 11 | 56621300 | 56621560 | 56621426 | 13 | 15  | 2  | 5.114179696 | 0.00088103  | LRRC55   | ENSG00000183908 |
| 11 | 56849052 | 56849237 | 56849144 | 8  | 8   | 2  | 2.876726079 | 0.0381137   | TNKS1BP1 | ENSG00000149115 |
| 11 | 57312488 | 57312719 | 57312603 | 8  | 9   | 0  | 9.589086931 | 0.00120187  | CTNND1   | ENSG00000198561 |
| 11 | 57324671 | 57325121 | 57324850 | 11 | 19  | 1  | 9.589086931 | 1.56E-05    | CTNND1   | ENSG00000198561 |
| 11 | 58102051 | 58102343 | 58102197 | 12 | 16  | 6  | 2.328778255 | 0.0221113   | CNTF     | ENSG00000186660 |
| 11 | 58725425 | 58725709 | 58725567 | 13 | 14  | 0  | 14.3836304  | 4.17E-05    |          | ENSG00000197629 |
| 11 | 59090212 | 59090538 | 59090372 | 10 | 12  | 11 | 1.038817751 | 0.460341    | OSBP     | ENSG00000110048 |
| 11 | 59300592 | 59300838 | 59300715 | 9  | 11  | 4  | 2.301380863 | 0.0459276   |          | ENSG00000166899 |
| 11 | 59887590 | 59887943 | 59887703 | 9  | 13  | 7  | 1.678090213 | 0.11195     | MS4A7    | ENSG00000166927 |
| 11 | 60087646 | 60088224 | 60087861 | 89 | 116 | 2  | 37.39743903 | 1.17E-31    | MS4A13   | ENSG00000204979 |
| 11 | 60355202 | 60355477 | 60355313 | 9  | 12  | 2  | 4.155271003 | 0.0046638   | CCDC86   | ENSG00000110104 |
| 11 | 60396188 | 60396428 | 60396307 | 8  | 10  | 1  | 5.273997812 | 0.00391723  | ZP1      | ENSG00000149506 |
| 11 | 60437984 | 60438177 | 60438080 | 8  | 10  | 7  | 1.318499453 | 0.269217    | TMEM109  | ENSG00000110108 |
| 11 | 60653802 | 60654131 | 60653976 | 13 | 18  | 4  | 3.643853034 | 0.00178791  | CD5      | ENSG00000110448 |
| 11 | 60682702 | 60683058 | 60682880 | 18 | 24  | 7  | 2.996589666 | 0.00154378  | VPS37C   | ENSG00000167987 |
| 11 | 60821597 | 60821991 | 60821769 | 10 | 16  | 1  | 8.150723891 | 0.000101217 | VWCE     | ENSG00000167992 |

|    |          |          |          |     |     |   |             |             |          |                 |
|----|----------|----------|----------|-----|-----|---|-------------|-------------|----------|-----------------|
| 11 | 60824627 | 60824994 | 60824838 | 16  | 22  | 1 | 11.02744997 | 2.36E-06    | VWCE     | ENSG00000167992 |
| 11 | 60860231 | 60860414 | 60860355 | 8   | 9   | 1 | 4.794543465 | 0.00708517  | DAK      | ENSG00000149476 |
| 11 | 61040951 | 61041167 | 61041019 | 8   | 9   | 0 | 9.589086931 | 0.00120187  |          | ENSG00000204950 |
| 11 | 61150834 | 61151112 | 61150964 | 19  | 21  | 7 | 2.636998906 | 0.00562102  |          | ENSG00000213553 |
| 11 | 61221770 | 61222049 | 61221915 | 11  | 12  | 1 | 6.232906505 | 0.00117736  | DAGLA    | ENSG00000134780 |
| 11 | 61282521 | 61282877 | 61282699 | 16  | 22  | 1 | 11.02744997 | 2.36E-06    |          | ENSG00000124915 |
| 11 | 61304939 | 61305327 | 61305103 | 16  | 22  | 4 | 4.410979988 | 0.000231863 | C11orf9  | ENSG00000124920 |
| 11 | 61344164 | 61344562 | 61344340 | 42  | 52  | 3 | 12.70554018 | 1.15E-12    | FADS1    | ENSG00000149485 |
| 11 | 61505207 | 61505644 | 61505479 | 22  | 30  | 2 | 9.908723162 | 1.20E-07    | FTH1     | ENSG00000167996 |
| 11 | 61523074 | 61523503 | 61523306 | 21  | 36  | 5 | 5.913270274 | 4.32E-07    | FTH1     | ENSG00000167996 |
| 11 | 61585534 | 61585739 | 61585645 | 8   | 8   | 2 | 2.876726079 | 0.0381137   | INCENP   | ENSG00000149503 |
| 11 | 61620321 | 61620549 | 61620435 | 11  | 12  | 0 | 12.46581301 | 0.000159888 | INCENP   | ENSG00000149503 |
| 11 | 61746927 | 61747471 | 61747106 | 39  | 52  | 0 | 50.82216073 | 3.34E-16    | SCGB2A1  | ENSG00000124939 |
| 11 | 61766061 | 61766367 | 61766214 | 12  | 14  | 2 | 4.794543465 | 0.00154571  | SCGB1D2  | ENSG00000124935 |
| 11 | 61809729 | 61810023 | 61809874 | 13  | 16  | 1 | 8.150723891 | 0.000101217 | SCGB1D4  | ENSG00000197745 |
| 11 | 62097796 | 62098015 | 62097916 | 8   | 9   | 2 | 3.19636231  | 0.0229249   | EEF1G    | ENSG00000186676 |
| 11 | 62115520 | 62115831 | 62115681 | 17  | 21  | 4 | 4.219198249 | 0.000390041 | TUT1     | ENSG00000149016 |
| 11 | 62123221 | 62123621 | 62123442 | 18  | 28  | 5 | 4.63472535  | 3.19E-05    | MTA2     | ENSG00000149480 |
| 11 | 62123726 | 62124380 | 62124103 | 118 | 159 | 6 | 21.91791298 | 7.20E-39    | MTA2     | ENSG00000149480 |
| 11 | 62177321 | 62177605 | 62177451 | 17  | 18  | 6 | 2.602752167 | 0.00970422  | INTS5    | ENSG00000185085 |
| 11 | 62195608 | 62195805 | 62195713 | 13  | 13  | 1 | 6.712360851 | 0.000640982 | C11orf83 | ENSG00000204922 |
| 11 | 62310485 | 62310850 | 62310664 | 9   | 15  | 6 | 2.191791298 | 0.0328001   | TMEM179B | ENSG00000185475 |
| 11 | 62329671 | 62330018 | 62329846 | 9   | 12  | 2 | 4.155271003 | 0.0046638   | NXF1     | ENSG00000162231 |
| 11 | 62405654 | 62405856 | 62405755 | 8   | 10  | 2 | 3.515998541 | 0.0136204   | SLC3A2   | ENSG00000168003 |
| 11 | 62433324 | 62433674 | 62433499 | 10  | 16  | 3 | 4.075361945 | 0.00173346  | CHRM1    | ENSG00000168539 |
| 11 | 63069772 | 63070097 | 63069934 | 14  | 16  | 1 | 8.150723891 | 0.000101217 | RARRES3  | ENSG00000133321 |
| 11 | 63146529 | 63146783 | 63146656 | 10  | 14  | 6 | 2.054804342 | 0.0480281   |          | ENSG00000196566 |
| 11 | 63158648 | 63158848 | 63158750 | 10  | 10  | 3 | 2.636998906 | 0.034203    |          | ENSG00000196566 |
| 11 | 63315633 | 63315905 | 63315769 | 12  | 14  | 1 | 7.191815198 | 0.00034761  | C11orf84 | ENSG00000168005 |
| 11 | 63327139 | 63327440 | 63327289 | 8   | 9   | 4 | 1.917817386 | 0.103282    | C11orf84 | ENSG00000168005 |
| 11 | 63462400 | 63462686 | 63462543 | 8   | 13  | 7 | 1.678090213 | 0.11195     | NAT11    | ENSG00000110583 |
| 11 | 63510232 | 63510452 | 63510349 | 9   | 9   | 3 | 2.397271733 | 0.0539397   | OTUB1    | ENSG00000167770 |
| 11 | 63690584 | 63690780 | 63690682 | 9   | 9   | 2 | 3.19636231  | 0.0229249   | MACROD1  | ENSG00000133315 |
| 11 | 63728520 | 63728835 | 63728689 | 9   | 10  | 2 | 3.515998541 | 0.0136204   | FERMT3   | ENSG00000149781 |

|    |          |          |          |     |     |    |             |             |          |                 |
|----|----------|----------|----------|-----|-----|----|-------------|-------------|----------|-----------------|
| 11 | 63835134 | 63835509 | 63835417 | 15  | 23  | 2  | 7.671269544 | 8.30E-06    | ESRRA    | ENSG00000173153 |
| 11 | 63841589 | 63841789 | 63841689 | 8   | 8   | 6  | 1.232882605 | 0.333038    |          | ENSG00000173113 |
| 11 | 63961459 | 63961676 | 63961559 | 10  | 12  | 0  | 12.46581301 | 0.000159888 |          | ENSG00000181908 |
| 11 | 63973660 | 63973883 | 63973805 | 9   | 10  | 2  | 3.515998541 | 0.0136204   |          | ENSG00000181908 |
| 11 | 64043401 | 64043880 | 64043580 | 8   | 15  | 4  | 3.068507818 | 0.0076507   |          | ENSG00000220919 |
| 11 | 64366860 | 64367444 | 64367265 | 53  | 83  | 1  | 40.27416511 | 1.25E-23    | CDC42BPG | ENSG00000171219 |
| 11 | 64551712 | 64551989 | 64551866 | 10  | 12  | 7  | 1.558226626 | 0.152813    | SNX15    | ENSG00000110025 |
| 11 | 64564912 | 64565165 | 64565064 | 8   | 10  | 3  | 2.636998906 | 0.034203    | SAC3D1   | ENSG00000168061 |
| 11 | 64565300 | 64565479 | 64565363 | 8   | 8   | 0  | 8.630178238 | 0.00235436  | SAC3D1   | ENSG00000168061 |
| 11 | 64608071 | 64608291 | 64608177 | 10  | 11  | 8  | 1.278544924 | 0.28289     | CDCA5    | ENSG00000146670 |
| 11 | 64619997 | 64620320 | 64620158 | 10  | 15  | 13 | 1.095895649 | 0.398774    | C11orf2  | ENSG00000149823 |
| 11 | 64646165 | 64646628 | 64646327 | 22  | 29  | 2  | 9.589086931 | 2.21E-07    | MRPL49   | ENSG00000149792 |
| 11 | 64648927 | 64649180 | 64649046 | 13  | 14  | 2  | 4.794543465 | 0.00154571  | FAU      | ENSG00000149806 |
| 11 | 64658925 | 64659222 | 64659073 | 8   | 11  | 5  | 1.917817386 | 0.0843804   | SYVN1    | ENSG00000162298 |
| 11 | 64707193 | 64707454 | 64707323 | 11  | 12  | 0  | 12.46581301 | 0.000159888 | CAPN1    | ENSG0000014216  |
| 11 | 64906179 | 64906567 | 64906388 | 11  | 18  | 2  | 6.073088389 | 0.000157975 | SLC25A45 | ENSG00000162241 |
| 11 | 64942825 | 64943633 | 64943018 | 12  | 35  | 10 | 3.138246632 | 0.000135509 |          | ENSG00000207727 |
| 11 | 64944031 | 64944563 | 64944210 | 13  | 28  | 3  | 6.952088025 | 2.20E-06    |          | ENSG00000207727 |
| 11 | 64944903 | 64946480 | 64945393 | 290 | 417 | 18 | 21.09599125 | 8.39E-97    |          | ENSG00000207727 |
| 11 | 64946528 | 64946958 | 64946820 | 14  | 20  | 4  | 4.027416511 | 0.000652226 |          | ENSG00000207727 |
| 11 | 64947705 | 64947901 | 64947803 | 9   | 9   | 0  | 9.589086931 | 0.00120187  |          | ENSG00000207727 |
| 11 | 64992960 | 64993161 | 64993060 | 9   | 10  | 1  | 5.273997812 | 0.00391723  |          | ENSG00000173727 |
| 11 | 64996213 | 64996588 | 64996409 | 12  | 20  | 5  | 3.356180426 | 0.0017534   |          | ENSG00000173727 |
| 11 | 65000828 | 65001149 | 65000988 | 10  | 12  | 4  | 2.493162602 | 0.0299057   |          | ENSG00000173727 |
| 11 | 65001624 | 65002100 | 65001774 | 8   | 15  | 9  | 1.534253909 | 0.136498    |          | ENSG00000173727 |
| 11 | 65011577 | 65011836 | 65011673 | 8   | 10  | 3  | 2.636998906 | 0.034203    |          | ENSG00000173727 |
| 11 | 65015825 | 65016190 | 65016011 | 9   | 15  | 3  | 3.835634772 | 0.00291691  | SCYL1    | ENSG00000142186 |
| 11 | 65021444 | 65021951 | 65021623 | 11  | 23  | 4  | 4.602761727 | 0.000137072 | SCYL1    | ENSG00000142186 |
| 11 | 65022639 | 65023154 | 65022950 | 10  | 20  | 10 | 1.830643869 | 0.0454769   | SCYL1    | ENSG00000142186 |
| 11 | 65024625 | 65024984 | 65024854 | 10  | 16  | 3  | 4.075361945 | 0.00173346  | SCYL1    | ENSG00000142186 |
| 11 | 65026645 | 65026850 | 65026769 | 8   | 9   | 2  | 3.19636231  | 0.0229249   | SCYL1    | ENSG00000142186 |
| 11 | 65032622 | 65032845 | 65032733 | 9   | 11  | 5  | 1.917817386 | 0.0843804   | SCYL1    | ENSG00000142186 |
| 11 | 65094430 | 65094643 | 65094536 | 8   | 11  | 2  | 3.835634772 | 0.00800699  | SSSCA1   | ENSG00000173465 |
| 11 | 65139193 | 65139586 | 65139410 | 18  | 24  | 15 | 1.498294833 | 0.0979832   | PCNXL3   | ENSG00000197136 |

|    |          |          |          |    |    |    |             |             |          |                 |
|----|----------|----------|----------|----|----|----|-------------|-------------|----------|-----------------|
| 11 | 65243768 | 65243967 | 65243877 | 8  | 8  | 5  | 1.43836304  | 0.235762    | RNASEH2C | ENSG00000172922 |
| 11 | 65308044 | 65308525 | 65308171 | 15 | 25 | 3  | 6.232906505 | 1.23E-05    | OVOL1    | ENSG00000172818 |
| 11 | 65313505 | 65313698 | 65313601 | 11 | 12 | 3  | 3.116453252 | 0.0131971   | OVOL1    | ENSG00000172818 |
| 11 | 65314106 | 65314324 | 65314236 | 8  | 8  | 4  | 1.726035648 | 0.150596    | OVOL1    | ENSG00000172818 |
| 11 | 65317054 | 65317602 | 65317335 | 21 | 33 | 6  | 4.657556509 | 7.52E-06    | OVOL1    | ENSG00000172818 |
| 11 | 65342376 | 65342590 | 65342472 | 8  | 10 | 0  | 10.54799562 | 0.000613541 | SNX32    | ENSG00000172803 |
| 11 | 65384324 | 65384573 | 65384442 | 10 | 12 | 4  | 2.493162602 | 0.0299057   | MUS81    | ENSG00000172732 |
| 11 | 65412410 | 65412849 | 65412629 | 8  | 16 | 12 | 1.253957522 | 0.265012    | FIBP     | ENSG00000172500 |
| 11 | 65423030 | 65423535 | 65423269 | 24 | 40 | 4  | 7.863051283 | 1.01E-08    | FOSL1    | ENSG00000175592 |
| 11 | 65513115 | 65513431 | 65513273 | 13 | 18 | 8  | 2.024362796 | 0.0334397   | BANF1    | ENSG00000175334 |
| 11 | 65526209 | 65526578 | 65526382 | 19 | 25 | 7  | 3.116453252 | 0.000988074 | EIF1AD   | ENSG00000175376 |
| 11 | 65575638 | 65575823 | 65575684 | 8  | 9  | 1  | 4.794543465 | 0.00708517  | SF3B2    | ENSG00000087365 |
| 11 | 65575890 | 65576437 | 65576203 | 10 | 21 | 12 | 1.622768557 | 0.076896    | SF3B2    | ENSG00000087365 |
| 11 | 65595065 | 65595299 | 65595182 | 9  | 11 | 7  | 1.43836304  | 0.204844    | PACS1    | ENSG00000175115 |
| 11 | 65637283 | 65637501 | 65637380 | 10 | 12 | 2  | 4.155271003 | 0.0046638   |          | ENSG00000210102 |
| 11 | 65651080 | 65651339 | 65651209 | 8  | 10 | 0  | 10.54799562 | 0.000613541 |          | ENSG00000210102 |
| 11 | 65746767 | 65746980 | 65746873 | 10 | 11 | 8  | 1.278544924 | 0.28289     | RAB1B    | ENSG00000174903 |
| 11 | 65861080 | 65861530 | 65861205 | 12 | 20 | 4  | 4.027416511 | 0.000652226 | RIN1     | ENSG00000174791 |
| 11 | 65863109 | 65863422 | 65863265 | 14 | 19 | 6  | 2.739739123 | 0.00632909  | RIN1     | ENSG00000174791 |
| 11 | 65868796 | 65869076 | 65868936 | 8  | 13 | 1  | 6.712360851 | 0.000640982 | BRMS1    | ENSG00000174744 |
| 11 | 65872098 | 65872534 | 65872361 | 12 | 21 | 9  | 2.109599125 | 0.0196396   |          | ENSG00000174684 |
| 11 | 65910223 | 65910440 | 65910358 | 9  | 9  | 7  | 1.198635866 | 0.346278    |          | ENSG00000202317 |
| 11 | 65910462 | 65910645 | 65910500 | 8  | 9  | 9  | 0.958908693 | 0.536911    |          | ENSG00000202317 |
| 11 | 65945595 | 65945943 | 65945821 | 12 | 16 | 6  | 2.328778255 | 0.0221113   | NPAS4    | ENSG00000174576 |
| 11 | 65954101 | 65954381 | 65954273 | 10 | 14 | 7  | 1.797953799 | 0.0806593   |          | ENSG00000201733 |
| 11 | 66034539 | 66035039 | 66034753 | 8  | 18 | 6  | 2.602752167 | 0.00970422  | BBS1     | ENSG00000174483 |
| 11 | 66128618 | 66128797 | 66128707 | 8  | 8  | 1  | 4.315089119 | 0.0127267   |          | ENSG00000199325 |
| 11 | 66141917 | 66142186 | 66142058 | 8  | 11 | 4  | 2.301380863 | 0.0459276   | RBM4     | ENSG00000173933 |
| 11 | 66143152 | 66143661 | 66143446 | 61 | 78 | 4  | 15.15075735 | 9.49E-19    | RBM4     | ENSG00000173933 |
| 11 | 66160553 | 66161025 | 66160721 | 15 | 24 | 7  | 2.996589666 | 0.00154378  | RBM4     | ENSG00000173933 |
| 11 | 66161569 | 66161903 | 66161743 | 8  | 11 | 7  | 1.43836304  | 0.204844    | RBM4     | ENSG00000173933 |
| 11 | 66202537 | 66202716 | 66202666 | 8  | 8  | 3  | 2.157544559 | 0.0836802   | RBM4B    | ENSG00000173914 |
| 11 | 66218698 | 66219217 | 66219038 | 14 | 27 | 7  | 3.356180426 | 0.000396559 | RBM4B    | ENSG00000173914 |
| 11 | 66242809 | 66243037 | 66242910 | 9  | 11 | 12 | 0.885146486 | 0.620672    | SPTBN2   | ENSG00000173898 |

|    |          |          |          |    |    |    |             |             |          |                 |
|----|----------|----------|----------|----|----|----|-------------|-------------|----------|-----------------|
| 11 | 66268516 | 66268705 | 66268629 | 8  | 8  | 0  | 8.630178238 | 0.00235436  | C11orf80 | ENSG00000173715 |
| 11 | 66273260 | 66273567 | 66273411 | 10 | 13 | 7  | 1.678090213 | 0.11195     |          | ENSG00000213410 |
| 11 | 66313600 | 66313928 | 66313759 | 8  | 13 | 3  | 3.356180426 | 0.00805599  |          | ENSG00000213409 |
| 11 | 66358232 | 66358613 | 66358434 | 9  | 16 | 11 | 1.358453982 | 0.20248     | RCE1     | ENSG00000173653 |
| 11 | 66416317 | 66416576 | 66416465 | 13 | 17 | 1  | 8.630178238 | 5.44E-05    | PC       | ENSG00000173599 |
| 11 | 66474110 | 66474499 | 66474329 | 11 | 18 | 11 | 1.518272097 | 0.122037    | PC       | ENSG00000173599 |
| 11 | 66546439 | 66546776 | 66546607 | 9  | 11 | 6  | 1.643843474 | 0.137712    | SYT12    | ENSG00000173227 |
| 11 | 66579247 | 66579572 | 66579412 | 9  | 14 | 10 | 1.307602763 | 0.244096    | RHOD     | ENSG00000173156 |
| 11 | 66581620 | 66582048 | 66581795 | 18 | 27 | 5  | 4.474907234 | 5.37E-05    | RHOD     | ENSG00000173156 |
| 11 | 66586812 | 66587028 | 66586920 | 8  | 9  | 6  | 1.369869562 | 0.253675    | RHOD     | ENSG00000173156 |
| 11 | 66595870 | 66596053 | 66595945 | 8  | 9  | 0  | 9.589086931 | 0.00120187  | RHOD     | ENSG00000173156 |
| 11 | 66605601 | 66605993 | 66605780 | 12 | 19 | 8  | 2.130908207 | 0.0233014   | RHOD     | ENSG00000173156 |
| 11 | 66606262 | 66606732 | 66606497 | 13 | 25 | 6  | 3.56166086  | 0.000408555 | RHOD     | ENSG00000173156 |
| 11 | 66643955 | 66644262 | 66644116 | 11 | 13 | 3  | 3.356180426 | 0.00805599  | FBXL11   | ENSG00000173120 |
| 11 | 66650787 | 66651019 | 66650913 | 8  | 8  | 1  | 4.315089119 | 0.0127267   | FBXL11   | ENSG00000173120 |
| 11 | 66763991 | 66764236 | 66764158 | 13 | 15 | 6  | 2.191791298 | 0.0328001   | ADRBK1   | ENSG00000173020 |
| 11 | 66765169 | 66765464 | 66765307 | 11 | 14 | 0  | 14.3836304  | 4.17E-05    | ADRBK1   | ENSG00000173020 |
| 11 | 66772786 | 66773146 | 66772865 | 9  | 15 | 11 | 1.278544924 | 0.254978    | ADRBK1   | ENSG00000173020 |
| 11 | 66786795 | 66787162 | 66786989 | 9  | 14 | 3  | 3.595907599 | 0.00486913  | ADRBK1   | ENSG00000173020 |
| 11 | 66836737 | 66836997 | 66836854 | 12 | 15 | 9  | 1.534253909 | 0.136498    | SSH3     | ENSG00000172830 |
| 11 | 66870058 | 66870345 | 66870167 | 11 | 14 | 3  | 3.595907599 | 0.00486913  | POLD4    | ENSG00000175482 |
| 11 | 66952387 | 66952614 | 66952500 | 8  | 10 | 6  | 1.506856518 | 0.188853    | RPS6KB2  | ENSG00000175634 |
| 11 | 66987956 | 66988443 | 66988269 | 28 | 41 | 9  | 4.027416511 | 3.38E-06    | TMEM134  | ENSG00000172663 |
| 11 | 66988551 | 66988743 | 66988670 | 8  | 8  | 1  | 4.315089119 | 0.0127267   | TMEM134  | ENSG00000172663 |
| 11 | 66988817 | 66989097 | 66988975 | 10 | 13 | 2  | 4.474907234 | 0.00269459  | TMEM134  | ENSG00000172663 |
| 11 | 67029914 | 67030367 | 67030208 | 13 | 20 | 7  | 2.517135319 | 0.00849957  | PITPNM1  | ENSG00000110697 |
| 11 | 67106486 | 67106837 | 67106661 | 8  | 13 | 5  | 2.237453617 | 0.038866    | GSTP1    | ENSG00000084207 |
| 11 | 67180381 | 67180702 | 67180555 | 15 | 19 | 2  | 6.39272462  | 8.83E-05    | ACY3     | ENSG00000132744 |
| 11 | 67198680 | 67198973 | 67198812 | 17 | 21 | 9  | 2.109599125 | 0.0196396   | ALDH3B2  | ENSG00000132746 |
| 11 | 67219902 | 67220144 | 67219999 | 9  | 9  | 2  | 3.19636231  | 0.0229249   | ALDH3B2  | ENSG00000132746 |
| 11 | 67722399 | 67722755 | 67722577 | 39 | 45 | 0  | 44.10979988 | 3.69E-14    | SUV420H1 | ENSG00000110066 |
| 11 | 67806215 | 67806505 | 67806393 | 10 | 14 | 5  | 2.397271733 | 0.0258078   | C11orf24 | ENSG00000171067 |
| 11 | 67861381 | 67861692 | 67861536 | 27 | 30 | 4  | 5.945233897 | 3.05E-06    | LRP5     | ENSG00000162337 |
| 11 | 67868107 | 67868348 | 67868203 | 9  | 9  | 6  | 1.369869562 | 0.253675    | LRP5     | ENSG00000162337 |

|    |          |          |          |    |    |   |             |             |          |                 |
|----|----------|----------|----------|----|----|---|-------------|-------------|----------|-----------------|
| 11 | 68062122 | 68062301 | 68062145 | 8  | 8  | 2 | 2.876726079 | 0.0381137   |          | ENSG00000212093 |
| 11 | 68287247 | 68287528 | 68287401 | 11 | 13 | 6 | 1.917817386 | 0.0693353   | MTL5     | ENSG00000132749 |
| 11 | 68414336 | 68414562 | 68414496 | 11 | 11 | 3 | 2.876726079 | 0.0213797   | MRPL21   | ENSG00000197345 |
| 11 | 68568249 | 68568488 | 68568367 | 9  | 10 | 3 | 2.636998906 | 0.034203    | TPCN2    | ENSG00000162341 |
| 11 | 68625420 | 68625791 | 68625628 | 10 | 15 | 6 | 2.191791298 | 0.0328001   | TPCN2    | ENSG00000162341 |
| 11 | 68645063 | 68645338 | 68645223 | 15 | 15 | 1 | 7.671269544 | 0.000187863 | TPCN2    | ENSG00000162341 |
| 11 | 68646735 | 68647214 | 68647003 | 12 | 22 | 9 | 2.205489994 | 0.0136443   | TPCN2    | ENSG00000162341 |
| 11 | 68673767 | 68674036 | 68673886 | 14 | 15 | 0 | 15.34253909 | 2.13E-05    | TPCN2    | ENSG00000162341 |
| 11 | 69025538 | 69025906 | 69025721 | 17 | 25 | 0 | 24.93162602 | 2.56E-08    | CCND1    | ENSG00000110092 |
| 11 | 69034338 | 69034872 | 69034642 | 16 | 26 | 2 | 8.630178238 | 1.37E-06    | CCND1    | ENSG00000110092 |
| 11 | 69178306 | 69178491 | 69178333 | 8  | 8  | 2 | 2.876726079 | 0.0381137   |          | ENSG00000204579 |
| 11 | 69178737 | 69179223 | 69178974 | 14 | 23 | 8 | 2.557089848 | 0.00494559  |          | ENSG00000204579 |
| 11 | 69333411 | 69333879 | 69333700 | 18 | 29 | 1 | 14.3836304  | 2.72E-08    | FGF3     | ENSG00000186895 |
| 11 | 69469413 | 69469780 | 69469553 | 9  | 13 | 2 | 4.474907234 | 0.00269459  | FGF3     | ENSG00000186895 |
| 11 | 69572549 | 69572840 | 69572672 | 10 | 14 | 4 | 2.876726079 | 0.01219     |          | ENSG00000202070 |
| 11 | 69587365 | 69587702 | 69587530 | 28 | 33 | 2 | 10.86763185 | 1.89E-08    |          | ENSG00000202070 |
| 11 | 69591785 | 69592120 | 69591955 | 10 | 15 | 4 | 3.068507818 | 0.0076507   |          | ENSG00000202070 |
| 11 | 69757200 | 69757480 | 69757340 | 11 | 15 | 4 | 3.068507818 | 0.0076507   | FADD     | ENSG00000168040 |
| 11 | 69797787 | 69798021 | 69797912 | 8  | 9  | 2 | 3.19636231  | 0.0229249   | PPFIA1   | ENSG00000131626 |
| 11 | 69972927 | 69973108 | 69972996 | 8  | 8  | 5 | 1.43836304  | 0.235762    | CTTN     | ENSG00000085733 |
| 11 | 70048879 | 70049258 | 70049021 | 17 | 23 | 1 | 11.50690432 | 1.25E-06    | CTTN     | ENSG00000085733 |
| 11 | 70092077 | 70092256 | 70092146 | 8  | 8  | 2 | 2.876726079 | 0.0381137   | SHANK2   | ENSG00000162105 |
| 11 | 70167463 | 70168036 | 70167791 | 28 | 45 | 4 | 8.821959976 | 5.35E-10    | SHANK2   | ENSG00000162105 |
| 11 | 70293349 | 70293766 | 70293528 | 8  | 15 | 1 | 7.671269544 | 0.000187863 |          | ENSG00000207196 |
| 11 | 70329654 | 70329870 | 70329726 | 11 | 11 | 5 | 1.917817386 | 0.0843804   | C11orf76 | ENSG00000171671 |
| 11 | 70466473 | 70466669 | 70466565 | 8  | 8  | 2 | 2.876726079 | 0.0381137   | SHANK2   | ENSG00000162105 |
| 11 | 70672667 | 70672905 | 70672798 | 11 | 12 | 6 | 1.78083043  | 0.0985525   | SHANK2   | ENSG00000162105 |
| 11 | 70688128 | 70688359 | 70688243 | 9  | 10 | 2 | 3.515998541 | 0.0136204   |          | ENSG00000172900 |
| 11 | 70732238 | 70732543 | 70732385 | 9  | 10 | 4 | 2.109599125 | 0.0694668   |          | ENSG00000172900 |
| 11 | 70761901 | 70762117 | 70762009 | 8  | 9  | 2 | 3.19636231  | 0.0229249   |          | ENSG00000172900 |
| 11 | 70814519 | 70814809 | 70814668 | 8  | 12 | 2 | 4.155271003 | 0.0046638   |          | ENSG00000172900 |
| 11 | 70841859 | 70842319 | 70842148 | 11 | 20 | 7 | 2.517135319 | 0.00849957  | NADSYN1  | ENSG00000172890 |
| 11 | 70843446 | 70843665 | 70843564 | 9  | 10 | 1 | 5.273997812 | 0.00391723  | NADSYN1  | ENSG00000172890 |
| 11 | 70849838 | 70850017 | 70850005 | 8  | 8  | 0 | 8.630178238 | 0.00235436  | NADSYN1  | ENSG00000172890 |

|    |          |          |          |    |    |    |             |             |          |                 |
|----|----------|----------|----------|----|----|----|-------------|-------------|----------|-----------------|
| 11 | 70869987 | 70870281 | 70870127 | 12 | 16 | 5  | 2.716907964 | 0.0109645   | NADSYN1  | ENSG00000172890 |
| 11 | 70876695 | 70877069 | 70876912 | 9  | 15 | 3  | 3.835634772 | 0.00291691  | NADSYN1  | ENSG00000172890 |
| 11 | 71333837 | 71334197 | 71334005 | 10 | 16 | 1  | 8.150723891 | 0.000101217 | RNF121   | ENSG00000137522 |
| 11 | 71413753 | 71414126 | 71413909 | 15 | 20 | 1  | 10.06854128 | 8.32E-06    |          | ENSG00000206783 |
| 11 | 71469350 | 71469786 | 71469609 | 9  | 17 | 6  | 2.465765211 | 0.014729    | LRRC51   | ENSG00000184154 |
| 11 | 71470644 | 71470897 | 71470770 | 14 | 17 | 8  | 1.917817386 | 0.0474153   | LRRC51   | ENSG00000184154 |
| 11 | 71472784 | 71473054 | 71472919 | 9  | 12 | 0  | 12.46581301 | 0.000159888 | LRRC51   | ENSG00000184154 |
| 11 | 71572196 | 71572400 | 71572284 | 9  | 11 | 5  | 1.917817386 | 0.0843804   | FOLR1    | ENSG00000110195 |
| 11 | 71860042 | 71860315 | 71860178 | 8  | 13 | 4  | 2.684944341 | 0.01921     | CLPB     | ENSG00000162129 |
| 11 | 71870996 | 71871191 | 71871095 | 9  | 10 | 3  | 2.636998906 | 0.034203    | CLPB     | ENSG00000162129 |
| 11 | 71974401 | 71974636 | 71974491 | 9  | 11 | 5  | 1.917817386 | 0.0843804   |          | ENSG00000207809 |
| 11 | 71997677 | 71997978 | 71997827 | 11 | 13 | 4  | 2.684944341 | 0.01921     |          | ENSG00000207809 |
| 11 | 72032146 | 72032866 | 72032520 | 16 | 35 | 3  | 8.630178238 | 3.59E-08    | PDE2A    | ENSG00000186642 |
| 11 | 72112740 | 72113042 | 72112891 | 12 | 15 | 1  | 7.671269544 | 0.000187863 | ARAP1    | ENSG00000186635 |
| 11 | 72169223 | 72169662 | 72169402 | 14 | 25 | 11 | 2.077635502 | 0.0139694   | STARD10  | ENSG00000214530 |
| 11 | 72182183 | 72182517 | 72182343 | 10 | 14 | 5  | 2.397271733 | 0.0258078   | STARD10  | ENSG00000214530 |
| 11 | 72220447 | 72220835 | 72220626 | 12 | 20 | 5  | 3.356180426 | 0.0017534   | FCHSD2   | ENSG00000137478 |
| 11 | 72529330 | 72529544 | 72529437 | 8  | 9  | 3  | 2.397271733 | 0.0539397   | FCHSD2   | ENSG00000137478 |
| 11 | 72531038 | 72531333 | 72531161 | 8  | 11 | 4  | 2.301380863 | 0.0459276   | FCHSD2   | ENSG00000137478 |
| 11 | 72574518 | 72575412 | 72575209 | 14 | 39 | 8  | 4.261816414 | 3.23E-06    | P2RY2    | ENSG00000175591 |
| 11 | 72576543 | 72576886 | 72576714 | 61 | 66 | 4  | 12.84937649 | 1.62E-15    | P2RY2    | ENSG00000175591 |
| 11 | 72581082 | 72581293 | 72581171 | 10 | 11 | 10 | 1.046082211 | 0.455063    | P2RY2    | ENSG00000175591 |
| 11 | 72582627 | 72583136 | 72582850 | 11 | 24 | 15 | 1.498294833 | 0.0979832   | P2RY2    | ENSG00000175591 |
| 11 | 72583237 | 72583575 | 72583406 | 17 | 22 | 3  | 5.513724985 | 6.69E-05    | P2RY2    | ENSG00000175591 |
| 11 | 72583989 | 72584383 | 72584168 | 13 | 20 | 7  | 2.517135319 | 0.00849957  | P2RY2    | ENSG00000175591 |
| 11 | 72616597 | 72616883 | 72616723 | 10 | 13 | 4  | 2.684944341 | 0.01921     | P2RY2    | ENSG00000175591 |
| 11 | 72660659 | 72661024 | 72660821 | 18 | 24 | 6  | 3.424673904 | 0.000656885 | P2RY6    | ENSG00000171631 |
| 11 | 72664054 | 72664319 | 72664185 | 8  | 11 | 7  | 1.43836304  | 0.204844    | P2RY6    | ENSG00000171631 |
| 11 | 72678162 | 72678553 | 72678297 | 8  | 14 | 4  | 2.876726079 | 0.01219     | P2RY6    | ENSG00000171631 |
| 11 | 72681078 | 72681311 | 72681183 | 9  | 9  | 1  | 4.794543465 | 0.00708517  | ARHGEF17 | ENSG00000110237 |
| 11 | 72696034 | 72696239 | 72696136 | 10 | 11 | 4  | 2.301380863 | 0.0459276   | ARHGEF17 | ENSG00000110237 |
| 11 | 72739905 | 72740277 | 72740129 | 8  | 13 | 6  | 1.917817386 | 0.0693353   | RELT     | ENSG00000054967 |
| 11 | 72792889 | 72793112 | 72792995 | 11 | 12 | 3  | 3.116453252 | 0.0131971   | RELT     | ENSG00000054967 |
| 11 | 72858876 | 72859156 | 72859016 | 8  | 10 | 0  | 10.54799562 | 0.000613541 | RELT     | ENSG00000054967 |



|    |          |          |          |    |    |    |             |             |         |                 |
|----|----------|----------|----------|----|----|----|-------------|-------------|---------|-----------------|
| 11 | 72867515 | 72867762 | 72867635 | 10 | 11 | 0  | 11.50690432 | 0.000313206 | RELT    | ENSG00000054967 |
| 11 | 72987198 | 72987494 | 72987376 | 11 | 14 | 2  | 4.794543465 | 0.00154571  | FAM168A | ENSG00000054965 |
| 11 | 73036534 | 73036875 | 73036707 | 11 | 16 | 3  | 4.075361945 | 0.00173346  | PLEKHB1 | ENSG00000021300 |
| 11 | 73049668 | 73049907 | 73049787 | 10 | 12 | 3  | 3.116453252 | 0.0131971   | PLEKHB1 | ENSG00000021300 |
| 11 | 73176407 | 73176793 | 73176600 | 14 | 22 | 8  | 2.450544438 | 0.0073921   | MRPL48  | ENSG00000175581 |
| 11 | 73265416 | 73265862 | 73265715 | 11 | 18 | 8  | 2.024362796 | 0.0334397   | PAAF1   | ENSG00000175575 |
| 11 | 73335846 | 73336065 | 73335976 | 8  | 9  | 2  | 3.19636231  | 0.0229249   | DNAJB13 | ENSG00000187726 |
| 11 | 73457794 | 73458173 | 73457969 | 15 | 23 | 4  | 4.602761727 | 0.000137072 |         | ENSG00000204552 |
| 11 | 73523896 | 73524323 | 73524109 | 39 | 50 | 5  | 8.150723891 | 1.52E-10    | C2CD3   | ENSG00000168014 |
| 11 | 73527273 | 73527581 | 73527427 | 10 | 15 | 3  | 3.835634772 | 0.00291691  | C2CD3   | ENSG00000168014 |
| 11 | 73559878 | 73560181 | 73560048 | 8  | 11 | 3  | 2.876726079 | 0.0213797   |         | ENSG00000214517 |
| 11 | 73760387 | 73760650 | 73760506 | 9  | 9  | 4  | 1.917817386 | 0.103282    | PGM2L1  | ENSG00000165434 |
| 11 | 73807217 | 73807427 | 73807322 | 8  | 9  | 0  | 9.589086931 | 0.00120187  | PGM2L1  | ENSG00000165434 |
| 11 | 73921222 | 73921499 | 73921325 | 11 | 13 | 4  | 2.684944341 | 0.01921     |         | ENSG00000210380 |
| 11 | 74023303 | 74023636 | 74023469 | 11 | 16 | 8  | 1.811271976 | 0.0663685   |         | ENSG00000221193 |
| 11 | 74138128 | 74138412 | 74138261 | 9  | 13 | 2  | 4.474907234 | 0.00269459  | RNF169  | ENSG00000166439 |
| 11 | 74337468 | 74337776 | 74337622 | 9  | 13 | 6  | 1.917817386 | 0.0693353   | XRRA1   | ENSG00000166435 |
| 11 | 74411624 | 74411957 | 74411791 | 14 | 17 | 4  | 3.452071295 | 0.00292757  | NEU3    | ENSG00000162139 |
| 11 | 74587214 | 74587596 | 74587405 | 30 | 38 | 2  | 12.46581301 | 8.46E-10    | SLCO2B1 | ENSG00000137491 |
| 11 | 74637297 | 74637660 | 74637516 | 11 | 15 | 5  | 2.557089848 | 0.0169197   |         | ENSG00000199090 |
| 11 | 74717451 | 74717717 | 74717584 | 11 | 13 | 1  | 6.712360851 | 0.000640982 |         | ENSG00000199090 |
| 11 | 74745210 | 74745516 | 74745363 | 11 | 15 | 2  | 5.114179696 | 0.00088103  | ARRB1   | ENSG00000137486 |
| 11 | 74760319 | 74760515 | 74760344 | 8  | 9  | 3  | 2.397271733 | 0.0539397   | ARRB1   | ENSG00000137486 |
| 11 | 74760886 | 74761385 | 74761135 | 13 | 26 | 16 | 1.52297263  | 0.0820811   | ARRB1   | ENSG00000137486 |
| 11 | 74773261 | 74773549 | 74773389 | 8  | 12 | 8  | 1.385090334 | 0.219216    | RPS3    | ENSG00000149273 |
| 11 | 74788120 | 74788573 | 74788394 | 10 | 19 | 8  | 2.130908207 | 0.0233014   | RPS3    | ENSG00000149273 |
| 11 | 74889443 | 74889826 | 74889647 | 25 | 34 | 3  | 8.390451064 | 6.50E-08    | GDPD5   | ENSG00000158555 |
| 11 | 75485311 | 75485765 | 75485480 | 15 | 27 | 8  | 2.98327149  | 0.000913494 | WNT11   | ENSG00000085741 |
| 11 | 75540702 | 75541149 | 75540970 | 10 | 18 | 4  | 3.643853034 | 0.00178791  | WNT11   | ENSG00000085741 |
| 11 | 75623978 | 75624697 | 75624308 | 12 | 29 | 20 | 1.369869562 | 0.130203    | WNT11   | ENSG00000085741 |
| 11 | 76173106 | 76173601 | 76173405 | 17 | 32 | 1  | 15.82199344 | 3.96E-09    | TSKU    | ENSG00000182704 |
| 11 | 76213704 | 76214005 | 76213861 | 12 | 13 | 0  | 13.4247217  | 8.16E-05    | PHCA    | ENSG00000078124 |
| 11 | 76250277 | 76250608 | 76250434 | 8  | 13 | 7  | 1.678090213 | 0.11195     | PHCA    | ENSG00000078124 |
| 11 | 76408960 | 76409251 | 76409087 | 9  | 12 | 2  | 4.155271003 | 0.0046638   | B3GNT6  | ENSG00000198488 |

|    |          |          |          |    |    |    |             |             |         |                 |
|----|----------|----------|----------|----|----|----|-------------|-------------|---------|-----------------|
| 11 | 76424285 | 76424556 | 76424420 | 8  | 9  | 11 | 0.799090578 | 0.702688    | B3GNT6  | ENSG00000198488 |
| 11 | 76740063 | 76740263 | 76740194 | 8  | 8  | 1  | 4.315089119 | 0.0127267   | GDPD4   | ENSG00000178795 |
| 11 | 76986990 | 76987238 | 76987110 | 8  | 10 | 5  | 1.757999271 | 0.121253    | AQP11   | ENSG00000178301 |
| 11 | 77209492 | 77209892 | 77209618 | 14 | 20 | 8  | 2.237453617 | 0.0160557   | RSF1    | ENSG00000048649 |
| 11 | 77383134 | 77383587 | 77383400 | 16 | 26 | 12 | 1.991579593 | 0.0165204   | INTS4   | ENSG00000149262 |
| 11 | 77383941 | 77384159 | 77384067 | 9  | 9  | 10 | 0.871735176 | 0.624623    | INTS4   | ENSG00000149262 |
| 11 | 77434828 | 77435016 | 77434964 | 8  | 10 | 5  | 1.757999271 | 0.121253    | THRSP   | ENSG00000151365 |
| 11 | 77446186 | 77446376 | 77446281 | 8  | 9  | 0  | 9.589086931 | 0.00120187  | THRSP   | ENSG00000151365 |
| 11 | 77468399 | 77468724 | 77468561 | 16 | 19 | 9  | 1.917817386 | 0.0394029   | NDUFC2  | ENSG00000151366 |
| 11 | 77863192 | 77863473 | 77863343 | 9  | 11 | 1  | 5.753452158 | 0.00215302  | GAB2    | ENSG00000033327 |
| 11 | 77864761 | 77865008 | 77864912 | 8  | 9  | 0  | 9.589086931 | 0.00120187  | GAB2    | ENSG00000033327 |
| 11 | 77953273 | 77953469 | 77953371 | 8  | 8  | 4  | 1.726035648 | 0.150596    | NARS2   | ENSG00000137513 |
| 11 | 78035355 | 78035588 | 78035446 | 9  | 11 | 6  | 1.643843474 | 0.137712    |         | ENSG00000210533 |
| 11 | 78104469 | 78104696 | 78104570 | 8  | 10 | 7  | 1.318499453 | 0.269217    |         | ENSG00000210533 |
| 11 | 78164673 | 78164852 | 78164703 | 8  | 8  | 4  | 1.726035648 | 0.150596    |         | ENSG00000210533 |
| 11 | 78187413 | 78187648 | 78187523 | 9  | 11 | 3  | 2.876726079 | 0.0213797   |         | ENSG00000210533 |
| 11 | 78307414 | 78307733 | 78307585 | 8  | 10 | 5  | 1.757999271 | 0.121253    | ODZ4    | ENSG00000149256 |
| 11 | 78448841 | 78449034 | 78448995 | 8  | 8  | 9  | 0.863017824 | 0.627343    | ODZ4    | ENSG00000149256 |
| 11 | 78505361 | 78505620 | 78505507 | 8  | 9  | 2  | 3.19636231  | 0.0229249   |         | ENSG00000212701 |
| 11 | 78544755 | 78545066 | 78544888 | 12 | 17 | 3  | 4.315089119 | 0.00102271  |         | ENSG00000212701 |
| 11 | 78557239 | 78557853 | 78557674 | 20 | 39 | 5  | 6.39272462  | 8.17E-08    |         | ENSG00000212701 |
| 11 | 79328879 | 79329094 | 79328989 | 8  | 11 | 4  | 2.301380863 | 0.0459276   |         | ENSG00000221551 |
| 11 | 79923352 | 79923630 | 79923488 | 8  | 8  | 2  | 2.876726079 | 0.0381137   |         | ENSG00000200146 |
| 11 | 80304965 | 80305263 | 80305110 | 13 | 16 | 1  | 8.150723891 | 0.000101217 |         | ENSG00000200146 |
| 11 | 81411604 | 81411983 | 81411804 | 16 | 22 | 1  | 11.02744997 | 2.36E-06    |         | ENSG00000210568 |
| 11 | 81703898 | 81704103 | 81704043 | 11 | 11 | 3  | 2.876726079 | 0.0213797   | FAM181B | ENSG00000182103 |
| 11 | 82084509 | 82084744 | 82084595 | 8  | 10 | 2  | 3.515998541 | 0.0136204   | FAM181B | ENSG00000182103 |
| 11 | 82090649 | 82090876 | 82090762 | 9  | 10 | 2  | 3.515998541 | 0.0136204   | FAM181B | ENSG00000182103 |
| 11 | 82107018 | 82107231 | 82107163 | 9  | 10 | 3  | 2.636998906 | 0.034203    | FAM181B | ENSG00000182103 |
| 11 | 82156600 | 82156780 | 82156631 | 8  | 8  | 0  | 8.630178238 | 0.00235436  | FAM181B | ENSG00000182103 |
| 11 | 82395657 | 82395856 | 82395748 | 8  | 9  | 4  | 1.917817386 | 0.103282    |         | ENSG00000207221 |
| 11 | 82460424 | 82460950 | 82460603 | 10 | 22 | 2  | 7.351633313 | 1.51E-05    | RAB30   | ENSG00000137502 |
| 11 | 82481523 | 82481927 | 82481691 | 11 | 19 | 14 | 1.278544924 | 0.231514    | RAB30   | ENSG00000137502 |
| 11 | 82544760 | 82545027 | 82544883 | 9  | 12 | 7  | 1.558226626 | 0.152813    | PCF11   | ENSG00000165494 |

|    |          |          |          |     |     |     |             |             |          |                 |
|----|----------|----------|----------|-----|-----|-----|-------------|-------------|----------|-----------------|
| 11 | 82546290 | 82546746 | 82546469 | 11  | 20  | 10  | 1.830643869 | 0.0454769   | PCF11    | ENSG00000165494 |
| 11 | 82549252 | 82549606 | 82549429 | 19  | 25  | 4   | 4.986325204 | 4.72E-05    | PCF11    | ENSG00000165494 |
| 11 | 82674184 | 82675038 | 82674359 | 25  | 51  | 10  | 4.533022913 | 6.87E-08    | CCDC90B  | ENSG00000137500 |
| 11 | 82675064 | 82675408 | 82675236 | 12  | 16  | 4   | 3.260289556 | 0.00475414  | CCDC90B  | ENSG00000137500 |
| 11 | 82868976 | 82869155 | 82869065 | 8   | 8   | 3   | 2.157544559 | 0.0836802   |          | ENSG00000210588 |
| 11 | 83050246 | 83050910 | 83050592 | 76  | 109 | 1   | 52.73997812 | 4.15E-31    | DLG2     | ENSG00000150672 |
| 11 | 83119462 | 83119653 | 83119543 | 8   | 8   | 5   | 1.43836304  | 0.235762    | DLG2     | ENSG00000150672 |
| 11 | 83564726 | 83564985 | 83564855 | 32  | 32  | 0   | 31.64398687 | 2.31E-10    | DLG2     | ENSG00000150672 |
| 11 | 83900764 | 83901060 | 83900930 | 11  | 14  | 2   | 4.794543465 | 0.00154571  | DLG2     | ENSG00000150672 |
| 11 | 84024336 | 84024529 | 84024448 | 8   | 8   | 1   | 4.315089119 | 0.0127267   | DLG2     | ENSG00000150672 |
| 11 | 84076508 | 84076729 | 84076602 | 9   | 10  | 1   | 5.273997812 | 0.00391723  | DLG2     | ENSG00000150672 |
| 11 | 84189605 | 84189853 | 84189722 | 8   | 8   | 4   | 1.726035648 | 0.150596    | DLG2     | ENSG00000150672 |
| 11 | 84366075 | 84366264 | 84366169 | 9   | 9   | 0   | 9.589086931 | 0.00120187  |          | ENSG00000213305 |
| 11 | 84672960 | 84673459 | 84673280 | 24  | 39  | 3   | 9.589086931 | 3.26E-09    | DLG2     | ENSG00000150672 |
| 11 | 84872513 | 84872982 | 84872748 | 167 | 209 | 203 | 0.98711189  | 0.552269    |          | ENSG00000210598 |
| 11 | 85016798 | 85017069 | 85016920 | 10  | 11  | 13  | 0.821921737 | 0.693119    | TMEM126B | ENSG00000171204 |
| 11 | 85017320 | 85017545 | 85017432 | 9   | 10  | 5   | 1.757999271 | 0.121253    | TMEM126B | ENSG00000171204 |
| 11 | 85157417 | 85157713 | 85157565 | 8   | 11  | 3   | 2.876726079 | 0.0213797   | SYTL2    | ENSG00000137501 |
| 11 | 85167136 | 85167315 | 85167225 | 8   | 9   | 3   | 2.397271733 | 0.0539397   | SYTL2    | ENSG00000137501 |
| 11 | 85195464 | 85196006 | 85195787 | 41  | 57  | 6   | 7.945243457 | 1.33E-11    | CCDC83   | ENSG00000150676 |
| 11 | 85198463 | 85198726 | 85198594 | 8   | 11  | 5   | 1.917817386 | 0.0843804   | CCDC83   | ENSG00000150676 |
| 11 | 85198766 | 85198997 | 85198866 | 9   | 10  | 3   | 2.636998906 | 0.034203    | CCDC83   | ENSG00000150676 |
| 11 | 85216377 | 85216956 | 85216719 | 11  | 25  | 11  | 2.077635502 | 0.0139694   | CCDC83   | ENSG00000150676 |
| 11 | 85217030 | 85217397 | 85217146 | 10  | 15  | 13  | 1.095895649 | 0.398774    | CCDC83   | ENSG00000150676 |
| 11 | 85219015 | 85219256 | 85219108 | 9   | 10  | 5   | 1.757999271 | 0.121253    | CCDC83   | ENSG00000150676 |
| 11 | 85233178 | 85233493 | 85233324 | 10  | 15  | 7   | 1.917817386 | 0.0572317   | CCDC83   | ENSG00000150676 |
| 11 | 85233783 | 85234076 | 85233918 | 8   | 10  | 7   | 1.318499453 | 0.269217    | CCDC83   | ENSG00000150676 |
| 11 | 85430709 | 85430907 | 85430846 | 8   | 9   | 4   | 1.917817386 | 0.103282    | PICALM   | ENSG00000073921 |
| 11 | 85536592 | 85536806 | 85536699 | 8   | 10  | 0   | 10.54799562 | 0.000613541 |          | ENSG00000200877 |
| 11 | 85549335 | 85549559 | 85549438 | 8   | 8   | 6   | 1.232882605 | 0.333038    |          | ENSG00000200877 |
| 11 | 85561865 | 85562069 | 85561983 | 8   | 8   | 2   | 2.876726079 | 0.0381137   |          | ENSG00000200877 |
| 11 | 85582309 | 85582503 | 85582419 | 9   | 10  | 3   | 2.636998906 | 0.034203    |          | ENSG00000200877 |
| 11 | 85633844 | 85634304 | 85634022 | 18  | 30  | 5   | 4.954361581 | 1.11E-05    | EED      | ENSG00000074266 |
| 11 | 85690599 | 85690909 | 85690769 | 12  | 14  | 1   | 7.191815198 | 0.00034761  | C11orf73 | ENSG00000149196 |

|    |           |           |           |     |     |    |             |             |          |                 |
|----|-----------|-----------|-----------|-----|-----|----|-------------|-------------|----------|-----------------|
| 11 | 85690920  | 85691121  | 85691013  | 9   | 10  | 5  | 1.757999271 | 0.121253    | C11orf73 | ENSG00000149196 |
| 11 | 85703377  | 85703679  | 85703503  | 8   | 12  | 2  | 4.155271003 | 0.0046638   |          | ENSG00000210623 |
| 11 | 85723741  | 85724647  | 85724294  | 130 | 234 | 13 | 16.09596735 | 3.66E-52    |          | ENSG00000222550 |
| 11 | 85844936  | 85845179  | 85845079  | 8   | 10  | 4  | 2.109599125 | 0.0694668   | CCDC81   | ENSG00000149201 |
| 11 | 85885957  | 85886302  | 85886129  | 9   | 14  | 2  | 4.794543465 | 0.00154571  | CCDC81   | ENSG00000149201 |
| 11 | 85888445  | 85888628  | 85888536  | 8   | 8   | 7  | 1.07877228  | 0.435076    | CCDC81   | ENSG00000149201 |
| 11 | 85912867  | 85913162  | 85913025  | 14  | 17  | 5  | 2.876726079 | 0.00703033  | ME3      | ENSG00000151376 |
| 11 | 85967880  | 85968147  | 85968023  | 9   | 12  | 0  | 12.46581301 | 0.000159888 | ME3      | ENSG00000151376 |
| 11 | 86054915  | 86055257  | 86055086  | 12  | 16  | 3  | 4.075361945 | 0.00173346  | ME3      | ENSG00000151376 |
| 11 | 86095055  | 86095424  | 86095263  | 23  | 29  | 7  | 3.595907599 | 0.000155266 | ME3      | ENSG00000151376 |
| 11 | 86129311  | 86129613  | 86129473  | 8   | 12  | 1  | 6.232906505 | 0.00117736  | PRSS23   | ENSG00000150687 |
| 11 | 86130576  | 86130888  | 86130732  | 8   | 11  | 3  | 2.876726079 | 0.0213797   | PRSS23   | ENSG00000150687 |
| 11 | 86852320  | 86852574  | 86852465  | 18  | 18  | 0  | 18.21926517 | 2.83E-06    |          | ENSG00000223015 |
| 11 | 86992892  | 86993234  | 86993063  | 20  | 26  | 2  | 8.630178238 | 1.37E-06    |          | ENSG00000223015 |
| 11 | 92943613  | 92943798  | 92943733  | 8   | 8   | 4  | 1.726035648 | 0.150596    |          | ENSG00000210746 |
| 11 | 93268286  | 93268503  | 93268394  | 8   | 8   | 2  | 2.876726079 | 0.0381137   | C11orf90 | ENSG00000214376 |
| 11 | 93359657  | 93359877  | 93359810  | 8   | 10  | 3  | 2.636998906 | 0.034203    | HEPHL1   | ENSG00000181333 |
| 11 | 93477651  | 93477882  | 93477766  | 11  | 12  | 0  | 12.46581301 | 0.000159888 | PANX1    | ENSG00000110218 |
| 11 | 93678044  | 93678445  | 93678222  | 23  | 30  | 2  | 9.908723162 | 1.20E-07    |          | ENSG00000183560 |
| 11 | 94218576  | 94218779  | 94218677  | 8   | 11  | 4  | 2.301380863 | 0.0459276   | AMOTL1   | ENSG00000166025 |
| 11 | 94408101  | 94408429  | 94408280  | 10  | 15  | 2  | 5.114179696 | 0.00088103  |          | ENSG00000180771 |
| 11 | 94438180  | 94438520  | 94438356  | 31  | 36  | 0  | 35.47962164 | 1.57E-11    |          | ENSG00000180771 |
| 11 | 97119422  | 97119685  | 97119555  | 17  | 18  | 0  | 18.21926517 | 2.83E-06    |          | ENSG00000199315 |
| 11 | 97937228  | 97937557  | 97937400  | 18  | 21  | 0  | 21.09599125 | 3.76E-07    |          |                 |
| 11 | 99888530  | 99888860  | 99888693  | 8   | 12  | 0  | 12.46581301 | 0.000159888 |          | ENSG00000210910 |
| 11 | 100065901 | 100066137 | 100066028 | 10  | 11  | 1  | 5.753452158 | 0.00215302  |          | ENSG00000223242 |
| 11 | 100410057 | 100410365 | 100410208 | 18  | 21  | 7  | 2.636998906 | 0.00562102  | TMEM133  | ENSG00000170647 |
| 11 | 100854479 | 100854726 | 100854594 | 11  | 13  | 2  | 4.474907234 | 0.00269459  | TRPC6    | ENSG00000137672 |
| 11 | 101487862 | 101488227 | 101488048 | 8   | 15  | 4  | 3.068507818 | 0.0076507   | YAP1     | ENSG00000137693 |
| 11 | 101632189 | 101632663 | 101632397 | 80  | 107 | 0  | 103.5621389 | 2.90E-32    |          | ENSG00000212466 |
| 11 | 101644443 | 101644682 | 101644562 | 9   | 12  | 1  | 6.232906505 | 0.00117736  |          | ENSG00000212466 |
| 11 | 102317119 | 102317391 | 102317255 | 13  | 14  | 5  | 2.397271733 | 0.0258078   | MMP13    | ENSG00000137745 |
| 11 | 102897616 | 102897915 | 102897766 | 11  | 13  | 0  | 13.4247217  | 8.16E-05    |          | ENSG00000211009 |
| 11 | 105359479 | 105359695 | 105359580 | 10  | 10  | 1  | 5.273997812 | 0.00391723  | KIAA1826 | ENSG00000170903 |

|    |           |           |           |    |    |   |             |             |          |                 |
|----|-----------|-----------|-----------|----|----|---|-------------|-------------|----------|-----------------|
| 11 | 105606040 | 105606232 | 105606136 | 8  | 9  | 1 | 4.794543465 | 0.00708517  | AASDHPPT | ENSG00000149313 |
| 11 | 106082483 | 106082694 | 106082586 | 8  | 8  | 0 | 8.630178238 | 0.00235436  |          | ENSG00000222559 |
| 11 | 106165417 | 106165632 | 106165516 | 11 | 11 | 1 | 5.753452158 | 0.00215302  |          | ENSG00000222559 |
| 11 | 106535033 | 106535553 | 106535260 | 47 | 59 | 6 | 8.219217369 | 4.19E-12    | GUCY1A2  | ENSG00000152402 |
| 11 | 107711197 | 107711495 | 107711331 | 10 | 12 | 0 | 12.46581301 | 0.000159888 | ATM      | ENSG00000149311 |
| 11 | 107717026 | 107717266 | 107717133 | 12 | 12 | 3 | 3.116453252 | 0.0131971   | ATM      | ENSG00000149311 |
| 11 | 108024302 | 108024679 | 108024500 | 12 | 19 | 3 | 4.794543465 | 0.000349205 | DDX10    | ENSG00000178105 |
| 11 | 108324224 | 108324567 | 108324395 | 25 | 29 | 0 | 28.76726079 | 1.74E-09    |          | ENSG00000203334 |
| 11 | 108718244 | 108718478 | 108718329 | 11 | 12 | 0 | 12.46581301 | 0.000159888 | C11orf87 | ENSG00000185742 |
| 11 | 109398525 | 109398851 | 109398688 | 15 | 20 | 1 | 10.06854128 | 8.32E-06    | ZC3H12C  | ENSG00000149289 |
| 11 | 110603856 | 110604035 | 110603946 | 8  | 8  | 0 | 8.630178238 | 0.00235436  | C11orf53 | ENSG00000150750 |
| 11 | 110802559 | 110802916 | 110802753 | 22 | 27 | 0 | 26.84944341 | 6.66E-09    | POU2AF1  | ENSG00000110777 |
| 11 | 110886154 | 110886700 | 110886452 | 45 | 71 | 3 | 17.26035648 | 7.81E-18    | BTG4     | ENSG00000137707 |
| 11 | 110967138 | 110967364 | 110967271 | 8  | 9  | 0 | 9.589086931 | 0.00120187  | SNF1LK2  | ENSG00000170145 |
| 11 | 111449996 | 111450199 | 111450097 | 9  | 10 | 2 | 3.515998541 | 0.0136204   | PIH1D2   | ENSG00000150773 |
| 11 | 112001816 | 112002110 | 112001947 | 9  | 9  | 0 | 9.589086931 | 0.00120187  |          | ENSG00000212397 |
| 11 | 112261733 | 112261980 | 112261856 | 10 | 12 | 4 | 2.493162602 | 0.0299057   | NCAM1    | ENSG00000149294 |
| 11 | 112720183 | 112720505 | 112720349 | 13 | 16 | 0 | 16.30144778 | 1.09E-05    | TTC12    | ENSG00000149292 |
| 11 | 112760526 | 112760925 | 112760705 | 26 | 35 | 2 | 11.50690432 | 5.48E-09    | ANKK1    | ENSG00000170209 |
| 11 | 112822800 | 112823276 | 112823038 | 43 | 58 | 3 | 14.14390322 | 2.76E-14    | DRD2     | ENSG00000149295 |
| 11 | 114963717 | 114963959 | 114963852 | 12 | 14 | 1 | 7.191815198 | 0.00034761  |          | ENSG00000211200 |
| 11 | 116447311 | 116447491 | 116447380 | 8  | 8  | 5 | 1.43836304  | 0.235762    |          | ENSG00000160584 |
| 11 | 116882247 | 116882608 | 116882400 | 16 | 21 | 1 | 10.54799562 | 4.43E-06    | CEP164   | ENSG00000110274 |
| 11 | 117305259 | 117305546 | 117305387 | 11 | 15 | 2 | 5.114179696 | 0.00088103  | TMPRSS13 | ENSG00000137747 |
| 11 | 117322848 | 117323082 | 117322996 | 8  | 11 | 2 | 3.835634772 | 0.00800699  | TMPRSS13 | ENSG00000137747 |
| 11 | 117450783 | 117451036 | 117450880 | 10 | 11 | 0 | 11.50690432 | 0.000313206 | TMPRSS4  | ENSG00000137648 |
| 11 | 117468903 | 117469392 | 117469082 | 12 | 23 | 4 | 4.602761727 | 0.000137072 | TMPRSS4  | ENSG00000137648 |
| 11 | 117574310 | 117574535 | 117574422 | 11 | 14 | 2 | 4.794543465 | 0.00154571  | AMICA1   | ENSG00000160593 |
| 11 | 117617533 | 117617799 | 117617667 | 11 | 14 | 7 | 1.797953799 | 0.0806593   | MPZL3    | ENSG00000160588 |
| 11 | 117639642 | 117639854 | 117639739 | 8  | 8  | 2 | 2.876726079 | 0.0381137   | MPZL2    | ENSG00000149573 |
| 11 | 117666931 | 117667219 | 117667081 | 13 | 15 | 1 | 7.671269544 | 0.000187863 | CD3E     | ENSG00000198851 |
| 11 | 117671822 | 117672001 | 117671951 | 8  | 8  | 3 | 2.157544559 | 0.0836802   | CD3E     | ENSG00000198851 |
| 11 | 117921541 | 117921769 | 117921665 | 9  | 12 | 8 | 1.385090334 | 0.219216    | TMEM25   | ENSG00000149582 |
| 11 | 117941916 | 117942107 | 117942026 | 9  | 9  | 5 | 1.598181155 | 0.170911    | C11orf60 | ENSG00000118096 |

|    |           |           |           |    |     |    |             |            |         |                 |
|----|-----------|-----------|-----------|----|-----|----|-------------|------------|---------|-----------------|
| 11 | 117987823 | 117988032 | 117987978 | 8  | 8   | 1  | 4.315089119 | 0.0127267  | PHLDB1  | ENSG00000019144 |
| 11 | 117999286 | 117999678 | 117999453 | 10 | 17  | 3  | 4.315089119 | 0.00102271 | PHLDB1  | ENSG00000019144 |
| 11 | 118166696 | 118166889 | 118166792 | 8  | 9   | 1  | 4.794543465 | 0.00708517 | DDX6    | ENSG00000110367 |
| 11 | 118167161 | 118167348 | 118167199 | 8  | 9   | 6  | 1.369869562 | 0.253675   | DDX6    | ENSG00000110367 |
| 11 | 118229617 | 118229923 | 118229772 | 8  | 9   | 2  | 3.19636231  | 0.0229249  |         | ENSG00000201535 |
| 11 | 118246498 | 118246726 | 118246612 | 8  | 8   | 5  | 1.43836304  | 0.235762   | CXCR5   | ENSG00000160683 |
| 11 | 118282920 | 118283200 | 118283060 | 9  | 10  | 4  | 2.109599125 | 0.0694668  | BCL9L   | ENSG00000186174 |
| 11 | 118287847 | 118288171 | 118288009 | 11 | 17  | 3  | 4.315089119 | 0.00102271 | BCL9L   | ENSG00000186174 |
| 11 | 118288249 | 118288629 | 118288417 | 9  | 15  | 16 | 0.902502299 | 0.616352   | BCL9L   | ENSG00000186174 |
| 11 | 118292858 | 118293186 | 118293013 | 13 | 17  | 4  | 3.452071295 | 0.00292757 | BCL9L   | ENSG00000186174 |
| 11 | 118294075 | 118294364 | 118294232 | 9  | 12  | 6  | 1.78083043  | 0.0985525  | BCL9L   | ENSG00000186174 |
| 11 | 118300451 | 118300649 | 118300582 | 8  | 8   | 1  | 4.315089119 | 0.0127267  |         | ENSG00000223272 |
| 11 | 118304606 | 118304906 | 118304774 | 9  | 12  | 3  | 3.116453252 | 0.0131971  |         | ENSG00000223272 |
| 11 | 118332575 | 118332782 | 118332680 | 9  | 9   | 5  | 1.598181155 | 0.170911   | UPK2    | ENSG00000110375 |
| 11 | 118364144 | 118364453 | 118364298 | 16 | 20  | 1  | 10.06854128 | 8.32E-06   |         | ENSG00000200242 |
| 11 | 118373666 | 118373883 | 118373743 | 9  | 10  | 7  | 1.318499453 | 0.269217   | CCDC84  | ENSG00000186166 |
| 11 | 118394104 | 118394407 | 118394255 | 9  | 13  | 5  | 2.237453617 | 0.038866   | RPS25   | ENSG00000118181 |
| 11 | 118394567 | 118394749 | 118394655 | 8  | 8   | 10 | 0.784561658 | 0.708731   | TRAPPC4 | ENSG00000196655 |
| 11 | 118460885 | 118461130 | 118461007 | 9  | 12  | 5  | 2.077635502 | 0.0577144  | HMBS    | ENSG00000149397 |
| 11 | 118461431 | 118461711 | 118461571 | 8  | 9   | 4  | 1.917817386 | 0.103282   | HMBS    | ENSG00000149397 |
| 11 | 118542263 | 118542648 | 118542418 | 15 | 22  | 2  | 7.351633313 | 1.51E-05   | NLRX1   | ENSG00000160703 |
| 11 | 118752248 | 118752596 | 118752426 | 8  | 12  | 3  | 3.116453252 | 0.0131971  | USP2    | ENSG00000036672 |
| 11 | 118988810 | 118989072 | 118988941 | 8  | 11  | 1  | 5.753452158 | 0.00215302 |         | ENSG00000199217 |
| 11 | 119072221 | 119072794 | 119072508 | 94 | 129 | 1  | 62.32906505 | 7.06E-37   | PVRL1   | ENSG00000110400 |
| 11 | 119221714 | 119222012 | 119221868 | 40 | 42  | 2  | 13.74435793 | 6.90E-11   | PVRL1   | ENSG00000110400 |
| 11 | 119400589 | 119400770 | 119400679 | 8  | 8   | 6  | 1.232882605 | 0.333038   | TRIM29  | ENSG00000137699 |
| 11 | 119400817 | 119401321 | 119401042 | 43 | 62  | 6  | 8.630178238 | 7.32E-13   | TRIM29  | ENSG00000137699 |
| 11 | 119675830 | 119676136 | 119675983 | 8  | 12  | 4  | 2.493162602 | 0.0299057  | TMEM136 | ENSG00000181264 |
| 11 | 119677845 | 119678047 | 119677983 | 9  | 10  | 2  | 3.515998541 | 0.0136204  | TMEM136 | ENSG00000181264 |
| 11 | 119692819 | 119693084 | 119692912 | 11 | 13  | 3  | 3.356180426 | 0.00805599 | TMEM136 | ENSG00000181264 |
| 11 | 120633909 | 120634248 | 120634078 | 19 | 22  | 3  | 5.513724985 | 6.69E-05   | SC5DL   | ENSG00000109929 |
| 11 | 120858495 | 120858815 | 120858666 | 11 | 15  | 0  | 15.34253909 | 2.13E-05   | SORL1   | ENSG00000137642 |
| 11 | 122637491 | 122637706 | 122637627 | 8  | 10  | 2  | 3.515998541 | 0.0136204  |         | ENSG00000200496 |
| 11 | 123054201 | 123054486 | 123054363 | 12 | 13  | 0  | 13.4247217  | 8.16E-05   | SCN3B   | ENSG00000166257 |

|    |           |           |           |     |     |    |             |             |          |                 |
|----|-----------|-----------|-----------|-----|-----|----|-------------|-------------|----------|-----------------|
| 11 | 123598333 | 123598662 | 123598497 | 22  | 26  | 0  | 25.89053471 | 1.31E-08    |          | ENSG00000203322 |
| 11 | 124015882 | 124016074 | 124015979 | 9   | 9   | 2  | 3.19636231  | 0.0229249   |          | ENSG00000200278 |
| 11 | 124946118 | 124946297 | 124946207 | 11  | 11  | 2  | 3.835634772 | 0.00800699  | EI24     | ENSG00000149547 |
| 11 | 125000962 | 125001153 | 125001057 | 8   | 8   | 2  | 2.876726079 | 0.0381137   | CHEK1    | ENSG00000149554 |
| 11 | 125651987 | 125652282 | 125652144 | 14  | 16  | 1  | 8.150723891 | 0.000101217 |          | ENSG00000209258 |
| 11 | 128699758 | 128699988 | 128699873 | 9   | 10  | 5  | 1.757999271 | 0.121253    |          | ENSG00000166080 |
| 11 | 129001046 | 129001436 | 129001232 | 31  | 40  | 1  | 19.65762821 | 2.24E-11    | TMEM45B  | ENSG00000151715 |
| 11 | 129017123 | 129017364 | 129017243 | 9   | 10  | 0  | 10.54799562 | 0.000613541 | TMEM45B  | ENSG00000151715 |
| 11 | 129203589 | 129203802 | 129203695 | 8   | 10  | 3  | 2.636998906 | 0.034203    | TMEM45B  | ENSG00000151715 |
| 11 | 129464350 | 129464553 | 129464451 | 8   | 10  | 3  | 2.636998906 | 0.034203    |          | ENSG00000215565 |
| 11 | 132444704 | 132445000 | 132444876 | 9   | 12  | 1  | 6.232906505 | 0.00117736  | OPCML    | ENSG00000183715 |
| 11 | 133204534 | 133204860 | 133204755 | 11  | 15  | 4  | 3.068507818 | 0.0076507   | SPATA19  | ENSG00000166118 |
| 12 | 380898    | 381088    | 380970    | 9   | 9   | 5  | 1.598181155 | 0.170911    | CCDC77   | ENSG00000120647 |
| 12 | 503641    | 504296    | 504028    | 66  | 106 | 10 | 9.327566378 | 4.43E-21    | B4GALNT3 | ENSG00000139044 |
| 12 | 577788    | 577994    | 577875    | 10  | 10  | 0  | 10.54799562 | 0.000613541 | NINJ2    | ENSG00000171840 |
| 12 | 611627    | 611886    | 611756    | 11  | 13  | 3  | 3.356180426 | 0.00805599  |          | ENSG00000177406 |
| 12 | 730697    | 730898    | 730797    | 9   | 10  | 6  | 1.506856518 | 0.188853    | WNK1     | ENSG00000060237 |
| 12 | 734474    | 734700    | 734603    | 9   | 9   | 0  | 9.589086931 | 0.00120187  | WNK1     | ENSG00000060237 |
| 12 | 827205    | 827613    | 827380    | 16  | 23  | 1  | 11.50690432 | 1.25E-06    | WNK1     | ENSG00000060237 |
| 12 | 1784059   | 1784367   | 1784224   | 9   | 12  | 4  | 2.493162602 | 0.0299057   | LRTM2    | ENSG00000166159 |
| 12 | 1983741   | 1984636   | 1984104   | 156 | 221 | 2  | 70.95924329 | 8.99E-62    | DCP1B    | ENSG00000151065 |
| 12 | 2603990   | 2604357   | 2604169   | 9   | 15  | 3  | 3.835634772 | 0.00291691  |          | ENSG00000216217 |
| 12 | 2676527   | 2677011   | 2676706   | 17  | 31  | 1  | 15.34253909 | 7.54E-09    |          | ENSG00000216217 |
| 12 | 3044776   | 3045018   | 3044897   | 8   | 8   | 0  | 8.630178238 | 0.00235436  |          | ENSG00000184127 |
| 12 | 3110602   | 3110789   | 3110719   | 8   | 8   | 0  | 8.630178238 | 0.00235436  | TSPAN9   | ENSG00000011105 |
| 12 | 3279357   | 3279716   | 3279536   | 19  | 26  | 1  | 12.94526736 | 1.86E-07    | TSPAN9   | ENSG00000011105 |
| 12 | 3294649   | 3294989   | 3294810   | 11  | 16  | 3  | 4.075361945 | 0.00173346  | TSPAN9   | ENSG00000011105 |
| 12 | 3358115   | 3358561   | 3358388   | 11  | 20  | 0  | 20.13708255 | 7.37E-07    |          | ENSG00000212730 |
| 12 | 3436179   | 3436358   | 3436283   | 8   | 8   | 5  | 1.43836304  | 0.235762    |          | ENSG00000212730 |
| 12 | 4012780   | 4012984   | 4012882   | 9   | 9   | 0  | 9.589086931 | 0.00120187  | PARP11   | ENSG00000111224 |
| 12 | 4092234   | 4092817   | 4092525   | 12  | 25  | 2  | 8.310542006 | 2.50E-06    | CCND2    | ENSG00000118971 |
| 12 | 4300562   | 4301411   | 4301061   | 30  | 70  | 2  | 22.6941724  | 1.20E-18    | C12orf5  | ENSG00000078237 |
| 12 | 4362741   | 4362994   | 4362837   | 12  | 14  | 0  | 14.3836304  | 4.17E-05    | FGF23    | ENSG00000118972 |
| 12 | 4462340   | 4462760   | 4462581   | 14  | 24  | 1  | 11.98635866 | 6.63E-07    | FGF6     | ENSG00000111241 |

|    |          |          |          |    |    |   |             |             |         |                 |
|----|----------|----------|----------|----|----|---|-------------|-------------|---------|-----------------|
| 12 | 5119517  | 5119830  | 5119659  | 9  | 13 | 0 | 13.4247217  | 8.16E-05    | KCNA5   | ENSG00000130037 |
| 12 | 5968082  | 5968279  | 5968243  | 8  | 10 | 5 | 1.757999271 | 0.121253    | ANO2    | ENSG00000047617 |
| 12 | 6023504  | 6023820  | 6023662  | 9  | 12 | 1 | 6.232906505 | 0.00117736  |         | ENSG00000209366 |
| 12 | 6214876  | 6215272  | 6215053  | 11 | 18 | 4 | 3.643853034 | 0.00178791  |         | ENSG00000202318 |
| 12 | 6251827  | 6252122  | 6251974  | 15 | 16 | 3 | 4.075361945 | 0.00173346  | PLEKHG6 | ENSG00000008323 |
| 12 | 6301412  | 6301938  | 6301533  | 10 | 19 | 6 | 2.739739123 | 0.00632909  | PLEKHG6 | ENSG00000008323 |
| 12 | 6486953  | 6487377  | 6487165  | 16 | 26 | 0 | 25.89053471 | 1.31E-08    | NCAPD2  | ENSG00000010292 |
| 12 | 6513612  | 6513895  | 6513753  | 12 | 16 | 2 | 5.433815927 | 0.000499302 | GAPDH   | ENSG00000111640 |
| 12 | 6615477  | 6615656  | 6615551  | 8  | 8  | 0 | 8.630178238 | 0.00235436  | LPAR5   | ENSG00000184574 |
| 12 | 6668942  | 6669187  | 6669063  | 9  | 12 | 8 | 1.385090334 | 0.219216    | ZNF384  | ENSG00000126746 |
| 12 | 6703144  | 6703374  | 6703254  | 8  | 10 | 6 | 1.506856518 | 0.188853    | COPS7A  | ENSG00000111652 |
| 12 | 6703392  | 6703620  | 6703479  | 8  | 12 | 4 | 2.493162602 | 0.0299057   | COPS7A  | ENSG00000111652 |
| 12 | 6715243  | 6715609  | 6715430  | 10 | 17 | 4 | 3.452071295 | 0.00292757  | COPS7A  | ENSG00000111652 |
| 12 | 6730000  | 6730261  | 6730127  | 8  | 10 | 0 | 10.54799562 | 0.000613541 | MLF2    | ENSG00000089693 |
| 12 | 6732963  | 6733288  | 6733125  | 11 | 15 | 4 | 3.068507818 | 0.0076507   | MLF2    | ENSG00000089693 |
| 12 | 6899066  | 6899339  | 6899182  | 9  | 11 | 1 | 5.753452158 | 0.00215302  | ATN1    | ENSG00000111676 |
| 12 | 6917470  | 6917719  | 6917574  | 10 | 11 | 2 | 3.835634772 | 0.00800699  | ATN1    | ENSG00000111676 |
| 12 | 6937658  | 6937869  | 6937763  | 9  | 9  | 1 | 4.794543465 | 0.00708517  |         | ENSG00000207713 |
| 12 | 6940982  | 6941170  | 6941076  | 8  | 8  | 2 | 2.876726079 | 0.0381137   |         | ENSG00000207713 |
| 12 | 6941429  | 6941731  | 6941593  | 9  | 11 | 3 | 2.876726079 | 0.0213797   |         | ENSG00000207713 |
| 12 | 7017017  | 7017313  | 7017139  | 21 | 26 | 1 | 12.94526736 | 1.86E-07    | LPCAT3  | ENSG00000111684 |
| 12 | 7153075  | 7153256  | 7153165  | 8  | 8  | 4 | 1.726035648 | 0.150596    | C1RL    | ENSG00000139178 |
| 12 | 7232498  | 7232682  | 7232590  | 8  | 8  | 2 | 2.876726079 | 0.0381137   | PEX5    | ENSG00000139197 |
| 12 | 8125770  | 8126036  | 8125903  | 8  | 10 | 1 | 5.273997812 | 0.00391723  |         | ENSG00000089818 |
| 12 | 8999935  | 9000189  | 9000070  | 10 | 12 | 1 | 6.232906505 | 0.00117736  | M6PR    | ENSG00000003056 |
| 12 | 9765436  | 9765770  | 9765521  | 8  | 13 | 1 | 6.712360851 | 0.000640982 | CLECL1  | ENSG00000184293 |
| 12 | 9769374  | 9769698  | 9769536  | 14 | 20 | 0 | 20.13708255 | 7.37E-07    | CLECL1  | ENSG00000184293 |
| 12 | 9786981  | 9787212  | 9787104  | 8  | 9  | 1 | 4.794543465 | 0.00708517  | CLECL1  | ENSG00000184293 |
| 12 | 9954932  | 9955340  | 9955136  | 30 | 40 | 2 | 13.10508547 | 2.42E-10    | CLEC2A  | ENSG00000188393 |
| 12 | 10439640 | 10439916 | 10439794 | 14 | 15 | 0 | 15.34253909 | 2.13E-05    | KLRK1   | ENSG00000213809 |
| 12 | 10760590 | 10760895 | 10760742 | 18 | 22 | 0 | 22.05489994 | 1.92E-07    | CSDA    | ENSG00000060138 |
| 12 | 10761314 | 10761691 | 10761490 | 14 | 19 | 1 | 9.589086931 | 1.56E-05    | CSDA    | ENSG00000060138 |
| 12 | 10962778 | 10963056 | 10962936 | 16 | 18 | 0 | 18.21926517 | 2.83E-06    | TAS2R13 | ENSG00000212128 |
| 12 | 11679650 | 11679878 | 11679779 | 13 | 14 | 0 | 14.3836304  | 4.17E-05    | ETV6    | ENSG00000139083 |



|    |          |          |          |     |     |     |             |             |          |                 |
|----|----------|----------|----------|-----|-----|-----|-------------|-------------|----------|-----------------|
| 12 | 11929138 | 11929317 | 11929188 | 8   | 8   | 0   | 8.630178238 | 0.00235436  | ETV6     | ENSG00000139083 |
| 12 | 12091276 | 12091713 | 12091493 | 28  | 38  | 0   | 37.39743903 | 4.09E-12    | BCL2L14  | ENSG00000121380 |
| 12 | 12490130 | 12490510 | 12490331 | 9   | 16  | 1   | 8.150723891 | 0.000101217 | LOH12CR1 | ENSG00000165714 |
| 12 | 12513636 | 12514252 | 12513791 | 24  | 39  | 0   | 38.35634772 | 2.09E-12    | DUSP16   | ENSG00000111266 |
| 12 | 12605121 | 12605334 | 12605257 | 8   | 8   | 3   | 2.157544559 | 0.0836802   | DUSP16   | ENSG00000111266 |
| 12 | 12857371 | 12857587 | 12857495 | 8   | 10  | 2   | 3.515998541 | 0.0136204   | DDX47    | ENSG00000213782 |
| 12 | 12927624 | 12927928 | 12927788 | 15  | 18  | 4   | 3.643853034 | 0.00178791  | GPRC5A   | ENSG00000013588 |
| 12 | 13383792 | 13384123 | 13383921 | 12  | 16  | 1   | 8.150723891 | 0.000101217 | C12orf36 | ENSG00000180861 |
| 12 | 13406511 | 13406765 | 13406638 | 10  | 10  | 4   | 2.109599125 | 0.0694668   | C12orf36 | ENSG00000180861 |
| 12 | 13917810 | 13918084 | 13917930 | 8   | 11  | 1   | 5.753452158 | 0.00215302  | GRIN2B   | ENSG00000150086 |
| 12 | 14304644 | 14304833 | 14304738 | 8   | 9   | 0   | 9.589086931 | 0.00120187  |          | ENSG00000209525 |
| 12 | 14361520 | 14361908 | 14361757 | 9   | 15  | 0   | 15.34253909 | 2.13E-05    | ATF7IP   | ENSG00000171681 |
| 12 | 14428622 | 14428801 | 14428714 | 8   | 8   | 1   | 4.315089119 | 0.0127267   | ATF7IP   | ENSG00000171681 |
| 12 | 14429095 | 14429298 | 14429190 | 8   | 8   | 0   | 8.630178238 | 0.00235436  | ATF7IP   | ENSG00000171681 |
| 12 | 14438651 | 14438854 | 14438752 | 8   | 9   | 0   | 9.589086931 | 0.00120187  | ATF7IP   | ENSG00000171681 |
| 12 | 14543825 | 14544029 | 14543873 | 9   | 9   | 0   | 9.589086931 | 0.00120187  |          | ENSG00000200830 |
| 12 | 15579441 | 15579905 | 15579709 | 28  | 40  | 1   | 19.65762821 | 2.24E-11    |          | ENSG00000200105 |
| 12 | 15980765 | 15981339 | 15981112 | 174 | 218 | 4   | 42.00020076 | 6.57E-58    | DERA     | ENSG00000023697 |
| 12 | 16840531 | 16840848 | 16840685 | 9   | 12  | 3   | 3.116453252 | 0.0131971   | LMO3     | ENSG00000048540 |
| 12 | 18294545 | 18294805 | 18294676 | 8   | 8   | 0   | 8.630178238 | 0.00235436  | PIK3C2G  | ENSG00000139144 |
| 12 | 18394016 | 18394223 | 18394119 | 10  | 11  | 0   | 11.50690432 | 0.000313206 |          | ENSG00000209542 |
| 12 | 19475943 | 19476611 | 19476225 | 93  | 128 | 0   | 123.6992214 | 2.14E-38    | AEBP2    | ENSG00000139154 |
| 12 | 20595490 | 20595900 | 20595685 | 102 | 133 | 128 | 0.996075697 | 0.512391    |          | ENSG00000209580 |
| 12 | 21862948 | 21863332 | 21863127 | 19  | 26  | 0   | 25.89053471 | 1.31E-08    | KCNJ8    | ENSG00000121361 |
| 12 | 22454720 | 22454983 | 22454849 | 8   | 10  | 1   | 5.273997812 | 0.00391723  | ST8SIA1  | ENSG00000111728 |
| 12 | 22588678 | 22588927 | 22588771 | 15  | 16  | 2   | 5.433815927 | 0.000499302 | KIAA0528 | ENSG00000111731 |
| 12 | 22875179 | 22875644 | 22875399 | 78  | 94  | 2   | 30.36544195 | 2.07E-25    | ETNK1    | ENSG00000139163 |
| 12 | 23128860 | 23129091 | 23128961 | 9   | 11  | 0   | 11.50690432 | 0.000313206 | ETNK1    | ENSG00000139163 |
| 12 | 25098357 | 25098652 | 25098504 | 18  | 21  | 1   | 10.54799562 | 4.43E-06    |          | ENSG00000212652 |
| 12 | 25179698 | 25180272 | 25180083 | 25  | 46  | 5   | 7.511451429 | 1.54E-09    | CASC1    | ENSG00000118307 |
| 12 | 25301047 | 25301517 | 25301384 | 13  | 20  | 4   | 4.027416511 | 0.000652226 | KRAS     | ENSG00000133703 |
| 12 | 25502254 | 25502535 | 25502394 | 11  | 14  | 4   | 2.876726079 | 0.01219     |          | ENSG00000209619 |
| 12 | 25755362 | 25755846 | 25755640 | 29  | 43  | 1   | 21.09599125 | 3.19E-12    |          | ENSG00000222950 |
| 12 | 26158148 | 26158351 | 26158286 | 9   | 9   | 2   | 3.19636231  | 0.0229249   | BHLHB3   | ENSG00000123095 |

|    |          |          |          |    |    |    |             |             |          |                 |
|----|----------|----------|----------|----|----|----|-------------|-------------|----------|-----------------|
| 12 | 26664210 | 26664389 | 26664299 | 8  | 8  | 1  | 4.315089119 | 0.0127267   |          | ENSG00000209639 |
| 12 | 27057084 | 27057510 | 27057297 | 28 | 40 | 1  | 19.65762821 | 2.24E-11    | TM7SF3   | ENSG00000064115 |
| 12 | 27567987 | 27568318 | 27568145 | 8  | 12 | 0  | 12.46581301 | 0.000159888 | PPFIBP1  | ENSG00000110841 |
| 12 | 27985075 | 27985281 | 27985161 | 9  | 9  | 1  | 4.794543465 | 0.00708517  | PTHLH    | ENSG00000087494 |
| 12 | 28011136 | 28011315 | 28011225 | 8  | 8  | 1  | 4.315089119 | 0.0127267   | PTHLH    | ENSG00000087494 |
| 12 | 29194345 | 29194524 | 29194434 | 8  | 8  | 1  | 4.315089119 | 0.0127267   |          | ENSG00000222481 |
| 12 | 30961972 | 30962160 | 30962123 | 8  | 9  | 2  | 3.19636231  | 0.0229249   | TSPAN11  | ENSG00000110900 |
| 12 | 31290536 | 31290819 | 31290687 | 15 | 17 | 3  | 4.315089119 | 0.00102271  |          | ENSG00000213703 |
| 12 | 31703347 | 31703742 | 31703522 | 8  | 14 | 1  | 7.191815198 | 0.00034761  | C12orf72 | ENSG00000139160 |
| 12 | 31777127 | 31777424 | 31777275 | 31 | 33 | 2  | 10.86763185 | 1.89E-08    | AMN1     | ENSG00000151743 |
| 12 | 31793501 | 31793829 | 31793665 | 16 | 22 | 3  | 5.513724985 | 6.69E-05    | AMN1     | ENSG00000151743 |
| 12 | 32292955 | 32293445 | 32293266 | 13 | 26 | 2  | 8.630178238 | 1.37E-06    | BICD1    | ENSG00000151746 |
| 12 | 32937251 | 32937444 | 32937396 | 11 | 12 | 4  | 2.493162602 | 0.0299057   | PKP2     | ENSG00000057294 |
| 12 | 32941385 | 32941635 | 32941507 | 12 | 13 | 1  | 6.712360851 | 0.000640982 | PKP2     | ENSG00000057294 |
| 12 | 32945687 | 32945910 | 32945855 | 8  | 10 | 2  | 3.515998541 | 0.0136204   | PKP2     | ENSG00000057294 |
| 12 | 32963437 | 32963659 | 32963505 | 8  | 8  | 2  | 2.876726079 | 0.0381137   | PKP2     | ENSG00000057294 |
| 12 | 34263749 | 34264078 | 34263913 | 24 | 24 | 47 | 0.499431611 | 0.998184    |          | ENSG00000209793 |
| 12 | 34273549 | 34273816 | 34273687 | 15 | 17 | 1  | 8.630178238 | 5.44E-05    |          | ENSG00000209793 |
| 12 | 34678355 | 34678534 | 34678394 | 8  | 8  | 1  | 4.315089119 | 0.0127267   |          | ENSG00000209793 |
| 12 | 34724574 | 34724906 | 34724740 | 17 | 17 | 16 | 1.015315087 | 0.480915    |          | ENSG00000209793 |
| 12 | 34740671 | 34740851 | 34740702 | 9  | 9  | 7  | 1.198635866 | 0.346278    |          | ENSG00000209793 |
| 12 | 34742039 | 34742369 | 34742204 | 10 | 11 | 5  | 1.917817386 | 0.0843804   |          | ENSG00000209793 |
| 12 | 36302526 | 36302709 | 36302690 | 8  | 8  | 6  | 1.232882605 | 0.333038    |          |                 |
| 12 | 36304344 | 36304611 | 36304495 | 14 | 14 | 12 | 1.106433107 | 0.392094    |          |                 |
| 12 | 36337994 | 36338174 | 36338146 | 9  | 9  | 6  | 1.369869562 | 0.253675    |          | ENSG00000209796 |
| 12 | 36411022 | 36411353 | 36411187 | 16 | 16 | 19 | 0.815072389 | 0.734271    |          | ENSG00000209796 |
| 12 | 36623205 | 36623385 | 36623234 | 8  | 8  | 11 | 0.71918152  | 0.777546    |          | ENSG00000209796 |
| 12 | 36730916 | 36731097 | 36731069 | 9  | 9  | 5  | 1.598181155 | 0.170911    |          | ENSG00000209796 |
| 12 | 36736269 | 36736452 | 36736301 | 11 | 12 | 7  | 1.558226626 | 0.152813    |          | ENSG00000209796 |
| 12 | 36830061 | 36830250 | 36830090 | 23 | 23 | 13 | 1.643843474 | 0.0639146   |          | ENSG00000199843 |
| 12 | 36996714 | 36996960 | 36996837 | 11 | 12 | 5  | 2.077635502 | 0.0577144   | ALG10B   | ENSG00000175548 |
| 12 | 37586799 | 37586995 | 37586897 | 8  | 8  | 1  | 4.315089119 | 0.0127267   | CPNE8    | ENSG00000139117 |
| 12 | 38708396 | 38708701 | 38708537 | 16 | 19 | 2  | 6.39272462  | 8.83E-05    |          | ENSG00000219786 |
| 12 | 39089283 | 39089862 | 39089606 | 23 | 35 | 0  | 34.52071295 | 3.07E-11    |          | ENSG00000214639 |

|    |          |          |          |    |    |    |             |             |         |                 |
|----|----------|----------|----------|----|----|----|-------------|-------------|---------|-----------------|
| 12 | 39154669 | 39155198 | 39154919 | 46 | 76 | 7  | 9.229496171 | 1.10E-15    |         | ENSG00000214639 |
| 12 | 39618880 | 39619186 | 39619033 | 13 | 18 | 0  | 18.21926517 | 2.83E-06    | CNTN1   | ENSG00000018236 |
| 12 | 39915620 | 39915803 | 39915679 | 8  | 10 | 1  | 5.273997812 | 0.00391723  | PDZRN4  | ENSG00000165966 |
| 12 | 41005704 | 41005915 | 41005809 | 8  | 8  | 2  | 2.876726079 | 0.0381137   | ZCRB1   | ENSG00000139168 |
| 12 | 42266688 | 42267111 | 42266898 | 55 | 71 | 1  | 34.52071295 | 3.42E-20    |         | ENSG00000214615 |
| 12 | 42680502 | 42680699 | 42680612 | 8  | 9  | 6  | 1.369869562 | 0.253675    | TMEM117 | ENSG00000139173 |
| 12 | 42709276 | 42709636 | 42709459 | 13 | 19 | 1  | 9.589086931 | 1.56E-05    | TMEM117 | ENSG00000139173 |
| 12 | 42998440 | 42998757 | 42998598 | 10 | 15 | 3  | 3.835634772 | 0.00291691  | TMEM117 | ENSG00000139173 |
| 12 | 43052431 | 43052683 | 43052557 | 8  | 9  | 1  | 4.794543465 | 0.00708517  |         |                 |
| 12 | 43562876 | 43563236 | 43563043 | 13 | 17 | 1  | 8.630178238 | 5.44E-05    |         | ENSG00000201788 |
| 12 | 43628831 | 43629052 | 43628923 | 8  | 8  | 11 | 0.71918152  | 0.777546    |         | ENSG00000201788 |
| 12 | 43850639 | 43850870 | 43850754 | 8  | 9  | 6  | 1.369869562 | 0.253675    | PLEKHA9 | ENSG00000134297 |
| 12 | 43913062 | 43913279 | 43913170 | 8  | 9  | 5  | 1.598181155 | 0.170911    | ANO6    | ENSG00000177119 |
| 12 | 43940238 | 43940450 | 43940333 | 8  | 9  | 1  | 4.794543465 | 0.00708517  | ANO6    | ENSG00000177119 |
| 12 | 43949240 | 43949425 | 43949361 | 9  | 11 | 1  | 5.753452158 | 0.00215302  | ANO6    | ENSG00000177119 |
| 12 | 43979214 | 43979410 | 43979295 | 8  | 9  | 0  | 9.589086931 | 0.00120187  | ANO6    | ENSG00000177119 |
| 12 | 44325126 | 44325327 | 44325248 | 9  | 9  | 1  | 4.794543465 | 0.00708517  | ARID2   | ENSG00000189079 |
| 12 | 44408677 | 44409122 | 44408980 | 8  | 15 | 2  | 5.114179696 | 0.00088103  | ARID2   | ENSG00000189079 |
| 12 | 44558732 | 44558922 | 44558839 | 8  | 10 | 3  | 2.636998906 | 0.034203    |         | ENSG00000209242 |
| 12 | 44670680 | 44670905 | 44670792 | 8  | 10 | 6  | 1.506856518 | 0.188853    | SFRS2IP | ENSG00000139218 |
| 12 | 44751362 | 44751782 | 44751588 | 44 | 56 | 5  | 9.109632584 | 4.52E-12    | SFRS2IP | ENSG00000139218 |
| 12 | 44752268 | 44752479 | 44752373 | 10 | 10 | 12 | 0.811384279 | 0.697544    | SFRS2IP | ENSG00000139218 |
| 12 | 44787628 | 44788106 | 44787857 | 77 | 97 | 2  | 31.32435064 | 2.92E-26    | SFRS2IP | ENSG00000139218 |
| 12 | 44844292 | 44844615 | 44844459 | 17 | 21 | 4  | 4.219198249 | 0.000390041 | SLC38A1 | ENSG00000111371 |
| 12 | 44917402 | 44917594 | 44917498 | 8  | 9  | 1  | 4.794543465 | 0.00708517  | SLC38A1 | ENSG00000111371 |
| 12 | 44939191 | 44939386 | 44939313 | 8  | 8  | 5  | 1.43836304  | 0.235762    | SLC38A1 | ENSG00000111371 |
| 12 | 44947919 | 44948219 | 44948069 | 8  | 10 | 2  | 3.515998541 | 0.0136204   | SLC38A1 | ENSG00000111371 |
| 12 | 44948941 | 44949177 | 44949059 | 8  | 9  | 7  | 1.198635866 | 0.346278    | SLC38A1 | ENSG00000111371 |
| 12 | 44983048 | 44983503 | 44983300 | 8  | 16 | 3  | 4.075361945 | 0.00173346  | SLC38A1 | ENSG00000111371 |
| 12 | 45022471 | 45022852 | 45022650 | 8  | 17 | 6  | 2.465765211 | 0.014729    | SLC38A2 | ENSG00000134294 |
| 12 | 45062766 | 45063132 | 45062987 | 8  | 14 | 2  | 4.794543465 | 0.00154571  | SLC38A2 | ENSG00000134294 |
| 12 | 45063862 | 45064277 | 45064122 | 9  | 14 | 9  | 1.43836304  | 0.179537    | SLC38A2 | ENSG00000134294 |
| 12 | 45135845 | 45136240 | 45136073 | 11 | 20 | 8  | 2.237453617 | 0.0160557   | SLC38A2 | ENSG00000134294 |
| 12 | 45142322 | 45142629 | 45142487 | 8  | 10 | 10 | 0.958908693 | 0.538751    | SLC38A2 | ENSG00000134294 |

|    |          |          |          |    |     |   |             |             |          |                 |
|----|----------|----------|----------|----|-----|---|-------------|-------------|----------|-----------------|
| 12 | 45143311 | 45143588 | 45143466 | 9  | 12  | 1 | 6.232906505 | 0.00117736  | SLC38A2  | ENSG00000134294 |
| 12 | 45153774 | 45154011 | 45153892 | 10 | 14  | 9 | 1.43836304  | 0.179537    | SLC38A2  | ENSG00000134294 |
| 12 | 45172601 | 45172974 | 45172743 | 13 | 17  | 9 | 1.726035648 | 0.0753664   | SLC38A2  | ENSG00000134294 |
| 12 | 45173562 | 45174128 | 45174049 | 8  | 20  | 3 | 5.034270639 | 0.000202317 | SLC38A2  | ENSG00000134294 |
| 12 | 45257547 | 45257859 | 45257718 | 20 | 23  | 4 | 4.602761727 | 0.000137072 | SLC38A2  | ENSG00000134294 |
| 12 | 45259755 | 45259997 | 45259876 | 8  | 10  | 1 | 5.273997812 | 0.00391723  | SLC38A2  | ENSG00000134294 |
| 12 | 45330530 | 45330796 | 45330668 | 8  | 11  | 6 | 1.643843474 | 0.137712    | SLC38A4  | ENSG00000139209 |
| 12 | 45356892 | 45357222 | 45357057 | 10 | 12  | 0 | 12.46581301 | 0.000159888 | SLC38A4  | ENSG00000139209 |
| 12 | 45358609 | 45358829 | 45358741 | 8  | 10  | 0 | 10.54799562 | 0.000613541 | SLC38A4  | ENSG00000139209 |
| 12 | 46058101 | 46058411 | 46058256 | 8  | 11  | 5 | 1.917817386 | 0.0843804   |          | ENSG00000199566 |
| 12 | 46189771 | 46190089 | 46189963 | 9  | 13  | 0 | 13.4247217  | 8.16E-05    |          | ENSG00000199566 |
| 12 | 46236213 | 46236794 | 46236481 | 97 | 122 | 3 | 29.48644231 | 4.73E-32    | RPAP3    | ENSG00000005175 |
| 12 | 46397777 | 46398012 | 46397892 | 8  | 10  | 1 | 5.273997812 | 0.00391723  |          | ENSG00000111405 |
| 12 | 46448376 | 46449036 | 46448637 | 58 | 78  | 9 | 7.575378675 | 8.89E-15    | SLC48A1  | ENSG00000211584 |
| 12 | 46484855 | 46485034 | 46484949 | 8  | 8   | 4 | 1.726035648 | 0.150596    | HDAC7    | ENSG00000061273 |
| 12 | 46501124 | 46501313 | 46501207 | 8  | 8   | 2 | 2.876726079 | 0.0381137   | HDAC7    | ENSG00000061273 |
| 12 | 46509039 | 46509224 | 46509169 | 9  | 9   | 3 | 2.397271733 | 0.0539397   | HDAC7    | ENSG00000061273 |
| 12 | 46585391 | 46585621 | 46585487 | 8  | 11  | 4 | 2.301380863 | 0.0459276   | VDR      | ENSG00000111424 |
| 12 | 46643381 | 46643570 | 46643475 | 8  | 9   | 4 | 1.917817386 | 0.103282    | TMEM106C | ENSG00000134291 |
| 12 | 46677291 | 46677474 | 46677391 | 8  | 9   | 0 | 9.589086931 | 0.00120187  | COL2A1   | ENSG00000139219 |
| 12 | 46701892 | 46702275 | 46702138 | 10 | 15  | 9 | 1.534253909 | 0.136498    | COL2A1   | ENSG00000139219 |
| 12 | 46703144 | 46703488 | 46703244 | 10 | 14  | 6 | 2.054804342 | 0.0480281   | COL2A1   | ENSG00000139219 |
| 12 | 46772214 | 46772435 | 46772303 | 8  | 8   | 5 | 1.43836304  | 0.235762    |          | ENSG00000222635 |
| 12 | 47034724 | 47034998 | 47034863 | 15 | 17  | 3 | 4.315089119 | 0.00102271  | ZNF641   | ENSG00000167528 |
| 12 | 47282119 | 47282838 | 47282428 | 80 | 116 | 8 | 12.46581301 | 2.85E-25    | LALBA    | ENSG00000167531 |
| 12 | 47330427 | 47330650 | 47330489 | 8  | 10  | 1 | 5.273997812 | 0.00391723  |          | ENSG00000221491 |
| 12 | 47474908 | 47475087 | 47475055 | 8  | 8   | 3 | 2.157544559 | 0.0836802   | ADCY6    | ENSG00000174233 |
| 12 | 47475970 | 47476197 | 47476046 | 11 | 12  | 7 | 1.558226626 | 0.152813    | ADCY6    | ENSG00000174233 |
| 12 | 47495184 | 47495526 | 47495357 | 8  | 13  | 1 | 6.712360851 | 0.000640982 | CACNB3   | ENSG00000167535 |
| 12 | 47532012 | 47532525 | 47532305 | 13 | 22  | 4 | 4.410979988 | 0.000231863 | DDX23    | ENSG00000174243 |
| 12 | 47545847 | 47546123 | 47545972 | 11 | 12  | 5 | 2.077635502 | 0.0577144   | RND1     | ENSG00000172602 |
| 12 | 47698607 | 47698857 | 47698763 | 9  | 11  | 5 | 1.917817386 | 0.0843804   | PRKAG1   | ENSG00000181929 |
| 12 | 47740662 | 47741198 | 47740790 | 13 | 24  | 5 | 3.995452888 | 0.00024777  | MLL2     | ENSG00000167548 |
| 12 | 47945375 | 47945875 | 47945711 | 14 | 26  | 0 | 25.89053471 | 1.31E-08    | TUBA1C   | ENSG00000167553 |

|    |          |          |          |     |     |    |             |             |         |                 |
|----|----------|----------|----------|-----|-----|----|-------------|-------------|---------|-----------------|
| 12 | 47969032 | 47969330 | 47969196 | 20  | 21  | 4  | 4.219198249 | 0.000390041 | PRPH    | ENSG00000135406 |
| 12 | 48022627 | 48022814 | 48022720 | 8   | 8   | 3  | 2.157544559 | 0.0836802   | DNAJC22 | ENSG00000178401 |
| 12 | 48081328 | 48081517 | 48081422 | 9   | 9   | 6  | 1.369869562 | 0.253675    | SPATS2  | ENSG00000123352 |
| 12 | 48084050 | 48084476 | 48084362 | 8   | 15  | 7  | 1.917817386 | 0.0572317   | SPATS2  | ENSG00000123352 |
| 12 | 48247993 | 48248206 | 48248099 | 8   | 10  | 3  | 2.636998906 | 0.034203    | MCRS1   | ENSG00000187778 |
| 12 | 48324661 | 48324906 | 48324829 | 9   | 12  | 10 | 1.133255728 | 0.37674     | PRPF40B | ENSG00000110844 |
| 12 | 48421245 | 48421729 | 48421366 | 9   | 18  | 9  | 1.821926517 | 0.0548428   | TMBIM6  | ENSG00000139644 |
| 12 | 48568409 | 48568588 | 48568498 | 8   | 8   | 5  | 1.43836304  | 0.235762    |         | ENSG00000202582 |
| 12 | 48574442 | 48574745 | 48574590 | 12  | 13  | 4  | 2.684944341 | 0.01921     | FAIM2   | ENSG00000135472 |
| 12 | 48719349 | 48719554 | 48719451 | 9   | 9   | 6  | 1.369869562 | 0.253675    | RACGAP1 | ENSG00000161800 |
| 12 | 48765036 | 48765296 | 48765147 | 10  | 12  | 8  | 1.385090334 | 0.219216    | SMARCD1 | ENSG00000066117 |
| 12 | 48847422 | 48847795 | 48847608 | 14  | 22  | 6  | 3.150699991 | 0.00166398  | LASS5   | ENSG00000139624 |
| 12 | 48850219 | 48850853 | 48850598 | 165 | 193 | 2  | 62.00942882 | 1.03E-53    | LASS5   | ENSG00000139624 |
| 12 | 48868865 | 48869118 | 48868971 | 10  | 11  | 2  | 3.835634772 | 0.00800699  | LASS5   | ENSG00000139624 |
| 12 | 48882379 | 48882637 | 48882508 | 8   | 11  | 3  | 2.876726079 | 0.0213797   |         | ENSG00000221604 |
| 12 | 48927187 | 48927398 | 48927285 | 10  | 11  | 0  | 11.50690432 | 0.000313206 |         | ENSG00000212496 |
| 12 | 48932055 | 48932246 | 48932175 | 8   | 9   | 7  | 1.198635866 | 0.346278    |         | ENSG00000212496 |
| 12 | 48954161 | 48954363 | 48954262 | 9   | 9   | 0  | 9.589086931 | 0.00120187  | LIMA1   | ENSG00000050405 |
| 12 | 49081497 | 49081684 | 49081648 | 9   | 9   | 3  | 2.397271733 | 0.0539397   | LARP4   | ENSG00000161813 |
| 12 | 49098503 | 49098820 | 49098652 | 13  | 15  | 2  | 5.114179696 | 0.00088103  | LARP4   | ENSG00000161813 |
| 12 | 49278341 | 49278550 | 49278450 | 8   | 8   | 2  | 2.876726079 | 0.0381137   |         | ENSG00000207136 |
| 12 | 49608388 | 49608784 | 49608566 | 14  | 20  | 1  | 10.06854128 | 8.32E-06    | METTL7A | ENSG00000185432 |
| 12 | 49667139 | 49667456 | 49667312 | 10  | 12  | 2  | 4.155271003 | 0.0046638   |         | ENSG00000206830 |
| 12 | 49704822 | 49705177 | 49704977 | 11  | 15  | 10 | 1.394776281 | 0.191426    | SLC11A2 | ENSG00000110911 |
| 12 | 49708127 | 49708452 | 49708290 | 9   | 12  | 6  | 1.78083043  | 0.0985525   | SLC11A2 | ENSG00000110911 |
| 12 | 50068160 | 50068438 | 50068299 | 9   | 12  | 6  | 1.78083043  | 0.0985525   | SLC4A8  | ENSG00000050438 |
| 12 | 50211917 | 50212225 | 50212086 | 16  | 19  | 5  | 3.19636231  | 0.00280933  | SLC4A8  | ENSG00000050438 |
| 12 | 50231957 | 50232166 | 50232110 | 8   | 8   | 2  | 2.876726079 | 0.0381137   | SLC4A8  | ENSG00000050438 |
| 12 | 50489178 | 50489362 | 50489291 | 9   | 9   | 1  | 4.794543465 | 0.00708517  | FIGNL2  | ENSG00000205432 |
| 12 | 50606840 | 50607149 | 50606994 | 9   | 12  | 3  | 3.116453252 | 0.0131971   | ACVRL1  | ENSG00000139567 |
| 12 | 50673206 | 50673385 | 50673306 | 8   | 8   | 14 | 0.575345216 | 0.912234    |         | ENSG00000206992 |
| 12 | 50684180 | 50684451 | 50684322 | 9   | 12  | 6  | 1.78083043  | 0.0985525   | GRASP   | ENSG00000161835 |
| 12 | 50740256 | 50740482 | 50740369 | 8   | 8   | 3  | 2.157544559 | 0.0836802   | NR4A1   | ENSG00000123358 |
| 12 | 50819668 | 50819866 | 50819712 | 8   | 9   | 3  | 2.397271733 | 0.0539397   |         | ENSG00000214487 |

|    |          |          |          |    |    |    |             |             |       |                 |
|----|----------|----------|----------|----|----|----|-------------|-------------|-------|-----------------|
| 12 | 50823654 | 50823885 | 50823745 | 10 | 11 | 2  | 3.835634772 | 0.00800699  |       | ENSG00000214487 |
| 12 | 50855928 | 50856569 | 50856262 | 69 | 90 | 4  | 17.45213821 | 5.11E-22    | KRT80 | ENSG00000167767 |
| 12 | 50872349 | 50872754 | 50872502 | 10 | 17 | 7  | 2.157544559 | 0.0276499   | KRT80 | ENSG00000167767 |
| 12 | 50895712 | 50896044 | 50895878 | 9  | 15 | 8  | 1.704726565 | 0.0916153   | KRT7  | ENSG00000135480 |
| 12 | 50908598 | 50908845 | 50908711 | 12 | 14 | 3  | 3.595907599 | 0.00486913  | KRT7  | ENSG00000135480 |
| 12 | 50924231 | 50924464 | 50924332 | 10 | 12 | 0  | 12.46581301 | 0.000159888 | KRT7  | ENSG00000135480 |
| 12 | 50959088 | 50959304 | 50959205 | 8  | 9  | 4  | 1.917817386 | 0.103282    | KRT81 | ENSG00000205426 |
| 12 | 51007656 | 51007892 | 51007774 | 11 | 14 | 6  | 2.054804342 | 0.0480281   | KRT83 | ENSG00000170523 |
| 12 | 51018545 | 51019030 | 51018767 | 21 | 37 | 6  | 5.205504334 | 9.20E-07    | KRT83 | ENSG00000170523 |
| 12 | 51052628 | 51052880 | 51052754 | 8  | 10 | 1  | 5.273997812 | 0.00391723  | KRT85 | ENSG00000135443 |
| 12 | 51263177 | 51263361 | 51263232 | 8  | 8  | 5  | 1.43836304  | 0.235762    | KRT74 | ENSG00000170484 |
| 12 | 51335672 | 51335859 | 51335790 | 9  | 9  | 4  | 1.917817386 | 0.103282    | KRT2  | ENSG00000172867 |
| 12 | 51347608 | 51347825 | 51347716 | 8  | 10 | 3  | 2.636998906 | 0.034203    | KRT1  | ENSG00000167768 |
| 12 | 51480896 | 51481213 | 51481037 | 14 | 19 | 7  | 2.397271733 | 0.0127287   | KRT3  | ENSG00000186442 |
| 12 | 51534086 | 51534265 | 51534212 | 8  | 9  | 1  | 4.794543465 | 0.00708517  | KRT78 | ENSG00000170423 |
| 12 | 51545317 | 51545726 | 51545547 | 16 | 27 | 7  | 3.356180426 | 0.000396559 | KRT78 | ENSG00000170423 |
| 12 | 51551259 | 51551464 | 51551416 | 9  | 10 | 3  | 2.636998906 | 0.034203    | KRT78 | ENSG00000170423 |
| 12 | 51554410 | 51554701 | 51554571 | 11 | 12 | 5  | 2.077635502 | 0.0577144   | KRT78 | ENSG00000170423 |
| 12 | 51560043 | 51560454 | 51560208 | 10 | 16 | 7  | 2.037680973 | 0.0400399   | KRT8  | ENSG00000170421 |
| 12 | 51575409 | 51575810 | 51575588 | 14 | 22 | 11 | 1.837908328 | 0.0378204   | KRT8  | ENSG00000170421 |
| 12 | 51583405 | 51583770 | 51583598 | 9  | 15 | 7  | 1.917817386 | 0.0572317   | KRT8  | ENSG00000170421 |
| 12 | 51583992 | 51584319 | 51584155 | 11 | 16 | 6  | 2.328778255 | 0.0221113   | KRT8  | ENSG00000170421 |
| 12 | 51585049 | 51585535 | 51585393 | 17 | 25 | 5  | 4.155271003 | 0.000149583 | KRT8  | ENSG00000170421 |
| 12 | 51587254 | 51587664 | 51587433 | 9  | 16 | 12 | 1.253957522 | 0.265012    | KRT8  | ENSG00000170421 |
| 12 | 51606152 | 51606713 | 51606292 | 9  | 20 | 7  | 2.517135319 | 0.00849957  | KRT8  | ENSG00000170421 |
| 12 | 51629769 | 51630074 | 51629921 | 9  | 13 | 7  | 1.678090213 | 0.11195     | KRT18 | ENSG00000111057 |
| 12 | 51650047 | 51650496 | 51650329 | 11 | 20 | 20 | 0.958908693 | 0.553754    | KRT18 | ENSG00000111057 |
| 12 | 51652150 | 51652440 | 51652295 | 10 | 12 | 5  | 2.077635502 | 0.0577144   | KRT18 | ENSG00000111057 |
| 12 | 51656268 | 51656718 | 51656435 | 11 | 20 | 8  | 2.237453617 | 0.0160557   | KRT18 | ENSG00000111057 |
| 12 | 51661020 | 51661303 | 51661165 | 14 | 18 | 11 | 1.518272097 | 0.122037    | EIF4B | ENSG00000063046 |
| 12 | 51686439 | 51686912 | 51686735 | 13 | 20 | 9  | 2.013708255 | 0.0279742   | EIF4B | ENSG00000063046 |
| 12 | 51702920 | 51703113 | 51703073 | 8  | 8  | 2  | 2.876726079 | 0.0381137   | EIF4B | ENSG00000063046 |
| 12 | 51726522 | 51726745 | 51726637 | 8  | 8  | 2  | 2.876726079 | 0.0381137   | TENC1 | ENSG00000111077 |
| 12 | 51733696 | 51733953 | 51733813 | 11 | 14 | 5  | 2.397271733 | 0.0258078   | TENC1 | ENSG00000111077 |

|    |          |          |          |    |    |    |             |             |          |                 |
|----|----------|----------|----------|----|----|----|-------------|-------------|----------|-----------------|
| 12 | 51734478 | 51734752 | 51734576 | 8  | 12 | 4  | 2.493162602 | 0.0299057   | TENC1    | ENSG00000111077 |
| 12 | 51741408 | 51741754 | 51741581 | 8  | 14 | 8  | 1.598181155 | 0.124586    | TENC1    | ENSG00000111077 |
| 12 | 51860620 | 51860835 | 51860726 | 10 | 11 | 3  | 2.876726079 | 0.0213797   | CSAD     | ENSG00000139631 |
| 12 | 51904651 | 51904969 | 51904810 | 13 | 17 | 2  | 5.753452158 | 0.000281509 | RARG     | ENSG00000172819 |
| 12 | 51910537 | 51910803 | 51910683 | 9  | 11 | 0  | 11.50690432 | 0.000313206 | RARG     | ENSG00000172819 |
| 12 | 51948020 | 51948301 | 51948154 | 8  | 11 | 0  | 11.50690432 | 0.000313206 | ESPL1    | ENSG00000135476 |
| 12 | 52001341 | 52002002 | 52001691 | 9  | 23 | 15 | 1.43836304  | 0.12479     | AAAS     | ENSG00000094914 |
| 12 | 52034300 | 52034567 | 52034433 | 9  | 10 | 1  | 5.273997812 | 0.00391723  | SP7      | ENSG00000170374 |
| 12 | 52050838 | 52051262 | 52051083 | 12 | 18 | 7  | 2.277408146 | 0.0188653   | SP1      | ENSG00000185591 |
| 12 | 52059494 | 52060101 | 52059718 | 18 | 36 | 15 | 2.217476353 | 0.00255902  | SP1      | ENSG00000185591 |
| 12 | 52061987 | 52062194 | 52062104 | 8  | 9  | 5  | 1.598181155 | 0.170911    | SP1      | ENSG00000185591 |
| 12 | 52178684 | 52179193 | 52178935 | 33 | 50 | 5  | 8.150723891 | 1.52E-10    | MAP3K12  | ENSG00000139625 |
| 12 | 52283830 | 52284078 | 52283910 | 8  | 8  | 2  | 2.876726079 | 0.0381137   | ATF7     | ENSG00000170653 |
| 12 | 52305724 | 52306017 | 52305870 | 10 | 13 | 3  | 3.356180426 | 0.00805599  | ATF7     | ENSG00000170653 |
| 12 | 52306410 | 52306762 | 52306586 | 10 | 16 | 8  | 1.811271976 | 0.0663685   | ATF7     | ENSG00000170653 |
| 12 | 52356121 | 52356574 | 52356395 | 9  | 17 | 4  | 3.452071295 | 0.00292757  | ATP5G2   | ENSG00000135390 |
| 12 | 52426774 | 52427141 | 52426898 | 10 | 15 | 4  | 3.068507818 | 0.0076507   | CALCOCO1 | ENSG00000012822 |
| 12 | 52435525 | 52435726 | 52435604 | 8  | 9  | 1  | 4.794543465 | 0.00708517  | CALCOCO1 | ENSG00000012822 |
| 12 | 52484458 | 52485079 | 52484587 | 9  | 23 | 14 | 1.534253909 | 0.0910901   |          | ENSG00000223213 |
| 12 | 52500984 | 52501193 | 52501088 | 8  | 10 | 3  | 2.636998906 | 0.034203    |          | ENSG00000223213 |
| 12 | 52505275 | 52505719 | 52505546 | 15 | 25 | 13 | 1.78083043  | 0.0357618   |          | ENSG00000223213 |
| 12 | 52525625 | 52525851 | 52525735 | 10 | 12 | 5  | 2.077635502 | 0.0577144   |          | ENSG00000223213 |
| 12 | 52619980 | 52620196 | 52620088 | 8  | 9  | 3  | 2.397271733 | 0.0539397   | HOXC13   | ENSG00000123364 |
| 12 | 52666135 | 52666420 | 52666277 | 8  | 10 | 1  | 5.273997812 | 0.00391723  | HOXC10   | ENSG00000180818 |
| 12 | 52871665 | 52871856 | 52871750 | 9  | 9  | 3  | 2.397271733 | 0.0539397   | SMUG1    | ENSG00000123415 |
| 12 | 52967344 | 52967624 | 52967484 | 9  | 11 | 0  | 11.50690432 | 0.000313206 | HNRNPA1  | ENSG00000135486 |
| 12 | 53048702 | 53048993 | 53048847 | 9  | 12 | 4  | 2.493162602 | 0.0299057   | GPR84    | ENSG00000139572 |
| 12 | 53067722 | 53068010 | 53067852 | 10 | 11 | 4  | 2.301380863 | 0.0459276   | ZNF385A  | ENSG00000161642 |
| 12 | 53572157 | 53572399 | 53572308 | 11 | 13 | 2  | 4.474907234 | 0.00269459  | MUCL1    | ENSG00000172551 |
| 12 | 53852746 | 53853140 | 53852925 | 44 | 52 | 1  | 25.41108037 | 8.99E-15    | OR9K2    | ENSG00000170605 |
| 12 | 54361459 | 54361762 | 54361637 | 10 | 13 | 4  | 2.684944341 | 0.01921     | METTL7B  | ENSG00000170439 |
| 12 | 54396041 | 54396317 | 54396147 | 8  | 11 | 1  | 5.753452158 | 0.00215302  | BLOC1S1  | ENSG00000135441 |
| 12 | 54407195 | 54407374 | 54407284 | 8  | 8  | 0  | 8.630178238 | 0.00235436  | CD63     | ENSG00000135404 |
| 12 | 54418965 | 54419200 | 54419117 | 11 | 11 | 1  | 5.753452158 | 0.00215302  | GDF11    | ENSG00000135414 |

|    |          |          |          |    |    |    |             |             |          |                 |
|----|----------|----------|----------|----|----|----|-------------|-------------|----------|-----------------|
| 12 | 54613356 | 54613691 | 54613522 | 14 | 17 | 3  | 4.315089119 | 0.00102271  | DGKA     | ENSG00000065357 |
| 12 | 54620362 | 54620564 | 54620463 | 8  | 10 | 5  | 1.757999271 | 0.121253    | DGKA     | ENSG00000065357 |
| 12 | 54636184 | 54636395 | 54636308 | 8  | 9  | 7  | 1.198635866 | 0.346278    | SILV     | ENSG00000185664 |
| 12 | 54653834 | 54654135 | 54653984 | 10 | 13 | 1  | 6.712360851 | 0.000640982 | RAB5B    | ENSG00000111540 |
| 12 | 54687305 | 54687522 | 54687383 | 9  | 10 | 3  | 2.636998906 | 0.034203    | SUOX     | ENSG00000139531 |
| 12 | 54709035 | 54709356 | 54709199 | 14 | 18 | 1  | 9.109632584 | 2.91E-05    | IKZF4    | ENSG00000123411 |
| 12 | 54721814 | 54722232 | 54722006 | 9  | 17 | 10 | 1.569123316 | 0.112309    | RPS26    | ENSG00000197728 |
| 12 | 54758989 | 54759198 | 54759093 | 8  | 9  | 0  | 9.589086931 | 0.00120187  | ERBB3    | ENSG00000065361 |
| 12 | 54784110 | 54784308 | 54784209 | 10 | 10 | 4  | 2.109599125 | 0.0694668   | PA2G4    | ENSG00000170515 |
| 12 | 54798072 | 54798321 | 54798196 | 12 | 12 | 5  | 2.077635502 | 0.0577144   | ZC3H10   | ENSG00000135482 |
| 12 | 54806251 | 54806462 | 54806351 | 11 | 12 | 6  | 1.78083043  | 0.0985525   | FAM62A   | ENSG00000139641 |
| 12 | 54902035 | 54902285 | 54902160 | 8  | 11 | 1  | 5.753452158 | 0.00215302  | RNF41    | ENSG00000181852 |
| 12 | 55040158 | 55040378 | 55040268 | 8  | 9  | 3  | 2.397271733 | 0.0539397   | STAT2    | ENSG00000170581 |
| 12 | 55315107 | 55315298 | 55315169 | 8  | 8  | 1  | 4.315089119 | 0.0127267   | BAZ2A    | ENSG00000076108 |
| 12 | 55405021 | 55405312 | 55405183 | 10 | 14 | 6  | 2.054804342 | 0.0480281   | NACA     | ENSG00000196531 |
| 12 | 55660263 | 55660591 | 55660426 | 8  | 12 | 0  | 12.46581301 | 0.000159888 | GPR182   | ENSG00000166856 |
| 12 | 55711346 | 55712039 | 55711674 | 56 | 93 | 0  | 90.13741715 | 3.55E-28    | TAC3     | ENSG00000166863 |
| 12 | 55766971 | 55767270 | 55767125 | 9  | 11 | 7  | 1.43836304  | 0.204844    | NAB2     | ENSG00000166886 |
| 12 | 55776055 | 55776529 | 55776353 | 61 | 74 | 5  | 11.98635866 | 9.10E-17    | NAB2     | ENSG00000166886 |
| 12 | 55792139 | 55792597 | 55792262 | 11 | 20 | 2  | 6.712360851 | 4.91E-05    | STAT6    | ENSG00000166888 |
| 12 | 55807334 | 55808229 | 55807790 | 20 | 56 | 1  | 27.32889775 | 6.55E-16    | LRP1     | ENSG00000123384 |
| 12 | 55863116 | 55863344 | 55863257 | 9  | 9  | 6  | 1.369869562 | 0.253675    |          | ENSG00000221365 |
| 12 | 55893388 | 55893667 | 55893527 | 8  | 11 | 0  | 11.50690432 | 0.000313206 | NXPH4    | ENSG00000182379 |
| 12 | 56062300 | 56062504 | 56062414 | 9  | 11 | 0  | 11.50690432 | 0.000313206 |          | ENSG00000201198 |
| 12 | 56142658 | 56142916 | 56142787 | 14 | 15 | 7  | 1.917817386 | 0.0572317   | GLI1     | ENSG00000111087 |
| 12 | 56167913 | 56168190 | 56168027 | 13 | 15 | 4  | 3.068507818 | 0.0076507   | MARS     | ENSG00000166986 |
| 12 | 56202210 | 56202644 | 56202346 | 17 | 27 | 2  | 8.949814469 | 7.46E-07    | MBD6     | ENSG00000166987 |
| 12 | 56373770 | 56374001 | 56373885 | 9  | 10 | 3  | 2.636998906 | 0.034203    |          | ENSG00000135506 |
| 12 | 56374070 | 56374267 | 56374202 | 9  | 10 | 3  | 2.636998906 | 0.034203    |          | ENSG00000135506 |
| 12 | 56406088 | 56406343 | 56406253 | 8  | 10 | 3  | 2.636998906 | 0.034203    | AGAP2    | ENSG00000135439 |
| 12 | 56451950 | 56452247 | 56452098 | 11 | 12 | 2  | 4.155271003 | 0.0046638   | METTL1   | ENSG00000037897 |
| 12 | 56462684 | 56462988 | 56462822 | 16 | 17 | 9  | 1.726035648 | 0.0753664   | TSFM     | ENSG00000123297 |
| 12 | 56585335 | 56585791 | 56585617 | 14 | 21 | 8  | 2.343999027 | 0.0109478   | XRCC6BP1 | ENSG00000166896 |
| 12 | 56747684 | 56747928 | 56747806 | 9  | 11 | 0  | 11.50690432 | 0.000313206 |          | ENSG00000213368 |



|    |          |          |          |    |    |    |             |             |        |                 |
|----|----------|----------|----------|----|----|----|-------------|-------------|--------|-----------------|
| 12 | 56990910 | 56991231 | 56991070 | 11 | 15 | 2  | 5.114179696 | 0.00088103  |        | ENSG00000213368 |
| 12 | 57568239 | 57568463 | 57568351 | 11 | 12 | 1  | 6.232906505 | 0.00117736  | LRIG3  | ENSG00000139263 |
| 12 | 57587027 | 57587301 | 57587164 | 10 | 14 | 4  | 2.876726079 | 0.01219     | LRIG3  | ENSG00000139263 |
| 12 | 58037830 | 58038266 | 58038009 | 61 | 84 | 1  | 40.75361945 | 6.43E-24    |        | ENSG00000212599 |
| 12 | 58233828 | 58234081 | 58233918 | 8  | 9  | 0  | 9.589086931 | 0.00120187  |        | ENSG00000202471 |
| 12 | 59601231 | 59601520 | 59601371 | 22 | 24 | 0  | 23.97271733 | 5.01E-08    |        |                 |
| 12 | 59723953 | 59724191 | 59724059 | 14 | 14 | 1  | 7.191815198 | 0.00034761  |        |                 |
| 12 | 60334744 | 60334991 | 60334867 | 9  | 10 | 0  | 10.54799562 | 0.000613541 |        | ENSG00000214304 |
| 12 | 60373838 | 60374201 | 60374039 | 11 | 15 | 1  | 7.671269544 | 0.000187863 |        | ENSG00000214304 |
| 12 | 60544079 | 60544272 | 60544166 | 8  | 8  | 3  | 2.157544559 | 0.0836802   |        | ENSG00000214304 |
| 12 | 60872775 | 60873419 | 60873086 | 50 | 91 | 10 | 8.019963615 | 2.58E-17    | USP15  | ENSG00000135655 |
| 12 | 60895564 | 60895808 | 60895702 | 10 | 11 | 6  | 1.643843474 | 0.137712    | USP15  | ENSG00000135655 |
| 12 | 60939691 | 60940171 | 60939828 | 11 | 20 | 7  | 2.517135319 | 0.00849957  | USP15  | ENSG00000135655 |
| 12 | 60940454 | 60941022 | 60940789 | 12 | 25 | 1  | 12.46581301 | 3.51E-07    | USP15  | ENSG00000135655 |
| 12 | 61118238 | 61118454 | 61118379 | 11 | 13 | 7  | 1.678090213 | 0.11195     | MON2   | ENSG00000061987 |
| 12 | 61147172 | 61147571 | 61147411 | 11 | 17 | 1  | 8.630178238 | 5.44E-05    | MON2   | ENSG00000061987 |
| 12 | 61404969 | 61405242 | 61405105 | 10 | 13 | 2  | 4.474907234 | 0.00269459  |        | ENSG00000213352 |
| 12 | 61473948 | 61474288 | 61474118 | 9  | 13 | 7  | 1.678090213 | 0.11195     |        | ENSG00000213352 |
| 12 | 61479029 | 61479323 | 61479197 | 8  | 11 | 3  | 2.876726079 | 0.0213797   |        | ENSG00000213352 |
| 12 | 61482446 | 61482666 | 61482537 | 11 | 12 | 1  | 6.232906505 | 0.00117736  |        | ENSG00000213352 |
| 12 | 61492001 | 61492191 | 61492096 | 9  | 9  | 1  | 4.794543465 | 0.00708517  |        | ENSG00000200296 |
| 12 | 61615193 | 61615400 | 61615296 | 8  | 8  | 5  | 1.43836304  | 0.235762    | PPM1H  | ENSG00000111110 |
| 12 | 61916926 | 61917115 | 61917033 | 8  | 9  | 1  | 4.794543465 | 0.00708517  | AVPR1A | ENSG00000166148 |
| 12 | 61956838 | 61957073 | 61956972 | 8  | 9  | 2  | 3.19636231  | 0.0229249   | AVPR1A | ENSG00000166148 |
| 12 | 62486087 | 62486278 | 62486182 | 8  | 9  | 6  | 1.369869562 | 0.253675    | TMEM5  | ENSG00000118600 |
| 12 | 62581588 | 62581828 | 62581708 | 13 | 16 | 1  | 8.150723891 | 0.000101217 | SRGAP1 | ENSG00000196935 |
| 12 | 62760750 | 62760948 | 62760849 | 12 | 12 | 11 | 1.038817751 | 0.460341    |        | ENSG00000212298 |
| 12 | 62850074 | 62850428 | 62850231 | 32 | 37 | 1  | 18.21926517 | 1.57E-10    |        | ENSG00000212298 |
| 12 | 63132889 | 63133398 | 63133174 | 26 | 40 | 6  | 5.616465202 | 1.84E-07    | TBK1   | ENSG00000183735 |
| 12 | 63201898 | 63202653 | 63202462 | 31 | 58 | 9  | 5.657561289 | 5.54E-10    |        | ENSG00000223294 |
| 12 | 63280350 | 63280664 | 63280487 | 17 | 21 | 3  | 5.273997812 | 0.00011662  | RASSF3 | ENSG00000153179 |
| 12 | 63288522 | 63288766 | 63288630 | 10 | 10 | 0  | 10.54799562 | 0.000613541 | RASSF3 | ENSG00000153179 |
| 12 | 63314014 | 63314438 | 63314190 | 18 | 26 | 4  | 5.178106943 | 2.75E-05    |        | ENSG00000207546 |
| 12 | 63314565 | 63315467 | 63314901 | 46 | 90 | 7  | 10.90758638 | 2.70E-19    |        | ENSG00000207546 |

|    |          |          |          |    |    |    |             |             |         |                 |
|----|----------|----------|----------|----|----|----|-------------|-------------|---------|-----------------|
| 12 | 63387451 | 63387709 | 63387580 | 11 | 13 | 1  | 6.712360851 | 0.000640982 | GNS     | ENSG00000135677 |
| 12 | 63476277 | 63476521 | 63476399 | 12 | 14 | 5  | 2.397271733 | 0.0258078   | TBC1D30 | ENSG00000111490 |
| 12 | 63513203 | 63513417 | 63513280 | 9  | 9  | 1  | 4.794543465 | 0.00708517  | TBC1D30 | ENSG00000111490 |
| 12 | 63569858 | 63570322 | 63570161 | 11 | 18 | 6  | 2.602752167 | 0.00970422  |         | ENSG00000210581 |
| 12 | 63663882 | 63664216 | 63664049 | 26 | 31 | 6  | 4.383582597 | 2.10E-05    |         | ENSG00000210581 |
| 12 | 63867324 | 63867566 | 63867438 | 9  | 10 | 4  | 2.109599125 | 0.0694668   | LEMD3   | ENSG00000174106 |
| 12 | 63971767 | 63972053 | 63971877 | 8  | 10 | 2  | 3.515998541 | 0.0136204   | MSRB3   | ENSG00000174099 |
| 12 | 64150163 | 64150499 | 64150329 | 8  | 12 | 1  | 6.232906505 | 0.00117736  |         | ENSG00000213344 |
| 12 | 64236805 | 64237091 | 64236951 | 13 | 15 | 8  | 1.704726565 | 0.0916153   |         | ENSG00000213344 |
| 12 | 64282581 | 64282835 | 64282680 | 12 | 15 | 3  | 3.835634772 | 0.00291691  |         | ENSG00000213344 |
| 12 | 64287606 | 64287913 | 64287762 | 13 | 16 | 9  | 1.630144778 | 0.102169    |         | ENSG00000213344 |
| 12 | 64311516 | 64312254 | 64311855 | 12 | 30 | 5  | 4.954361581 | 1.11E-05    |         | ENSG00000213344 |
| 12 | 64319665 | 64320088 | 64319793 | 26 | 36 | 2  | 11.82654055 | 2.94E-09    |         | ENSG00000213344 |
| 12 | 64558644 | 64558860 | 64558710 | 10 | 12 | 5  | 2.077635502 | 0.0577144   |         | ENSG00000197301 |
| 12 | 64617923 | 64618142 | 64618076 | 9  | 9  | 5  | 1.598181155 | 0.170911    |         | ENSG00000197301 |
| 12 | 64638641 | 64638829 | 64638725 | 8  | 8  | 2  | 2.876726079 | 0.0381137   |         | ENSG00000197301 |
| 12 | 64663686 | 64664040 | 64663863 | 10 | 14 | 5  | 2.397271733 | 0.0258078   |         | ENSG00000213343 |
| 12 | 64695035 | 64695376 | 64695205 | 23 | 28 | 5  | 4.63472535  | 3.19E-05    |         | ENSG00000213343 |
| 12 | 64715491 | 64715674 | 64715565 | 8  | 9  | 1  | 4.794543465 | 0.00708517  |         | ENSG00000213343 |
| 12 | 64786176 | 64786451 | 64786336 | 8  | 8  | 3  | 2.157544559 | 0.0836802   |         | ENSG00000177747 |
| 12 | 64810648 | 64811033 | 64810968 | 9  | 16 | 8  | 1.811271976 | 0.0663685   | LLPH    | ENSG00000139233 |
| 12 | 64811113 | 64811346 | 64811243 | 8  | 11 | 6  | 1.643843474 | 0.137712    | LLPH    | ENSG00000139233 |
| 12 | 64818276 | 64818515 | 64818397 | 9  | 10 | 1  | 5.273997812 | 0.00391723  |         | ENSG00000214287 |
| 12 | 64849398 | 64850235 | 64849615 | 12 | 36 | 12 | 2.729201665 | 0.000399575 | TMBIM4  | ENSG00000155957 |
| 12 | 64885860 | 64886042 | 64885949 | 8  | 8  | 3  | 2.157544559 | 0.0836802   | IRAK3   | ENSG00000090376 |
| 12 | 64916544 | 64916749 | 64916668 | 9  | 9  | 1  | 4.794543465 | 0.00708517  | RBMS1P  | ENSG00000174082 |
| 12 | 64959216 | 64959438 | 64959369 | 8  | 10 | 13 | 0.753428259 | 0.762589    |         | ENSG00000214286 |
| 12 | 64982553 | 64982828 | 64982658 | 9  | 12 | 6  | 1.78083043  | 0.0985525   | HELB    | ENSG00000127311 |
| 12 | 65084078 | 65084288 | 65084183 | 8  | 8  | 4  | 1.726035648 | 0.150596    |         | ENSG00000210604 |
| 12 | 65089540 | 65089800 | 65089670 | 11 | 13 | 5  | 2.237453617 | 0.038866    |         | ENSG00000210604 |
| 12 | 65342377 | 65342568 | 65342463 | 8  | 10 | 2  | 3.515998541 | 0.0136204   | GRIP1   | ENSG00000155974 |
| 12 | 65348924 | 65349133 | 65349075 | 8  | 8  | 1  | 4.315089119 | 0.0127267   | GRIP1   | ENSG00000155974 |
| 12 | 65349627 | 65349869 | 65349746 | 10 | 10 | 2  | 3.515998541 | 0.0136204   | GRIP1   | ENSG00000155974 |
| 12 | 65504262 | 65504567 | 65504430 | 11 | 14 | 7  | 1.797953799 | 0.0806593   | GRIP1   | ENSG00000155974 |

|    |          |          |          |    |    |    |             |             |         |                 |
|----|----------|----------|----------|----|----|----|-------------|-------------|---------|-----------------|
| 12 | 65641349 | 65641565 | 65641443 | 8  | 9  | 4  | 1.917817386 | 0.103282    | GRIP1   | ENSG00000155974 |
| 12 | 65754254 | 65754593 | 65754423 | 15 | 20 | 10 | 1.830643869 | 0.0454769   | CAND1   | ENSG00000111530 |
| 12 | 65825753 | 65826053 | 65825903 | 13 | 16 | 2  | 5.433815927 | 0.000499302 | CAND1   | ENSG00000111530 |
| 12 | 65882168 | 65882422 | 65882295 | 12 | 15 | 0  | 15.34253909 | 2.13E-05    | CAND1   | ENSG00000111530 |
| 12 | 66035898 | 66036095 | 66035996 | 9  | 11 | 2  | 3.835634772 | 0.00800699  |         | ENSG00000210608 |
| 12 | 66177998 | 66178219 | 66178103 | 8  | 10 | 7  | 1.318499453 | 0.269217    |         | ENSG00000210608 |
| 12 | 66273164 | 66273470 | 66273325 | 21 | 24 | 3  | 5.993179332 | 2.17E-05    | DYRK2   | ENSG00000127334 |
| 12 | 66275026 | 66275217 | 66275121 | 9  | 10 | 6  | 1.506856518 | 0.188853    | DYRK2   | ENSG00000127334 |
| 12 | 66275557 | 66275879 | 66275704 | 8  | 12 | 6  | 1.78083043  | 0.0985525   | DYRK2   | ENSG00000127334 |
| 12 | 66324486 | 66324755 | 66324620 | 8  | 9  | 3  | 2.397271733 | 0.0539397   | DYRK2   | ENSG00000127334 |
| 12 | 66327821 | 66328059 | 66327940 | 8  | 10 | 6  | 1.506856518 | 0.188853    | DYRK2   | ENSG00000127334 |
| 12 | 66394832 | 66395052 | 66394907 | 10 | 12 | 3  | 3.116453252 | 0.0131971   | DYRK2   | ENSG00000127334 |
| 12 | 66605302 | 66605836 | 66605512 | 9  | 22 | 10 | 2.004990904 | 0.023438    | IFNG    | ENSG00000111537 |
| 12 | 66720432 | 66720886 | 66720732 | 14 | 20 | 6  | 2.876726079 | 0.00408924  | IFNG    | ENSG00000111537 |
| 12 | 66722078 | 66722792 | 66722339 | 55 | 89 | 5  | 14.3836304  | 9.03E-21    | IFNG    | ENSG00000111537 |
| 12 | 66812086 | 66812481 | 66812265 | 21 | 29 | 4  | 5.753452158 | 5.31E-06    | IFNG    | ENSG00000111537 |
| 12 | 66870475 | 66870657 | 66870566 | 8  | 8  | 1  | 4.315089119 | 0.0127267   | IFNG    | ENSG00000111537 |
| 12 | 66903161 | 66903461 | 66903311 | 9  | 13 | 14 | 0.894981447 | 0.618069    | IL26    | ENSG00000111536 |
| 12 | 67038482 | 67038733 | 67038607 | 10 | 11 | 2  | 3.835634772 | 0.00800699  | MDM1    | ENSG00000111554 |
| 12 | 67045364 | 67045584 | 67045474 | 9  | 11 | 11 | 0.958908693 | 0.540507    | MDM1    | ENSG00000111554 |
| 12 | 67091401 | 67091786 | 67091607 | 15 | 23 | 3  | 5.753452158 | 3.82E-05    | MDM1    | ENSG00000111554 |
| 12 | 67115898 | 67116103 | 67115946 | 8  | 8  | 1  | 4.315089119 | 0.0127267   | MDM1    | ENSG00000111554 |
| 12 | 67264953 | 67265166 | 67265059 | 13 | 13 | 8  | 1.491635745 | 0.166708    | RAP1B   | ENSG00000127314 |
| 12 | 67290151 | 67290723 | 67290493 | 11 | 23 | 6  | 3.287686948 | 0.00104919  | RAP1B   | ENSG00000127314 |
| 12 | 67302882 | 67303142 | 67303019 | 11 | 12 | 1  | 6.232906505 | 0.00117736  |         | ENSG00000206650 |
| 12 | 67316336 | 67316636 | 67316480 | 15 | 18 | 4  | 3.643853034 | 0.00178791  |         | ENSG00000198751 |
| 12 | 67366600 | 67367176 | 67366997 | 20 | 33 | 17 | 1.811271976 | 0.0175837   | NUP107  | ENSG00000111581 |
| 12 | 67426809 | 67427040 | 67426924 | 10 | 12 | 2  | 4.155271003 | 0.0046638   | SLC35E3 | ENSG00000175782 |
| 12 | 67461453 | 67461684 | 67461568 | 18 | 18 | 2  | 6.073088389 | 0.000157975 | MDM2    | ENSG00000135679 |
| 12 | 67467109 | 67467317 | 67467272 | 9  | 10 | 1  | 5.273997812 | 0.00391723  | MDM2    | ENSG00000135679 |
| 12 | 67467368 | 67467979 | 67467764 | 59 | 85 | 5  | 13.74435793 | 1.07E-19    | MDM2    | ENSG00000135679 |
| 12 | 67479926 | 67480670 | 67480213 | 19 | 47 | 4  | 9.205523453 | 1.63E-10    | MDM2    | ENSG00000135679 |
| 12 | 67487786 | 67488235 | 67488012 | 17 | 31 | 4  | 6.137015636 | 1.74E-06    | MDM2    | ENSG00000135679 |
| 12 | 67488268 | 67488634 | 67488365 | 9  | 15 | 8  | 1.704726565 | 0.0916153   | MDM2    | ENSG00000135679 |

|    |          |          |          |     |     |    |             |             |          |                 |
|----|----------|----------|----------|-----|-----|----|-------------|-------------|----------|-----------------|
| 12 | 67488637 | 67489406 | 67488996 | 733 | 914 | 8  | 97.48905046 | 2.70E-251   | MDM2     | ENSG00000135679 |
| 12 | 67494773 | 67494969 | 67494860 | 8   | 9   | 1  | 4.794543465 | 0.00708517  | MDM2     | ENSG00000135679 |
| 12 | 67750302 | 67750628 | 67750464 | 8   | 13  | 4  | 2.684944341 | 0.01921     |          | ENSG00000221422 |
| 12 | 67836967 | 67837550 | 67837387 | 9   | 21  | 14 | 1.406399416 | 0.148881    |          | ENSG00000221422 |
| 12 | 68037552 | 68038034 | 68037889 | 9   | 19  | 3  | 4.794543465 | 0.000349205 | YEATS4   | ENSG00000127337 |
| 12 | 68150047 | 68150473 | 68150302 | 11  | 18  | 14 | 1.214617678 | 0.282961    | FRS2     | ENSG00000166225 |
| 12 | 68150672 | 68151286 | 68151081 | 18  | 33  | 8  | 3.622543952 | 5.95E-05    |          | ENSG00000205128 |
| 12 | 68246687 | 68247039 | 68246863 | 30  | 36  | 0  | 35.47962164 | 1.57E-11    | CCT2     | ENSG00000166226 |
| 12 | 68266024 | 68266211 | 68266110 | 8   | 8   | 3  | 2.157544559 | 0.0836802   | CCT2     | ENSG00000166226 |
| 12 | 68445656 | 68445922 | 68445789 | 12  | 13  | 1  | 6.712360851 | 0.000640982 | RAB3IP   | ENSG00000127328 |
| 12 | 68589205 | 68589484 | 68589309 | 10  | 11  | 3  | 2.876726079 | 0.0213797   | C12orf28 | ENSG00000166268 |
| 12 | 68616349 | 68616619 | 68616486 | 10  | 13  | 8  | 1.491635745 | 0.166708    | C12orf28 | ENSG00000166268 |
| 12 | 68758196 | 68758560 | 68758386 | 10  | 16  | 4  | 3.260289556 | 0.00475414  | C12orf28 | ENSG00000166268 |
| 12 | 68770888 | 68771684 | 68771232 | 27  | 61  | 3  | 14.86308474 | 4.23E-15    | CNOT2    | ENSG00000111596 |
| 12 | 68922785 | 68923083 | 68922963 | 12  | 15  | 5  | 2.557089848 | 0.0169197   | CNOT2    | ENSG00000111596 |
| 12 | 69200893 | 69201248 | 69201101 | 20  | 24  | 2  | 7.990905775 | 4.56E-06    |          | ENSG00000218665 |
| 12 | 69240787 | 69240994 | 69240834 | 8   | 10  | 4  | 2.109599125 | 0.0694668   | PTPRB    | ENSG00000127329 |
| 12 | 69242856 | 69243040 | 69242968 | 8   | 9   | 3  | 2.397271733 | 0.0539397   | PTPRB    | ENSG00000127329 |
| 12 | 69257179 | 69257428 | 69257354 | 10  | 12  | 3  | 3.116453252 | 0.0131971   | PTPRB    | ENSG00000127329 |
| 12 | 69270095 | 69270320 | 69270207 | 12  | 13  | 2  | 4.474907234 | 0.00269459  | PTPRB    | ENSG00000127329 |
| 12 | 69472662 | 69472992 | 69472827 | 13  | 15  | 3  | 3.835634772 | 0.00291691  | PTPRR    | ENSG00000153233 |
| 12 | 69897065 | 69897302 | 69897170 | 10  | 11  | 8  | 1.278544924 | 0.28289     | TSPAN8   | ENSG00000127324 |
| 12 | 70058991 | 70059298 | 70059144 | 12  | 16  | 3  | 4.075361945 | 0.00173346  | LGR5     | ENSG00000139292 |
| 12 | 70121410 | 70121743 | 70121576 | 9   | 15  | 0  | 15.34253909 | 2.13E-05    | TSPAN8   | ENSG00000127324 |
| 12 | 70343662 | 70343945 | 70343803 | 8   | 12  | 3  | 3.116453252 | 0.0131971   | ZFC3H1   | ENSG00000133858 |
| 12 | 70400094 | 70400340 | 70400248 | 8   | 11  | 4  | 2.301380863 | 0.0459276   | TMEM19   | ENSG00000139291 |
| 12 | 70405742 | 70406113 | 70405957 | 27  | 32  | 3  | 7.910996718 | 2.12E-07    | RAB21    | ENSG00000080371 |
| 12 | 70435436 | 70435658 | 70435553 | 8   | 10  | 3  | 2.636998906 | 0.034203    | RAB21    | ENSG00000080371 |
| 12 | 70558778 | 70559005 | 70558895 | 8   | 9   | 2  | 3.19636231  | 0.0229249   | TBC1D15  | ENSG00000121749 |
| 12 | 70618910 | 70619162 | 70619002 | 8   | 11  | 8  | 1.278544924 | 0.28289     | TPH2     | ENSG00000139287 |
| 12 | 70680004 | 70680189 | 70680043 | 9   | 10  | 0  | 10.54799562 | 0.000613541 | TPH2     | ENSG00000139287 |
| 12 | 70697218 | 70697475 | 70697350 | 9   | 10  | 6  | 1.506856518 | 0.188853    | TPH2     | ENSG00000139287 |
| 12 | 70953945 | 70954217 | 70954057 | 9   | 11  | 3  | 2.876726079 | 0.0213797   | TRHDE    | ENSG00000072657 |
| 12 | 70958994 | 70959264 | 70959129 | 14  | 14  | 2  | 4.794543465 | 0.00154571  | TRHDE    | ENSG00000072657 |

|    |          |          |          |     |     |    |             |             |          |                 |
|----|----------|----------|----------|-----|-----|----|-------------|-------------|----------|-----------------|
| 12 | 70962842 | 70963077 | 70962968 | 8   | 10  | 4  | 2.109599125 | 0.0694668   | TRHDE    | ENSG00000072657 |
| 12 | 70982889 | 70983069 | 70983036 | 8   | 8   | 4  | 1.726035648 | 0.150596    | TRHDE    | ENSG00000072657 |
| 12 | 71117217 | 71117411 | 71117347 | 9   | 11  | 2  | 3.835634772 | 0.00800699  | TRHDE    | ENSG00000072657 |
| 12 | 71164781 | 71165010 | 71164880 | 9   | 10  | 2  | 3.515998541 | 0.0136204   | TRHDE    | ENSG00000072657 |
| 12 | 71250753 | 71250966 | 71250889 | 12  | 12  | 5  | 2.077635502 | 0.0577144   |          | ENSG00000216084 |
| 12 | 71264982 | 71265170 | 71265076 | 8   | 8   | 2  | 2.876726079 | 0.0381137   |          | ENSG00000216084 |
| 12 | 71415025 | 71415230 | 71415127 | 8   | 10  | 1  | 5.273997812 | 0.00391723  |          | ENSG00000216084 |
| 12 | 71655013 | 71655592 | 71655287 | 26  | 49  | 1  | 23.97271733 | 6.39E-14    |          | ENSG00000216084 |
| 12 | 71870722 | 71871094 | 71870895 | 22  | 28  | 2  | 9.2694507   | 4.06E-07    |          | ENSG00000216084 |
| 12 | 71901126 | 71901372 | 71901249 | 8   | 11  | 5  | 1.917817386 | 0.0843804   |          | ENSG00000216084 |
| 12 | 72063852 | 72064060 | 72063972 | 9   | 11  | 4  | 2.301380863 | 0.0459276   |          | ENSG00000210684 |
| 12 | 72441052 | 72441327 | 72441189 | 13  | 17  | 3  | 4.315089119 | 0.00102271  |          | ENSG00000201809 |
| 12 | 72723347 | 72723863 | 72723646 | 14  | 29  | 9  | 2.876726079 | 0.000832979 |          | ENSG00000215944 |
| 12 | 72735359 | 72735573 | 72735508 | 8   | 9   | 0  | 9.589086931 | 0.00120187  |          | ENSG00000215944 |
| 12 | 72791746 | 72792003 | 72791841 | 11  | 13  | 5  | 2.237453617 | 0.038866    |          | ENSG00000215944 |
| 12 | 73045610 | 73045822 | 73045716 | 8   | 11  | 3  | 2.876726079 | 0.0213797   |          | ENSG00000180632 |
| 12 | 73194467 | 73194650 | 73194549 | 8   | 9   | 0  | 9.589086931 | 0.00120187  |          | ENSG00000180632 |
| 12 | 73210757 | 73211036 | 73210922 | 11  | 12  | 2  | 4.155271003 | 0.0046638   |          | ENSG00000180632 |
| 12 | 73326996 | 73327187 | 73327091 | 8   | 8   | 2  | 2.876726079 | 0.0381137   |          | ENSG00000188646 |
| 12 | 73453413 | 73453643 | 73453547 | 8   | 8   | 1  | 4.315089119 | 0.0127267   |          | ENSG00000188646 |
| 12 | 73533283 | 73533521 | 73533402 | 8   | 8   | 2  | 2.876726079 | 0.0381137   |          | ENSG00000210718 |
| 12 | 73569875 | 73570205 | 73570040 | 10  | 14  | 4  | 2.876726079 | 0.01219     |          | ENSG00000210718 |
| 12 | 73570313 | 73570590 | 73570451 | 12  | 16  | 10 | 1.481949798 | 0.147733    |          | ENSG00000210718 |
| 12 | 73577537 | 73577754 | 73577645 | 9   | 9   | 0  | 9.589086931 | 0.00120187  |          | ENSG00000210718 |
| 12 | 73730346 | 73730586 | 73730438 | 11  | 11  | 1  | 5.753452158 | 0.00215302  |          | ENSG00000210718 |
| 12 | 73857961 | 73858522 | 73858169 | 142 | 174 | 0  | 167.8090213 | 7.90E-52    | KCNC2    | ENSG00000166006 |
| 12 | 73869299 | 73869543 | 73869421 | 8   | 10  | 2  | 3.515998541 | 0.0136204   | KCNC2    | ENSG00000166006 |
| 12 | 73916309 | 73916529 | 73916415 | 9   | 11  | 3  | 2.876726079 | 0.0213797   | KCNC2    | ENSG00000166006 |
| 12 | 74010286 | 74010617 | 74010451 | 9   | 12  | 6  | 1.78083043  | 0.0985525   | CAPS2    | ENSG00000180881 |
| 12 | 74071103 | 74071343 | 74071166 | 12  | 15  | 10 | 1.394776281 | 0.191426    | GLIPR1L2 | ENSG00000180481 |
| 12 | 74113596 | 74113936 | 74113772 | 11  | 14  | 0  | 14.3836304  | 4.17E-05    | GLIPR1L2 | ENSG00000180481 |
| 12 | 74191420 | 74191972 | 74191698 | 16  | 28  | 8  | 3.0898169   | 0.000588149 | KRR1     | ENSG00000111615 |
| 12 | 74657885 | 74658325 | 74658211 | 11  | 18  | 6  | 2.602752167 | 0.00970422  |          | ENSG00000198923 |
| 12 | 74695245 | 74695567 | 74695406 | 17  | 20  | 0  | 20.13708255 | 7.37E-07    | PHLDA1   | ENSG00000139289 |

|    |          |          |          |     |     |    |             |             |         |                 |
|----|----------|----------|----------|-----|-----|----|-------------|-------------|---------|-----------------|
| 12 | 74762962 | 74763185 | 74763059 | 8   | 8   | 2  | 2.876726079 | 0.0381137   | NAP1L1  | ENSG00000187109 |
| 12 | 75057050 | 75057302 | 75057177 | 8   | 10  | 0  | 10.54799562 | 0.000613541 |         | ENSG00000199754 |
| 12 | 75265888 | 75266114 | 75265982 | 8   | 10  | 1  | 5.273997812 | 0.00391723  | BBS10   | ENSG00000179941 |
| 12 | 75379012 | 75379230 | 75379121 | 9   | 11  | 2  | 3.835634772 | 0.00800699  | OSBPL8  | ENSG00000091039 |
| 12 | 75480958 | 75481384 | 75481205 | 8   | 16  | 3  | 4.075361945 | 0.00173346  | OSBPL8  | ENSG00000091039 |
| 12 | 75496569 | 75496815 | 75496692 | 11  | 12  | 3  | 3.116453252 | 0.0131971   | OSBPL8  | ENSG00000091039 |
| 12 | 75526053 | 75526412 | 75526237 | 24  | 29  | 1  | 14.3836304  | 2.72E-08    |         | ENSG00000213272 |
| 12 | 75526737 | 75526938 | 75526879 | 8   | 8   | 0  | 8.630178238 | 0.00235436  |         | ENSG00000213272 |
| 12 | 75529574 | 75529872 | 75529723 | 14  | 17  | 1  | 8.630178238 | 5.44E-05    |         | ENSG00000213272 |
| 12 | 75539530 | 75539806 | 75539668 | 9   | 10  | 2  | 3.515998541 | 0.0136204   |         | ENSG00000213272 |
| 12 | 75606090 | 75606305 | 75606163 | 8   | 9   | 1  | 4.794543465 | 0.00708517  | ZDHHC17 | ENSG00000186908 |
| 12 | 75682102 | 75682410 | 75682256 | 8   | 11  | 4  | 2.301380863 | 0.0459276   | ZDHHC17 | ENSG00000186908 |
| 12 | 75717682 | 75717997 | 75717857 | 18  | 20  | 4  | 4.027416511 | 0.000652226 | ZDHHC17 | ENSG00000186908 |
| 12 | 75768290 | 75768471 | 75768380 | 9   | 9   | 2  | 3.19636231  | 0.0229249   | CSRP2   | ENSG00000175183 |
| 12 | 75870964 | 75871192 | 75871047 | 8   | 10  | 1  | 5.273997812 | 0.00391723  | CSRP2   | ENSG00000175183 |
| 12 | 75983566 | 75984242 | 75984002 | 143 | 199 | 6  | 27.39739123 | 5.54E-50    | E2F7    | ENSG00000165891 |
| 12 | 76069100 | 76069282 | 76069191 | 8   | 8   | 3  | 2.157544559 | 0.0836802   |         | ENSG00000210743 |
| 12 | 76157389 | 76157586 | 76157487 | 9   | 10  | 1  | 5.273997812 | 0.00391723  |         | ENSG00000210743 |
| 12 | 76227592 | 76227771 | 76227693 | 8   | 8   | 0  | 8.630178238 | 0.00235436  |         | ENSG00000210743 |
| 12 | 76246240 | 76246640 | 76246396 | 15  | 25  | 0  | 24.93162602 | 2.56E-08    |         | ENSG00000210743 |
| 12 | 76338392 | 76338605 | 76338537 | 8   | 9   | 1  | 4.794543465 | 0.00708517  |         | ENSG00000210743 |
| 12 | 76533314 | 76533559 | 76533440 | 11  | 11  | 3  | 2.876726079 | 0.0213797   | NAV3    | ENSG00000067798 |
| 12 | 76548335 | 76548610 | 76548472 | 15  | 15  | 3  | 3.835634772 | 0.00291691  | NAV3    | ENSG00000067798 |
| 12 | 76604535 | 76605014 | 76604840 | 20  | 30  | 4  | 5.945233897 | 3.05E-06    | NAV3    | ENSG00000067798 |
| 12 | 76843528 | 76843776 | 76843652 | 10  | 12  | 5  | 2.077635502 | 0.0577144   | NAV3    | ENSG00000067798 |
| 12 | 77075064 | 77075814 | 77075344 | 108 | 157 | 1  | 75.75378675 | 5.70E-45    | NAV3    | ENSG00000067798 |
| 12 | 77322944 | 77323253 | 77323105 | 8   | 9   | 2  | 3.19636231  | 0.0229249   |         | ENSG00000213271 |
| 12 | 77663910 | 77664404 | 77664173 | 55  | 76  | 4  | 14.76719387 | 3.30E-18    |         | ENSG00000213271 |
| 12 | 77784978 | 77785158 | 77785068 | 8   | 9   | 1  | 4.794543465 | 0.00708517  | SYT1    | ENSG00000067715 |
| 12 | 78252120 | 78252346 | 78252234 | 9   | 11  | 4  | 2.301380863 | 0.0459276   |         | ENSG00000221776 |
| 12 | 78322982 | 78323203 | 78323060 | 8   | 10  | 3  | 2.636998906 | 0.034203    |         | ENSG00000221788 |
| 12 | 78325755 | 78326091 | 78325913 | 10  | 13  | 6  | 1.917817386 | 0.0693353   |         | ENSG00000221788 |
| 12 | 78338130 | 78338440 | 78338261 | 9   | 13  | 10 | 1.220429246 | 0.306001    |         | ENSG00000221788 |
| 12 | 78342143 | 78342379 | 78342261 | 8   | 9   | 8  | 1.065454103 | 0.442605    |         | ENSG00000221788 |

|    |          |          |          |     |     |    |             |             |          |                 |
|----|----------|----------|----------|-----|-----|----|-------------|-------------|----------|-----------------|
| 12 | 78401676 | 78401855 | 78401765 | 8   | 8   | 0  | 8.630178238 | 0.00235436  |          | ENSG00000210752 |
| 12 | 78464959 | 78465213 | 78465086 | 9   | 12  | 3  | 3.116453252 | 0.0131971   |          | ENSG00000210752 |
| 12 | 78465464 | 78466040 | 78465617 | 11  | 23  | 5  | 3.835634772 | 0.000408054 |          | ENSG00000210752 |
| 12 | 78853461 | 78853787 | 78853611 | 11  | 14  | 2  | 4.794543465 | 0.00154571  | PPP1R12A | ENSG00000058272 |
| 12 | 79104571 | 79104898 | 79104697 | 14  | 18  | 7  | 2.277408146 | 0.0188653   | C12orf64 | ENSG00000165899 |
| 12 | 79113101 | 79113349 | 79113225 | 9   | 10  | 3  | 2.636998906 | 0.034203    | C12orf64 | ENSG00000165899 |
| 12 | 79343538 | 79343720 | 79343629 | 9   | 9   | 1  | 4.794543465 | 0.00708517  |          | ENSG00000222880 |
| 12 | 79578236 | 79578465 | 79578350 | 10  | 11  | 2  | 3.835634772 | 0.00800699  | PTPRQ    | ENSG00000139304 |
| 12 | 79695555 | 79695815 | 79695720 | 9   | 11  | 1  | 5.753452158 | 0.00215302  |          | ENSG00000207763 |
| 12 | 79695859 | 79696453 | 79696174 | 155 | 198 | 10 | 17.34752999 | 2.27E-45    |          | ENSG00000207763 |
| 12 | 79786579 | 79786825 | 79786702 | 8   | 10  | 11 | 0.878999635 | 0.622439    |          | ENSG00000207763 |
| 12 | 79843224 | 79843491 | 79843400 | 10  | 13  | 6  | 1.917817386 | 0.0693353   |          | ENSG00000208022 |
| 12 | 79930560 | 79930739 | 79930657 | 8   | 8   | 1  | 4.315089119 | 0.0127267   | ACSS3    | ENSG00000111058 |
| 12 | 79995425 | 79995625 | 79995544 | 8   | 9   | 3  | 2.397271733 | 0.0539397   | ACSS3    | ENSG00000111058 |
| 12 | 80061015 | 80061295 | 80061155 | 8   | 10  | 6  | 1.506856518 | 0.188853    | ACSS3    | ENSG00000111058 |
| 12 | 80176048 | 80176249 | 80176145 | 8   | 8   | 7  | 1.07877228  | 0.435076    | ACSS3    | ENSG00000111058 |
| 12 | 80299967 | 80300267 | 80300095 | 9   | 13  | 7  | 1.678090213 | 0.11195     | ACSS3    | ENSG00000111058 |
| 12 | 81035013 | 81035251 | 81035134 | 8   | 9   | 0  | 9.589086931 | 0.00120187  |          | ENSG00000221121 |
| 12 | 81276209 | 81276607 | 81276428 | 15  | 23  | 4  | 4.602761727 | 0.000137072 | C12orf26 | ENSG00000127720 |
| 12 | 81276642 | 81276891 | 81276746 | 9   | 12  | 2  | 4.155271003 | 0.0046638   | C12orf26 | ENSG00000127720 |
| 12 | 81568688 | 81568887 | 81568787 | 8   | 9   | 1  | 4.794543465 | 0.00708517  | TMTC2    | ENSG00000179104 |
| 12 | 81604247 | 81604832 | 81604388 | 13  | 27  | 8  | 2.98327149  | 0.000913494 | TMTC2    | ENSG00000179104 |
| 12 | 81814942 | 81815172 | 81815057 | 9   | 9   | 1  | 4.794543465 | 0.00708517  |          | ENSG00000212029 |
| 12 | 82307281 | 82307548 | 82307409 | 9   | 11  | 8  | 1.278544924 | 0.28289     |          | ENSG00000213270 |
| 12 | 82453905 | 82454150 | 82454027 | 13  | 14  | 0  | 14.3836304  | 4.17E-05    |          | ENSG00000213270 |
| 12 | 82491663 | 82491869 | 82491787 | 8   | 8   | 0  | 8.630178238 | 0.00235436  |          | ENSG00000213270 |
| 12 | 83656317 | 83656682 | 83656431 | 13  | 17  | 7  | 2.157544559 | 0.0276499   |          | ENSG00000222637 |
| 12 | 83774180 | 83774359 | 83774288 | 9   | 9   | 4  | 1.917817386 | 0.103282    |          | ENSG00000222637 |
| 12 | 83994588 | 83994908 | 83994748 | 9   | 12  | 2  | 4.155271003 | 0.0046638   | LRRIQ1   | ENSG00000133640 |
| 12 | 84100691 | 84100922 | 84100840 | 9   | 9   | 3  | 2.397271733 | 0.0539397   | ALX1     | ENSG00000180318 |
| 12 | 84263943 | 84264122 | 84264032 | 8   | 8   | 3  | 2.157544559 | 0.0836802   | ALX1     | ENSG00000180318 |
| 12 | 84386565 | 84386954 | 84386744 | 12  | 18  | 6  | 2.602752167 | 0.00970422  |          | ENSG00000213268 |
| 12 | 84599130 | 84599464 | 84599366 | 10  | 14  | 1  | 7.191815198 | 0.00034761  |          | ENSG00000213268 |
| 12 | 84674420 | 84674667 | 84674567 | 8   | 11  | 1  | 5.753452158 | 0.00215302  | RASSF9   | ENSG00000198774 |

|    |          |          |          |     |     |    |             |             |                          |
|----|----------|----------|----------|-----|-----|----|-------------|-------------|--------------------------|
| 12 | 86149738 | 86150129 | 86149912 | 40  | 48  | 1  | 23.49326298 | 1.23E-13    |                          |
| 12 | 86301710 | 86301940 | 86301825 | 9   | 10  | 1  | 5.273997812 | 0.00391723  | ENSG00000205071          |
| 12 | 86427343 | 86427522 | 86427432 | 8   | 8   | 5  | 1.43836304  | 0.235762    | ENSG00000205071          |
| 12 | 86970668 | 86970909 | 86970766 | 8   | 8   | 7  | 1.07877228  | 0.435076    | ENSG00000210797          |
| 12 | 87059695 | 87060100 | 87059874 | 9   | 17  | 4  | 3.452071295 | 0.00292757  | CEP290 ENSG00000198707   |
| 12 | 87062689 | 87062972 | 87062830 | 16  | 20  | 0  | 20.13708255 | 7.37E-07    | TMTC3 ENSG00000139324    |
| 12 | 87472253 | 87472516 | 87472406 | 12  | 14  | 3  | 3.595907599 | 0.00486913  | KITLG ENSG00000049130    |
| 12 | 87476366 | 87476580 | 87476462 | 8   | 8   | 1  | 4.315089119 | 0.0127267   | KITLG ENSG00000049130    |
| 12 | 87477286 | 87478191 | 87477783 | 751 | 924 | 6  | 126.7129344 | 9.50E-258   | KITLG ENSG00000049130    |
| 12 | 87681578 | 87681834 | 87681690 | 9   | 10  | 2  | 3.515998541 | 0.0136204   | ENSG00000210830          |
| 12 | 87699867 | 87700261 | 87700046 | 53  | 68  | 3  | 16.54117496 | 5.19E-17    | ENSG00000210830          |
| 12 | 87843853 | 87844199 | 87844026 | 8   | 13  | 3  | 3.356180426 | 0.00805599  | ENSG00000210830          |
| 12 | 88035459 | 88035997 | 88035764 | 13  | 25  | 6  | 3.56166086  | 0.000408555 | DUSP6 ENSG00000139318    |
| 12 | 88143639 | 88144087 | 88143890 | 13  | 23  | 7  | 2.876726079 | 0.00239423  | DUSP6 ENSG00000139318    |
| 12 | 88145638 | 88145846 | 88145759 | 8   | 10  | 3  | 2.636998906 | 0.034203    | DUSP6 ENSG00000139318    |
| 12 | 88154990 | 88155306 | 88155135 | 9   | 12  | 3  | 3.116453252 | 0.0131971   | DUSP6 ENSG00000139318    |
| 12 | 88237048 | 88237379 | 88237210 | 22  | 27  | 5  | 4.474907234 | 5.37E-05    | DUSP6 ENSG00000139318    |
| 12 | 88442516 | 88442776 | 88442655 | 10  | 11  | 2  | 3.835634772 | 0.00800699  | WDR51B ENSG00000139323   |
| 12 | 88443963 | 88444210 | 88444036 | 13  | 16  | 5  | 2.716907964 | 0.0109645   | WDR51B ENSG00000139323   |
| 12 | 88484587 | 88484894 | 88484752 | 9   | 13  | 9  | 1.34247217  | 0.232231    | WDR51B ENSG00000139323   |
| 12 | 88627529 | 88627718 | 88627600 | 9   | 9   | 1  | 4.794543465 | 0.00708517  | ENSG00000210846          |
| 12 | 88680598 | 88681010 | 88680804 | 10  | 18  | 5  | 3.036544195 | 0.0044641   | ENSG00000210846          |
| 12 | 88686807 | 88687072 | 88686939 | 10  | 11  | 1  | 5.753452158 | 0.00215302  | ENSG00000210846          |
| 12 | 88687179 | 88687403 | 88687313 | 10  | 11  | 3  | 2.876726079 | 0.0213797   | ENSG00000210846          |
| 12 | 88693383 | 88693674 | 88693528 | 8   | 11  | 1  | 5.753452158 | 0.00215302  | ENSG00000210846          |
| 12 | 88837380 | 88837620 | 88837500 | 8   | 11  | 5  | 1.917817386 | 0.0843804   | ENSG00000210846          |
| 12 | 88869280 | 88869702 | 88869398 | 8   | 16  | 6  | 2.328778255 | 0.0221113   | ENSG00000210846          |
| 12 | 89152331 | 89153002 | 89152534 | 56  | 79  | 1  | 38.35634772 | 1.75E-22    |                          |
| 12 | 89311071 | 89311250 | 89311200 | 8   | 8   | 0  | 8.630178238 | 0.00235436  |                          |
| 12 | 89492572 | 89492916 | 89492744 | 16  | 21  | 1  | 10.54799562 | 4.43E-06    | C12orf37 ENSG00000196243 |
| 12 | 89666300 | 89666492 | 89666426 | 9   | 9   | 1  | 4.794543465 | 0.00708517  | C12orf37 ENSG00000196243 |
| 12 | 89719680 | 89719859 | 89719799 | 8   | 8   | 0  | 8.630178238 | 0.00235436  | C12orf37 ENSG00000196243 |
| 12 | 89726578 | 89726813 | 89726695 | 9   | 11  | 1  | 5.753452158 | 0.00215302  | C12orf37 ENSG00000196243 |
| 12 | 90300026 | 90300362 | 90300194 | 8   | 14  | 15 | 0.8989769   | 0.617119    | DCN ENSG00000011465      |



|    |          |          |          |     |     |   |             |             |         |                 |
|----|----------|----------|----------|-----|-----|---|-------------|-------------|---------|-----------------|
| 12 | 90729696 | 90729952 | 90729857 | 13  | 13  | 1 | 6.712360851 | 0.000640982 | BTG1    | ENSG00000133639 |
| 12 | 90811455 | 90811640 | 90811588 | 8   | 8   | 1 | 4.315089119 | 0.0127267   | BTG1    | ENSG00000133639 |
| 12 | 90820744 | 90821206 | 90820975 | 84  | 103 | 1 | 49.86325204 | 2.22E-29    | BTG1    | ENSG00000133639 |
| 12 | 90846223 | 90846406 | 90846307 | 8   | 8   | 0 | 8.630178238 | 0.00235436  | BTG1    | ENSG00000133639 |
| 12 | 90952706 | 90953303 | 90952963 | 164 | 211 | 7 | 25.41108037 | 3.76E-52    | BTG1    | ENSG00000133639 |
| 12 | 90954290 | 90954476 | 90954342 | 8   | 8   | 1 | 4.315089119 | 0.0127267   | BTG1    | ENSG00000133639 |
| 12 | 90998410 | 90998616 | 90998471 | 9   | 9   | 0 | 9.589086931 | 0.00120187  | BTG1    | ENSG00000133639 |
| 12 | 91062025 | 91062281 | 91062166 | 10  | 13  | 4 | 2.684944341 | 0.01921     | BTG1    | ENSG00000133639 |
| 12 | 91452253 | 91452550 | 91452404 | 16  | 16  | 1 | 8.150723891 | 0.000101217 | CLLU1OS | ENSG00000205057 |
| 12 | 91461367 | 91461632 | 91461516 | 12  | 15  | 4 | 3.068507818 | 0.0076507   | CLLU1OS | ENSG00000205057 |
| 12 | 91510163 | 91510585 | 91510355 | 32  | 43  | 3 | 10.54799562 | 2.89E-10    |         | ENSG00000214215 |
| 12 | 91511766 | 91511992 | 91511879 | 8   | 8   | 2 | 2.876726079 | 0.0381137   |         | ENSG00000214215 |
| 12 | 91567915 | 91568179 | 91568068 | 8   | 11  | 2 | 3.835634772 | 0.00800699  |         | ENSG00000214215 |
| 12 | 91702323 | 91702973 | 91702545 | 92  | 126 | 5 | 20.29690067 | 7.44E-31    | PLEKHG7 | ENSG00000187510 |
| 12 | 91703053 | 91703310 | 91703181 | 11  | 12  | 3 | 3.116453252 | 0.0131971   | PLEKHG7 | ENSG00000187510 |
| 12 | 91739230 | 91739432 | 91739304 | 9   | 9   | 1 | 4.794543465 | 0.00708517  | PLEKHG7 | ENSG00000187510 |
| 12 | 91891549 | 91891918 | 91891751 | 48  | 54  | 0 | 52.73997812 | 8.69E-17    |         | ENSG00000202534 |
| 12 | 91980341 | 91980528 | 91980447 | 8   | 9   | 0 | 9.589086931 | 0.00120187  |         | ENSG00000221617 |
| 12 | 92295487 | 92295682 | 92295565 | 8   | 9   | 1 | 4.794543465 | 0.00708517  | NUDT4   | ENSG00000173598 |
| 12 | 92358736 | 92359060 | 92358912 | 9   | 11  | 0 | 11.50690432 | 0.000313206 | UBE2N   | ENSG00000177889 |
| 12 | 92385453 | 92385830 | 92385632 | 10  | 15  | 3 | 3.835634772 | 0.00291691  | MRPL42  | ENSG00000198015 |
| 12 | 92487545 | 92487933 | 92487784 | 8   | 14  | 5 | 2.397271733 | 0.0258078   | SOCS2   | ENSG00000120833 |
| 12 | 92509198 | 92509398 | 92509298 | 8   | 8   | 5 | 1.43836304  | 0.235762    | SOCS2   | ENSG00000120833 |
| 12 | 92542934 | 92543415 | 92543212 | 43  | 61  | 4 | 11.89046779 | 3.48E-14    |         | ENSG00000220515 |
| 12 | 92595013 | 92595394 | 92595192 | 10  | 17  | 4 | 3.452071295 | 0.00292757  | CRADD   | ENSG00000169372 |
| 12 | 92595549 | 92595838 | 92595693 | 12  | 15  | 4 | 3.068507818 | 0.0076507   | CRADD   | ENSG00000169372 |
| 12 | 92615913 | 92616098 | 92616036 | 8   | 9   | 0 | 9.589086931 | 0.00120187  | CRADD   | ENSG00000169372 |
| 12 | 92622434 | 92622613 | 92622512 | 8   | 8   | 1 | 4.315089119 | 0.0127267   | CRADD   | ENSG00000169372 |
| 12 | 92660611 | 92660846 | 92660728 | 8   | 11  | 3 | 2.876726079 | 0.0213797   | CRADD   | ENSG00000169372 |
| 12 | 93010919 | 93011168 | 93011050 | 8   | 9   | 4 | 1.917817386 | 0.103282    | PLXNC1  | ENSG00000136040 |
| 12 | 93016480 | 93016694 | 93016587 | 8   | 8   | 0 | 8.630178238 | 0.00235436  | PLXNC1  | ENSG00000136040 |
| 12 | 93038221 | 93038426 | 93038371 | 8   | 8   | 3 | 2.157544559 | 0.0836802   | PLXNC1  | ENSG00000136040 |
| 12 | 93391224 | 93391513 | 93391368 | 13  | 17  | 1 | 8.630178238 | 5.44E-05    | CCDC41  | ENSG00000173588 |
| 12 | 93450727 | 93450979 | 93450875 | 10  | 11  | 3 | 2.876726079 | 0.0213797   |         | ENSG00000213249 |

|    |          |          |          |    |    |    |             |             |          |                 |
|----|----------|----------|----------|----|----|----|-------------|-------------|----------|-----------------|
| 12 | 93507448 | 93507668 | 93507545 | 8  | 8  | 3  | 2.157544559 | 0.0836802   |          | ENSG00000187738 |
| 12 | 93706496 | 93706739 | 93706617 | 10 | 12 | 2  | 4.155271003 | 0.0046638   |          | ENSG00000216306 |
| 12 | 93991404 | 93991773 | 93991600 | 13 | 18 | 6  | 2.602752167 | 0.00970422  | NR2C1    | ENSG00000120798 |
| 12 | 94236106 | 94236458 | 94236291 | 12 | 17 | 5  | 2.876726079 | 0.00703033  |          | ENSG00000199172 |
| 12 | 94391879 | 94392181 | 94392030 | 12 | 16 | 5  | 2.716907964 | 0.0109645   | METAP2   | ENSG00000111142 |
| 12 | 94639121 | 94639693 | 94639416 | 73 | 95 | 7  | 11.50690432 | 1.34E-20    |          | ENSG00000216285 |
| 12 | 94720773 | 94721100 | 94720925 | 8  | 10 | 5  | 1.757999271 | 0.121253    |          | ENSG00000199506 |
| 12 | 94953669 | 94954068 | 94953827 | 15 | 24 | 14 | 1.598181155 | 0.0700275   | LTA4H    | ENSG00000111144 |
| 12 | 95012157 | 95012456 | 95012306 | 9  | 10 | 3  | 2.636998906 | 0.034203    |          | ENSG00000223104 |
| 12 | 95137696 | 95137931 | 95137830 | 8  | 11 | 1  | 5.753452158 | 0.00215302  | ELK3     | ENSG00000111145 |
| 12 | 95407348 | 95407548 | 95407409 | 9  | 10 | 0  | 10.54799562 | 0.000613541 | C12orf55 | ENSG00000165990 |
| 12 | 95670186 | 95670452 | 95670332 | 11 | 12 | 1  | 6.232906505 | 0.00117736  | C12orf63 | ENSG00000188596 |
| 12 | 96418408 | 96418668 | 96418497 | 8  | 11 | 1  | 5.753452158 | 0.00215302  |          | ENSG00000221479 |
| 12 | 96485771 | 96485996 | 96485867 | 8  | 11 | 3  | 2.876726079 | 0.0213797   |          | ENSG00000207586 |
| 12 | 96486589 | 96486926 | 96486757 | 11 | 16 | 7  | 2.037680973 | 0.0400399   |          | ENSG00000207586 |
| 12 | 96842173 | 96842376 | 96842274 | 10 | 11 | 3  | 2.876726079 | 0.0213797   |          | ENSG00000206899 |
| 12 | 97263149 | 97263786 | 97263421 | 30 | 49 | 4  | 9.589086931 | 4.95E-11    |          | ENSG00000201296 |
| 12 | 97408903 | 97409082 | 97409003 | 8  | 8  | 5  | 1.43836304  | 0.235762    | TMPO     | ENSG00000120802 |
| 12 | 97421199 | 97421792 | 97421401 | 12 | 27 | 15 | 1.678090213 | 0.0444653   | TMPO     | ENSG00000120802 |
| 12 | 97422015 | 97422426 | 97422248 | 9  | 16 | 10 | 1.481949798 | 0.147733    | TMPO     | ENSG00000120802 |
| 12 | 97450774 | 97451025 | 97450899 | 8  | 9  | 1  | 4.794543465 | 0.00708517  | TMPO     | ENSG00000120802 |
| 12 | 97484804 | 97485009 | 97484887 | 8  | 8  | 5  | 1.43836304  | 0.235762    |          | ENSG00000178957 |
| 12 | 97561982 | 97562738 | 97562586 | 22 | 45 | 1  | 22.05489994 | 8.68E-13    |          | ENSG00000166130 |
| 12 | 97564175 | 97564410 | 97564325 | 11 | 11 | 7  | 1.43836304  | 0.204844    | APAF1    | ENSG00000120868 |
| 12 | 97616763 | 97617055 | 97616909 | 9  | 13 | 5  | 2.237453617 | 0.038866    | APAF1    | ENSG00000120868 |
| 12 | 98368093 | 98368284 | 98368188 | 9  | 9  | 1  | 4.794543465 | 0.00708517  | ANKS1B   | ENSG00000185046 |
| 12 | 98415115 | 98415322 | 98415189 | 10 | 10 | 0  | 10.54799562 | 0.000613541 | ANKS1B   | ENSG00000185046 |
| 12 | 98765913 | 98766284 | 98766080 | 8  | 13 | 13 | 0.958908693 | 0.543805    | ANKS1B   | ENSG00000185046 |
| 12 | 98870036 | 98870215 | 98870085 | 8  | 9  | 3  | 2.397271733 | 0.0539397   | ANKS1B   | ENSG00000185046 |
| 12 | 98877555 | 98877874 | 98877690 | 8  | 12 | 5  | 2.077635502 | 0.0577144   | ANKS1B   | ENSG00000185046 |
| 12 | 99059664 | 99060216 | 99059940 | 9  | 22 | 10 | 2.004990904 | 0.023438    | UHRF1BP1 | ENSG00000111647 |
| 12 | 99118345 | 99119013 | 99118522 | 9  | 23 | 8  | 2.557089848 | 0.00494559  | ACTR6    | ENSG00000075089 |
| 12 | 99132659 | 99132964 | 99132816 | 10 | 13 | 5  | 2.237453617 | 0.038866    | ACTR6    | ENSG00000075089 |
| 12 | 99147228 | 99147520 | 99147397 | 8  | 11 | 8  | 1.278544924 | 0.28289     |          | ENSG00000206790 |

|    |           |           |           |     |     |    |             |            |          |                 |
|----|-----------|-----------|-----------|-----|-----|----|-------------|------------|----------|-----------------|
| 12 | 99147826  | 99148184  | 99148005  | 12  | 17  | 9  | 1.726035648 | 0.0753664  |          | ENSG00000206790 |
| 12 | 99184754  | 99185320  | 99185034  | 8   | 20  | 17 | 1.118726809 | 0.361026   | DEPDC4   | ENSG00000166153 |
| 12 | 99698477  | 99698664  | 99698570  | 8   | 8   | 2  | 2.876726079 | 0.0381137  | ANO4     | ENSG00000151572 |
| 12 | 100134753 | 100134932 | 100134842 | 8   | 8   | 2  | 2.876726079 | 0.0381137  | SLC5A8   | ENSG00000139357 |
| 12 | 100198222 | 100198510 | 100198370 | 9   | 12  | 1  | 6.232906505 | 0.00117736 | UTP20    | ENSG00000120800 |
| 12 | 100488054 | 100488250 | 100488100 | 8   | 10  | 2  | 3.515998541 | 0.0136204  | MYBPC1   | ENSG00000196091 |
| 12 | 100577120 | 100577353 | 100577238 | 9   | 11  | 3  | 2.876726079 | 0.0213797  | CHPT1    | ENSG00000111666 |
| 12 | 100773095 | 100773791 | 100773475 | 39  | 72  | 0  | 70.00033459 | 4.82E-22   |          | ENSG00000211206 |
| 12 | 100795210 | 100795587 | 100795420 | 17  | 24  | 3  | 5.993179332 | 2.17E-05   |          | ENSG00000136048 |
| 12 | 100812686 | 100813066 | 100812888 | 12  | 19  | 7  | 2.397271733 | 0.0127287  |          | ENSG00000211214 |
| 12 | 100827234 | 100827498 | 100827366 | 10  | 12  | 4  | 2.493162602 | 0.0299057  |          | ENSG00000204971 |
| 12 | 100898091 | 100898270 | 100898198 | 8   | 8   | 3  | 2.157544559 | 0.0836802  |          | ENSG00000211222 |
| 12 | 101797175 | 101797359 | 101797260 | 9   | 9   | 4  | 1.917817386 | 0.103282   | PAH      | ENSG00000171759 |
| 12 | 101801225 | 101801420 | 101801287 | 8   | 8   | 7  | 1.07877228  | 0.435076   | PAH      | ENSG00000171759 |
| 12 | 102426312 | 102426599 | 102426455 | 8   | 9   | 3  | 2.397271733 | 0.0539397  | C12orf42 | ENSG00000179088 |
| 12 | 102441659 | 102442441 | 102441868 | 157 | 210 | 10 | 18.3936122  | 1.26E-48   | C12orf42 | ENSG00000179088 |
| 12 | 102466616 | 102466825 | 102466720 | 9   | 9   | 0  | 9.589086931 | 0.00120187 | STAB2    | ENSG00000136011 |
| 12 | 102498078 | 102498322 | 102498200 | 8   | 9   | 0  | 9.589086931 | 0.00120187 | STAB2    | ENSG00000136011 |
| 12 | 102782409 | 102782686 | 102782532 | 12  | 15  | 4  | 3.068507818 | 0.0076507  |          | ENSG00000187809 |
| 12 | 102874979 | 102875184 | 102875081 | 8   | 9   | 4  | 1.917817386 | 0.103282   | C12orf73 | ENSG00000204954 |
| 12 | 102896641 | 102896841 | 102896727 | 9   | 9   | 1  | 4.794543465 | 0.00708517 |          | ENSG00000215976 |
| 12 | 103056336 | 103056519 | 103056481 | 8   | 8   | 2  | 2.876726079 | 0.0381137  | NFYB     | ENSG00000120837 |
| 12 | 103137415 | 103137707 | 103137561 | 11  | 12  | 5  | 2.077635502 | 0.0577144  | RPL18AP3 | ENSG00000218754 |
| 12 | 103137827 | 103138451 | 103138171 | 15  | 29  | 14 | 1.917817386 | 0.0161307  | RPL18AP3 | ENSG00000218754 |
| 12 | 103150835 | 103151046 | 103150979 | 9   | 11  | 3  | 2.876726079 | 0.0213797  | RPL18AP3 | ENSG00000218754 |
| 12 | 103205159 | 103205416 | 103205311 | 9   | 11  | 1  | 5.753452158 | 0.00215302 | TXNRD1   | ENSG00000198431 |
| 12 | 103206612 | 103206831 | 103206715 | 9   | 10  | 10 | 0.958908693 | 0.538751   | TXNRD1   | ENSG00000198431 |
| 12 | 103213193 | 103213546 | 103213369 | 12  | 17  | 5  | 2.876726079 | 0.00703033 | TXNRD1   | ENSG00000198431 |
| 12 | 103375335 | 103375690 | 103375519 | 8   | 12  | 5  | 2.077635502 | 0.0577144  | CHST11   | ENSG00000171310 |
| 12 | 103396860 | 103397059 | 103396964 | 9   | 9   | 1  | 4.794543465 | 0.00708517 | CHST11   | ENSG00000171310 |
| 12 | 103527450 | 103527662 | 103527527 | 10  | 12  | 2  | 4.155271003 | 0.0046638  | CHST11   | ENSG00000171310 |
| 12 | 103544711 | 103545003 | 103544861 | 11  | 14  | 2  | 4.794543465 | 0.00154571 | CHST11   | ENSG00000171310 |
| 12 | 103686988 | 103687177 | 103687082 | 8   | 9   | 1  | 4.794543465 | 0.00708517 |          | ENSG00000211260 |
| 12 | 103711076 | 103711327 | 103711211 | 11  | 13  | 2  | 4.474907234 | 0.00269459 |          | ENSG00000211260 |

|    |           |           |           |    |    |    |             |             |          |                 |
|----|-----------|-----------|-----------|----|----|----|-------------|-------------|----------|-----------------|
| 12 | 103814011 | 103814193 | 103814014 | 8  | 10 | 3  | 2.636998906 | 0.034203    | SLC41A2  | ENSG00000136052 |
| 12 | 103903986 | 103904165 | 103904075 | 8  | 9  | 4  | 1.917817386 | 0.103282    | C12orf45 | ENSG00000151131 |
| 12 | 104025069 | 104025334 | 104025166 | 10 | 13 | 4  | 2.684944341 | 0.01921     | KIAA1033 | ENSG00000136051 |
| 12 | 104121885 | 104122159 | 104122047 | 8  | 9  | 1  | 4.794543465 | 0.00708517  | APPL2    | ENSG00000136044 |
| 12 | 104126984 | 104127426 | 104127163 | 10 | 17 | 3  | 4.315089119 | 0.00102271  | APPL2    | ENSG00000136044 |
| 12 | 104171756 | 104172085 | 104171931 | 15 | 19 | 0  | 19.17817386 | 1.44E-06    | APPL2    | ENSG00000136044 |
| 12 | 104191606 | 104191830 | 104191715 | 10 | 13 | 7  | 1.678090213 | 0.11195     | APPL2    | ENSG00000136044 |
| 12 | 104338581 | 104338792 | 104338723 | 10 | 10 | 1  | 5.273997812 | 0.00391723  | APPL2    | ENSG00000136044 |
| 12 | 104873279 | 104873659 | 104873491 | 19 | 25 | 2  | 8.310542006 | 2.50E-06    | NUAK1    | ENSG00000074590 |
| 12 | 105054232 | 105054430 | 105054322 | 9  | 9  | 6  | 1.369869562 | 0.253675    | NUAK1    | ENSG00000074590 |
| 12 | 105142065 | 105142324 | 105142158 | 8  | 11 | 3  | 2.876726079 | 0.0213797   | CKAP4    | ENSG00000136026 |
| 12 | 105263511 | 105264009 | 105263813 | 14 | 23 | 4  | 4.602761727 | 0.000137072 | POLR3B   | ENSG00000013503 |
| 12 | 105275486 | 105275746 | 105275584 | 11 | 14 | 6  | 2.054804342 | 0.0480281   | POLR3B   | ENSG00000013503 |
| 12 | 106010003 | 106010330 | 106010176 | 11 | 15 | 2  | 5.114179696 | 0.00088103  | CRY1     | ENSG00000008405 |
| 12 | 106023083 | 106023275 | 106023146 | 8  | 8  | 2  | 2.876726079 | 0.0381137   | CRY1     | ENSG00000008405 |
| 12 | 106077531 | 106077813 | 106077676 | 9  | 9  | 1  | 4.794543465 | 0.00708517  | CRY1     | ENSG00000008405 |
| 12 | 106298167 | 106298503 | 106298335 | 19 | 24 | 4  | 4.794543465 | 8.06E-05    |          | ENSG00000200897 |
| 12 | 106322857 | 106323244 | 106323036 | 8  | 16 | 3  | 4.075361945 | 0.00173346  |          | ENSG00000200897 |
| 12 | 106436912 | 106437301 | 106437080 | 17 | 23 | 3  | 5.753452158 | 3.82E-05    |          | ENSG00000211282 |
| 12 | 106603413 | 106603793 | 106603632 | 9  | 14 | 10 | 1.307602763 | 0.244096    | PWP1     | ENSG00000136045 |
| 12 | 106677370 | 106677573 | 106677471 | 9  | 9  | 1  | 4.794543465 | 0.00708517  | PRDM4    | ENSG00000110851 |
| 12 | 106691379 | 106692012 | 106691677 | 32 | 52 | 3  | 12.70554018 | 1.15E-12    | ASCL4    | ENSG00000187855 |
| 12 | 106706659 | 106706839 | 106706749 | 8  | 8  | 1  | 4.315089119 | 0.0127267   | ASCL4    | ENSG00000187855 |
| 12 | 106847431 | 106847639 | 106847509 | 9  | 9  | 5  | 1.598181155 | 0.170911    | ASCL4    | ENSG00000187855 |
| 12 | 106908264 | 106908644 | 106908381 | 8  | 13 | 4  | 2.684944341 | 0.01921     | WSCD2    | ENSG00000075035 |
| 12 | 106960678 | 106960884 | 106960816 | 9  | 9  | 3  | 2.397271733 | 0.0539397   | WSCD2    | ENSG00000075035 |
| 12 | 107074735 | 107074994 | 107074871 | 8  | 11 | 3  | 2.876726079 | 0.0213797   | WSCD2    | ENSG00000075035 |
| 12 | 107271507 | 107271919 | 107271686 | 16 | 24 | 0  | 23.97271733 | 5.01E-08    | CMKLR1   | ENSG00000174600 |
| 12 | 107401551 | 107401805 | 107401677 | 8  | 12 | 3  | 3.116453252 | 0.0131971   | FICD     | ENSG00000198855 |
| 12 | 107429915 | 107430134 | 107430024 | 9  | 10 | 7  | 1.318499453 | 0.269217    | FICD     | ENSG00000198855 |
| 12 | 107480717 | 107481166 | 107480895 | 17 | 26 | 7  | 3.236316839 | 0.000628017 | ISCU     | ENSG00000136003 |
| 12 | 107481353 | 107481724 | 107481532 | 12 | 20 | 0  | 20.13708255 | 7.37E-07    | ISCU     | ENSG00000136003 |
| 12 | 107582641 | 107583070 | 107582921 | 17 | 25 | 4  | 4.986325204 | 4.72E-05    | SELPLG   | ENSG00000110876 |
| 12 | 107609658 | 107609969 | 107609821 | 9  | 13 | 4  | 2.684944341 | 0.01921     | CORO1C   | ENSG00000110880 |

|    |           |           |           |     |     |    |             |             |          |                 |
|----|-----------|-----------|-----------|-----|-----|----|-------------|-------------|----------|-----------------|
| 12 | 107650192 | 107650455 | 107650323 | 8   | 10  | 1  | 5.273997812 | 0.00391723  | CORO1C   | ENSG00000110880 |
| 12 | 107675714 | 107676040 | 107675877 | 12  | 15  | 1  | 7.671269544 | 0.000187863 |          | ENSG00000200060 |
| 12 | 107829928 | 107830130 | 107830000 | 9   | 11  | 5  | 1.917817386 | 0.0843804   |          | ENSG00000201324 |
| 12 | 107974513 | 107974843 | 107974678 | 8   | 13  | 5  | 2.237453617 | 0.038866    | USP30    | ENSG00000135093 |
| 12 | 108038371 | 108038601 | 108038509 | 8   | 10  | 9  | 1.054799562 | 0.4492      | UNG      | ENSG00000076248 |
| 12 | 108122372 | 108122618 | 108122516 | 13  | 14  | 0  | 14.3836304  | 4.17E-05    | ACACB    | ENSG00000076555 |
| 12 | 108234105 | 108234422 | 108234248 | 14  | 17  | 11 | 1.43836304  | 0.15834     | FOXN4    | ENSG00000139445 |
| 12 | 108277486 | 108277665 | 108277629 | 8   | 8   | 2  | 2.876726079 | 0.0381137   | MYO1H    | ENSG00000174527 |
| 12 | 108309603 | 108309835 | 108309767 | 10  | 11  | 1  | 5.753452158 | 0.00215302  | MYO1H    | ENSG00000174527 |
| 12 | 108699766 | 108700232 | 108699930 | 29  | 38  | 4  | 7.479487806 | 3.22E-08    |          | ENSG00000211357 |
| 12 | 108743094 | 108743596 | 108743342 | 54  | 75  | 1  | 36.43853034 | 2.45E-21    | TRPV4    | ENSG00000111199 |
| 12 | 108787273 | 108787533 | 108787392 | 13  | 15  | 3  | 3.835634772 | 0.00291691  |          | ENSG00000211363 |
| 12 | 108797672 | 108797872 | 108797787 | 8   | 10  | 3  | 2.636998906 | 0.034203    | GLTP     | ENSG00000139433 |
| 12 | 108822125 | 108822432 | 108822278 | 9   | 12  | 0  | 12.46581301 | 0.000159888 | TCHP     | ENSG00000139437 |
| 12 | 108921221 | 108921405 | 108921313 | 8   | 9   | 4  | 1.917817386 | 0.103282    | ANKRD13A | ENSG00000076513 |
| 12 | 108961320 | 108961509 | 108961414 | 8   | 8   | 3  | 2.157544559 | 0.0836802   |          | ENSG00000174456 |
| 12 | 108970826 | 108971082 | 108970940 | 9   | 12  | 5  | 2.077635502 | 0.0577144   |          | ENSG00000174456 |
| 12 | 109263036 | 109263368 | 109263193 | 23  | 25  | 1  | 12.46581301 | 3.51E-07    |          | ENSG00000223337 |
| 12 | 109267545 | 109267741 | 109267644 | 8   | 10  | 4  | 2.109599125 | 0.0694668   |          | ENSG00000223337 |
| 12 | 109372423 | 109372650 | 109372579 | 9   | 10  | 5  | 1.757999271 | 0.121253    | ARPC3    | ENSG00000111229 |
| 12 | 109390260 | 109390623 | 109390407 | 11  | 17  | 4  | 3.452071295 | 0.00292757  | GPN3     | ENSG00000111231 |
| 12 | 109424157 | 109424611 | 109424384 | 9   | 18  | 9  | 1.821926517 | 0.0548428   | RAD9B    | ENSG00000151164 |
| 12 | 109565559 | 109565746 | 109565652 | 9   | 9   | 2  | 3.19636231  | 0.0229249   |          | ENSG00000221246 |
| 12 | 109748897 | 109749101 | 109748999 | 9   | 9   | 3  | 2.397271733 | 0.0539397   | CCDC63   | ENSG00000173093 |
| 12 | 109854314 | 109854587 | 109854450 | 8   | 9   | 2  | 3.19636231  | 0.0229249   |          | ENSG00000185847 |
| 12 | 110056885 | 110057338 | 110057030 | 28  | 35  | 6  | 4.931530421 | 2.65E-06    | CUX2     | ENSG00000111249 |
| 12 | 110237115 | 110237399 | 110237241 | 8   | 10  | 2  | 3.515998541 | 0.0136204   |          | ENSG00000221386 |
| 12 | 110680577 | 110680944 | 110680754 | 17  | 23  | 2  | 7.671269544 | 8.30E-06    | ALDH2    | ENSG00000111275 |
| 12 | 111071823 | 111072012 | 111071934 | 8   | 9   | 10 | 0.871735176 | 0.624623    |          | ENSG00000200135 |
| 12 | 111331610 | 111331917 | 111331763 | 10  | 13  | 4  | 2.684944341 | 0.01921     | RPL6     | ENSG00000089009 |
| 12 | 112020590 | 112020852 | 112020716 | 8   | 11  | 4  | 2.301380863 | 0.0459276   | RASAL1   | ENSG00000111344 |
| 12 | 112038475 | 112038963 | 112038708 | 162 | 200 | 0  | 192.7406473 | 2.02E-59    | RASAL1   | ENSG00000111344 |
| 12 | 112082169 | 112082531 | 112082348 | 17  | 24  | 3  | 5.993179332 | 2.17E-05    |          | ENSG00000199899 |
| 12 | 112107041 | 112107271 | 112107185 | 8   | 11  | 3  | 2.876726079 | 0.0213797   | DDX54    | ENSG00000123064 |

|    |           |           |           |    |    |   |             |             |          |                 |
|----|-----------|-----------|-----------|----|----|---|-------------|-------------|----------|-----------------|
| 12 | 112168090 | 112168336 | 112168207 | 9  | 11 | 2 | 3.835634772 | 0.00800699  |          | ENSG00000186815 |
| 12 | 112762477 | 112762873 | 112762654 | 18 | 26 | 0 | 25.89053471 | 1.31E-08    |          | ENSG00000211425 |
| 12 | 113191334 | 113191752 | 113191540 | 42 | 56 | 2 | 18.21926517 | 9.63E-15    | TBX5     | ENSG00000089225 |
| 12 | 113558024 | 113558228 | 113558137 | 8  | 9  | 4 | 1.917817386 | 0.103282    |          | ENSG00000199220 |
| 12 | 113668611 | 113668837 | 113668724 | 8  | 8  | 2 | 2.876726079 | 0.0381137   |          | ENSG00000209253 |
| 12 | 113703103 | 113703413 | 113703258 | 12 | 15 | 2 | 5.114179696 | 0.00088103  |          | ENSG00000209253 |
| 12 | 114180069 | 114180299 | 114180184 | 8  | 10 | 0 | 10.54799562 | 0.000613541 |          | ENSG00000222458 |
| 12 | 114397210 | 114397557 | 114397383 | 8  | 14 | 2 | 4.794543465 | 0.00154571  |          | ENSG00000222458 |
| 12 | 114464939 | 114465244 | 114465109 | 13 | 15 | 1 | 7.671269544 | 0.000187863 |          | ENSG00000222458 |
| 12 | 114795043 | 114795375 | 114795207 | 15 | 20 | 4 | 4.027416511 | 0.000652226 |          | ENSG00000200112 |
| 12 | 115048493 | 115048768 | 115048623 | 9  | 10 | 1 | 5.273997812 | 0.00391723  |          | ENSG00000207967 |
| 12 | 115281441 | 115281662 | 115281551 | 9  | 10 | 3 | 2.636998906 | 0.034203    | MED13L   | ENSG00000123066 |
| 12 | 115312219 | 115312857 | 115312398 | 15 | 35 | 8 | 3.835634772 | 2.29E-05    | MED13L   | ENSG00000123066 |
| 12 | 115348528 | 115348772 | 115348661 | 10 | 11 | 3 | 2.876726079 | 0.0213797   |          | ENSG00000196668 |
| 12 | 115349432 | 115349629 | 115349523 | 8  | 9  | 2 | 3.19636231  | 0.0229249   |          | ENSG00000196668 |
| 12 | 115620375 | 115620609 | 115620492 | 13 | 13 | 8 | 1.491635745 | 0.166708    | C12orf49 | ENSG00000111412 |
| 12 | 115660236 | 115660494 | 115660365 | 8  | 9  | 2 | 3.19636231  | 0.0229249   | RNFT2    | ENSG00000135119 |
| 12 | 115735652 | 115735837 | 115735776 | 8  | 10 | 1 | 5.273997812 | 0.00391723  |          | ENSG00000201382 |
| 12 | 116134842 | 116135051 | 116134912 | 8  | 9  | 2 | 3.19636231  | 0.0229249   | FBXO21   | ENSG00000135108 |
| 12 | 116779294 | 116779603 | 116779464 | 10 | 14 | 2 | 4.794543465 | 0.00154571  | KSR2     | ENSG00000171435 |
| 12 | 117193942 | 117194189 | 117194078 | 8  | 9  | 1 | 4.794543465 | 0.00708517  | TAOK3    | ENSG00000135090 |
| 12 | 117447458 | 117447766 | 117447626 | 8  | 9  | 6 | 1.369869562 | 0.253675    | SUDS3    | ENSG00000111707 |
| 12 | 117465509 | 117465842 | 117465675 | 12 | 16 | 0 | 16.30144778 | 1.09E-05    | SUDS3    | ENSG00000111707 |
| 12 | 117959057 | 117959236 | 117959229 | 8  | 9  | 8 | 1.065454103 | 0.442605    |          | ENSG00000209188 |
| 12 | 118101839 | 118102105 | 118102003 | 11 | 12 | 4 | 2.493162602 | 0.0299057   | HSPB8    | ENSG00000152137 |
| 12 | 118257066 | 118257259 | 118257162 | 8  | 8  | 1 | 4.315089119 | 0.0127267   | CCDC60   | ENSG00000183273 |
| 12 | 118292091 | 118292529 | 118292289 | 59 | 72 | 2 | 23.33344486 | 3.30E-19    | CCDC60   | ENSG00000183273 |
| 12 | 118310186 | 118310577 | 118310383 | 38 | 48 | 4 | 9.397305192 | 8.99E-11    | CCDC60   | ENSG00000183273 |
| 12 | 118401418 | 118401830 | 118401597 | 19 | 26 | 4 | 5.178106943 | 2.75E-05    |          | ENSG00000222647 |
| 12 | 118467307 | 118467524 | 118467441 | 8  | 10 | 3 | 2.636998906 | 0.034203    |          | ENSG00000222647 |
| 12 | 118589990 | 118590540 | 118590240 | 33 | 48 | 1 | 23.49326298 | 1.23E-13    | PRKAB1   | ENSG00000111725 |
| 12 | 118726587 | 118726768 | 118726677 | 8  | 8  | 1 | 4.315089119 | 0.0127267   | CIT      | ENSG00000122966 |
| 12 | 118863074 | 118863356 | 118863219 | 9  | 12 | 2 | 4.155271003 | 0.0046638   | CCDC64   | ENSG00000135127 |
| 12 | 118896536 | 118896742 | 118896639 | 12 | 12 | 6 | 1.78083043  | 0.0985525   | CCDC64   | ENSG00000135127 |

|    |           |           |           |     |     |    |             |             |         |                 |
|----|-----------|-----------|-----------|-----|-----|----|-------------|-------------|---------|-----------------|
| 12 | 119001672 | 119001913 | 119001737 | 8   | 11  | 0  | 11.50690432 | 0.000313206 | RAB35   | ENSG00000111737 |
| 12 | 119123381 | 119123665 | 119123549 | 9   | 12  | 7  | 1.558226626 | 0.152813    | RPLP0   | ENSG00000089157 |
| 12 | 119212934 | 119213335 | 119213108 | 8   | 15  | 7  | 1.917817386 | 0.0572317   | RNU4-1B | ENSG00000202538 |
| 12 | 119214160 | 119214469 | 119214327 | 9   | 13  | 9  | 1.34247217  | 0.232231    | RNU4-1B | ENSG00000202538 |
| 12 | 119215515 | 119215695 | 119215605 | 8   | 11  | 2  | 3.835634772 | 0.00800699  |         | ENSG00000200795 |
| 12 | 119224314 | 119224811 | 119224484 | 18  | 32  | 8  | 3.515998541 | 9.51E-05    | SIRT4   | ENSG00000089163 |
| 12 | 119316904 | 119317144 | 119316981 | 12  | 14  | 9  | 1.43836304  | 0.179537    | MSI1    | ENSG00000135097 |
| 12 | 119367661 | 119368795 | 119368525 | 151 | 225 | 6  | 30.95905209 | 2.90E-57    | TRIAP1  | ENSG00000170855 |
| 12 | 119396739 | 119397098 | 119396918 | 13  | 20  | 7  | 2.517135319 | 0.00849957  | DYNLL1  | ENSG00000088986 |
| 12 | 119417963 | 119418194 | 119418078 | 9   | 9   | 4  | 1.917817386 | 0.103282    | DYNLL1  | ENSG00000088986 |
| 12 | 119847917 | 119848543 | 119848226 | 55  | 78  | 3  | 18.93844669 | 9.21E-20    |         | ENSG00000174074 |
| 12 | 120125324 | 120125572 | 120125439 | 10  | 11  | 2  | 3.835634772 | 0.00800699  | P2RX4   | ENSG00000135124 |
| 12 | 120274564 | 120274805 | 120274684 | 8   | 11  | 4  | 2.301380863 | 0.0459276   | ANAPC5  | ENSG00000089053 |
| 12 | 120321939 | 120322123 | 120322036 | 8   | 8   | 5  | 1.43836304  | 0.235762    | RNF34   | ENSG00000170633 |
| 12 | 120708654 | 120708962 | 120708808 | 10  | 16  | 2  | 5.433815927 | 0.000499302 | RHOF    | ENSG00000139725 |
| 12 | 120810739 | 120811009 | 120810885 | 9   | 12  | 2  | 4.155271003 | 0.0046638   | PSMD9   | ENSG00000110801 |
| 12 | 120923722 | 120924030 | 120923888 | 20  | 22  | 2  | 7.351633313 | 1.51E-05    | BCL7A   | ENSG00000110987 |
| 12 | 121173722 | 121174040 | 121173881 | 9   | 12  | 0  | 12.46581301 | 0.000159888 | MLXIP   | ENSG00000175727 |
| 12 | 121450514 | 121450743 | 121450628 | 8   | 8   | 2  | 2.876726079 | 0.0381137   | CLIP1   | ENSG00000130779 |
| 12 | 121451025 | 121451256 | 121451140 | 10  | 11  | 1  | 5.753452158 | 0.00215302  | CLIP1   | ENSG00000130779 |
| 12 | 121776448 | 121776772 | 121776669 | 9   | 14  | 5  | 2.397271733 | 0.0258078   | GPR81   | ENSG00000196917 |
| 12 | 121886901 | 121887165 | 121887056 | 9   | 12  | 4  | 2.493162602 | 0.0299057   | HIP1R   | ENSG00000130787 |
| 12 | 121938623 | 121939012 | 121938833 | 9   | 15  | 2  | 5.114179696 | 0.00088103  | VPS37B  | ENSG00000139722 |
| 12 | 121997256 | 121997839 | 121997463 | 71  | 100 | 2  | 32.28325933 | 4.12E-27    | ABCB9   | ENSG00000150967 |
| 12 | 122145299 | 122145496 | 122145387 | 9   | 9   | 4  | 1.917817386 | 0.103282    | PITPNM2 | ENSG00000090975 |
| 12 | 122496473 | 122496831 | 122496652 | 8   | 14  | 10 | 1.307602763 | 0.244096    | RILPL2  | ENSG00000150977 |
| 12 | 122508450 | 122508654 | 122508552 | 12  | 12  | 8  | 1.385090334 | 0.219216    |         | ENSG00000184209 |
| 12 | 122618167 | 122618410 | 122618241 | 11  | 14  | 1  | 7.191815198 | 0.00034761  | TMED2   | ENSG00000086598 |
| 12 | 122621815 | 122622131 | 122621973 | 8   | 8   | 0  | 8.630178238 | 0.00235436  | TMED2   | ENSG00000086598 |
| 12 | 122628983 | 122629162 | 122629072 | 8   | 8   | 3  | 2.157544559 | 0.0836802   | TMED2   | ENSG00000086598 |
| 12 | 122721230 | 122721432 | 122721332 | 8   | 9   | 1  | 4.794543465 | 0.00708517  | TCTN2   | ENSG00000168778 |
| 12 | 123239070 | 123239360 | 123239215 | 9   | 13  | 4  | 2.684944341 | 0.01921     | FAM101A | ENSG00000178882 |
| 12 | 123323979 | 123324614 | 123324291 | 92  | 126 | 2  | 40.59380134 | 1.65E-34    | FAM101A | ENSG00000178882 |
| 12 | 123410084 | 123410427 | 123410312 | 10  | 15  | 11 | 1.278544924 | 0.254978    | FAM101A | ENSG00000178882 |

|    |           |           |           |     |     |    |             |             |          |                 |
|----|-----------|-----------|-----------|-----|-----|----|-------------|-------------|----------|-----------------|
| 12 | 123569482 | 123569776 | 123569604 | 11  | 15  | 4  | 3.068507818 | 0.0076507   | NCOR2    | ENSG00000196498 |
| 12 | 123622628 | 123622887 | 123622777 | 12  | 13  | 2  | 4.474907234 | 0.00269459  | NCOR2    | ENSG00000196498 |
| 12 | 123628464 | 123628770 | 123628619 | 10  | 14  | 1  | 7.191815198 | 0.00034761  | NCOR2    | ENSG00000196498 |
| 12 | 123659553 | 123659953 | 123659797 | 10  | 16  | 6  | 2.328778255 | 0.0221113   | NCOR2    | ENSG00000196498 |
| 12 | 123689890 | 123690069 | 123689979 | 8   | 8   | 1  | 4.315089119 | 0.0127267   | NCOR2    | ENSG00000196498 |
| 12 | 123933940 | 123934288 | 123934109 | 10  | 14  | 7  | 1.797953799 | 0.0806593   |          | ENSG00000209201 |
| 12 | 123957333 | 123957584 | 123957458 | 8   | 10  | 1  | 5.273997812 | 0.00391723  |          | ENSG00000209201 |
| 12 | 123964415 | 123964910 | 123964731 | 13  | 25  | 4  | 4.986325204 | 4.72E-05    | UBC      | ENSG00000150991 |
| 12 | 123965208 | 123965462 | 123965319 | 14  | 16  | 7  | 2.037680973 | 0.0400399   | UBC      | ENSG00000150991 |
| 12 | 123967616 | 123967950 | 123967790 | 11  | 15  | 7  | 1.917817386 | 0.0572317   | UBC      | ENSG00000150991 |
| 12 | 123972625 | 123972900 | 123972762 | 8   | 12  | 3  | 3.116453252 | 0.0131971   | UBC      | ENSG00000150991 |
| 12 | 123977760 | 123978010 | 123977881 | 9   | 11  | 7  | 1.43836304  | 0.204844    | UBC      | ENSG00000150991 |
| 12 | 123978261 | 123978530 | 123978336 | 11  | 15  | 6  | 2.191791298 | 0.0328001   | UBC      | ENSG00000150991 |
| 12 | 123988746 | 123990851 | 123989265 | 204 | 412 | 27 | 14.14390322 | 1.08E-86    | UBC      | ENSG00000150991 |
| 12 | 124278904 | 124279239 | 124279071 | 13  | 16  | 0  | 16.30144778 | 1.09E-05    |          | ENSG00000222916 |
| 12 | 124429329 | 124429546 | 124429417 | 8   | 9   | 4  | 1.917817386 | 0.103282    | TMEM132B | ENSG00000139364 |
| 12 | 125946606 | 125947034 | 125946746 | 21  | 30  | 2  | 9.908723162 | 1.20E-07    |          | ENSG00000189238 |
| 12 | 126216412 | 126216597 | 126216504 | 9   | 9   | 14 | 0.639272462 | 0.869513    |          | ENSG00000208959 |
| 12 | 126216755 | 126217088 | 126216921 | 38  | 40  | 36 | 1.062574498 | 0.393268    |          | ENSG00000208959 |
| 12 | 127510553 | 127510741 | 127510602 | 8   | 9   | 0  | 9.589086931 | 0.00120187  | TMEM132C | ENSG00000181234 |
| 12 | 127955840 | 127956076 | 127955958 | 13  | 14  | 4  | 2.876726079 | 0.01219     | GLT1D1   | ENSG00000151948 |
| 12 | 130188457 | 130188636 | 130188546 | 8   | 8   | 1  | 4.315089119 | 0.0127267   |          | ENSG00000204603 |
| 12 | 130333405 | 130333667 | 130333533 | 11  | 14  | 0  | 14.3836304  | 4.17E-05    |          | ENSG00000212251 |
| 12 | 130680366 | 130680664 | 130680505 | 8   | 11  | 0  | 11.50690432 | 0.000313206 |          | ENSG00000212154 |
| 12 | 130734405 | 130734620 | 130734512 | 9   | 10  | 1  | 5.273997812 | 0.00391723  |          | ENSG00000212154 |
| 12 | 130761362 | 130761688 | 130761503 | 8   | 13  | 6  | 1.917817386 | 0.0693353   | SFRS8    | ENSG00000061936 |
| 12 | 130771355 | 130771809 | 130771534 | 10  | 18  | 0  | 18.21926517 | 2.83E-06    | SFRS8    | ENSG00000061936 |
| 12 | 130787728 | 130788136 | 130787968 | 11  | 17  | 2  | 5.753452158 | 0.000281509 | SFRS8    | ENSG00000061936 |
| 12 | 131209371 | 131209751 | 131209550 | 18  | 25  | 0  | 24.93162602 | 2.56E-08    | NOC4L    | ENSG00000184967 |
| 12 | 131611125 | 131611467 | 131611274 | 17  | 22  | 6  | 3.150699991 | 0.00166398  |          | ENSG00000204586 |
| 12 | 131915526 | 131915745 | 131915664 | 10  | 11  | 2  | 3.835634772 | 0.00800699  | GOLGA3   | ENSG00000090615 |
| 12 | 131995463 | 131995770 | 131995623 | 10  | 13  | 3  | 3.356180426 | 0.00805599  | CHFR     | ENSG00000072609 |
| 12 | 132267958 | 132268179 | 132268059 | 12  | 12  | 3  | 3.116453252 | 0.0131971   | ZNF268   | ENSG00000151963 |
| 13 | 18821123  | 18821434  | 18821265  | 17  | 20  | 1  | 10.06854128 | 8.32E-06    |          | ENSG00000219123 |



|    |          |          |          |    |     |    |             |             |         |                 |
|----|----------|----------|----------|----|-----|----|-------------|-------------|---------|-----------------|
| 13 | 19266793 | 19267024 | 19266928 | 9  | 11  | 5  | 1.917817386 | 0.0843804   | PSPC1   | ENSG00000121390 |
| 13 | 19267068 | 19267265 | 19267172 | 10 | 12  | 1  | 6.232906505 | 0.00117736  | PSPC1   | ENSG00000121390 |
| 13 | 19318000 | 19318223 | 19318111 | 8  | 9   | 2  | 3.19636231  | 0.0229249   | ZMYM5   | ENSG00000132950 |
| 13 | 19432334 | 19432545 | 19432439 | 8  | 8   | 7  | 1.07877228  | 0.435076    | ZMYM2   | ENSG00000121741 |
| 13 | 19590356 | 19590569 | 19590468 | 9  | 10  | 0  | 10.54799562 | 0.000613541 | GJA3    | ENSG00000121743 |
| 13 | 19635603 | 19635863 | 19635733 | 13 | 16  | 4  | 3.260289556 | 0.00475414  | GJA3    | ENSG00000121743 |
| 13 | 19643542 | 19643922 | 19643743 | 11 | 19  | 4  | 3.835634772 | 0.00108365  |         | ENSG00000217490 |
| 13 | 19746630 | 19746872 | 19746751 | 10 | 10  | 2  | 3.515998541 | 0.0136204   | GJB6    | ENSG00000121742 |
| 13 | 19834643 | 19835427 | 19835035 | 52 | 81  | 5  | 13.10508547 | 1.26E-18    | GJB6    | ENSG00000121742 |
| 13 | 19964724 | 19964953 | 19964890 | 9  | 12  | 6  | 1.78083043  | 0.0985525   | CRYL1   | ENSG00000165475 |
| 13 | 19997352 | 19997642 | 19997496 | 11 | 15  | 5  | 2.557089848 | 0.0169197   | CRYL1   | ENSG00000165475 |
| 13 | 20355157 | 20355336 | 20355305 | 8  | 8   | 0  | 8.630178238 | 0.00235436  | XPO4    | ENSG00000132953 |
| 13 | 20411608 | 20411938 | 20411772 | 9  | 12  | 3  | 3.116453252 | 0.0131971   |         | ENSG00000219009 |
| 13 | 20548216 | 20548490 | 20548353 | 17 | 19  | 0  | 19.17817386 | 1.44E-06    | LATS2   | ENSG00000150457 |
| 13 | 20648665 | 20648939 | 20648796 | 9  | 11  | 4  | 2.301380863 | 0.0459276   | C13orf3 | ENSG00000165480 |
| 13 | 20705246 | 20705673 | 20705467 | 40 | 53  | 5  | 8.630178238 | 2.64E-11    |         | ENSG00000215572 |
| 13 | 20949153 | 20949541 | 20949385 | 12 | 18  | 4  | 3.643853034 | 0.00178791  |         | ENSG00000217248 |
| 13 | 21030192 | 21030483 | 21030337 | 8  | 11  | 3  | 2.876726079 | 0.0213797   |         | ENSG00000207518 |
| 13 | 21110440 | 21110759 | 21110599 | 12 | 14  | 1  | 7.191815198 | 0.00034761  |         | ENSG00000218366 |
| 13 | 21110850 | 21111327 | 21111023 | 20 | 32  | 1  | 15.82199344 | 3.96E-09    |         | ENSG00000218366 |
| 13 | 21160269 | 21160523 | 21160427 | 8  | 10  | 2  | 3.515998541 | 0.0136204   | FGF9    | ENSG00000102678 |
| 13 | 21381582 | 21381775 | 21381753 | 9  | 9   | 2  | 3.19636231  | 0.0229249   |         | ENSG00000209405 |
| 13 | 21615895 | 21616095 | 21615975 | 11 | 12  | 1  | 6.232906505 | 0.00117736  |         | ENSG00000219046 |
| 13 | 21980353 | 21980562 | 21980446 | 10 | 10  | 3  | 2.636998906 | 0.034203    |         | ENSG00000218515 |
| 13 | 22451240 | 22451484 | 22451362 | 8  | 9   | 10 | 0.871735176 | 0.624623    |         | ENSG00000223116 |
| 13 | 22871410 | 22871979 | 22871636 | 70 | 101 | 0  | 97.80868669 | 1.64E-30    | SACS    | ENSG00000151835 |
| 13 | 22879140 | 22879349 | 22879208 | 9  | 10  | 2  | 3.515998541 | 0.0136204   | SACS    | ENSG00000151835 |
| 13 | 23260949 | 23261151 | 23261020 | 8  | 10  | 2  | 3.515998541 | 0.0136204   |         | ENSG00000217247 |
| 13 | 23451530 | 23451841 | 23451685 | 8  | 11  | 1  | 5.753452158 | 0.00215302  |         | ENSG00000196593 |
| 13 | 23525565 | 23525930 | 23525751 | 9  | 15  | 4  | 3.068507818 | 0.0076507   |         | ENSG00000218467 |
| 13 | 23967374 | 23967648 | 23967495 | 12 | 12  | 5  | 2.077635502 | 0.0577144   | PARP4   | ENSG00000102699 |
| 13 | 24020330 | 24020559 | 24020444 | 9  | 10  | 0  | 10.54799562 | 0.000613541 |         | ENSG00000220590 |
| 13 | 24121554 | 24122161 | 24121838 | 51 | 73  | 3  | 17.73981082 | 2.20E-18    | ATP12A  | ENSG00000075673 |
| 13 | 24132266 | 24132497 | 24132381 | 8  | 8   | 0  | 8.630178238 | 0.00235436  | ATP12A  | ENSG00000075673 |

|    |          |          |          |    |    |    |             |             |        |                 |
|----|----------|----------|----------|----|----|----|-------------|-------------|--------|-----------------|
| 13 | 24143563 | 24143836 | 24143699 | 9  | 13 | 8  | 1.491635745 | 0.166708    | ATP12A | ENSG00000075673 |
| 13 | 24347160 | 24347430 | 24347295 | 13 | 17 | 1  | 8.630178238 | 5.44E-05    | RNF17  | ENSG00000132972 |
| 13 | 24347470 | 24347826 | 24347563 | 13 | 18 | 1  | 9.109632584 | 2.91E-05    | RNF17  | ENSG00000132972 |
| 13 | 24395088 | 24395543 | 24395376 | 9  | 17 | 8  | 1.917817386 | 0.0474153   | CENPJ  | ENSG00000151849 |
| 13 | 24686011 | 24686200 | 24686105 | 8  | 8  | 0  | 8.630178238 | 0.00235436  |        | ENSG00000220865 |
| 13 | 24694337 | 24694710 | 24694505 | 17 | 22 | 3  | 5.513724985 | 6.69E-05    |        | ENSG00000220865 |
| 13 | 24773378 | 24773600 | 24773489 | 9  | 9  | 4  | 1.917817386 | 0.103282    | NUPL1  | ENSG00000139496 |
| 13 | 24960135 | 24960713 | 24960548 | 12 | 22 | 3  | 5.513724985 | 6.69E-05    | ATP8A2 | ENSG00000132932 |
| 13 | 25131337 | 25131526 | 25131461 | 8  | 9  | 1  | 4.794543465 | 0.00708517  |        | ENSG00000199767 |
| 13 | 25658678 | 25658910 | 25658793 | 11 | 12 | 2  | 4.155271003 | 0.0046638   | RNF6   | ENSG00000127870 |
| 13 | 25694460 | 25694672 | 25694575 | 9  | 11 | 4  | 2.301380863 | 0.0459276   | RNF6   | ENSG00000127870 |
| 13 | 25968834 | 25969062 | 25968894 | 9  | 12 | 3  | 3.116453252 | 0.0131971   | WASF3  | ENSG00000132970 |
| 13 | 26279006 | 26279334 | 26279165 | 8  | 10 | 1  | 5.273997812 | 0.00391723  | GPR12  | ENSG00000132975 |
| 13 | 26386692 | 26387404 | 26387093 | 42 | 61 | 4  | 11.89046779 | 3.48E-14    |        | ENSG00000218019 |
| 13 | 26395578 | 26395836 | 26395707 | 11 | 14 | 1  | 7.191815198 | 0.00034761  |        | ENSG00000218019 |
| 13 | 26402394 | 26402686 | 26402519 | 12 | 15 | 4  | 3.068507818 | 0.0076507   |        | ENSG00000218019 |
| 13 | 26457465 | 26457820 | 26457663 | 11 | 15 | 5  | 2.557089848 | 0.0169197   |        | ENSG00000218572 |
| 13 | 26515224 | 26515551 | 26515364 | 8  | 12 | 2  | 4.155271003 | 0.0046638   |        | ENSG00000220716 |
| 13 | 26715004 | 26715197 | 26715108 | 11 | 11 | 2  | 3.835634772 | 0.00800699  | RPL21  | ENSG00000122026 |
| 13 | 26723475 | 26723679 | 26723568 | 8  | 9  | 8  | 1.065454103 | 0.442605    | RPL21  | ENSG00000122026 |
| 13 | 26807559 | 26807997 | 26807738 | 32 | 45 | 3  | 11.02744997 | 8.54E-11    |        | ENSG00000209438 |
| 13 | 26898562 | 26898799 | 26898631 | 9  | 10 | 5  | 1.757999271 | 0.121253    | GTF3A  | ENSG00000122034 |
| 13 | 26921474 | 26921659 | 26921540 | 8  | 9  | 6  | 1.369869562 | 0.253675    | MTIF3  | ENSG00000122033 |
| 13 | 26922569 | 26922764 | 26922685 | 8  | 9  | 0  | 9.589086931 | 0.00120187  | MTIF3  | ENSG00000122033 |
| 13 | 26924165 | 26924418 | 26924291 | 10 | 11 | 5  | 1.917817386 | 0.0843804   | MTIF3  | ENSG00000122033 |
| 13 | 26931565 | 26932127 | 26931806 | 43 | 72 | 46 | 1.489368821 | 0.0152695   | MTIF3  | ENSG00000122033 |
| 13 | 27242975 | 27243641 | 27243230 | 32 | 54 | 4  | 10.54799562 | 2.45E-12    | GSX1   | ENSG00000169840 |
| 13 | 27387374 | 27387599 | 27387485 | 10 | 12 | 0  | 12.46581301 | 0.000159888 | PDX1   | ENSG00000139515 |
| 13 | 27645902 | 27646236 | 27646069 | 11 | 14 | 3  | 3.595907599 | 0.00486913  | PAN3   | ENSG00000152520 |
| 13 | 28131553 | 28131771 | 28131647 | 8  | 9  | 6  | 1.369869562 | 0.253675    | POMP   | ENSG00000132963 |
| 13 | 28225714 | 28225905 | 28225818 | 8  | 8  | 2  | 2.876726079 | 0.0381137   |        | ENSG00000220482 |
| 13 | 28944603 | 28944782 | 28944692 | 8  | 8  | 4  | 1.726035648 | 0.150596    |        | ENSG00000179141 |
| 13 | 29313779 | 29313993 | 29313910 | 8  | 9  | 6  | 1.369869562 | 0.253675    | UBL3   | ENSG00000122042 |
| 13 | 29390867 | 29391222 | 29391044 | 13 | 18 | 10 | 1.656296833 | 0.0841786   |        | ENSG00000122043 |

|    |          |          |          |    |     |    |             |             |          |                 |
|----|----------|----------|----------|----|-----|----|-------------|-------------|----------|-----------------|
| 13 | 29396194 | 29396615 | 29396367 | 14 | 22  | 13 | 1.575349996 | 0.0840573   |          | ENSG00000122043 |
| 13 | 29587194 | 29587510 | 29587344 | 15 | 17  | 2  | 5.753452158 | 0.000281509 |          | ENSG00000209486 |
| 13 | 29614824 | 29615163 | 29614993 | 8  | 13  | 11 | 1.118726809 | 0.38479     |          | ENSG00000209486 |
| 13 | 29814344 | 29814834 | 29814523 | 14 | 25  | 10 | 2.266511456 | 0.00802978  | KATNAL1  | ENSG00000102781 |
| 13 | 29867618 | 29867958 | 29867785 | 14 | 19  | 11 | 1.598181155 | 0.0927758   |          | ENSG00000169697 |
| 13 | 29880516 | 29880708 | 29880612 | 8  | 9   | 3  | 2.397271733 | 0.0539397   |          | ENSG00000169697 |
| 13 | 29903378 | 29903778 | 29903578 | 14 | 24  | 4  | 4.794543465 | 8.06E-05    |          | ENSG00000169697 |
| 13 | 29958498 | 29958868 | 29958666 | 12 | 18  | 9  | 1.821926517 | 0.0548428   | HMGB1    | ENSG00000189403 |
| 13 | 30089715 | 30090221 | 30090042 | 23 | 34  | 10 | 3.051073114 | 0.000209762 | USPL1    | ENSG00000132952 |
| 13 | 30090692 | 30091262 | 30091097 | 16 | 30  | 3  | 7.431542371 | 6.87E-07    | USPL1    | ENSG00000132952 |
| 13 | 30215690 | 30215944 | 30215804 | 8  | 12  | 5  | 2.077635502 | 0.0577144   | ALOX5AP  | ENSG00000132965 |
| 13 | 30264781 | 30264969 | 30264875 | 8  | 8   | 2  | 2.876726079 | 0.0381137   | ALOX5AP  | ENSG00000132965 |
| 13 | 30337403 | 30337762 | 30337512 | 10 | 14  | 10 | 1.307602763 | 0.244096    | C13orf33 | ENSG00000102802 |
| 13 | 30634308 | 30634487 | 30634397 | 8  | 10  | 7  | 1.318499453 | 0.269217    | HSPH1    | ENSG00000120694 |
| 13 | 31214277 | 31214495 | 31214381 | 8  | 10  | 4  | 2.109599125 | 0.0694668   | RXFP2    | ENSG00000133105 |
| 13 | 31637784 | 31638227 | 31638048 | 20 | 31  | 0  | 30.68507818 | 4.52E-10    | FRY      | ENSG00000073910 |
| 13 | 31661319 | 31661506 | 31661415 | 8  | 9   | 0  | 9.589086931 | 0.00120187  | FRY      | ENSG00000073910 |
| 13 | 31718674 | 31718853 | 31718724 | 8  | 8   | 6  | 1.232882605 | 0.333038    | FRY      | ENSG00000073910 |
| 13 | 31905093 | 31905309 | 31905259 | 8  | 9   | 2  | 3.19636231  | 0.0229249   | N4BP2L1  | ENSG00000139597 |
| 13 | 31976764 | 31977060 | 31976912 | 10 | 11  | 4  | 2.301380863 | 0.0459276   | N4BP2L2  | ENSG00000139617 |
| 13 | 32296284 | 32296468 | 32296376 | 9  | 9   | 1  | 4.794543465 | 0.00708517  |          | ENSG00000207325 |
| 13 | 32457079 | 32457361 | 32457220 | 15 | 19  | 9  | 1.917817386 | 0.0394029   |          | ENSG00000218413 |
| 13 | 32592256 | 32592614 | 32592435 | 23 | 28  | 6  | 3.972621728 | 9.48E-05    | STARD13  | ENSG00000133121 |
| 13 | 33014434 | 33014629 | 33014531 | 8  | 10  | 2  | 3.515998541 | 0.0136204   | STARD13  | ENSG00000133121 |
| 13 | 33014819 | 33015186 | 33015011 | 10 | 16  | 5  | 2.716907964 | 0.0109645   | STARD13  | ENSG00000133121 |
| 13 | 33039088 | 33039326 | 33039220 | 11 | 12  | 4  | 2.493162602 | 0.0299057   | RFC3     | ENSG00000133119 |
| 13 | 33169263 | 33169542 | 33169376 | 14 | 17  | 6  | 2.465765211 | 0.014729    | RFC3     | ENSG00000133119 |
| 13 | 33233940 | 33234173 | 33234063 | 10 | 10  | 4  | 2.109599125 | 0.0694668   | RFC3     | ENSG00000133119 |
| 13 | 33290065 | 33290418 | 33290241 | 8  | 13  | 5  | 2.237453617 | 0.038866    | RFC3     | ENSG00000133119 |
| 13 | 33412988 | 33413591 | 33413187 | 80 | 111 | 2  | 35.79925787 | 3.10E-30    |          | ENSG00000222132 |
| 13 | 33489447 | 33489654 | 33489550 | 8  | 8   | 0  | 8.630178238 | 0.00235436  |          | ENSG00000222132 |
| 13 | 33520836 | 33521245 | 33521010 | 11 | 18  | 0  | 18.21926517 | 2.83E-06    |          | ENSG00000217244 |
| 13 | 33548913 | 33549099 | 33549038 | 8  | 8   | 6  | 1.232882605 | 0.333038    |          | ENSG00000217244 |
| 13 | 33628002 | 33628345 | 33628173 | 14 | 18  | 0  | 18.21926517 | 2.83E-06    |          | ENSG00000199196 |

|    |          |          |          |    |    |    |             |             |        |                 |
|----|----------|----------|----------|----|----|----|-------------|-------------|--------|-----------------|
| 13 | 33820054 | 33820250 | 33820176 | 8  | 8  | 0  | 8.630178238 | 0.00235436  |        | ENSG00000220002 |
| 13 | 33893101 | 33893424 | 33893280 | 8  | 12 | 1  | 6.232906505 | 0.00117736  |        | ENSG00000220002 |
| 13 | 33996941 | 33997210 | 33997075 | 10 | 11 | 1  | 5.753452158 | 0.00215302  |        | ENSG00000220002 |
| 13 | 34221243 | 34221422 | 34221334 | 8  | 8  | 3  | 2.157544559 | 0.0836802   |        | ENSG00000220002 |
| 13 | 34832321 | 34832588 | 34832454 | 11 | 11 | 1  | 5.753452158 | 0.00215302  |        | ENSG00000218654 |
| 13 | 35071552 | 35071836 | 35071683 | 16 | 19 | 3  | 4.794543465 | 0.000349205 | NBEA   | ENSG00000172915 |
| 13 | 35420535 | 35420783 | 35420630 | 9  | 10 | 5  | 1.757999271 | 0.121253    | DCLK1  | ENSG00000133083 |
| 13 | 35639856 | 35640035 | 35639962 | 8  | 8  | 1  | 4.315089119 | 0.0127267   | DCLK1  | ENSG00000133083 |
| 13 | 36472565 | 36472884 | 36472734 | 12 | 15 | 6  | 2.191791298 | 0.0328001   | EXOSC8 | ENSG00000120699 |
| 13 | 36510896 | 36511075 | 36510985 | 8  | 8  | 1  | 4.315089119 | 0.0127267   |        | ENSG00000221100 |
| 13 | 36680947 | 36681130 | 36681039 | 8  | 8  | 3  | 2.157544559 | 0.0836802   |        | ENSG00000218218 |
| 13 | 36702185 | 36702430 | 36702313 | 9  | 10 | 3  | 2.636998906 | 0.034203    |        | ENSG00000218218 |
| 13 | 37012875 | 37013249 | 37013054 | 26 | 33 | 2  | 10.86763185 | 1.89E-08    | POSTN  | ENSG00000133110 |
| 13 | 37387074 | 37387538 | 37387278 | 27 | 41 | 5  | 6.712360851 | 2.66E-08    | TRPC4  | ENSG00000133107 |
| 13 | 37390170 | 37390349 | 37390259 | 8  | 8  | 1  | 4.315089119 | 0.0127267   | TRPC4  | ENSG00000133107 |
| 13 | 37428661 | 37428981 | 37428821 | 30 | 33 | 1  | 16.30144778 | 2.08E-09    |        | ENSG00000217350 |
| 13 | 37662248 | 37662484 | 37662389 | 13 | 13 | 2  | 4.474907234 | 0.00269459  | UFM1   | ENSG00000120686 |
| 13 | 37818866 | 37819238 | 37819050 | 32 | 40 | 0  | 39.31525642 | 1.07E-12    | UFM1   | ENSG00000120686 |
| 13 | 37821836 | 37822283 | 37822015 | 11 | 21 | 11 | 1.757999271 | 0.0516118   | UFM1   | ENSG00000120686 |
| 13 | 37822439 | 37822783 | 37822726 | 9  | 13 | 4  | 2.684944341 | 0.01921     | UFM1   | ENSG00000120686 |
| 13 | 37974753 | 37974949 | 37974771 | 8  | 8  | 3  | 2.157544559 | 0.0836802   |        | ENSG00000216558 |
| 13 | 38108996 | 38109202 | 38109063 | 9  | 9  | 9  | 0.958908693 | 0.536911    |        | ENSG00000216558 |
| 13 | 38158140 | 38158645 | 38158319 | 19 | 33 | 14 | 2.173526371 | 0.00425345  | FREM2  | ENSG00000150893 |
| 13 | 38393141 | 38393594 | 38393359 | 21 | 34 | 3  | 8.390451064 | 6.50E-08    |        | ENSG00000217780 |
| 13 | 38519882 | 38520105 | 38519985 | 8  | 9  | 0  | 9.589086931 | 0.00120187  | NHLRC3 | ENSG00000188811 |
| 13 | 38565040 | 38565219 | 38565143 | 8  | 9  | 1  | 4.794543465 | 0.00708517  | NHLRC3 | ENSG00000188811 |
| 13 | 38617017 | 38617403 | 38617224 | 8  | 15 | 4  | 3.068507818 | 0.0076507   |        | ENSG00000214823 |
| 13 | 38717878 | 38718157 | 38718014 | 13 | 14 | 1  | 7.191815198 | 0.00034761  |        | ENSG00000214823 |
| 13 | 39184863 | 39185108 | 39184985 | 8  | 9  | 0  | 9.589086931 | 0.00120187  | COG6   | ENSG00000133103 |
| 13 | 39588220 | 39588493 | 39588367 | 8  | 11 | 4  | 2.301380863 | 0.0459276   |        | ENSG00000207458 |
| 13 | 39705841 | 39706053 | 39705947 | 10 | 10 | 0  | 10.54799562 | 0.000613541 |        | ENSG00000207458 |
| 13 | 39712446 | 39712768 | 39712605 | 13 | 15 | 0  | 15.34253909 | 2.13E-05    |        | ENSG00000207458 |
| 13 | 39805373 | 39805745 | 39805566 | 35 | 42 | 0  | 41.2330738  | 2.78E-13    |        | ENSG00000207458 |
| 13 | 39857439 | 39857998 | 39857819 | 27 | 41 | 2  | 13.4247217  | 1.29E-10    |        | ENSG00000215483 |

|    |          |          |          |    |    |    |             |             |          |                 |
|----|----------|----------|----------|----|----|----|-------------|-------------|----------|-----------------|
| 13 | 40132150 | 40132503 | 40132326 | 9  | 15 | 1  | 7.671269544 | 0.000187863 | FOXO1    | ENSG00000150907 |
| 13 | 40243111 | 40243549 | 40243321 | 13 | 24 | 9  | 2.397271733 | 0.00639731  | MRPS31   | ENSG00000102738 |
| 13 | 40466163 | 40466364 | 40466263 | 9  | 10 | 5  | 1.757999271 | 0.121253    |          | ENSG00000220844 |
| 13 | 40491337 | 40491586 | 40491461 | 11 | 12 | 5  | 2.077635502 | 0.0577144   | ELF1     | ENSG00000120690 |
| 13 | 40532691 | 40532964 | 40532836 | 12 | 13 | 5  | 2.237453617 | 0.038866    | WBP4     | ENSG00000120688 |
| 13 | 40533492 | 40533772 | 40533670 | 9  | 12 | 6  | 1.78083043  | 0.0985525   | WBP4     | ENSG00000120688 |
| 13 | 40604728 | 40605169 | 40604991 | 12 | 21 | 5  | 3.515998541 | 0.00108602  | KBTBD6   | ENSG00000165572 |
| 13 | 40617658 | 40618119 | 40617835 | 55 | 72 | 3  | 17.50008365 | 4.15E-18    | KBTBD6   | ENSG00000165572 |
| 13 | 40825381 | 40825730 | 40825610 | 8  | 12 | 3  | 3.116453252 | 0.0131971   |          | ENSG00000209565 |
| 13 | 40874649 | 40875109 | 40874838 | 58 | 74 | 4  | 14.3836304  | 1.15E-17    |          | ENSG00000218901 |
| 13 | 40931044 | 40931287 | 40931192 | 9  | 11 | 3  | 2.876726079 | 0.0213797   | C13orf15 | ENSG00000102760 |
| 13 | 41140261 | 41140550 | 41140406 | 8  | 12 | 3  | 3.116453252 | 0.0131971   |          | ENSG00000221194 |
| 13 | 41275162 | 41275516 | 41275339 | 23 | 29 | 1  | 14.3836304  | 2.72E-08    |          | ENSG00000223066 |
| 13 | 41377774 | 41378040 | 41377907 | 8  | 9  | 0  | 9.589086931 | 0.00120187  |          | ENSG00000206962 |
| 13 | 42260639 | 42260838 | 42260738 | 9  | 9  | 1  | 4.794543465 | 0.00708517  | C13orf30 | ENSG00000179813 |
| 13 | 42349122 | 42349403 | 42349274 | 8  | 11 | 2  | 3.835634772 | 0.00800699  |          | ENSG00000217498 |
| 13 | 42366913 | 42367316 | 42367219 | 9  | 16 | 4  | 3.260289556 | 0.00475414  |          | ENSG00000217498 |
| 13 | 42378438 | 42378725 | 42378579 | 9  | 13 | 7  | 1.678090213 | 0.11195     |          | ENSG00000217498 |
| 13 | 42441162 | 42441484 | 42441273 | 10 | 14 | 2  | 4.794543465 | 0.00154571  | EPSTI1   | ENSG00000133106 |
| 13 | 42475159 | 42475450 | 42475322 | 11 | 14 | 0  | 14.3836304  | 4.17E-05    | EPSTI1   | ENSG00000133106 |
| 13 | 43352054 | 43352332 | 43352206 | 8  | 9  | 4  | 1.917817386 | 0.103282    | C13orf31 | ENSG00000179630 |
| 13 | 43568895 | 43569161 | 43569031 | 9  | 9  | 1  | 4.794543465 | 0.00708517  |          | ENSG00000139656 |
| 13 | 43809142 | 43809584 | 43809321 | 11 | 20 | 1  | 10.06854128 | 8.32E-06    | SERP2    | ENSG00000151778 |
| 13 | 43875376 | 43875784 | 43875660 | 11 | 18 | 11 | 1.518272097 | 0.122037    | SERP2    | ENSG00000151778 |
| 13 | 43907419 | 43907796 | 43907617 | 9  | 16 | 5  | 2.716907964 | 0.0109645   | TSC22D1  | ENSG00000102804 |
| 13 | 43909296 | 43909513 | 43909404 | 9  | 11 | 3  | 2.876726079 | 0.0213797   | TSC22D1  | ENSG00000102804 |
| 13 | 44231961 | 44232333 | 44232140 | 8  | 15 | 2  | 5.114179696 | 0.00088103  |          | ENSG00000209569 |
| 13 | 44372471 | 44372776 | 44372623 | 10 | 12 | 4  | 2.493162602 | 0.0299057   | NUFIP1   | ENSG00000083635 |
| 13 | 44389817 | 44390224 | 44390022 | 16 | 25 | 19 | 1.246581301 | 0.225794    | NUFIP1   | ENSG00000083635 |
| 13 | 44390263 | 44390793 | 44390583 | 16 | 30 | 13 | 2.12329782  | 0.0070778   | NUFIP1   | ENSG00000083635 |
| 13 | 44461557 | 44461825 | 44461726 | 8  | 9  | 5  | 1.598181155 | 0.170911    | KIAA1704 | ENSG00000133114 |
| 13 | 44519548 | 44519871 | 44519698 | 9  | 13 | 4  | 2.684944341 | 0.01921     |          | ENSG00000223341 |
| 13 | 44592288 | 44592754 | 44592575 | 11 | 24 | 2  | 7.990905775 | 4.56E-06    | GTF2F2   | ENSG00000188342 |
| 13 | 44608975 | 44609220 | 44609097 | 14 | 16 | 0  | 16.30144778 | 1.09E-05    |          | ENSG00000201061 |

|    |          |          |          |    |    |    |             |             |        |                 |
|----|----------|----------|----------|----|----|----|-------------|-------------|--------|-----------------|
| 13 | 44714418 | 44714677 | 44714535 | 8  | 10 | 1  | 5.273997812 | 0.00391723  | KCTD4  | ENSG00000180332 |
| 13 | 44746068 | 44746272 | 44746170 | 8  | 8  | 0  | 8.630178238 | 0.00235436  |        | ENSG00000221163 |
| 13 | 44753273 | 44753453 | 44753372 | 8  | 8  | 9  | 0.863017824 | 0.627343    |        | ENSG00000221163 |
| 13 | 44812538 | 44812768 | 44812624 | 8  | 10 | 5  | 1.757999271 | 0.121253    | TPT1   | ENSG00000133112 |
| 13 | 45245380 | 45245703 | 45245543 | 11 | 16 | 1  | 8.150723891 | 0.000101217 |        | ENSG00000209627 |
| 13 | 45524726 | 45525232 | 45524915 | 16 | 27 | 16 | 1.579379024 | 0.0636678   | ZC3H13 | ENSG00000123200 |
| 13 | 45592247 | 45592660 | 45592460 | 10 | 20 | 14 | 1.34247217  | 0.186867    | CPB2   | ENSG00000080618 |
| 13 | 45593697 | 45594261 | 45594082 | 11 | 24 | 12 | 1.844055179 | 0.0315307   | CPB2   | ENSG00000080618 |
| 13 | 45597815 | 45598040 | 45597927 | 10 | 11 | 3  | 2.876726079 | 0.0213797   | CPB2   | ENSG00000080618 |
| 13 | 45607268 | 45607598 | 45607433 | 18 | 21 | 12 | 1.622768557 | 0.076896    | CPB2   | ENSG00000080618 |
| 13 | 45668742 | 45668921 | 45668831 | 8  | 8  | 3  | 2.157544559 | 0.0836802   | LCP1   | ENSG00000136167 |
| 13 | 45676206 | 45676412 | 45676302 | 8  | 8  | 4  | 1.726035648 | 0.150596    | LCP1   | ENSG00000136167 |
| 13 | 45678366 | 45678606 | 45678466 | 8  | 10 | 8  | 1.171999514 | 0.35773     | LCP1   | ENSG00000136167 |
| 13 | 45683280 | 45683466 | 45683373 | 8  | 9  | 5  | 1.598181155 | 0.170911    | LCP1   | ENSG00000136167 |
| 13 | 45761180 | 45761432 | 45761310 | 10 | 12 | 1  | 6.232906505 | 0.00117736  |        | ENSG00000214554 |
| 13 | 45827065 | 45827361 | 45827227 | 9  | 11 | 1  | 5.753452158 | 0.00215302  |        | ENSG00000223336 |
| 13 | 46018616 | 46018888 | 46018752 | 9  | 12 | 11 | 1.038817751 | 0.460341    | LRCH1  | ENSG00000136141 |
| 13 | 46023601 | 46023951 | 46023776 | 22 | 28 | 12 | 2.139104008 | 0.0083421   | LRCH1  | ENSG00000136141 |
| 13 | 46026463 | 46026835 | 46026642 | 10 | 18 | 14 | 1.214617678 | 0.282961    | LRCH1  | ENSG00000136141 |
| 13 | 46041550 | 46042070 | 46041700 | 10 | 19 | 6  | 2.739739123 | 0.00632909  | LRCH1  | ENSG00000136141 |
| 13 | 46087547 | 46088422 | 46087953 | 38 | 72 | 8  | 7.777814955 | 5.75E-14    | LRCH1  | ENSG00000136141 |
| 13 | 46131918 | 46132246 | 46132082 | 17 | 20 | 12 | 1.54900635  | 0.101141    | LRCH1  | ENSG00000136141 |
| 13 | 46137770 | 46138100 | 46137945 | 12 | 15 | 8  | 1.704726565 | 0.0916153   | LRCH1  | ENSG00000136141 |
| 13 | 46151350 | 46151555 | 46151388 | 8  | 9  | 2  | 3.19636231  | 0.0229249   | ESD    | ENSG00000139684 |
| 13 | 46159923 | 46160117 | 46160023 | 8  | 9  | 1  | 4.794543465 | 0.00708517  | ESD    | ENSG00000139684 |
| 13 | 46160124 | 46160336 | 46160202 | 8  | 10 | 2  | 3.515998541 | 0.0136204   | ESD    | ENSG00000139684 |
| 13 | 46160578 | 46160774 | 46160666 | 8  | 8  | 6  | 1.232882605 | 0.333038    | ESD    | ENSG00000139684 |
| 13 | 46170358 | 46170537 | 46170498 | 8  | 8  | 4  | 1.726035648 | 0.150596    | ESD    | ENSG00000139684 |
| 13 | 46174027 | 46174222 | 46174150 | 8  | 8  | 1  | 4.315089119 | 0.0127267   | ESD    | ENSG00000139684 |
| 13 | 46191551 | 46191752 | 46191611 | 8  | 9  | 5  | 1.598181155 | 0.170911    | ESD    | ENSG00000139684 |
| 13 | 46193379 | 46193846 | 46193536 | 11 | 19 | 17 | 1.065454103 | 0.420867    | ESD    | ENSG00000139684 |
| 13 | 46200942 | 46201225 | 46201075 | 10 | 10 | 7  | 1.318499453 | 0.269217    | ESD    | ENSG00000139684 |
| 13 | 46257680 | 46257863 | 46257771 | 8  | 8  | 1  | 4.315089119 | 0.0127267   | ESD    | ENSG00000139684 |
| 13 | 46269621 | 46269908 | 46269779 | 12 | 12 | 9  | 1.246581301 | 0.295061    | ESD    | ENSG00000139684 |

|    |          |          |          |    |     |    |             |             |        |                 |
|----|----------|----------|----------|----|-----|----|-------------|-------------|--------|-----------------|
| 13 | 46305858 | 46306074 | 46305981 | 8  | 8   | 4  | 1.726035648 | 0.150596    | ESD    | ENSG00000139684 |
| 13 | 46309263 | 46309500 | 46309381 | 8  | 8   | 4  | 1.726035648 | 0.150596    | ESD    | ENSG00000139684 |
| 13 | 46310296 | 46310492 | 46310470 | 8  | 10  | 4  | 2.109599125 | 0.0694668   | ESD    | ENSG00000139684 |
| 13 | 46325250 | 46325464 | 46325357 | 10 | 11  | 6  | 1.643843474 | 0.137712    | HTR2A  | ENSG00000102468 |
| 13 | 46338378 | 46338702 | 46338541 | 10 | 15  | 8  | 1.704726565 | 0.0916153   | HTR2A  | ENSG00000102468 |
| 13 | 46353636 | 46353815 | 46353698 | 8  | 9   | 4  | 1.917817386 | 0.103282    | HTR2A  | ENSG00000102468 |
| 13 | 46360328 | 46360521 | 46360424 | 9  | 9   | 2  | 3.19636231  | 0.0229249   | HTR2A  | ENSG00000102468 |
| 13 | 46363654 | 46363934 | 46363790 | 8  | 11  | 8  | 1.278544924 | 0.28289     | HTR2A  | ENSG00000102468 |
| 13 | 46367599 | 46367805 | 46367702 | 10 | 10  | 1  | 5.273997812 | 0.00391723  | HTR2A  | ENSG00000102468 |
| 13 | 46423777 | 46423983 | 46423846 | 8  | 8   | 0  | 8.630178238 | 0.00235436  |        | ENSG00000209649 |
| 13 | 46434729 | 46434982 | 46434835 | 10 | 10  | 3  | 2.636998906 | 0.034203    |        | ENSG00000209653 |
| 13 | 46445982 | 46446447 | 46446166 | 10 | 20  | 13 | 1.43836304  | 0.140307    |        | ENSG00000209653 |
| 13 | 46464642 | 46464851 | 46464751 | 10 | 12  | 9  | 1.246581301 | 0.295061    |        | ENSG00000209653 |
| 13 | 46500288 | 46500591 | 46500439 | 11 | 15  | 5  | 2.557089848 | 0.0169197   |        | ENSG00000209653 |
| 13 | 46540281 | 46540625 | 46540459 | 11 | 13  | 3  | 3.356180426 | 0.00805599  |        | ENSG00000209653 |
| 13 | 46554575 | 46554803 | 46554645 | 9  | 10  | 5  | 1.757999271 | 0.121253    |        | ENSG00000209653 |
| 13 | 46584295 | 46584491 | 46584389 | 8  | 8   | 1  | 4.315089119 | 0.0127267   |        | ENSG00000209653 |
| 13 | 46596364 | 46596625 | 46596497 | 8  | 9   | 2  | 3.19636231  | 0.0229249   |        | ENSG00000209653 |
| 13 | 46636121 | 46636356 | 46636223 | 9  | 12  | 5  | 2.077635502 | 0.0577144   |        | ENSG00000220245 |
| 13 | 46667725 | 46668197 | 46668018 | 8  | 16  | 5  | 2.716907964 | 0.0109645   |        | ENSG00000220245 |
| 13 | 46917518 | 46917737 | 46917624 | 9  | 10  | 5  | 1.757999271 | 0.121253    |        | ENSG00000209657 |
| 13 | 46927643 | 46927951 | 46927818 | 8  | 10  | 3  | 2.636998906 | 0.034203    |        | ENSG00000209657 |
| 13 | 46931811 | 46932084 | 46931967 | 9  | 12  | 9  | 1.246581301 | 0.295061    |        | ENSG00000209657 |
| 13 | 47538560 | 47539157 | 47538858 | 71 | 100 | 0  | 96.849778   | 3.21E-30    | MED4   | ENSG00000136146 |
| 13 | 47544394 | 47544797 | 47544596 | 39 | 52  | 0  | 50.82216073 | 3.34E-16    | MED4   | ENSG00000136146 |
| 13 | 47628642 | 47629055 | 47628766 | 26 | 31  | 0  | 30.68507818 | 4.52E-10    |        | ENSG00000214488 |
| 13 | 49469439 | 49469684 | 49469561 | 9  | 9   | 2  | 3.19636231  | 0.0229249   | TRIM13 | ENSG00000204977 |
| 13 | 49685741 | 49686079 | 49685902 | 13 | 18  | 3  | 4.554816292 | 0.000599415 |        | ENSG00000220558 |
| 13 | 49717188 | 49717521 | 49717356 | 11 | 15  | 8  | 1.704726565 | 0.0916153   |        | ENSG00000220558 |
| 13 | 49733768 | 49734108 | 49733947 | 11 | 16  | 3  | 4.075361945 | 0.00173346  |        | ENSG00000220558 |
| 13 | 49829801 | 49830261 | 49829934 | 13 | 20  | 7  | 2.517135319 | 0.00849957  |        | ENSG00000217189 |
| 13 | 50001380 | 50001968 | 50001674 | 98 | 137 | 2  | 44.10979988 | 1.19E-37    |        | ENSG00000221198 |
| 13 | 50203591 | 50204036 | 50203757 | 21 | 26  | 1  | 12.94526736 | 1.86E-07    |        | ENSG00000200711 |
| 13 | 51055738 | 51056271 | 51056092 | 8  | 19  | 2  | 6.39272462  | 8.83E-05    | WDFY2  | ENSG00000139668 |

|    |          |          |          |    |    |   |             |             |        |                 |
|----|----------|----------|----------|----|----|---|-------------|-------------|--------|-----------------|
| 13 | 51068961 | 51069291 | 51069121 | 24 | 27 | 1 | 13.4247217  | 9.80E-08    |        | ENSG00000213991 |
| 13 | 51359561 | 51359906 | 51359733 | 13 | 17 | 1 | 8.630178238 | 5.44E-05    |        | ENSG00000174893 |
| 13 | 51498683 | 51498935 | 51498800 | 13 | 15 | 2 | 5.114179696 | 0.00088103  |        | ENSG00000214320 |
| 13 | 51683466 | 51683833 | 51683675 | 17 | 23 | 1 | 11.50690432 | 1.25E-06    |        | ENSG00000220040 |
| 13 | 52089478 | 52089700 | 52089589 | 8  | 8  | 7 | 1.07877228  | 0.435076    |        | ENSG00000139675 |
| 13 | 54219504 | 54219802 | 54219644 | 8  | 11 | 0 | 11.50690432 | 0.000313206 |        | ENSG00000136149 |
| 13 | 54790985 | 54791201 | 54791090 | 8  | 9  | 0 | 9.589086931 | 0.00120187  |        |                 |
| 13 | 58462586 | 58462829 | 58462707 | 15 | 15 | 0 | 15.34253909 | 2.13E-05    |        | ENSG00000214281 |
| 13 | 61106682 | 61106932 | 61106807 | 16 | 18 | 0 | 18.21926517 | 2.83E-06    |        | ENSG00000209865 |
| 13 | 67770301 | 67770580 | 67770443 | 13 | 15 | 0 | 15.34253909 | 2.13E-05    |        | ENSG00000220172 |
| 13 | 68582034 | 68582245 | 68582139 | 9  | 10 | 0 | 10.54799562 | 0.000613541 |        | ENSG00000216426 |
| 13 | 69460019 | 69460310 | 69460164 | 16 | 17 | 0 | 17.26035648 | 5.54E-06    |        | ENSG00000219838 |
| 13 | 69721523 | 69721712 | 69721680 | 8  | 10 | 0 | 10.54799562 | 0.000613541 | KLHL1  | ENSG00000150361 |
| 13 | 71569748 | 71570082 | 71569915 | 39 | 45 | 1 | 22.05489994 | 8.68E-13    |        | ENSG00000200037 |
| 13 | 72759227 | 72759489 | 72759346 | 13 | 15 | 0 | 15.34253909 | 2.13E-05    |        | ENSG00000206697 |
| 13 | 72871455 | 72871755 | 72871605 | 11 | 15 | 2 | 5.114179696 | 0.00088103  |        | ENSG00000218304 |
| 13 | 72985887 | 72986334 | 72986124 | 68 | 82 | 0 | 79.58942152 | 5.79E-25    |        | ENSG00000218304 |
| 13 | 73075616 | 73076166 | 73076000 | 37 | 48 | 0 | 46.98652596 | 4.91E-15    |        | ENSG00000218304 |
| 13 | 73508595 | 73508810 | 73508708 | 8  | 8  | 0 | 8.630178238 | 0.00235436  | KLF12  | ENSG00000118922 |
| 13 | 73512358 | 73512591 | 73512474 | 9  | 11 | 0 | 11.50690432 | 0.000313206 | KLF12  | ENSG00000118922 |
| 13 | 75994189 | 75994589 | 75994368 | 41 | 48 | 4 | 9.397305192 | 8.99E-11    | KCTD12 | ENSG00000178695 |
| 13 | 79103514 | 79103734 | 79103624 | 8  | 9  | 4 | 1.917817386 | 0.103282    | NDFIP2 | ENSG00000102471 |
| 13 | 80571931 | 80572125 | 80572050 | 10 | 10 | 0 | 10.54799562 | 0.000613541 |        | ENSG00000222486 |
| 13 | 83413762 | 83414216 | 83413988 | 68 | 87 | 3 | 21.09599125 | 2.96E-22    |        | ENSG00000220449 |
| 13 | 84580526 | 84580873 | 84580704 | 20 | 23 | 0 | 23.01380863 | 9.81E-08    |        | ENSG00000207012 |
| 13 | 85157132 | 85157311 | 85157190 | 9  | 9  | 1 | 4.794543465 | 0.00708517  |        | ENSG00000207012 |
| 13 | 85472849 | 85473030 | 85472939 | 8  | 8  | 1 | 4.315089119 | 0.0127267   |        | ENSG00000216694 |
| 13 | 87856015 | 87856311 | 87856167 | 11 | 13 | 0 | 13.4247217  | 8.16E-05    |        | ENSG00000218326 |
| 13 | 89801180 | 89801372 | 89801237 | 8  | 9  | 0 | 9.589086931 | 0.00120187  |        | ENSG00000207858 |
| 13 | 90042287 | 90042493 | 90042387 | 14 | 14 | 0 | 14.3836304  | 4.17E-05    |        | ENSG00000209120 |
| 13 | 92667866 | 92668349 | 92668038 | 19 | 28 | 1 | 13.90417605 | 5.17E-08    | GPC6   | ENSG00000183098 |
| 13 | 93795594 | 93795986 | 93795807 | 23 | 32 | 2 | 10.54799562 | 3.50E-08    |        | ENSG00000212057 |
| 13 | 94383495 | 94383853 | 94383712 | 16 | 21 | 0 | 21.09599125 | 3.76E-07    |        | ENSG00000216894 |
| 13 | 94928763 | 94929087 | 94928922 | 12 | 15 | 0 | 15.34253909 | 2.13E-05    | CLDN10 | ENSG00000134873 |



|    |           |           |           |    |     |    |             |             |          |                 |
|----|-----------|-----------|-----------|----|-----|----|-------------|-------------|----------|-----------------|
| 13 | 95284392  | 95284597  | 95284483  | 9  | 10  | 0  | 10.54799562 | 0.000613541 |          | ENSG00000217412 |
| 13 | 96591901  | 96592252  | 96592076  | 8  | 14  | 10 | 1.307602763 | 0.244096    | MBNL2    | ENSG00000139793 |
| 13 | 98109865  | 98110394  | 98110215  | 10 | 21  | 2  | 7.031997082 | 2.73E-05    |          | ENSG00000223127 |
| 13 | 98284942  | 98285194  | 98285092  | 11 | 13  | 0  | 13.4247217  | 8.16E-05    | DOCK9    | ENSG00000088387 |
| 13 | 98809289  | 98809526  | 98809437  | 8  | 8   | 0  | 8.630178238 | 0.00235436  |          | ENSG00000207719 |
| 13 | 99060814  | 99061319  | 99061096  | 16 | 27  | 2  | 8.949814469 | 7.46E-07    | CLYBL    | ENSG00000125246 |
| 13 | 99366870  | 99367056  | 99366960  | 8  | 9   | 1  | 4.794543465 | 0.00708517  |          | ENSG00000210405 |
| 13 | 99500644  | 99501019  | 99500818  | 31 | 39  | 2  | 12.78544924 | 4.53E-10    |          | ENSG00000220223 |
| 13 | 99843060  | 99843270  | 99843127  | 11 | 12  | 1  | 6.232906505 | 0.00117736  |          | ENSG00000214062 |
| 13 | 100659644 | 100659877 | 100659760 | 10 | 11  | 2  | 3.835634772 | 0.00800699  | NALCN    | ENSG00000102452 |
| 13 | 102137901 | 102138212 | 102138057 | 14 | 17  | 1  | 8.630178238 | 5.44E-05    | C13orf39 | ENSG00000139780 |
| 13 | 103153064 | 103153337 | 103153200 | 16 | 17  | 0  | 17.26035648 | 5.54E-06    |          | ENSG00000219505 |
| 13 | 103455020 | 103455380 | 103455157 | 14 | 20  | 1  | 10.06854128 | 8.32E-06    |          |                 |
| 13 | 108369978 | 108370176 | 108370089 | 8  | 8   | 6  | 1.232882605 | 0.333038    | MYO16    | ENSG00000041515 |
| 13 | 109026738 | 109027049 | 109026893 | 14 | 18  | 3  | 4.554816292 | 0.000599415 | IRS2     | ENSG00000185950 |
| 13 | 109573128 | 109573657 | 109573429 | 36 | 54  | 1  | 26.36998906 | 2.43E-15    |          | ENSG00000222584 |
| 13 | 110041039 | 110041236 | 110041143 | 11 | 11  | 1  | 5.753452158 | 0.00215302  | CARKD    | ENSG00000213995 |
| 13 | 110320548 | 110320841 | 110320696 | 17 | 19  | 2  | 6.39272462  | 8.83E-05    | ANKRD10  | ENSG00000088448 |
| 13 | 112212422 | 112212750 | 112212586 | 20 | 25  | 8  | 2.770180669 | 0.00215826  | TUBGCP3  | ENSG00000126216 |
| 13 | 112715727 | 112715953 | 112715840 | 10 | 11  | 5  | 1.917817386 | 0.0843804   | MCF2L    | ENSG00000126217 |
| 13 | 113195614 | 113195871 | 113195733 | 8  | 10  | 2  | 3.515998541 | 0.0136204   | TMCO3    | ENSG00000150403 |
| 13 | 113573011 | 113573972 | 113573550 | 97 | 159 | 0  | 153.4253909 | 1.90E-47    | GAS6     | ENSG00000183087 |
| 13 | 114127671 | 114127930 | 114127824 | 55 | 55  | 0  | 53.69888681 | 4.44E-17    | ZNF828   | ENSG00000198824 |
| 14 | 18076307  | 18076637  | 18076472  | 15 | 15  | 16 | 0.902502299 | 0.616352    |          | ENSG00000215398 |
| 14 | 19843898  | 19844077  | 19843968  | 9  | 9   | 1  | 4.794543465 | 0.00708517  | TTC5     | ENSG00000136319 |
| 14 | 19939100  | 19939494  | 19939315  | 25 | 33  | 0  | 32.60289556 | 1.18E-10    | TEP1     | ENSG00000129566 |
| 14 | 20147411  | 20147819  | 20147579  | 12 | 17  | 5  | 2.876726079 | 0.00703033  | RNASE12  | ENSG00000206171 |
| 14 | 20148141  | 20148323  | 20148232  | 8  | 9   | 3  | 2.397271733 | 0.0539397   | RNASE12  | ENSG00000206171 |
| 14 | 20151211  | 20151522  | 20151366  | 8  | 13  | 6  | 1.917817386 | 0.0693353   | RNASE12  | ENSG00000206171 |
| 14 | 20168410  | 20168650  | 20168543  | 9  | 11  | 5  | 1.917817386 | 0.0843804   | OR6S1    | ENSG00000181803 |
| 14 | 20219516  | 20219731  | 20219673  | 11 | 11  | 5  | 1.917817386 | 0.0843804   |          | ENSG00000199461 |
| 14 | 20289919  | 20290477  | 20290127  | 57 | 78  | 0  | 75.75378675 | 8.53E-24    | FAM12A   | ENSG00000181562 |
| 14 | 20358316  | 20358725  | 20358558  | 21 | 29  | 0  | 28.76726079 | 1.74E-09    | RNASE1   | ENSG00000129538 |
| 14 | 20511449  | 20511697  | 20511579  | 9  | 9   | 2  | 3.19636231  | 0.0229249   |          | ENSG00000209407 |

|    |          |          |          |     |     |    |             |             |          |                 |
|----|----------|----------|----------|-----|-----|----|-------------|-------------|----------|-----------------|
| 14 | 20635136 | 20635719 | 20635344 | 23  | 41  | 5  | 6.712360851 | 2.66E-08    | ZNF219   | ENSG00000165804 |
| 14 | 20984894 | 20985109 | 20985023 | 8   | 9   | 0  | 9.589086931 | 0.00120187  | CHD8     | ENSG00000100888 |
| 14 | 21015020 | 21015219 | 21015119 | 10  | 10  | 5  | 1.757999271 | 0.121253    | TOX4     | ENSG00000092203 |
| 14 | 21049300 | 21049485 | 21049392 | 8   | 9   | 5  | 1.598181155 | 0.170911    | METTL3   | ENSG00000165819 |
| 14 | 21135162 | 21135349 | 21135255 | 9   | 9   | 0  | 9.589086931 | 0.00120187  |          | ENSG00000202110 |
| 14 | 21306312 | 21306501 | 21306406 | 8   | 8   | 2  | 2.876726079 | 0.0381137   |          | ENSG00000211780 |
| 14 | 21406658 | 21406837 | 21406694 | 8   | 8   | 4  | 1.726035648 | 0.150596    |          | ENSG00000211788 |
| 14 | 21872336 | 21872653 | 21872494 | 14  | 16  | 5  | 2.716907964 | 0.0109645   |          | ENSG00000211820 |
| 14 | 21930105 | 21930367 | 21930215 | 8   | 10  | 7  | 1.318499453 | 0.269217    |          | ENSG00000211821 |
| 14 | 22075555 | 22076234 | 22075934 | 103 | 142 | 8  | 15.23599368 | 3.39E-32    |          | ENSG00000211882 |
| 14 | 22093103 | 22093349 | 22093240 | 8   | 9   | 0  | 9.589086931 | 0.00120187  | TRAC     | ENSG00000211889 |
| 14 | 22109143 | 22109398 | 22109270 | 8   | 9   | 3  | 2.397271733 | 0.0539397   | DAD1     | ENSG00000129562 |
| 14 | 22378198 | 22378575 | 22378423 | 13  | 20  | 0  | 20.13708255 | 7.37E-07    | MMP14    | ENSG00000157227 |
| 14 | 22410188 | 22410545 | 22410366 | 11  | 17  | 3  | 4.315089119 | 0.00102271  | LRP10    | ENSG00000197324 |
| 14 | 22429498 | 22429752 | 22429625 | 9   | 11  | 1  | 5.753452158 | 0.00215302  | REM2     | ENSG00000139890 |
| 14 | 22468621 | 22468946 | 22468783 | 15  | 20  | 10 | 1.830643869 | 0.0454769   | PRMT5    | ENSG00000100462 |
| 14 | 22519956 | 22520135 | 22520069 | 8   | 9   | 2  | 3.19636231  | 0.0229249   | JUB      | ENSG00000129474 |
| 14 | 22521748 | 22521954 | 22521846 | 10  | 11  | 2  | 3.835634772 | 0.00800699  | JUB      | ENSG00000129474 |
| 14 | 22595401 | 22595628 | 22595542 | 8   | 11  | 3  | 2.876726079 | 0.0213797   | CDH24    | ENSG00000139880 |
| 14 | 22722723 | 22722902 | 22722808 | 8   | 8   | 2  | 2.876726079 | 0.0381137   | SLC7A8   | ENSG00000092068 |
| 14 | 23128171 | 23128368 | 23128308 | 8   | 8   | 2  | 2.876726079 | 0.0381137   | JPH4     | ENSG00000092051 |
| 14 | 23170850 | 23171310 | 23171079 | 27  | 38  | 2  | 12.46581301 | 8.46E-10    | DHRS2    | ENSG00000100867 |
| 14 | 23209438 | 23209956 | 23209733 | 31  | 47  | 1  | 23.01380863 | 2.36E-13    | DHRS2    | ENSG00000100867 |
| 14 | 23647851 | 23648050 | 23647963 | 8   | 8   | 0  | 8.630178238 | 0.00235436  | WDR23    | ENSG00000100897 |
| 14 | 23727871 | 23728086 | 23727966 | 11  | 12  | 4  | 2.493162602 | 0.0299057   | IPO4     | ENSG00000196497 |
| 14 | 23755062 | 23755443 | 23755209 | 9   | 15  | 3  | 3.835634772 | 0.00291691  |          | ENSG00000213920 |
| 14 | 23810158 | 23810446 | 23810308 | 18  | 20  | 2  | 6.712360851 | 4.91E-05    | RABGGTA  | ENSG00000100949 |
| 14 | 23935226 | 23935716 | 23935524 | 21  | 31  | 2  | 10.22835939 | 6.48E-08    | KIAA1305 | ENSG00000205978 |
| 14 | 29634857 | 29635036 | 29634946 | 8   | 8   | 0  | 8.630178238 | 0.00235436  | PRKD1    | ENSG00000184304 |
| 14 | 29792036 | 29792499 | 29792153 | 9   | 18  | 1  | 9.109632584 | 2.91E-05    | KIAA1333 | ENSG00000092140 |
| 14 | 29834968 | 29835237 | 29835102 | 14  | 16  | 2  | 5.433815927 | 0.000499302 | KIAA1333 | ENSG00000092140 |
| 14 | 30098476 | 30098674 | 30098575 | 8   | 8   | 0  | 8.630178238 | 0.00235436  | KIAA1333 | ENSG00000092140 |
| 14 | 30149631 | 30149994 | 30149801 | 9   | 13  | 3  | 3.356180426 | 0.00805599  | SCFD1    | ENSG00000092108 |
| 14 | 30160801 | 30161224 | 30161045 | 9   | 18  | 7  | 2.277408146 | 0.0188653   | SCFD1    | ENSG00000092108 |

|    |          |          |          |     |     |    |             |             |           |                 |
|----|----------|----------|----------|-----|-----|----|-------------|-------------|-----------|-----------------|
| 14 | 30565847 | 30566143 | 30565995 | 10  | 12  | 5  | 2.077635502 | 0.0577144   | STRN3     | ENSG00000196792 |
| 14 | 30744650 | 30744841 | 30744744 | 8   | 9   | 4  | 1.917817386 | 0.103282    | HECTD1    | ENSG00000092148 |
| 14 | 30747312 | 30747492 | 30747402 | 8   | 8   | 8  | 0.958908693 | 0.534974    | HECTD1    | ENSG00000092148 |
| 14 | 30934669 | 30934884 | 30934765 | 8   | 10  | 1  | 5.273997812 | 0.00391723  | HEATR5A   | ENSG00000129493 |
| 14 | 30980406 | 30980833 | 30980521 | 9   | 16  | 1  | 8.150723891 | 0.000101217 | C14orf126 | ENSG00000129480 |
| 14 | 30988906 | 30989184 | 30989045 | 8   | 12  | 1  | 6.232906505 | 0.00117736  | C14orf126 | ENSG00000129480 |
| 14 | 31559812 | 31560386 | 31559991 | 17  | 33  | 2  | 10.86763185 | 1.89E-08    | C14orf128 | ENSG00000176127 |
| 14 | 31612605 | 31612807 | 31612706 | 8   | 8   | 7  | 1.07877228  | 0.435076    | C14orf128 | ENSG00000176127 |
| 14 | 31615118 | 31615674 | 31615297 | 12  | 24  | 6  | 3.424673904 | 0.000656885 | C14orf128 | ENSG00000176127 |
| 14 | 31625049 | 31625290 | 31625169 | 10  | 13  | 1  | 6.712360851 | 0.000640982 | ARHGAP5   | ENSG00000100852 |
| 14 | 31741845 | 31742507 | 31742365 | 8   | 24  | 13 | 1.712336952 | 0.0480623   |           | ENSG00000202337 |
| 14 | 31798624 | 31798910 | 31798770 | 9   | 12  | 2  | 4.155271003 | 0.0046638   |           | ENSG00000202337 |
| 14 | 31883040 | 31883384 | 31883168 | 10  | 15  | 3  | 3.835634772 | 0.00291691  | AKAP6     | ENSG00000151320 |
| 14 | 31884148 | 31884887 | 31884472 | 137 | 187 | 7  | 22.53435429 | 1.69E-45    | AKAP6     | ENSG00000151320 |
| 14 | 31888299 | 31888552 | 31888425 | 12  | 13  | 1  | 6.712360851 | 0.000640982 | AKAP6     | ENSG00000151320 |
| 14 | 32099064 | 32099551 | 32099308 | 31  | 45  | 4  | 8.821959976 | 5.35E-10    |           | ENSG00000209554 |
| 14 | 32951372 | 32951673 | 32951522 | 10  | 11  | 2  | 3.835634772 | 0.00800699  | NPAS3     | ENSG00000151322 |
| 14 | 33316689 | 33316960 | 33316824 | 10  | 12  | 5  | 2.077635502 | 0.0577144   | EGLN3     | ENSG00000129521 |
| 14 | 33320325 | 33320622 | 33320473 | 12  | 15  | 4  | 3.068507818 | 0.0076507   | EGLN3     | ENSG00000129521 |
| 14 | 33378669 | 33378866 | 33378743 | 8   | 8   | 0  | 8.630178238 | 0.00235436  | EGLN3     | ENSG00000129521 |
| 14 | 33620606 | 33621064 | 33620890 | 10  | 18  | 5  | 3.036544195 | 0.0044641   | EGLN3     | ENSG00000129521 |
| 14 | 33718579 | 33719071 | 33718725 | 11  | 20  | 9  | 2.013708255 | 0.0279742   | EGLN3     | ENSG00000129521 |
| 14 | 33836472 | 33837183 | 33836912 | 189 | 234 | 5  | 37.55725714 | 4.35E-61    | C14orf147 | ENSG00000165389 |
| 14 | 33837241 | 33837450 | 33837375 | 8   | 11  | 0  | 11.50690432 | 0.000313206 | C14orf147 | ENSG00000165389 |
| 14 | 33870675 | 33871249 | 33870958 | 17  | 37  | 13 | 2.602752167 | 0.000528768 | C14orf147 | ENSG00000165389 |
| 14 | 34373547 | 34373728 | 34373654 | 8   | 9   | 0  | 9.589086931 | 0.00120187  | BAZ1A     | ENSG00000198604 |
| 14 | 34382018 | 34382440 | 34382261 | 10  | 20  | 3  | 5.034270639 | 0.000202317 | BAZ1A     | ENSG00000198604 |
| 14 | 34413290 | 34413494 | 34413385 | 8   | 9   | 2  | 3.19636231  | 0.0229249   | BAZ1A     | ENSG00000198604 |
| 14 | 34414282 | 34414504 | 34414393 | 8   | 10  | 5  | 1.757999271 | 0.121253    | BAZ1A     | ENSG00000198604 |
| 14 | 34660751 | 34661010 | 34660834 | 9   | 12  | 5  | 2.077635502 | 0.0577144   | PPP2R3C   | ENSG00000092020 |
| 14 | 34699828 | 34700064 | 34699946 | 9   | 10  | 1  | 5.273997812 | 0.00391723  |           | ENSG00000203598 |
| 14 | 34752941 | 34753649 | 34753488 | 19  | 44  | 5  | 7.191815198 | 4.84E-09    |           | ENSG00000203598 |
| 14 | 34754042 | 34754305 | 34754148 | 9   | 10  | 4  | 2.109599125 | 0.0694668   |           | ENSG00000203598 |
| 14 | 34875805 | 34876143 | 34875943 | 15  | 19  | 11 | 1.598181155 | 0.0927758   | PSMA6     | ENSG00000100902 |

|    |          |          |          |    |    |    |             |             |          |                 |
|----|----------|----------|----------|----|----|----|-------------|-------------|----------|-----------------|
| 14 | 34932837 | 34933122 | 34932978 | 14 | 16 | 2  | 5.433815927 | 0.000499302 | NFKBIA   | ENSG00000100906 |
| 14 | 35034131 | 35034440 | 35034282 | 13 | 15 | 1  | 7.671269544 | 0.000187863 |          | ENSG00000214927 |
| 14 | 35208890 | 35209141 | 35209038 | 17 | 17 | 6  | 2.465765211 | 0.014729    |          | ENSG00000209579 |
| 14 | 35348223 | 35348451 | 35348337 | 8  | 9  | 5  | 1.598181155 | 0.170911    | GARNL1   | ENSG00000174373 |
| 14 | 35360845 | 35361118 | 35360983 | 11 | 11 | 4  | 2.301380863 | 0.0459276   | BRMS1L   | ENSG00000100916 |
| 14 | 35488966 | 35489273 | 35489136 | 9  | 12 | 2  | 4.155271003 | 0.0046638   | BRMS1L   | ENSG00000100916 |
| 14 | 36186952 | 36187321 | 36187154 | 8  | 14 | 3  | 3.595907599 | 0.00486913  |          | ENSG00000212929 |
| 14 | 36310276 | 36310546 | 36310411 | 10 | 11 | 2  | 3.835634772 | 0.00800699  | PAX9     | ENSG00000198807 |
| 14 | 36359397 | 36359705 | 36359562 | 10 | 15 | 2  | 5.114179696 | 0.00088103  | PAX9     | ENSG00000198807 |
| 14 | 36359862 | 36360341 | 36360059 | 69 | 92 | 3  | 22.29462711 | 1.21E-23    | PAX9     | ENSG00000198807 |
| 14 | 36710874 | 36711201 | 36711037 | 12 | 16 | 5  | 2.716907964 | 0.0109645   | SLC25A21 | ENSG00000183032 |
| 14 | 36736533 | 36736787 | 36736685 | 9  | 10 | 2  | 3.515998541 | 0.0136204   | MIPOL1   | ENSG00000151338 |
| 14 | 36771853 | 36772110 | 36772017 | 9  | 10 | 0  | 10.54799562 | 0.000613541 | MIPOL1   | ENSG00000151338 |
| 14 | 36975511 | 36975706 | 36975543 | 8  | 8  | 4  | 1.726035648 | 0.150596    |          | ENSG00000207046 |
| 14 | 36987257 | 36987439 | 36987329 | 8  | 9  | 1  | 4.794543465 | 0.00708517  |          | ENSG00000207046 |
| 14 | 37105682 | 37106225 | 37106061 | 12 | 27 | 10 | 2.440858491 | 0.00375894  | FOXA1    | ENSG00000129514 |
| 14 | 37118986 | 37119213 | 37119066 | 8  | 8  | 2  | 2.876726079 | 0.0381137   | FOXA1    | ENSG00000129514 |
| 14 | 37131755 | 37132036 | 37131881 | 13 | 16 | 5  | 2.716907964 | 0.0109645   | FOXA1    | ENSG00000129514 |
| 14 | 37132951 | 37133605 | 37133350 | 27 | 55 | 17 | 2.98327149  | 5.98E-06    | FOXA1    | ENSG00000129514 |
| 14 | 37134642 | 37135631 | 37135018 | 20 | 67 | 46 | 1.387357258 | 0.0402999   | FOXA1    | ENSG00000129514 |
| 14 | 37145795 | 37146002 | 37145847 | 8  | 10 | 2  | 3.515998541 | 0.0136204   | FOXA1    | ENSG00000129514 |
| 14 | 37155795 | 37156198 | 37155993 | 39 | 59 | 5  | 9.589086931 | 7.64E-13    | FOXA1    | ENSG00000129514 |
| 14 | 37162514 | 37162797 | 37162655 | 11 | 13 | 15 | 0.839045106 | 0.685928    | FOXA1    | ENSG00000129514 |
| 14 | 37180125 | 37180434 | 37180279 | 17 | 22 | 24 | 0.882195998 | 0.668517    | FOXA1    | ENSG00000129514 |
| 14 | 37186466 | 37186645 | 37186520 | 8  | 8  | 1  | 4.315089119 | 0.0127267   | FOXA1    | ENSG00000129514 |
| 14 | 37189357 | 37189614 | 37189459 | 10 | 14 | 21 | 0.653801382 | 0.90216     | FOXA1    | ENSG00000129514 |
| 14 | 37189820 | 37190087 | 37189951 | 8  | 9  | 10 | 0.871735176 | 0.624623    | FOXA1    | ENSG00000129514 |
| 14 | 37206455 | 37206672 | 37206563 | 11 | 11 | 7  | 1.43836304  | 0.204844    |          | ENSG00000200385 |
| 14 | 37259216 | 37259513 | 37259347 | 9  | 10 | 0  | 10.54799562 | 0.000613541 |          | ENSG00000200385 |
| 14 | 37413508 | 37413984 | 37413760 | 14 | 23 | 6  | 3.287686948 | 0.00104919  |          | ENSG00000201431 |
| 14 | 37470464 | 37470748 | 37470606 | 8  | 10 | 8  | 1.171999514 | 0.35773     |          | ENSG00000201431 |
| 14 | 37647793 | 37648064 | 37647928 | 9  | 10 | 1  | 5.273997812 | 0.00391723  | SSTR1    | ENSG00000139874 |
| 14 | 38562508 | 38563357 | 38562879 | 23 | 68 | 2  | 22.05489994 | 4.35E-18    |          | ENSG00000199285 |
| 14 | 38709048 | 38709472 | 38709383 | 10 | 18 | 2  | 6.073088389 | 0.000157975 | TRAPPC6B | ENSG00000182400 |

|    |          |          |          |     |     |   |             |             |           |                 |
|----|----------|----------|----------|-----|-----|---|-------------|-------------|-----------|-----------------|
| 14 | 38727082 | 38727589 | 38727252 | 34  | 42  | 2 | 13.74435793 | 6.90E-11    | PNN       | ENSG00000100941 |
| 14 | 38805910 | 38806175 | 38806073 | 8   | 11  | 7 | 1.43836304  | 0.204844    | CTAGE5    | ENSG00000150527 |
| 14 | 38972568 | 38972797 | 38972735 | 8   | 10  | 3 | 2.636998906 | 0.034203    | FBXO33    | ENSG00000165355 |
| 14 | 39207195 | 39207575 | 39207374 | 9   | 16  | 1 | 8.150723891 | 0.000101217 | FBXO33    | ENSG00000165355 |
| 14 | 39598688 | 39598888 | 39598788 | 8   | 9   | 0 | 9.589086931 | 0.00120187  |           |                 |
| 14 | 39760417 | 39760661 | 39760541 | 9   | 10  | 4 | 2.109599125 | 0.0694668   |           |                 |
| 14 | 39907394 | 39907589 | 39907491 | 11  | 11  | 7 | 1.43836304  | 0.204844    |           |                 |
| 14 | 39932219 | 39932431 | 39932314 | 8   | 11  | 1 | 5.753452158 | 0.00215302  |           |                 |
| 14 | 39986015 | 39986372 | 39986245 | 11  | 15  | 1 | 7.671269544 | 0.000187863 |           |                 |
| 14 | 40263442 | 40263674 | 40263546 | 8   | 8   | 1 | 4.315089119 | 0.0127267   |           |                 |
| 14 | 40676842 | 40677051 | 40676989 | 9   | 12  | 0 | 12.46581301 | 0.000159888 |           | ENSG00000221695 |
| 14 | 41060877 | 41061152 | 41060982 | 14  | 16  | 0 | 16.30144778 | 1.09E-05    | LRFN5     | ENSG00000165379 |
| 14 | 41175752 | 41175995 | 41175873 | 10  | 10  | 2 | 3.515998541 | 0.0136204   | LRFN5     | ENSG00000165379 |
| 14 | 41732077 | 41732334 | 41732197 | 10  | 13  | 3 | 3.356180426 | 0.00805599  |           | ENSG00000222084 |
| 14 | 42466400 | 42466579 | 42466476 | 8   | 8   | 1 | 4.315089119 | 0.0127267   |           |                 |
| 14 | 43160100 | 43160605 | 43160394 | 52  | 68  | 0 | 66.16469982 | 7.10E-21    |           | ENSG00000205898 |
| 14 | 43184195 | 43184425 | 43184351 | 9   | 12  | 1 | 6.232906505 | 0.00117736  |           | ENSG00000205898 |
| 14 | 43647493 | 43647906 | 43647704 | 53  | 65  | 1 | 31.64398687 | 1.78E-18    |           | ENSG00000205898 |
| 14 | 43855884 | 43856207 | 43856032 | 13  | 17  | 2 | 5.753452158 | 0.000281509 | FSCB      | ENSG00000189139 |
| 14 | 44310502 | 44310721 | 44310611 | 10  | 11  | 3 | 2.876726079 | 0.0213797   | C14orf28  | ENSG00000179476 |
| 14 | 44501778 | 44502025 | 44501858 | 8   | 10  | 7 | 1.318499453 | 0.269217    | FAM179B   | ENSG00000198718 |
| 14 | 44502612 | 44502853 | 44502737 | 10  | 12  | 4 | 2.493162602 | 0.0299057   | FAM179B   | ENSG00000198718 |
| 14 | 44623175 | 44623558 | 44623246 | 10  | 16  | 8 | 1.811271976 | 0.0663685   | PRPF39    | ENSG00000185246 |
| 14 | 44673542 | 44673753 | 44673655 | 12  | 12  | 4 | 2.493162602 | 0.0299057   | FKBP3     | ENSG00000100442 |
| 14 | 44674586 | 44674778 | 44674668 | 9   | 9   | 1 | 4.794543465 | 0.00708517  | FANCM     | ENSG00000187790 |
| 14 | 44792132 | 44792398 | 44792265 | 10  | 13  | 3 | 3.356180426 | 0.00805599  | C14orf106 | ENSG00000129534 |
| 14 | 44792497 | 44792684 | 44792590 | 8   | 8   | 5 | 1.43836304  | 0.235762    | C14orf106 | ENSG00000129534 |
| 14 | 44894636 | 44894905 | 44894770 | 12  | 16  | 3 | 4.075361945 | 0.00173346  |           | ENSG00000199739 |
| 14 | 45245201 | 45245499 | 45245350 | 8   | 10  | 2 | 3.515998541 | 0.0136204   |           | ENSG00000199739 |
| 14 | 45254339 | 45254531 | 45254419 | 8   | 8   | 0 | 8.630178238 | 0.00235436  |           | ENSG00000199739 |
| 14 | 45324171 | 45324693 | 45324514 | 117 | 145 | 2 | 46.66688973 | 6.14E-40    |           |                 |
| 14 | 45331995 | 45332455 | 45332211 | 40  | 58  | 1 | 28.28780645 | 1.76E-16    |           |                 |
| 14 | 45736670 | 45736944 | 45736807 | 13  | 17  | 1 | 8.630178238 | 5.44E-05    | RPL10L    | ENSG00000165496 |
| 14 | 47078166 | 47078352 | 47078281 | 8   | 8   | 1 | 4.315089119 | 0.0127267   |           | ENSG00000214903 |

|    |          |          |          |     |     |    |             |             |           |                 |
|----|----------|----------|----------|-----|-----|----|-------------|-------------|-----------|-----------------|
| 14 | 47937583 | 47937856 | 47937730 | 11  | 15  | 0  | 15.34253909 | 2.13E-05    |           | ENSG00000207366 |
| 14 | 48710280 | 48710467 | 48710350 | 8   | 8   | 2  | 2.876726079 | 0.0381137   |           | ENSG00000209067 |
| 14 | 48840374 | 48840747 | 48840531 | 8   | 13  | 3  | 3.356180426 | 0.00805599  |           | ENSG00000209067 |
| 14 | 49156652 | 49156992 | 49156823 | 9   | 12  | 6  | 1.78083043  | 0.0985525   | RPL36AL   | ENSG00000165502 |
| 14 | 49170654 | 49170995 | 49170824 | 9   | 13  | 7  | 1.678090213 | 0.11195     | C14orf104 | ENSG00000165506 |
| 14 | 49389270 | 49389680 | 49389449 | 10  | 16  | 3  | 4.075361945 | 0.00173346  | SDCCAG1   | ENSG00000165525 |
| 14 | 49390335 | 49390552 | 49390443 | 10  | 10  | 2  | 3.515998541 | 0.0136204   |           | ENSG00000222136 |
| 14 | 49398439 | 49399085 | 49398733 | 11  | 25  | 5  | 4.155271003 | 0.000149583 |           | ENSG00000222619 |
| 14 | 49399240 | 49399442 | 49399341 | 9   | 10  | 1  | 5.273997812 | 0.00391723  |           | ENSG00000222619 |
| 14 | 49428768 | 49429137 | 49428963 | 10  | 15  | 11 | 1.278544924 | 0.254978    | ARF6      | ENSG00000165527 |
| 14 | 49434538 | 49434833 | 49434685 | 8   | 10  | 3  | 2.636998906 | 0.034203    | ARF6      | ENSG00000165527 |
| 14 | 49487262 | 49487646 | 49487467 | 51  | 58  | 2  | 18.85853763 | 2.68E-15    |           | ENSG00000175860 |
| 14 | 49499081 | 49499295 | 49499206 | 10  | 10  | 6  | 1.506856518 | 0.188853    |           | ENSG00000175860 |
| 14 | 49537453 | 49537792 | 49537631 | 14  | 16  | 10 | 1.481949798 | 0.147733    |           | ENSG00000175860 |
| 14 | 49618433 | 49618785 | 49618609 | 12  | 18  | 2  | 6.073088389 | 0.000157975 |           | ENSG00000168260 |
| 14 | 49849283 | 49849466 | 49849354 | 9   | 9   | 5  | 1.598181155 | 0.170911    | ATP5S     | ENSG00000125375 |
| 14 | 49857491 | 49857931 | 49857764 | 14  | 22  | 7  | 2.756862493 | 0.003684    | ATP5S     | ENSG00000125375 |
| 14 | 49983424 | 49983603 | 49983513 | 8   | 8   | 5  | 1.43836304  | 0.235762    |           | ENSG00000201573 |
| 14 | 50069653 | 50069896 | 50069798 | 9   | 10  | 4  | 2.109599125 | 0.0694668   | MAP4K5    | ENSG00000012983 |
| 14 | 50082383 | 50082586 | 50082482 | 8   | 11  | 2  | 3.835634772 | 0.00800699  | MAP4K5    | ENSG00000012983 |
| 14 | 50136414 | 50137490 | 50136843 | 211 | 356 | 7  | 42.79130043 | 6.14E-93    |           | ENSG00000223050 |
| 14 | 50250897 | 50251104 | 50250990 | 9   | 11  | 2  | 3.835634772 | 0.00800699  | SAV1      | ENSG00000151748 |
| 14 | 50299930 | 50300217 | 50300073 | 10  | 11  | 6  | 1.643843474 | 0.137712    | NIN       | ENSG00000100503 |
| 14 | 50310143 | 50310358 | 50310207 | 11  | 11  | 1  | 5.753452158 | 0.00215302  | NIN       | ENSG00000100503 |
| 14 | 50314276 | 50314615 | 50314444 | 8   | 11  | 5  | 1.917817386 | 0.0843804   | NIN       | ENSG00000100503 |
| 14 | 50365888 | 50366069 | 50365993 | 9   | 9   | 0  | 9.589086931 | 0.00120187  | NIN       | ENSG00000100503 |
| 14 | 50491763 | 50492495 | 50492009 | 16  | 39  | 9  | 3.835634772 | 8.88E-06    | PYGL      | ENSG00000100504 |
| 14 | 50659958 | 50660290 | 50660124 | 37  | 40  | 1  | 19.65762821 | 2.24E-11    | TRIM9     | ENSG00000100505 |
| 14 | 50819900 | 50820088 | 50819994 | 8   | 8   | 4  | 1.726035648 | 0.150596    |           | ENSG00000201820 |
| 14 | 50873907 | 50874407 | 50874082 | 23  | 32  | 1  | 15.82199344 | 3.96E-09    |           | ENSG00000201820 |
| 14 | 50878679 | 50878900 | 50878789 | 8   | 9   | 3  | 2.397271733 | 0.0539397   |           | ENSG00000201820 |
| 14 | 50893786 | 50894049 | 50893917 | 10  | 13  | 1  | 6.712360851 | 0.000640982 |           | ENSG00000201820 |
| 14 | 50931351 | 50932255 | 50932047 | 24  | 62  | 7  | 7.551405958 | 3.65E-12    | FRMD6     | ENSG00000139926 |
| 14 | 51069597 | 51070015 | 51069915 | 12  | 18  | 6  | 2.602752167 | 0.00970422  | FRMD6     | ENSG00000139926 |

|    |          |          |          |    |    |    |             |             |           |                 |
|----|----------|----------|----------|----|----|----|-------------|-------------|-----------|-----------------|
| 14 | 51071299 | 51071666 | 51071506 | 9  | 15 | 4  | 3.068507818 | 0.0076507   | FRMD6     | ENSG00000139926 |
| 14 | 51081491 | 51081868 | 51081689 | 14 | 22 | 2  | 7.351633313 | 1.51E-05    |           | ENSG00000223144 |
| 14 | 51101512 | 51101859 | 51101684 | 11 | 16 | 3  | 4.075361945 | 0.00173346  |           | ENSG00000223144 |
| 14 | 51120599 | 51120839 | 51120753 | 8  | 10 | 1  | 5.273997812 | 0.00391723  |           | ENSG00000223144 |
| 14 | 51129389 | 51129579 | 51129484 | 8  | 8  | 0  | 8.630178238 | 0.00235436  |           | ENSG00000223144 |
| 14 | 51194563 | 51194968 | 51194799 | 8  | 14 | 4  | 2.876726079 | 0.01219     | FRMD6     | ENSG00000139926 |
| 14 | 51515960 | 51516154 | 51516057 | 8  | 9  | 0  | 9.589086931 | 0.00120187  | C14orf166 | ENSG00000087302 |
| 14 | 51525716 | 51525953 | 51525806 | 8  | 10 | 4  | 2.109599125 | 0.0694668   | C14orf166 | ENSG00000087302 |
| 14 | 51668298 | 51668552 | 51668425 | 10 | 10 | 5  | 1.757999271 | 0.121253    | NID2      | ENSG00000087303 |
| 14 | 52083655 | 52083834 | 52083789 | 8  | 8  | 2  | 2.876726079 | 0.0381137   | TXNDC16   | ENSG00000087301 |
| 14 | 52090336 | 52090526 | 52090390 | 8  | 8  | 0  | 8.630178238 | 0.00235436  | GPR137C   | ENSG00000180998 |
| 14 | 52237155 | 52237370 | 52237221 | 11 | 11 | 3  | 2.876726079 | 0.0213797   | ERO1L     | ENSG00000197930 |
| 14 | 52243227 | 52243841 | 52243406 | 10 | 23 | 7  | 2.876726079 | 0.00239423  | PSMC6     | ENSG00000100519 |
| 14 | 52244042 | 52244249 | 52244128 | 8  | 9  | 1  | 4.794543465 | 0.00708517  | PSMC6     | ENSG00000100519 |
| 14 | 52437157 | 52437464 | 52437305 | 12 | 14 | 7  | 1.797953799 | 0.0806593   |           | ENSG00000214855 |
| 14 | 52552120 | 52552323 | 52552233 | 8  | 9  | 6  | 1.369869562 | 0.253675    | FERMT2    | ENSG00000073712 |
| 14 | 52688164 | 52688369 | 52688306 | 8  | 11 | 4  | 2.301380863 | 0.0459276   | DDHD1     | ENSG00000100523 |
| 14 | 52949302 | 52949646 | 52949474 | 22 | 24 | 2  | 7.990905775 | 4.56E-06    |           | ENSG00000219652 |
| 14 | 53028124 | 53028320 | 53028255 | 12 | 12 | 5  | 2.077635502 | 0.0577144   |           | ENSG00000219652 |
| 14 | 53091063 | 53091471 | 53091242 | 18 | 25 | 6  | 3.56166086  | 0.000408555 |           | ENSG00000219652 |
| 14 | 53188641 | 53188890 | 53188765 | 9  | 9  | 3  | 2.397271733 | 0.0539397   |           | ENSG00000219652 |
| 14 | 53466869 | 53467064 | 53466976 | 8  | 9  | 4  | 1.917817386 | 0.103282    |           | ENSG00000220653 |
| 14 | 53479570 | 53479848 | 53479716 | 8  | 10 | 11 | 0.878999635 | 0.622439    | BMP4      | ENSG00000125378 |
| 14 | 53500219 | 53500431 | 53500340 | 8  | 11 | 5  | 1.917817386 | 0.0843804   | BMP4      | ENSG00000125378 |
| 14 | 53777648 | 53777827 | 53777758 | 8  | 9  | 1  | 4.794543465 | 0.00708517  | CDKN3     | ENSG00000100526 |
| 14 | 54025415 | 54025880 | 54025582 | 8  | 17 | 7  | 2.157544559 | 0.0276499   | GMFB      | ENSG00000197045 |
| 14 | 54045904 | 54046583 | 54046337 | 10 | 28 | 9  | 2.78083521  | 0.00127094  | CGRRF1    | ENSG00000100532 |
| 14 | 54108795 | 54109030 | 54108912 | 9  | 12 | 3  | 3.116453252 | 0.0131971   | SAMD4A    | ENSG00000020577 |
| 14 | 54228077 | 54228367 | 54228222 | 11 | 13 | 6  | 1.917817386 | 0.0693353   | SAMD4A    | ENSG00000020577 |
| 14 | 54309801 | 54310097 | 54309943 | 12 | 16 | 10 | 1.481949798 | 0.147733    | SAMD4A    | ENSG00000020577 |
| 14 | 54342441 | 54342707 | 54342574 | 9  | 11 | 4  | 2.301380863 | 0.0459276   | SAMD4A    | ENSG00000020577 |
| 14 | 54439421 | 54439960 | 54439800 | 13 | 25 | 6  | 3.56166086  | 0.000408555 | GCH1      | ENSG00000131979 |
| 14 | 54563060 | 54564136 | 54563646 | 12 | 46 | 22 | 1.959509068 | 0.00304329  | SOCS4     | ENSG00000180008 |
| 14 | 54587842 | 54588249 | 54587925 | 10 | 17 | 6  | 2.465765211 | 0.014729    | MAPK1IP1L | ENSG00000168175 |

|    |          |          |          |    |     |    |             |             |           |                 |
|----|----------|----------|----------|----|-----|----|-------------|-------------|-----------|-----------------|
| 14 | 54625944 | 54626286 | 54626123 | 8  | 12  | 1  | 6.232906505 | 0.00117736  | MAPK1IP1L | ENSG00000168175 |
| 14 | 54727619 | 54728046 | 54727854 | 10 | 19  | 13 | 1.369869562 | 0.177863    | DLGAP5    | ENSG00000126787 |
| 14 | 54728092 | 54728322 | 54728197 | 11 | 13  | 2  | 4.474907234 | 0.00269459  | DLGAP5    | ENSG00000126787 |
| 14 | 54749211 | 54749514 | 54749362 | 9  | 12  | 2  | 4.155271003 | 0.0046638   | UBE2L7P   | ENSG00000131982 |
| 14 | 54807587 | 54807849 | 54807718 | 13 | 16  | 2  | 5.433815927 | 0.000499302 | FBXO34    | ENSG00000178974 |
| 14 | 54963883 | 54964225 | 54964050 | 9  | 13  | 8  | 1.491635745 | 0.166708    | TBPL2     | ENSG00000182521 |
| 14 | 54966521 | 54966805 | 54966642 | 9  | 11  | 2  | 3.835634772 | 0.00800699  | TBPL2     | ENSG00000182521 |
| 14 | 54974696 | 54974888 | 54974792 | 11 | 11  | 8  | 1.278544924 | 0.28289     | TBPL2     | ENSG00000182521 |
| 14 | 54982581 | 54982949 | 54982808 | 8  | 13  | 7  | 1.678090213 | 0.11195     | TBPL2     | ENSG00000182521 |
| 14 | 54984552 | 54984975 | 54984719 | 15 | 22  | 6  | 3.150699991 | 0.00166398  | TBPL2     | ENSG00000182521 |
| 14 | 55000034 | 55000281 | 55000143 | 8  | 9   | 1  | 4.794543465 | 0.00708517  | TBPL2     | ENSG00000182521 |
| 14 | 55010479 | 55010678 | 55010578 | 8  | 9   | 0  | 9.589086931 | 0.00120187  | TBPL2     | ENSG00000182521 |
| 14 | 55183058 | 55183237 | 55183087 | 8  | 8   | 10 | 0.784561658 | 0.708731    |           | ENSG00000200742 |
| 14 | 55242167 | 55242458 | 55242312 | 10 | 14  | 4  | 2.876726079 | 0.01219     |           | ENSG00000200742 |
| 14 | 55289520 | 55289888 | 55289716 | 13 | 18  | 6  | 2.602752167 | 0.00970422  |           | ENSG00000177350 |
| 14 | 55290447 | 55290655 | 55290540 | 8  | 10  | 5  | 1.757999271 | 0.121253    |           | ENSG00000177350 |
| 14 | 55339686 | 55340019 | 55339852 | 10 | 14  | 3  | 3.595907599 | 0.00486913  |           | ENSG00000177350 |
| 14 | 55421206 | 55421475 | 55421340 | 12 | 13  | 4  | 2.684944341 | 0.01921     |           | ENSG00000213622 |
| 14 | 55717993 | 55718173 | 55718021 | 8  | 9   | 0  | 9.589086931 | 0.00120187  | PELI2     | ENSG00000139946 |
| 14 | 55718245 | 55718549 | 55718371 | 8  | 12  | 5  | 2.077635502 | 0.0577144   | PELI2     | ENSG00000139946 |
| 14 | 55876543 | 55876845 | 55876688 | 9  | 10  | 13 | 0.753428259 | 0.762589    | PELI2     | ENSG00000139946 |
| 14 | 56092449 | 56092687 | 56092566 | 9  | 10  | 4  | 2.109599125 | 0.0694668   | C14orf101 | ENSG00000070269 |
| 14 | 56202592 | 56203377 | 56202965 | 72 | 114 | 3  | 27.56862493 | 8.43E-30    | C14orf101 | ENSG00000070269 |
| 14 | 56383856 | 56384185 | 56384020 | 8  | 12  | 6  | 1.78083043  | 0.0985525   |           | ENSG00000200818 |
| 14 | 56410983 | 56411260 | 56411121 | 12 | 13  | 2  | 4.474907234 | 0.00269459  |           | ENSG00000200818 |
| 14 | 56422991 | 56423256 | 56423123 | 10 | 13  | 6  | 1.917817386 | 0.0693353   |           | ENSG00000200818 |
| 14 | 56448174 | 56448439 | 56448286 | 8  | 10  | 1  | 5.273997812 | 0.00391723  |           | ENSG00000213618 |
| 14 | 56463622 | 56463829 | 56463689 | 9  | 10  | 2  | 3.515998541 | 0.0136204   |           | ENSG00000213618 |
| 14 | 56594359 | 56594593 | 56594499 | 8  | 9   | 3  | 2.397271733 | 0.0539397   |           | ENSG00000213618 |
| 14 | 56622530 | 56622820 | 56622675 | 9  | 12  | 1  | 6.232906505 | 0.00117736  |           | ENSG00000213618 |
| 14 | 56793874 | 56794095 | 56793984 | 9  | 9   | 2  | 3.19636231  | 0.0229249   | EXOC5     | ENSG00000070367 |
| 14 | 56805486 | 56805776 | 56805631 | 10 | 13  | 8  | 1.491635745 | 0.166708    | C14orf108 | ENSG00000053770 |
| 14 | 56926853 | 56927111 | 56927000 | 9  | 10  | 6  | 1.506856518 | 0.188853    | NAT12     | ENSG00000139977 |
| 14 | 56935705 | 56935928 | 56935816 | 8  | 9   | 3  | 2.397271733 | 0.0539397   | NAT12     | ENSG00000139977 |



|    |          |          |          |    |    |    |             |             |           |                 |
|----|----------|----------|----------|----|----|----|-------------|-------------|-----------|-----------------|
| 14 | 57037630 | 57038000 | 57037848 | 12 | 17 | 3  | 4.315089119 | 0.00102271  | C14orf105 | ENSG00000100557 |
| 14 | 57073614 | 57074390 | 57074153 | 15 | 37 | 4  | 7.287706067 | 5.74E-08    | C14orf105 | ENSG00000100557 |
| 14 | 57189702 | 57190001 | 57189851 | 9  | 10 | 3  | 2.636998906 | 0.034203    | SLC35F4   | ENSG00000151812 |
| 14 | 57347266 | 57347548 | 57347376 | 8  | 10 | 1  | 5.273997812 | 0.00391723  |           | ENSG00000209817 |
| 14 | 57602660 | 57602911 | 57602785 | 12 | 13 | 0  | 13.4247217  | 8.16E-05    | C14orf37  | ENSG00000139971 |
| 14 | 57707447 | 57707982 | 57707725 | 10 | 22 | 10 | 2.004990904 | 0.023438    |           | ENSG00000223002 |
| 14 | 57776314 | 57776544 | 57776444 | 12 | 15 | 10 | 1.394776281 | 0.191426    | PSMA3     | ENSG00000100567 |
| 14 | 57824606 | 57825113 | 57824915 | 15 | 26 | 0  | 25.89053471 | 1.31E-08    |           | ENSG00000180189 |
| 14 | 57834189 | 57834722 | 57834444 | 11 | 22 | 8  | 2.450544438 | 0.0073921   | ARID4A    | ENSG00000032219 |
| 14 | 57834897 | 57835165 | 57835031 | 8  | 9  | 5  | 1.598181155 | 0.170911    | ARID4A    | ENSG00000032219 |
| 14 | 57963608 | 57964190 | 57964000 | 20 | 38 | 23 | 1.558226626 | 0.0403304   | TIMM9     | ENSG00000100575 |
| 14 | 57992413 | 57992623 | 57992483 | 9  | 11 | 4  | 2.301380863 | 0.0459276   | KIAA0586  | ENSG00000100578 |
| 14 | 58083807 | 58084059 | 58083964 | 9  | 10 | 2  | 3.515998541 | 0.0136204   | DACT1     | ENSG00000165617 |
| 14 | 58176384 | 58176691 | 58176540 | 9  | 13 | 1  | 6.712360851 | 0.000640982 | DACT1     | ENSG00000165617 |
| 14 | 58308601 | 58308793 | 58308697 | 8  | 8  | 2  | 2.876726079 | 0.0381137   |           | ENSG00000221427 |
| 14 | 58345324 | 58345581 | 58345460 | 10 | 12 | 8  | 1.385090334 | 0.219216    |           | ENSG00000213598 |
| 14 | 58448843 | 58449026 | 58448922 | 8  | 8  | 2  | 2.876726079 | 0.0381137   |           | ENSG00000213597 |
| 14 | 58565116 | 58565355 | 58565237 | 8  | 9  | 0  | 9.589086931 | 0.00120187  |           | ENSG00000214813 |
| 14 | 58781138 | 58781526 | 58781360 | 9  | 14 | 2  | 4.794543465 | 0.00154571  | DAAM1     | ENSG00000100592 |
| 14 | 58812311 | 58812690 | 58812511 | 8  | 15 | 1  | 7.671269544 | 0.000187863 | DAAM1     | ENSG00000100592 |
| 14 | 58814620 | 58814906 | 58814763 | 9  | 11 | 3  | 2.876726079 | 0.0213797   | DAAM1     | ENSG00000100592 |
| 14 | 58848161 | 58848380 | 58848306 | 14 | 15 | 2  | 5.114179696 | 0.00088103  | DAAM1     | ENSG00000100592 |
| 14 | 58897708 | 58897902 | 58897805 | 8  | 8  | 4  | 1.726035648 | 0.150596    | DAAM1     | ENSG00000100592 |
| 14 | 59019755 | 59020017 | 59019886 | 9  | 9  | 3  | 2.397271733 | 0.0539397   | C14orf149 | ENSG00000126790 |
| 14 | 59113378 | 59113565 | 59113401 | 8  | 8  | 5  | 1.43836304  | 0.235762    | C14orf38  | ENSG00000151838 |
| 14 | 59224068 | 59224494 | 59224280 | 20 | 31 | 3  | 7.671269544 | 3.82E-07    | RTN1      | ENSG00000139970 |
| 14 | 59224904 | 59225169 | 59225017 | 9  | 10 | 7  | 1.318499453 | 0.269217    | RTN1      | ENSG00000139970 |
| 14 | 59407452 | 59407671 | 59407598 | 8  | 11 | 2  | 3.835634772 | 0.00800699  | RTN1      | ENSG00000139970 |
| 14 | 59472093 | 59472388 | 59472231 | 19 | 22 | 1  | 11.02744997 | 2.36E-06    | LRRC9     | ENSG00000131951 |
| 14 | 59505770 | 59506141 | 59505981 | 12 | 17 | 3  | 4.315089119 | 0.00102271  | LRRC9     | ENSG00000131951 |
| 14 | 59627626 | 59627831 | 59627735 | 8  | 9  | 1  | 4.794543465 | 0.00708517  | C14orf135 | ENSG00000126773 |
| 14 | 59628085 | 59628342 | 59628190 | 11 | 13 | 8  | 1.491635745 | 0.166708    | C14orf135 | ENSG00000126773 |
| 14 | 59629177 | 59629446 | 59629287 | 10 | 13 | 1  | 6.712360851 | 0.000640982 | C14orf135 | ENSG00000126773 |
| 14 | 59715949 | 59716202 | 59716075 | 8  | 11 | 1  | 5.753452158 | 0.00215302  | DHRS7     | ENSG00000100612 |

|    |          |          |          |    |    |    |             |             |         |                 |
|----|----------|----------|----------|----|----|----|-------------|-------------|---------|-----------------|
| 14 | 59720678 | 59720879 | 59720837 | 8  | 10 | 4  | 2.109599125 | 0.0694668   | DHRS7   | ENSG00000100612 |
| 14 | 59751875 | 59752262 | 59752134 | 8  | 15 | 4  | 3.068507818 | 0.0076507   | PPM1A   | ENSG00000100614 |
| 14 | 59867666 | 59867913 | 59867789 | 8  | 12 | 1  | 6.232906505 | 0.00117736  | PPM1A   | ENSG00000100614 |
| 14 | 60153147 | 60153589 | 60153308 | 11 | 19 | 13 | 1.369869562 | 0.177863    | SIX1    | ENSG00000126778 |
| 14 | 60258580 | 60258891 | 60258746 | 8  | 11 | 7  | 1.43836304  | 0.204844    | SIX4    | ENSG00000100625 |
| 14 | 60271022 | 60271388 | 60271201 | 18 | 25 | 4  | 4.986325204 | 4.72E-05    | MNAT1   | ENSG00000020426 |
| 14 | 60398748 | 60399150 | 60398994 | 14 | 20 | 5  | 3.356180426 | 0.0017534   |         | ENSG00000214775 |
| 14 | 60415623 | 60416003 | 60415824 | 18 | 25 | 5  | 4.155271003 | 0.000149583 |         | ENSG00000214775 |
| 14 | 60517569 | 60517786 | 60517677 | 9  | 10 | 2  | 3.515998541 | 0.0136204   | SLC38A6 | ENSG00000139974 |
| 14 | 60561786 | 60561975 | 60561880 | 10 | 10 | 3  | 2.636998906 | 0.034203    | SLC38A6 | ENSG00000139974 |
| 14 | 60662211 | 60662697 | 60662417 | 29 | 41 | 1  | 20.13708255 | 1.17E-11    | SLC38A6 | ENSG00000139974 |
| 14 | 60892385 | 60892748 | 60892581 | 20 | 26 | 8  | 2.876726079 | 0.00140919  | PRKCH   | ENSG00000027075 |
| 14 | 60924743 | 60924936 | 60924800 | 10 | 12 | 1  | 6.232906505 | 0.00117736  | PRKCH   | ENSG00000027075 |
| 14 | 60951282 | 60951588 | 60951418 | 10 | 12 | 6  | 1.78083043  | 0.0985525   | PRKCH   | ENSG00000027075 |
| 14 | 60975285 | 60975584 | 60975445 | 11 | 13 | 7  | 1.678090213 | 0.11195     | PRKCH   | ENSG00000027075 |
| 14 | 61060284 | 61060564 | 61060409 | 12 | 13 | 3  | 3.356180426 | 0.00805599  | HIF1A   | ENSG00000100644 |
| 14 | 61061512 | 61062120 | 61061941 | 11 | 23 | 5  | 3.835634772 | 0.000408054 | HIF1A   | ENSG00000100644 |
| 14 | 61073994 | 61074368 | 61074148 | 12 | 18 | 5  | 3.036544195 | 0.0044641   | HIF1A   | ENSG00000100644 |
| 14 | 61123681 | 61123874 | 61123777 | 8  | 10 | 0  | 10.54799562 | 0.000613541 | HIF1A   | ENSG00000100644 |
| 14 | 61231461 | 61231680 | 61231604 | 8  | 9  | 13 | 0.684934781 | 0.824961    | HIF1A   | ENSG00000100644 |
| 14 | 61232706 | 61232957 | 61232784 | 9  | 12 | 7  | 1.558226626 | 0.152813    | HIF1A   | ENSG00000100644 |
| 14 | 61299054 | 61299262 | 61299156 | 8  | 10 | 4  | 2.109599125 | 0.0694668   | SNAPC1  | ENSG00000023608 |
| 14 | 61374187 | 61374395 | 61374291 | 10 | 10 | 7  | 1.318499453 | 0.269217    |         | ENSG00000213572 |
| 14 | 61430151 | 61430333 | 61430243 | 8  | 9  | 1  | 4.794543465 | 0.00708517  |         | ENSG00000213572 |
| 14 | 61501498 | 61501832 | 61501672 | 18 | 21 | 2  | 7.031997082 | 2.73E-05    | SYT16   | ENSG00000139973 |
| 14 | 61699574 | 61699778 | 61699676 | 8  | 9  | 2  | 3.19636231  | 0.0229249   |         | ENSG00000186369 |
| 14 | 61914595 | 61914920 | 61914757 | 9  | 12 | 4  | 2.493162602 | 0.0299057   |         | ENSG00000186369 |
| 14 | 62228482 | 62229006 | 62228835 | 62 | 75 | 0  | 72.87706067 | 6.41E-23    | KCNH5   | ENSG00000140015 |
| 14 | 62271333 | 62271658 | 62271495 | 21 | 25 | 1  | 12.46581301 | 3.51E-07    | KCNH5   | ENSG00000140015 |
| 14 | 62711263 | 62711457 | 62711351 | 8  | 8  | 4  | 1.726035648 | 0.150596    | RHOJ    | ENSG00000126785 |
| 14 | 63007522 | 63008031 | 63007686 | 10 | 17 | 2  | 5.753452158 | 0.000281509 |         | ENSG00000221675 |
| 14 | 63041145 | 63041386 | 63041247 | 13 | 15 | 3  | 3.835634772 | 0.00291691  |         | ENSG00000221675 |
| 14 | 63101928 | 63102232 | 63102067 | 12 | 15 | 0  | 15.34253909 | 2.13E-05    |         | ENSG00000205767 |
| 14 | 63178057 | 63178310 | 63178192 | 8  | 11 | 4  | 2.301380863 | 0.0459276   | WDR89   | ENSG00000140006 |

|    |          |          |          |     |     |    |             |             |         |                 |
|----|----------|----------|----------|-----|-----|----|-------------|-------------|---------|-----------------|
| 14 | 63214353 | 63214832 | 63214550 | 16  | 31  | 13 | 2.191791298 | 0.00499072  |         | ENSG00000209942 |
| 14 | 63225608 | 63225961 | 63225795 | 12  | 16  | 3  | 4.075361945 | 0.00173346  |         | ENSG00000209942 |
| 14 | 63264792 | 63265031 | 63264911 | 8   | 10  | 2  | 3.515998541 | 0.0136204   | SGPP1   | ENSG00000126821 |
| 14 | 63309814 | 63310624 | 63310196 | 135 | 176 | 5  | 28.28780645 | 9.38E-45    | SGPP1   | ENSG00000126821 |
| 14 | 63390521 | 63390918 | 63390698 | 10  | 17  | 6  | 2.465765211 | 0.014729    | SYNE2   | ENSG00000054654 |
| 14 | 63400742 | 63401056 | 63400899 | 11  | 13  | 6  | 1.917817386 | 0.0693353   | SYNE2   | ENSG00000054654 |
| 14 | 63432932 | 63433120 | 63433026 | 8   | 11  | 3  | 2.876726079 | 0.0213797   | SYNE2   | ENSG00000054654 |
| 14 | 63596949 | 63597339 | 63597163 | 38  | 46  | 5  | 7.511451429 | 1.54E-09    | SYNE2   | ENSG00000054654 |
| 14 | 63598198 | 63598434 | 63598316 | 10  | 10  | 3  | 2.636998906 | 0.034203    | SYNE2   | ENSG00000054654 |
| 14 | 63874194 | 63874558 | 63874373 | 8   | 13  | 9  | 1.34247217  | 0.232231    | ESR2    | ENSG00000140009 |
| 14 | 63875279 | 63875683 | 63875515 | 11  | 16  | 8  | 1.811271976 | 0.0663685   |         | ENSG00000214770 |
| 14 | 63925501 | 63925752 | 63925626 | 9   | 11  | 3  | 2.876726079 | 0.0213797   | MTHFD1  | ENSG00000100714 |
| 14 | 64041581 | 64042060 | 64041820 | 11  | 22  | 10 | 2.004990904 | 0.023438    | ZBTB1   | ENSG00000126804 |
| 14 | 64047593 | 64047815 | 64047699 | 8   | 11  | 9  | 1.150690432 | 0.367789    | ZBTB1   | ENSG00000126804 |
| 14 | 64051655 | 64051834 | 64051744 | 8   | 8   | 5  | 1.43836304  | 0.235762    | ZBTB1   | ENSG00000126804 |
| 14 | 64076944 | 64077252 | 64077033 | 8   | 13  | 5  | 2.237453617 | 0.038866    | HSPA2   | ENSG00000126803 |
| 14 | 64207975 | 64208294 | 64208134 | 10  | 15  | 6  | 2.191791298 | 0.0328001   | PLEKHG3 | ENSG00000126822 |
| 14 | 64216762 | 64217025 | 64216897 | 9   | 11  | 2  | 3.835634772 | 0.00800699  | PLEKHG3 | ENSG00000126822 |
| 14 | 64228646 | 64229035 | 64228856 | 21  | 28  | 3  | 6.952088025 | 2.20E-06    | PLEKHG3 | ENSG00000126822 |
| 14 | 64229500 | 64229699 | 64229550 | 9   | 9   | 1  | 4.794543465 | 0.00708517  | PLEKHG3 | ENSG00000126822 |
| 14 | 64326244 | 64326504 | 64326367 | 9   | 10  | 2  | 3.515998541 | 0.0136204   | SPTB    | ENSG00000070182 |
| 14 | 64473159 | 64473460 | 64473287 | 9   | 11  | 4  | 2.301380863 | 0.0459276   | GPX2    | ENSG00000176153 |
| 14 | 64503435 | 64503806 | 64503634 | 12  | 18  | 8  | 2.024362796 | 0.0334397   | RAB15   | ENSG00000139998 |
| 14 | 64523003 | 64523309 | 64523156 | 10  | 13  | 7  | 1.678090213 | 0.11195     | FNTB    | ENSG00000125954 |
| 14 | 64523318 | 64523655 | 64523411 | 13  | 17  | 6  | 2.465765211 | 0.014729    | FNTB    | ENSG00000125954 |
| 14 | 64541966 | 64542296 | 64542126 | 63  | 68  | 2  | 22.05489994 | 4.35E-18    | FNTB    | ENSG00000125954 |
| 14 | 64556410 | 64556769 | 64556589 | 10  | 17  | 14 | 1.150690432 | 0.340986    | FNTB    | ENSG00000125954 |
| 14 | 64606907 | 64607128 | 64607057 | 10  | 10  | 2  | 3.515998541 | 0.0136204   | MAX     | ENSG00000125952 |
| 14 | 64639259 | 64639631 | 64639467 | 8   | 14  | 7  | 1.797953799 | 0.0806593   | MAX     | ENSG00000125952 |
| 14 | 64674373 | 64674587 | 64674466 | 8   | 8   | 1  | 4.315089119 | 0.0127267   |         | ENSG00000222985 |
| 14 | 64758925 | 64759134 | 64759005 | 9   | 10  | 7  | 1.318499453 | 0.269217    |         | ENSG00000214760 |
| 14 | 64763132 | 64763653 | 64763485 | 22  | 38  | 13 | 2.671245645 | 0.000355791 |         | ENSG00000214760 |
| 14 | 64791499 | 64791761 | 64791613 | 11  | 11  | 4  | 2.301380863 | 0.0459276   |         | ENSG00000214760 |
| 14 | 64791825 | 64792033 | 64791929 | 8   | 8   | 6  | 1.232882605 | 0.333038    |         | ENSG00000214760 |

|    |          |          |          |     |     |    |             |             |          |                 |
|----|----------|----------|----------|-----|-----|----|-------------|-------------|----------|-----------------|
| 14 | 64792114 | 64792430 | 64792257 | 18  | 22  | 7  | 2.756862493 | 0.003684    |          | ENSG00000214760 |
| 14 | 64892906 | 64893111 | 64893000 | 8   | 8   | 2  | 2.876726079 | 0.0381137   | FUT8     | ENSG00000033170 |
| 14 | 64948605 | 64948941 | 64948773 | 9   | 14  | 10 | 1.307602763 | 0.244096    | FUT8     | ENSG00000033170 |
| 14 | 65103202 | 65103402 | 65103302 | 9   | 9   | 0  | 9.589086931 | 0.00120187  | FUT8     | ENSG00000033170 |
| 14 | 65111198 | 65111424 | 65111311 | 8   | 8   | 0  | 8.630178238 | 0.00235436  | FUT8     | ENSG00000033170 |
| 14 | 65130603 | 65130820 | 65130726 | 9   | 10  | 10 | 0.958908693 | 0.538751    | FUT8     | ENSG00000033170 |
| 14 | 65218316 | 65218517 | 65218414 | 9   | 9   | 0  | 9.589086931 | 0.00120187  | FUT8     | ENSG00000033170 |
| 14 | 65550632 | 65550968 | 65550800 | 16  | 21  | 2  | 7.031997082 | 2.73E-05    |          | ENSG00000197907 |
| 14 | 65551953 | 65552279 | 65552143 | 11  | 15  | 1  | 7.671269544 | 0.000187863 |          | ENSG00000197907 |
| 14 | 65617328 | 65617511 | 65617445 | 8   | 8   | 1  | 4.315089119 | 0.0127267   |          | ENSG00000197907 |
| 14 | 65640948 | 65641359 | 65641116 | 37  | 47  | 3  | 11.50690432 | 2.51E-11    |          | ENSG00000200860 |
| 14 | 65654135 | 65654378 | 65654256 | 9   | 12  | 5  | 2.077635502 | 0.0577144   |          | ENSG00000200860 |
| 14 | 66039945 | 66040360 | 66040188 | 42  | 52  | 1  | 25.41108037 | 8.99E-15    | GPHN     | ENSG00000171723 |
| 14 | 66044500 | 66044713 | 66044563 | 8   | 10  | 6  | 1.506856518 | 0.188853    | GPHN     | ENSG00000171723 |
| 14 | 66146551 | 66146880 | 66146716 | 8   | 13  | 5  | 2.237453617 | 0.038866    | GPHN     | ENSG00000171723 |
| 14 | 66468614 | 66469512 | 66469258 | 331 | 463 | 4  | 88.98672672 | 3.66E-128   | FAM71D   | ENSG00000172717 |
| 14 | 66469697 | 66469907 | 66469826 | 10  | 11  | 2  | 3.835634772 | 0.00800699  | FAM71D   | ENSG00000172717 |
| 14 | 66769164 | 66769393 | 66769300 | 8   | 9   | 5  | 1.598181155 | 0.170911    | MPP5     | ENSG00000072415 |
| 14 | 66896475 | 66897235 | 66896654 | 10  | 30  | 11 | 2.47718079  | 0.00221867  | EIF2S1   | ENSG00000134001 |
| 14 | 66963696 | 66963911 | 66963760 | 10  | 10  | 7  | 1.318499453 | 0.269217    | PLEK2    | ENSG00000100558 |
| 14 | 66964109 | 66964351 | 66964216 | 8   | 9   | 5  | 1.598181155 | 0.170911    | PLEK2    | ENSG00000100558 |
| 14 | 66977098 | 66977432 | 66977265 | 17  | 20  | 6  | 2.876726079 | 0.00408924  | PLEK2    | ENSG00000100558 |
| 14 | 67014269 | 67015395 | 67014661 | 89  | 144 | 22 | 6.045293934 | 1.34E-22    | C14orf83 | ENSG00000198133 |
| 14 | 67016466 | 67016912 | 67016740 | 14  | 22  | 16 | 1.297347055 | 0.203559    | C14orf83 | ENSG00000198133 |
| 14 | 67063344 | 67063608 | 67063513 | 8   | 10  | 3  | 2.636998906 | 0.034203    | PLEKHH1  | ENSG00000054690 |
| 14 | 67155974 | 67156161 | 67156105 | 8   | 8   | 8  | 0.958908693 | 0.534974    | ARG2     | ENSG00000081181 |
| 14 | 67241015 | 67241228 | 67241106 | 9   | 11  | 6  | 1.643843474 | 0.137712    |          | ENSG00000222857 |
| 14 | 67373614 | 67373875 | 67373744 | 10  | 10  | 3  | 2.636998906 | 0.034203    | RAD51L1  | ENSG00000182185 |
| 14 | 67470481 | 67470730 | 67470605 | 11  | 12  | 4  | 2.493162602 | 0.0299057   | RAD51L1  | ENSG00000182185 |
| 14 | 67480450 | 67480755 | 67480598 | 11  | 14  | 6  | 2.054804342 | 0.0480281   | RAD51L1  | ENSG00000182185 |
| 14 | 67514908 | 67515140 | 67515044 | 8   | 10  | 3  | 2.636998906 | 0.034203    | RAD51L1  | ENSG00000182185 |
| 14 | 67674083 | 67674730 | 67674475 | 21  | 40  | 7  | 4.914407052 | 6.35E-07    |          | ENSG00000210045 |
| 14 | 67748829 | 67749066 | 67748947 | 8   | 9   | 2  | 3.19636231  | 0.0229249   |          | ENSG00000210054 |
| 14 | 67769142 | 67769329 | 67769222 | 11  | 11  | 4  | 2.301380863 | 0.0459276   |          | ENSG00000210054 |

|    |          |          |          |    |    |    |             |             |           |                 |
|----|----------|----------|----------|----|----|----|-------------|-------------|-----------|-----------------|
| 14 | 67777466 | 67777672 | 67777569 | 8  | 9  | 6  | 1.369869562 | 0.253675    |           | ENSG00000210054 |
| 14 | 67782384 | 67782578 | 67782491 | 8  | 9  | 0  | 9.589086931 | 0.00120187  |           | ENSG00000210054 |
| 14 | 67844086 | 67844292 | 67844189 | 8  | 9  | 3  | 2.397271733 | 0.0539397   |           | ENSG00000219350 |
| 14 | 67934298 | 67934554 | 67934426 | 10 | 13 | 3  | 3.356180426 | 0.00805599  |           | ENSG00000213482 |
| 14 | 68005264 | 68005446 | 68005354 | 8  | 9  | 7  | 1.198635866 | 0.346278    |           | ENSG00000213482 |
| 14 | 68106765 | 68107083 | 68106924 | 9  | 11 | 3  | 2.876726079 | 0.0213797   |           | ENSG00000213482 |
| 14 | 68205698 | 68205985 | 68205861 | 10 | 13 | 7  | 1.678090213 | 0.11195     |           | ENSG00000207089 |
| 14 | 68252119 | 68252338 | 68252228 | 9  | 10 | 3  | 2.636998906 | 0.034203    |           | ENSG00000207089 |
| 14 | 68311233 | 68311439 | 68311336 | 8  | 8  | 4  | 1.726035648 | 0.150596    | ZFP36L1   | ENSG00000185650 |
| 14 | 68328161 | 68329083 | 68328424 | 25 | 49 | 8  | 5.327270517 | 1.89E-08    | ZFP36L1   | ENSG00000185650 |
| 14 | 68329854 | 68330074 | 68329987 | 9  | 12 | 2  | 4.155271003 | 0.0046638   | ZFP36L1   | ENSG00000185650 |
| 14 | 68332911 | 68333127 | 68333011 | 8  | 10 | 2  | 3.515998541 | 0.0136204   | C14orf181 | ENSG00000221899 |
| 14 | 68361340 | 68361556 | 68361461 | 10 | 11 | 11 | 0.958908693 | 0.540507    | C14orf181 | ENSG00000221899 |
| 14 | 68376831 | 68377105 | 68376936 | 13 | 15 | 3  | 3.835634772 | 0.00291691  |           | ENSG00000214730 |
| 14 | 68399702 | 68399953 | 68399827 | 10 | 14 | 4  | 2.876726079 | 0.01219     |           | ENSG00000214730 |
| 14 | 68524724 | 68525335 | 68524933 | 23 | 40 | 0  | 39.31525642 | 1.07E-12    | ACTN1     | ENSG00000072110 |
| 14 | 68642916 | 68643167 | 68643044 | 10 | 12 | 1  | 6.232906505 | 0.00117736  |           | ENSG00000206768 |
| 14 | 68643967 | 68644162 | 68644047 | 8  | 9  | 4  | 1.917817386 | 0.103282    |           | ENSG00000206768 |
| 14 | 68665806 | 68666086 | 68665946 | 9  | 11 | 10 | 1.046082211 | 0.455063    |           | ENSG00000206768 |
| 14 | 68687772 | 68687959 | 68687856 | 10 | 10 | 3  | 2.636998906 | 0.034203    | WDR22     | ENSG00000139990 |
| 14 | 68688301 | 68688480 | 68688393 | 8  | 8  | 1  | 4.315089119 | 0.0127267   | WDR22     | ENSG00000139990 |
| 14 | 68727809 | 68728277 | 68727966 | 16 | 22 | 8  | 2.450544438 | 0.0073921   | EXDL2     | ENSG00000081177 |
| 14 | 68750548 | 68750727 | 68750637 | 8  | 8  | 2  | 2.876726079 | 0.0381137   | EXDL2     | ENSG00000081177 |
| 14 | 68887920 | 68888116 | 68888020 | 9  | 11 | 0  | 11.50690432 | 0.000313206 | ERH       | ENSG00000100632 |
| 14 | 68893667 | 68893951 | 68893791 | 11 | 15 | 14 | 1.022835939 | 0.473606    | ERH       | ENSG00000100632 |
| 14 | 68893959 | 68894291 | 68894160 | 10 | 14 | 14 | 0.958908693 | 0.545362    | ERH       | ENSG00000100632 |
| 14 | 68934705 | 68934936 | 68934820 | 8  | 10 | 7  | 1.318499453 | 0.269217    | ERH       | ENSG00000100632 |
| 14 | 68935009 | 68935264 | 68935130 | 9  | 10 | 9  | 1.054799562 | 0.4492      | SLC39A9   | ENSG00000029364 |
| 14 | 68935773 | 68935964 | 68935868 | 8  | 8  | 4  | 1.726035648 | 0.150596    | SLC39A9   | ENSG00000029364 |
| 14 | 68964150 | 68964438 | 68964296 | 24 | 25 | 3  | 6.232906505 | 1.23E-05    | SLC39A9   | ENSG00000029364 |
| 14 | 68996611 | 68996853 | 68996732 | 11 | 13 | 3  | 3.356180426 | 0.00805599  |           | ENSG00000175985 |
| 14 | 69149227 | 69149672 | 69149468 | 63 | 79 | 7  | 9.589086931 | 1.88E-16    | KIAA0247  | ENSG00000100647 |
| 14 | 69149708 | 69150009 | 69149874 | 10 | 12 | 6  | 1.78083043  | 0.0985525   | KIAA0247  | ENSG00000100647 |
| 14 | 69179890 | 69180368 | 69180064 | 11 | 20 | 2  | 6.712360851 | 4.91E-05    | KIAA0247  | ENSG00000100647 |

|    |          |          |          |    |     |    |             |             |          |                 |
|----|----------|----------|----------|----|-----|----|-------------|-------------|----------|-----------------|
| 14 | 69181011 | 69181236 | 69181139 | 8  | 8   | 2  | 2.876726079 | 0.0381137   | KIAA0247 | ENSG00000100647 |
| 14 | 69188287 | 69188466 | 69188376 | 8  | 8   | 0  | 8.630178238 | 0.00235436  | KIAA0247 | ENSG00000100647 |
| 14 | 69199556 | 69199779 | 69199642 | 8  | 12  | 7  | 1.558226626 | 0.152813    | KIAA0247 | ENSG00000100647 |
| 14 | 69249227 | 69250144 | 69249765 | 56 | 95  | 12 | 7.081171887 | 5.60E-17    | SFRS5    | ENSG00000100650 |
| 14 | 69303470 | 69303831 | 69303610 | 9  | 15  | 13 | 1.095895649 | 0.398774    | SFRS5    | ENSG00000100650 |
| 14 | 69452826 | 69453005 | 69452910 | 8  | 8   | 1  | 4.315089119 | 0.0127267   | SMOC1    | ENSG00000198732 |
| 14 | 69534350 | 69534693 | 69534521 | 24 | 30  | 8  | 3.302907721 | 0.000239229 |          | ENSG00000210090 |
| 14 | 69535776 | 69536316 | 69535983 | 72 | 99  | 6  | 13.69869562 | 1.57E-22    |          | ENSG00000210090 |
| 14 | 69547500 | 69548040 | 69547759 | 90 | 121 | 4  | 23.39737211 | 1.41E-30    |          | ENSG00000210090 |
| 14 | 69854397 | 69854621 | 69854526 | 10 | 11  | 4  | 2.301380863 | 0.0459276   | COX16    | ENSG00000133983 |
| 14 | 69895978 | 69896376 | 69896155 | 14 | 21  | 12 | 1.622768557 | 0.076896    | COX16    | ENSG00000133983 |
| 14 | 69983634 | 69984190 | 69983898 | 49 | 67  | 0  | 65.20579113 | 1.39E-20    |          | ENSG00000213462 |
| 14 | 70137016 | 70137223 | 70137090 | 9  | 9   | 3  | 2.397271733 | 0.0539397   | MED6     | ENSG00000133997 |
| 14 | 70201927 | 70202199 | 70202075 | 10 | 11  | 8  | 1.278544924 | 0.28289     | TTC9     | ENSG00000133985 |
| 14 | 70292046 | 70292260 | 70292128 | 8  | 8   | 0  | 8.630178238 | 0.00235436  | MAP3K9   | ENSG00000006432 |
| 14 | 70401508 | 70401935 | 70401693 | 50 | 68  | 1  | 33.08234991 | 2.47E-19    | PCNX     | ENSG00000100731 |
| 14 | 70408893 | 70409329 | 70409158 | 13 | 19  | 1  | 9.589086931 | 1.56E-05    | PCNX     | ENSG00000100731 |
| 14 | 70445147 | 70445368 | 70445246 | 8  | 9   | 8  | 1.065454103 | 0.442605    | PCNX     | ENSG00000100731 |
| 14 | 70585072 | 70585252 | 70585160 | 8  | 8   | 7  | 1.07877228  | 0.435076    | PCNX     | ENSG00000100731 |
| 14 | 70612714 | 70613374 | 70613149 | 69 | 102 | 6  | 14.10965648 | 2.48E-23    | PCNX     | ENSG00000100731 |
| 14 | 70703036 | 70703246 | 70703143 | 9  | 10  | 6  | 1.506856518 | 0.188853    |          | ENSG00000207444 |
| 14 | 70856563 | 70857091 | 70856742 | 9  | 18  | 5  | 3.036544195 | 0.0044641   |          | ENSG00000207444 |
| 14 | 70858338 | 70858767 | 70858666 | 10 | 19  | 2  | 6.39272462  | 8.83E-05    |          | ENSG00000207444 |
| 14 | 70859207 | 70859414 | 70859310 | 9  | 10  | 4  | 2.109599125 | 0.0694668   |          | ENSG00000207444 |
| 14 | 70937233 | 70937443 | 70937347 | 8  | 8   | 6  | 1.232882605 | 0.333038    |          | ENSG00000207444 |
| 14 | 70940189 | 70940399 | 70940258 | 8  | 8   | 7  | 1.07877228  | 0.435076    |          | ENSG00000207444 |
| 14 | 71008297 | 71008753 | 71008458 | 13 | 22  | 10 | 2.004990904 | 0.023438    |          | ENSG00000210153 |
| 14 | 71019701 | 71019880 | 71019790 | 8  | 8   | 4  | 1.726035648 | 0.150596    |          | ENSG00000210153 |
| 14 | 71100422 | 71100777 | 71100599 | 20 | 26  | 6  | 3.698647816 | 0.00025253  | SIPA1L1  | ENSG00000197555 |
| 14 | 71175340 | 71175553 | 71175446 | 12 | 13  | 1  | 6.712360851 | 0.000640982 | SIPA1L1  | ENSG00000197555 |
| 14 | 71183546 | 71183816 | 71183681 | 8  | 11  | 11 | 0.958908693 | 0.540507    | SIPA1L1  | ENSG00000197555 |
| 14 | 71222529 | 71222716 | 71222657 | 8  | 8   | 1  | 4.315089119 | 0.0127267   | SIPA1L1  | ENSG00000197555 |
| 14 | 71250246 | 71250425 | 71250270 | 8  | 8   | 1  | 4.315089119 | 0.0127267   | SIPA1L1  | ENSG00000197555 |
| 14 | 71257386 | 71257809 | 71257597 | 10 | 18  | 1  | 9.109632584 | 2.91E-05    | SIPA1L1  | ENSG00000197555 |

|    |          |          |          |    |     |    |             |             |          |                 |
|----|----------|----------|----------|----|-----|----|-------------|-------------|----------|-----------------|
| 14 | 71289515 | 71289880 | 71289694 | 14 | 21  | 10 | 1.917817386 | 0.0328292   | RGS6     | ENSG00000182732 |
| 14 | 71310350 | 71310880 | 71310663 | 76 | 110 | 2  | 35.47962164 | 5.96E-30    | RGS6     | ENSG00000182732 |
| 14 | 71322609 | 71322931 | 71322770 | 24 | 27  | 1  | 13.4247217  | 9.80E-08    | RGS6     | ENSG00000182732 |
| 14 | 71335484 | 71335735 | 71335570 | 8  | 11  | 5  | 1.917817386 | 0.0843804   | RGS6     | ENSG00000182732 |
| 14 | 71340173 | 71340719 | 71340402 | 10 | 22  | 9  | 2.205489994 | 0.0136443   | RGS6     | ENSG00000182732 |
| 14 | 71560140 | 71560364 | 71560203 | 8  | 10  | 5  | 1.757999271 | 0.121253    |          | ENSG00000200298 |
| 14 | 71940482 | 71940872 | 71940743 | 16 | 20  | 3  | 5.034270639 | 0.000202317 | DPF3     | ENSG00000205683 |
| 14 | 71953398 | 71953756 | 71953603 | 8  | 13  | 3  | 3.356180426 | 0.00805599  | DPF3     | ENSG00000205683 |
| 14 | 71990867 | 71991084 | 71990974 | 8  | 8   | 6  | 1.232882605 | 0.333038    | DPF3     | ENSG00000205683 |
| 14 | 72053562 | 72053752 | 72053616 | 9  | 9   | 6  | 1.369869562 | 0.253675    | DPF3     | ENSG00000205683 |
| 14 | 72203117 | 72203328 | 72203222 | 10 | 10  | 4  | 2.109599125 | 0.0694668   | DPF3     | ENSG00000205683 |
| 14 | 72424530 | 72424728 | 72424629 | 9  | 10  | 4  | 2.109599125 | 0.0694668   | DPF3     | ENSG00000205683 |
| 14 | 72441452 | 72441731 | 72441611 | 14 | 18  | 3  | 4.554816292 | 0.000599415 | DPF3     | ENSG00000205683 |
| 14 | 72460786 | 72461167 | 72460965 | 14 | 23  | 2  | 7.671269544 | 8.30E-06    | WDR21A   | ENSG00000119599 |
| 14 | 72562519 | 72562833 | 72562684 | 9  | 10  | 5  | 1.757999271 | 0.121253    | ZFYVE1   | ENSG00000165861 |
| 14 | 72563530 | 72563957 | 72563778 | 9  | 18  | 1  | 9.109632584 | 2.91E-05    | ZFYVE1   | ENSG00000165861 |
| 14 | 72594584 | 72595031 | 72594863 | 12 | 21  | 8  | 2.343999027 | 0.0109478   | RBM25    | ENSG00000119707 |
| 14 | 72595535 | 72595815 | 72595687 | 11 | 12  | 6  | 1.78083043  | 0.0985525   | RBM25    | ENSG00000119707 |
| 14 | 72831436 | 72831624 | 72831530 | 8  | 8   | 2  | 2.876726079 | 0.0381137   | PAPLN    | ENSG00000100767 |
| 14 | 72969029 | 72969261 | 72969128 | 10 | 11  | 2  | 3.835634772 | 0.00800699  |          | ENSG00000221236 |
| 14 | 72995123 | 72995387 | 72995237 | 9  | 13  | 9  | 1.34247217  | 0.232231    |          | ENSG00000221236 |
| 14 | 73008660 | 73008870 | 73008765 | 8  | 8   | 7  | 1.07877228  | 0.435076    |          | ENSG00000170468 |
| 14 | 73063084 | 73063340 | 73063201 | 16 | 18  | 6  | 2.602752167 | 0.00970422  | ACOT1    | ENSG00000184227 |
| 14 | 73198910 | 73199188 | 73199049 | 10 | 12  | 10 | 1.133255728 | 0.37674     | DNAL1    | ENSG00000119661 |
| 14 | 73265118 | 73265387 | 73265213 | 10 | 13  | 3  | 3.356180426 | 0.00805599  |          | ENSG00000183700 |
| 14 | 73277209 | 73277522 | 73277365 | 8  | 12  | 6  | 1.78083043  | 0.0985525   | C14orf43 | ENSG00000156030 |
| 14 | 73289055 | 73289392 | 73289223 | 9  | 14  | 6  | 2.054804342 | 0.0480281   | C14orf43 | ENSG00000156030 |
| 14 | 73387674 | 73388644 | 73387960 | 9  | 32  | 7  | 3.955498359 | 3.65E-05    | PTGR2    | ENSG00000140043 |
| 14 | 73423851 | 73424061 | 73423913 | 8  | 9   | 5  | 1.598181155 | 0.170911    | ZNF410   | ENSG00000119725 |
| 14 | 73486397 | 73486624 | 73486530 | 8  | 9   | 5  | 1.598181155 | 0.170911    | FAM161B  | ENSG00000156050 |
| 14 | 73541501 | 73541733 | 73541613 | 9  | 10  | 3  | 2.636998906 | 0.034203    | ENTPD5   | ENSG00000187097 |
| 14 | 73554949 | 73555151 | 73555060 | 8  | 10  | 4  | 2.109599125 | 0.0694668   | C14orf45 | ENSG00000119636 |
| 14 | 73620658 | 73621022 | 73620855 | 10 | 14  | 8  | 1.598181155 | 0.124586    | ALDH6A1  | ENSG00000119711 |
| 14 | 73685314 | 73685560 | 73685454 | 9  | 10  | 2  | 3.515998541 | 0.0136204   |          | ENSG00000210266 |

|    |          |          |          |    |    |    |             |             |           |                 |
|----|----------|----------|----------|----|----|----|-------------|-------------|-----------|-----------------|
| 14 | 73787903 | 73788232 | 73788067 | 14 | 19 | 7  | 2.397271733 | 0.0127287   | VSX2      | ENSG00000119614 |
| 14 | 73838859 | 73839051 | 73838959 | 8  | 9  | 1  | 4.794543465 | 0.00708517  | ABCD4     | ENSG00000119688 |
| 14 | 73839380 | 73839666 | 73839517 | 8  | 12 | 10 | 1.133255728 | 0.37674     | ABCD4     | ENSG00000119688 |
| 14 | 73839675 | 73839854 | 73839730 | 8  | 8  | 1  | 4.315089119 | 0.0127267   | ABCD4     | ENSG00000119688 |
| 14 | 73898865 | 73899090 | 73898934 | 9  | 11 | 6  | 1.643843474 | 0.137712    | C14orf115 | ENSG00000133980 |
| 14 | 74029620 | 74029915 | 74029775 | 11 | 14 | 3  | 3.595907599 | 0.00486913  | NPC2      | ENSG00000119655 |
| 14 | 74038561 | 74038906 | 74038733 | 8  | 13 | 4  | 2.684944341 | 0.01921     | ISCA2     | ENSG00000165898 |
| 14 | 74106707 | 74106911 | 74106809 | 8  | 10 | 1  | 5.273997812 | 0.00391723  | LTBP2     | ENSG00000119681 |
| 14 | 74146174 | 74146421 | 74146321 | 9  | 9  | 0  | 9.589086931 | 0.00120187  | LTBP2     | ENSG00000119681 |
| 14 | 74249150 | 74249728 | 74249329 | 11 | 26 | 17 | 1.43836304  | 0.111326    |           | ENSG00000214670 |
| 14 | 74299435 | 74299754 | 74299594 | 17 | 19 | 3  | 4.794543465 | 0.000349205 | YLPM1     | ENSG00000119596 |
| 14 | 74418871 | 74419078 | 74418974 | 8  | 8  | 6  | 1.232882605 | 0.333038    | DLSTP     | ENSG00000119689 |
| 14 | 74447990 | 74448202 | 74448111 | 8  | 10 | 1  | 5.273997812 | 0.00391723  | RPS6KL1   | ENSG00000198208 |
| 14 | 74481700 | 74482002 | 74481874 | 11 | 14 | 5  | 2.397271733 | 0.0258078   | PGF       | ENSG00000119630 |
| 14 | 74482181 | 74482423 | 74482292 | 8  | 11 | 3  | 2.876726079 | 0.0213797   | PGF       | ENSG00000119630 |
| 14 | 74483185 | 74483623 | 74483446 | 15 | 24 | 6  | 3.424673904 | 0.000656885 | PGF       | ENSG00000119630 |
| 14 | 74489229 | 74489462 | 74489319 | 9  | 12 | 1  | 6.232906505 | 0.00117736  | PGF       | ENSG00000119630 |
| 14 | 74489495 | 74489840 | 74489670 | 34 | 39 | 2  | 12.78544924 | 4.53E-10    | PGF       | ENSG00000119630 |
| 14 | 74521212 | 74521394 | 74521303 | 8  | 8  | 1  | 4.315089119 | 0.0127267   | EIF2B2    | ENSG00000119718 |
| 14 | 74538812 | 74539101 | 74538947 | 10 | 12 | 1  | 6.232906505 | 0.00117736  | EIF2B2    | ENSG00000119718 |
| 14 | 74539176 | 74539382 | 74539279 | 9  | 10 | 5  | 1.757999271 | 0.121253    | EIF2B2    | ENSG00000119718 |
| 14 | 74620915 | 74621373 | 74621209 | 17 | 24 | 5  | 3.995452888 | 0.00024777  | FAM164C   | ENSG00000119703 |
| 14 | 74656975 | 74657243 | 74657113 | 8  | 10 | 6  | 1.506856518 | 0.188853    | NEK9      | ENSG00000119638 |
| 14 | 74713373 | 74713684 | 74713528 | 10 | 11 | 9  | 1.150690432 | 0.367789    | TMED10    | ENSG00000170348 |
| 14 | 74737028 | 74737412 | 74737207 | 20 | 26 | 17 | 1.43836304  | 0.111326    |           | ENSG00000210276 |
| 14 | 74758305 | 74758596 | 74758448 | 9  | 12 | 0  | 12.46581301 | 0.000159888 |           | ENSG00000210276 |
| 14 | 74791484 | 74791736 | 74791626 | 12 | 14 | 12 | 1.106433107 | 0.392094    | FOS       | ENSG00000170345 |
| 14 | 74796439 | 74796737 | 74796588 | 10 | 12 | 9  | 1.246581301 | 0.295061    | FOS       | ENSG00000170345 |
| 14 | 74800611 | 74800879 | 74800745 | 14 | 15 | 9  | 1.534253909 | 0.136498    | FOS       | ENSG00000170345 |
| 14 | 74814164 | 74814517 | 74814321 | 9  | 13 | 7  | 1.678090213 | 0.11195     | FOS       | ENSG00000170345 |
| 14 | 74840039 | 74840239 | 74840122 | 8  | 9  | 7  | 1.198635866 | 0.346278    |           | ENSG00000119660 |
| 14 | 74844340 | 74844526 | 74844400 | 9  | 11 | 3  | 2.876726079 | 0.0213797   |           | ENSG00000119660 |
| 14 | 75057652 | 75057902 | 75057777 | 9  | 13 | 8  | 1.491635745 | 0.166708    | BATF      | ENSG00000156127 |
| 14 | 75071979 | 75072360 | 75072150 | 12 | 18 | 5  | 3.036544195 | 0.0044641   | BATF      | ENSG00000156127 |



|    |          |          |          |    |    |    |             |             |           |                 |
|----|----------|----------|----------|----|----|----|-------------|-------------|-----------|-----------------|
| 14 | 75090803 | 75091023 | 75090920 | 9  | 11 | 3  | 2.876726079 | 0.0213797   | FLVCR2    | ENSG00000119686 |
| 14 | 75113690 | 75114370 | 75114076 | 13 | 28 | 9  | 2.78083521  | 0.00127094  | FLVCR2    | ENSG00000119686 |
| 14 | 75171018 | 75171353 | 75171191 | 16 | 20 | 3  | 5.034270639 | 0.000202317 | C14orf1   | ENSG00000133935 |
| 14 | 75197236 | 75197593 | 75197414 | 11 | 17 | 6  | 2.465765211 | 0.014729    | TTLL5     | ENSG00000119685 |
| 14 | 75213934 | 75214204 | 75214071 | 10 | 13 | 5  | 2.237453617 | 0.038866    | TTLL5     | ENSG00000119685 |
| 14 | 75521750 | 75522069 | 75521917 | 8  | 12 | 3  | 3.116453252 | 0.0131971   | C14orf179 | ENSG00000119650 |
| 14 | 75586909 | 75587318 | 75587146 | 10 | 16 | 4  | 3.260289556 | 0.00475414  | C14orf179 | ENSG00000119650 |
| 14 | 75630948 | 75631261 | 75631099 | 8  | 11 | 3  | 2.876726079 | 0.0213797   | C14orf118 | ENSG00000089916 |
| 14 | 75916142 | 75916378 | 75916266 | 8  | 9  | 2  | 3.19636231  | 0.0229249   | ESRRB     | ENSG00000119715 |
| 14 | 75923321 | 75923535 | 75923454 | 11 | 13 | 5  | 2.237453617 | 0.038866    | ESRRB     | ENSG00000119715 |
| 14 | 75929961 | 75930272 | 75930116 | 11 | 16 | 2  | 5.433815927 | 0.000499302 | ESRRB     | ENSG00000119715 |
| 14 | 76033973 | 76034286 | 76034129 | 8  | 10 | 2  | 3.515998541 | 0.0136204   |           | ENSG00000203517 |
| 14 | 76244889 | 76245119 | 76245000 | 8  | 9  | 2  | 3.19636231  | 0.0229249   | VASH1     | ENSG00000071246 |
| 14 | 76306997 | 76307189 | 76307093 | 8  | 9  | 4  | 1.917817386 | 0.103282    | VASH1     | ENSG00000071246 |
| 14 | 76320796 | 76321173 | 76320947 | 10 | 17 | 7  | 2.157544559 | 0.0276499   | VASH1     | ENSG00000071246 |
| 14 | 76348970 | 76349284 | 76349106 | 9  | 12 | 10 | 1.133255728 | 0.37674     | ANGEL1    | ENSG00000013523 |
| 14 | 76440823 | 76441018 | 76440920 | 8  | 9  | 3  | 2.397271733 | 0.0539397   |           | ENSG00000210304 |
| 14 | 76441114 | 76441444 | 76441279 | 14 | 19 | 2  | 6.39272462  | 8.83E-05    |           | ENSG00000210304 |
| 14 | 76449494 | 76449855 | 76449665 | 10 | 16 | 9  | 1.630144778 | 0.102169    |           | ENSG00000210304 |
| 14 | 76454810 | 76455170 | 76454979 | 15 | 21 | 3  | 5.273997812 | 0.00011662  |           | ENSG00000210304 |
| 14 | 76474266 | 76474577 | 76474427 | 11 | 14 | 5  | 2.397271733 | 0.0258078   |           | ENSG00000214657 |
| 14 | 76492802 | 76493180 | 76493011 | 9  | 13 | 3  | 3.356180426 | 0.00805599  |           | ENSG00000214657 |
| 14 | 76495352 | 76495763 | 76495556 | 30 | 40 | 6  | 5.616465202 | 1.84E-07    |           | ENSG00000214657 |
| 14 | 76497626 | 76497910 | 76497768 | 9  | 11 | 6  | 1.643843474 | 0.137712    |           | ENSG00000214657 |
| 14 | 76497978 | 76498230 | 76498092 | 9  | 10 | 6  | 1.506856518 | 0.188853    |           | ENSG00000214657 |
| 14 | 76543674 | 76543925 | 76543821 | 8  | 11 | 6  | 1.643843474 | 0.137712    | C14orf4   | ENSG00000119669 |
| 14 | 76543941 | 76544365 | 76544120 | 14 | 23 | 14 | 1.534253909 | 0.0910901   | C14orf4   | ENSG00000119669 |
| 14 | 76550196 | 76550431 | 76550313 | 8  | 10 | 2  | 3.515998541 | 0.0136204   | C14orf4   | ENSG00000119669 |
| 14 | 76551564 | 76551799 | 76551728 | 9  | 12 | 3  | 3.116453252 | 0.0131971   | C14orf4   | ENSG00000119669 |
| 14 | 76564825 | 76565212 | 76564984 | 12 | 19 | 13 | 1.369869562 | 0.177863    | C14orf4   | ENSG00000119669 |
| 14 | 76565384 | 76565592 | 76565488 | 9  | 11 | 0  | 11.50690432 | 0.000313206 | C14orf4   | ENSG00000119669 |
| 14 | 76569182 | 76569721 | 76569544 | 17 | 31 | 15 | 1.917817386 | 0.0135562   | C14orf4   | ENSG00000119669 |
| 14 | 76570300 | 76570651 | 76570464 | 12 | 17 | 11 | 1.43836304  | 0.15834     | C14orf4   | ENSG00000119669 |
| 14 | 76582854 | 76583195 | 76583024 | 8  | 13 | 8  | 1.491635745 | 0.166708    | C14orf4   | ENSG00000119669 |

|    |          |          |          |    |    |    |             |             |           |                 |
|----|----------|----------|----------|----|----|----|-------------|-------------|-----------|-----------------|
| 14 | 76589292 | 76589889 | 76589600 | 10 | 22 | 9  | 2.205489994 | 0.0136443   | C14orf4   | ENSG00000119669 |
| 14 | 76606698 | 76606904 | 76606851 | 8  | 9  | 5  | 1.598181155 | 0.170911    | KIAA1737  | ENSG00000198894 |
| 14 | 76624389 | 76624714 | 76624551 | 25 | 30 | 14 | 1.981744632 | 0.0116992   | KIAA1737  | ENSG00000198894 |
| 14 | 76629656 | 76629862 | 76629759 | 8  | 8  | 3  | 2.157544559 | 0.0836802   | KIAA1737  | ENSG00000198894 |
| 14 | 76630901 | 76631116 | 76631008 | 10 | 10 | 8  | 1.171999514 | 0.35773     | KIAA1737  | ENSG00000198894 |
| 14 | 76634066 | 76634374 | 76634220 | 8  | 13 | 11 | 1.118726809 | 0.38479     | KIAA1737  | ENSG00000198894 |
| 14 | 76670018 | 76670351 | 76670184 | 14 | 18 | 3  | 4.554816292 | 0.000599415 | ZDHHC22   | ENSG00000177108 |
| 14 | 76688454 | 76688695 | 76688588 | 8  | 10 | 4  | 2.109599125 | 0.0694668   | ZDHHC22   | ENSG00000177108 |
| 14 | 76717568 | 76717892 | 76717738 | 9  | 12 | 4  | 2.493162602 | 0.0299057   | TMEM63C   | ENSG00000165548 |
| 14 | 76718941 | 76719120 | 76718956 | 8  | 9  | 0  | 9.589086931 | 0.00120187  | TMEM63C   | ENSG00000165548 |
| 14 | 76782590 | 76782846 | 76782765 | 10 | 12 | 0  | 12.46581301 | 0.000159888 |           | ENSG00000221754 |
| 14 | 76839872 | 76840098 | 76839985 | 13 | 14 | 3  | 3.595907599 | 0.00486913  | GSTZ1     | ENSG00000100577 |
| 14 | 76850132 | 76850424 | 76850278 | 17 | 19 | 7  | 2.397271733 | 0.0127287   | GSTZ1     | ENSG00000100577 |
| 14 | 76878682 | 76878930 | 76878806 | 9  | 10 | 2  | 3.515998541 | 0.0136204   | GSTZ1     | ENSG00000100577 |
| 14 | 76993491 | 76993737 | 76993614 | 8  | 9  | 3  | 2.397271733 | 0.0539397   | C14orf133 | ENSG00000151445 |
| 14 | 76993886 | 76994134 | 76994024 | 9  | 12 | 5  | 2.077635502 | 0.0577144   | AHSA1     | ENSG00000100591 |
| 14 | 77235669 | 77235930 | 77235799 | 11 | 13 | 3  | 3.356180426 | 0.00805599  | ALKBH1    | ENSG00000100601 |
| 14 | 77243398 | 77243703 | 77243550 | 12 | 17 | 3  | 4.315089119 | 0.00102271  | ALKBH1    | ENSG00000100601 |
| 14 | 77335965 | 77336217 | 77336101 | 10 | 11 | 1  | 5.753452158 | 0.00215302  | ADCK1     | ENSG00000063761 |
| 14 | 77340669 | 77340955 | 77340794 | 8  | 11 | 3  | 2.876726079 | 0.0213797   | ADCK1     | ENSG00000063761 |
| 14 | 77671488 | 77671879 | 77671667 | 22 | 29 | 1  | 14.3836304  | 2.72E-08    |           | ENSG00000199454 |
| 14 | 77763868 | 77764161 | 77764014 | 8  | 11 | 4  | 2.301380863 | 0.0459276   | NRXN3     | ENSG00000021645 |
| 14 | 77984625 | 77984929 | 77984824 | 8  | 12 | 7  | 1.558226626 | 0.152813    |           | ENSG00000205585 |
| 14 | 78134363 | 78134553 | 78134521 | 8  | 10 | 0  | 10.54799562 | 0.000613541 |           | ENSG00000221178 |
| 14 | 78172145 | 78172360 | 78172298 | 8  | 9  | 1  | 4.794543465 | 0.00708517  | NRXN3     | ENSG00000021645 |
| 14 | 78239218 | 78239407 | 78239312 | 9  | 9  | 3  | 2.397271733 | 0.0539397   | NRXN3     | ENSG00000021645 |
| 14 | 78280784 | 78281068 | 78280904 | 15 | 18 | 1  | 9.109632584 | 2.91E-05    | NRXN3     | ENSG00000021645 |
| 14 | 78373039 | 78373269 | 78373156 | 10 | 12 | 2  | 4.155271003 | 0.0046638   | NRXN3     | ENSG00000021645 |
| 14 | 78384279 | 78384598 | 78384438 | 9  | 14 | 1  | 7.191815198 | 0.00034761  | NRXN3     | ENSG00000021645 |
| 14 | 78404537 | 78404726 | 78404631 | 8  | 8  | 3  | 2.157544559 | 0.0836802   | NRXN3     | ENSG00000021645 |
| 14 | 78427986 | 78428297 | 78428141 | 13 | 17 | 5  | 2.876726079 | 0.00703033  | NRXN3     | ENSG00000021645 |
| 14 | 78438173 | 78438363 | 78438221 | 9  | 9  | 1  | 4.794543465 | 0.00708517  | NRXN3     | ENSG00000021645 |
| 14 | 78495952 | 78496245 | 78496049 | 9  | 13 | 2  | 4.474907234 | 0.00269459  | NRXN3     | ENSG00000021645 |
| 14 | 78576792 | 78577221 | 78576971 | 35 | 45 | 3  | 11.02744997 | 8.54E-11    | NRXN3     | ENSG00000021645 |

|    |          |          |          |    |     |    |             |             |           |                 |
|----|----------|----------|----------|----|-----|----|-------------|-------------|-----------|-----------------|
| 14 | 78581437 | 78581732 | 78581573 | 17 | 21  | 2  | 7.031997082 | 2.73E-05    | NRXN3     | ENSG00000021645 |
| 14 | 78627484 | 78627686 | 78627585 | 9  | 10  | 1  | 5.273997812 | 0.00391723  | NRXN3     | ENSG00000021645 |
| 14 | 78695395 | 78696310 | 78695963 | 50 | 105 | 4  | 20.32886429 | 3.84E-26    | NRXN3     | ENSG00000021645 |
| 14 | 78815736 | 78816002 | 78815854 | 8  | 11  | 8  | 1.278544924 | 0.28289     | NRXN3     | ENSG00000021645 |
| 14 | 78879147 | 78879370 | 78879258 | 11 | 12  | 4  | 2.493162602 | 0.0299057   | NRXN3     | ENSG00000021645 |
| 14 | 78905938 | 78906122 | 78906030 | 8  | 8   | 1  | 4.315089119 | 0.0127267   | NRXN3     | ENSG00000021645 |
| 14 | 79349985 | 79350256 | 79350118 | 15 | 15  | 2  | 5.114179696 | 0.00088103  | DIO2      | ENSG00000211448 |
| 14 | 79403439 | 79403748 | 79403612 | 8  | 10  | 4  | 2.109599125 | 0.0694668   | DIO2      | ENSG00000211448 |
| 14 | 79533922 | 79534260 | 79534085 | 8  | 11  | 10 | 1.046082211 | 0.455063    | DIO2      | ENSG00000211448 |
| 14 | 79539282 | 79539613 | 79539437 | 12 | 17  | 10 | 1.569123316 | 0.112309    | DIO2      | ENSG00000211448 |
| 14 | 80121174 | 80121489 | 80121341 | 8  | 11  | 6  | 1.643843474 | 0.137712    | C14orf145 | ENSG00000100629 |
| 14 | 80322231 | 80322481 | 80322339 | 8  | 9   | 2  | 3.19636231  | 0.0229249   | C14orf145 | ENSG00000100629 |
| 14 | 80477633 | 80478080 | 80477812 | 9  | 20  | 9  | 2.013708255 | 0.0279742   | C14orf145 | ENSG00000100629 |
| 14 | 80706443 | 80706911 | 80706618 | 13 | 23  | 15 | 1.43836304  | 0.12479     |           | ENSG00000210351 |
| 14 | 80755488 | 80755776 | 80755632 | 9  | 13  | 7  | 1.678090213 | 0.11195     | GTF2A1    | ENSG00000165417 |
| 14 | 80835115 | 80835440 | 80835277 | 17 | 20  | 1  | 10.06854128 | 8.32E-06    |           | ENSG00000205579 |
| 14 | 80907924 | 80908236 | 80908080 | 28 | 29  | 7  | 3.595907599 | 0.000155266 | STON2     | ENSG00000140022 |
| 14 | 80937072 | 80937312 | 80937192 | 9  | 11  | 0  | 11.50690432 | 0.000313206 | STON2     | ENSG00000140022 |
| 14 | 80989379 | 80989580 | 80989479 | 8  | 9   | 5  | 1.598181155 | 0.170911    | SEL1L     | ENSG00000071537 |
| 14 | 81542834 | 81543113 | 81542988 | 16 | 20  | 3  | 5.034270639 | 0.000202317 |           | ENSG00000222877 |
| 14 | 82191976 | 82192199 | 82192096 | 10 | 10  | 2  | 3.515998541 | 0.0136204   |           | ENSG00000213346 |
| 14 | 86133536 | 86133721 | 86133628 | 8  | 8   | 1  | 4.315089119 | 0.0127267   |           |                 |
| 14 | 86586191 | 86586394 | 86586292 | 9  | 9   | 3  | 2.397271733 | 0.0539397   |           |                 |
| 14 | 86750524 | 86750853 | 86750688 | 19 | 23  | 2  | 7.671269544 | 8.30E-06    |           |                 |
| 14 | 87307178 | 87307727 | 87307544 | 76 | 141 | 94 | 1.433316152 | 0.00300567  | GALC      | ENSG00000054983 |
| 14 | 87704735 | 87704941 | 87704809 | 9  | 9   | 4  | 1.917817386 | 0.103282    | KCNK10    | ENSG00000100433 |
| 14 | 87725573 | 87725861 | 87725726 | 10 | 14  | 5  | 2.397271733 | 0.0258078   | KCNK10    | ENSG00000100433 |
| 14 | 88004926 | 88005319 | 88005152 | 8  | 15  | 3  | 3.835634772 | 0.00291691  |           | ENSG00000222990 |
| 14 | 88012459 | 88012754 | 88012606 | 9  | 10  | 2  | 3.515998541 | 0.0136204   |           | ENSG00000222990 |
| 14 | 88024048 | 88024494 | 88024271 | 44 | 60  | 6  | 8.356204325 | 2.34E-12    |           | ENSG00000222990 |
| 14 | 88096204 | 88096395 | 88096321 | 8  | 10  | 6  | 1.506856518 | 0.188853    | ZC3H14    | ENSG00000100722 |
| 14 | 88099591 | 88099881 | 88099736 | 8  | 11  | 4  | 2.301380863 | 0.0459276   | ZC3H14    | ENSG00000100722 |
| 14 | 88360494 | 88360683 | 88360571 | 8  | 9   | 5  | 1.598181155 | 0.170911    | TTC8      | ENSG00000165533 |
| 14 | 88404707 | 88404894 | 88404800 | 8  | 8   | 4  | 1.726035648 | 0.150596    | TTC8      | ENSG00000165533 |

|    |          |          |          |    |    |    |             |             |           |                 |
|----|----------|----------|----------|----|----|----|-------------|-------------|-----------|-----------------|
| 14 | 88515159 | 88515467 | 88515305 | 12 | 15 | 7  | 1.917817386 | 0.0572317   | TTC8      | ENSG00000165533 |
| 14 | 88548221 | 88548493 | 88548357 | 9  | 11 | 4  | 2.301380863 | 0.0459276   | TTC8      | ENSG00000165533 |
| 14 | 88548932 | 88549112 | 88549022 | 8  | 9  | 9  | 0.958908693 | 0.536911    | TTC8      | ENSG00000165533 |
| 14 | 88576506 | 88576844 | 88576680 | 9  | 14 | 8  | 1.598181155 | 0.124586    | TTC8      | ENSG00000165533 |
| 14 | 88577118 | 88577383 | 88577256 | 10 | 12 | 2  | 4.155271003 | 0.0046638   | TTC8      | ENSG00000165533 |
| 14 | 88722418 | 88722895 | 88722569 | 10 | 18 | 5  | 3.036544195 | 0.0044641   |           | ENSG00000214598 |
| 14 | 88750431 | 88750688 | 88750565 | 10 | 12 | 5  | 2.077635502 | 0.0577144   |           | ENSG00000214598 |
| 14 | 88751653 | 88751989 | 88751821 | 10 | 16 | 3  | 4.075361945 | 0.00173346  |           | ENSG00000214598 |
| 14 | 88964902 | 88965486 | 88965119 | 59 | 83 | 0  | 80.54833022 | 2.96E-25    | FOXN3     | ENSG00000053254 |
| 14 | 89145002 | 89145257 | 89145116 | 9  | 10 | 0  | 10.54799562 | 0.000613541 |           | ENSG00000201027 |
| 14 | 89280522 | 89280765 | 89280643 | 8  | 10 | 3  | 2.636998906 | 0.034203    |           | ENSG00000200312 |
| 14 | 89370628 | 89370873 | 89370760 | 8  | 9  | 6  | 1.369869562 | 0.253675    |           | ENSG00000210535 |
| 14 | 89491094 | 89491298 | 89491161 | 10 | 13 | 2  | 4.474907234 | 0.00269459  | C14orf143 | ENSG00000140025 |
| 14 | 89492529 | 89492806 | 89492657 | 8  | 10 | 2  | 3.515998541 | 0.0136204   | TDP1      | ENSG00000042088 |
| 14 | 89830993 | 89831247 | 89831093 | 11 | 12 | 1  | 6.232906505 | 0.00117736  |           | ENSG00000205533 |
| 14 | 89867253 | 89867439 | 89867346 | 8  | 8  | 5  | 1.43836304  | 0.235762    | C14orf102 | ENSG00000119720 |
| 14 | 89924577 | 89924775 | 89924650 | 8  | 10 | 7  | 1.318499453 | 0.269217    | CALM1     | ENSG00000198668 |
| 14 | 89935724 | 89936024 | 89935874 | 14 | 16 | 7  | 2.037680973 | 0.0400399   | CALM1     | ENSG00000198668 |
| 14 | 90023981 | 90024197 | 90024089 | 8  | 8  | 5  | 1.43836304  | 0.235762    | CALM1     | ENSG00000198668 |
| 14 | 90045046 | 90045479 | 90045170 | 8  | 17 | 8  | 1.917817386 | 0.0474153   | CALM1     | ENSG00000198668 |
| 14 | 90090526 | 90090750 | 90090591 | 10 | 11 | 5  | 1.917817386 | 0.0843804   | CALM1     | ENSG00000198668 |
| 14 | 90233612 | 90233858 | 90233735 | 8  | 8  | 9  | 0.863017824 | 0.627343    |           | ENSG00000213315 |
| 14 | 90296849 | 90297063 | 90296909 | 9  | 10 | 5  | 1.757999271 | 0.121253    |           | ENSG00000213315 |
| 14 | 90334090 | 90334530 | 90334308 | 11 | 21 | 8  | 2.343999027 | 0.0109478   | TTC7B     | ENSG00000165914 |
| 14 | 90407168 | 90407397 | 90407282 | 10 | 10 | 1  | 5.273997812 | 0.00391723  | TTC7B     | ENSG00000165914 |
| 14 | 90419812 | 90420165 | 90419974 | 16 | 21 | 2  | 7.031997082 | 2.73E-05    | TTC7B     | ENSG00000165914 |
| 14 | 90517814 | 90518005 | 90517932 | 8  | 8  | 2  | 2.876726079 | 0.0381137   | RPS6KA5   | ENSG00000100784 |
| 14 | 90645518 | 90645716 | 90645617 | 8  | 9  | 7  | 1.198635866 | 0.346278    | C14orf159 | ENSG00000133943 |
| 14 | 90651934 | 90652323 | 90652146 | 11 | 17 | 4  | 3.452071295 | 0.00292757  | C14orf159 | ENSG00000133943 |
| 14 | 90660939 | 90661129 | 90660971 | 9  | 9  | 0  | 9.589086931 | 0.00120187  |           | ENSG00000221102 |
| 14 | 90663471 | 90664112 | 90663790 | 17 | 34 | 9  | 3.356180426 | 9.18E-05    |           | ENSG00000221102 |
| 14 | 90694150 | 90694590 | 90694361 | 11 | 21 | 6  | 3.013713035 | 0.00261913  |           | ENSG00000221102 |
| 14 | 90713360 | 90713738 | 90713634 | 10 | 16 | 6  | 2.328778255 | 0.0221113   |           | ENSG00000221102 |
| 14 | 90812542 | 90812781 | 90812709 | 13 | 14 | 10 | 1.307602763 | 0.244096    | CCDC88C   | ENSG00000015133 |

|    |          |          |          |     |     |    |             |             |         |                 |
|----|----------|----------|----------|-----|-----|----|-------------|-------------|---------|-----------------|
| 14 | 90822886 | 90823135 | 90823008 | 9   | 11  | 6  | 1.643843474 | 0.137712    | CCDC88C | ENSG00000015133 |
| 14 | 90858747 | 90858926 | 90858777 | 8   | 8   | 4  | 1.726035648 | 0.150596    | CCDC88C | ENSG00000015133 |
| 14 | 90932064 | 90932551 | 90932280 | 22  | 35  | 5  | 5.753452158 | 7.49E-07    | CCDC88C | ENSG00000015133 |
| 14 | 91045117 | 91045841 | 91045638 | 112 | 180 | 11 | 14.46353945 | 1.41E-39    | SMEK1   | ENSG00000100796 |
| 14 | 91046156 | 91046671 | 91046309 | 10  | 22  | 7  | 2.756862493 | 0.003684    | SMEK1   | ENSG00000100796 |
| 14 | 91109987 | 91110289 | 91110145 | 9   | 14  | 4  | 2.876726079 | 0.01219     |         | ENSG00000178069 |
| 14 | 91372798 | 91373030 | 91372903 | 8   | 9   | 1  | 4.794543465 | 0.00708517  | TC2N    | ENSG00000165929 |
| 14 | 91408809 | 91409036 | 91408922 | 8   | 9   | 4  | 1.917817386 | 0.103282    | TC2N    | ENSG00000165929 |
| 14 | 91447609 | 91447969 | 91447762 | 8   | 14  | 8  | 1.598181155 | 0.124586    | FBLN5   | ENSG00000140092 |
| 14 | 91549476 | 91549737 | 91549612 | 8   | 10  | 2  | 3.515998541 | 0.0136204   | TRIP11  | ENSG00000100815 |
| 14 | 91575433 | 91575798 | 91575664 | 8   | 12  | 8  | 1.385090334 | 0.219216    | TRIP11  | ENSG00000100815 |
| 14 | 91639262 | 91640086 | 91639725 | 62  | 108 | 6  | 14.93157822 | 6.07E-25    | ATXN3   | ENSG00000066427 |
| 14 | 91641757 | 91641964 | 91641860 | 9   | 11  | 4  | 2.301380863 | 0.0459276   | ATXN3   | ENSG00000066427 |
| 14 | 91642794 | 91643148 | 91642973 | 9   | 14  | 3  | 3.595907599 | 0.00486913  | ATXN3   | ENSG00000066427 |
| 14 | 91657837 | 91658029 | 91657871 | 8   | 9   | 5  | 1.598181155 | 0.170911    | NDUFB1  | ENSG00000183648 |
| 14 | 91712616 | 91712922 | 91712786 | 12  | 17  | 3  | 4.315089119 | 0.00102271  | CPSF2   | ENSG00000165934 |
| 14 | 92040103 | 92040304 | 92040208 | 9   | 10  | 0  | 10.54799562 | 0.000613541 | RIN3    | ENSG00000100599 |
| 14 | 92134291 | 92135099 | 92134791 | 45  | 70  | 4  | 13.61650344 | 1.37E-16    | RIN3    | ENSG00000100599 |
| 14 | 92172661 | 92172907 | 92172758 | 12  | 13  | 1  | 6.712360851 | 0.000640982 | LG MN   | ENSG00000100600 |
| 14 | 92226347 | 92226772 | 92226550 | 9   | 18  | 5  | 3.036544195 | 0.0044641   | LG MN   | ENSG00000100600 |
| 14 | 92250744 | 92251025 | 92250868 | 8   | 10  | 6  | 1.506856518 | 0.188853    | LG MN   | ENSG00000100600 |
| 14 | 92262409 | 92262644 | 92262501 | 8   | 10  | 4  | 2.109599125 | 0.0694668   | LG MN   | ENSG00000100600 |
| 14 | 92329717 | 92330023 | 92329872 | 8   | 13  | 8  | 1.491635745 | 0.166708    | GOLGA5  | ENSG00000066455 |
| 14 | 92386580 | 92386794 | 92386678 | 9   | 10  | 2  | 3.515998541 | 0.0136204   | GOLGA5  | ENSG00000066455 |
| 14 | 92488007 | 92488327 | 92488167 | 11  | 17  | 4  | 3.452071295 | 0.00292757  | CHGA    | ENSG00000100604 |
| 14 | 92510021 | 92510448 | 92510343 | 11  | 19  | 11 | 1.598181155 | 0.0927758   | CHGA    | ENSG00000100604 |
| 14 | 92521688 | 92521915 | 92521765 | 9   | 11  | 5  | 1.917817386 | 0.0843804   | CHGA    | ENSG00000100604 |
| 14 | 92522399 | 92522602 | 92522509 | 8   | 9   | 4  | 1.917817386 | 0.103282    | CHGA    | ENSG00000100604 |
| 14 | 92569722 | 92569976 | 92569810 | 9   | 10  | 6  | 1.506856518 | 0.188853    | ITPK1   | ENSG00000100605 |
| 14 | 92579647 | 92579913 | 92579756 | 10  | 10  | 6  | 1.506856518 | 0.188853    | ITPK1   | ENSG00000100605 |
| 14 | 92596052 | 92596285 | 92596160 | 9   | 9   | 1  | 4.794543465 | 0.00708517  | ITPK1   | ENSG00000100605 |
| 14 | 92648832 | 92649192 | 92649011 | 10  | 17  | 13 | 1.232882605 | 0.274309    | ITPK1   | ENSG00000100605 |
| 14 | 92649456 | 92649771 | 92649607 | 17  | 20  | 11 | 1.678090213 | 0.0696225   | ITPK1   | ENSG00000100605 |
| 14 | 92668513 | 92668840 | 92668679 | 8   | 10  | 4  | 2.109599125 | 0.0694668   | ITPK1   | ENSG00000100605 |

|    |          |          |          |    |    |    |             |             |           |                 |
|----|----------|----------|----------|----|----|----|-------------|-------------|-----------|-----------------|
| 14 | 92671948 | 92672466 | 92672127 | 14 | 30 | 8  | 3.302907721 | 0.000239229 | ITPK1     | ENSG00000100605 |
| 14 | 92675290 | 92675785 | 92675462 | 23 | 34 | 10 | 3.051073114 | 0.000209762 | ITPK1     | ENSG00000100605 |
| 14 | 92702251 | 92702522 | 92702373 | 9  | 13 | 0  | 13.4247217  | 8.16E-05    | MOAP1     | ENSG00000165943 |
| 14 | 92721521 | 92721772 | 92721646 | 9  | 13 | 7  | 1.678090213 | 0.11195     | C14orf109 | ENSG00000153485 |
| 14 | 92743034 | 92743294 | 92743150 | 11 | 13 | 7  | 1.678090213 | 0.11195     | UBR7      | ENSG00000012963 |
| 14 | 92743583 | 92743800 | 92743706 | 8  | 8  | 4  | 1.726035648 | 0.150596    | C14orf142 | ENSG00000170270 |
| 14 | 92743956 | 92744208 | 92744082 | 8  | 8  | 3  | 2.157544559 | 0.0836802   | C14orf142 | ENSG00000170270 |
| 14 | 92856066 | 92856265 | 92856140 | 8  | 8  | 1  | 4.315089119 | 0.0127267   | BTBD7     | ENSG00000011114 |
| 14 | 93009726 | 93009913 | 93009835 | 9  | 9  | 0  | 9.589086931 | 0.00120187  |           | ENSG00000202306 |
| 14 | 93155246 | 93155436 | 93155341 | 8  | 8  | 3  | 2.157544559 | 0.0836802   | PRIMA1    | ENSG00000175785 |
| 14 | 93191176 | 93191451 | 93191310 | 8  | 9  | 7  | 1.198635866 | 0.346278    | PRIMA1    | ENSG00000175785 |
| 14 | 93196977 | 93197156 | 93197077 | 8  | 8  | 1  | 4.315089119 | 0.0127267   | PRIMA1    | ENSG00000175785 |
| 14 | 93472276 | 93472511 | 93472352 | 8  | 10 | 3  | 2.636998906 | 0.034203    | FAM181A   | ENSG00000140067 |
| 14 | 93506650 | 93506858 | 93506754 | 10 | 11 | 3  | 2.876726079 | 0.0213797   | ASB2      | ENSG00000100628 |
| 14 | 93537814 | 93538008 | 93537951 | 8  | 9  | 5  | 1.598181155 | 0.170911    | C14orf48  | ENSG00000175699 |
| 14 | 93616437 | 93616616 | 93616545 | 8  | 8  | 5  | 1.43836304  | 0.235762    | DDX24     | ENSG00000089737 |
| 14 | 93856337 | 93856671 | 93856508 | 26 | 29 | 2  | 9.589086931 | 2.21E-07    | SERPINA6  | ENSG00000170099 |
| 14 | 93870971 | 93871304 | 93871137 | 28 | 33 | 1  | 16.30144778 | 2.08E-09    | SERPINA6  | ENSG00000170099 |
| 14 | 93981657 | 93981989 | 93981823 | 9  | 15 | 4  | 3.068507818 | 0.0076507   | SERPINA11 | ENSG00000186910 |
| 14 | 94001859 | 94002225 | 94002046 | 12 | 19 | 2  | 6.39272462  | 8.83E-05    | SERPINA9  | ENSG00000170054 |
| 14 | 94022472 | 94022683 | 94022599 | 8  | 8  | 4  | 1.726035648 | 0.150596    | SERPINA9  | ENSG00000170054 |
| 14 | 94217512 | 94217787 | 94217662 | 9  | 12 | 6  | 1.78083043  | 0.0985525   | SERPINA13 | ENSG00000187483 |
| 14 | 94693691 | 94694171 | 94693945 | 8  | 19 | 8  | 2.130908207 | 0.0233014   | DICER1    | ENSG00000100697 |
| 14 | 94732447 | 94732800 | 94732623 | 15 | 19 | 7  | 2.397271733 | 0.0127287   |           | ENSG00000198411 |
| 14 | 94733733 | 94733971 | 94733881 | 10 | 11 | 1  | 5.753452158 | 0.00215302  |           | ENSG00000198411 |
| 14 | 94767973 | 94768381 | 94768227 | 8  | 14 | 5  | 2.397271733 | 0.0258078   |           | ENSG00000198411 |
| 14 | 94777441 | 94777627 | 94777534 | 8  | 8  | 4  | 1.726035648 | 0.150596    |           | ENSG00000198411 |
| 14 | 94801567 | 94802177 | 94801775 | 25 | 41 | 7  | 5.034270639 | 3.77E-07    | CLMN      | ENSG00000165959 |
| 14 | 94811085 | 94811312 | 94811160 | 9  | 11 | 7  | 1.43836304  | 0.204844    | CLMN      | ENSG00000165959 |
| 14 | 94850786 | 94851132 | 94850967 | 20 | 25 | 9  | 2.493162602 | 0.00432225  | CLMN      | ENSG00000165959 |
| 14 | 94876333 | 94876720 | 94876541 | 12 | 19 | 10 | 1.743470351 | 0.0622604   | CLMN      | ENSG00000165959 |
| 14 | 95070279 | 95070463 | 95070329 | 9  | 9  | 1  | 4.794543465 | 0.00708517  |           | ENSG00000212530 |
| 14 | 95070658 | 95070916 | 95070800 | 8  | 11 | 9  | 1.150690432 | 0.367789    | GLRX5     | ENSG00000182512 |
| 14 | 95277150 | 95277572 | 95277431 | 13 | 19 | 9  | 1.917817386 | 0.0394029   | TCL1A     | ENSG00000100721 |

|    |          |          |          |    |    |    |             |             |           |                 |
|----|----------|----------|----------|----|----|----|-------------|-------------|-----------|-----------------|
| 14 | 95310521 | 95310742 | 95310668 | 8  | 9  | 5  | 1.598181155 | 0.170911    | TCL1A     | ENSG00000100721 |
| 14 | 95385560 | 95385794 | 95385677 | 9  | 10 | 1  | 5.273997812 | 0.00391723  | TCL1A     | ENSG00000100721 |
| 14 | 95619835 | 95620140 | 95619976 | 11 | 14 | 4  | 2.876726079 | 0.01219     | BDKRB2    | ENSG00000168398 |
| 14 | 95622230 | 95622433 | 95622355 | 12 | 13 | 3  | 3.356180426 | 0.00805599  | BDKRB2    | ENSG00000168398 |
| 14 | 95631909 | 95632338 | 95632088 | 13 | 24 | 8  | 2.663635258 | 0.00328036  | BDKRB2    | ENSG00000168398 |
| 14 | 95636566 | 95636907 | 95636736 | 11 | 16 | 2  | 5.433815927 | 0.000499302 | BDKRB2    | ENSG00000168398 |
| 14 | 95672668 | 95672859 | 95672774 | 9  | 9  | 1  | 4.794543465 | 0.00708517  | BDKRB2    | ENSG00000168398 |
| 14 | 95707098 | 95707277 | 95707100 | 8  | 8  | 3  | 2.157544559 | 0.0836802   | BDKRB2    | ENSG00000168398 |
| 14 | 95740680 | 95740976 | 95740844 | 12 | 15 | 5  | 2.557089848 | 0.0169197   | BDKRB2    | ENSG00000168398 |
| 14 | 95752426 | 95752640 | 95752520 | 8  | 9  | 0  | 9.589086931 | 0.00120187  | BDKRB2    | ENSG00000168398 |
| 14 | 95824181 | 95824428 | 95824345 | 9  | 10 | 0  | 10.54799562 | 0.000613541 | BDKRB1    | ENSG00000100739 |
| 14 | 95928169 | 95928368 | 95928203 | 9  | 10 | 3  | 2.636998906 | 0.034203    | AK7       | ENSG00000140057 |
| 14 | 95960460 | 95960691 | 95960575 | 9  | 11 | 1  | 5.753452158 | 0.00215302  | AK7       | ENSG00000140057 |
| 14 | 96016517 | 96016747 | 96016632 | 14 | 15 | 3  | 3.835634772 | 0.00291691  | PAPOLA    | ENSG00000090060 |
| 14 | 96037667 | 96037981 | 96037804 | 13 | 18 | 5  | 3.036544195 | 0.0044641   | PAPOLA    | ENSG00000090060 |
| 14 | 96120461 | 96120678 | 96120577 | 8  | 10 | 2  | 3.515998541 | 0.0136204   |           | ENSG00000223299 |
| 14 | 96425599 | 96425787 | 96425728 | 8  | 8  | 5  | 1.43836304  | 0.235762    | VRK1      | ENSG00000100749 |
| 14 | 96778826 | 96779005 | 96778914 | 8  | 8  | 5  | 1.43836304  | 0.235762    |           | ENSG00000210655 |
| 14 | 96867728 | 96867948 | 96867830 | 8  | 8  | 4  | 1.726035648 | 0.150596    |           | ENSG00000210655 |
| 14 | 96868178 | 96868416 | 96868297 | 11 | 12 | 6  | 1.78083043  | 0.0985525   |           | ENSG00000210655 |
| 14 | 96911688 | 96911944 | 96911773 | 9  | 10 | 4  | 2.109599125 | 0.0694668   |           | ENSG00000210655 |
| 14 | 97036086 | 97036558 | 97036387 | 12 | 21 | 11 | 1.757999271 | 0.0516118   |           | ENSG00000210655 |
| 14 | 97226115 | 97226411 | 97226292 | 9  | 12 | 0  | 12.46581301 | 0.000159888 |           | ENSG00000197176 |
| 14 | 97307909 | 97308202 | 97308068 | 9  | 11 | 6  | 1.643843474 | 0.137712    |           | ENSG00000205477 |
| 14 | 97514619 | 97514941 | 97514779 | 10 | 13 | 6  | 1.917817386 | 0.0693353   |           | ENSG00000205477 |
| 14 | 97533784 | 97533971 | 97533884 | 8  | 8  | 3  | 2.157544559 | 0.0836802   |           | ENSG00000205477 |
| 14 | 97613168 | 97613701 | 97613498 | 36 | 58 | 5  | 9.429268815 | 1.38E-12    |           | ENSG00000222066 |
| 14 | 97769826 | 97770271 | 97770048 | 25 | 38 | 0  | 37.39743903 | 4.09E-12    |           | ENSG00000222066 |
| 14 | 98034504 | 98034819 | 98034677 | 14 | 18 | 2  | 6.073088389 | 0.000157975 |           | ENSG00000210657 |
| 14 | 98344624 | 98344815 | 98344719 | 9  | 10 | 2  | 3.515998541 | 0.0136204   | C14orf177 | ENSG00000176605 |
| 14 | 98355551 | 98355814 | 98355688 | 11 | 13 | 8  | 1.491635745 | 0.166708    | C14orf177 | ENSG00000176605 |
| 14 | 98445361 | 98445712 | 98445536 | 16 | 21 | 3  | 5.273997812 | 0.00011662  |           | ENSG00000218496 |
| 14 | 98449907 | 98450219 | 98450056 | 14 | 17 | 1  | 8.630178238 | 5.44E-05    |           | ENSG00000218496 |
| 14 | 98802662 | 98802889 | 98802804 | 14 | 14 | 4  | 2.876726079 | 0.01219     | BCL11B    | ENSG00000127152 |

|    |          |          |          |    |    |   |             |            |          |                 |
|----|----------|----------|----------|----|----|---|-------------|------------|----------|-----------------|
| 14 | 98808255 | 98808529 | 98808392 | 10 | 12 | 4 | 2.493162602 | 0.0299057  | BCL11B   | ENSG00000127152 |
| 14 | 98810778 | 98811097 | 98810945 | 11 | 15 | 3 | 3.835634772 | 0.00291691 | BCL11B   | ENSG00000127152 |
| 14 | 98856231 | 98856546 | 98856388 | 11 | 16 | 0 | 16.30144778 | 1.09E-05   |          | ENSG00000216173 |
| 14 | 98868066 | 98868473 | 98868294 | 12 | 20 | 2 | 6.712360851 | 4.91E-05   |          | ENSG00000216173 |
| 14 | 98869062 | 98869245 | 98869219 | 8  | 8  | 0 | 8.630178238 | 0.00235436 |          | ENSG00000216173 |
| 14 | 98951864 | 98952056 | 98951967 | 8  | 8  | 1 | 4.315089119 | 0.0127267  |          | ENSG00000199789 |
| 14 | 98996884 | 98997088 | 98996960 | 10 | 10 | 1 | 5.273997812 | 0.00391723 |          | ENSG00000199789 |
| 14 | 99017098 | 99017457 | 99017267 | 10 | 15 | 6 | 2.191791298 | 0.0328001  | CCNK     | ENSG00000090061 |
| 14 | 99017988 | 99018251 | 99018149 | 9  | 13 | 2 | 4.474907234 | 0.00269459 | CCNK     | ENSG00000090061 |
| 14 | 99020230 | 99020730 | 99020405 | 23 | 30 | 1 | 14.86308474 | 1.43E-08   | CCNK     | ENSG00000090061 |
| 14 | 99054705 | 99054947 | 99054826 | 8  | 10 | 6 | 1.506856518 | 0.188853   | CCNK     | ENSG00000090061 |
| 14 | 99054978 | 99055346 | 99055173 | 11 | 15 | 4 | 3.068507818 | 0.0076507  | CCNK     | ENSG00000090061 |
| 14 | 99102133 | 99102413 | 99102273 | 9  | 10 | 4 | 2.109599125 | 0.0694668  |          | ENSG00000200506 |
| 14 | 99115274 | 99115571 | 99115399 | 15 | 19 | 4 | 3.835634772 | 0.00108365 |          | ENSG00000200506 |
| 14 | 99158084 | 99158355 | 99158219 | 11 | 14 | 5 | 2.397271733 | 0.0258078  |          | ENSG00000205476 |
| 14 | 99164839 | 99165207 | 99165106 | 8  | 12 | 6 | 1.78083043  | 0.0985525  | HHIPL1   | ENSG00000182218 |
| 14 | 99219862 | 99220114 | 99219988 | 9  | 10 | 6 | 1.506856518 | 0.188853   | CYP46A1  | ENSG00000036530 |
| 14 | 99346091 | 99346295 | 99346157 | 9  | 9  | 3 | 2.397271733 | 0.0539397  | EML1     | ENSG00000066629 |
| 14 | 99517010 | 99517345 | 99517177 | 9  | 13 | 5 | 2.237453617 | 0.038866   | EVL      | ENSG00000196405 |
| 14 | 99561296 | 99561587 | 99561439 | 9  | 11 | 6 | 1.643843474 | 0.137712   | EVL      | ENSG00000196405 |
| 14 | 99567633 | 99567927 | 99567786 | 12 | 14 | 1 | 7.191815198 | 0.00034761 | EVL      | ENSG00000196405 |
| 14 | 99595575 | 99595869 | 99595722 | 17 | 19 | 7 | 2.397271733 | 0.0127287  | EVL      | ENSG00000196405 |
| 14 | 99635314 | 99635493 | 99635418 | 8  | 8  | 1 | 4.315089119 | 0.0127267  |          | ENSG00000199082 |
| 14 | 99640721 | 99640975 | 99640830 | 10 | 12 | 2 | 4.155271003 | 0.0046638  |          | ENSG00000199082 |
| 14 | 99644364 | 99644734 | 99644632 | 10 | 16 | 3 | 4.075361945 | 0.00173346 |          | ENSG00000199082 |
| 14 | 99750715 | 99751116 | 99751014 | 9  | 15 | 5 | 2.557089848 | 0.0169197  | YY1      | ENSG00000100811 |
| 14 | 99782917 | 99783260 | 99783075 | 12 | 17 | 9 | 1.726035648 | 0.0753664  | YY1      | ENSG00000100811 |
| 14 | 99807337 | 99807714 | 99807512 | 14 | 19 | 5 | 3.19636231  | 0.00280933 | YY1      | ENSG00000100811 |
| 14 | 99838799 | 99839157 | 99838928 | 8  | 13 | 8 | 1.491635745 | 0.166708   | SLC25A29 | ENSG00000197119 |
| 14 | 99856512 | 99856934 | 99856714 | 20 | 31 | 7 | 3.835634772 | 5.95E-05   |          | ENSG00000223312 |
| 14 | 99913721 | 99914171 | 99913992 | 8  | 16 | 3 | 4.075361945 | 0.00173346 | WDR25    | ENSG00000176473 |
| 14 | 99919865 | 99920104 | 99919984 | 10 | 10 | 5 | 1.757999271 | 0.121253   | WDR25    | ENSG00000176473 |
| 14 | 99921108 | 99921396 | 99921231 | 8  | 11 | 1 | 5.753452158 | 0.00215302 | WDR25    | ENSG00000176473 |
| 14 | 99929206 | 99929459 | 99929376 | 9  | 11 | 2 | 3.835634772 | 0.00800699 | WDR25    | ENSG00000176473 |



|    |           |           |           |    |    |    |             |             |          |                 |
|----|-----------|-----------|-----------|----|----|----|-------------|-------------|----------|-----------------|
| 14 | 99934268  | 99934463  | 99934371  | 10 | 12 | 0  | 12.46581301 | 0.000159888 | WDR25    | ENSG00000176473 |
| 14 | 99975445  | 99975701  | 99975545  | 9  | 11 | 2  | 3.835634772 | 0.00800699  | WDR25    | ENSG00000176473 |
| 14 | 99989562  | 99989772  | 99989657  | 9  | 9  | 0  | 9.589086931 | 0.00120187  | WDR25    | ENSG00000176473 |
| 14 | 100081345 | 100081556 | 100081450 | 8  | 9  | 5  | 1.598181155 | 0.170911    | BEGAIN   | ENSG00000183092 |
| 14 | 100084115 | 100084323 | 100084219 | 8  | 10 | 4  | 2.109599125 | 0.0694668   | BEGAIN   | ENSG00000183092 |
| 14 | 100182021 | 100182254 | 100182078 | 9  | 11 | 4  | 2.301380863 | 0.0459276   | C14orf70 | ENSG00000196273 |
| 14 | 100229186 | 100229458 | 100229322 | 10 | 12 | 3  | 3.116453252 | 0.0131971   | DLK1     | ENSG00000185559 |
| 14 | 100240004 | 100240319 | 100240161 | 13 | 16 | 3  | 4.075361945 | 0.00173346  | DLK1     | ENSG00000185559 |
| 14 | 100244550 | 100244907 | 100244699 | 10 | 15 | 9  | 1.534253909 | 0.136498    | DLK1     | ENSG00000185559 |
| 14 | 100246727 | 100246906 | 100246816 | 8  | 9  | 3  | 2.397271733 | 0.0539397   | DLK1     | ENSG00000185559 |
| 14 | 100248508 | 100248872 | 100248750 | 8  | 13 | 0  | 13.4247217  | 8.16E-05    | DLK1     | ENSG00000185559 |
| 14 | 100272244 | 100272535 | 100272417 | 8  | 11 | 5  | 1.917817386 | 0.0843804   | DLK1     | ENSG00000185559 |
| 14 | 100446883 | 100447140 | 100446995 | 10 | 12 | 0  | 12.46581301 | 0.000159888 |          | ENSG00000199005 |
| 14 | 100609292 | 100609797 | 100609471 | 9  | 20 | 9  | 2.013708255 | 0.0279742   |          | ENSG00000207959 |
| 14 | 100774216 | 100774395 | 100774305 | 8  | 8  | 1  | 4.315089119 | 0.0127267   |          | ENSG00000206761 |
| 14 | 100991531 | 100991734 | 100991625 | 8  | 8  | 2  | 2.876726079 | 0.0381137   |          | ENSG00000198348 |
| 14 | 101017251 | 101017430 | 101017340 | 8  | 8  | 0  | 8.630178238 | 0.00235436  |          | ENSG00000198348 |
| 14 | 101026367 | 101026546 | 101026456 | 8  | 8  | 2  | 2.876726079 | 0.0381137   |          | ENSG00000198348 |
| 14 | 101243338 | 101243530 | 101243441 | 8  | 9  | 2  | 3.19636231  | 0.0229249   | PPP2R5C  | ENSG00000078304 |
| 14 | 101267689 | 101268071 | 101267855 | 8  | 13 | 3  | 3.356180426 | 0.00805599  | PPP2R5C  | ENSG00000078304 |
| 14 | 101345686 | 101346230 | 101346051 | 9  | 23 | 4  | 4.602761727 | 0.000137072 | PPP2R5C  | ENSG00000078304 |
| 14 | 101346239 | 101346550 | 101346374 | 15 | 19 | 11 | 1.598181155 | 0.0927758   | PPP2R5C  | ENSG00000078304 |
| 14 | 101508462 | 101508865 | 101508637 | 14 | 21 | 2  | 7.031997082 | 2.73E-05    | DYNC1H1  | ENSG00000197102 |
| 14 | 101516226 | 101516430 | 101516341 | 9  | 10 | 2  | 3.515998541 | 0.0136204   | DYNC1H1  | ENSG00000197102 |
| 14 | 101516446 | 101516667 | 101516600 | 8  | 10 | 2  | 3.515998541 | 0.0136204   | DYNC1H1  | ENSG00000197102 |
| 14 | 101516835 | 101517140 | 101516987 | 13 | 16 | 3  | 4.075361945 | 0.00173346  | DYNC1H1  | ENSG00000197102 |
| 14 | 101562952 | 101563210 | 101563081 | 8  | 12 | 4  | 2.493162602 | 0.0299057   |          | ENSG00000211198 |
| 14 | 101599384 | 101599584 | 101599484 | 9  | 10 | 4  | 2.109599125 | 0.0694668   |          | ENSG00000211198 |
| 14 | 101633452 | 101634034 | 101633742 | 11 | 24 | 10 | 2.179337939 | 0.011585    | HSP90AA2 | ENSG00000080824 |
| 14 | 101675876 | 101676178 | 101676009 | 8  | 12 | 7  | 1.558226626 | 0.152813    | WDR20    | ENSG00000140153 |
| 14 | 101721490 | 101721756 | 101721623 | 9  | 11 | 2  | 3.835634772 | 0.00800699  | WDR20    | ENSG00000140153 |
| 14 | 101815699 | 101816041 | 101815870 | 8  | 14 | 6  | 2.054804342 | 0.0480281   | RAGE     | ENSG00000080823 |
| 14 | 101849656 | 101849868 | 101849716 | 11 | 12 | 2  | 4.155271003 | 0.0046638   | ZNF839   | ENSG00000022976 |
| 14 | 101853121 | 101853325 | 101853198 | 10 | 11 | 9  | 1.150690432 | 0.367789    | ZNF839   | ENSG00000022976 |

|    |           |           |           |     |     |    |             |             |           |                 |
|----|-----------|-----------|-----------|-----|-----|----|-------------|-------------|-----------|-----------------|
| 14 | 101854059 | 101854275 | 101854156 | 9   | 10  | 1  | 5.273997812 | 0.00391723  | ZNF839    | ENSG00000022976 |
| 14 | 102060618 | 102060836 | 102060763 | 8   | 10  | 8  | 1.171999514 | 0.35773     | ANKRD9    | ENSG00000156381 |
| 14 | 102130736 | 102130949 | 102130837 | 8   | 10  | 2  | 3.515998541 | 0.0136204   | RCOR1     | ENSG00000089902 |
| 14 | 102175302 | 102175500 | 102175401 | 8   | 8   | 9  | 0.863017824 | 0.627343    | RCOR1     | ENSG00000089902 |
| 14 | 102374385 | 102374736 | 102374560 | 9   | 15  | 2  | 5.114179696 | 0.00088103  |           | ENSG00000206969 |
| 14 | 102523155 | 102523808 | 102523500 | 54  | 82  | 4  | 15.9178843  | 7.78E-20    |           | ENSG00000213176 |
| 14 | 102641791 | 102642119 | 102641955 | 10  | 12  | 3  | 3.116453252 | 0.0131971   | C14orf73  | ENSG00000205436 |
| 14 | 102700851 | 102701122 | 102700986 | 9   | 12  | 0  | 12.46581301 | 0.000159888 | TNFAIP2   | ENSG00000185215 |
| 14 | 102780006 | 102780568 | 102780357 | 149 | 178 | 0  | 171.6446561 | 5.36E-53    |           | ENSG00000199528 |
| 14 | 102828908 | 102829253 | 102829096 | 8   | 13  | 3  | 3.356180426 | 0.00805599  |           | ENSG00000199528 |
| 14 | 102869454 | 102869908 | 102869683 | 9   | 18  | 3  | 4.554816292 | 0.000599415 | EIF5      | ENSG00000100664 |
| 14 | 102890478 | 102890819 | 102890647 | 13  | 17  | 5  | 2.876726079 | 0.00703033  |           | ENSG00000213173 |
| 14 | 102893975 | 102894341 | 102894162 | 14  | 20  | 1  | 10.06854128 | 8.32E-06    |           | ENSG00000213173 |
| 14 | 102922545 | 102923013 | 102922724 | 11  | 20  | 4  | 4.027416511 | 0.000652226 | MARK3     | ENSG00000075413 |
| 14 | 103036284 | 103036517 | 103036418 | 8   | 10  | 4  | 2.109599125 | 0.0694668   | CKB       | ENSG00000166165 |
| 14 | 103163246 | 103163442 | 103163344 | 8   | 8   | 5  | 1.43836304  | 0.235762    | KLC1      | ENSG00000126214 |
| 14 | 103272323 | 103272665 | 103272494 | 9   | 13  | 9  | 1.34247217  | 0.232231    | ZFYVE21   | ENSG00000100711 |
| 14 | 103437239 | 103437460 | 103437339 | 10  | 12  | 4  | 2.493162602 | 0.0299057   | C14orf2   | ENSG00000156411 |
| 14 | 103442596 | 103442775 | 103442675 | 9   | 9   | 5  | 1.598181155 | 0.170911    | C14orf2   | ENSG00000156411 |
| 14 | 103456973 | 103457358 | 103457181 | 10  | 16  | 13 | 1.164389127 | 0.333296    | C14orf2   | ENSG00000156411 |
| 14 | 103457636 | 103457889 | 103457746 | 8   | 10  | 6  | 1.506856518 | 0.188853    | C14orf2   | ENSG00000156411 |
| 14 | 103614091 | 103614346 | 103614218 | 11  | 14  | 14 | 0.958908693 | 0.545362    |           | ENSG00000166183 |
| 14 | 103637079 | 103637286 | 103637170 | 10  | 11  | 0  | 11.50690432 | 0.000313206 |           | ENSG00000166183 |
| 14 | 103907738 | 103907955 | 103907827 | 10  | 11  | 4  | 2.301380863 | 0.0459276   |           | ENSG00000222761 |
| 14 | 103972280 | 103972850 | 103972434 | 16  | 30  | 2  | 9.908723162 | 1.20E-07    |           | ENSG00000213159 |
| 14 | 104086921 | 104087296 | 104087090 | 13  | 20  | 2  | 6.712360851 | 4.91E-05    | C14orf180 | ENSG00000184601 |
| 14 | 104101554 | 104101881 | 104101709 | 9   | 9   | 6  | 1.369869562 | 0.253675    | C14orf180 | ENSG00000184601 |
| 14 | 104120215 | 104120415 | 104120310 | 9   | 10  | 2  | 3.515998541 | 0.0136204   | C14orf180 | ENSG00000184601 |
| 14 | 104261124 | 104261306 | 104261169 | 8   | 9   | 1  | 4.794543465 | 0.00708517  | ADSSL1    | ENSG00000185100 |
| 14 | 104289867 | 104290261 | 104290037 | 8   | 14  | 9  | 1.43836304  | 0.179537    | SIVA1     | ENSG00000184990 |
| 14 | 104338346 | 104338596 | 104338460 | 8   | 11  | 1  | 5.753452158 | 0.00215302  |           | ENSG00000179627 |
| 14 | 104358121 | 104358423 | 104358272 | 8   | 14  | 2  | 4.794543465 | 0.00154571  | RPS2P4    | ENSG00000196183 |
| 14 | 104450720 | 104451104 | 104450962 | 9   | 14  | 0  | 14.3836304  | 4.17E-05    | PLD4      | ENSG00000166428 |
| 14 | 104513590 | 104513776 | 104513648 | 8   | 9   | 8  | 1.065454103 | 0.442605    | AHNAK2    | ENSG00000185567 |

|    |           |           |           |    |    |   |             |             |            |                 |
|----|-----------|-----------|-----------|----|----|---|-------------|-------------|------------|-----------------|
| 14 | 104520059 | 104520491 | 104520312 | 30 | 42 | 2 | 13.74435793 | 6.90E-11    | C14orf79   | ENSG00000140104 |
| 14 | 104629023 | 104629221 | 104629142 | 9  | 10 | 3 | 2.636998906 | 0.034203    | GPR132     | ENSG00000183484 |
| 14 | 104708159 | 104708348 | 104708204 | 9  | 10 | 2 | 3.515998541 | 0.0136204   | JAG2       | ENSG00000184916 |
| 14 | 104716767 | 104717167 | 104716994 | 13 | 19 | 1 | 9.589086931 | 1.56E-05    | NUDT14     | ENSG00000183828 |
| 14 | 104740346 | 104740638 | 104740494 | 8  | 10 | 3 | 2.636998906 | 0.034203    | NUDT14     | ENSG00000183828 |
| 14 | 104819291 | 104819576 | 104819443 | 9  | 11 | 8 | 1.278544924 | 0.28289     | BRF1       | ENSG00000185024 |
| 14 | 104839049 | 104839228 | 104839098 | 8  | 8  | 6 | 1.232882605 | 0.333038    | BRF1       | ENSG00000185024 |
| 14 | 104853031 | 104853270 | 104853120 | 10 | 11 | 8 | 1.278544924 | 0.28289     | PACS2      | ENSG00000179364 |
| 14 | 104891741 | 104892027 | 104891863 | 22 | 24 | 8 | 2.663635258 | 0.00328036  | PACS2      | ENSG00000179364 |
| 14 | 104959181 | 104959417 | 104959319 | 10 | 10 | 4 | 2.109599125 | 0.0694668   | MTA1       | ENSG00000182979 |
| 14 | 104986000 | 104986219 | 104986109 | 8  | 9  | 9 | 0.958908693 | 0.536911    | CRIP2      | ENSG00000182809 |
| 14 | 105004633 | 105004831 | 105004732 | 9  | 9  | 0 | 9.589086931 | 0.00120187  | CRIP2      | ENSG00000182809 |
| 14 | 105018354 | 105018630 | 105018457 | 8  | 11 | 2 | 3.835634772 | 0.00800699  |            | ENSG00000182351 |
| 14 | 105028144 | 105028641 | 105028318 | 15 | 26 | 4 | 5.178106943 | 2.75E-05    | C14orf80   | ENSG00000185347 |
| 14 | 105105698 | 105105887 | 105105723 | 9  | 9  | 0 | 9.589086931 | 0.00120187  |            | ENSG00000219311 |
| 14 | 105225186 | 105225484 | 105225335 | 11 | 11 | 2 | 3.835634772 | 0.00800699  |            | ENSG00000183545 |
| 14 | 105481920 | 105482135 | 105482027 | 10 | 12 | 1 | 6.232906505 | 0.00117736  | IGHVII-1-1 | ENSG00000217515 |
| 14 | 105555132 | 105555327 | 105555161 | 8  | 9  | 4 | 1.917817386 | 0.103282    |            | ENSG00000211936 |
| 14 | 105612856 | 105613055 | 105612876 | 9  | 11 | 1 | 5.753452158 | 0.00215302  |            | ENSG00000211939 |
| 14 | 105714829 | 105715149 | 105714982 | 13 | 17 | 1 | 8.630178238 | 5.44E-05    |            | ENSG00000211945 |
| 14 | 105738099 | 105738694 | 105738276 | 25 | 55 | 7 | 6.712360851 | 1.89E-10    |            | ENSG00000211946 |
| 14 | 105836029 | 105836608 | 105836461 | 9  | 21 | 4 | 4.219198249 | 0.000390041 | IGHVIII-26 | ENSG00000216942 |
| 14 | 105856064 | 105856245 | 105856154 | 8  | 8  | 3 | 2.157544559 | 0.0836802   | IGHVII-28- | ENSG00000218895 |
| 14 | 105858873 | 105859142 | 105858987 | 13 | 14 | 2 | 4.794543465 | 0.00154571  | IGHV3-29   | ENSG00000218736 |
| 14 | 105864790 | 105864988 | 105864824 | 11 | 11 | 4 | 2.301380863 | 0.0459276   |            | ENSG00000211953 |
| 14 | 105906978 | 105907250 | 105907114 | 10 | 10 | 3 | 2.636998906 | 0.034203    | IGHV7-34-  | ENSG00000218701 |
| 14 | 106122485 | 106122750 | 106122617 | 10 | 12 | 1 | 6.232906505 | 0.00117736  |            | ENSG00000211967 |
| 14 | 106138927 | 106139598 | 106139266 | 31 | 63 | 6 | 8.767165194 | 4.08E-13    | IGHV7-56   | ENSG00000218845 |
| 14 | 106179745 | 106180004 | 106179858 | 9  | 9  | 3 | 2.397271733 | 0.0539397   | IGHV3-63   | ENSG00000216414 |
| 14 | 106184601 | 106184835 | 106184763 | 8  | 10 | 1 | 5.273997812 | 0.00391723  |            | ENSG00000211971 |
| 14 | 106309828 | 106310149 | 106309998 | 9  | 14 | 8 | 1.598181155 | 0.124586    | IGHVIII-76 | ENSG00000217363 |
| 14 | 106358449 | 106358899 | 106358627 | 11 | 19 | 9 | 1.917817386 | 0.0394029   | IGHVIII-82 | ENSG00000218325 |
| 15 | 19145849  | 19146258  | 19146028  | 20 | 27 | 5 | 4.474907234 | 5.37E-05    |            | ENSG00000187646 |
| 15 | 19179378  | 19179683  | 19179527  | 16 | 19 | 2 | 6.39272462  | 8.83E-05    |            | ENSG00000187646 |

|    |          |          |          |    |     |   |             |             |          |                 |
|----|----------|----------|----------|----|-----|---|-------------|-------------|----------|-----------------|
| 15 | 19180702 | 19180921 | 19180819 | 8  | 9   | 2 | 3.19636231  | 0.0229249   |          | ENSG00000187646 |
| 15 | 19254352 | 19254680 | 19254524 | 16 | 19  | 0 | 19.17817386 | 1.44E-06    |          | ENSG00000214319 |
| 15 | 22655065 | 22655296 | 22655176 | 12 | 13  | 0 | 13.4247217  | 8.16E-05    | SNURF    | ENSG00000214265 |
| 15 | 23878304 | 23878559 | 23878435 | 9  | 10  | 4 | 2.109599125 | 0.0694668   |          | ENSG00000212604 |
| 15 | 25329782 | 25330041 | 25329911 | 8  | 9   | 0 | 9.589086931 | 0.00120187  |          | ENSG00000200326 |
| 15 | 25613391 | 25613676 | 25613517 | 15 | 18  | 0 | 18.21926517 | 2.83E-06    |          | ENSG00000210015 |
| 15 | 27262638 | 27262860 | 27262749 | 10 | 11  | 1 | 5.753452158 | 0.00215302  |          | ENSG00000104059 |
| 15 | 27770545 | 27770879 | 27770702 | 16 | 20  | 1 | 10.06854128 | 8.32E-06    |          | ENSG00000212769 |
| 15 | 28983195 | 28983465 | 28983299 | 8  | 11  | 1 | 5.753452158 | 0.00215302  | MTMR15   | ENSG00000198690 |
| 15 | 29230273 | 29230596 | 29230428 | 34 | 36  | 0 | 35.47962164 | 1.57E-11    | TRPM1    | ENSG00000134160 |
| 15 | 29464041 | 29464271 | 29464156 | 8  | 11  | 2 | 3.835634772 | 0.00800699  | KLF13    | ENSG00000169926 |
| 15 | 29477393 | 29477828 | 29477655 | 22 | 27  | 0 | 26.84944341 | 6.66E-09    | KLF13    | ENSG00000169926 |
| 15 | 31225001 | 31225563 | 31225244 | 93 | 115 | 1 | 55.6167042  | 7.73E-33    |          | ENSG00000206125 |
| 15 | 31281399 | 31281758 | 31281566 | 10 | 15  | 7 | 1.917817386 | 0.0572317   |          | ENSG00000206125 |
| 15 | 31566783 | 31566963 | 31566920 | 8  | 8   | 0 | 8.630178238 | 0.00235436  | RYR3     | ENSG00000198838 |
| 15 | 32811903 | 32812317 | 32812137 | 51 | 64  | 2 | 20.77635502 | 5.71E-17    | GJD2     | ENSG00000159248 |
| 15 | 33336102 | 33336580 | 33336220 | 17 | 25  | 3 | 6.232906505 | 1.23E-05    |          | ENSG00000214149 |
| 15 | 33587697 | 33588055 | 33587876 | 14 | 20  | 0 | 20.13708255 | 7.37E-07    | ATPBD4   | ENSG00000134146 |
| 15 | 33948199 | 33948406 | 33948294 | 10 | 11  | 0 | 11.50690432 | 0.000313206 | ATPBD4   | ENSG00000134146 |
| 15 | 34085416 | 34085750 | 34085587 | 12 | 17  | 0 | 17.26035648 | 5.54E-06    | ATPBD4   | ENSG00000134146 |
| 15 | 36169542 | 36169723 | 36169694 | 9  | 9   | 4 | 1.917817386 | 0.103282    | TMCO5A   | ENSG00000166069 |
| 15 | 36533531 | 36533718 | 36533624 | 8  | 8   | 2 | 2.876726079 | 0.0381137   | FAM98B   | ENSG00000171262 |
| 15 | 36779256 | 36779441 | 36779348 | 8  | 8   | 1 | 4.315089119 | 0.0127267   | C15orf53 | ENSG00000175779 |
| 15 | 37984163 | 37984414 | 37984288 | 11 | 13  | 3 | 3.356180426 | 0.00805599  | GPR176   | ENSG00000166073 |
| 15 | 38188486 | 38188719 | 38188602 | 10 | 12  | 0 | 12.46581301 | 0.000159888 | BMF      | ENSG00000104081 |
| 15 | 38462334 | 38462532 | 38462489 | 8  | 10  | 4 | 2.109599125 | 0.0694668   | C15orf23 | ENSG00000128944 |
| 15 | 38886877 | 38887107 | 38886992 | 8  | 10  | 2 | 3.515998541 | 0.0136204   | DNAJC17  | ENSG00000104129 |
| 15 | 38945442 | 38945651 | 38945532 | 11 | 12  | 0 | 12.46581301 | 0.000159888 | RHOV     | ENSG00000104140 |
| 15 | 39097949 | 39098365 | 39098098 | 9  | 15  | 2 | 5.114179696 | 0.00088103  | CHAC1    | ENSG00000128965 |
| 15 | 39140149 | 39140349 | 39140246 | 8  | 9   | 1 | 4.794543465 | 0.00708517  | INO80    | ENSG00000128908 |
| 15 | 39481941 | 39482128 | 39482034 | 10 | 10  | 2 | 3.515998541 | 0.0136204   | NDUFAF1  | ENSG00000137806 |
| 15 | 40110796 | 40111046 | 40110921 | 12 | 15  | 0 | 15.34253909 | 2.13E-05    | PLA2G4E  | ENSG00000188089 |
| 15 | 40174206 | 40174435 | 40174316 | 9  | 10  | 3 | 2.636998906 | 0.034203    | PLA2G4D  | ENSG00000159337 |
| 15 | 40574731 | 40574984 | 40574806 | 9  | 11  | 4 | 2.301380863 | 0.0459276   | SNAP23   | ENSG00000092531 |

|    |          |          |          |     |     |    |             |             |          |                 |
|----|----------|----------|----------|-----|-----|----|-------------|-------------|----------|-----------------|
| 15 | 40729875 | 40730115 | 40730013 | 11  | 11  | 0  | 11.50690432 | 0.000313206 | STARD9   | ENSG00000166917 |
| 15 | 40750924 | 40751310 | 40751098 | 12  | 20  | 0  | 20.13708255 | 7.37E-07    | STARD9   | ENSG00000166917 |
| 15 | 40998778 | 40998974 | 40998903 | 8   | 9   | 1  | 4.794543465 | 0.00708517  | TTBK2    | ENSG00000128881 |
| 15 | 41298901 | 41299096 | 41298948 | 8   | 8   | 1  | 4.315089119 | 0.0127267   | EPB42    | ENSG00000166947 |
| 15 | 42790897 | 42791109 | 42791003 | 8   | 9   | 1  | 4.794543465 | 0.00708517  | B2M      | ENSG00000166710 |
| 15 | 42891530 | 42891715 | 42891622 | 9   | 10  | 0  | 10.54799562 | 0.000613541 |          | ENSG00000212424 |
| 15 | 42961955 | 42962230 | 42962092 | 9   | 11  | 1  | 5.753452158 | 0.00215302  |          | ENSG00000212424 |
| 15 | 43162783 | 43163103 | 43162955 | 22  | 24  | 1  | 11.98635866 | 6.63E-07    | DUOX2    | ENSG00000140279 |
| 15 | 45700765 | 45701063 | 45700914 | 8   | 11  | 0  | 11.50690432 | 0.000313206 |          | ENSG00000221202 |
| 15 | 46890554 | 46890780 | 46890667 | 10  | 13  | 4  | 2.684944341 | 0.01921     | CEP152   | ENSG00000103995 |
| 15 | 46947555 | 46947793 | 46947674 | 16  | 19  | 0  | 19.17817386 | 1.44E-06    | SHC4     | ENSG00000185634 |
| 15 | 47235183 | 47235468 | 47235306 | 10  | 12  | 1  | 6.232906505 | 0.00117736  | GALK2    | ENSG00000156958 |
| 15 | 47345372 | 47345880 | 47345638 | 19  | 34  | 0  | 33.56180426 | 6.02E-11    |          | ENSG00000210823 |
| 15 | 47529456 | 47529923 | 47529772 | 8   | 16  | 11 | 1.358453982 | 0.20248     | FGF7P2   | ENSG00000140285 |
| 15 | 47548164 | 47548393 | 47548269 | 11  | 12  | 11 | 1.038817751 | 0.460341    | FGF7P2   | ENSG00000140285 |
| 15 | 47551375 | 47551721 | 47551548 | 8   | 13  | 8  | 1.491635745 | 0.166708    | FGF7P2   | ENSG00000140285 |
| 15 | 47585829 | 47586260 | 47586008 | 48  | 60  | 6  | 8.356204325 | 2.34E-12    | FGF7P2   | ENSG00000140285 |
| 15 | 47586945 | 47587183 | 47587064 | 8   | 11  | 7  | 1.43836304  | 0.204844    | FGF7P2   | ENSG00000140285 |
| 15 | 47601037 | 47601666 | 47601376 | 12  | 26  | 18 | 1.362659722 | 0.14632     | FGF7P2   | ENSG00000140285 |
| 15 | 47619824 | 47620123 | 47619973 | 13  | 15  | 7  | 1.917817386 | 0.0572317   | C15orf33 | ENSG00000166262 |
| 15 | 47646767 | 47647001 | 47646872 | 8   | 9   | 11 | 0.799090578 | 0.702688    | C15orf33 | ENSG00000166262 |
| 15 | 47647762 | 47648085 | 47647932 | 9   | 13  | 7  | 1.678090213 | 0.11195     | C15orf33 | ENSG00000166262 |
| 15 | 47653439 | 47653640 | 47653535 | 8   | 8   | 4  | 1.726035648 | 0.150596    | C15orf33 | ENSG00000166262 |
| 15 | 47698779 | 47698987 | 47698883 | 8   | 8   | 5  | 1.43836304  | 0.235762    | C15orf33 | ENSG00000166262 |
| 15 | 47699510 | 47699716 | 47699596 | 8   | 10  | 3  | 2.636998906 | 0.034203    | C15orf33 | ENSG00000166262 |
| 15 | 47700081 | 47701454 | 47700478 | 54  | 124 | 52 | 2.261577106 | 9.27E-08    | C15orf33 | ENSG00000166262 |
| 15 | 47702708 | 47703106 | 47702887 | 9   | 16  | 7  | 2.037680973 | 0.0400399   | DTWD1    | ENSG00000104047 |
| 15 | 47704302 | 47704617 | 47704448 | 8   | 12  | 7  | 1.558226626 | 0.152813    | DTWD1    | ENSG00000104047 |
| 15 | 47704884 | 47705841 | 47705360 | 459 | 572 | 14 | 36.63031207 | 1.25E-144   | DTWD1    | ENSG00000104047 |
| 15 | 47725292 | 47725728 | 47725513 | 10  | 19  | 8  | 2.130908207 | 0.0233014   | DTWD1    | ENSG00000104047 |
| 15 | 47734501 | 47734842 | 47734676 | 8   | 12  | 10 | 1.133255728 | 0.37674     | DTWD1    | ENSG00000104047 |
| 15 | 47748108 | 47748346 | 47748227 | 8   | 10  | 5  | 1.757999271 | 0.121253    | DTWD1    | ENSG00000104047 |
| 15 | 47754373 | 47754889 | 47754710 | 17  | 28  | 15 | 1.738022006 | 0.0334925   | DTWD1    | ENSG00000104047 |
| 15 | 47761771 | 47761965 | 47761836 | 8   | 9   | 0  | 9.589086931 | 0.00120187  | DTWD1    | ENSG00000104047 |

|    |          |          |          |    |    |    |             |            |        |                 |
|----|----------|----------|----------|----|----|----|-------------|------------|--------|-----------------|
| 15 | 47767549 | 47767856 | 47767702 | 8  | 11 | 5  | 1.917817386 | 0.0843804  | DTWD1  | ENSG00000104047 |
| 15 | 47768689 | 47769293 | 47769076 | 25 | 45 | 23 | 1.837908328 | 0.00629521 | DTWD1  | ENSG00000104047 |
| 15 | 47774638 | 47774839 | 47774738 | 8  | 9  | 8  | 1.065454103 | 0.442605   | DTWD1  | ENSG00000104047 |
| 15 | 47775132 | 47775491 | 47775341 | 8  | 12 | 9  | 1.246581301 | 0.295061   | DTWD1  | ENSG00000104047 |
| 15 | 47789180 | 47789453 | 47789293 | 10 | 12 | 3  | 3.116453252 | 0.0131971  |        | ENSG00000214966 |
| 15 | 47791818 | 47792120 | 47791969 | 10 | 15 | 4  | 3.068507818 | 0.0076507  |        | ENSG00000214966 |
| 15 | 47800833 | 47801187 | 47801010 | 12 | 16 | 7  | 2.037680973 | 0.0400399  |        | ENSG00000214966 |
| 15 | 47802297 | 47802598 | 47802447 | 9  | 12 | 7  | 1.558226626 | 0.152813   |        | ENSG00000214966 |
| 15 | 47804267 | 47804505 | 47804386 | 8  | 9  | 9  | 0.958908693 | 0.536911   |        | ENSG00000214966 |
| 15 | 47828072 | 47828751 | 47828225 | 13 | 36 | 16 | 2.087036567 | 0.00432578 |        | ENSG00000214966 |
| 15 | 47838137 | 47838442 | 47838266 | 9  | 13 | 4  | 2.684944341 | 0.01921    |        | ENSG00000214966 |
| 15 | 47847228 | 47847583 | 47847405 | 9  | 15 | 12 | 1.180195315 | 0.324974   |        | ENSG00000214966 |
| 15 | 47849712 | 47849892 | 47849802 | 8  | 9  | 7  | 1.198635866 | 0.346278   |        | ENSG00000214966 |
| 15 | 47857197 | 47857438 | 47857351 | 8  | 9  | 7  | 1.198635866 | 0.346278   |        | ENSG00000214966 |
| 15 | 47857637 | 47857835 | 47857718 | 8  | 8  | 2  | 2.876726079 | 0.0381137  |        | ENSG00000214966 |
| 15 | 47870276 | 47870604 | 47870440 | 9  | 12 | 1  | 6.232906505 | 0.00117736 |        | ENSG00000214966 |
| 15 | 47881058 | 47881338 | 47881226 | 9  | 12 | 6  | 1.78083043  | 0.0985525  |        | ENSG00000214966 |
| 15 | 47881732 | 47882081 | 47881906 | 10 | 15 | 3  | 3.835634772 | 0.00291691 |        | ENSG00000214966 |
| 15 | 47886902 | 47887119 | 47886987 | 8  | 9  | 6  | 1.369869562 | 0.253675   |        | ENSG00000214966 |
| 15 | 47888417 | 47888810 | 47888568 | 9  | 14 | 9  | 1.43836304  | 0.179537   |        | ENSG00000214966 |
| 15 | 47889122 | 47889933 | 47889795 | 11 | 31 | 18 | 1.615004115 | 0.044781   |        | ENSG00000214966 |
| 15 | 47902105 | 47902284 | 47902194 | 8  | 8  | 6  | 1.232882605 | 0.333038   |        | ENSG00000214966 |
| 15 | 47902998 | 47903286 | 47903151 | 8  | 10 | 4  | 2.109599125 | 0.0694668  |        | ENSG00000214966 |
| 15 | 47903436 | 47903688 | 47903564 | 9  | 9  | 5  | 1.598181155 | 0.170911   |        | ENSG00000214966 |
| 15 | 47907331 | 47907526 | 47907428 | 8  | 9  | 2  | 3.19636231  | 0.0229249  |        | ENSG00000214966 |
| 15 | 47909378 | 47909598 | 47909483 | 8  | 10 | 12 | 0.811384279 | 0.697544   |        | ENSG00000214966 |
| 15 | 47912018 | 47912436 | 47912168 | 13 | 21 | 10 | 1.917817386 | 0.0328292  |        | ENSG00000214966 |
| 15 | 47924514 | 47924777 | 47924645 | 9  | 11 | 11 | 0.958908693 | 0.540507   |        | ENSG00000214966 |
| 15 | 47936064 | 47936267 | 47936172 | 8  | 9  | 4  | 1.917817386 | 0.103282   | ATP8B4 | ENSG00000104043 |
| 15 | 47938907 | 47939198 | 47939060 | 10 | 13 | 11 | 1.118726809 | 0.38479    | ATP8B4 | ENSG00000104043 |
| 15 | 47940564 | 47940867 | 47940720 | 10 | 14 | 3  | 3.595907599 | 0.00486913 | ATP8B4 | ENSG00000104043 |
| 15 | 47945537 | 47945969 | 47945770 | 10 | 19 | 12 | 1.475244143 | 0.131365   | ATP8B4 | ENSG00000104043 |
| 15 | 47949140 | 47949339 | 47949211 | 8  | 8  | 6  | 1.232882605 | 0.333038   | ATP8B4 | ENSG00000104043 |
| 15 | 47951514 | 47951822 | 47951720 | 10 | 14 | 12 | 1.106433107 | 0.392094   | ATP8B4 | ENSG00000104043 |

|    |          |          |          |    |    |    |             |            |        |                 |
|----|----------|----------|----------|----|----|----|-------------|------------|--------|-----------------|
| 15 | 47954666 | 47955015 | 47954841 | 10 | 14 | 10 | 1.307602763 | 0.244096   | ATP8B4 | ENSG00000104043 |
| 15 | 47955061 | 47955403 | 47955232 | 12 | 16 | 11 | 1.358453982 | 0.20248    | ATP8B4 | ENSG00000104043 |
| 15 | 47955955 | 47956387 | 47956129 | 9  | 16 | 13 | 1.164389127 | 0.333296   | ATP8B4 | ENSG00000104043 |
| 15 | 47956957 | 47957237 | 47957074 | 9  | 12 | 6  | 1.78083043  | 0.0985525  | ATP8B4 | ENSG00000104043 |
| 15 | 47959394 | 47960018 | 47959561 | 9  | 24 | 13 | 1.712336952 | 0.0480623  | ATP8B4 | ENSG00000104043 |
| 15 | 47965256 | 47965451 | 47965312 | 8  | 10 | 7  | 1.318499453 | 0.269217   | ATP8B4 | ENSG00000104043 |
| 15 | 47975148 | 47975599 | 47975433 | 9  | 16 | 6  | 2.328778255 | 0.0221113  | ATP8B4 | ENSG00000104043 |
| 15 | 47988291 | 47988501 | 47988396 | 8  | 9  | 4  | 1.917817386 | 0.103282   | ATP8B4 | ENSG00000104043 |
| 15 | 47988693 | 47988881 | 47988715 | 9  | 10 | 5  | 1.757999271 | 0.121253   | ATP8B4 | ENSG00000104043 |
| 15 | 47996422 | 47996845 | 47996680 | 12 | 19 | 11 | 1.598181155 | 0.0927758  | ATP8B4 | ENSG00000104043 |
| 15 | 48005382 | 48005581 | 48005481 | 8  | 11 | 6  | 1.643843474 | 0.137712   | ATP8B4 | ENSG00000104043 |
| 15 | 48007261 | 48007734 | 48007555 | 10 | 19 | 14 | 1.278544924 | 0.231514   | ATP8B4 | ENSG00000104043 |
| 15 | 48011943 | 48012172 | 48012035 | 8  | 11 | 7  | 1.43836304  | 0.204844   | ATP8B4 | ENSG00000104043 |
| 15 | 48013192 | 48013474 | 48013306 | 10 | 11 | 10 | 1.046082211 | 0.455063   | ATP8B4 | ENSG00000104043 |
| 15 | 48017292 | 48017486 | 48017385 | 8  | 9  | 5  | 1.598181155 | 0.170911   | ATP8B4 | ENSG00000104043 |
| 15 | 48044509 | 48044803 | 48044660 | 10 | 12 | 5  | 2.077635502 | 0.0577144  |        | ENSG00000201086 |
| 15 | 48063014 | 48063522 | 48063193 | 9  | 19 | 6  | 2.739739123 | 0.00632909 |        | ENSG00000201086 |
| 15 | 48063858 | 48064351 | 48064205 | 10 | 21 | 17 | 1.171999514 | 0.305749   |        | ENSG00000201086 |
| 15 | 48064810 | 48065278 | 48065153 | 9  | 16 | 8  | 1.811271976 | 0.0663685  |        | ENSG00000201086 |
| 15 | 48066799 | 48067229 | 48067104 | 12 | 20 | 11 | 1.678090213 | 0.0696225  |        | ENSG00000201086 |
| 15 | 48069546 | 48070055 | 48069725 | 10 | 21 | 7  | 2.636998906 | 0.00562102 |        | ENSG00000201086 |
| 15 | 48070708 | 48070913 | 48070758 | 8  | 9  | 9  | 0.958908693 | 0.536911   |        | ENSG00000201086 |
| 15 | 48076110 | 48076338 | 48076224 | 9  | 10 | 4  | 2.109599125 | 0.0694668  |        | ENSG00000201086 |
| 15 | 48082924 | 48083819 | 48083333 | 20 | 47 | 28 | 1.587159216 | 0.0224205  |        | ENSG00000201086 |
| 15 | 48084968 | 48085225 | 48085098 | 9  | 14 | 5  | 2.397271733 | 0.0258078  |        | ENSG00000201086 |
| 15 | 48085894 | 48086164 | 48086029 | 10 | 11 | 8  | 1.278544924 | 0.28289    |        | ENSG00000201086 |
| 15 | 48092069 | 48092279 | 48092164 | 9  | 11 | 8  | 1.278544924 | 0.28289    |        | ENSG00000201086 |
| 15 | 48093401 | 48093745 | 48093573 | 12 | 17 | 4  | 3.452071295 | 0.00292757 |        | ENSG00000201086 |
| 15 | 48094801 | 48095149 | 48094975 | 8  | 14 | 13 | 1.027402171 | 0.469541   |        | ENSG00000201086 |
| 15 | 48102533 | 48102756 | 48102601 | 8  | 9  | 5  | 1.598181155 | 0.170911   |        | ENSG00000201086 |
| 15 | 48105078 | 48105294 | 48105223 | 8  | 10 | 10 | 0.958908693 | 0.538751   |        | ENSG00000201086 |
| 15 | 48118260 | 48118635 | 48118501 | 8  | 14 | 11 | 1.198635866 | 0.315918   |        | ENSG00000201086 |
| 15 | 48124088 | 48124272 | 48124180 | 8  | 8  | 13 | 0.616441303 | 0.878084   |        | ENSG00000201086 |
| 15 | 48126432 | 48126758 | 48126602 | 8  | 13 | 6  | 1.917817386 | 0.0693353  |        | ENSG00000201086 |

|    |          |          |          |    |    |    |             |            |         |                 |
|----|----------|----------|----------|----|----|----|-------------|------------|---------|-----------------|
| 15 | 48129499 | 48129903 | 48129678 | 8  | 14 | 7  | 1.797953799 | 0.0806593  | ATP8B4  | ENSG00000104043 |
| 15 | 48131255 | 48131624 | 48131434 | 23 | 31 | 11 | 2.557089848 | 0.00150051 | ATP8B4  | ENSG00000104043 |
| 15 | 48135432 | 48135851 | 48135611 | 10 | 17 | 9  | 1.726035648 | 0.0753664  | ATP8B4  | ENSG00000104043 |
| 15 | 48136704 | 48137307 | 48136883 | 10 | 24 | 13 | 1.712336952 | 0.0480623  | ATP8B4  | ENSG00000104043 |
| 15 | 48138709 | 48139235 | 48139029 | 10 | 21 | 19 | 1.054799562 | 0.429896   | ATP8B4  | ENSG00000104043 |
| 15 | 48142236 | 48142535 | 48142384 | 8  | 11 | 3  | 2.876726079 | 0.0213797  | ATP8B4  | ENSG00000104043 |
| 15 | 48151558 | 48151807 | 48151682 | 13 | 15 | 6  | 2.191791298 | 0.0328001  | ATP8B4  | ENSG00000104043 |
| 15 | 48156240 | 48156584 | 48156412 | 8  | 14 | 6  | 2.054804342 | 0.0480281  | ATP8B4  | ENSG00000104043 |
| 15 | 48161213 | 48161513 | 48161383 | 11 | 15 | 11 | 1.278544924 | 0.254978   | ATP8B4  | ENSG00000104043 |
| 15 | 48163206 | 48163509 | 48163357 | 9  | 12 | 6  | 1.78083043  | 0.0985525  | ATP8B4  | ENSG00000104043 |
| 15 | 48186688 | 48186961 | 48186824 | 8  | 10 | 12 | 0.811384279 | 0.697544   | ATP8B4  | ENSG00000104043 |
| 15 | 48188533 | 48188747 | 48188592 | 8  | 9  | 9  | 0.958908693 | 0.536911   | ATP8B4  | ENSG00000104043 |
| 15 | 48188801 | 48189185 | 48188993 | 32 | 40 | 16 | 2.312662142 | 0.00107888 | ATP8B4  | ENSG00000104043 |
| 15 | 48190030 | 48190217 | 48190147 | 8  | 8  | 12 | 0.663859864 | 0.833689   | ATP8B4  | ENSG00000104043 |
| 15 | 48192674 | 48193149 | 48192816 | 9  | 17 | 13 | 1.232882605 | 0.274309   | ATP8B4  | ENSG00000104043 |
| 15 | 48195956 | 48196314 | 48196135 | 11 | 17 | 18 | 0.908439814 | 0.615249   | ATP8B4  | ENSG00000104043 |
| 15 | 48198540 | 48198726 | 48198628 | 8  | 8  | 6  | 1.232882605 | 0.333038   | ATP8B4  | ENSG00000104043 |
| 15 | 48206544 | 48206829 | 48206693 | 11 | 14 | 5  | 2.397271733 | 0.0258078  | ATP8B4  | ENSG00000104043 |
| 15 | 48207109 | 48207352 | 48207201 | 9  | 11 | 17 | 0.639272462 | 0.890352   | ATP8B4  | ENSG00000104043 |
| 15 | 48207424 | 48207863 | 48207688 | 13 | 22 | 19 | 1.102744997 | 0.372416   | ATP8B4  | ENSG00000104043 |
| 15 | 48221835 | 48222090 | 48221926 | 8  | 12 | 11 | 1.038817751 | 0.460341   | ATP8B4  | ENSG00000104043 |
| 15 | 48222119 | 48222307 | 48222212 | 8  | 10 | 6  | 1.506856518 | 0.188853   | ATP8B4  | ENSG00000104043 |
| 15 | 48224948 | 48225167 | 48225057 | 10 | 11 | 8  | 1.278544924 | 0.28289    | ATP8B4  | ENSG00000104043 |
| 15 | 48227573 | 48227783 | 48227730 | 10 | 12 | 3  | 3.116453252 | 0.0131971  | ATP8B4  | ENSG00000104043 |
| 15 | 48227841 | 48228221 | 48228020 | 10 | 18 | 8  | 2.024362796 | 0.0334397  | ATP8B4  | ENSG00000104043 |
| 15 | 48245728 | 48246315 | 48246065 | 9  | 21 | 15 | 1.318499453 | 0.19542    | SLC27A2 | ENSG00000140284 |
| 15 | 48259780 | 48260120 | 48259959 | 10 | 15 | 13 | 1.095895649 | 0.398774   | SLC27A2 | ENSG00000140284 |
| 15 | 48261475 | 48261756 | 48261615 | 13 | 16 | 7  | 2.037680973 | 0.0400399  | SLC27A2 | ENSG00000140284 |
| 15 | 48262077 | 48262734 | 48262471 | 9  | 25 | 15 | 1.558226626 | 0.0760878  | SLC27A2 | ENSG00000140284 |
| 15 | 48267534 | 48267897 | 48267838 | 8  | 15 | 8  | 1.704726565 | 0.0916153  | SLC27A2 | ENSG00000140284 |
| 15 | 48270355 | 48270579 | 48270521 | 8  | 9  | 7  | 1.198635866 | 0.346278   | SLC27A2 | ENSG00000140284 |
| 15 | 48272486 | 48273088 | 48272648 | 19 | 42 | 26 | 1.527150882 | 0.0393286  | SLC27A2 | ENSG00000140284 |
| 15 | 48285231 | 48285500 | 48285365 | 8  | 13 | 11 | 1.118726809 | 0.38479    |         | ENSG00000200605 |
| 15 | 48298676 | 48298900 | 48298790 | 11 | 11 | 6  | 1.643843474 | 0.137712   |         | ENSG00000200605 |



|    |          |          |          |    |    |    |             |            |                        |
|----|----------|----------|----------|----|----|----|-------------|------------|------------------------|
| 15 | 48299058 | 48299355 | 48299208 | 9  | 11 | 12 | 0.885146486 | 0.620672   | ENSG00000200605        |
| 15 | 48300036 | 48300299 | 48300167 | 8  | 11 | 6  | 1.643843474 | 0.137712   | ENSG00000200605        |
| 15 | 48303268 | 48303573 | 48303413 | 12 | 13 | 0  | 13.4247217  | 8.16E-05   | ENSG00000200605        |
| 15 | 48308412 | 48308739 | 48308575 | 16 | 21 | 23 | 0.878999635 | 0.669714   | ENSG00000200605        |
| 15 | 48310162 | 48310372 | 48310238 | 8  | 10 | 4  | 2.109599125 | 0.0694668  | ENSG00000200605        |
| 15 | 48310996 | 48311350 | 48311173 | 9  | 14 | 7  | 1.797953799 | 0.0806593  | ENSG00000200605        |
| 15 | 48314387 | 48314590 | 48314488 | 8  | 9  | 14 | 0.639272462 | 0.869513   | ENSG00000210855        |
| 15 | 48316994 | 48317372 | 48317220 | 8  | 12 | 12 | 0.958908693 | 0.542188   | ENSG00000210855        |
| 15 | 48320448 | 48320829 | 48320604 | 8  | 13 | 7  | 1.678090213 | 0.11195    | ENSG00000210855        |
| 15 | 48327376 | 48327795 | 48327585 | 27 | 37 | 15 | 2.277408146 | 0.00179502 | ENSG00000210855        |
| 15 | 48329400 | 48329869 | 48329559 | 9  | 18 | 13 | 1.301376083 | 0.22245    | ENSG00000210855        |
| 15 | 48330495 | 48330990 | 48330830 | 11 | 20 | 11 | 1.678090213 | 0.0696225  | ENSG00000210855        |
| 15 | 48335408 | 48335657 | 48335518 | 9  | 13 | 13 | 0.958908693 | 0.543805   | HDC ENSG00000140287    |
| 15 | 48335830 | 48336652 | 48336473 | 16 | 43 | 37 | 1.110315329 | 0.316685   | HDC ENSG00000140287    |
| 15 | 48336991 | 48337318 | 48337165 | 9  | 12 | 7  | 1.558226626 | 0.152813   | HDC ENSG00000140287    |
| 15 | 48339954 | 48340331 | 48340133 | 9  | 16 | 9  | 1.630144778 | 0.102169   | HDC ENSG00000140287    |
| 15 | 48341801 | 48341980 | 48341835 | 8  | 8  | 2  | 2.876726079 | 0.0381137  | HDC ENSG00000140287    |
| 15 | 48344187 | 48344394 | 48344240 | 8  | 9  | 4  | 1.917817386 | 0.103282   | HDC ENSG00000140287    |
| 15 | 48345619 | 48345839 | 48345729 | 9  | 11 | 11 | 0.958908693 | 0.540507   | HDC ENSG00000140287    |
| 15 | 48345909 | 48346185 | 48346050 | 9  | 12 | 9  | 1.246581301 | 0.295061   | HDC ENSG00000140287    |
| 15 | 48355578 | 48355757 | 48355667 | 8  | 8  | 1  | 4.315089119 | 0.0127267  | HDC ENSG00000140287    |
| 15 | 48359637 | 48360062 | 48359907 | 9  | 16 | 5  | 2.716907964 | 0.0109645  | HDC ENSG00000140287    |
| 15 | 48374626 | 48375378 | 48374796 | 10 | 29 | 13 | 2.054804342 | 0.00995827 | HDC ENSG00000140287    |
| 15 | 48380651 | 48380893 | 48380793 | 9  | 9  | 4  | 1.917817386 | 0.103282   | HDC ENSG00000140287    |
| 15 | 48387823 | 48388069 | 48387946 | 8  | 10 | 9  | 1.054799562 | 0.4492     | ENSG00000207498        |
| 15 | 48393856 | 48394184 | 48394009 | 16 | 19 | 13 | 1.369869562 | 0.177863   | ENSG00000207498        |
| 15 | 48395551 | 48395900 | 48395725 | 11 | 17 | 3  | 4.315089119 | 0.00102271 | ENSG00000207498        |
| 15 | 48401442 | 48401726 | 48401584 | 9  | 10 | 8  | 1.171999514 | 0.35773    | ENSG00000207498        |
| 15 | 48404763 | 48404969 | 48404866 | 10 | 10 | 4  | 2.109599125 | 0.0694668  | ENSG00000207498        |
| 15 | 48408135 | 48408343 | 48408235 | 10 | 11 | 10 | 1.046082211 | 0.455063   | ENSG00000207498        |
| 15 | 48433365 | 48433857 | 48433559 | 18 | 32 | 16 | 1.861410992 | 0.0155206  | GABPB1 ENSG00000104064 |
| 15 | 48434287 | 48435396 | 48434773 | 28 | 71 | 30 | 2.227142771 | 4.71E-05   | GABPB1 ENSG00000104064 |
| 15 | 48436149 | 48436355 | 48436241 | 9  | 11 | 11 | 0.958908693 | 0.540507   | GABPB1 ENSG00000104064 |
| 15 | 48438404 | 48438619 | 48438567 | 8  | 11 | 12 | 0.885146486 | 0.620672   | GABPB1 ENSG00000104064 |

|    |          |          |          |     |     |    |             |            |        |                 |
|----|----------|----------|----------|-----|-----|----|-------------|------------|--------|-----------------|
| 15 | 48451639 | 48451933 | 48451809 | 11  | 13  | 3  | 3.356180426 | 0.00805599 | GABPB1 | ENSG00000104064 |
| 15 | 48453633 | 48453818 | 48453725 | 8   | 8   | 4  | 1.726035648 | 0.150596   | GABPB1 | ENSG00000104064 |
| 15 | 48470434 | 48470915 | 48470610 | 15  | 26  | 9  | 2.589053471 | 0.00289627 | USP8   | ENSG00000138592 |
| 15 | 48476921 | 48477133 | 48477038 | 8   | 8   | 4  | 1.726035648 | 0.150596   | USP8   | ENSG00000138592 |
| 15 | 48486524 | 48486725 | 48486657 | 8   | 11  | 8  | 1.278544924 | 0.28289    | USP8   | ENSG00000138592 |
| 15 | 48503334 | 48504431 | 48504000 | 13  | 48  | 38 | 1.204782717 | 0.190443   | USP8   | ENSG00000138592 |
| 15 | 48504507 | 48504731 | 48504641 | 10  | 11  | 15 | 0.71918152  | 0.81018    | USP8   | ENSG00000138592 |
| 15 | 48524268 | 48524456 | 48524282 | 8   | 9   | 2  | 3.19636231  | 0.0229249  | USP8   | ENSG00000138592 |
| 15 | 48538248 | 48538488 | 48538326 | 8   | 11  | 13 | 0.821921737 | 0.693119   | USP8   | ENSG00000138592 |
| 15 | 48582109 | 48582397 | 48582227 | 9   | 12  | 7  | 1.558226626 | 0.152813   | USP8   | ENSG00000138592 |
| 15 | 48607652 | 48607940 | 48607769 | 9   | 13  | 4  | 2.684944341 | 0.01921    | USP50  | ENSG00000170236 |
| 15 | 48629400 | 48629599 | 48629524 | 9   | 9   | 4  | 1.917817386 | 0.103282   | USP50  | ENSG00000170236 |
| 15 | 48642466 | 48642652 | 48642536 | 8   | 9   | 6  | 1.369869562 | 0.253675   | USP50  | ENSG00000170236 |
| 15 | 48652607 | 48652838 | 48652722 | 9   | 10  | 2  | 3.515998541 | 0.0136204  | USP50  | ENSG00000170236 |
| 15 | 48720846 | 48721142 | 48720995 | 12  | 13  | 5  | 2.237453617 | 0.038866   | TRPM7  | ENSG00000092439 |
| 15 | 48725756 | 48726207 | 48725961 | 10  | 19  | 10 | 1.743470351 | 0.0622604  | TRPM7  | ENSG00000092439 |
| 15 | 48755265 | 48755621 | 48755443 | 9   | 14  | 7  | 1.797953799 | 0.0806593  | TRPM7  | ENSG00000092439 |
| 15 | 48757734 | 48757947 | 48757840 | 8   | 8   | 0  | 8.630178238 | 0.00235436 | TRPM7  | ENSG00000092439 |
| 15 | 48765349 | 48766031 | 48765690 | 14  | 38  | 21 | 1.699883592 | 0.0204456  | TRPM7  | ENSG00000092439 |
| 15 | 48766046 | 48766281 | 48766113 | 8   | 8   | 6  | 1.232882605 | 0.333038   | TRPM7  | ENSG00000092439 |
| 15 | 48766408 | 48766667 | 48766525 | 11  | 13  | 12 | 1.0326709   | 0.46514    | TRPM7  | ENSG00000092439 |
| 15 | 48766713 | 48767005 | 48766859 | 8   | 12  | 12 | 0.958908693 | 0.542188   | TRPM7  | ENSG00000092439 |
| 15 | 48832707 | 48832954 | 48832830 | 12  | 13  | 7  | 1.678090213 | 0.11195    |        | ENSG00000138600 |
| 15 | 48844077 | 48844329 | 48844203 | 9   | 12  | 12 | 0.958908693 | 0.542188   |        | ENSG00000138600 |
| 15 | 48844385 | 48844853 | 48844729 | 13  | 25  | 18 | 1.312190843 | 0.179876   |        | ENSG00000138600 |
| 15 | 48845131 | 48845637 | 48845406 | 13  | 25  | 9  | 2.493162602 | 0.00432225 |        | ENSG00000138600 |
| 15 | 48847110 | 48847546 | 48847368 | 18  | 25  | 10 | 2.266511456 | 0.00802978 |        | ENSG00000138600 |
| 15 | 48857631 | 48857952 | 48857791 | 10  | 14  | 13 | 1.027402171 | 0.469541   |        | ENSG00000138600 |
| 15 | 48866456 | 48866757 | 48866606 | 10  | 15  | 6  | 2.191791298 | 0.0328001  |        | ENSG00000138600 |
| 15 | 48870835 | 48871126 | 48870980 | 10  | 12  | 12 | 0.958908693 | 0.542188   |        | ENSG00000138600 |
| 15 | 48877357 | 48877895 | 48877600 | 208 | 254 | 15 | 15.2826073  | 1.24E-55   |        | ENSG00000138600 |
| 15 | 48878038 | 48878509 | 48878239 | 13  | 28  | 9  | 2.78083521  | 0.00127094 |        | ENSG00000138600 |
| 15 | 48882433 | 48882881 | 48882601 | 11  | 19  | 10 | 1.743470351 | 0.0622604  |        | ENSG00000138600 |
| 15 | 48887273 | 48887492 | 48887361 | 8   | 8   | 9  | 0.863017824 | 0.627343   |        | ENSG00000138600 |

|    |          |          |          |    |    |    |             |                     |                 |
|----|----------|----------|----------|----|----|----|-------------|---------------------|-----------------|
| 15 | 48895527 | 48896134 | 48895803 | 28 | 55 | 37 | 1.4131286   | 0.0476031           | ENSG00000138600 |
| 15 | 48897510 | 48897715 | 48897597 | 8  | 8  | 6  | 1.232882605 | 0.333038            | ENSG00000138600 |
| 15 | 48899215 | 48899405 | 48899310 | 8  | 8  | 5  | 1.43836304  | 0.235762            | ENSG00000138600 |
| 15 | 48908284 | 48908583 | 48908448 | 9  | 12 | 8  | 1.385090334 | 0.219216            | ENSG00000138600 |
| 15 | 48910607 | 48910793 | 48910652 | 8  | 10 | 4  | 2.109599125 | 0.0694668           | ENSG00000138600 |
| 15 | 48927143 | 48927331 | 48927157 | 8  | 8  | 6  | 1.232882605 | 0.333038 AP4E1      | ENSG00000081014 |
| 15 | 48927996 | 48928212 | 48928114 | 10 | 11 | 1  | 5.753452158 | 0.00215302 AP4E1    | ENSG00000081014 |
| 15 | 48933462 | 48933641 | 48933552 | 8  | 8  | 4  | 1.726035648 | 0.150596 AP4E1      | ENSG00000081014 |
| 15 | 48934066 | 48935068 | 48934245 | 21 | 60 | 32 | 1.77252819  | 0.00324193 AP4E1    | ENSG00000081014 |
| 15 | 48936093 | 48936361 | 48936227 | 9  | 11 | 7  | 1.43836304  | 0.204844 AP4E1      | ENSG00000081014 |
| 15 | 48936949 | 48937143 | 48937029 | 8  | 8  | 8  | 0.958908693 | 0.534974 AP4E1      | ENSG00000081014 |
| 15 | 48956366 | 48956842 | 48956581 | 26 | 38 | 31 | 1.16866997  | 0.254509 AP4E1      | ENSG00000081014 |
| 15 | 48959756 | 48960188 | 48960025 | 9  | 17 | 13 | 1.232882605 | 0.274309 AP4E1      | ENSG00000081014 |
| 15 | 48965236 | 48965786 | 48965511 | 19 | 38 | 9  | 3.739743903 | 1.43E-05 AP4E1      | ENSG00000081014 |
| 15 | 48987026 | 48987473 | 48987361 | 8  | 16 | 14 | 1.086763185 | 0.404922 AP4E1      | ENSG00000081014 |
| 15 | 48987870 | 48988393 | 48988079 | 30 | 40 | 18 | 2.069224022 | 0.00311868 AP4E1    | ENSG00000081014 |
| 15 | 48988546 | 48988963 | 48988782 | 13 | 24 | 11 | 1.997726444 | 0.0196649 AP4E1     | ENSG00000081014 |
| 15 | 48989969 | 48990217 | 48990093 | 8  | 10 | 6  | 1.506856518 | 0.188853 AP4E1      | ENSG00000081014 |
| 15 | 49012024 | 49012335 | 49012165 | 10 | 14 | 3  | 3.595907599 | 0.00486913 AP4E1    | ENSG00000081014 |
| 15 | 49023709 | 49023955 | 49023826 | 9  | 12 | 4  | 2.493162602 | 0.0299057 AP4E1     | ENSG00000081014 |
| 15 | 49043392 | 49043574 | 49043524 | 8  | 8  | 2  | 2.876726079 | 0.0381137 AP4E1     | ENSG00000081014 |
| 15 | 49062501 | 49062948 | 49062675 | 8  | 17 | 7  | 2.157544559 | 0.0276499 AP4E1     | ENSG00000081014 |
| 15 | 49126818 | 49127068 | 49126943 | 8  | 12 | 7  | 1.558226626 | 0.152813 TNFAIP8L3  | ENSG00000183578 |
| 15 | 49128675 | 49128870 | 49128772 | 8  | 9  | 7  | 1.198635866 | 0.346278 TNFAIP8L3  | ENSG00000183578 |
| 15 | 49132081 | 49132280 | 49132180 | 8  | 9  | 13 | 0.684934781 | 0.824961 TNFAIP8L3  | ENSG00000183578 |
| 15 | 49138535 | 49138750 | 49138619 | 8  | 9  | 10 | 0.871735176 | 0.624623 TNFAIP8L3  | ENSG00000183578 |
| 15 | 49148852 | 49149062 | 49148961 | 9  | 10 | 8  | 1.171999514 | 0.35773 TNFAIP8L3   | ENSG00000183578 |
| 15 | 49149826 | 49150043 | 49149938 | 9  | 10 | 2  | 3.515998541 | 0.0136204 TNFAIP8L3 | ENSG00000183578 |
| 15 | 49154368 | 49154569 | 49154468 | 8  | 10 | 7  | 1.318499453 | 0.269217 TNFAIP8L3  | ENSG00000183578 |
| 15 | 49159634 | 49160208 | 49159952 | 37 | 60 | 11 | 4.874452523 | 2.20E-09 TNFAIP8L3  | ENSG00000183578 |
| 15 | 49175215 | 49175449 | 49175325 | 10 | 13 | 4  | 2.684944341 | 0.01921 TNFAIP8L3   | ENSG00000183578 |
| 15 | 49176544 | 49176792 | 49176653 | 9  | 9  | 8  | 1.065454103 | 0.442605 TNFAIP8L3  | ENSG00000183578 |
| 15 | 49177039 | 49177241 | 49177114 | 9  | 10 | 6  | 1.506856518 | 0.188853 TNFAIP8L3  | ENSG00000183578 |
| 15 | 49188266 | 49188623 | 49188444 | 8  | 12 | 3  | 3.116453252 | 0.0131971 TNFAIP8L3 | ENSG00000183578 |

|    |          |          |          |    |    |    |             |             |           |                 |
|----|----------|----------|----------|----|----|----|-------------|-------------|-----------|-----------------|
| 15 | 49191805 | 49192139 | 49191962 | 8  | 12 | 9  | 1.246581301 | 0.295061    | TNFAIP8L3 | ENSG00000183578 |
| 15 | 49196944 | 49197164 | 49197054 | 8  | 9  | 2  | 3.19636231  | 0.0229249   | TNFAIP8L3 | ENSG00000183578 |
| 15 | 49200644 | 49200920 | 49200787 | 9  | 12 | 13 | 0.890415215 | 0.619237    | TNFAIP8L3 | ENSG00000183578 |
| 15 | 49212395 | 49212695 | 49212542 | 10 | 14 | 5  | 2.397271733 | 0.0258078   | TNFAIP8L3 | ENSG00000183578 |
| 15 | 49235295 | 49235503 | 49235399 | 8  | 9  | 5  | 1.598181155 | 0.170911    | TNFAIP8L3 | ENSG00000183578 |
| 15 | 49242376 | 49243030 | 49242550 | 23 | 38 | 20 | 1.78083043  | 0.0139648   | TNFAIP8L3 | ENSG00000183578 |
| 15 | 49247231 | 49247529 | 49247380 | 10 | 11 | 6  | 1.643843474 | 0.137712    | TNFAIP8L3 | ENSG00000183578 |
| 15 | 49251188 | 49251373 | 49251280 | 8  | 9  | 3  | 2.397271733 | 0.0539397   | TNFAIP8L3 | ENSG00000183578 |
| 15 | 49251626 | 49251865 | 49251745 | 8  | 9  | 2  | 3.19636231  | 0.0229249   | TNFAIP8L3 | ENSG00000183578 |
| 15 | 49272090 | 49272818 | 49272296 | 21 | 39 | 23 | 1.598181155 | 0.0315891   | CYP19A1   | ENSG00000137869 |
| 15 | 49278592 | 49278878 | 49278735 | 10 | 14 | 10 | 1.307602763 | 0.244096    | CYP19A1   | ENSG00000137869 |
| 15 | 49281788 | 49281984 | 49281857 | 9  | 10 | 5  | 1.757999271 | 0.121253    | CYP19A1   | ENSG00000137869 |
| 15 | 49294084 | 49294283 | 49294163 | 8  | 8  | 4  | 1.726035648 | 0.150596    | CYP19A1   | ENSG00000137869 |
| 15 | 49296967 | 49297242 | 49297104 | 9  | 14 | 3  | 3.595907599 | 0.00486913  | CYP19A1   | ENSG00000137869 |
| 15 | 49307954 | 49308287 | 49308120 | 12 | 17 | 3  | 4.315089119 | 0.00102271  | CYP19A1   | ENSG00000137869 |
| 15 | 49309703 | 49309992 | 49309826 | 10 | 14 | 4  | 2.876726079 | 0.01219     | CYP19A1   | ENSG00000137869 |
| 15 | 49313423 | 49313602 | 49313547 | 8  | 8  | 2  | 2.876726079 | 0.0381137   | CYP19A1   | ENSG00000137869 |
| 15 | 49323279 | 49323615 | 49323447 | 18 | 23 | 8  | 2.557089848 | 0.00494559  | CYP19A1   | ENSG00000137869 |
| 15 | 49324010 | 49324271 | 49324133 | 8  | 11 | 8  | 1.278544924 | 0.28289     | CYP19A1   | ENSG00000137869 |
| 15 | 49330939 | 49331244 | 49331070 | 10 | 11 | 17 | 0.639272462 | 0.890352    | CYP19A1   | ENSG00000137869 |
| 15 | 49344687 | 49345015 | 49344851 | 10 | 14 | 5  | 2.397271733 | 0.0258078   | CYP19A1   | ENSG00000137869 |
| 15 | 49346057 | 49346296 | 49346176 | 11 | 12 | 6  | 1.78083043  | 0.0985525   | CYP19A1   | ENSG00000137869 |
| 15 | 49355228 | 49355711 | 49355407 | 8  | 16 | 7  | 2.037680973 | 0.0400399   | CYP19A1   | ENSG00000137869 |
| 15 | 49359940 | 49360288 | 49360114 | 8  | 13 | 6  | 1.917817386 | 0.0693353   | CYP19A1   | ENSG00000137869 |
| 15 | 49360799 | 49361253 | 49361074 | 14 | 25 | 10 | 2.266511456 | 0.00802978  | CYP19A1   | ENSG00000137869 |
| 15 | 49366121 | 49366387 | 49366253 | 8  | 12 | 9  | 1.246581301 | 0.295061    | CYP19A1   | ENSG00000137869 |
| 15 | 49377678 | 49378042 | 49377903 | 8  | 14 | 7  | 1.797953799 | 0.0806593   | CYP19A1   | ENSG00000137869 |
| 15 | 49378087 | 49378430 | 49378258 | 8  | 13 | 4  | 2.684944341 | 0.01921     | CYP19A1   | ENSG00000137869 |
| 15 | 49395355 | 49395865 | 49395695 | 11 | 22 | 4  | 4.410979988 | 0.000231863 | CYP19A1   | ENSG00000137869 |
| 15 | 49404378 | 49404737 | 49404510 | 9  | 13 | 5  | 2.237453617 | 0.038866    | CYP19A1   | ENSG00000137869 |
| 15 | 49406629 | 49406849 | 49406728 | 9  | 10 | 7  | 1.318499453 | 0.269217    | CYP19A1   | ENSG00000137869 |
| 15 | 49420080 | 49420272 | 49420179 | 8  | 8  | 3  | 2.157544559 | 0.0836802   | GLDN      | ENSG00000186417 |
| 15 | 49420424 | 49420704 | 49420564 | 8  | 10 | 5  | 1.757999271 | 0.121253    | GLDN      | ENSG00000186417 |
| 15 | 49422485 | 49422742 | 49422624 | 8  | 9  | 4  | 1.917817386 | 0.103282    | GLDN      | ENSG00000186417 |

|    |          |          |          |    |    |    |             |             |       |                 |
|----|----------|----------|----------|----|----|----|-------------|-------------|-------|-----------------|
| 15 | 49456608 | 49456810 | 49456707 | 8  | 10 | 4  | 2.109599125 | 0.0694668   | GLDN  | ENSG00000186417 |
| 15 | 49460764 | 49461235 | 49460943 | 11 | 20 | 15 | 1.25856766  | 0.240048    | GLDN  | ENSG00000186417 |
| 15 | 49461672 | 49461953 | 49461812 | 8  | 10 | 9  | 1.054799562 | 0.4492      | GLDN  | ENSG00000186417 |
| 15 | 49462260 | 49462771 | 49462544 | 13 | 24 | 10 | 2.179337939 | 0.011585    | GLDN  | ENSG00000186417 |
| 15 | 49468068 | 49468281 | 49468174 | 8  | 10 | 5  | 1.757999271 | 0.121253    | GLDN  | ENSG00000186417 |
| 15 | 49481597 | 49481864 | 49481727 | 9  | 13 | 7  | 1.678090213 | 0.11195     | GLDN  | ENSG00000186417 |
| 15 | 49482748 | 49483394 | 49482958 | 16 | 35 | 11 | 2.876726079 | 0.000294022 | GLDN  | ENSG00000186417 |
| 15 | 49504274 | 49504634 | 49504453 | 9  | 15 | 12 | 1.180195315 | 0.324974    | GLDN  | ENSG00000186417 |
| 15 | 49526942 | 49527160 | 49527060 | 8  | 8  | 2  | 2.876726079 | 0.0381137   | GLDN  | ENSG00000186417 |
| 15 | 49555861 | 49556229 | 49556115 | 9  | 14 | 3  | 3.595907599 | 0.00486913  | GLDN  | ENSG00000186417 |
| 15 | 49573396 | 49573612 | 49573494 | 9  | 9  | 1  | 4.794543465 | 0.00708517  | GLDN  | ENSG00000186417 |
| 15 | 49574028 | 49574383 | 49574205 | 12 | 18 | 13 | 1.301376083 | 0.22245     | GLDN  | ENSG00000186417 |
| 15 | 49578927 | 49579284 | 49579105 | 8  | 14 | 16 | 0.846095906 | 0.68298     | GLDN  | ENSG00000186417 |
| 15 | 49626230 | 49626530 | 49626380 | 8  | 13 | 6  | 1.917817386 | 0.0693353   | DMXL2 | ENSG00000104093 |
| 15 | 49634851 | 49635038 | 49634944 | 8  | 9  | 6  | 1.369869562 | 0.253675    | DMXL2 | ENSG00000104093 |
| 15 | 49656150 | 49656341 | 49656244 | 8  | 8  | 5  | 1.43836304  | 0.235762    | DMXL2 | ENSG00000104093 |
| 15 | 49656676 | 49656955 | 49656788 | 10 | 14 | 5  | 2.397271733 | 0.0258078   | DMXL2 | ENSG00000104093 |
| 15 | 49669558 | 49669881 | 49669719 | 9  | 12 | 4  | 2.493162602 | 0.0299057   | DMXL2 | ENSG00000104093 |
| 15 | 49679737 | 49680039 | 49679888 | 10 | 13 | 9  | 1.34247217  | 0.232231    | DMXL2 | ENSG00000104093 |
| 15 | 49700569 | 49700828 | 49700698 | 11 | 14 | 4  | 2.876726079 | 0.01219     | DMXL2 | ENSG00000104093 |
| 15 | 49701019 | 49701776 | 49701385 | 9  | 32 | 17 | 1.757999271 | 0.0235073   | DMXL2 | ENSG00000104093 |
| 15 | 49701781 | 49701984 | 49701850 | 9  | 9  | 7  | 1.198635866 | 0.346278    | DMXL2 | ENSG00000104093 |
| 15 | 49702188 | 49702440 | 49702314 | 8  | 11 | 6  | 1.643843474 | 0.137712    | DMXL2 | ENSG00000104093 |
| 15 | 49702446 | 49702718 | 49702582 | 11 | 15 | 10 | 1.394776281 | 0.191426    | DMXL2 | ENSG00000104093 |
| 15 | 49703845 | 49704070 | 49703957 | 10 | 10 | 6  | 1.506856518 | 0.188853    | DMXL2 | ENSG00000104093 |
| 15 | 49721193 | 49721455 | 49721324 | 10 | 12 | 6  | 1.78083043  | 0.0985525   | DMXL2 | ENSG00000104093 |
| 15 | 49722266 | 49722483 | 49722405 | 8  | 9  | 8  | 1.065454103 | 0.442605    | DMXL2 | ENSG00000104093 |
| 15 | 49729450 | 49729858 | 49729679 | 15 | 23 | 9  | 2.301380863 | 0.00938618  | DMXL2 | ENSG00000104093 |
| 15 | 49759170 | 49759406 | 49759290 | 10 | 11 | 8  | 1.278544924 | 0.28289     | SCG3  | ENSG00000104112 |
| 15 | 49767140 | 49767398 | 49767236 | 10 | 12 | 4  | 2.493162602 | 0.0299057   | SCG3  | ENSG00000104112 |
| 15 | 49767827 | 49768037 | 49767974 | 8  | 10 | 3  | 2.636998906 | 0.034203    | SCG3  | ENSG00000104112 |
| 15 | 49771868 | 49772200 | 49772034 | 8  | 13 | 7  | 1.678090213 | 0.11195     | SCG3  | ENSG00000104112 |
| 15 | 49787103 | 49787305 | 49787209 | 8  | 8  | 4  | 1.726035648 | 0.150596    | SCG3  | ENSG00000104112 |
| 15 | 49787478 | 49787894 | 49787664 | 9  | 17 | 12 | 1.327719729 | 0.212795    | SCG3  | ENSG00000104112 |

|    |          |          |          |    |    |    |             |             |        |                 |
|----|----------|----------|----------|----|----|----|-------------|-------------|--------|-----------------|
| 15 | 49794964 | 49795245 | 49795095 | 8  | 11 | 5  | 1.917817386 | 0.0843804   | LYSMD2 | ENSG00000140280 |
| 15 | 49798286 | 49798605 | 49798445 | 9  | 15 | 7  | 1.917817386 | 0.0572317   | LYSMD2 | ENSG00000140280 |
| 15 | 49799658 | 49800008 | 49799906 | 8  | 13 | 11 | 1.118726809 | 0.38479     | LYSMD2 | ENSG00000140280 |
| 15 | 49805699 | 49806363 | 49806032 | 24 | 49 | 23 | 1.997726444 | 0.00189367  | LYSMD2 | ENSG00000140280 |
| 15 | 49806413 | 49806876 | 49806633 | 8  | 18 | 14 | 1.214617678 | 0.282961    | LYSMD2 | ENSG00000140280 |
| 15 | 49812127 | 49812431 | 49812279 | 14 | 18 | 3  | 4.554816292 | 0.000599415 | LYSMD2 | ENSG00000140280 |
| 15 | 49815956 | 49816592 | 49816446 | 10 | 23 | 15 | 1.43836304  | 0.12479     | LYSMD2 | ENSG00000140280 |
| 15 | 49818288 | 49819060 | 49818722 | 39 | 66 | 17 | 3.569271246 | 4.97E-08    | LYSMD2 | ENSG00000140280 |
| 15 | 49831623 | 49832310 | 49831882 | 11 | 27 | 29 | 0.894981447 | 0.664076    | TMOD2  | ENSG00000128872 |
| 15 | 49838280 | 49838816 | 49838637 | 9  | 21 | 7  | 2.636998906 | 0.00562102  | TMOD2  | ENSG00000128872 |
| 15 | 49839105 | 49839705 | 49839526 | 10 | 25 | 6  | 3.56166086  | 0.000408555 | TMOD2  | ENSG00000128872 |
| 15 | 49855515 | 49856301 | 49855751 | 14 | 39 | 26 | 1.420605471 | 0.0759455   | TMOD2  | ENSG00000128872 |
| 15 | 49856534 | 49857102 | 49856688 | 13 | 27 | 12 | 2.0653418   | 0.0117911   | TMOD2  | ENSG00000128872 |
| 15 | 49860941 | 49861127 | 49861034 | 9  | 10 | 10 | 0.958908693 | 0.538751    | TMOD2  | ENSG00000128872 |
| 15 | 49862321 | 49862565 | 49862445 | 8  | 9  | 4  | 1.917817386 | 0.103282    | TMOD2  | ENSG00000128872 |
| 15 | 49865905 | 49866144 | 49866042 | 8  | 11 | 8  | 1.278544924 | 0.28289     | TMOD2  | ENSG00000128872 |
| 15 | 49877670 | 49878031 | 49877811 | 10 | 15 | 9  | 1.534253909 | 0.136498    | TMOD3  | ENSG00000138594 |
| 15 | 49878589 | 49878803 | 49878719 | 10 | 11 | 6  | 1.643843474 | 0.137712    | TMOD3  | ENSG00000138594 |
| 15 | 49880997 | 49881440 | 49881140 | 9  | 17 | 19 | 0.863017824 | 0.676008    | TMOD3  | ENSG00000138594 |
| 15 | 49883546 | 49883762 | 49883628 | 8  | 9  | 3  | 2.397271733 | 0.0539397   | TMOD3  | ENSG00000138594 |
| 15 | 49892944 | 49893128 | 49893036 | 8  | 9  | 8  | 1.065454103 | 0.442605    | TMOD3  | ENSG00000138594 |
| 15 | 49908906 | 49909311 | 49909003 | 9  | 16 | 13 | 1.164389127 | 0.333296    | TMOD3  | ENSG00000138594 |
| 15 | 49909708 | 49910286 | 49909973 | 10 | 23 | 22 | 1.000600375 | 0.498356    | TMOD3  | ENSG00000138594 |
| 15 | 49916647 | 49916846 | 49916765 | 8  | 8  | 3  | 2.157544559 | 0.0836802   | TMOD3  | ENSG00000138594 |
| 15 | 49918495 | 49918809 | 49918652 | 9  | 14 | 5  | 2.397271733 | 0.0258078   | TMOD3  | ENSG00000138594 |
| 15 | 49924401 | 49924635 | 49924552 | 8  | 11 | 3  | 2.876726079 | 0.0213797   | TMOD3  | ENSG00000138594 |
| 15 | 49925737 | 49926131 | 49925878 | 11 | 16 | 5  | 2.716907964 | 0.0109645   | TMOD3  | ENSG00000138594 |
| 15 | 49926950 | 49927318 | 49927193 | 9  | 13 | 6  | 1.917817386 | 0.0693353   | TMOD3  | ENSG00000138594 |
| 15 | 49928265 | 49928498 | 49928381 | 9  | 9  | 8  | 1.065454103 | 0.442605    | TMOD3  | ENSG00000138594 |
| 15 | 49931312 | 49931592 | 49931467 | 8  | 11 | 6  | 1.643843474 | 0.137712    | TMOD3  | ENSG00000138594 |
| 15 | 49933298 | 49933607 | 49933452 | 9  | 10 | 9  | 1.054799562 | 0.4492      | TMOD3  | ENSG00000138594 |
| 15 | 49934864 | 49935121 | 49934975 | 10 | 10 | 6  | 1.506856518 | 0.188853    | TMOD3  | ENSG00000138594 |
| 15 | 49938505 | 49938728 | 49938662 | 8  | 8  | 6  | 1.232882605 | 0.333038    |        | ENSG00000207484 |
| 15 | 49938870 | 49939052 | 49939023 | 8  | 9  | 7  | 1.198635866 | 0.346278    |        | ENSG00000207484 |

|    |          |          |          |    |     |    |             |             |         |                 |
|----|----------|----------|----------|----|-----|----|-------------|-------------|---------|-----------------|
| 15 | 49939786 | 49940039 | 49939934 | 10 | 10  | 6  | 1.506856518 | 0.188853    |         | ENSG00000207484 |
| 15 | 49943797 | 49944535 | 49944168 | 88 | 144 | 14 | 9.2694507   | 9.62E-28    |         | ENSG00000207484 |
| 15 | 49949761 | 49950070 | 49949919 | 13 | 15  | 13 | 1.095895649 | 0.398774    |         | ENSG00000207484 |
| 15 | 49967810 | 49968026 | 49967981 | 8  | 9   | 7  | 1.198635866 | 0.346278    |         | ENSG00000207484 |
| 15 | 49973295 | 49973474 | 49973387 | 8  | 8   | 5  | 1.43836304  | 0.235762    |         | ENSG00000207484 |
| 15 | 49977371 | 49977709 | 49977543 | 8  | 11  | 3  | 2.876726079 | 0.0213797   |         | ENSG00000202323 |
| 15 | 49985367 | 49985804 | 49985625 | 12 | 22  | 12 | 1.696530765 | 0.057768    |         | ENSG00000202323 |
| 15 | 49986997 | 49987494 | 49987156 | 16 | 31  | 14 | 2.045671879 | 0.00841532  |         | ENSG00000202323 |
| 15 | 49997078 | 49997392 | 49997235 | 16 | 20  | 4  | 4.027416511 | 0.000652226 |         | ENSG00000202323 |
| 15 | 50001206 | 50001434 | 50001376 | 8  | 9   | 10 | 0.871735176 | 0.624623    |         | ENSG00000202323 |
| 15 | 50021471 | 50021773 | 50021610 | 9  | 12  | 7  | 1.558226626 | 0.152813    | LEO1    | ENSG00000166477 |
| 15 | 50049279 | 50049550 | 50049418 | 8  | 10  | 7  | 1.318499453 | 0.269217    | LEO1    | ENSG00000166477 |
| 15 | 50050309 | 50050847 | 50050653 | 8  | 19  | 9  | 1.917817386 | 0.0394029   | LEO1    | ENSG00000166477 |
| 15 | 50050869 | 50051661 | 50051309 | 22 | 49  | 31 | 1.498294833 | 0.0345532   | LEO1    | ENSG00000166477 |
| 15 | 50061699 | 50062090 | 50061920 | 14 | 21  | 11 | 1.757999271 | 0.0516118   | LEO1    | ENSG00000166477 |
| 15 | 50070734 | 50071056 | 50070894 | 10 | 14  | 6  | 2.054804342 | 0.0480281   | LEO1    | ENSG00000166477 |
| 15 | 50071078 | 50071344 | 50071241 | 8  | 12  | 12 | 0.958908693 | 0.542188    | LEO1    | ENSG00000166477 |
| 15 | 50075538 | 50075790 | 50075681 | 8  | 11  | 7  | 1.43836304  | 0.204844    | MAPK6   | ENSG00000069956 |
| 15 | 50084347 | 50084622 | 50084472 | 12 | 15  | 9  | 1.534253909 | 0.136498    | MAPK6   | ENSG00000069956 |
| 15 | 50090490 | 50090689 | 50090589 | 9  | 9   | 3  | 2.397271733 | 0.0539397   | MAPK6   | ENSG00000069956 |
| 15 | 50092698 | 50092924 | 50092811 | 8  | 8   | 2  | 2.876726079 | 0.0381137   | MAPK6   | ENSG00000069956 |
| 15 | 50098330 | 50098882 | 50098709 | 11 | 21  | 12 | 1.622768557 | 0.076896    | MAPK6   | ENSG00000069956 |
| 15 | 50099278 | 50100283 | 50100116 | 10 | 38  | 27 | 1.335622822 | 0.118053    | MAPK6   | ENSG00000069956 |
| 15 | 50100603 | 50101060 | 50100831 | 20 | 31  | 10 | 2.789552562 | 0.000751584 | MAPK6   | ENSG00000069956 |
| 15 | 50101922 | 50102138 | 50102036 | 8  | 9   | 3  | 2.397271733 | 0.0539397   | MAPK6   | ENSG00000069956 |
| 15 | 50123690 | 50123869 | 50123836 | 8  | 9   | 2  | 3.19636231  | 0.0229249   | MAPK6   | ENSG00000069956 |
| 15 | 50156433 | 50157056 | 50156631 | 41 | 61  | 10 | 5.404758088 | 3.97E-10    | MAPK6   | ENSG00000069956 |
| 15 | 50157903 | 50158291 | 50158082 | 8  | 15  | 10 | 1.394776281 | 0.191426    | MAPK6   | ENSG00000069956 |
| 15 | 50158428 | 50158659 | 50158548 | 8  | 10  | 15 | 0.659249726 | 0.861705    | MAPK6   | ENSG00000069956 |
| 15 | 50180462 | 50180670 | 50180566 | 8  | 10  | 1  | 5.273997812 | 0.00391723  | BCL2L10 | ENSG00000137875 |
| 15 | 50186359 | 50186538 | 50186488 | 8  | 8   | 4  | 1.726035648 | 0.150596    | BCL2L10 | ENSG00000137875 |
| 15 | 50203999 | 50204319 | 50204168 | 8  | 13  | 10 | 1.220429246 | 0.306001    | BCL2L10 | ENSG00000137875 |
| 15 | 50219376 | 50219697 | 50219529 | 19 | 24  | 10 | 2.179337939 | 0.011585    |         | ENSG00000206995 |
| 15 | 50219873 | 50220136 | 50219979 | 8  | 11  | 4  | 2.301380863 | 0.0459276   |         | ENSG00000206995 |

|    |          |          |          |    |    |    |             |             |       |                 |
|----|----------|----------|----------|----|----|----|-------------|-------------|-------|-----------------|
| 15 | 50241209 | 50241435 | 50241307 | 10 | 10 | 7  | 1.318499453 | 0.269217    |       | ENSG00000206995 |
| 15 | 50250976 | 50251266 | 50251133 | 9  | 13 | 10 | 1.220429246 | 0.306001    | GNB5  | ENSG00000069966 |
| 15 | 50251270 | 50251466 | 50251378 | 8  | 11 | 6  | 1.643843474 | 0.137712    | GNB5  | ENSG00000069966 |
| 15 | 50257476 | 50257851 | 50257631 | 9  | 15 | 14 | 1.022835939 | 0.473606    | GNB5  | ENSG00000069966 |
| 15 | 50258480 | 50258935 | 50258777 | 14 | 26 | 10 | 2.353684974 | 0.00551687  | GNB5  | ENSG00000069966 |
| 15 | 50265903 | 50266147 | 50265997 | 8  | 10 | 5  | 1.757999271 | 0.121253    | GNB5  | ENSG00000069966 |
| 15 | 50271277 | 50271574 | 50271408 | 11 | 13 | 4  | 2.684944341 | 0.01921     | GNB5  | ENSG00000069966 |
| 15 | 50273133 | 50273454 | 50273302 | 8  | 11 | 5  | 1.917817386 | 0.0843804   | GNB5  | ENSG00000069966 |
| 15 | 50276436 | 50276767 | 50276605 | 11 | 15 | 5  | 2.557089848 | 0.0169197   | GNB5  | ENSG00000069966 |
| 15 | 50281998 | 50282285 | 50282117 | 10 | 14 | 5  | 2.397271733 | 0.0258078   | GNB5  | ENSG00000069966 |
| 15 | 50287798 | 50288430 | 50288083 | 17 | 31 | 28 | 1.058106144 | 0.411497    | GNB5  | ENSG00000069966 |
| 15 | 50296651 | 50296918 | 50296763 | 14 | 17 | 12 | 1.327719729 | 0.212795    | GNB5  | ENSG00000069966 |
| 15 | 50299612 | 50299881 | 50299723 | 9  | 10 | 4  | 2.109599125 | 0.0694668   | GNB5  | ENSG00000069966 |
| 15 | 50300804 | 50301025 | 50300856 | 8  | 11 | 6  | 1.643843474 | 0.137712    | GNB5  | ENSG00000069966 |
| 15 | 50306934 | 50307323 | 50307128 | 10 | 19 | 10 | 1.743470351 | 0.0622604   | GNB5  | ENSG00000069966 |
| 15 | 50308654 | 50308886 | 50308741 | 8  | 9  | 5  | 1.598181155 | 0.170911    | GNB5  | ENSG00000069966 |
| 15 | 50314066 | 50314440 | 50314261 | 8  | 15 | 6  | 2.191791298 | 0.0328001   |       | ENSG00000221052 |
| 15 | 50324715 | 50324923 | 50324852 | 8  | 8  | 8  | 0.958908693 | 0.534974    |       | ENSG00000221052 |
| 15 | 50332234 | 50332650 | 50332442 | 30 | 40 | 9  | 3.931525642 | 5.49E-06    |       | ENSG00000221052 |
| 15 | 50335826 | 50336183 | 50336004 | 29 | 34 | 13 | 2.397271733 | 0.00167395  |       | ENSG00000221052 |
| 15 | 50343605 | 50344005 | 50343771 | 9  | 15 | 7  | 1.917817386 | 0.0572317   |       | ENSG00000221052 |
| 15 | 50348454 | 50348653 | 50348515 | 8  | 10 | 1  | 5.273997812 | 0.00391723  |       | ENSG00000221052 |
| 15 | 50355690 | 50355885 | 50355727 | 8  | 9  | 8  | 1.065454103 | 0.442605    |       | ENSG00000221052 |
| 15 | 50359244 | 50359472 | 50359323 | 8  | 10 | 7  | 1.318499453 | 0.269217    |       | ENSG00000221052 |
| 15 | 50367724 | 50368318 | 50368029 | 27 | 46 | 19 | 2.253435429 | 0.000687359 | MYO5C | ENSG00000128833 |
| 15 | 50368344 | 50368663 | 50368503 | 8  | 13 | 3  | 3.356180426 | 0.00805599  | MYO5C | ENSG00000128833 |
| 15 | 50372008 | 50372254 | 50372131 | 8  | 9  | 0  | 9.589086931 | 0.00120187  | MYO5C | ENSG00000128833 |
| 15 | 50373047 | 50373292 | 50373167 | 8  | 9  | 5  | 1.598181155 | 0.170911    | MYO5C | ENSG00000128833 |
| 15 | 50373914 | 50374372 | 50374210 | 10 | 18 | 11 | 1.518272097 | 0.122037    | MYO5C | ENSG00000128833 |
| 15 | 50375078 | 50375393 | 50375235 | 11 | 13 | 8  | 1.491635745 | 0.166708    | MYO5C | ENSG00000128833 |
| 15 | 50388611 | 50388800 | 50388705 | 8  | 8  | 7  | 1.07877228  | 0.435076    | MYO5C | ENSG00000128833 |
| 15 | 50398174 | 50398396 | 50398285 | 8  | 8  | 4  | 1.726035648 | 0.150596    | MYO5C | ENSG00000128833 |
| 15 | 50410897 | 50411353 | 50411110 | 21 | 33 | 11 | 2.716907964 | 0.000672572 | MYO5A | ENSG00000197535 |
| 15 | 50414152 | 50414745 | 50414480 | 23 | 39 | 3  | 9.589086931 | 3.26E-09    | MYO5A | ENSG00000197535 |



|    |          |          |          |    |    |    |             |             |          |                 |
|----|----------|----------|----------|----|----|----|-------------|-------------|----------|-----------------|
| 15 | 50415851 | 50416616 | 50416080 | 11 | 32 | 16 | 1.861410992 | 0.0155206   | MYO5A    | ENSG00000197535 |
| 15 | 50419237 | 50419600 | 50419423 | 13 | 19 | 9  | 1.917817386 | 0.0394029   | MYO5A    | ENSG00000197535 |
| 15 | 50419636 | 50420560 | 50420394 | 31 | 71 | 12 | 5.310878915 | 2.43E-11    | MYO5A    | ENSG00000197535 |
| 15 | 50420816 | 50421092 | 50420974 | 10 | 11 | 7  | 1.43836304  | 0.204844    | MYO5A    | ENSG00000197535 |
| 15 | 50424228 | 50424488 | 50424324 | 10 | 13 | 4  | 2.684944341 | 0.01921     | MYO5A    | ENSG00000197535 |
| 15 | 50429894 | 50430159 | 50430026 | 9  | 11 | 1  | 5.753452158 | 0.00215302  | MYO5A    | ENSG00000197535 |
| 15 | 50442740 | 50442996 | 50442868 | 8  | 9  | 2  | 3.19636231  | 0.0229249   | MYO5A    | ENSG00000197535 |
| 15 | 50446411 | 50446709 | 50446560 | 10 | 16 | 8  | 1.811271976 | 0.0663685   | MYO5A    | ENSG00000197535 |
| 15 | 50446721 | 50446998 | 50446823 | 13 | 14 | 10 | 1.307602763 | 0.244096    | MYO5A    | ENSG00000197535 |
| 15 | 50448475 | 50448855 | 50448612 | 10 | 15 | 11 | 1.278544924 | 0.254978    | MYO5A    | ENSG00000197535 |
| 15 | 50451603 | 50451920 | 50451770 | 8  | 11 | 4  | 2.301380863 | 0.0459276   | MYO5A    | ENSG00000197535 |
| 15 | 50453463 | 50453664 | 50453572 | 8  | 8  | 4  | 1.726035648 | 0.150596    | MYO5A    | ENSG00000197535 |
| 15 | 50463046 | 50463285 | 50463165 | 9  | 10 | 5  | 1.757999271 | 0.121253    | MYO5A    | ENSG00000197535 |
| 15 | 50464068 | 50464290 | 50464179 | 9  | 9  | 3  | 2.397271733 | 0.0539397   | MYO5A    | ENSG00000197535 |
| 15 | 50465194 | 50465431 | 50465312 | 8  | 11 | 5  | 1.917817386 | 0.0843804   | MYO5A    | ENSG00000197535 |
| 15 | 50471601 | 50472160 | 50471937 | 25 | 44 | 17 | 2.397271733 | 0.000451161 | MYO5A    | ENSG00000197535 |
| 15 | 50517210 | 50517533 | 50517368 | 9  | 14 | 8  | 1.598181155 | 0.124586    | MYO5A    | ENSG00000197535 |
| 15 | 50520917 | 50521186 | 50521051 | 9  | 10 | 8  | 1.171999514 | 0.35773     | MYO5A    | ENSG00000197535 |
| 15 | 50531637 | 50531892 | 50531764 | 10 | 12 | 9  | 1.246581301 | 0.295061    | MYO5A    | ENSG00000197535 |
| 15 | 50544591 | 50544817 | 50544725 | 10 | 10 | 6  | 1.506856518 | 0.188853    | MYO5A    | ENSG00000197535 |
| 15 | 50576336 | 50576546 | 50576441 | 9  | 10 | 3  | 2.636998906 | 0.034203    |          | ENSG00000174057 |
| 15 | 50597452 | 50597649 | 50597574 | 8  | 8  | 10 | 0.784561658 | 0.708731    | MYO5A    | ENSG00000197535 |
| 15 | 50607139 | 50607474 | 50607307 | 10 | 13 | 5  | 2.237453617 | 0.038866    | MYO5A    | ENSG00000197535 |
| 15 | 50637386 | 50638171 | 50637771 | 40 | 69 | 15 | 4.195225532 | 1.84E-09    |          | ENSG00000128989 |
| 15 | 50643093 | 50643392 | 50643242 | 9  | 11 | 5  | 1.917817386 | 0.0843804   |          | ENSG00000128989 |
| 15 | 50644949 | 50645284 | 50645116 | 11 | 15 | 12 | 1.180195315 | 0.324974    |          | ENSG00000128989 |
| 15 | 50646377 | 50646743 | 50646556 | 10 | 17 | 14 | 1.150690432 | 0.340986    |          | ENSG00000128989 |
| 15 | 50647240 | 50647887 | 50647553 | 10 | 28 | 19 | 1.390417605 | 0.124062    |          | ENSG00000128989 |
| 15 | 50647894 | 50648223 | 50648060 | 9  | 13 | 20 | 0.639272462 | 0.907338    |          | ENSG00000128989 |
| 15 | 50648550 | 50648940 | 50648683 | 14 | 20 | 11 | 1.678090213 | 0.0696225   |          | ENSG00000128989 |
| 15 | 50653699 | 50653922 | 50653810 | 8  | 8  | 4  | 1.726035648 | 0.150596    |          | ENSG00000128989 |
| 15 | 50665938 | 50666212 | 50666075 | 10 | 12 | 7  | 1.558226626 | 0.152813    |          | ENSG00000128989 |
| 15 | 50714639 | 50714839 | 50714739 | 8  | 8  | 3  | 2.157544559 | 0.0836802   | KIAA1370 | ENSG00000047346 |
| 15 | 50732181 | 50732457 | 50732292 | 8  | 10 | 4  | 2.109599125 | 0.0694668   | KIAA1370 | ENSG00000047346 |

|    |          |          |          |    |     |    |             |            |          |                 |
|----|----------|----------|----------|----|-----|----|-------------|------------|----------|-----------------|
| 15 | 50732947 | 50733498 | 50733265 | 16 | 36  | 20 | 1.689505793 | 0.0242828  | KIAA1370 | ENSG00000047346 |
| 15 | 50737245 | 50737548 | 50737378 | 10 | 12  | 1  | 6.232906505 | 0.00117736 | KIAA1370 | ENSG00000047346 |
| 15 | 50742444 | 50742858 | 50742692 | 8  | 15  | 7  | 1.917817386 | 0.0572317  | KIAA1370 | ENSG00000047346 |
| 15 | 50743005 | 50744258 | 50743261 | 79 | 141 | 15 | 8.510314651 | 2.83E-26   | KIAA1370 | ENSG00000047346 |
| 15 | 50757424 | 50758544 | 50757943 | 14 | 53  | 33 | 1.52297263  | 0.0252064  | KIAA1370 | ENSG00000047346 |
| 15 | 50758729 | 50759293 | 50758927 | 20 | 36  | 15 | 2.217476353 | 0.00255902 | KIAA1370 | ENSG00000047346 |
| 15 | 50759339 | 50759548 | 50759486 | 8  | 11  | 5  | 1.917817386 | 0.0843804  | KIAA1370 | ENSG00000047346 |
| 15 | 50774710 | 50775189 | 50774868 | 23 | 34  | 25 | 1.290838625 | 0.158753   | KIAA1370 | ENSG00000047346 |
| 15 | 50789071 | 50789598 | 50789419 | 17 | 30  | 11 | 2.47718079  | 0.00221867 | ONECUT1  | ENSG00000169856 |
| 15 | 50789667 | 50790177 | 50789929 | 9  | 22  | 8  | 2.450544438 | 0.0073921  | ONECUT1  | ENSG00000169856 |
| 15 | 50802448 | 50802689 | 50802558 | 9  | 9   | 5  | 1.598181155 | 0.170911   | ONECUT1  | ENSG00000169856 |
| 15 | 50814731 | 50814973 | 50814852 | 9  | 10  | 9  | 1.054799562 | 0.4492     | ONECUT1  | ENSG00000169856 |
| 15 | 50815030 | 50815280 | 50815149 | 9  | 11  | 13 | 0.821921737 | 0.693119   | ONECUT1  | ENSG00000169856 |
| 15 | 50832399 | 50832616 | 50832507 | 9  | 10  | 5  | 1.757999271 | 0.121253   | ONECUT1  | ENSG00000169856 |
| 15 | 50834960 | 50835219 | 50835085 | 8  | 9   | 4  | 1.917817386 | 0.103282   | ONECUT1  | ENSG00000169856 |
| 15 | 50837301 | 50837528 | 50837414 | 8  | 9   | 11 | 0.799090578 | 0.702688   | ONECUT1  | ENSG00000169856 |
| 15 | 50848954 | 50849204 | 50849079 | 8  | 9   | 9  | 0.958908693 | 0.536911   | ONECUT1  | ENSG00000169856 |
| 15 | 50849425 | 50849727 | 50849576 | 8  | 11  | 7  | 1.43836304  | 0.204844   | ONECUT1  | ENSG00000169856 |
| 15 | 50852193 | 50852415 | 50852305 | 10 | 11  | 5  | 1.917817386 | 0.0843804  | ONECUT1  | ENSG00000169856 |
| 15 | 50855955 | 50856207 | 50856081 | 9  | 13  | 5  | 2.237453617 | 0.038866   | ONECUT1  | ENSG00000169856 |
| 15 | 50859885 | 50860803 | 50860279 | 18 | 51  | 26 | 1.846787113 | 0.00380886 | ONECUT1  | ENSG00000169856 |
| 15 | 50870361 | 50870543 | 50870452 | 9  | 10  | 3  | 2.636998906 | 0.034203   | ONECUT1  | ENSG00000169856 |
| 15 | 50875974 | 50876265 | 50876119 | 10 | 15  | 8  | 1.704726565 | 0.0916153  | ONECUT1  | ENSG00000169856 |
| 15 | 50881809 | 50882095 | 50881963 | 9  | 10  | 4  | 2.109599125 | 0.0694668  | ONECUT1  | ENSG00000169856 |
| 15 | 50884224 | 50884489 | 50884336 | 8  | 9   | 11 | 0.799090578 | 0.702688   | ONECUT1  | ENSG00000169856 |
| 15 | 50889209 | 50889469 | 50889338 | 8  | 9   | 13 | 0.684934781 | 0.824961   | ONECUT1  | ENSG00000169856 |
| 15 | 50898926 | 50899157 | 50899037 | 10 | 10  | 2  | 3.515998541 | 0.0136204  | ONECUT1  | ENSG00000169856 |
| 15 | 50899943 | 50900136 | 50900045 | 8  | 8   | 3  | 2.157544559 | 0.0836802  | ONECUT1  | ENSG00000169856 |
| 15 | 50902032 | 50902467 | 50902211 | 10 | 19  | 2  | 6.39272462  | 8.83E-05   | ONECUT1  | ENSG00000169856 |
| 15 | 50902587 | 50902777 | 50902682 | 8  | 9   | 4  | 1.917817386 | 0.103282   | ONECUT1  | ENSG00000169856 |
| 15 | 50921285 | 50921500 | 50921379 | 8  | 11  | 2  | 3.835634772 | 0.00800699 |          | ENSG00000214896 |
| 15 | 50937575 | 50937820 | 50937689 | 12 | 13  | 6  | 1.917817386 | 0.0693353  |          | ENSG00000214896 |
| 15 | 50940996 | 50941252 | 50941142 | 8  | 10  | 2  | 3.515998541 | 0.0136204  |          | ENSG00000214896 |
| 15 | 50946734 | 50946913 | 50946799 | 8  | 8   | 9  | 0.863017824 | 0.627343   |          | ENSG00000214896 |

|    |          |          |          |    |    |    |             |             |                 |
|----|----------|----------|----------|----|----|----|-------------|-------------|-----------------|
| 15 | 50947845 | 50948103 | 50948021 | 8  | 11 | 3  | 2.876726079 | 0.0213797   | ENSG00000214896 |
| 15 | 50962598 | 50962820 | 50962699 | 9  | 10 | 7  | 1.318499453 | 0.269217    | ENSG00000214896 |
| 15 | 50974923 | 50975193 | 50975079 | 8  | 10 | 6  | 1.506856518 | 0.188853    | ENSG00000214896 |
| 15 | 50999663 | 50999894 | 50999778 | 8  | 10 | 8  | 1.171999514 | 0.35773     | ENSG00000221274 |
| 15 | 51003097 | 51003577 | 51003276 | 9  | 18 | 13 | 1.301376083 | 0.22245     | ENSG00000221274 |
| 15 | 51040189 | 51040447 | 51040318 | 8  | 12 | 9  | 1.246581301 | 0.295061    | ENSG00000221274 |
| 15 | 51043643 | 51044002 | 51043801 | 11 | 17 | 5  | 2.876726079 | 0.00703033  | ENSG00000221274 |
| 15 | 51048580 | 51048807 | 51048710 | 8  | 9  | 7  | 1.198635866 | 0.346278    | ENSG00000221274 |
| 15 | 51054865 | 51055305 | 51055044 | 9  | 18 | 7  | 2.277408146 | 0.0188653   | ENSG00000221274 |
| 15 | 51064480 | 51064667 | 51064573 | 9  | 10 | 1  | 5.273997812 | 0.00391723  | ENSG00000221274 |
| 15 | 51092589 | 51092960 | 51092721 | 12 | 19 | 4  | 3.835634772 | 0.00108365  | ENSG00000221274 |
| 15 | 51103951 | 51104155 | 51104053 | 9  | 9  | 3  | 2.397271733 | 0.0539397   | ENSG00000221274 |
| 15 | 51114543 | 51114816 | 51114679 | 10 | 12 | 4  | 2.493162602 | 0.0299057   | ENSG00000221274 |
| 15 | 51125267 | 51125568 | 51125406 | 12 | 15 | 4  | 3.068507818 | 0.0076507   | ENSG00000221274 |
| 15 | 51125617 | 51125891 | 51125774 | 9  | 12 | 6  | 1.78083043  | 0.0985525   | ENSG00000221274 |
| 15 | 51128645 | 51128876 | 51128787 | 8  | 10 | 4  | 2.109599125 | 0.0694668   | ENSG00000221274 |
| 15 | 51150013 | 51150264 | 51150090 | 8  | 9  | 2  | 3.19636231  | 0.0229249   | ENSG00000221274 |
| 15 | 51151434 | 51152115 | 51151685 | 44 | 86 | 30 | 2.691130848 | 2.11E-07    | ENSG00000221274 |
| 15 | 51156082 | 51156633 | 51156336 | 9  | 21 | 18 | 1.110315329 | 0.366889    | ENSG00000221274 |
| 15 | 51186031 | 51186355 | 51186199 | 10 | 13 | 1  | 6.712360851 | 0.000640982 | ENSG00000221274 |
| 15 | 51200074 | 51200296 | 51200174 | 9  | 11 | 16 | 0.676876725 | 0.854566    | ENSG00000221274 |
| 15 | 51202484 | 51202799 | 51202641 | 12 | 17 | 8  | 1.917817386 | 0.0474153   | ENSG00000221274 |
| 15 | 51207700 | 51207991 | 51207845 | 8  | 11 | 4  | 2.301380863 | 0.0459276   | ENSG00000221274 |
| 15 | 51242254 | 51242794 | 51242554 | 8  | 18 | 10 | 1.656296833 | 0.0841786   | ENSG00000221274 |
| 15 | 51244307 | 51244511 | 51244342 | 8  | 9  | 12 | 0.737622072 | 0.769563    | ENSG00000221274 |
| 15 | 51272837 | 51273021 | 51272930 | 8  | 9  | 11 | 0.799090578 | 0.702688    | ENSG00000221274 |
| 15 | 51274839 | 51275018 | 51274941 | 8  | 8  | 8  | 0.958908693 | 0.534974    | ENSG00000221274 |
| 15 | 51276556 | 51276798 | 51276677 | 8  | 11 | 5  | 1.917817386 | 0.0843804   | ENSG00000221274 |
| 15 | 51276828 | 51277355 | 51277069 | 14 | 27 | 13 | 1.917817386 | 0.0192196   | ENSG00000221274 |
| 15 | 51280981 | 51281249 | 51281154 | 11 | 14 | 3  | 3.595907599 | 0.00486913  | ENSG00000221274 |
| 15 | 51291519 | 51291751 | 51291658 | 9  | 10 | 5  | 1.757999271 | 0.121253    | ENSG00000221274 |
| 15 | 51327307 | 51327486 | 51327375 | 8  | 8  | 3  | 2.157544559 | 0.0836802   | ENSG00000221274 |
| 15 | 51335531 | 51335710 | 51335615 | 8  | 8  | 1  | 4.315089119 | 0.0127267   | ENSG00000221274 |
| 15 | 51387283 | 51387567 | 51387429 | 8  | 11 | 6  | 1.643843474 | 0.137712    | ENSG00000210932 |

|    |          |          |          |    |    |    |             |             |                       |
|----|----------|----------|----------|----|----|----|-------------|-------------|-----------------------|
| 15 | 51398277 | 51398593 | 51398424 | 10 | 13 | 7  | 1.678090213 | 0.11195     | ENSG00000210932       |
| 15 | 51437841 | 51438083 | 51437948 | 8  | 9  | 1  | 4.794543465 | 0.00708517  | ENSG00000210932       |
| 15 | 51441166 | 51441394 | 51441337 | 10 | 11 | 4  | 2.301380863 | 0.0459276   | ENSG00000210932       |
| 15 | 51447081 | 51447272 | 51447177 | 8  | 8  | 6  | 1.232882605 | 0.333038    | ENSG00000210932       |
| 15 | 51459143 | 51459361 | 51459244 | 8  | 10 | 8  | 1.171999514 | 0.35773     | ENSG00000210932       |
| 15 | 51463956 | 51464285 | 51464120 | 12 | 16 | 12 | 1.253957522 | 0.265012    | ENSG00000210932       |
| 15 | 51475802 | 51476019 | 51475910 | 9  | 11 | 11 | 0.958908693 | 0.540507    | ENSG00000210932       |
| 15 | 51477301 | 51478050 | 51477660 | 16 | 36 | 8  | 3.942180183 | 1.41E-05    | ENSG00000210932       |
| 15 | 51479202 | 51479490 | 51479354 | 8  | 11 | 12 | 0.885146486 | 0.620672    | ENSG00000210932       |
| 15 | 51515374 | 51515562 | 51515414 | 8  | 9  | 5  | 1.598181155 | 0.170911    | ENSG00000210932       |
| 15 | 51530993 | 51531172 | 51531081 | 8  | 8  | 9  | 0.863017824 | 0.627343    | ENSG00000210932       |
| 15 | 51543778 | 51544047 | 51543912 | 10 | 10 | 6  | 1.506856518 | 0.188853    | ENSG00000210932       |
| 15 | 51552407 | 51552858 | 51552578 | 10 | 16 | 8  | 1.811271976 | 0.0663685   | ENSG00000210932       |
| 15 | 51570184 | 51570399 | 51570301 | 11 | 11 | 1  | 5.753452158 | 0.00215302  | ENSG00000210932       |
| 15 | 51602526 | 51602790 | 51602686 | 8  | 11 | 6  | 1.643843474 | 0.137712    | ENSG00000210932       |
| 15 | 51605010 | 51605250 | 51605130 | 10 | 12 | 5  | 2.077635502 | 0.0577144   | ENSG00000210932       |
| 15 | 51619775 | 51620061 | 51619918 | 8  | 11 | 3  | 2.876726079 | 0.0213797   | ENSG00000210932       |
| 15 | 51639116 | 51639334 | 51639225 | 8  | 8  | 1  | 4.315089119 | 0.0127267   | ENSG00000210932       |
| 15 | 51643216 | 51643413 | 51643359 | 9  | 11 | 7  | 1.43836304  | 0.204844    | ENSG00000210932       |
| 15 | 51666348 | 51666596 | 51666476 | 9  | 10 | 2  | 3.515998541 | 0.0136204   | ENSG00000210932       |
| 15 | 51690282 | 51690481 | 51690381 | 8  | 10 | 1  | 5.273997812 | 0.00391723  | ENSG00000210932       |
| 15 | 51704936 | 51705215 | 51705075 | 9  | 12 | 7  | 1.558226626 | 0.152813    | ENSG00000210932       |
| 15 | 51717749 | 51718146 | 51717928 | 11 | 19 | 5  | 3.19636231  | 0.00280933  | ENSG00000210932       |
| 15 | 51750832 | 51751017 | 51751000 | 8  | 8  | 3  | 2.157544559 | 0.0836802   | ENSG00000210932       |
| 15 | 51755268 | 51755789 | 51755442 | 45 | 61 | 5  | 9.908723162 | 2.32E-13    | ENSG00000210932       |
| 15 | 51796381 | 51796666 | 51796525 | 8  | 11 | 12 | 0.885146486 | 0.620672    | WDR72 ENSG00000166415 |
| 15 | 51826783 | 51827135 | 51826960 | 8  | 12 | 7  | 1.558226626 | 0.152813    | WDR72 ENSG00000166415 |
| 15 | 51838501 | 51838701 | 51838556 | 8  | 8  | 7  | 1.07877228  | 0.435076    | WDR72 ENSG00000166415 |
| 15 | 51847469 | 51847649 | 51847559 | 8  | 9  | 7  | 1.198635866 | 0.346278    | ENSG00000206641       |
| 15 | 51887498 | 51887914 | 51887677 | 9  | 18 | 6  | 2.602752167 | 0.00970422  | ENSG00000206641       |
| 15 | 51891117 | 51891343 | 51891214 | 8  | 10 | 10 | 0.958908693 | 0.538751    | ENSG00000206641       |
| 15 | 51923739 | 51924007 | 51923893 | 9  | 13 | 1  | 6.712360851 | 0.000640982 | ENSG00000206641       |
| 15 | 51930714 | 51930897 | 51930803 | 9  | 9  | 2  | 3.19636231  | 0.0229249   | ENSG00000206641       |
| 15 | 51954788 | 51955026 | 51954907 | 8  | 9  | 11 | 0.799090578 | 0.702688    | ENSG00000206641       |

|    |          |          |          |     |     |    |             |             |                          |
|----|----------|----------|----------|-----|-----|----|-------------|-------------|--------------------------|
| 15 | 51955193 | 51955379 | 51955286 | 8   | 8   | 5  | 1.43836304  | 0.235762    | ENSG00000206641          |
| 15 | 51963968 | 51964414 | 51964138 | 18  | 27  | 3  | 6.712360851 | 3.92E-06    | ENSG00000206641          |
| 15 | 51978900 | 51979159 | 51979029 | 9   | 11  | 3  | 2.876726079 | 0.0213797   | ENSG00000206641          |
| 15 | 51989220 | 51990122 | 51989820 | 238 | 327 | 5  | 52.42034189 | 1.57E-87    | ENSG00000206641          |
| 15 | 51995931 | 51996365 | 51996098 | 9   | 15  | 8  | 1.704726565 | 0.0916153   | ENSG00000206641          |
| 15 | 51997983 | 51998367 | 51998156 | 8   | 14  | 14 | 0.958908693 | 0.545362    | ENSG00000206641          |
| 15 | 52042424 | 52042754 | 52042595 | 14  | 18  | 6  | 2.602752167 | 0.00970422  | ENSG00000206641          |
| 15 | 52056552 | 52056744 | 52056615 | 8   | 9   | 7  | 1.198635866 | 0.346278    | ENSG00000206641          |
| 15 | 52067525 | 52067712 | 52067605 | 8   | 8   | 2  | 2.876726079 | 0.0381137   | ENSG00000206641          |
| 15 | 52070180 | 52070432 | 52070324 | 8   | 11  | 6  | 1.643843474 | 0.137712    | ENSG00000206641          |
| 15 | 52071979 | 52072180 | 52072079 | 9   | 9   | 3  | 2.397271733 | 0.0539397   | ENSG00000206641          |
| 15 | 52127823 | 52128032 | 52127907 | 9   | 10  | 2  | 3.515998541 | 0.0136204   | UNC13C ENSG00000137766   |
| 15 | 52148723 | 52148914 | 52148818 | 8   | 8   | 6  | 1.232882605 | 0.333038    | UNC13C ENSG00000137766   |
| 15 | 52188471 | 52188655 | 52188563 | 8   | 8   | 1  | 4.315089119 | 0.0127267   | UNC13C ENSG00000137766   |
| 15 | 52235730 | 52235955 | 52235842 | 10  | 10  | 3  | 2.636998906 | 0.034203    | UNC13C ENSG00000137766   |
| 15 | 52244361 | 52244559 | 52244457 | 8   | 8   | 4  | 1.726035648 | 0.150596    | UNC13C ENSG00000137766   |
| 15 | 52259680 | 52259877 | 52259778 | 8   | 8   | 3  | 2.157544559 | 0.0836802   | UNC13C ENSG00000137766   |
| 15 | 52296951 | 52297148 | 52297067 | 8   | 9   | 4  | 1.917817386 | 0.103282    | UNC13C ENSG00000137766   |
| 15 | 52339420 | 52339752 | 52339579 | 9   | 11  | 1  | 5.753452158 | 0.00215302  | UNC13C ENSG00000137766   |
| 15 | 53276535 | 53276791 | 53276650 | 10  | 12  | 4  | 2.493162602 | 0.0299057   | C15orf15 ENSG00000137876 |
| 15 | 54073477 | 54073696 | 54073635 | 9   | 10  | 5  | 1.757999271 | 0.121253    | NEDD4 ENSG00000069869    |
| 15 | 54284618 | 54284974 | 54284796 | 40  | 46  | 1  | 22.53435429 | 4.53E-13    | RFX7 ENSG00000181827     |
| 15 | 54319641 | 54320303 | 54320097 | 50  | 72  | 2  | 23.33344486 | 3.30E-19    | RFX7 ENSG00000181827     |
| 15 | 54325521 | 54325874 | 54325697 | 13  | 19  | 6  | 2.739739123 | 0.00632909  | RFX7 ENSG00000181827     |
| 15 | 54448766 | 54449152 | 54448945 | 13  | 20  | 3  | 5.034270639 | 0.000202317 | TEX9 ENSG00000151575     |
| 15 | 54709925 | 54710237 | 54710074 | 20  | 22  | 1  | 11.02744997 | 2.36E-06    | ENSG00000211017          |
| 15 | 54901288 | 54901591 | 54901439 | 9   | 10  | 1  | 5.273997812 | 0.00391723  | ENSG00000140238          |
| 15 | 54967118 | 54967346 | 54967276 | 8   | 9   | 5  | 1.598181155 | 0.170911    | TCF12 ENSG00000140262    |
| 15 | 54978521 | 54978758 | 54978667 | 9   | 11  | 0  | 11.50690432 | 0.000313206 | TCF12 ENSG00000140262    |
| 15 | 55147009 | 55147337 | 55147185 | 12  | 15  | 2  | 5.114179696 | 0.00088103  | ENSG00000222586          |
| 15 | 55469685 | 55469898 | 55469791 | 8   | 8   | 1  | 4.315089119 | 0.0127267   | CGNL1 ENSG00000128849    |
| 15 | 55754134 | 55754392 | 55754263 | 8   | 9   | 0  | 9.589086931 | 0.00120187  | GRINL1A ENSG00000137878  |
| 15 | 56411720 | 56411975 | 56411807 | 8   | 11  | 2  | 3.835634772 | 0.00800699  | LIPC ENSG00000166035     |
| 15 | 57031237 | 57031459 | 57031414 | 8   | 8   | 2  | 2.876726079 | 0.0381137   | SLTM ENSG00000137776     |

|    |          |          |          |     |     |    |             |                    |                 |
|----|----------|----------|----------|-----|-----|----|-------------|--------------------|-----------------|
| 15 | 57245187 | 57245706 | 57245418 | 82  | 108 | 1  | 52.26052377 | 8.05E-31           | ENSG00000221096 |
| 15 | 57535725 | 57536007 | 57535864 | 13  | 14  | 2  | 4.794543465 | 0.00154571 FAM81A  | ENSG00000157470 |
| 15 | 57608483 | 57608742 | 57608612 | 10  | 13  | 2  | 4.474907234 | 0.00269459         | ENSG00000201704 |
| 15 | 57650944 | 57651261 | 57651085 | 8   | 12  | 0  | 12.46581301 | 0.000159888        | ENSG00000201704 |
| 15 | 58138697 | 58139119 | 58138901 | 24  | 36  | 1  | 17.73981082 | 3.00E-10 FOXB1     | ENSG00000171956 |
| 15 | 58302702 | 58302987 | 58302851 | 9   | 11  | 2  | 3.835634772 | 0.00800699 ANXA2P2 | ENSG00000182718 |
| 15 | 58396394 | 58396822 | 58396610 | 61  | 74  | 1  | 35.95907599 | 4.74E-21 ANXA2P2   | ENSG00000182718 |
| 15 | 58454280 | 58454487 | 58454383 | 9   | 11  | 6  | 1.643843474 | 0.137712 ANXA2P2   | ENSG00000182718 |
| 15 | 58472509 | 58472842 | 58472681 | 14  | 16  | 4  | 3.260289556 | 0.00475414 ANXA2P2 | ENSG00000182718 |
| 15 | 58988371 | 58988772 | 58988538 | 11  | 19  | 0  | 19.17817386 | 1.44E-06           | ENSG00000212625 |
| 15 | 58998118 | 58998394 | 58998256 | 10  | 13  | 3  | 3.356180426 | 0.00805599         | ENSG00000212625 |
| 15 | 59488563 | 59488876 | 59488718 | 16  | 19  | 2  | 6.39272462  | 8.83E-05 RORA      | ENSG00000069667 |
| 15 | 59643607 | 59643867 | 59643716 | 9   | 9   | 1  | 4.794543465 | 0.00708517 RORA    | ENSG00000069667 |
| 15 | 60341957 | 60342472 | 60342278 | 65  | 81  | 0  | 78.63051283 | 1.13E-24           | ENSG00000166104 |
| 15 | 60976299 | 60976823 | 60976561 | 14  | 27  | 5  | 4.474907234 | 5.37E-05           | ENSG00000213712 |
| 15 | 61236013 | 61236901 | 61236532 | 290 | 487 | 5  | 77.99124037 | 2.12E-133 RPS27L   | ENSG00000185088 |
| 15 | 61269852 | 61270054 | 61269953 | 8   | 8   | 2  | 2.876726079 | 0.0381137 RAB8B    | ENSG00000166128 |
| 15 | 61429767 | 61429969 | 61429881 | 8   | 9   | 1  | 4.794543465 | 0.00708517 CA12    | ENSG00000074410 |
| 15 | 61458662 | 61459008 | 61458835 | 11  | 15  | 12 | 1.180195315 | 0.324974 CA12      | ENSG00000074410 |
| 15 | 61461320 | 61461534 | 61461417 | 8   | 9   | 5  | 1.598181155 | 0.170911 CA12      | ENSG00000074410 |
| 15 | 61466951 | 61467131 | 61467041 | 8   | 8   | 2  | 2.876726079 | 0.0381137 CA12     | ENSG00000074410 |
| 15 | 61467390 | 61467626 | 61467516 | 10  | 10  | 7  | 1.318499453 | 0.269217 CA12      | ENSG00000074410 |
| 15 | 61507617 | 61507907 | 61507762 | 19  | 21  | 0  | 21.09599125 | 3.76E-07 CA12      | ENSG00000074410 |
| 15 | 61529022 | 61529380 | 61529201 | 9   | 14  | 7  | 1.797953799 | 0.0806593 USP3     | ENSG00000140455 |
| 15 | 61566720 | 61566942 | 61566851 | 8   | 11  | 4  | 2.301380863 | 0.0459276 USP3     | ENSG00000140455 |
| 15 | 61571873 | 61572052 | 61571971 | 8   | 8   | 0  | 8.630178238 | 0.00235436 USP3    | ENSG00000140455 |
| 15 | 61581500 | 61581800 | 61581670 | 10  | 15  | 3  | 3.835634772 | 0.00291691 USP3    | ENSG00000140455 |
| 15 | 61582631 | 61582897 | 61582779 | 14  | 14  | 2  | 4.794543465 | 0.00154571 USP3    | ENSG00000140455 |
| 15 | 61583727 | 61583946 | 61583836 | 11  | 11  | 5  | 1.917817386 | 0.0843804 USP3     | ENSG00000140455 |
| 15 | 61756989 | 61757304 | 61757135 | 8   | 11  | 2  | 3.835634772 | 0.00800699 FBXL22  | ENSG00000197361 |
| 15 | 62172806 | 62173463 | 62173123 | 14  | 29  | 4  | 5.753452158 | 5.31E-06 FAM96A    | ENSG00000166797 |
| 15 | 62232845 | 62233093 | 62232969 | 11  | 13  | 12 | 1.0326709   | 0.46514 SNX22      | ENSG00000157734 |
| 15 | 62433985 | 62435009 | 62434379 | 27  | 76  | 10 | 6.712360851 | 1.19E-13 CSNK1G1   | ENSG00000169118 |
| 15 | 62435243 | 62435650 | 62435422 | 9   | 16  | 5  | 2.716907964 | 0.0109645 CSNK1G1  | ENSG00000169118 |

|    |          |          |          |    |    |    |             |             |          |                 |
|----|----------|----------|----------|----|----|----|-------------|-------------|----------|-----------------|
| 15 | 62466741 | 62467015 | 62466869 | 9  | 12 | 4  | 2.493162602 | 0.0299057   | TRIP4    | ENSG00000103671 |
| 15 | 62539557 | 62539839 | 62539713 | 11 | 13 | 5  | 2.237453617 | 0.038866    |          | ENSG00000206781 |
| 15 | 62540604 | 62540878 | 62540741 | 13 | 16 | 5  | 2.716907964 | 0.0109645   |          | ENSG00000206781 |
| 15 | 62594479 | 62594752 | 62594615 | 14 | 17 | 1  | 8.630178238 | 5.44E-05    | ZNF609   | ENSG00000180357 |
| 15 | 62651247 | 62651464 | 62651358 | 8  | 9  | 6  | 1.369869562 | 0.253675    | ZNF609   | ENSG00000180357 |
| 15 | 62810540 | 62810870 | 62810705 | 9  | 14 | 2  | 4.794543465 | 0.00154571  |          | ENSG00000221033 |
| 15 | 62828872 | 62829154 | 62829009 | 8  | 11 | 4  | 2.301380863 | 0.0459276   |          | ENSG00000221033 |
| 15 | 62846372 | 62846898 | 62846559 | 22 | 34 | 3  | 8.390451064 | 6.50E-08    |          | ENSG00000221033 |
| 15 | 63133722 | 63133901 | 63133798 | 8  | 9  | 1  | 4.794543465 | 0.00708517  |          | ENSG00000186198 |
| 15 | 63180888 | 63181170 | 63181029 | 14 | 16 | 11 | 1.358453982 | 0.20248     | PDCD7    | ENSG00000090470 |
| 15 | 63264866 | 63265116 | 63264991 | 15 | 15 | 9  | 1.534253909 | 0.136498    | CLPX     | ENSG00000166855 |
| 15 | 63398310 | 63398507 | 63398408 | 8  | 9  | 3  | 2.397271733 | 0.0539397   | RNU5B-1  | ENSG00000200156 |
| 15 | 63464274 | 63464551 | 63464412 | 11 | 14 | 3  | 3.595907599 | 0.00486913  | PUNC     | ENSG00000174498 |
| 15 | 63480306 | 63480589 | 63480417 | 9  | 12 | 4  | 2.493162602 | 0.0299057   |          | ENSG00000103742 |
| 15 | 63597021 | 63597267 | 63597144 | 9  | 10 | 3  | 2.636998906 | 0.034203    | DPP8     | ENSG00000074603 |
| 15 | 63634968 | 63635249 | 63635134 | 8  | 9  | 2  | 3.19636231  | 0.0229249   |          | ENSG00000207449 |
| 15 | 63678446 | 63678682 | 63678541 | 8  | 9  | 1  | 4.794543465 | 0.00708517  | C15orf44 | ENSG00000138614 |
| 15 | 63690374 | 63690786 | 63690546 | 12 | 20 | 8  | 2.237453617 | 0.0160557   | C15orf44 | ENSG00000138614 |
| 15 | 63812069 | 63812436 | 63812266 | 13 | 18 | 4  | 3.643853034 | 0.00178791  |          | ENSG00000211307 |
| 15 | 63908551 | 63908785 | 63908666 | 8  | 9  | 2  | 3.19636231  | 0.0229249   | DENND4A  | ENSG00000174485 |
| 15 | 63912029 | 63912362 | 63912222 | 9  | 14 | 8  | 1.598181155 | 0.124586    | RAB11A   | ENSG00000103769 |
| 15 | 63948386 | 63948779 | 63948565 | 10 | 18 | 9  | 1.821926517 | 0.0548428   | RAB11A   | ENSG00000103769 |
| 15 | 63985833 | 63986029 | 63985931 | 8  | 8  | 4  | 1.726035648 | 0.150596    | RAB11A   | ENSG00000103769 |
| 15 | 64194252 | 64194619 | 64194418 | 11 | 17 | 1  | 8.630178238 | 5.44E-05    | MEGF11   | ENSG00000157890 |
| 15 | 64291553 | 64291732 | 64291642 | 8  | 9  | 1  | 4.794543465 | 0.00708517  | MEGF11   | ENSG00000157890 |
| 15 | 64584462 | 64584666 | 64584564 | 12 | 12 | 2  | 4.155271003 | 0.0046638   | ZWILCH   | ENSG00000174442 |
| 15 | 64603348 | 64603624 | 64603524 | 10 | 13 | 1  | 6.712360851 | 0.000640982 | ZWILCH   | ENSG00000174442 |
| 15 | 64942319 | 64942635 | 64942491 | 9  | 11 | 2  | 3.835634772 | 0.00800699  |          | ENSG00000213670 |
| 15 | 65041994 | 65042261 | 65042103 | 8  | 10 | 4  | 2.109599125 | 0.0694668   |          | ENSG00000213670 |
| 15 | 65103836 | 65104098 | 65103967 | 14 | 16 | 3  | 4.075361945 | 0.00173346  |          | ENSG00000205438 |
| 15 | 65127966 | 65128545 | 65128199 | 34 | 53 | 4  | 10.35621389 | 4.48E-12    |          | ENSG00000205438 |
| 15 | 65128777 | 65129106 | 65128946 | 10 | 15 | 4  | 3.068507818 | 0.0076507   |          | ENSG00000205438 |
| 15 | 65204972 | 65205334 | 65205151 | 10 | 16 | 9  | 1.630144778 | 0.102169    | SMAD3    | ENSG00000166949 |
| 15 | 65226803 | 65226997 | 65226900 | 8  | 10 | 2  | 3.515998541 | 0.0136204   | SMAD3    | ENSG00000166949 |

|    |          |          |          |    |    |    |             |             |          |                 |
|----|----------|----------|----------|----|----|----|-------------|-------------|----------|-----------------|
| 15 | 65227684 | 65227994 | 65227833 | 10 | 13 | 5  | 2.237453617 | 0.038866    | SMAD3    | ENSG00000166949 |
| 15 | 65229472 | 65229739 | 65229587 | 8  | 10 | 5  | 1.757999271 | 0.121253    | SMAD3    | ENSG00000166949 |
| 15 | 65245656 | 65245951 | 65245803 | 11 | 14 | 1  | 7.191815198 | 0.00034761  |          | ENSG00000103591 |
| 15 | 65319760 | 65320132 | 65319953 | 8  | 15 | 9  | 1.534253909 | 0.136498    |          | ENSG00000103591 |
| 15 | 65601541 | 65601754 | 65601647 | 8  | 8  | 2  | 2.876726079 | 0.0381137   | C15orf61 | ENSG00000189227 |
| 15 | 65697584 | 65697806 | 65697646 | 8  | 10 | 7  | 1.318499453 | 0.269217    | MAP2K5   | ENSG00000137764 |
| 15 | 65940934 | 65941114 | 65941020 | 9  | 9  | 2  | 3.19636231  | 0.0229249   |          | ENSG00000206625 |
| 15 | 65942776 | 65943053 | 65942934 | 8  | 10 | 1  | 5.273997812 | 0.00391723  |          | ENSG00000206625 |
| 15 | 66077972 | 66078224 | 66078098 | 8  | 11 | 2  | 3.835634772 | 0.00800699  | PIAS1    | ENSG00000033800 |
| 15 | 66122188 | 66122418 | 66122362 | 8  | 11 | 7  | 1.43836304  | 0.204844    | PIAS1    | ENSG00000033800 |
| 15 | 66332380 | 66332596 | 66332528 | 10 | 13 | 1  | 6.712360851 | 0.000640982 |          | ENSG00000213656 |
| 15 | 66351249 | 66351760 | 66351479 | 24 | 38 | 1  | 18.69871951 | 8.21E-11    | FEM1B    | ENSG00000169018 |
| 15 | 66356943 | 66357232 | 66357090 | 12 | 17 | 6  | 2.465765211 | 0.014729    | FEM1B    | ENSG00000169018 |
| 15 | 66385985 | 66386291 | 66386138 | 8  | 13 | 3  | 3.356180426 | 0.00805599  | FEM1B    | ENSG00000169018 |
| 15 | 66433149 | 66433405 | 66433261 | 9  | 11 | 2  | 3.835634772 | 0.00800699  | FEM1B    | ENSG00000169018 |
| 15 | 66574146 | 66574348 | 66574247 | 10 | 10 | 2  | 3.515998541 | 0.0136204   | ITGA11   | ENSG00000137809 |
| 15 | 66771125 | 66771329 | 66771210 | 10 | 10 | 3  | 2.636998906 | 0.034203    |          | ENSG00000214746 |
| 15 | 66901485 | 66901721 | 66901581 | 9  | 11 | 3  | 2.876726079 | 0.0213797   | ANP32A   | ENSG00000140350 |
| 15 | 67004384 | 67004601 | 67004492 | 8  | 9  | 2  | 3.19636231  | 0.0229249   | NOX5     | ENSG00000137808 |
| 15 | 67124500 | 67124726 | 67124582 | 8  | 11 | 4  | 2.301380863 | 0.0459276   | NOX5     | ENSG00000137808 |
| 15 | 67128096 | 67128327 | 67128156 | 8  | 8  | 2  | 2.876726079 | 0.0381137   | TMEM84   | ENSG00000212766 |
| 15 | 67239581 | 67239772 | 67239676 | 8  | 8  | 3  | 2.157544559 | 0.0836802   | GLCE     | ENSG00000138604 |
| 15 | 67241149 | 67241374 | 67241282 | 9  | 10 | 6  | 1.506856518 | 0.188853    | GLCE     | ENSG00000138604 |
| 15 | 67252316 | 67252507 | 67252411 | 8  | 8  | 2  | 2.876726079 | 0.0381137   | GLCE     | ENSG00000138604 |
| 15 | 67494201 | 67494451 | 67494343 | 8  | 9  | 2  | 3.19636231  | 0.0229249   | KIF23    | ENSG00000137807 |
| 15 | 67542160 | 67542360 | 67542260 | 8  | 10 | 5  | 1.757999271 | 0.121253    |          | ENSG00000207119 |
| 15 | 67547116 | 67547449 | 67547282 | 13 | 17 | 11 | 1.43836304  | 0.15834     |          | ENSG00000207119 |
| 15 | 67555231 | 67555489 | 67555360 | 11 | 13 | 6  | 1.917817386 | 0.0693353   |          | ENSG00000207119 |
| 15 | 67562195 | 67562415 | 67562292 | 8  | 10 | 13 | 0.753428259 | 0.762589    |          | ENSG00000207119 |
| 15 | 67602805 | 67603193 | 67603021 | 13 | 18 | 7  | 2.277408146 | 0.0188653   |          | ENSG00000207119 |
| 15 | 67673826 | 67674026 | 67673926 | 8  | 9  | 3  | 2.397271733 | 0.0539397   |          | ENSG00000207119 |
| 15 | 67683351 | 67683591 | 67683471 | 9  | 11 | 10 | 1.046082211 | 0.455063    |          | ENSG00000207119 |
| 15 | 67962511 | 67962798 | 67962679 | 12 | 16 | 4  | 3.260289556 | 0.00475414  |          | ENSG00000215958 |
| 15 | 68067168 | 68067615 | 68067340 | 13 | 20 | 7  | 2.517135319 | 0.00849957  |          | ENSG00000207965 |



|    |          |          |          |    |    |    |             |             |        |                 |
|----|----------|----------|----------|----|----|----|-------------|-------------|--------|-----------------|
| 15 | 68076629 | 68076911 | 68076795 | 9  | 11 | 7  | 1.43836304  | 0.204844    |        | ENSG00000207965 |
| 15 | 68127165 | 68127349 | 68127257 | 8  | 8  | 0  | 8.630178238 | 0.00235436  |        | ENSG00000207965 |
| 15 | 68172857 | 68173530 | 68173309 | 15 | 39 | 11 | 3.19636231  | 5.26E-05    | TLE3   | ENSG00000140332 |
| 15 | 68179094 | 68179385 | 68179222 | 9  | 12 | 5  | 2.077635502 | 0.0577144   | TLE3   | ENSG00000140332 |
| 15 | 68180968 | 68181246 | 68181112 | 9  | 12 | 5  | 2.077635502 | 0.0577144   | TLE3   | ENSG00000140332 |
| 15 | 68276070 | 68276402 | 68276246 | 13 | 18 | 6  | 2.602752167 | 0.00970422  |        | ENSG00000200216 |
| 15 | 68369093 | 68369297 | 68369195 | 8  | 9  | 6  | 1.369869562 | 0.253675    |        | ENSG00000200216 |
| 15 | 68403383 | 68403982 | 68403689 | 12 | 31 | 17 | 1.704726565 | 0.0311659   |        | ENSG00000200216 |
| 15 | 68442561 | 68442753 | 68442700 | 8  | 8  | 4  | 1.726035648 | 0.150596    |        | ENSG00000200216 |
| 15 | 68454457 | 68454766 | 68454636 | 8  | 10 | 1  | 5.273997812 | 0.00391723  |        | ENSG00000200216 |
| 15 | 68475031 | 68475357 | 68475194 | 9  | 13 | 2  | 4.474907234 | 0.00269459  |        | ENSG00000200216 |
| 15 | 68542344 | 68542595 | 68542468 | 8  | 10 | 2  | 3.515998541 | 0.0136204   | UACA   | ENSG00000137831 |
| 15 | 68545127 | 68545566 | 68545306 | 9  | 16 | 6  | 2.328778255 | 0.0221113   | UACA   | ENSG00000137831 |
| 15 | 68574459 | 68574756 | 68574591 | 8  | 12 | 4  | 2.493162602 | 0.0299057   | UACA   | ENSG00000137831 |
| 15 | 68587221 | 68587526 | 68587376 | 12 | 16 | 3  | 4.075361945 | 0.00173346  | UACA   | ENSG00000137831 |
| 15 | 68596322 | 68596617 | 68596460 | 9  | 13 | 6  | 1.917817386 | 0.0693353   | UACA   | ENSG00000137831 |
| 15 | 68605863 | 68606270 | 68606091 | 19 | 28 | 4  | 5.56167042  | 9.22E-06    | UACA   | ENSG00000137831 |
| 15 | 68904539 | 68904779 | 68904659 | 8  | 11 | 1  | 5.753452158 | 0.00215302  |        | ENSG00000156577 |
| 15 | 68971763 | 68972104 | 68971941 | 9  | 13 | 8  | 1.491635745 | 0.166708    | LRRC49 | ENSG00000137821 |
| 15 | 69129896 | 69130092 | 69130000 | 8  | 10 | 0  | 10.54799562 | 0.000613541 |        | ENSG00000214727 |
| 15 | 69135649 | 69135828 | 69135712 | 8  | 9  | 1  | 4.794543465 | 0.00708517  |        | ENSG00000214727 |
| 15 | 69182419 | 69182831 | 69182620 | 30 | 40 | 3  | 9.828814104 | 1.78E-09    | THSD4  | ENSG00000187720 |
| 15 | 69193519 | 69193730 | 69193624 | 8  | 10 | 3  | 2.636998906 | 0.034203    | THSD4  | ENSG00000187720 |
| 15 | 69274694 | 69274938 | 69274794 | 10 | 14 | 4  | 2.876726079 | 0.01219     | THSD4  | ENSG00000187720 |
| 15 | 69331379 | 69331642 | 69331513 | 9  | 10 | 10 | 0.958908693 | 0.538751    |        | ENSG00000175333 |
| 15 | 69374775 | 69374989 | 69374862 | 10 | 11 | 5  | 1.917817386 | 0.0843804   |        | ENSG00000175333 |
| 15 | 69416693 | 69417109 | 69416930 | 17 | 25 | 8  | 2.770180669 | 0.00215826  |        | ENSG00000175333 |
| 15 | 69443369 | 69443976 | 69443667 | 45 | 68 | 6  | 9.452099974 | 2.16E-14    |        | ENSG00000175333 |
| 15 | 69519936 | 69520183 | 69520059 | 12 | 13 | 3  | 3.356180426 | 0.00805599  |        | ENSG00000175333 |
| 15 | 69524293 | 69524582 | 69524450 | 15 | 17 | 1  | 8.630178238 | 5.44E-05    | THSD4  | ENSG00000187720 |
| 15 | 69612453 | 69612704 | 69612565 | 11 | 12 | 4  | 2.493162602 | 0.0299057   | THSD4  | ENSG00000187720 |
| 15 | 69652106 | 69652409 | 69652257 | 9  | 11 | 2  | 3.835634772 | 0.00800699  |        | ENSG00000203498 |
| 15 | 69689288 | 69689543 | 69689415 | 8  | 12 | 1  | 6.232906505 | 0.00117736  |        | ENSG00000203497 |
| 15 | 69739852 | 69740213 | 69740041 | 10 | 16 | 4  | 3.260289556 | 0.00475414  |        | ENSG00000203497 |

|    |          |          |          |    |     |    |             |             |                          |
|----|----------|----------|----------|----|-----|----|-------------|-------------|--------------------------|
| 15 | 69827037 | 69827314 | 69827175 | 10 | 14  | 8  | 1.598181155 | 0.124586    | ENSG00000203496          |
| 15 | 70054996 | 70055234 | 70055108 | 12 | 13  | 5  | 2.237453617 | 0.038866    | ENSG00000214713          |
| 15 | 70196265 | 70196575 | 70196420 | 10 | 12  | 3  | 3.116453252 | 0.0131971   | MYO9A ENSG00000066933    |
| 15 | 70234707 | 70234913 | 70234810 | 9  | 9   | 2  | 3.19636231  | 0.0229249   | SENP8 ENSG00000166192    |
| 15 | 70303413 | 70303635 | 70303487 | 9  | 9   | 3  | 2.397271733 | 0.0539397   | PKM2 ENSG00000067225     |
| 15 | 70352072 | 70352351 | 70352205 | 11 | 12  | 1  | 6.232906505 | 0.00117736  | PARP6 ENSG00000137817    |
| 15 | 70392158 | 70392371 | 70392241 | 8  | 9   | 1  | 4.794543465 | 0.00708517  | BRUNOL6 ENSG00000140488  |
| 15 | 70454918 | 70455324 | 70455097 | 12 | 20  | 5  | 3.356180426 | 0.0017534   | HEXA ENSG00000213614     |
| 15 | 70552995 | 70553327 | 70553162 | 10 | 15  | 4  | 3.068507818 | 0.0076507   | ARIH1 ENSG00000166233    |
| 15 | 70765348 | 70765722 | 70765527 | 9  | 16  | 11 | 1.358453982 | 0.20248     | HIGD2BP ENSG00000175202  |
| 15 | 70801470 | 70801766 | 70801618 | 8  | 11  | 7  | 1.43836304  | 0.204844    | BBS4 ENSG00000140463     |
| 15 | 71244877 | 71245774 | 71245325 | 81 | 125 | 0  | 120.8224953 | 1.61E-37    | NEO1 ENSG00000067141     |
| 15 | 71320370 | 71320549 | 71320459 | 9  | 9   | 5  | 1.598181155 | 0.170911    | HCN4 ENSG00000138622     |
| 15 | 71352759 | 71353045 | 71352912 | 8  | 11  | 4  | 2.301380863 | 0.0459276   | HCN4 ENSG00000138622     |
| 15 | 71385480 | 71385739 | 71385568 | 8  | 9   | 0  | 9.589086931 | 0.00120187  | HCN4 ENSG00000138622     |
| 15 | 71411941 | 71412258 | 71412099 | 14 | 17  | 4  | 3.452071295 | 0.00292757  | HCN4 ENSG00000138622     |
| 15 | 71603326 | 71603716 | 71603537 | 12 | 19  | 3  | 4.794543465 | 0.000349205 | C15orf60 ENSG00000183324 |
| 15 | 71715841 | 71716246 | 71716043 | 11 | 19  | 4  | 3.835634772 | 0.00108365  | NPTN ENSG00000156642     |
| 15 | 71784290 | 71784577 | 71784443 | 8  | 10  | 9  | 1.054799562 | 0.4492      | CD276 ENSG00000103855    |
| 15 | 71994479 | 71994702 | 71994586 | 8  | 10  | 4  | 2.109599125 | 0.0694668   | LOXL1 ENSG00000129038    |
| 15 | 72224937 | 72225285 | 72225123 | 17 | 22  | 0  | 22.05489994 | 1.92E-07    | ISLR2 ENSG00000167178    |
| 15 | 72279754 | 72280078 | 72279968 | 9  | 13  | 2  | 4.474907234 | 0.00269459  | STRA6 ENSG00000137868    |
| 15 | 72376778 | 72377083 | 72376930 | 8  | 10  | 3  | 2.636998906 | 0.034203    | CCDC33 ENSG00000140481   |
| 15 | 72454662 | 72454934 | 72454838 | 9  | 11  | 0  | 11.50690432 | 0.000313206 | CYP11A1 ENSG00000140459  |
| 15 | 72518185 | 72518443 | 72518291 | 8  | 11  | 9  | 1.150690432 | 0.367789    | SEMA7A ENSG00000138623   |
| 15 | 72540376 | 72540711 | 72540546 | 10 | 14  | 9  | 1.43836304  | 0.179537    | UBL7 ENSG00000138629     |
| 15 | 72577020 | 72577202 | 72577089 | 8  | 8   | 5  | 1.43836304  | 0.235762    | ENSG00000212279          |
| 15 | 72625465 | 72626051 | 72625644 | 24 | 42  | 6  | 5.890439114 | 6.20E-08    | ARID3B ENSG00000179361   |
| 15 | 72700547 | 72700836 | 72700701 | 11 | 15  | 4  | 3.068507818 | 0.0076507   | CLK3 ENSG00000179335     |
| 15 | 72775291 | 72775603 | 72775462 | 8  | 11  | 3  | 2.876726079 | 0.0213797   | EDC3 ENSG00000179151     |
| 15 | 72848249 | 72848444 | 72848346 | 9  | 9   | 6  | 1.369869562 | 0.253675    | CSK ENSG00000103653      |
| 15 | 72850461 | 72850698 | 72850571 | 8  | 9   | 7  | 1.198635866 | 0.346278    | CSK ENSG00000103653      |
| 15 | 72867298 | 72867585 | 72867449 | 11 | 16  | 2  | 5.433815927 | 0.000499302 | CSK ENSG00000103653      |
| 15 | 72871088 | 72871269 | 72871178 | 8  | 8   | 4  | 1.726035648 | 0.150596    | CSK ENSG00000103653      |

|    |          |          |          |    |    |   |             |             |          |                 |
|----|----------|----------|----------|----|----|---|-------------|-------------|----------|-----------------|
| 15 | 72878960 | 72879785 | 72879355 | 32 | 63 | 6 | 8.767165194 | 4.08E-13    | LMAN1L   | ENSG00000140506 |
| 15 | 72896920 | 72897138 | 72897017 | 9  | 9  | 1 | 4.794543465 | 0.00708517  | CPLX3    | ENSG00000213578 |
| 15 | 72914750 | 72914948 | 72914849 | 10 | 10 | 3 | 2.636998906 | 0.034203    | ULK3     | ENSG00000140474 |
| 15 | 72921934 | 72922316 | 72922143 | 10 | 16 | 7 | 2.037680973 | 0.0400399   | ULK3     | ENSG00000140474 |
| 15 | 72981208 | 72981393 | 72981307 | 8  | 8  | 4 | 1.726035648 | 0.150596    | C15orf17 | ENSG00000178761 |
| 15 | 73029820 | 73030073 | 73029902 | 8  | 10 | 4 | 2.109599125 | 0.0694668   | RPP25    | ENSG00000178718 |
| 15 | 73102813 | 73103033 | 73102923 | 9  | 10 | 4 | 2.109599125 | 0.0694668   | PPCDC    | ENSG00000138621 |
| 15 | 73108781 | 73109007 | 73108890 | 9  | 9  | 6 | 1.369869562 | 0.253675    | PPCDC    | ENSG00000138621 |
| 15 | 73115568 | 73115980 | 73115795 | 13 | 21 | 4 | 4.219198249 | 0.000390041 | PPCDC    | ENSG00000138621 |
| 15 | 73184267 | 73184498 | 73184377 | 11 | 13 | 0 | 13.4247217  | 8.16E-05    |          | ENSG00000213573 |
| 15 | 73447172 | 73447405 | 73447276 | 9  | 10 | 3 | 2.636998906 | 0.034203    | MAN2C1   | ENSG00000140400 |
| 15 | 73448327 | 73448669 | 73448498 | 9  | 13 | 1 | 6.712360851 | 0.000640982 | MAN2C1   | ENSG00000140400 |
| 15 | 73529866 | 73530070 | 73529959 | 8  | 9  | 5 | 1.598181155 | 0.170911    | SIN3A    | ENSG00000169375 |
| 15 | 73677600 | 73677805 | 73677713 | 8  | 8  | 2 | 2.876726079 | 0.0381137   | PTPN9    | ENSG00000169410 |
| 15 | 73800572 | 73800796 | 73800686 | 8  | 9  | 4 | 1.917817386 | 0.103282    | ODF3L1   | ENSG00000182950 |
| 15 | 73983107 | 73984096 | 73983415 | 36 | 93 | 7 | 11.26717714 | 4.45E-20    | FBXO22   | ENSG00000167196 |
| 15 | 74222575 | 74222852 | 74222740 | 8  | 9  | 0 | 9.589086931 | 0.00120187  | C15orf27 | ENSG00000169758 |
| 15 | 74230416 | 74230625 | 74230532 | 11 | 13 | 4 | 2.684944341 | 0.01921     | C15orf27 | ENSG00000169758 |
| 15 | 74314699 | 74314895 | 74314826 | 8  | 9  | 1 | 4.794543465 | 0.00708517  | ETFA     | ENSG00000140374 |
| 15 | 74392159 | 74392539 | 74392338 | 16 | 23 | 2 | 7.671269544 | 8.30E-06    | ETFA     | ENSG00000140374 |
| 15 | 74409729 | 74409951 | 74409840 | 8  | 8  | 3 | 2.157544559 | 0.0836802   | ISL2     | ENSG00000159556 |
| 15 | 74469957 | 74470199 | 74470078 | 10 | 10 | 2 | 3.515998541 | 0.0136204   |          | ENSG00000209250 |
| 15 | 75163194 | 75163563 | 75163354 | 9  | 14 | 8 | 1.598181155 | 0.124586    | TSPAN3   | ENSG00000140391 |
| 15 | 75392011 | 75392394 | 75392219 | 25 | 32 | 3 | 7.910996718 | 2.12E-07    |          | ENSG00000186690 |
| 15 | 75500047 | 75500303 | 75500179 | 11 | 14 | 5 | 2.397271733 | 0.0258078   | HMG20A   | ENSG00000140382 |
| 15 | 75576197 | 75576462 | 75576329 | 9  | 11 | 3 | 2.876726079 | 0.0213797   | HMG20A   | ENSG00000140382 |
| 15 | 75582720 | 75582945 | 75582823 | 9  | 11 | 6 | 1.643843474 | 0.137712    | HMG20A   | ENSG00000140382 |
| 15 | 75584947 | 75585356 | 75585123 | 43 | 51 | 5 | 8.310542006 | 8.51E-11    | HMG20A   | ENSG00000140382 |
| 15 | 75900880 | 75901221 | 75901050 | 10 | 14 | 5 | 2.397271733 | 0.0258078   |          | ENSG00000209296 |
| 15 | 76083162 | 76083344 | 76083209 | 8  | 9  | 1 | 4.794543465 | 0.00708517  |          | ENSG00000221476 |
| 15 | 76154899 | 76155112 | 76155005 | 11 | 11 | 1 | 5.753452158 | 0.00215302  | TBC1D2B  | ENSG00000167202 |
| 15 | 76296168 | 76296631 | 76296347 | 10 | 20 | 5 | 3.356180426 | 0.0017534   | ACSBG1   | ENSG00000103740 |
| 15 | 76517331 | 76517540 | 76517435 | 13 | 13 | 3 | 3.356180426 | 0.00805599  | IREB2    | ENSG00000136381 |
| 15 | 76620605 | 76620811 | 76620712 | 8  | 10 | 2 | 3.515998541 | 0.0136204   | PSMA4    | ENSG00000041357 |

|    |          |          |          |     |     |    |             |             |          |                 |
|----|----------|----------|----------|-----|-----|----|-------------|-------------|----------|-----------------|
| 15 | 76697113 | 76697385 | 76697249 | 8   | 11  | 1  | 5.753452158 | 0.00215302  | CHRNA3   | ENSG00000080644 |
| 15 | 76764696 | 76764905 | 76764756 | 8   | 9   | 4  | 1.917817386 | 0.103282    | CHRNA4   | ENSG00000117971 |
| 15 | 76939875 | 76940138 | 76940006 | 11  | 13  | 5  | 2.237453617 | 0.038866    | MORF4    | ENSG00000185787 |
| 15 | 76953027 | 76953274 | 76953159 | 12  | 14  | 4  | 2.876726079 | 0.01219     | MORF4    | ENSG00000185787 |
| 15 | 76988053 | 76988251 | 76988139 | 8   | 8   | 0  | 8.630178238 | 0.00235436  |          | ENSG00000209159 |
| 15 | 77010072 | 77010560 | 77010319 | 10  | 20  | 1  | 10.06854128 | 8.32E-06    | CTSH     | ENSG00000103811 |
| 15 | 77031099 | 77031351 | 77031206 | 8   | 9   | 3  | 2.397271733 | 0.0539397   | CTSH     | ENSG00000103811 |
| 15 | 77031412 | 77031652 | 77031520 | 12  | 13  | 1  | 6.712360851 | 0.000640982 | CTSH     | ENSG00000103811 |
| 15 | 77050883 | 77051121 | 77051002 | 9   | 10  | 4  | 2.109599125 | 0.0694668   |          | ENSG00000177699 |
| 15 | 77107803 | 77108135 | 77107969 | 8   | 13  | 11 | 1.118726809 | 0.38479     | RASGRF1  | ENSG00000058335 |
| 15 | 77258524 | 77258956 | 77258723 | 16  | 26  | 6  | 3.698647816 | 0.00025253  |          | ENSG00000207695 |
| 15 | 77301047 | 77301327 | 77301189 | 9   | 12  | 5  | 2.077635502 | 0.0577144   |          | ENSG00000207695 |
| 15 | 77301338 | 77301539 | 77301368 | 8   | 10  | 5  | 1.757999271 | 0.121253    |          | ENSG00000207695 |
| 15 | 77412594 | 77412836 | 77412715 | 13  | 15  | 3  | 3.835634772 | 0.00291691  | TMED3    | ENSG00000166557 |
| 15 | 77460107 | 77460344 | 77460190 | 10  | 10  | 1  | 5.273997812 | 0.00391723  | KIAA1024 | ENSG00000169330 |
| 15 | 77735642 | 77735821 | 77735684 | 8   | 8   | 1  | 4.315089119 | 0.0127267   |          | ENSG00000213527 |
| 15 | 77759536 | 77759828 | 77759691 | 11  | 13  | 4  | 2.684944341 | 0.01921     |          | ENSG00000213527 |
| 15 | 77929243 | 77929492 | 77929422 | 8   | 10  | 4  | 2.109599125 | 0.0694668   |          | ENSG00000209163 |
| 15 | 77932946 | 77933226 | 77933086 | 17  | 18  | 5  | 3.036544195 | 0.0044641   |          | ENSG00000209163 |
| 15 | 78082538 | 78083124 | 78082782 | 136 | 182 | 0  | 175.4802908 | 3.64E-54    |          | ENSG00000180725 |
| 15 | 78247787 | 78248162 | 78247983 | 21  | 28  | 4  | 5.56167042  | 9.22E-06    | FAH      | ENSG00000103876 |
| 15 | 78282111 | 78282452 | 78282284 | 12  | 16  | 0  | 16.30144778 | 1.09E-05    | FAH      | ENSG00000103876 |
| 15 | 78320740 | 78321033 | 78320854 | 12  | 15  | 2  | 5.114179696 | 0.00088103  | FAH      | ENSG00000103876 |
| 15 | 78321485 | 78321826 | 78321655 | 12  | 16  | 5  | 2.716907964 | 0.0109645   | FAH      | ENSG00000103876 |
| 15 | 78564647 | 78565243 | 78564969 | 66  | 92  | 4  | 17.83570169 | 1.45E-22    | ARNT2    | ENSG00000172379 |
| 15 | 78758872 | 78759140 | 78759009 | 11  | 13  | 5  | 2.237453617 | 0.038866    | FAM108C1 | ENSG00000136379 |
| 15 | 78822546 | 78822729 | 78822668 | 8   | 8   | 10 | 0.784561658 | 0.708731    | KIAA1199 | ENSG00000103888 |
| 15 | 78829022 | 78829357 | 78829194 | 19  | 24  | 12 | 1.844055179 | 0.0315307   | KIAA1199 | ENSG00000103888 |
| 15 | 78884414 | 78884926 | 78884772 | 18  | 27  | 7  | 3.356180426 | 0.000396559 | KIAA1199 | ENSG00000103888 |
| 15 | 78966614 | 78966880 | 78966747 | 8   | 11  | 2  | 3.835634772 | 0.00800699  |          | ENSG00000208003 |
| 15 | 78985818 | 78986075 | 78985946 | 10  | 13  | 4  | 2.684944341 | 0.01921     |          | ENSG00000208003 |
| 15 | 79056874 | 79057196 | 79057035 | 9   | 12  | 6  | 1.78083043  | 0.0985525   | MESDC2   | ENSG00000117899 |
| 15 | 79069367 | 79069578 | 79069440 | 11  | 11  | 1  | 5.753452158 | 0.00215302  | MESDC2   | ENSG00000117899 |
| 15 | 79344713 | 79344973 | 79344843 | 8   | 11  | 8  | 1.278544924 | 0.28289     | IL16     | ENSG00000172349 |

|    |          |          |          |    |     |    |             |             |          |                 |
|----|----------|----------|----------|----|-----|----|-------------|-------------|----------|-----------------|
| 15 | 79345196 | 79345485 | 79345334 | 10 | 12  | 3  | 3.116453252 | 0.0131971   | IL16     | ENSG00000172349 |
| 15 | 79345771 | 79345971 | 79345899 | 8  | 9   | 3  | 2.397271733 | 0.0539397   | IL16     | ENSG00000172349 |
| 15 | 79354539 | 79354738 | 79354587 | 9  | 9   | 1  | 4.794543465 | 0.00708517  | IL16     | ENSG00000172349 |
| 15 | 79361447 | 79361887 | 79361559 | 10 | 15  | 6  | 2.191791298 | 0.0328001   | IL16     | ENSG00000172349 |
| 15 | 79512434 | 79512952 | 79512645 | 25 | 38  | 3  | 9.349359757 | 5.96E-09    | TMC3     | ENSG00000188869 |
| 15 | 80101048 | 80101915 | 80101572 | 87 | 131 | 3  | 31.64398687 | 1.37E-34    |          | ENSG00000222521 |
| 15 | 80125780 | 80126013 | 80125885 | 8  | 9   | 3  | 2.397271733 | 0.0539397   | MEX3B    | ENSG00000183496 |
| 15 | 80220354 | 80220620 | 80220487 | 11 | 12  | 2  | 4.155271003 | 0.0046638   |          | ENSG00000212170 |
| 15 | 81017474 | 81017772 | 81017610 | 12 | 15  | 4  | 3.068507818 | 0.0076507   |          | ENSG00000182774 |
| 15 | 81207602 | 81208447 | 81208050 | 54 | 100 | 3  | 24.2124445  | 7.07E-26    |          | ENSG00000222483 |
| 15 | 81402581 | 81402825 | 81402657 | 8  | 10  | 2  | 3.515998541 | 0.0136204   | HOMER2   | ENSG00000103942 |
| 15 | 81445717 | 81445996 | 81445849 | 9  | 10  | 3  | 2.636998906 | 0.034203    | FAM103A1 | ENSG00000169612 |
| 15 | 81470621 | 81470990 | 81470800 | 10 | 16  | 6  | 2.328778255 | 0.0221113   | C15orf40 | ENSG00000169609 |
| 15 | 81651943 | 81652131 | 81652037 | 10 | 10  | 2  | 3.515998541 | 0.0136204   |          | ENSG00000166503 |
| 15 | 81656706 | 81656904 | 81656799 | 10 | 12  | 2  | 4.155271003 | 0.0046638   |          | ENSG00000166503 |
| 15 | 81670432 | 81670786 | 81670670 | 13 | 18  | 5  | 3.036544195 | 0.0044641   |          | ENSG00000166503 |
| 15 | 81812650 | 81812904 | 81812777 | 10 | 11  | 0  | 11.50690432 | 0.000313206 | BNC1     | ENSG00000169594 |
| 15 | 81840346 | 81840700 | 81840523 | 43 | 48  | 2  | 15.66217532 | 1.56E-12    | SH3GL3   | ENSG00000140600 |
| 15 | 82390847 | 82391050 | 82390937 | 8  | 10  | 5  | 1.757999271 | 0.121253    |          | ENSG00000221484 |
| 15 | 82414822 | 82415016 | 82414929 | 9  | 11  | 2  | 3.835634772 | 0.00800699  |          | ENSG00000221484 |
| 15 | 82571830 | 82572027 | 82571944 | 8  | 9   | 0  | 9.589086931 | 0.00120187  |          | ENSG00000205242 |
| 15 | 82932099 | 82932576 | 82932272 | 12 | 22  | 0  | 22.05489994 | 1.92E-07    | ZSCAN2   | ENSG00000176371 |
| 15 | 82982466 | 82982713 | 82982586 | 8  | 10  | 5  | 1.757999271 | 0.121253    | SCAND2   | ENSG00000176700 |
| 15 | 82998879 | 82999439 | 82999120 | 18 | 30  | 13 | 2.12329782  | 0.0070778   | WDR73    | ENSG00000177082 |
| 15 | 83002640 | 83003064 | 83002889 | 10 | 16  | 2  | 5.433815927 | 0.000499302 | NMB      | ENSG00000197696 |
| 15 | 83059601 | 83059939 | 83059800 | 9  | 14  | 5  | 2.397271733 | 0.0258078   | SEC11A   | ENSG00000140612 |
| 15 | 83060671 | 83060897 | 83060760 | 8  | 10  | 5  | 1.757999271 | 0.121253    | SEC11A   | ENSG00000140612 |
| 15 | 83061330 | 83061564 | 83061447 | 8  | 10  | 9  | 1.054799562 | 0.4492      | SEC11A   | ENSG00000140612 |
| 15 | 83199589 | 83199821 | 83199699 | 13 | 15  | 7  | 1.917817386 | 0.0572317   |          | ENSG00000200991 |
| 15 | 83203377 | 83203703 | 83203540 | 9  | 14  | 5  | 2.397271733 | 0.0258078   |          | ENSG00000200991 |
| 15 | 83234372 | 83234842 | 83234543 | 28 | 45  | 4  | 8.821959976 | 5.35E-10    | SLC28A1  | ENSG00000156222 |
| 15 | 83259344 | 83259579 | 83259461 | 9  | 12  | 5  | 2.077635502 | 0.0577144   |          | ENSG00000207037 |
| 15 | 83272468 | 83272690 | 83272579 | 13 | 15  | 6  | 2.191791298 | 0.0328001   |          | ENSG00000207037 |
| 15 | 83299785 | 83299974 | 83299899 | 8  | 9   | 7  | 1.198635866 | 0.346278    |          | ENSG00000212388 |

|    |          |          |          |     |     |    |             |             |        |                 |
|----|----------|----------|----------|-----|-----|----|-------------|-------------|--------|-----------------|
| 15 | 83325266 | 83325511 | 83325426 | 9   | 10  | 2  | 3.515998541 | 0.0136204   | PDE8A  | ENSG00000073417 |
| 15 | 83366590 | 83366769 | 83366679 | 9   | 9   | 4  | 1.917817386 | 0.103282    | PDE8A  | ENSG00000073417 |
| 15 | 83675419 | 83675640 | 83675529 | 9   | 11  | 5  | 1.917817386 | 0.0843804   | AKAP13 | ENSG00000170776 |
| 15 | 83757732 | 83757947 | 83757839 | 8   | 9   | 1  | 4.794543465 | 0.00708517  | AKAP13 | ENSG00000170776 |
| 15 | 83803070 | 83803314 | 83803195 | 10  | 11  | 0  | 11.50690432 | 0.000313206 | AKAP13 | ENSG00000170776 |
| 15 | 83960978 | 83961170 | 83961099 | 8   | 8   | 0  | 8.630178238 | 0.00235436  |        | ENSG00000202081 |
| 15 | 84181248 | 84181614 | 84181419 | 10  | 16  | 2  | 5.433815927 | 0.000499302 | KLHL25 | ENSG00000183655 |
| 15 | 84673676 | 84674146 | 84673847 | 12  | 22  | 2  | 7.351633313 | 1.51E-05    | AGBL1  | ENSG00000166748 |
| 15 | 84716192 | 84716470 | 84716331 | 9   | 12  | 0  | 12.46581301 | 0.000159888 | AGBL1  | ENSG00000166748 |
| 15 | 84717537 | 84717802 | 84717669 | 8   | 10  | 2  | 3.515998541 | 0.0136204   | AGBL1  | ENSG00000166748 |
| 15 | 84868573 | 84868752 | 84868662 | 8   | 8   | 0  | 8.630178238 | 0.00235436  | AGBL1  | ENSG00000166748 |
| 15 | 84968942 | 84969151 | 84969045 | 8   | 9   | 5  | 1.598181155 | 0.170911    | AGBL1  | ENSG00000166748 |
| 15 | 85087565 | 85087798 | 85087681 | 8   | 9   | 5  | 1.598181155 | 0.170911    | AGBL1  | ENSG00000166748 |
| 15 | 85693097 | 85693280 | 85693219 | 8   | 9   | 5  | 1.598181155 | 0.170911    |        | ENSG00000207150 |
| 15 | 85710217 | 85710451 | 85710338 | 12  | 14  | 2  | 4.794543465 | 0.00154571  |        | ENSG00000207150 |
| 15 | 85873183 | 85873475 | 85873361 | 12  | 14  | 2  | 4.794543465 | 0.00154571  | TMEM83 | ENSG00000219654 |
| 15 | 85927109 | 85927301 | 85927205 | 8   | 8   | 1  | 4.315089119 | 0.0127267   | TMEM83 | ENSG00000219654 |
| 15 | 86632317 | 86632543 | 86632426 | 9   | 9   | 3  | 2.397271733 | 0.0539397   | NTRK3  | ENSG00000140538 |
| 15 | 86811734 | 86811931 | 86811811 | 8   | 8   | 5  | 1.43836304  | 0.235762    | MRPS11 | ENSG00000181991 |
| 15 | 86965228 | 86965750 | 86965544 | 135 | 157 | 3  | 37.87689338 | 5.94E-42    | AEN    | ENSG00000181026 |
| 15 | 86983113 | 86983341 | 86983178 | 10  | 11  | 0  | 11.50690432 | 0.000313206 | ISG20  | ENSG00000172183 |
| 15 | 87048682 | 87048907 | 87048745 | 9   | 11  | 0  | 11.50690432 | 0.000313206 | ISG20  | ENSG00000172183 |
| 15 | 87257806 | 87258221 | 87258053 | 14  | 24  | 0  | 23.97271733 | 5.01E-08    | MFGE8  | ENSG00000140545 |
| 15 | 87411610 | 87411858 | 87411771 | 11  | 14  | 5  | 2.397271733 | 0.0258078   | ABHD2  | ENSG00000140526 |
| 15 | 87411956 | 87412345 | 87412167 | 9   | 14  | 0  | 14.3836304  | 4.17E-05    | ABHD2  | ENSG00000140526 |
| 15 | 87432072 | 87432436 | 87432224 | 9   | 15  | 3  | 3.835634772 | 0.00291691  | ABHD2  | ENSG00000140526 |
| 15 | 87465719 | 87466004 | 87465861 | 10  | 13  | 5  | 2.237453617 | 0.038866    | ABHD2  | ENSG00000140526 |
| 15 | 87617874 | 87618053 | 87617940 | 8   | 8   | 3  | 2.157544559 | 0.0836802   | FANCI  | ENSG00000140525 |
| 15 | 87679146 | 87679667 | 87679293 | 12  | 26  | 24 | 1.035621389 | 0.448641    | POLG   | ENSG00000140521 |
| 15 | 87700094 | 87700326 | 87700210 | 12  | 14  | 1  | 7.191815198 | 0.00034761  |        | ENSG00000207819 |
| 15 | 87700942 | 87701227 | 87701085 | 10  | 13  | 6  | 1.917817386 | 0.0693353   |        | ENSG00000207819 |
| 15 | 87702864 | 87703261 | 87702988 | 8   | 14  | 2  | 4.794543465 | 0.00154571  |        | ENSG00000207819 |
| 15 | 87723729 | 87724414 | 87724184 | 24  | 53  | 6  | 7.397295632 | 1.32E-10    |        | ENSG00000207819 |
| 15 | 87727389 | 87727568 | 87727478 | 8   | 8   | 3  | 2.157544559 | 0.0836802   |        | ENSG00000207819 |

|    |          |          |          |    |    |    |             |            |          |                 |
|----|----------|----------|----------|----|----|----|-------------|------------|----------|-----------------|
| 15 | 87755751 | 87756333 | 87755910 | 30 | 46 | 6  | 6.438386939 | 6.82E-09   |          | ENSG00000207819 |
| 15 | 87760375 | 87760668 | 87760521 | 11 | 14 | 4  | 2.876726079 | 0.01219    |          | ENSG00000207819 |
| 15 | 87792782 | 87792961 | 87792872 | 8  | 8  | 2  | 2.876726079 | 0.0381137  | RHCG     | ENSG00000140519 |
| 15 | 87857515 | 87857877 | 87857694 | 40 | 47 | 1  | 23.01380863 | 2.36E-13   | RHCG     | ENSG00000140519 |
| 15 | 87900969 | 87901210 | 87901095 | 9  | 9  | 3  | 2.397271733 | 0.0539397  | C15orf42 | ENSG00000140534 |
| 15 | 87919288 | 87919515 | 87919437 | 9  | 11 | 5  | 1.917817386 | 0.0843804  | C15orf42 | ENSG00000140534 |
| 15 | 88096057 | 88096395 | 88096226 | 11 | 17 | 8  | 1.917817386 | 0.0474153  | MESP1    | ENSG00000166823 |
| 15 | 88105034 | 88105306 | 88105196 | 9  | 12 | 3  | 3.116453252 | 0.0131971  | MESP1    | ENSG00000166823 |
| 15 | 88238164 | 88238394 | 88238286 | 13 | 14 | 8  | 1.598181155 | 0.124586   | AP3S2    | ENSG00000157823 |
| 15 | 88250546 | 88250809 | 88250664 | 8  | 11 | 6  | 1.643843474 | 0.137712   |          | ENSG00000214445 |
| 15 | 88302208 | 88302678 | 88302442 | 26 | 40 | 7  | 4.914407052 | 6.35E-07   | ZNF710   | ENSG00000140548 |
| 15 | 88315849 | 88316055 | 88315996 | 8  | 10 | 1  | 5.273997812 | 0.00391723 | ZNF710   | ENSG00000140548 |
| 15 | 88391064 | 88391328 | 88391193 | 9  | 13 | 3  | 3.356180426 | 0.00805599 | ZNF710   | ENSG00000140548 |
| 15 | 88415509 | 88415753 | 88415631 | 8  | 9  | 4  | 1.917817386 | 0.103282   | IDH2     | ENSG00000182054 |
| 15 | 88439822 | 88440258 | 88440090 | 10 | 18 | 8  | 2.024362796 | 0.0334397  | IDH2     | ENSG00000182054 |
| 15 | 88448926 | 88449169 | 88449018 | 8  | 10 | 5  | 1.757999271 | 0.121253   | IDH2     | ENSG00000182054 |
| 15 | 88509831 | 88510163 | 88509985 | 10 | 15 | 8  | 1.704726565 | 0.0916153  |          | ENSG00000208939 |
| 15 | 88510174 | 88510395 | 88510256 | 8  | 8  | 4  | 1.726035648 | 0.150596   |          | ENSG00000208939 |
| 15 | 88557785 | 88557966 | 88557894 | 9  | 9  | 4  | 1.917817386 | 0.103282   | CIB1     | ENSG00000185043 |
| 15 | 88567727 | 88567924 | 88567890 | 8  | 8  | 10 | 0.784561658 | 0.708731   | CIB1     | ENSG00000185043 |
| 15 | 88609252 | 88609707 | 88609424 | 9  | 16 | 7  | 2.037680973 | 0.0400399  | NGRN     | ENSG00000182768 |
| 15 | 88664339 | 88664588 | 88664442 | 8  | 11 | 10 | 1.046082211 | 0.455063   |          | ENSG00000221309 |
| 15 | 88678615 | 88678920 | 88678767 | 23 | 24 | 2  | 7.990905775 | 4.56E-06   |          | ENSG00000173683 |
| 15 | 88745014 | 88745246 | 88745130 | 8  | 11 | 2  | 3.835634772 | 0.00800699 | IQGAP1   | ENSG00000140575 |
| 15 | 88776508 | 88776909 | 88776657 | 8  | 14 | 2  | 4.794543465 | 0.00154571 | IQGAP1   | ENSG00000140575 |
| 15 | 88824056 | 88824286 | 88824226 | 11 | 14 | 7  | 1.797953799 | 0.0806593  | CRTC3    | ENSG00000140577 |
| 15 | 88833791 | 88834290 | 88833960 | 16 | 30 | 14 | 1.981744632 | 0.0116992  | CRTC3    | ENSG00000140577 |
| 15 | 88994448 | 88994682 | 88994537 | 8  | 10 | 4  | 2.109599125 | 0.0694668  | BLM      | ENSG00000197299 |
| 15 | 89103071 | 89103298 | 89103191 | 9  | 9  | 0  | 9.589086931 | 0.00120187 |          | ENSG00000200677 |
| 15 | 89332598 | 89332784 | 89332691 | 8  | 9  | 0  | 9.589086931 | 0.00120187 | PRC1     | ENSG00000198901 |
| 15 | 89405674 | 89405853 | 89405763 | 8  | 8  | 1  | 4.315089119 | 0.0127267  |          | ENSG00000208919 |
| 15 | 89498662 | 89498841 | 89498751 | 8  | 8  | 0  | 8.630178238 | 0.00235436 | SV2B     | ENSG00000185518 |
| 15 | 89789953 | 89790305 | 89790127 | 10 | 14 | 4  | 2.876726079 | 0.01219    | SV2B     | ENSG00000185518 |
| 15 | 89835330 | 89835614 | 89835472 | 14 | 14 | 0  | 14.3836304  | 4.17E-05   | SV2B     | ENSG00000185518 |

|    |          |          |          |     |     |    |             |             |          |                 |
|----|----------|----------|----------|-----|-----|----|-------------|-------------|----------|-----------------|
| 15 | 90161356 | 90161547 | 90161466 | 8   | 9   | 2  | 3.19636231  | 0.0229249   | SLCO3A1  | ENSG00000176463 |
| 15 | 90570395 | 90570654 | 90570524 | 8   | 11  | 5  | 1.917817386 | 0.0843804   |          | ENSG00000213443 |
| 15 | 90886216 | 90886483 | 90886333 | 8   | 10  | 3  | 2.636998906 | 0.034203    | C15orf32 | ENSG00000183643 |
| 15 | 91011507 | 91011687 | 91011597 | 8   | 8   | 6  | 1.232882605 | 0.333038    | FAM174B  | ENSG00000185442 |
| 15 | 91053580 | 91053760 | 91053704 | 8   | 8   | 1  | 4.315089119 | 0.0127267   |          | ENSG00000157576 |
| 15 | 91059111 | 91059370 | 91059280 | 8   | 12  | 3  | 3.116453252 | 0.0131971   |          | ENSG00000157576 |
| 15 | 91146530 | 91146822 | 91146695 | 23  | 24  | 0  | 23.97271733 | 5.01E-08    |          | ENSG00000213440 |
| 15 | 91148004 | 91148534 | 91148355 | 12  | 26  | 3  | 6.472633678 | 6.96E-06    |          | ENSG00000213440 |
| 15 | 91164358 | 91165216 | 91165007 | 16  | 39  | 14 | 2.557089848 | 0.000465588 | CHD2     | ENSG00000173575 |
| 15 | 91166064 | 91166274 | 91166139 | 8   | 9   | 4  | 1.917817386 | 0.103282    | CHD2     | ENSG00000173575 |
| 15 | 91213507 | 91213833 | 91213663 | 9   | 13  | 6  | 1.917817386 | 0.0693353   | CHD2     | ENSG00000173575 |
| 15 | 91225717 | 91226002 | 91225862 | 8   | 10  | 2  | 3.515998541 | 0.0136204   | CHD2     | ENSG00000173575 |
| 15 | 91248098 | 91248557 | 91248378 | 13  | 23  | 5  | 3.835634772 | 0.000408054 | CHD2     | ENSG00000173575 |
| 15 | 91248644 | 91248944 | 91248794 | 8   | 13  | 3  | 3.356180426 | 0.00805599  | CHD2     | ENSG00000173575 |
| 15 | 91262215 | 91262475 | 91262392 | 9   | 11  | 1  | 5.753452158 | 0.00215302  | CHD2     | ENSG00000173575 |
| 15 | 91265979 | 91266291 | 91266130 | 8   | 11  | 6  | 1.643843474 | 0.137712    | CHD2     | ENSG00000173575 |
| 15 | 91293922 | 91294547 | 91294341 | 112 | 148 | 3  | 35.71934882 | 2.12E-39    | CHD2     | ENSG00000173575 |
| 15 | 91432045 | 91432732 | 91432308 | 20  | 45  | 11 | 3.675816657 | 3.45E-06    | RGMA     | ENSG00000182175 |
| 15 | 91540166 | 91540382 | 91540236 | 10  | 12  | 2  | 4.155271003 | 0.0046638   |          | ENSG00000212063 |
| 15 | 91784783 | 91785024 | 91784903 | 8   | 8   | 1  | 4.315089119 | 0.0127267   |          | ENSG00000208918 |
| 15 | 92000475 | 92000745 | 92000610 | 8   | 10  | 2  | 3.515998541 | 0.0136204   |          | ENSG00000208918 |
| 15 | 92512444 | 92512720 | 92512580 | 11  | 14  | 3  | 3.595907599 | 0.00486913  | MCTP2    | ENSG00000140563 |
| 15 | 93037008 | 93037286 | 93037153 | 12  | 13  | 1  | 6.712360851 | 0.000640982 |          | ENSG00000176070 |
| 15 | 93136371 | 93136731 | 93136550 | 9   | 16  | 10 | 1.481949798 | 0.147733    |          | ENSG00000176070 |
| 15 | 93136737 | 93137040 | 93136888 | 8   | 12  | 6  | 1.78083043  | 0.0985525   |          | ENSG00000176070 |
| 15 | 93571207 | 93571546 | 93571375 | 13  | 17  | 0  | 17.26035648 | 5.54E-06    |          | ENSG00000176070 |
| 15 | 93591331 | 93591619 | 93591475 | 19  | 22  | 5  | 3.675816657 | 0.000667901 |          | ENSG00000176070 |
| 15 | 94033702 | 94033951 | 94033826 | 10  | 12  | 2  | 4.155271003 | 0.0046638   |          | ENSG00000222076 |
| 15 | 94256119 | 94256343 | 94256255 | 8   | 11  | 6  | 1.643843474 | 0.137712    |          | ENSG00000208900 |
| 15 | 94370642 | 94370840 | 94370741 | 8   | 9   | 0  | 9.589086931 | 0.00120187  |          | ENSG00000208900 |
| 15 | 94909605 | 94909878 | 94909739 | 11  | 11  | 2  | 3.835634772 | 0.00800699  |          | ENSG00000208895 |
| 15 | 95202611 | 95202848 | 95202735 | 8   | 9   | 1  | 4.794543465 | 0.00708517  |          | ENSG00000223120 |
| 15 | 96303924 | 96304264 | 96304097 | 9   | 12  | 5  | 2.077635502 | 0.0577144   | ARRDC4   | ENSG00000140450 |
| 15 | 96484674 | 96484986 | 96484823 | 11  | 16  | 0  | 16.30144778 | 1.09E-05    |          | ENSG00000222361 |



|    |           |           |           |    |    |    |             |             |           |                 |
|----|-----------|-----------|-----------|----|----|----|-------------|-------------|-----------|-----------------|
| 15 | 96789422  | 96789612  | 96789517  | 8  | 10 | 2  | 3.515998541 | 0.0136204   | FAM169B   | ENSG00000185087 |
| 15 | 96879889  | 96880115  | 96880000  | 8  | 9  | 2  | 3.19636231  | 0.0229249   | FAM169B   | ENSG00000185087 |
| 15 | 97011830  | 97012021  | 97011900  | 8  | 9  | 2  | 3.19636231  | 0.0229249   | IGF1R     | ENSG00000140443 |
| 15 | 97107501  | 97107715  | 97107608  | 9  | 10 | 6  | 1.506856518 | 0.188853    | IGF1R     | ENSG00000140443 |
| 15 | 97168514  | 97168749  | 97168631  | 10 | 11 | 3  | 2.876726079 | 0.0213797   | IGF1R     | ENSG00000140443 |
| 15 | 97213937  | 97214455  | 97214196  | 9  | 20 | 3  | 5.034270639 | 0.000202317 |           | ENSG00000183571 |
| 15 | 97235715  | 97235973  | 97235844  | 9  | 11 | 1  | 5.753452158 | 0.00215302  |           | ENSG00000183571 |
| 15 | 97257696  | 97258209  | 97257875  | 18 | 32 | 6  | 4.520569553 | 1.26E-05    |           | ENSG00000183571 |
| 15 | 97296138  | 97296323  | 97296230  | 8  | 8  | 0  | 8.630178238 | 0.00235436  |           | ENSG00000183571 |
| 15 | 97437419  | 97437863  | 97437703  | 10 | 16 | 4  | 3.260289556 | 0.00475414  | SYNM      | ENSG00000182253 |
| 15 | 97607139  | 97607322  | 97607230  | 8  | 8  | 6  | 1.232882605 | 0.333038    | TTC23     | ENSG00000103852 |
| 15 | 97621843  | 97622367  | 97622099  | 25 | 41 | 5  | 6.712360851 | 2.66E-08    | HSP90B2P  | ENSG00000205141 |
| 15 | 97628365  | 97628555  | 97628478  | 9  | 10 | 1  | 5.273997812 | 0.00391723  | HSP90B2P  | ENSG00000205141 |
| 15 | 98062183  | 98062381  | 98062282  | 11 | 11 | 7  | 1.43836304  | 0.204844    |           | ENSG00000201724 |
| 15 | 98325520  | 98325871  | 98325694  | 65 | 69 | 2  | 22.37453617 | 2.28E-18    |           | ENSG00000208876 |
| 15 | 98400768  | 98400978  | 98400854  | 9  | 10 | 3  | 2.636998906 | 0.034203    |           | ENSG00000208876 |
| 15 | 98696691  | 98696949  | 98696844  | 10 | 11 | 4  | 2.301380863 | 0.0459276   | ADAMTS17  | ENSG00000140470 |
| 15 | 98699799  | 98700020  | 98699924  | 8  | 10 | 1  | 5.273997812 | 0.00391723  | ADAMTS17  | ENSG00000140470 |
| 15 | 98741591  | 98741812  | 98741679  | 8  | 8  | 3  | 2.157544559 | 0.0836802   |           | ENSG00000189419 |
| 15 | 98959740  | 98960151  | 98959919  | 9  | 17 | 13 | 1.232882605 | 0.274309    | LINS1     | ENSG00000140471 |
| 15 | 99235165  | 99235632  | 99235378  | 53 | 66 | 2  | 21.41562748 | 1.58E-17    | ALDH1A3   | ENSG00000184254 |
| 15 | 99364885  | 99365247  | 99365086  | 8  | 13 | 6  | 1.917817386 | 0.0693353   | LRRK1     | ENSG00000154237 |
| 15 | 99366225  | 99366419  | 99366355  | 10 | 10 | 5  | 1.757999271 | 0.121253    | LRRK1     | ENSG00000154237 |
| 15 | 99373037  | 99373271  | 99373187  | 8  | 10 | 1  | 5.273997812 | 0.00391723  | LRRK1     | ENSG00000154237 |
| 15 | 99525868  | 99526170  | 99526019  | 9  | 14 | 4  | 2.876726079 | 0.01219     | CHSY1     | ENSG00000131873 |
| 15 | 99610539  | 99610817  | 99610678  | 10 | 13 | 3  | 3.356180426 | 0.00805599  | CHSY1     | ENSG00000131873 |
| 15 | 99971289  | 99971503  | 99971396  | 10 | 11 | 1  | 5.753452158 | 0.00215302  |           | ENSG00000208859 |
| 15 | 100022086 | 100022299 | 100022234 | 10 | 10 | 5  | 1.757999271 | 0.121253    | TM2D3     | ENSG00000184277 |
| 15 | 100043644 | 100043829 | 100043736 | 8  | 8  | 6  | 1.232882605 | 0.333038    |           | ENSG00000208853 |
| 16 | 61388     | 61592     | 61491     | 8  | 8  | 3  | 2.157544559 | 0.0836802   | RHBDF1    | ENSG00000007384 |
| 16 | 417405    | 417588    | 417454    | 8  | 8  | 0  | 8.630178238 | 0.00235436  | RAB11FIP3 | ENSG00000090565 |
| 16 | 578102    | 578336    | 578188    | 8  | 10 | 0  | 10.54799562 | 0.000613541 | RAB40C    | ENSG00000197562 |
| 16 | 626472    | 626654    | 626563    | 8  | 8  | 4  | 1.726035648 | 0.150596    | C16orf13  | ENSG00000130731 |
| 16 | 663226    | 663437    | 663318    | 10 | 10 | 0  | 10.54799562 | 0.000613541 | RHBDL1    | ENSG00000103269 |

|    |         |         |         |    |    |    |             |             |           |                 |
|----|---------|---------|---------|----|----|----|-------------|-------------|-----------|-----------------|
| 16 | 674490  | 674776  | 674636  | 8  | 11 | 1  | 5.753452158 | 0.00215302  | JMJD8     | ENSG00000161999 |
| 16 | 702791  | 703034  | 702921  | 10 | 11 | 2  | 3.835634772 | 0.00800699  | METRN     | ENSG00000103260 |
| 16 | 984766  | 985126  | 984957  | 10 | 15 | 1  | 7.671269544 | 0.000187863 | SOX8      | ENSG00000005513 |
| 16 | 1068629 | 1068898 | 1068763 | 12 | 15 | 2  | 5.114179696 | 0.00088103  | SSTR5     | ENSG00000162009 |
| 16 | 1073000 | 1073365 | 1073186 | 11 | 17 | 0  | 17.26035648 | 5.54E-06    | SSTR5     | ENSG00000162009 |
| 16 | 1286970 | 1287223 | 1287096 | 10 | 10 | 1  | 5.273997812 | 0.00391723  | UBE2I     | ENSG00000103275 |
| 16 | 1299178 | 1299453 | 1299315 | 9  | 11 | 2  | 3.835634772 | 0.00800699  | UBE2I     | ENSG00000103275 |
| 16 | 1368958 | 1369157 | 1369105 | 8  | 10 | 4  | 2.109599125 | 0.0694668   | UNKL      | ENSG00000059145 |
| 16 | 1635934 | 1636297 | 1636113 | 15 | 22 | 7  | 2.756862493 | 0.003684    | CRAMP1L   | ENSG00000007545 |
| 16 | 1670320 | 1670513 | 1670416 | 9  | 9  | 5  | 1.598181155 | 0.170911    | HN1L      | ENSG00000206053 |
| 16 | 1691476 | 1691748 | 1691605 | 14 | 17 | 9  | 1.726035648 | 0.0753664   | MAPK8IP3  | ENSG00000138834 |
| 16 | 1802704 | 1802956 | 1802817 | 8  | 11 | 1  | 5.753452158 | 0.00215302  | HAGH      | ENSG00000063854 |
| 16 | 1824219 | 1824463 | 1824306 | 10 | 11 | 6  | 1.643843474 | 0.137712    | FAHD1     | ENSG00000180185 |
| 16 | 1826350 | 1826652 | 1826520 | 9  | 12 | 2  | 4.155271003 | 0.0046638   | FAHD1     | ENSG00000180185 |
| 16 | 1903298 | 1903653 | 1903521 | 10 | 14 | 1  | 7.191815198 | 0.00034761  | HS3ST6    | ENSG00000162040 |
| 16 | 2146447 | 2146732 | 2146589 | 10 | 12 | 4  | 2.493162602 | 0.0299057   | TRAF7     | ENSG00000131653 |
| 16 | 2188494 | 2188872 | 2188632 | 14 | 20 | 4  | 4.027416511 | 0.000652226 | CASKIN1   | ENSG00000167971 |
| 16 | 2593176 | 2593475 | 2593296 | 12 | 15 | 1  | 7.671269544 | 0.000187863 |           | ENSG00000215154 |
| 16 | 2730121 | 2730510 | 2730347 | 17 | 24 | 1  | 11.98635866 | 6.63E-07    |           | ENSG00000205913 |
| 16 | 2858450 | 2858707 | 2858567 | 13 | 14 | 1  | 7.191815198 | 0.00034761  | PRSS22    | ENSG00000005001 |
| 16 | 2901789 | 2902006 | 2901861 | 8  | 9  | 1  | 4.794543465 | 0.00708517  | FLYWCH1   | ENSG00000059122 |
| 16 | 2905878 | 2906276 | 2906101 | 11 | 17 | 2  | 5.753452158 | 0.000281509 | FLYWCH1   | ENSG00000059122 |
| 16 | 2917128 | 2917347 | 2917237 | 9  | 9  | 3  | 2.397271733 | 0.0539397   |           | ENSG00000209474 |
| 16 | 2951752 | 2951992 | 2951868 | 8  | 10 | 3  | 2.636998906 | 0.034203    | KREMEN2   | ENSG00000131650 |
| 16 | 2999977 | 3000224 | 3000102 | 14 | 15 | 6  | 2.191791298 | 0.0328001   | CLDN9     | ENSG00000213937 |
| 16 | 3010729 | 3011027 | 3010857 | 10 | 13 | 3  | 3.356180426 | 0.00805599  | TNFRSF12A | ENSG00000006327 |
| 16 | 3012166 | 3012624 | 3012345 | 9  | 18 | 3  | 4.554816292 | 0.000599415 | THOC6     | ENSG00000131652 |
| 16 | 3090271 | 3090599 | 3090435 | 23 | 25 | 1  | 12.46581301 | 3.51E-07    | ZSCAN10   | ENSG00000130182 |
| 16 | 3102464 | 3102687 | 3102552 | 9  | 11 | 2  | 3.835634772 | 0.00800699  | ZNF205    | ENSG00000122386 |
| 16 | 3140581 | 3140839 | 3140750 | 12 | 14 | 4  | 2.876726079 | 0.01219     |           | ENSG00000209495 |
| 16 | 3147149 | 3147550 | 3147307 | 12 | 19 | 13 | 1.369869562 | 0.177863    |           | ENSG00000209495 |
| 16 | 3165634 | 3165822 | 3165698 | 8  | 9  | 8  | 1.065454103 | 0.442605    |           | ENSG00000209496 |
| 16 | 3181040 | 3181349 | 3181194 | 8  | 13 | 6  | 1.917817386 | 0.0693353   |           | ENSG00000209499 |
| 16 | 3181403 | 3181616 | 3181481 | 8  | 10 | 3  | 2.636998906 | 0.034203    |           | ENSG00000209499 |

|    |          |          |          |     |     |    |             |             |          |                 |
|----|----------|----------|----------|-----|-----|----|-------------|-------------|----------|-----------------|
| 16 | 3256984  | 3257236  | 3257142  | 10  | 13  | 6  | 1.917817386 | 0.0693353   | MEFV     | ENSG00000103313 |
| 16 | 3490846  | 3491213  | 3491025  | 10  | 17  | 3  | 4.315089119 | 0.00102271  | CLUAP1   | ENSG00000103351 |
| 16 | 3503984  | 3504431  | 3504140  | 22  | 36  | 5  | 5.913270274 | 4.32E-07    | CLUAP1   | ENSG00000103351 |
| 16 | 3632741  | 3632967  | 3632854  | 12  | 14  | 2  | 4.794543465 | 0.00154571  | DNASE1   | ENSG00000213918 |
| 16 | 3636303  | 3636586  | 3636457  | 11  | 12  | 5  | 2.077635502 | 0.0577144   | DNASE1   | ENSG00000213918 |
| 16 | 3686985  | 3687178  | 3687081  | 8   | 9   | 1  | 4.794543465 | 0.00708517  | TRAP1    | ENSG00000126602 |
| 16 | 4130623  | 4131236  | 4130891  | 202 | 239 | 1  | 115.0690432 | 9.78E-69    | ADCY9    | ENSG00000162104 |
| 16 | 4244048  | 4244300  | 4244129  | 10  | 13  | 7  | 1.678090213 | 0.11195     | SRL      | ENSG00000185739 |
| 16 | 4526814  | 4527022  | 4526918  | 8   | 10  | 0  | 10.54799562 | 0.000613541 | C16orf5  | ENSG00000089486 |
| 16 | 4527370  | 4527695  | 4527530  | 11  | 15  | 0  | 15.34253909 | 2.13E-05    | C16orf5  | ENSG00000089486 |
| 16 | 4538827  | 4539072  | 4538952  | 8   | 10  | 0  | 10.54799562 | 0.000613541 |          | ENSG00000205832 |
| 16 | 4615634  | 4616226  | 4616032  | 81  | 98  | 1  | 47.46598031 | 6.09E-28    | MGRN1    | ENSG00000102858 |
| 16 | 4887349  | 4887683  | 4887516  | 9   | 14  | 2  | 4.794543465 | 0.00154571  | PPL      | ENSG00000118898 |
| 16 | 4934842  | 4935202  | 4935021  | 9   | 16  | 4  | 3.260289556 | 0.00475414  |          | ENSG00000200980 |
| 16 | 4946281  | 4946460  | 4946363  | 8   | 8   | 1  | 4.315089119 | 0.0127267   | SEC14L5  | ENSG00000103184 |
| 16 | 5227019  | 5227213  | 5227099  | 8   | 8   | 0  | 8.630178238 | 0.00235436  |          | ENSG00000221809 |
| 16 | 5321164  | 5321679  | 5321503  | 32  | 41  | 4  | 8.054833022 | 5.63E-09    |          | ENSG00000215086 |
| 16 | 5395727  | 5396546  | 5395933  | 71  | 110 | 2  | 35.47962164 | 5.96E-30    |          | ENSG00000215086 |
| 16 | 8917345  | 8917527  | 8917368  | 8   | 9   | 2  | 3.19636231  | 0.0229249   | USP7     | ENSG00000187555 |
| 16 | 9049249  | 9049547  | 9049413  | 8   | 12  | 2  | 4.155271003 | 0.0046638   |          | ENSG00000209566 |
| 16 | 9097277  | 9097460  | 9097390  | 9   | 9   | 2  | 3.19636231  | 0.0229249   | C16orf72 | ENSG00000182831 |
| 16 | 9798792  | 9799022  | 9798901  | 8   | 8   | 3  | 2.157544559 | 0.0836802   |          | ENSG00000209573 |
| 16 | 10370401 | 10370825 | 10370609 | 44  | 55  | 4  | 10.73977736 | 1.34E-12    | ATF7IP2  | ENSG00000166669 |
| 16 | 10595871 | 10596404 | 10596137 | 38  | 57  | 10 | 5.056064018 | 3.21E-09    | EMP2     | ENSG00000213853 |
| 16 | 10738391 | 10738734 | 10738562 | 8   | 10  | 5  | 1.757999271 | 0.121253    | NUBP1    | ENSG00000103274 |
| 16 | 10835531 | 10835967 | 10835791 | 18  | 26  | 1  | 12.94526736 | 1.86E-07    | FAM18A   | ENSG00000166676 |
| 16 | 10972996 | 10973285 | 10973122 | 9   | 11  | 6  | 1.643843474 | 0.137712    | CLEC16A  | ENSG00000038532 |
| 16 | 11314525 | 11314768 | 11314660 | 9   | 9   | 0  | 9.589086931 | 0.00120187  |          | ENSG00000199668 |
| 16 | 11358843 | 11359075 | 11358959 | 8   | 8   | 4  | 1.726035648 | 0.150596    | C16orf75 | ENSG00000175643 |
| 16 | 11359145 | 11359377 | 11359261 | 10  | 11  | 2  | 3.835634772 | 0.00800699  | C16orf75 | ENSG00000175643 |
| 16 | 11360701 | 11361111 | 11360880 | 12  | 21  | 4  | 4.219198249 | 0.000390041 | C16orf75 | ENSG00000175643 |
| 16 | 11498696 | 11499159 | 11498931 | 30  | 47  | 7  | 5.753452158 | 1.54E-08    |          | ENSG00000188897 |
| 16 | 11563734 | 11564157 | 11563978 | 28  | 41  | 1  | 20.13708255 | 1.17E-11    |          | ENSG00000209636 |
| 16 | 11641659 | 11641856 | 11641758 | 8   | 9   | 2  | 3.19636231  | 0.0229249   | SNN      | ENSG00000184602 |

|    |          |          |          |    |     |    |             |             |         |                 |
|----|----------|----------|----------|----|-----|----|-------------|-------------|---------|-----------------|
| 16 | 11642720 | 11642958 | 11642839 | 10 | 10  | 2  | 3.515998541 | 0.0136204   | SNN     | ENSG00000184602 |
| 16 | 11707929 | 11708183 | 11708052 | 10 | 10  | 3  | 2.636998906 | 0.034203    | TXNDC11 | ENSG00000153066 |
| 16 | 11917915 | 11918297 | 11918094 | 11 | 17  | 6  | 2.465765211 | 0.014729    | GSPT1   | ENSG00000103342 |
| 16 | 12203696 | 12203917 | 12203831 | 8  | 8   | 3  | 2.157544559 | 0.0836802   |         | ENSG00000205782 |
| 16 | 12539888 | 12540308 | 12540067 | 35 | 43  | 0  | 42.19198249 | 1.42E-13    | SNX29   | ENSG00000048471 |
| 16 | 12804889 | 12805121 | 12805005 | 9  | 11  | 2  | 3.835634772 | 0.00800699  |         | ENSG00000103381 |
| 16 | 12898018 | 12898206 | 12898105 | 8  | 8   | 9  | 0.863017824 | 0.627343    |         | ENSG00000199474 |
| 16 | 12900928 | 12901121 | 12901024 | 8  | 9   | 7  | 1.198635866 | 0.346278    |         | ENSG00000199474 |
| 16 | 12941495 | 12941845 | 12941654 | 17 | 21  | 2  | 7.031997082 | 2.73E-05    |         | ENSG00000199474 |
| 16 | 13454673 | 13455554 | 13454905 | 75 | 112 | 4  | 21.67133646 | 4.44E-28    | ERCC4   | ENSG00000175595 |
| 16 | 13794360 | 13794576 | 13794440 | 8  | 8   | 2  | 2.876726079 | 0.0381137   | ERCC4   | ENSG00000175595 |
| 16 | 13959228 | 13959486 | 13959339 | 11 | 13  | 5  | 2.237453617 | 0.038866    | ERCC4   | ENSG00000175595 |
| 16 | 14004664 | 14004923 | 14004793 | 10 | 12  | 2  | 4.155271003 | 0.0046638   | MKL2    | ENSG00000186260 |
| 16 | 14015409 | 14015683 | 14015546 | 10 | 11  | 5  | 1.917817386 | 0.0843804   | MKL2    | ENSG00000186260 |
| 16 | 14098600 | 14098798 | 14098677 | 9  | 9   | 5  | 1.598181155 | 0.170911    | MKL2    | ENSG00000186260 |
| 16 | 14308160 | 14308767 | 14308332 | 10 | 24  | 3  | 5.993179332 | 2.17E-05    |         | ENSG00000199130 |
| 16 | 14465361 | 14465609 | 14465496 | 10 | 11  | 0  | 11.50690432 | 0.000313206 |         | ENSG00000212739 |
| 16 | 14488238 | 14488604 | 14488417 | 42 | 49  | 46 | 1.020115631 | 0.460219    |         | ENSG00000212739 |
| 16 | 14530410 | 14530801 | 14530683 | 8  | 12  | 5  | 2.077635502 | 0.0577144   |         | ENSG00000212739 |
| 16 | 14566640 | 14566990 | 14566815 | 14 | 20  | 3  | 5.034270639 | 0.000202317 | BFAR    | ENSG00000103429 |
| 16 | 15644983 | 15645280 | 15645130 | 10 | 13  | 2  | 4.474907234 | 0.00269459  |         | ENSG00000202641 |
| 16 | 15645611 | 15645871 | 15645741 | 9  | 10  | 0  | 10.54799562 | 0.000613541 |         | ENSG00000202641 |
| 16 | 15646619 | 15646806 | 15646700 | 9  | 9   | 1  | 4.794543465 | 0.00708517  |         | ENSG00000202641 |
| 16 | 16129067 | 16129256 | 16129128 | 9  | 9   | 3  | 2.397271733 | 0.0539397   | ABCC6   | ENSG00000091262 |
| 16 | 16153853 | 16154032 | 16153942 | 8  | 8   | 3  | 2.157544559 | 0.0836802   | ABCC6   | ENSG00000091262 |
| 16 | 16196322 | 16196603 | 16196477 | 9  | 11  | 1  | 5.753452158 | 0.00215302  | ABCC6   | ENSG00000091262 |
| 16 | 16634917 | 16635151 | 16635049 | 9  | 10  | 0  | 10.54799562 | 0.000613541 |         | ENSG00000214940 |
| 16 | 16862894 | 16863413 | 16863189 | 50 | 67  | 4  | 13.04115823 | 8.73E-16    |         | ENSG00000205748 |
| 16 | 16914793 | 16915002 | 16914897 | 9  | 9   | 2  | 3.19636231  | 0.0229249   |         | ENSG00000205748 |
| 16 | 17073761 | 17073949 | 17073855 | 8  | 9   | 0  | 9.589086931 | 0.00120187  |         | ENSG00000205748 |
| 16 | 17304573 | 17304763 | 17304668 | 8  | 8   | 1  | 4.315089119 | 0.0127267   | XYLT1   | ENSG00000103489 |
| 16 | 17305783 | 17306208 | 17306033 | 16 | 23  | 7  | 2.876726079 | 0.00239423  | XYLT1   | ENSG00000103489 |
| 16 | 17317088 | 17317296 | 17317172 | 11 | 11  | 1  | 5.753452158 | 0.00215302  | XYLT1   | ENSG00000103489 |
| 16 | 17516852 | 17517154 | 17516991 | 9  | 14  | 3  | 3.595907599 | 0.00486913  | XYLT1   | ENSG00000103489 |

|    |          |          |          |     |     |   |             |             |          |                 |
|----|----------|----------|----------|-----|-----|---|-------------|-------------|----------|-----------------|
| 16 | 17587213 | 17587451 | 17587310 | 9   | 10  | 0 | 10.54799562 | 0.000613541 | XYLT1    | ENSG00000103489 |
| 16 | 17634438 | 17634798 | 17634617 | 24  | 30  | 7 | 3.715771186 | 9.63E-05    | XYLT1    | ENSG00000103489 |
| 16 | 17838505 | 17838936 | 17838780 | 10  | 20  | 3 | 5.034270639 | 0.000202317 |          | ENSG00000221687 |
| 16 | 17941090 | 17941298 | 17941235 | 9   | 9   | 2 | 3.19636231  | 0.0229249   |          | ENSG00000221687 |
| 16 | 18011111 | 18011317 | 18011246 | 10  | 11  | 3 | 2.876726079 | 0.0213797   |          | ENSG00000221687 |
| 16 | 18720505 | 18720991 | 18720739 | 11  | 19  | 3 | 4.794543465 | 0.000349205 | ARL6IP1  | ENSG00000170540 |
| 16 | 18888194 | 18888484 | 18888318 | 8   | 10  | 5 | 1.757999271 | 0.121253    | TMC7     | ENSG00000170537 |
| 16 | 18917621 | 18917990 | 18917785 | 11  | 16  | 2 | 5.433815927 | 0.000499302 |          | ENSG00000207167 |
| 16 | 18927689 | 18928061 | 18927856 | 10  | 14  | 6 | 2.054804342 | 0.0480281   |          | ENSG00000207167 |
| 16 | 19013601 | 19013879 | 19013718 | 10  | 12  | 3 | 3.116453252 | 0.0131971   | ITPRIPL2 | ENSG00000205730 |
| 16 | 19035592 | 19035857 | 19035701 | 10  | 11  | 5 | 1.917817386 | 0.0843804   | ITPRIPL2 | ENSG00000205730 |
| 16 | 19139534 | 19139897 | 19139735 | 10  | 15  | 0 | 15.34253909 | 2.13E-05    | SYT17    | ENSG00000103528 |
| 16 | 19295609 | 19295853 | 19295749 | 9   | 9   | 4 | 1.917817386 | 0.103282    | TMC5     | ENSG00000103534 |
| 16 | 19307938 | 19308420 | 19308094 | 9   | 19  | 7 | 2.397271733 | 0.0127287   | TMC5     | ENSG00000103534 |
| 16 | 19356102 | 19356292 | 19356197 | 9   | 9   | 1 | 4.794543465 | 0.00708517  | TMC5     | ENSG00000103534 |
| 16 | 19443968 | 19444214 | 19444103 | 8   | 11  | 3 | 2.876726079 | 0.0213797   |          | ENSG00000103540 |
| 16 | 19474063 | 19474441 | 19474242 | 12  | 19  | 3 | 4.794543465 | 0.000349205 | C16orf62 | ENSG00000103544 |
| 16 | 19619155 | 19619473 | 19619314 | 8   | 13  | 1 | 6.712360851 | 0.000640982 | IQCK     | ENSG00000174628 |
| 16 | 19636992 | 19637308 | 19637131 | 10  | 13  | 1 | 6.712360851 | 0.000640982 | C16orf88 | ENSG00000103550 |
| 16 | 19805035 | 19805216 | 19805125 | 8   | 8   | 3 | 2.157544559 | 0.0836802   | GPRC5B   | ENSG00000167191 |
| 16 | 19968755 | 19968993 | 19968870 | 12  | 14  | 5 | 2.397271733 | 0.0258078   | GPR139   | ENSG00000180269 |
| 16 | 20003502 | 20003758 | 20003605 | 11  | 14  | 1 | 7.191815198 | 0.00034761  | GPR139   | ENSG00000180269 |
| 16 | 20102679 | 20103022 | 20102850 | 17  | 20  | 3 | 5.034270639 | 0.000202317 | GPR139   | ENSG00000180269 |
| 16 | 20660530 | 20661006 | 20660709 | 8   | 16  | 5 | 2.716907964 | 0.0109645   | THUMPD1  | ENSG00000066654 |
| 16 | 20768785 | 20769095 | 20768940 | 10  | 13  | 4 | 2.684944341 | 0.01921     |          | ENSG00000209026 |
| 16 | 20784238 | 20785235 | 20784760 | 132 | 191 | 1 | 92.05523453 | 8.15E-55    | DCUN1D3  | ENSG00000188215 |
| 16 | 20820371 | 20820627 | 20820488 | 13  | 15  | 6 | 2.191791298 | 0.0328001   | LYRM1    | ENSG00000102897 |
| 16 | 21135506 | 21135761 | 21135637 | 9   | 10  | 1 | 5.273997812 | 0.00391723  | ZP2      | ENSG00000103310 |
| 16 | 21871911 | 21872388 | 21872081 | 14  | 25  | 7 | 3.116453252 | 0.000988074 | UQCRC2   | ENSG00000140740 |
| 16 | 21917404 | 21917788 | 21917628 | 11  | 15  | 4 | 3.068507818 | 0.0076507   | C16orf65 | ENSG00000155714 |
| 16 | 21984012 | 21984440 | 21984191 | 8   | 15  | 2 | 5.114179696 | 0.00088103  | VWA3A    | ENSG00000175267 |
| 16 | 22017879 | 22018178 | 22018036 | 9   | 13  | 4 | 2.684944341 | 0.01921     | VWA3A    | ENSG00000175267 |
| 16 | 22089201 | 22089421 | 22089311 | 12  | 13  | 0 | 13.4247217  | 8.16E-05    |          | ENSG00000183921 |
| 16 | 22108551 | 22108882 | 22108716 | 8   | 11  | 5 | 1.917817386 | 0.0843804   | EEF2K    | ENSG00000103319 |

|    |          |          |          |     |     |    |             |             |          |                 |
|----|----------|----------|----------|-----|-----|----|-------------|-------------|----------|-----------------|
| 16 | 22109982 | 22110270 | 22110095 | 8   | 11  | 8  | 1.278544924 | 0.28289     | EEF2K    | ENSG00000103319 |
| 16 | 22114489 | 22114709 | 22114543 | 12  | 13  | 11 | 1.118726809 | 0.38479     | EEF2K    | ENSG00000103319 |
| 16 | 22151659 | 22151956 | 22151807 | 11  | 16  | 3  | 4.075361945 | 0.00173346  | EEF2K    | ENSG00000103319 |
| 16 | 22215706 | 22216154 | 22215977 | 16  | 27  | 7  | 3.356180426 | 0.000396559 | POLR3E   | ENSG00000058600 |
| 16 | 22216993 | 22217574 | 22217276 | 15  | 30  | 10 | 2.702379044 | 0.00113582  | POLR3E   | ENSG00000058600 |
| 16 | 22578809 | 22578988 | 22578909 | 8   | 9   | 5  | 1.598181155 | 0.170911    |          | ENSG00000198064 |
| 16 | 22599359 | 22599876 | 22599658 | 10  | 23  | 11 | 1.917817386 | 0.0274129   | HS3ST2   | ENSG00000122254 |
| 16 | 22762880 | 22763086 | 22762974 | 12  | 12  | 0  | 12.46581301 | 0.000159888 | HS3ST2   | ENSG00000122254 |
| 16 | 23001035 | 23001374 | 23001201 | 13  | 18  | 0  | 18.21926517 | 2.83E-06    | USP31    | ENSG00000103404 |
| 16 | 23068324 | 23068555 | 23068453 | 8   | 9   | 1  | 4.794543465 | 0.00708517  | USP31    | ENSG00000103404 |
| 16 | 23342342 | 23342761 | 23342468 | 12  | 20  | 8  | 2.237453617 | 0.0160557   |          | ENSG00000209795 |
| 16 | 23343392 | 23343646 | 23343515 | 11  | 13  | 2  | 4.474907234 | 0.00269459  |          | ENSG00000209795 |
| 16 | 23476170 | 23476476 | 23476323 | 9   | 12  | 4  | 2.493162602 | 0.0299057   | EARS2    | ENSG00000103356 |
| 16 | 23559356 | 23559689 | 23559514 | 13  | 16  | 5  | 2.716907964 | 0.0109645   | PALB2    | ENSG00000083093 |
| 16 | 23560525 | 23560745 | 23560635 | 8   | 9   | 1  | 4.794543465 | 0.00708517  | DCTN5    | ENSG00000166847 |
| 16 | 23628276 | 23628693 | 23628516 | 10  | 19  | 0  | 19.17817386 | 1.44E-06    | ERN2     | ENSG00000134398 |
| 16 | 23646809 | 23647051 | 23646978 | 10  | 11  | 7  | 1.43836304  | 0.204844    | ERN2     | ENSG00000134398 |
| 16 | 23767838 | 23768017 | 23767927 | 8   | 8   | 3  | 2.157544559 | 0.0836802   | PRKCB    | ENSG00000166501 |
| 16 | 23915500 | 23915809 | 23915654 | 8   | 12  | 5  | 2.077635502 | 0.0577144   | PRKCB    | ENSG00000166501 |
| 16 | 23960962 | 23961159 | 23961060 | 10  | 10  | 2  | 3.515998541 | 0.0136204   | PRKCB    | ENSG00000166501 |
| 16 | 24172127 | 24172342 | 24172177 | 8   | 9   | 2  | 3.19636231  | 0.0229249   | CACNG3   | ENSG00000006116 |
| 16 | 24300395 | 24301180 | 24300806 | 65  | 101 | 5  | 16.30144778 | 5.16E-24    |          | ENSG00000201541 |
| 16 | 24435895 | 24436203 | 24436049 | 10  | 11  | 2  | 3.835634772 | 0.00800699  | RBBP6    | ENSG00000122257 |
| 16 | 24459628 | 24459860 | 24459712 | 8   | 9   | 2  | 3.19636231  | 0.0229249   | RBBP6    | ENSG00000122257 |
| 16 | 24600888 | 24601157 | 24601022 | 8   | 8   | 4  | 1.726035648 | 0.150596    | TNRC6A   | ENSG00000090905 |
| 16 | 24763455 | 24763675 | 24763541 | 9   | 10  | 1  | 5.273997812 | 0.00391723  | SLC5A11  | ENSG00000158865 |
| 16 | 24959415 | 24959612 | 24959537 | 8   | 9   | 4  | 1.917817386 | 0.103282    | ARHGAP17 | ENSG00000140750 |
| 16 | 25025998 | 25026180 | 25026049 | 9   | 9   | 4  | 1.917817386 | 0.103282    | LCMT1    | ENSG00000205629 |
| 16 | 25198459 | 25198749 | 25198604 | 12  | 15  | 2  | 5.114179696 | 0.00088103  | ZKSCAN2  | ENSG00000155592 |
| 16 | 25352175 | 25352354 | 25352330 | 8   | 8   | 1  | 4.315089119 | 0.0127267   | ZKSCAN2  | ENSG00000155592 |
| 16 | 25472379 | 25473456 | 25472809 | 125 | 177 | 10 | 15.51688612 | 1.05E-39    | HS3ST4   | ENSG00000182601 |
| 16 | 25487734 | 25488592 | 25488042 | 48  | 86  | 4  | 16.68501126 | 6.33E-21    | HS3ST4   | ENSG00000182601 |
| 16 | 26941839 | 26942231 | 26942063 | 23  | 31  | 0  | 30.68507818 | 4.52E-10    |          | ENSG00000213704 |
| 16 | 27293848 | 27294064 | 27293956 | 8   | 8   | 3  | 2.157544559 | 0.0836802   | IL21R    | ENSG00000103522 |

|    |          |          |          |    |    |    |             |             |          |                 |
|----|----------|----------|----------|----|----|----|-------------|-------------|----------|-----------------|
| 16 | 27327581 | 27327951 | 27327774 | 29 | 35 | 2  | 11.50690432 | 5.48E-09    | IL21R    | ENSG00000103522 |
| 16 | 27333603 | 27333907 | 27333749 | 12 | 14 | 1  | 7.191815198 | 0.00034761  | IL21R    | ENSG00000103522 |
| 16 | 27469460 | 27469647 | 27469553 | 8  | 8  | 2  | 2.876726079 | 0.0381137   | KIAA0556 | ENSG00000047578 |
| 16 | 27642694 | 27643234 | 27642961 | 29 | 54 | 3  | 13.18499453 | 3.33E-13    |          | ENSG00000201371 |
| 16 | 27715663 | 27716006 | 27715798 | 15 | 19 | 1  | 9.589086931 | 1.56E-05    |          | ENSG00000212382 |
| 16 | 27786726 | 27786924 | 27786825 | 8  | 9  | 5  | 1.598181155 | 0.170911    |          | ENSG00000212382 |
| 16 | 27816598 | 27816902 | 27816731 | 9  | 13 | 7  | 1.678090213 | 0.11195     | GSG1L    | ENSG00000169181 |
| 16 | 27839430 | 27839734 | 27839580 | 9  | 11 | 7  | 1.43836304  | 0.204844    | GSG1L    | ENSG00000169181 |
| 16 | 27912329 | 27912815 | 27912560 | 35 | 48 | 4  | 9.397305192 | 8.99E-11    |          | ENSG00000207266 |
| 16 | 28456000 | 28456372 | 28456179 | 36 | 45 | 4  | 8.821959976 | 5.35E-10    |          | ENSG00000176046 |
| 16 | 28472739 | 28472979 | 28472910 | 10 | 12 | 2  | 4.155271003 | 0.0046638   | CCDC101  | ENSG00000176476 |
| 16 | 28782066 | 28782419 | 28782242 | 8  | 14 | 3  | 3.595907599 | 0.00486913  | SH2B1    | ENSG00000178188 |
| 16 | 28818822 | 28819205 | 28819033 | 15 | 20 | 0  | 20.13708255 | 7.37E-07    | ATP2A1   | ENSG00000196296 |
| 16 | 28864336 | 28864646 | 28864476 | 9  | 12 | 10 | 1.133255728 | 0.37674     | NFATC2IP | ENSG00000176953 |
| 16 | 28893418 | 28893646 | 28893509 | 11 | 13 | 6  | 1.917817386 | 0.0693353   | SPNS1    | ENSG00000169682 |
| 16 | 29629154 | 29629378 | 29629266 | 8  | 9  | 5  | 1.598181155 | 0.170911    |          | ENSG00000222375 |
| 16 | 29637836 | 29638125 | 29637987 | 15 | 17 | 0  | 17.26035648 | 5.54E-06    |          | ENSG00000222375 |
| 16 | 29648068 | 29648316 | 29648194 | 8  | 10 | 5  | 1.757999271 | 0.121253    |          | ENSG00000222375 |
| 16 | 29710403 | 29710608 | 29710503 | 8  | 9  | 6  | 1.369869562 | 0.253675    | KIF22    | ENSG00000079616 |
| 16 | 29782013 | 29782614 | 29782474 | 15 | 30 | 14 | 1.981744632 | 0.0116992   |          | ENSG00000214725 |
| 16 | 29880326 | 29880556 | 29880454 | 8  | 9  | 3  | 2.397271733 | 0.0539397   | TMEM219  | ENSG00000149932 |
| 16 | 29892822 | 29893052 | 29892937 | 9  | 10 | 1  | 5.273997812 | 0.00391723  | TAOK2    | ENSG00000149930 |
| 16 | 29913765 | 29913997 | 29913879 | 8  | 10 | 2  | 3.515998541 | 0.0136204   | HIRIP3   | ENSG00000149929 |
| 16 | 29971780 | 29972110 | 29971945 | 10 | 13 | 10 | 1.220429246 | 0.306001    | ALDOA    | ENSG00000149925 |
| 16 | 29984223 | 29984427 | 29984354 | 9  | 10 | 8  | 1.171999514 | 0.35773     | ALDOA    | ENSG00000149925 |
| 16 | 30008733 | 30008980 | 30008856 | 10 | 13 | 3  | 3.356180426 | 0.00805599  | TBX6     | ENSG00000149922 |
| 16 | 30348838 | 30349198 | 30349023 | 9  | 15 | 12 | 1.180195315 | 0.324974    |          | ENSG00000179958 |
| 16 | 30364699 | 30364966 | 30364832 | 10 | 11 | 5  | 1.917817386 | 0.0843804   | SEPHS2   | ENSG00000179918 |
| 16 | 30445621 | 30445832 | 30445759 | 8  | 8  | 1  | 4.315089119 | 0.0127267   | ZNF768   | ENSG00000169957 |
| 16 | 30446583 | 30446831 | 30446707 | 13 | 15 | 3  | 3.835634772 | 0.00291691  | ZNF768   | ENSG00000169957 |
| 16 | 30477105 | 30477406 | 30477183 | 8  | 12 | 8  | 1.385090334 | 0.219216    | ZNF764   | ENSG00000169951 |
| 16 | 30490599 | 30491391 | 30490917 | 13 | 33 | 10 | 2.963899597 | 0.000322893 | ZNF785   | ENSG00000197162 |
| 16 | 30504484 | 30504794 | 30504617 | 9  | 12 | 9  | 1.246581301 | 0.295061    | ZNF785   | ENSG00000197162 |
| 16 | 30516272 | 30516569 | 30516401 | 8  | 10 | 0  | 10.54799562 | 0.000613541 | ZNF785   | ENSG00000197162 |

|    |          |          |          |    |     |    |             |             |          |                 |
|----|----------|----------|----------|----|-----|----|-------------|-------------|----------|-----------------|
| 16 | 30529160 | 30529523 | 30529327 | 11 | 15  | 2  | 5.114179696 | 0.00088103  | ZNF689   | ENSG00000156853 |
| 16 | 30569459 | 30569735 | 30569589 | 11 | 13  | 4  | 2.684944341 | 0.01921     | PRR14    | ENSG00000156858 |
| 16 | 30617950 | 30618177 | 30618052 | 9  | 11  | 4  | 2.301380863 | 0.0459276   | SRCAP    | ENSG00000080603 |
| 16 | 30618243 | 30618559 | 30618401 | 10 | 12  | 6  | 1.78083043  | 0.0985525   | SRCAP    | ENSG00000080603 |
| 16 | 30659217 | 30659634 | 30659396 | 12 | 18  | 7  | 2.277408146 | 0.0188653   | PHKG2    | ENSG00000156873 |
| 16 | 30705864 | 30706135 | 30705999 | 10 | 13  | 10 | 1.220429246 | 0.306001    | ZNF629   | ENSG00000102870 |
| 16 | 30724155 | 30724564 | 30724334 | 8  | 14  | 13 | 1.027402171 | 0.469541    |          | ENSG00000183355 |
| 16 | 30775308 | 30775985 | 30775832 | 13 | 30  | 8  | 3.302907721 | 0.000239229 |          | ENSG00000183355 |
| 16 | 30841065 | 30841603 | 30841244 | 9  | 20  | 13 | 1.43836304  | 0.140307    |          | ENSG00000212972 |
| 16 | 30859258 | 30859473 | 30859365 | 9  | 9   | 0  | 9.589086931 | 0.00120187  | ORAI3    | ENSG00000175938 |
| 16 | 30868893 | 30869482 | 30869303 | 30 | 58  | 10 | 5.143237535 | 1.91E-09    | ORAI3    | ENSG00000175938 |
| 16 | 30876301 | 30876655 | 30876478 | 8  | 14  | 6  | 2.054804342 | 0.0480281   | SETD1A   | ENSG00000099381 |
| 16 | 30903889 | 30904073 | 30904018 | 8  | 10  | 4  | 2.109599125 | 0.0694668   | HSD3B7   | ENSG00000099377 |
| 16 | 30921247 | 30921479 | 30921314 | 10 | 11  | 4  | 2.301380863 | 0.0459276   | STX1B    | ENSG00000099365 |
| 16 | 30992888 | 30993314 | 30993135 | 12 | 22  | 14 | 1.470326663 | 0.117149    | ZNF646   | ENSG00000167395 |
| 16 | 31189255 | 31189499 | 31189377 | 9  | 11  | 0  | 11.50690432 | 0.000313206 | ITGAM    | ENSG00000169896 |
| 16 | 31192391 | 31192998 | 31192762 | 86 | 115 | 2  | 37.0778028  | 2.25E-31    | ITGAM    | ENSG00000169896 |
| 16 | 31203581 | 31203839 | 31203708 | 12 | 12  | 0  | 12.46581301 | 0.000159888 | ITGAM    | ENSG00000169896 |
| 16 | 31370659 | 31370861 | 31370754 | 11 | 12  | 4  | 2.493162602 | 0.0299057   | ARMC5    | ENSG00000140691 |
| 16 | 31454580 | 31454885 | 31454715 | 10 | 13  | 3  | 3.356180426 | 0.00805599  | ERAF     | ENSG00000169877 |
| 16 | 31458099 | 31458355 | 31458227 | 11 | 13  | 1  | 6.712360851 | 0.000640982 |          | ENSG00000213547 |
| 16 | 31615803 | 31616043 | 31615923 | 8  | 9   | 4  | 1.917817386 | 0.103282    | C16orf67 | ENSG00000131797 |
| 16 | 32784228 | 32784461 | 32784344 | 9  | 11  | 0  | 11.50690432 | 0.000313206 | IGHV2OR1 | ENSG00000214618 |
| 16 | 33796732 | 33797065 | 33796898 | 32 | 32  | 49 | 0.632879737 | 0.980874    |          | ENSG00000207986 |
| 16 | 33857534 | 33858009 | 33857830 | 32 | 43  | 36 | 1.140323851 | 0.276185    |          | ENSG00000207986 |
| 16 | 33858414 | 33858767 | 33858590 | 18 | 23  | 15 | 1.43836304  | 0.12479     |          | ENSG00000207986 |
| 16 | 33858776 | 33859013 | 33858883 | 8  | 11  | 14 | 0.767126954 | 0.756447    |          | ENSG00000207986 |
| 16 | 33860096 | 33861061 | 33860712 | 77 | 124 | 77 | 1.536712649 | 0.00124859  |          | ENSG00000207986 |
| 16 | 33861099 | 33861446 | 33861272 | 13 | 16  | 11 | 1.358453982 | 0.20248     |          | ENSG00000207986 |
| 16 | 33863018 | 33863502 | 33863197 | 17 | 31  | 18 | 1.615004115 | 0.044781    |          | ENSG00000207986 |
| 16 | 33863824 | 33864214 | 33864104 | 20 | 29  | 15 | 1.797953799 | 0.0249937   |          | ENSG00000207986 |
| 16 | 33864456 | 33865160 | 33864783 | 61 | 113 | 92 | 1.175436462 | 0.122484    |          | ENSG00000207986 |
| 16 | 33865206 | 33865523 | 33865364 | 9  | 10  | 14 | 0.703199708 | 0.817173    |          | ENSG00000207986 |
| 16 | 33866252 | 33867203 | 33866727 | 36 | 78  | 57 | 1.306099772 | 0.059537    |          | ENSG00000207986 |



|    |          |          |          |     |     |     |             |             |                        |
|----|----------|----------|----------|-----|-----|-----|-------------|-------------|------------------------|
| 16 | 33868120 | 33868384 | 33868275 | 10  | 10  | 8   | 1.171999514 | 0.35773     | ENSG00000207986        |
| 16 | 33868474 | 33868822 | 33868648 | 23  | 25  | 20  | 1.187220287 | 0.276369    | ENSG00000207986        |
| 16 | 33869915 | 33871757 | 33870865 | 134 | 543 | 434 | 1.199186963 | 0.0023033   | ENSG00000200002        |
| 16 | 33872370 | 33872620 | 33872464 | 20  | 20  | 21  | 0.915321934 | 0.614384    | ENSG00000200434        |
| 16 | 33872806 | 33873141 | 33872973 | 24  | 30  | 23  | 1.238590395 | 0.2125      | ENSG00000200434        |
| 16 | 33881236 | 33881419 | 33881284 | 8   | 8   | 6   | 1.232882605 | 0.333038    | ENSG00000200434        |
| 16 | 33881531 | 33881965 | 33881708 | 11  | 18  | 14  | 1.214617678 | 0.282961    | ENSG00000200434        |
| 16 | 33881979 | 33882336 | 33882157 | 11  | 17  | 17  | 0.958908693 | 0.549739    | ENSG00000200434        |
| 16 | 33882687 | 33883052 | 33882862 | 12  | 16  | 6   | 2.328778255 | 0.0221113   | ENSG00000200434        |
| 16 | 33930057 | 33930392 | 33930224 | 53  | 54  | 61  | 0.850644808 | 0.809499    | ENSG00000200434        |
| 16 | 34194748 | 34194970 | 34194859 | 8   | 8   | 1   | 4.315089119 | 0.0127267   | ENSG00000214590        |
| 16 | 34584229 | 34584450 | 34584372 | 9   | 9   | 3   | 2.397271733 | 0.0539397   | ENSG00000214581        |
| 16 | 34653625 | 34653960 | 34653792 | 11  | 16  | 2   | 5.433815927 | 0.000499302 | ENSG00000213543        |
| 16 | 44943938 | 44944337 | 44944158 | 18  | 25  | 22  | 1.08398374  | 0.38731     | ENSG00000199448        |
| 16 | 44949109 | 44949442 | 44949275 | 17  | 20  | 20  | 0.958908693 | 0.553754    | ENSG00000199448        |
| 16 | 44949562 | 44949893 | 44949732 | 10  | 12  | 14  | 0.831054201 | 0.689281    | ENSG00000199448        |
| 16 | 44951556 | 44952125 | 44951955 | 22  | 38  | 26  | 1.385090334 | 0.0931711   | ENSG00000199448        |
| 16 | 44962319 | 44962500 | 44962497 | 9   | 9   | 1   | 4.794543465 | 0.00708517  | ENSG00000199448        |
| 16 | 44974474 | 44974922 | 44974749 | 16  | 25  | 38  | 0.639272462 | 0.963789    | ENSG00000199448        |
| 16 | 44976976 | 44977157 | 44977007 | 8   | 8   | 1   | 4.315089119 | 0.0127267   | ENSG00000199448        |
| 16 | 44984378 | 44984777 | 44984599 | 8   | 12  | 11  | 1.038817751 | 0.460341    | ENSG00000199448        |
| 16 | 44984908 | 44985346 | 44985052 | 17  | 25  | 27  | 0.890415215 | 0.665585    | ENSG00000199448        |
| 16 | 44985427 | 44985607 | 44985460 | 8   | 8   | 1   | 4.315089119 | 0.0127267   | ENSG00000199448        |
| 16 | 46096228 | 46096413 | 46096255 | 13  | 14  | 16  | 0.846095906 | 0.68298     | ENSG00000210173        |
| 16 | 46748456 | 46748728 | 46748602 | 10  | 10  | 4   | 2.109599125 | 0.0694668   | ABCC12 ENSG00000140798 |
| 16 | 46757434 | 46757627 | 46757539 | 8   | 8   | 0   | 8.630178238 | 0.00235436  | ABCC12 ENSG00000140798 |
| 16 | 49422139 | 49422400 | 49422238 | 17  | 21  | 4   | 4.219198249 | 0.000390041 | ENSG00000199771        |
| 16 | 49904678 | 49904976 | 49904827 | 9   | 11  | 0   | 11.50690432 | 0.000313206 | SALL1 ENSG00000103449  |
| 16 | 50144724 | 50145051 | 50144887 | 16  | 20  | 6   | 2.876726079 | 0.00408924  | ENSG00000212961        |
| 16 | 51643908 | 51644515 | 51644094 | 53  | 79  | 0   | 76.71269544 | 4.35E-24    | CHD9 ENSG00000177200   |
| 16 | 51861448 | 51861700 | 51861545 | 8   | 9   | 0   | 9.589086931 | 0.00120187  | ENSG00000212582        |
| 16 | 51969365 | 51970060 | 51969712 | 45  | 64  | 2   | 20.77635502 | 5.71E-17    | ENSG00000202193        |
| 16 | 52041217 | 52041623 | 52041428 | 36  | 47  | 0   | 46.02761727 | 9.62E-15    | RBL2 ENSG00000103479   |
| 16 | 52323940 | 52324185 | 52324058 | 10  | 12  | 6   | 1.78083043  | 0.0985525   | FTO ENSG00000140718    |

|    |          |          |          |    |    |   |             |             |          |                 |
|----|----------|----------|----------|----|----|---|-------------|-------------|----------|-----------------|
| 16 | 52360053 | 52360319 | 52360188 | 10 | 11 | 3 | 2.876726079 | 0.0213797   | FTO      | ENSG00000140718 |
| 16 | 52517805 | 52518058 | 52517963 | 8  | 10 | 1 | 5.273997812 | 0.00391723  | FTO      | ENSG00000140718 |
| 16 | 52930608 | 52930799 | 52930703 | 9  | 9  | 0 | 9.589086931 | 0.00120187  | IRX3     | ENSG00000177508 |
| 16 | 55380801 | 55381070 | 55380973 | 8  | 10 | 0 | 10.54799562 | 0.000613541 | NUP93    | ENSG00000102900 |
| 16 | 56407843 | 56408077 | 56407948 | 9  | 9  | 3 | 2.397271733 | 0.0539397   |          | ENSG00000187185 |
| 16 | 56720687 | 56721107 | 56720935 | 12 | 18 | 1 | 9.109632584 | 2.91E-05    | C16orf80 | ENSG00000070761 |
| 16 | 57003285 | 57003479 | 57003341 | 8  | 9  | 4 | 1.917817386 | 0.103282    | GINS3    | ENSG00000181938 |
| 16 | 58580113 | 58580452 | 58580245 | 18 | 22 | 1 | 11.02744997 | 2.36E-06    |          | ENSG00000200911 |
| 16 | 59914864 | 59915128 | 59914996 | 10 | 13 | 0 | 13.4247217  | 8.16E-05    |          | ENSG00000180019 |
| 16 | 60524682 | 60524973 | 60524803 | 18 | 20 | 2 | 6.712360851 | 4.91E-05    | CDH8     | ENSG00000150394 |
| 16 | 60625305 | 60625716 | 60625456 | 11 | 18 | 3 | 4.554816292 | 0.000599415 | CDH8     | ENSG00000150394 |
| 16 | 61445322 | 61445594 | 61445459 | 12 | 13 | 0 | 13.4247217  | 8.16E-05    |          | ENSG00000223123 |
| 16 | 63029085 | 63029385 | 63029233 | 23 | 25 | 0 | 24.93162602 | 2.56E-08    |          |                 |
| 16 | 63691077 | 63691318 | 63691199 | 13 | 15 | 0 | 15.34253909 | 2.13E-05    | CDH11    | ENSG00000140937 |
| 16 | 64360454 | 64360869 | 64360631 | 17 | 24 | 0 | 23.97271733 | 5.01E-08    |          |                 |
| 16 | 64362255 | 64362434 | 64362344 | 8  | 8  | 0 | 8.630178238 | 0.00235436  |          |                 |
| 16 | 64475551 | 64475812 | 64475677 | 9  | 12 | 0 | 12.46581301 | 0.000159888 |          | ENSG00000201999 |
| 16 | 65172031 | 65172225 | 65172077 | 8  | 9  | 0 | 9.589086931 | 0.00120187  | CMTM2    | ENSG00000140932 |
| 16 | 65519304 | 65519743 | 65519473 | 27 | 39 | 2 | 12.78544924 | 4.53E-10    | RRAD     | ENSG00000166592 |
| 16 | 66053420 | 66053630 | 66053525 | 8  | 10 | 0 | 10.54799562 | 0.000613541 |          | ENSG00000214430 |
| 16 | 66135824 | 66136216 | 66136017 | 17 | 25 | 0 | 24.93162602 | 2.56E-08    | FAM65A   | ENSG00000039523 |
| 16 | 66267983 | 66268296 | 66268147 | 11 | 15 | 0 | 15.34253909 | 2.13E-05    | C16orf86 | ENSG00000159761 |
| 16 | 66407907 | 66408350 | 66408050 | 10 | 19 | 5 | 3.19636231  | 0.00280933  | TSNAXIP1 | ENSG00000102904 |
| 16 | 66437984 | 66438331 | 66438175 | 9  | 13 | 1 | 6.712360851 | 0.000640982 | NUTF2    | ENSG00000102898 |
| 16 | 66484333 | 66484560 | 66484448 | 10 | 11 | 4 | 2.301380863 | 0.0459276   | PSKH1    | ENSG00000159792 |
| 16 | 66553046 | 66553500 | 66553225 | 16 | 24 | 2 | 7.990905775 | 4.56E-06    | SLC12A4  | ENSG00000124067 |
| 16 | 66557429 | 66558104 | 66557790 | 55 | 85 | 3 | 20.6165369  | 1.06E-21    | SLC12A4  | ENSG00000124067 |
| 16 | 66614579 | 66614793 | 66614728 | 8  | 10 | 2 | 3.515998541 | 0.0136204   | DUS2L    | ENSG00000167264 |
| 16 | 66683032 | 66683504 | 66683268 | 31 | 42 | 6 | 5.890439114 | 6.20E-08    |          | ENSG00000201850 |
| 16 | 66866961 | 66867470 | 66867212 | 21 | 36 | 3 | 8.869905411 | 1.98E-08    |          | ENSG00000210531 |
| 16 | 66920134 | 66920344 | 66920245 | 9  | 10 | 5 | 1.757999271 | 0.121253    |          | ENSG00000222177 |
| 16 | 66984891 | 66985123 | 66985007 | 13 | 14 | 1 | 7.191815198 | 0.00034761  |          | ENSG00000214388 |
| 16 | 66998310 | 66998493 | 66998382 | 8  | 10 | 2 | 3.515998541 | 0.0136204   | SMPD3    | ENSG00000103056 |
| 16 | 67250126 | 67250377 | 67250267 | 11 | 12 | 4 | 2.493162602 | 0.0299057   | CDH3     | ENSG00000062038 |

|    |          |          |          |    |    |    |             |             |        |                 |
|----|----------|----------|----------|----|----|----|-------------|-------------|--------|-----------------|
| 16 | 67259519 | 67259990 | 67259698 | 16 | 27 | 3  | 6.712360851 | 3.92E-06    | CDH3   | ENSG00000062038 |
| 16 | 67295931 | 67296239 | 67296085 | 10 | 13 | 1  | 6.712360851 | 0.000640982 | CDH1   | ENSG00000039068 |
| 16 | 67336056 | 67336485 | 67336361 | 11 | 20 | 8  | 2.237453617 | 0.0160557   |        | ENSG00000200558 |
| 16 | 67341696 | 67341892 | 67341794 | 9  | 10 | 1  | 5.273997812 | 0.00391723  |        | ENSG00000200558 |
| 16 | 67527931 | 67528691 | 67528315 | 39 | 71 | 4  | 13.80828518 | 7.37E-17    |        | ENSG00000203389 |
| 16 | 67987576 | 67987764 | 67987698 | 8  | 9  | 2  | 3.19636231  | 0.0229249   | TERF2  | ENSG00000132604 |
| 16 | 68158560 | 68158893 | 68158736 | 10 | 15 | 5  | 2.557089848 | 0.0169197   |        | ENSG00000223109 |
| 16 | 69047549 | 69047733 | 69047641 | 9  | 9  | 3  | 2.397271733 | 0.0539397   | FUK    | ENSG00000157353 |
| 16 | 69114907 | 69115194 | 69115054 | 12 | 15 | 8  | 1.704726565 | 0.0916153   | COG4   | ENSG00000103051 |
| 16 | 69153100 | 69153327 | 69153213 | 9  | 10 | 7  | 1.318499453 | 0.269217    |        | ENSG00000221066 |
| 16 | 69338252 | 69338584 | 69338418 | 8  | 11 | 0  | 11.50690432 | 0.000313206 |        | ENSG00000214353 |
| 16 | 69370333 | 69370704 | 69370556 | 12 | 18 | 5  | 3.036544195 | 0.0044641   | VAC14  | ENSG00000103043 |
| 16 | 69467811 | 69468154 | 69467985 | 11 | 14 | 15 | 0.8989769   | 0.617119    |        | ENSG00000223316 |
| 16 | 69488169 | 69488374 | 69488224 | 8  | 9  | 3  | 2.397271733 | 0.0539397   |        | ENSG00000223316 |
| 16 | 69530766 | 69531103 | 69530934 | 13 | 18 | 8  | 2.024362796 | 0.0334397   | HYDIN2 | ENSG00000157423 |
| 16 | 69531121 | 69531655 | 69531350 | 11 | 22 | 11 | 1.837908328 | 0.0378204   | HYDIN2 | ENSG00000157423 |
| 16 | 69562874 | 69563143 | 69563018 | 9  | 10 | 7  | 1.318499453 | 0.269217    | HYDIN2 | ENSG00000157423 |
| 16 | 69564424 | 69564618 | 69564521 | 8  | 10 | 7  | 1.318499453 | 0.269217    | HYDIN2 | ENSG00000157423 |
| 16 | 69578624 | 69579089 | 69578842 | 11 | 21 | 22 | 0.917217011 | 0.614252    | HYDIN2 | ENSG00000157423 |
| 16 | 69588976 | 69589217 | 69589096 | 10 | 11 | 4  | 2.301380863 | 0.0459276   | HYDIN2 | ENSG00000157423 |
| 16 | 69590786 | 69590991 | 69590886 | 8  | 8  | 5  | 1.43836304  | 0.235762    | HYDIN2 | ENSG00000157423 |
| 16 | 69591229 | 69591669 | 69591396 | 10 | 17 | 29 | 0.575345216 | 0.971331    | HYDIN2 | ENSG00000157423 |
| 16 | 69600381 | 69600618 | 69600486 | 8  | 9  | 1  | 4.794543465 | 0.00708517  | HYDIN2 | ENSG00000157423 |
| 16 | 69610503 | 69610966 | 69610722 | 14 | 25 | 23 | 1.038817751 | 0.445246    | HYDIN2 | ENSG00000157423 |
| 16 | 69611240 | 69611497 | 69611368 | 9  | 10 | 4  | 2.109599125 | 0.0694668   | HYDIN2 | ENSG00000157423 |
| 16 | 69629400 | 69629641 | 69629520 | 8  | 10 | 11 | 0.878999635 | 0.622439    | HYDIN2 | ENSG00000157423 |
| 16 | 69632011 | 69632426 | 69632258 | 8  | 13 | 6  | 1.917817386 | 0.0693353   | HYDIN2 | ENSG00000157423 |
| 16 | 69633598 | 69633803 | 69633700 | 9  | 10 | 5  | 1.757999271 | 0.121253    | HYDIN2 | ENSG00000157423 |
| 16 | 69645793 | 69645987 | 69645945 | 8  | 8  | 6  | 1.232882605 | 0.333038    | HYDIN2 | ENSG00000157423 |
| 16 | 69654841 | 69655039 | 69654969 | 9  | 10 | 7  | 1.318499453 | 0.269217    | HYDIN2 | ENSG00000157423 |
| 16 | 69664798 | 69664984 | 69664844 | 9  | 9  | 3  | 2.397271733 | 0.0539397   | HYDIN2 | ENSG00000157423 |
| 16 | 69678799 | 69679016 | 69678858 | 8  | 9  | 6  | 1.369869562 | 0.253675    | HYDIN2 | ENSG00000157423 |
| 16 | 69684977 | 69685220 | 69685056 | 10 | 13 | 10 | 1.220429246 | 0.306001    | HYDIN2 | ENSG00000157423 |
| 16 | 69713113 | 69713296 | 69713240 | 9  | 9  | 3  | 2.397271733 | 0.0539397   | HYDIN2 | ENSG00000157423 |

|    |          |          |          |    |    |    |             |             |          |                 |
|----|----------|----------|----------|----|----|----|-------------|-------------|----------|-----------------|
| 16 | 69722496 | 69722792 | 69722647 | 10 | 12 | 3  | 3.116453252 | 0.0131971   | HYDIN2   | ENSG00000157423 |
| 16 | 69725608 | 69726342 | 69726091 | 29 | 54 | 21 | 2.397271733 | 0.000123904 | HYDIN2   | ENSG00000157423 |
| 16 | 69728245 | 69728507 | 69728369 | 8  | 10 | 1  | 5.273997812 | 0.00391723  | HYDIN2   | ENSG00000157423 |
| 16 | 69742635 | 69742857 | 69742766 | 8  | 10 | 9  | 1.054799562 | 0.4492      | HYDIN2   | ENSG00000157423 |
| 16 | 69755099 | 69755284 | 69755172 | 8  | 10 | 3  | 2.636998906 | 0.034203    | HYDIN2   | ENSG00000157423 |
| 16 | 69757280 | 69758057 | 69757548 | 19 | 49 | 9  | 4.794543465 | 6.20E-08    | HYDIN2   | ENSG00000157423 |
| 16 | 69881069 | 69881280 | 69881174 | 13 | 14 | 3  | 3.595907599 | 0.00486913  | FTSJD1   | ENSG00000180917 |
| 16 | 70222293 | 70222496 | 70222421 | 8  | 9  | 3  | 2.397271733 | 0.0539397   | MARVELD3 | ENSG00000140832 |
| 16 | 70314263 | 70314485 | 70314372 | 9  | 11 | 8  | 1.278544924 | 0.28289     | PHLPPL   | ENSG00000040199 |
| 16 | 70400117 | 70400612 | 70400296 | 11 | 20 | 17 | 1.118726809 | 0.361026    | AP1G1    | ENSG00000166747 |
| 16 | 70486530 | 70487103 | 70486709 | 10 | 25 | 6  | 3.56166086  | 0.000408555 | KIAA0174 | ENSG00000182149 |
| 16 | 70599797 | 70600004 | 70599900 | 9  | 10 | 2  | 3.515998541 | 0.0136204   | DHODH    | ENSG00000102967 |
| 16 | 70623818 | 70624052 | 70623950 | 9  | 9  | 2  | 3.19636231  | 0.0229249   | HP       | ENSG00000197711 |
| 16 | 70716405 | 70716609 | 70716475 | 8  | 9  | 3  | 2.397271733 | 0.0539397   | DHX38    | ENSG00000140829 |
| 16 | 71226594 | 71226816 | 71226721 | 8  | 8  | 0  | 8.630178238 | 0.00235436  |          | ENSG00000221286 |
| 16 | 71255534 | 71255782 | 71255689 | 9  | 11 | 5  | 1.917817386 | 0.0843804   |          | ENSG00000221286 |
| 16 | 71578973 | 71579406 | 71579193 | 11 | 19 | 4  | 3.835634772 | 0.00108365  |          | ENSG00000221799 |
| 16 | 71588365 | 71588820 | 71588619 | 15 | 23 | 16 | 1.353753449 | 0.165001    |          | ENSG00000221799 |
| 16 | 71607016 | 71607357 | 71607186 | 11 | 17 | 10 | 1.569123316 | 0.112309    |          | ENSG00000221799 |
| 16 | 71631470 | 71631893 | 71631745 | 12 | 21 | 1  | 10.54799562 | 4.43E-06    | ZFH3     | ENSG00000140836 |
| 16 | 71648320 | 71648602 | 71648454 | 8  | 10 | 3  | 2.636998906 | 0.034203    | ZFH3     | ENSG00000140836 |
| 16 | 71661977 | 71662391 | 71662212 | 12 | 20 | 4  | 4.027416511 | 0.000652226 | ZFH3     | ENSG00000140836 |
| 16 | 71669652 | 71669831 | 71669741 | 8  | 8  | 4  | 1.726035648 | 0.150596    | ZFH3     | ENSG00000140836 |
| 16 | 71763428 | 71763641 | 71763534 | 8  | 8  | 3  | 2.157544559 | 0.0836802   | C16orf47 | ENSG00000197445 |
| 16 | 71763988 | 71764209 | 71764071 | 10 | 11 | 9  | 1.150690432 | 0.367789    | C16orf47 | ENSG00000197445 |
| 16 | 71788116 | 71788382 | 71788249 | 12 | 14 | 2  | 4.794543465 | 0.00154571  | C16orf47 | ENSG00000197445 |
| 16 | 71810654 | 71810926 | 71810798 | 11 | 15 | 0  | 15.34253909 | 2.13E-05    | C16orf47 | ENSG00000197445 |
| 16 | 71883747 | 71883933 | 71883780 | 9  | 10 | 1  | 5.273997812 | 0.00391723  | C16orf47 | ENSG00000197445 |
| 16 | 72167785 | 72168042 | 72167875 | 9  | 10 | 0  | 10.54799562 | 0.000613541 |          | ENSG00000184543 |
| 16 | 72305551 | 72305871 | 72305706 | 12 | 15 | 0  | 15.34253909 | 2.13E-05    |          | ENSG00000184543 |
| 16 | 72326495 | 72326751 | 72326623 | 13 | 13 | 0  | 13.4247217  | 8.16E-05    |          | ENSG00000184543 |
| 16 | 72456329 | 72456589 | 72456458 | 9  | 10 | 0  | 10.54799562 | 0.000613541 |          | ENSG00000184543 |
| 16 | 72470487 | 72470666 | 72470613 | 8  | 8  | 1  | 4.315089119 | 0.0127267   |          | ENSG00000184543 |
| 16 | 72715339 | 72715677 | 72715473 | 13 | 17 | 3  | 4.315089119 | 0.00102271  |          | ENSG00000222127 |

|    |          |          |          |    |    |    |             |             |       |                 |
|----|----------|----------|----------|----|----|----|-------------|-------------|-------|-----------------|
| 16 | 72823813 | 72824085 | 72823943 | 8  | 11 | 1  | 5.753452158 | 0.00215302  | PSMD7 | ENSG00000103035 |
| 16 | 72824376 | 72824670 | 72824523 | 15 | 18 | 4  | 3.643853034 | 0.00178791  | PSMD7 | ENSG00000103035 |
| 16 | 72887388 | 72887643 | 72887515 | 8  | 10 | 3  | 2.636998906 | 0.034203    | PSMD7 | ENSG00000103035 |
| 16 | 72888200 | 72888445 | 72888289 | 10 | 11 | 5  | 1.917817386 | 0.0843804   | PSMD7 | ENSG00000103035 |
| 16 | 72889000 | 72889279 | 72889139 | 8  | 9  | 6  | 1.369869562 | 0.253675    | PSMD7 | ENSG00000103035 |
| 16 | 72889476 | 72889887 | 72889713 | 16 | 24 | 2  | 7.990905775 | 4.56E-06    | PSMD7 | ENSG00000103035 |
| 16 | 73022559 | 73023092 | 73022913 | 40 | 58 | 7  | 7.071951611 | 3.52E-11    |       | ENSG00000140839 |
| 16 | 73180877 | 73181056 | 73180959 | 8  | 8  | 1  | 4.315089119 | 0.0127267   | GLG1  | ENSG00000090863 |
| 16 | 73198715 | 73198947 | 73198851 | 12 | 13 | 4  | 2.684944341 | 0.01921     | GLG1  | ENSG00000090863 |
| 16 | 73321442 | 73321949 | 73321613 | 24 | 38 | 4  | 7.479487806 | 3.22E-08    | MLKL  | ENSG00000168404 |
| 16 | 73324916 | 73325107 | 73325029 | 8  | 8  | 3  | 2.157544559 | 0.0836802   | MLKL  | ENSG00000168404 |
| 16 | 73330886 | 73331397 | 73331149 | 15 | 29 | 0  | 28.76726079 | 1.74E-09    | FA2H  | ENSG00000103089 |
| 16 | 73335137 | 73335334 | 73335206 | 8  | 9  | 4  | 1.917817386 | 0.103282    | FA2H  | ENSG00000103089 |
| 16 | 73335377 | 73335786 | 73335512 | 11 | 19 | 7  | 2.397271733 | 0.0127287   | FA2H  | ENSG00000103089 |
| 16 | 73341259 | 73341492 | 73341349 | 9  | 11 | 6  | 1.643843474 | 0.137712    | FA2H  | ENSG00000103089 |
| 16 | 73404435 | 73404938 | 73404770 | 19 | 29 | 12 | 2.212866215 | 0.00585289  | FA2H  | ENSG00000103089 |
| 16 | 73409485 | 73409684 | 73409584 | 9  | 9  | 5  | 1.598181155 | 0.170911    | FA2H  | ENSG00000103089 |
| 16 | 73454116 | 73454463 | 73454293 | 13 | 16 | 3  | 4.075361945 | 0.00173346  | FA2H  | ENSG00000103089 |
| 16 | 73459108 | 73459444 | 73459287 | 12 | 17 | 1  | 8.630178238 | 5.44E-05    | FA2H  | ENSG00000103089 |
| 16 | 73489149 | 73489377 | 73489227 | 10 | 10 | 2  | 3.515998541 | 0.0136204   | WDR59 | ENSG00000103091 |
| 16 | 73569225 | 73569404 | 73569308 | 8  | 9  | 2  | 3.19636231  | 0.0229249   | WDR59 | ENSG00000103091 |
| 16 | 73576502 | 73576884 | 73576717 | 10 | 16 | 2  | 5.433815927 | 0.000499302 | WDR59 | ENSG00000103091 |
| 16 | 73593637 | 73593816 | 73593726 | 8  | 8  | 3  | 2.157544559 | 0.0836802   | ZNRF1 | ENSG00000186187 |
| 16 | 73617784 | 73618018 | 73617901 | 8  | 11 | 1  | 5.753452158 | 0.00215302  | ZNRF1 | ENSG00000186187 |
| 16 | 73636486 | 73636897 | 73636665 | 9  | 18 | 15 | 1.138704073 | 0.348127    | ZNRF1 | ENSG00000186187 |
| 16 | 73645440 | 73645729 | 73645585 | 9  | 11 | 6  | 1.643843474 | 0.137712    | ZNRF1 | ENSG00000186187 |
| 16 | 73650945 | 73651178 | 73651020 | 9  | 11 | 11 | 0.958908693 | 0.540507    | LDHD  | ENSG00000166816 |
| 16 | 73678110 | 73678327 | 73678218 | 8  | 9  | 5  | 1.598181155 | 0.170911    | LDHD  | ENSG00000166816 |
| 16 | 73678527 | 73678906 | 73678727 | 16 | 23 | 4  | 4.602761727 | 0.000137072 | LDHD  | ENSG00000166816 |
| 16 | 73687785 | 73688077 | 73687931 | 10 | 13 | 7  | 1.678090213 | 0.11195     | LDHD  | ENSG00000166816 |
| 16 | 73688117 | 73688391 | 73688254 | 14 | 16 | 13 | 1.164389127 | 0.333296    | LDHD  | ENSG00000166816 |
| 16 | 73702525 | 73703082 | 73702918 | 12 | 24 | 11 | 1.997726444 | 0.0196649   | LDHD  | ENSG00000166816 |
| 16 | 73739628 | 73739934 | 73739781 | 9  | 14 | 9  | 1.43836304  | 0.179537    | ZFP1  | ENSG00000184517 |
| 16 | 73780670 | 73780878 | 73780813 | 9  | 10 | 2  | 3.515998541 | 0.0136204   |       | ENSG00000213318 |

|    |          |          |          |    |    |    |             |             |                           |
|----|----------|----------|----------|----|----|----|-------------|-------------|---------------------------|
| 16 | 73790772 | 73791060 | 73790916 | 11 | 14 | 8  | 1.598181155 | 0.124586    | ENSG00000213318           |
| 16 | 73859367 | 73859631 | 73859527 | 12 | 13 | 6  | 1.917817386 | 0.0693353   | BCAR1 ENSG00000050820     |
| 16 | 73896436 | 73897439 | 73897048 | 23 | 65 | 20 | 3.013713035 | 8.74E-07    | BCAR1 ENSG00000050820     |
| 16 | 74025869 | 74026102 | 74026026 | 8  | 10 | 9  | 1.054799562 | 0.4492      | CFDP1 ENSG00000153774     |
| 16 | 74055914 | 74056415 | 74056233 | 12 | 24 | 14 | 1.598181155 | 0.0700275   | TMEM170A ENSG00000166822  |
| 16 | 74063172 | 74063522 | 74063343 | 10 | 15 | 8  | 1.704726565 | 0.0916153   | TMEM170A ENSG00000166822  |
| 16 | 74074752 | 74074970 | 74074827 | 10 | 10 | 2  | 3.515998541 | 0.0136204   | CHST6 ENSG00000183196     |
| 16 | 74077388 | 74077823 | 74077635 | 18 | 32 | 3  | 7.910996718 | 2.12E-07    | CHST6 ENSG00000183196     |
| 16 | 74111340 | 74111591 | 74111473 | 17 | 18 | 1  | 9.109632584 | 2.91E-05    | CHST5 ENSG00000135702     |
| 16 | 74139677 | 74139897 | 74139812 | 8  | 9  | 3  | 2.397271733 | 0.0539397   | ENSG00000205084           |
| 16 | 74146591 | 74147000 | 74146678 | 10 | 17 | 11 | 1.43836304  | 0.15834     | ENSG00000205084           |
| 16 | 74156390 | 74156737 | 74156563 | 19 | 25 | 6  | 3.56166086  | 0.000408555 | GABARAPL: ENSG00000034713 |
| 16 | 74158230 | 74158651 | 74158489 | 11 | 20 | 14 | 1.34247217  | 0.186867    | GABARAPL: ENSG00000034713 |
| 16 | 74160020 | 74160212 | 74160140 | 8  | 9  | 5  | 1.598181155 | 0.170911    | GABARAPL: ENSG00000034713 |
| 16 | 74194766 | 74194945 | 74194806 | 8  | 8  | 2  | 2.876726079 | 0.0381137   | ADAT1 ENSG00000065457     |
| 16 | 74197649 | 74197864 | 74197756 | 9  | 9  | 1  | 4.794543465 | 0.00708517  | ADAT1 ENSG00000065457     |
| 16 | 74212642 | 74212856 | 74212736 | 11 | 12 | 6  | 1.78083043  | 0.0985525   | ADAT1 ENSG00000065457     |
| 16 | 74214584 | 74215062 | 74214763 | 13 | 22 | 2  | 7.351633313 | 1.51E-05    | ADAT1 ENSG00000065457     |
| 16 | 74238492 | 74238697 | 74238618 | 8  | 8  | 8  | 0.958908693 | 0.534974    | KARS ENSG00000065427      |
| 16 | 74238880 | 74239571 | 74239275 | 9  | 26 | 15 | 1.61815842  | 0.0584619   | TERF2IP ENSG00000166848   |
| 16 | 74259918 | 74260380 | 74260097 | 21 | 29 | 5  | 4.794543465 | 1.89E-05    | TERF2IP ENSG00000166848   |
| 16 | 74293537 | 74293745 | 74293641 | 8  | 8  | 2  | 2.876726079 | 0.0381137   | ENSG00000214325           |
| 16 | 74361239 | 74361456 | 74361372 | 9  | 10 | 2  | 3.515998541 | 0.0136204   | ENSG00000213308           |
| 16 | 74494765 | 74495213 | 74495003 | 40 | 56 | 4  | 10.9315591  | 7.30E-13    | ENSG00000199299           |
| 16 | 74818054 | 74818268 | 74818131 | 8  | 8  | 4  | 1.726035648 | 0.150596    | ENSG00000213307           |
| 16 | 75771231 | 75771465 | 75771348 | 9  | 10 | 6  | 1.506856518 | 0.188853    | MON1B ENSG00000103111     |
| 16 | 75827466 | 75827713 | 75827582 | 10 | 12 | 5  | 2.077635502 | 0.0577144   | ENSG00000205078           |
| 16 | 75942021 | 75942200 | 75942110 | 9  | 9  | 1  | 4.794543465 | 0.00708517  | ADAMTS18 ENSG00000140873  |
| 16 | 76034703 | 76035038 | 76034870 | 8  | 14 | 4  | 2.876726079 | 0.01219     | ENSG00000216131           |
| 16 | 76048459 | 76048854 | 76048619 | 22 | 30 | 0  | 29.72616948 | 8.86E-10    | ENSG00000216131           |
| 16 | 76175644 | 76176110 | 76175823 | 11 | 20 | 7  | 2.517135319 | 0.00849957  | ENSG00000221226           |
| 16 | 76267231 | 76267444 | 76267306 | 9  | 12 | 1  | 6.232906505 | 0.00117736  | ENSG00000221226           |
| 16 | 76374177 | 76374520 | 76374312 | 11 | 15 | 7  | 1.917817386 | 0.0572317   | VAT1L ENSG00000171724     |
| 16 | 76496728 | 76497295 | 76497116 | 19 | 39 | 6  | 5.479478246 | 3.16E-07    | CLEC3A ENSG00000166509    |

|    |          |          |          |     |     |    |             |             |          |                 |
|----|----------|----------|----------|-----|-----|----|-------------|-------------|----------|-----------------|
| 16 | 76536271 | 76536533 | 76536388 | 8   | 11  | 0  | 11.50690432 | 0.000313206 | CLEC3A   | ENSG00000166509 |
| 16 | 76569834 | 76570435 | 76570190 | 13  | 28  | 6  | 3.972621728 | 9.48E-05    | CLEC3A   | ENSG00000166509 |
| 16 | 76583001 | 76583769 | 76583227 | 181 | 253 | 4  | 48.71256161 | 7.09E-68    | CLEC3A   | ENSG00000166509 |
| 16 | 76584396 | 76584778 | 76584726 | 8   | 15  | 4  | 3.068507818 | 0.0076507   | CLEC3A   | ENSG00000166509 |
| 16 | 76587184 | 76587811 | 76587431 | 96  | 139 | 9  | 13.4247217  | 1.77E-30    | CLEC3A   | ENSG00000166509 |
| 16 | 76594297 | 76594638 | 76594467 | 13  | 18  | 5  | 3.036544195 | 0.0044641   | CLEC3A   | ENSG00000166509 |
| 16 | 76641994 | 76642207 | 76642100 | 9   | 11  | 2  | 3.835634772 | 0.00800699  | CLEC3A   | ENSG00000166509 |
| 16 | 76663948 | 76664133 | 76663972 | 8   | 9   | 7  | 1.198635866 | 0.346278    | WVVOX    | ENSG00000186153 |
| 16 | 76690552 | 76691070 | 76690898 | 11  | 21  | 6  | 3.013713035 | 0.00261913  | WVVOX    | ENSG00000186153 |
| 16 | 76696957 | 76697203 | 76697080 | 10  | 10  | 3  | 2.636998906 | 0.034203    | WVVOX    | ENSG00000186153 |
| 16 | 76725414 | 76725598 | 76725506 | 8   | 9   | 7  | 1.198635866 | 0.346278    | WVVOX    | ENSG00000186153 |
| 16 | 76812087 | 76812301 | 76812179 | 9   | 9   | 2  | 3.19636231  | 0.0229249   | WVVOX    | ENSG00000186153 |
| 16 | 76826623 | 76826827 | 76826708 | 8   | 8   | 3  | 2.157544559 | 0.0836802   | WVVOX    | ENSG00000186153 |
| 16 | 77248579 | 77248758 | 77248668 | 8   | 9   | 1  | 4.794543465 | 0.00708517  | WVVOX    | ENSG00000186153 |
| 16 | 77266790 | 77267029 | 77266911 | 9   | 9   | 2  | 3.19636231  | 0.0229249   | WVVOX    | ENSG00000186153 |
| 16 | 77387596 | 77387782 | 77387689 | 8   | 9   | 3  | 2.397271733 | 0.0539397   | WVVOX    | ENSG00000186153 |
| 16 | 78122287 | 78122473 | 78122380 | 8   | 9   | 7  | 1.198635866 | 0.346278    | MAF      | ENSG00000178573 |
| 16 | 78231335 | 78231640 | 78231487 | 10  | 13  | 5  | 2.237453617 | 0.038866    |          | ENSG00000221330 |
| 16 | 78618330 | 78618772 | 78618597 | 52  | 65  | 4  | 12.65759475 | 2.99E-15    |          | ENSG00000221330 |
| 16 | 78696592 | 78696876 | 78696734 | 10  | 12  | 2  | 4.155271003 | 0.0046638   |          | ENSG00000221330 |
| 16 | 78822557 | 78822750 | 78822641 | 8   | 8   | 5  | 1.43836304  | 0.235762    | DYNLRB2  | ENSG00000168589 |
| 16 | 79011876 | 79012055 | 79011980 | 8   | 8   | 0  | 8.630178238 | 0.00235436  | DYNLRB2  | ENSG00000168589 |
| 16 | 79095740 | 79096143 | 79095964 | 8   | 14  | 3  | 3.595907599 | 0.00486913  | DYNLRB2  | ENSG00000168589 |
| 16 | 79113397 | 79113651 | 79113560 | 8   | 11  | 0  | 11.50690432 | 0.000313206 | DYNLRB2  | ENSG00000168589 |
| 16 | 79205295 | 79205873 | 79205523 | 21  | 38  | 14 | 2.493162602 | 0.000683772 | DYNLRB2  | ENSG00000168589 |
| 16 | 79207161 | 79207391 | 79207266 | 10  | 11  | 8  | 1.278544924 | 0.28289     | DYNLRB2  | ENSG00000168589 |
| 16 | 79211261 | 79211554 | 79211426 | 10  | 13  | 8  | 1.491635745 | 0.166708    | DYNLRB2  | ENSG00000168589 |
| 16 | 79309892 | 79310179 | 79310015 | 14  | 17  | 4  | 3.452071295 | 0.00292757  | CDYL2    | ENSG00000166446 |
| 16 | 79342575 | 79342985 | 79342724 | 15  | 23  | 6  | 3.287686948 | 0.00104919  | CDYL2    | ENSG00000166446 |
| 16 | 79429023 | 79429334 | 79429178 | 9   | 14  | 6  | 2.054804342 | 0.0480281   | CDYL2    | ENSG00000166446 |
| 16 | 79491734 | 79491932 | 79491783 | 9   | 10  | 6  | 1.506856518 | 0.188853    | CDYL2    | ENSG00000166446 |
| 16 | 79667925 | 79668156 | 79668040 | 9   | 12  | 5  | 2.077635502 | 0.0577144   | C16orf46 | ENSG00000166455 |
| 16 | 79728179 | 79728362 | 79728286 | 8   | 8   | 5  | 1.43836304  | 0.235762    | PKD1L2   | ENSG00000166473 |
| 16 | 79766467 | 79766791 | 79766627 | 8   | 12  | 5  | 2.077635502 | 0.0577144   | PKD1L2   | ENSG00000166473 |

|    |          |          |          |    |    |   |             |             |          |                 |
|----|----------|----------|----------|----|----|---|-------------|-------------|----------|-----------------|
| 16 | 79772367 | 79772623 | 79772462 | 11 | 14 | 4 | 2.876726079 | 0.01219     | PKD1L2   | ENSG00000166473 |
| 16 | 79847363 | 79847622 | 79847516 | 8  | 11 | 2 | 3.835634772 | 0.00800699  | BCMO1    | ENSG00000135697 |
| 16 | 79868876 | 79869080 | 79868950 | 8  | 9  | 6 | 1.369869562 | 0.253675    | GAN      | ENSG00000127688 |
| 16 | 79919013 | 79919194 | 79919113 | 8  | 8  | 1 | 4.315089119 | 0.0127267   | GAN      | ENSG00000127688 |
| 16 | 80090743 | 80091288 | 80090922 | 35 | 57 | 6 | 7.945243457 | 1.33E-11    |          | ENSG00000213288 |
| 16 | 80096050 | 80096387 | 80096218 | 14 | 17 | 8 | 1.917817386 | 0.0474153   |          | ENSG00000213288 |
| 16 | 80142593 | 80142772 | 80142694 | 8  | 9  | 6 | 1.369869562 | 0.253675    |          | ENSG00000153815 |
| 16 | 80176967 | 80177171 | 80177069 | 8  | 9  | 1 | 4.794543465 | 0.00708517  |          | ENSG00000153815 |
| 16 | 80214509 | 80214798 | 80214653 | 9  | 11 | 5 | 1.917817386 | 0.0843804   |          | ENSG00000153815 |
| 16 | 80275631 | 80275836 | 80275783 | 8  | 9  | 2 | 3.19636231  | 0.0229249   |          | ENSG00000153815 |
| 16 | 80314336 | 80314603 | 80314469 | 9  | 12 | 6 | 1.78083043  | 0.0985525   | PLCG2    | ENSG00000197943 |
| 16 | 80368562 | 80368760 | 80368604 | 8  | 9  | 0 | 9.589086931 | 0.00120187  | PLCG2    | ENSG00000197943 |
| 16 | 80399427 | 80399614 | 80399541 | 8  | 9  | 1 | 4.794543465 | 0.00708517  | PLCG2    | ENSG00000197943 |
| 16 | 80401986 | 80402462 | 80402317 | 10 | 18 | 2 | 6.073088389 | 0.000157975 | PLCG2    | ENSG00000197943 |
| 16 | 80481271 | 80481830 | 80481584 | 8  | 17 | 4 | 3.452071295 | 0.00292757  |          | ENSG00000200543 |
| 16 | 80703109 | 80703360 | 80703234 | 8  | 10 | 0 | 10.54799562 | 0.000613541 |          | ENSG00000210827 |
| 16 | 80778627 | 80778930 | 80778778 | 8  | 12 | 2 | 4.155271003 | 0.0046638   | MPHOSPH6 | ENSG00000135698 |
| 16 | 80921031 | 80921271 | 80921192 | 8  | 9  | 4 | 1.917817386 | 0.103282    |          | ENSG00000210858 |
| 16 | 80935390 | 80935592 | 80935536 | 9  | 11 | 2 | 3.835634772 | 0.00800699  |          | ENSG00000210858 |
| 16 | 81114784 | 81115012 | 81114898 | 9  | 11 | 2 | 3.835634772 | 0.00800699  |          | ENSG00000210858 |
| 16 | 81221981 | 81222249 | 81222115 | 8  | 11 | 2 | 3.835634772 | 0.00800699  |          | ENSG00000210858 |
| 16 | 81717343 | 81717714 | 81717522 | 18 | 25 | 0 | 24.93162602 | 2.56E-08    |          | ENSG00000210864 |
| 16 | 81844773 | 81844988 | 81844911 | 9  | 9  | 2 | 3.19636231  | 0.0229249   |          | ENSG00000222299 |
| 16 | 81855250 | 81855429 | 81855339 | 8  | 8  | 1 | 4.315089119 | 0.0127267   |          | ENSG00000222299 |
| 16 | 82152976 | 82153160 | 82153068 | 8  | 8  | 7 | 1.07877228  | 0.435076    |          | ENSG00000222299 |
| 16 | 82211909 | 82212117 | 82211961 | 8  | 8  | 1 | 4.315089119 | 0.0127267   | HSBP1    | ENSG00000166530 |
| 16 | 82227585 | 82228437 | 82228199 | 49 | 84 | 3 | 20.37680973 | 2.02E-21    | HSBP1    | ENSG00000166530 |
| 16 | 82252849 | 82253094 | 82252974 | 14 | 14 | 0 | 14.3836304  | 4.17E-05    | HSBP1    | ENSG00000166530 |
| 16 | 82393324 | 82393597 | 82393457 | 15 | 16 | 5 | 2.716907964 | 0.0109645   | HSBP1    | ENSG00000166530 |
| 16 | 82399077 | 82399291 | 82399165 | 8  | 9  | 2 | 3.19636231  | 0.0229249   | HSBP1    | ENSG00000166530 |
| 16 | 82417228 | 82417485 | 82417356 | 8  | 10 | 4 | 2.109599125 | 0.0694668   | HSBP1    | ENSG00000166530 |
| 16 | 82438714 | 82439191 | 82438919 | 46 | 68 | 8 | 7.351633313 | 5.58E-13    | HSBP1    | ENSG00000166530 |
| 16 | 82470015 | 82470222 | 82470118 | 10 | 11 | 5 | 1.917817386 | 0.0843804   | MLYCD    | ENSG00000103150 |
| 16 | 82545345 | 82545600 | 82545472 | 10 | 10 | 8 | 1.171999514 | 0.35773     | OSGIN1   | ENSG00000140961 |



|    |          |          |          |    |    |    |             |             |          |                 |
|----|----------|----------|----------|----|----|----|-------------|-------------|----------|-----------------|
| 16 | 82547956 | 82548232 | 82548094 | 9  | 11 | 8  | 1.278544924 | 0.28289     | OSGIN1   | ENSG00000140961 |
| 16 | 82653888 | 82654079 | 82653932 | 9  | 9  | 0  | 9.589086931 | 0.00120187  | SLC38A8  | ENSG00000166558 |
| 16 | 82687753 | 82688018 | 82687885 | 10 | 12 | 4  | 2.493162602 | 0.0299057   | MBTPS1   | ENSG00000140943 |
| 16 | 82694876 | 82695083 | 82694998 | 11 | 11 | 3  | 2.876726079 | 0.0213797   | MBTPS1   | ENSG00000140943 |
| 16 | 82695495 | 82695742 | 82695621 | 9  | 11 | 7  | 1.43836304  | 0.204844    | MBTPS1   | ENSG00000140943 |
| 16 | 82697691 | 82698036 | 82697805 | 8  | 13 | 6  | 1.917817386 | 0.0693353   | MBTPS1   | ENSG00000140943 |
| 16 | 82708544 | 82708820 | 82708642 | 9  | 12 | 4  | 2.493162602 | 0.0299057   | MBTPS1   | ENSG00000140943 |
| 16 | 82729743 | 82729956 | 82729854 | 8  | 8  | 5  | 1.43836304  | 0.235762    | HSDL1    | ENSG00000103160 |
| 16 | 82768131 | 82768493 | 82768384 | 11 | 15 | 4  | 3.068507818 | 0.0076507   | TAF1C    | ENSG00000103168 |
| 16 | 83102309 | 83102780 | 83102601 | 11 | 22 | 12 | 1.696530765 | 0.057768    | KIAA1609 | ENSG00000140950 |
| 16 | 83294926 | 83295194 | 83295060 | 8  | 12 | 5  | 2.077635502 | 0.0577144   | USP10    | ENSG00000103194 |
| 16 | 83316886 | 83317464 | 83317288 | 12 | 24 | 8  | 2.663635258 | 0.00328036  | USP10    | ENSG00000103194 |
| 16 | 83321585 | 83321819 | 83321758 | 18 | 20 | 5  | 3.356180426 | 0.0017534   | USP10    | ENSG00000103194 |
| 16 | 83329527 | 83329973 | 83329807 | 8  | 16 | 7  | 2.037680973 | 0.0400399   | USP10    | ENSG00000103194 |
| 16 | 83433679 | 83433927 | 83433812 | 8  | 9  | 2  | 3.19636231  | 0.0229249   | CRISPLD2 | ENSG00000103196 |
| 16 | 83442414 | 83442623 | 83442532 | 10 | 11 | 2  | 3.835634772 | 0.00800699  | CRISPLD2 | ENSG00000103196 |
| 16 | 83476070 | 83476319 | 83476186 | 8  | 9  | 3  | 2.397271733 | 0.0539397   |          | ENSG00000213275 |
| 16 | 83543389 | 83543626 | 83543512 | 10 | 13 | 6  | 1.917817386 | 0.0693353   |          | ENSG00000213275 |
| 16 | 83585928 | 83586152 | 83586040 | 11 | 13 | 2  | 4.474907234 | 0.00269459  | ZDHHC7   | ENSG00000153786 |
| 16 | 83590227 | 83590804 | 83590511 | 20 | 34 | 11 | 2.796817021 | 0.000446021 | ZDHHC7   | ENSG00000153786 |
| 16 | 83620665 | 83621016 | 83620845 | 24 | 29 | 2  | 9.589086931 | 2.21E-07    | KIAA0513 | ENSG00000135709 |
| 16 | 83677863 | 83678202 | 83678072 | 9  | 14 | 4  | 2.876726079 | 0.01219     | FAM92B   | ENSG00000153789 |
| 16 | 83689124 | 83689360 | 83689251 | 9  | 11 | 0  | 11.50690432 | 0.000313206 | FAM92B   | ENSG00000153789 |
| 16 | 83708885 | 83709162 | 83709023 | 14 | 17 | 3  | 4.315089119 | 0.00102271  | FAM92B   | ENSG00000153789 |
| 16 | 83734978 | 83735661 | 83735232 | 19 | 45 | 7  | 5.513724985 | 4.52E-08    | FAM92B   | ENSG00000153789 |
| 16 | 83738404 | 83738865 | 83738583 | 9  | 16 | 8  | 1.811271976 | 0.0663685   | FAM92B   | ENSG00000153789 |
| 16 | 83743866 | 83744077 | 83743978 | 8  | 10 | 1  | 5.273997812 | 0.00391723  | FAM92B   | ENSG00000153789 |
| 16 | 83780349 | 83780547 | 83780413 | 8  | 10 | 1  | 5.273997812 | 0.00391723  | FAM92B   | ENSG00000153789 |
| 16 | 83795400 | 83795592 | 83795496 | 9  | 9  | 4  | 1.917817386 | 0.103282    | TMEM148  | ENSG00000179219 |
| 16 | 83836845 | 83837133 | 83836989 | 8  | 11 | 4  | 2.301380863 | 0.0459276   | TMEM148  | ENSG00000179219 |
| 16 | 83881429 | 83881654 | 83881519 | 8  | 9  | 3  | 2.397271733 | 0.0539397   | TMEM148  | ENSG00000179219 |
| 16 | 83907604 | 83907859 | 83907731 | 8  | 12 | 1  | 6.232906505 | 0.00117736  |          | ENSG00000220991 |
| 16 | 83940745 | 83941090 | 83940913 | 8  | 13 | 8  | 1.491635745 | 0.166708    |          | ENSG00000220991 |
| 16 | 83942115 | 83942498 | 83942299 | 14 | 23 | 14 | 1.534253909 | 0.0910901   |          | ENSG00000220991 |

|    |          |          |          |    |    |    |             |             |          |                 |
|----|----------|----------|----------|----|----|----|-------------|-------------|----------|-----------------|
| 16 | 83951688 | 83951892 | 83951790 | 8  | 9  | 0  | 9.589086931 | 0.00120187  |          | ENSG00000220991 |
| 16 | 83956371 | 83956797 | 83956550 | 25 | 37 | 5  | 6.073088389 | 2.49E-07    |          | ENSG00000220991 |
| 16 | 83975873 | 83976397 | 83976139 | 19 | 35 | 3  | 8.630178238 | 3.59E-08    |          | ENSG00000220991 |
| 16 | 84007547 | 84007888 | 84007714 | 12 | 17 | 10 | 1.569123316 | 0.112309    |          | ENSG00000220991 |
| 16 | 84053306 | 84053734 | 84053609 | 12 | 17 | 4  | 3.452071295 | 0.00292757  |          | ENSG00000220991 |
| 16 | 84062999 | 84063429 | 84063216 | 14 | 24 | 12 | 1.844055179 | 0.0315307   | KIAA0182 | ENSG00000131149 |
| 16 | 84083171 | 84083389 | 84083253 | 11 | 12 | 5  | 2.077635502 | 0.0577144   | KIAA0182 | ENSG00000131149 |
| 16 | 84111912 | 84112227 | 84112059 | 17 | 19 | 13 | 1.369869562 | 0.177863    | KIAA0182 | ENSG00000131149 |
| 16 | 84112250 | 84112433 | 84112285 | 8  | 8  | 13 | 0.616441303 | 0.878084    | KIAA0182 | ENSG00000131149 |
| 16 | 84116247 | 84116451 | 84116339 | 8  | 8  | 2  | 2.876726079 | 0.0381137   | KIAA0182 | ENSG00000131149 |
| 16 | 84149346 | 84149647 | 84149496 | 12 | 15 | 1  | 7.671269544 | 0.000187863 | KIAA0182 | ENSG00000131149 |
| 16 | 84202989 | 84203355 | 84203168 | 14 | 21 | 2  | 7.031997082 | 2.73E-05    | KIAA0182 | ENSG00000131149 |
| 16 | 84204160 | 84204456 | 84204311 | 10 | 12 | 5  | 2.077635502 | 0.0577144   | KIAA0182 | ENSG00000131149 |
| 16 | 84206185 | 84206474 | 84206301 | 9  | 13 | 11 | 1.118726809 | 0.38479     | KIAA0182 | ENSG00000131149 |
| 16 | 84250948 | 84251150 | 84251095 | 10 | 11 | 6  | 1.643843474 | 0.137712    |          | ENSG00000222516 |
| 16 | 84368953 | 84369273 | 84369113 | 12 | 16 | 3  | 4.075361945 | 0.00173346  | COX4NB   | ENSG00000131148 |
| 16 | 84390602 | 84390855 | 84390714 | 11 | 12 | 2  | 4.155271003 | 0.0046638   | COX4I1   | ENSG00000131143 |
| 16 | 84391244 | 84391488 | 84391366 | 11 | 12 | 2  | 4.155271003 | 0.0046638   | COX4I1   | ENSG00000131143 |
| 16 | 84410406 | 84410599 | 84410496 | 8  | 8  | 6  | 1.232882605 | 0.333038    |          | ENSG00000214259 |
| 16 | 84412126 | 84412380 | 84412253 | 10 | 12 | 3  | 3.116453252 | 0.0131971   |          | ENSG00000214259 |
| 16 | 84412681 | 84412983 | 84412837 | 10 | 12 | 7  | 1.558226626 | 0.152813    |          | ENSG00000214259 |
| 16 | 84482476 | 84482871 | 84482633 | 10 | 17 | 4  | 3.452071295 | 0.00292757  | IRF8     | ENSG00000140968 |
| 16 | 84514295 | 84514495 | 84514393 | 8  | 9  | 1  | 4.794543465 | 0.00708517  | IRF8     | ENSG00000140968 |
| 16 | 84716301 | 84716798 | 84716514 | 17 | 30 | 2  | 9.908723162 | 1.20E-07    |          | ENSG00000199949 |
| 16 | 85093445 | 85093922 | 85093673 | 37 | 50 | 9  | 4.890434335 | 3.71E-08    | FOXF1    | ENSG00000103241 |
| 16 | 85216294 | 85216620 | 85216469 | 17 | 21 | 4  | 4.219198249 | 0.000390041 | FOXL1    | ENSG00000176678 |
| 16 | 85356654 | 85356962 | 85356815 | 10 | 12 | 0  | 12.46581301 | 0.000159888 | FOXL1    | ENSG00000176678 |
| 16 | 85435857 | 85436262 | 85436036 | 27 | 36 | 6  | 5.068517378 | 1.56E-06    | FOXL1    | ENSG00000176678 |
| 16 | 85493119 | 85493387 | 85493270 | 8  | 11 | 5  | 1.917817386 | 0.0843804   | FOXL1    | ENSG00000176678 |
| 16 | 85530893 | 85531126 | 85530999 | 8  | 9  | 1  | 4.794543465 | 0.00708517  | FOXL1    | ENSG00000176678 |
| 16 | 85798123 | 85798454 | 85798288 | 9  | 12 | 2  | 4.155271003 | 0.0046638   |          | ENSG00000210934 |
| 16 | 85869777 | 85870068 | 85869891 | 10 | 13 | 4  | 2.684944341 | 0.01921     |          | ENSG00000210934 |
| 16 | 85908028 | 85908218 | 85908123 | 8  | 9  | 7  | 1.198635866 | 0.346278    |          | ENSG00000131152 |
| 16 | 85908881 | 85909099 | 85908936 | 8  | 11 | 1  | 5.753452158 | 0.00215302  |          | ENSG00000131152 |

|    |          |          |          |    |    |    |             |             |          |                 |
|----|----------|----------|----------|----|----|----|-------------|-------------|----------|-----------------|
| 16 | 85915739 | 85915971 | 85915857 | 8  | 9  | 4  | 1.917817386 | 0.103282    |          | ENSG00000131152 |
| 16 | 85975017 | 85975431 | 85975155 | 11 | 19 | 10 | 1.743470351 | 0.0622604   | FBXO31   | ENSG00000103264 |
| 16 | 85979723 | 85979930 | 85979849 | 8  | 9  | 3  | 2.397271733 | 0.0539397   | MAP1LC3B | ENSG00000140941 |
| 16 | 86052627 | 86052835 | 86052748 | 9  | 11 | 4  | 2.301380863 | 0.0459276   | ZCCHC14  | ENSG00000140948 |
| 16 | 86360400 | 86360628 | 86360517 | 8  | 9  | 5  | 1.598181155 | 0.170911    | KLHDC4   | ENSG00000104731 |
| 16 | 86368672 | 86369279 | 86369149 | 12 | 30 | 12 | 2.286628422 | 0.0040739   | KLHDC4   | ENSG00000104731 |
| 16 | 86370154 | 86370549 | 86370318 | 9  | 15 | 5  | 2.557089848 | 0.0169197   | KLHDC4   | ENSG00000104731 |
| 16 | 86380670 | 86381439 | 86381132 | 14 | 42 | 14 | 2.748871587 | 0.000142169 | KLHDC4   | ENSG00000104731 |
| 16 | 86398055 | 86398429 | 86398218 | 11 | 17 | 10 | 1.569123316 | 0.112309    | KLHDC4   | ENSG00000104731 |
| 16 | 86425756 | 86426011 | 86425883 | 8  | 10 | 2  | 3.515998541 | 0.0136204   | SLC7A5   | ENSG00000103257 |
| 16 | 86441275 | 86441491 | 86441351 | 8  | 9  | 1  | 4.794543465 | 0.00708517  | SLC7A5   | ENSG00000103257 |
| 16 | 86443486 | 86443697 | 86443553 | 8  | 11 | 2  | 3.835634772 | 0.00800699  | SLC7A5   | ENSG00000103257 |
| 16 | 86444494 | 86445028 | 86444788 | 43 | 70 | 13 | 4.863036943 | 1.32E-10    | SLC7A5   | ENSG00000103257 |
| 16 | 86445263 | 86445774 | 86445647 | 13 | 23 | 9  | 2.301380863 | 0.00938618  | SLC7A5   | ENSG00000103257 |
| 16 | 86462690 | 86462998 | 86462844 | 13 | 15 | 10 | 1.394776281 | 0.191426    | SLC7A5   | ENSG00000103257 |
| 16 | 86516466 | 86516757 | 86516588 | 17 | 20 | 0  | 20.13708255 | 7.37E-07    | CA5A     | ENSG00000174990 |
| 16 | 86536869 | 86537142 | 86536992 | 14 | 17 | 2  | 5.753452158 | 0.000281509 | BANP     | ENSG00000172530 |
| 16 | 86541911 | 86542196 | 86542018 | 10 | 14 | 12 | 1.106433107 | 0.392094    | BANP     | ENSG00000172530 |
| 16 | 86542205 | 86542420 | 86542267 | 11 | 11 | 6  | 1.643843474 | 0.137712    | BANP     | ENSG00000172530 |
| 16 | 86710091 | 86710304 | 86710201 | 8  | 10 | 5  | 1.757999271 | 0.121253    |          | ENSG00000205037 |
| 16 | 86976286 | 86976673 | 86976475 | 18 | 27 | 5  | 4.474907234 | 5.37E-05    | ZFPM1    | ENSG00000179588 |
| 16 | 87045049 | 87045392 | 87045220 | 8  | 12 | 1  | 6.232906505 | 0.00117736  | ZFPM1    | ENSG00000179588 |
| 16 | 87047900 | 87048094 | 87047997 | 8  | 8  | 2  | 2.876726079 | 0.0381137   | ZFPM1    | ENSG00000179588 |
| 16 | 87048962 | 87049214 | 87049106 | 10 | 11 | 2  | 3.835634772 | 0.00800699  | ZFPM1    | ENSG00000179588 |
| 16 | 87104311 | 87104613 | 87104457 | 16 | 19 | 3  | 4.794543465 | 0.000349205 | ZFPM1    | ENSG00000179588 |
| 16 | 87331408 | 87331694 | 87331563 | 9  | 11 | 3  | 2.876726079 | 0.0213797   |          | ENSG00000197539 |
| 16 | 87341750 | 87342232 | 87341945 | 9  | 18 | 11 | 1.518272097 | 0.122037    |          | ENSG00000182376 |
| 16 | 87364805 | 87365157 | 87364981 | 8  | 14 | 5  | 2.397271733 | 0.0258078   |          | ENSG00000182376 |
| 16 | 87501905 | 87502091 | 87501949 | 8  | 9  | 4  | 1.917817386 | 0.103282    |          | ENSG00000205018 |
| 16 | 87519166 | 87519454 | 87519310 | 10 | 14 | 9  | 1.43836304  | 0.179537    |          | ENSG00000205018 |
| 16 | 87716234 | 87716650 | 87716335 | 14 | 23 | 5  | 3.835634772 | 0.000408054 | ACSF3    | ENSG00000176715 |
| 16 | 87744093 | 87744353 | 87744210 | 15 | 15 | 2  | 5.114179696 | 0.00088103  | C16orf81 | ENSG00000180422 |
| 16 | 87764636 | 87764829 | 87764762 | 8  | 8  | 1  | 4.315089119 | 0.0127267   | CDH15    | ENSG00000129910 |
| 16 | 87834753 | 87835034 | 87834893 | 12 | 15 | 6  | 2.191791298 | 0.0328001   |          | ENSG00000205014 |

|    |          |          |          |     |     |    |             |             |          |                 |
|----|----------|----------|----------|-----|-----|----|-------------|-------------|----------|-----------------|
| 16 | 87835256 | 87835563 | 87835409 | 8   | 11  | 1  | 5.753452158 | 0.00215302  |          | ENSG00000205014 |
| 16 | 87912641 | 87912867 | 87912696 | 11  | 12  | 2  | 4.155271003 | 0.0046638   | ANKRD11  | ENSG00000167522 |
| 16 | 87913016 | 87913370 | 87913231 | 13  | 18  | 4  | 3.643853034 | 0.00178791  | ANKRD11  | ENSG00000167522 |
| 16 | 87914110 | 87914547 | 87914400 | 11  | 17  | 10 | 1.569123316 | 0.112309    | ANKRD11  | ENSG00000167522 |
| 16 | 87964082 | 87964541 | 87964258 | 11  | 18  | 5  | 3.036544195 | 0.0044641   |          | ENSG00000210946 |
| 16 | 87998430 | 87998728 | 87998592 | 8   | 11  | 2  | 3.835634772 | 0.00800699  |          | ENSG00000210946 |
| 16 | 88035779 | 88036670 | 88036147 | 62  | 93  | 10 | 8.19431065  | 8.22E-18    | ANKRD11  | ENSG00000167522 |
| 16 | 88037386 | 88037727 | 88037553 | 12  | 17  | 5  | 2.876726079 | 0.00703033  | ANKRD11  | ENSG00000167522 |
| 16 | 88050552 | 88050735 | 88050659 | 8   | 8   | 6  | 1.232882605 | 0.333038    | ANKRD11  | ENSG00000167522 |
| 16 | 88052368 | 88053252 | 88052575 | 162 | 204 | 6  | 28.08232601 | 2.22E-51    | ANKRD11  | ENSG00000167522 |
| 16 | 88072646 | 88072885 | 88072765 | 12  | 14  | 4  | 2.876726079 | 0.01219     | ANKRD11  | ENSG00000167522 |
| 16 | 88159475 | 88159805 | 88159641 | 10  | 14  | 11 | 1.198635866 | 0.315918    |          | ENSG00000200084 |
| 16 | 88194105 | 88194626 | 88194492 | 12  | 23  | 5  | 3.835634772 | 0.000408054 | DPEP1    | ENSG00000015413 |
| 16 | 88226981 | 88227161 | 88227091 | 8   | 8   | 2  | 2.876726079 | 0.0381137   | DPEP1    | ENSG00000015413 |
| 16 | 88294190 | 88294392 | 88294291 | 10  | 11  | 8  | 1.278544924 | 0.28289     | SPATA2L  | ENSG00000158792 |
| 16 | 88299963 | 88300240 | 88300070 | 9   | 11  | 3  | 2.876726079 | 0.0213797   | SPATA2L  | ENSG00000158792 |
| 16 | 88389561 | 88389740 | 88389673 | 8   | 8   | 2  | 2.876726079 | 0.0381137   | FANCA    | ENSG00000187741 |
| 16 | 88416392 | 88416604 | 88416523 | 8   | 8   | 4  | 1.726035648 | 0.150596    | SPIRE2   | ENSG00000204991 |
| 16 | 88431735 | 88431990 | 88431864 | 8   | 10  | 7  | 1.318499453 | 0.269217    | SPIRE2   | ENSG00000204991 |
| 16 | 88504410 | 88504619 | 88504513 | 10  | 10  | 5  | 1.757999271 | 0.121253    |          | ENSG00000182289 |
| 16 | 88616233 | 88616530 | 88616381 | 10  | 14  | 5  | 2.397271733 | 0.0258078   | GAS8     | ENSG00000141013 |
| 16 | 88675884 | 88676320 | 88676010 | 8   | 15  | 7  | 1.917817386 | 0.0572317   | PRDM7    | ENSG00000126856 |
| 17 | 198896   | 199196   | 199042   | 12  | 13  | 3  | 3.356180426 | 0.00805599  | RPH3AL   | ENSG00000181031 |
| 17 | 964933   | 965151   | 965074   | 8   | 9   | 6  | 1.369869562 | 0.253675    | ABR      | ENSG00000159842 |
| 17 | 965352   | 965547   | 965409   | 8   | 10  | 6  | 1.506856518 | 0.188853    | ABR      | ENSG00000159842 |
| 17 | 1037314  | 1037501  | 1037407  | 10  | 10  | 0  | 10.54799562 | 0.000613541 | ABR      | ENSG00000159842 |
| 17 | 1103867  | 1104046  | 1103935  | 8   | 8   | 4  | 1.726035648 | 0.150596    |          | ENSG00000205899 |
| 17 | 1440079  | 1440408  | 1440251  | 18  | 22  | 2  | 7.351633313 | 1.51E-05    |          | ENSG00000209459 |
| 17 | 1447845  | 1448093  | 1447969  | 9   | 12  | 0  | 12.46581301 | 0.000159888 |          | ENSG00000209459 |
| 17 | 1564196  | 1564429  | 1564338  | 11  | 14  | 0  | 14.3836304  | 4.17E-05    |          | ENSG00000199060 |
| 17 | 1620200  | 1620486  | 1620365  | 14  | 17  | 3  | 4.315089119 | 0.00102271  | SERPINF1 | ENSG00000132386 |
| 17 | 1847360  | 1847954  | 1847568  | 43  | 58  | 2  | 18.85853763 | 2.68E-15    | DPH1     | ENSG00000108963 |
| 17 | 1945077  | 1945306  | 1945191  | 10  | 10  | 3  | 2.636998906 | 0.034203    | SMG6     | ENSG00000070366 |
| 17 | 1988909  | 1989194  | 1989051  | 9   | 10  | 10 | 0.958908693 | 0.538751    | SMG6     | ENSG00000070366 |

|    |         |         |         |    |    |   |             |             |           |                 |
|----|---------|---------|---------|----|----|---|-------------|-------------|-----------|-----------------|
| 17 | 2094811 | 2095186 | 2094990 | 8  | 15 | 2 | 5.114179696 | 0.00088103  | SMG6      | ENSG00000070366 |
| 17 | 2152971 | 2153262 | 2153116 | 8  | 10 | 2 | 3.515998541 | 0.0136204   | SMG6      | ENSG00000070366 |
| 17 | 2203182 | 2203367 | 2203274 | 8  | 9  | 1 | 4.794543465 | 0.00708517  | SGSM2     | ENSG00000141258 |
| 17 | 2647967 | 2648204 | 2648085 | 8  | 10 | 3 | 2.636998906 | 0.034203    | GARNL4    | ENSG00000132359 |
| 17 | 2776031 | 2776467 | 2776205 | 15 | 24 | 0 | 23.97271733 | 5.01E-08    |           | ENSG00000203592 |
| 17 | 2825530 | 2825804 | 2825667 | 10 | 13 | 4 | 2.684944341 | 0.01921     |           | ENSG00000203592 |
| 17 | 4011408 | 4011606 | 4011507 | 10 | 10 | 1 | 5.273997812 | 0.00391723  | CYB5D2    | ENSG00000167740 |
| 17 | 4037238 | 4037484 | 4037362 | 13 | 15 | 2 | 5.114179696 | 0.00088103  |           | ENSG00000207390 |
| 17 | 4069317 | 4069774 | 4069528 | 23 | 32 | 1 | 15.82199344 | 3.96E-09    |           | ENSG00000207390 |
| 17 | 4082248 | 4082427 | 4082386 | 8  | 9  | 1 | 4.794543465 | 0.00708517  | ANKFY1    | ENSG00000185722 |
| 17 | 4257987 | 4258209 | 4258136 | 9  | 10 | 1 | 5.273997812 | 0.00391723  | SPNS3     | ENSG00000182557 |
| 17 | 4365751 | 4366064 | 4365910 | 10 | 13 | 0 | 13.4247217  | 8.16E-05    | SPNS2     | ENSG00000183018 |
| 17 | 4411028 | 4411305 | 4411206 | 8  | 9  | 6 | 1.369869562 | 0.253675    | GGT6      | ENSG00000167741 |
| 17 | 4429664 | 4430093 | 4429930 | 16 | 25 | 2 | 8.310542006 | 2.50E-06    | SMTNL2    | ENSG00000188176 |
| 17 | 4640541 | 4640829 | 4640704 | 12 | 15 | 3 | 3.835634772 | 0.00291691  | GLTPD2    | ENSG00000182327 |
| 17 | 4646272 | 4646451 | 4646376 | 8  | 8  | 3 | 2.157544559 | 0.0836802   | PSMB6     | ENSG00000142507 |
| 17 | 4703683 | 4704316 | 4703970 | 35 | 51 | 1 | 24.93162602 | 1.73E-14    |           | ENSG00000216765 |
| 17 | 4784370 | 4784643 | 4784487 | 8  | 10 | 6 | 1.506856518 | 0.188853    | RNF167    | ENSG00000108523 |
| 17 | 5313095 | 5313274 | 5313174 | 8  | 8  | 0 | 8.630178238 | 0.00235436  | DHX33     | ENSG00000005100 |
| 17 | 5665180 | 5665425 | 5665326 | 10 | 11 | 1 | 5.753452158 | 0.00215302  | NLRP1     | ENSG00000091592 |
| 17 | 5681025 | 5681299 | 5681124 | 10 | 14 | 3 | 3.595907599 | 0.00486913  | WSCD1     | ENSG00000179314 |
| 17 | 6037041 | 6037433 | 6037272 | 13 | 19 | 2 | 6.39272462  | 8.83E-05    |           | ENSG00000206618 |
| 17 | 6411581 | 6411942 | 6411755 | 10 | 15 | 4 | 3.068507818 | 0.0076507   | PITPNM3   | ENSG00000091622 |
| 17 | 6498853 | 6499437 | 6499032 | 11 | 29 | 4 | 5.753452158 | 5.31E-06    | C17orf100 | ENSG00000212734 |
| 17 | 7086915 | 7087206 | 7087070 | 11 | 14 | 5 | 2.397271733 | 0.0258078   | GABARAP   | ENSG00000170296 |
| 17 | 7096287 | 7096570 | 7096463 | 9  | 12 | 3 | 3.116453252 | 0.0131971   | C17orf81  | ENSG00000170291 |
| 17 | 7124604 | 7124887 | 7124730 | 11 | 13 | 5 | 2.237453617 | 0.038866    | SLC2A4    | ENSG00000181856 |
| 17 | 7168316 | 7168561 | 7168463 | 8  | 10 | 1 | 5.273997812 | 0.00391723  |           | ENSG00000215041 |
| 17 | 7198382 | 7198781 | 7198639 | 14 | 20 | 1 | 10.06854128 | 8.32E-06    | TMEM95    | ENSG00000182896 |
| 17 | 7206013 | 7206310 | 7206141 | 8  | 11 | 0 | 11.50690432 | 0.000313206 | TMEM95    | ENSG00000182896 |
| 17 | 7531419 | 7531762 | 7531658 | 8  | 12 | 3 | 3.116453252 | 0.0131971   | TP53      | ENSG00000141510 |
| 17 | 7532080 | 7532717 | 7532227 | 12 | 25 | 9 | 2.493162602 | 0.00432225  | WDR79     | ENSG00000141499 |
| 17 | 7962540 | 7962819 | 7962673 | 8  | 10 | 0 | 10.54799562 | 0.000613541 | ALOXE3    | ENSG00000179148 |
| 17 | 7962951 | 7963131 | 7963041 | 9  | 9  | 3 | 2.397271733 | 0.0539397   | ALOXE3    | ENSG00000179148 |

|    |          |          |          |    |    |    |             |             |          |                 |
|----|----------|----------|----------|----|----|----|-------------|-------------|----------|-----------------|
| 17 | 7964252  | 7964528  | 7964407  | 8  | 12 | 5  | 2.077635502 | 0.0577144   | ALOXE3   | ENSG00000179148 |
| 17 | 7983229  | 7983716  | 7983408  | 12 | 25 | 6  | 3.56166086  | 0.000408555 | PER1     | ENSG00000179094 |
| 17 | 8000782  | 8001234  | 8000943  | 9  | 17 | 3  | 4.315089119 | 0.00102271  | PER1     | ENSG00000179094 |
| 17 | 8031107  | 8031408  | 8031259  | 12 | 17 | 6  | 2.465765211 | 0.014729    | C17orf59 | ENSG00000196544 |
| 17 | 8031685  | 8031995  | 8031838  | 10 | 15 | 9  | 1.534253909 | 0.136498    | C17orf59 | ENSG00000196544 |
| 17 | 8064678  | 8065067  | 8064764  | 9  | 15 | 6  | 2.191791298 | 0.0328001   | C17orf44 | ENSG00000178977 |
| 17 | 8066255  | 8066473  | 8066355  | 9  | 10 | 8  | 1.171999514 | 0.35773     | C17orf44 | ENSG00000178977 |
| 17 | 8066583  | 8066782  | 8066682  | 8  | 9  | 4  | 1.917817386 | 0.103282    | C17orf44 | ENSG00000178977 |
| 17 | 8070150  | 8070645  | 8070282  | 9  | 19 | 18 | 1.009377572 | 0.487356    | C17orf44 | ENSG00000178977 |
| 17 | 8070945  | 8071262  | 8071117  | 12 | 16 | 8  | 1.811271976 | 0.0663685   | C17orf44 | ENSG00000178977 |
| 17 | 8425353  | 8425661  | 8425507  | 17 | 19 | 4  | 3.835634772 | 0.00108365  |          | ENSG00000223093 |
| 17 | 8664581  | 8664856  | 8664718  | 9  | 9  | 3  | 2.397271733 | 0.0539397   | MFSD6L   | ENSG00000185156 |
| 17 | 8664882  | 8665271  | 8665043  | 12 | 18 | 3  | 4.554816292 | 0.000599415 | MFSD6L   | ENSG00000185156 |
| 17 | 8675386  | 8675620  | 8675482  | 10 | 11 | 0  | 11.50690432 | 0.000313206 | MFSD6L   | ENSG00000185156 |
| 17 | 9050974  | 9051227  | 9051100  | 8  | 8  | 1  | 4.315089119 | 0.0127267   |          | ENSG00000216007 |
| 17 | 9963874  | 9964124  | 9963989  | 8  | 10 | 4  | 2.109599125 | 0.0694668   |          | ENSG00000221486 |
| 17 | 10049591 | 10050069 | 10049890 | 55 | 67 | 0  | 65.20579113 | 1.39E-20    | GAS7     | ENSG00000007237 |
| 17 | 10054259 | 10054575 | 10054416 | 13 | 18 | 5  | 3.036544195 | 0.0044641   | GAS7     | ENSG00000007237 |
| 17 | 10141189 | 10141536 | 10141346 | 12 | 17 | 0  | 17.26035648 | 5.54E-06    | MYH13    | ENSG00000006788 |
| 17 | 10195739 | 10196096 | 10195918 | 12 | 17 | 0  | 17.26035648 | 5.54E-06    | MYH13    | ENSG00000006788 |
| 17 | 10642523 | 10642722 | 10642622 | 10 | 11 | 1  | 5.753452158 | 0.00215302  |          | ENSG00000205351 |
| 17 | 11779897 | 11780127 | 11780012 | 11 | 11 | 1  | 5.753452158 | 0.00215302  | DNAH9    | ENSG00000007174 |
| 17 | 12561061 | 12561254 | 12561113 | 9  | 11 | 0  | 11.50690432 | 0.000313206 | MYOCD    | ENSG00000141052 |
| 17 | 12746113 | 12746298 | 12746189 | 8  | 8  | 1  | 4.315089119 | 0.0127267   |          | ENSG00000006740 |
| 17 | 12862173 | 12862556 | 12862410 | 15 | 20 | 2  | 6.712360851 | 4.91E-05    | ELAC2    | ENSG00000006744 |
| 17 | 12943544 | 12943856 | 12943700 | 14 | 15 | 4  | 3.068507818 | 0.0076507   | ELAC2    | ENSG00000006744 |
| 17 | 13019237 | 13019618 | 13019393 | 18 | 24 | 1  | 11.98635866 | 6.63E-07    | ELAC2    | ENSG00000006744 |
| 17 | 13424955 | 13425155 | 13425036 | 8  | 8  | 3  | 2.157544559 | 0.0836802   | HS3ST3A1 | ENSG00000153976 |
| 17 | 14463845 | 14464212 | 14464063 | 11 | 16 | 0  | 16.30144778 | 1.09E-05    |          | ENSG00000217265 |
| 17 | 15764863 | 15765146 | 15765005 | 8  | 10 | 1  | 5.273997812 | 0.00391723  | ADORA2B  | ENSG00000170425 |
| 17 | 15807635 | 15808243 | 15807986 | 45 | 61 | 3  | 14.86308474 | 4.23E-15    | ADORA2B  | ENSG00000170425 |
| 17 | 16015724 | 16015935 | 16015816 | 8  | 9  | 3  | 2.397271733 | 0.0539397   |          | ENSG00000222695 |
| 17 | 16862754 | 16862942 | 16862887 | 9  | 10 | 0  | 10.54799562 | 0.000613541 | MPRIP    | ENSG00000133030 |
| 17 | 16864203 | 16864529 | 16864380 | 10 | 14 | 0  | 14.3836304  | 4.17E-05    | MPRIP    | ENSG00000133030 |

|    |          |          |          |    |    |    |             |             |        |                 |
|----|----------|----------|----------|----|----|----|-------------|-------------|--------|-----------------|
| 17 | 17003689 | 17003875 | 17003762 | 8  | 8  | 0  | 8.630178238 | 0.00235436  | MPRIIP | ENSG00000133030 |
| 17 | 17030121 | 17030364 | 17030242 | 9  | 12 | 2  | 4.155271003 | 0.0046638   |        | ENSG00000209051 |
| 17 | 17033651 | 17033991 | 17033821 | 21 | 26 | 1  | 12.94526736 | 1.86E-07    |        | ENSG00000209051 |
| 17 | 17140410 | 17140684 | 17140552 | 11 | 11 | 2  | 3.835634772 | 0.00800699  | NT5M   | ENSG00000205309 |
| 17 | 17290338 | 17290566 | 17290466 | 8  | 9  | 4  | 1.917817386 | 0.103282    |        | ENSG00000217731 |
| 17 | 17435575 | 17435943 | 17435776 | 11 | 17 | 3  | 4.315089119 | 0.00102271  | PEMT   | ENSG00000133027 |
| 17 | 17529928 | 17530133 | 17530074 | 8  | 11 | 6  | 1.643843474 | 0.137712    | RAI1   | ENSG00000108557 |
| 17 | 17555007 | 17555263 | 17555135 | 8  | 10 | 3  | 2.636998906 | 0.034203    | RAI1   | ENSG00000108557 |
| 17 | 17758051 | 17758266 | 17758158 | 10 | 10 | 5  | 1.757999271 | 0.121253    |        | ENSG00000212937 |
| 17 | 17795599 | 17795899 | 17795720 | 12 | 15 | 1  | 7.671269544 | 0.000187863 | TOM1L2 | ENSG00000175662 |
| 17 | 17931816 | 17932102 | 17931942 | 14 | 17 | 6  | 2.465765211 | 0.014729    | DRG2   | ENSG00000108591 |
| 17 | 19351984 | 19352302 | 19352142 | 10 | 13 | 8  | 1.491635745 | 0.166708    |        | ENSG00000220507 |
| 17 | 19493116 | 19493380 | 19493248 | 10 | 11 | 5  | 1.917817386 | 0.0843804   |        | ENSG00000209875 |
| 17 | 19597024 | 19597630 | 19597242 | 54 | 76 | 6  | 10.54799562 | 1.85E-16    |        | ENSG00000219014 |
| 17 | 19830763 | 19831067 | 19830895 | 13 | 17 | 0  | 17.26035648 | 5.54E-06    | AKAP10 | ENSG00000108599 |
| 17 | 19852819 | 19853009 | 19852931 | 8  | 8  | 1  | 4.315089119 | 0.0127267   | SPECC1 | ENSG00000128487 |
| 17 | 19939190 | 19939511 | 19939350 | 10 | 14 | 0  | 14.3836304  | 4.17E-05    | SPECC1 | ENSG00000128487 |
| 17 | 20067722 | 20068165 | 20067986 | 13 | 22 | 0  | 22.05489994 | 1.92E-07    | SPECC1 | ENSG00000128487 |
| 17 | 20942784 | 20943030 | 20942907 | 8  | 10 | 5  | 1.757999271 | 0.121253    | DHRS7B | ENSG00000109016 |
| 17 | 21166911 | 21167270 | 21167073 | 9  | 15 | 4  | 3.068507818 | 0.0076507   | MAP2K3 | ENSG00000034152 |
| 17 | 21240148 | 21240526 | 21240342 | 32 | 41 | 3  | 10.06854128 | 9.74E-10    | KCNJ12 | ENSG00000184185 |
| 17 | 21944682 | 21945022 | 21944852 | 33 | 33 | 85 | 0.379103437 | 1           |        | ENSG00000209244 |
| 17 | 22289014 | 22289378 | 22289193 | 8  | 15 | 10 | 1.394776281 | 0.191426    |        | ENSG00000210006 |
| 17 | 22592804 | 22593081 | 22592941 | 19 | 20 | 6  | 2.876726079 | 0.00408924  |        | ENSG00000213664 |
| 17 | 22682370 | 22682870 | 22682549 | 55 | 71 | 0  | 69.0414259  | 9.44E-22    | WSB1   | ENSG00000109046 |
| 17 | 22683595 | 22683974 | 22683756 | 10 | 16 | 0  | 16.30144778 | 1.09E-05    | WSB1   | ENSG00000109046 |
| 17 | 22845381 | 22845751 | 22845542 | 12 | 17 | 1  | 8.630178238 | 5.44E-05    | KSR1   | ENSG00000141068 |
| 17 | 22903155 | 22903476 | 22903316 | 8  | 11 | 3  | 2.876726079 | 0.0213797   | KSR1   | ENSG00000141068 |
| 17 | 23221662 | 23221875 | 23221768 | 9  | 10 | 0  | 10.54799562 | 0.000613541 |        | ENSG00000205191 |
| 17 | 23392554 | 23392792 | 23392655 | 12 | 13 | 3  | 3.356180426 | 0.00805599  | NLK    | ENSG00000087095 |
| 17 | 23570305 | 23570597 | 23570464 | 13 | 13 | 0  | 13.4247217  | 8.16E-05    |        | ENSG00000203482 |
| 17 | 23602861 | 23603067 | 23602964 | 8  | 11 | 6  | 1.643843474 | 0.137712    |        | ENSG00000203479 |
| 17 | 23633780 | 23634257 | 23633949 | 37 | 53 | 1  | 25.89053471 | 4.67E-15    |        | ENSG00000203478 |
| 17 | 23677331 | 23677616 | 23677472 | 11 | 14 | 4  | 2.876726079 | 0.01219     | IFT20  | ENSG00000109083 |

|    |          |          |          |     |     |    |             |             |          |                 |
|----|----------|----------|----------|-----|-----|----|-------------|-------------|----------|-----------------|
| 17 | 23731305 | 23731583 | 23731444 | 11  | 13  | 0  | 13.4247217  | 8.16E-05    |          | ENSG00000203472 |
| 17 | 23767956 | 23768209 | 23768082 | 10  | 10  | 0  | 10.54799562 | 0.000613541 |          | ENSG00000203468 |
| 17 | 23923106 | 23923313 | 23923237 | 8   | 9   | 3  | 2.397271733 | 0.0539397   | PIGS     | ENSG00000087111 |
| 17 | 24070531 | 24070878 | 24070727 | 10  | 14  | 1  | 7.191815198 | 0.00034761  | RPL23A   | ENSG00000198242 |
| 17 | 24071467 | 24071686 | 24071574 | 8   | 11  | 3  | 2.876726079 | 0.0213797   | RPL23A   | ENSG00000198242 |
| 17 | 24080143 | 24080458 | 24080300 | 8   | 13  | 5  | 2.237453617 | 0.038866    | NEK8     | ENSG00000160602 |
| 17 | 24094103 | 24094633 | 24094312 | 128 | 166 | 4  | 32.02755035 | 3.47E-43    | TRAF4    | ENSG00000076604 |
| 17 | 24094720 | 24095095 | 24094868 | 9   | 14  | 0  | 14.3836304  | 4.17E-05    | TRAF4    | ENSG00000076604 |
| 17 | 24097031 | 24097402 | 24097276 | 9   | 14  | 3  | 3.595907599 | 0.00486913  | TRAF4    | ENSG00000076604 |
| 17 | 24097855 | 24098380 | 24098001 | 10  | 19  | 8  | 2.130908207 | 0.0233014   | TRAF4    | ENSG00000076604 |
| 17 | 24290199 | 24290378 | 24290288 | 8   | 9   | 3  | 2.397271733 | 0.0539397   | PHF12    | ENSG00000109118 |
| 17 | 24299911 | 24300160 | 24300033 | 9   | 10  | 5  | 1.757999271 | 0.121253    | PHF12    | ENSG00000109118 |
| 17 | 24302959 | 24303180 | 24303040 | 9   | 10  | 5  | 1.757999271 | 0.121253    | PHF12    | ENSG00000109118 |
| 17 | 24303375 | 24303822 | 24303554 | 15  | 27  | 19 | 1.34247217  | 0.153055    | PHF12    | ENSG00000109118 |
| 17 | 24347543 | 24347927 | 24347779 | 11  | 17  | 2  | 5.753452158 | 0.000281509 | SEZ6     | ENSG00000063015 |
| 17 | 24410661 | 24410910 | 24410780 | 9   | 11  | 1  | 5.753452158 | 0.00215302  | TIAF1    | ENSG00000221995 |
| 17 | 24423809 | 24424090 | 24423949 | 8   | 11  | 1  | 5.753452158 | 0.00215302  | TIAF1    | ENSG00000221995 |
| 17 | 24592227 | 24592411 | 24592329 | 8   | 9   | 2  | 3.19636231  | 0.0229249   | CRYBA1   | ENSG00000108255 |
| 17 | 24634744 | 24634938 | 24634875 | 8   | 8   | 2  | 2.876726079 | 0.0381137   | NUFIP2   | ENSG00000108256 |
| 17 | 24645228 | 24645860 | 24645577 | 15  | 30  | 7  | 3.715771186 | 9.63E-05    | NUFIP2   | ENSG00000108256 |
| 17 | 24721161 | 24721365 | 24721263 | 8   | 10  | 1  | 5.273997812 | 0.00391723  |          | ENSG00000222363 |
| 17 | 24990478 | 24990965 | 24990605 | 11  | 23  | 4  | 4.602761727 | 0.000137072 |          | ENSG00000222858 |
| 17 | 25354974 | 25355650 | 25355357 | 22  | 42  | 3  | 10.30826845 | 5.31E-10    |          | ENSG00000207011 |
| 17 | 25391744 | 25392231 | 25391988 | 26  | 43  | 0  | 42.19198249 | 1.42E-13    |          | ENSG00000207011 |
| 17 | 25467697 | 25467886 | 25467768 | 8   | 8   | 4  | 1.726035648 | 0.150596    | CCDC55   | ENSG00000126653 |
| 17 | 25569800 | 25569979 | 25569913 | 8   | 8   | 0  | 8.630178238 | 0.00235436  | SLC6A4   | ENSG00000108576 |
| 17 | 25587964 | 25588224 | 25588094 | 11  | 13  | 1  | 6.712360851 | 0.000640982 | SLC6A4   | ENSG00000108576 |
| 17 | 25823761 | 25824057 | 25823921 | 11  | 14  | 1  | 7.191815198 | 0.00034761  | GOSR1    | ENSG00000108587 |
| 17 | 25828413 | 25828598 | 25828505 | 8   | 8   | 0  | 8.630178238 | 0.00235436  | GOSR1    | ENSG00000108587 |
| 17 | 26423333 | 26423741 | 26423509 | 38  | 46  | 3  | 11.26717714 | 4.63E-11    | NF1      | ENSG00000196712 |
| 17 | 26625401 | 26625723 | 26625562 | 15  | 17  | 2  | 5.753452158 | 0.000281509 |          | ENSG00000210267 |
| 17 | 26900967 | 26901447 | 26901210 | 13  | 21  | 12 | 1.622768557 | 0.076896    |          | ENSG00000207614 |
| 17 | 27193766 | 27194189 | 27193905 | 8   | 14  | 3  | 3.595907599 | 0.00486913  | C17orf79 | ENSG00000172301 |
| 17 | 28014395 | 28014588 | 28014516 | 8   | 8   | 3  | 2.157544559 | 0.0836802   |          | ENSG00000210329 |



|    |          |          |          |     |     |     |             |             |          |                 |
|----|----------|----------|----------|-----|-----|-----|-------------|-------------|----------|-----------------|
| 17 | 28173892 | 28174134 | 28174013 | 18  | 21  | 19  | 1.054799562 | 0.429896    |          | ENSG00000201178 |
| 17 | 28934492 | 28935036 | 28934857 | 33  | 44  | 5   | 7.191815198 | 4.84E-09    |          | ENSG00000221699 |
| 17 | 29497648 | 29497830 | 29497739 | 8   | 8   | 0   | 8.630178238 | 0.00235436  | ACCN1    | ENSG00000108684 |
| 17 | 29557820 | 29558085 | 29557951 | 10  | 11  | 1   | 5.753452158 | 0.00215302  | CCL2     | ENSG00000108691 |
| 17 | 29752255 | 29752628 | 29752449 | 18  | 25  | 1   | 12.46581301 | 3.51E-07    |          | ENSG00000210356 |
| 17 | 30502093 | 30502617 | 30502289 | 81  | 131 | 100 | 1.253227203 | 0.0428779   | UNC45B   | ENSG00000141161 |
| 17 | 30510745 | 30511040 | 30510892 | 18  | 23  | 0   | 23.01380863 | 9.81E-08    | UNC45B   | ENSG00000141161 |
| 17 | 30938328 | 30938587 | 30938457 | 8   | 10  | 7   | 1.318499453 | 0.269217    | AP2B1    | ENSG00000006125 |
| 17 | 31381497 | 31381894 | 31381661 | 8   | 15  | 0   | 15.34253909 | 2.13E-05    | CCL23    | ENSG00000167236 |
| 17 | 32470729 | 32470910 | 32470783 | 8   | 9   | 1   | 4.794543465 | 0.00708517  | AATF     | ENSG00000108270 |
| 17 | 32922258 | 32922647 | 32922452 | 8   | 18  | 3   | 4.554816292 | 0.000599415 | DUSP14   | ENSG00000161326 |
| 17 | 32925388 | 32925786 | 32925635 | 14  | 20  | 3   | 5.034270639 | 0.000202317 | DUSP14   | ENSG00000161326 |
| 17 | 32996448 | 32996627 | 32996598 | 10  | 10  | 2   | 3.515998541 | 0.0136204   | AP1GBP1  | ENSG00000006114 |
| 17 | 33004799 | 33004987 | 33004893 | 8   | 9   | 1   | 4.794543465 | 0.00708517  | AP1GBP1  | ENSG00000006114 |
| 17 | 34008344 | 34008630 | 34008482 | 11  | 14  | 5   | 2.397271733 | 0.0258078   |          | ENSG00000017373 |
| 17 | 34235072 | 34235285 | 34235178 | 8   | 9   | 5   | 1.598181155 | 0.170911    | CCDC49   | ENSG00000108296 |
| 17 | 34263542 | 34263760 | 34263651 | 9   | 9   | 8   | 1.065454103 | 0.442605    | RPL23    | ENSG00000125691 |
| 17 | 34277838 | 34278066 | 34277952 | 10  | 10  | 4   | 2.109599125 | 0.0694668   | LASP1    | ENSG00000002834 |
| 17 | 34281400 | 34281579 | 34281498 | 8   | 8   | 1   | 4.315089119 | 0.0127267   | LASP1    | ENSG00000002834 |
| 17 | 34456425 | 34457049 | 34456657 | 248 | 306 | 4   | 58.87699375 | 5.00E-83    |          | ENSG00000214553 |
| 17 | 34562226 | 34562534 | 34562390 | 8   | 11  | 6   | 1.643843474 | 0.137712    | PLXDC1   | ENSG00000161381 |
| 17 | 34563411 | 34563615 | 34563567 | 10  | 13  | 3   | 3.356180426 | 0.00805599  | PLXDC1   | ENSG00000161381 |
| 17 | 34574402 | 34574589 | 34574484 | 8   | 8   | 6   | 1.232882605 | 0.333038    | ARL5C    | ENSG00000141748 |
| 17 | 34871018 | 34871285 | 34871151 | 11  | 13  | 1   | 6.712360851 | 0.000640982 | CRKRS    | ENSG00000167258 |
| 17 | 35113324 | 35113569 | 35113409 | 8   | 9   | 4   | 1.917817386 | 0.103282    | ERBB2    | ENSG00000141736 |
| 17 | 35115606 | 35115896 | 35115756 | 10  | 12  | 4   | 2.493162602 | 0.0299057   | ERBB2    | ENSG00000141736 |
| 17 | 35159770 | 35160269 | 35159978 | 23  | 34  | 0   | 33.56180426 | 6.02E-11    | GRB7     | ENSG00000141738 |
| 17 | 35282566 | 35282791 | 35282681 | 9   | 10  | 5   | 1.757999271 | 0.121253    | ZBP2     | ENSG00000186075 |
| 17 | 35604079 | 35604345 | 35604212 | 18  | 19  | 0   | 19.17817386 | 1.44E-06    | RAPGEFL1 | ENSG00000108352 |
| 17 | 35721661 | 35721887 | 35721802 | 9   | 9   | 4   | 1.917817386 | 0.103282    | RARA     | ENSG00000131759 |
| 17 | 35723991 | 35724825 | 35724162 | 24  | 62  | 1   | 30.20562383 | 1.28E-17    | RARA     | ENSG00000131759 |
| 17 | 35772446 | 35772691 | 35772560 | 9   | 10  | 5   | 1.757999271 | 0.121253    | GJD3     | ENSG00000183153 |
| 17 | 35881023 | 35881306 | 35881173 | 10  | 12  | 1   | 6.232906505 | 0.00117736  | TNS4     | ENSG00000131746 |
| 17 | 35947741 | 35948169 | 35947920 | 27  | 36  | 1   | 17.73981082 | 3.00E-10    | CCR7     | ENSG00000126353 |

|    |          |          |          |    |    |    |             |            |          |                 |
|----|----------|----------|----------|----|----|----|-------------|------------|----------|-----------------|
| 17 | 35992092 | 35992524 | 35992305 | 16 | 27 | 3  | 6.712360851 | 3.92E-06   | CCR7     | ENSG00000126353 |
| 17 | 36144836 | 36145151 | 36144979 | 8  | 9  | 1  | 4.794543465 | 0.00708517 | KRT25    | ENSG00000204897 |
| 17 | 36367917 | 36368237 | 36368063 | 13 | 17 | 9  | 1.726035648 | 0.0753664  | KRT39    | ENSG00000196859 |
| 17 | 36874462 | 36874863 | 36874684 | 13 | 20 | 6  | 2.876726079 | 0.00408924 | KRT32    | ENSG00000108759 |
| 17 | 36928762 | 36928995 | 36928878 | 11 | 12 | 8  | 1.385090334 | 0.219216   | KRT15    | ENSG00000171346 |
| 17 | 36929374 | 36929680 | 36929498 | 13 | 17 | 7  | 2.157544559 | 0.0276499  | KRT15    | ENSG00000171346 |
| 17 | 36945927 | 36946149 | 36946043 | 8  | 10 | 2  | 3.515998541 | 0.0136204  | KRT19    | ENSG00000171345 |
| 17 | 36958610 | 36958881 | 36958745 | 9  | 11 | 7  | 1.43836304  | 0.204844   | KRT19    | ENSG00000171345 |
| 17 | 37105727 | 37105939 | 37105833 | 9  | 9  | 2  | 3.19636231  | 0.0229249  | EIF1     | ENSG00000173812 |
| 17 | 37182010 | 37182247 | 37182096 | 10 | 12 | 4  | 2.493162602 | 0.0299057  | JUP      | ENSG00000173801 |
| 17 | 37193998 | 37194332 | 37194163 | 9  | 13 | 3  | 3.356180426 | 0.00805599 | JUP      | ENSG00000173801 |
| 17 | 37196710 | 37197052 | 37196820 | 10 | 15 | 8  | 1.704726565 | 0.0916153  | JUP      | ENSG00000173801 |
| 17 | 37205815 | 37206056 | 37205935 | 8  | 9  | 6  | 1.369869562 | 0.253675   | JUP      | ENSG00000173801 |
| 17 | 37211239 | 37211637 | 37211458 | 9  | 16 | 8  | 1.811271976 | 0.0663685  |          | ENSG00000141696 |
| 17 | 37371521 | 37371746 | 37371632 | 8  | 9  | 6  | 1.369869562 | 0.253675   | CNP      | ENSG00000173786 |
| 17 | 37456629 | 37457280 | 37457106 | 13 | 25 | 4  | 4.986325204 | 4.72E-05   | ZNF385C  | ENSG00000187595 |
| 17 | 37522314 | 37522504 | 37522409 | 9  | 10 | 3  | 2.636998906 | 0.034203   | DHX58    | ENSG00000108771 |
| 17 | 37559296 | 37559502 | 37559416 | 8  | 8  | 2  | 2.876726079 | 0.0381137  | RAB5C    | ENSG00000108774 |
| 17 | 37794160 | 37794530 | 37794351 | 13 | 19 | 6  | 2.739739123 | 0.00632909 | STAT3    | ENSG00000168610 |
| 17 | 37833960 | 37834316 | 37834138 | 16 | 22 | 1  | 11.02744997 | 2.36E-06   | PTRF     | ENSG00000177469 |
| 17 | 37932990 | 37933169 | 37933031 | 8  | 8  | 2  | 2.876726079 | 0.0381137  | NAGLU    | ENSG00000108784 |
| 17 | 38300835 | 38301120 | 38300981 | 10 | 10 | 1  | 5.273997812 | 0.00391723 |          | ENSG00000213373 |
| 17 | 38403547 | 38403944 | 38403785 | 23 | 29 | 5  | 4.794543465 | 1.89E-05   | RPL27    | ENSG00000131469 |
| 17 | 38737215 | 38737990 | 38737472 | 25 | 58 | 45 | 1.229904628 | 0.144288   | TMEM106A | ENSG00000184988 |
| 17 | 38748592 | 38748881 | 38748736 | 8  | 13 | 21 | 0.610214623 | 0.930478   | TMEM106A | ENSG00000184988 |
| 17 | 38755704 | 38756769 | 38756027 | 34 | 82 | 85 | 0.92545839  | 0.692753   | TMEM106A | ENSG00000184988 |
| 17 | 38819009 | 38819201 | 38819027 | 10 | 12 | 2  | 4.155271003 | 0.0046638  |          | ENSG00000222944 |
| 17 | 38819234 | 38819543 | 38819390 | 8  | 10 | 4  | 2.109599125 | 0.0694668  |          | ENSG00000222944 |
| 17 | 38821508 | 38822180 | 38821951 | 15 | 39 | 34 | 1.095895649 | 0.344651   |          | ENSG00000204733 |
| 17 | 38822259 | 38822535 | 38822390 | 12 | 15 | 13 | 1.095895649 | 0.398774   |          | ENSG00000188825 |
| 17 | 38851826 | 38852021 | 38851923 | 8  | 9  | 0  | 9.589086931 | 0.00120187 | ARL4D    | ENSG00000175906 |
| 17 | 38877159 | 38877655 | 38877331 | 11 | 21 | 3  | 5.273997812 | 0.00011662 |          | ENSG00000186995 |
| 17 | 38916635 | 38916958 | 38916796 | 14 | 19 | 4  | 3.835634772 | 0.00108365 | DHX8     | ENSG00000067596 |
| 17 | 38980878 | 38981174 | 38981012 | 26 | 28 | 0  | 27.8083521  | 3.40E-09   | ETV4     | ENSG00000175832 |

|    |          |          |          |     |     |    |             |             |          |                 |
|----|----------|----------|----------|-----|-----|----|-------------|-------------|----------|-----------------|
| 17 | 39127371 | 39127604 | 39127487 | 8   | 11  | 2  | 3.835634772 | 0.00800699  | MEOX1    | ENSG00000005102 |
| 17 | 39151181 | 39151396 | 39151288 | 8   | 8   | 1  | 4.315089119 | 0.0127267   |          | ENSG00000215964 |
| 17 | 39272541 | 39273087 | 39272913 | 17  | 31  | 4  | 6.137015636 | 1.74E-06    | MPP3     | ENSG00000161647 |
| 17 | 39305111 | 39305612 | 39305400 | 62  | 83  | 1  | 40.27416511 | 1.25E-23    | CD300LG  | ENSG00000161649 |
| 17 | 39447770 | 39448099 | 39447931 | 16  | 21  | 4  | 4.219198249 | 0.000390041 | TMEM101  | ENSG00000091947 |
| 17 | 39565226 | 39565422 | 39565324 | 8   | 9   | 3  | 2.397271733 | 0.0539397   |          | ENSG00000212446 |
| 17 | 39570964 | 39571435 | 39571279 | 10  | 18  | 1  | 9.109632584 | 2.91E-05    |          | ENSG00000212446 |
| 17 | 39574564 | 39574891 | 39574722 | 13  | 17  | 5  | 2.876726079 | 0.00703033  | C17orf53 | ENSG00000125319 |
| 17 | 39585562 | 39586227 | 39585969 | 115 | 155 | 2  | 49.86325204 | 8.41E-43    | C17orf53 | ENSG00000125319 |
| 17 | 39777865 | 39778106 | 39777949 | 8   | 10  | 3  | 2.636998906 | 0.034203    | GRN      | ENSG0000030582  |
| 17 | 40020329 | 40020508 | 40020418 | 8   | 8   | 1  | 4.315089119 | 0.0127267   | FZD2     | ENSG00000180340 |
| 17 | 40311613 | 40311847 | 40311734 | 8   | 10  | 2  | 3.515998541 | 0.0136204   | EFTUD2   | ENSG00000108883 |
| 17 | 40343936 | 40344312 | 40344096 | 10  | 15  | 0  | 15.34253909 | 2.13E-05    | GFAP     | ENSG00000131095 |
| 17 | 40479749 | 40479928 | 40479881 | 8   | 8   | 0  | 8.630178238 | 0.00235436  | DCAKD    | ENSG00000172992 |
| 17 | 40480152 | 40480388 | 40480270 | 15  | 16  | 2  | 5.433815927 | 0.000499302 | DCAKD    | ENSG00000172992 |
| 17 | 40483359 | 40483689 | 40483523 | 11  | 15  | 5  | 2.557089848 | 0.0169197   | DCAKD    | ENSG00000172992 |
| 17 | 40560340 | 40560725 | 40560546 | 27  | 35  | 1  | 17.26035648 | 5.72E-10    | PLCD3    | ENSG00000161714 |
| 17 | 40568250 | 40568582 | 40568426 | 18  | 22  | 7  | 2.756862493 | 0.003684    | ACBD4    | ENSG00000181513 |
| 17 | 40580795 | 40581244 | 40581045 | 12  | 20  | 5  | 3.356180426 | 0.0017534   | HEXIM1   | ENSG00000186834 |
| 17 | 40581568 | 40581765 | 40581664 | 11  | 11  | 4  | 2.301380863 | 0.0459276   | HEXIM1   | ENSG00000186834 |
| 17 | 40631077 | 40631328 | 40631245 | 8   | 11  | 6  | 1.643843474 | 0.137712    | FMNL1    | ENSG00000184922 |
| 17 | 40717274 | 40717578 | 40717426 | 12  | 16  | 3  | 4.075361945 | 0.00173346  | MAP3K14  | ENSG00000006062 |
| 17 | 40841963 | 40842266 | 40842139 | 8   | 11  | 4  | 2.301380863 | 0.0459276   | ARHGAP27 | ENSG00000185602 |
| 17 | 41285920 | 41286103 | 41286062 | 8   | 8   | 1  | 4.315089119 | 0.0127267   |          | ENSG00000185294 |
| 17 | 41477514 | 41477822 | 41477668 | 11  | 13  | 4  | 2.684944341 | 0.01921     | KIAA1267 | ENSG00000120071 |
| 17 | 42252519 | 42252698 | 42252608 | 8   | 8   | 1  | 4.315089119 | 0.0127267   | WNT3     | ENSG00000108379 |
| 17 | 42374789 | 42375100 | 42374942 | 9   | 12  | 1  | 6.232906505 | 0.00117736  | GOSR2    | ENSG00000108433 |
| 17 | 42409083 | 42409328 | 42409205 | 8   | 10  | 5  | 1.757999271 | 0.121253    | RPRML    | ENSG00000179673 |
| 17 | 42567782 | 42568319 | 42567959 | 21  | 39  | 31 | 1.198635866 | 0.220022    |          | ENSG00000221016 |
| 17 | 42568479 | 42569131 | 42568952 | 43  | 82  | 81 | 0.970602702 | 0.575745    |          | ENSG00000221016 |
| 17 | 42569373 | 42569861 | 42569560 | 54  | 73  | 67 | 1.043518284 | 0.399142    |          | ENSG00000221016 |
| 17 | 42571019 | 42571207 | 42571113 | 9   | 10  | 6  | 1.506856518 | 0.188853    |          | ENSG00000221016 |
| 17 | 42574093 | 42574434 | 42574263 | 27  | 28  | 27 | 0.993155432 | 0.509675    |          | ENSG00000221016 |
| 17 | 42576110 | 42576435 | 42576272 | 13  | 13  | 14 | 0.894981447 | 0.618069    |          | ENSG00000221016 |

|    |          |          |          |    |    |    |             |             |          |                 |
|----|----------|----------|----------|----|----|----|-------------|-------------|----------|-----------------|
| 17 | 42586891 | 42587220 | 42587055 | 11 | 12 | 17 | 0.692545167 | 0.848017    | CDC27    | ENSG00000004897 |
| 17 | 42590426 | 42590810 | 42590601 | 22 | 27 | 24 | 1.073977736 | 0.396082    | CDC27    | ENSG00000004897 |
| 17 | 42604162 | 42604502 | 42604332 | 22 | 23 | 27 | 0.821921737 | 0.761135    | CDC27    | ENSG00000004897 |
| 17 | 42613781 | 42614116 | 42613955 | 15 | 18 | 25 | 0.700740968 | 0.883987    | CDC27    | ENSG00000004897 |
| 17 | 42621391 | 42621721 | 42621556 | 19 | 21 | 11 | 1.757999271 | 0.0516118   | CDC27    | ENSG00000004897 |
| 17 | 42662221 | 42662611 | 42662400 | 9  | 16 | 6  | 2.328778255 | 0.0221113   | MYL4     | ENSG00000198336 |
| 17 | 43242553 | 43242810 | 43242688 | 9  | 10 | 6  | 1.506856518 | 0.188853    | OSBPL7   | ENSG00000006025 |
| 17 | 43337502 | 43337779 | 43337618 | 10 | 12 | 2  | 4.155271003 | 0.0046638   | SP2      | ENSG00000167182 |
| 17 | 43373718 | 43374073 | 43373895 | 10 | 15 | 6  | 2.191791298 | 0.0328001   | PNPO     | ENSG00000108439 |
| 17 | 43403132 | 43403472 | 43403302 | 8  | 14 | 7  | 1.797953799 | 0.0806593   | CDK5RAP3 | ENSG00000108465 |
| 17 | 43450762 | 43450966 | 43450864 | 8  | 9  | 2  | 3.19636231  | 0.0229249   |          | ENSG00000207947 |
| 17 | 44068861 | 44069120 | 44069012 | 8  | 10 | 3  | 2.636998906 | 0.034203    |          | ENSG00000210741 |
| 17 | 44110895 | 44111399 | 44111074 | 47 | 58 | 2  | 18.85853763 | 2.68E-15    | C17orf92 | ENSG00000159182 |
| 17 | 44241505 | 44241716 | 44241603 | 8  | 9  | 0  | 9.589086931 | 0.00120187  | TLL6     | ENSG00000170703 |
| 17 | 44464508 | 44464762 | 44464635 | 8  | 9  | 3  | 2.397271733 | 0.0539397   |          | ENSG00000207346 |
| 17 | 44533627 | 44533863 | 44533745 | 15 | 16 | 0  | 16.30144778 | 1.09E-05    | B4GALNT2 | ENSG00000167080 |
| 17 | 44624804 | 44625331 | 44624971 | 12 | 23 | 10 | 2.092164421 | 0.0165595   | GNGT2    | ENSG00000167083 |
| 17 | 44747971 | 44748202 | 44748058 | 8  | 8  | 6  | 1.232882605 | 0.333038    | ZNF652   | ENSG00000198740 |
| 17 | 44940565 | 44941045 | 44940875 | 20 | 28 | 11 | 2.317362675 | 0.00474534  | NGFR     | ENSG00000064300 |
| 17 | 45220761 | 45221259 | 45220940 | 8  | 17 | 5  | 2.876726079 | 0.00703033  | MYST2    | ENSG00000136504 |
| 17 | 45319413 | 45319910 | 45319691 | 14 | 23 | 2  | 7.671269544 | 8.30E-06    | TAC4     | ENSG00000176358 |
| 17 | 45487763 | 45488102 | 45487932 | 9  | 13 | 5  | 2.237453617 | 0.038866    | ITGA3    | ENSG00000005884 |
| 17 | 45494765 | 45495399 | 45495029 | 61 | 82 | 6  | 11.36991736 | 5.00E-18    | ITGA3    | ENSG00000005884 |
| 17 | 45580983 | 45581212 | 45581077 | 9  | 10 | 3  | 2.636998906 | 0.034203    | PPP1R9B  | ENSG00000108819 |
| 17 | 45584383 | 45584585 | 45584484 | 8  | 9  | 4  | 1.917817386 | 0.103282    | PPP1R9B  | ENSG00000108819 |
| 17 | 45594045 | 45594227 | 45594148 | 8  | 8  | 4  | 1.726035648 | 0.150596    | SGCA     | ENSG00000108823 |
| 17 | 45749516 | 45750068 | 45749746 | 9  | 22 | 6  | 3.150699991 | 0.00166398  | XYLT2    | ENSG00000015532 |
| 17 | 45803932 | 45804452 | 45804111 | 60 | 80 | 8  | 8.630178238 | 5.75E-16    | MRPL27   | ENSG00000108826 |
| 17 | 45829049 | 45829411 | 45829234 | 9  | 14 | 7  | 1.797953799 | 0.0806593   | LRRC59   | ENSG00000108829 |
| 17 | 45905099 | 45905299 | 45905182 | 8  | 9  | 0  | 9.589086931 | 0.00120187  | CHAD     | ENSG00000136457 |
| 17 | 45966753 | 45967183 | 45966922 | 8  | 15 | 1  | 7.671269544 | 0.000187863 | EPN3     | ENSG00000049283 |
| 17 | 45972486 | 45972669 | 45972606 | 8  | 8  | 3  | 2.157544559 | 0.0836802   | SPATA20  | ENSG00000006282 |
| 17 | 46071615 | 46071899 | 46071757 | 11 | 14 | 2  | 4.794543465 | 0.00154571  | ABCC3    | ENSG00000108846 |
| 17 | 46219406 | 46219802 | 46219583 | 28 | 37 | 2  | 12.14617678 | 1.58E-09    | C17orf73 | ENSG00000167117 |

|    |          |          |          |     |     |    |             |            |          |                 |
|----|----------|----------|----------|-----|-----|----|-------------|------------|----------|-----------------|
| 17 | 46238125 | 46238495 | 46238304 | 26  | 33  | 0  | 32.60289556 | 1.18E-10   | WFIKKN2  | ENSG00000173714 |
| 17 | 46336887 | 46337189 | 46337046 | 11  | 12  | 8  | 1.385090334 | 0.219216   | TOB1     | ENSG00000141232 |
| 17 | 46381523 | 46381773 | 46381648 | 11  | 14  | 1  | 7.191815198 | 0.00034761 | TOB1     | ENSG00000141232 |
| 17 | 46381822 | 46382428 | 46382107 | 36  | 53  | 9  | 5.178106943 | 7.80E-09   | TOB1     | ENSG00000141232 |
| 17 | 46386404 | 46387189 | 46386794 | 84  | 115 | 5  | 18.5389014  | 7.82E-28   | TOB1     | ENSG00000141232 |
| 17 | 46585501 | 46586392 | 46585948 | 40  | 88  | 14 | 5.689524912 | 3.81E-14   | NME2     | ENSG00000011052 |
| 17 | 46676993 | 46677186 | 46677089 | 8   | 8   | 1  | 4.315089119 | 0.0127267  | MBTD1    | ENSG00000011258 |
| 17 | 47046294 | 47046729 | 47046511 | 20  | 32  | 1  | 15.82199344 | 3.96E-09   |          | ENSG00000187504 |
| 17 | 47072727 | 47072973 | 47072829 | 9   | 12  | 1  | 6.232906505 | 0.00117736 |          | ENSG00000187504 |
| 17 | 47552872 | 47553176 | 47553024 | 12  | 15  | 0  | 15.34253909 | 2.13E-05   | CA10     | ENSG00000154975 |
| 17 | 49049126 | 49049477 | 49049266 | 14  | 18  | 0  | 18.21926517 | 2.83E-06   |          | ENSG00000221534 |
| 17 | 50741213 | 50741459 | 50741344 | 13  | 14  | 1  | 7.191815198 | 0.00034761 |          | ENSG00000204772 |
| 17 | 50776921 | 50777224 | 50777048 | 10  | 13  | 5  | 2.237453617 | 0.038866   |          | ENSG00000204772 |
| 17 | 50865485 | 50865904 | 50865727 | 11  | 17  | 6  | 2.465765211 | 0.014729   | MMD      | ENSG00000108960 |
| 17 | 51595489 | 51595756 | 51595614 | 8   | 12  | 2  | 4.155271003 | 0.0046638  | ANKFN1   | ENSG00000153930 |
| 17 | 51655181 | 51655401 | 51655291 | 10  | 11  | 1  | 5.753452158 | 0.00215302 | ANKFN1   | ENSG00000153930 |
| 17 | 51744250 | 51744443 | 51744329 | 8   | 8   | 0  | 8.630178238 | 0.00235436 | ANKFN1   | ENSG00000153930 |
| 17 | 51791917 | 51792355 | 51792109 | 33  | 49  | 2  | 15.98181155 | 8.30E-13   | ANKFN1   | ENSG00000153930 |
| 17 | 51803877 | 51804165 | 51804001 | 9   | 10  | 1  | 5.273997812 | 0.00391723 | ANKFN1   | ENSG00000153930 |
| 17 | 51892074 | 51892297 | 51892140 | 8   | 9   | 2  | 3.19636231  | 0.0229249  | NOG      | ENSG00000183691 |
| 17 | 52131469 | 52131797 | 52131633 | 10  | 15  | 5  | 2.557089848 | 0.0169197  | NOG      | ENSG00000183691 |
| 17 | 52149560 | 52150551 | 52150045 | 83  | 135 | 5  | 21.73526371 | 2.44E-33   | C17orf67 | ENSG00000214226 |
| 17 | 52347185 | 52347364 | 52347339 | 8   | 8   | 0  | 8.630178238 | 0.00235436 | TRIM25   | ENSG00000121060 |
| 17 | 52393217 | 52393593 | 52393420 | 13  | 19  | 4  | 3.835634772 | 0.00108365 | COIL     | ENSG00000121058 |
| 17 | 52435231 | 52435590 | 52435400 | 13  | 18  | 1  | 9.109632584 | 2.91E-05   | SCPEP1   | ENSG00000121064 |
| 17 | 52518523 | 52518752 | 52518633 | 8   | 9   | 0  | 9.589086931 | 0.00120187 | AKAP1    | ENSG00000121057 |
| 17 | 52628555 | 52628927 | 52628731 | 25  | 31  | 1  | 15.34253909 | 7.54E-09   |          | ENSG00000210853 |
| 17 | 52636541 | 52636720 | 52636630 | 8   | 8   | 3  | 2.157544559 | 0.0836802  |          | ENSG00000210853 |
| 17 | 52675436 | 52675902 | 52675615 | 8   | 16  | 3  | 4.075361945 | 0.00173346 | MSI2     | ENSG00000153944 |
| 17 | 52790409 | 52790676 | 52790586 | 12  | 15  | 9  | 1.534253909 | 0.136498   |          | ENSG00000197862 |
| 17 | 52799017 | 52799235 | 52799138 | 8   | 9   | 2  | 3.19636231  | 0.0229249  |          | ENSG00000197862 |
| 17 | 52840225 | 52840556 | 52840404 | 10  | 14  | 3  | 3.595907599 | 0.00486913 |          | ENSG00000197862 |
| 17 | 52956049 | 52956995 | 52956487 | 192 | 294 | 4  | 56.57561289 | 1.36E-79   |          | ENSG00000210857 |
| 17 | 53004781 | 53004982 | 53004887 | 11  | 11  | 1  | 5.753452158 | 0.00215302 |          | ENSG00000210857 |

|    |          |          |          |    |    |    |             |             |                          |
|----|----------|----------|----------|----|----|----|-------------|-------------|--------------------------|
| 17 | 53030271 | 53030484 | 53030385 | 10 | 11 | 10 | 1.046082211 | 0.455063    | ENSG00000210857          |
| 17 | 53055472 | 53055652 | 53055562 | 8  | 8  | 2  | 2.876726079 | 0.0381137   | ENSG00000210857          |
| 17 | 53095205 | 53095405 | 53095305 | 8  | 9  | 1  | 4.794543465 | 0.00708517  | ENSG00000210857          |
| 17 | 53167698 | 53167889 | 53167793 | 8  | 8  | 3  | 2.157544559 | 0.0836802   | ENSG00000166329          |
| 17 | 53180031 | 53180212 | 53180061 | 9  | 9  | 4  | 1.917817386 | 0.103282    | ENSG00000166329          |
| 17 | 53265754 | 53266152 | 53265945 | 9  | 17 | 8  | 1.917817386 | 0.0474153   | MRPS23 ENSG00000181610   |
| 17 | 53282314 | 53282652 | 53282479 | 22 | 27 | 11 | 2.237453617 | 0.00685906  | MRPS23 ENSG00000181610   |
| 17 | 53300409 | 53300777 | 53300588 | 38 | 45 | 3  | 11.02744997 | 8.54E-11    | MRPS23 ENSG00000181610   |
| 17 | 53311507 | 53311744 | 53311612 | 8  | 12 | 3  | 3.116453252 | 0.0131971   | CUEDC1 ENSG00000180891   |
| 17 | 53324861 | 53325203 | 53325032 | 11 | 15 | 3  | 3.835634772 | 0.00291691  | CUEDC1 ENSG00000180891   |
| 17 | 53333536 | 53334247 | 53333970 | 63 | 95 | 8  | 10.22835939 | 8.59E-20    | CUEDC1 ENSG00000180891   |
| 17 | 53377166 | 53377351 | 53377258 | 8  | 10 | 0  | 10.54799562 | 0.000613541 | CUEDC1 ENSG00000180891   |
| 17 | 53427808 | 53428096 | 53427958 | 9  | 13 | 3  | 3.356180426 | 0.00805599  | VEZF1 ENSG00000136451    |
| 17 | 53439761 | 53440142 | 53439940 | 11 | 18 | 4  | 3.643853034 | 0.00178791  | SFRS1 ENSG00000136450    |
| 17 | 53455274 | 53455720 | 53455493 | 12 | 20 | 11 | 1.678090213 | 0.0696225   | SFRS1 ENSG00000136450    |
| 17 | 53472437 | 53472663 | 53472553 | 10 | 12 | 0  | 12.46581301 | 0.000159888 | SFRS1 ENSG00000136450    |
| 17 | 53517024 | 53517242 | 53517133 | 9  | 10 | 3  | 2.636998906 | 0.034203    | DYNLL2 ENSG00000121083   |
| 17 | 53518452 | 53518663 | 53518564 | 8  | 9  | 3  | 2.397271733 | 0.0539397   | DYNLL2 ENSG00000121083   |
| 17 | 53525213 | 53525722 | 53525543 | 16 | 29 | 3  | 7.191815198 | 1.23E-06    | DYNLL2 ENSG00000121083   |
| 17 | 53545266 | 53545904 | 53545639 | 10 | 25 | 12 | 1.917817386 | 0.0229342   | DYNLL2 ENSG00000121083   |
| 17 | 53648185 | 53648443 | 53648296 | 8  | 10 | 1  | 5.273997812 | 0.00391723  | MKS1 ENSG00000011143     |
| 17 | 53678648 | 53678844 | 53678746 | 8  | 9  | 4  | 1.917817386 | 0.103282    | LPO ENSG00000167419      |
| 17 | 53706342 | 53706521 | 53706441 | 8  | 8  | 0  | 8.630178238 | 0.00235436  | MPO ENSG00000005381      |
| 17 | 53784433 | 53784653 | 53784555 | 10 | 10 | 6  | 1.506856518 | 0.188853    | SUPT4H1 ENSG00000213246  |
| 17 | 53821137 | 53821411 | 53821274 | 11 | 15 | 8  | 1.704726565 | 0.0916153   | RNF43 ENSG00000108375    |
| 17 | 53823894 | 53824151 | 53824040 | 9  | 11 | 9  | 1.150690432 | 0.367789    | RNF43 ENSG00000108375    |
| 17 | 53849231 | 53849438 | 53849303 | 8  | 10 | 1  | 5.273997812 | 0.00391723  | RNF43 ENSG00000108375    |
| 17 | 53849871 | 53850279 | 53850016 | 12 | 20 | 13 | 1.43836304  | 0.140307    | RNF43 ENSG00000108375    |
| 17 | 53949590 | 53949791 | 53949690 | 8  | 8  | 4  | 1.726035648 | 0.150596    | MTMR4 ENSG00000108389    |
| 17 | 53950623 | 53950891 | 53950757 | 18 | 21 | 7  | 2.636998906 | 0.00562102  | MTMR4 ENSG00000108389    |
| 17 | 53951072 | 53951357 | 53951207 | 10 | 14 | 7  | 1.797953799 | 0.0806593   | MTMR4 ENSG00000108389    |
| 17 | 53992597 | 53992847 | 53992771 | 8  | 11 | 6  | 1.643843474 | 0.137712    | C17orf47 ENSG00000181013 |
| 17 | 54000136 | 54000599 | 54000420 | 8  | 17 | 22 | 0.750450282 | 0.822065    | C17orf47 ENSG00000181013 |
| 17 | 54002655 | 54002920 | 54002796 | 10 | 13 | 9  | 1.34247217  | 0.232231    | C17orf47 ENSG00000181013 |

|    |          |          |          |    |     |     |             |             |          |                 |
|----|----------|----------|----------|----|-----|-----|-------------|-------------|----------|-----------------|
| 17 | 54004046 | 54004308 | 54004177 | 10 | 10  | 18  | 0.555157664 | 0.945639    | C17orf47 | ENSG00000181013 |
| 17 | 54008033 | 54008228 | 54008130 | 8  | 9   | 14  | 0.639272462 | 0.869513    | C17orf47 | ENSG00000181013 |
| 17 | 54009971 | 54010436 | 54010222 | 18 | 31  | 14  | 2.045671879 | 0.00841532  | C17orf47 | ENSG00000181013 |
| 17 | 54011192 | 54011374 | 54011283 | 8  | 8   | 4   | 1.726035648 | 0.150596    | C17orf47 | ENSG00000181013 |
| 17 | 54011813 | 54012153 | 54012028 | 9  | 13  | 18  | 0.7065643   | 0.841991    | C17orf47 | ENSG00000181013 |
| 17 | 54016762 | 54017234 | 54016941 | 9  | 20  | 17  | 1.118726809 | 0.361026    | C17orf47 | ENSG00000181013 |
| 17 | 54018971 | 54019209 | 54019098 | 11 | 13  | 7   | 1.678090213 | 0.11195     | C17orf47 | ENSG00000181013 |
| 17 | 54019982 | 54020708 | 54020309 | 21 | 55  | 30  | 1.732222155 | 0.00588325  | C17orf47 | ENSG00000181013 |
| 17 | 54025644 | 54025976 | 54025798 | 8  | 13  | 15  | 0.839045106 | 0.685928    |          | ENSG00000212195 |
| 17 | 54027726 | 54028229 | 54027842 | 11 | 23  | 21  | 1.046082211 | 0.437961    |          | ENSG00000212195 |
| 17 | 54034596 | 54034991 | 54034732 | 9  | 15  | 6   | 2.191791298 | 0.0328001   |          | ENSG00000212195 |
| 17 | 54043942 | 54044157 | 54044055 | 9  | 9   | 25  | 0.368811036 | 0.997956    |          | ENSG00000212195 |
| 17 | 54047482 | 54047707 | 54047594 | 8  | 9   | 7   | 1.198635866 | 0.346278    |          | ENSG00000212195 |
| 17 | 54050087 | 54050514 | 54050300 | 11 | 20  | 19  | 1.006854128 | 0.490315    |          | ENSG00000212195 |
| 17 | 54052454 | 54052670 | 54052562 | 8  | 10  | 5   | 1.757999271 | 0.121253    |          | ENSG00000212195 |
| 17 | 54053850 | 54054036 | 54053956 | 8  | 8   | 7   | 1.07877228  | 0.435076    |          | ENSG00000212195 |
| 17 | 54054788 | 54055161 | 54054967 | 9  | 18  | 3   | 4.554816292 | 0.000599415 |          | ENSG00000212195 |
| 17 | 54059279 | 54059683 | 54059458 | 14 | 22  | 22  | 0.958908693 | 0.556268    |          | ENSG00000212195 |
| 17 | 54062684 | 54063039 | 54062812 | 12 | 17  | 19  | 0.863017824 | 0.676008    |          | ENSG00000212195 |
| 17 | 54063130 | 54064895 | 54064484 | 34 | 165 | 195 | 0.812136954 | 0.976047    |          | ENSG00000212195 |
| 17 | 54065102 | 54065354 | 54065277 | 8  | 12  | 21  | 0.566627864 | 0.952667    |          | ENSG00000212195 |
| 17 | 54065414 | 54065817 | 54065691 | 9  | 17  | 25  | 0.663859864 | 0.912943    |          | ENSG00000212195 |
| 17 | 54066772 | 54067259 | 54066894 | 11 | 24  | 27  | 0.856168476 | 0.714792    |          | ENSG00000212195 |
| 17 | 54068336 | 54068614 | 54068466 | 9  | 12  | 11  | 1.038817751 | 0.460341    |          | ENSG00000212195 |
| 17 | 54069502 | 54069734 | 54069639 | 8  | 10  | 7   | 1.318499453 | 0.269217    |          | ENSG00000212195 |
| 17 | 54069772 | 54070040 | 54069906 | 11 | 13  | 18  | 0.7065643   | 0.841991    |          | ENSG00000212195 |
| 17 | 54072069 | 54072402 | 54072235 | 25 | 30  | 43  | 0.675594761 | 0.954874    |          | ENSG00000212195 |
| 17 | 54072561 | 54073512 | 54072911 | 20 | 56  | 49  | 1.09315591  | 0.321608    |          | ENSG00000212195 |
| 17 | 54074192 | 54074715 | 54074366 | 16 | 28  | 29  | 0.92694507  | 0.614695    |          | ENSG00000212195 |
| 17 | 54075063 | 54075713 | 54075542 | 14 | 33  | 32  | 0.987966532 | 0.519197    |          | ENSG00000212195 |
| 17 | 54078542 | 54078735 | 54078644 | 8  | 9   | 13  | 0.684934781 | 0.824961    |          | ENSG00000202077 |
| 17 | 54078951 | 54079243 | 54079102 | 12 | 15  | 19  | 0.767126954 | 0.788167    |          | ENSG00000202077 |
| 17 | 54079838 | 54080073 | 54079936 | 8  | 11  | 3   | 2.876726079 | 0.0213797   |          | ENSG00000202077 |
| 17 | 54080401 | 54081092 | 54080859 | 10 | 24  | 31  | 0.749147416 | 0.862744    |          | ENSG00000202077 |

|    |          |          |          |    |     |     |             |           |                       |
|----|----------|----------|----------|----|-----|-----|-------------|-----------|-----------------------|
| 17 | 54081767 | 54081952 | 54081866 | 8  | 8   | 15  | 0.53938614  | 0.937867  | ENSG00000202077       |
| 17 | 54082948 | 54083275 | 54083114 | 13 | 17  | 16  | 1.015315087 | 0.480915  | ENSG00000202077       |
| 17 | 54083635 | 54084462 | 54084050 | 11 | 36  | 35  | 0.985545046 | 0.524285  | ENSG00000202077       |
| 17 | 54085005 | 54085297 | 54085160 | 8  | 12  | 19  | 0.62329065  | 0.912804  | ENSG00000202077       |
| 17 | 54085589 | 54086155 | 54085768 | 10 | 22  | 24  | 0.882195998 | 0.668517  | ENSG00000202077       |
| 17 | 54088020 | 54088411 | 54088262 | 8  | 12  | 12  | 0.958908693 | 0.542188  | ENSG00000202077       |
| 17 | 54089590 | 54089866 | 54089743 | 10 | 14  | 15  | 0.8989769   | 0.617119  | ENSG00000202077       |
| 17 | 54090916 | 54092225 | 54091754 | 50 | 145 | 148 | 0.939601807 | 0.703654  | ENSG00000202077       |
| 17 | 54092708 | 54092899 | 54092844 | 8  | 9   | 13  | 0.684934781 | 0.824961  | ENSG00000202077       |
| 17 | 54092954 | 54093220 | 54093089 | 8  | 11  | 14  | 0.767126954 | 0.756447  | ENSG00000202077       |
| 17 | 54094776 | 54095237 | 54095002 | 9  | 17  | 14  | 1.150690432 | 0.340986  | ENSG00000202077       |
| 17 | 54096795 | 54098146 | 54097682 | 33 | 96  | 46  | 1.979024324 | 3.52E-05  | ENSG00000199426       |
| 17 | 54098746 | 54100046 | 54099105 | 15 | 65  | 51  | 1.217076418 | 0.142799  | ENSG00000199426       |
| 17 | 54100197 | 54101476 | 54100667 | 21 | 82  | 31  | 2.487169423 | 1.75E-06  | ENSG00000199426       |
| 17 | 54101706 | 54101940 | 54101845 | 8  | 11  | 6   | 1.643843474 | 0.137712  | ENSG00000199426       |
| 17 | 54101993 | 54102779 | 54102600 | 21 | 46  | 35  | 1.251908571 | 0.152659  | ENSG00000199426       |
| 17 | 54103384 | 54103573 | 54103549 | 8  | 9   | 12  | 0.737622072 | 0.769563  | ENSG00000199426       |
| 17 | 54103580 | 54104088 | 54103857 | 14 | 25  | 24  | 0.997265041 | 0.503149  | ENSG00000199426       |
| 17 | 54104445 | 54104839 | 54104660 | 8  | 15  | 5   | 2.557089848 | 0.0169197 | ENSG00000206917       |
| 17 | 54107568 | 54107902 | 54107735 | 12 | 15  | 16  | 0.902502299 | 0.616352  | ENSG00000206917       |
| 17 | 54107928 | 54108175 | 54108049 | 8  | 10  | 10  | 0.958908693 | 0.538751  | ENSG00000206917       |
| 17 | 54108294 | 54108481 | 54108436 | 8  | 9   | 7   | 1.198635866 | 0.346278  | ENSG00000206917       |
| 17 | 54109459 | 54109723 | 54109591 | 11 | 13  | 15  | 0.839045106 | 0.685928  | ENSG00000206917       |
| 17 | 54109874 | 54110152 | 54110012 | 14 | 16  | 21  | 0.740974899 | 0.826507  | ENSG00000206917       |
| 17 | 54111465 | 54112717 | 54112032 | 18 | 75  | 94  | 0.767126954 | 0.95834   | ENSG00000200997       |
| 17 | 54114904 | 54115230 | 54115067 | 12 | 15  | 13  | 1.095895649 | 0.398774  | ENSG00000200997       |
| 17 | 54117136 | 54117348 | 54117259 | 8  | 9   | 6   | 1.369869562 | 0.253675  | ENSG00000200997       |
| 17 | 54117716 | 54118022 | 54117869 | 16 | 17  | 14  | 1.150690432 | 0.340986  | ENSG00000200997       |
| 17 | 54118346 | 54118525 | 54118501 | 8  | 9   | 10  | 0.871735176 | 0.624623  | TEX14 ENSG00000121101 |
| 17 | 54118554 | 54119169 | 54118861 | 11 | 28  | 38  | 0.713034669 | 0.918418  | TEX14 ENSG00000121101 |
| 17 | 54119388 | 54119575 | 54119481 | 9  | 9   | 11  | 0.799090578 | 0.702688  | TEX14 ENSG00000121101 |
| 17 | 54120825 | 54121301 | 54121174 | 9  | 19  | 27  | 0.684934781 | 0.905224  | TEX14 ENSG00000121101 |
| 17 | 54121960 | 54122149 | 54122054 | 9  | 9   | 15  | 0.599317933 | 0.904407  | TEX14 ENSG00000121101 |
| 17 | 54124105 | 54124394 | 54124266 | 9  | 13  | 16  | 0.789689512 | 0.746135  | TEX14 ENSG00000121101 |



|    |          |          |          |     |     |     |             |            |        |                 |
|----|----------|----------|----------|-----|-----|-----|-------------|------------|--------|-----------------|
| 17 | 54124498 | 54126541 | 54125815 | 312 | 731 | 150 | 4.648484525 | 1.08E-87   | RAD51C | ENSG00000108384 |
| 17 | 54127187 | 54127605 | 54127366 | 16  | 24  | 23  | 0.998863222 | 0.500802   | RAD51C | ENSG00000108384 |
| 17 | 54127751 | 54127943 | 54127848 | 8   | 8   | 7   | 1.07877228  | 0.435076   | RAD51C | ENSG00000108384 |
| 17 | 54128924 | 54129309 | 54129135 | 17  | 23  | 21  | 1.046082211 | 0.437961   | RAD51C | ENSG00000108384 |
| 17 | 54131613 | 54132309 | 54131881 | 12  | 29  | 19  | 1.43836304  | 0.0995642  | RAD51C | ENSG00000108384 |
| 17 | 54135557 | 54135828 | 54135705 | 14  | 17  | 12  | 1.327719729 | 0.212795   | RAD51C | ENSG00000108384 |
| 17 | 54136892 | 54137213 | 54137052 | 14  | 19  | 23  | 0.799090578 | 0.772621   | RAD51C | ENSG00000108384 |
| 17 | 54138717 | 54139143 | 54138964 | 14  | 23  | 9   | 2.301380863 | 0.00938618 | RAD51C | ENSG00000108384 |
| 17 | 54139885 | 54140249 | 54140064 | 8   | 15  | 8   | 1.704726565 | 0.0916153  | RAD51C | ENSG00000108384 |
| 17 | 54140927 | 54141176 | 54141050 | 10  | 13  | 11  | 1.118726809 | 0.38479    | RAD51C | ENSG00000108384 |
| 17 | 54142171 | 54142558 | 54142305 | 10  | 16  | 9   | 1.630144778 | 0.102169   | RAD51C | ENSG00000108384 |
| 17 | 54142927 | 54143922 | 54143458 | 17  | 48  | 37  | 1.236487525 | 0.160646   | RAD51C | ENSG00000108384 |
| 17 | 54144019 | 54144424 | 54144221 | 8   | 16  | 6   | 2.328778255 | 0.0221113  | RAD51C | ENSG00000108384 |
| 17 | 54144702 | 54145061 | 54144892 | 8   | 13  | 7   | 1.678090213 | 0.11195    | RAD51C | ENSG00000108384 |
| 17 | 54147292 | 54147518 | 54147451 | 8   | 10  | 8   | 1.171999514 | 0.35773    | RAD51C | ENSG00000108384 |
| 17 | 54150635 | 54151051 | 54150872 | 8   | 15  | 12  | 1.180195315 | 0.324974   | RAD51C | ENSG00000108384 |
| 17 | 54151852 | 54152076 | 54151930 | 9   | 10  | 5   | 1.757999271 | 0.121253   | RAD51C | ENSG00000108384 |
| 17 | 54154179 | 54154468 | 54154323 | 8   | 11  | 8   | 1.278544924 | 0.28289    | RAD51C | ENSG00000108384 |
| 17 | 54156405 | 54157101 | 54156667 | 13  | 33  | 25  | 1.253957522 | 0.189413   | PPM1E  | ENSG00000175175 |
| 17 | 54157161 | 54157805 | 54157407 | 12  | 28  | 25  | 1.069552004 | 0.40018    | PPM1E  | ENSG00000175175 |
| 17 | 54159707 | 54160327 | 54160181 | 10  | 26  | 11  | 2.157544559 | 0.00983179 | PPM1E  | ENSG00000175175 |
| 17 | 54161262 | 54161483 | 54161372 | 12  | 12  | 13  | 0.890415215 | 0.619237   | PPM1E  | ENSG00000175175 |
| 17 | 54163180 | 54163364 | 54163280 | 8   | 10  | 4   | 2.109599125 | 0.0694668  | PPM1E  | ENSG00000175175 |
| 17 | 54165022 | 54165389 | 54165155 | 9   | 15  | 5   | 2.557089848 | 0.0169197  | PPM1E  | ENSG00000175175 |
| 17 | 54169159 | 54169410 | 54169273 | 11  | 13  | 13  | 0.958908693 | 0.543805   | PPM1E  | ENSG00000175175 |
| 17 | 54171088 | 54171392 | 54171240 | 9   | 12  | 9   | 1.246581301 | 0.295061   | PPM1E  | ENSG00000175175 |
| 17 | 54171928 | 54172176 | 54172060 | 8   | 10  | 1   | 5.273997812 | 0.00391723 | PPM1E  | ENSG00000175175 |
| 17 | 54173249 | 54174087 | 54173591 | 30  | 58  | 29  | 1.885853763 | 0.00173859 | PPM1E  | ENSG00000175175 |
| 17 | 54177384 | 54177602 | 54177490 | 10  | 13  | 9   | 1.34247217  | 0.232231   | PPM1E  | ENSG00000175175 |
| 17 | 54179325 | 54179504 | 54179393 | 8   | 8   | 11  | 0.71918152  | 0.777546   | PPM1E  | ENSG00000175175 |
| 17 | 54184069 | 54184329 | 54184194 | 10  | 13  | 9   | 1.34247217  | 0.232231   | PPM1E  | ENSG00000175175 |
| 17 | 54184488 | 54184722 | 54184630 | 8   | 9   | 11  | 0.799090578 | 0.702688   | PPM1E  | ENSG00000175175 |
| 17 | 54186102 | 54186540 | 54186281 | 10  | 19  | 10  | 1.743470351 | 0.0622604  | PPM1E  | ENSG00000175175 |
| 17 | 54186756 | 54187033 | 54186890 | 10  | 12  | 9   | 1.246581301 | 0.295061   | PPM1E  | ENSG00000175175 |

|    |          |          |          |    |    |    |             |            |       |                 |
|----|----------|----------|----------|----|----|----|-------------|------------|-------|-----------------|
| 17 | 54187571 | 54187814 | 54187701 | 8  | 11 | 12 | 0.885146486 | 0.620672   | PPM1E | ENSG00000175175 |
| 17 | 54187821 | 54188137 | 54187979 | 9  | 13 | 17 | 0.745817872 | 0.798145   | PPM1E | ENSG00000175175 |
| 17 | 54188215 | 54188668 | 54188394 | 8  | 16 | 13 | 1.164389127 | 0.333296   | PPM1E | ENSG00000175175 |
| 17 | 54188708 | 54188966 | 54188874 | 11 | 12 | 6  | 1.78083043  | 0.0985525  | PPM1E | ENSG00000175175 |
| 17 | 54189068 | 54189555 | 54189247 | 15 | 31 | 31 | 0.958908693 | 0.566385   | PPM1E | ENSG00000175175 |
| 17 | 54189645 | 54189839 | 54189766 | 8  | 10 | 9  | 1.054799562 | 0.4492     | PPM1E | ENSG00000175175 |
| 17 | 54190847 | 54191153 | 54191011 | 10 | 12 | 10 | 1.133255728 | 0.37674    | PPM1E | ENSG00000175175 |
| 17 | 54192317 | 54192546 | 54192454 | 10 | 11 | 13 | 0.821921737 | 0.693119   | PPM1E | ENSG00000175175 |
| 17 | 54192825 | 54193185 | 54193003 | 17 | 23 | 26 | 0.852363283 | 0.716584   | PPM1E | ENSG00000175175 |
| 17 | 54193267 | 54193535 | 54193401 | 8  | 11 | 18 | 0.605626543 | 0.918575   | PPM1E | ENSG00000175175 |
| 17 | 54193999 | 54194202 | 54194137 | 10 | 11 | 5  | 1.917817386 | 0.0843804  | PPM1E | ENSG00000175175 |
| 17 | 54195488 | 54196133 | 54195866 | 34 | 62 | 33 | 1.776801402 | 0.00275133 | PPM1E | ENSG00000175175 |
| 17 | 54196640 | 54197087 | 54196908 | 10 | 18 | 5  | 3.036544195 | 0.0044641  | PPM1E | ENSG00000175175 |
| 17 | 54197127 | 54197440 | 54197262 | 10 | 14 | 4  | 2.876726079 | 0.01219    | PPM1E | ENSG00000175175 |
| 17 | 54197727 | 54197996 | 54197861 | 8  | 11 | 4  | 2.301380863 | 0.0459276  | PPM1E | ENSG00000175175 |
| 17 | 54199684 | 54199920 | 54199824 | 11 | 12 | 5  | 2.077635502 | 0.0577144  | PPM1E | ENSG00000175175 |
| 17 | 54211011 | 54211196 | 54211126 | 8  | 8  | 7  | 1.07877228  | 0.435076   | PPM1E | ENSG00000175175 |
| 17 | 54212679 | 54213224 | 54212855 | 8  | 20 | 13 | 1.43836304  | 0.140307   | PPM1E | ENSG00000175175 |
| 17 | 54215551 | 54216084 | 54215918 | 11 | 20 | 15 | 1.25856766  | 0.240048   | PPM1E | ENSG00000175175 |
| 17 | 54217995 | 54218263 | 54218129 | 9  | 12 | 11 | 1.038817751 | 0.460341   | PPM1E | ENSG00000175175 |
| 17 | 54218777 | 54219045 | 54218927 | 9  | 11 | 9  | 1.150690432 | 0.367789   | PPM1E | ENSG00000175175 |
| 17 | 54222956 | 54223257 | 54223106 | 10 | 15 | 7  | 1.917817386 | 0.0572317  | PPM1E | ENSG00000175175 |
| 17 | 54223831 | 54224201 | 54224005 | 11 | 17 | 19 | 0.863017824 | 0.676008   | PPM1E | ENSG00000175175 |
| 17 | 54229602 | 54230236 | 54230017 | 10 | 23 | 22 | 1.000600375 | 0.498356   |       | ENSG00000210940 |
| 17 | 54243162 | 54243346 | 54243254 | 8  | 9  | 1  | 4.794543465 | 0.00708517 |       | ENSG00000210940 |
| 17 | 54245533 | 54245754 | 54245643 | 8  | 11 | 9  | 1.150690432 | 0.367789   |       | ENSG00000210940 |
| 17 | 54246054 | 54246397 | 54246225 | 9  | 13 | 15 | 0.839045106 | 0.685928   |       | ENSG00000210940 |
| 17 | 54251069 | 54251318 | 54251193 | 14 | 14 | 11 | 1.198635866 | 0.315918   |       | ENSG00000210940 |
| 17 | 54254303 | 54254668 | 54254489 | 14 | 21 | 11 | 1.757999271 | 0.0516118  |       | ENSG00000210940 |
| 17 | 54255221 | 54255435 | 54255301 | 11 | 11 | 13 | 0.821921737 | 0.693119   |       | ENSG00000210940 |
| 17 | 54259293 | 54259506 | 54259399 | 8  | 10 | 8  | 1.171999514 | 0.35773    |       | ENSG00000210940 |
| 17 | 54261864 | 54262141 | 54262040 | 9  | 13 | 12 | 1.0326709   | 0.46514    |       | ENSG00000210940 |
| 17 | 54264297 | 54264490 | 54264407 | 8  | 10 | 6  | 1.506856518 | 0.188853   |       | ENSG00000210940 |
| 17 | 54265490 | 54265853 | 54265666 | 8  | 13 | 10 | 1.220429246 | 0.306001   |       | ENSG00000210940 |

|    |          |          |          |    |     |    |             |            |                 |
|----|----------|----------|----------|----|-----|----|-------------|------------|-----------------|
| 17 | 54272243 | 54272689 | 54272399 | 9  | 18  | 16 | 1.07172148  | 0.415914   | ENSG00000210940 |
| 17 | 54276648 | 54276986 | 54276817 | 9  | 13  | 16 | 0.789689512 | 0.746135   | ENSG00000210940 |
| 17 | 54285624 | 54285803 | 54285712 | 9  | 9   | 6  | 1.369869562 | 0.253675   | ENSG00000210940 |
| 17 | 54286946 | 54287591 | 54287283 | 9  | 23  | 20 | 1.095895649 | 0.377643   | ENSG00000210940 |
| 17 | 54291182 | 54291511 | 54291346 | 10 | 16  | 19 | 0.815072389 | 0.734271   | ENSG00000210940 |
| 17 | 54291584 | 54292229 | 54291763 | 10 | 23  | 20 | 1.095895649 | 0.377643   | ENSG00000210940 |
| 17 | 54293147 | 54293406 | 54293318 | 8  | 11  | 4  | 2.301380863 | 0.0459276  | ENSG00000210940 |
| 17 | 54293440 | 54293705 | 54293609 | 13 | 16  | 4  | 3.260289556 | 0.00475414 | ENSG00000210940 |
| 17 | 54294998 | 54295182 | 54295089 | 8  | 9   | 8  | 1.065454103 | 0.442605   | ENSG00000210940 |
| 17 | 54298183 | 54299125 | 54298654 | 10 | 34  | 30 | 1.082638847 | 0.37224    | ENSG00000210940 |
| 17 | 54299356 | 54299759 | 54299604 | 11 | 17  | 7  | 2.157544559 | 0.0276499  | ENSG00000210940 |
| 17 | 54302615 | 54302855 | 54302771 | 8  | 11  | 16 | 0.676876725 | 0.854566   | ENSG00000210940 |
| 17 | 54302886 | 54303256 | 54303077 | 11 | 18  | 21 | 0.828148417 | 0.728078   | ENSG00000210940 |
| 17 | 54303300 | 54303683 | 54303479 | 10 | 19  | 6  | 2.739739123 | 0.00632909 | ENSG00000210940 |
| 17 | 54304709 | 54304964 | 54304813 | 10 | 13  | 10 | 1.220429246 | 0.306001   | ENSG00000210940 |
| 17 | 54305374 | 54305773 | 54305644 | 9  | 16  | 10 | 1.481949798 | 0.147733   | ENSG00000210940 |
| 17 | 54306092 | 54306287 | 54306185 | 8  | 10  | 11 | 0.878999635 | 0.622439   | ENSG00000210940 |
| 17 | 54309591 | 54310115 | 54309936 | 9  | 18  | 15 | 1.138704073 | 0.348127   | ENSG00000210940 |
| 17 | 54315427 | 54315632 | 54315550 | 8  | 9   | 1  | 4.794543465 | 0.00708517 | ENSG00000210940 |
| 17 | 54316172 | 54316560 | 54316387 | 11 | 18  | 15 | 1.138704073 | 0.348127   | ENSG00000210940 |
| 17 | 54317625 | 54317821 | 54317669 | 8  | 10  | 10 | 0.958908693 | 0.538751   | ENSG00000210940 |
| 17 | 54318419 | 54318810 | 54318621 | 11 | 20  | 17 | 1.118726809 | 0.361026   | ENSG00000210940 |
| 17 | 54318895 | 54319174 | 54319033 | 12 | 14  | 11 | 1.198635866 | 0.315918   | ENSG00000210940 |
| 17 | 54319795 | 54320128 | 54320013 | 9  | 14  | 14 | 0.958908693 | 0.545362   | ENSG00000210940 |
| 17 | 54333565 | 54333750 | 54333657 | 8  | 9   | 3  | 2.397271733 | 0.0539397  | ENSG00000210952 |
| 17 | 54335183 | 54335437 | 54335259 | 8  | 11  | 26 | 0.426181641 | 0.995195   | ENSG00000210952 |
| 17 | 54335481 | 54335831 | 54335656 | 10 | 15  | 23 | 0.639272462 | 0.921343   | ENSG00000210952 |
| 17 | 54342902 | 54343131 | 54342984 | 13 | 15  | 13 | 1.095895649 | 0.398774   | ENSG00000210952 |
| 17 | 54343206 | 54343713 | 54343459 | 8  | 19  | 15 | 1.198635866 | 0.291044   | ENSG00000210952 |
| 17 | 54343887 | 54344800 | 54344371 | 64 | 106 | 22 | 4.461010007 | 3.88E-14   | ENSG00000210952 |
| 17 | 54345755 | 54346103 | 54345868 | 11 | 15  | 17 | 0.852363283 | 0.680376   | ENSG00000210952 |
| 17 | 54346420 | 54346802 | 54346693 | 10 | 17  | 23 | 0.71918152  | 0.858071   | ENSG00000210952 |
| 17 | 54347545 | 54347863 | 54347704 | 8  | 12  | 11 | 1.038817751 | 0.460341   | ENSG00000210952 |
| 17 | 54349580 | 54350021 | 54349747 | 9  | 18  | 14 | 1.214617678 | 0.282961   | ENSG00000210952 |

|    |          |          |          |    |    |    |             |            |                 |
|----|----------|----------|----------|----|----|----|-------------|------------|-----------------|
| 17 | 54359571 | 54359774 | 54359728 | 8  | 9  | 8  | 1.065454103 | 0.442605   | ENSG00000210952 |
| 17 | 54362729 | 54362963 | 54362834 | 8  | 10 | 3  | 2.636998906 | 0.034203   | ENSG00000210952 |
| 17 | 54367408 | 54367669 | 54367538 | 8  | 13 | 3  | 3.356180426 | 0.00805599 | ENSG00000210952 |
| 17 | 54375680 | 54376471 | 54376292 | 12 | 33 | 26 | 1.207514651 | 0.229506   | ENSG00000210952 |
| 17 | 54377498 | 54377837 | 54377667 | 8  | 13 | 3  | 3.356180426 | 0.00805599 | ENSG00000210952 |
| 17 | 54379655 | 54380513 | 54380286 | 12 | 32 | 24 | 1.265759475 | 0.183795   | ENSG00000210961 |
| 17 | 54383132 | 54383603 | 54383424 | 9  | 17 | 6  | 2.465765211 | 0.014729   | ENSG00000210961 |
| 17 | 54385664 | 54385874 | 54385721 | 9  | 11 | 9  | 1.150690432 | 0.367789   | ENSG00000210961 |
| 17 | 54387745 | 54387983 | 54387849 | 10 | 12 | 10 | 1.133255728 | 0.37674    | ENSG00000210961 |
| 17 | 54389202 | 54389389 | 54389304 | 10 | 10 | 9  | 1.054799562 | 0.4492     | ENSG00000210961 |
| 17 | 54389611 | 54389848 | 54389729 | 9  | 13 | 7  | 1.678090213 | 0.11195    | ENSG00000210961 |
| 17 | 54392002 | 54392708 | 54392477 | 52 | 88 | 32 | 2.586147687 | 3.54E-07   | ENSG00000210961 |
| 17 | 54392795 | 54393022 | 54392908 | 8  | 10 | 3  | 2.636998906 | 0.034203   | ENSG00000210961 |
| 17 | 54396289 | 54396630 | 54396463 | 16 | 18 | 25 | 0.700740968 | 0.883987   | ENSG00000210961 |
| 17 | 54397292 | 54398091 | 54397912 | 17 | 43 | 41 | 1.004571012 | 0.490923   | ENSG00000210961 |
| 17 | 54398600 | 54398822 | 54398711 | 8  | 11 | 5  | 1.917817386 | 0.0843804  | ENSG00000210961 |
| 17 | 54400448 | 54400915 | 54400738 | 10 | 20 | 19 | 1.006854128 | 0.490315   | ENSG00000210961 |
| 17 | 54401243 | 54401549 | 54401380 | 19 | 22 | 15 | 1.378431246 | 0.157106   | ENSG00000210961 |
| 17 | 54401599 | 54402342 | 54401911 | 13 | 38 | 36 | 1.010741595 | 0.48069    | ENSG00000210961 |
| 17 | 54402625 | 54402913 | 54402757 | 10 | 14 | 11 | 1.198635866 | 0.315918   | ENSG00000216168 |
| 17 | 54403305 | 54403883 | 54403496 | 12 | 26 | 38 | 0.663859864 | 0.951552   | ENSG00000216168 |
| 17 | 54404235 | 54404425 | 54404330 | 10 | 10 | 10 | 0.958908693 | 0.538751   | ENSG00000216168 |
| 17 | 54404785 | 54405089 | 54404937 | 8  | 12 | 16 | 0.733283118 | 0.803868   | ENSG00000216168 |
| 17 | 54406445 | 54406826 | 54406617 | 12 | 17 | 19 | 0.863017824 | 0.676008   | ENSG00000216168 |
| 17 | 54406890 | 54407136 | 54407013 | 9  | 12 | 20 | 0.593610143 | 0.935335   | ENSG00000216168 |
| 17 | 54407665 | 54408208 | 54407830 | 10 | 21 | 42 | 0.490604448 | 0.997546   | ENSG00000216168 |
| 17 | 54408218 | 54408454 | 54408302 | 8  | 11 | 26 | 0.426181641 | 0.995195   | ENSG00000216168 |
| 17 | 54408702 | 54409055 | 54408878 | 8  | 14 | 14 | 0.958908693 | 0.545362   | ENSG00000216168 |
| 17 | 54410060 | 54410410 | 54410235 | 8  | 14 | 11 | 1.198635866 | 0.315918   | ENSG00000216168 |
| 17 | 54410967 | 54411876 | 54411340 | 10 | 39 | 38 | 0.983496095 | 0.529003   | ENSG00000216168 |
| 17 | 54411890 | 54412719 | 54412390 | 10 | 37 | 29 | 1.214617678 | 0.210365   | ENSG00000216168 |
| 17 | 54412828 | 54413595 | 54413416 | 17 | 37 | 30 | 1.175436462 | 0.249802   | ENSG00000216168 |
| 17 | 54413607 | 54413821 | 54413724 | 9  | 10 | 14 | 0.703199708 | 0.817173   | ENSG00000216168 |
| 17 | 54414429 | 54414734 | 54414585 | 11 | 15 | 22 | 0.667066917 | 0.897252   | ENSG00000216168 |

|    |          |          |          |    |    |    |             |           |                 |
|----|----------|----------|----------|----|----|----|-------------|-----------|-----------------|
| 17 | 54414824 | 54415120 | 54414970 | 12 | 16 | 15 | 1.018840486 | 0.477384  | ENSG00000216168 |
| 17 | 54415464 | 54415711 | 54415636 | 9  | 11 | 12 | 0.885146486 | 0.620672  | ENSG00000216168 |
| 17 | 54416234 | 54416448 | 54416319 | 10 | 12 | 13 | 0.890415215 | 0.619237  | ENSG00000216168 |
| 17 | 54417685 | 54418018 | 54417858 | 11 | 15 | 29 | 0.51141797  | 0.98748   | ENSG00000216168 |
| 17 | 54419149 | 54419430 | 54419293 | 9  | 11 | 17 | 0.639272462 | 0.890352  | ENSG00000216168 |
| 17 | 54419509 | 54419870 | 54419722 | 12 | 16 | 10 | 1.481949798 | 0.147733  | ENSG00000216168 |
| 17 | 54420824 | 54421257 | 54421078 | 11 | 22 | 14 | 1.470326663 | 0.117149  | ENSG00000216168 |
| 17 | 54421794 | 54422167 | 54421950 | 9  | 14 | 19 | 0.71918152  | 0.83643   | ENSG00000216168 |
| 17 | 54423832 | 54424093 | 54423962 | 11 | 14 | 17 | 0.799090578 | 0.74177   | ENSG00000216168 |
| 17 | 54425499 | 54425999 | 54425834 | 12 | 25 | 26 | 0.923393556 | 0.614269  | ENSG00000216168 |
| 17 | 54426563 | 54426807 | 54426706 | 8  | 9  | 7  | 1.198635866 | 0.346278  | ENSG00000216168 |
| 17 | 54427788 | 54428030 | 54427887 | 9  | 12 | 10 | 1.133255728 | 0.37674   | ENSG00000216168 |
| 17 | 54429045 | 54429353 | 54429199 | 8  | 11 | 11 | 0.958908693 | 0.540507  | ENSG00000216168 |
| 17 | 54429448 | 54430814 | 54430075 | 11 | 55 | 64 | 0.82613672  | 0.85351   | ENSG00000216168 |
| 17 | 54430981 | 54431530 | 54431241 | 11 | 26 | 31 | 0.80907921  | 0.792852  | ENSG00000216168 |
| 17 | 54433316 | 54433618 | 54433477 | 10 | 14 | 10 | 1.307602763 | 0.244096  | ENSG00000216168 |
| 17 | 54434511 | 54434711 | 54434593 | 8  | 9  | 13 | 0.684934781 | 0.824961  | ENSG00000216168 |
| 17 | 54434781 | 54435078 | 54434929 | 11 | 15 | 20 | 0.730597099 | 0.831283  | ENSG00000216168 |
| 17 | 54435096 | 54435599 | 54435420 | 11 | 23 | 13 | 1.643843474 | 0.0639146 | ENSG00000216168 |
| 17 | 54436172 | 54436600 | 54436337 | 12 | 20 | 18 | 1.05984645  | 0.425516  | ENSG00000216168 |
| 17 | 54436637 | 54437640 | 54437238 | 31 | 77 | 60 | 1.226145542 | 0.114767  | ENSG00000216168 |
| 17 | 54438027 | 54438397 | 54438206 | 8  | 15 | 15 | 0.958908693 | 0.546868  | ENSG00000216168 |
| 17 | 54439419 | 54440604 | 54440374 | 13 | 56 | 47 | 1.138704073 | 0.252047  | ENSG00000216168 |
| 17 | 54440954 | 54441269 | 54441111 | 8  | 14 | 8  | 1.598181155 | 0.124586  | ENSG00000216168 |
| 17 | 54442174 | 54442560 | 54442381 | 8  | 15 | 21 | 0.69738814  | 0.867465  | ENSG00000216168 |
| 17 | 54443457 | 54443857 | 54443633 | 9  | 16 | 26 | 0.603757325 | 0.952213  | ENSG00000216168 |
| 17 | 54444015 | 54444325 | 54444170 | 12 | 17 | 23 | 0.71918152  | 0.858071  | ENSG00000216168 |
| 17 | 54445590 | 54445887 | 54445741 | 8  | 10 | 18 | 0.555157664 | 0.945639  | ENSG00000216168 |
| 17 | 54445980 | 54447077 | 54446815 | 10 | 42 | 29 | 1.374435793 | 0.0874918 | ENSG00000216168 |
| 17 | 54448865 | 54449059 | 54449010 | 9  | 11 | 7  | 1.43836304  | 0.204844  | ENSG00000216168 |
| 17 | 54449440 | 54449696 | 54449605 | 8  | 11 | 18 | 0.605626543 | 0.918575  | ENSG00000216168 |
| 17 | 54451069 | 54451320 | 54451142 | 8  | 11 | 17 | 0.639272462 | 0.890352  | ENSG00000216168 |
| 17 | 54452316 | 54452832 | 54452653 | 11 | 21 | 20 | 1.004571012 | 0.493124  | ENSG00000216168 |
| 17 | 54454470 | 54454802 | 54454636 | 14 | 18 | 13 | 1.301376083 | 0.22245   | ENSG00000216168 |

|    |          |          |          |    |    |    |             |           |                        |
|----|----------|----------|----------|----|----|----|-------------|-----------|------------------------|
| 17 | 54456495 | 54456819 | 54456657 | 8  | 10 | 13 | 0.753428259 | 0.762589  | ENSG00000216168        |
| 17 | 54457621 | 54457850 | 54457705 | 10 | 12 | 13 | 0.890415215 | 0.619237  | ENSG00000216168        |
| 17 | 54458187 | 54458562 | 54458366 | 9  | 15 | 20 | 0.730597099 | 0.831283  | ENSG00000216168        |
| 17 | 54459324 | 54459904 | 54459725 | 14 | 29 | 26 | 1.065454103 | 0.404106  | ENSG00000216168        |
| 17 | 54459944 | 54460256 | 54460085 | 9  | 14 | 16 | 0.846095906 | 0.68298   | ENSG00000216168        |
| 17 | 54460422 | 54460677 | 54460549 | 13 | 15 | 16 | 0.902502299 | 0.616352  | ENSG00000216168        |
| 17 | 54461132 | 54461658 | 54461479 | 9  | 23 | 20 | 1.095895649 | 0.377643  | ENSG00000216168        |
| 17 | 54462182 | 54462394 | 54462283 | 9  | 9  | 6  | 1.369869562 | 0.253675  | ENSG00000216168        |
| 17 | 54462402 | 54463097 | 54462918 | 9  | 26 | 22 | 1.125675422 | 0.336059  | ENSG00000216168        |
| 17 | 54463148 | 54463456 | 54463302 | 12 | 17 | 8  | 1.917817386 | 0.0474153 | ENSG00000216168        |
| 17 | 54463488 | 54463795 | 54463622 | 8  | 11 | 16 | 0.676876725 | 0.854566  | ENSG00000216168        |
| 17 | 54463977 | 54464222 | 54464098 | 8  | 10 | 6  | 1.506856518 | 0.188853  | ENSG00000216168        |
| 17 | 54464776 | 54465102 | 54464955 | 13 | 18 | 24 | 0.728770607 | 0.85379   | ENSG00000216168        |
| 17 | 54467890 | 54468069 | 54467979 | 8  | 8  | 11 | 0.71918152  | 0.777546  | ENSG00000216168        |
| 17 | 54468901 | 54469131 | 54469016 | 9  | 11 | 4  | 2.301380863 | 0.0459276 | ENSG00000216168        |
| 17 | 54469283 | 54469540 | 54469411 | 10 | 11 | 8  | 1.278544924 | 0.28289   | ENSG00000216168        |
| 17 | 54470448 | 54470648 | 54470561 | 8  | 11 | 9  | 1.150690432 | 0.367789  | ENSG00000216168        |
| 17 | 54471029 | 54471377 | 54471203 | 11 | 16 | 12 | 1.253957522 | 0.265012  | ENSG00000216168        |
| 17 | 54472401 | 54472724 | 54472551 | 12 | 15 | 18 | 0.807502057 | 0.737835  | ENSG00000216168        |
| 17 | 54475187 | 54476164 | 54475335 | 16 | 43 | 41 | 1.004571012 | 0.490923  | ENSG00000216168        |
| 17 | 54479576 | 54479822 | 54479738 | 8  | 10 | 8  | 1.171999514 | 0.35773   | TRIM37 ENSG00000108395 |
| 17 | 54479827 | 54480592 | 54480075 | 17 | 42 | 36 | 1.1144074   | 0.312878  | TRIM37 ENSG00000108395 |
| 17 | 54481155 | 54481662 | 54481483 | 14 | 25 | 17 | 1.385090334 | 0.139369  | TRIM37 ENSG00000108395 |
| 17 | 54482128 | 54482611 | 54482432 | 9  | 20 | 18 | 1.05984645  | 0.425516  | TRIM37 ENSG00000108395 |
| 17 | 54483957 | 54484263 | 54484127 | 10 | 14 | 13 | 1.027402171 | 0.469541  | TRIM37 ENSG00000108395 |
| 17 | 54484496 | 54484758 | 54484620 | 8  | 12 | 14 | 0.831054201 | 0.689281  | TRIM37 ENSG00000108395 |
| 17 | 54487863 | 54488045 | 54487983 | 8  | 8  | 7  | 1.07877228  | 0.435076  | TRIM37 ENSG00000108395 |
| 17 | 54488280 | 54488601 | 54488440 | 11 | 14 | 10 | 1.307602763 | 0.244096  | TRIM37 ENSG00000108395 |
| 17 | 54489315 | 54489556 | 54489431 | 10 | 12 | 4  | 2.493162602 | 0.0299057 | TRIM37 ENSG00000108395 |
| 17 | 54491092 | 54491328 | 54491210 | 9  | 11 | 8  | 1.278544924 | 0.28289   | TRIM37 ENSG00000108395 |
| 17 | 54492600 | 54492852 | 54492737 | 8  | 9  | 13 | 0.684934781 | 0.824961  | TRIM37 ENSG00000108395 |
| 17 | 54494382 | 54494626 | 54494522 | 9  | 11 | 12 | 0.885146486 | 0.620672  | TRIM37 ENSG00000108395 |
| 17 | 54494633 | 54495128 | 54494931 | 10 | 23 | 23 | 0.958908693 | 0.557483  | TRIM37 ENSG00000108395 |
| 17 | 54495607 | 54496152 | 54495984 | 13 | 25 | 12 | 1.917817386 | 0.0229342 | TRIM37 ENSG00000108395 |

|    |          |          |          |    |    |    |             |           |        |                 |
|----|----------|----------|----------|----|----|----|-------------|-----------|--------|-----------------|
| 17 | 54497941 | 54498747 | 54498343 | 17 | 41 | 49 | 0.805483302 | 0.85059   | TRIM37 | ENSG00000108395 |
| 17 | 54499148 | 54499463 | 54499305 | 9  | 14 | 14 | 0.958908693 | 0.545362  | TRIM37 | ENSG00000108395 |
| 17 | 54499573 | 54499868 | 54499727 | 9  | 11 | 19 | 0.575345216 | 0.94039   | TRIM37 | ENSG00000108395 |
| 17 | 54500209 | 54500842 | 54500429 | 8  | 22 | 26 | 0.816848146 | 0.76371   | TRIM37 | ENSG00000108395 |
| 17 | 54502566 | 54502886 | 54502726 | 10 | 14 | 25 | 0.553216554 | 0.969907  | TRIM37 | ENSG00000108395 |
| 17 | 54504027 | 54504451 | 54504284 | 8  | 14 | 18 | 0.757033179 | 0.792932  | TRIM37 | ENSG00000108395 |
| 17 | 54505633 | 54505834 | 54505745 | 8  | 8  | 12 | 0.663859864 | 0.833689  | TRIM37 | ENSG00000108395 |
| 17 | 54506505 | 54506777 | 54506701 | 10 | 14 | 13 | 1.027402171 | 0.469541  | TRIM37 | ENSG00000108395 |
| 17 | 54507117 | 54507505 | 54507353 | 8  | 13 | 10 | 1.220429246 | 0.306001  | TRIM37 | ENSG00000108395 |
| 17 | 54508042 | 54508332 | 54508167 | 9  | 13 | 15 | 0.839045106 | 0.685928  | TRIM37 | ENSG00000108395 |
| 17 | 54508562 | 54508760 | 54508636 | 9  | 10 | 5  | 1.757999271 | 0.121253  | TRIM37 | ENSG00000108395 |
| 17 | 54509328 | 54509765 | 54509503 | 9  | 15 | 6  | 2.191791298 | 0.0328001 | TRIM37 | ENSG00000108395 |
| 17 | 54511295 | 54512013 | 54511834 | 14 | 37 | 28 | 1.256501046 | 0.174292  | TRIM37 | ENSG00000108395 |
| 17 | 54513514 | 54514010 | 54513844 | 11 | 21 | 15 | 1.318499453 | 0.19542   | TRIM37 | ENSG00000108395 |
| 17 | 54514456 | 54514899 | 54514720 | 11 | 20 | 14 | 1.34247217  | 0.186867  | TRIM37 | ENSG00000108395 |
| 17 | 54515564 | 54515925 | 54515772 | 8  | 13 | 6  | 1.917817386 | 0.0693353 | TRIM37 | ENSG00000108395 |
| 17 | 54516247 | 54516679 | 54516393 | 8  | 15 | 7  | 1.917817386 | 0.0572317 | TRIM37 | ENSG00000108395 |
| 17 | 54516696 | 54517133 | 54516956 | 8  | 17 | 17 | 0.958908693 | 0.549739  | TRIM37 | ENSG00000108395 |
| 17 | 54518799 | 54519352 | 54518978 | 13 | 26 | 14 | 1.726035648 | 0.0400807 | TRIM37 | ENSG00000108395 |
| 17 | 54519535 | 54520296 | 54519909 | 11 | 34 | 35 | 0.93227234  | 0.616206  | TRIM37 | ENSG00000108395 |
| 17 | 54520376 | 54520824 | 54520554 | 12 | 19 | 19 | 0.958908693 | 0.552451  | TRIM37 | ENSG00000108395 |
| 17 | 54521871 | 54522299 | 54522179 | 11 | 18 | 27 | 0.650688042 | 0.929412  | TRIM37 | ENSG00000108395 |
| 17 | 54522921 | 54523158 | 54523059 | 13 | 13 | 4  | 2.684944341 | 0.01921   | TRIM37 | ENSG00000108395 |
| 17 | 54523280 | 54523517 | 54523396 | 10 | 13 | 13 | 0.958908693 | 0.543805  | TRIM37 | ENSG00000108395 |
| 17 | 54523831 | 54524020 | 54523925 | 8  | 8  | 7  | 1.07877228  | 0.435076  | TRIM37 | ENSG00000108395 |
| 17 | 54525318 | 54525973 | 54525551 | 16 | 36 | 42 | 0.82510748  | 0.805558  | TRIM37 | ENSG00000108395 |
| 17 | 54526290 | 54527191 | 54526769 | 15 | 46 | 44 | 1.001526857 | 0.496486  | TRIM37 | ENSG00000108395 |
| 17 | 54527264 | 54527948 | 54527485 | 14 | 33 | 27 | 1.164389127 | 0.273121  | TRIM37 | ENSG00000108395 |
| 17 | 54529082 | 54529322 | 54529202 | 10 | 14 | 14 | 0.958908693 | 0.545362  | TRIM37 | ENSG00000108395 |
| 17 | 54531702 | 54531943 | 54531822 | 13 | 14 | 9  | 1.43836304  | 0.179537  | TRIM37 | ENSG00000108395 |
| 17 | 54532174 | 54532376 | 54532286 | 9  | 10 | 14 | 0.703199708 | 0.817173  | TRIM37 | ENSG00000108395 |
| 17 | 54532619 | 54532981 | 54532795 | 8  | 14 | 16 | 0.846095906 | 0.68298   | TRIM37 | ENSG00000108395 |
| 17 | 54533265 | 54533501 | 54533383 | 9  | 13 | 14 | 0.894981447 | 0.618069  | TRIM37 | ENSG00000108395 |
| 17 | 54534208 | 54535118 | 54534534 | 15 | 43 | 35 | 1.171999514 | 0.23792   | TRIM37 | ENSG00000108395 |

|    |          |          |          |    |     |     |             |            |          |                 |
|----|----------|----------|----------|----|-----|-----|-------------|------------|----------|-----------------|
| 17 | 54535970 | 54537072 | 54536800 | 12 | 47  | 45  | 1.000600375 | 0.498258   | TRIM37   | ENSG00000108395 |
| 17 | 54537107 | 54540092 | 54538240 | 39 | 271 | 180 | 1.441011959 | 5.92E-05   | TRIM37   | ENSG00000108395 |
| 17 | 54540376 | 54540644 | 54540470 | 8  | 11  | 15  | 0.71918152  | 0.81018    | TRIM37   | ENSG00000108395 |
| 17 | 54543247 | 54543563 | 54543384 | 14 | 17  | 14  | 1.150690432 | 0.340986   | TRIM37   | ENSG00000108395 |
| 17 | 54544204 | 54544439 | 54544321 | 8  | 11  | 6   | 1.643843474 | 0.137712   | TRIM37   | ENSG00000108395 |
| 17 | 54544459 | 54544912 | 54544672 | 12 | 21  | 12  | 1.622768557 | 0.076896   | TRIM37   | ENSG00000108395 |
| 17 | 54546729 | 54547087 | 54546908 | 13 | 19  | 19  | 0.958908693 | 0.552451   | TRIM37   | ENSG00000108395 |
| 17 | 54547502 | 54547843 | 54547672 | 12 | 17  | 14  | 1.150690432 | 0.340986   | TRIM37   | ENSG00000108395 |
| 17 | 54549202 | 54549442 | 54549286 | 11 | 12  | 5   | 2.077635502 | 0.0577144  | TRIM37   | ENSG00000108395 |
| 17 | 54551037 | 54551314 | 54551242 | 9  | 13  | 23  | 0.559363404 | 0.962306   | TRIM37   | ENSG00000108395 |
| 17 | 54587166 | 54587601 | 54587440 | 9  | 17  | 13  | 1.232882605 | 0.274309   | FAM33A   | ENSG00000182628 |
| 17 | 54588299 | 54588594 | 54588437 | 8  | 9   | 6   | 1.369869562 | 0.253675   | PRR11    | ENSG00000068489 |
| 17 | 54641956 | 54642439 | 54642083 | 20 | 29  | 10  | 2.615205527 | 0.00170492 | C17orf71 | ENSG00000167447 |
| 17 | 54652296 | 54652523 | 54652388 | 10 | 11  | 6   | 1.643843474 | 0.137712   | GDPD1    | ENSG00000153982 |
| 17 | 54652720 | 54653053 | 54652886 | 9  | 14  | 8   | 1.598181155 | 0.124586   | GDPD1    | ENSG00000153982 |
| 17 | 54729037 | 54729308 | 54729175 | 8  | 11  | 7   | 1.43836304  | 0.204844   | YPEL2    | ENSG00000175155 |
| 17 | 54743025 | 54743463 | 54743284 | 12 | 19  | 14  | 1.278544924 | 0.231514   | YPEL2    | ENSG00000175155 |
| 17 | 54761575 | 54761905 | 54761735 | 9  | 13  | 3   | 3.356180426 | 0.00805599 | YPEL2    | ENSG00000175155 |
| 17 | 54838917 | 54839325 | 54839096 | 9  | 17  | 12  | 1.327719729 | 0.212795   | YPEL2    | ENSG00000175155 |
| 17 | 54839327 | 54839551 | 54839414 | 10 | 10  | 3   | 2.636998906 | 0.034203   | YPEL2    | ENSG00000175155 |
| 17 | 54850936 | 54851184 | 54851063 | 14 | 16  | 8   | 1.811271976 | 0.0663685  | YPEL2    | ENSG00000175155 |
| 17 | 54873021 | 54873342 | 54873169 | 10 | 14  | 6   | 2.054804342 | 0.0480281  |          | ENSG00000200889 |
| 17 | 54924289 | 54924515 | 54924404 | 12 | 14  | 0   | 14.3836304  | 4.17E-05   |          | ENSG00000200889 |
| 17 | 54928426 | 54928607 | 54928467 | 8  | 9   | 2   | 3.19636231  | 0.0229249  |          | ENSG00000200889 |
| 17 | 54997438 | 54997763 | 54997600 | 8  | 13  | 4   | 2.684944341 | 0.01921    | DHX40    | ENSG00000108406 |
| 17 | 55051203 | 55051561 | 55051372 | 9  | 14  | 4   | 2.876726079 | 0.01219    | CLTC     | ENSG00000141367 |
| 17 | 55051682 | 55052220 | 55051951 | 11 | 22  | 12  | 1.696530765 | 0.057768   | CLTC     | ENSG00000141367 |
| 17 | 55139313 | 55139800 | 55139632 | 26 | 35  | 13  | 2.465765211 | 0.00114722 | PTRH2    | ENSG00000141378 |
| 17 | 55218672 | 55219009 | 55218837 | 12 | 16  | 5   | 2.716907964 | 0.0109645  |          | ENSG00000199004 |
| 17 | 55261631 | 55261935 | 55261785 | 10 | 14  | 19  | 0.71918152  | 0.83643    |          | ENSG00000199004 |
| 17 | 55262130 | 55262664 | 55262387 | 9  | 22  | 22  | 0.958908693 | 0.556268   |          | ENSG00000199004 |
| 17 | 55262673 | 55263174 | 55262995 | 13 | 24  | 22  | 1.042292058 | 0.441692   |          | ENSG00000199004 |
| 17 | 55263395 | 55263751 | 55263572 | 16 | 19  | 23  | 0.799090578 | 0.772621   |          | ENSG00000199004 |
| 17 | 55263942 | 55264374 | 55264121 | 11 | 20  | 24  | 0.805483302 | 0.769433   |          | ENSG00000199004 |



|    |          |          |          |     |     |     |             |            |                       |
|----|----------|----------|----------|-----|-----|-----|-------------|------------|-----------------------|
| 17 | 55264995 | 55265513 | 55265292 | 13  | 30  | 24  | 1.189046779 | 0.257047   | ENSG00000199004       |
| 17 | 55268079 | 55268365 | 55268218 | 14  | 16  | 18  | 0.857970936 | 0.678066   | ENSG00000199004       |
| 17 | 55268494 | 55268934 | 55268794 | 11  | 17  | 17  | 0.958908693 | 0.549739   | ENSG00000199004       |
| 17 | 55269330 | 55271259 | 55269652 | 121 | 357 | 149 | 2.288595414 | 2.58E-19   | ENSG00000199004       |
| 17 | 55271314 | 55272852 | 55272089 | 26  | 94  | 95  | 0.948920061 | 0.641351   | ENSG00000199004       |
| 17 | 55273034 | 55273445 | 55273168 | 8   | 15  | 23  | 0.639272462 | 0.921343   | ENSG00000199004       |
| 17 | 55275191 | 55275948 | 55275493 | 68  | 104 | 33  | 2.96133567  | 1.36E-09   | ENSG00000199004       |
| 17 | 55276125 | 55276329 | 55276203 | 8   | 9   | 3   | 2.397271733 | 0.0539397  | ENSG00000199004       |
| 17 | 55276751 | 55277565 | 55277206 | 11  | 33  | 36  | 0.88115934  | 0.703441   | ENSG00000201524       |
| 17 | 55277604 | 55279413 | 55277872 | 73  | 324 | 182 | 1.702979919 | 2.07E-09   | ENSG00000201524       |
| 17 | 55279683 | 55280338 | 55279977 | 27  | 50  | 58  | 0.828887175 | 0.837804   | ENSG00000201524       |
| 17 | 55280570 | 55280958 | 55280822 | 12  | 19  | 24  | 0.767126954 | 0.814057   | ENSG00000201524       |
| 17 | 55281191 | 55281525 | 55281358 | 10  | 16  | 9   | 1.630144778 | 0.102169   | ENSG00000201524       |
| 17 | 55281890 | 55282216 | 55282053 | 8   | 13  | 26  | 0.497211915 | 0.986172   | ENSG00000201524       |
| 17 | 55283737 | 55284342 | 55283932 | 12  | 27  | 59  | 0.447490723 | 0.999875   | ENSG00000201524       |
| 17 | 55284451 | 55284744 | 55284593 | 12  | 14  | 16  | 0.846095906 | 0.68298    | ENSG00000201524       |
| 17 | 55285230 | 55285953 | 55285559 | 53  | 103 | 30  | 3.216984003 | 2.17E-10   | ENSG00000201524       |
| 17 | 55286544 | 55286745 | 55286673 | 8   | 8   | 5   | 1.43836304  | 0.235762   | ENSG00000201524       |
| 17 | 55287563 | 55288220 | 55287915 | 17  | 35  | 16  | 2.030630174 | 0.00601995 | ENSG00000201524       |
| 17 | 55288380 | 55288588 | 55288484 | 8   | 9   | 9   | 0.958908693 | 0.536911   | ENSG00000201524       |
| 17 | 55288858 | 55289893 | 55289659 | 29  | 85  | 93  | 0.877299443 | 0.810249   | ENSG00000201524       |
| 17 | 55290334 | 55290864 | 55290685 | 12  | 25  | 35  | 0.692545167 | 0.925864   | ENSG00000201524       |
| 17 | 55290954 | 55291190 | 55291110 | 11  | 12  | 13  | 0.890415215 | 0.619237   | ENSG00000201524       |
| 17 | 55291370 | 55292643 | 55291875 | 26  | 92  | 63  | 1.393414195 | 0.0194253  | ENSG00000201524       |
| 17 | 55295426 | 55295614 | 55295481 | 8   | 8   | 6   | 1.232882605 | 0.333038   | ENSG00000201524       |
| 17 | 55295770 | 55295967 | 55295840 | 8   | 9   | 11  | 0.799090578 | 0.702688   | ENSG00000201524       |
| 17 | 55298696 | 55298921 | 55298835 | 14  | 14  | 19  | 0.71918152  | 0.83643    | ENSG00000201524       |
| 17 | 55299535 | 55299735 | 55299635 | 9   | 10  | 17  | 0.585999757 | 0.924668   | ENSG00000201524       |
| 17 | 55299905 | 55300109 | 55299998 | 10  | 11  | 10  | 1.046082211 | 0.455063   | ENSG00000201524       |
| 17 | 55300373 | 55300565 | 55300466 | 10  | 10  | 6   | 1.506856518 | 0.188853   | ENSG00000201524       |
| 17 | 55301027 | 55301258 | 55301179 | 9   | 10  | 5   | 1.757999271 | 0.121253   | ENSG00000201524       |
| 17 | 55301371 | 55302226 | 55301762 | 18  | 45  | 25  | 1.696530765 | 0.0135281  | ENSG00000201524       |
| 17 | 55302308 | 55303428 | 55302793 | 22  | 76  | 42  | 1.717115567 | 0.00181444 | TUBD1 ENSG00000108423 |
| 17 | 55303762 | 55303985 | 55303869 | 10  | 12  | 14  | 0.831054201 | 0.689281   | TUBD1 ENSG00000108423 |

|    |          |          |          |    |     |     |             |           |         |                 |
|----|----------|----------|----------|----|-----|-----|-------------|-----------|---------|-----------------|
| 17 | 55306558 | 55306856 | 55306725 | 12 | 16  | 20  | 0.776259418 | 0.783794  | TUBD1   | ENSG00000108423 |
| 17 | 55306979 | 55307248 | 55307113 | 10 | 12  | 7   | 1.558226626 | 0.152813  | TUBD1   | ENSG00000108423 |
| 17 | 55307813 | 55308008 | 55307891 | 8  | 9   | 7   | 1.198635866 | 0.346278  | TUBD1   | ENSG00000108423 |
| 17 | 55309323 | 55309745 | 55309517 | 13 | 21  | 13  | 1.506856518 | 0.109266  | TUBD1   | ENSG00000108423 |
| 17 | 55310030 | 55310573 | 55310333 | 9  | 19  | 33  | 0.564063937 | 0.981419  | TUBD1   | ENSG00000108423 |
| 17 | 55311474 | 55311904 | 55311566 | 10 | 18  | 11  | 1.518272097 | 0.122037  | TUBD1   | ENSG00000108423 |
| 17 | 55312933 | 55313304 | 55313204 | 11 | 16  | 18  | 0.857970936 | 0.678066  | TUBD1   | ENSG00000108423 |
| 17 | 55316993 | 55317425 | 55317172 | 10 | 18  | 18  | 0.958908693 | 0.551113  | TUBD1   | ENSG00000108423 |
| 17 | 55317724 | 55318011 | 55317896 | 16 | 19  | 23  | 0.799090578 | 0.772621  | TUBD1   | ENSG00000108423 |
| 17 | 55319532 | 55319826 | 55319711 | 11 | 14  | 21  | 0.653801382 | 0.90216   | TUBD1   | ENSG00000108423 |
| 17 | 55320338 | 55320981 | 55320814 | 12 | 28  | 16  | 1.635785418 | 0.0488966 | TUBD1   | ENSG00000108423 |
| 17 | 55322782 | 55323290 | 55322992 | 25 | 44  | 25  | 1.659649661 | 0.0175382 | TUBD1   | ENSG00000108423 |
| 17 | 55324143 | 55326470 | 55325151 | 40 | 230 | 189 | 1.165831095 | 0.0579742 | TUBD1   | ENSG00000108423 |
| 17 | 55326520 | 55326792 | 55326656 | 13 | 17  | 16  | 1.015315087 | 0.480915  | RPS6KB1 | ENSG00000108443 |
| 17 | 55328523 | 55328932 | 55328727 | 16 | 25  | 16  | 1.466566236 | 0.10473   | RPS6KB1 | ENSG00000108443 |
| 17 | 55329094 | 55329475 | 55329317 | 13 | 19  | 19  | 0.958908693 | 0.552451  | RPS6KB1 | ENSG00000108443 |
| 17 | 55330077 | 55330263 | 55330188 | 8  | 8   | 10  | 0.784561658 | 0.708731  | RPS6KB1 | ENSG00000108443 |
| 17 | 55330880 | 55331073 | 55330949 | 8  | 8   | 13  | 0.616441303 | 0.878084  | RPS6KB1 | ENSG00000108443 |
| 17 | 55331332 | 55332382 | 55332203 | 10 | 42  | 41  | 0.981739852 | 0.533409  | RPS6KB1 | ENSG00000108443 |
| 17 | 55333844 | 55334032 | 55333982 | 8  | 10  | 14  | 0.703199708 | 0.817173  | RPS6KB1 | ENSG00000108443 |
| 17 | 55339561 | 55339815 | 55339688 | 8  | 9   | 20  | 0.456623187 | 0.983844  | RPS6KB1 | ENSG00000108443 |
| 17 | 55339857 | 55340379 | 55340161 | 11 | 22  | 17  | 1.225272219 | 0.255726  | RPS6KB1 | ENSG00000108443 |
| 17 | 55342696 | 55342900 | 55342811 | 8  | 9   | 10  | 0.871735176 | 0.624623  | RPS6KB1 | ENSG00000108443 |
| 17 | 55343028 | 55343282 | 55343162 | 9  | 13  | 6   | 1.917817386 | 0.0693353 | RPS6KB1 | ENSG00000108443 |
| 17 | 55344894 | 55345276 | 55345097 | 9  | 17  | 18  | 0.908439814 | 0.615249  | RPS6KB1 | ENSG00000108443 |
| 17 | 55345300 | 55345851 | 55345479 | 10 | 23  | 22  | 1.000600375 | 0.498356  | RPS6KB1 | ENSG00000108443 |
| 17 | 55346129 | 55346332 | 55346230 | 9  | 10  | 3   | 2.636998906 | 0.034203  | RPS6KB1 | ENSG00000108443 |
| 17 | 55346473 | 55346848 | 55346651 | 14 | 21  | 24  | 0.84383965  | 0.72062   | RPS6KB1 | ENSG00000108443 |
| 17 | 55348420 | 55348644 | 55348532 | 9  | 12  | 12  | 0.958908693 | 0.542188  | RPS6KB1 | ENSG00000108443 |
| 17 | 55348665 | 55349140 | 55348844 | 18 | 27  | 24  | 1.073977736 | 0.396082  | RPS6KB1 | ENSG00000108443 |
| 17 | 55351281 | 55351504 | 55351356 | 14 | 14  | 5   | 2.397271733 | 0.0258078 | RPS6KB1 | ENSG00000108443 |
| 17 | 55351596 | 55352284 | 55351797 | 16 | 34  | 19  | 1.678090213 | 0.0288712 | RPS6KB1 | ENSG00000108443 |
| 17 | 55353235 | 55353534 | 55353384 | 9  | 12  | 11  | 1.038817751 | 0.460341  | RPS6KB1 | ENSG00000108443 |
| 17 | 55379836 | 55380106 | 55379961 | 13 | 14  | 6   | 2.054804342 | 0.0480281 | RNFT1   | ENSG00000189050 |

|    |          |          |          |    |     |     |             |            |        |                 |
|----|----------|----------|----------|----|-----|-----|-------------|------------|--------|-----------------|
| 17 | 55383484 | 55383802 | 55383652 | 9  | 13  | 13  | 0.958908693 | 0.543805   | RNFT1  | ENSG00000189050 |
| 17 | 55383934 | 55384171 | 55384067 | 9  | 11  | 16  | 0.676876725 | 0.854566   | RNFT1  | ENSG00000189050 |
| 17 | 55384192 | 55384465 | 55384334 | 8  | 12  | 4   | 2.493162602 | 0.0299057  | RNFT1  | ENSG00000189050 |
| 17 | 55387713 | 55388038 | 55387868 | 8  | 13  | 21  | 0.610214623 | 0.930478   | RNFT1  | ENSG00000189050 |
| 17 | 55389330 | 55389569 | 55389425 | 11 | 11  | 16  | 0.676876725 | 0.854566   | RNFT1  | ENSG00000189050 |
| 17 | 55391357 | 55391589 | 55391518 | 11 | 11  | 7   | 1.43836304  | 0.204844   | RNFT1  | ENSG00000189050 |
| 17 | 55394282 | 55394558 | 55394420 | 12 | 14  | 7   | 1.797953799 | 0.0806593  | RNFT1  | ENSG00000189050 |
| 17 | 55394963 | 55395458 | 55395280 | 14 | 24  | 26  | 0.887878419 | 0.666463   | RNFT1  | ENSG00000189050 |
| 17 | 55395612 | 55397490 | 55397088 | 44 | 144 | 101 | 1.363154515 | 0.00777595 | RNFT1  | ENSG00000189050 |
| 17 | 55400508 | 55400918 | 55400687 | 12 | 19  | 14  | 1.278544924 | 0.231514   | RNFT1  | ENSG00000189050 |
| 17 | 55401486 | 55401863 | 55401702 | 8  | 15  | 6   | 2.191791298 | 0.0328001  | RNFT1  | ENSG00000189050 |
| 17 | 55403414 | 55403767 | 55403590 | 9  | 14  | 8   | 1.598181155 | 0.124586   | RNFT1  | ENSG00000189050 |
| 17 | 55404042 | 55404342 | 55404183 | 11 | 13  | 10  | 1.220429246 | 0.306001   | RNFT1  | ENSG00000189050 |
| 17 | 55405042 | 55405380 | 55405211 | 8  | 12  | 20  | 0.593610143 | 0.935335   | RNFT1  | ENSG00000189050 |
| 17 | 55406471 | 55406859 | 55406680 | 11 | 19  | 15  | 1.198635866 | 0.291044   | RNFT1  | ENSG00000189050 |
| 17 | 55468237 | 55468693 | 55468416 | 10 | 19  | 11  | 1.598181155 | 0.0927758  |        | ENSG00000204471 |
| 17 | 55469016 | 55470219 | 55469434 | 55 | 161 | 70  | 2.187932511 | 4.79E-09   |        | ENSG00000204471 |
| 17 | 55470229 | 55470466 | 55470361 | 10 | 13  | 14  | 0.894981447 | 0.618069   |        | ENSG00000204471 |
| 17 | 55470665 | 55470917 | 55470830 | 9  | 11  | 14  | 0.767126954 | 0.756447   |        | ENSG00000204471 |
| 17 | 55471183 | 55472109 | 55471847 | 18 | 61  | 47  | 1.238590395 | 0.130806   |        | ENSG00000204471 |
| 17 | 55472203 | 55472606 | 55472382 | 14 | 26  | 27  | 0.924661954 | 0.614379   |        | ENSG00000204471 |
| 17 | 55473001 | 55473458 | 55473144 | 13 | 23  | 23  | 0.958908693 | 0.557483   |        | ENSG00000204471 |
| 17 | 55473508 | 55473744 | 55473626 | 8  | 10  | 16  | 0.620470331 | 0.897128   |        | ENSG00000204471 |
| 17 | 55473780 | 55474009 | 55473898 | 11 | 13  | 19  | 0.671236085 | 0.87814    |        | ENSG00000204471 |
| 17 | 55476355 | 55476662 | 55476488 | 13 | 18  | 18  | 0.958908693 | 0.551113   |        | ENSG00000204471 |
| 17 | 55477350 | 55477789 | 55477610 | 10 | 20  | 14  | 1.34247217  | 0.186867   |        | ENSG00000204471 |
| 17 | 55478014 | 55478323 | 55478149 | 9  | 12  | 19  | 0.62329065  | 0.912804   |        | ENSG00000204471 |
| 17 | 55478337 | 55478746 | 55478516 | 10 | 20  | 20  | 0.958908693 | 0.553754   |        | ENSG00000204471 |
| 17 | 55478779 | 55479195 | 55479055 | 11 | 19  | 9   | 1.917817386 | 0.0394029  |        | ENSG00000204471 |
| 17 | 55479817 | 55480130 | 55479988 | 14 | 17  | 10  | 1.569123316 | 0.112309   |        | ENSG00000204471 |
| 17 | 55480264 | 55480630 | 55480414 | 9  | 14  | 13  | 1.027402171 | 0.469541   |        | ENSG00000204471 |
| 17 | 55480690 | 55481035 | 55480862 | 13 | 18  | 19  | 0.910963258 | 0.614871   |        | ENSG00000204471 |
| 17 | 55481603 | 55482509 | 55481794 | 14 | 39  | 41  | 0.913246374 | 0.659608   | HEATR6 | ENSG00000068097 |
| 17 | 55482675 | 55483434 | 55483015 | 11 | 36  | 25  | 1.364600832 | 0.108713   | HEATR6 | ENSG00000068097 |

|    |          |          |          |    |     |    |             |            |        |                 |
|----|----------|----------|----------|----|-----|----|-------------|------------|--------|-----------------|
| 17 | 55483824 | 55484608 | 55484019 | 12 | 38  | 25 | 1.43836304  | 0.0720575  | HEATR6 | ENSG00000068097 |
| 17 | 55486855 | 55487154 | 55487020 | 13 | 14  | 11 | 1.198635866 | 0.315918   | HEATR6 | ENSG00000068097 |
| 17 | 55487232 | 55487495 | 55487367 | 15 | 17  | 8  | 1.917817386 | 0.0474153  | HEATR6 | ENSG00000068097 |
| 17 | 55487724 | 55487999 | 55487852 | 9  | 12  | 7  | 1.558226626 | 0.152813   | HEATR6 | ENSG00000068097 |
| 17 | 55488527 | 55488776 | 55488676 | 9  | 10  | 20 | 0.502285506 | 0.972812   | HEATR6 | ENSG00000068097 |
| 17 | 55489242 | 55489517 | 55489379 | 12 | 15  | 20 | 0.730597099 | 0.831283   | HEATR6 | ENSG00000068097 |
| 17 | 55489832 | 55490066 | 55489992 | 9  | 10  | 8  | 1.171999514 | 0.35773    | HEATR6 | ENSG00000068097 |
| 17 | 55490415 | 55490859 | 55490800 | 8  | 16  | 28 | 0.562118889 | 0.973627   | HEATR6 | ENSG00000068097 |
| 17 | 55492093 | 55492333 | 55492228 | 12 | 13  | 20 | 0.639272462 | 0.907338   | HEATR6 | ENSG00000068097 |
| 17 | 55492350 | 55493342 | 55492694 | 8  | 34  | 20 | 1.598181155 | 0.0409436  | HEATR6 | ENSG00000068097 |
| 17 | 55493369 | 55494087 | 55493703 | 11 | 33  | 30 | 1.051706309 | 0.418347   | HEATR6 | ENSG00000068097 |
| 17 | 55494369 | 55494785 | 55494706 | 10 | 19  | 25 | 0.737622072 | 0.849755   | HEATR6 | ENSG00000068097 |
| 17 | 55496964 | 55497813 | 55497676 | 9  | 29  | 27 | 1.027402171 | 0.457998   | HEATR6 | ENSG00000068097 |
| 17 | 55497954 | 55498417 | 55498218 | 17 | 30  | 23 | 1.238590395 | 0.2125     | HEATR6 | ENSG00000068097 |
| 17 | 55499436 | 55499702 | 55499569 | 8  | 12  | 12 | 0.958908693 | 0.542188   | HEATR6 | ENSG00000068097 |
| 17 | 55500054 | 55500664 | 55500233 | 13 | 29  | 25 | 1.106433107 | 0.351025   | HEATR6 | ENSG00000068097 |
| 17 | 55500764 | 55501190 | 55500982 | 10 | 19  | 17 | 1.065454103 | 0.420867   | HEATR6 | ENSG00000068097 |
| 17 | 55502250 | 55502432 | 55502341 | 8  | 9   | 20 | 0.456623187 | 0.983844   | HEATR6 | ENSG00000068097 |
| 17 | 55502696 | 55502925 | 55502804 | 11 | 11  | 12 | 0.885146486 | 0.620672   | HEATR6 | ENSG00000068097 |
| 17 | 55504269 | 55504598 | 55504433 | 8  | 13  | 8  | 1.491635745 | 0.166708   | HEATR6 | ENSG00000068097 |
| 17 | 55504753 | 55505014 | 55504894 | 12 | 12  | 15 | 0.779113313 | 0.750998   | HEATR6 | ENSG00000068097 |
| 17 | 55505119 | 55505472 | 55505297 | 19 | 23  | 19 | 1.150690432 | 0.318834   | HEATR6 | ENSG00000068097 |
| 17 | 55505796 | 55506183 | 55505975 | 10 | 18  | 34 | 0.520550433 | 0.990954   | HEATR6 | ENSG00000068097 |
| 17 | 55506195 | 55506925 | 55506592 | 12 | 34  | 40 | 0.818580592 | 0.809111   | HEATR6 | ENSG00000068097 |
| 17 | 55507251 | 55507738 | 55507430 | 8  | 18  | 15 | 1.138704073 | 0.348127   | HEATR6 | ENSG00000068097 |
| 17 | 55508331 | 55508657 | 55508485 | 8  | 12  | 14 | 0.831054201 | 0.689281   | HEATR6 | ENSG00000068097 |
| 17 | 55509099 | 55509544 | 55509365 | 13 | 24  | 31 | 0.749147416 | 0.862744   | HEATR6 | ENSG00000068097 |
| 17 | 55509734 | 55511359 | 55510594 | 34 | 127 | 79 | 1.534253909 | 0.00114649 | HEATR6 | ENSG00000068097 |
| 17 | 55511467 | 55512330 | 55511696 | 31 | 80  | 59 | 1.294526736 | 0.0631362  | HEATR6 | ENSG00000068097 |
| 17 | 55512549 | 55513403 | 55512714 | 16 | 48  | 45 | 1.021446217 | 0.458084   | HEATR6 | ENSG00000068097 |
| 17 | 55514018 | 55514592 | 55514366 | 13 | 30  | 24 | 1.189046779 | 0.257047   | HEATR6 | ENSG00000068097 |
| 17 | 55514810 | 55515041 | 55514930 | 10 | 10  | 6  | 1.506856518 | 0.188853   | HEATR6 | ENSG00000068097 |
| 17 | 55515285 | 55515979 | 55515514 | 20 | 39  | 27 | 1.369869562 | 0.0974407  | HEATR6 | ENSG00000068097 |
| 17 | 55517251 | 55517544 | 55517408 | 14 | 16  | 20 | 0.776259418 | 0.783794   | HEATR6 | ENSG00000068097 |

|    |          |          |          |    |     |     |             |           |        |                 |
|----|----------|----------|----------|----|-----|-----|-------------|-----------|--------|-----------------|
| 17 | 55517800 | 55518005 | 55517904 | 11 | 12  | 21  | 0.566627864 | 0.952667  | HEATR6 | ENSG00000068097 |
| 17 | 55518016 | 55518340 | 55518178 | 8  | 14  | 26  | 0.532727052 | 0.97821   | HEATR6 | ENSG00000068097 |
| 17 | 55519083 | 55519867 | 55519466 | 12 | 38  | 38  | 0.958908693 | 0.573263  | HEATR6 | ENSG00000068097 |
| 17 | 55520035 | 55520727 | 55520548 | 9  | 28  | 28  | 0.958908693 | 0.563199  | HEATR6 | ENSG00000068097 |
| 17 | 55521335 | 55521634 | 55521500 | 13 | 15  | 12  | 1.180195315 | 0.324974  | HEATR6 | ENSG00000068097 |
| 17 | 55521707 | 55522398 | 55522237 | 12 | 29  | 41  | 0.684934781 | 0.945518  | HEATR6 | ENSG00000068097 |
| 17 | 55522564 | 55522851 | 55522707 | 10 | 14  | 20  | 0.684934781 | 0.872628  | HEATR6 | ENSG00000068097 |
| 17 | 55523046 | 55523477 | 55523281 | 8  | 17  | 24  | 0.690414259 | 0.888181  | HEATR6 | ENSG00000068097 |
| 17 | 55524085 | 55524482 | 55524310 | 16 | 21  | 21  | 0.958908693 | 0.555026  | HEATR6 | ENSG00000068097 |
| 17 | 55525998 | 55526372 | 55526244 | 10 | 17  | 14  | 1.150690432 | 0.340986  | HEATR6 | ENSG00000068097 |
| 17 | 55526574 | 55526982 | 55526793 | 10 | 19  | 10  | 1.743470351 | 0.0622604 | HEATR6 | ENSG00000068097 |
| 17 | 55527276 | 55527574 | 55527425 | 10 | 16  | 15  | 1.018840486 | 0.477384  | HEATR6 | ENSG00000068097 |
| 17 | 55527776 | 55528066 | 55527912 | 16 | 18  | 24  | 0.728770607 | 0.85379   | HEATR6 | ENSG00000068097 |
| 17 | 55534304 | 55534508 | 55534347 | 8  | 8   | 1   | 4.315089119 | 0.0127267 | HEATR6 | ENSG00000068097 |
| 17 | 55538574 | 55538971 | 55538745 | 9  | 15  | 18  | 0.807502057 | 0.737835  | HEATR6 | ENSG00000068097 |
| 17 | 55540158 | 55540660 | 55540486 | 11 | 20  | 25  | 0.774503175 | 0.810437  | HEATR6 | ENSG00000068097 |
| 17 | 55540697 | 55540899 | 55540798 | 9  | 10  | 19  | 0.527399781 | 0.961307  | HEATR6 | ENSG00000068097 |
| 17 | 55540913 | 55541284 | 55541092 | 11 | 17  | 9   | 1.726035648 | 0.0753664 | HEATR6 | ENSG00000068097 |
| 17 | 55541373 | 55541640 | 55541512 | 8  | 11  | 8   | 1.278544924 | 0.28289   | HEATR6 | ENSG00000068097 |
| 17 | 55559449 | 55560220 | 55559834 | 12 | 32  | 20  | 1.506856518 | 0.066798  | CA4    | ENSG00000167434 |
| 17 | 55560659 | 55561263 | 55560782 | 9  | 24  | 32  | 0.72644598  | 0.88851   | CA4    | ENSG00000167434 |
| 17 | 55561313 | 55561539 | 55561381 | 8  | 11  | 10  | 1.046082211 | 0.455063  | CA4    | ENSG00000167434 |
| 17 | 55563958 | 55564382 | 55564225 | 13 | 21  | 25  | 0.811384279 | 0.76647   | CA4    | ENSG00000167434 |
| 17 | 55564463 | 55564997 | 55564641 | 15 | 29  | 27  | 1.027402171 | 0.457998  | CA4    | ENSG00000167434 |
| 17 | 55565425 | 55565820 | 55565565 | 10 | 17  | 15  | 1.07877228  | 0.410615  | CA4    | ENSG00000167434 |
| 17 | 55566769 | 55567572 | 55566921 | 13 | 37  | 50  | 0.714480987 | 0.94341   | CA4    | ENSG00000167434 |
| 17 | 55567578 | 55568215 | 55567990 | 15 | 33  | 53  | 0.603757325 | 0.990542  | CA4    | ENSG00000167434 |
| 17 | 55568855 | 55569176 | 55569015 | 9  | 13  | 16  | 0.789689512 | 0.746135  | CA4    | ENSG00000167434 |
| 17 | 55570692 | 55570924 | 55570777 | 9  | 11  | 9   | 1.150690432 | 0.367789  | CA4    | ENSG00000167434 |
| 17 | 55571656 | 55572691 | 55572217 | 25 | 70  | 48  | 1.389439127 | 0.0365259 | CA4    | ENSG00000167434 |
| 17 | 55573263 | 55573570 | 55573416 | 8  | 11  | 10  | 1.046082211 | 0.455063  | CA4    | ENSG00000167434 |
| 17 | 55573708 | 55574136 | 55573887 | 14 | 22  | 12  | 1.696530765 | 0.057768  | CA4    | ENSG00000167434 |
| 17 | 55574434 | 55575775 | 55575175 | 42 | 114 | 102 | 1.070626211 | 0.306703  | CA4    | ENSG00000167434 |
| 17 | 55577315 | 55577570 | 55577435 | 11 | 13  | 22  | 0.583683552 | 0.948499  | CA4    | ENSG00000167434 |

|    |          |          |          |    |    |    |             |           |     |                 |
|----|----------|----------|----------|----|----|----|-------------|-----------|-----|-----------------|
| 17 | 55577664 | 55578296 | 55577842 | 10 | 24 | 26 | 0.887878419 | 0.666463  | CA4 | ENSG00000167434 |
| 17 | 55578944 | 55579860 | 55579123 | 20 | 49 | 55 | 0.856168476 | 0.78834   | CA4 | ENSG00000167434 |
| 17 | 55579913 | 55581052 | 55580092 | 21 | 58 | 59 | 0.942926882 | 0.625655  | CA4 | ENSG00000167434 |
| 17 | 55581446 | 55581685 | 55581517 | 10 | 12 | 16 | 0.733283118 | 0.803868  | CA4 | ENSG00000167434 |
| 17 | 55582715 | 55584128 | 55583347 | 12 | 65 | 74 | 0.84383965  | 0.843526  | CA4 | ENSG00000167434 |
| 17 | 55584392 | 55585050 | 55584761 | 14 | 32 | 25 | 1.217076418 | 0.224024  | CA4 | ENSG00000167434 |
| 17 | 55585617 | 55585942 | 55585779 | 14 | 17 | 13 | 1.232882605 | 0.274309  | CA4 | ENSG00000167434 |
| 17 | 55586463 | 55586656 | 55586609 | 12 | 13 | 5  | 2.237453617 | 0.038866  | CA4 | ENSG00000167434 |
| 17 | 55586665 | 55587122 | 55586859 | 14 | 23 | 25 | 0.885146486 | 0.667437  | CA4 | ENSG00000167434 |
| 17 | 55587389 | 55587729 | 55587559 | 9  | 15 | 26 | 0.568242188 | 0.9671    | CA4 | ENSG00000167434 |
| 17 | 55588385 | 55588564 | 55588474 | 8  | 8  | 5  | 1.43836304  | 0.235762  |     | ENSG00000221779 |
| 17 | 55589712 | 55589958 | 55589835 | 11 | 12 | 7  | 1.558226626 | 0.152813  |     | ENSG00000221779 |
| 17 | 55593051 | 55593619 | 55593387 | 14 | 27 | 24 | 1.073977736 | 0.396082  |     | ENSG00000221779 |
| 17 | 55593787 | 55594445 | 55593966 | 16 | 32 | 31 | 0.98887459  | 0.517406  |     | ENSG00000221779 |
| 17 | 55594449 | 55594739 | 55594614 | 8  | 12 | 15 | 0.779113313 | 0.750998  |     | ENSG00000221779 |
| 17 | 55595183 | 55595960 | 55595724 | 12 | 35 | 34 | 0.986306084 | 0.522633  |     | ENSG00000221779 |
| 17 | 55596770 | 55597320 | 55597158 | 8  | 19 | 26 | 0.710302736 | 0.88      |     | ENSG00000221779 |
| 17 | 55597775 | 55598323 | 55598005 | 10 | 25 | 23 | 1.038817751 | 0.445246  |     | ENSG00000221779 |
| 17 | 55599194 | 55599395 | 55599294 | 8  | 10 | 12 | 0.811384279 | 0.697544  |     | ENSG00000221779 |
| 17 | 55599931 | 55600111 | 55600001 | 8  | 8  | 11 | 0.71918152  | 0.777546  |     | ENSG00000221779 |
| 17 | 55602636 | 55602909 | 55602773 | 13 | 13 | 21 | 0.610214623 | 0.930478  |     | ENSG00000221779 |
| 17 | 55603204 | 55604105 | 55603866 | 10 | 38 | 45 | 0.812987805 | 0.830514  |     | ENSG00000221779 |
| 17 | 55604261 | 55604625 | 55604446 | 15 | 21 | 20 | 1.004571012 | 0.493124  |     | ENSG00000221779 |
| 17 | 55606366 | 55606645 | 55606525 | 8  | 12 | 7  | 1.558226626 | 0.152813  |     | ENSG00000221779 |
| 17 | 55606839 | 55607124 | 55606981 | 12 | 16 | 10 | 1.481949798 | 0.147733  |     | ENSG00000221779 |
| 17 | 55608559 | 55608768 | 55608626 | 8  | 10 | 5  | 1.757999271 | 0.121253  |     | ENSG00000221779 |
| 17 | 55617224 | 55617559 | 55617391 | 9  | 12 | 9  | 1.246581301 | 0.295061  |     | ENSG00000221779 |
| 17 | 55620959 | 55621417 | 55621226 | 8  | 18 | 14 | 1.214617678 | 0.282961  |     | ENSG00000221779 |
| 17 | 55630668 | 55630969 | 55630797 | 9  | 13 | 13 | 0.958908693 | 0.543805  |     | ENSG00000222433 |
| 17 | 55631063 | 55631332 | 55631194 | 9  | 9  | 8  | 1.065454103 | 0.442605  |     | ENSG00000222433 |
| 17 | 55653236 | 55653469 | 55653400 | 8  | 10 | 5  | 1.757999271 | 0.121253  |     | ENSG00000222433 |
| 17 | 55654125 | 55654434 | 55654267 | 10 | 14 | 25 | 0.553216554 | 0.969907  |     | ENSG00000222433 |
| 17 | 55654459 | 55654803 | 55654631 | 8  | 13 | 27 | 0.479454347 | 0.9903    |     | ENSG00000222433 |
| 17 | 55655820 | 55656481 | 55656280 | 12 | 33 | 21 | 1.481949798 | 0.0712625 |     | ENSG00000222433 |

|    |          |          |          |    |    |    |             |            |                 |
|----|----------|----------|----------|----|----|----|-------------|------------|-----------------|
| 17 | 55657003 | 55657214 | 55657108 | 8  | 8  | 8  | 0.958908693 | 0.534974   | ENSG00000222433 |
| 17 | 55658169 | 55658422 | 55658276 | 10 | 12 | 10 | 1.133255728 | 0.37674    | ENSG00000222433 |
| 17 | 55660468 | 55660774 | 55660621 | 9  | 14 | 13 | 1.027402171 | 0.469541   | ENSG00000211027 |
| 17 | 55661150 | 55662038 | 55661653 | 20 | 56 | 40 | 1.333116964 | 0.077771   | ENSG00000211027 |
| 17 | 55662611 | 55663102 | 55662954 | 11 | 22 | 23 | 0.918954164 | 0.614181   | ENSG00000221009 |
| 17 | 55663359 | 55663859 | 55663633 | 16 | 31 | 44 | 0.681890626 | 0.95316    | ENSG00000221009 |
| 17 | 55664021 | 55664233 | 55664127 | 8  | 10 | 12 | 0.811384279 | 0.697544   | ENSG00000221009 |
| 17 | 55665207 | 55665441 | 55665338 | 8  | 10 | 3  | 2.636998906 | 0.034203   | ENSG00000221009 |
| 17 | 55667817 | 55668105 | 55667961 | 9  | 12 | 10 | 1.133255728 | 0.37674    | ENSG00000221009 |
| 17 | 55668722 | 55668929 | 55668825 | 8  | 8  | 8  | 0.958908693 | 0.534974   | ENSG00000221009 |
| 17 | 55669424 | 55669690 | 55669567 | 12 | 14 | 3  | 3.595907599 | 0.00486913 | ENSG00000221009 |
| 17 | 55670944 | 55671594 | 55671306 | 13 | 29 | 17 | 1.598181155 | 0.0533584  | ENSG00000221009 |
| 17 | 55671603 | 55671840 | 55671721 | 8  | 10 | 11 | 0.878999635 | 0.622439   | ENSG00000221009 |
| 17 | 55672283 | 55672644 | 55672465 | 9  | 16 | 19 | 0.815072389 | 0.734271   | ENSG00000221009 |
| 17 | 55672782 | 55673087 | 55672908 | 10 | 14 | 12 | 1.106433107 | 0.392094   | ENSG00000221009 |
| 17 | 55673556 | 55674025 | 55673891 | 10 | 20 | 21 | 0.915321934 | 0.614384   | ENSG00000221009 |
| 17 | 55674882 | 55675094 | 55675026 | 8  | 9  | 8  | 1.065454103 | 0.442605   | ENSG00000221009 |
| 17 | 55675461 | 55675732 | 55675553 | 9  | 12 | 17 | 0.692545167 | 0.848017   | ENSG00000221009 |
| 17 | 55677387 | 55677664 | 55677518 | 9  | 11 | 7  | 1.43836304  | 0.204844   | ENSG00000221009 |
| 17 | 55677715 | 55677957 | 55677836 | 11 | 13 | 24 | 0.536988868 | 0.972726   | ENSG00000221009 |
| 17 | 55680480 | 55680713 | 55680597 | 13 | 14 | 14 | 0.958908693 | 0.545362   | ENSG00000221009 |
| 17 | 55681371 | 55682104 | 55681703 | 13 | 36 | 32 | 1.07514005  | 0.379706   | ENSG00000221009 |
| 17 | 55682803 | 55682988 | 55682895 | 9  | 9  | 11 | 0.799090578 | 0.702688   | ENSG00000221009 |
| 17 | 55684653 | 55685196 | 55684832 | 14 | 24 | 15 | 1.498294833 | 0.0979832  | ENSG00000221009 |
| 17 | 55686204 | 55686630 | 55686460 | 10 | 17 | 15 | 1.07877228  | 0.410615   | ENSG00000221009 |
| 17 | 55689087 | 55689557 | 55689334 | 10 | 20 | 23 | 0.839045106 | 0.722898   | ENSG00000212648 |
| 17 | 55689596 | 55689833 | 55689734 | 8  | 10 | 15 | 0.659249726 | 0.861705   | ENSG00000212648 |
| 17 | 55690112 | 55690308 | 55690227 | 8  | 9  | 22 | 0.416916823 | 0.992721   | ENSG00000212648 |
| 17 | 55691470 | 55691819 | 55691644 | 19 | 24 | 17 | 1.331817629 | 0.172585   | ENSG00000212648 |
| 17 | 55692932 | 55693267 | 55693099 | 11 | 17 | 18 | 0.908439814 | 0.615249   | ENSG00000212648 |
| 17 | 55694766 | 55694968 | 55694932 | 8  | 10 | 14 | 0.703199708 | 0.817173   | ENSG00000212648 |
| 17 | 55695583 | 55695918 | 55695750 | 11 | 15 | 18 | 0.807502057 | 0.737835   | ENSG00000212648 |
| 17 | 55697178 | 55697898 | 55697719 | 12 | 31 | 24 | 1.227403127 | 0.218358   | ENSG00000212648 |
| 17 | 55701467 | 55701755 | 55701595 | 9  | 12 | 17 | 0.692545167 | 0.848017   | ENSG00000212648 |

|    |          |          |          |    |    |    |             |           |                 |
|----|----------|----------|----------|----|----|----|-------------|-----------|-----------------|
| 17 | 55703074 | 55703706 | 55703533 | 12 | 26 | 24 | 1.035621389 | 0.448641  | ENSG00000212648 |
| 17 | 55704518 | 55704711 | 55704561 | 8  | 10 | 9  | 1.054799562 | 0.4492    | ENSG00000212648 |
| 17 | 55704756 | 55705100 | 55704928 | 11 | 17 | 11 | 1.43836304  | 0.15834   | ENSG00000212648 |
| 17 | 55705103 | 55705497 | 55705411 | 8  | 13 | 10 | 1.220429246 | 0.306001  | ENSG00000212648 |
| 17 | 55705597 | 55705841 | 55705719 | 12 | 14 | 9  | 1.43836304  | 0.179537  | ENSG00000212648 |
| 17 | 55706779 | 55707323 | 55707091 | 12 | 21 | 18 | 1.110315329 | 0.366889  | ENSG00000212648 |
| 17 | 55710287 | 55710613 | 55710450 | 8  | 14 | 7  | 1.797953799 | 0.0806593 | ENSG00000212648 |
| 17 | 55710844 | 55711160 | 55711002 | 10 | 15 | 20 | 0.730597099 | 0.831283  | ENSG00000212648 |
| 17 | 55711302 | 55711494 | 55711398 | 8  | 9  | 8  | 1.065454103 | 0.442605  | ENSG00000212648 |
| 17 | 55712450 | 55712994 | 55712855 | 8  | 19 | 14 | 1.278544924 | 0.231514  | ENSG00000212648 |
| 17 | 55713819 | 55714095 | 55713957 | 8  | 11 | 16 | 0.676876725 | 0.854566  | ENSG00000212648 |
| 17 | 55716716 | 55717313 | 55717014 | 11 | 26 | 28 | 0.892777059 | 0.664792  | ENSG00000212648 |
| 17 | 55717434 | 55717809 | 55717683 | 10 | 15 | 10 | 1.394776281 | 0.191426  | ENSG00000212648 |
| 17 | 55718445 | 55719029 | 55718712 | 10 | 22 | 21 | 1.002495452 | 0.4958    | ENSG00000212648 |
| 17 | 55719380 | 55719943 | 55719764 | 17 | 32 | 36 | 0.855242888 | 0.744072  | ENSG00000212648 |
| 17 | 55720607 | 55721104 | 55720898 | 8  | 17 | 16 | 1.015315087 | 0.480915  | ENSG00000212648 |
| 17 | 55721417 | 55722194 | 55721960 | 10 | 31 | 23 | 1.278544924 | 0.178011  | ENSG00000212648 |
| 17 | 55723742 | 55723982 | 55723862 | 8  | 10 | 11 | 0.878999635 | 0.622439  | ENSG00000212648 |
| 17 | 55724363 | 55724552 | 55724439 | 8  | 9  | 22 | 0.416916823 | 0.992721  | ENSG00000212648 |
| 17 | 55724659 | 55724949 | 55724829 | 9  | 13 | 16 | 0.789689512 | 0.746135  | ENSG00000212648 |
| 17 | 55725532 | 55726057 | 55725711 | 12 | 25 | 35 | 0.692545167 | 0.925864  | ENSG00000212648 |
| 17 | 55727102 | 55727351 | 55727223 | 9  | 12 | 10 | 1.133255728 | 0.37674   | ENSG00000212648 |
| 17 | 55727486 | 55727858 | 55727692 | 10 | 15 | 12 | 1.180195315 | 0.324974  | ENSG00000212648 |
| 17 | 55728451 | 55728681 | 55728566 | 10 | 13 | 12 | 1.0326709   | 0.46514   | ENSG00000212648 |
| 17 | 55730126 | 55730758 | 55730457 | 11 | 28 | 30 | 0.897043616 | 0.663432  | ENSG00000212648 |
| 17 | 55731629 | 55731948 | 55731788 | 9  | 15 | 12 | 1.180195315 | 0.324974  | ENSG00000212648 |
| 17 | 55732116 | 55732456 | 55732280 | 10 | 15 | 10 | 1.394776281 | 0.191426  | ENSG00000212648 |
| 17 | 55732801 | 55733072 | 55732953 | 9  | 11 | 11 | 0.958908693 | 0.540507  | ENSG00000212648 |
| 17 | 55733163 | 55733539 | 55733391 | 16 | 20 | 9  | 2.013708255 | 0.0279742 | ENSG00000212648 |
| 17 | 55734632 | 55735032 | 55734806 | 14 | 19 | 17 | 1.065454103 | 0.420867  | ENSG00000212648 |
| 17 | 55735362 | 55735589 | 55735501 | 11 | 13 | 21 | 0.610214623 | 0.930478  | ENSG00000212648 |
| 17 | 55736870 | 55737483 | 55737027 | 10 | 22 | 11 | 1.837908328 | 0.0378204 | ENSG00000212648 |
| 17 | 55737528 | 55737922 | 55737707 | 10 | 17 | 8  | 1.917817386 | 0.0474153 | ENSG00000212648 |
| 17 | 55739981 | 55740186 | 55740083 | 8  | 10 | 9  | 1.054799562 | 0.4492    | ENSG00000212648 |



|    |          |          |          |    |    |    |             |           |                       |
|----|----------|----------|----------|----|----|----|-------------|-----------|-----------------------|
| 17 | 55740481 | 55740714 | 55740585 | 8  | 9  | 11 | 0.799090578 | 0.702688  | ENSG00000212648       |
| 17 | 55741092 | 55741408 | 55741250 | 9  | 12 | 11 | 1.038817751 | 0.460341  | ENSG00000212648       |
| 17 | 55743953 | 55744252 | 55744055 | 14 | 18 | 15 | 1.138704073 | 0.348127  | ENSG00000212648       |
| 17 | 55744262 | 55744520 | 55744398 | 10 | 15 | 8  | 1.704726565 | 0.0916153 | ENSG00000212648       |
| 17 | 55744964 | 55745176 | 55745070 | 8  | 10 | 7  | 1.318499453 | 0.269217  | ENSG00000212648       |
| 17 | 55745556 | 55745869 | 55745714 | 10 | 14 | 7  | 1.797953799 | 0.0806593 | ENSG00000212648       |
| 17 | 55746603 | 55747049 | 55746870 | 9  | 17 | 10 | 1.569123316 | 0.112309  | ENSG00000212648       |
| 17 | 55747741 | 55748457 | 55748096 | 20 | 46 | 36 | 1.218073205 | 0.182357  | ENSG00000212648       |
| 17 | 55748988 | 55749274 | 55749131 | 9  | 12 | 10 | 1.133255728 | 0.37674   | ENSG00000212648       |
| 17 | 55750140 | 55750389 | 55750225 | 10 | 13 | 10 | 1.220429246 | 0.306001  | ENSG00000212648       |
| 17 | 55750541 | 55750886 | 55750713 | 15 | 20 | 17 | 1.118726809 | 0.361026  | ENSG00000212648       |
| 17 | 55752467 | 55752772 | 55752598 | 9  | 12 | 11 | 1.038817751 | 0.460341  | ENSG00000212648       |
| 17 | 55752989 | 55753246 | 55753120 | 11 | 14 | 19 | 0.71918152  | 0.83643   | ENSG00000212648       |
| 17 | 55753929 | 55754209 | 55754064 | 11 | 15 | 7  | 1.917817386 | 0.0572317 | ENSG00000212648       |
| 17 | 55754245 | 55754525 | 55754422 | 15 | 18 | 10 | 1.656296833 | 0.0841786 | ENSG00000212648       |
| 17 | 55754820 | 55754999 | 55754881 | 8  | 8  | 1  | 4.315089119 | 0.0127267 | ENSG00000212648       |
| 17 | 55755747 | 55756026 | 55755887 | 8  | 13 | 12 | 1.0326709   | 0.46514   | ENSG00000212648       |
| 17 | 55760370 | 55760730 | 55760551 | 8  | 13 | 8  | 1.491635745 | 0.166708  | ENSG00000212648       |
| 17 | 55761086 | 55761382 | 55761234 | 11 | 14 | 13 | 1.027402171 | 0.469541  | ENSG00000212648       |
| 17 | 55761611 | 55762014 | 55761870 | 9  | 16 | 12 | 1.253957522 | 0.265012  | ENSG00000212648       |
| 17 | 55762099 | 55762357 | 55762236 | 10 | 12 | 15 | 0.779113313 | 0.750998  | ENSG00000212648       |
| 17 | 55762374 | 55762607 | 55762490 | 9  | 10 | 8  | 1.171999514 | 0.35773   | ENSG00000212648       |
| 17 | 55762767 | 55763291 | 55763114 | 17 | 29 | 15 | 1.797953799 | 0.0249937 | ENSG00000212648       |
| 17 | 55763309 | 55763542 | 55763425 | 9  | 9  | 3  | 2.397271733 | 0.0539397 | ENSG00000212648       |
| 17 | 55765195 | 55765451 | 55765349 | 10 | 13 | 12 | 1.0326709   | 0.46514   | ENSG00000212648       |
| 17 | 55767344 | 55768010 | 55767510 | 14 | 30 | 20 | 1.41553188  | 0.105206  | USP32 ENSG00000170832 |
| 17 | 55769955 | 55770242 | 55770115 | 8  | 11 | 8  | 1.278544924 | 0.28289   | USP32 ENSG00000170832 |
| 17 | 55772269 | 55772591 | 55772430 | 18 | 23 | 11 | 1.917817386 | 0.0274129 | USP32 ENSG00000170832 |
| 17 | 55776940 | 55777162 | 55777025 | 8  | 10 | 15 | 0.659249726 | 0.861705  | USP32 ENSG00000170832 |
| 17 | 55777281 | 55777951 | 55777612 | 20 | 41 | 25 | 1.54900635  | 0.03671   | USP32 ENSG00000170832 |
| 17 | 55778297 | 55778655 | 55778523 | 12 | 17 | 14 | 1.150690432 | 0.340986  | USP32 ENSG00000170832 |
| 17 | 55778892 | 55779348 | 55779169 | 12 | 25 | 20 | 1.187220287 | 0.276369  | USP32 ENSG00000170832 |
| 17 | 55782911 | 55783107 | 55782976 | 8  | 9  | 16 | 0.564063937 | 0.931096  | USP32 ENSG00000170832 |
| 17 | 55783350 | 55783556 | 55783453 | 8  | 10 | 8  | 1.171999514 | 0.35773   | USP32 ENSG00000170832 |

|    |          |          |          |    |     |     |             |             |       |                 |
|----|----------|----------|----------|----|-----|-----|-------------|-------------|-------|-----------------|
| 17 | 55784172 | 55784614 | 55784351 | 9  | 16  | 21  | 0.740974899 | 0.826507    | USP32 | ENSG00000170832 |
| 17 | 55784674 | 55785439 | 55784891 | 22 | 45  | 52  | 0.832260375 | 0.81989     | USP32 | ENSG00000170832 |
| 17 | 55786326 | 55786800 | 55786568 | 15 | 26  | 20  | 1.232882605 | 0.232568    | USP32 | ENSG00000170832 |
| 17 | 55786837 | 55787077 | 55786992 | 10 | 13  | 10  | 1.220429246 | 0.306001    | USP32 | ENSG00000170832 |
| 17 | 55787295 | 55789426 | 55788277 | 39 | 155 | 110 | 1.347655461 | 0.00768914  | USP32 | ENSG00000170832 |
| 17 | 55789566 | 55789956 | 55789745 | 10 | 18  | 9   | 1.821926517 | 0.0548428   | USP32 | ENSG00000170832 |
| 17 | 55790249 | 55790549 | 55790415 | 11 | 13  | 1   | 6.712360851 | 0.000640982 | USP32 | ENSG00000170832 |
| 17 | 55794107 | 55794426 | 55794266 | 11 | 14  | 9   | 1.43836304  | 0.179537    | USP32 | ENSG00000170832 |
| 17 | 55796073 | 55796435 | 55796256 | 13 | 20  | 15  | 1.25856766  | 0.240048    | USP32 | ENSG00000170832 |
| 17 | 55796440 | 55796912 | 55796751 | 8  | 17  | 20  | 0.821921737 | 0.731032    | USP32 | ENSG00000170832 |
| 17 | 55799205 | 55799535 | 55799370 | 8  | 13  | 12  | 1.0326709   | 0.46514     | USP32 | ENSG00000170832 |
| 17 | 55801846 | 55802047 | 55801917 | 8  | 9   | 6   | 1.369869562 | 0.253675    | USP32 | ENSG00000170832 |
| 17 | 55803751 | 55804327 | 55803917 | 22 | 37  | 35  | 1.012181398 | 0.478474    | USP32 | ENSG00000170832 |
| 17 | 55804655 | 55805194 | 55805015 | 13 | 25  | 10  | 2.266511456 | 0.00802978  | USP32 | ENSG00000170832 |
| 17 | 55805268 | 55805543 | 55805440 | 18 | 20  | 9   | 2.013708255 | 0.0279742   | USP32 | ENSG00000170832 |
| 17 | 55814171 | 55814699 | 55814328 | 11 | 24  | 29  | 0.799090578 | 0.798033    | USP32 | ENSG00000170832 |
| 17 | 55815605 | 55816241 | 55815774 | 9  | 25  | 32  | 0.755503819 | 0.859753    | USP32 | ENSG00000170832 |
| 17 | 55816259 | 55816722 | 55816438 | 10 | 20  | 19  | 1.006854128 | 0.490315    | USP32 | ENSG00000170832 |
| 17 | 55818234 | 55818503 | 55818384 | 12 | 13  | 9   | 1.34247217  | 0.232231    | USP32 | ENSG00000170832 |
| 17 | 55818516 | 55818991 | 55818835 | 17 | 29  | 34  | 0.821921737 | 0.786085    | USP32 | ENSG00000170832 |
| 17 | 55820032 | 55820252 | 55820154 | 9  | 10  | 10  | 0.958908693 | 0.538751    | USP32 | ENSG00000170832 |
| 17 | 55820564 | 55820825 | 55820691 | 11 | 14  | 12  | 1.106433107 | 0.392094    | USP32 | ENSG00000170832 |
| 17 | 55821020 | 55821421 | 55821199 | 9  | 17  | 22  | 0.750450282 | 0.822065    | USP32 | ENSG00000170832 |
| 17 | 55822300 | 55822820 | 55822544 | 16 | 29  | 23  | 1.198635866 | 0.251284    | USP32 | ENSG00000170832 |
| 17 | 55822825 | 55825777 | 55824682 | 35 | 309 | 196 | 1.508942613 | 2.39E-06    | USP32 | ENSG00000170832 |
| 17 | 55826269 | 55826728 | 55826353 | 11 | 23  | 24  | 0.920552345 | 0.614165    | USP32 | ENSG00000170832 |
| 17 | 55827521 | 55828000 | 55827698 | 10 | 19  | 18  | 1.009377572 | 0.487356    | USP32 | ENSG00000170832 |
| 17 | 55828025 | 55828331 | 55828178 | 11 | 14  | 13  | 1.027402171 | 0.469541    | USP32 | ENSG00000170832 |
| 17 | 55828407 | 55828591 | 55828565 | 8  | 9   | 3   | 2.397271733 | 0.0539397   | USP32 | ENSG00000170832 |
| 17 | 55828606 | 55828976 | 55828797 | 12 | 19  | 17  | 1.065454103 | 0.420867    | USP32 | ENSG00000170832 |
| 17 | 55829339 | 55829598 | 55829518 | 11 | 13  | 8   | 1.491635745 | 0.166708    | USP32 | ENSG00000170832 |
| 17 | 55830374 | 55830758 | 55830591 | 10 | 15  | 17  | 0.852363283 | 0.680376    | USP32 | ENSG00000170832 |
| 17 | 55831350 | 55831546 | 55831448 | 8  | 9   | 5   | 1.598181155 | 0.170911    | USP32 | ENSG00000170832 |
| 17 | 55831879 | 55832217 | 55832048 | 9  | 13  | 21  | 0.610214623 | 0.930478    | USP32 | ENSG00000170832 |

|    |          |          |          |    |    |    |             |             |          |                 |
|----|----------|----------|----------|----|----|----|-------------|-------------|----------|-----------------|
| 17 | 55832694 | 55832954 | 55832857 | 8  | 11 | 10 | 1.046082211 | 0.455063    | USP32    | ENSG00000170832 |
| 17 | 55833946 | 55834438 | 55834259 | 12 | 24 | 21 | 1.089668969 | 0.382599    | USP32    | ENSG00000170832 |
| 17 | 55834677 | 55835069 | 55834862 | 10 | 19 | 19 | 0.958908693 | 0.552451    | USP32    | ENSG00000170832 |
| 17 | 55835548 | 55835764 | 55835621 | 11 | 13 | 10 | 1.220429246 | 0.306001    | USP32    | ENSG00000170832 |
| 17 | 55836207 | 55836440 | 55836323 | 8  | 11 | 8  | 1.278544924 | 0.28289     | USP32    | ENSG00000170832 |
| 17 | 55836872 | 55837130 | 55836977 | 8  | 10 | 14 | 0.703199708 | 0.817173    | USP32    | ENSG00000170832 |
| 17 | 55842009 | 55842258 | 55842133 | 8  | 11 | 12 | 0.885146486 | 0.620672    | C17orf64 | ENSG00000141371 |
| 17 | 55844078 | 55844315 | 55844196 | 9  | 10 | 11 | 0.878999635 | 0.622439    | C17orf64 | ENSG00000141371 |
| 17 | 55844628 | 55845150 | 55844791 | 8  | 18 | 18 | 0.958908693 | 0.551113    | C17orf64 | ENSG00000141371 |
| 17 | 55847178 | 55847593 | 55847351 | 15 | 23 | 26 | 0.852363283 | 0.716584    | C17orf64 | ENSG00000141371 |
| 17 | 55847677 | 55847911 | 55847816 | 12 | 13 | 11 | 1.118726809 | 0.38479     | C17orf64 | ENSG00000141371 |
| 17 | 55848457 | 55848741 | 55848568 | 10 | 14 | 20 | 0.684934781 | 0.872628    | C17orf64 | ENSG00000141371 |
| 17 | 55848744 | 55849070 | 55848907 | 13 | 18 | 18 | 0.958908693 | 0.551113    | C17orf64 | ENSG00000141371 |
| 17 | 55852288 | 55852501 | 55852355 | 10 | 10 | 14 | 0.703199708 | 0.817173    | C17orf64 | ENSG00000141371 |
| 17 | 55853246 | 55853629 | 55853425 | 8  | 16 | 16 | 0.958908693 | 0.548325    | C17orf64 | ENSG00000141371 |
| 17 | 55854294 | 55855236 | 55854525 | 10 | 34 | 35 | 0.93227234  | 0.616206    | C17orf64 | ENSG00000141371 |
| 17 | 55856021 | 55856740 | 55856427 | 11 | 28 | 19 | 1.390417605 | 0.124062    | C17orf64 | ENSG00000141371 |
| 17 | 55856945 | 55857774 | 55857513 | 9  | 30 | 27 | 1.06164891  | 0.407875    | C17orf64 | ENSG00000141371 |
| 17 | 55857944 | 55858365 | 55858123 | 11 | 20 | 27 | 0.71918152  | 0.876208    | C17orf64 | ENSG00000141371 |
| 17 | 55859016 | 55859290 | 55859146 | 11 | 13 | 12 | 1.0326709   | 0.46514     | C17orf64 | ENSG00000141371 |
| 17 | 55859950 | 55860390 | 55860129 | 12 | 22 | 23 | 0.918954164 | 0.614181    | C17orf64 | ENSG00000141371 |
| 17 | 55861234 | 55861456 | 55861387 | 9  | 10 | 16 | 0.620470331 | 0.897128    |          | ENSG00000213228 |
| 17 | 55861588 | 55861849 | 55861672 | 9  | 12 | 10 | 1.133255728 | 0.37674     |          | ENSG00000213228 |
| 17 | 55862363 | 55862668 | 55862516 | 11 | 15 | 14 | 1.022835939 | 0.473606    |          | ENSG00000213228 |
| 17 | 55862705 | 55864318 | 55863585 | 13 | 71 | 62 | 1.095895649 | 0.296635    |          | ENSG00000213228 |
| 17 | 55866586 | 55866786 | 55866692 | 8  | 9  | 8  | 1.065454103 | 0.442605    |          | ENSG00000213228 |
| 17 | 55867490 | 55868542 | 55868193 | 34 | 97 | 60 | 1.540541835 | 0.00354158  |          | ENSG00000213228 |
| 17 | 55869474 | 55869777 | 55869632 | 11 | 14 | 9  | 1.43836304  | 0.179537    |          | ENSG00000213228 |
| 17 | 55870230 | 55870705 | 55870352 | 11 | 21 | 14 | 1.406399416 | 0.148881    |          | ENSG00000213228 |
| 17 | 55871313 | 55872153 | 55871628 | 15 | 37 | 13 | 2.602752167 | 0.000528768 |          | ENSG00000213228 |
| 17 | 55873931 | 55874629 | 55874253 | 12 | 29 | 37 | 0.757033179 | 0.874819    |          | ENSG00000213228 |
| 17 | 55874637 | 55875268 | 55874919 | 15 | 32 | 38 | 0.811384279 | 0.812987    |          | ENSG00000213228 |
| 17 | 55876621 | 55877191 | 55877012 | 11 | 25 | 31 | 0.779113313 | 0.829763    |          | ENSG00000213228 |
| 17 | 55877351 | 55877602 | 55877497 | 11 | 14 | 18 | 0.757033179 | 0.792932    |          | ENSG00000213228 |

|    |          |          |          |    |    |    |             |           |                        |
|----|----------|----------|----------|----|----|----|-------------|-----------|------------------------|
| 17 | 55877857 | 55878174 | 55878044 | 11 | 16 | 17 | 0.905635988 | 0.615736  | ENSG00000213228        |
| 17 | 55878883 | 55879276 | 55879079 | 11 | 19 | 12 | 1.475244143 | 0.131365  | ENSG00000213228        |
| 17 | 55879343 | 55879708 | 55879468 | 9  | 15 | 14 | 1.022835939 | 0.473606  | ENSG00000213228        |
| 17 | 55880616 | 55880915 | 55880765 | 11 | 14 | 11 | 1.198635866 | 0.315918  | ENSG00000213228        |
| 17 | 55884072 | 55884436 | 55884257 | 13 | 20 | 20 | 0.958908693 | 0.553754  | ENSG00000213228        |
| 17 | 55886891 | 55887241 | 55887066 | 8  | 14 | 10 | 1.307602763 | 0.244096  | ENSG00000213228        |
| 17 | 55890620 | 55890925 | 55890772 | 11 | 13 | 13 | 0.958908693 | 0.543805  | ENSG00000213228        |
| 17 | 55891918 | 55892140 | 55892029 | 10 | 12 | 15 | 0.779113313 | 0.750998  | ENSG00000213228        |
| 17 | 55895352 | 55896064 | 55895531 | 11 | 33 | 23 | 1.358453982 | 0.121537  | ENSG00000213228        |
| 17 | 55897173 | 55897412 | 55897265 | 9  | 11 | 9  | 1.150690432 | 0.367789  | ENSG00000213228        |
| 17 | 55897489 | 55897805 | 55897587 | 8  | 13 | 11 | 1.118726809 | 0.38479   | ENSG00000213228        |
| 17 | 55897850 | 55898345 | 55898068 | 10 | 22 | 17 | 1.225272219 | 0.255726  | ENSG00000213228        |
| 17 | 55899771 | 55899985 | 55899878 | 8  | 9  | 13 | 0.684934781 | 0.824961  | ENSG00000213228        |
| 17 | 55900216 | 55900579 | 55900404 | 20 | 27 | 14 | 1.789962894 | 0.029869  | ENSG00000213228        |
| 17 | 55901652 | 55902572 | 55902090 | 19 | 46 | 36 | 1.218073205 | 0.182357  | ENSG00000213228        |
| 17 | 55904437 | 55904909 | 55904766 | 15 | 27 | 18 | 1.4131286   | 0.11777   | ENSG00000213228        |
| 17 | 55905632 | 55905843 | 55905737 | 9  | 11 | 7  | 1.43836304  | 0.204844  | ENSG00000213228        |
| 17 | 55906103 | 55906379 | 55906241 | 10 | 11 | 10 | 1.046082211 | 0.455063  | ENSG00000213228        |
| 17 | 55907285 | 55908022 | 55907705 | 10 | 30 | 19 | 1.486308474 | 0.0791381 | ENSG00000213228        |
| 17 | 55908885 | 55909475 | 55909057 | 9  | 22 | 25 | 0.848265382 | 0.718521  | ENSG00000213228        |
| 17 | 55909859 | 55910219 | 55910018 | 9  | 15 | 14 | 1.022835939 | 0.473606  | ENSG00000213228        |
| 17 | 55911261 | 55911633 | 55911401 | 10 | 15 | 21 | 0.69738814  | 0.867465  | ENSG00000213228        |
| 17 | 55911650 | 55911929 | 55911789 | 11 | 13 | 10 | 1.220429246 | 0.306001  | ENSG00000213228        |
| 17 | 55912022 | 55912241 | 55912131 | 10 | 12 | 7  | 1.558226626 | 0.152813  | ENSG00000213228        |
| 17 | 55912809 | 55913298 | 55913067 | 19 | 32 | 36 | 0.855242888 | 0.744072  | APPBP2 ENSG00000062725 |
| 17 | 55913670 | 55913885 | 55913743 | 8  | 9  | 13 | 0.684934781 | 0.824961  | APPBP2 ENSG00000062725 |
| 17 | 55913950 | 55914141 | 55914031 | 8  | 8  | 10 | 0.784561658 | 0.708731  | APPBP2 ENSG00000062725 |
| 17 | 55920584 | 55920885 | 55920728 | 9  | 13 | 16 | 0.789689512 | 0.746135  | APPBP2 ENSG00000062725 |
| 17 | 55922211 | 55922428 | 55922306 | 10 | 10 | 9  | 1.054799562 | 0.4492    | APPBP2 ENSG00000062725 |
| 17 | 55925154 | 55925334 | 55925244 | 9  | 10 | 7  | 1.318499453 | 0.269217  | APPBP2 ENSG00000062725 |
| 17 | 55925990 | 55926394 | 55926169 | 11 | 18 | 14 | 1.214617678 | 0.282961  | APPBP2 ENSG00000062725 |
| 17 | 55926470 | 55926796 | 55926633 | 9  | 13 | 17 | 0.745817872 | 0.798145  | APPBP2 ENSG00000062725 |
| 17 | 55927638 | 55927934 | 55927791 | 10 | 11 | 5  | 1.917817386 | 0.0843804 | APPBP2 ENSG00000062725 |
| 17 | 55931199 | 55931822 | 55931539 | 8  | 21 | 13 | 1.506856518 | 0.109266  | APPBP2 ENSG00000062725 |

|    |          |          |          |     |     |     |             |             |        |                 |
|----|----------|----------|----------|-----|-----|-----|-------------|-------------|--------|-----------------|
| 17 | 55933885 | 55934453 | 55934170 | 12  | 27  | 25  | 1.0326709   | 0.45189     | APPBP2 | ENSG00000062725 |
| 17 | 55934470 | 55934754 | 55934564 | 9   | 14  | 9   | 1.43836304  | 0.179537    | APPBP2 | ENSG00000062725 |
| 17 | 55936630 | 55937156 | 55936977 | 14  | 31  | 22  | 1.334133834 | 0.142045    | APPBP2 | ENSG00000062725 |
| 17 | 55940398 | 55941261 | 55940846 | 12  | 37  | 35  | 1.012181398 | 0.478474    | APPBP2 | ENSG00000062725 |
| 17 | 55941881 | 55942103 | 55941992 | 8   | 10  | 7   | 1.318499453 | 0.269217    | APPBP2 | ENSG00000062725 |
| 17 | 55942406 | 55942756 | 55942581 | 8   | 14  | 5   | 2.397271733 | 0.0258078   | APPBP2 | ENSG00000062725 |
| 17 | 55943003 | 55943328 | 55943174 | 10  | 13  | 19  | 0.671236085 | 0.87814     | APPBP2 | ENSG00000062725 |
| 17 | 55948397 | 55948588 | 55948454 | 8   | 9   | 13  | 0.684934781 | 0.824961    | APPBP2 | ENSG00000062725 |
| 17 | 55948964 | 55949228 | 55949096 | 9   | 11  | 10  | 1.046082211 | 0.455063    | APPBP2 | ENSG00000062725 |
| 17 | 55949922 | 55950270 | 55950096 | 9   | 15  | 12  | 1.180195315 | 0.324974    | APPBP2 | ENSG00000062725 |
| 17 | 55951662 | 55951841 | 55951747 | 8   | 8   | 10  | 0.784561658 | 0.708731    | APPBP2 | ENSG00000062725 |
| 17 | 55953149 | 55953447 | 55953323 | 12  | 16  | 11  | 1.358453982 | 0.20248     | APPBP2 | ENSG00000062725 |
| 17 | 55954031 | 55954214 | 55954080 | 8   | 8   | 7   | 1.07877228  | 0.435076    | APPBP2 | ENSG00000062725 |
| 17 | 55954339 | 55954637 | 55954477 | 10  | 12  | 11  | 1.038817751 | 0.460341    | APPBP2 | ENSG00000062725 |
| 17 | 55955012 | 55955476 | 55955297 | 8   | 17  | 13  | 1.232882605 | 0.274309    | APPBP2 | ENSG00000062725 |
| 17 | 55955536 | 55955842 | 55955669 | 12  | 15  | 7   | 1.917817386 | 0.0572317   | APPBP2 | ENSG00000062725 |
| 17 | 55956030 | 55959223 | 55958468 | 46  | 319 | 169 | 1.805004599 | 9.03E-11    | APPBP2 | ENSG00000062725 |
| 17 | 55959713 | 55960045 | 55959879 | 10  | 15  | 15  | 0.958908693 | 0.546868    | APPBP2 | ENSG00000062725 |
| 17 | 55960133 | 55960607 | 55960437 | 11  | 19  | 16  | 1.128127874 | 0.354788    | APPBP2 | ENSG00000062725 |
| 17 | 55960881 | 55961130 | 55961002 | 10  | 13  | 9   | 1.34247217  | 0.232231    | APPBP2 | ENSG00000062725 |
| 17 | 55961522 | 55962922 | 55962190 | 252 | 380 | 24  | 14.61376848 | 6.47E-81    | APPBP2 | ENSG00000062725 |
| 17 | 55965941 | 55966255 | 55966098 | 11  | 16  | 15  | 1.018840486 | 0.477384    | APPBP2 | ENSG00000062725 |
| 17 | 55967903 | 55968720 | 55968113 | 9   | 30  | 27  | 1.06164891  | 0.407875    | APPBP2 | ENSG00000062725 |
| 17 | 55969469 | 55970124 | 55969648 | 13  | 34  | 16  | 1.97422378  | 0.00831751  | APPBP2 | ENSG00000062725 |
| 17 | 55971355 | 55971623 | 55971465 | 8   | 11  | 12  | 0.885146486 | 0.620672    | APPBP2 | ENSG00000062725 |
| 17 | 55973652 | 55974142 | 55973971 | 16  | 26  | 21  | 1.176842487 | 0.282611    | APPBP2 | ENSG00000062725 |
| 17 | 55974801 | 55975079 | 55974936 | 12  | 15  | 7   | 1.917817386 | 0.0572317   | APPBP2 | ENSG00000062725 |
| 17 | 55975659 | 55975982 | 55975820 | 9   | 14  | 8   | 1.598181155 | 0.124586    | APPBP2 | ENSG00000062725 |
| 17 | 55976152 | 55976486 | 55976326 | 10  | 15  | 1   | 7.671269544 | 0.000187863 | APPBP2 | ENSG00000062725 |
| 17 | 55976490 | 55976974 | 55976795 | 11  | 22  | 3   | 5.513724985 | 6.69E-05    | APPBP2 | ENSG00000062725 |
| 17 | 55976976 | 55977201 | 55977029 | 8   | 11  | 7   | 1.43836304  | 0.204844    | APPBP2 | ENSG00000062725 |
| 17 | 55977824 | 55978184 | 55978005 | 9   | 15  | 25  | 0.590097657 | 0.955515    | APPBP2 | ENSG00000062725 |
| 17 | 55978294 | 55978475 | 55978387 | 8   | 9   | 10  | 0.871735176 | 0.624623    | APPBP2 | ENSG00000062725 |
| 17 | 55978590 | 55978951 | 55978779 | 9   | 15  | 12  | 1.180195315 | 0.324974    | APPBP2 | ENSG00000062725 |

|    |          |          |          |    |    |    |             |            |        |                 |
|----|----------|----------|----------|----|----|----|-------------|------------|--------|-----------------|
| 17 | 55979804 | 55980126 | 55979965 | 8  | 12 | 11 | 1.038817751 | 0.460341   | APPBP2 | ENSG00000062725 |
| 17 | 55985305 | 55985528 | 55985409 | 9  | 11 | 19 | 0.575345216 | 0.94039    | APPBP2 | ENSG00000062725 |
| 17 | 55987199 | 55987641 | 55987378 | 12 | 23 | 15 | 1.43836304  | 0.12479    | APPBP2 | ENSG00000062725 |
| 17 | 55989477 | 55989952 | 55989759 | 11 | 20 | 35 | 0.559363404 | 0.985014   | APPBP2 | ENSG00000062725 |
| 17 | 55990178 | 55990416 | 55990290 | 13 | 15 | 6  | 2.191791298 | 0.0328001  | APPBP2 | ENSG00000062725 |
| 17 | 55991164 | 55991655 | 55991411 | 11 | 22 | 20 | 1.05023333  | 0.434036   | APPBP2 | ENSG00000062725 |
| 17 | 55994085 | 55994366 | 55994225 | 9  | 12 | 13 | 0.890415215 | 0.619237   | APPBP2 | ENSG00000062725 |
| 17 | 55995414 | 55995695 | 55995554 | 15 | 16 | 8  | 1.811271976 | 0.0663685  | PPM1D  | ENSG00000170836 |
| 17 | 55995750 | 55996185 | 55995877 | 11 | 20 | 17 | 1.118726809 | 0.361026   | PPM1D  | ENSG00000170836 |
| 17 | 55996892 | 55997122 | 55997001 | 8  | 8  | 6  | 1.232882605 | 0.333038   | PPM1D  | ENSG00000170836 |
| 17 | 55997504 | 55997750 | 55997580 | 13 | 15 | 5  | 2.557089848 | 0.0169197  | PPM1D  | ENSG00000170836 |
| 17 | 55998535 | 55998821 | 55998663 | 14 | 17 | 28 | 0.595184706 | 0.961563   | PPM1D  | ENSG00000170836 |
| 17 | 55999927 | 56000473 | 56000302 | 8  | 19 | 27 | 0.684934781 | 0.905224   | PPM1D  | ENSG00000170836 |
| 17 | 56000964 | 56001494 | 56001154 | 10 | 21 | 12 | 1.622768557 | 0.076896   | PPM1D  | ENSG00000170836 |
| 17 | 56001658 | 56002336 | 56002050 | 23 | 47 | 35 | 1.278544924 | 0.129912   | PPM1D  | ENSG00000170836 |
| 17 | 56003337 | 56003750 | 56003488 | 17 | 24 | 24 | 0.958908693 | 0.558672   | PPM1D  | ENSG00000170836 |
| 17 | 56004595 | 56004989 | 56004732 | 9  | 15 | 19 | 0.767126954 | 0.788167   | PPM1D  | ENSG00000170836 |
| 17 | 56005579 | 56006108 | 56005884 | 9  | 20 | 15 | 1.25856766  | 0.240048   | PPM1D  | ENSG00000170836 |
| 17 | 56007098 | 56007544 | 56007395 | 11 | 21 | 27 | 0.753428259 | 0.842351   | PPM1D  | ENSG00000170836 |
| 17 | 56008018 | 56008314 | 56008168 | 9  | 13 | 8  | 1.491635745 | 0.166708   | PPM1D  | ENSG00000170836 |
| 17 | 56009491 | 56010120 | 56009954 | 17 | 34 | 41 | 0.799090578 | 0.837938   | PPM1D  | ENSG00000170836 |
| 17 | 56011112 | 56011387 | 56011234 | 9  | 11 | 12 | 0.885146486 | 0.620672   | PPM1D  | ENSG00000170836 |
| 17 | 56012017 | 56012268 | 56012103 | 11 | 16 | 12 | 1.253957522 | 0.265012   | PPM1D  | ENSG00000170836 |
| 17 | 56012688 | 56013497 | 56013366 | 17 | 35 | 17 | 1.917817386 | 0.00960758 | PPM1D  | ENSG00000170836 |
| 17 | 56014831 | 56015321 | 56015076 | 14 | 28 | 5  | 4.63472535  | 3.19E-05   | PPM1D  | ENSG00000170836 |
| 17 | 56015362 | 56015656 | 56015531 | 8  | 12 | 5  | 2.077635502 | 0.0577144  | PPM1D  | ENSG00000170836 |
| 17 | 56015891 | 56016350 | 56016183 | 9  | 17 | 24 | 0.690414259 | 0.888181   | PPM1D  | ENSG00000170836 |
| 17 | 56016892 | 56017085 | 56016992 | 8  | 8  | 8  | 0.958908693 | 0.534974   | PPM1D  | ENSG00000170836 |
| 17 | 56017109 | 56017460 | 56017284 | 9  | 15 | 20 | 0.730597099 | 0.831283   | PPM1D  | ENSG00000170836 |
| 17 | 56017496 | 56017734 | 56017594 | 8  | 11 | 8  | 1.278544924 | 0.28289    | PPM1D  | ENSG00000170836 |
| 17 | 56018058 | 56019203 | 56018548 | 29 | 92 | 37 | 2.346802854 | 1.57E-06   | PPM1D  | ENSG00000170836 |
| 17 | 56019639 | 56019891 | 56019765 | 12 | 14 | 18 | 0.757033179 | 0.792932   | PPM1D  | ENSG00000170836 |
| 17 | 56019965 | 56020227 | 56020096 | 11 | 14 | 15 | 0.8989769   | 0.617119   | PPM1D  | ENSG00000170836 |
| 17 | 56022435 | 56022903 | 56022609 | 13 | 19 | 27 | 0.684934781 | 0.905224   | PPM1D  | ENSG00000170836 |

|    |          |          |          |     |      |     |             |            |       |                 |
|----|----------|----------|----------|-----|------|-----|-------------|------------|-------|-----------------|
| 17 | 56022983 | 56024234 | 56023567 | 23  | 70   | 51  | 1.309279177 | 0.0680032  | PPM1D | ENSG00000170836 |
| 17 | 56024327 | 56024542 | 56024434 | 8   | 8    | 6   | 1.232882605 | 0.333038   | PPM1D | ENSG00000170836 |
| 17 | 56024832 | 56025490 | 56025189 | 10  | 25   | 9   | 2.493162602 | 0.00432225 | PPM1D | ENSG00000170836 |
| 17 | 56025602 | 56026191 | 56025884 | 9   | 19   | 13  | 1.369869562 | 0.177863   | PPM1D | ENSG00000170836 |
| 17 | 56026535 | 56027380 | 56027162 | 12  | 39   | 34  | 1.095895649 | 0.344651   | PPM1D | ENSG00000170836 |
| 17 | 56027968 | 56028161 | 56028098 | 9   | 11   | 17  | 0.639272462 | 0.890352   | PPM1D | ENSG00000170836 |
| 17 | 56028784 | 56029118 | 56028957 | 11  | 16   | 15  | 1.018840486 | 0.477384   | PPM1D | ENSG00000170836 |
| 17 | 56029123 | 56029406 | 56029264 | 14  | 17   | 17  | 0.958908693 | 0.549739   | PPM1D | ENSG00000170836 |
| 17 | 56030079 | 56030463 | 56030225 | 11  | 17   | 25  | 0.663859864 | 0.912943   | PPM1D | ENSG00000170836 |
| 17 | 56030572 | 56031196 | 56031017 | 15  | 34   | 44  | 0.745817872 | 0.905279   | PPM1D | ENSG00000170836 |
| 17 | 56031199 | 56035770 | 56032427 | 530 | 1172 | 286 | 3.919163404 | 6.86E-120  | PPM1D | ENSG00000170836 |
| 17 | 56035907 | 56036179 | 56036081 | 11  | 14   | 10  | 1.307602763 | 0.244096   | PPM1D | ENSG00000170836 |
| 17 | 56036314 | 56036770 | 56036542 | 15  | 25   | 32  | 0.755503819 | 0.859753   | PPM1D | ENSG00000170836 |
| 17 | 56037198 | 56037885 | 56037377 | 14  | 33   | 26  | 1.207514651 | 0.229506   | PPM1D | ENSG00000170836 |
| 17 | 56038132 | 56038338 | 56038213 | 8   | 8    | 7   | 1.07877228  | 0.435076   | PPM1D | ENSG00000170836 |
| 17 | 56038402 | 56038703 | 56038547 | 10  | 12   | 13  | 0.890415215 | 0.619237   | PPM1D | ENSG00000170836 |
| 17 | 56039713 | 56040190 | 56039819 | 9   | 21   | 23  | 0.878999635 | 0.669714   | PPM1D | ENSG00000170836 |
| 17 | 56040207 | 56040428 | 56040285 | 9   | 11   | 5   | 1.917817386 | 0.0843804  | PPM1D | ENSG00000170836 |
| 17 | 56042663 | 56043096 | 56042944 | 20  | 31   | 26  | 1.136484377 | 0.310077   | PPM1D | ENSG00000170836 |
| 17 | 56044024 | 56044723 | 56044355 | 11  | 25   | 26  | 0.923393556 | 0.614269   | PPM1D | ENSG00000170836 |
| 17 | 56044842 | 56045196 | 56045019 | 8   | 14   | 14  | 0.958908693 | 0.545362   | PPM1D | ENSG00000170836 |
| 17 | 56045408 | 56045652 | 56045530 | 9   | 10   | 7   | 1.318499453 | 0.269217   | PPM1D | ENSG00000170836 |
| 17 | 56049058 | 56049263 | 56049093 | 9   | 10   | 3   | 2.636998906 | 0.034203   | PPM1D | ENSG00000170836 |
| 17 | 56049721 | 56049918 | 56049819 | 8   | 9    | 11  | 0.799090578 | 0.702688   | PPM1D | ENSG00000170836 |
| 17 | 56050708 | 56051429 | 56051263 | 13  | 32   | 12  | 2.434152836 | 0.00192998 | PPM1D | ENSG00000170836 |
| 17 | 56055493 | 56056008 | 56055768 | 13  | 26   | 17  | 1.43836304  | 0.111326   | PPM1D | ENSG00000170836 |
| 17 | 56056112 | 56056409 | 56056260 | 8   | 12   | 6   | 1.78083043  | 0.0985525  | PPM1D | ENSG00000170836 |
| 17 | 56056468 | 56056675 | 56056630 | 10  | 11   | 3   | 2.876726079 | 0.0213797  | PPM1D | ENSG00000170836 |
| 17 | 56057700 | 56058198 | 56057983 | 10  | 19   | 19  | 0.958908693 | 0.552451   | PPM1D | ENSG00000170836 |
| 17 | 56058823 | 56059006 | 56058931 | 8   | 9    | 6   | 1.369869562 | 0.253675   | PPM1D | ENSG00000170836 |
| 17 | 56059207 | 56059567 | 56059393 | 18  | 23   | 15  | 1.43836304  | 0.12479    | PPM1D | ENSG00000170836 |
| 17 | 56061303 | 56061719 | 56061467 | 13  | 22   | 18  | 1.160784207 | 0.312473   | PPM1D | ENSG00000170836 |
| 17 | 56062498 | 56063268 | 56062686 | 15  | 36   | 29  | 1.182654055 | 0.244956   | PPM1D | ENSG00000170836 |
| 17 | 56063314 | 56063497 | 56063321 | 8   | 9    | 10  | 0.871735176 | 0.624623   | PPM1D | ENSG00000170836 |

|    |          |          |          |    |     |     |             |            |                       |
|----|----------|----------|----------|----|-----|-----|-------------|------------|-----------------------|
| 17 | 56066891 | 56067094 | 56066985 | 9  | 11  | 9   | 1.150690432 | 0.367789   | ENSG00000200013       |
| 17 | 56068079 | 56068315 | 56068174 | 8  | 10  | 19  | 0.527399781 | 0.961307   | ENSG00000200013       |
| 17 | 56068561 | 56068791 | 56068676 | 10 | 12  | 13  | 0.890415215 | 0.619237   | ENSG00000200013       |
| 17 | 56069431 | 56069832 | 56069653 | 15 | 22  | 18  | 1.160784207 | 0.312473   | ENSG00000200013       |
| 17 | 56069952 | 56070320 | 56070089 | 13 | 19  | 13  | 1.369869562 | 0.177863   | ENSG00000200013       |
| 17 | 56070790 | 56071406 | 56071011 | 42 | 60  | 31  | 1.827919696 | 0.00220924 | ENSG00000200013       |
| 17 | 56072099 | 56072346 | 56072262 | 9  | 13  | 8   | 1.491635745 | 0.166708   | ENSG00000200013       |
| 17 | 56072507 | 56073005 | 56072835 | 17 | 32  | 15  | 1.977749179 | 0.00986007 | ENSG00000200013       |
| 17 | 56073783 | 56074613 | 56074044 | 28 | 70  | 38  | 1.745705569 | 0.00206842 | ENSG00000200013       |
| 17 | 56075627 | 56076113 | 56075863 | 17 | 29  | 19  | 1.43836304  | 0.0995642  | ENSG00000200013       |
| 17 | 56078337 | 56078640 | 56078494 | 8  | 12  | 25  | 0.479454347 | 0.987914   | ENSG00000200013       |
| 17 | 56078983 | 56079284 | 56079131 | 10 | 13  | 28  | 0.462921438 | 0.99326    | ENSG00000200013       |
| 17 | 56079872 | 56080219 | 56080045 | 9  | 15  | 18  | 0.807502057 | 0.737835   | ENSG00000200013       |
| 17 | 56084991 | 56085486 | 56085318 | 9  | 21  | 23  | 0.878999635 | 0.669714   | ENSG00000200013       |
| 17 | 56086095 | 56086354 | 56086224 | 8  | 11  | 12  | 0.885146486 | 0.620672   | ENSG00000200013       |
| 17 | 56088180 | 56088389 | 56088232 | 8  | 9   | 6   | 1.369869562 | 0.253675   | ENSG00000200013       |
| 17 | 56088601 | 56089058 | 56088912 | 11 | 23  | 24  | 0.920552345 | 0.614165   | ENSG00000200013       |
| 17 | 56089500 | 56089873 | 56089679 | 8  | 14  | 13  | 1.027402171 | 0.469541   | ENSG00000200013       |
| 17 | 56090060 | 56090259 | 56090182 | 9  | 9   | 6   | 1.369869562 | 0.253675   | ENSG00000200013       |
| 17 | 56091564 | 56091769 | 56091666 | 8  | 9   | 17  | 0.532727052 | 0.951077   | ENSG00000200013       |
| 17 | 56091795 | 56091977 | 56091882 | 8  | 9   | 10  | 0.871735176 | 0.624623   | ENSG00000200013       |
| 17 | 56093675 | 56094122 | 56093881 | 8  | 20  | 14  | 1.34247217  | 0.186867   | ENSG00000200013       |
| 17 | 56094976 | 56095432 | 56095237 | 14 | 25  | 16  | 1.466566236 | 0.10473    | ENSG00000200013       |
| 17 | 56095495 | 56095839 | 56095669 | 11 | 16  | 17  | 0.905635988 | 0.615736   | ENSG00000200013       |
| 17 | 56097766 | 56097949 | 56097850 | 8  | 8   | 14  | 0.575345216 | 0.912234   | ENSG00000200013       |
| 17 | 56098077 | 56098308 | 56098161 | 11 | 11  | 15  | 0.71918152  | 0.81018    | ENSG00000200013       |
| 17 | 56101969 | 56102300 | 56102248 | 9  | 14  | 11  | 1.198635866 | 0.315918   | ENSG00000200013       |
| 17 | 56102316 | 56102562 | 56102425 | 8  | 10  | 12  | 0.811384279 | 0.697544   | BCAS3 ENSG00000141376 |
| 17 | 56103166 | 56103422 | 56103316 | 8  | 10  | 8   | 1.171999514 | 0.35773    | BCAS3 ENSG00000141376 |
| 17 | 56103472 | 56103675 | 56103617 | 8  | 10  | 11  | 0.878999635 | 0.622439   | BCAS3 ENSG00000141376 |
| 17 | 56104537 | 56104866 | 56104706 | 10 | 11  | 5   | 1.917817386 | 0.0843804  | BCAS3 ENSG00000141376 |
| 17 | 56106546 | 56106744 | 56106633 | 9  | 10  | 7   | 1.318499453 | 0.269217   | BCAS3 ENSG00000141376 |
| 17 | 56107893 | 56108414 | 56108256 | 11 | 21  | 14  | 1.406399416 | 0.148881   | BCAS3 ENSG00000141376 |
| 17 | 56109083 | 56110786 | 56109540 | 41 | 182 | 124 | 1.403842327 | 0.00157533 | BCAS3 ENSG00000141376 |



|    |          |          |          |    |    |    |             |             |       |                 |
|----|----------|----------|----------|----|----|----|-------------|-------------|-------|-----------------|
| 17 | 56111532 | 56111764 | 56111624 | 9  | 11 | 11 | 0.958908693 | 0.540507    | BCAS3 | ENSG00000141376 |
| 17 | 56112511 | 56112717 | 56112575 | 10 | 11 | 7  | 1.43836304  | 0.204844    | BCAS3 | ENSG00000141376 |
| 17 | 56114199 | 56114520 | 56114371 | 9  | 14 | 16 | 0.846095906 | 0.68298     | BCAS3 | ENSG00000141376 |
| 17 | 56115242 | 56115622 | 56115421 | 13 | 21 | 11 | 1.757999271 | 0.0516118   | BCAS3 | ENSG00000141376 |
| 17 | 56116101 | 56116531 | 56116277 | 18 | 27 | 15 | 1.678090213 | 0.0444653   | BCAS3 | ENSG00000141376 |
| 17 | 56116721 | 56117116 | 56116937 | 11 | 18 | 20 | 0.867584056 | 0.67417     | BCAS3 | ENSG00000141376 |
| 17 | 56118397 | 56119205 | 56118971 | 21 | 54 | 22 | 2.293042527 | 0.000218385 | BCAS3 | ENSG00000141376 |
| 17 | 56119743 | 56120188 | 56119922 | 14 | 24 | 23 | 0.998863222 | 0.500802    | BCAS3 | ENSG00000141376 |
| 17 | 56122002 | 56122308 | 56122141 | 8  | 11 | 3  | 2.876726079 | 0.0213797   |       | ENSG00000211041 |
| 17 | 56128062 | 56128321 | 56128193 | 9  | 11 | 8  | 1.278544924 | 0.28289     |       | ENSG00000211041 |
| 17 | 56128673 | 56128892 | 56128760 | 8  | 9  | 12 | 0.737622072 | 0.769563    |       | ENSG00000211041 |
| 17 | 56129335 | 56129572 | 56129427 | 9  | 9  | 2  | 3.19636231  | 0.0229249   |       | ENSG00000211041 |
| 17 | 56129755 | 56130012 | 56129881 | 10 | 12 | 12 | 0.958908693 | 0.542188    |       | ENSG00000211041 |
| 17 | 56132590 | 56132796 | 56132686 | 8  | 9  | 7  | 1.198635866 | 0.346278    |       | ENSG00000211041 |
| 17 | 56138042 | 56138237 | 56138153 | 10 | 11 | 7  | 1.43836304  | 0.204844    |       | ENSG00000211041 |
| 17 | 56138602 | 56138880 | 56138751 | 9  | 9  | 9  | 0.958908693 | 0.536911    |       | ENSG00000211041 |
| 17 | 56139467 | 56139777 | 56139607 | 8  | 11 | 12 | 0.885146486 | 0.620672    |       | ENSG00000211041 |
| 17 | 56141225 | 56141513 | 56141369 | 8  | 11 | 15 | 0.71918152  | 0.81018     |       | ENSG00000211041 |
| 17 | 56142210 | 56142389 | 56142299 | 8  | 8  | 9  | 0.863017824 | 0.627343    |       | ENSG00000211041 |
| 17 | 56143520 | 56143809 | 56143664 | 15 | 17 | 14 | 1.150690432 | 0.340986    |       | ENSG00000211041 |
| 17 | 56144444 | 56145443 | 56144764 | 12 | 42 | 45 | 0.89637117  | 0.697379    |       | ENSG00000175090 |
| 17 | 56146600 | 56147180 | 56147102 | 11 | 25 | 19 | 1.246581301 | 0.225794    |       | ENSG00000175090 |
| 17 | 56149147 | 56149392 | 56149284 | 9  | 11 | 12 | 0.885146486 | 0.620672    |       | ENSG00000175090 |
| 17 | 56150349 | 56150812 | 56150524 | 11 | 18 | 19 | 0.910963258 | 0.614871    |       | ENSG00000175090 |
| 17 | 56151315 | 56151616 | 56151465 | 8  | 13 | 17 | 0.745817872 | 0.798145    |       | ENSG00000175090 |
| 17 | 56152799 | 56153572 | 56153115 | 41 | 74 | 52 | 1.356946264 | 0.0427531   |       | ENSG00000175090 |
| 17 | 56153585 | 56153823 | 56153703 | 8  | 10 | 10 | 0.958908693 | 0.538751    |       | ENSG00000175090 |
| 17 | 56157121 | 56158066 | 56157853 | 11 | 39 | 41 | 0.913246374 | 0.659608    |       | ENSG00000175090 |
| 17 | 56159754 | 56160077 | 56159915 | 11 | 14 | 7  | 1.797953799 | 0.0806593   |       | ENSG00000175090 |
| 17 | 56160328 | 56160565 | 56160447 | 10 | 11 | 5  | 1.917817386 | 0.0843804   |       | ENSG00000175090 |
| 17 | 56161433 | 56161856 | 56161556 | 8  | 17 | 11 | 1.43836304  | 0.15834     |       | ENSG00000175090 |
| 17 | 56162064 | 56162419 | 56162241 | 12 | 16 | 28 | 0.562118889 | 0.973627    |       | ENSG00000175090 |
| 17 | 56162429 | 56162865 | 56162608 | 10 | 18 | 29 | 0.607308839 | 0.958845    |       | ENSG00000175090 |
| 17 | 56162896 | 56163438 | 56163191 | 12 | 23 | 23 | 0.958908693 | 0.557483    |       | ENSG00000175090 |

|    |          |          |          |    |    |    |             |           |                 |
|----|----------|----------|----------|----|----|----|-------------|-----------|-----------------|
| 17 | 56165547 | 56165761 | 56165654 | 8  | 8  | 12 | 0.663859864 | 0.833689  | ENSG00000175090 |
| 17 | 56166687 | 56166870 | 56166743 | 8  | 10 | 2  | 3.515998541 | 0.0136204 | ENSG00000175090 |
| 17 | 56167721 | 56167940 | 56167847 | 10 | 12 | 4  | 2.493162602 | 0.0299057 | ENSG00000175090 |
| 17 | 56170611 | 56170955 | 56170784 | 10 | 15 | 14 | 1.022835939 | 0.473606  | ENSG00000201988 |
| 17 | 56171783 | 56172481 | 56172162 | 18 | 43 | 38 | 1.081845705 | 0.358944  | ENSG00000201988 |
| 17 | 56172569 | 56173059 | 56172840 | 10 | 21 | 18 | 1.110315329 | 0.366889  | ENSG00000201988 |
| 17 | 56173071 | 56173614 | 56173354 | 12 | 25 | 21 | 1.133255728 | 0.330598  | ENSG00000201988 |
| 17 | 56174261 | 56174504 | 56174382 | 8  | 11 | 12 | 0.885146486 | 0.620672  | ENSG00000201988 |
| 17 | 56175131 | 56175559 | 56175308 | 8  | 16 | 11 | 1.358453982 | 0.20248   | ENSG00000201988 |
| 17 | 56175960 | 56176814 | 56176131 | 17 | 51 | 52 | 0.940816076 | 0.622647  | ENSG00000201988 |
| 17 | 56177731 | 56178057 | 56177894 | 18 | 22 | 20 | 1.05023333  | 0.434036  | ENSG00000201988 |
| 17 | 56178225 | 56178726 | 56178556 | 12 | 22 | 23 | 0.918954164 | 0.614181  | ENSG00000201988 |
| 17 | 56179210 | 56180037 | 56179833 | 19 | 51 | 57 | 0.859711242 | 0.786371  | ENSG00000201988 |
| 17 | 56180310 | 56180884 | 56180525 | 13 | 29 | 30 | 0.927976155 | 0.614895  | ENSG00000201988 |
| 17 | 56181011 | 56181782 | 56181534 | 19 | 48 | 41 | 1.118726809 | 0.295257  | ENSG00000201988 |
| 17 | 56182719 | 56183009 | 56182864 | 14 | 19 | 20 | 0.913246374 | 0.614587  | ENSG00000201988 |
| 17 | 56183186 | 56183380 | 56183310 | 8  | 11 | 10 | 1.046082211 | 0.455063  | ENSG00000201988 |
| 17 | 56184137 | 56184471 | 56184304 | 9  | 14 | 13 | 1.027402171 | 0.469541  | ENSG00000201988 |
| 17 | 56186549 | 56187662 | 56187352 | 17 | 52 | 45 | 1.104829581 | 0.308995  | ENSG00000201988 |
| 17 | 56188191 | 56188376 | 56188356 | 8  | 10 | 2  | 3.515998541 | 0.0136204 | ENSG00000201988 |
| 17 | 56188389 | 56188787 | 56188608 | 10 | 18 | 15 | 1.138704073 | 0.348127  | ENSG00000201988 |
| 17 | 56192543 | 56193137 | 56192857 | 12 | 26 | 35 | 0.71918152  | 0.904742  | ENSG00000201988 |
| 17 | 56199691 | 56200081 | 56199923 | 11 | 18 | 15 | 1.138704073 | 0.348127  | ENSG00000211058 |
| 17 | 56200106 | 56200395 | 56200227 | 15 | 19 | 19 | 0.958908693 | 0.552451  | ENSG00000211058 |
| 17 | 56200749 | 56201618 | 56201446 | 14 | 36 | 42 | 0.82510748  | 0.805558  | ENSG00000211058 |
| 17 | 56201646 | 56201831 | 56201738 | 8  | 8  | 17 | 0.479454347 | 0.970237  | ENSG00000211058 |
| 17 | 56202206 | 56202646 | 56202426 | 11 | 19 | 16 | 1.128127874 | 0.354788  | ENSG00000211058 |
| 17 | 56203199 | 56203645 | 56203378 | 16 | 25 | 20 | 1.187220287 | 0.276369  | ENSG00000211058 |
| 17 | 56204931 | 56205534 | 56205110 | 12 | 27 | 26 | 0.99442383  | 0.507579  | ENSG00000211058 |
| 17 | 56205572 | 56205826 | 56205699 | 8  | 11 | 8  | 1.278544924 | 0.28289   | ENSG00000211058 |
| 17 | 56205977 | 56206620 | 56206274 | 10 | 29 | 26 | 1.065454103 | 0.404106  | ENSG00000211058 |
| 17 | 56206710 | 56207015 | 56206878 | 9  | 12 | 16 | 0.733283118 | 0.803868  | ENSG00000211058 |
| 17 | 56207509 | 56207767 | 56207638 | 10 | 12 | 6  | 1.78083043  | 0.0985525 | ENSG00000211058 |
| 17 | 56213404 | 56213993 | 56213619 | 46 | 85 | 5  | 13.74435793 | 1.07E-19  | ENSG00000211058 |

|    |          |          |          |    |     |     |             |            |                 |
|----|----------|----------|----------|----|-----|-----|-------------|------------|-----------------|
| 17 | 56213996 | 56214568 | 56214192 | 14 | 30  | 15  | 1.857885593 | 0.0184859  | ENSG00000211058 |
| 17 | 56215551 | 56215836 | 56215703 | 8  | 11  | 10  | 1.046082211 | 0.455063   | ENSG00000211058 |
| 17 | 56215838 | 56216125 | 56215981 | 8  | 13  | 14  | 0.894981447 | 0.618069   | ENSG00000211058 |
| 17 | 56217854 | 56218078 | 56217970 | 8  | 10  | 12  | 0.811384279 | 0.697544   | ENSG00000211058 |
| 17 | 56218164 | 56218381 | 56218260 | 8  | 10  | 4   | 2.109599125 | 0.0694668  | ENSG00000211058 |
| 17 | 56219868 | 56220116 | 56220036 | 8  | 11  | 23  | 0.479454347 | 0.984912   | ENSG00000211058 |
| 17 | 56220264 | 56220485 | 56220412 | 8  | 11  | 13  | 0.821921737 | 0.693119   | ENSG00000211058 |
| 17 | 56220616 | 56220911 | 56220782 | 8  | 11  | 9   | 1.150690432 | 0.367789   | ENSG00000211058 |
| 17 | 56221413 | 56221846 | 56221582 | 11 | 18  | 13  | 1.301376083 | 0.22245    | ENSG00000211058 |
| 17 | 56222060 | 56222277 | 56222155 | 8  | 8   | 7   | 1.07877228  | 0.435076   | ENSG00000211058 |
| 17 | 56224202 | 56224463 | 56224351 | 9  | 11  | 4   | 2.301380863 | 0.0459276  | ENSG00000211058 |
| 17 | 56224765 | 56225047 | 56224926 | 11 | 11  | 14  | 0.767126954 | 0.756447   | ENSG00000211058 |
| 17 | 56230640 | 56231098 | 56230819 | 10 | 18  | 19  | 0.910963258 | 0.614871   | ENSG00000214207 |
| 17 | 56231399 | 56231684 | 56231508 | 12 | 14  | 11  | 1.198635866 | 0.315918   | ENSG00000214207 |
| 17 | 56232375 | 56233004 | 56232660 | 10 | 23  | 18  | 1.211253086 | 0.262955   | ENSG00000214207 |
| 17 | 56233346 | 56233648 | 56233486 | 9  | 11  | 6   | 1.643843474 | 0.137712   | ENSG00000214207 |
| 17 | 56233852 | 56234267 | 56234059 | 11 | 19  | 21  | 0.871735176 | 0.672523   | ENSG00000214207 |
| 17 | 56277343 | 56277874 | 56277666 | 26 | 38  | 1   | 18.69871951 | 8.21E-11   | ENSG00000211515 |
| 17 | 56404021 | 56404325 | 56404173 | 9  | 11  | 8   | 1.278544924 | 0.28289    | ENSG00000211066 |
| 17 | 56442165 | 56442416 | 56442263 | 9  | 11  | 1   | 5.753452158 | 0.00215302 | ENSG00000211066 |
| 17 | 56633287 | 56633608 | 56633443 | 10 | 14  | 6   | 2.054804342 | 0.0480281  | ENSG00000213227 |
| 17 | 56642718 | 56643971 | 56642897 | 14 | 58  | 73  | 0.764535309 | 0.939121   | ENSG00000213227 |
| 17 | 56644830 | 56645441 | 56645025 | 14 | 30  | 32  | 0.900793015 | 0.66233    | ENSG00000213227 |
| 17 | 56645503 | 56646249 | 56646010 | 10 | 28  | 35  | 0.772454225 | 0.85154    | ENSG00000213227 |
| 17 | 56646988 | 56647229 | 56647108 | 9  | 12  | 16  | 0.733283118 | 0.803868   | ENSG00000213227 |
| 17 | 56647399 | 56648123 | 56647658 | 15 | 38  | 30  | 1.206369001 | 0.215257   | ENSG00000213227 |
| 17 | 56648261 | 56648653 | 56648396 | 10 | 17  | 23  | 0.71918152  | 0.858071   | ENSG00000213227 |
| 17 | 56649548 | 56651085 | 56650600 | 19 | 83  | 111 | 0.71918152  | 0.989294   | ENSG00000213227 |
| 17 | 56651091 | 56652242 | 56651709 | 37 | 116 | 93  | 1.193535288 | 0.0995544  | ENSG00000213227 |
| 17 | 56652292 | 56652741 | 56652577 | 12 | 21  | 21  | 0.958908693 | 0.555026   | ENSG00000213227 |
| 17 | 56653414 | 56654220 | 56653885 | 11 | 36  | 51  | 0.682300416 | 0.963936   | ENSG00000213227 |
| 17 | 56654366 | 56655374 | 56654744 | 14 | 53  | 53  | 0.958908693 | 0.586097   | ENSG00000213227 |
| 17 | 56655644 | 56656248 | 56655823 | 13 | 30  | 31  | 0.928942796 | 0.615119   | ENSG00000213227 |
| 17 | 56656270 | 56656651 | 56656449 | 10 | 17  | 20  | 0.821921737 | 0.731032   | ENSG00000213227 |

|    |          |          |          |    |     |     |             |           |                 |
|----|----------|----------|----------|----|-----|-----|-------------|-----------|-----------------|
| 17 | 56656698 | 56656926 | 56656848 | 8  | 11  | 18  | 0.605626543 | 0.918575  | ENSG00000213227 |
| 17 | 56656929 | 56658033 | 56657834 | 17 | 70  | 64  | 1.047423342 | 0.392805  | ENSG00000213227 |
| 17 | 56658160 | 56658504 | 56658325 | 16 | 20  | 24  | 0.805483302 | 0.769433  | ENSG00000213227 |
| 17 | 56658595 | 56660017 | 56659838 | 14 | 65  | 94  | 0.666189197 | 0.99481   | ENSG00000213227 |
| 17 | 56660060 | 56660454 | 56660239 | 16 | 24  | 43  | 0.544834485 | 0.993598  | ENSG00000213227 |
| 17 | 56660543 | 56660731 | 56660657 | 8  | 9   | 12  | 0.737622072 | 0.769563  | ENSG00000213227 |
| 17 | 56660840 | 56661398 | 56661219 | 16 | 31  | 33  | 0.902502299 | 0.661862  | ENSG00000213227 |
| 17 | 56661427 | 56661958 | 56661779 | 14 | 28  | 28  | 0.958908693 | 0.563199  | ENSG00000213227 |
| 17 | 56662399 | 56662650 | 56662524 | 9  | 11  | 23  | 0.479454347 | 0.984912  | ENSG00000213227 |
| 17 | 56662662 | 56663418 | 56663132 | 13 | 32  | 45  | 0.687912758 | 0.951471  | ENSG00000213227 |
| 17 | 56663465 | 56663963 | 56663788 | 15 | 26  | 51  | 0.497894898 | 0.998806  | ENSG00000213227 |
| 17 | 56664170 | 56665008 | 56664695 | 13 | 41  | 47  | 0.839045106 | 0.797875  | ENSG00000213227 |
| 17 | 56665011 | 56667024 | 56666468 | 30 | 154 | 159 | 0.928942796 | 0.74349   | ENSG00000213227 |
| 17 | 56667224 | 56668487 | 56668168 | 75 | 200 | 158 | 1.212205329 | 0.0342683 | ENSG00000213227 |
| 17 | 56668628 | 56669373 | 56669077 | 18 | 37  | 38  | 0.934321291 | 0.617177  | ENSG00000213227 |
| 17 | 56669931 | 56670249 | 56670090 | 9  | 13  | 19  | 0.671236085 | 0.87814   | ENSG00000213227 |
| 17 | 56670566 | 56671854 | 56671106 | 17 | 82  | 84  | 0.936346136 | 0.665021  | ENSG00000213227 |
| 17 | 56671966 | 56672513 | 56672189 | 9  | 22  | 46  | 0.46925319  | 0.998997  | ENSG00000213227 |
| 17 | 56672980 | 56673282 | 56673131 | 10 | 15  | 18  | 0.807502057 | 0.737835  | ENSG00000213227 |
| 17 | 56673288 | 56673576 | 56673432 | 15 | 18  | 20  | 0.867584056 | 0.67417   | ENSG00000213227 |
| 17 | 56673994 | 56674273 | 56674131 | 14 | 15  | 8   | 1.704726565 | 0.0916153 | ENSG00000213227 |
| 17 | 56674386 | 56675118 | 56674705 | 15 | 39  | 42  | 0.892008087 | 0.699002  | ENSG00000213227 |
| 17 | 56675759 | 56676061 | 56675891 | 12 | 16  | 25  | 0.626978761 | 0.936688  | ENSG00000213227 |
| 17 | 56677108 | 56677308 | 56677208 | 8  | 9   | 9   | 0.958908693 | 0.536911  | ENSG00000213227 |
| 17 | 56677683 | 56678360 | 56678130 | 11 | 30  | 31  | 0.928942796 | 0.615119  | ENSG00000213227 |
| 17 | 56678531 | 56679383 | 56678742 | 10 | 34  | 32  | 1.017024371 | 0.471418  | ENSG00000213227 |
| 17 | 56679418 | 56680072 | 56679812 | 15 | 35  | 48  | 0.704504346 | 0.946557  | ENSG00000213227 |
| 17 | 56680077 | 56681149 | 56680655 | 12 | 49  | 72  | 0.656786776 | 0.989794  | ENSG00000213227 |
| 17 | 56681343 | 56681837 | 56681661 | 11 | 22  | 36  | 0.596078377 | 0.976695  | ENSG00000213227 |
| 17 | 56681881 | 56683417 | 56682870 | 17 | 80  | 78  | 0.983184863 | 0.542373  | ENSG00000213227 |
| 17 | 56683830 | 56684344 | 56684007 | 10 | 22  | 42  | 0.51290465  | 0.996164  | ENSG00000213227 |
| 17 | 56684476 | 56685101 | 56684922 | 11 | 30  | 33  | 0.874299102 | 0.706449  | ENSG00000213227 |
| 17 | 56685321 | 56686759 | 56686276 | 17 | 77  | 81  | 0.912132659 | 0.719723  | ENSG00000213227 |
| 17 | 56687119 | 56687596 | 56687417 | 18 | 30  | 40  | 0.725028524 | 0.913791  | ENSG00000213227 |

|    |          |          |          |     |     |     |             |           |                       |
|----|----------|----------|----------|-----|-----|-----|-------------|-----------|-----------------------|
| 17 | 56687618 | 56688383 | 56688062 | 13  | 38  | 46  | 0.795690192 | 0.85574   | ENSG00000213227       |
| 17 | 56688747 | 56689094 | 56688922 | 19  | 23  | 28  | 0.793579608 | 0.800857  | ENSG00000213227       |
| 17 | 56689801 | 56690060 | 56689956 | 10  | 12  | 16  | 0.733283118 | 0.803868  | ENSG00000213227       |
| 17 | 56690066 | 56690317 | 56690230 | 8   | 12  | 27  | 0.445207607 | 0.994259  | ENSG00000213227       |
| 17 | 56690341 | 56691438 | 56691122 | 14  | 55  | 70  | 0.756322349 | 0.942108  | ENSG00000213227       |
| 17 | 56691469 | 56692475 | 56691850 | 20  | 51  | 50  | 0.977710824 | 0.545166  | ENSG00000213227       |
| 17 | 56692571 | 56693101 | 56692816 | 16  | 31  | 39  | 0.767126954 | 0.870031  | ENSG00000213227       |
| 17 | 56693125 | 56693688 | 56693530 | 16  | 33  | 27  | 1.164389127 | 0.273121  | ENSG00000213227       |
| 17 | 56693721 | 56694007 | 56693836 | 11  | 14  | 18  | 0.757033179 | 0.792932  | ENSG00000213227       |
| 17 | 56694018 | 56694246 | 56694170 | 11  | 13  | 9   | 1.34247217  | 0.232231  | ENSG00000213227       |
| 17 | 56695161 | 56696210 | 56695324 | 15  | 54  | 54  | 0.958908693 | 0.586881  | ENSG00000213227       |
| 17 | 56696725 | 56697381 | 56697074 | 9   | 27  | 16  | 1.579379024 | 0.0636678 | ENSG00000213227       |
| 17 | 56697426 | 56699199 | 56698616 | 22  | 95  | 71  | 1.278544924 | 0.056089  | BCAS3 ENSG00000141376 |
| 17 | 56699507 | 56699758 | 56699632 | 10  | 11  | 12  | 0.885146486 | 0.620672  | BCAS3 ENSG00000141376 |
| 17 | 56699828 | 56700203 | 56700126 | 13  | 18  | 25  | 0.700740968 | 0.883987  | BCAS3 ENSG00000141376 |
| 17 | 56701550 | 56701968 | 56701789 | 13  | 22  | 23  | 0.918954164 | 0.614181  | BCAS3 ENSG00000141376 |
| 17 | 56702648 | 56702953 | 56702800 | 10  | 12  | 14  | 0.831054201 | 0.689281  | BCAS3 ENSG00000141376 |
| 17 | 56704870 | 56705143 | 56705006 | 14  | 16  | 22  | 0.708758599 | 0.862621  | BCAS3 ENSG00000141376 |
| 17 | 56705297 | 56705689 | 56705472 | 8   | 17  | 20  | 0.821921737 | 0.731032  | BCAS3 ENSG00000141376 |
| 17 | 56705715 | 56706180 | 56706001 | 10  | 19  | 17  | 1.065454103 | 0.420867  | BCAS3 ENSG00000141376 |
| 17 | 56706730 | 56706925 | 56706827 | 9   | 9   | 11  | 0.799090578 | 0.702688  | BCAS3 ENSG00000141376 |
| 17 | 56707065 | 56707273 | 56707128 | 9   | 10  | 21  | 0.479454347 | 0.981126  | BCAS3 ENSG00000141376 |
| 17 | 56707648 | 56708127 | 56707948 | 11  | 22  | 35  | 0.612636109 | 0.969367  | BCAS3 ENSG00000141376 |
| 17 | 56708920 | 56709305 | 56709175 | 12  | 19  | 16  | 1.128127874 | 0.354788  | BCAS3 ENSG00000141376 |
| 17 | 56710703 | 56710937 | 56710845 | 8   | 11  | 26  | 0.426181641 | 0.995195  | BCAS3 ENSG00000141376 |
| 17 | 56711008 | 56711187 | 56711020 | 8   | 8   | 7   | 1.07877228  | 0.435076  | BCAS3 ENSG00000141376 |
| 17 | 56711334 | 56712762 | 56711968 | 20  | 94  | 79  | 1.138704073 | 0.194788  | BCAS3 ENSG00000141376 |
| 17 | 56712859 | 56713063 | 56712966 | 9   | 10  | 18  | 0.555157664 | 0.945639  | BCAS3 ENSG00000141376 |
| 17 | 56714260 | 56715052 | 56714761 | 20  | 48  | 35  | 1.305181277 | 0.109832  | BCAS3 ENSG00000141376 |
| 17 | 56715241 | 56715644 | 56715420 | 9   | 16  | 15  | 1.018840486 | 0.477384  | BCAS3 ENSG00000141376 |
| 17 | 56716217 | 56718658 | 56717000 | 311 | 606 | 126 | 4.583130525 | 2.71E-72  | BCAS3 ENSG00000141376 |
| 17 | 56718687 | 56719211 | 56719032 | 12  | 23  | 27  | 0.821921737 | 0.761135  | BCAS3 ENSG00000141376 |
| 17 | 56719354 | 56719596 | 56719475 | 10  | 11  | 9   | 1.150690432 | 0.367789  | BCAS3 ENSG00000141376 |
| 17 | 56719965 | 56722500 | 56722096 | 28  | 163 | 157 | 0.995322947 | 0.516483  | BCAS3 ENSG00000141376 |

|    |          |          |          |     |     |     |             |           |       |                 |
|----|----------|----------|----------|-----|-----|-----|-------------|-----------|-------|-----------------|
| 17 | 56723173 | 56723463 | 56723337 | 10  | 10  | 21  | 0.479454347 | 0.981126  | BCAS3 | ENSG00000141376 |
| 17 | 56723521 | 56724507 | 56723817 | 18  | 54  | 61  | 0.850644808 | 0.809499  | BCAS3 | ENSG00000141376 |
| 17 | 56724835 | 56725430 | 56725235 | 11  | 26  | 36  | 0.699744181 | 0.923312  | BCAS3 | ENSG00000141376 |
| 17 | 56725448 | 56726255 | 56725720 | 11  | 34  | 42  | 0.780507076 | 0.863473  | BCAS3 | ENSG00000141376 |
| 17 | 56726446 | 56727720 | 56727061 | 13  | 54  | 62  | 0.83714251  | 0.833153  | BCAS3 | ENSG00000141376 |
| 17 | 56728062 | 56728629 | 56728488 | 18  | 39  | 31  | 1.198635866 | 0.220022  | BCAS3 | ENSG00000141376 |
| 17 | 56728684 | 56729180 | 56728958 | 14  | 26  | 17  | 1.43836304  | 0.111326  | BCAS3 | ENSG00000141376 |
| 17 | 56729186 | 56730477 | 56729800 | 20  | 79  | 55  | 1.369869562 | 0.0339016 | BCAS3 | ENSG00000141376 |
| 17 | 56730509 | 56730820 | 56730667 | 11  | 15  | 21  | 0.69738814  | 0.867465  | BCAS3 | ENSG00000141376 |
| 17 | 56731594 | 56732157 | 56731800 | 12  | 26  | 30  | 0.835178539 | 0.75436   | BCAS3 | ENSG00000141376 |
| 17 | 56732235 | 56733135 | 56732704 | 14  | 49  | 55  | 0.856168476 | 0.78834   | BCAS3 | ENSG00000141376 |
| 17 | 56733140 | 56733532 | 56733319 | 11  | 21  | 14  | 1.406399416 | 0.148881  | BCAS3 | ENSG00000141376 |
| 17 | 56733860 | 56734565 | 56734198 | 20  | 38  | 34  | 1.068498258 | 0.386697  | BCAS3 | ENSG00000141376 |
| 17 | 56734848 | 56735837 | 56735287 | 11  | 43  | 50  | 0.827293774 | 0.82266   | BCAS3 | ENSG00000141376 |
| 17 | 56735922 | 56736467 | 56736192 | 12  | 27  | 41  | 0.639272462 | 0.968806  | BCAS3 | ENSG00000141376 |
| 17 | 56737188 | 56737808 | 56737351 | 10  | 25  | 29  | 0.831054201 | 0.756473  | BCAS3 | ENSG00000141376 |
| 17 | 56738008 | 56738445 | 56738115 | 13  | 22  | 19  | 1.102744997 | 0.372416  | BCAS3 | ENSG00000141376 |
| 17 | 56738568 | 56738964 | 56738746 | 16  | 23  | 15  | 1.43836304  | 0.12479   | BCAS3 | ENSG00000141376 |
| 17 | 56739015 | 56739424 | 56739154 | 15  | 25  | 24  | 0.997265041 | 0.503149  | BCAS3 | ENSG00000141376 |
| 17 | 56739567 | 56739913 | 56739736 | 11  | 15  | 16  | 0.902502299 | 0.616352  | BCAS3 | ENSG00000141376 |
| 17 | 56740099 | 56740713 | 56740359 | 12  | 28  | 31  | 0.869011003 | 0.708837  | BCAS3 | ENSG00000141376 |
| 17 | 56740716 | 56742485 | 56742249 | 19  | 93  | 87  | 1.024288831 | 0.435173  | BCAS3 | ENSG00000141376 |
| 17 | 56742591 | 56743277 | 56742883 | 14  | 37  | 31  | 1.138704073 | 0.292149  | BCAS3 | ENSG00000141376 |
| 17 | 56743424 | 56743775 | 56743599 | 13  | 19  | 15  | 1.198635866 | 0.291044  | BCAS3 | ENSG00000141376 |
| 17 | 56744069 | 56747328 | 56746740 | 257 | 582 | 269 | 2.070532474 | 6.29E-25  | BCAS3 | ENSG00000141376 |
| 17 | 56747438 | 56748262 | 56747979 | 13  | 36  | 27  | 1.267129344 | 0.169235  | BCAS3 | ENSG00000141376 |
| 17 | 56748709 | 56749754 | 56749060 | 20  | 62  | 46  | 1.285345695 | 0.0942511 | BCAS3 | ENSG00000141376 |
| 17 | 56749798 | 56750362 | 56749936 | 14  | 29  | 35  | 0.799090578 | 0.819499  | BCAS3 | ENSG00000141376 |
| 17 | 56750523 | 56750799 | 56750691 | 13  | 17  | 22  | 0.750450282 | 0.822065  | BCAS3 | ENSG00000141376 |
| 17 | 56750863 | 56751540 | 56751199 | 15  | 36  | 31  | 1.108738176 | 0.332755  | BCAS3 | ENSG00000141376 |
| 17 | 56752397 | 56752671 | 56752522 | 12  | 12  | 13  | 0.890415215 | 0.619237  | BCAS3 | ENSG00000141376 |
| 17 | 56752758 | 56753103 | 56752926 | 8   | 12  | 13  | 0.890415215 | 0.619237  | BCAS3 | ENSG00000141376 |
| 17 | 56753271 | 56754107 | 56753627 | 20  | 56  | 30  | 1.763154694 | 0.0045072 | BCAS3 | ENSG00000141376 |
| 17 | 56754438 | 56754800 | 56754543 | 10  | 16  | 21  | 0.740974899 | 0.826507  | BCAS3 | ENSG00000141376 |

|    |          |          |          |     |     |     |             |            |       |                 |
|----|----------|----------|----------|-----|-----|-----|-------------|------------|-------|-----------------|
| 17 | 56754989 | 56755712 | 56755481 | 16  | 38  | 49  | 0.747948781 | 0.91468    | BCAS3 | ENSG00000141376 |
| 17 | 56755717 | 56756222 | 56756043 | 19  | 32  | 50  | 0.620470331 | 0.985095   | BCAS3 | ENSG00000141376 |
| 17 | 56757100 | 56757922 | 56757316 | 19  | 47  | 56  | 0.807502057 | 0.863617   | BCAS3 | ENSG00000141376 |
| 17 | 56757926 | 56759054 | 56758296 | 13  | 52  | 65  | 0.770032738 | 0.922963   | BCAS3 | ENSG00000141376 |
| 17 | 56759944 | 56760463 | 56760112 | 8   | 18  | 14  | 1.214617678 | 0.282961   | BCAS3 | ENSG00000141376 |
| 17 | 56761253 | 56761542 | 56761401 | 9   | 11  | 5   | 1.917817386 | 0.0843804  | BCAS3 | ENSG00000141376 |
| 17 | 56762003 | 56762261 | 56762101 | 9   | 12  | 22  | 0.54199187  | 0.965779   | BCAS3 | ENSG00000141376 |
| 17 | 56762424 | 56764711 | 56763411 | 16  | 116 | 122 | 0.912132659 | 0.76197    | BCAS3 | ENSG00000141376 |
| 17 | 56764991 | 56765740 | 56765298 | 12  | 30  | 31  | 0.928942796 | 0.615119   | BCAS3 | ENSG00000141376 |
| 17 | 56766280 | 56766542 | 56766372 | 8   | 11  | 22  | 0.500300188 | 0.978352   | BCAS3 | ENSG00000141376 |
| 17 | 56766819 | 56768115 | 56767345 | 22  | 106 | 65  | 1.554594396 | 0.00208054 | BCAS3 | ENSG00000141376 |
| 17 | 56768132 | 56768757 | 56768333 | 35  | 56  | 60  | 0.896029434 | 0.724736   | BCAS3 | ENSG00000141376 |
| 17 | 56769188 | 56769509 | 56769353 | 9   | 13  | 15  | 0.839045106 | 0.685928   | BCAS3 | ENSG00000141376 |
| 17 | 56769535 | 56770391 | 56769988 | 15  | 40  | 53  | 0.728060304 | 0.938881   | BCAS3 | ENSG00000141376 |
| 17 | 56770601 | 56770946 | 56770773 | 14  | 20  | 28  | 0.694382157 | 0.901601   | BCAS3 | ENSG00000141376 |
| 17 | 56770981 | 56771677 | 56771236 | 11  | 33  | 37  | 0.857970936 | 0.742682   | BCAS3 | ENSG00000141376 |
| 17 | 56771914 | 56772382 | 56772044 | 13  | 24  | 23  | 0.998863222 | 0.500802   | BCAS3 | ENSG00000141376 |
| 17 | 56772441 | 56774105 | 56773807 | 13  | 69  | 81  | 0.818580592 | 0.891517   | BCAS3 | ENSG00000141376 |
| 17 | 56774594 | 56774861 | 56774716 | 12  | 13  | 10  | 1.220429246 | 0.306001   | BCAS3 | ENSG00000141376 |
| 17 | 56775433 | 56776926 | 56776164 | 13  | 62  | 71  | 0.839045106 | 0.84626    | BCAS3 | ENSG00000141376 |
| 17 | 56777014 | 56777951 | 56777678 | 12  | 42  | 55  | 0.736304889 | 0.93599    | BCAS3 | ENSG00000141376 |
| 17 | 56778014 | 56778789 | 56778500 | 13  | 39  | 53  | 0.710302736 | 0.951108   | BCAS3 | ENSG00000141376 |
| 17 | 56778848 | 56779172 | 56779003 | 12  | 16  | 19  | 0.815072389 | 0.734271   | BCAS3 | ENSG00000141376 |
| 17 | 56779435 | 56779979 | 56779777 | 12  | 24  | 19  | 1.198635866 | 0.269826   | BCAS3 | ENSG00000141376 |
| 17 | 56780114 | 56780971 | 56780564 | 14  | 42  | 40  | 1.005684727 | 0.488979   | BCAS3 | ENSG00000141376 |
| 17 | 56781398 | 56782080 | 56781615 | 18  | 42  | 57  | 0.710915066 | 0.956509   | BCAS3 | ENSG00000141376 |
| 17 | 56782195 | 56782437 | 56782327 | 8   | 9   | 10  | 0.871735176 | 0.624623   | BCAS3 | ENSG00000141376 |
| 17 | 56783001 | 56785622 | 56784476 | 24  | 171 | 159 | 1.030826845 | 0.390666   | BCAS3 | ENSG00000141376 |
| 17 | 56785659 | 56786789 | 56786359 | 16  | 57  | 58  | 0.942656003 | 0.62522    | BCAS3 | ENSG00000141376 |
| 17 | 56786799 | 56788235 | 56787381 | 13  | 61  | 75  | 0.782267618 | 0.925383   | BCAS3 | ENSG00000141376 |
| 17 | 56788344 | 56789380 | 56789015 | 131 | 238 | 95  | 2.3872831   | 1.82E-14   | BCAS3 | ENSG00000141376 |
| 17 | 56790375 | 56790746 | 56790584 | 12  | 17  | 12  | 1.327719729 | 0.212795   | BCAS3 | ENSG00000141376 |
| 17 | 56790970 | 56791482 | 56791226 | 18  | 31  | 34  | 0.876716519 | 0.705376   | BCAS3 | ENSG00000141376 |
| 17 | 56791928 | 56792167 | 56792087 | 9   | 12  | 7   | 1.558226626 | 0.152813   | BCAS3 | ENSG00000141376 |

|    |          |          |          |    |     |     |             |           |       |                 |
|----|----------|----------|----------|----|-----|-----|-------------|-----------|-------|-----------------|
| 17 | 56792336 | 56792803 | 56792637 | 12 | 21  | 24  | 0.84383965  | 0.72062   | BCAS3 | ENSG00000141376 |
| 17 | 56792893 | 56793571 | 56793051 | 15 | 38  | 27  | 1.335622822 | 0.118053  | BCAS3 | ENSG00000141376 |
| 17 | 56793900 | 56795713 | 56794225 | 18 | 95  | 110 | 0.829326437 | 0.910931  | BCAS3 | ENSG00000141376 |
| 17 | 56795842 | 56796717 | 56796167 | 14 | 44  | 32  | 1.307602763 | 0.1181    | BCAS3 | ENSG00000141376 |
| 17 | 56797768 | 56798079 | 56797923 | 12 | 15  | 7   | 1.917817386 | 0.0572317 | BCAS3 | ENSG00000141376 |
| 17 | 56798283 | 56798772 | 56798549 | 8  | 18  | 23  | 0.759136049 | 0.817924  | BCAS3 | ENSG00000141376 |
| 17 | 56798839 | 56799265 | 56799018 | 12 | 20  | 18  | 1.05984645  | 0.425516  | BCAS3 | ENSG00000141376 |
| 17 | 56799285 | 56799888 | 56799616 | 14 | 30  | 43  | 0.675594761 | 0.954874  | BCAS3 | ENSG00000141376 |
| 17 | 56800581 | 56801074 | 56800760 | 11 | 22  | 22  | 0.958908693 | 0.556268  | BCAS3 | ENSG00000141376 |
| 17 | 56801078 | 56801384 | 56801232 | 8  | 12  | 13  | 0.890415215 | 0.619237  | BCAS3 | ENSG00000141376 |
| 17 | 56801748 | 56802330 | 56801927 | 11 | 28  | 27  | 0.993155432 | 0.509675  | BCAS3 | ENSG00000141376 |
| 17 | 56802951 | 56803562 | 56803264 | 13 | 33  | 44  | 0.72450879  | 0.923905  | BCAS3 | ENSG00000141376 |
| 17 | 56803784 | 56804323 | 56804028 | 8  | 20  | 32  | 0.610214623 | 0.964514  | BCAS3 | ENSG00000141376 |
| 17 | 56804548 | 56805330 | 56804975 | 11 | 33  | 33  | 0.958908693 | 0.568424  | BCAS3 | ENSG00000141376 |
| 17 | 56805549 | 56805946 | 56805720 | 37 | 46  | 6   | 6.438386939 | 6.82E-09  | BCAS3 | ENSG00000141376 |
| 17 | 56806901 | 56807724 | 56807545 | 10 | 33  | 41  | 0.776259418 | 0.865581  | BCAS3 | ENSG00000141376 |
| 17 | 56808205 | 56808961 | 56808717 | 12 | 33  | 44  | 0.72450879  | 0.923905  | BCAS3 | ENSG00000141376 |
| 17 | 56808978 | 56809335 | 56809156 | 12 | 17  | 14  | 1.150690432 | 0.340986  | BCAS3 | ENSG00000141376 |
| 17 | 56809405 | 56810698 | 56809803 | 14 | 53  | 47  | 1.07877228  | 0.349962  | BCAS3 | ENSG00000141376 |
| 17 | 56810799 | 56811081 | 56810931 | 9  | 12  | 15  | 0.779113313 | 0.750998  | BCAS3 | ENSG00000141376 |
| 17 | 56811104 | 56812768 | 56812589 | 18 | 79  | 76  | 0.996268772 | 0.50892   | BCAS3 | ENSG00000141376 |
| 17 | 56812803 | 56813040 | 56812943 | 9  | 11  | 25  | 0.442573243 | 0.992896  | BCAS3 | ENSG00000141376 |
| 17 | 56813047 | 56814357 | 56813226 | 17 | 68  | 62  | 1.05023333  | 0.38841   | BCAS3 | ENSG00000141376 |
| 17 | 56815510 | 56816059 | 56815827 | 9  | 21  | 34  | 0.602742607 | 0.971252  | BCAS3 | ENSG00000141376 |
| 17 | 56816597 | 56816890 | 56816743 | 10 | 14  | 21  | 0.653801382 | 0.90216   | BCAS3 | ENSG00000141376 |
| 17 | 56817320 | 56817600 | 56817477 | 9  | 11  | 19  | 0.575345216 | 0.94039   | BCAS3 | ENSG00000141376 |
| 17 | 56817928 | 56818675 | 56818300 | 11 | 32  | 38  | 0.811384279 | 0.812987  | BCAS3 | ENSG00000141376 |
| 17 | 56819095 | 56819722 | 56819245 | 10 | 25  | 30  | 0.804246001 | 0.795369  | BCAS3 | ENSG00000141376 |
| 17 | 56820177 | 56820775 | 56820596 | 12 | 25  | 25  | 0.958908693 | 0.559837  | BCAS3 | ENSG00000141376 |
| 17 | 56820787 | 56823081 | 56822304 | 31 | 141 | 129 | 1.047423342 | 0.350767  | BCAS3 | ENSG00000141376 |
| 17 | 56823101 | 56823434 | 56823267 | 12 | 18  | 18  | 0.958908693 | 0.551113  | TBX2  | ENSG00000121068 |
| 17 | 56823452 | 56823810 | 56823631 | 12 | 17  | 29  | 0.575345216 | 0.971331  | TBX2  | ENSG00000121068 |
| 17 | 56824008 | 56824725 | 56824428 | 10 | 26  | 38  | 0.663859864 | 0.951552  | TBX2  | ENSG00000121068 |
| 17 | 56824736 | 56827919 | 56825898 | 76 | 289 | 194 | 1.426069338 | 5.41E-05  | TBX2  | ENSG00000121068 |



|    |          |          |          |     |     |     |             |            |          |                 |
|----|----------|----------|----------|-----|-----|-----|-------------|------------|----------|-----------------|
| 17 | 56829797 | 56831528 | 56831141 | 19  | 95  | 102 | 0.893740141 | 0.786073   | TBX2     | ENSG00000121068 |
| 17 | 56831535 | 56831752 | 56831643 | 10  | 11  | 11  | 0.958908693 | 0.540507   | TBX2     | ENSG00000121068 |
| 17 | 56831791 | 56832110 | 56831948 | 34  | 36  | 29  | 1.182654055 | 0.244956   | TBX2     | ENSG00000121068 |
| 17 | 56832532 | 56834388 | 56832945 | 23  | 114 | 89  | 1.225272219 | 0.0732142  | TBX2     | ENSG00000121068 |
| 17 | 56834589 | 56836723 | 56835831 | 18  | 117 | 82  | 1.36326778  | 0.0144808  | TBX2     | ENSG00000121068 |
| 17 | 56837014 | 56837349 | 56837181 | 10  | 14  | 13  | 1.027402171 | 0.469541   | TBX2     | ENSG00000121068 |
| 17 | 56838347 | 56838888 | 56838576 | 20  | 35  | 34  | 0.986306084 | 0.522633   | C17orf82 | ENSG00000187013 |
| 17 | 56839341 | 56840201 | 56839589 | 21  | 53  | 45  | 1.125675422 | 0.276036   | C17orf82 | ENSG00000187013 |
| 17 | 56840276 | 56840537 | 56840406 | 8   | 12  | 16  | 0.733283118 | 0.803868   | C17orf82 | ENSG00000187013 |
| 17 | 56840592 | 56840991 | 56840818 | 12  | 22  | 31  | 0.689215623 | 0.916241   | C17orf82 | ENSG00000187013 |
| 17 | 56841009 | 56841716 | 56841436 | 14  | 38  | 30  | 1.206369001 | 0.215257   | C17orf82 | ENSG00000187013 |
| 17 | 56841955 | 56842509 | 56842245 | 14  | 28  | 32  | 0.842677336 | 0.750511   | C17orf82 | ENSG00000187013 |
| 17 | 56842517 | 56843161 | 56842805 | 14  | 37  | 36  | 0.984825144 | 0.525895   | C17orf82 | ENSG00000187013 |
| 17 | 56843330 | 56845113 | 56844461 | 160 | 501 | 139 | 3.438372599 | 3.79E-46   | C17orf82 | ENSG00000187013 |
| 17 | 56845120 | 56846229 | 56845615 | 20  | 84  | 62  | 1.293765697 | 0.0590671  | C17orf82 | ENSG00000187013 |
| 17 | 56846326 | 56847321 | 56846641 | 18  | 56  | 48  | 1.115465214 | 0.285996   | C17orf82 | ENSG00000187013 |
| 17 | 56847326 | 56849772 | 56849117 | 45  | 213 | 151 | 1.350042502 | 0.00216968 | C17orf82 | ENSG00000187013 |
| 17 | 56849931 | 56850449 | 56850208 | 14  | 22  | 31  | 0.689215623 | 0.916241   | C17orf82 | ENSG00000187013 |
| 17 | 56850677 | 56850951 | 56850846 | 11  | 15  | 14  | 1.022835939 | 0.473606   | C17orf82 | ENSG00000187013 |
| 17 | 56850996 | 56851899 | 56851291 | 16  | 58  | 50  | 1.109325743 | 0.292324   | C17orf82 | ENSG00000187013 |
| 17 | 56851909 | 56852380 | 56852150 | 11  | 22  | 17  | 1.225272219 | 0.255726   | C17orf82 | ENSG00000187013 |
| 17 | 56852905 | 56853993 | 56853283 | 19  | 72  | 52  | 1.32076103  | 0.0597306  | C17orf82 | ENSG00000187013 |
| 17 | 56854018 | 56854595 | 56854416 | 9   | 23  | 31  | 0.71918152  | 0.891586   | C17orf82 | ENSG00000187013 |
| 17 | 56854774 | 56855282 | 56855065 | 11  | 26  | 27  | 0.924661954 | 0.614379   | C17orf82 | ENSG00000187013 |
| 17 | 56855866 | 56857315 | 56856332 | 16  | 73  | 77  | 0.909733888 | 0.720245   | C17orf82 | ENSG00000187013 |
| 17 | 56857343 | 56858534 | 56858331 | 22  | 74  | 78  | 0.910356354 | 0.7201     | C17orf82 | ENSG00000187013 |
| 17 | 56858713 | 56860161 | 56859071 | 19  | 83  | 58  | 1.365225936 | 0.0319789  | C17orf82 | ENSG00000187013 |
| 17 | 56860875 | 56861361 | 56861072 | 8   | 18  | 18  | 0.958908693 | 0.551113   | C17orf82 | ENSG00000187013 |
| 17 | 56861470 | 56861912 | 56861669 | 12  | 23  | 23  | 0.958908693 | 0.557483   | C17orf82 | ENSG00000187013 |
| 17 | 56863177 | 56863501 | 56863324 | 10  | 14  | 15  | 0.8989769   | 0.617119   | C17orf82 | ENSG00000187013 |
| 17 | 56863741 | 56864597 | 56864233 | 15  | 50  | 52  | 0.922723459 | 0.659222   | C17orf82 | ENSG00000187013 |
| 17 | 56865091 | 56865287 | 56865189 | 8   | 10  | 17  | 0.585999757 | 0.924668   | C17orf82 | ENSG00000187013 |
| 17 | 56865917 | 56866631 | 56866477 | 12  | 32  | 26  | 1.171999514 | 0.267953   | TBX4     | ENSG00000121075 |
| 17 | 56866655 | 56866930 | 56866816 | 13  | 16  | 9   | 1.630144778 | 0.102169   | TBX4     | ENSG00000121075 |

|    |          |          |          |    |     |     |             |            |      |                 |
|----|----------|----------|----------|----|-----|-----|-------------|------------|------|-----------------|
| 17 | 56867164 | 56867414 | 56867285 | 9  | 9   | 8   | 1.065454103 | 0.442605   | TBX4 | ENSG00000121075 |
| 17 | 56868424 | 56868708 | 56868566 | 12 | 15  | 17  | 0.852363283 | 0.680376   | TBX4 | ENSG00000121075 |
| 17 | 56868713 | 56870206 | 56869978 | 15 | 67  | 41  | 1.552518836 | 0.0112428  | TBX4 | ENSG00000121075 |
| 17 | 56870248 | 56870873 | 56870415 | 17 | 31  | 40  | 0.748416541 | 0.89237    | TBX4 | ENSG00000121075 |
| 17 | 56871349 | 56873367 | 56872150 | 22 | 124 | 143 | 0.832386018 | 0.93376    | TBX4 | ENSG00000121075 |
| 17 | 56873478 | 56873917 | 56873781 | 16 | 25  | 34  | 0.712332172 | 0.907472   | TBX4 | ENSG00000121075 |
| 17 | 56874189 | 56875643 | 56874720 | 21 | 79  | 100 | 0.759531638 | 0.967691   | TBX4 | ENSG00000121075 |
| 17 | 56876022 | 56877447 | 56876401 | 14 | 70  | 94  | 0.716658076 | 0.983832   | TBX4 | ENSG00000121075 |
| 17 | 56878049 | 56881040 | 56879695 | 24 | 186 | 176 | 1.013084325 | 0.450324   | TBX4 | ENSG00000121075 |
| 17 | 56881372 | 56883663 | 56882652 | 63 | 248 | 186 | 1.276835639 | 0.00553915 | TBX4 | ENSG00000121075 |
| 17 | 56884880 | 56885343 | 56885095 | 9  | 20  | 36  | 0.544245474 | 0.988944   | TBX4 | ENSG00000121075 |
| 17 | 56885986 | 56886613 | 56886237 | 13 | 28  | 24  | 1.112334084 | 0.346253   | TBX4 | ENSG00000121075 |
| 17 | 56887072 | 56887925 | 56887355 | 14 | 47  | 41  | 1.095895649 | 0.330961   | TBX4 | ENSG00000121075 |
| 17 | 56887997 | 56888401 | 56888222 | 11 | 18  | 22  | 0.792141964 | 0.776057   | TBX4 | ENSG00000121075 |
| 17 | 56888878 | 56889072 | 56888991 | 9  | 10  | 11  | 0.878999635 | 0.622439   | TBX4 | ENSG00000121075 |
| 17 | 56889349 | 56889926 | 56889747 | 10 | 27  | 34  | 0.767126954 | 0.854158   | TBX4 | ENSG00000121075 |
| 17 | 56890141 | 56895175 | 56892923 | 22 | 286 | 264 | 1.038516207 | 0.328289   | TBX4 | ENSG00000121075 |
| 17 | 56895177 | 56895858 | 56895335 | 12 | 29  | 53  | 0.532727052 | 0.997751   | TBX4 | ENSG00000121075 |
| 17 | 56895884 | 56896973 | 56896162 | 15 | 59  | 50  | 1.128127874 | 0.26188    | TBX4 | ENSG00000121075 |
| 17 | 56897258 | 56897551 | 56897396 | 9  | 13  | 22  | 0.583683552 | 0.948499   | TBX4 | ENSG00000121075 |
| 17 | 56897606 | 56897991 | 56897785 | 9  | 17  | 21  | 0.784561658 | 0.779771   | TBX4 | ENSG00000121075 |
| 17 | 56898122 | 56899168 | 56898527 | 10 | 43  | 66  | 0.629731082 | 0.992222   | TBX4 | ENSG00000121075 |
| 17 | 56899246 | 56900346 | 56899831 | 41 | 117 | 98  | 1.142941675 | 0.16239    | TBX4 | ENSG00000121075 |
| 17 | 56900349 | 56901053 | 56900592 | 15 | 41  | 55  | 0.71918152  | 0.948404   | TBX4 | ENSG00000121075 |
| 17 | 56901058 | 56901648 | 56901305 | 13 | 33  | 26  | 1.207514651 | 0.229506   | TBX4 | ENSG00000121075 |
| 17 | 56901798 | 56902197 | 56902048 | 16 | 21  | 25  | 0.811384279 | 0.76647    | TBX4 | ENSG00000121075 |
| 17 | 56902202 | 56903451 | 56903245 | 15 | 65  | 72  | 0.866958544 | 0.800248   | TBX4 | ENSG00000121075 |
| 17 | 56903558 | 56903799 | 56903678 | 8  | 11  | 15  | 0.71918152  | 0.81018    | TBX4 | ENSG00000121075 |
| 17 | 56904202 | 56908173 | 56906005 | 20 | 229 | 188 | 1.166925923 | 0.057302   | TBX4 | ENSG00000121075 |
| 17 | 56908207 | 56908763 | 56908503 | 13 | 29  | 45  | 0.625375235 | 0.979034   | TBX4 | ENSG00000121075 |
| 17 | 56908780 | 56909670 | 56908928 | 14 | 44  | 49  | 0.863017824 | 0.764015   | TBX4 | ENSG00000121075 |
| 17 | 56910045 | 56910589 | 56910370 | 10 | 23  | 42  | 0.535204852 | 0.99417    | TBX4 | ENSG00000121075 |
| 17 | 56910731 | 56911392 | 56911235 | 10 | 26  | 34  | 0.739729563 | 0.882713   | TBX4 | ENSG00000121075 |
| 17 | 56911446 | 56911842 | 56911663 | 14 | 22  | 17  | 1.225272219 | 0.255726   | TBX4 | ENSG00000121075 |

|    |          |          |          |    |     |     |             |           |      |                 |
|----|----------|----------|----------|----|-----|-----|-------------|-----------|------|-----------------|
| 17 | 56911970 | 56914040 | 56913038 | 16 | 105 | 96  | 1.047879603 | 0.368957  | TBX4 | ENSG00000121075 |
| 17 | 56914127 | 56915594 | 56914873 | 17 | 75  | 86  | 0.837667364 | 0.871075  | TBX4 | ENSG00000121075 |
| 17 | 56915626 | 56916888 | 56916461 | 20 | 66  | 74  | 0.856625099 | 0.821999  | TBX4 | ENSG00000121075 |
| 17 | 56917116 | 56918363 | 56917819 | 16 | 63  | 69  | 0.876716519 | 0.777089  | TBX4 | ENSG00000121075 |
| 17 | 56918376 | 56919116 | 56918938 | 15 | 37  | 43  | 0.828148417 | 0.803892  | TBX4 | ENSG00000121075 |
| 17 | 56919133 | 56920364 | 56919383 | 16 | 67  | 62  | 1.035012558 | 0.421254  | TBX4 | ENSG00000121075 |
| 17 | 56920376 | 56921338 | 56920866 | 11 | 43  | 40  | 1.029072744 | 0.446616  | TBX4 | ENSG00000121075 |
| 17 | 56921376 | 56922664 | 56922083 | 14 | 65  | 80  | 0.781333009 | 0.932612  | TBX4 | ENSG00000121075 |
| 17 | 56922766 | 56923403 | 56923120 | 17 | 38  | 36  | 1.010741595 | 0.48069   | TBX4 | ENSG00000121075 |
| 17 | 56924056 | 56925716 | 56925063 | 14 | 79  | 112 | 0.678873411 | 0.996285  | TBX4 | ENSG00000121075 |
| 17 | 56926291 | 56927064 | 56926677 | 14 | 44  | 40  | 1.052460761 | 0.40533   | TBX4 | ENSG00000121075 |
| 17 | 56927090 | 56927943 | 56927419 | 19 | 56  | 53  | 1.012181398 | 0.473955  | TBX4 | ENSG00000121075 |
| 17 | 56928005 | 56929005 | 56928181 | 15 | 51  | 64  | 0.767126954 | 0.924164  | TBX4 | ENSG00000121075 |
| 17 | 56929008 | 56929901 | 56929563 | 19 | 61  | 70  | 0.837356887 | 0.847218  | TBX4 | ENSG00000121075 |
| 17 | 56930303 | 56931157 | 56930719 | 19 | 57  | 52  | 1.049371777 | 0.398986  | TBX4 | ENSG00000121075 |
| 17 | 56931218 | 56931628 | 56931393 | 16 | 23  | 17  | 1.278544924 | 0.211315  | TBX4 | ENSG00000121075 |
| 17 | 56931719 | 56932983 | 56932103 | 25 | 85  | 76  | 1.07098893  | 0.330119  | TBX4 | ENSG00000121075 |
| 17 | 56933452 | 56933670 | 56933571 | 8  | 11  | 13  | 0.821921737 | 0.693119  | TBX4 | ENSG00000121075 |
| 17 | 56933722 | 56935326 | 56934156 | 19 | 83  | 89  | 0.894981447 | 0.768013  | TBX4 | ENSG00000121075 |
| 17 | 56935553 | 56935783 | 56935668 | 8  | 11  | 5   | 1.917817386 | 0.0843804 | TBX4 | ENSG00000121075 |
| 17 | 56935899 | 56936537 | 56936201 | 12 | 26  | 24  | 1.035621389 | 0.448641  | TBX4 | ENSG00000121075 |
| 17 | 56936592 | 56937540 | 56936943 | 62 | 150 | 65  | 2.193866858 | 1.38E-08  | TBX4 | ENSG00000121075 |
| 17 | 56938040 | 56938291 | 56938165 | 15 | 17  | 18  | 0.908439814 | 0.615249  | TBX4 | ENSG00000121075 |
| 17 | 56938341 | 56938534 | 56938460 | 10 | 11  | 21  | 0.523041105 | 0.969287  | TBX4 | ENSG00000121075 |
| 17 | 56938538 | 56939450 | 56938908 | 11 | 37  | 52  | 0.68751944  | 0.962667  | TBX4 | ENSG00000121075 |
| 17 | 56939582 | 56940691 | 56940035 | 19 | 60  | 75  | 0.769650398 | 0.937196  | TBX4 | ENSG00000121075 |
| 17 | 56940793 | 56941620 | 56941294 | 25 | 49  | 43  | 1.089668969 | 0.337588  | TBX4 | ENSG00000121075 |
| 17 | 56941715 | 56942085 | 56941906 | 17 | 24  | 22  | 1.042292058 | 0.441692  | TBX4 | ENSG00000121075 |
| 17 | 56942126 | 56944503 | 56942625 | 24 | 153 | 133 | 1.102029394 | 0.204638  | TBX4 | ENSG00000121075 |
| 17 | 56944675 | 56944952 | 56944803 | 11 | 16  | 20  | 0.776259418 | 0.783794  | TBX4 | ENSG00000121075 |
| 17 | 56944962 | 56945268 | 56945137 | 12 | 15  | 13  | 1.095895649 | 0.398774  | TBX4 | ENSG00000121075 |
| 17 | 56945486 | 56945819 | 56945664 | 8  | 13  | 21  | 0.610214623 | 0.930478  | TBX4 | ENSG00000121075 |
| 17 | 56946407 | 56947081 | 56946804 | 14 | 36  | 37  | 0.933674254 | 0.616842  | TBX4 | ENSG00000121075 |
| 17 | 56947524 | 56947870 | 56947699 | 13 | 17  | 16  | 1.015315087 | 0.480915  | TBX4 | ENSG00000121075 |

|    |          |          |          |    |     |     |             |            |       |                 |
|----|----------|----------|----------|----|-----|-----|-------------|------------|-------|-----------------|
| 17 | 56948717 | 56948941 | 56948828 | 8  | 8   | 12  | 0.663859864 | 0.833689   | TBX4  | ENSG00000121075 |
| 17 | 56949043 | 56949919 | 56949554 | 25 | 58  | 29  | 1.885853763 | 0.00173859 | TBX4  | ENSG00000121075 |
| 17 | 56950095 | 56951612 | 56951105 | 15 | 84  | 96  | 0.840280814 | 0.879888   | TBX4  | ENSG00000121075 |
| 17 | 56951707 | 56952081 | 56951946 | 8  | 12  | 16  | 0.733283118 | 0.803868   | TBX4  | ENSG00000121075 |
| 17 | 56952094 | 56952478 | 56952266 | 12 | 17  | 11  | 1.43836304  | 0.15834    | TBX4  | ENSG00000121075 |
| 17 | 56952720 | 56953760 | 56953185 | 12 | 40  | 30  | 1.268234078 | 0.156183   | TBX4  | ENSG00000121075 |
| 17 | 56954322 | 56954671 | 56954467 | 10 | 15  | 23  | 0.639272462 | 0.921343   | TBX4  | ENSG00000121075 |
| 17 | 56955102 | 56955590 | 56955278 | 14 | 21  | 28  | 0.727447974 | 0.872597   | TBX4  | ENSG00000121075 |
| 17 | 56955967 | 56956172 | 56956028 | 8  | 10  | 10  | 0.958908693 | 0.538751   | NACA2 | ENSG00000196861 |
| 17 | 56956209 | 56956514 | 56956346 | 11 | 15  | 20  | 0.730597099 | 0.831283   | NACA2 | ENSG00000196861 |
| 17 | 56957145 | 56959096 | 56958016 | 26 | 113 | 109 | 0.9937781   | 0.518285   | NACA2 | ENSG00000196861 |
| 17 | 56959105 | 56959493 | 56959320 | 9  | 16  | 18  | 0.857970936 | 0.678066   | NACA2 | ENSG00000196861 |
| 17 | 56960367 | 56960724 | 56960578 | 17 | 22  | 17  | 1.225272219 | 0.255726   | NACA2 | ENSG00000196861 |
| 17 | 56961032 | 56961942 | 56961550 | 20 | 49  | 38  | 1.229370119 | 0.164546   | NACA2 | ENSG00000196861 |
| 17 | 56962106 | 56962463 | 56962284 | 15 | 20  | 24  | 0.805483302 | 0.769433   | NACA2 | ENSG00000196861 |
| 17 | 56962945 | 56963336 | 56963124 | 10 | 18  | 14  | 1.214617678 | 0.282961   | NACA2 | ENSG00000196861 |
| 17 | 56963411 | 56963792 | 56963613 | 10 | 16  | 12  | 1.253957522 | 0.265012   | NACA2 | ENSG00000196861 |
| 17 | 56963828 | 56964284 | 56964000 | 10 | 21  | 31  | 0.659249726 | 0.936811   | NACA2 | ENSG00000196861 |
| 17 | 56964291 | 56964506 | 56964405 | 8  | 9   | 22  | 0.416916823 | 0.992721   | NACA2 | ENSG00000196861 |
| 17 | 56964725 | 56965807 | 56965380 | 18 | 65  | 80  | 0.781333009 | 0.932612   | NACA2 | ENSG00000196861 |
| 17 | 56965922 | 56966441 | 56966313 | 11 | 23  | 24  | 0.920552345 | 0.614165   | NACA2 | ENSG00000196861 |
| 17 | 56966469 | 56967811 | 56966640 | 18 | 62  | 66  | 0.901660413 | 0.722642   | NACA2 | ENSG00000196861 |
| 17 | 56968502 | 56969024 | 56968714 | 10 | 23  | 22  | 1.000600375 | 0.498356   | NACA2 | ENSG00000196861 |
| 17 | 56969564 | 56969801 | 56969682 | 11 | 13  | 12  | 1.0326709   | 0.46514    | NACA2 | ENSG00000196861 |
| 17 | 56969850 | 56970121 | 56969985 | 8  | 12  | 13  | 0.890415215 | 0.619237   | NACA2 | ENSG00000196861 |
| 17 | 56970568 | 56970925 | 56970746 | 13 | 19  | 18  | 1.009377572 | 0.487356   | NACA2 | ENSG00000196861 |
| 17 | 56971795 | 56972249 | 56971970 | 11 | 18  | 15  | 1.138704073 | 0.348127   | NACA2 | ENSG00000196861 |
| 17 | 56973882 | 56974080 | 56973962 | 8  | 9   | 12  | 0.737622072 | 0.769563   | NACA2 | ENSG00000196861 |
| 17 | 56974409 | 56974761 | 56974585 | 13 | 19  | 15  | 1.198635866 | 0.291044   | NACA2 | ENSG00000196861 |
| 17 | 56975035 | 56975248 | 56975128 | 10 | 10  | 13  | 0.753428259 | 0.762589   | NACA2 | ENSG00000196861 |
| 17 | 56975494 | 56975718 | 56975573 | 8  | 10  | 6   | 1.506856518 | 0.188853   | NACA2 | ENSG00000196861 |
| 17 | 56977698 | 56977929 | 56977813 | 10 | 11  | 15  | 0.71918152  | 0.81018    | NACA2 | ENSG00000196861 |
| 17 | 56978406 | 56978776 | 56978597 | 10 | 17  | 12  | 1.327719729 | 0.212795   | NACA2 | ENSG00000196861 |
| 17 | 56978979 | 56979197 | 56979088 | 8  | 11  | 10  | 1.046082211 | 0.455063   | NACA2 | ENSG00000196861 |

|    |          |          |          |    |     |     |             |            |       |                 |
|----|----------|----------|----------|----|-----|-----|-------------|------------|-------|-----------------|
| 17 | 56979298 | 56979630 | 56979464 | 14 | 19  | 13  | 1.369869562 | 0.177863   | NACA2 | ENSG00000196861 |
| 17 | 56981395 | 56981753 | 56981574 | 9  | 15  | 11  | 1.278544924 | 0.254978   | NACA2 | ENSG00000196861 |
| 17 | 56981826 | 56982734 | 56982109 | 16 | 44  | 54  | 0.784561658 | 0.887657   | NACA2 | ENSG00000196861 |
| 17 | 56982755 | 56984051 | 56983612 | 42 | 116 | 71  | 1.558226626 | 0.00130641 | NACA2 | ENSG00000196861 |
| 17 | 56984962 | 56985267 | 56985108 | 8  | 13  | 19  | 0.671236085 | 0.87814    | NACA2 | ENSG00000196861 |
| 17 | 56985270 | 56985684 | 56985449 | 9  | 19  | 32  | 0.581156784 | 0.97504    | NACA2 | ENSG00000196861 |
| 17 | 56985689 | 56985896 | 56985792 | 10 | 12  | 12  | 0.958908693 | 0.542188   | NACA2 | ENSG00000196861 |
| 17 | 56986002 | 56986791 | 56986486 | 14 | 35  | 28  | 1.190369412 | 0.239964   | NACA2 | ENSG00000196861 |
| 17 | 56986854 | 56987803 | 56987557 | 38 | 94  | 94  | 0.958908693 | 0.613631   | NACA2 | ENSG00000196861 |
| 17 | 56988089 | 56988377 | 56988239 | 13 | 17  | 15  | 1.07877228  | 0.410615   | NACA2 | ENSG00000196861 |
| 17 | 56988392 | 56989103 | 56988615 | 23 | 57  | 60  | 0.911749249 | 0.692996   | NACA2 | ENSG00000196861 |
| 17 | 56989194 | 56989447 | 56989333 | 10 | 12  | 24  | 0.49863252  | 0.982718   | NACA2 | ENSG00000196861 |
| 17 | 56989522 | 56989763 | 56989642 | 9  | 12  | 14  | 0.831054201 | 0.689281   | NACA2 | ENSG00000196861 |
| 17 | 56989962 | 56990272 | 56990117 | 14 | 17  | 19  | 0.863017824 | 0.676008   | NACA2 | ENSG00000196861 |
| 17 | 56990305 | 56990837 | 56990571 | 12 | 25  | 34  | 0.712332172 | 0.907472   | NACA2 | ENSG00000196861 |
| 17 | 56991173 | 56991454 | 56991299 | 8  | 12  | 8   | 1.385090334 | 0.219216   | NACA2 | ENSG00000196861 |
| 17 | 56991494 | 56992017 | 56991695 | 14 | 29  | 24  | 1.150690432 | 0.299765   | NACA2 | ENSG00000196861 |
| 17 | 56992280 | 56992814 | 56992595 | 16 | 33  | 30  | 1.051706309 | 0.418347   | NACA2 | ENSG00000196861 |
| 17 | 56993138 | 56993401 | 56993248 | 9  | 12  | 9   | 1.246581301 | 0.295061   | NACA2 | ENSG00000196861 |
| 17 | 56993430 | 56994317 | 56993874 | 11 | 38  | 62  | 0.593610143 | 0.995446   | NACA2 | ENSG00000196861 |
| 17 | 56994386 | 56994977 | 56994663 | 12 | 28  | 29  | 0.92694507  | 0.614695   | NACA2 | ENSG00000196861 |
| 17 | 56995612 | 56996146 | 56995791 | 13 | 30  | 27  | 1.06164891  | 0.407875   | NACA2 | ENSG00000196861 |
| 17 | 56996971 | 56997490 | 56997311 | 20 | 34  | 38  | 0.860559084 | 0.741368   | NACA2 | ENSG00000196861 |
| 17 | 56999139 | 57001776 | 57000914 | 94 | 247 | 148 | 1.596035945 | 2.27E-06   | NACA2 | ENSG00000196861 |
| 17 | 57002125 | 57002345 | 57002235 | 8  | 10  | 13  | 0.753428259 | 0.762589   | NACA2 | ENSG00000196861 |
| 17 | 57002400 | 57002617 | 57002508 | 9  | 10  | 18  | 0.555157664 | 0.945639   | NACA2 | ENSG00000196861 |
| 17 | 57002803 | 57003478 | 57003303 | 13 | 32  | 34  | 0.904113911 | 0.661443   | NACA2 | ENSG00000196861 |
| 17 | 57003721 | 57004250 | 57003900 | 11 | 26  | 16  | 1.52297263  | 0.0820811  | NACA2 | ENSG00000196861 |
| 17 | 57004446 | 57004734 | 57004567 | 10 | 14  | 13  | 1.027402171 | 0.469541   | NACA2 | ENSG00000196861 |
| 17 | 57004928 | 57005389 | 57005266 | 9  | 19  | 19  | 0.958908693 | 0.552451   | NACA2 | ENSG00000196861 |
| 17 | 57005452 | 57006512 | 57006143 | 18 | 65  | 60  | 1.037507766 | 0.417112   | NACA2 | ENSG00000196861 |
| 17 | 57006675 | 57008041 | 57007256 | 47 | 135 | 99  | 1.304115823 | 0.0211303  | NACA2 | ENSG00000196861 |
| 17 | 57008081 | 57008655 | 57008390 | 10 | 25  | 35  | 0.692545167 | 0.925864   | NACA2 | ENSG00000196861 |
| 17 | 57008933 | 57009326 | 57009112 | 9  | 18  | 14  | 1.214617678 | 0.282961   | NACA2 | ENSG00000196861 |

|    |          |          |          |    |     |     |             |           |       |                 |
|----|----------|----------|----------|----|-----|-----|-------------|-----------|-------|-----------------|
| 17 | 57009889 | 57010604 | 57010425 | 16 | 35  | 41  | 0.821921737 | 0.807296  | NACA2 | ENSG00000196861 |
| 17 | 57010634 | 57011089 | 57010813 | 15 | 25  | 23  | 1.038817751 | 0.445246  | NACA2 | ENSG00000196861 |
| 17 | 57011603 | 57011956 | 57011779 | 10 | 16  | 28  | 0.562118889 | 0.973627  | NACA2 | ENSG00000196861 |
| 17 | 57012022 | 57013993 | 57012262 | 21 | 111 | 113 | 0.942085734 | 0.673039  | NACA2 | ENSG00000196861 |
| 17 | 57014237 | 57014647 | 57014535 | 9  | 15  | 16  | 0.902502299 | 0.616352  | NACA2 | ENSG00000196861 |
| 17 | 57014726 | 57015804 | 57015529 | 23 | 67  | 64  | 1.003166017 | 0.492223  | NACA2 | ENSG00000196861 |
| 17 | 57016594 | 57017698 | 57017142 | 11 | 45  | 52  | 0.832260375 | 0.81989   | NACA2 | ENSG00000196861 |
| 17 | 57017841 | 57018710 | 57018334 | 12 | 37  | 33  | 1.07172148  | 0.383257  | NACA2 | ENSG00000196861 |
| 17 | 57018907 | 57019850 | 57019586 | 13 | 40  | 49  | 0.786305128 | 0.874522  | NACA2 | ENSG00000196861 |
| 17 | 57019873 | 57020251 | 57020052 | 16 | 24  | 39  | 0.599317933 | 0.979769  | NACA2 | ENSG00000196861 |
| 17 | 57020277 | 57021149 | 57020533 | 15 | 44  | 57  | 0.743980883 | 0.933197  | NACA2 | ENSG00000196861 |
| 17 | 57021462 | 57022594 | 57021973 | 16 | 62  | 80  | 0.745817872 | 0.960573  | NACA2 | ENSG00000196861 |
| 17 | 57022785 | 57023068 | 57022898 | 11 | 14  | 13  | 1.027402171 | 0.469541  | NACA2 | ENSG00000196861 |
| 17 | 57023161 | 57023830 | 57023495 | 12 | 31  | 40  | 0.748416541 | 0.89237   | NACA2 | ENSG00000196861 |
| 17 | 57024037 | 57025182 | 57024316 | 14 | 62  | 58  | 1.023919452 | 0.447411  | NACA2 | ENSG00000196861 |
| 17 | 57025310 | 57026093 | 57025584 | 15 | 41  | 47  | 0.839045106 | 0.797875  | NACA2 | ENSG00000196861 |
| 17 | 57026684 | 57027047 | 57026868 | 17 | 24  | 15  | 1.498294833 | 0.0979832 | NACA2 | ENSG00000196861 |
| 17 | 57027117 | 57027594 | 57027288 | 9  | 17  | 20  | 0.821921737 | 0.731032  | NACA2 | ENSG00000196861 |
| 17 | 57027598 | 57028920 | 57027876 | 18 | 78  | 94  | 0.797408282 | 0.932271  | NACA2 | ENSG00000196861 |
| 17 | 57029272 | 57029502 | 57029399 | 10 | 11  | 8   | 1.278544924 | 0.28289   | NACA2 | ENSG00000196861 |
| 17 | 57029644 | 57030084 | 57029905 | 16 | 28  | 25  | 1.069552004 | 0.40018   | NACA2 | ENSG00000196861 |
| 17 | 57030147 | 57030521 | 57030324 | 17 | 25  | 25  | 0.958908693 | 0.559837  | NACA2 | ENSG00000196861 |
| 17 | 57030746 | 57032287 | 57031345 | 18 | 87  | 85  | 0.981208895 | 0.549477  | NACA2 | ENSG00000196861 |
| 17 | 57032296 | 57033176 | 57032892 | 19 | 54  | 63  | 0.824062158 | 0.854657  | NACA2 | ENSG00000196861 |
| 17 | 57033704 | 57033905 | 57033804 | 8  | 9   | 14  | 0.639272462 | 0.869513  | NACA2 | ENSG00000196861 |
| 17 | 57034639 | 57035472 | 57035184 | 17 | 47  | 43  | 1.046082211 | 0.413574  | NACA2 | ENSG00000196861 |
| 17 | 57036202 | 57036437 | 57036289 | 8  | 10  | 11  | 0.878999635 | 0.622439  | NACA2 | ENSG00000196861 |
| 17 | 57037009 | 57037536 | 57037173 | 16 | 28  | 26  | 1.029938967 | 0.455006  | NACA2 | ENSG00000196861 |
| 17 | 57038025 | 57038329 | 57038188 | 8  | 10  | 7   | 1.318499453 | 0.269217  | NACA2 | ENSG00000196861 |
| 17 | 57038713 | 57039120 | 57038887 | 10 | 19  | 25  | 0.737622072 | 0.849755  | NACA2 | ENSG00000196861 |
| 17 | 57039145 | 57039363 | 57039307 | 10 | 12  | 16  | 0.733283118 | 0.803868  | NACA2 | ENSG00000196861 |
| 17 | 57042106 | 57044074 | 57043498 | 13 | 78  | 77  | 0.971202394 | 0.572374  | NACA2 | ENSG00000196861 |
| 17 | 57044222 | 57044841 | 57044547 | 14 | 33  | 40  | 0.795192575 | 0.839981  | NACA2 | ENSG00000196861 |
| 17 | 57044994 | 57045240 | 57045127 | 8  | 9   | 13  | 0.684934781 | 0.824961  | NACA2 | ENSG00000196861 |

|    |          |          |          |    |     |     |             |           |       |                 |
|----|----------|----------|----------|----|-----|-----|-------------|-----------|-------|-----------------|
| 17 | 57045498 | 57045693 | 57045573 | 9  | 9   | 9   | 0.958908693 | 0.536911  | NACA2 | ENSG00000196861 |
| 17 | 57046104 | 57046885 | 57046275 | 11 | 31  | 12  | 2.360390629 | 0.0028142 | NACA2 | ENSG00000196861 |
| 17 | 57047824 | 57048540 | 57048190 | 17 | 41  | 38  | 1.0326709   | 0.441606  | NACA2 | ENSG00000196861 |
| 17 | 57048551 | 57049236 | 57048937 | 14 | 33  | 25  | 1.253957522 | 0.189413  | NACA2 | ENSG00000196861 |
| 17 | 57049296 | 57050023 | 57049703 | 14 | 42  | 32  | 1.249487085 | 0.165244  | NACA2 | ENSG00000196861 |
| 17 | 57050096 | 57050664 | 57050251 | 11 | 24  | 15  | 1.498294833 | 0.0979832 | NACA2 | ENSG00000196861 |
| 17 | 57050692 | 57051035 | 57050868 | 8  | 13  | 9   | 1.34247217  | 0.232231  | NACA2 | ENSG00000196861 |
| 17 | 57051101 | 57051366 | 57051259 | 12 | 14  | 14  | 0.958908693 | 0.545362  | NACA2 | ENSG00000196861 |
| 17 | 57051452 | 57051924 | 57051745 | 19 | 31  | 26  | 1.136484377 | 0.310077  | NACA2 | ENSG00000196861 |
| 17 | 57052121 | 57052411 | 57052271 | 8  | 11  | 20  | 0.547947825 | 0.956941  | NACA2 | ENSG00000196861 |
| 17 | 57052985 | 57055515 | 57054658 | 68 | 238 | 106 | 2.141861473 | 4.82E-12  | NACA2 | ENSG00000196861 |
| 17 | 57055855 | 57056354 | 57056018 | 10 | 21  | 21  | 0.958908693 | 0.555026  | NACA2 | ENSG00000196861 |
| 17 | 57056370 | 57056869 | 57056549 | 12 | 26  | 13  | 1.849323908 | 0.0263429 | NACA2 | ENSG00000196861 |
| 17 | 57057651 | 57057985 | 57057818 | 12 | 18  | 10  | 1.656296833 | 0.0841786 | NACA2 | ENSG00000196861 |
| 17 | 57058244 | 57058844 | 57058423 | 12 | 27  | 25  | 1.0326709   | 0.45189   | NACA2 | ENSG00000196861 |
| 17 | 57059249 | 57059786 | 57059517 | 14 | 26  | 13  | 1.849323908 | 0.0263429 | NACA2 | ENSG00000196861 |
| 17 | 57059877 | 57060172 | 57060024 | 10 | 16  | 16  | 0.958908693 | 0.548325  | NACA2 | ENSG00000196861 |
| 17 | 57061301 | 57061689 | 57061480 | 8  | 16  | 17  | 0.905635988 | 0.615736  | NACA2 | ENSG00000196861 |
| 17 | 57061797 | 57062043 | 57061920 | 9  | 10  | 11  | 0.878999635 | 0.622439  | NACA2 | ENSG00000196861 |
| 17 | 57062421 | 57062655 | 57062515 | 10 | 12  | 19  | 0.62329065  | 0.912804  | NACA2 | ENSG00000196861 |
| 17 | 57062757 | 57063298 | 57063119 | 13 | 25  | 27  | 0.890415215 | 0.665585  | NACA2 | ENSG00000196861 |
| 17 | 57063882 | 57064403 | 57064049 | 12 | 23  | 14  | 1.534253909 | 0.0910901 | NACA2 | ENSG00000196861 |
| 17 | 57065549 | 57065833 | 57065671 | 9  | 13  | 12  | 1.0326709   | 0.46514   | NACA2 | ENSG00000196861 |
| 17 | 57067017 | 57067564 | 57067192 | 9  | 22  | 38  | 0.565510255 | 0.986837  | NACA2 | ENSG00000196861 |
| 17 | 57067693 | 57068730 | 57068283 | 44 | 101 | 76  | 1.270242684 | 0.0552125 | NACA2 | ENSG00000196861 |
| 17 | 57068821 | 57069210 | 57069000 | 16 | 23  | 18  | 1.211253086 | 0.262955  | NACA2 | ENSG00000196861 |
| 17 | 57069974 | 57070315 | 57070088 | 8  | 12  | 11  | 1.038817751 | 0.460341  | NACA2 | ENSG00000196861 |
| 17 | 57070480 | 57070683 | 57070581 | 9  | 10  | 8   | 1.171999514 | 0.35773   | NACA2 | ENSG00000196861 |
| 17 | 57072262 | 57072463 | 57072362 | 8  | 9   | 10  | 0.871735176 | 0.624623  | NACA2 | ENSG00000196861 |
| 17 | 57073177 | 57073569 | 57073303 | 9  | 16  | 15  | 1.018840486 | 0.477384  | NACA2 | ENSG00000196861 |
| 17 | 57073918 | 57074615 | 57074436 | 13 | 33  | 31  | 1.018840486 | 0.468915  | NACA2 | ENSG00000196861 |
| 17 | 57074979 | 57075238 | 57075108 | 8  | 10  | 15  | 0.659249726 | 0.861705  | NACA2 | ENSG00000196861 |
| 17 | 57075599 | 57075920 | 57075759 | 11 | 16  | 23  | 0.679226991 | 0.892598  | NACA2 | ENSG00000196861 |
| 17 | 57076064 | 57076803 | 57076602 | 16 | 42  | 27  | 1.472609779 | 0.0523794 | NACA2 | ENSG00000196861 |

|    |          |          |          |    |    |    |             |           |       |                 |
|----|----------|----------|----------|----|----|----|-------------|-----------|-------|-----------------|
| 17 | 57076929 | 57077122 | 57077089 | 8  | 10 | 13 | 0.753428259 | 0.762589  | NACA2 | ENSG00000196861 |
| 17 | 57077138 | 57077709 | 57077449 | 15 | 32 | 35 | 0.878999635 | 0.704375  | NACA2 | ENSG00000196861 |
| 17 | 57078021 | 57078391 | 57078212 | 10 | 17 | 17 | 0.958908693 | 0.549739  | NACA2 | ENSG00000196861 |
| 17 | 57078721 | 57079288 | 57079099 | 14 | 26 | 35 | 0.71918152  | 0.904742  | NACA2 | ENSG00000196861 |
| 17 | 57079739 | 57080194 | 57079876 | 11 | 19 | 12 | 1.475244143 | 0.131365  | NACA2 | ENSG00000196861 |
| 17 | 57080992 | 57081692 | 57081533 | 11 | 29 | 29 | 0.958908693 | 0.564279  | NACA2 | ENSG00000196861 |
| 17 | 57081793 | 57082361 | 57081972 | 10 | 24 | 25 | 0.922027589 | 0.614196  | NACA2 | ENSG00000196861 |
| 17 | 57082451 | 57083342 | 57083045 | 24 | 59 | 60 | 0.943188878 | 0.626091  | NACA2 | ENSG00000196861 |
| 17 | 57083853 | 57085150 | 57084655 | 21 | 75 | 78 | 0.922494439 | 0.692303  | NACA2 | ENSG00000196861 |
| 17 | 57086084 | 57086472 | 57086311 | 11 | 19 | 19 | 0.958908693 | 0.552451  | NACA2 | ENSG00000196861 |
| 17 | 57086585 | 57087276 | 57087017 | 11 | 25 | 31 | 0.779113313 | 0.829763  | NACA2 | ENSG00000196861 |
| 17 | 57087643 | 57087933 | 57087759 | 10 | 13 | 19 | 0.671236085 | 0.87814   | NACA2 | ENSG00000196861 |
| 17 | 57088110 | 57088304 | 57088207 | 9  | 10 | 2  | 3.515998541 | 0.0136204 | NACA2 | ENSG00000196861 |
| 17 | 57088332 | 57088648 | 57088490 | 8  | 9  | 10 | 0.871735176 | 0.624623  | NACA2 | ENSG00000196861 |
| 17 | 57088844 | 57089293 | 57089017 | 12 | 22 | 27 | 0.787674998 | 0.803855  | NACA2 | ENSG00000196861 |
| 17 | 57090707 | 57091590 | 57091350 | 15 | 44 | 52 | 0.814167758 | 0.845921  | NACA2 | ENSG00000196861 |
| 17 | 57091856 | 57092333 | 57092035 | 9  | 19 | 26 | 0.710302736 | 0.88      | NACA2 | ENSG00000196861 |
| 17 | 57092646 | 57092877 | 57092761 | 9  | 10 | 18 | 0.555157664 | 0.945639  | NACA2 | ENSG00000196861 |
| 17 | 57092924 | 57093326 | 57093136 | 13 | 22 | 33 | 0.648673528 | 0.948418  | NACA2 | ENSG00000196861 |
| 17 | 57093511 | 57094219 | 57093965 | 13 | 31 | 42 | 0.713606469 | 0.927912  | NACA2 | ENSG00000196861 |
| 17 | 57094298 | 57095756 | 57095577 | 18 | 82 | 66 | 1.187901814 | 0.145695  | NACA2 | ENSG00000196861 |
| 17 | 57095942 | 57096361 | 57096104 | 11 | 21 | 19 | 1.054799562 | 0.429896  | NACA2 | ENSG00000196861 |
| 17 | 57100280 | 57100845 | 57100582 | 12 | 29 | 28 | 0.99197451  | 0.511702  | NACA2 | ENSG00000196861 |
| 17 | 57100870 | 57101420 | 57101243 | 11 | 25 | 48 | 0.508808694 | 0.997964  | NACA2 | ENSG00000196861 |
| 17 | 57101753 | 57102180 | 57101943 | 19 | 33 | 21 | 1.481949798 | 0.0712625 | NACA2 | ENSG00000196861 |
| 17 | 57102790 | 57103633 | 57103172 | 12 | 37 | 43 | 0.828148417 | 0.803892  | NACA2 | ENSG00000196861 |
| 17 | 57104265 | 57104755 | 57104506 | 19 | 32 | 34 | 0.904113911 | 0.661443  | NACA2 | ENSG00000196861 |
| 17 | 57104777 | 57105042 | 57104931 | 11 | 13 | 24 | 0.536988868 | 0.972726  | NACA2 | ENSG00000196861 |
| 17 | 57110443 | 57111765 | 57111216 | 16 | 73 | 54 | 1.29016806  | 0.074361  | NACA2 | ENSG00000196861 |
| 17 | 57112136 | 57112334 | 57112235 | 8  | 10 | 5  | 1.757999271 | 0.121253  | NACA2 | ENSG00000196861 |
| 17 | 57112351 | 57112623 | 57112482 | 12 | 15 | 6  | 2.191791298 | 0.0328001 | NACA2 | ENSG00000196861 |
| 17 | 57112789 | 57113160 | 57112950 | 8  | 13 | 9  | 1.34247217  | 0.232231  | NACA2 | ENSG00000196861 |
| 17 | 57113196 | 57114054 | 57113636 | 10 | 34 | 35 | 0.93227234  | 0.616206  | NACA2 | ENSG00000196861 |
| 17 | 57114843 | 57115195 | 57115032 | 8  | 12 | 16 | 0.733283118 | 0.803868  | NACA2 | ENSG00000196861 |



|    |          |          |          |    |    |    |             |           |       |                 |
|----|----------|----------|----------|----|----|----|-------------|-----------|-------|-----------------|
| 17 | 57115386 | 57116661 | 57116102 | 14 | 65 | 62 | 1.004571012 | 0.489146  | NACA2 | ENSG00000196861 |
| 17 | 57117133 | 57117374 | 57117253 | 9  | 13 | 17 | 0.745817872 | 0.798145  | NACA2 | ENSG00000196861 |
| 17 | 57117656 | 57117980 | 57117818 | 11 | 15 | 22 | 0.667066917 | 0.897252  | NACA2 | ENSG00000196861 |
| 17 | 57118110 | 57118412 | 57118261 | 11 | 14 | 22 | 0.625375235 | 0.925815  | NACA2 | ENSG00000196861 |
| 17 | 57118827 | 57119723 | 57119467 | 14 | 43 | 37 | 1.110315329 | 0.316685  | NACA2 | ENSG00000196861 |
| 17 | 57119795 | 57120349 | 57120151 | 11 | 27 | 41 | 0.639272462 | 0.968806  | NACA2 | ENSG00000196861 |
| 17 | 57120747 | 57121061 | 57120963 | 10 | 14 | 23 | 0.599317933 | 0.944443  | NACA2 | ENSG00000196861 |
| 17 | 57121383 | 57121778 | 57121599 | 9  | 17 | 25 | 0.663859864 | 0.912943  | NACA2 | ENSG00000196861 |
| 17 | 57122072 | 57122440 | 57122261 | 8  | 15 | 17 | 0.852363283 | 0.680376  | NACA2 | ENSG00000196861 |
| 17 | 57122444 | 57122765 | 57122612 | 10 | 15 | 15 | 0.958908693 | 0.546868  | NACA2 | ENSG00000196861 |
| 17 | 57124132 | 57124680 | 57124388 | 15 | 28 | 30 | 0.897043616 | 0.663432  | NACA2 | ENSG00000196861 |
| 17 | 57125174 | 57125478 | 57125321 | 12 | 13 | 14 | 0.894981447 | 0.618069  | NACA2 | ENSG00000196861 |
| 17 | 57125568 | 57125984 | 57125706 | 9  | 14 | 18 | 0.757033179 | 0.792932  | NACA2 | ENSG00000196861 |
| 17 | 57126297 | 57126630 | 57126454 | 9  | 13 | 20 | 0.639272462 | 0.907338  | NACA2 | ENSG00000196861 |
| 17 | 57126707 | 57126993 | 57126850 | 14 | 16 | 18 | 0.857970936 | 0.678066  | NACA2 | ENSG00000196861 |
| 17 | 57127078 | 57127489 | 57127257 | 8  | 16 | 24 | 0.652057911 | 0.917054  | NACA2 | ENSG00000196861 |
| 17 | 57127700 | 57127996 | 57127843 | 8  | 11 | 8  | 1.278544924 | 0.28289   | NACA2 | ENSG00000196861 |
| 17 | 57128259 | 57128474 | 57128425 | 8  | 11 | 16 | 0.676876725 | 0.854566  | NACA2 | ENSG00000196861 |
| 17 | 57128540 | 57128741 | 57128640 | 8  | 11 | 4  | 2.301380863 | 0.0459276 | NACA2 | ENSG00000196861 |
| 17 | 57129527 | 57129901 | 57129696 | 9  | 16 | 17 | 0.905635988 | 0.615736  | NACA2 | ENSG00000196861 |
| 17 | 57130100 | 57130341 | 57130235 | 9  | 11 | 9  | 1.150690432 | 0.367789  | NACA2 | ENSG00000196861 |
| 17 | 57130344 | 57130791 | 57130523 | 11 | 21 | 24 | 0.84383965  | 0.72062   | NACA2 | ENSG00000196861 |
| 17 | 57131027 | 57131325 | 57131192 | 10 | 11 | 10 | 1.046082211 | 0.455063  | NACA2 | ENSG00000196861 |
| 17 | 57131693 | 57132923 | 57131872 | 17 | 63 | 91 | 0.667066917 | 0.994047  | NACA2 | ENSG00000196861 |
| 17 | 57133463 | 57134245 | 57133642 | 14 | 37 | 29 | 1.214617678 | 0.210365  | NACA2 | ENSG00000196861 |
| 17 | 57134254 | 57134440 | 57134347 | 8  | 9  | 14 | 0.639272462 | 0.869513  | NACA2 | ENSG00000196861 |
| 17 | 57135680 | 57136031 | 57135855 | 11 | 17 | 12 | 1.327719729 | 0.212795  | NACA2 | ENSG00000196861 |
| 17 | 57136157 | 57136643 | 57136315 | 9  | 17 | 15 | 1.07877228  | 0.410615  | NACA2 | ENSG00000196861 |
| 17 | 57136849 | 57137238 | 57137070 | 8  | 14 | 12 | 1.106433107 | 0.392094  | NACA2 | ENSG00000196861 |
| 17 | 57137479 | 57137855 | 57137667 | 10 | 18 | 16 | 1.07172148  | 0.415914  | NACA2 | ENSG00000196861 |
| 17 | 57138392 | 57138822 | 57138643 | 9  | 18 | 25 | 0.700740968 | 0.883987  | NACA2 | ENSG00000196861 |
| 17 | 57138873 | 57139584 | 57139405 | 13 | 33 | 31 | 1.018840486 | 0.468915  | NACA2 | ENSG00000196861 |
| 17 | 57140425 | 57141482 | 57140908 | 21 | 57 | 47 | 1.158681337 | 0.223457  | NACA2 | ENSG00000196861 |
| 17 | 57142222 | 57142739 | 57142480 | 15 | 28 | 22 | 1.209058787 | 0.245294  | NACA2 | ENSG00000196861 |

|    |          |          |          |    |     |     |             |           |       |                 |
|----|----------|----------|----------|----|-----|-----|-------------|-----------|-------|-----------------|
| 17 | 57143531 | 57143744 | 57143692 | 9  | 10  | 15  | 0.659249726 | 0.861705  | NACA2 | ENSG00000196861 |
| 17 | 57145424 | 57145669 | 57145570 | 11 | 14  | 11  | 1.198635866 | 0.315918  | NACA2 | ENSG00000196861 |
| 17 | 57146855 | 57147084 | 57146969 | 10 | 12  | 4   | 2.493162602 | 0.0299057 | NACA2 | ENSG00000196861 |
| 17 | 57148089 | 57148434 | 57148261 | 10 | 15  | 26  | 0.568242188 | 0.9671    | NACA2 | ENSG00000196861 |
| 17 | 57148718 | 57149118 | 57148854 | 10 | 16  | 18  | 0.857970936 | 0.678066  | NACA2 | ENSG00000196861 |
| 17 | 57149171 | 57149486 | 57149362 | 8  | 12  | 7   | 1.558226626 | 0.152813  | NACA2 | ENSG00000196861 |
| 17 | 57149623 | 57149813 | 57149713 | 10 | 11  | 12  | 0.885146486 | 0.620672  | NACA2 | ENSG00000196861 |
| 17 | 57150085 | 57151030 | 57150453 | 17 | 56  | 43  | 1.242222625 | 0.137688  | NACA2 | ENSG00000196861 |
| 17 | 57152175 | 57152386 | 57152309 | 11 | 11  | 8   | 1.278544924 | 0.28289   | NACA2 | ENSG00000196861 |
| 17 | 57152730 | 57152954 | 57152853 | 10 | 12  | 16  | 0.733283118 | 0.803868  | NACA2 | ENSG00000196861 |
| 17 | 57153719 | 57153968 | 57153857 | 10 | 13  | 14  | 0.894981447 | 0.618069  | NACA2 | ENSG00000196861 |
| 17 | 57154382 | 57154572 | 57154477 | 8  | 8   | 13  | 0.616441303 | 0.878084  | NACA2 | ENSG00000196861 |
| 17 | 57154665 | 57154949 | 57154815 | 13 | 16  | 20  | 0.776259418 | 0.783794  | NACA2 | ENSG00000196861 |
| 17 | 57155065 | 57156278 | 57155451 | 32 | 106 | 101 | 1.005914021 | 0.482586  | NACA2 | ENSG00000196861 |
| 17 | 57156359 | 57157628 | 57157038 | 17 | 57  | 70  | 0.783333862 | 0.917269  | NACA2 | ENSG00000196861 |
| 17 | 57157979 | 57158499 | 57158259 | 13 | 30  | 38  | 0.762209474 | 0.872381  | NACA2 | ENSG00000196861 |
| 17 | 57158555 | 57158817 | 57158686 | 9  | 13  | 23  | 0.559363404 | 0.962306  | NACA2 | ENSG00000196861 |
| 17 | 57159081 | 57159397 | 57159253 | 9  | 12  | 14  | 0.831054201 | 0.689281  | NACA2 | ENSG00000196861 |
| 17 | 57160319 | 57161058 | 57160788 | 24 | 52  | 53  | 0.941151125 | 0.623071  | BRIP1 | ENSG00000136492 |
| 17 | 57161552 | 57162101 | 57161922 | 12 | 24  | 33  | 0.705079921 | 0.910297  | BRIP1 | ENSG00000136492 |
| 17 | 57162131 | 57162837 | 57162675 | 20 | 49  | 45  | 1.042292058 | 0.418741  | BRIP1 | ENSG00000136492 |
| 17 | 57163113 | 57164111 | 57163886 | 16 | 52  | 67  | 0.747384717 | 0.94522   | BRIP1 | ENSG00000136492 |
| 17 | 57164295 | 57164748 | 57164474 | 11 | 20  | 20  | 0.958908693 | 0.553754  | BRIP1 | ENSG00000136492 |
| 17 | 57165092 | 57165715 | 57165313 | 13 | 30  | 25  | 1.143314211 | 0.305022  | BRIP1 | ENSG00000136492 |
| 17 | 57165726 | 57166117 | 57165949 | 8  | 14  | 9   | 1.43836304  | 0.179537  | BRIP1 | ENSG00000136492 |
| 17 | 57166564 | 57167953 | 57166942 | 10 | 54  | 55  | 0.941785324 | 0.623925  | BRIP1 | ENSG00000136492 |
| 17 | 57168058 | 57168265 | 57168161 | 10 | 11  | 9   | 1.150690432 | 0.367789  | BRIP1 | ENSG00000136492 |
| 17 | 57168622 | 57169037 | 57168858 | 10 | 19  | 12  | 1.475244143 | 0.131365  | BRIP1 | ENSG00000136492 |
| 17 | 57169755 | 57170746 | 57170218 | 31 | 77  | 68  | 1.08398374  | 0.311771  | BRIP1 | ENSG00000136492 |
| 17 | 57171017 | 57171705 | 57171343 | 12 | 32  | 39  | 0.791099672 | 0.842107  | BRIP1 | ENSG00000136492 |
| 17 | 57171794 | 57173602 | 57172521 | 11 | 74  | 74  | 0.958908693 | 0.601222  | BRIP1 | ENSG00000136492 |
| 17 | 57174448 | 57174714 | 57174614 | 14 | 17  | 10  | 1.569123316 | 0.112309  | BRIP1 | ENSG00000136492 |
| 17 | 57174858 | 57175718 | 57175288 | 16 | 36  | 29  | 1.182654055 | 0.244956  | BRIP1 | ENSG00000136492 |
| 17 | 57176509 | 57176710 | 57176613 | 9  | 10  | 7   | 1.318499453 | 0.269217  | BRIP1 | ENSG00000136492 |

|    |          |          |          |    |     |    |             |                 |                 |
|----|----------|----------|----------|----|-----|----|-------------|-----------------|-----------------|
| 17 | 57176810 | 57177119 | 57176954 | 9  | 11  | 14 | 0.767126954 | 0.756447 BRIP1  | ENSG00000136492 |
| 17 | 57178691 | 57178982 | 57178836 | 10 | 14  | 18 | 0.757033179 | 0.792932 BRIP1  | ENSG00000136492 |
| 17 | 57178986 | 57179670 | 57179335 | 8  | 25  | 27 | 0.890415215 | 0.665585 BRIP1  | ENSG00000136492 |
| 17 | 57180371 | 57180797 | 57180618 | 12 | 19  | 12 | 1.475244143 | 0.131365 BRIP1  | ENSG00000136492 |
| 17 | 57182264 | 57183272 | 57182728 | 12 | 41  | 48 | 0.821921737 | 0.825633 BRIP1  | ENSG00000136492 |
| 17 | 57183285 | 57183813 | 57183391 | 9  | 21  | 18 | 1.110315329 | 0.366889 BRIP1  | ENSG00000136492 |
| 17 | 57184450 | 57184734 | 57184613 | 8  | 13  | 8  | 1.491635745 | 0.166708 BRIP1  | ENSG00000136492 |
| 17 | 57184762 | 57185390 | 57184941 | 13 | 30  | 41 | 0.70776594  | 0.929988 BRIP1  | ENSG00000136492 |
| 17 | 57185401 | 57185663 | 57185542 | 8  | 11  | 19 | 0.575345216 | 0.94039 BRIP1   | ENSG00000136492 |
| 17 | 57185928 | 57186884 | 57186223 | 18 | 54  | 54 | 0.958908693 | 0.586881 BRIP1  | ENSG00000136492 |
| 17 | 57186953 | 57187480 | 57187181 | 13 | 25  | 16 | 1.466566236 | 0.10473 BRIP1   | ENSG00000136492 |
| 17 | 57187595 | 57188494 | 57187901 | 15 | 47  | 40 | 1.122624811 | 0.291623 BRIP1  | ENSG00000136492 |
| 17 | 57188650 | 57189230 | 57188829 | 13 | 30  | 34 | 0.849319128 | 0.747103 BRIP1  | ENSG00000136492 |
| 17 | 57189303 | 57189731 | 57189482 | 12 | 25  | 31 | 0.779113313 | 0.829763 BRIP1  | ENSG00000136492 |
| 17 | 57189754 | 57190185 | 57190067 | 12 | 20  | 31 | 0.62928383  | 0.953537 BRIP1  | ENSG00000136492 |
| 17 | 57190411 | 57191024 | 57190812 | 11 | 29  | 26 | 1.065454103 | 0.404106 BRIP1  | ENSG00000136492 |
| 17 | 57191188 | 57191471 | 57191329 | 9  | 13  | 12 | 1.0326709   | 0.46514 BRIP1   | ENSG00000136492 |
| 17 | 57192054 | 57192381 | 57192188 | 8  | 12  | 14 | 0.831054201 | 0.689281 BRIP1  | ENSG00000136492 |
| 17 | 57192623 | 57193173 | 57193040 | 12 | 22  | 23 | 0.918954164 | 0.614181 BRIP1  | ENSG00000136492 |
| 17 | 57194043 | 57194361 | 57194202 | 15 | 19  | 15 | 1.198635866 | 0.291044 BRIP1  | ENSG00000136492 |
| 17 | 57194380 | 57194640 | 57194495 | 12 | 15  | 7  | 1.917817386 | 0.0572317 BRIP1 | ENSG00000136492 |
| 17 | 57195052 | 57195905 | 57195726 | 13 | 42  | 37 | 1.08508089  | 0.35552 BRIP1   | ENSG00000136492 |
| 17 | 57196045 | 57197390 | 57196273 | 25 | 98  | 68 | 1.375825516 | 0.0198954 BRIP1 | ENSG00000136492 |
| 17 | 57197743 | 57199503 | 57198861 | 18 | 86  | 56 | 1.463597479 | 0.0117167 BRIP1 | ENSG00000136492 |
| 17 | 57199775 | 57200308 | 57200051 | 9  | 21  | 23 | 0.878999635 | 0.669714 BRIP1  | ENSG00000136492 |
| 17 | 57200719 | 57202782 | 57201273 | 17 | 107 | 88 | 1.163619538 | 0.143704 BRIP1  | ENSG00000136492 |
| 17 | 57202922 | 57203355 | 57203176 | 13 | 22  | 16 | 1.297347055 | 0.203559 BRIP1  | ENSG00000136492 |
| 17 | 57204480 | 57204840 | 57204661 | 10 | 16  | 9  | 1.630144778 | 0.102169 BRIP1  | ENSG00000136492 |
| 17 | 57204942 | 57205390 | 57205121 | 11 | 23  | 21 | 1.046082211 | 0.437961 BRIP1  | ENSG00000136492 |
| 17 | 57207695 | 57208139 | 57207972 | 9  | 19  | 12 | 1.475244143 | 0.131365 BRIP1  | ENSG00000136492 |
| 17 | 57208472 | 57209282 | 57208943 | 14 | 46  | 36 | 1.218073205 | 0.182357 BRIP1  | ENSG00000136492 |
| 17 | 57209320 | 57209881 | 57209715 | 15 | 31  | 28 | 1.058106144 | 0.411497 BRIP1  | ENSG00000136492 |
| 17 | 57210015 | 57210288 | 57210151 | 9  | 12  | 17 | 0.692545167 | 0.848017 BRIP1  | ENSG00000136492 |
| 17 | 57210741 | 57211309 | 57211016 | 11 | 24  | 16 | 1.410159843 | 0.132195 BRIP1  | ENSG00000136492 |

|    |          |          |          |    |     |    |             |           |       |                 |
|----|----------|----------|----------|----|-----|----|-------------|-----------|-------|-----------------|
| 17 | 57211885 | 57212151 | 57212018 | 10 | 11  | 21 | 0.523041105 | 0.969287  | BRIP1 | ENSG00000136492 |
| 17 | 57212819 | 57213200 | 57212989 | 10 | 15  | 17 | 0.852363283 | 0.680376  | BRIP1 | ENSG00000136492 |
| 17 | 57213529 | 57213905 | 57213771 | 10 | 16  | 15 | 1.018840486 | 0.477384  | BRIP1 | ENSG00000136492 |
| 17 | 57214774 | 57214974 | 57214916 | 8  | 9   | 8  | 1.065454103 | 0.442605  | BRIP1 | ENSG00000136492 |
| 17 | 57216448 | 57217212 | 57216750 | 22 | 46  | 35 | 1.251908571 | 0.152659  | BRIP1 | ENSG00000136492 |
| 17 | 57217236 | 57217452 | 57217316 | 8  | 10  | 15 | 0.659249726 | 0.861705  | BRIP1 | ENSG00000136492 |
| 17 | 57218255 | 57218680 | 57218523 | 15 | 24  | 24 | 0.958908693 | 0.558672  | BRIP1 | ENSG00000136492 |
| 17 | 57219595 | 57219883 | 57219739 | 9  | 10  | 6  | 1.506856518 | 0.188853  | BRIP1 | ENSG00000136492 |
| 17 | 57220222 | 57220499 | 57220360 | 8  | 12  | 10 | 1.133255728 | 0.37674   | BRIP1 | ENSG00000136492 |
| 17 | 57220612 | 57220850 | 57220727 | 8  | 10  | 8  | 1.171999514 | 0.35773   | BRIP1 | ENSG00000136492 |
| 17 | 57222055 | 57222547 | 57222265 | 17 | 28  | 33 | 0.817892709 | 0.78822   | BRIP1 | ENSG00000136492 |
| 17 | 57223270 | 57223544 | 57223407 | 12 | 14  | 7  | 1.797953799 | 0.0806593 | BRIP1 | ENSG00000136492 |
| 17 | 57223587 | 57223997 | 57223832 | 16 | 23  | 20 | 1.095895649 | 0.377643  | BRIP1 | ENSG00000136492 |
| 17 | 57224041 | 57224291 | 57224166 | 10 | 12  | 11 | 1.038817751 | 0.460341  | BRIP1 | ENSG00000136492 |
| 17 | 57224621 | 57224975 | 57224798 | 16 | 22  | 21 | 1.002495452 | 0.4958    | BRIP1 | ENSG00000136492 |
| 17 | 57225823 | 57226267 | 57226002 | 8  | 18  | 21 | 0.828148417 | 0.728078  | BRIP1 | ENSG00000136492 |
| 17 | 57226312 | 57226805 | 57226652 | 10 | 21  | 23 | 0.878999635 | 0.669714  | BRIP1 | ENSG00000136492 |
| 17 | 57226940 | 57227200 | 57227049 | 14 | 16  | 8  | 1.811271976 | 0.0663685 | BRIP1 | ENSG00000136492 |
| 17 | 57228834 | 57229601 | 57229265 | 10 | 30  | 43 | 0.675594761 | 0.954874  | BRIP1 | ENSG00000136492 |
| 17 | 57229610 | 57230069 | 57229789 | 12 | 21  | 24 | 0.84383965  | 0.72062   | BRIP1 | ENSG00000136492 |
| 17 | 57230396 | 57230720 | 57230572 | 8  | 12  | 6  | 1.78083043  | 0.0985525 | BRIP1 | ENSG00000136492 |
| 17 | 57231208 | 57233008 | 57232097 | 19 | 112 | 88 | 1.217490813 | 0.0812429 | BRIP1 | ENSG00000136492 |
| 17 | 57233121 | 57234543 | 57233569 | 16 | 68  | 66 | 0.987532833 | 0.528765  | BRIP1 | ENSG00000136492 |
| 17 | 57235107 | 57235524 | 57235286 | 13 | 21  | 13 | 1.506856518 | 0.109266  | BRIP1 | ENSG00000136492 |
| 17 | 57236105 | 57236367 | 57236222 | 10 | 12  | 10 | 1.133255728 | 0.37674   | BRIP1 | ENSG00000136492 |
| 17 | 57236889 | 57238010 | 57237772 | 21 | 59  | 47 | 1.198635866 | 0.172804  | BRIP1 | ENSG00000136492 |
| 17 | 57238048 | 57238850 | 57238233 | 18 | 42  | 43 | 0.937115314 | 0.618997  | BRIP1 | ENSG00000136492 |
| 17 | 57238998 | 57239339 | 57239168 | 8  | 14  | 15 | 0.8989769   | 0.617119  | BRIP1 | ENSG00000136492 |
| 17 | 57239466 | 57239660 | 57239541 | 10 | 10  | 8  | 1.171999514 | 0.35773   | BRIP1 | ENSG00000136492 |
| 17 | 57240293 | 57241143 | 57240768 | 9  | 29  | 47 | 0.599317933 | 0.987534  | BRIP1 | ENSG00000136492 |
| 17 | 57241890 | 57242369 | 57242147 | 10 | 21  | 35 | 0.585999757 | 0.978277  | BRIP1 | ENSG00000136492 |
| 17 | 57242525 | 57242947 | 57242788 | 9  | 16  | 7  | 2.037680973 | 0.0400399 | BRIP1 | ENSG00000136492 |
| 17 | 57243208 | 57243389 | 57243307 | 9  | 9   | 8  | 1.065454103 | 0.442605  | BRIP1 | ENSG00000136492 |
| 17 | 57244102 | 57244469 | 57244280 | 14 | 20  | 19 | 1.006854128 | 0.490315  | BRIP1 | ENSG00000136492 |

|    |          |          |          |    |     |    |             |            |       |                 |
|----|----------|----------|----------|----|-----|----|-------------|------------|-------|-----------------|
| 17 | 57244573 | 57244821 | 57244728 | 9  | 13  | 17 | 0.745817872 | 0.798145   | BRIP1 | ENSG00000136492 |
| 17 | 57245264 | 57245805 | 57245487 | 8  | 20  | 20 | 0.958908693 | 0.553754   | BRIP1 | ENSG00000136492 |
| 17 | 57245890 | 57246183 | 57246029 | 11 | 13  | 19 | 0.671236085 | 0.87814    | BRIP1 | ENSG00000136492 |
| 17 | 57246241 | 57246463 | 57246352 | 8  | 10  | 23 | 0.439499818 | 0.991202   | BRIP1 | ENSG00000136492 |
| 17 | 57246740 | 57247081 | 57246910 | 10 | 16  | 9  | 1.630144778 | 0.102169   | BRIP1 | ENSG00000136492 |
| 17 | 57247255 | 57247584 | 57247410 | 17 | 21  | 28 | 0.727447974 | 0.872597   | BRIP1 | ENSG00000136492 |
| 17 | 57247757 | 57249383 | 57247936 | 22 | 108 | 88 | 1.174393793 | 0.129019   | BRIP1 | ENSG00000136492 |
| 17 | 57249426 | 57250738 | 57250556 | 16 | 63  | 36 | 1.658652874 | 0.00611211 | BRIP1 | ENSG00000136492 |
| 17 | 57252247 | 57252911 | 57252590 | 17 | 30  | 30 | 0.958908693 | 0.565341   | BRIP1 | ENSG00000136492 |
| 17 | 57253830 | 57254379 | 57254009 | 12 | 26  | 36 | 0.699744181 | 0.923312   | BRIP1 | ENSG00000136492 |
| 17 | 57254484 | 57254754 | 57254612 | 11 | 12  | 22 | 0.54199187  | 0.965779   | BRIP1 | ENSG00000136492 |
| 17 | 57254899 | 57256051 | 57255157 | 12 | 52  | 47 | 1.058795015 | 0.386127   | BRIP1 | ENSG00000136492 |
| 17 | 57256208 | 57256702 | 57256387 | 9  | 19  | 16 | 1.128127874 | 0.354788   | BRIP1 | ENSG00000136492 |
| 17 | 57256824 | 57257151 | 57257003 | 11 | 16  | 7  | 2.037680973 | 0.0400399  | BRIP1 | ENSG00000136492 |
| 17 | 57259857 | 57260119 | 57259971 | 8  | 11  | 13 | 0.821921737 | 0.693119   | BRIP1 | ENSG00000136492 |
| 17 | 57260706 | 57261279 | 57261016 | 11 | 25  | 17 | 1.385090334 | 0.139369   | BRIP1 | ENSG00000136492 |
| 17 | 57262847 | 57263186 | 57263016 | 8  | 14  | 12 | 1.106433107 | 0.392094   | BRIP1 | ENSG00000136492 |
| 17 | 57263190 | 57263475 | 57263367 | 12 | 16  | 15 | 1.018840486 | 0.477384   | BRIP1 | ENSG00000136492 |
| 17 | 57264665 | 57265303 | 57264844 | 16 | 32  | 34 | 0.904113911 | 0.661443   | BRIP1 | ENSG00000136492 |
| 17 | 57265312 | 57265584 | 57265406 | 9  | 12  | 19 | 0.62329065  | 0.912804   | BRIP1 | ENSG00000136492 |
| 17 | 57265716 | 57267262 | 57265882 | 55 | 138 | 73 | 1.801193356 | 1.36E-05   | BRIP1 | ENSG00000136492 |
| 17 | 57267405 | 57267864 | 57267725 | 9  | 18  | 22 | 0.792141964 | 0.776057   | BRIP1 | ENSG00000136492 |
| 17 | 57267947 | 57268345 | 57268126 | 12 | 19  | 14 | 1.278544924 | 0.231514   | BRIP1 | ENSG00000136492 |
| 17 | 57268458 | 57268841 | 57268634 | 11 | 19  | 12 | 1.475244143 | 0.131365   | BRIP1 | ENSG00000136492 |
| 17 | 57268869 | 57269753 | 57269497 | 38 | 84  | 67 | 1.198635866 | 0.131184   | BRIP1 | ENSG00000136492 |
| 17 | 57270800 | 57270985 | 57270933 | 8  | 8   | 8  | 0.958908693 | 0.534974   | BRIP1 | ENSG00000136492 |
| 17 | 57271109 | 57271435 | 57271262 | 8  | 13  | 12 | 1.0326709   | 0.46514    | BRIP1 | ENSG00000136492 |
| 17 | 57271823 | 57272221 | 57272042 | 12 | 19  | 29 | 0.639272462 | 0.942743   | BRIP1 | ENSG00000136492 |
| 17 | 57273632 | 57274013 | 57273811 | 9  | 17  | 7  | 2.157544559 | 0.0276499  | BRIP1 | ENSG00000136492 |
| 17 | 57274812 | 57275097 | 57274937 | 14 | 18  | 14 | 1.214617678 | 0.282961   | BRIP1 | ENSG00000136492 |
| 17 | 57275552 | 57275946 | 57275731 | 10 | 17  | 13 | 1.232882605 | 0.274309   | BRIP1 | ENSG00000136492 |
| 17 | 57276531 | 57276844 | 57276679 | 13 | 18  | 24 | 0.728770607 | 0.85379    | BRIP1 | ENSG00000136492 |
| 17 | 57277223 | 57277588 | 57277402 | 8  | 14  | 18 | 0.757033179 | 0.792932   | BRIP1 | ENSG00000136492 |
| 17 | 57277722 | 57278055 | 57277885 | 9  | 13  | 20 | 0.639272462 | 0.907338   | BRIP1 | ENSG00000136492 |

|    |          |          |          |    |     |     |             |           |       |                 |
|----|----------|----------|----------|----|-----|-----|-------------|-----------|-------|-----------------|
| 17 | 57278680 | 57279719 | 57279278 | 12 | 50  | 47  | 1.018840486 | 0.462307  | BRIP1 | ENSG00000136492 |
| 17 | 57280358 | 57280678 | 57280518 | 13 | 17  | 19  | 0.863017824 | 0.676008  | BRIP1 | ENSG00000136492 |
| 17 | 57281033 | 57281544 | 57281304 | 13 | 25  | 12  | 1.917817386 | 0.0229342 | BRIP1 | ENSG00000136492 |
| 17 | 57281777 | 57282156 | 57281977 | 16 | 23  | 20  | 1.095895649 | 0.377643  | BRIP1 | ENSG00000136492 |
| 17 | 57283679 | 57284686 | 57284045 | 21 | 53  | 60  | 0.848869991 | 0.810508  | BRIP1 | ENSG00000136492 |
| 17 | 57285020 | 57285248 | 57285134 | 9  | 11  | 20  | 0.547947825 | 0.956941  | BRIP1 | ENSG00000136492 |
| 17 | 57285282 | 57285947 | 57285774 | 10 | 26  | 29  | 0.863017824 | 0.711594  | BRIP1 | ENSG00000136492 |
| 17 | 57286084 | 57286577 | 57286366 | 11 | 23  | 30  | 0.742380924 | 0.865876  | BRIP1 | ENSG00000136492 |
| 17 | 57286930 | 57287433 | 57287254 | 15 | 30  | 25  | 1.143314211 | 0.305022  | BRIP1 | ENSG00000136492 |
| 17 | 57288260 | 57288671 | 57288439 | 18 | 26  | 19  | 1.294526736 | 0.18689   | BRIP1 | ENSG00000136492 |
| 17 | 57288687 | 57288936 | 57288771 | 8  | 12  | 13  | 0.890415215 | 0.619237  | BRIP1 | ENSG00000136492 |
| 17 | 57289138 | 57289604 | 57289309 | 16 | 26  | 16  | 1.52297263  | 0.0820811 | BRIP1 | ENSG00000136492 |
| 17 | 57290335 | 57290646 | 57290511 | 11 | 13  | 11  | 1.118726809 | 0.38479   | BRIP1 | ENSG00000136492 |
| 17 | 57291286 | 57291851 | 57291627 | 12 | 28  | 26  | 1.029938967 | 0.455006  | BRIP1 | ENSG00000136492 |
| 17 | 57291882 | 57292363 | 57292054 | 9  | 19  | 25  | 0.737622072 | 0.849755  | BRIP1 | ENSG00000136492 |
| 17 | 57293296 | 57294401 | 57293865 | 17 | 63  | 69  | 0.876716519 | 0.777089  | BRIP1 | ENSG00000136492 |
| 17 | 57294414 | 57296867 | 57295939 | 51 | 330 | 195 | 1.619381517 | 2.66E-08  | BRIP1 | ENSG00000136492 |
| 17 | 57297356 | 57297926 | 57297535 | 11 | 25  | 26  | 0.923393556 | 0.614269  | BRIP1 | ENSG00000136492 |
| 17 | 57298393 | 57298619 | 57298506 | 8  | 10  | 11  | 0.878999635 | 0.622439  | BRIP1 | ENSG00000136492 |
| 17 | 57299196 | 57299573 | 57299375 | 11 | 19  | 24  | 0.767126954 | 0.814057  | BRIP1 | ENSG00000136492 |
| 17 | 57299849 | 57300299 | 57300028 | 11 | 22  | 36  | 0.596078377 | 0.976695  | BRIP1 | ENSG00000136492 |
| 17 | 57301287 | 57301628 | 57301457 | 12 | 17  | 29  | 0.575345216 | 0.971331  |       | ENSG00000202361 |
| 17 | 57301673 | 57303140 | 57302592 | 14 | 62  | 70  | 0.850862643 | 0.825314  |       | ENSG00000202361 |
| 17 | 57303513 | 57303838 | 57303670 | 8  | 12  | 11  | 1.038817751 | 0.460341  |       | ENSG00000202361 |
| 17 | 57304274 | 57305653 | 57304554 | 19 | 62  | 47  | 1.25856766  | 0.112912  |       | ENSG00000202361 |
| 17 | 57305803 | 57306481 | 57306090 | 19 | 43  | 40  | 1.029072744 | 0.446616  |       | ENSG00000202361 |
| 17 | 57306521 | 57307476 | 57306700 | 10 | 36  | 41  | 0.844752896 | 0.773839  |       | ENSG00000202361 |
| 17 | 57307686 | 57308074 | 57307812 | 10 | 16  | 14  | 1.086763185 | 0.404922  |       | ENSG00000202361 |
| 17 | 57308231 | 57308704 | 57308530 | 11 | 18  | 25  | 0.700740968 | 0.883987  |       | ENSG00000202361 |
| 17 | 57309091 | 57309849 | 57309555 | 18 | 44  | 41  | 1.027402171 | 0.449024  |       | ENSG00000202361 |
| 17 | 57310066 | 57310486 | 57310245 | 11 | 18  | 31  | 0.569352037 | 0.976935  |       | ENSG00000202361 |
| 17 | 57310785 | 57311008 | 57310964 | 9  | 11  | 6   | 1.643843474 | 0.137712  |       | ENSG00000202361 |
| 17 | 57311203 | 57311496 | 57311270 | 13 | 17  | 28  | 0.595184706 | 0.961563  |       | ENSG00000202361 |
| 17 | 57311798 | 57312094 | 57311943 | 8  | 10  | 14  | 0.703199708 | 0.817173  |       | ENSG00000202361 |

|    |          |          |          |    |    |    |             |           |                          |
|----|----------|----------|----------|----|----|----|-------------|-----------|--------------------------|
| 17 | 57312576 | 57312759 | 57312742 | 8  | 9  | 5  | 1.598181155 | 0.170911  | ENSG00000202361          |
| 17 | 57313199 | 57313464 | 57313328 | 11 | 14 | 21 | 0.653801382 | 0.90216   | ENSG00000202361          |
| 17 | 57313585 | 57313986 | 57313807 | 11 | 19 | 16 | 1.128127874 | 0.354788  | ENSG00000202361          |
| 17 | 57314030 | 57314385 | 57314207 | 11 | 17 | 23 | 0.71918152  | 0.858071  | ENSG00000202361          |
| 17 | 57315365 | 57315601 | 57315525 | 10 | 11 | 15 | 0.71918152  | 0.81018   | ENSG00000202361          |
| 17 | 57315906 | 57316456 | 57316060 | 12 | 24 | 21 | 1.089668969 | 0.382599  | ENSG00000202361          |
| 17 | 57316831 | 57317465 | 57317254 | 14 | 31 | 48 | 0.626226085 | 0.981847  | ENSG00000202361          |
| 17 | 57318544 | 57318859 | 57318720 | 13 | 17 | 22 | 0.750450282 | 0.822065  | ENSG00000202361          |
| 17 | 57319673 | 57319981 | 57319832 | 9  | 13 | 10 | 1.220429246 | 0.306001  | ENSG00000202361          |
| 17 | 57320367 | 57320801 | 57320674 | 8  | 16 | 16 | 0.958908693 | 0.548325  | ENSG00000202361          |
| 17 | 57321432 | 57321702 | 57321567 | 8  | 10 | 12 | 0.811384279 | 0.697544  | ENSG00000202361          |
| 17 | 57321818 | 57322089 | 57321953 | 12 | 15 | 26 | 0.568242188 | 0.9671    | ENSG00000202361          |
| 17 | 57322145 | 57322438 | 57322313 | 11 | 16 | 31 | 0.509420243 | 0.989946  | ENSG00000202361          |
| 17 | 57323615 | 57323851 | 57323733 | 12 | 13 | 13 | 0.958908693 | 0.543805  | ENSG00000202361          |
| 17 | 57324023 | 57324599 | 57324311 | 11 | 24 | 41 | 0.570778984 | 0.988453  | ENSG00000202361          |
| 17 | 57325735 | 57326148 | 57325969 | 17 | 24 | 20 | 1.141557968 | 0.324865  | ENSG00000202361          |
| 17 | 57326264 | 57326467 | 57326396 | 8  | 10 | 9  | 1.054799562 | 0.4492    | ENSG00000202361          |
| 17 | 57327483 | 57327818 | 57327647 | 11 | 13 | 5  | 2.237453617 | 0.038866  | ENSG00000202361          |
| 17 | 57329047 | 57329262 | 57329132 | 11 | 12 | 6  | 1.78083043  | 0.0985525 | ENSG00000202361          |
| 17 | 57329535 | 57329743 | 57329639 | 9  | 12 | 20 | 0.593610143 | 0.935335  | ENSG00000202361          |
| 17 | 57329835 | 57330137 | 57329985 | 13 | 16 | 21 | 0.740974899 | 0.826507  | ENSG00000202361          |
| 17 | 57332037 | 57332837 | 57332529 | 17 | 50 | 55 | 0.873291845 | 0.758606  | ENSG00000202361          |
| 17 | 57333178 | 57333535 | 57333356 | 11 | 17 | 17 | 0.958908693 | 0.549739  | INTS2<br>ENSG00000108506 |
| 17 | 57334042 | 57334794 | 57334479 | 15 | 42 | 37 | 1.08508089  | 0.35552   | INTS2<br>ENSG00000108506 |
| 17 | 57335342 | 57336009 | 57335510 | 14 | 31 | 24 | 1.227403127 | 0.218358  | INTS2<br>ENSG00000108506 |
| 17 | 57336048 | 57336839 | 57336443 | 9  | 29 | 42 | 0.669006065 | 0.956612  | INTS2<br>ENSG00000108506 |
| 17 | 57336845 | 57337102 | 57336981 | 8  | 11 | 20 | 0.547947825 | 0.956941  | INTS2<br>ENSG00000108506 |
| 17 | 57337689 | 57337876 | 57337782 | 9  | 10 | 7  | 1.318499453 | 0.269217  | INTS2<br>ENSG00000108506 |
| 17 | 57338088 | 57338740 | 57338561 | 11 | 28 | 38 | 0.713034669 | 0.918418  | INTS2<br>ENSG00000108506 |
| 17 | 57339213 | 57340169 | 57339737 | 17 | 52 | 42 | 1.181910715 | 0.205759  | INTS2<br>ENSG00000108506 |
| 17 | 57340531 | 57341178 | 57340926 | 8  | 21 | 27 | 0.753428259 | 0.842351  | INTS2<br>ENSG00000108506 |
| 17 | 57359573 | 57360147 | 57359823 | 9  | 21 | 11 | 1.757999271 | 0.0516118 | INTS2<br>ENSG00000108506 |
| 17 | 57433122 | 57433421 | 57433245 | 9  | 12 | 8  | 1.385090334 | 0.219216  | ENSG00000211085          |
| 17 | 57434984 | 57435246 | 57435118 | 11 | 13 | 24 | 0.536988868 | 0.972726  | ENSG00000211085          |

|    |          |          |          |    |     |    |             |             |                        |
|----|----------|----------|----------|----|-----|----|-------------|-------------|------------------------|
| 17 | 57435886 | 57436101 | 57435933 | 9  | 10  | 15 | 0.659249726 | 0.861705    | ENSG00000211085        |
| 17 | 57436548 | 57437039 | 57436710 | 14 | 26  | 30 | 0.835178539 | 0.75436     | ENSG00000211085        |
| 17 | 57449668 | 57449887 | 57449799 | 10 | 13  | 14 | 0.894981447 | 0.618069    | ENSG00000221302        |
| 17 | 57449914 | 57450390 | 57450018 | 9  | 19  | 16 | 1.128127874 | 0.354788    | ENSG00000221302        |
| 17 | 57541606 | 57542069 | 57541836 | 16 | 26  | 9  | 2.589053471 | 0.00289627  | ENSG00000207123        |
| 17 | 57543024 | 57543617 | 57543203 | 15 | 32  | 39 | 0.791099672 | 0.842107    | ENSG00000207123        |
| 17 | 57543878 | 57544262 | 57544057 | 14 | 21  | 32 | 0.639272462 | 0.950953    | ENSG00000207123        |
| 17 | 57544315 | 57544907 | 57544772 | 13 | 29  | 38 | 0.737622072 | 0.897076    | ENSG00000207123        |
| 17 | 57562668 | 57563608 | 57563345 | 16 | 49  | 41 | 1.141557968 | 0.261779    | ENSG00000207123        |
| 17 | 57568832 | 57569410 | 57569231 | 8  | 22  | 22 | 0.958908693 | 0.556268    | ENSG00000207123        |
| 17 | 57576110 | 57576686 | 57576348 | 46 | 66  | 0  | 64.24688243 | 2.72E-20    | ENSG00000207123        |
| 17 | 57596129 | 57596430 | 57596251 | 9  | 13  | 7  | 1.678090213 | 0.11195     | ENSG00000207123        |
| 17 | 58135476 | 58135790 | 58135636 | 8  | 12  | 4  | 2.493162602 | 0.0299057   | ENSG00000199697        |
| 17 | 58147606 | 58148141 | 58147906 | 81 | 103 | 8  | 11.08072268 | 7.27E-22    | ENSG00000199697        |
| 17 | 58155762 | 58156161 | 58155990 | 14 | 21  | 4  | 4.219198249 | 0.000390041 | ENSG00000199697        |
| 17 | 58163343 | 58163913 | 58163559 | 42 | 59  | 3  | 14.3836304  | 1.48E-14    | ENSG00000199697        |
| 17 | 58231591 | 58231838 | 58231718 | 8  | 9   | 8  | 1.065454103 | 0.442605    | 10-Mar ENSG00000173838 |
| 17 | 58291994 | 58292309 | 58292151 | 28 | 31  | 19 | 1.534253909 | 0.0623199   | 10-Mar ENSG00000173838 |
| 17 | 58319215 | 58319628 | 58319500 | 10 | 16  | 6  | 2.328778255 | 0.0221113   | ENSG00000207552        |
| 17 | 58345340 | 58345610 | 58345475 | 8  | 8   | 7  | 1.07877228  | 0.435076    | ENSG00000207552        |
| 17 | 58381263 | 58381539 | 58381401 | 12 | 16  | 9  | 1.630144778 | 0.102169    | ENSG00000207552        |
| 17 | 58392827 | 58393781 | 58393242 | 14 | 37  | 33 | 1.07172148  | 0.383257    | ENSG00000207552        |
| 17 | 58394055 | 58394267 | 58394205 | 9  | 10  | 24 | 0.421919825 | 0.994085    | ENSG00000207552        |
| 17 | 58394276 | 58394929 | 58394497 | 11 | 28  | 48 | 0.56751739  | 0.99331     | ENSG00000207552        |
| 17 | 58395090 | 58397147 | 58396595 | 18 | 104 | 93 | 1.071121412 | 0.313435    | ENSG00000207552        |
| 17 | 58399632 | 58399880 | 58399730 | 10 | 12  | 8  | 1.385090334 | 0.219216    | ENSG00000207552        |
| 17 | 58400393 | 58400576 | 58400460 | 10 | 11  | 5  | 1.917817386 | 0.0843804   | ENSG00000207552        |
| 17 | 58426451 | 58426818 | 58426554 | 11 | 16  | 6  | 2.328778255 | 0.0221113   | TANC2 ENSG00000170921  |
| 17 | 58432820 | 58433747 | 58433325 | 16 | 43  | 40 | 1.029072744 | 0.446616    | TANC2 ENSG00000170921  |
| 17 | 58612888 | 58613509 | 58613275 | 53 | 75  | 2  | 24.29235356 | 4.74E-20    | TANC2 ENSG00000170921  |
| 17 | 58856572 | 58856752 | 58856662 | 8  | 8   | 4  | 1.726035648 | 0.150596    | CYB561 ENSG00000008283 |
| 17 | 58864345 | 58864660 | 58864502 | 14 | 18  | 2  | 6.073088389 | 0.000157975 | CYB561 ENSG00000008283 |
| 17 | 58878587 | 58878813 | 58878700 | 10 | 12  | 9  | 1.246581301 | 0.295061    | CYB561 ENSG00000008283 |
| 17 | 58981548 | 58981830 | 58981712 | 10 | 13  | 14 | 0.894981447 | 0.618069    | WDR68 ENSG00000136485  |



|    |          |          |          |    |    |    |             |             |         |                 |
|----|----------|----------|----------|----|----|----|-------------|-------------|---------|-----------------|
| 17 | 58983855 | 58984051 | 58983962 | 8  | 9  | 3  | 2.397271733 | 0.0539397   | WDR68   | ENSG00000136485 |
| 17 | 59031782 | 59032092 | 59031937 | 18 | 18 | 13 | 1.301376083 | 0.22245     | CCDC44  | ENSG00000136463 |
| 17 | 59043413 | 59043643 | 59043528 | 17 | 18 | 2  | 6.073088389 | 0.000157975 | MAP3K3  | ENSG00000198909 |
| 17 | 59053151 | 59053441 | 59053275 | 9  | 12 | 10 | 1.133255728 | 0.37674     | MAP3K3  | ENSG00000198909 |
| 17 | 59171839 | 59172979 | 59172699 | 11 | 47 | 18 | 2.422506172 | 0.000271503 | STRADA  | ENSG00000125695 |
| 17 | 59201286 | 59201599 | 59201442 | 11 | 14 | 7  | 1.797953799 | 0.0806593   | CCDC47  | ENSG00000108588 |
| 17 | 59204828 | 59205168 | 59204989 | 13 | 18 | 7  | 2.277408146 | 0.0188653   | DDX42   | ENSG00000198231 |
| 17 | 59211803 | 59211993 | 59211898 | 9  | 9  | 8  | 1.065454103 | 0.442605    | DDX42   | ENSG00000198231 |
| 17 | 59212140 | 59212319 | 59212207 | 8  | 8  | 4  | 1.726035648 | 0.150596    | DDX42   | ENSG00000198231 |
| 17 | 59223479 | 59223744 | 59223632 | 8  | 9  | 5  | 1.598181155 | 0.170911    | DDX42   | ENSG00000198231 |
| 17 | 59259083 | 59259274 | 59259179 | 8  | 8  | 0  | 8.630178238 | 0.00235436  | PSMC5   | ENSG00000087191 |
| 17 | 59259302 | 59259523 | 59259461 | 9  | 10 | 2  | 3.515998541 | 0.0136204   | PSMC5   | ENSG00000087191 |
| 17 | 59266016 | 59266261 | 59266098 | 9  | 10 | 2  | 3.515998541 | 0.0136204   | PSMC5   | ENSG00000087191 |
| 17 | 59269775 | 59269996 | 59269905 | 8  | 9  | 6  | 1.369869562 | 0.253675    | SMARCD2 | ENSG00000108604 |
| 17 | 59273772 | 59274086 | 59273913 | 19 | 23 | 10 | 2.092164421 | 0.0165595   | SMARCD2 | ENSG00000108604 |
| 17 | 59440212 | 59440415 | 59440362 | 8  | 9  | 1  | 4.794543465 | 0.00708517  | ICAM2   | ENSG00000108622 |
| 17 | 59456710 | 59457047 | 59456877 | 8  | 11 | 8  | 1.278544924 | 0.28289     | ICAM2   | ENSG00000108622 |
| 17 | 59460089 | 59460400 | 59460244 | 9  | 12 | 3  | 3.116453252 | 0.0131971   | ICAM2   | ENSG00000108622 |
| 17 | 59460402 | 59460627 | 59460496 | 8  | 10 | 1  | 5.273997812 | 0.00391723  | ICAM2   | ENSG00000108622 |
| 17 | 59511655 | 59511936 | 59511795 | 8  | 10 | 4  | 2.109599125 | 0.0694668   | ERN1    | ENSG00000178607 |
| 17 | 59537192 | 59537371 | 59537257 | 8  | 8  | 0  | 8.630178238 | 0.00235436  | ERN1    | ENSG00000178607 |
| 17 | 59576677 | 59576928 | 59576802 | 9  | 11 | 9  | 1.150690432 | 0.367789    |         | ENSG00000199753 |
| 17 | 59649103 | 59649336 | 59649243 | 8  | 9  | 2  | 3.19636231  | 0.0229249   | TEX2    | ENSG00000136478 |
| 17 | 59678666 | 59678849 | 59678741 | 8  | 8  | 3  | 2.157544559 | 0.0836802   | TEX2    | ENSG00000136478 |
| 17 | 59742607 | 59742798 | 59742702 | 8  | 8  | 9  | 0.863017824 | 0.627343    |         | ENSG00000220588 |
| 17 | 59744664 | 59745512 | 59744843 | 13 | 37 | 35 | 1.012181398 | 0.478474    |         | ENSG00000220588 |
| 17 | 59746004 | 59746323 | 59746163 | 9  | 12 | 7  | 1.558226626 | 0.152813    |         | ENSG00000220588 |
| 17 | 59746339 | 59746618 | 59746481 | 12 | 15 | 18 | 0.807502057 | 0.737835    |         | ENSG00000220588 |
| 17 | 59747461 | 59747961 | 59747632 | 13 | 22 | 14 | 1.470326663 | 0.117149    |         | ENSG00000220588 |
| 17 | 59750325 | 59750567 | 59750446 | 8  | 10 | 7  | 1.318499453 | 0.269217    |         | ENSG00000220588 |
| 17 | 59750584 | 59750833 | 59750729 | 10 | 12 | 12 | 0.958908693 | 0.542188    |         | ENSG00000220588 |
| 17 | 59751558 | 59752709 | 59752384 | 26 | 72 | 60 | 1.147546469 | 0.212323    |         | ENSG00000220588 |
| 17 | 59752911 | 59753447 | 59753087 | 13 | 24 | 13 | 1.712336952 | 0.0480623   |         | ENSG00000220588 |
| 17 | 59753498 | 59753770 | 59753639 | 10 | 12 | 6  | 1.78083043  | 0.0985525   |         | ENSG00000220588 |

|    |          |          |          |    |     |    |             |             |                        |
|----|----------|----------|----------|----|-----|----|-------------|-------------|------------------------|
| 17 | 59754523 | 59755060 | 59754929 | 14 | 24  | 24 | 0.958908693 | 0.558672    | ENSG00000220588        |
| 17 | 59756744 | 59757231 | 59757052 | 11 | 21  | 19 | 1.054799562 | 0.429896    | ENSG00000220588        |
| 17 | 59757845 | 59758380 | 59758024 | 11 | 24  | 30 | 0.773313462 | 0.832666    | ENSG00000220588        |
| 17 | 59758488 | 59759230 | 59758777 | 16 | 45  | 21 | 2.004990904 | 0.00262929  | ENSG00000220588        |
| 17 | 59759412 | 59760024 | 59759591 | 11 | 25  | 28 | 0.859711242 | 0.713133    | ENSG00000220588        |
| 17 | 59760352 | 59760682 | 59760517 | 10 | 16  | 19 | 0.815072389 | 0.734271    | ENSG00000220588        |
| 17 | 59762033 | 59762267 | 59762144 | 9  | 11  | 18 | 0.605626543 | 0.918575    | ENSG00000220588        |
| 17 | 59763064 | 59763826 | 59763243 | 17 | 36  | 35 | 0.985545046 | 0.524285    | ENSG00000220588        |
| 17 | 59765151 | 59765575 | 59765322 | 9  | 17  | 27 | 0.616441303 | 0.948982    | ENSG00000220588        |
| 17 | 59765828 | 59766428 | 59766225 | 12 | 28  | 19 | 1.390417605 | 0.124062    | ENSG00000220588        |
| 17 | 59768230 | 59768824 | 59768555 | 11 | 29  | 44 | 0.639272462 | 0.973089    | PECAM1 ENSG00000198802 |
| 17 | 59770337 | 59770774 | 59770562 | 13 | 24  | 24 | 0.958908693 | 0.558672    | PECAM1 ENSG00000198802 |
| 17 | 59771119 | 59771677 | 59771498 | 14 | 27  | 26 | 0.99442383  | 0.507579    | PECAM1 ENSG00000198802 |
| 17 | 59772540 | 59772736 | 59772689 | 10 | 11  | 7  | 1.43836304  | 0.204844    | PECAM1 ENSG00000198802 |
| 17 | 59773159 | 59773366 | 59773267 | 10 | 12  | 4  | 2.493162602 | 0.0299057   | PECAM1 ENSG00000198802 |
| 17 | 59773964 | 59774251 | 59774097 | 9  | 13  | 13 | 0.958908693 | 0.543805    | PECAM1 ENSG00000198802 |
| 17 | 59775095 | 59775754 | 59775219 | 9  | 26  | 26 | 0.958908693 | 0.560979    | PECAM1 ENSG00000198802 |
| 17 | 59775775 | 59776051 | 59775913 | 9  | 14  | 25 | 0.553216554 | 0.969907    | PECAM1 ENSG00000198802 |
| 17 | 59777246 | 59777433 | 59777273 | 10 | 10  | 9  | 1.054799562 | 0.4492      | PECAM1 ENSG00000198802 |
| 17 | 59777800 | 59777997 | 59777909 | 8  | 9   | 14 | 0.639272462 | 0.869513    | PECAM1 ENSG00000198802 |
| 17 | 59923741 | 59923936 | 59923839 | 8  | 8   | 6  | 1.232882605 | 0.333038    | POLG2 ENSG00000136480  |
| 17 | 59931937 | 59932290 | 59932113 | 11 | 16  | 6  | 2.328778255 | 0.0221113   | CCDC45 ENSG00000141325 |
| 17 | 59932909 | 59933632 | 59933291 | 10 | 27  | 9  | 2.684944341 | 0.00192568  | DDX5 ENSG00000108654   |
| 17 | 60106463 | 60106897 | 60106597 | 8  | 15  | 3  | 3.835634772 | 0.00291691  | SMURF2 ENSG00000108854 |
| 17 | 60388428 | 60388616 | 60388593 | 8  | 10  | 0  | 10.54799562 | 0.000613541 | ENSG00000204399        |
| 17 | 60401374 | 60402241 | 60401596 | 25 | 53  | 6  | 7.397295632 | 1.32E-10    | ENSG00000204399        |
| 17 | 60411760 | 60412042 | 60411901 | 12 | 15  | 2  | 5.114179696 | 0.00088103  | ENSG00000214174        |
| 17 | 60418956 | 60419272 | 60419105 | 16 | 17  | 4  | 3.452071295 | 0.00292757  | ENSG00000214174        |
| 17 | 60484931 | 60485625 | 60485385 | 71 | 110 | 10 | 9.676260448 | 4.25E-22    | GNA13 ENSG00000120063  |
| 17 | 60491037 | 60491293 | 60491154 | 11 | 14  | 3  | 3.595907599 | 0.00486913  | GNA13 ENSG00000120063  |
| 17 | 60497194 | 60497375 | 60497319 | 9  | 9   | 3  | 2.397271733 | 0.0539397   | ENSG00000211170        |
| 17 | 60506321 | 60506505 | 60506360 | 8  | 9   | 1  | 4.794543465 | 0.00708517  | ENSG00000211170        |
| 17 | 60550048 | 60550269 | 60550129 | 9  | 9   | 8  | 1.065454103 | 0.442605    | RGS9 ENSG00000108370   |
| 17 | 60625286 | 60625483 | 60625384 | 8  | 9   | 3  | 2.397271733 | 0.0539397   | RGS9 ENSG00000108370   |

|    |          |          |          |    |    |    |             |             |         |                 |
|----|----------|----------|----------|----|----|----|-------------|-------------|---------|-----------------|
| 17 | 60765733 | 60765926 | 60765820 | 9  | 9  | 2  | 3.19636231  | 0.0229249   | RGS9    | ENSG00000108370 |
| 17 | 60789573 | 60789836 | 60789695 | 8  | 12 | 4  | 2.493162602 | 0.0299057   | AXIN2   | ENSG00000168646 |
| 17 | 60996114 | 60996334 | 60996260 | 8  | 9  | 0  | 9.589086931 | 0.00120187  | AXIN2   | ENSG00000168646 |
| 17 | 61054874 | 61055253 | 61055032 | 13 | 19 | 5  | 3.19636231  | 0.00280933  | AXIN2   | ENSG00000168646 |
| 17 | 61315524 | 61315809 | 61315666 | 11 | 14 | 3  | 3.595907599 | 0.00486913  | CCDC46  | ENSG00000154240 |
| 17 | 61427145 | 61427500 | 61427322 | 9  | 15 | 5  | 2.557089848 | 0.0169197   | CCDC46  | ENSG00000154240 |
| 17 | 61554077 | 61554278 | 61554177 | 9  | 9  | 1  | 4.794543465 | 0.00708517  | CCDC46  | ENSG00000154240 |
| 17 | 61681707 | 61681948 | 61681817 | 9  | 11 | 2  | 3.835634772 | 0.00800699  |         | ENSG00000211172 |
| 17 | 61722861 | 61723150 | 61723005 | 14 | 17 | 4  | 3.452071295 | 0.00292757  | PRKCA   | ENSG00000154229 |
| 17 | 61934167 | 61934478 | 61934330 | 11 | 14 | 2  | 4.794543465 | 0.00154571  |         | ENSG00000211176 |
| 17 | 61993898 | 61994097 | 61993986 | 10 | 11 | 5  | 1.917817386 | 0.0843804   |         | ENSG00000211176 |
| 17 | 61994219 | 61994661 | 61994535 | 8  | 15 | 6  | 2.191791298 | 0.0328001   |         | ENSG00000211176 |
| 17 | 62079868 | 62080047 | 62080010 | 9  | 10 | 0  | 10.54799562 | 0.000613541 |         | ENSG00000211176 |
| 17 | 62088009 | 62088362 | 62088185 | 13 | 18 | 5  | 3.036544195 | 0.0044641   |         | ENSG00000211176 |
| 17 | 62093133 | 62093331 | 62093232 | 8  | 8  | 0  | 8.630178238 | 0.00235436  |         | ENSG00000211176 |
| 17 | 62100442 | 62100820 | 62100682 | 10 | 15 | 6  | 2.191791298 | 0.0328001   |         | ENSG00000211176 |
| 17 | 62103014 | 62103497 | 62103167 | 19 | 30 | 6  | 4.246595641 | 3.49E-05    |         | ENSG00000211176 |
| 17 | 62142426 | 62142745 | 62142584 | 11 | 14 | 6  | 2.054804342 | 0.0480281   |         | ENSG00000207943 |
| 17 | 62333322 | 62333544 | 62333466 | 9  | 10 | 4  | 2.109599125 | 0.0694668   | CACNG5  | ENSG00000075429 |
| 17 | 62378253 | 62378463 | 62378358 | 8  | 9  | 4  | 1.917817386 | 0.103282    | CACNG4  | ENSG00000075461 |
| 17 | 62378832 | 62379098 | 62378965 | 8  | 11 | 9  | 1.150690432 | 0.367789    | CACNG4  | ENSG00000075461 |
| 17 | 62639686 | 62640003 | 62639834 | 8  | 12 | 2  | 4.155271003 | 0.0046638   |         | ENSG00000213180 |
| 17 | 62671994 | 62672303 | 62672156 | 9  | 13 | 2  | 4.474907234 | 0.00269459  | HELZ    | ENSG00000198265 |
| 17 | 62673284 | 62673533 | 62673449 | 9  | 12 | 5  | 2.077635502 | 0.0577144   | HELZ    | ENSG00000198265 |
| 17 | 62803053 | 62803236 | 62803193 | 8  | 8  | 6  | 1.232882605 | 0.333038    | PITPNC1 | ENSG00000154217 |
| 17 | 62902062 | 62902439 | 62902190 | 8  | 14 | 7  | 1.797953799 | 0.0806593   |         | ENSG00000207688 |
| 17 | 62909194 | 62909514 | 62909350 | 8  | 12 | 5  | 2.077635502 | 0.0577144   |         | ENSG00000207688 |
| 17 | 62914108 | 62914342 | 62914220 | 9  | 10 | 2  | 3.515998541 | 0.0136204   |         | ENSG00000207688 |
| 17 | 62934349 | 62934739 | 62934525 | 8  | 15 | 1  | 7.671269544 | 0.000187863 |         | ENSG00000207688 |
| 17 | 63064401 | 63064937 | 63064652 | 16 | 30 | 10 | 2.702379044 | 0.00113582  | NOL11   | ENSG00000130935 |
| 17 | 63098208 | 63098412 | 63098290 | 8  | 9  | 0  | 9.589086931 | 0.00120187  | NOL11   | ENSG00000130935 |
| 17 | 63115963 | 63116394 | 63116142 | 8  | 15 | 4  | 3.068507818 | 0.0076507   | NOL11   | ENSG00000130935 |
| 17 | 63144083 | 63144875 | 63144406 | 21 | 45 | 22 | 1.917817386 | 0.00412726  | NOL11   | ENSG00000130935 |
| 17 | 63145181 | 63145471 | 63145340 | 9  | 12 | 6  | 1.78083043  | 0.0985525   | NOL11   | ENSG00000130935 |

|    |          |          |          |     |     |    |             |             |         |                 |
|----|----------|----------|----------|-----|-----|----|-------------|-------------|---------|-----------------|
| 17 | 63148809 | 63149129 | 63148969 | 8   | 10  | 2  | 3.515998541 | 0.0136204   | NOL11   | ENSG00000130935 |
| 17 | 63446274 | 63446659 | 63446453 | 23  | 31  | 11 | 2.557089848 | 0.00150051  | KPNA2   | ENSG00000182481 |
| 17 | 63462202 | 63462444 | 63462334 | 12  | 15  | 6  | 2.191791298 | 0.0328001   | KPNA2   | ENSG00000182481 |
| 17 | 63737036 | 63737267 | 63737099 | 8   | 9   | 0  | 9.589086931 | 0.00120187  | AMZ2    | ENSG00000196704 |
| 17 | 63756179 | 63756532 | 63756356 | 17  | 22  | 3  | 5.513724985 | 6.69E-05    | AMZ2    | ENSG00000196704 |
| 17 | 63800373 | 63800697 | 63800537 | 11  | 14  | 5  | 2.397271733 | 0.0258078   | SLC16A6 | ENSG00000108932 |
| 17 | 63943764 | 63944017 | 63943938 | 11  | 14  | 4  | 2.876726079 | 0.01219     |         | ENSG00000207561 |
| 17 | 63944152 | 63944359 | 63944255 | 8   | 8   | 6  | 1.232882605 | 0.333038    |         | ENSG00000207561 |
| 17 | 63965538 | 63965819 | 63965687 | 8   | 11  | 5  | 1.917817386 | 0.0843804   | WIPI1   | ENSG00000070540 |
| 17 | 63973877 | 63974177 | 63974019 | 12  | 15  | 4  | 3.068507818 | 0.0076507   | WIPI1   | ENSG00000070540 |
| 17 | 63980865 | 63981135 | 63981000 | 8   | 9   | 1  | 4.794543465 | 0.00708517  | WIPI1   | ENSG00000070540 |
| 17 | 64005360 | 64005666 | 64005517 | 10  | 13  | 4  | 2.684944341 | 0.01921     | PRKAR1A | ENSG00000108946 |
| 17 | 64019773 | 64020100 | 64019975 | 8   | 13  | 3  | 3.356180426 | 0.00805599  | PRKAR1A | ENSG00000108946 |
| 17 | 64122510 | 64122693 | 64122621 | 9   | 9   | 2  | 3.19636231  | 0.0229249   | FAM20A  | ENSG00000108950 |
| 17 | 64205374 | 64206117 | 64205703 | 69  | 113 | 3  | 27.32889775 | 1.61E-29    | FAM20A  | ENSG00000108950 |
| 17 | 64267674 | 64268027 | 64267848 | 11  | 16  | 8  | 1.811271976 | 0.0663685   | FAM20A  | ENSG00000108950 |
| 17 | 64279682 | 64279993 | 64279837 | 12  | 14  | 2  | 4.794543465 | 0.00154571  | FAM20A  | ENSG00000108950 |
| 17 | 64357452 | 64357882 | 64357631 | 11  | 18  | 5  | 3.036544195 | 0.0044641   | ABCA8   | ENSG00000141338 |
| 17 | 64566012 | 64566224 | 64566118 | 10  | 11  | 3  | 2.876726079 | 0.0213797   | ABCA9   | ENSG00000154258 |
| 17 | 64592634 | 64592925 | 64592778 | 8   | 10  | 7  | 1.318499453 | 0.269217    | ABCA9   | ENSG00000154258 |
| 17 | 64657136 | 64657449 | 64657292 | 9   | 13  | 2  | 4.474907234 | 0.00269459  | ABCA6   | ENSG00000154262 |
| 17 | 64938157 | 64938594 | 64938353 | 51  | 62  | 3  | 15.10281192 | 2.26E-15    | MAP2K6  | ENSG00000108984 |
| 17 | 65033837 | 65034100 | 65033993 | 9   | 10  | 2  | 3.515998541 | 0.0136204   | MAP2K6  | ENSG00000108984 |
| 17 | 65114828 | 65115731 | 65115108 | 542 | 676 | 6  | 92.74016931 | 3.88E-186   | MAP2K6  | ENSG00000108984 |
| 17 | 65117152 | 65117543 | 65117364 | 11  | 20  | 8  | 2.237453617 | 0.0160557   | MAP2K6  | ENSG00000108984 |
| 17 | 65513986 | 65514176 | 65514056 | 10  | 11  | 0  | 11.50690432 | 0.000313206 |         | ENSG00000199801 |
| 17 | 66966103 | 66966442 | 66966272 | 29  | 33  | 5  | 5.433815927 | 2.23E-06    |         | ENSG00000211255 |
| 17 | 66981086 | 66981284 | 66981160 | 9   | 9   | 1  | 4.794543465 | 0.00708517  |         | ENSG00000187141 |
| 17 | 67781374 | 67781707 | 67781534 | 10  | 15  | 4  | 3.068507818 | 0.0076507   |         | ENSG00000211264 |
| 17 | 69049580 | 69049769 | 69049674 | 9   | 9   | 1  | 4.794543465 | 0.00708517  | SDK2    | ENSG00000069188 |
| 17 | 69122027 | 69122326 | 69122176 | 42  | 46  | 2  | 15.02290286 | 5.55E-12    | SDK2    | ENSG00000069188 |
| 17 | 69700623 | 69701015 | 69700840 | 21  | 27  | 6  | 3.835634772 | 0.000155182 | RPL38   | ENSG00000172809 |
| 17 | 69711047 | 69711228 | 69711181 | 8   | 8   | 4  | 1.726035648 | 0.150596    | RPL38   | ENSG00000172809 |
| 17 | 69711242 | 69711488 | 69711347 | 12  | 14  | 3  | 3.595907599 | 0.00486913  | RPL38   | ENSG00000172809 |

|    |          |          |          |    |    |   |             |             |          |                 |
|----|----------|----------|----------|----|----|---|-------------|-------------|----------|-----------------|
| 17 | 69962221 | 69962534 | 69962377 | 8  | 9  | 2 | 3.19636231  | 0.0229249   | CD300A   | ENSG00000167851 |
| 17 | 70252425 | 70252641 | 70252533 | 9  | 10 | 7 | 1.318499453 | 0.269217    | SLC9A3R1 | ENSG00000109062 |
| 17 | 70266299 | 70266716 | 70266478 | 15 | 24 | 6 | 3.424673904 | 0.000656885 | SLC9A3R1 | ENSG00000109062 |
| 17 | 70278529 | 70278725 | 70278614 | 10 | 10 | 1 | 5.273997812 | 0.00391723  | NAT9     | ENSG00000109065 |
| 17 | 70299150 | 70299511 | 70299372 | 8  | 14 | 0 | 14.3836304  | 4.17E-05    | TMEM104  | ENSG00000109066 |
| 17 | 70520197 | 70520408 | 70520302 | 10 | 11 | 4 | 2.301380863 | 0.0459276   | ICT1     | ENSG00000167862 |
| 17 | 70541436 | 70541769 | 70541645 | 10 | 14 | 2 | 4.794543465 | 0.00154571  |          | ENSG00000222347 |
| 17 | 70542072 | 70542360 | 70542232 | 9  | 12 | 7 | 1.558226626 | 0.152813    |          | ENSG00000222347 |
| 17 | 70542855 | 70543158 | 70543006 | 11 | 14 | 5 | 2.397271733 | 0.0258078   |          | ENSG00000222347 |
| 17 | 70632069 | 70632277 | 70632170 | 8  | 10 | 1 | 5.273997812 | 0.00391723  | NT5C     | ENSG00000125458 |
| 17 | 70769857 | 70770053 | 70769947 | 8  | 9  | 0 | 9.589086931 | 0.00120187  | MRPS7    | ENSG00000125445 |
| 17 | 70778076 | 70778336 | 70778166 | 8  | 11 | 2 | 3.835634772 | 0.00800699  | MIF4GD   | ENSG00000125457 |
| 17 | 70794171 | 70794422 | 70794309 | 9  | 11 | 4 | 2.301380863 | 0.0459276   | SLC25A19 | ENSG00000125454 |
| 17 | 70797376 | 70797626 | 70797510 | 8  | 10 | 1 | 5.273997812 | 0.00391723  | SLC25A19 | ENSG00000125454 |
| 17 | 70901505 | 70901717 | 70901586 | 9  | 10 | 6 | 1.506856518 | 0.188853    | GRB2     | ENSG00000177885 |
| 17 | 71048160 | 71048432 | 71048287 | 13 | 17 | 2 | 5.753452158 | 0.000281509 | LLGL2    | ENSG00000073350 |
| 17 | 71140732 | 71140936 | 71140787 | 8  | 9  | 2 | 3.19636231  | 0.0229249   |          | ENSG00000204323 |
| 17 | 71141441 | 71141653 | 71141581 | 11 | 13 | 1 | 6.712360851 | 0.000640982 |          | ENSG00000204323 |
| 17 | 71147623 | 71147837 | 71147699 | 9  | 11 | 6 | 1.643843474 | 0.137712    |          | ENSG00000204323 |
| 17 | 71174675 | 71174939 | 71174845 | 8  | 11 | 7 | 1.43836304  | 0.204844    | RECQL5   | ENSG00000108469 |
| 17 | 71257655 | 71257936 | 71257795 | 8  | 10 | 2 | 3.515998541 | 0.0136204   | GALK1    | ENSG00000108479 |
| 17 | 71293133 | 71293410 | 71293289 | 12 | 15 | 5 | 2.557089848 | 0.0169197   | UNK      | ENSG00000132478 |
| 17 | 71352490 | 71352769 | 71352604 | 8  | 12 | 5 | 2.077635502 | 0.0577144   | UNC13D   | ENSG00000092929 |
| 17 | 71448714 | 71449001 | 71448857 | 8  | 10 | 1 | 5.273997812 | 0.00391723  | FBF1     | ENSG00000188878 |
| 17 | 71487112 | 71487666 | 71487488 | 14 | 25 | 3 | 6.232906505 | 1.23E-05    | ACOX1    | ENSG00000161533 |
| 17 | 71579674 | 71580023 | 71579850 | 16 | 21 | 0 | 21.09599125 | 3.76E-07    | SRP68    | ENSG00000167881 |
| 17 | 71639882 | 71640238 | 71640060 | 23 | 29 | 2 | 9.589086931 | 2.21E-07    | FOXJ1    | ENSG00000129654 |
| 17 | 71861661 | 71861856 | 71861758 | 11 | 12 | 3 | 3.116453252 | 0.0131971   | PRPSAP1  | ENSG00000161542 |
| 17 | 72048495 | 72048849 | 72048672 | 9  | 14 | 5 | 2.397271733 | 0.0258078   | PRCD     | ENSG00000214140 |
| 17 | 72058441 | 72059255 | 72058880 | 18 | 42 | 0 | 41.2330738  | 2.78E-13    |          | ENSG00000204303 |
| 17 | 72066215 | 72066487 | 72066378 | 13 | 15 | 1 | 7.671269544 | 0.000187863 |          | ENSG00000200185 |
| 17 | 72179453 | 72179862 | 72179703 | 11 | 19 | 5 | 3.19636231  | 0.00280933  |          | ENSG00000199735 |
| 17 | 72245140 | 72245427 | 72245268 | 8  | 12 | 1 | 6.232906505 | 0.00117736  | MFSD11   | ENSG00000092931 |
| 17 | 72426505 | 72426886 | 72426620 | 9  | 15 | 4 | 3.068507818 | 0.0076507   | MGAT5B   | ENSG00000167889 |

|    |          |          |          |    |     |   |             |             |          |                 |
|----|----------|----------|----------|----|-----|---|-------------|-------------|----------|-----------------|
| 17 | 72682617 | 72682842 | 72682729 | 11 | 11  | 1 | 5.753452158 | 0.00215302  |          | ENSG00000211400 |
| 17 | 72741611 | 72741867 | 72741772 | 11 | 13  | 3 | 3.356180426 | 0.00805599  |          | ENSG00000211400 |
| 17 | 72793695 | 72794139 | 72793917 | 48 | 67  | 6 | 9.315113018 | 3.89E-14    | 9-Sep    | ENSG00000184640 |
| 17 | 72794221 | 72794857 | 72794378 | 17 | 32  | 4 | 6.328797374 | 9.93E-07    | 9-Sep    | ENSG00000184640 |
| 17 | 72795353 | 72795663 | 72795508 | 12 | 14  | 4 | 2.876726079 | 0.01219     | 9-Sep    | ENSG00000184640 |
| 17 | 72796389 | 72796665 | 72796496 | 9  | 12  | 1 | 6.232906505 | 0.00117736  | 9-Sep    | ENSG00000184640 |
| 17 | 73050398 | 73050760 | 73050577 | 8  | 14  | 5 | 2.397271733 | 0.0258078   |          | ENSG00000203307 |
| 17 | 73344344 | 73344627 | 73344485 | 12 | 13  | 3 | 3.356180426 | 0.00805599  |          | ENSG00000204283 |
| 17 | 73546599 | 73546940 | 73546769 | 12 | 15  | 0 | 15.34253909 | 2.13E-05    | TNRC6C   | ENSG00000078687 |
| 17 | 73548714 | 73548979 | 73548856 | 8  | 12  | 2 | 4.155271003 | 0.0046638   | TNRC6C   | ENSG00000078687 |
| 17 | 73592726 | 73592950 | 73592790 | 8  | 8   | 5 | 1.43836304  | 0.235762    |          | ENSG00000204282 |
| 17 | 73706643 | 73706927 | 73706786 | 15 | 18  | 1 | 9.109632584 | 2.91E-05    | AFMID    | ENSG00000183077 |
| 17 | 73797577 | 73797766 | 73797671 | 8  | 8   | 3 | 2.157544559 | 0.0836802   |          | ENSG00000204277 |
| 17 | 73979570 | 73979812 | 73979718 | 9  | 12  | 0 | 12.46581301 | 0.000159888 | DNAH17   | ENSG00000187775 |
| 17 | 74299796 | 74300157 | 74299970 | 14 | 20  | 1 | 10.06854128 | 8.32E-06    | CYTH1    | ENSG00000108669 |
| 17 | 74373469 | 74373651 | 74373560 | 8  | 9   | 5 | 1.598181155 | 0.170911    | USP36    | ENSG00000055483 |
| 17 | 74674481 | 74674745 | 74674623 | 8  | 10  | 1 | 5.273997812 | 0.00391723  |          | ENSG00000167280 |
| 17 | 74735860 | 74736436 | 74736061 | 27 | 43  | 1 | 21.09599125 | 3.19E-12    |          | ENSG00000167280 |
| 17 | 75334081 | 75334281 | 75334161 | 9  | 9   | 0 | 9.589086931 | 0.00120187  | ENPP7    | ENSG00000182156 |
| 17 | 75388856 | 75389220 | 75389091 | 10 | 15  | 0 | 15.34253909 | 2.13E-05    | CBX8     | ENSG00000141570 |
| 17 | 75594393 | 75594572 | 75594482 | 8  | 9   | 2 | 3.19636231  | 0.0229249   | TBC1D16  | ENSG00000167291 |
| 17 | 76036240 | 76036730 | 76036460 | 16 | 29  | 4 | 5.753452158 | 5.31E-06    | NPTX1    | ENSG00000171246 |
| 17 | 76163769 | 76163980 | 76163851 | 8  | 11  | 1 | 5.753452158 | 0.00215302  |          | ENSG00000216958 |
| 17 | 76282422 | 76282889 | 76282693 | 25 | 36  | 1 | 17.73981082 | 3.00E-10    |          | ENSG00000216958 |
| 17 | 76827876 | 76828699 | 76828260 | 62 | 107 | 4 | 20.71242777 | 1.08E-26    | C17orf56 | ENSG00000167302 |
| 17 | 76894859 | 76895093 | 76894971 | 12 | 14  | 2 | 4.794543465 | 0.00154571  | C17orf55 | ENSG00000185168 |
| 17 | 76918003 | 76918374 | 76918131 | 8  | 13  | 6 | 1.917817386 | 0.0693353   | TMEM105  | ENSG00000185332 |
| 17 | 76982306 | 76982740 | 76982460 | 11 | 18  | 8 | 2.024362796 | 0.0334397   |          | ENSG00000171282 |
| 17 | 77300953 | 77301518 | 77301339 | 13 | 26  | 7 | 3.236316839 | 0.000628017 | SLC25A10 | ENSG00000183048 |
| 17 | 77849001 | 77849276 | 77849138 | 8  | 10  | 3 | 2.636998906 | 0.034203    | CD7      | ENSG00000173762 |
| 17 | 77935804 | 77936381 | 77935992 | 15 | 28  | 3 | 6.952088025 | 2.20E-06    | UTS2R    | ENSG00000181408 |
| 17 | 78045410 | 78045775 | 78045589 | 13 | 20  | 5 | 3.356180426 | 0.0017534   | FOXK2    | ENSG00000141568 |
| 17 | 78045784 | 78046216 | 78045963 | 9  | 20  | 9 | 2.013708255 | 0.0279742   | FOXK2    | ENSG00000141568 |
| 17 | 78046898 | 78047667 | 78047201 | 60 | 103 | 6 | 14.24664344 | 1.34E-23    | FOXK2    | ENSG00000141568 |

|    |          |          |          |    |     |     |             |             |          |                 |
|----|----------|----------|----------|----|-----|-----|-------------|-------------|----------|-----------------|
| 17 | 78080066 | 78080275 | 78080131 | 8  | 9   | 3   | 2.397271733 | 0.0539397   | FOXK2    | ENSG00000141568 |
| 17 | 78332982 | 78333260 | 78333116 | 8  | 11  | 2   | 3.835634772 | 0.00800699  | TBCD     | ENSG00000141556 |
| 17 | 78389560 | 78389917 | 78389780 | 9  | 14  | 2   | 4.794543465 | 0.00154571  | ZNF750   | ENSG00000141579 |
| 17 | 78391190 | 78391372 | 78391303 | 8  | 9   | 3   | 2.397271733 | 0.0539397   | ZNF750   | ENSG00000141579 |
| 17 | 78391606 | 78391969 | 78391785 | 11 | 18  | 6   | 2.602752167 | 0.00970422  | ZNF750   | ENSG00000141579 |
| 17 | 78409518 | 78409732 | 78409620 | 13 | 14  | 4   | 2.876726079 | 0.01219     | ZNF750   | ENSG00000141579 |
| 17 | 78409798 | 78410008 | 78409903 | 8  | 11  | 5   | 1.917817386 | 0.0843804   | ZNF750   | ENSG00000141579 |
| 17 | 78427185 | 78427584 | 78427340 | 14 | 21  | 5   | 3.515998541 | 0.00108602  | ZNF750   | ENSG00000141579 |
| 17 | 78427872 | 78428125 | 78427998 | 8  | 9   | 2   | 3.19636231  | 0.0229249   | ZNF750   | ENSG00000141579 |
| 17 | 78620755 | 78621030 | 78620883 | 9  | 10  | 0   | 10.54799562 | 0.000613541 | METRNL   | ENSG00000176845 |
| 17 | 78648174 | 78648370 | 78648297 | 8  | 10  | 2   | 3.515998541 | 0.0136204   | METRNL   | ENSG00000176845 |
| 18 | 98065    | 99667    | 98242    | 70 | 235 | 197 | 1.142941675 | 0.0821829   |          | ENSG00000215585 |
| 18 | 240815   | 241008   | 240911   | 9  | 9   | 1   | 4.794543465 | 0.00708517  | THOC1    | ENSG00000079134 |
| 18 | 262402   | 262770   | 262651   | 8  | 13  | 0   | 13.4247217  | 8.16E-05    | THOC1    | ENSG00000079134 |
| 18 | 487085   | 487309   | 487215   | 8  | 10  | 1   | 5.273997812 | 0.00391723  | COLEC12  | ENSG00000158270 |
| 18 | 494045   | 494264   | 494195   | 8  | 9   | 6   | 1.369869562 | 0.253675    | COLEC12  | ENSG00000158270 |
| 18 | 587056   | 587271   | 587163   | 10 | 10  | 3   | 2.636998906 | 0.034203    | CLUL1    | ENSG00000079101 |
| 18 | 594705   | 595117   | 594846   | 11 | 18  | 4   | 3.643853034 | 0.00178791  | CLUL1    | ENSG00000079101 |
| 18 | 647866   | 648546   | 648277   | 60 | 97  | 8   | 10.44145021 | 2.62E-20    | C18orf56 | ENSG00000176912 |
| 18 | 802845   | 803035   | 802917   | 8  | 9   | 2   | 3.19636231  | 0.0229249   | YES1     | ENSG00000176105 |
| 18 | 829430   | 829623   | 829526   | 8  | 9   | 7   | 1.198635866 | 0.346278    | YES1     | ENSG00000176105 |
| 18 | 2470571  | 2470838  | 2470724  | 13 | 14  | 5   | 2.397271733 | 0.0258078   | METTL4   | ENSG00000101574 |
| 18 | 2547697  | 2547986  | 2547836  | 8  | 9   | 1   | 4.794543465 | 0.00708517  | METTL4   | ENSG00000101574 |
| 18 | 2938191  | 2938414  | 2938302  | 9  | 10  | 4   | 2.109599125 | 0.0694668   | LPIN2    | ENSG00000101577 |
| 18 | 3002119  | 3002322  | 3002165  | 8  | 10  | 3   | 2.636998906 | 0.034203    | LPIN2    | ENSG00000101577 |
| 18 | 3034831  | 3035074  | 3034955  | 10 | 13  | 3   | 3.356180426 | 0.00805599  | LPIN2    | ENSG00000101577 |
| 18 | 3048477  | 3048747  | 3048610  | 11 | 14  | 5   | 2.397271733 | 0.0258078   | LPIN2    | ENSG00000101577 |
| 18 | 3063663  | 3063900  | 3063728  | 8  | 11  | 1   | 5.753452158 | 0.00215302  | LPIN2    | ENSG00000101577 |
| 18 | 3119368  | 3119612  | 3119499  | 10 | 12  | 2   | 4.155271003 | 0.0046638   | MYOM1    | ENSG00000101605 |
| 18 | 3177442  | 3177630  | 3177531  | 8  | 8   | 2   | 2.876726079 | 0.0381137   | MYOM1    | ENSG00000101605 |
| 18 | 3206375  | 3206624  | 3206528  | 9  | 10  | 4   | 2.109599125 | 0.0694668   | MYOM1    | ENSG00000101605 |
| 18 | 3208005  | 3208246  | 3208130  | 9  | 11  | 9   | 1.150690432 | 0.367789    | MYOM1    | ENSG00000101605 |
| 18 | 3217893  | 3218072  | 3217982  | 8  | 8   | 3   | 2.157544559 | 0.0836802   | MYOM1    | ENSG00000101605 |
| 18 | 3226361  | 3226670  | 3226492  | 14 | 18  | 9   | 1.821926517 | 0.0548428   |          | ENSG00000101608 |

|    |         |         |         |    |    |    |             |             |          |                 |
|----|---------|---------|---------|----|----|----|-------------|-------------|----------|-----------------|
| 18 | 3235758 | 3235975 | 3235866 | 9  | 10 | 4  | 2.109599125 | 0.0694668   |          | ENSG00000101608 |
| 18 | 3236040 | 3236614 | 3236192 | 11 | 25 | 23 | 1.038817751 | 0.445246    |          | ENSG00000101608 |
| 18 | 3236923 | 3237153 | 3237024 | 8  | 9  | 6  | 1.369869562 | 0.253675    |          | ENSG00000101608 |
| 18 | 3237464 | 3237920 | 3237643 | 11 | 22 | 12 | 1.696530765 | 0.057768    |          | ENSG00000101608 |
| 18 | 3238637 | 3238821 | 3238729 | 8  | 8  | 3  | 2.157544559 | 0.0836802   |          | ENSG00000101608 |
| 18 | 3247373 | 3247722 | 3247547 | 23 | 29 | 3  | 7.191815198 | 1.23E-06    |          | ENSG00000118680 |
| 18 | 3250746 | 3250984 | 3250856 | 11 | 12 | 9  | 1.246581301 | 0.295061    |          | ENSG00000118680 |
| 18 | 3251097 | 3251319 | 3251161 | 8  | 10 | 9  | 1.054799562 | 0.4492      |          | ENSG00000118680 |
| 18 | 3251392 | 3251967 | 3251566 | 14 | 29 | 6  | 4.109608685 | 5.77E-05    |          | ENSG00000118680 |
| 18 | 3252677 | 3253143 | 3252964 | 13 | 25 | 3  | 6.232906505 | 1.23E-05    |          | ENSG00000118680 |
| 18 | 3253355 | 3253590 | 3253430 | 8  | 10 | 10 | 0.958908693 | 0.538751    |          | ENSG00000118680 |
| 18 | 3253725 | 3253953 | 3253851 | 10 | 12 | 3  | 3.116453252 | 0.0131971   |          | ENSG00000118680 |
| 18 | 3258835 | 3259014 | 3258909 | 8  | 8  | 2  | 2.876726079 | 0.0381137   |          | ENSG00000118680 |
| 18 | 3259200 | 3259460 | 3259330 | 8  | 11 | 4  | 2.301380863 | 0.0459276   |          | ENSG00000118680 |
| 18 | 3387005 | 3387483 | 3387304 | 10 | 20 | 10 | 1.830643869 | 0.0454769   | TGIF1    | ENSG00000177426 |
| 18 | 3444755 | 3445040 | 3444897 | 12 | 15 | 3  | 3.835634772 | 0.00291691  | TGIF1    | ENSG00000177426 |
| 18 | 3502004 | 3502358 | 3502181 | 8  | 14 | 7  | 1.797953799 | 0.0806593   | TGIF1    | ENSG00000177426 |
| 18 | 3575775 | 3576113 | 3575944 | 11 | 16 | 9  | 1.630144778 | 0.102169    |          | ENSG00000177337 |
| 18 | 3583121 | 3583419 | 3583270 | 10 | 12 | 4  | 2.493162602 | 0.0299057   |          | ENSG00000177337 |
| 18 | 3583565 | 3584062 | 3583744 | 20 | 38 | 10 | 3.399767184 | 3.54E-05    |          | ENSG00000177337 |
| 18 | 3584357 | 3584622 | 3584489 | 12 | 13 | 12 | 1.0326709   | 0.46514     |          | ENSG00000177337 |
| 18 | 3750833 | 3751042 | 3750937 | 8  | 9  | 5  | 1.598181155 | 0.170911    |          | ENSG00000209562 |
| 18 | 6984086 | 6984343 | 6984190 | 9  | 11 | 0  | 11.50690432 | 0.000313206 | LAMA1    | ENSG00000101680 |
| 18 | 6985077 | 6985284 | 6985185 | 8  | 9  | 2  | 3.19636231  | 0.0229249   | LAMA1    | ENSG00000101680 |
| 18 | 7012329 | 7012521 | 7012455 | 8  | 9  | 3  | 2.397271733 | 0.0539397   | LAMA1    | ENSG00000101680 |
| 18 | 7025021 | 7025381 | 7025200 | 18 | 25 | 3  | 6.232906505 | 1.23E-05    | LAMA1    | ENSG00000101680 |
| 18 | 7718333 | 7718815 | 7718512 | 46 | 58 | 0  | 56.57561289 | 5.90E-18    |          | ENSG00000221631 |
| 18 | 7723704 | 7724286 | 7723875 | 25 | 38 | 1  | 18.69871951 | 8.21E-11    |          | ENSG00000221631 |
| 18 | 8219844 | 8220061 | 8219952 | 10 | 10 | 2  | 3.515998541 | 0.0136204   |          | ENSG00000212067 |
| 18 | 8686657 | 8686878 | 8686729 | 8  | 9  | 5  | 1.598181155 | 0.170911    | KIAA0802 | ENSG00000168502 |
| 18 | 8714498 | 8714824 | 8714626 | 17 | 21 | 1  | 10.54799562 | 4.43E-06    |          | ENSG00000209617 |
| 18 | 9123283 | 9123525 | 9123404 | 9  | 11 | 2  | 3.835634772 | 0.00800699  | ANKRD12  | ENSG00000101745 |
| 18 | 9280087 | 9280521 | 9280311 | 29 | 41 | 1  | 20.13708255 | 1.17E-11    |          | ENSG00000209637 |
| 18 | 9356221 | 9356628 | 9356366 | 10 | 18 | 4  | 3.643853034 | 0.00178791  | TWSG1    | ENSG00000128791 |



|    |          |          |          |    |     |     |             |             |          |                 |
|----|----------|----------|----------|----|-----|-----|-------------|-------------|----------|-----------------|
| 18 | 9426312  | 9426584  | 9426433  | 12 | 14  | 2   | 4.794543465 | 0.00154571  | RALBP1   | ENSG00000017797 |
| 18 | 9464887  | 9465167  | 9465028  | 14 | 16  | 5   | 2.716907964 | 0.0109645   | RALBP1   | ENSG00000017797 |
| 18 | 9539050  | 9539262  | 9539156  | 8  | 8   | 0   | 8.630178238 | 0.00235436  |          | ENSG00000209641 |
| 18 | 9565617  | 9565821  | 9565735  | 8  | 8   | 3   | 2.157544559 | 0.0836802   | PPP4R1   | ENSG00000154845 |
| 18 | 9706315  | 9706680  | 9706506  | 8  | 13  | 0   | 13.4247217  | 8.16E-05    | RAB31    | ENSG00000168461 |
| 18 | 10084418 | 10084878 | 10084727 | 12 | 17  | 0   | 17.26035648 | 5.54E-06    |          | ENSG00000223138 |
| 18 | 10199352 | 10199738 | 10199559 | 39 | 47  | 0   | 46.02761727 | 9.62E-15    |          | ENSG00000209662 |
| 18 | 10546949 | 10547159 | 10547054 | 8  | 9   | 1   | 4.794543465 | 0.00708517  | NAPG     | ENSG00000134265 |
| 18 | 10550496 | 10550813 | 10550671 | 8  | 12  | 1   | 6.232906505 | 0.00117736  | NAPG     | ENSG00000134265 |
| 18 | 10677609 | 10677876 | 10677742 | 8  | 10  | 2   | 3.515998541 | 0.0136204   | FAM38B   | ENSG00000154864 |
| 18 | 11040285 | 11040608 | 11040446 | 8  | 12  | 0   | 12.46581301 | 0.000159888 | C18orf58 | ENSG00000168738 |
| 18 | 11126402 | 11126699 | 11126550 | 8  | 11  | 3   | 2.876726079 | 0.0213797   | C18orf58 | ENSG00000168738 |
| 18 | 11377963 | 11378173 | 11378086 | 8  | 9   | 1   | 4.794543465 | 0.00708517  |          | ENSG00000153081 |
| 18 | 11490461 | 11490746 | 11490603 | 16 | 19  | 2   | 6.39272462  | 8.83E-05    |          | ENSG00000153081 |
| 18 | 11507560 | 11507823 | 11507691 | 8  | 11  | 3   | 2.876726079 | 0.0213797   |          | ENSG00000153081 |
| 18 | 11841289 | 11841569 | 11841453 | 9  | 12  | 5   | 2.077635502 | 0.0577144   | MPPE1    | ENSG00000154889 |
| 18 | 11841825 | 11842067 | 11841910 | 8  | 12  | 3   | 3.116453252 | 0.0131971   | MPPE1    | ENSG00000154889 |
| 18 | 11970174 | 11970534 | 11970353 | 9  | 16  | 7   | 2.037680973 | 0.0400399   | IMPA2    | ENSG00000141401 |
| 18 | 11985492 | 11985676 | 11985576 | 8  | 8   | 3   | 2.157544559 | 0.0836802   | IMPA2    | ENSG00000141401 |
| 18 | 12261744 | 12261932 | 12261794 | 8  | 11  | 2   | 3.835634772 | 0.00800699  | CIDEA    | ENSG00000176194 |
| 18 | 12298589 | 12298960 | 12298764 | 12 | 16  | 3   | 4.075361945 | 0.00173346  | TUBB6    | ENSG00000176014 |
| 18 | 12299563 | 12300335 | 12300059 | 39 | 79  | 5   | 12.78544924 | 4.29E-18    | TUBB6    | ENSG00000176014 |
| 18 | 12350667 | 12350846 | 12350756 | 8  | 8   | 1   | 4.315089119 | 0.0127267   | AFG3L2   | ENSG00000141385 |
| 18 | 12635861 | 12636078 | 12635963 | 11 | 11  | 6   | 1.643843474 | 0.137712    | SPIRE1   | ENSG00000134278 |
| 18 | 12688280 | 12688703 | 12688524 | 11 | 21  | 0   | 21.09599125 | 3.76E-07    | PSMG2    | ENSG00000128789 |
| 18 | 12717104 | 12717413 | 12717273 | 9  | 13  | 3   | 3.356180426 | 0.00805599  | PSMG2    | ENSG00000128789 |
| 18 | 12731355 | 12731676 | 12731515 | 23 | 29  | 4   | 5.753452158 | 5.31E-06    |          | ENSG00000201466 |
| 18 | 12883817 | 12884099 | 12883958 | 13 | 13  | 5   | 2.237453617 | 0.038866    | PTPN2    | ENSG00000175354 |
| 18 | 16765010 | 16765229 | 16765094 | 8  | 8   | 12  | 0.663859864 | 0.833689    |          | ENSG00000216205 |
| 18 | 16765415 | 16766521 | 16765685 | 65 | 130 | 114 | 1.092322076 | 0.243947    |          | ENSG00000216205 |
| 18 | 16766796 | 16767322 | 16767043 | 77 | 100 | 110 | 0.872520523 | 0.83973     |          | ENSG00000216205 |
| 18 | 16767455 | 16767792 | 16767623 | 12 | 15  | 25  | 0.590097657 | 0.955515    |          | ENSG00000216205 |
| 18 | 16768028 | 16768361 | 16768194 | 18 | 19  | 13  | 1.369869562 | 0.177863    |          | ENSG00000216205 |
| 18 | 16768789 | 16769134 | 16768992 | 8  | 13  | 19  | 0.671236085 | 0.87814     |          | ENSG00000216205 |

|    |          |          |          |     |     |     |             |             |          |                 |
|----|----------|----------|----------|-----|-----|-----|-------------|-------------|----------|-----------------|
| 18 | 16769960 | 16770334 | 16770155 | 35  | 43  | 56  | 0.740210219 | 0.934581    |          | ENSG00000216205 |
| 18 | 16770415 | 16770609 | 16770575 | 21  | 24  | 32  | 0.72644598  | 0.88851     |          | ENSG00000216205 |
| 18 | 16770724 | 16771175 | 16771019 | 35  | 44  | 57  | 0.743980883 | 0.933197    |          | ENSG00000216205 |
| 18 | 16771275 | 16771749 | 16771570 | 14  | 20  | 32  | 0.610214623 | 0.964514    |          | ENSG00000216205 |
| 18 | 16771779 | 16772313 | 16772134 | 105 | 132 | 131 | 0.966173153 | 0.610131    |          | ENSG00000216205 |
| 18 | 16772484 | 16773156 | 16772977 | 50  | 79  | 67  | 1.128127874 | 0.231135    |          | ENSG00000216205 |
| 18 | 16773688 | 16774445 | 16774273 | 49  | 82  | 87  | 0.904425245 | 0.74449     |          | ENSG00000216205 |
| 18 | 16876499 | 16876679 | 16876589 | 8   | 8   | 0   | 8.630178238 | 0.00235436  |          | ENSG00000216205 |
| 18 | 17026016 | 17026234 | 17026108 | 8   | 9   | 0   | 9.589086931 | 0.00120187  | KIAA1772 | ENSG00000141449 |
| 18 | 17052788 | 17053040 | 17052929 | 9   | 12  | 2   | 4.155271003 | 0.0046638   | KIAA1772 | ENSG00000141449 |
| 18 | 17225123 | 17225373 | 17225200 | 8   | 10  | 6   | 1.506856518 | 0.188853    |          | ENSG00000221139 |
| 18 | 17699874 | 17700081 | 17699972 | 9   | 9   | 2   | 3.19636231  | 0.0229249   |          | ENSG00000207694 |
| 18 | 17731871 | 17732059 | 17731965 | 8   | 8   | 2   | 2.876726079 | 0.0381137   |          | ENSG00000209125 |
| 18 | 17755288 | 17755522 | 17755405 | 12  | 14  | 0   | 14.3836304  | 4.17E-05    |          | ENSG00000209125 |
| 18 | 18538341 | 18538561 | 18538451 | 8   | 9   | 3   | 2.397271733 | 0.0539397   |          | ENSG00000206827 |
| 18 | 18747868 | 18748062 | 18747965 | 9   | 10  | 4   | 2.109599125 | 0.0694668   | RBBP8    | ENSG00000101773 |
| 18 | 18935784 | 18936046 | 18935915 | 10  | 12  | 4   | 2.493162602 | 0.0299057   | CABLES1  | ENSG00000134508 |
| 18 | 18949727 | 18949921 | 18949802 | 10  | 11  | 0   | 11.50690432 | 0.000313206 | CABLES1  | ENSG00000134508 |
| 18 | 18968006 | 18968302 | 18968151 | 9   | 12  | 7   | 1.558226626 | 0.152813    | CABLES1  | ENSG00000134508 |
| 18 | 19094031 | 19094379 | 19094205 | 9   | 15  | 3   | 3.835634772 | 0.00291691  | CABLES1  | ENSG00000134508 |
| 18 | 19111376 | 19111813 | 19111555 | 28  | 41  | 1   | 20.13708255 | 1.17E-11    | CABLES1  | ENSG00000134508 |
| 18 | 19147133 | 19147634 | 19147289 | 13  | 23  | 4   | 4.602761727 | 0.000137072 | C18orf45 | ENSG00000134490 |
| 18 | 19170002 | 19170308 | 19170175 | 8   | 11  | 2   | 3.835634772 | 0.00800699  | C18orf45 | ENSG00000134490 |
| 18 | 19173500 | 19173679 | 19173636 | 8   | 8   | 5   | 1.43836304  | 0.235762    | C18orf45 | ENSG00000134490 |
| 18 | 19349910 | 19350214 | 19350070 | 18  | 22  | 3   | 5.513724985 | 6.69E-05    | C18orf8  | ENSG00000141452 |
| 18 | 19369737 | 19369941 | 19369853 | 10  | 11  | 0   | 11.50690432 | 0.000313206 | C18orf8  | ENSG00000141452 |
| 18 | 19465753 | 19465979 | 19465844 | 9   | 9   | 7   | 1.198635866 | 0.346278    | ANKRD29  | ENSG00000154065 |
| 18 | 19553533 | 19553920 | 19553741 | 24  | 32  | 2   | 10.54799562 | 3.50E-08    |          | ENSG00000215051 |
| 18 | 19554003 | 19554211 | 19554107 | 8   | 9   | 1   | 4.794543465 | 0.00708517  |          | ENSG00000215051 |
| 18 | 19576008 | 19576187 | 19576097 | 8   | 8   | 0   | 8.630178238 | 0.00235436  |          | ENSG00000215051 |
| 18 | 19696507 | 19696769 | 19696675 | 8   | 9   | 4   | 1.917817386 | 0.103282    | LAMA3    | ENSG00000053747 |
| 18 | 19706686 | 19707005 | 19706826 | 12  | 16  | 1   | 8.150723891 | 0.000101217 | LAMA3    | ENSG00000053747 |
| 18 | 19717373 | 19717862 | 19717607 | 28  | 44  | 2   | 14.3836304  | 1.96E-11    |          | ENSG00000221389 |
| 18 | 19828423 | 19828798 | 19828643 | 10  | 16  | 3   | 4.075361945 | 0.00173346  | TTC39C   | ENSG00000168234 |

|    |          |          |          |    |    |   |             |            |          |                 |
|----|----------|----------|----------|----|----|---|-------------|------------|----------|-----------------|
| 18 | 19850716 | 19850928 | 19850822 | 8  | 9  | 2 | 3.19636231  | 0.0229249  |          | ENSG00000176309 |
| 18 | 19910259 | 19910442 | 19910350 | 9  | 9  | 0 | 9.589086931 | 0.00120187 |          | ENSG00000215504 |
| 18 | 19953079 | 19953359 | 19953202 | 10 | 10 | 2 | 3.515998541 | 0.0136204  |          | ENSG00000215504 |
| 18 | 19969943 | 19970133 | 19970088 | 8  | 8  | 6 | 1.232882605 | 0.333038   |          | ENSG00000215503 |
| 18 | 20065950 | 20066152 | 20066059 | 8  | 10 | 8 | 1.171999514 | 0.35773    |          | ENSG00000206766 |
| 18 | 20196871 | 20197060 | 20196958 | 8  | 8  | 6 | 1.232882605 | 0.333038   | OSBPL1A  | ENSG00000141447 |
| 18 | 20197158 | 20197355 | 20197254 | 8  | 8  | 2 | 2.876726079 | 0.0381137  | OSBPL1A  | ENSG00000141447 |
| 18 | 20231978 | 20232263 | 20232118 | 12 | 13 | 5 | 2.237453617 | 0.038866   | OSBPL1A  | ENSG00000141447 |
| 18 | 20348424 | 20348603 | 20348503 | 8  | 9  | 5 | 1.598181155 | 0.170911   | HRH4     | ENSG00000134489 |
| 18 | 20868076 | 20868390 | 20868228 | 20 | 21 | 2 | 7.031997082 | 2.73E-05   |          | ENSG00000216836 |
| 18 | 20868484 | 20868819 | 20868647 | 9  | 14 | 0 | 14.3836304  | 4.17E-05   |          | ENSG00000216836 |
| 18 | 21366982 | 21367613 | 21367349 | 52 | 78 | 3 | 18.93844669 | 9.21E-20   | ZNF521   | ENSG00000198795 |
| 18 | 21931533 | 21931854 | 21931681 | 13 | 16 | 3 | 4.075361945 | 0.00173346 | SS18     | ENSG00000141380 |
| 18 | 22294466 | 22294677 | 22294530 | 9  | 9  | 5 | 1.598181155 | 0.170911   | KCTD1    | ENSG00000134504 |
| 18 | 22294741 | 22295124 | 22294932 | 21 | 30 | 6 | 4.246595641 | 3.49E-05   | KCTD1    | ENSG00000134504 |
| 18 | 22384265 | 22384704 | 22384557 | 12 | 22 | 3 | 5.513724985 | 6.69E-05   | KCTD1    | ENSG00000134504 |
| 18 | 22483745 | 22483974 | 22483867 | 11 | 12 | 5 | 2.077635502 | 0.0577144  | KCTD1    | ENSG00000134504 |
| 18 | 23381003 | 23381325 | 23381171 | 25 | 28 | 0 | 27.8083521  | 3.40E-09   |          | ENSG00000215499 |
| 18 | 23623452 | 23623652 | 23623621 | 9  | 9  | 2 | 3.19636231  | 0.0229249  | CDH2     | ENSG00000170558 |
| 18 | 26261880 | 26262373 | 26262198 | 24 | 41 | 3 | 10.06854128 | 9.74E-10   |          |                 |
| 18 | 27040917 | 27041104 | 27041010 | 9  | 9  | 6 | 1.369869562 | 0.253675   | DSC1     | ENSG00000134765 |
| 18 | 27064581 | 27064802 | 27064664 | 8  | 9  | 4 | 1.917817386 | 0.103282   | DSC1     | ENSG00000134765 |
| 18 | 27075826 | 27076232 | 27076005 | 16 | 25 | 9 | 2.493162602 | 0.00432225 | DSG1     | ENSG00000134760 |
| 18 | 27453267 | 27453515 | 27453391 | 9  | 10 | 2 | 3.515998541 | 0.0136204  | TTR      | ENSG00000118271 |
| 18 | 27547333 | 27547785 | 27547508 | 32 | 43 | 2 | 14.06399416 | 3.68E-11   |          | ENSG00000200472 |
| 18 | 27992017 | 27992275 | 27992146 | 11 | 13 | 5 | 2.237453617 | 0.038866   |          | ENSG00000199373 |
| 18 | 28119041 | 28119456 | 28119198 | 12 | 19 | 0 | 19.17817386 | 1.44E-06   |          | ENSG00000222395 |
| 18 | 28142609 | 28143044 | 28142887 | 17 | 26 | 2 | 8.630178238 | 1.37E-06   |          | ENSG00000222395 |
| 18 | 28206611 | 28207027 | 28206790 | 9  | 16 | 3 | 4.075361945 | 0.00173346 |          | ENSG00000215492 |
| 18 | 28426346 | 28426659 | 28426500 | 23 | 25 | 0 | 24.93162602 | 2.56E-08   |          | ENSG00000221621 |
| 18 | 29203735 | 29203983 | 29203869 | 8  | 9  | 0 | 9.589086931 | 0.00120187 | C18orf34 | ENSG00000166960 |
| 18 | 29394740 | 29395021 | 29394862 | 23 | 25 | 0 | 24.93162602 | 2.56E-08   | ASXL3    | ENSG00000141431 |
| 18 | 31013504 | 31013809 | 31013657 | 9  | 13 | 0 | 13.4247217  | 8.16E-05   | ZNF397   | ENSG00000186812 |
| 18 | 31124244 | 31124613 | 31124411 | 8  | 13 | 2 | 4.474907234 | 0.00269459 | ZNF271   | ENSG00000118267 |

|    |          |          |          |    |     |    |             |             |          |                 |
|----|----------|----------|----------|----|-----|----|-------------|-------------|----------|-----------------|
| 18 | 31331801 | 31332077 | 31331951 | 16 | 19  | 7  | 2.397271733 | 0.0127287   | INO80C   | ENSG00000153391 |
| 18 | 31341575 | 31341899 | 31341747 | 10 | 14  | 3  | 3.595907599 | 0.00486913  | INO80C   | ENSG00000153391 |
| 18 | 31695958 | 31696448 | 31696281 | 19 | 30  | 0  | 29.72616948 | 8.86E-10    |          | ENSG00000207797 |
| 18 | 31806499 | 31806820 | 31806659 | 10 | 11  | 7  | 1.43836304  | 0.204844    | C18orf21 | ENSG00000141428 |
| 18 | 31958977 | 31959225 | 31959099 | 12 | 12  | 1  | 6.232906505 | 0.00117736  | SLC39A6  | ENSG00000141424 |
| 18 | 31963551 | 31963951 | 31963703 | 10 | 17  | 6  | 2.465765211 | 0.014729    | ELP2     | ENSG00000134759 |
| 18 | 32529744 | 32530076 | 32529906 | 9  | 12  | 1  | 6.232906505 | 0.00117736  | C18orf10 | ENSG00000134779 |
| 18 | 32649554 | 32649884 | 32649719 | 13 | 18  | 1  | 9.109632584 | 2.91E-05    | C18orf10 | ENSG00000134779 |
| 18 | 32853204 | 32853411 | 32853307 | 12 | 12  | 1  | 6.232906505 | 0.00117736  | C18orf10 | ENSG00000134779 |
| 18 | 34445879 | 34446058 | 34445960 | 8  | 8   | 1  | 4.315089119 | 0.0127267   |          | ENSG00000222704 |
| 18 | 35482042 | 35482315 | 35482178 | 9  | 13  | 4  | 2.684944341 | 0.01921     |          | ENSG00000212354 |
| 18 | 35724904 | 35725187 | 35725045 | 17 | 20  | 3  | 5.034270639 | 0.000202317 |          | ENSG00000212354 |
| 18 | 36049924 | 36050294 | 36050115 | 31 | 38  | 1  | 18.69871951 | 8.21E-11    |          |                 |
| 18 | 36700139 | 36700566 | 36700342 | 25 | 37  | 1  | 18.21926517 | 1.57E-10    |          |                 |
| 18 | 39294188 | 39294448 | 39294318 | 8  | 8   | 0  | 8.630178238 | 0.00235436  | SYT4     | ENSG00000132872 |
| 18 | 41046763 | 41046953 | 41046896 | 9  | 9   | 3  | 2.397271733 | 0.0539397   | SLC14A2  | ENSG00000132874 |
| 18 | 41582115 | 41582423 | 41582269 | 8  | 12  | 4  | 2.493162602 | 0.0299057   | SLC14A1  | ENSG00000141469 |
| 18 | 41593503 | 41593683 | 41593593 | 8  | 8   | 1  | 4.315089119 | 0.0127267   | SLC14A1  | ENSG00000141469 |
| 18 | 41619494 | 41619855 | 41619637 | 8  | 13  | 1  | 6.712360851 | 0.000640982 | SIGLEC15 | ENSG00000197046 |
| 18 | 41626995 | 41627889 | 41627445 | 24 | 57  | 22 | 2.418117574 | 7.50E-05    | SIGLEC15 | ENSG00000197046 |
| 18 | 41636562 | 41637033 | 41636854 | 25 | 36  | 15 | 2.217476353 | 0.00255902  | SIGLEC15 | ENSG00000197046 |
| 18 | 41637065 | 41637484 | 41637244 | 16 | 26  | 12 | 1.991579593 | 0.0165204   | SIGLEC15 | ENSG00000197046 |
| 18 | 41638272 | 41638473 | 41638372 | 8  | 9   | 4  | 1.917817386 | 0.103282    | SIGLEC15 | ENSG00000197046 |
| 18 | 41693774 | 41693953 | 41693853 | 8  | 8   | 7  | 1.07877228  | 0.435076    | SIGLEC15 | ENSG00000197046 |
| 18 | 41801069 | 41801406 | 41801237 | 10 | 15  | 3  | 3.835634772 | 0.00291691  | KIAA1632 | ENSG00000152223 |
| 18 | 41801508 | 41802119 | 41801944 | 11 | 23  | 7  | 2.876726079 | 0.00239423  | KIAA1632 | ENSG00000152223 |
| 18 | 41867691 | 41867942 | 41867816 | 8  | 10  | 2  | 3.515998541 | 0.0136204   | PSTPIP2  | ENSG00000152229 |
| 18 | 41902780 | 41903295 | 41903037 | 8  | 19  | 4  | 3.835634772 | 0.00108365  | PSTPIP2  | ENSG00000152229 |
| 18 | 41903464 | 41904217 | 41903707 | 82 | 110 | 8  | 11.82654055 | 1.08E-23    | PSTPIP2  | ENSG00000152229 |
| 18 | 41921005 | 41921198 | 41921147 | 9  | 9   | 2  | 3.19636231  | 0.0229249   | ATP5A1   | ENSG00000152234 |
| 18 | 41931883 | 41932197 | 41932040 | 8  | 11  | 2  | 3.835634772 | 0.00800699  | ATP5A1   | ENSG00000152234 |
| 18 | 41932357 | 41932574 | 41932454 | 11 | 11  | 7  | 1.43836304  | 0.204844    | ATP5A1   | ENSG00000152234 |
| 18 | 41938001 | 41938218 | 41938094 | 10 | 10  | 0  | 10.54799562 | 0.000613541 | ATP5A1   | ENSG00000152234 |
| 18 | 42007417 | 42007636 | 42007535 | 8  | 9   | 10 | 0.871735176 | 0.624623    | C18orf25 | ENSG00000152242 |

|    |          |          |          |    |    |    |             |             |          |                 |
|----|----------|----------|----------|----|----|----|-------------|-------------|----------|-----------------|
| 18 | 42007650 | 42008173 | 42007994 | 15 | 27 | 12 | 2.0653418   | 0.0117911   | C18orf25 | ENSG00000152242 |
| 18 | 42084323 | 42084676 | 42084524 | 14 | 18 | 5  | 3.036544195 | 0.0044641   | C18orf25 | ENSG00000152242 |
| 18 | 42107305 | 42107564 | 42107416 | 8  | 10 | 3  | 2.636998906 | 0.034203    | RNF165   | ENSG00000141622 |
| 18 | 42107845 | 42108210 | 42108022 | 8  | 13 | 12 | 1.0326709   | 0.46514     | RNF165   | ENSG00000141622 |
| 18 | 42302453 | 42302731 | 42302616 | 13 | 14 | 2  | 4.794543465 | 0.00154571  | LOXHD1   | ENSG00000167210 |
| 18 | 42303485 | 42303930 | 42303776 | 14 | 22 | 19 | 1.102744997 | 0.372416    | LOXHD1   | ENSG00000167210 |
| 18 | 42374645 | 42374877 | 42374761 | 10 | 12 | 2  | 4.155271003 | 0.0046638   | LOXHD1   | ENSG00000167210 |
| 18 | 42457387 | 42457710 | 42457546 | 14 | 17 | 4  | 3.452071295 | 0.00292757  | LOXHD1   | ENSG00000167210 |
| 18 | 42569753 | 42569971 | 42569862 | 14 | 14 | 1  | 7.191815198 | 0.00034761  | ST8SIA5  | ENSG00000101638 |
| 18 | 42702338 | 42702576 | 42702457 | 10 | 13 | 0  | 13.4247217  | 8.16E-05    | PIAS2    | ENSG00000078043 |
| 18 | 42711335 | 42711725 | 42711547 | 24 | 31 | 2  | 10.22835939 | 6.48E-08    | PIAS2    | ENSG00000078043 |
| 18 | 42995847 | 42996247 | 42996135 | 8  | 14 | 14 | 0.958908693 | 0.545362    |          | ENSG00000201825 |
| 18 | 43553083 | 43553283 | 43553146 | 8  | 10 | 2  | 3.515998541 | 0.0136204   |          | ENSG00000210133 |
| 18 | 43802945 | 43803132 | 43803095 | 8  | 9  | 3  | 2.397271733 | 0.0539397   | ZBTB7C   | ENSG00000184828 |
| 18 | 43804107 | 43804418 | 43804262 | 14 | 19 | 8  | 2.130908207 | 0.0233014   | ZBTB7C   | ENSG00000184828 |
| 18 | 43914005 | 43914398 | 43914188 | 12 | 20 | 14 | 1.34247217  | 0.186867    |          | ENSG00000206944 |
| 18 | 44074945 | 44075142 | 44075071 | 8  | 9  | 3  | 2.397271733 | 0.0539397   |          | ENSG00000206944 |
| 18 | 44110323 | 44110758 | 44110563 | 23 | 39 | 0  | 38.35634772 | 2.09E-12    |          | ENSG00000200872 |
| 18 | 44110828 | 44111084 | 44110956 | 14 | 15 | 4  | 3.068507818 | 0.0076507   |          | ENSG00000200872 |
| 18 | 44173697 | 44173902 | 44173799 | 8  | 9  | 1  | 4.794543465 | 0.00708517  |          | ENSG00000200872 |
| 18 | 44233866 | 44234109 | 44233987 | 9  | 9  | 5  | 1.598181155 | 0.170911    |          | ENSG00000200872 |
| 18 | 44395857 | 44396873 | 44396531 | 15 | 41 | 7  | 5.034270639 | 3.77E-07    | KIAA0427 | ENSG00000134030 |
| 18 | 44396912 | 44397222 | 44397067 | 10 | 14 | 3  | 3.595907599 | 0.00486913  | KIAA0427 | ENSG00000134030 |
| 18 | 44456908 | 44457087 | 44456952 | 8  | 8  | 4  | 1.726035648 | 0.150596    | KIAA0427 | ENSG00000134030 |
| 18 | 44496022 | 44496212 | 44496140 | 8  | 8  | 0  | 8.630178238 | 0.00235436  | KIAA0427 | ENSG00000134030 |
| 18 | 44513058 | 44513652 | 44513230 | 11 | 26 | 4  | 5.178106943 | 2.75E-05    | KIAA0427 | ENSG00000134030 |
| 18 | 44628981 | 44629479 | 44629215 | 37 | 53 | 6  | 7.397295632 | 1.32E-10    | SMAD7    | ENSG00000101665 |
| 18 | 44763413 | 44763610 | 44763557 | 8  | 9  | 3  | 2.397271733 | 0.0539397   | SMAD7    | ENSG00000101665 |
| 18 | 44800919 | 44801139 | 44800972 | 9  | 11 | 1  | 5.753452158 | 0.00215302  | SMAD7    | ENSG00000101665 |
| 18 | 44802101 | 44802514 | 44802275 | 8  | 16 | 10 | 1.481949798 | 0.147733    | SMAD7    | ENSG00000101665 |
| 18 | 45213925 | 45214195 | 45214047 | 9  | 12 | 2  | 4.155271003 | 0.0046638   | DYM      | ENSG00000141627 |
| 18 | 45241506 | 45241685 | 45241543 | 8  | 8  | 2  | 2.876726079 | 0.0381137   | DYM      | ENSG00000141627 |
| 18 | 45290959 | 45291324 | 45291236 | 9  | 15 | 8  | 1.704726565 | 0.0916153   |          | ENSG00000206696 |
| 18 | 45390289 | 45390610 | 45390436 | 11 | 15 | 1  | 7.671269544 | 0.000187863 | LIPG     | ENSG00000101670 |

|    |          |          |          |     |     |    |             |             |        |                 |
|----|----------|----------|----------|-----|-----|----|-------------|-------------|--------|-----------------|
| 18 | 45436537 | 45436760 | 45436661 | 9   | 11  | 10 | 1.046082211 | 0.455063    | LIPG   | ENSG00000101670 |
| 18 | 45924303 | 45924500 | 45924401 | 9   | 9   | 2  | 3.19636231  | 0.0229249   | MYO5B  | ENSG00000167306 |
| 18 | 45939276 | 45939593 | 45939446 | 15  | 18  | 2  | 6.073088389 | 0.000157975 | MYO5B  | ENSG00000167306 |
| 18 | 45943472 | 45943675 | 45943562 | 8   | 9   | 4  | 1.917817386 | 0.103282    | MYO5B  | ENSG00000167306 |
| 18 | 46068193 | 46068428 | 46068276 | 8   | 10  | 2  | 3.515998541 | 0.0136204   | CXXC1  | ENSG00000154832 |
| 18 | 46391864 | 46392197 | 46392030 | 11  | 16  | 6  | 2.328778255 | 0.0221113   | MAPK4  | ENSG00000141639 |
| 18 | 46409666 | 46410039 | 46409874 | 11  | 15  | 5  | 2.557089848 | 0.0169197   | MAPK4  | ENSG00000141639 |
| 18 | 46412690 | 46413028 | 46412860 | 24  | 29  | 1  | 14.3836304  | 2.72E-08    | MAPK4  | ENSG00000141639 |
| 18 | 47858011 | 47858190 | 47858114 | 8   | 8   | 0  | 8.630178238 | 0.00235436  |        | ENSG00000215457 |
| 18 | 48573014 | 48573344 | 48573179 | 15  | 16  | 11 | 1.358453982 | 0.20248     |        | ENSG00000221291 |
| 18 | 51052820 | 51053132 | 51052988 | 8   | 11  | 4  | 2.301380863 | 0.0459276   | CCDC68 | ENSG00000166510 |
| 18 | 51469518 | 51469712 | 51469615 | 11  | 12  | 1  | 6.232906505 | 0.00117736  | TCF4   | ENSG00000196628 |
| 18 | 51901898 | 51902163 | 51902044 | 10  | 10  | 0  | 10.54799562 | 0.000613541 |        | ENSG00000201816 |
| 18 | 52687463 | 52687710 | 52687586 | 12  | 12  | 0  | 12.46581301 | 0.000159888 |        | ENSG00000212539 |
| 18 | 52715371 | 52715783 | 52715550 | 16  | 24  | 0  | 23.97271733 | 5.01E-08    |        | ENSG00000212539 |
| 18 | 53068354 | 53068766 | 53068587 | 12  | 23  | 4  | 4.602761727 | 0.000137072 |        | ENSG00000202240 |
| 18 | 53405085 | 53405324 | 53405217 | 9   | 9   | 2  | 3.19636231  | 0.0229249   | FECH   | ENSG00000066926 |
| 18 | 53517225 | 53517486 | 53517355 | 12  | 14  | 4  | 2.876726079 | 0.01219     |        | ENSG00000209025 |
| 18 | 53524518 | 53524769 | 53524643 | 10  | 11  | 4  | 2.301380863 | 0.0459276   | ATP8B1 | ENSG00000081923 |
| 18 | 53596877 | 53597172 | 53597020 | 8   | 13  | 6  | 1.917817386 | 0.0693353   |        | ENSG00000202159 |
| 18 | 53798763 | 53799528 | 53798998 | 103 | 151 | 5  | 24.29235356 | 8.91E-38    |        | ENSG00000172186 |
| 18 | 53861704 | 53862001 | 53861880 | 10  | 13  | 7  | 1.678090213 | 0.11195     | NEDD4L | ENSG00000049759 |
| 18 | 53895674 | 53895973 | 53895853 | 9   | 13  | 2  | 4.474907234 | 0.00269459  | NEDD4L | ENSG00000049759 |
| 18 | 53909679 | 53909865 | 53909812 | 8   | 8   | 2  | 2.876726079 | 0.0381137   | NEDD4L | ENSG00000049759 |
| 18 | 54020661 | 54020922 | 54020791 | 14  | 15  | 8  | 1.704726565 | 0.0916153   | NEDD4L | ENSG00000049759 |
| 18 | 54042212 | 54042514 | 54042363 | 9   | 13  | 4  | 2.684944341 | 0.01921     | NEDD4L | ENSG00000049759 |
| 18 | 54081393 | 54081587 | 54081490 | 8   | 9   | 4  | 1.917817386 | 0.103282    | NEDD4L | ENSG00000049759 |
| 18 | 54586710 | 54587120 | 54586868 | 10  | 18  | 3  | 4.554816292 | 0.000599415 |        | ENSG00000223035 |
| 18 | 55007308 | 55007795 | 55007460 | 30  | 39  | 3  | 9.589086931 | 3.26E-09    | GRP    | ENSG00000134443 |
| 18 | 55655812 | 55656012 | 55655888 | 9   | 9   | 5  | 1.598181155 | 0.170911    | PMAIP1 | ENSG00000141682 |
| 18 | 55717612 | 55718236 | 55717894 | 27  | 48  | 3  | 11.74663149 | 1.36E-11    | PMAIP1 | ENSG00000141682 |
| 18 | 56688651 | 56688833 | 56688766 | 8   | 8   | 0  | 8.630178238 | 0.00235436  |        | ENSG00000214345 |
| 18 | 56711151 | 56711363 | 56711309 | 9   | 9   | 1  | 4.794543465 | 0.00708517  |        | ENSG00000214345 |
| 18 | 56962142 | 56962329 | 56962235 | 8   | 8   | 0  | 8.630178238 | 0.00235436  |        | ENSG00000206769 |

|    |          |          |          |    |     |    |             |             |           |                 |
|----|----------|----------|----------|----|-----|----|-------------|-------------|-----------|-----------------|
| 18 | 57359837 | 57360226 | 57360016 | 18 | 25  | 0  | 24.93162602 | 2.56E-08    | CDH20     | ENSG00000101542 |
| 18 | 57693701 | 57693880 | 57693784 | 8  | 8   | 2  | 2.876726079 | 0.0381137   | RNF152    | ENSG00000176641 |
| 18 | 58067741 | 58067984 | 58067862 | 12 | 12  | 3  | 3.116453252 | 0.0131971   | KIAA1468  | ENSG00000134444 |
| 18 | 58304031 | 58304253 | 58304113 | 9  | 10  | 3  | 2.636998906 | 0.034203    | ZCCHC2    | ENSG00000141664 |
| 18 | 58304581 | 58304871 | 58304726 | 8  | 11  | 0  | 11.50690432 | 0.000313206 | ZCCHC2    | ENSG00000141664 |
| 18 | 58390403 | 58391033 | 58390857 | 37 | 53  | 5  | 8.630178238 | 2.64E-11    | ZCCHC2    | ENSG00000141664 |
| 18 | 58533237 | 58533513 | 58533348 | 9  | 11  | 9  | 1.150690432 | 0.367789    | PHLPP     | ENSG00000081913 |
| 18 | 58535801 | 58536021 | 58535946 | 9  | 10  | 5  | 1.757999271 | 0.121253    | PHLPP     | ENSG00000081913 |
| 18 | 58618799 | 58619118 | 58618970 | 11 | 14  | 10 | 1.307602763 | 0.244096    |           | ENSG00000215431 |
| 18 | 58743589 | 58743808 | 58743712 | 8  | 9   | 0  | 9.589086931 | 0.00120187  | PHLPP     | ENSG00000081913 |
| 18 | 58795743 | 58795939 | 58795841 | 8  | 9   | 2  | 3.19636231  | 0.0229249   | PHLPP     | ENSG00000081913 |
| 18 | 58834607 | 58834888 | 58834749 | 9  | 10  | 5  | 1.757999271 | 0.121253    | PHLPP     | ENSG00000081913 |
| 18 | 58893130 | 58893372 | 58893251 | 9  | 11  | 6  | 1.643843474 | 0.137712    | BCL2      | ENSG00000171791 |
| 18 | 58937914 | 58938157 | 58937997 | 9  | 12  | 4  | 2.493162602 | 0.0299057   | BCL2      | ENSG00000171791 |
| 18 | 58969473 | 58969652 | 58969597 | 8  | 9   | 6  | 1.369869562 | 0.253675    | BCL2      | ENSG00000171791 |
| 18 | 58975858 | 58976080 | 58975980 | 8  | 8   | 1  | 4.315089119 | 0.0127267   | BCL2      | ENSG00000171791 |
| 18 | 58979755 | 58979934 | 58979844 | 8  | 8   | 4  | 1.726035648 | 0.150596    | BCL2      | ENSG00000171791 |
| 18 | 58980076 | 58980386 | 58980231 | 9  | 13  | 4  | 2.684944341 | 0.01921     | BCL2      | ENSG00000171791 |
| 18 | 59020530 | 59020847 | 59020708 | 8  | 10  | 2  | 3.515998541 | 0.0136204   | BCL2      | ENSG00000171791 |
| 18 | 59075477 | 59075882 | 59075742 | 9  | 15  | 20 | 0.730597099 | 0.831283    | BCL2      | ENSG00000171791 |
| 18 | 59122365 | 59122708 | 59122536 | 9  | 14  | 2  | 4.794543465 | 0.00154571  | BCL2      | ENSG00000171791 |
| 18 | 59136177 | 59136522 | 59136277 | 12 | 16  | 6  | 2.328778255 | 0.0221113   | BCL2      | ENSG00000171791 |
| 18 | 59139398 | 59139591 | 59139500 | 8  | 9   | 8  | 1.065454103 | 0.442605    | BCL2      | ENSG00000171791 |
| 18 | 59180039 | 59180473 | 59180294 | 26 | 39  | 4  | 7.671269544 | 1.80E-08    | KDSR      | ENSG00000119537 |
| 18 | 59184402 | 59184740 | 59184571 | 9  | 14  | 6  | 2.054804342 | 0.0480281   | KDSR      | ENSG00000119537 |
| 18 | 59185714 | 59186255 | 59185987 | 17 | 30  | 13 | 2.12329782  | 0.0070778   | KDSR      | ENSG00000119537 |
| 18 | 59220552 | 59220731 | 59220641 | 10 | 10  | 6  | 1.506856518 | 0.188853    | VPS4B     | ENSG00000119541 |
| 18 | 59240303 | 59240541 | 59240452 | 9  | 13  | 5  | 2.237453617 | 0.038866    | VPS4B     | ENSG00000119541 |
| 18 | 59240543 | 59240840 | 59240690 | 9  | 13  | 10 | 1.220429246 | 0.306001    | VPS4B     | ENSG00000119541 |
| 18 | 59294690 | 59295240 | 59294986 | 85 | 102 | 3  | 24.69189885 | 1.95E-26    | SERPINB5  | ENSG00000206075 |
| 18 | 59295342 | 59295604 | 59295471 | 11 | 15  | 2  | 5.114179696 | 0.00088103  | SERPINB5  | ENSG00000206075 |
| 18 | 59329538 | 59329934 | 59329731 | 14 | 22  | 9  | 2.205489994 | 0.0136443   |           | ENSG00000214318 |
| 18 | 59336690 | 59336959 | 59336821 | 8  | 11  | 8  | 1.278544924 | 0.28289     |           | ENSG00000214318 |
| 18 | 59396627 | 59396903 | 59396765 | 10 | 13  | 2  | 4.474907234 | 0.00269459  | SERPINB13 | ENSG00000197641 |

|    |          |          |          |    |    |   |             |             |           |                 |
|----|----------|----------|----------|----|----|---|-------------|-------------|-----------|-----------------|
| 18 | 59502964 | 59503331 | 59503152 | 17 | 24 | 2 | 7.990905775 | 4.56E-06    | SERPINB11 | ENSG00000206072 |
| 18 | 59662538 | 59662847 | 59662692 | 9  | 11 | 6 | 1.643843474 | 0.137712    | SERPINB2  | ENSG00000197632 |
| 18 | 59700911 | 59701113 | 59701051 | 8  | 10 | 1 | 5.273997812 | 0.00391723  | SERPINB2  | ENSG00000197632 |
| 18 | 59754403 | 59754661 | 59754486 | 8  | 11 | 3 | 2.876726079 | 0.0213797   | HMSD      | ENSG00000221887 |
| 18 | 59788928 | 59789135 | 59788992 | 8  | 10 | 0 | 10.54799562 | 0.000613541 | SERPINB8  | ENSG00000166401 |
| 18 | 60148225 | 60148490 | 60148335 | 9  | 9  | 2 | 3.19636231  | 0.0229249   |           | ENSG00000210488 |
| 18 | 60441021 | 60441435 | 60441225 | 15 | 24 | 0 | 23.97271733 | 5.01E-08    |           | ENSG00000210488 |
| 18 | 62718452 | 62718686 | 62718569 | 10 | 12 | 1 | 6.232906505 | 0.00117736  |           | ENSG00000221536 |
| 18 | 65370077 | 65370352 | 65370214 | 11 | 12 | 0 | 12.46581301 | 0.000159888 | DOK6      | ENSG00000206052 |
| 18 | 67628005 | 67628226 | 67628097 | 10 | 11 | 0 | 11.50690432 | 0.000313206 |           |                 |
| 18 | 69553696 | 69553985 | 69553840 | 14 | 16 | 3 | 4.075361945 | 0.00173346  |           | ENSG00000210546 |
| 18 | 69968045 | 69968499 | 69968272 | 47 | 61 | 4 | 11.89046779 | 3.48E-14    | C18orf55  | ENSG00000075336 |
| 18 | 70128748 | 70128979 | 70128842 | 13 | 14 | 7 | 1.797953799 | 0.0806593   |           | ENSG00000206043 |
| 18 | 70737448 | 70737627 | 70737537 | 8  | 8  | 5 | 1.43836304  | 0.235762    | ZNF407    | ENSG00000215421 |
| 18 | 71972852 | 71973108 | 71972980 | 11 | 12 | 0 | 12.46581301 | 0.000159888 | ZNF516    | ENSG00000101493 |
| 18 | 74403260 | 74403548 | 74403404 | 27 | 29 | 2 | 9.589086931 | 2.21E-07    |           | ENSG00000201723 |
| 18 | 75991059 | 75991424 | 75991216 | 23 | 29 | 5 | 4.794543465 | 1.89E-05    | ADNP2     | ENSG00000101544 |
| 19 | 747880   | 748090   | 747978   | 8  | 8  | 1 | 4.315089119 | 0.0127267   | PTBP1     | ENSG00000011304 |
| 19 | 884477   | 884776   | 884647   | 13 | 16 | 0 | 16.30144778 | 1.09E-05    | ARID3A    | ENSG00000116017 |
| 19 | 972396   | 972814   | 972575   | 8  | 16 | 8 | 1.811271976 | 0.0663685   |           | ENSG00000207357 |
| 19 | 1161400  | 1161723  | 1161579  | 13 | 18 | 0 | 18.21926517 | 2.83E-06    | STK11     | ENSG00000118046 |
| 19 | 1334342  | 1334535  | 1334438  | 8  | 9  | 6 | 1.369869562 | 0.253675    | NDUFS7    | ENSG00000115286 |
| 19 | 1334618  | 1334962  | 1334787  | 9  | 14 | 5 | 2.397271733 | 0.0258078   | NDUFS7    | ENSG00000115286 |
| 19 | 2009439  | 2009919  | 2009740  | 20 | 33 | 0 | 32.60289556 | 1.18E-10    | MKNK2     | ENSG00000099875 |
| 19 | 2530459  | 2530833  | 2530617  | 20 | 26 | 5 | 4.315089119 | 8.98E-05    | GNG7      | ENSG00000213611 |
| 19 | 2904251  | 2904487  | 2904369  | 9  | 10 | 1 | 5.273997812 | 0.00391723  | ZNF77     | ENSG00000175691 |
| 19 | 3672438  | 3672634  | 3672536  | 9  | 9  | 4 | 1.917817386 | 0.103282    | TJP3      | ENSG00000105289 |
| 19 | 3803651  | 3803838  | 3803763  | 9  | 9  | 3 | 2.397271733 | 0.0539397   | ZFR2      | ENSG00000105278 |
| 19 | 3919551  | 3919989  | 3919875  | 9  | 16 | 8 | 1.811271976 | 0.0663685   | DAPK3     | ENSG00000167657 |
| 19 | 4470959  | 4471245  | 4471102  | 11 | 14 | 1 | 7.191815198 | 0.00034761  | KIAA1881  | ENSG00000167676 |
| 19 | 4575790  | 4576166  | 4575974  | 55 | 65 | 1 | 31.64398687 | 1.78E-18    | TNFAIP8L1 | ENSG00000185361 |
| 19 | 4674862  | 4675131  | 4675026  | 9  | 10 | 3 | 2.636998906 | 0.034203    | DPP9      | ENSG00000142002 |
| 19 | 4923933  | 4924165  | 4924041  | 12 | 13 | 3 | 3.356180426 | 0.00805599  | JMJD2B    | ENSG00000127663 |
| 19 | 5421412  | 5421864  | 5421561  | 30 | 36 | 2 | 11.82654055 | 2.94E-09    | ZNRF4     | ENSG00000105428 |



|    |          |          |          |     |     |    |             |             |          |                 |
|----|----------|----------|----------|-----|-----|----|-------------|-------------|----------|-----------------|
| 19 | 5705604  | 5705810  | 5705719  | 8   | 8   | 0  | 8.630178238 | 0.00235436  | TMEM146  | ENSG00000174898 |
| 19 | 6411179  | 6411358  | 6411268  | 8   | 8   | 1  | 4.315089119 | 0.0127267   | SLC25A23 | ENSG00000125648 |
| 19 | 6528241  | 6528960  | 6528603  | 162 | 208 | 1  | 100.2059584 | 9.62E-60    |          | ENSG00000199223 |
| 19 | 6694790  | 6695198  | 6695002  | 44  | 54  | 2  | 17.57999271 | 3.45E-14    | TRIP10   | ENSG00000125733 |
| 19 | 6696035  | 6696241  | 6696138  | 9   | 10  | 1  | 5.273997812 | 0.00391723  | TRIP10   | ENSG00000125733 |
| 19 | 6814611  | 6814846  | 6814711  | 8   | 10  | 1  | 5.273997812 | 0.00391723  | EMR1     | ENSG00000174837 |
| 19 | 7392917  | 7393114  | 7393011  | 11  | 11  | 4  | 2.301380863 | 0.0459276   | ARHGEF18 | ENSG00000104880 |
| 19 | 8332922  | 8333119  | 8333020  | 8   | 8   | 2  | 2.876726079 | 0.0381137   | ANGPTL4  | ENSG00000167772 |
| 19 | 9011311  | 9011800  | 9011532  | 25  | 41  | 1  | 20.13708255 | 1.17E-11    | OR1M1    | ENSG00000170929 |
| 19 | 9593382  | 9593889  | 9593710  | 28  | 40  | 0  | 39.31525642 | 1.07E-12    | ZNF561   | ENSG00000171469 |
| 19 | 9594283  | 9594627  | 9594455  | 30  | 35  | 0  | 34.52071295 | 3.07E-11    | ZNF561   | ENSG00000171469 |
| 19 | 9930511  | 9930746  | 9930628  | 10  | 11  | 0  | 11.50690432 | 0.000313206 | OLFM2    | ENSG00000105088 |
| 19 | 9999318  | 9999659  | 9999491  | 10  | 13  | 3  | 3.356180426 | 0.00805599  |          | ENSG00000167798 |
| 19 | 10061489 | 10061807 | 10061648 | 11  | 13  | 4  | 2.684944341 | 0.01921     | C19orf66 | ENSG00000130813 |
| 19 | 10165769 | 10166072 | 10165931 | 9   | 11  | 4  | 2.301380863 | 0.0459276   | DNMT1    | ENSG00000130816 |
| 19 | 10257663 | 10258054 | 10257926 | 16  | 23  | 3  | 5.753452158 | 3.82E-05    | ICAM4    | ENSG00000105371 |
| 19 | 10335618 | 10335832 | 10335725 | 9   | 9   | 2  | 3.19636231  | 0.0229249   | TYK2     | ENSG00000105397 |
| 19 | 10362366 | 10362584 | 10362495 | 8   | 8   | 1  | 4.315089119 | 0.0127267   | TYK2     | ENSG00000105397 |
| 19 | 10625472 | 10625944 | 10625648 | 13  | 20  | 4  | 4.027416511 | 0.000652226 | ILF3     | ENSG00000129351 |
| 19 | 10627659 | 10627863 | 10627749 | 8   | 9   | 3  | 2.397271733 | 0.0539397   | ILF3     | ENSG00000129351 |
| 19 | 10836119 | 10836363 | 10836235 | 9   | 9   | 4  | 1.917817386 | 0.103282    | CARM1    | ENSG00000142453 |
| 19 | 10859320 | 10859536 | 10859428 | 8   | 9   | 1  | 4.794543465 | 0.00708517  | CARM1    | ENSG00000142453 |
| 19 | 10900326 | 10900533 | 10900425 | 9   | 10  | 5  | 1.757999271 | 0.121253    | C19orf52 | ENSG00000142444 |
| 19 | 11060969 | 11061163 | 11061090 | 9   | 9   | 3  | 2.397271733 | 0.0539397   | LDLR     | ENSG00000130164 |
| 19 | 11236367 | 11236558 | 11236454 | 8   | 8   | 2  | 2.876726079 | 0.0381137   | DOCK6    | ENSG00000130158 |
| 19 | 11237382 | 11237609 | 11237518 | 9   | 9   | 3  | 2.397271733 | 0.0539397   | DOCK6    | ENSG00000130158 |
| 19 | 11265435 | 11265836 | 11265585 | 10  | 16  | 4  | 3.260289556 | 0.00475414  | TSPAN16  | ENSG00000130167 |
| 19 | 11296008 | 11296352 | 11296180 | 14  | 20  | 1  | 10.06854128 | 8.32E-06    | RAB3D    | ENSG00000105514 |
| 19 | 11316021 | 11316401 | 11316200 | 21  | 28  | 11 | 2.317362675 | 0.00474534  |          | ENSG00000183401 |
| 19 | 11425248 | 11425660 | 11425452 | 9   | 18  | 0  | 18.21926517 | 2.83E-06    | PRKCSH   | ENSG00000130175 |
| 19 | 11553030 | 11553232 | 11553115 | 9   | 10  | 5  | 1.757999271 | 0.121253    | ACP5     | ENSG00000102575 |
| 19 | 11787131 | 11787325 | 11787214 | 9   | 9   | 0  | 9.589086931 | 0.00120187  | ZNF440   | ENSG00000171295 |
| 19 | 12467158 | 12467443 | 12467291 | 14  | 14  | 2  | 4.794543465 | 0.00154571  | ZNF709   | ENSG00000196826 |
| 19 | 12522661 | 12522840 | 12522750 | 8   | 8   | 1  | 4.315089119 | 0.0127267   | ZNF564   | ENSG00000220949 |

|    |          |          |          |    |    |    |             |             |          |                 |
|----|----------|----------|----------|----|----|----|-------------|-------------|----------|-----------------|
| 19 | 12536019 | 12536222 | 12536087 | 8  | 8  | 3  | 2.157544559 | 0.0836802   |          | ENSG00000213290 |
| 19 | 12583356 | 12583581 | 12583447 | 8  | 9  | 4  | 1.917817386 | 0.103282    | ZNF791   | ENSG00000173875 |
| 19 | 12640587 | 12640879 | 12640738 | 8  | 9  | 6  | 1.369869562 | 0.253675    | C19orf56 | ENSG00000105583 |
| 19 | 12641015 | 12641580 | 12641271 | 12 | 29 | 14 | 1.917817386 | 0.0161307   | C19orf56 | ENSG00000105583 |
| 19 | 12648246 | 12648554 | 12648417 | 9  | 13 | 5  | 2.237453617 | 0.038866    | DHPS     | ENSG00000095059 |
| 19 | 12653632 | 12653889 | 12653800 | 13 | 15 | 6  | 2.191791298 | 0.0328001   | DHPS     | ENSG00000095059 |
| 19 | 12668390 | 12668878 | 12668601 | 12 | 22 | 27 | 0.787674998 | 0.803855    | FBXW9    | ENSG00000132004 |
| 19 | 12694524 | 12694831 | 12694694 | 15 | 19 | 7  | 2.397271733 | 0.0127287   | TNPO2    | ENSG00000105576 |
| 19 | 12695603 | 12695917 | 12695760 | 8  | 12 | 6  | 1.78083043  | 0.0985525   | TNPO2    | ENSG00000105576 |
| 19 | 12705257 | 12705620 | 12705427 | 11 | 17 | 2  | 5.753452158 | 0.000281509 | C19orf43 | ENSG00000123144 |
| 19 | 12709073 | 12709531 | 12709352 | 12 | 23 | 9  | 2.301380863 | 0.00938618  | ASNA1    | ENSG00000198356 |
| 19 | 12746853 | 12747285 | 12746977 | 9  | 17 | 15 | 1.07877228  | 0.410615    | HOOK2    | ENSG00000095066 |
| 19 | 12747439 | 12747779 | 12747611 | 8  | 12 | 4  | 2.493162602 | 0.0299057   | HOOK2    | ENSG00000095066 |
| 19 | 12758422 | 12758714 | 12758568 | 12 | 14 | 4  | 2.876726079 | 0.01219     | JUNB     | ENSG00000171223 |
| 19 | 12761933 | 12762130 | 12762051 | 8  | 8  | 5  | 1.43836304  | 0.235762    | JUNB     | ENSG00000171223 |
| 19 | 12766835 | 12767015 | 12766925 | 8  | 8  | 1  | 4.315089119 | 0.0127267   | JUNB     | ENSG00000171223 |
| 19 | 12777862 | 12778074 | 12777932 | 8  | 9  | 8  | 1.065454103 | 0.442605    | RNASEH2A | ENSG00000104889 |
| 19 | 12819408 | 12819622 | 12819540 | 8  | 9  | 2  | 3.19636231  | 0.0229249   | MAST1    | ENSG00000105613 |
| 19 | 12856833 | 12857083 | 12856969 | 9  | 12 | 1  | 6.232906505 | 0.00117736  | KLF1     | ENSG00000105610 |
| 19 | 12857209 | 12857413 | 12857332 | 9  | 11 | 3  | 2.876726079 | 0.0213797   | KLF1     | ENSG00000105610 |
| 19 | 12912148 | 12912541 | 12912352 | 10 | 18 | 2  | 6.073088389 | 0.000157975 | CALR     | ENSG00000179218 |
| 19 | 12918402 | 12918674 | 12918538 | 11 | 13 | 1  | 6.712360851 | 0.000640982 | RAD23A   | ENSG00000179262 |
| 19 | 12936772 | 12937021 | 12936889 | 8  | 10 | 8  | 1.171999514 | 0.35773     | DAND5    | ENSG00000179284 |
| 19 | 12949718 | 12949929 | 12949823 | 8  | 9  | 3  | 2.397271733 | 0.0539397   | DAND5    | ENSG00000179284 |
| 19 | 13089690 | 13089938 | 13089814 | 8  | 9  | 3  | 2.397271733 | 0.0539397   | NACC1    | ENSG00000160877 |
| 19 | 13122090 | 13122447 | 13122263 | 16 | 21 | 1  | 10.54799562 | 4.43E-06    | IER2     | ENSG00000160888 |
| 19 | 13126709 | 13127209 | 13126904 | 10 | 23 | 6  | 3.287686948 | 0.00104919  | IER2     | ENSG00000160888 |
| 19 | 13234324 | 13234627 | 13234475 | 8  | 13 | 1  | 6.712360851 | 0.000640982 |          | ENSG00000213253 |
| 19 | 13625710 | 13626077 | 13625900 | 31 | 37 | 1  | 18.21926517 | 1.57E-10    | CCDC130  | ENSG00000104957 |
| 19 | 13737248 | 13737770 | 13737591 | 37 | 51 | 7  | 6.232906505 | 1.73E-09    |          | ENSG00000037757 |
| 19 | 13745976 | 13746391 | 13746144 | 9  | 16 | 3  | 4.075361945 | 0.00173346  | C19orf53 | ENSG00000104979 |
| 19 | 13805341 | 13805546 | 13805460 | 8  | 10 | 4  | 2.109599125 | 0.0694668   |          | ENSG00000209707 |
| 19 | 13806256 | 13806455 | 13806419 | 8  | 10 | 3  | 2.636998906 | 0.034203    |          | ENSG00000209707 |
| 19 | 13813135 | 13813526 | 13813421 | 9  | 14 | 5  | 2.397271733 | 0.0258078   |          | ENSG00000205463 |

|    |          |          |          |     |     |    |             |             |          |                 |
|----|----------|----------|----------|-----|-----|----|-------------|-------------|----------|-----------------|
| 19 | 13984365 | 13984744 | 13984525 | 14  | 21  | 0  | 21.09599125 | 3.76E-07    | RFX1     | ENSG00000132005 |
| 19 | 14053080 | 14053346 | 14053234 | 9   | 13  | 12 | 1.0326709   | 0.46514     | C19orf67 | ENSG00000188032 |
| 19 | 14508800 | 14509032 | 14508916 | 8   | 8   | 0  | 8.630178238 | 0.00235436  | GPSN2    | ENSG00000099797 |
| 19 | 15010132 | 15010366 | 15010233 | 8   | 12  | 2  | 4.155271003 | 0.0046638   | CASP14   | ENSG00000105141 |
| 19 | 15084373 | 15084552 | 15084462 | 8   | 8   | 0  | 8.630178238 | 0.00235436  | SYDE1    | ENSG00000105137 |
| 19 | 15125851 | 15126079 | 15125965 | 8   | 8   | 4  | 1.726035648 | 0.150596    |          | ENSG00000209740 |
| 19 | 15167867 | 15168053 | 15167960 | 8   | 8   | 3  | 2.157544559 | 0.0836802   | NOTCH3   | ENSG00000074181 |
| 19 | 15241150 | 15241354 | 15241271 | 8   | 8   | 0  | 8.630178238 | 0.00235436  | BRD4     | ENSG00000141867 |
| 19 | 15352184 | 15352404 | 15352284 | 8   | 10  | 5  | 1.757999271 | 0.121253    | AKAP8    | ENSG00000105127 |
| 19 | 15390842 | 15391196 | 15391032 | 8   | 13  | 6  | 1.917817386 | 0.0693353   | AKAP8L   | ENSG00000011243 |
| 19 | 15527565 | 15527803 | 15527660 | 10  | 10  | 3  | 2.636998906 | 0.034203    | CYP4F22  | ENSG00000171954 |
| 19 | 15528218 | 15528541 | 15528379 | 9   | 14  | 2  | 4.794543465 | 0.00154571  | CYP4F22  | ENSG00000171954 |
| 19 | 15590969 | 15591166 | 15591030 | 8   | 9   | 0  | 9.589086931 | 0.00120187  | CYP4F8   | ENSG00000186526 |
| 19 | 15618314 | 15618816 | 15618577 | 64  | 91  | 2  | 29.40653325 | 1.46E-24    | CYP4F3   | ENSG00000186529 |
| 19 | 15692983 | 15693162 | 15693069 | 8   | 8   | 3  | 2.157544559 | 0.0836802   | OR10H2   | ENSG00000171942 |
| 19 | 15864472 | 15865193 | 15864708 | 43  | 76  | 4  | 14.76719387 | 3.30E-18    | CYP4F2   | ENSG00000186115 |
| 19 | 15957808 | 15958027 | 15957917 | 10  | 10  | 0  | 10.54799562 | 0.000613541 | HSH2D    | ENSG00000196684 |
| 19 | 16144838 | 16145097 | 16144945 | 10  | 12  | 6  | 1.78083043  | 0.0985525   | CIB3     | ENSG00000141977 |
| 19 | 16169512 | 16169723 | 16169603 | 10  | 10  | 0  | 10.54799562 | 0.000613541 | AP1M1    | ENSG00000072958 |
| 19 | 16928909 | 16929280 | 16929101 | 10  | 16  | 6  | 2.328778255 | 0.0221113   |          | ENSG00000223132 |
| 19 | 17221919 | 17222201 | 17222055 | 9   | 10  | 2  | 3.515998541 | 0.0136204   | NR2F6    | ENSG00000160113 |
| 19 | 17232745 | 17232982 | 17232863 | 8   | 11  | 2  | 3.835634772 | 0.00800699  | USHBP1   | ENSG00000130307 |
| 19 | 17309116 | 17309314 | 17309215 | 8   | 8   | 7  | 1.07877228  | 0.435076    | GTPBP3   | ENSG00000130299 |
| 19 | 17318189 | 17318371 | 17318297 | 8   | 8   | 1  | 4.315089119 | 0.0127267   | GTPBP3   | ENSG00000130299 |
| 19 | 17483132 | 17483402 | 17483303 | 8   | 10  | 4  | 2.109599125 | 0.0694668   | PGLS     | ENSG00000130313 |
| 19 | 17626763 | 17627220 | 17626993 | 21  | 36  | 5  | 5.913270274 | 4.32E-07    | UNC13A   | ENSG00000130477 |
| 19 | 17763129 | 17763351 | 17763246 | 10  | 11  | 1  | 5.753452158 | 0.00215302  | B3GNT3   | ENSG00000179913 |
| 19 | 17861725 | 17861920 | 17861760 | 8   | 8   | 0  | 8.630178238 | 0.00235436  | SLC5A5   | ENSG00000105641 |
| 19 | 17874537 | 17874835 | 17874682 | 18  | 20  | 0  | 20.13708255 | 7.37E-07    | SLC5A5   | ENSG00000105641 |
| 19 | 17978817 | 17979027 | 17978961 | 8   | 11  | 1  | 5.753452158 | 0.00215302  | ARRDC2   | ENSG00000105643 |
| 19 | 18001593 | 18001924 | 18001758 | 8   | 12  | 2  | 4.155271003 | 0.0046638   | ARRDC2   | ENSG00000105643 |
| 19 | 18006819 | 18007239 | 18007005 | 42  | 54  | 2  | 17.57999271 | 3.45E-14    | ARRDC2   | ENSG00000105643 |
| 19 | 18065205 | 18065575 | 18065381 | 29  | 33  | 2  | 10.86763185 | 1.89E-08    | MAST3    | ENSG00000099308 |
| 19 | 18195747 | 18196934 | 18196488 | 207 | 309 | 5  | 49.54361581 | 2.14E-82    | PDE4C    | ENSG00000105650 |

|    |          |          |          |     |     |     |             |             |         |                 |
|----|----------|----------|----------|-----|-----|-----|-------------|-------------|---------|-----------------|
| 19 | 18251479 | 18251820 | 18251649 | 17  | 21  | 2   | 7.031997082 | 2.73E-05    | JUND    | ENSG00000130522 |
| 19 | 18294983 | 18295213 | 18295098 | 9   | 9   | 3   | 2.397271733 | 0.0539397   | LSM4    | ENSG00000130520 |
| 19 | 18300272 | 18300537 | 18300404 | 9   | 13  | 5   | 2.237453617 | 0.038866    |         | ENSG00000209784 |
| 19 | 18328501 | 18328684 | 18328571 | 9   | 10  | 0   | 10.54799562 | 0.000613541 | PGPEP1  | ENSG00000130517 |
| 19 | 18336437 | 18337239 | 18336819 | 379 | 574 | 7   | 68.92156231 | 3.65E-155   | GDF15   | ENSG00000130513 |
| 19 | 18345309 | 18346438 | 18345771 | 292 | 410 | 2   | 131.3704909 | 1.97E-116   | GDF15   | ENSG00000130513 |
| 19 | 18356509 | 18356801 | 18356667 | 8   | 10  | 0   | 10.54799562 | 0.000613541 | GDF15   | ENSG00000130513 |
| 19 | 18357612 | 18358303 | 18358000 | 131 | 185 | 3   | 44.58925423 | 6.40E-50    | GDF15   | ENSG00000130513 |
| 19 | 18360253 | 18360513 | 18360392 | 11  | 11  | 0   | 11.50690432 | 0.000313206 | GDF15   | ENSG00000130513 |
| 19 | 18410590 | 18410956 | 18410737 | 11  | 15  | 2   | 5.114179696 | 0.00088103  | ISYNA1  | ENSG00000105655 |
| 19 | 18728840 | 18729238 | 18729027 | 21  | 30  | 1   | 14.86308474 | 1.43E-08    | COMP    | ENSG00000105664 |
| 19 | 18819110 | 18819310 | 18819210 | 9   | 10  | 6   | 1.506856518 | 0.188853    | UPF1    | ENSG00000005007 |
| 19 | 18967622 | 18967829 | 18967725 | 10  | 10  | 5   | 1.757999271 | 0.121253    | SFRS14  | ENSG00000064607 |
| 19 | 19242591 | 19242804 | 19242735 | 8   | 9   | 0   | 9.589086931 | 0.00120187  | TM6SF2  | ENSG00000213996 |
| 19 | 19349542 | 19349943 | 19349785 | 13  | 19  | 4   | 3.835634772 | 0.00108365  | GATAD2A | ENSG00000167491 |
| 19 | 19378743 | 19378986 | 19378834 | 8   | 9   | 0   | 9.589086931 | 0.00120187  | GATAD2A | ENSG00000167491 |
| 19 | 19381093 | 19381325 | 19381195 | 12  | 12  | 1   | 6.232906505 | 0.00117736  | GATAD2A | ENSG00000167491 |
| 19 | 19487872 | 19488195 | 19488046 | 12  | 15  | 7   | 1.917817386 | 0.0572317   | NDUFA13 | ENSG00000130288 |
| 19 | 19635541 | 19635733 | 19635607 | 9   | 9   | 2   | 3.19636231  | 0.0229249   | ATP13A1 | ENSG00000105726 |
| 19 | 19679643 | 19679823 | 19679752 | 9   | 9   | 2   | 3.19636231  | 0.0229249   | ZNF14   | ENSG00000105708 |
| 19 | 19704676 | 19704906 | 19704763 | 8   | 8   | 5   | 1.43836304  | 0.235762    | ZNF14   | ENSG00000105708 |
| 19 | 19746977 | 19747168 | 19747072 | 8   | 8   | 0   | 8.630178238 | 0.00235436  | ZNF14   | ENSG00000105708 |
| 19 | 19748202 | 19748798 | 19748466 | 90  | 112 | 7   | 13.54458529 | 4.30E-25    | ZNF14   | ENSG00000105708 |
| 19 | 21457558 | 21457864 | 21457691 | 12  | 15  | 4   | 3.068507818 | 0.0076507   | ZNF429  | ENSG00000197013 |
| 19 | 23262374 | 23262686 | 23262514 | 17  | 21  | 3   | 5.273997812 | 0.00011662  |         | ENSG00000213971 |
| 19 | 23975387 | 23975666 | 23975532 | 8   | 8   | 12  | 0.663859864 | 0.833689    |         | ENSG00000211551 |
| 19 | 23975784 | 23976122 | 23975954 | 20  | 21  | 21  | 0.958908693 | 0.555026    |         | ENSG00000211551 |
| 19 | 23976336 | 23977000 | 23976662 | 12  | 22  | 12  | 1.696530765 | 0.057768    |         | ENSG00000211551 |
| 19 | 24317867 | 24318207 | 24318037 | 41  | 41  | 34  | 1.150690432 | 0.267862    | ZNF254  | ENSG00000213096 |
| 19 | 32423683 | 32424788 | 32423870 | 142 | 305 | 263 | 1.111462349 | 0.103669    |         |                 |
| 19 | 32424818 | 32425417 | 32425238 | 45  | 67  | 65  | 0.987966532 | 0.527533    |         |                 |
| 19 | 32425623 | 32425864 | 32425740 | 9   | 9   | 3   | 2.397271733 | 0.0539397   |         |                 |
| 19 | 32425937 | 32426784 | 32426607 | 58  | 102 | 129 | 0.759750734 | 0.981852    |         |                 |
| 19 | 32426893 | 32427230 | 32427061 | 49  | 52  | 53  | 0.941151125 | 0.623071    |         |                 |

|    |          |          |          |     |     |     |             |             |                         |
|----|----------|----------|----------|-----|-----|-----|-------------|-------------|-------------------------|
| 19 | 32427352 | 32427928 | 32427751 | 26  | 44  | 47  | 0.8989769   | 0.69647     |                         |
| 19 | 32428341 | 32428943 | 32428614 | 95  | 132 | 135 | 0.937756295 | 0.70089     |                         |
| 19 | 32429294 | 32429627 | 32429460 | 15  | 19  | 19  | 0.958908693 | 0.552451    |                         |
| 19 | 32429629 | 32429958 | 32429788 | 9   | 14  | 17  | 0.799090578 | 0.74177     |                         |
| 19 | 32429960 | 32430501 | 32430323 | 247 | 264 | 232 | 1.090604308 | 0.166538    |                         |
| 19 | 32431025 | 32431354 | 32431189 | 20  | 22  | 24  | 0.882195998 | 0.668517    |                         |
| 19 | 32493930 | 32494259 | 32494094 | 8   | 8   | 20  | 0.410960868 | 0.991048    |                         |
| 19 | 32561992 | 32562322 | 32562157 | 23  | 26  | 16  | 1.52297263  | 0.0820811   |                         |
| 19 | 32571356 | 32571686 | 32571525 | 16  | 18  | 10  | 1.656296833 | 0.0841786   |                         |
| 19 | 32593469 | 32593799 | 32593634 | 14  | 15  | 13  | 1.095895649 | 0.398774    |                         |
| 19 | 32616897 | 32617227 | 32617062 | 17  | 17  | 17  | 0.958908693 | 0.549739    |                         |
| 19 | 32658823 | 32659154 | 32658988 | 29  | 29  | 37  | 0.757033179 | 0.874819    |                         |
| 19 | 32900949 | 32901135 | 32901077 | 8   | 9   | 1   | 4.794543465 | 0.00708517  |                         |
| 19 | 33508070 | 33508262 | 33508166 | 8   | 8   | 11  | 0.71918152  | 0.777546    | ENSG00000205243         |
| 19 | 33664833 | 33665285 | 33665079 | 63  | 72  | 2   | 23.33344486 | 3.30E-19    | ENSG00000205243         |
| 19 | 34572153 | 34572625 | 34572312 | 15  | 25  | 8   | 2.770180669 | 0.00215826  | VSTM2B ENSG00000187135  |
| 19 | 34788911 | 34789128 | 34789046 | 9   | 10  | 5   | 1.757999271 | 0.121253    | POP4 ENSG00000105171    |
| 19 | 35865733 | 35865956 | 35865844 | 8   | 8   | 1   | 4.315089119 | 0.0127267   | ENSG00000223148         |
| 19 | 37556454 | 37556886 | 37556707 | 13  | 22  | 2   | 7.351633313 | 1.51E-05    | ZNF507 ENSG00000168813  |
| 19 | 38359688 | 38359944 | 38359802 | 15  | 17  | 11  | 1.43836304  | 0.15834     | LRP3 ENSG00000130881    |
| 19 | 38481246 | 38481504 | 38481369 | 11  | 13  | 2   | 4.474907234 | 0.00269459  | CEBPA ENSG00000184771   |
| 19 | 38533260 | 38533628 | 38533449 | 11  | 19  | 0   | 19.17817386 | 1.44E-06    | CEBPG ENSG00000153879   |
| 19 | 38786134 | 38786493 | 38786307 | 14  | 20  | 0   | 20.13708255 | 7.37E-07    | CHST8 ENSG00000124302   |
| 19 | 39916794 | 39917068 | 39916889 | 9   | 12  | 2   | 4.155271003 | 0.0046638   | ZNF181 ENSG00000197841  |
| 19 | 39955864 | 39956059 | 39955964 | 8   | 8   | 4   | 1.726035648 | 0.150596    | ZNF599 ENSG00000153896  |
| 19 | 40305754 | 40306031 | 40305897 | 10  | 11  | 2   | 3.835634772 | 0.00800699  | FXVD3 ENSG00000089356   |
| 19 | 40350893 | 40351091 | 40351003 | 10  | 11  | 3   | 2.876726079 | 0.0213797   | FXVD5 ENSG00000089327   |
| 19 | 40351094 | 40351366 | 40351257 | 8   | 11  | 3   | 2.876726079 | 0.0213797   | FXVD5 ENSG00000089327   |
| 19 | 40399273 | 40399484 | 40399327 | 9   | 11  | 3   | 2.876726079 | 0.0213797   | FAM187B ENSG00000177558 |
| 19 | 40510479 | 40510684 | 40510581 | 9   | 10  | 2   | 3.515998541 | 0.0136204   | CD22 ENSG00000012124    |
| 19 | 40702216 | 40702395 | 40702305 | 8   | 8   | 1   | 4.315089119 | 0.0127267   | DMKN ENSG00000161249    |
| 19 | 40758217 | 40758722 | 40758547 | 44  | 58  | 45  | 1.229904628 | 0.144288    | ENSG00000209925         |
| 19 | 40876454 | 40876816 | 40876759 | 8   | 12  | 3   | 3.116453252 | 0.0131971   | ZBTB32 ENSG00000011590  |
| 19 | 40933119 | 40933326 | 40933213 | 10  | 11  | 0   | 11.50690432 | 0.000313206 | LIN37 ENSG00000188223   |

|    |          |          |          |    |    |    |             |             |         |                 |
|----|----------|----------|----------|----|----|----|-------------|-------------|---------|-----------------|
| 19 | 40971988 | 40972172 | 40972113 | 9  | 9  | 0  | 9.589086931 | 0.00120187  | SNX26   | ENSG00000004777 |
| 19 | 41118912 | 41119091 | 41119001 | 8  | 8  | 2  | 2.876726079 | 0.0381137   | LRFN3   | ENSG00000126243 |
| 19 | 41177762 | 41177966 | 41177864 | 8  | 10 | 5  | 1.757999271 | 0.121253    |         | ENSG00000205138 |
| 19 | 41243310 | 41243498 | 41243404 | 8  | 9  | 0  | 9.589086931 | 0.00120187  | WDR62   | ENSG00000075702 |
| 19 | 41310533 | 41310865 | 41310699 | 11 | 15 | 4  | 3.068507818 | 0.0076507   | CAPNS1  | ENSG00000126247 |
| 19 | 41311223 | 41311449 | 41311390 | 10 | 13 | 0  | 13.4247217  | 8.16E-05    | CAPNS1  | ENSG00000126247 |
| 19 | 41319859 | 41320070 | 41319964 | 8  | 9  | 4  | 1.917817386 | 0.103282    | CAPNS1  | ENSG00000126247 |
| 19 | 41672149 | 41672537 | 41672358 | 10 | 17 | 8  | 1.917817386 | 0.0474153   | ZNF566  | ENSG00000186017 |
| 19 | 41849438 | 41849691 | 41849564 | 11 | 14 | 4  | 2.876726079 | 0.01219     | ZNF461  | ENSG00000197808 |
| 19 | 42650149 | 42650419 | 42650302 | 10 | 12 | 4  | 2.493162602 | 0.0299057   | ZNF569  | ENSG00000196437 |
| 19 | 42689695 | 42690033 | 42689864 | 9  | 15 | 9  | 1.534253909 | 0.136498    | ZNF793  | ENSG00000188227 |
| 19 | 43148692 | 43148998 | 43148845 | 18 | 20 | 2  | 6.712360851 | 4.91E-05    | SIPA1L3 | ENSG00000105738 |
| 19 | 43162250 | 43162554 | 43162377 | 11 | 14 | 0  | 14.3836304  | 4.17E-05    | SIPA1L3 | ENSG00000105738 |
| 19 | 43183673 | 43183937 | 43183798 | 8  | 10 | 1  | 5.273997812 | 0.00391723  |         | ENSG00000221258 |
| 19 | 43460005 | 43460299 | 43460120 | 17 | 20 | 3  | 5.034270639 | 0.000202317 | SPINT2  | ENSG00000167642 |
| 19 | 43464443 | 43464717 | 43464580 | 8  | 10 | 2  | 3.515998541 | 0.0136204   |         | ENSG00000200209 |
| 19 | 43557297 | 43557613 | 43557455 | 8  | 13 | 10 | 1.220429246 | 0.306001    | PSMD8   | ENSG00000099341 |
| 19 | 43841072 | 43841452 | 43841251 | 10 | 18 | 6  | 2.602752167 | 0.00970422  | ACTN4   | ENSG00000130402 |
| 19 | 43844594 | 43844872 | 43844733 | 13 | 14 | 6  | 2.054804342 | 0.0480281   | ACTN4   | ENSG00000130402 |
| 19 | 43866252 | 43866446 | 43866334 | 8  | 10 | 2  | 3.515998541 | 0.0136204   | ACTN4   | ENSG00000130402 |
| 19 | 43881593 | 43881793 | 43881693 | 8  | 9  | 1  | 4.794543465 | 0.00708517  | CAPN12  | ENSG00000182472 |
| 19 | 43957791 | 43958277 | 43958098 | 44 | 57 | 0  | 55.6167042  | 1.16E-17    | LGALS7  | ENSG00000205076 |
| 19 | 43969128 | 43969399 | 43969255 | 13 | 14 | 1  | 7.191815198 | 0.00034761  | LGALS7B | ENSG00000178934 |
| 19 | 43975622 | 43975852 | 43975737 | 8  | 9  | 0  | 9.589086931 | 0.00120187  |         | ENSG00000207296 |
| 19 | 44019406 | 44019709 | 44019550 | 21 | 26 | 3  | 6.472633678 | 6.96E-06    | ECH1    | ENSG00000104823 |
| 19 | 44020099 | 44020525 | 44020273 | 37 | 46 | 11 | 3.755725714 | 2.16E-06    | ECH1    | ENSG00000104823 |
| 19 | 44021085 | 44021342 | 44021209 | 11 | 13 | 0  | 13.4247217  | 8.16E-05    | ECH1    | ENSG00000104823 |
| 19 | 44031426 | 44031648 | 44031534 | 9  | 10 | 3  | 2.636998906 | 0.034203    | HNRNPL  | ENSG00000104824 |
| 19 | 44060404 | 44060662 | 44060542 | 8  | 10 | 1  | 5.273997812 | 0.00391723  | RINL    | ENSG00000187994 |
| 19 | 44157532 | 44157746 | 44157693 | 8  | 9  | 2  | 3.19636231  | 0.0229249   | FBXO17  | ENSG00000161241 |
| 19 | 44304608 | 44304839 | 44304723 | 8  | 9  | 0  | 9.589086931 | 0.00120187  | PAK4    | ENSG00000130669 |
| 19 | 44340317 | 44340561 | 44340467 | 11 | 13 | 2  | 4.474907234 | 0.00269459  | PAK4    | ENSG00000130669 |
| 19 | 44342942 | 44343152 | 44343082 | 9  | 11 | 5  | 1.917817386 | 0.0843804   | PAK4    | ENSG00000130669 |
| 19 | 44350070 | 44350295 | 44350201 | 9  | 10 | 3  | 2.636998906 | 0.034203    | PAK4    | ENSG00000130669 |

|    |          |          |          |     |     |    |             |             |          |                 |
|----|----------|----------|----------|-----|-----|----|-------------|-------------|----------|-----------------|
| 19 | 44594597 | 44594826 | 44594734 | 8   | 11  | 10 | 1.046082211 | 0.455063    | PLEKHG2  | ENSG00000090924 |
| 19 | 45007052 | 45007231 | 45007153 | 9   | 9   | 4  | 1.917817386 | 0.103282    | DYRK1B   | ENSG00000105204 |
| 19 | 45167084 | 45167346 | 45167215 | 14  | 15  | 1  | 7.671269544 | 0.000187863 | PSMC4    | ENSG00000013275 |
| 19 | 45483177 | 45483448 | 45483298 | 8   | 11  | 2  | 3.835634772 | 0.00800699  | AKT2     | ENSG00000105221 |
| 19 | 45499942 | 45500413 | 45500112 | 19  | 32  | 0  | 31.64398687 | 2.31E-10    |          | ENSG00000206674 |
| 19 | 45500425 | 45500705 | 45500553 | 12  | 12  | 1  | 6.232906505 | 0.00117736  |          | ENSG00000206674 |
| 19 | 45528841 | 45529222 | 45529039 | 31  | 39  | 3  | 9.589086931 | 3.26E-09    |          | ENSG00000207281 |
| 19 | 45618544 | 45619029 | 45618793 | 8   | 17  | 3  | 4.315089119 | 0.00102271  | SERTAD1  | ENSG00000197019 |
| 19 | 45623669 | 45624159 | 45623912 | 43  | 62  | 9  | 6.041124766 | 6.43E-11    | SERTAD1  | ENSG00000197019 |
| 19 | 45643771 | 45644039 | 45643894 | 9   | 10  | 1  | 5.273997812 | 0.00391723  | SERTAD3  | ENSG00000167565 |
| 19 | 45864193 | 45864489 | 45864364 | 8   | 10  | 1  | 5.273997812 | 0.00391723  |          | ENSG00000179368 |
| 19 | 45916757 | 45917049 | 45916915 | 8   | 11  | 6  | 1.643843474 | 0.137712    | ITPKC    | ENSG00000086544 |
| 19 | 46118801 | 46119040 | 46118920 | 8   | 9   | 5  | 1.598181155 | 0.170911    | CYP2B7P1 | ENSG00000197573 |
| 19 | 46119052 | 46119250 | 46119140 | 8   | 10  | 5  | 1.757999271 | 0.121253    | CYP2B7P1 | ENSG00000197573 |
| 19 | 46143259 | 46143874 | 46143483 | 19  | 40  | 5  | 6.552542736 | 4.67E-08    | CYP2B7P1 | ENSG00000197573 |
| 19 | 46211353 | 46211707 | 46211483 | 11  | 15  | 1  | 7.671269544 | 0.000187863 | CYP2A7P1 | ENSG00000213908 |
| 19 | 46416185 | 46416637 | 46416463 | 20  | 29  | 3  | 7.191815198 | 1.23E-06    | AXL      | ENSG00000167601 |
| 19 | 46459741 | 46460405 | 46460112 | 29  | 64  | 5  | 10.38817751 | 3.85E-14    | HNRNPUL1 | ENSG00000105323 |
| 19 | 46461808 | 46462108 | 46461935 | 8   | 11  | 5  | 1.917817386 | 0.0843804   | HNRNPUL1 | ENSG00000105323 |
| 19 | 46595314 | 46595570 | 46595442 | 9   | 11  | 5  | 1.917817386 | 0.0843804   | BCKDHA   | ENSG00000142046 |
| 19 | 46725968 | 46727126 | 46726555 | 286 | 399 | 0  | 383.5634772 | 1.56E-117   | CEACAM21 | ENSG00000007129 |
| 19 | 46793565 | 46793798 | 46793677 | 9   | 11  | 3  | 2.876726079 | 0.0213797   | CEACAM21 | ENSG00000007129 |
| 19 | 46795804 | 46796068 | 46795936 | 8   | 11  | 2  | 3.835634772 | 0.00800699  | CEACAM21 | ENSG00000007129 |
| 19 | 46981424 | 46981606 | 46981553 | 9   | 10  | 2  | 3.515998541 | 0.0136204   | CEACAM3  | ENSG00000170956 |
| 19 | 47031885 | 47032104 | 47031997 | 8   | 9   | 5  | 1.598181155 | 0.170911    | LYPD4    | ENSG00000183103 |
| 19 | 47055325 | 47056274 | 47056107 | 27  | 57  | 9  | 5.56167042  | 9.45E-10    | RPS19    | ENSG00000105372 |
| 19 | 47056335 | 47057512 | 47056511 | 25  | 71  | 5  | 11.50690432 | 5.64E-16    | RPS19    | ENSG00000105372 |
| 19 | 47080108 | 47080303 | 47080205 | 8   | 9   | 9  | 0.958908693 | 0.536911    | ARHGEF1  | ENSG00000076928 |
| 19 | 47153732 | 47154015 | 47153873 | 9   | 11  | 3  | 2.876726079 | 0.0213797   | RABAC1   | ENSG00000105404 |
| 19 | 47247609 | 47247883 | 47247746 | 12  | 15  | 3  | 3.835634772 | 0.00291691  | GRIK5    | ENSG00000105737 |
| 19 | 47247885 | 47248187 | 47248032 | 14  | 17  | 5  | 2.876726079 | 0.00703033  | GRIK5    | ENSG00000105737 |
| 19 | 47364358 | 47364593 | 47364475 | 8   | 9   | 2  | 3.19636231  | 0.0229249   | POU2F2   | ENSG00000028277 |
| 19 | 47438984 | 47439305 | 47439139 | 9   | 13  | 5  | 2.237453617 | 0.038866    |          | ENSG00000204957 |
| 19 | 47464079 | 47464271 | 47464228 | 9   | 10  | 3  | 2.636998906 | 0.034203    | ERF      | ENSG00000105722 |

|    |          |          |          |     |     |   |             |             |          |                 |
|----|----------|----------|----------|-----|-----|---|-------------|-------------|----------|-----------------|
| 19 | 47548189 | 47548523 | 47548350 | 18  | 20  | 2 | 6.712360851 | 4.91E-05    | MEGF8    | ENSG00000105429 |
| 19 | 47597364 | 47597573 | 47597475 | 8   | 9   | 2 | 3.19636231  | 0.0229249   | CNFN     | ENSG00000105427 |
| 19 | 47616400 | 47616790 | 47616639 | 9   | 14  | 3 | 3.595907599 | 0.00486913  | LIPE     | ENSG00000079435 |
| 19 | 48344320 | 48344543 | 48344431 | 11  | 11  | 0 | 11.50690432 | 0.000313206 | PSG5     | ENSG00000204941 |
| 19 | 48950660 | 48950867 | 48950763 | 8   | 9   | 0 | 9.589086931 | 0.00120187  | C19orf61 | ENSG00000105771 |
| 19 | 48955444 | 48955776 | 48955610 | 10  | 14  | 6 | 2.054804342 | 0.0480281   | C19orf61 | ENSG00000105771 |
| 19 | 48978684 | 48979185 | 48978934 | 43  | 59  | 2 | 19.17817386 | 1.41E-15    | KCNN4    | ENSG00000104783 |
| 19 | 48980238 | 48980704 | 48980367 | 13  | 23  | 4 | 4.602761727 | 0.000137072 | KCNN4    | ENSG00000104783 |
| 19 | 49360792 | 49361033 | 49360912 | 8   | 11  | 4 | 2.301380863 | 0.0459276   | ZNF226   | ENSG00000167380 |
| 19 | 49408228 | 49408501 | 49408364 | 8   | 11  | 9 | 1.150690432 | 0.367789    | ZNF227   | ENSG00000131115 |
| 19 | 49473499 | 49473680 | 49473565 | 9   | 9   | 2 | 3.19636231  | 0.0229249   | ZNF233   | ENSG00000159915 |
| 19 | 49937004 | 49937431 | 49937252 | 16  | 23  | 6 | 3.287686948 | 0.00104919  | BCL3     | ENSG00000069399 |
| 19 | 49942624 | 49942892 | 49942758 | 9   | 11  | 4 | 2.301380863 | 0.0459276   | BCL3     | ENSG00000069399 |
| 19 | 49965895 | 49966148 | 49966010 | 14  | 15  | 5 | 2.557089848 | 0.0169197   |          | ENSG00000216919 |
| 19 | 50228068 | 50228448 | 50228216 | 9   | 13  | 1 | 6.712360851 | 0.000640982 | SFRS16   | ENSG00000104859 |
| 19 | 50287829 | 50288202 | 50288047 | 8   | 13  | 4 | 2.684944341 | 0.01921     | LRRC68   | ENSG00000104866 |
| 19 | 50331401 | 50331733 | 50331567 | 16  | 21  | 4 | 4.219198249 | 0.000390041 |          | ENSG00000213043 |
| 19 | 50501270 | 50501670 | 50501439 | 18  | 25  | 3 | 6.232906505 | 1.23E-05    | CKM      | ENSG00000104879 |
| 19 | 50595390 | 50595668 | 50595552 | 14  | 15  | 2 | 5.114179696 | 0.00088103  | PPP1R13L | ENSG00000104881 |
| 19 | 50618919 | 50619206 | 50619050 | 16  | 18  | 2 | 6.073088389 | 0.000157975 | ERCC1    | ENSG00000012061 |
| 19 | 50825633 | 50825998 | 50825796 | 13  | 19  | 0 | 19.17817386 | 1.44E-06    |          | ENSG00000199066 |
| 19 | 50827434 | 50827941 | 50827713 | 117 | 137 | 6 | 18.90419995 | 8.08E-33    |          | ENSG00000199066 |
| 19 | 50833361 | 50833600 | 50833462 | 10  | 13  | 1 | 6.712360851 | 0.000640982 |          | ENSG00000199066 |
| 19 | 50835950 | 50836150 | 50836024 | 8   | 9   | 2 | 3.19636231  | 0.0229249   | EML2     | ENSG00000125746 |
| 19 | 50836275 | 50836508 | 50836386 | 8   | 10  | 4 | 2.109599125 | 0.0694668   | EML2     | ENSG00000125746 |
| 19 | 50836657 | 50836913 | 50836785 | 8   | 11  | 2 | 3.835634772 | 0.00800699  | EML2     | ENSG00000125746 |
| 19 | 50841151 | 50841468 | 50841309 | 11  | 15  | 4 | 3.068507818 | 0.0076507   |          | ENSG00000223232 |
| 19 | 50887078 | 50887282 | 50887209 | 8   | 10  | 6 | 1.506856518 | 0.188853    | SNRPD2   | ENSG00000125743 |
| 19 | 50912587 | 50912933 | 50912761 | 9   | 12  | 4 | 2.493162602 | 0.0299057   |          | ENSG00000177051 |
| 19 | 51012239 | 51012515 | 51012377 | 9   | 12  | 8 | 1.385090334 | 0.219216    | RSHL1    | ENSG00000104941 |
| 19 | 51122877 | 51123098 | 51122987 | 10  | 12  | 5 | 2.077635502 | 0.0577144   | NANOS2   | ENSG00000188425 |
| 19 | 51328360 | 51329458 | 51328680 | 66  | 111 | 1 | 53.69888681 | 1.10E-31    | IGFL3    | ENSG00000188624 |
| 19 | 51354372 | 51354893 | 51354693 | 33  | 50  | 4 | 9.780868669 | 2.72E-11    | IGFL3    | ENSG00000188624 |
| 19 | 51541462 | 51541860 | 51541627 | 8   | 15  | 2 | 5.114179696 | 0.00088103  | PPP5C    | ENSG00000011485 |



|    |          |          |          |     |     |    |             |             |         |                 |
|----|----------|----------|----------|-----|-----|----|-------------|-------------|---------|-----------------|
| 19 | 51646448 | 51646672 | 51646590 | 10  | 11  | 0  | 11.50690432 | 0.000313206 | PNMAL1  | ENSG00000182013 |
| 19 | 51741707 | 51741896 | 51741801 | 8   | 9   | 4  | 1.917817386 | 0.103282    |         | ENSG00000204851 |
| 19 | 51988291 | 51988598 | 51988423 | 11  | 13  | 1  | 6.712360851 | 0.000640982 | SLC1A5  | ENSG00000105281 |
| 19 | 52045541 | 52045725 | 52045585 | 8   | 9   | 2  | 3.19636231  | 0.0229249   | AP2S1   | ENSG00000042753 |
| 19 | 52058067 | 52058318 | 52058192 | 8   | 11  | 2  | 3.835634772 | 0.00800699  | AP2S1   | ENSG00000042753 |
| 19 | 52059017 | 52059274 | 52059153 | 8   | 10  | 1  | 5.273997812 | 0.00391723  | AP2S1   | ENSG00000042753 |
| 19 | 52061860 | 52062164 | 52062017 | 19  | 22  | 13 | 1.575349996 | 0.0840573   | AP2S1   | ENSG00000042753 |
| 19 | 52062432 | 52062641 | 52062533 | 11  | 12  | 3  | 3.116453252 | 0.0131971   | AP2S1   | ENSG00000042753 |
| 19 | 52120375 | 52120581 | 52120461 | 9   | 9   | 5  | 1.598181155 | 0.170911    | GRLF1   | ENSG00000160007 |
| 19 | 52230637 | 52230986 | 52230808 | 15  | 20  | 6  | 2.876726079 | 0.00408924  | TMEM160 | ENSG00000130748 |
| 19 | 52251815 | 52252154 | 52251984 | 29  | 32  | 1  | 15.82199344 | 3.96E-09    | TMEM160 | ENSG00000130748 |
| 19 | 52260983 | 52261167 | 52261052 | 8   | 8   | 0  | 8.630178238 | 0.00235436  | TMEM160 | ENSG00000130748 |
| 19 | 52274477 | 52274762 | 52274607 | 10  | 13  | 1  | 6.712360851 | 0.000640982 | TMEM160 | ENSG00000130748 |
| 19 | 52305006 | 52305209 | 52305131 | 10  | 10  | 3  | 2.636998906 | 0.034203    | ZC3H4   | ENSG00000130749 |
| 19 | 52305419 | 52305647 | 52305524 | 10  | 11  | 4  | 2.301380863 | 0.0459276   | ZC3H4   | ENSG00000130749 |
| 19 | 52320212 | 52320437 | 52320265 | 12  | 13  | 3  | 3.356180426 | 0.00805599  | SAE1    | ENSG00000142230 |
| 19 | 52347333 | 52348246 | 52347908 | 46  | 80  | 7  | 9.708950517 | 1.04E-16    | SAE1    | ENSG00000142230 |
| 19 | 52426351 | 52427202 | 52426530 | 109 | 159 | 2  | 51.14179696 | 6.00E-44    | BBC3    | ENSG00000105327 |
| 19 | 52427341 | 52427990 | 52427665 | 49  | 78  | 1  | 37.87689338 | 3.38E-22    | BBC3    | ENSG00000105327 |
| 19 | 52439099 | 52439642 | 52439463 | 12  | 23  | 4  | 4.602761727 | 0.000137072 | BBC3    | ENSG00000105327 |
| 19 | 52451397 | 52451584 | 52451449 | 9   | 11  | 2  | 3.835634772 | 0.00800699  | CCDC9   | ENSG00000105321 |
| 19 | 52678924 | 52679117 | 52679020 | 8   | 10  | 1  | 5.273997812 | 0.00391723  | KPTN    | ENSG00000118162 |
| 19 | 52776760 | 52777014 | 52776887 | 10  | 11  | 8  | 1.278544924 | 0.28289     |         | ENSG00000223326 |
| 19 | 52837229 | 52837527 | 52837378 | 9   | 13  | 1  | 6.712360851 | 0.000640982 | GLTSCR1 | ENSG00000063169 |
| 19 | 52843411 | 52843681 | 52843531 | 9   | 12  | 10 | 1.133255728 | 0.37674     | GLTSCR1 | ENSG00000063169 |
| 19 | 53091988 | 53092274 | 53092131 | 22  | 26  | 0  | 25.89053471 | 1.31E-08    |         | ENSG00000221072 |
| 19 | 53208259 | 53208463 | 53208345 | 10  | 10  | 2  | 3.515998541 | 0.0136204   | ELSPBP1 | ENSG00000169393 |
| 19 | 53248922 | 53249236 | 53249084 | 19  | 22  | 1  | 11.02744997 | 2.36E-06    |         | ENSG00000221595 |
| 19 | 53255683 | 53255901 | 53255795 | 8   | 9   | 0  | 9.589086931 | 0.00120187  |         | ENSG00000221595 |
| 19 | 53359533 | 53359947 | 53359804 | 19  | 28  | 7  | 3.476044012 | 0.000248863 | LIG1    | ENSG00000105486 |
| 19 | 53567965 | 53568174 | 53568017 | 9   | 10  | 3  | 2.636998906 | 0.034203    | SYNGR4  | ENSG00000105467 |
| 19 | 53622862 | 53623115 | 53622953 | 12  | 14  | 1  | 7.191815198 | 0.00034761  | GRWD1   | ENSG00000105447 |
| 19 | 53639559 | 53639738 | 53639630 | 8   | 8   | 0  | 8.630178238 | 0.00235436  | GRWD1   | ENSG00000105447 |
| 19 | 53683124 | 53683411 | 53683293 | 8   | 11  | 4  | 2.301380863 | 0.0459276   | CYTH2   | ENSG00000105443 |

|    |          |          |          |     |     |    |             |             |          |                 |
|----|----------|----------|----------|-----|-----|----|-------------|-------------|----------|-----------------|
| 19 | 53738573 | 53738857 | 53738713 | 9   | 11  | 7  | 1.43836304  | 0.204844    | SULT2B1  | ENSG00000088002 |
| 19 | 53814235 | 53814580 | 53814410 | 16  | 20  | 9  | 2.013708255 | 0.0279742   | SPHK2    | ENSG00000063176 |
| 19 | 53870618 | 53870804 | 53870666 | 8   | 8   | 3  | 2.157544559 | 0.0836802   |          | ENSG00000142233 |
| 19 | 54150017 | 54150757 | 54150283 | 91  | 138 | 1  | 66.64415417 | 1.77E-39    | BAX      | ENSG00000087088 |
| 19 | 54188645 | 54189106 | 54188952 | 11  | 18  | 2  | 6.073088389 | 0.000157975 | RUVBL2   | ENSG00000183207 |
| 19 | 54292875 | 54293110 | 54292989 | 8   | 11  | 6  | 1.643843474 | 0.137712    | SNRNP70  | ENSG00000104852 |
| 19 | 54466974 | 54467690 | 54467403 | 51  | 92  | 7  | 11.14731356 | 8.13E-20    | SLC6A16  | ENSG00000063127 |
| 19 | 54558660 | 54559128 | 54558949 | 8   | 15  | 2  | 5.114179696 | 0.00088103  | DKKL1    | ENSG00000104901 |
| 19 | 54638549 | 54638870 | 54638709 | 11  | 13  | 2  | 4.474907234 | 0.00269459  | SLC17A7  | ENSG00000104888 |
| 19 | 54682693 | 54682886 | 54682788 | 8   | 9   | 2  | 3.19636231  | 0.0229249   | RPL13A   | ENSG00000142541 |
| 19 | 54741899 | 54742247 | 54742071 | 12  | 16  | 8  | 1.811271976 | 0.0663685   | RCN3     | ENSG00000142552 |
| 19 | 54776141 | 54776389 | 54776265 | 8   | 10  | 2  | 3.515998541 | 0.0136204   | NOSIP    | ENSG00000142546 |
| 19 | 55064698 | 55064908 | 55064803 | 10  | 12  | 4  | 2.493162602 | 0.0299057   | PNKP     | ENSG00000039650 |
| 19 | 55112099 | 55112280 | 55112189 | 8   | 9   | 2  | 3.19636231  | 0.0229249   | ATF5     | ENSG00000169136 |
| 19 | 55132803 | 55133016 | 55132909 | 9   | 11  | 5  | 1.917817386 | 0.0843804   | IL4I1    | ENSG00000104951 |
| 19 | 55220789 | 55221254 | 55220946 | 10  | 20  | 12 | 1.54900635  | 0.101141    | ZNF473   | ENSG00000142528 |
| 19 | 55246112 | 55246963 | 55246764 | 68  | 117 | 3  | 28.28780645 | 1.21E-30    |          | ENSG00000204666 |
| 19 | 55410407 | 55410658 | 55410565 | 10  | 11  | 4  | 2.301380863 | 0.0459276   | MYH14    | ENSG00000105357 |
| 19 | 55674283 | 55674482 | 55674382 | 9   | 9   | 4  | 1.917817386 | 0.103282    | FAM71E1  | ENSG00000142530 |
| 19 | 55732832 | 55733078 | 55732929 | 11  | 12  | 5  | 2.077635502 | 0.0577144   |          | ENSG00000204653 |
| 19 | 56091604 | 56091966 | 56091783 | 71  | 78  | 0  | 75.75378675 | 8.53E-24    | KLKP1    | ENSG00000197588 |
| 19 | 56211874 | 56212269 | 56212046 | 9   | 14  | 3  | 3.595907599 | 0.00486913  | KLK10    | ENSG00000129451 |
| 19 | 56323832 | 56324108 | 56323937 | 10  | 13  | 3  | 3.356180426 | 0.00805599  | SIGLEC9  | ENSG00000129450 |
| 19 | 56475406 | 56475734 | 56475570 | 17  | 20  | 1  | 10.06854128 | 8.32E-06    |          | ENSG00000179213 |
| 19 | 56604034 | 56604237 | 56604135 | 9   | 10  | 9  | 1.054799562 | 0.4492      | SIGLEC10 | ENSG00000142512 |
| 19 | 56788399 | 56788606 | 56788502 | 8   | 11  | 6  | 1.643843474 | 0.137712    |          | ENSG00000167765 |
| 19 | 56852084 | 56852352 | 56852218 | 9   | 10  | 2  | 3.515998541 | 0.0136204   | SIGLEC14 | ENSG00000197865 |
| 19 | 57181853 | 57182060 | 57181961 | 9   | 10  | 0  | 10.54799562 | 0.000613541 | ZNF350   | ENSG00000171032 |
| 19 | 57933104 | 57933370 | 57933257 | 13  | 15  | 0  | 15.34253909 | 2.13E-05    |          | ENSG00000175885 |
| 19 | 58489779 | 58490588 | 58490362 | 245 | 309 | 5  | 49.54361581 | 2.14E-82    | BIRC8    | ENSG00000180152 |
| 19 | 58676105 | 58676385 | 58676247 | 10  | 11  | 3  | 2.876726079 | 0.0213797   | ZNF813   | ENSG00000198346 |
| 19 | 58715950 | 58716149 | 58716034 | 10  | 11  | 8  | 1.278544924 | 0.28289     | ZNF331   | ENSG00000130844 |
| 19 | 59037304 | 59037498 | 59037401 | 8   | 9   | 4  | 1.917817386 | 0.103282    | NLRP12   | ENSG00000142405 |
| 19 | 59310801 | 59311014 | 59310907 | 8   | 10  | 2  | 3.515998541 | 0.0136204   | TFPT     | ENSG00000105619 |

|    |          |          |          |     |     |    |             |             |          |                 |
|----|----------|----------|----------|-----|-----|----|-------------|-------------|----------|-----------------|
| 19 | 59392668 | 59392936 | 59392795 | 11  | 11  | 0  | 11.50690432 | 0.000313206 | RPS9     | ENSG00000170889 |
| 19 | 59814976 | 59815159 | 59815067 | 9   | 9   | 1  | 4.794543465 | 0.00708517  |          | ENSG00000216269 |
| 19 | 60076847 | 60077133 | 60077022 | 13  | 16  | 2  | 5.433815927 | 0.000499302 | FCAR     | ENSG00000186431 |
| 19 | 60369216 | 60369396 | 60369276 | 8   | 8   | 2  | 2.876726079 | 0.0381137   | C19orf51 | ENSG00000167646 |
| 19 | 60419629 | 60419886 | 60419757 | 10  | 12  | 0  | 12.46581301 | 0.000159888 | PTPRH    | ENSG00000080031 |
| 19 | 60462409 | 60462652 | 60462545 | 11  | 13  | 2  | 4.474907234 | 0.00269459  | SAPS1    | ENSG00000105063 |
| 19 | 60541934 | 60542399 | 60542081 | 9   | 18  | 10 | 1.656296833 | 0.0841786   | SUV420H2 | ENSG00000133247 |
| 19 | 60547592 | 60548088 | 60547871 | 34  | 51  | 3  | 12.46581301 | 2.13E-12    | SUV420H2 | ENSG00000133247 |
| 19 | 60803178 | 60803361 | 60803269 | 8   | 8   | 1  | 4.315089119 | 0.0127267   | ZNF524   | ENSG00000171443 |
| 19 | 60804351 | 60804927 | 60804583 | 43  | 63  | 5  | 10.22835939 | 7.02E-14    | ZNF524   | ENSG00000171443 |
| 19 | 60838038 | 60838246 | 60838111 | 10  | 10  | 2  | 3.515998541 | 0.0136204   | ZNF580   | ENSG00000213015 |
| 19 | 61104627 | 61104908 | 61104765 | 8   | 11  | 0  | 11.50690432 | 0.000313206 | NLRP13   | ENSG00000173572 |
| 19 | 63481655 | 63481931 | 63481793 | 9   | 10  | 2  | 3.515998541 | 0.0136204   | ZNF8     | ENSG00000083842 |
| 19 | 63722810 | 63723183 | 63723006 | 13  | 19  | 3  | 4.794543465 | 0.000349205 | ZBTB45   | ENSG00000119574 |
| 2  | 627156   | 627356   | 627249   | 8   | 8   | 2  | 2.876726079 | 0.0381137   | TMEM18   | ENSG00000151353 |
| 2  | 1471532  | 1472268  | 1471901  | 210 | 338 | 3  | 81.26751174 | 7.95E-94    | TPO      | ENSG00000115705 |
| 2  | 1608044  | 1608402  | 1608223  | 14  | 20  | 3  | 5.034270639 | 0.000202317 | PXDN     | ENSG00000130508 |
| 2  | 1687707  | 1688116  | 1687948  | 54  | 62  | 3  | 15.10281192 | 2.26E-15    | PXDN     | ENSG00000130508 |
| 2  | 2974191  | 2974504  | 2974348  | 24  | 26  | 4  | 5.178106943 | 2.75E-05    | TSSC1    | ENSG00000032389 |
| 2  | 3426540  | 3426822  | 3426712  | 9   | 12  | 0  | 12.46581301 | 0.000159888 |          | ENSG00000210538 |
| 2  | 3600537  | 3600808  | 3600672  | 13  | 13  | 10 | 1.220429246 | 0.306001    | RPS7     | ENSG00000171863 |
| 2  | 3684661  | 3684919  | 3684770  | 10  | 12  | 0  | 12.46581301 | 0.000159888 | ALLC     | ENSG00000151360 |
| 2  | 4380257  | 4380562  | 4380412  | 11  | 12  | 1  | 6.232906505 | 0.00117736  |          | ENSG00000215960 |
| 2  | 5834812  | 5835015  | 5834913  | 9   | 9   | 3  | 2.397271733 | 0.0539397   | SOX11    | ENSG00000176887 |
| 2  | 5839764  | 5839943  | 5839832  | 8   | 8   | 4  | 1.726035648 | 0.150596    | SOX11    | ENSG00000176887 |
| 2  | 7089528  | 7089731  | 7089633  | 8   | 10  | 2  | 3.515998541 | 0.0136204   |          | ENSG00000223145 |
| 2  | 8597531  | 8597815  | 8597673  | 16  | 18  | 8  | 2.024362796 | 0.0334397   |          | ENSG00000182367 |
| 2  | 8768654  | 8768848  | 8768751  | 10  | 10  | 0  | 10.54799562 | 0.000613541 | ID2      | ENSG00000115738 |
| 2  | 8861591  | 8861886  | 8861760  | 12  | 15  | 2  | 5.114179696 | 0.00088103  |          | ENSG00000134313 |
| 2  | 8913841  | 8914027  | 8913926  | 8   | 9   | 0  | 9.589086931 | 0.00120187  |          | ENSG00000134313 |
| 2  | 8939806  | 8940123  | 8939964  | 8   | 12  | 1  | 6.232906505 | 0.00117736  |          | ENSG00000134313 |
| 2  | 9056748  | 9056976  | 9056862  | 8   | 9   | 1  | 4.794543465 | 0.00708517  | MBOAT2   | ENSG00000143797 |
| 2  | 9139796  | 9140233  | 9139961  | 28  | 34  | 0  | 33.56180426 | 6.02E-11    | MBOAT2   | ENSG00000143797 |
| 2  | 9160435  | 9160705  | 9160578  | 8   | 9   | 4  | 1.917817386 | 0.103282    | MBOAT2   | ENSG00000143797 |

|   |          |          |          |    |    |    |             |             |          |                 |
|---|----------|----------|----------|----|----|----|-------------|-------------|----------|-----------------|
| 2 | 9161276  | 9161483  | 9161341  | 8  | 9  | 3  | 2.397271733 | 0.0539397   | MBOAT2   | ENSG00000143797 |
| 2 | 9702262  | 9702507  | 9702370  | 11 | 12 | 5  | 2.077635502 | 0.0577144   | YWHAQ    | ENSG00000134308 |
| 2 | 9720773  | 9720956  | 9720874  | 8  | 8  | 0  | 8.630178238 | 0.00235436  | YWHAQ    | ENSG00000134308 |
| 2 | 9866516  | 9866810  | 9866667  | 13 | 14 | 2  | 4.794543465 | 0.00154571  | TAF1B    | ENSG00000115750 |
| 2 | 9888030  | 9888243  | 9888080  | 10 | 12 | 6  | 1.78083043  | 0.0985525   | TAF1B    | ENSG00000115750 |
| 2 | 9900980  | 9901191  | 9901085  | 9  | 9  | 0  | 9.589086931 | 0.00120187  | TAF1B    | ENSG00000115750 |
| 2 | 10153586 | 10153890 | 10153738 | 10 | 14 | 3  | 3.595907599 | 0.00486913  |          | ENSG00000212558 |
| 2 | 10410083 | 10410263 | 10410154 | 8  | 9  | 2  | 3.19636231  | 0.0229249   | HPCAL1   | ENSG00000115756 |
| 2 | 10463104 | 10463347 | 10463225 | 9  | 10 | 3  | 2.636998906 | 0.034203    |          | ENSG00000206633 |
| 2 | 10583970 | 10584252 | 10584111 | 10 | 13 | 0  | 13.4247217  | 8.16E-05    |          | ENSG00000217258 |
| 2 | 10814986 | 10815167 | 10815076 | 8  | 8  | 2  | 2.876726079 | 0.0381137   | ATP6V1C2 | ENSG00000143882 |
| 2 | 10993846 | 10994162 | 10993991 | 12 | 15 | 3  | 3.835634772 | 0.00291691  | KCNF1    | ENSG00000162975 |
| 2 | 11400448 | 11400878 | 11400622 | 8  | 13 | 2  | 4.474907234 | 0.00269459  | ROCK2    | ENSG00000134318 |
| 2 | 11523661 | 11524047 | 11523868 | 12 | 18 | 5  | 3.036544195 | 0.0044641   | E2F6     | ENSG00000169016 |
| 2 | 11588377 | 11588558 | 11588539 | 8  | 8  | 1  | 4.315089119 | 0.0127267   |          | ENSG00000196208 |
| 2 | 11589957 | 11590371 | 11590178 | 30 | 39 | 11 | 3.19636231  | 5.26E-05    |          | ENSG00000196208 |
| 2 | 11641787 | 11641967 | 11641805 | 9  | 10 | 3  | 2.636998906 | 0.034203    |          | ENSG00000210722 |
| 2 | 11714249 | 11714461 | 11714372 | 8  | 10 | 1  | 5.273997812 | 0.00391723  |          | ENSG00000220847 |
| 2 | 11746118 | 11746319 | 11746212 | 9  | 10 | 1  | 5.273997812 | 0.00391723  | NTSR2    | ENSG00000169006 |
| 2 | 11801721 | 11801973 | 11801842 | 14 | 16 | 2  | 5.433815927 | 0.000499302 | LPIN1    | ENSG00000134324 |
| 2 | 12566294 | 12566560 | 12566406 | 10 | 12 | 0  | 12.46581301 | 0.000159888 |          | ENSG00000207183 |
| 2 | 13739589 | 13739850 | 13739719 | 9  | 9  | 0  | 9.589086931 | 0.00120187  |          |                 |
| 2 | 13754278 | 13754713 | 13754499 | 44 | 56 | 0  | 54.6577955  | 2.27E-17    |          |                 |
| 2 | 14181391 | 14181678 | 14181518 | 9  | 10 | 1  | 5.273997812 | 0.00391723  |          | ENSG00000210748 |
| 2 | 14345598 | 14346230 | 14345767 | 63 | 84 | 1  | 40.75361945 | 6.43E-24    |          | ENSG00000210748 |
| 2 | 14630357 | 14630607 | 14630500 | 8  | 10 | 2  | 3.515998541 | 0.0136204   | FAM84A   | ENSG00000162981 |
| 2 | 14686516 | 14686952 | 14686734 | 43 | 55 | 3  | 13.4247217  | 1.79E-13    | FAM84A   | ENSG00000162981 |
| 2 | 14838774 | 14839051 | 14838914 | 9  | 11 | 2  | 3.835634772 | 0.00800699  | FAM84A   | ENSG00000162981 |
| 2 | 15618800 | 15619085 | 15618975 | 10 | 13 | 3  | 3.356180426 | 0.00805599  |          | ENSG00000151779 |
| 2 | 15788204 | 15788450 | 15788290 | 10 | 11 | 2  | 3.835634772 | 0.00800699  |          | ENSG00000202160 |
| 2 | 15969850 | 15970137 | 15969993 | 10 | 12 | 2  | 4.155271003 | 0.0046638   |          | ENSG00000210765 |
| 2 | 16697628 | 16697984 | 16697806 | 24 | 29 | 2  | 9.589086931 | 2.21E-07    | FAM49A   | ENSG00000197872 |
| 2 | 17354465 | 17354771 | 17354616 | 9  | 11 | 1  | 5.753452158 | 0.00215302  |          | ENSG00000214843 |
| 2 | 17515651 | 17515844 | 17515782 | 8  | 9  | 0  | 9.589086931 | 0.00120187  |          | ENSG00000214842 |

|   |          |          |          |    |     |    |             |             |         |                 |
|---|----------|----------|----------|----|-----|----|-------------|-------------|---------|-----------------|
| 2 | 17860350 | 17860804 | 17860573 | 53 | 77  | 1  | 37.39743903 | 6.55E-22    | MSGN1   | ENSG00000151379 |
| 2 | 18565319 | 18565547 | 18565426 | 8  | 8   | 4  | 1.726035648 | 0.150596    | NT5C1B  | ENSG00000185013 |
| 2 | 19136818 | 19137149 | 19136980 | 15 | 18  | 11 | 1.518272097 | 0.122037    | OSR1    | ENSG00000143867 |
| 2 | 19195074 | 19195412 | 19195237 | 9  | 12  | 4  | 2.493162602 | 0.0299057   | OSR1    | ENSG00000143867 |
| 2 | 19291978 | 19292559 | 19292200 | 91 | 117 | 5  | 18.85853763 | 2.21E-28    | OSR1    | ENSG00000143867 |
| 2 | 19556830 | 19557020 | 19556949 | 9  | 9   | 2  | 3.19636231  | 0.0229249   | OSR1    | ENSG00000143867 |
| 2 | 19592861 | 19593070 | 19593010 | 8  | 8   | 2  | 2.876726079 | 0.0381137   | OSR1    | ENSG00000143867 |
| 2 | 19717916 | 19718429 | 19718095 | 29 | 40  | 1  | 19.65762821 | 2.24E-11    | CISD1B  | ENSG00000143880 |
| 2 | 19730443 | 19730622 | 19730563 | 8  | 8   | 3  | 2.157544559 | 0.0836802   | CISD1B  | ENSG00000143880 |
| 2 | 20024124 | 20024382 | 20024253 | 12 | 13  | 1  | 6.712360851 | 0.000640982 | WDR35   | ENSG00000118965 |
| 2 | 20156155 | 20156412 | 20156283 | 8  | 12  | 1  | 6.232906505 | 0.00117736  | LAPTM4A | ENSG00000068697 |
| 2 | 20276279 | 20276651 | 20276437 | 14 | 18  | 11 | 1.518272097 | 0.122037    | SDC1    | ENSG00000115884 |
| 2 | 20294871 | 20295099 | 20295000 | 8  | 11  | 3  | 2.876726079 | 0.0213797   | SDC1    | ENSG00000115884 |
| 2 | 20417086 | 20417285 | 20417148 | 10 | 11  | 1  | 5.753452158 | 0.00215302  | PUM2    | ENSG00000055917 |
| 2 | 20419438 | 20419617 | 20419482 | 8  | 8   | 2  | 2.876726079 | 0.0381137   | PUM2    | ENSG00000055917 |
| 2 | 20529343 | 20529543 | 20529473 | 9  | 11  | 3  | 2.876726079 | 0.0213797   |         | ENSG00000200829 |
| 2 | 20641167 | 20641441 | 20641304 | 9  | 13  | 1  | 6.712360851 | 0.000640982 |         | ENSG00000219263 |
| 2 | 20647842 | 20648178 | 20647999 | 20 | 25  | 5  | 4.155271003 | 0.000149583 |         | ENSG00000219263 |
| 2 | 20724779 | 20724988 | 20724853 | 8  | 8   | 5  | 1.43836304  | 0.235762    | GDF7    | ENSG00000143869 |
| 2 | 20886178 | 20886444 | 20886275 | 13 | 14  | 1  | 7.191815198 | 0.00034761  | C2orf43 | ENSG00000118961 |
| 2 | 23731089 | 23731488 | 23731286 | 27 | 35  | 0  | 34.52071295 | 3.07E-11    | KBTBD9  | ENSG00000119771 |
| 2 | 24003618 | 24003878 | 24003713 | 12 | 15  | 5  | 2.557089848 | 0.0169197   | UBXN2A  | ENSG00000173960 |
| 2 | 24152555 | 24152815 | 24152688 | 8  | 10  | 2  | 3.515998541 | 0.0136204   |         | ENSG00000115128 |
| 2 | 24160184 | 24161109 | 24160726 | 27 | 61  | 6  | 8.493191281 | 1.31E-12    | TP53I3  | ENSG00000115129 |
| 2 | 24240844 | 24241043 | 24240991 | 9  | 9   | 2  | 3.19636231  | 0.0229249   |         | ENSG00000186453 |
| 2 | 24486359 | 24486592 | 24486475 | 9  | 11  | 2  | 3.835634772 | 0.00800699  |         | ENSG00000211550 |
| 2 | 24870172 | 24870428 | 24870267 | 8  | 10  | 2  | 3.515998541 | 0.0136204   | CENPO   | ENSG00000138092 |
| 2 | 24961454 | 24961698 | 24961535 | 14 | 16  | 1  | 8.150723891 | 0.000101217 | ADCY3   | ENSG00000138031 |
| 2 | 25154849 | 25155201 | 25155034 | 8  | 12  | 3  | 3.116453252 | 0.0131971   |         | ENSG00000219935 |
| 2 | 25260785 | 25261146 | 25261010 | 9  | 14  | 4  | 2.876726079 | 0.01219     | POMC    | ENSG00000115138 |
| 2 | 25695056 | 25695489 | 25695339 | 11 | 18  | 1  | 9.109632584 | 2.91E-05    | DTNB    | ENSG00000138101 |
| 2 | 25776750 | 25776948 | 25776857 | 8  | 8   | 1  | 4.315089119 | 0.0127267   |         | ENSG00000201160 |
| 2 | 26085264 | 26085509 | 26085386 | 12 | 13  | 5  | 2.237453617 | 0.038866    |         | ENSG00000220917 |
| 2 | 26152735 | 26152914 | 26152824 | 8  | 8   | 10 | 0.784561658 | 0.708731    |         | ENSG00000199872 |

|   |          |          |          |     |     |    |             |             |         |                 |
|---|----------|----------|----------|-----|-----|----|-------------|-------------|---------|-----------------|
| 2 | 26431845 | 26432166 | 26432081 | 10  | 14  | 1  | 7.191815198 | 0.00034761  |         | ENSG00000138018 |
| 2 | 26747461 | 26747673 | 26747573 | 8   | 9   | 1  | 4.794543465 | 0.00708517  |         | ENSG00000216626 |
| 2 | 26861619 | 26861812 | 26861726 | 8   | 8   | 1  | 4.315089119 | 0.0127267   | CENPA   | ENSG00000115163 |
| 2 | 26885582 | 26885877 | 26885729 | 14  | 14  | 2  | 4.794543465 | 0.00154571  |         | ENSG00000217550 |
| 2 | 27126925 | 27127522 | 27127126 | 20  | 43  | 10 | 3.835634772 | 3.45E-06    | AGBL5   | ENSG00000084693 |
| 2 | 27157650 | 27157858 | 27157745 | 11  | 11  | 3  | 2.876726079 | 0.0213797   | EMILIN1 | ENSG00000138080 |
| 2 | 27241691 | 27242053 | 27241870 | 24  | 31  | 6  | 4.383582597 | 2.10E-05    |         | ENSG00000216392 |
| 2 | 27254468 | 27254659 | 27254537 | 8   | 8   | 3  | 2.157544559 | 0.0836802   |         | ENSG00000216392 |
| 2 | 27267983 | 27268250 | 27268112 | 9   | 10  | 0  | 10.54799562 | 0.000613541 | SLC5A6  | ENSG00000138074 |
| 2 | 27286172 | 27286556 | 27286351 | 8   | 15  | 5  | 2.557089848 | 0.0169197   | SLC5A6  | ENSG00000138074 |
| 2 | 27369762 | 27370060 | 27369932 | 10  | 14  | 5  | 2.397271733 | 0.0258078   | TRIM54  | ENSG00000138100 |
| 2 | 27397531 | 27397776 | 27397638 | 9   | 10  | 6  | 1.506856518 | 0.188853    | MPV17   | ENSG00000115204 |
| 2 | 27446790 | 27447020 | 27446905 | 8   | 9   | 2  | 3.19636231  | 0.0229249   | SNX17   | ENSG00000115234 |
| 2 | 27471778 | 27472126 | 27471955 | 19  | 24  | 0  | 23.97271733 | 5.01E-08    | FTHL3P  | ENSG00000213453 |
| 2 | 27782293 | 27783185 | 27782729 | 79  | 134 | 2  | 43.15089119 | 8.58E-37    |         | ENSG00000205334 |
| 2 | 27848015 | 27848261 | 27848127 | 10  | 10  | 0  | 10.54799562 | 0.000613541 | MRPL33  | ENSG00000163797 |
| 2 | 28248656 | 28249121 | 28248898 | 50  | 64  | 2  | 20.77635502 | 5.71E-17    |         | ENSG00000197918 |
| 2 | 28360257 | 28360745 | 28360429 | 15  | 24  | 3  | 5.993179332 | 2.17E-05    | FOSL2   | ENSG00000075426 |
| 2 | 28642397 | 28642588 | 28642491 | 9   | 10  | 1  | 5.273997812 | 0.00391723  | PLB1    | ENSG00000163803 |
| 2 | 28971508 | 28972331 | 28971738 | 47  | 74  | 3  | 17.97953799 | 1.17E-18    | WDR43   | ENSG00000163811 |
| 2 | 29035138 | 29035350 | 29035244 | 11  | 12  | 1  | 6.232906505 | 0.00117736  | FAM179A | ENSG00000189350 |
| 2 | 29144923 | 29145134 | 29145029 | 8   | 8   | 1  | 4.315089119 | 0.0127267   | C2orf71 | ENSG00000179270 |
| 2 | 29306591 | 29306857 | 29306724 | 8   | 12  | 4  | 2.493162602 | 0.0299057   | CLIP4   | ENSG00000115295 |
| 2 | 29309913 | 29310211 | 29310048 | 10  | 12  | 6  | 1.78083043  | 0.0985525   | CLIP4   | ENSG00000115295 |
| 2 | 29380932 | 29381139 | 29380996 | 8   | 9   | 1  | 4.794543465 | 0.00708517  | CLIP4   | ENSG00000115295 |
| 2 | 29715095 | 29715390 | 29715251 | 14  | 17  | 0  | 17.26035648 | 5.54E-06    |         | ENSG00000222996 |
| 2 | 29766473 | 29766652 | 29766562 | 8   | 8   | 0  | 8.630178238 | 0.00235436  |         | ENSG00000222996 |
| 2 | 29824577 | 29824879 | 29824724 | 14  | 15  | 3  | 3.835634772 | 0.00291691  |         | ENSG00000222996 |
| 2 | 30042544 | 30043105 | 30042767 | 106 | 137 | 0  | 132.3293996 | 5.04E-41    | ALK     | ENSG00000171094 |
| 2 | 30294171 | 30294427 | 30294345 | 8   | 9   | 5  | 1.598181155 | 0.170911    |         | ENSG00000217617 |
| 2 | 30788009 | 30788266 | 30788137 | 8   | 9   | 2  | 3.19636231  | 0.0229249   |         | ENSG00000219426 |
| 2 | 30832429 | 30832833 | 30832679 | 11  | 19  | 6  | 2.739739123 | 0.00632909  |         | ENSG00000219426 |
| 2 | 30848813 | 30849019 | 30848921 | 9   | 10  | 0  | 10.54799562 | 0.000613541 |         | ENSG00000219426 |
| 2 | 31025001 | 31025190 | 31025095 | 8   | 8   | 1  | 4.315089119 | 0.0127267   |         | ENSG00000216093 |

|   |          |          |          |     |     |    |             |             |          |                 |
|---|----------|----------|----------|-----|-----|----|-------------|-------------|----------|-----------------|
| 2 | 32089601 | 32089969 | 32089805 | 8   | 13  | 2  | 4.474907234 | 0.00269459  | MEMO1    | ENSG00000162959 |
| 2 | 32393844 | 32394023 | 32393878 | 8   | 8   | 0  | 8.630178238 | 0.00235436  |          | ENSG00000211097 |
| 2 | 33092940 | 33093275 | 33093107 | 18  | 22  | 0  | 22.05489994 | 1.92E-07    |          | ENSG00000217182 |
| 2 | 33370005 | 33370292 | 33370127 | 10  | 13  | 3  | 3.356180426 | 0.00805599  |          | ENSG00000212204 |
| 2 | 33888834 | 33889024 | 33888929 | 10  | 10  | 1  | 5.273997812 | 0.00391723  |          | ENSG00000219819 |
| 2 | 34657209 | 34657467 | 34657338 | 14  | 14  | 1  | 7.191815198 | 0.00034761  |          | ENSG00000212025 |
| 2 | 35377177 | 35377422 | 35377275 | 9   | 12  | 5  | 2.077635502 | 0.0577144   |          | ENSG00000217899 |
| 2 | 36642183 | 36642364 | 36642273 | 8   | 8   | 0  | 8.630178238 | 0.00235436  |          | ENSG00000217075 |
| 2 | 36786091 | 36786326 | 36786208 | 9   | 10  | 1  | 5.273997812 | 0.00391723  | VIT      | ENSG00000205221 |
| 2 | 37260730 | 37260987 | 37260858 | 8   | 10  | 5  | 1.757999271 | 0.121253    | SULT6B1  | ENSG00000138068 |
| 2 | 37362603 | 37362783 | 37362699 | 8   | 8   | 0  | 8.630178238 | 0.00235436  | PRKD3    | ENSG00000115825 |
| 2 | 37442046 | 37442398 | 37442222 | 16  | 21  | 2  | 7.031997082 | 2.73E-05    | QPCT     | ENSG00000115828 |
| 2 | 37710162 | 37710544 | 37710366 | 9   | 15  | 0  | 15.34253909 | 2.13E-05    | CDC42EP3 | ENSG00000163171 |
| 2 | 37734669 | 37735123 | 37734906 | 58  | 78  | 3  | 18.93844669 | 9.21E-20    | CDC42EP3 | ENSG00000163171 |
| 2 | 37867513 | 37867937 | 37867740 | 102 | 120 | 1  | 58.01397593 | 2.79E-34    |          | ENSG00000213595 |
| 2 | 38107509 | 38108048 | 38107686 | 35  | 53  | 2  | 17.26035648 | 6.53E-14    | CYP1B1   | ENSG00000138061 |
| 2 | 38176911 | 38177138 | 38177024 | 12  | 12  | 2  | 4.155271003 | 0.0046638   | CYP1B1   | ENSG00000138061 |
| 2 | 38235869 | 38236089 | 38235950 | 8   | 8   | 0  | 8.630178238 | 0.00235436  |          | ENSG00000199603 |
| 2 | 38697092 | 38697350 | 38697221 | 14  | 15  | 2  | 5.114179696 | 0.00088103  | HNRPLL   | ENSG00000143889 |
| 2 | 38771477 | 38771756 | 38771616 | 16  | 18  | 5  | 3.036544195 | 0.0044641   | GALM     | ENSG00000143891 |
| 2 | 39485908 | 39486204 | 39486056 | 8   | 12  | 1  | 6.232906505 | 0.00117736  | MAP4K3   | ENSG00000011566 |
| 2 | 39588159 | 39588349 | 39588283 | 8   | 8   | 3  | 2.157544559 | 0.0836802   |          | ENSG00000211215 |
| 2 | 40925056 | 40925314 | 40925156 | 8   | 11  | 5  | 1.917817386 | 0.0843804   | SLC8A1   | ENSG00000183023 |
| 2 | 41803386 | 41803755 | 41803649 | 8   | 14  | 1  | 7.191815198 | 0.00034761  |          | ENSG00000213574 |
| 2 | 42167145 | 42167353 | 42167249 | 8   | 9   | 2  | 3.19636231  | 0.0229249   |          | ENSG00000162878 |
| 2 | 42213672 | 42213883 | 42213777 | 9   | 10  | 6  | 1.506856518 | 0.188853    | EML4     | ENSG00000143924 |
| 2 | 42407869 | 42408103 | 42407986 | 13  | 16  | 1  | 8.150723891 | 0.000101217 | EML4     | ENSG00000143924 |
| 2 | 42423175 | 42423387 | 42423280 | 8   | 8   | 6  | 1.232882605 | 0.333038    | COX7A2L  | ENSG00000115944 |
| 2 | 42575605 | 42575841 | 42575739 | 10  | 11  | 12 | 0.885146486 | 0.620672    | MTA3     | ENSG00000057935 |
| 2 | 42595495 | 42595701 | 42595590 | 8   | 9   | 4  | 1.917817386 | 0.103282    |          | ENSG00000217380 |
| 2 | 42643178 | 42643430 | 42643292 | 9   | 9   | 4  | 1.917817386 | 0.103282    | MTA3     | ENSG00000057935 |
| 2 | 42876480 | 42877198 | 42876815 | 63  | 107 | 0  | 103.5621389 | 2.90E-32    |          | ENSG00000217155 |
| 2 | 42908643 | 42908881 | 42908798 | 9   | 9   | 2  | 3.19636231  | 0.0229249   |          | ENSG00000218916 |
| 2 | 42909332 | 42909610 | 42909464 | 8   | 10  | 4  | 2.109599125 | 0.0694668   |          | ENSG00000218916 |

|   |          |          |          |    |     |    |             |             |         |                 |
|---|----------|----------|----------|----|-----|----|-------------|-------------|---------|-----------------|
| 2 | 43132093 | 43132313 | 43132200 | 8  | 9   | 0  | 9.589086931 | 0.00120187  |         | ENSG00000207087 |
| 2 | 43258734 | 43258916 | 43258825 | 8  | 11  | 0  | 11.50690432 | 0.000313206 | ZFP36L2 | ENSG00000152518 |
| 2 | 43310235 | 43310458 | 43310330 | 8  | 9   | 2  | 3.19636231  | 0.0229249   |         | ENSG00000178006 |
| 2 | 43470394 | 43470622 | 43470496 | 9  | 9   | 3  | 2.397271733 | 0.0539397   |         | ENSG00000211259 |
| 2 | 43507142 | 43507400 | 43507264 | 11 | 12  | 12 | 0.958908693 | 0.542188    |         | ENSG00000211259 |
| 2 | 43519063 | 43519255 | 43519159 | 8  | 9   | 3  | 2.397271733 | 0.0539397   |         | ENSG00000211259 |
| 2 | 43543900 | 43544184 | 43544023 | 9  | 12  | 5  | 2.077635502 | 0.0577144   |         | ENSG00000211259 |
| 2 | 43559120 | 43559357 | 43559281 | 10 | 11  | 1  | 5.753452158 | 0.00215302  |         | ENSG00000211259 |
| 2 | 43715271 | 43715555 | 43715413 | 15 | 16  | 3  | 4.075361945 | 0.00173346  | PLEKHH2 | ENSG00000152527 |
| 2 | 44372331 | 44372617 | 44372474 | 11 | 11  | 6  | 1.643843474 | 0.137712    | SLC3A1  | ENSG00000138079 |
| 2 | 44629812 | 44630141 | 44629976 | 10 | 13  | 1  | 6.712360851 | 0.000640982 | C2orf34 | ENSG00000143919 |
| 2 | 45691861 | 45692106 | 45691963 | 8  | 11  | 5  | 1.917817386 | 0.0843804   | SRBD1   | ENSG00000068784 |
| 2 | 45734908 | 45735181 | 45735044 | 8  | 9   | 2  | 3.19636231  | 0.0229249   | PRKCE   | ENSG00000171132 |
| 2 | 45756063 | 45756350 | 45756210 | 12 | 14  | 5  | 2.397271733 | 0.0258078   | PRKCE   | ENSG00000171132 |
| 2 | 45833217 | 45833503 | 45833360 | 8  | 9   | 5  | 1.598181155 | 0.170911    | PRKCE   | ENSG00000171132 |
| 2 | 45930099 | 45930479 | 45930296 | 30 | 39  | 2  | 12.78544924 | 4.53E-10    | PRKCE   | ENSG00000171132 |
| 2 | 45932306 | 45932508 | 45932472 | 11 | 11  | 1  | 5.753452158 | 0.00215302  | PRKCE   | ENSG00000171132 |
| 2 | 45990271 | 45990631 | 45990450 | 10 | 15  | 3  | 3.835634772 | 0.00291691  | PRKCE   | ENSG00000171132 |
| 2 | 46019356 | 46019805 | 46019493 | 13 | 22  | 9  | 2.205489994 | 0.0136443   | PRKCE   | ENSG00000171132 |
| 2 | 46089017 | 46089424 | 46089253 | 21 | 32  | 0  | 31.64398687 | 2.31E-10    |         | ENSG00000217939 |
| 2 | 46244790 | 46245241 | 46244969 | 9  | 18  | 2  | 6.073088389 | 0.000157975 | EPAS1   | ENSG00000116016 |
| 2 | 46252694 | 46253433 | 46253147 | 86 | 128 | 9  | 12.36992214 | 1.42E-27    | EPAS1   | ENSG00000116016 |
| 2 | 46253697 | 46253969 | 46253828 | 8  | 9   | 1  | 4.794543465 | 0.00708517  | EPAS1   | ENSG00000116016 |
| 2 | 46367384 | 46367603 | 46367539 | 8  | 8   | 3  | 2.157544559 | 0.0836802   | EPAS1   | ENSG00000116016 |
| 2 | 46515762 | 46515999 | 46515889 | 9  | 10  | 2  | 3.515998541 | 0.0136204   |         | ENSG00000211311 |
| 2 | 46726282 | 46726602 | 46726442 | 11 | 13  | 2  | 4.474907234 | 0.00269459  |         | ENSG00000203445 |
| 2 | 46727647 | 46728025 | 46727846 | 19 | 25  | 2  | 8.310542006 | 2.50E-06    |         | ENSG00000203445 |
| 2 | 46857490 | 46857842 | 46857666 | 8  | 11  | 4  | 2.301380863 | 0.0459276   |         | ENSG00000222005 |
| 2 | 46945057 | 46945268 | 46945213 | 8  | 9   | 1  | 4.794543465 | 0.00708517  |         | ENSG00000222005 |
| 2 | 46969737 | 46969929 | 46969829 | 8  | 8   | 4  | 1.726035648 | 0.150596    | MCFD2   | ENSG00000180398 |
| 2 | 47048616 | 47048869 | 47048787 | 10 | 14  | 1  | 7.191815198 | 0.00034761  | TTC7A   | ENSG00000068724 |
| 2 | 47135963 | 47136207 | 47136030 | 9  | 12  | 0  | 12.46581301 | 0.000159888 | C2orf61 | ENSG00000162864 |
| 2 | 47257217 | 47257522 | 47257359 | 11 | 13  | 6  | 1.917817386 | 0.0693353   | CALM2   | ENSG00000143933 |
| 2 | 47420625 | 47421053 | 47420787 | 10 | 18  | 8  | 2.024362796 | 0.0334397   | TACSTD1 | ENSG00000119888 |



|   |          |          |          |     |     |    |             |             |         |                 |
|---|----------|----------|----------|-----|-----|----|-------------|-------------|---------|-----------------|
| 2 | 47987262 | 47987515 | 47987383 | 9   | 11  | 0  | 11.50690432 | 0.000313206 | FBXO11  | ENSG00000138081 |
| 2 | 48145886 | 48146125 | 48146005 | 9   | 12  | 0  | 12.46581301 | 0.000159888 |         | ENSG00000217681 |
| 2 | 48396226 | 48396421 | 48396355 | 8   | 9   | 2  | 3.19636231  | 0.0229249   | FOXN2   | ENSG00000170802 |
| 2 | 48396427 | 48396917 | 48396753 | 9   | 18  | 3  | 4.554816292 | 0.000599415 | FOXN2   | ENSG00000170802 |
| 2 | 48501351 | 48501652 | 48501501 | 14  | 14  | 12 | 1.106433107 | 0.392094    | KLRAQ1  | ENSG00000162869 |
| 2 | 48521097 | 48521383 | 48521235 | 8   | 9   | 0  | 9.589086931 | 0.00120187  | KLRAQ1  | ENSG00000162869 |
| 2 | 48921764 | 48922383 | 48921955 | 52  | 71  | 2  | 23.01380863 | 6.29E-19    | TCEB2   | ENSG00000217429 |
| 2 | 48992792 | 48993047 | 48992923 | 9   | 10  | 1  | 5.273997812 | 0.00391723  |         | ENSG00000214602 |
| 2 | 50606379 | 50606811 | 50606558 | 22  | 33  | 3  | 8.150723891 | 1.18E-07    | NRXN1   | ENSG00000179915 |
| 2 | 50627442 | 50627673 | 50627557 | 9   | 10  | 1  | 5.273997812 | 0.00391723  |         | ENSG00000218921 |
| 2 | 50827283 | 50827463 | 50827373 | 8   | 9   | 2  | 3.19636231  | 0.0229249   |         | ENSG00000216191 |
| 2 | 51337437 | 51337640 | 51337537 | 9   | 10  | 0  | 10.54799562 | 0.000613541 |         | ENSG00000222692 |
| 2 | 54411538 | 54411855 | 54411696 | 8   | 13  | 5  | 2.237453617 | 0.038866    | C2orf73 | ENSG00000177994 |
| 2 | 54660394 | 54660624 | 54660521 | 10  | 11  | 5  | 1.917817386 | 0.0843804   | SPTBN1  | ENSG00000115306 |
| 2 | 54700635 | 54700938 | 54700786 | 16  | 19  | 1  | 9.589086931 | 1.56E-05    | SPTBN1  | ENSG00000115306 |
| 2 | 55060274 | 55060573 | 55060431 | 11  | 15  | 1  | 7.671269544 | 0.000187863 | RTN4    | ENSG00000115310 |
| 2 | 55158862 | 55159129 | 55159017 | 13  | 14  | 1  | 7.191815198 | 0.00034761  | RTN4    | ENSG00000115310 |
| 2 | 55349689 | 55350067 | 55349915 | 11  | 17  | 1  | 8.630178238 | 5.44E-05    | MTIF2   | ENSG00000085760 |
| 2 | 55592168 | 55592396 | 55592282 | 8   | 8   | 1  | 4.315089119 | 0.0127267   | CCDC104 | ENSG00000163001 |
| 2 | 55698231 | 55698448 | 55698339 | 8   | 10  | 8  | 1.171999514 | 0.35773     | SMEK2   | ENSG00000138041 |
| 2 | 56024166 | 56024456 | 56024282 | 20  | 22  | 2  | 7.351633313 | 1.51E-05    |         | ENSG00000202344 |
| 2 | 56459683 | 56460075 | 56459896 | 55  | 64  | 4  | 12.46581301 | 5.53E-15    |         | ENSG00000199395 |
| 2 | 57915009 | 57915246 | 57915100 | 10  | 13  | 1  | 6.712360851 | 0.000640982 | VRK2    | ENSG00000028116 |
| 2 | 58127126 | 58127377 | 58127262 | 8   | 10  | 3  | 2.636998906 | 0.034203    | VRK2    | ENSG00000028116 |
| 2 | 60580496 | 60580888 | 60580715 | 10  | 17  | 1  | 8.630178238 | 5.44E-05    | BCL11A  | ENSG00000119866 |
| 2 | 61097784 | 61098017 | 61097900 | 8   | 9   | 2  | 3.19636231  | 0.0229249   | PEX13   | ENSG00000162928 |
| 2 | 61261147 | 61261377 | 61261262 | 11  | 12  | 4  | 2.493162602 | 0.0299057   | AHSA2   | ENSG00000173209 |
| 2 | 61358346 | 61358888 | 61358651 | 25  | 38  | 0  | 37.39743903 | 4.09E-12    | AHSA2   | ENSG00000173209 |
| 2 | 61934713 | 61935033 | 61934873 | 8   | 12  | 2  | 4.155271003 | 0.0046638   | FAM161A | ENSG00000170264 |
| 2 | 61969342 | 61969574 | 61969480 | 9   | 10  | 5  | 1.757999271 | 0.121253    | CCT4    | ENSG00000115484 |
| 2 | 62040533 | 62041316 | 62040757 | 100 | 132 | 3  | 31.88371404 | 7.15E-35    |         | ENSG00000209229 |
| 2 | 62041454 | 62041670 | 62041562 | 8   | 9   | 3  | 2.397271733 | 0.0539397   |         | ENSG00000209229 |
| 2 | 62041847 | 62042306 | 62042095 | 62  | 74  | 1  | 35.95907599 | 4.74E-21    |         | ENSG00000209229 |
| 2 | 62230395 | 62230682 | 62230538 | 8   | 10  | 2  | 3.515998541 | 0.0136204   |         | ENSG00000220214 |

|   |          |          |          |    |    |   |             |             |          |                 |
|---|----------|----------|----------|----|----|---|-------------|-------------|----------|-----------------|
| 2 | 62387315 | 62387494 | 62387411 | 8  | 8  | 5 | 1.43836304  | 0.235762    |          | ENSG00000209133 |
| 2 | 62387585 | 62387860 | 62387722 | 13 | 16 | 7 | 2.037680973 | 0.0400399   |          | ENSG00000209133 |
| 2 | 63159625 | 63159820 | 63159667 | 8  | 9  | 3 | 2.397271733 | 0.0539397   | OTX1     | ENSG00000115507 |
| 2 | 63203630 | 63203828 | 63203729 | 8  | 8  | 2 | 2.876726079 | 0.0381137   |          | ENSG00000209139 |
| 2 | 63269666 | 63269869 | 63269744 | 9  | 11 | 2 | 3.835634772 | 0.00800699  |          | ENSG00000209278 |
| 2 | 63669257 | 63669591 | 63669436 | 13 | 17 | 3 | 4.315089119 | 0.00102271  |          | ENSG00000143951 |
| 2 | 64224110 | 64224309 | 64224209 | 8  | 9  | 2 | 3.19636231  | 0.0229249   | PELI1    | ENSG00000197329 |
| 2 | 64314841 | 64315129 | 64314985 | 9  | 11 | 0 | 11.50690432 | 0.000313206 | PELI1    | ENSG00000197329 |
| 2 | 64597284 | 64597492 | 64597388 | 10 | 11 | 2 | 3.835634772 | 0.00800699  | AFTPH    | ENSG00000119844 |
| 2 | 64680230 | 64680482 | 64680356 | 9  | 10 | 7 | 1.318499453 | 0.269217    |          | ENSG00000209305 |
| 2 | 64811363 | 64811557 | 64811412 | 9  | 9  | 1 | 4.794543465 | 0.00708517  | SERTAD2  | ENSG00000179833 |
| 2 | 64816274 | 64816509 | 64816391 | 10 | 10 | 2 | 3.515998541 | 0.0136204   |          | ENSG00000209316 |
| 2 | 64912407 | 64912772 | 64912580 | 22 | 28 | 4 | 5.56167042  | 9.22E-06    |          | ENSG00000199964 |
| 2 | 65087234 | 65087563 | 65087404 | 13 | 16 | 2 | 5.433815927 | 0.000499302 |          | ENSG00000209008 |
| 2 | 65145492 | 65145774 | 65145633 | 9  | 11 | 1 | 5.753452158 | 0.00215302  | CEP68    | ENSG00000011523 |
| 2 | 65149423 | 65149843 | 65149623 | 39 | 53 | 1 | 25.89053471 | 4.67E-15    | CEP68    | ENSG00000011523 |
| 2 | 65210323 | 65210515 | 65210395 | 9  | 11 | 1 | 5.753452158 | 0.00215302  | RAB1A    | ENSG00000138069 |
| 2 | 65210522 | 65210745 | 65210668 | 9  | 12 | 3 | 3.116453252 | 0.0131971   | RAB1A    | ENSG00000138069 |
| 2 | 65308848 | 65309053 | 65308932 | 9  | 9  | 1 | 4.794543465 | 0.00708517  | ACTR2    | ENSG00000138071 |
| 2 | 65447290 | 65447589 | 65447413 | 9  | 12 | 2 | 4.155271003 | 0.0046638   | SPRED2   | ENSG00000198369 |
| 2 | 65454025 | 65454338 | 65454181 | 10 | 11 | 3 | 2.876726079 | 0.0213797   | SPRED2   | ENSG00000198369 |
| 2 | 65458408 | 65458711 | 65458558 | 10 | 12 | 7 | 1.558226626 | 0.152813    | SPRED2   | ENSG00000198369 |
| 2 | 65513135 | 65513669 | 65513378 | 12 | 22 | 4 | 4.410979988 | 0.000231863 | SPRED2   | ENSG00000198369 |
| 2 | 65516361 | 65516625 | 65516483 | 9  | 10 | 2 | 3.515998541 | 0.0136204   |          | ENSG00000204929 |
| 2 | 65618753 | 65619175 | 65618964 | 42 | 54 | 1 | 26.36998906 | 2.43E-15    |          | ENSG00000208992 |
| 2 | 65721131 | 65721533 | 65721379 | 9  | 15 | 0 | 15.34253909 | 2.13E-05    |          | ENSG00000214533 |
| 2 | 66628571 | 66628754 | 66628648 | 8  | 8  | 2 | 2.876726079 | 0.0381137   | MEIS1    | ENSG00000143995 |
| 2 | 67532182 | 67532538 | 67532360 | 17 | 22 | 1 | 11.02744997 | 2.36E-06    | ETAA1    | ENSG00000143971 |
| 2 | 68203091 | 68203275 | 68203183 | 8  | 8  | 2 | 2.876726079 | 0.0381137   | WDR92    | ENSG00000221823 |
| 2 | 68238097 | 68238481 | 68238302 | 18 | 25 | 4 | 4.986325204 | 4.72E-05    | WDR92    | ENSG00000221823 |
| 2 | 68331739 | 68332171 | 68331906 | 10 | 17 | 2 | 5.753452158 | 0.000281509 | PPP3R1   | ENSG00000115953 |
| 2 | 68790452 | 68790644 | 68790548 | 10 | 10 | 1 | 5.273997812 | 0.00391723  | ARHGAP25 | ENSG00000163219 |
| 2 | 68825153 | 68825499 | 68825323 | 13 | 18 | 1 | 9.109632584 | 2.91E-05    | ARHGAP25 | ENSG00000163219 |
| 2 | 68879836 | 68880015 | 68879913 | 8  | 8  | 4 | 1.726035648 | 0.150596    | ARHGAP25 | ENSG00000163219 |

|   |          |          |          |    |     |   |             |             |         |                 |
|---|----------|----------|----------|----|-----|---|-------------|-------------|---------|-----------------|
| 2 | 68917848 | 68918207 | 68918059 | 8  | 12  | 3 | 3.116453252 | 0.0131971   | BMP10   | ENSG00000163217 |
| 2 | 68997696 | 68997936 | 68997823 | 12 | 12  | 1 | 6.232906505 | 0.00117736  | GKN2    | ENSG00000183607 |
| 2 | 69163463 | 69163652 | 69163580 | 8  | 9   | 5 | 1.598181155 | 0.170911    | ANTXR1  | ENSG00000169604 |
| 2 | 69401098 | 69401296 | 69401192 | 8  | 8   | 0 | 8.630178238 | 0.00235436  |         | ENSG00000208985 |
| 2 | 69517297 | 69517561 | 69517412 | 8  | 11  | 0 | 11.50690432 | 0.000313206 | NFU1    | ENSG00000169599 |
| 2 | 69728976 | 69729254 | 69729109 | 11 | 15  | 0 | 15.34253909 | 2.13E-05    |         | ENSG00000220011 |
| 2 | 69862137 | 69862420 | 69862278 | 8  | 10  | 4 | 2.109599125 | 0.0694668   | ANXA4   | ENSG00000196975 |
| 2 | 69995337 | 69995577 | 69995487 | 8  | 8   | 2 | 2.876726079 | 0.0381137   | MXD1    | ENSG00000059728 |
| 2 | 70027978 | 70028192 | 70028058 | 8  | 10  | 2 | 3.515998541 | 0.0136204   |         | ENSG00000208950 |
| 2 | 70126585 | 70126820 | 70126702 | 9  | 9   | 3 | 2.397271733 | 0.0539397   | PCBP1   | ENSG00000169564 |
| 2 | 70151545 | 70151796 | 70151633 | 8  | 11  | 0 | 11.50690432 | 0.000313206 | PCBP1   | ENSG00000169564 |
| 2 | 70221837 | 70222235 | 70222000 | 10 | 17  | 3 | 4.315089119 | 0.00102271  | C2orf42 | ENSG00000115998 |
| 2 | 70223398 | 70223624 | 70223527 | 9  | 9   | 2 | 3.19636231  | 0.0229249   | C2orf42 | ENSG00000115998 |
| 2 | 70677197 | 70678008 | 70677728 | 75 | 107 | 5 | 17.26035648 | 1.20E-25    | TGFA    | ENSG00000163235 |
| 2 | 71075588 | 71075858 | 71075723 | 9  | 12  | 1 | 6.232906505 | 0.00117736  | TEX261  | ENSG00000144043 |
| 2 | 71210336 | 71210678 | 71210565 | 8  | 13  | 4 | 2.684944341 | 0.01921     | MCEE    | ENSG00000124370 |
| 2 | 71808344 | 71808616 | 71808480 | 22 | 27  | 2 | 8.949814469 | 7.46E-07    | DYSF    | ENSG00000135636 |
| 2 | 71828287 | 71828559 | 71828454 | 17 | 20  | 4 | 4.027416511 | 0.000652226 | DYSF    | ENSG00000135636 |
| 2 | 71961514 | 71961887 | 71961687 | 23 | 29  | 2 | 9.589086931 | 2.21E-07    | CYP26B1 | ENSG00000003137 |
| 2 | 72176904 | 72177103 | 72177017 | 9  | 9   | 0 | 9.589086931 | 0.00120187  | CYP26B1 | ENSG00000003137 |
| 2 | 72908676 | 72908878 | 72908762 | 8  | 8   | 0 | 8.630178238 | 0.00235436  | EXOC6B  | ENSG00000144036 |
| 2 | 72974380 | 72975041 | 72974832 | 17 | 39  | 0 | 38.35634772 | 2.09E-12    | SPR     | ENSG00000116096 |
| 2 | 73419584 | 73419797 | 73419718 | 8  | 10  | 3 | 2.636998906 | 0.034203    |         | ENSG00000214484 |
| 2 | 73857757 | 73858071 | 73857914 | 28 | 28  | 0 | 27.8083521  | 3.40E-09    | DUSP11  | ENSG00000144048 |
| 2 | 74064294 | 74064619 | 74064470 | 16 | 19  | 8 | 2.130908207 | 0.0233014   |         | ENSG00000201876 |
| 2 | 74090943 | 74091359 | 74091122 | 28 | 36  | 5 | 5.913270274 | 4.32E-07    | TET3    | ENSG00000187605 |
| 2 | 74268907 | 74269248 | 74269075 | 16 | 21  | 2 | 7.031997082 | 2.73E-05    | MOBKL1B | ENSG00000114978 |
| 2 | 74342221 | 74342480 | 74342350 | 11 | 14  | 2 | 4.794543465 | 0.00154571  | SLC4A5  | ENSG00000188687 |
| 2 | 74472569 | 74472806 | 74472687 | 10 | 10  | 4 | 2.109599125 | 0.0694668   | DCTN1   | ENSG00000204843 |
| 2 | 74535557 | 74535829 | 74535656 | 11 | 14  | 5 | 2.397271733 | 0.0258078   | INO80B  | ENSG00000221956 |
| 2 | 74588936 | 74589182 | 74589064 | 8  | 10  | 2 | 3.515998541 | 0.0136204   | PCGF1   | ENSG00000115289 |
| 2 | 75039640 | 75039846 | 75039743 | 8  | 8   | 1 | 4.315089119 | 0.0127267   | POLE4   | ENSG00000115350 |
| 2 | 75426437 | 75426618 | 75426527 | 9  | 9   | 1 | 4.794543465 | 0.00708517  |         | ENSG00000208916 |
| 2 | 75460502 | 75460776 | 75460639 | 14 | 16  | 0 | 16.30144778 | 1.09E-05    |         | ENSG00000208916 |

|   |          |          |          |    |    |    |             |             |         |                 |
|---|----------|----------|----------|----|----|----|-------------|-------------|---------|-----------------|
| 2 | 75721238 | 75721447 | 75721325 | 8  | 8  | 3  | 2.157544559 | 0.0836802   |         | ENSG00000208911 |
| 2 | 75836651 | 75836877 | 75836764 | 9  | 11 | 1  | 5.753452158 | 0.00215302  | C2orf3  | ENSG00000005436 |
| 2 | 75977439 | 75977661 | 75977547 | 8  | 9  | 1  | 4.794543465 | 0.00708517  | C2orf3  | ENSG00000005436 |
| 2 | 81006911 | 81007144 | 81007027 | 8  | 9  | 0  | 9.589086931 | 0.00120187  |         | ENSG00000212001 |
| 2 | 83931718 | 83932028 | 83931870 | 10 | 12 | 0  | 12.46581301 | 0.000159888 |         | ENSG00000199295 |
| 2 | 84136563 | 84136838 | 84136700 | 11 | 14 | 1  | 7.191815198 | 0.00034761  |         | ENSG00000182814 |
| 2 | 84158307 | 84158616 | 84158448 | 9  | 12 | 0  | 12.46581301 | 0.000159888 |         | ENSG00000182814 |
| 2 | 84945685 | 84945935 | 84945810 | 9  | 11 | 13 | 0.821921737 | 0.693119    |         | ENSG00000208827 |
| 2 | 84962660 | 84962884 | 84962772 | 8  | 9  | 5  | 1.598181155 | 0.170911    |         | ENSG00000186854 |
| 2 | 84974786 | 84974993 | 84974889 | 9  | 11 | 12 | 0.885146486 | 0.620672    | TMSB10  | ENSG00000034510 |
| 2 | 85006288 | 85006769 | 85006603 | 17 | 25 | 9  | 2.493162602 | 0.00432225  |         | ENSG00000213399 |
| 2 | 85038672 | 85039001 | 85038836 | 8  | 11 | 7  | 1.43836304  | 0.204844    | KCMF1   | ENSG00000176407 |
| 2 | 85039096 | 85039371 | 85039233 | 10 | 12 | 3  | 3.116453252 | 0.0131971   | KCMF1   | ENSG00000176407 |
| 2 | 85050541 | 85050873 | 85050707 | 8  | 13 | 5  | 2.237453617 | 0.038866    | KCMF1   | ENSG00000176407 |
| 2 | 85051027 | 85051217 | 85051122 | 9  | 9  | 1  | 4.794543465 | 0.00708517  | KCMF1   | ENSG00000176407 |
| 2 | 85072494 | 85072755 | 85072611 | 11 | 14 | 2  | 4.794543465 | 0.00154571  | KCMF1   | ENSG00000176407 |
| 2 | 85095409 | 85095702 | 85095555 | 43 | 44 | 2  | 14.3836304  | 1.96E-11    | KCMF1   | ENSG00000176407 |
| 2 | 85172526 | 85172758 | 85172642 | 13 | 13 | 0  | 13.4247217  | 8.16E-05    | TCF7L1  | ENSG00000152284 |
| 2 | 85213076 | 85213378 | 85213240 | 8  | 11 | 3  | 2.876726079 | 0.0213797   | TCF7L1  | ENSG00000152284 |
| 2 | 85381015 | 85381268 | 85381151 | 9  | 11 | 8  | 1.278544924 | 0.28289     |         | ENSG00000221579 |
| 2 | 85435011 | 85435635 | 85435250 | 18 | 33 | 14 | 2.173526371 | 0.00425345  | RETSAT  | ENSG00000042445 |
| 2 | 85501943 | 85502157 | 85502040 | 8  | 10 | 2  | 3.515998541 | 0.0136204   | SH2D6   | ENSG00000152292 |
| 2 | 85556958 | 85557173 | 85557057 | 9  | 11 | 1  | 5.753452158 | 0.00215302  |         | ENSG00000199936 |
| 2 | 85619400 | 85619710 | 85619571 | 10 | 13 | 6  | 1.917817386 | 0.0693353   | MAT2A   | ENSG00000168906 |
| 2 | 85641276 | 85641482 | 85641379 | 9  | 9  | 1  | 4.794543465 | 0.00708517  | GGCX    | ENSG00000115486 |
| 2 | 85658234 | 85658541 | 85658387 | 8  | 12 | 4  | 2.493162602 | 0.0299057   | VAMP8   | ENSG00000118640 |
| 2 | 85787883 | 85788254 | 85788075 | 10 | 17 | 1  | 8.630178238 | 5.44E-05    | GNLY    | ENSG00000115523 |
| 2 | 85823253 | 85823462 | 85823342 | 11 | 12 | 4  | 2.493162602 | 0.0299057   | ATOH8   | ENSG00000168874 |
| 2 | 85853078 | 85853355 | 85853250 | 11 | 14 | 2  | 4.794543465 | 0.00154571  | ATOH8   | ENSG00000168874 |
| 2 | 86016448 | 86016642 | 86016517 | 8  | 8  | 0  | 8.630178238 | 0.00235436  | ST3GAL5 | ENSG00000115525 |
| 2 | 86160589 | 86160791 | 86160707 | 8  | 9  | 3  | 2.397271733 | 0.0539397   | POLR1A  | ENSG00000068654 |
| 2 | 86185887 | 86186178 | 86186052 | 8  | 13 | 5  | 2.237453617 | 0.038866    | POLR1A  | ENSG00000068654 |
| 2 | 86186292 | 86186883 | 86186471 | 8  | 21 | 9  | 2.109599125 | 0.0196396   | POLR1A  | ENSG00000068654 |
| 2 | 86276329 | 86276616 | 86276451 | 8  | 12 | 7  | 1.558226626 | 0.152813    | IMMT    | ENSG00000132305 |

|   |          |          |          |     |     |    |             |             |         |                 |
|---|----------|----------|----------|-----|-----|----|-------------|-------------|---------|-----------------|
| 2 | 86279917 | 86280283 | 86280123 | 9   | 15  | 9  | 1.534253909 | 0.136498    | MRPL35  | ENSG00000132313 |
| 2 | 86330202 | 86330401 | 86330301 | 8   | 8   | 0  | 8.630178238 | 0.00235436  | MRPL35  | ENSG00000132313 |
| 2 | 86355083 | 86355262 | 86355151 | 8   | 8   | 1  | 4.315089119 | 0.0127267   | REEP1   | ENSG00000068615 |
| 2 | 86373060 | 86373262 | 86373142 | 8   | 8   | 2  | 2.876726079 | 0.0381137   | REEP1   | ENSG00000068615 |
| 2 | 86506874 | 86507686 | 86507151 | 57  | 86  | 17 | 4.63472535  | 3.59E-12    | JMJD1A  | ENSG00000115548 |
| 2 | 86521349 | 86521613 | 86521490 | 8   | 11  | 4  | 2.301380863 | 0.0459276   | JMJD1A  | ENSG00000115548 |
| 2 | 86643885 | 86644491 | 86644215 | 51  | 72  | 6  | 10.0000478  | 2.01E-15    | VPS24   | ENSG00000115561 |
| 2 | 86845388 | 86845712 | 86845553 | 8   | 11  | 6  | 1.643843474 | 0.137712    | CD8A    | ENSG00000153563 |
| 2 | 88240627 | 88240841 | 88240734 | 10  | 10  | 7  | 1.318499453 | 0.269217    | THNSL2  | ENSG00000144115 |
| 2 | 88272148 | 88272876 | 88272374 | 118 | 161 | 11 | 12.94526736 | 1.55E-34    | THNSL2  | ENSG00000144115 |
| 2 | 88346261 | 88346630 | 88346437 | 9   | 14  | 4  | 2.876726079 | 0.01219     |         | ENSG00000202012 |
| 2 | 88431607 | 88431940 | 88431773 | 13  | 18  | 4  | 3.643853034 | 0.00178791  |         | ENSG00000212133 |
| 2 | 88570378 | 88570557 | 88570495 | 8   | 8   | 0  | 8.630178238 | 0.00235436  | C2orf51 | ENSG00000172073 |
| 2 | 88618820 | 88619357 | 88619119 | 84  | 108 | 0  | 104.5210475 | 1.48E-32    | C2orf51 | ENSG00000172073 |
| 2 | 88630205 | 88630409 | 88630287 | 9   | 9   | 2  | 3.19636231  | 0.0229249   | C2orf51 | ENSG00000172073 |
| 2 | 88671426 | 88671692 | 88671565 | 9   | 11  | 2  | 3.835634772 | 0.00800699  | EIF2AK3 | ENSG00000172071 |
| 2 | 88680855 | 88681131 | 88681010 | 8   | 10  | 3  | 2.636998906 | 0.034203    | EIF2AK3 | ENSG00000172071 |
| 2 | 88961013 | 88961199 | 88961107 | 8   | 9   | 2  | 3.19636231  | 0.0229249   | IGKV4-1 | ENSG00000211598 |
| 2 | 88961238 | 88961459 | 88961348 | 8   | 10  | 3  | 2.636998906 | 0.034203    | IGKV4-1 | ENSG00000211598 |
| 2 | 89048539 | 89048891 | 89048715 | 28  | 32  | 4  | 6.328797374 | 9.93E-07    |         | ENSG00000211601 |
| 2 | 89407342 | 89407558 | 89407483 | 9   | 10  | 1  | 5.273997812 | 0.00391723  |         | ENSG00000211619 |
| 2 | 89745511 | 89745726 | 89745630 | 9   | 10  | 1  | 5.273997812 | 0.00391723  |         | ENSG00000211626 |
| 2 | 90960422 | 90960742 | 90960576 | 9   | 11  | 14 | 0.767126954 | 0.756447    |         | ENSG00000219041 |
| 2 | 90970921 | 90971105 | 90971087 | 8   | 8   | 16 | 0.507657543 | 0.956688    |         | ENSG00000219041 |
| 2 | 90974774 | 90975026 | 90974900 | 8   | 11  | 4  | 2.301380863 | 0.0459276   |         | ENSG00000219041 |
| 2 | 91133470 | 91133934 | 91133755 | 17  | 29  | 7  | 3.595907599 | 0.000155266 |         | ENSG00000213356 |
| 2 | 91134291 | 91134489 | 91134423 | 8   | 9   | 4  | 1.917817386 | 0.103282    |         | ENSG00000213356 |
| 2 | 91143270 | 91143474 | 91143340 | 8   | 9   | 4  | 1.917817386 | 0.103282    |         | ENSG00000213356 |
| 2 | 91145282 | 91145587 | 91145419 | 8   | 13  | 10 | 1.220429246 | 0.306001    |         | ENSG00000213356 |
| 2 | 91150770 | 91150974 | 91150833 | 10  | 10  | 10 | 0.958908693 | 0.538751    |         | ENSG00000212975 |
| 2 | 91151090 | 91151423 | 91151256 | 8   | 14  | 9  | 1.43836304  | 0.179537    |         | ENSG00000212975 |
| 2 | 91158826 | 91159019 | 91158903 | 8   | 8   | 10 | 0.784561658 | 0.708731    |         | ENSG00000212975 |
| 2 | 91163040 | 91163398 | 91163219 | 17  | 23  | 8  | 2.557089848 | 0.00494559  |         | ENSG00000212975 |
| 2 | 91172418 | 91172618 | 91172502 | 8   | 9   | 6  | 1.369869562 | 0.253675    |         | ENSG00000212975 |

|   |          |          |          |     |     |     |             |             |                         |
|---|----------|----------|----------|-----|-----|-----|-------------|-------------|-------------------------|
| 2 | 91178671 | 91179054 | 91178946 | 11  | 18  | 11  | 1.518272097 | 0.122037    | ENSG00000212975         |
| 2 | 91179836 | 91181058 | 91180591 | 28  | 73  | 47  | 1.478317568 | 0.0161388   | ENSG00000212975         |
| 2 | 91181561 | 91181867 | 91181696 | 9   | 13  | 5   | 2.237453617 | 0.038866    | ENSG00000212975         |
| 2 | 91182337 | 91182632 | 91182484 | 14  | 14  | 7   | 1.797953799 | 0.0806593   | ENSG00000212975         |
| 2 | 91637260 | 91637541 | 91637408 | 9   | 11  | 15  | 0.71918152  | 0.81018     | ENSG00000198710         |
| 2 | 91639147 | 91639476 | 91639311 | 9   | 10  | 8   | 1.171999514 | 0.35773     | ENSG00000198710         |
| 2 | 91639512 | 91639847 | 91639679 | 67  | 68  | 63  | 1.033823435 | 0.423273    | ENSG00000198710         |
| 2 | 91639881 | 91640214 | 91640047 | 24  | 25  | 44  | 0.554036134 | 0.993006    | ENSG00000198710         |
| 2 | 91644892 | 91645239 | 91645065 | 95  | 100 | 66  | 1.445519075 | 0.00893223  | ENSG00000198710         |
| 2 | 91647910 | 91648238 | 91648074 | 20  | 20  | 23  | 0.839045106 | 0.722898    | ENSG00000198710         |
| 2 | 91653969 | 91654444 | 91654250 | 120 | 156 | 148 | 1.010393724 | 0.463613    | ENSG00000198710         |
| 2 | 91654738 | 91655185 | 91655008 | 20  | 24  | 31  | 0.749147416 | 0.862744    | ENSG00000198710         |
| 2 | 91660301 | 91660748 | 91660576 | 106 | 117 | 114 | 0.983923702 | 0.54894     | ENSG00000198710         |
| 2 | 91667494 | 91667823 | 91667658 | 18  | 18  | 19  | 0.910963258 | 0.614871    | ENSG00000198710         |
| 2 | 91669312 | 91669850 | 91669490 | 143 | 157 | 159 | 0.946922334 | 0.686559    | ENSG00000198710         |
| 2 | 91669889 | 91670220 | 91670054 | 10  | 16  | 9   | 1.630144778 | 0.102169    | ENSG00000198710         |
| 2 | 91670713 | 91670892 | 91670863 | 9   | 9   | 17  | 0.532727052 | 0.951077    | ENSG00000198710         |
| 2 | 91672803 | 91673129 | 91672966 | 10  | 13  | 16  | 0.789689512 | 0.746135    | ENSG00000198710         |
| 2 | 91681308 | 91681647 | 91681477 | 42  | 42  | 55  | 0.736304889 | 0.93599     | ENSG00000198710         |
| 2 | 91682690 | 91682986 | 91682842 | 10  | 11  | 9   | 1.150690432 | 0.367789    | ENSG00000198710         |
| 2 | 91685092 | 91685278 | 91685248 | 8   | 9   | 5   | 1.598181155 | 0.170911    | ENSG00000198710         |
| 2 | 91686986 | 91687479 | 91687165 | 77  | 84  | 88  | 0.915811673 | 0.719148    | ENSG00000198710         |
| 2 | 95013576 | 95013851 | 95013695 | 8   | 10  | 1   | 5.273997812 | 0.00391723  | ENSG00000208689         |
| 2 | 95061179 | 95061500 | 95061339 | 8   | 12  | 1   | 6.232906505 | 0.00117736  | MAL ENSG00000172005     |
| 2 | 95194935 | 95195217 | 95195076 | 8   | 13  | 10  | 1.220429246 | 0.306001    | ZNF2 ENSG00000163067    |
| 2 | 95303278 | 95303646 | 95303435 | 9   | 14  | 2   | 4.794543465 | 0.00154571  | PROM2 ENSG00000155066   |
| 2 | 95303764 | 95304123 | 95303944 | 13  | 20  | 4   | 4.027416511 | 0.000652226 | PROM2 ENSG00000155066   |
| 2 | 95304132 | 95304396 | 95304264 | 11  | 14  | 7   | 1.797953799 | 0.0806593   | PROM2 ENSG00000155066   |
| 2 | 95375009 | 95375378 | 95375244 | 9   | 15  | 3   | 3.835634772 | 0.00291691  | KCNIP3 ENSG00000115041  |
| 2 | 96129779 | 96130002 | 96129925 | 10  | 13  | 3   | 3.356180426 | 0.00805599  | ADRA2B ENSG00000222040  |
| 2 | 96173644 | 96173829 | 96173768 | 8   | 8   | 2   | 2.876726079 | 0.0381137   | DUSP2 ENSG00000158050   |
| 2 | 96235192 | 96235560 | 96235398 | 9   | 15  | 5   | 2.557089848 | 0.0169197   | STARD7 ENSG00000084090  |
| 2 | 96270197 | 96270646 | 96270331 | 10  | 16  | 5   | 2.716907964 | 0.0109645   | TMEM127 ENSG00000135956 |
| 2 | 96289793 | 96290101 | 96289935 | 8   | 12  | 6   | 1.78083043  | 0.0985525   | TMEM127 ENSG00000135956 |

|   |           |           |           |    |    |    |             |            |          |                 |
|---|-----------|-----------|-----------|----|----|----|-------------|------------|----------|-----------------|
| 2 | 96335132  | 96335318  | 96335225  | 8  | 9  | 5  | 1.598181155 | 0.170911   | SNRNP200 | ENSG00000144028 |
| 2 | 96436186  | 96436405  | 96436295  | 10 | 10 | 3  | 2.636998906 | 0.034203   | NCAPH    | ENSG00000121152 |
| 2 | 96709468  | 96709683  | 96709545  | 8  | 9  | 8  | 1.065454103 | 0.442605   | FER1L5   | ENSG00000214272 |
| 2 | 96710059  | 96710280  | 96710173  | 9  | 9  | 5  | 1.598181155 | 0.170911   | FER1L5   | ENSG00000214272 |
| 2 | 96801315  | 96801620  | 96801488  | 14 | 17 | 6  | 2.465765211 | 0.014729   | CNNM4    | ENSG00000158158 |
| 2 | 96804877  | 96805087  | 96804982  | 8  | 9  | 3  | 2.397271733 | 0.0539397  | CNNM4    | ENSG00000158158 |
| 2 | 96918015  | 96918307  | 96918161  | 16 | 18 | 5  | 3.036544195 | 0.0044641  | FAM178B  | ENSG00000168754 |
| 2 | 96964699  | 96964918  | 96964801  | 8  | 8  | 1  | 4.315089119 | 0.0127267  |          | ENSG00000208682 |
| 2 | 96994232  | 96994456  | 96994344  | 9  | 11 | 6  | 1.643843474 | 0.137712   | FAM178B  | ENSG00000168754 |
| 2 | 97007093  | 97007275  | 97007187  | 8  | 8  | 1  | 4.315089119 | 0.0127267  |          | ENSG00000208680 |
| 2 | 97034821  | 97035000  | 97034910  | 9  | 9  | 2  | 3.19636231  | 0.0229249  |          | ENSG00000208680 |
| 2 | 97680262  | 97680573  | 97680417  | 10 | 14 | 1  | 7.191815198 | 0.00034761 | ZAP70    | ENSG00000115085 |
| 2 | 97790185  | 97790433  | 97790309  | 8  | 9  | 2  | 3.19636231  | 0.0229249  |          | ENSG00000198875 |
| 2 | 97831296  | 97831698  | 97831554  | 17 | 25 | 1  | 12.46581301 | 3.51E-07   |          | ENSG00000198875 |
| 2 | 97978646  | 97978868  | 97978819  | 10 | 12 | 3  | 3.116453252 | 0.0131971  | TMEM131  | ENSG00000075568 |
| 2 | 97980686  | 97980976  | 97980843  | 10 | 11 | 2  | 3.835634772 | 0.00800699 | TMEM131  | ENSG00000075568 |
| 2 | 98041324  | 98041586  | 98041500  | 9  | 12 | 2  | 4.155271003 | 0.0046638  | VWA3B    | ENSG00000168658 |
| 2 | 98138776  | 98138960  | 98138857  | 8  | 8  | 1  | 4.315089119 | 0.0127267  | VWA3B    | ENSG00000168658 |
| 2 | 98252099  | 98252363  | 98252247  | 9  | 11 | 3  | 2.876726079 | 0.0213797  | VWA3B    | ENSG00000168658 |
| 2 | 98272068  | 98272353  | 98272210  | 11 | 12 | 1  | 6.232906505 | 0.00117736 |          | ENSG00000216112 |
| 2 | 98418596  | 98418944  | 98418770  | 27 | 31 | 0  | 30.68507818 | 4.52E-10   | INPP4A   | ENSG00000040933 |
| 2 | 98593302  | 98593653  | 98593545  | 9  | 13 | 3  | 3.356180426 | 0.00805599 | UNC50    | ENSG00000115446 |
| 2 | 98777145  | 98777362  | 98777290  | 12 | 14 | 3  | 3.595907599 | 0.00486913 |          | ENSG00000201070 |
| 2 | 99023642  | 99024137  | 99023817  | 53 | 61 | 0  | 59.45233897 | 7.85E-19   | TSGA10   | ENSG00000135951 |
| 2 | 99123983  | 99124179  | 99124029  | 9  | 9  | 4  | 1.917817386 | 0.103282   | TSGA10   | ENSG00000135951 |
| 2 | 99163902  | 99164272  | 99164081  | 14 | 21 | 10 | 1.917817386 | 0.0328292  | MRPL30   | ENSG00000185414 |
| 2 | 99294464  | 99294658  | 99294616  | 8  | 8  | 0  | 8.630178238 | 0.00235436 | LYG1     | ENSG00000144214 |
| 2 | 99319018  | 99319237  | 99319120  | 9  | 9  | 9  | 0.958908693 | 0.536911   | TXNDC9   | ENSG00000115514 |
| 2 | 99590922  | 99591189  | 99591067  | 8  | 10 | 7  | 1.318499453 | 0.269217   |          | ENSG00000222274 |
| 2 | 99748952  | 99749294  | 99749128  | 19 | 22 | 3  | 5.513724985 | 6.69E-05   |          | ENSG00000222274 |
| 2 | 99763359  | 99763579  | 99763517  | 8  | 9  | 0  | 9.589086931 | 0.00120187 |          | ENSG00000222274 |
| 2 | 99960747  | 99961183  | 99961004  | 15 | 27 | 0  | 26.84944341 | 6.66E-09   | AFF3     | ENSG00000144218 |
| 2 | 100049693 | 100050035 | 100049858 | 9  | 12 | 7  | 1.558226626 | 0.152813   | AFF3     | ENSG00000144218 |
| 2 | 100232053 | 100232372 | 100232219 | 20 | 23 | 2  | 7.671269544 | 8.30E-06   | LONRF2   | ENSG00000170500 |

|   |           |           |           |     |     |   |             |             |         |                 |
|---|-----------|-----------|-----------|-----|-----|---|-------------|-------------|---------|-----------------|
| 2 | 100250833 | 100251029 | 100250931 | 8   | 8   | 5 | 1.43836304  | 0.235762    | LONRF2  | ENSG00000170500 |
| 2 | 100274000 | 100274354 | 100274177 | 9   | 15  | 6 | 2.191791298 | 0.0328001   | LONRF2  | ENSG00000170500 |
| 2 | 100275047 | 100275260 | 100275144 | 10  | 12  | 6 | 1.78083043  | 0.0985525   | LONRF2  | ENSG00000170500 |
| 2 | 100364216 | 100364459 | 100364337 | 9   | 9   | 1 | 4.794543465 | 0.00708517  | CHST10  | ENSG00000115526 |
| 2 | 100545593 | 100545848 | 100545706 | 14  | 15  | 7 | 1.917817386 | 0.0572317   | PDCL3   | ENSG00000115539 |
| 2 | 100769081 | 100769563 | 100769260 | 9   | 20  | 8 | 2.237453617 | 0.0160557   | NPAS2   | ENSG00000170485 |
| 2 | 100870710 | 100870928 | 100870854 | 9   | 10  | 4 | 2.109599125 | 0.0694668   | NPAS2   | ENSG00000170485 |
| 2 | 100876802 | 100877030 | 100876900 | 8   | 8   | 1 | 4.315089119 | 0.0127267   | NPAS2   | ENSG00000170485 |
| 2 | 100886887 | 100887066 | 100886976 | 8   | 8   | 4 | 1.726035648 | 0.150596    | NPAS2   | ENSG00000170485 |
| 2 | 100915807 | 100916021 | 100915914 | 9   | 9   | 0 | 9.589086931 | 0.00120187  | RPL31   | ENSG00000071082 |
| 2 | 101093395 | 101093603 | 101093500 | 10  | 10  | 6 | 1.506856518 | 0.188853    | TBC1D8  | ENSG00000204634 |
| 2 | 101096199 | 101096583 | 101096374 | 38  | 45  | 3 | 11.02744997 | 8.54E-11    | TBC1D8  | ENSG00000204634 |
| 2 | 101107915 | 101108307 | 101108066 | 9   | 15  | 7 | 1.917817386 | 0.0572317   | TBC1D8  | ENSG00000204634 |
| 2 | 101135762 | 101135990 | 101135878 | 11  | 13  | 3 | 3.356180426 | 0.00805599  | TBC1D8  | ENSG00000204634 |
| 2 | 101142237 | 101142816 | 101142614 | 31  | 48  | 2 | 15.66217532 | 1.56E-12    | TBC1D8  | ENSG00000204634 |
| 2 | 101168014 | 101168359 | 101168186 | 8   | 14  | 3 | 3.595907599 | 0.00486913  | TBC1D8  | ENSG00000204634 |
| 2 | 101236636 | 101236823 | 101236728 | 8   | 10  | 5 | 1.757999271 | 0.121253    | C2orf29 | ENSG00000158435 |
| 2 | 101260055 | 101260365 | 101260219 | 10  | 12  | 4 | 2.493162602 | 0.0299057   |         | ENSG00000212283 |
| 2 | 101310682 | 101310984 | 101310814 | 30  | 32  | 8 | 3.515998541 | 9.51E-05    | RNF149  | ENSG00000163162 |
| 2 | 101686880 | 101687389 | 101687113 | 171 | 218 | 2 | 70.00033459 | 6.58E-61    | MAP4K4  | ENSG00000071054 |
| 2 | 101753649 | 101753888 | 101753776 | 8   | 10  | 2 | 3.515998541 | 0.0136204   | MAP4K4  | ENSG00000071054 |
| 2 | 101799179 | 101799361 | 101799208 | 8   | 8   | 1 | 4.315089119 | 0.0127267   | MAP4K4  | ENSG00000071054 |
| 2 | 101814225 | 101814449 | 101814301 | 8   | 9   | 1 | 4.794543465 | 0.00708517  | MAP4K4  | ENSG00000071054 |
| 2 | 101814573 | 101814831 | 101814746 | 8   | 10  | 0 | 10.54799562 | 0.000613541 | MAP4K4  | ENSG00000071054 |
| 2 | 102210740 | 102210998 | 102210899 | 10  | 13  | 3 | 3.356180426 | 0.00805599  |         | ENSG00000205716 |
| 2 | 102284803 | 102284982 | 102284936 | 8   | 8   | 1 | 4.315089119 | 0.0127267   | IL1RL1  | ENSG00000115602 |
| 2 | 102502972 | 102503264 | 102503121 | 11  | 12  | 4 | 2.493162602 | 0.0299057   | SLC9A4  | ENSG00000180251 |
| 2 | 102835510 | 102835702 | 102835577 | 10  | 10  | 4 | 2.109599125 | 0.0694668   | TMEM182 | ENSG00000170417 |
| 2 | 102918618 | 102918888 | 102918755 | 9   | 11  | 0 | 11.50690432 | 0.000313206 | TMEM182 | ENSG00000170417 |
| 2 | 102933413 | 102933592 | 102933521 | 8   | 8   | 0 | 8.630178238 | 0.00235436  | TMEM182 | ENSG00000170417 |
| 2 | 102966661 | 102967097 | 102966894 | 30  | 49  | 2 | 15.98181155 | 8.30E-13    | TMEM182 | ENSG00000170417 |
| 2 | 103620535 | 103621263 | 103620923 | 67  | 100 | 0 | 96.849778   | 3.21E-30    |         |                 |
| 2 | 104160090 | 104160323 | 104160187 | 9   | 11  | 0 | 11.50690432 | 0.000313206 |         | ENSG00000199727 |
| 2 | 104686385 | 104687050 | 104686632 | 40  | 66  | 4 | 12.84937649 | 1.62E-15    |         | ENSG00000207249 |



|   |           |           |           |    |    |    |             |             |          |                 |
|---|-----------|-----------|-----------|----|----|----|-------------|-------------|----------|-----------------|
| 2 | 104837232 | 104837587 | 104837409 | 11 | 16 | 6  | 2.328778255 | 0.0221113   | POU3F3   | ENSG00000198914 |
| 2 | 105020969 | 105021214 | 105021085 | 10 | 12 | 2  | 4.155271003 | 0.0046638   | MRPS9    | ENSG00000135972 |
| 2 | 105162614 | 105162904 | 105162759 | 9  | 13 | 2  | 4.474907234 | 0.00269459  | GPR45    | ENSG00000135973 |
| 2 | 105170465 | 105170683 | 105170549 | 8  | 9  | 1  | 4.794543465 | 0.00708517  | GPR45    | ENSG00000135973 |
| 2 | 105280253 | 105280486 | 105280312 | 8  | 9  | 0  | 9.589086931 | 0.00120187  | TGFBRAP1 | ENSG00000135966 |
| 2 | 105387071 | 105387577 | 105387250 | 15 | 25 | 1  | 12.46581301 | 3.51E-07    | FHL2     | ENSG00000115641 |
| 2 | 105411585 | 105411833 | 105411709 | 9  | 12 | 0  | 12.46581301 | 0.000159888 | FHL2     | ENSG00000115641 |
| 2 | 105438068 | 105438414 | 105438240 | 9  | 13 | 5  | 2.237453617 | 0.038866    | FHL2     | ENSG00000115641 |
| 2 | 105742170 | 105742351 | 105742260 | 8  | 8  | 1  | 4.315089119 | 0.0127267   | NCK2     | ENSG00000071051 |
| 2 | 105823760 | 105824045 | 105823902 | 10 | 14 | 1  | 7.191815198 | 0.00034761  | NCK2     | ENSG00000071051 |
| 2 | 106166372 | 106166557 | 106166537 | 8  | 9  | 0  | 9.589086931 | 0.00120187  | UXS1     | ENSG00000115652 |
| 2 | 106525749 | 106525956 | 106525852 | 8  | 10 | 2  | 3.515998541 | 0.0136204   | CD8BP    | ENSG00000169664 |
| 2 | 106689264 | 106689502 | 106689383 | 8  | 10 | 0  | 10.54799562 | 0.000613541 |          | ENSG00000214199 |
| 2 | 106697937 | 106698160 | 106698048 | 8  | 8  | 2  | 2.876726079 | 0.0381137   |          | ENSG00000214199 |
| 2 | 108088684 | 108088907 | 108088800 | 10 | 10 | 0  | 10.54799562 | 0.000613541 | SLC5A7   | ENSG00000115665 |
| 2 | 108347392 | 108347989 | 108347671 | 64 | 80 | 2  | 25.89053471 | 1.86E-21    | SULT1C4  | ENSG00000198075 |
| 2 | 108352970 | 108353204 | 108353093 | 9  | 11 | 3  | 2.876726079 | 0.0213797   | SULT1C4  | ENSG00000198075 |
| 2 | 108387669 | 108388076 | 108387848 | 17 | 25 | 0  | 24.93162602 | 2.56E-08    | SULT1C4  | ENSG00000198075 |
| 2 | 108427802 | 108428507 | 108428281 | 60 | 87 | 0  | 84.38396499 | 2.01E-26    | GCC2     | ENSG00000135968 |
| 2 | 108832220 | 108832632 | 108832453 | 14 | 23 | 2  | 7.671269544 | 8.30E-06    | CCDC138  | ENSG00000163006 |
| 2 | 108905962 | 108906182 | 108906085 | 8  | 8  | 1  | 4.315089119 | 0.0127267   | EDAR     | ENSG00000135960 |
| 2 | 108965236 | 108965576 | 108965406 | 12 | 17 | 5  | 2.876726079 | 0.00703033  | EDAR     | ENSG00000135960 |
| 2 | 108972073 | 108972297 | 108972185 | 9  | 10 | 2  | 3.515998541 | 0.0136204   | EDAR     | ENSG00000135960 |
| 2 | 109034354 | 109034560 | 109034457 | 8  | 9  | 2  | 3.19636231  | 0.0229249   | EDAR     | ENSG00000135960 |
| 2 | 109119495 | 109119769 | 109119628 | 9  | 10 | 6  | 1.506856518 | 0.188853    | EDAR     | ENSG00000135960 |
| 2 | 109390655 | 109390951 | 109390804 | 10 | 14 | 4  | 2.876726079 | 0.01219     |          | ENSG00000172985 |
| 2 | 109453455 | 109453840 | 109453697 | 11 | 17 | 2  | 5.753452158 | 0.000281509 |          | ENSG00000172985 |
| 2 | 109625074 | 109625262 | 109625104 | 9  | 9  | 1  | 4.794543465 | 0.00708517  | 10-Sep   | ENSG00000186522 |
| 2 | 109759468 | 109759855 | 109759754 | 12 | 18 | 2  | 6.073088389 | 0.000157975 | ANKRD57  | ENSG00000198142 |
| 2 | 110186780 | 110187144 | 110186967 | 13 | 19 | 12 | 1.475244143 | 0.131365    | MALL     | ENSG00000144063 |
| 2 | 111328004 | 111328260 | 111328135 | 9  | 9  | 1  | 4.794543465 | 0.00708517  | ACOXL    | ENSG00000153093 |
| 2 | 111361937 | 111362726 | 111362306 | 30 | 53 | 5  | 8.630178238 | 2.64E-11    | ACOXL    | ENSG00000153093 |
| 2 | 111591120 | 111591324 | 111591222 | 9  | 11 | 4  | 2.301380863 | 0.0459276   | BCL2L11  | ENSG00000153094 |
| 2 | 111709630 | 111709860 | 111709698 | 9  | 11 | 0  | 11.50690432 | 0.000313206 | BCL2L11  | ENSG00000153094 |

|   |           |           |           |     |     |    |             |             |         |                 |
|---|-----------|-----------|-----------|-----|-----|----|-------------|-------------|---------|-----------------|
| 2 | 112358318 | 112358627 | 112358472 | 10  | 13  | 9  | 1.34247217  | 0.232231    | ANAPC1  | ENSG00000153107 |
| 2 | 112420812 | 112421068 | 112420940 | 11  | 13  | 2  | 4.474907234 | 0.00269459  |         | ENSG00000208643 |
| 2 | 112506000 | 112506378 | 112506168 | 15  | 21  | 4  | 4.219198249 | 0.000390041 | TMEM87B | ENSG00000153214 |
| 2 | 112703366 | 112703830 | 112703609 | 39  | 58  | 1  | 28.28780645 | 1.76E-16    | ZC3H8   | ENSG00000144161 |
| 2 | 112749485 | 112749745 | 112749614 | 8   | 10  | 7  | 1.318499453 | 0.269217    | ZC3H6   | ENSG00000188177 |
| 2 | 113058288 | 113058560 | 113058422 | 9   | 11  | 3  | 2.876726079 | 0.0213797   | CHCHD5  | ENSG00000125611 |
| 2 | 113074150 | 113074343 | 113074277 | 8   | 9   | 2  | 3.19636231  | 0.0229249   | CHCHD5  | ENSG00000125611 |
| 2 | 113166582 | 113166995 | 113166796 | 67  | 82  | 4  | 15.9178843  | 7.78E-20    |         | ENSG00000223139 |
| 2 | 113167008 | 113167415 | 113167138 | 9   | 16  | 2  | 5.433815927 | 0.000499302 |         | ENSG00000223139 |
| 2 | 113200697 | 113201045 | 113200871 | 8   | 14  | 3  | 3.595907599 | 0.00486913  | NT5DC4  | ENSG00000144130 |
| 2 | 113223922 | 113224129 | 113224025 | 8   | 8   | 1  | 4.315089119 | 0.0127267   | CKAP2L  | ENSG00000169607 |
| 2 | 113279667 | 113279962 | 113279814 | 12  | 15  | 1  | 7.671269544 | 0.000187863 | IL1A    | ENSG00000115008 |
| 2 | 113288101 | 113288819 | 113288535 | 62  | 91  | 9  | 8.821959976 | 5.10E-18    | IL1B    | ENSG00000125538 |
| 2 | 113314663 | 113314876 | 113314762 | 8   | 8   | 2  | 2.876726079 | 0.0381137   |         | ENSG00000221541 |
| 2 | 113459029 | 113459341 | 113459186 | 8   | 9   | 4  | 1.917817386 | 0.103282    | IL1F9   | ENSG00000136688 |
| 2 | 113591692 | 113591887 | 113591837 | 8   | 8   | 0  | 8.630178238 | 0.00235436  | IL1RN   | ENSG00000136689 |
| 2 | 113723196 | 113723533 | 113723364 | 11  | 15  | 8  | 1.704726565 | 0.0916153   | PAX8    | ENSG00000125618 |
| 2 | 113804114 | 113804485 | 113804306 | 12  | 19  | 1  | 9.589086931 | 1.56E-05    | PAX8    | ENSG00000125618 |
| 2 | 113881683 | 113882156 | 113881852 | 8   | 16  | 3  | 4.075361945 | 0.00173346  | CBWD2   | ENSG00000136682 |
| 2 | 114137787 | 114138065 | 114137926 | 9   | 11  | 1  | 5.753452158 | 0.00215302  |         | ENSG00000175509 |
| 2 | 114363655 | 114364027 | 114363834 | 8   | 15  | 9  | 1.534253909 | 0.136498    | ACTR3   | ENSG00000115091 |
| 2 | 115411437 | 115411772 | 115411604 | 12  | 15  | 7  | 1.917817386 | 0.0572317   |         | ENSG00000208611 |
| 2 | 117795941 | 117796199 | 117796064 | 19  | 21  | 2  | 7.031997082 | 2.73E-05    |         | ENSG00000208565 |
| 2 | 118288602 | 118288921 | 118288761 | 10  | 13  | 6  | 1.917817386 | 0.0693353   | DDX18   | ENSG00000088205 |
| 2 | 118439132 | 118439316 | 118439227 | 9   | 9   | 7  | 1.198635866 | 0.346278    |         | ENSG00000218814 |
| 2 | 118587095 | 118587393 | 118587244 | 8   | 12  | 2  | 4.155271003 | 0.0046638   | INSIG2  | ENSG00000125629 |
| 2 | 118589711 | 118590426 | 118590011 | 50  | 82  | 5  | 13.26490359 | 6.79E-19    | INSIG2  | ENSG00000125629 |
| 2 | 119221244 | 119221436 | 119221314 | 8   | 9   | 2  | 3.19636231  | 0.0229249   | EN1     | ENSG00000163064 |
| 2 | 119356612 | 119356875 | 119356746 | 10  | 10  | 3  | 2.636998906 | 0.034203    | EN1     | ENSG00000163064 |
| 2 | 119502536 | 119502718 | 119502684 | 9   | 10  | 0  | 10.54799562 | 0.000613541 | MARCO   | ENSG00000019169 |
| 2 | 119547872 | 119548220 | 119548045 | 14  | 19  | 5  | 3.19636231  | 0.00280933  | C1QL2   | ENSG00000144119 |
| 2 | 119600744 | 119600966 | 119600855 | 8   | 10  | 3  | 2.636998906 | 0.034203    | C1QL2   | ENSG00000144119 |
| 2 | 119691184 | 119691538 | 119691336 | 9   | 14  | 3  | 3.595907599 | 0.00486913  | STEAP3  | ENSG00000115107 |
| 2 | 119692111 | 119693131 | 119692548 | 204 | 298 | 14 | 19.11424661 | 1.72E-68    | STEAP3  | ENSG00000115107 |

|   |           |           |           |    |    |    |             |             |         |                 |
|---|-----------|-----------|-----------|----|----|----|-------------|-------------|---------|-----------------|
| 2 | 119708689 | 119708983 | 119708866 | 8  | 12 | 1  | 6.232906505 | 0.00117736  | STEAP3  | ENSG00000115107 |
| 2 | 119714551 | 119714929 | 119714750 | 20 | 28 | 3  | 6.952088025 | 2.20E-06    | STEAP3  | ENSG00000115107 |
| 2 | 119840903 | 119841261 | 119841082 | 8  | 14 | 7  | 1.797953799 | 0.0806593   | DBI     | ENSG00000155368 |
| 2 | 119966189 | 119966460 | 119966319 | 11 | 12 | 1  | 6.232906505 | 0.00117736  | SCTR    | ENSG00000080293 |
| 2 | 120018210 | 120018419 | 120018314 | 10 | 12 | 0  | 12.46581301 | 0.000159888 |         | ENSG00000163075 |
| 2 | 120115673 | 120115892 | 120115782 | 8  | 10 | 6  | 1.506856518 | 0.188853    | TMEM177 | ENSG00000144120 |
| 2 | 120185072 | 120185291 | 120185224 | 9  | 9  | 5  | 1.598181155 | 0.170911    | TMEM177 | ENSG00000144120 |
| 2 | 120233749 | 120234182 | 120234028 | 12 | 18 | 9  | 1.821926517 | 0.0548428   | PTPN4   | ENSG00000088179 |
| 2 | 120312239 | 120312955 | 120312615 | 17 | 42 | 3  | 10.30826845 | 5.31E-10    |         | ENSG00000208541 |
| 2 | 120541247 | 120541608 | 120541430 | 13 | 19 | 7  | 2.397271733 | 0.0127287   | EPB41L5 | ENSG00000115109 |
| 2 | 120572853 | 120573055 | 120572988 | 8  | 8  | 3  | 2.157544559 | 0.0836802   | EPB41L5 | ENSG00000115109 |
| 2 | 120582187 | 120582424 | 120582305 | 10 | 11 | 2  | 3.835634772 | 0.00800699  |         | ENSG00000202046 |
| 2 | 120716990 | 120717221 | 120717105 | 8  | 11 | 1  | 5.753452158 | 0.00215302  | RALB    | ENSG00000144118 |
| 2 | 120765464 | 120765823 | 120765643 | 24 | 31 | 12 | 2.360390629 | 0.0028142   | RALB    | ENSG00000144118 |
| 2 | 121510072 | 121510288 | 121510154 | 8  | 9  | 3  | 2.397271733 | 0.0539397   |         | ENSG00000221321 |
| 2 | 121554311 | 121554500 | 121554414 | 8  | 8  | 6  | 1.232882605 | 0.333038    |         | ENSG00000201584 |
| 2 | 121602894 | 121603229 | 121603060 | 9  | 13 | 1  | 6.712360851 | 0.000640982 |         | ENSG00000208508 |
| 2 | 121954323 | 121954595 | 121954458 | 9  | 11 | 1  | 5.753452158 | 0.00215302  | CLASP1  | ENSG00000074054 |
| 2 | 121963415 | 121963679 | 121963549 | 9  | 10 | 1  | 5.273997812 | 0.00391723  | CLASP1  | ENSG00000074054 |
| 2 | 122004928 | 122005290 | 122005124 | 11 | 17 | 12 | 1.327719729 | 0.212795    |         | ENSG00000208506 |
| 2 | 122062465 | 122062760 | 122062633 | 8  | 12 | 1  | 6.232906505 | 0.00117736  |         | ENSG00000222467 |
| 2 | 122157846 | 122158096 | 122157986 | 15 | 18 | 2  | 6.073088389 | 0.000157975 |         | ENSG00000213239 |
| 2 | 122473434 | 122473958 | 122473723 | 13 | 25 | 5  | 4.155271003 | 0.000149583 | TSN     | ENSG00000211460 |
| 2 | 122517943 | 122518551 | 122518353 | 20 | 35 | 3  | 8.630178238 | 3.59E-08    | TSN     | ENSG00000211460 |
| 2 | 122710527 | 122710838 | 122710685 | 11 | 14 | 3  | 3.595907599 | 0.00486913  | TSN     | ENSG00000211460 |
| 2 | 122889022 | 122889415 | 122889162 | 20 | 25 | 4  | 4.986325204 | 4.72E-05    |         |                 |
| 2 | 122965151 | 122965492 | 122965321 | 8  | 13 | 6  | 1.917817386 | 0.0693353   |         |                 |
| 2 | 122993834 | 122994256 | 122994077 | 27 | 34 | 4  | 6.712360851 | 3.20E-07    |         |                 |
| 2 | 124873547 | 124873726 | 124873563 | 8  | 8  | 0  | 8.630178238 | 0.00235436  |         | ENSG00000208489 |
| 2 | 125925224 | 125925555 | 125925377 | 33 | 38 | 1  | 18.69871951 | 8.21E-11    |         | ENSG00000201853 |
| 2 | 127251205 | 127251681 | 127251442 | 8  | 17 | 9  | 1.726035648 | 0.0753664   |         | ENSG00000206963 |
| 2 | 127542136 | 127542392 | 127542255 | 10 | 10 | 2  | 3.515998541 | 0.0136204   | BIN1    | ENSG00000136717 |
| 2 | 127671029 | 127671259 | 127671144 | 12 | 12 | 6  | 1.78083043  | 0.0985525   | CYP27C1 | ENSG00000186684 |
| 2 | 127700522 | 127701257 | 127700874 | 31 | 58 | 14 | 3.771707526 | 1.30E-07    | CYP27C1 | ENSG00000186684 |

|   |           |           |           |    |     |     |             |             |         |                 |
|---|-----------|-----------|-----------|----|-----|-----|-------------|-------------|---------|-----------------|
| 2 | 127703806 | 127704082 | 127703944 | 9  | 9   | 0   | 9.589086931 | 0.00120187  | CYP27C1 | ENSG00000186684 |
| 2 | 127744894 | 127745088 | 127744988 | 8  | 9   | 1   | 4.794543465 | 0.00708517  |         | ENSG00000208457 |
| 2 | 127767673 | 127767992 | 127767829 | 10 | 13  | 3   | 3.356180426 | 0.00805599  | ERCC3   | ENSG00000163161 |
| 2 | 127844017 | 127844369 | 127844194 | 10 | 13  | 3   | 3.356180426 | 0.00805599  | MAP3K2  | ENSG00000169967 |
| 2 | 127872412 | 127872671 | 127872517 | 13 | 14  | 9   | 1.43836304  | 0.179537    | MAP3K2  | ENSG00000169967 |
| 2 | 128000641 | 128000901 | 128000771 | 10 | 11  | 4   | 2.301380863 | 0.0459276   | IWS1    | ENSG00000163166 |
| 2 | 128000907 | 128001137 | 128001038 | 9  | 11  | 3   | 2.876726079 | 0.0213797   | IWS1    | ENSG00000163166 |
| 2 | 128333770 | 128334143 | 128333967 | 14 | 21  | 4   | 4.219198249 | 0.000390041 | POLR2D  | ENSG00000144231 |
| 2 | 128516857 | 128517259 | 128517090 | 20 | 27  | 0   | 26.84944341 | 6.66E-09    | SAP130  | ENSG00000136715 |
| 2 | 128780355 | 128780674 | 128780514 | 12 | 14  | 0   | 14.3836304  | 4.17E-05    | HS6ST1  | ENSG00000136720 |
| 2 | 129045841 | 129046307 | 129046128 | 15 | 26  | 0   | 25.89053471 | 1.31E-08    |         | ENSG00000208433 |
| 2 | 129530064 | 129530633 | 129530458 | 48 | 61  | 5   | 9.908723162 | 2.32E-13    |         | ENSG00000204460 |
| 2 | 129708241 | 129708425 | 129708356 | 8  | 9   | 2   | 3.19636231  | 0.0229249   |         | ENSG00000204460 |
| 2 | 129827890 | 129828126 | 129828013 | 9  | 11  | 1   | 5.753452158 | 0.00215302  |         | ENSG00000208427 |
| 2 | 130095147 | 130095461 | 130095302 | 10 | 13  | 1   | 6.712360851 | 0.000640982 |         | ENSG00000204459 |
| 2 | 130136106 | 130136340 | 130136223 | 8  | 9   | 4   | 1.917817386 | 0.103282    |         | ENSG00000204459 |
| 2 | 130805554 | 130805761 | 130805657 | 8  | 9   | 2   | 3.19636231  | 0.0229249   | CCDC115 | ENSG00000136710 |
| 2 | 130806685 | 130806872 | 130806778 | 8  | 8   | 8   | 0.958908693 | 0.534974    | CCDC115 | ENSG00000136710 |
| 2 | 130810917 | 130811361 | 130811228 | 14 | 21  | 9   | 2.109599125 | 0.0196396   | CCDC115 | ENSG00000136710 |
| 2 | 130816559 | 130817103 | 130816824 | 9  | 23  | 11  | 1.917817386 | 0.0274129   | IMP4    | ENSG00000136718 |
| 2 | 131201520 | 131201753 | 131201668 | 10 | 10  | 8   | 1.171999514 | 0.35773     | GPR148  | ENSG00000173302 |
| 2 | 131887272 | 131887573 | 131887422 | 10 | 13  | 5   | 2.237453617 | 0.038866    |         | ENSG00000214077 |
| 2 | 132142974 | 132143237 | 132143110 | 14 | 16  | 1   | 8.150723891 | 0.000101217 | ACTBL3  | ENSG00000204434 |
| 2 | 132218858 | 132219057 | 132218957 | 10 | 10  | 0   | 10.54799562 | 0.000613541 |         | ENSG00000213222 |
| 2 | 132712630 | 132712822 | 132712789 | 16 | 17  | 13  | 1.232882605 | 0.274309    |         | ENSG00000202174 |
| 2 | 132712878 | 132713274 | 132713118 | 19 | 23  | 31  | 0.71918152  | 0.891586    |         | ENSG00000202174 |
| 2 | 132719635 | 132719968 | 132719801 | 34 | 35  | 32  | 1.046082211 | 0.424727    |         | ENSG00000202174 |
| 2 | 132728303 | 132728638 | 132728470 | 43 | 48  | 31  | 1.468328936 | 0.0428579   |         | ENSG00000202174 |
| 2 | 132728870 | 132730150 | 132729215 | 67 | 216 | 188 | 1.10096924  | 0.166182    |         | ENSG00000200236 |
| 2 | 132731518 | 132731884 | 132731689 | 40 | 46  | 37  | 1.186018647 | 0.214968    |         | ENSG00000221288 |
| 2 | 132733009 | 132733549 | 132733272 | 36 | 61  | 57  | 1.025040327 | 0.445454    |         | ENSG00000221288 |
| 2 | 132733559 | 132733986 | 132733736 | 31 | 41  | 17  | 2.237453617 | 0.00132226  |         | ENSG00000221288 |
| 2 | 132735097 | 132735730 | 132735406 | 44 | 68  | 56  | 1.160784207 | 0.200843    |         | ENSG00000221288 |
| 2 | 132735758 | 132736981 | 132736578 | 34 | 114 | 87  | 1.253119315 | 0.054385    |         | ENSG00000221288 |

|   |           |           |           |    |     |     |             |             |                       |
|---|-----------|-----------|-----------|----|-----|-----|-------------|-------------|-----------------------|
| 2 | 132737362 | 132737697 | 132737529 | 23 | 27  | 27  | 0.958908693 | 0.562099    | ENSG00000221288       |
| 2 | 132738757 | 132739086 | 132738914 | 16 | 18  | 9   | 1.821926517 | 0.0548428   | ENSG00000221288       |
| 2 | 132739498 | 132740045 | 132739686 | 37 | 52  | 41  | 1.210051446 | 0.175882    | ENSG00000221288       |
| 2 | 132740077 | 132740261 | 132740169 | 13 | 15  | 13  | 1.095895649 | 0.398774    | ENSG00000221288       |
| 2 | 132741486 | 132743720 | 132743215 | 51 | 251 | 218 | 1.103401784 | 0.142823    | ENSG00000211547       |
| 2 | 132743810 | 132744152 | 132743981 | 28 | 30  | 33  | 0.874299102 | 0.706449    | ENSG00000211547       |
| 2 | 132744734 | 132745087 | 132744910 | 77 | 82  | 60  | 1.304744615 | 0.0557422   | ENSG00000211547       |
| 2 | 132745424 | 132746547 | 132746157 | 65 | 151 | 119 | 1.214617678 | 0.0547631   | ENSG00000211547       |
| 2 | 132746553 | 132747957 | 132747043 | 78 | 215 | 188 | 1.095895649 | 0.178317    | ENSG00000211547       |
| 2 | 132747993 | 132748451 | 132748214 | 26 | 37  | 34  | 1.041100867 | 0.430699    | ENSG00000211547       |
| 2 | 132748611 | 132750193 | 132750019 | 32 | 123 | 82  | 1.432586481 | 0.00516422  | ENSG00000211547       |
| 2 | 132750609 | 132751409 | 132751082 | 65 | 115 | 92  | 1.196058155 | 0.0979725   | ENSG00000211547       |
| 2 | 132751506 | 132751695 | 132751670 | 13 | 15  | 11  | 1.278544924 | 0.254978    | ENSG00000211547       |
| 2 | 132751915 | 132752112 | 132752059 | 9  | 9   | 9   | 0.958908693 | 0.536911    | ENSG00000211547       |
| 2 | 132752116 | 132752499 | 132752321 | 19 | 24  | 20  | 1.141557968 | 0.324865    | ENSG00000211547       |
| 2 | 132752932 | 132753319 | 132753142 | 13 | 19  | 7   | 2.397271733 | 0.0127287   | ENSG00000211547       |
| 2 | 132754599 | 132754831 | 132754715 | 29 | 30  | 11  | 2.47718079  | 0.00221867  | ENSG00000211547       |
| 2 | 132755377 | 132755787 | 132755611 | 11 | 18  | 19  | 0.910963258 | 0.614871    | ENSG00000211547       |
| 2 | 132771859 | 132772081 | 132771970 | 10 | 11  | 0   | 11.50690432 | 0.000313206 | ENSG00000211547       |
| 2 | 132821227 | 132821700 | 132821396 | 14 | 22  | 5   | 3.675816657 | 0.000667901 | ENSG00000199460       |
| 2 | 132890561 | 132890794 | 132890683 | 8  | 10  | 6   | 1.506856518 | 0.188853    | GPR39 ENSG00000183840 |
| 2 | 132905036 | 132905252 | 132905107 | 8  | 9   | 1   | 4.794543465 | 0.00708517  | GPR39 ENSG00000183840 |
| 2 | 133017151 | 133017721 | 133017459 | 46 | 70  | 0   | 68.08251721 | 1.85E-21    | ENSG00000221142       |
| 2 | 133394266 | 133394445 | 133394352 | 8  | 8   | 1   | 4.315089119 | 0.0127267   | LYPD1 ENSG00000150551 |
| 2 | 133430545 | 133430930 | 133430724 | 17 | 26  | 0   | 25.89053471 | 1.31E-08    | LYPD1 ENSG00000150551 |
| 2 | 133518635 | 133518985 | 133518810 | 22 | 28  | 1   | 13.90417605 | 5.17E-08    | ENSG00000176771       |
| 2 | 133737206 | 133737536 | 133737375 | 13 | 17  | 9   | 1.726035648 | 0.0753664   | ENSG00000176771       |
| 2 | 133805468 | 133805706 | 133805606 | 8  | 9   | 1   | 4.794543465 | 0.00708517  | ENSG00000208327       |
| 2 | 133909457 | 133909735 | 133909583 | 12 | 15  | 7   | 1.917817386 | 0.0572317   | ENSG00000208316       |
| 2 | 133911578 | 133911816 | 133911697 | 9  | 9   | 4   | 1.917817386 | 0.103282    | ENSG00000208316       |
| 2 | 134115571 | 134115870 | 134115722 | 15 | 18  | 8   | 2.024362796 | 0.0334397   | ENSG00000200708       |
| 2 | 134185235 | 134185447 | 134185363 | 8  | 8   | 2   | 2.876726079 | 0.0381137   | ENSG00000200708       |
| 2 | 134254219 | 134254602 | 134254442 | 11 | 16  | 2   | 5.433815927 | 0.000499302 | ENSG00000200708       |
| 2 | 134273473 | 134273959 | 134273685 | 27 | 38  | 5   | 6.232906505 | 1.43E-07    | ENSG00000200708       |

|   |           |           |           |    |    |   |             |             |          |                 |
|---|-----------|-----------|-----------|----|----|---|-------------|-------------|----------|-----------------|
| 2 | 134320882 | 134321139 | 134321003 | 10 | 11 | 3 | 2.876726079 | 0.0213797   |          | ENSG00000200708 |
| 2 | 134529148 | 134529368 | 134529236 | 8  | 10 | 0 | 10.54799562 | 0.000613541 | MGAT5    | ENSG00000152127 |
| 2 | 134593804 | 134594126 | 134593951 | 8  | 11 | 5 | 1.917817386 | 0.0843804   | MGAT5    | ENSG00000152127 |
| 2 | 134953557 | 134953879 | 134953735 | 9  | 13 | 2 | 4.474907234 | 0.00269459  | MGAT5    | ENSG00000152127 |
| 2 | 135064756 | 135065451 | 135064940 | 57 | 80 | 2 | 25.89053471 | 1.86E-21    | TMEM163  | ENSG00000152128 |
| 2 | 135289913 | 135290162 | 135290062 | 8  | 9  | 3 | 2.397271733 | 0.0539397   | ACMSD    | ENSG00000153086 |
| 2 | 135392024 | 135392298 | 135392161 | 9  | 12 | 8 | 1.385090334 | 0.219216    | CCNT2    | ENSG00000082258 |
| 2 | 135719217 | 135719438 | 135719355 | 12 | 12 | 4 | 2.493162602 | 0.0299057   | RAB3GAP1 | ENSG00000115839 |
| 2 | 136004930 | 136005196 | 136005072 | 10 | 10 | 2 | 3.515998541 | 0.0136204   | ZRANB3   | ENSG00000121988 |
| 2 | 136271488 | 136272242 | 136271931 | 14 | 43 | 1 | 21.09599125 | 3.19E-12    |          | ENSG00000200664 |
| 2 | 136459012 | 136459342 | 136459177 | 8  | 13 | 1 | 6.712360851 | 0.000640982 | DARS     | ENSG00000115866 |
| 2 | 136592464 | 136592722 | 136592593 | 8  | 11 | 5 | 1.917817386 | 0.0843804   | CXCR4    | ENSG00000121966 |
| 2 | 136706770 | 136707005 | 136706887 | 8  | 9  | 3 | 2.397271733 | 0.0539397   | CXCR4    | ENSG00000121966 |
| 2 | 136849549 | 136850060 | 136849883 | 40 | 62 | 3 | 15.10281192 | 2.26E-15    |          | ENSG00000216081 |
| 2 | 136852734 | 136853099 | 136852926 | 12 | 18 | 3 | 4.554816292 | 0.000599415 |          | ENSG00000216081 |
| 2 | 136858745 | 136858982 | 136858863 | 8  | 10 | 5 | 1.757999271 | 0.121253    |          | ENSG00000216081 |
| 2 | 136907668 | 136907847 | 136907757 | 8  | 8  | 1 | 4.315089119 | 0.0127267   |          | ENSG00000216081 |
| 2 | 137131398 | 137131885 | 137131671 | 16 | 27 | 0 | 26.84944341 | 6.66E-09    |          | ENSG00000221762 |
| 2 | 137505842 | 137506189 | 137506015 | 8  | 14 | 0 | 14.3836304  | 4.17E-05    | THSD7B   | ENSG00000144229 |
| 2 | 137642639 | 137642944 | 137642807 | 22 | 24 | 2 | 7.990905775 | 4.56E-06    | THSD7B   | ENSG00000144229 |
| 2 | 137655197 | 137655376 | 137655286 | 8  | 8  | 2 | 2.876726079 | 0.0381137   | THSD7B   | ENSG00000144229 |
| 2 | 138546206 | 138546705 | 138546465 | 29 | 44 | 2 | 14.3836304  | 1.96E-11    | HNMT     | ENSG00000150540 |
| 2 | 138596156 | 138596342 | 138596249 | 8  | 8  | 2 | 2.876726079 | 0.0381137   | HNMT     | ENSG00000150540 |
| 2 | 138750035 | 138750256 | 138750145 | 8  | 9  | 1 | 4.794543465 | 0.00708517  |          | ENSG00000181399 |
| 2 | 138909810 | 138910014 | 138909876 | 8  | 9  | 6 | 1.369869562 | 0.253675    | SPOPL    | ENSG00000144228 |
| 2 | 138911774 | 138912095 | 138911934 | 11 | 16 | 0 | 16.30144778 | 1.09E-05    | SPOPL    | ENSG00000144228 |
| 2 | 139651162 | 139651477 | 139651326 | 15 | 17 | 1 | 8.630178238 | 5.44E-05    |          | ENSG00000222826 |
| 2 | 140338901 | 140339234 | 140339068 | 18 | 20 | 1 | 10.06854128 | 8.32E-06    |          | ENSG00000221074 |
| 2 | 140614919 | 140615165 | 140615042 | 8  | 9  | 1 | 4.794543465 | 0.00708517  |          | ENSG00000208289 |
| 2 | 142374934 | 142375125 | 142375006 | 8  | 10 | 0 | 10.54799562 | 0.000613541 | LRP1B    | ENSG00000168702 |
| 2 | 142892539 | 142892718 | 142892628 | 9  | 9  | 1 | 4.794543465 | 0.00708517  | LRP1B    | ENSG00000168702 |
| 2 | 143331289 | 143331680 | 143331416 | 10 | 18 | 3 | 4.554816292 | 0.000599415 | KYNU     | ENSG00000115919 |
| 2 | 143348306 | 143348829 | 143348477 | 9  | 19 | 1 | 9.589086931 | 1.56E-05    | KYNU     | ENSG00000115919 |
| 2 | 143447327 | 143447506 | 143447416 | 8  | 8  | 1 | 4.315089119 | 0.0127267   |          | ENSG00000221169 |

|   |           |           |           |    |    |   |             |             |          |                 |
|---|-----------|-----------|-----------|----|----|---|-------------|-------------|----------|-----------------|
| 2 | 143448431 | 143448710 | 143448570 | 10 | 11 | 3 | 2.876726079 | 0.0213797   |          | ENSG00000221169 |
| 2 | 143508440 | 143508653 | 143508557 | 12 | 12 | 2 | 4.155271003 | 0.0046638   |          | ENSG00000221169 |
| 2 | 143758167 | 143758369 | 143758298 | 8  | 8  | 1 | 4.315089119 | 0.0127267   | ARHGAP15 | ENSG00000075884 |
| 2 | 143810820 | 143811053 | 143810887 | 10 | 10 | 6 | 1.506856518 | 0.188853    | ARHGAP15 | ENSG00000075884 |
| 2 | 143872277 | 143872582 | 143872464 | 10 | 15 | 0 | 15.34253909 | 2.13E-05    | ARHGAP15 | ENSG00000075884 |
| 2 | 143872705 | 143873282 | 143872970 | 38 | 63 | 5 | 10.22835939 | 7.02E-14    | ARHGAP15 | ENSG00000075884 |
| 2 | 144576435 | 144576814 | 144576638 | 38 | 46 | 4 | 9.013741715 | 2.96E-10    | GTDC1    | ENSG00000121964 |
| 2 | 147171053 | 147171759 | 147171378 | 33 | 68 | 3 | 16.54117496 | 5.19E-17    | PABPCP2  | ENSG00000198526 |
| 2 | 147856393 | 147856707 | 147856550 | 8  | 11 | 2 | 3.835634772 | 0.00800699  |          | ENSG00000207225 |
| 2 | 149117831 | 149118018 | 149117992 | 8  | 10 | 2 | 3.515998541 | 0.0136204   | EPC2     | ENSG00000135999 |
| 2 | 149144755 | 149145008 | 149144872 | 9  | 11 | 0 | 11.50690432 | 0.000313206 | EPC2     | ENSG00000135999 |
| 2 | 149369774 | 149370053 | 149369937 | 16 | 19 | 3 | 4.794543465 | 0.000349205 |          | ENSG00000218198 |
| 2 | 149554751 | 149554998 | 149554874 | 9  | 9  | 5 | 1.598181155 | 0.170911    | KIF5C    | ENSG00000168280 |
| 2 | 149571906 | 149572309 | 149572080 | 29 | 38 | 6 | 5.34249129  | 5.40E-07    | LYPD6B   | ENSG00000150556 |
| 2 | 149605290 | 149605552 | 149605421 | 13 | 14 | 7 | 1.797953799 | 0.0806593   | LYPD6B   | ENSG00000150556 |
| 2 | 149634224 | 149634409 | 149634316 | 8  | 9  | 0 | 9.589086931 | 0.00120187  | LYPD6B   | ENSG00000150556 |
| 2 | 149675673 | 149675865 | 149675729 | 8  | 8  | 1 | 4.315089119 | 0.0127267   | LYPD6B   | ENSG00000150556 |
| 2 | 149893835 | 149894150 | 149893992 | 15 | 20 | 3 | 5.034270639 | 0.000202317 | LYPD6    | ENSG00000187123 |
| 2 | 150175940 | 150176416 | 150176119 | 11 | 23 | 2 | 7.671269544 | 8.30E-06    |          | ENSG00000207270 |
| 2 | 150858450 | 150858971 | 150858740 | 19 | 30 | 2 | 9.908723162 | 1.20E-07    |          | ENSG00000208244 |
| 2 | 151024126 | 151024428 | 151024277 | 9  | 13 | 1 | 6.712360851 | 0.000640982 | RND3     | ENSG00000115963 |
| 2 | 151052375 | 151052697 | 151052530 | 12 | 17 | 8 | 1.917817386 | 0.0474153   | RND3     | ENSG00000115963 |
| 2 | 151473855 | 151474183 | 151474019 | 11 | 14 | 1 | 7.191815198 | 0.00034761  |          | ENSG00000222031 |
| 2 | 153265955 | 153266332 | 153266165 | 33 | 40 | 0 | 39.31525642 | 1.07E-12    | PRPF40A  | ENSG00000196504 |
| 2 | 153624427 | 153624812 | 153624616 | 45 | 55 | 3 | 13.4247217  | 1.79E-13    |          | ENSG00000214025 |
| 2 | 153969999 | 153970260 | 153970150 | 10 | 10 | 0 | 10.54799562 | 0.000613541 |          | ENSG00000214024 |
| 2 | 154442542 | 154442772 | 154442657 | 8  | 11 | 1 | 5.753452158 | 0.00215302  | GALNT13  | ENSG00000144278 |
| 2 | 155018270 | 155018513 | 155018391 | 8  | 9  | 0 | 9.589086931 | 0.00120187  |          | ENSG00000223290 |
| 2 | 155419750 | 155419966 | 155419890 | 8  | 10 | 2 | 3.515998541 | 0.0136204   |          | ENSG00000219170 |
| 2 | 156746899 | 156747186 | 156747065 | 9  | 12 | 7 | 1.558226626 | 0.152813    | NR4A2    | ENSG00000153234 |
| 2 | 156900417 | 156900662 | 156900554 | 12 | 13 | 0 | 13.4247217  | 8.16E-05    | NR4A2    | ENSG00000153234 |
| 2 | 156965394 | 156965704 | 156965557 | 10 | 13 | 5 | 2.237453617 | 0.038866    |          | ENSG00000208227 |
| 2 | 156965818 | 156966032 | 156965895 | 9  | 10 | 6 | 1.506856518 | 0.188853    |          | ENSG00000208227 |
| 2 | 157457046 | 157457687 | 157457388 | 32 | 52 | 7 | 6.352770092 | 1.00E-09    |          | ENSG00000213194 |

|   |           |           |           |    |    |   |             |             |          |                 |
|---|-----------|-----------|-----------|----|----|---|-------------|-------------|----------|-----------------|
| 2 | 158678479 | 158678919 | 158678740 | 19 | 28 | 1 | 13.90417605 | 5.17E-08    | UPP2     | ENSG00000007001 |
| 2 | 158886035 | 158886387 | 158886211 | 24 | 29 | 1 | 14.3836304  | 2.72E-08    | CCDC148  | ENSG00000153237 |
| 2 | 159067881 | 159068116 | 159067945 | 11 | 14 | 3 | 3.595907599 | 0.00486913  | PKP4     | ENSG00000144283 |
| 2 | 159288888 | 159289108 | 159288998 | 9  | 11 | 5 | 1.917817386 | 0.0843804   |          | ENSG00000204380 |
| 2 | 159295403 | 159295605 | 159295500 | 8  | 8  | 2 | 2.876726079 | 0.0381137   |          | ENSG00000204380 |
| 2 | 159457959 | 159458235 | 159458097 | 10 | 13 | 1 | 6.712360851 | 0.000640982 |          | ENSG00000208221 |
| 2 | 159533531 | 159534195 | 159533792 | 12 | 26 | 2 | 8.630178238 | 1.37E-06    | TANC1    | ENSG00000115183 |
| 2 | 159534574 | 159534930 | 159534751 | 8  | 12 | 5 | 2.077635502 | 0.0577144   | TANC1    | ENSG00000115183 |
| 2 | 159600862 | 159601050 | 159600988 | 8  | 9  | 0 | 9.589086931 | 0.00120187  |          | ENSG00000202029 |
| 2 | 159964588 | 159964841 | 159964729 | 11 | 13 | 3 | 3.356180426 | 0.00805599  | WDSUB1   | ENSG00000196151 |
| 2 | 160280311 | 160280604 | 160280443 | 15 | 17 | 2 | 5.753452158 | 0.000281509 | 7-Mar    | ENSG00000136536 |
| 2 | 160730780 | 160731087 | 160730937 | 9  | 12 | 5 | 2.077635502 | 0.0577144   | ITGB6    | ENSG00000115221 |
| 2 | 160788858 | 160789286 | 160788954 | 14 | 21 | 2 | 7.031997082 | 2.73E-05    | ITGB6    | ENSG00000115221 |
| 2 | 160806596 | 160806908 | 160806752 | 8  | 14 | 9 | 1.43836304  | 0.179537    | ITGB6    | ENSG00000115221 |
| 2 | 160917171 | 160917615 | 160917409 | 23 | 33 | 2 | 10.86763185 | 1.89E-08    |          | ENSG00000208218 |
| 2 | 160998527 | 160998813 | 160998662 | 11 | 14 | 3 | 3.595907599 | 0.00486913  | RBMS1    | ENSG00000153250 |
| 2 | 161080199 | 161080483 | 161080350 | 8  | 8  | 3 | 2.157544559 | 0.0836802   | RBMS1    | ENSG00000153250 |
| 2 | 161117142 | 161117462 | 161117302 | 9  | 13 | 2 | 4.474907234 | 0.00269459  | RBMS1    | ENSG00000153250 |
| 2 | 161126288 | 161126694 | 161126453 | 13 | 21 | 3 | 5.273997812 | 0.00011662  | RBMS1    | ENSG00000153250 |
| 2 | 161147915 | 161148197 | 161148056 | 8  | 8  | 5 | 1.43836304  | 0.235762    | RBMS1    | ENSG00000153250 |
| 2 | 161211982 | 161212197 | 161212086 | 8  | 9  | 7 | 1.198635866 | 0.346278    | RBMS1    | ENSG00000153250 |
| 2 | 161317854 | 161318131 | 161317979 | 14 | 15 | 1 | 7.671269544 | 0.000187863 |          | ENSG00000222605 |
| 2 | 161440852 | 161441072 | 161440962 | 8  | 9  | 3 | 2.397271733 | 0.0539397   |          | ENSG00000222605 |
| 2 | 161483738 | 161483924 | 161483847 | 8  | 8  | 4 | 1.726035648 | 0.150596    |          | ENSG00000208217 |
| 2 | 161688075 | 161688428 | 161688251 | 10 | 16 | 3 | 4.075361945 | 0.00173346  | TANK     | ENSG00000136560 |
| 2 | 162326000 | 162326280 | 162326140 | 8  | 11 | 2 | 3.835634772 | 0.00800699  | SLC4A10  | ENSG00000144290 |
| 2 | 163054723 | 163055152 | 163054947 | 36 | 47 | 0 | 46.02761727 | 9.62E-15    |          | ENSG00000212312 |
| 2 | 163147281 | 163147534 | 163147358 | 11 | 13 | 6 | 1.917817386 | 0.0693353   |          | ENSG00000212312 |
| 2 | 163170152 | 163170421 | 163170320 | 9  | 10 | 1 | 5.273997812 | 0.00391723  |          | ENSG00000212312 |
| 2 | 164343114 | 164343356 | 164343213 | 9  | 10 | 2 | 3.515998541 | 0.0136204   | FIGN     | ENSG00000182263 |
| 2 | 164518137 | 164518518 | 164518327 | 33 | 41 | 0 | 40.27416511 | 5.44E-13    | FIGN     | ENSG00000182263 |
| 2 | 165164813 | 165165032 | 165164890 | 11 | 12 | 2 | 4.155271003 | 0.0046638   | GRB14    | ENSG00000115290 |
| 2 | 165557646 | 165557873 | 165557759 | 8  | 8  | 1 | 4.315089119 | 0.0127267   | SLC38A11 | ENSG00000169507 |
| 2 | 165579955 | 165580175 | 165580083 | 8  | 10 | 4 | 2.109599125 | 0.0694668   | SLC38A11 | ENSG00000169507 |



|   |           |           |           |     |     |    |             |             |         |                 |
|---|-----------|-----------|-----------|-----|-----|----|-------------|-------------|---------|-----------------|
| 2 | 166439273 | 166439471 | 166439371 | 8   | 9   | 2  | 3.19636231  | 0.0229249   |         | ENSG00000221234 |
| 2 | 166656193 | 166656372 | 166656283 | 8   | 8   | 3  | 2.157544559 | 0.0836802   | SCN1A   | ENSG00000144285 |
| 2 | 166746321 | 166746561 | 166746426 | 8   | 9   | 0  | 9.589086931 | 0.00120187  |         | ENSG00000222376 |
| 2 | 168829603 | 168829832 | 168829717 | 8   | 9   | 0  | 9.589086931 | 0.00120187  | STK39   | ENSG00000198648 |
| 2 | 169017469 | 169018052 | 169017738 | 76  | 106 | 2  | 34.20107672 | 8.17E-29    |         | ENSG00000208206 |
| 2 | 169148494 | 169148807 | 169148669 | 29  | 33  | 4  | 6.520579113 | 5.65E-07    |         | ENSG00000199348 |
| 2 | 169173034 | 169173252 | 169173110 | 8   | 9   | 0  | 9.589086931 | 0.00120187  |         | ENSG00000199348 |
| 2 | 169696737 | 169696918 | 169696827 | 8   | 9   | 5  | 1.598181155 | 0.170911    | DHRS9   | ENSG00000073737 |
| 2 | 169825639 | 169825819 | 169825773 | 8   | 9   | 2  | 3.19636231  | 0.0229249   | LRP2    | ENSG00000081479 |
| 2 | 169957786 | 169958259 | 169957921 | 10  | 21  | 10 | 1.917817386 | 0.0328292   | LRP2    | ENSG00000081479 |
| 2 | 170150369 | 170150548 | 170150483 | 8   | 8   | 1  | 4.315089119 | 0.0127267   | PPIG    | ENSG00000138398 |
| 2 | 170518744 | 170519090 | 170518917 | 21  | 26  | 1  | 12.94526736 | 1.86E-07    | UBR3    | ENSG00000144357 |
| 2 | 170740339 | 170740613 | 170740514 | 10  | 13  | 3  | 3.356180426 | 0.00805599  | MYO3B   | ENSG00000071909 |
| 2 | 170786210 | 170787277 | 170786615 | 122 | 208 | 5  | 33.40198614 | 9.58E-54    | MYO3B   | ENSG00000071909 |
| 2 | 170803434 | 170803917 | 170803785 | 29  | 45  | 5  | 7.351633313 | 2.73E-09    | MYO3B   | ENSG00000071909 |
| 2 | 170886254 | 170886718 | 170886433 | 77  | 88  | 0  | 85.34287368 | 1.03E-26    | MYO3B   | ENSG00000071909 |
| 2 | 171239045 | 171239226 | 171239085 | 8   | 8   | 1  | 4.315089119 | 0.0127267   |         | ENSG00000213981 |
| 2 | 171377403 | 171377783 | 171377621 | 9   | 13  | 6  | 1.917817386 | 0.0693353   | GAD1    | ENSG00000128683 |
| 2 | 171493551 | 171493887 | 171493725 | 15  | 18  | 2  | 6.073088389 | 0.000157975 | GORASP2 | ENSG00000115806 |
| 2 | 171836667 | 171837169 | 171837001 | 12  | 22  | 1  | 11.02744997 | 2.36E-06    |         | ENSG00000218900 |
| 2 | 171851888 | 171852668 | 171852133 | 22  | 44  | 8  | 4.794543465 | 2.57E-07    |         | ENSG00000218900 |
| 2 | 171974919 | 171975278 | 171975111 | 11  | 17  | 4  | 3.452071295 | 0.00292757  | METTL8  | ENSG00000123600 |
| 2 | 171995777 | 171996083 | 171995930 | 13  | 15  | 1  | 7.671269544 | 0.000187863 | METTL8  | ENSG00000123600 |
| 2 | 171998862 | 171999092 | 171998977 | 10  | 10  | 1  | 5.273997812 | 0.00391723  | C2orf37 | ENSG00000115827 |
| 2 | 172050274 | 172050453 | 172050358 | 8   | 8   | 1  | 4.315089119 | 0.0127267   | CYBRD1  | ENSG00000071967 |
| 2 | 172129300 | 172129576 | 172129426 | 8   | 8   | 5  | 1.43836304  | 0.235762    | CYBRD1  | ENSG00000071967 |
| 2 | 172272555 | 172272888 | 172272721 | 20  | 25  | 0  | 24.93162602 | 2.56E-08    | DYNC1I2 | ENSG00000077380 |
| 2 | 172981391 | 172981694 | 172981558 | 26  | 29  | 0  | 28.76726079 | 1.74E-09    | ITGA6   | ENSG00000091409 |
| 2 | 173009989 | 173010356 | 173010098 | 11  | 17  | 8  | 1.917817386 | 0.0474153   | ITGA6   | ENSG00000091409 |
| 2 | 173379443 | 173379668 | 173379495 | 8   | 10  | 1  | 5.273997812 | 0.00391723  | RAPGEF4 | ENSG00000091428 |
| 2 | 173506364 | 173506731 | 173506521 | 11  | 17  | 4  | 3.452071295 | 0.00292757  | RAPGEF4 | ENSG00000091428 |
| 2 | 173621771 | 173622054 | 173621927 | 9   | 12  | 4  | 2.493162602 | 0.0299057   |         | ENSG00000091436 |
| 2 | 173622319 | 173622599 | 173622440 | 8   | 10  | 3  | 2.636998906 | 0.034203    |         | ENSG00000091436 |
| 2 | 173697406 | 173697776 | 173697597 | 16  | 23  | 4  | 4.602761727 | 0.000137072 |         | ENSG00000091436 |

|   |           |           |           |     |     |    |             |             |         |                 |
|---|-----------|-----------|-----------|-----|-----|----|-------------|-------------|---------|-----------------|
| 2 | 173864455 | 173864718 | 173864614 | 8   | 9   | 0  | 9.589086931 | 0.00120187  | CDCA7   | ENSG00000144354 |
| 2 | 173975575 | 173975765 | 173975621 | 8   | 9   | 1  | 4.794543465 | 0.00708517  |         | ENSG00000213148 |
| 2 | 174022231 | 174022454 | 174022323 | 9   | 10  | 4  | 2.109599125 | 0.0694668   |         | ENSG00000213148 |
| 2 | 174144550 | 174144790 | 174144632 | 12  | 13  | 2  | 4.474907234 | 0.00269459  |         | ENSG00000170226 |
| 2 | 174225695 | 174226015 | 174225855 | 12  | 17  | 5  | 2.876726079 | 0.00703033  |         | ENSG00000170226 |
| 2 | 174240160 | 174240347 | 174240244 | 8   | 8   | 4  | 1.726035648 | 0.150596    |         | ENSG00000170226 |
| 2 | 174401537 | 174401750 | 174401630 | 9   | 10  | 2  | 3.515998541 | 0.0136204   | SP3     | ENSG00000172845 |
| 2 | 174401853 | 174402112 | 174401982 | 9   | 10  | 2  | 3.515998541 | 0.0136204   | SP3     | ENSG00000172845 |
| 2 | 174424240 | 174424490 | 174424365 | 8   | 9   | 5  | 1.598181155 | 0.170911    | SP3     | ENSG00000172845 |
| 2 | 174555871 | 174556592 | 174556140 | 78  | 111 | 4  | 21.47955472 | 8.41E-28    | SP3     | ENSG00000172845 |
| 2 | 174557911 | 174558144 | 174558018 | 10  | 10  | 5  | 1.757999271 | 0.121253    | SP3     | ENSG00000172845 |
| 2 | 174612813 | 174613178 | 174613019 | 14  | 21  | 5  | 3.515998541 | 0.00108602  | SP3     | ENSG00000172845 |
| 2 | 174636843 | 174637162 | 174636935 | 12  | 17  | 2  | 5.753452158 | 0.000281509 | SP3     | ENSG00000172845 |
| 2 | 174885791 | 174885970 | 174885896 | 8   | 8   | 2  | 2.876726079 | 0.0381137   |         | ENSG00000217236 |
| 2 | 175270144 | 175270376 | 175270269 | 8   | 9   | 4  | 1.917817386 | 0.103282    | WIPF1   | ENSG00000115935 |
| 2 | 176109578 | 176109799 | 176109684 | 8   | 8   | 0  | 8.630178238 | 0.00235436  |         | ENSG00000221347 |
| 2 | 177027826 | 177028122 | 177027981 | 9   | 11  | 6  | 1.643843474 | 0.137712    |         | ENSG00000221304 |
| 2 | 177504820 | 177505018 | 177504990 | 8   | 9   | 1  | 4.794543465 | 0.00708517  |         | ENSG00000206866 |
| 2 | 177742133 | 177742312 | 177742149 | 8   | 8   | 0  | 8.630178238 | 0.00235436  |         | ENSG00000201102 |
| 2 | 177743038 | 177743970 | 177743334 | 147 | 225 | 11 | 18.05944705 | 1.08E-51    |         | ENSG00000201102 |
| 2 | 177836233 | 177836665 | 177836489 | 10  | 19  | 5  | 3.19636231  | 0.00280933  | NFE2L2  | ENSG00000222043 |
| 2 | 177886419 | 177886841 | 177886582 | 33  | 47  | 1  | 23.01380863 | 2.36E-13    |         | ENSG00000208194 |
| 2 | 178047335 | 178047647 | 178047491 | 10  | 12  | 0  | 12.46581301 | 0.000159888 | TTC30B  | ENSG00000196659 |
| 2 | 178685190 | 178685525 | 178685356 | 12  | 16  | 2  | 5.433815927 | 0.000499302 | RBM45   | ENSG00000155636 |
| 2 | 178987518 | 178987706 | 178987612 | 9   | 10  | 2  | 3.515998541 | 0.0136204   |         | ENSG00000203325 |
| 2 | 179464385 | 179464644 | 179464514 | 8   | 11  | 4  | 2.301380863 | 0.0459276   | CCDC141 | ENSG00000163492 |
| 2 | 180698634 | 180698924 | 180698787 | 9   | 12  | 1  | 6.232906505 | 0.00117736  |         | ENSG00000163510 |
| 2 | 181657051 | 181657289 | 181657170 | 8   | 11  | 1  | 5.753452158 | 0.00215302  | UBE2E3  | ENSG00000170035 |
| 2 | 181687008 | 181687328 | 181687175 | 14  | 17  | 5  | 2.876726079 | 0.00703033  | UBE2E3  | ENSG00000170035 |
| 2 | 182147972 | 182148199 | 182148122 | 8   | 9   | 2  | 3.19636231  | 0.0229249   |         | ENSG00000197819 |
| 2 | 182229517 | 182229736 | 182229676 | 10  | 10  | 4  | 2.109599125 | 0.0694668   | CERKL   | ENSG00000188452 |
| 2 | 182288105 | 182288293 | 182288219 | 8   | 8   | 2  | 2.876726079 | 0.0381137   |         | ENSG00000221023 |
| 2 | 182315906 | 182316096 | 182315993 | 8   | 8   | 5  | 1.43836304  | 0.235762    |         | ENSG00000221023 |
| 2 | 183166060 | 183166549 | 183166291 | 9   | 20  | 3  | 5.034270639 | 0.000202317 | PDE1A   | ENSG00000115252 |

|   |           |           |           |    |     |   |             |             |          |                 |
|---|-----------|-----------|-----------|----|-----|---|-------------|-------------|----------|-----------------|
| 2 | 183335601 | 183335857 | 183335741 | 9  | 11  | 4 | 2.301380863 | 0.0459276   | DNAJC10  | ENSG00000077232 |
| 2 | 183501158 | 183501454 | 183501289 | 20 | 21  | 3 | 5.273997812 | 0.00011662  |          | ENSG00000207178 |
| 2 | 183651605 | 183651849 | 183651727 | 9  | 9   | 3 | 2.397271733 | 0.0539397   | DUSP19   | ENSG00000162999 |
| 2 | 184165349 | 184165528 | 184165419 | 8  | 8   | 0 | 8.630178238 | 0.00235436  |          | ENSG00000177855 |
| 2 | 184524719 | 184525027 | 184524854 | 9  | 13  | 6 | 1.917817386 | 0.0693353   |          | ENSG00000208184 |
| 2 | 184565845 | 184566049 | 184565947 | 9  | 10  | 3 | 2.636998906 | 0.034203    |          | ENSG00000208184 |
| 2 | 184604648 | 184604926 | 184604787 | 8  | 8   | 2 | 2.876726079 | 0.0381137   |          | ENSG00000208184 |
| 2 | 186140876 | 186141489 | 186141166 | 83 | 120 | 2 | 38.67598395 | 8.48E-33    |          | ENSG00000212581 |
| 2 | 187164222 | 187164401 | 187164303 | 8  | 8   | 2 | 2.876726079 | 0.0381137   | ITGAV    | ENSG00000138448 |
| 2 | 188073961 | 188074213 | 188074123 | 8  | 11  | 6 | 1.643843474 | 0.137712    | TFPI     | ENSG00000003436 |
| 2 | 189266118 | 189266404 | 189266266 | 8  | 10  | 2 | 3.515998541 | 0.0136204   | DIRC1    | ENSG00000174325 |
| 2 | 189299903 | 189300205 | 189300049 | 9  | 12  | 3 | 3.116453252 | 0.0131971   | DIRC1    | ENSG00000174325 |
| 2 | 189716166 | 189716450 | 189716299 | 12 | 13  | 5 | 2.237453617 | 0.038866    | COL5A2   | ENSG00000204262 |
| 2 | 190014245 | 190014467 | 190014356 | 9  | 12  | 4 | 2.493162602 | 0.0299057   | WDR75    | ENSG00000115368 |
| 2 | 190059327 | 190059571 | 190059441 | 9  | 10  | 2 | 3.515998541 | 0.0136204   | WDR75    | ENSG00000115368 |
| 2 | 190158383 | 190158781 | 190158552 | 28 | 36  | 1 | 17.73981082 | 3.00E-10    | SLC40A1  | ENSG00000138449 |
| 2 | 190336016 | 190336307 | 190336145 | 11 | 12  | 3 | 3.116453252 | 0.0131971   | OSGEPL1  | ENSG00000128694 |
| 2 | 190626402 | 190626751 | 190626576 | 16 | 20  | 1 | 10.06854128 | 8.32E-06    | MSTN     | ENSG00000138379 |
| 2 | 190892876 | 190893114 | 190893005 | 8  | 9   | 3 | 2.397271733 | 0.0539397   | HIBCH    | ENSG00000198130 |
| 2 | 191253353 | 191253670 | 191253511 | 8  | 12  | 3 | 3.116453252 | 0.0131971   | NAB1     | ENSG00000138386 |
| 2 | 191292039 | 191292231 | 191292134 | 8  | 8   | 0 | 8.630178238 | 0.00235436  | NAB1     | ENSG00000138386 |
| 2 | 191587149 | 191587328 | 191587238 | 8  | 8   | 0 | 8.630178238 | 0.00235436  | STAT1    | ENSG00000115415 |
| 2 | 191792402 | 191792640 | 191792529 | 10 | 12  | 4 | 2.493162602 | 0.0299057   | MYO1B    | ENSG00000128641 |
| 2 | 191902857 | 191903068 | 191902962 | 8  | 8   | 4 | 1.726035648 | 0.150596    |          | ENSG00000208171 |
| 2 | 191955664 | 191956073 | 191955838 | 9  | 16  | 2 | 5.433815927 | 0.000499302 |          | ENSG00000208171 |
| 2 | 192269175 | 192269530 | 192269352 | 13 | 18  | 0 | 18.21926517 | 2.83E-06    | OBFC2A   | ENSG00000173559 |
| 2 | 192296632 | 192296849 | 192296740 | 8  | 9   | 1 | 4.794543465 | 0.00708517  | OBFC2A   | ENSG00000173559 |
| 2 | 192331899 | 192332186 | 192332058 | 16 | 19  | 6 | 2.739739123 | 0.00632909  | OBFC2A   | ENSG00000173559 |
| 2 | 192417770 | 192418060 | 192417907 | 19 | 20  | 5 | 3.356180426 | 0.0017534   | SDPR     | ENSG00000168497 |
| 2 | 192535749 | 192535928 | 192535838 | 8  | 8   | 1 | 4.315089119 | 0.0127267   |          | ENSG00000213946 |
| 2 | 193117422 | 193117967 | 193117790 | 35 | 50  | 0 | 48.90434335 | 1.28E-15    | TMEFF2   | ENSG00000144339 |
| 2 | 194916095 | 194916467 | 194916274 | 20 | 27  | 1 | 13.4247217  | 9.80E-08    |          | ENSG00000208170 |
| 2 | 195282432 | 195282688 | 195282575 | 10 | 11  | 2 | 3.835634772 | 0.00800699  |          | ENSG00000208170 |
| 2 | 196230113 | 196230395 | 196230259 | 11 | 13  | 7 | 1.678090213 | 0.11195     | SLC39A10 | ENSG00000196950 |

|   |           |           |           |    |    |    |             |             |                 |                 |
|---|-----------|-----------|-----------|----|----|----|-------------|-------------|-----------------|-----------------|
| 2 | 196805864 | 196806266 | 196806089 | 15 | 21 | 0  | 21.09599125 | 3.76E-07    | ENSG00000208167 |                 |
| 2 | 197089544 | 197089839 | 197089682 | 8  | 8  | 0  | 8.630178238 | 0.00235436  | HECW2           | ENSG00000138411 |
| 2 | 197324079 | 197324401 | 197324256 | 12 | 15 | 5  | 2.557089848 | 0.0169197   | CCDC150         | ENSG00000144395 |
| 2 | 197372515 | 197372827 | 197372658 | 11 | 15 | 4  | 3.068507818 | 0.0076507   | GTF3C3          | ENSG00000119041 |
| 2 | 197498553 | 197498842 | 197498694 | 13 | 18 | 6  | 2.602752167 | 0.00970422  | PGAP1           | ENSG00000197121 |
| 2 | 197756372 | 197756551 | 197756462 | 8  | 8  | 1  | 4.315089119 | 0.0127267   | ANKRD44         | ENSG00000065413 |
| 2 | 197774908 | 197775265 | 197775086 | 27 | 33 | 1  | 16.30144778 | 2.08E-09    | ANKRD44         | ENSG00000065413 |
| 2 | 197880286 | 197880558 | 197880448 | 8  | 10 | 2  | 3.515998541 | 0.0136204   | ANKRD44         | ENSG00000065413 |
| 2 | 198072868 | 198073142 | 198073005 | 11 | 14 | 9  | 1.43836304  | 0.179537    | HSPE1           | ENSG00000115541 |
| 2 | 198073326 | 198073544 | 198073435 | 10 | 12 | 1  | 6.232906505 | 0.00117736  | HSPE1           | ENSG00000115541 |
| 2 | 198186572 | 198186863 | 198186721 | 13 | 15 | 1  | 7.671269544 | 0.000187863 | RFTN2           | ENSG00000162944 |
| 2 | 198277856 | 198278153 | 198278034 | 10 | 13 | 4  | 2.684944341 | 0.01921     | MARS2           | ENSG00000152428 |
| 2 | 198376061 | 198376329 | 198376195 | 12 | 14 | 7  | 1.797953799 | 0.0806593   | BOLL            | ENSG00000152430 |
| 2 | 200528474 | 200528714 | 200528565 | 9  | 10 | 2  | 3.515998541 | 0.0136204   | C2orf47         | ENSG00000162972 |
| 2 | 200555456 | 200555791 | 200555612 | 19 | 23 | 1  | 11.50690432 | 1.25E-06    | C2orf47         | ENSG00000162972 |
| 2 | 200832466 | 200832900 | 200832721 | 11 | 20 | 12 | 1.54900635  | 0.101141    |                 | ENSG00000196141 |
| 2 | 200851557 | 200851975 | 200851766 | 15 | 27 | 5  | 4.474907234 | 5.37E-05    |                 | ENSG00000196141 |
| 2 | 200861716 | 200861915 | 200861845 | 8  | 9  | 3  | 2.397271733 | 0.0539397   |                 | ENSG00000196141 |
| 2 | 200873590 | 200874197 | 200873823 | 50 | 86 | 3  | 20.85626407 | 5.62E-22    |                 | ENSG00000196141 |
| 2 | 201054441 | 201054639 | 201054540 | 9  | 10 | 3  | 2.636998906 | 0.034203    | KCTD18          | ENSG00000155729 |
| 2 | 201462125 | 201462431 | 201462264 | 11 | 13 | 4  | 2.684944341 | 0.01921     | PPIL3           | ENSG00000115934 |
| 2 | 201642464 | 201642649 | 201642556 | 8  | 9  | 6  | 1.369869562 | 0.253675    | FAM126B         | ENSG00000155744 |
| 2 | 201691556 | 201692208 | 201691854 | 15 | 34 | 4  | 6.712360851 | 3.20E-07    | CFLAR           | ENSG00000003402 |
| 2 | 201805276 | 201805479 | 201805378 | 9  | 9  | 2  | 3.19636231  | 0.0229249   | CASP8           | ENSG00000064012 |
| 2 | 202215648 | 202216073 | 202215795 | 11 | 17 | 1  | 8.630178238 | 5.44E-05    | ALS2CR4         | ENSG00000155755 |
| 2 | 202981715 | 202982062 | 202981888 | 10 | 16 | 0  | 16.30144778 | 1.09E-05    | BMPR2           | ENSG00000204217 |
| 2 | 203266566 | 203266808 | 203266649 | 9  | 11 | 0  | 11.50690432 | 0.000313206 | FAM117B         | ENSG00000138439 |
| 2 | 203404475 | 203404762 | 203404624 | 10 | 13 | 6  | 1.917817386 | 0.0693353   | ICA1L           | ENSG00000163596 |
| 2 | 204152020 | 204152489 | 204152223 | 13 | 24 | 10 | 2.179337939 | 0.011585    | RAPH1           | ENSG00000173166 |
| 2 | 204599910 | 204600334 | 204600155 | 22 | 30 | 2  | 9.908723162 | 1.20E-07    | ICOS            | ENSG00000163600 |
| 2 | 204682601 | 204682859 | 204682691 | 8  | 11 | 3  | 2.876726079 | 0.0213797   | ICOS            | ENSG00000163600 |
| 2 | 205021428 | 205021793 | 205021607 | 17 | 24 | 0  | 23.97271733 | 5.01E-08    | PARD3B          | ENSG00000116117 |
| 2 | 205337158 | 205337498 | 205337328 | 29 | 35 | 0  | 34.52071295 | 3.07E-11    | PARD3B          | ENSG00000116117 |
| 2 | 205422873 | 205423184 | 205423030 | 22 | 25 | 2  | 8.310542006 | 2.50E-06    | PARD3B          | ENSG00000116117 |

|   |           |           |           |    |    |    |             |             |         |                 |
|---|-----------|-----------|-----------|----|----|----|-------------|-------------|---------|-----------------|
| 2 | 205598018 | 205598357 | 205598187 | 13 | 19 | 3  | 4.794543465 | 0.000349205 |         | ENSG00000208122 |
| 2 | 205966310 | 205966514 | 205966412 | 8  | 8  | 1  | 4.315089119 | 0.0127267   |         | ENSG00000208122 |
| 2 | 206243258 | 206243690 | 206243478 | 30 | 38 | 2  | 12.46581301 | 8.46E-10    | NRP2    | ENSG00000118257 |
| 2 | 206252956 | 206253303 | 206253127 | 12 | 17 | 8  | 1.917817386 | 0.0474153   | NRP2    | ENSG00000118257 |
| 2 | 206803255 | 206803726 | 206803457 | 41 | 57 | 2  | 18.5389014  | 5.08E-15    |         | ENSG00000222496 |
| 2 | 207181790 | 207181969 | 207181879 | 8  | 8  | 1  | 4.315089119 | 0.0127267   |         | ENSG00000213083 |
| 2 | 208378900 | 208379172 | 208379061 | 13 | 16 | 2  | 5.433815927 | 0.000499302 |         | ENSG00000188519 |
| 2 | 208481746 | 208482051 | 208481900 | 14 | 16 | 1  | 8.150723891 | 0.000101217 |         | ENSG00000220999 |
| 2 | 208747309 | 208747684 | 208747508 | 15 | 21 | 7  | 2.636998906 | 0.00562102  | CRYGA   | ENSG00000168582 |
| 2 | 209039310 | 209039519 | 209039426 | 9  | 11 | 3  | 2.876726079 | 0.0213797   | PTH2R   | ENSG00000144407 |
| 2 | 209556610 | 209556838 | 209556738 | 8  | 10 | 2  | 3.515998541 | 0.0136204   |         | ENSG00000202164 |
| 2 | 209907455 | 209907699 | 209907543 | 12 | 14 | 0  | 14.3836304  | 4.17E-05    | MAP2    | ENSG00000078018 |
| 2 | 209941930 | 209942127 | 209942049 | 8  | 10 | 2  | 3.515998541 | 0.0136204   | MAP2    | ENSG00000078018 |
| 2 | 210068857 | 210069063 | 210068960 | 8  | 10 | 2  | 3.515998541 | 0.0136204   | MAP2    | ENSG00000078018 |
| 2 | 210129407 | 210129617 | 210129512 | 9  | 10 | 0  | 10.54799562 | 0.000613541 | MAP2    | ENSG00000078018 |
| 2 | 210226803 | 210226982 | 210226892 | 9  | 9  | 2  | 3.19636231  | 0.0229249   |         | ENSG00000208106 |
| 2 | 210299359 | 210299573 | 210299466 | 10 | 10 | 0  | 10.54799562 | 0.000613541 |         | ENSG00000222317 |
| 2 | 210743305 | 210743615 | 210743460 | 10 | 13 | 2  | 4.474907234 | 0.00269459  | C2orf67 | ENSG00000144445 |
| 2 | 211821924 | 211822239 | 211822081 | 11 | 12 | 3  | 3.116453252 | 0.0131971   |         | ENSG00000199585 |
| 2 | 211940328 | 211940558 | 211940433 | 11 | 13 | 4  | 2.684944341 | 0.01921     |         | ENSG00000199585 |
| 2 | 212137442 | 212137883 | 212137568 | 25 | 35 | 1  | 17.26035648 | 5.72E-10    |         | ENSG00000199585 |
| 2 | 212453444 | 212453710 | 212453612 | 13 | 15 | 0  | 15.34253909 | 2.13E-05    |         | ENSG00000208089 |
| 2 | 212474399 | 212474786 | 212474637 | 23 | 30 | 0  | 29.72616948 | 8.86E-10    |         | ENSG00000208089 |
| 2 | 212727017 | 212727237 | 212727127 | 10 | 10 | 0  | 10.54799562 | 0.000613541 |         | ENSG00000221782 |
| 2 | 212727319 | 212727868 | 212727498 | 30 | 46 | 2  | 15.02290286 | 5.55E-12    |         | ENSG00000221782 |
| 2 | 213201550 | 213201928 | 213201739 | 19 | 27 | 0  | 26.84944341 | 6.66E-09    | ERBB4   | ENSG00000178568 |
| 2 | 213478879 | 213479203 | 213479033 | 9  | 14 | 10 | 1.307602763 | 0.244096    |         | ENSG00000221388 |
| 2 | 213513158 | 213513376 | 213513215 | 9  | 12 | 4  | 2.493162602 | 0.0299057   |         | ENSG00000221388 |
| 2 | 213848312 | 213848538 | 213848414 | 9  | 11 | 1  | 5.753452158 | 0.00215302  |         | ENSG00000196096 |
| 2 | 214073924 | 214074232 | 214074067 | 14 | 18 | 7  | 2.277408146 | 0.0188653   |         | ENSG00000208087 |
| 2 | 214469725 | 214469917 | 214469821 | 11 | 11 | 0  | 11.50690432 | 0.000313206 |         | ENSG00000208083 |
| 2 | 214790615 | 214790884 | 214790749 | 10 | 11 | 2  | 3.835634772 | 0.00800699  |         | ENSG00000213917 |
| 2 | 214983925 | 214984118 | 214983972 | 8  | 9  | 1  | 4.794543465 | 0.00708517  |         | ENSG00000174453 |
| 2 | 215418325 | 215418542 | 215418392 | 8  | 9  | 0  | 9.589086931 | 0.00120187  |         | ENSG00000207274 |

|   |           |           |           |     |     |    |             |             |         |                 |
|---|-----------|-----------|-----------|-----|-----|----|-------------|-------------|---------|-----------------|
| 2 | 215625561 | 215625753 | 215625669 | 11  | 11  | 0  | 11.50690432 | 0.000313206 | ABCA12  | ENSG00000144452 |
| 2 | 215709789 | 215710388 | 215710210 | 16  | 28  | 7  | 3.476044012 | 0.000248863 | ABCA12  | ENSG00000144452 |
| 2 | 215710659 | 215711839 | 215710891 | 168 | 231 | 15 | 13.90417605 | 1.64E-49    | ABCA12  | ENSG00000144452 |
| 2 | 215789878 | 215790080 | 215789979 | 8   | 9   | 3  | 2.397271733 | 0.0539397   | ABCA12  | ENSG00000144452 |
| 2 | 215811499 | 215811678 | 215811588 | 8   | 8   | 2  | 2.876726079 | 0.0381137   |         | ENSG00000208081 |
| 2 | 215842823 | 215843076 | 215842961 | 8   | 10  | 3  | 2.636998906 | 0.034203    |         | ENSG00000208081 |
| 2 | 216060143 | 216060439 | 216060260 | 8   | 11  | 1  | 5.753452158 | 0.00215302  | FN1     | ENSG00000115414 |
| 2 | 216235623 | 216235949 | 216235786 | 8   | 13  | 3  | 3.356180426 | 0.00805599  |         | ENSG00000216721 |
| 2 | 216522949 | 216523207 | 216523078 | 12  | 13  | 3  | 3.356180426 | 0.00805599  | MREG    | ENSG00000118242 |
| 2 | 216552703 | 216552882 | 216552810 | 8   | 8   | 13 | 0.616441303 | 0.878084    | MREG    | ENSG00000118242 |
| 2 | 216555479 | 216555925 | 216555650 | 13  | 22  | 7  | 2.756862493 | 0.003684    | MREG    | ENSG00000118242 |
| 2 | 216586677 | 216586921 | 216586834 | 9   | 11  | 2  | 3.835634772 | 0.00800699  | MREG    | ENSG00000118242 |
| 2 | 217124669 | 217125065 | 217124848 | 37  | 49  | 3  | 11.98635866 | 7.33E-12    | RPL37A  | ENSG00000197756 |
| 2 | 217286671 | 217286935 | 217286804 | 12  | 14  | 0  | 14.3836304  | 4.17E-05    | IGFBP5  | ENSG00000115461 |
| 2 | 217510603 | 217510879 | 217510710 | 8   | 10  | 1  | 5.273997812 | 0.00391723  | TNP1    | ENSG00000118245 |
| 2 | 218007275 | 218007466 | 218007338 | 9   | 9   | 1  | 4.794543465 | 0.00708517  | TNS1    | ENSG00000079308 |
| 2 | 218280045 | 218280519 | 218280214 | 9   | 18  | 9  | 1.821926517 | 0.0548428   | TNS1    | ENSG00000079308 |
| 2 | 218561148 | 218561346 | 218561239 | 8   | 8   | 4  | 1.726035648 | 0.150596    | TNS1    | ENSG00000079308 |
| 2 | 218698833 | 218699051 | 218698930 | 10  | 11  | 0  | 11.50690432 | 0.000313206 | IL8RB   | ENSG00000180871 |
| 2 | 218759290 | 218759485 | 218759374 | 8   | 8   | 2  | 2.876726079 | 0.0381137   |         | ENSG00000208079 |
| 2 | 218791952 | 218792267 | 218792122 | 16  | 20  | 2  | 6.712360851 | 4.91E-05    | ARPC2   | ENSG00000163466 |
| 2 | 218907827 | 218908127 | 218907977 | 16  | 16  | 2  | 5.433815927 | 0.000499302 |         | ENSG00000212106 |
| 2 | 218969540 | 218969775 | 218969657 | 8   | 9   | 2  | 3.19636231  | 0.0229249   | CTDSP1  | ENSG00000144579 |
| 2 | 219017634 | 219017831 | 219017738 | 8   | 8   | 2  | 2.876726079 | 0.0381137   | VIL1    | ENSG00000127831 |
| 2 | 219022012 | 219022259 | 219022135 | 8   | 10  | 5  | 1.757999271 | 0.121253    | VIL1    | ENSG00000127831 |
| 2 | 219420737 | 219420932 | 219420834 | 10  | 10  | 9  | 1.054799562 | 0.4492      | WNT6    | ENSG00000115596 |
| 2 | 219481761 | 219481964 | 219481862 | 8   | 8   | 4  | 1.726035648 | 0.150596    |         | ENSG00000200029 |
| 2 | 219614444 | 219614767 | 219614605 | 8   | 12  | 4  | 2.493162602 | 0.0299057   | CCDC108 | ENSG00000181378 |
| 2 | 219699336 | 219699754 | 219699645 | 9   | 15  | 11 | 1.278544924 | 0.254978    |         | ENSG00000223334 |
| 2 | 219750688 | 219750925 | 219750800 | 10  | 10  | 1  | 5.273997812 | 0.00391723  | C2orf24 | ENSG00000115649 |
| 2 | 219790869 | 219791191 | 219791043 | 10  | 14  | 3  | 3.595907599 | 0.00486913  | ABCB6   | ENSG00000115657 |
| 2 | 219818864 | 219819138 | 219819004 | 9   | 10  | 7  | 1.318499453 | 0.269217    | STK16   | ENSG00000115661 |
| 2 | 219859424 | 219859855 | 219859614 | 17  | 29  | 0  | 28.76726079 | 1.74E-09    | DNAJB2  | ENSG00000135924 |
| 2 | 219971909 | 219972156 | 219972046 | 9   | 9   | 9  | 0.958908693 | 0.536911    | DNPEP   | ENSG00000123992 |

|   |           |           |           |    |    |   |             |             |        |                 |
|---|-----------|-----------|-----------|----|----|---|-------------|-------------|--------|-----------------|
| 2 | 219973053 | 219973344 | 219973198 | 9  | 10 | 6 | 1.506856518 | 0.188853    | DNPEP  | ENSG00000123992 |
| 2 | 220003852 | 220004052 | 220003952 | 8  | 9  | 3 | 2.397271733 | 0.0539397   | SPEG   | ENSG00000072195 |
| 2 | 220144892 | 220145120 | 220145024 | 11 | 12 | 2 | 4.155271003 | 0.0046638   | INHA   | ENSG00000123999 |
| 2 | 220215525 | 220215718 | 220215608 | 9  | 10 | 3 | 2.636998906 | 0.034203    | SLC4A3 | ENSG00000114923 |
| 2 | 220234081 | 220234330 | 220234205 | 9  | 9  | 2 | 3.19636231  | 0.0229249   |        | ENSG00000216281 |
| 2 | 220257537 | 220258405 | 220257754 | 36 | 74 | 2 | 23.97271733 | 9.05E-20    |        | ENSG00000216281 |
| 2 | 220306133 | 220306550 | 220306305 | 47 | 54 | 1 | 26.36998906 | 2.43E-15    |        | ENSG00000216666 |
| 2 | 220587859 | 220588158 | 220588008 | 11 | 14 | 6 | 2.054804342 | 0.0480281   |        | ENSG00000221199 |
| 2 | 220771998 | 220772393 | 220772158 | 18 | 23 | 0 | 23.01380863 | 9.81E-08    |        | ENSG00000221199 |
| 2 | 220846161 | 220846340 | 220846250 | 8  | 8  | 5 | 1.43836304  | 0.235762    |        | ENSG00000221199 |
| 2 | 221192591 | 221192846 | 221192697 | 10 | 10 | 1 | 5.273997812 | 0.00391723  |        | ENSG00000222096 |
| 2 | 221255636 | 221255933 | 221255784 | 10 | 12 | 8 | 1.385090334 | 0.219216    |        | ENSG00000222096 |
| 2 | 221407813 | 221408037 | 221407925 | 8  | 8  | 2 | 2.876726079 | 0.0381137   |        | ENSG00000208071 |
| 2 | 221428293 | 221428501 | 221428397 | 9  | 9  | 3 | 2.397271733 | 0.0539397   |        | ENSG00000208071 |
| 2 | 221562564 | 221562766 | 221562665 | 8  | 8  | 0 | 8.630178238 | 0.00235436  |        | ENSG00000208071 |
| 2 | 221871589 | 221871795 | 221871712 | 8  | 8  | 0 | 8.630178238 | 0.00235436  |        | ENSG00000221432 |
| 2 | 222103044 | 222103415 | 222103223 | 53 | 61 | 4 | 11.89046779 | 3.48E-14    |        | ENSG00000221432 |
| 2 | 223281339 | 223281544 | 223281441 | 8  | 8  | 4 | 1.726035648 | 0.150596    |        | ENSG00000208067 |
| 2 | 223350427 | 223350643 | 223350535 | 8  | 8  | 0 | 8.630178238 | 0.00235436  |        | ENSG00000208067 |
| 2 | 223410717 | 223411210 | 223410915 | 12 | 22 | 2 | 7.351633313 | 1.51E-05    | ACSL3  | ENSG00000123983 |
| 2 | 223760281 | 223760473 | 223760377 | 9  | 10 | 0 | 10.54799562 | 0.000613541 |        | ENSG00000222485 |
| 2 | 224122161 | 224122549 | 224122408 | 8  | 13 | 3 | 3.356180426 | 0.00805599  | SCG2   | ENSG00000171951 |
| 2 | 224214201 | 224214418 | 224214309 | 10 | 11 | 3 | 2.876726079 | 0.0213797   | SCG2   | ENSG00000171951 |
| 2 | 224298589 | 224298779 | 224298723 | 10 | 10 | 2 | 3.515998541 | 0.0136204   | AP1S3  | ENSG00000152056 |
| 2 | 224460127 | 224460395 | 224460286 | 9  | 12 | 1 | 6.232906505 | 0.00117736  | AP1S3  | ENSG00000152056 |
| 2 | 225094930 | 225095242 | 225095109 | 17 | 20 | 1 | 10.06854128 | 8.32E-06    | CUL3   | ENSG00000036257 |
| 2 | 225421558 | 225421780 | 225421669 | 8  | 9  | 4 | 1.917817386 | 0.103282    |        | ENSG00000208064 |
| 2 | 226188546 | 226188989 | 226188706 | 36 | 41 | 1 | 20.13708255 | 1.17E-11    |        | ENSG00000144460 |
| 2 | 226189329 | 226189539 | 226189434 | 12 | 12 | 0 | 12.46581301 | 0.000159888 |        | ENSG00000144460 |
| 2 | 226209616 | 226209941 | 226209778 | 25 | 30 | 2 | 9.908723162 | 1.20E-07    |        | ENSG00000144460 |
| 2 | 226604671 | 226604856 | 226604831 | 8  | 8  | 2 | 2.876726079 | 0.0381137   |        |                 |
| 2 | 226688081 | 226688359 | 226688201 | 15 | 17 | 7 | 2.157544559 | 0.0276499   |        | ENSG00000208062 |
| 2 | 226697658 | 226697861 | 226697744 | 8  | 11 | 5 | 1.917817386 | 0.0843804   |        | ENSG00000208062 |
| 2 | 228039328 | 228040088 | 228039816 | 12 | 36 | 4 | 7.095924329 | 1.02E-07    | AGFG1  | ENSG00000173744 |

|    |           |           |           |    |     |    |             |             |         |                 |
|----|-----------|-----------|-----------|----|-----|----|-------------|-------------|---------|-----------------|
| 2  | 229753593 | 229754007 | 229753831 | 75 | 93  | 72 | 1.234759139 | 0.086758    |         | ENSG00000208058 |
| 2  | 229846744 | 229847088 | 229846916 | 9  | 13  | 1  | 6.712360851 | 0.000640982 | PID1    | ENSG00000153823 |
| 2  | 231938314 | 231938550 | 231938412 | 9  | 10  | 5  | 1.757999271 | 0.121253    | B3GNT7  | ENSG00000156966 |
| 2  | 232868976 | 232869185 | 232869085 | 12 | 12  | 3  | 3.116453252 | 0.0131971   | ALPP    | ENSG00000163283 |
| 2  | 232968879 | 232969111 | 232969025 | 10 | 11  | 0  | 11.50690432 | 0.000313206 | ECEL1P2 | ENSG00000204121 |
| 2  | 233924179 | 233924371 | 233924275 | 8  | 10  | 0  | 10.54799562 | 0.000613541 | DGKD    | ENSG00000077044 |
| 2  | 235207092 | 235207434 | 235207263 | 15 | 18  | 6  | 2.602752167 | 0.00970422  | ARL4C   | ENSG00000188042 |
| 2  | 235400668 | 235401075 | 235400804 | 13 | 19  | 0  | 19.17817386 | 1.44E-06    | SH3BP4  | ENSG00000130147 |
| 2  | 235600918 | 235601144 | 235601016 | 8  | 9   | 1  | 4.794543465 | 0.00708517  | SH3BP4  | ENSG00000130147 |
| 2  | 235898563 | 235898853 | 235898712 | 19 | 22  | 0  | 22.05489994 | 1.92E-07    |         | ENSG00000216002 |
| 2  | 236215759 | 236216061 | 236215910 | 13 | 15  | 0  | 15.34253909 | 2.13E-05    | AGAP1   | ENSG00000157985 |
| 2  | 236239226 | 236239532 | 236239382 | 8  | 10  | 2  | 3.515998541 | 0.0136204   | AGAP1   | ENSG00000157985 |
| 2  | 236735383 | 236735718 | 236735550 | 19 | 24  | 0  | 23.97271733 | 5.01E-08    | GBX2    | ENSG00000168505 |
| 2  | 237265301 | 237265635 | 237265478 | 11 | 14  | 2  | 4.794543465 | 0.00154571  | CXCR7   | ENSG00000144476 |
| 2  | 237305396 | 237305718 | 237305568 | 14 | 16  | 2  | 5.433815927 | 0.000499302 | CXCR7   | ENSG00000144476 |
| 2  | 237319285 | 237319505 | 237319414 | 9  | 9   | 2  | 3.19636231  | 0.0229249   | CXCR7   | ENSG00000144476 |
| 2  | 237560017 | 237560282 | 237560141 | 9  | 12  | 1  | 6.232906505 | 0.00117736  |         | ENSG00000202341 |
| 2  | 238297164 | 238297369 | 238297295 | 10 | 13  | 2  | 4.474907234 | 0.00269459  | LRRFIP1 | ENSG00000124831 |
| 2  | 238513238 | 238513517 | 238513377 | 26 | 28  | 0  | 27.8083521  | 3.40E-09    | UBE2F   | ENSG00000184182 |
| 2  | 238809007 | 238809268 | 238809137 | 17 | 17  | 3  | 4.315089119 | 0.00102271  |         | ENSG00000186235 |
| 2  | 238829942 | 238830202 | 238830115 | 8  | 11  | 2  | 3.835634772 | 0.00800699  | HES6    | ENSG00000144485 |
| 2  | 238840795 | 238841081 | 238840938 | 12 | 15  | 1  | 7.671269544 | 0.000187863 | PER2    | ENSG00000132326 |
| 2  | 238963328 | 238964074 | 238963835 | 76 | 114 | 2  | 36.75816657 | 4.34E-31    |         | ENSG00000202099 |
| 2  | 240294265 | 240294463 | 240294364 | 8  | 8   | 1  | 4.315089119 | 0.0127267   |         | ENSG00000213827 |
| 2  | 241761678 | 241761912 | 241761772 | 8  | 10  | 4  | 2.109599125 | 0.0694668   | ANO7    | ENSG00000146205 |
| 2  | 242486503 | 242486787 | 242486626 | 9  | 10  | 1  | 5.273997812 | 0.00391723  |         | ENSG00000216921 |
| 20 | 164642    | 164833    | 164755    | 9  | 9   | 3  | 2.397271733 | 0.0539397   | DEFB129 | ENSG00000125903 |
| 20 | 226837    | 227182    | 227012    | 10 | 14  | 3  | 3.595907599 | 0.00486913  | ZCCHC3  | ENSG00000177764 |
| 20 | 390362    | 390557    | 390459    | 8  | 9   | 0  | 9.589086931 | 0.00120187  | TBC1D20 | ENSG00000125875 |
| 20 | 831677    | 832230    | 831934    | 25 | 39  | 1  | 19.17817386 | 4.29E-11    | ANGPT4  | ENSG00000101280 |
| 20 | 1141643   | 1141881   | 1141737   | 9  | 9   | 2  | 3.19636231  | 0.0229249   |         | ENSG00000215595 |
| 20 | 1428234   | 1428444   | 1428351   | 10 | 10  | 0  | 10.54799562 | 0.000613541 | SIRPB2  | ENSG00000196209 |
| 20 | 1429187   | 1429374   | 1429269   | 8  | 9   | 0  | 9.589086931 | 0.00120187  | SIRPB2  | ENSG00000196209 |
| 20 | 2112920   | 2113221   | 2113067   | 11 | 15  | 1  | 7.671269544 | 0.000187863 | STK35   | ENSG00000125834 |



|    |          |          |          |    |    |   |             |            |          |                 |
|----|----------|----------|----------|----|----|---|-------------|------------|----------|-----------------|
| 20 | 2399284  | 2399545  | 2399374  | 8  | 10 | 1 | 5.273997812 | 0.00391723 | SNRPB    | ENSG00000125835 |
| 20 | 3422811  | 3423244  | 3423055  | 53 | 65 | 3 | 15.82199344 | 3.44E-16   | SF3A3P1  | ENSG00000217305 |
| 20 | 3681623  | 3681918  | 3681800  | 8  | 10 | 4 | 2.109599125 | 0.0694668  | C20orf27 | ENSG00000101220 |
| 20 | 3696441  | 3696630  | 3696572  | 8  | 8  | 4 | 1.726035648 | 0.150596   | C20orf27 | ENSG00000101220 |
| 20 | 3697386  | 3697579  | 3697466  | 9  | 11 | 4 | 2.301380863 | 0.0459276  | C20orf27 | ENSG00000101220 |
| 20 | 3736013  | 3736358  | 3736202  | 11 | 15 | 3 | 3.835634772 | 0.00291691 | CDC25B   | ENSG00000101224 |
| 20 | 3749407  | 3749740  | 3749573  | 8  | 14 | 7 | 1.797953799 | 0.0806593  | C20orf29 | ENSG00000125843 |
| 20 | 3783846  | 3784034  | 3783990  | 8  | 8  | 4 | 1.726035648 | 0.150596   |          | ENSG00000088888 |
| 20 | 3821696  | 3821881  | 3821743  | 8  | 9  | 1 | 4.794543465 | 0.00708517 | PANK2    | ENSG00000125779 |
| 20 | 3822079  | 3822549  | 3822257  | 35 | 46 | 1 | 22.53435429 | 4.53E-13   | PANK2    | ENSG00000125779 |
| 20 | 3942767  | 3942983  | 3942871  | 8  | 9  | 9 | 0.958908693 | 0.536911   | RNF24    | ENSG00000101236 |
| 20 | 4380142  | 4380467  | 4380304  | 19 | 22 | 1 | 11.02744997 | 2.36E-06   | RPL7AL2  | ENSG00000219900 |
| 20 | 4700318  | 4700697  | 4700571  | 17 | 24 | 2 | 7.990905775 | 4.56E-06   | RASSF2   | ENSG00000101265 |
| 20 | 5048649  | 5049139  | 5048828  | 37 | 51 | 3 | 12.46581301 | 2.13E-12   | PCNA     | ENSG00000132646 |
| 20 | 6030022  | 6030303  | 6030162  | 11 | 14 | 3 | 3.595907599 | 0.00486913 |          | ENSG00000198145 |
| 20 | 6362727  | 6363113  | 6362941  | 15 | 22 | 1 | 11.02744997 | 2.36E-06   |          | ENSG00000221449 |
| 20 | 6583455  | 6583781  | 6583618  | 12 | 15 | 0 | 15.34253909 | 2.13E-05   | BMP2     | ENSG00000125845 |
| 20 | 6758240  | 6758673  | 6758498  | 8  | 14 | 1 | 7.191815198 | 0.00034761 | BMP2     | ENSG00000125845 |
| 20 | 7530168  | 7530418  | 7530285  | 14 | 14 | 2 | 4.794543465 | 0.00154571 |          | ENSG00000209691 |
| 20 | 7701018  | 7701477  | 7701196  | 41 | 52 | 2 | 16.94072024 | 1.23E-13   |          | ENSG00000215586 |
| 20 | 8184931  | 8185202  | 8185104  | 8  | 11 | 3 | 2.876726079 | 0.0213797  | PLCB1    | ENSG00000182621 |
| 20 | 8752545  | 8752724  | 8752655  | 8  | 8  | 2 | 2.876726079 | 0.0381137  |          | ENSG00000201348 |
| 20 | 8785604  | 8785929  | 8785765  | 18 | 21 | 0 | 21.09599125 | 3.76E-07   |          | ENSG00000201348 |
| 20 | 8831293  | 8831600  | 8831466  | 24 | 28 | 1 | 13.90417605 | 5.17E-08   |          | ENSG00000219276 |
| 20 | 10021984 | 10022234 | 10022109 | 12 | 14 | 4 | 2.876726079 | 0.01219    | ANKRD5   | ENSG00000132623 |
| 20 | 10047957 | 10048496 | 10048189 | 71 | 88 | 2 | 28.44762456 | 1.03E-23   | ANKRD5   | ENSG00000132623 |
| 20 | 10179626 | 10179876 | 10179751 | 8  | 10 | 2 | 3.515998541 | 0.0136204  | SNAP25   | ENSG00000132639 |
| 20 | 10317298 | 10317656 | 10317480 | 12 | 17 | 3 | 4.315089119 | 0.00102271 |          | ENSG00000218202 |
| 20 | 10363582 | 10363863 | 10363751 | 9  | 12 | 6 | 1.78083043  | 0.0985525  | C20orf94 | ENSG00000149346 |
| 20 | 10375787 | 10376041 | 10375890 | 8  | 9  | 2 | 3.19636231  | 0.0229249  | C20orf94 | ENSG00000149346 |
| 20 | 10488024 | 10488225 | 10488124 | 8  | 8  | 2 | 2.876726079 | 0.0381137  |          | ENSG00000125881 |
| 20 | 10593367 | 10593590 | 10593509 | 8  | 8  | 2 | 2.876726079 | 0.0381137  | JAG1     | ENSG00000101384 |
| 20 | 10593677 | 10594262 | 10594044 | 37 | 55 | 2 | 17.89962894 | 1.82E-14   | JAG1     | ENSG00000101384 |
| 20 | 10661774 | 10662267 | 10661989 | 63 | 92 | 0 | 89.17850845 | 6.96E-28   | JAG1     | ENSG00000101384 |

|    |          |          |          |    |    |    |             |             |           |                 |
|----|----------|----------|----------|----|----|----|-------------|-------------|-----------|-----------------|
| 20 | 10930532 | 10930799 | 10930665 | 8  | 11 | 3  | 2.876726079 | 0.0213797   | C20orf187 | ENSG00000125899 |
| 20 | 11810213 | 11810418 | 11810298 | 8  | 8  | 0  | 8.630178238 | 0.00235436  | BTBD3     | ENSG00000132640 |
| 20 | 12859488 | 12859846 | 12859667 | 14 | 18 | 2  | 6.073088389 | 0.000157975 | SPTLC3    | ENSG00000172296 |
| 20 | 12869900 | 12870102 | 12870001 | 8  | 8  | 2  | 2.876726079 | 0.0381137   | SPTLC3    | ENSG00000172296 |
| 20 | 13190487 | 13190739 | 13190584 | 8  | 10 | 1  | 5.273997812 | 0.00391723  | C20orf82  | ENSG00000101230 |
| 20 | 13213442 | 13214004 | 13213774 | 54 | 87 | 1  | 42.19198249 | 8.85E-25    | C20orf82  | ENSG00000101230 |
| 20 | 13215226 | 13215622 | 13215423 | 11 | 20 | 4  | 4.027416511 | 0.000652226 | C20orf82  | ENSG00000101230 |
| 20 | 13387606 | 13388111 | 13387938 | 8  | 17 | 8  | 1.917817386 | 0.0474153   |           | ENSG00000216261 |
| 20 | 13729401 | 13729858 | 13729580 | 28 | 42 | 3  | 10.30826845 | 5.31E-10    | C20orf7   | ENSG00000101247 |
| 20 | 13789845 | 13790116 | 13789980 | 10 | 11 | 1  | 5.753452158 | 0.00215302  | C20orf7   | ENSG00000101247 |
| 20 | 14520527 | 14520992 | 14520699 | 20 | 30 | 4  | 5.945233897 | 3.05E-06    |           | ENSG00000216947 |
| 20 | 14693425 | 14693735 | 14693580 | 10 | 12 | 3  | 3.116453252 | 0.0131971   | RPS10P2   | ENSG00000220654 |
| 20 | 14774216 | 14774580 | 14774395 | 9  | 16 | 7  | 2.037680973 | 0.0400399   | RPS10P2   | ENSG00000220654 |
| 20 | 15233021 | 15233472 | 15233221 | 37 | 49 | 0  | 47.94543465 | 2.51E-15    |           | ENSG00000222500 |
| 20 | 16400773 | 16401008 | 16400890 | 9  | 11 | 2  | 3.835634772 | 0.00800699  |           | ENSG00000221448 |
| 20 | 16658527 | 16658809 | 16658668 | 10 | 13 | 12 | 1.0326709   | 0.46514     | SNRPB2    | ENSG00000125870 |
| 20 | 16696990 | 16697264 | 16697136 | 11 | 14 | 2  | 4.794543465 | 0.00154571  | OTOR      | ENSG00000125879 |
| 20 | 17100402 | 17100755 | 17100576 | 8  | 13 | 2  | 4.474907234 | 0.00269459  |           | ENSG00000220540 |
| 20 | 17250843 | 17251058 | 17250935 | 9  | 9  | 1  | 4.794543465 | 0.00708517  | PCSK2     | ENSG00000125851 |
| 20 | 17253932 | 17254124 | 17254028 | 8  | 9  | 0  | 9.589086931 | 0.00120187  | PCSK2     | ENSG00000125851 |
| 20 | 17254193 | 17254686 | 17254439 | 40 | 55 | 1  | 26.84944341 | 1.26E-15    | PCSK2     | ENSG00000125851 |
| 20 | 17356366 | 17356618 | 17356492 | 16 | 16 | 3  | 4.075361945 | 0.00173346  | TCTE1P    | ENSG00000216727 |
| 20 | 17462157 | 17462496 | 17462326 | 8  | 14 | 2  | 4.794543465 | 0.00154571  | BFSP1     | ENSG00000125864 |
| 20 | 17465675 | 17465894 | 17465784 | 8  | 8  | 4  | 1.726035648 | 0.150596    | BFSP1     | ENSG00000125864 |
| 20 | 17497719 | 17497968 | 17497840 | 8  | 10 | 4  | 2.109599125 | 0.0694668   | DSTN      | ENSG00000125868 |
| 20 | 17501011 | 17501372 | 17501188 | 10 | 16 | 1  | 8.150723891 | 0.000101217 | DSTN      | ENSG00000125868 |
| 20 | 17533900 | 17534240 | 17534021 | 8  | 13 | 3  | 3.356180426 | 0.00805599  |           | ENSG00000219283 |
| 20 | 17778838 | 17779183 | 17779000 | 23 | 28 | 3  | 6.952088025 | 2.20E-06    |           | ENSG00000221220 |
| 20 | 17897556 | 17897934 | 17897689 | 11 | 18 | 11 | 1.518272097 | 0.122037    | C20orf72  | ENSG00000125871 |
| 20 | 17898024 | 17898854 | 17898446 | 27 | 76 | 6  | 10.54799562 | 1.85E-16    | C20orf72  | ENSG00000125871 |
| 20 | 17899642 | 17899830 | 17899756 | 9  | 9  | 2  | 3.19636231  | 0.0229249   | C20orf72  | ENSG00000125871 |
| 20 | 17986513 | 17986719 | 17986616 | 13 | 13 | 4  | 2.684944341 | 0.01921     | OVOL2     | ENSG00000125850 |
| 20 | 18517304 | 18517535 | 18517419 | 8  | 8  | 1  | 4.315089119 | 0.0127267   | DTD1      | ENSG00000125821 |
| 20 | 18722598 | 18722787 | 18722721 | 8  | 8  | 3  | 2.157544559 | 0.0836802   |           | ENSG00000179935 |

|    |          |          |          |     |     |     |             |             |          |                 |
|----|----------|----------|----------|-----|-----|-----|-------------|-------------|----------|-----------------|
| 20 | 18780942 | 18781339 | 18781160 | 27  | 36  | 0   | 35.47962164 | 1.57E-11    | C20orf78 | ENSG00000149443 |
| 20 | 19160499 | 19160678 | 19160588 | 8   | 8   | 2   | 2.876726079 | 0.0381137   | SLC24A3  | ENSG00000185052 |
| 20 | 19204500 | 19204776 | 19204609 | 9   | 13  | 6   | 1.917817386 | 0.0693353   |          | ENSG00000179447 |
| 20 | 20094197 | 20094388 | 20094292 | 8   | 8   | 3   | 2.157544559 | 0.0836802   | C20orf26 | ENSG00000089101 |
| 20 | 20289105 | 20289440 | 20289281 | 30  | 34  | 6   | 4.794543465 | 4.47E-06    | INSM1    | ENSG00000173404 |
| 20 | 20478410 | 20478671 | 20478540 | 12  | 13  | 3   | 3.356180426 | 0.00805599  |          | ENSG00000204746 |
| 20 | 20532146 | 20532338 | 20532212 | 12  | 12  | 1   | 6.232906505 | 0.00117736  | C20orf74 | ENSG00000188559 |
| 20 | 20701281 | 20701484 | 20701382 | 8   | 9   | 3   | 2.397271733 | 0.0539397   |          | ENSG00000209927 |
| 20 | 20708900 | 20709104 | 20709002 | 8   | 9   | 1   | 4.794543465 | 0.00708517  |          | ENSG00000209927 |
| 20 | 21208888 | 21209105 | 21208996 | 8   | 8   | 3   | 2.157544559 | 0.0836802   |          | ENSG00000217505 |
| 20 | 21209220 | 21209429 | 21209337 | 8   | 8   | 2   | 2.876726079 | 0.0381137   |          | ENSG00000217505 |
| 20 | 21425102 | 21425439 | 21425258 | 24  | 29  | 2   | 9.589086931 | 2.21E-07    | GSTM3P   | ENSG00000220966 |
| 20 | 22248949 | 22249190 | 22249053 | 9   | 10  | 0   | 10.54799562 | 0.000613541 | ST13P    | ENSG00000218837 |
| 20 | 22267843 | 22268047 | 22267945 | 9   | 10  | 2   | 3.515998541 | 0.0136204   | ST13P    | ENSG00000218837 |
| 20 | 22308126 | 22308475 | 22308296 | 26  | 31  | 5   | 5.114179696 | 6.54E-06    |          | ENSG00000204684 |
| 20 | 22979516 | 22979752 | 22979598 | 8   | 10  | 3   | 2.636998906 | 0.034203    | THBD     | ENSG00000178726 |
| 20 | 23029031 | 23029439 | 23029240 | 106 | 122 | 4   | 23.58915385 | 7.42E-31    | CD93     | ENSG00000125810 |
| 20 | 23068194 | 23068496 | 23068343 | 16  | 19  | 0   | 19.17817386 | 1.44E-06    |          | ENSG00000201527 |
| 20 | 23083687 | 23084047 | 23083866 | 19  | 26  | 1   | 12.94526736 | 1.86E-07    |          | ENSG00000201527 |
| 20 | 23375374 | 23375581 | 23375488 | 8   | 9   | 2   | 3.19636231  | 0.0229249   | CST11    | ENSG00000125831 |
| 20 | 23963706 | 23963896 | 23963781 | 9   | 9   | 2   | 3.19636231  | 0.0229249   |          | ENSG00000167390 |
| 20 | 24024439 | 24024668 | 24024531 | 9   | 11  | 0   | 11.50690432 | 0.000313206 |          | ENSG00000167390 |
| 20 | 24388348 | 24388649 | 24388499 | 13  | 16  | 1   | 8.150723891 | 0.000101217 | C20orf39 | ENSG00000101463 |
| 20 | 24859100 | 24859334 | 24859217 | 9   | 9   | 4   | 1.917817386 | 0.103282    | CST7     | ENSG00000077984 |
| 20 | 24881525 | 24881863 | 24881689 | 13  | 16  | 0   | 16.30144778 | 1.09E-05    | CST7     | ENSG00000077984 |
| 20 | 24923579 | 24923760 | 24923681 | 8   | 9   | 7   | 1.198635866 | 0.346278    | C20orf3  | ENSG00000101474 |
| 20 | 25005287 | 25005636 | 25005443 | 9   | 13  | 7   | 1.678090213 | 0.11195     | VSX1     | ENSG00000100987 |
| 20 | 25107547 | 25107964 | 25107725 | 10  | 17  | 3   | 4.315089119 | 0.00102271  | ENTPD6   | ENSG00000197586 |
| 20 | 25166382 | 25166806 | 25166561 | 12  | 21  | 1   | 10.54799562 | 4.43E-06    | PYGB     | ENSG00000100994 |
| 20 | 25624438 | 25625171 | 25624780 | 49  | 93  | 13  | 6.438386939 | 6.94E-16    | ZNF337   | ENSG00000130684 |
| 20 | 25679340 | 25679568 | 25679454 | 9   | 10  | 3   | 2.636998906 | 0.034203    |          | ENSG00000219137 |
| 20 | 26136709 | 26137600 | 26137343 | 37  | 94  | 98  | 0.920164907 | 0.718921    |          | ENSG00000207985 |
| 20 | 26137645 | 26137831 | 26137790 | 10  | 10  | 19  | 0.527399781 | 0.961307    |          | ENSG00000207985 |
| 20 | 26137835 | 26138636 | 26138029 | 71  | 124 | 104 | 1.141557968 | 0.157586    |          | ENSG00000207985 |

|    |          |          |          |     |     |     |             |             |                         |
|----|----------|----------|----------|-----|-----|-----|-------------|-------------|-------------------------|
| 20 | 26235622 | 26235945 | 26235783 | 9   | 9   | 6   | 1.369869562 | 0.253675    | ENSG00000207985         |
| 20 | 26244214 | 26244543 | 26244378 | 9   | 9   | 9   | 0.958908693 | 0.536911    | ENSG00000207985         |
| 20 | 26264992 | 26265174 | 26265141 | 12  | 12  | 21  | 0.566627864 | 0.952667    | ENSG00000207985         |
| 20 | 26266176 | 26266650 | 26266477 | 12  | 19  | 25  | 0.737622072 | 0.849755    | ENSG00000207985         |
| 20 | 26267261 | 26267599 | 26267430 | 204 | 205 | 174 | 1.128772519 | 0.11863     | ENSG00000207985         |
| 20 | 28197369 | 28197605 | 28197513 | 8   | 9   | 2   | 3.19636231  | 0.0229249   | FRG1B ENSG00000149531   |
| 20 | 28252104 | 28252425 | 28252273 | 15  | 19  | 14  | 1.278544924 | 0.231514    | MLLT10L ENSG00000217081 |
| 20 | 28260861 | 28261064 | 28260989 | 8   | 10  | 8   | 1.171999514 | 0.35773     | MLLT10L ENSG00000217081 |
| 20 | 28261911 | 28262117 | 28262034 | 10  | 10  | 3   | 2.636998906 | 0.034203    | MLLT10L ENSG00000217081 |
| 20 | 28266940 | 28267303 | 28267138 | 8   | 14  | 6   | 2.054804342 | 0.0480281   | MLLT10L ENSG00000217081 |
| 20 | 29268243 | 29268572 | 29268407 | 16  | 16  | 6   | 2.328778255 | 0.0221113   | DEFB115 ENSG00000215547 |
| 20 | 29274644 | 29274823 | 29274733 | 8   | 9   | 7   | 1.198635866 | 0.346278    | DEFB115 ENSG00000215547 |
| 20 | 29278742 | 29279073 | 29278907 | 15  | 16  | 15  | 1.018840486 | 0.477384    | DEFB115 ENSG00000215547 |
| 20 | 29282521 | 29282848 | 29282684 | 13  | 13  | 13  | 0.958908693 | 0.543805    | DEFB115 ENSG00000215547 |
| 20 | 29284139 | 29284464 | 29284301 | 9   | 11  | 12  | 0.885146486 | 0.620672    | DEFB115 ENSG00000215547 |
| 20 | 29287455 | 29287786 | 29287620 | 17  | 20  | 14  | 1.34247217  | 0.186867    | DEFB115 ENSG00000215547 |
| 20 | 29364775 | 29365121 | 29364948 | 12  | 15  | 7   | 1.917817386 | 0.0572317   | RPL31P3 ENSG00000217200 |
| 20 | 29552084 | 29552385 | 29552234 | 8   | 8   | 2   | 2.876726079 | 0.0381137   | HM13 ENSG00000101294    |
| 20 | 29598764 | 29599049 | 29598906 | 8   | 12  | 4   | 2.493162602 | 0.0299057   | ENSG00000219431         |
| 20 | 29624177 | 29624619 | 29624467 | 14  | 21  | 4   | 4.219198249 | 0.000390041 | ENSG00000201770         |
| 20 | 29644752 | 29645150 | 29644955 | 22  | 30  | 6   | 4.246595641 | 3.49E-05    | ID1 ENSG00000125968     |
| 20 | 29658765 | 29658970 | 29658909 | 8   | 9   | 5   | 1.598181155 | 0.170911    | ID1 ENSG00000125968     |
| 20 | 29729950 | 29730778 | 29730267 | 136 | 180 | 12  | 13.3509595  | 1.12E-38    | COX4I2 ENSG00000131055  |
| 20 | 29731433 | 29731751 | 29731597 | 12  | 16  | 7   | 2.037680973 | 0.0400399   | BCL2L1 ENSG00000171552  |
| 20 | 29731791 | 29732103 | 29731947 | 9   | 10  | 8   | 1.171999514 | 0.35773     | BCL2L1 ENSG00000171552  |
| 20 | 29732465 | 29732650 | 29732587 | 8   | 8   | 3   | 2.157544559 | 0.0836802   | BCL2L1 ENSG00000171552  |
| 20 | 29750727 | 29751222 | 29750873 | 15  | 24  | 2   | 7.990905775 | 4.56E-06    | BCL2L1 ENSG00000171552  |
| 20 | 29774154 | 29774678 | 29774523 | 9   | 19  | 8   | 2.130908207 | 0.0233014   | BCL2L1 ENSG00000171552  |
| 20 | 29775336 | 29775649 | 29775492 | 9   | 14  | 4   | 2.876726079 | 0.01219     | BCL2L1 ENSG00000171552  |
| 20 | 29790103 | 29790572 | 29790439 | 9   | 16  | 10  | 1.481949798 | 0.147733    | TPX2 ENSG00000088325    |
| 20 | 29790659 | 29791006 | 29790832 | 14  | 20  | 8   | 2.237453617 | 0.0160557   | TPX2 ENSG00000088325    |
| 20 | 29930939 | 29931295 | 29931117 | 9   | 14  | 6   | 2.054804342 | 0.0480281   | TTL9 ENSG00000131044    |
| 20 | 29949461 | 29949695 | 29949578 | 10  | 12  | 3   | 3.116453252 | 0.0131971   | ENSG00000199497         |
| 20 | 30002151 | 30002338 | 30002244 | 9   | 9   | 3   | 2.397271733 | 0.0539397   | PDRG1 ENSG00000088356   |

|    |          |          |          |     |     |   |             |             |          |                 |
|----|----------|----------|----------|-----|-----|---|-------------|-------------|----------|-----------------|
| 20 | 30082947 | 30083229 | 30083088 | 10  | 14  | 3 | 3.595907599 | 0.00486913  |          | ENSG00000212571 |
| 20 | 30092179 | 30092458 | 30092318 | 11  | 13  | 4 | 2.684944341 | 0.01921     |          | ENSG00000212571 |
| 20 | 30115841 | 30116193 | 30116017 | 10  | 16  | 7 | 2.037680973 | 0.0400399   | HCK      | ENSG00000101336 |
| 20 | 30160854 | 30161196 | 30161032 | 8   | 13  | 6 | 1.917817386 | 0.0693353   | TM9SF4   | ENSG00000101337 |
| 20 | 30187626 | 30187990 | 30187825 | 8   | 13  | 8 | 1.491635745 | 0.166708    | TM9SF4   | ENSG00000101337 |
| 20 | 30381537 | 30381882 | 30381696 | 8   | 12  | 2 | 4.155271003 | 0.0046638   | ASXL1    | ENSG00000171456 |
| 20 | 30746703 | 30746916 | 30746769 | 8   | 9   | 4 | 1.917817386 | 0.103282    |          | ENSG00000198179 |
| 20 | 31425235 | 31425677 | 31425498 | 15  | 26  | 5 | 4.315089119 | 8.98E-05    |          | ENSG00000131062 |
| 20 | 31452949 | 31453144 | 31453046 | 9   | 9   | 5 | 1.598181155 | 0.170911    | CDK5RAP1 | ENSG00000101391 |
| 20 | 31508682 | 31508863 | 31508789 | 8   | 8   | 6 | 1.232882605 | 0.333038    | SNTA1    | ENSG00000101400 |
| 20 | 31843575 | 31843775 | 31843685 | 8   | 8   | 3 | 2.157544559 | 0.0836802   |          | ENSG00000203434 |
| 20 | 31889599 | 31889934 | 31889766 | 16  | 21  | 3 | 5.273997812 | 0.00011662  | CHMP4B   | ENSG00000101421 |
| 20 | 31984990 | 31985174 | 31985099 | 8   | 9   | 2 | 3.19636231  | 0.0229249   |          | ENSG00000214200 |
| 20 | 32253095 | 32253274 | 32253195 | 8   | 8   | 0 | 8.630178238 | 0.00235436  |          | ENSG00000214185 |
| 20 | 32392112 | 32392538 | 32392318 | 10  | 18  | 2 | 6.073088389 | 0.000157975 |          | ENSG00000216910 |
| 20 | 32500689 | 32500868 | 32500811 | 8   | 8   | 0 | 8.630178238 | 0.00235436  |          | ENSG00000207997 |
| 20 | 32577290 | 32577820 | 32577665 | 16  | 34  | 8 | 3.729089362 | 3.70E-05    |          | ENSG00000206582 |
| 20 | 32673149 | 32673349 | 32673249 | 8   | 8   | 1 | 4.315089119 | 0.0127267   | PIGU     | ENSG00000101464 |
| 20 | 32924417 | 32924596 | 32924496 | 8   | 8   | 1 | 4.315089119 | 0.0127267   | GGT7     | ENSG00000131067 |
| 20 | 32959251 | 32959456 | 32959353 | 9   | 10  | 0 | 10.54799562 | 0.000613541 | ACSS2    | ENSG00000131069 |
| 20 | 33006688 | 33006883 | 33006785 | 8   | 9   | 1 | 4.794543465 | 0.00708517  | GSS      | ENSG00000100983 |
| 20 | 33006907 | 33007197 | 33007052 | 16  | 19  | 2 | 6.39272462  | 8.83E-05    | GSS      | ENSG00000100983 |
| 20 | 33335991 | 33336238 | 33336114 | 9   | 10  | 1 | 5.273997812 | 0.00391723  | EIF6     | ENSG00000126005 |
| 20 | 33358265 | 33358469 | 33358367 | 8   | 10  | 3 | 2.636998906 | 0.034203    | FAM83C   | ENSG00000125998 |
| 20 | 33359393 | 33359918 | 33359556 | 47  | 63  | 3 | 15.34253909 | 1.21E-15    | FAM83C   | ENSG00000125998 |
| 20 | 33463137 | 33463484 | 33463310 | 20  | 26  | 8 | 2.876726079 | 0.00140919  | UQCC     | ENSG00000101019 |
| 20 | 33502400 | 33502887 | 33502651 | 158 | 186 | 9 | 17.93159256 | 4.10E-43    |          | ENSG00000221763 |
| 20 | 33670917 | 33671116 | 33670993 | 8   | 8   | 1 | 4.315089119 | 0.0127267   | SPAG4    | ENSG00000061656 |
| 20 | 33792114 | 33792362 | 33792268 | 9   | 9   | 6 | 1.369869562 | 0.253675    | RBM39    | ENSG00000131051 |
| 20 | 33793947 | 33794176 | 33794061 | 10  | 12  | 7 | 1.558226626 | 0.152813    | RBM39    | ENSG00000131051 |
| 20 | 33797965 | 33798272 | 33798131 | 9   | 11  | 3 | 2.876726079 | 0.0213797   | RBM39    | ENSG00000131051 |
| 20 | 33904763 | 33905087 | 33904925 | 10  | 14  | 0 | 14.3836304  | 4.17E-05    |          | ENSG00000199676 |
| 20 | 34005659 | 34005917 | 34005757 | 10  | 14  | 3 | 3.595907599 | 0.00486913  | SCAND1   | ENSG00000171222 |
| 20 | 34102328 | 34102539 | 34102426 | 8   | 8   | 3 | 2.157544559 | 0.0836802   |          | ENSG00000220639 |

|    |          |          |          |     |     |    |             |             |           |                 |
|----|----------|----------|----------|-----|-----|----|-------------|-------------|-----------|-----------------|
| 20 | 34208079 | 34208267 | 34208245 | 8   | 9   | 5  | 1.598181155 | 0.170911    | EPB41L1   | ENSG00000088367 |
| 20 | 34461519 | 34461749 | 34461607 | 10  | 12  | 1  | 6.232906505 | 0.00117736  | DLGAP4    | ENSG00000080845 |
| 20 | 34618401 | 34618585 | 34618493 | 8   | 9   | 1  | 4.794543465 | 0.00708517  | MYL9      | ENSG00000101335 |
| 20 | 34647307 | 34647499 | 34647421 | 8   | 8   | 7  | 1.07877228  | 0.435076    | TGIF2     | ENSG00000118707 |
| 20 | 34667199 | 34667489 | 34667326 | 13  | 14  | 2  | 4.794543465 | 0.00154571  | C20orf24  | ENSG00000101084 |
| 20 | 34708296 | 34708869 | 34708693 | 42  | 54  | 6  | 7.534282588 | 7.46E-11    | SLA2      | ENSG00000101082 |
| 20 | 34832758 | 34833004 | 34832862 | 8   | 8   | 1  | 4.315089119 | 0.0127267   | DSN1      | ENSG00000149636 |
| 20 | 34897080 | 34897675 | 34897368 | 42  | 74  | 7  | 8.989768997 | 3.55E-15    | C20orf117 | ENSG00000149639 |
| 20 | 34923760 | 34924023 | 34923891 | 12  | 15  | 0  | 15.34253909 | 2.13E-05    | C20orf117 | ENSG00000149639 |
| 20 | 35144101 | 35144293 | 35144197 | 8   | 8   | 1  | 4.315089119 | 0.0127267   | RBL1      | ENSG00000080839 |
| 20 | 35239796 | 35239975 | 35239891 | 8   | 9   | 1  | 4.794543465 | 0.00708517  | RPN2      | ENSG00000118705 |
| 20 | 35239996 | 35240444 | 35240344 | 13  | 20  | 5  | 3.356180426 | 0.0017534   | RPN2      | ENSG00000118705 |
| 20 | 35240558 | 35240901 | 35240725 | 12  | 16  | 5  | 2.716907964 | 0.0109645   | RPN2      | ENSG00000118705 |
| 20 | 35254190 | 35254486 | 35254338 | 9   | 13  | 3  | 3.356180426 | 0.00805599  | C20orf132 | ENSG00000101353 |
| 20 | 35341072 | 35341316 | 35341194 | 8   | 9   | 6  | 1.369869562 | 0.253675    | MANBAL    | ENSG00000101363 |
| 20 | 35456535 | 35457104 | 35456856 | 152 | 186 | 1  | 89.6579628  | 2.29E-53    | SRC       | ENSG00000197122 |
| 20 | 35588136 | 35588439 | 35588270 | 10  | 13  | 1  | 6.712360851 | 0.000640982 | BLCAP     | ENSG00000166619 |
| 20 | 35964151 | 35964436 | 35964296 | 9   | 10  | 2  | 3.515998541 | 0.0136204   | VSTM2L    | ENSG00000132821 |
| 20 | 36201061 | 36201281 | 36201171 | 9   | 10  | 3  | 2.636998906 | 0.034203    | TGM2      | ENSG00000198959 |
| 20 | 36534480 | 36535010 | 36534745 | 9   | 20  | 7  | 2.517135319 | 0.00849957  | KIAA1219  | ENSG00000170471 |
| 20 | 36990355 | 36990559 | 36990457 | 8   | 9   | 0  | 9.589086931 | 0.00120187  | FAM83D    | ENSG00000101447 |
| 20 | 37573562 | 37573800 | 37573681 | 11  | 11  | 1  | 5.753452158 | 0.00215302  |           | ENSG00000210455 |
| 20 | 37874245 | 37874643 | 37874473 | 24  | 31  | 3  | 7.671269544 | 3.82E-07    | HSPEP1    | ENSG00000219645 |
| 20 | 38005317 | 38005572 | 38005442 | 8   | 9   | 1  | 4.794543465 | 0.00708517  | HSPEP1    | ENSG00000219645 |
| 20 | 38525512 | 38525757 | 38525669 | 12  | 14  | 1  | 7.191815198 | 0.00034761  | MAFB      | ENSG00000204103 |
| 20 | 38735556 | 38735774 | 38735715 | 10  | 12  | 7  | 1.558226626 | 0.152813    | MAFB      | ENSG00000204103 |
| 20 | 38803529 | 38803774 | 38803675 | 9   | 11  | 0  | 11.50690432 | 0.000313206 | MAFB      | ENSG00000204103 |
| 20 | 38965460 | 38965798 | 38965635 | 15  | 20  | 10 | 1.830643869 | 0.0454769   |           | ENSG00000222612 |
| 20 | 39008039 | 39008584 | 39008179 | 9   | 20  | 18 | 1.05984645  | 0.425516    |           | ENSG00000222612 |
| 20 | 39030762 | 39031069 | 39030915 | 9   | 12  | 9  | 1.246581301 | 0.295061    |           | ENSG00000222612 |
| 20 | 39040877 | 39041191 | 39041034 | 12  | 16  | 6  | 2.328778255 | 0.0221113   |           | ENSG00000222612 |
| 20 | 39052537 | 39053398 | 39052794 | 38  | 65  | 20 | 3.013713035 | 8.74E-07    |           | ENSG00000222612 |
| 20 | 39053990 | 39054169 | 39054079 | 8   | 8   | 4  | 1.726035648 | 0.150596    |           | ENSG00000222612 |
| 20 | 39065454 | 39065846 | 39065675 | 9   | 17  | 6  | 2.465765211 | 0.014729    |           | ENSG00000222612 |

|    |          |          |          |    |    |    |             |                  |                 |
|----|----------|----------|----------|----|----|----|-------------|------------------|-----------------|
| 20 | 39079299 | 39080124 | 39079874 | 19 | 43 | 18 | 2.220630658 | 0.0011336        | ENSG00000222612 |
| 20 | 39080825 | 39081004 | 39080934 | 8  | 8  | 0  | 8.630178238 | 0.00235436       | ENSG00000222612 |
| 20 | 39090381 | 39090743 | 39090511 | 8  | 13 | 7  | 1.678090213 | 0.11195 TOP1     | ENSG00000198900 |
| 20 | 39092576 | 39092906 | 39092728 | 10 | 13 | 6  | 1.917817386 | 0.0693353 TOP1   | ENSG00000198900 |
| 20 | 39113595 | 39113785 | 39113690 | 8  | 9  | 2  | 3.19636231  | 0.0229249 TOP1   | ENSG00000198900 |
| 20 | 39114317 | 39114645 | 39114481 | 11 | 16 | 7  | 2.037680973 | 0.0400399 TOP1   | ENSG00000198900 |
| 20 | 39139580 | 39139923 | 39139751 | 8  | 12 | 3  | 3.116453252 | 0.0131971 TOP1   | ENSG00000198900 |
| 20 | 39140455 | 39140805 | 39140630 | 11 | 15 | 13 | 1.095895649 | 0.398774 TOP1    | ENSG00000198900 |
| 20 | 39149130 | 39149452 | 39149294 | 8  | 13 | 10 | 1.220429246 | 0.306001 PLCG1   | ENSG00000124181 |
| 20 | 39154294 | 39154532 | 39154447 | 8  | 9  | 2  | 3.19636231  | 0.0229249 PLCG1  | ENSG00000124181 |
| 20 | 39157485 | 39157730 | 39157581 | 9  | 12 | 9  | 1.246581301 | 0.295061 PLCG1   | ENSG00000124181 |
| 20 | 39197098 | 39197723 | 39197263 | 13 | 26 | 10 | 2.353684974 | 0.00551687 PLCG1 | ENSG00000124181 |
| 20 | 39198600 | 39198961 | 39198790 | 8  | 14 | 5  | 2.397271733 | 0.0258078 PLCG1  | ENSG00000124181 |
| 20 | 39221789 | 39221978 | 39221883 | 8  | 9  | 0  | 9.589086931 | 0.00120187 PLCG1 | ENSG00000124181 |
| 20 | 39294362 | 39294604 | 39294483 | 8  | 10 | 7  | 1.318499453 | 0.269217 ZHX3    | ENSG00000174306 |
| 20 | 39294625 | 39294804 | 39294640 | 8  | 8  | 2  | 2.876726079 | 0.0381137 ZHX3   | ENSG00000174306 |
| 20 | 39311535 | 39311752 | 39311603 | 11 | 12 | 5  | 2.077635502 | 0.0577144        | ENSG00000223210 |
| 20 | 39312204 | 39312400 | 39312291 | 8  | 9  | 3  | 2.397271733 | 0.0539397        | ENSG00000223210 |
| 20 | 39358655 | 39358853 | 39358768 | 8  | 9  | 3  | 2.397271733 | 0.0539397 ZHX3   | ENSG00000174306 |
| 20 | 39380004 | 39380220 | 39380112 | 8  | 9  | 11 | 0.799090578 | 0.702688         | ENSG00000218353 |
| 20 | 39402157 | 39402624 | 39402336 | 16 | 26 | 13 | 1.849323908 | 0.0263429 LPIN3  | ENSG00000132793 |
| 20 | 39402755 | 39403016 | 39402858 | 11 | 13 | 6  | 1.917817386 | 0.0693353 LPIN3  | ENSG00000132793 |
| 20 | 39453846 | 39454279 | 39454008 | 10 | 18 | 8  | 2.024362796 | 0.0334397        | ENSG00000219721 |
| 20 | 39455480 | 39455806 | 39455637 | 19 | 23 | 7  | 2.876726079 | 0.00239423       | ENSG00000219721 |
| 20 | 39461648 | 39461925 | 39461786 | 10 | 13 | 11 | 1.118726809 | 0.38479          | ENSG00000219721 |
| 20 | 39538135 | 39538588 | 39538445 | 15 | 24 | 11 | 1.997726444 | 0.0196649        | ENSG00000217365 |
| 20 | 39580286 | 39580547 | 39580388 | 9  | 11 | 3  | 2.876726079 | 0.0213797        | ENSG00000196775 |
| 20 | 39586976 | 39587157 | 39587087 | 8  | 8  | 1  | 4.315089119 | 0.0127267        | ENSG00000196775 |
| 20 | 39679059 | 39679610 | 39679238 | 8  | 17 | 7  | 2.157544559 | 0.0276499 CHD6   | ENSG00000124177 |
| 20 | 39680287 | 39680559 | 39680439 | 9  | 11 | 6  | 1.643843474 | 0.137712 CHD6    | ENSG00000124177 |
| 20 | 39712322 | 39712926 | 39712763 | 24 | 39 | 23 | 1.598181155 | 0.0315891 CHD6   | ENSG00000124177 |
| 20 | 39713265 | 39713609 | 39713447 | 8  | 12 | 11 | 1.038817751 | 0.460341 CHD6    | ENSG00000124177 |
| 20 | 39752462 | 39752724 | 39752593 | 8  | 10 | 5  | 1.757999271 | 0.121253         | ENSG00000210486 |
| 20 | 39755370 | 39755815 | 39755543 | 23 | 33 | 15 | 2.037680973 | 0.00711556       | ENSG00000199287 |

|    |          |          |          |    |     |    |             |            |                 |
|----|----------|----------|----------|----|-----|----|-------------|------------|-----------------|
| 20 | 39800730 | 39801206 | 39800909 | 15 | 26  | 12 | 1.991579593 | 0.0165204  | ENSG00000212224 |
| 20 | 39833480 | 39833814 | 39833647 | 10 | 15  | 0  | 15.34253909 | 2.13E-05   | ENSG00000212224 |
| 20 | 39910376 | 39910827 | 39910555 | 8  | 17  | 4  | 3.452071295 | 0.00292757 | ENSG00000212224 |
| 20 | 39927896 | 39928425 | 39928211 | 84 | 103 | 5  | 16.62108401 | 1.47E-24   | ENSG00000220309 |
| 20 | 40018325 | 40018638 | 40018482 | 8  | 12  | 9  | 1.246581301 | 0.295061   | ENSG00000220309 |
| 20 | 40138130 | 40138397 | 40138248 | 8  | 9   | 1  | 4.794543465 | 0.00708517 | ENSG00000220309 |
| 20 | 40248575 | 40248798 | 40248679 | 9  | 9   | 5  | 1.598181155 | 0.170911   | ENSG00000220309 |
| 20 | 40249577 | 40249816 | 40249696 | 8  | 11  | 13 | 0.821921737 | 0.693119   | ENSG00000220309 |
| 20 | 40250360 | 40250559 | 40250459 | 8  | 9   | 6  | 1.369869562 | 0.253675   | ENSG00000220309 |
| 20 | 40252192 | 40252836 | 40252359 | 12 | 25  | 23 | 1.038817751 | 0.445246   | ENSG00000220309 |
| 20 | 40253247 | 40253927 | 40253751 | 15 | 35  | 36 | 0.932992242 | 0.616517   | ENSG00000220309 |
| 20 | 40254172 | 40254563 | 40254420 | 8  | 16  | 9  | 1.630144778 | 0.102169   | ENSG00000220309 |
| 20 | 40254576 | 40254895 | 40254718 | 9  | 14  | 13 | 1.027402171 | 0.469541   | ENSG00000220309 |
| 20 | 40255063 | 40255533 | 40255354 | 9  | 18  | 15 | 1.138704073 | 0.348127   | ENSG00000220309 |
| 20 | 40258046 | 40258306 | 40258152 | 10 | 10  | 4  | 2.109599125 | 0.0694668  | ENSG00000220309 |
| 20 | 40260881 | 40261219 | 40261050 | 11 | 16  | 9  | 1.630144778 | 0.102169   | ENSG00000220309 |
| 20 | 40261603 | 40261817 | 40261771 | 8  | 11  | 14 | 0.767126954 | 0.756447   | ENSG00000220309 |
| 20 | 40263610 | 40263917 | 40263789 | 10 | 14  | 9  | 1.43836304  | 0.179537   | ENSG00000220309 |
| 20 | 40266381 | 40266766 | 40266560 | 15 | 23  | 12 | 1.770292972 | 0.0429088  | ENSG00000220309 |
| 20 | 40267836 | 40268293 | 40268064 | 8  | 16  | 16 | 0.958908693 | 0.548325   | ENSG00000220309 |
| 20 | 40276675 | 40276892 | 40276783 | 9  | 9   | 3  | 2.397271733 | 0.0539397  | ENSG00000220309 |
| 20 | 40286073 | 40286288 | 40286180 | 8  | 9   | 0  | 9.589086931 | 0.00120187 | ENSG00000220309 |
| 20 | 40343253 | 40343526 | 40343389 | 19 | 22  | 2  | 7.351633313 | 1.51E-05   | ENSG00000220309 |
| 20 | 40438076 | 40438363 | 40438210 | 9  | 14  | 7  | 1.797953799 | 0.0806593  | ENSG00000217390 |
| 20 | 40440641 | 40440937 | 40440769 | 11 | 14  | 11 | 1.198635866 | 0.315918   | ENSG00000217390 |
| 20 | 40441595 | 40441815 | 40441705 | 9  | 10  | 6  | 1.506856518 | 0.188853   | ENSG00000217390 |
| 20 | 40444503 | 40444834 | 40444679 | 13 | 14  | 7  | 1.797953799 | 0.0806593  | ENSG00000217390 |
| 20 | 40445521 | 40446029 | 40445655 | 8  | 17  | 7  | 2.157544559 | 0.0276499  | ENSG00000217390 |
| 20 | 40528775 | 40528960 | 40528867 | 8  | 8   | 1  | 4.315089119 | 0.0127267  | ENSG00000217390 |
| 20 | 40530845 | 40531192 | 40530989 | 21 | 26  | 2  | 8.630178238 | 1.37E-06   | ENSG00000217390 |
| 20 | 40531428 | 40531824 | 40531596 | 31 | 43  | 2  | 14.06399416 | 3.68E-11   | ENSG00000217390 |
| 20 | 40532082 | 40532516 | 40532207 | 11 | 18  | 7  | 2.277408146 | 0.0188653  | ENSG00000217390 |
| 20 | 40545839 | 40546115 | 40545995 | 10 | 13  | 11 | 1.118726809 | 0.38479    | ENSG00000217390 |
| 20 | 40592624 | 40592847 | 40592705 | 8  | 10  | 5  | 1.757999271 | 0.121253   | ENSG00000217390 |



|    |          |          |          |    |    |    |             |             |           |                 |
|----|----------|----------|----------|----|----|----|-------------|-------------|-----------|-----------------|
| 20 | 40592898 | 40593233 | 40593069 | 12 | 16 | 7  | 2.037680973 | 0.0400399   |           | ENSG00000217390 |
| 20 | 40610984 | 40611194 | 40611089 | 8  | 10 | 6  | 1.506856518 | 0.188853    |           | ENSG00000217390 |
| 20 | 40636363 | 40636614 | 40636488 | 9  | 10 | 10 | 0.958908693 | 0.538751    |           | ENSG00000217390 |
| 20 | 40662993 | 40663334 | 40663163 | 9  | 12 | 5  | 2.077635502 | 0.0577144   |           | ENSG00000217390 |
| 20 | 40685120 | 40685427 | 40685273 | 12 | 14 | 4  | 2.876726079 | 0.01219     |           | ENSG00000217390 |
| 20 | 40703869 | 40704168 | 40704018 | 8  | 12 | 5  | 2.077635502 | 0.0577144   |           | ENSG00000217390 |
| 20 | 41378652 | 41378995 | 41378828 | 8  | 12 | 1  | 6.232906505 | 0.00117736  |           | ENSG00000223025 |
| 20 | 41591617 | 41591856 | 41591742 | 18 | 18 | 0  | 18.21926517 | 2.83E-06    | L3MBTL    | ENSG00000185513 |
| 20 | 41790073 | 41790295 | 41790201 | 13 | 15 | 4  | 3.068507818 | 0.0076507   | GTSF1L    | ENSG00000124196 |
| 20 | 41911921 | 41912203 | 41912093 | 11 | 14 | 4  | 2.876726079 | 0.01219     |           | ENSG00000206801 |
| 20 | 41988449 | 41988638 | 41988530 | 8  | 8  | 4  | 1.726035648 | 0.150596    | TOX2      | ENSG00000124191 |
| 20 | 42014776 | 42015064 | 42014930 | 9  | 11 | 2  | 3.835634772 | 0.00800699  | TOX2      | ENSG00000124191 |
| 20 | 42152025 | 42152510 | 42152266 | 15 | 28 | 6  | 3.972621728 | 9.48E-05    |           | ENSG00000222893 |
| 20 | 42152838 | 42153148 | 42152994 | 9  | 13 | 1  | 6.712360851 | 0.000640982 |           | ENSG00000222893 |
| 20 | 42178624 | 42179045 | 42178898 | 9  | 17 | 6  | 2.465765211 | 0.014729    | JPH2      | ENSG00000149596 |
| 20 | 42252368 | 42252552 | 42252475 | 8  | 8  | 8  | 0.958908693 | 0.534974    | JPH2      | ENSG00000149596 |
| 20 | 42265698 | 42265890 | 42265721 | 8  | 9  | 1  | 4.794543465 | 0.00708517  | C20orf111 | ENSG00000132823 |
| 20 | 42266253 | 42266512 | 42266382 | 8  | 9  | 5  | 1.598181155 | 0.170911    | C20orf111 | ENSG00000132823 |
| 20 | 42270815 | 42271064 | 42270932 | 9  | 11 | 4  | 2.301380863 | 0.0459276   | C20orf111 | ENSG00000132823 |
| 20 | 42271375 | 42271628 | 42271501 | 8  | 10 | 2  | 3.515998541 | 0.0136204   | C20orf111 | ENSG00000132823 |
| 20 | 42272994 | 42273195 | 42273094 | 8  | 9  | 9  | 0.958908693 | 0.536911    | C20orf111 | ENSG00000132823 |
| 20 | 42364528 | 42364714 | 42364621 | 8  | 9  | 1  | 4.794543465 | 0.00708517  | C20orf142 | ENSG00000197296 |
| 20 | 42381907 | 42382149 | 42382028 | 8  | 8  | 5  | 1.43836304  | 0.235762    | C20orf142 | ENSG00000197296 |
| 20 | 42392889 | 42393133 | 42393011 | 17 | 18 | 1  | 9.109632584 | 2.91E-05    | R3HDML    | ENSG00000101074 |
| 20 | 42450610 | 42450834 | 42450731 | 9  | 10 | 5  | 1.757999271 | 0.121253    | HNF4A     | ENSG00000101076 |
| 20 | 42469552 | 42469754 | 42469651 | 9  | 10 | 2  | 3.515998541 | 0.0136204   | HNF4A     | ENSG00000101076 |
| 20 | 42665614 | 42665882 | 42665763 | 11 | 14 | 5  | 2.397271733 | 0.0258078   | PKIG      | ENSG00000168734 |
| 20 | 42703400 | 42703669 | 42703534 | 14 | 15 | 4  | 3.068507818 | 0.0076507   | ADA       | ENSG00000196839 |
| 20 | 42740258 | 42740742 | 42740523 | 53 | 80 | 3  | 19.41790103 | 2.58E-20    |           | ENSG00000132832 |
| 20 | 42747349 | 42747528 | 42747438 | 8  | 8  | 4  | 1.726035648 | 0.150596    |           | ENSG00000132832 |
| 20 | 42809236 | 42809479 | 42809309 | 8  | 10 | 3  | 2.636998906 | 0.034203    | KCNK15    | ENSG00000124249 |
| 20 | 42809592 | 42809861 | 42809699 | 9  | 10 | 5  | 1.757999271 | 0.121253    | KCNK15    | ENSG00000124249 |
| 20 | 42849976 | 42850156 | 42850146 | 8  | 8  | 4  | 1.726035648 | 0.150596    | RIMS4     | ENSG00000101098 |
| 20 | 42951130 | 42951312 | 42951239 | 9  | 9  | 1  | 4.794543465 | 0.00708517  | YWHAB     | ENSG00000166913 |

|    |          |          |          |    |     |     |             |             |         |                 |
|----|----------|----------|----------|----|-----|-----|-------------|-------------|---------|-----------------|
| 20 | 43061977 | 43062316 | 43062146 | 13 | 17  | 0   | 17.26035648 | 5.54E-06    | STK4    | ENSG00000101109 |
| 20 | 43401259 | 43401508 | 43401386 | 10 | 13  | 1   | 6.712360851 | 0.000640982 | SDC4    | ENSG00000124145 |
| 20 | 43405542 | 43405749 | 43405661 | 9  | 10  | 12  | 0.811384279 | 0.697544    | SDC4    | ENSG00000124145 |
| 20 | 43407795 | 43407979 | 43407887 | 10 | 10  | 3   | 2.636998906 | 0.034203    | SDC4    | ENSG00000124145 |
| 20 | 43425248 | 43425440 | 43425344 | 8  | 11  | 4   | 2.301380863 | 0.0459276   | SYS1    | ENSG00000198641 |
| 20 | 43436019 | 43436221 | 43436120 | 8  | 8   | 0   | 8.630178238 | 0.00235436  | TP53TG5 | ENSG00000124251 |
| 20 | 43787985 | 43788185 | 43788098 | 8  | 8   | 4   | 1.726035648 | 0.150596    | SPINT4  | ENSG00000149651 |
| 20 | 43840997 | 43841395 | 43841176 | 12 | 19  | 4   | 3.835634772 | 0.00108365  |         | ENSG00000210634 |
| 20 | 44034230 | 44034474 | 44034362 | 12 | 15  | 5   | 2.557089848 | 0.0169197   | ZNF335  | ENSG00000198026 |
| 20 | 44055630 | 44055965 | 44055797 | 13 | 18  | 6   | 2.602752167 | 0.00970422  | MMP9    | ENSG00000100985 |
| 20 | 44057401 | 44057957 | 44057791 | 42 | 53  | 7   | 6.472633678 | 5.75E-10    | MMP9    | ENSG00000100985 |
| 20 | 44066858 | 44067050 | 44066954 | 8  | 8   | 4   | 1.726035648 | 0.150596    | MMP9    | ENSG00000100985 |
| 20 | 44190571 | 44190761 | 44190666 | 8  | 8   | 2   | 2.876726079 | 0.0381137   | CD40    | ENSG00000101017 |
| 20 | 44317599 | 44317850 | 44317753 | 12 | 14  | 1   | 7.191815198 | 0.00034761  | CDH22   | ENSG00000149654 |
| 20 | 44675807 | 44676047 | 44675927 | 10 | 11  | 2   | 3.835634772 | 0.00800699  | SLC13A3 | ENSG00000158296 |
| 20 | 44751389 | 44751618 | 44751555 | 8  | 9   | 3   | 2.397271733 | 0.0539397   | TP53RK  | ENSG00000172315 |
| 20 | 44809995 | 44810252 | 44810109 | 10 | 10  | 5   | 1.757999271 | 0.121253    | SLC2A10 | ENSG00000197496 |
| 20 | 45203656 | 45205201 | 45204881 | 12 | 68  | 66  | 0.987532833 | 0.528765    |         | ENSG00000215450 |
| 20 | 45211786 | 45212507 | 45212334 | 20 | 39  | 28  | 1.32263268  | 0.122619    |         | ENSG00000215450 |
| 20 | 45219648 | 45220274 | 45219826 | 13 | 33  | 38  | 0.835971681 | 0.778572    |         | ENSG00000215450 |
| 20 | 45220480 | 45220705 | 45220592 | 11 | 12  | 15  | 0.779113313 | 0.750998    |         | ENSG00000215450 |
| 20 | 45221349 | 45221573 | 45221479 | 8  | 11  | 14  | 0.767126954 | 0.756447    |         | ENSG00000215450 |
| 20 | 45229893 | 45230279 | 45230130 | 9  | 15  | 16  | 0.902502299 | 0.616352    |         | ENSG00000215450 |
| 20 | 45230752 | 45231389 | 45231227 | 17 | 38  | 43  | 0.849941796 | 0.771039    |         | ENSG00000215450 |
| 20 | 45231536 | 45231726 | 45231700 | 8  | 9   | 14  | 0.639272462 | 0.869513    |         | ENSG00000215450 |
| 20 | 45231731 | 45232063 | 45231908 | 11 | 15  | 8   | 1.704726565 | 0.0916153   |         | ENSG00000215450 |
| 20 | 45232248 | 45232485 | 45232323 | 8  | 9   | 10  | 0.871735176 | 0.624623    |         | ENSG00000215450 |
| 20 | 45232706 | 45233961 | 45233372 | 12 | 57  | 82  | 0.670080773 | 0.990994    |         | ENSG00000215450 |
| 20 | 45234405 | 45235065 | 45234677 | 10 | 28  | 28  | 0.958908693 | 0.563199    |         | ENSG00000215450 |
| 20 | 45235182 | 45235406 | 45235298 | 10 | 12  | 15  | 0.779113313 | 0.750998    |         | ENSG00000215450 |
| 20 | 45235425 | 45238106 | 45235764 | 21 | 138 | 144 | 0.919229713 | 0.761087    |         | ENSG00000215450 |
| 20 | 45238490 | 45238784 | 45238638 | 12 | 14  | 13  | 1.027402171 | 0.469541    |         | ENSG00000215450 |
| 20 | 45239390 | 45239784 | 45239673 | 11 | 19  | 22  | 0.833833646 | 0.725376    |         | ENSG00000215450 |
| 20 | 45240353 | 45240790 | 45240611 | 15 | 24  | 21  | 1.089668969 | 0.382599    |         | ENSG00000215450 |

|    |          |          |          |    |     |     |             |             |                 |
|----|----------|----------|----------|----|-----|-----|-------------|-------------|-----------------|
| 20 | 45240817 | 45241170 | 45240993 | 11 | 17  | 13  | 1.232882605 | 0.274309    | ENSG00000215450 |
| 20 | 45241509 | 45241900 | 45241722 | 12 | 19  | 28  | 0.66131634  | 0.92595     | ENSG00000215450 |
| 20 | 45242318 | 45242509 | 45242442 | 9  | 9   | 5   | 1.598181155 | 0.170911    | ENSG00000215450 |
| 20 | 45242661 | 45244086 | 45243515 | 30 | 98  | 104 | 0.904113911 | 0.764311    | ENSG00000215450 |
| 20 | 45245084 | 45245328 | 45245206 | 12 | 12  | 10  | 1.133255728 | 0.37674     | ENSG00000215450 |
| 20 | 45245550 | 45245985 | 45245806 | 15 | 24  | 26  | 0.887878419 | 0.666463    | ENSG00000215450 |
| 20 | 45246817 | 45247097 | 45246957 | 13 | 17  | 21  | 0.784561658 | 0.779771    | ENSG00000215450 |
| 20 | 45247110 | 45247298 | 45247195 | 8  | 8   | 13  | 0.616441303 | 0.878084    | ENSG00000215450 |
| 20 | 45247708 | 45248422 | 45248210 | 27 | 51  | 27  | 1.78083043  | 0.00565068  | ENSG00000215450 |
| 20 | 45248660 | 45248900 | 45248795 | 9  | 11  | 8   | 1.278544924 | 0.28289     | ENSG00000215450 |
| 20 | 45249428 | 45250162 | 45249983 | 15 | 39  | 32  | 1.162313567 | 0.259084    | ENSG00000215450 |
| 20 | 45250219 | 45250431 | 45250325 | 9  | 11  | 19  | 0.575345216 | 0.94039     | ENSG00000215450 |
| 20 | 45250442 | 45250946 | 45250767 | 12 | 23  | 40  | 0.561312406 | 0.989347    | ENSG00000215450 |
| 20 | 45251083 | 45251643 | 45251375 | 9  | 22  | 30  | 0.711448385 | 0.894789    | ENSG00000215450 |
| 20 | 45252082 | 45254291 | 45253311 | 27 | 125 | 94  | 1.27181574  | 0.0373931   | ENSG00000215450 |
| 20 | 45255523 | 45255718 | 45255639 | 9  | 11  | 3   | 2.876726079 | 0.0213797   | ENSG00000215450 |
| 20 | 45255806 | 45256018 | 45255956 | 9  | 11  | 8   | 1.278544924 | 0.28289     | ENSG00000215450 |
| 20 | 45256104 | 45256295 | 45256251 | 8  | 10  | 5   | 1.757999271 | 0.121253    | ENSG00000215450 |
| 20 | 45256350 | 45256640 | 45256495 | 13 | 19  | 11  | 1.598181155 | 0.0927758   | ENSG00000215450 |
| 20 | 45257033 | 45259116 | 45258626 | 62 | 193 | 133 | 1.388270794 | 0.00159859  | ENSG00000215450 |
| 20 | 45259126 | 45259708 | 45259351 | 8  | 21  | 33  | 0.620470331 | 0.962281    | ENSG00000215450 |
| 20 | 45260396 | 45261013 | 45260585 | 18 | 42  | 40  | 1.005684727 | 0.488979    | ENSG00000215450 |
| 20 | 45262682 | 45262935 | 45262817 | 12 | 15  | 16  | 0.902502299 | 0.616352    | ENSG00000215450 |
| 20 | 45263115 | 45263808 | 45263538 | 16 | 36  | 31  | 1.108738176 | 0.332755    | ENSG00000215450 |
| 20 | 45264016 | 45264335 | 45264175 | 13 | 16  | 6   | 2.328778255 | 0.0221113   | ENSG00000215450 |
| 20 | 45264712 | 45265295 | 45265172 | 15 | 32  | 33  | 0.930705496 | 0.615627    | ENSG00000215450 |
| 20 | 45265743 | 45266050 | 45265896 | 8  | 11  | 9   | 1.150690432 | 0.367789    | ENSG00000215450 |
| 20 | 45266233 | 45267027 | 45266630 | 56 | 106 | 52  | 1.935910003 | 2.44E-05    | ENSG00000215450 |
| 20 | 45267435 | 45268214 | 45268035 | 42 | 100 | 57  | 1.669823759 | 0.000740438 | ENSG00000215450 |
| 20 | 45269027 | 45269628 | 45269238 | 14 | 34  | 41  | 0.799090578 | 0.837938    | ENSG00000215450 |
| 20 | 45270535 | 45270809 | 45270690 | 12 | 13  | 7   | 1.678090213 | 0.11195     | ENSG00000215450 |
| 20 | 45271066 | 45271344 | 45271205 | 11 | 14  | 24  | 0.575345216 | 0.958881    | ENSG00000215450 |
| 20 | 45271420 | 45272597 | 45272241 | 15 | 56  | 72  | 0.748736925 | 0.950334    | ENSG00000215450 |
| 20 | 45272713 | 45273384 | 45273042 | 17 | 33  | 42  | 0.758206874 | 0.887959    | ENSG00000215450 |

|    |          |          |          |    |     |    |             |           |                        |
|----|----------|----------|----------|----|-----|----|-------------|-----------|------------------------|
| 20 | 45273386 | 45273969 | 45273575 | 13 | 30  | 38 | 0.762209474 | 0.872381  | ENSG00000215450        |
| 20 | 45274018 | 45274271 | 45274109 | 10 | 11  | 11 | 0.958908693 | 0.540507  | ENSG00000215450        |
| 20 | 45274525 | 45274833 | 45274679 | 13 | 18  | 14 | 1.214617678 | 0.282961  | ENSG00000215450        |
| 20 | 45274853 | 45275375 | 45275196 | 11 | 24  | 22 | 1.042292058 | 0.441692  | ENSG00000215450        |
| 20 | 45275549 | 45276700 | 45275728 | 13 | 59  | 54 | 1.046082211 | 0.403775  | ENSG00000215450        |
| 20 | 45277717 | 45278260 | 45277856 | 9  | 20  | 20 | 0.958908693 | 0.553754  | ENSG00000215450        |
| 20 | 45278955 | 45279675 | 45279134 | 20 | 45  | 47 | 0.918954164 | 0.659122  | ENSG00000215450        |
| 20 | 45279867 | 45281063 | 45280342 | 18 | 64  | 45 | 1.354979675 | 0.0553765 | ENSG00000215450        |
| 20 | 45281559 | 45282759 | 45282345 | 25 | 80  | 71 | 1.07877228  | 0.318879  | ENSG00000215450        |
| 20 | 45283503 | 45283870 | 45283632 | 10 | 16  | 18 | 0.857970936 | 0.678066  | ENSG00000215450        |
| 20 | 45284028 | 45284297 | 45284162 | 11 | 14  | 9  | 1.43836304  | 0.179537  | ENSG00000215450        |
| 20 | 45284528 | 45285213 | 45285058 | 13 | 28  | 34 | 0.794524346 | 0.821881  | ENSG00000215450        |
| 20 | 45285763 | 45286479 | 45286087 | 14 | 38  | 41 | 0.890415215 | 0.699622  | ENSG00000215450        |
| 20 | 45286762 | 45287283 | 45286998 | 10 | 22  | 24 | 0.882195998 | 0.668517  | ENSG00000215450        |
| 20 | 45288161 | 45288345 | 45288257 | 8  | 9   | 9  | 0.958908693 | 0.536911  | ENSG00000215450        |
| 20 | 45288350 | 45289713 | 45288584 | 14 | 68  | 61 | 1.067172578 | 0.35416   | ENSG00000215450        |
| 20 | 45289721 | 45289985 | 45289896 | 8  | 11  | 14 | 0.767126954 | 0.756447  | ENSG00000215450        |
| 20 | 45290200 | 45290482 | 45290324 | 9  | 14  | 16 | 0.846095906 | 0.68298   | ENSG00000215450        |
| 20 | 45290503 | 45290760 | 45290628 | 8  | 11  | 22 | 0.500300188 | 0.978352  | ENSG00000215450        |
| 20 | 45290867 | 45291241 | 45291090 | 8  | 15  | 20 | 0.730597099 | 0.831283  | ENSG00000215450        |
| 20 | 45291363 | 45292160 | 45291741 | 15 | 40  | 35 | 1.092090456 | 0.34838   | ENSG00000215450        |
| 20 | 45292181 | 45292543 | 45292397 | 8  | 14  | 10 | 1.307602763 | 0.244096  | ENSG00000215450        |
| 20 | 45292714 | 45293517 | 45293056 | 17 | 43  | 33 | 1.240940662 | 0.169645  | ENSG00000215450        |
| 20 | 45293910 | 45294182 | 45294037 | 11 | 14  | 22 | 0.625375235 | 0.925815  | ENSG00000215450        |
| 20 | 45294535 | 45294998 | 45294722 | 11 | 22  | 18 | 1.160784207 | 0.312473  | ENSG00000215450        |
| 20 | 45295633 | 45296301 | 45295797 | 17 | 33  | 28 | 1.124237778 | 0.319632  | ENSG00000215450        |
| 20 | 45296494 | 45296904 | 45296725 | 10 | 21  | 15 | 1.318499453 | 0.19542   | ENSG00000215450        |
| 20 | 45297807 | 45300372 | 45299298 | 30 | 197 | 91 | 2.063738274 | 1.31E-09  | ENSG00000215450        |
| 20 | 45300524 | 45301183 | 45300951 | 17 | 38  | 30 | 1.206369001 | 0.215257  | ENSG00000215450        |
| 20 | 45301371 | 45302031 | 45301852 | 12 | 31  | 36 | 0.829326437 | 0.782137  | ENSG00000215450        |
| 20 | 45303462 | 45304003 | 45303791 | 14 | 30  | 38 | 0.762209474 | 0.872381  | ZMYND8 ENSG00000101040 |
| 20 | 45304253 | 45304623 | 45304449 | 14 | 20  | 14 | 1.34247217  | 0.186867  | ZMYND8 ENSG00000101040 |
| 20 | 45304699 | 45305078 | 45304899 | 15 | 23  | 30 | 0.742380924 | 0.865876  | ZMYND8 ENSG00000101040 |
| 20 | 45305095 | 45307049 | 45305451 | 16 | 99  | 73 | 1.295822558 | 0.0442102 | ZMYND8 ENSG00000101040 |

|    |          |          |          |    |     |    |             |           |        |                 |
|----|----------|----------|----------|----|-----|----|-------------|-----------|--------|-----------------|
| 20 | 45308152 | 45309422 | 45308558 | 15 | 61  | 56 | 1.043023491 | 0.408384  | ZMYND8 | ENSG00000101040 |
| 20 | 45309797 | 45310175 | 45309961 | 9  | 16  | 18 | 0.857970936 | 0.678066  | ZMYND8 | ENSG00000101040 |
| 20 | 45310500 | 45311600 | 45311040 | 14 | 54  | 53 | 0.976666261 | 0.548697  | ZMYND8 | ENSG00000101040 |
| 20 | 45311787 | 45312593 | 45312115 | 17 | 45  | 30 | 1.42289677  | 0.0615964 | ZMYND8 | ENSG00000101040 |
| 20 | 45312611 | 45313031 | 45312852 | 15 | 26  | 27 | 0.924661954 | 0.614379  | ZMYND8 | ENSG00000101040 |
| 20 | 45313246 | 45313558 | 45313390 | 10 | 12  | 10 | 1.133255728 | 0.37674   | ZMYND8 | ENSG00000101040 |
| 20 | 45313964 | 45314184 | 45314017 | 9  | 11  | 7  | 1.43836304  | 0.204844  | ZMYND8 | ENSG00000101040 |
| 20 | 45314457 | 45314895 | 45314716 | 12 | 24  | 23 | 0.998863222 | 0.500802  | ZMYND8 | ENSG00000101040 |
| 20 | 45315636 | 45316198 | 45316025 | 10 | 22  | 33 | 0.648673528 | 0.948418  | ZMYND8 | ENSG00000101040 |
| 20 | 45316301 | 45316823 | 45316495 | 13 | 30  | 38 | 0.762209474 | 0.872381  | ZMYND8 | ENSG00000101040 |
| 20 | 45317354 | 45317669 | 45317509 | 13 | 16  | 21 | 0.740974899 | 0.826507  | ZMYND8 | ENSG00000101040 |
| 20 | 45318652 | 45319491 | 45319065 | 21 | 48  | 41 | 1.118726809 | 0.295257  | ZMYND8 | ENSG00000101040 |
| 20 | 45320191 | 45320514 | 45320352 | 9  | 14  | 11 | 1.198635866 | 0.315918  | ZMYND8 | ENSG00000101040 |
| 20 | 45320614 | 45321385 | 45320999 | 9  | 31  | 41 | 0.730597099 | 0.911573  | ZMYND8 | ENSG00000101040 |
| 20 | 45321757 | 45322404 | 45322078 | 11 | 27  | 32 | 0.813619497 | 0.790473  | ZMYND8 | ENSG00000101040 |
| 20 | 45322446 | 45322643 | 45322553 | 8  | 9   | 12 | 0.737622072 | 0.769563  | ZMYND8 | ENSG00000101040 |
| 20 | 45322767 | 45323081 | 45322924 | 12 | 17  | 16 | 1.015315087 | 0.480915  | ZMYND8 | ENSG00000101040 |
| 20 | 45324151 | 45324567 | 45324428 | 11 | 17  | 28 | 0.595184706 | 0.961563  | ZMYND8 | ENSG00000101040 |
| 20 | 45324623 | 45325180 | 45324753 | 9  | 21  | 27 | 0.753428259 | 0.842351  | ZMYND8 | ENSG00000101040 |
| 20 | 45325644 | 45326093 | 45325915 | 11 | 20  | 25 | 0.774503175 | 0.810437  | ZMYND8 | ENSG00000101040 |
| 20 | 45326647 | 45326996 | 45326821 | 8  | 14  | 9  | 1.43836304  | 0.179537  | ZMYND8 | ENSG00000101040 |
| 20 | 45327119 | 45327572 | 45327399 | 12 | 20  | 17 | 1.118726809 | 0.361026  | ZMYND8 | ENSG00000101040 |
| 20 | 45328032 | 45328337 | 45328167 | 15 | 19  | 21 | 0.871735176 | 0.672523  | ZMYND8 | ENSG00000101040 |
| 20 | 45328641 | 45329418 | 45328897 | 11 | 35  | 42 | 0.802807278 | 0.835974  | ZMYND8 | ENSG00000101040 |
| 20 | 45329522 | 45330467 | 45330017 | 12 | 38  | 24 | 1.495897561 | 0.0545351 | ZMYND8 | ENSG00000101040 |
| 20 | 45331429 | 45331708 | 45331540 | 13 | 18  | 17 | 1.012181398 | 0.48423   | ZMYND8 | ENSG00000101040 |
| 20 | 45332430 | 45332734 | 45332582 | 13 | 16  | 7  | 2.037680973 | 0.0400399 | ZMYND8 | ENSG00000101040 |
| 20 | 45333328 | 45333872 | 45333694 | 12 | 24  | 28 | 0.826645425 | 0.758727  | ZMYND8 | ENSG00000101040 |
| 20 | 45334398 | 45335429 | 45335145 | 61 | 109 | 74 | 1.406399416 | 0.0106414 | ZMYND8 | ENSG00000101040 |
| 20 | 45335436 | 45335732 | 45335588 | 8  | 11  | 15 | 0.71918152  | 0.81018   | ZMYND8 | ENSG00000101040 |
| 20 | 45335813 | 45337466 | 45336930 | 17 | 78  | 77 | 0.971202394 | 0.572374  | ZMYND8 | ENSG00000101040 |
| 20 | 45337539 | 45337866 | 45337702 | 9  | 10  | 7  | 1.318499453 | 0.269217  | ZMYND8 | ENSG00000101040 |
| 20 | 45337887 | 45338132 | 45338066 | 8  | 10  | 13 | 0.753428259 | 0.762589  | ZMYND8 | ENSG00000101040 |
| 20 | 45339079 | 45339935 | 45339540 | 19 | 53  | 40 | 1.262952913 | 0.127514  | ZMYND8 | ENSG00000101040 |

|    |          |          |          |    |    |    |             |             |        |                 |
|----|----------|----------|----------|----|----|----|-------------|-------------|--------|-----------------|
| 20 | 45339957 | 45340546 | 45340132 | 11 | 26 | 28 | 0.892777059 | 0.664792    | ZMYND8 | ENSG00000101040 |
| 20 | 45340580 | 45341266 | 45341098 | 16 | 37 | 39 | 0.910963258 | 0.659965    | ZMYND8 | ENSG00000101040 |
| 20 | 45341295 | 45342119 | 45341793 | 11 | 33 | 28 | 1.124237778 | 0.319632    | ZMYND8 | ENSG00000101040 |
| 20 | 45342191 | 45342646 | 45342503 | 9  | 20 | 24 | 0.805483302 | 0.769433    | ZMYND8 | ENSG00000101040 |
| 20 | 45342911 | 45343206 | 45343058 | 10 | 15 | 15 | 0.958908693 | 0.546868    | ZMYND8 | ENSG00000101040 |
| 20 | 45343277 | 45343700 | 45343441 | 8  | 16 | 17 | 0.905635988 | 0.615736    | ZMYND8 | ENSG00000101040 |
| 20 | 45343727 | 45344675 | 45344191 | 14 | 49 | 57 | 0.826645425 | 0.839055    | ZMYND8 | ENSG00000101040 |
| 20 | 45344908 | 45346116 | 45345301 | 11 | 50 | 65 | 0.740974899 | 0.947365    | ZMYND8 | ENSG00000101040 |
| 20 | 45346348 | 45346564 | 45346456 | 8  | 10 | 13 | 0.753428259 | 0.762589    | ZMYND8 | ENSG00000101040 |
| 20 | 45346720 | 45347139 | 45346899 | 9  | 17 | 28 | 0.595184706 | 0.961563    | ZMYND8 | ENSG00000101040 |
| 20 | 45347246 | 45347635 | 45347410 | 15 | 21 | 26 | 0.781333009 | 0.807043    | ZMYND8 | ENSG00000101040 |
| 20 | 45348797 | 45349225 | 45349046 | 12 | 22 | 34 | 0.630139998 | 0.960074    | ZMYND8 | ENSG00000101040 |
| 20 | 45349258 | 45349926 | 45349568 | 16 | 36 | 53 | 0.65703003  | 0.976962    | ZMYND8 | ENSG00000101040 |
| 20 | 45350042 | 45350604 | 45350260 | 10 | 23 | 32 | 0.69738814  | 0.913218    | ZMYND8 | ENSG00000101040 |
| 20 | 45351074 | 45352879 | 45352385 | 18 | 96 | 67 | 1.367855047 | 0.0226943   | ZMYND8 | ENSG00000101040 |
| 20 | 45353123 | 45354202 | 45353892 | 17 | 61 | 58 | 1.007666762 | 0.482686    | ZMYND8 | ENSG00000101040 |
| 20 | 45354765 | 45355057 | 45354915 | 9  | 11 | 6  | 1.643843474 | 0.137712    | ZMYND8 | ENSG00000101040 |
| 20 | 45355467 | 45355928 | 45355639 | 17 | 25 | 23 | 1.038817751 | 0.445246    | ZMYND8 | ENSG00000101040 |
| 20 | 45356575 | 45357288 | 45357145 | 13 | 28 | 33 | 0.817892709 | 0.78822     | ZMYND8 | ENSG00000101040 |
| 20 | 45357512 | 45357813 | 45357670 | 13 | 15 | 10 | 1.394776281 | 0.191426    | ZMYND8 | ENSG00000101040 |
| 20 | 45357854 | 45358901 | 45358262 | 14 | 51 | 54 | 0.906604583 | 0.694158    | ZMYND8 | ENSG00000101040 |
| 20 | 45359035 | 45359570 | 45359293 | 32 | 55 | 25 | 2.0653418   | 0.000729286 | ZMYND8 | ENSG00000101040 |
| 20 | 45360000 | 45360402 | 45360158 | 11 | 19 | 21 | 0.871735176 | 0.672523    | ZMYND8 | ENSG00000101040 |
| 20 | 45360653 | 45361212 | 45361033 | 13 | 27 | 28 | 0.925842876 | 0.614522    | ZMYND8 | ENSG00000101040 |
| 20 | 45361361 | 45361618 | 45361468 | 9  | 10 | 13 | 0.753428259 | 0.762589    | ZMYND8 | ENSG00000101040 |
| 20 | 45362057 | 45362369 | 45362221 | 12 | 17 | 15 | 1.07877228  | 0.410615    | ZMYND8 | ENSG00000101040 |
| 20 | 45362373 | 45362913 | 45362552 | 14 | 27 | 29 | 0.894981447 | 0.664076    | ZMYND8 | ENSG00000101040 |
| 20 | 45363012 | 45363211 | 45363111 | 9  | 9  | 4  | 1.917817386 | 0.103282    | ZMYND8 | ENSG00000101040 |
| 20 | 45363627 | 45363859 | 45363720 | 9  | 11 | 5  | 1.917817386 | 0.0843804   | ZMYND8 | ENSG00000101040 |
| 20 | 45364690 | 45365469 | 45365109 | 12 | 38 | 60 | 0.613072771 | 0.992386    | ZMYND8 | ENSG00000101040 |
| 20 | 45365772 | 45367361 | 45366556 | 22 | 82 | 85 | 0.92545839  | 0.692753    | ZMYND8 | ENSG00000101040 |
| 20 | 45367747 | 45368028 | 45367887 | 8  | 11 | 18 | 0.605626543 | 0.918575    | ZMYND8 | ENSG00000101040 |
| 20 | 45368583 | 45369390 | 45369143 | 15 | 40 | 38 | 1.008083498 | 0.484943    | ZMYND8 | ENSG00000101040 |
| 20 | 45370516 | 45370695 | 45370668 | 8  | 8  | 7  | 1.07877228  | 0.435076    | ZMYND8 | ENSG00000101040 |

|    |          |          |          |    |     |     |             |           |        |                 |
|----|----------|----------|----------|----|-----|-----|-------------|-----------|--------|-----------------|
| 20 | 45370745 | 45371414 | 45370914 | 18 | 36  | 37  | 0.933674254 | 0.616842  | ZMYND8 | ENSG00000101040 |
| 20 | 45371709 | 45372210 | 45372031 | 13 | 24  | 19  | 1.198635866 | 0.269826  | ZMYND8 | ENSG00000101040 |
| 20 | 45372234 | 45372556 | 45372407 | 8  | 13  | 22  | 0.583683552 | 0.948499  | ZMYND8 | ENSG00000101040 |
| 20 | 45372928 | 45373257 | 45373094 | 13 | 17  | 17  | 0.958908693 | 0.549739  | ZMYND8 | ENSG00000101040 |
| 20 | 45374056 | 45374816 | 45374523 | 20 | 48  | 39  | 1.174663149 | 0.222981  | ZMYND8 | ENSG00000101040 |
| 20 | 45376039 | 45376352 | 45376195 | 10 | 15  | 17  | 0.852363283 | 0.680376  | ZMYND8 | ENSG00000101040 |
| 20 | 45376624 | 45378300 | 45377330 | 23 | 101 | 104 | 0.931511302 | 0.695118  | ZMYND8 | ENSG00000101040 |
| 20 | 45379006 | 45380125 | 45379375 | 15 | 55  | 68  | 0.778244736 | 0.919486  | ZMYND8 | ENSG00000101040 |
| 20 | 45380133 | 45381485 | 45380568 | 16 | 73  | 98  | 0.716760033 | 0.985511  | ZMYND8 | ENSG00000101040 |
| 20 | 45381494 | 45382721 | 45382151 | 63 | 140 | 117 | 1.145814625 | 0.136675  | ZMYND8 | ENSG00000101040 |
| 20 | 45382906 | 45383980 | 45383694 | 27 | 74  | 69  | 1.027402171 | 0.434739  | ZMYND8 | ENSG00000101040 |
| 20 | 45384898 | 45385915 | 45385543 | 12 | 43  | 50  | 0.827293774 | 0.82266   | ZMYND8 | ENSG00000101040 |
| 20 | 45385962 | 45386169 | 45386062 | 9  | 11  | 13  | 0.821921737 | 0.693119  | ZMYND8 | ENSG00000101040 |
| 20 | 45386783 | 45387145 | 45386989 | 12 | 17  | 22  | 0.750450282 | 0.822065  | ZMYND8 | ENSG00000101040 |
| 20 | 45387386 | 45387988 | 45387821 | 13 | 25  | 41  | 0.593610143 | 0.983549  | ZMYND8 | ENSG00000101040 |
| 20 | 45388464 | 45389240 | 45389009 | 15 | 36  | 40  | 0.865356625 | 0.738948  | ZMYND8 | ENSG00000101040 |
| 20 | 45389710 | 45390160 | 45389988 | 9  | 17  | 20  | 0.821921737 | 0.731032  | ZMYND8 | ENSG00000101040 |
| 20 | 45390235 | 45390714 | 45390414 | 24 | 33  | 34  | 0.931511302 | 0.615909  | ZMYND8 | ENSG00000101040 |
| 20 | 45390898 | 45391499 | 45391340 | 16 | 37  | 41  | 0.867584056 | 0.737834  | ZMYND8 | ENSG00000101040 |
| 20 | 45391747 | 45392339 | 45392020 | 12 | 25  | 28  | 0.859711242 | 0.713133  | ZMYND8 | ENSG00000101040 |
| 20 | 45392499 | 45393938 | 45393172 | 24 | 90  | 62  | 1.385090334 | 0.0222315 | ZMYND8 | ENSG00000101040 |
| 20 | 45394676 | 45395132 | 45394971 | 15 | 25  | 20  | 1.187220287 | 0.276369  | ZMYND8 | ENSG00000101040 |
| 20 | 45396289 | 45396653 | 45396475 | 8  | 14  | 22  | 0.625375235 | 0.925815  | ZMYND8 | ENSG00000101040 |
| 20 | 45397566 | 45397765 | 45397595 | 10 | 11  | 8   | 1.278544924 | 0.28289   | ZMYND8 | ENSG00000101040 |
| 20 | 45397869 | 45398195 | 45398032 | 11 | 16  | 14  | 1.086763185 | 0.404922  | ZMYND8 | ENSG00000101040 |
| 20 | 45398529 | 45399106 | 45398885 | 14 | 29  | 28  | 0.99197451  | 0.511702  | ZMYND8 | ENSG00000101040 |
| 20 | 45399764 | 45400965 | 45400099 | 11 | 52  | 54  | 0.924039286 | 0.65936   | ZMYND8 | ENSG00000101040 |
| 20 | 45401937 | 45402160 | 45402027 | 8  | 10  | 9   | 1.054799562 | 0.4492    | ZMYND8 | ENSG00000101040 |
| 20 | 45402248 | 45402632 | 45402427 | 10 | 18  | 16  | 1.07172148  | 0.415914  | ZMYND8 | ENSG00000101040 |
| 20 | 45402976 | 45403339 | 45403213 | 15 | 20  | 31  | 0.62928383  | 0.953537  | ZMYND8 | ENSG00000101040 |
| 20 | 45406259 | 45406901 | 45406590 | 18 | 41  | 35  | 1.118726809 | 0.308965  | ZMYND8 | ENSG00000101040 |
| 20 | 45406910 | 45407121 | 45406978 | 8  | 10  | 9   | 1.054799562 | 0.4492    | ZMYND8 | ENSG00000101040 |
| 20 | 45407255 | 45407657 | 45407432 | 14 | 20  | 17  | 1.118726809 | 0.361026  | ZMYND8 | ENSG00000101040 |
| 20 | 45408236 | 45408581 | 45408408 | 12 | 17  | 19  | 0.863017824 | 0.676008  | ZMYND8 | ENSG00000101040 |

|    |          |          |          |     |     |     |             |           |        |                 |
|----|----------|----------|----------|-----|-----|-----|-------------|-----------|--------|-----------------|
| 20 | 45409045 | 45409427 | 45409248 | 15  | 23  | 15  | 1.43836304  | 0.12479   | ZMYND8 | ENSG00000101040 |
| 20 | 45409468 | 45409947 | 45409768 | 12  | 24  | 40  | 0.584700423 | 0.984658  | ZMYND8 | ENSG00000101040 |
| 20 | 45409992 | 45411414 | 45410210 | 15  | 75  | 83  | 0.867584056 | 0.815716  | ZMYND8 | ENSG00000101040 |
| 20 | 45411467 | 45412587 | 45412143 | 15  | 54  | 63  | 0.824062158 | 0.854657  | ZMYND8 | ENSG00000101040 |
| 20 | 45412596 | 45413651 | 45413154 | 17  | 62  | 60  | 0.990348322 | 0.5211    | ZMYND8 | ENSG00000101040 |
| 20 | 45413664 | 45415965 | 45414054 | 22  | 156 | 141 | 1.060201865 | 0.306247  | ZMYND8 | ENSG00000101040 |
| 20 | 45415993 | 45419257 | 45418243 | 16  | 178 | 194 | 0.880229005 | 0.891361  | ZMYND8 | ENSG00000101040 |
| 20 | 45419322 | 45420291 | 45419839 | 41  | 107 | 102 | 1.005457659 | 0.483822  | ZMYND8 | ENSG00000101040 |
| 20 | 45420396 | 45423979 | 45423106 | 49  | 393 | 237 | 1.58743708  | 5.40E-09  | ZMYND8 | ENSG00000101040 |
| 20 | 45424574 | 45425362 | 45425008 | 12  | 39  | 46  | 0.816092505 | 0.828827  | ZMYND8 | ENSG00000101040 |
| 20 | 45425637 | 45425834 | 45425735 | 8   | 8   | 8   | 0.958908693 | 0.534974  | ZMYND8 | ENSG00000101040 |
| 20 | 45429006 | 45429231 | 45429122 | 10  | 12  | 20  | 0.593610143 | 0.935335  | ZMYND8 | ENSG00000101040 |
| 20 | 45429474 | 45429720 | 45429638 | 8   | 11  | 4   | 2.301380863 | 0.0459276 | ZMYND8 | ENSG00000101040 |
| 20 | 45430399 | 45430766 | 45430587 | 13  | 20  | 17  | 1.118726809 | 0.361026  | ZMYND8 | ENSG00000101040 |
| 20 | 45430776 | 45431553 | 45431340 | 13  | 38  | 48  | 0.763213041 | 0.897658  | ZMYND8 | ENSG00000101040 |
| 20 | 45431561 | 45431930 | 45431740 | 10  | 17  | 32  | 0.523041105 | 0.988758  | ZMYND8 | ENSG00000101040 |
| 20 | 45433029 | 45433846 | 45433464 | 16  | 39  | 33  | 1.128127874 | 0.300803  | ZMYND8 | ENSG00000101040 |
| 20 | 45434049 | 45434445 | 45434208 | 16  | 22  | 15  | 1.378431246 | 0.157106  | ZMYND8 | ENSG00000101040 |
| 20 | 45435031 | 45435851 | 45435381 | 21  | 54  | 61  | 0.850644808 | 0.809499  | ZMYND8 | ENSG00000101040 |
| 20 | 45437237 | 45437611 | 45437462 | 13  | 17  | 16  | 1.015315087 | 0.480915  | ZMYND8 | ENSG00000101040 |
| 20 | 45438446 | 45440649 | 45439462 | 579 | 892 | 63  | 13.37977286 | 1.92E-181 | ZMYND8 | ENSG00000101040 |
| 20 | 45440892 | 45441446 | 45441257 | 19  | 35  | 34  | 0.986306084 | 0.522633  | ZMYND8 | ENSG00000101040 |
| 20 | 45442689 | 45443092 | 45442853 | 11  | 18  | 21  | 0.828148417 | 0.728078  | ZMYND8 | ENSG00000101040 |
| 20 | 45444603 | 45445467 | 45444992 | 20  | 49  | 47  | 0.998863222 | 0.501691  | ZMYND8 | ENSG00000101040 |
| 20 | 45445775 | 45446772 | 45446301 | 82  | 154 | 83  | 1.76941485  | 8.00E-06  | ZMYND8 | ENSG00000101040 |
| 20 | 45446969 | 45447485 | 45447275 | 15  | 34  | 28  | 1.157303595 | 0.278114  | ZMYND8 | ENSG00000101040 |
| 20 | 45449746 | 45450000 | 45449878 | 8   | 11  | 16  | 0.676876725 | 0.854566  | ZMYND8 | ENSG00000101040 |
| 20 | 45450201 | 45450724 | 45450380 | 11  | 22  | 29  | 0.735163331 | 0.869157  | ZMYND8 | ENSG00000101040 |
| 20 | 45451848 | 45452639 | 45452370 | 73  | 127 | 38  | 3.147187505 | 4.36E-12  | ZMYND8 | ENSG00000101040 |
| 20 | 45452951 | 45453176 | 45453063 | 10  | 11  | 5   | 1.917817386 | 0.0843804 | ZMYND8 | ENSG00000101040 |
| 20 | 45453512 | 45455442 | 45454405 | 38  | 154 | 86  | 1.708400545 | 2.20E-05  | ZMYND8 | ENSG00000101040 |
| 20 | 45456423 | 45456730 | 45456590 | 14  | 17  | 12  | 1.327719729 | 0.212795  | ZMYND8 | ENSG00000101040 |
| 20 | 45457138 | 45457349 | 45457199 | 9   | 10  | 4   | 2.109599125 | 0.0694668 | ZMYND8 | ENSG00000101040 |
| 20 | 45459079 | 45459689 | 45459496 | 14  | 31  | 23  | 1.278544924 | 0.178011  | ZMYND8 | ENSG00000101040 |



|    |          |          |          |    |    |    |             |             |         |                 |
|----|----------|----------|----------|----|----|----|-------------|-------------|---------|-----------------|
| 20 | 45459971 | 45460475 | 45460179 | 12 | 24 | 27 | 0.856168476 | 0.714792    | ZMYND8  | ENSG00000101040 |
| 20 | 45461218 | 45462190 | 45462011 | 29 | 67 | 30 | 2.103412617 | 0.000174743 | ZMYND8  | ENSG00000101040 |
| 20 | 45462681 | 45463301 | 45462860 | 13 | 33 | 39 | 0.815072389 | 0.811006    | ZMYND8  | ENSG00000101040 |
| 20 | 45464882 | 45465159 | 45465020 | 17 | 19 | 14 | 1.278544924 | 0.231514    | ZMYND8  | ENSG00000101040 |
| 20 | 45465819 | 45466258 | 45466068 | 15 | 24 | 26 | 0.887878419 | 0.666463    | ZMYND8  | ENSG00000101040 |
| 20 | 45466515 | 45467495 | 45467019 | 10 | 40 | 40 | 0.958908693 | 0.575108    | ZMYND8  | ENSG00000101040 |
| 20 | 45467960 | 45468396 | 45468069 | 9  | 18 | 19 | 0.910963258 | 0.614871    | ZMYND8  | ENSG00000101040 |
| 20 | 45469089 | 45469306 | 45469148 | 8  | 9  | 15 | 0.599317933 | 0.904407    | ZMYND8  | ENSG00000101040 |
| 20 | 45469429 | 45469774 | 45469601 | 13 | 19 | 19 | 0.958908693 | 0.552451    | ZMYND8  | ENSG00000101040 |
| 20 | 45470524 | 45470934 | 45470667 | 8  | 14 | 15 | 0.8989769   | 0.617119    | ZMYND8  | ENSG00000101040 |
| 20 | 45471627 | 45472001 | 45471822 | 10 | 17 | 28 | 0.595184706 | 0.961563    | ZMYND8  | ENSG00000101040 |
| 20 | 45472434 | 45472914 | 45472627 | 11 | 22 | 26 | 0.816848146 | 0.76371     | ZMYND8  | ENSG00000101040 |
| 20 | 45473382 | 45473749 | 45473488 | 12 | 17 | 22 | 0.750450282 | 0.822065    | ZMYND8  | ENSG00000101040 |
| 20 | 45474108 | 45474644 | 45474280 | 11 | 23 | 24 | 0.920552345 | 0.614165    | ZMYND8  | ENSG00000101040 |
| 20 | 45474920 | 45475669 | 45475099 | 31 | 74 | 41 | 1.712336952 | 0.00213013  | ZMYND8  | ENSG00000101040 |
| 20 | 45476484 | 45476966 | 45476652 | 10 | 17 | 16 | 1.015315087 | 0.480915    | ZMYND8  | ENSG00000101040 |
| 20 | 45477262 | 45477839 | 45477631 | 8  | 22 | 37 | 0.580392104 | 0.982416    | ZMYND8  | ENSG00000101040 |
| 20 | 45478173 | 45478517 | 45478345 | 10 | 13 | 7  | 1.678090213 | 0.11195     | ZMYND8  | ENSG00000101040 |
| 20 | 45478730 | 45479869 | 45479529 | 11 | 45 | 54 | 0.801996361 | 0.866512    | ZMYND8  | ENSG00000101040 |
| 20 | 45480038 | 45480855 | 45480261 | 24 | 64 | 51 | 1.198635866 | 0.163234    | RPL35AP | ENSG00000217854 |
| 20 | 45482264 | 45482695 | 45482410 | 9  | 16 | 14 | 1.086763185 | 0.404922    | RPL35AP | ENSG00000217854 |
| 20 | 45484606 | 45485192 | 45484832 | 12 | 27 | 41 | 0.639272462 | 0.968806    | RPL35AP | ENSG00000217854 |
| 20 | 45485206 | 45486143 | 45485819 | 16 | 50 | 55 | 0.873291845 | 0.758606    | RPL35AP | ENSG00000217854 |
| 20 | 45488657 | 45488930 | 45488813 | 9  | 10 | 7  | 1.318499453 | 0.269217    | RPL35AP | ENSG00000217854 |
| 20 | 45489051 | 45489353 | 45489202 | 11 | 15 | 17 | 0.852363283 | 0.680376    | RPL35AP | ENSG00000217854 |
| 20 | 45489747 | 45490491 | 45490005 | 16 | 44 | 36 | 1.166240302 | 0.242128    | RPL35AP | ENSG00000217854 |
| 20 | 45490808 | 45491408 | 45491065 | 18 | 38 | 22 | 1.62597561  | 0.0290977   | RPL35AP | ENSG00000217854 |
| 20 | 45493023 | 45493642 | 45493201 | 16 | 40 | 18 | 2.069224022 | 0.00311868  | RPL35AP | ENSG00000217854 |
| 20 | 45494389 | 45494921 | 45494747 | 11 | 21 | 23 | 0.878999635 | 0.669714    | RPL35AP | ENSG00000217854 |
| 20 | 45495114 | 45495300 | 45495207 | 9  | 9  | 13 | 0.684934781 | 0.824961    | RPL35AP | ENSG00000217854 |
| 20 | 45495781 | 45496055 | 45495918 | 16 | 18 | 25 | 0.700740968 | 0.883987    | RPL35AP | ENSG00000217854 |
| 20 | 45496149 | 45496664 | 45496489 | 22 | 34 | 40 | 0.818580592 | 0.809111    | RPL35AP | ENSG00000217854 |
| 20 | 45496743 | 45497069 | 45496906 | 11 | 17 | 16 | 1.015315087 | 0.480915    | RPL35AP | ENSG00000217854 |
| 20 | 45497092 | 45497380 | 45497215 | 10 | 14 | 24 | 0.575345216 | 0.958881    | RPL35AP | ENSG00000217854 |

|    |          |          |          |     |     |     |             |            |         |                 |
|----|----------|----------|----------|-----|-----|-----|-------------|------------|---------|-----------------|
| 20 | 45497510 | 45498373 | 45497747 | 15  | 45  | 36  | 1.192156754 | 0.210834   | RPL35AP | ENSG00000217854 |
| 20 | 45498802 | 45499140 | 45498971 | 15  | 19  | 10  | 1.743470351 | 0.0622604  | RPL35AP | ENSG00000217854 |
| 20 | 45500261 | 45500644 | 45500409 | 11  | 19  | 13  | 1.369869562 | 0.177863   | RPL35AP | ENSG00000217854 |
| 20 | 45500730 | 45501717 | 45501044 | 33  | 93  | 70  | 1.269541087 | 0.0630735  | RPL35AP | ENSG00000217854 |
| 20 | 45502850 | 45503117 | 45503001 | 10  | 12  | 1   | 6.232906505 | 0.00117736 | RPL35AP | ENSG00000217854 |
| 20 | 45503476 | 45503828 | 45503652 | 14  | 20  | 29  | 0.671236085 | 0.922603   | RPL35AP | ENSG00000217854 |
| 20 | 45503838 | 45504104 | 45503971 | 11  | 13  | 14  | 0.894981447 | 0.618069   | RPL35AP | ENSG00000217854 |
| 20 | 45504482 | 45504802 | 45504652 | 8   | 12  | 15  | 0.779113313 | 0.750998   | RPL35AP | ENSG00000217854 |
| 20 | 45507447 | 45507643 | 45507545 | 8   | 9   | 13  | 0.684934781 | 0.824961   | RPL35AP | ENSG00000217854 |
| 20 | 45510449 | 45511147 | 45510878 | 11  | 29  | 33  | 0.846095906 | 0.748756   | RPL35AP | ENSG00000217854 |
| 20 | 45512818 | 45514039 | 45513860 | 18  | 57  | 38  | 1.426069338 | 0.0410583  | RPL35AP | ENSG00000217854 |
| 20 | 45514801 | 45515805 | 45515327 | 14  | 50  | 47  | 1.018840486 | 0.462307   | RPL35AP | ENSG00000217854 |
| 20 | 45516156 | 45516486 | 45516333 | 9   | 13  | 17  | 0.745817872 | 0.798145   | RPL35AP | ENSG00000217854 |
| 20 | 45516755 | 45517959 | 45517647 | 40  | 113 | 69  | 1.5616513   | 0.00142075 | RPL35AP | ENSG00000217854 |
| 20 | 45518311 | 45518818 | 45518564 | 11  | 24  | 33  | 0.705079921 | 0.910297   | RPL35AP | ENSG00000217854 |
| 20 | 45519344 | 45519897 | 45519569 | 17  | 37  | 40  | 0.888744642 | 0.700285   | RPL35AP | ENSG00000217854 |
| 20 | 45520317 | 45520606 | 45520461 | 18  | 21  | 14  | 1.406399416 | 0.148881   | RPL35AP | ENSG00000217854 |
| 20 | 45521536 | 45521846 | 45521688 | 12  | 16  | 28  | 0.562118889 | 0.973627   | RPL35AP | ENSG00000217854 |
| 20 | 45522857 | 45523214 | 45523036 | 10  | 14  | 11  | 1.198635866 | 0.315918   | RPL35AP | ENSG00000217854 |
| 20 | 45523223 | 45523773 | 45523543 | 12  | 27  | 31  | 0.839045106 | 0.752376   | RPL35AP | ENSG00000217854 |
| 20 | 45523872 | 45524169 | 45524028 | 10  | 13  | 13  | 0.958908693 | 0.543805   | RPL35AP | ENSG00000217854 |
| 20 | 45524800 | 45525191 | 45525054 | 8   | 15  | 13  | 1.095895649 | 0.398774   | RPL35AP | ENSG00000217854 |
| 20 | 45525707 | 45526005 | 45525866 | 10  | 15  | 16  | 0.902502299 | 0.616352   | RPL35AP | ENSG00000217854 |
| 20 | 45526159 | 45527549 | 45526769 | 149 | 321 | 131 | 2.339156054 | 3.19E-18   | RPL35AP | ENSG00000217854 |
| 20 | 45527716 | 45529358 | 45528075 | 23  | 104 | 67  | 1.480667835 | 0.00528604 | RPL35AP | ENSG00000217854 |
| 20 | 45530253 | 45531377 | 45530815 | 62  | 153 | 46  | 3.141956143 | 3.84E-14   | RPL35AP | ENSG00000217854 |
| 20 | 45531690 | 45532281 | 45531960 | 16  | 29  | 30  | 0.927976155 | 0.614895   | RPL35AP | ENSG00000217854 |
| 20 | 45532877 | 45533367 | 45533056 | 16  | 28  | 18  | 1.463597479 | 0.0938263  | RPL35AP | ENSG00000217854 |
| 20 | 45533604 | 45533807 | 45533705 | 9   | 10  | 15  | 0.659249726 | 0.861705   | RPL35AP | ENSG00000217854 |
| 20 | 45534304 | 45534502 | 45534403 | 8   | 9   | 9   | 0.958908693 | 0.536911   | RPL35AP | ENSG00000217854 |
| 20 | 45534779 | 45535072 | 45534929 | 9   | 13  | 18  | 0.7065643   | 0.841991   | RPL35AP | ENSG00000217854 |
| 20 | 45535083 | 45535358 | 45535220 | 13  | 18  | 22  | 0.792141964 | 0.776057   | RPL35AP | ENSG00000217854 |
| 20 | 45535686 | 45536107 | 45535964 | 12  | 20  | 12  | 1.54900635  | 0.101141   | RPL35AP | ENSG00000217854 |
| 20 | 45538685 | 45538918 | 45538808 | 8   | 10  | 22  | 0.458608505 | 0.987045   | RPL35AP | ENSG00000217854 |

|    |          |          |          |    |     |     |             |            |         |                 |
|----|----------|----------|----------|----|-----|-----|-------------|------------|---------|-----------------|
| 20 | 45540514 | 45540800 | 45540632 | 10 | 14  | 9   | 1.43836304  | 0.179537   | RPL35AP | ENSG00000217854 |
| 20 | 45541259 | 45541463 | 45541333 | 8  | 10  | 14  | 0.703199708 | 0.817173   | RPL35AP | ENSG00000217854 |
| 20 | 45541478 | 45542157 | 45541991 | 22 | 50  | 42  | 1.13731031  | 0.265456   | RPL35AP | ENSG00000217854 |
| 20 | 45542389 | 45542926 | 45542772 | 11 | 25  | 16  | 1.466566236 | 0.10473    | RPL35AP | ENSG00000217854 |
| 20 | 45543786 | 45544512 | 45544211 | 38 | 68  | 40  | 1.613773166 | 0.00663011 |         | ENSG00000202186 |
| 20 | 45545104 | 45545609 | 45545452 | 11 | 22  | 22  | 0.958908693 | 0.556268   |         | ENSG00000202186 |
| 20 | 45546401 | 45547234 | 45546725 | 17 | 50  | 38  | 1.253957522 | 0.141278   |         | ENSG00000202186 |
| 20 | 45549055 | 45550065 | 45549932 | 15 | 52  | 61  | 0.81971227  | 0.857046   |         | ENSG00000202186 |
| 20 | 45550301 | 45550672 | 45550432 | 10 | 15  | 6   | 2.191791298 | 0.0328001  |         | ENSG00000202186 |
| 20 | 45552940 | 45553453 | 45553188 | 9  | 20  | 17  | 1.118726809 | 0.361026   |         | ENSG00000201742 |
| 20 | 45554341 | 45554603 | 45554472 | 8  | 11  | 19  | 0.575345216 | 0.94039    |         | ENSG00000201742 |
| 20 | 45555005 | 45556395 | 45555484 | 62 | 253 | 108 | 2.234521175 | 1.12E-13   |         | ENSG00000201742 |
| 20 | 45556645 | 45556825 | 45556677 | 8  | 9   | 13  | 0.684934781 | 0.824961   |         | ENSG00000201742 |
| 20 | 45557408 | 45557824 | 45557649 | 9  | 16  | 22  | 0.708758599 | 0.862621   |         | ENSG00000201742 |
| 20 | 45558152 | 45558375 | 45558255 | 8  | 9   | 14  | 0.639272462 | 0.869513   |         | ENSG00000201742 |
| 20 | 45558429 | 45558834 | 45558704 | 9  | 16  | 14  | 1.086763185 | 0.404922   |         | ENSG00000201742 |
| 20 | 45559008 | 45559328 | 45559168 | 14 | 19  | 7   | 2.397271733 | 0.0127287  |         | ENSG00000201742 |
| 20 | 45559693 | 45560050 | 45559871 | 10 | 16  | 19  | 0.815072389 | 0.734271   | NCOA3   | ENSG00000124151 |
| 20 | 45560553 | 45560805 | 45560678 | 9  | 11  | 16  | 0.676876725 | 0.854566   | NCOA3   | ENSG00000124151 |
| 20 | 45560845 | 45561050 | 45560929 | 10 | 12  | 10  | 1.133255728 | 0.37674    | NCOA3   | ENSG00000124151 |
| 20 | 45561328 | 45561909 | 45561741 | 8  | 20  | 13  | 1.43836304  | 0.140307   | NCOA3   | ENSG00000124151 |
| 20 | 45562491 | 45566737 | 45564047 | 35 | 405 | 292 | 1.328726721 | 9.46E-05   | NCOA3   | ENSG00000124151 |
| 20 | 45567444 | 45567924 | 45567614 | 15 | 25  | 29  | 0.831054201 | 0.756473   | NCOA3   | ENSG00000124151 |
| 20 | 45568174 | 45568979 | 45568763 | 70 | 126 | 84  | 1.4327224   | 0.00471652 | NCOA3   | ENSG00000124151 |
| 20 | 45569021 | 45569432 | 45569222 | 16 | 25  | 42  | 0.579805256 | 0.987542   | NCOA3   | ENSG00000124151 |
| 20 | 45569440 | 45569673 | 45569569 | 12 | 15  | 23  | 0.639272462 | 0.921343   | NCOA3   | ENSG00000124151 |
| 20 | 45570363 | 45570712 | 45570540 | 17 | 21  | 16  | 1.240940662 | 0.248103   | NCOA3   | ENSG00000124151 |
| 20 | 45570849 | 45571353 | 45571107 | 11 | 23  | 9   | 2.301380863 | 0.00938618 | NCOA3   | ENSG00000124151 |
| 20 | 45571659 | 45571929 | 45571800 | 11 | 14  | 15  | 0.8989769   | 0.617119   | NCOA3   | ENSG00000124151 |
| 20 | 45571931 | 45572214 | 45572096 | 13 | 16  | 14  | 1.086763185 | 0.404922   | NCOA3   | ENSG00000124151 |
| 20 | 45572693 | 45573466 | 45573047 | 12 | 35  | 43  | 0.784561658 | 0.861438   | NCOA3   | ENSG00000124151 |
| 20 | 45573878 | 45574062 | 45574021 | 8  | 9   | 5   | 1.598181155 | 0.170911   | NCOA3   | ENSG00000124151 |
| 20 | 45574202 | 45574508 | 45574370 | 8  | 12  | 7   | 1.558226626 | 0.152813   | NCOA3   | ENSG00000124151 |
| 20 | 45574665 | 45575098 | 45574919 | 10 | 18  | 14  | 1.214617678 | 0.282961   | NCOA3   | ENSG00000124151 |

|    |          |          |          |    |    |    |             |             |       |                 |
|----|----------|----------|----------|----|----|----|-------------|-------------|-------|-----------------|
| 20 | 45575315 | 45575723 | 45575407 | 10 | 17 | 12 | 1.327719729 | 0.212795    | NCOA3 | ENSG00000124151 |
| 20 | 45576413 | 45576840 | 45576686 | 9  | 16 | 12 | 1.253957522 | 0.265012    | NCOA3 | ENSG00000124151 |
| 20 | 45577035 | 45577333 | 45577159 | 9  | 12 | 5  | 2.077635502 | 0.0577144   | NCOA3 | ENSG00000124151 |
| 20 | 45583550 | 45583921 | 45583711 | 10 | 15 | 6  | 2.191791298 | 0.0328001   | NCOA3 | ENSG00000124151 |
| 20 | 45586063 | 45586305 | 45586184 | 8  | 10 | 15 | 0.659249726 | 0.861705    | NCOA3 | ENSG00000124151 |
| 20 | 45589737 | 45590042 | 45589900 | 11 | 14 | 21 | 0.653801382 | 0.90216     | NCOA3 | ENSG00000124151 |
| 20 | 45592016 | 45592296 | 45592156 | 11 | 13 | 12 | 1.0326709   | 0.46514     | NCOA3 | ENSG00000124151 |
| 20 | 45593542 | 45594200 | 45593756 | 13 | 31 | 29 | 1.022835939 | 0.463651    | NCOA3 | ENSG00000124151 |
| 20 | 45594307 | 45594642 | 45594474 | 14 | 18 | 15 | 1.138704073 | 0.348127    | NCOA3 | ENSG00000124151 |
| 20 | 45595614 | 45595908 | 45595761 | 10 | 16 | 13 | 1.164389127 | 0.333296    | NCOA3 | ENSG00000124151 |
| 20 | 45595941 | 45596309 | 45596120 | 10 | 17 | 9  | 1.726035648 | 0.0753664   | NCOA3 | ENSG00000124151 |
| 20 | 45596447 | 45596744 | 45596597 | 8  | 12 | 16 | 0.733283118 | 0.803868    | NCOA3 | ENSG00000124151 |
| 20 | 45597027 | 45597678 | 45597268 | 19 | 41 | 22 | 1.751050657 | 0.01312     | NCOA3 | ENSG00000124151 |
| 20 | 45599227 | 45599711 | 45599465 | 11 | 20 | 17 | 1.118726809 | 0.361026    |       | ENSG00000221294 |
| 20 | 45600571 | 45600846 | 45600714 | 9  | 11 | 12 | 0.885146486 | 0.620672    |       | ENSG00000221294 |
| 20 | 45600993 | 45601431 | 45601254 | 14 | 25 | 31 | 0.779113313 | 0.829763    |       | ENSG00000221294 |
| 20 | 45601444 | 45602143 | 45601623 | 13 | 35 | 33 | 1.015315087 | 0.473842    |       | ENSG00000221294 |
| 20 | 45602170 | 45602462 | 45602316 | 8  | 13 | 18 | 0.7065643   | 0.841991    |       | ENSG00000221294 |
| 20 | 45602808 | 45603079 | 45602969 | 10 | 12 | 13 | 0.890415215 | 0.619237    |       | ENSG00000221294 |
| 20 | 45603157 | 45603459 | 45603308 | 18 | 21 | 15 | 1.318499453 | 0.19542     |       | ENSG00000221294 |
| 20 | 45603675 | 45603930 | 45603785 | 8  | 11 | 18 | 0.605626543 | 0.918575    |       | ENSG00000221294 |
| 20 | 45604321 | 45604549 | 45604443 | 9  | 11 | 13 | 0.821921737 | 0.693119    |       | ENSG00000221294 |
| 20 | 45605244 | 45605758 | 45605579 | 11 | 23 | 26 | 0.852363283 | 0.716584    |       | ENSG00000221294 |
| 20 | 45605798 | 45606000 | 45605899 | 9  | 11 | 7  | 1.43836304  | 0.204844    |       | ENSG00000221294 |
| 20 | 45606148 | 45606892 | 45606532 | 35 | 64 | 28 | 2.149278105 | 0.000172632 |       | ENSG00000221294 |
| 20 | 45607042 | 45607380 | 45607211 | 19 | 24 | 13 | 1.712336952 | 0.0480623   |       | ENSG00000221294 |
| 20 | 45607619 | 45607905 | 45607762 | 10 | 15 | 17 | 0.852363283 | 0.680376    |       | ENSG00000221294 |
| 20 | 45608143 | 45608788 | 45608566 | 18 | 38 | 21 | 1.699883592 | 0.0204456   |       | ENSG00000221294 |
| 20 | 45608950 | 45609528 | 45609349 | 12 | 26 | 24 | 1.035621389 | 0.448641    |       | ENSG00000221294 |
| 20 | 45610870 | 45611066 | 45610898 | 8  | 8  | 10 | 0.784561658 | 0.708731    |       | ENSG00000221294 |
| 20 | 45611493 | 45611842 | 45611667 | 11 | 17 | 18 | 0.908439814 | 0.615249    |       | ENSG00000221294 |
| 20 | 45612774 | 45613088 | 45612931 | 8  | 11 | 15 | 0.71918152  | 0.81018     |       | ENSG00000221294 |
| 20 | 45613321 | 45613729 | 45613588 | 13 | 20 | 26 | 0.745817872 | 0.845948    |       | ENSG00000221294 |
| 20 | 45614017 | 45614397 | 45614218 | 15 | 23 | 17 | 1.278544924 | 0.211315    |       | ENSG00000221294 |

|    |          |          |          |    |     |    |             |             |                 |
|----|----------|----------|----------|----|-----|----|-------------|-------------|-----------------|
| 20 | 45615278 | 45615561 | 45615401 | 10 | 11  | 11 | 0.958908693 | 0.540507    | ENSG00000221294 |
| 20 | 45617350 | 45617723 | 45617583 | 15 | 20  | 19 | 1.006854128 | 0.490315    | ENSG00000221294 |
| 20 | 45618354 | 45618549 | 45618483 | 8  | 9   | 11 | 0.799090578 | 0.702688    | ENSG00000221294 |
| 20 | 45618927 | 45619392 | 45619213 | 10 | 19  | 16 | 1.128127874 | 0.354788    | ENSG00000221294 |
| 20 | 45619428 | 45619769 | 45619598 | 11 | 16  | 16 | 0.958908693 | 0.548325    | ENSG00000221294 |
| 20 | 45620592 | 45620868 | 45620719 | 12 | 13  | 16 | 0.789689512 | 0.746135    | ENSG00000221294 |
| 20 | 45621080 | 45621611 | 45621340 | 10 | 20  | 28 | 0.694382157 | 0.901601    | ENSG00000221294 |
| 20 | 45622569 | 45622944 | 45622742 | 8  | 13  | 11 | 1.118726809 | 0.38479     | ENSG00000221294 |
| 20 | 45623463 | 45623914 | 45623642 | 8  | 16  | 15 | 1.018840486 | 0.477384    | ENSG00000221294 |
| 20 | 45623953 | 45624433 | 45624131 | 11 | 18  | 16 | 1.07172148  | 0.415914    | ENSG00000221294 |
| 20 | 45625319 | 45625649 | 45625488 | 12 | 16  | 21 | 0.740974899 | 0.826507    | ENSG00000221294 |
| 20 | 45626513 | 45626746 | 45626629 | 9  | 10  | 8  | 1.171999514 | 0.35773     | ENSG00000221294 |
| 20 | 45626901 | 45627180 | 45627040 | 8  | 10  | 17 | 0.585999757 | 0.924668    | ENSG00000221294 |
| 20 | 45627498 | 45627733 | 45627655 | 8  | 9   | 7  | 1.198635866 | 0.346278    | ENSG00000221294 |
| 20 | 45628959 | 45629147 | 45629013 | 8  | 9   | 7  | 1.198635866 | 0.346278    | ENSG00000221294 |
| 20 | 45630028 | 45630741 | 45630380 | 21 | 50  | 38 | 1.253957522 | 0.141278    | ENSG00000221294 |
| 20 | 45630895 | 45631118 | 45631023 | 10 | 11  | 9  | 1.150690432 | 0.367789    | ENSG00000221294 |
| 20 | 45633676 | 45633962 | 45633846 | 9  | 12  | 3  | 3.116453252 | 0.0131971   | ENSG00000221294 |
| 20 | 45634388 | 45634615 | 45634549 | 11 | 13  | 15 | 0.839045106 | 0.685928    | ENSG00000221294 |
| 20 | 45635706 | 45635897 | 45635801 | 8  | 9   | 20 | 0.456623187 | 0.983844    | ENSG00000221294 |
| 20 | 45635942 | 45636461 | 45636116 | 14 | 28  | 36 | 0.751577084 | 0.877351    | ENSG00000221294 |
| 20 | 45636740 | 45637497 | 45637318 | 16 | 41  | 23 | 1.678090213 | 0.0189605   | ENSG00000221294 |
| 20 | 45638371 | 45640024 | 45638928 | 49 | 150 | 95 | 1.508283465 | 0.000705285 | ENSG00000221294 |
| 20 | 45640726 | 45641434 | 45640982 | 16 | 37  | 35 | 1.012181398 | 0.478474    | ENSG00000221294 |
| 20 | 45641836 | 45642256 | 45642015 | 11 | 19  | 35 | 0.532727052 | 0.989963    | ENSG00000221294 |
| 20 | 45642665 | 45642887 | 45642776 | 10 | 12  | 5  | 2.077635502 | 0.0577144   | ENSG00000221294 |
| 20 | 45643324 | 45643836 | 45643657 | 12 | 26  | 22 | 1.125675422 | 0.336059    | ENSG00000221294 |
| 20 | 45643870 | 45644296 | 45644159 | 12 | 21  | 23 | 0.878999635 | 0.669714    | ENSG00000221294 |
| 20 | 45645097 | 45645697 | 45645429 | 12 | 28  | 25 | 1.069552004 | 0.40018     | ENSG00000221294 |
| 20 | 45647603 | 45647838 | 45647720 | 10 | 13  | 20 | 0.639272462 | 0.907338    | ENSG00000221294 |
| 20 | 45648645 | 45649882 | 45648803 | 19 | 66  | 36 | 1.736402228 | 0.00286112  | ENSG00000221294 |
| 20 | 45651069 | 45651575 | 45651424 | 8  | 17  | 15 | 1.07877228  | 0.410615    | ENSG00000221294 |
| 20 | 45651912 | 45652313 | 45652142 | 12 | 16  | 18 | 0.857970936 | 0.678066    | ENSG00000221294 |
| 20 | 45653892 | 45654277 | 45654098 | 14 | 20  | 16 | 1.184534268 | 0.298622    | ENSG00000221294 |

|    |          |          |          |    |    |    |             |            |                 |
|----|----------|----------|----------|----|----|----|-------------|------------|-----------------|
| 20 | 45654605 | 45654957 | 45654781 | 11 | 17 | 19 | 0.863017824 | 0.676008   | ENSG00000221294 |
| 20 | 45657591 | 45658077 | 45657770 | 11 | 22 | 18 | 1.160784207 | 0.312473   | ENSG00000221294 |
| 20 | 45658183 | 45658639 | 45658528 | 9  | 18 | 10 | 1.656296833 | 0.0841786  | ENSG00000221294 |
| 20 | 45659259 | 45659591 | 45659425 | 13 | 17 | 19 | 0.863017824 | 0.676008   | ENSG00000221294 |
| 20 | 45661170 | 45661743 | 45661542 | 14 | 32 | 26 | 1.171999514 | 0.267953   | ENSG00000221294 |
| 20 | 45661806 | 45662173 | 45661985 | 12 | 19 | 11 | 1.598181155 | 0.0927758  | ENSG00000221294 |
| 20 | 45663201 | 45663631 | 45663349 | 9  | 17 | 26 | 0.639272462 | 0.93299    | ENSG00000218714 |
| 20 | 45663900 | 45664101 | 45663985 | 11 | 13 | 13 | 0.958908693 | 0.543805   | ENSG00000218714 |
| 20 | 45664875 | 45665411 | 45665232 | 8  | 18 | 21 | 0.828148417 | 0.728078   | ENSG00000218714 |
| 20 | 45666107 | 45666667 | 45666379 | 16 | 30 | 27 | 1.06164891  | 0.407875   | ENSG00000218714 |
| 20 | 45666729 | 45666927 | 45666828 | 8  | 11 | 9  | 1.150690432 | 0.367789   | ENSG00000218714 |
| 20 | 45667529 | 45668047 | 45667758 | 14 | 25 | 20 | 1.187220287 | 0.276369   | ENSG00000218714 |
| 20 | 45669016 | 45669744 | 45669140 | 10 | 27 | 29 | 0.894981447 | 0.664076   | ENSG00000218714 |
| 20 | 45670707 | 45671200 | 45671021 | 14 | 29 | 23 | 1.198635866 | 0.251284   | ENSG00000218714 |
| 20 | 45671253 | 45671619 | 45671432 | 12 | 19 | 15 | 1.198635866 | 0.291044   | ENSG00000218714 |
| 20 | 45671934 | 45672257 | 45672102 | 14 | 16 | 13 | 1.164389127 | 0.333296   | ENSG00000218714 |
| 20 | 45672554 | 45673434 | 45672849 | 18 | 55 | 36 | 1.451321265 | 0.0371129  | ENSG00000218714 |
| 20 | 45673451 | 45673710 | 45673572 | 9  | 12 | 11 | 1.038817751 | 0.460341   | ENSG00000218714 |
| 20 | 45674125 | 45674448 | 45674296 | 17 | 19 | 13 | 1.369869562 | 0.177863   | ENSG00000218714 |
| 20 | 45674941 | 45675274 | 45675107 | 12 | 17 | 10 | 1.569123316 | 0.112309   | ENSG00000218714 |
| 20 | 45675395 | 45675608 | 45675490 | 10 | 11 | 16 | 0.676876725 | 0.854566   | ENSG00000218714 |
| 20 | 45676096 | 45677282 | 45676255 | 12 | 45 | 47 | 0.918954164 | 0.659122   | ENSG00000218714 |
| 20 | 45677542 | 45677789 | 45677624 | 9  | 12 | 11 | 1.038817751 | 0.460341   | ENSG00000218714 |
| 20 | 45678553 | 45679104 | 45678925 | 18 | 30 | 21 | 1.351189522 | 0.136197   | ENSG00000218714 |
| 20 | 45679484 | 45679737 | 45679581 | 10 | 12 | 8  | 1.385090334 | 0.219216   | ENSG00000218714 |
| 20 | 45680477 | 45681054 | 45680825 | 9  | 21 | 13 | 1.506856518 | 0.109266   | ENSG00000218714 |
| 20 | 45682243 | 45683898 | 45683474 | 25 | 92 | 59 | 1.486308474 | 0.00759317 | ENSG00000218714 |
| 20 | 45684338 | 45684727 | 45684459 | 14 | 20 | 14 | 1.34247217  | 0.186867   | ENSG00000218714 |
| 20 | 45685568 | 45685946 | 45685767 | 9  | 17 | 3  | 4.315089119 | 0.00102271 | ENSG00000218714 |
| 20 | 45685963 | 45686340 | 45686182 | 16 | 26 | 13 | 1.849323908 | 0.0263429  | ENSG00000218714 |
| 20 | 45687501 | 45688017 | 45687661 | 9  | 20 | 28 | 0.694382157 | 0.901601   | ENSG00000218714 |
| 20 | 45688130 | 45689096 | 45688613 | 8  | 35 | 49 | 0.690414259 | 0.956741   | ENSG00000218714 |
| 20 | 45689511 | 45690164 | 45689806 | 13 | 33 | 34 | 0.931511302 | 0.615909   | ENSG00000218714 |
| 20 | 45690836 | 45691193 | 45690899 | 8  | 12 | 16 | 0.733283118 | 0.803868   | ENSG00000218714 |

|    |          |          |          |    |    |    |             |           |                       |
|----|----------|----------|----------|----|----|----|-------------|-----------|-----------------------|
| 20 | 45691997 | 45692364 | 45692185 | 17 | 24 | 23 | 0.998863222 | 0.500802  | ENSG00000218714       |
| 20 | 45692387 | 45692612 | 45692483 | 9  | 11 | 17 | 0.639272462 | 0.890352  | ENSG00000218714       |
| 20 | 45693029 | 45693721 | 45693446 | 16 | 35 | 32 | 1.046082211 | 0.424727  | ENSG00000218714       |
| 20 | 45693743 | 45694540 | 45694151 | 8  | 28 | 33 | 0.817892709 | 0.78822   | ENSG00000218714       |
| 20 | 45695166 | 45695395 | 45695284 | 11 | 12 | 9  | 1.246581301 | 0.295061  | ENSG00000218714       |
| 20 | 45695935 | 45696114 | 45696038 | 8  | 8  | 10 | 0.784561658 | 0.708731  | ENSG00000218714       |
| 20 | 45696866 | 45697076 | 45696980 | 9  | 11 | 5  | 1.917817386 | 0.0843804 | ENSG00000218714       |
| 20 | 45697426 | 45697864 | 45697594 | 11 | 20 | 21 | 0.915321934 | 0.614384  | ENSG00000218714       |
| 20 | 45697987 | 45698276 | 45698131 | 12 | 15 | 23 | 0.639272462 | 0.921343  | ENSG00000218714       |
| 20 | 45698294 | 45698875 | 45698660 | 10 | 26 | 26 | 0.958908693 | 0.560979  | ENSG00000218714       |
| 20 | 45699343 | 45699590 | 45699460 | 10 | 12 | 12 | 0.958908693 | 0.542188  | ENSG00000218714       |
| 20 | 45699887 | 45700123 | 45700005 | 10 | 13 | 9  | 1.34247217  | 0.232231  | ENSG00000218714       |
| 20 | 45701084 | 45701368 | 45701237 | 10 | 13 | 17 | 0.745817872 | 0.798145  | ENSG00000218714       |
| 20 | 45701526 | 45702076 | 45701796 | 9  | 24 | 33 | 0.705079921 | 0.910297  | ENSG00000218714       |
| 20 | 45702220 | 45702484 | 45702307 | 9  | 12 | 16 | 0.733283118 | 0.803868  | ENSG00000218714       |
| 20 | 45703304 | 45703523 | 45703425 | 8  | 11 | 10 | 1.046082211 | 0.455063  | ENSG00000218714       |
| 20 | 45703986 | 45705148 | 45704165 | 14 | 62 | 50 | 1.184534268 | 0.182512  | ENSG00000218714       |
| 20 | 45705311 | 45705992 | 45705490 | 8  | 21 | 30 | 0.680515847 | 0.919368  | ENSG00000218714       |
| 20 | 45706664 | 45706983 | 45706823 | 9  | 12 | 12 | 0.958908693 | 0.542188  | ENSG00000218714       |
| 20 | 45707141 | 45708023 | 45707519 | 11 | 38 | 39 | 0.934935976 | 0.617524  | ENSG00000218714       |
| 20 | 45708404 | 45708848 | 45708669 | 13 | 22 | 24 | 0.882195998 | 0.668517  | ENSG00000218714       |
| 20 | 45709388 | 45709716 | 45709552 | 8  | 13 | 16 | 0.789689512 | 0.746135  | ENSG00000218714       |
| 20 | 45710990 | 45712362 | 45711954 | 12 | 61 | 51 | 1.143314211 | 0.236592  | SULF2 ENSG00000196562 |
| 20 | 45713311 | 45713804 | 45713490 | 11 | 25 | 24 | 0.997265041 | 0.503149  | SULF2 ENSG00000196562 |
| 20 | 45714097 | 45714398 | 45714247 | 10 | 13 | 15 | 0.839045106 | 0.685928  | SULF2 ENSG00000196562 |
| 20 | 45714406 | 45715318 | 45714878 | 11 | 43 | 31 | 1.318499453 | 0.114064  | SULF2 ENSG00000196562 |
| 20 | 45715452 | 45716391 | 45716052 | 14 | 46 | 44 | 1.001526857 | 0.496486  | SULF2 ENSG00000196562 |
| 20 | 45716987 | 45717448 | 45717231 | 12 | 22 | 31 | 0.689215623 | 0.916241  | SULF2 ENSG00000196562 |
| 20 | 45719122 | 45719357 | 45719255 | 9  | 11 | 15 | 0.71918152  | 0.81018   | SULF2 ENSG00000196562 |
| 20 | 45719496 | 45720991 | 45720270 | 14 | 69 | 67 | 0.98711189  | 0.52998   | SULF2 ENSG00000196562 |
| 20 | 45721063 | 45721329 | 45721183 | 8  | 11 | 12 | 0.885146486 | 0.620672  | SULF2 ENSG00000196562 |
| 20 | 45721338 | 45721945 | 45721766 | 15 | 31 | 29 | 1.022835939 | 0.463651  | SULF2 ENSG00000196562 |
| 20 | 45722299 | 45722680 | 45722514 | 15 | 24 | 23 | 0.998863222 | 0.500802  | SULF2 ENSG00000196562 |
| 20 | 45723097 | 45724277 | 45723964 | 13 | 62 | 47 | 1.25856766  | 0.112912  | SULF2 ENSG00000196562 |

|    |          |          |          |     |     |     |             |           |       |                 |
|----|----------|----------|----------|-----|-----|-----|-------------|-----------|-------|-----------------|
| 20 | 45724283 | 45725046 | 45724880 | 12  | 33  | 43  | 0.740974899 | 0.907319  | SULF2 | ENSG00000196562 |
| 20 | 45725087 | 45725483 | 45725260 | 9   | 16  | 12  | 1.253957522 | 0.265012  | SULF2 | ENSG00000196562 |
| 20 | 45725647 | 45728079 | 45727582 | 194 | 407 | 128 | 3.032827494 | 7.67E-33  | SULF2 | ENSG00000196562 |
| 20 | 45728254 | 45728451 | 45728352 | 8   | 9   | 13  | 0.684934781 | 0.824961  | SULF2 | ENSG00000196562 |
| 20 | 45728539 | 45728944 | 45728697 | 12  | 20  | 18  | 1.05984645  | 0.425516  | SULF2 | ENSG00000196562 |
| 20 | 45728963 | 45730090 | 45729273 | 12  | 53  | 67  | 0.761486315 | 0.933748  | SULF2 | ENSG00000196562 |
| 20 | 45730163 | 45730383 | 45730292 | 8   | 9   | 17  | 0.532727052 | 0.951077  | SULF2 | ENSG00000196562 |
| 20 | 45730478 | 45730766 | 45730618 | 8   | 12  | 17  | 0.692545167 | 0.848017  | SULF2 | ENSG00000196562 |
| 20 | 45731167 | 45731562 | 45731346 | 8   | 17  | 20  | 0.821921737 | 0.731032  | SULF2 | ENSG00000196562 |
| 20 | 45731729 | 45732208 | 45732029 | 10  | 22  | 28  | 0.760513791 | 0.838947  | SULF2 | ENSG00000196562 |
| 20 | 45733196 | 45733416 | 45733294 | 9   | 11  | 17  | 0.639272462 | 0.890352  | SULF2 | ENSG00000196562 |
| 20 | 45733420 | 45733619 | 45733526 | 8   | 11  | 10  | 1.046082211 | 0.455063  | SULF2 | ENSG00000196562 |
| 20 | 45734446 | 45734995 | 45734779 | 14  | 27  | 34  | 0.767126954 | 0.854158  | SULF2 | ENSG00000196562 |
| 20 | 45735096 | 45735614 | 45735275 | 8   | 20  | 25  | 0.774503175 | 0.810437  | SULF2 | ENSG00000196562 |
| 20 | 45735617 | 45736429 | 45736245 | 11  | 32  | 26  | 1.171999514 | 0.267953  | SULF2 | ENSG00000196562 |
| 20 | 45736440 | 45737502 | 45736630 | 14  | 45  | 39  | 1.102744997 | 0.324004  | SULF2 | ENSG00000196562 |
| 20 | 45737512 | 45738072 | 45737614 | 8   | 19  | 29  | 0.639272462 | 0.942743  | SULF2 | ENSG00000196562 |
| 20 | 45738362 | 45739060 | 45738717 | 12  | 35  | 30  | 1.113571385 | 0.328528  | SULF2 | ENSG00000196562 |
| 20 | 45739202 | 45739557 | 45739379 | 10  | 16  | 26  | 0.603757325 | 0.952213  | SULF2 | ENSG00000196562 |
| 20 | 45739674 | 45741108 | 45740196 | 41  | 118 | 99  | 1.141101345 | 0.16421   | SULF2 | ENSG00000196562 |
| 20 | 45741255 | 45741764 | 45741507 | 15  | 27  | 23  | 1.118726809 | 0.34127   | SULF2 | ENSG00000196562 |
| 20 | 45742629 | 45742973 | 45742801 | 10  | 16  | 13  | 1.164389127 | 0.333296  | SULF2 | ENSG00000196562 |
| 20 | 45742980 | 45743801 | 45743226 | 13  | 40  | 22  | 1.709358975 | 0.0172316 | SULF2 | ENSG00000196562 |
| 20 | 45744085 | 45744616 | 45744241 | 10  | 20  | 26  | 0.745817872 | 0.845948  | SULF2 | ENSG00000196562 |
| 20 | 45745088 | 45745584 | 45745267 | 8   | 17  | 24  | 0.690414259 | 0.888181  | SULF2 | ENSG00000196562 |
| 20 | 45745715 | 45745935 | 45745806 | 11  | 13  | 14  | 0.894981447 | 0.618069  | SULF2 | ENSG00000196562 |
| 20 | 45746336 | 45746654 | 45746495 | 11  | 15  | 20  | 0.730597099 | 0.831283  | SULF2 | ENSG00000196562 |
| 20 | 45748382 | 45748805 | 45748626 | 10  | 18  | 21  | 0.828148417 | 0.728078  | SULF2 | ENSG00000196562 |
| 20 | 45749034 | 45749545 | 45749366 | 8   | 19  | 23  | 0.799090578 | 0.772621  | SULF2 | ENSG00000196562 |
| 20 | 45751002 | 45752034 | 45751836 | 15  | 51  | 46  | 1.060920256 | 0.383385  | SULF2 | ENSG00000196562 |
| 20 | 45752081 | 45752631 | 45752458 | 13  | 25  | 30  | 0.804246001 | 0.795369  | SULF2 | ENSG00000196562 |
| 20 | 45753151 | 45753684 | 45753505 | 8   | 19  | 31  | 0.599317933 | 0.96677   | SULF2 | ENSG00000196562 |
| 20 | 45753707 | 45753929 | 45753835 | 10  | 12  | 20  | 0.593610143 | 0.935335  | SULF2 | ENSG00000196562 |
| 20 | 45754072 | 45754284 | 45754219 | 9   | 9   | 14  | 0.639272462 | 0.869513  | SULF2 | ENSG00000196562 |



|    |          |          |          |    |    |    |             |            |       |                 |
|----|----------|----------|----------|----|----|----|-------------|------------|-------|-----------------|
| 20 | 45754765 | 45755310 | 45755043 | 15 | 29 | 23 | 1.198635866 | 0.251284   | SULF2 | ENSG00000196562 |
| 20 | 45755353 | 45756254 | 45756115 | 21 | 45 | 36 | 1.192156754 | 0.210834   | SULF2 | ENSG00000196562 |
| 20 | 45756340 | 45757239 | 45756651 | 13 | 42 | 39 | 1.030826845 | 0.444144   | SULF2 | ENSG00000196562 |
| 20 | 45757346 | 45757757 | 45757519 | 12 | 18 | 20 | 0.867584056 | 0.67417    | SULF2 | ENSG00000196562 |
| 20 | 45757990 | 45758439 | 45758214 | 10 | 19 | 22 | 0.833833646 | 0.725376   | SULF2 | ENSG00000196562 |
| 20 | 45758802 | 45758999 | 45758905 | 10 | 11 | 17 | 0.639272462 | 0.890352   | SULF2 | ENSG00000196562 |
| 20 | 45759088 | 45759572 | 45759206 | 11 | 21 | 19 | 1.054799562 | 0.429896   | SULF2 | ENSG00000196562 |
| 20 | 45759757 | 45760918 | 45760155 | 13 | 56 | 40 | 1.333116964 | 0.077771   | SULF2 | ENSG00000196562 |
| 20 | 45761226 | 45762366 | 45761771 | 13 | 54 | 50 | 1.034117218 | 0.430677   | SULF2 | ENSG00000196562 |
| 20 | 45762475 | 45762775 | 45762625 | 14 | 16 | 26 | 0.603757325 | 0.952213   | SULF2 | ENSG00000196562 |
| 20 | 45763834 | 45764035 | 45763934 | 8  | 9  | 20 | 0.456623187 | 0.983844   | SULF2 | ENSG00000196562 |
| 20 | 45764227 | 45765011 | 45764631 | 15 | 38 | 24 | 1.495897561 | 0.0545351  | SULF2 | ENSG00000196562 |
| 20 | 45765384 | 45765586 | 45765470 | 9  | 11 | 15 | 0.71918152  | 0.81018    | SULF2 | ENSG00000196562 |
| 20 | 45766716 | 45767034 | 45766890 | 16 | 21 | 14 | 1.406399416 | 0.148881   | SULF2 | ENSG00000196562 |
| 20 | 45767136 | 45767949 | 45767474 | 19 | 49 | 25 | 1.844055179 | 0.00450038 | SULF2 | ENSG00000196562 |
| 20 | 45768429 | 45769157 | 45768593 | 11 | 30 | 27 | 1.06164891  | 0.407875   | SULF2 | ENSG00000196562 |
| 20 | 45769815 | 45770022 | 45769918 | 8  | 9  | 9  | 0.958908693 | 0.536911   | SULF2 | ENSG00000196562 |
| 20 | 45770395 | 45770892 | 45770643 | 9  | 20 | 22 | 0.875525328 | 0.671044   | SULF2 | ENSG00000196562 |
| 20 | 45771059 | 45771358 | 45771208 | 12 | 15 | 19 | 0.767126954 | 0.788167   | SULF2 | ENSG00000196562 |
| 20 | 45771478 | 45772044 | 45771657 | 11 | 26 | 29 | 0.863017824 | 0.711594   | SULF2 | ENSG00000196562 |
| 20 | 45772485 | 45772664 | 45772574 | 8  | 8  | 12 | 0.663859864 | 0.833689   | SULF2 | ENSG00000196562 |
| 20 | 45772786 | 45773344 | 45772953 | 14 | 26 | 22 | 1.125675422 | 0.336059   | SULF2 | ENSG00000196562 |
| 20 | 45773398 | 45773960 | 45773590 | 12 | 27 | 28 | 0.925842876 | 0.614522   | SULF2 | ENSG00000196562 |
| 20 | 45774169 | 45774983 | 45774781 | 22 | 49 | 44 | 1.065454103 | 0.377712   | SULF2 | ENSG00000196562 |
| 20 | 45775424 | 45775696 | 45775560 | 9  | 13 | 15 | 0.839045106 | 0.685928   | SULF2 | ENSG00000196562 |
| 20 | 45776443 | 45777113 | 45776879 | 9  | 27 | 35 | 0.745817872 | 0.879981   | SULF2 | ENSG00000196562 |
| 20 | 45777908 | 45778219 | 45778062 | 9  | 12 | 11 | 1.038817751 | 0.460341   | SULF2 | ENSG00000196562 |
| 20 | 45778976 | 45779173 | 45779075 | 8  | 11 | 5  | 1.917817386 | 0.0843804  | SULF2 | ENSG00000196562 |
| 20 | 45779226 | 45779919 | 45779572 | 8  | 26 | 36 | 0.699744181 | 0.923312   | SULF2 | ENSG00000196562 |
| 20 | 45780281 | 45780940 | 45780627 | 12 | 32 | 27 | 1.130142388 | 0.314942   | SULF2 | ENSG00000196562 |
| 20 | 45781028 | 45781315 | 45781161 | 8  | 11 | 23 | 0.479454347 | 0.984912   | SULF2 | ENSG00000196562 |
| 20 | 45781400 | 45781661 | 45781546 | 10 | 11 | 18 | 0.605626543 | 0.918575   | SULF2 | ENSG00000196562 |
| 20 | 45781686 | 45782196 | 45781865 | 10 | 21 | 17 | 1.171999514 | 0.305749   | SULF2 | ENSG00000196562 |
| 20 | 45782813 | 45783047 | 45782962 | 8  | 10 | 15 | 0.659249726 | 0.861705   | SULF2 | ENSG00000196562 |

|    |          |          |          |    |     |     |             |           |       |                 |
|----|----------|----------|----------|----|-----|-----|-------------|-----------|-------|-----------------|
| 20 | 45783180 | 45783525 | 45783352 | 16 | 19  | 22  | 0.833833646 | 0.725376  | SULF2 | ENSG00000196562 |
| 20 | 45783912 | 45784297 | 45784034 | 12 | 19  | 16  | 1.128127874 | 0.354788  | SULF2 | ENSG00000196562 |
| 20 | 45786019 | 45786352 | 45786185 | 11 | 16  | 18  | 0.857970936 | 0.678066  | SULF2 | ENSG00000196562 |
| 20 | 45786598 | 45786960 | 45786769 | 8  | 14  | 28  | 0.495987255 | 0.988914  | SULF2 | ENSG00000196562 |
| 20 | 45787041 | 45788101 | 45787726 | 42 | 97  | 79  | 1.174663149 | 0.141349  | SULF2 | ENSG00000196562 |
| 20 | 45789019 | 45789206 | 45789187 | 8  | 10  | 7   | 1.318499453 | 0.269217  | SULF2 | ENSG00000196562 |
| 20 | 45789210 | 45789439 | 45789333 | 13 | 15  | 8   | 1.704726565 | 0.0916153 | SULF2 | ENSG00000196562 |
| 20 | 45789532 | 45790001 | 45789677 | 11 | 23  | 30  | 0.742380924 | 0.865876  | SULF2 | ENSG00000196562 |
| 20 | 45790016 | 45790236 | 45790132 | 8  | 10  | 22  | 0.458608505 | 0.987045  | SULF2 | ENSG00000196562 |
| 20 | 45790272 | 45790845 | 45790450 | 12 | 24  | 29  | 0.799090578 | 0.798033  | SULF2 | ENSG00000196562 |
| 20 | 45791073 | 45791332 | 45791202 | 11 | 14  | 10  | 1.307602763 | 0.244096  | SULF2 | ENSG00000196562 |
| 20 | 45791407 | 45791819 | 45791646 | 14 | 21  | 25  | 0.811384279 | 0.76647   | SULF2 | ENSG00000196562 |
| 20 | 45791842 | 45792500 | 45792322 | 14 | 34  | 22  | 1.459208881 | 0.0757064 | SULF2 | ENSG00000196562 |
| 20 | 45792897 | 45793301 | 45793143 | 14 | 22  | 26  | 0.816848146 | 0.76371   | SULF2 | ENSG00000196562 |
| 20 | 45793565 | 45794655 | 45794068 | 12 | 50  | 54  | 0.889169879 | 0.727598  | SULF2 | ENSG00000196562 |
| 20 | 45795013 | 45795626 | 45795192 | 13 | 29  | 22  | 1.250750469 | 0.206436  | SULF2 | ENSG00000196562 |
| 20 | 45795960 | 45797387 | 45796217 | 21 | 75  | 74  | 0.971694142 | 0.569758  | SULF2 | ENSG00000196562 |
| 20 | 45797444 | 45797830 | 45797637 | 11 | 20  | 17  | 1.118726809 | 0.361026  | SULF2 | ENSG00000196562 |
| 20 | 45797857 | 45799525 | 45799311 | 12 | 70  | 44  | 1.512944827 | 0.0135933 | SULF2 | ENSG00000196562 |
| 20 | 45799529 | 45800023 | 45799844 | 19 | 31  | 17  | 1.704726565 | 0.0311659 | SULF2 | ENSG00000196562 |
| 20 | 45800040 | 45800652 | 45800346 | 9  | 25  | 16  | 1.466566236 | 0.10473   | SULF2 | ENSG00000196562 |
| 20 | 45801029 | 45803389 | 45802052 | 15 | 102 | 104 | 0.940643766 | 0.67045   | SULF2 | ENSG00000196562 |
| 20 | 45803535 | 45803940 | 45803714 | 8  | 16  | 25  | 0.626978761 | 0.936688  | SULF2 | ENSG00000196562 |
| 20 | 45804253 | 45804453 | 45804350 | 12 | 12  | 9   | 1.246581301 | 0.295061  | SULF2 | ENSG00000196562 |
| 20 | 45804818 | 45805448 | 45805186 | 12 | 28  | 19  | 1.390417605 | 0.124062  | SULF2 | ENSG00000196562 |
| 20 | 45805863 | 45806284 | 45806035 | 13 | 22  | 17  | 1.225272219 | 0.255726  | SULF2 | ENSG00000196562 |
| 20 | 45806540 | 45806814 | 45806710 | 11 | 15  | 14  | 1.022835939 | 0.473606  | SULF2 | ENSG00000196562 |
| 20 | 45806827 | 45807314 | 45807165 | 12 | 25  | 30  | 0.804246001 | 0.795369  | SULF2 | ENSG00000196562 |
| 20 | 45807672 | 45807869 | 45807833 | 8  | 8   | 4   | 1.726035648 | 0.150596  | SULF2 | ENSG00000196562 |
| 20 | 45807964 | 45808461 | 45808143 | 12 | 24  | 16  | 1.410159843 | 0.132195  | SULF2 | ENSG00000196562 |
| 20 | 45809177 | 45809641 | 45809274 | 12 | 20  | 19  | 1.006854128 | 0.490315  | SULF2 | ENSG00000196562 |
| 20 | 45809655 | 45809890 | 45809748 | 9  | 12  | 12  | 0.958908693 | 0.542188  | SULF2 | ENSG00000196562 |
| 20 | 45810174 | 45810413 | 45810273 | 9  | 11  | 16  | 0.676876725 | 0.854566  | SULF2 | ENSG00000196562 |
| 20 | 45810493 | 45811836 | 45811384 | 18 | 71  | 73  | 0.932992242 | 0.662412  | SULF2 | ENSG00000196562 |

|    |          |          |          |     |     |    |             |            |       |                 |
|----|----------|----------|----------|-----|-----|----|-------------|------------|-------|-----------------|
| 20 | 45817424 | 45817603 | 45817472 | 8   | 8   | 5  | 1.43836304  | 0.235762   | SULF2 | ENSG00000196562 |
| 20 | 45818387 | 45818774 | 45818595 | 8   | 16  | 15 | 1.018840486 | 0.477384   | SULF2 | ENSG00000196562 |
| 20 | 45822363 | 45822903 | 45822724 | 11  | 23  | 8  | 2.557089848 | 0.00494559 | SULF2 | ENSG00000196562 |
| 20 | 45825044 | 45825343 | 45825193 | 10  | 14  | 17 | 0.799090578 | 0.74177    | SULF2 | ENSG00000196562 |
| 20 | 45826525 | 45826738 | 45826601 | 12  | 13  | 10 | 1.220429246 | 0.306001   | SULF2 | ENSG00000196562 |
| 20 | 45826783 | 45827037 | 45826910 | 10  | 13  | 7  | 1.678090213 | 0.11195    | SULF2 | ENSG00000196562 |
| 20 | 45827796 | 45828031 | 45827895 | 8   | 10  | 15 | 0.659249726 | 0.861705   | SULF2 | ENSG00000196562 |
| 20 | 45828626 | 45828873 | 45828757 | 11  | 12  | 4  | 2.493162602 | 0.0299057  | SULF2 | ENSG00000196562 |
| 20 | 45829219 | 45829493 | 45829345 | 10  | 11  | 5  | 1.917817386 | 0.0843804  | SULF2 | ENSG00000196562 |
| 20 | 45830041 | 45830467 | 45830335 | 11  | 17  | 13 | 1.232882605 | 0.274309   | SULF2 | ENSG00000196562 |
| 20 | 45830516 | 45831031 | 45830669 | 11  | 21  | 21 | 0.958908693 | 0.555026   | SULF2 | ENSG00000196562 |
| 20 | 45831617 | 45831917 | 45831746 | 9   | 13  | 6  | 1.917817386 | 0.0693353  | SULF2 | ENSG00000196562 |
| 20 | 45831968 | 45832231 | 45832124 | 8   | 10  | 12 | 0.811384279 | 0.697544   | SULF2 | ENSG00000196562 |
| 20 | 45839290 | 45839589 | 45839459 | 9   | 12  | 14 | 0.831054201 | 0.689281   | SULF2 | ENSG00000196562 |
| 20 | 45845293 | 45847397 | 45847050 | 204 | 388 | 60 | 6.115007895 | 1.95E-57   | SULF2 | ENSG00000196562 |
| 20 | 45848084 | 45849603 | 45848882 | 38  | 141 | 78 | 1.723608031 | 3.65E-05   | SULF2 | ENSG00000196562 |
| 20 | 45850037 | 45850609 | 45850320 | 8   | 20  | 18 | 1.05984645  | 0.425516   | SULF2 | ENSG00000196562 |
| 20 | 45851115 | 45851859 | 45851680 | 17  | 37  | 31 | 1.138704073 | 0.292149   | SULF2 | ENSG00000196562 |
| 20 | 45852370 | 45852834 | 45852625 | 10  | 20  | 20 | 0.958908693 | 0.553754   | SULF2 | ENSG00000196562 |
| 20 | 45867466 | 45867727 | 45867596 | 10  | 11  | 7  | 1.43836304  | 0.204844   | SULF2 | ENSG00000196562 |
| 20 | 45869537 | 45869795 | 45869674 | 8   | 11  | 12 | 0.885146486 | 0.620672   | SULF2 | ENSG00000196562 |
| 20 | 45871451 | 45871757 | 45871593 | 13  | 16  | 13 | 1.164389127 | 0.333296   | SULF2 | ENSG00000196562 |
| 20 | 45872094 | 45872502 | 45872258 | 9   | 17  | 19 | 0.863017824 | 0.676008   | SULF2 | ENSG00000196562 |
| 20 | 45873719 | 45874282 | 45873889 | 12  | 26  | 25 | 0.995789797 | 0.505405   | SULF2 | ENSG00000196562 |
| 20 | 45874666 | 45875035 | 45874789 | 12  | 17  | 12 | 1.327719729 | 0.212795   | SULF2 | ENSG00000196562 |
| 20 | 45876108 | 45876287 | 45876216 | 8   | 8   | 5  | 1.43836304  | 0.235762   | SULF2 | ENSG00000196562 |
| 20 | 45876443 | 45877060 | 45876881 | 13  | 33  | 19 | 1.630144778 | 0.03763    | SULF2 | ENSG00000196562 |
| 20 | 45877065 | 45877268 | 45877126 | 9   | 10  | 6  | 1.506856518 | 0.188853   | SULF2 | ENSG00000196562 |
| 20 | 45877293 | 45877623 | 45877452 | 8   | 12  | 15 | 0.779113313 | 0.750998   | SULF2 | ENSG00000196562 |
| 20 | 45879625 | 45880550 | 45879999 | 17  | 49  | 30 | 1.546626924 | 0.0258926  | SULF2 | ENSG00000196562 |
| 20 | 45885887 | 45886117 | 45886002 | 8   | 9   | 13 | 0.684934781 | 0.824961   |       | ENSG00000215448 |
| 20 | 45911965 | 45912370 | 45912174 | 11  | 21  | 16 | 1.240940662 | 0.248103   |       | ENSG00000215448 |
| 20 | 45913787 | 45914207 | 45913966 | 9   | 18  | 6  | 2.602752167 | 0.00970422 |       | ENSG00000215448 |
| 20 | 45914220 | 45914494 | 45914316 | 8   | 11  | 4  | 2.301380863 | 0.0459276  |       | ENSG00000215448 |

|    |          |          |          |    |    |    |             |             |                 |
|----|----------|----------|----------|----|----|----|-------------|-------------|-----------------|
| 20 | 45916891 | 45917509 | 45917174 | 19 | 38 | 29 | 1.246581301 | 0.179231    | ENSG00000215448 |
| 20 | 45918163 | 45918463 | 45918313 | 8  | 11 | 10 | 1.046082211 | 0.455063    | ENSG00000215448 |
| 20 | 45918500 | 45918853 | 45918676 | 13 | 18 | 3  | 4.554816292 | 0.000599415 | ENSG00000215448 |
| 20 | 45919494 | 45920293 | 45919893 | 10 | 31 | 22 | 1.334133834 | 0.142045    | ENSG00000215448 |
| 20 | 45920376 | 45920635 | 45920505 | 13 | 16 | 13 | 1.164389127 | 0.333296    | ENSG00000215448 |
| 20 | 45923250 | 45923555 | 45923404 | 9  | 12 | 4  | 2.493162602 | 0.0299057   | ENSG00000215448 |
| 20 | 45925551 | 45925760 | 45925692 | 9  | 12 | 7  | 1.558226626 | 0.152813    | ENSG00000215448 |
| 20 | 45925799 | 45925981 | 45925871 | 9  | 10 | 5  | 1.757999271 | 0.121253    | ENSG00000215448 |
| 20 | 45925996 | 45926216 | 45926107 | 8  | 11 | 8  | 1.278544924 | 0.28289     | ENSG00000215448 |
| 20 | 45927656 | 45927937 | 45927796 | 9  | 13 | 14 | 0.894981447 | 0.618069    | ENSG00000215448 |
| 20 | 45928575 | 45928803 | 45928654 | 8  | 10 | 6  | 1.506856518 | 0.188853    | ENSG00000215448 |
| 20 | 45931332 | 45931783 | 45931621 | 8  | 16 | 13 | 1.164389127 | 0.333296    | ENSG00000215448 |
| 20 | 45932690 | 45933009 | 45932838 | 9  | 11 | 10 | 1.046082211 | 0.455063    | ENSG00000215448 |
| 20 | 45935151 | 45935430 | 45935301 | 8  | 12 | 15 | 0.779113313 | 0.750998    | ENSG00000215448 |
| 20 | 45936642 | 45936851 | 45936718 | 8  | 9  | 8  | 1.065454103 | 0.442605    | ENSG00000215448 |
| 20 | 45938603 | 45938885 | 45938779 | 9  | 14 | 13 | 1.027402171 | 0.469541    | ENSG00000215448 |
| 20 | 45940528 | 45941188 | 45940858 | 11 | 32 | 18 | 1.665472993 | 0.0343673   | ENSG00000215448 |
| 20 | 45941955 | 45942153 | 45942054 | 9  | 10 | 3  | 2.636998906 | 0.034203    | ENSG00000215448 |
| 20 | 45944939 | 45945265 | 45945102 | 14 | 19 | 19 | 0.958908693 | 0.552451    | ENSG00000215448 |
| 20 | 45946655 | 45946870 | 45946726 | 8  | 9  | 13 | 0.684934781 | 0.824961    | ENSG00000215448 |
| 20 | 45949418 | 45949712 | 45949569 | 9  | 11 | 7  | 1.43836304  | 0.204844    | ENSG00000215448 |
| 20 | 45956765 | 45957361 | 45956944 | 12 | 30 | 30 | 0.958908693 | 0.565341    | ENSG00000215448 |
| 20 | 45957585 | 45958160 | 45957966 | 13 | 29 | 19 | 1.43836304  | 0.0995642   | ENSG00000215448 |
| 20 | 45968916 | 45969197 | 45969056 | 11 | 14 | 5  | 2.397271733 | 0.0258078   | ENSG00000215448 |
| 20 | 45977143 | 45977484 | 45977313 | 9  | 15 | 11 | 1.278544924 | 0.254978    | ENSG00000215448 |
| 20 | 45978195 | 45978476 | 45978372 | 10 | 14 | 10 | 1.307602763 | 0.244096    | ENSG00000215448 |
| 20 | 45981296 | 45982012 | 45981674 | 9  | 27 | 13 | 1.917817386 | 0.0192196   | ENSG00000215448 |
| 20 | 45983474 | 45983735 | 45983604 | 9  | 12 | 11 | 1.038817751 | 0.460341    | ENSG00000215448 |
| 20 | 45984935 | 45985119 | 45985027 | 8  | 8  | 9  | 0.863017824 | 0.627343    | ENSG00000215448 |
| 20 | 45985666 | 45986137 | 45985962 | 11 | 22 | 21 | 1.002495452 | 0.4958      | ENSG00000215448 |
| 20 | 45986301 | 45986879 | 45986460 | 9  | 20 | 19 | 1.006854128 | 0.490315    | ENSG00000215448 |
| 20 | 45989240 | 45990434 | 45989837 | 10 | 49 | 50 | 0.940106562 | 0.621808    | ENSG00000215448 |
| 20 | 45992294 | 45992588 | 45992461 | 11 | 13 | 6  | 1.917817386 | 0.0693353   | ENSG00000215448 |
| 20 | 45993593 | 45993897 | 45993750 | 10 | 11 | 10 | 1.046082211 | 0.455063    | ENSG00000215448 |

|    |          |          |          |    |    |    |             |            |                 |
|----|----------|----------|----------|----|----|----|-------------|------------|-----------------|
| 20 | 45995101 | 45995395 | 45995262 | 10 | 12 | 7  | 1.558226626 | 0.152813   | ENSG00000215448 |
| 20 | 45995458 | 45995745 | 45995584 | 9  | 12 | 5  | 2.077635502 | 0.0577144  | ENSG00000215448 |
| 20 | 45998996 | 45999363 | 45999192 | 15 | 20 | 18 | 1.05984645  | 0.425516   | ENSG00000215448 |
| 20 | 46000566 | 46000895 | 46000730 | 11 | 15 | 15 | 0.958908693 | 0.546868   | ENSG00000215448 |
| 20 | 46000950 | 46001407 | 46001228 | 8  | 17 | 18 | 0.908439814 | 0.615249   | ENSG00000215448 |
| 20 | 46002456 | 46003077 | 46002898 | 11 | 28 | 15 | 1.738022006 | 0.0334925  | ENSG00000215448 |
| 20 | 46003439 | 46003682 | 46003560 | 9  | 11 | 12 | 0.885146486 | 0.620672   | ENSG00000215448 |
| 20 | 46007018 | 46007637 | 46007376 | 13 | 31 | 19 | 1.534253909 | 0.0623199  | ENSG00000215448 |
| 20 | 46007690 | 46007912 | 46007849 | 9  | 10 | 12 | 0.811384279 | 0.697544   | ENSG00000215448 |
| 20 | 46008040 | 46008393 | 46008214 | 9  | 13 | 12 | 1.0326709   | 0.46514    | ENSG00000215448 |
| 20 | 46010033 | 46010345 | 46010189 | 8  | 12 | 12 | 0.958908693 | 0.542188   | ENSG00000215448 |
| 20 | 46011285 | 46011479 | 46011420 | 9  | 10 | 8  | 1.171999514 | 0.35773    | ENSG00000215448 |
| 20 | 46011859 | 46012642 | 46012498 | 13 | 38 | 23 | 1.558226626 | 0.0403304  | ENSG00000215448 |
| 20 | 46015254 | 46015752 | 46015573 | 10 | 22 | 12 | 1.696530765 | 0.057768   | ENSG00000215448 |
| 20 | 46016021 | 46016220 | 46016097 | 9  | 10 | 4  | 2.109599125 | 0.0694668  | ENSG00000215448 |
| 20 | 46017973 | 46018438 | 46018260 | 9  | 17 | 19 | 0.863017824 | 0.676008   | ENSG00000215448 |
| 20 | 46018680 | 46018915 | 46018817 | 10 | 12 | 15 | 0.779113313 | 0.750998   | ENSG00000215448 |
| 20 | 46019557 | 46019946 | 46019869 | 8  | 16 | 6  | 2.328778255 | 0.0221113  | ENSG00000215448 |
| 20 | 46020072 | 46020444 | 46020251 | 9  | 15 | 10 | 1.394776281 | 0.191426   | ENSG00000215448 |
| 20 | 46026760 | 46026994 | 46026889 | 11 | 14 | 13 | 1.027402171 | 0.469541   | ENSG00000215448 |
| 20 | 46028851 | 46029084 | 46028967 | 8  | 9  | 6  | 1.369869562 | 0.253675   | ENSG00000215448 |
| 20 | 46030014 | 46030294 | 46030154 | 8  | 12 | 16 | 0.733283118 | 0.803868   | ENSG00000215448 |
| 20 | 46030644 | 46030874 | 46030759 | 8  | 9  | 3  | 2.397271733 | 0.0539397  | ENSG00000215448 |
| 20 | 46031040 | 46031389 | 46031267 | 8  | 12 | 2  | 4.155271003 | 0.0046638  | ENSG00000215448 |
| 20 | 46031620 | 46032047 | 46031799 | 9  | 18 | 27 | 0.650688042 | 0.929412   | ENSG00000215448 |
| 20 | 46032129 | 46032778 | 46032480 | 9  | 26 | 19 | 1.294526736 | 0.18689    | ENSG00000215448 |
| 20 | 46032869 | 46033057 | 46032962 | 8  | 9  | 7  | 1.198635866 | 0.346278   | ENSG00000215448 |
| 20 | 46033197 | 46033384 | 46033278 | 8  | 9  | 11 | 0.799090578 | 0.702688   | ENSG00000215448 |
| 20 | 46033408 | 46033731 | 46033567 | 9  | 13 | 12 | 1.0326709   | 0.46514    | ENSG00000215448 |
| 20 | 46034266 | 46034829 | 46034547 | 15 | 29 | 15 | 1.797953799 | 0.0249937  | ENSG00000215448 |
| 20 | 46035802 | 46036237 | 46035951 | 10 | 17 | 4  | 3.452071295 | 0.00292757 | ENSG00000215448 |
| 20 | 46037107 | 46037290 | 46037222 | 8  | 9  | 4  | 1.917817386 | 0.103282   | ENSG00000215448 |
| 20 | 46041043 | 46041364 | 46041203 | 10 | 13 | 7  | 1.678090213 | 0.11195    | ENSG00000215448 |
| 20 | 46042898 | 46043374 | 46043136 | 10 | 21 | 22 | 0.917217011 | 0.614252   | ENSG00000215448 |

|    |          |          |          |     |     |    |             |             |                 |
|----|----------|----------|----------|-----|-----|----|-------------|-------------|-----------------|
| 20 | 46044314 | 46044832 | 46044653 | 9   | 20  | 10 | 1.830643869 | 0.0454769   | ENSG00000215448 |
| 20 | 46046240 | 46046719 | 46046540 | 11  | 18  | 17 | 1.012181398 | 0.48423     | ENSG00000215448 |
| 20 | 46047282 | 46047606 | 46047444 | 12  | 16  | 14 | 1.086763185 | 0.404922    | ENSG00000215448 |
| 20 | 46047624 | 46048062 | 46047843 | 10  | 21  | 12 | 1.622768557 | 0.076896    | ENSG00000215448 |
| 20 | 46048704 | 46048909 | 46048806 | 8   | 9   | 8  | 1.065454103 | 0.442605    | ENSG00000215448 |
| 20 | 46049178 | 46049369 | 46049279 | 8   | 9   | 3  | 2.397271733 | 0.0539397   | ENSG00000215448 |
| 20 | 46050025 | 46050250 | 46050184 | 8   | 9   | 6  | 1.369869562 | 0.253675    | ENSG00000215448 |
| 20 | 46050276 | 46050575 | 46050425 | 10  | 14  | 9  | 1.43836304  | 0.179537    | ENSG00000215448 |
| 20 | 46050720 | 46051127 | 46050948 | 9   | 17  | 13 | 1.232882605 | 0.274309    | ENSG00000215448 |
| 20 | 46051581 | 46052764 | 46052337 | 32  | 88  | 42 | 1.984717993 | 6.63E-05    | ENSG00000215448 |
| 20 | 46053355 | 46056006 | 46055390 | 437 | 742 | 90 | 7.829331417 | 4.89E-123   | ENSG00000215448 |
| 20 | 46056036 | 46056288 | 46056172 | 9   | 13  | 8  | 1.491635745 | 0.166708    | ENSG00000215448 |
| 20 | 46056932 | 46057198 | 46057065 | 12  | 15  | 6  | 2.191791298 | 0.0328001   | ENSG00000215448 |
| 20 | 46061264 | 46061674 | 46061443 | 12  | 21  | 8  | 2.343999027 | 0.0109478   | ENSG00000215448 |
| 20 | 46064967 | 46065274 | 46065135 | 9   | 12  | 11 | 1.038817751 | 0.460341    | ENSG00000215448 |
| 20 | 46065371 | 46065690 | 46065539 | 8   | 12  | 14 | 0.831054201 | 0.689281    | ENSG00000215448 |
| 20 | 46066033 | 46066246 | 46066197 | 10  | 11  | 17 | 0.639272462 | 0.890352    | ENSG00000215448 |
| 20 | 46066488 | 46066757 | 46066622 | 11  | 11  | 10 | 1.046082211 | 0.455063    | ENSG00000215448 |
| 20 | 46067699 | 46067905 | 46067785 | 8   | 9   | 7  | 1.198635866 | 0.346278    | ENSG00000215448 |
| 20 | 46067953 | 46068213 | 46068085 | 10  | 12  | 7  | 1.558226626 | 0.152813    | ENSG00000215448 |
| 20 | 46068885 | 46069120 | 46069001 | 9   | 9   | 6  | 1.369869562 | 0.253675    | ENSG00000215448 |
| 20 | 46071058 | 46071256 | 46071157 | 8   | 9   | 7  | 1.198635866 | 0.346278    | ENSG00000215448 |
| 20 | 46071414 | 46071815 | 46071593 | 10  | 18  | 16 | 1.07172148  | 0.415914    | ENSG00000215448 |
| 20 | 46072420 | 46072763 | 46072586 | 10  | 14  | 12 | 1.106433107 | 0.392094    | ENSG00000215448 |
| 20 | 46074018 | 46074520 | 46074365 | 11  | 20  | 22 | 0.875525328 | 0.671044    | ENSG00000215448 |
| 20 | 46074645 | 46075028 | 46074831 | 32  | 42  | 14 | 2.748871587 | 0.000142169 | ENSG00000215448 |
| 20 | 46075049 | 46075265 | 46075156 | 9   | 10  | 8  | 1.171999514 | 0.35773     | ENSG00000215448 |
| 20 | 46076258 | 46076659 | 46076349 | 8   | 16  | 12 | 1.253957522 | 0.265012    | ENSG00000215448 |
| 20 | 46077058 | 46077558 | 46077427 | 8   | 18  | 10 | 1.656296833 | 0.0841786   | ENSG00000215448 |
| 20 | 46078542 | 46078880 | 46078711 | 8   | 14  | 10 | 1.307602763 | 0.244096    | ENSG00000215448 |
| 20 | 46079266 | 46079453 | 46079341 | 9   | 9   | 10 | 0.871735176 | 0.624623    | ENSG00000215448 |
| 20 | 46081537 | 46082242 | 46081716 | 11  | 27  | 9  | 2.684944341 | 0.00192568  | ENSG00000215448 |
| 20 | 46083574 | 46083810 | 46083692 | 8   | 9   | 9  | 0.958908693 | 0.536911    | ENSG00000215448 |
| 20 | 46083853 | 46084195 | 46084024 | 9   | 14  | 12 | 1.106433107 | 0.392094    | ENSG00000215448 |

|    |          |          |          |    |    |    |             |           |                 |
|----|----------|----------|----------|----|----|----|-------------|-----------|-----------------|
| 20 | 46086046 | 46086414 | 46086151 | 9  | 15 | 17 | 0.852363283 | 0.680376  | ENSG00000215448 |
| 20 | 46086824 | 46087110 | 46086967 | 12 | 15 | 16 | 0.902502299 | 0.616352  | ENSG00000215448 |
| 20 | 46087342 | 46087671 | 46087506 | 8  | 13 | 12 | 1.0326709   | 0.46514   | ENSG00000215448 |
| 20 | 46089089 | 46089315 | 46089244 | 8  | 10 | 10 | 0.958908693 | 0.538751  | ENSG00000215448 |
| 20 | 46089508 | 46089716 | 46089622 | 8  | 9  | 8  | 1.065454103 | 0.442605  | ENSG00000215448 |
| 20 | 46090676 | 46090870 | 46090790 | 10 | 11 | 6  | 1.643843474 | 0.137712  | ENSG00000215448 |
| 20 | 46091833 | 46092217 | 46092085 | 10 | 16 | 9  | 1.630144778 | 0.102169  | ENSG00000215448 |
| 20 | 46092579 | 46092861 | 46092729 | 8  | 12 | 18 | 0.656095422 | 0.884036  | ENSG00000215448 |
| 20 | 46092955 | 46093640 | 46093378 | 10 | 28 | 20 | 1.324207243 | 0.159584  | ENSG00000215448 |
| 20 | 46093751 | 46094510 | 46093922 | 13 | 31 | 33 | 0.902502299 | 0.661862  | ENSG00000215448 |
| 20 | 46098032 | 46098591 | 46098412 | 15 | 32 | 22 | 1.375825516 | 0.116194  | ENSG00000215448 |
| 20 | 46100362 | 46100666 | 46100530 | 15 | 19 | 7  | 2.397271733 | 0.0127287 | ENSG00000215448 |
| 20 | 46101128 | 46101339 | 46101187 | 10 | 11 | 4  | 2.301380863 | 0.0459276 | ENSG00000215448 |
| 20 | 46101900 | 46102377 | 46102198 | 9  | 19 | 21 | 0.871735176 | 0.672523  | ENSG00000215448 |
| 20 | 46102506 | 46103899 | 46103296 | 18 | 59 | 56 | 1.009377572 | 0.479288  | ENSG00000215448 |
| 20 | 46104012 | 46104222 | 46104117 | 9  | 9  | 9  | 0.958908693 | 0.536911  | ENSG00000215448 |
| 20 | 46104414 | 46105013 | 46104623 | 11 | 27 | 20 | 1.278544924 | 0.193646  | ENSG00000215448 |
| 20 | 46105035 | 46105545 | 46105290 | 9  | 21 | 19 | 1.054799562 | 0.429896  | ENSG00000215448 |
| 20 | 46105965 | 46106650 | 46106335 | 8  | 23 | 23 | 0.958908693 | 0.557483  | ENSG00000215448 |
| 20 | 46108075 | 46108543 | 46108253 | 11 | 21 | 19 | 1.054799562 | 0.429896  | ENSG00000215448 |
| 20 | 46108571 | 46109036 | 46108867 | 11 | 19 | 24 | 0.767126954 | 0.814057  | ENSG00000215448 |
| 20 | 46109624 | 46109963 | 46109793 | 15 | 20 | 25 | 0.774503175 | 0.810437  | ENSG00000215448 |
| 20 | 46110359 | 46110556 | 46110501 | 8  | 9  | 3  | 2.397271733 | 0.0539397 | ENSG00000215448 |
| 20 | 46113065 | 46113305 | 46113185 | 8  | 12 | 2  | 4.155271003 | 0.0046638 | ENSG00000215448 |
| 20 | 46113575 | 46114934 | 46114246 | 19 | 84 | 75 | 1.07246367  | 0.327928  | ENSG00000215448 |
| 20 | 46115086 | 46115405 | 46115245 | 9  | 13 | 11 | 1.118726809 | 0.38479   | ENSG00000215448 |
| 20 | 46115427 | 46115833 | 46115654 | 11 | 19 | 16 | 1.128127874 | 0.354788  | ENSG00000215448 |
| 20 | 46115869 | 46116574 | 46116048 | 15 | 36 | 38 | 0.909733888 | 0.660189  | ENSG00000215448 |
| 20 | 46116686 | 46118238 | 46117882 | 15 | 66 | 43 | 1.460156419 | 0.0238664 | ENSG00000215448 |
| 20 | 46118295 | 46118932 | 46118585 | 18 | 42 | 35 | 1.145363161 | 0.272078  | ENSG00000215448 |
| 20 | 46119002 | 46119187 | 46119077 | 8  | 9  | 6  | 1.369869562 | 0.253675  | ENSG00000215448 |
| 20 | 46120367 | 46120728 | 46120573 | 11 | 16 | 9  | 1.630144778 | 0.102169  | ENSG00000215448 |
| 20 | 46122423 | 46122657 | 46122548 | 9  | 11 | 19 | 0.575345216 | 0.94039   | ENSG00000215448 |
| 20 | 46123242 | 46123510 | 46123394 | 11 | 15 | 17 | 0.852363283 | 0.680376  | ENSG00000215448 |

|    |          |          |          |    |    |    |             |            |                 |
|----|----------|----------|----------|----|----|----|-------------|------------|-----------------|
| 20 | 46123521 | 46123735 | 46123646 | 10 | 12 | 9  | 1.246581301 | 0.295061   | ENSG00000215448 |
| 20 | 46125486 | 46126381 | 46125938 | 9  | 30 | 42 | 0.691306267 | 0.943579   | ENSG00000215448 |
| 20 | 46126432 | 46126829 | 46126605 | 9  | 16 | 15 | 1.018840486 | 0.477384   | ENSG00000215448 |
| 20 | 46126966 | 46127338 | 46127145 | 17 | 24 | 25 | 0.922027589 | 0.614196   | ENSG00000215448 |
| 20 | 46128002 | 46128362 | 46128107 | 12 | 18 | 24 | 0.728770607 | 0.85379    | ENSG00000215448 |
| 20 | 46129334 | 46129591 | 46129498 | 10 | 12 | 10 | 1.133255728 | 0.37674    | ENSG00000215448 |
| 20 | 46131723 | 46132224 | 46132035 | 12 | 23 | 12 | 1.770292972 | 0.0429088  | ENSG00000215448 |
| 20 | 46132228 | 46132572 | 46132400 | 11 | 16 | 15 | 1.018840486 | 0.477384   | ENSG00000215448 |
| 20 | 46133254 | 46133523 | 46133388 | 8  | 10 | 9  | 1.054799562 | 0.4492     | ENSG00000215448 |
| 20 | 46134452 | 46134865 | 46134678 | 12 | 21 | 15 | 1.318499453 | 0.19542    | ENSG00000215448 |
| 20 | 46135599 | 46135925 | 46135755 | 11 | 14 | 8  | 1.598181155 | 0.124586   | ENSG00000215448 |
| 20 | 46141676 | 46142021 | 46141848 | 13 | 19 | 8  | 2.130908207 | 0.0233014  | ENSG00000215448 |
| 20 | 46147806 | 46148059 | 46147932 | 8  | 11 | 3  | 2.876726079 | 0.0213797  | ENSG00000215448 |
| 20 | 46152409 | 46152816 | 46152551 | 13 | 20 | 9  | 2.013708255 | 0.0279742  | ENSG00000215448 |
| 20 | 46155045 | 46155323 | 46155196 | 10 | 13 | 15 | 0.839045106 | 0.685928   | ENSG00000215448 |
| 20 | 46157198 | 46157406 | 46157287 | 8  | 8  | 9  | 0.863017824 | 0.627343   | ENSG00000215448 |
| 20 | 46160054 | 46160784 | 46160272 | 20 | 43 | 32 | 1.278544924 | 0.140191   | ENSG00000215448 |
| 20 | 46161373 | 46161571 | 46161461 | 8  | 10 | 3  | 2.636998906 | 0.034203   | ENSG00000215448 |
| 20 | 46161886 | 46162163 | 46162007 | 10 | 11 | 9  | 1.150690432 | 0.367789   | ENSG00000215448 |
| 20 | 46163057 | 46163413 | 46163208 | 11 | 16 | 16 | 0.958908693 | 0.548325   | ENSG00000215448 |
| 20 | 46164569 | 46164750 | 46164678 | 8  | 10 | 6  | 1.506856518 | 0.188853   | ENSG00000215448 |
| 20 | 46165123 | 46165717 | 46165445 | 13 | 26 | 23 | 1.07877228  | 0.391798   | ENSG00000215448 |
| 20 | 46165802 | 46166294 | 46166115 | 8  | 19 | 29 | 0.639272462 | 0.942743   | ENSG00000215448 |
| 20 | 46166370 | 46166575 | 46166472 | 8  | 9  | 8  | 1.065454103 | 0.442605   | ENSG00000215448 |
| 20 | 46166615 | 46167032 | 46166794 | 9  | 17 | 10 | 1.569123316 | 0.112309   | ENSG00000215448 |
| 20 | 46168247 | 46168980 | 46168725 | 50 | 85 | 30 | 2.66019831  | 3.09E-07   | ENSG00000215448 |
| 20 | 46172997 | 46173266 | 46173136 | 11 | 13 | 8  | 1.491635745 | 0.166708   | ENSG00000215448 |
| 20 | 46175835 | 46176168 | 46176001 | 9  | 14 | 11 | 1.198635866 | 0.315918   | ENSG00000215448 |
| 20 | 46187050 | 46187252 | 46187129 | 8  | 8  | 4  | 1.726035648 | 0.150596   | ENSG00000215448 |
| 20 | 46191512 | 46192026 | 46191805 | 8  | 17 | 8  | 1.917817386 | 0.0474153  | ENSG00000215448 |
| 20 | 46197259 | 46197586 | 46197436 | 8  | 12 | 12 | 0.958908693 | 0.542188   | ENSG00000215448 |
| 20 | 46203865 | 46204097 | 46203993 | 9  | 11 | 14 | 0.767126954 | 0.756447   | ENSG00000215448 |
| 20 | 46204476 | 46204831 | 46204653 | 15 | 21 | 7  | 2.636998906 | 0.00562102 | ENSG00000215448 |
| 20 | 46208386 | 46208744 | 46208565 | 11 | 17 | 9  | 1.726035648 | 0.0753664  | ENSG00000215448 |



|    |          |          |          |    |    |    |             |             |                       |
|----|----------|----------|----------|----|----|----|-------------|-------------|-----------------------|
| 20 | 46212168 | 46212522 | 46212345 | 9  | 14 | 14 | 0.958908693 | 0.545362    | ENSG00000215448       |
| 20 | 46216244 | 46216450 | 46216342 | 8  | 9  | 9  | 0.958908693 | 0.536911    | ENSG00000215448       |
| 20 | 46238307 | 46238665 | 46238486 | 10 | 15 | 4  | 3.068507818 | 0.0076507   | ENSG00000215448       |
| 20 | 46239878 | 46240161 | 46240022 | 10 | 13 | 9  | 1.34247217  | 0.232231    | ENSG00000215448       |
| 20 | 46242307 | 46242670 | 46242486 | 10 | 16 | 6  | 2.328778255 | 0.0221113   | ENSG00000215448       |
| 20 | 46243199 | 46243438 | 46243356 | 9  | 11 | 4  | 2.301380863 | 0.0459276   | ENSG00000215448       |
| 20 | 46251030 | 46251228 | 46251129 | 8  | 8  | 1  | 4.315089119 | 0.0127267   | ENSG00000215448       |
| 20 | 46251284 | 46251803 | 46251534 | 19 | 31 | 13 | 2.191791298 | 0.00499072  | ENSG00000215448       |
| 20 | 46257869 | 46258119 | 46258024 | 11 | 13 | 8  | 1.491635745 | 0.166708    | ENSG00000215448       |
| 20 | 46262340 | 46262530 | 46262435 | 10 | 10 | 3  | 2.636998906 | 0.034203    | ENSG00000215448       |
| 20 | 46264123 | 46264312 | 46264217 | 8  | 8  | 3  | 2.157544559 | 0.0836802   | ENSG00000215448       |
| 20 | 46265604 | 46265931 | 46265776 | 9  | 13 | 6  | 1.917817386 | 0.0693353   | ENSG00000215448       |
| 20 | 46267533 | 46267874 | 46267703 | 15 | 19 | 8  | 2.130908207 | 0.0233014   | ENSG00000215448       |
| 20 | 46279463 | 46279723 | 46279621 | 8  | 11 | 3  | 2.876726079 | 0.0213797   | ENSG00000215448       |
| 20 | 46284836 | 46285300 | 46285121 | 12 | 21 | 3  | 5.273997812 | 0.00011662  | ENSG00000215448       |
| 20 | 46298847 | 46299174 | 46299010 | 10 | 15 | 3  | 3.835634772 | 0.00291691  | ENSG00000215448       |
| 20 | 46300823 | 46301066 | 46300941 | 8  | 10 | 5  | 1.757999271 | 0.121253    | ENSG00000215448       |
| 20 | 46309041 | 46309241 | 46309146 | 9  | 10 | 9  | 1.054799562 | 0.4492      | ENSG00000215448       |
| 20 | 46318795 | 46319083 | 46318939 | 9  | 12 | 2  | 4.155271003 | 0.0046638   | ENSG00000215448       |
| 20 | 46325196 | 46325505 | 46325350 | 10 | 12 | 4  | 2.493162602 | 0.0299057   | PREX1 ENSG00000124126 |
| 20 | 46326959 | 46327162 | 46327061 | 8  | 8  | 8  | 0.958908693 | 0.534974    | PREX1 ENSG00000124126 |
| 20 | 46328467 | 46328687 | 46328577 | 8  | 9  | 6  | 1.369869562 | 0.253675    | PREX1 ENSG00000124126 |
| 20 | 46335058 | 46335237 | 46335086 | 8  | 8  | 1  | 4.315089119 | 0.0127267   | PREX1 ENSG00000124126 |
| 20 | 46335489 | 46335815 | 46335664 | 8  | 12 | 3  | 3.116453252 | 0.0131971   | PREX1 ENSG00000124126 |
| 20 | 46339815 | 46340113 | 46339973 | 11 | 13 | 8  | 1.491635745 | 0.166708    | PREX1 ENSG00000124126 |
| 20 | 46343768 | 46344056 | 46343912 | 9  | 12 | 13 | 0.890415215 | 0.619237    | PREX1 ENSG00000124126 |
| 20 | 46345783 | 46345972 | 46345877 | 8  | 8  | 6  | 1.232882605 | 0.333038    | PREX1 ENSG00000124126 |
| 20 | 46349470 | 46349803 | 46349636 | 8  | 11 | 5  | 1.917817386 | 0.0843804   | PREX1 ENSG00000124126 |
| 20 | 46350789 | 46351054 | 46350921 | 12 | 14 | 9  | 1.43836304  | 0.179537    | PREX1 ENSG00000124126 |
| 20 | 46351331 | 46351531 | 46351431 | 9  | 9  | 5  | 1.598181155 | 0.170911    | PREX1 ENSG00000124126 |
| 20 | 46354901 | 46355237 | 46355067 | 8  | 12 | 7  | 1.558226626 | 0.152813    | PREX1 ENSG00000124126 |
| 20 | 46357469 | 46358146 | 46357967 | 23 | 43 | 21 | 1.917817386 | 0.00487974  | PREX1 ENSG00000124126 |
| 20 | 46360935 | 46362221 | 46361453 | 23 | 78 | 39 | 1.893844669 | 0.000342473 | PREX1 ENSG00000124126 |
| 20 | 46376727 | 46377026 | 46376876 | 10 | 12 | 8  | 1.385090334 | 0.219216    | PREX1 ENSG00000124126 |

|    |          |          |          |    |    |    |             |            |       |                 |
|----|----------|----------|----------|----|----|----|-------------|------------|-------|-----------------|
| 20 | 46378613 | 46379132 | 46378857 | 12 | 27 | 18 | 1.4131286   | 0.11777    | PREX1 | ENSG00000124126 |
| 20 | 46382737 | 46383003 | 46382856 | 11 | 12 | 10 | 1.133255728 | 0.37674    | PREX1 | ENSG00000124126 |
| 20 | 46385319 | 46385600 | 46385426 | 9  | 13 | 6  | 1.917817386 | 0.0693353  | PREX1 | ENSG00000124126 |
| 20 | 46386231 | 46386424 | 46386327 | 8  | 9  | 8  | 1.065454103 | 0.442605   | PREX1 | ENSG00000124126 |
| 20 | 46387612 | 46387819 | 46387715 | 10 | 10 | 7  | 1.318499453 | 0.269217   | PREX1 | ENSG00000124126 |
| 20 | 46393773 | 46394055 | 46393895 | 8  | 11 | 13 | 0.821921737 | 0.693119   | PREX1 | ENSG00000124126 |
| 20 | 46394460 | 46394650 | 46394513 | 8  | 9  | 13 | 0.684934781 | 0.824961   | PREX1 | ENSG00000124126 |
| 20 | 46394702 | 46395272 | 46394980 | 13 | 29 | 20 | 1.369869562 | 0.130203   | PREX1 | ENSG00000124126 |
| 20 | 46395350 | 46395699 | 46395528 | 8  | 11 | 6  | 1.643843474 | 0.137712   | PREX1 | ENSG00000124126 |
| 20 | 46397511 | 46397756 | 46397633 | 8  | 9  | 4  | 1.917817386 | 0.103282   | PREX1 | ENSG00000124126 |
| 20 | 46406488 | 46406667 | 46406563 | 8  | 8  | 4  | 1.726035648 | 0.150596   | PREX1 | ENSG00000124126 |
| 20 | 46407575 | 46407780 | 46407695 | 9  | 11 | 4  | 2.301380863 | 0.0459276  | PREX1 | ENSG00000124126 |
| 20 | 46411400 | 46411620 | 46411526 | 8  | 8  | 9  | 0.863017824 | 0.627343   | PREX1 | ENSG00000124126 |
| 20 | 46412436 | 46412811 | 46412658 | 9  | 14 | 3  | 3.595907599 | 0.00486913 | PREX1 | ENSG00000124126 |
| 20 | 46420534 | 46420829 | 46420681 | 9  | 11 | 7  | 1.43836304  | 0.204844   | PREX1 | ENSG00000124126 |
| 20 | 46426097 | 46426320 | 46426227 | 9  | 11 | 12 | 0.885146486 | 0.620672   | PREX1 | ENSG00000124126 |
| 20 | 46428251 | 46428501 | 46428353 | 9  | 11 | 6  | 1.643843474 | 0.137712   | PREX1 | ENSG00000124126 |
| 20 | 46439573 | 46439764 | 46439668 | 8  | 9  | 4  | 1.917817386 | 0.103282   | PREX1 | ENSG00000124126 |
| 20 | 46443531 | 46443941 | 46443814 | 9  | 15 | 10 | 1.394776281 | 0.191426   | PREX1 | ENSG00000124126 |
| 20 | 46444346 | 46444680 | 46444513 | 8  | 12 | 5  | 2.077635502 | 0.0577144  | PREX1 | ENSG00000124126 |
| 20 | 46446008 | 46446404 | 46446178 | 11 | 18 | 11 | 1.518272097 | 0.122037   | PREX1 | ENSG00000124126 |
| 20 | 46449893 | 46450177 | 46450035 | 8  | 11 | 16 | 0.676876725 | 0.854566   | PREX1 | ENSG00000124126 |
| 20 | 46457493 | 46457778 | 46457640 | 10 | 13 | 5  | 2.237453617 | 0.038866   | PREX1 | ENSG00000124126 |
| 20 | 46461270 | 46461690 | 46461449 | 9  | 17 | 9  | 1.726035648 | 0.0753664  | PREX1 | ENSG00000124126 |
| 20 | 46471996 | 46472483 | 46472262 | 8  | 18 | 9  | 1.821926517 | 0.0548428  | PREX1 | ENSG00000124126 |
| 20 | 46482451 | 46482672 | 46482549 | 8  | 9  | 3  | 2.397271733 | 0.0539397  | PREX1 | ENSG00000124126 |
| 20 | 46483576 | 46483987 | 46483808 | 9  | 17 | 17 | 0.958908693 | 0.549739   | PREX1 | ENSG00000124126 |
| 20 | 46485261 | 46485443 | 46485396 | 8  | 10 | 6  | 1.506856518 | 0.188853   | PREX1 | ENSG00000124126 |
| 20 | 46496621 | 46496855 | 46496739 | 8  | 10 | 1  | 5.273997812 | 0.00391723 | PREX1 | ENSG00000124126 |
| 20 | 46498327 | 46498614 | 46498498 | 8  | 11 | 4  | 2.301380863 | 0.0459276  | PREX1 | ENSG00000124126 |
| 20 | 46505525 | 46505722 | 46505626 | 9  | 11 | 15 | 0.71918152  | 0.81018    | PREX1 | ENSG00000124126 |
| 20 | 46510856 | 46511052 | 46510955 | 9  | 10 | 8  | 1.171999514 | 0.35773    | PREX1 | ENSG00000124126 |
| 20 | 46513683 | 46514011 | 46513840 | 8  | 10 | 7  | 1.318499453 | 0.269217   | PREX1 | ENSG00000124126 |
| 20 | 46517255 | 46517648 | 46517378 | 10 | 17 | 8  | 1.917817386 | 0.0474153  | PREX1 | ENSG00000124126 |

|    |          |          |          |    |    |    |             |            |       |                 |
|----|----------|----------|----------|----|----|----|-------------|------------|-------|-----------------|
| 20 | 46517663 | 46517895 | 46517750 | 8  | 9  | 9  | 0.958908693 | 0.536911   | PREX1 | ENSG00000124126 |
| 20 | 46520908 | 46521144 | 46521026 | 8  | 9  | 4  | 1.917817386 | 0.103282   | PREX1 | ENSG00000124126 |
| 20 | 46523152 | 46523364 | 46523306 | 8  | 9  | 6  | 1.369869562 | 0.253675   | PREX1 | ENSG00000124126 |
| 20 | 46523526 | 46523766 | 46523611 | 8  | 9  | 6  | 1.369869562 | 0.253675   | PREX1 | ENSG00000124126 |
| 20 | 46525485 | 46525709 | 46525661 | 9  | 12 | 7  | 1.558226626 | 0.152813   | PREX1 | ENSG00000124126 |
| 20 | 46526709 | 46526967 | 46526842 | 10 | 12 | 7  | 1.558226626 | 0.152813   | PREX1 | ENSG00000124126 |
| 20 | 46535669 | 46535945 | 46535807 | 8  | 11 | 4  | 2.301380863 | 0.0459276  | PREX1 | ENSG00000124126 |
| 20 | 46542646 | 46542834 | 46542778 | 9  | 10 | 4  | 2.109599125 | 0.0694668  | PREX1 | ENSG00000124126 |
| 20 | 46564465 | 46564798 | 46564635 | 8  | 11 | 10 | 1.046082211 | 0.455063   | PREX1 | ENSG00000124126 |
| 20 | 46565003 | 46565812 | 46565326 | 26 | 66 | 45 | 1.396671357 | 0.0386221  | PREX1 | ENSG00000124126 |
| 20 | 46566056 | 46566559 | 46566225 | 19 | 28 | 15 | 1.738022006 | 0.0334925  | PREX1 | ENSG00000124126 |
| 20 | 46570667 | 46570919 | 46570793 | 8  | 9  | 5  | 1.598181155 | 0.170911   | PREX1 | ENSG00000124126 |
| 20 | 46573087 | 46573435 | 46573280 | 13 | 18 | 15 | 1.138704073 | 0.348127   | PREX1 | ENSG00000124126 |
| 20 | 46579112 | 46579424 | 46579251 | 11 | 14 | 6  | 2.054804342 | 0.0480281  | PREX1 | ENSG00000124126 |
| 20 | 46588463 | 46588692 | 46588577 | 11 | 13 | 14 | 0.894981447 | 0.618069   | PREX1 | ENSG00000124126 |
| 20 | 46588744 | 46588997 | 46588883 | 10 | 12 | 15 | 0.779113313 | 0.750998   | PREX1 | ENSG00000124126 |
| 20 | 46594839 | 46595102 | 46594970 | 15 | 17 | 6  | 2.465765211 | 0.014729   | PREX1 | ENSG00000124126 |
| 20 | 46596121 | 46596476 | 46596358 | 8  | 12 | 6  | 1.78083043  | 0.0985525  | PREX1 | ENSG00000124126 |
| 20 | 46596692 | 46596883 | 46596787 | 10 | 10 | 5  | 1.757999271 | 0.121253   | PREX1 | ENSG00000124126 |
| 20 | 46607425 | 46607666 | 46607558 | 8  | 9  | 6  | 1.369869562 | 0.253675   | PREX1 | ENSG00000124126 |
| 20 | 46615122 | 46615472 | 46615297 | 9  | 14 | 5  | 2.397271733 | 0.0258078  | PREX1 | ENSG00000124126 |
| 20 | 46617453 | 46618422 | 46618096 | 30 | 67 | 21 | 2.963899597 | 8.01E-07   | PREX1 | ENSG00000124126 |
| 20 | 46621940 | 46622206 | 46622093 | 9  | 11 | 3  | 2.876726079 | 0.0213797  | PREX1 | ENSG00000124126 |
| 20 | 46622284 | 46622675 | 46622429 | 11 | 16 | 15 | 1.018840486 | 0.477384   | PREX1 | ENSG00000124126 |
| 20 | 46626324 | 46626625 | 46626474 | 12 | 13 | 8  | 1.491635745 | 0.166708   | PREX1 | ENSG00000124126 |
| 20 | 46628436 | 46628615 | 46628535 | 8  | 9  | 6  | 1.369869562 | 0.253675   | PREX1 | ENSG00000124126 |
| 20 | 46642294 | 46642625 | 46642459 | 10 | 14 | 4  | 2.876726079 | 0.01219    | PREX1 | ENSG00000124126 |
| 20 | 46644480 | 46644676 | 46644534 | 8  | 9  | 12 | 0.737622072 | 0.769563   | PREX1 | ENSG00000124126 |
| 20 | 46657480 | 46657790 | 46657635 | 10 | 14 | 4  | 2.876726079 | 0.01219    | PREX1 | ENSG00000124126 |
| 20 | 46661580 | 46661807 | 46661693 | 8  | 10 | 7  | 1.318499453 | 0.269217   | PREX1 | ENSG00000124126 |
| 20 | 46663801 | 46664209 | 46664053 | 8  | 12 | 14 | 0.831054201 | 0.689281   | PREX1 | ENSG00000124126 |
| 20 | 46665947 | 46666269 | 46666112 | 13 | 17 | 3  | 4.315089119 | 0.00102271 | PREX1 | ENSG00000124126 |
| 20 | 46670351 | 46671527 | 46671036 | 24 | 90 | 26 | 3.231877447 | 2.35E-09   | PREX1 | ENSG00000124126 |
| 20 | 46672506 | 46672752 | 46672657 | 9  | 12 | 11 | 1.038817751 | 0.460341   | PREX1 | ENSG00000124126 |

|    |          |          |          |    |    |    |             |            |       |                 |
|----|----------|----------|----------|----|----|----|-------------|------------|-------|-----------------|
| 20 | 46680290 | 46680603 | 46680464 | 10 | 12 | 4  | 2.493162602 | 0.0299057  | PREX1 | ENSG00000124126 |
| 20 | 46685688 | 46686190 | 46685909 | 14 | 29 | 11 | 2.397271733 | 0.00325702 | PREX1 | ENSG00000124126 |
| 20 | 46698136 | 46698488 | 46698312 | 10 | 15 | 5  | 2.557089848 | 0.0169197  | PREX1 | ENSG00000124126 |
| 20 | 46707713 | 46708104 | 46707839 | 12 | 19 | 17 | 1.065454103 | 0.420867   | PREX1 | ENSG00000124126 |
| 20 | 46709803 | 46710250 | 46710121 | 8  | 16 | 17 | 0.905635988 | 0.615736   | PREX1 | ENSG00000124126 |
| 20 | 46711802 | 46712099 | 46711950 | 9  | 12 | 11 | 1.038817751 | 0.460341   | PREX1 | ENSG00000124126 |
| 20 | 46719838 | 46720044 | 46720000 | 8  | 10 | 2  | 3.515998541 | 0.0136204  | PREX1 | ENSG00000124126 |
| 20 | 46722684 | 46722882 | 46722798 | 8  | 8  | 4  | 1.726035648 | 0.150596   | PREX1 | ENSG00000124126 |
| 20 | 46723635 | 46723897 | 46723728 | 8  | 12 | 13 | 0.890415215 | 0.619237   | PREX1 | ENSG00000124126 |
| 20 | 46729488 | 46730152 | 46729966 | 9  | 25 | 22 | 1.08398374  | 0.38731    | PREX1 | ENSG00000124126 |
| 20 | 46734956 | 46735253 | 46735096 | 9  | 13 | 17 | 0.745817872 | 0.798145   | PREX1 | ENSG00000124126 |
| 20 | 46736079 | 46736354 | 46736225 | 11 | 14 | 9  | 1.43836304  | 0.179537   | PREX1 | ENSG00000124126 |
| 20 | 46745210 | 46745389 | 46745277 | 8  | 8  | 6  | 1.232882605 | 0.333038   |       | ENSG00000212716 |
| 20 | 46747701 | 46748229 | 46747869 | 14 | 27 | 27 | 0.958908693 | 0.562099   |       | ENSG00000212716 |
| 20 | 46751013 | 46751229 | 46751100 | 10 | 12 | 6  | 1.78083043  | 0.0985525  |       | ENSG00000212716 |
| 20 | 46753943 | 46754159 | 46754057 | 8  | 9  | 4  | 1.917817386 | 0.103282   |       | ENSG00000212716 |
| 20 | 46755041 | 46755584 | 46755248 | 16 | 32 | 25 | 1.217076418 | 0.224024   |       | ENSG00000212716 |
| 20 | 46755689 | 46755964 | 46755825 | 10 | 12 | 16 | 0.733283118 | 0.803868   |       | ENSG00000212716 |
| 20 | 46756297 | 46756620 | 46756458 | 10 | 14 | 13 | 1.027402171 | 0.469541   |       | ENSG00000212716 |
| 20 | 46759771 | 46760287 | 46759987 | 10 | 20 | 10 | 1.830643869 | 0.0454769  |       | ENSG00000212716 |
| 20 | 46768101 | 46768444 | 46768192 | 9  | 14 | 6  | 2.054804342 | 0.0480281  |       | ENSG00000212716 |
| 20 | 46773096 | 46773297 | 46773186 | 8  | 10 | 10 | 0.958908693 | 0.538751   |       | ENSG00000212716 |
| 20 | 46776924 | 46777299 | 46777131 | 9  | 15 | 7  | 1.917817386 | 0.0572317  |       | ENSG00000212716 |
| 20 | 46777426 | 46777842 | 46777677 | 9  | 16 | 16 | 0.958908693 | 0.548325   |       | ENSG00000212716 |
| 20 | 46784319 | 46784556 | 46784409 | 9  | 9  | 1  | 4.794543465 | 0.00708517 |       | ENSG00000212716 |
| 20 | 46788723 | 46789146 | 46788896 | 11 | 19 | 11 | 1.598181155 | 0.0927758  |       | ENSG00000212716 |
| 20 | 46789861 | 46790137 | 46789960 | 8  | 11 | 12 | 0.885146486 | 0.620672   |       | ENSG00000212716 |
| 20 | 46803981 | 46804365 | 46804160 | 10 | 17 | 14 | 1.150690432 | 0.340986   |       | ENSG00000212716 |
| 20 | 46810234 | 46810482 | 46810370 | 9  | 9  | 9  | 0.958908693 | 0.536911   |       | ENSG00000212716 |
| 20 | 46820737 | 46821040 | 46820884 | 8  | 12 | 8  | 1.385090334 | 0.219216   | PREX1 | ENSG00000124126 |
| 20 | 46829094 | 46829371 | 46829232 | 8  | 11 | 2  | 3.835634772 | 0.00800699 | PREX1 | ENSG00000124126 |
| 20 | 46834415 | 46834703 | 46834559 | 13 | 14 | 6  | 2.054804342 | 0.0480281  | PREX1 | ENSG00000124126 |
| 20 | 46841001 | 46841302 | 46841131 | 12 | 15 | 10 | 1.394776281 | 0.191426   | PREX1 | ENSG00000124126 |
| 20 | 46841420 | 46841730 | 46841594 | 12 | 17 | 4  | 3.452071295 | 0.00292757 | PREX1 | ENSG00000124126 |

|    |          |          |          |    |    |    |             |            |         |                 |
|----|----------|----------|----------|----|----|----|-------------|------------|---------|-----------------|
| 20 | 46858266 | 46858640 | 46858483 | 11 | 15 | 13 | 1.095895649 | 0.398774   | PREX1   | ENSG00000124126 |
| 20 | 46861618 | 46862259 | 46861953 | 11 | 26 | 9  | 2.589053471 | 0.00289627 | PREX1   | ENSG00000124126 |
| 20 | 46862531 | 46862803 | 46862667 | 8  | 11 | 11 | 0.958908693 | 0.540507   | PREX1   | ENSG00000124126 |
| 20 | 46863351 | 46863689 | 46863530 | 8  | 12 | 10 | 1.133255728 | 0.37674    | PREX1   | ENSG00000124126 |
| 20 | 46864178 | 46864419 | 46864321 | 10 | 12 | 8  | 1.385090334 | 0.219216   | PREX1   | ENSG00000124126 |
| 20 | 46865518 | 46866044 | 46865781 | 10 | 19 | 7  | 2.397271733 | 0.0127287  | PREX1   | ENSG00000124126 |
| 20 | 46869262 | 46869482 | 46869326 | 9  | 10 | 5  | 1.757999271 | 0.121253   | PREX1   | ENSG00000124126 |
| 20 | 46872130 | 46872317 | 46872223 | 8  | 9  | 4  | 1.917817386 | 0.103282   | PREX1   | ENSG00000124126 |
| 20 | 46872819 | 46873041 | 46872903 | 9  | 9  | 5  | 1.598181155 | 0.170911   | PREX1   | ENSG00000124126 |
| 20 | 46876211 | 46876510 | 46876353 | 9  | 12 | 11 | 1.038817751 | 0.460341   | PREX1   | ENSG00000124126 |
| 20 | 46876862 | 46877359 | 46877015 | 10 | 22 | 10 | 2.004990904 | 0.023438   | PREX1   | ENSG00000124126 |
| 20 | 46877442 | 46877649 | 46877545 | 9  | 10 | 4  | 2.109599125 | 0.0694668  | PREX1   | ENSG00000124126 |
| 20 | 46880226 | 46880516 | 46880360 | 9  | 11 | 12 | 0.885146486 | 0.620672   | PREX1   | ENSG00000124126 |
| 20 | 46882966 | 46883266 | 46883092 | 9  | 12 | 7  | 1.558226626 | 0.152813   | PREX1   | ENSG00000124126 |
| 20 | 46889609 | 46889795 | 46889700 | 8  | 8  | 9  | 0.863017824 | 0.627343   | PREX1   | ENSG00000124126 |
| 20 | 46891860 | 46892072 | 46891966 | 15 | 16 | 14 | 1.086763185 | 0.404922   | PREX1   | ENSG00000124126 |
| 20 | 46896324 | 46896521 | 46896465 | 9  | 9  | 2  | 3.19636231  | 0.0229249  | PREX1   | ENSG00000124126 |
| 20 | 46911287 | 46911512 | 46911363 | 8  | 9  | 4  | 1.917817386 | 0.103282   | PREX1   | ENSG00000124126 |
| 20 | 46914206 | 46914639 | 46914385 | 13 | 23 | 21 | 1.046082211 | 0.437961   | PREX1   | ENSG00000124126 |
| 20 | 46914677 | 46915108 | 46914929 | 14 | 26 | 31 | 0.80907921  | 0.792852   | PREX1   | ENSG00000124126 |
| 20 | 46915244 | 46915434 | 46915339 | 9  | 9  | 8  | 1.065454103 | 0.442605   | PREX1   | ENSG00000124126 |
| 20 | 46925289 | 46925663 | 46925468 | 8  | 15 | 3  | 3.835634772 | 0.00291691 | ARFGEF2 | ENSG00000124198 |
| 20 | 46934747 | 46934969 | 46934858 | 8  | 10 | 6  | 1.506856518 | 0.188853   | ARFGEF2 | ENSG00000124198 |
| 20 | 46936488 | 46936667 | 46936536 | 8  | 9  | 7  | 1.198635866 | 0.346278   | ARFGEF2 | ENSG00000124198 |
| 20 | 46939497 | 46939721 | 46939560 | 8  | 8  | 8  | 0.958908693 | 0.534974   | ARFGEF2 | ENSG00000124198 |
| 20 | 46940208 | 46940571 | 46940370 | 10 | 16 | 10 | 1.481949798 | 0.147733   | ARFGEF2 | ENSG00000124198 |
| 20 | 46943644 | 46943964 | 46943819 | 8  | 12 | 15 | 0.779113313 | 0.750998   | ARFGEF2 | ENSG00000124198 |
| 20 | 46947394 | 46947618 | 46947506 | 8  | 10 | 10 | 0.958908693 | 0.538751   | ARFGEF2 | ENSG00000124198 |
| 20 | 46954874 | 46955515 | 46955148 | 23 | 45 | 24 | 1.764391995 | 0.00934627 | ARFGEF2 | ENSG00000124198 |
| 20 | 46956051 | 46956321 | 46956204 | 8  | 12 | 8  | 1.385090334 | 0.219216   | ARFGEF2 | ENSG00000124198 |
| 20 | 46956546 | 46956899 | 46956732 | 11 | 16 | 8  | 1.811271976 | 0.0663685  | ARFGEF2 | ENSG00000124198 |
| 20 | 46957609 | 46957855 | 46957747 | 9  | 10 | 14 | 0.703199708 | 0.817173   | ARFGEF2 | ENSG00000124198 |
| 20 | 46970279 | 46970523 | 46970454 | 12 | 15 | 8  | 1.704726565 | 0.0916153  | ARFGEF2 | ENSG00000124198 |
| 20 | 46971036 | 46971669 | 46971508 | 13 | 29 | 24 | 1.150690432 | 0.299765   | ARFGEF2 | ENSG00000124198 |

|    |          |          |          |    |     |    |             |             |         |                 |
|----|----------|----------|----------|----|-----|----|-------------|-------------|---------|-----------------|
| 20 | 46971837 | 46972827 | 46972137 | 29 | 88  | 25 | 3.282418219 | 2.49E-09    | ARFGEF2 | ENSG00000124198 |
| 20 | 46973139 | 46973349 | 46973235 | 9  | 11  | 19 | 0.575345216 | 0.94039     | ARFGEF2 | ENSG00000124198 |
| 20 | 46995861 | 46996130 | 46995982 | 18 | 19  | 4  | 3.835634772 | 0.00108365  | ARFGEF2 | ENSG00000124198 |
| 20 | 47383963 | 47384164 | 47384063 | 12 | 12  | 14 | 0.831054201 | 0.689281    |         | ENSG00000212304 |
| 20 | 47401587 | 47401808 | 47401696 | 8  | 8   | 1  | 4.315089119 | 0.0127267   |         | ENSG00000212304 |
| 20 | 47474466 | 47474687 | 47474576 | 8  | 9   | 1  | 4.794543465 | 0.00708517  | KCNB1   | ENSG00000158445 |
| 20 | 47511050 | 47511292 | 47511171 | 8  | 9   | 2  | 3.19636231  | 0.0229249   | KCNB1   | ENSG00000158445 |
| 20 | 47591723 | 47592092 | 47591920 | 10 | 15  | 13 | 1.095895649 | 0.398774    | PTGIS   | ENSG00000124212 |
| 20 | 47626398 | 47626584 | 47626491 | 8  | 8   | 0  | 8.630178238 | 0.00235436  | PTGIS   | ENSG00000124212 |
| 20 | 47654495 | 47654763 | 47654629 | 10 | 12  | 3  | 3.116453252 | 0.0131971   | PTGIS   | ENSG00000124212 |
| 20 | 47675689 | 47675883 | 47675783 | 9  | 9   | 2  | 3.19636231  | 0.0229249   | PTGIS   | ENSG00000124212 |
| 20 | 47682443 | 47682733 | 47682587 | 13 | 14  | 0  | 14.3836304  | 4.17E-05    | PTGIS   | ENSG00000124212 |
| 20 | 47819970 | 47820562 | 47820273 | 17 | 38  | 3  | 9.349359757 | 5.96E-09    | SNRPP1  | ENSG00000217373 |
| 20 | 47884934 | 47885372 | 47885222 | 39 | 52  | 1  | 25.41108037 | 8.99E-15    |         | ENSG00000220552 |
| 20 | 47909819 | 47910114 | 47909966 | 17 | 20  | 12 | 1.54900635  | 0.101141    |         | ENSG00000220552 |
| 20 | 47966389 | 47966582 | 47966485 | 8  | 10  | 3  | 2.636998906 | 0.034203    | SPATA2  | ENSG00000158480 |
| 20 | 47978726 | 47978955 | 47978840 | 10 | 12  | 6  | 1.78083043  | 0.0985525   | RNF114  | ENSG00000124226 |
| 20 | 47988459 | 47988795 | 47988627 | 8  | 12  | 4  | 2.493162602 | 0.0299057   |         | ENSG00000210727 |
| 20 | 48062415 | 48062700 | 48062557 | 11 | 13  | 4  | 2.684944341 | 0.01921     | SNAI1   | ENSG00000124216 |
| 20 | 48165674 | 48165857 | 48165745 | 8  | 10  | 4  | 2.109599125 | 0.0694668   | TMEM189 | ENSG00000124208 |
| 20 | 48170857 | 48171089 | 48170973 | 8  | 10  | 7  | 1.318499453 | 0.269217    | TMEM189 | ENSG00000124208 |
| 20 | 48200992 | 48201227 | 48201117 | 9  | 11  | 5  | 1.917817386 | 0.0843804   | TMEM189 | ENSG00000124208 |
| 20 | 48215802 | 48216354 | 48216115 | 16 | 30  | 8  | 3.302907721 | 0.000239229 | TMEM189 | ENSG00000124208 |
| 20 | 48242203 | 48242440 | 48242317 | 10 | 11  | 1  | 5.753452158 | 0.00215302  | CEBPB   | ENSG00000172216 |
| 20 | 48288410 | 48288640 | 48288542 | 8  | 10  | 0  | 10.54799562 | 0.000613541 | CEBPB   | ENSG00000172216 |
| 20 | 48338212 | 48338408 | 48338349 | 8  | 8   | 0  | 8.630178238 | 0.00235436  |         | ENSG00000203999 |
| 20 | 48384064 | 48384263 | 48384163 | 10 | 10  | 4  | 2.109599125 | 0.0694668   |         | ENSG00000203999 |
| 20 | 48421967 | 48422342 | 48422163 | 15 | 23  | 3  | 5.753452158 | 3.82E-05    |         | ENSG00000210745 |
| 20 | 48477945 | 48478424 | 48478104 | 18 | 27  | 6  | 3.835634772 | 0.000155182 |         | ENSG00000210745 |
| 20 | 48488970 | 48489224 | 48489097 | 9  | 11  | 3  | 2.876726079 | 0.0213797   |         | ENSG00000210745 |
| 20 | 48638152 | 48638349 | 48638270 | 10 | 10  | 2  | 3.515998541 | 0.0136204   |         | ENSG00000208018 |
| 20 | 48706665 | 48707008 | 48706868 | 12 | 17  | 11 | 1.43836304  | 0.15834     | FAM65C  | ENSG00000042062 |
| 20 | 48720056 | 48721715 | 48720595 | 83 | 173 | 77 | 2.139104008 | 3.18E-09    | FAM65C  | ENSG00000042062 |
| 20 | 48721814 | 48722654 | 48722379 | 9  | 33  | 31 | 1.018840486 | 0.468915    | FAM65C  | ENSG00000042062 |

|    |          |          |          |    |    |    |             |           |        |                 |
|----|----------|----------|----------|----|----|----|-------------|-----------|--------|-----------------|
| 20 | 48723507 | 48724516 | 48724271 | 15 | 42 | 46 | 0.877299443 | 0.733069  | FAM65C | ENSG00000042062 |
| 20 | 48725092 | 48726323 | 48726029 | 19 | 77 | 54 | 1.359906874 | 0.038788  | FAM65C | ENSG00000042062 |
| 20 | 48726861 | 48727440 | 48727040 | 21 | 36 | 23 | 1.478317568 | 0.0642458 | FAM65C | ENSG00000042062 |
| 20 | 48727891 | 48728701 | 48728070 | 16 | 40 | 44 | 0.873672365 | 0.734826  | FAM65C | ENSG00000042062 |
| 20 | 48729734 | 48730628 | 48730099 | 15 | 44 | 66 | 0.644043152 | 0.989676  | FAM65C | ENSG00000042062 |
| 20 | 48731240 | 48732337 | 48731857 | 12 | 47 | 63 | 0.71918152  | 0.959188  | FAM65C | ENSG00000042062 |
| 20 | 48732967 | 48733329 | 48733165 | 11 | 17 | 20 | 0.821921737 | 0.731032  | FAM65C | ENSG00000042062 |
| 20 | 48734019 | 48734435 | 48734256 | 12 | 22 | 30 | 0.711448385 | 0.894789  | FAM65C | ENSG00000042062 |
| 20 | 48734463 | 48735043 | 48734642 | 10 | 25 | 26 | 0.923393556 | 0.614269  | FAM65C | ENSG00000042062 |
| 20 | 48736658 | 48737254 | 48737075 | 14 | 33 | 31 | 1.018840486 | 0.468915  | FAM65C | ENSG00000042062 |
| 20 | 48738107 | 48738499 | 48738320 | 10 | 18 | 15 | 1.138704073 | 0.348127  | FAM65C | ENSG00000042062 |
| 20 | 48738511 | 48739070 | 48738891 | 17 | 31 | 34 | 0.876716519 | 0.705376  | FAM65C | ENSG00000042062 |
| 20 | 48739442 | 48740848 | 48740070 | 22 | 94 | 87 | 1.035185521 | 0.406971  | FAM65C | ENSG00000042062 |
| 20 | 48740882 | 48741304 | 48741140 | 10 | 18 | 30 | 0.587718231 | 0.969044  | FAM65C | ENSG00000042062 |
| 20 | 48741900 | 48742451 | 48742272 | 9  | 21 | 26 | 0.781333009 | 0.807043  | FAM65C | ENSG00000042062 |
| 20 | 48742482 | 48742869 | 48742661 | 13 | 20 | 19 | 1.006854128 | 0.490315  | FAM65C | ENSG00000042062 |
| 20 | 48743079 | 48743404 | 48743243 | 12 | 17 | 14 | 1.150690432 | 0.340986  | FAM65C | ENSG00000042062 |
| 20 | 48744661 | 48746064 | 48745220 | 15 | 63 | 68 | 0.889422556 | 0.75062   | FAM65C | ENSG00000042062 |
| 20 | 48746793 | 48747117 | 48746983 | 9  | 14 | 20 | 0.684934781 | 0.872628  | FAM65C | ENSG00000042062 |
| 20 | 48747892 | 48748350 | 48748245 | 12 | 20 | 17 | 1.118726809 | 0.361026  | FAM65C | ENSG00000042062 |
| 20 | 48749309 | 48749888 | 48749475 | 11 | 25 | 32 | 0.755503819 | 0.859753  | FAM65C | ENSG00000042062 |
| 20 | 48750184 | 48750687 | 48750512 | 13 | 22 | 27 | 0.787674998 | 0.803855  | FAM65C | ENSG00000042062 |
| 20 | 48750812 | 48751167 | 48750989 | 9  | 15 | 33 | 0.45125115  | 0.996958  | FAM65C | ENSG00000042062 |
| 20 | 48751169 | 48751977 | 48751798 | 18 | 44 | 44 | 0.958908693 | 0.578662  | FAM65C | ENSG00000042062 |
| 20 | 48752441 | 48752821 | 48752617 | 12 | 19 | 19 | 0.958908693 | 0.552451  | FAM65C | ENSG00000042062 |
| 20 | 48753512 | 48753885 | 48753670 | 15 | 20 | 24 | 0.805483302 | 0.769433  | FAM65C | ENSG00000042062 |
| 20 | 48754429 | 48754730 | 48754571 | 11 | 16 | 25 | 0.626978761 | 0.936688  | FAM65C | ENSG00000042062 |
| 20 | 48754739 | 48755234 | 48754918 | 12 | 25 | 26 | 0.923393556 | 0.614269  | FAM65C | ENSG00000042062 |
| 20 | 48756944 | 48757204 | 48757074 | 13 | 14 | 15 | 0.8989769   | 0.617119  | FAM65C | ENSG00000042062 |
| 20 | 48757609 | 48758200 | 48757931 | 12 | 25 | 29 | 0.831054201 | 0.756473  | FAM65C | ENSG00000042062 |
| 20 | 48758872 | 48759671 | 48759415 | 12 | 36 | 33 | 1.043518284 | 0.427761  | FAM65C | ENSG00000042062 |
| 20 | 48760482 | 48760793 | 48760621 | 15 | 19 | 13 | 1.369869562 | 0.177863  | FAM65C | ENSG00000042062 |
| 20 | 48760797 | 48761564 | 48761289 | 29 | 63 | 55 | 1.095895649 | 0.307168  | FAM65C | ENSG00000042062 |
| 20 | 48761900 | 48762496 | 48762191 | 14 | 32 | 32 | 0.958908693 | 0.567412  | PARD6B | ENSG00000124171 |

|    |          |          |          |     |     |     |             |            |        |                 |
|----|----------|----------|----------|-----|-----|-----|-------------|------------|--------|-----------------|
| 20 | 48762587 | 48763159 | 48762838 | 14  | 31  | 22  | 1.334133834 | 0.142045   | PARD6B | ENSG00000124171 |
| 20 | 48763545 | 48764232 | 48763810 | 43  | 73  | 42  | 1.65021496  | 0.00380649 | PARD6B | ENSG00000124171 |
| 20 | 48764942 | 48765426 | 48765247 | 12  | 21  | 21  | 0.958908693 | 0.555026   | PARD6B | ENSG00000124171 |
| 20 | 48765491 | 48766194 | 48765858 | 40  | 75  | 27  | 2.602752167 | 2.02E-06   | PARD6B | ENSG00000124171 |
| 20 | 48766298 | 48766801 | 48766572 | 13  | 27  | 30  | 0.866111078 | 0.710165   | PARD6B | ENSG00000124171 |
| 20 | 48768008 | 48769074 | 48768514 | 21  | 64  | 74  | 0.831054201 | 0.863406   | PARD6B | ENSG00000124171 |
| 20 | 48769362 | 48769679 | 48769532 | 12  | 13  | 6   | 1.917817386 | 0.0693353  | PARD6B | ENSG00000124171 |
| 20 | 48769731 | 48770214 | 48770030 | 17  | 29  | 27  | 1.027402171 | 0.457998   | PARD6B | ENSG00000124171 |
| 20 | 48770384 | 48770846 | 48770720 | 10  | 21  | 19  | 1.054799562 | 0.429896   | PARD6B | ENSG00000124171 |
| 20 | 48771093 | 48771559 | 48771394 | 13  | 22  | 9   | 2.205489994 | 0.0136443  | PARD6B | ENSG00000124171 |
| 20 | 48771733 | 48772272 | 48771949 | 14  | 25  | 15  | 1.558226626 | 0.0760878  | PARD6B | ENSG00000124171 |
| 20 | 48772371 | 48772834 | 48772535 | 18  | 28  | 25  | 1.069552004 | 0.40018    | PARD6B | ENSG00000124171 |
| 20 | 48772895 | 48773367 | 48773188 | 22  | 35  | 32  | 1.046082211 | 0.424727   | PARD6B | ENSG00000124171 |
| 20 | 48773634 | 48773970 | 48773802 | 11  | 14  | 10  | 1.307602763 | 0.244096   | PARD6B | ENSG00000124171 |
| 20 | 48774216 | 48775495 | 48775012 | 68  | 138 | 81  | 1.625467175 | 0.0001898  | PARD6B | ENSG00000124171 |
| 20 | 48775656 | 48775983 | 48775819 | 11  | 13  | 6   | 1.917817386 | 0.0693353  | PARD6B | ENSG00000124171 |
| 20 | 48776395 | 48776938 | 48776759 | 12  | 27  | 27  | 0.958908693 | 0.562099   | PARD6B | ENSG00000124171 |
| 20 | 48776942 | 48781387 | 48779669 | 225 | 736 | 357 | 1.97406622  | 6.36E-28   | PARD6B | ENSG00000124171 |
| 20 | 48781433 | 48781785 | 48781609 | 10  | 15  | 22  | 0.667066917 | 0.897252   | PARD6B | ENSG00000124171 |
| 20 | 48781870 | 48783215 | 48782652 | 28  | 110 | 77  | 1.364600832 | 0.0168042  | PARD6B | ENSG00000124171 |
| 20 | 48783250 | 48783797 | 48783551 | 34  | 56  | 32  | 1.656296833 | 0.00913243 | PARD6B | ENSG00000124171 |
| 20 | 48783803 | 48784863 | 48784685 | 22  | 55  | 45  | 1.167367105 | 0.216559   | PARD6B | ENSG00000124171 |
| 20 | 48785148 | 48786687 | 48785967 | 41  | 107 | 97  | 1.056756519 | 0.345452   | PARD6B | ENSG00000124171 |
| 20 | 48786949 | 48787798 | 48787518 | 18  | 52  | 47  | 1.058795015 | 0.386127   | PARD6B | ENSG00000124171 |
| 20 | 48787964 | 48788404 | 48788112 | 9   | 17  | 18  | 0.908439814 | 0.615249   | PARD6B | ENSG00000124171 |
| 20 | 48788697 | 48789217 | 48788855 | 12  | 24  | 23  | 0.998863222 | 0.500802   | PARD6B | ENSG00000124171 |
| 20 | 48789404 | 48790164 | 48789582 | 21  | 53  | 47  | 1.07877228  | 0.349962   | PARD6B | ENSG00000124171 |
| 20 | 48790197 | 48790597 | 48790376 | 8   | 16  | 15  | 1.018840486 | 0.477384   | PARD6B | ENSG00000124171 |
| 20 | 48790784 | 48791512 | 48791210 | 14  | 34  | 37  | 0.883205375 | 0.70257    | PARD6B | ENSG00000124171 |
| 20 | 48791898 | 48792114 | 48792006 | 8   | 10  | 4   | 2.109599125 | 0.0694668  | PARD6B | ENSG00000124171 |
| 20 | 48792679 | 48793504 | 48793287 | 24  | 59  | 55  | 1.027402171 | 0.441432   | PARD6B | ENSG00000124171 |
| 20 | 48793700 | 48794060 | 48793881 | 12  | 19  | 5   | 3.19636231  | 0.00280933 | PARD6B | ENSG00000124171 |
| 20 | 48794272 | 48795074 | 48794520 | 54  | 124 | 61  | 1.933283655 | 5.94E-06   | PARD6B | ENSG00000124171 |
| 20 | 48795664 | 48796950 | 48796571 | 24  | 78  | 76  | 0.983815412 | 0.54024    | PARD6B | ENSG00000124171 |



|    |          |          |          |     |     |     |             |            |        |                 |
|----|----------|----------|----------|-----|-----|-----|-------------|------------|--------|-----------------|
| 20 | 48797009 | 48797479 | 48797274 | 10  | 21  | 27  | 0.753428259 | 0.842351   | PARD6B | ENSG00000124171 |
| 20 | 48797631 | 48798116 | 48797810 | 14  | 24  | 28  | 0.826645425 | 0.758727   | PARD6B | ENSG00000124171 |
| 20 | 48798517 | 48798993 | 48798696 | 12  | 24  | 25  | 0.922027589 | 0.614196   | PARD6B | ENSG00000124171 |
| 20 | 48799202 | 48800984 | 48799519 | 16  | 95  | 61  | 1.484761847 | 0.00693395 | PARD6B | ENSG00000124171 |
| 20 | 48801977 | 48802281 | 48802115 | 13  | 17  | 10  | 1.569123316 | 0.112309   | PARD6B | ENSG00000124171 |
| 20 | 48802410 | 48802923 | 48802559 | 9   | 18  | 17  | 1.012181398 | 0.48423    | PARD6B | ENSG00000124171 |
| 20 | 48804047 | 48804247 | 48804163 | 9   | 10  | 8   | 1.171999514 | 0.35773    | PARD6B | ENSG00000124171 |
| 20 | 48804250 | 48804736 | 48804557 | 15  | 31  | 27  | 1.095895649 | 0.360001   | PARD6B | ENSG00000124171 |
| 20 | 48804941 | 48805656 | 48805426 | 11  | 28  | 34  | 0.794524346 | 0.821881   | PARD6B | ENSG00000124171 |
| 20 | 48806304 | 48806886 | 48806465 | 17  | 35  | 45  | 0.750450282 | 0.903295   | PARD6B | ENSG00000124171 |
| 20 | 48807040 | 48807400 | 48807219 | 9   | 16  | 12  | 1.253957522 | 0.265012   | PARD6B | ENSG00000124171 |
| 20 | 48807877 | 48808160 | 48808042 | 8   | 13  | 11  | 1.118726809 | 0.38479    | PARD6B | ENSG00000124171 |
| 20 | 48808496 | 48809368 | 48809041 | 12  | 39  | 50  | 0.752085249 | 0.912963   | PARD6B | ENSG00000124171 |
| 20 | 48809921 | 48810153 | 48810055 | 10  | 11  | 11  | 0.958908693 | 0.540507   | PARD6B | ENSG00000124171 |
| 20 | 48810205 | 48810784 | 48810610 | 14  | 25  | 35  | 0.692545167 | 0.925864   | PARD6B | ENSG00000124171 |
| 20 | 48811263 | 48813233 | 48811808 | 197 | 458 | 194 | 2.257123539 | 1.25E-23   | PARD6B | ENSG00000124171 |
| 20 | 48813945 | 48814953 | 48814296 | 46  | 113 | 75  | 1.43836304  | 0.00648503 | BCAS4  | ENSG00000124243 |
| 20 | 48815338 | 48815559 | 48815448 | 11  | 11  | 9   | 1.150690432 | 0.367789   | BCAS4  | ENSG00000124243 |
| 20 | 48815594 | 48816171 | 48815843 | 15  | 28  | 24  | 1.112334084 | 0.346253   | BCAS4  | ENSG00000124243 |
| 20 | 48816297 | 48816718 | 48816523 | 12  | 21  | 19  | 1.054799562 | 0.429896   | BCAS4  | ENSG00000124243 |
| 20 | 48816803 | 48817431 | 48817156 | 15  | 33  | 22  | 1.417517198 | 0.0941994  | BCAS4  | ENSG00000124243 |
| 20 | 48820117 | 48820441 | 48820279 | 10  | 12  | 6   | 1.78083043  | 0.0985525  | BCAS4  | ENSG00000124243 |
| 20 | 48822373 | 48823101 | 48822613 | 11  | 28  | 27  | 0.993155432 | 0.509675   | BCAS4  | ENSG00000124243 |
| 20 | 48824193 | 48824407 | 48824343 | 8   | 9   | 4   | 1.917817386 | 0.103282   | BCAS4  | ENSG00000124243 |
| 20 | 48826330 | 48826848 | 48826509 | 10  | 20  | 25  | 0.774503175 | 0.810437   | BCAS4  | ENSG00000124243 |
| 20 | 48827399 | 48827628 | 48827547 | 9   | 11  | 13  | 0.821921737 | 0.693119   | BCAS4  | ENSG00000124243 |
| 20 | 48828713 | 48829065 | 48828799 | 10  | 15  | 4   | 3.068507818 | 0.0076507  | BCAS4  | ENSG00000124243 |
| 20 | 48829067 | 48829372 | 48829219 | 9   | 14  | 5   | 2.397271733 | 0.0258078  | BCAS4  | ENSG00000124243 |
| 20 | 48830254 | 48830499 | 48830380 | 8   | 12  | 20  | 0.593610143 | 0.935335   | BCAS4  | ENSG00000124243 |
| 20 | 48831365 | 48832263 | 48831985 | 17  | 47  | 37  | 1.211253086 | 0.186437   | BCAS4  | ENSG00000124243 |
| 20 | 48832607 | 48832966 | 48832679 | 10  | 16  | 12  | 1.253957522 | 0.265012   | BCAS4  | ENSG00000124243 |
| 20 | 48833242 | 48833538 | 48833406 | 8   | 11  | 14  | 0.767126954 | 0.756447   | BCAS4  | ENSG00000124243 |
| 20 | 48833800 | 48834271 | 48833979 | 9   | 20  | 36  | 0.544245474 | 0.988944   | BCAS4  | ENSG00000124243 |
| 20 | 48836378 | 48836689 | 48836528 | 10  | 14  | 20  | 0.684934781 | 0.872628   | BCAS4  | ENSG00000124243 |

|    |          |          |          |    |     |     |             |             |       |                 |
|----|----------|----------|----------|----|-----|-----|-------------|-------------|-------|-----------------|
| 20 | 48837552 | 48837756 | 48837665 | 9  | 9   | 8   | 1.065454103 | 0.442605    | BCAS4 | ENSG00000124243 |
| 20 | 48837836 | 48838655 | 48838160 | 68 | 107 | 68  | 1.500900563 | 0.00375759  | BCAS4 | ENSG00000124243 |
| 20 | 48838659 | 48839092 | 48838809 | 11 | 22  | 36  | 0.596078377 | 0.976695    | BCAS4 | ENSG00000124243 |
| 20 | 48839811 | 48841768 | 48840800 | 77 | 208 | 151 | 1.318499453 | 0.00449522  | BCAS4 | ENSG00000124243 |
| 20 | 48842610 | 48844875 | 48844719 | 24 | 151 | 129 | 1.121185549 | 0.168293    | BCAS4 | ENSG00000124243 |
| 20 | 48844999 | 48846115 | 48845706 | 26 | 82  | 70  | 1.120977768 | 0.238742    | BCAS4 | ENSG00000124243 |
| 20 | 48846930 | 48847522 | 48847102 | 11 | 27  | 40  | 0.654864473 | 0.960158    | BCAS4 | ENSG00000124243 |
| 20 | 48848294 | 48849282 | 48848466 | 16 | 54  | 45  | 1.146521263 | 0.245189    | BCAS4 | ENSG00000124243 |
| 20 | 48849288 | 48849622 | 48849451 | 10 | 15  | 24  | 0.613701564 | 0.940506    | BCAS4 | ENSG00000124243 |
| 20 | 48849878 | 48850252 | 48850117 | 13 | 19  | 34  | 0.547947825 | 0.986287    | BCAS4 | ENSG00000124243 |
| 20 | 48850866 | 48851115 | 48850990 | 12 | 13  | 16  | 0.789689512 | 0.746135    | BCAS4 | ENSG00000124243 |
| 20 | 48851413 | 48851691 | 48851552 | 11 | 13  | 14  | 0.894981447 | 0.618069    | BCAS4 | ENSG00000124243 |
| 20 | 48851697 | 48852337 | 48852091 | 9  | 28  | 19  | 1.390417605 | 0.124062    | BCAS4 | ENSG00000124243 |
| 20 | 48853112 | 48853507 | 48853309 | 9  | 18  | 24  | 0.728770607 | 0.85379     | BCAS4 | ENSG00000124243 |
| 20 | 48853703 | 48854010 | 48853839 | 10 | 14  | 14  | 0.958908693 | 0.545362    | BCAS4 | ENSG00000124243 |
| 20 | 48854184 | 48855653 | 48855182 | 11 | 65  | 59  | 1.054799562 | 0.381539    | BCAS4 | ENSG00000124243 |
| 20 | 48855853 | 48856289 | 48856071 | 16 | 28  | 16  | 1.635785418 | 0.0488966   | BCAS4 | ENSG00000124243 |
| 20 | 48856398 | 48856664 | 48856531 | 11 | 14  | 16  | 0.846095906 | 0.68298     | BCAS4 | ENSG00000124243 |
| 20 | 48858417 | 48858675 | 48858546 | 9  | 9   | 6   | 1.369869562 | 0.253675    | BCAS4 | ENSG00000124243 |
| 20 | 48860111 | 48860466 | 48860288 | 13 | 19  | 26  | 0.710302736 | 0.88        | BCAS4 | ENSG00000124243 |
| 20 | 48860815 | 48861089 | 48860952 | 8  | 11  | 10  | 1.046082211 | 0.455063    | BCAS4 | ENSG00000124243 |
| 20 | 48861177 | 48861695 | 48861435 | 11 | 23  | 16  | 1.353753449 | 0.165001    | BCAS4 | ENSG00000124243 |
| 20 | 48863133 | 48863555 | 48863411 | 11 | 17  | 39  | 0.431508912 | 0.999048    | BCAS4 | ENSG00000124243 |
| 20 | 48868424 | 48868735 | 48868579 | 10 | 16  | 9   | 1.630144778 | 0.102169    | TMSL6 | ENSG00000189262 |
| 20 | 48888969 | 48889311 | 48889148 | 14 | 18  | 1   | 9.109632584 | 2.91E-05    | TMSL6 | ENSG00000189262 |
| 20 | 48894622 | 48894960 | 48894791 | 9  | 14  | 0   | 14.3836304  | 4.17E-05    | TMSL6 | ENSG00000189262 |
| 20 | 48979232 | 48979649 | 48979470 | 12 | 20  | 4   | 4.027416511 | 0.000652226 | ADNP  | ENSG00000101126 |
| 20 | 48980008 | 48980193 | 48980100 | 8  | 8   | 1   | 4.315089119 | 0.0127267   | ADNP  | ENSG00000101126 |
| 20 | 49008537 | 49008792 | 49008659 | 8  | 10  | 4   | 2.109599125 | 0.0694668   | MOCS3 | ENSG00000124217 |
| 20 | 49037825 | 49038054 | 49037944 | 8  | 10  | 6   | 1.506856518 | 0.188853    | MOCS3 | ENSG00000124217 |
| 20 | 49042304 | 49042521 | 49042470 | 8  | 10  | 2   | 3.515998541 | 0.0136204   | KCNG1 | ENSG00000026559 |
| 20 | 49065130 | 49065366 | 49065248 | 8  | 10  | 3   | 2.636998906 | 0.034203    | KCNG1 | ENSG00000026559 |
| 20 | 49070234 | 49070435 | 49070303 | 9  | 9   | 4   | 1.917817386 | 0.103282    | KCNG1 | ENSG00000026559 |
| 20 | 49210446 | 49210638 | 49210542 | 8  | 9   | 2   | 3.19636231  | 0.0229249   |       | ENSG00000219218 |

|    |          |          |          |    |    |    |             |             |        |                 |
|----|----------|----------|----------|----|----|----|-------------|-------------|--------|-----------------|
| 20 | 49236691 | 49236921 | 49236806 | 9  | 9  | 7  | 1.198635866 | 0.346278    |        | ENSG00000219218 |
| 20 | 49356834 | 49357080 | 49356960 | 9  | 10 | 3  | 2.636998906 | 0.034203    |        | ENSG00000219218 |
| 20 | 49422323 | 49422528 | 49422355 | 8  | 11 | 3  | 2.876726079 | 0.0213797   | NFATC2 | ENSG00000101096 |
| 20 | 49613856 | 49614081 | 49613968 | 11 | 11 | 1  | 5.753452158 | 0.00215302  | NFATC2 | ENSG00000101096 |
| 20 | 49673821 | 49674088 | 49673958 | 8  | 9  | 2  | 3.19636231  | 0.0229249   | NFATC2 | ENSG00000101096 |
| 20 | 49689275 | 49689609 | 49689441 | 11 | 15 | 6  | 2.191791298 | 0.0328001   |        | ENSG00000215444 |
| 20 | 49703924 | 49704138 | 49704006 | 8  | 8  | 8  | 0.958908693 | 0.534974    |        | ENSG00000215444 |
| 20 | 49737011 | 49737285 | 49737151 | 17 | 18 | 6  | 2.602752167 | 0.00970422  |        | ENSG00000215444 |
| 20 | 49740444 | 49740913 | 49740714 | 9  | 17 | 4  | 3.452071295 | 0.00292757  |        | ENSG00000215444 |
| 20 | 49750782 | 49751086 | 49750940 | 11 | 13 | 3  | 3.356180426 | 0.00805599  |        | ENSG00000215444 |
| 20 | 49789703 | 49789939 | 49789817 | 11 | 13 | 3  | 3.356180426 | 0.00805599  |        | ENSG00000215444 |
| 20 | 49794469 | 49794801 | 49794611 | 10 | 14 | 4  | 2.876726079 | 0.01219     |        | ENSG00000215444 |
| 20 | 49800112 | 49800683 | 49800277 | 15 | 25 | 17 | 1.385090334 | 0.139369    |        | ENSG00000215444 |
| 20 | 49802440 | 49802625 | 49802546 | 8  | 10 | 3  | 2.636998906 | 0.034203    | ATP9A  | ENSG00000054793 |
| 20 | 49813737 | 49813947 | 49813842 | 8  | 10 | 3  | 2.636998906 | 0.034203    | ATP9A  | ENSG00000054793 |
| 20 | 49816925 | 49817246 | 49817085 | 10 | 15 | 5  | 2.557089848 | 0.0169197   | ATP9A  | ENSG00000054793 |
| 20 | 49817666 | 49817936 | 49817839 | 8  | 12 | 2  | 4.155271003 | 0.0046638   | ATP9A  | ENSG00000054793 |
| 20 | 49849942 | 49850545 | 49850309 | 13 | 30 | 10 | 2.702379044 | 0.00113582  | SALL4  | ENSG00000101115 |
| 20 | 49850920 | 49851167 | 49851043 | 9  | 11 | 14 | 0.767126954 | 0.756447    | SALL4  | ENSG00000101115 |
| 20 | 49883367 | 49883717 | 49883542 | 10 | 13 | 12 | 1.0326709   | 0.46514     | SALL4  | ENSG00000101115 |
| 20 | 49897687 | 49897873 | 49897786 | 8  | 9  | 3  | 2.397271733 | 0.0539397   | SALL4  | ENSG00000101115 |
| 20 | 49903356 | 49903550 | 49903454 | 8  | 8  | 3  | 2.157544559 | 0.0836802   |        | ENSG00000210764 |
| 20 | 49921896 | 49922189 | 49922015 | 11 | 14 | 10 | 1.307602763 | 0.244096    |        | ENSG00000210764 |
| 20 | 49922624 | 49922940 | 49922782 | 10 | 15 | 0  | 15.34253909 | 2.13E-05    |        | ENSG00000210764 |
| 20 | 49968452 | 49968885 | 49968625 | 11 | 19 | 9  | 1.917817386 | 0.0394029   |        | ENSG00000210768 |
| 20 | 49969535 | 49969740 | 49969637 | 8  | 8  | 9  | 0.863017824 | 0.627343    |        | ENSG00000210768 |
| 20 | 50012228 | 50012603 | 50012407 | 11 | 17 | 17 | 0.958908693 | 0.549739    |        | ENSG00000210768 |
| 20 | 50016251 | 50016580 | 50016415 | 13 | 17 | 7  | 2.157544559 | 0.0276499   |        | ENSG00000210768 |
| 20 | 50021313 | 50021509 | 50021430 | 9  | 10 | 0  | 10.54799562 | 0.000613541 |        | ENSG00000210768 |
| 20 | 50021658 | 50021851 | 50021775 | 8  | 8  | 1  | 4.315089119 | 0.0127267   |        | ENSG00000210768 |
| 20 | 50027934 | 50028470 | 50028277 | 47 | 64 | 0  | 62.32906505 | 1.04E-19    |        | ENSG00000210768 |
| 20 | 50034880 | 50035165 | 50035044 | 10 | 11 | 7  | 1.43836304  | 0.204844    |        | ENSG00000210768 |
| 20 | 50051983 | 50052303 | 50052143 | 8  | 11 | 10 | 1.046082211 | 0.455063    |        | ENSG00000210768 |
| 20 | 50069278 | 50069468 | 50069406 | 8  | 8  | 4  | 1.726035648 | 0.150596    | ZFP64  | ENSG00000020256 |

|    |          |          |          |    |     |     |             |             |         |                 |
|----|----------|----------|----------|----|-----|-----|-------------|-------------|---------|-----------------|
| 20 | 50133555 | 50133939 | 50133728 | 9  | 15  | 8   | 1.704726565 | 0.0916153   | ZFP64   | ENSG00000020256 |
| 20 | 50144747 | 50145082 | 50144906 | 12 | 15  | 2   | 5.114179696 | 0.00088103  | ZFP64   | ENSG00000020256 |
| 20 | 51212299 | 51212506 | 51212402 | 9  | 9   | 1   | 4.794543465 | 0.00708517  |         | ENSG00000199218 |
| 20 | 51381514 | 51381732 | 51381581 | 13 | 13  | 1   | 6.712360851 | 0.000640982 | PPIAP10 | ENSG00000216445 |
| 20 | 51586301 | 51586507 | 51586398 | 8  | 8   | 0   | 8.630178238 | 0.00235436  |         | ENSG00000206959 |
| 20 | 51597704 | 51597954 | 51597825 | 8  | 11  | 6   | 1.643843474 | 0.137712    |         | ENSG00000206959 |
| 20 | 51615094 | 51615499 | 51615229 | 11 | 17  | 28  | 0.595184706 | 0.961563    |         | ENSG00000197670 |
| 20 | 51615610 | 51616283 | 51615857 | 14 | 33  | 25  | 1.253957522 | 0.189413    |         | ENSG00000197670 |
| 20 | 51616755 | 51617043 | 51616905 | 12 | 14  | 20  | 0.684934781 | 0.872628    |         | ENSG00000197670 |
| 20 | 51617127 | 51618597 | 51617717 | 20 | 72  | 102 | 0.679614899 | 0.994608    |         | ENSG00000197670 |
| 20 | 51619576 | 51620340 | 51619859 | 17 | 48  | 48  | 0.958908693 | 0.582054    | ZNF217  | ENSG00000171940 |
| 20 | 51620345 | 51621389 | 51620663 | 19 | 63  | 57  | 1.058106144 | 0.376758    | ZNF217  | ENSG00000171940 |
| 20 | 51621546 | 51622703 | 51621924 | 16 | 57  | 84  | 0.654314167 | 0.994151    | ZNF217  | ENSG00000171940 |
| 20 | 51622708 | 51623071 | 51622887 | 12 | 19  | 38  | 0.491748048 | 0.996245    | ZNF217  | ENSG00000171940 |
| 20 | 51623329 | 51623755 | 51623508 | 11 | 18  | 19  | 0.910963258 | 0.614871    | ZNF217  | ENSG00000171940 |
| 20 | 51624136 | 51624505 | 51624267 | 11 | 17  | 30  | 0.556785693 | 0.978823    | ZNF217  | ENSG00000171940 |
| 20 | 51624668 | 51625126 | 51624897 | 18 | 31  | 24  | 1.227403127 | 0.218358    | ZNF217  | ENSG00000171940 |
| 20 | 51625170 | 51625596 | 51625417 | 10 | 19  | 35  | 0.532727052 | 0.989963    | ZNF217  | ENSG00000171940 |
| 20 | 51625605 | 51627861 | 51625791 | 22 | 142 | 122 | 1.114828806 | 0.187497    | ZNF217  | ENSG00000171940 |
| 20 | 51627969 | 51631490 | 51628874 | 74 | 312 | 301 | 0.993835831 | 0.530348    | ZNF217  | ENSG00000171940 |
| 20 | 51631518 | 51633177 | 51632381 | 18 | 95  | 116 | 0.786796876 | 0.959813    | ZNF217  | ENSG00000171940 |
| 20 | 51635682 | 51636128 | 51635949 | 11 | 19  | 15  | 1.198635866 | 0.291044    | ZNF217  | ENSG00000171940 |
| 20 | 51636434 | 51636877 | 51636709 | 21 | 31  | 37  | 0.807502057 | 0.815059    | ZNF217  | ENSG00000171940 |
| 20 | 51638164 | 51638343 | 51638253 | 8  | 9   | 6   | 1.369869562 | 0.253675    | ZNF217  | ENSG00000171940 |
| 20 | 51638460 | 51638793 | 51638626 | 14 | 18  | 18  | 0.958908693 | 0.551113    | ZNF217  | ENSG00000171940 |
| 20 | 51639332 | 51639723 | 51639544 | 15 | 23  | 15  | 1.43836304  | 0.12479     | ZNF217  | ENSG00000171940 |
| 20 | 51639758 | 51640015 | 51639933 | 11 | 14  | 14  | 0.958908693 | 0.545362    | ZNF217  | ENSG00000171940 |
| 20 | 51640059 | 51640385 | 51640263 | 15 | 20  | 12  | 1.54900635  | 0.101141    | ZNF217  | ENSG00000171940 |
| 20 | 51640559 | 51641046 | 51640720 | 10 | 19  | 21  | 0.871735176 | 0.672523    | ZNF217  | ENSG00000171940 |
| 20 | 51641117 | 51641360 | 51641235 | 12 | 15  | 12  | 1.180195315 | 0.324974    | ZNF217  | ENSG00000171940 |
| 20 | 51641545 | 51642054 | 51641712 | 10 | 20  | 19  | 1.006854128 | 0.490315    | ZNF217  | ENSG00000171940 |
| 20 | 51642067 | 51642496 | 51642246 | 19 | 31  | 18  | 1.615004115 | 0.044781    | ZNF217  | ENSG00000171940 |
| 20 | 51642528 | 51643565 | 51642770 | 24 | 67  | 38  | 1.671943362 | 0.00442915  | ZNF217  | ENSG00000171940 |
| 20 | 51644538 | 51645349 | 51644744 | 29 | 79  | 54  | 1.394776281 | 0.0272946   | ZNF217  | ENSG00000171940 |

|    |          |          |          |    |     |     |             |            |        |                 |
|----|----------|----------|----------|----|-----|-----|-------------|------------|--------|-----------------|
| 20 | 51645704 | 51650727 | 51647303 | 57 | 466 | 380 | 1.175355275 | 0.00945883 | ZNF217 | ENSG00000171940 |
| 20 | 51650811 | 51651438 | 51651132 | 24 | 40  | 37  | 1.034612011 | 0.438996   | ZNF217 | ENSG00000171940 |
| 20 | 51652434 | 51653171 | 51652992 | 12 | 34  | 35  | 0.93227234  | 0.616206   | ZNF217 | ENSG00000171940 |
| 20 | 51653912 | 51654121 | 51654066 | 13 | 13  | 13  | 0.958908693 | 0.543805   | ZNF217 | ENSG00000171940 |
| 20 | 51654699 | 51655027 | 51654863 | 14 | 17  | 11  | 1.43836304  | 0.15834    | ZNF217 | ENSG00000171940 |
| 20 | 51655390 | 51655744 | 51655565 | 8  | 12  | 16  | 0.733283118 | 0.803868   | ZNF217 | ENSG00000171940 |
| 20 | 51655770 | 51655963 | 51655816 | 8  | 10  | 5   | 1.757999271 | 0.121253   | ZNF217 | ENSG00000171940 |
| 20 | 51656135 | 51657124 | 51656522 | 28 | 71  | 65  | 1.046082211 | 0.394951   | ZNF217 | ENSG00000171940 |
| 20 | 51657793 | 51659207 | 51658360 | 21 | 88  | 89  | 0.948254152 | 0.638783   | ZNF217 | ENSG00000171940 |
| 20 | 51659286 | 51659938 | 51659500 | 24 | 59  | 62  | 0.913246374 | 0.692738   | ZNF217 | ENSG00000171940 |
| 20 | 51659956 | 51660488 | 51660162 | 25 | 48  | 58  | 0.796381796 | 0.881807   | ZNF217 | ENSG00000171940 |
| 20 | 51660543 | 51660794 | 51660680 | 10 | 12  | 6   | 1.78083043  | 0.0985525  | ZNF217 | ENSG00000171940 |
| 20 | 51660895 | 51661190 | 51661042 | 10 | 12  | 7   | 1.558226626 | 0.152813   | ZNF217 | ENSG00000171940 |
| 20 | 51661205 | 51662081 | 51661444 | 27 | 81  | 64  | 1.209700197 | 0.124224   | ZNF217 | ENSG00000171940 |
| 20 | 51662327 | 51664594 | 51662607 | 23 | 150 | 156 | 0.922262501 | 0.761221   | ZNF217 | ENSG00000171940 |
| 20 | 51665479 | 51666117 | 51665798 | 9  | 24  | 26  | 0.887878419 | 0.666463   | ZNF217 | ENSG00000171940 |
| 20 | 51666321 | 51666507 | 51666461 | 9  | 9   | 3   | 2.397271733 | 0.0539397  | ZNF217 | ENSG00000171940 |
| 20 | 51666576 | 51666942 | 51666763 | 12 | 19  | 14  | 1.278544924 | 0.231514   | ZNF217 | ENSG00000171940 |
| 20 | 51667094 | 51667530 | 51667258 | 9  | 16  | 18  | 0.857970936 | 0.678066   | ZNF217 | ENSG00000171940 |
| 20 | 51667713 | 51668353 | 51668198 | 14 | 30  | 29  | 0.990872316 | 0.513662   | ZNF217 | ENSG00000171940 |
| 20 | 51669232 | 51669973 | 51669624 | 18 | 40  | 42  | 0.914308289 | 0.65947    | ZNF217 | ENSG00000171940 |
| 20 | 51670616 | 51670939 | 51670777 | 11 | 14  | 9   | 1.43836304  | 0.179537   | ZNF217 | ENSG00000171940 |
| 20 | 51671215 | 51674689 | 51671718 | 85 | 658 | 446 | 1.413693129 | 5.93E-09   | ZNF217 | ENSG00000171940 |
| 20 | 51674926 | 51675167 | 51675095 | 8  | 10  | 16  | 0.620470331 | 0.897128   | ZNF217 | ENSG00000171940 |
| 20 | 51675191 | 51675636 | 51675370 | 9  | 18  | 14  | 1.214617678 | 0.282961   | ZNF217 | ENSG00000171940 |
| 20 | 51675761 | 51675992 | 51675876 | 8  | 11  | 11  | 0.958908693 | 0.540507   | ZNF217 | ENSG00000171940 |
| 20 | 51676117 | 51676326 | 51676221 | 8  | 10  | 13  | 0.753428259 | 0.762589   | ZNF217 | ENSG00000171940 |
| 20 | 51676372 | 51676726 | 51676549 | 15 | 20  | 27  | 0.71918152  | 0.876208   | ZNF217 | ENSG00000171940 |
| 20 | 51677143 | 51677460 | 51677301 | 8  | 11  | 10  | 1.046082211 | 0.455063   | ZNF217 | ENSG00000171940 |
| 20 | 51677650 | 51678286 | 51678070 | 28 | 50  | 31  | 1.52826073  | 0.0276853  | ZNF217 | ENSG00000171940 |
| 20 | 51678775 | 51679071 | 51678907 | 13 | 15  | 17  | 0.852363283 | 0.680376   | ZNF217 | ENSG00000171940 |
| 20 | 51679356 | 51680339 | 51680188 | 16 | 53  | 37  | 1.362659722 | 0.0694425  | ZNF217 | ENSG00000171940 |
| 20 | 51681563 | 51682523 | 51681774 | 24 | 66  | 60  | 1.053227581 | 0.383868   | ZNF217 | ENSG00000171940 |
| 20 | 51683434 | 51683789 | 51683610 | 14 | 19  | 18  | 1.009377572 | 0.487356   | ZNF217 | ENSG00000171940 |

|    |          |          |          |    |     |     |             |            |        |                 |
|----|----------|----------|----------|----|-----|-----|-------------|------------|--------|-----------------|
| 20 | 51683963 | 51684621 | 51684323 | 36 | 58  | 75  | 0.744415959 | 0.956613   | ZNF217 | ENSG00000171940 |
| 20 | 51684849 | 51685765 | 51685263 | 21 | 65  | 70  | 0.891379912 | 0.749724   | ZNF217 | ENSG00000171940 |
| 20 | 51685955 | 51687330 | 51686459 | 23 | 75  | 66  | 1.087717323 | 0.306869   | ZNF217 | ENSG00000171940 |
| 20 | 51687812 | 51688406 | 51688041 | 15 | 29  | 28  | 0.99197451  | 0.511702   | ZNF217 | ENSG00000171940 |
| 20 | 51688837 | 51690417 | 51690176 | 32 | 148 | 143 | 0.992204134 | 0.526411   | ZNF217 | ENSG00000171940 |
| 20 | 51691367 | 51691787 | 51691524 | 19 | 28  | 11  | 2.317362675 | 0.00474534 | ZNF217 | ENSG00000171940 |
| 20 | 51691891 | 51692288 | 51692070 | 17 | 24  | 23  | 0.998863222 | 0.500802   | ZNF217 | ENSG00000171940 |
| 20 | 51692378 | 51693582 | 51692746 | 30 | 110 | 83  | 1.267129344 | 0.0495984  | ZNF217 | ENSG00000171940 |
| 20 | 51693631 | 51694156 | 51693799 | 11 | 25  | 18  | 1.312190843 | 0.179876   | ZNF217 | ENSG00000171940 |
| 20 | 51694331 | 51694590 | 51694493 | 9  | 11  | 9   | 1.150690432 | 0.367789   | ZNF217 | ENSG00000171940 |
| 20 | 51695142 | 51696144 | 51695587 | 22 | 66  | 63  | 1.003857538 | 0.490697   | ZNF217 | ENSG00000171940 |
| 20 | 51696300 | 51697053 | 51696723 | 18 | 42  | 35  | 1.145363161 | 0.272078   | ZNF217 | ENSG00000171940 |
| 20 | 51697107 | 51697479 | 51697300 | 13 | 20  | 22  | 0.875525328 | 0.671044   | ZNF217 | ENSG00000171940 |
| 20 | 51697621 | 51698168 | 51697800 | 15 | 30  | 40  | 0.725028524 | 0.913791   | ZNF217 | ENSG00000171940 |
| 20 | 51699184 | 51699588 | 51699333 | 12 | 18  | 14  | 1.214617678 | 0.282961   | ZNF217 | ENSG00000171940 |
| 20 | 51700037 | 51700514 | 51700335 | 9  | 18  | 20  | 0.867584056 | 0.67417    | ZNF217 | ENSG00000171940 |
| 20 | 51700837 | 51701540 | 51701077 | 10 | 25  | 12  | 1.917817386 | 0.0229342  | ZNF217 | ENSG00000171940 |
| 20 | 51701780 | 51703567 | 51702792 | 27 | 141 | 146 | 0.926292751 | 0.74244    | ZNF217 | ENSG00000171940 |
| 20 | 51703800 | 51704192 | 51704015 | 15 | 21  | 16  | 1.240940662 | 0.248103   | ZNF217 | ENSG00000171940 |
| 20 | 51704239 | 51704732 | 51704553 | 12 | 24  | 25  | 0.922027589 | 0.614196   | ZNF217 | ENSG00000171940 |
| 20 | 51704790 | 51708160 | 51706513 | 42 | 350 | 323 | 1.038817751 | 0.310203   | ZNF217 | ENSG00000171940 |
| 20 | 51708188 | 51709196 | 51708667 | 21 | 68  | 70  | 0.931897181 | 0.661779   | ZNF217 | ENSG00000171940 |
| 20 | 51709577 | 51710165 | 51709731 | 11 | 24  | 33  | 0.705079921 | 0.910297   | ZNF217 | ENSG00000171940 |
| 20 | 51710246 | 51712102 | 51711844 | 33 | 159 | 174 | 0.876716519 | 0.885773   | ZNF217 | ENSG00000171940 |
| 20 | 51712320 | 51712908 | 51712644 | 11 | 27  | 31  | 0.839045106 | 0.752376   | ZNF217 | ENSG00000171940 |
| 20 | 51712959 | 51713681 | 51713509 | 12 | 35  | 34  | 0.986306084 | 0.522633   | ZNF217 | ENSG00000171940 |
| 20 | 51713847 | 51714794 | 51714212 | 20 | 58  | 62  | 0.898025601 | 0.723963   | ZNF217 | ENSG00000171940 |
| 20 | 51714980 | 51715432 | 51715256 | 25 | 36  | 21  | 1.612710075 | 0.0345008  | ZNF217 | ENSG00000171940 |
| 20 | 51715919 | 51716798 | 51716622 | 20 | 50  | 38  | 1.253957522 | 0.141278   | ZNF217 | ENSG00000171940 |
| 20 | 51716876 | 51717470 | 51717176 | 17 | 29  | 33  | 0.846095906 | 0.748756   | ZNF217 | ENSG00000171940 |
| 20 | 51717745 | 51718382 | 51718200 | 10 | 25  | 45  | 0.54199187  | 0.994813   | ZNF217 | ENSG00000171940 |
| 20 | 51718626 | 51718849 | 51718739 | 9  | 9   | 11  | 0.799090578 | 0.702688   | ZNF217 | ENSG00000171940 |
| 20 | 51719049 | 51719657 | 51719478 | 19 | 44  | 51  | 0.829824831 | 0.821251   | ZNF217 | ENSG00000171940 |
| 20 | 51720912 | 51721102 | 51720977 | 8  | 9   | 2   | 3.19636231  | 0.0229249  | ZNF217 | ENSG00000171940 |

|    |          |          |          |    |     |     |             |           |        |                 |
|----|----------|----------|----------|----|-----|-----|-------------|-----------|--------|-----------------|
| 20 | 51721142 | 51721700 | 51721490 | 22 | 40  | 40  | 0.958908693 | 0.575108  | ZNF217 | ENSG00000171940 |
| 20 | 51721988 | 51722301 | 51722144 | 8  | 11  | 11  | 0.958908693 | 0.540507  | ZNF217 | ENSG00000171940 |
| 20 | 51722539 | 51723086 | 51722827 | 20 | 36  | 44  | 0.788436037 | 0.859473  | ZNF217 | ENSG00000171940 |
| 20 | 51723332 | 51723843 | 51723508 | 15 | 27  | 27  | 0.958908693 | 0.562099  | ZNF217 | ENSG00000171940 |
| 20 | 51724000 | 51724266 | 51724122 | 8  | 9   | 9   | 0.958908693 | 0.536911  | ZNF217 | ENSG00000171940 |
| 20 | 51724576 | 51724941 | 51724744 | 8  | 14  | 21  | 0.653801382 | 0.90216   | ZNF217 | ENSG00000171940 |
| 20 | 51725416 | 51725705 | 51725560 | 8  | 12  | 23  | 0.519408875 | 0.975546  | ZNF217 | ENSG00000171940 |
| 20 | 51726569 | 51726868 | 51726714 | 18 | 21  | 39  | 0.527399781 | 0.993468  | ZNF217 | ENSG00000171940 |
| 20 | 51726874 | 51730436 | 51729784 | 54 | 366 | 328 | 1.069664104 | 0.187126  | ZNF217 | ENSG00000171940 |
| 20 | 51730461 | 51731167 | 51730891 | 19 | 45  | 42  | 1.0258093   | 0.451372  | ZNF217 | ENSG00000171940 |
| 20 | 51731279 | 51732270 | 51731546 | 17 | 53  | 49  | 1.035621389 | 0.428392  | ZNF217 | ENSG00000171940 |
| 20 | 51732506 | 51733100 | 51732715 | 15 | 31  | 33  | 0.902502299 | 0.661862  | ZNF217 | ENSG00000171940 |
| 20 | 51733305 | 51733517 | 51733411 | 13 | 14  | 8   | 1.598181155 | 0.124586  | ZNF217 | ENSG00000171940 |
| 20 | 51733528 | 51733948 | 51733755 | 19 | 33  | 49  | 0.652057911 | 0.974478  | ZNF217 | ENSG00000171940 |
| 20 | 51734619 | 51734816 | 51734717 | 8  | 11  | 11  | 0.958908693 | 0.540507  | ZNF217 | ENSG00000171940 |
| 20 | 51734829 | 51736418 | 51736113 | 27 | 107 | 121 | 0.848869991 | 0.893038  | ZNF217 | ENSG00000171940 |
| 20 | 51737084 | 51738459 | 51738010 | 25 | 91  | 74  | 1.17626133  | 0.146968  | ZNF217 | ENSG00000171940 |
| 20 | 51738616 | 51739293 | 51738913 | 19 | 45  | 29  | 1.470326663 | 0.0473607 | ZNF217 | ENSG00000171940 |
| 20 | 51740316 | 51740821 | 51740495 | 14 | 27  | 31  | 0.839045106 | 0.752376  | ZNF217 | ENSG00000171940 |
| 20 | 51740826 | 51742247 | 51741657 | 91 | 193 | 160 | 1.155455195 | 0.0868921 | ZNF217 | ENSG00000171940 |
| 20 | 51742370 | 51743623 | 51742741 | 21 | 90  | 80  | 1.077292482 | 0.312091  | ZNF217 | ENSG00000171940 |
| 20 | 51744504 | 51744894 | 51744682 | 15 | 22  | 26  | 0.816848146 | 0.76371   | ZNF217 | ENSG00000171940 |
| 20 | 51745253 | 51745661 | 51745482 | 10 | 19  | 14  | 1.278544924 | 0.231514  | ZNF217 | ENSG00000171940 |
| 20 | 51745664 | 51746539 | 51746014 | 19 | 54  | 66  | 0.787163853 | 0.906939  | ZNF217 | ENSG00000171940 |
| 20 | 51746769 | 51747042 | 51746905 | 8  | 10  | 13  | 0.753428259 | 0.762589  | ZNF217 | ENSG00000171940 |
| 20 | 51747897 | 51748327 | 51748075 | 17 | 25  | 25  | 0.958908693 | 0.559837  | ZNF217 | ENSG00000171940 |
| 20 | 51748492 | 51749219 | 51748897 | 10 | 28  | 27  | 0.993155432 | 0.509675  | ZNF217 | ENSG00000171940 |
| 20 | 51749261 | 51750375 | 51749783 | 21 | 84  | 88  | 0.915811673 | 0.719148  | ZNF217 | ENSG00000171940 |
| 20 | 51750491 | 51750701 | 51750564 | 9  | 12  | 6   | 1.78083043  | 0.0985525 | ZNF217 | ENSG00000171940 |
| 20 | 51750729 | 51751955 | 51751288 | 15 | 71  | 57  | 1.190369412 | 0.15997   | ZNF217 | ENSG00000171940 |
| 20 | 51752722 | 51752963 | 51752824 | 9  | 12  | 17  | 0.692545167 | 0.848017  | ZNF217 | ENSG00000171940 |
| 20 | 51753258 | 51753458 | 51753379 | 8  | 9   | 10  | 0.871735176 | 0.624623  | ZNF217 | ENSG00000171940 |
| 20 | 51754770 | 51755251 | 51754915 | 9  | 18  | 31  | 0.569352037 | 0.976935  | ZNF217 | ENSG00000171940 |
| 20 | 51755837 | 51759194 | 51758360 | 32 | 277 | 272 | 0.976471123 | 0.609894  | ZNF217 | ENSG00000171940 |

|    |          |          |          |    |     |     |             |           |        |                 |
|----|----------|----------|----------|----|-----|-----|-------------|-----------|--------|-----------------|
| 20 | 51759445 | 51759649 | 51759580 | 9  | 11  | 9   | 1.150690432 | 0.367789  | ZNF217 | ENSG00000171940 |
| 20 | 51759816 | 51760199 | 51759995 | 20 | 27  | 20  | 1.278544924 | 0.193646  | ZNF217 | ENSG00000171940 |
| 20 | 51760947 | 51764817 | 51764624 | 26 | 306 | 268 | 1.094367914 | 0.139621  | ZNF217 | ENSG00000171940 |
| 20 | 51765049 | 51765810 | 51765384 | 17 | 43  | 51  | 0.811384279 | 0.847428  | ZNF217 | ENSG00000171940 |
| 20 | 51766093 | 51766948 | 51766520 | 19 | 47  | 41  | 1.095895649 | 0.330961  | ZNF217 | ENSG00000171940 |
| 20 | 51767237 | 51767474 | 51767364 | 10 | 11  | 17  | 0.639272462 | 0.890352  | ZNF217 | ENSG00000171940 |
| 20 | 51767682 | 51769280 | 51768097 | 26 | 105 | 109 | 0.924039286 | 0.719269  | ZNF217 | ENSG00000171940 |
| 20 | 51769509 | 51769740 | 51769668 | 10 | 12  | 28  | 0.429855621 | 0.996097  | ZNF217 | ENSG00000171940 |
| 20 | 51769755 | 51769982 | 51769883 | 9  | 13  | 17  | 0.745817872 | 0.798145  | ZNF217 | ENSG00000171940 |
| 20 | 51770391 | 51770652 | 51770519 | 12 | 12  | 14  | 0.831054201 | 0.689281  | ZNF217 | ENSG00000171940 |
| 20 | 51770777 | 51771471 | 51771119 | 24 | 46  | 33  | 1.325550252 | 0.102513  | ZNF217 | ENSG00000171940 |
| 20 | 51771609 | 51771814 | 51771743 | 8  | 10  | 7   | 1.318499453 | 0.269217  | ZNF217 | ENSG00000171940 |
| 20 | 51772075 | 51772445 | 51772216 | 16 | 22  | 34  | 0.630139998 | 0.960074  | ZNF217 | ENSG00000171940 |
| 20 | 51772592 | 51773339 | 51772770 | 15 | 39  | 70  | 0.54023025  | 0.999295  | ZNF217 | ENSG00000171940 |
| 20 | 51773341 | 51774562 | 51773866 | 25 | 67  | 71  | 0.905635988 | 0.721355  | ZNF217 | ENSG00000171940 |
| 20 | 51774922 | 51775492 | 51775241 | 26 | 49  | 41  | 1.141557968 | 0.261779  | ZNF217 | ENSG00000171940 |
| 20 | 51775676 | 51776423 | 51776211 | 14 | 45  | 47  | 0.918954164 | 0.659122  | ZNF217 | ENSG00000171940 |
| 20 | 51776514 | 51777277 | 51776751 | 23 | 50  | 28  | 1.686356667 | 0.0106337 | ZNF217 | ENSG00000171940 |
| 20 | 51777398 | 51778821 | 51778536 | 25 | 82  | 79  | 0.994867769 | 0.512695  | ZNF217 | ENSG00000171940 |
| 20 | 51778973 | 51779345 | 51779145 | 10 | 16  | 9   | 1.630144778 | 0.102169  | ZNF217 | ENSG00000171940 |
| 20 | 51779542 | 51780073 | 51779721 | 21 | 36  | 47  | 0.739158784 | 0.918239  | ZNF217 | ENSG00000171940 |
| 20 | 51780183 | 51781021 | 51780752 | 19 | 44  | 45  | 0.938062852 | 0.619775  | ZNF217 | ENSG00000171940 |
| 20 | 51781240 | 51782962 | 51781946 | 18 | 95  | 84  | 1.083002759 | 0.295279  | ZNF217 | ENSG00000171940 |
| 20 | 51782968 | 51783603 | 51783217 | 19 | 43  | 66  | 0.629731082 | 0.992222  | ZNF217 | ENSG00000171940 |
| 20 | 51783851 | 51784820 | 51784264 | 26 | 83  | 71  | 1.118726809 | 0.241221  | ZNF217 | ENSG00000171940 |
| 20 | 51784976 | 51785234 | 51785081 | 14 | 15  | 15  | 0.958908693 | 0.546868  |        | ENSG00000149617 |
| 20 | 51785404 | 51786472 | 51786103 | 21 | 86  | 100 | 0.825990656 | 0.905066  |        | ENSG00000149617 |
| 20 | 51786521 | 51791975 | 51788606 | 40 | 441 | 505 | 0.837623799 | 0.996794  |        | ENSG00000149617 |
| 20 | 51792070 | 51793141 | 51792906 | 22 | 70  | 58  | 1.15394097  | 0.206654  |        | ENSG00000149617 |
| 20 | 51793347 | 51793974 | 51793772 | 21 | 41  | 57  | 0.694382157 | 0.96555   |        | ENSG00000149617 |
| 20 | 51794075 | 51794917 | 51794738 | 19 | 50  | 55  | 0.873291845 | 0.758606  |        | ENSG00000149617 |
| 20 | 51795187 | 51795416 | 51795307 | 9  | 12  | 9   | 1.246581301 | 0.295061  |        | ENSG00000149617 |
| 20 | 51795812 | 51796170 | 51795991 | 14 | 20  | 29  | 0.671236085 | 0.922603  |        | ENSG00000149617 |
| 20 | 51796213 | 51796633 | 51796392 | 15 | 22  | 34  | 0.630139998 | 0.960074  |        | ENSG00000149617 |



|    |          |          |          |     |     |     |             |            |                 |
|----|----------|----------|----------|-----|-----|-----|-------------|------------|-----------------|
| 20 | 51796740 | 51797258 | 51797007 | 13  | 23  | 20  | 1.095895649 | 0.377643   | ENSG00000149617 |
| 20 | 51797640 | 51797899 | 51797744 | 10  | 13  | 9   | 1.34247217  | 0.232231   | ENSG00000149617 |
| 20 | 51798064 | 51800046 | 51799737 | 28  | 168 | 182 | 0.885549558 | 0.872957   | ENSG00000149617 |
| 20 | 51800514 | 51805296 | 51803612 | 42  | 586 | 437 | 1.285112792 | 3.25E-05   | ENSG00000149617 |
| 20 | 51805612 | 51806897 | 51806258 | 28  | 115 | 93  | 1.183334132 | 0.111374   | ENSG00000149617 |
| 20 | 51807366 | 51808362 | 51807864 | 20  | 56  | 46  | 1.162931819 | 0.220037   | ENSG00000149617 |
| 20 | 51808489 | 51809046 | 51808826 | 24  | 44  | 53  | 0.799090578 | 0.868022   | ENSG00000149617 |
| 20 | 51809718 | 51810589 | 51810061 | 18  | 54  | 62  | 0.83714251  | 0.833153   | ENSG00000149617 |
| 20 | 51810727 | 51811176 | 51810892 | 11  | 18  | 24  | 0.728770607 | 0.85379    | ENSG00000149617 |
| 20 | 51811221 | 51811575 | 51811385 | 10  | 15  | 30  | 0.494920616 | 0.991097   | ENSG00000149617 |
| 20 | 51811830 | 51812093 | 51811927 | 12  | 14  | 30  | 0.463988077 | 0.994565   | ENSG00000149617 |
| 20 | 51812331 | 51812690 | 51812632 | 8   | 14  | 15  | 0.8989769   | 0.617119   | ENSG00000149617 |
| 20 | 51812702 | 51812973 | 51812837 | 9   | 12  | 17  | 0.692545167 | 0.848017   | ENSG00000149617 |
| 20 | 51813105 | 51814823 | 51813847 | 30  | 146 | 179 | 0.783108766 | 0.986364   | ENSG00000149617 |
| 20 | 51815945 | 51816718 | 51816364 | 25  | 66  | 38  | 1.64735596  | 0.0056575  | ENSG00000149617 |
| 20 | 51817047 | 51819667 | 51817704 | 32  | 206 | 206 | 0.958908693 | 0.665165   | ENSG00000149617 |
| 20 | 51820097 | 51820611 | 51820288 | 10  | 21  | 29  | 0.703199708 | 0.898125   | ENSG00000149617 |
| 20 | 51820786 | 51821333 | 51821077 | 23  | 42  | 24  | 1.649322952 | 0.0207473  | ENSG00000149617 |
| 20 | 51821382 | 51821595 | 51821554 | 8   | 10  | 17  | 0.585999757 | 0.924668   | ENSG00000149617 |
| 20 | 51821619 | 51822124 | 51821832 | 16  | 26  | 37  | 0.681329861 | 0.938791   | ENSG00000149617 |
| 20 | 51822191 | 51822859 | 51822568 | 12  | 32  | 35  | 0.878999635 | 0.704375   | ENSG00000149617 |
| 20 | 51823218 | 51825385 | 51823919 | 45  | 256 | 225 | 1.090440416 | 0.170639   | ENSG00000149617 |
| 20 | 51825510 | 51826121 | 51825869 | 20  | 44  | 52  | 0.814167758 | 0.845921   | ENSG00000149617 |
| 20 | 51826172 | 51826971 | 51826470 | 18  | 43  | 38  | 1.081845705 | 0.358944   | ENSG00000149617 |
| 20 | 51827063 | 51828616 | 51828196 | 31  | 121 | 104 | 1.114160577 | 0.207423   | ENSG00000149617 |
| 20 | 51828625 | 51829099 | 51828783 | 21  | 32  | 21  | 1.43836304  | 0.089235   | ENSG00000149617 |
| 20 | 51829193 | 51830339 | 51829963 | 28  | 86  | 55  | 1.489733148 | 0.00911088 | ENSG00000149617 |
| 20 | 51832344 | 51833151 | 51832612 | 19  | 44  | 57  | 0.743980883 | 0.933197   | ENSG00000149617 |
| 20 | 51833501 | 51833680 | 51833664 | 8   | 9   | 2   | 3.19636231  | 0.0229249  | ENSG00000149617 |
| 20 | 51833689 | 51834098 | 51833919 | 18  | 25  | 19  | 1.246581301 | 0.225794   | ENSG00000149617 |
| 20 | 51834216 | 51835010 | 51834437 | 17  | 42  | 47  | 0.859022371 | 0.766152   | ENSG00000149617 |
| 20 | 51835130 | 51837446 | 51836198 | 167 | 464 | 277 | 1.603930008 | 1.20E-10   | ENSG00000149617 |
| 20 | 51837531 | 51838964 | 51837812 | 32  | 104 | 77  | 1.290838625 | 0.0425956  | ENSG00000149617 |
| 20 | 51839125 | 51839392 | 51839278 | 9   | 11  | 14  | 0.767126954 | 0.756447   | ENSG00000149617 |

|    |          |          |          |     |     |     |             |           |                 |
|----|----------|----------|----------|-----|-----|-----|-------------|-----------|-----------------|
| 20 | 51839460 | 51841450 | 51841186 | 52  | 233 | 221 | 1.010741595 | 0.454301  | ENSG00000149617 |
| 20 | 51841595 | 51841885 | 51841729 | 13  | 14  | 13  | 1.027402171 | 0.469541  | ENSG00000149617 |
| 20 | 51841966 | 51845089 | 51843937 | 421 | 859 | 230 | 3.5699631   | 1.13E-80  | ENSG00000149617 |
| 20 | 51845261 | 51845633 | 51845454 | 14  | 21  | 16  | 1.240940662 | 0.248103  | ENSG00000149617 |
| 20 | 51845837 | 51846271 | 51846011 | 16  | 28  | 18  | 1.463597479 | 0.0938263 | ENSG00000149617 |
| 20 | 51846392 | 51847579 | 51846997 | 31  | 85  | 65  | 1.249487085 | 0.0851442 | ENSG00000149617 |
| 20 | 51847588 | 51848173 | 51847744 | 15  | 30  | 28  | 1.025040327 | 0.460877  | ENSG00000149617 |
| 20 | 51848190 | 51849383 | 51849091 | 18  | 64  | 74  | 0.831054201 | 0.863406  | ENSG00000149617 |
| 20 | 51849598 | 51851783 | 51851374 | 32  | 173 | 179 | 0.92694507  | 0.7623    | ENSG00000149617 |
| 20 | 51851883 | 51852128 | 51851951 | 16  | 19  | 18  | 1.009377572 | 0.487356  | ENSG00000149617 |
| 20 | 51852146 | 51852541 | 51852423 | 14  | 20  | 28  | 0.694382157 | 0.901601  | ENSG00000149617 |
| 20 | 51852572 | 51853385 | 51852942 | 16  | 50  | 60  | 0.801710547 | 0.879098  | ENSG00000149617 |
| 20 | 51853664 | 51854251 | 51853881 | 17  | 31  | 36  | 0.829326437 | 0.782137  | ENSG00000149617 |
| 20 | 51854451 | 51857424 | 51855937 | 186 | 588 | 263 | 2.13938341  | 6.92E-27  | ENSG00000149617 |
| 20 | 51857853 | 51858552 | 51858069 | 10  | 27  | 34  | 0.767126954 | 0.854158  | ENSG00000149617 |
| 20 | 51858674 | 51861312 | 51859226 | 24  | 161 | 189 | 0.817595833 | 0.970496  | ENSG00000149617 |
| 20 | 51861395 | 51862032 | 51861752 | 21  | 46  | 39  | 1.126717714 | 0.287903  | ENSG00000149617 |
| 20 | 51862442 | 51862636 | 51862539 | 8   | 9   | 14  | 0.639272462 | 0.869513  | ENSG00000149617 |
| 20 | 51862685 | 51863034 | 51862862 | 21  | 24  | 19  | 1.198635866 | 0.269826  | ENSG00000149617 |
| 20 | 51863104 | 51864269 | 51863862 | 17  | 65  | 99  | 0.632879737 | 0.998273  | ENSG00000149617 |
| 20 | 51864637 | 51865537 | 51865120 | 23  | 65  | 65  | 0.958908693 | 0.595057  | ENSG00000149617 |
| 20 | 51865649 | 51866263 | 51866103 | 9   | 23  | 37  | 0.605626543 | 0.975111  | ENSG00000149617 |
| 20 | 51866861 | 51867093 | 51866977 | 9   | 10  | 6   | 1.506856518 | 0.188853  | ENSG00000149617 |
| 20 | 51867155 | 51867459 | 51867295 | 8   | 11  | 7   | 1.43836304  | 0.204844  | ENSG00000149617 |
| 20 | 51867715 | 51868578 | 51868047 | 9   | 29  | 30  | 0.927976155 | 0.614895  | ENSG00000149617 |
| 20 | 51868600 | 51869160 | 51869000 | 12  | 25  | 21  | 1.133255728 | 0.330598  | ENSG00000149617 |
| 20 | 51869298 | 51870821 | 51869746 | 45  | 168 | 65  | 2.455387411 | 3.24E-11  | ENSG00000149617 |
| 20 | 51870842 | 51871033 | 51870869 | 8   | 8   | 10  | 0.784561658 | 0.708731  | ENSG00000149617 |
| 20 | 51871646 | 51872002 | 51871824 | 23  | 29  | 28  | 0.99197451  | 0.511702  | ENSG00000149617 |
| 20 | 51872602 | 51873903 | 51873451 | 31  | 99  | 79  | 1.198635866 | 0.112182  | ENSG00000149617 |
| 20 | 51873961 | 51875704 | 51874783 | 19  | 96  | 103 | 0.894366762 | 0.78578   | ENSG00000149617 |
| 20 | 51875731 | 51876502 | 51875910 | 27  | 68  | 81  | 0.806886583 | 0.906375  | ENSG00000149617 |
| 20 | 51876580 | 51880822 | 51878725 | 39  | 424 | 364 | 1.116537519 | 0.0608404 | ENSG00000149617 |
| 20 | 51880932 | 51881393 | 51881094 | 11  | 19  | 13  | 1.369869562 | 0.177863  | ENSG00000149617 |

|    |          |          |          |     |      |     |             |            |                 |
|----|----------|----------|----------|-----|------|-----|-------------|------------|-----------------|
| 20 | 51881447 | 51881700 | 51881573 | 10  | 14   | 9   | 1.43836304  | 0.179537   | ENSG00000149617 |
| 20 | 51881704 | 51884634 | 51881929 | 26  | 205  | 191 | 1.028829119 | 0.388064   | ENSG00000149617 |
| 20 | 51884701 | 51885090 | 51884939 | 10  | 17   | 15  | 1.07877228  | 0.410615   | ENSG00000149617 |
| 20 | 51885250 | 51885992 | 51885580 | 12  | 34   | 38  | 0.860559084 | 0.741368   | ENSG00000149617 |
| 20 | 51886029 | 51886340 | 51886175 | 11  | 13   | 15  | 0.839045106 | 0.685928   | ENSG00000149617 |
| 20 | 51886366 | 51887602 | 51887146 | 22  | 78   | 73  | 1.023699821 | 0.44183    | ENSG00000149617 |
| 20 | 51887898 | 51888129 | 51887982 | 9   | 11   | 12  | 0.885146486 | 0.620672   | ENSG00000149617 |
| 20 | 51888316 | 51888843 | 51888579 | 16  | 28   | 28  | 0.958908693 | 0.563199   | ENSG00000149617 |
| 20 | 51889323 | 51890122 | 51889560 | 20  | 58   | 65  | 0.857206256 | 0.805767   | ENSG00000149617 |
| 20 | 51890397 | 51890988 | 51890610 | 29  | 49   | 41  | 1.141557968 | 0.261779   | ENSG00000149617 |
| 20 | 51891039 | 51891479 | 51891301 | 11  | 21   | 22  | 0.917217011 | 0.614252   | ENSG00000149617 |
| 20 | 51891969 | 51892266 | 51892126 | 13  | 17   | 18  | 0.908439814 | 0.615249   | ENSG00000149617 |
| 20 | 51892411 | 51893093 | 51892916 | 17  | 37   | 49  | 0.728770607 | 0.931004   | ENSG00000149617 |
| 20 | 51893509 | 51895815 | 51895014 | 14  | 94   | 90  | 1.001058526 | 0.496707   | ENSG00000149617 |
| 20 | 51895872 | 51896540 | 51896206 | 12  | 33   | 32  | 0.987966532 | 0.519197   | ENSG00000149617 |
| 20 | 51896615 | 51897396 | 51896918 | 21  | 62   | 55  | 1.07877228  | 0.338761   | ENSG00000149617 |
| 20 | 51897402 | 51898798 | 51898107 | 24  | 121  | 141 | 0.823851131 | 0.942243   | ENSG00000149617 |
| 20 | 51899302 | 51899929 | 51899709 | 18  | 43   | 51  | 0.811384279 | 0.847428   | ENSG00000149617 |
| 20 | 51900066 | 51900881 | 51900636 | 25  | 69   | 42  | 1.561014151 | 0.00962645 | ENSG00000149617 |
| 20 | 51901331 | 51902479 | 51902251 | 27  | 86   | 94  | 0.878158487 | 0.809774   | ENSG00000149617 |
| 20 | 51902607 | 51903545 | 51903379 | 15  | 52   | 70  | 0.715805081 | 0.968386   | ENSG00000149617 |
| 20 | 51905086 | 51905433 | 51905260 | 17  | 22   | 15  | 1.378431246 | 0.157106   | ENSG00000149617 |
| 20 | 51905607 | 51907463 | 51906537 | 20  | 110  | 162 | 0.652999171 | 0.999769   | ENSG00000149617 |
| 20 | 51907490 | 51908575 | 51908020 | 25  | 88   | 91  | 0.927639931 | 0.693348   | ENSG00000149617 |
| 20 | 51909399 | 51911510 | 51909814 | 28  | 142  | 126 | 1.079716087 | 0.263936   | ENSG00000149617 |
| 20 | 51911687 | 51912335 | 51912026 | 23  | 47   | 55  | 0.821921737 | 0.841675   | ENSG00000149617 |
| 20 | 51912573 | 51918338 | 51916414 | 125 | 1056 | 759 | 1.333640117 | 5.54E-10   | ENSG00000149617 |
| 20 | 51919232 | 51919436 | 51919334 | 8   | 9    | 13  | 0.684934781 | 0.824961   | ENSG00000149617 |
| 20 | 51919439 | 51921258 | 51919884 | 110 | 282  | 182 | 1.482902514 | 1.31E-05   | ENSG00000149617 |
| 20 | 51921298 | 51923971 | 51923333 | 20  | 154  | 172 | 0.859137846 | 0.915433   | ENSG00000149617 |
| 20 | 51924092 | 51925181 | 51924320 | 16  | 60   | 58  | 0.991414072 | 0.518388   | ENSG00000149617 |
| 20 | 51925190 | 51925429 | 51925309 | 12  | 12   | 17  | 0.692545167 | 0.848017   | ENSG00000149617 |
| 20 | 51925581 | 51926122 | 51925993 | 12  | 26   | 48  | 0.528378259 | 0.996902   | ENSG00000149617 |
| 20 | 51926461 | 51927606 | 51926842 | 15  | 67   | 66  | 0.973220763 | 0.562364   | ENSG00000149617 |

|    |          |          |          |    |     |     |             |            |                 |
|----|----------|----------|----------|----|-----|-----|-------------|------------|-----------------|
| 20 | 51927738 | 51929440 | 51928922 | 15 | 84  | 118 | 0.684934781 | 0.996423   | ENSG00000149617 |
| 20 | 51929666 | 51930687 | 51930021 | 21 | 69  | 54  | 1.220429246 | 0.132635   | ENSG00000149617 |
| 20 | 51931164 | 51931981 | 51931433 | 19 | 49  | 28  | 1.65329085  | 0.0137184  | ENSG00000149617 |
| 20 | 51932144 | 51932533 | 51932354 | 11 | 19  | 5   | 3.19636231  | 0.00280933 | ENSG00000149617 |
| 20 | 51932849 | 51933705 | 51933526 | 22 | 44  | 36  | 1.166240302 | 0.242128   | ENSG00000149617 |
| 20 | 51934091 | 51935602 | 51935122 | 25 | 110 | 119 | 0.886990541 | 0.81906    | ENSG00000149617 |
| 20 | 51935782 | 51936474 | 51936128 | 12 | 30  | 34  | 0.849319128 | 0.747103   | ENSG00000149617 |
| 20 | 51936777 | 51937377 | 51937207 | 10 | 23  | 28  | 0.793579608 | 0.800857   | ENSG00000149617 |
| 20 | 51937603 | 51938094 | 51937838 | 17 | 30  | 15  | 1.857885593 | 0.0184859  | ENSG00000149617 |
| 20 | 51938368 | 51939281 | 51938981 | 18 | 49  | 60  | 0.785990732 | 0.897827   | ENSG00000149617 |
| 20 | 51939342 | 51940038 | 51939521 | 19 | 49  | 45  | 1.042292058 | 0.418741   | ENSG00000149617 |
| 20 | 51940180 | 51940621 | 51940335 | 9  | 16  | 16  | 0.958908693 | 0.548325   | ENSG00000149617 |
| 20 | 51940636 | 51942441 | 51941172 | 19 | 104 | 118 | 0.846095906 | 0.894538   | ENSG00000149617 |
| 20 | 51942879 | 51943640 | 51943227 | 29 | 58  | 43  | 1.285809384 | 0.101204   | ENSG00000149617 |
| 20 | 51944286 | 51944670 | 51944460 | 11 | 17  | 16  | 1.015315087 | 0.480915   | ENSG00000149617 |
| 20 | 51944886 | 51945938 | 51945619 | 15 | 53  | 82  | 0.623868306 | 0.996919   | ENSG00000149617 |
| 20 | 51946042 | 51946240 | 51946195 | 8  | 9   | 3   | 2.397271733 | 0.0539397  | ENSG00000149617 |
| 20 | 51946300 | 51947026 | 51946438 | 11 | 31  | 51  | 0.590097657 | 0.991683   | ENSG00000149617 |
| 20 | 51947132 | 51947629 | 51947484 | 13 | 23  | 20  | 1.095895649 | 0.377643   | ENSG00000149617 |
| 20 | 51947814 | 51950167 | 51948352 | 49 | 242 | 204 | 1.136657622 | 0.0877681  | ENSG00000149617 |
| 20 | 51950227 | 51952792 | 51950575 | 23 | 157 | 176 | 0.855974992 | 0.922672   | ENSG00000149617 |
| 20 | 51952950 | 51954063 | 51953444 | 21 | 72  | 79  | 0.875004182 | 0.79577    | ENSG00000149617 |
| 20 | 51954262 | 51954765 | 51954426 | 17 | 26  | 23  | 1.07877228  | 0.391798   | ENSG00000149617 |
| 20 | 51954929 | 51956008 | 51955350 | 18 | 63  | 77  | 0.786796876 | 0.923451   | ENSG00000149617 |
| 20 | 51956012 | 51956641 | 51956465 | 33 | 69  | 41  | 1.598181155 | 0.00714726 | ENSG00000149617 |
| 20 | 51956643 | 51957400 | 51957246 | 20 | 59  | 44  | 1.278544924 | 0.104159   | ENSG00000149617 |
| 20 | 51957553 | 51958156 | 51957849 | 21 | 35  | 44  | 0.767126954 | 0.883819   | ENSG00000149617 |
| 20 | 51958291 | 51958555 | 51958388 | 10 | 14  | 19  | 0.71918152  | 0.83643    | ENSG00000149617 |
| 20 | 51958896 | 51959677 | 51959183 | 15 | 38  | 44  | 0.831054201 | 0.802294   | ENSG00000149617 |
| 20 | 51960267 | 51961047 | 51960612 | 18 | 44  | 47  | 0.8989769   | 0.69647    | ENSG00000149617 |
| 20 | 51961203 | 51962725 | 51961912 | 21 | 89  | 101 | 0.846095906 | 0.876659   | ENSG00000149617 |
| 20 | 51963235 | 51963743 | 51963474 | 21 | 31  | 23  | 1.278544924 | 0.178011   | ENSG00000149617 |
| 20 | 51964043 | 51966484 | 51965930 | 91 | 389 | 246 | 1.514066357 | 1.19E-07   | ENSG00000149617 |
| 20 | 51966718 | 51968620 | 51967090 | 18 | 122 | 118 | 0.991140918 | 0.527276   | ENSG00000149617 |

|    |          |          |          |    |     |     |             |            |                          |
|----|----------|----------|----------|----|-----|-----|-------------|------------|--------------------------|
| 20 | 51968664 | 51969361 | 51968980 | 17 | 40  | 39  | 0.98288141  | 0.530504   | ENSG00000149617          |
| 20 | 51969693 | 51970441 | 51969954 | 19 | 45  | 57  | 0.760513791 | 0.918643   | ENSG00000149617          |
| 20 | 51970614 | 51971975 | 51971671 | 40 | 124 | 93  | 1.275144539 | 0.0364999  | ENSG00000149617          |
| 20 | 51972308 | 51972574 | 51972441 | 15 | 16  | 14  | 1.086763185 | 0.404922   | ENSG00000149617          |
| 20 | 51972707 | 51973489 | 51973079 | 20 | 47  | 48  | 0.939339128 | 0.620982   | ENSG00000149617          |
| 20 | 51973500 | 51974808 | 51973714 | 29 | 108 | 102 | 1.014767452 | 0.457054   | ENSG00000149617          |
| 20 | 51975041 | 51975765 | 51975404 | 14 | 38  | 39  | 0.934935976 | 0.617524   | ENSG00000149617          |
| 20 | 51975767 | 51977288 | 51976859 | 19 | 96  | 95  | 0.968897325 | 0.586648   | ENSG00000149617          |
| 20 | 51977412 | 51978142 | 51977621 | 15 | 40  | 49  | 0.786305128 | 0.874522   | ENSG00000149617          |
| 20 | 51978967 | 51981982 | 51980658 | 21 | 195 | 201 | 0.930426257 | 0.764035   | ENSG00000149617          |
| 20 | 51982455 | 51982804 | 51982629 | 8  | 14  | 12  | 1.106433107 | 0.392094   | ENSG00000149617          |
| 20 | 51982859 | 51986449 | 51985395 | 27 | 240 | 206 | 1.116410604 | 0.121989   | ENSG00000149617          |
| 20 | 51986656 | 51987780 | 51987192 | 20 | 77  | 64  | 1.150690432 | 0.200221   | ENSG00000149617          |
| 20 | 51987805 | 51992500 | 51989975 | 74 | 493 | 400 | 1.181298988 | 0.00645669 | ENSG00000149617          |
| 20 | 51992872 | 51994388 | 51993869 | 45 | 171 | 139 | 1.178087823 | 0.0741168  | ENSG00000149617          |
| 20 | 51994441 | 51995444 | 51994946 | 20 | 62  | 69  | 0.863017824 | 0.80247    | ENSG00000149617          |
| 20 | 51995474 | 51995735 | 51995614 | 11 | 14  | 24  | 0.575345216 | 0.958881   | ENSG00000149617          |
| 20 | 51996209 | 51996489 | 51996325 | 17 | 21  | 25  | 0.811384279 | 0.76647    | ENSG00000149617          |
| 20 | 51996959 | 51998120 | 51997103 | 20 | 69  | 68  | 0.97280592  | 0.564274   | ENSG00000149617          |
| 20 | 51998385 | 52001033 | 52000320 | 20 | 160 | 161 | 0.952989504 | 0.667297   | ENSG00000149617          |
| 20 | 52001469 | 52002079 | 52001733 | 17 | 35  | 42  | 0.802807278 | 0.835974   | ENSG00000149617          |
| 20 | 52002112 | 52005839 | 52002593 | 24 | 256 | 261 | 0.940608909 | 0.757212   | ENSG00000149617          |
| 20 | 52006092 | 52008531 | 52007934 | 22 | 142 | 174 | 0.783565389 | 0.985069   | ENSG00000149617          |
| 20 | 52008646 | 52009050 | 52008874 | 15 | 23  | 30  | 0.742380924 | 0.865876   | ENSG00000149617          |
| 20 | 52009527 | 52012429 | 52010263 | 28 | 198 | 161 | 1.177918703 | 0.0601592  | ENSG00000149617          |
| 20 | 52012464 | 52012903 | 52012643 | 13 | 23  | 20  | 1.095895649 | 0.377643   | ENSG00000149617          |
| 20 | 52013323 | 52015679 | 52014171 | 23 | 152 | 135 | 1.07877228  | 0.259288   | ENSG00000149617          |
| 20 | 52016318 | 52017071 | 52016823 | 19 | 47  | 43  | 1.046082211 | 0.413574   | ENSG00000149617          |
| 20 | 52017077 | 52018216 | 52017672 | 19 | 75  | 75  | 0.958908693 | 0.601882   | ENSG00000149617          |
| 20 | 52018275 | 52021779 | 52018999 | 22 | 234 | 237 | 0.946821609 | 0.723773   | ENSG00000149617          |
| 20 | 52021856 | 52022578 | 52022091 | 14 | 42  | 49  | 0.824661476 | 0.82412    | ENSG00000149617          |
| 20 | 52022580 | 52023003 | 52022778 | 17 | 27  | 21  | 1.220429246 | 0.239062   | ENSG00000149617          |
| 20 | 52023435 | 52023934 | 52023611 | 20 | 32  | 32  | 0.958908693 | 0.567412   | BCAS1<br>ENSG00000064787 |
| 20 | 52024266 | 52025784 | 52025100 | 15 | 80  | 82  | 0.935802459 | 0.664519   | BCAS1<br>ENSG00000064787 |

|    |          |          |          |    |     |     |             |           |       |                 |
|----|----------|----------|----------|----|-----|-----|-------------|-----------|-------|-----------------|
| 20 | 52025861 | 52027053 | 52026179 | 16 | 54  | 62  | 0.83714251  | 0.833153  | BCAS1 | ENSG00000064787 |
| 20 | 52027085 | 52027904 | 52027491 | 19 | 46  | 36  | 1.218073205 | 0.182357  | BCAS1 | ENSG00000064787 |
| 20 | 52028353 | 52029458 | 52028924 | 17 | 71  | 77  | 0.885146486 | 0.772716  | BCAS1 | ENSG00000064787 |
| 20 | 52029514 | 52029720 | 52029658 | 9  | 11  | 17  | 0.639272462 | 0.890352  | BCAS1 | ENSG00000064787 |
| 20 | 52029813 | 52031488 | 52031192 | 16 | 95  | 123 | 0.742380924 | 0.986252  | BCAS1 | ENSG00000064787 |
| 20 | 52031526 | 52031927 | 52031748 | 13 | 23  | 24  | 0.920552345 | 0.614165  | BCAS1 | ENSG00000064787 |
| 20 | 52031965 | 52032283 | 52032124 | 18 | 22  | 20  | 1.05023333  | 0.434036  | BCAS1 | ENSG00000064787 |
| 20 | 52032417 | 52034016 | 52033331 | 23 | 88  | 88  | 0.958908693 | 0.61007   | BCAS1 | ENSG00000064787 |
| 20 | 52034203 | 52035535 | 52035142 | 16 | 77  | 79  | 0.934935976 | 0.663787  | BCAS1 | ENSG00000064787 |
| 20 | 52035624 | 52035878 | 52035769 | 8  | 11  | 13  | 0.821921737 | 0.693119  | BCAS1 | ENSG00000064787 |
| 20 | 52035920 | 52036647 | 52036099 | 14 | 42  | 53  | 0.763575441 | 0.908048  | BCAS1 | ENSG00000064787 |
| 20 | 52036832 | 52038480 | 52037813 | 20 | 100 | 145 | 0.663354644 | 0.999324  | BCAS1 | ENSG00000064787 |
| 20 | 52038509 | 52039775 | 52038905 | 13 | 59  | 82  | 0.693187007 | 0.985489  | BCAS1 | ENSG00000064787 |
| 20 | 52039860 | 52041665 | 52040195 | 18 | 102 | 108 | 0.906124728 | 0.763625  | BCAS1 | ENSG00000064787 |
| 20 | 52041775 | 52042130 | 52041952 | 9  | 15  | 22  | 0.667066917 | 0.897252  | BCAS1 | ENSG00000064787 |
| 20 | 52042221 | 52045435 | 52043570 | 22 | 214 | 178 | 1.151761838 | 0.0805998 | BCAS1 | ENSG00000064787 |
| 20 | 52045439 | 52045797 | 52045618 | 19 | 24  | 28  | 0.826645425 | 0.758727  | BCAS1 | ENSG00000064787 |
| 20 | 52045812 | 52047265 | 52047001 | 29 | 114 | 94  | 1.160784207 | 0.139946  | BCAS1 | ENSG00000064787 |
| 20 | 52047431 | 52048728 | 52048047 | 17 | 67  | 48  | 1.330730431 | 0.0616668 | BCAS1 | ENSG00000064787 |
| 20 | 52048781 | 52049005 | 52048900 | 10 | 12  | 12  | 0.958908693 | 0.542188  | BCAS1 | ENSG00000064787 |
| 20 | 52049131 | 52049469 | 52049300 | 10 | 15  | 24  | 0.613701564 | 0.940506  | BCAS1 | ENSG00000064787 |
| 20 | 52049513 | 52049806 | 52049661 | 10 | 12  | 21  | 0.566627864 | 0.952667  | BCAS1 | ENSG00000064787 |
| 20 | 52050017 | 52050419 | 52050196 | 10 | 19  | 24  | 0.767126954 | 0.814057  | BCAS1 | ENSG00000064787 |
| 20 | 52050486 | 52050729 | 52050613 | 12 | 15  | 8   | 1.704726565 | 0.0916153 | BCAS1 | ENSG00000064787 |
| 20 | 52050758 | 52051861 | 52050937 | 12 | 44  | 60  | 0.707391659 | 0.962327  | BCAS1 | ENSG00000064787 |
| 20 | 52051880 | 52052574 | 52052069 | 16 | 44  | 56  | 0.757033179 | 0.92008   | BCAS1 | ENSG00000064787 |
| 20 | 52052741 | 52053975 | 52053017 | 19 | 66  | 84  | 0.755845676 | 0.95762   | BCAS1 | ENSG00000064787 |
| 20 | 52054099 | 52055044 | 52054571 | 17 | 52  | 38  | 1.303132326 | 0.102235  | BCAS1 | ENSG00000064787 |
| 20 | 52055382 | 52056378 | 52055690 | 17 | 53  | 41  | 1.232882605 | 0.152205  | BCAS1 | ENSG00000064787 |
| 20 | 52056660 | 52056947 | 52056811 | 8  | 12  | 19  | 0.62329065  | 0.912804  | BCAS1 | ENSG00000064787 |
| 20 | 52057269 | 52057641 | 52057482 | 18 | 24  | 20  | 1.141557968 | 0.324865  | BCAS1 | ENSG00000064787 |
| 20 | 52057683 | 52058253 | 52057876 | 17 | 32  | 29  | 1.054799562 | 0.414985  | BCAS1 | ENSG00000064787 |
| 20 | 52058465 | 52058860 | 52058644 | 10 | 16  | 20  | 0.776259418 | 0.783794  | BCAS1 | ENSG00000064787 |
| 20 | 52059670 | 52060063 | 52059933 | 11 | 19  | 22  | 0.833833646 | 0.725376  | BCAS1 | ENSG00000064787 |

|    |          |          |          |    |     |     |             |            |       |                 |
|----|----------|----------|----------|----|-----|-----|-------------|------------|-------|-----------------|
| 20 | 52060740 | 52061421 | 52060911 | 12 | 28  | 29  | 0.92694507  | 0.614695   | BCAS1 | ENSG00000064787 |
| 20 | 52061550 | 52063038 | 52062805 | 14 | 72  | 71  | 0.972226869 | 0.567061   | BCAS1 | ENSG00000064787 |
| 20 | 52063212 | 52063810 | 52063636 | 11 | 27  | 34  | 0.767126954 | 0.854158   | BCAS1 | ENSG00000064787 |
| 20 | 52063877 | 52066226 | 52065275 | 96 | 285 | 109 | 2.493162602 | 3.91E-18   | BCAS1 | ENSG00000064787 |
| 20 | 52066604 | 52067345 | 52066782 | 18 | 39  | 47  | 0.799090578 | 0.853966   | BCAS1 | ENSG00000064787 |
| 20 | 52067559 | 52068167 | 52067899 | 10 | 25  | 26  | 0.923393556 | 0.614269   | BCAS1 | ENSG00000064787 |
| 20 | 52068654 | 52069369 | 52069175 | 26 | 53  | 47  | 1.07877228  | 0.349962   | BCAS1 | ENSG00000064787 |
| 20 | 52070058 | 52070692 | 52070415 | 10 | 26  | 40  | 0.631476456 | 0.970372   | BCAS1 | ENSG00000064787 |
| 20 | 52070871 | 52071301 | 52071122 | 10 | 18  | 18  | 0.958908693 | 0.551113   | BCAS1 | ENSG00000064787 |
| 20 | 52071896 | 52073056 | 52072835 | 15 | 55  | 44  | 1.193308596 | 0.186701   | BCAS1 | ENSG00000064787 |
| 20 | 52073247 | 52073918 | 52073509 | 11 | 31  | 43  | 0.69738814  | 0.941676   | BCAS1 | ENSG00000064787 |
| 20 | 52073920 | 52074153 | 52074036 | 10 | 11  | 18  | 0.605626543 | 0.918575   | BCAS1 | ENSG00000064787 |
| 20 | 52074232 | 52074903 | 52074469 | 14 | 33  | 41  | 0.776259418 | 0.865581   | BCAS1 | ENSG00000064787 |
| 20 | 52074998 | 52077135 | 52076368 | 15 | 103 | 69  | 1.424664344 | 0.0102573  | BCAS1 | ENSG00000064787 |
| 20 | 52077414 | 52077699 | 52077556 | 8  | 14  | 13  | 1.027402171 | 0.469541   | BCAS1 | ENSG00000064787 |
| 20 | 52078070 | 52078459 | 52078280 | 12 | 19  | 15  | 1.198635866 | 0.291044   | BCAS1 | ENSG00000064787 |
| 20 | 52078471 | 52079329 | 52078864 | 16 | 38  | 27  | 1.335622822 | 0.118053   | BCAS1 | ENSG00000064787 |
| 20 | 52079615 | 52079837 | 52079755 | 11 | 12  | 17  | 0.692545167 | 0.848017   | BCAS1 | ENSG00000064787 |
| 20 | 52080149 | 52080340 | 52080245 | 8  | 9   | 19  | 0.479454347 | 0.976332   | BCAS1 | ENSG00000064787 |
| 20 | 52080353 | 52080815 | 52080636 | 17 | 27  | 26  | 0.99442383  | 0.507579   | BCAS1 | ENSG00000064787 |
| 20 | 52081264 | 52081572 | 52081437 | 13 | 17  | 28  | 0.595184706 | 0.961563   | BCAS1 | ENSG00000064787 |
| 20 | 52083508 | 52083816 | 52083662 | 10 | 13  | 3   | 3.356180426 | 0.00805599 | BCAS1 | ENSG00000064787 |
| 20 | 52086285 | 52086544 | 52086414 | 9  | 13  | 17  | 0.745817872 | 0.798145   | BCAS1 | ENSG00000064787 |
| 20 | 52086798 | 52087221 | 52087048 | 11 | 20  | 22  | 0.875525328 | 0.671044   | BCAS1 | ENSG00000064787 |
| 20 | 52087607 | 52087808 | 52087707 | 8  | 10  | 27  | 0.376714129 | 0.998299   | BCAS1 | ENSG00000064787 |
| 20 | 52087886 | 52089647 | 52088215 | 15 | 85  | 92  | 0.88673277  | 0.789522   | BCAS1 | ENSG00000064787 |
| 20 | 52089974 | 52090710 | 52090436 | 15 | 37  | 29  | 1.214617678 | 0.210365   | BCAS1 | ENSG00000064787 |
| 20 | 52090733 | 52091436 | 52091175 | 15 | 37  | 26  | 1.349575198 | 0.113417   | BCAS1 | ENSG00000064787 |
| 20 | 52091805 | 52092192 | 52092038 | 10 | 17  | 19  | 0.863017824 | 0.676008   | BCAS1 | ENSG00000064787 |
| 20 | 52092523 | 52092949 | 52092770 | 16 | 28  | 28  | 0.958908693 | 0.563199   | BCAS1 | ENSG00000064787 |
| 20 | 52092955 | 52093958 | 52093779 | 15 | 50  | 42  | 1.13731031  | 0.265456   | BCAS1 | ENSG00000064787 |
| 20 | 52093969 | 52094593 | 52094177 | 14 | 34  | 26  | 1.243029787 | 0.194872   | BCAS1 | ENSG00000064787 |
| 20 | 52095177 | 52095963 | 52095784 | 12 | 36  | 28  | 1.223435229 | 0.205341   | BCAS1 | ENSG00000064787 |
| 20 | 52096770 | 52097032 | 52096937 | 9  | 11  | 16  | 0.676876725 | 0.854566   | BCAS1 | ENSG00000064787 |

|    |          |          |          |    |     |     |             |           |       |                 |
|----|----------|----------|----------|----|-----|-----|-------------|-----------|-------|-----------------|
| 20 | 52097074 | 52097617 | 52097444 | 13 | 28  | 31  | 0.869011003 | 0.708837  | BCAS1 | ENSG00000064787 |
| 20 | 52097923 | 52098911 | 52098264 | 15 | 49  | 51  | 0.922027589 | 0.659173  | BCAS1 | ENSG00000064787 |
| 20 | 52099698 | 52100371 | 52099948 | 18 | 33  | 40  | 0.795192575 | 0.839981  | BCAS1 | ENSG00000064787 |
| 20 | 52100410 | 52100763 | 52100586 | 14 | 20  | 24  | 0.805483302 | 0.769433  | BCAS1 | ENSG00000064787 |
| 20 | 52100890 | 52101631 | 52101489 | 11 | 33  | 40  | 0.795192575 | 0.839981  | BCAS1 | ENSG00000064787 |
| 20 | 52101930 | 52102354 | 52102103 | 8  | 15  | 19  | 0.767126954 | 0.788167  | BCAS1 | ENSG00000064787 |
| 20 | 52102467 | 52102675 | 52102546 | 8  | 9   | 10  | 0.871735176 | 0.624623  | BCAS1 | ENSG00000064787 |
| 20 | 52102961 | 52103216 | 52103088 | 8  | 10  | 16  | 0.620470331 | 0.897128  | BCAS1 | ENSG00000064787 |
| 20 | 52103559 | 52103856 | 52103691 | 10 | 14  | 16  | 0.846095906 | 0.68298   | BCAS1 | ENSG00000064787 |
| 20 | 52106544 | 52107536 | 52107040 | 12 | 48  | 57  | 0.810112517 | 0.862229  | BCAS1 | ENSG00000064787 |
| 20 | 52107542 | 52108544 | 52107952 | 12 | 43  | 53  | 0.781333009 | 0.889216  | BCAS1 | ENSG00000064787 |
| 20 | 52108546 | 52108979 | 52108725 | 9  | 17  | 15  | 1.07877228  | 0.410615  | BCAS1 | ENSG00000064787 |
| 20 | 52109587 | 52110208 | 52110045 | 13 | 31  | 35  | 0.852363283 | 0.745543  | BCAS1 | ENSG00000064787 |
| 20 | 52110543 | 52111502 | 52111104 | 12 | 43  | 58  | 0.715118347 | 0.955317  | BCAS1 | ENSG00000064787 |
| 20 | 52111808 | 52111995 | 52111890 | 9  | 10  | 13  | 0.753428259 | 0.762589  | BCAS1 | ENSG00000064787 |
| 20 | 52112007 | 52114123 | 52112850 | 40 | 156 | 145 | 1.031155238 | 0.394327  | BCAS1 | ENSG00000064787 |
| 20 | 52114400 | 52114992 | 52114658 | 13 | 30  | 31  | 0.928942796 | 0.615119  | BCAS1 | ENSG00000064787 |
| 20 | 52115187 | 52115486 | 52115323 | 14 | 15  | 24  | 0.613701564 | 0.940506  | BCAS1 | ENSG00000064787 |
| 20 | 52115529 | 52115876 | 52115702 | 12 | 17  | 27  | 0.616441303 | 0.948982  | BCAS1 | ENSG00000064787 |
| 20 | 52116310 | 52117133 | 52116423 | 18 | 45  | 41  | 1.05023333  | 0.408148  | BCAS1 | ENSG00000064787 |
| 20 | 52117257 | 52119313 | 52117751 | 96 | 280 | 149 | 1.796355618 | 1.47E-09  | BCAS1 | ENSG00000064787 |
| 20 | 52119435 | 52119739 | 52119588 | 8  | 12  | 20  | 0.593610143 | 0.935335  | BCAS1 | ENSG00000064787 |
| 20 | 52119947 | 52121460 | 52121015 | 23 | 105 | 97  | 1.037186954 | 0.396615  | BCAS1 | ENSG00000064787 |
| 20 | 52121630 | 52121984 | 52121807 | 13 | 19  | 32  | 0.581156784 | 0.97504   | BCAS1 | ENSG00000064787 |
| 20 | 52122473 | 52122696 | 52122583 | 10 | 11  | 12  | 0.885146486 | 0.620672  | BCAS1 | ENSG00000064787 |
| 20 | 52123195 | 52123454 | 52123306 | 11 | 14  | 15  | 0.8989769   | 0.617119  | BCAS1 | ENSG00000064787 |
| 20 | 52123484 | 52124330 | 52123746 | 14 | 43  | 57  | 0.727447974 | 0.945775  | BCAS1 | ENSG00000064787 |
| 20 | 52125080 | 52125786 | 52125432 | 9  | 28  | 45  | 0.604529393 | 0.984734  | BCAS1 | ENSG00000064787 |
| 20 | 52125876 | 52126571 | 52126168 | 28 | 57  | 61  | 0.897043616 | 0.724339  | BCAS1 | ENSG00000064787 |
| 20 | 52126785 | 52127796 | 52126964 | 23 | 65  | 54  | 1.150690432 | 0.219447  | BCAS1 | ENSG00000064787 |
| 20 | 52128263 | 52129478 | 52129091 | 19 | 75  | 55  | 1.301376083 | 0.0655652 | BCAS1 | ENSG00000064787 |
| 20 | 52129566 | 52130290 | 52129844 | 12 | 30  | 24  | 1.189046779 | 0.257047  | BCAS1 | ENSG00000064787 |
| 20 | 52130425 | 52130725 | 52130575 | 10 | 14  | 14  | 0.958908693 | 0.545362  | BCAS1 | ENSG00000064787 |
| 20 | 52130783 | 52131170 | 52131004 | 21 | 30  | 25  | 1.143314211 | 0.305022  | BCAS1 | ENSG00000064787 |



|    |          |          |          |    |     |     |             |             |       |                 |
|----|----------|----------|----------|----|-----|-----|-------------|-------------|-------|-----------------|
| 20 | 52131349 | 52131722 | 52131603 | 10 | 17  | 20  | 0.821921737 | 0.731032    | BCAS1 | ENSG00000064787 |
| 20 | 52132154 | 52132694 | 52132470 | 12 | 27  | 26  | 0.99442383  | 0.507579    | BCAS1 | ENSG00000064787 |
| 20 | 52133154 | 52133424 | 52133289 | 9  | 12  | 5   | 2.077635502 | 0.0577144   | BCAS1 | ENSG00000064787 |
| 20 | 52133556 | 52135888 | 52135110 | 43 | 182 | 139 | 1.253430649 | 0.0215284   | BCAS1 | ENSG00000064787 |
| 20 | 52135895 | 52137349 | 52136968 | 22 | 81  | 75  | 1.034612011 | 0.41472     | BCAS1 | ENSG00000064787 |
| 20 | 52137483 | 52139104 | 52138736 | 16 | 95  | 70  | 1.296552599 | 0.0471668   | BCAS1 | ENSG00000064787 |
| 20 | 52139137 | 52139371 | 52139252 | 8  | 11  | 7   | 1.43836304  | 0.204844    | BCAS1 | ENSG00000064787 |
| 20 | 52139500 | 52140631 | 52140401 | 16 | 52  | 63  | 0.794096261 | 0.893921    | BCAS1 | ENSG00000064787 |
| 20 | 52140694 | 52140888 | 52140817 | 8  | 9   | 26  | 0.355151368 | 0.998685    | BCAS1 | ENSG00000064787 |
| 20 | 52141492 | 52141839 | 52141665 | 16 | 20  | 16  | 1.184534268 | 0.298622    | BCAS1 | ENSG00000064787 |
| 20 | 52141844 | 52142488 | 52142167 | 11 | 29  | 32  | 0.871735176 | 0.7076      | BCAS1 | ENSG00000064787 |
| 20 | 52142839 | 52144141 | 52143773 | 19 | 75  | 72  | 0.9983159   | 0.503657    | BCAS1 | ENSG00000064787 |
| 20 | 52144182 | 52144983 | 52144713 | 22 | 55  | 38  | 1.376894534 | 0.0601706   | BCAS1 | ENSG00000064787 |
| 20 | 52145783 | 52146286 | 52145962 | 14 | 25  | 40  | 0.608088439 | 0.978436    | BCAS1 | ENSG00000064787 |
| 20 | 52146419 | 52147960 | 52146907 | 46 | 139 | 88  | 1.508395697 | 0.00105258  | BCAS1 | ENSG00000064787 |
| 20 | 52147965 | 52149736 | 52149155 | 19 | 113 | 99  | 1.09315591  | 0.25693     | BCAS1 | ENSG00000064787 |
| 20 | 52149835 | 52150133 | 52149960 | 12 | 14  | 12  | 1.106433107 | 0.392094    | BCAS1 | ENSG00000064787 |
| 20 | 52150718 | 52151646 | 52151393 | 15 | 42  | 36  | 1.1144074   | 0.312878    | BCAS1 | ENSG00000064787 |
| 20 | 52151870 | 52152480 | 52152211 | 15 | 34  | 43  | 0.762768279 | 0.885856    | BCAS1 | ENSG00000064787 |
| 20 | 52152515 | 52153116 | 52152956 | 13 | 26  | 43  | 0.588421243 | 0.986618    | BCAS1 | ENSG00000064787 |
| 20 | 52153176 | 52153741 | 52153502 | 48 | 76  | 59  | 1.230599489 | 0.112372    | BCAS1 | ENSG00000064787 |
| 20 | 52153789 | 52154656 | 52154265 | 16 | 52  | 45  | 1.104829581 | 0.308995    | BCAS1 | ENSG00000064787 |
| 20 | 52154664 | 52156464 | 52155374 | 19 | 88  | 87  | 0.969805383 | 0.580576    | BCAS1 | ENSG00000064787 |
| 20 | 52156603 | 52158379 | 52157390 | 48 | 156 | 101 | 1.475967302 | 0.000966531 | BCAS1 | ENSG00000064787 |
| 20 | 52158494 | 52158704 | 52158606 | 12 | 13  | 15  | 0.839045106 | 0.685928    | BCAS1 | ENSG00000064787 |
| 20 | 52158817 | 52159025 | 52158919 | 9  | 10  | 4   | 2.109599125 | 0.0694668   | BCAS1 | ENSG00000064787 |
| 20 | 52159109 | 52160961 | 52160088 | 78 | 215 | 97  | 2.113513038 | 8.59E-11    | BCAS1 | ENSG00000064787 |
| 20 | 52161048 | 52161298 | 52161180 | 9  | 13  | 11  | 1.118726809 | 0.38479     | BCAS1 | ENSG00000064787 |
| 20 | 52161649 | 52162894 | 52162009 | 17 | 71  | 82  | 0.831824408 | 0.874306    | BCAS1 | ENSG00000064787 |
| 20 | 52163029 | 52164035 | 52163779 | 21 | 57  | 53  | 1.029938967 | 0.437257    | BCAS1 | ENSG00000064787 |
| 20 | 52164398 | 52165482 | 52164681 | 13 | 47  | 61  | 0.742380924 | 0.940744    | BCAS1 | ENSG00000064787 |
| 20 | 52166631 | 52167575 | 52166954 | 13 | 51  | 59  | 0.831054201 | 0.836589    | BCAS1 | ENSG00000064787 |
| 20 | 52167593 | 52168159 | 52167890 | 8  | 20  | 36  | 0.544245474 | 0.988944    | BCAS1 | ENSG00000064787 |
| 20 | 52168162 | 52169285 | 52168421 | 19 | 62  | 57  | 1.041573236 | 0.410625    | BCAS1 | ENSG00000064787 |

|    |          |          |          |    |     |     |             |            |         |                 |
|----|----------|----------|----------|----|-----|-----|-------------|------------|---------|-----------------|
| 20 | 52169331 | 52171235 | 52170213 | 14 | 86  | 104 | 0.794524346 | 0.944417   | BCAS1   | ENSG00000064787 |
| 20 | 52171643 | 52174249 | 52173818 | 75 | 334 | 208 | 1.537006757 | 3.82E-07   | CYP24A1 | ENSG00000019186 |
| 20 | 52174278 | 52174539 | 52174415 | 9  | 11  | 10  | 1.046082211 | 0.455063   | CYP24A1 | ENSG00000019186 |
| 20 | 52174608 | 52175339 | 52175079 | 23 | 50  | 27  | 1.746583691 | 0.00741682 | CYP24A1 | ENSG00000019186 |
| 20 | 52175580 | 52175916 | 52175748 | 11 | 16  | 19  | 0.815072389 | 0.734271   | CYP24A1 | ENSG00000019186 |
| 20 | 52176427 | 52179026 | 52177748 | 27 | 153 | 125 | 1.171999514 | 0.0922794  | CYP24A1 | ENSG00000019186 |
| 20 | 52179473 | 52179968 | 52179806 | 14 | 24  | 29  | 0.799090578 | 0.798033   | CYP24A1 | ENSG00000019186 |
| 20 | 52180128 | 52180529 | 52180304 | 10 | 17  | 37  | 0.454219907 | 0.998001   | CYP24A1 | ENSG00000019186 |
| 20 | 52180683 | 52180952 | 52180817 | 9  | 12  | 20  | 0.593610143 | 0.935335   | CYP24A1 | ENSG00000019186 |
| 20 | 52181524 | 52182434 | 52182255 | 17 | 51  | 46  | 1.060920256 | 0.383385   | CYP24A1 | ENSG00000019186 |
| 20 | 52182497 | 52183698 | 52182885 | 35 | 95  | 88  | 1.034328478 | 0.40867    | CYP24A1 | ENSG00000019186 |
| 20 | 52183889 | 52184193 | 52184032 | 12 | 17  | 21  | 0.784561658 | 0.779771   | CYP24A1 | ENSG00000019186 |
| 20 | 52184254 | 52184604 | 52184429 | 20 | 25  | 17  | 1.385090334 | 0.139369   | CYP24A1 | ENSG00000019186 |
| 20 | 52184747 | 52185430 | 52184926 | 12 | 27  | 36  | 0.725660633 | 0.902101   | CYP24A1 | ENSG00000019186 |
| 20 | 52185581 | 52186159 | 52185939 | 20 | 34  | 29  | 1.118726809 | 0.324157   | CYP24A1 | ENSG00000019186 |
| 20 | 52186260 | 52186921 | 52186428 | 17 | 38  | 38  | 0.958908693 | 0.573263   | CYP24A1 | ENSG00000019186 |
| 20 | 52187076 | 52188680 | 52187429 | 18 | 77  | 58  | 1.267709798 | 0.0828359  | CYP24A1 | ENSG00000019186 |
| 20 | 52188949 | 52189627 | 52189497 | 17 | 44  | 37  | 1.135549768 | 0.280189   | CYP24A1 | ENSG00000019186 |
| 20 | 52189692 | 52190012 | 52189847 | 13 | 15  | 30  | 0.494920616 | 0.991097   | CYP24A1 | ENSG00000019186 |
| 20 | 52190026 | 52191844 | 52190205 | 20 | 108 | 95  | 1.088760912 | 0.27085    | CYP24A1 | ENSG00000019186 |
| 20 | 52191851 | 52193365 | 52192030 | 12 | 66  | 75  | 0.845353716 | 0.842659   | CYP24A1 | ENSG00000019186 |
| 20 | 52193758 | 52194234 | 52194055 | 16 | 29  | 21  | 1.307602763 | 0.165913   | CYP24A1 | ENSG00000019186 |
| 20 | 52194888 | 52195181 | 52195034 | 10 | 13  | 20  | 0.639272462 | 0.907338   | CYP24A1 | ENSG00000019186 |
| 20 | 52195239 | 52195444 | 52195315 | 9  | 10  | 14  | 0.703199708 | 0.817173   | CYP24A1 | ENSG00000019186 |
| 20 | 52195628 | 52195952 | 52195789 | 9  | 14  | 26  | 0.532727052 | 0.97821    | CYP24A1 | ENSG00000019186 |
| 20 | 52196294 | 52196724 | 52196473 | 11 | 19  | 40  | 0.467760338 | 0.99812    | CYP24A1 | ENSG00000019186 |
| 20 | 52196864 | 52197553 | 52197204 | 10 | 26  | 35  | 0.71918152  | 0.904742   | CYP24A1 | ENSG00000019186 |
| 20 | 52198148 | 52198726 | 52198534 | 15 | 32  | 51  | 0.608538209 | 0.988458   | CYP24A1 | ENSG00000019186 |
| 20 | 52198728 | 52199911 | 52199238 | 54 | 168 | 134 | 1.200411623 | 0.0559464  | CYP24A1 | ENSG00000019186 |
| 20 | 52200124 | 52200400 | 52200271 | 8  | 11  | 11  | 0.958908693 | 0.540507   | CYP24A1 | ENSG00000019186 |
| 20 | 52200553 | 52200980 | 52200717 | 12 | 19  | 27  | 0.684934781 | 0.905224   | CYP24A1 | ENSG00000019186 |
| 20 | 52201951 | 52203313 | 52202331 | 16 | 63  | 79  | 0.767126954 | 0.944048   | CYP24A1 | ENSG00000019186 |
| 20 | 52203752 | 52205533 | 52204962 | 14 | 87  | 109 | 0.767126954 | 0.968767   | CYP24A1 | ENSG00000019186 |
| 20 | 52205537 | 52205760 | 52205700 | 8  | 12  | 9   | 1.246581301 | 0.295061   | CYP24A1 | ENSG00000019186 |

|    |          |          |          |    |     |     |             |           |         |                 |
|----|----------|----------|----------|----|-----|-----|-------------|-----------|---------|-----------------|
| 20 | 52206034 | 52209243 | 52206564 | 17 | 167 | 147 | 1.088490949 | 0.22528   | CYP24A1 | ENSG00000019186 |
| 20 | 52209834 | 52213875 | 52212889 | 17 | 195 | 212 | 0.882376074 | 0.897164  | CYP24A1 | ENSG00000019186 |
| 20 | 52214175 | 52215242 | 52215086 | 14 | 55  | 50  | 1.052919349 | 0.394002  | CYP24A1 | ENSG00000019186 |
| 20 | 52215277 | 52216298 | 52215955 | 13 | 45  | 59  | 0.735163331 | 0.943222  | CYP24A1 | ENSG00000019186 |
| 20 | 52216422 | 52216778 | 52216600 | 8  | 14  | 19  | 0.71918152  | 0.83643   | CYP24A1 | ENSG00000019186 |
| 20 | 52216842 | 52217134 | 52216968 | 8  | 11  | 18  | 0.605626543 | 0.918575  | CYP24A1 | ENSG00000019186 |
| 20 | 52217148 | 52217381 | 52217264 | 8  | 10  | 18  | 0.555157664 | 0.945639  | CYP24A1 | ENSG00000019186 |
| 20 | 52217588 | 52218130 | 52217908 | 16 | 30  | 16  | 1.748598205 | 0.0280371 | CYP24A1 | ENSG00000019186 |
| 20 | 52218138 | 52218610 | 52218306 | 9  | 16  | 26  | 0.603757325 | 0.952213  | CYP24A1 | ENSG00000019186 |
| 20 | 52219066 | 52220689 | 52219316 | 26 | 101 | 84  | 1.150690432 | 0.168389  | CYP24A1 | ENSG00000019186 |
| 20 | 52220722 | 52224695 | 52224478 | 25 | 232 | 217 | 1.024888649 | 0.396726  | CYP24A1 | ENSG00000019186 |
| 20 | 52224716 | 52225183 | 52224977 | 14 | 25  | 37  | 0.656095422 | 0.953633  | CYP24A1 | ENSG00000019186 |
| 20 | 52225443 | 52225906 | 52225679 | 15 | 24  | 33  | 0.705079921 | 0.910297  | CYP24A1 | ENSG00000019186 |
| 20 | 52226371 | 52227141 | 52226674 | 14 | 37  | 34  | 1.041100867 | 0.430699  | CYP24A1 | ENSG00000019186 |
| 20 | 52227338 | 52227768 | 52227499 | 12 | 19  | 32  | 0.581156784 | 0.97504   | CYP24A1 | ENSG00000019186 |
| 20 | 52228033 | 52228272 | 52228147 | 9  | 12  | 15  | 0.779113313 | 0.750998  | CYP24A1 | ENSG00000019186 |
| 20 | 52228298 | 52229043 | 52228739 | 11 | 32  | 49  | 0.632879737 | 0.980874  | CYP24A1 | ENSG00000019186 |
| 20 | 52229197 | 52229757 | 52229326 | 10 | 21  | 20  | 1.004571012 | 0.493124  | CYP24A1 | ENSG00000019186 |
| 20 | 52229816 | 52231312 | 52230652 | 17 | 81  | 81  | 0.958908693 | 0.605747  | CYP24A1 | ENSG00000019186 |
| 20 | 52231316 | 52231959 | 52231601 | 15 | 31  | 58  | 0.520086071 | 0.998906  | CYP24A1 | ENSG00000019186 |
| 20 | 52232008 | 52232359 | 52232156 | 16 | 21  | 17  | 1.171999514 | 0.305749  | CYP24A1 | ENSG00000019186 |
| 20 | 52232412 | 52232638 | 52232589 | 14 | 16  | 12  | 1.253957522 | 0.265012  | CYP24A1 | ENSG00000019186 |
| 20 | 52232650 | 52233203 | 52233025 | 15 | 32  | 32  | 0.958908693 | 0.567412  | CYP24A1 | ENSG00000019186 |
| 20 | 52233666 | 52233925 | 52233793 | 9  | 11  | 13  | 0.821921737 | 0.693119  | CYP24A1 | ENSG00000019186 |
| 20 | 52234038 | 52235599 | 52235189 | 20 | 90  | 89  | 0.969563234 | 0.582131  | CYP24A1 | ENSG00000019186 |
| 20 | 52235697 | 52236847 | 52235985 | 18 | 63  | 75  | 0.807502057 | 0.897156  | CYP24A1 | ENSG00000019186 |
| 20 | 52237492 | 52237828 | 52237589 | 8  | 12  | 16  | 0.733283118 | 0.803868  | CYP24A1 | ENSG00000019186 |
| 20 | 52237912 | 52238679 | 52238320 | 12 | 38  | 43  | 0.849941796 | 0.771039  | CYP24A1 | ENSG00000019186 |
| 20 | 52238702 | 52239042 | 52238864 | 12 | 17  | 29  | 0.575345216 | 0.971331  | CYP24A1 | ENSG00000019186 |
| 20 | 52239211 | 52239567 | 52239389 | 12 | 18  | 26  | 0.674787599 | 0.909003  | CYP24A1 | ENSG00000019186 |
| 20 | 52239655 | 52240740 | 52240185 | 13 | 50  | 46  | 1.040517944 | 0.421235  | CYP24A1 | ENSG00000019186 |
| 20 | 52241360 | 52241682 | 52241521 | 14 | 17  | 20  | 0.821921737 | 0.731032  | PFDN4   | ENSG00000101132 |
| 20 | 52241758 | 52242620 | 52242095 | 19 | 48  | 28  | 1.620225033 | 0.0175919 | PFDN4   | ENSG00000101132 |
| 20 | 52242628 | 52243092 | 52242787 | 14 | 24  | 30  | 0.773313462 | 0.832666  | PFDN4   | ENSG00000101132 |

|    |          |          |          |     |     |     |             |             |       |                 |
|----|----------|----------|----------|-----|-----|-----|-------------|-------------|-------|-----------------|
| 20 | 52243146 | 52243992 | 52243494 | 26  | 57  | 56  | 0.975731653 | 0.552069    | PFDN4 | ENSG00000101132 |
| 20 | 52244044 | 52244283 | 52244139 | 11  | 14  | 15  | 0.8989769   | 0.617119    | PFDN4 | ENSG00000101132 |
| 20 | 52244502 | 52246882 | 52244858 | 30  | 155 | 130 | 1.141906535 | 0.130512    | PFDN4 | ENSG00000101132 |
| 20 | 52246899 | 52248296 | 52248117 | 25  | 103 | 78  | 1.262360811 | 0.0579403   | PFDN4 | ENSG00000101132 |
| 20 | 52249171 | 52251690 | 52249869 | 132 | 406 | 195 | 1.991203255 | 1.40E-16    | PFDN4 | ENSG00000101132 |
| 20 | 52254086 | 52254646 | 52254347 | 9   | 23  | 18  | 1.211253086 | 0.262955    | PFDN4 | ENSG00000101132 |
| 20 | 52254917 | 52255289 | 52255163 | 8   | 14  | 15  | 0.8989769   | 0.617119    | PFDN4 | ENSG00000101132 |
| 20 | 52255640 | 52255835 | 52255782 | 9   | 10  | 11  | 0.878999635 | 0.622439    | PFDN4 | ENSG00000101132 |
| 20 | 52256096 | 52256481 | 52256305 | 11  | 17  | 14  | 1.150690432 | 0.340986    | PFDN4 | ENSG00000101132 |
| 20 | 52256488 | 52256781 | 52256640 | 10  | 13  | 16  | 0.789689512 | 0.746135    | PFDN4 | ENSG00000101132 |
| 20 | 52257276 | 52258184 | 52257870 | 44  | 97  | 54  | 1.708600944 | 0.000571841 | PFDN4 | ENSG00000101132 |
| 20 | 52258247 | 52259864 | 52258949 | 20  | 112 | 96  | 1.117079199 | 0.210879    | PFDN4 | ENSG00000101132 |
| 20 | 52259949 | 52260600 | 52260274 | 14  | 35  | 29  | 1.150690432 | 0.282944    | PFDN4 | ENSG00000101132 |
| 20 | 52261022 | 52261580 | 52261291 | 11  | 25  | 20  | 1.187220287 | 0.276369    | PFDN4 | ENSG00000101132 |
| 20 | 52262698 | 52263622 | 52262903 | 15  | 44  | 29  | 1.43836304  | 0.0585153   | PFDN4 | ENSG00000101132 |
| 20 | 52263807 | 52264062 | 52263934 | 9   | 13  | 11  | 1.118726809 | 0.38479     | PFDN4 | ENSG00000101132 |
| 20 | 52264072 | 52264374 | 52264223 | 10  | 13  | 11  | 1.118726809 | 0.38479     | PFDN4 | ENSG00000101132 |
| 20 | 52264834 | 52265169 | 52265001 | 12  | 15  | 22  | 0.667066917 | 0.897252    | PFDN4 | ENSG00000101132 |
| 20 | 52265260 | 52266383 | 52266126 | 11  | 48  | 44  | 1.044145021 | 0.416188    | PFDN4 | ENSG00000101132 |
| 20 | 52266928 | 52267250 | 52267089 | 11  | 14  | 19  | 0.71918152  | 0.83643     | PFDN4 | ENSG00000101132 |
| 20 | 52267308 | 52267726 | 52267552 | 12  | 19  | 18  | 1.009377572 | 0.487356    | PFDN4 | ENSG00000101132 |
| 20 | 52267743 | 52268088 | 52267913 | 8   | 12  | 18  | 0.656095422 | 0.884036    | PFDN4 | ENSG00000101132 |
| 20 | 52268168 | 52268980 | 52268622 | 12  | 34  | 36  | 0.907075791 | 0.660739    | PFDN4 | ENSG00000101132 |
| 20 | 52269328 | 52270239 | 52269896 | 27  | 68  | 39  | 1.654117496 | 0.00482069  | PFDN4 | ENSG00000101132 |
| 20 | 52270785 | 52271043 | 52270957 | 8   | 12  | 24  | 0.49863252  | 0.982718    | PFDN4 | ENSG00000101132 |
| 20 | 52271070 | 52272245 | 52272030 | 15  | 54  | 53  | 0.976666261 | 0.548697    | PFDN4 | ENSG00000101132 |
| 20 | 52272432 | 52272933 | 52272646 | 10  | 23  | 24  | 0.920552345 | 0.614165    | PFDN4 | ENSG00000101132 |
| 20 | 52273049 | 52273429 | 52273228 | 14  | 21  | 14  | 1.406399416 | 0.148881    | PFDN4 | ENSG00000101132 |
| 20 | 52273470 | 52273749 | 52273609 | 8   | 12  | 15  | 0.779113313 | 0.750998    | PFDN4 | ENSG00000101132 |
| 20 | 52273956 | 52274230 | 52274056 | 10  | 14  | 11  | 1.198635866 | 0.315918    | PFDN4 | ENSG00000101132 |
| 20 | 52275156 | 52275408 | 52275291 | 8   | 10  | 11  | 0.878999635 | 0.622439    | PFDN4 | ENSG00000101132 |
| 20 | 52275614 | 52276423 | 52275805 | 12  | 40  | 31  | 1.228601763 | 0.188772    | PFDN4 | ENSG00000101132 |
| 20 | 52276488 | 52276669 | 52276563 | 8   | 9   | 3   | 2.397271733 | 0.0539397   | PFDN4 | ENSG00000101132 |
| 20 | 52277109 | 52277429 | 52277269 | 10  | 14  | 28  | 0.495987255 | 0.988914    | PFDN4 | ENSG00000101132 |

|    |          |          |          |    |    |    |             |           |       |                 |
|----|----------|----------|----------|----|----|----|-------------|-----------|-------|-----------------|
| 20 | 52277839 | 52278145 | 52277992 | 9  | 13 | 12 | 1.0326709   | 0.46514   | PFDN4 | ENSG00000101132 |
| 20 | 52278819 | 52279344 | 52279032 | 12 | 23 | 27 | 0.821921737 | 0.761135  | PFDN4 | ENSG00000101132 |
| 20 | 52279352 | 52279607 | 52279466 | 8  | 11 | 23 | 0.479454347 | 0.984912  | PFDN4 | ENSG00000101132 |
| 20 | 52279743 | 52280313 | 52279922 | 10 | 25 | 25 | 0.958908693 | 0.559837  | PFDN4 | ENSG00000101132 |
| 20 | 52281156 | 52281424 | 52281313 | 9  | 12 | 16 | 0.733283118 | 0.803868  | PFDN4 | ENSG00000101132 |
| 20 | 52281718 | 52282509 | 52281982 | 14 | 39 | 43 | 0.871735176 | 0.735776  | PFDN4 | ENSG00000101132 |
| 20 | 52284751 | 52285176 | 52285070 | 11 | 19 | 11 | 1.598181155 | 0.0927758 | PFDN4 | ENSG00000101132 |
| 20 | 52285183 | 52285461 | 52285318 | 9  | 11 | 23 | 0.479454347 | 0.984912  | PFDN4 | ENSG00000101132 |
| 20 | 52285867 | 52286217 | 52286042 | 12 | 18 | 10 | 1.656296833 | 0.0841786 | PFDN4 | ENSG00000101132 |
| 20 | 52286463 | 52286964 | 52286642 | 11 | 20 | 23 | 0.839045106 | 0.722898  | PFDN4 | ENSG00000101132 |
| 20 | 52287463 | 52287884 | 52287673 | 10 | 19 | 23 | 0.799090578 | 0.772621  | PFDN4 | ENSG00000101132 |
| 20 | 52287917 | 52288435 | 52288256 | 11 | 22 | 19 | 1.102744997 | 0.372416  | PFDN4 | ENSG00000101132 |
| 20 | 52288758 | 52289494 | 52289341 | 12 | 32 | 19 | 1.582199344 | 0.0486368 | PFDN4 | ENSG00000101132 |
| 20 | 52294221 | 52294773 | 52294400 | 11 | 23 | 23 | 0.958908693 | 0.557483  | PFDN4 | ENSG00000101132 |
| 20 | 52295461 | 52295721 | 52295591 | 8  | 11 | 10 | 1.046082211 | 0.455063  | PFDN4 | ENSG00000101132 |
| 20 | 52295770 | 52296021 | 52295895 | 10 | 13 | 11 | 1.118726809 | 0.38479   | PFDN4 | ENSG00000101132 |
| 20 | 52297142 | 52297386 | 52297291 | 9  | 12 | 8  | 1.385090334 | 0.219216  | PFDN4 | ENSG00000101132 |
| 20 | 52297395 | 52297732 | 52297564 | 12 | 16 | 17 | 0.905635988 | 0.615736  | PFDN4 | ENSG00000101132 |
| 20 | 52297833 | 52298152 | 52297992 | 11 | 16 | 19 | 0.815072389 | 0.734271  | PFDN4 | ENSG00000101132 |
| 20 | 52300729 | 52301418 | 52300908 | 15 | 42 | 37 | 1.08508089  | 0.35552   | PFDN4 | ENSG00000101132 |
| 20 | 52301453 | 52301994 | 52301631 | 17 | 30 | 29 | 0.990872316 | 0.513662  | PFDN4 | ENSG00000101132 |
| 20 | 52302418 | 52303201 | 52303030 | 18 | 41 | 44 | 0.894981447 | 0.697883  | PFDN4 | ENSG00000101132 |
| 20 | 52303939 | 52304326 | 52304152 | 15 | 21 | 27 | 0.753428259 | 0.842351  | PFDN4 | ENSG00000101132 |
| 20 | 52305026 | 52305602 | 52305345 | 11 | 24 | 24 | 0.958908693 | 0.558672  | PFDN4 | ENSG00000101132 |
| 20 | 52306550 | 52306748 | 52306571 | 9  | 11 | 10 | 1.046082211 | 0.455063  | PFDN4 | ENSG00000101132 |
| 20 | 52306793 | 52307306 | 52306972 | 13 | 27 | 24 | 1.073977736 | 0.396082  | PFDN4 | ENSG00000101132 |
| 20 | 52307472 | 52307785 | 52307633 | 8  | 12 | 14 | 0.831054201 | 0.689281  | PFDN4 | ENSG00000101132 |
| 20 | 52307997 | 52308335 | 52308176 | 10 | 14 | 21 | 0.653801382 | 0.90216   | PFDN4 | ENSG00000101132 |
| 20 | 52310902 | 52311219 | 52311060 | 12 | 15 | 13 | 1.095895649 | 0.398774  | PFDN4 | ENSG00000101132 |
| 20 | 52311343 | 52311568 | 52311419 | 10 | 13 | 20 | 0.639272462 | 0.907338  | PFDN4 | ENSG00000101132 |
| 20 | 52312892 | 52313434 | 52313108 | 12 | 29 | 26 | 1.065454103 | 0.404106  | PFDN4 | ENSG00000101132 |
| 20 | 52314202 | 52314842 | 52314681 | 19 | 40 | 32 | 1.191371407 | 0.224665  | PFDN4 | ENSG00000101132 |
| 20 | 52315029 | 52315208 | 52315176 | 9  | 10 | 8  | 1.171999514 | 0.35773   | PFDN4 | ENSG00000101132 |
| 20 | 52315236 | 52315964 | 52315485 | 16 | 34 | 19 | 1.678090213 | 0.0288712 | PFDN4 | ENSG00000101132 |

|    |          |          |          |    |     |     |             |           |       |                 |
|----|----------|----------|----------|----|-----|-----|-------------|-----------|-------|-----------------|
| 20 | 52316619 | 52318160 | 52317854 | 59 | 213 | 108 | 1.882628076 | 1.59E-08  | PFDN4 | ENSG00000101132 |
| 20 | 52318221 | 52319352 | 52318544 | 20 | 57  | 46  | 1.183334132 | 0.193643  | PFDN4 | ENSG00000101132 |
| 20 | 52320925 | 52321247 | 52321086 | 9  | 15  | 6   | 2.191791298 | 0.0328001 | PFDN4 | ENSG00000101132 |
| 20 | 52321272 | 52321749 | 52321570 | 10 | 21  | 20  | 1.004571012 | 0.493124  | PFDN4 | ENSG00000101132 |
| 20 | 52322138 | 52322347 | 52322279 | 8  | 8   | 10  | 0.784561658 | 0.708731  | PFDN4 | ENSG00000101132 |
| 20 | 52323090 | 52323499 | 52323294 | 8  | 16  | 26  | 0.603757325 | 0.952213  | PFDN4 | ENSG00000101132 |
| 20 | 52325260 | 52325620 | 52325421 | 9  | 14  | 21  | 0.653801382 | 0.90216   | PFDN4 | ENSG00000101132 |
| 20 | 52325855 | 52326175 | 52326017 | 9  | 12  | 13  | 0.890415215 | 0.619237  | PFDN4 | ENSG00000101132 |
| 20 | 52326489 | 52326881 | 52326687 | 8  | 16  | 8   | 1.811271976 | 0.0663685 | PFDN4 | ENSG00000101132 |
| 20 | 52326893 | 52327306 | 52327099 | 9  | 18  | 16  | 1.07172148  | 0.415914  | PFDN4 | ENSG00000101132 |
| 20 | 52328241 | 52328722 | 52328543 | 9  | 21  | 21  | 0.958908693 | 0.555026  | PFDN4 | ENSG00000101132 |
| 20 | 52328914 | 52329118 | 52328990 | 8  | 9   | 13  | 0.684934781 | 0.824961  | PFDN4 | ENSG00000101132 |
| 20 | 52329268 | 52329785 | 52329546 | 9  | 20  | 28  | 0.694382157 | 0.901601  | PFDN4 | ENSG00000101132 |
| 20 | 52330214 | 52331247 | 52330393 | 9  | 36  | 60  | 0.581633142 | 0.996018  | PFDN4 | ENSG00000101132 |
| 20 | 52331719 | 52332542 | 52332363 | 12 | 34  | 29  | 1.118726809 | 0.324157  | PFDN4 | ENSG00000101132 |
| 20 | 52332953 | 52334139 | 52333278 | 12 | 53  | 43  | 1.176842487 | 0.209422  | PFDN4 | ENSG00000101132 |
| 20 | 52334795 | 52335261 | 52335073 | 13 | 23  | 21  | 1.046082211 | 0.437961  | PFDN4 | ENSG00000101132 |
| 20 | 52335276 | 52336225 | 52335709 | 28 | 69  | 56  | 1.177607167 | 0.178086  | PFDN4 | ENSG00000101132 |
| 20 | 52336245 | 52336590 | 52336414 | 11 | 15  | 20  | 0.730597099 | 0.831283  | PFDN4 | ENSG00000101132 |
| 20 | 52336928 | 52337393 | 52337107 | 8  | 19  | 11  | 1.598181155 | 0.0927758 | PFDN4 | ENSG00000101132 |
| 20 | 52337550 | 52338041 | 52337729 | 10 | 22  | 19  | 1.102744997 | 0.372416  | PFDN4 | ENSG00000101132 |
| 20 | 52338830 | 52339673 | 52339129 | 17 | 51  | 33  | 1.466566236 | 0.0388124 | PFDN4 | ENSG00000101132 |
| 20 | 52339812 | 52340008 | 52339910 | 9  | 10  | 14  | 0.703199708 | 0.817173  | PFDN4 | ENSG00000101132 |
| 20 | 52341735 | 52342195 | 52342002 | 17 | 26  | 27  | 0.924661954 | 0.614379  | PFDN4 | ENSG00000101132 |
| 20 | 52342991 | 52343321 | 52343156 | 9  | 13  | 14  | 0.894981447 | 0.618069  | PFDN4 | ENSG00000101132 |
| 20 | 52343474 | 52343962 | 52343596 | 11 | 24  | 18  | 1.261721965 | 0.218718  | PFDN4 | ENSG00000101132 |
| 20 | 52344063 | 52344403 | 52344253 | 14 | 19  | 15  | 1.198635866 | 0.291044  | PFDN4 | ENSG00000101132 |
| 20 | 52344683 | 52344967 | 52344824 | 10 | 13  | 8   | 1.491635745 | 0.166708  | PFDN4 | ENSG00000101132 |
| 20 | 52345270 | 52345555 | 52345412 | 15 | 18  | 10  | 1.656296833 | 0.0841786 | PFDN4 | ENSG00000101132 |
| 20 | 52345895 | 52346160 | 52346027 | 10 | 12  | 18  | 0.656095422 | 0.884036  | PFDN4 | ENSG00000101132 |
| 20 | 52346850 | 52347450 | 52347150 | 16 | 33  | 23  | 1.358453982 | 0.121537  | PFDN4 | ENSG00000101132 |
| 20 | 52348071 | 52348392 | 52348236 | 11 | 15  | 14  | 1.022835939 | 0.473606  | PFDN4 | ENSG00000101132 |
| 20 | 52348447 | 52348948 | 52348611 | 13 | 24  | 27  | 0.856168476 | 0.714792  | PFDN4 | ENSG00000101132 |
| 20 | 52349989 | 52350422 | 52350264 | 16 | 27  | 16  | 1.579379024 | 0.0636678 | PFDN4 | ENSG00000101132 |

|    |          |          |          |    |    |    |             |           |       |                 |
|----|----------|----------|----------|----|----|----|-------------|-----------|-------|-----------------|
| 20 | 52350424 | 52350630 | 52350543 | 8  | 10 | 16 | 0.620470331 | 0.897128  | PFDN4 | ENSG00000101132 |
| 20 | 52351842 | 52352108 | 52351949 | 9  | 12 | 11 | 1.038817751 | 0.460341  | PFDN4 | ENSG00000101132 |
| 20 | 52352349 | 52352915 | 52352743 | 13 | 25 | 25 | 0.958908693 | 0.559837  | PFDN4 | ENSG00000101132 |
| 20 | 52353242 | 52353543 | 52353416 | 10 | 14 | 15 | 0.8989769   | 0.617119  | PFDN4 | ENSG00000101132 |
| 20 | 52353757 | 52354282 | 52354158 | 8  | 18 | 13 | 1.301376083 | 0.22245   | PFDN4 | ENSG00000101132 |
| 20 | 52354468 | 52354753 | 52354614 | 8  | 10 | 9  | 1.054799562 | 0.4492    | PFDN4 | ENSG00000101132 |
| 20 | 52356366 | 52356750 | 52356545 | 11 | 18 | 16 | 1.07172148  | 0.415914  | PFDN4 | ENSG00000101132 |
| 20 | 52356859 | 52357773 | 52357316 | 20 | 48 | 41 | 1.118726809 | 0.295257  | PFDN4 | ENSG00000101132 |
| 20 | 52357818 | 52358326 | 52358072 | 13 | 27 | 13 | 1.917817386 | 0.0192196 | PFDN4 | ENSG00000101132 |
| 20 | 52358345 | 52359173 | 52358994 | 13 | 36 | 31 | 1.108738176 | 0.332755  | PFDN4 | ENSG00000101132 |
| 20 | 52360817 | 52361041 | 52360933 | 9  | 10 | 4  | 2.109599125 | 0.0694668 | PFDN4 | ENSG00000101132 |
| 20 | 52361510 | 52361947 | 52361769 | 11 | 19 | 20 | 0.913246374 | 0.614587  | PFDN4 | ENSG00000101132 |
| 20 | 52362400 | 52362862 | 52362656 | 13 | 23 | 16 | 1.353753449 | 0.165001  | PFDN4 | ENSG00000101132 |
| 20 | 52363405 | 52363698 | 52363548 | 10 | 14 | 9  | 1.43836304  | 0.179537  | PFDN4 | ENSG00000101132 |
| 20 | 52363721 | 52364036 | 52363880 | 9  | 13 | 16 | 0.789689512 | 0.746135  | PFDN4 | ENSG00000101132 |
| 20 | 52364229 | 52365411 | 52364960 | 13 | 53 | 59 | 0.863017824 | 0.784539  | PFDN4 | ENSG00000101132 |
| 20 | 52365431 | 52365682 | 52365506 | 8  | 11 | 19 | 0.575345216 | 0.94039   | PFDN4 | ENSG00000101132 |
| 20 | 52365705 | 52366699 | 52366482 | 12 | 42 | 30 | 1.330099155 | 0.109979  | PFDN4 | ENSG00000101132 |
| 20 | 52366788 | 52367035 | 52366911 | 9  | 10 | 13 | 0.753428259 | 0.762589  | PFDN4 | ENSG00000101132 |
| 20 | 52367275 | 52368019 | 52367874 | 11 | 29 | 38 | 0.737622072 | 0.897076  | PFDN4 | ENSG00000101132 |
| 20 | 52368071 | 52368360 | 52368238 | 16 | 17 | 13 | 1.232882605 | 0.274309  | PFDN4 | ENSG00000101132 |
| 20 | 52369596 | 52369939 | 52369767 | 9  | 14 | 17 | 0.799090578 | 0.74177   | PFDN4 | ENSG00000101132 |
| 20 | 52369946 | 52370489 | 52370121 | 10 | 21 | 33 | 0.620470331 | 0.962281  | PFDN4 | ENSG00000101132 |
| 20 | 52371440 | 52372321 | 52371897 | 12 | 39 | 43 | 0.871735176 | 0.735776  | PFDN4 | ENSG00000101132 |
| 20 | 52372666 | 52373133 | 52372845 | 12 | 22 | 17 | 1.225272219 | 0.255726  | PFDN4 | ENSG00000101132 |
| 20 | 52373383 | 52374509 | 52373776 | 12 | 49 | 35 | 1.331817629 | 0.0922602 | PFDN4 | ENSG00000101132 |
| 20 | 52374578 | 52374779 | 52374665 | 9  | 10 | 10 | 0.958908693 | 0.538751  | PFDN4 | ENSG00000101132 |
| 20 | 52374937 | 52375202 | 52375076 | 12 | 14 | 12 | 1.106433107 | 0.392094  | PFDN4 | ENSG00000101132 |
| 20 | 52375584 | 52375948 | 52375737 | 12 | 18 | 25 | 0.700740968 | 0.883987  | PFDN4 | ENSG00000101132 |
| 20 | 52376045 | 52376448 | 52376269 | 9  | 16 | 11 | 1.358453982 | 0.20248   | PFDN4 | ENSG00000101132 |
| 20 | 52376590 | 52377087 | 52376767 | 13 | 26 | 22 | 1.125675422 | 0.336059  | PFDN4 | ENSG00000101132 |
| 20 | 52377728 | 52378026 | 52377877 | 12 | 17 | 15 | 1.07877228  | 0.410615  | PFDN4 | ENSG00000101132 |
| 20 | 52378688 | 52379001 | 52378844 | 8  | 12 | 17 | 0.692545167 | 0.848017  | PFDN4 | ENSG00000101132 |
| 20 | 52379197 | 52380042 | 52379376 | 14 | 39 | 26 | 1.420605471 | 0.0759455 | PFDN4 | ENSG00000101132 |

|    |          |          |          |    |     |    |             |             |       |                 |
|----|----------|----------|----------|----|-----|----|-------------|-------------|-------|-----------------|
| 20 | 52380971 | 52381150 | 52381079 | 9  | 9   | 8  | 1.065454103 | 0.442605    | PFDN4 | ENSG00000101132 |
| 20 | 52381645 | 52382112 | 52381800 | 12 | 22  | 25 | 0.848265382 | 0.718521    | PFDN4 | ENSG00000101132 |
| 20 | 52382451 | 52382721 | 52382586 | 8  | 12  | 15 | 0.779113313 | 0.750998    | PFDN4 | ENSG00000101132 |
| 20 | 52383020 | 52383567 | 52383175 | 9  | 17  | 17 | 0.958908693 | 0.549739    | PFDN4 | ENSG00000101132 |
| 20 | 52383693 | 52383947 | 52383820 | 8  | 11  | 12 | 0.885146486 | 0.620672    | PFDN4 | ENSG00000101132 |
| 20 | 52384387 | 52385314 | 52384892 | 15 | 45  | 41 | 1.05023333  | 0.408148    | PFDN4 | ENSG00000101132 |
| 20 | 52385341 | 52385986 | 52385677 | 10 | 29  | 23 | 1.198635866 | 0.251284    | PFDN4 | ENSG00000101132 |
| 20 | 52387228 | 52387507 | 52387371 | 9  | 11  | 6  | 1.643843474 | 0.137712    | PFDN4 | ENSG00000101132 |
| 20 | 52387697 | 52388212 | 52387876 | 12 | 25  | 20 | 1.187220287 | 0.276369    | PFDN4 | ENSG00000101132 |
| 20 | 52388401 | 52388866 | 52388747 | 10 | 19  | 26 | 0.710302736 | 0.88        | PFDN4 | ENSG00000101132 |
| 20 | 52389246 | 52389926 | 52389636 | 11 | 27  | 24 | 1.073977736 | 0.396082    | PFDN4 | ENSG00000101132 |
| 20 | 52390117 | 52390436 | 52390291 | 17 | 21  | 31 | 0.659249726 | 0.936811    | PFDN4 | ENSG00000101132 |
| 20 | 52390551 | 52391407 | 52390976 | 15 | 41  | 40 | 0.98229671  | 0.531972    | PFDN4 | ENSG00000101132 |
| 20 | 52391508 | 52391963 | 52391807 | 14 | 24  | 14 | 1.598181155 | 0.0700275   | DOK5  | ENSG00000101134 |
| 20 | 52392168 | 52393045 | 52392518 | 15 | 42  | 35 | 1.145363161 | 0.272078    | DOK5  | ENSG00000101134 |
| 20 | 52393068 | 52393679 | 52393375 | 15 | 34  | 35 | 0.93227234  | 0.616206    | DOK5  | ENSG00000101134 |
| 20 | 52393687 | 52394104 | 52393884 | 12 | 20  | 26 | 0.745817872 | 0.845948    | DOK5  | ENSG00000101134 |
| 20 | 52394648 | 52396854 | 52395404 | 37 | 139 | 80 | 1.65737305  | 0.000111582 | DOK5  | ENSG00000101134 |
| 20 | 52397055 | 52397613 | 52397233 | 11 | 22  | 21 | 1.002495452 | 0.4958      | DOK5  | ENSG00000101134 |
| 20 | 52398411 | 52399139 | 52398839 | 15 | 33  | 27 | 1.164389127 | 0.273121    | DOK5  | ENSG00000101134 |
| 20 | 52399228 | 52399850 | 52399623 | 12 | 28  | 26 | 1.029938967 | 0.455006    | DOK5  | ENSG00000101134 |
| 20 | 52400035 | 52400984 | 52400808 | 13 | 43  | 31 | 1.318499453 | 0.114064    | DOK5  | ENSG00000101134 |
| 20 | 52401346 | 52402207 | 52401563 | 18 | 53  | 25 | 1.991579593 | 0.00136597  | DOK5  | ENSG00000101134 |
| 20 | 52402833 | 52403356 | 52403019 | 10 | 21  | 19 | 1.054799562 | 0.429896    | DOK5  | ENSG00000101134 |
| 20 | 52404597 | 52405027 | 52404849 | 17 | 27  | 24 | 1.073977736 | 0.396082    | DOK5  | ENSG00000101134 |
| 20 | 52405508 | 52406024 | 52405845 | 23 | 35  | 28 | 1.190369412 | 0.239964    | DOK5  | ENSG00000101134 |
| 20 | 52406807 | 52407017 | 52406889 | 10 | 11  | 12 | 0.885146486 | 0.620672    | DOK5  | ENSG00000101134 |
| 20 | 52407426 | 52407647 | 52407536 | 8  | 10  | 17 | 0.585999757 | 0.924668    | DOK5  | ENSG00000101134 |
| 20 | 52408060 | 52408992 | 52408375 | 12 | 44  | 38 | 1.106433107 | 0.320392    | DOK5  | ENSG00000101134 |
| 20 | 52409599 | 52409955 | 52409777 | 9  | 15  | 24 | 0.613701564 | 0.940506    | DOK5  | ENSG00000101134 |
| 20 | 52410854 | 52411315 | 52411033 | 8  | 17  | 7  | 2.157544559 | 0.0276499   | DOK5  | ENSG00000101134 |
| 20 | 52411461 | 52411852 | 52411673 | 11 | 19  | 27 | 0.684934781 | 0.905224    | DOK5  | ENSG00000101134 |
| 20 | 52412186 | 52412713 | 52412534 | 12 | 28  | 21 | 1.264016004 | 0.200156    | DOK5  | ENSG00000101134 |
| 20 | 52412759 | 52413112 | 52412935 | 10 | 16  | 10 | 1.481949798 | 0.147733    | DOK5  | ENSG00000101134 |



|    |          |          |          |    |     |    |             |            |      |                 |
|----|----------|----------|----------|----|-----|----|-------------|------------|------|-----------------|
| 20 | 52413197 | 52413430 | 52413318 | 9  | 12  | 11 | 1.038817751 | 0.460341   | DOK5 | ENSG00000101134 |
| 20 | 52413724 | 52414183 | 52413953 | 10 | 20  | 8  | 2.237453617 | 0.0160557  | DOK5 | ENSG00000101134 |
| 20 | 52414281 | 52414768 | 52414589 | 12 | 20  | 18 | 1.05984645  | 0.425516   | DOK5 | ENSG00000101134 |
| 20 | 52414944 | 52415156 | 52415022 | 12 | 15  | 11 | 1.278544924 | 0.254978   | DOK5 | ENSG00000101134 |
| 20 | 52415315 | 52415963 | 52415545 | 12 | 31  | 23 | 1.278544924 | 0.178011   | DOK5 | ENSG00000101134 |
| 20 | 52415984 | 52416256 | 52416162 | 15 | 18  | 12 | 1.401481936 | 0.168368   | DOK5 | ENSG00000101134 |
| 20 | 52416425 | 52416720 | 52416572 | 10 | 13  | 16 | 0.789689512 | 0.746135   | DOK5 | ENSG00000101134 |
| 20 | 52416942 | 52417226 | 52417069 | 12 | 15  | 18 | 0.807502057 | 0.737835   | DOK5 | ENSG00000101134 |
| 20 | 52417256 | 52418240 | 52417664 | 14 | 50  | 54 | 0.889169879 | 0.727598   | DOK5 | ENSG00000101134 |
| 20 | 52418429 | 52418929 | 52418679 | 10 | 24  | 46 | 0.510057815 | 0.997487   | DOK5 | ENSG00000101134 |
| 20 | 52419279 | 52419686 | 52419531 | 10 | 18  | 20 | 0.867584056 | 0.67417    | DOK5 | ENSG00000101134 |
| 20 | 52421005 | 52421254 | 52421117 | 11 | 12  | 12 | 0.958908693 | 0.542188   | DOK5 | ENSG00000101134 |
| 20 | 52421430 | 52421735 | 52421582 | 8  | 13  | 5  | 2.237453617 | 0.038866   | DOK5 | ENSG00000101134 |
| 20 | 52422934 | 52423275 | 52423104 | 9  | 15  | 14 | 1.022835939 | 0.473606   | DOK5 | ENSG00000101134 |
| 20 | 52423480 | 52424057 | 52423825 | 9  | 23  | 16 | 1.353753449 | 0.165001   | DOK5 | ENSG00000101134 |
| 20 | 52424064 | 52424304 | 52424184 | 8  | 11  | 16 | 0.676876725 | 0.854566   | DOK5 | ENSG00000101134 |
| 20 | 52427834 | 52428307 | 52428070 | 8  | 19  | 21 | 0.871735176 | 0.672523   | DOK5 | ENSG00000101134 |
| 20 | 52428318 | 52428598 | 52428458 | 14 | 16  | 17 | 0.905635988 | 0.615736   | DOK5 | ENSG00000101134 |
| 20 | 52429463 | 52429863 | 52429642 | 12 | 20  | 14 | 1.34247217  | 0.186867   | DOK5 | ENSG00000101134 |
| 20 | 52429960 | 52430308 | 52430134 | 8  | 13  | 23 | 0.559363404 | 0.962306   | DOK5 | ENSG00000101134 |
| 20 | 52430746 | 52431012 | 52430895 | 13 | 14  | 10 | 1.307602763 | 0.244096   | DOK5 | ENSG00000101134 |
| 20 | 52431298 | 52431853 | 52431674 | 12 | 29  | 30 | 0.927976155 | 0.614895   | DOK5 | ENSG00000101134 |
| 20 | 52432270 | 52434138 | 52432624 | 32 | 135 | 79 | 1.630144778 | 0.00020487 | DOK5 | ENSG00000101134 |
| 20 | 52434395 | 52435462 | 52434901 | 10 | 44  | 57 | 0.743980883 | 0.933197   | DOK5 | ENSG00000101134 |
| 20 | 52435480 | 52435692 | 52435522 | 8  | 11  | 25 | 0.442573243 | 0.992896   | DOK5 | ENSG00000101134 |
| 20 | 52435694 | 52435889 | 52435791 | 8  | 9   | 18 | 0.504688786 | 0.965748   | DOK5 | ENSG00000101134 |
| 20 | 52435999 | 52436783 | 52436566 | 10 | 33  | 26 | 1.207514651 | 0.229506   | DOK5 | ENSG00000101134 |
| 20 | 52437136 | 52437576 | 52437352 | 12 | 22  | 18 | 1.160784207 | 0.312473   | DOK5 | ENSG00000101134 |
| 20 | 52437708 | 52438606 | 52438192 | 17 | 57  | 55 | 0.993155432 | 0.514152   | DOK5 | ENSG00000101134 |
| 20 | 52438949 | 52439368 | 52439217 | 13 | 20  | 16 | 1.184534268 | 0.298622   | DOK5 | ENSG00000101134 |
| 20 | 52439427 | 52439844 | 52439606 | 17 | 23  | 31 | 0.71918152  | 0.891586   | DOK5 | ENSG00000101134 |
| 20 | 52439931 | 52440892 | 52440524 | 16 | 45  | 49 | 0.882195998 | 0.730752   | DOK5 | ENSG00000101134 |
| 20 | 52441448 | 52441815 | 52441627 | 8  | 15  | 15 | 0.958908693 | 0.546868   | DOK5 | ENSG00000101134 |
| 20 | 52442170 | 52442406 | 52442273 | 8  | 10  | 8  | 1.171999514 | 0.35773    | DOK5 | ENSG00000101134 |

|    |          |          |          |    |    |    |             |            |      |                 |
|----|----------|----------|----------|----|----|----|-------------|------------|------|-----------------|
| 20 | 52442894 | 52443139 | 52443019 | 8  | 12 | 9  | 1.246581301 | 0.295061   | DOK5 | ENSG00000101134 |
| 20 | 52443170 | 52443421 | 52443295 | 9  | 13 | 12 | 1.0326709   | 0.46514    | DOK5 | ENSG00000101134 |
| 20 | 52445424 | 52445780 | 52445619 | 12 | 17 | 25 | 0.663859864 | 0.912943   | DOK5 | ENSG00000101134 |
| 20 | 52447640 | 52447986 | 52447813 | 9  | 15 | 14 | 1.022835939 | 0.473606   | DOK5 | ENSG00000101134 |
| 20 | 52448050 | 52448743 | 52448379 | 8  | 23 | 14 | 1.534253909 | 0.0910901  | DOK5 | ENSG00000101134 |
| 20 | 52449663 | 52450540 | 52450127 | 11 | 37 | 34 | 1.041100867 | 0.430699   | DOK5 | ENSG00000101134 |
| 20 | 52450739 | 52450940 | 52450820 | 9  | 9  | 23 | 0.399545289 | 0.995189   | DOK5 | ENSG00000101134 |
| 20 | 52451501 | 52451868 | 52451617 | 8  | 14 | 12 | 1.106433107 | 0.392094   | DOK5 | ENSG00000101134 |
| 20 | 52452033 | 52452729 | 52452199 | 12 | 32 | 11 | 2.636998906 | 0.00100788 | DOK5 | ENSG00000101134 |
| 20 | 52453336 | 52453791 | 52453639 | 11 | 18 | 15 | 1.138704073 | 0.348127   | DOK5 | ENSG00000101134 |
| 20 | 52454189 | 52454741 | 52454562 | 10 | 23 | 20 | 1.095895649 | 0.377643   | DOK5 | ENSG00000101134 |
| 20 | 52455005 | 52455242 | 52455123 | 11 | 12 | 18 | 0.656095422 | 0.884036   | DOK5 | ENSG00000101134 |
| 20 | 52455265 | 52455604 | 52455425 | 9  | 14 | 26 | 0.532727052 | 0.97821    | DOK5 | ENSG00000101134 |
| 20 | 52456374 | 52456557 | 52456465 | 8  | 9  | 9  | 0.958908693 | 0.536911   | DOK5 | ENSG00000101134 |
| 20 | 52457049 | 52457294 | 52457171 | 9  | 12 | 18 | 0.656095422 | 0.884036   | DOK5 | ENSG00000101134 |
| 20 | 52457343 | 52458000 | 52457522 | 11 | 27 | 34 | 0.767126954 | 0.854158   | DOK5 | ENSG00000101134 |
| 20 | 52458090 | 52459054 | 52458433 | 13 | 45 | 43 | 1.002495452 | 0.494674   | DOK5 | ENSG00000101134 |
| 20 | 52459330 | 52459785 | 52459557 | 9  | 19 | 5  | 3.19636231  | 0.00280933 | DOK5 | ENSG00000101134 |
| 20 | 52460810 | 52461190 | 52460997 | 10 | 18 | 9  | 1.821926517 | 0.0548428  | DOK5 | ENSG00000101134 |
| 20 | 52461370 | 52462083 | 52461523 | 14 | 32 | 32 | 0.958908693 | 0.567412   | DOK5 | ENSG00000101134 |
| 20 | 52462222 | 52463111 | 52462872 | 18 | 48 | 48 | 0.958908693 | 0.582054   | DOK5 | ENSG00000101134 |
| 20 | 52464780 | 52465382 | 52465102 | 14 | 32 | 30 | 1.02077377  | 0.466328   | DOK5 | ENSG00000101134 |
| 20 | 52465603 | 52465822 | 52465720 | 10 | 11 | 7  | 1.43836304  | 0.204844   | DOK5 | ENSG00000101134 |
| 20 | 52466120 | 52466336 | 52466228 | 8  | 9  | 12 | 0.737622072 | 0.769563   | DOK5 | ENSG00000101134 |
| 20 | 52467119 | 52467457 | 52467295 | 8  | 12 | 16 | 0.733283118 | 0.803868   | DOK5 | ENSG00000101134 |
| 20 | 52468749 | 52469326 | 52469147 | 8  | 21 | 24 | 0.84383965  | 0.72062    | DOK5 | ENSG00000101134 |
| 20 | 52469851 | 52470033 | 52469942 | 8  | 8  | 18 | 0.454219907 | 0.979817   | DOK5 | ENSG00000101134 |
| 20 | 52470124 | 52470399 | 52470236 | 10 | 11 | 15 | 0.71918152  | 0.81018    | DOK5 | ENSG00000101134 |
| 20 | 52470464 | 52470822 | 52470641 | 15 | 20 | 17 | 1.118726809 | 0.361026   | DOK5 | ENSG00000101134 |
| 20 | 52470838 | 52471391 | 52471095 | 12 | 26 | 27 | 0.924661954 | 0.614379   | DOK5 | ENSG00000101134 |
| 20 | 52472786 | 52473011 | 52472889 | 10 | 11 | 8  | 1.278544924 | 0.28289    | DOK5 | ENSG00000101134 |
| 20 | 52473561 | 52473988 | 52473660 | 11 | 19 | 27 | 0.684934781 | 0.905224   | DOK5 | ENSG00000101134 |
| 20 | 52474478 | 52474798 | 52474638 | 11 | 14 | 13 | 1.027402171 | 0.469541   | DOK5 | ENSG00000101134 |
| 20 | 52474802 | 52475094 | 52474948 | 10 | 16 | 15 | 1.018840486 | 0.477384   | DOK5 | ENSG00000101134 |

|    |          |          |          |    |     |    |             |             |      |                 |
|----|----------|----------|----------|----|-----|----|-------------|-------------|------|-----------------|
| 20 | 52477124 | 52477661 | 52477483 | 11 | 24  | 9  | 2.397271733 | 0.00639731  | DOK5 | ENSG00000101134 |
| 20 | 52479039 | 52479610 | 52479431 | 15 | 30  | 46 | 0.632471691 | 0.977895    | DOK5 | ENSG00000101134 |
| 20 | 52480484 | 52480896 | 52480721 | 10 | 19  | 13 | 1.369869562 | 0.177863    | DOK5 | ENSG00000101134 |
| 20 | 52480918 | 52481272 | 52481095 | 10 | 15  | 16 | 0.902502299 | 0.616352    | DOK5 | ENSG00000101134 |
| 20 | 52481348 | 52481712 | 52481557 | 11 | 17  | 31 | 0.53938614  | 0.984501    | DOK5 | ENSG00000101134 |
| 20 | 52482214 | 52482582 | 52482403 | 10 | 17  | 10 | 1.569123316 | 0.112309    | DOK5 | ENSG00000101134 |
| 20 | 52482948 | 52483221 | 52483084 | 9  | 12  | 13 | 0.890415215 | 0.619237    | DOK5 | ENSG00000101134 |
| 20 | 52483421 | 52484546 | 52483696 | 12 | 44  | 42 | 1.003509097 | 0.49282     | DOK5 | ENSG00000101134 |
| 20 | 52484739 | 52484957 | 52484873 | 8  | 11  | 11 | 0.958908693 | 0.540507    | DOK5 | ENSG00000101134 |
| 20 | 52484959 | 52485320 | 52485121 | 9  | 15  | 20 | 0.730597099 | 0.831283    | DOK5 | ENSG00000101134 |
| 20 | 52486125 | 52486457 | 52486283 | 11 | 15  | 8  | 1.704726565 | 0.0916153   | DOK5 | ENSG00000101134 |
| 20 | 52486976 | 52487172 | 52487092 | 8  | 9   | 18 | 0.504688786 | 0.965748    | DOK5 | ENSG00000101134 |
| 20 | 52487199 | 52487740 | 52487503 | 9  | 22  | 25 | 0.848265382 | 0.718521    | DOK5 | ENSG00000101134 |
| 20 | 52488133 | 52488812 | 52488486 | 11 | 28  | 18 | 1.463597479 | 0.0938263   | DOK5 | ENSG00000101134 |
| 20 | 52490702 | 52491219 | 52491043 | 14 | 25  | 28 | 0.859711242 | 0.713133    | DOK5 | ENSG00000101134 |
| 20 | 52491658 | 52491882 | 52491770 | 8  | 10  | 16 | 0.620470331 | 0.897128    | DOK5 | ENSG00000101134 |
| 20 | 52492613 | 52492901 | 52492757 | 12 | 18  | 15 | 1.138704073 | 0.348127    | DOK5 | ENSG00000101134 |
| 20 | 52497249 | 52497682 | 52497427 | 11 | 18  | 27 | 0.650688042 | 0.929412    | DOK5 | ENSG00000101134 |
| 20 | 52497688 | 52498303 | 52497867 | 12 | 28  | 42 | 0.646705863 | 0.96725     | DOK5 | ENSG00000101134 |
| 20 | 52498429 | 52498644 | 52498557 | 10 | 12  | 14 | 0.831054201 | 0.689281    | DOK5 | ENSG00000101134 |
| 20 | 52498975 | 52499485 | 52499306 | 9  | 22  | 18 | 1.160784207 | 0.312473    | DOK5 | ENSG00000101134 |
| 20 | 52499858 | 52500216 | 52500037 | 15 | 21  | 7  | 2.636998906 | 0.00562102  | DOK5 | ENSG00000101134 |
| 20 | 52501068 | 52501798 | 52501632 | 18 | 37  | 16 | 2.143442961 | 0.00308695  | DOK5 | ENSG00000101134 |
| 20 | 52502700 | 52504141 | 52503439 | 13 | 72  | 48 | 1.428578257 | 0.0251657   | DOK5 | ENSG00000101134 |
| 20 | 52504880 | 52505251 | 52505059 | 11 | 18  | 13 | 1.301376083 | 0.22245     | DOK5 | ENSG00000101134 |
| 20 | 52505643 | 52507429 | 52506603 | 55 | 149 | 90 | 1.580618725 | 0.000229893 | DOK5 | ENSG00000101134 |
| 20 | 52507767 | 52508629 | 52507946 | 16 | 45  | 40 | 1.075848778 | 0.36552     | DOK5 | ENSG00000101134 |
| 20 | 52508955 | 52509774 | 52509364 | 20 | 43  | 19 | 2.109599125 | 0.00190723  | DOK5 | ENSG00000101134 |
| 20 | 52510488 | 52511110 | 52510931 | 24 | 38  | 21 | 1.699883592 | 0.0204456   | DOK5 | ENSG00000101134 |
| 20 | 52511544 | 52512247 | 52511959 | 14 | 31  | 31 | 0.958908693 | 0.566385    | DOK5 | ENSG00000101134 |
| 20 | 52512568 | 52513228 | 52512747 | 13 | 29  | 29 | 0.958908693 | 0.564279    | DOK5 | ENSG00000101134 |
| 20 | 52513327 | 52513727 | 52513506 | 8  | 16  | 16 | 0.958908693 | 0.548325    | DOK5 | ENSG00000101134 |
| 20 | 52515004 | 52515595 | 52515301 | 12 | 29  | 19 | 1.43836304  | 0.0995642   | DOK5 | ENSG00000101134 |
| 20 | 52515820 | 52516009 | 52515914 | 9  | 9   | 8  | 1.065454103 | 0.442605    | DOK5 | ENSG00000101134 |

|    |          |          |          |    |    |    |             |           |      |                 |
|----|----------|----------|----------|----|----|----|-------------|-----------|------|-----------------|
| 20 | 52516015 | 52517190 | 52516286 | 18 | 59 | 61 | 0.927976155 | 0.660176  | DOK5 | ENSG00000101134 |
| 20 | 52517612 | 52518497 | 52518324 | 17 | 39 | 38 | 0.983496095 | 0.529003  | DOK5 | ENSG00000101134 |
| 20 | 52519209 | 52520342 | 52519827 | 17 | 54 | 43 | 1.198635866 | 0.18315   | DOK5 | ENSG00000101134 |
| 20 | 52521031 | 52521283 | 52521157 | 9  | 12 | 12 | 0.958908693 | 0.542188  | DOK5 | ENSG00000101134 |
| 20 | 52521335 | 52521751 | 52521593 | 15 | 25 | 13 | 1.78083043  | 0.0357618 | DOK5 | ENSG00000101134 |
| 20 | 52522249 | 52522477 | 52522363 | 11 | 13 | 10 | 1.220429246 | 0.306001  | DOK5 | ENSG00000101134 |
| 20 | 52522713 | 52523099 | 52522920 | 11 | 19 | 20 | 0.913246374 | 0.614587  | DOK5 | ENSG00000101134 |
| 20 | 52523500 | 52523712 | 52523602 | 11 | 14 | 8  | 1.598181155 | 0.124586  | DOK5 | ENSG00000101134 |
| 20 | 52524059 | 52525213 | 52524238 | 19 | 59 | 63 | 0.8989769   | 0.723606  | DOK5 | ENSG00000101134 |
| 20 | 52526597 | 52527065 | 52526795 | 12 | 25 | 26 | 0.923393556 | 0.614269  | DOK5 | ENSG00000101134 |
| 20 | 52527203 | 52527690 | 52527481 | 13 | 25 | 15 | 1.558226626 | 0.0760878 | DOK5 | ENSG00000101134 |
| 20 | 52527905 | 52528474 | 52528295 | 11 | 25 | 12 | 1.917817386 | 0.0229342 | DOK5 | ENSG00000101134 |
| 20 | 52528476 | 52528717 | 52528609 | 10 | 12 | 18 | 0.656095422 | 0.884036  | DOK5 | ENSG00000101134 |
| 20 | 52529116 | 52530177 | 52529827 | 31 | 88 | 57 | 1.471428857 | 0.010143  | DOK5 | ENSG00000101134 |
| 20 | 52531426 | 52531844 | 52531605 | 10 | 17 | 23 | 0.71918152  | 0.858071  | DOK5 | ENSG00000101134 |
| 20 | 52532800 | 52533207 | 52532976 | 10 | 18 | 21 | 0.828148417 | 0.728078  | DOK5 | ENSG00000101134 |
| 20 | 52533741 | 52533948 | 52533827 | 8  | 10 | 9  | 1.054799562 | 0.4492    | DOK5 | ENSG00000101134 |
| 20 | 52534674 | 52534904 | 52534781 | 8  | 10 | 11 | 0.878999635 | 0.622439  | DOK5 | ENSG00000101134 |
| 20 | 52535321 | 52535586 | 52535414 | 10 | 12 | 10 | 1.133255728 | 0.37674   | DOK5 | ENSG00000101134 |
| 20 | 52535629 | 52535965 | 52535797 | 11 | 17 | 26 | 0.639272462 | 0.93299   | DOK5 | ENSG00000101134 |
| 20 | 52536391 | 52536750 | 52536570 | 11 | 18 | 15 | 1.138704073 | 0.348127  | DOK5 | ENSG00000101134 |
| 20 | 52537144 | 52537456 | 52537300 | 9  | 14 | 21 | 0.653801382 | 0.90216   | DOK5 | ENSG00000101134 |
| 20 | 52537494 | 52537922 | 52537743 | 9  | 17 | 16 | 1.015315087 | 0.480915  | DOK5 | ENSG00000101134 |
| 20 | 52539611 | 52540088 | 52539950 | 10 | 22 | 25 | 0.848265382 | 0.718521  | DOK5 | ENSG00000101134 |
| 20 | 52540928 | 52541801 | 52541124 | 14 | 41 | 28 | 1.388764314 | 0.0836658 | DOK5 | ENSG00000101134 |
| 20 | 52543188 | 52543673 | 52543529 | 12 | 21 | 21 | 0.958908693 | 0.555026  | DOK5 | ENSG00000101134 |
| 20 | 52543995 | 52544580 | 52544174 | 13 | 27 | 36 | 0.725660633 | 0.902101  | DOK5 | ENSG00000101134 |
| 20 | 52544727 | 52545024 | 52544854 | 8  | 12 | 14 | 0.831054201 | 0.689281  | DOK5 | ENSG00000101134 |
| 20 | 52545205 | 52545545 | 52545375 | 10 | 14 | 14 | 0.958908693 | 0.545362  | DOK5 | ENSG00000101134 |
| 20 | 52545890 | 52546268 | 52546143 | 8  | 13 | 10 | 1.220429246 | 0.306001  | DOK5 | ENSG00000101134 |
| 20 | 52546654 | 52547558 | 52547106 | 11 | 36 | 31 | 1.108738176 | 0.332755  | DOK5 | ENSG00000101134 |
| 20 | 52548967 | 52549152 | 52549088 | 8  | 10 | 15 | 0.659249726 | 0.861705  | DOK5 | ENSG00000101134 |
| 20 | 52549224 | 52550081 | 52549403 | 14 | 37 | 43 | 0.828148417 | 0.803892  | DOK5 | ENSG00000101134 |
| 20 | 52551847 | 52552092 | 52551973 | 8  | 11 | 10 | 1.046082211 | 0.455063  | DOK5 | ENSG00000101134 |

|    |          |          |          |    |    |    |             |            |      |                 |
|----|----------|----------|----------|----|----|----|-------------|------------|------|-----------------|
| 20 | 52553890 | 52554594 | 52554198 | 16 | 38 | 32 | 1.133255728 | 0.296541   | DOK5 | ENSG00000101134 |
| 20 | 52554607 | 52555377 | 52555001 | 11 | 37 | 42 | 0.847407682 | 0.772406   | DOK5 | ENSG00000101134 |
| 20 | 52555652 | 52556396 | 52556223 | 13 | 38 | 32 | 1.133255728 | 0.296541   | DOK5 | ENSG00000101134 |
| 20 | 52556690 | 52556984 | 52556837 | 9  | 13 | 9  | 1.34247217  | 0.232231   | DOK5 | ENSG00000101134 |
| 20 | 52557008 | 52557240 | 52557166 | 9  | 10 | 9  | 1.054799562 | 0.4492     | DOK5 | ENSG00000101134 |
| 20 | 52557437 | 52557637 | 52557537 | 9  | 10 | 18 | 0.555157664 | 0.945639   | DOK5 | ENSG00000101134 |
| 20 | 52558158 | 52558476 | 52558337 | 10 | 13 | 12 | 1.0326709   | 0.46514    | DOK5 | ENSG00000101134 |
| 20 | 52559931 | 52560110 | 52560037 | 8  | 8  | 6  | 1.232882605 | 0.333038   | DOK5 | ENSG00000101134 |
| 20 | 52560423 | 52560887 | 52560571 | 8  | 16 | 25 | 0.626978761 | 0.936688   | DOK5 | ENSG00000101134 |
| 20 | 52560941 | 52561630 | 52561097 | 11 | 31 | 31 | 0.958908693 | 0.566385   | DOK5 | ENSG00000101134 |
| 20 | 52561644 | 52561998 | 52561836 | 8  | 13 | 29 | 0.447490723 | 0.995358   | DOK5 | ENSG00000101134 |
| 20 | 52562581 | 52563099 | 52562959 | 9  | 19 | 16 | 1.128127874 | 0.354788   | DOK5 | ENSG00000101134 |
| 20 | 52563943 | 52564619 | 52564291 | 14 | 32 | 39 | 0.791099672 | 0.842107   | DOK5 | ENSG00000101134 |
| 20 | 52565202 | 52565551 | 52565376 | 10 | 16 | 8  | 1.811271976 | 0.0663685  | DOK5 | ENSG00000101134 |
| 20 | 52565580 | 52565991 | 52565835 | 11 | 18 | 18 | 0.958908693 | 0.551113   | DOK5 | ENSG00000101134 |
| 20 | 52566335 | 52566659 | 52566491 | 9  | 13 | 14 | 0.894981447 | 0.618069   | DOK5 | ENSG00000101134 |
| 20 | 52567876 | 52568089 | 52567989 | 8  | 9  | 11 | 0.799090578 | 0.702688   | DOK5 | ENSG00000101134 |
| 20 | 52570757 | 52571465 | 52571220 | 13 | 35 | 39 | 0.863017824 | 0.740125   | DOK5 | ENSG00000101134 |
| 20 | 52571609 | 52572366 | 52571760 | 11 | 34 | 29 | 1.118726809 | 0.324157   | DOK5 | ENSG00000101134 |
| 20 | 52573988 | 52574588 | 52574261 | 10 | 28 | 31 | 0.869011003 | 0.708837   | DOK5 | ENSG00000101134 |
| 20 | 52574604 | 52575251 | 52574872 | 12 | 28 | 24 | 1.112334084 | 0.346253   | DOK5 | ENSG00000101134 |
| 20 | 52575681 | 52575906 | 52575801 | 8  | 10 | 18 | 0.555157664 | 0.945639   | DOK5 | ENSG00000101134 |
| 20 | 52575962 | 52576328 | 52576152 | 11 | 16 | 18 | 0.857970936 | 0.678066   | DOK5 | ENSG00000101134 |
| 20 | 52576355 | 52576611 | 52576462 | 10 | 10 | 10 | 0.958908693 | 0.538751   | DOK5 | ENSG00000101134 |
| 20 | 52576967 | 52577186 | 52577100 | 8  | 10 | 6  | 1.506856518 | 0.188853   | DOK5 | ENSG00000101134 |
| 20 | 52577197 | 52577690 | 52577396 | 10 | 20 | 31 | 0.62928383  | 0.953537   | DOK5 | ENSG00000101134 |
| 20 | 52578337 | 52578751 | 52578575 | 14 | 23 | 18 | 1.211253086 | 0.262955   | DOK5 | ENSG00000101134 |
| 20 | 52578855 | 52579091 | 52578979 | 9  | 11 | 12 | 0.885146486 | 0.620672   | DOK5 | ENSG00000101134 |
| 20 | 52580779 | 52581646 | 52580942 | 14 | 40 | 16 | 2.312662142 | 0.00107888 | DOK5 | ENSG00000101134 |
| 20 | 52582063 | 52582358 | 52582210 | 10 | 14 | 23 | 0.599317933 | 0.944443   | DOK5 | ENSG00000101134 |
| 20 | 52582470 | 52583314 | 52582678 | 19 | 44 | 36 | 1.166240302 | 0.242128   | DOK5 | ENSG00000101134 |
| 20 | 52583995 | 52584306 | 52584150 | 10 | 13 | 13 | 0.958908693 | 0.543805   | DOK5 | ENSG00000101134 |
| 20 | 52585000 | 52585474 | 52585295 | 12 | 20 | 13 | 1.43836304  | 0.140307   | DOK5 | ENSG00000101134 |
| 20 | 52585601 | 52586466 | 52586148 | 12 | 38 | 32 | 1.133255728 | 0.296541   | DOK5 | ENSG00000101134 |

|    |          |          |          |    |    |    |             |           |      |                 |
|----|----------|----------|----------|----|----|----|-------------|-----------|------|-----------------|
| 20 | 52586724 | 52587192 | 52587013 | 14 | 24 | 14 | 1.598181155 | 0.0700275 | DOK5 | ENSG00000101134 |
| 20 | 52587216 | 52587784 | 52587610 | 13 | 29 | 20 | 1.369869562 | 0.130203  | DOK5 | ENSG00000101134 |
| 20 | 52589564 | 52589807 | 52589712 | 11 | 13 | 19 | 0.671236085 | 0.87814   | DOK5 | ENSG00000101134 |
| 20 | 52589930 | 52590200 | 52590046 | 9  | 11 | 24 | 0.460276173 | 0.989595  | DOK5 | ENSG00000101134 |
| 20 | 52594787 | 52595090 | 52594958 | 8  | 13 | 7  | 1.678090213 | 0.11195   | DOK5 | ENSG00000101134 |
| 20 | 52595256 | 52595535 | 52595395 | 11 | 15 | 15 | 0.958908693 | 0.546868  | DOK5 | ENSG00000101134 |
| 20 | 52595645 | 52595867 | 52595756 | 8  | 10 | 8  | 1.171999514 | 0.35773   | DOK5 | ENSG00000101134 |
| 20 | 52596512 | 52597766 | 52596813 | 16 | 62 | 42 | 1.404912736 | 0.0408034 | DOK5 | ENSG00000101134 |
| 20 | 52597782 | 52598184 | 52598015 | 11 | 17 | 14 | 1.150690432 | 0.340986  | DOK5 | ENSG00000101134 |
| 20 | 52598754 | 52599206 | 52599052 | 11 | 20 | 16 | 1.184534268 | 0.298622  | DOK5 | ENSG00000101134 |
| 20 | 52599728 | 52600027 | 52599877 | 8  | 12 | 19 | 0.62329065  | 0.912804  | DOK5 | ENSG00000101134 |
| 20 | 52600401 | 52600633 | 52600477 | 9  | 10 | 8  | 1.171999514 | 0.35773   | DOK5 | ENSG00000101134 |
| 20 | 52601021 | 52601385 | 52601089 | 10 | 16 | 19 | 0.815072389 | 0.734271  | DOK5 | ENSG00000101134 |
| 20 | 52603906 | 52604244 | 52604075 | 11 | 17 | 18 | 0.908439814 | 0.615249  | DOK5 | ENSG00000101134 |
| 20 | 52604278 | 52604668 | 52604457 | 16 | 25 | 16 | 1.466566236 | 0.10473   | DOK5 | ENSG00000101134 |
| 20 | 52604908 | 52605316 | 52605087 | 9  | 18 | 37 | 0.479454347 | 0.996703  | DOK5 | ENSG00000101134 |
| 20 | 52605546 | 52605987 | 52605763 | 11 | 20 | 20 | 0.958908693 | 0.553754  | DOK5 | ENSG00000101134 |
| 20 | 52606104 | 52606303 | 52606199 | 9  | 10 | 16 | 0.620470331 | 0.897128  | DOK5 | ENSG00000101134 |
| 20 | 52606373 | 52606727 | 52606550 | 11 | 16 | 14 | 1.086763185 | 0.404922  | DOK5 | ENSG00000101134 |
| 20 | 52606970 | 52607886 | 52607707 | 12 | 34 | 25 | 1.290838625 | 0.158753  | DOK5 | ENSG00000101134 |
| 20 | 52607966 | 52608286 | 52608141 | 10 | 13 | 11 | 1.118726809 | 0.38479   | DOK5 | ENSG00000101134 |
| 20 | 52608894 | 52609732 | 52609068 | 12 | 35 | 27 | 1.232882605 | 0.200179  | DOK5 | ENSG00000101134 |
| 20 | 52611111 | 52611627 | 52611448 | 10 | 24 | 26 | 0.887878419 | 0.666463  | DOK5 | ENSG00000101134 |
| 20 | 52612656 | 52613098 | 52612850 | 8  | 18 | 12 | 1.401481936 | 0.168368  | DOK5 | ENSG00000101134 |
| 20 | 52616047 | 52616296 | 52616127 | 8  | 11 | 8  | 1.278544924 | 0.28289   | DOK5 | ENSG00000101134 |
| 20 | 52616325 | 52616573 | 52616449 | 9  | 12 | 14 | 0.831054201 | 0.689281  | DOK5 | ENSG00000101134 |
| 20 | 52617545 | 52617876 | 52617700 | 10 | 13 | 10 | 1.220429246 | 0.306001  | DOK5 | ENSG00000101134 |
| 20 | 52619210 | 52619600 | 52619403 | 8  | 17 | 15 | 1.07877228  | 0.410615  | DOK5 | ENSG00000101134 |
| 20 | 52619817 | 52620508 | 52619996 | 11 | 27 | 19 | 1.34247217  | 0.153055  | DOK5 | ENSG00000101134 |
| 20 | 52620881 | 52621127 | 52620986 | 8  | 10 | 10 | 0.958908693 | 0.538751  | DOK5 | ENSG00000101134 |
| 20 | 52621196 | 52621599 | 52621317 | 9  | 17 | 24 | 0.690414259 | 0.888181  | DOK5 | ENSG00000101134 |
| 20 | 52621784 | 52622011 | 52621940 | 10 | 12 | 11 | 1.038817751 | 0.460341  | DOK5 | ENSG00000101134 |
| 20 | 52622841 | 52623370 | 52623205 | 10 | 22 | 21 | 1.002495452 | 0.4958    | DOK5 | ENSG00000101134 |
| 20 | 52623683 | 52624132 | 52623843 | 14 | 22 | 29 | 0.735163331 | 0.869157  | DOK5 | ENSG00000101134 |

|    |          |          |          |    |    |    |             |           |      |                 |
|----|----------|----------|----------|----|----|----|-------------|-----------|------|-----------------|
| 20 | 52625137 | 52625426 | 52625285 | 12 | 15 | 15 | 0.958908693 | 0.546868  | DOK5 | ENSG00000101134 |
| 20 | 52626389 | 52626795 | 52626646 | 14 | 21 | 18 | 1.110315329 | 0.366889  | DOK5 | ENSG00000101134 |
| 20 | 52627460 | 52628096 | 52627697 | 17 | 33 | 38 | 0.835971681 | 0.778572  | DOK5 | ENSG00000101134 |
| 20 | 52628298 | 52628554 | 52628443 | 8  | 11 | 7  | 1.43836304  | 0.204844  | DOK5 | ENSG00000101134 |
| 20 | 52628567 | 52628986 | 52628807 | 13 | 21 | 9  | 2.109599125 | 0.0196396 | DOK5 | ENSG00000101134 |
| 20 | 52630401 | 52630587 | 52630494 | 9  | 9  | 6  | 1.369869562 | 0.253675  | DOK5 | ENSG00000101134 |
| 20 | 52635245 | 52635851 | 52635412 | 13 | 28 | 28 | 0.958908693 | 0.563199  | DOK5 | ENSG00000101134 |
| 20 | 52636291 | 52636567 | 52636436 | 8  | 12 | 13 | 0.890415215 | 0.619237  | DOK5 | ENSG00000101134 |
| 20 | 52636753 | 52637055 | 52636904 | 12 | 16 | 20 | 0.776259418 | 0.783794  | DOK5 | ENSG00000101134 |
| 20 | 52637524 | 52638795 | 52637881 | 16 | 65 | 47 | 1.318499453 | 0.0704199 | DOK5 | ENSG00000101134 |
| 20 | 52639052 | 52640008 | 52639861 | 12 | 41 | 29 | 1.34247217  | 0.105846  | DOK5 | ENSG00000101134 |
| 20 | 52640078 | 52640344 | 52640211 | 8  | 11 | 8  | 1.278544924 | 0.28289   | DOK5 | ENSG00000101134 |
| 20 | 52640830 | 52641035 | 52640891 | 8  | 9  | 11 | 0.799090578 | 0.702688  | DOK5 | ENSG00000101134 |
| 20 | 52641437 | 52641846 | 52641616 | 13 | 20 | 19 | 1.006854128 | 0.490315  | DOK5 | ENSG00000101134 |
| 20 | 52644229 | 52644482 | 52644355 | 9  | 11 | 8  | 1.278544924 | 0.28289   | DOK5 | ENSG00000101134 |
| 20 | 52644851 | 52645059 | 52644955 | 8  | 10 | 3  | 2.636998906 | 0.034203  | DOK5 | ENSG00000101134 |
| 20 | 52645644 | 52645948 | 52645787 | 9  | 14 | 20 | 0.684934781 | 0.872628  | DOK5 | ENSG00000101134 |
| 20 | 52646072 | 52646831 | 52646251 | 9  | 29 | 42 | 0.669006065 | 0.956612  | DOK5 | ENSG00000101134 |
| 20 | 52647138 | 52647785 | 52647317 | 12 | 27 | 29 | 0.894981447 | 0.664076  | DOK5 | ENSG00000101134 |
| 20 | 52647917 | 52648633 | 52648323 | 10 | 27 | 36 | 0.725660633 | 0.902101  | DOK5 | ENSG00000101134 |
| 20 | 52649710 | 52650086 | 52649889 | 10 | 17 | 18 | 0.908439814 | 0.615249  | DOK5 | ENSG00000101134 |
| 20 | 52650826 | 52651407 | 52651228 | 14 | 29 | 33 | 0.846095906 | 0.748756  | DOK5 | ENSG00000101134 |
| 20 | 52651727 | 52652492 | 52652034 | 14 | 37 | 49 | 0.728770607 | 0.931004  | DOK5 | ENSG00000101134 |
| 20 | 52653376 | 52653915 | 52653529 | 14 | 30 | 17 | 1.65145386  | 0.0409633 | DOK5 | ENSG00000101134 |
| 20 | 52654156 | 52654582 | 52654371 | 11 | 20 | 12 | 1.54900635  | 0.101141  | DOK5 | ENSG00000101134 |
| 20 | 52654614 | 52654793 | 52654715 | 8  | 8  | 6  | 1.232882605 | 0.333038  | DOK5 | ENSG00000101134 |
| 20 | 52655133 | 52655500 | 52655312 | 11 | 18 | 19 | 0.910963258 | 0.614871  | DOK5 | ENSG00000101134 |
| 20 | 52655574 | 52655765 | 52655669 | 8  | 9  | 9  | 0.958908693 | 0.536911  | DOK5 | ENSG00000101134 |
| 20 | 52656615 | 52656922 | 52656768 | 11 | 16 | 12 | 1.253957522 | 0.265012  | DOK5 | ENSG00000101134 |
| 20 | 52657123 | 52657647 | 52657332 | 9  | 18 | 24 | 0.728770607 | 0.85379   | DOK5 | ENSG00000101134 |
| 20 | 52658821 | 52659248 | 52658988 | 10 | 17 | 15 | 1.07877228  | 0.410615  | DOK5 | ENSG00000101134 |
| 20 | 52660067 | 52660608 | 52660429 | 11 | 24 | 22 | 1.042292058 | 0.441692  | DOK5 | ENSG00000101134 |
| 20 | 52660732 | 52661214 | 52660911 | 12 | 22 | 19 | 1.102744997 | 0.372416  | DOK5 | ENSG00000101134 |
| 20 | 52661603 | 52662000 | 52661845 | 12 | 20 | 15 | 1.25856766  | 0.240048  | DOK5 | ENSG00000101134 |

|    |          |          |          |    |    |    |             |           |      |                 |
|----|----------|----------|----------|----|----|----|-------------|-----------|------|-----------------|
| 20 | 52662125 | 52662772 | 52662429 | 11 | 31 | 35 | 0.852363283 | 0.745543  | DOK5 | ENSG00000101134 |
| 20 | 52662993 | 52663297 | 52663145 | 11 | 15 | 18 | 0.807502057 | 0.737835  | DOK5 | ENSG00000101134 |
| 20 | 52663355 | 52663797 | 52663534 | 9  | 17 | 10 | 1.569123316 | 0.112309  | DOK5 | ENSG00000101134 |
| 20 | 52664052 | 52664483 | 52664304 | 13 | 23 | 20 | 1.095895649 | 0.377643  | DOK5 | ENSG00000101134 |
| 20 | 52665764 | 52666725 | 52666225 | 16 | 42 | 23 | 1.718044742 | 0.0145358 | DOK5 | ENSG00000101134 |
| 20 | 52668051 | 52668330 | 52668226 | 9  | 13 | 10 | 1.220429246 | 0.306001  | DOK5 | ENSG00000101134 |
| 20 | 52669060 | 52669624 | 52669352 | 13 | 28 | 27 | 0.993155432 | 0.509675  | DOK5 | ENSG00000101134 |
| 20 | 52672064 | 52672304 | 52672193 | 11 | 12 | 7  | 1.558226626 | 0.152813  | DOK5 | ENSG00000101134 |
| 20 | 52672354 | 52673249 | 52672626 | 12 | 42 | 51 | 0.792943727 | 0.871177  | DOK5 | ENSG00000101134 |
| 20 | 52673254 | 52673507 | 52673366 | 8  | 11 | 11 | 0.958908693 | 0.540507  | DOK5 | ENSG00000101134 |
| 20 | 52673814 | 52674204 | 52673960 | 8  | 13 | 13 | 0.958908693 | 0.543805  | DOK5 | ENSG00000101134 |
| 20 | 52674377 | 52675701 | 52674556 | 14 | 70 | 73 | 0.920034016 | 0.692183  | DOK5 | ENSG00000101134 |
| 20 | 52675755 | 52676486 | 52675997 | 18 | 44 | 27 | 1.541103257 | 0.0334126 | DOK5 | ENSG00000101134 |
| 20 | 52677313 | 52678214 | 52677427 | 13 | 42 | 34 | 1.178087823 | 0.23361   | DOK5 | ENSG00000101134 |
| 20 | 52678335 | 52678758 | 52678579 | 9  | 16 | 9  | 1.630144778 | 0.102169  | DOK5 | ENSG00000101134 |
| 20 | 52678862 | 52679250 | 52679120 | 8  | 15 | 20 | 0.730597099 | 0.831283  | DOK5 | ENSG00000101134 |
| 20 | 52679641 | 52680104 | 52679846 | 10 | 21 | 30 | 0.680515847 | 0.919368  | DOK5 | ENSG00000101134 |
| 20 | 52681109 | 52681308 | 52681213 | 8  | 10 | 7  | 1.318499453 | 0.269217  | DOK5 | ENSG00000101134 |
| 20 | 52681850 | 52682269 | 52681993 | 8  | 16 | 11 | 1.358453982 | 0.20248   | DOK5 | ENSG00000101134 |
| 20 | 52682342 | 52682761 | 52682631 | 11 | 18 | 19 | 0.910963258 | 0.614871  | DOK5 | ENSG00000101134 |
| 20 | 52682890 | 52683311 | 52683063 | 9  | 17 | 14 | 1.150690432 | 0.340986  | DOK5 | ENSG00000101134 |
| 20 | 52683387 | 52683924 | 52683566 | 9  | 22 | 34 | 0.630139998 | 0.960074  | DOK5 | ENSG00000101134 |
| 20 | 52683988 | 52684380 | 52684167 | 8  | 15 | 14 | 1.022835939 | 0.473606  | DOK5 | ENSG00000101134 |
| 20 | 52685540 | 52685844 | 52685622 | 8  | 12 | 11 | 1.038817751 | 0.460341  | DOK5 | ENSG00000101134 |
| 20 | 52686457 | 52686941 | 52686673 | 10 | 22 | 24 | 0.882195998 | 0.668517  | DOK5 | ENSG00000101134 |
| 20 | 52687188 | 52687516 | 52687352 | 13 | 18 | 25 | 0.700740968 | 0.883987  | DOK5 | ENSG00000101134 |
| 20 | 52688214 | 52688596 | 52688378 | 9  | 16 | 26 | 0.603757325 | 0.952213  | DOK5 | ENSG00000101134 |
| 20 | 52688911 | 52689357 | 52689194 | 11 | 18 | 14 | 1.214617678 | 0.282961  | DOK5 | ENSG00000101134 |
| 20 | 52689403 | 52689731 | 52689563 | 8  | 12 | 15 | 0.779113313 | 0.750998  | DOK5 | ENSG00000101134 |
| 20 | 52689759 | 52690729 | 52690054 | 16 | 52 | 45 | 1.104829581 | 0.308995  | DOK5 | ENSG00000101134 |
| 20 | 52691780 | 52692454 | 52692123 | 14 | 36 | 22 | 1.542592245 | 0.0476873 | DOK5 | ENSG00000101134 |
| 20 | 52692684 | 52692941 | 52692766 | 11 | 14 | 17 | 0.799090578 | 0.74177   | DOK5 | ENSG00000101134 |
| 20 | 52692950 | 52693231 | 52693090 | 9  | 13 | 19 | 0.671236085 | 0.87814   | DOK5 | ENSG00000101134 |
| 20 | 52693351 | 52694250 | 52693767 | 9  | 33 | 44 | 0.72450879  | 0.923905  | DOK5 | ENSG00000101134 |



|    |          |          |          |    |     |     |             |            |      |                 |
|----|----------|----------|----------|----|-----|-----|-------------|------------|------|-----------------|
| 20 | 52695412 | 52696400 | 52695555 | 13 | 40  | 30  | 1.268234078 | 0.156183   | DOK5 | ENSG00000101134 |
| 20 | 52696556 | 52697272 | 52696974 | 27 | 52  | 57  | 0.876244151 | 0.757085   | DOK5 | ENSG00000101134 |
| 20 | 52697538 | 52698062 | 52697883 | 20 | 34  | 37  | 0.883205375 | 0.70257    | DOK5 | ENSG00000101134 |
| 20 | 52698092 | 52700688 | 52698887 | 57 | 241 | 175 | 1.318499453 | 0.00247285 | DOK5 | ENSG00000101134 |
| 20 | 52701124 | 52702215 | 52701301 | 12 | 44  | 56  | 0.757033179 | 0.92008    | DOK5 | ENSG00000101134 |
| 20 | 52702770 | 52702971 | 52702870 | 8  | 8   | 10  | 0.784561658 | 0.708731   | DOK5 | ENSG00000101134 |
| 20 | 52703395 | 52704755 | 52704576 | 16 | 64  | 49  | 1.246581301 | 0.11865    | DOK5 | ENSG00000101134 |
| 20 | 52705655 | 52705873 | 52705825 | 8  | 11  | 9   | 1.150690432 | 0.367789   | DOK5 | ENSG00000101134 |
| 20 | 52705993 | 52706191 | 52706077 | 8  | 9   | 7   | 1.198635866 | 0.346278   | DOK5 | ENSG00000101134 |
| 20 | 52707175 | 52707391 | 52707267 | 9  | 11  | 24  | 0.460276173 | 0.989595   | DOK5 | ENSG00000101134 |
| 20 | 52707637 | 52708073 | 52707903 | 8  | 16  | 11  | 1.358453982 | 0.20248    | DOK5 | ENSG00000101134 |
| 20 | 52708701 | 52709190 | 52708861 | 11 | 20  | 37  | 0.529923225 | 0.991908   | DOK5 | ENSG00000101134 |
| 20 | 52709497 | 52709983 | 52709804 | 12 | 23  | 25  | 0.885146486 | 0.667437   | DOK5 | ENSG00000101134 |
| 20 | 52710539 | 52710920 | 52710687 | 9  | 14  | 12  | 1.106433107 | 0.392094   | DOK5 | ENSG00000101134 |
| 20 | 52711594 | 52712112 | 52711794 | 14 | 26  | 25  | 0.995789797 | 0.505405   | DOK5 | ENSG00000101134 |
| 20 | 52712229 | 52712905 | 52712408 | 11 | 32  | 41  | 0.753428259 | 0.890129   | DOK5 | ENSG00000101134 |
| 20 | 52713034 | 52713375 | 52713204 | 10 | 14  | 20  | 0.684934781 | 0.872628   | DOK5 | ENSG00000101134 |
| 20 | 52713618 | 52714018 | 52713797 | 10 | 18  | 24  | 0.728770607 | 0.85379    | DOK5 | ENSG00000101134 |
| 20 | 52714747 | 52715304 | 52715011 | 15 | 30  | 15  | 1.857885593 | 0.0184859  | DOK5 | ENSG00000101134 |
| 20 | 52715572 | 52716328 | 52715962 | 12 | 32  | 32  | 0.958908693 | 0.567412   | DOK5 | ENSG00000101134 |
| 20 | 52716925 | 52717294 | 52717104 | 12 | 20  | 16  | 1.184534268 | 0.298622   | DOK5 | ENSG00000101134 |
| 20 | 52717867 | 52719281 | 52718787 | 41 | 118 | 98  | 1.152627621 | 0.147089   |      | ENSG00000210815 |
| 20 | 52719817 | 52720084 | 52719973 | 9  | 11  | 12  | 0.885146486 | 0.620672   |      | ENSG00000210815 |
| 20 | 52720372 | 52720632 | 52720510 | 8  | 10  | 4   | 2.109599125 | 0.0694668  |      | ENSG00000210815 |
| 20 | 52720814 | 52721440 | 52721223 | 18 | 35  | 33  | 1.015315087 | 0.473842   |      | ENSG00000210815 |
| 20 | 52721571 | 52722004 | 52721745 | 9  | 15  | 20  | 0.730597099 | 0.831283   |      | ENSG00000210815 |
| 20 | 52722807 | 52723229 | 52722972 | 9  | 17  | 15  | 1.07877228  | 0.410615   |      | ENSG00000210815 |
| 20 | 52723401 | 52724113 | 52723792 | 17 | 39  | 31  | 1.198635866 | 0.220022   |      | ENSG00000210815 |
| 20 | 52724883 | 52725267 | 52725164 | 10 | 19  | 34  | 0.547947825 | 0.986287   |      | ENSG00000210815 |
| 20 | 52726513 | 52726968 | 52726728 | 8  | 17  | 18  | 0.908439814 | 0.615249   |      | ENSG00000210815 |
| 20 | 52727099 | 52727490 | 52727254 | 9  | 16  | 16  | 0.958908693 | 0.548325   |      | ENSG00000210815 |
| 20 | 52727643 | 52728158 | 52727822 | 14 | 28  | 20  | 1.324207243 | 0.159584   |      | ENSG00000210815 |
| 20 | 52730036 | 52732725 | 52731002 | 40 | 171 | 122 | 1.340912969 | 0.00613082 |      | ENSG00000210815 |
| 20 | 52732843 | 52733335 | 52733019 | 9  | 17  | 31  | 0.53938614  | 0.984501   |      | ENSG00000210815 |

|    |          |          |          |     |     |    |             |          |                 |
|----|----------|----------|----------|-----|-----|----|-------------|----------|-----------------|
| 20 | 52733377 | 52733977 | 52733736 | 13  | 27  | 32 | 0.813619497 | 0.790473 | ENSG00000210815 |
| 20 | 52734063 | 52735689 | 52734595 | 121 | 273 | 61 | 4.237757773 | 9.33E-32 | ENSG00000210815 |
| 20 | 52735752 | 52736162 | 52735983 | 10  | 16  | 22 | 0.708758599 | 0.862621 | ENSG00000210815 |
| 20 | 52736415 | 52736742 | 52736575 | 18  | 21  | 19 | 1.054799562 | 0.429896 | ENSG00000210815 |
| 20 | 52736797 | 52737089 | 52736943 | 11  | 15  | 12 | 1.180195315 | 0.324974 | ENSG00000210815 |
| 20 | 52738474 | 52738732 | 52738593 | 8   | 10  | 11 | 0.878999635 | 0.622439 | ENSG00000210815 |
| 20 | 52740821 | 52741633 | 52741368 | 10  | 31  | 36 | 0.829326437 | 0.782137 | ENSG00000210815 |
| 20 | 52741766 | 52742219 | 52741945 | 15  | 25  | 14 | 1.662108401 | 0.053254 | ENSG00000210815 |
| 20 | 52742247 | 52742614 | 52742426 | 15  | 22  | 19 | 1.102744997 | 0.372416 | ENSG00000210815 |
| 20 | 52743160 | 52743850 | 52743447 | 11  | 27  | 33 | 0.789689512 | 0.82438  | ENSG00000210815 |
| 20 | 52743933 | 52744226 | 52744080 | 9   | 13  | 11 | 1.118726809 | 0.38479  | ENSG00000210815 |
| 20 | 52744495 | 52744946 | 52744661 | 12  | 19  | 14 | 1.278544924 | 0.231514 | ENSG00000210815 |
| 20 | 52745360 | 52745693 | 52745526 | 9   | 13  | 16 | 0.789689512 | 0.746135 | ENSG00000210815 |
| 20 | 52745699 | 52746019 | 52745856 | 16  | 20  | 22 | 0.875525328 | 0.671044 | ENSG00000210815 |
| 20 | 52747101 | 52747546 | 52747323 | 17  | 26  | 18 | 1.362659722 | 0.14632  | ENSG00000210815 |
| 20 | 52747922 | 52748219 | 52748073 | 12  | 15  | 9  | 1.534253909 | 0.136498 | ENSG00000210815 |
| 20 | 52748222 | 52748471 | 52748346 | 10  | 13  | 21 | 0.610214623 | 0.930478 | ENSG00000210815 |
| 20 | 52748524 | 52748908 | 52748694 | 11  | 16  | 16 | 0.958908693 | 0.548325 | ENSG00000210815 |
| 20 | 52749101 | 52750226 | 52749699 | 13  | 54  | 60 | 0.864589805 | 0.783671 | ENSG00000210815 |
| 20 | 52750784 | 52751095 | 52750933 | 15  | 18  | 18 | 0.958908693 | 0.551113 | ENSG00000210815 |
| 20 | 52752040 | 52752238 | 52752131 | 8   | 9   | 11 | 0.799090578 | 0.702688 | ENSG00000210815 |
| 20 | 52753012 | 52753795 | 52753252 | 14  | 40  | 30 | 1.268234078 | 0.156183 | ENSG00000210815 |
| 20 | 52754083 | 52754536 | 52754262 | 10  | 21  | 20 | 1.004571012 | 0.493124 | ENSG00000210815 |
| 20 | 52755849 | 52756044 | 52755963 | 8   | 10  | 7  | 1.318499453 | 0.269217 | ENSG00000210815 |
| 20 | 52756104 | 52756485 | 52756370 | 10  | 16  | 17 | 0.905635988 | 0.615736 | ENSG00000210815 |
| 20 | 52756541 | 52756732 | 52756636 | 9   | 11  | 10 | 1.046082211 | 0.455063 | ENSG00000210815 |
| 20 | 52756820 | 52757456 | 52757277 | 10  | 26  | 26 | 0.958908693 | 0.560979 | ENSG00000210815 |
| 20 | 52759021 | 52759483 | 52759289 | 9   | 17  | 21 | 0.784561658 | 0.779771 | ENSG00000210815 |
| 20 | 52760651 | 52761210 | 52760946 | 11  | 24  | 26 | 0.887878419 | 0.666463 | ENSG00000210815 |
| 20 | 52761598 | 52761910 | 52761754 | 12  | 15  | 12 | 1.180195315 | 0.324974 | ENSG00000210815 |
| 20 | 52762020 | 52763035 | 52762527 | 12  | 48  | 41 | 1.118726809 | 0.295257 | ENSG00000210815 |
| 20 | 52763650 | 52764144 | 52763890 | 8   | 19  | 28 | 0.66131634  | 0.92595  | ENSG00000210815 |
| 20 | 52764469 | 52764670 | 52764541 | 8   | 8   | 4  | 1.726035648 | 0.150596 | ENSG00000210815 |
| 20 | 52764749 | 52765099 | 52764883 | 13  | 17  | 20 | 0.821921737 | 0.731032 | ENSG00000210815 |

|    |          |          |          |    |    |    |             |             |                 |
|----|----------|----------|----------|----|----|----|-------------|-------------|-----------------|
| 20 | 52765225 | 52765555 | 52765387 | 10 | 12 | 17 | 0.692545167 | 0.848017    | ENSG00000210815 |
| 20 | 52765942 | 52766152 | 52766015 | 10 | 10 | 10 | 0.958908693 | 0.538751    | ENSG00000210815 |
| 20 | 52766313 | 52767094 | 52766831 | 11 | 35 | 36 | 0.932992242 | 0.616517    | ENSG00000210815 |
| 20 | 52767461 | 52768423 | 52767607 | 13 | 44 | 40 | 1.052460761 | 0.40533     | ENSG00000210815 |
| 20 | 52770379 | 52770718 | 52770548 | 9  | 14 | 10 | 1.307602763 | 0.244096    | ENSG00000210815 |
| 20 | 52771203 | 52771563 | 52771450 | 10 | 15 | 24 | 0.613701564 | 0.940506    | ENSG00000210815 |
| 20 | 52771588 | 52772202 | 52771802 | 17 | 39 | 33 | 1.128127874 | 0.300803    | ENSG00000210815 |
| 20 | 52773080 | 52773421 | 52773253 | 14 | 19 | 9  | 1.917817386 | 0.0394029   | ENSG00000210815 |
| 20 | 52775990 | 52776270 | 52776118 | 14 | 16 | 9  | 1.630144778 | 0.102169    | ENSG00000210815 |
| 20 | 52776597 | 52777676 | 52776856 | 24 | 81 | 53 | 1.456120608 | 0.0148572   | ENSG00000210815 |
| 20 | 52778405 | 52778698 | 52778577 | 9  | 12 | 6  | 1.78083043  | 0.0985525   | ENSG00000210815 |
| 20 | 52779085 | 52779268 | 52779219 | 8  | 9  | 18 | 0.504688786 | 0.965748    | ENSG00000210815 |
| 20 | 52779514 | 52779710 | 52779587 | 8  | 9  | 13 | 0.684934781 | 0.824961    | ENSG00000210815 |
| 20 | 52782568 | 52782821 | 52782649 | 9  | 11 | 14 | 0.767126954 | 0.756447    | ENSG00000210815 |
| 20 | 52783013 | 52783434 | 52783190 | 12 | 19 | 12 | 1.475244143 | 0.131365    | ENSG00000210815 |
| 20 | 52783513 | 52783889 | 52783710 | 8  | 14 | 24 | 0.575345216 | 0.958881    | ENSG00000210815 |
| 20 | 52784532 | 52785895 | 52785718 | 13 | 57 | 44 | 1.23592676  | 0.141006    | ENSG00000210815 |
| 20 | 52786249 | 52786726 | 52786481 | 9  | 18 | 2  | 6.073088389 | 0.000157975 | ENSG00000210815 |
| 20 | 52787039 | 52787294 | 52787211 | 10 | 13 | 9  | 1.34247217  | 0.232231    | ENSG00000210815 |
| 20 | 52789548 | 52789968 | 52789711 | 9  | 16 | 17 | 0.905635988 | 0.615736    | ENSG00000210815 |
| 20 | 52790485 | 52790832 | 52790658 | 15 | 20 | 20 | 0.958908693 | 0.553754    | ENSG00000210815 |
| 20 | 52790990 | 52791174 | 52791088 | 9  | 10 | 17 | 0.585999757 | 0.924668    | ENSG00000210815 |
| 20 | 52795687 | 52796102 | 52795866 | 12 | 21 | 12 | 1.622768557 | 0.076896    | ENSG00000210815 |
| 20 | 52796580 | 52797715 | 52796911 | 11 | 46 | 36 | 1.218073205 | 0.182357    | ENSG00000210815 |
| 20 | 52799833 | 52800032 | 52799974 | 10 | 11 | 10 | 1.046082211 | 0.455063    | ENSG00000210815 |
| 20 | 52800035 | 52800643 | 52800214 | 9  | 24 | 22 | 1.042292058 | 0.441692    | ENSG00000210815 |
| 20 | 52801021 | 52801372 | 52801196 | 9  | 14 | 22 | 0.625375235 | 0.925815    | ENSG00000210815 |
| 20 | 52802188 | 52802431 | 52802309 | 8  | 10 | 15 | 0.659249726 | 0.861705    | ENSG00000210815 |
| 20 | 52802465 | 52802702 | 52802600 | 9  | 10 | 9  | 1.054799562 | 0.4492      | ENSG00000210815 |
| 20 | 52808029 | 52808284 | 52808141 | 9  | 10 | 11 | 0.878999635 | 0.622439    | ENSG00000210815 |
| 20 | 52808579 | 52808906 | 52808742 | 9  | 12 | 14 | 0.831054201 | 0.689281    | ENSG00000210815 |
| 20 | 52809002 | 52809280 | 52809141 | 8  | 11 | 17 | 0.639272462 | 0.890352    | ENSG00000210815 |
| 20 | 52809324 | 52809712 | 52809554 | 10 | 17 | 33 | 0.507657543 | 0.991914    | ENSG00000210815 |
| 20 | 52813393 | 52813618 | 52813571 | 9  | 13 | 9  | 1.34247217  | 0.232231    | ENSG00000210815 |

|    |          |          |          |    |    |    |             |           |                 |
|----|----------|----------|----------|----|----|----|-------------|-----------|-----------------|
| 20 | 52813811 | 52814036 | 52813910 | 9  | 11 | 13 | 0.821921737 | 0.693119  | ENSG00000210815 |
| 20 | 52815461 | 52815835 | 52815703 | 16 | 22 | 16 | 1.297347055 | 0.203559  | ENSG00000210815 |
| 20 | 52815973 | 52816215 | 52816094 | 8  | 10 | 9  | 1.054799562 | 0.4492    | ENSG00000210815 |
| 20 | 52816770 | 52817425 | 52817074 | 8  | 20 | 21 | 0.915321934 | 0.614384  | ENSG00000210815 |
| 20 | 52819035 | 52819259 | 52819148 | 8  | 10 | 8  | 1.171999514 | 0.35773   | ENSG00000210815 |
| 20 | 52819712 | 52820332 | 52820034 | 12 | 29 | 31 | 0.8989769   | 0.662851  | ENSG00000210815 |
| 20 | 52821962 | 52822245 | 52822105 | 13 | 16 | 16 | 0.958908693 | 0.548325  | ENSG00000210815 |
| 20 | 52823539 | 52823780 | 52823664 | 11 | 14 | 4  | 2.876726079 | 0.01219   | ENSG00000210815 |
| 20 | 52824479 | 52824741 | 52824636 | 12 | 14 | 12 | 1.106433107 | 0.392094  | ENSG00000210815 |
| 20 | 52824912 | 52825129 | 52825040 | 9  | 13 | 5  | 2.237453617 | 0.038866  | ENSG00000210815 |
| 20 | 52825360 | 52825800 | 52825651 | 11 | 18 | 8  | 2.024362796 | 0.0334397 | ENSG00000210815 |
| 20 | 52826827 | 52827033 | 52826930 | 8  | 9  | 17 | 0.532727052 | 0.951077  | ENSG00000210815 |
| 20 | 52827782 | 52828168 | 52827961 | 10 | 17 | 21 | 0.784561658 | 0.779771  | ENSG00000210815 |
| 20 | 52828297 | 52828642 | 52828469 | 8  | 14 | 16 | 0.846095906 | 0.68298   | ENSG00000210815 |
| 20 | 52828665 | 52829430 | 52829049 | 17 | 40 | 38 | 1.008083498 | 0.484943  | ENSG00000210815 |
| 20 | 52829470 | 52829720 | 52829605 | 8  | 10 | 16 | 0.620470331 | 0.897128  | ENSG00000210815 |
| 20 | 52830624 | 52830932 | 52830759 | 11 | 13 | 12 | 1.0326709   | 0.46514   | ENSG00000210815 |
| 20 | 52839009 | 52839259 | 52839116 | 10 | 10 | 12 | 0.811384279 | 0.697544  | ENSG00000210815 |
| 20 | 52842301 | 52842605 | 52842433 | 9  | 14 | 15 | 0.8989769   | 0.617119  | ENSG00000210815 |
| 20 | 52843320 | 52844017 | 52843621 | 12 | 32 | 21 | 1.43836304  | 0.089235  | ENSG00000210815 |
| 20 | 52845221 | 52845493 | 52845357 | 11 | 13 | 12 | 1.0326709   | 0.46514   | ENSG00000210815 |
| 20 | 52847022 | 52847483 | 52847304 | 8  | 17 | 23 | 0.71918152  | 0.858071  | ENSG00000210815 |
| 20 | 52847595 | 52847878 | 52847736 | 9  | 13 | 7  | 1.678090213 | 0.11195   | ENSG00000210815 |
| 20 | 52849895 | 52850911 | 52850505 | 17 | 49 | 33 | 1.410159843 | 0.0583372 | ENSG00000210815 |
| 20 | 52851527 | 52851722 | 52851585 | 8  | 8  | 12 | 0.663859864 | 0.833689  | ENSG00000210815 |
| 20 | 52852061 | 52852600 | 52852421 | 9  | 21 | 19 | 1.054799562 | 0.429896  | ENSG00000210815 |
| 20 | 52853626 | 52853972 | 52853799 | 9  | 15 | 7  | 1.917817386 | 0.0572317 | ENSG00000210815 |
| 20 | 52854009 | 52855397 | 52854660 | 13 | 64 | 61 | 1.005307501 | 0.487571  | ENSG00000210815 |
| 20 | 52855891 | 52856395 | 52856139 | 8  | 20 | 23 | 0.839045106 | 0.722898  | ENSG00000210815 |
| 20 | 52856403 | 52856940 | 52856582 | 11 | 24 | 22 | 1.042292058 | 0.441692  | ENSG00000210815 |
| 20 | 52857713 | 52857948 | 52857832 | 8  | 11 | 10 | 1.046082211 | 0.455063  | ENSG00000210815 |
| 20 | 52858033 | 52858732 | 52858212 | 13 | 35 | 29 | 1.150690432 | 0.282944  | ENSG00000210815 |
| 20 | 52858878 | 52859343 | 52859040 | 9  | 16 | 13 | 1.164389127 | 0.333296  | ENSG00000210815 |
| 20 | 52859825 | 52860329 | 52859974 | 15 | 27 | 13 | 1.917817386 | 0.0192196 | ENSG00000210815 |

|    |          |          |          |    |    |    |             |           |                 |
|----|----------|----------|----------|----|----|----|-------------|-----------|-----------------|
| 20 | 52860353 | 52860594 | 52860460 | 11 | 11 | 9  | 1.150690432 | 0.367789  | ENSG00000210815 |
| 20 | 52867400 | 52867985 | 52867810 | 19 | 40 | 28 | 1.355698497 | 0.101666  | ENSG00000210815 |
| 20 | 52870417 | 52870665 | 52870541 | 11 | 12 | 10 | 1.133255728 | 0.37674   | ENSG00000210815 |
| 20 | 52871182 | 52871361 | 52871274 | 8  | 9  | 9  | 0.958908693 | 0.536911  | ENSG00000210815 |
| 20 | 52871411 | 52871721 | 52871575 | 10 | 14 | 13 | 1.027402171 | 0.469541  | ENSG00000210815 |
| 20 | 52872114 | 52872411 | 52872262 | 9  | 12 | 11 | 1.038817751 | 0.460341  | ENSG00000210815 |
| 20 | 52872755 | 52873539 | 52873091 | 11 | 32 | 31 | 0.98887459  | 0.517406  | ENSG00000210815 |
| 20 | 52874032 | 52874316 | 52874197 | 9  | 11 | 5  | 1.917817386 | 0.0843804 | ENSG00000210815 |
| 20 | 52875257 | 52875619 | 52875451 | 8  | 13 | 14 | 0.894981447 | 0.618069  | ENSG00000210815 |
| 20 | 52875686 | 52876621 | 52876359 | 14 | 44 | 34 | 1.232882605 | 0.173963  | ENSG00000210815 |
| 20 | 52878274 | 52879064 | 52878601 | 14 | 37 | 19 | 1.821926517 | 0.0124355 | ENSG00000210815 |
| 20 | 52879132 | 52879900 | 52879311 | 11 | 29 | 25 | 1.106433107 | 0.351025  | ENSG00000210815 |
| 20 | 52880844 | 52881077 | 52880960 | 8  | 12 | 12 | 0.958908693 | 0.542188  | ENSG00000210815 |
| 20 | 52881662 | 52882209 | 52882038 | 11 | 21 | 23 | 0.878999635 | 0.669714  | ENSG00000210815 |
| 20 | 52882387 | 52882794 | 52882537 | 12 | 19 | 21 | 0.871735176 | 0.672523  | ENSG00000210815 |
| 20 | 52884755 | 52885403 | 52885035 | 10 | 26 | 24 | 1.035621389 | 0.448641  | ENSG00000210815 |
| 20 | 52886147 | 52886965 | 52886576 | 12 | 37 | 44 | 0.809745119 | 0.832265  | ENSG00000210815 |
| 20 | 52887076 | 52887954 | 52887644 | 14 | 42 | 43 | 0.937115314 | 0.618997  | ENSG00000210815 |
| 20 | 52888339 | 52888774 | 52888518 | 8  | 17 | 12 | 1.327719729 | 0.212795  | ENSG00000210815 |
| 20 | 52889112 | 52889403 | 52889257 | 8  | 12 | 19 | 0.62329065  | 0.912804  | ENSG00000210815 |
| 20 | 52889597 | 52890065 | 52889749 | 10 | 21 | 17 | 1.171999514 | 0.305749  | ENSG00000210815 |
| 20 | 52890548 | 52891258 | 52890965 | 11 | 31 | 24 | 1.227403127 | 0.218358  | ENSG00000210815 |
| 20 | 52893048 | 52893364 | 52893198 | 8  | 13 | 19 | 0.671236085 | 0.87814   | ENSG00000210815 |
| 20 | 52893664 | 52894249 | 52894070 | 10 | 24 | 23 | 0.998863222 | 0.500802  | ENSG00000210815 |
| 20 | 52894664 | 52895041 | 52894843 | 14 | 21 | 12 | 1.622768557 | 0.076896  | ENSG00000210815 |
| 20 | 52895473 | 52896682 | 52896167 | 10 | 43 | 36 | 1.140323851 | 0.276185  | ENSG00000210815 |
| 20 | 52896794 | 52897062 | 52896965 | 11 | 15 | 13 | 1.095895649 | 0.398774  | ENSG00000210815 |
| 20 | 52897929 | 52898758 | 52898108 | 14 | 36 | 22 | 1.542592245 | 0.0476873 | ENSG00000210815 |
| 20 | 52898955 | 52899170 | 52899018 | 10 | 12 | 20 | 0.593610143 | 0.935335  | ENSG00000210815 |
| 20 | 52899753 | 52900264 | 52899926 | 10 | 20 | 23 | 0.839045106 | 0.722898  | ENSG00000210815 |
| 20 | 52901536 | 52902587 | 52901715 | 12 | 45 | 58 | 0.747623727 | 0.931837  | ENSG00000210815 |
| 20 | 52903104 | 52903799 | 52903331 | 10 | 29 | 29 | 0.958908693 | 0.564279  | ENSG00000210815 |
| 20 | 52903978 | 52904233 | 52904091 | 9  | 11 | 10 | 1.046082211 | 0.455063  | ENSG00000210815 |
| 20 | 52905675 | 52906174 | 52906029 | 11 | 22 | 18 | 1.160784207 | 0.312473  | ENSG00000210815 |

|    |          |          |          |    |    |    |             |           |                 |
|----|----------|----------|----------|----|----|----|-------------|-----------|-----------------|
| 20 | 52906185 | 52906444 | 52906272 | 9  | 13 | 13 | 0.958908693 | 0.543805  | ENSG00000210815 |
| 20 | 52906562 | 52906779 | 52906613 | 8  | 10 | 17 | 0.585999757 | 0.924668  | ENSG00000210815 |
| 20 | 52907009 | 52907311 | 52907132 | 11 | 15 | 19 | 0.767126954 | 0.788167  | ENSG00000210815 |
| 20 | 52908016 | 52908688 | 52908195 | 13 | 32 | 26 | 1.171999514 | 0.267953  | ENSG00000210815 |
| 20 | 52908943 | 52909169 | 52909056 | 8  | 8  | 11 | 0.71918152  | 0.777546  | ENSG00000210815 |
| 20 | 52910267 | 52911719 | 52910593 | 13 | 65 | 62 | 1.004571012 | 0.489146  | ENSG00000210815 |
| 20 | 52911984 | 52912730 | 52912416 | 20 | 44 | 34 | 1.232882605 | 0.173963  | ENSG00000210815 |
| 20 | 52912740 | 52913927 | 52912946 | 16 | 49 | 52 | 0.904630843 | 0.694698  | ENSG00000210815 |
| 20 | 52914748 | 52915111 | 52914970 | 8  | 14 | 25 | 0.553216554 | 0.969907  | ENSG00000210815 |
| 20 | 52916756 | 52917052 | 52916904 | 11 | 15 | 9  | 1.534253909 | 0.136498  | ENSG00000210815 |
| 20 | 52919271 | 52920023 | 52919788 | 9  | 29 | 39 | 0.71918152  | 0.916072  | ENSG00000210815 |
| 20 | 52922478 | 52922694 | 52922586 | 8  | 11 | 14 | 0.767126954 | 0.756447  | ENSG00000210815 |
| 20 | 52922722 | 52923051 | 52922802 | 13 | 18 | 16 | 1.07172148  | 0.415914  | ENSG00000210815 |
| 20 | 52923749 | 52923966 | 52923857 | 8  | 9  | 4  | 1.917817386 | 0.103282  | ENSG00000210815 |
| 20 | 52925132 | 52925566 | 52925311 | 13 | 21 | 9  | 2.109599125 | 0.0196396 | ENSG00000210815 |
| 20 | 52926640 | 52927178 | 52926888 | 12 | 28 | 18 | 1.463597479 | 0.0938263 | ENSG00000210815 |
| 20 | 52927803 | 52928084 | 52927937 | 9  | 13 | 8  | 1.491635745 | 0.166708  | ENSG00000210815 |
| 20 | 52928551 | 52928770 | 52928660 | 9  | 12 | 12 | 0.958908693 | 0.542188  | ENSG00000210815 |
| 20 | 52929027 | 52929668 | 52929511 | 11 | 27 | 27 | 0.958908693 | 0.562099  | ENSG00000210815 |
| 20 | 52930308 | 52930642 | 52930475 | 11 | 17 | 26 | 0.639272462 | 0.93299   | ENSG00000210815 |
| 20 | 52931348 | 52932079 | 52931730 | 13 | 30 | 28 | 1.025040327 | 0.460877  | ENSG00000210815 |
| 20 | 52937203 | 52937435 | 52937319 | 8  | 10 | 15 | 0.659249726 | 0.861705  | ENSG00000210815 |
| 20 | 52937951 | 52938198 | 52938074 | 9  | 12 | 8  | 1.385090334 | 0.219216  | ENSG00000210815 |
| 20 | 52938363 | 52938734 | 52938511 | 11 | 18 | 11 | 1.518272097 | 0.122037  | ENSG00000210815 |
| 20 | 52938781 | 52939559 | 52939099 | 12 | 35 | 47 | 0.71918152  | 0.934421  | ENSG00000210815 |
| 20 | 52940214 | 52940560 | 52940531 | 8  | 13 | 19 | 0.671236085 | 0.87814   | ENSG00000210815 |
| 20 | 52940875 | 52941079 | 52940968 | 9  | 11 | 11 | 0.958908693 | 0.540507  | ENSG00000210815 |
| 20 | 52941215 | 52941620 | 52941374 | 9  | 16 | 12 | 1.253957522 | 0.265012  | ENSG00000210815 |
| 20 | 52942123 | 52942859 | 52942609 | 16 | 40 | 22 | 1.709358975 | 0.0172316 | ENSG00000210815 |
| 20 | 52943279 | 52943624 | 52943451 | 9  | 15 | 9  | 1.534253909 | 0.136498  | ENSG00000210815 |
| 20 | 52945115 | 52945355 | 52945188 | 10 | 11 | 19 | 0.575345216 | 0.94039   | ENSG00000210815 |
| 20 | 52945551 | 52945883 | 52945730 | 9  | 12 | 11 | 1.038817751 | 0.460341  | ENSG00000210815 |
| 20 | 52946165 | 52946501 | 52946357 | 8  | 12 | 8  | 1.385090334 | 0.219216  | ENSG00000210815 |
| 20 | 52947396 | 52947654 | 52947519 | 8  | 10 | 11 | 0.878999635 | 0.622439  | ENSG00000210815 |

|    |          |          |          |    |     |    |             |             |                 |
|----|----------|----------|----------|----|-----|----|-------------|-------------|-----------------|
| 20 | 52947779 | 52948203 | 52948024 | 9  | 18  | 13 | 1.301376083 | 0.22245     | ENSG00000210815 |
| 20 | 52948705 | 52949103 | 52948924 | 12 | 20  | 19 | 1.006854128 | 0.490315    | ENSG00000210815 |
| 20 | 52949112 | 52949693 | 52949402 | 27 | 45  | 18 | 2.321568415 | 0.00056079  | ENSG00000210815 |
| 20 | 52961359 | 52961619 | 52961489 | 10 | 12  | 18 | 0.656095422 | 0.884036    | ENSG00000210815 |
| 20 | 52961761 | 52962096 | 52961923 | 9  | 14  | 16 | 0.846095906 | 0.68298     | ENSG00000210815 |
| 20 | 52962747 | 52962983 | 52962879 | 9  | 12  | 8  | 1.385090334 | 0.219216    | ENSG00000210815 |
| 20 | 52963225 | 52963453 | 52963339 | 11 | 13  | 12 | 1.0326709   | 0.46514     | ENSG00000210815 |
| 20 | 52963546 | 52964651 | 52964233 | 48 | 119 | 27 | 4.109608685 | 1.18E-14    | ENSG00000210815 |
| 20 | 52964845 | 52965344 | 52965024 | 9  | 21  | 19 | 1.054799562 | 0.429896    | ENSG00000210815 |
| 20 | 52965420 | 52965711 | 52965546 | 12 | 16  | 18 | 0.857970936 | 0.678066    | ENSG00000210815 |
| 20 | 52965791 | 52966024 | 52965907 | 8  | 9   | 10 | 0.871735176 | 0.624623    | ENSG00000210815 |
| 20 | 52967421 | 52968113 | 52967745 | 15 | 33  | 11 | 2.716907964 | 0.000672572 | ENSG00000210815 |
| 20 | 52969688 | 52970046 | 52969867 | 11 | 17  | 24 | 0.690414259 | 0.888181    | ENSG00000210815 |
| 20 | 52970052 | 52970331 | 52970204 | 10 | 14  | 15 | 0.8989769   | 0.617119    | ENSG00000210815 |
| 20 | 52970340 | 52971134 | 52970519 | 13 | 39  | 35 | 1.065454103 | 0.390032    | ENSG00000210815 |
| 20 | 52971219 | 52971738 | 52971596 | 10 | 20  | 24 | 0.805483302 | 0.769433    | ENSG00000210815 |
| 20 | 52971809 | 52972254 | 52972104 | 12 | 23  | 18 | 1.211253086 | 0.262955    | ENSG00000210815 |
| 20 | 52972537 | 52972891 | 52972714 | 11 | 17  | 22 | 0.750450282 | 0.822065    | ENSG00000210815 |
| 20 | 52973471 | 52973791 | 52973621 | 12 | 16  | 17 | 0.905635988 | 0.615736    | ENSG00000210815 |
| 20 | 52973873 | 52974328 | 52974100 | 11 | 24  | 18 | 1.261721965 | 0.218718    | ENSG00000210815 |
| 20 | 52975026 | 52975511 | 52975339 | 15 | 24  | 21 | 1.089668969 | 0.382599    | ENSG00000210815 |
| 20 | 52977004 | 52977551 | 52977314 | 11 | 24  | 14 | 1.598181155 | 0.0700275   | ENSG00000210815 |
| 20 | 52977849 | 52978173 | 52978011 | 9  | 14  | 6  | 2.054804342 | 0.0480281   | ENSG00000210815 |
| 20 | 52978710 | 52978981 | 52978865 | 11 | 11  | 6  | 1.643843474 | 0.137712    | ENSG00000210815 |
| 20 | 52980690 | 52981437 | 52980940 | 10 | 33  | 31 | 1.018840486 | 0.468915    | ENSG00000210815 |
| 20 | 52984953 | 52985293 | 52985060 | 9  | 14  | 5  | 2.397271733 | 0.0258078   | ENSG00000210815 |
| 20 | 52985314 | 52986217 | 52985765 | 15 | 44  | 26 | 1.598181155 | 0.0244786   | ENSG00000210815 |
| 20 | 52986258 | 52986629 | 52986450 | 11 | 17  | 16 | 1.015315087 | 0.480915    | ENSG00000210815 |
| 20 | 52987376 | 52987611 | 52987545 | 13 | 16  | 15 | 1.018840486 | 0.477384    | ENSG00000210815 |
| 20 | 52987644 | 52987862 | 52987724 | 8  | 12  | 19 | 0.62329065  | 0.912804    | ENSG00000210815 |
| 20 | 52987888 | 52988148 | 52987999 | 8  | 11  | 13 | 0.821921737 | 0.693119    | ENSG00000210815 |
| 20 | 52988471 | 52988913 | 52988737 | 14 | 23  | 24 | 0.920552345 | 0.614165    | ENSG00000210815 |
| 20 | 52988966 | 52989959 | 52989364 | 13 | 44  | 40 | 1.052460761 | 0.40533     | ENSG00000210815 |
| 20 | 52990119 | 52990425 | 52990262 | 10 | 13  | 10 | 1.220429246 | 0.306001    | ENSG00000210815 |

|    |          |          |          |    |     |    |             |             |           |                 |
|----|----------|----------|----------|----|-----|----|-------------|-------------|-----------|-----------------|
| 20 | 53465662 | 53465885 | 53465773 | 11 | 12  | 2  | 4.155271003 | 0.0046638   |           | ENSG00000185834 |
| 20 | 53536469 | 53536682 | 53536563 | 8  | 9   | 2  | 3.19636231  | 0.0229249   |           | ENSG00000185834 |
| 20 | 53585421 | 53587757 | 53585776 | 15 | 112 | 98 | 1.094511943 | 0.255006    | CBLN4     | ENSG00000054803 |
| 20 | 53587962 | 53588334 | 53588155 | 13 | 19  | 15 | 1.198635866 | 0.291044    | CBLN4     | ENSG00000054803 |
| 20 | 53588391 | 53588576 | 53588495 | 9  | 9   | 11 | 0.799090578 | 0.702688    | CBLN4     | ENSG00000054803 |
| 20 | 53589104 | 53589845 | 53589744 | 12 | 34  | 29 | 1.118726809 | 0.324157    | CBLN4     | ENSG00000054803 |
| 20 | 53590021 | 53590284 | 53590157 | 9  | 10  | 14 | 0.703199708 | 0.817173    | CBLN4     | ENSG00000054803 |
| 20 | 53590919 | 53591289 | 53591110 | 11 | 18  | 20 | 0.867584056 | 0.67417     | CBLN4     | ENSG00000054803 |
| 20 | 53592638 | 53593479 | 53593060 | 11 | 35  | 36 | 0.932992242 | 0.616517    | CBLN4     | ENSG00000054803 |
| 20 | 53594000 | 53594513 | 53594338 | 12 | 24  | 11 | 1.997726444 | 0.0196649   | CBLN4     | ENSG00000054803 |
| 20 | 53605554 | 53605752 | 53605675 | 8  | 8   | 3  | 2.157544559 | 0.0836802   | CBLN4     | ENSG00000054803 |
| 20 | 53748661 | 53748908 | 53748739 | 8  | 11  | 3  | 2.876726079 | 0.0213797   | CBLN4     | ENSG00000054803 |
| 20 | 54179559 | 54179825 | 54179673 | 9  | 12  | 2  | 4.155271003 | 0.0046638   |           | ENSG00000209086 |
| 20 | 54256509 | 54256792 | 54256650 | 8  | 13  | 8  | 1.491635745 | 0.166708    | MC3R      | ENSG00000124089 |
| 20 | 54333744 | 54334089 | 54333916 | 18 | 23  | 3  | 5.753452158 | 3.82E-05    | C20orf108 | ENSG00000124098 |
| 20 | 54368031 | 54368419 | 54368240 | 18 | 27  | 7  | 3.356180426 | 0.000396559 | C20orf108 | ENSG00000124098 |
| 20 | 54400838 | 54401105 | 54400935 | 12 | 15  | 6  | 2.191791298 | 0.0328001   | CSTF1     | ENSG00000101138 |
| 20 | 54408557 | 54408838 | 54408697 | 11 | 15  | 4  | 3.068507818 | 0.0076507   | CSTF1     | ENSG00000101138 |
| 20 | 54477025 | 54477314 | 54477173 | 9  | 11  | 6  | 1.643843474 | 0.137712    | C20orf43  | ENSG00000022277 |
| 20 | 54524306 | 54524488 | 54524397 | 8  | 8   | 7  | 1.07877228  | 0.435076    |           | ENSG00000179467 |
| 20 | 54559170 | 54559382 | 54559274 | 9  | 10  | 5  | 1.757999271 | 0.121253    | C20orf107 | ENSG00000213714 |
| 20 | 54563327 | 54563799 | 54563506 | 19 | 29  | 7  | 3.595907599 | 0.000155266 | C20orf107 | ENSG00000213714 |
| 20 | 54574774 | 54574978 | 54574914 | 8  | 9   | 2  | 3.19636231  | 0.0229249   | C20orf107 | ENSG00000213714 |
| 20 | 54575054 | 54575576 | 54575233 | 14 | 30  | 8  | 3.302907721 | 0.000239229 | C20orf107 | ENSG00000213714 |
| 20 | 54585827 | 54586035 | 54585953 | 8  | 8   | 1  | 4.315089119 | 0.0127267   |           | ENSG00000219489 |
| 20 | 54615034 | 54615364 | 54615199 | 10 | 14  | 5  | 2.397271733 | 0.0258078   |           | ENSG00000210831 |
| 20 | 54635017 | 54635264 | 54635166 | 8  | 12  | 2  | 4.155271003 | 0.0046638   | TFAP2C    | ENSG00000087510 |
| 20 | 54638467 | 54638741 | 54638573 | 11 | 16  | 5  | 2.716907964 | 0.0109645   | TFAP2C    | ENSG00000087510 |
| 20 | 54698850 | 54699056 | 54698994 | 8  | 10  | 4  | 2.109599125 | 0.0694668   |           | ENSG00000210843 |
| 20 | 54725408 | 54725695 | 54725551 | 12 | 16  | 2  | 5.433815927 | 0.000499302 |           | ENSG00000221416 |
| 20 | 54743870 | 54744132 | 54744001 | 8  | 10  | 3  | 2.636998906 | 0.034203    |           | ENSG00000221416 |
| 20 | 54760836 | 54761143 | 54760986 | 9  | 11  | 10 | 1.046082211 | 0.455063    |           | ENSG00000207158 |
| 20 | 54796077 | 54796298 | 54796251 | 8  | 11  | 4  | 2.301380863 | 0.0459276   |           | ENSG00000207158 |
| 20 | 54810897 | 54811113 | 54811005 | 8  | 9   | 7  | 1.198635866 | 0.346278    |           | ENSG00000207158 |



|    |          |          |          |    |     |     |             |             |      |                 |
|----|----------|----------|----------|----|-----|-----|-------------|-------------|------|-----------------|
| 20 | 54812930 | 54813274 | 54813012 | 19 | 24  | 6   | 3.424673904 | 0.000656885 |      | ENSG00000207158 |
| 20 | 54817156 | 54817568 | 54817416 | 25 | 31  | 9   | 3.068507818 | 0.000350883 |      | ENSG00000207158 |
| 20 | 54838012 | 54838191 | 54838101 | 8  | 8   | 6   | 1.232882605 | 0.333038    |      | ENSG00000207158 |
| 20 | 54898534 | 54898916 | 54898737 | 9  | 15  | 4   | 3.068507818 | 0.0076507   |      | ENSG00000207158 |
| 20 | 54961341 | 54961520 | 54961430 | 8  | 8   | 4   | 1.726035648 | 0.150596    |      | ENSG00000207158 |
| 20 | 54982903 | 54983121 | 54983012 | 8  | 10  | 4   | 2.109599125 | 0.0694668   |      | ENSG00000207158 |
| 20 | 54983222 | 54983623 | 54983357 | 9  | 15  | 10  | 1.394776281 | 0.191426    |      | ENSG00000207158 |
| 20 | 55064020 | 55064210 | 55064085 | 9  | 9   | 1   | 4.794543465 | 0.00708517  | BMP7 | ENSG00000101144 |
| 20 | 55100699 | 55100949 | 55100824 | 8  | 11  | 1   | 5.753452158 | 0.00215302  | BMP7 | ENSG00000101144 |
| 20 | 55108955 | 55109780 | 55109444 | 15 | 48  | 43  | 1.06787559  | 0.374775    | BMP7 | ENSG00000101144 |
| 20 | 55110053 | 55110767 | 55110232 | 18 | 40  | 43  | 0.893528555 | 0.698423    | BMP7 | ENSG00000101144 |
| 20 | 55110900 | 55111196 | 55111048 | 10 | 15  | 24  | 0.613701564 | 0.940506    | BMP7 | ENSG00000101144 |
| 20 | 55111270 | 55112035 | 55111678 | 15 | 48  | 58  | 0.796381796 | 0.881807    | BMP7 | ENSG00000101144 |
| 20 | 55112572 | 55113490 | 55112778 | 15 | 52  | 50  | 0.996512956 | 0.506585    | BMP7 | ENSG00000101144 |
| 20 | 55113580 | 55115366 | 55115187 | 17 | 102 | 94  | 1.039658899 | 0.391641    | BMP7 | ENSG00000101144 |
| 20 | 55115368 | 55115826 | 55115547 | 9  | 20  | 39  | 0.503427064 | 0.995762    | BMP7 | ENSG00000101144 |
| 20 | 55115921 | 55116236 | 55116061 | 11 | 14  | 31  | 0.44948845  | 0.996243    | BMP7 | ENSG00000101144 |
| 20 | 55116341 | 55117095 | 55116704 | 12 | 35  | 49  | 0.690414259 | 0.956741    | BMP7 | ENSG00000101144 |
| 20 | 55117148 | 55117800 | 55117420 | 14 | 34  | 46  | 0.714080942 | 0.936181    | BMP7 | ENSG00000101144 |
| 20 | 55117826 | 55118768 | 55118080 | 14 | 45  | 69  | 0.630139998 | 0.993232    | BMP7 | ENSG00000101144 |
| 20 | 55119095 | 55119513 | 55119258 | 13 | 21  | 16  | 1.240940662 | 0.248103    | BMP7 | ENSG00000101144 |
| 20 | 55119584 | 55119812 | 55119655 | 8  | 11  | 22  | 0.500300188 | 0.978352    | BMP7 | ENSG00000101144 |
| 20 | 55119838 | 55120148 | 55119979 | 9  | 14  | 29  | 0.479454347 | 0.992203    | BMP7 | ENSG00000101144 |
| 20 | 55120268 | 55120478 | 55120388 | 10 | 11  | 20  | 0.547947825 | 0.956941    | BMP7 | ENSG00000101144 |
| 20 | 55120524 | 55121602 | 55121193 | 21 | 66  | 56  | 1.127138288 | 0.251885    | BMP7 | ENSG00000101144 |
| 20 | 55121628 | 55121911 | 55121771 | 8  | 12  | 12  | 0.958908693 | 0.542188    | BMP7 | ENSG00000101144 |
| 20 | 55121923 | 55122588 | 55122340 | 11 | 33  | 37  | 0.857970936 | 0.742682    | BMP7 | ENSG00000101144 |
| 20 | 55122595 | 55123799 | 55123637 | 12 | 51  | 78  | 0.631180406 | 0.995526    | BMP7 | ENSG00000101144 |
| 20 | 55123830 | 55124014 | 55123940 | 8  | 9   | 21  | 0.435867588 | 0.989097    | BMP7 | ENSG00000101144 |
| 20 | 55124124 | 55124812 | 55124324 | 13 | 33  | 44  | 0.72450879  | 0.923905    | BMP7 | ENSG00000101144 |
| 20 | 55124856 | 55126095 | 55125921 | 15 | 63  | 66  | 0.915972483 | 0.692382    | BMP7 | ENSG00000101144 |
| 20 | 55126782 | 55127132 | 55126956 | 13 | 17  | 14  | 1.150690432 | 0.340986    | BMP7 | ENSG00000101144 |
| 20 | 55127343 | 55130233 | 55129988 | 16 | 132 | 171 | 0.741481722 | 0.995405    | BMP7 | ENSG00000101144 |
| 20 | 55130673 | 55132901 | 55132074 | 22 | 131 | 115 | 1.091171961 | 0.245671    | BMP7 | ENSG00000101144 |

|    |          |          |          |    |     |     |             |            |      |                 |
|----|----------|----------|----------|----|-----|-----|-------------|------------|------|-----------------|
| 20 | 55132904 | 55133626 | 55133114 | 21 | 47  | 39  | 1.150690432 | 0.254182   | BMP7 | ENSG00000101144 |
| 20 | 55133726 | 55134909 | 55134730 | 13 | 60  | 64  | 0.899898927 | 0.723267   | BMP7 | ENSG00000101144 |
| 20 | 55134936 | 55137400 | 55135339 | 50 | 190 | 139 | 1.308225431 | 0.00751089 | BMP7 | ENSG00000101144 |
| 20 | 55137487 | 55138072 | 55137794 | 17 | 31  | 28  | 1.058106144 | 0.411497   | BMP7 | ENSG00000101144 |
| 20 | 55138351 | 55139669 | 55139448 | 17 | 63  | 69  | 0.876716519 | 0.777089   | BMP7 | ENSG00000101144 |
| 20 | 55139708 | 55140111 | 55139950 | 9  | 16  | 25  | 0.626978761 | 0.936688   | BMP7 | ENSG00000101144 |
| 20 | 55140209 | 55142907 | 55142513 | 19 | 171 | 143 | 1.145363161 | 0.113926   | BMP7 | ENSG00000101144 |
| 20 | 55143065 | 55143649 | 55143470 | 12 | 29  | 55  | 0.513701086 | 0.998787   | BMP7 | ENSG00000101144 |
| 20 | 55143719 | 55145700 | 55145047 | 17 | 105 | 119 | 0.847036012 | 0.894031   | BMP7 | ENSG00000101144 |
| 20 | 55146067 | 55147553 | 55147164 | 17 | 83  | 65  | 1.220429246 | 0.111339   | BMP7 | ENSG00000101144 |
| 20 | 55147917 | 55149028 | 55148285 | 20 | 71  | 65  | 1.046082211 | 0.394951   | BMP7 | ENSG00000101144 |
| 20 | 55149032 | 55152652 | 55150424 | 20 | 183 | 217 | 0.809354126 | 0.982943   | BMP7 | ENSG00000101144 |
| 20 | 55152655 | 55153275 | 55152939 | 11 | 30  | 34  | 0.849319128 | 0.747103   | BMP7 | ENSG00000101144 |
| 20 | 55153600 | 55153994 | 55153779 | 9  | 19  | 19  | 0.958908693 | 0.552451   | BMP7 | ENSG00000101144 |
| 20 | 55154061 | 55155789 | 55155498 | 12 | 73  | 98  | 0.716760033 | 0.985511   | BMP7 | ENSG00000101144 |
| 20 | 55155809 | 55156854 | 55156270 | 13 | 49  | 85  | 0.557505054 | 0.999608   | BMP7 | ENSG00000101144 |
| 20 | 55156859 | 55159449 | 55157152 | 21 | 154 | 129 | 1.143314211 | 0.129148   | BMP7 | ENSG00000101144 |
| 20 | 55159809 | 55160102 | 55159955 | 8  | 12  | 20  | 0.593610143 | 0.935335   | BMP7 | ENSG00000101144 |
| 20 | 55160112 | 55160550 | 55160354 | 9  | 18  | 34  | 0.520550433 | 0.990954   | BMP7 | ENSG00000101144 |
| 20 | 55160568 | 55160881 | 55160745 | 8  | 12  | 13  | 0.890415215 | 0.619237   | BMP7 | ENSG00000101144 |
| 20 | 55161073 | 55161377 | 55161227 | 13 | 17  | 21  | 0.784561658 | 0.779771   | BMP7 | ENSG00000101144 |
| 20 | 55161479 | 55164188 | 55163983 | 18 | 146 | 157 | 0.892149227 | 0.840582   | BMP7 | ENSG00000101144 |
| 20 | 55164203 | 55164408 | 55164299 | 8  | 10  | 19  | 0.527399781 | 0.961307   | BMP7 | ENSG00000101144 |
| 20 | 55164410 | 55165592 | 55165415 | 15 | 61  | 72  | 0.814415602 | 0.883642   | BMP7 | ENSG00000101144 |
| 20 | 55165622 | 55166296 | 55166111 | 17 | 42  | 38  | 1.057258303 | 0.399466   | BMP7 | ENSG00000101144 |
| 20 | 55166531 | 55169326 | 55167302 | 21 | 173 | 167 | 0.993155432 | 0.525044   | BMP7 | ENSG00000101144 |
| 20 | 55169335 | 55169544 | 55169439 | 9  | 13  | 10  | 1.220429246 | 0.306001   | BMP7 | ENSG00000101144 |
| 20 | 55169874 | 55171968 | 55170135 | 22 | 138 | 114 | 1.159028768 | 0.11984    | BMP7 | ENSG00000101144 |
| 20 | 55172054 | 55172294 | 55172173 | 8  | 10  | 23  | 0.439499818 | 0.991202   | BMP7 | ENSG00000101144 |
| 20 | 55172623 | 55172933 | 55172788 | 12 | 14  | 25  | 0.553216554 | 0.969907   | BMP7 | ENSG00000101144 |
| 20 | 55173030 | 55173999 | 55173820 | 16 | 49  | 69  | 0.684934781 | 0.980553   | BMP7 | ENSG00000101144 |
| 20 | 55174027 | 55174359 | 55174187 | 8  | 12  | 32  | 0.377751909 | 0.999231   | BMP7 | ENSG00000101144 |
| 20 | 55174383 | 55174690 | 55174536 | 8  | 13  | 29  | 0.447490723 | 0.995358   | BMP7 | ENSG00000101144 |
| 20 | 55175088 | 55175757 | 55175267 | 12 | 33  | 44  | 0.72450879  | 0.923905   | BMP7 | ENSG00000101144 |

|    |          |          |          |    |     |     |             |           |      |                 |
|----|----------|----------|----------|----|-----|-----|-------------|-----------|------|-----------------|
| 20 | 55176163 | 55176754 | 55176543 | 12 | 30  | 27  | 1.06164891  | 0.407875  | BMP7 | ENSG00000101144 |
| 20 | 55176767 | 55178158 | 55177660 | 18 | 85  | 101 | 0.808491643 | 0.927491  | BMP7 | ENSG00000101144 |
| 20 | 55178475 | 55180029 | 55178771 | 19 | 86  | 96  | 0.860052127 | 0.846895  | BMP7 | ENSG00000101144 |
| 20 | 55180213 | 55180797 | 55180618 | 15 | 33  | 56  | 0.571980624 | 0.995783  | BMP7 | ENSG00000101144 |
| 20 | 55180885 | 55181420 | 55181064 | 14 | 31  | 50  | 0.6016682   | 0.989143  | BMP7 | ENSG00000101144 |
| 20 | 55181625 | 55183013 | 55182478 | 18 | 73  | 78  | 0.898218269 | 0.746792  | BMP7 | ENSG00000101144 |
| 20 | 55183111 | 55185845 | 55184090 | 20 | 176 | 133 | 1.266618199 | 0.0189225 | BMP7 | ENSG00000101144 |
| 20 | 55186107 | 55187002 | 55186422 | 15 | 45  | 47  | 0.918954164 | 0.659122  | BMP7 | ENSG00000101144 |
| 20 | 55187020 | 55188126 | 55187540 | 16 | 66  | 80  | 0.793171388 | 0.920664  | BMP7 | ENSG00000101144 |
| 20 | 55188244 | 55188496 | 55188401 | 8  | 11  | 17  | 0.639272462 | 0.890352  | BMP7 | ENSG00000101144 |
| 20 | 55188759 | 55190028 | 55189234 | 22 | 80  | 68  | 1.125675422 | 0.233699  | BMP7 | ENSG00000101144 |
| 20 | 55190164 | 55191032 | 55190391 | 14 | 34  | 60  | 0.550193512 | 0.998049  | BMP7 | ENSG00000101144 |
| 20 | 55191039 | 55191487 | 55191218 | 12 | 23  | 30  | 0.742380924 | 0.865876  | BMP7 | ENSG00000101144 |
| 20 | 55191918 | 55192444 | 55192186 | 12 | 25  | 31  | 0.779113313 | 0.829763  | BMP7 | ENSG00000101144 |
| 20 | 55192453 | 55192957 | 55192778 | 17 | 32  | 34  | 0.904113911 | 0.661443  | BMP7 | ENSG00000101144 |
| 20 | 55192992 | 55194328 | 55193941 | 20 | 75  | 67  | 1.07172148  | 0.338137  | BMP7 | ENSG00000101144 |
| 20 | 55194495 | 55196407 | 55194713 | 22 | 120 | 132 | 0.872390615 | 0.861771  | BMP7 | ENSG00000101144 |
| 20 | 55196417 | 55198741 | 55196925 | 24 | 156 | 126 | 1.185422558 | 0.0761253 | BMP7 | ENSG00000101144 |
| 20 | 55199038 | 55200003 | 55199577 | 23 | 68  | 59  | 1.102744997 | 0.288555  | BMP7 | ENSG00000101144 |
| 20 | 55200829 | 55201893 | 55201484 | 17 | 68  | 77  | 0.848265382 | 0.840987  | BMP7 | ENSG00000101144 |
| 20 | 55201908 | 55205357 | 55202798 | 20 | 162 | 180 | 0.863547608 | 0.913189  | BMP7 | ENSG00000101144 |
| 20 | 55205639 | 55206531 | 55205864 | 24 | 65  | 65  | 0.958908693 | 0.595057  | BMP7 | ENSG00000101144 |
| 20 | 55206718 | 55207524 | 55206956 | 12 | 36  | 41  | 0.844752896 | 0.773839  | BMP7 | ENSG00000101144 |
| 20 | 55207570 | 55208123 | 55207716 | 11 | 24  | 57  | 0.413322713 | 0.999948  | BMP7 | ENSG00000101144 |
| 20 | 55208274 | 55209018 | 55208623 | 12 | 37  | 52  | 0.68751944  | 0.962667  | BMP7 | ENSG00000101144 |
| 20 | 55209143 | 55210748 | 55209947 | 28 | 129 | 108 | 1.14365257  | 0.149657  | BMP7 | ENSG00000101144 |
| 20 | 55211171 | 55211871 | 55211606 | 17 | 40  | 44  | 0.873672365 | 0.734826  | BMP7 | ENSG00000101144 |
| 20 | 55212099 | 55212726 | 55212455 | 16 | 34  | 47  | 0.699204255 | 0.948169  | BMP7 | ENSG00000101144 |
| 20 | 55212815 | 55215007 | 55214246 | 14 | 107 | 143 | 0.71918152  | 0.995442  | BMP7 | ENSG00000101144 |
| 20 | 55215028 | 55216317 | 55215751 | 14 | 67  | 86  | 0.749491852 | 0.963487  | BMP7 | ENSG00000101144 |
| 20 | 55216648 | 55217435 | 55216841 | 14 | 35  | 36  | 0.932992242 | 0.616517  | BMP7 | ENSG00000101144 |
| 20 | 55217958 | 55218583 | 55218151 | 13 | 32  | 56  | 0.555157664 | 0.997063  | BMP7 | ENSG00000101144 |
| 20 | 55218624 | 55219543 | 55219218 | 16 | 51  | 70  | 0.702299324 | 0.974666  | BMP7 | ENSG00000101144 |
| 20 | 55219648 | 55221538 | 55220807 | 23 | 105 | 101 | 0.996512956 | 0.509679  | BMP7 | ENSG00000101144 |

|    |          |          |          |    |     |     |             |           |      |                 |
|----|----------|----------|----------|----|-----|-----|-------------|-----------|------|-----------------|
| 20 | 55221659 | 55222941 | 55222707 | 17 | 73  | 96  | 0.731538591 | 0.979297  | BMP7 | ENSG00000101144 |
| 20 | 55222953 | 55225568 | 55223294 | 20 | 155 | 130 | 1.141906535 | 0.130512  | BMP7 | ENSG00000101144 |
| 20 | 55225860 | 55226208 | 55226034 | 13 | 18  | 15  | 1.138704073 | 0.348127  | BMP7 | ENSG00000101144 |
| 20 | 55226266 | 55227322 | 55227150 | 14 | 47  | 36  | 1.243989656 | 0.156684  | BMP7 | ENSG00000101144 |
| 20 | 55227725 | 55228321 | 55227904 | 16 | 34  | 44  | 0.745817872 | 0.905279  | BMP7 | ENSG00000101144 |
| 20 | 55228332 | 55230259 | 55229384 | 20 | 124 | 151 | 0.788576228 | 0.975846  | BMP7 | ENSG00000101144 |
| 20 | 55230690 | 55231546 | 55230959 | 19 | 53  | 60  | 0.848869991 | 0.810508  | BMP7 | ENSG00000101144 |
| 20 | 55231554 | 55234124 | 55232233 | 48 | 235 | 147 | 1.529070619 | 2.00E-05  | BMP7 | ENSG00000101144 |
| 20 | 55234135 | 55235113 | 55234314 | 20 | 60  | 69  | 0.835620433 | 0.848201  | BMP7 | ENSG00000101144 |
| 20 | 55235542 | 55239156 | 55237943 | 25 | 252 | 211 | 1.144358016 | 0.0731819 | BMP7 | ENSG00000101144 |
| 20 | 55239569 | 55240931 | 55240304 | 14 | 66  | 74  | 0.856625099 | 0.821999  | BMP7 | ENSG00000101144 |
| 20 | 55241020 | 55241566 | 55241387 | 12 | 29  | 40  | 0.701640507 | 0.932113  | BMP7 | ENSG00000101144 |
| 20 | 55241577 | 55243024 | 55241831 | 15 | 70  | 78  | 0.861804015 | 0.819022  | BMP7 | ENSG00000101144 |
| 20 | 55243133 | 55243499 | 55243320 | 15 | 22  | 28  | 0.760513791 | 0.838947  | BMP7 | ENSG00000101144 |
| 20 | 55243509 | 55243933 | 55243729 | 14 | 25  | 34  | 0.712332172 | 0.907472  | BMP7 | ENSG00000101144 |
| 20 | 55243943 | 55244403 | 55244199 | 17 | 30  | 40  | 0.725028524 | 0.913791  | BMP7 | ENSG00000101144 |
| 20 | 55244418 | 55246230 | 55245023 | 19 | 98  | 88  | 1.066651243 | 0.328541  | BMP7 | ENSG00000101144 |
| 20 | 55246342 | 55247036 | 55246673 | 11 | 33  | 39  | 0.815072389 | 0.811006  | BMP7 | ENSG00000101144 |
| 20 | 55249383 | 55249650 | 55249516 | 9  | 13  | 18  | 0.7065643   | 0.841991  | BMP7 | ENSG00000101144 |
| 20 | 55249667 | 55250586 | 55250171 | 13 | 43  | 58  | 0.715118347 | 0.955317  | BMP7 | ENSG00000101144 |
| 20 | 55250693 | 55251139 | 55250930 | 11 | 21  | 34  | 0.602742607 | 0.971252  | BMP7 | ENSG00000101144 |
| 20 | 55251397 | 55251741 | 55251569 | 8  | 13  | 18  | 0.7065643   | 0.841991  | BMP7 | ENSG00000101144 |
| 20 | 55251846 | 55254022 | 55252473 | 30 | 181 | 165 | 1.051333627 | 0.31993   | BMP7 | ENSG00000101144 |
| 20 | 55254458 | 55255151 | 55254793 | 17 | 46  | 45  | 0.979754534 | 0.538876  | BMP7 | ENSG00000101144 |
| 20 | 55255345 | 55257298 | 55255831 | 26 | 153 | 140 | 1.047318714 | 0.34526   | BMP7 | ENSG00000101144 |
| 20 | 55257306 | 55258745 | 55258196 | 20 | 86  | 105 | 0.787028833 | 0.951805  | BMP7 | ENSG00000101144 |
| 20 | 55258748 | 55259074 | 55258908 | 10 | 13  | 17  | 0.745817872 | 0.798145  | BMP7 | ENSG00000101144 |
| 20 | 55259086 | 55260241 | 55259335 | 20 | 75  | 57  | 1.256501046 | 0.0933784 | BMP7 | ENSG00000101144 |
| 20 | 55260297 | 55262544 | 55261127 | 41 | 218 | 199 | 1.050005019 | 0.308456  | BMP7 | ENSG00000101144 |
| 20 | 55262761 | 55262962 | 55262882 | 9  | 10  | 20  | 0.502285506 | 0.972812  | BMP7 | ENSG00000101144 |
| 20 | 55263014 | 55264143 | 55263383 | 20 | 82  | 70  | 1.120977768 | 0.238742  | BMP7 | ENSG00000101144 |
| 20 | 55264178 | 55264922 | 55264408 | 22 | 52  | 61  | 0.81971227  | 0.857046  | BMP7 | ENSG00000101144 |
| 20 | 55264930 | 55265141 | 55265035 | 9  | 10  | 20  | 0.502285506 | 0.972812  | BMP7 | ENSG00000101144 |
| 20 | 55265356 | 55265910 | 55265560 | 23 | 39  | 44  | 0.852363283 | 0.769733  | BMP7 | ENSG00000101144 |

|    |          |          |          |     |      |     |             |            |          |                 |
|----|----------|----------|----------|-----|------|-----|-------------|------------|----------|-----------------|
| 20 | 55265942 | 55267523 | 55266860 | 22  | 110  | 102 | 1.033387038 | 0.404577   | BMP7     | ENSG00000101144 |
| 20 | 55267585 | 55273350 | 55271868 | 223 | 1063 | 528 | 1.928693477 | 2.57E-37   | BMP7     | ENSG00000101144 |
| 20 | 55273391 | 55274620 | 55274448 | 19  | 83   | 59  | 1.34247217  | 0.0392119  | BMP7     | ENSG00000101144 |
| 20 | 55274809 | 55278954 | 55277995 | 25  | 321  | 345 | 0.892394795 | 0.929389   | BMP7     | ENSG00000101144 |
| 20 | 55278957 | 55282083 | 55280521 | 20  | 216  | 239 | 0.867013277 | 0.936406   | BMP7     | ENSG00000101144 |
| 20 | 55282112 | 55282408 | 55282260 | 11  | 15   | 11  | 1.278544924 | 0.254978   | BMP7     | ENSG00000101144 |
| 20 | 55282501 | 55284974 | 55283169 | 31  | 227  | 211 | 1.03127916  | 0.373027   | BMP7     | ENSG00000101144 |
| 20 | 55285259 | 55287464 | 55287165 | 20  | 136  | 141 | 0.925144302 | 0.742123   | BMP7     | ENSG00000101144 |
| 20 | 55287532 | 55288244 | 55287954 | 19  | 42   | 38  | 1.057258303 | 0.399466   | BMP7     | ENSG00000101144 |
| 20 | 55314302 | 55314612 | 55314449 | 9   | 13   | 9   | 1.34247217  | 0.232231   |          | ENSG00000217823 |
| 20 | 55317417 | 55317615 | 55317516 | 8   | 9    | 3   | 2.397271733 | 0.0539397  |          | ENSG00000217823 |
| 20 | 55335125 | 55335319 | 55335247 | 8   | 8    | 9   | 0.863017824 | 0.627343   |          | ENSG00000217823 |
| 20 | 55354956 | 55355203 | 55355079 | 11  | 11   | 7   | 1.43836304  | 0.204844   | RAE1     | ENSG00000101146 |
| 20 | 55379576 | 55379792 | 55379706 | 8   | 8    | 4   | 1.726035648 | 0.150596   |          | ENSG00000210879 |
| 20 | 55465618 | 55465924 | 55465771 | 15  | 17   | 0   | 17.26035648 | 5.54E-06   | HMG1L1   | ENSG00000124097 |
| 20 | 55503651 | 55503952 | 55503787 | 10  | 13   | 8   | 1.491635745 | 0.166708   | HMG1L1   | ENSG00000124097 |
| 20 | 55522779 | 55523085 | 55522922 | 8   | 12   | 4   | 2.493162602 | 0.0299057  | CTCFL    | ENSG00000124092 |
| 20 | 55610297 | 55610550 | 55610447 | 8   | 11   | 1   | 5.753452158 | 0.00215302 | ZBP1     | ENSG00000124256 |
| 20 | 55690660 | 55690856 | 55690808 | 10  | 10   | 3   | 2.636998906 | 0.034203   | PMEPA1   | ENSG00000124225 |
| 20 | 55781069 | 55781326 | 55781166 | 8   | 10   | 4   | 2.109599125 | 0.0694668  | PMEPA1   | ENSG00000124225 |
| 20 | 55787811 | 55788033 | 55787922 | 9   | 10   | 1   | 5.273997812 | 0.00391723 | PMEPA1   | ENSG00000124225 |
| 20 | 56011325 | 56011520 | 56011422 | 10  | 10   | 2   | 3.515998541 | 0.0136204  |          | ENSG00000221451 |
| 20 | 56095787 | 56096038 | 56095912 | 9   | 12   | 5   | 2.077635502 | 0.0577144  |          | ENSG00000221385 |
| 20 | 56120668 | 56120917 | 56120811 | 8   | 9    | 6   | 1.369869562 | 0.253675   | C20orf85 | ENSG00000124237 |
| 20 | 56201277 | 56201483 | 56201391 | 8   | 9    | 5   | 1.598181155 | 0.170911   | ANKRD60  | ENSG00000124227 |
| 20 | 56218468 | 56218695 | 56218558 | 8   | 9    | 4   | 1.917817386 | 0.103282   | ANKRD60  | ENSG00000124227 |
| 20 | 56260589 | 56260818 | 56260703 | 11  | 12   | 4   | 2.493162602 | 0.0299057  | PPP4R1L  | ENSG00000124224 |
| 20 | 56315330 | 56315589 | 56315459 | 8   | 9    | 1   | 4.794543465 | 0.00708517 | PPP4R1L  | ENSG00000124224 |
| 20 | 56467170 | 56467480 | 56467336 | 8   | 11   | 3   | 2.876726079 | 0.0213797  | VAPB     | ENSG00000124164 |
| 20 | 56619690 | 56619941 | 56619815 | 16  | 18   | 9   | 1.821926517 | 0.0548428  |          | ENSG00000221174 |
| 20 | 56659554 | 56660148 | 56659727 | 17  | 34   | 7   | 4.195225532 | 1.36E-05   | STX16    | ENSG00000124222 |
| 20 | 56841286 | 56841465 | 56841375 | 8   | 8    | 5   | 1.43836304  | 0.235762   |          | ENSG00000213705 |
| 20 | 56848063 | 56848352 | 56848207 | 8   | 10   | 2   | 3.515998541 | 0.0136204  |          | ENSG00000213705 |
| 20 | 56854342 | 56854557 | 56854449 | 9   | 10   | 1   | 5.273997812 | 0.00391723 |          | ENSG00000213705 |

|    |          |          |          |    |    |    |             |             |           |                 |
|----|----------|----------|----------|----|----|----|-------------|-------------|-----------|-----------------|
| 20 | 56864545 | 56864844 | 56864692 | 18 | 21 | 12 | 1.622768557 | 0.076896    | GNAS      | ENSG00000087460 |
| 20 | 56873038 | 56873248 | 56873143 | 8  | 8  | 0  | 8.630178238 | 0.00235436  | GNAS      | ENSG00000087460 |
| 20 | 56901341 | 56901561 | 56901451 | 8  | 9  | 0  | 9.589086931 | 0.00120187  | GNAS      | ENSG00000087460 |
| 20 | 56916091 | 56916511 | 56916233 | 9  | 17 | 13 | 1.232882605 | 0.274309    | GNAS      | ENSG00000087460 |
| 20 | 56922633 | 56922813 | 56922722 | 8  | 8  | 1  | 4.315089119 | 0.0127267   | GNAS      | ENSG00000087460 |
| 20 | 56988171 | 56988350 | 56988260 | 8  | 8  | 1  | 4.315089119 | 0.0127267   | TH1L      | ENSG00000101158 |
| 20 | 57072634 | 57073112 | 57072871 | 58 | 88 | 9  | 8.534287368 | 2.90E-17    | SLMO2     | ENSG00000101166 |
| 20 | 57230993 | 57231534 | 57231215 | 9  | 21 | 9  | 2.109599125 | 0.0196396   | ZNF831    | ENSG00000124203 |
| 20 | 57294077 | 57294332 | 57294204 | 9  | 10 | 1  | 5.273997812 | 0.00391723  | EDN3      | ENSG00000124205 |
| 20 | 57504292 | 57504637 | 57504464 | 9  | 12 | 3  | 3.116453252 | 0.0131971   | C20orf83  | ENSG00000157033 |
| 20 | 57524168 | 57524409 | 57524243 | 8  | 10 | 5  | 1.757999271 | 0.121253    | C20orf83  | ENSG00000157033 |
| 20 | 57527972 | 57528167 | 57528015 | 8  | 9  | 2  | 3.19636231  | 0.0229249   | PHACTR3   | ENSG00000087495 |
| 20 | 57702592 | 57702788 | 57702690 | 8  | 8  | 1  | 4.315089119 | 0.0127267   | PHACTR3   | ENSG00000087495 |
| 20 | 57949064 | 57949570 | 57949354 | 10 | 21 | 9  | 2.109599125 | 0.0196396   | C20orf177 | ENSG00000196227 |
| 20 | 58214698 | 58214918 | 58214780 | 8  | 8  | 0  | 8.630178238 | 0.00235436  |           | ENSG00000207802 |
| 20 | 58236623 | 58237165 | 58236972 | 31 | 47 | 11 | 3.835634772 | 1.35E-06    |           | ENSG00000207802 |
| 20 | 58278691 | 58278892 | 58278791 | 8  | 9  | 7  | 1.198635866 | 0.346278    |           | ENSG00000207802 |
| 20 | 58281264 | 58281529 | 58281410 | 13 | 15 | 8  | 1.704726565 | 0.0916153   |           | ENSG00000207802 |
| 20 | 58333881 | 58334112 | 58333975 | 9  | 9  | 3  | 2.397271733 | 0.0539397   |           | ENSG00000203961 |
| 20 | 58360581 | 58360817 | 58360699 | 8  | 9  | 3  | 2.397271733 | 0.0539397   |           | ENSG00000203961 |
| 20 | 59173614 | 59174129 | 59173959 | 11 | 20 | 3  | 5.034270639 | 0.000202317 | CDH4      | ENSG00000179242 |
| 20 | 59356353 | 59356532 | 59356442 | 8  | 8  | 1  | 4.315089119 | 0.0127267   | CDH4      | ENSG00000179242 |
| 20 | 60096972 | 60097241 | 60097117 | 14 | 17 | 1  | 8.630178238 | 5.44E-05    | TAF4      | ENSG00000130699 |
| 20 | 60386695 | 60386910 | 60386802 | 8  | 11 | 0  | 11.50690432 | 0.000313206 | RPS21     | ENSG00000171858 |
| 20 | 60435960 | 60436216 | 60436084 | 17 | 17 | 8  | 1.917817386 | 0.0474153   | C20orf151 | ENSG00000130701 |
| 20 | 60805273 | 60805677 | 60805450 | 14 | 20 | 8  | 2.237453617 | 0.0160557   | NTSR1     | ENSG00000101188 |
| 20 | 60893287 | 60893511 | 60893399 | 10 | 11 | 2  | 3.835634772 | 0.00800699  | C20orf20  | ENSG00000101189 |
| 20 | 60930823 | 60931021 | 60930976 | 8  | 8  | 3  | 2.157544559 | 0.0836802   | COL9A3    | ENSG00000092758 |
| 20 | 61002708 | 61002933 | 61002796 | 8  | 9  | 4  | 1.917817386 | 0.103282    | DIDO1     | ENSG00000101191 |
| 20 | 61357832 | 61358217 | 61358023 | 30 | 39 | 1  | 19.17817386 | 4.29E-11    | NKAIN4    | ENSG00000101198 |
| 20 | 61739236 | 61739530 | 61739385 | 12 | 15 | 0  | 15.34253909 | 2.13E-05    | GMEB2     | ENSG00000101216 |
| 20 | 61759287 | 61759548 | 61759417 | 11 | 14 | 11 | 1.198635866 | 0.315918    | TNFRSF6B  | ENSG00000026036 |
| 20 | 61760034 | 61760287 | 61760159 | 12 | 13 | 6  | 1.917817386 | 0.0693353   | TNFRSF6B  | ENSG00000026036 |
| 20 | 61766566 | 61767421 | 61767256 | 14 | 46 | 34 | 1.287677388 | 0.126024    | TNFRSF6B  | ENSG00000026036 |

|    |          |          |          |    |    |    |             |             |          |                 |
|----|----------|----------|----------|----|----|----|-------------|-------------|----------|-----------------|
| 20 | 61784319 | 61784536 | 61784462 | 9  | 11 | 3  | 2.876726079 | 0.0213797   | TNFRSF6B | ENSG00000026036 |
| 20 | 61965480 | 61965777 | 61965628 | 12 | 15 | 4  | 3.068507818 | 0.0076507   | TPD52L2  | ENSG00000101150 |
| 20 | 61966656 | 61967017 | 61966834 | 11 | 17 | 7  | 2.157544559 | 0.0276499   | TPD52L2  | ENSG00000101150 |
| 20 | 61967299 | 61967640 | 61967466 | 9  | 14 | 1  | 7.191815198 | 0.00034761  | TPD52L2  | ENSG00000101150 |
| 20 | 62347861 | 62348119 | 62347946 | 10 | 11 | 1  | 5.753452158 | 0.00215302  | PCMTD2   | ENSG00000203880 |
| 21 | 9740192  | 9740418  | 9740305  | 9  | 12 | 3  | 3.116453252 | 0.0131971   |          | ENSG00000169861 |
| 21 | 9772443  | 9772811  | 9772634  | 16 | 20 | 8  | 2.237453617 | 0.0160557   |          | ENSG00000169861 |
| 21 | 9814824  | 9815062  | 9814922  | 9  | 9  | 4  | 1.917817386 | 0.103282    |          | ENSG00000169861 |
| 21 | 9820356  | 9820572  | 9820434  | 8  | 8  | 9  | 0.863017824 | 0.627343    |          | ENSG00000169861 |
| 21 | 9825898  | 9826302  | 9826123  | 13 | 19 | 16 | 1.128127874 | 0.354788    |          | ENSG00000169861 |
| 21 | 9833650  | 9833980  | 9833815  | 13 | 15 | 15 | 0.958908693 | 0.546868    |          | ENSG00000169861 |
| 21 | 10130945 | 10131325 | 10131156 | 11 | 16 | 10 | 1.481949798 | 0.147733    | BAGE4    | ENSG00000187172 |
| 21 | 10140167 | 10140584 | 10140402 | 11 | 19 | 20 | 0.913246374 | 0.614587    | BAGE4    | ENSG00000187172 |
| 21 | 10150218 | 10150479 | 10150348 | 9  | 12 | 4  | 2.493162602 | 0.0299057   | VN1R7P   | ENSG00000217858 |
| 21 | 10168137 | 10168321 | 10168229 | 8  | 9  | 8  | 1.065454103 | 0.442605    | VN1R7P   | ENSG00000217858 |
| 21 | 10192910 | 10193257 | 10193083 | 8  | 13 | 9  | 1.34247217  | 0.232231    |          | ENSG00000220888 |
| 21 | 14994395 | 14994596 | 14994495 | 8  | 9  | 0  | 9.589086931 | 0.00120187  |          | ENSG00000215552 |
| 21 | 15161055 | 15161466 | 15161195 | 17 | 26 | 0  | 25.89053471 | 1.31E-08    |          | ENSG00000217388 |
| 21 | 15359347 | 15359537 | 15359442 | 8  | 8  | 0  | 8.630178238 | 0.00235436  | NRIP1    | ENSG00000180530 |
| 21 | 15458893 | 15459268 | 15459070 | 17 | 23 | 1  | 11.50690432 | 1.25E-06    | NRIP1    | ENSG00000180530 |
| 21 | 17400267 | 17400459 | 17400363 | 8  | 8  | 3  | 2.157544559 | 0.0836802   |          | ENSG00000216487 |
| 21 | 17741095 | 17741416 | 17741264 | 11 | 14 | 3  | 3.595907599 | 0.00486913  |          | ENSG00000209722 |
| 21 | 17901904 | 17902368 | 17902081 | 32 | 40 | 3  | 9.828814104 | 1.78E-09    | BTG3     | ENSG00000154640 |
| 21 | 17961427 | 17961875 | 17961696 | 37 | 45 | 0  | 44.10979988 | 3.69E-14    | BTG3     | ENSG00000154640 |
| 21 | 18002457 | 18003037 | 18002841 | 63 | 88 | 0  | 85.34287368 | 1.03E-26    | BTG3     | ENSG00000154640 |
| 21 | 20886520 | 20887065 | 20886779 | 40 | 61 | 1  | 29.72616948 | 2.46E-17    | RPS3AP1  | ENSG00000189005 |
| 21 | 21533208 | 21533538 | 21533373 | 13 | 17 | 0  | 17.26035648 | 5.54E-06    | NCAM2    | ENSG00000154654 |
| 21 | 22191623 | 22192008 | 22191821 | 39 | 47 | 0  | 46.02761727 | 9.62E-15    | C21orf74 | ENSG00000184856 |
| 21 | 22483901 | 22484181 | 22484041 | 14 | 16 | 0  | 16.30144778 | 1.09E-05    |          | ENSG00000202339 |
| 21 | 23184906 | 23185131 | 23185018 | 11 | 12 | 0  | 12.46581301 | 0.000159888 |          | ENSG00000219889 |
| 21 | 24308989 | 24309356 | 24309106 | 10 | 16 | 0  | 16.30144778 | 1.09E-05    |          | ENSG00000197382 |
| 21 | 25196538 | 25196948 | 25196704 | 9  | 14 | 3  | 3.595907599 | 0.00486913  |          | ENSG00000222567 |
| 21 | 25694659 | 25695019 | 25694854 | 15 | 19 | 0  | 19.17817386 | 1.44E-06    | C21orf42 | ENSG00000185433 |
| 21 | 25901480 | 25901853 | 25901703 | 16 | 21 | 6  | 3.013713035 | 0.00261913  | MRPL39   | ENSG00000154719 |

|    |          |          |          |     |     |    |             |             |           |                 |
|----|----------|----------|----------|-----|-----|----|-------------|-------------|-----------|-----------------|
| 21 | 26410714 | 26410899 | 26410776 | 8   | 8   | 2  | 2.876726079 | 0.0381137   | APP       | ENSG00000142192 |
| 21 | 26684092 | 26684759 | 26684512 | 30  | 54  | 4  | 10.54799562 | 2.45E-12    |           | ENSG00000197934 |
| 21 | 26735319 | 26735663 | 26735491 | 22  | 26  | 0  | 25.89053471 | 1.31E-08    |           | ENSG00000197934 |
| 21 | 26953375 | 26953734 | 26953549 | 14  | 19  | 1  | 9.589086931 | 1.56E-05    | CYYR1     | ENSG00000166265 |
| 21 | 29368122 | 29368325 | 29368223 | 8   | 9   | 0  | 9.589086931 | 0.00120187  | CCT8      | ENSG00000156261 |
| 21 | 29698131 | 29698450 | 29698290 | 15  | 16  | 0  | 16.30144778 | 1.09E-05    |           | ENSG00000209835 |
| 21 | 30772152 | 30772515 | 30772344 | 49  | 54  | 2  | 17.57999271 | 3.45E-14    | KRTAP19-1 | ENSG00000184351 |
| 21 | 33066218 | 33066477 | 33066344 | 10  | 11  | 2  | 3.835634772 | 0.00800699  | C21orf49  | ENSG00000205930 |
| 21 | 33305741 | 33305952 | 33305846 | 8   | 9   | 1  | 4.794543465 | 0.00708517  | OLIG2     | ENSG00000205927 |
| 21 | 33661334 | 33661810 | 33661569 | 111 | 140 | 1  | 67.60306286 | 4.69E-40    |           | ENSG00000217665 |
| 21 | 34095920 | 34096265 | 34096095 | 28  | 32  | 5  | 5.273997812 | 3.82E-06    | ITSN1     | ENSG00000205726 |
| 21 | 34218352 | 34218553 | 34218476 | 8   | 9   | 3  | 2.397271733 | 0.0539397   |           | ENSG00000209912 |
| 21 | 34723829 | 34724115 | 34723993 | 11  | 13  | 0  | 13.4247217  | 8.16E-05    | KCNE1     | ENSG00000180509 |
| 21 | 34876696 | 34876875 | 34876745 | 8   | 8   | 2  | 2.876726079 | 0.0381137   | RCAN1     | ENSG00000159200 |
| 21 | 34969340 | 34969711 | 34969548 | 26  | 33  | 2  | 10.86763185 | 1.89E-08    | CLIC6     | ENSG00000159212 |
| 21 | 35101780 | 35101993 | 35101871 | 10  | 10  | 0  | 10.54799562 | 0.000613541 | RUNX1     | ENSG00000159216 |
| 21 | 35239374 | 35239676 | 35239525 | 13  | 15  | 1  | 7.671269544 | 0.000187863 | RUNX1     | ENSG00000159216 |
| 21 | 35357645 | 35358055 | 35357809 | 17  | 25  | 0  | 24.93162602 | 2.56E-08    | RUNX1     | ENSG00000159216 |
| 21 | 38512928 | 38513162 | 38513045 | 10  | 12  | 5  | 2.077635502 | 0.0577144   |           | ENSG00000220701 |
| 21 | 38707491 | 38707694 | 38707576 | 8   | 8   | 4  | 1.726035648 | 0.150596    | ERG       | ENSG00000157554 |
| 21 | 38814948 | 38815158 | 38815112 | 8   | 11  | 1  | 5.753452158 | 0.00215302  |           | ENSG00000216884 |
| 21 | 39081370 | 39081757 | 39081524 | 17  | 24  | 3  | 5.993179332 | 2.17E-05    | ETS2      | ENSG00000157557 |
| 21 | 39200977 | 39201198 | 39201122 | 12  | 13  | 6  | 1.917817386 | 0.0693353   |           | ENSG00000220397 |
| 21 | 39287471 | 39287772 | 39287644 | 10  | 13  | 3  | 3.356180426 | 0.00805599  |           | ENSG00000205622 |
| 21 | 39627524 | 39627756 | 39627640 | 8   | 8   | 8  | 0.958908693 | 0.534974    | HMGN1     | ENSG00000205581 |
| 21 | 39667541 | 39667789 | 39667665 | 10  | 12  | 1  | 6.232906505 | 0.00117736  |           | ENSG00000216294 |
| 21 | 40082156 | 40082437 | 40082284 | 13  | 16  | 11 | 1.358453982 | 0.20248     | IGSF5     | ENSG00000183067 |
| 21 | 40099852 | 40100059 | 40099955 | 8   | 9   | 5  | 1.598181155 | 0.170911    | IGSF5     | ENSG00000183067 |
| 21 | 40150448 | 40150663 | 40150555 | 8   | 10  | 0  | 10.54799562 | 0.000613541 | PCP4      | ENSG00000183036 |
| 21 | 40424225 | 40424766 | 40424575 | 38  | 54  | 3  | 13.18499453 | 3.33E-13    | PCP4      | ENSG00000183036 |
| 21 | 40437762 | 40437948 | 40437802 | 8   | 9   | 1  | 4.794543465 | 0.00708517  | PCP4      | ENSG00000183036 |
| 21 | 40572147 | 40572580 | 40572397 | 27  | 41  | 4  | 8.054833022 | 5.63E-09    |           | ENSG00000207147 |
| 21 | 40680186 | 40680425 | 40680305 | 10  | 11  | 6  | 1.643843474 | 0.137712    |           | ENSG00000207147 |
| 21 | 41134287 | 41134504 | 41134435 | 8   | 9   | 0  | 9.589086931 | 0.00120187  | DSCAM     | ENSG00000171587 |



|    |          |          |          |    |    |    |             |             |           |                 |
|----|----------|----------|----------|----|----|----|-------------|-------------|-----------|-----------------|
| 21 | 41217084 | 41217419 | 41217243 | 16 | 21 | 3  | 5.273997812 | 0.00011662  | DSCAM     | ENSG00000171587 |
| 21 | 41304521 | 41304729 | 41304582 | 8  | 9  | 1  | 4.794543465 | 0.00708517  | BACE2     | ENSG00000182240 |
| 21 | 41362949 | 41363357 | 41363128 | 13 | 20 | 2  | 6.712360851 | 4.91E-05    | BACE2     | ENSG00000182240 |
| 21 | 41830264 | 41830443 | 41830353 | 8  | 8  | 5  | 1.43836304  | 0.235762    |           | ENSG00000207503 |
| 21 | 41906288 | 41906546 | 41906417 | 8  | 10 | 5  | 1.757999271 | 0.121253    |           | ENSG00000207503 |
| 21 | 41971584 | 41971841 | 41971706 | 9  | 11 | 1  | 5.753452158 | 0.00215302  | RIPK4     | ENSG00000183421 |
| 21 | 41972235 | 41972423 | 41972326 | 8  | 9  | 2  | 3.19636231  | 0.0229249   | RIPK4     | ENSG00000183421 |
| 21 | 41974497 | 41974910 | 41974676 | 14 | 24 | 9  | 2.397271733 | 0.00639731  | RIPK4     | ENSG00000183421 |
| 21 | 42079633 | 42080033 | 42079886 | 13 | 18 | 3  | 4.554816292 | 0.000599415 | RIPK4     | ENSG00000183421 |
| 21 | 42085678 | 42085869 | 42085787 | 8  | 8  | 4  | 1.726035648 | 0.150596    | RIPK4     | ENSG00000183421 |
| 21 | 42110187 | 42110475 | 42110341 | 9  | 10 | 3  | 2.636998906 | 0.034203    | RIPK4     | ENSG00000183421 |
| 21 | 42189065 | 42189255 | 42189160 | 8  | 8  | 4  | 1.726035648 | 0.150596    |           | ENSG00000215494 |
| 21 | 42350097 | 42350412 | 42350240 | 10 | 14 | 6  | 2.054804342 | 0.0480281   | UMODL1    | ENSG00000177398 |
| 21 | 42372050 | 42372406 | 42372228 | 22 | 28 | 1  | 13.90417605 | 5.17E-08    | UMODL1    | ENSG00000177398 |
| 21 | 42407424 | 42407700 | 42407562 | 12 | 14 | 3  | 3.595907599 | 0.00486913  | UMODL1    | ENSG00000177398 |
| 21 | 42457560 | 42457971 | 42457798 | 11 | 17 | 10 | 1.569123316 | 0.112309    | ABCG1     | ENSG00000160179 |
| 21 | 42650666 | 42651021 | 42650851 | 8  | 12 | 1  | 6.232906505 | 0.00117736  | TFF2      | ENSG00000160181 |
| 21 | 42760586 | 42760779 | 42760682 | 8  | 8  | 0  | 8.630178238 | 0.00235436  | RSPH1     | ENSG00000160188 |
| 21 | 42809471 | 42809687 | 42809611 | 8  | 9  | 1  | 4.794543465 | 0.00708517  | SLC37A1   | ENSG00000160190 |
| 21 | 43172021 | 43172235 | 43172153 | 8  | 9  | 3  | 2.397271733 | 0.0539397   | WDR4      | ENSG00000160193 |
| 21 | 43248981 | 43249206 | 43249085 | 11 | 11 | 1  | 5.753452158 | 0.00215302  | PKNOX1    | ENSG00000160199 |
| 21 | 43588812 | 43589038 | 43588927 | 8  | 9  | 2  | 3.19636231  | 0.0229249   | SNF1LK    | ENSG00000142178 |
| 21 | 43744947 | 43745213 | 43745080 | 12 | 13 | 1  | 6.712360851 | 0.000640982 | C21orf84  | ENSG00000185186 |
| 21 | 43761208 | 43761493 | 43761346 | 15 | 17 | 3  | 4.315089119 | 0.00102271  |           | ENSG00000214326 |
| 21 | 43782144 | 43782549 | 43782395 | 11 | 17 | 2  | 5.753452158 | 0.000281509 |           | ENSG00000214326 |
| 21 | 43971159 | 43971426 | 43971278 | 11 | 13 | 0  | 13.4247217  | 8.16E-05    | PDXK      | ENSG00000160209 |
| 21 | 44149918 | 44150112 | 44150015 | 8  | 9  | 1  | 4.794543465 | 0.00708517  | AGPAT3    | ENSG00000160216 |
| 21 | 44382352 | 44382576 | 44382474 | 10 | 11 | 0  | 11.50690432 | 0.000313206 | C21orf33  | ENSG00000160221 |
| 21 | 44447070 | 44447393 | 44447247 | 8  | 13 | 6  | 1.917817386 | 0.0693353   | ICOSLG    | ENSG00000160223 |
| 21 | 44485693 | 44485878 | 44485826 | 8  | 9  | 1  | 4.794543465 | 0.00708517  | ICOSLG    | ENSG00000160223 |
| 21 | 44494015 | 44494246 | 44494121 | 8  | 10 | 0  | 10.54799562 | 0.000613541 | ICOSLG    | ENSG00000160223 |
| 21 | 44736576 | 44737160 | 44736974 | 16 | 34 | 3  | 8.390451064 | 6.50E-08    |           | ENSG00000210065 |
| 21 | 44793281 | 44793693 | 44793543 | 17 | 25 | 1  | 12.46581301 | 3.51E-07    | KRTAP10-2 | ENSG00000205445 |
| 21 | 44838258 | 44838586 | 44838422 | 29 | 33 | 0  | 32.60289556 | 1.18E-10    | KRTAP10-6 | ENSG00000188155 |

|    |          |          |          |     |     |    |             |             |           |                 |
|----|----------|----------|----------|-----|-----|----|-------------|-------------|-----------|-----------------|
| 21 | 44842247 | 44842659 | 44842484 | 34  | 44  | 2  | 14.3836304  | 1.96E-11    | KRTAP10-7 | ENSG00000205441 |
| 21 | 44954087 | 44954670 | 44954397 | 111 | 145 | 3  | 35.0001673  | 1.50E-38    | C21orf29  | ENSG00000175894 |
| 21 | 45010103 | 45010316 | 45010207 | 8   | 10  | 4  | 2.109599125 | 0.0694668   | UBE2G2    | ENSG00000184787 |
| 21 | 45010600 | 45011042 | 45010779 | 50  | 66  | 3  | 16.06172061 | 1.83E-16    | UBE2G2    | ENSG00000184787 |
| 21 | 45018032 | 45018321 | 45018207 | 10  | 12  | 5  | 2.077635502 | 0.0577144   | UBE2G2    | ENSG00000184787 |
| 21 | 45044575 | 45044823 | 45044690 | 8   | 8   | 0  | 8.630178238 | 0.00235436  | UBE2G2    | ENSG00000184787 |
| 21 | 45305473 | 45305652 | 45305536 | 8   | 8   | 0  | 8.630178238 | 0.00235436  | ADARB1    | ENSG00000197381 |
| 21 | 45373038 | 45373282 | 45373188 | 11  | 14  | 4  | 2.876726079 | 0.01219     | ADARB1    | ENSG00000197381 |
| 21 | 45426449 | 45426636 | 45426546 | 8   | 10  | 0  | 10.54799562 | 0.000613541 | ADARB1    | ENSG00000197381 |
| 21 | 45574385 | 45574567 | 45574454 | 8   | 8   | 6  | 1.232882605 | 0.333038    | C21orf93  | ENSG00000184274 |
| 21 | 45578013 | 45578288 | 45578150 | 12  | 13  | 3  | 3.356180426 | 0.00805599  | C21orf93  | ENSG00000184274 |
| 21 | 45608389 | 45608601 | 45608522 | 10  | 11  | 1  | 5.753452158 | 0.00215302  |           | ENSG00000217185 |
| 21 | 45617344 | 45617614 | 45617505 | 10  | 12  | 3  | 3.116453252 | 0.0131971   |           | ENSG00000217185 |
| 21 | 45771460 | 45771703 | 45771579 | 11  | 12  | 0  | 12.46581301 | 0.000159888 | SLC19A1   | ENSG00000173638 |
| 21 | 45876979 | 45877499 | 45877269 | 34  | 58  | 6  | 8.082230413 | 7.47E-12    | PCBP3     | ENSG00000183570 |
| 21 | 46124798 | 46125139 | 46124968 | 10  | 16  | 1  | 8.150723891 | 0.000101217 | PCBP3     | ENSG00000183570 |
| 21 | 46942597 | 46942857 | 46942697 | 11  | 14  | 2  | 4.794543465 | 0.00154571  | RPL23AP4  | ENSG00000212932 |
| 22 | 15658741 | 15659068 | 15658911 | 12  | 15  | 0  | 15.34253909 | 2.13E-05    | XKR3      | ENSG00000172967 |
| 22 | 16091237 | 16091529 | 16091381 | 23  | 26  | 0  | 25.89053471 | 1.31E-08    | CECR1     | ENSG00000093072 |
| 22 | 16208838 | 16209093 | 16208965 | 16  | 17  | 2  | 5.753452158 | 0.000281509 |           | ENSG00000209324 |
| 22 | 16418272 | 16418504 | 16418388 | 8   | 10  | 0  | 10.54799562 | 0.000613541 | SLC25A18  | ENSG00000182902 |
| 22 | 17020022 | 17020201 | 17020091 | 8   | 8   | 8  | 0.958908693 | 0.534974    | USP18     | ENSG00000184979 |
| 22 | 17258320 | 17258788 | 17258614 | 15  | 19  | 12 | 1.475244143 | 0.131365    | DGCR6     | ENSG00000183628 |
| 22 | 17296816 | 17297438 | 17297207 | 25  | 42  | 2  | 13.74435793 | 6.90E-11    | PRODH     | ENSG00000100033 |
| 22 | 17301349 | 17301546 | 17301447 | 8   | 8   | 2  | 2.876726079 | 0.0381137   | PRODH     | ENSG00000100033 |
| 22 | 17846971 | 17847213 | 17847083 | 9   | 11  | 2  | 3.835634772 | 0.00800699  | CDC45L    | ENSG00000093009 |
| 22 | 18111228 | 18111573 | 18111400 | 15  | 20  | 0  | 20.13708255 | 7.37E-07    | TBX1      | ENSG00000184058 |
| 22 | 18174064 | 18174528 | 18174198 | 22  | 33  | 2  | 10.86763185 | 1.89E-08    |           | ENSG00000219300 |
| 22 | 18216487 | 18216666 | 18216567 | 8   | 8   | 1  | 4.315089119 | 0.0127267   | GNB1L     | ENSG00000185838 |
| 22 | 18217368 | 18217577 | 18217472 | 8   | 9   | 5  | 1.598181155 | 0.170911    | GNB1L     | ENSG00000185838 |
| 22 | 18236384 | 18236736 | 18236560 | 20  | 26  | 0  | 25.89053471 | 1.31E-08    | GNB1L     | ENSG00000185838 |
| 22 | 18248720 | 18248950 | 18248808 | 8   | 8   | 1  | 4.315089119 | 0.0127267   |           | ENSG00000217984 |
| 22 | 18330536 | 18330817 | 18330676 | 14  | 15  | 2  | 5.114179696 | 0.00088103  | COMT      | ENSG00000093010 |
| 22 | 18351930 | 18352175 | 18352046 | 12  | 14  | 3  | 3.595907599 | 0.00486913  | ARVCF     | ENSG00000099889 |

|    |          |          |          |    |    |    |             |             |          |                 |
|----|----------|----------|----------|----|----|----|-------------|-------------|----------|-----------------|
| 22 | 18378029 | 18378232 | 18378121 | 8  | 9  | 2  | 3.19636231  | 0.0229249   | ARVCF    | ENSG00000099889 |
| 22 | 18605523 | 18605826 | 18605675 | 23 | 26 | 0  | 25.89053471 | 1.31E-08    |          | ENSG00000221039 |
| 22 | 18676437 | 18676667 | 18676497 | 8  | 10 | 0  | 10.54799562 | 0.000613541 |          | ENSG00000161132 |
| 22 | 19078118 | 19078379 | 19078248 | 9  | 11 | 3  | 2.876726079 | 0.0213797   | ZNF74    | ENSG00000185252 |
| 22 | 19180814 | 19181058 | 19180908 | 10 | 13 | 4  | 2.684944341 | 0.01921     | KLHL22   | ENSG00000185214 |
| 22 | 19248635 | 19248882 | 19248758 | 9  | 13 | 0  | 13.4247217  | 8.16E-05    |          | ENSG00000220624 |
| 22 | 19462050 | 19462403 | 19462229 | 8  | 13 | 5  | 2.237453617 | 0.038866    | SERPIND1 | ENSG00000099937 |
| 22 | 19569885 | 19570151 | 19570031 | 10 | 12 | 3  | 3.116453252 | 0.0131971   | SNAP29   | ENSG00000099940 |
| 22 | 19597077 | 19597436 | 19597215 | 10 | 15 | 0  | 15.34253909 | 2.13E-05    | CRKL     | ENSG00000099942 |
| 22 | 20476688 | 20476883 | 20476785 | 9  | 9  | 3  | 2.397271733 | 0.0539397   |          | ENSG00000200985 |
| 22 | 20667137 | 20667404 | 20667293 | 11 | 13 | 10 | 1.220429246 | 0.306001    | TOP3B    | ENSG00000100038 |
| 22 | 21598003 | 21598385 | 21598173 | 11 | 15 | 2  | 5.114179696 | 0.00088103  |          | ENSG00000211685 |
| 22 | 21854696 | 21854926 | 21854824 | 9  | 10 | 6  | 1.506856518 | 0.188853    | BCR      | ENSG00000186716 |
| 22 | 22498304 | 22498485 | 22498409 | 8  | 9  | 0  | 9.589086931 | 0.00120187  | DERL3    | ENSG00000099958 |
| 22 | 23029426 | 23029638 | 23029491 | 11 | 13 | 4  | 2.684944341 | 0.01921     | ADORA2A  | ENSG00000128271 |
| 22 | 23232976 | 23233176 | 23233112 | 9  | 10 | 4  | 2.109599125 | 0.0694668   | UPB1     | ENSG00000100024 |
| 22 | 23247502 | 23247725 | 23247631 | 9  | 10 | 1  | 5.273997812 | 0.00391723  | UPB1     | ENSG00000100024 |
| 22 | 23247748 | 23248001 | 23247874 | 8  | 11 | 2  | 3.835634772 | 0.00800699  | UPB1     | ENSG00000100024 |
| 22 | 23281666 | 23281848 | 23281749 | 8  | 8  | 6  | 1.232882605 | 0.333038    | SNRPD3   | ENSG00000100028 |
| 22 | 23494868 | 23495056 | 23494964 | 8  | 9  | 1  | 4.794543465 | 0.00708517  | PIWIL3   | ENSG00000184571 |
| 22 | 23576263 | 23576519 | 23576408 | 9  | 9  | 8  | 1.065454103 | 0.442605    | SGSM1    | ENSG00000167037 |
| 22 | 23695950 | 23696173 | 23696061 | 8  | 9  | 6  | 1.369869562 | 0.253675    | TMEM211  | ENSG00000206069 |
| 22 | 23787696 | 23788039 | 23787867 | 10 | 15 | 0  | 15.34253909 | 2.13E-05    |          | ENSG00000197077 |
| 22 | 24555272 | 24555545 | 24555408 | 19 | 20 | 1  | 10.06854128 | 8.32E-06    | MYO18B   | ENSG00000133454 |
| 22 | 25274989 | 25275355 | 25275157 | 16 | 21 | 2  | 7.031997082 | 2.73E-05    |          | ENSG00000221760 |
| 22 | 25384775 | 25385048 | 25384911 | 9  | 12 | 2  | 4.155271003 | 0.0046638   |          | ENSG00000218556 |
| 22 | 25489927 | 25490168 | 25490059 | 10 | 10 | 3  | 2.636998906 | 0.034203    |          | ENSG00000206028 |
| 22 | 25620851 | 25621120 | 25620975 | 10 | 13 | 1  | 6.712360851 | 0.000640982 |          | ENSG00000219956 |
| 22 | 25699495 | 25699891 | 25699603 | 8  | 14 | 2  | 4.794543465 | 0.00154571  |          | ENSG00000200443 |
| 22 | 25819883 | 25820211 | 25820037 | 14 | 18 | 1  | 9.109632584 | 2.91E-05    |          | ENSG00000200443 |
| 22 | 26444204 | 26444393 | 26444321 | 8  | 9  | 0  | 9.589086931 | 0.00120187  | MN1      | ENSG00000169184 |
| 22 | 26445441 | 26445903 | 26445675 | 31 | 49 | 0  | 47.94543465 | 2.51E-15    | MN1      | ENSG00000169184 |
| 22 | 26500084 | 26500296 | 26500190 | 9  | 11 | 1  | 5.753452158 | 0.00215302  | MN1      | ENSG00000169184 |
| 22 | 26838757 | 26838983 | 26838911 | 10 | 10 | 3  | 2.636998906 | 0.034203    |          | ENSG00000223230 |

|    |          |          |          |     |     |    |             |             |         |                 |
|----|----------|----------|----------|-----|-----|----|-------------|-------------|---------|-----------------|
| 22 | 27041931 | 27042459 | 27042201 | 128 | 155 | 0  | 149.5897561 | 2.79E-46    | TTC28   | ENSG00000100154 |
| 22 | 27467604 | 27468015 | 27467756 | 18  | 25  | 7  | 3.116453252 | 0.000988074 | CHEK2   | ENSG00000183765 |
| 22 | 27468212 | 27468466 | 27468326 | 12  | 12  | 0  | 12.46581301 | 0.000159888 | HSCB    | ENSG00000100209 |
| 22 | 27498487 | 27498738 | 27498588 | 14  | 17  | 4  | 3.452071295 | 0.00292757  | CCDC117 | ENSG00000159873 |
| 22 | 27510014 | 27510387 | 27510193 | 17  | 24  | 4  | 4.794543465 | 8.06E-05    | CCDC117 | ENSG00000159873 |
| 22 | 27581547 | 27581982 | 27581823 | 10  | 17  | 6  | 2.465765211 | 0.014729    |         | ENSG00000216570 |
| 22 | 27709029 | 27709594 | 27709370 | 52  | 80  | 1  | 38.83580207 | 9.03E-23    | ZNRF3   | ENSG00000183579 |
| 22 | 27709794 | 27710138 | 27709966 | 8   | 13  | 2  | 4.474907234 | 0.00269459  | ZNRF3   | ENSG00000183579 |
| 22 | 27806487 | 27806666 | 27806529 | 8   | 8   | 2  | 2.876726079 | 0.0381137   | KREMEN1 | ENSG00000183762 |
| 22 | 28114036 | 28114278 | 28114163 | 10  | 11  | 0  | 11.50690432 | 0.000313206 | AP1B1   | ENSG00000100280 |
| 22 | 28194892 | 28195407 | 28195149 | 20  | 32  | 2  | 10.54799562 | 3.50E-08    | NEFH    | ENSG00000100285 |
| 22 | 28279540 | 28280016 | 28279837 | 8   | 16  | 5  | 2.716907964 | 0.0109645   | THOC5   | ENSG00000100296 |
| 22 | 28348074 | 28348400 | 28348237 | 15  | 17  | 5  | 2.876726079 | 0.00703033  | NF2     | ENSG00000186575 |
| 22 | 28349098 | 28349293 | 28349195 | 9   | 10  | 0  | 10.54799562 | 0.000613541 | NF2     | ENSG00000186575 |
| 22 | 28547281 | 28547630 | 28547455 | 17  | 21  | 2  | 7.031997082 | 2.73E-05    | ZMAT5   | ENSG00000100319 |
| 22 | 28718914 | 28719357 | 28719073 | 8   | 16  | 5  | 2.716907964 | 0.0109645   | MTMR3   | ENSG00000100330 |
| 22 | 28814917 | 28815246 | 28815094 | 9   | 12  | 4  | 2.493162602 | 0.0299057   | HORMAD2 | ENSG00000176635 |
| 22 | 28971582 | 28972496 | 28971888 | 117 | 183 | 2  | 58.81306651 | 7.75E-51    | LIF     | ENSG00000128342 |
| 22 | 29024396 | 29024743 | 29024574 | 12  | 17  | 10 | 1.569123316 | 0.112309    |         | ENSG00000182482 |
| 22 | 29317939 | 29318252 | 29318111 | 9   | 11  | 3  | 2.876726079 | 0.0213797   | PES1    | ENSG00000100029 |
| 22 | 29608436 | 29608615 | 29608532 | 8   | 8   | 1  | 4.315089119 | 0.0127267   |         | ENSG00000218230 |
| 22 | 29903583 | 29903786 | 29903670 | 8   | 10  | 2  | 3.515998541 | 0.0136204   | RNF185  | ENSG00000138942 |
| 22 | 29944917 | 29945306 | 29945081 | 31  | 39  | 2  | 12.78544924 | 4.53E-10    |         | ENSG00000209392 |
| 22 | 29979938 | 29980363 | 29980146 | 77  | 98  | 2  | 31.64398687 | 1.52E-26    | LIMK2   | ENSG00000182541 |
| 22 | 29998931 | 29999151 | 29999041 | 8   | 9   | 1  | 4.794543465 | 0.00708517  | PIK3IP1 | ENSG00000100100 |
| 22 | 30032642 | 30032869 | 30032762 | 10  | 12  | 4  | 2.493162602 | 0.0299057   |         | ENSG00000212542 |
| 22 | 30039332 | 30039625 | 30039488 | 15  | 18  | 4  | 3.643853034 | 0.00178791  |         | ENSG00000212542 |
| 22 | 30126199 | 30126449 | 30126324 | 11  | 12  | 5  | 2.077635502 | 0.0577144   | DRG1    | ENSG00000185721 |
| 22 | 30287353 | 30287542 | 30287417 | 9   | 9   | 1  | 4.794543465 | 0.00708517  |         | ENSG00000214093 |
| 22 | 30359765 | 30360064 | 30359904 | 9   | 10  | 2  | 3.515998541 | 0.0136204   | PISD    | ENSG00000100141 |
| 22 | 30372805 | 30373065 | 30372897 | 10  | 13  | 1  | 6.712360851 | 0.000640982 | PISD    | ENSG00000100141 |
| 22 | 30409210 | 30409589 | 30409430 | 19  | 23  | 0  | 23.01380863 | 9.81E-08    | PISD    | ENSG00000100141 |
| 22 | 30696122 | 30696326 | 30696224 | 9   | 11  | 1  | 5.753452158 | 0.00215302  |         | ENSG00000209414 |
| 22 | 30776597 | 30777053 | 30776855 | 15  | 24  | 6  | 3.424673904 | 0.000656885 | SLC5A1  | ENSG00000100170 |

|    |          |          |          |    |    |   |             |             |          |                 |
|----|----------|----------|----------|----|----|---|-------------|-------------|----------|-----------------|
| 22 | 30805083 | 30805416 | 30805259 | 15 | 18 | 3 | 4.554816292 | 0.000599415 | SLC5A1   | ENSG00000100170 |
| 22 | 30832998 | 30833343 | 30833170 | 14 | 20 | 3 | 5.034270639 | 0.000202317 |          | ENSG00000216309 |
| 22 | 30966752 | 30967083 | 30966955 | 8  | 12 | 4 | 2.493162602 | 0.0299057   | SLC5A4   | ENSG00000100191 |
| 22 | 30992254 | 30992433 | 30992306 | 8  | 8  | 0 | 8.630178238 | 0.00235436  |          | ENSG00000214076 |
| 22 | 31283443 | 31283693 | 31283568 | 16 | 17 | 1 | 8.630178238 | 5.44E-05    |          | ENSG00000209417 |
| 22 | 31588305 | 31588542 | 31588435 | 8  | 9  | 0 | 9.589086931 | 0.00120187  |          | ENSG00000183531 |
| 22 | 31712035 | 31712294 | 31712164 | 8  | 10 | 3 | 2.636998906 | 0.034203    | SYN3     | ENSG00000185666 |
| 22 | 32968995 | 32969243 | 32969119 | 8  | 11 | 0 | 11.50690432 | 0.000313206 | LARGE    | ENSG00000133424 |
| 22 | 33487232 | 33487553 | 33487389 | 16 | 20 | 2 | 6.712360851 | 4.91E-05    |          | ENSG00000220899 |
| 22 | 33626047 | 33626269 | 33626135 | 8  | 10 | 0 | 10.54799562 | 0.000613541 | ISX      | ENSG00000175329 |
| 22 | 33919940 | 33920208 | 33920074 | 9  | 10 | 0 | 10.54799562 | 0.000613541 |          | ENSG00000219612 |
| 22 | 34098017 | 34098275 | 34098146 | 10 | 13 | 0 | 13.4247217  | 8.16E-05    | HMOX1    | ENSG00000100292 |
| 22 | 34778568 | 34778770 | 34778693 | 8  | 8  | 0 | 8.630178238 | 0.00235436  | RBM9     | ENSG00000100320 |
| 22 | 35112227 | 35112416 | 35112320 | 8  | 10 | 5 | 1.757999271 | 0.121253    | MYH9     | ENSG00000100345 |
| 22 | 35207204 | 35207444 | 35207321 | 9  | 11 | 5 | 1.917817386 | 0.0843804   | TXN2     | ENSG00000100348 |
| 22 | 35256213 | 35256515 | 35256364 | 8  | 11 | 0 | 11.50690432 | 0.000313206 | EIF3D    | ENSG00000100353 |
| 22 | 35284455 | 35284655 | 35284520 | 9  | 9  | 0 | 9.589086931 | 0.00120187  |          | ENSG00000188078 |
| 22 | 35535020 | 35535210 | 35535115 | 8  | 10 | 1 | 5.273997812 | 0.00391723  | PVALB    | ENSG00000100362 |
| 22 | 36333066 | 36333262 | 36333164 | 9  | 9  | 1 | 4.794543465 | 0.00708517  | GGA1     | ENSG00000100083 |
| 22 | 36510745 | 36511091 | 36510918 | 32 | 35 | 2 | 11.50690432 | 5.48E-09    |          | ENSG00000209462 |
| 22 | 36624680 | 36625092 | 36624887 | 43 | 55 | 0 | 53.69888681 | 4.44E-17    | MICALL1  | ENSG00000100139 |
| 22 | 37044275 | 37044461 | 37044321 | 8  | 8  | 1 | 4.315089119 | 0.0127267   | CSNK1E   | ENSG00000213923 |
| 22 | 37177313 | 37177525 | 37177477 | 9  | 9  | 1 | 4.794543465 | 0.00708517  | KCNJ4    | ENSG00000168135 |
| 22 | 37650490 | 37650750 | 37650620 | 12 | 13 | 3 | 3.356180426 | 0.00805599  | APOBEC3A | ENSG00000128383 |
| 22 | 37823047 | 37823624 | 37823239 | 28 | 43 | 4 | 8.438396499 | 1.74E-09    | APOBEC3H | ENSG00000100298 |
| 22 | 38360551 | 38361059 | 38360883 | 10 | 18 | 2 | 6.073088389 | 0.000157975 |          | ENSG00000203593 |
| 22 | 38525579 | 38525780 | 38525670 | 8  | 8  | 0 | 8.630178238 | 0.00235436  |          | ENSG00000209490 |
| 22 | 39402640 | 39402943 | 39402789 | 19 | 21 | 1 | 10.54799562 | 4.43E-06    | MCHR1    | ENSG00000128285 |
| 22 | 39437584 | 39437812 | 39437698 | 9  | 10 | 4 | 2.109599125 | 0.0694668   | MCHR1    | ENSG00000128285 |
| 22 | 39454871 | 39455056 | 39454963 | 8  | 8  | 0 | 8.630178238 | 0.00235436  | MCHR1    | ENSG00000128285 |
| 22 | 39458690 | 39459074 | 39458899 | 13 | 17 | 4 | 3.452071295 | 0.00292757  | SLC25A17 | ENSG00000100372 |
| 22 | 40006075 | 40006442 | 40006224 | 14 | 19 | 1 | 9.589086931 | 1.56E-05    | RANGAP1  | ENSG00000100401 |
| 22 | 40014375 | 40014891 | 40014715 | 22 | 38 | 0 | 37.39743903 | 4.09E-12    | RANGAP1  | ENSG00000100401 |
| 22 | 40392804 | 40393004 | 40392899 | 8  | 9  | 0 | 9.589086931 | 0.00120187  |          | ENSG00000207457 |

|    |          |          |          |     |     |    |             |             |          |                 |
|----|----------|----------|----------|-----|-----|----|-------------|-------------|----------|-----------------|
| 22 | 41340794 | 41341119 | 41340956 | 9   | 13  | 1  | 6.712360851 | 0.000640982 | POLDIP3  | ENSG00000100227 |
| 22 | 41437162 | 41437549 | 41437300 | 8   | 12  | 2  | 4.155271003 | 0.0046638   | A4GALT   | ENSG00000128274 |
| 22 | 41531568 | 41531770 | 41531720 | 8   | 9   | 3  | 2.397271733 | 0.0539397   |          | ENSG00000188999 |
| 22 | 41820065 | 41820324 | 41820194 | 10  | 13  | 4  | 2.684944341 | 0.01921     |          | ENSG00000218619 |
| 22 | 42682489 | 42682668 | 42682578 | 8   | 8   | 5  | 1.43836304  | 0.235762    | SAMM50   | ENSG00000100347 |
| 22 | 42812994 | 42813184 | 42813089 | 8   | 8   | 2  | 2.876726079 | 0.0381137   | PARVB    | ENSG00000188677 |
| 22 | 43460112 | 43460467 | 43460295 | 22  | 27  | 0  | 26.84944341 | 6.66E-09    | PRR5     | ENSG00000186654 |
| 22 | 43570229 | 43570522 | 43570375 | 10  | 14  | 0  | 14.3836304  | 4.17E-05    | PRR5     | ENSG00000186654 |
| 22 | 43595226 | 43595451 | 43595350 | 10  | 11  | 3  | 2.876726079 | 0.0213797   | PRR5     | ENSG00000186654 |
| 22 | 43847587 | 43848270 | 43847854 | 44  | 72  | 2  | 23.33344486 | 3.30E-19    | PHF21B   | ENSG00000056487 |
| 22 | 43870807 | 43871124 | 43870959 | 9   | 12  | 0  | 12.46581301 | 0.000159888 | NUP50    | ENSG00000093000 |
| 22 | 44244291 | 44244715 | 44244490 | 42  | 60  | 2  | 19.49781009 | 7.45E-16    | FBLN1    | ENSG00000077942 |
| 22 | 44606896 | 44607228 | 44607068 | 9   | 14  | 2  | 4.794543465 | 0.00154571  |          | ENSG00000219324 |
| 22 | 44709165 | 44709392 | 44709320 | 8   | 10  | 0  | 10.54799562 | 0.000613541 | WNT7B    | ENSG00000188064 |
| 22 | 44788047 | 44788250 | 44788148 | 10  | 10  | 2  | 3.515998541 | 0.0136204   | WNT7B    | ENSG00000188064 |
| 22 | 45071050 | 45071313 | 45071181 | 10  | 11  | 4  | 2.301380863 | 0.0459276   | GTSE1    | ENSG00000075218 |
| 22 | 45149779 | 45150033 | 45149912 | 9   | 11  | 2  | 3.835634772 | 0.00800699  | TRMU     | ENSG00000100416 |
| 22 | 45517543 | 45517722 | 45517601 | 8   | 8   | 6  | 1.232882605 | 0.333038    | CERK     | ENSG00000100422 |
| 22 | 45548474 | 45548885 | 45548722 | 12  | 19  | 5  | 3.19636231  | 0.00280933  | TBC1D22A | ENSG00000054611 |
| 22 | 45573241 | 45573482 | 45573361 | 10  | 12  | 1  | 6.232906505 | 0.00117736  | TBC1D22A | ENSG00000054611 |
| 22 | 45617182 | 45617585 | 45617409 | 19  | 27  | 1  | 13.4247217  | 9.80E-08    |          | ENSG00000221672 |
| 22 | 45903931 | 45904723 | 45904332 | 80  | 117 | 5  | 18.85853763 | 2.21E-28    |          | ENSG00000221672 |
| 22 | 47172287 | 47172501 | 47172394 | 9   | 11  | 0  | 11.50690432 | 0.000313206 | FAM19A5  | ENSG00000219438 |
| 22 | 48539976 | 48540352 | 48540188 | 11  | 18  | 2  | 6.073088389 | 0.000157975 |          | ENSG00000218799 |
| 22 | 48811044 | 48811247 | 48811120 | 8   | 8   | 1  | 4.315089119 | 0.0127267   | IL17REL  | ENSG00000188263 |
| 22 | 49086370 | 49086975 | 49086579 | 74  | 90  | 1  | 43.63034553 | 1.22E-25    | PLXNB2   | ENSG00000196576 |
| 22 | 49262074 | 49262412 | 49262243 | 22  | 27  | 1  | 13.4247217  | 9.80E-08    | SBF1     | ENSG00000100241 |
| 3  | 86450    | 86749    | 86599    | 8   | 9   | 4  | 1.917817386 | 0.103282    | CHL1     | ENSG00000134121 |
| 3  | 98576    | 98899    | 98737    | 13  | 18  | 4  | 3.643853034 | 0.00178791  | CHL1     | ENSG00000134121 |
| 3  | 127601   | 128693   | 127998   | 185 | 295 | 15 | 17.73981082 | 1.15E-66    | CHL1     | ENSG00000134121 |
| 3  | 128961   | 129224   | 129125   | 8   | 10  | 2  | 3.515998541 | 0.0136204   | CHL1     | ENSG00000134121 |
| 3  | 198948   | 199127   | 199037   | 8   | 8   | 2  | 2.876726079 | 0.0381137   | CHL1     | ENSG00000134121 |
| 3  | 259914   | 260113   | 259980   | 8   | 8   | 0  | 8.630178238 | 0.00235436  | CHL1     | ENSG00000134121 |
| 3  | 371138   | 371472   | 371305   | 13  | 17  | 3  | 4.315089119 | 0.00102271  | CHL1     | ENSG00000134121 |

|   |         |         |         |    |     |    |             |             |        |                 |
|---|---------|---------|---------|----|-----|----|-------------|-------------|--------|-----------------|
| 3 | 589882  | 590077  | 590035  | 8  | 8   | 7  | 1.07877228  | 0.435076    | CHL1   | ENSG00000134121 |
| 3 | 623082  | 623266  | 623190  | 9  | 10  | 1  | 5.273997812 | 0.00391723  | CHL1   | ENSG00000134121 |
| 3 | 631133  | 631316  | 631212  | 8  | 8   | 3  | 2.157544559 | 0.0836802   | CHL1   | ENSG00000134121 |
| 3 | 934350  | 934543  | 934420  | 9  | 9   | 1  | 4.794543465 | 0.00708517  |        | ENSG00000209700 |
| 3 | 1085835 | 1086303 | 1086057 | 25 | 36  | 2  | 11.82654055 | 2.94E-09    |        | ENSG00000209700 |
| 3 | 1088793 | 1089268 | 1089095 | 18 | 29  | 6  | 4.109608685 | 5.77E-05    |        | ENSG00000209700 |
| 3 | 2992986 | 2993256 | 2993121 | 8  | 10  | 0  | 10.54799562 | 0.000613541 | CNTN4  | ENSG00000144619 |
| 3 | 3212843 | 3213164 | 3212999 | 15 | 18  | 1  | 9.109632584 | 2.91E-05    | CRBN   | ENSG00000113851 |
| 3 | 3576330 | 3576974 | 3576665 | 77 | 119 | 3  | 28.76726079 | 3.31E-31    |        | ENSG00000223036 |
| 3 | 3653474 | 3654042 | 3653680 | 52 | 69  | 7  | 8.390451064 | 6.53E-14    |        | ENSG00000223036 |
| 3 | 3750724 | 3750907 | 3750815 | 8  | 8   | 0  | 8.630178238 | 0.00235436  | LRRN1  | ENSG00000175928 |
| 3 | 4307058 | 4307241 | 4307149 | 8  | 8   | 2  | 2.876726079 | 0.0381137   | SETMAR | ENSG00000170364 |
| 3 | 4483858 | 4484046 | 4483952 | 8  | 10  | 1  | 5.273997812 | 0.00391723  | SUMF1  | ENSG00000144455 |
| 3 | 4508916 | 4509135 | 4508992 | 8  | 10  | 7  | 1.318499453 | 0.269217    | ITPR1  | ENSG00000150995 |
| 3 | 4550588 | 4550798 | 4550693 | 9  | 9   | 3  | 2.397271733 | 0.0539397   | ITPR1  | ENSG00000150995 |
| 3 | 4598733 | 4599293 | 4598975 | 47 | 70  | 5  | 11.3470862  | 1.03E-15    | ITPR1  | ENSG00000150995 |
| 3 | 4650042 | 4650351 | 4650186 | 8  | 12  | 7  | 1.558226626 | 0.152813    | ITPR1  | ENSG00000150995 |
| 3 | 4702766 | 4702945 | 4702903 | 8  | 8   | 0  | 8.630178238 | 0.00235436  |        | ENSG00000209718 |
| 3 | 4703910 | 4704248 | 4704075 | 20 | 25  | 11 | 2.077635502 | 0.0139694   |        | ENSG00000209718 |
| 3 | 4704906 | 4705408 | 4705229 | 17 | 28  | 12 | 2.139104008 | 0.0083421   |        | ENSG00000209718 |
| 3 | 4728126 | 4728412 | 4728272 | 13 | 15  | 6  | 2.191791298 | 0.0328001   |        | ENSG00000209718 |
| 3 | 4737385 | 4737744 | 4737578 | 9  | 14  | 3  | 3.595907599 | 0.00486913  |        | ENSG00000209718 |
| 3 | 4738730 | 4739023 | 4738876 | 10 | 13  | 5  | 2.237453617 | 0.038866    |        | ENSG00000209718 |
| 3 | 4758363 | 4758646 | 4758517 | 12 | 16  | 4  | 3.260289556 | 0.00475414  |        | ENSG00000209718 |
| 3 | 4761053 | 4761337 | 4761195 | 10 | 12  | 5  | 2.077635502 | 0.0577144   |        | ENSG00000209718 |
| 3 | 4793351 | 4793593 | 4793466 | 8  | 9   | 10 | 0.871735176 | 0.624623    |        | ENSG00000209718 |
| 3 | 4922760 | 4923077 | 4922912 | 12 | 15  | 8  | 1.704726565 | 0.0916153   |        | ENSG00000209718 |
| 3 | 4925663 | 4925842 | 4925752 | 8  | 8   | 2  | 2.876726079 | 0.0381137   |        | ENSG00000209718 |
| 3 | 4992750 | 4993162 | 4992983 | 11 | 18  | 13 | 1.301376083 | 0.22245     | BHLHB2 | ENSG00000134107 |
| 3 | 4994276 | 4994547 | 4994392 | 9  | 10  | 8  | 1.171999514 | 0.35773     | BHLHB2 | ENSG00000134107 |
| 3 | 4995440 | 4995646 | 4995541 | 8  | 9   | 2  | 3.19636231  | 0.0229249   | BHLHB2 | ENSG00000134107 |
| 3 | 4996421 | 4996618 | 4996501 | 9  | 10  | 3  | 2.636998906 | 0.034203    | BHLHB2 | ENSG00000134107 |
| 3 | 4996760 | 4997615 | 4997184 | 14 | 38  | 15 | 2.337339939 | 0.00125105  | BHLHB2 | ENSG00000134107 |
| 3 | 5003571 | 5004059 | 5003728 | 15 | 24  | 8  | 2.663635258 | 0.00328036  | BHLHB2 | ENSG00000134107 |

|   |         |         |         |    |    |    |             |             |         |                 |
|---|---------|---------|---------|----|----|----|-------------|-------------|---------|-----------------|
| 3 | 5011476 | 5012077 | 5011855 | 42 | 65 | 5  | 10.54799562 | 2.11E-14    | BHLHB2  | ENSG00000134107 |
| 3 | 5016473 | 5017005 | 5016740 | 37 | 52 | 6  | 7.260308676 | 2.33E-10    | BHLHB2  | ENSG00000134107 |
| 3 | 5043584 | 5043893 | 5043744 | 9  | 11 | 10 | 1.046082211 | 0.455063    | BHLHB2  | ENSG00000134107 |
| 3 | 5074517 | 5074786 | 5074651 | 11 | 13 | 2  | 4.474907234 | 0.00269459  |         | ENSG00000207283 |
| 3 | 5123115 | 5123469 | 5123319 | 19 | 23 | 0  | 23.01380863 | 9.81E-08    | ARL8B   | ENSG00000134108 |
| 3 | 5138737 | 5138918 | 5138827 | 9  | 9  | 4  | 1.917817386 | 0.103282    | ARL8B   | ENSG00000134108 |
| 3 | 5153390 | 5154080 | 5153849 | 9  | 27 | 6  | 3.835634772 | 0.000155182 | ARL8B   | ENSG00000134108 |
| 3 | 5154855 | 5155264 | 5154999 | 9  | 16 | 3  | 4.075361945 | 0.00173346  | ARL8B   | ENSG00000134108 |
| 3 | 5405875 | 5406102 | 5406004 | 8  | 10 | 3  | 2.636998906 | 0.034203    |         | ENSG00000209727 |
| 3 | 5443113 | 5443309 | 5443199 | 9  | 10 | 7  | 1.318499453 | 0.269217    |         | ENSG00000209727 |
| 3 | 5627974 | 5628299 | 5628124 | 9  | 13 | 3  | 3.356180426 | 0.00805599  |         | ENSG00000209727 |
| 3 | 5828422 | 5828875 | 5828705 | 8  | 16 | 4  | 3.260289556 | 0.00475414  |         |                 |
| 3 | 6135772 | 6135951 | 6135849 | 8  | 8  | 4  | 1.726035648 | 0.150596    |         |                 |
| 3 | 7001444 | 7001627 | 7001492 | 8  | 10 | 2  | 3.515998541 | 0.0136204   | GRM7    | ENSG00000196277 |
| 3 | 7563057 | 7563270 | 7563119 | 8  | 9  | 3  | 2.397271733 | 0.0539397   |         |                 |
| 3 | 8368489 | 8368850 | 8368668 | 14 | 21 | 0  | 21.09599125 | 3.76E-07    |         | ENSG00000209729 |
| 3 | 8461088 | 8461402 | 8461245 | 10 | 14 | 7  | 1.797953799 | 0.0806593   | LMCD1   | ENSG00000071282 |
| 3 | 8473058 | 8473341 | 8473200 | 18 | 20 | 4  | 4.027416511 | 0.000652226 | LMCD1   | ENSG00000071282 |
| 3 | 8517281 | 8517550 | 8517414 | 8  | 11 | 3  | 2.876726079 | 0.0213797   | LMCD1   | ENSG00000071282 |
| 3 | 8542565 | 8542900 | 8542721 | 12 | 15 | 5  | 2.557089848 | 0.0169197   | LMCD1   | ENSG00000071282 |
| 3 | 8624245 | 8624465 | 8624355 | 11 | 11 | 2  | 3.835634772 | 0.00800699  | C3orf32 | ENSG00000125046 |
| 3 | 8636234 | 8636510 | 8636387 | 12 | 14 | 3  | 3.595907599 | 0.00486913  | C3orf32 | ENSG00000125046 |
| 3 | 8639683 | 8640017 | 8639850 | 9  | 12 | 3  | 3.116453252 | 0.0131971   | C3orf32 | ENSG00000125046 |
| 3 | 8646188 | 8646502 | 8646345 | 14 | 16 | 2  | 5.433815927 | 0.000499302 | C3orf32 | ENSG00000125046 |
| 3 | 8661132 | 8661319 | 8661225 | 9  | 10 | 0  | 10.54799562 | 0.000613541 | C3orf32 | ENSG00000125046 |
| 3 | 8732440 | 8732780 | 8732610 | 18 | 21 | 0  | 21.09599125 | 3.76E-07    | CAV3    | ENSG00000182533 |
| 3 | 8793800 | 8793998 | 8793899 | 8  | 8  | 2  | 2.876726079 | 0.0381137   | OXTR    | ENSG00000180914 |
| 3 | 8980027 | 8980656 | 8980518 | 10 | 23 | 7  | 2.876726079 | 0.00239423  | RAD18   | ENSG00000070950 |
| 3 | 8987707 | 8988065 | 8987822 | 10 | 15 | 9  | 1.534253909 | 0.136498    | RAD18   | ENSG00000070950 |
| 3 | 9004707 | 9005012 | 9004859 | 9  | 12 | 9  | 1.246581301 | 0.295061    | RAD18   | ENSG00000070950 |
| 3 | 9060479 | 9060658 | 9060490 | 9  | 10 | 0  | 10.54799562 | 0.000613541 | RAD18   | ENSG00000070950 |
| 3 | 9096408 | 9096687 | 9096547 | 8  | 10 | 5  | 1.757999271 | 0.121253    | RAD18   | ENSG00000070950 |
| 3 | 9166139 | 9166575 | 9166396 | 13 | 24 | 4  | 4.794543465 | 8.06E-05    | SRGAP3  | ENSG00000196220 |
| 3 | 9186080 | 9186332 | 9186167 | 8  | 11 | 6  | 1.643843474 | 0.137712    | SRGAP3  | ENSG00000196220 |



|   |          |          |          |    |    |    |             |             |         |                 |
|---|----------|----------|----------|----|----|----|-------------|-------------|---------|-----------------|
| 3 | 9375560  | 9375739  | 9375622  | 8  | 8  | 2  | 2.876726079 | 0.0381137   | THUMPD3 | ENSG00000134077 |
| 3 | 9412778  | 9413294  | 9413147  | 9  | 20 | 7  | 2.517135319 | 0.00849957  |         | ENSG00000206573 |
| 3 | 9439355  | 9440109  | 9439534  | 12 | 32 | 12 | 2.434152836 | 0.00192998  | SETD5   | ENSG00000168137 |
| 3 | 9520045  | 9520276  | 9520187  | 8  | 10 | 3  | 2.636998906 | 0.034203    | LHFPL4  | ENSG00000156959 |
| 3 | 9748221  | 9748404  | 9748312  | 8  | 8  | 1  | 4.315089119 | 0.0127267   | BRPF1   | ENSG00000156983 |
| 3 | 9766412  | 9766804  | 9766605  | 9  | 17 | 5  | 2.876726079 | 0.00703033  | OGG1    | ENSG00000114026 |
| 3 | 9809334  | 9809890  | 9809504  | 11 | 22 | 7  | 2.756862493 | 0.003684    | TADA3L  | ENSG00000171148 |
| 3 | 9987069  | 9987383  | 9987208  | 14 | 17 | 2  | 5.753452158 | 0.000281509 | TMEM111 | ENSG00000125037 |
| 3 | 9993712  | 9994067  | 9993879  | 8  | 13 | 3  | 3.356180426 | 0.00805599  | TMEM111 | ENSG00000125037 |
| 3 | 10003407 | 10003611 | 10003492 | 9  | 9  | 3  | 2.397271733 | 0.0539397   | TMEM111 | ENSG00000125037 |
| 3 | 10102476 | 10102744 | 10102651 | 9  | 11 | 6  | 1.643843474 | 0.137712    | C3orf24 | ENSG00000163705 |
| 3 | 10264809 | 10265060 | 10264922 | 9  | 11 | 11 | 0.958908693 | 0.540507    | TATDN2  | ENSG00000157014 |
| 3 | 10387797 | 10388151 | 10387974 | 9  | 15 | 3  | 3.835634772 | 0.00291691  |         | ENSG00000216135 |
| 3 | 10487212 | 10487471 | 10487355 | 8  | 10 | 1  | 5.273997812 | 0.00391723  | ATP2B2  | ENSG00000157087 |
| 3 | 10510253 | 10510470 | 10510363 | 8  | 8  | 5  | 1.43836304  | 0.235762    | ATP2B2  | ENSG00000157087 |
| 3 | 10564908 | 10565304 | 10565076 | 11 | 19 | 2  | 6.39272462  | 8.83E-05    | ATP2B2  | ENSG00000157087 |
| 3 | 10919748 | 10920240 | 10919933 | 31 | 44 | 3  | 10.7877228  | 1.57E-10    | SLC6A11 | ENSG00000132164 |
| 3 | 11077535 | 11077740 | 11077649 | 8  | 10 | 1  | 5.273997812 | 0.00391723  | SLC6A1  | ENSG00000157103 |
| 3 | 11253416 | 11253658 | 11253517 | 8  | 11 | 1  | 5.753452158 | 0.00215302  |         | ENSG00000213964 |
| 3 | 11288761 | 11289186 | 11289007 | 20 | 28 | 4  | 5.56167042  | 9.22E-06    | ATG7    | ENSG00000197548 |
| 3 | 11421783 | 11421979 | 11421881 | 8  | 8  | 1  | 4.315089119 | 0.0127267   | ATG7    | ENSG00000197548 |
| 3 | 11471062 | 11471258 | 11471170 | 8  | 9  | 2  | 3.19636231  | 0.0229249   | ATG7    | ENSG00000197548 |
| 3 | 11495121 | 11495541 | 11495300 | 25 | 33 | 3  | 8.150723891 | 1.18E-07    | ATG7    | ENSG00000197548 |
| 3 | 11525267 | 11525565 | 11525416 | 8  | 9  | 7  | 1.198635866 | 0.346278    | VGLL4   | ENSG00000144560 |
| 3 | 11555709 | 11555906 | 11555780 | 8  | 9  | 6  | 1.369869562 | 0.253675    | VGLL4   | ENSG00000144560 |
| 3 | 11556286 | 11556504 | 11556367 | 9  | 9  | 4  | 1.917817386 | 0.103282    | VGLL4   | ENSG00000144560 |
| 3 | 11607484 | 11607725 | 11607619 | 8  | 9  | 6  | 1.369869562 | 0.253675    | VGLL4   | ENSG00000144560 |
| 3 | 11660311 | 11660583 | 11660451 | 9  | 12 | 9  | 1.246581301 | 0.295061    | VGLL4   | ENSG00000144560 |
| 3 | 11736907 | 11737242 | 11737074 | 10 | 13 | 3  | 3.356180426 | 0.00805599  | VGLL4   | ENSG00000144560 |
| 3 | 11786955 | 11787631 | 11787297 | 23 | 47 | 8  | 5.114179696 | 5.40E-08    | VGLL4   | ENSG00000144560 |
| 3 | 11787755 | 11787958 | 11787856 | 10 | 10 | 2  | 3.515998541 | 0.0136204   | VGLL4   | ENSG00000144560 |
| 3 | 11790860 | 11791066 | 11790905 | 8  | 10 | 5  | 1.757999271 | 0.121253    | VGLL4   | ENSG00000144560 |
| 3 | 11792832 | 11793126 | 11792980 | 16 | 20 | 4  | 4.027416511 | 0.000652226 | VGLL4   | ENSG00000144560 |
| 3 | 11820582 | 11820884 | 11820717 | 10 | 12 | 1  | 6.232906505 | 0.00117736  | C3orf31 | ENSG00000144559 |

|   |          |          |          |    |    |    |             |             |         |                 |
|---|----------|----------|----------|----|----|----|-------------|-------------|---------|-----------------|
| 3 | 11834618 | 11834933 | 11834781 | 11 | 15 | 3  | 3.835634772 | 0.00291691  | C3orf31 | ENSG00000144559 |
| 3 | 11867151 | 11867330 | 11867228 | 8  | 8  | 1  | 4.315089119 | 0.0127267   | C3orf31 | ENSG00000144559 |
| 3 | 12062948 | 12063226 | 12063078 | 11 | 14 | 5  | 2.397271733 | 0.0258078   | SYN2    | ENSG00000157152 |
| 3 | 12269401 | 12269647 | 12269568 | 9  | 10 | 0  | 10.54799562 | 0.000613541 | PPARG   | ENSG00000132170 |
| 3 | 12461433 | 12461724 | 12461586 | 10 | 12 | 4  | 2.493162602 | 0.0299057   | TSEN2   | ENSG00000154743 |
| 3 | 12573227 | 12573564 | 12573390 | 17 | 22 | 7  | 2.756862493 | 0.003684    | MKRN2   | ENSG00000075975 |
| 3 | 12588366 | 12588598 | 12588463 | 9  | 10 | 2  | 3.515998541 | 0.0136204   | MKRN2   | ENSG00000075975 |
| 3 | 12633085 | 12633313 | 12633199 | 8  | 8  | 4  | 1.726035648 | 0.150596    |         | ENSG00000209806 |
| 3 | 12679675 | 12679874 | 12679802 | 8  | 10 | 2  | 3.515998541 | 0.0136204   | RAF1    | ENSG00000132155 |
| 3 | 12680549 | 12681022 | 12680728 | 9  | 17 | 10 | 1.569123316 | 0.112309    | RAF1    | ENSG00000132155 |
| 3 | 12775196 | 12775439 | 12775280 | 9  | 11 | 3  | 2.876726079 | 0.0213797   | TMEM40  | ENSG00000088726 |
| 3 | 12775689 | 12776085 | 12775906 | 14 | 22 | 2  | 7.351633313 | 1.51E-05    | TMEM40  | ENSG00000088726 |
| 3 | 12776389 | 12776638 | 12776475 | 9  | 10 | 4  | 2.109599125 | 0.0694668   | TMEM40  | ENSG00000088726 |
| 3 | 12779868 | 12780169 | 12780007 | 14 | 18 | 1  | 9.109632584 | 2.91E-05    | TMEM40  | ENSG00000088726 |
| 3 | 12827007 | 12827194 | 12827085 | 8  | 8  | 2  | 2.876726079 | 0.0381137   | CAND2   | ENSG00000144712 |
| 3 | 12857356 | 12857635 | 12857492 | 9  | 11 | 3  | 2.876726079 | 0.0213797   | RPL32   | ENSG00000144713 |
| 3 | 12857823 | 12858027 | 12857990 | 8  | 11 | 4  | 2.301380863 | 0.0459276   | RPL32   | ENSG00000144713 |
| 3 | 13000787 | 13001059 | 13000923 | 9  | 11 | 11 | 0.958908693 | 0.540507    | IQSEC1  | ENSG00000144711 |
| 3 | 13006813 | 13007051 | 13006881 | 9  | 12 | 0  | 12.46581301 | 0.000159888 | IQSEC1  | ENSG00000144711 |
| 3 | 13176457 | 13176776 | 13176605 | 11 | 14 | 4  | 2.876726079 | 0.01219     | IQSEC1  | ENSG00000144711 |
| 3 | 13195682 | 13195944 | 13195792 | 8  | 10 | 0  | 10.54799562 | 0.000613541 | IQSEC1  | ENSG00000144711 |
| 3 | 13246105 | 13246452 | 13246278 | 14 | 20 | 8  | 2.237453617 | 0.0160557   | NUP210  | ENSG00000132182 |
| 3 | 13317956 | 13318529 | 13318240 | 46 | 75 | 4  | 14.57541213 | 6.15E-18    | NUP210  | ENSG00000132182 |
| 3 | 13318699 | 13318913 | 13318827 | 11 | 12 | 0  | 12.46581301 | 0.000159888 | NUP210  | ENSG00000132182 |
| 3 | 13324948 | 13325145 | 13325046 | 8  | 9  | 6  | 1.369869562 | 0.253675    | NUP210  | ENSG00000132182 |
| 3 | 13429919 | 13430173 | 13430030 | 12 | 12 | 0  | 12.46581301 | 0.000159888 | NUP210  | ENSG00000132182 |
| 3 | 13471768 | 13472193 | 13471930 | 32 | 40 | 1  | 19.65762821 | 2.24E-11    | HDAC11  | ENSG00000163517 |
| 3 | 13542335 | 13542910 | 13542720 | 31 | 56 | 0  | 54.6577955  | 2.27E-17    | FBLN2   | ENSG00000163520 |
| 3 | 13901978 | 13902208 | 13902115 | 8  | 10 | 3  | 2.636998906 | 0.034203    | WNT7A   | ENSG00000154764 |
| 3 | 13907277 | 13907662 | 13907505 | 22 | 29 | 3  | 7.191815198 | 1.23E-06    | WNT7A   | ENSG00000154764 |
| 3 | 13911917 | 13912352 | 13912173 | 10 | 22 | 3  | 5.513724985 | 6.69E-05    | WNT7A   | ENSG00000154764 |
| 3 | 13913011 | 13913221 | 13913159 | 9  | 9  | 4  | 1.917817386 | 0.103282    | WNT7A   | ENSG00000154764 |
| 3 | 14023665 | 14023996 | 14023830 | 12 | 14 | 0  | 14.3836304  | 4.17E-05    | TPRXL   | ENSG00000180438 |
| 3 | 14141866 | 14142224 | 14142045 | 8  | 14 | 9  | 1.43836304  | 0.179537    | TMEM43  | ENSG00000170876 |

|   |          |          |          |    |     |    |             |             |         |                 |
|---|----------|----------|----------|----|-----|----|-------------|-------------|---------|-----------------|
| 3 | 14142311 | 14142520 | 14142422 | 10 | 12  | 2  | 4.155271003 | 0.0046638   | TMEM43  | ENSG00000170876 |
| 3 | 14157518 | 14157697 | 14157618 | 8  | 8   | 4  | 1.726035648 | 0.150596    | TMEM43  | ENSG00000170876 |
| 3 | 14173013 | 14173204 | 14173108 | 9  | 9   | 6  | 1.369869562 | 0.253675    | XPC     | ENSG00000154767 |
| 3 | 14187442 | 14187637 | 14187537 | 8  | 9   | 2  | 3.19636231  | 0.0229249   | XPC     | ENSG00000154767 |
| 3 | 14194633 | 14195550 | 14195093 | 58 | 101 | 11 | 8.150723891 | 4.14E-19    | XPC     | ENSG00000154767 |
| 3 | 14251795 | 14251974 | 14251884 | 8  | 8   | 4  | 1.726035648 | 0.150596    | LSM3    | ENSG00000170860 |
| 3 | 14277731 | 14278014 | 14277898 | 10 | 12  | 4  | 2.493162602 | 0.0299057   | LSM3    | ENSG00000170860 |
| 3 | 14281987 | 14282392 | 14282213 | 16 | 25  | 5  | 4.155271003 | 0.000149583 | LSM3    | ENSG00000170860 |
| 3 | 14284500 | 14284798 | 14284632 | 8  | 11  | 8  | 1.278544924 | 0.28289     | LSM3    | ENSG00000170860 |
| 3 | 14341097 | 14341284 | 14341193 | 10 | 10  | 2  | 3.515998541 | 0.0136204   |         | ENSG00000199609 |
| 3 | 14342286 | 14342653 | 14342488 | 25 | 30  | 5  | 4.954361581 | 1.11E-05    |         | ENSG00000199609 |
| 3 | 14345142 | 14345379 | 14345276 | 10 | 12  | 4  | 2.493162602 | 0.0299057   |         | ENSG00000199609 |
| 3 | 14388556 | 14388868 | 14388712 | 8  | 12  | 7  | 1.558226626 | 0.152813    |         | ENSG00000199609 |
| 3 | 14418819 | 14419104 | 14418944 | 10 | 13  | 5  | 2.237453617 | 0.038866    | SLC6A6  | ENSG00000131389 |
| 3 | 14448591 | 14449056 | 14448877 | 16 | 23  | 13 | 1.643843474 | 0.0639146   | SLC6A6  | ENSG00000131389 |
| 3 | 14456093 | 14456399 | 14456246 | 10 | 12  | 8  | 1.385090334 | 0.219216    | SLC6A6  | ENSG00000131389 |
| 3 | 14478028 | 14478284 | 14478118 | 8  | 11  | 1  | 5.753452158 | 0.00215302  | SLC6A6  | ENSG00000131389 |
| 3 | 14505162 | 14505566 | 14505364 | 27 | 36  | 1  | 17.73981082 | 3.00E-10    |         | ENSG00000207163 |
| 3 | 14614545 | 14614753 | 14614638 | 8  | 9   | 1  | 4.794543465 | 0.00708517  | C3orf19 | ENSG00000154781 |
| 3 | 14667925 | 14668466 | 14668153 | 20 | 33  | 12 | 2.507915043 | 0.00131447  | C3orf19 | ENSG00000154781 |
| 3 | 14670080 | 14670306 | 14670171 | 8  | 9   | 0  | 9.589086931 | 0.00120187  | C3orf19 | ENSG00000154781 |
| 3 | 14797371 | 14797729 | 14797535 | 10 | 15  | 12 | 1.180195315 | 0.324974    | FGD5    | ENSG00000154783 |
| 3 | 14839218 | 14839576 | 14839397 | 9  | 15  | 8  | 1.704726565 | 0.0916153   | FGD5    | ENSG00000154783 |
| 3 | 14893280 | 14893485 | 14893359 | 8  | 8   | 1  | 4.315089119 | 0.0127267   | FGD5    | ENSG00000154783 |
| 3 | 14893607 | 14893940 | 14893773 | 8  | 12  | 4  | 2.493162602 | 0.0299057   | FGD5    | ENSG00000154783 |
| 3 | 14937562 | 14937926 | 14937741 | 10 | 16  | 7  | 2.037680973 | 0.0400399   | NR2C2   | ENSG00000177463 |
| 3 | 15115120 | 15115429 | 15115259 | 9  | 11  | 7  | 1.43836304  | 0.204844    | ZFYVE20 | ENSG00000131381 |
| 3 | 15189388 | 15190059 | 15189560 | 26 | 47  | 2  | 15.34253909 | 2.95E-12    | CAPN7   | ENSG00000131375 |
| 3 | 15323657 | 15324004 | 15323830 | 14 | 18  | 1  | 9.109632584 | 2.91E-05    | SH3BP5  | ENSG00000131370 |
| 3 | 15327280 | 15327553 | 15327457 | 9  | 12  | 10 | 1.133255728 | 0.37674     | SH3BP5  | ENSG00000131370 |
| 3 | 15347925 | 15348120 | 15348022 | 8  | 8   | 1  | 4.315089119 | 0.0127267   | SH3BP5  | ENSG00000131370 |
| 3 | 15394704 | 15395101 | 15394969 | 8  | 13  | 8  | 1.491635745 | 0.166708    |         | ENSG00000201162 |
| 3 | 15443799 | 15444286 | 15444131 | 10 | 23  | 8  | 2.557089848 | 0.00494559  | EAF1    | ENSG00000144597 |
| 3 | 15573309 | 15573488 | 15573374 | 8  | 8   | 2  | 2.876726079 | 0.0381137   | COLQ    | ENSG00000206561 |

|   |          |          |          |    |    |    |             |             |         |                 |
|---|----------|----------|----------|----|----|----|-------------|-------------|---------|-----------------|
| 3 | 15618056 | 15618398 | 15618227 | 9  | 13 | 8  | 1.491635745 | 0.166708    | BTD     | ENSG00000169814 |
| 3 | 15799319 | 15799524 | 15799444 | 8  | 8  | 1  | 4.315089119 | 0.0127267   | ANKRD28 | ENSG00000206560 |
| 3 | 15799989 | 15800213 | 15800108 | 9  | 10 | 1  | 5.273997812 | 0.00391723  | ANKRD28 | ENSG00000206560 |
| 3 | 16306106 | 16306337 | 16306221 | 8  | 8  | 1  | 4.315089119 | 0.0127267   | OXNAD1  | ENSG00000154814 |
| 3 | 16335795 | 16336048 | 16335921 | 8  | 10 | 0  | 10.54799562 | 0.000613541 | OXNAD1  | ENSG00000154814 |
| 3 | 16567341 | 16567520 | 16567369 | 8  | 9  | 2  | 3.19636231  | 0.0229249   | RFTN1   | ENSG00000131378 |
| 3 | 17260480 | 17260688 | 17260584 | 8  | 10 | 2  | 3.515998541 | 0.0136204   | PLCL2   | ENSG00000154822 |
| 3 | 17429534 | 17429877 | 17429699 | 9  | 13 | 2  | 4.474907234 | 0.00269459  |         | ENSG00000209905 |
| 3 | 18328834 | 18329016 | 18328925 | 8  | 8  | 0  | 8.630178238 | 0.00235436  | SATB1   | ENSG00000182568 |
| 3 | 18405639 | 18405846 | 18405767 | 9  | 9  | 1  | 4.794543465 | 0.00708517  | SATB1   | ENSG00000182568 |
| 3 | 18515661 | 18516108 | 18515951 | 30 | 39 | 1  | 19.17817386 | 4.29E-11    | SATB1   | ENSG00000182568 |
| 3 | 18575942 | 18576180 | 18576061 | 11 | 12 | 2  | 4.155271003 | 0.0046638   | SATB1   | ENSG00000182568 |
| 3 | 18729932 | 18730152 | 18730016 | 12 | 13 | 0  | 13.4247217  | 8.16E-05    |         | ENSG00000209918 |
| 3 | 18774499 | 18774932 | 18774753 | 18 | 29 | 5  | 4.794543465 | 1.89E-05    |         | ENSG00000209918 |
| 3 | 18963136 | 18963329 | 18963232 | 8  | 9  | 3  | 2.397271733 | 0.0539397   |         | ENSG00000209918 |
| 3 | 18981112 | 18981356 | 18981256 | 9  | 11 | 2  | 3.835634772 | 0.00800699  |         | ENSG00000209918 |
| 3 | 19424068 | 19424270 | 19424173 | 8  | 8  | 2  | 2.876726079 | 0.0381137   | KCNH8   | ENSG00000183960 |
| 3 | 19473930 | 19474284 | 19474107 | 14 | 19 | 2  | 6.39272462  | 8.83E-05    | KCNH8   | ENSG00000183960 |
| 3 | 19484847 | 19485036 | 19484924 | 8  | 9  | 0  | 9.589086931 | 0.00120187  | KCNH8   | ENSG00000183960 |
| 3 | 19883319 | 19883501 | 19883379 | 8  | 10 | 1  | 5.273997812 | 0.00391723  | EFHB    | ENSG00000163576 |
| 3 | 19901972 | 19902286 | 19902134 | 9  | 13 | 3  | 3.356180426 | 0.00805599  | EFHB    | ENSG00000163576 |
| 3 | 19963152 | 19963742 | 19963563 | 12 | 28 | 9  | 2.78083521  | 0.00127094  | EFHB    | ENSG00000163576 |
| 3 | 19988394 | 19988806 | 19988630 | 16 | 26 | 7  | 3.236316839 | 0.000628017 |         | ENSG00000201545 |
| 3 | 20056206 | 20056437 | 20056334 | 10 | 13 | 0  | 13.4247217  | 8.16E-05    | KAT2B   | ENSG00000114166 |
| 3 | 20057922 | 20058407 | 20058287 | 9  | 17 | 10 | 1.569123316 | 0.112309    | KAT2B   | ENSG00000114166 |
| 3 | 20071202 | 20071436 | 20071359 | 11 | 12 | 3  | 3.116453252 | 0.0131971   | KAT2B   | ENSG00000114166 |
| 3 | 20073783 | 20073982 | 20073866 | 8  | 10 | 2  | 3.515998541 | 0.0136204   | KAT2B   | ENSG00000114166 |
| 3 | 20094787 | 20095245 | 20095016 | 42 | 63 | 3  | 15.34253909 | 1.21E-15    | KAT2B   | ENSG00000114166 |
| 3 | 23034421 | 23034605 | 23034527 | 9  | 10 | 1  | 5.273997812 | 0.00391723  |         | ENSG00000215016 |
| 3 | 24015488 | 24015695 | 24015591 | 8  | 10 | 1  | 5.273997812 | 0.00391723  | NR1D2   | ENSG00000174738 |
| 3 | 24379823 | 24380018 | 24379947 | 8  | 8  | 3  | 2.157544559 | 0.0836802   | THRB    | ENSG00000151090 |
| 3 | 24849420 | 24849669 | 24849505 | 14 | 15 | 1  | 7.671269544 | 0.000187863 |         | ENSG00000210001 |
| 3 | 25309123 | 25309382 | 25309244 | 8  | 11 | 0  | 11.50690432 | 0.000313206 |         | ENSG00000213877 |
| 3 | 27108159 | 27108465 | 27108310 | 14 | 15 | 5  | 2.557089848 | 0.0169197   | NEK10   | ENSG00000163491 |

|   |          |          |          |    |    |   |             |             |         |                 |
|---|----------|----------|----------|----|----|---|-------------|-------------|---------|-----------------|
| 3 | 27270338 | 27270548 | 27270443 | 8  | 10 | 2 | 3.515998541 | 0.0136204   |         | ENSG00000207251 |
| 3 | 27697750 | 27698050 | 27697883 | 10 | 12 | 7 | 1.558226626 | 0.152813    | EOMES   | ENSG00000163508 |
| 3 | 27728642 | 27728848 | 27728687 | 8  | 10 | 3 | 2.636998906 | 0.034203    | EOMES   | ENSG00000163508 |
| 3 | 28257800 | 28258023 | 28257903 | 9  | 9  | 2 | 3.19636231  | 0.0229249   | CMC1    | ENSG00000187118 |
| 3 | 28614655 | 28614987 | 28614820 | 19 | 23 | 2 | 7.671269544 | 8.30E-06    | C3orf53 | ENSG00000178811 |
| 3 | 29953810 | 29953992 | 29953902 | 8  | 8  | 2 | 2.876726079 | 0.0381137   |         | ENSG00000203652 |
| 3 | 30110150 | 30110465 | 30110307 | 15 | 19 | 3 | 4.794543465 | 0.000349205 |         | ENSG00000203652 |
| 3 | 30205292 | 30205504 | 30205364 | 8  | 8  | 6 | 1.232882605 | 0.333038    |         | ENSG00000199927 |
| 3 | 30564954 | 30565434 | 30565133 | 11 | 21 | 1 | 10.54799562 | 4.43E-06    | TGFBR2  | ENSG00000163513 |
| 3 | 30700424 | 30700614 | 30700515 | 8  | 9  | 0 | 9.589086931 | 0.00120187  | TGFBR2  | ENSG00000163513 |
| 3 | 30742104 | 30742307 | 30742205 | 8  | 8  | 0 | 8.630178238 | 0.00235436  | TGFBR2  | ENSG00000163513 |
| 3 | 30981119 | 30981391 | 30981255 | 12 | 14 | 1 | 7.191815198 | 0.00034761  | GADL1   | ENSG00000144644 |
| 3 | 31122852 | 31123081 | 31122954 | 10 | 10 | 2 | 3.515998541 | 0.0136204   |         | ENSG00000213854 |
| 3 | 31964170 | 31964360 | 31964271 | 8  | 8  | 4 | 1.726035648 | 0.150596    | OSBPL10 | ENSG00000144645 |
| 3 | 32053552 | 32053826 | 32053689 | 10 | 14 | 2 | 4.794543465 | 0.00154571  |         | ENSG00000201701 |
| 3 | 32149281 | 32149694 | 32149425 | 20 | 26 | 3 | 6.472633678 | 6.96E-06    | GPD1L   | ENSG00000152642 |
| 3 | 32193807 | 32194021 | 32193903 | 9  | 11 | 9 | 1.150690432 | 0.367789    |         | ENSG00000210105 |
| 3 | 32423376 | 32424117 | 32423746 | 31 | 56 | 3 | 13.66444888 | 9.60E-14    | CMTM7   | ENSG00000153551 |
| 3 | 32526675 | 32526878 | 32526781 | 8  | 10 | 3 | 2.636998906 | 0.034203    |         | ENSG00000213849 |
| 3 | 32646773 | 32646988 | 32646870 | 10 | 12 | 2 | 4.155271003 | 0.0046638   | CNOT10  | ENSG00000182973 |
| 3 | 32964256 | 32964644 | 32964408 | 9  | 14 | 3 | 3.595907599 | 0.00486913  | CCR4    | ENSG00000183813 |
| 3 | 33484268 | 33484994 | 33484525 | 51 | 80 | 2 | 25.89053471 | 1.86E-21    |         | ENSG00000202175 |
| 3 | 33498648 | 33499034 | 33498782 | 9  | 13 | 6 | 1.917817386 | 0.0693353   |         | ENSG00000202175 |
| 3 | 33595457 | 33595648 | 33595572 | 8  | 10 | 2 | 3.515998541 | 0.0136204   | CLASP2  | ENSG00000163539 |
| 3 | 33815415 | 33815650 | 33815532 | 10 | 12 | 3 | 3.116453252 | 0.0131971   | PDCD6IP | ENSG00000170248 |
| 3 | 34033446 | 34033683 | 34033564 | 8  | 9  | 1 | 4.794543465 | 0.00708517  | PDCD6IP | ENSG00000170248 |
| 3 | 34041466 | 34041763 | 34041617 | 11 | 12 | 1 | 6.232906505 | 0.00117736  | PDCD6IP | ENSG00000170248 |
| 3 | 36949171 | 36949768 | 36949529 | 36 | 56 | 1 | 27.32889775 | 6.55E-16    |         | ENSG00000210181 |
| 3 | 36986284 | 36986599 | 36986441 | 10 | 15 | 1 | 7.671269544 | 0.000187863 |         | ENSG00000210181 |
| 3 | 37010087 | 37010444 | 37010265 | 12 | 18 | 2 | 6.073088389 | 0.000157975 | MLH1    | ENSG00000076242 |
| 3 | 37260526 | 37260895 | 37260668 | 10 | 15 | 2 | 5.114179696 | 0.00088103  |         | ENSG00000176354 |
| 3 | 37559417 | 37559676 | 37559546 | 13 | 13 | 4 | 2.684944341 | 0.01921     | ITGA9   | ENSG00000144668 |
| 3 | 37677216 | 37677644 | 37677395 | 29 | 38 | 2 | 12.46581301 | 8.46E-10    | CTDSPL  | ENSG00000144677 |
| 3 | 37962452 | 37962854 | 37962688 | 10 | 16 | 5 | 2.716907964 | 0.0109645   |         | ENSG00000199075 |

|   |          |          |          |    |     |   |             |             |          |                 |
|---|----------|----------|----------|----|-----|---|-------------|-------------|----------|-----------------|
| 3 | 38013346 | 38013594 | 38013492 | 13 | 14  | 6 | 2.054804342 | 0.0480281   | VILL     | ENSG00000136059 |
| 3 | 38041060 | 38041341 | 38041167 | 10 | 14  | 2 | 4.794543465 | 0.00154571  | PLCD1    | ENSG00000187091 |
| 3 | 38042321 | 38042560 | 38042467 | 8  | 10  | 3 | 2.636998906 | 0.034203    | PLCD1    | ENSG00000187091 |
| 3 | 38047708 | 38047900 | 38047804 | 8  | 8   | 1 | 4.315089119 | 0.0127267   | PLCD1    | ENSG00000187091 |
| 3 | 38512737 | 38512989 | 38512819 | 9  | 12  | 5 | 2.077635502 | 0.0577144   | ENDOGL2  | ENSG00000157036 |
| 3 | 38547245 | 38547481 | 38547363 | 10 | 11  | 1 | 5.753452158 | 0.00215302  |          | ENSG00000207512 |
| 3 | 39068355 | 39068570 | 39068461 | 8  | 10  | 3 | 2.636998906 | 0.034203    | WDR48    | ENSG00000114742 |
| 3 | 39142334 | 39142596 | 39142465 | 12 | 13  | 4 | 2.684944341 | 0.01921     | GORASP1  | ENSG00000114745 |
| 3 | 39167471 | 39167693 | 39167574 | 9  | 12  | 2 | 4.155271003 | 0.0046638   | AXUD1    | ENSG00000144655 |
| 3 | 39230961 | 39231147 | 39231032 | 9  | 9   | 2 | 3.19636231  | 0.0229249   | XIRP1    | ENSG00000168334 |
| 3 | 39515145 | 39515331 | 39515256 | 9  | 9   | 4 | 1.917817386 | 0.103282    | MOBP     | ENSG00000168314 |
| 3 | 40061024 | 40061386 | 40061203 | 20 | 27  | 3 | 6.712360851 | 3.92E-06    |          | ENSG00000201570 |
| 3 | 40326324 | 40326540 | 40326432 | 8  | 9   | 3 | 2.397271733 | 0.0539397   | EIF1B    | ENSG00000114784 |
| 3 | 40469950 | 40470156 | 40470053 | 9  | 9   | 2 | 3.19636231  | 0.0229249   | RPL14    | ENSG00000188846 |
| 3 | 41284660 | 41284957 | 41284808 | 9  | 13  | 2 | 4.474907234 | 0.00269459  | CTNNB1   | ENSG00000168036 |
| 3 | 41487948 | 41488270 | 41488106 | 16 | 20  | 1 | 10.06854128 | 8.32E-06    |          | ENSG00000221337 |
| 3 | 42273642 | 42273877 | 42273759 | 11 | 11  | 0 | 11.50690432 | 0.000313206 | CCK      | ENSG00000187094 |
| 3 | 42839684 | 42840298 | 42840062 | 87 | 128 | 4 | 24.73984428 | 1.58E-32    | CCBP2    | ENSG00000144648 |
| 3 | 44778006 | 44778194 | 44778124 | 8  | 8   | 2 | 2.876726079 | 0.0381137   | KIAA1143 | ENSG00000163807 |
| 3 | 45105132 | 45105408 | 45105286 | 8  | 10  | 4 | 2.109599125 | 0.0694668   | CDCP1    | ENSG00000163814 |
| 3 | 45435008 | 45435391 | 45435166 | 11 | 17  | 4 | 3.452071295 | 0.00292757  | LARS2    | ENSG00000011376 |
| 3 | 46646606 | 46646929 | 46646766 | 13 | 17  | 3 | 4.315089119 | 0.00102271  |          | ENSG00000203651 |
| 3 | 46677136 | 46677689 | 46677487 | 54 | 71  | 4 | 13.80828518 | 7.37E-17    | ALS2CL   | ENSG00000178038 |
| 3 | 46779642 | 46780028 | 46779863 | 24 | 30  | 0 | 29.72616948 | 8.86E-10    |          | ENSG00000206549 |
| 3 | 47460552 | 47460973 | 47460794 | 10 | 19  | 3 | 4.794543465 | 0.000349205 | SCAP     | ENSG00000114650 |
| 3 | 48249261 | 48249443 | 48249419 | 8  | 8   | 3 | 2.157544559 | 0.0836802   | ZNF589   | ENSG00000164048 |
| 3 | 48448902 | 48449322 | 48449149 | 25 | 36  | 0 | 35.47962164 | 1.57E-11    | PLXNB1   | ENSG00000164050 |
| 3 | 48449591 | 48449783 | 48449673 | 9  | 9   | 1 | 4.794543465 | 0.00708517  | PLXNB1   | ENSG00000164050 |
| 3 | 48457108 | 48457296 | 48457202 | 8  | 8   | 1 | 4.315089119 | 0.0127267   | CCDC51   | ENSG00000164051 |
| 3 | 48721566 | 48721787 | 48721692 | 8  | 10  | 0 | 10.54799562 | 0.000613541 | IHPK2    | ENSG00000068745 |
| 3 | 49735794 | 49736088 | 49735940 | 8  | 10  | 4 | 2.109599125 | 0.0694668   | AMIGO3   | ENSG00000176020 |
| 3 | 50863562 | 50863869 | 50863721 | 10 | 14  | 0 | 14.3836304  | 4.17E-05    |          | ENSG00000188420 |
| 3 | 51974700 | 51974969 | 51974834 | 9  | 10  | 0 | 10.54799562 | 0.000613541 | PCBP4    | ENSG00000090097 |
| 3 | 52004908 | 52005193 | 52005050 | 14 | 17  | 4 | 3.452071295 | 0.00292757  | RPL29    | ENSG00000162244 |

|   |          |          |          |    |    |    |             |             |          |                 |
|---|----------|----------|----------|----|----|----|-------------|-------------|----------|-----------------|
| 3 | 52116037 | 52116359 | 52116200 | 14 | 15 | 0  | 15.34253909 | 2.13E-05    | C3orf74  | ENSG00000221939 |
| 3 | 52615783 | 52616018 | 52615853 | 11 | 13 | 2  | 4.474907234 | 0.00269459  |          | ENSG00000221518 |
| 3 | 53278864 | 53279395 | 53279170 | 76 | 96 | 1  | 46.50707161 | 2.29E-27    |          | ENSG00000210751 |
| 3 | 53356465 | 53356895 | 53356716 | 9  | 17 | 12 | 1.327719729 | 0.212795    | DCP1A    | ENSG00000162290 |
| 3 | 53540807 | 53541035 | 53540921 | 10 | 12 | 1  | 6.232906505 | 0.00117736  | CACNA1D  | ENSG00000157388 |
| 3 | 53592314 | 53592541 | 53592414 | 11 | 11 | 1  | 5.753452158 | 0.00215302  | CACNA1D  | ENSG00000157388 |
| 3 | 54329578 | 54329757 | 54329681 | 8  | 8  | 2  | 2.876726079 | 0.0381137   | CACNA2D3 | ENSG00000157445 |
| 3 | 54331523 | 54331763 | 54331643 | 9  | 9  | 4  | 1.917817386 | 0.103282    | CACNA2D3 | ENSG00000157445 |
| 3 | 54663164 | 54663526 | 54663347 | 8  | 14 | 0  | 14.3836304  | 4.17E-05    | CACNA2D3 | ENSG00000157445 |
| 3 | 54900676 | 54900933 | 54900819 | 13 | 15 | 4  | 3.068507818 | 0.0076507   | LRTM1    | ENSG00000144771 |
| 3 | 54996759 | 54997057 | 54996930 | 10 | 12 | 2  | 4.155271003 | 0.0046638   | LRTM1    | ENSG00000144771 |
| 3 | 55667800 | 55668048 | 55667915 | 12 | 14 | 0  | 14.3836304  | 4.17E-05    |          | ENSG00000178189 |
| 3 | 56379074 | 56379320 | 56379199 | 8  | 8  | 5  | 1.43836304  | 0.235762    | ERC2     | ENSG00000187672 |
| 3 | 56458817 | 56458996 | 56458907 | 8  | 9  | 0  | 9.589086931 | 0.00120187  | ERC2     | ENSG00000187672 |
| 3 | 56792635 | 56793589 | 56793105 | 46 | 87 | 0  | 84.38396499 | 2.01E-26    | ARHGEF3  | ENSG00000163947 |
| 3 | 56895330 | 56895509 | 56895352 | 8  | 8  | 0  | 8.630178238 | 0.00235436  | ARHGEF3  | ENSG00000163947 |
| 3 | 57024157 | 57024537 | 57024363 | 21 | 27 | 4  | 5.369888681 | 1.60E-05    | ARHGEF3  | ENSG00000163947 |
| 3 | 57516778 | 57517067 | 57516948 | 10 | 13 | 3  | 3.356180426 | 0.00805599  | PDE12    | ENSG00000174840 |
| 3 | 57764477 | 57764836 | 57764630 | 11 | 16 | 2  | 5.433815927 | 0.000499302 | SLMAP    | ENSG00000163681 |
| 3 | 58010124 | 58010332 | 58010220 | 9  | 9  | 0  | 9.589086931 | 0.00120187  |          | ENSG00000197750 |
| 3 | 58835213 | 58835404 | 58835283 | 8  | 9  | 1  | 4.794543465 | 0.00708517  | C3orf67  | ENSG00000163689 |
| 3 | 59354535 | 59354925 | 59354764 | 32 | 39 | 0  | 38.35634772 | 2.09E-12    | C3orf67  | ENSG00000163689 |
| 3 | 59614897 | 59615146 | 59615033 | 10 | 11 | 2  | 3.835634772 | 0.00800699  |          |                 |
| 3 | 59759521 | 59759939 | 59759760 | 11 | 19 | 2  | 6.39272462  | 8.83E-05    |          |                 |
| 3 | 60026004 | 60026183 | 60026126 | 8  | 8  | 3  | 2.157544559 | 0.0836802   | FHIT     | ENSG00000189283 |
| 3 | 61586624 | 61586841 | 61586732 | 10 | 10 | 7  | 1.318499453 | 0.269217    | PTPRG    | ENSG00000144724 |
| 3 | 61587190 | 61587506 | 61587348 | 10 | 12 | 8  | 1.385090334 | 0.219216    | PTPRG    | ENSG00000144724 |
| 3 | 61588444 | 61588909 | 61588615 | 9  | 17 | 16 | 1.015315087 | 0.480915    | PTPRG    | ENSG00000144724 |
| 3 | 61589238 | 61589736 | 61589374 | 10 | 21 | 7  | 2.636998906 | 0.00562102  | PTPRG    | ENSG00000144724 |
| 3 | 61595331 | 61595707 | 61595528 | 16 | 24 | 11 | 1.997726444 | 0.0196649   | PTPRG    | ENSG00000144724 |
| 3 | 61601501 | 61601871 | 61601543 | 8  | 15 | 9  | 1.534253909 | 0.136498    | PTPRG    | ENSG00000144724 |
| 3 | 61601886 | 61602204 | 61602057 | 8  | 12 | 4  | 2.493162602 | 0.0299057   | PTPRG    | ENSG00000144724 |
| 3 | 61603006 | 61603711 | 61603339 | 11 | 28 | 24 | 1.112334084 | 0.346253    | PTPRG    | ENSG00000144724 |
| 3 | 61608936 | 61609410 | 61609231 | 9  | 19 | 10 | 1.743470351 | 0.0622604   | PTPRG    | ENSG00000144724 |

|   |          |          |          |    |    |    |             |             |       |                 |
|---|----------|----------|----------|----|----|----|-------------|-------------|-------|-----------------|
| 3 | 61614622 | 61614830 | 61614719 | 8  | 9  | 7  | 1.198635866 | 0.346278    | PTPRG | ENSG00000144724 |
| 3 | 61615821 | 61616111 | 61615943 | 12 | 15 | 8  | 1.704726565 | 0.0916153   | PTPRG | ENSG00000144724 |
| 3 | 61617036 | 61617295 | 61617160 | 8  | 11 | 5  | 1.917817386 | 0.0843804   | PTPRG | ENSG00000144724 |
| 3 | 61617327 | 61617634 | 61617461 | 9  | 11 | 4  | 2.301380863 | 0.0459276   | PTPRG | ENSG00000144724 |
| 3 | 61623354 | 61623542 | 61623494 | 9  | 11 | 1  | 5.753452158 | 0.00215302  | PTPRG | ENSG00000144724 |
| 3 | 61627180 | 61627434 | 61627293 | 10 | 12 | 14 | 0.831054201 | 0.689281    | PTPRG | ENSG00000144724 |
| 3 | 61630771 | 61631041 | 61630887 | 10 | 13 | 9  | 1.34247217  | 0.232231    | PTPRG | ENSG00000144724 |
| 3 | 61635251 | 61635564 | 61635407 | 8  | 12 | 4  | 2.493162602 | 0.0299057   | PTPRG | ENSG00000144724 |
| 3 | 61645127 | 61645436 | 61645275 | 10 | 14 | 7  | 1.797953799 | 0.0806593   | PTPRG | ENSG00000144724 |
| 3 | 61648268 | 61648458 | 61648442 | 8  | 9  | 5  | 1.598181155 | 0.170911    | PTPRG | ENSG00000144724 |
| 3 | 61648461 | 61648695 | 61648578 | 9  | 11 | 5  | 1.917817386 | 0.0843804   | PTPRG | ENSG00000144724 |
| 3 | 61656630 | 61656858 | 61656762 | 8  | 8  | 3  | 2.157544559 | 0.0836802   | PTPRG | ENSG00000144724 |
| 3 | 61657497 | 61657871 | 61657693 | 8  | 13 | 5  | 2.237453617 | 0.038866    | PTPRG | ENSG00000144724 |
| 3 | 61658030 | 61658672 | 61658327 | 14 | 38 | 13 | 2.671245645 | 0.000355791 | PTPRG | ENSG00000144724 |
| 3 | 61660404 | 61660640 | 61660543 | 10 | 13 | 5  | 2.237453617 | 0.038866    | PTPRG | ENSG00000144724 |
| 3 | 61665781 | 61666027 | 61665953 | 9  | 12 | 15 | 0.779113313 | 0.750998    | PTPRG | ENSG00000144724 |
| 3 | 61666332 | 61667173 | 61666827 | 9  | 33 | 20 | 1.552518836 | 0.0525199   | PTPRG | ENSG00000144724 |
| 3 | 61670357 | 61670694 | 61670525 | 10 | 13 | 8  | 1.491635745 | 0.166708    | PTPRG | ENSG00000144724 |
| 3 | 61671007 | 61671208 | 61671103 | 8  | 9  | 4  | 1.917817386 | 0.103282    | PTPRG | ENSG00000144724 |
| 3 | 61674400 | 61674656 | 61674528 | 9  | 12 | 5  | 2.077635502 | 0.0577144   | PTPRG | ENSG00000144724 |
| 3 | 61677280 | 61677514 | 61677385 | 9  | 9  | 3  | 2.397271733 | 0.0539397   | PTPRG | ENSG00000144724 |
| 3 | 61679287 | 61679475 | 61679381 | 8  | 9  | 14 | 0.639272462 | 0.869513    | PTPRG | ENSG00000144724 |
| 3 | 61679705 | 61680001 | 61679859 | 13 | 16 | 8  | 1.811271976 | 0.0663685   | PTPRG | ENSG00000144724 |
| 3 | 61680605 | 61680784 | 61680650 | 8  | 8  | 6  | 1.232882605 | 0.333038    | PTPRG | ENSG00000144724 |
| 3 | 61682934 | 61683185 | 61683098 | 8  | 11 | 8  | 1.278544924 | 0.28289     | PTPRG | ENSG00000144724 |
| 3 | 61694091 | 61694441 | 61694266 | 15 | 21 | 11 | 1.757999271 | 0.0516118   | PTPRG | ENSG00000144724 |
| 3 | 61702853 | 61703062 | 61702957 | 8  | 8  | 3  | 2.157544559 | 0.0836802   | PTPRG | ENSG00000144724 |
| 3 | 61716279 | 61716482 | 61716380 | 9  | 9  | 11 | 0.799090578 | 0.702688    | PTPRG | ENSG00000144724 |
| 3 | 61717520 | 61717804 | 61717644 | 8  | 11 | 6  | 1.643843474 | 0.137712    | PTPRG | ENSG00000144724 |
| 3 | 61718129 | 61718328 | 61718228 | 9  | 11 | 8  | 1.278544924 | 0.28289     | PTPRG | ENSG00000144724 |
| 3 | 61729505 | 61729727 | 61729638 | 8  | 11 | 3  | 2.876726079 | 0.0213797   | PTPRG | ENSG00000144724 |
| 3 | 61730551 | 61730833 | 61730671 | 10 | 12 | 9  | 1.246581301 | 0.295061    | PTPRG | ENSG00000144724 |
| 3 | 61737817 | 61738066 | 61737972 | 8  | 10 | 5  | 1.757999271 | 0.121253    | PTPRG | ENSG00000144724 |
| 3 | 61742752 | 61742953 | 61742852 | 8  | 10 | 9  | 1.054799562 | 0.4492      | PTPRG | ENSG00000144724 |



|   |          |          |          |    |    |    |             |            |       |                 |
|---|----------|----------|----------|----|----|----|-------------|------------|-------|-----------------|
| 3 | 61748736 | 61749066 | 61748897 | 9  | 12 | 7  | 1.558226626 | 0.152813   | PTPRG | ENSG00000144724 |
| 3 | 61754327 | 61754506 | 61754358 | 8  | 8  | 2  | 2.876726079 | 0.0381137  | PTPRG | ENSG00000144724 |
| 3 | 61759422 | 61759770 | 61759596 | 9  | 14 | 2  | 4.794543465 | 0.00154571 | PTPRG | ENSG00000144724 |
| 3 | 61763548 | 61763866 | 61763719 | 12 | 15 | 6  | 2.191791298 | 0.0328001  | PTPRG | ENSG00000144724 |
| 3 | 61765006 | 61765353 | 61765179 | 9  | 14 | 11 | 1.198635866 | 0.315918   | PTPRG | ENSG00000144724 |
| 3 | 61765678 | 61765905 | 61765778 | 8  | 11 | 6  | 1.643843474 | 0.137712   | PTPRG | ENSG00000144724 |
| 3 | 61768437 | 61769220 | 61768719 | 16 | 36 | 25 | 1.364600832 | 0.108713   | PTPRG | ENSG00000144724 |
| 3 | 61769377 | 61769642 | 61769537 | 8  | 10 | 15 | 0.659249726 | 0.861705   | PTPRG | ENSG00000144724 |
| 3 | 61774922 | 61775277 | 61775082 | 9  | 14 | 8  | 1.598181155 | 0.124586   | PTPRG | ENSG00000144724 |
| 3 | 61776611 | 61776894 | 61776752 | 10 | 14 | 6  | 2.054804342 | 0.0480281  | PTPRG | ENSG00000144724 |
| 3 | 61789131 | 61789477 | 61789304 | 14 | 19 | 11 | 1.598181155 | 0.0927758  | PTPRG | ENSG00000144724 |
| 3 | 61798734 | 61799139 | 61798998 | 10 | 17 | 10 | 1.569123316 | 0.112309   | PTPRG | ENSG00000144724 |
| 3 | 61805867 | 61806137 | 61806002 | 8  | 10 | 6  | 1.506856518 | 0.188853   | PTPRG | ENSG00000144724 |
| 3 | 61808916 | 61809230 | 61809073 | 11 | 15 | 4  | 3.068507818 | 0.0076507  | PTPRG | ENSG00000144724 |
| 3 | 61818861 | 61819251 | 61819023 | 12 | 18 | 8  | 2.024362796 | 0.0334397  | PTPRG | ENSG00000144724 |
| 3 | 61822032 | 61822323 | 61822200 | 9  | 11 | 10 | 1.046082211 | 0.455063   | PTPRG | ENSG00000144724 |
| 3 | 61826966 | 61827214 | 61827090 | 9  | 13 | 4  | 2.684944341 | 0.01921    | PTPRG | ENSG00000144724 |
| 3 | 61833857 | 61834040 | 61833948 | 9  | 9  | 5  | 1.598181155 | 0.170911   | PTPRG | ENSG00000144724 |
| 3 | 61835624 | 61836095 | 61835803 | 9  | 18 | 9  | 1.821926517 | 0.0548428  | PTPRG | ENSG00000144724 |
| 3 | 61838260 | 61838456 | 61838364 | 8  | 9  | 4  | 1.917817386 | 0.103282   | PTPRG | ENSG00000144724 |
| 3 | 61845643 | 61845913 | 61845778 | 8  | 11 | 5  | 1.917817386 | 0.0843804  | PTPRG | ENSG00000144724 |
| 3 | 61846679 | 61846886 | 61846782 | 9  | 9  | 5  | 1.598181155 | 0.170911   | PTPRG | ENSG00000144724 |
| 3 | 61847919 | 61848146 | 61848040 | 10 | 11 | 8  | 1.278544924 | 0.28289    | PTPRG | ENSG00000144724 |
| 3 | 61855267 | 61855476 | 61855371 | 9  | 11 | 5  | 1.917817386 | 0.0843804  | PTPRG | ENSG00000144724 |
| 3 | 61855597 | 61856109 | 61855776 | 13 | 30 | 17 | 1.65145386  | 0.0409633  | PTPRG | ENSG00000144724 |
| 3 | 61861690 | 61861920 | 61861835 | 8  | 10 | 3  | 2.636998906 | 0.034203   | PTPRG | ENSG00000144724 |
| 3 | 61866267 | 61866487 | 61866377 | 10 | 10 | 2  | 3.515998541 | 0.0136204  | PTPRG | ENSG00000144724 |
| 3 | 61867946 | 61868160 | 61868020 | 8  | 10 | 5  | 1.757999271 | 0.121253   | PTPRG | ENSG00000144724 |
| 3 | 61873353 | 61873537 | 61873460 | 8  | 9  | 9  | 0.958908693 | 0.536911   | PTPRG | ENSG00000144724 |
| 3 | 61874689 | 61874991 | 61874838 | 8  | 11 | 8  | 1.278544924 | 0.28289    | PTPRG | ENSG00000144724 |
| 3 | 61879802 | 61880281 | 61879981 | 15 | 25 | 20 | 1.187220287 | 0.276369   | PTPRG | ENSG00000144724 |
| 3 | 61880722 | 61881015 | 61880824 | 10 | 14 | 8  | 1.598181155 | 0.124586   | PTPRG | ENSG00000144724 |
| 3 | 61897001 | 61897468 | 61897289 | 15 | 27 | 13 | 1.917817386 | 0.0192196  | PTPRG | ENSG00000144724 |
| 3 | 61900020 | 61900211 | 61900115 | 8  | 11 | 9  | 1.150690432 | 0.367789   | PTPRG | ENSG00000144724 |

|   |          |          |          |    |    |    |             |            |       |                 |
|---|----------|----------|----------|----|----|----|-------------|------------|-------|-----------------|
| 3 | 61900434 | 61900619 | 61900513 | 9  | 11 | 4  | 2.301380863 | 0.0459276  | PTPRG | ENSG00000144724 |
| 3 | 61907372 | 61907565 | 61907456 | 8  | 9  | 6  | 1.369869562 | 0.253675   | PTPRG | ENSG00000144724 |
| 3 | 61913246 | 61913665 | 61913391 | 13 | 20 | 18 | 1.05984645  | 0.425516   | PTPRG | ENSG00000144724 |
| 3 | 61914704 | 61915215 | 61914959 | 9  | 18 | 16 | 1.07172148  | 0.415914   | PTPRG | ENSG00000144724 |
| 3 | 61915392 | 61915669 | 61915533 | 9  | 11 | 10 | 1.046082211 | 0.455063   | PTPRG | ENSG00000144724 |
| 3 | 61918559 | 61918758 | 61918658 | 8  | 8  | 2  | 2.876726079 | 0.0381137  | PTPRG | ENSG00000144724 |
| 3 | 61925177 | 61925356 | 61925241 | 8  | 8  | 8  | 0.958908693 | 0.534974   | PTPRG | ENSG00000144724 |
| 3 | 61929666 | 61929938 | 61929802 | 9  | 13 | 2  | 4.474907234 | 0.00269459 | PTPRG | ENSG00000144724 |
| 3 | 61934785 | 61935013 | 61934879 | 8  | 10 | 4  | 2.109599125 | 0.0694668  | PTPRG | ENSG00000144724 |
| 3 | 61936977 | 61937238 | 61937075 | 9  | 11 | 7  | 1.43836304  | 0.204844   | PTPRG | ENSG00000144724 |
| 3 | 61940654 | 61940842 | 61940791 | 8  | 10 | 2  | 3.515998541 | 0.0136204  | PTPRG | ENSG00000144724 |
| 3 | 61942064 | 61942276 | 61942206 | 8  | 9  | 8  | 1.065454103 | 0.442605   | PTPRG | ENSG00000144724 |
| 3 | 61957051 | 61957364 | 61957207 | 15 | 18 | 7  | 2.277408146 | 0.0188653  | PTPRG | ENSG00000144724 |
| 3 | 61957378 | 61957692 | 61957535 | 11 | 15 | 12 | 1.180195315 | 0.324974   | PTPRG | ENSG00000144724 |
| 3 | 61958330 | 61958600 | 61958452 | 10 | 10 | 9  | 1.054799562 | 0.4492     | PTPRG | ENSG00000144724 |
| 3 | 61961143 | 61961418 | 61961250 | 8  | 10 | 4  | 2.109599125 | 0.0694668  | PTPRG | ENSG00000144724 |
| 3 | 61961779 | 61962051 | 61961915 | 10 | 12 | 6  | 1.78083043  | 0.0985525  | PTPRG | ENSG00000144724 |
| 3 | 61963685 | 61963876 | 61963775 | 8  | 8  | 5  | 1.43836304  | 0.235762   | PTPRG | ENSG00000144724 |
| 3 | 61966102 | 61966364 | 61966233 | 9  | 13 | 7  | 1.678090213 | 0.11195    | PTPRG | ENSG00000144724 |
| 3 | 61967479 | 61968766 | 61968332 | 28 | 75 | 33 | 2.143442961 | 5.77E-05   | PTPRG | ENSG00000144724 |
| 3 | 61971870 | 61972242 | 61972070 | 10 | 16 | 11 | 1.358453982 | 0.20248    | PTPRG | ENSG00000144724 |
| 3 | 61972609 | 61972935 | 61972772 | 9  | 14 | 11 | 1.198635866 | 0.315918   | PTPRG | ENSG00000144724 |
| 3 | 61978601 | 61978947 | 61978809 | 8  | 12 | 4  | 2.493162602 | 0.0299057  | PTPRG | ENSG00000144724 |
| 3 | 61987876 | 61988245 | 61988127 | 11 | 16 | 9  | 1.630144778 | 0.102169   | PTPRG | ENSG00000144724 |
| 3 | 61997007 | 61997236 | 61997124 | 8  | 10 | 5  | 1.757999271 | 0.121253   | PTPRG | ENSG00000144724 |
| 3 | 62002791 | 62002985 | 62002888 | 10 | 11 | 4  | 2.301380863 | 0.0459276  | PTPRG | ENSG00000144724 |
| 3 | 62006499 | 62006860 | 62006678 | 8  | 16 | 10 | 1.481949798 | 0.147733   | PTPRG | ENSG00000144724 |
| 3 | 62012368 | 62012712 | 62012547 | 10 | 15 | 14 | 1.022835939 | 0.473606   | PTPRG | ENSG00000144724 |
| 3 | 62019757 | 62020280 | 62020039 | 10 | 20 | 8  | 2.237453617 | 0.0160557  | PTPRG | ENSG00000144724 |
| 3 | 62032013 | 62032247 | 62032130 | 10 | 12 | 6  | 1.78083043  | 0.0985525  | PTPRG | ENSG00000144724 |
| 3 | 62036204 | 62036542 | 62036383 | 8  | 11 | 10 | 1.046082211 | 0.455063   | PTPRG | ENSG00000144724 |
| 3 | 62045288 | 62045502 | 62045399 | 9  | 10 | 9  | 1.054799562 | 0.4492     | PTPRG | ENSG00000144724 |
| 3 | 62048664 | 62048876 | 62048770 | 8  | 9  | 1  | 4.794543465 | 0.00708517 | PTPRG | ENSG00000144724 |
| 3 | 62049740 | 62049999 | 62049890 | 9  | 11 | 7  | 1.43836304  | 0.204844   | PTPRG | ENSG00000144724 |

|   |          |          |          |    |    |    |             |             |         |                 |
|---|----------|----------|----------|----|----|----|-------------|-------------|---------|-----------------|
| 3 | 62080837 | 62081072 | 62080954 | 10 | 11 | 5  | 1.917817386 | 0.0843804   | PTPRG   | ENSG00000144724 |
| 3 | 62086272 | 62086547 | 62086400 | 13 | 14 | 5  | 2.397271733 | 0.0258078   | PTPRG   | ENSG00000144724 |
| 3 | 62089627 | 62089806 | 62089716 | 8  | 8  | 7  | 1.07877228  | 0.435076    | PTPRG   | ENSG00000144724 |
| 3 | 62092382 | 62092700 | 62092541 | 11 | 15 | 7  | 1.917817386 | 0.0572317   | PTPRG   | ENSG00000144724 |
| 3 | 62106448 | 62106765 | 62106606 | 8  | 11 | 4  | 2.301380863 | 0.0459276   | PTPRG   | ENSG00000144724 |
| 3 | 62124903 | 62125272 | 62125070 | 8  | 13 | 9  | 1.34247217  | 0.232231    | C3orf14 | ENSG00000114405 |
| 3 | 62144544 | 62144794 | 62144669 | 13 | 15 | 4  | 3.068507818 | 0.0076507   | C3orf14 | ENSG00000114405 |
| 3 | 62144843 | 62145367 | 62145143 | 9  | 19 | 11 | 1.598181155 | 0.0927758   | C3orf14 | ENSG00000114405 |
| 3 | 62148235 | 62148541 | 62148388 | 9  | 13 | 6  | 1.917817386 | 0.0693353   | C3orf14 | ENSG00000114405 |
| 3 | 62149577 | 62150184 | 62149727 | 17 | 31 | 14 | 2.045671879 | 0.00841532  | C3orf14 | ENSG00000114405 |
| 3 | 62162238 | 62162480 | 62162355 | 13 | 14 | 8  | 1.598181155 | 0.124586    | C3orf14 | ENSG00000114405 |
| 3 | 62201840 | 62202222 | 62202019 | 11 | 17 | 8  | 1.917817386 | 0.0474153   | C3orf14 | ENSG00000114405 |
| 3 | 62216319 | 62216504 | 62216411 | 8  | 8  | 8  | 0.958908693 | 0.534974    | C3orf14 | ENSG00000114405 |
| 3 | 62248813 | 62249184 | 62248992 | 8  | 15 | 8  | 1.704726565 | 0.0916153   | C3orf14 | ENSG00000114405 |
| 3 | 62255552 | 62255738 | 62255693 | 8  | 9  | 2  | 3.19636231  | 0.0229249   | C3orf14 | ENSG00000114405 |
| 3 | 62258352 | 62258569 | 62258419 | 9  | 10 | 5  | 1.757999271 | 0.121253    | C3orf14 | ENSG00000114405 |
| 3 | 62260079 | 62260273 | 62260176 | 9  | 9  | 6  | 1.369869562 | 0.253675    | C3orf14 | ENSG00000114405 |
| 3 | 62278334 | 62278567 | 62278450 | 9  | 10 | 3  | 2.636998906 | 0.034203    | C3orf14 | ENSG00000114405 |
| 3 | 62279124 | 62279638 | 62279455 | 9  | 21 | 24 | 0.84383965  | 0.72062     | C3orf14 | ENSG00000114405 |
| 3 | 62279778 | 62280127 | 62279907 | 10 | 15 | 18 | 0.807502057 | 0.737835    | C3orf14 | ENSG00000114405 |
| 3 | 62280557 | 62280885 | 62280721 | 13 | 19 | 12 | 1.475244143 | 0.131365    | C3orf14 | ENSG00000114405 |
| 3 | 62310325 | 62310700 | 62310434 | 8  | 14 | 4  | 2.876726079 | 0.01219     | FEZF2   | ENSG00000153266 |
| 3 | 62310801 | 62310980 | 62310871 | 8  | 8  | 5  | 1.43836304  | 0.235762    | FEZF2   | ENSG00000153266 |
| 3 | 62386307 | 62386525 | 62386417 | 8  | 9  | 9  | 0.958908693 | 0.536911    | FEZF2   | ENSG00000153266 |
| 3 | 62405045 | 62405238 | 62405086 | 8  | 8  | 2  | 2.876726079 | 0.0381137   | FEZF2   | ENSG00000153266 |
| 3 | 62405349 | 62405528 | 62405438 | 9  | 9  | 6  | 1.369869562 | 0.253675    | FEZF2   | ENSG00000153266 |
| 3 | 62406464 | 62406643 | 62406520 | 8  | 9  | 1  | 4.794543465 | 0.00708517  | FEZF2   | ENSG00000153266 |
| 3 | 62414457 | 62414752 | 62414632 | 10 | 14 | 15 | 0.8989769   | 0.617119    | FEZF2   | ENSG00000153266 |
| 3 | 62432076 | 62432356 | 62432239 | 8  | 10 | 5  | 1.757999271 | 0.121253    | FEZF2   | ENSG00000153266 |
| 3 | 62436963 | 62437217 | 62437092 | 8  | 8  | 15 | 0.53938614  | 0.937867    | FEZF2   | ENSG00000153266 |
| 3 | 62450696 | 62451105 | 62450856 | 8  | 15 | 2  | 5.114179696 | 0.00088103  | FEZF2   | ENSG00000153266 |
| 3 | 62454801 | 62455203 | 62454918 | 11 | 17 | 2  | 5.753452158 | 0.000281509 | FEZF2   | ENSG00000153266 |
| 3 | 62470004 | 62470183 | 62470075 | 8  | 8  | 5  | 1.43836304  | 0.235762    | FEZF2   | ENSG00000153266 |
| 3 | 62474127 | 62474446 | 62474283 | 8  | 11 | 7  | 1.43836304  | 0.204844    | FEZF2   | ENSG00000153266 |

|   |          |          |          |    |    |    |             |             |       |                 |
|---|----------|----------|----------|----|----|----|-------------|-------------|-------|-----------------|
| 3 | 62479035 | 62479354 | 62479194 | 10 | 13 | 10 | 1.220429246 | 0.306001    | FEZF2 | ENSG00000153266 |
| 3 | 62485826 | 62486141 | 62485991 | 9  | 14 | 3  | 3.595907599 | 0.00486913  | FEZF2 | ENSG00000153266 |
| 3 | 62503078 | 62503277 | 62503228 | 8  | 9  | 9  | 0.958908693 | 0.536911    | FEZF2 | ENSG00000153266 |
| 3 | 62507050 | 62507273 | 62507194 | 9  | 9  | 11 | 0.799090578 | 0.702688    | FEZF2 | ENSG00000153266 |
| 3 | 62511093 | 62511538 | 62511272 | 9  | 19 | 14 | 1.278544924 | 0.231514    | FEZF2 | ENSG00000153266 |
| 3 | 62511771 | 62512017 | 62511901 | 8  | 9  | 6  | 1.369869562 | 0.253675    | FEZF2 | ENSG00000153266 |
| 3 | 62514258 | 62514540 | 62514372 | 8  | 10 | 3  | 2.636998906 | 0.034203    | FEZF2 | ENSG00000153266 |
| 3 | 62516122 | 62516364 | 62516243 | 8  | 9  | 7  | 1.198635866 | 0.346278    | FEZF2 | ENSG00000153266 |
| 3 | 62517753 | 62517983 | 62517912 | 9  | 11 | 5  | 1.917817386 | 0.0843804   | FEZF2 | ENSG00000153266 |
| 3 | 62519300 | 62519588 | 62519447 | 15 | 17 | 11 | 1.43836304  | 0.15834     | FEZF2 | ENSG00000153266 |
| 3 | 62520576 | 62520919 | 62520748 | 19 | 22 | 10 | 2.004990904 | 0.023438    | FEZF2 | ENSG00000153266 |
| 3 | 62550986 | 62551393 | 62551232 | 17 | 24 | 11 | 1.997726444 | 0.0196649   |       | ENSG00000210876 |
| 3 | 62552201 | 62552402 | 62552299 | 8  | 8  | 4  | 1.726035648 | 0.150596    |       | ENSG00000210876 |
| 3 | 62553852 | 62554073 | 62553962 | 9  | 10 | 8  | 1.171999514 | 0.35773     |       | ENSG00000210876 |
| 3 | 62562246 | 62562554 | 62562400 | 14 | 17 | 7  | 2.157544559 | 0.0276499   |       | ENSG00000210876 |
| 3 | 62566336 | 62566835 | 62566589 | 8  | 19 | 14 | 1.278544924 | 0.231514    |       | ENSG00000210876 |
| 3 | 62575137 | 62575613 | 62575434 | 12 | 21 | 5  | 3.515998541 | 0.00108602  |       | ENSG00000210876 |
| 3 | 62575942 | 62576220 | 62576076 | 8  | 11 | 4  | 2.301380863 | 0.0459276   |       | ENSG00000210876 |
| 3 | 62578898 | 62579167 | 62579008 | 8  | 11 | 6  | 1.643843474 | 0.137712    |       | ENSG00000210876 |
| 3 | 62579208 | 62579444 | 62579295 | 9  | 11 | 4  | 2.301380863 | 0.0459276   |       | ENSG00000210876 |
| 3 | 62583086 | 62584036 | 62583418 | 15 | 40 | 21 | 1.78705711  | 0.0117653   |       | ENSG00000210876 |
| 3 | 62585329 | 62585548 | 62585396 | 9  | 10 | 2  | 3.515998541 | 0.0136204   |       | ENSG00000210876 |
| 3 | 62586902 | 62587444 | 62587265 | 13 | 28 | 8  | 3.0898169   | 0.000588149 |       | ENSG00000210876 |
| 3 | 62593399 | 62593766 | 62593578 | 13 | 18 | 12 | 1.401481936 | 0.168368    |       | ENSG00000210876 |
| 3 | 62600348 | 62600532 | 62600440 | 8  | 8  | 3  | 2.157544559 | 0.0836802   |       | ENSG00000210876 |
| 3 | 62604442 | 62604627 | 62604529 | 9  | 9  | 10 | 0.871735176 | 0.624623    |       | ENSG00000210876 |
| 3 | 62607402 | 62607814 | 62607635 | 11 | 19 | 12 | 1.475244143 | 0.131365    |       | ENSG00000210876 |
| 3 | 62622696 | 62622887 | 62622791 | 8  | 8  | 2  | 2.876726079 | 0.0381137   |       | ENSG00000210876 |
| 3 | 62638137 | 62638412 | 62638274 | 9  | 11 | 7  | 1.43836304  | 0.204844    |       | ENSG00000210876 |
| 3 | 62640218 | 62640472 | 62640341 | 8  | 9  | 5  | 1.598181155 | 0.170911    |       | ENSG00000210876 |
| 3 | 62644916 | 62645151 | 62645010 | 9  | 10 | 1  | 5.273997812 | 0.00391723  |       | ENSG00000210876 |
| 3 | 62648860 | 62649083 | 62648987 | 11 | 12 | 3  | 3.116453252 | 0.0131971   |       | ENSG00000210876 |
| 3 | 62651322 | 62651538 | 62651417 | 10 | 10 | 7  | 1.318499453 | 0.269217    |       | ENSG00000210876 |
| 3 | 62692117 | 62692302 | 62692210 | 9  | 10 | 4  | 2.109599125 | 0.0694668   |       | ENSG00000210876 |

|   |          |          |          |    |    |    |             |                  |                 |
|---|----------|----------|----------|----|----|----|-------------|------------------|-----------------|
| 3 | 62700731 | 62700937 | 62700813 | 8  | 10 | 2  | 3.515998541 | 0.0136204        | ENSG00000210876 |
| 3 | 62711242 | 62711507 | 62711342 | 9  | 12 | 3  | 3.116453252 | 0.0131971        | ENSG00000210876 |
| 3 | 62726087 | 62726296 | 62726191 | 8  | 9  | 2  | 3.19636231  | 0.0229249        | ENSG00000210876 |
| 3 | 62761569 | 62761803 | 62761686 | 9  | 10 | 4  | 2.109599125 | 0.0694668        | ENSG00000210876 |
| 3 | 62794278 | 62794471 | 62794346 | 9  | 10 | 12 | 0.811384279 | 0.697544         | ENSG00000210884 |
| 3 | 62821702 | 62821881 | 62821791 | 8  | 8  | 14 | 0.575345216 | 0.912234 CADPS   | ENSG00000163618 |
| 3 | 62822554 | 62822733 | 62822643 | 8  | 9  | 4  | 1.917817386 | 0.103282 CADPS   | ENSG00000163618 |
| 3 | 62834435 | 62834684 | 62834585 | 11 | 12 | 4  | 2.493162602 | 0.0299057 CADPS  | ENSG00000163618 |
| 3 | 62848352 | 62848628 | 62848490 | 8  | 11 | 4  | 2.301380863 | 0.0459276 CADPS  | ENSG00000163618 |
| 3 | 62848890 | 62849164 | 62848995 | 14 | 16 | 11 | 1.358453982 | 0.20248 CADPS    | ENSG00000163618 |
| 3 | 62849975 | 62850228 | 62850101 | 11 | 12 | 3  | 3.116453252 | 0.0131971 CADPS  | ENSG00000163618 |
| 3 | 62861858 | 62862094 | 62861970 | 9  | 10 | 3  | 2.636998906 | 0.034203 CADPS   | ENSG00000163618 |
| 3 | 62868386 | 62868732 | 62868564 | 9  | 13 | 7  | 1.678090213 | 0.11195 CADPS    | ENSG00000163618 |
| 3 | 62873672 | 62874005 | 62873889 | 12 | 16 | 3  | 4.075361945 | 0.00173346 CADPS | ENSG00000163618 |
| 3 | 62877787 | 62878022 | 62877904 | 8  | 8  | 4  | 1.726035648 | 0.150596 CADPS   | ENSG00000163618 |
| 3 | 62878080 | 62878339 | 62878209 | 10 | 13 | 5  | 2.237453617 | 0.038866 CADPS   | ENSG00000163618 |
| 3 | 62880471 | 62880753 | 62880612 | 11 | 13 | 4  | 2.684944341 | 0.01921 CADPS    | ENSG00000163618 |
| 3 | 62885256 | 62885590 | 62885435 | 9  | 13 | 8  | 1.491635745 | 0.166708 CADPS   | ENSG00000163618 |
| 3 | 62885925 | 62886289 | 62886187 | 8  | 13 | 5  | 2.237453617 | 0.038866 CADPS   | ENSG00000163618 |
| 3 | 62909250 | 62909429 | 62909339 | 8  | 8  | 13 | 0.616441303 | 0.878084 CADPS   | ENSG00000163618 |
| 3 | 62915490 | 62915699 | 62915597 | 8  | 10 | 7  | 1.318499453 | 0.269217 CADPS   | ENSG00000163618 |
| 3 | 62923634 | 62923913 | 62923758 | 9  | 12 | 1  | 6.232906505 | 0.00117736 CADPS | ENSG00000163618 |
| 3 | 62953734 | 62954057 | 62953907 | 11 | 15 | 3  | 3.835634772 | 0.00291691 CADPS | ENSG00000163618 |
| 3 | 62992909 | 62993099 | 62992973 | 8  | 10 | 8  | 1.171999514 | 0.35773 CADPS    | ENSG00000163618 |
| 3 | 63008404 | 63008583 | 63008498 | 8  | 8  | 2  | 2.876726079 | 0.0381137 CADPS  | ENSG00000163618 |
| 3 | 63009214 | 63009650 | 63009471 | 9  | 16 | 5  | 2.716907964 | 0.0109645 CADPS  | ENSG00000163618 |
| 3 | 63011237 | 63011500 | 63011368 | 9  | 11 | 5  | 1.917817386 | 0.0843804 CADPS  | ENSG00000163618 |
| 3 | 63022071 | 63022259 | 63022175 | 8  | 8  | 2  | 2.876726079 | 0.0381137 CADPS  | ENSG00000163618 |
| 3 | 63028827 | 63029111 | 63028969 | 9  | 12 | 10 | 1.133255728 | 0.37674 CADPS    | ENSG00000163618 |
| 3 | 63029922 | 63030146 | 63030034 | 8  | 8  | 5  | 1.43836304  | 0.235762 CADPS   | ENSG00000163618 |
| 3 | 63037170 | 63037673 | 63037385 | 8  | 19 | 14 | 1.278544924 | 0.231514 CADPS   | ENSG00000163618 |
| 3 | 63046974 | 63047165 | 63047007 | 8  | 9  | 9  | 0.958908693 | 0.536911 CADPS   | ENSG00000163618 |
| 3 | 63051038 | 63051249 | 63051217 | 8  | 10 | 5  | 1.757999271 | 0.121253 CADPS   | ENSG00000163618 |
| 3 | 63053111 | 63053298 | 63053146 | 8  | 8  | 5  | 1.43836304  | 0.235762 CADPS   | ENSG00000163618 |

|   |          |          |          |    |    |    |             |                 |                 |
|---|----------|----------|----------|----|----|----|-------------|-----------------|-----------------|
| 3 | 63083178 | 63083426 | 63083302 | 9  | 10 | 9  | 1.054799562 | 0.4492          | ENSG00000222622 |
| 3 | 63083582 | 63083878 | 63083730 | 8  | 12 | 2  | 4.155271003 | 0.0046638       | ENSG00000222622 |
| 3 | 63089644 | 63089900 | 63089733 | 9  | 9  | 7  | 1.198635866 | 0.346278        | ENSG00000222622 |
| 3 | 63093969 | 63094160 | 63094089 | 8  | 8  | 7  | 1.07877228  | 0.435076        | ENSG00000222622 |
| 3 | 63104253 | 63104488 | 63104404 | 12 | 12 | 4  | 2.493162602 | 0.0299057       | ENSG00000222622 |
| 3 | 63118930 | 63119264 | 63119105 | 8  | 12 | 7  | 1.558226626 | 0.152813        | ENSG00000222622 |
| 3 | 63140903 | 63141167 | 63141051 | 11 | 11 | 9  | 1.150690432 | 0.367789        | ENSG00000222622 |
| 3 | 63158191 | 63158460 | 63158312 | 9  | 10 | 3  | 2.636998906 | 0.034203        | ENSG00000222622 |
| 3 | 63160866 | 63161479 | 63161178 | 10 | 24 | 10 | 2.179337939 | 0.011585        | ENSG00000222622 |
| 3 | 63161893 | 63162105 | 63161991 | 8  | 10 | 4  | 2.109599125 | 0.0694668       | ENSG00000222622 |
| 3 | 63163352 | 63163653 | 63163499 | 14 | 18 | 12 | 1.401481936 | 0.168368        | ENSG00000222622 |
| 3 | 63167698 | 63167945 | 63167821 | 9  | 11 | 6  | 1.643843474 | 0.137712        | ENSG00000222622 |
| 3 | 63170499 | 63170711 | 63170605 | 10 | 10 | 9  | 1.054799562 | 0.4492          | ENSG00000222622 |
| 3 | 63188551 | 63188805 | 63188672 | 9  | 9  | 12 | 0.737622072 | 0.769563        | ENSG00000222622 |
| 3 | 63189374 | 63189692 | 63189542 | 15 | 19 | 9  | 1.917817386 | 0.0394029       | ENSG00000222622 |
| 3 | 63193252 | 63193490 | 63193388 | 9  | 12 | 3  | 3.116453252 | 0.0131971       | ENSG00000222622 |
| 3 | 63193626 | 63193947 | 63193791 | 9  | 14 | 12 | 1.106433107 | 0.392094        | ENSG00000222622 |
| 3 | 63198452 | 63198663 | 63198557 | 8  | 12 | 9  | 1.246581301 | 0.295061        | ENSG00000222622 |
| 3 | 63206321 | 63206551 | 63206427 | 9  | 10 | 5  | 1.757999271 | 0.121253        | ENSG00000222622 |
| 3 | 63240202 | 63240521 | 63240361 | 9  | 14 | 4  | 2.876726079 | 0.01219         | ENSG00000222622 |
| 3 | 63273013 | 63273237 | 63273133 | 8  | 8  | 1  | 4.315089119 | 0.0127267       | ENSG00000222622 |
| 3 | 63283530 | 63283821 | 63283675 | 10 | 13 | 10 | 1.220429246 | 0.306001        | ENSG00000222622 |
| 3 | 63286280 | 63286686 | 63286521 | 8  | 14 | 6  | 2.054804342 | 0.0480281       | ENSG00000222622 |
| 3 | 63291861 | 63292076 | 63291980 | 8  | 10 | 2  | 3.515998541 | 0.0136204       | ENSG00000222622 |
| 3 | 63293342 | 63293585 | 63293469 | 11 | 12 | 7  | 1.558226626 | 0.152813        | ENSG00000222622 |
| 3 | 63299361 | 63299565 | 63299463 | 9  | 9  | 8  | 1.065454103 | 0.442605        | ENSG00000222622 |
| 3 | 63304263 | 63304674 | 63304442 | 10 | 18 | 9  | 1.821926517 | 0.0548428       | ENSG00000222622 |
| 3 | 63311856 | 63312294 | 63312115 | 10 | 16 | 9  | 1.630144778 | 0.102169        | ENSG00000222622 |
| 3 | 63317063 | 63317283 | 63317173 | 8  | 8  | 9  | 0.863017824 | 0.627343        | ENSG00000222622 |
| 3 | 63320782 | 63320983 | 63320912 | 8  | 9  | 3  | 2.397271733 | 0.0539397       | ENSG00000222622 |
| 3 | 63325749 | 63325986 | 63325881 | 11 | 12 | 1  | 6.232906505 | 0.00117736      | ENSG00000222622 |
| 3 | 63351333 | 63351601 | 63351471 | 9  | 10 | 7  | 1.318499453 | 0.269217        | ENSG00000222622 |
| 3 | 63365989 | 63366221 | 63366105 | 8  | 9  | 5  | 1.598181155 | 0.170911        | ENSG00000222622 |
| 3 | 63369201 | 63369418 | 63369309 | 9  | 10 | 2  | 3.515998541 | 0.0136204 SYNPR | ENSG00000163630 |

|   |          |          |          |    |    |    |             |             |       |                 |
|---|----------|----------|----------|----|----|----|-------------|-------------|-------|-----------------|
| 3 | 63369761 | 63370008 | 63369888 | 9  | 11 | 3  | 2.876726079 | 0.0213797   | SYNPR | ENSG00000163630 |
| 3 | 63370543 | 63370799 | 63370671 | 9  | 10 | 7  | 1.318499453 | 0.269217    | SYNPR | ENSG00000163630 |
| 3 | 63373829 | 63374063 | 63373975 | 8  | 11 | 4  | 2.301380863 | 0.0459276   | SYNPR | ENSG00000163630 |
| 3 | 63389241 | 63389673 | 63389481 | 20 | 31 | 7  | 3.835634772 | 5.95E-05    | SYNPR | ENSG00000163630 |
| 3 | 63405553 | 63405769 | 63405695 | 8  | 11 | 5  | 1.917817386 | 0.0843804   | SYNPR | ENSG00000163630 |
| 3 | 63409527 | 63409805 | 63409666 | 10 | 12 | 4  | 2.493162602 | 0.0299057   | SYNPR | ENSG00000163630 |
| 3 | 63418850 | 63419545 | 63419195 | 19 | 37 | 13 | 2.602752167 | 0.000528768 | SYNPR | ENSG00000163630 |
| 3 | 63420621 | 63421007 | 63420739 | 10 | 17 | 14 | 1.150690432 | 0.340986    | SYNPR | ENSG00000163630 |
| 3 | 63422053 | 63422234 | 63422165 | 8  | 9  | 2  | 3.19636231  | 0.0229249   | SYNPR | ENSG00000163630 |
| 3 | 63424099 | 63424294 | 63424228 | 8  | 10 | 11 | 0.878999635 | 0.622439    | SYNPR | ENSG00000163630 |
| 3 | 63430420 | 63430661 | 63430540 | 9  | 11 | 3  | 2.876726079 | 0.0213797   | SYNPR | ENSG00000163630 |
| 3 | 63434312 | 63434834 | 63434452 | 8  | 17 | 6  | 2.465765211 | 0.014729    | SYNPR | ENSG00000163630 |
| 3 | 63439610 | 63439820 | 63439737 | 8  | 8  | 9  | 0.863017824 | 0.627343    | SYNPR | ENSG00000163630 |
| 3 | 63445785 | 63446019 | 63445902 | 11 | 13 | 3  | 3.356180426 | 0.00805599  | SYNPR | ENSG00000163630 |
| 3 | 63450859 | 63451132 | 63450995 | 10 | 13 | 5  | 2.237453617 | 0.038866    | SYNPR | ENSG00000163630 |
| 3 | 63455286 | 63455537 | 63455411 | 8  | 8  | 9  | 0.863017824 | 0.627343    | SYNPR | ENSG00000163630 |
| 3 | 63465519 | 63465732 | 63465625 | 8  | 8  | 4  | 1.726035648 | 0.150596    | SYNPR | ENSG00000163630 |
| 3 | 63471720 | 63472021 | 63471843 | 8  | 13 | 6  | 1.917817386 | 0.0693353   | SYNPR | ENSG00000163630 |
| 3 | 63484083 | 63484413 | 63484248 | 13 | 16 | 8  | 1.811271976 | 0.0663685   |       | ENSG00000210887 |
| 3 | 63486089 | 63486275 | 63486115 | 10 | 11 | 15 | 0.71918152  | 0.81018     |       | ENSG00000210887 |
| 3 | 63487890 | 63488127 | 63488008 | 9  | 10 | 4  | 2.109599125 | 0.0694668   |       | ENSG00000210887 |
| 3 | 63516617 | 63516796 | 63516720 | 8  | 8  | 1  | 4.315089119 | 0.0127267   |       | ENSG00000210887 |
| 3 | 63527110 | 63527344 | 63527232 | 8  | 8  | 7  | 1.07877228  | 0.435076    |       | ENSG00000210887 |
| 3 | 63528959 | 63529214 | 63529129 | 8  | 11 | 8  | 1.278544924 | 0.28289     |       | ENSG00000210887 |
| 3 | 63537471 | 63538039 | 63537725 | 22 | 33 | 11 | 2.716907964 | 0.000672572 |       | ENSG00000210887 |
| 3 | 63541052 | 63541496 | 63541317 | 9  | 19 | 8  | 2.130908207 | 0.0233014   |       | ENSG00000210887 |
| 3 | 63555812 | 63556232 | 63556103 | 11 | 19 | 20 | 0.913246374 | 0.614587    |       | ENSG00000210887 |
| 3 | 63584691 | 63584952 | 63584821 | 9  | 12 | 3  | 3.116453252 | 0.0131971   |       | ENSG00000188817 |
| 3 | 63586025 | 63586273 | 63586156 | 8  | 11 | 5  | 1.917817386 | 0.0843804   |       | ENSG00000188817 |
| 3 | 63591480 | 63591698 | 63591589 | 8  | 11 | 3  | 2.876726079 | 0.0213797   |       | ENSG00000188817 |
| 3 | 63592142 | 63592355 | 63592248 | 8  | 10 | 0  | 10.54799562 | 0.000613541 |       | ENSG00000188817 |
| 3 | 63604608 | 63604890 | 63604749 | 11 | 14 | 9  | 1.43836304  | 0.179537    |       | ENSG00000188817 |
| 3 | 63605133 | 63605795 | 63605386 | 11 | 27 | 12 | 2.0653418   | 0.0117911   |       | ENSG00000188817 |
| 3 | 63623279 | 63623510 | 63623431 | 8  | 10 | 8  | 1.171999514 | 0.35773     |       | ENSG00000188817 |

|   |          |          |          |    |    |    |             |            |                         |
|---|----------|----------|----------|----|----|----|-------------|------------|-------------------------|
| 3 | 63628873 | 63629101 | 63628979 | 11 | 11 | 13 | 0.821921737 | 0.693119   | ENSG00000188817         |
| 3 | 63632259 | 63632670 | 63632425 | 8  | 15 | 5  | 2.557089848 | 0.0169197  | ENSG00000188817         |
| 3 | 63647924 | 63648553 | 63648237 | 8  | 21 | 7  | 2.636998906 | 0.00562102 | ENSG00000188817         |
| 3 | 63651064 | 63651358 | 63651211 | 9  | 13 | 17 | 0.745817872 | 0.798145   | ENSG00000188817         |
| 3 | 63662393 | 63662625 | 63662509 | 9  | 11 | 3  | 2.876726079 | 0.0213797  | ENSG00000188817         |
| 3 | 63664439 | 63664865 | 63664643 | 9  | 17 | 4  | 3.452071295 | 0.00292757 | ENSG00000188817         |
| 3 | 63666014 | 63666333 | 63666173 | 8  | 12 | 16 | 0.733283118 | 0.803868   | ENSG00000188817         |
| 3 | 63667724 | 63667905 | 63667807 | 8  | 8  | 6  | 1.232882605 | 0.333038   | ENSG00000188817         |
| 3 | 63668043 | 63668490 | 63668363 | 8  | 16 | 11 | 1.358453982 | 0.20248    | ENSG00000188817         |
| 3 | 63668626 | 63668917 | 63668771 | 8  | 12 | 12 | 0.958908693 | 0.542188   | ENSG00000188817         |
| 3 | 63677855 | 63678102 | 63677978 | 8  | 10 | 6  | 1.506856518 | 0.188853   | ENSG00000188817         |
| 3 | 63679210 | 63679493 | 63679396 | 10 | 15 | 16 | 0.902502299 | 0.616352   | ENSG00000188817         |
| 3 | 63679740 | 63680437 | 63680068 | 11 | 26 | 31 | 0.80907921  | 0.792852   | ENSG00000188817         |
| 3 | 63680616 | 63680855 | 63680715 | 8  | 11 | 18 | 0.605626543 | 0.918575   | ENSG00000188817         |
| 3 | 63680859 | 63681606 | 63681439 | 20 | 47 | 47 | 0.958908693 | 0.58122    | ENSG00000188817         |
| 3 | 63681680 | 63682013 | 63681837 | 9  | 12 | 17 | 0.692545167 | 0.848017   | ENSG00000188817         |
| 3 | 63684046 | 63684242 | 63684144 | 8  | 8  | 3  | 2.157544559 | 0.0836802  | ENSG00000188817         |
| 3 | 63684495 | 63685048 | 63684785 | 9  | 22 | 39 | 0.551372499 | 0.990222   | ENSG00000188817         |
| 3 | 63685059 | 63686156 | 63685298 | 14 | 56 | 46 | 1.162931819 | 0.220037   | ENSG00000188817         |
| 3 | 63687147 | 63688028 | 63687582 | 11 | 41 | 46 | 0.85689713  | 0.767292   | ENSG00000188817         |
| 3 | 63688040 | 63688383 | 63688236 | 9  | 14 | 25 | 0.553216554 | 0.969907   | ENSG00000188817         |
| 3 | 63688418 | 63689809 | 63688757 | 11 | 53 | 45 | 1.125675422 | 0.276036   | ENSG00000188817         |
| 3 | 63690137 | 63690317 | 63690291 | 9  | 9  | 7  | 1.198635866 | 0.346278   | ENSG00000188817         |
| 3 | 63690643 | 63691411 | 63690835 | 24 | 49 | 33 | 1.410159843 | 0.0583372  | ENSG00000188817         |
| 3 | 63691433 | 63691676 | 63691602 | 8  | 11 | 12 | 0.885146486 | 0.620672   | ENSG00000188817         |
| 3 | 63693384 | 63693774 | 63693616 | 10 | 16 | 10 | 1.481949798 | 0.147733   | ENSG00000188817         |
| 3 | 63700195 | 63700533 | 63700365 | 15 | 18 | 7  | 2.277408146 | 0.0188653  | C3orf49 ENSG00000163632 |
| 3 | 63700894 | 63701466 | 63701190 | 9  | 23 | 45 | 0.500300188 | 0.997758   | C3orf49 ENSG00000163632 |
| 3 | 63701557 | 63702106 | 63701948 | 16 | 29 | 40 | 0.701640507 | 0.932113   | C3orf49 ENSG00000163632 |
| 3 | 63702451 | 63703065 | 63702814 | 12 | 27 | 33 | 0.789689512 | 0.82438    | C3orf49 ENSG00000163632 |
| 3 | 63703137 | 63703437 | 63703278 | 11 | 15 | 16 | 0.902502299 | 0.616352   | C3orf49 ENSG00000163632 |
| 3 | 63703445 | 63703732 | 63703527 | 9  | 13 | 5  | 2.237453617 | 0.038866   | C3orf49 ENSG00000163632 |
| 3 | 63703991 | 63704989 | 63704736 | 13 | 41 | 39 | 1.006854128 | 0.486987   | C3orf49 ENSG00000163632 |
| 3 | 63705011 | 63705238 | 63705077 | 11 | 13 | 10 | 1.220429246 | 0.306001   | C3orf49 ENSG00000163632 |



|   |          |          |          |    |    |    |             |            |         |                 |
|---|----------|----------|----------|----|----|----|-------------|------------|---------|-----------------|
| 3 | 63706463 | 63706718 | 63706590 | 12 | 15 | 12 | 1.180195315 | 0.324974   | C3orf49 | ENSG00000163632 |
| 3 | 63706851 | 63707899 | 63707372 | 8  | 36 | 43 | 0.806355037 | 0.834084   | C3orf49 | ENSG00000163632 |
| 3 | 63708308 | 63708761 | 63708602 | 14 | 24 | 21 | 1.089668969 | 0.382599   | C3orf49 | ENSG00000163632 |
| 3 | 63708857 | 63709095 | 63709007 | 9  | 11 | 8  | 1.278544924 | 0.28289    | C3orf49 | ENSG00000163632 |
| 3 | 63709203 | 63709891 | 63709599 | 20 | 42 | 21 | 1.874230627 | 0.00658623 | C3orf49 | ENSG00000163632 |
| 3 | 63710852 | 63711200 | 63711026 | 10 | 15 | 11 | 1.278544924 | 0.254978   | C3orf49 | ENSG00000163632 |
| 3 | 63711587 | 63711979 | 63711766 | 12 | 20 | 34 | 0.575345216 | 0.979853   | C3orf49 | ENSG00000163632 |
| 3 | 63713132 | 63713597 | 63713274 | 14 | 23 | 18 | 1.211253086 | 0.262955   | C3orf49 | ENSG00000163632 |
| 3 | 63713757 | 63714123 | 63713944 | 10 | 17 | 15 | 1.07877228  | 0.410615   | C3orf49 | ENSG00000163632 |
| 3 | 63714200 | 63715215 | 63714533 | 35 | 85 | 59 | 1.374435793 | 0.0279716  | C3orf49 | ENSG00000163632 |
| 3 | 63715746 | 63715975 | 63715828 | 10 | 12 | 11 | 1.038817751 | 0.460341   | C3orf49 | ENSG00000163632 |
| 3 | 63716469 | 63716677 | 63716558 | 10 | 11 | 9  | 1.150690432 | 0.367789   | C3orf49 | ENSG00000163632 |
| 3 | 63720336 | 63720528 | 63720367 | 8  | 10 | 1  | 5.273997812 | 0.00391723 | C3orf49 | ENSG00000163632 |
| 3 | 63720929 | 63721238 | 63721083 | 14 | 17 | 5  | 2.876726079 | 0.00703033 | C3orf49 | ENSG00000163632 |
| 3 | 63731360 | 63731600 | 63731449 | 9  | 9  | 3  | 2.397271733 | 0.0539397  | C3orf49 | ENSG00000163632 |
| 3 | 63736152 | 63736392 | 63736279 | 8  | 9  | 9  | 0.958908693 | 0.536911   | C3orf49 | ENSG00000163632 |
| 3 | 63743114 | 63743357 | 63743272 | 8  | 11 | 3  | 2.876726079 | 0.0213797  | C3orf49 | ENSG00000163632 |
| 3 | 63752724 | 63752991 | 63752840 | 8  | 13 | 16 | 0.789689512 | 0.746135   | C3orf49 | ENSG00000163632 |
| 3 | 63756243 | 63756635 | 63756417 | 8  | 15 | 12 | 1.180195315 | 0.324974   | C3orf49 | ENSG00000163632 |
| 3 | 63759727 | 63760055 | 63759891 | 8  | 14 | 8  | 1.598181155 | 0.124586   | C3orf49 | ENSG00000163632 |
| 3 | 63771243 | 63771444 | 63771351 | 9  | 9  | 7  | 1.198635866 | 0.346278   | C3orf49 | ENSG00000163632 |
| 3 | 63772697 | 63772944 | 63772785 | 9  | 11 | 2  | 3.835634772 | 0.00800699 | C3orf49 | ENSG00000163632 |
| 3 | 63772961 | 63773374 | 63773134 | 26 | 34 | 2  | 11.18726809 | 1.02E-08   | C3orf49 | ENSG00000163632 |
| 3 | 63775077 | 63775263 | 63775170 | 8  | 8  | 5  | 1.43836304  | 0.235762   | C3orf49 | ENSG00000163632 |
| 3 | 63777839 | 63778108 | 63777976 | 9  | 11 | 4  | 2.301380863 | 0.0459276  | C3orf49 | ENSG00000163632 |
| 3 | 63779042 | 63779287 | 63779164 | 11 | 13 | 18 | 0.7065643   | 0.841991   | C3orf49 | ENSG00000163632 |
| 3 | 63779339 | 63779577 | 63779458 | 11 | 13 | 20 | 0.639272462 | 0.907338   | C3orf49 | ENSG00000163632 |
| 3 | 63779782 | 63780056 | 63779919 | 8  | 10 | 6  | 1.506856518 | 0.188853   | C3orf49 | ENSG00000163632 |
| 3 | 63781067 | 63781319 | 63781164 | 9  | 13 | 2  | 4.474907234 | 0.00269459 | C3orf49 | ENSG00000163632 |
| 3 | 63785156 | 63785407 | 63785308 | 8  | 11 | 4  | 2.301380863 | 0.0459276  | C3orf49 | ENSG00000163632 |
| 3 | 63791378 | 63791676 | 63791541 | 8  | 11 | 5  | 1.917817386 | 0.0843804  | THOC7   | ENSG00000163634 |
| 3 | 63814755 | 63814946 | 63814850 | 8  | 8  | 6  | 1.232882605 | 0.333038   | THOC7   | ENSG00000163634 |
| 3 | 63818483 | 63818698 | 63818560 | 8  | 10 | 7  | 1.318499453 | 0.269217   | THOC7   | ENSG00000163634 |
| 3 | 63823212 | 63823432 | 63823281 | 8  | 9  | 6  | 1.369869562 | 0.253675   | THOC7   | ENSG00000163634 |

|   |          |          |          |    |    |    |             |             |       |                 |
|---|----------|----------|----------|----|----|----|-------------|-------------|-------|-----------------|
| 3 | 63823570 | 63824393 | 63823981 | 8  | 29 | 18 | 1.514066357 | 0.0740168   | THOC7 | ENSG00000163634 |
| 3 | 63825359 | 63825649 | 63825489 | 10 | 14 | 16 | 0.846095906 | 0.68298     | ATXN7 | ENSG00000163635 |
| 3 | 63833053 | 63833248 | 63833120 | 10 | 10 | 12 | 0.811384279 | 0.697544    | ATXN7 | ENSG00000163635 |
| 3 | 63833308 | 63833653 | 63833478 | 9  | 13 | 7  | 1.678090213 | 0.11195     | ATXN7 | ENSG00000163635 |
| 3 | 63834224 | 63834470 | 63834347 | 8  | 11 | 4  | 2.301380863 | 0.0459276   | ATXN7 | ENSG00000163635 |
| 3 | 63836394 | 63836579 | 63836479 | 9  | 10 | 9  | 1.054799562 | 0.4492      | ATXN7 | ENSG00000163635 |
| 3 | 63850373 | 63850588 | 63850436 | 8  | 8  | 5  | 1.43836304  | 0.235762    | ATXN7 | ENSG00000163635 |
| 3 | 63853548 | 63853837 | 63853692 | 8  | 10 | 7  | 1.318499453 | 0.269217    | ATXN7 | ENSG00000163635 |
| 3 | 63864422 | 63864757 | 63864589 | 8  | 13 | 7  | 1.678090213 | 0.11195     | ATXN7 | ENSG00000163635 |
| 3 | 63868908 | 63869160 | 63869019 | 8  | 10 | 8  | 1.171999514 | 0.35773     | ATXN7 | ENSG00000163635 |
| 3 | 63870328 | 63870695 | 63870507 | 11 | 18 | 13 | 1.301376083 | 0.22245     | ATXN7 | ENSG00000163635 |
| 3 | 63871006 | 63871211 | 63871096 | 9  | 11 | 7  | 1.43836304  | 0.204844    | ATXN7 | ENSG00000163635 |
| 3 | 63871626 | 63871931 | 63871778 | 10 | 12 | 5  | 2.077635502 | 0.0577144   | ATXN7 | ENSG00000163635 |
| 3 | 63872323 | 63872805 | 63872626 | 12 | 26 | 22 | 1.125675422 | 0.336059    | ATXN7 | ENSG00000163635 |
| 3 | 63874648 | 63874868 | 63874760 | 10 | 11 | 13 | 0.821921737 | 0.693119    | ATXN7 | ENSG00000163635 |
| 3 | 63874927 | 63875417 | 63875182 | 20 | 31 | 19 | 1.534253909 | 0.0623199   | ATXN7 | ENSG00000163635 |
| 3 | 63879873 | 63880064 | 63879968 | 9  | 9  | 11 | 0.799090578 | 0.702688    | ATXN7 | ENSG00000163635 |
| 3 | 63885188 | 63885370 | 63885294 | 8  | 9  | 7  | 1.198635866 | 0.346278    | ATXN7 | ENSG00000163635 |
| 3 | 63886988 | 63887239 | 63887074 | 8  | 12 | 6  | 1.78083043  | 0.0985525   | ATXN7 | ENSG00000163635 |
| 3 | 63889304 | 63889578 | 63889410 | 10 | 13 | 2  | 4.474907234 | 0.00269459  | ATXN7 | ENSG00000163635 |
| 3 | 63893282 | 63893576 | 63893429 | 11 | 15 | 10 | 1.394776281 | 0.191426    | ATXN7 | ENSG00000163635 |
| 3 | 63897146 | 63897571 | 63897302 | 9  | 17 | 21 | 0.784561658 | 0.779771    | ATXN7 | ENSG00000163635 |
| 3 | 63900522 | 63900999 | 63900820 | 11 | 21 | 12 | 1.622768557 | 0.076896    | ATXN7 | ENSG00000163635 |
| 3 | 63901591 | 63901819 | 63901681 | 9  | 11 | 10 | 1.046082211 | 0.455063    | ATXN7 | ENSG00000163635 |
| 3 | 63907486 | 63907793 | 63907625 | 10 | 11 | 8  | 1.278544924 | 0.28289     | PSMD6 | ENSG00000163636 |
| 3 | 63952805 | 63953025 | 63952936 | 10 | 11 | 17 | 0.639272462 | 0.890352    | PSMD6 | ENSG00000163636 |
| 3 | 63953042 | 63953511 | 63953332 | 13 | 27 | 31 | 0.839045106 | 0.752376    | PSMD6 | ENSG00000163636 |
| 3 | 63953751 | 63954051 | 63953904 | 13 | 17 | 22 | 0.750450282 | 0.822065    | PSMD6 | ENSG00000163636 |
| 3 | 63954162 | 63955023 | 63954483 | 48 | 89 | 49 | 1.726035648 | 0.000765132 | PSMD6 | ENSG00000163636 |
| 3 | 63955115 | 63955542 | 63955294 | 9  | 19 | 16 | 1.128127874 | 0.354788    | PSMD6 | ENSG00000163636 |
| 3 | 63955612 | 63955880 | 63955740 | 12 | 13 | 21 | 0.610214623 | 0.930478    | PSMD6 | ENSG00000163636 |
| 3 | 63955959 | 63956196 | 63956077 | 10 | 14 | 6  | 2.054804342 | 0.0480281   | PSMD6 | ENSG00000163636 |
| 3 | 63956650 | 63957766 | 63957626 | 9  | 39 | 47 | 0.799090578 | 0.853966    | PSMD6 | ENSG00000163636 |
| 3 | 63957963 | 63958635 | 63958352 | 11 | 28 | 36 | 0.751577084 | 0.877351    | PSMD6 | ENSG00000163636 |

|   |          |          |          |    |     |     |             |            |       |                 |
|---|----------|----------|----------|----|-----|-----|-------------|------------|-------|-----------------|
| 3 | 63958640 | 63959080 | 63958819 | 10 | 19  | 21  | 0.871735176 | 0.672523   | PSMD6 | ENSG00000163636 |
| 3 | 63959430 | 63961868 | 63960513 | 15 | 113 | 126 | 0.860752685 | 0.877859   | PSMD6 | ENSG00000163636 |
| 3 | 63962007 | 63962358 | 63962212 | 15 | 20  | 16  | 1.184534268 | 0.298622   | PSMD6 | ENSG00000163636 |
| 3 | 63962465 | 63962783 | 63962617 | 8  | 10  | 16  | 0.620470331 | 0.897128   | PSMD6 | ENSG00000163636 |
| 3 | 63963396 | 63963810 | 63963618 | 16 | 24  | 22  | 1.042292058 | 0.441692   | PSMD6 | ENSG00000163636 |
| 3 | 63963980 | 63964208 | 63964073 | 8  | 12  | 13  | 0.890415215 | 0.619237   | PSMD6 | ENSG00000163636 |
| 3 | 63964466 | 63964656 | 63964580 | 8  | 9   | 16  | 0.564063937 | 0.931096   | PSMD6 | ENSG00000163636 |
| 3 | 63964876 | 63965452 | 63965186 | 13 | 31  | 21  | 1.394776281 | 0.11075    | PSMD6 | ENSG00000163636 |
| 3 | 63965630 | 63966332 | 63965990 | 16 | 34  | 48  | 0.684934781 | 0.958194   | PSMD6 | ENSG00000163636 |
| 3 | 63966485 | 63967392 | 63966681 | 11 | 37  | 37  | 0.958908693 | 0.572322   | PSMD6 | ENSG00000163636 |
| 3 | 63967522 | 63968064 | 63967673 | 11 | 25  | 30  | 0.804246001 | 0.795369   | PSMD6 | ENSG00000163636 |
| 3 | 63968261 | 63968955 | 63968681 | 12 | 32  | 36  | 0.855242888 | 0.744072   | PSMD6 | ENSG00000163636 |
| 3 | 63968971 | 63969253 | 63969085 | 16 | 19  | 19  | 0.958908693 | 0.552451   | PSMD6 | ENSG00000163636 |
| 3 | 63969734 | 63970025 | 63969874 | 8  | 11  | 22  | 0.500300188 | 0.978352   | PSMD6 | ENSG00000163636 |
| 3 | 63970165 | 63970578 | 63970399 | 13 | 23  | 20  | 1.095895649 | 0.377643   | PSMD6 | ENSG00000163636 |
| 3 | 63970995 | 63971652 | 63971174 | 10 | 28  | 18  | 1.463597479 | 0.0938263  | PSMD6 | ENSG00000163636 |
| 3 | 63971669 | 63972044 | 63971900 | 10 | 17  | 10  | 1.569123316 | 0.112309   | PSMD6 | ENSG00000163636 |
| 3 | 63972122 | 63972515 | 63972267 | 11 | 17  | 18  | 0.908439814 | 0.615249   | PSMD6 | ENSG00000163636 |
| 3 | 63972519 | 63973605 | 63973225 | 14 | 52  | 53  | 0.941151125 | 0.623071   | PSMD6 | ENSG00000163636 |
| 3 | 63973730 | 63974034 | 63973882 | 8  | 11  | 15  | 0.71918152  | 0.81018    | PSMD6 | ENSG00000163636 |
| 3 | 63974102 | 63974563 | 63974456 | 8  | 17  | 20  | 0.821921737 | 0.731032   | PSMD6 | ENSG00000163636 |
| 3 | 63974762 | 63975431 | 63975252 | 9  | 24  | 26  | 0.887878419 | 0.666463   | PSMD6 | ENSG00000163636 |
| 3 | 63975569 | 63975896 | 63975732 | 14 | 19  | 22  | 0.833833646 | 0.725376   | PSMD6 | ENSG00000163636 |
| 3 | 63976278 | 63976764 | 63976613 | 12 | 21  | 12  | 1.622768557 | 0.076896   | PSMD6 | ENSG00000163636 |
| 3 | 63978020 | 63979464 | 63979098 | 15 | 68  | 49  | 1.323293996 | 0.0637751  | PSMD6 | ENSG00000163636 |
| 3 | 63981668 | 63982024 | 63981846 | 13 | 18  | 17  | 1.012181398 | 0.48423    | PSMD6 | ENSG00000163636 |
| 3 | 63982662 | 63984977 | 63984247 | 44 | 209 | 117 | 1.70653242  | 1.05E-06   | PSMD6 | ENSG00000163636 |
| 3 | 63985253 | 63985506 | 63985420 | 9  | 10  | 15  | 0.659249726 | 0.861705   | PSMD6 | ENSG00000163636 |
| 3 | 63985556 | 63985884 | 63985716 | 12 | 17  | 14  | 1.150690432 | 0.340986   | PSMD6 | ENSG00000163636 |
| 3 | 63986981 | 63987492 | 63987334 | 14 | 27  | 11  | 2.237453617 | 0.00685906 | PSMD6 | ENSG00000163636 |
| 3 | 63987668 | 63988087 | 63987943 | 10 | 17  | 15  | 1.07877228  | 0.410615   | PSMD6 | ENSG00000163636 |
| 3 | 63988583 | 63988969 | 63988762 | 10 | 16  | 21  | 0.740974899 | 0.826507   | PSMD6 | ENSG00000163636 |
| 3 | 63988980 | 63989242 | 63989139 | 9  | 12  | 13  | 0.890415215 | 0.619237   | PSMD6 | ENSG00000163636 |
| 3 | 63989446 | 63990170 | 63989932 | 15 | 35  | 29  | 1.150690432 | 0.282944   | PSMD6 | ENSG00000163636 |

|   |          |          |          |    |     |    |             |             |       |                 |
|---|----------|----------|----------|----|-----|----|-------------|-------------|-------|-----------------|
| 3 | 63990196 | 63991155 | 63990776 | 10 | 40  | 27 | 1.404116301 | 0.0798161   | PSMD6 | ENSG00000163636 |
| 3 | 63991277 | 63992349 | 63991539 | 58 | 117 | 70 | 1.593679236 | 0.000793853 | PSMD6 | ENSG00000163636 |
| 3 | 63992834 | 63993261 | 63993027 | 8  | 16  | 28 | 0.562118889 | 0.973627    | PSMD6 | ENSG00000163636 |
| 3 | 63993468 | 63994286 | 63993630 | 13 | 39  | 16 | 2.256255748 | 0.00154127  | PSMD6 | ENSG00000163636 |
| 3 | 63995814 | 63996144 | 63996002 | 9  | 13  | 18 | 0.7065643   | 0.841991    | PSMD6 | ENSG00000163636 |
| 3 | 63996665 | 63997112 | 63996779 | 11 | 20  | 17 | 1.118726809 | 0.361026    | PSMD6 | ENSG00000163636 |
| 3 | 63997125 | 63997489 | 63997310 | 8  | 15  | 18 | 0.807502057 | 0.737835    | PSMD6 | ENSG00000163636 |
| 3 | 63997620 | 63998088 | 63997862 | 10 | 22  | 33 | 0.648673528 | 0.948418    | PSMD6 | ENSG00000163636 |
| 3 | 63998804 | 63999766 | 63999561 | 13 | 49  | 41 | 1.141557968 | 0.261779    | PSMD6 | ENSG00000163636 |
| 3 | 63999854 | 64000096 | 63999999 | 11 | 14  | 15 | 0.8989769   | 0.617119    | PSMD6 | ENSG00000163636 |
| 3 | 64000684 | 64000885 | 64000784 | 8  | 10  | 18 | 0.555157664 | 0.945639    | PSMD6 | ENSG00000163636 |
| 3 | 64000900 | 64001269 | 64001079 | 10 | 17  | 23 | 0.71918152  | 0.858071    | PSMD6 | ENSG00000163636 |
| 3 | 64001614 | 64001876 | 64001748 | 9  | 9   | 1  | 4.794543465 | 0.00708517  | PSMD6 | ENSG00000163636 |
| 3 | 64002750 | 64003044 | 64002906 | 8  | 12  | 10 | 1.133255728 | 0.37674     | PSMD6 | ENSG00000163636 |
| 3 | 64003219 | 64003444 | 64003331 | 8  | 8   | 7  | 1.07877228  | 0.435076    | PSMD6 | ENSG00000163636 |
| 3 | 64005286 | 64005563 | 64005424 | 9  | 12  | 15 | 0.779113313 | 0.750998    | PSMD6 | ENSG00000163636 |
| 3 | 64006050 | 64006463 | 64006256 | 9  | 17  | 14 | 1.150690432 | 0.340986    | PSMD6 | ENSG00000163636 |
| 3 | 64006755 | 64006944 | 64006849 | 11 | 11  | 7  | 1.43836304  | 0.204844    | PSMD6 | ENSG00000163636 |
| 3 | 64007056 | 64008063 | 64007414 | 13 | 49  | 52 | 0.904630843 | 0.694698    | PSMD6 | ENSG00000163636 |
| 3 | 64008501 | 64008994 | 64008818 | 14 | 25  | 25 | 0.958908693 | 0.559837    |       | ENSG00000200222 |
| 3 | 64009459 | 64010828 | 64009869 | 15 | 74  | 61 | 1.159970193 | 0.192144    |       | ENSG00000200222 |
| 3 | 64012707 | 64013520 | 64013113 | 15 | 48  | 45 | 1.021446217 | 0.458084    |       | ENSG00000200222 |
| 3 | 64014310 | 64014848 | 64014582 | 12 | 24  | 38 | 0.61468506  | 0.973527    |       | ENSG00000200222 |
| 3 | 64015083 | 64015333 | 64015207 | 11 | 13  | 25 | 0.51633545  | 0.980479    |       | ENSG00000200222 |
| 3 | 64015836 | 64016450 | 64016006 | 13 | 28  | 25 | 1.069552004 | 0.40018     |       | ENSG00000200222 |
| 3 | 64016460 | 64017041 | 64016862 | 9  | 24  | 20 | 1.141557968 | 0.324865    |       | ENSG00000200222 |
| 3 | 64017044 | 64017321 | 64017182 | 9  | 12  | 7  | 1.558226626 | 0.152813    |       | ENSG00000200222 |
| 3 | 64017382 | 64018095 | 64017520 | 11 | 31  | 32 | 0.929850854 | 0.615363    |       | ENSG00000200222 |
| 3 | 64018109 | 64018810 | 64018266 | 14 | 34  | 18 | 1.76641075  | 0.0197371   |       | ENSG00000200222 |
| 3 | 64019002 | 64019230 | 64019141 | 9  | 12  | 9  | 1.246581301 | 0.295061    |       | ENSG00000200222 |
| 3 | 64020029 | 64020533 | 64020157 | 11 | 22  | 33 | 0.648673528 | 0.948418    |       | ENSG00000200222 |
| 3 | 64020697 | 64021588 | 64021426 | 9  | 31  | 35 | 0.852363283 | 0.745543    |       | ENSG00000200222 |
| 3 | 64021691 | 64022134 | 64021870 | 11 | 20  | 27 | 0.71918152  | 0.876208    |       | ENSG00000200222 |
| 3 | 64022566 | 64023529 | 64023078 | 17 | 51  | 69 | 0.712332172 | 0.969198    |       | ENSG00000200222 |

|   |          |          |          |    |    |    |             |            |                 |
|---|----------|----------|----------|----|----|----|-------------|------------|-----------------|
| 3 | 64023601 | 64023952 | 64023776 | 8  | 14 | 21 | 0.653801382 | 0.90216    | ENSG00000200222 |
| 3 | 64023959 | 64025246 | 64024421 | 17 | 66 | 69 | 0.917812606 | 0.692238   | ENSG00000200222 |
| 3 | 64025770 | 64026049 | 64025909 | 12 | 16 | 14 | 1.086763185 | 0.404922   | ENSG00000200222 |
| 3 | 64026239 | 64026572 | 64026407 | 10 | 13 | 12 | 1.0326709   | 0.46514    | ENSG00000200222 |
| 3 | 64026723 | 64027393 | 64026865 | 8  | 22 | 34 | 0.630139998 | 0.960074   | ENSG00000200222 |
| 3 | 64028017 | 64028445 | 64028266 | 12 | 21 | 16 | 1.240940662 | 0.248103   | ENSG00000200222 |
| 3 | 64028742 | 64029264 | 64028896 | 11 | 23 | 21 | 1.046082211 | 0.437961   | ENSG00000200222 |
| 3 | 64029371 | 64029768 | 64029537 | 8  | 14 | 11 | 1.198635866 | 0.315918   | ENSG00000200222 |
| 3 | 64029944 | 64030149 | 64030042 | 9  | 9  | 3  | 2.397271733 | 0.0539397  | ENSG00000200222 |
| 3 | 64031136 | 64031434 | 64031285 | 10 | 15 | 11 | 1.278544924 | 0.254978   | ENSG00000200222 |
| 3 | 64032238 | 64032767 | 64032549 | 12 | 23 | 24 | 0.920552345 | 0.614165   | ENSG00000200222 |
| 3 | 64033556 | 64034410 | 64034223 | 11 | 35 | 56 | 0.605626543 | 0.991758   | ENSG00000200222 |
| 3 | 64034503 | 64034698 | 64034600 | 8  | 8  | 8  | 0.958908693 | 0.534974   | ENSG00000200222 |
| 3 | 64034773 | 64035016 | 64034894 | 10 | 12 | 12 | 0.958908693 | 0.542188   | ENSG00000200222 |
| 3 | 64035082 | 64035618 | 64035261 | 10 | 22 | 18 | 1.160784207 | 0.312473   | ENSG00000200222 |
| 3 | 64037248 | 64037778 | 64037610 | 13 | 27 | 28 | 0.925842876 | 0.614522   | ENSG00000200222 |
| 3 | 64037995 | 64038900 | 64038737 | 11 | 32 | 34 | 0.904113911 | 0.661443   | ENSG00000200222 |
| 3 | 64039135 | 64039433 | 64039284 | 14 | 18 | 14 | 1.214617678 | 0.282961   | ENSG00000200222 |
| 3 | 64039793 | 64040716 | 64039942 | 12 | 38 | 39 | 0.934935976 | 0.617524   | ENSG00000200222 |
| 3 | 64040761 | 64042059 | 64041758 | 15 | 61 | 64 | 0.914651369 | 0.692535   | ENSG00000189196 |
| 3 | 64042738 | 64043002 | 64042834 | 10 | 14 | 28 | 0.495987255 | 0.988914   | ENSG00000189196 |
| 3 | 64043089 | 64043281 | 64043174 | 9  | 11 | 18 | 0.605626543 | 0.918575   | ENSG00000189196 |
| 3 | 64043412 | 64043816 | 64043549 | 11 | 21 | 21 | 0.958908693 | 0.555026   | ENSG00000189196 |
| 3 | 64043852 | 64044629 | 64044210 | 13 | 35 | 43 | 0.784561658 | 0.861438   | ENSG00000189196 |
| 3 | 64044727 | 64045838 | 64045490 | 15 | 56 | 49 | 1.09315591  | 0.321608   | ENSG00000189196 |
| 3 | 64045995 | 64046395 | 64046141 | 8  | 15 | 16 | 0.902502299 | 0.616352   | ENSG00000189196 |
| 3 | 64047020 | 64047455 | 64047199 | 9  | 21 | 22 | 0.917217011 | 0.614252   | ENSG00000189196 |
| 3 | 64047699 | 64048002 | 64047850 | 13 | 17 | 20 | 0.821921737 | 0.731032   | ENSG00000189196 |
| 3 | 64048654 | 64050174 | 64049370 | 17 | 86 | 52 | 1.574057666 | 0.00402054 | ENSG00000189196 |
| 3 | 64050610 | 64050909 | 64050759 | 13 | 16 | 20 | 0.776259418 | 0.783794   | ENSG00000189196 |
| 3 | 64051965 | 64052509 | 64052305 | 13 | 32 | 31 | 0.98887459  | 0.517406   | ENSG00000189196 |
| 3 | 64052800 | 64053450 | 64053128 | 13 | 28 | 27 | 0.993155432 | 0.509675   | ENSG00000189196 |
| 3 | 64054099 | 64054682 | 64054533 | 10 | 23 | 29 | 0.767126954 | 0.835723   | ENSG00000189196 |
| 3 | 64054728 | 64055274 | 64055095 | 12 | 26 | 17 | 1.43836304  | 0.111326   | ENSG00000189196 |

|   |          |          |          |    |     |    |             |            |                 |
|---|----------|----------|----------|----|-----|----|-------------|------------|-----------------|
| 3 | 64055584 | 64056251 | 64055823 | 11 | 29  | 37 | 0.757033179 | 0.874819   | ENSG00000189196 |
| 3 | 64056324 | 64057314 | 64056767 | 11 | 40  | 48 | 0.802352172 | 0.85225    | ENSG00000189196 |
| 3 | 64057363 | 64057798 | 64057539 | 8  | 17  | 18 | 0.908439814 | 0.615249   | ENSG00000189196 |
| 3 | 64057967 | 64059877 | 64059044 | 15 | 91  | 82 | 1.062886744 | 0.342714   | ENSG00000189196 |
| 3 | 64061586 | 64062997 | 64061778 | 14 | 62  | 54 | 1.098386321 | 0.304303   | ENSG00000189196 |
| 3 | 64063382 | 64063604 | 64063493 | 8  | 10  | 8  | 1.171999514 | 0.35773    | ENSG00000189196 |
| 3 | 64063897 | 64064355 | 64064158 | 10 | 20  | 27 | 0.71918152  | 0.876208   | ENSG00000189196 |
| 3 | 64064799 | 64066946 | 64065461 | 24 | 132 | 92 | 1.37134254  | 0.00917032 | ENSG00000189196 |
| 3 | 64066967 | 64068420 | 64067877 | 12 | 65  | 48 | 1.291591301 | 0.0853474  | ENSG00000189196 |
| 3 | 64069387 | 64069734 | 64069560 | 8  | 14  | 9  | 1.43836304  | 0.179537   | ENSG00000189196 |
| 3 | 64070395 | 64071088 | 64070916 | 15 | 38  | 35 | 1.038817751 | 0.433548   | ENSG00000189196 |
| 3 | 64072027 | 64073233 | 64072821 | 19 | 68  | 58 | 1.12143559  | 0.257686   | ENSG00000189196 |
| 3 | 64073394 | 64074150 | 64073722 | 9  | 30  | 18 | 1.564535236 | 0.0578367  | ENSG00000189196 |
| 3 | 64074454 | 64074761 | 64074628 | 8  | 12  | 4  | 2.493162602 | 0.0299057  | ENSG00000189196 |
| 3 | 64081235 | 64081476 | 64081355 | 8  | 10  | 16 | 0.620470331 | 0.897128   | ENSG00000189196 |
| 3 | 64081701 | 64082915 | 64081891 | 14 | 55  | 49 | 1.073977736 | 0.355756   | ENSG00000189196 |
| 3 | 64082930 | 64083749 | 64083599 | 11 | 37  | 25 | 1.401481936 | 0.0888599  | ENSG00000189196 |
| 3 | 64084777 | 64084992 | 64084880 | 8  | 9   | 6  | 1.369869562 | 0.253675   | ENSG00000189196 |
| 3 | 64086492 | 64086705 | 64086611 | 8  | 9   | 6  | 1.369869562 | 0.253675   | ENSG00000189196 |
| 3 | 64086869 | 64087324 | 64087033 | 9  | 18  | 15 | 1.138704073 | 0.348127   | ENSG00000189196 |
| 3 | 64088098 | 64088427 | 64088262 | 10 | 15  | 18 | 0.807502057 | 0.737835   | ENSG00000189196 |
| 3 | 64088520 | 64088719 | 64088619 | 10 | 10  | 14 | 0.703199708 | 0.817173   | ENSG00000189196 |
| 3 | 64089829 | 64090180 | 64090004 | 11 | 16  | 11 | 1.358453982 | 0.20248    | ENSG00000189196 |
| 3 | 64090419 | 64090634 | 64090526 | 10 | 10  | 11 | 0.878999635 | 0.622439   | ENSG00000189196 |
| 3 | 64090956 | 64091205 | 64091080 | 10 | 13  | 15 | 0.839045106 | 0.685928   | ENSG00000189196 |
| 3 | 64091305 | 64091806 | 64091635 | 15 | 25  | 17 | 1.385090334 | 0.139369   | ENSG00000189196 |
| 3 | 64091870 | 64092356 | 64092186 | 10 | 20  | 20 | 0.958908693 | 0.553754   | ENSG00000189196 |
| 3 | 64092662 | 64093199 | 64093020 | 16 | 33  | 26 | 1.207514651 | 0.229506   | ENSG00000189196 |
| 3 | 64093402 | 64094520 | 64094114 | 25 | 71  | 54 | 1.255298653 | 0.100232   | ENSG00000189196 |
| 3 | 64095003 | 64095289 | 64095177 | 10 | 14  | 15 | 0.8989769   | 0.617119   | ENSG00000189196 |
| 3 | 64095728 | 64096192 | 64096025 | 8  | 15  | 17 | 0.852363283 | 0.680376   | ENSG00000189196 |
| 3 | 64096686 | 64097095 | 64096916 | 8  | 16  | 19 | 0.815072389 | 0.734271   | ENSG00000189196 |
| 3 | 64098253 | 64098521 | 64098403 | 9  | 12  | 7  | 1.558226626 | 0.152813   | ENSG00000189196 |
| 3 | 64098669 | 64099062 | 64098837 | 9  | 16  | 19 | 0.815072389 | 0.734271   | ENSG00000189196 |

|   |          |          |          |    |    |    |             |           |                          |
|---|----------|----------|----------|----|----|----|-------------|-----------|--------------------------|
| 3 | 64099625 | 64100302 | 64100087 | 8  | 23 | 23 | 0.958908693 | 0.557483  | ENSG00000189196          |
| 3 | 64100837 | 64101177 | 64101001 | 10 | 14 | 11 | 1.198635866 | 0.315918  | ENSG00000189196          |
| 3 | 64101526 | 64101896 | 64101696 | 10 | 16 | 17 | 0.905635988 | 0.615736  | ENSG00000189196          |
| 3 | 64102309 | 64102856 | 64102488 | 13 | 26 | 17 | 1.43836304  | 0.111326  | ENSG00000189196          |
| 3 | 64103299 | 64103898 | 64103584 | 9  | 23 | 10 | 2.092164421 | 0.0165595 | ENSG00000189196          |
| 3 | 64103951 | 64104249 | 64104089 | 10 | 13 | 9  | 1.34247217  | 0.232231  | ENSG00000189196          |
| 3 | 64104322 | 64104564 | 64104443 | 8  | 12 | 8  | 1.385090334 | 0.219216  | ENSG00000189196          |
| 3 | 64104636 | 64104844 | 64104734 | 8  | 10 | 9  | 1.054799562 | 0.4492    | ENSG00000189196          |
| 3 | 64104878 | 64105117 | 64104972 | 8  | 9  | 12 | 0.737622072 | 0.769563  | ENSG00000189196          |
| 3 | 64105455 | 64105848 | 64105609 | 9  | 15 | 12 | 1.180195315 | 0.324974  | ENSG00000189196          |
| 3 | 64106542 | 64106748 | 64106681 | 9  | 9  | 10 | 0.871735176 | 0.624623  | ENSG00000189196          |
| 3 | 64106869 | 64107095 | 64106987 | 8  | 8  | 7  | 1.07877228  | 0.435076  | ENSG00000189196          |
| 3 | 64107638 | 64107854 | 64107746 | 8  | 11 | 11 | 0.958908693 | 0.540507  | ENSG00000189196          |
| 3 | 64108457 | 64108685 | 64108571 | 9  | 11 | 4  | 2.301380863 | 0.0459276 | ENSG00000189196          |
| 3 | 64109870 | 64110290 | 64110122 | 11 | 20 | 15 | 1.25856766  | 0.240048  | ENSG00000189196          |
| 3 | 64110313 | 64111009 | 64110830 | 12 | 33 | 24 | 1.304115823 | 0.153319  | ENSG00000189196          |
| 3 | 64111467 | 64111946 | 64111694 | 9  | 20 | 38 | 0.51633545  | 0.994122  | ENSG00000189196          |
| 3 | 64111957 | 64112568 | 64112185 | 15 | 29 | 40 | 0.701640507 | 0.932113  | ENSG00000189196          |
| 3 | 64112699 | 64113258 | 64112989 | 11 | 23 | 26 | 0.852363283 | 0.716584  | ENSG00000189196          |
| 3 | 64113271 | 64113577 | 64113446 | 9  | 14 | 19 | 0.71918152  | 0.83643   | ENSG00000189196          |
| 3 | 64116170 | 64116376 | 64116299 | 8  | 10 | 5  | 1.757999271 | 0.121253  | ENSG00000189196          |
| 3 | 64116844 | 64117278 | 64117143 | 10 | 18 | 19 | 0.910963258 | 0.614871  | PRICKLE2 ENSG00000163637 |
| 3 | 64117374 | 64118439 | 64118200 | 32 | 84 | 74 | 1.086763185 | 0.298729  | PRICKLE2 ENSG00000163637 |
| 3 | 64118605 | 64119428 | 64119163 | 16 | 45 | 63 | 0.689215623 | 0.97416   | PRICKLE2 ENSG00000163637 |
| 3 | 64119492 | 64119778 | 64119628 | 16 | 21 | 25 | 0.811384279 | 0.76647   | PRICKLE2 ENSG00000163637 |
| 3 | 64121099 | 64121515 | 64121308 | 10 | 20 | 17 | 1.118726809 | 0.361026  | PRICKLE2 ENSG00000163637 |
| 3 | 64121759 | 64122215 | 64122043 | 10 | 20 | 29 | 0.671236085 | 0.922603  | PRICKLE2 ENSG00000163637 |
| 3 | 64122245 | 64122920 | 64122613 | 14 | 40 | 49 | 0.786305128 | 0.874522  | PRICKLE2 ENSG00000163637 |
| 3 | 64124162 | 64124616 | 64124329 | 10 | 17 | 14 | 1.150690432 | 0.340986  | PRICKLE2 ENSG00000163637 |
| 3 | 64125316 | 64125585 | 64125467 | 13 | 15 | 22 | 0.667066917 | 0.897252  | PRICKLE2 ENSG00000163637 |
| 3 | 64125795 | 64126006 | 64125935 | 9  | 11 | 13 | 0.821921737 | 0.693119  | PRICKLE2 ENSG00000163637 |
| 3 | 64126897 | 64128010 | 64127543 | 19 | 58 | 46 | 1.203736444 | 0.169483  | PRICKLE2 ENSG00000163637 |
| 3 | 64130902 | 64131269 | 64131090 | 9  | 16 | 15 | 1.018840486 | 0.477384  | PRICKLE2 ENSG00000163637 |
| 3 | 64133862 | 64134064 | 64133927 | 9  | 10 | 3  | 2.636998906 | 0.034203  | PRICKLE2 ENSG00000163637 |

|   |          |          |          |     |     |    |             |            |          |                 |
|---|----------|----------|----------|-----|-----|----|-------------|------------|----------|-----------------|
| 3 | 64134197 | 64134724 | 64134545 | 13  | 25  | 10 | 2.266511456 | 0.00802978 | PRICKLE2 | ENSG00000163637 |
| 3 | 64134937 | 64135474 | 64135295 | 15  | 27  | 13 | 1.917817386 | 0.0192196  | PRICKLE2 | ENSG00000163637 |
| 3 | 64135520 | 64135992 | 64135831 | 13  | 26  | 17 | 1.43836304  | 0.111326   | PRICKLE2 | ENSG00000163637 |
| 3 | 64136543 | 64136807 | 64136668 | 9   | 12  | 21 | 0.566627864 | 0.952667   | PRICKLE2 | ENSG00000163637 |
| 3 | 64136856 | 64137146 | 64137003 | 9   | 14  | 24 | 0.575345216 | 0.958881   | PRICKLE2 | ENSG00000163637 |
| 3 | 64137292 | 64137767 | 64137582 | 12  | 22  | 13 | 1.575349996 | 0.0840573  | PRICKLE2 | ENSG00000163637 |
| 3 | 64139089 | 64139479 | 64139313 | 13  | 20  | 18 | 1.05984645  | 0.425516   | PRICKLE2 | ENSG00000163637 |
| 3 | 64139969 | 64140450 | 64140246 | 16  | 25  | 14 | 1.662108401 | 0.053254   | PRICKLE2 | ENSG00000163637 |
| 3 | 64140453 | 64140815 | 64140632 | 9   | 16  | 18 | 0.857970936 | 0.678066   | PRICKLE2 | ENSG00000163637 |
| 3 | 64141769 | 64142353 | 64142050 | 10  | 22  | 16 | 1.297347055 | 0.203559   | PRICKLE2 | ENSG00000163637 |
| 3 | 64145008 | 64145253 | 64145129 | 9   | 11  | 6  | 1.643843474 | 0.137712   | PRICKLE2 | ENSG00000163637 |
| 3 | 64145504 | 64145804 | 64145654 | 9   | 14  | 10 | 1.307602763 | 0.244096   | PRICKLE2 | ENSG00000163637 |
| 3 | 64145819 | 64146157 | 64145988 | 15  | 19  | 10 | 1.743470351 | 0.0622604  | PRICKLE2 | ENSG00000163637 |
| 3 | 64146202 | 64146518 | 64146360 | 10  | 15  | 14 | 1.022835939 | 0.473606   | PRICKLE2 | ENSG00000163637 |
| 3 | 64147488 | 64148648 | 64147889 | 106 | 187 | 33 | 5.302201009 | 1.92E-26   | PRICKLE2 | ENSG00000163637 |
| 3 | 64148889 | 64149123 | 64148997 | 9   | 10  | 20 | 0.502285506 | 0.972812   | PRICKLE2 | ENSG00000163637 |
| 3 | 64149738 | 64150570 | 64150033 | 18  | 51  | 36 | 1.347655461 | 0.0800783  | PRICKLE2 | ENSG00000163637 |
| 3 | 64150745 | 64150986 | 64150894 | 8   | 11  | 12 | 0.885146486 | 0.620672   | PRICKLE2 | ENSG00000163637 |
| 3 | 64151927 | 64152145 | 64152036 | 9   | 9   | 16 | 0.564063937 | 0.931096   | PRICKLE2 | ENSG00000163637 |
| 3 | 64152339 | 64153028 | 64152518 | 8   | 25  | 24 | 0.997265041 | 0.503149   | PRICKLE2 | ENSG00000163637 |
| 3 | 64153884 | 64154113 | 64154025 | 9   | 12  | 8  | 1.385090334 | 0.219216   | PRICKLE2 | ENSG00000163637 |
| 3 | 64154541 | 64155220 | 64155041 | 11  | 29  | 16 | 1.692191811 | 0.0371959  | PRICKLE2 | ENSG00000163637 |
| 3 | 64159354 | 64159614 | 64159511 | 10  | 12  | 13 | 0.890415215 | 0.619237   | PRICKLE2 | ENSG00000163637 |
| 3 | 64161151 | 64161357 | 64161232 | 8   | 8   | 1  | 4.315089119 | 0.0127267  | PRICKLE2 | ENSG00000163637 |
| 3 | 64161970 | 64162479 | 64162300 | 13  | 29  | 10 | 2.615205527 | 0.00170492 | PRICKLE2 | ENSG00000163637 |
| 3 | 64162751 | 64162965 | 64162878 | 8   | 9   | 8  | 1.065454103 | 0.442605   | PRICKLE2 | ENSG00000163637 |
| 3 | 64163852 | 64164087 | 64163987 | 9   | 12  | 10 | 1.133255728 | 0.37674    | PRICKLE2 | ENSG00000163637 |
| 3 | 64164647 | 64165054 | 64164944 | 11  | 19  | 8  | 2.130908207 | 0.0233014  | PRICKLE2 | ENSG00000163637 |
| 3 | 64165301 | 64165663 | 64165480 | 8   | 15  | 33 | 0.45125115  | 0.996958   | PRICKLE2 | ENSG00000163637 |
| 3 | 64166894 | 64167105 | 64166975 | 10  | 12  | 6  | 1.78083043  | 0.0985525  | PRICKLE2 | ENSG00000163637 |
| 3 | 64168501 | 64168912 | 64168672 | 10  | 15  | 24 | 0.613701564 | 0.940506   | PRICKLE2 | ENSG00000163637 |
| 3 | 64168980 | 64169291 | 64169132 | 8   | 12  | 24 | 0.49863252  | 0.982718   | PRICKLE2 | ENSG00000163637 |
| 3 | 64170293 | 64170893 | 64170714 | 11  | 27  | 15 | 1.678090213 | 0.0444653  | PRICKLE2 | ENSG00000163637 |
| 3 | 64171029 | 64171313 | 64171171 | 10  | 14  | 10 | 1.307602763 | 0.244096   | PRICKLE2 | ENSG00000163637 |



|   |          |          |          |    |    |    |             |            |          |                 |
|---|----------|----------|----------|----|----|----|-------------|------------|----------|-----------------|
| 3 | 64171542 | 64172097 | 64171706 | 11 | 23 | 6  | 3.287686948 | 0.00104919 | PRICKLE2 | ENSG00000163637 |
| 3 | 64172522 | 64172946 | 64172666 | 8  | 17 | 11 | 1.43836304  | 0.15834    | PRICKLE2 | ENSG00000163637 |
| 3 | 64173962 | 64174763 | 64174591 | 10 | 29 | 19 | 1.43836304  | 0.0995642  | PRICKLE2 | ENSG00000163637 |
| 3 | 64175222 | 64175412 | 64175310 | 8  | 9  | 10 | 0.871735176 | 0.624623   | PRICKLE2 | ENSG00000163637 |
| 3 | 64175661 | 64176202 | 64175840 | 9  | 19 | 20 | 0.913246374 | 0.614587   | PRICKLE2 | ENSG00000163637 |
| 3 | 64176327 | 64176564 | 64176424 | 9  | 12 | 5  | 2.077635502 | 0.0577144  | PRICKLE2 | ENSG00000163637 |
| 3 | 64177323 | 64177800 | 64177621 | 12 | 23 | 17 | 1.278544924 | 0.211315   | PRICKLE2 | ENSG00000163637 |
| 3 | 64179779 | 64180573 | 64180210 | 12 | 36 | 36 | 0.958908693 | 0.571368   | PRICKLE2 | ENSG00000163637 |
| 3 | 64180893 | 64181728 | 64181143 | 13 | 38 | 39 | 0.934935976 | 0.617524   | PRICKLE2 | ENSG00000163637 |
| 3 | 64182114 | 64182463 | 64182268 | 8  | 13 | 17 | 0.745817872 | 0.798145   | PRICKLE2 | ENSG00000163637 |
| 3 | 64182488 | 64182786 | 64182639 | 12 | 16 | 9  | 1.630144778 | 0.102169   | PRICKLE2 | ENSG00000163637 |
| 3 | 64184689 | 64185191 | 64184840 | 13 | 23 | 25 | 0.885146486 | 0.667437   | PRICKLE2 | ENSG00000163637 |
| 3 | 64185777 | 64186344 | 64186165 | 8  | 21 | 13 | 1.506856518 | 0.109266   | PRICKLE2 | ENSG00000163637 |
| 3 | 64186452 | 64187139 | 64186731 | 9  | 27 | 30 | 0.866111078 | 0.710165   | PRICKLE2 | ENSG00000163637 |
| 3 | 64187373 | 64187763 | 64187534 | 8  | 14 | 17 | 0.799090578 | 0.74177    | PRICKLE2 | ENSG00000163637 |
| 3 | 64189073 | 64189335 | 64189171 | 9  | 12 | 8  | 1.385090334 | 0.219216   | PRICKLE2 | ENSG00000163637 |
| 3 | 64189584 | 64189800 | 64189653 | 9  | 11 | 20 | 0.547947825 | 0.956941   | PRICKLE2 | ENSG00000163637 |
| 3 | 64190635 | 64190934 | 64190784 | 8  | 11 | 7  | 1.43836304  | 0.204844   | PRICKLE2 | ENSG00000163637 |
| 3 | 64192002 | 64192188 | 64192076 | 8  | 10 | 12 | 0.811384279 | 0.697544   | PRICKLE2 | ENSG00000163637 |
| 3 | 64192504 | 64192776 | 64192678 | 10 | 12 | 15 | 0.779113313 | 0.750998   | PRICKLE2 | ENSG00000163637 |
| 3 | 64193919 | 64194211 | 64194065 | 12 | 14 | 12 | 1.106433107 | 0.392094   | PRICKLE2 | ENSG00000163637 |
| 3 | 64195335 | 64195529 | 64195397 | 8  | 9  | 14 | 0.639272462 | 0.869513   | PRICKLE2 | ENSG00000163637 |
| 3 | 64196041 | 64196370 | 64196248 | 13 | 17 | 7  | 2.157544559 | 0.0276499  | PRICKLE2 | ENSG00000163637 |
| 3 | 64198333 | 64198567 | 64198429 | 8  | 9  | 13 | 0.684934781 | 0.824961   | PRICKLE2 | ENSG00000163637 |
| 3 | 64199292 | 64199597 | 64199444 | 8  | 12 | 14 | 0.831054201 | 0.689281   | PRICKLE2 | ENSG00000163637 |
| 3 | 64199634 | 64200173 | 64199776 | 9  | 20 | 23 | 0.839045106 | 0.722898   | PRICKLE2 | ENSG00000163637 |
| 3 | 64201569 | 64201817 | 64201662 | 8  | 10 | 18 | 0.555157664 | 0.945639   | PRICKLE2 | ENSG00000163637 |
| 3 | 64201973 | 64202862 | 64202433 | 8  | 33 | 28 | 1.124237778 | 0.319632   | PRICKLE2 | ENSG00000163637 |
| 3 | 64204066 | 64204399 | 64204228 | 10 | 13 | 4  | 2.684944341 | 0.01921    | PRICKLE2 | ENSG00000163637 |
| 3 | 64205007 | 64205648 | 64205245 | 16 | 40 | 41 | 0.936077534 | 0.618244   | PRICKLE2 | ENSG00000163637 |
| 3 | 64205975 | 64206323 | 64206147 | 11 | 13 | 25 | 0.51633545  | 0.980479   | PRICKLE2 | ENSG00000163637 |
| 3 | 64211103 | 64211444 | 64211272 | 14 | 19 | 15 | 1.198635866 | 0.291044   | PRICKLE2 | ENSG00000163637 |
| 3 | 64214445 | 64214761 | 64214632 | 9  | 13 | 14 | 0.894981447 | 0.618069   | PRICKLE2 | ENSG00000163637 |
| 3 | 64214838 | 64215485 | 64215065 | 11 | 25 | 26 | 0.923393556 | 0.614269   | PRICKLE2 | ENSG00000163637 |

|   |          |          |          |    |     |    |             |            |          |                 |
|---|----------|----------|----------|----|-----|----|-------------|------------|----------|-----------------|
| 3 | 64215537 | 64217069 | 64216561 | 16 | 79  | 55 | 1.369869562 | 0.0339016  | PRICKLE2 | ENSG00000163637 |
| 3 | 64217291 | 64218254 | 64217772 | 10 | 39  | 32 | 1.162313567 | 0.259084   | PRICKLE2 | ENSG00000163637 |
| 3 | 64218377 | 64218682 | 64218511 | 8  | 13  | 9  | 1.34247217  | 0.232231   | PRICKLE2 | ENSG00000163637 |
| 3 | 64218858 | 64219175 | 64219031 | 10 | 14  | 9  | 1.43836304  | 0.179537   | PRICKLE2 | ENSG00000163637 |
| 3 | 64221162 | 64221524 | 64221323 | 10 | 16  | 30 | 0.525853154 | 0.986007   | PRICKLE2 | ENSG00000163637 |
| 3 | 64221563 | 64221884 | 64221738 | 12 | 15  | 20 | 0.730597099 | 0.831283   | PRICKLE2 | ENSG00000163637 |
| 3 | 64222403 | 64222665 | 64222561 | 10 | 13  | 13 | 0.958908693 | 0.543805   | PRICKLE2 | ENSG00000163637 |
| 3 | 64222853 | 64223934 | 64223663 | 15 | 56  | 52 | 1.03127916  | 0.435107   | PRICKLE2 | ENSG00000163637 |
| 3 | 64223951 | 64225993 | 64225215 | 41 | 129 | 84 | 1.466566236 | 0.00271428 | PRICKLE2 | ENSG00000163637 |
| 3 | 64226259 | 64226682 | 64226513 | 15 | 23  | 21 | 1.046082211 | 0.437961   | PRICKLE2 | ENSG00000163637 |
| 3 | 64227329 | 64227827 | 64227596 | 14 | 27  | 19 | 1.34247217  | 0.153055   | PRICKLE2 | ENSG00000163637 |
| 3 | 64228912 | 64229155 | 64228992 | 9  | 11  | 12 | 0.885146486 | 0.620672   | PRICKLE2 | ENSG00000163637 |
| 3 | 64229635 | 64229998 | 64229839 | 8  | 13  | 13 | 0.958908693 | 0.543805   | PRICKLE2 | ENSG00000163637 |
| 3 | 64230146 | 64230612 | 64230417 | 10 | 19  | 13 | 1.369869562 | 0.177863   | PRICKLE2 | ENSG00000163637 |
| 3 | 64231282 | 64231763 | 64231446 | 13 | 22  | 17 | 1.225272219 | 0.255726   | PRICKLE2 | ENSG00000163637 |
| 3 | 64231864 | 64232615 | 64232449 | 9  | 29  | 27 | 1.027402171 | 0.457998   | PRICKLE2 | ENSG00000163637 |
| 3 | 64233096 | 64234097 | 64233275 | 15 | 49  | 30 | 1.546626924 | 0.0258926  | PRICKLE2 | ENSG00000163637 |
| 3 | 64234190 | 64234853 | 64234369 | 11 | 29  | 23 | 1.198635866 | 0.251284   | PRICKLE2 | ENSG00000163637 |
| 3 | 64235872 | 64236094 | 64235983 | 14 | 15  | 6  | 2.191791298 | 0.0328001  | PRICKLE2 | ENSG00000163637 |
| 3 | 64236419 | 64237302 | 64237047 | 95 | 159 | 29 | 5.114179696 | 2.87E-22   | PRICKLE2 | ENSG00000163637 |
| 3 | 64237489 | 64237668 | 64237578 | 8  | 8   | 12 | 0.663859864 | 0.833689   | PRICKLE2 | ENSG00000163637 |
| 3 | 64238996 | 64239869 | 64239431 | 15 | 41  | 43 | 0.915321934 | 0.659357   | PRICKLE2 | ENSG00000163637 |
| 3 | 64239903 | 64240375 | 64240212 | 10 | 20  | 21 | 0.915321934 | 0.614384   | PRICKLE2 | ENSG00000163637 |
| 3 | 64240786 | 64241017 | 64240930 | 8  | 10  | 10 | 0.958908693 | 0.538751   | PRICKLE2 | ENSG00000163637 |
| 3 | 64241268 | 64242262 | 64241601 | 13 | 45  | 35 | 1.225272219 | 0.178199   | PRICKLE2 | ENSG00000163637 |
| 3 | 64242273 | 64242493 | 64242382 | 8  | 11  | 8  | 1.278544924 | 0.28289    | PRICKLE2 | ENSG00000163637 |
| 3 | 64243807 | 64243992 | 64243899 | 8  | 8   | 6  | 1.232882605 | 0.333038   | PRICKLE2 | ENSG00000163637 |
| 3 | 64245558 | 64246222 | 64245737 | 11 | 27  | 18 | 1.4131286   | 0.11777    | PRICKLE2 | ENSG00000163637 |
| 3 | 64246424 | 64246848 | 64246649 | 10 | 18  | 25 | 0.700740968 | 0.883987   | PRICKLE2 | ENSG00000163637 |
| 3 | 64248059 | 64248286 | 64248172 | 9  | 11  | 7  | 1.43836304  | 0.204844   | PRICKLE2 | ENSG00000163637 |
| 3 | 64249918 | 64250175 | 64250077 | 8  | 10  | 8  | 1.171999514 | 0.35773    | PRICKLE2 | ENSG00000163637 |
| 3 | 64250286 | 64250688 | 64250462 | 9  | 16  | 13 | 1.164389127 | 0.333296   | PRICKLE2 | ENSG00000163637 |
| 3 | 64250797 | 64250986 | 64250891 | 8  | 8   | 13 | 0.616441303 | 0.878084   | PRICKLE2 | ENSG00000163637 |
| 3 | 64251560 | 64251801 | 64251680 | 9  | 13  | 11 | 1.118726809 | 0.38479    | PRICKLE2 | ENSG00000163637 |

|   |          |          |          |    |    |    |             |           |          |                 |
|---|----------|----------|----------|----|----|----|-------------|-----------|----------|-----------------|
| 3 | 64251857 | 64252083 | 64251970 | 8  | 10 | 14 | 0.703199708 | 0.817173  | PRICKLE2 | ENSG00000163637 |
| 3 | 64252906 | 64253336 | 64253196 | 9  | 15 | 12 | 1.180195315 | 0.324974  | PRICKLE2 | ENSG00000163637 |
| 3 | 64253483 | 64253727 | 64253647 | 8  | 10 | 10 | 0.958908693 | 0.538751  | PRICKLE2 | ENSG00000163637 |
| 3 | 64253964 | 64254288 | 64254126 | 12 | 17 | 7  | 2.157544559 | 0.0276499 | PRICKLE2 | ENSG00000163637 |
| 3 | 64255635 | 64255861 | 64255749 | 8  | 9  | 10 | 0.871735176 | 0.624623  | PRICKLE2 | ENSG00000163637 |
| 3 | 64257665 | 64258292 | 64257844 | 10 | 21 | 15 | 1.318499453 | 0.19542   | PRICKLE2 | ENSG00000163637 |
| 3 | 64262366 | 64262582 | 64262483 | 8  | 9  | 11 | 0.799090578 | 0.702688  | PRICKLE2 | ENSG00000163637 |
| 3 | 64263237 | 64263701 | 64263522 | 12 | 24 | 19 | 1.198635866 | 0.269826  | PRICKLE2 | ENSG00000163637 |
| 3 | 64263730 | 64264044 | 64263887 | 14 | 17 | 10 | 1.569123316 | 0.112309  | PRICKLE2 | ENSG00000163637 |
| 3 | 64264276 | 64264856 | 64264639 | 8  | 22 | 12 | 1.696530765 | 0.057768  | PRICKLE2 | ENSG00000163637 |
| 3 | 64265180 | 64265654 | 64265335 | 10 | 19 | 11 | 1.598181155 | 0.0927758 | PRICKLE2 | ENSG00000163637 |
| 3 | 64266018 | 64266251 | 64266134 | 12 | 12 | 10 | 1.133255728 | 0.37674   | PRICKLE2 | ENSG00000163637 |
| 3 | 64266363 | 64266614 | 64266436 | 8  | 11 | 9  | 1.150690432 | 0.367789  | PRICKLE2 | ENSG00000163637 |
| 3 | 64267578 | 64267880 | 64267729 | 10 | 12 | 15 | 0.779113313 | 0.750998  | PRICKLE2 | ENSG00000163637 |
| 3 | 64271061 | 64271268 | 64271164 | 8  | 10 | 8  | 1.171999514 | 0.35773   | PRICKLE2 | ENSG00000163637 |
| 3 | 64276632 | 64276974 | 64276805 | 11 | 13 | 6  | 1.917817386 | 0.0693353 | PRICKLE2 | ENSG00000163637 |
| 3 | 64277773 | 64278358 | 64278049 | 10 | 25 | 14 | 1.662108401 | 0.053254  | PRICKLE2 | ENSG00000163637 |
| 3 | 64278667 | 64279038 | 64278974 | 10 | 15 | 15 | 0.958908693 | 0.546868  | PRICKLE2 | ENSG00000163637 |
| 3 | 64279041 | 64279523 | 64279220 | 8  | 17 | 25 | 0.663859864 | 0.912943  | PRICKLE2 | ENSG00000163637 |
| 3 | 64279676 | 64280684 | 64280301 | 11 | 41 | 33 | 1.184534268 | 0.229193  | PRICKLE2 | ENSG00000163637 |
| 3 | 64282390 | 64282813 | 64282569 | 10 | 18 | 14 | 1.214617678 | 0.282961  | PRICKLE2 | ENSG00000163637 |
| 3 | 64284256 | 64284508 | 64284367 | 8  | 11 | 11 | 0.958908693 | 0.540507  | PRICKLE2 | ENSG00000163637 |
| 3 | 64285088 | 64285391 | 64285247 | 8  | 11 | 12 | 0.885146486 | 0.620672  | PRICKLE2 | ENSG00000163637 |
| 3 | 64285802 | 64285997 | 64285884 | 8  | 8  | 9  | 0.863017824 | 0.627343  | PRICKLE2 | ENSG00000163637 |
| 3 | 64287819 | 64288327 | 64288025 | 13 | 24 | 11 | 1.997726444 | 0.0196649 | PRICKLE2 | ENSG00000163637 |
| 3 | 64288419 | 64289103 | 64288645 | 8  | 23 | 21 | 1.046082211 | 0.437961  | PRICKLE2 | ENSG00000163637 |
| 3 | 64289161 | 64289672 | 64289493 | 14 | 25 | 16 | 1.466566236 | 0.10473   | PRICKLE2 | ENSG00000163637 |
| 3 | 64289674 | 64290220 | 64289931 | 14 | 29 | 25 | 1.106433107 | 0.351025  | PRICKLE2 | ENSG00000163637 |
| 3 | 64291320 | 64291716 | 64291481 | 8  | 15 | 9  | 1.534253909 | 0.136498  | PRICKLE2 | ENSG00000163637 |
| 3 | 64291718 | 64292027 | 64291872 | 10 | 12 | 9  | 1.246581301 | 0.295061  | PRICKLE2 | ENSG00000163637 |
| 3 | 64292119 | 64292400 | 64292256 | 10 | 14 | 20 | 0.684934781 | 0.872628  | PRICKLE2 | ENSG00000163637 |
| 3 | 64292403 | 64292982 | 64292608 | 10 | 24 | 34 | 0.684934781 | 0.928489  | PRICKLE2 | ENSG00000163637 |
| 3 | 64294089 | 64294345 | 64294217 | 10 | 12 | 3  | 3.116453252 | 0.0131971 | PRICKLE2 | ENSG00000163637 |
| 3 | 64294708 | 64295042 | 64294811 | 10 | 15 | 10 | 1.394776281 | 0.191426  | PRICKLE2 | ENSG00000163637 |

|   |          |          |          |    |    |    |             |           |          |                 |
|---|----------|----------|----------|----|----|----|-------------|-----------|----------|-----------------|
| 3 | 64295446 | 64295789 | 64295617 | 12 | 16 | 6  | 2.328778255 | 0.0221113 | PRICKLE2 | ENSG00000163637 |
| 3 | 64298535 | 64298908 | 64298708 | 11 | 16 | 18 | 0.857970936 | 0.678066  | PRICKLE2 | ENSG00000163637 |
| 3 | 64300832 | 64301151 | 64300995 | 11 | 16 | 13 | 1.164389127 | 0.333296  | PRICKLE2 | ENSG00000163637 |
| 3 | 64301284 | 64301807 | 64301463 | 13 | 26 | 18 | 1.362659722 | 0.14632   | PRICKLE2 | ENSG00000163637 |
| 3 | 64301881 | 64302060 | 64301931 | 8  | 8  | 6  | 1.232882605 | 0.333038  | PRICKLE2 | ENSG00000163637 |
| 3 | 64302173 | 64302382 | 64302286 | 8  | 9  | 9  | 0.958908693 | 0.536911  | PRICKLE2 | ENSG00000163637 |
| 3 | 64303658 | 64304061 | 64303882 | 9  | 16 | 11 | 1.358453982 | 0.20248   | PRICKLE2 | ENSG00000163637 |
| 3 | 64304251 | 64304646 | 64304388 | 11 | 17 | 19 | 0.863017824 | 0.676008  | PRICKLE2 | ENSG00000163637 |
| 3 | 64304666 | 64304948 | 64304839 | 8  | 12 | 12 | 0.958908693 | 0.542188  | PRICKLE2 | ENSG00000163637 |
| 3 | 64305281 | 64305523 | 64305458 | 12 | 15 | 8  | 1.704726565 | 0.0916153 | PRICKLE2 | ENSG00000163637 |
| 3 | 64305932 | 64306365 | 64306186 | 9  | 17 | 11 | 1.43836304  | 0.15834   | PRICKLE2 | ENSG00000163637 |
| 3 | 64307012 | 64307267 | 64307139 | 10 | 13 | 20 | 0.639272462 | 0.907338  | PRICKLE2 | ENSG00000163637 |
| 3 | 64307912 | 64308153 | 64307990 | 8  | 10 | 4  | 2.109599125 | 0.0694668 | PRICKLE2 | ENSG00000163637 |
| 3 | 64312692 | 64313115 | 64312936 | 11 | 19 | 13 | 1.369869562 | 0.177863  | PRICKLE2 | ENSG00000163637 |
| 3 | 64313339 | 64313744 | 64313628 | 13 | 19 | 10 | 1.743470351 | 0.0622604 | PRICKLE2 | ENSG00000163637 |
| 3 | 64315105 | 64315516 | 64315304 | 12 | 23 | 15 | 1.43836304  | 0.12479   | PRICKLE2 | ENSG00000163637 |
| 3 | 64315794 | 64316404 | 64315973 | 11 | 24 | 25 | 0.922027589 | 0.614196  | PRICKLE2 | ENSG00000163637 |
| 3 | 64316519 | 64316727 | 64316652 | 8  | 8  | 9  | 0.863017824 | 0.627343  | PRICKLE2 | ENSG00000163637 |
| 3 | 64318013 | 64318481 | 64318307 | 12 | 19 | 21 | 0.871735176 | 0.672523  | PRICKLE2 | ENSG00000163637 |
| 3 | 64321285 | 64321520 | 64321402 | 8  | 11 | 10 | 1.046082211 | 0.455063  | PRICKLE2 | ENSG00000163637 |
| 3 | 64322142 | 64322511 | 64322357 | 11 | 15 | 13 | 1.095895649 | 0.398774  | PRICKLE2 | ENSG00000163637 |
| 3 | 64325990 | 64326205 | 64326097 | 8  | 10 | 12 | 0.811384279 | 0.697544  | PRICKLE2 | ENSG00000163637 |
| 3 | 64326495 | 64326983 | 64326674 | 10 | 19 | 25 | 0.737622072 | 0.849755  | PRICKLE2 | ENSG00000163637 |
| 3 | 64328966 | 64329308 | 64329139 | 9  | 12 | 13 | 0.890415215 | 0.619237  | PRICKLE2 | ENSG00000163637 |
| 3 | 64331139 | 64331437 | 64331288 | 8  | 13 | 6  | 1.917817386 | 0.0693353 |          | ENSG00000212340 |
| 3 | 64335455 | 64335717 | 64335577 | 9  | 12 | 13 | 0.890415215 | 0.619237  |          | ENSG00000212340 |
| 3 | 64338883 | 64339127 | 64339014 | 9  | 12 | 11 | 1.038817751 | 0.460341  |          | ENSG00000212340 |
| 3 | 64339138 | 64339426 | 64339252 | 10 | 14 | 14 | 0.958908693 | 0.545362  |          | ENSG00000212340 |
| 3 | 64339522 | 64339855 | 64339699 | 10 | 14 | 11 | 1.198635866 | 0.315918  |          | ENSG00000212340 |
| 3 | 64339882 | 64340296 | 64340089 | 8  | 16 | 11 | 1.358453982 | 0.20248   |          | ENSG00000212340 |
| 3 | 64340521 | 64340704 | 64340645 | 8  | 8  | 6  | 1.232882605 | 0.333038  |          | ENSG00000212340 |
| 3 | 64340853 | 64341502 | 64341196 | 9  | 21 | 21 | 0.958908693 | 0.555026  |          | ENSG00000212340 |
| 3 | 64342049 | 64342624 | 64342240 | 10 | 23 | 19 | 1.150690432 | 0.318834  |          | ENSG00000212340 |
| 3 | 64343326 | 64343821 | 64343505 | 13 | 27 | 18 | 1.4131286   | 0.11777   |          | ENSG00000212340 |

|   |          |          |          |    |    |    |             |           |                 |
|---|----------|----------|----------|----|----|----|-------------|-----------|-----------------|
| 3 | 64343972 | 64344162 | 64344067 | 8  | 8  | 4  | 1.726035648 | 0.150596  | ENSG00000212340 |
| 3 | 64345205 | 64345726 | 64345594 | 10 | 23 | 26 | 0.852363283 | 0.716584  | ENSG00000212340 |
| 3 | 64346272 | 64346627 | 64346449 | 16 | 22 | 23 | 0.918954164 | 0.614181  | ENSG00000212340 |
| 3 | 64346652 | 64347273 | 64346999 | 9  | 26 | 13 | 1.849323908 | 0.0263429 | ENSG00000212340 |
| 3 | 64347463 | 64347698 | 64347612 | 9  | 12 | 9  | 1.246581301 | 0.295061  | ENSG00000212340 |
| 3 | 64347716 | 64348006 | 64347882 | 9  | 12 | 9  | 1.246581301 | 0.295061  | ENSG00000212340 |
| 3 | 64348396 | 64348638 | 64348539 | 10 | 12 | 9  | 1.246581301 | 0.295061  | ENSG00000212340 |
| 3 | 64349347 | 64349579 | 64349500 | 9  | 11 | 13 | 0.821921737 | 0.693119  | ENSG00000212340 |
| 3 | 64350298 | 64350505 | 64350396 | 8  | 11 | 4  | 2.301380863 | 0.0459276 | ENSG00000212340 |
| 3 | 64350560 | 64350746 | 64350653 | 8  | 10 | 6  | 1.506856518 | 0.188853  | ENSG00000212340 |
| 3 | 64353358 | 64353575 | 64353447 | 9  | 11 | 9  | 1.150690432 | 0.367789  | ENSG00000212340 |
| 3 | 64353988 | 64354254 | 64354135 | 8  | 13 | 14 | 0.894981447 | 0.618069  | ENSG00000212340 |
| 3 | 64355403 | 64355897 | 64355574 | 17 | 28 | 15 | 1.738022006 | 0.0334925 | ENSG00000212340 |
| 3 | 64356069 | 64356264 | 64356154 | 8  | 9  | 9  | 0.958908693 | 0.536911  | ENSG00000212340 |
| 3 | 64358725 | 64359005 | 64358882 | 8  | 10 | 14 | 0.703199708 | 0.817173  | ENSG00000212340 |
| 3 | 64359098 | 64359391 | 64359238 | 9  | 13 | 4  | 2.684944341 | 0.01921   | ENSG00000212340 |
| 3 | 64359755 | 64360709 | 64360043 | 16 | 51 | 36 | 1.347655461 | 0.0800783 | ENSG00000212340 |
| 3 | 64361432 | 64361981 | 64361611 | 10 | 24 | 17 | 1.331817629 | 0.172585  | ENSG00000212340 |
| 3 | 64362230 | 64362449 | 64362362 | 8  | 10 | 5  | 1.757999271 | 0.121253  | ENSG00000212340 |
| 3 | 64362851 | 64363071 | 64362961 | 8  | 12 | 4  | 2.493162602 | 0.0299057 | ENSG00000212340 |
| 3 | 64364388 | 64364971 | 64364792 | 13 | 26 | 20 | 1.232882605 | 0.232568  | ENSG00000212340 |
| 3 | 64365775 | 64366725 | 64366433 | 18 | 46 | 43 | 1.024288831 | 0.453663  | ENSG00000212340 |
| 3 | 64367123 | 64368030 | 64367498 | 8  | 32 | 21 | 1.43836304  | 0.089235  | ENSG00000212340 |
| 3 | 64368034 | 64368636 | 64368377 | 11 | 27 | 26 | 0.99442383  | 0.507579  | ENSG00000212340 |
| 3 | 64368911 | 64369321 | 64369142 | 13 | 20 | 11 | 1.678090213 | 0.0696225 | ENSG00000212340 |
| 3 | 64369742 | 64369926 | 64369851 | 8  | 8  | 4  | 1.726035648 | 0.150596  | ENSG00000212340 |
| 3 | 64370369 | 64370620 | 64370529 | 8  | 10 | 14 | 0.703199708 | 0.817173  | ENSG00000212340 |
| 3 | 64372407 | 64372826 | 64372524 | 9  | 16 | 8  | 1.811271976 | 0.0663685 | ENSG00000212340 |
| 3 | 64373279 | 64373846 | 64373563 | 10 | 23 | 18 | 1.211253086 | 0.262955  | ENSG00000212340 |
| 3 | 64374010 | 64374363 | 64374220 | 11 | 15 | 12 | 1.180195315 | 0.324974  | ENSG00000212340 |
| 3 | 64374613 | 64374969 | 64374791 | 10 | 15 | 15 | 0.958908693 | 0.546868  | ENSG00000212340 |
| 3 | 64378627 | 64379002 | 64378829 | 10 | 15 | 14 | 1.022835939 | 0.473606  | ENSG00000212340 |
| 3 | 64379327 | 64379699 | 64379607 | 11 | 17 | 7  | 2.157544559 | 0.0276499 | ENSG00000212340 |
| 3 | 64380580 | 64380926 | 64380753 | 9  | 14 | 14 | 0.958908693 | 0.545362  | ENSG00000212340 |

|   |          |          |          |    |    |    |             |            |                 |
|---|----------|----------|----------|----|----|----|-------------|------------|-----------------|
| 3 | 64380975 | 64381564 | 64381090 | 8  | 19 | 23 | 0.799090578 | 0.772621   | ENSG00000212340 |
| 3 | 64384491 | 64385254 | 64384674 | 9  | 27 | 18 | 1.4131286   | 0.11777    | ENSG00000212340 |
| 3 | 64386918 | 64387807 | 64387443 | 12 | 36 | 17 | 1.971090091 | 0.00702208 | ENSG00000212340 |
| 3 | 64389988 | 64390244 | 64390104 | 9  | 12 | 4  | 2.493162602 | 0.0299057  | ENSG00000212340 |
| 3 | 64392526 | 64392794 | 64392633 | 8  | 10 | 19 | 0.527399781 | 0.961307   | ENSG00000212340 |
| 3 | 64392917 | 64393180 | 64393049 | 12 | 15 | 12 | 1.180195315 | 0.324974   | ENSG00000212340 |
| 3 | 64393346 | 64393634 | 64393472 | 8  | 11 | 9  | 1.150690432 | 0.367789   | ENSG00000212340 |
| 3 | 64394062 | 64394363 | 64394236 | 8  | 11 | 14 | 0.767126954 | 0.756447   | ENSG00000212340 |
| 3 | 64397629 | 64397902 | 64397765 | 9  | 14 | 16 | 0.846095906 | 0.68298    | ENSG00000212340 |
| 3 | 64400249 | 64400459 | 64400301 | 9  | 10 | 10 | 0.958908693 | 0.538751   | ENSG00000212340 |
| 3 | 64400829 | 64401231 | 64401052 | 10 | 17 | 18 | 0.908439814 | 0.615249   | ENSG00000212340 |
| 3 | 64401249 | 64401533 | 64401391 | 9  | 15 | 12 | 1.180195315 | 0.324974   | ENSG00000212340 |
| 3 | 64401685 | 64402193 | 64401863 | 10 | 18 | 8  | 2.024362796 | 0.0334397  | ENSG00000212340 |
| 3 | 64403177 | 64403437 | 64403299 | 10 | 11 | 23 | 0.479454347 | 0.984912   | ENSG00000212340 |
| 3 | 64403828 | 64404180 | 64404004 | 11 | 17 | 8  | 1.917817386 | 0.0474153  | ENSG00000212340 |
| 3 | 64407431 | 64407779 | 64407605 | 8  | 12 | 14 | 0.831054201 | 0.689281   | ENSG00000212340 |
| 3 | 64408238 | 64408417 | 64408334 | 8  | 8  | 7  | 1.07877228  | 0.435076   | ENSG00000212340 |
| 3 | 64408860 | 64409091 | 64408972 | 8  | 9  | 9  | 0.958908693 | 0.536911   | ENSG00000212340 |
| 3 | 64409258 | 64409625 | 64409437 | 8  | 14 | 10 | 1.307602763 | 0.244096   | ENSG00000212340 |
| 3 | 64409726 | 64410130 | 64409951 | 8  | 15 | 9  | 1.534253909 | 0.136498   | ENSG00000212340 |
| 3 | 64411110 | 64411827 | 64411574 | 9  | 26 | 27 | 0.924661954 | 0.614379   | ENSG00000212340 |
| 3 | 64412315 | 64412578 | 64412438 | 8  | 10 | 11 | 0.878999635 | 0.622439   | ENSG00000212340 |
| 3 | 64413115 | 64413521 | 64413344 | 9  | 15 | 15 | 0.958908693 | 0.546868   | ENSG00000212340 |
| 3 | 64415040 | 64415309 | 64415174 | 14 | 16 | 17 | 0.905635988 | 0.615736   | ENSG00000212340 |
| 3 | 64415699 | 64415888 | 64415745 | 8  | 9  | 6  | 1.369869562 | 0.253675   | ENSG00000212340 |
| 3 | 64416249 | 64417116 | 64416414 | 10 | 31 | 24 | 1.227403127 | 0.218358   | ENSG00000212340 |
| 3 | 64417838 | 64418026 | 64417932 | 8  | 9  | 14 | 0.639272462 | 0.869513   | ENSG00000212340 |
| 3 | 64419295 | 64419619 | 64419457 | 9  | 13 | 7  | 1.678090213 | 0.11195    | ENSG00000212340 |
| 3 | 64422967 | 64423479 | 64423193 | 11 | 21 | 14 | 1.406399416 | 0.148881   | ENSG00000212340 |
| 3 | 64423505 | 64424024 | 64423764 | 9  | 18 | 15 | 1.138704073 | 0.348127   | ENSG00000212340 |
| 3 | 64424195 | 64425258 | 64424538 | 13 | 49 | 32 | 1.452891959 | 0.0452843  | ENSG00000212340 |
| 3 | 64425356 | 64425625 | 64425503 | 10 | 12 | 15 | 0.779113313 | 0.750998   | ENSG00000212340 |
| 3 | 64426247 | 64426564 | 64426409 | 8  | 11 | 11 | 0.958908693 | 0.540507   | ENSG00000212340 |
| 3 | 64426666 | 64427144 | 64426845 | 10 | 21 | 13 | 1.506856518 | 0.109266   | ENSG00000212340 |

|   |          |          |          |    |    |    |             |           |                 |
|---|----------|----------|----------|----|----|----|-------------|-----------|-----------------|
| 3 | 64427589 | 64427861 | 64427749 | 8  | 9  | 15 | 0.599317933 | 0.904407  | ENSG00000212340 |
| 3 | 64429733 | 64429986 | 64429888 | 10 | 12 | 11 | 1.038817751 | 0.460341  | ENSG00000212340 |
| 3 | 64432027 | 64432559 | 64432286 | 9  | 20 | 9  | 2.013708255 | 0.0279742 | ENSG00000212340 |
| 3 | 64433472 | 64433846 | 64433724 | 10 | 16 | 13 | 1.164389127 | 0.333296  | ENSG00000212340 |
| 3 | 64434293 | 64434543 | 64434418 | 13 | 15 | 12 | 1.180195315 | 0.324974  | ENSG00000212340 |
| 3 | 64434649 | 64434876 | 64434728 | 9  | 11 | 6  | 1.643843474 | 0.137712  | ENSG00000212340 |
| 3 | 64435358 | 64435733 | 64435567 | 8  | 13 | 13 | 0.958908693 | 0.543805  | ENSG00000212340 |
| 3 | 64443105 | 64443371 | 64443238 | 11 | 14 | 11 | 1.198635866 | 0.315918  | ENSG00000212340 |
| 3 | 64444460 | 64444692 | 64444594 | 8  | 9  | 10 | 0.871735176 | 0.624623  | ENSG00000212340 |
| 3 | 64444707 | 64445034 | 64444884 | 13 | 17 | 8  | 1.917817386 | 0.0474153 | ENSG00000212340 |
| 3 | 64445076 | 64445573 | 64445284 | 30 | 48 | 35 | 1.305181277 | 0.109832  | ENSG00000212340 |
| 3 | 64446662 | 64447127 | 64446909 | 9  | 19 | 16 | 1.128127874 | 0.354788  | ENSG00000212340 |
| 3 | 64447628 | 64447907 | 64447767 | 8  | 10 | 21 | 0.479454347 | 0.981126  | ENSG00000212340 |
| 3 | 64448303 | 64448610 | 64448442 | 9  | 14 | 4  | 2.876726079 | 0.01219   | ENSG00000212340 |
| 3 | 64449297 | 64449698 | 64449476 | 9  | 18 | 27 | 0.650688042 | 0.929412  | ENSG00000212340 |
| 3 | 64449717 | 64450203 | 64450007 | 15 | 32 | 27 | 1.130142388 | 0.314942  | ENSG00000212340 |
| 3 | 64450265 | 64450524 | 64450390 | 9  | 11 | 7  | 1.43836304  | 0.204844  | ENSG00000212340 |
| 3 | 64451593 | 64452145 | 64451885 | 15 | 28 | 33 | 0.817892709 | 0.78822   | ENSG00000212340 |
| 3 | 64452227 | 64452506 | 64452341 | 11 | 13 | 21 | 0.610214623 | 0.930478  | ENSG00000212340 |
| 3 | 64452519 | 64453054 | 64452698 | 8  | 19 | 27 | 0.684934781 | 0.905224  | ENSG00000212340 |
| 3 | 64453100 | 64453660 | 64453488 | 10 | 23 | 31 | 0.71918152  | 0.891586  | ENSG00000212340 |
| 3 | 64454147 | 64454723 | 64454343 | 8  | 22 | 20 | 1.05023333  | 0.434036  | ENSG00000212340 |
| 3 | 64454900 | 64455269 | 64455024 | 10 | 15 | 23 | 0.639272462 | 0.921343  | ENSG00000212340 |
| 3 | 64455502 | 64455714 | 64455608 | 8  | 9  | 19 | 0.479454347 | 0.976332  | ENSG00000212340 |
| 3 | 64456138 | 64456399 | 64456245 | 11 | 12 | 14 | 0.831054201 | 0.689281  | ENSG00000212340 |
| 3 | 64456496 | 64456742 | 64456619 | 9  | 13 | 5  | 2.237453617 | 0.038866  | ENSG00000212340 |
| 3 | 64457255 | 64457457 | 64457356 | 9  | 11 | 5  | 1.917817386 | 0.0843804 | ENSG00000212340 |
| 3 | 64458276 | 64458650 | 64458519 | 9  | 14 | 8  | 1.598181155 | 0.124586  | ENSG00000212340 |
| 3 | 64459517 | 64459764 | 64459639 | 9  | 11 | 4  | 2.301380863 | 0.0459276 | ENSG00000212340 |
| 3 | 64460466 | 64460664 | 64460577 | 9  | 9  | 4  | 1.917817386 | 0.103282  | ENSG00000212340 |
| 3 | 64461623 | 64462615 | 64461948 | 17 | 63 | 48 | 1.252452171 | 0.115791  | ENSG00000212340 |
| 3 | 64463601 | 64463849 | 64463767 | 9  | 12 | 7  | 1.558226626 | 0.152813  | ENSG00000212340 |
| 3 | 64464465 | 64464751 | 64464609 | 8  | 12 | 5  | 2.077635502 | 0.0577144 | ENSG00000212340 |
| 3 | 64465911 | 64466262 | 64466160 | 10 | 15 | 14 | 1.022835939 | 0.473606  | ENSG00000212340 |

|   |          |          |          |    |     |    |             |            |                 |
|---|----------|----------|----------|----|-----|----|-------------|------------|-----------------|
| 3 | 64466360 | 64466564 | 64466485 | 8  | 11  | 12 | 0.885146486 | 0.620672   | ENSG00000212340 |
| 3 | 64467409 | 64467717 | 64467584 | 10 | 13  | 8  | 1.491635745 | 0.166708   | ENSG00000212340 |
| 3 | 64467892 | 64468323 | 64468071 | 9  | 18  | 17 | 1.012181398 | 0.48423    | ENSG00000212340 |
| 3 | 64468881 | 64469184 | 64469018 | 15 | 18  | 9  | 1.821926517 | 0.0548428  | ENSG00000212340 |
| 3 | 64470079 | 64470311 | 64470195 | 9  | 12  | 10 | 1.133255728 | 0.37674    | ENSG00000212340 |
| 3 | 64470470 | 64470925 | 64470649 | 11 | 23  | 10 | 2.092164421 | 0.0165595  | ENSG00000212340 |
| 3 | 64474282 | 64474587 | 64474434 | 10 | 14  | 5  | 2.397271733 | 0.0258078  | ENSG00000212340 |
| 3 | 64476756 | 64477099 | 64476882 | 11 | 16  | 13 | 1.164389127 | 0.333296   | ENSG00000212340 |
| 3 | 64478528 | 64478752 | 64478629 | 9  | 9   | 10 | 0.871735176 | 0.624623   | ENSG00000212340 |
| 3 | 64486983 | 64487286 | 64487118 | 12 | 16  | 8  | 1.811271976 | 0.0663685  | ENSG00000212340 |
| 3 | 64488745 | 64489098 | 64488921 | 12 | 18  | 11 | 1.518272097 | 0.122037   | ENSG00000212340 |
| 3 | 64490162 | 64490393 | 64490276 | 8  | 9   | 11 | 0.799090578 | 0.702688   | ENSG00000212340 |
| 3 | 64490940 | 64491724 | 64491324 | 15 | 44  | 18 | 2.271099536 | 0.00079954 | ENSG00000212340 |
| 3 | 64491746 | 64492077 | 64491916 | 9  | 13  | 9  | 1.34247217  | 0.232231   | ENSG00000212340 |
| 3 | 64492490 | 64492703 | 64492666 | 8  | 11  | 10 | 1.046082211 | 0.455063   | ENSG00000212340 |
| 3 | 64493004 | 64493396 | 64493183 | 10 | 17  | 13 | 1.232882605 | 0.274309   | ENSG00000212340 |
| 3 | 64493415 | 64495246 | 64494473 | 40 | 132 | 83 | 1.518272097 | 0.00118264 | ENSG00000212340 |
| 3 | 64496900 | 64497308 | 64497139 | 11 | 19  | 18 | 1.009377572 | 0.487356   | ENSG00000212340 |
| 3 | 64498272 | 64498697 | 64498393 | 15 | 23  | 15 | 1.43836304  | 0.12479    | ENSG00000212340 |
| 3 | 64499804 | 64500347 | 64499979 | 9  | 21  | 15 | 1.318499453 | 0.19542    | ENSG00000212340 |
| 3 | 64500425 | 64500644 | 64500559 | 8  | 11  | 18 | 0.605626543 | 0.918575   | ENSG00000212340 |
| 3 | 64501549 | 64501728 | 64501671 | 8  | 8   | 11 | 0.71918152  | 0.777546   | ENSG00000212340 |
| 3 | 64501744 | 64502109 | 64501943 | 8  | 14  | 16 | 0.846095906 | 0.68298    | ENSG00000212340 |
| 3 | 64502574 | 64502753 | 64502641 | 8  | 8   | 5  | 1.43836304  | 0.235762   | ENSG00000212340 |
| 3 | 64507817 | 64508121 | 64507969 | 8  | 13  | 6  | 1.917817386 | 0.0693353  | ENSG00000212340 |
| 3 | 64508473 | 64508741 | 64508607 | 8  | 11  | 4  | 2.301380863 | 0.0459276  | ENSG00000212340 |
| 3 | 64508945 | 64509125 | 64509035 | 8  | 8   | 13 | 0.616441303 | 0.878084   | ENSG00000212340 |
| 3 | 64509626 | 64509819 | 64509722 | 8  | 9   | 12 | 0.737622072 | 0.769563   | ENSG00000212340 |
| 3 | 64510166 | 64510345 | 64510255 | 8  | 8   | 7  | 1.07877228  | 0.435076   | ENSG00000212340 |
| 3 | 64510435 | 64510935 | 64510757 | 13 | 21  | 16 | 1.240940662 | 0.248103   | ENSG00000212340 |
| 3 | 64512526 | 64512993 | 64512701 | 11 | 21  | 6  | 3.013713035 | 0.00261913 | ENSG00000212340 |
| 3 | 64513001 | 64513297 | 64513139 | 12 | 16  | 7  | 2.037680973 | 0.0400399  | ENSG00000212340 |
| 3 | 64515391 | 64515790 | 64515627 | 11 | 17  | 18 | 0.908439814 | 0.615249   | ENSG00000212340 |
| 3 | 64518961 | 64519399 | 64519244 | 9  | 18  | 14 | 1.214617678 | 0.282961   | ENSG00000212340 |



|   |          |          |          |    |    |    |             |           |                 |
|---|----------|----------|----------|----|----|----|-------------|-----------|-----------------|
| 3 | 64520038 | 64520660 | 64520198 | 11 | 26 | 22 | 1.125675422 | 0.336059  | ENSG00000212340 |
| 3 | 64520942 | 64521365 | 64521098 | 10 | 17 | 23 | 0.71918152  | 0.858071  | ENSG00000212340 |
| 3 | 64521851 | 64522053 | 64521993 | 9  | 10 | 5  | 1.757999271 | 0.121253  | ENSG00000212340 |
| 3 | 64522143 | 64522778 | 64522603 | 16 | 33 | 17 | 1.811271976 | 0.0175837 | ENSG00000212340 |
| 3 | 64522859 | 64523412 | 64523147 | 9  | 21 | 16 | 1.240940662 | 0.248103  | ENSG00000212340 |
| 3 | 64524276 | 64524728 | 64524455 | 10 | 19 | 16 | 1.128127874 | 0.354788  | ENSG00000212340 |
| 3 | 64525573 | 64525976 | 64525747 | 9  | 16 | 13 | 1.164389127 | 0.333296  | ENSG00000212340 |
| 3 | 64526030 | 64526252 | 64526141 | 10 | 12 | 5  | 2.077635502 | 0.0577144 | ENSG00000212340 |
| 3 | 64527513 | 64527706 | 64527609 | 9  | 10 | 6  | 1.506856518 | 0.188853  | ENSG00000212340 |
| 3 | 64527868 | 64528120 | 64528009 | 8  | 11 | 17 | 0.639272462 | 0.890352  | ENSG00000212340 |
| 3 | 64528807 | 64529345 | 64529253 | 18 | 36 | 28 | 1.223435229 | 0.205341  | ENSG00000212340 |
| 3 | 64529358 | 64529620 | 64529529 | 9  | 14 | 12 | 1.106433107 | 0.392094  | ENSG00000212340 |
| 3 | 64529646 | 64530102 | 64529875 | 11 | 22 | 23 | 0.918954164 | 0.614181  | ENSG00000212340 |
| 3 | 64532956 | 64533406 | 64533278 | 9  | 18 | 27 | 0.650688042 | 0.929412  | ENSG00000212340 |
| 3 | 64533712 | 64533935 | 64533823 | 9  | 9  | 2  | 3.19636231  | 0.0229249 | ENSG00000212340 |
| 3 | 64534715 | 64534978 | 64534857 | 9  | 12 | 13 | 0.890415215 | 0.619237  | ENSG00000212340 |
| 3 | 64535424 | 64535808 | 64535541 | 10 | 18 | 18 | 0.958908693 | 0.551113  | ENSG00000212340 |
| 3 | 64535868 | 64537077 | 64536339 | 25 | 73 | 76 | 0.921548614 | 0.692232  | ENSG00000212340 |
| 3 | 64537247 | 64537612 | 64537426 | 9  | 16 | 16 | 0.958908693 | 0.548325  | ENSG00000212340 |
| 3 | 64537915 | 64538467 | 64538286 | 12 | 25 | 28 | 0.859711242 | 0.713133  | ENSG00000212340 |
| 3 | 64538765 | 64538960 | 64538894 | 8  | 8  | 9  | 0.863017824 | 0.627343  | ENSG00000212340 |
| 3 | 64538964 | 64539240 | 64539111 | 10 | 14 | 14 | 0.958908693 | 0.545362  | ENSG00000212340 |
| 3 | 64539334 | 64540073 | 64539899 | 14 | 31 | 26 | 1.136484377 | 0.310077  | ENSG00000212340 |
| 3 | 64540513 | 64540910 | 64540731 | 10 | 17 | 14 | 1.150690432 | 0.340986  | ENSG00000212340 |
| 3 | 64541255 | 64541494 | 64541349 | 14 | 17 | 16 | 1.015315087 | 0.480915  | ENSG00000212340 |
| 3 | 64541501 | 64541992 | 64541813 | 9  | 19 | 16 | 1.128127874 | 0.354788  | ENSG00000212340 |
| 3 | 64542397 | 64542715 | 64542556 | 10 | 14 | 13 | 1.027402171 | 0.469541  | ENSG00000212340 |
| 3 | 64542795 | 64543115 | 64542955 | 8  | 11 | 14 | 0.767126954 | 0.756447  | ENSG00000212340 |
| 3 | 64543961 | 64544398 | 64544122 | 9  | 17 | 25 | 0.663859864 | 0.912943  | ENSG00000212340 |
| 3 | 64544422 | 64544727 | 64544574 | 12 | 17 | 12 | 1.327719729 | 0.212795  | ENSG00000212340 |
| 3 | 64544756 | 64545298 | 64545004 | 10 | 23 | 21 | 1.046082211 | 0.437961  | ENSG00000212340 |
| 3 | 64545923 | 64546175 | 64546049 | 11 | 14 | 19 | 0.71918152  | 0.83643   | ENSG00000212340 |
| 3 | 64546718 | 64547082 | 64546897 | 11 | 18 | 17 | 1.012181398 | 0.48423   | ENSG00000212340 |
| 3 | 64547522 | 64548095 | 64547916 | 10 | 23 | 18 | 1.211253086 | 0.262955  | ENSG00000212340 |

|   |          |          |          |    |    |    |             |            |                         |
|---|----------|----------|----------|----|----|----|-------------|------------|-------------------------|
| 3 | 64549166 | 64549609 | 64549345 | 8  | 17 | 19 | 0.863017824 | 0.676008   | ENSG00000212340         |
| 3 | 64549658 | 64549878 | 64549740 | 8  | 10 | 5  | 1.757999271 | 0.121253   | ENSG00000212340         |
| 3 | 64550614 | 64551111 | 64550771 | 11 | 22 | 6  | 3.150699991 | 0.00166398 | ENSG00000212340         |
| 3 | 64551323 | 64551890 | 64551490 | 17 | 27 | 16 | 1.579379024 | 0.0636678  | ENSG00000212340         |
| 3 | 64552157 | 64552675 | 64552434 | 10 | 20 | 10 | 1.830643869 | 0.0454769  | ENSG00000212340         |
| 3 | 64554188 | 64554621 | 64554407 | 9  | 19 | 25 | 0.737622072 | 0.849755   | ENSG00000212340         |
| 3 | 64554784 | 64555229 | 64554929 | 8  | 16 | 21 | 0.740974899 | 0.826507   | ENSG00000212340         |
| 3 | 64555817 | 64556145 | 64555981 | 12 | 18 | 16 | 1.07172148  | 0.415914   | ENSG00000212340         |
| 3 | 64557553 | 64558123 | 64557762 | 12 | 27 | 27 | 0.958908693 | 0.562099   | ENSG00000212340         |
| 3 | 64558236 | 64558912 | 64558406 | 13 | 31 | 20 | 1.461194199 | 0.084213   | ENSG00000212340         |
| 3 | 64559784 | 64559994 | 64559889 | 11 | 13 | 9  | 1.34247217  | 0.232231   | ENSG00000212340         |
| 3 | 64560443 | 64560743 | 64560595 | 12 | 14 | 13 | 1.027402171 | 0.469541   | ADAMTS9 ENSG00000163638 |
| 3 | 64560956 | 64561324 | 64561135 | 8  | 15 | 28 | 0.529053072 | 0.982554   | ADAMTS9 ENSG00000163638 |
| 3 | 64561359 | 64561689 | 64561512 | 10 | 15 | 20 | 0.730597099 | 0.831283   | ADAMTS9 ENSG00000163638 |
| 3 | 64562325 | 64562829 | 64562504 | 12 | 26 | 27 | 0.924661954 | 0.614379   | ADAMTS9 ENSG00000163638 |
| 3 | 64563196 | 64563465 | 64563366 | 10 | 14 | 10 | 1.307602763 | 0.244096   | ADAMTS9 ENSG00000163638 |
| 3 | 64563822 | 64564137 | 64563977 | 9  | 14 | 17 | 0.799090578 | 0.74177    | ADAMTS9 ENSG00000163638 |
| 3 | 64564357 | 64564750 | 64564536 | 10 | 18 | 15 | 1.138704073 | 0.348127   | ADAMTS9 ENSG00000163638 |
| 3 | 64564906 | 64565093 | 64564995 | 8  | 9  | 15 | 0.599317933 | 0.904407   | ADAMTS9 ENSG00000163638 |
| 3 | 64565703 | 64565978 | 64565843 | 10 | 12 | 5  | 2.077635502 | 0.0577144  | ADAMTS9 ENSG00000163638 |
| 3 | 64566159 | 64566479 | 64566319 | 10 | 14 | 18 | 0.757033179 | 0.792932   | ADAMTS9 ENSG00000163638 |
| 3 | 64566571 | 64567162 | 64566733 | 13 | 26 | 21 | 1.176842487 | 0.282611   | ADAMTS9 ENSG00000163638 |
| 3 | 64567506 | 64567798 | 64567637 | 10 | 13 | 19 | 0.671236085 | 0.87814    | ADAMTS9 ENSG00000163638 |
| 3 | 64568632 | 64568944 | 64568788 | 8  | 12 | 8  | 1.385090334 | 0.219216   | ADAMTS9 ENSG00000163638 |
| 3 | 64569667 | 64569882 | 64569728 | 8  | 9  | 6  | 1.369869562 | 0.253675   | ADAMTS9 ENSG00000163638 |
| 3 | 64570672 | 64570980 | 64570826 | 8  | 12 | 14 | 0.831054201 | 0.689281   | ADAMTS9 ENSG00000163638 |
| 3 | 64572352 | 64572729 | 64572530 | 9  | 14 | 11 | 1.198635866 | 0.315918   | ADAMTS9 ENSG00000163638 |
| 3 | 64573117 | 64574403 | 64573839 | 15 | 65 | 53 | 1.171999514 | 0.191852   | ADAMTS9 ENSG00000163638 |
| 3 | 64574990 | 64575405 | 64575150 | 8  | 15 | 15 | 0.958908693 | 0.546868   | ADAMTS9 ENSG00000163638 |
| 3 | 64575609 | 64575986 | 64575771 | 10 | 16 | 20 | 0.776259418 | 0.783794   | ADAMTS9 ENSG00000163638 |
| 3 | 64576353 | 64576707 | 64576530 | 10 | 16 | 22 | 0.708758599 | 0.862621   | ADAMTS9 ENSG00000163638 |
| 3 | 64576851 | 64577817 | 64577114 | 14 | 46 | 33 | 1.325550252 | 0.102513   | ADAMTS9 ENSG00000163638 |
| 3 | 64577918 | 64578346 | 64578042 | 8  | 15 | 16 | 0.902502299 | 0.616352   | ADAMTS9 ENSG00000163638 |
| 3 | 64578465 | 64578702 | 64578574 | 8  | 10 | 6  | 1.506856518 | 0.188853   | ADAMTS9 ENSG00000163638 |

|   |          |          |          |    |     |    |             |             |         |                 |
|---|----------|----------|----------|----|-----|----|-------------|-------------|---------|-----------------|
| 3 | 64579027 | 64579499 | 64579320 | 10 | 18  | 11 | 1.518272097 | 0.122037    | ADAMTS9 | ENSG00000163638 |
| 3 | 64579621 | 64579869 | 64579706 | 8  | 10  | 10 | 0.958908693 | 0.538751    | ADAMTS9 | ENSG00000163638 |
| 3 | 64579896 | 64580290 | 64580066 | 12 | 20  | 12 | 1.54900635  | 0.101141    | ADAMTS9 | ENSG00000163638 |
| 3 | 64581135 | 64581461 | 64581286 | 11 | 16  | 15 | 1.018840486 | 0.477384    | ADAMTS9 | ENSG00000163638 |
| 3 | 64583786 | 64584185 | 64584007 | 9  | 15  | 15 | 0.958908693 | 0.546868    | ADAMTS9 | ENSG00000163638 |
| 3 | 64584351 | 64584691 | 64584521 | 10 | 15  | 11 | 1.278544924 | 0.254978    | ADAMTS9 | ENSG00000163638 |
| 3 | 64586535 | 64586757 | 64586641 | 9  | 11  | 4  | 2.301380863 | 0.0459276   | ADAMTS9 | ENSG00000163638 |
| 3 | 64587421 | 64588191 | 64587577 | 11 | 29  | 34 | 0.821921737 | 0.786085    | ADAMTS9 | ENSG00000163638 |
| 3 | 64588225 | 64590244 | 64588706 | 22 | 109 | 62 | 1.67428502  | 0.000432372 | ADAMTS9 | ENSG00000163638 |
| 3 | 64590789 | 64591037 | 64590914 | 8  | 11  | 4  | 2.301380863 | 0.0459276   | ADAMTS9 | ENSG00000163638 |
| 3 | 64591918 | 64592283 | 64592095 | 10 | 16  | 13 | 1.164389127 | 0.333296    | ADAMTS9 | ENSG00000163638 |
| 3 | 64592678 | 64592984 | 64592831 | 9  | 14  | 9  | 1.43836304  | 0.179537    | ADAMTS9 | ENSG00000163638 |
| 3 | 64593009 | 64593411 | 64593188 | 13 | 23  | 10 | 2.092164421 | 0.0165595   | ADAMTS9 | ENSG00000163638 |
| 3 | 64593441 | 64593802 | 64593624 | 11 | 18  | 18 | 0.958908693 | 0.551113    | ADAMTS9 | ENSG00000163638 |
| 3 | 64593863 | 64594626 | 64594297 | 12 | 35  | 46 | 0.734483254 | 0.920083    | ADAMTS9 | ENSG00000163638 |
| 3 | 64595130 | 64595445 | 64595293 | 14 | 16  | 24 | 0.652057911 | 0.917054    | ADAMTS9 | ENSG00000163638 |
| 3 | 64595518 | 64595869 | 64595693 | 11 | 16  | 20 | 0.776259418 | 0.783794    | ADAMTS9 | ENSG00000163638 |
| 3 | 64596284 | 64596566 | 64596425 | 8  | 12  | 9  | 1.246581301 | 0.295061    | ADAMTS9 | ENSG00000163638 |
| 3 | 64597017 | 64597197 | 64597087 | 8  | 9   | 13 | 0.684934781 | 0.824961    | ADAMTS9 | ENSG00000163638 |
| 3 | 64597355 | 64597700 | 64597527 | 10 | 16  | 17 | 0.905635988 | 0.615736    | ADAMTS9 | ENSG00000163638 |
| 3 | 64598068 | 64598443 | 64598297 | 8  | 13  | 18 | 0.7065643   | 0.841991    | ADAMTS9 | ENSG00000163638 |
| 3 | 64598459 | 64598729 | 64598609 | 8  | 12  | 9  | 1.246581301 | 0.295061    | ADAMTS9 | ENSG00000163638 |
| 3 | 64598880 | 64599179 | 64599029 | 8  | 12  | 5  | 2.077635502 | 0.0577144   | ADAMTS9 | ENSG00000163638 |
| 3 | 64599302 | 64599560 | 64599431 | 12 | 13  | 7  | 1.678090213 | 0.111195    | ADAMTS9 | ENSG00000163638 |
| 3 | 64599718 | 64599986 | 64599852 | 8  | 10  | 14 | 0.703199708 | 0.817173    | ADAMTS9 | ENSG00000163638 |
| 3 | 64600894 | 64601148 | 64601018 | 8  | 11  | 7  | 1.43836304  | 0.204844    | ADAMTS9 | ENSG00000163638 |
| 3 | 64602875 | 64603538 | 64603241 | 13 | 30  | 19 | 1.486308474 | 0.0791381   | ADAMTS9 | ENSG00000163638 |
| 3 | 64604676 | 64604873 | 64604764 | 8  | 10  | 8  | 1.171999514 | 0.35773     | ADAMTS9 | ENSG00000163638 |
| 3 | 64605971 | 64606239 | 64606071 | 12 | 15  | 11 | 1.278544924 | 0.254978    | ADAMTS9 | ENSG00000163638 |
| 3 | 64606337 | 64606810 | 64606516 | 12 | 25  | 19 | 1.246581301 | 0.225794    | ADAMTS9 | ENSG00000163638 |
| 3 | 64607367 | 64607911 | 64607604 | 11 | 21  | 15 | 1.318499453 | 0.19542     | ADAMTS9 | ENSG00000163638 |
| 3 | 64608526 | 64608903 | 64608777 | 10 | 16  | 15 | 1.018840486 | 0.477384    | ADAMTS9 | ENSG00000163638 |
| 3 | 64609519 | 64609791 | 64609696 | 8  | 12  | 13 | 0.890415215 | 0.619237    | ADAMTS9 | ENSG00000163638 |
| 3 | 64609813 | 64610308 | 64610129 | 18 | 29  | 21 | 1.307602763 | 0.165913    | ADAMTS9 | ENSG00000163638 |

|   |          |          |          |    |    |    |             |           |         |                 |
|---|----------|----------|----------|----|----|----|-------------|-----------|---------|-----------------|
| 3 | 64611726 | 64611912 | 64611855 | 9  | 10 | 13 | 0.753428259 | 0.762589  | ADAMTS9 | ENSG00000163638 |
| 3 | 64612064 | 64612373 | 64612194 | 13 | 14 | 17 | 0.799090578 | 0.74177   | ADAMTS9 | ENSG00000163638 |
| 3 | 64613124 | 64613516 | 64613303 | 9  | 16 | 12 | 1.253957522 | 0.265012  | ADAMTS9 | ENSG00000163638 |
| 3 | 64613859 | 64614394 | 64614038 | 9  | 20 | 9  | 2.013708255 | 0.0279742 | ADAMTS9 | ENSG00000163638 |
| 3 | 64614641 | 64614968 | 64614804 | 8  | 12 | 15 | 0.779113313 | 0.750998  | ADAMTS9 | ENSG00000163638 |
| 3 | 64616928 | 64617499 | 64617099 | 10 | 20 | 19 | 1.006854128 | 0.490315  | ADAMTS9 | ENSG00000163638 |
| 3 | 64617526 | 64617938 | 64617840 | 8  | 15 | 14 | 1.022835939 | 0.473606  | ADAMTS9 | ENSG00000163638 |
| 3 | 64618420 | 64618828 | 64618599 | 9  | 17 | 19 | 0.863017824 | 0.676008  | ADAMTS9 | ENSG00000163638 |
| 3 | 64618856 | 64619037 | 64618932 | 8  | 9  | 8  | 1.065454103 | 0.442605  | ADAMTS9 | ENSG00000163638 |
| 3 | 64619212 | 64619449 | 64619327 | 10 | 11 | 23 | 0.479454347 | 0.984912  | ADAMTS9 | ENSG00000163638 |
| 3 | 64619745 | 64620038 | 64619874 | 10 | 13 | 12 | 1.0326709   | 0.46514   | ADAMTS9 | ENSG00000163638 |
| 3 | 64620407 | 64620653 | 64620530 | 8  | 10 | 22 | 0.458608505 | 0.987045  | ADAMTS9 | ENSG00000163638 |
| 3 | 64621180 | 64621511 | 64621335 | 8  | 12 | 10 | 1.133255728 | 0.37674   | ADAMTS9 | ENSG00000163638 |
| 3 | 64622200 | 64622440 | 64622330 | 10 | 12 | 12 | 0.958908693 | 0.542188  | ADAMTS9 | ENSG00000163638 |
| 3 | 64625180 | 64625369 | 64625296 | 8  | 8  | 7  | 1.07877228  | 0.435076  | ADAMTS9 | ENSG00000163638 |
| 3 | 64626338 | 64626662 | 64626590 | 8  | 12 | 11 | 1.038817751 | 0.460341  | ADAMTS9 | ENSG00000163638 |
| 3 | 64626839 | 64627288 | 64627035 | 11 | 22 | 22 | 0.958908693 | 0.556268  | ADAMTS9 | ENSG00000163638 |
| 3 | 64627449 | 64628061 | 64627783 | 9  | 20 | 16 | 1.184534268 | 0.298622  | ADAMTS9 | ENSG00000163638 |
| 3 | 64628073 | 64628389 | 64628231 | 9  | 13 | 6  | 1.917817386 | 0.0693353 | ADAMTS9 | ENSG00000163638 |
| 3 | 64629540 | 64629891 | 64629716 | 13 | 18 | 15 | 1.138704073 | 0.348127  | ADAMTS9 | ENSG00000163638 |
| 3 | 64630625 | 64631195 | 64630984 | 11 | 25 | 22 | 1.08398374  | 0.38731   | ADAMTS9 | ENSG00000163638 |
| 3 | 64631524 | 64631875 | 64631736 | 8  | 12 | 17 | 0.692545167 | 0.848017  | ADAMTS9 | ENSG00000163638 |
| 3 | 64632536 | 64633051 | 64632687 | 13 | 27 | 23 | 1.118726809 | 0.34127   | ADAMTS9 | ENSG00000163638 |
| 3 | 64635019 | 64635906 | 64635400 | 10 | 36 | 19 | 1.773981082 | 0.0165925 | ADAMTS9 | ENSG00000163638 |
| 3 | 64636847 | 64637064 | 64636958 | 9  | 10 | 18 | 0.555157664 | 0.945639  | ADAMTS9 | ENSG00000163638 |
| 3 | 64637667 | 64638226 | 64637987 | 12 | 27 | 15 | 1.678090213 | 0.0444653 | ADAMTS9 | ENSG00000163638 |
| 3 | 64638545 | 64638857 | 64638705 | 10 | 15 | 24 | 0.613701564 | 0.940506  | ADAMTS9 | ENSG00000163638 |
| 3 | 64638870 | 64639118 | 64639016 | 8  | 10 | 15 | 0.659249726 | 0.861705  | ADAMTS9 | ENSG00000163638 |
| 3 | 64639262 | 64639772 | 64639524 | 13 | 24 | 23 | 0.998863222 | 0.500802  | ADAMTS9 | ENSG00000163638 |
| 3 | 64641089 | 64641355 | 64641194 | 12 | 16 | 16 | 0.958908693 | 0.548325  | ADAMTS9 | ENSG00000163638 |
| 3 | 64642098 | 64642310 | 64642204 | 8  | 10 | 10 | 0.958908693 | 0.538751  | ADAMTS9 | ENSG00000163638 |
| 3 | 64642315 | 64642551 | 64642469 | 10 | 12 | 9  | 1.246581301 | 0.295061  | ADAMTS9 | ENSG00000163638 |
| 3 | 64642740 | 64643044 | 64642883 | 14 | 17 | 17 | 0.958908693 | 0.549739  | ADAMTS9 | ENSG00000163638 |
| 3 | 64643202 | 64643551 | 64643376 | 13 | 18 | 21 | 0.828148417 | 0.728078  | ADAMTS9 | ENSG00000163638 |

|   |          |          |          |    |     |    |             |           |         |                 |
|---|----------|----------|----------|----|-----|----|-------------|-----------|---------|-----------------|
| 3 | 64643794 | 64644185 | 64643989 | 17 | 26  | 25 | 0.995789797 | 0.505405  | ADAMTS9 | ENSG00000163638 |
| 3 | 64644651 | 64646203 | 64644921 | 11 | 60  | 56 | 1.026200531 | 0.443462  | ADAMTS9 | ENSG00000163638 |
| 3 | 64646218 | 64648143 | 64647237 | 22 | 126 | 59 | 2.029690067 | 1.41E-06  | ADAMTS9 | ENSG00000163638 |
| 3 | 64648872 | 64649104 | 64648988 | 9  | 12  | 14 | 0.831054201 | 0.689281  | ADAMTS9 | ENSG00000163638 |
| 3 | 64649121 | 64649593 | 64649357 | 21 | 32  | 34 | 0.904113911 | 0.661443  | ADAMTS9 | ENSG00000163638 |
| 3 | 64649597 | 64650479 | 64650030 | 11 | 37  | 20 | 1.735168111 | 0.0184834 | ADAMTS9 | ENSG00000163638 |
| 3 | 64651392 | 64651710 | 64651561 | 9  | 13  | 9  | 1.34247217  | 0.232231  | ADAMTS9 | ENSG00000163638 |
| 3 | 64652607 | 64653595 | 64653051 | 9  | 34  | 29 | 1.118726809 | 0.324157  | ADAMTS9 | ENSG00000163638 |
| 3 | 64654549 | 64654924 | 64654728 | 12 | 19  | 28 | 0.66131634  | 0.92595   | ADAMTS9 | ENSG00000163638 |
| 3 | 64655090 | 64655296 | 64655193 | 9  | 11  | 10 | 1.046082211 | 0.455063  | ADAMTS9 | ENSG00000163638 |
| 3 | 64655452 | 64655782 | 64655615 | 11 | 16  | 24 | 0.652057911 | 0.917054  | ADAMTS9 | ENSG00000163638 |
| 3 | 64656749 | 64657073 | 64656911 | 10 | 12  | 5  | 2.077635502 | 0.0577144 | ADAMTS9 | ENSG00000163638 |
| 3 | 64657323 | 64657507 | 64657415 | 8  | 8   | 1  | 4.315089119 | 0.0127267 | ADAMTS9 | ENSG00000163638 |
| 3 | 64660991 | 64661186 | 64661090 | 9  | 9   | 8  | 1.065454103 | 0.442605  | ADAMTS9 | ENSG00000163638 |
| 3 | 64663082 | 64663555 | 64663376 | 12 | 22  | 25 | 0.848265382 | 0.718521  | ADAMTS9 | ENSG00000163638 |
| 3 | 64663726 | 64663966 | 64663846 | 9  | 11  | 8  | 1.278544924 | 0.28289   | ADAMTS9 | ENSG00000163638 |
| 3 | 64664116 | 64664332 | 64664224 | 8  | 9   | 14 | 0.639272462 | 0.869513  | ADAMTS9 | ENSG00000163638 |
| 3 | 64665251 | 64665493 | 64665345 | 8  | 9   | 5  | 1.598181155 | 0.170911  | ADAMTS9 | ENSG00000163638 |
| 3 | 64667756 | 64667966 | 64667861 | 8  | 10  | 11 | 0.878999635 | 0.622439  | ADAMTS9 | ENSG00000163638 |
| 3 | 64668843 | 64669679 | 64669095 | 15 | 35  | 31 | 1.07877228  | 0.376036  | ADAMTS9 | ENSG00000163638 |
| 3 | 64670106 | 64670757 | 64670285 | 9  | 25  | 29 | 0.831054201 | 0.756473  | ADAMTS9 | ENSG00000163638 |
| 3 | 64670921 | 64671251 | 64671091 | 9  | 13  | 10 | 1.220429246 | 0.306001  | ADAMTS9 | ENSG00000163638 |
| 3 | 64671301 | 64671934 | 64671731 | 13 | 28  | 25 | 1.069552004 | 0.40018   | ADAMTS9 | ENSG00000163638 |
| 3 | 64672881 | 64673221 | 64673051 | 15 | 21  | 21 | 0.958908693 | 0.555026  | ADAMTS9 | ENSG00000163638 |
| 3 | 64673284 | 64673661 | 64673459 | 10 | 16  | 25 | 0.626978761 | 0.936688  | ADAMTS9 | ENSG00000163638 |
| 3 | 64675062 | 64675294 | 64675178 | 12 | 13  | 17 | 0.745817872 | 0.798145  | ADAMTS9 | ENSG00000163638 |
| 3 | 64676006 | 64676312 | 64676155 | 12 | 15  | 18 | 0.807502057 | 0.737835  | ADAMTS9 | ENSG00000163638 |
| 3 | 64676400 | 64676761 | 64676579 | 9  | 16  | 5  | 2.716907964 | 0.0109645 | ADAMTS9 | ENSG00000163638 |
| 3 | 64676790 | 64676994 | 64676929 | 8  | 11  | 9  | 1.150690432 | 0.367789  | ADAMTS9 | ENSG00000163638 |
| 3 | 64678211 | 64679158 | 64678979 | 11 | 39  | 26 | 1.420605471 | 0.0759455 | ADAMTS9 | ENSG00000163638 |
| 3 | 64679342 | 64679555 | 64679477 | 9  | 11  | 11 | 0.958908693 | 0.540507  | ADAMTS9 | ENSG00000163638 |
| 3 | 64680394 | 64680603 | 64680542 | 10 | 12  | 14 | 0.831054201 | 0.689281  | ADAMTS9 | ENSG00000163638 |
| 3 | 64681003 | 64681203 | 64681130 | 9  | 10  | 12 | 0.811384279 | 0.697544  | ADAMTS9 | ENSG00000163638 |
| 3 | 64682436 | 64682647 | 64682541 | 10 | 12  | 15 | 0.779113313 | 0.750998  | ADAMTS9 | ENSG00000163638 |

|   |          |          |          |    |    |    |             |            |         |                 |
|---|----------|----------|----------|----|----|----|-------------|------------|---------|-----------------|
| 3 | 64684664 | 64685053 | 64684874 | 12 | 20 | 10 | 1.830643869 | 0.0454769  | ADAMTS9 | ENSG00000163638 |
| 3 | 64686410 | 64686651 | 64686530 | 10 | 13 | 12 | 1.0326709   | 0.46514    | ADAMTS9 | ENSG00000163638 |
| 3 | 64686927 | 64687147 | 64687037 | 9  | 11 | 11 | 0.958908693 | 0.540507   | ADAMTS9 | ENSG00000163638 |
| 3 | 64687453 | 64687837 | 64687632 | 12 | 20 | 21 | 0.915321934 | 0.614384   | ADAMTS9 | ENSG00000163638 |
| 3 | 64687888 | 64688148 | 64687972 | 9  | 13 | 15 | 0.839045106 | 0.685928   | ADAMTS9 | ENSG00000163638 |
| 3 | 64688340 | 64688836 | 64688506 | 10 | 20 | 12 | 1.54900635  | 0.101141   | ADAMTS9 | ENSG00000163638 |
| 3 | 64689074 | 64689805 | 64689590 | 13 | 37 | 25 | 1.401481936 | 0.0888599  | ADAMTS9 | ENSG00000163638 |
| 3 | 64690959 | 64691512 | 64691365 | 10 | 21 | 31 | 0.659249726 | 0.936811   | ADAMTS9 | ENSG00000163638 |
| 3 | 64691780 | 64692251 | 64691964 | 9  | 20 | 17 | 1.118726809 | 0.361026   | ADAMTS9 | ENSG00000163638 |
| 3 | 64694277 | 64694623 | 64694456 | 10 | 14 | 8  | 1.598181155 | 0.124586   | ADAMTS9 | ENSG00000163638 |
| 3 | 64694981 | 64695284 | 64695144 | 11 | 12 | 8  | 1.385090334 | 0.219216   | ADAMTS9 | ENSG00000163638 |
| 3 | 64698693 | 64699019 | 64698856 | 10 | 16 | 13 | 1.164389127 | 0.333296   | ADAMTS9 | ENSG00000163638 |
| 3 | 64699451 | 64699742 | 64699596 | 9  | 12 | 6  | 1.78083043  | 0.0985525  | ADAMTS9 | ENSG00000163638 |
| 3 | 64699806 | 64700565 | 64700333 | 16 | 35 | 28 | 1.190369412 | 0.239964   | ADAMTS9 | ENSG00000163638 |
| 3 | 64700580 | 64701483 | 64700987 | 12 | 40 | 23 | 1.638135684 | 0.0245609  | ADAMTS9 | ENSG00000163638 |
| 3 | 64701849 | 64702195 | 64702022 | 11 | 17 | 25 | 0.663859864 | 0.912943   | ADAMTS9 | ENSG00000163638 |
| 3 | 64703536 | 64704183 | 64704004 | 10 | 26 | 13 | 1.849323908 | 0.0263429  | ADAMTS9 | ENSG00000163638 |
| 3 | 64704908 | 64705303 | 64705124 | 12 | 19 | 14 | 1.278544924 | 0.231514   | ADAMTS9 | ENSG00000163638 |
| 3 | 64705373 | 64705718 | 64705540 | 20 | 23 | 17 | 1.278544924 | 0.211315   | ADAMTS9 | ENSG00000163638 |
| 3 | 64705723 | 64705933 | 64705840 | 8  | 10 | 6  | 1.506856518 | 0.188853   | ADAMTS9 | ENSG00000163638 |
| 3 | 64706855 | 64707237 | 64707034 | 13 | 20 | 10 | 1.830643869 | 0.0454769  | ADAMTS9 | ENSG00000163638 |
| 3 | 64707943 | 64708169 | 64708052 | 8  | 12 | 13 | 0.890415215 | 0.619237   | ADAMTS9 | ENSG00000163638 |
| 3 | 64708186 | 64708927 | 64708611 | 12 | 31 | 29 | 1.022835939 | 0.463651   | ADAMTS9 | ENSG00000163638 |
| 3 | 64708936 | 64709366 | 64709187 | 9  | 18 | 21 | 0.828148417 | 0.728078   | ADAMTS9 | ENSG00000163638 |
| 3 | 64709433 | 64709902 | 64709686 | 16 | 28 | 29 | 0.92694507  | 0.614695   | ADAMTS9 | ENSG00000163638 |
| 3 | 64710066 | 64710265 | 64710168 | 9  | 10 | 13 | 0.753428259 | 0.762589   | ADAMTS9 | ENSG00000163638 |
| 3 | 64710381 | 64710667 | 64710490 | 8  | 12 | 5  | 2.077635502 | 0.0577144  | ADAMTS9 | ENSG00000163638 |
| 3 | 64710676 | 64711748 | 64711569 | 12 | 43 | 36 | 1.140323851 | 0.276185   | ADAMTS9 | ENSG00000163638 |
| 3 | 64711768 | 64711972 | 64711870 | 8  | 8  | 18 | 0.454219907 | 0.979817   | ADAMTS9 | ENSG00000163638 |
| 3 | 64714825 | 64715069 | 64714924 | 14 | 16 | 12 | 1.253957522 | 0.265012   | ADAMTS9 | ENSG00000163638 |
| 3 | 64715557 | 64716036 | 64715721 | 12 | 20 | 7  | 2.517135319 | 0.00849957 | ADAMTS9 | ENSG00000163638 |
| 3 | 64716186 | 64717856 | 64717004 | 14 | 83 | 66 | 1.202213884 | 0.128877   | ADAMTS9 | ENSG00000163638 |
| 3 | 64717869 | 64718176 | 64718012 | 10 | 13 | 17 | 0.745817872 | 0.798145   | ADAMTS9 | ENSG00000163638 |
| 3 | 64718647 | 64718852 | 64718787 | 9  | 9  | 11 | 0.799090578 | 0.702688   | ADAMTS9 | ENSG00000163638 |

|   |          |          |          |    |    |    |             |            |         |                 |
|---|----------|----------|----------|----|----|----|-------------|------------|---------|-----------------|
| 3 | 64719680 | 64720005 | 64719834 | 10 | 14 | 13 | 1.027402171 | 0.469541   | ADAMTS9 | ENSG00000163638 |
| 3 | 64720029 | 64721044 | 64720139 | 10 | 35 | 33 | 1.015315087 | 0.473842   | ADAMTS9 | ENSG00000163638 |
| 3 | 64722091 | 64722733 | 64722412 | 15 | 31 | 25 | 1.180195315 | 0.262599   | ADAMTS9 | ENSG00000163638 |
| 3 | 64722735 | 64723337 | 64723226 | 10 | 26 | 15 | 1.61815842  | 0.0584619  | ADAMTS9 | ENSG00000163638 |
| 3 | 64723423 | 64723630 | 64723532 | 8  | 10 | 8  | 1.171999514 | 0.35773    | ADAMTS9 | ENSG00000163638 |
| 3 | 64724383 | 64725143 | 64724763 | 14 | 39 | 23 | 1.598181155 | 0.0315891  | ADAMTS9 | ENSG00000163638 |
| 3 | 64725455 | 64726600 | 64726067 | 11 | 48 | 68 | 0.680964144 | 0.981197   | ADAMTS9 | ENSG00000163638 |
| 3 | 64726619 | 64727098 | 64726850 | 13 | 26 | 33 | 0.761486315 | 0.856894   | ADAMTS9 | ENSG00000163638 |
| 3 | 64727197 | 64727615 | 64727376 | 14 | 24 | 16 | 1.410159843 | 0.132195   | ADAMTS9 | ENSG00000163638 |
| 3 | 64727952 | 64728256 | 64728104 | 9  | 12 | 14 | 0.831054201 | 0.689281   | ADAMTS9 | ENSG00000163638 |
| 3 | 64729038 | 64729305 | 64729171 | 8  | 10 | 19 | 0.527399781 | 0.961307   | ADAMTS9 | ENSG00000163638 |
| 3 | 64729421 | 64729866 | 64729600 | 8  | 17 | 25 | 0.663859864 | 0.912943   | ADAMTS9 | ENSG00000163638 |
| 3 | 64730257 | 64730550 | 64730431 | 10 | 14 | 26 | 0.532727052 | 0.97821    | ADAMTS9 | ENSG00000163638 |
| 3 | 64730588 | 64730781 | 64730698 | 8  | 10 | 14 | 0.703199708 | 0.817173   | ADAMTS9 | ENSG00000163638 |
| 3 | 64732619 | 64733140 | 64732829 | 17 | 29 | 17 | 1.598181155 | 0.0533584  | ADAMTS9 | ENSG00000163638 |
| 3 | 64733562 | 64733972 | 64733767 | 10 | 19 | 28 | 0.66131634  | 0.92595    | ADAMTS9 | ENSG00000163638 |
| 3 | 64733990 | 64734318 | 64734156 | 8  | 13 | 24 | 0.536988868 | 0.972726   | ADAMTS9 | ENSG00000163638 |
| 3 | 64735457 | 64735683 | 64735616 | 10 | 11 | 8  | 1.278544924 | 0.28289    | ADAMTS9 | ENSG00000163638 |
| 3 | 64744062 | 64744361 | 64744211 | 12 | 14 | 8  | 1.598181155 | 0.124586   | ADAMTS9 | ENSG00000163638 |
| 3 | 64745089 | 64745438 | 64745265 | 16 | 20 | 15 | 1.25856766  | 0.240048   | ADAMTS9 | ENSG00000163638 |
| 3 | 64747931 | 64748116 | 64748023 | 8  | 8  | 14 | 0.575345216 | 0.912234   | ADAMTS9 | ENSG00000163638 |
| 3 | 64749843 | 64750673 | 64750427 | 14 | 42 | 33 | 1.212737465 | 0.197889   | ADAMTS9 | ENSG00000163638 |
| 3 | 64751063 | 64751279 | 64751170 | 13 | 16 | 8  | 1.811271976 | 0.0663685  | ADAMTS9 | ENSG00000163638 |
| 3 | 64751288 | 64751624 | 64751456 | 13 | 18 | 9  | 1.821926517 | 0.0548428  | ADAMTS9 | ENSG00000163638 |
| 3 | 64752208 | 64752444 | 64752380 | 9  | 12 | 13 | 0.890415215 | 0.619237   | ADAMTS9 | ENSG00000163638 |
| 3 | 64752831 | 64753242 | 64753126 | 10 | 18 | 23 | 0.759136049 | 0.817924   | ADAMTS9 | ENSG00000163638 |
| 3 | 64753278 | 64753694 | 64753445 | 10 | 18 | 19 | 0.910963258 | 0.614871   | ADAMTS9 | ENSG00000163638 |
| 3 | 64755604 | 64755931 | 64755768 | 10 | 13 | 3  | 3.356180426 | 0.00805599 | ADAMTS9 | ENSG00000163638 |
| 3 | 64757076 | 64757298 | 64757136 | 8  | 10 | 12 | 0.811384279 | 0.697544   | ADAMTS9 | ENSG00000163638 |
| 3 | 64758032 | 64758898 | 64758330 | 13 | 36 | 32 | 1.07514005  | 0.379706   | ADAMTS9 | ENSG00000163638 |
| 3 | 64759423 | 64759666 | 64759564 | 11 | 12 | 15 | 0.779113313 | 0.750998   | ADAMTS9 | ENSG00000163638 |
| 3 | 64759913 | 64760167 | 64760052 | 8  | 10 | 14 | 0.703199708 | 0.817173   | ADAMTS9 | ENSG00000163638 |
| 3 | 64760269 | 64760729 | 64760550 | 14 | 24 | 23 | 0.998863222 | 0.500802   | ADAMTS9 | ENSG00000163638 |
| 3 | 64762231 | 64763085 | 64762667 | 13 | 35 | 32 | 1.046082211 | 0.424727   | ADAMTS9 | ENSG00000163638 |

|   |          |          |          |    |    |    |             |            |         |                 |
|---|----------|----------|----------|----|----|----|-------------|------------|---------|-----------------|
| 3 | 64763123 | 64763502 | 64763226 | 12 | 19 | 16 | 1.128127874 | 0.354788   | ADAMTS9 | ENSG00000163638 |
| 3 | 64763621 | 64764521 | 64764172 | 12 | 41 | 38 | 1.0326709   | 0.441606   | ADAMTS9 | ENSG00000163638 |
| 3 | 64764533 | 64764963 | 64764748 | 9  | 18 | 24 | 0.728770607 | 0.85379    | ADAMTS9 | ENSG00000163638 |
| 3 | 64765092 | 64765483 | 64765304 | 13 | 20 | 14 | 1.34247217  | 0.186867   | ADAMTS9 | ENSG00000163638 |
| 3 | 64765899 | 64767020 | 64766680 | 14 | 47 | 33 | 1.353753449 | 0.0855052  | ADAMTS9 | ENSG00000163638 |
| 3 | 64767472 | 64767880 | 64767707 | 12 | 19 | 25 | 0.737622072 | 0.849755   | ADAMTS9 | ENSG00000163638 |
| 3 | 64767900 | 64768127 | 64768023 | 10 | 11 | 7  | 1.43836304  | 0.204844   | ADAMTS9 | ENSG00000163638 |
| 3 | 64768503 | 64768844 | 64768673 | 10 | 15 | 10 | 1.394776281 | 0.191426   | ADAMTS9 | ENSG00000163638 |
| 3 | 64769226 | 64769425 | 64769313 | 8  | 9  | 6  | 1.369869562 | 0.253675   | ADAMTS9 | ENSG00000163638 |
| 3 | 64769683 | 64769883 | 64769828 | 8  | 9  | 8  | 1.065454103 | 0.442605   | ADAMTS9 | ENSG00000163638 |
| 3 | 64770523 | 64771547 | 64770972 | 11 | 42 | 41 | 0.981739852 | 0.533409   | ADAMTS9 | ENSG00000163638 |
| 3 | 64772056 | 64772252 | 64772154 | 9  | 9  | 5  | 1.598181155 | 0.170911   | ADAMTS9 | ENSG00000163638 |
| 3 | 64773444 | 64773681 | 64773559 | 10 | 12 | 12 | 0.958908693 | 0.542188   | ADAMTS9 | ENSG00000163638 |
| 3 | 64774118 | 64774408 | 64774257 | 13 | 16 | 19 | 0.815072389 | 0.734271   | ADAMTS9 | ENSG00000163638 |
| 3 | 64774986 | 64775388 | 64775165 | 12 | 21 | 22 | 0.917217011 | 0.614252   | ADAMTS9 | ENSG00000163638 |
| 3 | 64775729 | 64776701 | 64776078 | 11 | 34 | 29 | 1.118726809 | 0.324157   | ADAMTS9 | ENSG00000163638 |
| 3 | 64776873 | 64777746 | 64777286 | 13 | 38 | 29 | 1.246581301 | 0.179231   | ADAMTS9 | ENSG00000163638 |
| 3 | 64778205 | 64778625 | 64778376 | 8  | 15 | 20 | 0.730597099 | 0.831283   | ADAMTS9 | ENSG00000163638 |
| 3 | 64778698 | 64779084 | 64778905 | 12 | 19 | 14 | 1.278544924 | 0.231514   | ADAMTS9 | ENSG00000163638 |
| 3 | 64781689 | 64782193 | 64781932 | 9  | 20 | 16 | 1.184534268 | 0.298622   | ADAMTS9 | ENSG00000163638 |
| 3 | 64783888 | 64784214 | 64784092 | 10 | 14 | 13 | 1.027402171 | 0.469541   | ADAMTS9 | ENSG00000163638 |
| 3 | 64784768 | 64785391 | 64785068 | 12 | 29 | 19 | 1.43836304  | 0.0995642  | ADAMTS9 | ENSG00000163638 |
| 3 | 64785421 | 64785700 | 64785580 | 9  | 12 | 16 | 0.733283118 | 0.803868   | ADAMTS9 | ENSG00000163638 |
| 3 | 64786172 | 64787237 | 64786940 | 14 | 52 | 45 | 1.104829581 | 0.308995   | ADAMTS9 | ENSG00000163638 |
| 3 | 64788208 | 64788788 | 64788506 | 11 | 23 | 39 | 0.575345216 | 0.985755   | ADAMTS9 | ENSG00000163638 |
| 3 | 64788976 | 64789457 | 64789278 | 12 | 27 | 17 | 1.491635745 | 0.0879967  | ADAMTS9 | ENSG00000163638 |
| 3 | 64790137 | 64790341 | 64790178 | 8  | 10 | 11 | 0.878999635 | 0.622439   | ADAMTS9 | ENSG00000163638 |
| 3 | 64790835 | 64791707 | 64791101 | 13 | 43 | 38 | 1.081845705 | 0.358944   | ADAMTS9 | ENSG00000163638 |
| 3 | 64791845 | 64792278 | 64791930 | 15 | 26 | 21 | 1.176842487 | 0.282611   | ADAMTS9 | ENSG00000163638 |
| 3 | 64792385 | 64792767 | 64792596 | 8  | 15 | 13 | 1.095895649 | 0.398774   | ADAMTS9 | ENSG00000163638 |
| 3 | 64792998 | 64793299 | 64793156 | 10 | 13 | 22 | 0.583683552 | 0.948499   | ADAMTS9 | ENSG00000163638 |
| 3 | 64793381 | 64793702 | 64793541 | 19 | 23 | 9  | 2.301380863 | 0.00938618 | ADAMTS9 | ENSG00000163638 |
| 3 | 64794988 | 64795491 | 64795127 | 10 | 20 | 23 | 0.839045106 | 0.722898   | ADAMTS9 | ENSG00000163638 |
| 3 | 64795511 | 64795932 | 64795753 | 9  | 18 | 18 | 0.958908693 | 0.551113   | ADAMTS9 | ENSG00000163638 |



|   |          |          |          |     |     |    |             |            |         |                 |
|---|----------|----------|----------|-----|-----|----|-------------|------------|---------|-----------------|
| 3 | 64796105 | 64798469 | 64797005 | 193 | 453 | 61 | 7.021686236 | 4.72E-72   | ADAMTS9 | ENSG00000163638 |
| 3 | 64798759 | 64799034 | 64798894 | 11  | 13  | 15 | 0.839045106 | 0.685928   | ADAMTS9 | ENSG00000163638 |
| 3 | 64799190 | 64799650 | 64799478 | 10  | 19  | 25 | 0.737622072 | 0.849755   | ADAMTS9 | ENSG00000163638 |
| 3 | 64799796 | 64800433 | 64800144 | 14  | 27  | 17 | 1.491635745 | 0.0879967  | ADAMTS9 | ENSG00000163638 |
| 3 | 64800637 | 64801254 | 64800844 | 8   | 24  | 20 | 1.141557968 | 0.324865   | ADAMTS9 | ENSG00000163638 |
| 3 | 64801450 | 64801694 | 64801529 | 8   | 11  | 10 | 1.046082211 | 0.455063   | ADAMTS9 | ENSG00000163638 |
| 3 | 64801775 | 64802308 | 64802052 | 8   | 19  | 18 | 1.009377572 | 0.487356   | ADAMTS9 | ENSG00000163638 |
| 3 | 64803709 | 64803963 | 64803878 | 11  | 14  | 10 | 1.307602763 | 0.244096   | ADAMTS9 | ENSG00000163638 |
| 3 | 64804553 | 64805142 | 64804926 | 11  | 24  | 16 | 1.410159843 | 0.132195   | ADAMTS9 | ENSG00000163638 |
| 3 | 64805253 | 64805541 | 64805397 | 13  | 14  | 10 | 1.307602763 | 0.244096   | ADAMTS9 | ENSG00000163638 |
| 3 | 64806150 | 64806444 | 64806297 | 8   | 10  | 7  | 1.318499453 | 0.269217   | ADAMTS9 | ENSG00000163638 |
| 3 | 64806956 | 64807255 | 64807118 | 13  | 17  | 13 | 1.232882605 | 0.274309   | ADAMTS9 | ENSG00000163638 |
| 3 | 64807537 | 64807762 | 64807696 | 10  | 13  | 19 | 0.671236085 | 0.87814    | ADAMTS9 | ENSG00000163638 |
| 3 | 64807772 | 64808150 | 64807996 | 10  | 15  | 20 | 0.730597099 | 0.831283   | ADAMTS9 | ENSG00000163638 |
| 3 | 64808809 | 64809080 | 64808938 | 13  | 15  | 12 | 1.180195315 | 0.324974   | ADAMTS9 | ENSG00000163638 |
| 3 | 64809513 | 64809823 | 64809687 | 9   | 11  | 9  | 1.150690432 | 0.367789   | ADAMTS9 | ENSG00000163638 |
| 3 | 64810935 | 64811784 | 64811605 | 11  | 38  | 41 | 0.890415215 | 0.699622   | ADAMTS9 | ENSG00000163638 |
| 3 | 64811993 | 64812216 | 64812147 | 8   | 10  | 9  | 1.054799562 | 0.4492     | ADAMTS9 | ENSG00000163638 |
| 3 | 64812531 | 64812944 | 64812666 | 11  | 18  | 16 | 1.07172148  | 0.415914   | ADAMTS9 | ENSG00000163638 |
| 3 | 64814740 | 64815425 | 64815084 | 13  | 33  | 20 | 1.552518836 | 0.0525199  | ADAMTS9 | ENSG00000163638 |
| 3 | 64815799 | 64815985 | 64815892 | 9   | 10  | 11 | 0.878999635 | 0.622439   | ADAMTS9 | ENSG00000163638 |
| 3 | 64816364 | 64817380 | 64817201 | 13  | 43  | 30 | 1.361031693 | 0.0912914  | ADAMTS9 | ENSG00000163638 |
| 3 | 64817508 | 64817728 | 64817635 | 10  | 12  | 9  | 1.246581301 | 0.295061   | ADAMTS9 | ENSG00000163638 |
| 3 | 64817921 | 64818545 | 64818120 | 11  | 26  | 10 | 2.353684974 | 0.00551687 | ADAMTS9 | ENSG00000163638 |
| 3 | 64820289 | 64820885 | 64820732 | 10  | 24  | 11 | 1.997726444 | 0.0196649  | ADAMTS9 | ENSG00000163638 |
| 3 | 64821191 | 64821407 | 64821299 | 9   | 10  | 17 | 0.585999757 | 0.924668   | ADAMTS9 | ENSG00000163638 |
| 3 | 64822638 | 64823108 | 64822791 | 9   | 17  | 20 | 0.821921737 | 0.731032   | ADAMTS9 | ENSG00000163638 |
| 3 | 64823680 | 64824602 | 64823907 | 15  | 46  | 36 | 1.218073205 | 0.182357   | ADAMTS9 | ENSG00000163638 |
| 3 | 64824956 | 64825143 | 64825064 | 8   | 8   | 7  | 1.07877228  | 0.435076   | ADAMTS9 | ENSG00000163638 |
| 3 | 64825217 | 64825883 | 64825756 | 10  | 26  | 28 | 0.892777059 | 0.664792   | ADAMTS9 | ENSG00000163638 |
| 3 | 64826180 | 64826436 | 64826305 | 12  | 14  | 6  | 2.054804342 | 0.0480281  | ADAMTS9 | ENSG00000163638 |
| 3 | 64826453 | 64826675 | 64826564 | 9   | 13  | 14 | 0.894981447 | 0.618069   | ADAMTS9 | ENSG00000163638 |
| 3 | 64826677 | 64826896 | 64826802 | 10  | 10  | 11 | 0.878999635 | 0.622439   | ADAMTS9 | ENSG00000163638 |
| 3 | 64827004 | 64827260 | 64827132 | 10  | 12  | 4  | 2.493162602 | 0.0299057  | ADAMTS9 | ENSG00000163638 |

|   |          |          |          |    |    |    |             |            |         |                 |
|---|----------|----------|----------|----|----|----|-------------|------------|---------|-----------------|
| 3 | 64827402 | 64827585 | 64827530 | 9  | 9  | 7  | 1.198635866 | 0.346278   | ADAMTS9 | ENSG00000163638 |
| 3 | 64827904 | 64828129 | 64827969 | 10 | 13 | 16 | 0.789689512 | 0.746135   | ADAMTS9 | ENSG00000163638 |
| 3 | 64828590 | 64828887 | 64828738 | 9  | 13 | 12 | 1.0326709   | 0.46514    | ADAMTS9 | ENSG00000163638 |
| 3 | 64828907 | 64829229 | 64829068 | 10 | 16 | 18 | 0.857970936 | 0.678066   | ADAMTS9 | ENSG00000163638 |
| 3 | 64830498 | 64830689 | 64830632 | 8  | 9  | 15 | 0.599317933 | 0.904407   | ADAMTS9 | ENSG00000163638 |
| 3 | 64831730 | 64831969 | 64831815 | 10 | 12 | 10 | 1.133255728 | 0.37674    | ADAMTS9 | ENSG00000163638 |
| 3 | 64832616 | 64832956 | 64832780 | 11 | 16 | 20 | 0.776259418 | 0.783794   | ADAMTS9 | ENSG00000163638 |
| 3 | 64833147 | 64833330 | 64833224 | 8  | 10 | 11 | 0.878999635 | 0.622439   | ADAMTS9 | ENSG00000163638 |
| 3 | 64833452 | 64834085 | 64833733 | 9  | 26 | 23 | 1.07877228  | 0.391798   | ADAMTS9 | ENSG00000163638 |
| 3 | 64834656 | 64835180 | 64835001 | 10 | 21 | 20 | 1.004571012 | 0.493124   | ADAMTS9 | ENSG00000163638 |
| 3 | 64835501 | 64836132 | 64835816 | 11 | 24 | 22 | 1.042292058 | 0.441692   | ADAMTS9 | ENSG00000163638 |
| 3 | 64836220 | 64836443 | 64836327 | 8  | 9  | 12 | 0.737622072 | 0.769563   | ADAMTS9 | ENSG00000163638 |
| 3 | 64837933 | 64838463 | 64838150 | 17 | 31 | 27 | 1.095895649 | 0.360001   | ADAMTS9 | ENSG00000163638 |
| 3 | 64838949 | 64839526 | 64839128 | 13 | 30 | 11 | 2.47718079  | 0.00221867 | ADAMTS9 | ENSG00000163638 |
| 3 | 64842155 | 64842364 | 64842259 | 9  | 10 | 7  | 1.318499453 | 0.269217   | ADAMTS9 | ENSG00000163638 |
| 3 | 64842537 | 64843199 | 64842861 | 13 | 34 | 23 | 1.398408511 | 0.0991023  | ADAMTS9 | ENSG00000163638 |
| 3 | 64843967 | 64844453 | 64844072 | 10 | 21 | 19 | 1.054799562 | 0.429896   | ADAMTS9 | ENSG00000163638 |
| 3 | 64844625 | 64845731 | 64844852 | 15 | 54 | 29 | 1.757999271 | 0.00531833 | ADAMTS9 | ENSG00000163638 |
| 3 | 64845766 | 64846038 | 64845944 | 8  | 11 | 9  | 1.150690432 | 0.367789   | ADAMTS9 | ENSG00000163638 |
| 3 | 64849953 | 64850338 | 64850024 | 8  | 15 | 5  | 2.557089848 | 0.0169197  | ADAMTS9 | ENSG00000163638 |
| 3 | 64850778 | 64851016 | 64850893 | 11 | 15 | 14 | 1.022835939 | 0.473606   | ADAMTS9 | ENSG00000163638 |
| 3 | 64851021 | 64851538 | 64851279 | 11 | 24 | 22 | 1.042292058 | 0.441692   | ADAMTS9 | ENSG00000163638 |
| 3 | 64852968 | 64853241 | 64853104 | 11 | 15 | 18 | 0.807502057 | 0.737835   | ADAMTS9 | ENSG00000163638 |
| 3 | 64853342 | 64853880 | 64853521 | 12 | 27 | 28 | 0.925842876 | 0.614522   | ADAMTS9 | ENSG00000163638 |
| 3 | 64854352 | 64854611 | 64854453 | 10 | 12 | 14 | 0.831054201 | 0.689281   | ADAMTS9 | ENSG00000163638 |
| 3 | 64854785 | 64855187 | 64855030 | 9  | 15 | 11 | 1.278544924 | 0.254978   | ADAMTS9 | ENSG00000163638 |
| 3 | 64855834 | 64857064 | 64856449 | 15 | 56 | 54 | 0.9937781   | 0.512692   | ADAMTS9 | ENSG00000163638 |
| 3 | 64857692 | 64858546 | 64858367 | 10 | 34 | 32 | 1.017024371 | 0.471418   | ADAMTS9 | ENSG00000163638 |
| 3 | 64859148 | 64859455 | 64859323 | 9  | 13 | 24 | 0.536988868 | 0.972726   | ADAMTS9 | ENSG00000163638 |
| 3 | 64859468 | 64859929 | 64859653 | 9  | 19 | 21 | 0.871735176 | 0.672523   | ADAMTS9 | ENSG00000163638 |
| 3 | 64860691 | 64861123 | 64860959 | 12 | 20 | 12 | 1.54900635  | 0.101141   | ADAMTS9 | ENSG00000163638 |
| 3 | 64861578 | 64861975 | 64861746 | 8  | 14 | 11 | 1.198635866 | 0.315918   | ADAMTS9 | ENSG00000163638 |
| 3 | 64862084 | 64862653 | 64862518 | 14 | 27 | 23 | 1.118726809 | 0.34127    | ADAMTS9 | ENSG00000163638 |
| 3 | 64862744 | 64863276 | 64863027 | 10 | 22 | 12 | 1.696530765 | 0.057768   | ADAMTS9 | ENSG00000163638 |

|   |          |          |          |    |    |    |             |           |         |                 |
|---|----------|----------|----------|----|----|----|-------------|-----------|---------|-----------------|
| 3 | 64864863 | 64865094 | 64864952 | 8  | 11 | 9  | 1.150690432 | 0.367789  | ADAMTS9 | ENSG00000163638 |
| 3 | 64866426 | 64866662 | 64866557 | 8  | 10 | 6  | 1.506856518 | 0.188853  | ADAMTS9 | ENSG00000163638 |
| 3 | 64866672 | 64867072 | 64866893 | 9  | 17 | 19 | 0.863017824 | 0.676008  | ADAMTS9 | ENSG00000163638 |
| 3 | 64867870 | 64868239 | 64868049 | 9  | 16 | 17 | 0.905635988 | 0.615736  | ADAMTS9 | ENSG00000163638 |
| 3 | 64868415 | 64869669 | 64868979 | 17 | 64 | 40 | 1.520221099 | 0.0163318 | ADAMTS9 | ENSG00000163638 |
| 3 | 64869903 | 64870535 | 64870295 | 15 | 32 | 32 | 0.958908693 | 0.567412  | ADAMTS9 | ENSG00000163638 |
| 3 | 64870550 | 64871007 | 64870729 | 14 | 29 | 14 | 1.917817386 | 0.0161307 | ADAMTS9 | ENSG00000163638 |
| 3 | 64871465 | 64872158 | 64871742 | 8  | 24 | 30 | 0.773313462 | 0.832666  | ADAMTS9 | ENSG00000163638 |
| 3 | 64873387 | 64874282 | 64874050 | 16 | 42 | 26 | 1.527150882 | 0.0393286 | ADAMTS9 | ENSG00000163638 |
| 3 | 64874497 | 64874964 | 64874785 | 10 | 21 | 9  | 2.109599125 | 0.0196396 | ADAMTS9 | ENSG00000163638 |
| 3 | 64875037 | 64876386 | 64875211 | 12 | 56 | 56 | 0.958908693 | 0.588428  | ADAMTS9 | ENSG00000163638 |
| 3 | 64876439 | 64877125 | 64876779 | 17 | 38 | 31 | 1.16866997  | 0.254509  | ADAMTS9 | ENSG00000163638 |
| 3 | 64877270 | 64877463 | 64877366 | 8  | 9  | 12 | 0.737622072 | 0.769563  | ADAMTS9 | ENSG00000163638 |
| 3 | 64877676 | 64877954 | 64877824 | 11 | 14 | 16 | 0.846095906 | 0.68298   | ADAMTS9 | ENSG00000163638 |
| 3 | 64878098 | 64878421 | 64878277 | 8  | 12 | 14 | 0.831054201 | 0.689281  | ADAMTS9 | ENSG00000163638 |
| 3 | 64879318 | 64880445 | 64879757 | 9  | 43 | 48 | 0.861060867 | 0.76506   | ADAMTS9 | ENSG00000163638 |
| 3 | 64880839 | 64881110 | 64880974 | 9  | 12 | 13 | 0.890415215 | 0.619237  | ADAMTS9 | ENSG00000163638 |
| 3 | 64881340 | 64881571 | 64881455 | 8  | 11 | 20 | 0.547947825 | 0.956941  | ADAMTS9 | ENSG00000163638 |
| 3 | 64882475 | 64882748 | 64882611 | 10 | 11 | 19 | 0.575345216 | 0.94039   | ADAMTS9 | ENSG00000163638 |
| 3 | 64884121 | 64884793 | 64884300 | 10 | 28 | 30 | 0.897043616 | 0.663432  | ADAMTS9 | ENSG00000163638 |
| 3 | 64884836 | 64885102 | 64884927 | 8  | 12 | 17 | 0.692545167 | 0.848017  | ADAMTS9 | ENSG00000163638 |
| 3 | 64885159 | 64885533 | 64885413 | 14 | 20 | 19 | 1.006854128 | 0.490315  | ADAMTS9 | ENSG00000163638 |
| 3 | 64885628 | 64885985 | 64885806 | 12 | 18 | 13 | 1.301376083 | 0.22245   | ADAMTS9 | ENSG00000163638 |
| 3 | 64886277 | 64887224 | 64886735 | 12 | 40 | 43 | 0.893528555 | 0.698423  | ADAMTS9 | ENSG00000163638 |
| 3 | 64887510 | 64887703 | 64887606 | 9  | 9  | 17 | 0.532727052 | 0.951077  | ADAMTS9 | ENSG00000163638 |
| 3 | 64887820 | 64888194 | 64887982 | 10 | 16 | 25 | 0.626978761 | 0.936688  | ADAMTS9 | ENSG00000163638 |
| 3 | 64888355 | 64888651 | 64888503 | 9  | 14 | 18 | 0.757033179 | 0.792932  | ADAMTS9 | ENSG00000163638 |
| 3 | 64889118 | 64890033 | 64889560 | 11 | 37 | 47 | 0.759136049 | 0.899486  | ADAMTS9 | ENSG00000163638 |
| 3 | 64890102 | 64890391 | 64890246 | 13 | 16 | 8  | 1.811271976 | 0.0663685 | ADAMTS9 | ENSG00000163638 |
| 3 | 64891692 | 64892160 | 64891836 | 15 | 22 | 16 | 1.297347055 | 0.203559  | ADAMTS9 | ENSG00000163638 |
| 3 | 64892250 | 64892528 | 64892371 | 10 | 12 | 4  | 2.493162602 | 0.0299057 | ADAMTS9 | ENSG00000163638 |
| 3 | 64892546 | 64893253 | 64892725 | 9  | 28 | 16 | 1.635785418 | 0.0488966 | ADAMTS9 | ENSG00000163638 |
| 3 | 64894115 | 64894494 | 64894315 | 8  | 14 | 10 | 1.307602763 | 0.244096  | ADAMTS9 | ENSG00000163638 |
| 3 | 64895354 | 64895533 | 64895465 | 8  | 8  | 6  | 1.232882605 | 0.333038  | ADAMTS9 | ENSG00000163638 |

|   |          |          |          |     |     |    |             |            |         |                 |
|---|----------|----------|----------|-----|-----|----|-------------|------------|---------|-----------------|
| 3 | 64896044 | 64896455 | 64896255 | 10  | 19  | 20 | 0.913246374 | 0.614587   | ADAMTS9 | ENSG00000163638 |
| 3 | 64896820 | 64897613 | 64896987 | 19  | 47  | 33 | 1.353753449 | 0.0855052  | ADAMTS9 | ENSG00000163638 |
| 3 | 64898292 | 64898578 | 64898435 | 8   | 12  | 9  | 1.246581301 | 0.295061   | ADAMTS9 | ENSG00000163638 |
| 3 | 64899080 | 64899824 | 64899535 | 12  | 36  | 32 | 1.07514005  | 0.379706   | ADAMTS9 | ENSG00000163638 |
| 3 | 64900684 | 64901089 | 64900910 | 10  | 17  | 18 | 0.908439814 | 0.615249   | ADAMTS9 | ENSG00000163638 |
| 3 | 64901107 | 64901659 | 64901392 | 9   | 20  | 34 | 0.575345216 | 0.979853   | ADAMTS9 | ENSG00000163638 |
| 3 | 64902063 | 64902438 | 64902246 | 9   | 17  | 13 | 1.232882605 | 0.274309   | ADAMTS9 | ENSG00000163638 |
| 3 | 64902650 | 64902997 | 64902823 | 11  | 15  | 15 | 0.958908693 | 0.546868   | ADAMTS9 | ENSG00000163638 |
| 3 | 64903094 | 64903513 | 64903376 | 14  | 22  | 23 | 0.918954164 | 0.614181   | ADAMTS9 | ENSG00000163638 |
| 3 | 64904469 | 64906705 | 64905344 | 155 | 312 | 77 | 3.847928473 | 4.94E-33   | ADAMTS9 | ENSG00000163638 |
| 3 | 64907155 | 64907578 | 64907381 | 11  | 21  | 20 | 1.004571012 | 0.493124   | ADAMTS9 | ENSG00000163638 |
| 3 | 64908215 | 64908609 | 64908463 | 9   | 16  | 13 | 1.164389127 | 0.333296   | ADAMTS9 | ENSG00000163638 |
| 3 | 64908740 | 64908999 | 64908852 | 10  | 12  | 10 | 1.133255728 | 0.37674    | ADAMTS9 | ENSG00000163638 |
| 3 | 64909511 | 64909751 | 64909587 | 12  | 12  | 9  | 1.246581301 | 0.295061   | ADAMTS9 | ENSG00000163638 |
| 3 | 64910610 | 64910935 | 64910767 | 13  | 17  | 18 | 0.908439814 | 0.615249   | ADAMTS9 | ENSG00000163638 |
| 3 | 64911065 | 64911367 | 64911281 | 9   | 13  | 15 | 0.839045106 | 0.685928   | ADAMTS9 | ENSG00000163638 |
| 3 | 64911700 | 64912182 | 64912003 | 15  | 26  | 26 | 0.958908693 | 0.560979   | ADAMTS9 | ENSG00000163638 |
| 3 | 64912184 | 64912895 | 64912363 | 13  | 31  | 20 | 1.461194199 | 0.084213   | ADAMTS9 | ENSG00000163638 |
| 3 | 64913632 | 64914037 | 64913858 | 8   | 15  | 18 | 0.807502057 | 0.737835   | ADAMTS9 | ENSG00000163638 |
| 3 | 64914159 | 64914379 | 64914232 | 8   | 10  | 14 | 0.703199708 | 0.817173   | ADAMTS9 | ENSG00000163638 |
| 3 | 64914620 | 64914848 | 64914772 | 9   | 10  | 15 | 0.659249726 | 0.861705   | ADAMTS9 | ENSG00000163638 |
| 3 | 64915055 | 64915314 | 64915181 | 9   | 12  | 13 | 0.890415215 | 0.619237   | ADAMTS9 | ENSG00000163638 |
| 3 | 64915316 | 64915497 | 64915333 | 8   | 10  | 20 | 0.502285506 | 0.972812   | ADAMTS9 | ENSG00000163638 |
| 3 | 64916997 | 64917309 | 64917153 | 15  | 19  | 22 | 0.833833646 | 0.725376   | ADAMTS9 | ENSG00000163638 |
| 3 | 64917428 | 64918527 | 64918301 | 13  | 53  | 33 | 1.52297263  | 0.0252064  | ADAMTS9 | ENSG00000163638 |
| 3 | 64919175 | 64919360 | 64919251 | 8   | 9   | 13 | 0.684934781 | 0.824961   | ADAMTS9 | ENSG00000163638 |
| 3 | 64920166 | 64920460 | 64920313 | 9   | 12  | 22 | 0.54199187  | 0.965779   | ADAMTS9 | ENSG00000163638 |
| 3 | 64921914 | 64923513 | 64923121 | 13  | 73  | 52 | 1.338853647 | 0.0506479  | ADAMTS9 | ENSG00000163638 |
| 3 | 64923695 | 64924242 | 64923857 | 9   | 21  | 12 | 1.622768557 | 0.076896   | ADAMTS9 | ENSG00000163638 |
| 3 | 66896448 | 66896727 | 66896587 | 9   | 12  | 1  | 6.232906505 | 0.00117736 |         | ENSG00000214560 |
| 3 | 69184370 | 69184667 | 69184549 | 11  | 14  | 1  | 7.191815198 | 0.00034761 | TMF1    | ENSG00000144747 |
| 3 | 69240316 | 69240525 | 69240420 | 8   | 8   | 1  | 4.315089119 | 0.0127267  | LMOD3   | ENSG00000163380 |
| 3 | 69252765 | 69252958 | 69252861 | 10  | 12  | 1  | 6.232906505 | 0.00117736 | LMOD3   | ENSG00000163380 |
| 3 | 69332386 | 69332565 | 69332473 | 8   | 8   | 6  | 1.232882605 | 0.333038   |         | ENSG00000210965 |

|   |          |          |          |    |     |    |             |             |        |                 |
|---|----------|----------|----------|----|-----|----|-------------|-------------|--------|-----------------|
| 3 | 69335766 | 69336046 | 69335906 | 8  | 12  | 4  | 2.493162602 | 0.0299057   |        | ENSG00000210965 |
| 3 | 70985979 | 70986495 | 70986316 | 31 | 46  | 1  | 22.53435429 | 4.53E-13    |        | ENSG00000221382 |
| 3 | 71579628 | 71579974 | 71579801 | 21 | 27  | 0  | 26.84944341 | 6.66E-09    |        | ENSG00000221264 |
| 3 | 72045531 | 72045715 | 72045579 | 8  | 8   | 1  | 4.315089119 | 0.0127267   |        | ENSG00000210995 |
| 3 | 72255909 | 72256146 | 72256034 | 10 | 12  | 0  | 12.46581301 | 0.000159888 |        | ENSG00000213456 |
| 3 | 72309186 | 72309569 | 72309355 | 14 | 20  | 1  | 10.06854128 | 8.32E-06    |        | ENSG00000212070 |
| 3 | 72760029 | 72760257 | 72760152 | 13 | 13  | 2  | 4.474907234 | 0.00269459  |        | ENSG00000199469 |
| 3 | 73074435 | 73074614 | 73074524 | 8  | 8   | 0  | 8.630178238 | 0.00235436  | PPP4R2 | ENSG00000163605 |
| 3 | 75180533 | 75180910 | 75180712 | 44 | 53  | 1  | 25.89053471 | 4.67E-15    |        | ENSG00000211042 |
| 3 | 75356229 | 75356618 | 75356506 | 8  | 12  | 2  | 4.155271003 | 0.0046638   |        | ENSG00000222549 |
| 3 | 75758769 | 75759056 | 75758923 | 41 | 41  | 0  | 40.27416511 | 5.44E-13    |        | ENSG00000172971 |
| 3 | 75780768 | 75781245 | 75781110 | 9  | 19  | 14 | 1.278544924 | 0.231514    | FRG2C  | ENSG00000172969 |
| 3 | 78776564 | 78776772 | 78776653 | 8  | 8   | 0  | 8.630178238 | 0.00235436  |        | ENSG00000211088 |
| 3 | 79217081 | 79217314 | 79217197 | 9  | 9   | 1  | 4.794543465 | 0.00708517  | ROBO1  | ENSG00000169855 |
| 3 | 79538031 | 79538330 | 79538180 | 14 | 16  | 0  | 16.30144778 | 1.09E-05    |        | ENSG00000216116 |
| 3 | 79556763 | 79556950 | 79556880 | 8  | 9   | 3  | 2.397271733 | 0.0539397   |        | ENSG00000216116 |
| 3 | 80004413 | 80004646 | 80004534 | 9  | 10  | 2  | 3.515998541 | 0.0136204   | ROBO1  | ENSG00000169855 |
| 3 | 80017233 | 80017417 | 80017325 | 8  | 8   | 1  | 4.315089119 | 0.0127267   | ROBO1  | ENSG00000169855 |
| 3 | 81893032 | 81893859 | 81893450 | 20 | 43  | 4  | 8.438396499 | 1.74E-09    | GBE1   | ENSG00000114480 |
| 3 | 82232303 | 82232573 | 82232447 | 12 | 13  | 1  | 6.712360851 | 0.000640982 | GBE1   | ENSG00000114480 |
| 3 | 82774930 | 82775241 | 82775085 | 12 | 14  | 3  | 3.595907599 | 0.00486913  |        |                 |
| 3 | 84066189 | 84066924 | 84066482 | 97 | 139 | 4  | 26.84944341 | 1.33E-35    |        | ENSG00000223141 |
| 3 | 85296376 | 85296580 | 85296446 | 9  | 10  | 4  | 2.109599125 | 0.0694668   | CADM2  | ENSG00000175161 |
| 3 | 85639789 | 85640084 | 85639916 | 13 | 18  | 1  | 9.109632584 | 2.91E-05    | CADM2  | ENSG00000175161 |
| 3 | 87201992 | 87202229 | 87202110 | 9  | 11  | 7  | 1.43836304  | 0.204844    | VGLL3  | ENSG00000206538 |
| 3 | 87465306 | 87465512 | 87465409 | 11 | 11  | 2  | 3.835634772 | 0.00800699  |        | ENSG00000211155 |
| 3 | 87635882 | 87636145 | 87636013 | 8  | 9   | 5  | 1.598181155 | 0.170911    |        | ENSG00000211155 |
| 3 | 87739102 | 87739324 | 87739230 | 11 | 12  | 1  | 6.232906505 | 0.00117736  |        | ENSG00000200703 |
| 3 | 88189846 | 88190051 | 88189960 | 10 | 11  | 2  | 3.835634772 | 0.00800699  | CGGBP1 | ENSG00000163320 |
| 3 | 88190821 | 88191071 | 88190973 | 8  | 9   | 5  | 1.598181155 | 0.170911    | CGGBP1 | ENSG00000163320 |
| 3 | 88191501 | 88191729 | 88191615 | 9  | 11  | 5  | 1.917817386 | 0.0843804   | CGGBP1 | ENSG00000163320 |
| 3 | 88237777 | 88238037 | 88237928 | 8  | 9   | 0  | 9.589086931 | 0.00120187  | ZNF654 | ENSG00000175105 |
| 3 | 88245411 | 88245711 | 88245556 | 11 | 14  | 7  | 1.797953799 | 0.0806593   | ZNF654 | ENSG00000175105 |
| 3 | 88560876 | 88561076 | 88560925 | 8  | 10  | 0  | 10.54799562 | 0.000613541 |        | ENSG00000207316 |

|   |           |           |           |    |    |     |             |             |         |                 |
|---|-----------|-----------|-----------|----|----|-----|-------------|-------------|---------|-----------------|
| 3 | 89129111  | 89129598  | 89129335  | 18 | 32 | 1   | 15.82199344 | 3.96E-09    | EPHA3   | ENSG00000044524 |
| 3 | 89749641  | 89749888  | 89749770  | 9  | 9  | 0   | 9.589086931 | 0.00120187  |         | ENSG00000211188 |
| 3 | 90096809  | 90097163  | 90096986  | 15 | 21 | 5   | 3.515998541 | 0.00108602  |         | ENSG00000212598 |
| 3 | 90475067  | 90475384  | 90475225  | 8  | 8  | 4   | 1.726035648 | 0.150596    |         | ENSG00000189002 |
| 3 | 90530478  | 90530821  | 90530649  | 77 | 77 | 100 | 0.740543347 | 0.977544    |         | ENSG00000189002 |
| 3 | 90573326  | 90573654  | 90573490  | 22 | 23 | 23  | 0.958908693 | 0.557483    |         | ENSG00000189002 |
| 3 | 90581514  | 90581700  | 90581550  | 9  | 9  | 5   | 1.598181155 | 0.170911    |         | ENSG00000189002 |
| 3 | 95505401  | 95505666  | 95505516  | 8  | 11 | 6   | 1.643843474 | 0.137712    |         | ENSG00000178660 |
| 3 | 96162967  | 96163544  | 96163398  | 11 | 26 | 11  | 2.157544559 | 0.00983179  | WDR82P1 | ENSG00000185141 |
| 3 | 96811084  | 96811276  | 96811180  | 9  | 9  | 0   | 9.589086931 | 0.00120187  |         | ENSG00000222633 |
| 3 | 98437172  | 98437459  | 98437315  | 9  | 11 | 8   | 1.278544924 | 0.28289     | EPHA6   | ENSG00000080224 |
| 3 | 99561191  | 99561500  | 99561337  | 11 | 14 | 0   | 14.3836304  | 4.17E-05    | OR5K4   | ENSG00000196098 |
| 3 | 99646782  | 99646961  | 99646871  | 8  | 8  | 0   | 8.630178238 | 0.00235436  | OR5K1   | ENSG00000185408 |
| 3 | 99647407  | 99647877  | 99647586  | 26 | 35 | 2   | 11.50690432 | 5.48E-09    | OR5K1   | ENSG00000185408 |
| 3 | 100839219 | 100839406 | 100839312 | 9  | 9  | 0   | 9.589086931 | 0.00120187  | COL8A1  | ENSG00000144810 |
| 3 | 101270376 | 101270657 | 101270513 | 10 | 13 | 5   | 2.237453617 | 0.038866    | FILIP1L | ENSG00000168386 |
| 3 | 101665432 | 101665948 | 101665690 | 15 | 25 | 0   | 24.93162602 | 2.56E-08    | TMEM45A | ENSG00000181458 |
| 3 | 101694482 | 101694687 | 101694585 | 8  | 9  | 6   | 1.369869562 | 0.253675    | TMEM45A | ENSG00000181458 |
| 3 | 101836350 | 101836529 | 101836461 | 8  | 8  | 2   | 2.876726079 | 0.0381137   | GPR128  | ENSG00000144820 |
| 3 | 101852860 | 101853090 | 101852975 | 11 | 12 | 0   | 12.46581301 | 0.000159888 | GPR128  | ENSG00000144820 |
| 3 | 102714699 | 102715041 | 102714870 | 8  | 12 | 7   | 1.558226626 | 0.152813    | SENP7   | ENSG00000138468 |
| 3 | 102763245 | 102763517 | 102763381 | 8  | 11 | 4   | 2.301380863 | 0.0459276   | RG9MTD1 | ENSG00000174173 |
| 3 | 102775179 | 102775368 | 102775273 | 8  | 9  | 1   | 4.794543465 | 0.00708517  | PCNP    | ENSG00000081154 |
| 3 | 102775486 | 102776447 | 102775931 | 27 | 73 | 7   | 8.869905411 | 6.37E-15    | PCNP    | ENSG00000081154 |
| 3 | 102803570 | 102803793 | 102803681 | 10 | 11 | 0   | 11.50690432 | 0.000313206 |         | ENSG00000209035 |
| 3 | 102888342 | 102888540 | 102888441 | 9  | 10 | 3   | 2.636998906 | 0.034203    | RPL24   | ENSG00000114391 |
| 3 | 103052060 | 103052263 | 103052161 | 8  | 9  | 2   | 3.19636231  | 0.0229249   | NFKBIZ  | ENSG00000144802 |
| 3 | 103364622 | 103364803 | 103364712 | 8  | 8  | 1   | 4.315089119 | 0.0127267   | ZPLD1   | ENSG00000170044 |
| 3 | 103894264 | 103894584 | 103894424 | 17 | 22 | 0   | 22.05489994 | 1.92E-07    |         | ENSG00000201065 |
| 3 | 106424245 | 106424624 | 106424454 | 26 | 32 | 4   | 6.328797374 | 9.93E-07    | ALCAM   | ENSG00000170017 |
| 3 | 106574029 | 106574345 | 106574185 | 15 | 18 | 3   | 4.554816292 | 0.000599415 | ALCAM   | ENSG00000170017 |
| 3 | 107226547 | 107226756 | 107226596 | 10 | 10 | 2   | 3.515998541 | 0.0136204   | CBLB    | ENSG00000114423 |
| 3 | 107811404 | 107811583 | 107811504 | 8  | 8  | 1   | 4.315089119 | 0.0127267   |         | ENSG00000200361 |
| 3 | 107887320 | 107887643 | 107887470 | 12 | 16 | 5   | 2.716907964 | 0.0109645   |         | ENSG00000200361 |

|   |           |           |           |    |    |    |             |             |          |                 |
|---|-----------|-----------|-----------|----|----|----|-------------|-------------|----------|-----------------|
| 3 | 108443280 | 108443606 | 108443429 | 8  | 11 | 0  | 11.50690432 | 0.000313206 |          | ENSG00000220989 |
| 3 | 108466332 | 108466724 | 108466546 | 21 | 29 | 10 | 2.615205527 | 0.00170492  |          | ENSG00000220989 |
| 3 | 108563751 | 108564091 | 108563917 | 13 | 17 | 5  | 2.876726079 | 0.00703033  |          | ENSG00000220989 |
| 3 | 109057242 | 109057459 | 109057350 | 10 | 10 | 5  | 1.757999271 | 0.121253    | CD47     | ENSG00000196776 |
| 3 | 109129111 | 109129315 | 109129202 | 8  | 9  | 4  | 1.917817386 | 0.103282    | CD47     | ENSG00000196776 |
| 3 | 109790814 | 109791215 | 109791054 | 12 | 19 | 8  | 2.130908207 | 0.0233014   | KIAA1524 | ENSG00000163507 |
| 3 | 109795308 | 109795614 | 109795461 | 19 | 21 | 2  | 7.031997082 | 2.73E-05    | DZIP3    | ENSG00000198919 |
| 3 | 109821878 | 109822138 | 109822008 | 12 | 14 | 7  | 1.797953799 | 0.0806593   | DZIP3    | ENSG00000198919 |
| 3 | 110032548 | 110032874 | 110032711 | 9  | 11 | 2  | 3.835634772 | 0.00800699  | TRAT1    | ENSG00000163519 |
| 3 | 110116254 | 110116954 | 110116418 | 25 | 61 | 3  | 14.86308474 | 4.23E-15    | GUCA1C   | ENSG00000138472 |
| 3 | 110252225 | 110252419 | 110252322 | 9  | 9  | 0  | 9.589086931 | 0.00120187  |          | ENSG00000211433 |
| 3 | 110283639 | 110283831 | 110283715 | 8  | 8  | 2  | 2.876726079 | 0.0381137   | MORC1    | ENSG00000114487 |
| 3 | 112710805 | 112711260 | 112711084 | 27 | 34 | 2  | 11.18726809 | 1.02E-08    | CD96     | ENSG00000153283 |
| 3 | 112878256 | 112878476 | 112878366 | 8  | 9  | 4  | 1.917817386 | 0.103282    | PLCXD2   | ENSG00000144824 |
| 3 | 113276447 | 113277171 | 113276655 | 24 | 44 | 6  | 6.164413027 | 2.07E-08    | C3orf52  | ENSG00000114529 |
| 3 | 113298989 | 113299235 | 113299128 | 12 | 12 | 2  | 4.155271003 | 0.0046638   | C3orf52  | ENSG00000114529 |
| 3 | 113313307 | 113313606 | 113313456 | 14 | 15 | 2  | 5.114179696 | 0.00088103  |          | ENSG00000207940 |
| 3 | 113763390 | 113763798 | 113763619 | 8  | 16 | 6  | 2.328778255 | 0.0221113   | SLC35A5  | ENSG00000138459 |
| 3 | 114102609 | 114103017 | 114102812 | 25 | 35 | 1  | 17.26035648 | 5.72E-10    | CD200R1L | ENSG00000206531 |
| 3 | 114219415 | 114219643 | 114219528 | 11 | 13 | 3  | 3.356180426 | 0.00805599  | C3orf17  | ENSG00000163608 |
| 3 | 114369776 | 114369959 | 114369867 | 8  | 9  | 5  | 1.598181155 | 0.170911    | BOC      | ENSG00000144857 |
| 3 | 114566125 | 114566342 | 114566266 | 8  | 8  | 2  | 2.876726079 | 0.0381137   | WDR52    | ENSG00000206530 |
| 3 | 114737643 | 114737829 | 114737705 | 8  | 8  | 4  | 1.726035648 | 0.150596    | SIDT1    | ENSG00000072858 |
| 3 | 114737905 | 114738577 | 114738409 | 10 | 24 | 10 | 2.179337939 | 0.011585    | SIDT1    | ENSG00000072858 |
| 3 | 114769325 | 114769535 | 114769430 | 8  | 9  | 5  | 1.598181155 | 0.170911    | SIDT1    | ENSG00000072858 |
| 3 | 114897206 | 114897455 | 114897313 | 8  | 10 | 5  | 1.757999271 | 0.121253    | KIAA2018 | ENSG00000176542 |
| 3 | 114938066 | 114938571 | 114938245 | 15 | 24 | 5  | 3.995452888 | 0.00024777  | NAT13    | ENSG00000121579 |
| 3 | 114946568 | 114947067 | 114946747 | 12 | 26 | 3  | 6.472633678 | 6.96E-06    | NAT13    | ENSG00000121579 |
| 3 | 114947119 | 114947307 | 114947252 | 8  | 9  | 4  | 1.917817386 | 0.103282    | NAT13    | ENSG00000121579 |
| 3 | 114947896 | 114948461 | 114948317 | 13 | 29 | 11 | 2.397271733 | 0.00325702  | ATP6V1A  | ENSG00000114573 |
| 3 | 114950218 | 114950397 | 114950307 | 8  | 8  | 1  | 4.315089119 | 0.0127267   | ATP6V1A  | ENSG00000114573 |
| 3 | 114955518 | 114955833 | 114955656 | 10 | 14 | 0  | 14.3836304  | 4.17E-05    | ATP6V1A  | ENSG00000114573 |
| 3 | 115167654 | 115167838 | 115167746 | 8  | 9  | 2  | 3.19636231  | 0.0229249   | ZDHHC23  | ENSG00000184307 |
| 3 | 115257905 | 115258120 | 115258075 | 8  | 11 | 15 | 0.71918152  | 0.81018     | KIAA1407 | ENSG00000163617 |

|   |           |           |           |    |    |    |             |             |         |                 |
|---|-----------|-----------|-----------|----|----|----|-------------|-------------|---------|-----------------|
| 3 | 115346737 | 115347121 | 115346915 | 9  | 15 | 1  | 7.671269544 | 0.000187863 | DRD3    | ENSG00000151577 |
| 3 | 115651042 | 115651546 | 115651294 | 14 | 26 | 1  | 12.94526736 | 1.86E-07    | ZBTB20  | ENSG00000181722 |
| 3 | 115914301 | 115914575 | 115914438 | 14 | 14 | 3  | 3.595907599 | 0.00486913  | ZBTB20  | ENSG00000181722 |
| 3 | 116201977 | 116202171 | 116202054 | 8  | 8  | 0  | 8.630178238 | 0.00235436  |         | ENSG00000212786 |
| 3 | 116273109 | 116273314 | 116273152 | 9  | 9  | 1  | 4.794543465 | 0.00708517  |         | ENSG00000212786 |
| 3 | 116347465 | 116347777 | 116347631 | 10 | 14 | 4  | 2.876726079 | 0.01219     | ZBTB20  | ENSG00000181722 |
| 3 | 116349156 | 116349464 | 116349310 | 10 | 13 | 3  | 3.356180426 | 0.00805599  | ZBTB20  | ENSG00000181722 |
| 3 | 116363524 | 116363806 | 116363665 | 12 | 12 | 0  | 12.46581301 | 0.000159888 | ZBTB20  | ENSG00000181722 |
| 3 | 116441222 | 116441613 | 116441395 | 9  | 13 | 5  | 2.237453617 | 0.038866    |         | ENSG00000213384 |
| 3 | 116894456 | 116894797 | 116894624 | 8  | 12 | 8  | 1.385090334 | 0.219216    |         | ENSG00000221098 |
| 3 | 116985920 | 116986135 | 116986021 | 9  | 10 | 2  | 3.515998541 | 0.0136204   |         | ENSG00000222510 |
| 3 | 117016396 | 117016587 | 117016523 | 8  | 8  | 3  | 2.157544559 | 0.0836802   |         | ENSG00000222510 |
| 3 | 117021380 | 117021674 | 117021506 | 14 | 16 | 10 | 1.481949798 | 0.147733    |         | ENSG00000222510 |
| 3 | 117160713 | 117160912 | 117160812 | 8  | 8  | 2  | 2.876726079 | 0.0381137   |         | ENSG00000209194 |
| 3 | 117172505 | 117172711 | 117172601 | 8  | 10 | 3  | 2.636998906 | 0.034203    |         | ENSG00000209194 |
| 3 | 117819768 | 117820022 | 117819931 | 16 | 17 | 3  | 4.315089119 | 0.00102271  | BZW1L1  | ENSG00000198406 |
| 3 | 118066023 | 118066240 | 118066155 | 11 | 12 | 5  | 2.077635502 | 0.0577144   |         | ENSG00000196797 |
| 3 | 118122299 | 118122553 | 118122426 | 10 | 11 | 4  | 2.301380863 | 0.0459276   |         | ENSG00000196797 |
| 3 | 118123281 | 118123460 | 118123332 | 8  | 9  | 2  | 3.19636231  | 0.0229249   |         | ENSG00000196797 |
| 3 | 118830558 | 118830776 | 118830636 | 9  | 9  | 2  | 3.19636231  | 0.0229249   |         | ENSG00000206889 |
| 3 | 120083975 | 120084160 | 120084071 | 8  | 10 | 0  | 10.54799562 | 0.000613541 | IGSF11  | ENSG00000144847 |
| 3 | 120840386 | 120840830 | 120840644 | 26 | 43 | 7  | 5.273997812 | 1.31E-07    | POPDC2  | ENSG00000121577 |
| 3 | 120995475 | 120995797 | 120995636 | 21 | 24 | 0  | 23.97271733 | 5.01E-08    | NR1I2   | ENSG00000144852 |
| 3 | 121296244 | 121296485 | 121296404 | 8  | 10 | 4  | 2.109599125 | 0.0694668   | GSK3B   | ENSG00000082701 |
| 3 | 121297083 | 121297393 | 121297238 | 9  | 14 | 7  | 1.797953799 | 0.0806593   | GSK3B   | ENSG00000082701 |
| 3 | 121300350 | 121300541 | 121300445 | 8  | 9  | 4  | 1.917817386 | 0.103282    | GSK3B   | ENSG00000082701 |
| 3 | 121445940 | 121446139 | 121446039 | 9  | 10 | 0  | 10.54799562 | 0.000613541 | GPR156  | ENSG00000175697 |
| 3 | 121619436 | 121619615 | 121619552 | 8  | 8  | 0  | 8.630178238 | 0.00235436  | FSTL1   | ENSG00000163430 |
| 3 | 121769593 | 121769772 | 121769680 | 8  | 8  | 0  | 8.630178238 | 0.00235436  |         | ENSG00000196095 |
| 3 | 121862883 | 121863297 | 121863062 | 11 | 19 | 6  | 2.739739123 | 0.00632909  | HGD     | ENSG00000113924 |
| 3 | 122320687 | 122320923 | 122320805 | 8  | 8  | 0  | 8.630178238 | 0.00235436  | STXBP5L | ENSG00000145087 |
| 3 | 122932880 | 122933219 | 122933049 | 17 | 21 | 2  | 7.031997082 | 2.73E-05    | GOLGB1  | ENSG00000173230 |
| 3 | 122951349 | 122951757 | 122951450 | 9  | 17 | 5  | 2.876726079 | 0.00703033  | GOLGB1  | ENSG00000173230 |
| 3 | 123053845 | 123054142 | 123053969 | 21 | 25 | 1  | 12.46581301 | 3.51E-07    | EAF2    | ENSG00000145088 |



|   |           |           |           |    |     |    |             |             |         |                 |
|---|-----------|-----------|-----------|----|-----|----|-------------|-------------|---------|-----------------|
| 3 | 123142220 | 123142520 | 123142369 | 9  | 12  | 2  | 4.155271003 | 0.0046638   | SLC15A2 | ENSG00000163406 |
| 3 | 123144970 | 123145178 | 123145074 | 10 | 10  | 0  | 10.54799562 | 0.000613541 | SLC15A2 | ENSG00000163406 |
| 3 | 123197092 | 123197315 | 123197176 | 8  | 11  | 1  | 5.753452158 | 0.00215302  | ILDR1   | ENSG00000145103 |
| 3 | 123283246 | 123283434 | 123283295 | 9  | 9   | 3  | 2.397271733 | 0.0539397   | CD86    | ENSG00000114013 |
| 3 | 123584732 | 123585056 | 123584894 | 9  | 12  | 12 | 0.958908693 | 0.542188    | CCDC58  | ENSG00000160124 |
| 3 | 123595710 | 123596116 | 123595913 | 87 | 104 | 0  | 100.6854128 | 2.18E-31    | FAM162A | ENSG00000114023 |
| 3 | 123618187 | 123618414 | 123618306 | 8  | 11  | 5  | 1.917817386 | 0.0843804   | WDR5B   | ENSG00000196981 |
| 3 | 123645364 | 123645578 | 123645470 | 8  | 9   | 3  | 2.397271733 | 0.0539397   | WDR5B   | ENSG00000196981 |
| 3 | 123697798 | 123698415 | 123698206 | 37 | 56  | 6  | 7.808256501 | 2.37E-11    | KPNA1   | ENSG00000114030 |
| 3 | 123735453 | 123735680 | 123735566 | 9  | 10  | 7  | 1.318499453 | 0.269217    | KPNA1   | ENSG00000114030 |
| 3 | 123879804 | 123880048 | 123879926 | 10 | 10  | 3  | 2.636998906 | 0.034203    | PARP14  | ENSG00000173193 |
| 3 | 123995278 | 123995515 | 123995378 | 8  | 10  | 6  | 1.506856518 | 0.188853    | HSPBAP1 | ENSG00000169087 |
| 3 | 124091757 | 124092163 | 124091960 | 73 | 85  | 3  | 20.6165369  | 1.06E-21    |         | ENSG00000221211 |
| 3 | 124099919 | 124100112 | 124100015 | 9  | 9   | 4  | 1.917817386 | 0.103282    |         | ENSG00000221211 |
| 3 | 124135795 | 124136169 | 124135974 | 26 | 33  | 1  | 16.30144778 | 2.08E-09    |         | ENSG00000221211 |
| 3 | 124448656 | 124448858 | 124448742 | 8  | 8   | 4  | 1.726035648 | 0.150596    | SEC22A  | ENSG00000121542 |
| 3 | 124567359 | 124567538 | 124567448 | 8  | 8   | 0  | 8.630178238 | 0.00235436  | ADCY5   | ENSG00000173175 |
| 3 | 124786757 | 124787016 | 124786886 | 9  | 11  | 10 | 1.046082211 | 0.455063    | PTPLB   | ENSG00000206527 |
| 3 | 124807504 | 124807756 | 124807636 | 11 | 11  | 5  | 1.917817386 | 0.0843804   | PTPLB   | ENSG00000206527 |
| 3 | 124843913 | 124844279 | 124844141 | 9  | 13  | 3  | 3.356180426 | 0.00805599  | PTPLB   | ENSG00000206527 |
| 3 | 124846047 | 124846417 | 124846240 | 18 | 24  | 1  | 11.98635866 | 6.63E-07    | PTPLB   | ENSG00000206527 |
| 3 | 125419145 | 125419383 | 125419253 | 13 | 15  | 3  | 3.835634772 | 0.00291691  | KALRN   | ENSG00000160145 |
| 3 | 125448613 | 125448798 | 125448724 | 8  | 8   | 2  | 2.876726079 | 0.0381137   | KALRN   | ENSG00000160145 |
| 3 | 125468009 | 125468474 | 125468180 | 11 | 18  | 7  | 2.277408146 | 0.0188653   | KALRN   | ENSG00000160145 |
| 3 | 125476647 | 125476829 | 125476738 | 8  | 9   | 2  | 3.19636231  | 0.0229249   | KALRN   | ENSG00000160145 |
| 3 | 125584386 | 125584856 | 125584672 | 12 | 21  | 4  | 4.219198249 | 0.000390041 | KALRN   | ENSG00000160145 |
| 3 | 125593384 | 125593857 | 125593722 | 20 | 29  | 3  | 7.191815198 | 1.23E-06    | KALRN   | ENSG00000160145 |
| 3 | 125596761 | 125596975 | 125596853 | 8  | 9   | 5  | 1.598181155 | 0.170911    | KALRN   | ENSG00000160145 |
| 3 | 125597572 | 125597885 | 125597711 | 14 | 17  | 9  | 1.726035648 | 0.0753664   | KALRN   | ENSG00000160145 |
| 3 | 125598566 | 125599242 | 125598804 | 50 | 78  | 9  | 7.575378675 | 8.89E-15    | KALRN   | ENSG00000160145 |
| 3 | 125630433 | 125630986 | 125630776 | 17 | 31  | 9  | 3.068507818 | 0.000350883 | KALRN   | ENSG00000160145 |
| 3 | 125666603 | 125666813 | 125666691 | 8  | 9   | 0  | 9.589086931 | 0.00120187  | KALRN   | ENSG00000160145 |
| 3 | 125669780 | 125669983 | 125669933 | 8  | 9   | 2  | 3.19636231  | 0.0229249   | KALRN   | ENSG00000160145 |
| 3 | 125722566 | 125722837 | 125722712 | 13 | 13  | 3  | 3.356180426 | 0.00805599  | KALRN   | ENSG00000160145 |

|   |           |           |           |     |     |   |             |             |         |                 |
|---|-----------|-----------|-----------|-----|-----|---|-------------|-------------|---------|-----------------|
| 3 | 125760826 | 125761039 | 125760928 | 8   | 10  | 6 | 1.506856518 | 0.188853    | KALRN   | ENSG00000160145 |
| 3 | 125761503 | 125761731 | 125761617 | 8   | 10  | 4 | 2.109599125 | 0.0694668   | KALRN   | ENSG00000160145 |
| 3 | 125775452 | 125775927 | 125775700 | 22  | 39  | 0 | 38.35634772 | 2.09E-12    | KALRN   | ENSG00000160145 |
| 3 | 125794128 | 125794565 | 125794176 | 9   | 18  | 6 | 2.602752167 | 0.00970422  | KALRN   | ENSG00000160145 |
| 3 | 125896009 | 125896287 | 125896176 | 12  | 14  | 0 | 14.3836304  | 4.17E-05    | UMPS    | ENSG00000114491 |
| 3 | 125901077 | 125901256 | 125901164 | 8   | 8   | 0 | 8.630178238 | 0.00235436  | UMPS    | ENSG00000114491 |
| 3 | 125933433 | 125933626 | 125933588 | 9   | 9   | 0 | 9.589086931 | 0.00120187  | UMPS    | ENSG00000114491 |
| 3 | 125963583 | 125963804 | 125963715 | 8   | 9   | 6 | 1.369869562 | 0.253675    | UMPS    | ENSG00000114491 |
| 3 | 125988365 | 125988612 | 125988444 | 11  | 13  | 1 | 6.712360851 | 0.000640982 | UMPS    | ENSG00000114491 |
| 3 | 126016298 | 126016486 | 126016392 | 9   | 9   | 5 | 1.598181155 | 0.170911    | ITGB5   | ENSG00000082781 |
| 3 | 126034194 | 126034384 | 126034234 | 8   | 8   | 7 | 1.07877228  | 0.435076    | ITGB5   | ENSG00000082781 |
| 3 | 126035542 | 126035765 | 126035619 | 8   | 9   | 3 | 2.397271733 | 0.0539397   | ITGB5   | ENSG00000082781 |
| 3 | 126039343 | 126039650 | 126039494 | 12  | 16  | 9 | 1.630144778 | 0.102169    | ITGB5   | ENSG00000082781 |
| 3 | 126087400 | 126087709 | 126087564 | 10  | 13  | 5 | 2.237453617 | 0.038866    | ITGB5   | ENSG00000082781 |
| 3 | 126102876 | 126103121 | 126102985 | 9   | 11  | 4 | 2.301380863 | 0.0459276   | ITGB5   | ENSG00000082781 |
| 3 | 126188045 | 126188334 | 126188163 | 10  | 11  | 2 | 3.835634772 | 0.00800699  | MUC13   | ENSG00000173702 |
| 3 | 126264525 | 126265001 | 126264793 | 8   | 17  | 5 | 2.876726079 | 0.00703033  |         | ENSG00000209255 |
| 3 | 126353583 | 126353770 | 126353680 | 8   | 8   | 1 | 4.315089119 | 0.0127267   |         | ENSG00000199327 |
| 3 | 126421265 | 126421513 | 126421399 | 8   | 9   | 2 | 3.19636231  | 0.0229249   | SLC12A8 | ENSG00000221955 |
| 3 | 126472732 | 126472955 | 126472821 | 9   | 10  | 0 | 10.54799562 | 0.000613541 | SLC12A8 | ENSG00000221955 |
| 3 | 126576752 | 126576994 | 126576873 | 8   | 10  | 1 | 5.273997812 | 0.00391723  | ZNF148  | ENSG00000163848 |
| 3 | 126577654 | 126577978 | 126577816 | 8   | 13  | 0 | 13.4247217  | 8.16E-05    | ZNF148  | ENSG00000163848 |
| 3 | 127315411 | 127315590 | 127315489 | 8   | 9   | 0 | 9.589086931 | 0.00120187  | SLC41A3 | ENSG00000114544 |
| 3 | 127320868 | 127321298 | 127321098 | 120 | 140 | 4 | 27.04122514 | 7.00E-36    | SLC41A3 | ENSG00000114544 |
| 3 | 127681882 | 127682065 | 127681973 | 8   | 8   | 0 | 8.630178238 | 0.00235436  | ZXDC    | ENSG00000070476 |
| 3 | 127770468 | 127770874 | 127770747 | 10  | 16  | 3 | 4.075361945 | 0.00173346  |         | ENSG00000206483 |
| 3 | 128207374 | 128207802 | 128207552 | 19  | 28  | 2 | 9.2694507   | 4.06E-07    | PLXNA1  | ENSG00000114554 |
| 3 | 128577207 | 128577390 | 128577273 | 8   | 8   | 0 | 8.630178238 | 0.00235436  |         | ENSG00000201288 |
| 3 | 128606994 | 128607362 | 128607191 | 17  | 23  | 2 | 7.671269544 | 8.30E-06    |         | ENSG00000201288 |
| 3 | 129205720 | 129205941 | 129205868 | 9   | 10  | 2 | 3.515998541 | 0.0136204   |         | ENSG00000201210 |
| 3 | 129209180 | 129209528 | 129209354 | 31  | 36  | 1 | 17.73981082 | 3.00E-10    |         | ENSG00000201210 |
| 3 | 129212856 | 129213083 | 129212969 | 9   | 12  | 5 | 2.077635502 | 0.0577144   | SEC61A1 | ENSG00000058262 |
| 3 | 129276701 | 129276883 | 129276727 | 8   | 8   | 2 | 2.876726079 | 0.0381137   |         | ENSG00000222627 |
| 3 | 129296692 | 129297265 | 129296939 | 70  | 104 | 6 | 14.3836304  | 7.21E-24    |         | ENSG00000222627 |

|   |           |           |           |    |    |    |             |             |         |                 |
|---|-----------|-----------|-----------|----|----|----|-------------|-------------|---------|-----------------|
| 3 | 129309399 | 129309609 | 129309552 | 8  | 9  | 1  | 4.794543465 | 0.00708517  | RUVBL1  | ENSG00000175792 |
| 3 | 129354725 | 129354919 | 129354846 | 10 | 10 | 3  | 2.636998906 | 0.034203    | EEFSEC  | ENSG00000132394 |
| 3 | 129355373 | 129355634 | 129355503 | 9  | 9  | 2  | 3.19636231  | 0.0229249   | EEFSEC  | ENSG00000132394 |
| 3 | 129545200 | 129545491 | 129545345 | 11 | 13 | 4  | 2.684944341 | 0.01921     |         | ENSG00000221067 |
| 3 | 129603869 | 129604067 | 129604028 | 8  | 9  | 1  | 4.794543465 | 0.00708517  |         | ENSG00000221067 |
| 3 | 129723328 | 129723533 | 129723430 | 8  | 8  | 1  | 4.315089119 | 0.0127267   | GATA2   | ENSG00000179348 |
| 3 | 129785899 | 129786204 | 129786049 | 10 | 13 | 6  | 1.917817386 | 0.0693353   | C3orf27 | ENSG00000198685 |
| 3 | 129842434 | 129842733 | 129842581 | 9  | 11 | 4  | 2.301380863 | 0.0459276   | RPN1    | ENSG00000163902 |
| 3 | 129845698 | 129845883 | 129845775 | 8  | 8  | 2  | 2.876726079 | 0.0381137   | RPN1    | ENSG00000163902 |
| 3 | 129858020 | 129858237 | 129858058 | 8  | 10 | 0  | 10.54799562 | 0.000613541 | RPN1    | ENSG00000163902 |
| 3 | 129882349 | 129882567 | 129882470 | 9  | 9  | 4  | 1.917817386 | 0.103282    |         | ENSG00000208982 |
| 3 | 129911429 | 129911694 | 129911572 | 15 | 17 | 7  | 2.157544559 | 0.0276499   |         | ENSG00000207130 |
| 3 | 130362562 | 130362973 | 130362794 | 16 | 23 | 5  | 3.835634772 | 0.000408054 | ISY1    | ENSG00000221812 |
| 3 | 130363275 | 130363476 | 130363335 | 8  | 9  | 5  | 1.598181155 | 0.170911    | ISY1    | ENSG00000221812 |
| 3 | 130470693 | 130470897 | 130470795 | 8  | 8  | 4  | 1.726035648 | 0.150596    | C3orf37 | ENSG00000183624 |
| 3 | 130641516 | 130641710 | 130641613 | 8  | 8  | 3  | 2.157544559 | 0.0836802   | IFT122  | ENSG00000163913 |
| 3 | 130691696 | 130692016 | 130691859 | 8  | 13 | 4  | 2.684944341 | 0.01921     | RHO     | ENSG00000163914 |
| 3 | 130799895 | 130800106 | 130800000 | 8  | 8  | 2  | 2.876726079 | 0.0381137   |         | ENSG00000208944 |
| 3 | 130864608 | 130864996 | 130864777 | 13 | 19 | 5  | 3.19636231  | 0.00280933  | TMCC1   | ENSG00000172765 |
| 3 | 131026462 | 131026685 | 131026573 | 8  | 9  | 5  | 1.598181155 | 0.170911    |         | ENSG00000208938 |
| 3 | 131050058 | 131050283 | 131050156 | 8  | 9  | 0  | 9.589086931 | 0.00120187  |         | ENSG00000203644 |
| 3 | 131095752 | 131096091 | 131095921 | 8  | 9  | 3  | 2.397271733 | 0.0539397   | TMCC1   | ENSG00000172765 |
| 3 | 132041386 | 132041577 | 132041532 | 8  | 8  | 0  | 8.630178238 | 0.00235436  |         | ENSG00000186110 |
| 3 | 132704425 | 132704794 | 132704536 | 9  | 14 | 3  | 3.595907599 | 0.00486913  | MRPL3   | ENSG00000114686 |
| 3 | 132930495 | 132930728 | 132930611 | 10 | 11 | 2  | 3.835634772 | 0.00800699  | MRPL3   | ENSG00000114686 |
| 3 | 133230709 | 133231096 | 133230953 | 11 | 17 | 6  | 2.465765211 | 0.014729    | CPNE4   | ENSG00000196353 |
| 3 | 133235984 | 133236189 | 133236086 | 8  | 10 | 0  | 10.54799562 | 0.000613541 | CPNE4   | ENSG00000196353 |
| 3 | 133236424 | 133236719 | 133236555 | 8  | 11 | 4  | 2.301380863 | 0.0459276   | CPNE4   | ENSG00000196353 |
| 3 | 133397720 | 133398016 | 133397868 | 25 | 26 | 6  | 3.698647816 | 0.00025253  | ACPP    | ENSG00000014257 |
| 3 | 133518678 | 133519473 | 133519308 | 15 | 45 | 10 | 4.009981807 | 1.32E-06    | ACPP    | ENSG00000014257 |
| 3 | 133619682 | 133620122 | 133619911 | 10 | 20 | 11 | 1.678090213 | 0.0696225   | DNAJC13 | ENSG00000138246 |
| 3 | 133737642 | 133737923 | 133737782 | 9  | 12 | 3  | 3.116453252 | 0.0131971   | CCRL1   | ENSG00000129048 |
| 3 | 133828453 | 133828885 | 133828642 | 50 | 62 | 6  | 8.630178238 | 7.32E-13    | CCRL1   | ENSG00000129048 |
| 3 | 134654588 | 134654888 | 134654725 | 13 | 15 | 6  | 2.191791298 | 0.0328001   |         | ENSG00000208917 |

|   |           |           |           |    |    |    |             |             |         |                 |
|---|-----------|-----------|-----------|----|----|----|-------------|-------------|---------|-----------------|
| 3 | 134846418 | 134846712 | 134846565 | 10 | 11 | 7  | 1.43836304  | 0.204844    | TOPBP1  | ENSG00000163781 |
| 3 | 135023521 | 135023730 | 135023625 | 8  | 8  | 4  | 1.726035648 | 0.150596    | SRPRB   | ENSG00000144867 |
| 3 | 135145101 | 135145341 | 135145180 | 8  | 11 | 1  | 5.753452158 | 0.00215302  | C3orf36 | ENSG00000221972 |
| 3 | 135414512 | 135414745 | 135414606 | 8  | 10 | 7  | 1.318499453 | 0.269217    | RYK     | ENSG00000163785 |
| 3 | 135451320 | 135451768 | 135451592 | 11 | 17 | 0  | 17.26035648 | 5.54E-06    | RYK     | ENSG00000163785 |
| 3 | 135509969 | 135510162 | 135510076 | 9  | 11 | 5  | 1.917817386 | 0.0843804   | RPL39P5 | ENSG00000214289 |
| 3 | 135542881 | 135543392 | 135543113 | 31 | 45 | 3  | 11.02744997 | 8.54E-11    | RPL39P5 | ENSG00000214289 |
| 3 | 135576835 | 135577035 | 135576919 | 9  | 10 | 3  | 2.636998906 | 0.034203    | AMOTL2  | ENSG00000114019 |
| 3 | 135583382 | 135583694 | 135583538 | 16 | 18 | 4  | 3.643853034 | 0.00178791  | AMOTL2  | ENSG00000114019 |
| 3 | 135650858 | 135651169 | 135651013 | 11 | 13 | 4  | 2.684944341 | 0.01921     |         | ENSG00000214288 |
| 3 | 135675449 | 135675761 | 135675605 | 9  | 11 | 4  | 2.301380863 | 0.0459276   | CEP63   | ENSG00000182923 |
| 3 | 135676452 | 135676838 | 135676610 | 21 | 26 | 0  | 25.89053471 | 1.31E-08    | CEP63   | ENSG00000182923 |
| 3 | 135687072 | 135687377 | 135687224 | 10 | 14 | 4  | 2.876726079 | 0.01219     | CEP63   | ENSG00000182923 |
| 3 | 135799166 | 135799519 | 135799342 | 10 | 15 | 3  | 3.835634772 | 0.00291691  | KY      | ENSG00000174611 |
| 3 | 136875940 | 136876505 | 136876234 | 21 | 38 | 3  | 9.349359757 | 5.96E-09    | PPP2R3A | ENSG00000073711 |
| 3 | 137050822 | 137051049 | 137050943 | 11 | 13 | 0  | 13.4247217  | 8.16E-05    | PPP2R3A | ENSG00000073711 |
| 3 | 137096627 | 137097055 | 137096806 | 9  | 19 | 7  | 2.397271733 | 0.0127287   | PPP2R3A | ENSG00000073711 |
| 3 | 137119766 | 137120058 | 137119910 | 16 | 19 | 3  | 4.794543465 | 0.000349205 | PPP2R3A | ENSG00000073711 |
| 3 | 137128716 | 137129094 | 137128877 | 21 | 27 | 9  | 2.684944341 | 0.00192568  | PPP2R3A | ENSG00000073711 |
| 3 | 137141549 | 137141762 | 137141655 | 8  | 8  | 1  | 4.315089119 | 0.0127267   | PPP2R3A | ENSG00000073711 |
| 3 | 137167701 | 137167941 | 137167805 | 12 | 12 | 5  | 2.077635502 | 0.0577144   | PPP2R3A | ENSG00000073711 |
| 3 | 137210888 | 137211196 | 137211042 | 10 | 16 | 5  | 2.716907964 | 0.0109645   | PPP2R3A | ENSG00000073711 |
| 3 | 137224133 | 137224655 | 137224418 | 45 | 63 | 6  | 8.767165194 | 4.08E-13    | PPP2R3A | ENSG00000073711 |
| 3 | 137276842 | 137277078 | 137276973 | 10 | 11 | 4  | 2.301380863 | 0.0459276   | PPP2R3A | ENSG00000073711 |
| 3 | 137343716 | 137344479 | 137343893 | 23 | 50 | 6  | 6.986334764 | 7.24E-10    | MSL2    | ENSG00000174579 |
| 3 | 137393026 | 137393346 | 137393174 | 12 | 15 | 2  | 5.114179696 | 0.00088103  | MSL2    | ENSG00000174579 |
| 3 | 137394070 | 137394330 | 137394174 | 8  | 10 | 3  | 2.636998906 | 0.034203    | MSL2    | ENSG00000174579 |
| 3 | 137396766 | 137396997 | 137396891 | 9  | 11 | 3  | 2.876726079 | 0.0213797   | MSL2    | ENSG00000174579 |
| 3 | 137397941 | 137398417 | 137398120 | 11 | 21 | 7  | 2.636998906 | 0.00562102  | MSL2    | ENSG00000174579 |
| 3 | 137398720 | 137399071 | 137398895 | 11 | 16 | 10 | 1.481949798 | 0.147733    | MSL2    | ENSG00000174579 |
| 3 | 137536753 | 137536986 | 137536869 | 8  | 9  | 5  | 1.598181155 | 0.170911    | PCCB    | ENSG00000114054 |
| 3 | 137593190 | 137593462 | 137593326 | 15 | 18 | 1  | 9.109632584 | 2.91E-05    |         | ENSG00000200571 |
| 3 | 137953813 | 137954087 | 137953950 | 9  | 11 | 2  | 3.835634772 | 0.00800699  | STAG1   | ENSG00000118007 |
| 3 | 138063220 | 138063469 | 138063323 | 8  | 11 | 3  | 2.876726079 | 0.0213797   | NCK1    | ENSG00000158092 |

|   |           |           |           |    |     |   |             |             |          |                 |
|---|-----------|-----------|-----------|----|-----|---|-------------|-------------|----------|-----------------|
| 3 | 138064180 | 138064615 | 138064478 | 8  | 14  | 4 | 2.876726079 | 0.01219     | NCK1     | ENSG00000158092 |
| 3 | 138234106 | 138234346 | 138234180 | 8  | 11  | 5 | 1.917817386 | 0.0843804   | IL20RB   | ENSG00000174564 |
| 3 | 138256257 | 138256872 | 138256599 | 42 | 63  | 5 | 10.22835939 | 7.02E-14    | IL20RB   | ENSG00000174564 |
| 3 | 138312026 | 138312240 | 138312133 | 9  | 11  | 3 | 2.876726079 | 0.0213797   | IL20RB   | ENSG00000174564 |
| 3 | 138323251 | 138323573 | 138323412 | 10 | 13  | 4 | 2.684944341 | 0.01921     | IL20RB   | ENSG00000174564 |
| 3 | 138533788 | 138534464 | 138534011 | 41 | 65  | 3 | 15.82199344 | 3.44E-16    |          | ENSG00000201325 |
| 3 | 138537731 | 138537952 | 138537807 | 9  | 9   | 5 | 1.598181155 | 0.170911    |          | ENSG00000201325 |
| 3 | 138894341 | 138894545 | 138894443 | 9  | 10  | 0 | 10.54799562 | 0.000613541 | SOX14    | ENSG00000168875 |
| 3 | 139147988 | 139148498 | 139148167 | 10 | 22  | 9 | 2.205489994 | 0.0136443   | CLDN18   | ENSG00000066405 |
| 3 | 139284151 | 139284373 | 139284306 | 9  | 10  | 3 | 2.636998906 | 0.034203    |          | ENSG00000214282 |
| 3 | 139388860 | 139389074 | 139388977 | 8  | 8   | 3 | 2.157544559 | 0.0836802   | ARMC8    | ENSG00000114098 |
| 3 | 139529995 | 139530198 | 139530100 | 8  | 9   | 1 | 4.794543465 | 0.00708517  | TXNDC6   | ENSG00000181322 |
| 3 | 139549495 | 139549722 | 139549626 | 8  | 9   | 5 | 1.598181155 | 0.170911    | MRAS     | ENSG00000158186 |
| 3 | 139585634 | 139585850 | 139585742 | 9  | 11  | 1 | 5.753452158 | 0.00215302  | MRAS     | ENSG00000158186 |
| 3 | 139680959 | 139681201 | 139681067 | 12 | 14  | 3 | 3.595907599 | 0.00486913  | FAM62C   | ENSG00000158220 |
| 3 | 139875679 | 139876033 | 139875914 | 13 | 18  | 2 | 6.073088389 | 0.000157975 |          | ENSG00000174715 |
| 3 | 139888451 | 139888678 | 139888561 | 8  | 8   | 7 | 1.07877228  | 0.435076    |          | ENSG00000174715 |
| 3 | 140425233 | 140425643 | 140425443 | 53 | 66  | 1 | 32.12344122 | 9.20E-19    | MRPS22   | ENSG00000175110 |
| 3 | 140519230 | 140519409 | 140519321 | 8  | 8   | 3 | 2.157544559 | 0.0836802   | MRPS22   | ENSG00000175110 |
| 3 | 140519879 | 140520113 | 140520024 | 8  | 9   | 4 | 1.917817386 | 0.103282    | MRPS22   | ENSG00000175110 |
| 3 | 140545396 | 140545654 | 140545525 | 9  | 11  | 3 | 2.876726079 | 0.0213797   | MRPS22   | ENSG00000175110 |
| 3 | 140545912 | 140546123 | 140546017 | 12 | 13  | 1 | 6.712360851 | 0.000640982 | MRPS22   | ENSG00000175110 |
| 3 | 140917178 | 140917717 | 140917411 | 50 | 77  | 1 | 37.39743903 | 6.55E-22    | NMNAT3   | ENSG00000163864 |
| 3 | 141117781 | 141118134 | 141117947 | 8  | 12  | 4 | 2.493162602 | 0.0299057   | CLSTN2   | ENSG00000158258 |
| 3 | 141118384 | 141118703 | 141118553 | 13 | 18  | 8 | 2.024362796 | 0.0334397   | CLSTN2   | ENSG00000158258 |
| 3 | 141382107 | 141382360 | 141382263 | 12 | 13  | 1 | 6.712360851 | 0.000640982 | CLSTN2   | ENSG00000158258 |
| 3 | 141624704 | 141625421 | 141625218 | 62 | 111 | 1 | 53.69888681 | 1.10E-31    |          | ENSG00000216184 |
| 3 | 141702476 | 141702666 | 141702608 | 8  | 8   | 0 | 8.630178238 | 0.00235436  |          | ENSG00000216184 |
| 3 | 141831448 | 141831629 | 141831538 | 8  | 9   | 0 | 9.589086931 | 0.00120187  | TRIM42   | ENSG00000155890 |
| 3 | 141972757 | 141972947 | 141972883 | 8  | 8   | 3 | 2.157544559 | 0.0836802   | TRIM42   | ENSG00000155890 |
| 3 | 142129243 | 142129563 | 142129403 | 12 | 16  | 7 | 2.037680973 | 0.0400399   | SLC25A36 | ENSG00000114120 |
| 3 | 142213131 | 142213368 | 142213249 | 13 | 14  | 4 | 2.876726079 | 0.01219     | SPSB4    | ENSG00000175093 |
| 3 | 142393851 | 142394091 | 142393951 | 8  | 10  | 6 | 1.506856518 | 0.188853    | ACPL2    | ENSG00000155893 |
| 3 | 142477599 | 142477821 | 142477702 | 16 | 18  | 1 | 9.109632584 | 2.91E-05    | ACPL2    | ENSG00000155893 |

|   |           |           |           |    |    |    |             |             |         |                 |
|---|-----------|-----------|-----------|----|----|----|-------------|-------------|---------|-----------------|
| 3 | 142510140 | 142510547 | 142510380 | 21 | 28 | 7  | 3.476044012 | 0.000248863 | ZBTB38  | ENSG00000177311 |
| 3 | 142562367 | 142562901 | 142562483 | 12 | 23 | 11 | 1.917817386 | 0.0274129   | ZBTB38  | ENSG00000177311 |
| 3 | 142567460 | 142567643 | 142567551 | 9  | 9  | 2  | 3.19636231  | 0.0229249   | ZBTB38  | ENSG00000177311 |
| 3 | 142567787 | 142568228 | 142567912 | 12 | 20 | 2  | 6.712360851 | 4.91E-05    | ZBTB38  | ENSG00000177311 |
| 3 | 142939536 | 142939858 | 142939699 | 9  | 12 | 7  | 1.558226626 | 0.152813    | RNF7    | ENSG00000114125 |
| 3 | 142965420 | 142965623 | 142965457 | 8  | 8  | 3  | 2.157544559 | 0.0836802   | GRK7    | ENSG00000114124 |
| 3 | 143077095 | 143077403 | 143077254 | 11 | 15 | 3  | 3.835634772 | 0.00291691  | ATP1B3  | ENSG00000069849 |
| 3 | 143114680 | 143114973 | 143114822 | 12 | 14 | 1  | 7.191815198 | 0.00034761  |         | ENSG00000200389 |
| 3 | 143141705 | 143141908 | 143141811 | 8  | 10 | 3  | 2.636998906 | 0.034203    |         | ENSG00000200389 |
| 3 | 143151920 | 143152146 | 143152033 | 8  | 9  | 5  | 1.598181155 | 0.170911    |         | ENSG00000214271 |
| 3 | 143182765 | 143182954 | 143182826 | 8  | 8  | 1  | 4.315089119 | 0.0127267   |         | ENSG00000214271 |
| 3 | 143797761 | 143798107 | 143797934 | 11 | 17 | 8  | 1.917817386 | 0.0474153   | ATR     | ENSG00000175054 |
| 3 | 144030332 | 144030547 | 144030419 | 8  | 10 | 1  | 5.273997812 | 0.00391723  | PCOLCE2 | ENSG00000163710 |
| 3 | 144202815 | 144203242 | 144203063 | 11 | 20 | 14 | 1.34247217  | 0.186867    |         | ENSG00000163714 |
| 3 | 144450538 | 144450924 | 144450717 | 20 | 29 | 1  | 14.3836304  | 2.72E-08    |         | ENSG00000181814 |
| 3 | 144465332 | 144465678 | 144465505 | 31 | 36 | 0  | 35.47962164 | 1.57E-11    |         | ENSG00000181814 |
| 3 | 144803340 | 144803958 | 144803751 | 51 | 75 | 5  | 12.14617678 | 4.95E-17    | SLC9A9  | ENSG00000181804 |
| 3 | 145084748 | 145085323 | 145084898 | 19 | 31 | 4  | 6.137015636 | 1.74E-06    | SLC9A9  | ENSG00000181804 |
| 3 | 145152993 | 145153215 | 145153133 | 8  | 8  | 5  | 1.43836304  | 0.235762    | C3orf58 | ENSG00000181744 |
| 3 | 145363668 | 145364067 | 145363847 | 8  | 15 | 2  | 5.114179696 | 0.00088103  |         | ENSG00000222778 |
| 3 | 145633216 | 145633448 | 145633314 | 11 | 13 | 0  | 13.4247217  | 8.16E-05    |         | ENSG00000212780 |
| 3 | 146445025 | 146445243 | 146445135 | 11 | 11 | 0  | 11.50690432 | 0.000313206 |         |                 |
| 3 | 146466841 | 146467138 | 146466965 | 8  | 10 | 3  | 2.636998906 | 0.034203    |         |                 |
| 3 | 146554717 | 146554964 | 146554840 | 11 | 13 | 0  | 13.4247217  | 8.16E-05    |         |                 |
| 3 | 146558084 | 146558655 | 146558439 | 32 | 46 | 2  | 15.02290286 | 5.55E-12    |         |                 |
| 3 | 146828550 | 146829046 | 146828867 | 18 | 26 | 0  | 25.89053471 | 1.31E-08    |         | ENSG00000222350 |
| 3 | 147260855 | 147261034 | 147260981 | 8  | 8  | 1  | 4.315089119 | 0.0127267   |         | ENSG00000198533 |
| 3 | 147395887 | 147396102 | 147395994 | 8  | 11 | 1  | 5.753452158 | 0.00215302  | PLOD2   | ENSG00000152952 |
| 3 | 147622374 | 147622695 | 147622534 | 8  | 14 | 5  | 2.397271733 | 0.0258078   | PLSCR2  | ENSG00000163746 |
| 3 | 147745299 | 147745495 | 147745388 | 10 | 10 | 6  | 1.506856518 | 0.188853    | PLSCR1  | ENSG00000188313 |
| 3 | 147782520 | 147783010 | 147782874 | 33 | 53 | 2  | 17.26035648 | 6.53E-14    |         | ENSG00000199812 |
| 3 | 148733103 | 148733292 | 148733132 | 8  | 9  | 1  | 4.794543465 | 0.00708517  | ZIC1    | ENSG00000152977 |
| 3 | 149087564 | 149087791 | 149087627 | 8  | 10 | 9  | 1.054799562 | 0.4492      |         | ENSG00000221431 |
| 3 | 149146597 | 149146867 | 149146732 | 8  | 11 | 1  | 5.753452158 | 0.00215302  |         | ENSG00000221431 |

|   |           |           |           |    |    |    |             |            |         |                 |
|---|-----------|-----------|-----------|----|----|----|-------------|------------|---------|-----------------|
| 3 | 149428047 | 149428359 | 149428200 | 15 | 18 | 5  | 3.036544195 | 0.0044641  |         | ENSG00000205412 |
| 3 | 149478986 | 149479166 | 149479099 | 8  | 8  | 4  | 1.726035648 | 0.150596   |         | ENSG00000205412 |
| 3 | 149898210 | 149898395 | 149898268 | 8  | 8  | 1  | 4.315089119 | 0.0127267  | AGTR1   | ENSG00000144891 |
| 3 | 149927786 | 149928063 | 149927924 | 11 | 13 | 7  | 1.678090213 | 0.11195    | AGTR1   | ENSG00000144891 |
| 3 | 150017589 | 150017782 | 150017684 | 8  | 8  | 3  | 2.157544559 | 0.0836802  | CPB1    | ENSG00000153002 |
| 3 | 150132199 | 150132439 | 150132371 | 8  | 11 | 4  | 2.301380863 | 0.0459276  |         | ENSG00000174995 |
| 3 | 150144047 | 150144330 | 150144188 | 8  | 10 | 9  | 1.054799562 | 0.4492     |         | ENSG00000174995 |
| 3 | 150151413 | 150151699 | 150151556 | 9  | 11 | 2  | 3.835634772 | 0.00800699 |         | ENSG00000174995 |
| 3 | 150156045 | 150156283 | 150156109 | 8  | 11 | 1  | 5.753452158 | 0.00215302 |         | ENSG00000174995 |
| 3 | 150392223 | 150392816 | 150392604 | 60 | 85 | 0  | 82.4661476  | 7.71E-26   | CP      | ENSG00000047457 |
| 3 | 150447610 | 150448198 | 150447884 | 8  | 21 | 13 | 1.506856518 | 0.109266   | CP      | ENSG00000047457 |
| 3 | 150473630 | 150473892 | 150473761 | 11 | 13 | 4  | 2.684944341 | 0.01921    | CP      | ENSG00000047457 |
| 3 | 150477939 | 150478271 | 150478105 | 14 | 19 | 8  | 2.130908207 | 0.0233014  | CP      | ENSG00000047457 |
| 3 | 150500523 | 150500999 | 150500694 | 34 | 45 | 11 | 3.675816657 | 3.45E-06   | TM4SF18 | ENSG00000163762 |
| 3 | 150586930 | 150587472 | 150587281 | 10 | 23 | 12 | 1.770292972 | 0.0429088  | TM4SF1  | ENSG00000169908 |
| 3 | 150602121 | 150602357 | 150602261 | 10 | 10 | 4  | 2.109599125 | 0.0694668  | TM4SF1  | ENSG00000169908 |
| 3 | 150674248 | 150674515 | 150674391 | 13 | 16 | 5  | 2.716907964 | 0.0109645  | TM4SF4  | ENSG00000169903 |
| 3 | 150762183 | 150762362 | 150762270 | 8  | 8  | 4  | 1.726035648 | 0.150596   | TM4SF4  | ENSG00000169903 |
| 3 | 150819412 | 150819595 | 150819465 | 8  | 8  | 7  | 1.07877228  | 0.435076   | WWTR1   | ENSG00000018408 |
| 3 | 150917921 | 150918181 | 150918051 | 10 | 13 | 7  | 1.678090213 | 0.11195    | COMMD2  | ENSG00000114744 |
| 3 | 150952858 | 150953181 | 150953037 | 12 | 16 | 5  | 2.716907964 | 0.0109645  | COMMD2  | ENSG00000114744 |
| 3 | 150984175 | 150984889 | 150984418 | 35 | 58 | 2  | 18.85853763 | 2.68E-15   | C3orf16 | ENSG00000206199 |
| 3 | 151013607 | 151014242 | 151014003 | 11 | 24 | 7  | 2.996589666 | 0.00154378 | RNF13   | ENSG00000082996 |
| 3 | 151026025 | 151026216 | 151026091 | 10 | 10 | 1  | 5.273997812 | 0.00391723 | RNF13   | ENSG00000082996 |
| 3 | 151137378 | 151137737 | 151137557 | 8  | 15 | 4  | 3.068507818 | 0.0076507  |         | ENSG00000208760 |
| 3 | 151169245 | 151169459 | 151169352 | 8  | 9  | 3  | 2.397271733 | 0.0539397  | PFN2    | ENSG00000070087 |
| 3 | 151169527 | 151169890 | 151169719 | 10 | 16 | 4  | 3.260289556 | 0.00475414 | PFN2    | ENSG00000070087 |
| 3 | 151171997 | 151172181 | 151172159 | 8  | 10 | 3  | 2.636998906 | 0.034203   | PFN2    | ENSG00000070087 |
| 3 | 151295088 | 151295374 | 151295240 | 9  | 12 | 5  | 2.077635502 | 0.0577144  |         | ENSG00000208756 |
| 3 | 151364194 | 151364398 | 151364294 | 10 | 11 | 4  | 2.301380863 | 0.0459276  |         | ENSG00000222269 |
| 3 | 151364474 | 151364664 | 151364553 | 8  | 8  | 5  | 1.43836304  | 0.235762   |         | ENSG00000222269 |
| 3 | 151378986 | 151379165 | 151379055 | 8  | 8  | 2  | 2.876726079 | 0.0381137  |         | ENSG00000222269 |
| 3 | 151384768 | 151385035 | 151384881 | 8  | 11 | 4  | 2.301380863 | 0.0459276  |         | ENSG00000222269 |
| 3 | 151421828 | 151422017 | 151421922 | 8  | 8  | 4  | 1.726035648 | 0.150596   |         | ENSG00000222269 |

|   |           |           |           |    |     |    |             |             |                         |
|---|-----------|-----------|-----------|----|-----|----|-------------|-------------|-------------------------|
| 3 | 151438942 | 151439258 | 151439100 | 10 | 14  | 18 | 0.757033179 | 0.792932    | ENSG00000222269         |
| 3 | 151469298 | 151469562 | 151469430 | 9  | 12  | 4  | 2.493162602 | 0.0299057   | ENSG00000222269         |
| 3 | 151473962 | 151474223 | 151474081 | 10 | 10  | 6  | 1.506856518 | 0.188853    | ENSG00000222269         |
| 3 | 151514995 | 151515386 | 151515207 | 12 | 20  | 4  | 4.027416511 | 0.000652226 | ENSG00000222269         |
| 3 | 151517928 | 151518291 | 151518097 | 10 | 15  | 8  | 1.704726565 | 0.0916153   | ENSG00000222269         |
| 3 | 151520406 | 151520726 | 151520551 | 12 | 17  | 1  | 8.630178238 | 5.44E-05    | ENSG00000222269         |
| 3 | 151545577 | 151545950 | 151545771 | 18 | 26  | 6  | 3.698647816 | 0.00025253  | TSC22D2 ENSG00000196428 |
| 3 | 151551087 | 151551336 | 151551202 | 8  | 8   | 10 | 0.784561658 | 0.708731    | TSC22D2 ENSG00000196428 |
| 3 | 151572369 | 151572694 | 151572531 | 8  | 14  | 2  | 4.794543465 | 0.00154571  | TSC22D2 ENSG00000196428 |
| 3 | 151594329 | 151594536 | 151594432 | 10 | 12  | 1  | 6.232906505 | 0.00117736  | TSC22D2 ENSG00000196428 |
| 3 | 151607660 | 151607921 | 151607790 | 8  | 12  | 5  | 2.077635502 | 0.0577144   | TSC22D2 ENSG00000196428 |
| 3 | 151643138 | 151643328 | 151643271 | 8  | 10  | 4  | 2.109599125 | 0.0694668   | TSC22D2 ENSG00000196428 |
| 3 | 151649679 | 151649969 | 151649824 | 10 | 13  | 3  | 3.356180426 | 0.00805599  | TSC22D2 ENSG00000196428 |
| 3 | 151670191 | 151670392 | 151670291 | 8  | 9   | 5  | 1.598181155 | 0.170911    | TSC22D2 ENSG00000196428 |
| 3 | 151698563 | 151698772 | 151698693 | 9  | 9   | 5  | 1.598181155 | 0.170911    | SERP1 ENSG00000120742   |
| 3 | 151746874 | 151747553 | 151747183 | 9  | 27  | 5  | 4.474907234 | 5.37E-05    | EIF2A ENSG00000144895   |
| 3 | 151766429 | 151766713 | 151766571 | 9  | 10  | 0  | 10.54799562 | 0.000613541 | EIF2A ENSG00000144895   |
| 3 | 151800325 | 151800539 | 151800432 | 8  | 8   | 0  | 8.630178238 | 0.00235436  | ENSG00000198843         |
| 3 | 151868683 | 151868928 | 151868792 | 8  | 11  | 3  | 2.876726079 | 0.0213797   | C3orf44 ENSG00000163645 |
| 3 | 151923332 | 151923651 | 151923509 | 13 | 17  | 4  | 3.452071295 | 0.00292757  | C3orf44 ENSG00000163645 |
| 3 | 151936787 | 151937012 | 151936929 | 9  | 11  | 10 | 1.046082211 | 0.455063    | SIAH2 ENSG00000181788   |
| 3 | 151956859 | 151957101 | 151956998 | 9  | 10  | 6  | 1.506856518 | 0.188853    | SIAH2 ENSG00000181788   |
| 3 | 151988372 | 151988657 | 151988499 | 10 | 12  | 2  | 4.155271003 | 0.0046638   | SIAH2 ENSG00000181788   |
| 3 | 151991133 | 151991388 | 151991247 | 8  | 8   | 1  | 4.315089119 | 0.0127267   | SIAH2 ENSG00000181788   |
| 3 | 152285118 | 152285321 | 152285201 | 8  | 9   | 4  | 1.917817386 | 0.103282    | MED12L ENSG00000144893  |
| 3 | 152346479 | 152346743 | 152346611 | 9  | 12  | 4  | 2.493162602 | 0.0299057   | ENSG00000199994         |
| 3 | 152427891 | 152428118 | 152427950 | 8  | 10  | 5  | 1.757999271 | 0.121253    | GPR171 ENSG00000174946  |
| 3 | 152428274 | 152428520 | 152428380 | 8  | 12  | 3  | 3.116453252 | 0.0131971   | GPR171 ENSG00000174946  |
| 3 | 152505650 | 152505980 | 152505815 | 12 | 17  | 1  | 8.630178238 | 5.44E-05    | GPR87 ENSG00000138271   |
| 3 | 152516267 | 152517530 | 152516550 | 81 | 143 | 8  | 15.34253909 | 1.83E-32    | GPR87 ENSG00000138271   |
| 3 | 152528967 | 152529281 | 152529124 | 8  | 10  | 5  | 1.757999271 | 0.121253    | P2RY13 ENSG00000181631  |
| 3 | 153037544 | 153038004 | 153037723 | 17 | 30  | 9  | 2.972616948 | 0.000542331 | AADAC ENSG00000114771   |
| 3 | 153039501 | 153039753 | 153039627 | 8  | 9   | 9  | 0.958908693 | 0.536911    | AADAC ENSG00000114771   |
| 3 | 153056663 | 153056996 | 153056829 | 10 | 14  | 6  | 2.054804342 | 0.0480281   | SUCNR1 ENSG00000198829  |



|   |           |           |           |     |     |    |             |             |         |                 |
|---|-----------|-----------|-----------|-----|-----|----|-------------|-------------|---------|-----------------|
| 3 | 153272575 | 153272828 | 153272681 | 11  | 11  | 5  | 1.917817386 | 0.0843804   | SUCNR1  | ENSG00000198829 |
| 3 | 153350403 | 153350663 | 153350532 | 15  | 16  | 1  | 8.150723891 | 0.000101217 | MBNL1   | ENSG00000152601 |
| 3 | 153468678 | 153468887 | 153468788 | 9   | 10  | 1  | 5.273997812 | 0.00391723  | MBNL1   | ENSG00000152601 |
| 3 | 153469374 | 153469598 | 153469520 | 12  | 12  | 2  | 4.155271003 | 0.0046638   | MBNL1   | ENSG00000152601 |
| 3 | 153499783 | 153500004 | 153499893 | 9   | 9   | 3  | 2.397271733 | 0.0539397   | MBNL1   | ENSG00000152601 |
| 3 | 153672535 | 153672718 | 153672594 | 8   | 8   | 3  | 2.157544559 | 0.0836802   |         | ENSG00000201217 |
| 3 | 153709633 | 153709844 | 153709697 | 8   | 10  | 0  | 10.54799562 | 0.000613541 |         | ENSG00000201217 |
| 3 | 154243542 | 154243845 | 154243693 | 11  | 14  | 2  | 4.794543465 | 0.00154571  |         | ENSG00000208713 |
| 3 | 154339090 | 154339479 | 154339269 | 14  | 22  | 4  | 4.410979988 | 0.000231863 |         | ENSG00000208713 |
| 3 | 154360393 | 154362199 | 154361298 | 202 | 399 | 15 | 23.97271733 | 3.99E-95    | RAP2B   | ENSG00000181467 |
| 3 | 154362426 | 154362646 | 154362536 | 8   | 9   | 3  | 2.397271733 | 0.0539397   | RAP2B   | ENSG00000181467 |
| 3 | 154514022 | 154514872 | 154514402 | 55  | 102 | 4  | 19.75351908 | 2.58E-25    |         | ENSG00000222228 |
| 3 | 154814821 | 154815634 | 154815282 | 184 | 263 | 5  | 42.19198249 | 2.62E-69    |         | ENSG00000200162 |
| 3 | 155260297 | 155260632 | 155260464 | 11  | 15  | 4  | 3.068507818 | 0.0076507   |         | ENSG00000201398 |
| 3 | 155277600 | 155277819 | 155277771 | 8   | 9   | 7  | 1.198635866 | 0.346278    |         | ENSG00000114790 |
| 3 | 155289997 | 155290230 | 155290118 | 13  | 14  | 6  | 2.054804342 | 0.0480281   |         | ENSG00000114790 |
| 3 | 155333498 | 155333863 | 155333706 | 19  | 25  | 4  | 4.986325204 | 4.72E-05    |         | ENSG00000114790 |
| 3 | 155362263 | 155362531 | 155362376 | 11  | 14  | 4  | 2.876726079 | 0.01219     |         | ENSG00000114790 |
| 3 | 155381965 | 155382253 | 155382115 | 11  | 13  | 1  | 6.712360851 | 0.000640982 |         | ENSG00000114790 |
| 3 | 155621620 | 155621879 | 155621732 | 8   | 9   | 4  | 1.917817386 | 0.103282    | GPR149  | ENSG00000174948 |
| 3 | 156104891 | 156105227 | 156105059 | 10  | 13  | 2  | 4.474907234 | 0.00269459  | MME     | ENSG00000196549 |
| 3 | 156223450 | 156223632 | 156223580 | 8   | 9   | 3  | 2.397271733 | 0.0539397   | MME     | ENSG00000196549 |
| 3 | 156514443 | 156514643 | 156514605 | 8   | 8   | 0  | 8.630178238 | 0.00235436  |         | ENSG00000208662 |
| 3 | 156523548 | 156523787 | 156523669 | 9   | 10  | 2  | 3.515998541 | 0.0136204   |         | ENSG00000208662 |
| 3 | 156543304 | 156543544 | 156543443 | 8   | 11  | 0  | 11.50690432 | 0.000313206 |         | ENSG00000208662 |
| 3 | 156627303 | 156627643 | 156627472 | 32  | 33  | 0  | 32.60289556 | 1.18E-10    |         | ENSG00000208662 |
| 3 | 156844141 | 156844359 | 156844250 | 9   | 11  | 3  | 2.876726079 | 0.0213797   | PLCH1   | ENSG00000114805 |
| 3 | 156928390 | 156928683 | 156928532 | 12  | 16  | 5  | 2.716907964 | 0.0109645   | PLCH1   | ENSG00000114805 |
| 3 | 156931397 | 156931630 | 156931543 | 10  | 12  | 14 | 0.831054201 | 0.689281    | PLCH1   | ENSG00000114805 |
| 3 | 156945460 | 156945747 | 156945603 | 8   | 11  | 3  | 2.876726079 | 0.0213797   | C3orf33 | ENSG00000174928 |
| 3 | 156983161 | 156983365 | 156983263 | 9   | 9   | 9  | 0.958908693 | 0.536911    | C3orf33 | ENSG00000174928 |
| 3 | 157006909 | 157007149 | 157007030 | 9   | 11  | 5  | 1.917817386 | 0.0843804   | C3orf33 | ENSG00000174928 |
| 3 | 157054686 | 157055242 | 157054979 | 20  | 35  | 11 | 2.876726079 | 0.000294022 | SLC33A1 | ENSG00000169359 |
| 3 | 157196147 | 157196433 | 157196290 | 8   | 12  | 11 | 1.038817751 | 0.460341    |         | ENSG00000208661 |

|   |           |           |           |     |     |    |             |             |          |                 |
|---|-----------|-----------|-----------|-----|-----|----|-------------|-------------|----------|-----------------|
| 3 | 157225557 | 157225763 | 157225660 | 9   | 10  | 1  | 5.273997812 | 0.00391723  | CASRL1   | ENSG00000174930 |
| 3 | 157352346 | 157352558 | 157352440 | 8   | 9   | 6  | 1.369869562 | 0.253675    | KCNAB1   | ENSG00000169282 |
| 3 | 157583006 | 157583202 | 157583111 | 8   | 10  | 1  | 5.273997812 | 0.00391723  | KCNAB1   | ENSG00000169282 |
| 3 | 157600728 | 157600922 | 157600825 | 9   | 10  | 1  | 5.273997812 | 0.00391723  | KCNAB1   | ENSG00000169282 |
| 3 | 157741602 | 157741817 | 157741712 | 9   | 11  | 3  | 2.876726079 | 0.0213797   | SSR3     | ENSG00000114850 |
| 3 | 157774208 | 157774393 | 157774300 | 8   | 8   | 2  | 2.876726079 | 0.0381137   | SSR3     | ENSG00000114850 |
| 3 | 157876346 | 157876738 | 157876581 | 11  | 19  | 4  | 3.835634772 | 0.00108365  | TIPARP   | ENSG00000163659 |
| 3 | 158013103 | 158013358 | 158013232 | 14  | 14  | 10 | 1.307602763 | 0.244096    |          | ENSG00000213198 |
| 3 | 158017772 | 158018305 | 158018146 | 16  | 26  | 17 | 1.43836304  | 0.111326    |          | ENSG00000213198 |
| 3 | 158026345 | 158026637 | 158026496 | 8   | 10  | 7  | 1.318499453 | 0.269217    | LEKR1    | ENSG00000197980 |
| 3 | 158289303 | 158289673 | 158289482 | 9   | 16  | 3  | 4.075361945 | 0.00173346  |          | ENSG00000201778 |
| 3 | 158338017 | 158338231 | 158338079 | 8   | 10  | 3  | 2.636998906 | 0.034203    |          | ENSG00000201778 |
| 3 | 158375270 | 158376040 | 158375565 | 21  | 47  | 11 | 3.835634772 | 1.35E-06    |          | ENSG00000208656 |
| 3 | 158404918 | 158405102 | 158405010 | 10  | 10  | 1  | 5.273997812 | 0.00391723  |          | ENSG00000208656 |
| 3 | 158699865 | 158700206 | 158700041 | 8   | 13  | 7  | 1.678090213 | 0.11195     | VEPH1    | ENSG00000197415 |
| 3 | 158827387 | 158827770 | 158827562 | 12  | 18  | 6  | 2.602752167 | 0.00970422  | C3orf55  | ENSG00000174899 |
| 3 | 159065878 | 159066144 | 159066057 | 9   | 12  | 8  | 1.385090334 | 0.219216    |          | ENSG00000208653 |
| 3 | 159288540 | 159288764 | 159288604 | 8   | 10  | 0  | 10.54799562 | 0.000613541 | SHOX2    | ENSG00000168779 |
| 3 | 159310490 | 159310835 | 159310660 | 10  | 15  | 5  | 2.557089848 | 0.0169197   | RSRC1    | ENSG00000174891 |
| 3 | 159310896 | 159311203 | 159311034 | 8   | 12  | 3  | 3.116453252 | 0.0131971   | RSRC1    | ENSG00000174891 |
| 3 | 159434548 | 159434732 | 159434643 | 8   | 8   | 4  | 1.726035648 | 0.150596    | RSRC1    | ENSG00000174891 |
| 3 | 160574569 | 160574817 | 160574693 | 9   | 9   | 1  | 4.794543465 | 0.00708517  | SCHIP1   | ENSG00000151967 |
| 3 | 161021612 | 161022044 | 161021781 | 11  | 21  | 0  | 21.09599125 | 3.76E-07    |          | ENSG00000208651 |
| 3 | 161029053 | 161029306 | 161029192 | 17  | 17  | 3  | 4.315089119 | 0.00102271  |          | ENSG00000208651 |
| 3 | 161029924 | 161030599 | 161030214 | 265 | 335 | 7  | 40.27416511 | 5.48E-87    |          | ENSG00000208651 |
| 3 | 161082275 | 161082637 | 161082452 | 33  | 39  | 3  | 9.589086931 | 3.26E-09    |          | ENSG00000208651 |
| 3 | 161220439 | 161220766 | 161220602 | 8   | 9   | 1  | 4.794543465 | 0.00708517  | IL12A    | ENSG00000168811 |
| 3 | 161232802 | 161233033 | 161232926 | 8   | 10  | 2  | 3.515998541 | 0.0136204   | IL12A    | ENSG00000168811 |
| 3 | 161600097 | 161600493 | 161600225 | 12  | 19  | 1  | 9.589086931 | 1.56E-05    | SMC4     | ENSG00000113810 |
| 3 | 161766134 | 161766326 | 161766236 | 8   | 8   | 3  | 2.157544559 | 0.0836802   | KPNA4    | ENSG00000186432 |
| 3 | 161867993 | 161868186 | 161868089 | 9   | 10  | 0  | 10.54799562 | 0.000613541 | ARL14    | ENSG00000179674 |
| 3 | 161958274 | 161958488 | 161958381 | 8   | 8   | 2  | 2.876726079 | 0.0381137   | PPM1L    | ENSG00000163590 |
| 3 | 162302454 | 162302634 | 162302542 | 8   | 8   | 1  | 4.315089119 | 0.0127267   | B3GALNT1 | ENSG00000169255 |
| 3 | 162420862 | 162421101 | 162420981 | 8   | 9   | 2  | 3.19636231  | 0.0229249   | NMD3     | ENSG00000169251 |

|   |           |           |           |    |    |    |             |            |         |                 |
|---|-----------|-----------|-----------|----|----|----|-------------|------------|---------|-----------------|
| 3 | 162430772 | 162431087 | 162430929 | 9  | 11 | 2  | 3.835634772 | 0.00800699 | NMD3    | ENSG00000169251 |
| 3 | 162501599 | 162501844 | 162501721 | 9  | 9  | 2  | 3.19636231  | 0.0229249  | C3orf57 | ENSG00000196542 |
| 3 | 162540122 | 162540315 | 162540218 | 8  | 8  | 11 | 0.71918152  | 0.777546   | C3orf57 | ENSG00000196542 |
| 3 | 162571900 | 162572448 | 162572079 | 10 | 23 | 10 | 2.092164421 | 0.0165595  | C3orf57 | ENSG00000196542 |
| 3 | 162572515 | 162572862 | 162572692 | 10 | 14 | 7  | 1.797953799 | 0.0806593  | C3orf57 | ENSG00000196542 |
| 3 | 162572901 | 162573084 | 162572983 | 8  | 9  | 2  | 3.19636231  | 0.0229249  |         | ENSG00000179522 |
| 3 | 162573124 | 162573309 | 162573242 | 8  | 8  | 4  | 1.726035648 | 0.150596   |         | ENSG00000179522 |
| 3 | 162612551 | 162612909 | 162612730 | 14 | 20 | 9  | 2.013708255 | 0.0279742  |         | ENSG00000129973 |
| 3 | 162616378 | 162616703 | 162616540 | 18 | 21 | 11 | 1.757999271 | 0.0516118  |         | ENSG00000129973 |
| 3 | 162621268 | 162621564 | 162621433 | 23 | 26 | 10 | 2.353684974 | 0.00551687 |         | ENSG00000129973 |
| 3 | 162623692 | 162623930 | 162623770 | 9  | 11 | 4  | 2.301380863 | 0.0459276  |         | ENSG00000129973 |
| 3 | 162709392 | 162709618 | 162709505 | 8  | 9  | 3  | 2.397271733 | 0.0539397  |         | ENSG00000182447 |
| 3 | 162752139 | 162752403 | 162752266 | 11 | 12 | 2  | 4.155271003 | 0.0046638  |         | ENSG00000182447 |
| 3 | 162759937 | 162760208 | 162760047 | 15 | 17 | 13 | 1.232882605 | 0.274309   |         | ENSG00000182447 |
| 3 | 162761556 | 162761842 | 162761695 | 8  | 10 | 4  | 2.109599125 | 0.0694668  |         | ENSG00000182447 |
| 3 | 162801156 | 162801388 | 162801272 | 9  | 10 | 6  | 1.506856518 | 0.188853   |         | ENSG00000182447 |
| 3 | 162831320 | 162831538 | 162831409 | 9  | 9  | 2  | 3.19636231  | 0.0229249  |         | ENSG00000182447 |
| 3 | 163221794 | 163221973 | 163221883 | 8  | 8  | 3  | 2.157544559 | 0.0836802  |         |                 |
| 3 | 163320031 | 163320324 | 163320179 | 10 | 12 | 5  | 2.077635502 | 0.0577144  |         |                 |
| 3 | 163622319 | 163622788 | 163622652 | 19 | 29 | 2  | 9.589086931 | 2.21E-07   |         |                 |
| 3 | 163661721 | 163661989 | 163661855 | 8  | 8  | 2  | 2.876726079 | 0.0381137  |         |                 |
| 3 | 164165740 | 164165948 | 164165844 | 8  | 8  | 3  | 2.157544559 | 0.0836802  |         |                 |
| 3 | 164272271 | 164272480 | 164272375 | 13 | 13 | 9  | 1.34247217  | 0.232231   |         | ENSG00000221205 |
| 3 | 164340652 | 164340875 | 164340749 | 9  | 9  | 0  | 9.589086931 | 0.00120187 |         | ENSG00000221205 |
| 3 | 164674607 | 164674798 | 164674717 | 8  | 8  | 2  | 2.876726079 | 0.0381137  |         | ENSG00000221205 |
| 3 | 164780884 | 164781195 | 164781033 | 8  | 9  | 4  | 1.917817386 | 0.103282   |         | ENSG00000221205 |
| 3 | 164871788 | 164871983 | 164871942 | 8  | 9  | 1  | 4.794543465 | 0.00708517 |         | ENSG00000221205 |
| 3 | 164898820 | 164899036 | 164898928 | 13 | 13 | 4  | 2.684944341 | 0.01921    |         | ENSG00000221205 |
| 3 | 164905758 | 164905948 | 164905853 | 8  | 8  | 1  | 4.315089119 | 0.0127267  |         | ENSG00000221205 |
| 3 | 165228927 | 165229175 | 165228974 | 8  | 12 | 2  | 4.155271003 | 0.0046638  |         | ENSG00000214210 |
| 3 | 165400588 | 165400775 | 165400723 | 8  | 8  | 2  | 2.876726079 | 0.0381137  |         | ENSG00000221251 |
| 3 | 165609637 | 165609879 | 165609753 | 9  | 11 | 1  | 5.753452158 | 0.00215302 |         | ENSG00000221755 |
| 3 | 166090846 | 166091072 | 166090974 | 8  | 8  | 1  | 4.315089119 | 0.0127267  | SI      | ENSG00000090402 |
| 3 | 166407303 | 166407535 | 166407442 | 10 | 11 | 11 | 0.958908693 | 0.540507   | SLITRK3 | ENSG00000121871 |

|   |           |           |           |    |    |    |             |             |          |                 |
|---|-----------|-----------|-----------|----|----|----|-------------|-------------|----------|-----------------|
| 3 | 166410632 | 166410811 | 166410696 | 8  | 8  | 2  | 2.876726079 | 0.0381137   | SLITRK3  | ENSG00000121871 |
| 3 | 166419468 | 166419665 | 166419547 | 8  | 8  | 3  | 2.157544559 | 0.0836802   | SLITRK3  | ENSG00000121871 |
| 3 | 166582800 | 166582996 | 166582875 | 9  | 9  | 1  | 4.794543465 | 0.00708517  | SLITRK3  | ENSG00000121871 |
| 3 | 166944957 | 166945280 | 166945118 | 9  | 10 | 5  | 1.757999271 | 0.121253    | BCHE     | ENSG00000114200 |
| 3 | 167367369 | 167367585 | 167367477 | 9  | 9  | 0  | 9.589086931 | 0.00120187  |          | ENSG00000208609 |
| 3 | 167382872 | 167383051 | 167382961 | 8  | 8  | 0  | 8.630178238 | 0.00235436  |          | ENSG00000208609 |
| 3 | 167486586 | 167486766 | 167486657 | 8  | 8  | 1  | 4.315089119 | 0.0127267   |          | ENSG00000208601 |
| 3 | 167627207 | 167627393 | 167627300 | 9  | 9  | 0  | 9.589086931 | 0.00120187  |          | ENSG00000208601 |
| 3 | 167647166 | 167647411 | 167647288 | 8  | 8  | 1  | 4.315089119 | 0.0127267   |          | ENSG00000208601 |
| 3 | 167935173 | 167935515 | 167935372 | 12 | 16 | 3  | 4.075361945 | 0.00173346  |          | ENSG00000208599 |
| 3 | 168008651 | 168008855 | 168008753 | 8  | 10 | 1  | 5.273997812 | 0.00391723  |          | ENSG00000185790 |
| 3 | 168030357 | 168030662 | 168030509 | 16 | 17 | 3  | 4.315089119 | 0.00102271  |          | ENSG00000185790 |
| 3 | 168038170 | 168038408 | 168038292 | 9  | 9  | 1  | 4.794543465 | 0.00708517  |          | ENSG00000185790 |
| 3 | 168580499 | 168581070 | 168580678 | 21 | 37 | 11 | 3.036544195 | 0.00012563  | ZBBX     | ENSG00000169064 |
| 3 | 168607346 | 168607651 | 168607491 | 13 | 16 | 4  | 3.260289556 | 0.00475414  | ZBBX     | ENSG00000169064 |
| 3 | 168934611 | 168934900 | 168934755 | 9  | 12 | 3  | 3.116453252 | 0.0131971   | PDCD10   | ENSG00000114209 |
| 3 | 168935378 | 168935789 | 168935554 | 10 | 16 | 8  | 1.811271976 | 0.0663685   | PDCD10   | ENSG00000114209 |
| 3 | 168936018 | 168936306 | 168936162 | 8  | 13 | 8  | 1.491635745 | 0.166708    | SERPINI1 | ENSG00000163536 |
| 3 | 168950236 | 168950434 | 168950335 | 8  | 8  | 1  | 4.315089119 | 0.0127267   | SERPINI1 | ENSG00000163536 |
| 3 | 169128548 | 169128881 | 169128714 | 11 | 16 | 2  | 5.433815927 | 0.000499302 | GOLIM4   | ENSG00000173905 |
| 3 | 169140752 | 169141020 | 169140886 | 11 | 14 | 3  | 3.595907599 | 0.00486913  | GOLIM4   | ENSG00000173905 |
| 3 | 169178782 | 169179014 | 169178914 | 12 | 13 | 6  | 1.917817386 | 0.0693353   | GOLIM4   | ENSG00000173905 |
| 3 | 169296006 | 169296231 | 169296171 | 8  | 9  | 2  | 3.19636231  | 0.0229249   | GOLIM4   | ENSG00000173905 |
| 3 | 169296445 | 169297150 | 169296721 | 21 | 44 | 5  | 7.191815198 | 4.84E-09    | GOLIM4   | ENSG00000173905 |
| 3 | 169411887 | 169412165 | 169412030 | 10 | 11 | 5  | 1.917817386 | 0.0843804   | GOLIM4   | ENSG00000173905 |
| 3 | 169431755 | 169431980 | 169431822 | 9  | 12 | 3  | 3.116453252 | 0.0131971   | GOLIM4   | ENSG00000173905 |
| 3 | 169871627 | 169871919 | 169871802 | 8  | 11 | 4  | 2.301380863 | 0.0459276   |          | ENSG00000207717 |
| 3 | 170071353 | 170071562 | 170071465 | 10 | 12 | 5  | 2.077635502 | 0.0577144   | C3orf50  | ENSG00000206120 |
| 3 | 170078380 | 170078695 | 170078537 | 20 | 23 | 8  | 2.557089848 | 0.00494559  | C3orf50  | ENSG00000206120 |
| 3 | 170286357 | 170286664 | 170286510 | 18 | 20 | 3  | 5.034270639 | 0.000202317 | EVI1     | ENSG00000085276 |
| 3 | 170349874 | 170350190 | 170350045 | 16 | 19 | 3  | 4.794543465 | 0.000349205 | EVI1     | ENSG00000085276 |
| 3 | 170355820 | 170356008 | 170355922 | 8  | 8  | 2  | 2.876726079 | 0.0381137   | EVI1     | ENSG00000085276 |
| 3 | 170373097 | 170373353 | 170373225 | 11 | 13 | 3  | 3.356180426 | 0.00805599  | EVI1     | ENSG00000085276 |
| 3 | 170373693 | 170374037 | 170373865 | 14 | 19 | 6  | 2.739739123 | 0.00632909  | EVI1     | ENSG00000085276 |

|   |           |           |           |    |    |    |             |             |         |                 |
|---|-----------|-----------|-----------|----|----|----|-------------|-------------|---------|-----------------|
| 3 | 170425641 | 170426096 | 170425814 | 29 | 38 | 3  | 9.349359757 | 5.96E-09    | EVI1    | ENSG00000085276 |
| 3 | 170445202 | 170445470 | 170445336 | 8  | 8  | 1  | 4.315089119 | 0.0127267   | EVI1    | ENSG00000085276 |
| 3 | 170590794 | 170591034 | 170590914 | 10 | 13 | 2  | 4.474907234 | 0.00269459  | MDS1    | ENSG00000206115 |
| 3 | 170817914 | 170818233 | 170818081 | 11 | 12 | 1  | 6.232906505 | 0.00117736  |         | ENSG00000184531 |
| 3 | 170857892 | 170858243 | 170858067 | 11 | 15 | 9  | 1.534253909 | 0.136498    |         | ENSG00000184531 |
| 3 | 170892877 | 170893077 | 170892955 | 8  | 9  | 1  | 4.794543465 | 0.00708517  |         | ENSG00000184531 |
| 3 | 170963577 | 170963761 | 170963657 | 9  | 9  | 2  | 3.19636231  | 0.0229249   |         | ENSG00000200182 |
| 3 | 170972051 | 170972362 | 170972188 | 9  | 13 | 5  | 2.237453617 | 0.038866    | MYNN    | ENSG00000085274 |
| 3 | 170972405 | 170972615 | 170972510 | 8  | 11 | 13 | 0.821921737 | 0.693119    | MYNN    | ENSG00000085274 |
| 3 | 170972934 | 170973470 | 170973127 | 8  | 19 | 9  | 1.917817386 | 0.0394029   | MYNN    | ENSG00000085274 |
| 3 | 170973995 | 170974240 | 170974117 | 8  | 11 | 6  | 1.643843474 | 0.137712    | MYNN    | ENSG00000085274 |
| 3 | 170974595 | 170974782 | 170974609 | 8  | 9  | 5  | 1.598181155 | 0.170911    | MYNN    | ENSG00000085274 |
| 3 | 171107988 | 171108209 | 171108098 | 9  | 10 | 2  | 3.515998541 | 0.0136204   | SAMD7   | ENSG00000187033 |
| 3 | 171166782 | 171167420 | 171167211 | 11 | 29 | 11 | 2.397271733 | 0.00325702  | SEC62   | ENSG00000008952 |
| 3 | 171246990 | 171247400 | 171247280 | 9  | 17 | 6  | 2.465765211 | 0.014729    | GPR160  | ENSG00000173890 |
| 3 | 171360566 | 171360778 | 171360672 | 8  | 8  | 4  | 1.726035648 | 0.150596    |         | ENSG00000199536 |
| 3 | 171381099 | 171381390 | 171381244 | 8  | 12 | 5  | 2.077635502 | 0.0577144   | PHC3    | ENSG00000173889 |
| 3 | 171422630 | 171422930 | 171422794 | 10 | 14 | 8  | 1.598181155 | 0.124586    | PRKCI   | ENSG00000163558 |
| 3 | 171508380 | 171508570 | 171508425 | 9  | 9  | 3  | 2.397271733 | 0.0539397   | SKIL    | ENSG00000136603 |
| 3 | 171510698 | 171510917 | 171510807 | 8  | 10 | 7  | 1.318499453 | 0.269217    | SKIL    | ENSG00000136603 |
| 3 | 171558967 | 171559222 | 171559098 | 8  | 10 | 3  | 2.636998906 | 0.034203    | SKIL    | ENSG00000136603 |
| 3 | 171620846 | 171621025 | 171620915 | 8  | 8  | 1  | 4.315089119 | 0.0127267   | CLDN11  | ENSG00000013297 |
| 3 | 171652367 | 171652563 | 171652492 | 8  | 8  | 4  | 1.726035648 | 0.150596    | CLDN11  | ENSG00000013297 |
| 3 | 171687598 | 171687781 | 171687713 | 8  | 8  | 6  | 1.232882605 | 0.333038    | CLDN11  | ENSG00000013297 |
| 3 | 171689341 | 171689601 | 171689499 | 9  | 11 | 0  | 11.50690432 | 0.000313206 | CLDN11  | ENSG00000013297 |
| 3 | 171693416 | 171693633 | 171693530 | 11 | 11 | 6  | 1.643843474 | 0.137712    | CLDN11  | ENSG00000013297 |
| 3 | 171697888 | 171698126 | 171698007 | 8  | 10 | 3  | 2.636998906 | 0.034203    | CLDN11  | ENSG00000013297 |
| 3 | 171707069 | 171707306 | 171707195 | 9  | 10 | 3  | 2.636998906 | 0.034203    | SLC7A14 | ENSG00000013293 |
| 3 | 171734764 | 171734947 | 171734872 | 8  | 8  | 1  | 4.315089119 | 0.0127267   | SLC7A14 | ENSG00000013293 |
| 3 | 171839073 | 171839299 | 171839219 | 9  | 10 | 5  | 1.757999271 | 0.121253    |         | ENSG00000213174 |
| 3 | 171889785 | 171890323 | 171890069 | 23 | 41 | 4  | 8.054833022 | 5.63E-09    |         | ENSG00000213174 |
| 3 | 171952090 | 171952541 | 171952291 | 13 | 23 | 9  | 2.301380863 | 0.00938618  |         | ENSG00000208537 |
| 3 | 172010039 | 172010374 | 172010236 | 10 | 14 | 7  | 1.797953799 | 0.0806593   |         | ENSG00000208537 |
| 3 | 172012657 | 172012950 | 172012833 | 10 | 13 | 2  | 4.474907234 | 0.00269459  |         | ENSG00000208537 |

|   |           |           |           |    |    |    |             |             |         |                 |
|---|-----------|-----------|-----------|----|----|----|-------------|-------------|---------|-----------------|
| 3 | 172070168 | 172070523 | 172070345 | 12 | 17 | 15 | 1.07877228  | 0.410615    | RPL22L1 | ENSG00000163584 |
| 3 | 172070560 | 172070915 | 172070737 | 11 | 17 | 15 | 1.07877228  | 0.410615    | RPL22L1 | ENSG00000163584 |
| 3 | 172178602 | 172179015 | 172178906 | 10 | 16 | 4  | 3.260289556 | 0.00475414  |         | ENSG00000199488 |
| 3 | 172193325 | 172193665 | 172193495 | 17 | 22 | 3  | 5.513724985 | 6.69E-05    |         | ENSG00000199488 |
| 3 | 172250259 | 172250444 | 172250351 | 8  | 10 | 6  | 1.506856518 | 0.188853    | SLC2A2  | ENSG00000163581 |
| 3 | 172303233 | 172303424 | 172303313 | 8  | 9  | 3  | 2.397271733 | 0.0539397   |         | ENSG00000207963 |
| 3 | 172388180 | 172388367 | 172388231 | 8  | 9  | 1  | 4.794543465 | 0.00708517  |         | ENSG00000207963 |
| 3 | 172421288 | 172421467 | 172421337 | 8  | 8  | 2  | 2.876726079 | 0.0381137   |         | ENSG00000207963 |
| 3 | 172462100 | 172462356 | 172462228 | 10 | 13 | 3  | 3.356180426 | 0.00805599  |         | ENSG00000207963 |
| 3 | 172490601 | 172490790 | 172490685 | 8  | 10 | 3  | 2.636998906 | 0.034203    |         | ENSG00000222506 |
| 3 | 172510630 | 172510851 | 172510692 | 9  | 11 | 0  | 11.50690432 | 0.000313206 |         | ENSG00000222506 |
| 3 | 172618480 | 172618752 | 172618582 | 9  | 11 | 2  | 3.835634772 | 0.00800699  |         | ENSG00000222506 |
| 3 | 172628126 | 172628325 | 172628225 | 8  | 9  | 2  | 3.19636231  | 0.0229249   |         | ENSG00000222506 |
| 3 | 172660823 | 172661254 | 172661027 | 8  | 18 | 5  | 3.036544195 | 0.0044641   | TNIK    | ENSG00000154310 |
| 3 | 172681500 | 172681719 | 172681625 | 8  | 9  | 1  | 4.794543465 | 0.00708517  | TNIK    | ENSG00000154310 |
| 3 | 172840935 | 172841355 | 172841143 | 35 | 45 | 4  | 8.821959976 | 5.35E-10    |         | ENSG00000208522 |
| 3 | 172953444 | 172953746 | 172953596 | 8  | 12 | 7  | 1.558226626 | 0.152813    |         | ENSG00000183657 |
| 3 | 172973004 | 172973218 | 172973111 | 8  | 11 | 12 | 0.885146486 | 0.620672    |         | ENSG00000183657 |
| 3 | 172990505 | 172990722 | 172990613 | 8  | 9  | 1  | 4.794543465 | 0.00708517  |         | ENSG00000183657 |
| 3 | 172993205 | 172993482 | 172993343 | 8  | 10 | 3  | 2.636998906 | 0.034203    |         | ENSG00000183657 |
| 3 | 173009652 | 173009831 | 173009743 | 9  | 9  | 5  | 1.598181155 | 0.170911    |         | ENSG00000183657 |
| 3 | 173010251 | 173010468 | 173010365 | 8  | 9  | 5  | 1.598181155 | 0.170911    |         | ENSG00000183657 |
| 3 | 173030502 | 173030929 | 173030681 | 11 | 20 | 4  | 4.027416511 | 0.000652226 | TMEM212 | ENSG00000186329 |
| 3 | 173137911 | 173138098 | 173137949 | 8  | 9  | 1  | 4.794543465 | 0.00708517  | TMEM212 | ENSG00000186329 |
| 3 | 173151027 | 173151315 | 173151171 | 10 | 14 | 7  | 1.797953799 | 0.0806593   | FNDC3B  | ENSG00000075420 |
| 3 | 173235570 | 173235854 | 173235700 | 21 | 21 | 6  | 3.013713035 | 0.00261913  | FNDC3B  | ENSG00000075420 |
| 3 | 173239887 | 173240099 | 173239992 | 9  | 11 | 7  | 1.43836304  | 0.204844    | FNDC3B  | ENSG00000075420 |
| 3 | 173304232 | 173304411 | 173304331 | 8  | 8  | 1  | 4.315089119 | 0.0127267   | FNDC3B  | ENSG00000075420 |
| 3 | 173330426 | 173331089 | 173330567 | 21 | 40 | 12 | 3.024250493 | 7.54E-05    | FNDC3B  | ENSG00000075420 |
| 3 | 173339462 | 173339751 | 173339606 | 8  | 12 | 3  | 3.116453252 | 0.0131971   |         | ENSG00000222342 |
| 3 | 173341112 | 173341761 | 173341349 | 13 | 32 | 12 | 2.434152836 | 0.00192998  |         | ENSG00000222342 |
| 3 | 173343039 | 173343259 | 173343187 | 10 | 12 | 5  | 2.077635502 | 0.0577144   |         | ENSG00000222342 |
| 3 | 173356902 | 173357177 | 173357039 | 12 | 15 | 7  | 1.917817386 | 0.0572317   |         | ENSG00000222342 |
| 3 | 173469592 | 173469776 | 173469711 | 8  | 9  | 3  | 2.397271733 | 0.0539397   |         | ENSG00000208521 |

|   |           |           |           |    |    |    |             |             |          |                 |
|---|-----------|-----------|-----------|----|----|----|-------------|-------------|----------|-----------------|
| 3 | 173542072 | 173542267 | 173542137 | 8  | 10 | 2  | 3.515998541 | 0.0136204   |          | ENSG00000208521 |
| 3 | 173588149 | 173588328 | 173588242 | 9  | 9  | 0  | 9.589086931 | 0.00120187  | GHSR     | ENSG00000121853 |
| 3 | 173677671 | 173678141 | 173677850 | 12 | 22 | 4  | 4.410979988 | 0.000231863 | GHSR     | ENSG00000121853 |
| 3 | 173717309 | 173717610 | 173717467 | 10 | 12 | 14 | 0.831054201 | 0.689281    | TNFSF10  | ENSG00000121858 |
| 3 | 173737132 | 173737937 | 173737713 | 23 | 50 | 9  | 4.890434335 | 3.71E-08    | TNFSF10  | ENSG00000121858 |
| 3 | 173824313 | 173824667 | 173824490 | 9  | 14 | 8  | 1.598181155 | 0.124586    |          | ENSG00000208518 |
| 3 | 173840236 | 173840434 | 173840335 | 8  | 10 | 1  | 5.273997812 | 0.00391723  |          | ENSG00000208518 |
| 3 | 173847306 | 173847519 | 173847420 | 8  | 10 | 3  | 2.636998906 | 0.034203    |          | ENSG00000208518 |
| 3 | 173873702 | 173873892 | 173873767 | 10 | 11 | 4  | 2.301380863 | 0.0459276   |          | ENSG00000208518 |
| 3 | 173885814 | 173886418 | 173886071 | 33 | 67 | 6  | 9.315113018 | 3.89E-14    |          | ENSG00000208518 |
| 3 | 173911588 | 173911828 | 173911708 | 9  | 12 | 7  | 1.558226626 | 0.152813    | AADACL1  | ENSG00000144959 |
| 3 | 174199110 | 174199289 | 174199201 | 8  | 8  | 1  | 4.315089119 | 0.0127267   | SPATA16  | ENSG00000144962 |
| 3 | 174421567 | 174421746 | 174421591 | 8  | 8  | 3  | 2.157544559 | 0.0836802   | SPATA16  | ENSG00000144962 |
| 3 | 174562114 | 174562293 | 174562220 | 8  | 8  | 0  | 8.630178238 | 0.00235436  | SPATA16  | ENSG00000144962 |
| 3 | 174595945 | 174596337 | 174596124 | 9  | 16 | 4  | 3.260289556 | 0.00475414  | NLGN1    | ENSG00000169760 |
| 3 | 174612209 | 174612485 | 174612347 | 11 | 12 | 3  | 3.116453252 | 0.0131971   | NLGN1    | ENSG00000169760 |
| 3 | 174943626 | 174943930 | 174943783 | 9  | 13 | 3  | 3.356180426 | 0.00805599  | NLGN1    | ENSG00000169760 |
| 3 | 175057630 | 175057837 | 175057761 | 8  | 9  | 2  | 3.19636231  | 0.0229249   | NLGN1    | ENSG00000169760 |
| 3 | 175138677 | 175138945 | 175138830 | 8  | 11 | 2  | 3.835634772 | 0.00800699  | NLGN1    | ENSG00000169760 |
| 3 | 175325802 | 175326100 | 175325951 | 10 | 12 | 6  | 1.78083043  | 0.0985525   | NLGN1    | ENSG00000169760 |
| 3 | 175329320 | 175329720 | 175329477 | 25 | 32 | 0  | 31.64398687 | 2.31E-10    | NLGN1    | ENSG00000169760 |
| 3 | 176059650 | 176059833 | 176059715 | 8  | 9  | 1  | 4.794543465 | 0.00708517  | NAALADL2 | ENSG00000177694 |
| 3 | 176062649 | 176062937 | 176062793 | 15 | 19 | 4  | 3.835634772 | 0.00108365  | NAALADL2 | ENSG00000177694 |
| 3 | 176064034 | 176064342 | 176064188 | 13 | 17 | 6  | 2.465765211 | 0.014729    | NAALADL2 | ENSG00000177694 |
| 3 | 176156063 | 176156315 | 176156189 | 10 | 13 | 5  | 2.237453617 | 0.038866    | NAALADL2 | ENSG00000177694 |
| 3 | 176174045 | 176174309 | 176174196 | 10 | 10 | 2  | 3.515998541 | 0.0136204   | NAALADL2 | ENSG00000177694 |
| 3 | 176226518 | 176226755 | 176226663 | 8  | 10 | 0  | 10.54799562 | 0.000613541 | NAALADL2 | ENSG00000177694 |
| 3 | 176350353 | 176350565 | 176350428 | 8  | 8  | 4  | 1.726035648 | 0.150596    | NAALADL2 | ENSG00000177694 |
| 3 | 176351317 | 176351964 | 176351655 | 10 | 29 | 10 | 2.615205527 | 0.00170492  | NAALADL2 | ENSG00000177694 |
| 3 | 176425279 | 176425601 | 176425440 | 14 | 20 | 0  | 20.13708255 | 7.37E-07    | NAALADL2 | ENSG00000177694 |
| 3 | 176525328 | 176525515 | 176525384 | 9  | 10 | 6  | 1.506856518 | 0.188853    |          | ENSG00000199792 |
| 3 | 176539267 | 176539576 | 176539421 | 21 | 24 | 10 | 2.179337939 | 0.011585    |          | ENSG00000199792 |
| 3 | 176539655 | 176539965 | 176539818 | 9  | 11 | 9  | 1.150690432 | 0.367789    |          | ENSG00000199792 |
| 3 | 176547114 | 176547351 | 176547232 | 8  | 8  | 3  | 2.157544559 | 0.0836802   |          | ENSG00000199792 |

|   |           |           |           |     |     |    |             |             |          |                 |
|---|-----------|-----------|-----------|-----|-----|----|-------------|-------------|----------|-----------------|
| 3 | 176547454 | 176547642 | 176547548 | 9   | 9   | 4  | 1.917817386 | 0.103282    |          | ENSG00000199792 |
| 3 | 176716862 | 176717041 | 176716951 | 8   | 8   | 3  | 2.157544559 | 0.0836802   |          | ENSG00000201648 |
| 3 | 176771622 | 176772153 | 176771801 | 22  | 38  | 6  | 5.34249129  | 5.40E-07    |          | ENSG00000201648 |
| 3 | 176773162 | 176773422 | 176773308 | 9   | 12  | 5  | 2.077635502 | 0.0577144   |          | ENSG00000201648 |
| 3 | 176806431 | 176806621 | 176806491 | 8   | 9   | 6  | 1.369869562 | 0.253675    |          | ENSG00000201648 |
| 3 | 176839355 | 176839632 | 176839500 | 9   | 10  | 1  | 5.273997812 | 0.00391723  |          | ENSG00000201648 |
| 3 | 176882934 | 176883355 | 176883228 | 12  | 21  | 2  | 7.031997082 | 2.73E-05    | UBE2V1P2 | ENSG00000214192 |
| 3 | 176885960 | 176886263 | 176886127 | 10  | 15  | 4  | 3.068507818 | 0.0076507   | UBE2V1P2 | ENSG00000214192 |
| 3 | 177157512 | 177158012 | 177157687 | 11  | 22  | 4  | 4.410979988 | 0.000231863 |          | ENSG00000201452 |
| 3 | 177367786 | 177368079 | 177367935 | 20  | 22  | 13 | 1.575349996 | 0.0840573   |          | ENSG00000201452 |
| 3 | 177773706 | 177773965 | 177773835 | 8   | 9   | 2  | 3.19636231  | 0.0229249   |          | ENSG00000208490 |
| 3 | 177988072 | 177988476 | 177988291 | 26  | 34  | 0  | 33.56180426 | 6.02E-11    |          | ENSG00000208490 |
| 3 | 178056406 | 178056637 | 178056521 | 8   | 9   | 3  | 2.397271733 | 0.0539397   |          | ENSG00000208490 |
| 3 | 178117407 | 178117674 | 178117531 | 9   | 11  | 2  | 3.835634772 | 0.00800699  |          | ENSG00000208490 |
| 3 | 178345425 | 178345631 | 178345528 | 8   | 8   | 1  | 4.315089119 | 0.0127267   |          | ENSG00000200882 |
| 3 | 178560068 | 178560310 | 178560226 | 8   | 11  | 4  | 2.301380863 | 0.0459276   |          | ENSG00000208471 |
| 3 | 178560419 | 178560837 | 178560590 | 13  | 18  | 3  | 4.554816292 | 0.000599415 |          | ENSG00000208471 |
| 3 | 178643905 | 178644151 | 178644041 | 9   | 9   | 4  | 1.917817386 | 0.103282    |          | ENSG00000208471 |
| 3 | 178648523 | 178648772 | 178648627 | 11  | 12  | 3  | 3.116453252 | 0.0131971   |          | ENSG00000208471 |
| 3 | 178791549 | 178791757 | 178791618 | 8   | 8   | 2  | 2.876726079 | 0.0381137   |          | ENSG00000203635 |
| 3 | 178791812 | 178792181 | 178792002 | 9   | 16  | 2  | 5.433815927 | 0.000499302 |          | ENSG00000203635 |
| 3 | 178797473 | 178797757 | 178797610 | 12  | 14  | 10 | 1.307602763 | 0.244096    |          | ENSG00000203635 |
| 3 | 179010672 | 179010884 | 179010778 | 8   | 9   | 5  | 1.598181155 | 0.170911    |          | ENSG00000200288 |
| 3 | 179116929 | 179117201 | 179117102 | 17  | 19  | 1  | 9.589086931 | 1.56E-05    |          | ENSG00000199858 |
| 3 | 179509254 | 179509493 | 179509368 | 8   | 10  | 0  | 10.54799562 | 0.000613541 |          | ENSG00000208463 |
| 3 | 179585925 | 179586120 | 179586022 | 8   | 9   | 4  | 1.917817386 | 0.103282    |          | ENSG00000208463 |
| 3 | 179635057 | 179635260 | 179635158 | 9   | 10  | 0  | 10.54799562 | 0.000613541 |          | ENSG00000208463 |
| 3 | 180270473 | 180270924 | 180270673 | 134 | 167 | 5  | 26.84944341 | 3.09E-42    | ZMAT3    | ENSG00000172667 |
| 3 | 180271336 | 180271833 | 180271515 | 9   | 20  | 7  | 2.517135319 | 0.00849957  | ZMAT3    | ENSG00000172667 |
| 3 | 180347604 | 180348029 | 180347816 | 8   | 17  | 11 | 1.43836304  | 0.15834     | PIK3CA   | ENSG00000121879 |
| 3 | 180516547 | 180516871 | 180516704 | 10  | 14  | 0  | 14.3836304  | 4.17E-05    | ZNF639   | ENSG00000121864 |
| 3 | 180524207 | 180524451 | 180524300 | 9   | 10  | 2  | 3.515998541 | 0.0136204   | ZNF639   | ENSG00000121864 |
| 3 | 180548100 | 180548303 | 180548257 | 10  | 13  | 6  | 1.917817386 | 0.0693353   | MFN1     | ENSG00000171109 |
| 3 | 180652256 | 180652475 | 180652365 | 8   | 11  | 1  | 5.753452158 | 0.00215302  | GNB4     | ENSG00000114450 |



|   |           |           |           |     |     |   |             |             |        |                 |
|---|-----------|-----------|-----------|-----|-----|---|-------------|-------------|--------|-----------------|
| 3 | 180764110 | 180764390 | 180764255 | 8   | 10  | 4 | 2.109599125 | 0.0694668   | ACTL6A | ENSG00000136518 |
| 3 | 180853825 | 180854124 | 180853974 | 9   | 13  | 2 | 4.474907234 | 0.00269459  | USP13  | ENSG00000058056 |
| 3 | 181129572 | 181129843 | 181129688 | 13  | 15  | 3 | 3.835634772 | 0.00291691  | PEX5L  | ENSG00000114757 |
| 3 | 181169974 | 181170564 | 181170240 | 122 | 155 | 0 | 149.5897561 | 2.79E-46    | PEX5L  | ENSG00000114757 |
| 3 | 181435930 | 181436228 | 181436073 | 11  | 14  | 1 | 7.191815198 | 0.00034761  |        | ENSG00000213158 |
| 3 | 181803135 | 181803333 | 181803202 | 9   | 9   | 1 | 4.794543465 | 0.00708517  | TTC14  | ENSG00000163728 |
| 3 | 182112954 | 182113133 | 182113051 | 8   | 8   | 2 | 2.876726079 | 0.0381137   | FXR1   | ENSG00000114416 |
| 3 | 183087245 | 183087452 | 183087378 | 8   | 9   | 3 | 2.397271733 | 0.0539397   |        | ENSG00000213155 |
| 3 | 183113821 | 183114117 | 183113967 | 13  | 15  | 0 | 15.34253909 | 2.13E-05    |        | ENSG00000213155 |
| 3 | 183174677 | 183175047 | 183174902 | 35  | 41  | 3 | 10.06854128 | 9.74E-10    |        | ENSG00000213155 |
| 3 | 183412929 | 183413339 | 183413108 | 18  | 26  | 4 | 5.178106943 | 2.75E-05    |        | ENSG00000213155 |
| 3 | 183939667 | 183939912 | 183939808 | 10  | 12  | 6 | 1.78083043  | 0.0985525   | ATP11B | ENSG00000058063 |
| 3 | 183993606 | 183993826 | 183993691 | 8   | 9   | 4 | 1.917817386 | 0.103282    | ATP11B | ENSG00000058063 |
| 3 | 184020011 | 184020271 | 184020141 | 8   | 11  | 1 | 5.753452158 | 0.00215302  | ATP11B | ENSG00000058063 |
| 3 | 184300070 | 184300388 | 184300229 | 8   | 11  | 8 | 1.278544924 | 0.28289     | MCCC1  | ENSG00000078070 |
| 3 | 184394364 | 184394625 | 184394494 | 10  | 12  | 5 | 2.077635502 | 0.0577144   |        | ENSG00000208403 |
| 3 | 184492216 | 184492548 | 184492382 | 18  | 22  | 9 | 2.205489994 | 0.0136443   |        | ENSG00000202502 |
| 3 | 184495729 | 184496171 | 184495935 | 19  | 32  | 9 | 3.164398687 | 0.000225664 |        | ENSG00000202502 |
| 3 | 184902195 | 184902569 | 184902408 | 10  | 15  | 2 | 5.114179696 | 0.00088103  | YEATS2 | ENSG00000163872 |
| 3 | 185013454 | 185014019 | 185013633 | 19  | 33  | 6 | 4.657556509 | 7.52E-06    |        | ENSG00000212778 |
| 3 | 185045154 | 185045372 | 185045247 | 9   | 9   | 0 | 9.589086931 | 0.00120187  | MAP6D1 | ENSG00000180834 |
| 3 | 185079205 | 185079396 | 185079286 | 8   | 8   | 3 | 2.157544559 | 0.0836802   | PARL   | ENSG00000175193 |
| 3 | 185085332 | 185085708 | 185085511 | 12  | 20  | 7 | 2.517135319 | 0.00849957  | PARL   | ENSG00000175193 |
| 3 | 185112617 | 185112811 | 185112714 | 10  | 10  | 1 | 5.273997812 | 0.00391723  | PARL   | ENSG00000175193 |
| 3 | 185138529 | 185138780 | 185138622 | 8   | 8   | 1 | 4.315089119 | 0.0127267   | PARL   | ENSG00000175193 |
| 3 | 185206571 | 185206947 | 185206750 | 11  | 19  | 8 | 2.130908207 | 0.0233014   | ABCC5  | ENSG00000114770 |
| 3 | 185216548 | 185216849 | 185216698 | 9   | 12  | 3 | 3.116453252 | 0.0131971   | ABCC5  | ENSG00000114770 |
| 3 | 185246510 | 185246689 | 185246539 | 11  | 12  | 3 | 3.116453252 | 0.0131971   | HTR3C  | ENSG00000178084 |
| 3 | 185334445 | 185334942 | 185334621 | 10  | 17  | 5 | 2.876726079 | 0.00703033  | EIF2B5 | ENSG00000145191 |
| 3 | 185335704 | 185335935 | 185335814 | 10  | 11  | 5 | 1.917817386 | 0.0843804   | EIF2B5 | ENSG00000145191 |
| 3 | 185450787 | 185451084 | 185450962 | 22  | 25  | 5 | 4.155271003 | 0.000149583 | ECE2   | ENSG00000145194 |
| 3 | 185485183 | 185485478 | 185485330 | 11  | 15  | 7 | 1.917817386 | 0.0572317   | ECE2   | ENSG00000145194 |
| 3 | 185489871 | 185490171 | 185489995 | 10  | 14  | 3 | 3.595907599 | 0.00486913  | PSMD2  | ENSG00000175166 |
| 3 | 185524186 | 185524384 | 185524285 | 8   | 9   | 2 | 3.19636231  | 0.0229249   |        | ENSG00000212158 |

|   |           |           |           |    |    |    |             |             |         |                 |
|---|-----------|-----------|-----------|----|----|----|-------------|-------------|---------|-----------------|
| 3 | 185529031 | 185529217 | 185529124 | 9  | 9  | 1  | 4.794543465 | 0.00708517  |         | ENSG00000212158 |
| 3 | 185563555 | 185564094 | 185563893 | 10 | 22 | 5  | 3.675816657 | 0.000667901 | POLR2H  | ENSG00000163882 |
| 3 | 185571759 | 185572001 | 185571880 | 9  | 11 | 5  | 1.917817386 | 0.0843804   | THPO    | ENSG00000090534 |
| 3 | 185649296 | 185649624 | 185649460 | 12 | 16 | 5  | 2.716907964 | 0.0109645   | CHRD    | ENSG00000090539 |
| 3 | 185669849 | 185670128 | 185669973 | 9  | 11 | 3  | 2.876726079 | 0.0213797   | CHRD    | ENSG00000090539 |
| 3 | 185671853 | 185672386 | 185672231 | 18 | 32 | 2  | 10.54799562 | 3.50E-08    | CHRD    | ENSG00000090539 |
| 3 | 185741589 | 185741914 | 185741751 | 11 | 17 | 1  | 8.630178238 | 5.44E-05    | EPHB3   | ENSG00000182580 |
| 3 | 185766245 | 185766569 | 185766401 | 15 | 17 | 9  | 1.726035648 | 0.0753664   | EPHB3   | ENSG00000182580 |
| 3 | 185967043 | 185967515 | 185967284 | 75 | 94 | 3  | 22.77408146 | 3.34E-24    | VPS8    | ENSG00000156931 |
| 3 | 185978223 | 185978638 | 185978459 | 10 | 17 | 3  | 4.315089119 | 0.00102271  | VPS8    | ENSG00000156931 |
| 3 | 185982816 | 185983178 | 185982975 | 22 | 27 | 0  | 26.84944341 | 6.66E-09    | VPS8    | ENSG00000156931 |
| 3 | 186003861 | 186004072 | 186003966 | 12 | 13 | 2  | 4.474907234 | 0.00269459  | VPS8    | ENSG00000156931 |
| 3 | 186536377 | 186536640 | 186536483 | 8  | 10 | 5  | 1.757999271 | 0.121253    | MAP3K13 | ENSG00000073803 |
| 3 | 186661448 | 186661645 | 186661546 | 10 | 11 | 1  | 5.753452158 | 0.00215302  |         | ENSG00000208382 |
| 3 | 186683761 | 186683967 | 186683864 | 8  | 8  | 1  | 4.315089119 | 0.0127267   | TMEM41A | ENSG00000163900 |
| 3 | 186699278 | 186699652 | 186699511 | 12 | 18 | 14 | 1.214617678 | 0.282961    | TMEM41A | ENSG00000163900 |
| 3 | 186877724 | 186877984 | 186877848 | 12 | 13 | 3  | 3.356180426 | 0.00805599  | C3orf65 | ENSG00000163915 |
| 3 | 186918004 | 186918701 | 186918505 | 40 | 68 | 4  | 13.23293996 | 4.71E-16    | C3orf65 | ENSG00000163915 |
| 3 | 186934478 | 186934718 | 186934572 | 14 | 15 | 4  | 3.068507818 | 0.0076507   | C3orf65 | ENSG00000163915 |
| 3 | 186997142 | 186997371 | 186997214 | 12 | 12 | 5  | 2.077635502 | 0.0577144   | IGF2BP2 | ENSG00000073792 |
| 3 | 187137884 | 187138166 | 187138004 | 11 | 11 | 1  | 5.753452158 | 0.00215302  | SFRS10  | ENSG00000136527 |
| 3 | 187276015 | 187276398 | 187276219 | 13 | 19 | 2  | 6.39272462  | 8.83E-05    |         | ENSG00000208376 |
| 3 | 187276419 | 187276900 | 187276644 | 35 | 47 | 1  | 23.01380863 | 2.36E-13    |         | ENSG00000208376 |
| 3 | 187456466 | 187456678 | 187456509 | 8  | 9  | 1  | 4.794543465 | 0.00708517  | DGKG    | ENSG00000058866 |
| 3 | 187676660 | 187677132 | 187676908 | 32 | 45 | 3  | 11.02744997 | 8.54E-11    | CRYGS   | ENSG00000213139 |
| 3 | 187770714 | 187771000 | 187770833 | 8  | 12 | 8  | 1.385090334 | 0.219216    | DNAJB11 | ENSG00000090520 |
| 3 | 187815437 | 187815833 | 187815595 | 11 | 18 | 7  | 2.277408146 | 0.0188653   | AHSG    | ENSG00000145192 |
| 3 | 187817566 | 187817855 | 187817711 | 11 | 14 | 8  | 1.598181155 | 0.124586    | AHSG    | ENSG00000145192 |
| 3 | 187841041 | 187841305 | 187841145 | 18 | 20 | 1  | 10.06854128 | 8.32E-06    | FETUB   | ENSG00000090512 |
| 3 | 187845326 | 187845506 | 187845472 | 8  | 8  | 3  | 2.157544559 | 0.0836802   | FETUB   | ENSG00000090512 |
| 3 | 187983695 | 187984037 | 187983866 | 10 | 16 | 7  | 2.037680973 | 0.0400399   | EIF4A2  | ENSG00000156976 |
| 3 | 188006836 | 188007111 | 188006987 | 8  | 13 | 4  | 2.684944341 | 0.01921     | RFC4    | ENSG00000163918 |
| 3 | 188123346 | 188123528 | 188123483 | 9  | 9  | 3  | 2.397271733 | 0.0539397   | ST6GAL1 | ENSG00000073849 |
| 3 | 188180398 | 188180794 | 188180594 | 10 | 18 | 4  | 3.643853034 | 0.00178791  |         | ENSG00000203632 |

|   |           |           |           |     |     |    |             |             |         |                 |
|---|-----------|-----------|-----------|-----|-----|----|-------------|-------------|---------|-----------------|
| 3 | 188313783 | 188314120 | 188313951 | 16  | 20  | 1  | 10.06854128 | 8.32E-06    | RPL39L  | ENSG00000163923 |
| 3 | 188383411 | 188384098 | 188383867 | 161 | 200 | 4  | 38.54812946 | 8.46E-53    | RTP1    | ENSG00000175077 |
| 3 | 188520265 | 188520486 | 188520375 | 9   | 11  | 3  | 2.876726079 | 0.0213797   | MASP1   | ENSG00000127241 |
| 3 | 188604023 | 188604274 | 188604148 | 8   | 11  | 6  | 1.643843474 | 0.137712    |         | ENSG00000208368 |
| 3 | 188879996 | 188880421 | 188880164 | 8   | 15  | 9  | 1.534253909 | 0.136498    | SST     | ENSG00000157005 |
| 3 | 188914971 | 188915154 | 188915058 | 8   | 9   | 3  | 2.397271733 | 0.0539397   | RTP2    | ENSG00000198471 |
| 3 | 188950378 | 188950923 | 188950726 | 15  | 32  | 6  | 4.520569553 | 1.26E-05    | BCL6    | ENSG00000113916 |
| 3 | 189009506 | 189009972 | 189009793 | 12  | 21  | 8  | 2.343999027 | 0.0109478   | BCL6    | ENSG00000113916 |
| 3 | 189261575 | 189261935 | 189261773 | 16  | 21  | 12 | 1.622768557 | 0.076896    |         | ENSG00000213132 |
| 3 | 189376906 | 189377160 | 189377026 | 8   | 10  | 5  | 1.757999271 | 0.121253    |         | ENSG00000213132 |
| 3 | 189674763 | 189675002 | 189674882 | 11  | 12  | 7  | 1.558226626 | 0.152813    |         | ENSG00000207651 |
| 3 | 189784037 | 189784242 | 189784139 | 8   | 8   | 2  | 2.876726079 | 0.0381137   |         | ENSG00000207651 |
| 3 | 189949474 | 189949802 | 189949638 | 11  | 17  | 1  | 8.630178238 | 5.44E-05    |         | ENSG00000207651 |
| 3 | 190039691 | 190040043 | 190039867 | 9   | 14  | 8  | 1.598181155 | 0.124586    |         | ENSG00000207651 |
| 3 | 190148493 | 190148736 | 190148647 | 10  | 11  | 3  | 2.876726079 | 0.0213797   | TPRG1   | ENSG00000188001 |
| 3 | 190176462 | 190176940 | 190176627 | 13  | 22  | 4  | 4.410979988 | 0.000231863 | TPRG1   | ENSG00000188001 |
| 3 | 190176943 | 190177303 | 190177130 | 28  | 34  | 1  | 16.78090213 | 1.09E-09    | TPRG1   | ENSG00000188001 |
| 3 | 190242069 | 190242276 | 190242134 | 9   | 10  | 4  | 2.109599125 | 0.0694668   | TPRG1   | ENSG00000188001 |
| 3 | 190282555 | 190282741 | 190282651 | 8   | 8   | 3  | 2.157544559 | 0.0836802   | TPRG1   | ENSG00000188001 |
| 3 | 190296570 | 190297016 | 190296711 | 9   | 17  | 5  | 2.876726079 | 0.00703033  | TPRG1   | ENSG00000188001 |
| 3 | 190299485 | 190299830 | 190299657 | 11  | 15  | 6  | 2.191791298 | 0.0328001   | TPRG1   | ENSG00000188001 |
| 3 | 190348576 | 190348886 | 190348746 | 9   | 11  | 7  | 1.43836304  | 0.204844    | TPRG1   | ENSG00000188001 |
| 3 | 190473368 | 190473570 | 190473453 | 8   | 9   | 4  | 1.917817386 | 0.103282    | TPRG1   | ENSG00000188001 |
| 3 | 190504841 | 190505309 | 190505107 | 14  | 24  | 15 | 1.498294833 | 0.0979832   | TPRG1   | ENSG00000188001 |
| 3 | 190505335 | 190505602 | 190505470 | 10  | 13  | 5  | 2.237453617 | 0.038866    | TPRG1   | ENSG00000188001 |
| 3 | 190516843 | 190517191 | 190516951 | 11  | 15  | 11 | 1.278544924 | 0.254978    | TPRG1   | ENSG00000188001 |
| 3 | 190521040 | 190521262 | 190521151 | 8   | 9   | 1  | 4.794543465 | 0.00708517  | TPRG1   | ENSG00000188001 |
| 3 | 190606643 | 190606869 | 190606756 | 8   | 9   | 1  | 4.794543465 | 0.00708517  |         | ENSG00000208357 |
| 3 | 190659064 | 190659352 | 190659200 | 10  | 12  | 10 | 1.133255728 | 0.37674     |         | ENSG00000208357 |
| 3 | 190957195 | 190957377 | 190957331 | 8   | 9   | 7  | 1.198635866 | 0.346278    | TP63    | ENSG00000073282 |
| 3 | 190966977 | 190967194 | 190967058 | 11  | 11  | 5  | 1.917817386 | 0.0843804   | TP63    | ENSG00000073282 |
| 3 | 191033940 | 191034120 | 191034034 | 9   | 9   | 3  | 2.397271733 | 0.0539397   |         | ENSG00000216058 |
| 3 | 191144543 | 191144856 | 191144682 | 10  | 12  | 2  | 4.155271003 | 0.0046638   |         | ENSG00000216058 |
| 3 | 191212857 | 191213076 | 191212945 | 8   | 9   | 2  | 3.19636231  | 0.0229249   | LEPREL1 | ENSG00000090530 |

|   |           |           |           |    |    |    |             |             |         |                 |
|---|-----------|-----------|-----------|----|----|----|-------------|-------------|---------|-----------------|
| 3 | 191238294 | 191238992 | 191238694 | 48 | 68 | 4  | 13.23293996 | 4.71E-16    | LEPREL1 | ENSG00000090530 |
| 3 | 191317051 | 191317592 | 191317362 | 59 | 80 | 8  | 8.630178238 | 5.75E-16    | LEPREL1 | ENSG00000090530 |
| 3 | 191430490 | 191430982 | 191430740 | 17 | 32 | 9  | 3.164398687 | 0.000225664 |         | ENSG00000212489 |
| 3 | 191526453 | 191527079 | 191526704 | 33 | 57 | 3  | 13.90417605 | 5.15E-14    | CLDN1   | ENSG00000163347 |
| 3 | 191560500 | 191560698 | 191560614 | 9  | 9  | 0  | 9.589086931 | 0.00120187  | CLDN16  | ENSG00000113946 |
| 3 | 191570201 | 191570432 | 191570354 | 8  | 9  | 0  | 9.589086931 | 0.00120187  | CLDN16  | ENSG00000113946 |
| 3 | 191735484 | 191735701 | 191735641 | 8  | 10 | 3  | 2.636998906 | 0.034203    | IL1RAP  | ENSG00000196083 |
| 3 | 191735866 | 191736045 | 191735954 | 8  | 8  | 1  | 4.315089119 | 0.0127267   | IL1RAP  | ENSG00000196083 |
| 3 | 191791683 | 191792051 | 191791827 | 8  | 12 | 3  | 3.116453252 | 0.0131971   |         | ENSG00000223117 |
| 3 | 192021927 | 192022120 | 192022019 | 8  | 8  | 0  | 8.630178238 | 0.00235436  |         | ENSG00000208348 |
| 3 | 192358101 | 192358531 | 192358264 | 23 | 31 | 1  | 15.34253909 | 7.54E-09    | OSTN    | ENSG00000188729 |
| 3 | 192520876 | 192521204 | 192521086 | 9  | 13 | 0  | 13.4247217  | 8.16E-05    | CCDC50  | ENSG00000152492 |
| 3 | 192700259 | 192700727 | 192700604 | 8  | 15 | 6  | 2.191791298 | 0.0328001   | PYDC2   | ENSG00000221856 |
| 3 | 192976474 | 192976735 | 192976597 | 9  | 10 | 2  | 3.515998541 | 0.0136204   |         | ENSG00000200270 |
| 3 | 193004527 | 193004752 | 193004639 | 8  | 9  | 2  | 3.19636231  | 0.0229249   |         | ENSG00000200270 |
| 3 | 193331155 | 193331413 | 193331246 | 10 | 12 | 6  | 1.78083043  | 0.0985525   |         | ENSG00000222583 |
| 3 | 193388803 | 193389058 | 193388947 | 8  | 10 | 10 | 0.958908693 | 0.538751    |         | ENSG00000222583 |
| 3 | 193474060 | 193474383 | 193474221 | 9  | 14 | 4  | 2.876726079 | 0.01219     | FGF12   | ENSG00000114279 |
| 3 | 193667843 | 193668263 | 193668021 | 8  | 17 | 8  | 1.917817386 | 0.0474153   | FGF12   | ENSG00000114279 |
| 3 | 193767242 | 193767620 | 193767383 | 14 | 20 | 6  | 2.876726079 | 0.00408924  |         | ENSG00000208337 |
| 3 | 193771722 | 193772010 | 193771866 | 12 | 14 | 10 | 1.307602763 | 0.244096    |         | ENSG00000208337 |
| 3 | 193798023 | 193798397 | 193798188 | 21 | 26 | 17 | 1.43836304  | 0.111326    |         | ENSG00000208337 |
| 3 | 193798695 | 193798890 | 193798748 | 8  | 11 | 3  | 2.876726079 | 0.0213797   |         | ENSG00000208337 |
| 3 | 193994918 | 193995099 | 193995008 | 8  | 8  | 1  | 4.315089119 | 0.0127267   |         | ENSG00000200184 |
| 3 | 194013252 | 194013496 | 194013370 | 9  | 11 | 5  | 1.917817386 | 0.0843804   |         | ENSG00000200184 |
| 3 | 194017040 | 194017307 | 194017161 | 8  | 10 | 4  | 2.109599125 | 0.0694668   |         | ENSG00000200184 |
| 3 | 194019375 | 194019676 | 194019525 | 13 | 15 | 4  | 3.068507818 | 0.0076507   |         | ENSG00000200184 |
| 3 | 194026446 | 194026718 | 194026582 | 11 | 13 | 5  | 2.237453617 | 0.038866    | C3orf59 | ENSG00000180611 |
| 3 | 194032562 | 194032784 | 194032657 | 8  | 10 | 2  | 3.515998541 | 0.0136204   | C3orf59 | ENSG00000180611 |
| 3 | 194052289 | 194052851 | 194052565 | 25 | 41 | 16 | 2.369068536 | 0.000750719 | C3orf59 | ENSG00000180611 |
| 3 | 194080277 | 194080532 | 194080371 | 10 | 12 | 6  | 1.78083043  | 0.0985525   | C3orf59 | ENSG00000180611 |
| 3 | 194102991 | 194103181 | 194103086 | 8  | 9  | 1  | 4.794543465 | 0.00708517  | C3orf59 | ENSG00000180611 |
| 3 | 194107531 | 194107894 | 194107689 | 11 | 16 | 7  | 2.037680973 | 0.0400399   | C3orf59 | ENSG00000180611 |
| 3 | 194108250 | 194108659 | 194108480 | 19 | 27 | 6  | 3.835634772 | 0.000155182 | C3orf59 | ENSG00000180611 |

|   |           |           |           |    |    |    |             |             |         |                 |
|---|-----------|-----------|-----------|----|----|----|-------------|-------------|---------|-----------------|
| 3 | 194224183 | 194224365 | 194224310 | 8  | 8  | 2  | 2.876726079 | 0.0381137   | C3orf59 | ENSG00000180611 |
| 3 | 194391042 | 194391255 | 194391148 | 10 | 11 | 8  | 1.278544924 | 0.28289     |         | ENSG00000220985 |
| 3 | 194431764 | 194432106 | 194431935 | 14 | 19 | 6  | 2.739739123 | 0.00632909  | HRASLS  | ENSG00000127252 |
| 3 | 194447660 | 194447995 | 194447827 | 12 | 17 | 1  | 8.630178238 | 5.44E-05    | HRASLS  | ENSG00000127252 |
| 3 | 194489539 | 194490127 | 194489948 | 12 | 27 | 6  | 3.835634772 | 0.000155182 | ATP13A5 | ENSG00000187527 |
| 3 | 194582425 | 194582612 | 194582518 | 9  | 9  | 4  | 1.917817386 | 0.103282    | ATP13A5 | ENSG00000187527 |
| 3 | 194612236 | 194612494 | 194612358 | 8  | 12 | 5  | 2.077635502 | 0.0577144   | ATP13A5 | ENSG00000187527 |
| 3 | 194652866 | 194653115 | 194652974 | 8  | 9  | 8  | 1.065454103 | 0.442605    | ATP13A5 | ENSG00000187527 |
| 3 | 194700552 | 194700907 | 194700729 | 12 | 18 | 8  | 2.024362796 | 0.0334397   | ATP13A4 | ENSG00000127249 |
| 3 | 194772925 | 194773225 | 194773061 | 11 | 15 | 7  | 1.917817386 | 0.0572317   |         | ENSG00000221728 |
| 3 | 194793491 | 194793806 | 194793644 | 14 | 18 | 3  | 4.554816292 | 0.000599415 | OPA1    | ENSG00000198836 |
| 3 | 194820402 | 194820652 | 194820527 | 8  | 8  | 6  | 1.232882605 | 0.333038    |         | ENSG00000207370 |
| 3 | 194821249 | 194821450 | 194821379 | 10 | 10 | 5  | 1.757999271 | 0.121253    |         | ENSG00000207370 |
| 3 | 194944550 | 194944964 | 194944728 | 14 | 21 | 7  | 2.636998906 | 0.00562102  |         | ENSG00000208326 |
| 3 | 194945974 | 194946153 | 194946040 | 8  | 8  | 0  | 8.630178238 | 0.00235436  |         | ENSG00000208326 |
| 3 | 194981302 | 194981807 | 194981481 | 11 | 20 | 3  | 5.034270639 | 0.000202317 |         | ENSG00000208326 |
| 3 | 194988433 | 194989046 | 194988718 | 8  | 20 | 4  | 4.027416511 | 0.000652226 |         | ENSG00000208326 |
| 3 | 194991926 | 194992424 | 194992270 | 8  | 16 | 14 | 1.086763185 | 0.404922    |         | ENSG00000208326 |
| 3 | 195006064 | 195006291 | 195006177 | 9  | 10 | 15 | 0.659249726 | 0.861705    |         | ENSG00000208326 |
| 3 | 195028895 | 195029529 | 195029212 | 11 | 26 | 12 | 1.991579593 | 0.0165204   |         | ENSG00000208326 |
| 3 | 195030439 | 195030651 | 195030545 | 8  | 9  | 5  | 1.598181155 | 0.170911    |         | ENSG00000208326 |
| 3 | 195037298 | 195037661 | 195037448 | 8  | 14 | 9  | 1.43836304  | 0.179537    |         | ENSG00000208326 |
| 3 | 195049522 | 195049793 | 195049614 | 12 | 15 | 4  | 3.068507818 | 0.0076507   |         | ENSG00000208326 |
| 3 | 195071142 | 195071367 | 195071254 | 10 | 11 | 10 | 1.046082211 | 0.455063    |         | ENSG00000208326 |
| 3 | 195072587 | 195073145 | 195072932 | 19 | 31 | 17 | 1.704726565 | 0.0311659   |         | ENSG00000214146 |
| 3 | 195074861 | 195075111 | 195074986 | 8  | 10 | 3  | 2.636998906 | 0.034203    |         | ENSG00000214146 |
| 3 | 195077776 | 195077996 | 195077922 | 8  | 10 | 3  | 2.636998906 | 0.034203    |         | ENSG00000214146 |
| 3 | 195110569 | 195110982 | 195110844 | 9  | 15 | 2  | 5.114179696 | 0.00088103  |         | ENSG00000214146 |
| 3 | 195112423 | 195112605 | 195112514 | 8  | 8  | 9  | 0.863017824 | 0.627343    |         | ENSG00000214146 |
| 3 | 195122821 | 195123152 | 195122999 | 12 | 17 | 8  | 1.917817386 | 0.0474153   |         | ENSG00000214146 |
| 3 | 195152419 | 195152766 | 195152592 | 12 | 18 | 3  | 4.554816292 | 0.000599415 |         | ENSG00000214146 |
| 3 | 195204122 | 195204368 | 195204245 | 8  | 10 | 5  | 1.757999271 | 0.121253    |         | ENSG00000214146 |
| 3 | 195254904 | 195255095 | 195255009 | 9  | 9  | 1  | 4.794543465 | 0.00708517  |         | ENSG00000214146 |
| 3 | 195282764 | 195283002 | 195282889 | 8  | 9  | 4  | 1.917817386 | 0.103282    | HES1    | ENSG00000114315 |

|   |           |           |           |    |    |    |             |             |         |                 |
|---|-----------|-----------|-----------|----|----|----|-------------|-------------|---------|-----------------|
| 3 | 195290143 | 195290326 | 195290284 | 9  | 9  | 2  | 3.19636231  | 0.0229249   | HES1    | ENSG00000114315 |
| 3 | 195333010 | 195333633 | 195333185 | 17 | 31 | 8  | 3.409453131 | 0.000151231 | HES1    | ENSG00000114315 |
| 3 | 195335521 | 195335781 | 195335683 | 12 | 14 | 5  | 2.397271733 | 0.0258078   | HES1    | ENSG00000114315 |
| 3 | 195336501 | 195336683 | 195336621 | 8  | 8  | 8  | 0.958908693 | 0.534974    | HES1    | ENSG00000114315 |
| 3 | 195337948 | 195338198 | 195338118 | 10 | 12 | 6  | 1.78083043  | 0.0985525   | HES1    | ENSG00000114315 |
| 3 | 195342175 | 195342461 | 195342318 | 9  | 13 | 5  | 2.237453617 | 0.038866    |         | ENSG00000223332 |
| 3 | 195359055 | 195359679 | 195359500 | 15 | 32 | 13 | 2.260284776 | 0.00349245  |         | ENSG00000208323 |
| 3 | 195362459 | 195362685 | 195362572 | 8  | 8  | 3  | 2.157544559 | 0.0836802   |         | ENSG00000208323 |
| 3 | 195377818 | 195378112 | 195377965 | 19 | 20 | 9  | 2.013708255 | 0.0279742   |         | ENSG00000208323 |
| 3 | 195382331 | 195382648 | 195382488 | 8  | 10 | 2  | 3.515998541 | 0.0136204   |         | ENSG00000208323 |
| 3 | 195404885 | 195405536 | 195405357 | 51 | 83 | 8  | 8.949814469 | 1.00E-16    |         | ENSG00000208323 |
| 3 | 195414716 | 195414949 | 195414832 | 8  | 10 | 5  | 1.757999271 | 0.121253    |         | ENSG00000208323 |
| 3 | 195500976 | 195501252 | 195501127 | 12 | 17 | 2  | 5.753452158 | 0.000281509 |         | ENSG00000214145 |
| 3 | 195509345 | 195509841 | 195509596 | 10 | 20 | 4  | 4.027416511 | 0.000652226 |         | ENSG00000214145 |
| 3 | 195513402 | 195513740 | 195513571 | 8  | 13 | 7  | 1.678090213 | 0.111195    |         | ENSG00000214145 |
| 3 | 195588568 | 195589036 | 195588809 | 8  | 19 | 7  | 2.397271733 | 0.0127287   | GP5     | ENSG00000178732 |
| 3 | 195684644 | 195684851 | 195684747 | 11 | 11 | 0  | 11.50690432 | 0.000313206 | ATP13A3 | ENSG00000133657 |
| 3 | 195696402 | 195696584 | 195696462 | 8  | 9  | 6  | 1.369869562 | 0.253675    |         | ENSG00000198579 |
| 3 | 195716722 | 195716910 | 195716816 | 8  | 8  | 4  | 1.726035648 | 0.150596    |         | ENSG00000198579 |
| 3 | 195763465 | 195763731 | 195763598 | 9  | 11 | 0  | 11.50690432 | 0.000313206 |         | ENSG00000208322 |
| 3 | 195874219 | 195874725 | 195874491 | 14 | 31 | 14 | 2.045671879 | 0.00841532  | LSG1    | ENSG00000041802 |
| 3 | 195884557 | 195884953 | 195884736 | 16 | 24 | 5  | 3.995452888 | 0.00024777  | FAM43A  | ENSG00000185112 |
| 3 | 195887661 | 195888030 | 195887866 | 14 | 20 | 4  | 4.027416511 | 0.000652226 | FAM43A  | ENSG00000185112 |
| 3 | 195963661 | 195963853 | 195963757 | 8  | 8  | 9  | 0.863017824 | 0.627343    | FAM43A  | ENSG00000185112 |
| 3 | 195971364 | 195971663 | 195971494 | 18 | 21 | 10 | 1.917817386 | 0.0328292   | FAM43A  | ENSG00000185112 |
| 3 | 196055339 | 196055629 | 196055503 | 8  | 8  | 3  | 2.157544559 | 0.0836802   | FAM43A  | ENSG00000185112 |
| 3 | 196073809 | 196073999 | 196073854 | 8  | 8  | 7  | 1.07877228  | 0.435076    | FAM43A  | ENSG00000185112 |
| 3 | 196074691 | 196074995 | 196074860 | 10 | 13 | 11 | 1.118726809 | 0.38479     | FAM43A  | ENSG00000185112 |
| 3 | 196136882 | 196137090 | 196136986 | 8  | 10 | 3  | 2.636998906 | 0.034203    | C3orf21 | ENSG00000173950 |
| 3 | 196187210 | 196187447 | 196187330 | 13 | 13 | 3  | 3.356180426 | 0.00805599  | C3orf21 | ENSG00000173950 |
| 3 | 196232663 | 196233304 | 196233074 | 15 | 33 | 10 | 2.963899597 | 0.000322893 | C3orf21 | ENSG00000173950 |
| 3 | 196307326 | 196307833 | 196307515 | 25 | 39 | 16 | 2.256255748 | 0.00154127  | C3orf21 | ENSG00000173950 |
| 3 | 196315801 | 196316029 | 196315916 | 10 | 10 | 6  | 1.506856518 | 0.188853    | C3orf21 | ENSG00000173950 |
| 3 | 196322477 | 196322657 | 196322567 | 8  | 8  | 4  | 1.726035648 | 0.150596    | C3orf21 | ENSG00000173950 |

|   |           |           |           |     |     |    |             |             |          |                 |
|---|-----------|-----------|-----------|-----|-----|----|-------------|-------------|----------|-----------------|
| 3 | 196389419 | 196390403 | 196389818 | 121 | 211 | 5  | 33.88144049 | 1.37E-54    | C3orf21  | ENSG00000173950 |
| 3 | 196440147 | 196440357 | 196440252 | 9   | 10  | 3  | 2.636998906 | 0.034203    |          | ENSG00000206600 |
| 3 | 196473712 | 196473993 | 196473852 | 13  | 14  | 3  | 3.595907599 | 0.00486913  | C3orf21  | ENSG00000173950 |
| 3 | 196525628 | 196525891 | 196525759 | 10  | 11  | 0  | 11.50690432 | 0.000313206 |          | ENSG00000203631 |
| 3 | 196645342 | 196645596 | 196645469 | 8   | 12  | 3  | 3.116453252 | 0.0131971   | ACAP2    | ENSG00000114331 |
| 3 | 196747648 | 196747938 | 196747799 | 14  | 18  | 3  | 4.554816292 | 0.000599415 | PPP1R2P3 | ENSG00000184203 |
| 3 | 196751590 | 196751963 | 196751711 | 10  | 16  | 11 | 1.358453982 | 0.20248     | PPP1R2P3 | ENSG00000184203 |
| 3 | 196766769 | 196767039 | 196766904 | 9   | 10  | 4  | 2.109599125 | 0.0694668   | PPP1R2P3 | ENSG00000184203 |
| 3 | 196792061 | 196792757 | 196792469 | 16  | 35  | 3  | 8.630178238 | 3.59E-08    | APOD     | ENSG00000189058 |
| 3 | 196905907 | 196906205 | 196906056 | 9   | 12  | 4  | 2.493162602 | 0.0299057   |          | ENSG00000207650 |
| 3 | 196911249 | 196911435 | 196911346 | 8   | 8   | 4  | 1.726035648 | 0.150596    |          | ENSG00000207650 |
| 3 | 196978293 | 196978521 | 196978407 | 8   | 8   | 1  | 4.315089119 | 0.0127267   | MUC4     | ENSG00000145113 |
| 3 | 197062109 | 197062537 | 197062390 | 20  | 30  | 13 | 2.12329782  | 0.0070778   | MUC4     | ENSG00000145113 |
| 3 | 197126258 | 197126625 | 197126446 | 13  | 20  | 3  | 5.034270639 | 0.000202317 | TNK2     | ENSG00000061938 |
| 3 | 197284558 | 197284964 | 197284715 | 9   | 15  | 12 | 1.180195315 | 0.324974    | TFRC     | ENSG00000072274 |
| 3 | 197292005 | 197292234 | 197292073 | 11  | 12  | 3  | 3.116453252 | 0.0131971   | TFRC     | ENSG00000072274 |
| 3 | 197292478 | 197292697 | 197292582 | 10  | 11  | 6  | 1.643843474 | 0.137712    | TFRC     | ENSG00000072274 |
| 3 | 197302882 | 197303069 | 197303021 | 9   | 9   | 2  | 3.19636231  | 0.0229249   | TFRC     | ENSG00000072274 |
| 3 | 197324665 | 197325206 | 197324843 | 22  | 33  | 2  | 10.86763185 | 1.89E-08    | TFRC     | ENSG00000072274 |
| 3 | 197347282 | 197348129 | 197347866 | 46  | 96  | 14 | 6.200942882 | 5.28E-16    | TFRC     | ENSG00000072274 |
| 3 | 197464871 | 197465142 | 197465006 | 11  | 13  | 4  | 2.684944341 | 0.01921     | PCYT1A   | ENSG00000161217 |
| 3 | 197489214 | 197489608 | 197489362 | 19  | 24  | 1  | 11.98635866 | 6.63E-07    | PCYT1A   | ENSG00000161217 |
| 3 | 197490685 | 197490901 | 197490762 | 12  | 14  | 6  | 2.054804342 | 0.0480281   | PCYT1A   | ENSG00000161217 |
| 3 | 197498726 | 197499069 | 197498897 | 9   | 15  | 4  | 3.068507818 | 0.0076507   | PCYT1A   | ENSG00000161217 |
| 3 | 197531323 | 197531890 | 197531563 | 32  | 51  | 6  | 7.12332172  | 4.11E-10    | TCTEX1D2 | ENSG00000213123 |
| 3 | 197620243 | 197620525 | 197620386 | 10  | 13  | 1  | 6.712360851 | 0.000640982 |          | ENSG00000208294 |
| 3 | 197642568 | 197642828 | 197642675 | 8   | 11  | 3  | 2.876726079 | 0.0213797   | UBXN7    | ENSG00000163960 |
| 3 | 197704404 | 197704621 | 197704512 | 8   | 8   | 2  | 2.876726079 | 0.0381137   | RNF168   | ENSG00000163961 |
| 3 | 197714086 | 197714413 | 197714249 | 9   | 15  | 2  | 5.114179696 | 0.00088103  | RNF168   | ENSG00000163961 |
| 3 | 197714786 | 197715103 | 197714944 | 14  | 19  | 3  | 4.794543465 | 0.000349205 | RNF168   | ENSG00000163961 |
| 3 | 197780607 | 197780923 | 197780774 | 10  | 15  | 2  | 5.114179696 | 0.00088103  | FBXO45   | ENSG00000174013 |
| 3 | 197843552 | 197843754 | 197843685 | 8   | 9   | 6  | 1.369869562 | 0.253675    | LRRC33   | ENSG00000174004 |
| 3 | 197862068 | 197862548 | 197862324 | 17  | 29  | 9  | 2.876726079 | 0.000832979 | LRRC33   | ENSG00000174004 |
| 3 | 197871819 | 197872015 | 197871918 | 8   | 8   | 9  | 0.863017824 | 0.627343    | LRRC33   | ENSG00000174004 |

|   |           |           |           |    |    |    |             |             |          |                 |
|---|-----------|-----------|-----------|----|----|----|-------------|-------------|----------|-----------------|
| 3 | 197873227 | 197873519 | 197873375 | 10 | 12 | 0  | 12.46581301 | 0.000159888 | LRRC33   | ENSG00000174004 |
| 3 | 197896206 | 197896432 | 197896298 | 9  | 11 | 14 | 0.767126954 | 0.756447    |          | ENSG00000201441 |
| 3 | 197918861 | 197919440 | 197919159 | 11 | 24 | 5  | 3.995452888 | 0.00024777  |          | ENSG00000201441 |
| 3 | 197951723 | 197952160 | 197951902 | 10 | 19 | 3  | 4.794543465 | 0.000349205 | PAK2     | ENSG00000180370 |
| 3 | 197965779 | 197966281 | 197966128 | 8  | 18 | 7  | 2.277408146 | 0.0188653   |          | ENSG00000202181 |
| 3 | 197969421 | 197969600 | 197969510 | 8  | 8  | 1  | 4.315089119 | 0.0127267   |          | ENSG00000202181 |
| 3 | 197999012 | 197999377 | 197999198 | 11 | 18 | 15 | 1.138704073 | 0.348127    |          | ENSG00000206892 |
| 3 | 198004476 | 198004900 | 198004647 | 42 | 48 | 15 | 2.936657872 | 2.49E-05    |          | ENSG00000206892 |
| 3 | 198018991 | 198019283 | 198019165 | 22 | 23 | 4  | 4.602761727 | 0.000137072 |          | ENSG00000206892 |
| 3 | 198055136 | 198055347 | 198055240 | 8  | 8  | 0  | 8.630178238 | 0.00235436  | SENP5    | ENSG00000119231 |
| 3 | 198152674 | 198152853 | 198152780 | 8  | 8  | 7  | 1.07877228  | 0.435076    | NCBP2    | ENSG00000114503 |
| 3 | 198153321 | 198153903 | 198153500 | 11 | 24 | 9  | 2.397271733 | 0.00639731  | NCBP2    | ENSG00000114503 |
| 3 | 198213012 | 198213268 | 198213140 | 9  | 12 | 4  | 2.493162602 | 0.0299057   | MFI2     | ENSG00000163975 |
| 3 | 198215149 | 198215447 | 198215298 | 8  | 11 | 3  | 2.876726079 | 0.0213797   | MFI2     | ENSG00000163975 |
| 3 | 198242180 | 198242469 | 198242330 | 9  | 11 | 5  | 1.917817386 | 0.0843804   | MFI2     | ENSG00000163975 |
| 3 | 198242749 | 198243102 | 198242925 | 12 | 18 | 10 | 1.656296833 | 0.0841786   | MFI2     | ENSG00000163975 |
| 3 | 198328400 | 198328721 | 198328573 | 8  | 11 | 11 | 0.958908693 | 0.540507    | MFI2     | ENSG00000163975 |
| 3 | 198373396 | 198373641 | 198373515 | 10 | 11 | 0  | 11.50690432 | 0.000313206 | MFI2     | ENSG00000163975 |
| 3 | 198454494 | 198454711 | 198454602 | 8  | 10 | 3  | 2.636998906 | 0.034203    | DLG1     | ENSG00000075711 |
| 3 | 198528506 | 198528900 | 198528721 | 10 | 18 | 4  | 3.643853034 | 0.00178791  | DLG1     | ENSG00000075711 |
| 3 | 198540579 | 198540785 | 198540682 | 8  | 10 | 4  | 2.109599125 | 0.0694668   | DLG1     | ENSG00000075711 |
| 3 | 198646416 | 198646622 | 198646495 | 10 | 10 | 3  | 2.636998906 | 0.034203    | BDH1     | ENSG00000161267 |
| 3 | 198694638 | 198695071 | 198694770 | 17 | 24 | 9  | 2.397271733 | 0.00639731  | BDH1     | ENSG00000161267 |
| 3 | 198699280 | 198699529 | 198699376 | 8  | 9  | 5  | 1.598181155 | 0.170911    | BDH1     | ENSG00000161267 |
| 3 | 198739209 | 198739482 | 198739345 | 8  | 10 | 4  | 2.109599125 | 0.0694668   | BDH1     | ENSG00000161267 |
| 3 | 198751140 | 198751454 | 198751280 | 11 | 12 | 5  | 2.077635502 | 0.0577144   | BDH1     | ENSG00000161267 |
| 3 | 198752424 | 198752686 | 198752555 | 14 | 15 | 14 | 1.022835939 | 0.473606    | BDH1     | ENSG00000161267 |
| 3 | 198765852 | 198766179 | 198766015 | 8  | 13 | 6  | 1.917817386 | 0.0693353   | BDH1     | ENSG00000161267 |
| 3 | 198786656 | 198787000 | 198786832 | 10 | 13 | 7  | 1.678090213 | 0.11195     | BDH1     | ENSG00000161267 |
| 3 | 198870482 | 198870939 | 198870650 | 12 | 22 | 13 | 1.575349996 | 0.0840573   |          | ENSG00000216042 |
| 3 | 198887872 | 198888094 | 198887983 | 9  | 9  | 4  | 1.917817386 | 0.103282    |          | ENSG00000216042 |
| 3 | 198892337 | 198892530 | 198892465 | 8  | 8  | 1  | 4.315089119 | 0.0127267   |          | ENSG00000216042 |
| 3 | 198925925 | 198926129 | 198926027 | 8  | 9  | 5  | 1.598181155 | 0.170911    | KIAA0226 | ENSG00000145016 |
| 3 | 198936268 | 198936447 | 198936292 | 8  | 8  | 0  | 8.630178238 | 0.00235436  | KIAA0226 | ENSG00000145016 |



|   |           |           |           |     |     |    |             |             |         |                 |
|---|-----------|-----------|-----------|-----|-----|----|-------------|-------------|---------|-----------------|
| 3 | 198960797 | 198961048 | 198960922 | 9   | 11  | 4  | 2.301380863 | 0.0459276   | FYTTD1  | ENSG00000122068 |
| 3 | 198962012 | 198962261 | 198962136 | 8   | 11  | 5  | 1.917817386 | 0.0843804   | FYTTD1  | ENSG00000122068 |
| 3 | 199002192 | 199002503 | 199002365 | 10  | 13  | 7  | 1.678090213 | 0.11195     | LRCH3   | ENSG00000186001 |
| 3 | 199033388 | 199033618 | 199033466 | 11  | 12  | 2  | 4.155271003 | 0.0046638   | LRCH3   | ENSG00000186001 |
| 3 | 199117386 | 199117632 | 199117509 | 8   | 11  | 12 | 0.885146486 | 0.620672    |         | ENSG00000199306 |
| 3 | 199154294 | 199154567 | 199154431 | 13  | 16  | 5  | 2.716907964 | 0.0109645   | RPL35A  | ENSG00000182899 |
| 3 | 199161014 | 199161687 | 199161350 | 11  | 28  | 15 | 1.738022006 | 0.0334925   | RPL35A  | ENSG00000182899 |
| 3 | 199161738 | 199162001 | 199161846 | 9   | 10  | 2  | 3.515998541 | 0.0136204   | RPL35A  | ENSG00000182899 |
| 3 | 199162063 | 199162357 | 199162197 | 8   | 11  | 11 | 0.958908693 | 0.540507    | RPL35A  | ENSG00000182899 |
| 3 | 199275903 | 199276101 | 199276002 | 9   | 9   | 5  | 1.598181155 | 0.170911    |         | ENSG00000212297 |
| 3 | 199301095 | 199301299 | 199301197 | 8   | 8   | 5  | 1.43836304  | 0.235762    |         | ENSG00000213114 |
| 4 | 2185      | 2390      | 2287      | 10  | 12  | 1  | 6.232906505 | 0.00117736  | ZNF595  | ENSG00000197701 |
| 4 | 6223      | 6937      | 6503      | 351 | 386 | 4  | 74.21953284 | 5.45E-106   | ZNF595  | ENSG00000197701 |
| 4 | 19222     | 19471     | 19321     | 8   | 12  | 5  | 2.077635502 | 0.0577144   | ZNF595  | ENSG00000197701 |
| 4 | 40737     | 41038     | 40879     | 8   | 12  | 4  | 2.493162602 | 0.0299057   | ZNF595  | ENSG00000197701 |
| 4 | 42868     | 43412     | 43074     | 17  | 35  | 22 | 1.500900563 | 0.0603321   | ZNF595  | ENSG00000197701 |
| 4 | 49895     | 50210     | 50035     | 10  | 13  | 5  | 2.237453617 | 0.038866    |         | ENSG00000207643 |
| 4 | 197794    | 198168    | 198000    | 10  | 15  | 1  | 7.671269544 | 0.000187863 | ZNF732  | ENSG00000198155 |
| 4 | 226066    | 226274    | 226190    | 9   | 9   | 3  | 2.397271733 | 0.0539397   |         | ENSG00000186777 |
| 4 | 1526770   | 1527006   | 1526888   | 9   | 12  | 5  | 2.077635502 | 0.0577144   |         | ENSG00000207009 |
| 4 | 1742303   | 1742686   | 1742522   | 18  | 25  | 1  | 12.46581301 | 3.51E-07    | FGFR3   | ENSG00000068078 |
| 4 | 1870839   | 1871038   | 1870873   | 8   | 8   | 1  | 4.315089119 | 0.0127267   | WHSC1   | ENSG00000109685 |
| 4 | 1970153   | 1970332   | 1970196   | 8   | 8   | 1  | 4.315089119 | 0.0127267   | WHSC2   | ENSG00000185049 |
| 4 | 2194544   | 2194726   | 2194645   | 9   | 9   | 2  | 3.19636231  | 0.0229249   | POLN    | ENSG00000130997 |
| 4 | 2407855   | 2408116   | 2407968   | 9   | 12  | 4  | 2.493162602 | 0.0299057   |         | ENSG00000206113 |
| 4 | 3078153   | 3078450   | 3078318   | 9   | 11  | 0  | 11.50690432 | 0.000313206 | HTT     | ENSG00000197386 |
| 4 | 3358082   | 3358399   | 3358240   | 11  | 14  | 1  | 7.191815198 | 0.00034761  | RGS12   | ENSG00000159788 |
| 4 | 3359818   | 3360038   | 3359916   | 8   | 10  | 1  | 5.273997812 | 0.00391723  | RGS12   | ENSG00000159788 |
| 4 | 3408351   | 3408934   | 3408637   | 106 | 147 | 5  | 23.6530811  | 1.15E-36    | HGFAC   | ENSG00000109758 |
| 4 | 3433065   | 3433278   | 3433171   | 10  | 11  | 3  | 2.876726079 | 0.0213797   | DOK7    | ENSG00000175920 |
| 4 | 3503148   | 3503458   | 3503300   | 22  | 23  | 3  | 5.753452158 | 3.82E-05    | LRPAP1  | ENSG00000163956 |
| 4 | 3756005   | 3756469   | 3756203   | 23  | 32  | 1  | 15.82199344 | 3.96E-09    | ADRA2C  | ENSG00000184160 |
| 4 | 3992709   | 3992984   | 3992846   | 24  | 26  | 0  | 25.89053471 | 1.31E-08    |         | ENSG00000151539 |
| 4 | 4300970   | 4301174   | 4301080   | 8   | 10  | 2  | 3.515998541 | 0.0136204   | TMEM128 | ENSG00000132406 |

|   |          |          |          |    |    |   |             |             |         |                 |
|---|----------|----------|----------|----|----|---|-------------|-------------|---------|-----------------|
| 4 | 4541130  | 4541334  | 4541232  | 9  | 9  | 2 | 3.19636231  | 0.0229249   | STX18   | ENSG00000168818 |
| 4 | 4594593  | 4594840  | 4594715  | 9  | 9  | 5 | 1.598181155 | 0.170911    | STX18   | ENSG00000168818 |
| 4 | 5038545  | 5038869  | 5038705  | 17 | 18 | 1 | 9.109632584 | 2.91E-05    | CYTL1   | ENSG00000170891 |
| 4 | 5097130  | 5097341  | 5097231  | 9  | 10 | 1 | 5.273997812 | 0.00391723  | STK32B  | ENSG00000152953 |
| 4 | 5825868  | 5826247  | 5826040  | 38 | 44 | 0 | 43.15089119 | 7.23E-14    | EVC     | ENSG00000072840 |
| 4 | 5916349  | 5916539  | 5916416  | 8  | 8  | 1 | 4.315089119 | 0.0127267   | CRMP1   | ENSG00000072832 |
| 4 | 5965185  | 5965704  | 5965456  | 31 | 51 | 7 | 6.232906505 | 1.73E-09    | CRMP1   | ENSG00000072832 |
| 4 | 6051029  | 6051318  | 6051191  | 8  | 12 | 2 | 4.155271003 | 0.0046638   |         | ENSG00000181215 |
| 4 | 6317272  | 6317633  | 6317428  | 19 | 25 | 0 | 24.93162602 | 2.56E-08    | WFS1    | ENSG00000109501 |
| 4 | 6740731  | 6741010  | 6740848  | 9  | 11 | 4 | 2.301380863 | 0.0459276   | S100P   | ENSG00000163993 |
| 4 | 6741609  | 6741825  | 6741693  | 9  | 10 | 2 | 3.515998541 | 0.0136204   | S100P   | ENSG00000163993 |
| 4 | 6748426  | 6748660  | 6748543  | 10 | 13 | 7 | 1.678090213 | 0.11195     | S100P   | ENSG00000163993 |
| 4 | 6938025  | 6938358  | 6938191  | 11 | 15 | 3 | 3.835634772 | 0.00291691  |         | ENSG00000196377 |
| 4 | 6969298  | 6969521  | 6969431  | 12 | 12 | 2 | 4.155271003 | 0.0046638   | TBC1D14 | ENSG00000132405 |
| 4 | 7067287  | 7067466  | 7067391  | 8  | 8  | 4 | 1.726035648 | 0.150596    |         | ENSG00000202392 |
| 4 | 7188540  | 7189022  | 7188843  | 12 | 21 | 1 | 10.54799562 | 4.43E-06    |         | ENSG00000200867 |
| 4 | 7308206  | 7308545  | 7308373  | 21 | 26 | 0 | 25.89053471 | 1.31E-08    | SORCS2  | ENSG00000184985 |
| 4 | 7754714  | 7755195  | 7755017  | 52 | 75 | 0 | 72.87706067 | 6.41E-23    | AFAP1   | ENSG00000196526 |
| 4 | 7759316  | 7759624  | 7759470  | 13 | 14 | 1 | 7.191815198 | 0.00034761  | AFAP1   | ENSG00000196526 |
| 4 | 8040116  | 8040335  | 8040225  | 9  | 10 | 0 | 10.54799562 | 0.000613541 |         | ENSG00000207807 |
| 4 | 8045833  | 8046078  | 8045955  | 8  | 10 | 2 | 3.515998541 | 0.0136204   |         | ENSG00000207807 |
| 4 | 8116293  | 8116851  | 8116495  | 40 | 57 | 1 | 27.8083521  | 3.40E-16    |         | ENSG00000207807 |
| 4 | 8160095  | 8160396  | 8160245  | 9  | 12 | 1 | 6.232906505 | 0.00117736  | ABLIM2  | ENSG00000163995 |
| 4 | 8294901  | 8295151  | 8295026  | 8  | 8  | 0 | 8.630178238 | 0.00235436  | HTRA3   | ENSG00000170801 |
| 4 | 9717227  | 9717488  | 9717394  | 8  | 9  | 1 | 4.794543465 | 0.00708517  |         | ENSG00000223086 |
| 4 | 9726716  | 9727008  | 9726876  | 9  | 13 | 1 | 6.712360851 | 0.000640982 | WDR1    | ENSG00000071127 |
| 4 | 9894606  | 9894858  | 9894769  | 9  | 13 | 1 | 6.712360851 | 0.000640982 | WDR1    | ENSG00000071127 |
| 4 | 10909608 | 10910127 | 10909948 | 12 | 24 | 2 | 7.990905775 | 4.56E-06    |         | ENSG00000207716 |
| 4 | 13271355 | 13271611 | 13271483 | 8  | 10 | 1 | 5.273997812 | 0.00391723  | FAM44A  | ENSG00000038219 |
| 4 | 13918943 | 13919142 | 13919042 | 8  | 8  | 1 | 4.315089119 | 0.0127267   |         | ENSG00000202449 |
| 4 | 14611865 | 14612333 | 14612066 | 62 | 84 | 0 | 81.50723891 | 1.51E-25    | CPEB2   | ENSG00000137449 |
| 4 | 15291959 | 15292431 | 15292229 | 46 | 63 | 3 | 15.34253909 | 1.21E-15    | BST1    | ENSG00000109743 |
| 4 | 15682364 | 15682867 | 15682721 | 11 | 23 | 5 | 3.835634772 | 0.000408054 | PROM1   | ENSG00000007062 |
| 4 | 16492638 | 16492900 | 16492769 | 9  | 12 | 0 | 12.46581301 | 0.000159888 | LDB2    | ENSG00000169744 |

|   |          |          |          |     |     |    |             |             |          |                 |
|---|----------|----------|----------|-----|-----|----|-------------|-------------|----------|-----------------|
| 4 | 16957078 | 16957257 | 16957189 | 8   | 8   | 0  | 8.630178238 | 0.00235436  |          | ENSG00000206780 |
| 4 | 17124052 | 17124317 | 17124193 | 9   | 11  | 1  | 5.753452158 | 0.00215302  | QDPR     | ENSG00000151552 |
| 4 | 18792409 | 18792708 | 18792559 | 21  | 22  | 0  | 22.05489994 | 1.92E-07    |          | ENSG00000209240 |
| 4 | 23515649 | 23515882 | 23515757 | 11  | 12  | 0  | 12.46581301 | 0.000159888 | PPARGC1A | ENSG00000109819 |
| 4 | 23883925 | 23884274 | 23884099 | 9   | 14  | 1  | 7.191815198 | 0.00034761  |          | ENSG00000222262 |
| 4 | 24048780 | 24048959 | 24048869 | 8   | 8   | 0  | 8.630178238 | 0.00235436  |          | ENSG00000222262 |
| 4 | 24080969 | 24081169 | 24081069 | 9   | 9   | 2  | 3.19636231  | 0.0229249   |          | ENSG00000222262 |
| 4 | 24298167 | 24298431 | 24298281 | 9   | 13  | 5  | 2.237453617 | 0.038866    | DHX15    | ENSG00000109606 |
| 4 | 24374270 | 24375041 | 24374545 | 27  | 47  | 0  | 46.02761727 | 9.62E-15    | SOD3     | ENSG00000109610 |
| 4 | 24474265 | 24474593 | 24474429 | 12  | 17  | 1  | 8.630178238 | 5.44E-05    | CCDC149  | ENSG00000181982 |
| 4 | 24479711 | 24480094 | 24479918 | 20  | 27  | 1  | 13.4247217  | 9.80E-08    | CCDC149  | ENSG00000181982 |
| 4 | 24845352 | 24845587 | 24845469 | 9   | 10  | 0  | 10.54799562 | 0.000613541 | PI4K2B   | ENSG00000038210 |
| 4 | 25052232 | 25052635 | 25052411 | 9   | 16  | 1  | 8.150723891 | 0.000101217 | ANAPC4   | ENSG00000053900 |
| 4 | 25633136 | 25633406 | 25633271 | 15  | 17  | 4  | 3.452071295 | 0.00292757  |          | ENSG00000180408 |
| 4 | 25672123 | 25672428 | 25672253 | 9   | 12  | 4  | 2.493162602 | 0.0299057   |          | ENSG00000180408 |
| 4 | 26017376 | 26017774 | 26017571 | 54  | 65  | 3  | 15.82199344 | 3.44E-16    | RBPJ     | ENSG00000168214 |
| 4 | 26194619 | 26194839 | 26194685 | 8   | 9   | 2  | 3.19636231  | 0.0229249   | TBC1D19  | ENSG00000109680 |
| 4 | 26390572 | 26390853 | 26390712 | 8   | 10  | 2  | 3.515998541 | 0.0136204   |          | ENSG00000200999 |
| 4 | 26889841 | 26890112 | 26889997 | 9   | 9   | 0  | 9.589086931 | 0.00120187  |          | ENSG00000222206 |
| 4 | 27693535 | 27693715 | 27693625 | 8   | 8   | 0  | 8.630178238 | 0.00235436  |          | ENSG00000221807 |
| 4 | 27962536 | 27962965 | 27962715 | 33  | 41  | 3  | 10.06854128 | 9.74E-10    |          | ENSG00000210070 |
| 4 | 28297515 | 28297749 | 28297655 | 8   | 9   | 5  | 1.598181155 | 0.170911    |          | ENSG00000210070 |
| 4 | 29110803 | 29111106 | 29110962 | 10  | 13  | 1  | 6.712360851 | 0.000640982 |          | ENSG00000209052 |
| 4 | 30845213 | 30845589 | 30845410 | 34  | 43  | 0  | 42.19198249 | 1.42E-13    |          | ENSG00000215248 |
| 4 | 33425071 | 33425416 | 33425244 | 29  | 33  | 3  | 8.150723891 | 1.18E-07    |          |                 |
| 4 | 35178780 | 35179279 | 35179040 | 29  | 42  | 1  | 20.6165369  | 6.12E-12    |          | ENSG00000206665 |
| 4 | 35198041 | 35198503 | 35198299 | 206 | 223 | 4  | 42.95910945 | 2.49E-59    |          | ENSG00000206665 |
| 4 | 36925034 | 36925237 | 36925103 | 9   | 10  | 2  | 3.515998541 | 0.0136204   |          | ENSG00000215243 |
| 4 | 37131012 | 37131265 | 37131121 | 8   | 10  | 2  | 3.515998541 | 0.0136204   | C4orf19  | ENSG00000154274 |
| 4 | 38248089 | 38248460 | 38248283 | 15  | 21  | 0  | 21.09599125 | 3.76E-07    |          | ENSG00000211560 |
| 4 | 38281153 | 38281417 | 38281285 | 15  | 17  | 1  | 8.630178238 | 5.44E-05    | KLF3     | ENSG00000109787 |
| 4 | 38351453 | 38352009 | 38351842 | 10  | 21  | 2  | 7.031997082 | 2.73E-05    |          | ENSG00000196680 |
| 4 | 38550746 | 38551013 | 38550920 | 11  | 13  | 11 | 1.118726809 | 0.38479     |          | ENSG00000207944 |
| 4 | 38845089 | 38845590 | 38845338 | 26  | 43  | 0  | 42.19198249 | 1.42E-13    | WDR19    | ENSG00000157796 |

|   |          |          |          |    |    |    |             |             |         |                 |
|---|----------|----------|----------|----|----|----|-------------|-------------|---------|-----------------|
| 4 | 39136639 | 39137032 | 39136867 | 8  | 15 | 4  | 3.068507818 | 0.0076507   | RPL9    | ENSG00000163682 |
| 4 | 39317066 | 39317262 | 39317100 | 9  | 10 | 2  | 3.515998541 | 0.0136204   | C4orf34 | ENSG00000163683 |
| 4 | 39735306 | 39735590 | 39735437 | 10 | 13 | 1  | 6.712360851 | 0.000640982 |         | ENSG00000205794 |
| 4 | 40092642 | 40092838 | 40092776 | 8  | 9  | 3  | 2.397271733 | 0.0539397   | CHRNA9  | ENSG00000174343 |
| 4 | 40143588 | 40144012 | 40143834 | 14 | 22 | 5  | 3.675816657 | 0.000667901 |         | ENSG00000221122 |
| 4 | 40326708 | 40326899 | 40326757 | 8  | 8  | 3  | 2.157544559 | 0.0836802   | RBM47   | ENSG00000163694 |
| 4 | 40375333 | 40375563 | 40375455 | 9  | 12 | 3  | 3.116453252 | 0.0131971   | RBM47   | ENSG00000163694 |
| 4 | 40415978 | 40416199 | 40416088 | 8  | 9  | 1  | 4.794543465 | 0.00708517  | NSUN7   | ENSG00000179299 |
| 4 | 40537785 | 40538120 | 40537952 | 13 | 17 | 2  | 5.753452158 | 0.000281509 |         | ENSG00000207195 |
| 4 | 40605514 | 40605803 | 40605675 | 8  | 10 | 6  | 1.506856518 | 0.188853    |         | ENSG00000210261 |
| 4 | 40841413 | 40842114 | 40841780 | 34 | 62 | 2  | 20.13708255 | 2.06E-16    |         | ENSG00000207198 |
| 4 | 41015568 | 41015846 | 41015703 | 8  | 11 | 0  | 11.50690432 | 0.000313206 |         | ENSG00000207481 |
| 4 | 41016364 | 41016644 | 41016504 | 9  | 13 | 5  | 2.237453617 | 0.038866    |         | ENSG00000207481 |
| 4 | 42020630 | 42020978 | 42020807 | 30 | 32 | 2  | 10.54799562 | 3.50E-08    | SHISA3  | ENSG00000178343 |
| 4 | 47412888 | 47413077 | 47412979 | 8  | 8  | 4  | 1.726035648 | 0.150596    |         | ENSG00000210377 |
| 4 | 47818042 | 47818238 | 47818121 | 9  | 9  | 2  | 3.19636231  | 0.0229249   |         | ENSG00000210391 |
| 4 | 48317732 | 48317989 | 48317852 | 10 | 12 | 0  | 12.46581301 | 0.000159888 | FRYL    | ENSG00000075539 |
| 4 | 48423443 | 48423630 | 48423565 | 9  | 9  | 1  | 4.794543465 | 0.00708517  | FRYL    | ENSG00000075539 |
| 4 | 48541702 | 48541918 | 48541810 | 12 | 12 | 0  | 12.46581301 | 0.000159888 | OCIAD1  | ENSG00000109180 |
| 4 | 48599102 | 48599395 | 48599247 | 12 | 14 | 2  | 4.794543465 | 0.00154571  | OCIAD2  | ENSG00000145247 |
| 4 | 48804556 | 48804887 | 48804721 | 17 | 17 | 13 | 1.232882605 | 0.274309    |         | ENSG00000222437 |
| 4 | 48816076 | 48816258 | 48816167 | 8  | 10 | 7  | 1.318499453 | 0.269217    |         | ENSG00000222437 |
| 4 | 48846365 | 48846703 | 48846534 | 79 | 79 | 73 | 1.036658047 | 0.41099     |         | ENSG00000222437 |
| 4 | 48850244 | 48850582 | 48850413 | 39 | 41 | 38 | 1.0326709   | 0.441606    |         | ENSG00000222437 |
| 4 | 49191700 | 49192036 | 49191868 | 32 | 32 | 0  | 31.64398687 | 2.31E-10    |         | ENSG00000221256 |
| 4 | 49329212 | 49329464 | 49329324 | 8  | 8  | 3  | 2.157544559 | 0.0836802   |         | ENSG00000223099 |
| 4 | 49330675 | 49330857 | 49330705 | 13 | 13 | 3  | 3.356180426 | 0.00805599  |         | ENSG00000223099 |
| 4 | 49336055 | 49336385 | 49336220 | 15 | 17 | 10 | 1.569123316 | 0.112309    |         | ENSG00000223099 |
| 4 | 49347367 | 49347701 | 49347534 | 35 | 35 | 24 | 1.380828518 | 0.103941    |         | ENSG00000223099 |
| 4 | 49350420 | 49350638 | 49350529 | 8  | 10 | 18 | 0.555157664 | 0.945639    |         | ENSG00000223099 |
| 4 | 49354372 | 49354562 | 49354408 | 8  | 10 | 9  | 1.054799562 | 0.4492      |         | ENSG00000223099 |
| 4 | 52403323 | 52403562 | 52403442 | 9  | 11 | 3  | 2.876726079 | 0.0213797   | DCUN1D4 | ENSG00000109184 |
| 4 | 52612635 | 52613202 | 52612910 | 43 | 63 | 2  | 20.45671879 | 1.09E-16    | SPATA18 | ENSG00000163071 |
| 4 | 52618249 | 52618604 | 52618425 | 14 | 19 | 0  | 19.17817386 | 1.44E-06    | SPATA18 | ENSG00000163071 |

|   |          |          |          |     |     |     |             |             |          |                 |
|---|----------|----------|----------|-----|-----|-----|-------------|-------------|----------|-----------------|
| 4 | 53409126 | 53409475 | 53409297 | 12  | 15  | 2   | 5.114179696 | 0.00088103  | RASL11B  | ENSG00000128045 |
| 4 | 53472669 | 53472982 | 53472825 | 10  | 12  | 1   | 6.232906505 | 0.00117736  | RASL11B  | ENSG00000128045 |
| 4 | 53529199 | 53529408 | 53529313 | 9   | 10  | 1   | 5.273997812 | 0.00391723  | RASL11B  | ENSG00000128045 |
| 4 | 53926974 | 53927341 | 53927120 | 8   | 13  | 3   | 3.356180426 | 0.00805599  | SCFD2    | ENSG00000184178 |
| 4 | 54152089 | 54152751 | 54152579 | 10  | 24  | 5   | 3.995452888 | 0.00024777  | LNK1     | ENSG00000072201 |
| 4 | 54491007 | 54491311 | 54491159 | 11  | 15  | 5   | 2.557089848 | 0.0169197   |          | ENSG00000215164 |
| 4 | 54672800 | 54672979 | 54672862 | 8   | 8   | 0   | 8.630178238 | 0.00235436  |          | ENSG00000221219 |
| 4 | 54980702 | 54981060 | 54980881 | 29  | 35  | 1   | 17.26035648 | 5.72E-10    | PDGFRA   | ENSG00000134853 |
| 4 | 54981215 | 54981413 | 54981311 | 9   | 9   | 2   | 3.19636231  | 0.0229249   | PDGFRA   | ENSG00000134853 |
| 4 | 55463238 | 55463444 | 55463393 | 9   | 11  | 0   | 11.50690432 | 0.000313206 |          | ENSG00000210511 |
| 4 | 55578401 | 55578665 | 55578533 | 9   | 10  | 1   | 5.273997812 | 0.00391723  |          | ENSG00000210511 |
| 4 | 55916499 | 55916730 | 55916588 | 13  | 15  | 1   | 7.671269544 | 0.000187863 | SRD5A3   | ENSG00000128039 |
| 4 | 56414512 | 56414829 | 56414672 | 8   | 13  | 3   | 3.356180426 | 0.00805599  | EXOC1    | ENSG00000090989 |
| 4 | 56610798 | 56611051 | 56610975 | 8   | 9   | 1   | 4.794543465 | 0.00708517  |          | ENSG00000200741 |
| 4 | 57242212 | 57242431 | 57242321 | 9   | 10  | 3   | 2.636998906 | 0.034203    | HOPX     | ENSG00000171476 |
| 4 | 57285278 | 57285534 | 57285406 | 12  | 14  | 0   | 14.3836304  | 4.17E-05    |          | ENSG00000145268 |
| 4 | 57293758 | 57294073 | 57293936 | 8   | 11  | 1   | 5.753452158 | 0.00215302  |          | ENSG00000145268 |
| 4 | 57304679 | 57304858 | 57304780 | 9   | 9   | 8   | 1.065454103 | 0.442605    |          | ENSG00000145268 |
| 4 | 57521224 | 57521541 | 57521383 | 10  | 13  | 1   | 6.712360851 | 0.000640982 | POLR2B   | ENSG00000047315 |
| 4 | 57539822 | 57540193 | 57539978 | 8   | 14  | 4   | 2.876726079 | 0.01219     | POLR2B   | ENSG00000047315 |
| 4 | 57598981 | 57599198 | 57599111 | 9   | 10  | 1   | 5.273997812 | 0.00391723  |          | ENSG00000210626 |
| 4 | 57673058 | 57673258 | 57673148 | 9   | 12  | 1   | 6.232906505 | 0.00117736  | IGFBP7   | ENSG00000163453 |
| 4 | 62979842 | 62980146 | 62979994 | 22  | 25  | 2   | 8.310542006 | 2.50E-06    |          | ENSG00000180673 |
| 4 | 65129785 | 65130071 | 65129944 | 12  | 15  | 2   | 5.114179696 | 0.00088103  |          | ENSG00000210689 |
| 4 | 66289254 | 66289511 | 66289408 | 9   | 10  | 0   | 10.54799562 | 0.000613541 |          | ENSG00000222765 |
| 4 | 67655302 | 67655550 | 67655441 | 8   | 9   | 2   | 3.19636231  | 0.0229249   |          | ENSG00000206629 |
| 4 | 67946748 | 67947284 | 67946926 | 59  | 95  | 115 | 0.793579608 | 0.953741    |          | ENSG00000206629 |
| 4 | 67947300 | 67947574 | 67947450 | 10  | 11  | 14  | 0.767126954 | 0.756447    |          | ENSG00000206629 |
| 4 | 67947826 | 67948726 | 67948161 | 110 | 242 | 211 | 1.099126474 | 0.156685    |          | ENSG00000206629 |
| 4 | 67949172 | 67949365 | 67949268 | 12  | 12  | 14  | 0.831054201 | 0.689281    |          | ENSG00000206629 |
| 4 | 68678084 | 68678443 | 68678236 | 12  | 17  | 0   | 17.26035648 | 5.54E-06    | TMPRSS11 | ENSG00000198092 |
| 4 | 68723040 | 68723630 | 68723217 | 10  | 22  | 3   | 5.513724985 | 6.69E-05    | TMPRSS11 | ENSG00000198092 |
| 4 | 69967215 | 69967535 | 69967375 | 19  | 21  | 1   | 10.54799562 | 4.43E-06    | UGT2B7   | ENSG00000171234 |
| 4 | 69969418 | 69969629 | 69969523 | 10  | 10  | 2   | 3.515998541 | 0.0136204   | UGT2B7   | ENSG00000171234 |

|   |          |          |          |     |     |    |             |             |         |                 |
|---|----------|----------|----------|-----|-----|----|-------------|-------------|---------|-----------------|
| 4 | 70331252 | 70331434 | 70331343 | 10  | 10  | 9  | 1.054799562 | 0.4492      |         | ENSG00000210783 |
| 4 | 70549983 | 70550215 | 70550112 | 15  | 15  | 0  | 15.34253909 | 2.13E-05    | UGT2A1  | ENSG00000173610 |
| 4 | 70608199 | 70608485 | 70608319 | 14  | 16  | 1  | 8.150723891 | 0.000101217 | SULT1B1 | ENSG00000173597 |
| 4 | 70813299 | 70813576 | 70813408 | 8   | 10  | 2  | 3.515998541 | 0.0136204   | CSN1S1  | ENSG00000126545 |
| 4 | 70839335 | 70839616 | 70839475 | 8   | 9   | 2  | 3.19636231  | 0.0229249   | CSN1S1  | ENSG00000126545 |
| 4 | 71034956 | 71035135 | 71035081 | 8   | 8   | 1  | 4.315089119 | 0.0127267   | C4orf40 | ENSG00000187533 |
| 4 | 71484693 | 71485170 | 71484902 | 11  | 24  | 5  | 3.995452888 | 0.00024777  | AMBN    | ENSG00000178522 |
| 4 | 71772706 | 71773071 | 71772885 | 13  | 20  | 6  | 2.876726079 | 0.00408924  | UTP3    | ENSG00000132467 |
| 4 | 71785865 | 71786206 | 71786035 | 27  | 32  | 4  | 6.328797374 | 9.93E-07    |         | ENSG00000207448 |
| 4 | 72638301 | 72638505 | 72638413 | 9   | 9   | 0  | 9.589086931 | 0.00120187  |         | ENSG00000210828 |
| 4 | 72692818 | 72693317 | 72692991 | 9   | 18  | 3  | 4.554816292 | 0.000599415 |         | ENSG00000210828 |
| 4 | 72738961 | 72739269 | 72739105 | 11  | 15  | 1  | 7.671269544 | 0.000187863 |         | ENSG00000210828 |
| 4 | 73023360 | 73023650 | 73023505 | 15  | 17  | 0  | 17.26035648 | 5.54E-06    | NPFFR2  | ENSG00000056291 |
| 4 | 73197137 | 73197389 | 73197212 | 9   | 12  | 0  | 12.46581301 | 0.000159888 | NPFFR2  | ENSG00000056291 |
| 4 | 74020581 | 74020847 | 74020706 | 10  | 10  | 1  | 5.273997812 | 0.00391723  |         | ENSG00000210833 |
| 4 | 74182863 | 74183072 | 74182951 | 8   | 9   | 0  | 9.589086931 | 0.00120187  |         | ENSG00000210847 |
| 4 | 74370312 | 74370690 | 74370467 | 8   | 14  | 4  | 2.876726079 | 0.01219     |         | ENSG00000221639 |
| 4 | 74792616 | 74792838 | 74792715 | 8   | 10  | 5  | 1.757999271 | 0.121253    |         | ENSG00000210851 |
| 4 | 74824926 | 74825128 | 74825027 | 9   | 10  | 3  | 2.636998906 | 0.034203    | IL8     | ENSG00000169429 |
| 4 | 75368284 | 75368635 | 75368422 | 16  | 21  | 5  | 3.515998541 | 0.00108602  | EPGN    | ENSG00000182585 |
| 4 | 75498027 | 75498300 | 75498163 | 12  | 13  | 0  | 13.4247217  | 8.16E-05    | AREG    | ENSG00000109321 |
| 4 | 75500308 | 75500525 | 75500416 | 9   | 10  | 1  | 5.273997812 | 0.00391723  | AREG    | ENSG00000109321 |
| 4 | 76030608 | 76031143 | 76030915 | 122 | 158 | 1  | 76.2332411  | 2.93E-45    |         | ENSG00000169116 |
| 4 | 76077046 | 76077260 | 76077153 | 8   | 9   | 0  | 9.589086931 | 0.00120187  |         | ENSG00000169116 |
| 4 | 76262386 | 76262697 | 76262544 | 12  | 14  | 1  | 7.191815198 | 0.00034761  |         | ENSG00000179272 |
| 4 | 76717768 | 76717953 | 76717887 | 9   | 10  | 1  | 5.273997812 | 0.00391723  | C4orf26 | ENSG00000174792 |
| 4 | 77026070 | 77026397 | 77026233 | 16  | 17  | 14 | 1.150690432 | 0.340986    |         | ENSG00000210905 |
| 4 | 77080266 | 77080450 | 77080379 | 8   | 8   | 1  | 4.315089119 | 0.0127267   | NAAA    | ENSG00000138744 |
| 4 | 77131026 | 77131293 | 77131128 | 10  | 12  | 1  | 6.232906505 | 0.00117736  | SDAD1   | ENSG00000198301 |
| 4 | 77135999 | 77136337 | 77136168 | 39  | 43  | 0  | 42.19198249 | 1.42E-13    | SDAD1   | ENSG00000198301 |
| 4 | 77352260 | 77352457 | 77352358 | 9   | 9   | 1  | 4.794543465 | 0.00708517  | SCARB2  | ENSG00000138760 |
| 4 | 77528637 | 77528979 | 77528808 | 13  | 18  | 0  | 18.21926517 | 2.83E-06    |         | ENSG00000210916 |
| 4 | 77921981 | 77922494 | 77922241 | 36  | 59  | 4  | 11.50690432 | 1.18E-13    | SHROOM3 | ENSG00000138771 |
| 4 | 78049970 | 78050203 | 78050086 | 9   | 11  | 0  | 11.50690432 | 0.000313206 | ANKRD56 | ENSG00000186212 |

|   |          |          |          |     |     |    |             |            |          |                 |
|---|----------|----------|----------|-----|-----|----|-------------|------------|----------|-----------------|
| 4 | 78216119 | 78216414 | 78216265 | 9   | 9   | 6  | 1.369869562 | 0.253675   | CCNI     | ENSG00000118816 |
| 4 | 78369726 | 78370136 | 78369869 | 11  | 16  | 3  | 4.075361945 | 0.00173346 | CCNG2    | ENSG00000138764 |
| 4 | 78472927 | 78473518 | 78473271 | 127 | 168 | 0  | 162.0555691 | 4.46E-50   | CCNG2    | ENSG00000138764 |
| 4 | 78482441 | 78483090 | 78482808 | 85  | 108 | 0  | 104.5210475 | 1.48E-32   | CXCL13   | ENSG00000156234 |
| 4 | 78484119 | 78484805 | 78484367 | 92  | 130 | 5  | 20.93617313 | 5.87E-32   | CXCL13   | ENSG00000156234 |
| 4 | 78515073 | 78515350 | 78515210 | 8   | 11  | 1  | 5.753452158 | 0.00215302 | CXCL13   | ENSG00000156234 |
| 4 | 78958409 | 78958785 | 78958550 | 8   | 12  | 4  | 2.493162602 | 0.0299057  | CNOT6L   | ENSG00000138767 |
| 4 | 78961102 | 78961387 | 78961244 | 9   | 11  | 3  | 2.876726079 | 0.0213797  | CNOT6L   | ENSG00000138767 |
| 4 | 79002734 | 79003055 | 79002894 | 16  | 18  | 8  | 2.024362796 | 0.0334397  | MRPL1    | ENSG00000169288 |
| 4 | 79020971 | 79021455 | 79021150 | 60  | 78  | 2  | 25.25126225 | 6.80E-21   | MRPL1    | ENSG00000169288 |
| 4 | 80492541 | 80492879 | 80492710 | 19  | 24  | 17 | 1.331817629 | 0.172585   | ARD1B    | ENSG00000156269 |
| 4 | 81062210 | 81062462 | 81062336 | 11  | 13  | 0  | 13.4247217  | 8.16E-05   |          | ENSG00000212620 |
| 4 | 82612560 | 82612759 | 82612608 | 9   | 9   | 1  | 4.794543465 | 0.00708517 | RASGEF1B | ENSG00000138670 |
| 4 | 82984941 | 82985171 | 82985076 | 11  | 11  | 4  | 2.301380863 | 0.0459276  |          | ENSG00000202485 |
| 4 | 83187936 | 83188177 | 83188044 | 9   | 9   | 0  | 9.589086931 | 0.00120187 |          | ENSG00000202485 |
| 4 | 83693326 | 83693586 | 83693418 | 8   | 11  | 3  | 2.876726079 | 0.0213797  |          | ENSG00000213632 |
| 4 | 84027516 | 84027843 | 84027680 | 18  | 20  | 1  | 10.06854128 | 8.32E-06   | SEC31A   | ENSG00000138674 |
| 4 | 84153287 | 84153555 | 84153421 | 8   | 10  | 9  | 1.054799562 | 0.4492     | LIN54    | ENSG00000189308 |
| 4 | 84175051 | 84175533 | 84175230 | 9   | 17  | 5  | 2.876726079 | 0.00703033 | COPS4    | ENSG00000138663 |
| 4 | 84311016 | 84311687 | 84311361 | 130 | 185 | 1  | 89.17850845 | 4.46E-53   | PLAC8    | ENSG00000145287 |
| 4 | 84596024 | 84596382 | 84596203 | 10  | 16  | 6  | 2.328778255 | 0.0221113  | MRPS18C  | ENSG00000163319 |
| 4 | 84977419 | 84977598 | 84977508 | 8   | 8   | 0  | 8.630178238 | 0.00235436 |          | ENSG00000201633 |
| 4 | 85722648 | 85722909 | 85722775 | 8   | 10  | 4  | 2.109599125 | 0.0694668  | CDS1     | ENSG00000163624 |
| 4 | 85746845 | 85747093 | 85747003 | 9   | 9   | 0  | 9.589086931 | 0.00120187 | CDS1     | ENSG00000163624 |
| 4 | 86461291 | 86461578 | 86461434 | 10  | 10  | 1  | 5.273997812 | 0.00391723 | ARHGAP24 | ENSG00000138639 |
| 4 | 87459641 | 87459947 | 87459799 | 16  | 18  | 4  | 3.643853034 | 0.00178791 | MAPK10   | ENSG00000109339 |
| 4 | 87726323 | 87726557 | 87726413 | 17  | 17  | 3  | 4.315089119 | 0.00102271 | PTPN13   | ENSG00000163629 |
| 4 | 88884532 | 88884838 | 88884685 | 12  | 15  | 0  | 15.34253909 | 2.13E-05   |          | ENSG00000200024 |
| 4 | 89352068 | 89352309 | 89352188 | 8   | 9   | 3  | 2.397271733 | 0.0539397  |          | ENSG00000221440 |
| 4 | 89459264 | 89459460 | 89459362 | 10  | 10  | 3  | 2.636998906 | 0.034203   |          | ENSG00000207480 |
| 4 | 89551716 | 89551950 | 89551833 | 8   | 9   | 0  | 9.589086931 | 0.00120187 | HERC6    | ENSG00000138642 |
| 4 | 89595515 | 89595858 | 89595690 | 15  | 20  | 0  | 20.13708255 | 7.37E-07   | HERC5    | ENSG00000138646 |
| 4 | 90262828 | 90263177 | 90263002 | 10  | 15  | 4  | 3.068507818 | 0.0076507  |          | ENSG00000212226 |
| 4 | 90367193 | 90367729 | 90367372 | 15  | 27  | 13 | 1.917817386 | 0.0192196  | GPRIN3   | ENSG00000185477 |

|   |           |           |           |     |     |   |             |             |          |                 |
|---|-----------|-----------|-----------|-----|-----|---|-------------|-------------|----------|-----------------|
| 4 | 90821312  | 90821880  | 90821543  | 125 | 167 | 4 | 32.21933209 | 1.81E-43    | SNCA     | ENSG00000145335 |
| 4 | 91054866  | 91055045  | 91054931  | 8   | 8   | 0 | 8.630178238 | 0.00235436  | MMRN1    | ENSG00000138722 |
| 4 | 91314962  | 91315375  | 91315111  | 13  | 20  | 3 | 5.034270639 | 0.000202317 |          | ENSG00000184305 |
| 4 | 91981012  | 91981392  | 91981192  | 33  | 42  | 1 | 20.6165369  | 6.12E-12    | TMSL3    | ENSG00000187653 |
| 4 | 93137284  | 93137577  | 93137447  | 17  | 21  | 0 | 21.09599125 | 3.76E-07    |          | ENSG00000214910 |
| 4 | 94110201  | 94110407  | 94110289  | 8   | 8   | 1 | 4.315089119 | 0.0127267   |          | ENSG00000211179 |
| 4 | 94725689  | 94726039  | 94725864  | 13  | 18  | 0 | 18.21926517 | 2.83E-06    |          | ENSG00000209063 |
| 4 | 96331362  | 96331583  | 96331447  | 9   | 10  | 1 | 5.273997812 | 0.00391723  | BMPRI1B  | ENSG00000138696 |
| 4 | 96901794  | 96902075  | 96901934  | 10  | 13  | 0 | 13.4247217  | 8.16E-05    | PDHA2    | ENSG00000163114 |
| 4 | 97559342  | 97559598  | 97559423  | 8   | 10  | 0 | 10.54799562 | 0.000613541 |          | ENSG00000201837 |
| 4 | 97883778  | 97883989  | 97883946  | 9   | 11  | 0 | 11.50690432 | 0.000313206 |          | ENSG00000109238 |
| 4 | 99333876  | 99334301  | 99334124  | 28  | 34  | 0 | 33.56180426 | 6.02E-11    |          | ENSG00000200658 |
| 4 | 99802031  | 99802223  | 99802126  | 8   | 9   | 1 | 4.794543465 | 0.00708517  | TSPAN5   | ENSG00000168785 |
| 4 | 100069098 | 100069283 | 100069207 | 8   | 9   | 1 | 4.794543465 | 0.00708517  | EIF4E    | ENSG00000151247 |
| 4 | 100103665 | 100104012 | 100103835 | 24  | 28  | 2 | 9.2694507   | 4.06E-07    | FAM177A2 | ENSG00000214886 |
| 4 | 100229020 | 100229205 | 100229097 | 8   | 8   | 1 | 4.315089119 | 0.0127267   | ADH5     | ENSG00000197894 |
| 4 | 101233675 | 101233857 | 101233766 | 9   | 9   | 1 | 4.794543465 | 0.00708517  |          | ENSG00000222196 |
| 4 | 101633996 | 101634231 | 101634116 | 9   | 9   | 2 | 3.19636231  | 0.0229249   | EMCN     | ENSG00000164035 |
| 4 | 101721574 | 101721890 | 101721732 | 9   | 11  | 2 | 3.835634772 | 0.00800699  | EMCN     | ENSG00000164035 |
| 4 | 101992607 | 101992810 | 101992708 | 13  | 15  | 1 | 7.671269544 | 0.000187863 |          | ENSG00000214865 |
| 4 | 102309540 | 102309747 | 102309610 | 9   | 10  | 1 | 5.273997812 | 0.00391723  |          | ENSG00000197473 |
| 4 | 102834017 | 102834353 | 102834182 | 10  | 14  | 2 | 4.794543465 | 0.00154571  |          | ENSG00000199529 |
| 4 | 103357630 | 103357970 | 103357801 | 9   | 14  | 4 | 2.876726079 | 0.01219     | SLC39A8  | ENSG00000138821 |
| 4 | 103484498 | 103484697 | 103484597 | 8   | 8   | 2 | 2.876726079 | 0.0381137   | SLC39A8  | ENSG00000138821 |
| 4 | 103677602 | 103677906 | 103677754 | 23  | 24  | 1 | 11.98635866 | 6.63E-07    | NFKB1    | ENSG00000109320 |
| 4 | 103761035 | 103761214 | 103761091 | 8   | 8   | 2 | 2.876726079 | 0.0381137   |          | ENSG00000213538 |
| 4 | 104240303 | 104240602 | 104240462 | 8   | 11  | 2 | 3.835634772 | 0.00800699  | BDH2     | ENSG00000164039 |
| 4 | 104565467 | 104565717 | 104565575 | 8   | 10  | 7 | 1.318499453 | 0.269217    |          | ENSG00000221522 |
| 4 | 104650009 | 104650297 | 104650134 | 17  | 18  | 0 | 18.21926517 | 2.83E-06    |          | ENSG00000221522 |
| 4 | 105633052 | 105633285 | 105633214 | 9   | 11  | 1 | 5.753452158 | 0.00215302  |          | ENSG00000222234 |
| 4 | 105911940 | 105912167 | 105912075 | 9   | 9   | 2 | 3.19636231  | 0.0229249   |          | ENSG00000211278 |
| 4 | 106001185 | 106001428 | 106001289 | 9   | 10  | 7 | 1.318499453 | 0.269217    |          | ENSG00000211278 |
| 4 | 106107741 | 106108037 | 106107888 | 15  | 17  | 1 | 8.630178238 | 5.44E-05    |          | ENSG00000211278 |
| 4 | 106112183 | 106112506 | 106112344 | 39  | 40  | 1 | 19.65762821 | 2.24E-11    |          | ENSG00000211278 |



|   |           |           |           |    |    |   |             |             |         |                 |
|---|-----------|-----------|-----------|----|----|---|-------------|-------------|---------|-----------------|
| 4 | 106163594 | 106163801 | 106163757 | 8  | 8  | 2 | 2.876726079 | 0.0381137   |         | ENSG00000211278 |
| 4 | 106163955 | 106164281 | 106164118 | 18 | 21 | 9 | 2.109599125 | 0.0196396   |         | ENSG00000211278 |
| 4 | 106285726 | 106286352 | 106286036 | 19 | 37 | 3 | 9.109632584 | 1.09E-08    | TET2    | ENSG00000168769 |
| 4 | 106287552 | 106287781 | 106287670 | 8  | 9  | 3 | 2.397271733 | 0.0539397   | TET2    | ENSG00000168769 |
| 4 | 106773965 | 106774187 | 106774076 | 8  | 8  | 0 | 8.630178238 | 0.00235436  | INTS12  | ENSG00000138785 |
| 4 | 106823668 | 106823991 | 106823814 | 12 | 16 | 2 | 5.433815927 | 0.000499302 | INTS12  | ENSG00000138785 |
| 4 | 106849277 | 106849468 | 106849369 | 8  | 9  | 0 | 9.589086931 | 0.00120187  | GSTCD   | ENSG00000138780 |
| 4 | 107034893 | 107035262 | 107035072 | 17 | 24 | 3 | 5.993179332 | 2.17E-05    | NPNT    | ENSG00000168743 |
| 4 | 107065249 | 107065453 | 107065322 | 8  | 8  | 4 | 1.726035648 | 0.150596    | NPNT    | ENSG00000168743 |
| 4 | 107094761 | 107095156 | 107094923 | 8  | 14 | 6 | 2.054804342 | 0.0480281   | NPNT    | ENSG00000168743 |
| 4 | 107106742 | 107106944 | 107106843 | 8  | 9  | 1 | 4.794543465 | 0.00708517  | NPNT    | ENSG00000168743 |
| 4 | 107131655 | 107131922 | 107131768 | 9  | 11 | 9 | 1.150690432 | 0.367789    | NPNT    | ENSG00000168743 |
| 4 | 107133133 | 107133415 | 107133278 | 13 | 15 | 0 | 15.34253909 | 2.13E-05    | NPNT    | ENSG00000168743 |
| 4 | 107134569 | 107135095 | 107134918 | 10 | 21 | 7 | 2.636998906 | 0.00562102  | NPNT    | ENSG00000168743 |
| 4 | 107406873 | 107407055 | 107406992 | 8  | 8  | 0 | 8.630178238 | 0.00235436  | SCYE1   | ENSG00000164022 |
| 4 | 108519756 | 108520438 | 108520135 | 43 | 74 | 1 | 35.95907599 | 4.74E-21    |         | ENSG00000211308 |
| 4 | 108521522 | 108521767 | 108521644 | 8  | 9  | 1 | 4.794543465 | 0.00708517  |         | ENSG00000211308 |
| 4 | 109171012 | 109171265 | 109171110 | 9  | 10 | 0 | 10.54799562 | 0.000613541 | HADH    | ENSG00000138796 |
| 4 | 109607859 | 109608053 | 109607956 | 8  | 9  | 3 | 2.397271733 | 0.0539397   | RPL34   | ENSG00000109475 |
| 4 | 109761183 | 109761364 | 109761273 | 8  | 8  | 2 | 2.876726079 | 0.0381137   | RPL34   | ENSG00000109475 |
| 4 | 110443874 | 110444185 | 110444046 | 9  | 13 | 0 | 13.4247217  | 8.16E-05    | COL25A1 | ENSG00000188517 |
| 4 | 111129778 | 111130037 | 111129907 | 9  | 10 | 1 | 5.273997812 | 0.00391723  |         | ENSG00000207260 |
| 4 | 113100762 | 113101069 | 113100918 | 10 | 14 | 1 | 7.191815198 | 0.00034761  | C4orf32 | ENSG00000174749 |
| 4 | 113375888 | 113376071 | 113375979 | 9  | 9  | 1 | 4.794543465 | 0.00708517  | C4orf16 | ENSG00000138660 |
| 4 | 114493479 | 114493952 | 114493774 | 21 | 32 | 4 | 6.328797374 | 9.93E-07    |         | ENSG00000209187 |
| 4 | 114701643 | 114702163 | 114701933 | 28 | 44 | 2 | 14.3836304  | 1.96E-11    |         | ENSG00000206820 |
| 4 | 115198372 | 115198739 | 115198551 | 11 | 18 | 0 | 18.21926517 | 2.83E-06    | ARSJ    | ENSG00000180801 |
| 4 | 116565405 | 116565782 | 116565603 | 11 | 18 | 2 | 6.073088389 | 0.000157975 | NDST4   | ENSG00000138653 |
| 4 | 116594116 | 116594372 | 116594244 | 12 | 13 | 1 | 6.712360851 | 0.000640982 | NDST4   | ENSG00000138653 |
| 4 | 116643202 | 116643452 | 116643327 | 10 | 11 | 1 | 5.753452158 | 0.00215302  | NDST4   | ENSG00000138653 |
| 4 | 117110418 | 117110782 | 117110593 | 58 | 64 | 1 | 31.16453252 | 3.43E-18    |         | ENSG00000209247 |
| 4 | 118521374 | 118521661 | 118521517 | 14 | 16 | 2 | 5.433815927 | 0.000499302 |         | ENSG00000218006 |
| 4 | 119364857 | 119365080 | 119364990 | 8  | 9  | 1 | 4.794543465 | 0.00708517  |         | ENSG00000206823 |
| 4 | 119537774 | 119538249 | 119538011 | 36 | 48 | 0 | 46.98652596 | 4.91E-15    | PRSS12  | ENSG00000164099 |

|   |           |           |           |    |     |   |             |             |         |                 |
|---|-----------|-----------|-----------|----|-----|---|-------------|-------------|---------|-----------------|
| 4 | 119558049 | 119558343 | 119558196 | 11 | 13  | 3 | 3.356180426 | 0.00805599  | PRSS12  | ENSG00000164099 |
| 4 | 119626450 | 119626702 | 119626590 | 10 | 12  | 0 | 12.46581301 | 0.000159888 | CEP170L | ENSG00000154608 |
| 4 | 120005875 | 120006142 | 120006008 | 8  | 11  | 2 | 3.835634772 | 0.00800699  | SYNPO2  | ENSG00000172403 |
| 4 | 121984550 | 121984774 | 121984662 | 11 | 11  | 3 | 2.876726079 | 0.0213797   |         | ENSG00000212359 |
| 4 | 122366989 | 122367255 | 122367122 | 19 | 22  | 1 | 11.02744997 | 2.36E-06    |         | ENSG00000212169 |
| 4 | 122962385 | 122962573 | 122962427 | 9  | 10  | 1 | 5.273997812 | 0.00391723  | CCNA2   | ENSG00000145386 |
| 4 | 122964496 | 122964770 | 122964644 | 10 | 12  | 0 | 12.46581301 | 0.000159888 | CCNA2   | ENSG00000145386 |
| 4 | 123743847 | 123744167 | 123744011 | 23 | 25  | 1 | 12.46581301 | 3.51E-07    | IL21    | ENSG00000138684 |
| 4 | 123917378 | 123917927 | 123917736 | 41 | 53  | 0 | 51.78106943 | 1.70E-16    | BBS12   | ENSG00000181004 |
| 4 | 123938752 | 123939193 | 123939001 | 86 | 109 | 3 | 26.36998906 | 2.14E-28    | FGF2    | ENSG00000138685 |
| 4 | 123939343 | 123939600 | 123939467 | 9  | 10  | 2 | 3.515998541 | 0.0136204   | FGF2    | ENSG00000138685 |
| 4 | 125772402 | 125772655 | 125772501 | 12 | 12  | 4 | 2.493162602 | 0.0299057   | ANKRD50 | ENSG00000151458 |
| 4 | 125774201 | 125774568 | 125774380 | 11 | 18  | 4 | 3.643853034 | 0.00178791  | ANKRD50 | ENSG00000151458 |
| 4 | 126053953 | 126054511 | 126054282 | 39 | 62  | 0 | 60.41124766 | 4.01E-19    | ANKRD50 | ENSG00000151458 |
| 4 | 126080610 | 126080847 | 126080705 | 8  | 10  | 4 | 2.109599125 | 0.0694668   | ANKRD50 | ENSG00000151458 |
| 4 | 126686102 | 126686331 | 126686198 | 10 | 11  | 0 | 11.50690432 | 0.000313206 |         | ENSG00000213464 |
| 4 | 128402028 | 128402475 | 128402286 | 67 | 84  | 1 | 40.75361945 | 6.43E-24    |         | ENSG00000199862 |
| 4 | 128796957 | 128797153 | 128797122 | 9  | 9   | 0 | 9.589086931 | 0.00120187  | INTU    | ENSG00000164066 |
| 4 | 128923836 | 128924282 | 128924103 | 65 | 77  | 1 | 37.39743903 | 6.55E-22    | HSPA4L  | ENSG00000164070 |
| 4 | 129568496 | 129568689 | 129568592 | 9  | 10  | 3 | 2.636998906 | 0.034203    | PGRMC2  | ENSG00000164040 |
| 4 | 129666650 | 129666881 | 129666765 | 9  | 10  | 0 | 10.54799562 | 0.000613541 |         | ENSG00000209148 |
| 4 | 129826637 | 129827038 | 129826837 | 24 | 33  | 1 | 16.30144778 | 2.08E-09    |         | ENSG00000209148 |
| 4 | 130503329 | 130503606 | 130503498 | 9  | 11  | 3 | 2.876726079 | 0.0213797   | C4orf33 | ENSG00000151470 |
| 4 | 132951191 | 132951530 | 132951354 | 21 | 22  | 1 | 11.02744997 | 2.36E-06    |         | ENSG00000209132 |
| 4 | 133199934 | 133200159 | 133200031 | 10 | 10  | 0 | 10.54799562 | 0.000613541 |         | ENSG00000209132 |
| 4 | 134316259 | 134316438 | 134316348 | 8  | 8   | 1 | 4.315089119 | 0.0127267   |         | ENSG00000209007 |
| 4 | 134450256 | 134450435 | 134450345 | 8  | 8   | 0 | 8.630178238 | 0.00235436  |         | ENSG00000209007 |
| 4 | 134530765 | 134531136 | 134530907 | 17 | 25  | 0 | 24.93162602 | 2.56E-08    |         | ENSG00000221637 |
| 4 | 136460226 | 136460538 | 136460395 | 27 | 31  | 2 | 10.22835939 | 6.48E-08    |         | ENSG00000207188 |
| 4 | 137177418 | 137177679 | 137177532 | 21 | 21  | 0 | 21.09599125 | 3.76E-07    |         | ENSG00000207322 |
| 4 | 140120398 | 140120724 | 140120561 | 11 | 16  | 0 | 16.30144778 | 1.09E-05    |         | ENSG00000208970 |
| 4 | 140384026 | 140384404 | 140384245 | 25 | 31  | 0 | 30.68507818 | 4.52E-10    |         | ENSG00000206722 |
| 4 | 140449993 | 140450204 | 140450089 | 10 | 10  | 1 | 5.273997812 | 0.00391723  | NDUFC1  | ENSG00000109390 |
| 4 | 140817597 | 140818045 | 140817832 | 35 | 48  | 1 | 23.49326298 | 1.23E-13    |         | ENSG00000201533 |

|   |           |           |           |    |     |   |             |             |          |                 |
|---|-----------|-----------|-----------|----|-----|---|-------------|-------------|----------|-----------------|
| 4 | 141897557 | 141897807 | 141897715 | 10 | 12  | 2 | 4.155271003 | 0.0046638   | TBC1D9   | ENSG00000109436 |
| 4 | 143933762 | 143934072 | 143933917 | 9  | 11  | 0 | 11.50690432 | 0.000313206 | INPP4B   | ENSG00000109452 |
| 4 | 144441479 | 144441867 | 144441641 | 18 | 24  | 1 | 11.98635866 | 6.63E-07    |          | ENSG00000200049 |
| 4 | 144914761 | 144914949 | 144914848 | 8  | 8   | 1 | 4.315089119 | 0.0127267   | FREM3    | ENSG00000183090 |
| 4 | 146648389 | 146648770 | 146648580 | 43 | 53  | 0 | 51.78106943 | 1.70E-16    | SMAD1    | ENSG00000170365 |
| 4 | 147195274 | 147195589 | 147195437 | 9  | 12  | 1 | 6.232906505 | 0.00117736  |          | ENSG00000216055 |
| 4 | 148824866 | 148825090 | 148824962 | 8  | 10  | 4 | 2.109599125 | 0.0694668   |          | ENSG00000164169 |
| 4 | 148972443 | 148972652 | 148972547 | 8  | 9   | 2 | 3.19636231  | 0.0229249   |          | ENSG00000208847 |
| 4 | 149007545 | 149007749 | 149007595 | 8  | 8   | 1 | 4.315089119 | 0.0127267   |          | ENSG00000208847 |
| 4 | 149188058 | 149188300 | 149188191 | 8  | 10  | 2 | 3.515998541 | 0.0136204   |          | ENSG00000208847 |
| 4 | 152901585 | 152901824 | 152901704 | 11 | 12  | 1 | 6.232906505 | 0.00117736  | PET112L  | ENSG00000059691 |
| 4 | 153399514 | 153400100 | 153399766 | 42 | 58  | 0 | 56.57561289 | 5.90E-18    |          | ENSG00000208788 |
| 4 | 153405790 | 153405993 | 153405891 | 11 | 11  | 2 | 3.835634772 | 0.00800699  |          | ENSG00000208788 |
| 4 | 153492938 | 153493644 | 153493239 | 54 | 97  | 3 | 23.49326298 | 4.87E-25    | FBXW7    | ENSG00000109670 |
| 4 | 153919484 | 153919681 | 153919582 | 8  | 9   | 4 | 1.917817386 | 0.103282    | TIGD4    | ENSG00000169989 |
| 4 | 154627505 | 154627690 | 154627561 | 10 | 10  | 2 | 3.515998541 | 0.0136204   | KIAA0922 | ENSG00000121210 |
| 4 | 154932883 | 154933190 | 154933036 | 8  | 13  | 1 | 6.712360851 | 0.000640982 | SFRP2    | ENSG00000145423 |
| 4 | 157627704 | 157627976 | 157627863 | 14 | 15  | 3 | 3.835634772 | 0.00291691  |          | ENSG00000221189 |
| 4 | 157797003 | 157797205 | 157797104 | 8  | 8   | 0 | 8.630178238 | 0.00235436  | PDGFC    | ENSG00000145431 |
| 4 | 157911726 | 157912441 | 157912262 | 76 | 108 | 3 | 26.13026189 | 4.07E-28    | PDGFC    | ENSG00000145431 |
| 4 | 159311787 | 159312212 | 159311966 | 48 | 59  | 1 | 28.76726079 | 9.15E-17    | C4orf18  | ENSG00000164125 |
| 4 | 159351040 | 159351259 | 159351179 | 9  | 9   | 1 | 4.794543465 | 0.00708517  | TMEM144  | ENSG00000164124 |
| 4 | 160824757 | 160825079 | 160824932 | 12 | 15  | 1 | 7.671269544 | 0.000187863 |          | ENSG00000208635 |
| 4 | 161005068 | 161005247 | 161005157 | 8  | 8   | 1 | 4.315089119 | 0.0127267   |          | ENSG00000208635 |
| 4 | 161459790 | 161460137 | 161459963 | 12 | 15  | 9 | 1.534253909 | 0.136498    |          | ENSG00000208632 |
| 4 | 163096265 | 163096682 | 163096561 | 9  | 18  | 0 | 18.21926517 | 2.83E-06    | FSTL5    | ENSG00000168843 |
| 4 | 163478812 | 163479208 | 163479034 | 19 | 29  | 2 | 9.589086931 | 2.21E-07    |          | ENSG00000208630 |
| 4 | 163824796 | 163824985 | 163824877 | 12 | 12  | 1 | 6.232906505 | 0.00117736  |          | ENSG00000208630 |
| 4 | 164691083 | 164691327 | 164691154 | 9  | 11  | 0 | 11.50690432 | 0.000313206 | C4orf43  | ENSG00000198498 |
| 4 | 165677366 | 165677844 | 165677593 | 41 | 53  | 0 | 51.78106943 | 1.70E-16    |          | ENSG00000223037 |
| 4 | 165920448 | 165920689 | 165920568 | 8  | 10  | 4 | 2.109599125 | 0.0694668   |          | ENSG00000201050 |
| 4 | 166253658 | 166253988 | 166253823 | 10 | 14  | 1 | 7.191815198 | 0.00034761  | TMEM192  | ENSG00000170088 |
| 4 | 166969604 | 166969902 | 166969753 | 15 | 17  | 0 | 17.26035648 | 5.54E-06    | TLL1     | ENSG00000038295 |
| 4 | 169054818 | 169055283 | 169055069 | 58 | 72  | 3 | 17.50008365 | 4.15E-18    |          | ENSG00000221576 |

|   |           |           |           |    |    |   |             |             |          |                 |
|---|-----------|-----------|-----------|----|----|---|-------------|-------------|----------|-----------------|
| 4 | 169659158 | 169659368 | 169659263 | 10 | 10 | 1 | 5.273997812 | 0.00391723  | PALLD    | ENSG00000129116 |
| 4 | 170191484 | 170191842 | 170191663 | 16 | 22 | 5 | 3.675816657 | 0.000667901 | CBR4     | ENSG00000145439 |
| 4 | 170227764 | 170228009 | 170227903 | 10 | 11 | 3 | 2.876726079 | 0.0213797   | CBR4     | ENSG00000145439 |
| 4 | 170777376 | 170777576 | 170777476 | 9  | 9  | 0 | 9.589086931 | 0.00120187  | CLCN3    | ENSG00000109572 |
| 4 | 171184980 | 171185292 | 171185124 | 10 | 14 | 0 | 14.3836304  | 4.17E-05    | MFAP3L   | ENSG00000198948 |
| 4 | 172272728 | 172272926 | 172272838 | 9  | 9  | 0 | 9.589086931 | 0.00120187  |          |                 |
| 4 | 172361215 | 172361482 | 172361348 | 9  | 12 | 3 | 3.116453252 | 0.0131971   |          |                 |
| 4 | 174139924 | 174140416 | 174140159 | 74 | 91 | 3 | 22.05489994 | 2.29E-23    |          | ENSG00000205182 |
| 4 | 174367330 | 174367509 | 174367419 | 8  | 8  | 1 | 4.315089119 | 0.0127267   |          | ENSG00000221426 |
| 4 | 177173583 | 177173790 | 177173687 | 10 | 10 | 0 | 10.54799562 | 0.000613541 | GPM6A    | ENSG00000150625 |
| 4 | 178182170 | 178182559 | 178182348 | 10 | 17 | 3 | 4.315089119 | 0.00102271  |          | ENSG00000208515 |
| 4 | 178669795 | 178670152 | 178669973 | 46 | 51 | 3 | 12.46581301 | 2.13E-12    |          | ENSG00000221499 |
| 4 | 178754194 | 178754407 | 178754336 | 10 | 12 | 1 | 6.232906505 | 0.00117736  |          | ENSG00000221499 |
| 4 | 181856849 | 181857234 | 181857055 | 13 | 20 | 0 | 20.13708255 | 7.37E-07    |          | ENSG00000214628 |
| 4 | 187857570 | 187857893 | 187857731 | 19 | 21 | 0 | 21.09599125 | 3.76E-07    | FAT1     | ENSG00000083857 |
| 4 | 188078680 | 188079002 | 188078835 | 35 | 37 | 0 | 36.43853034 | 8.01E-12    | FAT1     | ENSG00000083857 |
| 4 | 190889449 | 190889628 | 190889570 | 8  | 8  | 2 | 2.876726079 | 0.0381137   |          | ENSG00000202215 |
| 5 | 67592     | 67988     | 67811     | 62 | 69 | 0 | 67.12360851 | 3.62E-21    | PLEKHG4B | ENSG00000153404 |
| 5 | 477856    | 478150    | 478023    | 10 | 13 | 0 | 13.4247217  | 8.16E-05    |          | ENSG00000221990 |
| 5 | 1126526   | 1126850   | 1126695   | 14 | 15 | 0 | 15.34253909 | 2.13E-05    | NKD2     | ENSG00000145506 |
| 5 | 1221287   | 1221510   | 1221398   | 10 | 10 | 3 | 2.636998906 | 0.034203    | SLC6A19  | ENSG00000174358 |
| 5 | 1425015   | 1425305   | 1425150   | 10 | 13 | 0 | 13.4247217  | 8.16E-05    |          | ENSG00000215245 |
| 5 | 1569256   | 1569643   | 1569435   | 15 | 22 | 2 | 7.351633313 | 1.51E-05    | LPCAT1   | ENSG00000153395 |
| 5 | 1861625   | 1861901   | 1861765   | 13 | 14 | 0 | 14.3836304  | 4.17E-05    | NDUFS6   | ENSG00000145494 |
| 5 | 2091307   | 2091518   | 2091409   | 8  | 9  | 1 | 4.794543465 | 0.00708517  |          | ENSG00000201026 |
| 5 | 4072513   | 4072896   | 4072717   | 13 | 21 | 0 | 21.09599125 | 3.76E-07    |          | ENSG00000221195 |
| 5 | 5324468   | 5324754   | 5324616   | 8  | 10 | 2 | 3.515998541 | 0.0136204   |          | ENSG00000209884 |
| 5 | 5475394   | 5475684   | 5475557   | 12 | 14 | 7 | 1.797953799 | 0.0806593   |          | ENSG00000164151 |
| 5 | 5758222   | 5758601   | 5758363   | 16 | 23 | 1 | 11.50690432 | 1.25E-06    |          | ENSG00000164151 |
| 5 | 5834526   | 5834811   | 5834660   | 16 | 17 | 0 | 17.26035648 | 5.54E-06    |          | ENSG00000221568 |
| 5 | 6729125   | 6729680   | 6729293   | 21 | 34 | 0 | 33.56180426 | 6.02E-11    | POLS     | ENSG00000112941 |
| 5 | 6818785   | 6819134   | 6818959   | 23 | 29 | 9 | 2.876726079 | 0.000832979 | POLS     | ENSG00000112941 |
| 5 | 7720400   | 7720767   | 7720611   | 9  | 15 | 3 | 3.835634772 | 0.00291691  | C5orf49  | ENSG00000215217 |
| 5 | 10199111  | 10199290  | 10199215  | 8  | 8  | 4 | 1.726035648 | 0.150596    |          | ENSG00000196193 |

|   |          |          |          |    |    |    |             |             |          |                 |
|---|----------|----------|----------|----|----|----|-------------|-------------|----------|-----------------|
| 5 | 10360471 | 10361024 | 10360650 | 20 | 39 | 6  | 5.479478246 | 3.16E-07    | CMBL     | ENSG00000164237 |
| 5 | 10363502 | 10363779 | 10363671 | 8  | 10 | 1  | 5.273997812 | 0.00391723  | CMBL     | ENSG00000164237 |
| 5 | 10406223 | 10406490 | 10406356 | 9  | 12 | 0  | 12.46581301 | 0.000159888 | 6-Mar    | ENSG00000145495 |
| 5 | 10427242 | 10427422 | 10427251 | 9  | 9  | 7  | 1.198635866 | 0.346278    |          | ENSG00000209963 |
| 5 | 10506820 | 10507027 | 10506976 | 8  | 8  | 3  | 2.157544559 | 0.0836802   | ROPN1L   | ENSG00000145491 |
| 5 | 10581477 | 10581934 | 10581725 | 73 | 93 | 1  | 45.06870857 | 1.67E-26    |          | ENSG00000214179 |
| 5 | 10654540 | 10654843 | 10654691 | 11 | 14 | 3  | 3.595907599 | 0.00486913  | ANKRD33B | ENSG00000164236 |
| 5 | 10680981 | 10681237 | 10681072 | 11 | 13 | 3  | 3.356180426 | 0.00805599  | ANKRD33B | ENSG00000164236 |
| 5 | 10813406 | 10813666 | 10813530 | 8  | 10 | 3  | 2.636998906 | 0.034203    | DAP      | ENSG00000112977 |
| 5 | 14317691 | 14317926 | 14317808 | 8  | 10 | 3  | 2.636998906 | 0.034203    | TRIO     | ENSG00000038382 |
| 5 | 14321307 | 14321644 | 14321475 | 10 | 15 | 2  | 5.114179696 | 0.00088103  | TRIO     | ENSG00000038382 |
| 5 | 14405319 | 14405516 | 14405447 | 8  | 8  | 3  | 2.157544559 | 0.0836802   | TRIO     | ENSG00000038382 |
| 5 | 14833138 | 14833340 | 14833239 | 9  | 9  | 1  | 4.794543465 | 0.00708517  |          | ENSG00000212736 |
| 5 | 14999617 | 15000265 | 15000086 | 63 | 83 | 4  | 16.10966604 | 4.16E-20    |          | ENSG00000212036 |
| 5 | 15012552 | 15013013 | 15012815 | 8  | 17 | 1  | 8.630178238 | 5.44E-05    |          | ENSG00000212036 |
| 5 | 15061711 | 15061945 | 15061829 | 8  | 10 | 3  | 2.636998906 | 0.034203    |          | ENSG00000212036 |
| 5 | 16228310 | 16228521 | 16228436 | 9  | 13 | 1  | 6.712360851 | 0.000640982 | 11-Mar   | ENSG00000183654 |
| 5 | 16947649 | 16947910 | 16947774 | 9  | 12 | 3  | 3.116453252 | 0.0131971   | MYO10    | ENSG00000145555 |
| 5 | 17199024 | 17199213 | 17199109 | 8  | 8  | 3  | 2.157544559 | 0.0836802   |          | ENSG00000209068 |
| 5 | 17266436 | 17266637 | 17266559 | 8  | 8  | 2  | 2.876726079 | 0.0381137   |          | ENSG00000215196 |
| 5 | 17355315 | 17355579 | 17355443 | 14 | 17 | 3  | 4.315089119 | 0.00102271  |          | ENSG00000185296 |
| 5 | 17358915 | 17359494 | 17359180 | 16 | 36 | 10 | 3.225420149 | 8.71E-05    |          | ENSG00000185296 |
| 5 | 17365548 | 17365778 | 17365663 | 8  | 8  | 4  | 1.726035648 | 0.150596    |          | ENSG00000185296 |
| 5 | 17394102 | 17394304 | 17394178 | 8  | 8  | 6  | 1.232882605 | 0.333038    |          | ENSG00000201715 |
| 5 | 17396868 | 17397105 | 17396986 | 9  | 10 | 4  | 2.109599125 | 0.0694668   |          | ENSG00000201715 |
| 5 | 17428536 | 17428715 | 17428610 | 9  | 9  | 1  | 4.794543465 | 0.00708517  |          | ENSG00000201715 |
| 5 | 17479584 | 17479872 | 17479742 | 8  | 10 | 0  | 10.54799562 | 0.000613541 |          | ENSG00000185041 |
| 5 | 17987738 | 17987936 | 17987842 | 10 | 11 | 2  | 3.835634772 | 0.00800699  |          | ENSG00000212278 |
| 5 | 18430276 | 18430480 | 18430376 | 8  | 9  | 4  | 1.917817386 | 0.103282    |          | ENSG00000210087 |
| 5 | 18828247 | 18828426 | 18828306 | 8  | 8  | 0  | 8.630178238 | 0.00235436  |          | ENSG00000210097 |
| 5 | 19358626 | 19359025 | 19358801 | 31 | 38 | 2  | 12.46581301 | 8.46E-10    |          | ENSG00000210097 |
| 5 | 19436875 | 19437202 | 19437038 | 14 | 17 | 4  | 3.452071295 | 0.00292757  | CDH18    | ENSG00000145526 |
| 5 | 19820136 | 19820443 | 19820298 | 29 | 30 | 2  | 9.908723162 | 1.20E-07    | CDH18    | ENSG00000145526 |
| 5 | 19927453 | 19927634 | 19927602 | 8  | 8  | 2  | 2.876726079 | 0.0381137   | CDH18    | ENSG00000145526 |

|   |          |          |          |     |     |    |             |             |         |                 |
|---|----------|----------|----------|-----|-----|----|-------------|-------------|---------|-----------------|
| 5 | 19927645 | 19927839 | 19927689 | 8   | 8   | 2  | 2.876726079 | 0.0381137   | CDH18   | ENSG00000145526 |
| 5 | 20145291 | 20145540 | 20145427 | 8   | 8   | 3  | 2.157544559 | 0.0836802   | CDH18   | ENSG00000145526 |
| 5 | 21595084 | 21595303 | 21595193 | 9   | 10  | 2  | 3.515998541 | 0.0136204   |         | ENSG00000198014 |
| 5 | 22286353 | 22286532 | 22286504 | 8   | 8   | 0  | 8.630178238 | 0.00235436  | PMCHL1  | ENSG00000168967 |
| 5 | 22286534 | 22286754 | 22286644 | 9   | 11  | 0  | 11.50690432 | 0.000313206 | PMCHL1  | ENSG00000168967 |
| 5 | 24859598 | 24859799 | 24859698 | 8   | 8   | 0  | 8.630178238 | 0.00235436  |         | ENSG00000223004 |
| 5 | 27507753 | 27508286 | 27507983 | 66  | 87  | 0  | 84.38396499 | 2.01E-26    |         | ENSG00000207261 |
| 5 | 28891557 | 28892065 | 28891757 | 15  | 27  | 0  | 26.84944341 | 6.66E-09    |         | ENSG00000210223 |
| 5 | 29895868 | 29896051 | 29895979 | 8   | 8   | 0  | 8.630178238 | 0.00235436  |         | ENSG00000223136 |
| 5 | 30901389 | 30901724 | 30901556 | 10  | 15  | 1  | 7.671269544 | 0.000187863 | CDH6    | ENSG00000113361 |
| 5 | 31379914 | 31380103 | 31380000 | 9   | 10  | 3  | 2.636998906 | 0.034203    | C5orf22 | ENSG00000082213 |
| 5 | 31624647 | 31625129 | 31625008 | 10  | 20  | 1  | 10.06854128 | 8.32E-06    |         | ENSG00000199765 |
| 5 | 31970132 | 31970352 | 31970242 | 10  | 10  | 3  | 2.636998906 | 0.034203    |         | ENSG00000214108 |
| 5 | 32841931 | 32842179 | 32842075 | 8   | 10  | 1  | 5.273997812 | 0.00391723  | C5orf23 | ENSG00000181495 |
| 5 | 33476468 | 33476693 | 33476580 | 10  | 11  | 1  | 5.753452158 | 0.00215302  | TARS    | ENSG00000113407 |
| 5 | 34488192 | 34488403 | 34488270 | 8   | 9   | 2  | 3.19636231  | 0.0229249   |         | ENSG00000222261 |
| 5 | 34545311 | 34545504 | 34545407 | 8   | 8   | 0  | 8.630178238 | 0.00235436  |         | ENSG00000222261 |
| 5 | 34994028 | 34994279 | 34994150 | 9   | 11  | 5  | 1.917817386 | 0.0843804   | DNAJC21 | ENSG00000168724 |
| 5 | 35125572 | 35125807 | 35125689 | 8   | 10  | 5  | 1.757999271 | 0.121253    | PRLR    | ENSG00000113494 |
| 5 | 35223987 | 35224244 | 35224081 | 10  | 13  | 6  | 1.917817386 | 0.0693353   | PRLR    | ENSG00000113494 |
| 5 | 35249503 | 35249831 | 35249651 | 11  | 15  | 11 | 1.278544924 | 0.254978    | PRLR    | ENSG00000113494 |
| 5 | 35265311 | 35265509 | 35265432 | 8   | 10  | 3  | 2.636998906 | 0.034203    | PRLR    | ENSG00000113494 |
| 5 | 35266034 | 35266512 | 35266368 | 8   | 16  | 6  | 2.328778255 | 0.0221113   | PRLR    | ENSG00000113494 |
| 5 | 35342585 | 35342877 | 35342731 | 8   | 11  | 3  | 2.876726079 | 0.0213797   | PRLR    | ENSG00000113494 |
| 5 | 36077458 | 36077786 | 36077622 | 15  | 19  | 0  | 19.17817386 | 1.44E-06    | UGT3A2  | ENSG00000168671 |
| 5 | 36414458 | 36414864 | 36414637 | 26  | 34  | 3  | 8.390451064 | 6.50E-08    | RANBP3L | ENSG00000164188 |
| 5 | 36477937 | 36478978 | 36478366 | 124 | 203 | 10 | 17.78339758 | 1.00E-46    |         | ENSG00000222178 |
| 5 | 36781095 | 36781389 | 36781242 | 8   | 12  | 7  | 1.558226626 | 0.152813    | NIPBL   | ENSG00000164190 |
| 5 | 37448942 | 37449144 | 37449043 | 8   | 8   | 4  | 1.726035648 | 0.150596    | WDR70   | ENSG00000082068 |
| 5 | 37753293 | 37753602 | 37753447 | 9   | 12  | 2  | 4.155271003 | 0.0046638   |         | ENSG00000206743 |
| 5 | 37883607 | 37884196 | 37883901 | 125 | 169 | 3  | 40.75361945 | 2.31E-45    | GDNF    | ENSG00000168621 |
| 5 | 37902500 | 37902768 | 37902634 | 12  | 13  | 0  | 13.4247217  | 8.16E-05    | GDNF    | ENSG00000168621 |
| 5 | 38463013 | 38463463 | 38463229 | 49  | 62  | 2  | 20.13708255 | 2.06E-16    | EGFLAM  | ENSG00000164318 |
| 5 | 39136757 | 39137087 | 39136913 | 9   | 10  | 6  | 1.506856518 | 0.188853    |         | ENSG00000164327 |

|   |          |          |          |    |     |    |             |             |         |                 |
|---|----------|----------|----------|----|-----|----|-------------|-------------|---------|-----------------|
| 5 | 39227162 | 39227341 | 39227237 | 8  | 8   | 2  | 2.876726079 | 0.0381137   | FYB     | ENSG00000082074 |
| 5 | 39319300 | 39319498 | 39319413 | 8  | 8   | 0  | 8.630178238 | 0.00235436  | FYB     | ENSG00000082074 |
| 5 | 39684688 | 39684931 | 39684809 | 8  | 10  | 2  | 3.515998541 | 0.0136204   | DAB2    | ENSG00000153071 |
| 5 | 39752457 | 39752840 | 39752599 | 12 | 16  | 3  | 4.075361945 | 0.00173346  | DAB2    | ENSG00000153071 |
| 5 | 40465430 | 40465714 | 40465583 | 14 | 16  | 1  | 8.150723891 | 0.000101217 |         | ENSG00000199361 |
| 5 | 40554992 | 40555175 | 40555090 | 9  | 9   | 1  | 4.794543465 | 0.00708517  |         | ENSG00000199552 |
| 5 | 40604477 | 40604850 | 40604671 | 20 | 28  | 1  | 13.90417605 | 5.17E-08    |         | ENSG00000199552 |
| 5 | 40637052 | 40637492 | 40637316 | 29 | 44  | 4  | 8.630178238 | 9.65E-10    |         | ENSG00000199552 |
| 5 | 40732992 | 40733321 | 40733156 | 14 | 14  | 0  | 14.3836304  | 4.17E-05    | PTGER4  | ENSG00000171522 |
| 5 | 40871085 | 40871313 | 40871199 | 11 | 12  | 5  | 2.077635502 | 0.0577144   | RPL37   | ENSG00000145592 |
| 5 | 41158291 | 41158720 | 41158545 | 65 | 73  | 3  | 17.73981082 | 2.20E-18    |         | ENSG00000171495 |
| 5 | 42619161 | 42619478 | 42619301 | 15 | 19  | 4  | 3.835634772 | 0.00108365  |         | ENSG00000215083 |
| 5 | 42634094 | 42634533 | 42634354 | 23 | 34  | 3  | 8.390451064 | 6.50E-08    |         | ENSG00000215083 |
| 5 | 42691902 | 42692168 | 42692023 | 9  | 12  | 0  | 12.46581301 | 0.000159888 | CCDC152 | ENSG00000198865 |
| 5 | 42986235 | 42986544 | 42986398 | 8  | 12  | 3  | 3.116453252 | 0.0131971   |         | ENSG00000177738 |
| 5 | 43042993 | 43044074 | 43043533 | 74 | 123 | 5  | 19.81744632 | 4.98E-30    |         | ENSG00000177738 |
| 5 | 43076152 | 43076466 | 43076306 | 8  | 11  | 1  | 5.753452158 | 0.00215302  |         | ENSG00000215068 |
| 5 | 43100744 | 43101040 | 43100877 | 11 | 15  | 1  | 7.671269544 | 0.000187863 | C5orf39 | ENSG00000177721 |
| 5 | 43102709 | 43102903 | 43102806 | 8  | 9   | 3  | 2.397271733 | 0.0539397   | C5orf39 | ENSG00000177721 |
| 5 | 43141610 | 43141842 | 43141720 | 10 | 10  | 6  | 1.506856518 | 0.188853    | ZNF131  | ENSG00000172262 |
| 5 | 43244403 | 43244846 | 43244542 | 21 | 28  | 4  | 5.56167042  | 9.22E-06    |         | ENSG00000177453 |
| 5 | 43263641 | 43263847 | 43263732 | 8  | 10  | 2  | 3.515998541 | 0.0136204   |         | ENSG00000177453 |
| 5 | 43464560 | 43464764 | 43464696 | 9  | 10  | 0  | 10.54799562 | 0.000613541 | CCL28   | ENSG00000151882 |
| 5 | 43465611 | 43465987 | 43465734 | 9  | 13  | 3  | 3.356180426 | 0.00805599  | CCL28   | ENSG00000151882 |
| 5 | 43519123 | 43519345 | 43519234 | 8  | 9   | 3  | 2.397271733 | 0.0539397   | C5orf28 | ENSG00000151881 |
| 5 | 43550325 | 43550574 | 43550448 | 8  | 9   | 0  | 9.589086931 | 0.00120187  | C5orf34 | ENSG00000172244 |
| 5 | 43662837 | 43663135 | 43662998 | 9  | 10  | 4  | 2.109599125 | 0.0694668   | NNT     | ENSG00000112992 |
| 5 | 44038488 | 44038825 | 44038651 | 21 | 25  | 3  | 6.232906505 | 1.23E-05    |         | ENSG00000212561 |
| 5 | 44764130 | 44764442 | 44764286 | 17 | 20  | 0  | 20.13708255 | 7.37E-07    |         | ENSG00000222995 |
| 5 | 44786190 | 44786423 | 44786316 | 10 | 12  | 3  | 3.116453252 | 0.0131971   |         | ENSG00000222995 |
| 5 | 46433321 | 46433654 | 46433487 | 31 | 31  | 14 | 2.045671879 | 0.00841532  |         |                 |
| 5 | 49486215 | 49486551 | 49486383 | 43 | 43  | 41 | 1.004571012 | 0.490923    | EMB     | ENSG00000170571 |
| 5 | 49537700 | 49538028 | 49537864 | 12 | 12  | 13 | 0.890415215 | 0.619237    | EMB     | ENSG00000170571 |
| 5 | 49755053 | 49755427 | 49755173 | 22 | 28  | 0  | 27.8083521  | 3.40E-09    | EMB     | ENSG00000170571 |

|   |          |          |          |     |     |   |             |             |         |                 |
|---|----------|----------|----------|-----|-----|---|-------------|-------------|---------|-----------------|
| 5 | 50533808 | 50534233 | 50533934 | 9   | 16  | 3 | 4.075361945 | 0.00173346  |         | ENSG00000206606 |
| 5 | 51929422 | 51929880 | 51929597 | 24  | 35  | 0 | 34.52071295 | 3.07E-11    | PELO    | ENSG00000152684 |
| 5 | 52132454 | 52132776 | 52132649 | 14  | 18  | 1 | 9.109632584 | 2.91E-05    | PELO    | ENSG00000152684 |
| 5 | 52359701 | 52359922 | 52359811 | 10  | 10  | 2 | 3.515998541 | 0.0136204   | ITGA2   | ENSG00000164171 |
| 5 | 52822260 | 52822843 | 52822464 | 84  | 105 | 5 | 16.94072024 | 4.21E-25    | FST     | ENSG00000134363 |
| 5 | 53114325 | 53114631 | 53114477 | 11  | 14  | 1 | 7.191815198 | 0.00034761  |         | ENSG00000222077 |
| 5 | 53198102 | 53198286 | 53198211 | 9   | 9   | 1 | 4.794543465 | 0.00708517  |         | ENSG00000217791 |
| 5 | 53736114 | 53736476 | 53736274 | 21  | 27  | 1 | 13.4247217  | 9.80E-08    | HSPB3   | ENSG00000169271 |
| 5 | 54478268 | 54478513 | 54478377 | 11  | 14  | 5 | 2.397271733 | 0.0258078   | GPX8    | ENSG00000164294 |
| 5 | 54639309 | 54639564 | 54639436 | 10  | 12  | 2 | 4.155271003 | 0.0046638   | SKIV2L2 | ENSG00000039123 |
| 5 | 54924579 | 54924954 | 54924775 | 16  | 24  | 1 | 11.98635866 | 6.63E-07    | PPAP2A  | ENSG00000067113 |
| 5 | 55682132 | 55682436 | 55682296 | 9   | 12  | 3 | 3.116453252 | 0.0131971   |         | ENSG00000210678 |
| 5 | 56152377 | 56152715 | 56152532 | 14  | 19  | 4 | 3.835634772 | 0.00108365  | MAP3K1  | ENSG00000095015 |
| 5 | 56193731 | 56193985 | 56193858 | 12  | 15  | 2 | 5.114179696 | 0.00088103  | C5orf35 | ENSG00000155542 |
| 5 | 56399092 | 56399568 | 56399311 | 74  | 96  | 0 | 93.01414323 | 4.73E-29    |         | ENSG00000218706 |
| 5 | 56505422 | 56505618 | 56505520 | 8   | 8   | 2 | 2.876726079 | 0.0381137   | GPBP1   | ENSG00000062194 |
| 5 | 56506316 | 56506666 | 56506491 | 11  | 13  | 2 | 4.474907234 | 0.00269459  | GPBP1   | ENSG00000062194 |
| 5 | 56826238 | 56826826 | 56826475 | 50  | 68  | 3 | 16.54117496 | 5.19E-17    | ACTBL2  | ENSG00000169067 |
| 5 | 57019541 | 57019720 | 57019642 | 9   | 9   | 2 | 3.19636231  | 0.0229249   | ACTBL2  | ENSG00000169067 |
| 5 | 57166722 | 57167395 | 57166985 | 146 | 200 | 1 | 96.37032365 | 2.01E-57    |         | ENSG00000209041 |
| 5 | 57321082 | 57321293 | 57321187 | 9   | 9   | 7 | 1.198635866 | 0.346278    |         | ENSG00000209041 |
| 5 | 57412203 | 57412647 | 57412368 | 10  | 16  | 3 | 4.075361945 | 0.00173346  |         | ENSG00000209041 |
| 5 | 57425694 | 57425919 | 57425799 | 9   | 10  | 3 | 2.636998906 | 0.034203    |         | ENSG00000209041 |
| 5 | 57793653 | 57794104 | 57793869 | 126 | 157 | 0 | 151.5075735 | 7.27E-47    | PLK2    | ENSG00000145632 |
| 5 | 57794277 | 57794536 | 57794406 | 11  | 12  | 0 | 12.46581301 | 0.000159888 | PLK2    | ENSG00000145632 |
| 5 | 57857472 | 57857652 | 57857554 | 8   | 8   | 2 | 2.876726079 | 0.0381137   | GAPT    | ENSG00000175857 |
| 5 | 57914218 | 57914397 | 57914307 | 8   | 8   | 5 | 1.43836304  | 0.235762    | RAB3C   | ENSG00000152932 |
| 5 | 58459285 | 58459542 | 58459413 | 9   | 12  | 2 | 4.155271003 | 0.0046638   | PDE4D   | ENSG00000113448 |
| 5 | 58607298 | 58607571 | 58607456 | 8   | 10  | 1 | 5.273997812 | 0.00391723  | PDE4D   | ENSG00000113448 |
| 5 | 58633345 | 58633722 | 58633543 | 14  | 21  | 2 | 7.031997082 | 2.73E-05    | PDE4D   | ENSG00000113448 |
| 5 | 58648911 | 58649231 | 58649067 | 11  | 13  | 3 | 3.356180426 | 0.00805599  | PDE4D   | ENSG00000113448 |
| 5 | 59785201 | 59785432 | 59785316 | 11  | 12  | 1 | 6.232906505 | 0.00117736  |         | ENSG00000213896 |
| 5 | 60041774 | 60041974 | 60041836 | 8   | 8   | 6 | 1.232882605 | 0.333038    | DEPDC1B | ENSG00000035499 |
| 5 | 60494489 | 60494751 | 60494620 | 9   | 11  | 9 | 1.150690432 | 0.367789    | C5orf43 | ENSG00000188725 |



|   |          |          |          |    |     |     |             |             |         |                 |
|---|----------|----------|----------|----|-----|-----|-------------|-------------|---------|-----------------|
| 5 | 60633360 | 60633545 | 60633457 | 8  | 9   | 0   | 9.589086931 | 0.00120187  | FAM133B | ENSG00000183055 |
| 5 | 60703107 | 60703396 | 60703252 | 8  | 9   | 8   | 1.065454103 | 0.442605    | FAM133B | ENSG00000183055 |
| 5 | 60740213 | 60740467 | 60740329 | 10 | 11  | 1   | 5.753452158 | 0.00215302  |         | ENSG00000213891 |
| 5 | 61136737 | 61137037 | 61136887 | 26 | 28  | 6   | 3.972621728 | 9.48E-05    |         | ENSG00000178722 |
| 5 | 61399382 | 61399568 | 61399475 | 8  | 8   | 3   | 2.157544559 | 0.0836802   | KIF2A   | ENSG00000068796 |
| 5 | 61611553 | 61612098 | 61611858 | 50 | 66  | 1   | 32.12344122 | 9.20E-19    | KIF2A   | ENSG00000068796 |
| 5 | 61799195 | 61799384 | 61799289 | 8  | 9   | 2   | 3.19636231  | 0.0229249   |         | ENSG00000199279 |
| 5 | 63100117 | 63100371 | 63100260 | 8  | 11  | 0   | 11.50690432 | 0.000313206 | HTR1A   | ENSG00000178394 |
| 5 | 65320159 | 65320338 | 65320293 | 8  | 8   | 1   | 4.315089119 | 0.0127267   | ERBB2IP | ENSG00000112851 |
| 5 | 65927430 | 65927628 | 65927529 | 8  | 8   | 6   | 1.232882605 | 0.333038    | MAST4   | ENSG00000069020 |
| 5 | 65929005 | 65929330 | 65929156 | 11 | 16  | 1   | 8.150723891 | 0.000101217 | MAST4   | ENSG00000069020 |
| 5 | 66336106 | 66336305 | 66336266 | 8  | 9   | 5   | 1.598181155 | 0.170911    | MAST4   | ENSG00000069020 |
| 5 | 66426371 | 66426732 | 66426550 | 18 | 25  | 0   | 24.93162602 | 2.56E-08    | MAST4   | ENSG00000069020 |
| 5 | 67295867 | 67296155 | 67296011 | 8  | 10  | 0   | 10.54799562 | 0.000613541 |         | ENSG00000223149 |
| 5 | 67880904 | 67881136 | 67881033 | 9  | 12  | 1   | 6.232906505 | 0.00117736  | PIK3R1  | ENSG00000145675 |
| 5 | 71182352 | 71182846 | 71182529 | 93 | 126 | 105 | 1.14888117  | 0.144676    |         | ENSG00000210845 |
| 5 | 71204934 | 71205298 | 71205129 | 16 | 22  | 1   | 11.02744997 | 2.36E-06    |         | ENSG00000210845 |
| 5 | 71238683 | 71239135 | 71238909 | 37 | 52  | 3   | 12.70554018 | 1.15E-12    |         | ENSG00000210845 |
| 5 | 71651662 | 71651902 | 71651793 | 9  | 11  | 14  | 0.767126954 | 0.756447    | MRPS27  | ENSG00000113048 |
| 5 | 71694809 | 71695147 | 71694981 | 12 | 17  | 2   | 5.753452158 | 0.000281509 | PTCD2   | ENSG00000049883 |
| 5 | 71903958 | 71904283 | 71904124 | 11 | 16  | 0   | 16.30144778 | 1.09E-05    | ZNF366  | ENSG00000178175 |
| 5 | 72179568 | 72179791 | 72179679 | 8  | 10  | 1   | 5.273997812 | 0.00391723  | TNPO1   | ENSG00000083312 |
| 5 | 72286645 | 72287538 | 72286882 | 44 | 87  | 5   | 14.06399416 | 3.11E-20    | FCHO2   | ENSG00000157107 |
| 5 | 72568105 | 72568510 | 72568369 | 27 | 35  | 0   | 34.52071295 | 3.07E-11    | TMEM174 | ENSG00000164325 |
| 5 | 72659129 | 72659311 | 72659170 | 8  | 8   | 2   | 2.876726079 | 0.0381137   |         | ENSG00000183900 |
| 5 | 72896837 | 72897411 | 72897103 | 20 | 39  | 2   | 12.78544924 | 4.53E-10    | ANKRA2  | ENSG00000164331 |
| 5 | 73154628 | 73154834 | 73154731 | 9  | 9   | 1   | 4.794543465 | 0.00708517  |         | ENSG00000184084 |
| 5 | 73531421 | 73531601 | 73531503 | 8  | 8   | 1   | 4.315089119 | 0.0127267   |         | ENSG00000210914 |
| 5 | 73533078 | 73533288 | 73533183 | 9  | 11  | 2   | 3.835634772 | 0.00800699  |         | ENSG00000210914 |
| 5 | 73573454 | 73573633 | 73573543 | 8  | 8   | 3   | 2.157544559 | 0.0836802   |         | ENSG00000222551 |
| 5 | 73978670 | 73979136 | 73978845 | 34 | 54  | 1   | 26.36998906 | 2.43E-15    | ENC1    | ENSG00000171617 |
| 5 | 74098650 | 74098873 | 74098768 | 8  | 9   | 1   | 4.794543465 | 0.00708517  | GFM2    | ENSG00000164347 |
| 5 | 74287879 | 74288177 | 74288028 | 15 | 17  | 0   | 17.26035648 | 5.54E-06    |         | ENSG00000182383 |
| 5 | 74377257 | 74377438 | 74377373 | 8  | 8   | 1   | 4.315089119 | 0.0127267   | GCNT4   | ENSG00000176928 |

|   |          |          |          |    |     |   |             |             |         |                 |
|---|----------|----------|----------|----|-----|---|-------------|-------------|---------|-----------------|
| 5 | 74377903 | 74378372 | 74378193 | 21 | 32  | 1 | 15.82199344 | 3.96E-09    | GCNT4   | ENSG00000176928 |
| 5 | 74574757 | 74575006 | 74574881 | 13 | 13  | 1 | 6.712360851 | 0.000640982 | ANKRD31 | ENSG00000145700 |
| 5 | 75222139 | 75222336 | 75222251 | 8  | 10  | 5 | 1.757999271 | 0.121253    |         | ENSG00000214913 |
| 5 | 75381793 | 75382029 | 75381882 | 10 | 11  | 0 | 11.50690432 | 0.000313206 | SV2C    | ENSG00000122012 |
| 5 | 75603630 | 75603832 | 75603679 | 8  | 8   | 3 | 2.157544559 | 0.0836802   |         | ENSG00000176276 |
| 5 | 75704216 | 75704506 | 75704328 | 9  | 13  | 4 | 2.684944341 | 0.01921     |         | ENSG00000171601 |
| 5 | 76145864 | 76146100 | 76145982 | 8  | 10  | 3 | 2.636998906 | 0.034203    | F2RL1   | ENSG00000164251 |
| 5 | 76418990 | 76419169 | 76419079 | 8  | 8   | 1 | 4.315089119 | 0.0127267   | ZBED3   | ENSG00000132846 |
| 5 | 76461046 | 76461310 | 76461178 | 8  | 9   | 3 | 2.397271733 | 0.0539397   |         | ENSG00000222316 |
| 5 | 76500452 | 76500895 | 76500625 | 11 | 19  | 8 | 2.130908207 | 0.0233014   |         | ENSG00000222316 |
| 5 | 77211474 | 77211858 | 77211681 | 18 | 25  | 2 | 8.310542006 | 2.50E-06    |         | ENSG00000213763 |
| 5 | 77230042 | 77230328 | 77230177 | 11 | 12  | 2 | 4.155271003 | 0.0046638   |         | ENSG00000213763 |
| 5 | 77277973 | 77278304 | 77278130 | 11 | 15  | 2 | 5.114179696 | 0.00088103  |         | ENSG00000222085 |
| 5 | 77536037 | 77536431 | 77536203 | 8  | 13  | 5 | 2.237453617 | 0.038866    | AP3B1   | ENSG00000132842 |
| 5 | 77627479 | 77627745 | 77627594 | 9  | 12  | 3 | 3.116453252 | 0.0131971   | AP3B1   | ENSG00000132842 |
| 5 | 77677094 | 77677820 | 77677494 | 85 | 114 | 5 | 18.37908328 | 1.47E-27    | SCAMP1  | ENSG00000085365 |
| 5 | 77926768 | 77927020 | 77926919 | 8  | 11  | 6 | 1.643843474 | 0.137712    | LHFPL2  | ENSG00000145685 |
| 5 | 78031372 | 78031782 | 78031551 | 8  | 15  | 2 | 5.114179696 | 0.00088103  | LHFPL2  | ENSG00000145685 |
| 5 | 78296635 | 78296814 | 78296724 | 8  | 8   | 3 | 2.157544559 | 0.0836802   | ARSB    | ENSG00000113273 |
| 5 | 78356585 | 78356936 | 78356761 | 10 | 15  | 1 | 7.671269544 | 0.000187863 |         | ENSG00000214890 |
| 5 | 78465210 | 78465389 | 78465326 | 8  | 9   | 6 | 1.369869562 | 0.253675    | BHMT    | ENSG00000145692 |
| 5 | 78465403 | 78465730 | 78465566 | 8  | 14  | 7 | 1.797953799 | 0.0806593   | BHMT    | ENSG00000145692 |
| 5 | 78505376 | 78505597 | 78505486 | 9  | 11  | 2 | 3.835634772 | 0.00800699  |         | ENSG00000201955 |
| 5 | 78525373 | 78525620 | 78525529 | 13 | 15  | 3 | 3.835634772 | 0.00291691  |         | ENSG00000201955 |
| 5 | 78635889 | 78636093 | 78635991 | 9  | 9   | 2 | 3.19636231  | 0.0229249   |         | ENSG00000213757 |
| 5 | 78637310 | 78637620 | 78637465 | 15 | 18  | 0 | 18.21926517 | 2.83E-06    |         | ENSG00000213757 |
| 5 | 78879663 | 78879897 | 78879742 | 9  | 10  | 9 | 1.054799562 | 0.4492      |         | ENSG00000207391 |
| 5 | 78887858 | 78888039 | 78887936 | 8  | 8   | 2 | 2.876726079 | 0.0381137   |         | ENSG00000207391 |
| 5 | 78910524 | 78910793 | 78910658 | 10 | 11  | 1 | 5.753452158 | 0.00215302  | PAPD4   | ENSG00000164329 |
| 5 | 79021718 | 79022070 | 79021894 | 11 | 17  | 3 | 4.315089119 | 0.00102271  | CMYA5   | ENSG00000164309 |
| 5 | 79269967 | 79270510 | 79270351 | 18 | 31  | 1 | 15.34253909 | 7.54E-09    | MTX3    | ENSG00000177034 |
| 5 | 79287987 | 79288302 | 79288134 | 14 | 18  | 3 | 4.554816292 | 0.000599415 | MTX3    | ENSG00000177034 |
| 5 | 79519995 | 79520268 | 79520143 | 8  | 8   | 2 | 2.876726079 | 0.0381137   | SERINC5 | ENSG00000164300 |
| 5 | 79586556 | 79586979 | 79586779 | 15 | 23  | 2 | 7.671269544 | 8.30E-06    |         | ENSG00000211056 |

|   |          |          |          |    |    |   |             |             |         |                 |
|---|----------|----------|----------|----|----|---|-------------|-------------|---------|-----------------|
| 5 | 79739199 | 79739514 | 79739343 | 9  | 13 | 0 | 13.4247217  | 8.16E-05    | ZFYVE16 | ENSG00000039319 |
| 5 | 79740140 | 79740365 | 79740251 | 8  | 11 | 1 | 5.753452158 | 0.00215302  | ZFYVE16 | ENSG00000039319 |
| 5 | 79798630 | 79799231 | 79798974 | 26 | 41 | 3 | 10.06854128 | 9.74E-10    | FAM151B | ENSG00000152380 |
| 5 | 79819944 | 79820240 | 79820112 | 17 | 19 | 3 | 4.794543465 | 0.000349205 | FAM151B | ENSG00000152380 |
| 5 | 79821644 | 79821905 | 79821740 | 8  | 10 | 3 | 2.636998906 | 0.034203    | FAM151B | ENSG00000152380 |
| 5 | 80578467 | 80578646 | 80578556 | 8  | 8  | 0 | 8.630178238 | 0.00235436  | CKMT2   | ENSG00000131730 |
| 5 | 80989087 | 80989316 | 80989189 | 9  | 10 | 4 | 2.109599125 | 0.0694668   | SSBP2   | ENSG00000145687 |
| 5 | 81082878 | 81083076 | 81082948 | 10 | 11 | 1 | 5.753452158 | 0.00215302  | SSBP2   | ENSG00000145687 |
| 5 | 81100855 | 81101096 | 81100975 | 10 | 10 | 1 | 5.273997812 | 0.00391723  | SSBP2   | ENSG00000145687 |
| 5 | 81151692 | 81151871 | 81151800 | 9  | 9  | 3 | 2.397271733 | 0.0539397   | SSBP2   | ENSG00000145687 |
| 5 | 81174473 | 81174884 | 81174705 | 10 | 17 | 4 | 3.452071295 | 0.00292757  |         | ENSG00000214857 |
| 5 | 81187191 | 81187511 | 81187351 | 28 | 31 | 1 | 15.34253909 | 7.54E-09    |         | ENSG00000214857 |
| 5 | 81496195 | 81496442 | 81496317 | 8  | 9  | 0 | 9.589086931 | 0.00120187  |         | ENSG00000222962 |
| 5 | 81497557 | 81497756 | 81497616 | 8  | 9  | 2 | 3.19636231  | 0.0229249   |         | ENSG00000222962 |
| 5 | 81544897 | 81545076 | 81544947 | 8  | 8  | 0 | 8.630178238 | 0.00235436  | RPS23   | ENSG00000186468 |
| 5 | 81972944 | 81973255 | 81973087 | 10 | 13 | 6 | 1.917817386 | 0.0693353   |         | ENSG00000205462 |
| 5 | 82416632 | 82417011 | 82416844 | 17 | 23 | 0 | 23.01380863 | 9.81E-08    | XRCC4   | ENSG00000152422 |
| 5 | 82596821 | 82597072 | 82596969 | 8  | 11 | 1 | 5.753452158 | 0.00215302  | XRCC4   | ENSG00000152422 |
| 5 | 82804979 | 82805348 | 82805193 | 11 | 17 | 6 | 2.465765211 | 0.014729    | VCAN    | ENSG00000038427 |
| 5 | 82838841 | 82839275 | 82839108 | 12 | 17 | 8 | 1.917817386 | 0.0474153   | VCAN    | ENSG00000038427 |
| 5 | 82895295 | 82895496 | 82895395 | 8  | 9  | 3 | 2.397271733 | 0.0539397   | VCAN    | ENSG00000038427 |
| 5 | 82915481 | 82915731 | 82915606 | 10 | 11 | 1 | 5.753452158 | 0.00215302  | HAPLN1  | ENSG00000145681 |
| 5 | 83319495 | 83319758 | 83319626 | 11 | 11 | 2 | 3.835634772 | 0.00800699  |         | ENSG00000216125 |
| 5 | 83416266 | 83416446 | 83416405 | 8  | 8  | 2 | 2.876726079 | 0.0381137   |         | ENSG00000216125 |
| 5 | 83713066 | 83713443 | 83713264 | 17 | 24 | 1 | 11.98635866 | 6.63E-07    | EDIL3   | ENSG00000164176 |
| 5 | 83713811 | 83714039 | 83713946 | 8  | 10 | 2 | 3.515998541 | 0.0136204   | EDIL3   | ENSG00000164176 |
| 5 | 83743435 | 83743673 | 83743582 | 8  | 10 | 4 | 2.109599125 | 0.0694668   | EDIL3   | ENSG00000164176 |
| 5 | 84652211 | 84652447 | 84652329 | 10 | 11 | 2 | 3.835634772 | 0.00800699  |         | ENSG00000215953 |
| 5 | 85949430 | 85949753 | 85949608 | 8  | 12 | 3 | 3.116453252 | 0.0131971   | COX7C   | ENSG00000127184 |
| 5 | 86573787 | 86574243 | 86573966 | 45 | 53 | 2 | 17.26035648 | 6.53E-14    |         | ENSG00000196836 |
| 5 | 87722809 | 87723006 | 87722986 | 8  | 9  | 5 | 1.598181155 | 0.170911    |         | ENSG00000206958 |
| 5 | 88343965 | 88344320 | 88344168 | 12 | 17 | 0 | 17.26035648 | 5.54E-06    | MEF2C   | ENSG00000081189 |
| 5 | 88752602 | 88752845 | 88752723 | 9  | 10 | 4 | 2.109599125 | 0.0694668   |         |                 |
| 5 | 89596820 | 89597137 | 89596978 | 10 | 14 | 7 | 1.797953799 | 0.0806593   | CETN3   | ENSG00000153140 |

|   |          |          |          |    |    |    |             |             |         |                 |
|---|----------|----------|----------|----|----|----|-------------|-------------|---------|-----------------|
| 5 | 89742048 | 89742319 | 89742181 | 9  | 10 | 2  | 3.515998541 | 0.0136204   |         | ENSG00000176265 |
| 5 | 89771388 | 89771591 | 89771489 | 9  | 11 | 2  | 3.835634772 | 0.00800699  |         | ENSG00000176265 |
| 5 | 89804899 | 89805096 | 89805003 | 8  | 8  | 0  | 8.630178238 | 0.00235436  |         | ENSG00000176055 |
| 5 | 89861251 | 89861775 | 89861505 | 8  | 19 | 7  | 2.397271733 | 0.0127287   | LYSMD3  | ENSG00000176018 |
| 5 | 89890150 | 89890407 | 89890278 | 10 | 12 | 8  | 1.385090334 | 0.219216    | GPR98   | ENSG00000164199 |
| 5 | 90040987 | 90041205 | 90041120 | 8  | 10 | 2  | 3.515998541 | 0.0136204   | GPR98   | ENSG00000164199 |
| 5 | 90326380 | 90326629 | 90326483 | 9  | 10 | 2  | 3.515998541 | 0.0136204   |         | ENSG00000199643 |
| 5 | 90433346 | 90433534 | 90433440 | 8  | 8  | 1  | 4.315089119 | 0.0127267   |         | ENSG00000199643 |
| 5 | 90611965 | 90612346 | 90612144 | 10 | 17 | 5  | 2.876726079 | 0.00703033  |         | ENSG00000211248 |
| 5 | 90711442 | 90711758 | 90711602 | 17 | 19 | 0  | 19.17817386 | 1.44E-06    | ARRDC3  | ENSG00000113369 |
| 5 | 90715240 | 90715458 | 90715324 | 8  | 10 | 4  | 2.109599125 | 0.0694668   | ARRDC3  | ENSG00000113369 |
| 5 | 90751214 | 90751426 | 90751320 | 8  | 8  | 0  | 8.630178238 | 0.00235436  | ARRDC3  | ENSG00000113369 |
| 5 | 91175601 | 91175915 | 91175758 | 9  | 14 | 4  | 2.876726079 | 0.01219     |         | ENSG00000213731 |
| 5 | 91180115 | 91180345 | 91180230 | 13 | 14 | 8  | 1.598181155 | 0.124586    |         | ENSG00000213731 |
| 5 | 92450210 | 92450413 | 92450311 | 9  | 9  | 3  | 2.397271733 | 0.0539397   |         | ENSG00000213730 |
| 5 | 93038888 | 93039174 | 93039031 | 9  | 13 | 3  | 3.356180426 | 0.00805599  |         | ENSG00000205434 |
| 5 | 93505122 | 93505409 | 93505265 | 14 | 16 | 2  | 5.433815927 | 0.000499302 | FAM172A | ENSG00000113391 |
| 5 | 93728268 | 93728707 | 93728433 | 12 | 19 | 2  | 6.39272462  | 8.83E-05    |         | ENSG00000218494 |
| 5 | 94211917 | 94212109 | 94211994 | 8  | 8  | 1  | 4.315089119 | 0.0127267   | MCTP1   | ENSG00000175471 |
| 5 | 94215394 | 94215650 | 94215547 | 15 | 18 | 2  | 6.073088389 | 0.000157975 | MCTP1   | ENSG00000175471 |
| 5 | 94452451 | 94452630 | 94452520 | 8  | 8  | 0  | 8.630178238 | 0.00235436  | MCTP1   | ENSG00000175471 |
| 5 | 94644925 | 94645153 | 94645039 | 9  | 11 | 2  | 3.835634772 | 0.00800699  | MCTP1   | ENSG00000175471 |
| 5 | 94916304 | 94916579 | 94916450 | 11 | 14 | 11 | 1.198635866 | 0.315918    | TTC37   | ENSG00000198677 |
| 5 | 95026059 | 95026286 | 95026176 | 8  | 9  | 0  | 9.589086931 | 0.00120187  | RFESD   | ENSG00000175449 |
| 5 | 95073896 | 95074252 | 95074074 | 10 | 15 | 5  | 2.557089848 | 0.0169197   | RHOBTB3 | ENSG00000164292 |
| 5 | 95079891 | 95080072 | 95079981 | 8  | 8  | 1  | 4.315089119 | 0.0127267   | RHOBTB3 | ENSG00000164292 |
| 5 | 95142462 | 95142816 | 95142590 | 8  | 13 | 6  | 1.917817386 | 0.0693353   | GLRX    | ENSG00000173221 |
| 5 | 95208211 | 95208763 | 95208577 | 39 | 63 | 8  | 6.818906262 | 9.24E-12    | GLRX    | ENSG00000173221 |
| 5 | 95220250 | 95220539 | 95220456 | 9  | 13 | 7  | 1.678090213 | 0.11195     | GLRX    | ENSG00000173221 |
| 5 | 95222736 | 95223087 | 95222974 | 10 | 15 | 3  | 3.835634772 | 0.00291691  | GLRX    | ENSG00000173221 |
| 5 | 95286211 | 95286511 | 95286361 | 13 | 14 | 0  | 14.3836304  | 4.17E-05    | ELL2    | ENSG00000118985 |
| 5 | 95336542 | 95336721 | 95336631 | 8  | 8  | 5  | 1.43836304  | 0.235762    |         | ENSG00000213716 |
| 5 | 95437226 | 95437444 | 95437339 | 8  | 10 | 5  | 1.757999271 | 0.121253    |         | ENSG00000207578 |
| 5 | 95455831 | 95456012 | 95455921 | 8  | 8  | 0  | 8.630178238 | 0.00235436  |         | ENSG00000207578 |

|   |           |           |           |    |    |    |             |             |         |                 |
|---|-----------|-----------|-----------|----|----|----|-------------|-------------|---------|-----------------|
| 5 | 95511063  | 95511364  | 95511214  | 13 | 14 | 2  | 4.794543465 | 0.00154571  |         | ENSG00000206997 |
| 5 | 95706189  | 95706514  | 95706349  | 12 | 13 | 2  | 4.474907234 | 0.00269459  | PCSK1   | ENSG00000175426 |
| 5 | 95975666  | 95976046  | 95975845  | 9  | 16 | 1  | 8.150723891 | 0.000101217 | CAST    | ENSG00000153113 |
| 5 | 96169588  | 96170102  | 96169801  | 18 | 29 | 5  | 4.794543465 | 1.89E-05    | ERAP1   | ENSG00000164307 |
| 5 | 96295933  | 96296529  | 96296172  | 16 | 29 | 6  | 4.109608685 | 5.77E-05    | LNPEP   | ENSG00000113441 |
| 5 | 96297082  | 96297578  | 96297255  | 9  | 17 | 5  | 2.876726079 | 0.00703033  | LNPEP   | ENSG00000113441 |
| 5 | 96544716  | 96545124  | 96544849  | 14 | 21 | 4  | 4.219198249 | 0.000390041 | RIOK2   | ENSG00000058729 |
| 5 | 98138164  | 98138387  | 98138286  | 9  | 11 | 2  | 3.835634772 | 0.00800699  | RGMB    | ENSG00000174136 |
| 5 | 98203366  | 98203608  | 98203463  | 13 | 15 | 0  | 15.34253909 | 2.13E-05    |         | ENSG00000211353 |
| 5 | 98210134  | 98210536  | 98210350  | 30 | 43 | 1  | 21.09599125 | 3.19E-12    |         | ENSG00000211353 |
| 5 | 98293356  | 98293535  | 98293445  | 8  | 8  | 1  | 4.315089119 | 0.0127267   | CHD1    | ENSG00000153922 |
| 5 | 98813259  | 98813678  | 98813391  | 13 | 21 | 3  | 5.273997812 | 0.00011662  |         |                 |
| 5 | 99545501  | 99545979  | 99545749  | 44 | 61 | 5  | 9.908723162 | 2.32E-13    |         | ENSG00000207077 |
| 5 | 99998601  | 99998927  | 99998764  | 11 | 15 | 1  | 7.671269544 | 0.000187863 |         | ENSG00000207269 |
| 5 | 100001749 | 100002120 | 100001914 | 20 | 25 | 2  | 8.310542006 | 2.50E-06    |         | ENSG00000207269 |
| 5 | 100243319 | 100243504 | 100243411 | 8  | 8  | 2  | 2.876726079 | 0.0381137   | ST8SIA4 | ENSG00000113532 |
| 5 | 100264024 | 100264203 | 100264062 | 8  | 8  | 5  | 1.43836304  | 0.235762    | ST8SIA4 | ENSG00000113532 |
| 5 | 100670501 | 100670748 | 100670575 | 8  | 10 | 6  | 1.506856518 | 0.188853    |         | ENSG00000222929 |
| 5 | 100854382 | 100854778 | 100854530 | 15 | 21 | 0  | 21.09599125 | 3.76E-07    |         | ENSG00000222929 |
| 5 | 100881412 | 100881734 | 100881575 | 22 | 26 | 1  | 12.94526736 | 1.86E-07    |         | ENSG00000222929 |
| 5 | 101013956 | 101014172 | 101014045 | 9  | 10 | 0  | 10.54799562 | 0.000613541 |         | ENSG00000222929 |
| 5 | 101027030 | 101027509 | 101027293 | 22 | 34 | 3  | 8.390451064 | 6.50E-08    |         | ENSG00000222929 |
| 5 | 101040384 | 101040848 | 101040687 | 10 | 18 | 8  | 2.024362796 | 0.0334397   |         | ENSG00000222929 |
| 5 | 101359293 | 101359546 | 101359433 | 12 | 13 | 5  | 2.237453617 | 0.038866    |         | ENSG00000199786 |
| 5 | 101396123 | 101396433 | 101396278 | 8  | 14 | 1  | 7.191815198 | 0.00034761  |         | ENSG00000199786 |
| 5 | 101587402 | 101587581 | 101587495 | 8  | 8  | 2  | 2.876726079 | 0.0381137   | SLCO4C1 | ENSG00000173930 |
| 5 | 102309620 | 102309907 | 102309763 | 10 | 12 | 4  | 2.493162602 | 0.0299057   | PAM     | ENSG00000145730 |
| 5 | 102377886 | 102378096 | 102377956 | 8  | 9  | 7  | 1.198635866 | 0.346278    |         | ENSG00000175749 |
| 5 | 102483622 | 102483956 | 102483790 | 25 | 29 | 14 | 1.917817386 | 0.0161307   | GIN1    | ENSG00000145723 |
| 5 | 102621954 | 102622282 | 102622118 | 8  | 14 | 4  | 2.876726079 | 0.01219     | C5orf30 | ENSG00000181751 |
| 5 | 102711253 | 102711544 | 102711398 | 10 | 12 | 4  | 2.493162602 | 0.0299057   | C5orf30 | ENSG00000181751 |
| 5 | 102808030 | 102808357 | 102808181 | 14 | 17 | 9  | 1.726035648 | 0.0753664   | NUDT12  | ENSG00000112874 |
| 5 | 103680101 | 103680617 | 103680442 | 14 | 28 | 1  | 13.90417605 | 5.17E-08    |         | ENSG00000209151 |
| 5 | 103904244 | 103904460 | 103904340 | 8  | 9  | 2  | 3.19636231  | 0.0229249   |         | ENSG00000209193 |

|   |           |           |           |     |     |   |             |             |                          |
|---|-----------|-----------|-----------|-----|-----|---|-------------|-------------|--------------------------|
| 5 | 105246601 | 105246920 | 105246771 | 15  | 19  | 8 | 2.130908207 | 0.0233014   | ENSG00000201790          |
| 5 | 105457842 | 105458060 | 105457950 | 10  | 10  | 6 | 1.506856518 | 0.188853    | ENSG00000201790          |
| 5 | 105605034 | 105605213 | 105605123 | 8   | 8   | 4 | 1.726035648 | 0.150596    | ENSG00000209251          |
| 5 | 106820082 | 106820285 | 106820175 | 8   | 9   | 2 | 3.19636231  | 0.0229249   | EFNA5 ENSG00000184349    |
| 5 | 106920990 | 106921169 | 106921064 | 8   | 8   | 4 | 1.726035648 | 0.150596    | EFNA5 ENSG00000184349    |
| 5 | 106931838 | 106932274 | 106932056 | 17  | 28  | 0 | 27.8083521  | 3.40E-09    | EFNA5 ENSG00000184349    |
| 5 | 106935683 | 106935947 | 106935827 | 9   | 12  | 6 | 1.78083043  | 0.0985525   | EFNA5 ENSG00000184349    |
| 5 | 107906561 | 107906804 | 107906657 | 9   | 10  | 0 | 10.54799562 | 0.000613541 | FBXL17 ENSG00000145743   |
| 5 | 108091843 | 108092085 | 108091964 | 8   | 11  | 4 | 2.301380863 | 0.0459276   | FER ENSG00000151422      |
| 5 | 108112125 | 108112512 | 108112251 | 8   | 13  | 2 | 4.474907234 | 0.00269459  | FER ENSG00000151422      |
| 5 | 108726347 | 108726574 | 108726418 | 8   | 9   | 0 | 9.589086931 | 0.00120187  | PJA2 ENSG00000198961     |
| 5 | 108815200 | 108815381 | 108815290 | 8   | 8   | 1 | 4.315089119 | 0.0127267   | PJA2 ENSG00000198961     |
| 5 | 108832321 | 108832588 | 108832454 | 8   | 9   | 3 | 2.397271733 | 0.0539397   | PJA2 ENSG00000198961     |
| 5 | 108893532 | 108894006 | 108893829 | 15  | 24  | 2 | 7.990905775 | 4.56E-06    | ENSG00000214794          |
| 5 | 109052425 | 109052650 | 109052513 | 8   | 8   | 9 | 0.863017824 | 0.627343    | MAN2A1 ENSG00000112893   |
| 5 | 109054781 | 109055020 | 109054919 | 8   | 10  | 3 | 2.636998906 | 0.034203    | MAN2A1 ENSG00000112893   |
| 5 | 109421742 | 109422049 | 109421901 | 8   | 12  | 7 | 1.558226626 | 0.152813    | ENSG00000202512          |
| 5 | 110455582 | 110455997 | 110455847 | 13  | 20  | 4 | 4.027416511 | 0.000652226 | WDR36 ENSG00000134987    |
| 5 | 110630071 | 110630391 | 110630216 | 24  | 28  | 1 | 13.90417605 | 5.17E-08    | CAMK4 ENSG00000152495    |
| 5 | 110642405 | 110642736 | 110642562 | 11  | 14  | 3 | 3.595907599 | 0.00486913  | CAMK4 ENSG00000152495    |
| 5 | 110835077 | 110835528 | 110835300 | 21  | 32  | 5 | 5.273997812 | 3.82E-06    | STARD4 ENSG00000164211   |
| 5 | 110857968 | 110858816 | 110858365 | 170 | 234 | 4 | 45.06870857 | 1.84E-62    | STARD4 ENSG00000164211   |
| 5 | 110914306 | 110914495 | 110914400 | 8   | 8   | 0 | 8.630178238 | 0.00235436  | ENSG00000221310          |
| 5 | 111034601 | 111034785 | 111034667 | 8   | 9   | 1 | 4.794543465 | 0.00708517  | ENSG00000209164          |
| 5 | 111044375 | 111044588 | 111044481 | 9   | 10  | 1 | 5.273997812 | 0.00391723  | ENSG00000209164          |
| 5 | 111346610 | 111346868 | 111346743 | 8   | 12  | 1 | 6.232906505 | 0.00117736  | C5orf13 ENSG00000134986  |
| 5 | 111843050 | 111843435 | 111843229 | 82  | 91  | 4 | 17.64391995 | 2.72E-22    | EPB41L4A ENSG00000129595 |
| 5 | 112055379 | 112055588 | 112055504 | 11  | 12  | 2 | 4.155271003 | 0.0046638   | APC ENSG00000134982      |
| 5 | 112322136 | 112322390 | 112322263 | 12  | 14  | 4 | 2.876726079 | 0.01219     | DCP2 ENSG00000172795     |
| 5 | 112344547 | 112344886 | 112344772 | 8   | 13  | 1 | 6.712360851 | 0.000640982 | DCP2 ENSG00000172795     |
| 5 | 112408404 | 112408763 | 112408561 | 10  | 14  | 4 | 2.876726079 | 0.01219     | DCP2 ENSG00000172795     |
| 5 | 112531546 | 112532119 | 112531796 | 27  | 41  | 4 | 8.054833022 | 5.63E-09    | MCC ENSG00000171444      |
| 5 | 112709210 | 112709479 | 112709316 | 8   | 8   | 1 | 4.315089119 | 0.0127267   | MCC ENSG00000171444      |
| 5 | 112852014 | 112852251 | 112852140 | 9   | 10  | 4 | 2.109599125 | 0.0694668   | MCC ENSG00000171444      |

|   |           |           |           |     |     |    |             |             |         |                 |
|---|-----------|-----------|-----------|-----|-----|----|-------------|-------------|---------|-----------------|
| 5 | 113038744 | 113039162 | 113038919 | 31  | 45  | 7  | 5.513724985 | 4.52E-08    | YTHDC2  | ENSG00000047188 |
| 5 | 113210661 | 113210864 | 113210790 | 9   | 9   | 4  | 1.917817386 | 0.103282    | YTHDC2  | ENSG00000047188 |
| 5 | 113316701 | 113316969 | 113316822 | 8   | 10  | 3  | 2.636998906 | 0.034203    |         | ENSG00000222706 |
| 5 | 113725529 | 113725708 | 113725620 | 8   | 8   | 2  | 2.876726079 | 0.0381137   | KCNN2   | ENSG00000080709 |
| 5 | 114288374 | 114288805 | 114288583 | 32  | 44  | 4  | 8.630178238 | 9.65E-10    | TRIM36  | ENSG00000152503 |
| 5 | 114396156 | 114396724 | 114396484 | 30  | 41  | 1  | 20.13708255 | 1.17E-11    | TRIM36  | ENSG00000152503 |
| 5 | 114432965 | 114433204 | 114433084 | 10  | 11  | 9  | 1.150690432 | 0.367789    | TRIM36  | ENSG00000152503 |
| 5 | 114729798 | 114730347 | 114730074 | 17  | 29  | 6  | 4.109608685 | 5.77E-05    |         | ENSG00000177962 |
| 5 | 115029748 | 115030007 | 115029880 | 10  | 12  | 0  | 12.46581301 | 0.000159888 | TICAM2  | ENSG00000134970 |
| 5 | 115112626 | 115113028 | 115112805 | 38  | 47  | 1  | 23.01380863 | 2.36E-13    |         | ENSG00000222598 |
| 5 | 115221634 | 115221926 | 115221780 | 9   | 11  | 3  | 2.876726079 | 0.0213797   | AP3S1   | ENSG00000177879 |
| 5 | 115768331 | 115768544 | 115768438 | 8   | 9   | 2  | 3.19636231  | 0.0229249   | SEMA6A  | ENSG00000092421 |
| 5 | 115855861 | 115856070 | 115855965 | 9   | 10  | 4  | 2.109599125 | 0.0694668   | SEMA6A  | ENSG00000092421 |
| 5 | 115882052 | 115882454 | 115882193 | 20  | 27  | 3  | 6.712360851 | 3.92E-06    | SEMA6A  | ENSG00000092421 |
| 5 | 115938363 | 115938552 | 115938442 | 8   | 9   | 5  | 1.598181155 | 0.170911    | SEMA6A  | ENSG00000092421 |
| 5 | 116098289 | 116098588 | 116098441 | 9   | 9   | 3  | 2.397271733 | 0.0539397   | RPS17P2 | ENSG00000197575 |
| 5 | 116311424 | 116311811 | 116311657 | 27  | 34  | 7  | 4.195225532 | 1.36E-05    | RPS17P2 | ENSG00000197575 |
| 5 | 116818397 | 116818707 | 116818552 | 11  | 14  | 2  | 4.794543465 | 0.00154571  |         | ENSG00000182152 |
| 5 | 116850615 | 116850988 | 116850809 | 12  | 18  | 12 | 1.401481936 | 0.168368    |         | ENSG00000182152 |
| 5 | 117357609 | 117357978 | 117357848 | 11  | 17  | 4  | 3.452071295 | 0.00292757  |         | ENSG00000182152 |
| 5 | 117370847 | 117371109 | 117370978 | 11  | 14  | 4  | 2.876726079 | 0.01219     |         | ENSG00000182152 |
| 5 | 117373591 | 117373899 | 117373745 | 9   | 12  | 5  | 2.077635502 | 0.0577144   |         | ENSG00000182152 |
| 5 | 118163367 | 118163723 | 118163545 | 20  | 25  | 3  | 6.232906505 | 1.23E-05    |         | ENSG00000197744 |
| 5 | 118351614 | 118351849 | 118351731 | 8   | 10  | 3  | 2.636998906 | 0.034203    | DTWD2   | ENSG00000169570 |
| 5 | 118352549 | 118352782 | 118352656 | 8   | 9   | 2  | 3.19636231  | 0.0229249   | DTWD2   | ENSG00000169570 |
| 5 | 118418908 | 118419211 | 118419059 | 24  | 25  | 2  | 8.310542006 | 2.50E-06    |         | ENSG00000209207 |
| 5 | 118434171 | 118434427 | 118434299 | 8   | 10  | 4  | 2.109599125 | 0.0694668   | DMXL1   | ENSG00000172869 |
| 5 | 118434508 | 118434897 | 118434759 | 10  | 16  | 6  | 2.328778255 | 0.0221113   | DMXL1   | ENSG00000172869 |
| 5 | 118632892 | 118633239 | 118633065 | 18  | 23  | 5  | 3.835634772 | 0.000408054 |         | ENSG00000222450 |
| 5 | 118687145 | 118687865 | 118687421 | 111 | 158 | 4  | 30.49329644 | 6.20E-41    |         | ENSG00000222450 |
| 5 | 118687889 | 118688170 | 118688043 | 9   | 13  | 6  | 1.917817386 | 0.0693353   |         | ENSG00000222450 |
| 5 | 118698590 | 118698893 | 118698741 | 10  | 15  | 6  | 2.191791298 | 0.0328001   |         | ENSG00000222450 |
| 5 | 118751498 | 118751845 | 118751674 | 16  | 20  | 0  | 20.13708255 | 7.37E-07    | TNFAIP8 | ENSG00000145779 |
| 5 | 119011456 | 119011711 | 119011565 | 13  | 15  | 2  | 5.114179696 | 0.00088103  | FAM170A | ENSG00000164334 |

|   |           |           |           |    |    |    |             |             |         |                 |
|---|-----------|-----------|-----------|----|----|----|-------------|-------------|---------|-----------------|
| 5 | 121842664 | 121842923 | 121842793 | 12 | 14 | 8  | 1.598181155 | 0.124586    |         | ENSG00000197462 |
| 5 | 121879790 | 121880018 | 121879907 | 10 | 11 | 6  | 1.643843474 | 0.137712    |         | ENSG00000197462 |
| 5 | 122138725 | 122139031 | 122138884 | 10 | 13 | 3  | 3.356180426 | 0.00805599  | SNX2    | ENSG00000205302 |
| 5 | 122363670 | 122363854 | 122363785 | 8  | 8  | 6  | 1.232882605 | 0.333038    |         | ENSG00000208997 |
| 5 | 122484257 | 122484513 | 122484385 | 9  | 9  | 1  | 4.794543465 | 0.00708517  | PRDM6   | ENSG00000061455 |
| 5 | 122786691 | 122787196 | 122787050 | 10 | 21 | 3  | 5.273997812 | 0.00011662  | CEP120  | ENSG00000168944 |
| 5 | 123377568 | 123377855 | 123377692 | 10 | 13 | 1  | 6.712360851 | 0.000640982 |         | ENSG00000214750 |
| 5 | 123491114 | 123491435 | 123491277 | 9  | 12 | 3  | 3.116453252 | 0.0131971   |         | ENSG00000214750 |
| 5 | 123496331 | 123496775 | 123496542 | 24 | 36 | 3  | 8.869905411 | 1.98E-08    |         | ENSG00000214750 |
| 5 | 123605974 | 123606409 | 123606230 | 12 | 22 | 1  | 11.02744997 | 2.36E-06    |         | ENSG00000214750 |
| 5 | 124009988 | 124010444 | 124010203 | 43 | 58 | 4  | 11.31512258 | 2.17E-13    | ZNF608  | ENSG00000168916 |
| 5 | 124019577 | 124019944 | 124019745 | 13 | 18 | 9  | 1.821926517 | 0.0548428   | ZNF608  | ENSG00000168916 |
| 5 | 124170037 | 124170293 | 124170165 | 11 | 12 | 6  | 1.78083043  | 0.0985525   |         | ENSG00000214748 |
| 5 | 124407401 | 124407623 | 124407512 | 8  | 9  | 1  | 4.794543465 | 0.00708517  |         | ENSG00000214748 |
| 5 | 124413318 | 124413512 | 124413415 | 9  | 9  | 10 | 0.871735176 | 0.624623    |         | ENSG00000214748 |
| 5 | 124641276 | 124641490 | 124641378 | 9  | 11 | 1  | 5.753452158 | 0.00215302  |         | ENSG00000208973 |
| 5 | 124774697 | 124774953 | 124774825 | 9  | 12 | 3  | 3.116453252 | 0.0131971   |         | ENSG00000208973 |
| 5 | 124845597 | 124845975 | 124845796 | 10 | 16 | 4  | 3.260289556 | 0.00475414  |         | ENSG00000208973 |
| 5 | 125468532 | 125468764 | 125468626 | 8  | 8  | 6  | 1.232882605 | 0.333038    | GRAMD3  | ENSG00000155324 |
| 5 | 125472068 | 125472387 | 125472227 | 22 | 27 | 1  | 13.4247217  | 9.80E-08    | GRAMD3  | ENSG00000155324 |
| 5 | 125729110 | 125729367 | 125729238 | 10 | 10 | 0  | 10.54799562 | 0.000613541 | GRAMD3  | ENSG00000155324 |
| 5 | 125731938 | 125732430 | 125732184 | 22 | 35 | 9  | 3.452071295 | 5.81E-05    | GRAMD3  | ENSG00000155324 |
| 5 | 125786698 | 125787033 | 125786866 | 12 | 15 | 8  | 1.704726565 | 0.0916153   | GRAMD3  | ENSG00000155324 |
| 5 | 125856519 | 125856810 | 125856664 | 12 | 13 | 2  | 4.474907234 | 0.00269459  |         | ENSG00000200347 |
| 5 | 125879711 | 125880100 | 125879875 | 13 | 20 | 6  | 2.876726079 | 0.00408924  |         | ENSG00000200347 |
| 5 | 125880522 | 125880751 | 125880636 | 10 | 11 | 6  | 1.643843474 | 0.137712    |         | ENSG00000200347 |
| 5 | 125883287 | 125883493 | 125883411 | 8  | 10 | 3  | 2.636998906 | 0.034203    |         | ENSG00000200347 |
| 5 | 125900129 | 125900375 | 125900243 | 9  | 11 | 2  | 3.835634772 | 0.00800699  |         | ENSG00000200347 |
| 5 | 125902705 | 125903025 | 125902865 | 13 | 16 | 8  | 1.811271976 | 0.0663685   |         | ENSG00000200347 |
| 5 | 125957571 | 125957974 | 125957843 | 8  | 16 | 5  | 2.716907964 | 0.0109645   | ALDH7A1 | ENSG00000164904 |
| 5 | 125958735 | 125959074 | 125958897 | 9  | 12 | 11 | 1.038817751 | 0.460341    | ALDH7A1 | ENSG00000164904 |
| 5 | 126040801 | 126041181 | 126041023 | 23 | 27 | 8  | 2.98327149  | 0.000913494 |         | ENSG00000213630 |
| 5 | 126140081 | 126140478 | 126140260 | 12 | 19 | 11 | 1.598181155 | 0.0927758   | LMNB1   | ENSG00000113368 |
| 5 | 126325347 | 126325538 | 126325494 | 8  | 8  | 2  | 2.876726079 | 0.0381137   | 3-Mar   | ENSG00000173926 |



|   |           |           |           |    |    |    |             |             |         |                 |
|---|-----------|-----------|-----------|----|----|----|-------------|-------------|---------|-----------------|
| 5 | 126405838 | 126406115 | 126405986 | 8  | 11 | 2  | 3.835634772 | 0.00800699  | 3-Mar   | ENSG00000173926 |
| 5 | 126475915 | 126476295 | 126476087 | 17 | 24 | 2  | 7.990905775 | 4.56E-06    |         | ENSG00000214743 |
| 5 | 126653478 | 126653692 | 126653585 | 10 | 11 | 3  | 2.876726079 | 0.0213797   | MEGF10  | ENSG00000145794 |
| 5 | 126925813 | 126926103 | 126925941 | 8  | 9  | 2  | 3.19636231  | 0.0229249   | PRRC1   | ENSG00000164244 |
| 5 | 126927831 | 126928046 | 126927938 | 9  | 10 | 4  | 2.109599125 | 0.0694668   | PRRC1   | ENSG00000164244 |
| 5 | 126988408 | 126988597 | 126988502 | 8  | 9  | 1  | 4.794543465 | 0.00708517  | CTXN3   | ENSG00000205279 |
| 5 | 127298479 | 127298858 | 127298679 | 16 | 23 | 6  | 3.287686948 | 0.00104919  | SLC12A2 | ENSG00000064651 |
| 5 | 127379571 | 127379817 | 127379705 | 8  | 8  | 3  | 2.157544559 | 0.0836802   | SLC12A2 | ENSG00000064651 |
| 5 | 127485382 | 127485613 | 127485561 | 9  | 12 | 7  | 1.558226626 | 0.152813    | SLC12A2 | ENSG00000064651 |
| 5 | 127517594 | 127517908 | 127517742 | 15 | 20 | 0  | 20.13708255 | 7.37E-07    | SLC12A2 | ENSG00000064651 |
| 5 | 127564696 | 127565093 | 127564956 | 12 | 19 | 6  | 2.739739123 | 0.00632909  | SLC12A2 | ENSG00000064651 |
| 5 | 128490029 | 128490429 | 128490261 | 14 | 21 | 7  | 2.636998906 | 0.00562102  | ISOC1   | ENSG00000066583 |
| 5 | 128541148 | 128541548 | 128541349 | 39 | 49 | 11 | 3.995452888 | 5.19E-07    | ISOC1   | ENSG00000066583 |
| 5 | 129562543 | 129562816 | 129562679 | 9  | 11 | 3  | 2.876726079 | 0.0213797   |         | ENSG00000199455 |
| 5 | 129859798 | 129860143 | 129859974 | 9  | 13 | 4  | 2.684944341 | 0.01921     |         | ENSG00000199455 |
| 5 | 130534356 | 130534551 | 130534453 | 8  | 8  | 4  | 1.726035648 | 0.150596    | LYRM7   | ENSG00000186687 |
| 5 | 130998961 | 130999204 | 130999041 | 8  | 11 | 5  | 1.917817386 | 0.0843804   | RAPGEF6 | ENSG00000158987 |
| 5 | 131105491 | 131105671 | 131105553 | 8  | 8  | 1  | 4.315089119 | 0.0127267   | FNIP1   | ENSG00000217128 |
| 5 | 131457498 | 131457805 | 131457658 | 11 | 14 | 0  | 14.3836304  | 4.17E-05    | CSF2    | ENSG00000164400 |
| 5 | 131466816 | 131467031 | 131466923 | 8  | 10 | 0  | 10.54799562 | 0.000613541 | CSF2    | ENSG00000164400 |
| 5 | 131650927 | 131651223 | 131651075 | 11 | 12 | 4  | 2.493162602 | 0.0299057   |         | ENSG00000196303 |
| 5 | 131742254 | 131742448 | 131742353 | 10 | 10 | 8  | 1.171999514 | 0.35773     | SLC22A5 | ENSG00000197375 |
| 5 | 131753274 | 131753697 | 131753444 | 12 | 20 | 4  | 4.027416511 | 0.000652226 | SLC22A5 | ENSG00000197375 |
| 5 | 131783179 | 131783643 | 131783358 | 10 | 18 | 4  | 3.643853034 | 0.00178791  |         | ENSG00000197536 |
| 5 | 131814183 | 131814449 | 131814319 | 10 | 12 | 1  | 6.232906505 | 0.00117736  |         | ENSG00000202533 |
| 5 | 131859979 | 131860175 | 131860077 | 8  | 9  | 4  | 1.917817386 | 0.103282    | IRF1    | ENSG00000125347 |
| 5 | 131890411 | 131890746 | 131890578 | 9  | 11 | 3  | 2.876726079 | 0.0213797   | IL5     | ENSG00000113525 |
| 5 | 132101308 | 132101530 | 132101393 | 9  | 10 | 4  | 2.109599125 | 0.0694668   | KIF3A   | ENSG00000131437 |
| 5 | 132163023 | 132163366 | 132163194 | 11 | 16 | 5  | 2.716907964 | 0.0109645   | ANKRD43 | ENSG00000198944 |
| 5 | 132208520 | 132208891 | 132208750 | 11 | 17 | 7  | 2.157544559 | 0.0276499   |         | ENSG00000201274 |
| 5 | 132327568 | 132327782 | 132327675 | 9  | 10 | 5  | 1.757999271 | 0.121253    | AFF4    | ENSG00000072364 |
| 5 | 132404234 | 132404485 | 132404314 | 8  | 10 | 5  | 1.757999271 | 0.121253    | HSPA4   | ENSG00000170606 |
| 5 | 132404818 | 132405115 | 132404966 | 10 | 13 | 0  | 13.4247217  | 8.16E-05    | HSPA4   | ENSG00000170606 |
| 5 | 132413207 | 132413507 | 132413353 | 11 | 15 | 1  | 7.671269544 | 0.000187863 | HSPA4   | ENSG00000170606 |

|   |           |           |           |    |     |    |             |             |        |                 |
|---|-----------|-----------|-----------|----|-----|----|-------------|-------------|--------|-----------------|
| 5 | 132415431 | 132415611 | 132415536 | 9  | 9   | 5  | 1.598181155 | 0.170911    | HSPA4  | ENSG00000170606 |
| 5 | 132416153 | 132416627 | 132416290 | 15 | 24  | 7  | 2.996589666 | 0.00154378  | HSPA4  | ENSG00000170606 |
| 5 | 132604245 | 132604499 | 132604372 | 9  | 12  | 1  | 6.232906505 | 0.00117736  |        | ENSG00000221287 |
| 5 | 132609230 | 132609455 | 132609359 | 12 | 13  | 3  | 3.356180426 | 0.00805599  |        | ENSG00000221287 |
| 5 | 132785060 | 132785270 | 132785214 | 8  | 9   | 0  | 9.589086931 | 0.00120187  |        | ENSG00000221287 |
| 5 | 132787319 | 132787641 | 132787480 | 29 | 32  | 3  | 7.910996718 | 2.12E-07    |        | ENSG00000221287 |
| 5 | 132916491 | 132916930 | 132916622 | 10 | 17  | 4  | 3.452071295 | 0.00292757  | FSTL4  | ENSG00000053108 |
| 5 | 133211949 | 133212178 | 133212063 | 8  | 9   | 3  | 2.397271733 | 0.0539397   |        | ENSG00000208898 |
| 5 | 133367025 | 133367222 | 133367131 | 9  | 9   | 7  | 1.198635866 | 0.346278    | VDAC1  | ENSG00000213585 |
| 5 | 133452603 | 133452868 | 133452735 | 9  | 13  | 2  | 4.474907234 | 0.00269459  | TCF7   | ENSG00000081059 |
| 5 | 133539660 | 133539996 | 133539828 | 10 | 15  | 4  | 3.068507818 | 0.0076507   | SKP1   | ENSG00000113558 |
| 5 | 133653177 | 133653358 | 133653267 | 9  | 9   | 7  | 1.198635866 | 0.346278    | PPP2CA | ENSG00000113575 |
| 5 | 133709777 | 133710007 | 133709883 | 8  | 8   | 1  | 4.315089119 | 0.0127267   | CDKL3  | ENSG00000006837 |
| 5 | 133734324 | 133734613 | 133734468 | 8  | 12  | 7  | 1.558226626 | 0.152813    | UBE2B  | ENSG00000119048 |
| 5 | 133850797 | 133851046 | 133850909 | 9  | 11  | 3  | 2.876726079 | 0.0213797   |        | ENSG00000207222 |
| 5 | 133874460 | 133874746 | 133874587 | 8  | 8   | 0  | 8.630178238 | 0.00235436  |        | ENSG00000208888 |
| 5 | 134122153 | 134122500 | 134122326 | 10 | 16  | 10 | 1.481949798 | 0.147733    | DDX46  | ENSG00000145833 |
| 5 | 134288001 | 134288336 | 134288168 | 31 | 31  | 54 | 0.557910512 | 0.996394    |        | ENSG00000208861 |
| 5 | 134290486 | 134290817 | 134290651 | 13 | 14  | 22 | 0.625375235 | 0.925815    |        | ENSG00000208849 |
| 5 | 134396966 | 134397270 | 134397118 | 10 | 11  | 4  | 2.301380863 | 0.0459276   | PITX1  | ENSG00000069011 |
| 5 | 134700690 | 134701129 | 134700841 | 30 | 39  | 2  | 12.78544924 | 4.53E-10    | H2AFY  | ENSG00000113648 |
| 5 | 134701199 | 134701417 | 134701318 | 10 | 10  | 0  | 10.54799562 | 0.000613541 | H2AFY  | ENSG00000113648 |
| 5 | 134728351 | 134728604 | 134728477 | 8  | 10  | 1  | 5.273997812 | 0.00391723  | H2AFY  | ENSG00000113648 |
| 5 | 134764465 | 134764831 | 134764672 | 8  | 14  | 1  | 7.191815198 | 0.00034761  | H2AFY  | ENSG00000113648 |
| 5 | 134767438 | 134767622 | 134767553 | 8  | 8   | 0  | 8.630178238 | 0.00235436  | H2AFY  | ENSG00000113648 |
| 5 | 134826004 | 134826214 | 134826109 | 9  | 9   | 5  | 1.598181155 | 0.170911    | TIFAB  | ENSG00000214707 |
| 5 | 134855606 | 134855857 | 134855700 | 8  | 10  | 4  | 2.109599125 | 0.0694668   | TIFAB  | ENSG00000214707 |
| 5 | 135047269 | 135047453 | 135047427 | 9  | 9   | 2  | 3.19636231  | 0.0229249   | CXCL14 | ENSG00000145824 |
| 5 | 135193661 | 135193945 | 135193822 | 8  | 9   | 11 | 0.799090578 | 0.702688    |        | ENSG00000145832 |
| 5 | 135221580 | 135221798 | 135221689 | 9  | 10  | 4  | 2.109599125 | 0.0694668   |        | ENSG00000145832 |
| 5 | 135397432 | 135397727 | 135397603 | 16 | 18  | 1  | 9.109632584 | 2.91E-05    | TGFBI  | ENSG00000120708 |
| 5 | 135471669 | 135472502 | 135472029 | 53 | 121 | 5  | 19.49781009 | 1.77E-29    | SMAD5  | ENSG00000113658 |
| 5 | 135495771 | 135496057 | 135495907 | 12 | 14  | 7  | 1.797953799 | 0.0806593   | SMAD5  | ENSG00000113658 |
| 5 | 135496194 | 135496431 | 135496346 | 9  | 11  | 2  | 3.835634772 | 0.00800699  | SMAD5  | ENSG00000113658 |

|   |           |           |           |     |     |    |             |             |         |                 |
|---|-----------|-----------|-----------|-----|-----|----|-------------|-------------|---------|-----------------|
| 5 | 135497123 | 135497327 | 135497266 | 8   | 9   | 5  | 1.598181155 | 0.170911    | SMAD5   | ENSG00000113658 |
| 5 | 135728767 | 135728982 | 135728868 | 9   | 9   | 11 | 0.799090578 | 0.702688    | TRPC7   | ENSG00000069018 |
| 5 | 135811297 | 135811518 | 135811420 | 9   | 11  | 0  | 11.50690432 | 0.000313206 |         | ENSG00000213568 |
| 5 | 136445667 | 136445850 | 136445754 | 8   | 8   | 0  | 8.630178238 | 0.00235436  |         | ENSG00000222285 |
| 5 | 136684043 | 136684418 | 136684177 | 8   | 13  | 2  | 4.474907234 | 0.00269459  | SPOCK1  | ENSG00000152377 |
| 5 | 136993249 | 136993445 | 136993346 | 9   | 11  | 3  | 2.876726079 | 0.0213797   |         | ENSG00000216009 |
| 5 | 137197069 | 137197312 | 137197186 | 11  | 13  | 6  | 1.917817386 | 0.0693353   | NPY6R   | ENSG00000159279 |
| 5 | 137399578 | 137399855 | 137399730 | 10  | 13  | 3  | 3.356180426 | 0.00805599  | FAM13B1 | ENSG00000031003 |
| 5 | 137432515 | 137432704 | 137432636 | 8   | 10  | 1  | 5.273997812 | 0.00391723  |         | ENSG00000222924 |
| 5 | 137542532 | 137542797 | 137542622 | 10  | 13  | 3  | 3.356180426 | 0.00805599  | KIF20A  | ENSG00000112984 |
| 5 | 137586511 | 137586700 | 137586605 | 8   | 8   | 3  | 2.157544559 | 0.0836802   | CDC23   | ENSG00000094880 |
| 5 | 137669405 | 137669807 | 137669599 | 35  | 46  | 4  | 9.013741715 | 2.96E-10    | CDC25C  | ENSG00000158402 |
| 5 | 137695133 | 137695379 | 137695234 | 9   | 12  | 3  | 3.116453252 | 0.0131971   | CDC25C  | ENSG00000158402 |
| 5 | 137827862 | 137828053 | 137827933 | 8   | 9   | 7  | 1.198635866 | 0.346278    | EGR1    | ENSG00000120738 |
| 5 | 137939306 | 137939684 | 137939535 | 10  | 16  | 3  | 4.075361945 | 0.00173346  | HSPA9   | ENSG00000113013 |
| 5 | 137973053 | 137973390 | 137973221 | 16  | 22  | 5  | 3.675816657 | 0.000667901 |         | ENSG00000208810 |
| 5 | 137973516 | 137973750 | 137973633 | 8   | 10  | 0  | 10.54799562 | 0.000613541 |         | ENSG00000208810 |
| 5 | 138088690 | 138089141 | 138088909 | 16  | 29  | 4  | 5.753452158 | 5.31E-06    | CTNNA1  | ENSG00000044115 |
| 5 | 138116547 | 138116842 | 138116694 | 10  | 14  | 3  | 3.595907599 | 0.00486913  | CTNNA1  | ENSG00000044115 |
| 5 | 138234263 | 138234655 | 138234428 | 18  | 25  | 3  | 6.232906505 | 1.23E-05    | LRRTM2  | ENSG00000146006 |
| 5 | 138235185 | 138235412 | 138235284 | 8   | 9   | 3  | 2.397271733 | 0.0539397   | LRRTM2  | ENSG00000146006 |
| 5 | 138239277 | 138239459 | 138239352 | 9   | 9   | 3  | 2.397271733 | 0.0539397   | LRRTM2  | ENSG00000146006 |
| 5 | 138428252 | 138428485 | 138428369 | 9   | 12  | 7  | 1.558226626 | 0.152813    |         | ENSG00000201532 |
| 5 | 138464533 | 138464800 | 138464666 | 8   | 11  | 4  | 2.301380863 | 0.0459276   |         | ENSG00000201532 |
| 5 | 138511977 | 138512345 | 138512075 | 14  | 19  | 3  | 4.794543465 | 0.000349205 | SIL1    | ENSG00000120725 |
| 5 | 138542504 | 138542887 | 138542739 | 10  | 15  | 2  | 5.114179696 | 0.00088103  | SIL1    | ENSG00000120725 |
| 5 | 138595619 | 138596234 | 138595979 | 118 | 157 | 0  | 151.5075735 | 7.27E-47    |         | ENSG00000208799 |
| 5 | 138626245 | 138626586 | 138626428 | 10  | 15  | 5  | 2.557089848 | 0.0169197   | MATR3   | ENSG00000015479 |
| 5 | 138640153 | 138640351 | 138640252 | 8   | 9   | 3  | 2.397271733 | 0.0539397   |         | ENSG00000200959 |
| 5 | 138657984 | 138658512 | 138658336 | 8   | 19  | 2  | 6.39272462  | 8.83E-05    | MATR3   | ENSG00000015479 |
| 5 | 138767447 | 138767679 | 138767540 | 8   | 9   | 9  | 0.958908693 | 0.536911    |         | ENSG00000170469 |
| 5 | 138921997 | 138922305 | 138922150 | 9   | 12  | 2  | 4.155271003 | 0.0046638   | UBE2D2  | ENSG00000131508 |
| 5 | 139030491 | 139030670 | 139030576 | 8   | 9   | 1  | 4.794543465 | 0.00708517  | CXXC5   | ENSG00000171604 |
| 5 | 139098892 | 139099282 | 139099070 | 24  | 31  | 3  | 7.671269544 | 3.82E-07    |         | ENSG00000200756 |

|   |           |           |           |    |    |    |             |             |         |                 |
|---|-----------|-----------|-----------|----|----|----|-------------|-------------|---------|-----------------|
| 5 | 139147920 | 139148243 | 139148094 | 14 | 18 | 2  | 6.073088389 | 0.000157975 | PSD2    | ENSG00000146005 |
| 5 | 139662442 | 139663022 | 139662732 | 12 | 26 | 8  | 2.876726079 | 0.00140919  | PFDN1   | ENSG00000113068 |
| 5 | 139711619 | 139711827 | 139711749 | 8  | 8  | 3  | 2.157544559 | 0.0836802   | HBEGF   | ENSG00000113070 |
| 5 | 139917071 | 139917571 | 139917321 | 38 | 53 | 4  | 10.35621389 | 4.48E-12    | SRA1    | ENSG00000213523 |
| 5 | 140050875 | 140051119 | 140050960 | 9  | 13 | 1  | 6.712360851 | 0.000640982 | HARS    | ENSG00000170445 |
| 5 | 140051198 | 140051433 | 140051301 | 8  | 10 | 7  | 1.318499453 | 0.269217    |         | ENSG00000112855 |
| 5 | 140070703 | 140070921 | 140070820 | 8  | 9  | 5  | 1.598181155 | 0.170911    |         | ENSG00000199990 |
| 5 | 140070960 | 140071335 | 140071139 | 9  | 16 | 6  | 2.328778255 | 0.0221113   |         | ENSG00000199990 |
| 5 | 140078428 | 140078922 | 140078607 | 10 | 21 | 12 | 1.622768557 | 0.076896    |         | ENSG00000202111 |
| 5 | 140085790 | 140086069 | 140085929 | 8  | 13 | 4  | 2.684944341 | 0.01921     |         | ENSG00000202515 |
| 5 | 140137814 | 140138250 | 140137993 | 23 | 32 | 3  | 7.910996718 | 2.12E-07    | PCDHA1  | ENSG00000204970 |
| 5 | 140187556 | 140187922 | 140187772 | 11 | 15 | 1  | 7.671269544 | 0.000187863 | PCDHA6  | ENSG00000204964 |
| 5 | 140362848 | 140363061 | 140362954 | 9  | 9  | 0  | 9.589086931 | 0.00120187  | PCDHA10 | ENSG00000081842 |
| 5 | 140399900 | 140400144 | 140399997 | 8  | 10 | 6  | 1.506856518 | 0.188853    | PCDHB1  | ENSG00000171815 |
| 5 | 140400757 | 140401252 | 140401002 | 13 | 22 | 15 | 1.378431246 | 0.157106    | PCDHB1  | ENSG00000171815 |
| 5 | 140444282 | 140444593 | 140444429 | 10 | 12 | 6  | 1.78083043  | 0.0985525   | PCDHB2  | ENSG00000112852 |
| 5 | 140510372 | 140510625 | 140510498 | 8  | 10 | 2  | 3.515998541 | 0.0136204   | PCDHB6  | ENSG00000113211 |
| 5 | 140835392 | 140835960 | 140835604 | 8  | 22 | 4  | 4.410979988 | 0.000231863 | PCDHGC4 | ENSG00000081853 |
| 5 | 140884521 | 140884792 | 140884656 | 9  | 13 | 1  | 6.712360851 | 0.000640982 | PCDHGC4 | ENSG00000081853 |
| 5 | 140923944 | 140924229 | 140924086 | 12 | 15 | 2  | 5.114179696 | 0.00088103  | DIAPH1  | ENSG00000131504 |
| 5 | 140951822 | 140952095 | 140951958 | 11 | 11 | 1  | 5.753452158 | 0.00215302  | DIAPH1  | ENSG00000131504 |
| 5 | 140977911 | 140978146 | 140978028 | 9  | 11 | 3  | 2.876726079 | 0.0213797   | DIAPH1  | ENSG00000131504 |
| 5 | 141060019 | 141060224 | 141060121 | 8  | 8  | 1  | 4.315089119 | 0.0127267   | ARAP3   | ENSG00000120318 |
| 5 | 141073750 | 141074158 | 141073910 | 21 | 28 | 5  | 4.63472535  | 3.19E-05    | ARAP3   | ENSG00000120318 |
| 5 | 141093878 | 141094065 | 141094019 | 8  | 8  | 1  | 4.315089119 | 0.0127267   | ARAP3   | ENSG00000120318 |
| 5 | 141181282 | 141181702 | 141181492 | 20 | 29 | 3  | 7.191815198 | 1.23E-06    | PCDH1   | ENSG00000156453 |
| 5 | 141225803 | 141226107 | 141225962 | 15 | 18 | 2  | 6.073088389 | 0.000157975 | PCDH1   | ENSG00000156453 |
| 5 | 141320659 | 141320876 | 141320770 | 8  | 9  | 5  | 1.598181155 | 0.170911    | PCDH12  | ENSG00000113555 |
| 5 | 141363213 | 141363399 | 141363335 | 8  | 8  | 0  | 8.630178238 | 0.00235436  | GNPDA1  | ENSG00000113552 |
| 5 | 141363690 | 141364439 | 141364038 | 14 | 38 | 6  | 5.34249129  | 5.40E-07    | GNPDA1  | ENSG00000113552 |
| 5 | 141374883 | 141375164 | 141374994 | 8  | 12 | 2  | 4.155271003 | 0.0046638   | GNPDA1  | ENSG00000113552 |
| 5 | 141722536 | 141722750 | 141722643 | 8  | 9  | 2  | 3.19636231  | 0.0229249   | SPRY4   | ENSG00000187678 |
| 5 | 141763394 | 141763676 | 141763535 | 15 | 17 | 3  | 4.315089119 | 0.00102271  | SPRY4   | ENSG00000187678 |
| 5 | 141867418 | 141867736 | 141867585 | 11 | 14 | 2  | 4.794543465 | 0.00154571  |         | ENSG00000222534 |

|   |           |           |           |    |     |    |             |             |          |                 |
|---|-----------|-----------|-----------|----|-----|----|-------------|-------------|----------|-----------------|
| 5 | 141908591 | 141908905 | 141908742 | 14 | 15  | 7  | 1.917817386 | 0.0572317   |          | ENSG00000222534 |
| 5 | 141928846 | 141929080 | 141929012 | 13 | 16  | 0  | 16.30144778 | 1.09E-05    |          | ENSG00000219227 |
| 5 | 142100143 | 142100535 | 142100363 | 15 | 22  | 6  | 3.150699991 | 0.00166398  | ARHGAP26 | ENSG00000145819 |
| 5 | 142130082 | 142130266 | 142130174 | 8  | 9   | 0  | 9.589086931 | 0.00120187  | ARHGAP26 | ENSG00000145819 |
| 5 | 142151831 | 142152107 | 142151969 | 10 | 12  | 4  | 2.493162602 | 0.0299057   | ARHGAP26 | ENSG00000145819 |
| 5 | 142264300 | 142264482 | 142264452 | 8  | 8   | 1  | 4.315089119 | 0.0127267   | ARHGAP26 | ENSG00000145819 |
| 5 | 142434271 | 142434867 | 142434549 | 68 | 100 | 5  | 16.14162967 | 9.63E-24    | ARHGAP26 | ENSG00000145819 |
| 5 | 142502695 | 142503143 | 142502968 | 22 | 31  | 10 | 2.789552562 | 0.000751584 | NR3C1    | ENSG00000113580 |
| 5 | 142542402 | 142542629 | 142542515 | 9  | 10  | 0  | 10.54799562 | 0.000613541 | NR3C1    | ENSG00000113580 |
| 5 | 142542863 | 142543158 | 142543037 | 11 | 14  | 8  | 1.598181155 | 0.124586    | NR3C1    | ENSG00000113580 |
| 5 | 142560463 | 142560984 | 142560701 | 33 | 48  | 1  | 23.49326298 | 1.23E-13    | NR3C1    | ENSG00000113580 |
| 5 | 142582599 | 142582946 | 142582771 | 14 | 18  | 11 | 1.518272097 | 0.122037    | NR3C1    | ENSG00000113580 |
| 5 | 142603801 | 142604014 | 142603899 | 8  | 9   | 2  | 3.19636231  | 0.0229249   | NR3C1    | ENSG00000113580 |
| 5 | 142605742 | 142606029 | 142605885 | 11 | 15  | 5  | 2.557089848 | 0.0169197   | NR3C1    | ENSG00000113580 |
| 5 | 142715546 | 142715808 | 142715703 | 10 | 12  | 6  | 1.78083043  | 0.0985525   | NR3C1    | ENSG00000113580 |
| 5 | 142954630 | 142955512 | 142954833 | 30 | 91  | 13 | 6.301399983 | 2.06E-15    | NR3C1    | ENSG00000113580 |
| 5 | 142956000 | 142956360 | 142956195 | 17 | 22  | 3  | 5.513724985 | 6.69E-05    | NR3C1    | ENSG00000113580 |
| 5 | 143019486 | 143019685 | 143019596 | 8  | 9   | 6  | 1.369869562 | 0.253675    | HMHB1    | ENSG00000158497 |
| 5 | 143142564 | 143142779 | 143142709 | 10 | 10  | 4  | 2.109599125 | 0.0694668   | HMHB1    | ENSG00000158497 |
| 5 | 143337724 | 143337983 | 143337819 | 9  | 12  | 3  | 3.116453252 | 0.0131971   |          | ENSG00000208708 |
| 5 | 143693251 | 143693634 | 143693455 | 27 | 36  | 0  | 35.47962164 | 1.57E-11    | KCTD16   | ENSG00000183775 |
| 5 | 143780654 | 143781087 | 143780908 | 13 | 22  | 1  | 11.02744997 | 2.36E-06    |          | ENSG00000213488 |
| 5 | 143941911 | 143942189 | 143942050 | 11 | 14  | 1  | 7.191815198 | 0.00034761  |          | ENSG00000201423 |
| 5 | 144607230 | 144607582 | 144607406 | 14 | 18  | 1  | 9.109632584 | 2.91E-05    |          | ENSG00000213487 |
| 5 | 144891233 | 144891414 | 144891323 | 8  | 8   | 3  | 2.157544559 | 0.0836802   |          | ENSG00000213487 |
| 5 | 145193783 | 145194128 | 145193956 | 8  | 10  | 3  | 2.636998906 | 0.034203    | PRELID2  | ENSG00000186314 |
| 5 | 145425913 | 145426174 | 145426040 | 10 | 10  | 0  | 10.54799562 | 0.000613541 | PLAC8L1  | ENSG00000173261 |
| 5 | 145431428 | 145431803 | 145431646 | 26 | 33  | 2  | 10.86763185 | 1.89E-08    | PLAC8L1  | ENSG00000173261 |
| 5 | 145542219 | 145542685 | 145542386 | 12 | 23  | 11 | 1.917817386 | 0.0274129   | LARS     | ENSG00000133706 |
| 5 | 145562763 | 145563525 | 145563346 | 10 | 26  | 20 | 1.232882605 | 0.232568    | RBM27    | ENSG00000091009 |
| 5 | 145652399 | 145652721 | 145652560 | 17 | 22  | 0  | 22.05489994 | 1.92E-07    | POU4F3   | ENSG00000091010 |
| 5 | 145653061 | 145653292 | 145653159 | 8  | 10  | 1  | 5.273997812 | 0.00391723  | POU4F3   | ENSG00000091010 |
| 5 | 145806637 | 145807014 | 145806790 | 12 | 17  | 9  | 1.726035648 | 0.0753664   | TCERG1   | ENSG00000113649 |
| 5 | 145925625 | 145925827 | 145925726 | 9  | 10  | 2  | 3.515998541 | 0.0136204   |          | ENSG00000208688 |

|   |           |           |           |    |    |    |             |             |          |                 |
|---|-----------|-----------|-----------|----|----|----|-------------|-------------|----------|-----------------|
| 5 | 146780499 | 146780750 | 146780634 | 9  | 11 | 2  | 3.835634772 | 0.00800699  | DPYSL3   | ENSG00000113657 |
| 5 | 147050556 | 147050756 | 147050656 | 8  | 9  | 2  | 3.19636231  | 0.0229249   | JAKMIP2  | ENSG00000176049 |
| 5 | 147309022 | 147309201 | 147309032 | 8  | 8  | 0  | 8.630178238 | 0.00235436  | C5orf46  | ENSG00000178776 |
| 5 | 147505783 | 147506055 | 147505919 | 11 | 14 | 1  | 7.191815198 | 0.00034761  |          | ENSG00000196800 |
| 5 | 147743534 | 147743817 | 147743675 | 9  | 12 | 2  | 4.155271003 | 0.0046638   | FBXO38   | ENSG00000145868 |
| 5 | 147758159 | 147758627 | 147758448 | 9  | 17 | 5  | 2.876726079 | 0.00703033  | FBXO38   | ENSG00000145868 |
| 5 | 147881930 | 147882318 | 147882139 | 32 | 38 | 0  | 37.39743903 | 4.09E-12    | HTR4     | ENSG00000164270 |
| 5 | 148180755 | 148180967 | 148180804 | 8  | 10 | 4  | 2.109599125 | 0.0694668   | ADRB2    | ENSG00000169252 |
| 5 | 148185722 | 148186293 | 148186019 | 37 | 58 | 2  | 18.85853763 | 2.68E-15    | ADRB2    | ENSG00000169252 |
| 5 | 148489019 | 148489364 | 148489191 | 11 | 14 | 8  | 1.598181155 | 0.124586    | ABLIM3   | ENSG00000173210 |
| 5 | 148494358 | 148494573 | 148494460 | 8  | 9  | 0  | 9.589086931 | 0.00120187  | ABLIM3   | ENSG00000173210 |
| 5 | 148644467 | 148644669 | 148644571 | 9  | 10 | 1  | 5.273997812 | 0.00391723  | AFAP1L1  | ENSG00000157510 |
| 5 | 148684787 | 148685287 | 148685066 | 12 | 24 | 5  | 3.995452888 | 0.00024777  | GRPEL2   | ENSG00000164284 |
| 5 | 148705055 | 148705268 | 148705161 | 9  | 11 | 9  | 1.150690432 | 0.367789    | GRPEL2   | ENSG00000164284 |
| 5 | 148781839 | 148782023 | 148781879 | 8  | 9  | 3  | 2.397271733 | 0.0539397   |          | ENSG00000208035 |
| 5 | 148788736 | 148789057 | 148788896 | 9  | 13 | 0  | 13.4247217  | 8.16E-05    |          | ENSG00000208035 |
| 5 | 148846151 | 148846367 | 148846259 | 8  | 9  | 0  | 9.589086931 | 0.00120187  |          | ENSG00000207700 |
| 5 | 148853146 | 148853347 | 148853246 | 9  | 9  | 5  | 1.598181155 | 0.170911    |          | ENSG00000214490 |
| 5 | 148906705 | 148907086 | 148906932 | 13 | 19 | 4  | 3.835634772 | 0.00108365  |          | ENSG00000214490 |
| 5 | 148909319 | 148909680 | 148909441 | 11 | 16 | 7  | 2.037680973 | 0.0400399   | CSNK1A1  | ENSG00000113712 |
| 5 | 148910271 | 148910488 | 148910379 | 8  | 10 | 0  | 10.54799562 | 0.000613541 | CSNK1A1  | ENSG00000113712 |
| 5 | 148911395 | 148911644 | 148911519 | 8  | 10 | 5  | 1.757999271 | 0.121253    | CSNK1A1  | ENSG00000113712 |
| 5 | 149124803 | 149125194 | 149124982 | 29 | 39 | 0  | 38.35634772 | 2.09E-12    | PPARGC1B | ENSG00000155846 |
| 5 | 149188312 | 149188533 | 149188422 | 8  | 9  | 8  | 1.065454103 | 0.442605    | PPARGC1B | ENSG00000155846 |
| 5 | 149240730 | 149241209 | 149241048 | 22 | 29 | 0  | 28.76726079 | 1.74E-09    |          | ENSG00000200334 |
| 5 | 149275509 | 149275694 | 149275617 | 9  | 9  | 3  | 2.397271733 | 0.0539397   |          | ENSG00000200334 |
| 5 | 149487754 | 149488470 | 149488128 | 30 | 54 | 5  | 8.789996353 | 1.47E-11    | CSF1R    | ENSG00000182578 |
| 5 | 149489728 | 149490024 | 149489863 | 14 | 17 | 5  | 2.876726079 | 0.00703033  | CSF1R    | ENSG00000182578 |
| 5 | 149560670 | 149560849 | 149560745 | 8  | 8  | 2  | 2.876726079 | 0.0381137   | SLC6A7   | ENSG00000011083 |
| 5 | 149678589 | 149678768 | 149678685 | 8  | 9  | 0  | 9.589086931 | 0.00120187  | ARSI     | ENSG00000183876 |
| 5 | 149703904 | 149704321 | 149704144 | 17 | 24 | 2  | 7.990905775 | 4.56E-06    | TCOF1    | ENSG00000070814 |
| 5 | 149710276 | 149710500 | 149710374 | 8  | 11 | 5  | 1.917817386 | 0.0843804   | TCOF1    | ENSG00000070814 |
| 5 | 149809272 | 149809487 | 149809379 | 8  | 9  | 5  | 1.598181155 | 0.170911    | RPS14    | ENSG00000164587 |
| 5 | 149809576 | 149809975 | 149809797 | 11 | 18 | 10 | 1.656296833 | 0.0841786   | RPS14    | ENSG00000164587 |

|   |           |           |           |    |     |   |             |             |          |                 |
|---|-----------|-----------|-----------|----|-----|---|-------------|-------------|----------|-----------------|
| 5 | 149846373 | 149846712 | 149846542 | 8  | 12  | 1 | 6.232906505 | 0.00117736  | NDST1    | ENSG00000070614 |
| 5 | 149904493 | 149904726 | 149904617 | 9  | 10  | 2 | 3.515998541 | 0.0136204   |          | ENSG00000208629 |
| 5 | 150138203 | 150138454 | 150138328 | 8  | 10  | 3 | 2.636998906 | 0.034203    |          | ENSG00000181368 |
| 5 | 150143394 | 150143587 | 150143490 | 9  | 9   | 2 | 3.19636231  | 0.0229249   |          | ENSG00000181368 |
| 5 | 150150082 | 150150456 | 150150309 | 11 | 15  | 6 | 2.191791298 | 0.0328001   |          | ENSG00000181368 |
| 5 | 150524625 | 150524882 | 150524758 | 10 | 12  | 4 | 2.493162602 | 0.0299057   | ANXA6    | ENSG00000197043 |
| 5 | 150562522 | 150562881 | 150562737 | 20 | 25  | 2 | 8.310542006 | 2.50E-06    | CCDC69   | ENSG00000198624 |
| 5 | 150583840 | 150584025 | 150583932 | 9  | 9   | 0 | 9.589086931 | 0.00120187  | CCDC69   | ENSG00000198624 |
| 5 | 150623784 | 150624064 | 150623924 | 15 | 16  | 2 | 5.433815927 | 0.000499302 | GM2A     | ENSG00000196743 |
| 5 | 150634508 | 150634808 | 150634658 | 11 | 13  | 3 | 3.356180426 | 0.00805599  | GM2A     | ENSG00000196743 |
| 5 | 150647895 | 150648271 | 150648153 | 9  | 13  | 2 | 4.474907234 | 0.00269459  | SLC36A3  | ENSG00000186334 |
| 5 | 150731646 | 150731833 | 150731773 | 8  | 8   | 3 | 2.157544559 | 0.0836802   | SLC36A2  | ENSG00000186335 |
| 5 | 150930299 | 150930567 | 150930433 | 14 | 16  | 4 | 3.260289556 | 0.00475414  | FAT2     | ENSG00000086570 |
| 5 | 150975257 | 150975464 | 150975360 | 8  | 9   | 0 | 9.589086931 | 0.00120187  | FAT2     | ENSG00000086570 |
| 5 | 150977834 | 150978070 | 150977952 | 11 | 12  | 9 | 1.246581301 | 0.295061    | FAT2     | ENSG00000086570 |
| 5 | 151284362 | 151284562 | 151284466 | 8  | 8   | 3 | 2.157544559 | 0.0836802   | GLRA1    | ENSG00000145888 |
| 5 | 151578457 | 151578701 | 151578579 | 9  | 11  | 5 | 1.917817386 | 0.0843804   | NMUR2    | ENSG00000132911 |
| 5 | 151589897 | 151590182 | 151590039 | 14 | 16  | 1 | 8.150723891 | 0.000101217 | NMUR2    | ENSG00000132911 |
| 5 | 151762808 | 151762997 | 151762902 | 8  | 8   | 0 | 8.630178238 | 0.00235436  | NMUR2    | ENSG00000132911 |
| 5 | 152171715 | 152172271 | 152171903 | 94 | 124 | 6 | 17.12336952 | 2.85E-29    | NMUR2    | ENSG00000132911 |
| 5 | 152287216 | 152287485 | 152287350 | 9  | 11  | 1 | 5.753452158 | 0.00215302  |          |                 |
| 5 | 153251433 | 153251737 | 153251585 | 9  | 10  | 1 | 5.273997812 | 0.00391723  |          | ENSG00000208592 |
| 5 | 153301046 | 153301368 | 153301204 | 8  | 12  | 3 | 3.116453252 | 0.0131971   | FAM114A2 | ENSG00000055147 |
| 5 | 153634542 | 153634751 | 153634591 | 8  | 8   | 3 | 2.157544559 | 0.0836802   |          | ENSG00000221070 |
| 5 | 153656610 | 153656882 | 153656754 | 11 | 12  | 7 | 1.558226626 | 0.152813    |          | ENSG00000221070 |
| 5 | 153755623 | 153755819 | 153755682 | 8  | 9   | 1 | 4.794543465 | 0.00708517  |          | ENSG00000216873 |
| 5 | 153770324 | 153770557 | 153770450 | 11 | 12  | 0 | 12.46581301 | 0.000159888 | GALNT10  | ENSG00000164574 |
| 5 | 153943673 | 153944103 | 153943775 | 12 | 20  | 5 | 3.356180426 | 0.0017534   |          | ENSG00000221552 |
| 5 | 154060937 | 154061230 | 154061083 | 9  | 12  | 8 | 1.385090334 | 0.219216    |          | ENSG00000208575 |
| 5 | 154169113 | 154169475 | 154169311 | 13 | 18  | 0 | 18.21926517 | 2.83E-06    | C5orf4   | ENSG00000170271 |
| 5 | 154204670 | 154205103 | 154204849 | 15 | 25  | 7 | 3.116453252 | 0.000988074 | C5orf4   | ENSG00000170271 |
| 5 | 154217994 | 154218448 | 154218169 | 12 | 21  | 3 | 5.273997812 | 0.00011662  | CNOT8    | ENSG00000155508 |
| 5 | 154237750 | 154238107 | 154237932 | 30 | 35  | 4 | 6.90414259  | 1.81E-07    | CNOT8    | ENSG00000155508 |
| 5 | 154409667 | 154409892 | 154409829 | 8  | 10  | 3 | 2.636998906 | 0.034203    |          | ENSG00000221131 |

|   |           |           |           |    |     |   |             |             |        |                 |
|---|-----------|-----------|-----------|----|-----|---|-------------|-------------|--------|-----------------|
| 5 | 154445440 | 154445707 | 154445573 | 9  | 11  | 0 | 11.50690432 | 0.000313206 |        | ENSG00000221131 |
| 5 | 154944347 | 154944674 | 154944513 | 19 | 22  | 0 | 22.05489994 | 1.92E-07    |        | ENSG00000208570 |
| 5 | 155114213 | 155114392 | 155114255 | 8  | 8   | 2 | 2.876726079 | 0.0381137   |        | ENSG00000200275 |
| 5 | 156386696 | 156386925 | 156386790 | 9  | 9   | 1 | 4.794543465 | 0.00708517  | HAVCR1 | ENSG00000113249 |
| 5 | 156510647 | 156510842 | 156510744 | 8  | 8   | 2 | 2.876726079 | 0.0381137   | MED7   | ENSG00000155868 |
| 5 | 156824119 | 156824410 | 156824264 | 15 | 18  | 1 | 9.109632584 | 2.91E-05    |        | ENSG00000172548 |
| 5 | 156971787 | 156972121 | 156971945 | 11 | 16  | 1 | 8.150723891 | 0.000101217 |        | ENSG00000208540 |
| 5 | 157091211 | 157091436 | 157091323 | 8  | 9   | 4 | 1.917817386 | 0.103282    | THG1L  | ENSG00000113272 |
| 5 | 157102442 | 157102663 | 157102552 | 10 | 13  | 0 | 13.4247217  | 8.16E-05    | LSM11  | ENSG00000155858 |
| 5 | 157308461 | 157308641 | 157308551 | 8  | 9   | 4 | 1.917817386 | 0.103282    |        | ENSG00000214374 |
| 5 | 157711607 | 157711903 | 157711740 | 10 | 12  | 1 | 6.232906505 | 0.00117736  |        | ENSG00000213414 |
| 5 | 157954515 | 157954857 | 157954687 | 12 | 16  | 5 | 2.716907964 | 0.0109645   |        | ENSG00000212796 |
| 5 | 158055145 | 158055333 | 158055257 | 9  | 10  | 4 | 2.109599125 | 0.0694668   |        | ENSG00000212796 |
| 5 | 158061066 | 158061329 | 158061176 | 11 | 13  | 2 | 4.474907234 | 0.00269459  |        | ENSG00000212796 |
| 5 | 158459149 | 158459353 | 158459213 | 9  | 9   | 3 | 2.397271733 | 0.0539397   | EBF1   | ENSG00000164330 |
| 5 | 158462510 | 158462714 | 158462669 | 9  | 9   | 2 | 3.19636231  | 0.0229249   | EBF1   | ENSG00000164330 |
| 5 | 158535226 | 158535449 | 158535337 | 8  | 11  | 5 | 1.917817386 | 0.0843804   | RNF145 | ENSG00000145860 |
| 5 | 158701521 | 158701781 | 158701642 | 15 | 16  | 0 | 16.30144778 | 1.09E-05    | IL12B  | ENSG00000113302 |
| 5 | 158870001 | 158870250 | 158870103 | 9  | 11  | 6 | 1.643843474 | 0.137712    | IL12B  | ENSG00000113302 |
| 5 | 159160427 | 159160679 | 159160564 | 8  | 11  | 1 | 5.753452158 | 0.00215302  | ADRA1B | ENSG00000170214 |
| 5 | 159424863 | 159425166 | 159425009 | 10 | 14  | 0 | 14.3836304  | 4.17E-05    | PWWP2A | ENSG00000170234 |
| 5 | 159564770 | 159565170 | 159564991 | 12 | 20  | 1 | 10.06854128 | 8.32E-06    | FABP6  | ENSG00000170231 |
| 5 | 159675590 | 159675836 | 159675724 | 8  | 10  | 0 | 10.54799562 | 0.000613541 | CCNJL  | ENSG00000135083 |
| 5 | 159694900 | 159695120 | 159695010 | 10 | 10  | 0 | 10.54799562 | 0.000613541 | CCNJL  | ENSG00000135083 |
| 5 | 159703547 | 159703817 | 159703682 | 8  | 12  | 5 | 2.077635502 | 0.0577144   | CCNJL  | ENSG00000135083 |
| 5 | 159704877 | 159705228 | 159705052 | 13 | 17  | 2 | 5.753452158 | 0.000281509 | CCNJL  | ENSG00000135083 |
| 5 | 159778581 | 159778912 | 159778753 | 11 | 15  | 1 | 7.671269544 | 0.000187863 | SLU7   | ENSG00000164609 |
| 5 | 159798055 | 159798241 | 159798148 | 8  | 8   | 2 | 2.876726079 | 0.0381137   | PTTG2  | ENSG00000164611 |
| 5 | 159868590 | 159868820 | 159868696 | 8  | 10  | 4 | 2.109599125 | 0.0694668   |        | ENSG00000207936 |
| 5 | 159993525 | 159993719 | 159993592 | 9  | 9   | 1 | 4.794543465 | 0.00708517  | ATP10B | ENSG00000118322 |
| 5 | 162796896 | 162797778 | 162797518 | 76 | 144 | 4 | 27.8083521  | 5.30E-37    | CCNG1  | ENSG00000113328 |
| 5 | 162819449 | 162819687 | 162819555 | 9  | 11  | 4 | 2.301380863 | 0.0459276   | NUDCD2 | ENSG00000170584 |
| 5 | 162827328 | 162827550 | 162827439 | 8  | 8   | 2 | 2.876726079 | 0.0381137   | HMMR   | ENSG00000072571 |
| 5 | 162868886 | 162869311 | 162869061 | 31 | 40  | 7 | 4.914407052 | 6.35E-07    | MAT2B  | ENSG00000038274 |



|   |           |           |           |     |     |    |             |             |                        |
|---|-----------|-----------|-----------|-----|-----|----|-------------|-------------|------------------------|
| 5 | 163479341 | 163479987 | 163479648 | 107 | 157 | 2  | 50.5025245  | 2.25E-43    | ENSG00000208477        |
| 5 | 164328174 | 164328423 | 164328274 | 11  | 12  | 0  | 12.46581301 | 0.000159888 | ENSG00000206845        |
| 5 | 167082949 | 167083146 | 167083047 | 10  | 10  | 3  | 2.636998906 | 0.034203    | ENSG00000221741        |
| 5 | 167445922 | 167446165 | 167446043 | 9   | 11  | 7  | 1.43836304  | 0.204844    | ENSG00000208456        |
| 5 | 167567413 | 167567593 | 167567493 | 8   | 8   | 1  | 4.315089119 | 0.0127267   | WWC1 ENSG00000113645   |
| 5 | 167648032 | 167648219 | 167648083 | 8   | 8   | 4  | 1.726035648 | 0.150596    | WWC1 ENSG00000113645   |
| 5 | 167674423 | 167674854 | 167674675 | 9   | 15  | 4  | 3.068507818 | 0.0076507   | WWC1 ENSG00000113645   |
| 5 | 167808812 | 167809179 | 167808972 | 9   | 13  | 3  | 3.356180426 | 0.00805599  | RARS ENSG00000113643   |
| 5 | 167845709 | 167845970 | 167845860 | 9   | 12  | 6  | 1.78083043  | 0.0985525   | RARS ENSG00000113643   |
| 5 | 167846016 | 167846234 | 167846065 | 8   | 10  | 5  | 1.757999271 | 0.121253    | RARS ENSG00000113643   |
| 5 | 167851934 | 167852255 | 167852094 | 11  | 15  | 2  | 5.114179696 | 0.00088103  | RARS ENSG00000113643   |
| 5 | 167959939 | 167960340 | 167960165 | 10  | 16  | 9  | 1.630144778 | 0.102169    | PANK3 ENSG00000120137  |
| 5 | 168017961 | 168018543 | 168018328 | 23  | 42  | 7  | 5.154134225 | 2.23E-07    | PANK3 ENSG00000120137  |
| 5 | 168056910 | 168057275 | 168057089 | 10  | 16  | 11 | 1.358453982 | 0.20248     | ENSG00000207739        |
| 5 | 168662131 | 168662310 | 168662220 | 8   | 8   | 4  | 1.726035648 | 0.150596    | SLIT3 ENSG00000184347  |
| 5 | 168715754 | 168716009 | 168715881 | 9   | 11  | 1  | 5.753452158 | 0.00215302  | SLIT3 ENSG00000184347  |
| 5 | 169191028 | 169191340 | 169191199 | 8   | 10  | 2  | 3.515998541 | 0.0136204   | ENSG00000204767        |
| 5 | 169202489 | 169202718 | 169202603 | 8   | 8   | 2  | 2.876726079 | 0.0381137   | ENSG00000204767        |
| 5 | 169340130 | 169340362 | 169340227 | 8   | 10  | 5  | 1.757999271 | 0.121253    | ENSG00000204767        |
| 5 | 169377393 | 169377695 | 169377517 | 9   | 11  | 6  | 1.643843474 | 0.137712    | ENSG00000204767        |
| 5 | 169460022 | 169460516 | 169460337 | 9   | 18  | 8  | 2.024362796 | 0.0334397   | FOXI1 ENSG00000168269  |
| 5 | 169532932 | 169533111 | 169533059 | 8   | 8   | 4  | 1.726035648 | 0.150596    | ENSG00000203776        |
| 5 | 169627381 | 169627761 | 169627584 | 9   | 15  | 6  | 2.191791298 | 0.0328001   | ENSG00000198424        |
| 5 | 169633409 | 169633700 | 169633575 | 10  | 12  | 2  | 4.155271003 | 0.0046638   | ENSG00000198424        |
| 5 | 169788617 | 169789022 | 169788843 | 18  | 23  | 0  | 23.01380863 | 9.81E-08    | KCNMB1 ENSG00000145936 |
| 5 | 169802469 | 169802680 | 169802537 | 10  | 10  | 11 | 0.878999635 | 0.622439    | KCNMB1 ENSG00000145936 |
| 5 | 169997874 | 169998149 | 169998035 | 8   | 10  | 3  | 2.636998906 | 0.034203    | KCNIP1 ENSG00000182132 |
| 5 | 170080063 | 170080253 | 170080158 | 8   | 9   | 3  | 2.397271733 | 0.0539397   | GABRP ENSG00000094755  |
| 5 | 170109450 | 170109670 | 170109558 | 8   | 11  | 0  | 11.50690432 | 0.000313206 | GABRP ENSG00000094755  |
| 5 | 170632977 | 170633219 | 170633098 | 11  | 14  | 2  | 4.794543465 | 0.00154571  | TLX3 ENSG00000164438   |
| 5 | 170701972 | 170702245 | 170702089 | 11  | 13  | 1  | 6.712360851 | 0.000640982 | ENSG00000213393        |
| 5 | 170746805 | 170747148 | 170746976 | 11  | 17  | 9  | 1.726035648 | 0.0753664   | NPM1 ENSG00000181163   |
| 5 | 170778384 | 170778587 | 170778504 | 8   | 9   | 2  | 3.19636231  | 0.0229249   | FGF18 ENSG00000156427  |
| 5 | 170836249 | 170836465 | 170836357 | 9   | 9   | 4  | 1.917817386 | 0.103282    | FGF18 ENSG00000156427  |

|   |            |            |            |    |    |    |             |             |         |                 |
|---|------------|------------|------------|----|----|----|-------------|-------------|---------|-----------------|
| 5 | 171001686  | 171001975  | 171001815  | 8  | 8  | 4  | 1.726035648 | 0.150596    | C5orf50 | ENSG00000185662 |
| 5 | 171106808  | 171107060  | 171106983  | 8  | 11 | 1  | 5.753452158 | 0.00215302  | C5orf50 | ENSG00000185662 |
| 5 | 1711117621 | 1711117830 | 1711117725 | 8  | 8  | 1  | 4.315089119 | 0.0127267   | C5orf50 | ENSG00000185662 |
| 5 | 171144238  | 171144458  | 171144365  | 8  | 10 | 1  | 5.273997812 | 0.00391723  | C5orf50 | ENSG00000185662 |
| 5 | 171304999  | 171305306  | 171305172  | 10 | 14 | 2  | 4.794543465 | 0.00154571  | FBXW11  | ENSG00000072803 |
| 5 | 171314378  | 171314626  | 171314479  | 9  | 12 | 4  | 2.493162602 | 0.0299057   | FBXW11  | ENSG00000072803 |
| 5 | 171436574  | 171436825  | 171436699  | 11 | 13 | 2  | 4.474907234 | 0.00269459  | FBXW11  | ENSG00000072803 |
| 5 | 171471674  | 171471911  | 171471739  | 10 | 13 | 2  | 4.474907234 | 0.00269459  | STK10   | ENSG00000072786 |
| 5 | 171652991  | 171653170  | 171653084  | 8  | 8  | 1  | 4.315089119 | 0.0127267   |         | ENSG00000204762 |
| 5 | 171996490  | 171997039  | 171996794  | 60 | 96 | 5  | 15.5023572  | 1.17E-22    |         | ENSG00000214357 |
| 5 | 172019358  | 172019853  | 172019674  | 9  | 18 | 4  | 3.643853034 | 0.00178791  |         | ENSG00000214357 |
| 5 | 172057301  | 172057531  | 172057416  | 8  | 10 | 8  | 1.171999514 | 0.35773     |         | ENSG00000214357 |
| 5 | 172076342  | 172076581  | 172076458  | 9  | 9  | 6  | 1.369869562 | 0.253675    |         | ENSG00000213386 |
| 5 | 172128131  | 172128310  | 172128269  | 8  | 8  | 1  | 4.315089119 | 0.0127267   | DUSP1   | ENSG00000120129 |
| 5 | 172263490  | 172263869  | 172263665  | 12 | 18 | 6  | 2.602752167 | 0.00970422  | ERGIC1  | ENSG00000113719 |
| 5 | 172411426  | 172411680  | 172411556  | 8  | 11 | 1  | 5.753452158 | 0.00215302  |         | ENSG00000207210 |
| 5 | 172503911  | 172504298  | 172504086  | 16 | 22 | 11 | 1.837908328 | 0.0378204   | BNIP1   | ENSG00000113734 |
| 5 | 172508177  | 172508356  | 172508271  | 8  | 8  | 3  | 2.157544559 | 0.0836802   | BNIP1   | ENSG00000113734 |
| 5 | 172561667  | 172562169  | 172561763  | 12 | 23 | 2  | 7.671269544 | 8.30E-06    |         | ENSG00000208401 |
| 5 | 172643274  | 172643816  | 172643654  | 11 | 23 | 11 | 1.917817386 | 0.0274129   |         | ENSG00000208394 |
| 5 | 172651793  | 172652420  | 172652173  | 69 | 89 | 4  | 17.26035648 | 9.60E-22    |         | ENSG00000208394 |
| 5 | 172653634  | 172654005  | 172653826  | 9  | 16 | 5  | 2.716907964 | 0.0109645   |         | ENSG00000208394 |
| 5 | 172662084  | 172662334  | 172662169  | 11 | 12 | 7  | 1.558226626 | 0.152813    |         | ENSG00000208394 |
| 5 | 172662492  | 172662703  | 172662597  | 8  | 8  | 2  | 2.876726079 | 0.0381137   |         | ENSG00000208394 |
| 5 | 172675102  | 172675299  | 172675208  | 8  | 9  | 5  | 1.598181155 | 0.170911    | STC2    | ENSG00000113739 |
| 5 | 172852864  | 172853049  | 172852982  | 8  | 10 | 1  | 5.273997812 | 0.00391723  | FAM44B  | ENSG00000145919 |
| 5 | 172927085  | 172927542  | 172927384  | 14 | 23 | 5  | 3.835634772 | 0.000408054 | FAM44B  | ENSG00000145919 |
| 5 | 172929269  | 172929607  | 172929438  | 28 | 30 | 3  | 7.431542371 | 6.87E-07    | FAM44B  | ENSG00000145919 |
| 5 | 172975514  | 172975840  | 172975677  | 12 | 18 | 7  | 2.277408146 | 0.0188653   | FAM44B  | ENSG00000145919 |
| 5 | 172976211  | 172976441  | 172976329  | 10 | 10 | 0  | 10.54799562 | 0.000613541 | FAM44B  | ENSG00000145919 |
| 5 | 172983346  | 172983539  | 172983499  | 8  | 8  | 2  | 2.876726079 | 0.0381137   | FAM44B  | ENSG00000145919 |
| 5 | 173088064  | 173088378  | 173088222  | 12 | 15 | 4  | 3.068507818 | 0.0076507   | FAM44B  | ENSG00000145919 |
| 5 | 173243591  | 173244350  | 173243978  | 32 | 59 | 5  | 9.589086931 | 7.64E-13    | CPEB4   | ENSG00000113742 |
| 5 | 173404937  | 173405409  | 173405181  | 13 | 26 | 6  | 3.698647816 | 0.00025253  |         | ENSG00000170091 |

|   |           |           |           |     |     |    |             |             |         |                 |
|---|-----------|-----------|-----------|-----|-----|----|-------------|-------------|---------|-----------------|
| 5 | 173686979 | 173687506 | 173687264 | 19  | 36  | 5  | 5.913270274 | 4.32E-07    |         | ENSG00000213376 |
| 5 | 173687894 | 173689330 | 173688465 | 336 | 508 | 9  | 48.80845248 | 2.63E-133   |         | ENSG00000213376 |
| 5 | 173779225 | 173779574 | 173779399 | 18  | 23  | 13 | 1.643843474 | 0.0639146   |         | ENSG00000213376 |
| 5 | 173784930 | 173785258 | 173785094 | 20  | 24  | 1  | 11.98635866 | 6.63E-07    |         | ENSG00000213376 |
| 5 | 173892121 | 173892506 | 173892313 | 25  | 33  | 7  | 4.075361945 | 2.23E-05    |         | ENSG00000213376 |
| 5 | 173966642 | 173966839 | 173966740 | 8   | 9   | 1  | 4.794543465 | 0.00708517  |         | ENSG00000213376 |
| 5 | 174080200 | 174080408 | 174080284 | 8   | 9   | 1  | 4.794543465 | 0.00708517  | MSX2    | ENSG00000120149 |
| 5 | 174130520 | 174130769 | 174130641 | 8   | 9   | 0  | 9.589086931 | 0.00120187  |         | ENSG00000222422 |
| 5 | 174188638 | 174188823 | 174188729 | 8   | 9   | 0  | 9.589086931 | 0.00120187  |         | ENSG00000222422 |
| 5 | 174295534 | 174295827 | 174295648 | 13  | 17  | 2  | 5.753452158 | 0.000281509 |         | ENSG00000204754 |
| 5 | 174310901 | 174311096 | 174310998 | 8   | 9   | 1  | 4.794543465 | 0.00708517  |         | ENSG00000204754 |
| 5 | 174331955 | 174332241 | 174332100 | 10  | 12  | 4  | 2.493162602 | 0.0299057   |         | ENSG00000204754 |
| 5 | 174474240 | 174474537 | 174474388 | 10  | 11  | 12 | 0.885146486 | 0.620672    |         | ENSG00000204754 |
| 5 | 174531728 | 174531909 | 174531879 | 8   | 8   | 1  | 4.315089119 | 0.0127267   |         | ENSG00000204754 |
| 5 | 174563675 | 174564100 | 174563921 | 18  | 29  | 0  | 28.76726079 | 1.74E-09    |         | ENSG00000204754 |
| 5 | 174586385 | 174586672 | 174586533 | 11  | 13  | 1  | 6.712360851 | 0.000640982 | DRD1    | ENSG00000184845 |
| 5 | 174646348 | 174646668 | 174646523 | 13  | 17  | 0  | 17.26035648 | 5.54E-06    | DRD1    | ENSG00000184845 |
| 5 | 174738181 | 174738457 | 174738317 | 8   | 12  | 2  | 4.155271003 | 0.0046638   | DRD1    | ENSG00000184845 |
| 5 | 174819758 | 174820118 | 174820010 | 9   | 15  | 4  | 3.068507818 | 0.0076507   |         | ENSG00000208388 |
| 5 | 174853887 | 174854207 | 174854047 | 9   | 13  | 9  | 1.34247217  | 0.232231    | SFXN1   | ENSG00000164466 |
| 5 | 174893767 | 174894223 | 174893897 | 10  | 19  | 10 | 1.743470351 | 0.0622604   | SFXN1   | ENSG00000164466 |
| 5 | 174983689 | 174983922 | 174983776 | 9   | 9   | 3  | 2.397271733 | 0.0539397   |         | ENSG00000222111 |
| 5 | 175078380 | 175078785 | 175078631 | 11  | 18  | 1  | 9.109632584 | 2.91E-05    |         | ENSG00000200648 |
| 5 | 175112429 | 175112713 | 175112571 | 15  | 19  | 4  | 3.835634772 | 0.00108365  | CPLX2   | ENSG00000145920 |
| 5 | 175169324 | 175169727 | 175169548 | 10  | 17  | 3  | 4.315089119 | 0.00102271  | CPLX2   | ENSG00000145920 |
| 5 | 175189723 | 175190156 | 175189977 | 13  | 23  | 2  | 7.671269544 | 8.30E-06    | CPLX2   | ENSG00000145920 |
| 5 | 175365747 | 175365944 | 175365802 | 9   | 9   | 2  | 3.19636231  | 0.0229249   |         | ENSG00000214351 |
| 5 | 175506452 | 175506730 | 175506595 | 10  | 12  | 2  | 4.155271003 | 0.0046638   | FAM153B | ENSG00000182230 |
| 5 | 175747975 | 175748306 | 175748146 | 8   | 12  | 3  | 3.116453252 | 0.0131971   | NOP16   | ENSG00000048162 |
| 5 | 175748406 | 175748842 | 175748585 | 11  | 22  | 4  | 4.410979988 | 0.000231863 | HIGD2A  | ENSG00000146066 |
| 5 | 175798666 | 175798938 | 175798786 | 9   | 13  | 1  | 6.712360851 | 0.000640982 | FAF2    | ENSG00000113194 |
| 5 | 175807522 | 175807889 | 175807700 | 15  | 21  | 10 | 1.917817386 | 0.0328292   | FAF2    | ENSG00000113194 |
| 5 | 175832410 | 175832592 | 175832463 | 8   | 9   | 3  | 2.397271733 | 0.0539397   |         | ENSG00000221373 |
| 5 | 175896989 | 175897194 | 175897091 | 10  | 12  | 3  | 3.116453252 | 0.0131971   | RNF44   | ENSG00000146083 |

|   |           |           |           |    |    |    |             |             |         |                 |
|---|-----------|-----------|-----------|----|----|----|-------------|-------------|---------|-----------------|
| 5 | 175897533 | 175897904 | 175897712 | 8  | 15 | 6  | 2.191791298 | 0.0328001   | RNF44   | ENSG00000146083 |
| 5 | 175938114 | 175938500 | 175938237 | 9  | 14 | 3  | 3.595907599 | 0.00486913  |         | ENSG00000204738 |
| 5 | 175971083 | 175971338 | 175971210 | 8  | 11 | 2  | 3.835634772 | 0.00800699  | GPRIN1  | ENSG00000169258 |
| 5 | 176075283 | 176075541 | 176075412 | 9  | 12 | 2  | 4.155271003 | 0.0046638   | TSPAN17 | ENSG00000048140 |
| 5 | 176229758 | 176229941 | 176229855 | 8  | 8  | 3  | 2.157544559 | 0.0836802   | UNC5A   | ENSG00000113763 |
| 5 | 176244509 | 176244715 | 176244638 | 10 | 10 | 0  | 10.54799562 | 0.000613541 | HK3     | ENSG00000160883 |
| 5 | 176363390 | 176363728 | 176363558 | 8  | 12 | 2  | 4.155271003 | 0.0046638   | UIMC1   | ENSG00000087206 |
| 5 | 176366430 | 176366721 | 176366575 | 11 | 15 | 4  | 3.068507818 | 0.0076507   | UIMC1   | ENSG00000087206 |
| 5 | 176381530 | 176381709 | 176381656 | 8  | 8  | 7  | 1.07877228  | 0.435076    | ZNF346  | ENSG00000113761 |
| 5 | 176382900 | 176383153 | 176383026 | 9  | 12 | 0  | 12.46581301 | 0.000159888 | ZNF346  | ENSG00000113761 |
| 5 | 176431570 | 176431768 | 176431671 | 8  | 9  | 2  | 3.19636231  | 0.0229249   | FGFR4   | ENSG00000160867 |
| 5 | 176629622 | 176629984 | 176629799 | 12 | 18 | 6  | 2.602752167 | 0.00970422  |         | ENSG00000213350 |
| 5 | 176660939 | 176661137 | 176661016 | 8  | 9  | 6  | 1.369869562 | 0.253675    | RAB24   | ENSG00000169228 |
| 5 | 176661226 | 176661843 | 176661562 | 10 | 27 | 12 | 2.0653418   | 0.0117911   | RAB24   | ENSG00000169228 |
| 5 | 176664033 | 176664253 | 176664093 | 8  | 10 | 1  | 5.273997812 | 0.00391723  | PRELID1 | ENSG00000169230 |
| 5 | 176711115 | 176711539 | 176711364 | 14 | 21 | 13 | 1.506856518 | 0.109266    | LMAN2   | ENSG00000169223 |
| 5 | 176730374 | 176730589 | 176730460 | 9  | 9  | 5  | 1.598181155 | 0.170911    | RGS14   | ENSG00000169220 |
| 5 | 176761989 | 176762475 | 176762307 | 10 | 22 | 18 | 1.160784207 | 0.312473    | PFN3    | ENSG00000196570 |
| 5 | 176786937 | 176787181 | 176787011 | 11 | 14 | 5  | 2.397271733 | 0.0258078   | GRK6    | ENSG00000198055 |
| 5 | 176876528 | 176876998 | 176876788 | 10 | 23 | 9  | 2.301380863 | 0.00938618  | DDX41   | ENSG00000183258 |
| 5 | 176914203 | 176914433 | 176914318 | 9  | 9  | 0  | 9.589086931 | 0.00120187  |         | ENSG00000146067 |
| 5 | 176935753 | 176936273 | 176935972 | 63 | 80 | 2  | 25.89053471 | 1.86E-21    | TMED9   | ENSG00000184840 |
| 5 | 177217295 | 177217490 | 177217448 | 19 | 19 | 1  | 9.589086931 | 1.56E-05    |         | ENSG00000170089 |
| 5 | 177421697 | 177422022 | 177421858 | 12 | 15 | 7  | 1.917817386 | 0.0572317   |         | ENSG00000218227 |
| 5 | 177435045 | 177435281 | 177435195 | 8  | 10 | 10 | 0.958908693 | 0.538751    |         | ENSG00000218227 |
| 5 | 177435664 | 177436014 | 177435839 | 19 | 25 | 18 | 1.312190843 | 0.179876    |         | ENSG00000218227 |
| 5 | 177437954 | 177438176 | 177438120 | 9  | 11 | 14 | 0.767126954 | 0.756447    |         | ENSG00000218227 |
| 5 | 177440344 | 177440640 | 177440488 | 12 | 13 | 2  | 4.474907234 | 0.00269459  |         | ENSG00000218227 |
| 5 | 177465767 | 177465987 | 177465877 | 8  | 9  | 2  | 3.19636231  | 0.0229249   |         | ENSG00000145911 |
| 5 | 177480565 | 177480942 | 177480744 | 9  | 16 | 13 | 1.164389127 | 0.333296    |         | ENSG00000145911 |
| 5 | 177483249 | 177483483 | 177483402 | 9  | 9  | 5  | 1.598181155 | 0.170911    | RMND5B  | ENSG00000145916 |
| 5 | 177483669 | 177484166 | 177483995 | 11 | 22 | 24 | 0.882195998 | 0.668517    | RMND5B  | ENSG00000145916 |
| 5 | 177495955 | 177496234 | 177496091 | 9  | 13 | 5  | 2.237453617 | 0.038866    | RMND5B  | ENSG00000145916 |
| 5 | 177505259 | 177505452 | 177505351 | 8  | 10 | 4  | 2.109599125 | 0.0694668   | NHP2    | ENSG00000145912 |

|   |           |           |           |    |    |    |             |             |         |                 |
|---|-----------|-----------|-----------|----|----|----|-------------|-------------|---------|-----------------|
| 5 | 177512723 | 177512926 | 177512875 | 8  | 9  | 3  | 2.397271733 | 0.0539397   | NHP2    | ENSG00000145912 |
| 5 | 177513476 | 177513719 | 177513592 | 11 | 13 | 9  | 1.34247217  | 0.232231    | NHP2    | ENSG00000145912 |
| 5 | 177563715 | 177564230 | 177563888 | 13 | 24 | 3  | 5.993179332 | 2.17E-05    | HNRNPAB | ENSG00000197451 |
| 5 | 177639624 | 177639849 | 177639698 | 8  | 10 | 5  | 1.757999271 | 0.121253    | AGXT2L2 | ENSG00000175309 |
| 5 | 177670537 | 177670825 | 177670681 | 9  | 9  | 4  | 1.917817386 | 0.103282    |         | ENSG00000223150 |
| 5 | 177890760 | 177891013 | 177890922 | 12 | 14 | 1  | 7.191815198 | 0.00034761  | COL23A1 | ENSG00000050767 |
| 5 | 178002131 | 178002450 | 178002290 | 12 | 15 | 9  | 1.534253909 | 0.136498    | CLK4    | ENSG00000113240 |
| 5 | 178035677 | 178035911 | 178035797 | 14 | 14 | 2  | 4.794543465 | 0.00154571  | CLK4    | ENSG00000113240 |
| 5 | 178090404 | 178090618 | 178090490 | 9  | 10 | 2  | 3.515998541 | 0.0136204   | ZNF354A | ENSG00000169131 |
| 5 | 178198987 | 178199381 | 178199162 | 13 | 20 | 2  | 6.712360851 | 4.91E-05    | ZNF354B | ENSG00000178338 |
| 5 | 178467220 | 178467603 | 178467451 | 19 | 25 | 1  | 12.46581301 | 3.51E-07    | ZNF354C | ENSG00000177932 |
| 5 | 178853774 | 178854045 | 178853869 | 14 | 16 | 4  | 3.260289556 | 0.00475414  |         | ENSG00000202120 |
| 5 | 178983347 | 178983618 | 178983482 | 8  | 11 | 3  | 2.876726079 | 0.0213797   | HNRNPH1 | ENSG00000169045 |
| 5 | 178984084 | 178984263 | 178984173 | 8  | 9  | 1  | 4.794543465 | 0.00708517  | HNRNPH1 | ENSG00000169045 |
| 5 | 179028054 | 179028352 | 179028203 | 9  | 12 | 3  | 3.116453252 | 0.0131971   | CBY3    | ENSG00000204659 |
| 5 | 179057538 | 179057972 | 179057778 | 10 | 18 | 3  | 4.554816292 | 0.000599415 | CANX    | ENSG00000127022 |
| 5 | 179092156 | 179092488 | 179092310 | 10 | 14 | 12 | 1.106433107 | 0.392094    | MAML1   | ENSG00000161021 |
| 5 | 179122875 | 179123064 | 179122972 | 9  | 10 | 5  | 1.757999271 | 0.121253    | MAML1   | ENSG00000161021 |
| 5 | 179154833 | 179155013 | 179154917 | 8  | 8  | 4  | 1.726035648 | 0.150596    | LTC4S   | ENSG00000213316 |
| 5 | 179367852 | 179368040 | 179367945 | 8  | 9  | 6  | 1.369869562 | 0.253675    |         | ENSG00000198995 |
| 5 | 179617392 | 179617684 | 179617538 | 19 | 20 | 5  | 3.356180426 | 0.0017534   | MAPK9   | ENSG00000050748 |
| 5 | 179653245 | 179653454 | 179653313 | 8  | 10 | 0  | 10.54799562 | 0.000613541 | MAPK9   | ENSG00000050748 |
| 5 | 179855642 | 179856109 | 179855817 | 12 | 19 | 6  | 2.739739123 | 0.00632909  | CNOT6   | ENSG00000113300 |
| 5 | 180030285 | 180030503 | 180030425 | 8  | 9  | 6  | 1.369869562 | 0.253675    | FLT4    | ENSG00000037280 |
| 5 | 180078434 | 180078733 | 180078583 | 11 | 14 | 1  | 7.191815198 | 0.00034761  |         | ENSG00000199892 |
| 5 | 180158889 | 180159083 | 180159007 | 8  | 9  | 5  | 1.598181155 | 0.170911    | MGAT1   | ENSG00000131446 |
| 5 | 180220992 | 180221205 | 180221122 | 8  | 8  | 6  | 1.232882605 | 0.333038    |         | ENSG00000214302 |
| 5 | 180258133 | 180258384 | 180258216 | 8  | 10 | 5  | 1.757999271 | 0.121253    | BTNL8   | ENSG00000113303 |
| 5 | 180474640 | 180474917 | 180474755 | 8  | 11 | 5  | 1.917817386 | 0.0843804   |         | ENSG00000214293 |
| 5 | 180518927 | 180519204 | 180519074 | 10 | 12 | 6  | 1.78083043  | 0.0985525   | OR2V2   | ENSG00000182613 |
| 5 | 180527338 | 180527624 | 180527481 | 10 | 13 | 3  | 3.356180426 | 0.00805599  |         | ENSG00000208343 |
| 5 | 180533310 | 180533568 | 180533473 | 11 | 15 | 5  | 2.557089848 | 0.0169197   |         | ENSG00000208343 |
| 5 | 180547185 | 180547625 | 180547405 | 10 | 22 | 14 | 1.470326663 | 0.117149    | TRIM7   | ENSG00000146054 |
| 5 | 180548288 | 180548594 | 180548442 | 13 | 16 | 10 | 1.481949798 | 0.147733    | TRIM7   | ENSG00000146054 |

|   |           |           |           |    |    |    |             |             |          |                 |
|---|-----------|-----------|-----------|----|----|----|-------------|-------------|----------|-----------------|
| 5 | 180551199 | 180551546 | 180551372 | 9  | 13 | 7  | 1.678090213 | 0.11195     | TRIM7    | ENSG00000146054 |
| 5 | 180560254 | 180560469 | 180560383 | 8  | 9  | 1  | 4.794543465 | 0.00708517  | TRIM7    | ENSG00000146054 |
| 5 | 180565867 | 180566214 | 180566039 | 8  | 11 | 3  | 2.876726079 | 0.0213797   | TRIM7    | ENSG00000146054 |
| 5 | 180566395 | 180566734 | 180566564 | 14 | 20 | 8  | 2.237453617 | 0.0160557   | TRIM7    | ENSG00000146054 |
| 5 | 180567276 | 180567746 | 180567440 | 8  | 17 | 20 | 0.821921737 | 0.731032    | TRIM7    | ENSG00000146054 |
| 5 | 180577214 | 180578032 | 180577708 | 13 | 39 | 19 | 1.917817386 | 0.00683587  | TRIM41   | ENSG00000146063 |
| 5 | 180581355 | 180582279 | 180581710 | 13 | 43 | 23 | 1.757999271 | 0.011069    | TRIM41   | ENSG00000146063 |
| 5 | 180603600 | 180603835 | 180603710 | 8  | 9  | 9  | 0.958908693 | 0.536911    | GNB2L1   | ENSG00000204628 |
| 5 | 180619951 | 180620230 | 180620114 | 8  | 11 | 1  | 5.753452158 | 0.00215302  | TRIM52   | ENSG00000183718 |
| 6 | 236654    | 236920    | 236754    | 9  | 11 | 0  | 11.50690432 | 0.000313206 | DUSP22   | ENSG00000112679 |
| 6 | 562560    | 562767    | 562663    | 11 | 11 | 7  | 1.43836304  | 0.204844    | HUS1B    | ENSG00000188996 |
| 6 | 625576    | 626050    | 625820    | 12 | 23 | 0  | 23.01380863 | 9.81E-08    |          | ENSG00000219712 |
| 6 | 1270953   | 1271290   | 1271126   | 8  | 11 | 1  | 5.753452158 | 0.00215302  | FOXQ1    | ENSG00000164379 |
| 6 | 1342311   | 1342495   | 1342403   | 8  | 8  | 3  | 2.157544559 | 0.0836802   | FOXF2    | ENSG00000137273 |
| 6 | 2452265   | 2452692   | 2452458   | 31 | 41 | 0  | 40.27416511 | 5.44E-13    |          | ENSG00000203564 |
| 6 | 2897818   | 2898152   | 2897996   | 16 | 19 | 0  | 19.17817386 | 1.44E-06    | SERPINB6 | ENSG00000124570 |
| 6 | 2934754   | 2934984   | 2934894   | 11 | 13 | 5  | 2.237453617 | 0.038866    |          | ENSG00000215076 |
| 6 | 2935128   | 2935307   | 2935226   | 8  | 8  | 4  | 1.726035648 | 0.150596    |          | ENSG00000215076 |
| 6 | 3415382   | 3415823   | 3415602   | 24 | 35 | 5  | 5.753452158 | 7.49E-07    | SLC22A23 | ENSG00000137266 |
| 6 | 3463626   | 3463836   | 3463731   | 8  | 8  | 5  | 1.43836304  | 0.235762    | SLC22A23 | ENSG00000137266 |
| 6 | 3530668   | 3530847   | 3530752   | 8  | 8  | 3  | 2.157544559 | 0.0836802   | SLC22A23 | ENSG00000137266 |
| 6 | 3558007   | 3558281   | 3558153   | 13 | 14 | 2  | 4.794543465 | 0.00154571  | C6orf145 | ENSG00000168994 |
| 6 | 3660600   | 3660809   | 3660736   | 9  | 10 | 3  | 2.636998906 | 0.034203    | C6orf145 | ENSG00000168994 |
| 6 | 3750933   | 3751161   | 3751038   | 8  | 8  | 0  | 8.630178238 | 0.00235436  | FAM50B   | ENSG00000145945 |
| 6 | 3963910   | 3964182   | 3964046   | 11 | 15 | 4  | 3.068507818 | 0.0076507   |          | ENSG00000215066 |
| 6 | 4264596   | 4264785   | 4264690   | 9  | 9  | 2  | 3.19636231  | 0.0229249   |          | ENSG00000201185 |
| 6 | 4268205   | 4268401   | 4268303   | 9  | 10 | 6  | 1.506856518 | 0.188853    |          | ENSG00000201185 |
| 6 | 4304032   | 4304229   | 4304114   | 8  | 9  | 4  | 1.917817386 | 0.103282    |          | ENSG00000201185 |
| 6 | 4329015   | 4329458   | 4329234   | 39 | 53 | 2  | 17.26035648 | 6.53E-14    |          | ENSG00000201185 |
| 6 | 4497618   | 4497875   | 4497746   | 9  | 9  | 0  | 9.589086931 | 0.00120187  |          | ENSG00000205444 |
| 6 | 4593003   | 4593182   | 4593092   | 8  | 8  | 2  | 2.876726079 | 0.0381137   |          | ENSG00000205444 |
| 6 | 4755320   | 4755519   | 4755455   | 9  | 10 | 5  | 1.757999271 | 0.121253    | CDYL     | ENSG00000153046 |
| 6 | 4980041   | 4980301   | 4980171   | 11 | 11 | 5  | 1.917817386 | 0.0843804   |          | ENSG00000209924 |
| 6 | 5851157   | 5851622   | 5851472   | 29 | 38 | 0  | 37.39743903 | 4.09E-12    |          | ENSG00000222735 |

|   |          |          |          |    |    |   |             |             |          |                 |
|---|----------|----------|----------|----|----|---|-------------|-------------|----------|-----------------|
| 6 | 7012623  | 7012841  | 7012734  | 10 | 10 | 1 | 5.273997812 | 0.00391723  | RREB1    | ENSG00000124782 |
| 6 | 7146492  | 7146730  | 7146611  | 11 | 12 | 1 | 6.232906505 | 0.00117736  | RREB1    | ENSG00000124782 |
| 6 | 7188750  | 7188940  | 7188785  | 8  | 8  | 4 | 1.726035648 | 0.150596    | RREB1    | ENSG00000124782 |
| 6 | 7206407  | 7206635  | 7206483  | 10 | 12 | 0 | 12.46581301 | 0.000159888 | RREB1    | ENSG00000124782 |
| 6 | 7207409  | 7207768  | 7207589  | 22 | 28 | 3 | 6.952088025 | 2.20E-06    | RREB1    | ENSG00000124782 |
| 6 | 7212701  | 7213089  | 7212913  | 19 | 25 | 3 | 6.232906505 | 1.23E-05    | RREB1    | ENSG00000124782 |
| 6 | 7268398  | 7268787  | 7268608  | 30 | 37 | 2 | 12.14617678 | 1.58E-09    | ATP5GP1  | ENSG00000219375 |
| 6 | 7363446  | 7363725  | 7363585  | 13 | 15 | 6 | 2.191791298 | 0.0328001   | RIOK1    | ENSG00000124784 |
| 6 | 7408923  | 7409358  | 7409185  | 23 | 30 | 2 | 9.908723162 | 1.20E-07    |          | ENSG00000215042 |
| 6 | 7450517  | 7450860  | 7450689  | 11 | 16 | 3 | 4.075361945 | 0.00173346  |          | ENSG00000219993 |
| 6 | 7450894  | 7451181  | 7451037  | 9  | 12 | 1 | 6.232906505 | 0.00117736  |          | ENSG00000219993 |
| 6 | 7469423  | 7469602  | 7469512  | 8  | 8  | 2 | 2.876726079 | 0.0381137   |          | ENSG00000168929 |
| 6 | 7477540  | 7477790  | 7477665  | 8  | 11 | 0 | 11.50690432 | 0.000313206 | DSP      | ENSG00000096696 |
| 6 | 7495686  | 7496001  | 7495845  | 25 | 27 | 0 | 26.84944341 | 6.66E-09    | DSP      | ENSG00000096696 |
| 6 | 7535207  | 7535454  | 7535330  | 9  | 12 | 4 | 2.493162602 | 0.0299057   | SNRNP48  | ENSG00000168566 |
| 6 | 7920279  | 7920550  | 7920390  | 9  | 12 | 5 | 2.077635502 | 0.0577144   |          | ENSG00000219294 |
| 6 | 7993190  | 7993418  | 7993281  | 10 | 11 | 2 | 3.835634772 | 0.00800699  |          | ENSG00000221663 |
| 6 | 8047279  | 8047510  | 8047394  | 8  | 9  | 1 | 4.794543465 | 0.00708517  | EEF1E1   | ENSG00000124802 |
| 6 | 8557467  | 8557760  | 8557626  | 9  | 9  | 1 | 4.794543465 | 0.00708517  | SLC35B3  | ENSG00000124786 |
| 6 | 8653237  | 8653423  | 8653348  | 9  | 9  | 5 | 1.598181155 | 0.170911    | SLC35B3  | ENSG00000124786 |
| 6 | 9590367  | 9590624  | 9590495  | 10 | 12 | 4 | 2.493162602 | 0.0299057   |          | ENSG00000222597 |
| 6 | 9619437  | 9619695  | 9619566  | 13 | 15 | 2 | 5.114179696 | 0.00088103  |          | ENSG00000222597 |
| 6 | 9949042  | 9949221  | 9949131  | 8  | 8  | 0 | 8.630178238 | 0.00235436  | OFCC1    | ENSG00000181355 |
| 6 | 10235542 | 10235729 | 10235654 | 8  | 9  | 3 | 2.397271733 | 0.0539397   |          | ENSG00000216368 |
| 6 | 10255174 | 10255353 | 10255326 | 8  | 8  | 0 | 8.630178238 | 0.00235436  |          | ENSG00000216368 |
| 6 | 10271342 | 10271873 | 10271612 | 24 | 39 | 3 | 9.589086931 | 3.26E-09    |          | ENSG00000216368 |
| 6 | 10539538 | 10539928 | 10539749 | 14 | 22 | 0 | 22.05489994 | 1.92E-07    | C6orf218 | ENSG00000183674 |
| 6 | 10618832 | 10619038 | 10618992 | 8  | 8  | 3 | 2.157544559 | 0.0836802   |          | ENSG00000216359 |
| 6 | 10802939 | 10803191 | 10803074 | 10 | 11 | 5 | 1.917817386 | 0.0843804   | PAK1IP1  | ENSG00000111845 |
| 6 | 10826740 | 10827346 | 10827089 | 55 | 81 | 3 | 19.65762821 | 1.37E-20    | TMEM14C  | ENSG00000111843 |
| 6 | 10867582 | 10867851 | 10867712 | 8  | 10 | 1 | 5.273997812 | 0.00391723  |          | ENSG00000209246 |
| 6 | 11338058 | 11338331 | 11338187 | 8  | 11 | 2 | 3.835634772 | 0.00800699  | NEDD9    | ENSG00000111859 |
| 6 | 12116537 | 12116717 | 12116680 | 8  | 8  | 4 | 1.726035648 | 0.150596    | HIVEP1   | ENSG00000095951 |
| 6 | 12342318 | 12342577 | 12342403 | 10 | 13 | 5 | 2.237453617 | 0.038866    | EDN1     | ENSG00000078401 |

|   |          |          |          |    |    |   |             |             |         |                 |
|---|----------|----------|----------|----|----|---|-------------|-------------|---------|-----------------|
| 6 | 12432522 | 12432747 | 12432652 | 9  | 11 | 2 | 3.835634772 | 0.00800699  |         | ENSG00000218893 |
| 6 | 12480650 | 12480851 | 12480733 | 9  | 9  | 3 | 2.397271733 | 0.0539397   |         | ENSG00000223321 |
| 6 | 12580962 | 12581196 | 12581029 | 9  | 11 | 1 | 5.753452158 | 0.00215302  | RPL15P3 | ENSG00000212802 |
| 6 | 12593667 | 12593847 | 12593701 | 8  | 10 | 5 | 1.757999271 | 0.121253    | RPL15P3 | ENSG00000212802 |
| 6 | 12614441 | 12614631 | 12614547 | 8  | 8  | 2 | 2.876726079 | 0.0381137   | RPL15P3 | ENSG00000212802 |
| 6 | 13356202 | 13356649 | 13356457 | 44 | 53 | 0 | 51.78106943 | 1.70E-16    | PHACTR1 | ENSG00000112137 |
| 6 | 13683093 | 13683436 | 13683264 | 11 | 16 | 3 | 4.075361945 | 0.00173346  | SIRT5   | ENSG00000124523 |
| 6 | 13722873 | 13723181 | 13723027 | 10 | 14 | 0 | 14.3836304  | 4.17E-05    | NOL7    | ENSG00000137420 |
| 6 | 14175045 | 14175312 | 14175178 | 9  | 9  | 4 | 1.917817386 | 0.103282    | CD83    | ENSG00000112149 |
| 6 | 14213606 | 14214082 | 14213841 | 19 | 31 | 4 | 6.137015636 | 1.74E-06    | CD83    | ENSG00000112149 |
| 6 | 14226830 | 14227041 | 14226935 | 8  | 8  | 3 | 2.157544559 | 0.0836802   | CD83    | ENSG00000112149 |
| 6 | 14871322 | 14871542 | 14871432 | 8  | 9  | 2 | 3.19636231  | 0.0229249   |         | ENSG00000206960 |
| 6 | 15174893 | 15175253 | 15175054 | 23 | 28 | 1 | 13.90417605 | 5.17E-08    |         | ENSG00000216754 |
| 6 | 15564005 | 15564193 | 15564099 | 8  | 8  | 2 | 2.876726079 | 0.0381137   | JARID2  | ENSG00000008083 |
| 6 | 15799582 | 15799791 | 15799659 | 9  | 10 | 4 | 2.109599125 | 0.0694668   | DTNBP1  | ENSG00000047579 |
| 6 | 16016388 | 16016658 | 16016523 | 13 | 14 | 6 | 2.054804342 | 0.0480281   |         | ENSG00000214027 |
| 6 | 16238718 | 16238988 | 16238869 | 11 | 12 | 2 | 4.155271003 | 0.0046638   | MYLIP   | ENSG00000007944 |
| 6 | 16359929 | 16360302 | 16360104 | 14 | 20 | 2 | 6.712360851 | 4.91E-05    | GMPR    | ENSG00000137198 |
| 6 | 16877466 | 16877679 | 16877564 | 8  | 9  | 2 | 3.19636231  | 0.0229249   |         | ENSG00000215019 |
| 6 | 17055824 | 17056031 | 17055927 | 8  | 8  | 4 | 1.726035648 | 0.150596    |         | ENSG00000215019 |
| 6 | 17264413 | 17264681 | 17264547 | 8  | 9  | 4 | 1.917817386 | 0.103282    |         | ENSG00000209103 |
| 6 | 17341790 | 17342042 | 17341887 | 10 | 12 | 2 | 4.155271003 | 0.0046638   |         | ENSG00000209103 |
| 6 | 18096414 | 18096688 | 18096555 | 10 | 13 | 5 | 2.237453617 | 0.038866    | KIF13A  | ENSG00000137177 |
| 6 | 18136510 | 18136810 | 18136684 | 15 | 18 | 0 | 18.21926517 | 2.83E-06    |         | ENSG00000210163 |
| 6 | 18198524 | 18198942 | 18198707 | 24 | 35 | 1 | 17.26035648 | 5.72E-10    | NHLRC1  | ENSG00000187566 |
| 6 | 18388410 | 18388612 | 18388548 | 8  | 9  | 5 | 1.598181155 | 0.170911    |         | ENSG00000199715 |
| 6 | 18434254 | 18434662 | 18434433 | 35 | 41 | 2 | 13.4247217  | 1.29E-10    |         | ENSG00000200681 |
| 6 | 18601838 | 18602034 | 18601941 | 9  | 10 | 4 | 2.109599125 | 0.0694668   |         | ENSG00000207775 |
| 6 | 18612246 | 18612478 | 18612341 | 8  | 9  | 5 | 1.598181155 | 0.170911    |         | ENSG00000207775 |
| 6 | 18953918 | 18954513 | 18954261 | 61 | 86 | 0 | 83.4250563  | 3.93E-26    |         | ENSG00000207775 |
| 6 | 20000511 | 20000826 | 20000672 | 9  | 13 | 4 | 2.684944341 | 0.01921     | ID4     | ENSG00000172201 |
| 6 | 20096807 | 20097131 | 20096969 | 13 | 18 | 2 | 6.073088389 | 0.000157975 |         | ENSG00000177246 |
| 6 | 20296964 | 20297174 | 20297077 | 10 | 11 | 0 | 11.50690432 | 0.000313206 | MBOAT1  | ENSG00000172197 |
| 6 | 20479021 | 20479353 | 20479197 | 16 | 18 | 4 | 3.643853034 | 0.00178791  | E2F3    | ENSG00000112242 |



|   |          |          |          |    |     |    |             |            |           |                 |
|---|----------|----------|----------|----|-----|----|-------------|------------|-----------|-----------------|
| 6 | 20512920 | 20513142 | 20513029 | 10 | 10  | 3  | 2.636998906 | 0.034203   | E2F3      | ENSG00000112242 |
| 6 | 20642531 | 20642781 | 20642631 | 11 | 11  | 2  | 3.835634772 | 0.00800699 | CDKAL1    | ENSG00000145996 |
| 6 | 20658640 | 20658880 | 20658709 | 8  | 9   | 0  | 9.589086931 | 0.00120187 | CDKAL1    | ENSG00000145996 |
| 6 | 20943524 | 20943892 | 20943723 | 20 | 25  | 1  | 12.46581301 | 3.51E-07   |           | ENSG00000216591 |
| 6 | 20974850 | 20975424 | 20975087 | 57 | 91  | 7  | 11.02744997 | 1.48E-19   |           | ENSG00000216591 |
| 6 | 21041395 | 21041588 | 21041514 | 9  | 9   | 3  | 2.397271733 | 0.0539397  | CXorf29   | ENSG00000205147 |
| 6 | 21296707 | 21297066 | 21296884 | 19 | 25  | 1  | 12.46581301 | 3.51E-07   | CXorf29   | ENSG00000205147 |
| 6 | 21489823 | 21490075 | 21489949 | 10 | 12  | 4  | 2.493162602 | 0.0299057  | SOX4      | ENSG00000124766 |
| 6 | 21847077 | 21847364 | 21847220 | 11 | 14  | 1  | 7.191815198 | 0.00034761 |           | ENSG00000220771 |
| 6 | 21873310 | 21873493 | 21873401 | 8  | 8   | 1  | 4.315089119 | 0.0127267  |           | ENSG00000220771 |
| 6 | 22544379 | 22544584 | 22544457 | 8  | 8   | 1  | 4.315089119 | 0.0127267  | HDGFL1    | ENSG00000112273 |
| 6 | 22551004 | 22551536 | 22551263 | 85 | 116 | 0  | 112.1923171 | 6.83E-35   | HDGFL1    | ENSG00000112273 |
| 6 | 24871816 | 24872148 | 24871994 | 16 | 19  | 0  | 19.17817386 | 1.44E-06   | GMNN      | ENSG00000112312 |
| 6 | 24935398 | 24935870 | 24935574 | 70 | 86  | 4  | 16.68501126 | 6.33E-21   | FAM65B    | ENSG00000111913 |
| 6 | 24935880 | 24936082 | 24935951 | 9  | 9   | 0  | 9.589086931 | 0.00120187 | FAM65B    | ENSG00000111913 |
| 6 | 25027872 | 25028160 | 25028002 | 8  | 8   | 0  | 8.630178238 | 0.00235436 | FAM65B    | ENSG00000111913 |
| 6 | 25093588 | 25093976 | 25093797 | 22 | 31  | 5  | 5.114179696 | 6.54E-06   |           | ENSG00000214975 |
| 6 | 25557402 | 25557725 | 25557568 | 27 | 30  | 2  | 9.908723162 | 1.20E-07   |           | ENSG00000210368 |
| 6 | 26066915 | 26067250 | 26067082 | 14 | 18  | 0  | 18.21926517 | 2.83E-06   | TRIM38    | ENSG00000112343 |
| 6 | 26134573 | 26134897 | 26134730 | 12 | 14  | 3  | 3.595907599 | 0.00486913 | HIST1H4B  | ENSG00000124529 |
| 6 | 26264297 | 26264678 | 26264499 | 9  | 17  | 4  | 3.452071295 | 0.00292757 | HIST1H1E  | ENSG00000168298 |
| 6 | 26297154 | 26297424 | 26297268 | 9  | 10  | 10 | 0.958908693 | 0.538751   | HIST1H4D  | ENSG00000188987 |
| 6 | 26303603 | 26303843 | 26303730 | 11 | 13  | 3  | 3.356180426 | 0.00805599 | HIST1H1P  | ENSG00000216331 |
| 6 | 26307725 | 26307930 | 26307827 | 8  | 9   | 3  | 2.397271733 | 0.0539397  | HIST1H2Bf | ENSG00000197846 |
| 6 | 26312668 | 26312858 | 26312769 | 8  | 8   | 9  | 0.863017824 | 0.627343   | HIST1H4E  | ENSG00000198518 |
| 6 | 26324689 | 26324886 | 26324799 | 10 | 10  | 5  | 1.757999271 | 0.121253   | HIST1H2Bc | ENSG00000187990 |
| 6 | 26325084 | 26325295 | 26325189 | 8  | 10  | 2  | 3.515998541 | 0.0136204  | HIST1H2Ae | ENSG00000168274 |
| 6 | 26327247 | 26327478 | 26327332 | 8  | 9   | 1  | 4.794543465 | 0.00708517 | HIST1H2Ae | ENSG00000168274 |
| 6 | 26381123 | 26381342 | 26381248 | 10 | 12  | 3  | 3.116453252 | 0.0131971  | HIST1H2Bi | ENSG00000168242 |
| 6 | 26393702 | 26394146 | 26393967 | 8  | 16  | 9  | 1.630144778 | 0.102169   | HIST1H4H  | ENSG00000158406 |
| 6 | 26421038 | 26421424 | 26421245 | 11 | 18  | 12 | 1.401481936 | 0.168368   | H3F3AP1   | ENSG00000220875 |
| 6 | 26430954 | 26431281 | 26431104 | 10 | 14  | 4  | 2.876726079 | 0.01219    | H3F3AP1   | ENSG00000220875 |
| 6 | 26436283 | 26436507 | 26436351 | 9  | 9   | 4  | 1.917817386 | 0.103282   | H3F3AP1   | ENSG00000220875 |
| 6 | 26629398 | 26629690 | 26629550 | 9  | 12  | 7  | 1.558226626 | 0.152813   |           | ENSG00000199289 |

|   |          |          |          |    |    |    |             |            |           |                 |
|---|----------|----------|----------|----|----|----|-------------|------------|-----------|-----------------|
| 6 | 26640941 | 26641164 | 26641072 | 9  | 10 | 6  | 1.506856518 | 0.188853   | HMGN4     | ENSG00000182952 |
| 6 | 26641315 | 26641496 | 26641430 | 8  | 8  | 5  | 1.43836304  | 0.235762   | HMGN4     | ENSG00000182952 |
| 6 | 26645456 | 26646128 | 26645718 | 11 | 27 | 12 | 2.0653418   | 0.0117911  | HMGN4     | ENSG00000182952 |
| 6 | 26662042 | 26662579 | 26662414 | 13 | 24 | 5  | 3.995452888 | 0.00024777 |           | ENSG00000210390 |
| 6 | 26663460 | 26663757 | 26663608 | 9  | 12 | 4  | 2.493162602 | 0.0299057  |           | ENSG00000210390 |
| 6 | 26664780 | 26665014 | 26664897 | 9  | 9  | 7  | 1.198635866 | 0.346278   |           | ENSG00000210392 |
| 6 | 26665026 | 26665244 | 26665135 | 10 | 13 | 4  | 2.684944341 | 0.01921    |           | ENSG00000210392 |
| 6 | 26676899 | 26677263 | 26677155 | 12 | 16 | 5  | 2.716907964 | 0.0109645  |           | ENSG00000210392 |
| 6 | 26680079 | 26680346 | 26680197 | 8  | 10 | 2  | 3.515998541 | 0.0136204  |           | ENSG00000210392 |
| 6 | 26703073 | 26703309 | 26703191 | 10 | 12 | 10 | 1.133255728 | 0.37674    | ABT1      | ENSG00000146109 |
| 6 | 26795034 | 26795469 | 26795213 | 33 | 43 | 0  | 42.19198249 | 1.42E-13   |           | ENSG00000210409 |
| 6 | 26813093 | 26813486 | 26813316 | 13 | 19 | 2  | 6.39272462  | 8.83E-05   |           | ENSG00000210409 |
| 6 | 27167454 | 27167875 | 27167696 | 8  | 16 | 7  | 2.037680973 | 0.0400399  |           | ENSG00000219770 |
| 6 | 27207580 | 27208030 | 27207780 | 47 | 58 | 3  | 14.14390322 | 2.76E-14   | HIST1H2BJ | ENSG00000124635 |
| 6 | 27355834 | 27356137 | 27355985 | 9  | 13 | 4  | 2.684944341 | 0.01921    |           | ENSG00000210450 |
| 6 | 27388459 | 27388679 | 27388569 | 8  | 10 | 1  | 5.273997812 | 0.00391723 | POM121L2  | ENSG00000158553 |
| 6 | 27408525 | 27408808 | 27408638 | 9  | 12 | 8  | 1.385090334 | 0.219216   |           | ENSG00000220758 |
| 6 | 27410681 | 27411069 | 27410806 | 9  | 16 | 3  | 4.075361945 | 0.00173346 |           | ENSG00000220758 |
| 6 | 27464493 | 27464808 | 27464648 | 12 | 15 | 2  | 5.114179696 | 0.00088103 | ZNF391    | ENSG00000124613 |
| 6 | 27549009 | 27549214 | 27549111 | 8  | 8  | 1  | 4.315089119 | 0.0127267  | ZNF184    | ENSG00000096654 |
| 6 | 27554478 | 27554742 | 27554584 | 14 | 16 | 3  | 4.075361945 | 0.00173346 | ZNF184    | ENSG00000096654 |
| 6 | 27571542 | 27571733 | 27571660 | 8  | 9  | 5  | 1.598181155 | 0.170911   | ZNF184    | ENSG00000096654 |
| 6 | 27578723 | 27578926 | 27578784 | 9  | 10 | 2  | 3.515998541 | 0.0136204  |           | ENSG00000218347 |
| 6 | 27579418 | 27579653 | 27579492 | 8  | 11 | 5  | 1.917817386 | 0.0843804  |           | ENSG00000218347 |
| 6 | 27581274 | 27581682 | 27581511 | 11 | 17 | 13 | 1.232882605 | 0.274309   |           | ENSG00000218347 |
| 6 | 27594482 | 27594825 | 27594680 | 8  | 12 | 6  | 1.78083043  | 0.0985525  |           | ENSG00000218347 |
| 6 | 27595192 | 27595430 | 27595290 | 11 | 12 | 6  | 1.78083043  | 0.0985525  |           | ENSG00000218347 |
| 6 | 27608209 | 27608506 | 27608357 | 8  | 10 | 6  | 1.506856518 | 0.188853   |           | ENSG00000218347 |
| 6 | 27621594 | 27621782 | 27621631 | 8  | 8  | 3  | 2.157544559 | 0.0836802  |           | ENSG00000219738 |
| 6 | 27624193 | 27624399 | 27624311 | 8  | 9  | 3  | 2.397271733 | 0.0539397  |           | ENSG00000219738 |
| 6 | 27629007 | 27629504 | 27629255 | 13 | 22 | 3  | 5.513724985 | 6.69E-05   |           | ENSG00000219738 |
| 6 | 27667433 | 27667654 | 27667529 | 8  | 9  | 2  | 3.19636231  | 0.0229249  |           | ENSG00000206671 |
| 6 | 27668370 | 27668668 | 27668505 | 11 | 13 | 8  | 1.491635745 | 0.166708   |           | ENSG00000206671 |
| 6 | 27677690 | 27678008 | 27677861 | 9  | 12 | 4  | 2.493162602 | 0.0299057  |           | ENSG00000206671 |

|   |          |          |          |    |    |    |             |             |          |                 |
|---|----------|----------|----------|----|----|----|-------------|-------------|----------|-----------------|
| 6 | 27726620 | 27726818 | 27726741 | 9  | 10 | 4  | 2.109599125 | 0.0694668   |          | ENSG00000216676 |
| 6 | 27748117 | 27748383 | 27748229 | 15 | 17 | 7  | 2.157544559 | 0.0276499   |          | ENSG00000216676 |
| 6 | 27760080 | 27760567 | 27760391 | 13 | 23 | 10 | 2.092164421 | 0.0165595   |          | ENSG00000216676 |
| 6 | 27763372 | 27763581 | 27763489 | 8  | 10 | 2  | 3.515998541 | 0.0136204   |          | ENSG00000216676 |
| 6 | 27763699 | 27764206 | 27764041 | 12 | 22 | 8  | 2.450544438 | 0.0073921   |          | ENSG00000216676 |
| 6 | 27796691 | 27797062 | 27796905 | 9  | 13 | 5  | 2.237453617 | 0.038866    |          | ENSG00000216915 |
| 6 | 27802415 | 27802723 | 27802569 | 9  | 12 | 7  | 1.558226626 | 0.152813    |          | ENSG00000216915 |
| 6 | 27829040 | 27829287 | 27829151 | 10 | 11 | 13 | 0.821921737 | 0.693119    |          | ENSG00000216915 |
| 6 | 27848124 | 27848433 | 27848278 | 8  | 11 | 6  | 1.643843474 | 0.137712    |          | ENSG00000218069 |
| 6 | 27867104 | 27867523 | 27867353 | 8  | 17 | 6  | 2.465765211 | 0.014729    |          | ENSG00000218069 |
| 6 | 27867908 | 27868375 | 27868087 | 9  | 18 | 4  | 3.643853034 | 0.00178791  |          | ENSG00000218069 |
| 6 | 27966439 | 27966683 | 27966561 | 8  | 9  | 5  | 1.598181155 | 0.170911    | HIST1H3J | ENSG00000197153 |
| 6 | 27978414 | 27978937 | 27978675 | 10 | 19 | 14 | 1.278544924 | 0.231514    | OR2B2    | ENSG00000168131 |
| 6 | 28156534 | 28156799 | 28156666 | 17 | 19 | 1  | 9.589086931 | 1.56E-05    | ZNF165   | ENSG00000197279 |
| 6 | 28212515 | 28212818 | 28212686 | 11 | 13 | 1  | 6.712360851 | 0.000640982 | ZNF192   | ENSG00000198315 |
| 6 | 28288119 | 28288358 | 28288238 | 9  | 11 | 2  | 3.835634772 | 0.00800699  |          | ENSG00000176933 |
| 6 | 28342547 | 28342908 | 28342762 | 8  | 13 | 10 | 1.220429246 | 0.306001    | ZNF187   | ENSG00000197062 |
| 6 | 28425512 | 28425780 | 28425644 | 8  | 9  | 7  | 1.198635866 | 0.346278    | ZKSCAN3  | ENSG00000189298 |
| 6 | 28459133 | 28459709 | 28459301 | 16 | 27 | 3  | 6.712360851 | 3.92E-06    | ZSCAN12  | ENSG00000158691 |
| 6 | 28487846 | 28488093 | 28487969 | 12 | 12 | 1  | 6.232906505 | 0.00117736  | ZSCAN12  | ENSG00000158691 |
| 6 | 28550223 | 28550552 | 28550387 | 11 | 15 | 4  | 3.068507818 | 0.0076507   |          | ENSG00000210498 |
| 6 | 28618307 | 28619053 | 28618719 | 13 | 34 | 10 | 3.051073114 | 0.000209762 | GPX6     | ENSG00000198704 |
| 6 | 33819960 | 33820645 | 33820447 | 18 | 38 | 0  | 37.39743903 | 4.09E-12    | IHPK3    | ENSG00000161896 |
| 6 | 33910432 | 33910649 | 33910526 | 8  | 8  | 0  | 8.630178238 | 0.00235436  | MLN      | ENSG00000096395 |
| 6 | 33915860 | 33916271 | 33916035 | 13 | 22 | 5  | 3.675816657 | 0.000667901 | MLN      | ENSG00000096395 |
| 6 | 34300181 | 34300460 | 34300287 | 8  | 11 | 3  | 2.876726079 | 0.0213797   |          | ENSG00000214810 |
| 6 | 34620810 | 34621165 | 34620988 | 8  | 12 | 5  | 2.077635502 | 0.0577144   | SPDEF    | ENSG00000124664 |
| 6 | 34833079 | 34833470 | 34833341 | 9  | 15 | 5  | 2.557089848 | 0.0169197   | SNRPC    | ENSG00000124562 |
| 6 | 34963585 | 34963954 | 34963781 | 12 | 18 | 7  | 2.277408146 | 0.0188653   | TAF11    | ENSG00000064995 |
| 6 | 34964757 | 34965084 | 34964927 | 10 | 15 | 3  | 3.835634772 | 0.00291691  | ANKS1A   | ENSG00000064999 |
| 6 | 35417881 | 35418242 | 35418032 | 14 | 19 | 5  | 3.19636231  | 0.00280933  | PPARD    | ENSG00000112033 |
| 6 | 35491144 | 35491364 | 35491219 | 8  | 9  | 4  | 1.917817386 | 0.103282    | MKRNP2   | ENSG00000218225 |
| 6 | 35561882 | 35562202 | 35562052 | 8  | 11 | 2  | 3.835634772 | 0.00800699  | TEAD3    | ENSG00000007866 |
| 6 | 35567522 | 35567721 | 35567593 | 8  | 8  | 2  | 2.876726079 | 0.0381137   | TEAD3    | ENSG00000007866 |

|   |          |          |          |     |     |    |             |             |          |                 |
|---|----------|----------|----------|-----|-----|----|-------------|-------------|----------|-----------------|
| 6 | 35571479 | 35571721 | 35571622 | 8   | 10  | 1  | 5.273997812 | 0.00391723  | TEAD3    | ENSG00000007866 |
| 6 | 36171034 | 36171223 | 36171073 | 8   | 8   | 6  | 1.232882605 | 0.333038    |          | ENSG00000204135 |
| 6 | 36230118 | 36230389 | 36230253 | 10  | 14  | 2  | 4.794543465 | 0.00154571  |          | ENSG00000221743 |
| 6 | 36321518 | 36321733 | 36321645 | 8   | 9   | 2  | 3.19636231  | 0.0229249   | PNPLA1   | ENSG00000180316 |
| 6 | 36387791 | 36388024 | 36387892 | 9   | 10  | 1  | 5.273997812 | 0.00391723  | C6orf222 | ENSG00000189325 |
| 6 | 36498973 | 36499152 | 36499062 | 8   | 8   | 2  | 2.876726079 | 0.0381137   | KCTD20   | ENSG00000112078 |
| 6 | 36531273 | 36531470 | 36531371 | 9   | 10  | 2  | 3.515998541 | 0.0136204   |          | ENSG00000222599 |
| 6 | 36683835 | 36684373 | 36683980 | 15  | 27  | 2  | 8.949814469 | 7.46E-07    | SFRS3    | ENSG00000112081 |
| 6 | 36742712 | 36743268 | 36743019 | 187 | 237 | 3  | 57.05506724 | 8.67E-65    |          | ENSG00000213500 |
| 6 | 36744477 | 36744727 | 36744606 | 8   | 9   | 0  | 9.589086931 | 0.00120187  |          | ENSG00000213500 |
| 6 | 36751765 | 36753463 | 36752212 | 340 | 726 | 15 | 43.57041374 | 8.69E-187   | CDKN1A   | ENSG00000124762 |
| 6 | 36753484 | 36753783 | 36753655 | 11  | 15  | 2  | 5.114179696 | 0.00088103  | CDKN1A   | ENSG00000124762 |
| 6 | 36753934 | 36754407 | 36754190 | 14  | 26  | 8  | 2.876726079 | 0.00140919  | CDKN1A   | ENSG00000124762 |
| 6 | 36758029 | 36758895 | 36758428 | 162 | 222 | 6  | 30.54809122 | 2.02E-56    | CDKN1A   | ENSG00000124762 |
| 6 | 36950378 | 36950747 | 36950611 | 8   | 14  | 6  | 2.054804342 | 0.0480281   | PPIL1    | ENSG00000137168 |
| 6 | 37320591 | 37321109 | 37320761 | 26  | 34  | 2  | 11.18726809 | 1.02E-08    |          | ENSG00000210733 |
| 6 | 37549213 | 37549587 | 37549410 | 9   | 15  | 6  | 2.191791298 | 0.0328001   | C6orf129 | ENSG00000198937 |
| 6 | 37867088 | 37867479 | 37867300 | 16  | 23  | 4  | 4.602761727 | 0.000137072 | ZFAND3   | ENSG00000156639 |
| 6 | 37883906 | 37884289 | 37884085 | 13  | 20  | 6  | 2.876726079 | 0.00408924  | ZFAND3   | ENSG00000156639 |
| 6 | 37965337 | 37965561 | 37965441 | 8   | 9   | 1  | 4.794543465 | 0.00708517  |          | ENSG00000200597 |
| 6 | 37965575 | 37965868 | 37965721 | 13  | 17  | 1  | 8.630178238 | 5.44E-05    |          | ENSG00000200597 |
| 6 | 38144682 | 38144935 | 38144807 | 9   | 9   | 7  | 1.198635866 | 0.346278    |          | ENSG00000218521 |
| 6 | 38180929 | 38181173 | 38181051 | 10  | 10  | 2  | 3.515998541 | 0.0136204   |          | ENSG00000200706 |
| 6 | 38470084 | 38470389 | 38470236 | 8   | 11  | 1  | 5.753452158 | 0.00215302  | BTBD9    | ENSG00000183826 |
| 6 | 38831767 | 38831975 | 38831897 | 8   | 8   | 0  | 8.630178238 | 0.00235436  |          | ENSG00000219273 |
| 6 | 39080339 | 39080628 | 39080481 | 8   | 10  | 1  | 5.273997812 | 0.00391723  |          | ENSG00000220556 |
| 6 | 39437815 | 39438047 | 39437931 | 10  | 11  | 3  | 2.876726079 | 0.0213797   |          | ENSG00000218986 |
| 6 | 40259561 | 40260087 | 40259908 | 22  | 38  | 3  | 9.349359757 | 5.96E-09    |          | ENSG00000204092 |
| 6 | 40472310 | 40472829 | 40472607 | 43  | 64  | 9  | 6.232906505 | 2.17E-11    |          | ENSG00000210787 |
| 6 | 40599187 | 40599742 | 40599364 | 22  | 41  | 1  | 20.13708255 | 1.17E-11    | LRFN2    | ENSG00000156564 |
| 6 | 40724799 | 40725039 | 40724919 | 8   | 11  | 1  | 5.753452158 | 0.00215302  | LRFN2    | ENSG00000156564 |
| 6 | 40921418 | 40921682 | 40921593 | 8   | 11  | 4  | 2.301380863 | 0.0459276   | UNC5CL   | ENSG00000124602 |
| 6 | 41265242 | 41265482 | 41265350 | 8   | 11  | 2  | 3.835634772 | 0.00800699  | TREML2   | ENSG00000112195 |
| 6 | 41265515 | 41265968 | 41265764 | 31  | 41  | 3  | 10.06854128 | 9.74E-10    | TREML2   | ENSG00000112195 |

|   |          |          |          |    |     |   |             |             |          |                 |
|---|----------|----------|----------|----|-----|---|-------------|-------------|----------|-----------------|
| 6 | 41382057 | 41382242 | 41382217 | 8  | 8   | 1 | 4.315089119 | 0.0127267   |          | ENSG00000213461 |
| 6 | 41612672 | 41612873 | 41612819 | 11 | 11  | 1 | 5.753452158 | 0.00215302  | FOXP4    | ENSG00000137166 |
| 6 | 41621745 | 41622041 | 41621893 | 10 | 14  | 1 | 7.191815198 | 0.00034761  | FOXP4    | ENSG00000137166 |
| 6 | 41689296 | 41689703 | 41689475 | 23 | 32  | 2 | 10.54799562 | 3.50E-08    |          | ENSG00000214738 |
| 6 | 41726939 | 41727295 | 41727117 | 13 | 19  | 4 | 3.835634772 | 0.00108365  | MDFI     | ENSG00000112559 |
| 6 | 41728996 | 41729345 | 41729170 | 9  | 15  | 2 | 5.114179696 | 0.00088103  |          | ENSG00000220573 |
| 6 | 41843024 | 41843322 | 41843173 | 10 | 14  | 5 | 2.397271733 | 0.0258078   | FRS3     | ENSG00000137218 |
| 6 | 41844395 | 41844837 | 41844568 | 27 | 36  | 0 | 35.47962164 | 1.57E-11    | FRS3     | ENSG00000137218 |
| 6 | 41922163 | 41922771 | 41922550 | 52 | 87  | 4 | 16.876793   | 3.38E-21    |          | ENSG00000206977 |
| 6 | 41996576 | 41996862 | 41996692 | 10 | 11  | 3 | 2.876726079 | 0.0213797   | MED20    | ENSG00000124641 |
| 6 | 42286402 | 42286613 | 42286507 | 9  | 10  | 2 | 3.515998541 | 0.0136204   | MRPS10   | ENSG00000048544 |
| 6 | 42356931 | 42357190 | 42357022 | 8  | 10  | 2 | 3.515998541 | 0.0136204   | MRPS10   | ENSG00000048544 |
| 6 | 42524905 | 42525183 | 42525068 | 10 | 11  | 0 | 11.50690432 | 0.000313206 | TRERF1   | ENSG00000124496 |
| 6 | 42623304 | 42623634 | 42623455 | 9  | 14  | 2 | 4.794543465 | 0.00154571  | UBR2     | ENSG00000024048 |
| 6 | 42639897 | 42640085 | 42639991 | 9  | 9   | 3 | 2.397271733 | 0.0539397   | UBR2     | ENSG00000024048 |
| 6 | 42965950 | 42966277 | 42966104 | 12 | 16  | 4 | 3.260289556 | 0.00475414  |          | ENSG00000221821 |
| 6 | 43171989 | 43172758 | 43172477 | 92 | 157 | 4 | 30.3015147  | 1.19E-40    |          | ENSG00000223079 |
| 6 | 43262488 | 43262727 | 43262573 | 12 | 13  | 4 | 2.684944341 | 0.01921     |          | ENSG00000112659 |
| 6 | 43339084 | 43339468 | 43339345 | 9  | 15  | 4 | 3.068507818 | 0.0076507   | TTBK1    | ENSG00000146216 |
| 6 | 43558354 | 43558549 | 43558414 | 8  | 8   | 1 | 4.315089119 | 0.0127267   |          | ENSG00000137221 |
| 6 | 43572375 | 43572597 | 43572467 | 10 | 11  | 1 | 5.753452158 | 0.00215302  | C6orf154 | ENSG00000204052 |
| 6 | 43592418 | 43592657 | 43592552 | 11 | 15  | 2 | 5.114179696 | 0.00088103  | YIPF3    | ENSG00000137207 |
| 6 | 43651802 | 43652638 | 43652016 | 52 | 82  | 2 | 26.52980717 | 5.08E-22    | POLH     | ENSG00000170734 |
| 6 | 43744148 | 43744521 | 43744321 | 13 | 19  | 1 | 9.589086931 | 1.56E-05    |          | ENSG00000210930 |
| 6 | 43763433 | 43763654 | 43763562 | 8  | 10  | 5 | 1.757999271 | 0.121253    | MRPS18A  | ENSG00000096080 |
| 6 | 44042178 | 44042455 | 44042319 | 12 | 15  | 2 | 5.114179696 | 0.00088103  | C6orf223 | ENSG00000181577 |
| 6 | 44313228 | 44313540 | 44313363 | 10 | 14  | 0 | 14.3836304  | 4.17E-05    | HSP90AB1 | ENSG00000096384 |
| 6 | 44388996 | 44389180 | 44389085 | 8  | 8   | 4 | 1.726035648 | 0.150596    | AARS2    | ENSG00000124608 |
| 6 | 44551527 | 44551752 | 44551670 | 8  | 11  | 2 | 3.835634772 | 0.00800699  | CDC5L    | ENSG00000096401 |
| 6 | 44760932 | 44761374 | 44761143 | 63 | 78  | 2 | 25.25126225 | 6.80E-21    | SUPT3H   | ENSG00000196284 |
| 6 | 44860800 | 44861182 | 44861040 | 14 | 21  | 1 | 10.54799562 | 4.43E-06    | SUPT3H   | ENSG00000196284 |
| 6 | 45495372 | 45495587 | 45495479 | 9  | 9   | 5 | 1.598181155 | 0.170911    | RUNX2    | ENSG00000124813 |
| 6 | 45521601 | 45521859 | 45521730 | 12 | 13  | 1 | 6.712360851 | 0.000640982 | RUNX2    | ENSG00000124813 |
| 6 | 45786138 | 45786522 | 45786283 | 9  | 13  | 3 | 3.356180426 | 0.00805599  |          | ENSG00000210937 |

|   |          |          |          |    |    |   |             |             |          |                 |
|---|----------|----------|----------|----|----|---|-------------|-------------|----------|-----------------|
| 6 | 45940933 | 45941117 | 45941019 | 8  | 9  | 1 | 4.794543465 | 0.00708517  | CLIC5    | ENSG00000112782 |
| 6 | 46486066 | 46486245 | 46486233 | 9  | 10 | 1 | 5.273997812 | 0.00391723  | RCAN2    | ENSG00000172348 |
| 6 | 46897129 | 46897627 | 46897448 | 21 | 36 | 3 | 8.869905411 | 1.98E-08    | MEP1A    | ENSG00000112818 |
| 6 | 47055965 | 47056158 | 47056061 | 8  | 8  | 0 | 8.630178238 | 0.00235436  | GPR116   | ENSG00000069122 |
| 6 | 47173104 | 47173359 | 47173231 | 15 | 15 | 2 | 5.114179696 | 0.00088103  | GPR110   | ENSG00000153292 |
| 6 | 47557529 | 47557812 | 47557670 | 15 | 17 | 4 | 3.452071295 | 0.00292757  | CD2AP    | ENSG00000198087 |
| 6 | 47647630 | 47647809 | 47647719 | 8  | 8  | 1 | 4.315089119 | 0.0127267   |          | ENSG00000216813 |
| 6 | 47740875 | 47741122 | 47740998 | 11 | 13 | 4 | 2.684944341 | 0.01921     | GPR111   | ENSG00000164393 |
| 6 | 47745665 | 47746037 | 47745872 | 19 | 24 | 3 | 5.993179332 | 2.17E-05    | GPR111   | ENSG00000164393 |
| 6 | 47774039 | 47774259 | 47774158 | 11 | 12 | 0 | 12.46581301 | 0.000159888 | GPR115   | ENSG00000153294 |
| 6 | 48186680 | 48187143 | 48186939 | 57 | 82 | 1 | 39.79471076 | 2.41E-23    |          | ENSG00000214653 |
| 6 | 49340545 | 49340825 | 49340685 | 13 | 14 | 0 | 14.3836304  | 4.17E-05    |          | ENSG00000217631 |
| 6 | 50106681 | 50106913 | 50106784 | 8  | 10 | 2 | 3.515998541 | 0.0136204   | DEFB110  | ENSG00000203970 |
| 6 | 51445867 | 51446322 | 51446045 | 16 | 24 | 7 | 2.996589666 | 0.00154378  |          | ENSG00000212532 |
| 6 | 51765113 | 51765345 | 51765226 | 13 | 15 | 0 | 15.34253909 | 2.13E-05    |          | ENSG00000211003 |
| 6 | 52036341 | 52036719 | 52036520 | 20 | 28 | 2 | 9.2694507   | 4.06E-07    | PKHD1    | ENSG00000170927 |
| 6 | 52105367 | 52105575 | 52105459 | 8  | 9  | 4 | 1.917817386 | 0.103282    |          | ENSG00000207604 |
| 6 | 52472018 | 52472213 | 52472146 | 8  | 9  | 3 | 2.397271733 | 0.0539397   | TRAM2    | ENSG00000065308 |
| 6 | 52476696 | 52476909 | 52476867 | 10 | 12 | 2 | 4.155271003 | 0.0046638   | TRAM2    | ENSG00000065308 |
| 6 | 52477101 | 52477476 | 52477266 | 8  | 14 | 2 | 4.794543465 | 0.00154571  | TRAM2    | ENSG00000065308 |
| 6 | 52524190 | 52524485 | 52524341 | 12 | 13 | 9 | 1.34247217  | 0.232231    | TRAM2    | ENSG00000065308 |
| 6 | 52855215 | 52855399 | 52855307 | 9  | 9  | 2 | 3.19636231  | 0.0229249   |          | ENSG00000216211 |
| 6 | 53034457 | 53034730 | 53034593 | 8  | 10 | 3 | 2.636998906 | 0.034203    | ICK      | ENSG00000112144 |
| 6 | 53085319 | 53085565 | 53085439 | 9  | 11 | 1 | 5.753452158 | 0.00215302  |          | ENSG00000211047 |
| 6 | 53144721 | 53144946 | 53144833 | 10 | 10 | 2 | 3.515998541 | 0.0136204   | GCM1     | ENSG00000137270 |
| 6 | 53268965 | 53269144 | 53269027 | 8  | 8  | 1 | 4.315089119 | 0.0127267   |          | ENSG00000217527 |
| 6 | 53299289 | 53299748 | 53299508 | 12 | 22 | 6 | 3.150699991 | 0.00166398  |          | ENSG00000217527 |
| 6 | 53438564 | 53438838 | 53438701 | 10 | 14 | 7 | 1.797953799 | 0.0806593   |          | ENSG00000212065 |
| 6 | 53445748 | 53446250 | 53445915 | 20 | 29 | 1 | 14.3836304  | 2.72E-08    |          | ENSG00000212065 |
| 6 | 53717212 | 53717416 | 53717314 | 10 | 11 | 6 | 1.643843474 | 0.137712    | LRRC1    | ENSG00000137269 |
| 6 | 53783923 | 53784225 | 53784074 | 14 | 15 | 1 | 7.671269544 | 0.000187863 | LRRC1    | ENSG00000137269 |
| 6 | 53842659 | 53842967 | 53842810 | 9  | 11 | 4 | 2.301380863 | 0.0459276   | LRRC1    | ENSG00000137269 |
| 6 | 54088720 | 54089171 | 54088954 | 59 | 74 | 3 | 17.97953799 | 1.17E-18    | C6orf142 | ENSG00000146147 |
| 6 | 54334530 | 54334763 | 54334664 | 11 | 13 | 2 | 4.474907234 | 0.00269459  | TINAG    | ENSG00000137251 |

|   |          |          |          |     |      |      |             |             |          |                 |
|---|----------|----------|----------|-----|------|------|-------------|-------------|----------|-----------------|
| 6 | 54635402 | 54635685 | 54635547 | 10  | 13   | 0    | 13.4247217  | 8.16E-05    |          | ENSG00000220773 |
| 6 | 54819085 | 54819453 | 54819282 | 9   | 15   | 7    | 1.917817386 | 0.0572317   | FAM83B   | ENSG00000168143 |
| 6 | 55184950 | 55185280 | 55185114 | 18  | 22   | 1    | 11.02744997 | 2.36E-06    | HCRTR2   | ENSG00000137252 |
| 6 | 55609232 | 55609486 | 55609321 | 9   | 12   | 2    | 4.155271003 | 0.0046638   |          | ENSG00000220725 |
| 6 | 55651825 | 55652006 | 55651915 | 8   | 8    | 5    | 1.43836304  | 0.235762    |          | ENSG00000220725 |
| 6 | 55731419 | 55731614 | 55731542 | 8   | 8    | 5    | 1.43836304  | 0.235762    |          | ENSG00000220725 |
| 6 | 56215179 | 56215376 | 56215293 | 8   | 8    | 1    | 4.315089119 | 0.0127267   | COL21A1  | ENSG00000124749 |
| 6 | 56343431 | 56343610 | 56343547 | 8   | 8    | 5    | 1.43836304  | 0.235762    | COL21A1  | ENSG00000124749 |
| 6 | 56389851 | 56390030 | 56389940 | 8   | 8    | 0    | 8.630178238 | 0.00235436  |          | ENSG00000220666 |
| 6 | 56515107 | 56515297 | 56515231 | 8   | 8    | 3    | 2.157544559 | 0.0836802   | DST      | ENSG00000151914 |
| 6 | 56515610 | 56515794 | 56515656 | 8   | 10   | 0    | 10.54799562 | 0.000613541 | DST      | ENSG00000151914 |
| 6 | 56625710 | 56626028 | 56625869 | 13  | 16   | 1    | 8.150723891 | 0.000101217 | DST      | ENSG00000151914 |
| 6 | 56632839 | 56633155 | 56632980 | 10  | 13   | 1    | 6.712360851 | 0.000640982 | DST      | ENSG00000151914 |
| 6 | 56636101 | 56636310 | 56636246 | 10  | 11   | 5    | 1.917817386 | 0.0843804   | DST      | ENSG00000151914 |
| 6 | 56714985 | 56715222 | 56715103 | 8   | 8    | 2    | 2.876726079 | 0.0381137   | DST      | ENSG00000151914 |
| 6 | 56971903 | 56972243 | 56972073 | 20  | 24   | 6    | 3.424673904 | 0.000656885 |          | ENSG00000218980 |
| 6 | 57002528 | 57002845 | 57002674 | 11  | 14   | 2    | 4.794543465 | 0.00154571  | KIAA1586 | ENSG00000168116 |
| 6 | 57255928 | 57256226 | 57256070 | 13  | 15   | 1    | 7.671269544 | 0.000187863 | PRIM2    | ENSG00000146143 |
| 6 | 57289285 | 57289533 | 57289409 | 12  | 14   | 4    | 2.876726079 | 0.01219     | PRIM2    | ENSG00000146143 |
| 6 | 57290056 | 57290402 | 57290229 | 8   | 13   | 2    | 4.474907234 | 0.00269459  | PRIM2    | ENSG00000146143 |
| 6 | 57464668 | 57464997 | 57464830 | 10  | 13   | 1    | 6.712360851 | 0.000640982 | PRIM2    | ENSG00000146143 |
| 6 | 57489026 | 57489205 | 57489063 | 8   | 8    | 2    | 2.876726079 | 0.0381137   | PRIM2    | ENSG00000146143 |
| 6 | 57564308 | 57564507 | 57564356 | 8   | 9    | 0    | 9.589086931 | 0.00120187  |          | ENSG00000214566 |
| 6 | 57572576 | 57572793 | 57572732 | 8   | 9    | 5    | 1.598181155 | 0.170911    |          | ENSG00000214566 |
| 6 | 57573543 | 57574271 | 57573900 | 30  | 53   | 3    | 12.94526736 | 6.19E-13    |          | ENSG00000214566 |
| 6 | 57607926 | 57608105 | 57608019 | 8   | 9    | 0    | 9.589086931 | 0.00120187  |          | ENSG00000214566 |
| 6 | 58881682 | 58882028 | 58881859 | 27  | 29   | 37   | 0.757033179 | 0.874819    |          | ENSG00000214561 |
| 6 | 58882333 | 58882677 | 58882505 | 39  | 39   | 44   | 0.852363283 | 0.769733    |          | ENSG00000214561 |
| 6 | 58882797 | 58883132 | 58882964 | 30  | 31   | 19   | 1.534253909 | 0.0623199   |          | ENSG00000214561 |
| 6 | 58884051 | 58887389 | 58886886 | 255 | 2161 | 2308 | 0.897860803 | 0.999842    |          | ENSG00000214561 |
| 6 | 58887620 | 58887957 | 58887788 | 29  | 33   | 22   | 1.417517198 | 0.0941994   |          | ENSG00000214561 |
| 6 | 61958642 | 61958973 | 61958807 | 31  | 31   | 44   | 0.681890626 | 0.95316     |          | ENSG00000220030 |
| 6 | 61967595 | 61967921 | 61967758 | 12  | 12   | 15   | 0.779113313 | 0.750998    |          | ENSG00000220030 |
| 6 | 63767274 | 63767526 | 63767369 | 10  | 12   | 0    | 12.46581301 | 0.000159888 |          | ENSG00000217477 |

|   |           |           |           |     |     |   |             |             |         |                 |
|---|-----------|-----------|-----------|-----|-----|---|-------------|-------------|---------|-----------------|
| 6 | 63767615  | 63767795  | 63767705  | 8   | 8   | 0 | 8.630178238 | 0.00235436  |         | ENSG00000217477 |
| 6 | 64328861  | 64329073  | 64328967  | 8   | 9   | 1 | 4.794543465 | 0.00708517  | PTP4A1  | ENSG00000112245 |
| 6 | 64333408  | 64333627  | 64333519  | 12  | 12  | 5 | 2.077635502 | 0.0577144   | PTP4A1  | ENSG00000112245 |
| 6 | 64341396  | 64341828  | 64341581  | 101 | 118 | 4 | 22.82202689 | 9.61E-30    | PTP4A1  | ENSG00000112245 |
| 6 | 64342187  | 64342513  | 64342336  | 12  | 16  | 2 | 5.433815927 | 0.000499302 | PTP4A1  | ENSG00000112245 |
| 6 | 65517550  | 65517855  | 65517702  | 13  | 17  | 0 | 17.26035648 | 5.54E-06    |         | ENSG00000219332 |
| 6 | 67826299  | 67826537  | 67826407  | 13  | 15  | 3 | 3.835634772 | 0.00291691  |         | ENSG00000220995 |
| 6 | 69006047  | 69006352  | 69006199  | 14  | 15  | 0 | 15.34253909 | 2.13E-05    |         | ENSG00000218834 |
| 6 | 72133981  | 72134867  | 72134340  | 136 | 183 | 6 | 25.20559993 | 1.60E-45    |         | ENSG00000199094 |
| 6 | 73553997  | 73554332  | 73554164  | 13  | 16  | 2 | 5.433815927 | 0.000499302 | KCNQ5   | ENSG00000185760 |
| 6 | 74470645  | 74471113  | 74470810  | 10  | 18  | 3 | 4.554816292 | 0.000599415 | CD109   | ENSG00000156535 |
| 6 | 74873369  | 74873550  | 74873461  | 8   | 8   | 0 | 8.630178238 | 0.00235436  |         | ENSG00000217268 |
| 6 | 76038576  | 76039044  | 76038783  | 32  | 45  | 2 | 14.70326663 | 1.04E-11    | TMEM30A | ENSG00000112697 |
| 6 | 76051377  | 76051843  | 76051706  | 8   | 16  | 5 | 2.716907964 | 0.0109645   | TMEM30A | ENSG00000112697 |
| 6 | 76368766  | 76368976  | 76368871  | 9   | 9   | 0 | 9.589086931 | 0.00120187  | SENP6   | ENSG00000112701 |
| 6 | 79019526  | 79019748  | 79019604  | 12  | 12  | 0 | 12.46581301 | 0.000159888 |         |                 |
| 6 | 80219947  | 80220423  | 80220214  | 16  | 27  | 0 | 26.84944341 | 6.66E-09    |         | ENSG00000218748 |
| 6 | 80311427  | 80311865  | 80311646  | 24  | 36  | 3 | 8.869905411 | 1.98E-08    | LCA5    | ENSG00000135338 |
| 6 | 81302479  | 81303260  | 81302863  | 47  | 85  | 2 | 27.48871587 | 7.24E-23    |         | ENSG00000216352 |
| 6 | 82526331  | 82526706  | 82526510  | 33  | 41  | 0 | 40.27416511 | 5.44E-13    |         | ENSG00000206886 |
| 6 | 83905192  | 83905530  | 83905361  | 11  | 12  | 0 | 12.46581301 | 0.000159888 | DOPEY1  | ENSG00000083097 |
| 6 | 85602648  | 85603075  | 85602852  | 19  | 30  | 2 | 9.908723162 | 1.20E-07    | TBX18   | ENSG00000112837 |
| 6 | 88188117  | 88188316  | 88188235  | 8   | 8   | 4 | 1.726035648 | 0.150596    |         | ENSG00000216324 |
| 6 | 88238860  | 88239054  | 88238957  | 8   | 8   | 3 | 2.157544559 | 0.0836802   | SLC35A1 | ENSG00000164414 |
| 6 | 89729972  | 89730161  | 89730036  | 8   | 8   | 2 | 2.876726079 | 0.0381137   | RNGTT   | ENSG00000111880 |
| 6 | 90202681  | 90202886  | 90202783  | 8   | 8   | 1 | 4.315089119 | 0.0127267   | ANKRD6  | ENSG00000135299 |
| 6 | 94911185  | 94911724  | 94911444  | 57  | 78  | 3 | 18.93844669 | 9.21E-20    |         | ENSG00000220370 |
| 6 | 96278377  | 96278593  | 96278479  | 8   | 10  | 1 | 5.273997812 | 0.00391723  |         | ENSG00000219549 |
| 6 | 96711010  | 96711386  | 96711207  | 25  | 32  | 4 | 6.328797374 | 9.93E-07    |         | ENSG00000223167 |
| 6 | 96859769  | 96860055  | 96859912  | 10  | 10  | 1 | 5.273997812 | 0.00391723  |         | ENSG00000209313 |
| 6 | 99676423  | 99676640  | 99676576  | 12  | 13  | 1 | 6.712360851 | 0.000640982 |         | ENSG00000168768 |
| 6 | 99980054  | 99980265  | 99980159  | 8   | 9   | 0 | 9.589086931 | 0.00120187  | SFRS18  | ENSG00000132424 |
| 6 | 100377381 | 100377601 | 100377472 | 9   | 10  | 3 | 2.636998906 | 0.034203    | MCHR2   | ENSG00000152034 |
| 6 | 100391088 | 100391437 | 100391266 | 58  | 63  | 2 | 20.45671879 | 1.09E-16    | MCHR2   | ENSG00000152034 |



|   |           |           |           |     |     |     |             |             |          |                 |
|---|-----------|-----------|-----------|-----|-----|-----|-------------|-------------|----------|-----------------|
| 6 | 100551793 | 100552070 | 100551931 | 8   | 12  | 1   | 6.232906505 | 0.00117736  | MCHR2    | ENSG00000152034 |
| 6 | 101034142 | 101034360 | 101034240 | 8   | 9   | 2   | 3.19636231  | 0.0229249   | SIM1     | ENSG00000112246 |
| 6 | 101047764 | 101048199 | 101047913 | 16  | 22  | 5   | 3.675816657 | 0.000667901 | SIM1     | ENSG00000112246 |
| 6 | 101435334 | 101435680 | 101435507 | 13  | 19  | 7   | 2.397271733 | 0.0127287   | ASCC3    | ENSG00000112249 |
| 6 | 102953530 | 102953988 | 102953761 | 32  | 47  | 0   | 46.02761727 | 9.62E-15    |          | ENSG00000219757 |
| 6 | 106546130 | 106546333 | 106546231 | 11  | 11  | 0   | 11.50690432 | 0.000313206 |          | ENSG00000200198 |
| 6 | 106653000 | 106653383 | 106653204 | 22  | 29  | 2   | 9.589086931 | 2.21E-07    | PRDM1    | ENSG00000057657 |
| 6 | 107656710 | 107657046 | 107656879 | 22  | 24  | 0   | 23.97271733 | 5.01E-08    |          | ENSG00000203285 |
| 6 | 107658352 | 107658821 | 107658557 | 37  | 49  | 5   | 7.990905775 | 2.72E-10    |          | ENSG00000220237 |
| 6 | 107846141 | 107846320 | 107846230 | 8   | 8   | 1   | 4.315089119 | 0.0127267   | PDSS2    | ENSG00000164494 |
| 6 | 107887371 | 107887579 | 107887456 | 8   | 9   | 2   | 3.19636231  | 0.0229249   | PDSS2    | ENSG00000164494 |
| 6 | 109167456 | 109167684 | 109167570 | 8   | 9   | 5   | 1.598181155 | 0.170911    |          | ENSG00000203801 |
| 6 | 109325214 | 109325737 | 109325475 | 143 | 172 | 1   | 82.94560195 | 2.60E-49    |          | ENSG00000185796 |
| 6 | 109369266 | 109369451 | 109369319 | 8   | 8   | 0   | 8.630178238 | 0.00235436  |          | ENSG00000185796 |
| 6 | 109375517 | 109375771 | 109375613 | 8   | 11  | 2   | 3.835634772 | 0.00800699  |          | ENSG00000185796 |
| 6 | 109436619 | 109437259 | 109436945 | 49  | 83  | 6   | 11.50690432 | 2.73E-18    | SESN1    | ENSG00000080546 |
| 6 | 109443262 | 109443498 | 109443380 | 8   | 9   | 1   | 4.794543465 | 0.00708517  |          | ENSG00000208908 |
| 6 | 110309796 | 110310017 | 110309861 | 9   | 12  | 1   | 6.232906505 | 0.00117736  | GPR6     | ENSG00000146360 |
| 6 | 110310020 | 110310433 | 110310226 | 33  | 44  | 1   | 21.57544559 | 1.67E-12    | GPR6     | ENSG00000146360 |
| 6 | 110493285 | 110493597 | 110493441 | 11  | 15  | 0   | 15.34253909 | 2.13E-05    | GPR6     | ENSG00000146360 |
| 6 | 110606596 | 110606869 | 110606732 | 10  | 11  | 1   | 5.753452158 | 0.00215302  | WASF1    | ENSG00000112290 |
| 6 | 111534787 | 111535375 | 111535146 | 55  | 74  | 0   | 71.91815198 | 1.26E-22    |          | ENSG00000200926 |
| 6 | 111911746 | 111912431 | 111912042 | 133 | 195 | 3   | 46.98652596 | 8.98E-53    | REV3L    | ENSG00000009413 |
| 6 | 112001036 | 112001292 | 112001164 | 9   | 11  | 2   | 3.835634772 | 0.00800699  | TRAF3IP2 | ENSG00000056972 |
| 6 | 112415217 | 112415674 | 112415427 | 56  | 68  | 2   | 22.05489994 | 4.35E-18    | WISP3    | ENSG00000112761 |
| 6 | 113861463 | 113861697 | 113861615 | 8   | 9   | 2   | 3.19636231  | 0.0229249   |          | ENSG00000222677 |
| 6 | 114071046 | 114071230 | 114071138 | 8   | 8   | 2   | 2.876726079 | 0.0381137   |          | ENSG00000221559 |
| 6 | 115498705 | 115499156 | 115498936 | 44  | 57  | 1   | 27.8083521  | 3.40E-16    |          | ENSG00000208800 |
| 6 | 116780470 | 116780812 | 116780641 | 15  | 20  | 1   | 10.06854128 | 8.32E-06    | DSE      | ENSG00000111817 |
| 6 | 118640769 | 118641072 | 118640920 | 12  | 15  | 0   | 15.34253909 | 2.13E-05    |          | ENSG00000216809 |
| 6 | 119001814 | 119002213 | 119002034 | 42  | 51  | 1   | 24.93162602 | 1.73E-14    |          | ENSG00000217330 |
| 6 | 119076919 | 119077227 | 119077073 | 10  | 16  | 0   | 16.30144778 | 1.09E-05    | C6orf204 | ENSG00000111860 |
| 6 | 119600139 | 119600549 | 119600371 | 196 | 237 | 167 | 1.358453982 | 0.00108802  |          | ENSG00000216316 |
| 6 | 120127882 | 120128125 | 120127988 | 15  | 18  | 0   | 18.21926517 | 2.83E-06    | MAN1A1   | ENSG00000111885 |

|   |           |           |           |    |    |    |             |             |         |                 |
|---|-----------|-----------|-----------|----|----|----|-------------|-------------|---------|-----------------|
| 6 | 123059738 | 123060014 | 123059879 | 8  | 11 | 3  | 2.876726079 | 0.0213797   | PKIB    | ENSG00000135549 |
| 6 | 125408926 | 125409324 | 125409074 | 20 | 24 | 1  | 11.98635866 | 6.63E-07    | RNF217  | ENSG00000146373 |
| 6 | 125516446 | 125516639 | 125516548 | 8  | 8  | 0  | 8.630178238 | 0.00235436  | TPD52L1 | ENSG00000111907 |
| 6 | 125616842 | 125617111 | 125616976 | 18 | 19 | 4  | 3.835634772 | 0.00108365  | TPD52L1 | ENSG00000111907 |
| 6 | 125947381 | 125947766 | 125947514 | 12 | 18 | 2  | 6.073088389 | 0.000157975 | HEY2    | ENSG00000135547 |
| 6 | 126143056 | 126143280 | 126143158 | 11 | 12 | 3  | 3.116453252 | 0.0131971   | NCOA7   | ENSG00000111912 |
| 6 | 127949164 | 127949571 | 127949336 | 37 | 47 | 0  | 46.02761727 | 9.62E-15    | C6orf58 | ENSG00000184530 |
| 6 | 129509738 | 129509986 | 129509862 | 9  | 12 | 0  | 12.46581301 | 0.000159888 |         | ENSG00000219642 |
| 6 | 131220368 | 131220682 | 131220539 | 10 | 14 | 0  | 14.3836304  | 4.17E-05    | EPB41L2 | ENSG00000079819 |
| 6 | 132366481 | 132366730 | 132366611 | 11 | 13 | 0  | 13.4247217  | 8.16E-05    | CTGF    | ENSG00000118523 |
| 6 | 132615026 | 132615336 | 132615181 | 8  | 12 | 2  | 4.155271003 | 0.0046638   |         | ENSG00000220956 |
| 6 | 133635621 | 133635956 | 133635788 | 18 | 21 | 22 | 0.917217011 | 0.614252    |         | ENSG00000208647 |
| 6 | 134200664 | 134200894 | 134200797 | 11 | 11 | 4  | 2.301380863 | 0.0459276   | TCF21   | ENSG00000118526 |
| 6 | 134420301 | 134420561 | 134420473 | 8  | 10 | 0  | 10.54799562 | 0.000613541 | SLC2A12 | ENSG00000146411 |
| 6 | 134537247 | 134537471 | 134537414 | 8  | 9  | 0  | 9.589086931 | 0.00120187  | SGK1    | ENSG00000118515 |
| 6 | 135548441 | 135548629 | 135548534 | 11 | 12 | 1  | 6.232906505 | 0.00117736  | MYB     | ENSG00000118513 |
| 6 | 137520444 | 137520759 | 137520606 | 12 | 15 | 2  | 5.114179696 | 0.00088103  | IL22RA2 | ENSG00000164485 |
| 6 | 137654351 | 137654589 | 137654470 | 8  | 8  | 1  | 4.315089119 | 0.0127267   | IFNGR1  | ENSG00000027697 |
| 6 | 137839442 | 137839669 | 137839512 | 11 | 13 | 2  | 4.474907234 | 0.00269459  | OLIG3   | ENSG00000177468 |
| 6 | 138176349 | 138176560 | 138176454 | 10 | 10 | 3  | 2.636998906 | 0.034203    |         | ENSG00000207300 |
| 6 | 138397817 | 138398250 | 138398045 | 73 | 88 | 3  | 21.33571842 | 1.56E-22    |         | ENSG00000219463 |
| 6 | 138451172 | 138451420 | 138451267 | 9  | 10 | 1  | 5.273997812 | 0.00391723  | PERP    | ENSG00000112378 |
| 6 | 139180662 | 139180932 | 139180797 | 10 | 12 | 1  | 6.232906505 | 0.00117736  |         | ENSG00000218003 |
| 6 | 139582147 | 139582378 | 139582262 | 9  | 11 | 2  | 3.835634772 | 0.00800699  | TXLNB   | ENSG00000164440 |
| 6 | 139794130 | 139794352 | 139794244 | 13 | 15 | 3  | 3.835634772 | 0.00291691  | CITED2  | ENSG00000164442 |
| 6 | 142509760 | 142510209 | 142509939 | 10 | 17 | 2  | 5.753452158 | 0.000281509 | VTA1    | ENSG00000009844 |
| 6 | 142810245 | 142810441 | 142810343 | 8  | 8  | 0  | 8.630178238 | 0.00235436  | GPR126  | ENSG00000112414 |
| 6 | 143205607 | 143205875 | 143205741 | 10 | 11 | 3  | 2.876726079 | 0.0213797   | HIVEP2  | ENSG00000010818 |
| 6 | 143216281 | 143216541 | 143216410 | 8  | 10 | 2  | 3.515998541 | 0.0136204   | HIVEP2  | ENSG00000010818 |
| 6 | 143691784 | 143691993 | 143691927 | 8  | 8  | 2  | 2.876726079 | 0.0381137   |         | ENSG00000216642 |
| 6 | 143813444 | 143813696 | 143813600 | 10 | 13 | 1  | 6.712360851 | 0.000640982 | PEX3    | ENSG00000034693 |
| 6 | 144706939 | 144707203 | 144707087 | 11 | 15 | 5  | 2.557089848 | 0.0169197   | UTRN    | ENSG00000152818 |
| 6 | 145020462 | 145020659 | 145020560 | 8  | 9  | 0  | 9.589086931 | 0.00120187  | UTRN    | ENSG00000152818 |
| 6 | 145876009 | 145876233 | 145876121 | 9  | 9  | 0  | 9.589086931 | 0.00120187  |         | ENSG00000217612 |

|   |           |           |           |    |     |   |             |             |           |                 |
|---|-----------|-----------|-----------|----|-----|---|-------------|-------------|-----------|-----------------|
| 6 | 147407083 | 147407609 | 147407245 | 44 | 58  | 0 | 56.57561289 | 5.90E-18    |           | ENSG00000216063 |
| 6 | 147585502 | 147585760 | 147585631 | 8  | 10  | 2 | 3.515998541 | 0.0136204   | STXBP5    | ENSG00000164506 |
| 6 | 148538746 | 148538945 | 148538845 | 9  | 9   | 2 | 3.19636231  | 0.0229249   | SASH1     | ENSG00000111961 |
| 6 | 148737013 | 148737254 | 148737148 | 8  | 10  | 1 | 5.273997812 | 0.00391723  | SASH1     | ENSG00000111961 |
| 6 | 149248818 | 149249158 | 149248988 | 14 | 19  | 4 | 3.835634772 | 0.00108365  |           | ENSG00000203725 |
| 6 | 149442641 | 149442998 | 149442819 | 29 | 35  | 6 | 4.931530421 | 2.65E-06    |           | ENSG00000219487 |
| 6 | 149699426 | 149699806 | 149699638 | 69 | 77  | 2 | 24.93162602 | 1.30E-20    | MAP3K7IP2 | ENSG00000055208 |
| 6 | 149741844 | 149742236 | 149742022 | 18 | 26  | 1 | 12.94526736 | 1.86E-07    | SUMO4     | ENSG00000177688 |
| 6 | 149841581 | 149841899 | 149841740 | 16 | 22  | 0 | 22.05489994 | 1.92E-07    | ZC3H12D   | ENSG00000178199 |
| 6 | 149908892 | 149909072 | 149908982 | 8  | 9   | 3 | 2.397271733 | 0.0539397   | PPIL4     | ENSG00000131013 |
| 6 | 150210522 | 150210767 | 150210644 | 8  | 11  | 1 | 5.753452158 | 0.00215302  | LRP11     | ENSG00000120256 |
| 6 | 150613701 | 150613962 | 150613848 | 15 | 17  | 2 | 5.753452158 | 0.000281509 |           | ENSG00000201628 |
| 6 | 151219795 | 151220605 | 151220201 | 76 | 107 | 0 | 103.5621389 | 2.90E-32    | MTHFD1L   | ENSG00000120254 |
| 6 | 151367558 | 151367834 | 151367696 | 8  | 9   | 4 | 1.917817386 | 0.103282    |           | ENSG00000221469 |
| 6 | 151815018 | 151815272 | 151815145 | 8  | 11  | 3 | 2.876726079 | 0.0213797   | C6orf211  | ENSG00000146476 |
| 6 | 151886855 | 151887290 | 151887104 | 17 | 28  | 0 | 27.8083521  | 3.40E-09    | C6orf97   | ENSG00000120262 |
| 6 | 151920815 | 151921204 | 151920994 | 10 | 18  | 0 | 18.21926517 | 2.83E-06    |           | ENSG00000207422 |
| 6 | 152020822 | 152021184 | 152020993 | 10 | 16  | 6 | 2.328778255 | 0.0221113   | ESR1      | ENSG00000091831 |
| 6 | 152045933 | 152046160 | 152046046 | 8  | 9   | 1 | 4.794543465 | 0.00708517  | ESR1      | ENSG00000091831 |
| 6 | 152058020 | 152058254 | 152058145 | 9  | 11  | 3 | 2.876726079 | 0.0213797   | ESR1      | ENSG00000091831 |
| 6 | 152128293 | 152128836 | 152128493 | 60 | 82  | 2 | 26.52980717 | 5.08E-22    | ESR1      | ENSG00000091831 |
| 6 | 152458072 | 152458327 | 152458199 | 11 | 12  | 2 | 4.155271003 | 0.0046638   | C6orf98   | ENSG00000222029 |
| 6 | 152584574 | 152585015 | 152584803 | 53 | 66  | 0 | 64.24688243 | 2.72E-20    | SYNE1     | ENSG00000131018 |
| 6 | 152676800 | 152677206 | 152677003 | 43 | 53  | 0 | 51.78106943 | 1.70E-16    | SYNE1     | ENSG00000131018 |
| 6 | 152938693 | 152939003 | 152938849 | 20 | 24  | 0 | 23.97271733 | 5.01E-08    | SYNE1     | ENSG00000131018 |
| 6 | 153934572 | 153934801 | 153934745 | 10 | 12  | 0 | 12.46581301 | 0.000159888 |           | ENSG00000208470 |
| 6 | 154090896 | 154091083 | 154090989 | 9  | 9   | 1 | 4.794543465 | 0.00708517  |           | ENSG00000199246 |
| 6 | 154655869 | 154656095 | 154655982 | 9  | 11  | 3 | 2.876726079 | 0.0213797   |           | ENSG00000074706 |
| 6 | 154873476 | 154873655 | 154873544 | 8  | 8   | 1 | 4.315089119 | 0.0127267   | CNKSR3    | ENSG00000153721 |
| 6 | 155038428 | 155038689 | 155038564 | 15 | 17  | 3 | 4.315089119 | 0.00102271  |           | ENSG00000205625 |
| 6 | 155291236 | 155291415 | 155291325 | 8  | 8   | 3 | 2.157544559 | 0.0836802   |           | ENSG00000223286 |
| 6 | 157143223 | 157143452 | 157143354 | 9  | 11  | 3 | 2.876726079 | 0.0213797   | ARID1B    | ENSG00000049618 |
| 6 | 157897795 | 157897993 | 157897869 | 9  | 9   | 0 | 9.589086931 | 0.00120187  |           | ENSG00000219448 |
| 6 | 157938481 | 157938751 | 157938607 | 9  | 10  | 2 | 3.515998541 | 0.0136204   | ZDHHC14   | ENSG00000175048 |

|   |           |           |           |    |     |   |             |             |          |                 |
|---|-----------|-----------|-----------|----|-----|---|-------------|-------------|----------|-----------------|
| 6 | 157989542 | 157989926 | 157989717 | 27 | 33  | 0 | 32.60289556 | 1.18E-10    | ZDHHC14  | ENSG00000175048 |
| 6 | 158104487 | 158104749 | 158104618 | 9  | 10  | 2 | 3.515998541 | 0.0136204   |          | ENSG00000208440 |
| 6 | 158105496 | 158105777 | 158105636 | 8  | 12  | 2 | 4.155271003 | 0.0046638   |          | ENSG00000208440 |
| 6 | 158349301 | 158349503 | 158349402 | 8  | 9   | 1 | 4.794543465 | 0.00708517  | SYNJ2    | ENSG00000078269 |
| 6 | 158381266 | 158381665 | 158381445 | 9  | 16  | 4 | 3.260289556 | 0.00475414  | SYNJ2    | ENSG00000078269 |
| 6 | 158383292 | 158383576 | 158383446 | 8  | 10  | 0 | 10.54799562 | 0.000613541 | SYNJ2    | ENSG00000078269 |
| 6 | 158390561 | 158391128 | 158390709 | 11 | 24  | 5 | 3.995452888 | 0.00024777  | SYNJ2    | ENSG00000078269 |
| 6 | 158463134 | 158463488 | 158463313 | 31 | 36  | 3 | 8.869905411 | 1.98E-08    | SYNJ2    | ENSG00000078269 |
| 6 | 159078801 | 159079072 | 159078936 | 10 | 13  | 3 | 3.356180426 | 0.00805599  |          | ENSG00000219249 |
| 6 | 159190935 | 159191159 | 159191083 | 8  | 9   | 2 | 3.19636231  | 0.0229249   |          | ENSG00000213077 |
| 6 | 159238276 | 159238662 | 159238483 | 20 | 27  | 0 | 26.84944341 | 6.66E-09    |          | ENSG00000213076 |
| 6 | 159593924 | 159594515 | 159594148 | 42 | 59  | 4 | 11.50690432 | 1.18E-13    | FNDC1    | ENSG00000164694 |
| 6 | 161734989 | 161735179 | 161735084 | 8  | 8   | 0 | 8.630178238 | 0.00235436  | AGPAT4   | ENSG00000026652 |
| 6 | 163728381 | 163728759 | 163728560 | 28 | 35  | 0 | 34.52071295 | 3.07E-11    |          | ENSG00000217514 |
| 6 | 163975567 | 163976226 | 163975845 | 70 | 110 | 1 | 53.21943246 | 2.14E-31    |          | ENSG00000222470 |
| 6 | 165714071 | 165714540 | 165714388 | 12 | 23  | 0 | 23.01380863 | 9.81E-08    |          | ENSG00000199523 |
| 6 | 166223601 | 166223844 | 166223722 | 9  | 9   | 1 | 4.794543465 | 0.00708517  |          | ENSG00000222214 |
| 6 | 166362794 | 166363002 | 166362842 | 8  | 9   | 1 | 4.794543465 | 0.00708517  |          | ENSG00000216624 |
| 6 | 166681431 | 166681709 | 166681559 | 17 | 20  | 2 | 6.712360851 | 4.91E-05    | SFT2D1   | ENSG00000198818 |
| 6 | 167894570 | 167894840 | 167894705 | 8  | 10  | 1 | 5.273997812 | 0.00391723  |          | ENSG00000213065 |
| 6 | 168513844 | 168514097 | 168513924 | 8  | 9   | 1 | 4.794543465 | 0.00708517  | DACT2    | ENSG00000164488 |
| 6 | 169366236 | 169366459 | 169366384 | 9  | 9   | 0 | 9.589086931 | 0.00120187  | THBS2    | ENSG00000186340 |
| 6 | 169851051 | 169851284 | 169851163 | 9  | 11  | 0 | 11.50690432 | 0.000313206 | C6orf120 | ENSG00000185127 |
| 6 | 170183536 | 170183715 | 170183637 | 8  | 8   | 8 | 0.958908693 | 0.534974    |          | ENSG00000218716 |
| 6 | 170183717 | 170183897 | 170183780 | 9  | 10  | 3 | 2.636998906 | 0.034203    |          | ENSG00000218716 |
| 6 | 170383550 | 170383849 | 170383700 | 15 | 17  | 0 | 17.26035648 | 5.54E-06    |          | ENSG00000218716 |
| 7 | 244316    | 244604    | 244453    | 9  | 11  | 3 | 2.876726079 | 0.0213797   | FAM20C   | ENSG00000177706 |
| 7 | 545961    | 546628    | 546180    | 74 | 101 | 5 | 16.30144778 | 5.16E-24    | PDGFA    | ENSG00000197461 |
| 7 | 624926    | 625105    | 625015    | 9  | 9   | 1 | 4.794543465 | 0.00708517  | PRKAR1B  | ENSG00000188191 |
| 7 | 647532    | 647754    | 647613    | 8  | 10  | 0 | 10.54799562 | 0.000613541 | PRKAR1B  | ENSG00000188191 |
| 7 | 708180    | 708359    | 708251    | 8  | 8   | 0 | 8.630178238 | 0.00235436  | PRKAR1B  | ENSG00000188191 |
| 7 | 711699    | 711937    | 711856    | 10 | 12  | 3 | 3.116453252 | 0.0131971   | PRKAR1B  | ENSG00000188191 |
| 7 | 792591    | 792942    | 792717    | 8  | 13  | 3 | 3.356180426 | 0.00805599  |          | ENSG00000206016 |
| 7 | 837908    | 838185    | 838056    | 11 | 11  | 3 | 2.876726079 | 0.0213797   | UNC84A   | ENSG00000164828 |

|   |         |         |         |     |     |   |             |             |         |                 |
|---|---------|---------|---------|-----|-----|---|-------------|-------------|---------|-----------------|
| 7 | 999343  | 999579  | 999461  | 11  | 12  | 2 | 4.155271003 | 0.0046638   | CYP2W1  | ENSG00000073067 |
| 7 | 1143365 | 1143659 | 1143512 | 19  | 22  | 3 | 5.513724985 | 6.69E-05    | C7orf50 | ENSG00000146540 |
| 7 | 1308924 | 1309505 | 1309238 | 41  | 74  | 0 | 71.91815198 | 1.26E-22    | UNCX    | ENSG00000164853 |
| 7 | 1513160 | 1513400 | 1513280 | 11  | 13  | 4 | 2.684944341 | 0.01921     | INTS1   | ENSG00000164880 |
| 7 | 1519488 | 1519761 | 1519637 | 11  | 13  | 3 | 3.356180426 | 0.00805599  | INTS1   | ENSG00000164880 |
| 7 | 1543338 | 1543625 | 1543477 | 9   | 11  | 3 | 2.876726079 | 0.0213797   | MAFK    | ENSG00000198517 |
| 7 | 1585727 | 1585967 | 1585837 | 8   | 10  | 6 | 1.506856518 | 0.188853    | PSMG3   | ENSG00000157778 |
| 7 | 1716048 | 1716279 | 1716183 | 9   | 10  | 3 | 2.636998906 | 0.034203    |         | ENSG00000205971 |
| 7 | 1818304 | 1818576 | 1818457 | 9   | 11  | 4 | 2.301380863 | 0.0459276   |         | ENSG00000176349 |
| 7 | 1889430 | 1889654 | 1889557 | 8   | 8   | 0 | 8.630178238 | 0.00235436  |         | ENSG00000215135 |
| 7 | 1902484 | 1902986 | 1902716 | 26  | 43  | 0 | 42.19198249 | 1.42E-13    |         | ENSG00000215135 |
| 7 | 1944589 | 1944951 | 1944772 | 21  | 28  | 3 | 6.952088025 | 2.20E-06    |         | ENSG00000215135 |
| 7 | 1986224 | 1986724 | 1986474 | 18  | 30  | 2 | 9.908723162 | 1.20E-07    |         | ENSG00000215135 |
| 7 | 2176072 | 2176626 | 2176316 | 129 | 175 | 4 | 33.753586   | 1.00E-45    | MAD1L1  | ENSG00000002822 |
| 7 | 2179097 | 2179364 | 2179228 | 14  | 15  | 5 | 2.557089848 | 0.0169197   | MAD1L1  | ENSG00000002822 |
| 7 | 2431534 | 2431856 | 2431695 | 11  | 14  | 2 | 4.794543465 | 0.00154571  |         | ENSG00000175873 |
| 7 | 2533945 | 2534170 | 2534057 | 12  | 12  | 2 | 4.155271003 | 0.0046638   | LFNG    | ENSG00000106003 |
| 7 | 2639518 | 2639808 | 2639639 | 11  | 13  | 1 | 6.712360851 | 0.000640982 | TTYH3   | ENSG00000136295 |
| 7 | 2763757 | 2764054 | 2763961 | 8   | 12  | 6 | 1.78083043  | 0.0985525   | GNA12   | ENSG00000146535 |
| 7 | 2764136 | 2764455 | 2764288 | 13  | 17  | 5 | 2.876726079 | 0.00703033  | GNA12   | ENSG00000146535 |
| 7 | 2792305 | 2792551 | 2792428 | 9   | 9   | 5 | 1.598181155 | 0.170911    | GNA12   | ENSG00000146535 |
| 7 | 2808817 | 2809031 | 2808968 | 10  | 11  | 3 | 2.876726079 | 0.0213797   | GNA12   | ENSG00000146535 |
| 7 | 2850871 | 2851050 | 2850940 | 8   | 8   | 6 | 1.232882605 | 0.333038    | GNA12   | ENSG00000146535 |
| 7 | 2871870 | 2872088 | 2871979 | 10  | 12  | 3 | 3.116453252 | 0.0131971   | GNA12   | ENSG00000146535 |
| 7 | 3004378 | 3004719 | 3004557 | 15  | 18  | 0 | 18.21926517 | 2.83E-06    |         | ENSG00000201794 |
| 7 | 3222194 | 3222426 | 3222299 | 12  | 12  | 7 | 1.558226626 | 0.152813    |         | ENSG00000217455 |
| 7 | 3381268 | 3381600 | 3381434 | 9   | 15  | 1 | 7.671269544 | 0.000187863 |         | ENSG00000211544 |
| 7 | 3410654 | 3410918 | 3410757 | 10  | 13  | 1 | 6.712360851 | 0.000640982 |         | ENSG00000211544 |
| 7 | 3488771 | 3488955 | 3488863 | 8   | 8   | 4 | 1.726035648 | 0.150596    |         | ENSG00000211544 |
| 7 | 3634855 | 3635118 | 3634968 | 10  | 13  | 1 | 6.712360851 | 0.000640982 |         | ENSG00000211544 |
| 7 | 3658395 | 3658659 | 3658527 | 8   | 10  | 1 | 5.273997812 | 0.00391723  |         | ENSG00000211544 |
| 7 | 4160037 | 4160224 | 4160153 | 8   | 9   | 2 | 3.19636231  | 0.0229249   | SDK1    | ENSG00000146555 |
| 7 | 4632252 | 4632498 | 4632375 | 8   | 9   | 5 | 1.598181155 | 0.170911    | FOXK1   | ENSG00000164916 |
| 7 | 4637851 | 4638110 | 4637992 | 13  | 17  | 5 | 2.876726079 | 0.00703033  | FOXK1   | ENSG00000164916 |

|   |         |         |         |    |    |    |             |            |         |                 |
|---|---------|---------|---------|----|----|----|-------------|------------|---------|-----------------|
| 7 | 4648007 | 4648189 | 4648098 | 8  | 8  | 3  | 2.157544559 | 0.0836802  | FO XK1  | ENSG00000164916 |
| 7 | 4661503 | 4661834 | 4661663 | 9  | 13 | 0  | 13.4247217  | 8.16E-05   | FO XK1  | ENSG00000164916 |
| 7 | 4690197 | 4690898 | 4690532 | 19 | 38 | 8  | 4.155271003 | 5.31E-06   | FO XK1  | ENSG00000164916 |
| 7 | 4855681 | 4855975 | 4855828 | 10 | 11 | 2  | 3.835634772 | 0.00800699 | PAPOLB  | ENSG00000218823 |
| 7 | 4979868 | 4980159 | 4980012 | 12 | 12 | 2  | 4.155271003 | 0.0046638  | RNF216L | ENSG00000196204 |
| 7 | 5402549 | 5402845 | 5402682 | 11 | 13 | 4  | 2.684944341 | 0.01921    |         | ENSG00000182095 |
| 7 | 5403291 | 5403762 | 5403597 | 17 | 25 | 4  | 4.986325204 | 4.72E-05   |         | ENSG00000182095 |
| 7 | 5424515 | 5424895 | 5424694 | 9  | 16 | 3  | 4.075361945 | 0.00173346 |         | ENSG00000188365 |
| 7 | 5428818 | 5429019 | 5428870 | 8  | 8  | 0  | 8.630178238 | 0.00235436 |         | ENSG00000188365 |
| 7 | 5431758 | 5432000 | 5431914 | 8  | 9  | 4  | 1.917817386 | 0.103282   |         | ENSG00000182095 |
| 7 | 5432378 | 5432561 | 5432469 | 9  | 9  | 9  | 0.958908693 | 0.536911   |         | ENSG00000182095 |
| 7 | 5474922 | 5475227 | 5475081 | 10 | 11 | 3  | 2.876726079 | 0.0213797  |         | ENSG00000210024 |
| 7 | 5500766 | 5501004 | 5500915 | 9  | 11 | 2  | 3.835634772 | 0.00800699 |         | ENSG00000207973 |
| 7 | 5532100 | 5532727 | 5532366 | 33 | 52 | 2  | 16.94072024 | 1.23E-13   | ACTB    | ENSG00000075624 |
| 7 | 5565084 | 5565309 | 5565189 | 9  | 11 | 9  | 1.150690432 | 0.367789   |         | ENSG00000169549 |
| 7 | 5568940 | 5569151 | 5568993 | 8  | 10 | 3  | 2.636998906 | 0.034203   |         | ENSG00000169549 |
| 7 | 5652904 | 5653375 | 5653197 | 48 | 65 | 1  | 31.64398687 | 1.78E-18   |         | ENSG00000215059 |
| 7 | 5684211 | 5684469 | 5684332 | 9  | 11 | 4  | 2.301380863 | 0.0459276  |         | ENSG00000215059 |
| 7 | 5698934 | 5699233 | 5699054 | 14 | 16 | 7  | 2.037680973 | 0.0400399  |         | ENSG00000215059 |
| 7 | 6001691 | 6002181 | 6001884 | 15 | 26 | 10 | 2.353684974 | 0.00551687 |         | ENSG00000201990 |
| 7 | 6064703 | 6064980 | 6064869 | 9  | 12 | 4  | 2.493162602 | 0.0299057  | EIF2AK1 | ENSG00000086232 |
| 7 | 6233547 | 6233726 | 6233651 | 8  | 8  | 1  | 4.315089119 | 0.0127267  |         | ENSG00000202273 |
| 7 | 6338273 | 6338490 | 6338323 | 8  | 9  | 1  | 4.794543465 | 0.00708517 |         | ENSG00000178397 |
| 7 | 6391564 | 6391853 | 6391699 | 10 | 14 | 5  | 2.397271733 | 0.0258078  | RAC1    | ENSG00000136238 |
| 7 | 6454732 | 6454948 | 6454840 | 8  | 8  | 0  | 8.630178238 | 0.00235436 | DAGLB   | ENSG00000164535 |
| 7 | 6565109 | 6565337 | 6565246 | 9  | 10 | 4  | 2.109599125 | 0.0694668  | GRID2IP | ENSG00000215045 |
| 7 | 6580201 | 6580380 | 6580336 | 8  | 8  | 0  | 8.630178238 | 0.00235436 | ZDHHC4  | ENSG00000136247 |
| 7 | 6608498 | 6608726 | 6608631 | 9  | 10 | 3  | 2.636998906 | 0.034203   | C7orf26 | ENSG00000146576 |
| 7 | 6713141 | 6713414 | 6713270 | 20 | 21 | 8  | 2.343999027 | 0.0109478  | ZNF12   | ENSG00000164631 |
| 7 | 6735645 | 6735867 | 6735783 | 8  | 8  | 4  | 1.726035648 | 0.150596   | PMS2CL  | ENSG00000187953 |
| 7 | 7105571 | 7106042 | 7105846 | 17 | 31 | 5  | 5.114179696 | 6.54E-06   |         | ENSG00000201218 |
| 7 | 7120993 | 7121241 | 7121083 | 8  | 10 | 5  | 1.757999271 | 0.121253   |         | ENSG00000201218 |
| 7 | 7183119 | 7183356 | 7183237 | 8  | 8  | 1  | 4.315089119 | 0.0127267  | C1GALT1 | ENSG00000106392 |
| 7 | 7188100 | 7188394 | 7188267 | 10 | 14 | 5  | 2.397271733 | 0.0258078  | C1GALT1 | ENSG00000106392 |

|   |          |          |          |     |     |    |             |             |         |                 |
|---|----------|----------|----------|-----|-----|----|-------------|-------------|---------|-----------------|
| 7 | 7333614  | 7333930  | 7333772  | 21  | 24  | 2  | 7.990905775 | 4.56E-06    |         | ENSG00000218370 |
| 7 | 7335524  | 7335868  | 7335698  | 20  | 25  | 2  | 8.310542006 | 2.50E-06    |         | ENSG00000218370 |
| 7 | 7360876  | 7361159  | 7361008  | 10  | 11  | 7  | 1.43836304  | 0.204844    |         | ENSG00000218370 |
| 7 | 7445080  | 7445604  | 7445356  | 12  | 22  | 1  | 11.02744997 | 2.36E-06    | COL28A1 | ENSG00000215018 |
| 7 | 7452795  | 7453171  | 7452961  | 20  | 26  | 1  | 12.94526736 | 1.86E-07    | COL28A1 | ENSG00000215018 |
| 7 | 7570564  | 7570864  | 7570714  | 13  | 15  | 7  | 1.917817386 | 0.0572317   |         | ENSG00000164654 |
| 7 | 7572199  | 7572551  | 7572375  | 12  | 17  | 7  | 2.157544559 | 0.0276499   |         | ENSG00000164654 |
| 7 | 7786147  | 7786327  | 7786286  | 8   | 8   | 2  | 2.876726079 | 0.0381137   |         | ENSG00000219545 |
| 7 | 7805329  | 7805605  | 7805492  | 19  | 20  | 1  | 10.06854128 | 8.32E-06    |         | ENSG00000219545 |
| 7 | 7814387  | 7814586  | 7814486  | 10  | 10  | 3  | 2.636998906 | 0.034203    |         | ENSG00000219545 |
| 7 | 8002690  | 8002977  | 8002864  | 18  | 19  | 3  | 4.794543465 | 0.000349205 |         | ENSG00000217142 |
| 7 | 8266960  | 8267230  | 8267090  | 14  | 14  | 2  | 4.794543465 | 0.00154571  | ICA1    | ENSG00000003147 |
| 7 | 8267371  | 8267571  | 8267443  | 8   | 9   | 2  | 3.19636231  | 0.0229249   | ICA1    | ENSG00000003147 |
| 7 | 8297186  | 8297383  | 8297284  | 8   | 8   | 11 | 0.71918152  | 0.777546    | ICA1    | ENSG00000003147 |
| 7 | 8302325  | 8302531  | 8302390  | 10  | 10  | 4  | 2.109599125 | 0.0694668   | ICA1    | ENSG00000003147 |
| 7 | 8332163  | 8332415  | 8332258  | 16  | 18  | 7  | 2.277408146 | 0.0188653   | ICA1    | ENSG00000003147 |
| 7 | 8443171  | 8443353  | 8443287  | 8   | 8   | 8  | 0.958908693 | 0.534974    | NXPH1   | ENSG00000122584 |
| 7 | 8499521  | 8499711  | 8499616  | 8   | 8   | 2  | 2.876726079 | 0.0381137   | NXPH1   | ENSG00000122584 |
| 7 | 8764563  | 8764794  | 8764678  | 8   | 9   | 0  | 9.589086931 | 0.00120187  | NXPH1   | ENSG00000122584 |
| 7 | 10605291 | 10605599 | 10605421 | 8   | 11  | 1  | 5.753452158 | 0.00215302  |         | ENSG00000216737 |
| 7 | 10765441 | 10765885 | 10765719 | 12  | 17  | 5  | 2.876726079 | 0.00703033  |         | ENSG00000201774 |
| 7 | 11088735 | 11089336 | 11089101 | 85  | 119 | 0  | 115.0690432 | 9.08E-36    |         | ENSG00000219777 |
| 7 | 12415295 | 12415474 | 12415384 | 8   | 8   | 0  | 8.630178238 | 0.00235436  |         | ENSG00000178459 |
| 7 | 12501069 | 12501308 | 12501147 | 8   | 9   | 0  | 9.589086931 | 0.00120187  |         | ENSG00000203523 |
| 7 | 12563478 | 12564152 | 12563800 | 106 | 135 | 1  | 65.20579113 | 1.31E-38    | SCIN    | ENSG00000006747 |
| 7 | 12653849 | 12654120 | 12653984 | 13  | 16  | 6  | 2.328778255 | 0.0221113   | ARL4A   | ENSG00000122644 |
| 7 | 12811503 | 12811926 | 12811671 | 8   | 14  | 1  | 7.191815198 | 0.00034761  |         | ENSG00000222974 |
| 7 | 12815589 | 12815979 | 12815819 | 18  | 25  | 1  | 12.46581301 | 3.51E-07    |         | ENSG00000222974 |
| 7 | 12899427 | 12899757 | 12899592 | 11  | 14  | 1  | 7.191815198 | 0.00034761  |         | ENSG00000222974 |
| 7 | 13037703 | 13037908 | 13037805 | 9   | 9   | 4  | 1.917817386 | 0.103282    |         | ENSG00000216374 |
| 7 | 14108236 | 14108510 | 14108373 | 8   | 11  | 0  | 11.50690432 | 0.000313206 |         | ENSG00000220499 |
| 7 | 16427863 | 16428335 | 16428112 | 28  | 39  | 1  | 19.17817386 | 4.29E-11    |         | ENSG00000214960 |
| 7 | 16438350 | 16438578 | 16438419 | 8   | 11  | 5  | 1.917817386 | 0.0843804   |         | ENSG00000214960 |
| 7 | 16659018 | 16659428 | 16659223 | 24  | 33  | 2  | 10.86763185 | 1.89E-08    | BZW2    | ENSG00000136261 |

|   |          |          |          |    |    |    |             |             |          |                 |
|---|----------|----------|----------|----|----|----|-------------|-------------|----------|-----------------|
| 7 | 16674212 | 16674561 | 16674375 | 15 | 20 | 5  | 3.356180426 | 0.0017534   | BZW2     | ENSG00000136261 |
| 7 | 16776852 | 16777212 | 16776998 | 9  | 13 | 4  | 2.684944341 | 0.01921     | TSPAN13  | ENSG00000106537 |
| 7 | 16897644 | 16897863 | 16897800 | 8  | 9  | 1  | 4.794543465 | 0.00708517  |          | ENSG00000217531 |
| 7 | 16996110 | 16996450 | 16996269 | 10 | 15 | 6  | 2.191791298 | 0.0328001   |          | ENSG00000219142 |
| 7 | 17212552 | 17212759 | 17212655 | 8  | 9  | 1  | 4.794543465 | 0.00708517  |          | ENSG00000209101 |
| 7 | 17496174 | 17496535 | 17496353 | 34 | 41 | 2  | 13.4247217  | 1.29E-10    |          | ENSG00000199473 |
| 7 | 17565255 | 17565453 | 17565354 | 9  | 9  | 8  | 1.065454103 | 0.442605    |          | ENSG00000199473 |
| 7 | 17775977 | 17776270 | 17776123 | 11 | 14 | 2  | 4.794543465 | 0.00154571  | SNX13    | ENSG00000071189 |
| 7 | 17777148 | 17777537 | 17777358 | 23 | 31 | 0  | 30.68507818 | 4.52E-10    | SNX13    | ENSG00000071189 |
| 7 | 17938939 | 17939131 | 17939022 | 8  | 8  | 0  | 8.630178238 | 0.00235436  | SNX13    | ENSG00000071189 |
| 7 | 18426875 | 18427318 | 18427104 | 53 | 68 | 4  | 13.23293996 | 4.71E-16    | HDAC9    | ENSG00000048052 |
| 7 | 19241867 | 19242054 | 19241996 | 8  | 8  | 0  | 8.630178238 | 0.00235436  | FERD3L   | ENSG00000146618 |
| 7 | 20314244 | 20314423 | 20314333 | 8  | 8  | 3  | 2.157544559 | 0.0836802   | ITGB8    | ENSG00000105855 |
| 7 | 21586313 | 21586585 | 21586431 | 18 | 21 | 2  | 7.031997082 | 2.73E-05    | DNAH11   | ENSG00000105877 |
| 7 | 21721297 | 21721488 | 21721392 | 8  | 8  | 2  | 2.876726079 | 0.0381137   | DNAH11   | ENSG00000105877 |
| 7 | 22357031 | 22357246 | 22357138 | 8  | 9  | 2  | 3.19636231  | 0.0229249   | RAPGEF5  | ENSG00000136237 |
| 7 | 22363765 | 22364058 | 22363901 | 11 | 14 | 1  | 7.191815198 | 0.00034761  | RAPGEF5  | ENSG00000136237 |
| 7 | 22674075 | 22674283 | 22674197 | 10 | 11 | 0  | 11.50690432 | 0.000313206 |          | ENSG00000179460 |
| 7 | 22679570 | 22679970 | 22679744 | 8  | 14 | 12 | 1.106433107 | 0.392094    |          | ENSG00000179460 |
| 7 | 22752656 | 22753066 | 22752828 | 17 | 25 | 0  | 24.93162602 | 2.56E-08    |          | ENSG00000210285 |
| 7 | 23092272 | 23092459 | 23092405 | 8  | 9  | 0  | 9.589086931 | 0.00120187  | KLHL7    | ENSG00000122550 |
| 7 | 23197225 | 23197420 | 23197325 | 8  | 9  | 4  | 1.917817386 | 0.103282    | NUPL2    | ENSG00000136243 |
| 7 | 23340804 | 23341081 | 23340943 | 10 | 15 | 2  | 5.114179696 | 0.00088103  | C7orf30  | ENSG00000156928 |
| 7 | 23553166 | 23553406 | 23553331 | 9  | 10 | 2  | 3.515998541 | 0.0136204   |          | ENSG00000164548 |
| 7 | 24977418 | 24977814 | 24977597 | 15 | 24 | 1  | 11.98635866 | 6.63E-07    | OSBPL3   | ENSG00000070882 |
| 7 | 25131467 | 25131747 | 25131580 | 8  | 10 | 3  | 2.636998906 | 0.034203    | CYCS     | ENSG00000172115 |
| 7 | 25405588 | 25405767 | 25405679 | 8  | 8  | 0  | 8.630178238 | 0.00235436  |          | ENSG00000202233 |
| 7 | 25574785 | 25575225 | 25575051 | 11 | 19 | 6  | 2.739739123 | 0.00632909  |          | ENSG00000222101 |
| 7 | 25589083 | 25589367 | 25589251 | 9  | 11 | 3  | 2.876726079 | 0.0213797   |          | ENSG00000222101 |
| 7 | 25810330 | 25810645 | 25810487 | 41 | 42 | 3  | 10.30826845 | 5.31E-10    |          | ENSG00000199085 |
| 7 | 25810936 | 25811170 | 25811011 | 11 | 11 | 3  | 2.876726079 | 0.0213797   |          | ENSG00000199085 |
| 7 | 25899240 | 25899493 | 25899366 | 8  | 9  | 0  | 9.589086931 | 0.00120187  |          | ENSG00000199085 |
| 7 | 26193724 | 26193962 | 26193843 | 9  | 10 | 1  | 5.273997812 | 0.00391723  | HNRNPA2B | ENSG00000122566 |
| 7 | 26205819 | 26206105 | 26205956 | 11 | 13 | 2  | 4.474907234 | 0.00269459  | HNRNPA2B | ENSG00000122566 |



|   |          |          |          |    |    |   |             |             |         |                 |
|---|----------|----------|----------|----|----|---|-------------|-------------|---------|-----------------|
| 7 | 26291142 | 26291465 | 26291306 | 12 | 15 | 2 | 5.114179696 | 0.00088103  | SNX10   | ENSG00000086300 |
| 7 | 26375817 | 26376039 | 26375922 | 8  | 9  | 2 | 3.19636231  | 0.0229249   | SNX10   | ENSG00000086300 |
| 7 | 26673686 | 26673977 | 26673848 | 13 | 15 | 3 | 3.835634772 | 0.00291691  |         | ENSG00000222004 |
| 7 | 26698377 | 26698556 | 26698466 | 9  | 9  | 2 | 3.19636231  | 0.0229249   |         | ENSG00000222004 |
| 7 | 26720060 | 26720334 | 26720198 | 12 | 14 | 0 | 14.3836304  | 4.17E-05    |         | ENSG00000222004 |
| 7 | 27148686 | 27148886 | 27148782 | 9  | 9  | 1 | 4.794543465 | 0.00708517  | HOXA5   | ENSG00000106004 |
| 7 | 27430446 | 27430630 | 27430546 | 9  | 10 | 3 | 2.636998906 | 0.034203    |         | ENSG00000177093 |
| 7 | 27561493 | 27561731 | 27561610 | 11 | 11 | 1 | 5.753452158 | 0.00215302  |         | ENSG00000203508 |
| 7 | 27669213 | 27669423 | 27669318 | 15 | 16 | 6 | 2.328778255 | 0.0221113   | HIBADH  | ENSG00000106049 |
| 7 | 27790513 | 27790716 | 27790589 | 10 | 11 | 4 | 2.301380863 | 0.0459276   | TAX1BP1 | ENSG00000106052 |
| 7 | 28026582 | 28026797 | 28026689 | 13 | 13 | 5 | 2.237453617 | 0.038866    |         | ENSG00000206623 |
| 7 | 28043430 | 28043715 | 28043598 | 10 | 12 | 1 | 6.232906505 | 0.00117736  |         | ENSG00000206623 |
| 7 | 28064359 | 28064627 | 28064493 | 8  | 9  | 1 | 4.794543465 | 0.00708517  |         | ENSG00000206623 |
| 7 | 28110494 | 28110868 | 28110699 | 9  | 15 | 5 | 2.557089848 | 0.0169197   |         | ENSG00000206623 |
| 7 | 28513756 | 28514058 | 28513907 | 9  | 10 | 1 | 5.273997812 | 0.00391723  | CREB5   | ENSG00000146592 |
| 7 | 28624666 | 28624906 | 28624736 | 8  | 9  | 0 | 9.589086931 | 0.00120187  |         | ENSG00000205786 |
| 7 | 28632787 | 28633025 | 28632966 | 8  | 11 | 1 | 5.753452158 | 0.00215302  |         | ENSG00000205786 |
| 7 | 28995006 | 28995223 | 28995086 | 8  | 9  | 0 | 9.589086931 | 0.00120187  |         | ENSG00000176734 |
| 7 | 29219198 | 29219424 | 29219273 | 9  | 9  | 0 | 9.589086931 | 0.00120187  | CHN2    | ENSG00000106069 |
| 7 | 29334780 | 29335105 | 29334942 | 12 | 16 | 1 | 8.150723891 | 0.000101217 | CHN2    | ENSG00000106069 |
| 7 | 29456170 | 29456359 | 29456236 | 9  | 9  | 2 | 3.19636231  | 0.0229249   | CHN2    | ENSG00000106069 |
| 7 | 30032435 | 30032643 | 30032568 | 10 | 10 | 2 | 3.515998541 | 0.0136204   | FKBP14  | ENSG00000106080 |
| 7 | 30143184 | 30143441 | 30143340 | 8  | 10 | 0 | 10.54799562 | 0.000613541 | C7orf41 | ENSG00000180354 |
| 7 | 30172379 | 30172670 | 30172524 | 9  | 12 | 4 | 2.493162602 | 0.0299057   | C7orf41 | ENSG00000180354 |
| 7 | 30409731 | 30410081 | 30409904 | 18 | 21 | 1 | 10.54799562 | 4.43E-06    | NOD1    | ENSG00000106100 |
| 7 | 30511175 | 30511490 | 30511334 | 11 | 15 | 3 | 3.835634772 | 0.00291691  | GGCT    | ENSG00000006625 |
| 7 | 30511505 | 30511684 | 30511584 | 8  | 9  | 2 | 3.19636231  | 0.0229249   | GGCT    | ENSG00000006625 |
| 7 | 30557235 | 30557813 | 30557578 | 26 | 45 | 9 | 4.410979988 | 4.70E-07    |         | ENSG00000196295 |
| 7 | 30600833 | 30601035 | 30600865 | 8  | 9  | 4 | 1.917817386 | 0.103282    | GARS    | ENSG00000106105 |
| 7 | 30998505 | 30998960 | 30998684 | 23 | 32 | 2 | 10.54799562 | 3.50E-08    | GHRHR   | ENSG00000106128 |
| 7 | 31379543 | 31379760 | 31379651 | 8  | 10 | 1 | 5.273997812 | 0.00391723  | NEUROD6 | ENSG00000164600 |
| 7 | 32003600 | 32003779 | 32003735 | 8  | 8  | 1 | 4.315089119 | 0.0127267   | PDE1C   | ENSG00000154678 |
| 7 | 32040377 | 32040643 | 32040467 | 8  | 10 | 1 | 5.273997812 | 0.00391723  | PDE1C   | ENSG00000154678 |
| 7 | 32124958 | 32125152 | 32125055 | 10 | 10 | 0 | 10.54799562 | 0.000613541 | PDE1C   | ENSG00000154678 |

|   |          |          |          |     |     |    |             |             |         |                 |
|---|----------|----------|----------|-----|-----|----|-------------|-------------|---------|-----------------|
| 7 | 32210569 | 32210827 | 32210711 | 12  | 12  | 0  | 12.46581301 | 0.000159888 | PDE1C   | ENSG00000154678 |
| 7 | 32394854 | 32395107 | 32394977 | 8   | 10  | 2  | 3.515998541 | 0.0136204   |         | ENSG00000177329 |
| 7 | 32496087 | 32496752 | 32496577 | 12  | 35  | 17 | 1.917817386 | 0.00960758  | LSM5    | ENSG00000106355 |
| 7 | 32822582 | 32822785 | 32822682 | 8   | 10  | 4  | 2.109599125 | 0.0694668   |         | ENSG00000210417 |
| 7 | 33114735 | 33114931 | 33114849 | 8   | 8   | 4  | 1.726035648 | 0.150596    | RP9     | ENSG00000164610 |
| 7 | 33191895 | 33192142 | 33192015 | 10  | 12  | 3  | 3.116453252 | 0.0131971   |         | ENSG00000222741 |
| 7 | 33293876 | 33294655 | 33294186 | 251 | 334 | 4  | 64.24688243 | 4.71E-91    |         | ENSG00000222741 |
| 7 | 33340572 | 33340887 | 33340729 | 8   | 12  | 2  | 4.155271003 | 0.0046638   |         | ENSG00000222741 |
| 7 | 33357765 | 33358339 | 33358019 | 50  | 74  | 3  | 17.97953799 | 1.17E-18    |         | ENSG00000222741 |
| 7 | 33675508 | 33675912 | 33675733 | 8   | 15  | 2  | 5.114179696 | 0.00088103  |         | ENSG00000173862 |
| 7 | 33679221 | 33679461 | 33679341 | 9   | 9   | 2  | 3.19636231  | 0.0229249   |         | ENSG00000173862 |
| 7 | 33814092 | 33814511 | 33814224 | 12  | 19  | 7  | 2.397271733 | 0.0127287   |         | ENSG00000203495 |
| 7 | 33889164 | 33889402 | 33889283 | 8   | 10  | 0  | 10.54799562 | 0.000613541 | BMPER   | ENSG00000164619 |
| 7 | 33939070 | 33939390 | 33939230 | 12  | 15  | 12 | 1.180195315 | 0.324974    | BMPER   | ENSG00000164619 |
| 7 | 33993540 | 33993731 | 33993635 | 10  | 10  | 4  | 2.109599125 | 0.0694668   | BMPER   | ENSG00000164619 |
| 7 | 34040791 | 34041397 | 34041099 | 30  | 53  | 9  | 5.178106943 | 7.80E-09    | BMPER   | ENSG00000164619 |
| 7 | 34106929 | 34107145 | 34107037 | 8   | 10  | 3  | 2.636998906 | 0.034203    | BMPER   | ENSG00000164619 |
| 7 | 34140370 | 34140673 | 34140533 | 9   | 12  | 3  | 3.116453252 | 0.0131971   |         | ENSG00000202431 |
| 7 | 34327094 | 34327420 | 34327257 | 8   | 12  | 5  | 2.077635502 | 0.0577144   |         | ENSG00000202431 |
| 7 | 34327463 | 34327957 | 34327732 | 8   | 18  | 5  | 3.036544195 | 0.0044641   |         | ENSG00000202431 |
| 7 | 34754601 | 34754848 | 34754724 | 8   | 9   | 8  | 1.065454103 | 0.442605    |         | ENSG00000210454 |
| 7 | 34765515 | 34765941 | 34765762 | 13  | 21  | 6  | 3.013713035 | 0.00261913  |         | ENSG00000197085 |
| 7 | 35031695 | 35032116 | 35031824 | 8   | 16  | 9  | 1.630144778 | 0.102169    | DPY19L1 | ENSG00000173852 |
| 7 | 36043432 | 36043847 | 36043591 | 8   | 15  | 5  | 2.557089848 | 0.0169197   |         | ENSG00000205745 |
| 7 | 36054305 | 36054580 | 36054434 | 11  | 14  | 5  | 2.397271733 | 0.0258078   |         | ENSG00000205745 |
| 7 | 36325209 | 36325411 | 36325310 | 11  | 11  | 5  | 1.917817386 | 0.0843804   |         | ENSG00000201432 |
| 7 | 37038070 | 37038376 | 37038231 | 11  | 14  | 4  | 2.876726079 | 0.01219     | ELMO1   | ENSG00000155849 |
| 7 | 37494621 | 37495220 | 37494800 | 44  | 65  | 2  | 21.09599125 | 3.00E-17    | ELMO1   | ENSG00000155849 |
| 7 | 37598432 | 37598849 | 37598677 | 20  | 26  | 2  | 8.630178238 | 1.37E-06    |         | ENSG00000178503 |
| 7 | 38221900 | 38222181 | 38222037 | 10  | 13  | 1  | 6.712360851 | 0.000640982 | TRG@    | ENSG00000211686 |
| 7 | 38564447 | 38564626 | 38564536 | 8   | 9   | 6  | 1.369869562 | 0.253675    |         | ENSG00000223296 |
| 7 | 38860448 | 38860711 | 38860579 | 10  | 10  | 3  | 2.636998906 | 0.034203    | VPS41   | ENSG00000006715 |
| 7 | 39022638 | 39022818 | 39022717 | 8   | 8   | 0  | 8.630178238 | 0.00235436  | POU6F2  | ENSG00000106536 |
| 7 | 39706338 | 39706655 | 39706494 | 12  | 16  | 3  | 4.075361945 | 0.00173346  |         | ENSG00000221013 |

|   |          |          |          |     |     |   |             |             |         |                 |
|---|----------|----------|----------|-----|-----|---|-------------|-------------|---------|-----------------|
| 7 | 39817058 | 39817304 | 39817181 | 8   | 11  | 5 | 1.917817386 | 0.0843804   |         | ENSG00000213727 |
| 7 | 40140701 | 40140978 | 40140814 | 8   | 12  | 6 | 1.78083043  | 0.0985525   | C7orf11 | ENSG00000168303 |
| 7 | 40723404 | 40724003 | 40723616 | 245 | 301 | 1 | 144.7952127 | 9.65E-87    |         |                 |
| 7 | 40821499 | 40821825 | 40821662 | 9   | 12  | 3 | 3.116453252 | 0.0131971   |         |                 |
| 7 | 40849775 | 40850096 | 40849935 | 19  | 21  | 1 | 10.54799562 | 4.43E-06    |         |                 |
| 7 | 41962039 | 41962218 | 41962128 | 8   | 8   | 2 | 2.876726079 | 0.0381137   |         | ENSG00000213721 |
| 7 | 42500929 | 42501215 | 42501067 | 11  | 14  | 0 | 14.3836304  | 4.17E-05    | GLI3    | ENSG00000106571 |
| 7 | 42603271 | 42604006 | 42603628 | 41  | 59  | 4 | 11.50690432 | 1.18E-13    | C7orf25 | ENSG00000136197 |
| 7 | 42781423 | 42781665 | 42781544 | 9   | 9   | 1 | 4.794543465 | 0.00708517  | C7orf25 | ENSG00000136197 |
| 7 | 42875570 | 42875841 | 42875707 | 9   | 13  | 4 | 2.684944341 | 0.01921     | C7orf25 | ENSG00000136197 |
| 7 | 43245763 | 43246122 | 43245921 | 10  | 16  | 0 | 16.30144778 | 1.09E-05    |         | ENSG00000223258 |
| 7 | 43583378 | 43583560 | 43583496 | 8   | 8   | 0 | 8.630178238 | 0.00235436  | STK17A  | ENSG00000164543 |
| 7 | 43583607 | 43583959 | 43583783 | 116 | 121 | 4 | 23.39737211 | 1.41E-30    | STK17A  | ENSG00000164543 |
| 7 | 43680863 | 43681169 | 43681038 | 8   | 11  | 1 | 5.753452158 | 0.00215302  | C7orf44 | ENSG00000106603 |
| 7 | 43725813 | 43726029 | 43725921 | 9   | 9   | 0 | 9.589086931 | 0.00120187  | C7orf44 | ENSG00000106603 |
| 7 | 43735558 | 43735908 | 43735733 | 10  | 16  | 3 | 4.075361945 | 0.00173346  | C7orf44 | ENSG00000106603 |
| 7 | 43771091 | 43771409 | 43771217 | 12  | 16  | 4 | 3.260289556 | 0.00475414  | BLVRA   | ENSG00000106605 |
| 7 | 43805763 | 43806062 | 43805912 | 17  | 18  | 0 | 18.21926517 | 2.83E-06    | BLVRA   | ENSG00000106605 |
| 7 | 44252468 | 44252862 | 44252631 | 25  | 34  | 1 | 16.78090213 | 1.09E-09    | YKT6    | ENSG00000106636 |
| 7 | 44549490 | 44549697 | 44549593 | 8   | 8   | 0 | 8.630178238 | 0.00235436  | NPC1L1  | ENSG00000015520 |
| 7 | 44550101 | 44550673 | 44550411 | 23  | 35  | 4 | 6.90414259  | 1.81E-07    | NPC1L1  | ENSG00000015520 |
| 7 | 44708254 | 44708529 | 44708414 | 14  | 15  | 1 | 7.671269544 | 0.000187863 |         | ENSG00000203476 |
| 7 | 44817246 | 44817428 | 44817337 | 8   | 8   | 4 | 1.726035648 | 0.150596    | PPIA    | ENSG00000196262 |
| 7 | 45039979 | 45040338 | 45040158 | 32  | 39  | 1 | 19.17817386 | 4.29E-11    | CCM2    | ENSG00000136280 |
| 7 | 45354004 | 45354259 | 45354149 | 11  | 12  | 5 | 2.077635502 | 0.0577144   | RAMP3   | ENSG00000122679 |
| 7 | 45489952 | 45490154 | 45490055 | 8   | 9   | 1 | 4.794543465 | 0.00708517  | ADCY1   | ENSG00000164742 |
| 7 | 45984170 | 45984553 | 45984348 | 15  | 22  | 4 | 4.410979988 | 0.000231863 | IGFBP3  | ENSG00000146674 |
| 7 | 47208327 | 47208646 | 47208486 | 12  | 17  | 3 | 4.315089119 | 0.00102271  |         | ENSG00000214754 |
| 7 | 48120288 | 48120563 | 48120413 | 9   | 11  | 0 | 11.50690432 | 0.000313206 | UPP1    | ENSG00000183696 |
| 7 | 48573490 | 48573814 | 48573652 | 18  | 23  | 4 | 4.602761727 | 0.000137072 |         | ENSG00000218305 |
| 7 | 49025016 | 49025342 | 49025179 | 36  | 38  | 0 | 37.39743903 | 4.09E-12    |         | ENSG00000218305 |
| 7 | 49811830 | 49812127 | 49811978 | 11  | 14  | 0 | 14.3836304  | 4.17E-05    | VWC2    | ENSG00000188730 |
| 7 | 51348712 | 51348891 | 51348859 | 9   | 9   | 0 | 9.589086931 | 0.00120187  | COBL    | ENSG00000106078 |
| 7 | 51360316 | 51360710 | 51360513 | 38  | 47  | 1 | 23.01380863 | 2.36E-13    | COBL    | ENSG00000106078 |

|   |          |          |          |     |     |     |             |             |         |                 |
|---|----------|----------|----------|-----|-----|-----|-------------|-------------|---------|-----------------|
| 7 | 52218996 | 52219205 | 52219100 | 9   | 9   | 0   | 9.589086931 | 0.00120187  |         | ENSG00000210739 |
| 7 | 52219258 | 52219545 | 52219401 | 28  | 30  | 1   | 14.86308474 | 1.43E-08    |         | ENSG00000210739 |
| 7 | 54804428 | 54804627 | 54804527 | 8   | 8   | 1   | 4.315089119 | 0.0127267   | SEC61G  | ENSG00000132432 |
| 7 | 55609607 | 55609909 | 55609756 | 14  | 17  | 0   | 17.26035648 | 5.54E-06    |         | ENSG00000154978 |
| 7 | 55809845 | 55810206 | 55809998 | 20  | 24  | 1   | 11.98635866 | 6.63E-07    |         | ENSG00000206729 |
| 7 | 56826890 | 56827071 | 56826916 | 9   | 9   | 0   | 9.589086931 | 0.00120187  |         | ENSG00000188639 |
| 7 | 61083018 | 61083199 | 61083124 | 8   | 8   | 2   | 2.876726079 | 0.0381137   |         |                 |
| 7 | 61083415 | 61083598 | 61083506 | 12  | 13  | 13  | 0.958908693 | 0.543805    |         |                 |
| 7 | 61255162 | 61255492 | 61255327 | 14  | 15  | 15  | 0.958908693 | 0.546868    |         |                 |
| 7 | 61268290 | 61268624 | 61268457 | 35  | 36  | 30  | 1.144503924 | 0.287619    |         |                 |
| 7 | 61285220 | 61285548 | 61285384 | 14  | 14  | 9   | 1.43836304  | 0.179537    |         |                 |
| 7 | 61425783 | 61425968 | 61425848 | 8   | 9   | 1   | 4.794543465 | 0.00708517  |         |                 |
| 7 | 61431884 | 61432205 | 61432044 | 10  | 10  | 11  | 0.878999635 | 0.622439    |         |                 |
| 7 | 61606234 | 61607135 | 61606786 | 201 | 310 | 329 | 0.903698799 | 0.900065    |         |                 |
| 7 | 61607655 | 61607987 | 61607821 | 16  | 17  | 13  | 1.232882605 | 0.274309    |         |                 |
| 7 | 61613096 | 61613328 | 61613245 | 11  | 12  | 6   | 1.78083043  | 0.0985525   |         | ENSG00000207443 |
| 7 | 61614571 | 61614899 | 61614735 | 14  | 15  | 14  | 1.022835939 | 0.473606    |         | ENSG00000207443 |
| 7 | 61623503 | 61623809 | 61623656 | 9   | 10  | 5   | 1.757999271 | 0.121253    |         | ENSG00000207443 |
| 7 | 61628205 | 61628483 | 61628329 | 8   | 8   | 11  | 0.71918152  | 0.777546    |         | ENSG00000207443 |
| 7 | 61632299 | 61632628 | 61632463 | 10  | 10  | 11  | 0.878999635 | 0.622439    |         | ENSG00000207443 |
| 7 | 62113509 | 62113707 | 62113591 | 9   | 9   | 4   | 1.917817386 | 0.103282    |         | ENSG00000207443 |
| 7 | 63736714 | 63736950 | 63736837 | 11  | 13  | 4   | 2.684944341 | 0.01921     | ZNF107  | ENSG00000196247 |
| 7 | 63737023 | 63737247 | 63737135 | 9   | 9   | 0   | 9.589086931 | 0.00120187  | ZNF107  | ENSG00000196247 |
| 7 | 63784453 | 63784675 | 63784564 | 10  | 11  | 4   | 2.301380863 | 0.0459276   | ZNF107  | ENSG00000196247 |
| 7 | 64843554 | 64843760 | 64843661 | 10  | 10  | 0   | 10.54799562 | 0.000613541 |         | ENSG00000203448 |
| 7 | 66447228 | 66447599 | 66447407 | 14  | 21  | 0   | 21.09599125 | 3.76E-07    | STAG3L4 | ENSG00000106610 |
| 7 | 68036031 | 68036416 | 68036177 | 10  | 17  | 1   | 8.630178238 | 5.44E-05    |         | ENSG00000211270 |
| 7 | 68883365 | 68883551 | 68883458 | 8   | 8   | 5   | 1.43836304  | 0.235762    | AUTS2   | ENSG00000158321 |
| 7 | 68885876 | 68886070 | 68885971 | 8   | 8   | 1   | 4.315089119 | 0.0127267   | AUTS2   | ENSG00000158321 |
| 7 | 69424059 | 69424303 | 69424181 | 11  | 11  | 0   | 11.50690432 | 0.000313206 |         |                 |
| 7 | 69939218 | 69939673 | 69939365 | 13  | 21  | 2   | 7.031997082 | 2.73E-05    | WBSCR17 | ENSG00000185274 |
| 7 | 69952276 | 69953021 | 69952665 | 61  | 96  | 3   | 23.25353581 | 9.26E-25    | WBSCR17 | ENSG00000185274 |
| 7 | 69959900 | 69960113 | 69960018 | 10  | 10  | 4   | 2.109599125 | 0.0694668   | WBSCR17 | ENSG00000185274 |
| 7 | 70591242 | 70591624 | 70591472 | 21  | 26  | 0   | 25.89053471 | 1.31E-08    |         | ENSG00000199940 |

|   |          |          |          |    |    |    |             |             |          |                 |
|---|----------|----------|----------|----|----|----|-------------|-------------|----------|-----------------|
| 7 | 71429323 | 71429546 | 71429406 | 10 | 11 | 3  | 2.876726079 | 0.0213797   | CALN1    | ENSG00000183166 |
| 7 | 71508285 | 71508606 | 71508442 | 14 | 18 | 1  | 9.109632584 | 2.91E-05    | CALN1    | ENSG00000183166 |
| 7 | 72586080 | 72586259 | 72586169 | 8  | 8  | 0  | 8.630178238 | 0.00235436  | BAZ1B    | ENSG00000009954 |
| 7 | 72767898 | 72768135 | 72768016 | 8  | 10 | 0  | 10.54799562 | 0.000613541 | STX1A    | ENSG00000106089 |
| 7 | 72787013 | 72787417 | 72787238 | 11 | 18 | 2  | 6.073088389 | 0.000157975 |          | ENSG00000209048 |
| 7 | 72874952 | 72875167 | 72875059 | 9  | 11 | 2  | 3.835634772 | 0.00800699  |          | ENSG00000212838 |
| 7 | 72883112 | 72883436 | 72883274 | 9  | 13 | 7  | 1.678090213 | 0.11195     | CLDN4    | ENSG00000189143 |
| 7 | 72890904 | 72891132 | 72891018 | 8  | 8  | 1  | 4.315089119 | 0.0127267   | WBSCR27  | ENSG00000165171 |
| 7 | 72907648 | 72908136 | 72907827 | 32 | 42 | 3  | 10.30826845 | 5.31E-10    | WBSCR28  | ENSG00000175877 |
| 7 | 73322191 | 73322370 | 73322280 | 8  | 8  | 4  | 1.726035648 | 0.150596    | RFC2     | ENSG00000049541 |
| 7 | 73364906 | 73365304 | 73365146 | 19 | 25 | 5  | 4.155271003 | 0.000149583 | CLIP2    | ENSG00000106665 |
| 7 | 73407508 | 73407695 | 73407567 | 8  | 8  | 1  | 4.315089119 | 0.0127267   | CLIP2    | ENSG00000106665 |
| 7 | 73578187 | 73578486 | 73578336 | 11 | 13 | 0  | 13.4247217  | 8.16E-05    | GTF2IRD1 | ENSG00000006704 |
| 7 | 73618903 | 73619282 | 73619105 | 10 | 17 | 1  | 8.630178238 | 5.44E-05    | GTF2I    | ENSG00000077809 |
| 7 | 73687856 | 73688215 | 73688023 | 10 | 15 | 6  | 2.191791298 | 0.0328001   | GTF2I    | ENSG00000077809 |
| 7 | 73728655 | 73728850 | 73728727 | 8  | 8  | 1  | 4.315089119 | 0.0127267   | GTF2I    | ENSG00000077809 |
| 7 | 74995311 | 74995686 | 74995490 | 10 | 17 | 6  | 2.465765211 | 0.014729    | PMS2L3   | ENSG00000127957 |
| 7 | 75195541 | 75195812 | 75195691 | 9  | 11 | 2  | 3.835634772 | 0.00800699  | HIP1     | ENSG00000127946 |
| 7 | 75196271 | 75196622 | 75196449 | 14 | 18 | 1  | 9.109632584 | 2.91E-05    | HIP1     | ENSG00000127946 |
| 7 | 75487492 | 75487672 | 75487537 | 9  | 9  | 1  | 4.794543465 | 0.00708517  | TMEM120A | ENSG00000189077 |
| 7 | 75758818 | 75759261 | 75758963 | 16 | 25 | 14 | 1.662108401 | 0.053254    |          | ENSG00000177679 |
| 7 | 75781615 | 75781840 | 75781727 | 10 | 12 | 10 | 1.133255728 | 0.37674     | HSPB1    | ENSG00000106211 |
| 7 | 76589417 | 76589709 | 76589563 | 8  | 10 | 1  | 5.273997812 | 0.00391723  |          | ENSG00000214439 |
| 7 | 76836209 | 76836408 | 76836307 | 9  | 10 | 4  | 2.109599125 | 0.0694668   | PION     | ENSG00000186088 |
| 7 | 77211252 | 77211622 | 77211444 | 24 | 29 | 0  | 28.76726079 | 1.74E-09    | RSBN1L   | ENSG00000187257 |
| 7 | 77381553 | 77381812 | 77381682 | 9  | 10 | 1  | 5.273997812 | 0.00391723  |          | ENSG00000222432 |
| 7 | 77552427 | 77552617 | 77552481 | 10 | 10 | 0  | 10.54799562 | 0.000613541 |          | ENSG00000211483 |
| 7 | 77977878 | 77978126 | 77978002 | 8  | 9  | 3  | 2.397271733 | 0.0539397   |          | ENSG00000209138 |
| 7 | 78201759 | 78202100 | 78201929 | 15 | 20 | 1  | 10.06854128 | 8.32E-06    |          | ENSG00000209138 |
| 7 | 78255085 | 78255562 | 78255322 | 63 | 84 | 1  | 40.75361945 | 6.43E-24    |          | ENSG00000209138 |
| 7 | 78703931 | 78704281 | 78704106 | 13 | 17 | 2  | 5.753452158 | 0.000281509 |          | ENSG00000212482 |
| 7 | 78784963 | 78785215 | 78785089 | 13 | 15 | 2  | 5.114179696 | 0.00088103  |          | ENSG00000212482 |
| 7 | 79600517 | 79600984 | 79600821 | 28 | 35 | 2  | 11.50690432 | 5.48E-09    | GNAI1    | ENSG00000127955 |
| 7 | 79606587 | 79606849 | 79606681 | 11 | 13 | 1  | 6.712360851 | 0.000640982 | GNAI1    | ENSG00000127955 |

|   |          |          |          |    |     |    |             |            |        |                 |
|---|----------|----------|----------|----|-----|----|-------------|------------|--------|-----------------|
| 7 | 79618238 | 79618654 | 79618473 | 36 | 48  | 3  | 11.74663149 | 1.36E-11   | GNAI1  | ENSG00000127955 |
| 7 | 79667033 | 79667250 | 79667141 | 8  | 8   | 3  | 2.157544559 | 0.0836802  |        | ENSG00000209287 |
| 7 | 79966681 | 79966950 | 79966808 | 9  | 10  | 5  | 1.757999271 | 0.121253   | GNAT3  | ENSG00000214415 |
| 7 | 80005194 | 80005913 | 80005550 | 96 | 130 | 5  | 20.93617313 | 5.87E-32   | GNAT3  | ENSG00000214415 |
| 7 | 80009703 | 80010117 | 80009859 | 16 | 24  | 8  | 2.663635258 | 0.00328036 | GNAT3  | ENSG00000214415 |
| 7 | 80079108 | 80079427 | 80079249 | 12 | 15  | 10 | 1.394776281 | 0.191426   | CD36   | ENSG00000135218 |
| 7 | 80110810 | 80111059 | 80110934 | 10 | 12  | 6  | 1.78083043  | 0.0985525  | CD36   | ENSG00000135218 |
| 7 | 80132848 | 80133310 | 80133027 | 40 | 51  | 0  | 49.86325204 | 6.54E-16   | CD36   | ENSG00000135218 |
| 7 | 80199932 | 80200196 | 80200021 | 8  | 11  | 5  | 1.917817386 | 0.0843804  | CD36   | ENSG00000135218 |
| 7 | 80202740 | 80202987 | 80202863 | 13 | 16  | 0  | 16.30144778 | 1.09E-05   | CD36   | ENSG00000135218 |
| 7 | 80240983 | 80241273 | 80241132 | 10 | 12  | 2  | 4.155271003 | 0.0046638  | CD36   | ENSG00000135218 |
| 7 | 80241318 | 80241523 | 80241420 | 8  | 9   | 4  | 1.917817386 | 0.103282   | CD36   | ENSG00000135218 |
| 7 | 80248863 | 80249066 | 80248958 | 8  | 10  | 5  | 1.757999271 | 0.121253   | SEMA3C | ENSG00000075223 |
| 7 | 80258752 | 80258954 | 80258853 | 8  | 10  | 2  | 3.515998541 | 0.0136204  | SEMA3C | ENSG00000075223 |
| 7 | 80350672 | 80351102 | 80350912 | 12 | 22  | 8  | 2.450544438 | 0.0073921  | SEMA3C | ENSG00000075223 |
| 7 | 80363931 | 80364239 | 80364084 | 8  | 10  | 3  | 2.636998906 | 0.034203   | SEMA3C | ENSG00000075223 |
| 7 | 80378604 | 80379019 | 80378840 | 21 | 29  | 3  | 7.191815198 | 1.23E-06   | SEMA3C | ENSG00000075223 |
| 7 | 80389569 | 80389880 | 80389702 | 10 | 13  | 6  | 1.917817386 | 0.0693353  | SEMA3C | ENSG00000075223 |
| 7 | 80407847 | 80408083 | 80407955 | 11 | 12  | 8  | 1.385090334 | 0.219216   | SEMA3C | ENSG00000075223 |
| 7 | 80408740 | 80408964 | 80408903 | 10 | 10  | 4  | 2.109599125 | 0.0694668  | SEMA3C | ENSG00000075223 |
| 7 | 80409403 | 80410316 | 80409660 | 40 | 72  | 13 | 5.0000239   | 4.74E-11   | SEMA3C | ENSG00000075223 |
| 7 | 80540886 | 80541161 | 80541023 | 11 | 13  | 5  | 2.237453617 | 0.038866   | SEMA3C | ENSG00000075223 |
| 7 | 80600586 | 80601063 | 80600892 | 11 | 21  | 1  | 10.54799562 | 4.43E-06   |        | ENSG00000209303 |
| 7 | 80626685 | 80626933 | 80626809 | 14 | 15  | 2  | 5.114179696 | 0.00088103 |        | ENSG00000209303 |
| 7 | 80751921 | 80752100 | 80752010 | 8  | 8   | 0  | 8.630178238 | 0.00235436 |        | ENSG00000209303 |
| 7 | 80967101 | 80967280 | 80967148 | 8  | 8   | 1  | 4.315089119 | 0.0127267  |        | ENSG00000209220 |
| 7 | 81062217 | 81062403 | 81062281 | 8  | 8   | 6  | 1.232882605 | 0.333038   | HGF    | ENSG00000019991 |
| 7 | 81071457 | 81071670 | 81071563 | 8  | 8   | 1  | 4.315089119 | 0.0127267  | HGF    | ENSG00000019991 |
| 7 | 81090194 | 81091122 | 81090712 | 75 | 129 | 3  | 31.16453252 | 5.03E-34   | HGF    | ENSG00000019991 |
| 7 | 81152318 | 81152550 | 81152434 | 10 | 11  | 3  | 2.876726079 | 0.0213797  | HGF    | ENSG00000019991 |
| 7 | 81183349 | 81183561 | 81183455 | 8  | 8   | 2  | 2.876726079 | 0.0381137  | HGF    | ENSG00000019991 |
| 7 | 81599690 | 81599923 | 81599832 | 10 | 11  | 2  | 3.835634772 | 0.00800699 |        | ENSG00000221262 |
| 7 | 82039562 | 82039767 | 82039664 | 10 | 10  | 3  | 2.636998906 | 0.034203   |        | ENSG00000213530 |
| 7 | 82167043 | 82167255 | 82167149 | 12 | 13  | 2  | 4.474907234 | 0.00269459 |        | ENSG00000213530 |

|   |          |          |          |    |    |    |             |             |           |                 |
|---|----------|----------|----------|----|----|----|-------------|-------------|-----------|-----------------|
| 7 | 82913706 | 82913973 | 82913813 | 8  | 8  | 3  | 2.157544559 | 0.0836802   | SEMA3E    | ENSG00000170381 |
| 7 | 82935579 | 82935859 | 82935738 | 10 | 14 | 4  | 2.876726079 | 0.01219     | SEMA3E    | ENSG00000170381 |
| 7 | 83079741 | 83080167 | 83079954 | 29 | 43 | 3  | 10.54799562 | 2.89E-10    | SEMA3E    | ENSG00000170381 |
| 7 | 83111152 | 83111394 | 83111215 | 10 | 13 | 2  | 4.474907234 | 0.00269459  | SEMA3E    | ENSG00000170381 |
| 7 | 83144445 | 83144883 | 83144624 | 9  | 18 | 1  | 9.109632584 | 2.91E-05    | SEMA3E    | ENSG00000170381 |
| 7 | 83175943 | 83176517 | 83176304 | 37 | 57 | 4  | 11.12334084 | 3.98E-13    | SEMA3E    | ENSG00000170381 |
| 7 | 83428500 | 83428745 | 83428622 | 9  | 10 | 2  | 3.515998541 | 0.0136204   |           | ENSG00000222994 |
| 7 | 83674208 | 83674634 | 83674360 | 15 | 24 | 3  | 5.993179332 | 2.17E-05    | SEMA3A    | ENSG00000075213 |
| 7 | 84056328 | 84056622 | 84056468 | 13 | 15 | 2  | 5.114179696 | 0.00088103  |           | ENSG00000146736 |
| 7 | 84508994 | 84509189 | 84509109 | 8  | 9  | 5  | 1.598181155 | 0.170911    |           | ENSG00000197029 |
| 7 | 85162993 | 85163179 | 85163033 | 9  | 9  | 2  | 3.19636231  | 0.0229249   |           |                 |
| 7 | 86282343 | 86282596 | 86282449 | 8  | 10 | 11 | 0.878999635 | 0.622439    | KIAA1324L | ENSG00000164659 |
| 7 | 86558899 | 86559097 | 86558998 | 10 | 11 | 10 | 1.046082211 | 0.455063    |           | ENSG00000214406 |
| 7 | 86619680 | 86619895 | 86619775 | 10 | 10 | 1  | 5.273997812 | 0.00391723  | DMTF1     | ENSG00000135164 |
| 7 | 86620694 | 86620919 | 86620806 | 8  | 10 | 4  | 2.109599125 | 0.0694668   | DMTF1     | ENSG00000135164 |
| 7 | 86686170 | 86686460 | 86686322 | 9  | 11 | 6  | 1.643843474 | 0.137712    |           | ENSG00000200397 |
| 7 | 86686925 | 86687244 | 86687077 | 10 | 14 | 5  | 2.397271733 | 0.0258078   | C7orf23   | ENSG00000135185 |
| 7 | 86687903 | 86688105 | 86688004 | 8  | 9  | 9  | 0.958908693 | 0.536911    | C7orf23   | ENSG00000135185 |
| 7 | 86688118 | 86688371 | 86688244 | 10 | 13 | 5  | 2.237453617 | 0.038866    | C7orf23   | ENSG00000135185 |
| 7 | 86779603 | 86779799 | 86779719 | 8  | 8  | 5  | 1.43836304  | 0.235762    | TP53AP1   | ENSG00000182165 |
| 7 | 86784113 | 86784692 | 86784281 | 13 | 27 | 7  | 3.356180426 | 0.000396559 | TP53AP1   | ENSG00000182165 |
| 7 | 86790287 | 86790665 | 86790457 | 15 | 20 | 5  | 3.356180426 | 0.0017534   | TP53AP1   | ENSG00000182165 |
| 7 | 86798182 | 86798634 | 86798356 | 23 | 34 | 0  | 33.56180426 | 6.02E-11    | TP53AP1   | ENSG00000182165 |
| 7 | 86811693 | 86812201 | 86811920 | 41 | 54 | 7  | 6.592497265 | 3.30E-10    | TP53AP1   | ENSG00000182165 |
| 7 | 86812234 | 86812750 | 86812420 | 18 | 33 | 10 | 2.963899597 | 0.000322893 | TP53AP1   | ENSG00000182165 |
| 7 | 87084889 | 87085068 | 87084996 | 8  | 8  | 3  | 2.157544559 | 0.0836802   |           | ENSG00000209318 |
| 7 | 87169558 | 87169885 | 87169721 | 16 | 19 | 6  | 2.739739123 | 0.00632909  | ABCB1     | ENSG00000085563 |
| 7 | 87265151 | 87265456 | 87265291 | 8  | 11 | 3  | 2.876726079 | 0.0213797   | DBF4      | ENSG00000006634 |
| 7 | 87344379 | 87344643 | 87344533 | 10 | 13 | 1  | 6.712360851 | 0.000640982 | SLC25A40  | ENSG00000075303 |
| 7 | 87687731 | 87687944 | 87687812 | 8  | 9  | 4  | 1.917817386 | 0.103282    | SRI       | ENSG00000075142 |
| 7 | 87694213 | 87694604 | 87694426 | 8  | 15 | 9  | 1.534253909 | 0.136498    | SRI       | ENSG00000075142 |
| 7 | 87759074 | 87759421 | 87759247 | 20 | 26 | 2  | 8.630178238 | 1.37E-06    | STEAP4    | ENSG00000127954 |
| 7 | 88497300 | 88497507 | 88497403 | 9  | 9  | 1  | 4.794543465 | 0.00708517  |           | ENSG00000209282 |
| 7 | 89712215 | 89712528 | 89712357 | 11 | 14 | 5  | 2.397271733 | 0.0258078   | C7orf63   | ENSG00000105792 |

|   |          |          |          |    |     |    |             |             |         |                 |
|---|----------|----------|----------|----|-----|----|-------------|-------------|---------|-----------------|
| 7 | 89813662 | 89814044 | 89813865 | 8  | 14  | 9  | 1.43836304  | 0.179537    | GTPBP10 | ENSG00000105793 |
| 7 | 90490286 | 90490580 | 90490407 | 8  | 13  | 1  | 6.712360851 | 0.000640982 |         | ENSG00000220307 |
| 7 | 90710524 | 90710844 | 90710677 | 8  | 12  | 4  | 2.493162602 | 0.0299057   | FZD1    | ENSG00000157240 |
| 7 | 90731056 | 90731735 | 90731580 | 12 | 27  | 11 | 2.237453617 | 0.00685906  | FZD1    | ENSG00000157240 |
| 7 | 90732635 | 90732856 | 90732725 | 9  | 10  | 2  | 3.515998541 | 0.0136204   | FZD1    | ENSG00000157240 |
| 7 | 90782274 | 90782524 | 90782399 | 9  | 10  | 1  | 5.273997812 | 0.00391723  | FZD1    | ENSG00000157240 |
| 7 | 91072825 | 91073635 | 91073281 | 26 | 48  | 0  | 46.98652596 | 4.91E-15    | MTERF   | ENSG00000127989 |
| 7 | 91248866 | 91249087 | 91248959 | 8  | 9   | 0  | 9.589086931 | 0.00120187  | MTERF   | ENSG00000127989 |
| 7 | 91347685 | 91348238 | 91348050 | 14 | 28  | 14 | 1.85389014  | 0.0220495   | MTERF   | ENSG00000127989 |
| 7 | 91348342 | 91348555 | 91348456 | 11 | 13  | 2  | 4.474907234 | 0.00269459  | MTERF   | ENSG00000127989 |
| 7 | 91515329 | 91516034 | 91515729 | 64 | 133 | 3  | 32.12344122 | 3.73E-35    | AKAP9   | ENSG00000127914 |
| 7 | 91524599 | 91524849 | 91524724 | 8  | 10  | 11 | 0.878999635 | 0.622439    | AKAP9   | ENSG00000127914 |
| 7 | 91543571 | 91544101 | 91543922 | 18 | 30  | 8  | 3.302907721 | 0.000239229 | AKAP9   | ENSG00000127914 |
| 7 | 91601707 | 91602095 | 91601916 | 13 | 20  | 7  | 2.517135319 | 0.00849957  | CYP51A1 | ENSG00000001630 |
| 7 | 91631905 | 91632148 | 91632026 | 9  | 10  | 7  | 1.318499453 | 0.269217    |         | ENSG00000188693 |
| 7 | 91633411 | 91633623 | 91633465 | 8  | 10  | 0  | 10.54799562 | 0.000613541 |         | ENSG00000188693 |
| 7 | 91712470 | 91713423 | 91713099 | 12 | 40  | 22 | 1.709358975 | 0.0172316   | KRIT1   | ENSG00000001631 |
| 7 | 91891368 | 91891912 | 91891491 | 8  | 20  | 1  | 10.06854128 | 8.32E-06    | GATAD1  | ENSG00000157259 |
| 7 | 91914435 | 91914806 | 91914597 | 10 | 16  | 6  | 2.328778255 | 0.0221113   | GATAD1  | ENSG00000157259 |
| 7 | 91994998 | 91995318 | 91995176 | 8  | 12  | 4  | 2.493162602 | 0.0299057   | PEX1    | ENSG00000127980 |
| 7 | 91995823 | 91996135 | 91995968 | 13 | 18  | 6  | 2.602752167 | 0.00970422  | C7orf64 | ENSG00000127993 |
| 7 | 92056942 | 92057323 | 92057234 | 9  | 15  | 5  | 2.557089848 | 0.0169197   | C7orf64 | ENSG00000127993 |
| 7 | 92057422 | 92057855 | 92057710 | 10 | 17  | 11 | 1.43836304  | 0.15834     | C7orf64 | ENSG00000127993 |
| 7 | 92230923 | 92231110 | 92231022 | 10 | 10  | 2  | 3.515998541 | 0.0136204   |         | ENSG00000206763 |
| 7 | 92401384 | 92401666 | 92401531 | 10 | 12  | 6  | 1.78083043  | 0.0985525   |         | ENSG00000222576 |
| 7 | 92455356 | 92455593 | 92455474 | 8  | 9   | 4  | 1.917817386 | 0.103282    |         | ENSG00000222576 |
| 7 | 92496317 | 92496547 | 92496432 | 8  | 10  | 1  | 5.273997812 | 0.00391723  |         | ENSG00000222576 |
| 7 | 93029410 | 93029803 | 93029624 | 13 | 22  | 2  | 7.351633313 | 1.51E-05    | CALCR   | ENSG00000004948 |
| 7 | 93042622 | 93042874 | 93042736 | 9  | 10  | 1  | 5.273997812 | 0.00391723  | CALCR   | ENSG00000004948 |
| 7 | 93267129 | 93267333 | 93267231 | 8  | 8   | 2  | 2.876726079 | 0.0381137   |         | ENSG00000213483 |
| 7 | 93578238 | 93578623 | 93578417 | 37 | 47  | 2  | 15.34253909 | 2.95E-12    | BET1    | ENSG00000105829 |
| 7 | 94124371 | 94124683 | 94124519 | 8  | 12  | 10 | 1.133255728 | 0.37674     | PEG10   | ENSG00000217473 |
| 7 | 94124775 | 94124975 | 94124875 | 8  | 9   | 7  | 1.198635866 | 0.346278    | PEG10   | ENSG00000217473 |
| 7 | 94164586 | 94164863 | 94164710 | 10 | 12  | 7  | 1.558226626 | 0.152813    | PEG10   | ENSG00000217473 |



|   |          |          |          |    |     |    |             |             |          |                 |
|---|----------|----------|----------|----|-----|----|-------------|-------------|----------|-----------------|
| 7 | 94288599 | 94288791 | 94288695 | 8  | 8   | 1  | 4.315089119 | 0.0127267   |          | ENSG00000219807 |
| 7 | 94301700 | 94302172 | 94301873 | 9  | 15  | 5  | 2.557089848 | 0.0169197   |          | ENSG00000219807 |
| 7 | 94821142 | 94821326 | 94821234 | 11 | 11  | 0  | 11.50690432 | 0.000313206 | PON1     | ENSG00000005421 |
| 7 | 94842740 | 94843670 | 94843291 | 37 | 75  | 4  | 14.57541213 | 6.15E-18    | PON3     | ENSG00000105852 |
| 7 | 94994742 | 94994999 | 94994859 | 9  | 11  | 3  | 2.876726079 | 0.0213797   | ASB4     | ENSG00000005981 |
| 7 | 95052475 | 95052725 | 95052600 | 8  | 9   | 3  | 2.397271733 | 0.0539397   | PDK4     | ENSG00000004799 |
| 7 | 95108317 | 95108712 | 95108483 | 8  | 14  | 2  | 4.794543465 | 0.00154571  | PDK4     | ENSG00000004799 |
| 7 | 95158715 | 95159127 | 95158955 | 12 | 20  | 1  | 10.06854128 | 8.32E-06    | DYNC1I1  | ENSG00000158560 |
| 7 | 95543676 | 95543867 | 95543698 | 8  | 10  | 4  | 2.109599125 | 0.0694668   |          | ENSG00000208025 |
| 7 | 95645855 | 95646134 | 95645972 | 14 | 15  | 2  | 5.114179696 | 0.00088103  |          | ENSG00000208025 |
| 7 | 95679814 | 95680146 | 95679979 | 11 | 15  | 7  | 1.917817386 | 0.0572317   |          | ENSG00000208025 |
| 7 | 95691952 | 95692131 | 95692041 | 8  | 8   | 3  | 2.157544559 | 0.0836802   |          | ENSG00000208025 |
| 7 | 95770402 | 95770775 | 95770581 | 13 | 20  | 8  | 2.237453617 | 0.0160557   |          | ENSG00000220987 |
| 7 | 95788448 | 95788835 | 95788592 | 9  | 14  | 2  | 4.794543465 | 0.00154571  | SLC25A13 | ENSG00000004864 |
| 7 | 95797279 | 95797834 | 95797635 | 71 | 102 | 2  | 32.92253179 | 1.12E-27    |          | ENSG00000207045 |
| 7 | 95798468 | 95798764 | 95798612 | 12 | 14  | 1  | 7.191815198 | 0.00034761  |          | ENSG00000207045 |
| 7 | 95882268 | 95882487 | 95882345 | 10 | 11  | 3  | 2.876726079 | 0.0213797   |          | ENSG00000197851 |
| 7 | 95963112 | 95963414 | 95963263 | 14 | 17  | 4  | 3.452071295 | 0.00292757  |          | ENSG00000197851 |
| 7 | 96015852 | 96016136 | 96015994 | 12 | 14  | 8  | 1.598181155 | 0.124586    |          | ENSG00000197851 |
| 7 | 96176875 | 96177215 | 96177045 | 9  | 14  | 7  | 1.797953799 | 0.0806593   | SHFM1    | ENSG00000127922 |
| 7 | 96245579 | 96245785 | 96245668 | 8  | 8   | 4  | 1.726035648 | 0.150596    | SHFM1    | ENSG00000127922 |
| 7 | 96417076 | 96417451 | 96417338 | 9  | 17  | 3  | 4.315089119 | 0.00102271  |          | ENSG00000222415 |
| 7 | 96492102 | 96492298 | 96492207 | 8  | 8   | 1  | 4.315089119 | 0.0127267   | DLX5     | ENSG00000105880 |
| 7 | 96635008 | 96635549 | 96635201 | 27 | 44  | 7  | 5.393861398 | 7.71E-08    |          | ENSG00000208926 |
| 7 | 96639369 | 96639589 | 96639479 | 8  | 8   | 5  | 1.43836304  | 0.235762    |          | ENSG00000208926 |
| 7 | 96885720 | 96885929 | 96885828 | 8  | 8   | 0  | 8.630178238 | 0.00235436  |          | ENSG00000221192 |
| 7 | 97439558 | 97439899 | 97439720 | 9  | 13  | 2  | 4.474907234 | 0.00269459  |          | ENSG00000183444 |
| 7 | 97553518 | 97553977 | 97553739 | 14 | 22  | 3  | 5.513724985 | 6.69E-05    | LMTK2    | ENSG00000164715 |
| 7 | 97561943 | 97562158 | 97562050 | 10 | 11  | 0  | 11.50690432 | 0.000313206 | LMTK2    | ENSG00000164715 |
| 7 | 97633861 | 97634131 | 97633996 | 9  | 11  | 0  | 11.50690432 | 0.000313206 |          | ENSG00000208904 |
| 7 | 97686453 | 97686667 | 97686556 | 9  | 11  | 0  | 11.50690432 | 0.000313206 | BHLHB8   | ENSG00000180535 |
| 7 | 97718840 | 97719022 | 97718968 | 8  | 8   | 1  | 4.315089119 | 0.0127267   |          | ENSG00000205356 |
| 7 | 97762175 | 97762399 | 97762306 | 8  | 9   | 5  | 1.598181155 | 0.170911    | BRI3     | ENSG00000164713 |
| 7 | 97821476 | 97822073 | 97821880 | 17 | 33  | 14 | 2.173526371 | 0.00425345  |          | ENSG00000205871 |

|   |          |          |          |    |     |   |             |             |          |                 |
|---|----------|----------|----------|----|-----|---|-------------|-------------|----------|-----------------|
| 7 | 97888348 | 97888545 | 97888446 | 8  | 9   | 4 | 1.917817386 | 0.103282    | BAIAP2L1 | ENSG00000006453 |
| 7 | 97900631 | 97900849 | 97900703 | 8  | 10  | 1 | 5.273997812 | 0.00391723  |          | ENSG00000213455 |
| 7 | 97992869 | 97993205 | 97993037 | 10 | 12  | 7 | 1.558226626 | 0.152813    |          | ENSG00000213455 |
| 7 | 98200500 | 98200723 | 98200611 | 11 | 12  | 6 | 1.78083043  | 0.0985525   |          | ENSG00000207204 |
| 7 | 98272468 | 98272757 | 98272612 | 8  | 9   | 9 | 0.958908693 | 0.536911    | TMEM130  | ENSG00000166448 |
| 7 | 98315169 | 98315443 | 98315344 | 11 | 14  | 4 | 2.876726079 | 0.01219     | TRRAP    | ENSG00000196367 |
| 7 | 98534660 | 98534902 | 98534786 | 13 | 15  | 6 | 2.191791298 | 0.0328001   | SMURF1   | ENSG00000198742 |
| 7 | 98547609 | 98547830 | 98547719 | 8  | 9   | 1 | 4.794543465 | 0.00708517  | SMURF1   | ENSG00000198742 |
| 7 | 98560941 | 98561144 | 98560988 | 8  | 9   | 1 | 4.794543465 | 0.00708517  | SMURF1   | ENSG00000198742 |
| 7 | 98592228 | 98592500 | 98592364 | 10 | 12  | 1 | 6.232906505 | 0.00117736  | SMURF1   | ENSG00000198742 |
| 7 | 98632746 | 98632930 | 98632838 | 8  | 8   | 6 | 1.232882605 | 0.333038    |          | ENSG00000185467 |
| 7 | 98844346 | 98844712 | 98844538 | 8  | 14  | 6 | 2.054804342 | 0.0480281   | BUD31    | ENSG00000106245 |
| 7 | 98874825 | 98875054 | 98874939 | 8  | 9   | 3 | 2.397271733 | 0.0539397   | CPSF4    | ENSG00000160917 |
| 7 | 98875791 | 98876225 | 98876070 | 14 | 22  | 1 | 11.02744997 | 2.36E-06    | CPSF4    | ENSG00000160917 |
| 7 | 98901528 | 98901987 | 98901751 | 11 | 20  | 5 | 3.356180426 | 0.0017534   | ATP5J2   | ENSG00000160916 |
| 7 | 98908322 | 98908517 | 98908445 | 8  | 8   | 2 | 2.876726079 | 0.0381137   | ZNF789   | ENSG00000198556 |
| 7 | 98935036 | 98935332 | 98935199 | 8  | 13  | 4 | 2.684944341 | 0.01921     | ZNF394   | ENSG00000160908 |
| 7 | 98940606 | 98941055 | 98940857 | 8  | 17  | 6 | 2.465765211 | 0.014729    | ZKSCAN5  | ENSG00000196652 |
| 7 | 98961312 | 98961521 | 98961413 | 8  | 10  | 8 | 1.171999514 | 0.35773     | ZKSCAN5  | ENSG00000196652 |
| 7 | 98963731 | 98963919 | 98963817 | 8  | 9   | 1 | 4.794543465 | 0.00708517  |          | ENSG00000221909 |
| 7 | 98996937 | 98997462 | 98997103 | 27 | 36  | 3 | 8.869905411 | 1.98E-08    | ZNF655   | ENSG00000197343 |
| 7 | 98998197 | 98998472 | 98998334 | 9  | 12  | 1 | 6.232906505 | 0.00117736  | ZNF655   | ENSG00000197343 |
| 7 | 98998507 | 98998729 | 98998573 | 9  | 10  | 2 | 3.515998541 | 0.0136204   | ZNF655   | ENSG00000197343 |
| 7 | 99173203 | 99173713 | 99173472 | 88 | 110 | 6 | 15.20555213 | 1.76E-25    | CYP3A7   | ENSG00000160870 |
| 7 | 99222247 | 99222680 | 99222414 | 12 | 22  | 2 | 7.351633313 | 1.51E-05    | CYP3A4   | ENSG00000160868 |
| 7 | 99253017 | 99253345 | 99253181 | 16 | 18  | 5 | 3.036544195 | 0.0044641   | CYP3A43  | ENSG0000021461  |
| 7 | 99429776 | 99430094 | 99429932 | 20 | 23  | 3 | 5.753452158 | 3.82E-05    |          | ENSG00000214313 |
| 7 | 99480316 | 99480653 | 99480445 | 16 | 20  | 4 | 4.027416511 | 0.000652226 | ZSCAN21  | ENSG00000166529 |
| 7 | 99517221 | 99517506 | 99517366 | 12 | 15  | 6 | 2.191791298 | 0.0328001   | ZNF3     | ENSG00000166526 |
| 7 | 99535981 | 99536332 | 99536156 | 11 | 17  | 3 | 4.315089119 | 0.00102271  | MCM7     | ENSG00000166508 |
| 7 | 99555166 | 99555430 | 99555317 | 8  | 9   | 5 | 1.598181155 | 0.170911    | CNPY4    | ENSG00000166997 |
| 7 | 99584103 | 99584316 | 99584209 | 8  | 11  | 0 | 11.50690432 | 0.000313206 | C7orf59  | ENSG00000188186 |
| 7 | 99584539 | 99584826 | 99584682 | 9  | 12  | 8 | 1.385090334 | 0.219216    | C7orf59  | ENSG00000188186 |
| 7 | 99682916 | 99683187 | 99683053 | 9  | 11  | 0 | 11.50690432 | 0.000313206 |          | ENSG00000160844 |

|   |           |           |           |    |     |    |             |             |          |                 |
|---|-----------|-----------|-----------|----|-----|----|-------------|-------------|----------|-----------------|
| 7 | 99863910  | 99864167  | 99864049  | 10 | 13  | 9  | 1.34247217  | 0.232231    | ZCWPW1   | ENSG00000078487 |
| 7 | 99864389  | 99864729  | 99864558  | 10 | 15  | 12 | 1.180195315 | 0.324974    | ZCWPW1   | ENSG00000078487 |
| 7 | 99864773  | 99865205  | 99864925  | 11 | 21  | 14 | 1.406399416 | 0.148881    | MEPCE    | ENSG00000146834 |
| 7 | 99871885  | 99872064  | 99871991  | 8  | 9   | 4  | 1.917817386 | 0.103282    | C7orf47  | ENSG00000160813 |
| 7 | 99872067  | 99872297  | 99872189  | 8  | 11  | 6  | 1.643843474 | 0.137712    | C7orf47  | ENSG00000160813 |
| 7 | 99886360  | 99886680  | 99886533  | 9  | 14  | 7  | 1.797953799 | 0.0806593   | C7orf61  | ENSG00000185955 |
| 7 | 99980399  | 99980746  | 99980572  | 8  | 12  | 3  | 3.116453252 | 0.0131971   | AGFG2    | ENSG00000106351 |
| 7 | 100004751 | 100004982 | 100004866 | 8  | 10  | 3  | 2.636998906 | 0.034203    |          | ENSG00000184414 |
| 7 | 100021611 | 100021796 | 100021703 | 9  | 9   | 3  | 2.397271733 | 0.0539397   | LRCH4    | ENSG00000077454 |
| 7 | 100109079 | 100109295 | 100109187 | 9  | 9   | 7  | 1.198635866 | 0.346278    | GNB2     | ENSG00000172354 |
| 7 | 100111237 | 100111622 | 100111387 | 11 | 17  | 2  | 5.753452158 | 0.000281509 | GNB2     | ENSG00000172354 |
| 7 | 100160816 | 100161074 | 100160945 | 8  | 9   | 7  | 1.198635866 | 0.346278    | EPO      | ENSG00000130427 |
| 7 | 100205407 | 100205699 | 100205553 | 11 | 14  | 5  | 2.397271733 | 0.0258078   | ZAN      | ENSG00000146839 |
| 7 | 100237362 | 100238125 | 100237623 | 63 | 132 | 14 | 8.502323745 | 9.84E-25    | EPHB4    | ENSG00000196411 |
| 7 | 100249731 | 100250250 | 100250084 | 13 | 23  | 0  | 23.01380863 | 9.81E-08    | EPHB4    | ENSG00000196411 |
| 7 | 100287542 | 100287965 | 100287799 | 10 | 16  | 5  | 2.716907964 | 0.0109645   | SLC12A9  | ENSG00000146828 |
| 7 | 100303737 | 100304025 | 100303909 | 10 | 14  | 5  | 2.397271733 | 0.0258078   | TRIP6    | ENSG00000087077 |
| 7 | 100310458 | 100310743 | 100310600 | 12 | 15  | 8  | 1.704726565 | 0.0916153   |          | ENSG00000087087 |
| 7 | 100325394 | 100325606 | 100325478 | 10 | 10  | 4  | 2.109599125 | 0.0694668   | UFSP1    | ENSG00000176125 |
| 7 | 100325775 | 100326226 | 100325953 | 10 | 18  | 4  | 3.643853034 | 0.00178791  | UFSP1    | ENSG00000176125 |
| 7 | 100329943 | 100330177 | 100330048 | 9  | 11  | 10 | 1.046082211 | 0.455063    | ACHE     | ENSG00000087085 |
| 7 | 100331717 | 100331940 | 100331855 | 8  | 9   | 2  | 3.19636231  | 0.0229249   | ACHE     | ENSG00000087085 |
| 7 | 100365094 | 100365445 | 100365269 | 11 | 17  | 3  | 4.315089119 | 0.00102271  | MUC3B    | ENSG00000169894 |
| 7 | 100388554 | 100388927 | 100388753 | 10 | 16  | 11 | 1.358453982 | 0.20248     | MUC3B    | ENSG00000169894 |
| 7 | 100396068 | 100396264 | 100396166 | 9  | 10  | 5  | 1.757999271 | 0.121253    | MUC3B    | ENSG00000169894 |
| 7 | 100507475 | 100507901 | 100507722 | 11 | 20  | 5  | 3.356180426 | 0.0017534   | TRIM56   | ENSG00000169871 |
| 7 | 100524978 | 100525163 | 100525076 | 10 | 10  | 2  | 3.515998541 | 0.0136204   | TRIM56   | ENSG00000169871 |
| 7 | 100530225 | 100530517 | 100530371 | 15 | 18  | 0  | 18.21926517 | 2.83E-06    | TRIM56   | ENSG00000169871 |
| 7 | 100556712 | 100557143 | 100556962 | 11 | 21  | 2  | 7.031997082 | 2.73E-05    | SERPINE1 | ENSG00000106366 |
| 7 | 100568442 | 100568801 | 100568666 | 17 | 22  | 9  | 2.205489994 | 0.0136443   | SERPINE1 | ENSG00000106366 |
| 7 | 100570899 | 100571297 | 100571103 | 9  | 17  | 4  | 3.452071295 | 0.00292757  | AP1S1    | ENSG00000106367 |
| 7 | 100574076 | 100574360 | 100574218 | 12 | 14  | 3  | 3.595907599 | 0.00486913  | AP1S1    | ENSG00000106367 |
| 7 | 100585166 | 100585460 | 100585307 | 10 | 13  | 3  | 3.356180426 | 0.00805599  | AP1S1    | ENSG00000106367 |
| 7 | 100587373 | 100587552 | 100587389 | 8  | 8   | 3  | 2.157544559 | 0.0836802   | AP1S1    | ENSG00000106367 |

|   |           |           |           |    |    |    |             |            |         |                 |
|---|-----------|-----------|-----------|----|----|----|-------------|------------|---------|-----------------|
| 7 | 100604087 | 100604324 | 100604244 | 9  | 11 | 3  | 2.876726079 | 0.0213797  | C7orf52 | ENSG00000167011 |
| 7 | 100647962 | 100648230 | 100648096 | 14 | 16 | 3  | 4.075361945 | 0.00173346 |         | ENSG00000219716 |
| 7 | 100682167 | 100682498 | 100682332 | 8  | 13 | 9  | 1.34247217  | 0.232231   | FIS1    | ENSG00000214253 |
| 7 | 100793993 | 100794291 | 100794142 | 9  | 13 | 6  | 1.917817386 | 0.0693353  | EMID2   | ENSG00000160963 |
| 7 | 100804009 | 100804255 | 100804113 | 10 | 13 | 4  | 2.684944341 | 0.01921    | EMID2   | ENSG00000160963 |
| 7 | 100817038 | 100817254 | 100817146 | 9  | 10 | 3  | 2.636998906 | 0.034203   | EMID2   | ENSG00000160963 |
| 7 | 100918977 | 100919242 | 100919109 | 9  | 11 | 5  | 1.917817386 | 0.0843804  |         | ENSG00000214248 |
| 7 | 100937750 | 100938156 | 100937998 | 10 | 18 | 4  | 3.643853034 | 0.00178791 |         | ENSG00000214248 |
| 7 | 101013489 | 101013761 | 101013665 | 10 | 13 | 0  | 13.4247217  | 8.16E-05   |         | ENSG00000106436 |
| 7 | 101038854 | 101039126 | 101038955 | 12 | 15 | 10 | 1.394776281 | 0.191426   |         | ENSG00000106436 |
| 7 | 101065631 | 101065871 | 101065751 | 11 | 11 | 1  | 5.753452158 | 0.00215302 |         | ENSG00000214247 |
| 7 | 101243861 | 101244050 | 101243955 | 8  | 8  | 1  | 4.315089119 | 0.0127267  | CUX1    | ENSG00000160967 |
| 7 | 101300671 | 101300972 | 101300821 | 11 | 13 | 3  | 3.356180426 | 0.00805599 | CUX1    | ENSG00000160967 |
| 7 | 101312640 | 101312945 | 101312774 | 9  | 13 | 3  | 3.356180426 | 0.00805599 | CUX1    | ENSG00000160967 |
| 7 | 101312979 | 101313535 | 101313251 | 11 | 27 | 15 | 1.678090213 | 0.0444653  | CUX1    | ENSG00000160967 |
| 7 | 101333010 | 101333189 | 101333099 | 8  | 8  | 0  | 8.630178238 | 0.00235436 | CUX1    | ENSG00000160967 |
| 7 | 101356613 | 101356802 | 101356706 | 9  | 9  | 0  | 9.589086931 | 0.00120187 | CUX1    | ENSG00000160967 |
| 7 | 101443826 | 101444107 | 101443969 | 9  | 11 | 5  | 1.917817386 | 0.0843804  |         | ENSG00000203383 |
| 7 | 101626318 | 101626539 | 101626427 | 10 | 12 | 2  | 4.155271003 | 0.0046638  |         | ENSG00000208808 |
| 7 | 101674703 | 101674888 | 101674856 | 8  | 8  | 6  | 1.232882605 | 0.333038   |         | ENSG00000160999 |
| 7 | 101717848 | 101718070 | 101717983 | 8  | 10 | 6  | 1.506856518 | 0.188853   |         | ENSG00000160999 |
| 7 | 101823193 | 101823508 | 101823356 | 10 | 14 | 6  | 2.054804342 | 0.0480281  | PRKRIP1 | ENSG00000128563 |
| 7 | 101823657 | 101823867 | 101823772 | 9  | 10 | 9  | 1.054799562 | 0.4492     | PRKRIP1 | ENSG00000128563 |
| 7 | 102176177 | 102176383 | 102176273 | 8  | 9  | 3  | 2.397271733 | 0.0539397  |         | ENSG00000222011 |
| 7 | 102303532 | 102303882 | 102303707 | 10 | 16 | 0  | 16.30144778 | 1.09E-05   |         | ENSG00000208781 |
| 7 | 102306607 | 102306840 | 102306723 | 9  | 11 | 3  | 2.876726079 | 0.0213797  |         | ENSG00000208781 |
| 7 | 102503483 | 102503719 | 102503601 | 10 | 12 | 4  | 2.493162602 | 0.0299057  | ARMC10  | ENSG00000170632 |
| 7 | 102577122 | 102577450 | 102577271 | 12 | 15 | 9  | 1.534253909 | 0.136498   | NAPEPLD | ENSG00000161048 |
| 7 | 102724935 | 102725221 | 102725049 | 10 | 14 | 6  | 2.054804342 | 0.0480281  | PMPCB   | ENSG00000105819 |
| 7 | 102771434 | 102771654 | 102771529 | 10 | 11 | 9  | 1.150690432 | 0.367789   | DNAJC2  | ENSG00000105821 |
| 7 | 102772286 | 102772754 | 102772575 | 16 | 26 | 9  | 2.589053471 | 0.00289627 | DNAJC2  | ENSG00000105821 |
| 7 | 102775213 | 102775420 | 102775267 | 9  | 11 | 7  | 1.43836304  | 0.204844   | PSMC2   | ENSG00000161057 |
| 7 | 102775498 | 102775730 | 102775614 | 9  | 10 | 4  | 2.109599125 | 0.0694668  | PSMC2   | ENSG00000161057 |
| 7 | 102834601 | 102834850 | 102834687 | 13 | 15 | 9  | 1.534253909 | 0.136498   | SLC26A5 | ENSG00000170615 |

|   |           |           |           |    |    |    |             |             |         |                 |
|---|-----------|-----------|-----------|----|----|----|-------------|-------------|---------|-----------------|
| 7 | 102874953 | 102875175 | 102875064 | 9  | 11 | 4  | 2.301380863 | 0.0459276   | SLC26A5 | ENSG00000170615 |
| 7 | 103088338 | 103088684 | 103088426 | 8  | 12 | 3  | 3.116453252 | 0.0131971   |         | ENSG00000222386 |
| 7 | 103200304 | 103200495 | 103200399 | 8  | 10 | 2  | 3.515998541 | 0.0136204   | RELN    | ENSG00000189056 |
| 7 | 103222910 | 103223113 | 103222983 | 8  | 8  | 2  | 2.876726079 | 0.0381137   | RELN    | ENSG00000189056 |
| 7 | 103424975 | 103425184 | 103425127 | 8  | 8  | 1  | 4.315089119 | 0.0127267   | RELN    | ENSG00000189056 |
| 7 | 103521440 | 103521721 | 103521542 | 8  | 12 | 0  | 12.46581301 | 0.000159888 | RELN    | ENSG00000189056 |
| 7 | 103524419 | 103524772 | 103524595 | 13 | 19 | 8  | 2.130908207 | 0.0233014   | RELN    | ENSG00000189056 |
| 7 | 103635852 | 103636076 | 103635931 | 8  | 10 | 6  | 1.506856518 | 0.188853    | ORC5L   | ENSG00000164815 |
| 7 | 103700548 | 103700805 | 103700687 | 8  | 9  | 1  | 4.794543465 | 0.00708517  | LHFPL3  | ENSG00000187416 |
| 7 | 103720274 | 103720526 | 103720400 | 11 | 11 | 0  | 11.50690432 | 0.000313206 | LHFPL3  | ENSG00000187416 |
| 7 | 103779442 | 103779653 | 103779531 | 8  | 8  | 2  | 2.876726079 | 0.0381137   | LHFPL3  | ENSG00000187416 |
| 7 | 103865020 | 103865275 | 103865139 | 8  | 10 | 4  | 2.109599125 | 0.0694668   | LHFPL3  | ENSG00000187416 |
| 7 | 103979620 | 103979964 | 103979792 | 8  | 13 | 8  | 1.491635745 | 0.166708    |         | ENSG00000197258 |
| 7 | 103997399 | 103997702 | 103997550 | 15 | 18 | 7  | 2.277408146 | 0.0188653   |         | ENSG00000197258 |
| 7 | 104188126 | 104188336 | 104188238 | 8  | 8  | 3  | 2.157544559 | 0.0836802   |         | ENSG00000197258 |
| 7 | 104207367 | 104207546 | 104207493 | 8  | 8  | 9  | 0.863017824 | 0.627343    |         | ENSG00000197258 |
| 7 | 104276087 | 104276388 | 104276237 | 8  | 12 | 10 | 1.133255728 | 0.37674     |         | ENSG00000208761 |
| 7 | 104315506 | 104315692 | 104315585 | 8  | 8  | 7  | 1.07877228  | 0.435076    |         | ENSG00000208761 |
| 7 | 104323945 | 104324136 | 104324040 | 8  | 9  | 2  | 3.19636231  | 0.0229249   |         | ENSG00000208761 |
| 7 | 104378259 | 104378518 | 104378388 | 9  | 12 | 5  | 2.077635502 | 0.0577144   |         | ENSG00000208757 |
| 7 | 104407295 | 104407686 | 104407517 | 11 | 16 | 13 | 1.164389127 | 0.333296    |         | ENSG00000208754 |
| 7 | 104408660 | 104409080 | 104408774 | 8  | 16 | 7  | 2.037680973 | 0.0400399   |         | ENSG00000208754 |
| 7 | 104415202 | 104415483 | 104415342 | 8  | 9  | 1  | 4.794543465 | 0.00708517  |         | ENSG00000208754 |
| 7 | 104434384 | 104434607 | 104434495 | 9  | 12 | 3  | 3.116453252 | 0.0131971   | MLL5    | ENSG00000005483 |
| 7 | 104440001 | 104440491 | 104440312 | 11 | 20 | 7  | 2.517135319 | 0.00849957  | MLL5    | ENSG00000005483 |
| 7 | 104440565 | 104440797 | 104440681 | 10 | 11 | 3  | 2.876726079 | 0.0213797   | MLL5    | ENSG00000005483 |
| 7 | 104440961 | 104441166 | 104441070 | 8  | 8  | 3  | 2.157544559 | 0.0836802   | MLL5    | ENSG00000005483 |
| 7 | 104441607 | 104441811 | 104441709 | 9  | 10 | 4  | 2.109599125 | 0.0694668   | MLL5    | ENSG00000005483 |
| 7 | 104441905 | 104442084 | 104441994 | 8  | 8  | 2  | 2.876726079 | 0.0381137   | MLL5    | ENSG00000005483 |
| 7 | 104442360 | 104442546 | 104442453 | 9  | 10 | 7  | 1.318499453 | 0.269217    | MLL5    | ENSG00000005483 |
| 7 | 104458001 | 104458285 | 104458143 | 9  | 13 | 5  | 2.237453617 | 0.038866    | MLL5    | ENSG00000005483 |
| 7 | 104462110 | 104462291 | 104462200 | 9  | 10 | 2  | 3.515998541 | 0.0136204   | MLL5    | ENSG00000005483 |
| 7 | 104524157 | 104524374 | 104524275 | 8  | 9  | 3  | 2.397271733 | 0.0539397   | MLL5    | ENSG00000005483 |
| 7 | 104626113 | 104626292 | 104626149 | 8  | 8  | 3  | 2.157544559 | 0.0836802   | SRPK2   | ENSG00000135250 |

|   |           |           |           |    |    |    |             |             |         |                 |
|---|-----------|-----------|-----------|----|----|----|-------------|-------------|---------|-----------------|
| 7 | 104657837 | 104658048 | 104657973 | 9  | 10 | 1  | 5.273997812 | 0.00391723  |         | ENSG00000213361 |
| 7 | 104685238 | 104685476 | 104685308 | 9  | 13 | 5  | 2.237453617 | 0.038866    | SRPK2   | ENSG00000135250 |
| 7 | 104732094 | 104732385 | 104732221 | 15 | 19 | 4  | 3.835634772 | 0.00108365  |         | ENSG00000208751 |
| 7 | 104748359 | 104748547 | 104748434 | 8  | 9  | 0  | 9.589086931 | 0.00120187  |         | ENSG00000208751 |
| 7 | 104815307 | 104815562 | 104815425 | 11 | 12 | 1  | 6.232906505 | 0.00117736  | SRPK2   | ENSG00000135250 |
| 7 | 104857448 | 104857732 | 104857565 | 9  | 11 | 9  | 1.150690432 | 0.367789    |         | ENSG00000208745 |
| 7 | 104870781 | 104870960 | 104870870 | 8  | 8  | 1  | 4.315089119 | 0.0127267   |         | ENSG00000208745 |
| 7 | 104915819 | 104916100 | 104915938 | 10 | 11 | 2  | 3.835634772 | 0.00800699  | PUS7    | ENSG00000091127 |
| 7 | 104949160 | 104949389 | 104949283 | 8  | 9  | 2  | 3.19636231  | 0.0229249   | PUS7    | ENSG00000091127 |
| 7 | 105009035 | 105009535 | 105009317 | 63 | 82 | 7  | 9.94867769  | 3.19E-17    | EFCAB10 | ENSG00000185055 |
| 7 | 105016914 | 105017413 | 105017079 | 11 | 18 | 10 | 1.656296833 | 0.0841786   | EFCAB10 | ENSG00000185055 |
| 7 | 105076399 | 105077105 | 105076652 | 13 | 32 | 14 | 2.109599125 | 0.00600552  | EFCAB10 | ENSG00000185055 |
| 7 | 105084620 | 105084977 | 105084798 | 12 | 17 | 2  | 5.753452158 | 0.000281509 | EFCAB10 | ENSG00000185055 |
| 7 | 105092586 | 105092794 | 105092690 | 9  | 10 | 5  | 1.757999271 | 0.121253    | EFCAB10 | ENSG00000185055 |
| 7 | 105113397 | 105113576 | 105113489 | 8  | 8  | 5  | 1.43836304  | 0.235762    | EFCAB10 | ENSG00000185055 |
| 7 | 105119331 | 105119840 | 105119615 | 13 | 27 | 5  | 4.474907234 | 5.37E-05    | EFCAB10 | ENSG00000185055 |
| 7 | 105131726 | 105131969 | 105131863 | 8  | 9  | 7  | 1.198635866 | 0.346278    | EFCAB10 | ENSG00000185055 |
| 7 | 105192714 | 105193193 | 105192953 | 14 | 23 | 3  | 5.753452158 | 3.82E-05    | ATXN7L1 | ENSG00000146776 |
| 7 | 105197996 | 105198322 | 105198159 | 11 | 15 | 7  | 1.917817386 | 0.0572317   | ATXN7L1 | ENSG00000146776 |
| 7 | 105304887 | 105305224 | 105305055 | 15 | 20 | 4  | 4.027416511 | 0.000652226 | ATXN7L1 | ENSG00000146776 |
| 7 | 105437059 | 105437483 | 105437238 | 10 | 19 | 7  | 2.397271733 | 0.0127287   |         | ENSG00000128536 |
| 7 | 105454994 | 105455666 | 105455387 | 31 | 51 | 3  | 12.46581301 | 2.13E-12    |         | ENSG00000128536 |
| 7 | 105455943 | 105456151 | 105456046 | 8  | 9  | 1  | 4.794543465 | 0.00708517  |         | ENSG00000128536 |
| 7 | 105458109 | 105458428 | 105458268 | 8  | 11 | 0  | 11.50690432 | 0.000313206 |         | ENSG00000128536 |
| 7 | 105486148 | 105486451 | 105486318 | 12 | 16 | 9  | 1.630144778 | 0.102169    | SYPL1   | ENSG00000008282 |
| 7 | 105492683 | 105493223 | 105492833 | 10 | 23 | 6  | 3.287686948 | 0.00104919  | SYPL1   | ENSG00000008282 |
| 7 | 105496703 | 105497141 | 105497040 | 10 | 18 | 10 | 1.656296833 | 0.0841786   | SYPL1   | ENSG00000008282 |
| 7 | 105497984 | 105498165 | 105498020 | 8  | 9  | 4  | 1.917817386 | 0.103282    | SYPL1   | ENSG00000008282 |
| 7 | 105499489 | 105500203 | 105499948 | 14 | 33 | 14 | 2.173526371 | 0.00425345  | SYPL1   | ENSG00000008282 |
| 7 | 105511035 | 105511225 | 105511149 | 9  | 9  | 2  | 3.19636231  | 0.0229249   | SYPL1   | ENSG00000008282 |
| 7 | 105539117 | 105539325 | 105539241 | 9  | 10 | 9  | 1.054799562 | 0.4492      | SYPL1   | ENSG00000008282 |
| 7 | 105543633 | 105543841 | 105543737 | 8  | 9  | 2  | 3.19636231  | 0.0229249   | SYPL1   | ENSG00000008282 |
| 7 | 105581571 | 105581820 | 105581743 | 11 | 14 | 6  | 2.054804342 | 0.0480281   | SYPL1   | ENSG00000008282 |
| 7 | 105594319 | 105594751 | 105594498 | 9  | 18 | 10 | 1.656296833 | 0.0841786   |         | ENSG00000201796 |

|   |           |           |           |    |    |    |             |             |         |                 |
|---|-----------|-----------|-----------|----|----|----|-------------|-------------|---------|-----------------|
| 7 | 105604414 | 105604692 | 105604536 | 13 | 16 | 10 | 1.481949798 | 0.147733    |         | ENSG00000201796 |
| 7 | 105607452 | 105607686 | 105607569 | 9  | 12 | 4  | 2.493162602 | 0.0299057   |         | ENSG00000201796 |
| 7 | 105624160 | 105624411 | 105624285 | 9  | 10 | 6  | 1.506856518 | 0.188853    |         | ENSG00000201796 |
| 7 | 105667181 | 105667418 | 105667293 | 8  | 10 | 4  | 2.109599125 | 0.0694668   |         | ENSG00000201796 |
| 7 | 105713075 | 105713304 | 105713189 | 8  | 12 | 5  | 2.077635502 | 0.0577144   | NAMPT   | ENSG00000105835 |
| 7 | 105733304 | 105733587 | 105733445 | 12 | 15 | 5  | 2.557089848 | 0.0169197   | NAMPT   | ENSG00000105835 |
| 7 | 105890277 | 105890466 | 105890337 | 8  | 8  | 7  | 1.07877228  | 0.435076    | NAMPT   | ENSG00000105835 |
| 7 | 105996579 | 105996829 | 105996658 | 9  | 13 | 9  | 1.34247217  | 0.232231    |         | ENSG00000177820 |
| 7 | 106087700 | 106087942 | 106087821 | 8  | 9  | 2  | 3.19636231  | 0.0229249   |         | ENSG00000177820 |
| 7 | 106088746 | 106088977 | 106088845 | 9  | 11 | 0  | 11.50690432 | 0.000313206 |         | ENSG00000177820 |
| 7 | 106169760 | 106170033 | 106169897 | 12 | 13 | 2  | 4.474907234 | 0.00269459  |         | ENSG00000177820 |
| 7 | 106338890 | 106339085 | 106338966 | 9  | 9  | 3  | 2.397271733 | 0.0539397   | PIK3CG  | ENSG00000105851 |
| 7 | 106418787 | 106418989 | 106418859 | 8  | 10 | 1  | 5.273997812 | 0.00391723  | PRKAR2B | ENSG00000005249 |
| 7 | 106596237 | 106596607 | 106596416 | 10 | 16 | 9  | 1.630144778 | 0.102169    | HBP1    | ENSG00000105856 |
| 7 | 106597224 | 106597734 | 106597538 | 11 | 21 | 10 | 1.917817386 | 0.0328292   | HBP1    | ENSG00000105856 |
| 7 | 106629542 | 106629755 | 106629648 | 9  | 9  | 4  | 1.917817386 | 0.103282    | HBP1    | ENSG00000105856 |
| 7 | 106776539 | 106776859 | 106776699 | 24 | 28 | 1  | 13.90417605 | 5.17E-08    |         | ENSG00000208728 |
| 7 | 106890939 | 106891135 | 106891037 | 9  | 9  | 3  | 2.397271733 | 0.0539397   | GPR22   | ENSG00000172209 |
| 7 | 106934213 | 106934502 | 106934357 | 8  | 11 | 10 | 1.046082211 | 0.455063    | GPR22   | ENSG00000172209 |
| 7 | 106991446 | 106991702 | 106991547 | 9  | 9  | 2  | 3.19636231  | 0.0229249   | DUS4L   | ENSG00000105865 |
| 7 | 107002802 | 107002996 | 107002899 | 8  | 9  | 2  | 3.19636231  | 0.0229249   | BCAP29  | ENSG00000075790 |
| 7 | 107140401 | 107141070 | 107140794 | 29 | 48 | 5  | 7.83108766  | 4.86E-10    | CBLL1   | ENSG00000105879 |
| 7 | 107145749 | 107145977 | 107145913 | 8  | 8  | 1  | 4.315089119 | 0.0127267   | CBLL1   | ENSG00000105879 |
| 7 | 107171109 | 107171409 | 107171240 | 15 | 18 | 9  | 1.821926517 | 0.0548428   | CBLL1   | ENSG00000105879 |
| 7 | 107171481 | 107171818 | 107171654 | 10 | 15 | 7  | 1.917817386 | 0.0572317   | CBLL1   | ENSG00000105879 |
| 7 | 107319137 | 107319435 | 107319269 | 8  | 11 | 7  | 1.43836304  | 0.204844    | DLD     | ENSG00000091140 |
| 7 | 107319654 | 107319833 | 107319743 | 9  | 9  | 9  | 0.958908693 | 0.536911    | DLD     | ENSG00000091140 |
| 7 | 107368347 | 107368560 | 107368457 | 9  | 10 | 8  | 1.171999514 | 0.35773     | DLD     | ENSG00000091140 |
| 7 | 107380146 | 107380510 | 107380316 | 20 | 26 | 12 | 1.991579593 | 0.0165204   |         | ENSG00000208718 |
| 7 | 107423455 | 107423755 | 107423582 | 8  | 13 | 6  | 1.917817386 | 0.0693353   |         | ENSG00000208718 |
| 7 | 107428622 | 107428801 | 107428716 | 8  | 8  | 3  | 2.157544559 | 0.0836802   | LAMB1   | ENSG00000091136 |
| 7 | 107454522 | 107454701 | 107454611 | 8  | 8  | 3  | 2.157544559 | 0.0836802   |         | ENSG00000216085 |
| 7 | 107474625 | 107475088 | 107474852 | 22 | 31 | 1  | 15.34253909 | 7.54E-09    |         | ENSG00000216085 |
| 7 | 107482181 | 107482578 | 107482408 | 11 | 16 | 7  | 2.037680973 | 0.0400399   |         | ENSG00000216085 |

|   |           |           |           |     |     |    |             |             |        |                 |
|---|-----------|-----------|-----------|-----|-----|----|-------------|-------------|--------|-----------------|
| 7 | 107491379 | 107491558 | 107491468 | 8   | 8   | 5  | 1.43836304  | 0.235762    |        | ENSG00000216085 |
| 7 | 107531050 | 107531259 | 107531117 | 8   | 8   | 4  | 1.726035648 | 0.150596    | LAMB4  | ENSG00000091128 |
| 7 | 107541969 | 107542228 | 107542123 | 9   | 11  | 1  | 5.753452158 | 0.00215302  | LAMB4  | ENSG00000091128 |
| 7 | 107573997 | 107574337 | 107574168 | 10  | 13  | 3  | 3.356180426 | 0.00805599  | NRCAM  | ENSG00000091129 |
| 7 | 107627698 | 107628033 | 107627865 | 10  | 15  | 5  | 2.557089848 | 0.0169197   | NRCAM  | ENSG00000091129 |
| 7 | 107629468 | 107629876 | 107629647 | 16  | 25  | 3  | 6.232906505 | 1.23E-05    | NRCAM  | ENSG00000091129 |
| 7 | 107834300 | 107834498 | 107834398 | 8   | 10  | 1  | 5.273997812 | 0.00391723  | NRCAM  | ENSG00000091129 |
| 7 | 107849523 | 107849712 | 107849577 | 8   | 9   | 2  | 3.19636231  | 0.0229249   | NRCAM  | ENSG00000091129 |
| 7 | 107887804 | 107888104 | 107887954 | 8   | 13  | 6  | 1.917817386 | 0.0693353   | NRCAM  | ENSG00000091129 |
| 7 | 107924846 | 107925071 | 107924964 | 11  | 11  | 2  | 3.835634772 | 0.00800699  | PNPLA8 | ENSG00000135241 |
| 7 | 107953802 | 107954222 | 107954051 | 10  | 16  | 8  | 1.811271976 | 0.0663685   | PNPLA8 | ENSG00000135241 |
| 7 | 107996695 | 107996911 | 107996803 | 8   | 10  | 3  | 2.636998906 | 0.034203    | THAP5  | ENSG00000177683 |
| 7 | 107997054 | 107997304 | 107997156 | 12  | 13  | 3  | 3.356180426 | 0.00805599  | THAP5  | ENSG00000177683 |
| 7 | 107998093 | 107998319 | 107998197 | 10  | 11  | 3  | 2.876726079 | 0.0213797   | DNAJB9 | ENSG00000128590 |
| 7 | 108039030 | 108039245 | 108039137 | 12  | 13  | 4  | 2.684944341 | 0.01921     | DNAJB9 | ENSG00000128590 |
| 7 | 108041555 | 108041917 | 108041738 | 10  | 17  | 15 | 1.07877228  | 0.410615    | DNAJB9 | ENSG00000128590 |
| 7 | 108233600 | 108233878 | 108233704 | 12  | 15  | 4  | 3.068507818 | 0.0076507   |        | ENSG00000205174 |
| 7 | 108437069 | 108437283 | 108437176 | 8   | 8   | 2  | 2.876726079 | 0.0381137   |        | ENSG00000205174 |
| 7 | 108770354 | 108770549 | 108770451 | 8   | 8   | 1  | 4.315089119 | 0.0127267   |        | ENSG00000205174 |
| 7 | 108804682 | 108804861 | 108804792 | 8   | 9   | 0  | 9.589086931 | 0.00120187  |        | ENSG00000205174 |
| 7 | 109434555 | 109435327 | 109434810 | 60  | 84  | 7  | 10.18840486 | 9.72E-18    |        |                 |
| 7 | 109710157 | 109710773 | 109710478 | 18  | 34  | 8  | 3.729089362 | 3.70E-05    |        |                 |
| 7 | 109754303 | 109754488 | 109754398 | 9   | 9   | 3  | 2.397271733 | 0.0539397   |        |                 |
| 7 | 109790637 | 109790904 | 109790786 | 8   | 8   | 6  | 1.232882605 | 0.333038    |        |                 |
| 7 | 109869620 | 109869917 | 109869745 | 8   | 11  | 7  | 1.43836304  | 0.204844    |        | ENSG00000221279 |
| 7 | 109950099 | 109950499 | 109950320 | 21  | 27  | 8  | 2.98327149  | 0.000913494 |        | ENSG00000221279 |
| 7 | 109961368 | 109962522 | 109962021 | 362 | 499 | 25 | 18.44055179 | 6.63E-112   |        | ENSG00000221279 |
| 7 | 110001284 | 110001463 | 110001373 | 8   | 9   | 6  | 1.369869562 | 0.253675    |        | ENSG00000221279 |
| 7 | 110030732 | 110030929 | 110030829 | 9   | 9   | 2  | 3.19636231  | 0.0229249   |        | ENSG00000221279 |
| 7 | 110104737 | 110104950 | 110104841 | 8   | 8   | 5  | 1.43836304  | 0.235762    |        | ENSG00000221279 |
| 7 | 110161996 | 110162273 | 110162153 | 15  | 18  | 1  | 9.109632584 | 2.91E-05    |        | ENSG00000221279 |
| 7 | 110785019 | 110785377 | 110785217 | 17  | 22  | 4  | 4.410979988 | 0.000231863 | IMMP2L | ENSG00000184903 |
| 7 | 110842196 | 110842378 | 110842276 | 8   | 9   | 5  | 1.598181155 | 0.170911    | IMMP2L | ENSG00000184903 |
| 7 | 110913957 | 110914223 | 110914131 | 9   | 12  | 9  | 1.246581301 | 0.295061    | IMMP2L | ENSG00000184903 |



|   |           |           |           |    |    |    |             |             |         |                 |
|---|-----------|-----------|-----------|----|----|----|-------------|-------------|---------|-----------------|
| 7 | 110926360 | 110926748 | 110926539 | 14 | 20 | 10 | 1.830643869 | 0.0454769   | IMMP2L  | ENSG00000184903 |
| 7 | 110939262 | 110939593 | 110939422 | 8  | 12 | 10 | 1.133255728 | 0.37674     | IMMP2L  | ENSG00000184903 |
| 7 | 110957219 | 110957584 | 110957323 | 9  | 14 | 14 | 0.958908693 | 0.545362    | IMMP2L  | ENSG00000184903 |
| 7 | 110984688 | 110984874 | 110984801 | 9  | 10 | 5  | 1.757999271 | 0.121253    | IMMP2L  | ENSG00000184903 |
| 7 | 110988123 | 110988315 | 110988217 | 8  | 9  | 11 | 0.799090578 | 0.702688    | IMMP2L  | ENSG00000184903 |
| 7 | 110988414 | 110988728 | 110988590 | 10 | 13 | 9  | 1.34247217  | 0.232231    | IMMP2L  | ENSG00000184903 |
| 7 | 110989886 | 110990075 | 110989960 | 8  | 8  | 12 | 0.663859864 | 0.833689    | IMMP2L  | ENSG00000184903 |
| 7 | 111137982 | 111138161 | 111138107 | 8  | 8  | 12 | 0.663859864 | 0.833689    | IMMP2L  | ENSG00000184903 |
| 7 | 111146257 | 111146573 | 111146413 | 8  | 11 | 4  | 2.301380863 | 0.0459276   | IMMP2L  | ENSG00000184903 |
| 7 | 111157975 | 111158226 | 111158100 | 8  | 9  | 1  | 4.794543465 | 0.00708517  | IMMP2L  | ENSG00000184903 |
| 7 | 111162901 | 111163289 | 111163142 | 10 | 15 | 9  | 1.534253909 | 0.136498    | IMMP2L  | ENSG00000184903 |
| 7 | 111177756 | 111178065 | 111177904 | 9  | 12 | 9  | 1.246581301 | 0.295061    | IMMP2L  | ENSG00000184903 |
| 7 | 111212334 | 111212540 | 111212437 | 12 | 12 | 5  | 2.077635502 | 0.0577144   |         | ENSG00000208691 |
| 7 | 111275650 | 111275861 | 111275745 | 8  | 9  | 2  | 3.19636231  | 0.0229249   |         | ENSG00000208691 |
| 7 | 111280969 | 111281175 | 111281072 | 8  | 8  | 3  | 2.157544559 | 0.0836802   |         | ENSG00000208691 |
| 7 | 111282488 | 111282846 | 111282667 | 10 | 16 | 7  | 2.037680973 | 0.0400399   |         | ENSG00000208691 |
| 7 | 111296676 | 111296908 | 111296819 | 8  | 10 | 3  | 2.636998906 | 0.034203    |         | ENSG00000208691 |
| 7 | 111300620 | 111300816 | 111300718 | 9  | 9  | 4  | 1.917817386 | 0.103282    |         | ENSG00000208691 |
| 7 | 111386343 | 111386624 | 111386489 | 12 | 15 | 3  | 3.835634772 | 0.00291691  |         | ENSG00000208691 |
| 7 | 111415981 | 111416160 | 111416103 | 8  | 9  | 4  | 1.917817386 | 0.103282    | DOCK4   | ENSG00000128512 |
| 7 | 111610759 | 111610938 | 111610848 | 8  | 8  | 4  | 1.726035648 | 0.150596    | ZNF277  | ENSG00000198839 |
| 7 | 111633609 | 111633940 | 111633781 | 9  | 12 | 1  | 6.232906505 | 0.00117736  | ZNF277  | ENSG00000198839 |
| 7 | 111676072 | 111676557 | 111676363 | 14 | 26 | 3  | 6.472633678 | 6.96E-06    |         | ENSG00000202406 |
| 7 | 111681494 | 111681707 | 111681592 | 8  | 10 | 5  | 1.757999271 | 0.121253    |         | ENSG00000202406 |
| 7 | 111811203 | 111811444 | 111811321 | 10 | 12 | 4  | 2.493162602 | 0.0299057   |         | ENSG00000208671 |
| 7 | 111841595 | 111841813 | 111841708 | 9  | 9  | 7  | 1.198635866 | 0.346278    | IFRD1   | ENSG00000006652 |
| 7 | 111842254 | 111842553 | 111842400 | 13 | 16 | 6  | 2.328778255 | 0.0221113   | IFRD1   | ENSG00000006652 |
| 7 | 111847618 | 111848275 | 111847886 | 11 | 30 | 10 | 2.702379044 | 0.00113582  | IFRD1   | ENSG00000006652 |
| 7 | 111850272 | 111850506 | 111850389 | 10 | 13 | 4  | 2.684944341 | 0.01921     | IFRD1   | ENSG00000006652 |
| 7 | 111876666 | 111877100 | 111876813 | 11 | 18 | 3  | 4.554816292 | 0.000599415 | IFRD1   | ENSG00000006652 |
| 7 | 111878094 | 111878439 | 111878266 | 10 | 16 | 4  | 3.260289556 | 0.00475414  | IFRD1   | ENSG00000006652 |
| 7 | 111908999 | 111909554 | 111909281 | 13 | 26 | 18 | 1.362659722 | 0.14632     | C7orf53 | ENSG00000181016 |
| 7 | 111911825 | 111912171 | 111911998 | 10 | 15 | 1  | 7.671269544 | 0.000187863 | C7orf53 | ENSG00000181016 |
| 7 | 111923179 | 111923536 | 111923357 | 14 | 20 | 17 | 1.118726809 | 0.361026    | C7orf53 | ENSG00000181016 |

|   |           |           |           |     |     |    |             |            |                         |
|---|-----------|-----------|-----------|-----|-----|----|-------------|------------|-------------------------|
| 7 | 111977810 | 111978016 | 111977925 | 13  | 13  | 5  | 2.237453617 | 0.038866   | ENSG00000182965         |
| 7 | 112000087 | 112000374 | 112000223 | 14  | 16  | 5  | 2.716907964 | 0.0109645  | ENSG00000182965         |
| 7 | 112001082 | 112001272 | 112001177 | 8   | 9   | 6  | 1.369869562 | 0.253675   | ENSG00000182965         |
| 7 | 112011450 | 112012240 | 112011785 | 107 | 141 | 9  | 13.61650344 | 5.21E-31   | ENSG00000182965         |
| 7 | 112043806 | 112044084 | 112043945 | 12  | 12  | 8  | 1.385090334 | 0.219216   | ENSG00000182965         |
| 7 | 112171204 | 112171425 | 112171331 | 9   | 10  | 2  | 3.515998541 | 0.0136204  | TMEM168 ENSG00000146802 |
| 7 | 112195894 | 112196158 | 112195998 | 10  | 12  | 7  | 1.558226626 | 0.152813   | TMEM168 ENSG00000146802 |
| 7 | 112197324 | 112197747 | 112197585 | 37  | 50  | 10 | 4.445849395 | 1.13E-07   | TMEM168 ENSG00000146802 |
| 7 | 112209723 | 112210323 | 112209915 | 38  | 53  | 4  | 10.35621389 | 4.48E-12   | TMEM168 ENSG00000146802 |
| 7 | 112217525 | 112217808 | 112217648 | 10  | 13  | 6  | 1.917817386 | 0.0693353  | TMEM168 ENSG00000146802 |
| 7 | 112279609 | 112279802 | 112279697 | 9   | 9   | 5  | 1.598181155 | 0.170911   | TMEM168 ENSG00000146802 |
| 7 | 112402411 | 112402592 | 112402501 | 8   | 8   | 0  | 8.630178238 | 0.00235436 | C7orf60 ENSG00000164603 |
| 7 | 112442299 | 112442512 | 112442392 | 8   | 10  | 4  | 2.109599125 | 0.0694668  | GPR85 ENSG00000164604   |
| 7 | 112493713 | 112494057 | 112493887 | 9   | 11  | 3  | 2.876726079 | 0.0213797  | GPR85 ENSG00000164604   |
| 7 | 112545579 | 112546052 | 112545879 | 12  | 21  | 14 | 1.406399416 | 0.148881   | ENSG00000214194         |
| 7 | 112583553 | 112583732 | 112583642 | 8   | 8   | 6  | 1.232882605 | 0.333038   | ENSG00000214194         |
| 7 | 112846890 | 112847126 | 112847051 | 8   | 10  | 4  | 2.109599125 | 0.0694668  | ENSG00000214194         |
| 7 | 112849101 | 112849352 | 112849236 | 10  | 13  | 9  | 1.34247217  | 0.232231   | ENSG00000214194         |
| 7 | 112918648 | 112918845 | 112918750 | 9   | 9   | 1  | 4.794543465 | 0.00708517 | ENSG00000214194         |
| 7 | 113063595 | 113063835 | 113063691 | 9   | 9   | 4  | 1.917817386 | 0.103282   | PPP1R3A ENSG00000154415 |
| 7 | 113190473 | 113190950 | 113190683 | 19  | 31  | 17 | 1.704726565 | 0.0311659  | PPP1R3A ENSG00000154415 |
| 7 | 113191862 | 113192194 | 113192042 | 9   | 14  | 7  | 1.797953799 | 0.0806593  | PPP1R3A ENSG00000154415 |
| 7 | 113220903 | 113221111 | 113220978 | 8   | 8   | 1  | 4.315089119 | 0.0127267  | PPP1R3A ENSG00000154415 |
| 7 | 113325888 | 113326069 | 113325978 | 8   | 8   | 7  | 1.07877228  | 0.435076   | PPP1R3A ENSG00000154415 |
| 7 | 113439188 | 113439367 | 113439288 | 8   | 8   | 0  | 8.630178238 | 0.00235436 | PPP1R3A ENSG00000154415 |
| 7 | 113439711 | 113439964 | 113439862 | 10  | 10  | 3  | 2.636998906 | 0.034203   | PPP1R3A ENSG00000154415 |
| 7 | 113448630 | 113448905 | 113448767 | 12  | 14  | 7  | 1.797953799 | 0.0806593  | PPP1R3A ENSG00000154415 |
| 7 | 113510954 | 113511148 | 113511051 | 9   | 9   | 2  | 3.19636231  | 0.0229249  | ENSG00000208668         |
| 7 | 113512797 | 113513364 | 113513103 | 20  | 33  | 12 | 2.507915043 | 0.00131447 | ENSG00000208668         |
| 7 | 113515550 | 113515835 | 113515664 | 10  | 14  | 3  | 3.595907599 | 0.00486913 | ENSG00000208668         |
| 7 | 113578373 | 113578569 | 113578471 | 8   | 9   | 4  | 1.917817386 | 0.103282   | ENSG00000208668         |
| 7 | 113603265 | 113603642 | 113603463 | 28  | 35  | 2  | 11.50690432 | 5.48E-09   | ENSG00000208668         |
| 7 | 113603774 | 113604024 | 113603899 | 10  | 10  | 1  | 5.273997812 | 0.00391723 | ENSG00000208668         |
| 7 | 113608687 | 113608903 | 113608795 | 8   | 10  | 3  | 2.636998906 | 0.034203   | ENSG00000208668         |

|   |           |           |           |     |     |    |             |             |         |                 |
|---|-----------|-----------|-----------|-----|-----|----|-------------|-------------|---------|-----------------|
| 7 | 113610668 | 113610913 | 113610790 | 10  | 11  | 0  | 11.50690432 | 0.000313206 |         | ENSG00000208668 |
| 7 | 113631686 | 113631873 | 113631760 | 8   | 8   | 2  | 2.876726079 | 0.0381137   |         | ENSG00000208668 |
| 7 | 113725380 | 113725597 | 113725488 | 9   | 11  | 1  | 5.753452158 | 0.00215302  |         | ENSG00000218695 |
| 7 | 113804884 | 113805089 | 113804957 | 10  | 10  | 11 | 0.878999635 | 0.622439    | FOXP2   | ENSG00000128573 |
| 7 | 115489266 | 115489501 | 115489383 | 9   | 9   | 0  | 9.589086931 | 0.00120187  | TFEC    | ENSG00000105967 |
| 7 | 116228448 | 116228633 | 116228565 | 8   | 8   | 1  | 4.315089119 | 0.0127267   | CAPZA2  | ENSG00000198898 |
| 7 | 116701232 | 116701470 | 116701331 | 9   | 10  | 0  | 10.54799562 | 0.000613541 |         | ENSG00000220630 |
| 7 | 117057734 | 117058295 | 117058014 | 68  | 105 | 1  | 50.82216073 | 5.89E-30    |         | ENSG00000216672 |
| 7 | 117145263 | 117145600 | 117145431 | 12  | 17  | 2  | 5.753452158 | 0.000281509 |         | ENSG00000216672 |
| 7 | 117611756 | 117611986 | 117611817 | 8   | 9   | 1  | 4.794543465 | 0.00708517  | LSM8    | ENSG00000128534 |
| 7 | 118624607 | 118624851 | 118624733 | 8   | 8   | 0  | 8.630178238 | 0.00235436  |         | ENSG00000203365 |
| 7 | 120176661 | 120176840 | 120176750 | 8   | 8   | 1  | 4.315089119 | 0.0127267   |         | ENSG00000208634 |
| 7 | 120379452 | 120379674 | 120379563 | 9   | 10  | 1  | 5.273997812 | 0.00391723  | ING3    | ENSG00000071243 |
| 7 | 120932930 | 120933491 | 120933289 | 89  | 108 | 2  | 34.84034918 | 2.21E-29    |         | ENSG00000221690 |
| 7 | 120938288 | 120938822 | 120938572 | 64  | 83  | 0  | 80.54833022 | 2.96E-25    |         | ENSG00000221690 |
| 7 | 122192308 | 122192539 | 122192436 | 9   | 11  | 1  | 5.753452158 | 0.00215302  | RNF133  | ENSG00000188050 |
| 7 | 122581618 | 122581822 | 122581720 | 8   | 9   | 0  | 9.589086931 | 0.00120187  | SLC13A1 | ENSG00000081800 |
| 7 | 122999064 | 122999268 | 122999217 | 9   | 9   | 0  | 9.589086931 | 0.00120187  | NDUFA5  | ENSG00000128609 |
| 7 | 123607342 | 123607815 | 123607662 | 11  | 19  | 0  | 19.17817386 | 1.44E-06    | SPAM1   | ENSG00000106304 |
| 7 | 123673466 | 123674134 | 123673892 | 107 | 148 | 1  | 71.43869763 | 2.28E-42    |         | ENSG00000213296 |
| 7 | 124099296 | 124099611 | 124099444 | 15  | 18  | 2  | 6.073088389 | 0.000157975 |         | ENSG00000207214 |
| 7 | 126535052 | 126535253 | 126535152 | 8   | 9   | 3  | 2.397271733 | 0.0539397   |         | ENSG00000207692 |
| 7 | 127447499 | 127447678 | 127447599 | 8   | 8   | 1  | 4.315089119 | 0.0127267   | LRRC4   | ENSG00000128594 |
| 7 | 127448710 | 127449169 | 127448882 | 10  | 17  | 4  | 3.452071295 | 0.00292757  | LRRC4   | ENSG00000128594 |
| 7 | 127563293 | 127563519 | 127563381 | 12  | 12  | 3  | 3.116453252 | 0.0131971   |         | ENSG00000207588 |
| 7 | 127771082 | 127771398 | 127771227 | 15  | 19  | 2  | 6.39272462  | 8.83E-05    | RBM28   | ENSG00000106344 |
| 7 | 127862646 | 127862901 | 127862773 | 10  | 12  | 4  | 2.493162602 | 0.0299057   |         | ENSG00000135245 |
| 7 | 127884713 | 127885010 | 127884883 | 15  | 18  | 1  | 9.109632584 | 2.91E-05    |         | ENSG00000214175 |
| 7 | 128481530 | 128481805 | 128481662 | 9   | 12  | 2  | 4.155271003 | 0.0046638   | TNPO3   | ENSG00000064419 |
| 7 | 128482204 | 128482640 | 128482383 | 12  | 22  | 4  | 4.410979988 | 0.000231863 | TNPO3   | ENSG00000064419 |
| 7 | 129280937 | 129281340 | 129281073 | 10  | 18  | 0  | 18.21926517 | 2.83E-06    |         | ENSG00000207691 |
| 7 | 129376082 | 129376308 | 129376188 | 9   | 10  | 4  | 2.109599125 | 0.0694668   | UBE2H   | ENSG00000186591 |
| 7 | 129396888 | 129397168 | 129397040 | 11  | 12  | 7  | 1.558226626 | 0.152813    |         | ENSG00000207184 |
| 7 | 129437923 | 129438184 | 129438062 | 9   | 10  | 5  | 1.757999271 | 0.121253    |         | ENSG00000201109 |

|   |           |           |           |     |     |   |             |             |          |                 |
|---|-----------|-----------|-----------|-----|-----|---|-------------|-------------|----------|-----------------|
| 7 | 129478378 | 129478643 | 129478504 | 10  | 12  | 8 | 1.385090334 | 0.219216    | ZC3HC1   | ENSG00000091732 |
| 7 | 129497212 | 129497685 | 129497515 | 9   | 18  | 8 | 2.024362796 | 0.0334397   | KLHDC10  | ENSG00000128607 |
| 7 | 129699483 | 129699747 | 129699610 | 9   | 11  | 0 | 11.50690432 | 0.000313206 | CPA2     | ENSG00000158516 |
| 7 | 129801007 | 129801196 | 129801101 | 8   | 8   | 3 | 2.157544559 | 0.0836802   | CPA1     | ENSG00000091704 |
| 7 | 129913181 | 129913525 | 129913354 | 8   | 13  | 1 | 6.712360851 | 0.000640982 | MEST     | ENSG00000106484 |
| 7 | 130489551 | 130489903 | 130489727 | 13  | 18  | 0 | 18.21926517 | 2.83E-06    |          | ENSG00000199627 |
| 7 | 130523738 | 130524127 | 130523884 | 10  | 16  | 0 | 16.30144778 | 1.09E-05    |          | ENSG00000199627 |
| 7 | 131109955 | 131110424 | 131110206 | 48  | 63  | 0 | 61.37015636 | 2.05E-19    |          | ENSG00000172400 |
| 7 | 131214098 | 131214367 | 131214241 | 8   | 9   | 1 | 4.794543465 | 0.00708517  |          | ENSG00000172400 |
| 7 | 131363800 | 131364106 | 131363957 | 10  | 13  | 6 | 1.917817386 | 0.0693353   |          | ENSG00000205067 |
| 7 | 131451793 | 131452130 | 131451940 | 9   | 13  | 4 | 2.684944341 | 0.01921     |          | ENSG00000205067 |
| 7 | 131465417 | 131465632 | 131465580 | 8   | 8   | 3 | 2.157544559 | 0.0836802   |          | ENSG00000205067 |
| 7 | 131591255 | 131591554 | 131591403 | 11  | 13  | 1 | 6.712360851 | 0.000640982 | PLXNA4   | ENSG00000221866 |
| 7 | 131654102 | 131654370 | 131654229 | 13  | 16  | 4 | 3.260289556 | 0.00475414  | PLXNA4   | ENSG00000221866 |
| 7 | 132045422 | 132045601 | 132045511 | 8   | 8   | 2 | 2.876726079 | 0.0381137   |          | ENSG00000201009 |
| 7 | 132925304 | 132925523 | 132925399 | 8   | 9   | 1 | 4.794543465 | 0.00708517  |          | ENSG00000208439 |
| 7 | 133779614 | 133779794 | 133779657 | 8   | 9   | 2 | 3.19636231  | 0.0229249   | AKR1B1   | ENSG00000085662 |
| 7 | 133855132 | 133855344 | 133855245 | 8   | 8   | 1 | 4.315089119 | 0.0127267   | AKR1B10  | ENSG00000198074 |
| 7 | 133881380 | 133881779 | 133881619 | 25  | 35  | 0 | 34.52071295 | 3.07E-11    | AKR1B10  | ENSG00000198074 |
| 7 | 133882705 | 133883098 | 133883011 | 8   | 14  | 4 | 2.876726079 | 0.01219     | AKR1B10  | ENSG00000198074 |
| 7 | 133958515 | 133958844 | 133958669 | 17  | 21  | 0 | 21.09599125 | 3.76E-07    | BPGM     | ENSG00000172331 |
| 7 | 134106969 | 134107462 | 134107283 | 21  | 31  | 5 | 5.114179696 | 6.54E-06    | CALD1    | ENSG00000122786 |
| 7 | 134180552 | 134181125 | 134180889 | 135 | 162 | 6 | 22.32887385 | 1.07E-39    | CALD1    | ENSG00000122786 |
| 7 | 134616826 | 134617059 | 134616921 | 9   | 11  | 2 | 3.835634772 | 0.00800699  | STRA8    | ENSG00000146857 |
| 7 | 134624777 | 134625189 | 134625010 | 13  | 19  | 1 | 9.589086931 | 1.56E-05    | STRA8    | ENSG00000146857 |
| 7 | 134670950 | 134671323 | 134671176 | 15  | 21  | 3 | 5.273997812 | 0.00011662  | STRA8    | ENSG00000146857 |
| 7 | 134671408 | 134671739 | 134671597 | 9   | 13  | 2 | 4.474907234 | 0.00269459  | STRA8    | ENSG00000146857 |
| 7 | 135143648 | 135143911 | 135143779 | 8   | 8   | 1 | 4.315089119 | 0.0127267   |          | ENSG00000222219 |
| 7 | 135627845 | 135628067 | 135627942 | 8   | 9   | 3 | 2.397271733 | 0.0539397   |          | ENSG00000220982 |
| 7 | 137499653 | 137500462 | 137500180 | 71  | 108 | 2 | 34.84034918 | 2.21E-29    |          | ENSG00000222912 |
| 7 | 137523768 | 137524165 | 137523986 | 13  | 20  | 0 | 20.13708255 | 7.37E-07    |          | ENSG00000201465 |
| 7 | 137766720 | 137767196 | 137766978 | 47  | 66  | 1 | 32.12344122 | 9.20E-19    |          | ENSG00000202072 |
| 7 | 137863011 | 137863234 | 137863122 | 9   | 10  | 2 | 3.515998541 | 0.0136204   |          | ENSG00000208395 |
| 7 | 138074096 | 138074469 | 138074252 | 28  | 34  | 4 | 6.712360851 | 3.20E-07    | ATP6V0A4 | ENSG00000105929 |

|   |           |           |           |    |    |    |             |             |         |                 |
|---|-----------|-----------|-----------|----|----|----|-------------|-------------|---------|-----------------|
| 7 | 138453440 | 138453691 | 138453565 | 11 | 13 | 1  | 6.712360851 | 0.000640982 | ZC3HAV1 | ENSG00000105939 |
| 7 | 138643734 | 138644069 | 138643930 | 19 | 23 | 0  | 23.01380863 | 9.81E-08    |         | ENSG00000206843 |
| 7 | 138676460 | 138676679 | 138676569 | 8  | 10 | 3  | 2.636998906 | 0.034203    | FMC1    | ENSG00000164898 |
| 7 | 138695747 | 138695991 | 138695860 | 11 | 13 | 4  | 2.684944341 | 0.01921     | LUC7L2  | ENSG00000146963 |
| 7 | 138696024 | 138696352 | 138696192 | 24 | 27 | 1  | 13.4247217  | 9.80E-08    | LUC7L2  | ENSG00000146963 |
| 7 | 138967027 | 138967217 | 138967064 | 8  | 10 | 2  | 3.515998541 | 0.0136204   | HIPK2   | ENSG00000064393 |
| 7 | 139997378 | 139997597 | 139997477 | 9  | 9  | 1  | 4.794543465 | 0.00708517  |         | ENSG00000208351 |
| 7 | 140214147 | 140214455 | 140214301 | 16 | 20 | 0  | 20.13708255 | 7.37E-07    |         | ENSG00000207040 |
| 7 | 141000794 | 141000978 | 141000886 | 8  | 8  | 3  | 2.157544559 | 0.0836802   |         | ENSG00000219583 |
| 7 | 141009432 | 141009822 | 141009651 | 9  | 16 | 10 | 1.481949798 | 0.147733    |         | ENSG00000219583 |
| 7 | 141084360 | 141084773 | 141084594 | 8  | 15 | 6  | 2.191791298 | 0.0328001   | SSBP1   | ENSG00000106028 |
| 7 | 141322666 | 141322952 | 141322883 | 8  | 13 | 5  | 2.237453617 | 0.038866    | TAS2R38 | ENSG00000183609 |
| 7 | 141644454 | 141644667 | 141644554 | 8  | 9  | 1  | 4.794543465 | 0.00708517  |         | ENSG00000211702 |
| 7 | 141945406 | 141945622 | 141945514 | 9  | 10 | 1  | 5.273997812 | 0.00391723  |         | ENSG00000211738 |
| 7 | 142191158 | 142191531 | 142191326 | 10 | 16 | 5  | 2.716907964 | 0.0109645   |         | ENSG00000211755 |
| 7 | 142294808 | 142295060 | 142294934 | 14 | 15 | 2  | 5.114179696 | 0.00088103  | TRPV6   | ENSG00000165125 |
| 7 | 142351097 | 142351471 | 142351295 | 20 | 27 | 3  | 6.712360851 | 3.92E-06    | C7orf34 | ENSG00000165131 |
| 7 | 143719739 | 143720060 | 143719895 | 8  | 12 | 2  | 4.155271003 | 0.0046638   | NOBOX   | ENSG00000106410 |
| 7 | 143999315 | 143999895 | 143999683 | 61 | 79 | 2  | 25.57089848 | 3.56E-21    |         | ENSG00000214036 |
| 7 | 144115239 | 144115472 | 144115355 | 8  | 9  | 1  | 4.794543465 | 0.00708517  | TPK1    | ENSG00000196511 |
| 7 | 144364726 | 144364968 | 144364900 | 9  | 12 | 2  | 4.155271003 | 0.0046638   |         | ENSG00000214035 |
| 7 | 146749887 | 146750066 | 146749976 | 8  | 8  | 0  | 8.630178238 | 0.00235436  |         | ENSG00000221442 |
| 7 | 147570376 | 147570606 | 147570491 | 8  | 8  | 5  | 1.43836304  | 0.235762    |         | ENSG00000199370 |
| 7 | 147730102 | 147730611 | 147730409 | 50 | 71 | 0  | 69.0414259  | 9.44E-22    |         | ENSG00000199370 |
| 7 | 147903638 | 147904042 | 147903863 | 11 | 17 | 5  | 2.876726079 | 0.00703033  |         | ENSG00000213210 |
| 7 | 148000130 | 148000465 | 148000297 | 43 | 47 | 0  | 46.02761727 | 9.62E-15    | CUL1    | ENSG00000055130 |
| 7 | 148028190 | 148028369 | 148028289 | 8  | 8  | 2  | 2.876726079 | 0.0381137   | CUL1    | ENSG00000055130 |
| 7 | 148193394 | 148193585 | 148193498 | 9  | 10 | 2  | 3.515998541 | 0.0136204   | EZH2    | ENSG00000106462 |
| 7 | 148229380 | 148229674 | 148229527 | 16 | 20 | 1  | 10.06854128 | 8.32E-06    |         | ENSG00000208292 |
| 7 | 148266183 | 148266537 | 148266304 | 9  | 14 | 1  | 7.191815198 | 0.00034761  |         | ENSG00000208290 |
| 7 | 148269033 | 148269248 | 148269137 | 9  | 11 | 2  | 3.835634772 | 0.00800699  |         | ENSG00000208290 |
| 7 | 148294770 | 148295130 | 148294959 | 9  | 15 | 6  | 2.191791298 | 0.0328001   |         | ENSG00000202442 |
| 7 | 148315123 | 148315432 | 148315278 | 10 | 14 | 4  | 2.876726079 | 0.01219     |         | ENSG00000201098 |
| 7 | 148451440 | 148451676 | 148451558 | 11 | 11 | 1  | 5.753452158 | 0.00215302  |         | ENSG00000208283 |

|   |           |           |           |    |    |   |             |             |        |                 |
|---|-----------|-----------|-----------|----|----|---|-------------|-------------|--------|-----------------|
| 7 | 148455781 | 148456025 | 148455903 | 8  | 8  | 7 | 1.07877228  | 0.435076    | ZNF425 | ENSG00000204947 |
| 7 | 148473114 | 148473566 | 148473290 | 13 | 21 | 7 | 2.636998906 | 0.00562102  | ZNF398 | ENSG00000197024 |
| 7 | 148475174 | 148475413 | 148475241 | 10 | 11 | 6 | 1.643843474 | 0.137712    | ZNF398 | ENSG00000197024 |
| 7 | 148495048 | 148495498 | 148495319 | 11 | 20 | 8 | 2.237453617 | 0.0160557   | ZNF398 | ENSG00000197024 |
| 7 | 148509350 | 148509643 | 148509496 | 10 | 13 | 2 | 4.474907234 | 0.00269459  | ZNF282 | ENSG00000170265 |
| 7 | 148524466 | 148524808 | 148524637 | 8  | 14 | 1 | 7.191815198 | 0.00034761  | ZNF282 | ENSG00000170265 |
| 7 | 148537596 | 148537851 | 148537710 | 11 | 13 | 2 | 4.474907234 | 0.00269459  | ZNF282 | ENSG00000170265 |
| 7 | 148557825 | 148558030 | 148557927 | 8  | 8  | 5 | 1.43836304  | 0.235762    | ZNF212 | ENSG00000170260 |
| 7 | 148567392 | 148567765 | 148567657 | 14 | 20 | 6 | 2.876726079 | 0.00408924  | ZNF212 | ENSG00000170260 |
| 7 | 148567913 | 148568185 | 148568049 | 10 | 13 | 1 | 6.712360851 | 0.000640982 | ZNF212 | ENSG00000170260 |
| 7 | 148589547 | 148589871 | 148589715 | 11 | 14 | 7 | 1.797953799 | 0.0806593   | ZNF783 | ENSG00000204946 |
| 7 | 148612872 | 148613052 | 148612962 | 8  | 8  | 6 | 1.232882605 | 0.333038    | ZNF783 | ENSG00000204946 |
| 7 | 148638215 | 148638470 | 148638342 | 8  | 10 | 5 | 1.757999271 | 0.121253    |        | ENSG00000219420 |
| 7 | 148722125 | 148722649 | 148722369 | 43 | 69 | 1 | 33.56180426 | 1.28E-19    |        | ENSG00000208277 |
| 7 | 148863308 | 148863587 | 148863447 | 9  | 10 | 0 | 10.54799562 | 0.000613541 | ZNF746 | ENSG00000181220 |
| 7 | 148886071 | 148886335 | 148886203 | 8  | 10 | 2 | 3.515998541 | 0.0136204   |        | ENSG00000208274 |
| 7 | 148951854 | 148952337 | 148952033 | 25 | 36 | 4 | 7.095924329 | 1.02E-07    | ZNF767 | ENSG00000133624 |
| 7 | 149018941 | 149019348 | 149019183 | 10 | 18 | 7 | 2.277408146 | 0.0188653   | KRBA1  | ENSG00000133619 |
| 7 | 149070129 | 149070425 | 149070276 | 8  | 9  | 7 | 1.198635866 | 0.346278    | ZNF467 | ENSG00000181444 |
| 7 | 149121835 | 149122543 | 149122136 | 25 | 45 | 4 | 8.821959976 | 5.35E-10    |        | ENSG00000197558 |
| 7 | 149166258 | 149166564 | 149166411 | 9  | 12 | 4 | 2.493162602 | 0.0299057   | ZNF862 | ENSG00000106479 |
| 7 | 149166968 | 149167220 | 149167113 | 8  | 10 | 6 | 1.506856518 | 0.188853    | ZNF862 | ENSG00000106479 |
| 7 | 149200783 | 149201006 | 149200900 | 8  | 8  | 0 | 8.630178238 | 0.00235436  |        | ENSG00000171130 |
| 7 | 149695993 | 149696190 | 149696101 | 8  | 9  | 8 | 1.065454103 | 0.442605    | REPIN1 | ENSG00000214022 |
| 7 | 149749129 | 149749354 | 149749262 | 9  | 9  | 3 | 2.397271733 | 0.0539397   | GIMAP8 | ENSG00000171115 |
| 7 | 150272761 | 150273078 | 150272914 | 10 | 13 | 4 | 2.684944341 | 0.01921     | KCNH2  | ENSG00000055118 |
| 7 | 150356658 | 150356852 | 150356755 | 8  | 9  | 0 | 9.589086931 | 0.00120187  | ABCB8  | ENSG00000197150 |
| 7 | 150386210 | 150386444 | 150386297 | 8  | 10 | 3 | 2.636998906 | 0.034203    | CDK5   | ENSG00000164885 |
| 7 | 150500675 | 150500939 | 150500819 | 9  | 12 | 4 | 2.493162602 | 0.0299057   | GBX1   | ENSG00000164900 |
| 7 | 150522978 | 150523157 | 150523067 | 8  | 8  | 3 | 2.157544559 | 0.0836802   | ASB10  | ENSG00000146926 |
| 7 | 150529315 | 150529538 | 150529406 | 9  | 9  | 0 | 9.589086931 | 0.00120187  |        | ENSG00000183016 |
| 7 | 150696118 | 150696374 | 150696265 | 8  | 10 | 4 | 2.109599125 | 0.0694668   | NUB1   | ENSG00000013374 |
| 7 | 150880478 | 150880804 | 150880636 | 15 | 16 | 5 | 2.716907964 | 0.0109645   | RHEB   | ENSG00000106615 |
| 7 | 151016059 | 151016506 | 151016248 | 66 | 89 | 1 | 43.15089119 | 2.36E-25    | PRKAG2 | ENSG00000106617 |

|   |           |           |           |     |     |    |             |             |         |                 |
|---|-----------|-----------|-----------|-----|-----|----|-------------|-------------|---------|-----------------|
| 7 | 151016524 | 151016710 | 151016617 | 9   | 10  | 1  | 5.273997812 | 0.00391723  | PRKAG2  | ENSG00000106617 |
| 7 | 151055841 | 151056059 | 151055953 | 9   | 10  | 2  | 3.515998541 | 0.0136204   | PRKAG2  | ENSG00000106617 |
| 7 | 151064531 | 151064721 | 151064632 | 9   | 10  | 1  | 5.273997812 | 0.00391723  | PRKAG2  | ENSG00000106617 |
| 7 | 151082091 | 151082556 | 151082377 | 16  | 24  | 1  | 11.98635866 | 6.63E-07    | PRKAG2  | ENSG00000106617 |
| 7 | 151147118 | 151147378 | 151147219 | 9   | 10  | 7  | 1.318499453 | 0.269217    | PRKAG2  | ENSG00000106617 |
| 7 | 151179140 | 151179439 | 151179288 | 13  | 15  | 5  | 2.557089848 | 0.0169197   | PRKAG2  | ENSG00000106617 |
| 7 | 151320477 | 151320778 | 151320627 | 11  | 14  | 3  | 3.595907599 | 0.00486913  |         | ENSG00000208257 |
| 7 | 151400047 | 151400380 | 151400213 | 12  | 15  | 0  | 15.34253909 | 2.13E-05    |         | ENSG00000208254 |
| 7 | 151400424 | 151400975 | 151400655 | 106 | 139 | 2  | 44.74907234 | 3.19E-38    |         | ENSG00000208254 |
| 7 | 151404305 | 151404621 | 151404483 | 11  | 15  | 6  | 2.191791298 | 0.0328001   | GALNT11 | ENSG00000178234 |
| 7 | 151429181 | 151429360 | 151429260 | 8   | 8   | 4  | 1.726035648 | 0.150596    | GALNT11 | ENSG00000178234 |
| 7 | 151664752 | 151664933 | 151664884 | 10  | 10  | 0  | 10.54799562 | 0.000613541 |         | ENSG00000204894 |
| 7 | 151739443 | 151739690 | 151739562 | 9   | 11  | 2  | 3.835634772 | 0.00800699  | MLL3    | ENSG00000055609 |
| 7 | 152061540 | 152062082 | 152061793 | 61  | 76  | 1  | 36.91798468 | 1.27E-21    |         | ENSG00000214003 |
| 7 | 152317681 | 152318280 | 152317994 | 46  | 75  | 6  | 10.41100867 | 3.36E-16    |         | ENSG00000217267 |
| 7 | 153801186 | 153801405 | 153801245 | 8   | 8   | 1  | 4.315089119 | 0.0127267   | DPP6    | ENSG00000130226 |
| 7 | 153841239 | 153841422 | 153841302 | 8   | 9   | 3  | 2.397271733 | 0.0539397   |         | ENSG00000221099 |
| 7 | 154116457 | 154116653 | 154116534 | 9   | 9   | 0  | 9.589086931 | 0.00120187  |         | ENSG00000221099 |
| 7 | 154351094 | 154351434 | 154351264 | 10  | 16  | 3  | 4.075361945 | 0.00173346  |         | ENSG00000214106 |
| 7 | 154646850 | 154647478 | 154647299 | 23  | 39  | 4  | 7.671269544 | 1.80E-08    |         | ENSG00000217825 |
| 7 | 154967630 | 154968293 | 154968056 | 18  | 41  | 0  | 40.27416511 | 5.44E-13    | EN2     | ENSG00000164778 |
| 7 | 155129664 | 155129909 | 155129804 | 11  | 12  | 6  | 1.78083043  | 0.0985525   |         | ENSG00000216895 |
| 7 | 155144246 | 155144432 | 155144380 | 8   | 9   | 3  | 2.397271733 | 0.0539397   | RBM33   | ENSG00000184863 |
| 7 | 155300809 | 155301019 | 155300914 | 11  | 12  | 1  | 6.232906505 | 0.00117736  | SHH     | ENSG00000164690 |
| 7 | 155337321 | 155337664 | 155337552 | 8   | 13  | 0  | 13.4247217  | 8.16E-05    |         | ENSG00000221113 |
| 7 | 155346347 | 155346656 | 155346501 | 13  | 15  | 10 | 1.394776281 | 0.191426    |         | ENSG00000221113 |
| 7 | 155515720 | 155515964 | 155515839 | 8   | 10  | 0  | 10.54799562 | 0.000613541 |         | ENSG00000204876 |
| 7 | 155832672 | 155832914 | 155832792 | 11  | 12  | 1  | 6.232906505 | 0.00117736  |         | ENSG00000207061 |
| 7 | 155886766 | 155887061 | 155886914 | 9   | 9   | 4  | 1.917817386 | 0.103282    |         | ENSG00000207061 |
| 7 | 155928112 | 155928298 | 155928188 | 9   | 9   | 1  | 4.794543465 | 0.00708517  | RNF32   | ENSG00000105982 |
| 7 | 156249586 | 156249797 | 156249670 | 10  | 11  | 2  | 3.835634772 | 0.00800699  |         | ENSG00000206938 |
| 7 | 156394375 | 156394633 | 156394469 | 10  | 11  | 3  | 2.876726079 | 0.0213797   | LMBR1   | ENSG00000105983 |
| 7 | 156440270 | 156440667 | 156440492 | 9   | 16  | 1  | 8.150723891 | 0.000101217 | NOM1    | ENSG00000146909 |
| 7 | 156774903 | 156775252 | 156775077 | 11  | 15  | 4  | 3.068507818 | 0.0076507   |         | ENSG00000208243 |

|   |           |           |           |     |     |    |             |             |         |                 |
|---|-----------|-----------|-----------|-----|-----|----|-------------|-------------|---------|-----------------|
| 7 | 156803531 | 156803787 | 156803663 | 8   | 10  | 6  | 1.506856518 | 0.188853    |         | ENSG00000208243 |
| 7 | 156825469 | 156825872 | 156825693 | 9   | 17  | 5  | 2.876726079 | 0.00703033  | DNAJB6  | ENSG00000105993 |
| 7 | 156841188 | 156841962 | 156841577 | 20  | 47  | 9  | 4.602761727 | 1.72E-07    | DNAJB6  | ENSG00000105993 |
| 7 | 156883446 | 156883673 | 156883547 | 8   | 9   | 6  | 1.369869562 | 0.253675    | DNAJB6  | ENSG00000105993 |
| 7 | 156890578 | 156890883 | 156890743 | 10  | 13  | 2  | 4.474907234 | 0.00269459  | DNAJB6  | ENSG00000105993 |
| 7 | 156978535 | 156978771 | 156978653 | 9   | 11  | 1  | 5.753452158 | 0.00215302  |         | ENSG00000178158 |
| 7 | 157810140 | 157810734 | 157810404 | 22  | 36  | 0  | 35.47962164 | 1.57E-11    |         | ENSG00000208234 |
| 7 | 157882976 | 157883283 | 157883134 | 13  | 16  | 0  | 16.30144778 | 1.09E-05    |         | ENSG00000208234 |
| 7 | 158019979 | 158020217 | 158020132 | 14  | 14  | 1  | 7.191815198 | 0.00034761  |         | ENSG00000207637 |
| 7 | 158057709 | 158058049 | 158057879 | 9   | 10  | 5  | 1.757999271 | 0.121253    | PTPRN2  | ENSG00000155093 |
| 7 | 158080549 | 158080733 | 158080641 | 9   | 9   | 13 | 0.684934781 | 0.824961    | PTPRN2  | ENSG00000155093 |
| 7 | 158132707 | 158133174 | 158132912 | 16  | 25  | 8  | 2.770180669 | 0.00215826  |         | ENSG00000186921 |
| 7 | 158293044 | 158293328 | 158293160 | 8   | 10  | 0  | 10.54799562 | 0.000613541 | FAM62B  | ENSG00000117868 |
| 7 | 158303901 | 158304605 | 158304329 | 14  | 37  | 5  | 6.073088389 | 2.49E-07    | FAM62B  | ENSG00000117868 |
| 7 | 158306886 | 158307137 | 158307036 | 8   | 12  | 4  | 2.493162602 | 0.0299057   | FAM62B  | ENSG00000117868 |
| 7 | 158682624 | 158682818 | 158682667 | 8   | 8   | 7  | 1.07877228  | 0.435076    |         | ENSG00000220691 |
| 7 | 158703840 | 158704078 | 158703959 | 9   | 12  | 4  | 2.493162602 | 0.0299057   |         | ENSG00000220691 |
| 7 | 158796239 | 158796800 | 158796493 | 41  | 60  | 0  | 58.49343028 | 1.54E-18    |         | ENSG00000220691 |
| 8 | 154526    | 154828    | 154695    | 73  | 77  | 1  | 37.39743903 | 6.55E-22    | ZNF596  | ENSG00000172748 |
| 8 | 201252    | 201489    | 201357    | 10  | 13  | 0  | 13.4247217  | 8.16E-05    | ZNF596  | ENSG00000172748 |
| 8 | 634243    | 634483    | 634363    | 8   | 9   | 3  | 2.397271733 | 0.0539397   |         | ENSG00000206100 |
| 8 | 1591254   | 1591614   | 1591449   | 9   | 14  | 2  | 4.794543465 | 0.00154571  | CLN8    | ENSG00000182372 |
| 8 | 2339702   | 2340066   | 2339915   | 18  | 22  | 0  | 22.05489994 | 1.92E-07    | MYOM2   | ENSG00000036448 |
| 8 | 2374513   | 2374762   | 2374642   | 13  | 14  | 2  | 4.794543465 | 0.00154571  | MYOM2   | ENSG00000036448 |
| 8 | 3044487   | 3044720   | 3044636   | 8   | 10  | 0  | 10.54799562 | 0.000613541 | CSMD1   | ENSG00000183117 |
| 8 | 5166338   | 5166732   | 5166553   | 37  | 47  | 1  | 23.01380863 | 2.36E-13    |         | ENSG00000209245 |
| 8 | 6183884   | 6184279   | 6184079   | 35  | 45  | 0  | 44.10979988 | 3.69E-14    | MCPH1   | ENSG00000147316 |
| 8 | 8253708   | 8254023   | 8253869   | 15  | 18  | 1  | 9.109632584 | 2.91E-05    |         | ENSG00000182319 |
| 8 | 8257571   | 8258089   | 8257909   | 106 | 127 | 2  | 40.91343757 | 8.56E-35    |         | ENSG00000182319 |
| 8 | 8281916   | 8282214   | 8282065   | 10  | 12  | 2  | 4.155271003 | 0.0046638   |         | ENSG00000182319 |
| 8 | 8301736   | 8302781   | 8302390   | 77  | 123 | 4  | 23.78093559 | 3.91E-31    |         | ENSG00000182319 |
| 8 | 9021423   | 9021706   | 9021564   | 16  | 18  | 0  | 18.21926517 | 2.83E-06    | PPP1R3B | ENSG00000173281 |
| 8 | 14610329  | 14610632  | 14610479  | 13  | 15  | 2  | 5.114179696 | 0.00088103  |         | ENSG00000199127 |
| 8 | 17668126  | 17668386  | 17668277  | 9   | 10  | 2  | 3.515998541 | 0.0136204   |         | ENSG00000212280 |



|   |          |          |          |     |     |   |             |             |           |                 |
|---|----------|----------|----------|-----|-----|---|-------------|-------------|-----------|-----------------|
| 8 | 17824264 | 17824587 | 17824425 | 9   | 14  | 1 | 7.191815198 | 0.00034761  | PCM1      | ENSG00000078674 |
| 8 | 18856612 | 18856860 | 18856690 | 9   | 11  | 3 | 2.876726079 | 0.0213797   |           | ENSG00000201157 |
| 8 | 18943160 | 18944122 | 18943532 | 144 | 192 | 5 | 30.84489629 | 3.05E-49    | PSD3      | ENSG00000156011 |
| 8 | 19323425 | 19323636 | 19323530 | 8   | 10  | 1 | 5.273997812 | 0.00391723  | CSGALNAC  | ENSG00000147408 |
| 8 | 19759851 | 19760070 | 19759989 | 9   | 9   | 3 | 2.397271733 | 0.0539397   |           | ENSG00000210316 |
| 8 | 20030754 | 20030943 | 20030840 | 9   | 10  | 3 | 2.636998906 | 0.034203    | SLC18A1   | ENSG00000036565 |
| 8 | 20061527 | 20061777 | 20061638 | 10  | 10  | 3 | 2.636998906 | 0.034203    | SLC18A1   | ENSG00000036565 |
| 8 | 20278063 | 20278248 | 20278155 | 10  | 10  | 0 | 10.54799562 | 0.000613541 | LZTS1     | ENSG00000061337 |
| 8 | 20329831 | 20330208 | 20330029 | 29  | 39  | 0 | 38.35634772 | 2.09E-12    |           | ENSG00000210340 |
| 8 | 21505936 | 21506264 | 21506100 | 11  | 16  | 1 | 8.150723891 | 0.000101217 |           | ENSG00000210349 |
| 8 | 21965554 | 21965961 | 21965733 | 9   | 16  | 0 | 16.30144778 | 1.09E-05    | EPB49     | ENSG00000158856 |
| 8 | 22266057 | 22266269 | 22266186 | 9   | 10  | 0 | 10.54799562 | 0.000613541 | SLC39A14  | ENSG00000104635 |
| 8 | 22517935 | 22518194 | 22518080 | 10  | 12  | 5 | 2.077635502 | 0.0577144   | KIAA1967  | ENSG00000158941 |
| 8 | 22927800 | 22928161 | 22927979 | 28  | 35  | 2 | 11.50690432 | 5.48E-09    | RHOBTB2   | ENSG00000008853 |
| 8 | 22981806 | 22982646 | 22982075 | 69  | 118 | 1 | 57.05506724 | 1.05E-33    | TNFRSF10E | ENSG00000120889 |
| 8 | 23137998 | 23138383 | 23138218 | 13  | 20  | 0 | 20.13708255 | 7.37E-07    | TNFRSF10A | ENSG00000104689 |
| 8 | 23836114 | 23836332 | 23836157 | 8   | 11  | 2 | 3.835634772 | 0.00800699  | STC1      | ENSG00000159167 |
| 8 | 24916484 | 24916753 | 24916618 | 11  | 15  | 1 | 7.671269544 | 0.000187863 | NEFL      | ENSG00000104725 |
| 8 | 25088440 | 25088730 | 25088585 | 9   | 11  | 0 | 11.50690432 | 0.000313206 |           | ENSG00000210447 |
| 8 | 26179408 | 26179664 | 26179563 | 9   | 10  | 0 | 10.54799562 | 0.000613541 | PPP2R2A   | ENSG00000221914 |
| 8 | 26706902 | 26707145 | 26707068 | 8   | 11  | 0 | 11.50690432 | 0.000313206 | ADRA1A    | ENSG00000120907 |
| 8 | 26772771 | 26772988 | 26772857 | 8   | 8   | 2 | 2.876726079 | 0.0381137   | ADRA1A    | ENSG00000120907 |
| 8 | 27339733 | 27340010 | 27339871 | 8   | 11  | 2 | 3.835634772 | 0.00800699  | PTK2B     | ENSG00000120899 |
| 8 | 27527371 | 27527564 | 27527453 | 8   | 8   | 4 | 1.726035648 | 0.150596    | CLU       | ENSG00000120885 |
| 8 | 27530390 | 27530818 | 27530641 | 8   | 16  | 2 | 5.433815927 | 0.000499302 | CLU       | ENSG00000120885 |
| 8 | 28608338 | 28608666 | 28608502 | 21  | 23  | 0 | 23.01380863 | 9.81E-08    | EXTL3     | ENSG00000012232 |
| 8 | 29200308 | 29200807 | 29200467 | 13  | 22  | 2 | 7.351633313 | 1.51E-05    |           | ENSG00000212034 |
| 8 | 29495474 | 29495687 | 29495549 | 8   | 8   | 0 | 8.630178238 | 0.00235436  | DUSP4     | ENSG00000120875 |
| 8 | 29683846 | 29684361 | 29684078 | 289 | 336 | 3 | 80.78805739 | 3.00E-93    |           | ENSG00000221003 |
| 8 | 30134648 | 30134925 | 30134772 | 8   | 12  | 4 | 2.493162602 | 0.0299057   | DCTN6     | ENSG00000104671 |
| 8 | 30531386 | 30531566 | 30531495 | 8   | 9   | 0 | 9.589086931 | 0.00120187  |           | ENSG00000200319 |
| 8 | 30700052 | 30700259 | 30700136 | 8   | 8   | 2 | 2.876726079 | 0.0381137   | GSR       | ENSG00000104687 |
| 8 | 30780481 | 30780804 | 30780647 | 24  | 25  | 3 | 6.232906505 | 1.23E-05    | PPP2CB    | ENSG00000104695 |
| 8 | 31149500 | 31149850 | 31149675 | 19  | 24  | 0 | 23.97271733 | 5.01E-08    | PURG      | ENSG00000172733 |

|   |          |          |          |     |     |     |             |             |         |                 |
|---|----------|----------|----------|-----|-----|-----|-------------|-------------|---------|-----------------|
| 8 | 32762127 | 32762564 | 32762385 | 55  | 68  | 3   | 16.54117496 | 5.19E-17    |         | ENSG00000210559 |
| 8 | 33106595 | 33106889 | 33106751 | 21  | 23  | 1   | 11.50690432 | 1.25E-06    |         | ENSG00000210596 |
| 8 | 36839402 | 36839617 | 36839495 | 9   | 11  | 0   | 11.50690432 | 0.000313206 |         | ENSG00000219491 |
| 8 | 36900491 | 36900740 | 36900611 | 11  | 12  | 0   | 12.46581301 | 0.000159888 |         | ENSG00000219491 |
| 8 | 37121521 | 37121821 | 37121686 | 10  | 13  | 3   | 3.356180426 | 0.00805599  |         | ENSG00000219491 |
| 8 | 37571632 | 37571912 | 37571772 | 13  | 14  | 3   | 3.595907599 | 0.00486913  |         | ENSG00000223215 |
| 8 | 38161141 | 38161338 | 38161239 | 9   | 9   | 1   | 4.794543465 | 0.00708517  | BAG4    | ENSG00000156735 |
| 8 | 38507463 | 38507708 | 38507585 | 8   | 10  | 1   | 5.273997812 | 0.00391723  |         | ENSG00000196166 |
| 8 | 38594705 | 38594957 | 38594836 | 9   | 10  | 0   | 10.54799562 | 0.000613541 |         | ENSG00000205408 |
| 8 | 38769836 | 38770089 | 38769962 | 18  | 20  | 6   | 2.876726079 | 0.00408924  | TACC1   | ENSG00000147526 |
| 8 | 39927424 | 39927759 | 39927591 | 13  | 18  | 0   | 18.21926517 | 2.83E-06    | INDOL1  | ENSG00000188676 |
| 8 | 40031437 | 40031648 | 40031542 | 10  | 10  | 1   | 5.273997812 | 0.00391723  | C8orf4  | ENSG00000176907 |
| 8 | 40441187 | 40441473 | 40441330 | 14  | 17  | 0   | 17.26035648 | 5.54E-06    | C8orf4  | ENSG00000176907 |
| 8 | 40836226 | 40836474 | 40836361 | 8   | 10  | 1   | 5.273997812 | 0.00391723  | ZMAT4   | ENSG00000165061 |
| 8 | 41132962 | 41133287 | 41133124 | 17  | 22  | 1   | 11.02744997 | 2.36E-06    |         | ENSG00000206867 |
| 8 | 41747194 | 41747551 | 41747372 | 13  | 18  | 1   | 9.109632584 | 2.91E-05    | ANK1    | ENSG00000029534 |
| 8 | 41795340 | 41795825 | 41795610 | 77  | 94  | 0   | 91.09632584 | 1.81E-28    |         | ENSG00000207101 |
| 8 | 42548220 | 42548520 | 42548370 | 10  | 13  | 0   | 13.4247217  | 8.16E-05    | SLC20A2 | ENSG00000168575 |
| 8 | 42726223 | 42726560 | 42726391 | 23  | 25  | 0   | 24.93162602 | 2.56E-08    | CHRNA6  | ENSG00000147434 |
| 8 | 42817692 | 42817934 | 42817786 | 8   | 10  | 2   | 3.515998541 | 0.0136204   | THAP1   | ENSG00000131931 |
| 8 | 43211905 | 43212804 | 43212075 | 125 | 192 | 164 | 1.121632592 | 0.138756    | A26A1   | ENSG00000188877 |
| 8 | 43213789 | 43214037 | 43213928 | 9   | 10  | 13  | 0.753428259 | 0.762589    | A26A1   | ENSG00000188877 |
| 8 | 43214079 | 43214530 | 43214258 | 25  | 35  | 27  | 1.232882605 | 0.200179    | A26A1   | ENSG00000188877 |
| 8 | 43214832 | 43215368 | 43215110 | 95  | 111 | 104 | 1.022835939 | 0.433485    | A26A1   | ENSG00000188877 |
| 8 | 43215441 | 43215920 | 43215619 | 48  | 64  | 55  | 1.113019019 | 0.277181    | A26A1   | ENSG00000188877 |
| 8 | 43880933 | 43881271 | 43881102 | 30  | 30  | 28  | 1.025040327 | 0.460877    |         | ENSG00000221295 |
| 8 | 43887389 | 43887720 | 43887554 | 18  | 19  | 33  | 0.564063937 | 0.981419    |         | ENSG00000221295 |
| 8 | 43939553 | 43939884 | 43939718 | 15  | 16  | 18  | 0.857970936 | 0.678066    |         | ENSG00000221295 |
| 8 | 43943405 | 43943734 | 43943569 | 20  | 20  | 14  | 1.34247217  | 0.186867    |         | ENSG00000221295 |
| 8 | 46964426 | 46964768 | 46964597 | 87  | 87  | 48  | 1.722121734 | 0.000896726 |         | ENSG00000210854 |
| 8 | 46971494 | 46971825 | 46971659 | 28  | 28  | 24  | 1.112334084 | 0.346253    |         | ENSG00000210854 |
| 8 | 46988338 | 46988517 | 46988369 | 8   | 8   | 9   | 0.863017824 | 0.627343    |         | ENSG00000210854 |
| 8 | 46995799 | 46996117 | 46995958 | 11  | 11  | 6   | 1.643843474 | 0.137712    |         | ENSG00000210854 |
| 8 | 47066979 | 47067165 | 47067009 | 12  | 12  | 1   | 6.232906505 | 0.00117736  |         | ENSG00000210854 |

|   |          |          |          |     |     |    |             |             |         |                 |
|---|----------|----------|----------|-----|-----|----|-------------|-------------|---------|-----------------|
| 8 | 48998819 | 48999096 | 48998952 | 9   | 13  | 6  | 1.917817386 | 0.0693353   |         | ENSG00000211562 |
| 8 | 49017081 | 49017522 | 49017298 | 15  | 24  | 2  | 7.990905775 | 4.56E-06    | PRKDC   | ENSG00000121031 |
| 8 | 49035569 | 49036011 | 49035934 | 10  | 18  | 5  | 3.036544195 | 0.0044641   | MCM4    | ENSG00000104738 |
| 8 | 49036457 | 49036680 | 49036613 | 12  | 12  | 3  | 3.116453252 | 0.0131971   | MCM4    | ENSG00000104738 |
| 8 | 49329248 | 49329564 | 49329404 | 11  | 14  | 7  | 1.797953799 | 0.0806593   |         | ENSG00000210964 |
| 8 | 50000797 | 50001012 | 50000904 | 8   | 10  | 0  | 10.54799562 | 0.000613541 | SNAI2   | ENSG00000019549 |
| 8 | 50178945 | 50179149 | 50179064 | 8   | 9   | 0  | 9.589086931 | 0.00120187  | C8orf22 | ENSG00000168333 |
| 8 | 50179281 | 50179522 | 50179355 | 8   | 9   | 0  | 9.589086931 | 0.00120187  | C8orf22 | ENSG00000168333 |
| 8 | 50185389 | 50185963 | 50185703 | 48  | 74  | 2  | 23.97271733 | 9.05E-20    | C8orf22 | ENSG00000168333 |
| 8 | 50247078 | 50247266 | 50247172 | 8   | 8   | 0  | 8.630178238 | 0.00235436  | C8orf22 | ENSG00000168333 |
| 8 | 53000193 | 53000747 | 53000435 | 140 | 172 | 0  | 165.8912039 | 3.03E-51    | PCMTD1  | ENSG00000168300 |
| 8 | 53542154 | 53542427 | 53542287 | 9   | 11  | 9  | 1.150690432 | 0.367789    | ST18    | ENSG00000147488 |
| 8 | 53571345 | 53571622 | 53571483 | 10  | 12  | 0  | 12.46581301 | 0.000159888 | FAM150A | ENSG00000196711 |
| 8 | 53621134 | 53621766 | 53621596 | 31  | 45  | 0  | 44.10979988 | 3.69E-14    | FAM150A | ENSG00000196711 |
| 8 | 53704504 | 53705014 | 53704672 | 19  | 28  | 3  | 6.952088025 | 2.20E-06    | FAM150A | ENSG00000196711 |
| 8 | 53828232 | 53828454 | 53828321 | 8   | 9   | 0  | 9.589086931 | 0.00120187  | RB1CC1  | ENSG00000023287 |
| 8 | 54348053 | 54348566 | 54348251 | 66  | 80  | 1  | 38.83580207 | 9.03E-23    | OPRK1   | ENSG00000082556 |
| 8 | 55020119 | 55020299 | 55020209 | 8   | 9   | 0  | 9.589086931 | 0.00120187  | RGS20   | ENSG00000147509 |
| 8 | 55020302 | 55020733 | 55020554 | 8   | 17  | 1  | 8.630178238 | 5.44E-05    | RGS20   | ENSG00000147509 |
| 8 | 55020762 | 55020951 | 55020855 | 8   | 8   | 2  | 2.876726079 | 0.0381137   | RGS20   | ENSG00000147509 |
| 8 | 55833974 | 55834189 | 55834081 | 8   | 10  | 0  | 10.54799562 | 0.000613541 | RP1     | ENSG00000104237 |
| 8 | 56290132 | 56290533 | 56290354 | 34  | 44  | 3  | 10.7877228  | 1.57E-10    | XKR4    | ENSG00000206579 |
| 8 | 56820271 | 56820497 | 56820384 | 9   | 10  | 1  | 5.273997812 | 0.00391723  |         | ENSG00000222955 |
| 8 | 56847117 | 56847718 | 56847480 | 29  | 48  | 2  | 15.66217532 | 1.56E-12    | TGS1    | ENSG00000137574 |
| 8 | 56848228 | 56848645 | 56848403 | 11  | 16  | 6  | 2.328778255 | 0.0221113   | TMEM68  | ENSG00000167904 |
| 8 | 56917592 | 56917936 | 56917764 | 21  | 23  | 16 | 1.353753449 | 0.165001    |         | ENSG00000211045 |
| 8 | 57064146 | 57064330 | 57064238 | 8   | 8   | 1  | 4.315089119 | 0.0127267   |         | ENSG00000222746 |
| 8 | 57085762 | 57086013 | 57085887 | 12  | 13  | 1  | 6.712360851 | 0.000640982 |         | ENSG00000211063 |
| 8 | 57329879 | 57330165 | 57330039 | 24  | 25  | 0  | 24.93162602 | 2.56E-08    | CHCHD7  | ENSG00000170791 |
| 8 | 57676180 | 57676423 | 57676342 | 9   | 12  | 0  | 12.46581301 | 0.000159888 | PENK    | ENSG00000181195 |
| 8 | 57693145 | 57693324 | 57693234 | 8   | 9   | 1  | 4.794543465 | 0.00708517  | PENK    | ENSG00000181195 |
| 8 | 57981096 | 57981439 | 57981261 | 36  | 41  | 1  | 20.13708255 | 1.17E-11    |         | ENSG00000206975 |
| 8 | 58027506 | 58027844 | 58027675 | 21  | 23  | 1  | 11.50690432 | 1.25E-06    |         | ENSG00000197334 |
| 8 | 58418408 | 58418588 | 58418541 | 10  | 10  | 1  | 5.273997812 | 0.00391723  |         | ENSG00000202265 |

|   |          |          |          |     |     |    |             |             |         |                 |
|---|----------|----------|----------|-----|-----|----|-------------|-------------|---------|-----------------|
| 8 | 59331545 | 59331735 | 59331640 | 8   | 9   | 0  | 9.589086931 | 0.00120187  | UBXN2B  | ENSG00000215114 |
| 8 | 59470426 | 59470776 | 59470600 | 11  | 14  | 2  | 4.794543465 | 0.00154571  | UBXN2B  | ENSG00000215114 |
| 8 | 59683793 | 59683983 | 59683937 | 8   | 9   | 2  | 3.19636231  | 0.0229249   | NSMAF   | ENSG00000035681 |
| 8 | 60011030 | 60011561 | 60011279 | 27  | 37  | 0  | 36.43853034 | 8.01E-12    |         | ENSG00000201231 |
| 8 | 60028669 | 60028937 | 60028777 | 9   | 12  | 1  | 6.232906505 | 0.00117736  |         | ENSG00000201231 |
| 8 | 61413881 | 61414223 | 61414052 | 12  | 17  | 5  | 2.876726079 | 0.00703033  | CA8     | ENSG00000178538 |
| 8 | 62129654 | 62129959 | 62129813 | 12  | 15  | 7  | 1.917817386 | 0.0572317   |         | ENSG00000213881 |
| 8 | 62171249 | 62171523 | 62171410 | 9   | 10  | 2  | 3.515998541 | 0.0136204   |         | ENSG00000213881 |
| 8 | 62543949 | 62544189 | 62544087 | 9   | 10  | 2  | 3.515998541 | 0.0136204   |         | ENSG00000222898 |
| 8 | 62812727 | 62813051 | 62812902 | 10  | 15  | 0  | 15.34253909 | 2.13E-05    | ASPH    | ENSG00000198363 |
| 8 | 64757258 | 64757437 | 64757338 | 9   | 9   | 1  | 4.794543465 | 0.00708517  |         | ENSG00000211148 |
| 8 | 66709035 | 66709337 | 66709200 | 18  | 21  | 5  | 3.515998541 | 0.00108602  | ARMC1   | ENSG00000104442 |
| 8 | 66711568 | 66711776 | 66711672 | 9   | 9   | 1  | 4.794543465 | 0.00708517  | ARMC1   | ENSG00000104442 |
| 8 | 66792229 | 66792482 | 66792355 | 10  | 11  | 3  | 2.876726079 | 0.0213797   | PDE7A   | ENSG00000205268 |
| 8 | 67023288 | 67023649 | 67023434 | 15  | 20  | 5  | 3.356180426 | 0.0017534   | DNAJC5B | ENSG00000147570 |
| 8 | 67095737 | 67095934 | 67095835 | 8   | 9   | 5  | 1.598181155 | 0.170911    | DNAJC5B | ENSG00000147570 |
| 8 | 67101237 | 67101525 | 67101378 | 17  | 18  | 9  | 1.821926517 | 0.0548428   | DNAJC5B | ENSG00000147570 |
| 8 | 67111426 | 67111694 | 67111565 | 8   | 11  | 1  | 5.753452158 | 0.00215302  | DNAJC5B | ENSG00000147570 |
| 8 | 67174718 | 67174961 | 67174815 | 10  | 11  | 0  | 11.50690432 | 0.000313206 |         | ENSG00000209078 |
| 8 | 67188004 | 67189287 | 67188420 | 145 | 251 | 13 | 17.26035648 | 9.58E-57    |         | ENSG00000209078 |
| 8 | 67198708 | 67199380 | 67199262 | 19  | 39  | 2  | 12.78544924 | 4.53E-10    | TRIM55  | ENSG00000147573 |
| 8 | 67513808 | 67514113 | 67513960 | 10  | 14  | 11 | 1.198635866 | 0.315918    | ADHFE1  | ENSG00000147576 |
| 8 | 67664975 | 67665435 | 67665262 | 21  | 31  | 1  | 15.34253909 | 7.54E-09    |         | ENSG00000219180 |
| 8 | 67684197 | 67684387 | 67684269 | 8   | 8   | 0  | 8.630178238 | 0.00235436  |         | ENSG00000219180 |
| 8 | 67977760 | 67977946 | 67977774 | 8   | 10  | 2  | 3.515998541 | 0.0136204   |         | ENSG00000201719 |
| 8 | 67999661 | 67999885 | 67999773 | 8   | 9   | 1  | 4.794543465 | 0.00708517  |         | ENSG00000201719 |
| 8 | 68537555 | 68537772 | 68537663 | 8   | 8   | 0  | 8.630178238 | 0.00235436  |         | ENSG00000211224 |
| 8 | 69705533 | 69705802 | 69705659 | 16  | 19  | 0  | 19.17817386 | 1.44E-06    | C8orf34 | ENSG00000165084 |
| 8 | 70771247 | 70771426 | 70771336 | 8   | 8   | 2  | 2.876726079 | 0.0381137   |         | ENSG00000211324 |
| 8 | 71017363 | 71017640 | 71017501 | 8   | 11  | 3  | 2.876726079 | 0.0213797   |         | ENSG00000223293 |
| 8 | 71568068 | 71568292 | 71568142 | 8   | 9   | 3  | 2.397271733 | 0.0539397   |         | ENSG00000222928 |
| 8 | 71743251 | 71743519 | 71743386 | 8   | 11  | 0  | 11.50690432 | 0.000313206 | LACTB2  | ENSG00000147592 |
| 8 | 72036115 | 72036341 | 72036210 | 9   | 9   | 2  | 3.19636231  | 0.0229249   |         | ENSG00000223220 |
| 8 | 72182166 | 72182437 | 72182301 | 9   | 11  | 1  | 5.753452158 | 0.00215302  | EYA1    | ENSG00000104313 |

|   |          |          |          |    |     |    |             |             |          |                 |
|---|----------|----------|----------|----|-----|----|-------------|-------------|----------|-----------------|
| 8 | 73177170 | 73177364 | 73177267 | 8  | 8   | 0  | 8.630178238 | 0.00235436  | TRPA1    | ENSG00000104321 |
| 8 | 73198136 | 73198385 | 73198268 | 9  | 9   | 1  | 4.794543465 | 0.00708517  | TRPA1    | ENSG00000104321 |
| 8 | 74250068 | 74250749 | 74250409 | 23 | 44  | 5  | 7.191815198 | 4.84E-09    |          | ENSG00000164764 |
| 8 | 74299049 | 74299436 | 74299224 | 8  | 15  | 3  | 3.835634772 | 0.00291691  | RPL7     | ENSG00000147604 |
| 8 | 74367773 | 74367999 | 74367886 | 8  | 9   | 4  | 1.917817386 | 0.103282    | RPL7     | ENSG00000147604 |
| 8 | 74431203 | 74431480 | 74431341 | 9  | 13  | 6  | 1.917817386 | 0.0693353   | RPL7     | ENSG00000147604 |
| 8 | 74642965 | 74643144 | 74643054 | 8  | 8   | 1  | 4.315089119 | 0.0127267   |          | ENSG00000215037 |
| 8 | 74953856 | 74954183 | 74954072 | 9  | 14  | 2  | 4.794543465 | 0.00154571  | UBE2W    | ENSG00000104343 |
| 8 | 75035275 | 75035454 | 75035364 | 8  | 8   | 5  | 1.43836304  | 0.235762    | TCEB1    | ENSG00000154582 |
| 8 | 75379165 | 75379487 | 75379325 | 20 | 22  | 1  | 11.02744997 | 2.36E-06    | JPH1     | ENSG00000104369 |
| 8 | 76151642 | 76151833 | 76151737 | 9  | 9   | 2  | 3.19636231  | 0.0229249   | CRISPLD1 | ENSG00000121005 |
| 8 | 76300674 | 76300923 | 76300779 | 10 | 11  | 2  | 3.835634772 | 0.00800699  | HNF4G    | ENSG00000164749 |
| 8 | 76794060 | 76794269 | 76794124 | 9  | 11  | 0  | 11.50690432 | 0.000313206 |          | ENSG00000221029 |
| 8 | 78066435 | 78066618 | 78066497 | 9  | 9   | 1  | 4.794543465 | 0.00708517  | PXMP3    | ENSG00000164751 |
| 8 | 78074779 | 78074992 | 78074885 | 8  | 9   | 7  | 1.198635866 | 0.346278    | PXMP3    | ENSG00000164751 |
| 8 | 78625437 | 78625726 | 78625568 | 18 | 19  | 3  | 4.794543465 | 0.000349205 |          |                 |
| 8 | 79635450 | 79635657 | 79635553 | 8  | 9   | 2  | 3.19636231  | 0.0229249   | PKIA     | ENSG00000171033 |
| 8 | 79672145 | 79672405 | 79672262 | 9  | 9   | 5  | 1.598181155 | 0.170911    | FAM164A  | ENSG00000104427 |
| 8 | 80194746 | 80195121 | 80194858 | 19 | 24  | 2  | 7.990905775 | 4.56E-06    | IL7      | ENSG00000104432 |
| 8 | 80199011 | 80199399 | 80199235 | 21 | 30  | 0  | 29.72616948 | 8.86E-10    | IL7      | ENSG00000104432 |
| 8 | 81027338 | 81027517 | 81027430 | 8  | 8   | 2  | 2.876726079 | 0.0381137   | MRPS28   | ENSG00000147586 |
| 8 | 81098452 | 81098660 | 81098524 | 10 | 11  | 3  | 2.876726079 | 0.0213797   | MRPS28   | ENSG00000147586 |
| 8 | 81104323 | 81104653 | 81104452 | 9  | 13  | 2  | 4.474907234 | 0.00269459  | MRPS28   | ENSG00000147586 |
| 8 | 81143094 | 81143753 | 81143432 | 86 | 125 | 2  | 40.27416511 | 3.18E-34    | TPD52    | ENSG00000076554 |
| 8 | 81153184 | 81153497 | 81153353 | 12 | 15  | 2  | 5.114179696 | 0.00088103  | TPD52    | ENSG00000076554 |
| 8 | 81158881 | 81159101 | 81158985 | 9  | 11  | 3  | 2.876726079 | 0.0213797   | TPD52    | ENSG00000076554 |
| 8 | 81159122 | 81159629 | 81159301 | 12 | 24  | 5  | 3.995452888 | 0.00024777  | TPD52    | ENSG00000076554 |
| 8 | 81162346 | 81162624 | 81162496 | 10 | 13  | 1  | 6.712360851 | 0.000640982 | TPD52    | ENSG00000076554 |
| 8 | 81166540 | 81166741 | 81166640 | 9  | 10  | 3  | 2.636998906 | 0.034203    | TPD52    | ENSG00000076554 |
| 8 | 81220757 | 81220965 | 81220852 | 8  | 9   | 1  | 4.794543465 | 0.00708517  |          | ENSG00000209175 |
| 8 | 81305641 | 81305910 | 81305775 | 11 | 14  | 2  | 4.794543465 | 0.00154571  |          | ENSG00000209175 |
| 8 | 81315324 | 81315651 | 81315487 | 8  | 14  | 6  | 2.054804342 | 0.0480281   |          | ENSG00000209175 |
| 8 | 81331764 | 81332173 | 81331994 | 12 | 20  | 3  | 5.034270639 | 0.000202317 |          | ENSG00000213791 |
| 8 | 81441576 | 81441924 | 81441750 | 14 | 19  | 12 | 1.475244143 | 0.131365    |          | ENSG00000206649 |

|   |          |          |          |    |    |    |             |             |          |                 |
|---|----------|----------|----------|----|----|----|-------------|-------------|----------|-----------------|
| 8 | 81560075 | 81560407 | 81560241 | 13 | 17 | 8  | 1.917817386 | 0.0474153   | ZBTB10   | ENSG00000205189 |
| 8 | 81573172 | 81573393 | 81573299 | 8  | 8  | 1  | 4.315089119 | 0.0127267   | ZBTB10   | ENSG00000205189 |
| 8 | 81576037 | 81576533 | 81576234 | 22 | 33 | 2  | 10.86763185 | 1.89E-08    | ZBTB10   | ENSG00000205189 |
| 8 | 81609218 | 81609403 | 81609310 | 9  | 9  | 7  | 1.198635866 | 0.346278    |          | ENSG00000188856 |
| 8 | 81643206 | 81643692 | 81643394 | 15 | 23 | 3  | 5.753452158 | 3.82E-05    |          | ENSG00000188856 |
| 8 | 81656366 | 81656747 | 81656568 | 19 | 26 | 4  | 5.178106943 | 2.75E-05    |          | ENSG00000223327 |
| 8 | 81762131 | 81762463 | 81762304 | 13 | 17 | 3  | 4.315089119 | 0.00102271  |          | ENSG00000212429 |
| 8 | 81827897 | 81828424 | 81828183 | 21 | 36 | 5  | 5.913270274 | 4.32E-07    |          | ENSG00000212429 |
| 8 | 81842725 | 81843006 | 81842896 | 11 | 15 | 6  | 2.191791298 | 0.0328001   |          | ENSG00000209154 |
| 8 | 81882667 | 81882958 | 81882821 | 11 | 13 | 4  | 2.684944341 | 0.01921     |          | ENSG00000209154 |
| 8 | 82040181 | 82040564 | 82040356 | 17 | 24 | 3  | 5.993179332 | 2.17E-05    |          | ENSG00000215844 |
| 8 | 82066726 | 82067042 | 82066900 | 11 | 14 | 2  | 4.794543465 | 0.00154571  |          | ENSG00000215844 |
| 8 | 82125500 | 82125721 | 82125610 | 9  | 13 | 4  | 2.684944341 | 0.01921     | PAG1     | ENSG00000076641 |
| 8 | 82125756 | 82126057 | 82125906 | 9  | 12 | 3  | 3.116453252 | 0.0131971   | PAG1     | ENSG00000076641 |
| 8 | 82152675 | 82152854 | 82152819 | 8  | 8  | 4  | 1.726035648 | 0.150596    | PAG1     | ENSG00000076641 |
| 8 | 82302323 | 82302544 | 82302466 | 11 | 12 | 0  | 12.46581301 | 0.000159888 | FABP5L3  | ENSG00000164687 |
| 8 | 82583245 | 82583424 | 82583316 | 8  | 10 | 0  | 10.54799562 | 0.000613541 |          | ENSG00000219507 |
| 8 | 82917156 | 82917503 | 82917329 | 32 | 37 | 25 | 1.401481936 | 0.0888599   | SNX16    | ENSG00000104497 |
| 8 | 83237322 | 83237653 | 83237487 | 19 | 23 | 2  | 7.671269544 | 8.30E-06    | HNRNPA1P | ENSG00000206228 |
| 8 | 86454205 | 86454395 | 86454270 | 8  | 9  | 1  | 4.794543465 | 0.00708517  | CA1      | ENSG00000133742 |
| 8 | 86534781 | 86534960 | 86534875 | 8  | 8  | 5  | 1.43836304  | 0.235762    | CA3      | ENSG00000164879 |
| 8 | 86551113 | 86551313 | 86551213 | 8  | 8  | 4  | 1.726035648 | 0.150596    | CA2      | ENSG00000104267 |
| 8 | 86551972 | 86552583 | 86552277 | 12 | 27 | 5  | 4.474907234 | 5.37E-05    | CA2      | ENSG00000104267 |
| 8 | 86562668 | 86562938 | 86562837 | 15 | 17 | 5  | 2.876726079 | 0.00703033  | CA2      | ENSG00000104267 |
| 8 | 86669117 | 86669342 | 86669229 | 9  | 10 | 5  | 1.757999271 | 0.121253    |          | ENSG00000205178 |
| 8 | 86672404 | 86672614 | 86672531 | 8  | 8  | 3  | 2.157544559 | 0.0836802   |          | ENSG00000205178 |
| 8 | 86714337 | 86714550 | 86714443 | 9  | 10 | 1  | 5.273997812 | 0.00391723  |          | ENSG00000205178 |
| 8 | 86734564 | 86734791 | 86734652 | 10 | 12 | 2  | 4.155271003 | 0.0046638   |          | ENSG00000205178 |
| 8 | 86739696 | 86740112 | 86739827 | 15 | 24 | 0  | 23.97271733 | 5.01E-08    |          | ENSG00000205178 |
| 8 | 86918426 | 86918620 | 86918509 | 9  | 9  | 3  | 2.397271733 | 0.0539397   |          | ENSG00000205162 |
| 8 | 86948146 | 86948374 | 86948297 | 9  | 9  | 0  | 9.589086931 | 0.00120187  |          | ENSG00000205162 |
| 8 | 86964249 | 86964432 | 86964343 | 8  | 9  | 3  | 2.397271733 | 0.0539397   |          | ENSG00000205162 |
| 8 | 87054652 | 87055024 | 87054798 | 11 | 17 | 4  | 3.452071295 | 0.00292757  | PSKH2    | ENSG00000147613 |
| 8 | 87068598 | 87068936 | 87068767 | 10 | 15 | 12 | 1.180195315 | 0.324974    | PSKH2    | ENSG00000147613 |

|   |          |          |          |    |    |    |             |             |          |                 |
|---|----------|----------|----------|----|----|----|-------------|-------------|----------|-----------------|
| 8 | 87083584 | 87083763 | 87083673 | 9  | 9  | 2  | 3.19636231  | 0.0229249   | PSKH2    | ENSG00000147613 |
| 8 | 87098936 | 87099145 | 87099073 | 9  | 10 | 2  | 3.515998541 | 0.0136204   | PSKH2    | ENSG00000147613 |
| 8 | 87114804 | 87115019 | 87114911 | 9  | 10 | 11 | 0.878999635 | 0.622439    | PSKH2    | ENSG00000147613 |
| 8 | 87125549 | 87125836 | 87125692 | 8  | 10 | 4  | 2.109599125 | 0.0694668   | PSKH2    | ENSG00000147613 |
| 8 | 87223090 | 87223320 | 87223235 | 8  | 9  | 5  | 1.598181155 | 0.170911    | ATP6V0D2 | ENSG00000147614 |
| 8 | 87338700 | 87338963 | 87338824 | 8  | 8  | 6  | 1.232882605 | 0.333038    | SLC7A13  | ENSG00000164893 |
| 8 | 87339938 | 87340207 | 87340072 | 9  | 12 | 11 | 1.038817751 | 0.460341    | SLC7A13  | ENSG00000164893 |
| 8 | 87343331 | 87343510 | 87343393 | 8  | 8  | 7  | 1.07877228  | 0.435076    | SLC7A13  | ENSG00000164893 |
| 8 | 87386766 | 87386989 | 87386815 | 8  | 10 | 2  | 3.515998541 | 0.0136204   | WWP1     | ENSG00000123124 |
| 8 | 87402645 | 87403032 | 87402923 | 8  | 14 | 8  | 1.598181155 | 0.124586    | WWP1     | ENSG00000123124 |
| 8 | 87423130 | 87423361 | 87423247 | 8  | 10 | 10 | 0.958908693 | 0.538751    | WWP1     | ENSG00000123124 |
| 8 | 87423452 | 87423975 | 87423572 | 16 | 32 | 13 | 2.260284776 | 0.00349245  | WWP1     | ENSG00000123124 |
| 8 | 87424504 | 87424739 | 87424590 | 10 | 11 | 3  | 2.876726079 | 0.0213797   | WWP1     | ENSG00000123124 |
| 8 | 87424810 | 87425019 | 87424914 | 9  | 10 | 10 | 0.958908693 | 0.538751    | WWP1     | ENSG00000123124 |
| 8 | 87509528 | 87509719 | 87509701 | 9  | 10 | 4  | 2.109599125 | 0.0694668   | WWP1     | ENSG00000123124 |
| 8 | 87511555 | 87512067 | 87511786 | 33 | 53 | 3  | 12.94526736 | 6.19E-13    |          | ENSG00000214965 |
| 8 | 87590081 | 87590383 | 87590223 | 11 | 15 | 10 | 1.394776281 | 0.191426    | FAM82B   | ENSG00000176623 |
| 8 | 87643702 | 87643941 | 87643864 | 8  | 10 | 4  | 2.109599125 | 0.0694668   |          | ENSG00000209264 |
| 8 | 87700245 | 87700676 | 87700453 | 12 | 22 | 5  | 3.675816657 | 0.000667901 |          | ENSG00000221137 |
| 8 | 87741346 | 87741601 | 87741456 | 9  | 9  | 5  | 1.598181155 | 0.170911    |          | ENSG00000221137 |
| 8 | 87816662 | 87816950 | 87816810 | 9  | 12 | 2  | 4.155271003 | 0.0046638   | CNGB3    | ENSG00000170289 |
| 8 | 87952459 | 87952768 | 87952603 | 12 | 16 | 6  | 2.328778255 | 0.0221113   | CNBD1    | ENSG00000176571 |
| 8 | 88000752 | 88001071 | 88000911 | 8  | 11 | 9  | 1.150690432 | 0.367789    | CNBD1    | ENSG00000176571 |
| 8 | 88092535 | 88092758 | 88092646 | 10 | 11 | 3  | 2.876726079 | 0.0213797   | CNBD1    | ENSG00000176571 |
| 8 | 88191644 | 88191824 | 88191673 | 8  | 9  | 2  | 3.19636231  | 0.0229249   | CNBD1    | ENSG00000176571 |
| 8 | 88247691 | 88248123 | 88247944 | 12 | 21 | 5  | 3.515998541 | 0.00108602  | CNBD1    | ENSG00000176571 |
| 8 | 88396728 | 88396907 | 88396791 | 8  | 8  | 0  | 8.630178238 | 0.00235436  | CNBD1    | ENSG00000176571 |
| 8 | 88662258 | 88662443 | 88662350 | 9  | 10 | 6  | 1.506856518 | 0.188853    | WDR21C   | ENSG00000176566 |
| 8 | 88664448 | 88664627 | 88664537 | 9  | 9  | 1  | 4.794543465 | 0.00708517  | WDR21C   | ENSG00000176566 |
| 8 | 88670493 | 88670718 | 88670605 | 8  | 11 | 2  | 3.835634772 | 0.00800699  | WDR21C   | ENSG00000176566 |
| 8 | 88738967 | 88739270 | 88739118 | 9  | 10 | 5  | 1.757999271 | 0.121253    | WDR21C   | ENSG00000176566 |
| 8 | 88823193 | 88823451 | 88823322 | 9  | 10 | 3  | 2.636998906 | 0.034203    | WDR21C   | ENSG00000176566 |
| 8 | 88959401 | 88959631 | 88959482 | 8  | 8  | 3  | 2.157544559 | 0.0836802   | WDR21C   | ENSG00000176566 |
| 8 | 89022642 | 89022821 | 89022725 | 8  | 8  | 1  | 4.315089119 | 0.0127267   | WDR21C   | ENSG00000176566 |

|   |          |          |          |    |    |    |             |             |       |                 |
|---|----------|----------|----------|----|----|----|-------------|-------------|-------|-----------------|
| 8 | 89054721 | 89054921 | 89054821 | 8  | 9  | 1  | 4.794543465 | 0.00708517  |       | ENSG00000176562 |
| 8 | 89277605 | 89277898 | 89277751 | 8  | 10 | 4  | 2.109599125 | 0.0694668   | MMP16 | ENSG00000156103 |
| 8 | 89296927 | 89297168 | 89297082 | 8  | 8  | 1  | 4.315089119 | 0.0127267   | MMP16 | ENSG00000156103 |
| 8 | 89324933 | 89325254 | 89325106 | 9  | 12 | 5  | 2.077635502 | 0.0577144   | MMP16 | ENSG00000156103 |
| 8 | 89325357 | 89325598 | 89325477 | 9  | 11 | 8  | 1.278544924 | 0.28289     | MMP16 | ENSG00000156103 |
| 8 | 89365961 | 89366202 | 89366081 | 8  | 9  | 1  | 4.794543465 | 0.00708517  | MMP16 | ENSG00000156103 |
| 8 | 89371077 | 89371338 | 89371207 | 8  | 10 | 5  | 1.757999271 | 0.121253    | MMP16 | ENSG00000156103 |
| 8 | 89401934 | 89402287 | 89402110 | 10 | 15 | 15 | 0.958908693 | 0.546868    | MMP16 | ENSG00000156103 |
| 8 | 89407625 | 89407833 | 89407729 | 11 | 12 | 4  | 2.493162602 | 0.0299057   | MMP16 | ENSG00000156103 |
| 8 | 89408016 | 89408320 | 89408168 | 8  | 12 | 4  | 2.493162602 | 0.0299057   | MMP16 | ENSG00000156103 |
| 8 | 89408943 | 89409302 | 89409055 | 12 | 17 | 8  | 1.917817386 | 0.0474153   | MMP16 | ENSG00000156103 |
| 8 | 89409911 | 89410460 | 89410130 | 17 | 28 | 14 | 1.85389014  | 0.0220495   | MMP16 | ENSG00000156103 |
| 8 | 89420331 | 89420510 | 89420391 | 8  | 8  | 5  | 1.43836304  | 0.235762    | MMP16 | ENSG00000156103 |
| 8 | 89496274 | 89496530 | 89496429 | 8  | 10 | 6  | 1.506856518 | 0.188853    |       | ENSG00000209292 |
| 8 | 89496811 | 89497160 | 89496989 | 18 | 21 | 16 | 1.240940662 | 0.248103    |       | ENSG00000209292 |
| 8 | 89635991 | 89636261 | 89636118 | 8  | 10 | 6  | 1.506856518 | 0.188853    |       | ENSG00000209292 |
| 8 | 89647030 | 89647314 | 89647167 | 8  | 10 | 2  | 3.515998541 | 0.0136204   |       | ENSG00000209292 |
| 8 | 89672451 | 89672649 | 89672550 | 8  | 8  | 2  | 2.876726079 | 0.0381137   |       | ENSG00000209292 |
| 8 | 89679973 | 89680328 | 89680150 | 21 | 27 | 6  | 3.835634772 | 0.000155182 |       | ENSG00000209292 |
| 8 | 89717793 | 89718102 | 89717948 | 8  | 10 | 1  | 5.273997812 | 0.00391723  |       | ENSG00000209292 |
| 8 | 89722071 | 89722380 | 89722221 | 9  | 12 | 1  | 6.232906505 | 0.00117736  |       | ENSG00000209292 |
| 8 | 89760058 | 89760906 | 89760483 | 8  | 27 | 7  | 3.356180426 | 0.000396559 |       | ENSG00000209292 |
| 8 | 89832624 | 89832814 | 89832719 | 8  | 8  | 2  | 2.876726079 | 0.0381137   |       | ENSG00000209292 |
| 8 | 89833355 | 89833681 | 89833518 | 19 | 24 | 6  | 3.424673904 | 0.000656885 |       | ENSG00000209292 |
| 8 | 89972614 | 89972856 | 89972778 | 9  | 11 | 4  | 2.301380863 | 0.0459276   |       | ENSG00000209292 |
| 8 | 90064553 | 90064819 | 90064647 | 12 | 14 | 5  | 2.397271733 | 0.0258078   |       | ENSG00000213771 |
| 8 | 90547650 | 90547979 | 90547881 | 8  | 12 | 11 | 1.038817751 | 0.460341    |       | ENSG00000213771 |
| 8 | 90553044 | 90553316 | 90553180 | 8  | 10 | 4  | 2.109599125 | 0.0694668   |       | ENSG00000213771 |
| 8 | 90578811 | 90579038 | 90578900 | 8  | 9  | 3  | 2.397271733 | 0.0539397   |       | ENSG00000213771 |
| 8 | 90640703 | 90640896 | 90640794 | 8  | 8  | 0  | 8.630178238 | 0.00235436  |       | ENSG00000213771 |
| 8 | 90743611 | 90743828 | 90743651 | 8  | 10 | 2  | 3.515998541 | 0.0136204   | RIPK2 | ENSG00000104312 |
| 8 | 90839724 | 90839955 | 90839865 | 9  | 12 | 7  | 1.558226626 | 0.152813    | RIPK2 | ENSG00000104312 |
| 8 | 90840501 | 90840721 | 90840617 | 9  | 10 | 8  | 1.171999514 | 0.35773     | RIPK2 | ENSG00000104312 |
| 8 | 90880874 | 90881154 | 90881014 | 9  | 9  | 2  | 3.19636231  | 0.0229249   | RIPK2 | ENSG00000104312 |



|   |          |          |          |    |    |    |             |             |         |                 |
|---|----------|----------|----------|----|----|----|-------------|-------------|---------|-----------------|
| 8 | 90882470 | 90882663 | 90882503 | 8  | 9  | 7  | 1.198635866 | 0.346278    | RIPK2   | ENSG00000104312 |
| 8 | 90896292 | 90896573 | 90896452 | 8  | 13 | 5  | 2.237453617 | 0.038866    | RIPK2   | ENSG00000104312 |
| 8 | 90964093 | 90964362 | 90964227 | 10 | 13 | 9  | 1.34247217  | 0.232231    |         | ENSG00000207359 |
| 8 | 90966535 | 90966722 | 90966628 | 8  | 8  | 4  | 1.726035648 | 0.150596    |         | ENSG00000207359 |
| 8 | 90983185 | 90983440 | 90983319 | 9  | 11 | 15 | 0.71918152  | 0.81018     | OSGIN2  | ENSG00000164823 |
| 8 | 91020570 | 91020762 | 91020626 | 8  | 10 | 4  | 2.109599125 | 0.0694668   | OSGIN2  | ENSG00000164823 |
| 8 | 91029801 | 91030103 | 91029952 | 21 | 24 | 1  | 11.98635866 | 6.63E-07    | NBN     | ENSG00000104320 |
| 8 | 91065229 | 91065846 | 91065380 | 13 | 29 | 18 | 1.514066357 | 0.0740168   | NBN     | ENSG00000104320 |
| 8 | 91066030 | 91066336 | 91066193 | 14 | 16 | 8  | 1.811271976 | 0.0663685   | NBN     | ENSG00000104320 |
| 8 | 91082118 | 91082610 | 91082289 | 17 | 28 | 2  | 9.2694507   | 4.06E-07    | DECR1   | ENSG00000104325 |
| 8 | 91164081 | 91164414 | 91164247 | 11 | 14 | 12 | 1.106433107 | 0.392094    | CALB1   | ENSG00000104327 |
| 8 | 91297443 | 91297684 | 91297563 | 8  | 9  | 2  | 3.19636231  | 0.0229249   |         | ENSG00000209140 |
| 8 | 91675044 | 91675276 | 91675176 | 8  | 11 | 6  | 1.643843474 | 0.137712    |         | ENSG00000209319 |
| 8 | 91685853 | 91686041 | 91685971 | 8  | 8  | 2  | 2.876726079 | 0.0381137   |         | ENSG00000209319 |
| 8 | 91692052 | 91692320 | 91692147 | 8  | 10 | 0  | 10.54799562 | 0.000613541 |         | ENSG00000209319 |
| 8 | 91725906 | 91726605 | 91726247 | 20 | 45 | 7  | 5.513724985 | 4.52E-08    | TMEM64  | ENSG00000180694 |
| 8 | 91726673 | 91726869 | 91726786 | 8  | 9  | 8  | 1.065454103 | 0.442605    | TMEM64  | ENSG00000180694 |
| 8 | 91850317 | 91850496 | 91850461 | 8  | 8  | 4  | 1.726035648 | 0.150596    | NECAB1  | ENSG00000123119 |
| 8 | 92151076 | 92151695 | 92151418 | 11 | 23 | 3  | 5.753452158 | 3.82E-05    | OTUD6B  | ENSG00000155100 |
| 8 | 92405629 | 92406007 | 92405839 | 17 | 23 | 9  | 2.301380863 | 0.00938618  | SLC26A7 | ENSG00000147606 |
| 8 | 92845908 | 92846225 | 92846084 | 9  | 13 | 0  | 13.4247217  | 8.16E-05    |         | ENSG00000200151 |
| 8 | 93552038 | 93552260 | 93552170 | 8  | 10 | 3  | 2.636998906 | 0.034203    |         | ENSG00000221172 |
| 8 | 93591355 | 93591534 | 93591495 | 8  | 9  | 2  | 3.19636231  | 0.0229249   |         | ENSG00000221172 |
| 8 | 93616634 | 93617096 | 93616867 | 35 | 52 | 3  | 12.70554018 | 1.15E-12    |         | ENSG00000221172 |
| 8 | 93617168 | 93617348 | 93617258 | 10 | 11 | 2  | 3.835634772 | 0.00800699  |         | ENSG00000221172 |
| 8 | 93917456 | 93917795 | 93917634 | 9  | 14 | 5  | 2.397271733 | 0.0258078   |         | ENSG00000212999 |
| 8 | 94046150 | 94046575 | 94046326 | 24 | 32 | 10 | 2.876726079 | 0.00049414  | C8orf83 | ENSG00000205133 |
| 8 | 94168117 | 94168314 | 94168187 | 8  | 9  | 1  | 4.794543465 | 0.00708517  | C8orf83 | ENSG00000205133 |
| 8 | 94485982 | 94486179 | 94486080 | 8  | 8  | 1  | 4.315089119 | 0.0127267   |         | ENSG00000209199 |
| 8 | 94524949 | 94525222 | 94525085 | 11 | 12 | 2  | 4.155271003 | 0.0046638   |         | ENSG00000209199 |
| 8 | 94600658 | 94600989 | 94600823 | 17 | 20 | 3  | 5.034270639 | 0.000202317 |         | ENSG00000209199 |
| 8 | 94816503 | 94816795 | 94816662 | 13 | 15 | 0  | 15.34253909 | 2.13E-05    | RBM12B  | ENSG00000183808 |
| 8 | 94822087 | 94822773 | 94822539 | 11 | 29 | 13 | 2.054804342 | 0.00995827  | RBM12B  | ENSG00000183808 |
| 8 | 94832344 | 94832828 | 94832636 | 40 | 50 | 2  | 16.30144778 | 4.40E-13    | TMEM67  | ENSG00000164953 |

|   |          |          |          |     |     |    |             |             |          |                 |
|---|----------|----------|----------|-----|-----|----|-------------|-------------|----------|-----------------|
| 8 | 95056602 | 95056844 | 95056766 | 10  | 12  | 16 | 0.733283118 | 0.803868    | PPM2C    | ENSG00000164951 |
| 8 | 95060301 | 95060488 | 95060394 | 8   | 8   | 0  | 8.630178238 | 0.00235436  | PPM2C    | ENSG00000164951 |
| 8 | 95072188 | 95073178 | 95072462 | 72  | 135 | 12 | 10.03166017 | 5.87E-27    | PPM2C    | ENSG00000164951 |
| 8 | 95161124 | 95161467 | 95161295 | 8   | 14  | 4  | 2.876726079 | 0.01219     | CDH17    | ENSG00000079112 |
| 8 | 95248350 | 95248944 | 95248680 | 20  | 38  | 1  | 18.69871951 | 8.21E-11    | CDH17    | ENSG00000079112 |
| 8 | 95374281 | 95374503 | 95374392 | 8   | 8   | 0  | 8.630178238 | 0.00235436  | GEM      | ENSG00000164949 |
| 8 | 95438488 | 95438773 | 95438630 | 9   | 11  | 5  | 1.917817386 | 0.0843804   |          | ENSG00000197065 |
| 8 | 95439182 | 95439397 | 95439269 | 11  | 11  | 2  | 3.835634772 | 0.00800699  |          | ENSG00000197065 |
| 8 | 95454599 | 95454866 | 95454732 | 8   | 9   | 7  | 1.198635866 | 0.346278    |          | ENSG00000197065 |
| 8 | 95486667 | 95487017 | 95486842 | 10  | 15  | 3  | 3.835634772 | 0.00291691  |          | ENSG00000197065 |
| 8 | 95499214 | 95499444 | 95499329 | 11  | 12  | 2  | 4.155271003 | 0.0046638   |          | ENSG00000197065 |
| 8 | 95634860 | 95635273 | 95635097 | 15  | 24  | 9  | 2.397271733 | 0.00639731  | KIAA1429 | ENSG00000164944 |
| 8 | 95649012 | 95649272 | 95649134 | 8   | 10  | 2  | 3.515998541 | 0.0136204   | KIAA1429 | ENSG00000164944 |
| 8 | 95655615 | 95655843 | 95655729 | 8   | 9   | 1  | 4.794543465 | 0.00708517  | KIAA1429 | ENSG00000164944 |
| 8 | 95721205 | 95721532 | 95721368 | 8   | 13  | 10 | 1.220429246 | 0.306001    | RBM35A   | ENSG00000104413 |
| 8 | 95721936 | 95722401 | 95722115 | 8   | 18  | 16 | 1.07172148  | 0.415914    | RBM35A   | ENSG00000104413 |
| 8 | 95723807 | 95724010 | 95723926 | 8   | 9   | 5  | 1.598181155 | 0.170911    | RBM35A   | ENSG00000104413 |
| 8 | 95724183 | 95724398 | 95724222 | 8   | 10  | 3  | 2.636998906 | 0.034203    | RBM35A   | ENSG00000104413 |
| 8 | 95738405 | 95739340 | 95739015 | 146 | 225 | 16 | 12.74784498 | 4.72E-47    |          | ENSG00000209267 |
| 8 | 95800934 | 95801305 | 95801113 | 10  | 17  | 4  | 3.452071295 | 0.00292757  | DPY19L4  | ENSG00000156162 |
| 8 | 95904294 | 95904763 | 95904473 | 9   | 18  | 12 | 1.401481936 | 0.168368    | INTS8    | ENSG00000164941 |
| 8 | 95905187 | 95905384 | 95905222 | 9   | 11  | 0  | 11.50690432 | 0.000313206 | INTS8    | ENSG00000164941 |
| 8 | 95977783 | 95977992 | 95977892 | 8   | 8   | 2  | 2.876726079 | 0.0381137   | C8orf38  | ENSG00000156170 |
| 8 | 96028493 | 96028843 | 96028666 | 9   | 14  | 4  | 2.876726079 | 0.01219     | TP53INP1 | ENSG00000164938 |
| 8 | 96030817 | 96031385 | 96031009 | 57  | 74  | 1  | 35.95907599 | 4.74E-21    | TP53INP1 | ENSG00000164938 |
| 8 | 96032902 | 96033110 | 96033004 | 9   | 11  | 4  | 2.301380863 | 0.0459276   | TP53INP1 | ENSG00000164938 |
| 8 | 96033170 | 96033392 | 96033235 | 10  | 10  | 5  | 1.757999271 | 0.121253    | TP53INP1 | ENSG00000164938 |
| 8 | 96069659 | 96069903 | 96069781 | 13  | 13  | 2  | 4.474907234 | 0.00269459  | C8orf38  | ENSG00000156170 |
| 8 | 96072288 | 96072856 | 96072695 | 13  | 23  | 13 | 1.643843474 | 0.0639146   | C8orf38  | ENSG00000156170 |
| 8 | 96110229 | 96110465 | 96110347 | 8   | 8   | 4  | 1.726035648 | 0.150596    | C8orf38  | ENSG00000156170 |
| 8 | 96138407 | 96138874 | 96138538 | 13  | 22  | 5  | 3.675816657 | 0.000667901 |          | ENSG00000200525 |
| 8 | 96171790 | 96172009 | 96171899 | 8   | 10  | 1  | 5.273997812 | 0.00391723  |          | ENSG00000200525 |
| 8 | 96194026 | 96194550 | 96194221 | 15  | 28  | 19 | 1.390417605 | 0.124062    | PLEKHF2  | ENSG00000175895 |
| 8 | 96194612 | 96194851 | 96194731 | 8   | 10  | 7  | 1.318499453 | 0.269217    | PLEKHF2  | ENSG00000175895 |

|   |          |          |          |     |     |    |             |             |         |                 |
|---|----------|----------|----------|-----|-----|----|-------------|-------------|---------|-----------------|
| 8 | 96214636 | 96214933 | 96214792 | 12  | 15  | 5  | 2.557089848 | 0.0169197   | PLEKHF2 | ENSG00000175895 |
| 8 | 96221383 | 96221590 | 96221488 | 9   | 9   | 4  | 1.917817386 | 0.103282    | PLEKHF2 | ENSG00000175895 |
| 8 | 96274335 | 96274808 | 96274571 | 12  | 22  | 21 | 1.002495452 | 0.4958      | PLEKHF2 | ENSG00000175895 |
| 8 | 96300973 | 96301217 | 96301095 | 9   | 10  | 5  | 1.757999271 | 0.121253    | C8orf37 | ENSG00000156172 |
| 8 | 96306801 | 96307404 | 96307122 | 38  | 60  | 9  | 5.849343028 | 1.90E-10    | C8orf37 | ENSG00000156172 |
| 8 | 96330098 | 96330426 | 96330262 | 14  | 20  | 5  | 3.356180426 | 0.0017534   | C8orf37 | ENSG00000156172 |
| 8 | 96350802 | 96351571 | 96351045 | 24  | 46  | 21 | 2.048577662 | 0.00191286  | C8orf37 | ENSG00000156172 |
| 8 | 96386764 | 96387002 | 96386890 | 9   | 10  | 7  | 1.318499453 | 0.269217    | C8orf37 | ENSG00000156172 |
| 8 | 96467979 | 96468248 | 96468113 | 13  | 16  | 4  | 3.260289556 | 0.00475414  | C8orf37 | ENSG00000156172 |
| 8 | 96794984 | 96795201 | 96795100 | 9   | 11  | 3  | 2.876726079 | 0.0213797   |         | ENSG00000223297 |
| 8 | 96854370 | 96854930 | 96854634 | 111 | 149 | 13 | 10.27402171 | 9.04E-30    |         | ENSG00000223297 |
| 8 | 97090742 | 97090946 | 97090833 | 8   | 8   | 3  | 2.157544559 | 0.0836802   |         | ENSG00000183663 |
| 8 | 97111165 | 97111356 | 97111260 | 8   | 8   | 6  | 1.232882605 | 0.333038    |         | ENSG00000183663 |
| 8 | 97394550 | 97394782 | 97394619 | 9   | 11  | 2  | 3.835634772 | 0.00800699  |         | ENSG00000199732 |
| 8 | 97446866 | 97447137 | 97447001 | 10  | 12  | 0  | 12.46581301 | 0.000159888 |         | ENSG00000199732 |
| 8 | 97574985 | 97575177 | 97575056 | 8   | 11  | 8  | 1.278544924 | 0.28289     | SDC2    | ENSG00000169439 |
| 8 | 98252119 | 98252469 | 98252297 | 13  | 17  | 3  | 4.315089119 | 0.00102271  | TSPYL5  | ENSG00000180543 |
| 8 | 98359429 | 98359637 | 98359546 | 8   | 10  | 2  | 3.515998541 | 0.0136204   | TSPYL5  | ENSG00000180543 |
| 8 | 98505461 | 98505770 | 98505616 | 19  | 21  | 3  | 5.273997812 | 0.00011662  |         | ENSG00000207215 |
| 8 | 98634924 | 98635218 | 98635071 | 9   | 11  | 8  | 1.278544924 | 0.28289     |         | ENSG00000208981 |
| 8 | 98641562 | 98641788 | 98641682 | 8   | 10  | 7  | 1.318499453 | 0.269217    |         | ENSG00000208981 |
| 8 | 98663897 | 98664189 | 98664057 | 9   | 12  | 5  | 2.077635502 | 0.0577144   |         | ENSG00000208981 |
| 8 | 98698592 | 98698892 | 98698742 | 8   | 11  | 3  | 2.876726079 | 0.0213797   |         | ENSG00000213750 |
| 8 | 98724894 | 98725162 | 98725011 | 8   | 12  | 8  | 1.385090334 | 0.219216    | MTDH    | ENSG00000147649 |
| 8 | 98877833 | 98878162 | 98877994 | 8   | 11  | 3  | 2.876726079 | 0.0213797   | LAPTM4B | ENSG00000104341 |
| 8 | 98921316 | 98921576 | 98921472 | 9   | 11  | 0  | 11.50690432 | 0.000313206 | MATN2   | ENSG00000132561 |
| 8 | 99126785 | 99127129 | 99126957 | 8   | 13  | 6  | 1.917817386 | 0.0693353   | RPL30   | ENSG00000156482 |
| 8 | 99127601 | 99127841 | 99127765 | 9   | 12  | 2  | 4.155271003 | 0.0046638   | RPL30   | ENSG00000156482 |
| 8 | 99170965 | 99171154 | 99171020 | 8   | 8   | 4  | 1.726035648 | 0.150596    | C8orf47 | ENSG00000177459 |
| 8 | 99198426 | 99198711 | 99198605 | 8   | 11  | 3  | 2.876726079 | 0.0213797   | HRSP12  | ENSG00000132541 |
| 8 | 99198890 | 99199286 | 99199069 | 9   | 16  | 5  | 2.716907964 | 0.0109645   | POP1    | ENSG00000104356 |
| 8 | 99245197 | 99245452 | 99245318 | 8   | 10  | 4  | 2.109599125 | 0.0694668   |         | ENSG00000208954 |
| 8 | 99246091 | 99246479 | 99246270 | 9   | 17  | 11 | 1.43836304  | 0.15834     |         | ENSG00000208954 |
| 8 | 99321452 | 99321719 | 99321585 | 11  | 14  | 1  | 7.191815198 | 0.00034761  | NPAL2   | ENSG00000104361 |

|   |           |           |           |    |    |    |             |             |         |                 |
|---|-----------|-----------|-----------|----|----|----|-------------|-------------|---------|-----------------|
| 8 | 99340924  | 99341254  | 99341089  | 21 | 25 | 6  | 3.56166086  | 0.000408555 | NPAL2   | ENSG00000104361 |
| 8 | 99387540  | 99387722  | 99387695  | 8  | 8  | 1  | 4.315089119 | 0.0127267   | NPAL2   | ENSG00000104361 |
| 8 | 99628424  | 99628628  | 99628572  | 8  | 8  | 2  | 2.876726079 | 0.0381137   |         | ENSG00000207378 |
| 8 | 100094307 | 100094763 | 100094584 | 11 | 18 | 9  | 1.821926517 | 0.0548428   | VPS13B  | ENSG00000132549 |
| 8 | 100249580 | 100249775 | 100249736 | 8  | 8  | 4  | 1.726035648 | 0.150596    |         | ENSG00000217401 |
| 8 | 100440034 | 100440223 | 100440160 | 8  | 9  | 3  | 2.397271733 | 0.0539397   |         | ENSG00000220743 |
| 8 | 100456333 | 100456540 | 100456436 | 8  | 8  | 2  | 2.876726079 | 0.0381137   |         | ENSG00000220743 |
| 8 | 100577134 | 100577468 | 100577301 | 22 | 24 | 23 | 0.998863222 | 0.500802    |         | ENSG00000206699 |
| 8 | 100592288 | 100592601 | 100592439 | 9  | 11 | 1  | 5.753452158 | 0.00215302  |         | ENSG00000206699 |
| 8 | 100787220 | 100787503 | 100787368 | 13 | 15 | 9  | 1.534253909 | 0.136498    |         | ENSG00000220387 |
| 8 | 100835841 | 100836021 | 100835931 | 8  | 8  | 1  | 4.315089119 | 0.0127267   |         | ENSG00000220387 |
| 8 | 100880659 | 100880910 | 100880780 | 8  | 12 | 6  | 1.78083043  | 0.0985525   | COX6C   | ENSG00000164919 |
| 8 | 100880980 | 100881324 | 100881148 | 10 | 15 | 3  | 3.835634772 | 0.00291691  | COX6C   | ENSG00000164919 |
| 8 | 100919504 | 100919684 | 100919620 | 8  | 10 | 8  | 1.171999514 | 0.35773     | COX6C   | ENSG00000164919 |
| 8 | 100975112 | 100975380 | 100975284 | 9  | 12 | 5  | 2.077635502 | 0.0577144   | COX6C   | ENSG00000164919 |
| 8 | 101088651 | 101089123 | 101088889 | 25 | 40 | 3  | 9.828814104 | 1.78E-09    |         | ENSG00000212414 |
| 8 | 101230469 | 101230656 | 101230562 | 8  | 8  | 3  | 2.157544559 | 0.0836802   | POLR2K  | ENSG00000147669 |
| 8 | 101231739 | 101232060 | 101231899 | 14 | 18 | 14 | 1.214617678 | 0.282961    | POLR2K  | ENSG00000147669 |
| 8 | 101232077 | 101232265 | 101232113 | 8  | 9  | 8  | 1.065454103 | 0.442605    | POLR2K  | ENSG00000147669 |
| 8 | 101294929 | 101295235 | 101295069 | 10 | 14 | 2  | 4.794543465 | 0.00154571  |         | ENSG00000199667 |
| 8 | 101319957 | 101320161 | 101320081 | 9  | 10 | 1  | 5.273997812 | 0.00391723  | RNF19A  | ENSG00000034677 |
| 8 | 101343589 | 101343893 | 101343741 | 9  | 12 | 3  | 3.116453252 | 0.0131971   | RNF19A  | ENSG00000034677 |
| 8 | 101447329 | 101447607 | 101447468 | 10 | 10 | 3  | 2.636998906 | 0.034203    | RNF19A  | ENSG00000034677 |
| 8 | 101498810 | 101499008 | 101498915 | 9  | 10 | 3  | 2.636998906 | 0.034203    | RNF19A  | ENSG00000034677 |
| 8 | 101526170 | 101526707 | 101526325 | 10 | 20 | 5  | 3.356180426 | 0.0017534   | ANKRD46 | ENSG00000186106 |
| 8 | 101530475 | 101530654 | 101530579 | 8  | 8  | 2  | 2.876726079 | 0.0381137   | ANKRD46 | ENSG00000186106 |
| 8 | 101569172 | 101569710 | 101569474 | 46 | 69 | 8  | 7.458178724 | 3.17E-13    | ANKRD46 | ENSG00000186106 |
| 8 | 101591586 | 101591883 | 101591756 | 12 | 17 | 4  | 3.452071295 | 0.00292757  | ANKRD46 | ENSG00000186106 |
| 8 | 101641099 | 101641461 | 101641213 | 12 | 17 | 5  | 2.876726079 | 0.00703033  | ANKRD46 | ENSG00000186106 |
| 8 | 101645456 | 101645717 | 101645587 | 12 | 15 | 1  | 7.671269544 | 0.000187863 | ANKRD46 | ENSG00000186106 |
| 8 | 101723702 | 101723986 | 101723849 | 10 | 13 | 7  | 1.678090213 | 0.11195     | SNX31   | ENSG00000174226 |
| 8 | 101754834 | 101755286 | 101755076 | 31 | 45 | 2  | 14.70326663 | 1.04E-11    |         | ENSG00000208885 |
| 8 | 101758103 | 101758351 | 101758224 | 9  | 10 | 3  | 2.636998906 | 0.034203    |         | ENSG00000208885 |
| 8 | 101762254 | 101762526 | 101762393 | 10 | 13 | 2  | 4.474907234 | 0.00269459  |         | ENSG00000208885 |

|   |           |           |           |    |    |    |             |             |         |                 |
|---|-----------|-----------|-----------|----|----|----|-------------|-------------|---------|-----------------|
| 8 | 101762841 | 101763078 | 101762953 | 9  | 10 | 8  | 1.171999514 | 0.35773     |         | ENSG00000208885 |
| 8 | 101801062 | 101801333 | 101801230 | 8  | 10 | 0  | 10.54799562 | 0.000613541 | PABPC1  | ENSG00000070756 |
| 8 | 101801508 | 101801855 | 101801681 | 8  | 13 | 6  | 1.917817386 | 0.0693353   | PABPC1  | ENSG00000070756 |
| 8 | 101802155 | 101802385 | 101802270 | 8  | 13 | 8  | 1.491635745 | 0.166708    | PABPC1  | ENSG00000070756 |
| 8 | 101804397 | 101804626 | 101804518 | 9  | 11 | 4  | 2.301380863 | 0.0459276   | PABPC1  | ENSG00000070756 |
| 8 | 101827744 | 101828147 | 101827894 | 8  | 16 | 8  | 1.811271976 | 0.0663685   |         | ENSG00000208882 |
| 8 | 101829460 | 101829726 | 101829611 | 12 | 14 | 9  | 1.43836304  | 0.179537    |         | ENSG00000202001 |
| 8 | 101837390 | 101837664 | 101837527 | 8  | 11 | 3  | 2.876726079 | 0.0213797   |         | ENSG00000202001 |
| 8 | 101916960 | 101917285 | 101917122 | 8  | 13 | 8  | 1.491635745 | 0.166708    |         | ENSG00000222795 |
| 8 | 101928527 | 101928876 | 101928701 | 8  | 14 | 7  | 1.797953799 | 0.0806593   |         | ENSG00000222795 |
| 8 | 101981882 | 101982306 | 101982015 | 15 | 23 | 4  | 4.602761727 | 0.000137072 | RPS26P6 | ENSG00000212994 |
| 8 | 101989945 | 101990374 | 101990195 | 8  | 18 | 4  | 3.643853034 | 0.00178791  | RPS26P6 | ENSG00000212994 |
| 8 | 102019946 | 102020252 | 102020099 | 9  | 12 | 10 | 1.133255728 | 0.37674     | YWHAZ   | ENSG00000164924 |
| 8 | 102031774 | 102032062 | 102031915 | 11 | 14 | 4  | 2.876726079 | 0.01219     | YWHAZ   | ENSG00000164924 |
| 8 | 102033696 | 102033978 | 102033810 | 11 | 13 | 7  | 1.678090213 | 0.11195     | YWHAZ   | ENSG00000164924 |
| 8 | 102034692 | 102035048 | 102034870 | 8  | 13 | 10 | 1.220429246 | 0.306001    | YWHAZ   | ENSG00000164924 |
| 8 | 102045924 | 102046113 | 102046066 | 8  | 9  | 3  | 2.397271733 | 0.0539397   |         | ENSG00000207080 |
| 8 | 102061383 | 102061647 | 102061515 | 11 | 12 | 3  | 3.116453252 | 0.0131971   |         | ENSG00000207080 |
| 8 | 102085054 | 102085313 | 102085185 | 8  | 9  | 4  | 1.917817386 | 0.103282    |         | ENSG00000207080 |
| 8 | 102123519 | 102123777 | 102123680 | 9  | 9  | 1  | 4.794543465 | 0.00708517  |         | ENSG00000207080 |
| 8 | 102132922 | 102133316 | 102133137 | 8  | 16 | 19 | 0.815072389 | 0.734271    |         | ENSG00000202360 |
| 8 | 102134628 | 102135090 | 102134822 | 9  | 20 | 2  | 6.712360851 | 4.91E-05    |         | ENSG00000202360 |
| 8 | 102135123 | 102135715 | 102135539 | 36 | 54 | 3  | 13.18499453 | 3.33E-13    |         | ENSG00000202360 |
| 8 | 102135746 | 102135952 | 102135874 | 8  | 10 | 0  | 10.54799562 | 0.000613541 |         | ENSG00000202360 |
| 8 | 102282073 | 102282340 | 102282206 | 8  | 11 | 2  | 3.835634772 | 0.00800699  | ZNF706  | ENSG00000120963 |
| 8 | 102286373 | 102286613 | 102286448 | 8  | 10 | 2  | 3.515998541 | 0.0136204   | ZNF706  | ENSG00000120963 |
| 8 | 102326765 | 102327150 | 102326960 | 17 | 25 | 6  | 3.56166086  | 0.000408555 | ZNF706  | ENSG00000120963 |
| 8 | 102340178 | 102340362 | 102340229 | 8  | 9  | 4  | 1.917817386 | 0.103282    | ZNF706  | ENSG00000120963 |
| 8 | 102382954 | 102383214 | 102383047 | 9  | 11 | 2  | 3.835634772 | 0.00800699  |         | ENSG00000180230 |
| 8 | 102414307 | 102414707 | 102414528 | 9  | 17 | 6  | 2.465765211 | 0.014729    |         | ENSG00000180230 |
| 8 | 102442247 | 102442747 | 102442471 | 16 | 28 | 17 | 1.54490845  | 0.0688567   |         | ENSG00000180230 |
| 8 | 102457529 | 102458129 | 102457702 | 12 | 27 | 12 | 2.0653418   | 0.0117911   |         | ENSG00000180230 |
| 8 | 102516750 | 102516978 | 102516860 | 9  | 11 | 8  | 1.278544924 | 0.28289     |         | ENSG00000222841 |
| 8 | 102518464 | 102518993 | 102518659 | 15 | 31 | 17 | 1.704726565 | 0.0311659   |         | ENSG00000222841 |

|   |           |           |           |     |     |    |             |             |       |                 |
|---|-----------|-----------|-----------|-----|-----|----|-------------|-------------|-------|-----------------|
| 8 | 102519764 | 102520110 | 102519937 | 12  | 17  | 10 | 1.569123316 | 0.112309    |       | ENSG00000222841 |
| 8 | 102532700 | 102532958 | 102532829 | 10  | 11  | 4  | 2.301380863 | 0.0459276   | GRHL2 | ENSG00000083307 |
| 8 | 102536453 | 102536680 | 102536585 | 10  | 10  | 5  | 1.757999271 | 0.121253    | GRHL2 | ENSG00000083307 |
| 8 | 102540373 | 102540552 | 102540462 | 8   | 8   | 2  | 2.876726079 | 0.0381137   | GRHL2 | ENSG00000083307 |
| 8 | 102541025 | 102541508 | 102541331 | 13  | 22  | 14 | 1.470326663 | 0.117149    | GRHL2 | ENSG00000083307 |
| 8 | 102548549 | 102548819 | 102548684 | 9   | 12  | 7  | 1.558226626 | 0.152813    | GRHL2 | ENSG00000083307 |
| 8 | 102554074 | 102554269 | 102554164 | 9   | 9   | 7  | 1.198635866 | 0.346278    | GRHL2 | ENSG00000083307 |
| 8 | 102554355 | 102554580 | 102554467 | 9   | 9   | 5  | 1.598181155 | 0.170911    | GRHL2 | ENSG00000083307 |
| 8 | 102555702 | 102556131 | 102555875 | 18  | 25  | 5  | 4.155271003 | 0.000149583 | GRHL2 | ENSG00000083307 |
| 8 | 102556648 | 102556827 | 102556737 | 8   | 8   | 3  | 2.157544559 | 0.0836802   | GRHL2 | ENSG00000083307 |
| 8 | 102572969 | 102573151 | 102573119 | 8   | 8   | 6  | 1.232882605 | 0.333038    | GRHL2 | ENSG00000083307 |
| 8 | 102573155 | 102574370 | 102574118 | 34  | 82  | 29 | 2.652980717 | 5.09E-07    | GRHL2 | ENSG00000083307 |
| 8 | 102575486 | 102575935 | 102575650 | 10  | 18  | 10 | 1.656296833 | 0.0841786   | GRHL2 | ENSG00000083307 |
| 8 | 102576084 | 102576791 | 102576263 | 11  | 28  | 14 | 1.85389014  | 0.0220495   | GRHL2 | ENSG00000083307 |
| 8 | 102582881 | 102583353 | 102583060 | 9   | 19  | 7  | 2.397271733 | 0.0127287   | GRHL2 | ENSG00000083307 |
| 8 | 102585910 | 102586329 | 102586171 | 18  | 26  | 7  | 3.236316839 | 0.000628017 | GRHL2 | ENSG00000083307 |
| 8 | 102619645 | 102619974 | 102619809 | 12  | 16  | 7  | 2.037680973 | 0.0400399   |       | ENSG00000208823 |
| 8 | 102684966 | 102685352 | 102685145 | 28  | 34  | 11 | 2.796817021 | 0.000446021 |       | ENSG00000222247 |
| 8 | 102688955 | 102689148 | 102689079 | 8   | 8   | 12 | 0.663859864 | 0.833689    |       | ENSG00000222247 |
| 8 | 102690029 | 102690382 | 102690205 | 8   | 12  | 6  | 1.78083043  | 0.0985525   |       | ENSG00000222247 |
| 8 | 102713852 | 102714276 | 102714115 | 12  | 18  | 9  | 1.821926517 | 0.0548428   |       | ENSG00000222247 |
| 8 | 102716120 | 102716445 | 102716282 | 8   | 14  | 5  | 2.397271733 | 0.0258078   |       | ENSG00000222247 |
| 8 | 102717139 | 102717451 | 102717295 | 17  | 21  | 5  | 3.515998541 | 0.00108602  |       | ENSG00000222247 |
| 8 | 102727712 | 102728015 | 102727945 | 12  | 16  | 7  | 2.037680973 | 0.0400399   |       | ENSG00000222247 |
| 8 | 102836435 | 102836689 | 102836558 | 8   | 9   | 2  | 3.19636231  | 0.0229249   | NCALD | ENSG00000104490 |
| 8 | 102837860 | 102838046 | 102837959 | 8   | 9   | 4  | 1.917817386 | 0.103282    | NCALD | ENSG00000104490 |
| 8 | 102917443 | 102917660 | 102917523 | 9   | 11  | 7  | 1.43836304  | 0.204844    |       | ENSG00000208818 |
| 8 | 102983760 | 102983944 | 102983866 | 8   | 8   | 2  | 2.876726079 | 0.0381137   |       | ENSG00000208818 |
| 8 | 103185409 | 103185697 | 103185545 | 8   | 10  | 3  | 2.636998906 | 0.034203    | NCALD | ENSG00000104490 |
| 8 | 103190304 | 103190568 | 103190454 | 9   | 10  | 5  | 1.757999271 | 0.121253    | NCALD | ENSG00000104490 |
| 8 | 103312773 | 103313010 | 103312847 | 9   | 12  | 5  | 2.077635502 | 0.0577144   | RRM2B | ENSG00000048392 |
| 8 | 103317826 | 103318627 | 103318255 | 269 | 350 | 11 | 28.04807927 | 3.83E-86    | RRM2B | ENSG00000048392 |
| 8 | 103318818 | 103319190 | 103318984 | 10  | 17  | 1  | 8.630178238 | 5.44E-05    | RRM2B | ENSG00000048392 |
| 8 | 103320048 | 103320492 | 103320222 | 16  | 26  | 9  | 2.589053471 | 0.00289627  | RRM2B | ENSG00000048392 |

|   |           |           |           |    |    |    |             |             |          |                 |
|---|-----------|-----------|-----------|----|----|----|-------------|-------------|----------|-----------------|
| 8 | 103320641 | 103320881 | 103320737 | 8  | 10 | 6  | 1.506856518 | 0.188853    | RRM2B    | ENSG00000048392 |
| 8 | 103372999 | 103373221 | 103373080 | 8  | 8  | 5  | 1.43836304  | 0.235762    | RRM2B    | ENSG00000048392 |
| 8 | 103382830 | 103383025 | 103382978 | 8  | 9  | 1  | 4.794543465 | 0.00708517  | RRM2B    | ENSG00000048392 |
| 8 | 103415223 | 103415404 | 103415323 | 8  | 8  | 1  | 4.315089119 | 0.0127267   |          | ENSG00000208813 |
| 8 | 103448941 | 103449377 | 103449120 | 9  | 15 | 5  | 2.557089848 | 0.0169197   |          | ENSG00000208813 |
| 8 | 103477459 | 103477649 | 103477517 | 8  | 8  | 2  | 2.876726079 | 0.0381137   |          | ENSG00000208813 |
| 8 | 103508381 | 103508773 | 103508594 | 30 | 39 | 1  | 19.17817386 | 4.29E-11    |          | ENSG00000221387 |
| 8 | 103508780 | 103508965 | 103508882 | 8  | 9  | 1  | 4.794543465 | 0.00708517  |          | ENSG00000221387 |
| 8 | 103548240 | 103548422 | 103548328 | 8  | 8  | 1  | 4.315089119 | 0.0127267   |          | ENSG00000214885 |
| 8 | 103593103 | 103593388 | 103593245 | 12 | 14 | 8  | 1.598181155 | 0.124586    |          | ENSG00000208806 |
| 8 | 103666702 | 103666897 | 103666762 | 9  | 10 | 0  | 10.54799562 | 0.000613541 | ODF1     | ENSG00000155087 |
| 8 | 103682281 | 103682761 | 103682582 | 10 | 19 | 13 | 1.369869562 | 0.177863    | ODF1     | ENSG00000155087 |
| 8 | 103698214 | 103698659 | 103698362 | 10 | 17 | 9  | 1.726035648 | 0.0753664   | KLF10    | ENSG00000155090 |
| 8 | 103714020 | 103714233 | 103714126 | 8  | 10 | 10 | 0.958908693 | 0.538751    | KLF10    | ENSG00000155090 |
| 8 | 103733175 | 103733505 | 103733340 | 11 | 16 | 11 | 1.358453982 | 0.20248     | KLF10    | ENSG00000155090 |
| 8 | 103734996 | 103735297 | 103735159 | 11 | 15 | 6  | 2.191791298 | 0.0328001   | KLF10    | ENSG00000155090 |
| 8 | 103764991 | 103765203 | 103765097 | 12 | 12 | 3  | 3.116453252 | 0.0131971   | KLF10    | ENSG00000155090 |
| 8 | 103783382 | 103783568 | 103783446 | 8  | 8  | 2  | 2.876726079 | 0.0381137   | KLF10    | ENSG00000155090 |
| 8 | 103802981 | 103803470 | 103803160 | 10 | 19 | 8  | 2.130908207 | 0.0233014   | KLF10    | ENSG00000155090 |
| 8 | 103886498 | 103886688 | 103886618 | 8  | 8  | 4  | 1.726035648 | 0.150596    |          | ENSG00000217620 |
| 8 | 103888634 | 103889246 | 103889067 | 18 | 32 | 10 | 2.876726079 | 0.00049414  |          | ENSG00000217620 |
| 8 | 103890574 | 103890906 | 103890735 | 18 | 23 | 4  | 4.602761727 | 0.000137072 |          | ENSG00000217620 |
| 8 | 103891690 | 103891904 | 103891797 | 9  | 10 | 7  | 1.318499453 | 0.269217    |          | ENSG00000217620 |
| 8 | 103896142 | 103896404 | 103896321 | 11 | 14 | 6  | 2.054804342 | 0.0480281   |          | ENSG00000217620 |
| 8 | 103945307 | 103945720 | 103945436 | 8  | 16 | 8  | 1.811271976 | 0.0663685   | AZIN1    | ENSG00000155096 |
| 8 | 104042897 | 104043172 | 104043034 | 8  | 11 | 6  | 1.643843474 | 0.137712    |          | ENSG00000201216 |
| 8 | 104049617 | 104049821 | 104049720 | 8  | 10 | 5  | 1.757999271 | 0.121253    |          | ENSG00000201216 |
| 8 | 104061856 | 104062099 | 104061999 | 8  | 10 | 1  | 5.273997812 | 0.00391723  |          | ENSG00000201216 |
| 8 | 104102453 | 104102663 | 104102551 | 10 | 12 | 6  | 1.78083043  | 0.0985525   | ATP6V1C1 | ENSG00000155097 |
| 8 | 104201734 | 104201980 | 104201863 | 14 | 15 | 4  | 3.068507818 | 0.0076507   | BAALC    | ENSG00000164929 |
| 8 | 104217511 | 104217761 | 104217636 | 13 | 14 | 15 | 0.8989769   | 0.617119    | BAALC    | ENSG00000164929 |
| 8 | 104256842 | 104257263 | 104257110 | 11 | 16 | 3  | 4.075361945 | 0.00173346  | BAALC    | ENSG00000164929 |
| 8 | 104268325 | 104268535 | 104268430 | 8  | 9  | 3  | 2.397271733 | 0.0539397   | BAALC    | ENSG00000164929 |
| 8 | 104291610 | 104292162 | 104291945 | 68 | 86 | 4  | 16.68501126 | 6.33E-21    | BAALC    | ENSG00000164929 |

|   |           |           |           |    |    |    |             |             |        |                 |
|---|-----------|-----------|-----------|----|----|----|-------------|-------------|--------|-----------------|
| 8 | 104292465 | 104292732 | 104292621 | 8  | 10 | 5  | 1.757999271 | 0.121253    | BAALC  | ENSG00000164929 |
| 8 | 104311215 | 104311408 | 104311393 | 8  | 9  | 1  | 4.794543465 | 0.00708517  |        | ENSG00000205066 |
| 8 | 104337512 | 104337732 | 104337595 | 9  | 11 | 5  | 1.917817386 | 0.0843804   |        | ENSG00000205066 |
| 8 | 104360585 | 104360773 | 104360679 | 8  | 8  | 4  | 1.726035648 | 0.150596    |        | ENSG00000205066 |
| 8 | 104380980 | 104381297 | 104381205 | 10 | 14 | 9  | 1.43836304  | 0.179537    | FZD6   | ENSG00000164930 |
| 8 | 104454617 | 104455138 | 104454877 | 18 | 30 | 7  | 3.715771186 | 9.63E-05    | CTHRC1 | ENSG00000164932 |
| 8 | 104496515 | 104497257 | 104496780 | 15 | 36 | 22 | 1.542592245 | 0.0476873   | WDSOF1 | ENSG00000164934 |
| 8 | 104580287 | 104580619 | 104580454 | 8  | 11 | 1  | 5.753452158 | 0.00215302  | RIMS2  | ENSG00000176406 |
| 8 | 104593519 | 104593778 | 104593605 | 14 | 16 | 3  | 4.075361945 | 0.00173346  | RIMS2  | ENSG00000176406 |
| 8 | 104788775 | 104789009 | 104788910 | 9  | 12 | 3  | 3.116453252 | 0.0131971   |        | ENSG00000208758 |
| 8 | 104845732 | 104845984 | 104845874 | 8  | 11 | 2  | 3.835634772 | 0.00800699  | RIMS2  | ENSG00000176406 |
| 8 | 104876925 | 104877249 | 104877087 | 21 | 25 | 6  | 3.56166086  | 0.000408555 | RIMS2  | ENSG00000176406 |
| 8 | 104878015 | 104878388 | 104878194 | 9  | 17 | 8  | 1.917817386 | 0.0474153   | RIMS2  | ENSG00000176406 |
| 8 | 105153837 | 105154477 | 105154367 | 17 | 34 | 2  | 11.18726809 | 1.02E-08    | RIMS2  | ENSG00000176406 |
| 8 | 105211638 | 105212011 | 105211851 | 12 | 18 | 11 | 1.518272097 | 0.122037    | RIMS2  | ENSG00000176406 |
| 8 | 105216284 | 105216695 | 105216435 | 9  | 15 | 6  | 2.191791298 | 0.0328001   | RIMS2  | ENSG00000176406 |
| 8 | 105237511 | 105237847 | 105237672 | 9  | 12 | 1  | 6.232906505 | 0.00117736  | RIMS2  | ENSG00000176406 |
| 8 | 105406843 | 105407221 | 105407055 | 8  | 14 | 3  | 3.595907599 | 0.00486913  | TM7SF4 | ENSG00000164935 |
| 8 | 105407239 | 105407580 | 105407405 | 10 | 14 | 3  | 3.595907599 | 0.00486913  | TM7SF4 | ENSG00000164935 |
| 8 | 105432138 | 105432350 | 105432244 | 8  | 8  | 2  | 2.876726079 | 0.0381137   | TM7SF4 | ENSG00000164935 |
| 8 | 105471336 | 105471727 | 105471453 | 10 | 17 | 7  | 2.157544559 | 0.0276499   |        | ENSG00000220279 |
| 8 | 105499364 | 105499665 | 105499498 | 13 | 16 | 10 | 1.481949798 | 0.147733    |        | ENSG00000179577 |
| 8 | 105523722 | 105523978 | 105523827 | 9  | 11 | 4  | 2.301380863 | 0.0459276   |        | ENSG00000212028 |
| 8 | 105602224 | 105602405 | 105602314 | 9  | 9  | 3  | 2.397271733 | 0.0539397   |        | ENSG00000208032 |
| 8 | 105670641 | 105670829 | 105670735 | 9  | 9  | 0  | 9.589086931 | 0.00120187  | LRP12  | ENSG00000147650 |
| 8 | 105724381 | 105724743 | 105724525 | 9  | 16 | 1  | 8.150723891 | 0.000101217 | LRP12  | ENSG00000147650 |
| 8 | 105780618 | 105780864 | 105780727 | 10 | 12 | 1  | 6.232906505 | 0.00117736  | LRP12  | ENSG00000147650 |
| 8 | 105787365 | 105787809 | 105787587 | 14 | 23 | 1  | 11.50690432 | 1.25E-06    | LRP12  | ENSG00000147650 |
| 8 | 105814808 | 105814999 | 105814903 | 9  | 9  | 1  | 4.794543465 | 0.00708517  | LRP12  | ENSG00000147650 |
| 8 | 105841185 | 105841397 | 105841291 | 10 | 11 | 5  | 1.917817386 | 0.0843804   | LRP12  | ENSG00000147650 |
| 8 | 105859785 | 105860003 | 105859921 | 10 | 11 | 4  | 2.301380863 | 0.0459276   | LRP12  | ENSG00000147650 |
| 8 | 105869203 | 105869569 | 105869382 | 8  | 15 | 12 | 1.180195315 | 0.324974    | LRP12  | ENSG00000147650 |
| 8 | 105912501 | 105912694 | 105912574 | 9  | 10 | 1  | 5.273997812 | 0.00391723  | LRP12  | ENSG00000147650 |
| 8 | 105973539 | 105973724 | 105973631 | 8  | 8  | 1  | 4.315089119 | 0.0127267   | LRP12  | ENSG00000147650 |



|   |           |           |           |    |     |    |             |             |        |                 |
|---|-----------|-----------|-----------|----|-----|----|-------------|-------------|--------|-----------------|
| 8 | 105976391 | 105976802 | 105976596 | 14 | 24  | 5  | 3.995452888 | 0.00024777  | LRP12  | ENSG00000147650 |
| 8 | 106323377 | 106323568 | 106323472 | 8  | 8   | 0  | 8.630178238 | 0.00235436  | ZFPM2  | ENSG00000169946 |
| 8 | 106446331 | 106446575 | 106446453 | 9  | 10  | 1  | 5.273997812 | 0.00391723  | ZFPM2  | ENSG00000169946 |
| 8 | 106506433 | 106506677 | 106506541 | 11 | 12  | 8  | 1.385090334 | 0.219216    | ZFPM2  | ENSG00000169946 |
| 8 | 107381959 | 107382158 | 107382046 | 8  | 8   | 3  | 2.157544559 | 0.0836802   |        | ENSG00000213708 |
| 8 | 107415415 | 107415804 | 107415594 | 11 | 18  | 2  | 6.073088389 | 0.000157975 |        | ENSG00000213708 |
| 8 | 107574867 | 107575091 | 107574973 | 8  | 9   | 5  | 1.598181155 | 0.170911    | OXR1   | ENSG00000164830 |
| 8 | 107673209 | 107673479 | 107673344 | 8  | 11  | 6  | 1.643843474 | 0.137712    | OXR1   | ENSG00000164830 |
| 8 | 107689855 | 107690348 | 107690139 | 88 | 113 | 8  | 12.14617678 | 1.76E-24    | OXR1   | ENSG00000164830 |
| 8 | 107738770 | 107738971 | 107738871 | 9  | 9   | 7  | 1.198635866 | 0.346278    | OXR1   | ENSG00000164830 |
| 8 | 107739813 | 107740116 | 107739965 | 13 | 16  | 6  | 2.328778255 | 0.0221113   | OXR1   | ENSG00000164830 |
| 8 | 107807291 | 107807678 | 107807437 | 10 | 16  | 10 | 1.481949798 | 0.147733    | OXR1   | ENSG00000164830 |
| 8 | 107854120 | 107854317 | 107854224 | 8  | 10  | 4  | 2.109599125 | 0.0694668   | ABRA   | ENSG00000174429 |
| 8 | 107937988 | 107938231 | 107938109 | 9  | 12  | 6  | 1.78083043  | 0.0985525   | ABRA   | ENSG00000174429 |
| 8 | 107971951 | 107972198 | 107972074 | 8  | 9   | 6  | 1.369869562 | 0.253675    | ABRA   | ENSG00000174429 |
| 8 | 108003932 | 108004111 | 108004061 | 8  | 8   | 0  | 8.630178238 | 0.00235436  | ABRA   | ENSG00000174429 |
| 8 | 108512964 | 108513164 | 108513085 | 8  | 8   | 1  | 4.315089119 | 0.0127267   | ANGPT1 | ENSG00000154188 |
| 8 | 108613837 | 108614079 | 108613959 | 8  | 9   | 1  | 4.794543465 | 0.00708517  | ANGPT1 | ENSG00000154188 |
| 8 | 108837721 | 108838000 | 108837860 | 8  | 10  | 0  | 10.54799562 | 0.000613541 |        | ENSG00000200806 |
| 8 | 108862896 | 108863177 | 108863036 | 11 | 13  | 1  | 6.712360851 | 0.000640982 |        | ENSG00000200806 |
| 8 | 109076316 | 109076495 | 109076417 | 8  | 8   | 2  | 2.876726079 | 0.0381137   | RSPO2  | ENSG00000147655 |
| 8 | 109161948 | 109162198 | 109162073 | 8  | 10  | 3  | 2.636998906 | 0.034203    | RSPO2  | ENSG00000147655 |
| 8 | 109288296 | 109288494 | 109288395 | 10 | 11  | 2  | 3.835634772 | 0.00800699  | EIF3E  | ENSG00000104408 |
| 8 | 109324526 | 109324714 | 109324620 | 8  | 8   | 3  | 2.157544559 | 0.0836802   | EIF3E  | ENSG00000104408 |
| 8 | 109329490 | 109329758 | 109329610 | 11 | 13  | 6  | 1.917817386 | 0.0693353   | EIF3E  | ENSG00000104408 |
| 8 | 109329933 | 109330433 | 109330152 | 21 | 31  | 9  | 3.068507818 | 0.000350883 | EIF3E  | ENSG00000104408 |
| 8 | 109347885 | 109348175 | 109348014 | 9  | 12  | 1  | 6.232906505 | 0.00117736  | EIF3E  | ENSG00000104408 |
| 8 | 109390712 | 109390919 | 109390836 | 10 | 10  | 5  | 1.757999271 | 0.121253    |        | ENSG00000208733 |
| 8 | 109518949 | 109519186 | 109519071 | 11 | 11  | 4  | 2.301380863 | 0.0459276   | TTC35  | ENSG00000104412 |
| 8 | 109524355 | 109524692 | 109524523 | 8  | 14  | 5  | 2.397271733 | 0.0258078   | TTC35  | ENSG00000104412 |
| 8 | 109524696 | 109525015 | 109524855 | 8  | 13  | 6  | 1.917817386 | 0.0693353   | TTC35  | ENSG00000104412 |
| 8 | 109562555 | 109562768 | 109562710 | 8  | 9   | 2  | 3.19636231  | 0.0229249   | TTC35  | ENSG00000104412 |
| 8 | 109653907 | 109654279 | 109654059 | 27 | 34  | 4  | 6.712360851 | 3.20E-07    | TTC35  | ENSG00000104412 |
| 8 | 109785212 | 109785488 | 109785358 | 9  | 11  | 5  | 1.917817386 | 0.0843804   | TMEM74 | ENSG00000164841 |

|   |           |           |           |    |    |    |             |             |        |                 |
|---|-----------|-----------|-----------|----|----|----|-------------|-------------|--------|-----------------|
| 8 | 110198180 | 110198455 | 110198327 | 11 | 14 | 4  | 2.876726079 | 0.01219     | TRHR   | ENSG00000174417 |
| 8 | 110227211 | 110227397 | 110227314 | 8  | 9  | 5  | 1.598181155 | 0.170911    | TRHR   | ENSG00000174417 |
| 8 | 110397874 | 110398132 | 110398037 | 8  | 11 | 5  | 1.917817386 | 0.0843804   | NUDCD1 | ENSG00000120526 |
| 8 | 110415484 | 110415753 | 110415618 | 12 | 15 | 14 | 1.022835939 | 0.473606    | NUDCD1 | ENSG00000120526 |
| 8 | 110415854 | 110416321 | 110416184 | 9  | 18 | 8  | 2.024362796 | 0.0334397   | ENY2   | ENSG00000120533 |
| 8 | 110651803 | 110651994 | 110651941 | 8  | 8  | 2  | 2.876726079 | 0.0381137   | EBAG9  | ENSG00000147654 |
| 8 | 110658630 | 110658828 | 110658776 | 8  | 9  | 5  | 1.598181155 | 0.170911    | EBAG9  | ENSG00000147654 |
| 8 | 110819058 | 110819318 | 110819171 | 10 | 10 | 2  | 3.515998541 | 0.0136204   |        | ENSG00000147642 |
| 8 | 110882859 | 110883104 | 110882981 | 9  | 10 | 2  | 3.515998541 | 0.0136204   |        | ENSG00000222729 |
| 8 | 110920076 | 110920268 | 110920238 | 8  | 8  | 0  | 8.630178238 | 0.00235436  |        | ENSG00000222729 |
| 8 | 110974636 | 110974893 | 110974776 | 8  | 11 | 2  | 3.835634772 | 0.00800699  |        | ENSG00000222729 |
| 8 | 111057012 | 111057259 | 111057135 | 11 | 13 | 3  | 3.356180426 | 0.00805599  | KCNV1  | ENSG00000164794 |
| 8 | 111478137 | 111478335 | 111478247 | 8  | 9  | 5  | 1.598181155 | 0.170911    | KCNV1  | ENSG00000164794 |
| 8 | 111478409 | 111478697 | 111478565 | 8  | 12 | 7  | 1.558226626 | 0.152813    | KCNV1  | ENSG00000164794 |
| 8 | 111575028 | 111575417 | 111575266 | 20 | 27 | 2  | 8.949814469 | 7.46E-07    |        | ENSG00000208705 |
| 8 | 111913981 | 111914172 | 111914064 | 9  | 9  | 1  | 4.794543465 | 0.00708517  |        | ENSG00000208705 |
| 8 | 112105987 | 112106311 | 112106134 | 8  | 11 | 1  | 5.753452158 | 0.00215302  |        | ENSG00000208693 |
| 8 | 112479788 | 112480052 | 112479920 | 11 | 13 | 3  | 3.356180426 | 0.00805599  |        | ENSG00000208693 |
| 8 | 113538126 | 113538350 | 113538214 | 8  | 9  | 3  | 2.397271733 | 0.0539397   |        | ENSG00000208686 |
| 8 | 113754967 | 113755300 | 113755122 | 13 | 17 | 2  | 5.753452158 | 0.000281509 |        | ENSG00000208686 |
| 8 | 113831871 | 113832191 | 113832031 | 23 | 26 | 0  | 25.89053471 | 1.31E-08    |        | ENSG00000208686 |
| 8 | 113882592 | 113882785 | 113882623 | 9  | 11 | 1  | 5.753452158 | 0.00215302  |        | ENSG00000208686 |
| 8 | 114902135 | 114902375 | 114902225 | 9  | 11 | 0  | 11.50690432 | 0.000313206 |        | ENSG00000206719 |
| 8 | 115005018 | 115005221 | 115005163 | 8  | 9  | 2  | 3.19636231  | 0.0229249   |        | ENSG00000206719 |
| 8 | 116192868 | 116193188 | 116193029 | 14 | 17 | 1  | 8.630178238 | 5.44E-05    |        |                 |
| 8 | 116254252 | 116254440 | 116254327 | 8  | 8  | 4  | 1.726035648 | 0.150596    | TRPS1  | ENSG00000104447 |
| 8 | 116462187 | 116462369 | 116462297 | 8  | 9  | 3  | 2.397271733 | 0.0539397   | TRPS1  | ENSG00000104447 |
| 8 | 116919534 | 116920226 | 116920051 | 23 | 47 | 7  | 5.753452158 | 1.54E-08    | TRPS1  | ENSG00000104447 |
| 8 | 116948338 | 116948911 | 116948517 | 19 | 31 | 6  | 4.383582597 | 2.10E-05    |        | ENSG00000199450 |
| 8 | 116948961 | 116949193 | 116949061 | 9  | 11 | 1  | 5.753452158 | 0.00215302  |        | ENSG00000199450 |
| 8 | 117020492 | 117020702 | 117020578 | 10 | 10 | 15 | 0.659249726 | 0.861705    |        | ENSG00000199450 |
| 8 | 117059694 | 117060049 | 117059871 | 16 | 21 | 7  | 2.636998906 | 0.00562102  |        | ENSG00000199450 |
| 8 | 117069142 | 117069518 | 117069346 | 19 | 26 | 12 | 1.991579593 | 0.0165204   |        | ENSG00000199450 |
| 8 | 117079789 | 117079997 | 117079922 | 8  | 10 | 11 | 0.878999635 | 0.622439    |        | ENSG00000199450 |

|   |           |           |           |    |    |   |             |                      |                 |
|---|-----------|-----------|-----------|----|----|---|-------------|----------------------|-----------------|
| 8 | 117118529 | 117118715 | 117118665 | 8  | 8  | 0 | 8.630178238 | 0.00235436           | ENSG00000199450 |
| 8 | 117176499 | 117176679 | 117176589 | 8  | 10 | 2 | 3.515998541 | 0.0136204            | ENSG00000221793 |
| 8 | 117524612 | 117524816 | 117524753 | 8  | 9  | 2 | 3.19636231  | 0.0229249            | ENSG00000221793 |
| 8 | 117738316 | 117738499 | 117738372 | 8  | 8  | 2 | 2.876726079 | 0.0381137 EIF3H      | ENSG00000147677 |
| 8 | 117866363 | 117866690 | 117866526 | 11 | 15 | 0 | 15.34253909 | 2.13E-05 UTP23       | ENSG00000147679 |
| 8 | 117866696 | 117866943 | 117866835 | 8  | 10 | 1 | 5.273997812 | 0.00391723 UTP23     | ENSG00000147679 |
| 8 | 117869912 | 117870220 | 117870062 | 9  | 12 | 6 | 1.78083043  | 0.0985525 UTP23      | ENSG00000147679 |
| 8 | 117901609 | 117901874 | 117901736 | 12 | 13 | 0 | 13.4247217  | 8.16E-05 UTP23       | ENSG00000147679 |
| 8 | 117969002 | 117969262 | 117969106 | 10 | 14 | 5 | 2.397271733 | 0.0258078 RAD21      | ENSG00000164754 |
| 8 | 118119192 | 118119404 | 118119298 | 8  | 9  | 1 | 4.794543465 | 0.00708517           | ENSG00000208665 |
| 8 | 118313482 | 118313707 | 118313592 | 9  | 11 | 5 | 1.917817386 | 0.0843804            | ENSG00000208663 |
| 8 | 118697904 | 118698114 | 118698009 | 10 | 11 | 2 | 3.835634772 | 0.00800699 MED30     | ENSG00000164758 |
| 8 | 118900081 | 118900262 | 118900113 | 8  | 8  | 1 | 4.315089119 | 0.0127267 EXT1       | ENSG00000182197 |
| 8 | 119318909 | 119319169 | 119319083 | 8  | 8  | 3 | 2.157544559 | 0.0836802 EXT1       | ENSG00000182197 |
| 8 | 119497177 | 119497442 | 119497295 | 11 | 12 | 3 | 3.116453252 | 0.0131971 SAMD12     | ENSG00000177570 |
| 8 | 119521224 | 119521474 | 119521335 | 11 | 12 | 1 | 6.232906505 | 0.00117736 SAMD12    | ENSG00000177570 |
| 8 | 119931395 | 119931840 | 119931580 | 34 | 45 | 5 | 7.351633313 | 2.73E-09 TNFRSF11E   | ENSG00000164761 |
| 8 | 119960105 | 119960337 | 119960208 | 10 | 14 | 3 | 3.595907599 | 0.00486913 TNFRSF11E | ENSG00000164761 |
| 8 | 120010750 | 120010940 | 120010855 | 8  | 10 | 2 | 3.515998541 | 0.0136204 TNFRSF11E  | ENSG00000164761 |
| 8 | 120193847 | 120194103 | 120194025 | 11 | 13 | 2 | 4.474907234 | 0.00269459 COLEC10   | ENSG00000184374 |
| 8 | 120214693 | 120214934 | 120214813 | 9  | 11 | 1 | 5.753452158 | 0.00215302 COLEC10   | ENSG00000184374 |
| 8 | 120520551 | 120520771 | 120520661 | 8  | 9  | 1 | 4.794543465 | 0.00708517 NOV       | ENSG00000136999 |
| 8 | 120583400 | 120583706 | 120583533 | 11 | 13 | 2 | 4.474907234 | 0.00269459           | ENSG00000213690 |
| 8 | 120616743 | 120616981 | 120616851 | 9  | 11 | 2 | 3.835634772 | 0.00800699           | ENSG00000213690 |
| 8 | 120702179 | 120702605 | 120702426 | 28 | 40 | 2 | 13.10508547 | 2.42E-10 ENPP2       | ENSG00000136960 |
| 8 | 120722849 | 120723138 | 120722965 | 8  | 10 | 2 | 3.515998541 | 0.0136204 ENPP2      | ENSG00000136960 |
| 8 | 120914202 | 120914588 | 120914381 | 10 | 18 | 5 | 3.036544195 | 0.0044641 TAF2       | ENSG00000064313 |
| 8 | 120944659 | 120944867 | 120944763 | 9  | 9  | 2 | 3.19636231  | 0.0229249            | ENSG00000208631 |
| 8 | 120947034 | 120947231 | 120947095 | 8  | 8  | 0 | 8.630178238 | 0.00235436           | ENSG00000208631 |
| 8 | 120956095 | 120956289 | 120956215 | 8  | 9  | 4 | 1.917817386 | 0.103282 DEPDC6      | ENSG00000155792 |
| 8 | 121064227 | 121064488 | 121064331 | 14 | 17 | 2 | 5.753452158 | 0.000281509          | ENSG00000202356 |
| 8 | 121204960 | 121205271 | 121205048 | 10 | 14 | 4 | 2.876726079 | 0.01219 COL14A1      | ENSG00000187955 |
| 8 | 121519343 | 121519823 | 121519529 | 26 | 37 | 2 | 12.14617678 | 1.58E-09 MRPL13      | ENSG00000172172 |
| 8 | 121526578 | 121526784 | 121526652 | 9  | 10 | 5 | 1.757999271 | 0.121253 MRPL13      | ENSG00000172172 |

|   |           |           |           |    |    |    |             |             |       |                 |
|---|-----------|-----------|-----------|----|----|----|-------------|-------------|-------|-----------------|
| 8 | 121733688 | 121733962 | 121733825 | 9  | 11 | 2  | 3.835634772 | 0.00800699  | SNTB1 | ENSG00000172164 |
| 8 | 121760563 | 121760763 | 121760705 | 8  | 9  | 4  | 1.917817386 | 0.103282    | SNTB1 | ENSG00000172164 |
| 8 | 121836547 | 121836831 | 121836689 | 8  | 9  | 3  | 2.397271733 | 0.0539397   | SNTB1 | ENSG00000172164 |
| 8 | 121890036 | 121890465 | 121890203 | 11 | 18 | 13 | 1.301376083 | 0.22245     | SNTB1 | ENSG00000172164 |
| 8 | 121998169 | 121998450 | 121998309 | 10 | 12 | 5  | 2.077635502 | 0.0577144   | SNTB1 | ENSG00000172164 |
| 8 | 121998661 | 121998860 | 121998771 | 8  | 9  | 2  | 3.19636231  | 0.0229249   | SNTB1 | ENSG00000172164 |
| 8 | 122017969 | 122018664 | 122018323 | 45 | 74 | 7  | 8.989768997 | 3.55E-15    | SNTB1 | ENSG00000172164 |
| 8 | 122020367 | 122020799 | 122020645 | 13 | 22 | 9  | 2.205489994 | 0.0136443   | SNTB1 | ENSG00000172164 |
| 8 | 122032656 | 122032921 | 122032788 | 10 | 13 | 3  | 3.356180426 | 0.00805599  | SNTB1 | ENSG00000172164 |
| 8 | 122178862 | 122179142 | 122179002 | 10 | 12 | 2  | 4.155271003 | 0.0046638   |       | ENSG00000221644 |
| 8 | 122226970 | 122227337 | 122227149 | 14 | 21 | 4  | 4.219198249 | 0.000390041 |       | ENSG00000221644 |
| 8 | 122232316 | 122232720 | 122232536 | 11 | 19 | 13 | 1.369869562 | 0.177863    |       | ENSG00000221644 |
| 8 | 122235856 | 122236321 | 122236035 | 14 | 22 | 8  | 2.450544438 | 0.0073921   |       | ENSG00000221644 |
| 8 | 122236725 | 122236995 | 122236894 | 9  | 10 | 2  | 3.515998541 | 0.0136204   |       | ENSG00000221644 |
| 8 | 122246617 | 122246929 | 122246772 | 11 | 15 | 6  | 2.191791298 | 0.0328001   |       | ENSG00000221644 |
| 8 | 122304935 | 122305142 | 122304986 | 9  | 10 | 9  | 1.054799562 | 0.4492      |       | ENSG00000221644 |
| 8 | 122321896 | 122322188 | 122322033 | 10 | 14 | 4  | 2.876726079 | 0.01219     |       | ENSG00000221644 |
| 8 | 122330226 | 122330655 | 122330476 | 12 | 22 | 6  | 3.150699991 | 0.00166398  |       | ENSG00000221644 |
| 8 | 122342679 | 122342868 | 122342773 | 8  | 8  | 3  | 2.157544559 | 0.0836802   |       | ENSG00000221644 |
| 8 | 122508232 | 122508433 | 122508332 | 8  | 9  | 3  | 2.397271733 | 0.0539397   |       | ENSG00000222786 |
| 8 | 122615691 | 122616133 | 122615904 | 19 | 30 | 3  | 7.431542371 | 6.87E-07    |       | ENSG00000222786 |
| 8 | 122668697 | 122668895 | 122668808 | 8  | 9  | 2  | 3.19636231  | 0.0229249   | HAS2  | ENSG00000170961 |
| 8 | 122669994 | 122670212 | 122670075 | 8  | 10 | 6  | 1.506856518 | 0.188853    | HAS2  | ENSG00000170961 |
| 8 | 122715992 | 122716226 | 122716109 | 9  | 9  | 4  | 1.917817386 | 0.103282    | HAS2  | ENSG00000170961 |
| 8 | 122723632 | 122723938 | 122723785 | 8  | 11 | 8  | 1.278544924 | 0.28289     | HAS2  | ENSG00000170961 |
| 8 | 122823217 | 122823553 | 122823375 | 9  | 14 | 14 | 0.958908693 | 0.545362    | HAS2  | ENSG00000170961 |
| 8 | 122857587 | 122858113 | 122857904 | 33 | 51 | 12 | 3.835634772 | 5.27E-07    | HAS2  | ENSG00000170961 |
| 8 | 122899035 | 122899337 | 122899197 | 12 | 14 | 1  | 7.191815198 | 0.00034761  | HAS2  | ENSG00000170961 |
| 8 | 123267287 | 123267602 | 123267444 | 9  | 13 | 8  | 1.491635745 | 0.166708    |       | ENSG00000208620 |
| 8 | 123353553 | 123353760 | 123353656 | 9  | 11 | 1  | 5.753452158 | 0.00215302  |       | ENSG00000208620 |
| 8 | 123363335 | 123363599 | 123363477 | 8  | 11 | 6  | 1.643843474 | 0.137712    |       | ENSG00000208620 |
| 8 | 123414207 | 123414435 | 123414290 | 8  | 10 | 0  | 10.54799562 | 0.000613541 |       | ENSG00000208620 |
| 8 | 123420358 | 123420923 | 123420534 | 16 | 32 | 5  | 5.273997812 | 3.82E-06    |       | ENSG00000208620 |
| 8 | 123650027 | 123650322 | 123650174 | 18 | 22 | 4  | 4.410979988 | 0.000231863 |       | ENSG00000208620 |

|   |           |           |           |    |    |    |             |            |                            |
|---|-----------|-----------|-----------|----|----|----|-------------|------------|----------------------------|
| 8 | 123653619 | 123654006 | 123653882 | 9  | 15 | 8  | 1.704726565 | 0.0916153  | ENSG00000208620            |
| 8 | 123656880 | 123657078 | 123656979 | 9  | 9  | 5  | 1.598181155 | 0.170911   | ENSG00000208620            |
| 8 | 123725099 | 123725320 | 123725209 | 8  | 9  | 9  | 0.958908693 | 0.536911   | ENSG00000208620            |
| 8 | 123754868 | 123755159 | 123755025 | 8  | 12 | 9  | 1.246581301 | 0.295061   | ENSG00000208620            |
| 8 | 123830590 | 123830786 | 123830688 | 8  | 8  | 6  | 1.232882605 | 0.333038   | ENSG00000217845            |
| 8 | 123861506 | 123861990 | 123861712 | 10 | 23 | 13 | 1.643843474 | 0.0639146  | ZHX2<br>ENSG00000178764    |
| 8 | 123862261 | 123862597 | 123862429 | 10 | 14 | 11 | 1.198635866 | 0.315918   | ZHX2<br>ENSG00000178764    |
| 8 | 123867277 | 123867744 | 123867467 | 32 | 44 | 19 | 2.157544559 | 0.001365   | ZHX2<br>ENSG00000178764    |
| 8 | 123876482 | 123876756 | 123876619 | 13 | 17 | 11 | 1.43836304  | 0.15834    | ZHX2<br>ENSG00000178764    |
| 8 | 123903469 | 123903752 | 123903572 | 8  | 12 | 6  | 1.78083043  | 0.0985525  | ENSG00000221542            |
| 8 | 123966518 | 123966722 | 123966620 | 9  | 9  | 4  | 1.917817386 | 0.103282   | ENSG00000221542            |
| 8 | 124027062 | 124027365 | 124027213 | 8  | 11 | 3  | 2.876726079 | 0.0213797  | ENSG00000220455            |
| 8 | 124053814 | 124053993 | 124053919 | 8  | 8  | 2  | 2.876726079 | 0.0381137  | ENSG00000220455            |
| 8 | 124100371 | 124100631 | 124100477 | 8  | 12 | 3  | 3.116453252 | 0.0131971  | ENSG00000220455            |
| 8 | 124103913 | 124104184 | 124104054 | 10 | 11 | 3  | 2.876726079 | 0.0213797  | ENSG00000220455            |
| 8 | 124119155 | 124119501 | 124119327 | 10 | 13 | 5  | 2.237453617 | 0.038866   | DERL1<br>ENSG00000136986   |
| 8 | 124121842 | 124122136 | 124121976 | 10 | 14 | 2  | 4.794543465 | 0.00154571 | DERL1<br>ENSG00000136986   |
| 8 | 124123643 | 124123843 | 124123765 | 8  | 9  | 6  | 1.369869562 | 0.253675   | DERL1<br>ENSG00000136986   |
| 8 | 124124077 | 124124445 | 124124256 | 13 | 20 | 8  | 2.237453617 | 0.0160557  | DERL1<br>ENSG00000136986   |
| 8 | 124146786 | 124146981 | 124146942 | 8  | 9  | 6  | 1.369869562 | 0.253675   | WDR67<br>ENSG00000156787   |
| 8 | 124154494 | 124154734 | 124154619 | 8  | 12 | 4  | 2.493162602 | 0.0299057  | WDR67<br>ENSG00000156787   |
| 8 | 124177834 | 124178157 | 124177986 | 11 | 15 | 5  | 2.557089848 | 0.0169197  | WDR67<br>ENSG00000156787   |
| 8 | 124220811 | 124221073 | 124220970 | 12 | 13 | 4  | 2.684944341 | 0.01921    | ENSG00000214821            |
| 8 | 124227604 | 124227802 | 124227703 | 8  | 8  | 2  | 2.876726079 | 0.0381137  | ENSG00000214821            |
| 8 | 124236291 | 124236494 | 124236352 | 8  | 9  | 7  | 1.198635866 | 0.346278   | ENSG00000208612            |
| 8 | 124238447 | 124238963 | 124238641 | 24 | 39 | 18 | 2.018755143 | 0.00431574 | ENSG00000208612            |
| 8 | 124241764 | 124241995 | 124241872 | 11 | 12 | 2  | 4.155271003 | 0.0046638  | ENSG00000208612            |
| 8 | 124263730 | 124264120 | 124263941 | 15 | 22 | 12 | 1.696530765 | 0.057768   | FAM83A<br>ENSG00000147689  |
| 8 | 124302096 | 124302460 | 124302222 | 8  | 13 | 3  | 3.356180426 | 0.00805599 | ENSG00000204949            |
| 8 | 124322591 | 124322777 | 124322694 | 8  | 8  | 2  | 2.876726079 | 0.0381137  | C8orf76<br>ENSG00000189376 |
| 8 | 124356054 | 124356456 | 124356293 | 9  | 16 | 5  | 2.716907964 | 0.0109645  | ZHX1<br>ENSG00000165156    |
| 8 | 124358353 | 124358532 | 124358442 | 8  | 8  | 10 | 0.784561658 | 0.708731   | ZHX1<br>ENSG00000165156    |
| 8 | 124438402 | 124438653 | 124438531 | 8  | 8  | 6  | 1.232882605 | 0.333038   | ENSG00000207704            |
| 8 | 124465961 | 124466149 | 124466046 | 8  | 8  | 1  | 4.315089119 | 0.0127267  | ATAD2<br>ENSG00000156802   |

|   |           |           |           |     |     |    |             |             |         |                 |
|---|-----------|-----------|-----------|-----|-----|----|-------------|-------------|---------|-----------------|
| 8 | 124476785 | 124477319 | 124477050 | 10  | 24  | 18 | 1.261721965 | 0.218718    | ATAD2   | ENSG00000156802 |
| 8 | 124477679 | 124478326 | 124478005 | 22  | 43  | 18 | 2.220630658 | 0.0011336   | ATAD2   | ENSG00000156802 |
| 8 | 124498266 | 124498784 | 124498498 | 8   | 19  | 21 | 0.871735176 | 0.672523    | WDYHV1  | ENSG00000156795 |
| 8 | 124568013 | 124568278 | 124568141 | 9   | 10  | 10 | 0.958908693 | 0.538751    |         | ENSG00000222694 |
| 8 | 124577930 | 124578144 | 124577980 | 8   | 9   | 3  | 2.397271733 | 0.0539397   |         | ENSG00000222694 |
| 8 | 124629652 | 124629975 | 124629813 | 12  | 16  | 2  | 5.433815927 | 0.000499302 | FBXO32  | ENSG00000156804 |
| 8 | 124645402 | 124645836 | 124645565 | 9   | 16  | 24 | 0.652057911 | 0.917054    |         | ENSG00000208595 |
| 8 | 124693606 | 124694455 | 124693944 | 162 | 237 | 2  | 76.07342298 | 2.20E-66    |         | ENSG00000208595 |
| 8 | 124714309 | 124714544 | 124714426 | 8   | 11  | 7  | 1.43836304  | 0.204844    | KLHL38  | ENSG00000175946 |
| 8 | 124767546 | 124767740 | 124767643 | 8   | 8   | 3  | 2.157544559 | 0.0836802   | ANXA13  | ENSG00000104537 |
| 8 | 124775218 | 124775569 | 124775414 | 10  | 15  | 4  | 3.068507818 | 0.0076507   | ANXA13  | ENSG00000104537 |
| 8 | 124795423 | 124795602 | 124795534 | 8   | 8   | 2  | 2.876726079 | 0.0381137   | ANXA13  | ENSG00000104537 |
| 8 | 124797018 | 124797407 | 124797197 | 9   | 16  | 10 | 1.481949798 | 0.147733    | ANXA13  | ENSG00000104537 |
| 8 | 124801282 | 124801898 | 124801604 | 17  | 29  | 7  | 3.595907599 | 0.000155266 | ANXA13  | ENSG00000104537 |
| 8 | 124844778 | 124845150 | 124844957 | 10  | 18  | 6  | 2.602752167 | 0.00970422  | FAM91A1 | ENSG00000176853 |
| 8 | 124847502 | 124847701 | 124847601 | 8   | 9   | 6  | 1.369869562 | 0.253675    | FAM91A1 | ENSG00000176853 |
| 8 | 124850423 | 124850668 | 124850499 | 9   | 11  | 6  | 1.643843474 | 0.137712    | FAM91A1 | ENSG00000176853 |
| 8 | 124907399 | 124907623 | 124907539 | 9   | 12  | 3  | 3.116453252 | 0.0131971   | FAM91A1 | ENSG00000176853 |
| 8 | 124913897 | 124914182 | 124914031 | 8   | 9   | 5  | 1.598181155 | 0.170911    | FAM91A1 | ENSG00000176853 |
| 8 | 124925587 | 124926815 | 124926409 | 432 | 578 | 6  | 79.31544761 | 6.33E-158   | FAM91A1 | ENSG00000176853 |
| 8 | 125016717 | 125016932 | 125016814 | 8   | 8   | 1  | 4.315089119 | 0.0127267   | FER1L6  | ENSG00000214814 |
| 8 | 125061259 | 125061543 | 125061401 | 8   | 10  | 5  | 1.757999271 | 0.121253    | FER1L6  | ENSG00000214814 |
| 8 | 125063417 | 125063616 | 125063497 | 8   | 8   | 7  | 1.07877228  | 0.435076    | FER1L6  | ENSG00000214814 |
| 8 | 125097251 | 125097496 | 125097430 | 8   | 10  | 0  | 10.54799562 | 0.000613541 | C8orf54 | ENSG00000181171 |
| 8 | 125111809 | 125112083 | 125111946 | 9   | 12  | 7  | 1.558226626 | 0.152813    | C8orf54 | ENSG00000181171 |
| 8 | 125119281 | 125119500 | 125119390 | 8   | 9   | 6  | 1.369869562 | 0.253675    | C8orf54 | ENSG00000181171 |
| 8 | 125186275 | 125186622 | 125186445 | 12  | 16  | 4  | 3.260289556 | 0.00475414  | C8orf54 | ENSG00000181171 |
| 8 | 125219653 | 125219985 | 125219822 | 14  | 19  | 9  | 1.917817386 | 0.0394029   | C8orf54 | ENSG00000181171 |
| 8 | 125227262 | 125227469 | 125227364 | 8   | 10  | 7  | 1.318499453 | 0.269217    |         | ENSG00000214803 |
| 8 | 125229290 | 125229608 | 125229461 | 8   | 13  | 5  | 2.237453617 | 0.038866    |         | ENSG00000214803 |
| 8 | 125261800 | 125262145 | 125261968 | 14  | 17  | 6  | 2.465765211 | 0.014729    |         | ENSG00000214803 |
| 8 | 125281148 | 125281341 | 125281282 | 8   | 9   | 3  | 2.397271733 | 0.0539397   |         | ENSG00000214803 |
| 8 | 125281349 | 125282346 | 125281694 | 19  | 60  | 20 | 2.785401442 | 6.69E-06    |         | ENSG00000214803 |
| 8 | 125352962 | 125353154 | 125353058 | 9   | 9   | 5  | 1.598181155 | 0.170911    |         | ENSG00000206724 |

|   |           |           |           |    |    |    |             |             |                        |
|---|-----------|-----------|-----------|----|----|----|-------------|-------------|------------------------|
| 8 | 125362253 | 125362477 | 125362333 | 10 | 11 | 3  | 2.876726079 | 0.0213797   | ENSG00000206724        |
| 8 | 125362527 | 125362706 | 125362673 | 8  | 8  | 0  | 8.630178238 | 0.00235436  | ENSG00000206724        |
| 8 | 125432362 | 125432619 | 125432490 | 8  | 11 | 1  | 5.753452158 | 0.00215302  | TMEM65 ENSG00000164983 |
| 8 | 125454155 | 125454436 | 125454315 | 10 | 14 | 5  | 2.397271733 | 0.0258078   | TMEM65 ENSG00000164983 |
| 8 | 125454800 | 125455096 | 125454963 | 8  | 11 | 18 | 0.605626543 | 0.918575    | TMEM65 ENSG00000164983 |
| 8 | 125506809 | 125507014 | 125506908 | 10 | 10 | 7  | 1.318499453 | 0.269217    | TRMT12 ENSG00000183665 |
| 8 | 125507482 | 125507846 | 125507682 | 10 | 16 | 8  | 1.811271976 | 0.0663685   | TRMT12 ENSG00000183665 |
| 8 | 125509436 | 125509652 | 125509527 | 8  | 8  | 5  | 1.43836304  | 0.235762    | TRMT12 ENSG00000183665 |
| 8 | 125521868 | 125522059 | 125521993 | 8  | 8  | 10 | 0.784561658 | 0.708731    | TRMT12 ENSG00000183665 |
| 8 | 125532029 | 125532443 | 125532239 | 9  | 17 | 15 | 1.07877228  | 0.410615    | TRMT12 ENSG00000183665 |
| 8 | 125554512 | 125554739 | 125554625 | 8  | 9  | 4  | 1.917817386 | 0.103282    | RNF139 ENSG00000170881 |
| 8 | 125555517 | 125556235 | 125555702 | 10 | 30 | 18 | 1.564535236 | 0.0578367   | RNF139 ENSG00000170881 |
| 8 | 125556692 | 125556995 | 125556846 | 11 | 12 | 8  | 1.385090334 | 0.219216    | RNF139 ENSG00000170881 |
| 8 | 125557491 | 125557941 | 125557783 | 10 | 17 | 11 | 1.43836304  | 0.15834     | RNF139 ENSG00000170881 |
| 8 | 125572651 | 125573143 | 125572826 | 17 | 31 | 24 | 1.227403127 | 0.218358    | RNF139 ENSG00000170881 |
| 8 | 125619852 | 125620069 | 125619999 | 9  | 11 | 8  | 1.278544924 | 0.28289     | TATDN1 ENSG00000147687 |
| 8 | 125620090 | 125620717 | 125620394 | 13 | 30 | 10 | 2.702379044 | 0.00113582  | TATDN1 ENSG00000147687 |
| 8 | 125620793 | 125621010 | 125620901 | 9  | 9  | 6  | 1.369869562 | 0.253675    | NDUFB9 ENSG00000147684 |
| 8 | 125631312 | 125631538 | 125631425 | 8  | 10 | 2  | 3.515998541 | 0.0136204   | NDUFB9 ENSG00000147684 |
| 8 | 125674440 | 125674713 | 125674576 | 9  | 12 | 7  | 1.558226626 | 0.152813    | MTSS1 ENSG00000170873  |
| 8 | 125716986 | 125717188 | 125717025 | 8  | 10 | 4  | 2.109599125 | 0.0694668   | MTSS1 ENSG00000170873  |
| 8 | 125833534 | 125833832 | 125833683 | 12 | 14 | 5  | 2.397271733 | 0.0258078   | MTSS1 ENSG00000170873  |
| 8 | 125890713 | 125890908 | 125890745 | 8  | 9  | 6  | 1.369869562 | 0.253675    | MTSS1 ENSG00000170873  |
| 8 | 125925976 | 125926168 | 125926067 | 8  | 9  | 3  | 2.397271733 | 0.0539397   | MTSS1 ENSG00000170873  |
| 8 | 125970178 | 125970490 | 125970352 | 9  | 13 | 10 | 1.220429246 | 0.306001    | ZNF572 ENSG00000180938 |
| 8 | 126000595 | 126000810 | 126000734 | 8  | 9  | 3  | 2.397271733 | 0.0539397   | ZNF572 ENSG00000180938 |
| 8 | 126054475 | 126054904 | 126054654 | 18 | 28 | 11 | 2.317362675 | 0.00474534  | ZNF572 ENSG00000180938 |
| 8 | 126079938 | 126080159 | 126080041 | 10 | 11 | 4  | 2.301380863 | 0.0459276   | SQLE ENSG00000104549   |
| 8 | 126080373 | 126080853 | 126080507 | 8  | 18 | 16 | 1.07172148  | 0.415914    | SQLE ENSG00000104549   |
| 8 | 126173132 | 126173413 | 126173264 | 13 | 14 | 6  | 2.054804342 | 0.0480281   | NSMCE2 ENSG00000156831 |
| 8 | 126181701 | 126181893 | 126181799 | 8  | 8  | 1  | 4.315089119 | 0.0127267   | NSMCE2 ENSG00000156831 |
| 8 | 126192353 | 126192546 | 126192449 | 10 | 10 | 4  | 2.109599125 | 0.0694668   | NSMCE2 ENSG00000156831 |
| 8 | 126216998 | 126217177 | 126217037 | 9  | 9  | 0  | 9.589086931 | 0.00120187  | NSMCE2 ENSG00000156831 |
| 8 | 126224916 | 126225256 | 126225077 | 17 | 22 | 4  | 4.410979988 | 0.000231863 | NSMCE2 ENSG00000156831 |

|   |           |           |           |    |    |    |             |             |        |                 |
|---|-----------|-----------|-----------|----|----|----|-------------|-------------|--------|-----------------|
| 8 | 126234870 | 126235158 | 126235014 | 8  | 10 | 3  | 2.636998906 | 0.034203    | NSMCE2 | ENSG00000156831 |
| 8 | 126270368 | 126270610 | 126270496 | 8  | 8  | 4  | 1.726035648 | 0.150596    |        | ENSG00000222813 |
| 8 | 126270627 | 126271080 | 126270895 | 56 | 71 | 3  | 17.26035648 | 7.81E-18    |        | ENSG00000222813 |
| 8 | 126271439 | 126271693 | 126271539 | 8  | 11 | 5  | 1.917817386 | 0.0843804   |        | ENSG00000222813 |
| 8 | 126300666 | 126301024 | 126300845 | 17 | 23 | 3  | 5.753452158 | 3.82E-05    |        | ENSG00000222813 |
| 8 | 126305015 | 126305233 | 126305124 | 8  | 8  | 4  | 1.726035648 | 0.150596    |        | ENSG00000222813 |
| 8 | 126312068 | 126312482 | 126312245 | 11 | 17 | 4  | 3.452071295 | 0.00292757  |        | ENSG00000222813 |
| 8 | 126321290 | 126321482 | 126321386 | 8  | 8  | 4  | 1.726035648 | 0.150596    |        | ENSG00000222813 |
| 8 | 126341344 | 126341529 | 126341445 | 8  | 8  | 1  | 4.315089119 | 0.0127267   |        | ENSG00000222813 |
| 8 | 126354463 | 126354642 | 126354552 | 11 | 11 | 4  | 2.301380863 | 0.0459276   |        | ENSG00000222813 |
| 8 | 126360494 | 126360794 | 126360661 | 9  | 13 | 3  | 3.356180426 | 0.00805599  |        | ENSG00000222813 |
| 8 | 126367347 | 126367550 | 126367452 | 10 | 10 | 2  | 3.515998541 | 0.0136204   |        | ENSG00000222813 |
| 8 | 126377295 | 126377497 | 126377396 | 8  | 8  | 9  | 0.863017824 | 0.627343    |        | ENSG00000222813 |
| 8 | 126419390 | 126419607 | 126419512 | 8  | 9  | 7  | 1.198635866 | 0.346278    |        | ENSG00000222813 |
| 8 | 126511472 | 126511972 | 126511629 | 23 | 32 | 9  | 3.164398687 | 0.000225664 | TRIB1  | ENSG00000173334 |
| 8 | 126512642 | 126512926 | 126512778 | 8  | 11 | 3  | 2.876726079 | 0.0213797   | TRIB1  | ENSG00000173334 |
| 8 | 126513426 | 126513771 | 126513598 | 19 | 22 | 6  | 3.150699991 | 0.00166398  | TRIB1  | ENSG00000173334 |
| 8 | 126515115 | 126515446 | 126515280 | 8  | 10 | 11 | 0.878999635 | 0.622439    | TRIB1  | ENSG00000173334 |
| 8 | 126533507 | 126533815 | 126533662 | 11 | 16 | 9  | 1.630144778 | 0.102169    | TRIB1  | ENSG00000173334 |
| 8 | 126560939 | 126561185 | 126561064 | 8  | 10 | 3  | 2.636998906 | 0.034203    | TRIB1  | ENSG00000173334 |
| 8 | 126594495 | 126594726 | 126594605 | 11 | 11 | 3  | 2.876726079 | 0.0213797   | TRIB1  | ENSG00000173334 |
| 8 | 126628548 | 126628776 | 126628641 | 8  | 10 | 5  | 1.757999271 | 0.121253    | TRIB1  | ENSG00000173334 |
| 8 | 126644963 | 126645360 | 126645142 | 13 | 20 | 7  | 2.517135319 | 0.00849957  | TRIB1  | ENSG00000173334 |
| 8 | 126694150 | 126694337 | 126694235 | 8  | 8  | 1  | 4.315089119 | 0.0127267   | TRIB1  | ENSG00000173334 |
| 8 | 126725782 | 126726304 | 126726125 | 24 | 40 | 17 | 2.184180912 | 0.00187032  | TRIB1  | ENSG00000173334 |
| 8 | 126745837 | 126746316 | 126746051 | 15 | 24 | 8  | 2.663635258 | 0.00328036  | TRIB1  | ENSG00000173334 |
| 8 | 126789438 | 126789720 | 126789579 | 8  | 10 | 7  | 1.318499453 | 0.269217    |        | ENSG00000206695 |
| 8 | 126814870 | 126815077 | 126814975 | 8  | 10 | 4  | 2.109599125 | 0.0694668   |        | ENSG00000206695 |
| 8 | 126868786 | 126869106 | 126868942 | 10 | 13 | 9  | 1.34247217  | 0.232231    |        | ENSG00000206695 |
| 8 | 126869177 | 126869599 | 126869334 | 11 | 16 | 14 | 1.086763185 | 0.404922    |        | ENSG00000206695 |
| 8 | 126965728 | 126965958 | 126965843 | 9  | 9  | 1  | 4.794543465 | 0.00708517  |        | ENSG00000206695 |
| 8 | 126975103 | 126975295 | 126975212 | 8  | 8  | 2  | 2.876726079 | 0.0381137   |        | ENSG00000206695 |
| 8 | 126993408 | 126993741 | 126993576 | 11 | 14 | 11 | 1.198635866 | 0.315918    |        | ENSG00000206695 |
| 8 | 127039287 | 127039623 | 127039460 | 14 | 17 | 6  | 2.465765211 | 0.014729    |        | ENSG00000206695 |



|   |           |           |           |     |     |    |             |            |                          |
|---|-----------|-----------|-----------|-----|-----|----|-------------|------------|--------------------------|
| 8 | 127047481 | 127047669 | 127047598 | 8   | 8   | 5  | 1.43836304  | 0.235762   | ENSG00000206695          |
| 8 | 127049974 | 127050277 | 127050134 | 9   | 12  | 3  | 3.116453252 | 0.0131971  | ENSG00000206695          |
| 8 | 127148288 | 127148622 | 127148454 | 13  | 16  | 6  | 2.328778255 | 0.0221113  | ENSG00000221706          |
| 8 | 127150251 | 127150555 | 127150393 | 8   | 12  | 5  | 2.077635502 | 0.0577144  | ENSG00000221706          |
| 8 | 127192560 | 127192761 | 127192709 | 9   | 9   | 4  | 1.917817386 | 0.103282   | ENSG00000221706          |
| 8 | 127256224 | 127256461 | 127256316 | 9   | 10  | 3  | 2.636998906 | 0.034203   | ENSG00000221706          |
| 8 | 127357250 | 127357503 | 127357376 | 10  | 10  | 8  | 1.171999514 | 0.35773    | ENSG00000221706          |
| 8 | 127401865 | 127402082 | 127401964 | 8   | 10  | 3  | 2.636998906 | 0.034203   | ENSG00000221706          |
| 8 | 127440272 | 127440486 | 127440341 | 10  | 11  | 2  | 3.835634772 | 0.00800699 | ENSG00000207138          |
| 8 | 127465135 | 127465353 | 127465277 | 9   | 10  | 10 | 0.958908693 | 0.538751   | ENSG00000207138          |
| 8 | 127533474 | 127533831 | 127533652 | 27  | 32  | 7  | 3.955498359 | 3.65E-05   | ENSG00000207138          |
| 8 | 127584890 | 127585095 | 127584992 | 8   | 8   | 4  | 1.726035648 | 0.150596   | ENSG00000207138          |
| 8 | 127591751 | 127592000 | 127591875 | 13  | 14  | 5  | 2.397271733 | 0.0258078  | ENSG00000207138          |
| 8 | 127639080 | 127639619 | 127639302 | 15  | 28  | 20 | 1.324207243 | 0.159584   | FAM84B ENSG00000168672   |
| 8 | 127639693 | 127640301 | 127640122 | 18  | 38  | 11 | 3.116453252 | 8.15E-05   | FAM84B ENSG00000168672   |
| 8 | 127645734 | 127646210 | 127645995 | 15  | 31  | 13 | 2.191791298 | 0.00499072 | FAM84B ENSG00000168672   |
| 8 | 127646228 | 127646506 | 127646367 | 8   | 12  | 8  | 1.385090334 | 0.219216   | FAM84B ENSG00000168672   |
| 8 | 127651938 | 127652211 | 127652045 | 9   | 11  | 5  | 1.917817386 | 0.0843804  | FAM84B ENSG00000168672   |
| 8 | 127653201 | 127653674 | 127653495 | 18  | 34  | 5  | 5.593634043 | 1.29E-06   | FAM84B ENSG00000168672   |
| 8 | 127661079 | 127662082 | 127661607 | 168 | 240 | 13 | 16.50692822 | 8.90E-54   | FAM84B ENSG00000168672   |
| 8 | 127666209 | 127666429 | 127666319 | 8   | 8   | 4  | 1.726035648 | 0.150596   | FAM84B ENSG00000168672   |
| 8 | 127685270 | 127685590 | 127685430 | 15  | 20  | 7  | 2.517135319 | 0.00849957 | FAM84B ENSG00000168672   |
| 8 | 127690941 | 127691461 | 127691181 | 10  | 21  | 10 | 1.917817386 | 0.0328292  | FAM84B ENSG00000168672   |
| 8 | 127717617 | 127717838 | 127717727 | 9   | 9   | 6  | 1.369869562 | 0.253675   | ENSG00000212451          |
| 8 | 127751842 | 127752063 | 127752004 | 8   | 9   | 2  | 3.19636231  | 0.0229249  | ENSG00000212451          |
| 8 | 127855671 | 127855902 | 127855786 | 8   | 10  | 1  | 5.273997812 | 0.00391723 | ENSG00000212451          |
| 8 | 127905953 | 127906149 | 127906059 | 8   | 10  | 3  | 2.636998906 | 0.034203   | ENSG00000212451          |
| 8 | 127958092 | 127958483 | 127958271 | 37  | 46  | 3  | 11.26717714 | 4.63E-11   | ENSG00000212451          |
| 8 | 128120194 | 128120436 | 128120315 | 9   | 12  | 2  | 4.155271003 | 0.0046638  | ENSG00000212451          |
| 8 | 128252726 | 128252910 | 128252761 | 8   | 8   | 2  | 2.876726079 | 0.0381137  | POU5F1P1 ENSG00000212993 |
| 8 | 128288465 | 128288948 | 128288644 | 45  | 58  | 9  | 5.657561289 | 5.54E-10   | POU5F1P1 ENSG00000212993 |
| 8 | 128289006 | 128289207 | 128289132 | 8   | 11  | 6  | 1.643843474 | 0.137712   | POU5F1P1 ENSG00000212993 |
| 8 | 128296546 | 128297039 | 128296806 | 14  | 25  | 11 | 2.077635502 | 0.0139694  | POU5F1P1 ENSG00000212993 |
| 8 | 128298435 | 128298758 | 128298597 | 9   | 11  | 2  | 3.835634772 | 0.00800699 | POU5F1P1 ENSG00000212993 |

|   |           |           |           |     |     |    |             |             |          |                 |
|---|-----------|-----------|-----------|-----|-----|----|-------------|-------------|----------|-----------------|
| 8 | 128348343 | 128348599 | 128348471 | 8   | 11  | 4  | 2.301380863 | 0.0459276   | POU5F1P1 | ENSG00000212993 |
| 8 | 128350261 | 128350636 | 128350457 | 17  | 24  | 1  | 11.98635866 | 6.63E-07    | POU5F1P1 | ENSG00000212993 |
| 8 | 128352303 | 128352717 | 128352557 | 13  | 20  | 9  | 2.013708255 | 0.0279742   | POU5F1P1 | ENSG00000212993 |
| 8 | 128384235 | 128384461 | 128384348 | 11  | 11  | 5  | 1.917817386 | 0.0843804   | POU5F1P1 | ENSG00000212993 |
| 8 | 128385326 | 128385593 | 128385459 | 8   | 10  | 3  | 2.636998906 | 0.034203    | POU5F1P1 | ENSG00000212993 |
| 8 | 128423505 | 128424053 | 128423719 | 15  | 30  | 6  | 4.246595641 | 3.49E-05    | POU5F1P1 | ENSG00000212993 |
| 8 | 128446123 | 128446354 | 128446241 | 8   | 10  | 1  | 5.273997812 | 0.00391723  | POU5F1P1 | ENSG00000212993 |
| 8 | 128479445 | 128479964 | 128479785 | 17  | 27  | 10 | 2.440858491 | 0.00375894  | POU5F1P1 | ENSG00000212993 |
| 8 | 128482198 | 128482482 | 128482340 | 11  | 11  | 6  | 1.643843474 | 0.137712    | POU5F1P1 | ENSG00000212993 |
| 8 | 128482931 | 128483115 | 128483023 | 8   | 9   | 4  | 1.917817386 | 0.103282    | POU5F1P1 | ENSG00000212993 |
| 8 | 128533971 | 128534241 | 128534097 | 8   | 10  | 4  | 2.109599125 | 0.0694668   | POU5F1P1 | ENSG00000212993 |
| 8 | 128631750 | 128632069 | 128631890 | 10  | 13  | 8  | 1.491635745 | 0.166708    | POU5F1P1 | ENSG00000212993 |
| 8 | 128634065 | 128634604 | 128634435 | 10  | 22  | 12 | 1.696530765 | 0.057768    | POU5F1P1 | ENSG00000212993 |
| 8 | 128634836 | 128635109 | 128634972 | 8   | 11  | 1  | 5.753452158 | 0.00215302  | POU5F1P1 | ENSG00000212993 |
| 8 | 128671004 | 128671313 | 128671171 | 11  | 14  | 4  | 2.876726079 | 0.01219     | MYC      | ENSG00000136997 |
| 8 | 128742733 | 128743053 | 128742886 | 15  | 17  | 5  | 2.876726079 | 0.00703033  | MYC      | ENSG00000136997 |
| 8 | 128749382 | 128749709 | 128749559 | 11  | 15  | 4  | 3.068507818 | 0.0076507   | MYC      | ENSG00000136997 |
| 8 | 128750110 | 128750597 | 128750332 | 20  | 31  | 20 | 1.461194199 | 0.084213    | MYC      | ENSG00000136997 |
| 8 | 128750850 | 128751139 | 128751016 | 14  | 17  | 6  | 2.465765211 | 0.014729    | MYC      | ENSG00000136997 |
| 8 | 128765395 | 128765614 | 128765504 | 9   | 10  | 3  | 2.636998906 | 0.034203    | MYC      | ENSG00000136997 |
| 8 | 128807229 | 128807731 | 128807378 | 14  | 26  | 12 | 1.991579593 | 0.0165204   | MYC      | ENSG00000136997 |
| 8 | 128815155 | 128816000 | 128815573 | 24  | 53  | 22 | 2.251350845 | 0.000308984 | MYC      | ENSG00000136997 |
| 8 | 128816268 | 128816668 | 128816382 | 10  | 16  | 7  | 2.037680973 | 0.0400399   | MYC      | ENSG00000136997 |
| 8 | 128817113 | 128817320 | 128817189 | 10  | 11  | 10 | 1.046082211 | 0.455063    | MYC      | ENSG00000136997 |
| 8 | 128817401 | 128817777 | 128817605 | 14  | 20  | 15 | 1.25856766  | 0.240048    | MYC      | ENSG00000136997 |
| 8 | 128817884 | 128818136 | 128817989 | 10  | 14  | 13 | 1.027402171 | 0.469541    | MYC      | ENSG00000136997 |
| 8 | 128820177 | 128820486 | 128820332 | 11  | 15  | 8  | 1.704726565 | 0.0916153   | MYC      | ENSG00000136997 |
| 8 | 128831096 | 128831325 | 128831240 | 8   | 9   | 2  | 3.19636231  | 0.0229249   | MYC      | ENSG00000136997 |
| 8 | 128848303 | 128848534 | 128848417 | 10  | 10  | 4  | 2.109599125 | 0.0694668   |          | ENSG00000214789 |
| 8 | 128863800 | 128864444 | 128864125 | 10  | 27  | 11 | 2.237453617 | 0.00685906  |          | ENSG00000214789 |
| 8 | 128871373 | 128871577 | 128871475 | 8   | 8   | 6  | 1.232882605 | 0.333038    |          | ENSG00000214789 |
| 8 | 128876041 | 128878220 | 128877209 | 427 | 732 | 36 | 18.9967587  | 5.88E-164   |          | ENSG00000221315 |
| 8 | 128891104 | 128891373 | 128891265 | 10  | 13  | 7  | 1.678090213 | 0.11195     |          | ENSG00000221315 |
| 8 | 128900897 | 128901192 | 128901038 | 10  | 12  | 8  | 1.385090334 | 0.219216    |          | ENSG00000221315 |

|   |           |           |           |    |    |    |             |             |                        |
|---|-----------|-----------|-----------|----|----|----|-------------|-------------|------------------------|
| 8 | 128901314 | 128901751 | 128901468 | 10 | 19 | 9  | 1.917817386 | 0.0394029   | ENSG00000221315        |
| 8 | 128904953 | 128905143 | 128904990 | 8  | 10 | 4  | 2.109599125 | 0.0694668   | ENSG00000221315        |
| 8 | 128913060 | 128913352 | 128913206 | 18 | 22 | 2  | 7.351633313 | 1.51E-05    | ENSG00000221315        |
| 8 | 128913387 | 128913826 | 128913597 | 11 | 21 | 8  | 2.343999027 | 0.0109478   | ENSG00000221315        |
| 8 | 128926708 | 128926947 | 128926827 | 9  | 11 | 9  | 1.150690432 | 0.367789    | ENSG00000221315        |
| 8 | 128930737 | 128930988 | 128930862 | 11 | 12 | 16 | 0.733283118 | 0.803868    | ENSG00000221315        |
| 8 | 128932674 | 128933390 | 128933148 | 9  | 26 | 10 | 2.353684974 | 0.00551687  | ENSG00000221315        |
| 8 | 128933529 | 128934478 | 128933770 | 21 | 55 | 19 | 2.684944341 | 2.45E-05    | ENSG00000221315        |
| 8 | 128935807 | 128936306 | 128936065 | 8  | 18 | 8  | 2.024362796 | 0.0334397   | ENSG00000221315        |
| 8 | 128941042 | 128941732 | 128941466 | 19 | 45 | 17 | 2.450544438 | 0.000311809 | ENSG00000221315        |
| 8 | 128946490 | 128946703 | 128946596 | 10 | 11 | 11 | 0.958908693 | 0.540507    | ENSG00000221315        |
| 8 | 128947408 | 128947991 | 128947587 | 11 | 25 | 10 | 2.266511456 | 0.00802978  | ENSG00000221315        |
| 8 | 128948566 | 128948842 | 128948704 | 10 | 16 | 5  | 2.716907964 | 0.0109645   | ENSG00000221315        |
| 8 | 128949224 | 128949465 | 128949344 | 8  | 9  | 7  | 1.198635866 | 0.346278    | ENSG00000221315        |
| 8 | 128951678 | 128952698 | 128952227 | 14 | 44 | 27 | 1.541103257 | 0.0334126   | ENSG00000221315        |
| 8 | 128977443 | 128977669 | 128977530 | 8  | 10 | 11 | 0.878999635 | 0.622439    | TMEM75 ENSG00000184090 |
| 8 | 128977728 | 128977956 | 128977857 | 8  | 9  | 3  | 2.397271733 | 0.0539397   | TMEM75 ENSG00000184090 |
| 8 | 128980382 | 128980913 | 128980601 | 20 | 35 | 8  | 3.835634772 | 2.29E-05    | TMEM75 ENSG00000184090 |
| 8 | 128981918 | 128982285 | 128982006 | 8  | 12 | 11 | 1.038817751 | 0.460341    | TMEM75 ENSG00000184090 |
| 8 | 128995828 | 128996122 | 128995975 | 8  | 11 | 6  | 1.643843474 | 0.137712    | TMEM75 ENSG00000184090 |
| 8 | 129001674 | 129001936 | 129001787 | 8  | 10 | 1  | 5.273997812 | 0.00391723  | TMEM75 ENSG00000184090 |
| 8 | 129004370 | 129004636 | 129004537 | 8  | 10 | 6  | 1.506856518 | 0.188853    | TMEM75 ENSG00000184090 |
| 8 | 129005285 | 129005628 | 129005473 | 10 | 15 | 3  | 3.835634772 | 0.00291691  | TMEM75 ENSG00000184090 |
| 8 | 129008264 | 129008466 | 129008337 | 8  | 9  | 5  | 1.598181155 | 0.170911    | TMEM75 ENSG00000184090 |
| 8 | 129027036 | 129027245 | 129027079 | 8  | 9  | 7  | 1.198635866 | 0.346278    | TMEM75 ENSG00000184090 |
| 8 | 129028695 | 129029029 | 129028893 | 10 | 15 | 3  | 3.835634772 | 0.00291691  | TMEM75 ENSG00000184090 |
| 8 | 129040553 | 129040732 | 129040626 | 8  | 9  | 3  | 2.397271733 | 0.0539397   | ENSG00000221771        |
| 8 | 129055364 | 129055548 | 129055533 | 8  | 9  | 4  | 1.917817386 | 0.103282    | ENSG00000221771        |
| 8 | 129071143 | 129071840 | 129071607 | 12 | 30 | 5  | 4.954361581 | 1.11E-05    | ENSG00000207110        |
| 8 | 129076336 | 129076539 | 129076460 | 8  | 11 | 8  | 1.278544924 | 0.28289     | ENSG00000207110        |
| 8 | 129079058 | 129079531 | 129079139 | 8  | 17 | 9  | 1.726035648 | 0.0753664   | ENSG00000207110        |
| 8 | 129081564 | 129081917 | 129081740 | 8  | 13 | 8  | 1.491635745 | 0.166708    | ENSG00000207110        |
| 8 | 129095964 | 129096207 | 129096128 | 8  | 10 | 4  | 2.109599125 | 0.0694668   | ENSG00000222501        |
| 8 | 129106924 | 129107371 | 129107080 | 8  | 16 | 10 | 1.481949798 | 0.147733    | ENSG00000222501        |

|   |           |           |           |    |     |    |             |             |                 |
|---|-----------|-----------|-----------|----|-----|----|-------------|-------------|-----------------|
| 8 | 129114188 | 129114597 | 129114445 | 10 | 18  | 6  | 2.602752167 | 0.00970422  | ENSG00000221176 |
| 8 | 129115729 | 129116057 | 129115893 | 8  | 14  | 9  | 1.43836304  | 0.179537    | ENSG00000221176 |
| 8 | 129116609 | 129116862 | 129116730 | 9  | 11  | 2  | 3.835634772 | 0.00800699  | ENSG00000221176 |
| 8 | 129138485 | 129139033 | 129138685 | 8  | 19  | 17 | 1.065454103 | 0.420867    | ENSG00000221176 |
| 8 | 129169587 | 129170366 | 129170132 | 10 | 29  | 23 | 1.198635866 | 0.251284    | ENSG00000221176 |
| 8 | 129176557 | 129176758 | 129176652 | 8  | 10  | 6  | 1.506856518 | 0.188853    | ENSG00000221176 |
| 8 | 129183271 | 129183509 | 129183390 | 8  | 8   | 8  | 0.958908693 | 0.534974    | ENSG00000221261 |
| 8 | 129196422 | 129196620 | 129196493 | 8  | 8   | 5  | 1.43836304  | 0.235762    | ENSG00000221261 |
| 8 | 129197493 | 129197862 | 129197684 | 9  | 16  | 3  | 4.075361945 | 0.00173346  | ENSG00000221261 |
| 8 | 129198944 | 129199131 | 129198990 | 8  | 10  | 10 | 0.958908693 | 0.538751    | ENSG00000221261 |
| 8 | 129204627 | 129204900 | 129204766 | 8  | 11  | 3  | 2.876726079 | 0.0213797   | ENSG00000221261 |
| 8 | 129207005 | 129207490 | 129207321 | 9  | 16  | 8  | 1.811271976 | 0.0663685   | ENSG00000221261 |
| 8 | 129214055 | 129214430 | 129214181 | 12 | 18  | 13 | 1.301376083 | 0.22245     | ENSG00000221261 |
| 8 | 129216195 | 129216374 | 129216277 | 8  | 8   | 4  | 1.726035648 | 0.150596    | ENSG00000221261 |
| 8 | 129217621 | 129217833 | 129217723 | 9  | 11  | 3  | 2.876726079 | 0.0213797   | ENSG00000221261 |
| 8 | 129218238 | 129218448 | 129218367 | 10 | 10  | 9  | 1.054799562 | 0.4492      | ENSG00000221261 |
| 8 | 129219026 | 129219262 | 129219144 | 9  | 11  | 6  | 1.643843474 | 0.137712    | ENSG00000221261 |
| 8 | 129221211 | 129221780 | 129221608 | 13 | 28  | 35 | 0.772454225 | 0.85154     | ENSG00000221261 |
| 8 | 129222781 | 129223071 | 129222917 | 11 | 14  | 5  | 2.397271733 | 0.0258078   | ENSG00000221261 |
| 8 | 129223140 | 129224196 | 129223535 | 58 | 114 | 42 | 2.564523249 | 1.11E-08    | ENSG00000221261 |
| 8 | 129226386 | 129226701 | 129226530 | 9  | 11  | 11 | 0.958908693 | 0.540507    | ENSG00000221261 |
| 8 | 129231485 | 129231763 | 129231640 | 10 | 12  | 5  | 2.077635502 | 0.0577144   | ENSG00000221261 |
| 8 | 129233807 | 129234174 | 129233975 | 9  | 15  | 11 | 1.278544924 | 0.254978    | ENSG00000221261 |
| 8 | 129234283 | 129234806 | 129234640 | 31 | 44  | 24 | 1.726035648 | 0.012272    | ENSG00000221261 |
| 8 | 129235395 | 129235589 | 129235508 | 8  | 9   | 10 | 0.871735176 | 0.624623    | ENSG00000221261 |
| 8 | 129235611 | 129235808 | 129235673 | 8  | 9   | 14 | 0.639272462 | 0.869513    | ENSG00000221261 |
| 8 | 129240284 | 129240688 | 129240472 | 10 | 18  | 2  | 6.073088389 | 0.000157975 | ENSG00000221261 |
| 8 | 129245098 | 129245306 | 129245207 | 8  | 9   | 3  | 2.397271733 | 0.0539397   | ENSG00000221261 |
| 8 | 129248047 | 129248396 | 129248217 | 9  | 13  | 15 | 0.839045106 | 0.685928    | ENSG00000221261 |
| 8 | 129248854 | 129249160 | 129248990 | 10 | 14  | 11 | 1.198635866 | 0.315918    | ENSG00000221261 |
| 8 | 129249674 | 129250322 | 129249873 | 11 | 26  | 33 | 0.761486315 | 0.856894    | ENSG00000221261 |
| 8 | 129258010 | 129258751 | 129258429 | 21 | 42  | 27 | 1.472609779 | 0.0523794   | ENSG00000221261 |
| 8 | 129261262 | 129261584 | 129261423 | 8  | 12  | 5  | 2.077635502 | 0.0577144   | ENSG00000221261 |
| 8 | 129266079 | 129266434 | 129266256 | 12 | 18  | 6  | 2.602752167 | 0.00970422  | ENSG00000221261 |

|   |           |           |           |    |    |    |             |             |                 |
|---|-----------|-----------|-----------|----|----|----|-------------|-------------|-----------------|
| 8 | 129271358 | 129271550 | 129271440 | 8  | 9  | 7  | 1.198635866 | 0.346278    | ENSG00000201782 |
| 8 | 129274720 | 129275068 | 129274894 | 9  | 14 | 13 | 1.027402171 | 0.469541    | ENSG00000201782 |
| 8 | 129278531 | 129278966 | 129278699 | 13 | 22 | 16 | 1.297347055 | 0.203559    | ENSG00000201782 |
| 8 | 129278972 | 129279533 | 129279158 | 14 | 29 | 27 | 1.027402171 | 0.457998    | ENSG00000201782 |
| 8 | 129284045 | 129284260 | 129284170 | 8  | 11 | 2  | 3.835634772 | 0.00800699  | ENSG00000201782 |
| 8 | 129291236 | 129291486 | 129291351 | 9  | 10 | 8  | 1.171999514 | 0.35773     | ENSG00000201782 |
| 8 | 129298199 | 129298444 | 129298308 | 8  | 9  | 5  | 1.598181155 | 0.170911    | ENSG00000201782 |
| 8 | 129302266 | 129302560 | 129302413 | 9  | 13 | 14 | 0.894981447 | 0.618069    | ENSG00000201782 |
| 8 | 129316616 | 129316802 | 129316685 | 8  | 9  | 5  | 1.598181155 | 0.170911    | ENSG00000201782 |
| 8 | 129320246 | 129320590 | 129320418 | 9  | 15 | 5  | 2.557089848 | 0.0169197   | ENSG00000201782 |
| 8 | 129320771 | 129321049 | 129320902 | 9  | 11 | 9  | 1.150690432 | 0.367789    | ENSG00000201782 |
| 8 | 129323617 | 129323863 | 129323733 | 10 | 13 | 9  | 1.34247217  | 0.232231    | ENSG00000201782 |
| 8 | 129323923 | 129324178 | 129324050 | 10 | 12 | 0  | 12.46581301 | 0.000159888 | ENSG00000201782 |
| 8 | 129326333 | 129326533 | 129326440 | 8  | 10 | 0  | 10.54799562 | 0.000613541 | ENSG00000201782 |
| 8 | 129328837 | 129329033 | 129328929 | 8  | 9  | 1  | 4.794543465 | 0.00708517  | ENSG00000201782 |
| 8 | 129333219 | 129333716 | 129333397 | 9  | 19 | 16 | 1.128127874 | 0.354788    | ENSG00000201782 |
| 8 | 129335850 | 129336183 | 129336010 | 10 | 14 | 4  | 2.876726079 | 0.01219     | ENSG00000201782 |
| 8 | 129340292 | 129340557 | 129340392 | 9  | 13 | 11 | 1.118726809 | 0.38479     | ENSG00000201782 |
| 8 | 129341196 | 129341423 | 129341324 | 9  | 11 | 9  | 1.150690432 | 0.367789    | ENSG00000201782 |
| 8 | 129350974 | 129351167 | 129351075 | 9  | 10 | 10 | 0.958908693 | 0.538751    | ENSG00000201782 |
| 8 | 129388447 | 129388651 | 129388540 | 8  | 9  | 5  | 1.598181155 | 0.170911    | ENSG00000201782 |
| 8 | 129403182 | 129403417 | 129403338 | 10 | 12 | 1  | 6.232906505 | 0.00117736  | ENSG00000201782 |
| 8 | 129404241 | 129404486 | 129404337 | 9  | 13 | 9  | 1.34247217  | 0.232231    | ENSG00000201782 |
| 8 | 129408420 | 129408600 | 129408469 | 8  | 8  | 8  | 0.958908693 | 0.534974    | ENSG00000201782 |
| 8 | 129411016 | 129411265 | 129411140 | 8  | 12 | 2  | 4.155271003 | 0.0046638   | ENSG00000201782 |
| 8 | 129424231 | 129424564 | 129424438 | 11 | 16 | 9  | 1.630144778 | 0.102169    | ENSG00000201782 |
| 8 | 129439458 | 129439637 | 129439601 | 8  | 8  | 5  | 1.43836304  | 0.235762    | ENSG00000201782 |
| 8 | 129490190 | 129490480 | 129490349 | 8  | 10 | 2  | 3.515998541 | 0.0136204   | ENSG00000201782 |
| 8 | 129509638 | 129509959 | 129509804 | 10 | 12 | 5  | 2.077635502 | 0.0577144   | ENSG00000201782 |
| 8 | 129591626 | 129591809 | 129591717 | 8  | 9  | 2  | 3.19636231  | 0.0229249   | ENSG00000201782 |
| 8 | 129595063 | 129595292 | 129595203 | 9  | 10 | 1  | 5.273997812 | 0.00391723  | ENSG00000201782 |
| 8 | 129617477 | 129617716 | 129617613 | 9  | 9  | 5  | 1.598181155 | 0.170911    | ENSG00000221351 |
| 8 | 129672573 | 129672783 | 129672695 | 8  | 8  | 2  | 2.876726079 | 0.0381137   | ENSG00000221351 |
| 8 | 129679974 | 129680182 | 129680078 | 8  | 9  | 4  | 1.917817386 | 0.103282    | ENSG00000221351 |

|   |           |           |           |    |    |    |             |             |        |                 |
|---|-----------|-----------|-----------|----|----|----|-------------|-------------|--------|-----------------|
| 8 | 129686845 | 129687028 | 129686927 | 8  | 8  | 1  | 4.315089119 | 0.0127267   |        | ENSG00000221351 |
| 8 | 129734843 | 129735087 | 129734965 | 8  | 10 | 9  | 1.054799562 | 0.4492      |        | ENSG00000221351 |
| 8 | 129744318 | 129744517 | 129744419 | 8  | 8  | 2  | 2.876726079 | 0.0381137   |        | ENSG00000221351 |
| 8 | 129748250 | 129748448 | 129748351 | 10 | 10 | 0  | 10.54799562 | 0.000613541 |        | ENSG00000221351 |
| 8 | 129820096 | 129820430 | 129820258 | 10 | 14 | 3  | 3.595907599 | 0.00486913  |        | ENSG00000221351 |
| 8 | 129924718 | 129924921 | 129924819 | 9  | 10 | 0  | 10.54799562 | 0.000613541 |        | ENSG00000221351 |
| 8 | 129950034 | 129950326 | 129950180 | 8  | 11 | 8  | 1.278544924 | 0.28289     |        | ENSG00000221351 |
| 8 | 130086582 | 130086918 | 130086749 | 33 | 37 | 1  | 18.21926517 | 1.57E-10    |        | ENSG00000221351 |
| 8 | 130471321 | 130471583 | 130471441 | 9  | 12 | 3  | 3.116453252 | 0.0131971   |        | ENSG00000208525 |
| 8 | 130617119 | 130617487 | 130617298 | 19 | 26 | 7  | 3.236316839 | 0.000628017 |        | ENSG00000208525 |
| 8 | 130632773 | 130633045 | 130632895 | 10 | 13 | 6  | 1.917817386 | 0.0693353   | GSDMC  | ENSG00000147697 |
| 8 | 130763407 | 130763693 | 130763531 | 11 | 13 | 10 | 1.220429246 | 0.306001    | GSDMC  | ENSG00000147697 |
| 8 | 130772230 | 130772419 | 130772377 | 8  | 9  | 2  | 3.19636231  | 0.0229249   | GSDMC  | ENSG00000147697 |
| 8 | 130807805 | 130808041 | 130807866 | 8  | 10 | 4  | 2.109599125 | 0.0694668   | GSDMC  | ENSG00000147697 |
| 8 | 130907553 | 130907732 | 130907675 | 8  | 8  | 3  | 2.157544559 | 0.0836802   |        | ENSG00000198683 |
| 8 | 131021222 | 131021587 | 131021377 | 9  | 14 | 5  | 2.397271733 | 0.0258078   | FAM49B | ENSG00000153310 |
| 8 | 131078023 | 131078492 | 131078176 | 15 | 25 | 15 | 1.558226626 | 0.0760878   | FAM49B | ENSG00000153310 |
| 8 | 131079623 | 131079813 | 131079662 | 8  | 8  | 8  | 0.958908693 | 0.534974    | FAM49B | ENSG00000153310 |
| 8 | 131080584 | 131080797 | 131080665 | 8  | 10 | 4  | 2.109599125 | 0.0694668   | FAM49B | ENSG00000153310 |
| 8 | 131081452 | 131081690 | 131081571 | 9  | 10 | 2  | 3.515998541 | 0.0136204   | FAM49B | ENSG00000153310 |
| 8 | 131123662 | 131124134 | 131123979 | 12 | 22 | 13 | 1.575349996 | 0.0840573   | FAM49B | ENSG00000153310 |
| 8 | 131176101 | 131176490 | 131176280 | 9  | 16 | 8  | 1.811271976 | 0.0663685   |        | ENSG00000203377 |
| 8 | 131387166 | 131387631 | 131387343 | 16 | 25 | 2  | 8.310542006 | 2.50E-06    | ASAP1  | ENSG00000153317 |
| 8 | 131430091 | 131430301 | 131430196 | 9  | 10 | 1  | 5.273997812 | 0.00391723  | ASAP1  | ENSG00000153317 |
| 8 | 131580922 | 131581336 | 131581098 | 11 | 18 | 4  | 3.643853034 | 0.00178791  | ASAP1  | ENSG00000153317 |
| 8 | 131756804 | 131757026 | 131756918 | 9  | 10 | 4  | 2.109599125 | 0.0694668   |        | ENSG00000208512 |
| 8 | 131757039 | 131757360 | 131757192 | 11 | 15 | 5  | 2.557089848 | 0.0169197   |        | ENSG00000208512 |
| 8 | 131766876 | 131767353 | 131767063 | 23 | 36 | 0  | 35.47962164 | 1.57E-11    |        | ENSG00000208512 |
| 8 | 131797164 | 131797448 | 131797306 | 10 | 13 | 0  | 13.4247217  | 8.16E-05    |        | ENSG00000208512 |
| 8 | 131870598 | 131870924 | 131870776 | 20 | 23 | 1  | 11.50690432 | 1.25E-06    |        | ENSG00000208512 |
| 8 | 132696850 | 132697064 | 132696957 | 8  | 8  | 1  | 4.315089119 | 0.0127267   | EFR3A  | ENSG00000132294 |
| 8 | 133106578 | 133107322 | 133106841 | 34 | 56 | 3  | 13.66444888 | 9.60E-14    | OC90   | ENSG00000132297 |
| 8 | 133139214 | 133139465 | 133139371 | 9  | 12 | 2  | 4.155271003 | 0.0046638   | OC90   | ENSG00000132297 |
| 8 | 133485183 | 133485691 | 133485540 | 27 | 38 | 2  | 12.46581301 | 8.46E-10    | KCNQ3  | ENSG00000184156 |

|   |           |           |           |    |    |   |             |             |         |                 |
|---|-----------|-----------|-----------|----|----|---|-------------|-------------|---------|-----------------|
| 8 | 133571045 | 133571318 | 133571181 | 12 | 13 | 6 | 1.917817386 | 0.0693353   | KCNQ3   | ENSG00000184156 |
| 8 | 133980366 | 133980807 | 133980464 | 14 | 23 | 2 | 7.671269544 | 8.30E-06    | TG      | ENSG00000042832 |
| 8 | 134286356 | 134286731 | 134286596 | 13 | 18 | 2 | 6.073088389 | 0.000157975 | WISP1   | ENSG00000104415 |
| 8 | 134331071 | 134331463 | 134331311 | 10 | 16 | 6 | 2.328778255 | 0.0221113   | NDRG1   | ENSG00000104419 |
| 8 | 134374985 | 134375267 | 134375126 | 8  | 9  | 2 | 3.19636231  | 0.0229249   | NDRG1   | ENSG00000104419 |
| 8 | 134379294 | 134379479 | 134379386 | 8  | 8  | 1 | 4.315089119 | 0.0127267   | NDRG1   | ENSG00000104419 |
| 8 | 134472422 | 134472767 | 134472600 | 21 | 26 | 4 | 5.178106943 | 2.75E-05    |         | ENSG00000213627 |
| 8 | 134577931 | 134578137 | 134578034 | 9  | 11 | 3 | 2.876726079 | 0.0213797   |         | ENSG00000212992 |
| 8 | 134967636 | 134967841 | 134967750 | 9  | 9  | 2 | 3.19636231  | 0.0229249   |         | ENSG00000208501 |
| 8 | 135319304 | 135319549 | 135319402 | 10 | 12 | 2 | 4.155271003 | 0.0046638   | ZFAT    | ENSG00000066827 |
| 8 | 135772794 | 135773033 | 135772913 | 10 | 12 | 5 | 2.077635502 | 0.0577144   | ZFAT    | ENSG00000066827 |
| 8 | 135832013 | 135832288 | 135832153 | 8  | 11 | 0 | 11.50690432 | 0.000313206 | ZFAT    | ENSG00000066827 |
| 8 | 136016025 | 136016295 | 136016168 | 8  | 10 | 0 | 10.54799562 | 0.000613541 |         | ENSG00000213624 |
| 8 | 136086390 | 136086595 | 136086492 | 8  | 8  | 1 | 4.315089119 | 0.0127267   |         | ENSG00000213624 |
| 8 | 136115387 | 136115625 | 136115506 | 12 | 14 | 3 | 3.595907599 | 0.00486913  |         | ENSG00000213624 |
| 8 | 136308570 | 136308771 | 136308670 | 8  | 10 | 2 | 3.515998541 | 0.0136204   | KHDRBS3 | ENSG00000131773 |
| 8 | 138838717 | 138839190 | 138838959 | 35 | 45 | 3 | 11.02744997 | 8.54E-11    |         |                 |
| 8 | 139228347 | 139228680 | 139228506 | 27 | 29 | 0 | 28.76726079 | 1.74E-09    | FAM135B | ENSG00000147724 |
| 8 | 139808865 | 139809089 | 139808977 | 10 | 12 | 6 | 1.78083043  | 0.0985525   | COL22A1 | ENSG00000169436 |
| 8 | 139860133 | 139860337 | 139860235 | 8  | 9  | 1 | 4.794543465 | 0.00708517  |         | ENSG00000208469 |
| 8 | 140104624 | 140104869 | 140104744 | 8  | 10 | 3 | 2.636998906 | 0.034203    | COL22A1 | ENSG00000169436 |
| 8 | 140261034 | 140261348 | 140261189 | 11 | 14 | 1 | 7.191815198 | 0.00034761  | COL22A1 | ENSG00000169436 |
| 8 | 140507890 | 140508129 | 140508009 | 8  | 9  | 1 | 4.794543465 | 0.00708517  | KCNK9   | ENSG00000169427 |
| 8 | 140740268 | 140740492 | 140740373 | 9  | 9  | 1 | 4.794543465 | 0.00708517  | KCNK9   | ENSG00000169427 |
| 8 | 140856305 | 140856484 | 140856343 | 8  | 8  | 4 | 1.726035648 | 0.150596    | KCNK9   | ENSG00000169427 |
| 8 | 140976009 | 140976526 | 140976310 | 20 | 32 | 2 | 10.54799562 | 3.50E-08    | C8orf17 | ENSG00000211505 |
| 8 | 141375255 | 141375459 | 141375296 | 9  | 9  | 4 | 1.917817386 | 0.103282    | TRAPPC9 | ENSG00000167632 |
| 8 | 141437928 | 141438108 | 141437985 | 8  | 8  | 1 | 4.315089119 | 0.0127267   | TRAPPC9 | ENSG00000167632 |
| 8 | 141537005 | 141537218 | 141537111 | 8  | 11 | 4 | 2.301380863 | 0.0459276   | TRAPPC9 | ENSG00000167632 |
| 8 | 141543661 | 141544099 | 141543826 | 11 | 18 | 3 | 4.554816292 | 0.000599415 | TRAPPC9 | ENSG00000167632 |
| 8 | 141747587 | 141747877 | 141747732 | 12 | 14 | 2 | 4.794543465 | 0.00154571  | EIF2C2  | ENSG00000123908 |
| 8 | 141870144 | 141870340 | 141870222 | 8  | 8  | 3 | 2.157544559 | 0.0836802   | PTK2    | ENSG00000169398 |
| 8 | 141910440 | 141910619 | 141910529 | 8  | 8  | 5 | 1.43836304  | 0.235762    | PTK2    | ENSG00000169398 |
| 8 | 142088163 | 142088378 | 142088224 | 8  | 11 | 0 | 11.50690432 | 0.000313206 | PTK2    | ENSG00000169398 |

|   |           |           |           |     |     |    |             |             |         |                 |
|---|-----------|-----------|-----------|-----|-----|----|-------------|-------------|---------|-----------------|
| 8 | 142105986 | 142106285 | 142106153 | 9   | 12  | 1  | 6.232906505 | 0.00117736  | PTK2    | ENSG00000169398 |
| 8 | 142120693 | 142121052 | 142120909 | 12  | 18  | 5  | 3.036544195 | 0.0044641   | PTK2    | ENSG00000169398 |
| 8 | 142155229 | 142155590 | 142155362 | 8   | 12  | 5  | 2.077635502 | 0.0577144   | DENND3  | ENSG00000105339 |
| 8 | 142211223 | 142211447 | 142211335 | 8   | 8   | 2  | 2.876726079 | 0.0381137   | DENND3  | ENSG00000105339 |
| 8 | 142227284 | 142227504 | 142227382 | 8   | 8   | 6  | 1.232882605 | 0.333038    |         | ENSG00000214762 |
| 8 | 142523245 | 142523424 | 142523334 | 8   | 8   | 0  | 8.630178238 | 0.00235436  |         | ENSG00000208454 |
| 8 | 142634023 | 142634245 | 142634097 | 8   | 9   | 0  | 9.589086931 | 0.00120187  |         | ENSG00000214761 |
| 8 | 143086727 | 143086906 | 143086810 | 8   | 8   | 2  | 2.876726079 | 0.0381137   |         | ENSG00000221123 |
| 8 | 143209682 | 143210085 | 143209891 | 26  | 36  | 0  | 35.47962164 | 1.57E-11    |         | ENSG00000222423 |
| 8 | 143314375 | 143314587 | 143314481 | 8   | 9   | 0  | 9.589086931 | 0.00120187  |         | ENSG00000222423 |
| 8 | 143421629 | 143421966 | 143421797 | 12  | 17  | 1  | 8.630178238 | 5.44E-05    | TSNARE1 | ENSG00000171045 |
| 8 | 143489661 | 143489916 | 143489789 | 10  | 11  | 1  | 5.753452158 | 0.00215302  | TSNARE1 | ENSG00000171045 |
| 8 | 143559586 | 143560029 | 143559881 | 11  | 21  | 4  | 4.219198249 | 0.000390041 | BAI1    | ENSG00000181790 |
| 8 | 143588508 | 143588723 | 143588638 | 8   | 9   | 7  | 1.198635866 | 0.346278    | BAI1    | ENSG00000181790 |
| 8 | 143629554 | 143629768 | 143629661 | 9   | 11  | 3  | 2.876726079 | 0.0213797   | ARC     | ENSG00000198576 |
| 8 | 143748384 | 143748567 | 143748475 | 8   | 8   | 4  | 1.726035648 | 0.150596    | PSCA    | ENSG00000167653 |
| 8 | 143754539 | 143754909 | 143754695 | 13  | 19  | 7  | 2.397271733 | 0.0127287   | PSCA    | ENSG00000167653 |
| 8 | 143783523 | 143783961 | 143783767 | 17  | 28  | 1  | 13.90417605 | 5.17E-08    | LY6K    | ENSG00000160886 |
| 8 | 143796604 | 143796792 | 143796727 | 8   | 9   | 0  | 9.589086931 | 0.00120187  | C8orf55 | ENSG00000130193 |
| 8 | 143820767 | 143820981 | 143820843 | 9   | 9   | 0  | 9.589086931 | 0.00120187  | SLURP1  | ENSG00000126233 |
| 8 | 143860818 | 143861255 | 143860997 | 9   | 16  | 3  | 4.075361945 | 0.00173346  | LY6D    | ENSG00000167656 |
| 8 | 143866727 | 143867119 | 143866945 | 14  | 21  | 6  | 3.013713035 | 0.00261913  | LY6D    | ENSG00000167656 |
| 8 | 143867517 | 143867909 | 143867736 | 9   | 16  | 1  | 8.150723891 | 0.000101217 | LY6D    | ENSG00000167656 |
| 8 | 143893596 | 143895064 | 143894281 | 471 | 695 | 9  | 66.74004504 | 1.06E-186   | GML     | ENSG00000104499 |
| 8 | 144208702 | 144208954 | 144208824 | 9   | 9   | 5  | 1.598181155 | 0.170911    | C8orf31 | ENSG00000177335 |
| 8 | 144260867 | 144261123 | 144260966 | 9   | 11  | 0  | 11.50690432 | 0.000313206 |         | ENSG00000203366 |
| 8 | 144269770 | 144270769 | 144270196 | 84  | 133 | 14 | 8.566250991 | 5.54E-25    |         | ENSG00000203366 |
| 8 | 144434332 | 144434660 | 144434496 | 13  | 17  | 10 | 1.569123316 | 0.112309    | GLI4    | ENSG00000221850 |
| 8 | 144435012 | 144435442 | 144435187 | 9   | 17  | 6  | 2.465765211 | 0.014729    | GLI4    | ENSG00000221850 |
| 8 | 144487502 | 144487757 | 144487622 | 8   | 9   | 2  | 3.19636231  | 0.0229249   | TOP1MT  | ENSG00000184428 |
| 8 | 144890734 | 144890979 | 144890864 | 9   | 10  | 4  | 2.109599125 | 0.0694668   | FAM83H  | ENSG00000180921 |
| 8 | 144892794 | 144893103 | 144892952 | 11  | 13  | 1  | 6.712360851 | 0.000640982 | FAM83H  | ENSG00000180921 |
| 8 | 144893373 | 144893624 | 144893538 | 10  | 13  | 7  | 1.678090213 | 0.11195     | FAM83H  | ENSG00000180921 |
| 8 | 144927360 | 144927642 | 144927509 | 16  | 16  | 2  | 5.433815927 | 0.000499302 |         | ENSG00000214733 |



|   |           |           |           |     |     |    |             |             |         |                 |
|---|-----------|-----------|-----------|-----|-----|----|-------------|-------------|---------|-----------------|
| 8 | 144969132 | 144969489 | 144969310 | 19  | 25  | 6  | 3.56166086  | 0.000408555 | SCRIB   | ENSG00000180900 |
| 8 | 145032240 | 145032574 | 145032407 | 13  | 18  | 0  | 18.21926517 | 2.83E-06    | NRBP2   | ENSG00000185189 |
| 8 | 145052195 | 145052440 | 145052318 | 8   | 10  | 3  | 2.636998906 | 0.034203    | PLEC1   | ENSG00000178209 |
| 8 | 145088965 | 145089197 | 145089081 | 10  | 11  | 2  | 3.835634772 | 0.00800699  | PLEC1   | ENSG00000178209 |
| 8 | 145098933 | 145099114 | 145099005 | 9   | 9   | 6  | 1.369869562 | 0.253675    | PLEC1   | ENSG00000178209 |
| 8 | 145102823 | 145103370 | 145103191 | 16  | 30  | 4  | 5.945233897 | 3.05E-06    | PLEC1   | ENSG00000178209 |
| 8 | 145128705 | 145128940 | 145128822 | 9   | 12  | 9  | 1.246581301 | 0.295061    | PARP10  | ENSG00000178685 |
| 8 | 145149618 | 145149978 | 145149797 | 13  | 18  | 12 | 1.401481936 | 0.168368    | SPATC1  | ENSG00000186583 |
| 8 | 145151295 | 145151750 | 145151518 | 83  | 101 | 6  | 13.97266953 | 4.59E-23    | SPATC1  | ENSG00000186583 |
| 8 | 145153975 | 145154178 | 145154049 | 8   | 8   | 0  | 8.630178238 | 0.00235436  | SPATC1  | ENSG00000186583 |
| 8 | 145205313 | 145205648 | 145205486 | 10  | 14  | 6  | 2.054804342 | 0.0480281   | EXOSC4  | ENSG00000178896 |
| 8 | 145506796 | 145507126 | 145506961 | 13  | 17  | 2  | 5.753452158 | 0.000281509 | DGAT1   | ENSG00000185000 |
| 8 | 145567587 | 145568064 | 145567749 | 9   | 18  | 8  | 2.024362796 | 0.0334397   | ADCK5   | ENSG00000173137 |
| 8 | 145644391 | 145644788 | 145644583 | 12  | 20  | 3  | 5.034270639 | 0.000202317 | NFKBIL2 | ENSG00000160949 |
| 8 | 145651427 | 145651717 | 145651572 | 16  | 18  | 0  | 18.21926517 | 2.83E-06    |         | ENSG00000204763 |
| 8 | 145663762 | 145664064 | 145663901 | 9   | 13  | 5  | 2.237453617 | 0.038866    | KIFC2   | ENSG00000167702 |
| 8 | 145880319 | 145880749 | 145880534 | 10  | 18  | 8  | 2.024362796 | 0.0334397   |         | ENSG00000204756 |
| 8 | 145885293 | 145885472 | 145885382 | 8   | 8   | 5  | 1.43836304  | 0.235762    |         | ENSG00000204756 |
| 8 | 145897898 | 145898461 | 145898219 | 67  | 101 | 6  | 13.97266953 | 4.59E-23    |         | ENSG00000204756 |
| 8 | 146145365 | 146145577 | 146145484 | 8   | 8   | 3  | 2.157544559 | 0.0836802   | ZNF16   | ENSG00000170631 |
| 8 | 146199056 | 146199496 | 146199232 | 11  | 21  | 1  | 10.54799562 | 4.43E-06    |         | ENSG00000188653 |
| 8 | 146222909 | 146223257 | 146223080 | 16  | 21  | 12 | 1.622768557 | 0.076896    | C8orf33 | ENSG00000182307 |
| 9 | 337781    | 338028    | 337904    | 9   | 11  | 9  | 1.150690432 | 0.367789    | DOCK8   | ENSG00000107099 |
| 9 | 382656    | 382835    | 382697    | 8   | 8   | 3  | 2.157544559 | 0.0836802   | DOCK8   | ENSG00000107099 |
| 9 | 754146    | 754447    | 754301    | 9   | 13  | 3  | 3.356180426 | 0.00805599  | KANK1   | ENSG00000107104 |
| 9 | 883831    | 884096    | 883963    | 9   | 12  | 2  | 4.155271003 | 0.0046638   | DMRT1   | ENSG00000137090 |
| 9 | 889917    | 890204    | 890062    | 9   | 12  | 1  | 6.232906505 | 0.00117736  | DMRT1   | ENSG00000137090 |
| 9 | 991800    | 991998    | 991899    | 11  | 11  | 2  | 3.835634772 | 0.00800699  |         | ENSG00000210012 |
| 9 | 995186    | 995453    | 995303    | 10  | 12  | 2  | 4.155271003 | 0.0046638   |         | ENSG00000210012 |
| 9 | 999089    | 999968    | 999399    | 102 | 199 | 9  | 19.17817386 | 1.18E-46    |         | ENSG00000216922 |
| 9 | 1198391   | 1198571   | 1198479   | 8   | 8   | 1  | 4.315089119 | 0.0127267   |         | ENSG00000217881 |
| 9 | 1697326   | 1697717   | 1697521   | 44  | 52  | 3  | 12.70554018 | 1.15E-12    |         | ENSG00000218148 |
| 9 | 1967065   | 1967421   | 1967243   | 27  | 32  | 0  | 31.64398687 | 2.31E-10    |         | ENSG00000218148 |
| 9 | 3499131   | 3499359   | 3499245   | 13  | 13  | 1  | 6.712360851 | 0.000640982 | RFX3    | ENSG00000080298 |

|   |          |          |          |     |     |   |             |             |          |                 |
|---|----------|----------|----------|-----|-----|---|-------------|-------------|----------|-----------------|
| 9 | 4594672  | 4595011  | 4594832  | 11  | 12  | 1 | 6.232906505 | 0.00117736  | C9orf68  | ENSG00000106686 |
| 9 | 4733269  | 4733625  | 4733447  | 17  | 23  | 1 | 11.50690432 | 1.25E-06    | AK3      | ENSG00000147853 |
| 9 | 5611370  | 5611598  | 5611516  | 8   | 9   | 1 | 4.794543465 | 0.00708517  | KIAA1432 | ENSG00000107036 |
| 9 | 5791216  | 5791412  | 5791314  | 8   | 8   | 0 | 8.630178238 | 0.00235436  | ERMP1    | ENSG00000099219 |
| 9 | 6077342  | 6077677  | 6077501  | 24  | 27  | 0 | 26.84944341 | 6.66E-09    | RANBP6   | ENSG00000137040 |
| 9 | 6854326  | 6854810  | 6854578  | 16  | 26  | 2 | 8.630178238 | 1.37E-06    |          | ENSG00000220077 |
| 9 | 7424068  | 7424298  | 7424183  | 10  | 11  | 3 | 2.876726079 | 0.0213797   |          | ENSG00000216892 |
| 9 | 10049035 | 10049434 | 10049255 | 20  | 29  | 3 | 7.191815198 | 1.23E-06    |          | ENSG00000218032 |
| 9 | 11090744 | 11091095 | 11090887 | 14  | 19  | 0 | 19.17817386 | 1.44E-06    |          | ENSG00000220830 |
| 9 | 12788062 | 12788383 | 12788222 | 19  | 22  | 1 | 11.02744997 | 2.36E-06    | C9orf150 | ENSG00000153714 |
| 9 | 13043606 | 13043785 | 13043674 | 8   | 8   | 1 | 4.315089119 | 0.0127267   |          | ENSG00000216614 |
| 9 | 13430125 | 13430304 | 13430214 | 8   | 8   | 0 | 8.630178238 | 0.00235436  |          | ENSG00000216249 |
| 9 | 14228630 | 14228886 | 14228758 | 8   | 9   | 7 | 1.198635866 | 0.346278    |          | ENSG00000218212 |
| 9 | 15917317 | 15917577 | 15917447 | 9   | 9   | 1 | 4.794543465 | 0.00708517  |          | ENSG00000207360 |
| 9 | 16425941 | 16426280 | 16426110 | 12  | 18  | 0 | 18.21926517 | 2.83E-06    | C9orf92  | ENSG00000205549 |
| 9 | 16627249 | 16627559 | 16627404 | 21  | 23  | 0 | 23.01380863 | 9.81E-08    |          | ENSG00000218275 |
| 9 | 19399430 | 19399744 | 19399576 | 15  | 20  | 5 | 3.356180426 | 0.0017534   | ASAH3L   | ENSG00000177076 |
| 9 | 19475188 | 19475490 | 19475338 | 18  | 23  | 4 | 4.602761727 | 0.000137072 |          | ENSG00000210448 |
| 9 | 19894716 | 19894971 | 19894843 | 17  | 19  | 3 | 4.794543465 | 0.000349205 | SLC24A2  | ENSG00000155886 |
| 9 | 20346355 | 20346672 | 20346514 | 13  | 16  | 1 | 8.150723891 | 0.000101217 |          | ENSG00000216770 |
| 9 | 22124471 | 22124765 | 22124618 | 21  | 24  | 0 | 23.97271733 | 5.01E-08    |          | ENSG00000215221 |
| 9 | 22234183 | 22234409 | 22234310 | 8   | 11  | 3 | 2.876726079 | 0.0213797   | DMRTA1   | ENSG00000176399 |
| 9 | 26966504 | 26966849 | 26966676 | 22  | 27  | 1 | 13.4247217  | 9.80E-08    | IFT74    | ENSG00000096872 |
| 9 | 30915598 | 30915889 | 30915743 | 13  | 15  | 1 | 7.671269544 | 0.000187863 |          | ENSG00000214020 |
| 9 | 32707003 | 32707188 | 32707131 | 9   | 9   | 1 | 4.794543465 | 0.00708517  |          | ENSG00000221450 |
| 9 | 33151680 | 33151866 | 33151775 | 8   | 9   | 1 | 4.794543465 | 0.00708517  | B4GALT1  | ENSG00000086062 |
| 9 | 33219419 | 33219737 | 33219578 | 13  | 16  | 5 | 2.716907964 | 0.0109645   | SPINK4   | ENSG00000122711 |
| 9 | 33277072 | 33277315 | 33277213 | 8   | 11  | 2 | 3.835634772 | 0.00800699  | NFX1     | ENSG00000086102 |
| 9 | 33405690 | 33405899 | 33405793 | 9   | 10  | 3 | 2.636998906 | 0.034203    | AQP7     | ENSG00000165269 |
| 9 | 33611141 | 33611487 | 33611289 | 12  | 16  | 1 | 8.150723891 | 0.000101217 |          | ENSG00000216740 |
| 9 | 33866986 | 33867166 | 33867076 | 9   | 9   | 0 | 9.589086931 | 0.00120187  |          | ENSG00000210688 |
| 9 | 34062357 | 34062818 | 34062611 | 157 | 184 | 5 | 29.56635137 | 5.37E-47    |          | ENSG00000210706 |
| 9 | 34062937 | 34063480 | 34063313 | 17  | 34  | 2 | 11.18726809 | 1.02E-08    |          | ENSG00000210706 |
| 9 | 35647693 | 35648018 | 35647862 | 10  | 14  | 7 | 1.797953799 | 0.0806593   |          | ENSG00000199916 |

|   |          |          |          |    |    |    |             |             |          |                 |
|---|----------|----------|----------|----|----|----|-------------|-------------|----------|-----------------|
| 9 | 35722167 | 35722354 | 35722269 | 8  | 8  | 0  | 8.630178238 | 0.00235436  | CREB3    | ENSG00000107175 |
| 9 | 35816020 | 35816557 | 35816191 | 35 | 51 | 2  | 16.62108401 | 2.33E-13    | C9orf128 | ENSG00000204930 |
| 9 | 35834513 | 35834697 | 35834542 | 8  | 8  | 0  | 8.630178238 | 0.00235436  | C9orf127 | ENSG00000137103 |
| 9 | 35861573 | 35861788 | 35861664 | 9  | 10 | 1  | 5.273997812 | 0.00391723  | OR13J1   | ENSG00000168828 |
| 9 | 36064926 | 36065163 | 36065044 | 12 | 14 | 0  | 14.3836304  | 4.17E-05    | RECK     | ENSG00000122707 |
| 9 | 36409743 | 36410164 | 36409986 | 9  | 16 | 1  | 8.150723891 | 0.000101217 | RNF38    | ENSG00000137075 |
| 9 | 36876314 | 36876691 | 36876512 | 27 | 34 | 1  | 16.78090213 | 1.09E-09    | PAX5     | ENSG00000196092 |
| 9 | 36963192 | 36963481 | 36963326 | 13 | 15 | 2  | 5.114179696 | 0.00088103  | PAX5     | ENSG00000196092 |
| 9 | 37024613 | 37024887 | 37024717 | 8  | 12 | 1  | 6.232906505 | 0.00117736  | PAX5     | ENSG00000196092 |
| 9 | 38198762 | 38198941 | 38198841 | 8  | 8  | 0  | 8.630178238 | 0.00235436  |          | ENSG00000210816 |
| 9 | 66561580 | 66562034 | 66561759 | 18 | 26 | 29 | 0.863017824 | 0.711594    | ANKRD36  | ENSG00000158185 |
| 9 | 66573749 | 66574079 | 66573914 | 12 | 14 | 10 | 1.307602763 | 0.244096    | ANKRD36  | ENSG00000158185 |
| 9 | 66583651 | 66583831 | 66583680 | 8  | 8  | 5  | 1.43836304  | 0.235762    | ANKRD36  | ENSG00000158185 |
| 9 | 67902981 | 67903557 | 67903236 | 11 | 26 | 10 | 2.353684974 | 0.00551687  |          | ENSG00000217091 |
| 9 | 67903635 | 67904093 | 67903849 | 25 | 38 | 11 | 3.116453252 | 8.15E-05    |          | ENSG00000217091 |
| 9 | 67904309 | 67904621 | 67904465 | 9  | 11 | 10 | 1.046082211 | 0.455063    |          | ENSG00000217091 |
| 9 | 67905932 | 67906168 | 67906022 | 9  | 10 | 2  | 3.515998541 | 0.0136204   |          | ENSG00000217091 |
| 9 | 67906949 | 67907473 | 67907257 | 10 | 19 | 24 | 0.767126954 | 0.814057    |          | ENSG00000217091 |
| 9 | 67907651 | 67907930 | 67907800 | 8  | 11 | 8  | 1.278544924 | 0.28289     |          | ENSG00000217091 |
| 9 | 67908169 | 67908722 | 67908410 | 14 | 31 | 24 | 1.227403127 | 0.218358    |          | ENSG00000217091 |
| 9 | 67909119 | 67909447 | 67909283 | 10 | 12 | 16 | 0.733283118 | 0.803868    |          | ENSG00000217091 |
| 9 | 67910413 | 67910740 | 67910576 | 16 | 21 | 16 | 1.240940662 | 0.248103    |          | ENSG00000217091 |
| 9 | 67911041 | 67911279 | 67911122 | 8  | 11 | 11 | 0.958908693 | 0.540507    |          | ENSG00000217091 |
| 9 | 67911770 | 67912206 | 67911981 | 9  | 17 | 16 | 1.015315087 | 0.480915    |          | ENSG00000217091 |
| 9 | 67913797 | 67914032 | 67913914 | 8  | 10 | 24 | 0.421919825 | 0.994085    |          | ENSG00000217091 |
| 9 | 67915021 | 67915357 | 67915238 | 9  | 14 | 18 | 0.757033179 | 0.792932    |          | ENSG00000217091 |
| 9 | 67915368 | 67915573 | 67915518 | 8  | 11 | 21 | 0.523041105 | 0.969287    |          | ENSG00000217091 |
| 9 | 67915593 | 67915847 | 67915742 | 9  | 12 | 13 | 0.890415215 | 0.619237    |          | ENSG00000217091 |
| 9 | 67916497 | 67916785 | 67916641 | 10 | 14 | 5  | 2.397271733 | 0.0258078   |          | ENSG00000217091 |
| 9 | 70260181 | 70260556 | 70260356 | 19 | 25 | 2  | 8.310542006 | 2.50E-06    | C9orf71  | ENSG00000181778 |
| 9 | 71780848 | 71781336 | 71781168 | 31 | 46 | 3  | 11.26717714 | 4.63E-11    | MAMDC2   | ENSG00000165072 |
| 9 | 73588006 | 73588190 | 73588098 | 8  | 8  | 4  | 1.726035648 | 0.150596    | TMEM2    | ENSG00000135048 |
| 9 | 73914598 | 73914893 | 73914735 | 10 | 13 | 3  | 3.356180426 | 0.00805599  |          | ENSG00000219658 |
| 9 | 74236271 | 74236719 | 74236421 | 17 | 26 | 4  | 5.178106943 | 2.75E-05    |          | ENSG00000217630 |

|   |          |          |          |     |     |    |             |             |         |                 |
|---|----------|----------|----------|-----|-----|----|-------------|-------------|---------|-----------------|
| 9 | 74362211 | 74362399 | 74362377 | 8   | 8   | 1  | 4.315089119 | 0.0127267   |         | ENSG00000211074 |
| 9 | 74382222 | 74382441 | 74382331 | 10  | 11  | 3  | 2.876726079 | 0.0213797   | TMC1    | ENSG00000165091 |
| 9 | 74912310 | 74912523 | 74912416 | 8   | 8   | 1  | 4.315089119 | 0.0127267   | ANXA1   | ENSG00000135046 |
| 9 | 74937148 | 74937366 | 74937257 | 8   | 10  | 2  | 3.515998541 | 0.0136204   | ANXA1   | ENSG00000135046 |
| 9 | 75488710 | 75488892 | 75488825 | 8   | 9   | 3  | 2.397271733 | 0.0539397   |         | ENSG00000219821 |
| 9 | 75488923 | 75489647 | 75489222 | 70  | 109 | 3  | 26.36998906 | 2.14E-28    |         | ENSG00000219821 |
| 9 | 76457864 | 76458118 | 76457993 | 13  | 16  | 1  | 8.150723891 | 0.000101217 |         | ENSG00000202217 |
| 9 | 76806890 | 76807092 | 76806990 | 8   | 8   | 2  | 2.876726079 | 0.0381137   | C9orf41 | ENSG00000156017 |
| 9 | 78198159 | 78198423 | 78198256 | 11  | 13  | 0  | 13.4247217  | 8.16E-05    | RFK     | ENSG00000135002 |
| 9 | 78376328 | 78376537 | 78376432 | 15  | 15  | 17 | 0.852363283 | 0.680376    |         | ENSG00000211139 |
| 9 | 79111868 | 79112216 | 79112042 | 9   | 14  | 2  | 4.794543465 | 0.00154571  | VPS13A  | ENSG00000197969 |
| 9 | 79384385 | 79384638 | 79384510 | 9   | 11  | 5  | 1.917817386 | 0.0843804   |         | ENSG00000218284 |
| 9 | 79385149 | 79385616 | 79385327 | 18  | 29  | 1  | 14.3836304  | 2.72E-08    |         | ENSG00000218284 |
| 9 | 79394210 | 79394476 | 79394343 | 11  | 13  | 5  | 2.237453617 | 0.038866    |         | ENSG00000218284 |
| 9 | 79786068 | 79786382 | 79786225 | 10  | 15  | 2  | 5.114179696 | 0.00088103  | GNAQ    | ENSG00000156052 |
| 9 | 79870331 | 79870580 | 79870455 | 14  | 15  | 1  | 7.671269544 | 0.000187863 | GNAQ    | ENSG00000156052 |
| 9 | 80093040 | 80093225 | 80093180 | 8   | 8   | 3  | 2.157544559 | 0.0836802   | PSAT1   | ENSG00000135069 |
| 9 | 80093246 | 80093588 | 80093418 | 20  | 25  | 3  | 6.232906505 | 1.23E-05    | PSAT1   | ENSG00000135069 |
| 9 | 80406766 | 80407235 | 80407057 | 16  | 26  | 3  | 6.472633678 | 6.96E-06    |         | ENSG00000211157 |
| 9 | 80831012 | 80831619 | 80831251 | 52  | 74  | 5  | 11.98635866 | 9.10E-17    |         | ENSG00000220535 |
| 9 | 81108095 | 81108337 | 81108243 | 11  | 12  | 0  | 12.46581301 | 0.000159888 | CHCHD9  | ENSG00000186940 |
| 9 | 81294344 | 81294715 | 81294506 | 8   | 13  | 3  | 3.356180426 | 0.00805599  | TLE4    | ENSG00000106829 |
| 9 | 81379452 | 81379770 | 81379628 | 14  | 17  | 1  | 8.630178238 | 5.44E-05    | TLE4    | ENSG00000106829 |
| 9 | 83396975 | 83397379 | 83397177 | 26  | 34  | 1  | 16.78090213 | 1.09E-09    | TLE1    | ENSG00000196781 |
| 9 | 83490911 | 83491231 | 83491071 | 9   | 13  | 6  | 1.917817386 | 0.0693353   | TLE1    | ENSG00000196781 |
| 9 | 83494710 | 83494984 | 83494836 | 8   | 10  | 2  | 3.515998541 | 0.0136204   | TLE1    | ENSG00000196781 |
| 9 | 83825917 | 83826464 | 83826167 | 121 | 155 | 1  | 74.79487806 | 2.16E-44    |         | ENSG00000214929 |
| 9 | 84437661 | 84437854 | 84437805 | 11  | 11  | 0  | 11.50690432 | 0.000313206 |         | ENSG00000211245 |
| 9 | 84766411 | 84766635 | 84766517 | 8   | 10  | 3  | 2.636998906 | 0.034203    | RASEF   | ENSG00000165105 |
| 9 | 84971266 | 84971550 | 84971430 | 9   | 11  | 3  | 2.876726079 | 0.0213797   | FRMD3   | ENSG00000172159 |
| 9 | 85512662 | 85512867 | 85512748 | 9   | 10  | 0  | 10.54799562 | 0.000613541 | UBQLN1  | ENSG00000135018 |
| 9 | 85761388 | 85761651 | 85761500 | 8   | 12  | 1  | 6.232906505 | 0.00117736  | C9orf64 | ENSG00000165118 |
| 9 | 85767113 | 85767405 | 85767242 | 8   | 9   | 0  | 9.589086931 | 0.00120187  | C9orf64 | ENSG00000165118 |
| 9 | 85784057 | 85784407 | 85784168 | 8   | 12  | 7  | 1.558226626 | 0.152813    | HNRNPK  | ENSG00000165119 |

|   |          |          |          |     |     |   |             |             |          |                 |
|---|----------|----------|----------|-----|-----|---|-------------|-------------|----------|-----------------|
| 9 | 85785175 | 85785577 | 85785407 | 9   | 15  | 7 | 1.917817386 | 0.0572317   | HNRNPK   | ENSG00000165119 |
| 9 | 86043363 | 86044014 | 86043638 | 133 | 172 | 2 | 55.29706797 | 1.12E-47    |          | ENSG00000221282 |
| 9 | 86317321 | 86317737 | 86317510 | 27  | 38  | 2 | 12.46581301 | 8.46E-10    |          | ENSG00000217944 |
| 9 | 86378554 | 86378828 | 86378692 | 13  | 15  | 1 | 7.671269544 | 0.000187863 |          | ENSG00000217944 |
| 9 | 86656611 | 86657152 | 86656835 | 71  | 101 | 1 | 48.90434335 | 8.35E-29    | NTRK2    | ENSG00000148053 |
| 9 | 86661012 | 86661205 | 86661108 | 8   | 9   | 0 | 9.589086931 | 0.00120187  | NTRK2    | ENSG00000148053 |
| 9 | 87213282 | 87213560 | 87213421 | 15  | 17  | 4 | 3.452071295 | 0.00292757  |          | ENSG00000203398 |
| 9 | 87911787 | 87911976 | 87911881 | 8   | 9   | 2 | 3.19636231  | 0.0229249   | GOLM1    | ENSG00000135052 |
| 9 | 88087654 | 88088006 | 88087831 | 12  | 17  | 1 | 8.630178238 | 5.44E-05    | ISCA1    | ENSG00000135070 |
| 9 | 88191084 | 88191336 | 88191203 | 8   | 8   | 1 | 4.315089119 | 0.0127267   |          | ENSG00000214908 |
| 9 | 88238741 | 88238951 | 88238839 | 9   | 9   | 1 | 4.794543465 | 0.00708517  |          | ENSG00000222293 |
| 9 | 88296040 | 88296375 | 88296207 | 8   | 13  | 0 | 13.4247217  | 8.16E-05    |          | ENSG00000222293 |
| 9 | 88526107 | 88526332 | 88526231 | 10  | 12  | 0 | 12.46581301 | 0.000159888 | GAS1     | ENSG00000180447 |
| 9 | 88596947 | 88597149 | 88597048 | 12  | 13  | 0 | 13.4247217  | 8.16E-05    | GAS1     | ENSG00000180447 |
| 9 | 89017266 | 89017632 | 89017461 | 8   | 14  | 3 | 3.595907599 | 0.00486913  |          | ENSG00000212421 |
| 9 | 89504871 | 89505224 | 89505047 | 20  | 25  | 2 | 8.310542006 | 2.50E-06    | CTSL1    | ENSG00000135047 |
| 9 | 89765253 | 89765483 | 89765397 | 8   | 8   | 1 | 4.315089119 | 0.0127267   | CCRK     | ENSG00000156345 |
| 9 | 89879426 | 89879680 | 89879553 | 12  | 12  | 1 | 6.232906505 | 0.00117736  |          | ENSG00000218944 |
| 9 | 90324608 | 90324960 | 90324784 | 32  | 38  | 2 | 12.46581301 | 8.46E-10    | NXNL2    | ENSG00000130045 |
| 9 | 90877396 | 90877587 | 90877457 | 8   | 8   | 0 | 8.630178238 | 0.00235436  | SHC3     | ENSG00000148082 |
| 9 | 90985157 | 90985394 | 90985263 | 11  | 11  | 3 | 2.876726079 | 0.0213797   | SHC3     | ENSG00000148082 |
| 9 | 91123675 | 91123900 | 91123818 | 8   | 9   | 4 | 1.917817386 | 0.103282    | SECISBP2 | ENSG00000187742 |
| 9 | 91251793 | 91252054 | 91251924 | 11  | 14  | 1 | 7.191815198 | 0.00034761  |          | ENSG00000219641 |
| 9 | 91466690 | 91467012 | 91466851 | 9   | 12  | 1 | 6.232906505 | 0.00117736  | GADD45G  | ENSG00000130222 |
| 9 | 91490882 | 91491354 | 91491126 | 153 | 186 | 3 | 44.8289814  | 3.32E-50    | GADD45G  | ENSG00000130222 |
| 9 | 91608887 | 91609423 | 91609086 | 42  | 54  | 0 | 52.73997812 | 8.69E-17    | GADD45G  | ENSG00000130222 |
| 9 | 92167833 | 92168131 | 92168006 | 12  | 15  | 1 | 7.671269544 | 0.000187863 |          | ENSG00000105061 |
| 9 | 92444724 | 92444926 | 92444825 | 8   | 8   | 5 | 1.43836304  | 0.235762    | DIRAS2   | ENSG00000165023 |
| 9 | 92604300 | 92604508 | 92604403 | 9   | 9   | 1 | 4.794543465 | 0.00708517  | SYK      | ENSG00000165025 |
| 9 | 92787846 | 92788123 | 92787966 | 10  | 13  | 3 | 3.356180426 | 0.00805599  | SYK      | ENSG00000165025 |
| 9 | 92839330 | 92839683 | 92839440 | 10  | 14  | 5 | 2.397271733 | 0.0258078   |          | ENSG00000219788 |
| 9 | 93235371 | 93235743 | 93235550 | 8   | 14  | 6 | 2.054804342 | 0.0480281   | NFIL3    | ENSG00000165030 |
| 9 | 93765894 | 93766306 | 93766125 | 25  | 35  | 0 | 34.52071295 | 3.07E-11    | ROR2     | ENSG00000169071 |
| 9 | 93780966 | 93781157 | 93781089 | 9   | 10  | 0 | 10.54799562 | 0.000613541 |          | ENSG00000218751 |

|   |           |           |           |     |     |    |             |             |          |                 |
|---|-----------|-----------|-----------|-----|-----|----|-------------|-------------|----------|-----------------|
| 9 | 93949259  | 93949880  | 93949577  | 197 | 232 | 1  | 111.7128627 | 1.05E-66    |          | ENSG00000209034 |
| 9 | 93954140  | 93954473  | 93954305  | 18  | 22  | 3  | 5.513724985 | 6.69E-05    |          | ENSG00000209034 |
| 9 | 94035788  | 94036033  | 94035862  | 8   | 9   | 1  | 4.794543465 | 0.00708517  | IARS     | ENSG00000196305 |
| 9 | 94115000  | 94115432  | 94115144  | 15  | 22  | 3  | 5.513724985 | 6.69E-05    | NOL8     | ENSG00000198000 |
| 9 | 94127458  | 94127668  | 94127608  | 8   | 11  | 8  | 1.278544924 | 0.28289     | NOL8     | ENSG00000198000 |
| 9 | 94472300  | 94472497  | 94472408  | 8   | 9   | 2  | 3.19636231  | 0.0229249   | IPPK     | ENSG00000127080 |
| 9 | 94602374  | 94602784  | 94602553  | 83  | 90  | 4  | 17.45213821 | 5.11E-22    | ANKRD19  | ENSG00000218940 |
| 9 | 94790070  | 94790981  | 94790509  | 105 | 164 | 4  | 31.64398687 | 1.27E-42    | FGD3     | ENSG00000127084 |
| 9 | 94893581  | 94893891  | 94893725  | 8   | 11  | 1  | 5.753452158 | 0.00215302  | C9orf89  | ENSG00000165233 |
| 9 | 94934708  | 94935106  | 94934907  | 46  | 56  | 1  | 27.32889775 | 6.55E-16    | NINJ1    | ENSG00000131669 |
| 9 | 94935182  | 94935590  | 94935440  | 9   | 16  | 1  | 8.150723891 | 0.000101217 | NINJ1    | ENSG00000131669 |
| 9 | 95115182  | 95115466  | 95115307  | 19  | 22  | 1  | 11.02744997 | 2.36E-06    | WNK2     | ENSG00000165238 |
| 9 | 95484381  | 95484632  | 95484512  | 12  | 14  | 5  | 2.397271733 | 0.0258078   |          | ENSG00000211429 |
| 9 | 95799381  | 95799563  | 95799493  | 8   | 8   | 4  | 1.726035648 | 0.150596    | PTPDC1   | ENSG00000158079 |
| 9 | 96470847  | 96471220  | 96471145  | 10  | 16  | 3  | 4.075361945 | 0.00173346  | C9orf118 | ENSG00000204343 |
| 9 | 96585309  | 96585723  | 96585488  | 17  | 26  | 4  | 5.178106943 | 2.75E-05    | C9orf3   | ENSG00000148120 |
| 9 | 96999725  | 97000228  | 96999973  | 35  | 48  | 3  | 11.74663149 | 1.36E-11    |          | ENSG00000209183 |
| 9 | 97567057  | 97567344  | 97567200  | 8   | 12  | 0  | 12.46581301 | 0.000159888 |          | ENSG00000175611 |
| 9 | 97739225  | 97739611  | 97739433  | 21  | 27  | 1  | 13.4247217  | 9.80E-08    |          | ENSG00000217452 |
| 9 | 97806589  | 97806769  | 97806643  | 8   | 8   | 2  | 2.876726079 | 0.0381137   |          | ENSG00000204330 |
| 9 | 98068954  | 98069311  | 98069132  | 42  | 48  | 0  | 46.98652596 | 4.91E-15    |          | ENSG00000207276 |
| 9 | 98082244  | 98082429  | 98082367  | 8   | 8   | 3  | 2.157544559 | 0.0836802   | HSD17B3  | ENSG00000130948 |
| 9 | 98222466  | 98222855  | 98222688  | 13  | 20  | 5  | 3.356180426 | 0.0017534   | ZNF367   | ENSG00000165244 |
| 9 | 98580154  | 98580424  | 98580293  | 15  | 18  | 4  | 3.643853034 | 0.00178791  | ZNF510   | ENSG00000081386 |
| 9 | 98970286  | 98970624  | 98970453  | 23  | 26  | 2  | 8.630178238 | 1.37E-06    |          | ENSG00000209181 |
| 9 | 99289335  | 99289524  | 99289398  | 8   | 8   | 1  | 4.315089119 | 0.0127267   | TMOD1    | ENSG00000136842 |
| 9 | 99692170  | 99692397  | 99692288  | 8   | 10  | 2  | 3.515998541 | 0.0136204   | C9orf156 | ENSG00000136932 |
| 9 | 99724241  | 99724884  | 99724758  | 8   | 22  | 16 | 1.297347055 | 0.203559    | C9orf156 | ENSG00000136932 |
| 9 | 99725854  | 99726151  | 99725981  | 10  | 12  | 2  | 4.155271003 | 0.0046638   | C9orf156 | ENSG00000136932 |
| 9 | 99788719  | 99788915  | 99788796  | 9   | 9   | 7  | 1.198635866 | 0.346278    | ANP32B   | ENSG00000136938 |
| 9 | 100108627 | 100109074 | 100108799 | 15  | 22  | 3  | 5.513724985 | 6.69E-05    | TBC1D2   | ENSG00000095383 |
| 9 | 100202399 | 100202726 | 100202560 | 17  | 18  | 0  | 18.21926517 | 2.83E-06    | TBC1D2   | ENSG00000095383 |
| 9 | 100257465 | 100257740 | 100257611 | 20  | 22  | 0  | 22.05489994 | 1.92E-07    |          | ENSG00000217589 |
| 9 | 100567382 | 100567860 | 100567615 | 14  | 25  | 0  | 24.93162602 | 2.56E-08    | ANKS6    | ENSG00000165138 |

|   |           |           |           |     |     |    |             |             |         |                 |
|---|-----------|-----------|-----------|-----|-----|----|-------------|-------------|---------|-----------------|
| 9 | 100650817 | 100651017 | 100650893 | 9   | 9   | 1  | 4.794543465 | 0.00708517  | GALNT12 | ENSG00000119514 |
| 9 | 102177819 | 102178236 | 102177996 | 25  | 35  | 0  | 34.52071295 | 3.07E-11    | TEX10   | ENSG00000136891 |
| 9 | 102397750 | 102398049 | 102397899 | 9   | 11  | 0  | 11.50690432 | 0.000313206 |         | ENSG00000200966 |
| 9 | 102802271 | 102802606 | 102802438 | 29  | 33  | 1  | 16.30144778 | 2.08E-09    |         | ENSG00000217715 |
| 9 | 105967340 | 105967544 | 105967455 | 9   | 9   | 0  | 9.589086931 | 0.00120187  | SMC2    | ENSG00000136824 |
| 9 | 106058195 | 106058516 | 106058382 | 8   | 12  | 1  | 6.232906505 | 0.00117736  |         | ENSG00000218103 |
| 9 | 107644175 | 107644433 | 107644305 | 10  | 11  | 2  | 3.835634772 | 0.00800699  |         | ENSG00000218063 |
| 9 | 107666606 | 107666854 | 107666730 | 10  | 14  | 1  | 7.191815198 | 0.00034761  |         | ENSG00000218063 |
| 9 | 107863056 | 107863249 | 107863198 | 10  | 11  | 2  | 3.835634772 | 0.00800699  |         | ENSG00000218063 |
| 9 | 108135719 | 108135943 | 108135831 | 8   | 10  | 5  | 1.757999271 | 0.121253    |         | ENSG00000200131 |
| 9 | 108384327 | 108384526 | 108384415 | 8   | 8   | 1  | 4.315089119 | 0.0127267   |         | ENSG00000200131 |
| 9 | 108596313 | 108596615 | 108596443 | 10  | 13  | 2  | 4.474907234 | 0.00269459  |         | ENSG00000212276 |
| 9 | 108933037 | 108933304 | 108933172 | 8   | 11  | 1  | 5.753452158 | 0.00215302  |         | ENSG00000219668 |
| 9 | 108933772 | 108933985 | 108933878 | 8   | 9   | 0  | 9.589086931 | 0.00120187  |         | ENSG00000219668 |
| 9 | 109045918 | 109046245 | 109046081 | 19  | 24  | 11 | 1.997726444 | 0.0196649   | RAD23B  | ENSG00000119318 |
| 9 | 109047721 | 109047961 | 109047841 | 11  | 12  | 4  | 2.493162602 | 0.0299057   | RAD23B  | ENSG00000119318 |
| 9 | 109051205 | 109051736 | 109051477 | 93  | 117 | 5  | 18.85853763 | 2.21E-28    | RAD23B  | ENSG00000119318 |
| 9 | 109143337 | 109143555 | 109143426 | 12  | 13  | 4  | 2.684944341 | 0.01921     | RAD23B  | ENSG00000119318 |
| 9 | 109240588 | 109241123 | 109241003 | 12  | 22  | 1  | 11.02744997 | 2.36E-06    |         | ENSG00000213558 |
| 9 | 109283565 | 109283744 | 109283636 | 8   | 8   | 1  | 4.315089119 | 0.0127267   |         | ENSG00000199905 |
| 9 | 109306641 | 109307485 | 109307040 | 13  | 38  | 11 | 3.116453252 | 8.15E-05    | KLF4    | ENSG00000136826 |
| 9 | 109540003 | 109540731 | 109540351 | 108 | 162 | 4  | 31.26042339 | 4.64E-42    |         | ENSG00000208975 |
| 9 | 109557322 | 109557760 | 109557581 | 16  | 25  | 5  | 4.155271003 | 0.000149583 |         | ENSG00000208975 |
| 9 | 110169873 | 110170080 | 110169979 | 10  | 10  | 0  | 10.54799562 | 0.000613541 |         | ENSG00000222512 |
| 9 | 110291773 | 110292048 | 110291910 | 20  | 21  | 2  | 7.031997082 | 2.73E-05    |         | ENSG00000222512 |
| 9 | 110369958 | 110370574 | 110370334 | 24  | 45  | 5  | 7.351633313 | 2.73E-09    |         | ENSG00000169253 |
| 9 | 110405378 | 110405569 | 110405497 | 8   | 8   | 2  | 2.876726079 | 0.0381137   |         | ENSG00000169253 |
| 9 | 110661909 | 110662175 | 110662042 | 19  | 19  | 2  | 6.39272462  | 8.83E-05    | ACTL7A  | ENSG00000187003 |
| 9 | 110814370 | 110814690 | 110814487 | 11  | 15  | 1  | 7.671269544 | 0.000187863 | CTNNAL1 | ENSG00000119326 |
| 9 | 111339519 | 111339741 | 111339591 | 8   | 9   | 0  | 9.589086931 | 0.00120187  |         | ENSG00000213539 |
| 9 | 113399984 | 113400191 | 113400087 | 9   | 11  | 5  | 1.917817386 | 0.0843804   | PTGR1   | ENSG00000106853 |
| 9 | 113432987 | 113433331 | 113433163 | 10  | 13  | 6  | 1.917817386 | 0.0693353   | C9orf29 | ENSG00000204173 |
| 9 | 113493893 | 113494080 | 113493992 | 8   | 8   | 5  | 1.43836304  | 0.235762    | DNAJC25 | ENSG00000059769 |
| 9 | 113864273 | 113864532 | 113864403 | 14  | 17  | 1  | 8.630178238 | 5.44E-05    |         | ENSG00000208841 |

|   |           |           |           |     |     |    |             |             |         |                 |
|---|-----------|-----------|-----------|-----|-----|----|-------------|-------------|---------|-----------------|
| 9 | 113946584 | 113946780 | 113946682 | 8   | 8   | 0  | 8.630178238 | 0.00235436  |         | ENSG00000208835 |
| 9 | 113946800 | 113947311 | 113947056 | 95  | 121 | 1  | 58.49343028 | 1.44E-34    |         | ENSG00000208835 |
| 9 | 114101738 | 114101998 | 114101889 | 15  | 16  | 0  | 16.30144778 | 1.09E-05    | ROD1    | ENSG00000119314 |
| 9 | 114399651 | 114399910 | 114399780 | 14  | 15  | 1  | 7.671269544 | 0.000187863 |         | ENSG00000218158 |
| 9 | 114446569 | 114446880 | 114446710 | 12  | 16  | 0  | 16.30144778 | 1.09E-05    |         | ENSG00000218158 |
| 9 | 114638735 | 114638914 | 114638824 | 8   | 8   | 1  | 4.315089119 | 0.0127267   | SLC46A2 | ENSG00000119457 |
| 9 | 115142232 | 115142674 | 115142551 | 13  | 20  | 7  | 2.517135319 | 0.00849957  | WDR31   | ENSG00000148225 |
| 9 | 115382760 | 115383004 | 115382882 | 12  | 14  | 5  | 2.397271733 | 0.0258078   | RGS3    | ENSG00000138835 |
| 9 | 115460150 | 115460379 | 115460252 | 9   | 10  | 2  | 3.515998541 | 0.0136204   | RGS3    | ENSG00000138835 |
| 9 | 116078837 | 116079220 | 116078998 | 16  | 22  | 0  | 22.05489994 | 1.92E-07    | ORM1    | ENSG00000187681 |
| 9 | 116141361 | 116141582 | 116141476 | 11  | 11  | 0  | 11.50690432 | 0.000313206 | ORM2    | ENSG00000204154 |
| 9 | 116206663 | 116206953 | 116206791 | 9   | 13  | 3  | 3.356180426 | 0.00805599  | AKNA    | ENSG00000106948 |
| 9 | 116236959 | 116237167 | 116237093 | 8   | 10  | 4  | 2.109599125 | 0.0694668   | DFNB31  | ENSG00000095397 |
| 9 | 116414977 | 116415156 | 116415116 | 8   | 8   | 1  | 4.315089119 | 0.0127267   | C9orf91 | ENSG00000157693 |
| 9 | 116710060 | 116710951 | 116710662 | 165 | 290 | 17 | 15.5023572  | 2.17E-63    | TNFSF8  | ENSG00000106952 |
| 9 | 116710968 | 116711447 | 116711154 | 12  | 21  | 2  | 7.031997082 | 2.73E-05    | TNFSF8  | ENSG00000106952 |
| 9 | 117171094 | 117171315 | 117171204 | 9   | 9   | 1  | 4.794543465 | 0.00708517  | 1-Dec   | ENSG00000173077 |
| 9 | 117746122 | 117746846 | 117746402 | 171 | 245 | 3  | 58.97288462 | 4.41E-67    | C9orf27 | ENSG00000204148 |
| 9 | 118489053 | 118489495 | 118489318 | 29  | 35  | 1  | 17.26035648 | 5.72E-10    | ASTN2   | ENSG00000148219 |
| 9 | 118587603 | 118588033 | 118587843 | 24  | 35  | 2  | 11.50690432 | 5.48E-09    | TRIM32  | ENSG00000119401 |
| 9 | 118658391 | 118658723 | 118658557 | 11  | 16  | 1  | 8.150723891 | 0.000101217 | TRIM32  | ENSG00000119401 |
| 9 | 118735374 | 118735674 | 118735524 | 11  | 12  | 1  | 6.232906505 | 0.00117736  | TRIM32  | ENSG00000119401 |
| 9 | 118900040 | 118900240 | 118900140 | 8   | 8   | 0  | 8.630178238 | 0.00235436  | RPL10P3 | ENSG00000216739 |
| 9 | 119268244 | 119268435 | 119268329 | 8   | 10  | 4  | 2.109599125 | 0.0694668   | ASTN2   | ENSG00000148219 |
| 9 | 119846855 | 119847277 | 119846978 | 17  | 24  | 0  | 23.97271733 | 5.01E-08    |         | ENSG00000184353 |
| 9 | 121255536 | 121255832 | 121255683 | 13  | 14  | 1  | 7.191815198 | 0.00034761  | DBC1    | ENSG00000078725 |
| 9 | 122146406 | 122146649 | 122146525 | 12  | 13  | 1  | 6.712360851 | 0.000640982 |         | ENSG00000208742 |
| 9 | 122510665 | 122510906 | 122510785 | 12  | 14  | 2  | 4.794543465 | 0.00154571  | MEGF9   | ENSG00000106780 |
| 9 | 122569729 | 122569967 | 122569871 | 10  | 12  | 1  | 6.232906505 | 0.00117736  | FBXW2   | ENSG00000119402 |
| 9 | 122645038 | 122645278 | 122645188 | 9   | 10  | 3  | 2.636998906 | 0.034203    | PSMD5   | ENSG00000095261 |
| 9 | 122738654 | 122738873 | 122738763 | 8   | 9   | 0  | 9.589086931 | 0.00120187  | TRAF1   | ENSG00000056558 |
| 9 | 122996980 | 122997260 | 122997106 | 15  | 16  | 3  | 4.075361945 | 0.00173346  | RAB14   | ENSG00000119396 |
| 9 | 123084039 | 123084448 | 123084205 | 11  | 18  | 4  | 3.643853034 | 0.00178791  | GSN     | ENSG00000148180 |
| 9 | 123089114 | 123089391 | 123089225 | 11  | 13  | 3  | 3.356180426 | 0.00805599  | GSN     | ENSG00000148180 |



|   |           |           |           |     |     |   |             |             |         |                 |
|---|-----------|-----------|-----------|-----|-----|---|-------------|-------------|---------|-----------------|
| 9 | 123122231 | 123122477 | 123122354 | 12  | 14  | 2 | 4.794543465 | 0.00154571  | GSN     | ENSG00000148180 |
| 9 | 123124383 | 123125047 | 123124644 | 271 | 332 | 6 | 45.6166564  | 1.62E-87    | GSN     | ENSG00000148180 |
| 9 | 123175114 | 123175386 | 123175250 | 10  | 13  | 0 | 13.4247217  | 8.16E-05    | STOM    | ENSG00000148175 |
| 9 | 123300372 | 123300679 | 123300503 | 11  | 14  | 9 | 1.43836304  | 0.179537    | GGTA1   | ENSG00000204136 |
| 9 | 123321235 | 123321505 | 123321402 | 24  | 26  | 1 | 12.94526736 | 1.86E-07    |         | ENSG00000213467 |
| 9 | 123774704 | 123774899 | 123774775 | 8   | 8   | 3 | 2.157544559 | 0.0836802   | TTLL11  | ENSG00000175764 |
| 9 | 123924609 | 123924838 | 123924706 | 16  | 17  | 6 | 2.465765211 | 0.014729    | TTLL11  | ENSG00000175764 |
| 9 | 123992737 | 123992988 | 123992862 | 10  | 12  | 0 | 12.46581301 | 0.000159888 | MORN5   | ENSG00000185681 |
| 9 | 124301463 | 124301906 | 124301642 | 14  | 24  | 0 | 23.97271733 | 5.01E-08    | OR1J2   | ENSG00000197233 |
| 9 | 124340057 | 124340268 | 124340200 | 9   | 11  | 0 | 11.50690432 | 0.000313206 | OR1N1   | ENSG00000171505 |
| 9 | 124353449 | 124353830 | 124353651 | 30  | 36  | 1 | 17.73981082 | 3.00E-10    | OR1N2   | ENSG00000171501 |
| 9 | 124604791 | 124604970 | 124604888 | 8   | 8   | 1 | 4.315089119 | 0.0127267   | OR1K1   | ENSG00000165204 |
| 9 | 124715296 | 124715526 | 124715411 | 9   | 9   | 2 | 3.19636231  | 0.0229249   | ZBTB6   | ENSG00000186130 |
| 9 | 124793527 | 124793715 | 124793621 | 8   | 8   | 0 | 8.630178238 | 0.00235436  | RABGAP1 | ENSG00000011454 |
| 9 | 126217514 | 126217811 | 126217655 | 12  | 15  | 6 | 2.191791298 | 0.0328001   | PSMB7   | ENSG00000136930 |
| 9 | 126238459 | 126238791 | 126238688 | 11  | 15  | 0 | 15.34253909 | 2.13E-05    | GPR144  | ENSG00000180264 |
| 9 | 126353887 | 126354225 | 126354057 | 11  | 16  | 2 | 5.433815927 | 0.000499302 | NR5A1   | ENSG00000136931 |
| 9 | 126404233 | 126404679 | 126404500 | 30  | 43  | 5 | 7.031997082 | 8.56E-09    |         | ENSG00000217017 |
| 9 | 126406072 | 126406700 | 126406374 | 46  | 71  | 6 | 9.863060843 | 3.64E-15    |         | ENSG00000223143 |
| 9 | 126513964 | 126514292 | 126514128 | 9   | 14  | 3 | 3.595907599 | 0.00486913  |         | ENSG00000207737 |
| 9 | 126581392 | 126581629 | 126581510 | 11  | 14  | 0 | 14.3836304  | 4.17E-05    | OLFML2A | ENSG00000185585 |
| 9 | 127099047 | 127099392 | 127099219 | 9   | 15  | 5 | 2.557089848 | 0.0169197   | GAPVD1  | ENSG00000165219 |
| 9 | 127312169 | 127312368 | 127312299 | 11  | 13  | 2 | 4.474907234 | 0.00269459  |         | ENSG00000208649 |
| 9 | 127313975 | 127314189 | 127314082 | 8   | 10  | 3 | 2.636998906 | 0.034203    |         | ENSG00000208649 |
| 9 | 127338227 | 127338520 | 127338399 | 10  | 14  | 5 | 2.397271733 | 0.0258078   |         | ENSG00000222288 |
| 9 | 127340290 | 127340485 | 127340414 | 10  | 10  | 3 | 2.636998906 | 0.034203    |         | ENSG00000222288 |
| 9 | 127360600 | 127360850 | 127360725 | 8   | 9   | 3 | 2.397271733 | 0.0539397   |         | ENSG00000217525 |
| 9 | 128013594 | 128014078 | 128013773 | 28  | 36  | 0 | 35.47962164 | 1.57E-11    | FAM125B | ENSG00000196814 |
| 9 | 128030985 | 128031372 | 128031159 | 8   | 13  | 6 | 1.917817386 | 0.0693353   | FAM125B | ENSG00000196814 |
| 9 | 128445017 | 128445289 | 128445132 | 8   | 10  | 8 | 1.171999514 | 0.35773     | LMX1B   | ENSG00000136944 |
| 9 | 128524436 | 128524689 | 128524560 | 9   | 10  | 2 | 3.515998541 | 0.0136204   | ZBTB43  | ENSG00000169155 |
| 9 | 128584095 | 128584300 | 128584149 | 10  | 12  | 0 | 12.46581301 | 0.000159888 | ZBTB43  | ENSG00000169155 |
| 9 | 128604950 | 128605190 | 128605070 | 9   | 9   | 3 | 2.397271733 | 0.0539397   | ZBTB43  | ENSG00000169155 |
| 9 | 129097092 | 129097585 | 129097308 | 42  | 60  | 4 | 11.69868606 | 6.40E-14    |         | ENSG00000220303 |

|   |           |           |           |    |    |    |             |             |          |                 |
|---|-----------|-----------|-----------|----|----|----|-------------|-------------|----------|-----------------|
| 9 | 129113408 | 129113741 | 129113574 | 8  | 14 | 2  | 4.794543465 | 0.00154571  |          | ENSG00000220303 |
| 9 | 129138817 | 129139354 | 129139102 | 23 | 38 | 2  | 12.46581301 | 8.46E-10    |          | ENSG00000220303 |
| 9 | 129219296 | 129219563 | 129219430 | 17 | 19 | 0  | 19.17817386 | 1.44E-06    | ZNF79    | ENSG00000196152 |
| 9 | 129226226 | 129226961 | 129226653 | 40 | 72 | 11 | 5.833361216 | 4.08E-12    | ZNF79    | ENSG00000196152 |
| 9 | 129306142 | 129306490 | 129306318 | 16 | 20 | 4  | 4.027416511 | 0.000652226 |          | ENSG00000200788 |
| 9 | 129363775 | 129364215 | 129364040 | 16 | 28 | 2  | 9.2694507   | 4.06E-07    | FAM129B  | ENSG00000136830 |
| 9 | 129376797 | 129376995 | 129376854 | 8  | 9  | 6  | 1.369869562 | 0.253675    | FAM129B  | ENSG00000136830 |
| 9 | 129386398 | 129386636 | 129386517 | 11 | 12 | 0  | 12.46581301 | 0.000159888 | FAM129B  | ENSG00000136830 |
| 9 | 129401238 | 129401481 | 129401340 | 9  | 10 | 5  | 1.757999271 | 0.121253    | STXBP1   | ENSG00000136854 |
| 9 | 129757571 | 129757803 | 129757687 | 9  | 11 | 2  | 3.835634772 | 0.00800699  | FAM102A  | ENSG00000167106 |
| 9 | 129770183 | 129770481 | 129770332 | 21 | 23 | 8  | 2.557089848 | 0.00494559  | FAM102A  | ENSG00000167106 |
| 9 | 129874390 | 129874775 | 129874638 | 8  | 13 | 0  | 13.4247217  | 8.16E-05    | SLC25A25 | ENSG00000148339 |
| 9 | 129919792 | 129920019 | 129919903 | 11 | 12 | 9  | 1.246581301 | 0.295061    | PTGES2   | ENSG00000148334 |
| 9 | 130124608 | 130124909 | 130124758 | 12 | 15 | 6  | 2.191791298 | 0.0328001   | COQ4     | ENSG00000167113 |
| 9 | 130131015 | 130131438 | 130131259 | 61 | 74 | 0  | 71.91815198 | 1.26E-22    | COQ4     | ENSG00000167113 |
| 9 | 130141964 | 130142296 | 130142130 | 11 | 16 | 6  | 2.328778255 | 0.0221113   | SLC27A4  | ENSG00000167114 |
| 9 | 130486690 | 130487020 | 130486848 | 8  | 13 | 2  | 4.474907234 | 0.00269459  | SET      | ENSG00000119335 |
| 9 | 130487181 | 130487361 | 130487245 | 8  | 9  | 2  | 3.19636231  | 0.0229249   | SET      | ENSG00000119335 |
| 9 | 130838835 | 130839074 | 130838954 | 8  | 9  | 1  | 4.794543465 | 0.00708517  | FAM73B   | ENSG00000148343 |
| 9 | 130933906 | 130934087 | 130934015 | 8  | 8  | 2  | 2.876726079 | 0.0381137   | PPP2R4   | ENSG00000119383 |
| 9 | 130976331 | 130976637 | 130976468 | 8  | 12 | 5  | 2.077635502 | 0.0577144   |          | ENSG00000204055 |
| 9 | 131080574 | 131080894 | 131080748 | 13 | 16 | 10 | 1.481949798 | 0.147733    | C9orf106 | ENSG00000179082 |
| 9 | 131080937 | 131081208 | 131081072 | 8  | 11 | 2  | 3.835634772 | 0.00800699  | C9orf106 | ENSG00000179082 |
| 9 | 131122932 | 131123138 | 131123033 | 8  | 8  | 5  | 1.43836304  | 0.235762    | C9orf106 | ENSG00000179082 |
| 9 | 131136212 | 131136448 | 131136333 | 8  | 11 | 5  | 1.917817386 | 0.0843804   | C9orf106 | ENSG00000179082 |
| 9 | 131164404 | 131164615 | 131164509 | 12 | 13 | 2  | 4.474907234 | 0.00269459  |          | ENSG00000223137 |
| 9 | 131290821 | 131291110 | 131290963 | 8  | 11 | 5  | 1.917817386 | 0.0843804   |          | ENSG00000204054 |
| 9 | 131448768 | 131449231 | 131448996 | 10 | 19 | 4  | 3.835634772 | 0.00108365  | ASB6     | ENSG00000148331 |
| 9 | 131452728 | 131453004 | 131452858 | 8  | 9  | 3  | 2.397271733 | 0.0539397   | ASB6     | ENSG00000148331 |
| 9 | 131487862 | 131488041 | 131487951 | 8  | 8  | 0  | 8.630178238 | 0.00235436  | PRRX2    | ENSG00000167157 |
| 9 | 131826692 | 131826938 | 131826815 | 9  | 11 | 3  | 2.876726079 | 0.0213797   | FNBP1    | ENSG00000187239 |
| 9 | 131853955 | 131854211 | 131854083 | 16 | 17 | 4  | 3.452071295 | 0.00292757  | GPR107   | ENSG00000148358 |
| 9 | 132224953 | 132225337 | 132225176 | 8  | 14 | 0  | 14.3836304  | 4.17E-05    | HMCN2    | ENSG00000148357 |
| 9 | 132292385 | 132292593 | 132292451 | 8  | 8  | 0  | 8.630178238 | 0.00235436  |          | ENSG00000175223 |

|   |           |           |           |     |     |   |             |             |         |                 |
|---|-----------|-----------|-----------|-----|-----|---|-------------|-------------|---------|-----------------|
| 9 | 132317018 | 132317228 | 132317123 | 8   | 8   | 4 | 1.726035648 | 0.150596    |         | ENSG00000208562 |
| 9 | 132547737 | 132548002 | 132547861 | 11  | 12  | 0 | 12.46581301 | 0.000159888 | EXOSC2  | ENSG00000130713 |
| 9 | 132731682 | 132731923 | 132731802 | 10  | 11  | 4 | 2.301380863 | 0.0459276   | QRFP    | ENSG00000188710 |
| 9 | 132751275 | 132751572 | 132751422 | 14  | 16  | 0 | 16.30144778 | 1.09E-05    | QRFP    | ENSG00000188710 |
| 9 | 132857657 | 132858057 | 132857878 | 30  | 39  | 9 | 3.835634772 | 8.88E-06    | LAMC3   | ENSG00000050555 |
| 9 | 132911889 | 132912152 | 132912039 | 8   | 9   | 1 | 4.794543465 | 0.00708517  | LAMC3   | ENSG00000050555 |
| 9 | 133043574 | 133043813 | 133043693 | 10  | 11  | 2 | 3.835634772 | 0.00800699  |         | ENSG00000208557 |
| 9 | 133170280 | 133170575 | 133170428 | 12  | 14  | 5 | 2.397271733 | 0.0258078   | PPAPDC3 | ENSG00000160539 |
| 9 | 133261091 | 133261324 | 133261208 | 11  | 12  | 5 | 2.077635502 | 0.0577144   | BAT2L   | ENSG00000130723 |
| 9 | 133262410 | 133262638 | 133262553 | 8   | 9   | 1 | 4.794543465 | 0.00708517  | BAT2L   | ENSG00000130723 |
| 9 | 133456447 | 133456641 | 133456550 | 8   | 8   | 2 | 2.876726079 | 0.0381137   | UCK1    | ENSG00000130717 |
| 9 | 133483143 | 133483582 | 133483411 | 14  | 23  | 1 | 11.50690432 | 1.25E-06    | UCK1    | ENSG00000130717 |
| 9 | 133675864 | 133676125 | 133675987 | 9   | 12  | 2 | 4.155271003 | 0.0046638   |         | ENSG00000212395 |
| 9 | 133997732 | 133997939 | 133997835 | 10  | 10  | 1 | 5.273997812 | 0.00391723  | NTNG2   | ENSG00000196358 |
| 9 | 134470599 | 134470778 | 134470681 | 8   | 10  | 0 | 10.54799562 | 0.000613541 | BARHL1  | ENSG00000125492 |
| 9 | 134470783 | 134471099 | 134470941 | 12  | 17  | 1 | 8.630178238 | 5.44E-05    | BARHL1  | ENSG00000125492 |
| 9 | 134767092 | 134767294 | 134767193 | 11  | 11  | 6 | 1.643843474 | 0.137712    | C9orf9  | ENSG00000165698 |
| 9 | 134858712 | 134859043 | 134858877 | 10  | 16  | 1 | 8.150723891 | 0.000101217 | GFI1B   | ENSG00000165702 |
| 9 | 134926401 | 134926712 | 134926556 | 12  | 15  | 0 | 15.34253909 | 2.13E-05    | CEL     | ENSG00000170835 |
| 9 | 134998860 | 134999231 | 134999059 | 32  | 37  | 3 | 9.109632584 | 1.09E-08    | RALGDS  | ENSG00000160271 |
| 9 | 135243456 | 135243676 | 135243590 | 8   | 10  | 2 | 3.515998541 | 0.0136204   | C9orf96 | ENSG00000198870 |
| 9 | 135258865 | 135259099 | 135258991 | 12  | 13  | 4 | 2.684944341 | 0.01921     | REXO4   | ENSG00000148300 |
| 9 | 135318098 | 135318326 | 135318264 | 10  | 12  | 3 | 3.116453252 | 0.0131971   | C9orf7  | ENSG00000160325 |
| 9 | 135729287 | 135729595 | 135729416 | 9   | 13  | 1 | 6.712360851 | 0.000640982 | VAV2    | ENSG00000160293 |
| 9 | 135735795 | 135737018 | 135736248 | 229 | 321 | 8 | 34.30762213 | 1.01E-81    | VAV2    | ENSG00000160293 |
| 9 | 135743219 | 135743611 | 135743392 | 27  | 35  | 2 | 11.50690432 | 5.48E-09    | VAV2    | ENSG00000160293 |
| 9 | 136927570 | 136927828 | 136927722 | 10  | 12  | 2 | 4.155271003 | 0.0046638   | FCN2    | ENSG00000160339 |
| 9 | 137055019 | 137055371 | 137055229 | 13  | 17  | 5 | 2.876726079 | 0.00703033  | OLFM1   | ENSG00000130558 |
| 9 | 137402418 | 137402744 | 137402569 | 24  | 28  | 1 | 13.90417605 | 5.17E-08    | C9orf62 | ENSG00000178243 |
| 9 | 137425303 | 137425601 | 137425452 | 15  | 19  | 4 | 3.835634772 | 0.00108365  | C9orf62 | ENSG00000178243 |
| 9 | 137676274 | 137676800 | 137676489 | 16  | 28  | 3 | 6.952088025 | 2.20E-06    | GLT6D1  | ENSG00000204007 |
| 9 | 137757325 | 137757555 | 137757443 | 14  | 15  | 0 | 15.34253909 | 2.13E-05    | KCNT1   | ENSG00000107147 |
| 9 | 137920501 | 137920720 | 137920610 | 10  | 11  | 0 | 11.50690432 | 0.000313206 | CAMSAP1 | ENSG00000130559 |
| 9 | 138140026 | 138140549 | 138140214 | 51  | 66  | 6 | 9.178126062 | 7.01E-14    | NACC2   | ENSG00000148411 |

|    |           |           |           |     |      |      |             |             |          |                 |
|----|-----------|-----------|-----------|-----|------|------|-------------|-------------|----------|-----------------|
| 9  | 138140878 | 138141784 | 138141499 | 78  | 117  | 7    | 14.14390322 | 1.99E-26    | NACC2    | ENSG00000148411 |
| 9  | 138202007 | 138202266 | 138202136 | 9   | 12   | 3    | 3.116453252 | 0.0131971   | LHX3     | ENSG00000107187 |
| 9  | 138564514 | 138565106 | 138564882 | 117 | 155  | 3    | 37.39743903 | 2.20E-41    | NOTCH1   | ENSG00000148400 |
| 9  | 138565544 | 138565906 | 138565774 | 13  | 17   | 3    | 4.315089119 | 0.00102271  | NOTCH1   | ENSG00000148400 |
| 9  | 138615980 | 138616286 | 138616133 | 14  | 17   | 2    | 5.753452158 | 0.000281509 |          | ENSG00000203275 |
| 9  | 138636909 | 138637230 | 138637080 | 15  | 18   | 2    | 6.073088389 | 0.000157975 |          | ENSG00000203275 |
| 9  | 138637291 | 138637689 | 138637493 | 20  | 28   | 5    | 4.63472535  | 3.19E-05    |          | ENSG00000203275 |
| 9  | 138638266 | 138638504 | 138638385 | 9   | 10   | 0    | 10.54799562 | 0.000613541 |          | ENSG00000203275 |
| 9  | 138739999 | 138740212 | 138740106 | 8   | 11   | 1    | 5.753452158 | 0.00215302  |          | ENSG00000199437 |
| 9  | 138778950 | 138779285 | 138779117 | 13  | 17   | 0    | 17.26035648 | 5.54E-06    |          | ENSG00000177984 |
| 9  | 138863339 | 138863952 | 138863777 | 80  | 105  | 3    | 25.41108037 | 2.82E-27    | PHPT1    | ENSG00000054148 |
| 9  | 139240305 | 139240568 | 139240450 | 14  | 18   | 3    | 4.554816292 | 0.000599415 | C9orf169 | ENSG00000197191 |
| 9  | 139240955 | 139241245 | 139241096 | 10  | 12   | 2    | 4.155271003 | 0.0046638   |          | ENSG00000189110 |
| 9  | 139241894 | 139242088 | 139241991 | 8   | 8    | 3    | 2.157544559 | 0.0836802   |          | ENSG00000189110 |
| 9  | 139898883 | 139899095 | 139899055 | 9   | 11   | 3    | 2.876726079 | 0.0213797   | CACNA1B  | ENSG00000148408 |
| 9  | 139902825 | 139903030 | 139902895 | 8   | 9    | 0    | 9.589086931 | 0.00120187  |          | ENSG00000203987 |
| MT | 1         | 4498      | 284       | 415 | 3436 | 6662 | 0.494637427 | 1           |          | ENSG00000223073 |
| MT | 4558      | 7326      | 6375      | 135 | 867  | 1605 | 0.518264474 | 1           | MT-CO1   | ENSG00000198804 |
| MT | 7343      | 16711     | 16143     | 755 | 8250 | ###  | 0.50327305  | 1           |          | ENSG00000210196 |
| X  | 3304251   | 3304491   | 3304371   | 28  | 28   | 0    | 27.8083521  | 3.40E-09    |          | ENSG00000215325 |
| X  | 4638604   | 4639136   | 4638845   | 90  | 117  | 0    | 113.1512258 | 3.49E-35    |          | ENSG00000222834 |
| X  | 6657650   | 6657883   | 6657742   | 19  | 20   | 1    | 10.06854128 | 8.32E-06    | VCX3A    | ENSG00000169059 |
| X  | 7529475   | 7529790   | 7529632   | 18  | 20   | 1    | 10.06854128 | 8.32E-06    | VCX      | ENSG00000182583 |
| X  | 7617897   | 7618181   | 7618031   | 11  | 12   | 1    | 6.232906505 | 0.00117736  | VCX      | ENSG00000182583 |
| X  | 7625185   | 7625388   | 7625358   | 8   | 10   | 0    | 10.54799562 | 0.000613541 | VCX      | ENSG00000182583 |
| X  | 7639307   | 7639558   | 7639458   | 8   | 9    | 2    | 3.19636231  | 0.0229249   | VCX      | ENSG00000182583 |
| X  | 10689507  | 10689874  | 10689686  | 23  | 31   | 1    | 15.34253909 | 7.54E-09    | MID1     | ENSG00000101871 |
| X  | 11422312  | 11422512  | 11422412  | 9   | 9    | 0    | 9.589086931 | 0.00120187  | ARHGAP6  | ENSG00000047648 |
| X  | 15603546  | 15603743  | 15603644  | 8   | 8    | 1    | 4.315089119 | 0.0127267   | CA5BL    | ENSG00000186312 |
| X  | 16590455  | 16590735  | 16590595  | 8   | 11   | 6    | 1.643843474 | 0.137712    | S100G    | ENSG00000169906 |
| X  | 16820951  | 16821171  | 16821061  | 9   | 10   | 4    | 2.109599125 | 0.0694668   |          | ENSG00000218928 |
| X  | 17475793  | 17476165  | 17475940  | 27  | 33   | 5    | 5.433815927 | 2.23E-06    |          | ENSG00000221408 |
| X  | 17635811  | 17636182  | 17635982  | 12  | 19   | 5    | 3.19636231  | 0.00280933  |          | ENSG00000217991 |
| X  | 18721723  | 18722143  | 18721917  | 59  | 68   | 0    | 66.16469982 | 7.10E-21    |          | ENSG00000203503 |

|   |          |          |          |    |    |    |             |             |           |                 |
|---|----------|----------|----------|----|----|----|-------------|-------------|-----------|-----------------|
| X | 19513790 | 19513983 | 19513913 | 8  | 9  | 1  | 4.794543465 | 0.00708517  | SH3KBP1   | ENSG00000147010 |
| X | 19835892 | 19836214 | 19836063 | 14 | 16 | 1  | 8.150723891 | 0.000101217 | SH3KBP1   | ENSG00000147010 |
| X | 22063089 | 22063590 | 22063426 | 8  | 16 | 10 | 1.481949798 | 0.147733    | PHEX      | ENSG00000102174 |
| X | 23825623 | 23825853 | 23825738 | 9  | 9  | 0  | 9.589086931 | 0.00120187  | APOO      | ENSG00000184831 |
| X | 23829191 | 23829486 | 23829338 | 8  | 13 | 0  | 13.4247217  | 8.16E-05    | APOO      | ENSG00000184831 |
| X | 26301951 | 26302408 | 26302108 | 15 | 21 | 0  | 21.09599125 | 3.76E-07    |           | ENSG00000216472 |
| X | 30719509 | 30720063 | 30719863 | 30 | 45 | 2  | 14.70326663 | 1.04E-11    | MAP3K7IP3 | ENSG00000157625 |
| X | 30720346 | 30720840 | 30720517 | 16 | 29 | 0  | 28.76726079 | 1.74E-09    | MAP3K7IP3 | ENSG00000157625 |
| X | 30721460 | 30722006 | 30721755 | 15 | 29 | 0  | 28.76726079 | 1.74E-09    | MAP3K7IP3 | ENSG00000157625 |
| X | 30722589 | 30722991 | 30722756 | 16 | 24 | 0  | 23.97271733 | 5.01E-08    | MAP3K7IP3 | ENSG00000157625 |
| X | 30724003 | 30724619 | 30724213 | 19 | 36 | 2  | 11.82654055 | 2.94E-09    | MAP3K7IP3 | ENSG00000157625 |
| X | 30725530 | 30725738 | 30725646 | 10 | 12 | 0  | 12.46581301 | 0.000159888 | MAP3K7IP3 | ENSG00000157625 |
| X | 30726558 | 30727405 | 30726997 | 59 | 95 | 1  | 46.02761727 | 4.44E-27    | MAP3K7IP3 | ENSG00000157625 |
| X | 30727436 | 30727961 | 30727693 | 22 | 37 | 0  | 36.43853034 | 8.01E-12    | MAP3K7IP3 | ENSG00000157625 |
| X | 30728559 | 30729629 | 30729128 | 32 | 71 | 1  | 34.52071295 | 3.42E-20    | MAP3K7IP3 | ENSG00000157625 |
| X | 30832665 | 30833021 | 30832843 | 22 | 27 | 2  | 8.949814469 | 7.46E-07    | MAP3K7IP3 | ENSG00000157625 |
| X | 33088344 | 33088686 | 33088516 | 20 | 24 | 0  | 23.97271733 | 5.01E-08    | DMD       | ENSG00000198947 |
| X | 33884425 | 33884724 | 33884570 | 14 | 15 | 2  | 5.114179696 | 0.00088103  | FAM47A    | ENSG00000185448 |
| X | 34487440 | 34487808 | 34487602 | 36 | 42 | 0  | 41.2330738  | 2.78E-13    |           | ENSG00000222668 |
| X | 38437299 | 38437493 | 38437396 | 8  | 9  | 0  | 9.589086931 | 0.00120187  | MID1IP1   | ENSG00000165175 |
| X | 40937071 | 40937447 | 40937271 | 17 | 22 | 4  | 4.410979988 | 0.000231863 |           | ENSG00000199564 |
| X | 41704289 | 41704573 | 41704431 | 8  | 12 | 1  | 6.232906505 | 0.00117736  | CASK      | ENSG00000147044 |
| X | 42664879 | 42665120 | 42665011 | 10 | 11 | 0  | 11.50690432 | 0.000313206 |           | ENSG00000102055 |
| X | 42720923 | 42721187 | 42721050 | 14 | 16 | 0  | 16.30144778 | 1.09E-05    |           | ENSG00000102055 |
| X | 42920917 | 42921221 | 42921077 | 18 | 22 | 0  | 22.05489994 | 1.92E-07    |           | ENSG00000220898 |
| X | 44419635 | 44419926 | 44419793 | 9  | 13 | 1  | 6.712360851 | 0.000640982 |           | ENSG00000214017 |
| X | 44587690 | 44587889 | 44587789 | 8  | 8  | 0  | 8.630178238 | 0.00235436  | DUSP21    | ENSG00000189037 |
| X | 44657900 | 44658151 | 44658036 | 12 | 14 | 0  | 14.3836304  | 4.17E-05    | UTX       | ENSG00000147050 |
| X | 44719877 | 44720205 | 44720018 | 18 | 22 | 0  | 22.05489994 | 1.92E-07    |           | ENSG00000203505 |
| X | 46703154 | 46703471 | 46703310 | 17 | 20 | 0  | 20.13708255 | 7.37E-07    | PHF16     | ENSG00000102221 |
| X | 47560214 | 47560644 | 47560421 | 34 | 43 | 0  | 42.19198249 | 1.42E-13    | WASF4     | ENSG00000188459 |
| X | 47563288 | 47563722 | 47563475 | 31 | 45 | 0  | 44.10979988 | 3.69E-14    | ZNF81     | ENSG00000197779 |
| X | 53427178 | 53427528 | 53427357 | 13 | 18 | 2  | 6.073088389 | 0.000157975 | SMC1A     | ENSG00000072501 |
| X | 58529268 | 58529447 | 58529418 | 9  | 9  | 3  | 2.397271733 | 0.0539397   |           |                 |

|   |           |           |           |    |     |    |             |             |                         |
|---|-----------|-----------|-----------|----|-----|----|-------------|-------------|-------------------------|
| X | 58568486  | 58568666  | 58568576  | 12 | 12  | 10 | 1.133255728 | 0.37674     |                         |
| X | 58577955  | 58578314  | 58578135  | 37 | 44  | 34 | 1.232882605 | 0.173963    |                         |
| X | 61651997  | 61652176  | 61652147  | 8  | 8   | 6  | 1.232882605 | 0.333038    | ENSG00000216395         |
| X | 61676849  | 61677184  | 61677016  | 57 | 57  | 39 | 1.390417605 | 0.0520985   | ENSG00000216395         |
| X | 61685056  | 61685384  | 61685220  | 11 | 11  | 10 | 1.046082211 | 0.455063    | ENSG00000216395         |
| X | 61755869  | 61756200  | 61756034  | 51 | 51  | 42 | 1.159610513 | 0.234409    | ENSG00000216395         |
| X | 61764095  | 61764414  | 61764254  | 10 | 10  | 5  | 1.757999271 | 0.121253    | ENSG00000216395         |
| X | 61813999  | 61814327  | 61814163  | 14 | 14  | 6  | 2.054804342 | 0.0480281   | ENSG00000216395         |
| X | 62540905  | 62541277  | 62541123  | 17 | 22  | 1  | 11.02744997 | 2.36E-06    | SPIN4 ENSG00000186767   |
| X | 65774896  | 65775660  | 65775271  | 70 | 117 | 2  | 37.71707526 | 6.07E-32    | EDA2R ENSG00000131080   |
| X | 68252690  | 68253024  | 68252854  | 14 | 16  | 0  | 16.30144778 | 1.09E-05    | PJA1 ENSG00000181191    |
| X | 69247747  | 69248076  | 69247911  | 15 | 21  | 0  | 21.09599125 | 3.76E-07    | ENSG00000219613         |
| X | 70669397  | 70669634  | 70669505  | 8  | 9   | 1  | 4.794543465 | 0.00708517  | OGT ENSG00000147162     |
| X | 71263263  | 71263507  | 71263404  | 13 | 15  | 0  | 15.34253909 | 2.13E-05    | NHSL2 ENSG00000204131   |
| X | 72508316  | 72508576  | 72508446  | 11 | 11  | 0  | 11.50690432 | 0.000313206 | ENSG00000207486         |
| X | 82035192  | 82035371  | 82035300  | 8  | 8   | 0  | 8.630178238 | 0.00235436  | ENSG00000217962         |
| X | 83876714  | 83876980  | 83876847  | 19 | 19  | 0  | 19.17817386 | 1.44E-06    | ENSG00000219196         |
| X | 84451620  | 84451932  | 84451764  | 38 | 39  | 0  | 38.35634772 | 2.09E-12    | ENSG00000209072         |
| X | 86407169  | 86407569  | 86407400  | 21 | 31  | 0  | 30.68507818 | 4.52E-10    | ENSG00000200422         |
| X | 93502495  | 93502906  | 93502727  | 19 | 27  | 1  | 13.4247217  | 9.80E-08    | ENSG00000209165         |
| X | 93542162  | 93542579  | 93542362  | 56 | 69  | 1  | 33.56180426 | 1.28E-19    | ENSG00000209165         |
| X | 94433287  | 94433502  | 94433394  | 12 | 12  | 0  | 12.46581301 | 0.000159888 | ENSG00000212098         |
| X | 95322994  | 95323323  | 95323159  | 10 | 15  | 0  | 15.34253909 | 2.13E-05    | ENSG00000218262         |
| X | 96367784  | 96368086  | 96367923  | 9  | 11  | 0  | 11.50690432 | 0.000313206 | ENSG00000222977         |
| X | 96470624  | 96470830  | 96470727  | 9  | 9   | 3  | 2.397271733 | 0.0539397   | ENSG00000222977         |
| X | 97506880  | 97507185  | 97507032  | 8  | 11  | 1  | 5.753452158 | 0.00215302  | ENSG00000217946         |
| X | 99521013  | 99521216  | 99521165  | 9  | 9   | 5  | 1.598181155 | 0.170911    | PCDH19 ENSG00000165194  |
| X | 99756645  | 99757199  | 99756956  | 48 | 72  | 5  | 11.66672243 | 3.07E-16    | TSPAN6 ENSG00000000003  |
| X | 99961867  | 99962065  | 99961993  | 8  | 9   | 2  | 3.19636231  | 0.0229249   | CSTF2 ENSG00000101811   |
| X | 100039461 | 100039675 | 100039568 | 8  | 8   | 0  | 8.630178238 | 0.00235436  | ENSG00000220945         |
| X | 102583514 | 102583727 | 102583620 | 9  | 10  | 0  | 10.54799562 | 0.000613541 | RAB40A ENSG00000172476  |
| X | 102829487 | 102829738 | 102829605 | 8  | 8   | 5  | 1.43836304  | 0.235762    | MORF4L2 ENSG00000123562 |
| X | 103402331 | 103402539 | 103402441 | 9  | 10  | 1  | 5.273997812 | 0.00391723  | ESX1 ENSG00000123576    |
| X | 104148948 | 104149321 | 104149127 | 24 | 31  | 0  | 30.68507818 | 4.52E-10    | TEX13A ENSG00000133149  |

|   |           |           |           |    |    |    |             |             |          |                 |
|---|-----------|-----------|-----------|----|----|----|-------------|-------------|----------|-----------------|
| X | 105263444 | 105263655 | 105263564 | 9  | 9  | 0  | 9.589086931 | 0.00120187  | MUM1L1   | ENSG00000157502 |
| X | 105823359 | 105823566 | 105823462 | 8  | 9  | 1  | 4.794543465 | 0.00708517  | RNF128   | ENSG00000133135 |
| X | 106490854 | 106491125 | 106491008 | 8  | 11 | 1  | 5.753452158 | 0.00215302  |          | ENSG00000215007 |
| X | 106856727 | 106856944 | 106856835 | 8  | 8  | 1  | 4.315089119 | 0.0127267   | TSC22D3  | ENSG00000157514 |
| X | 107130659 | 107131251 | 107130955 | 26 | 41 | 0  | 40.27416511 | 5.44E-13    | TEX13B   | ENSG00000170925 |
| X | 107131299 | 107131559 | 107131442 | 11 | 12 | 3  | 3.116453252 | 0.0131971   | TEX13B   | ENSG00000170925 |
| X | 107252600 | 107253156 | 107252895 | 43 | 65 | 1  | 31.64398687 | 1.78E-18    | ATG4A    | ENSG00000101844 |
| X | 107400144 | 107400489 | 107400316 | 40 | 46 | 1  | 22.53435429 | 4.53E-13    |          | ENSG00000189372 |
| X | 107442901 | 107443234 | 107443067 | 35 | 39 | 1  | 19.17817386 | 4.29E-11    |          | ENSG00000189372 |
| X | 107465519 | 107465763 | 107465685 | 10 | 11 | 1  | 5.753452158 | 0.00215302  |          | ENSG00000189372 |
| X | 107529450 | 107529654 | 107529552 | 10 | 11 | 2  | 3.835634772 | 0.00800699  |          | ENSG00000189372 |
| X | 107646202 | 107646483 | 107646342 | 12 | 15 | 0  | 15.34253909 | 2.13E-05    | COL4A5   | ENSG00000188153 |
| X | 108183914 | 108184640 | 108184090 | 28 | 61 | 44 | 1.321163088 | 0.0752939   |          | ENSG00000208893 |
| X | 108893514 | 108894086 | 108893891 | 21 | 38 | 1  | 18.69871951 | 8.21E-11    | ACSL4    | ENSG00000068366 |
| X | 111443358 | 111443537 | 111443512 | 9  | 9  | 4  | 1.917817386 | 0.103282    |          | ENSG00000213534 |
| X | 112871330 | 112871584 | 112871469 | 8  | 10 | 4  | 2.109599125 | 0.0694668   |          | ENSG00000201674 |
| X | 113200880 | 113201193 | 113201036 | 16 | 20 | 0  | 20.13708255 | 7.37E-07    |          | ENSG00000212611 |
| X | 113401256 | 113401517 | 113401386 | 11 | 12 | 0  | 12.46581301 | 0.000159888 |          | ENSG00000219648 |
| X | 114734955 | 114735278 | 114735123 | 8  | 10 | 0  | 10.54799562 | 0.000613541 | PLS3     | ENSG00000102024 |
| X | 115768010 | 115768547 | 115768206 | 56 | 77 | 1  | 37.39743903 | 6.55E-22    |          | ENSG00000217238 |
| X | 116736153 | 116736447 | 116736295 | 13 | 14 | 0  | 14.3836304  | 4.17E-05    |          | ENSG00000200291 |
| X | 118085091 | 118085336 | 118085213 | 10 | 10 | 1  | 5.273997812 | 0.00391723  | KIAA1210 | ENSG00000175553 |
| X | 118199559 | 118199787 | 118199673 | 8  | 9  | 0  | 9.589086931 | 0.00120187  |          | ENSG00000217500 |
| X | 118477746 | 118478024 | 118477900 | 23 | 25 | 2  | 8.310542006 | 2.50E-06    | SLC25A5  | ENSG00000005022 |
| X | 118961617 | 118961924 | 118961779 | 8  | 10 | 4  | 2.109599125 | 0.0694668   | NKAP     | ENSG00000101882 |
| X | 119263066 | 119263316 | 119263218 | 10 | 12 | 1  | 6.232906505 | 0.00117736  | ZBTB33   | ENSG00000177485 |
| X | 119578734 | 119579039 | 119578879 | 8  | 12 | 4  | 2.493162602 | 0.0299057   | CUL4B    | ENSG00000158290 |
| X | 119621638 | 119621840 | 119621762 | 8  | 10 | 3  | 2.636998906 | 0.034203    | MCTS1    | ENSG00000101898 |
| X | 119975026 | 119975369 | 119975190 | 12 | 15 | 1  | 7.671269544 | 0.000187863 |          | ENSG00000215359 |
| X | 119975603 | 119975791 | 119975655 | 8  | 10 | 2  | 3.515998541 | 0.0136204   |          | ENSG00000215359 |
| X | 120785021 | 120785240 | 120785161 | 9  | 10 | 0  | 10.54799562 | 0.000613541 |          | ENSG00000213498 |
| X | 121200381 | 121200657 | 121200519 | 15 | 15 | 1  | 7.671269544 | 0.000187863 |          | ENSG00000219462 |
| X | 122302506 | 122302714 | 122302609 | 8  | 9  | 3  | 2.397271733 | 0.0539397   | GRIA3    | ENSG00000125675 |
| X | 122393948 | 122394185 | 122394052 | 12 | 12 | 1  | 6.232906505 | 0.00117736  |          | ENSG00000179101 |

|   |           |           |           |    |    |    |             |             |          |                 |
|---|-----------|-----------|-----------|----|----|----|-------------|-------------|----------|-----------------|
| X | 122411857 | 122412040 | 122412006 | 9  | 10 | 3  | 2.636998906 | 0.034203    |          | ENSG00000179101 |
| X | 122764988 | 122765243 | 122765115 | 9  | 10 | 9  | 1.054799562 | 0.4492      |          | ENSG00000213737 |
| X | 122924665 | 122924872 | 122924768 | 8  | 10 | 4  | 2.109599125 | 0.0694668   | STAG2    | ENSG00000101972 |
| X | 123738122 | 123738373 | 123738256 | 10 | 12 | 0  | 12.46581301 | 0.000159888 |          | ENSG00000217069 |
| X | 128449922 | 128450296 | 128450126 | 9  | 14 | 1  | 7.191815198 | 0.00034761  | SMARCA1  | ENSG00000102038 |
| X | 128468386 | 128468710 | 128468548 | 23 | 28 | 0  | 27.8083521  | 3.40E-09    | SMARCA1  | ENSG00000102038 |
| X | 128567244 | 128567459 | 128567377 | 8  | 10 | 2  | 3.515998541 | 0.0136204   | APLN     | ENSG00000171388 |
| X | 128933830 | 128934044 | 128933917 | 8  | 10 | 1  | 5.273997812 | 0.00391723  | BCORL1   | ENSG00000085185 |
| X | 129127726 | 129128017 | 129127818 | 12 | 16 | 3  | 4.075361945 | 0.00173346  | AIFM1    | ENSG00000156709 |
| X | 130569552 | 130569929 | 130569758 | 22 | 29 | 1  | 14.3836304  | 2.72E-08    |          | ENSG00000219221 |
| X | 130792468 | 130792654 | 130792561 | 8  | 8  | 2  | 2.876726079 | 0.0381137   |          | ENSG00000220528 |
| X | 130807047 | 130807290 | 130807164 | 9  | 9  | 3  | 2.397271733 | 0.0539397   |          | ENSG00000220528 |
| X | 131150034 | 131150370 | 131150195 | 17 | 18 | 0  | 18.21926517 | 2.83E-06    | RAP2C    | ENSG00000123728 |
| X | 131291869 | 131292079 | 131291937 | 9  | 9  | 0  | 9.589086931 | 0.00120187  | MBNL3    | ENSG00000076770 |
| X | 131593397 | 131593616 | 131593497 | 9  | 10 | 0  | 10.54799562 | 0.000613541 |          | ENSG00000206900 |
| X | 131839879 | 131840290 | 131840094 | 65 | 82 | 0  | 79.58942152 | 5.79E-25    |          | ENSG00000218958 |
| X | 132238671 | 132238856 | 132238776 | 8  | 9  | 1  | 4.794543465 | 0.00708517  |          | ENSG00000202199 |
| X | 132405968 | 132406251 | 132406102 | 11 | 11 | 1  | 5.753452158 | 0.00215302  | GPC4     | ENSG00000076716 |
| X | 132748108 | 132748455 | 132748281 | 30 | 34 | 0  | 33.56180426 | 6.02E-11    |          | ENSG00000219153 |
| X | 134385141 | 134385467 | 134385314 | 10 | 13 | 0  | 13.4247217  | 8.16E-05    | NCRNA000 | ENSG00000178947 |
| X | 134482172 | 134482392 | 134482286 | 8  | 8  | 2  | 2.876726079 | 0.0381137   | DDX26B   | ENSG00000165359 |
| X | 135782042 | 135782248 | 135782182 | 8  | 9  | 4  | 1.917817386 | 0.103282    |          | ENSG00000206979 |
| X | 136211829 | 136212190 | 136212038 | 10 | 15 | 0  | 15.34253909 | 2.13E-05    |          | ENSG00000217721 |
| X | 136347919 | 136348303 | 136348095 | 53 | 59 | 39 | 1.43836304  | 0.0353964   |          | ENSG00000134598 |
| X | 136443828 | 136444007 | 136443934 | 8  | 8  | 0  | 8.630178238 | 0.00235436  | ZIC3     | ENSG00000156925 |
| X | 136994876 | 136995273 | 136995077 | 25 | 35 | 1  | 17.26035648 | 5.72E-10    |          | ENSG00000208536 |
| X | 137680574 | 137680825 | 137680699 | 11 | 11 | 1  | 5.753452158 | 0.00215302  | FGF13    | ENSG00000129682 |
| X | 138590217 | 138590545 | 138590371 | 18 | 23 | 2  | 7.671269544 | 8.30E-06    | MCF2     | ENSG00000101977 |
| X | 139871292 | 139871580 | 139871435 | 10 | 12 | 4  | 2.493162602 | 0.0299057   |          | ENSG00000221081 |
| X | 139907359 | 139907694 | 139907525 | 11 | 13 | 0  | 13.4247217  | 8.16E-05    | SPANXF1  | ENSG00000198820 |
| X | 140168913 | 140169199 | 140169064 | 12 | 13 | 0  | 13.4247217  | 8.16E-05    | SPANXC   | ENSG00000198573 |
| X | 141166040 | 141166240 | 141166140 | 8  | 8  | 1  | 4.315089119 | 0.0127267   | MAGEC2   | ENSG00000046774 |
| X | 148400654 | 148400912 | 148400799 | 9  | 11 | 2  | 3.835634772 | 0.00800699  | IDS      | ENSG00000010404 |
| X | 148996321 | 148996666 | 148996493 | 12 | 18 | 0  | 18.21926517 | 2.83E-06    |          | ENSG00000183171 |



|   |           |           |           |    |    |    |             |             |        |                 |
|---|-----------|-----------|-----------|----|----|----|-------------|-------------|--------|-----------------|
| X | 149613520 | 149613750 | 149613613 | 8  | 11 | 4  | 2.301380863 | 0.0459276   | MTMR1  | ENSG00000063601 |
| X | 150462851 | 150463409 | 150463030 | 68 | 83 | 0  | 80.54833022 | 2.96E-25    | PASD1  | ENSG00000166049 |
| X | 150895233 | 150895486 | 150895328 | 9  | 12 | 0  | 12.46581301 | 0.000159888 | GABRE  | ENSG00000102287 |
| X | 151815000 | 151815200 | 151815100 | 8  | 9  | 1  | 4.794543465 | 0.00708517  | ZNF185 | ENSG00000147394 |
| X | 152318911 | 152319090 | 152319000 | 8  | 8  | 0  | 8.630178238 | 0.00235436  |        | ENSG00000214897 |
| X | 152359901 | 152360361 | 152360159 | 57 | 77 | 4  | 14.95897561 | 1.77E-18    | TREX2  | ENSG00000183479 |
| X | 152697435 | 152697719 | 152697577 | 12 | 14 | 1  | 7.191815198 | 0.00034761  | SRPK3  | ENSG00000184343 |
| X | 153255092 | 153255439 | 153255265 | 11 | 17 | 4  | 3.452071295 | 0.00292757  | FLNA   | ENSG00000196924 |
| X | 153279677 | 153279907 | 153279797 | 10 | 11 | 6  | 1.643843474 | 0.137712    | RPL10  | ENSG00000147403 |
| X | 153408107 | 153408909 | 153408611 | 27 | 64 | 8  | 6.925451672 | 5.29E-12    | FAM3A  | ENSG00000071889 |
| X | 153722327 | 153722533 | 153722487 | 8  | 8  | 2  | 2.876726079 | 0.0381137   |        | ENSG00000203870 |
| X | 153907973 | 153908170 | 153908071 | 9  | 9  | 2  | 3.19636231  | 0.0229249   | FUNDC2 | ENSG00000165775 |
| X | 154703082 | 154703436 | 154703257 | 19 | 24 | 1  | 11.98635866 | 6.63E-07    |        | ENSG00000219128 |
| X | 154831946 | 154832319 | 154832110 | 8  | 14 | 1  | 7.191815198 | 0.00034761  |        | ENSG00000220501 |
| X | 154851031 | 154851516 | 154851122 | 16 | 26 | 1  | 12.94526736 | 1.86E-07    |        | ENSG00000220501 |
| Y | 10629112  | 10629718  | 10629392  | 53 | 81 | 56 | 1.379482681 | 0.0296081   |        | ENSG00000219584 |
| Y | 10629906  | 10630111  | 10629944  | 17 | 17 | 11 | 1.43836304  | 0.15834     |        | ENSG00000219584 |
| Y | 10630483  | 10630820  | 10630651  | 32 | 36 | 24 | 1.419184866 | 0.0845096   |        | ENSG00000219584 |
| Y | 10631122  | 10631450  | 10631286  | 9  | 12 | 11 | 1.038817751 | 0.460341    |        | ENSG00000218597 |
| Y | 10632296  | 10632638  | 10632464  | 40 | 42 | 33 | 1.212737465 | 0.197889    |        | ENSG00000218597 |
| Y | 10632749  | 10633542  | 10633366  | 31 | 54 | 29 | 1.757999271 | 0.00531833  |        | ENSG00000218597 |
| Y | 10633954  | 10634282  | 10634111  | 10 | 13 | 15 | 0.839045106 | 0.685928    |        | ENSG00000218597 |
| Y | 10634759  | 10634940  | 10634790  | 8  | 8  | 6  | 1.232882605 | 0.333038    |        | ENSG00000218597 |
| Y | 10635026  | 10635409  | 10635233  | 28 | 36 | 31 | 1.108738176 | 0.332755    |        | ENSG00000218597 |
| Y | 10636500  | 10636907  | 10636728  | 16 | 25 | 15 | 1.558226626 | 0.0760878   |        | ENSG00000218597 |
| Y | 10636955  | 10637136  | 10636986  | 10 | 10 | 5  | 1.757999271 | 0.121253    |        | ENSG00000218597 |
| Y | 10637390  | 10637716  | 10637553  | 18 | 18 | 21 | 0.828148417 | 0.728078    |        | ENSG00000218597 |
| Y | 10639371  | 10639833  | 10639655  | 54 | 74 | 55 | 1.284252714 | 0.0764813   |        | ENSG00000218597 |
| Y | 10641232  | 10641607  | 10641428  | 23 | 31 | 16 | 1.805004599 | 0.0209486   |        | ENSG00000218597 |
| Y | 10641700  | 10642155  | 10641986  | 19 | 27 | 15 | 1.678090213 | 0.0444653   |        | ENSG00000221022 |
| Y | 10643360  | 10643565  | 10643536  | 26 | 26 | 17 | 1.43836304  | 0.111326    |        | ENSG00000221022 |
| Y | 10644886  | 10645634  | 10645076  | 32 | 56 | 50 | 1.07172148  | 0.358565    |        | ENSG00000223068 |
| Y | 10645749  | 10646295  | 10646116  | 27 | 44 | 37 | 1.135549768 | 0.280189    |        | ENSG00000219313 |
| Y | 10646402  | 10646726  | 10646564  | 11 | 14 | 8  | 1.598181155 | 0.124586    |        | ENSG00000219313 |

|   |          |          |          |    |    |    |             |            |                 |
|---|----------|----------|----------|----|----|----|-------------|------------|-----------------|
| Y | 10647619 | 10648029 | 10647853 | 59 | 71 | 53 | 1.278544924 | 0.0842368  | ENSG00000222088 |
| Y | 11243325 | 11243655 | 11243490 | 25 | 25 | 9  | 2.493162602 | 0.00432225 |                 |
| Y | 11247680 | 11248012 | 11247846 | 22 | 23 | 23 | 0.958908693 | 0.557483   |                 |
| Y | 11913427 | 11913782 | 11913603 | 15 | 19 | 14 | 1.278544924 | 0.231514   | ENSG00000206163 |
| Y | 11918271 | 11918611 | 11918441 | 24 | 24 | 16 | 1.410159843 | 0.132195   | ENSG00000206163 |
| Y | 11919519 | 11919847 | 11919683 | 10 | 10 | 9  | 1.054799562 | 0.4492     | ENSG00000206163 |
| Y | 11920187 | 11920505 | 11920346 | 11 | 12 | 7  | 1.558226626 | 0.152813   | ENSG00000206163 |
| Y | 11920729 | 11921393 | 11920907 | 30 | 67 | 47 | 1.358453982 | 0.0501337  | ENSG00000206163 |
| Y | 11924459 | 11924771 | 11924615 | 13 | 17 | 15 | 1.07877228  | 0.410615   | ENSG00000206161 |
| Y | 11924972 | 11925413 | 11925141 | 9  | 17 | 14 | 1.150690432 | 0.340986   | ENSG00000206161 |
| Y | 11926373 | 11926999 | 11926829 | 13 | 23 | 7  | 2.876726079 | 0.00239423 | ENSG00000206161 |
| Y | 11927335 | 11927633 | 11927484 | 11 | 15 | 9  | 1.534253909 | 0.136498   | ENSG00000206161 |
| Y | 11927684 | 11928277 | 11927863 | 16 | 35 | 42 | 0.802807278 | 0.835974   | ENSG00000206161 |
| Y | 11928320 | 11928549 | 11928460 | 10 | 12 | 9  | 1.246581301 | 0.295061   | ENSG00000206161 |
| Y | 11936421 | 11936743 | 11936582 | 9  | 12 | 13 | 0.890415215 | 0.619237   | ENSG00000217642 |
| Y | 11941476 | 11941715 | 11941556 | 11 | 13 | 26 | 0.497211915 | 0.986172   | ENSG00000217642 |
| Y | 11941766 | 11942490 | 11941945 | 14 | 39 | 40 | 0.935520676 | 0.61788    | ENSG00000217642 |
| Y | 11944343 | 11944925 | 11944747 | 35 | 52 | 26 | 1.882302249 | 0.00285253 | ENSG00000217642 |
| Y | 11945263 | 11945613 | 11945438 | 44 | 47 | 48 | 0.939339128 | 0.620982   | ENSG00000217642 |
| Y | 11948727 | 11948922 | 11948884 | 11 | 12 | 7  | 1.558226626 | 0.152813   | ENSG00000217642 |
| Y | 11949779 | 11950098 | 11949956 | 14 | 18 | 13 | 1.301376083 | 0.22245    | ENSG00000217642 |
| Y | 12110661 | 12110990 | 12110825 | 12 | 12 | 13 | 0.890415215 | 0.619237   | ENSG00000183704 |
| Y | 12128531 | 12128860 | 12128695 | 19 | 19 | 14 | 1.278544924 | 0.231514   | ENSG00000183704 |
| Y | 12142787 | 12143116 | 12142951 | 9  | 9  | 5  | 1.598181155 | 0.170911   | ENSG00000183704 |
| Y | 12312123 | 12312452 | 12312287 | 15 | 17 | 14 | 1.150690432 | 0.340986   | ENSG00000220799 |
| Y | 12314550 | 12315022 | 12314847 | 20 | 25 | 14 | 1.662108401 | 0.053254   | ENSG00000220799 |
| Y | 12319954 | 12320436 | 12320259 | 14 | 20 | 23 | 0.839045106 | 0.722898   | ENSG00000220799 |
| Y | 12323478 | 12323862 | 12323706 | 17 | 25 | 25 | 0.958908693 | 0.559837   | ENSG00000220799 |
| Y | 12327789 | 12328118 | 12327953 | 14 | 14 | 13 | 1.027402171 | 0.469541   | ENSG00000220799 |
| Y | 12334101 | 12334430 | 12334265 | 12 | 14 | 23 | 0.599317933 | 0.944443   | ENSG00000220799 |
| Y | 12341551 | 12341877 | 12341714 | 8  | 8  | 7  | 1.07877228  | 0.435076   | ENSG00000220799 |
| Y | 12361513 | 12361839 | 12361676 | 10 | 10 | 18 | 0.555157664 | 0.945639   | ENSG00000220799 |
| Y | 12372445 | 12372776 | 12372610 | 26 | 27 | 23 | 1.118726809 | 0.34127    | ENSG00000220799 |
| Y | 12372957 | 12373297 | 12373127 | 33 | 33 | 34 | 0.931511302 | 0.615909   | ENSG00000220799 |

|      |          |          |          |    |    |    |             |          |                 |
|------|----------|----------|----------|----|----|----|-------------|----------|-----------------|
| Y    | 27209320 | 27209649 | 27209484 | 11 | 12 | 9  | 1.246581301 | 0.295061 | ENSG00000219871 |
| Y    | 57381663 | 57381994 | 57381828 | 38 | 38 | 31 | 1.16866997  | 0.254509 | ENSG00000217042 |
| Y    | 57384491 | 57384700 | 57384575 | 9  | 10 | 10 | 0.958908693 | 0.538751 | ENSG00000217042 |
| Y    | 57386591 | 57386817 | 57386704 | 8  | 10 | 10 | 0.958908693 | 0.538751 | ENSG00000217042 |
| Y    | 57394832 | 57395198 | 57395026 | 14 | 18 | 15 | 1.138704073 | 0.348127 | ENSG00000217042 |
| Y    | 57406449 | 57406632 | 57406487 | 10 | 10 | 8  | 1.171999514 | 0.35773  | ENSG00000217042 |
| Y    | 57411169 | 57411469 | 57411326 | 10 | 14 | 8  | 1.598181155 | 0.124586 | ENSG00000217042 |
| Y    | 57426501 | 57426764 | 57426636 | 9  | 10 | 5  | 1.757999271 | 0.121253 | ENSG00000217042 |
| c6_Q | 31429265 | 31429665 | 31429489 | 35 | 40 | 1  | 19.65762821 | 2.24E-11 | ENSG00000219118 |
| c6_Q | 31437987 | 31438180 | 31438144 | 26 | 26 | 0  | 25.89053471 | 1.31E-08 | ENSG00000206450 |
