# Supplementary material for: Insights into p53 transcriptional function via genome-wide chromatin occupancy and gene expression analysis
Source: PubMed Central journal article supplement — Cell Death Differ. 2012 Jul 13;19(12):1992–2002. doi: 10.1038/cdd.2012.89 (PMC3504713; doi:10.1038/cdd.2012.89), 2012-07-13
Supplement: cdd201289x6.pdf [file cdd201289x6.pdf]

| chr | start   | end     | maximum | p53<br>Height | p53<br>Area | IgG | Ratio p53/IgG | P-Value     | Gene<br>Symbol | Ensemble<br>name |
|-----|---------|---------|---------|---------------|-------------|-----|---------------|-------------|----------------|------------------|
| 1   | 557273  | 557605  | 557439  | 13            | 13          | 28  | 0.56629944    | 0.965798    |                | ENSG00000209350  |
| 1   | 559622  | 559962  | 559792  | 21            | 21          | 54  | 0.469219536   | 0.999213    |                | ENSG00000212678  |
| 1   | 846502  | 846716  | 846555  | 8             | 8           | 0   | 10.55743955   | 0.000925496 | SAMD11         | ENSG00000187634  |
| 1   | 998957  | 999257  | 999107  | 9             | 13          | 3   | 4.105670938   | 0.00243034  |                | ENSG00000217801  |
| 1   | 999404  | 999647  | 999513  | 9             | 10          | 0   | 12.90353723   | 0.000195991 |                | ENSG00000217801  |
| 1   | 1176117 | 1176529 | 1176296 | 17            | 26          | 3   | 7.918079665   | 5.55E-07    | FAM132A        | ENSG00000184163  |
| 1   | 1827625 | 1827845 | 1827754 | 11            | 12          | 2   | 5.083211637   | 0.00143337  | CALML6         | ENSG00000169885  |
| 1   | 1828778 | 1829125 | 1828951 | 21            | 25          | 1   | 15.24963491   | 2.59E-08    | CALML6         | ENSG00000169885  |
| 1   | 1881428 | 1881611 | 1881542 | 9             | 9           | 1   | 5.865244197   | 0.00272497  | C1orf222       | ENSG00000205073  |
| 1   | 3266116 | 3266362 | 3266219 | 8             | 9           | 1   | 5.865244197   | 0.00272497  | ARHGEF16       | ENSG00000130762  |
| 1   | 3575269 | 3575556 | 3575412 | 12            | 13          | 3   | 4.105670938   | 0.00243034  | TP73           | ENSG00000078900  |
| 1   | 3807046 | 3807247 | 3807146 | 8             | 9           | 2   | 3.910162798   | 0.00955088  | C1orf174       | ENSG00000198912  |
| 1   | 5043778 | 5043979 | 5043878 | 8             | 8           | 0   | 10.55743955   | 0.000925496 | AJAP1          | ENSG00000196581  |
| 1   | 6056814 | 6057267 | 6056990 | 21            | 30          | 1   | 18.18225701   | 6.30E-10    | KCNAB2         | ENSG00000069424  |
| 1   | 6182234 | 6182485 | 6182359 | 8             | 10          | 2   | 4.301179077   | 0.00512919  | RPL22          | ENSG00000116251  |
| 1   | 6202980 | 6203235 | 6203107 | 9             | 9           | 2   | 3.910162798   | 0.00955088  | RNF207         | ENSG00000158286  |
| 1   | 6395632 | 6395911 | 6395793 | 12            | 12          | 1   | 7.624817456   | 0.000332769 | HES2           | ENSG00000069812  |
| 1   | 6397056 | 6397785 | 6397318 | 61            | 105         | 0   | 124.343177    | 1.86E-36    | HES2           | ENSG00000069812  |
| 1   | 6506271 | 6506514 | 6506392 | 8             | 11          | 1   | 7.038293036   | 0.000674435 | PLEKHG5        | ENSG00000171680  |
| 1   | 6596174 | 6596376 | 6596275 | 10            | 11          | 1   | 7.038293036   | 0.000674435 | PHF13          | ENSG00000116273  |
| 1   | 6872568 | 6872815 | 6872691 | 9             | 10          | 3   | 3.225884308   | 0.0139466   |                | ENSG00000219260  |
| 1   | 7208154 | 7208360 | 7208264 | 8             | 8           | 1   | 5.278719777   | 0.00542188  |                | ENSG00000207056  |
| 1   | 8000225 | 8000451 | 8000346 | 11            | 13          | 3   | 4.105670938   | 0.00243034  | ERRFI1         | ENSG00000116285  |
| 1   | 8043956 | 8044151 | 8044102 | 8             | 8           | 3   | 2.639359888   | 0.0415794   |                | ENSG00000219182  |
| 1   | 8053027 | 8053326 | 8053178 | 9             | 12          | 2   | 5.083211637   | 0.00143337  |                | ENSG00000219182  |
| 1   | 8653107 | 8653439 | 8653273 | 9             | 12          | 2   | 5.083211637   | 0.00143337  |                | ENSG00000218821  |
| 1   | 8886576 | 8886812 | 8886694 | 10            | 12          | 3   | 3.812408728   | 0.004404    |                | ENSG00000220443  |
| 1   | 8894246 | 8894427 | 8894336 | 8             | 8           | 2   | 3.519146518   | 0.017558    |                | ENSG00000218059  |
| 1   | 9164065 | 9164387 | 9164226 | 13            | 19          | 3   | 5.865244197   | 5.72E-05    |                | ENSG00000207865  |
| 1   | 9164404 | 9165205 | 9164864 | 105           | 190         | 2   | 74.68410944   | 2.27E-61    |                | ENSG00000207865  |
| 1   | 9609717 | 9609957 | 9609842 | 8             | 10          | 0   | 12.90353723   | 0.000195991 | PIK3CD         | ENSG00000171608  |
| 1   | 9808236 | 9808457 | 9808346 | 8             | 10          | 1   | 6.451768616   | 0.00135978  | CLSTN1         | ENSG00000171603  |

|   |          |          |          |    |    |    |             |             |          |                 |
|---|----------|----------|----------|----|----|----|-------------|-------------|----------|-----------------|
| 1 | 9808556  | 9808736  | 9808646  | 8  | 8  | 0  | 10.55743955 | 0.000925496 | CLSTN1   | ENSG00000171603 |
| 1 | 9826206  | 9826504  | 9826359  | 12 | 13 | 3  | 4.105670938 | 0.00243034  | CLSTN1   | ENSG00000171603 |
| 1 | 9857559  | 9857739  | 9857649  | 8  | 8  | 4  | 2.111487911 | 0.0804809   | CTNNBIP1 | ENSG00000178585 |
| 1 | 9873817  | 9874117  | 9873994  | 9  | 12 | 2  | 5.083211637 | 0.00143337  | CTNNBIP1 | ENSG00000178585 |
| 1 | 9925985  | 9926187  | 9926086  | 8  | 9  | 2  | 3.910162798 | 0.00955088  | NMNAT1   | ENSG00000173614 |
| 1 | 9933102  | 9933356  | 9933229  | 11 | 12 | 1  | 7.624817456 | 0.000332769 |          | ENSG00000202415 |
| 1 | 10065798 | 10066114 | 10065956 | 19 | 21 | 0  | 25.80707446 | 3.84E-08    | UBE4B    | ENSG00000130939 |
| 1 | 10152016 | 10152242 | 10152129 | 8  | 8  | 0  | 10.55743955 | 0.000925496 |          | ENSG00000201746 |
| 1 | 10192308 | 10192502 | 10192405 | 8  | 8  | 3  | 2.639359888 | 0.0415794   | KIF1B    | ENSG00000054523 |
| 1 | 10382109 | 10382369 | 10382264 | 8  | 8  | 0  | 10.55743955 | 0.000925496 | PGD      | ENSG00000142657 |
| 1 | 10493639 | 10493867 | 10493753 | 12 | 13 | 2  | 5.474227917 | 0.000747844 | PEX14    | ENSG00000142655 |
| 1 | 10706915 | 10707138 | 10707026 | 11 | 11 | 3  | 3.519146518 | 0.00788869  | CASZ1    | ENSG00000130940 |
| 1 | 10726732 | 10727152 | 10726987 | 17 | 23 | 0  | 28.15317214 | 8.13E-09    | CASZ1    | ENSG00000130940 |
| 1 | 10727207 | 10727533 | 10727370 | 23 | 25 | 0  | 30.49926982 | 1.72E-09    | CASZ1    | ENSG00000130940 |
| 1 | 10759192 | 10759450 | 10759296 | 12 | 13 | 0  | 16.42268375 | 1.91E-05    | CASZ1    | ENSG00000130940 |
| 1 | 10779213 | 10779512 | 10779362 | 14 | 14 | 4  | 3.519146518 | 0.00361132  | CASZ1    | ENSG00000130940 |
| 1 | 10873485 | 10873736 | 10873598 | 8  | 10 | 2  | 4.301179077 | 0.00512919  |          | ENSG00000217499 |
| 1 | 10892477 | 10892704 | 10892590 | 9  | 9  | 2  | 3.910162798 | 0.00955088  |          | ENSG00000217499 |
| 1 | 10995089 | 10995278 | 10995135 | 8  | 8  | 2  | 3.519146518 | 0.017558    | TARDBP   | ENSG00000120948 |
| 1 | 11062887 | 11063106 | 11062996 | 9  | 9  | 3  | 2.932622098 | 0.0242899   | EXOSC10  | ENSG00000171824 |
| 1 | 11245225 | 11245582 | 11245390 | 12 | 16 | 2  | 6.647276756 | 0.000101928 | FRAP1    | ENSG00000198793 |
| 1 | 11633003 | 11633266 | 11633168 | 9  | 10 | 1  | 6.451768616 | 0.00135978  | FBXO44   | ENSG00000132879 |
| 1 | 11890879 | 11891616 | 11891069 | 13 | 33 | 16 | 2.346097679 | 0.00141036  |          | ENSG00000199347 |
| 1 | 11892295 | 11892667 | 11892557 | 8  | 14 | 4  | 3.519146518 | 0.00361132  |          | ENSG00000201801 |
| 1 | 12189720 | 12190224 | 12189927 | 46 | 68 | 0  | 80.94036991 | 5.52E-24    |          | ENSG00000219226 |
| 1 | 12214827 | 12215206 | 12214857 | 9  | 16 | 4  | 3.988366054 | 0.00115141  | VPS13D   | ENSG00000048707 |
| 1 | 12467984 | 12468174 | 12468086 | 8  | 8  | 1  | 5.278719777 | 0.00542188  |          | ENSG00000209463 |
| 1 | 12600894 | 12601444 | 12601083 | 32 | 46 | 1  | 27.56664772 | 3.79E-15    | DHRS3    | ENSG00000162496 |
| 1 | 12601636 | 12601860 | 12601749 | 8  | 9  | 2  | 3.910162798 | 0.00955088  | DHRS3    | ENSG00000162496 |
| 1 | 12623151 | 12623439 | 12623305 | 13 | 16 | 0  | 19.94183027 | 1.86E-06    | AADA4L4  | ENSG00000204518 |
| 1 | 14623726 | 14623980 | 14623850 | 8  | 9  | 2  | 3.910162798 | 0.00955088  |          | ENSG00000189337 |
| 1 | 14932240 | 14932521 | 14932380 | 11 | 11 | 1  | 7.038293036 | 0.000674435 |          | ENSG00000203390 |
| 1 | 15094084 | 15094368 | 15094226 | 9  | 12 | 2  | 5.083211637 | 0.00143337  |          | ENSG00000189337 |
| 1 | 15106499 | 15106889 | 15106712 | 21 | 26 | 0  | 31.67231866 | 7.93E-10    |          | ENSG00000189337 |

|   |          |          |          |    |    |    |             |             |           |                 |
|---|----------|----------|----------|----|----|----|-------------|-------------|-----------|-----------------|
| 1 | 15245559 | 15245913 | 15245736 | 12 | 17 | 0  | 21.11487911 | 8.57E-07    |           | ENSG00000189337 |
| 1 | 15352011 | 15352212 | 15352094 | 9  | 10 | 0  | 12.90353723 | 0.000195991 | TMEM51    | ENSG00000171729 |
| 1 | 15399677 | 15399870 | 15399762 | 8  | 10 | 1  | 6.451768616 | 0.00135978  |           | ENSG00000215720 |
| 1 | 15502227 | 15502545 | 15502376 | 11 | 14 | 1  | 8.797866295 | 8.00E-05    | FHAD1     | ENSG00000142621 |
| 1 | 15503763 | 15503942 | 15503852 | 8  | 8  | 3  | 2.639359888 | 0.0415794   | FHAD1     | ENSG00000142621 |
| 1 | 15599757 | 15600138 | 15599959 | 13 | 20 | 0  | 24.63402563 | 8.35E-08    | EFHD2     | ENSG00000142634 |
| 1 | 15816253 | 15816439 | 15816294 | 8  | 9  | 0  | 11.73048839 | 0.000425898 | DDI2      | ENSG00000197312 |
| 1 | 15999386 | 15999956 | 15999787 | 11 | 23 | 2  | 9.384390715 | 8.25E-07    |           | ENSG00000197883 |
| 1 | 16035057 | 16035294 | 16035175 | 8  | 9  | 3  | 2.932622098 | 0.0242899   |           | ENSG00000216318 |
| 1 | 16048435 | 16048623 | 16048529 | 8  | 8  | 1  | 5.278719777 | 0.00542188  |           | ENSG00000179743 |
| 1 | 16351580 | 16351825 | 16351702 | 8  | 8  | 2  | 3.519146518 | 0.017558    | EPHA2     | ENSG00000142627 |
| 1 | 16383680 | 16384089 | 16383910 | 48 | 59 | 1  | 35.19146518 | 1.99E-19    | ARHGEF19  | ENSG00000142632 |
| 1 | 16566007 | 16566332 | 16566181 | 16 | 21 | 3  | 6.451768616 | 1.56E-05    | C1orf144  | ENSG00000055070 |
| 1 | 16639532 | 16639844 | 16639688 | 11 | 13 | 7  | 2.052835469 | 0.046392    | NECAP2    | ENSG00000157191 |
| 1 | 16712966 | 16713326 | 16713162 | 22 | 28 | 14 | 2.267894423 | 0.00376222  |           | ENSG00000206652 |
| 1 | 16758752 | 16759378 | 16758980 | 58 | 80 | 0  | 95.01695598 | 4.98E-28    |           | ENSG00000209524 |
| 1 | 16807308 | 16807631 | 16807469 | 11 | 14 | 2  | 5.865244197 | 0.000387308 | NBPF1     | ENSG00000179571 |
| 1 | 16812435 | 16812972 | 16812793 | 14 | 27 | 12 | 2.526566731 | 0.00187486  | NBPF1     | ENSG00000179571 |
| 1 | 16820154 | 16820406 | 16820280 | 9  | 10 | 6  | 1.843362462 | 0.0964212   | NBPF1     | ENSG00000179571 |
| 1 | 16843541 | 16843938 | 16843746 | 13 | 21 | 6  | 3.686724924 | 0.000453999 |           | ENSG00000186543 |
| 1 | 16877246 | 16877456 | 16877331 | 13 | 14 | 2  | 5.865244197 | 0.000387308 |           | ENSG00000188605 |
| 1 | 16926309 | 16926517 | 16926446 | 11 | 11 | 5  | 2.346097679 | 0.0364013   |           | ENSG00000209530 |
| 1 | 17095167 | 17095450 | 17095305 | 8  | 10 | 0  | 12.90353723 | 0.000195991 |           | ENSG00000207005 |
| 1 | 17104034 | 17104216 | 17104064 | 8  | 10 | 1  | 6.451768616 | 0.00135978  |           | ENSG00000207005 |
| 1 | 17104280 | 17104480 | 17104410 | 8  | 9  | 6  | 1.675784056 | 0.141978    |           | ENSG00000207005 |
| 1 | 17253041 | 17253375 | 17253214 | 11 | 14 | 2  | 5.865244197 | 0.000387308 | SDHB      | ENSG00000117118 |
| 1 | 17444422 | 17444655 | 17444538 | 9  | 10 | 0  | 12.90353723 | 0.000195991 | PADI3     | ENSG00000142619 |
| 1 | 17449892 | 17450141 | 17450039 | 8  | 10 | 0  | 12.90353723 | 0.000195991 | PADI3     | ENSG00000142619 |
| 1 | 17476894 | 17477236 | 17477084 | 13 | 17 | 3  | 5.278719777 | 0.000205462 | PADI3     | ENSG00000142619 |
| 1 | 17508618 | 17509143 | 17508937 | 22 | 32 | 3  | 9.677652924 | 9.12E-09    | PADI4     | ENSG00000159339 |
| 1 | 17611282 | 17611577 | 17611425 | 16 | 19 | 1  | 11.73048839 | 2.14E-06    | RCC2      | ENSG00000179051 |
| 1 | 17638994 | 17639306 | 17639165 | 9  | 10 | 0  | 12.90353723 | 0.000195991 | RCC2      | ENSG00000179051 |
| 1 | 17642629 | 17642843 | 17642736 | 10 | 10 | 2  | 4.301179077 | 0.00512919  | RCC2      | ENSG00000179051 |
| 1 | 17719223 | 17719493 | 17719317 | 12 | 15 | 2  | 6.256260476 | 0.000199274 | ARHGEF10L | ENSG00000074964 |

|   |          |          |          |    |    |   |             |             |           |                 |
|---|----------|----------|----------|----|----|---|-------------|-------------|-----------|-----------------|
| 1 | 17737435 | 17737742 | 17737569 | 8  | 10 | 8 | 1.433726359 | 0.209175    | ARHGEF10L | ENSG00000074964 |
| 1 | 18156885 | 18157271 | 18157062 | 19 | 25 | 2 | 10.16642327 | 2.02E-07    | ACTL8     | ENSG00000117148 |
| 1 | 18391986 | 18392407 | 18392205 | 12 | 20 | 0 | 24.63402563 | 8.35E-08    | IGSF21    | ENSG00000117154 |
| 1 | 18679977 | 18680273 | 18680122 | 10 | 12 | 2 | 5.083211637 | 0.00143337  | KLHDC7A   | ENSG00000179023 |
| 1 | 18865776 | 18865980 | 18865862 | 8  | 8  | 1 | 5.278719777 | 0.00542188  | PAX7      | ENSG00000009709 |
| 1 | 18867970 | 18868248 | 18868076 | 12 | 15 | 3 | 4.692195357 | 0.000718455 | PAX7      | ENSG00000009709 |
| 1 | 19197316 | 19197831 | 19197514 | 33 | 45 | 1 | 26.9801233  | 8.07E-15    | IFFO2     | ENSG00000169991 |
| 1 | 19210178 | 19210424 | 19210304 | 9  | 11 | 1 | 7.038293036 | 0.000674435 | IFFO2     | ENSG00000169991 |
| 1 | 19409359 | 19409646 | 19409467 | 8  | 12 | 1 | 7.624817456 | 0.000332769 | UBR4      | ENSG00000127481 |
| 1 | 19450411 | 19450602 | 19450490 | 9  | 10 | 2 | 4.301179077 | 0.00512919  | KIAA0090  | ENSG00000127463 |
| 1 | 20081074 | 20081489 | 20081310 | 11 | 18 | 1 | 11.14396397 | 4.44E-06    | OTUD3     | ENSG00000169914 |
| 1 | 20174034 | 20174251 | 20174139 | 9  | 10 | 0 | 12.90353723 | 0.000195991 |           | ENSG00000209591 |
| 1 | 20332631 | 20332997 | 20332805 | 17 | 21 | 0 | 25.80707446 | 3.84E-08    | PLA2G2F   | ENSG00000158786 |
| 1 | 20555993 | 20556276 | 20556134 | 10 | 12 | 4 | 3.049926982 | 0.0108184   | VWA5B1    | ENSG00000158816 |
| 1 | 20812799 | 20813172 | 20812978 | 13 | 19 | 0 | 23.46097679 | 1.81E-07    | PINK1     | ENSG00000158828 |
| 1 | 21082866 | 21083208 | 21083037 | 21 | 24 | 0 | 29.32622098 | 3.74E-09    | EIF4G3    | ENSG00000075151 |
| 1 | 21454310 | 21454590 | 21454450 | 11 | 12 | 7 | 1.906204364 | 0.0695918   | ECE1      | ENSG00000117298 |
| 1 | 21535008 | 21535227 | 21535117 | 8  | 9  | 5 | 1.955081399 | 0.0892323   | ECE1      | ENSG00000117298 |
| 1 | 21876221 | 21876400 | 21876383 | 8  | 8  | 1 | 5.278719777 | 0.00542188  | RAP1GAP   | ENSG00000076864 |
| 1 | 22154735 | 22155301 | 22155087 | 24 | 40 | 0 | 48.09500241 | 1.51E-14    | HSPG2     | ENSG00000142798 |
| 1 | 22155940 | 22156287 | 22156113 | 15 | 21 | 5 | 4.301179077 | 0.000172642 | HSPG2     | ENSG00000142798 |
| 1 | 22173771 | 22174149 | 22173973 | 25 | 32 | 0 | 38.7106117  | 7.53E-12    | ELA3B     | ENSG00000219073 |
| 1 | 22242292 | 22242612 | 22242452 | 27 | 31 | 5 | 6.256260476 | 3.74E-07    | CDC42     | ENSG00000070831 |
| 1 | 22547586 | 22547778 | 22547669 | 8  | 8  | 7 | 1.319679944 | 0.283403    |           | ENSG00000198137 |
| 1 | 22570041 | 22570220 | 22570108 | 8  | 8  | 1 | 5.278719777 | 0.00542188  |           | ENSG00000198137 |
| 1 | 22671718 | 22672121 | 22671881 | 18 | 25 | 3 | 7.624817456 | 1.09E-06    | ZBTB40    | ENSG00000184677 |
| 1 | 23016523 | 23016975 | 23016724 | 32 | 47 | 1 | 28.15317214 | 1.78E-15    | EPHB2     | ENSG00000133216 |
| 1 | 23218235 | 23218551 | 23218412 | 16 | 20 | 9 | 2.463402563 | 0.00689886  | AOF2      | ENSG00000004487 |
| 1 | 23576477 | 23576814 | 23576643 | 31 | 36 | 4 | 8.680561411 | 3.18E-09    |           | ENSG00000201405 |
| 1 | 23623869 | 23624331 | 23624048 | 16 | 24 | 0 | 29.32622098 | 3.74E-09    | TCEA3     | ENSG00000204219 |
| 1 | 23651035 | 23651481 | 23651241 | 14 | 23 | 3 | 7.038293036 | 4.15E-06    | TCEA3     | ENSG00000204219 |
| 1 | 23738839 | 23739170 | 23738999 | 11 | 15 | 4 | 3.753756286 | 0.0020497   | E2F2      | ENSG00000007968 |
| 1 | 23758250 | 23758578 | 23758414 | 9  | 13 | 3 | 4.105670938 | 0.00243034  | ID3       | ENSG00000117318 |
| 1 | 23784692 | 23785020 | 23784856 | 12 | 15 | 1 | 9.384390715 | 3.90E-05    | ID3       | ENSG00000117318 |

|   |          |          |          |     |     |   |             |             |          |                 |
|---|----------|----------|----------|-----|-----|---|-------------|-------------|----------|-----------------|
| 1 | 23791587 | 23792429 | 23791858 | 122 | 183 | 5 | 35.97349774 | 8.52E-55    | ID3      | ENSG00000117318 |
| 1 | 24156278 | 24156532 | 24156361 | 9   | 12  | 4 | 3.049926982 | 0.0108184   | PNRC2    | ENSG00000189266 |
| 1 | 24158031 | 24158408 | 24158188 | 11  | 16  | 5 | 3.323638378 | 0.00288759  | PNRC2    | ENSG00000189266 |
| 1 | 24158696 | 24158904 | 24158800 | 10  | 11  | 3 | 3.519146518 | 0.00788869  | PNRC2    | ENSG00000189266 |
| 1 | 24328365 | 24328654 | 24328516 | 10  | 13  | 1 | 8.211341875 | 0.000163445 | IL22RA1  | ENSG00000142677 |
| 1 | 24415501 | 24415696 | 24415598 | 8   | 9   | 0 | 11.73048839 | 0.000425898 |          | ENSG00000221054 |
| 1 | 24482863 | 24483207 | 24483035 | 12  | 18  | 5 | 3.714654658 | 0.000961539 | GRHL3    | ENSG00000158055 |
| 1 | 24518256 | 24518440 | 24518348 | 8   | 8   | 4 | 2.111487911 | 0.0804809   | GRHL3    | ENSG00000158055 |
| 1 | 24518508 | 24518985 | 24518622 | 12  | 22  | 6 | 3.854303329 | 0.000260696 | GRHL3    | ENSG00000158055 |
| 1 | 24614553 | 24614872 | 24614709 | 13  | 16  | 2 | 6.647276756 | 0.000101928 | NPAL3    | ENSG00000001461 |
| 1 | 24734944 | 24735152 | 24735082 | 8   | 9   | 1 | 5.865244197 | 0.00272497  | C1orf130 | ENSG00000184454 |
| 1 | 24793334 | 24793651 | 24793492 | 8   | 10  | 5 | 2.150589539 | 0.0575848   | C1orf130 | ENSG00000184454 |
| 1 | 25171324 | 25171762 | 25171543 | 63  | 78  | 3 | 23.16771458 | 3.38E-23    | RUNX3    | ENSG00000020633 |
| 1 | 25681382 | 25681606 | 25681494 | 8   | 8   | 0 | 10.55743955 | 0.000925496 | TMEM57   | ENSG00000204178 |
| 1 | 25995960 | 25996156 | 25996125 | 11  | 11  | 4 | 2.815317214 | 0.0183428   | SEPN1    | ENSG00000162430 |
| 1 | 26197292 | 26197611 | 26197471 | 8   | 12  | 1 | 7.624817456 | 0.000332769 | PAFAH2   | ENSG00000158006 |
| 1 | 26730308 | 26730678 | 26730454 | 8   | 14  | 4 | 3.519146518 | 0.00361132  | RPS6KA1  | ENSG00000117676 |
| 1 | 26819668 | 26820088 | 26819840 | 8   | 14  | 2 | 5.865244197 | 0.000387308 |          | ENSG00000217647 |
| 1 | 26820351 | 26820530 | 26820432 | 8   | 8   | 2 | 3.519146518 | 0.017558    |          | ENSG00000217647 |
| 1 | 26876615 | 26876880 | 26876774 | 8   | 10  | 1 | 6.451768616 | 0.00135978  | ARID1A   | ENSG00000117713 |
| 1 | 26891366 | 26891552 | 26891466 | 8   | 8   | 1 | 5.278719777 | 0.00542188  | ARID1A   | ENSG00000117713 |
| 1 | 26892130 | 26892432 | 26892264 | 10  | 13  | 6 | 2.346097679 | 0.0266147   | ARID1A   | ENSG00000117713 |
| 1 | 26894542 | 26894832 | 26894681 | 11  | 12  | 2 | 5.083211637 | 0.00143337  | ARID1A   | ENSG00000117713 |
| 1 | 27060320 | 27060757 | 27060559 | 29  | 46  | 1 | 27.56664772 | 3.79E-15    | SFN      | ENSG00000175793 |
| 1 | 27061920 | 27062151 | 27062062 | 9   | 9   | 1 | 5.865244197 | 0.00272497  | SFN      | ENSG00000175793 |
| 1 | 27064072 | 27064520 | 27064188 | 8   | 16  | 2 | 6.647276756 | 0.000101928 | SFN      | ENSG00000175793 |
| 1 | 27159444 | 27159625 | 27159534 | 8   | 8   | 7 | 1.319679944 | 0.283403    | C1orf172 | ENSG00000175707 |
| 1 | 27365535 | 27365756 | 27365645 | 12  | 12  | 0 | 15.24963491 | 4.15E-05    | SLC9A1   | ENSG00000090020 |
| 1 | 27540880 | 27541116 | 27540998 | 12  | 14  | 3 | 4.398933147 | 0.00132748  | SYTL1    | ENSG00000142765 |
| 1 | 27541981 | 27542324 | 27542152 | 23  | 25  | 1 | 15.24963491 | 2.59E-08    | SYTL1    | ENSG00000142765 |
| 1 | 27703303 | 27703510 | 27703427 | 8   | 8   | 1 | 5.278719777 | 0.00542188  | WASF2    | ENSG00000158195 |
| 1 | 27742005 | 27742216 | 27742091 | 8   | 8   | 0 | 10.55743955 | 0.000925496 | WASF2    | ENSG00000158195 |
| 1 | 28134174 | 28134396 | 28134285 | 9   | 11  | 4 | 2.815317214 | 0.0183428   | SMPDL3B  | ENSG00000130768 |
| 1 | 28396126 | 28396338 | 28396236 | 9   | 9   | 2 | 3.910162798 | 0.00955088  |          | ENSG00000215903 |

|   |          |          |          |    |     |   |             |             |          |                 |
|---|----------|----------|----------|----|-----|---|-------------|-------------|----------|-----------------|
| 1 | 28438178 | 28438559 | 28438380 | 10 | 17  | 0 | 21.11487911 | 8.57E-07    | ATPIF1   | ENSG00000130770 |
| 1 | 28440937 | 28441292 | 28441114 | 19 | 24  | 0 | 29.32622098 | 3.74E-09    | ATPIF1   | ENSG00000130770 |
| 1 | 28459225 | 28459768 | 28459404 | 29 | 44  | 3 | 13.19679944 | 1.95E-12    | SESN2    | ENSG00000130766 |
| 1 | 28491853 | 28492078 | 28491968 | 8  | 9   | 0 | 11.73048839 | 0.000425898 |          | ENSG00000209766 |
| 1 | 28551396 | 28551720 | 28551558 | 41 | 42  | 0 | 50.44110009 | 3.21E-15    | PHACTR4  | ENSG00000204138 |
| 1 | 28637098 | 28637285 | 28637218 | 8  | 8   | 2 | 3.519146518 | 0.017558    | PHACTR4  | ENSG00000204138 |
| 1 | 28705028 | 28705279 | 28705155 | 8  | 10  | 2 | 4.301179077 | 0.00512919  | RCC1     | ENSG00000180198 |
| 1 | 28751947 | 28752135 | 28752023 | 8  | 8   | 1 | 5.278719777 | 0.00542188  | TRNAU1AP | ENSG00000180098 |
| 1 | 28780736 | 28780958 | 28780838 | 8  | 10  | 6 | 1.843362462 | 0.0964212   | SNHG12   | ENSG00000197989 |
| 1 | 28842010 | 28842289 | 28842149 | 8  | 12  | 1 | 7.624817456 | 0.000332769 | TAF12    | ENSG00000120656 |
| 1 | 28847673 | 28848083 | 28847907 | 12 | 19  | 8 | 2.606775198 | 0.00583935  |          | ENSG00000209804 |
| 1 | 29081277 | 29081496 | 29081396 | 8  | 9   | 4 | 2.346097679 | 0.050148    |          | ENSG00000199756 |
| 1 | 29402031 | 29402300 | 29402165 | 9  | 11  | 5 | 2.346097679 | 0.0364013   | SFRS4    | ENSG00000116350 |
| 1 | 29438333 | 29438713 | 29438538 | 39 | 45  | 0 | 53.96024661 | 3.12E-16    | PTPRU    | ENSG00000060656 |
| 1 | 29578711 | 29578951 | 29578831 | 11 | 11  | 3 | 3.519146518 | 0.00788869  |          | ENSG00000219178 |
| 1 | 29955047 | 29955595 | 29955428 | 31 | 45  | 3 | 13.49006165 | 9.57E-13    |          | ENSG00000221126 |
| 1 | 30233189 | 30233410 | 30233299 | 13 | 14  | 1 | 8.797866295 | 8.00E-05    |          | ENSG00000222787 |
| 1 | 30663775 | 30664217 | 30663954 | 12 | 21  | 5 | 4.301179077 | 0.000172642 |          | ENSG00000217351 |
| 1 | 30666037 | 30666465 | 30666298 | 35 | 45  | 0 | 53.96024661 | 3.12E-16    |          | ENSG00000217351 |
| 1 | 30993465 | 30994113 | 30993753 | 73 | 111 | 2 | 43.79382333 | 3.37E-35    | LAPTM5   | ENSG00000162511 |
| 1 | 31052954 | 31053135 | 31053044 | 8  | 8   | 3 | 2.639359888 | 0.0415794   |          | ENSG00000222784 |
| 1 | 31069501 | 31069909 | 31069730 | 9  | 16  | 3 | 4.985457567 | 0.000385643 |          | ENSG00000222784 |
| 1 | 31310875 | 31311099 | 31310994 | 9  | 10  | 3 | 3.225884308 | 0.0139466   | PUM1     | ENSG00000134644 |
| 1 | 31416163 | 31416532 | 31416339 | 9  | 15  | 4 | 3.753756286 | 0.0020497   | NKAIN1   | ENSG00000084628 |
| 1 | 31417755 | 31417967 | 31417890 | 9  | 9   | 2 | 3.910162798 | 0.00955088  | NKAIN1   | ENSG00000084628 |
| 1 | 31542044 | 31542332 | 31542188 | 8  | 9   | 4 | 2.346097679 | 0.050148    | SNRNP40  | ENSG00000060688 |
| 1 | 31729014 | 31729206 | 31729110 | 8  | 8   | 4 | 2.111487911 | 0.0804809   |          | ENSG00000215899 |
| 1 | 31939277 | 31939528 | 31939374 | 9  | 11  | 0 | 14.07658607 | 9.02E-05    | COL16A1  | ENSG00000084636 |
| 1 | 32003454 | 32003719 | 32003586 | 10 | 12  | 7 | 1.906204364 | 0.0695918   | BAI2     | ENSG00000121753 |
| 1 | 32026278 | 32026640 | 32026449 | 16 | 22  | 1 | 13.49006165 | 2.37E-07    | SPOCD1   | ENSG00000134668 |
| 1 | 32251556 | 32251824 | 32251690 | 8  | 11  | 3 | 3.519146518 | 0.00788869  | KHDRBS1  | ENSG00000121774 |
| 1 | 32300546 | 32300828 | 32300649 | 8  | 9   | 5 | 1.955081399 | 0.0892323   | TMEM39B  | ENSG00000121775 |
| 1 | 32997613 | 32997879 | 32997746 | 15 | 18  | 2 | 7.429309316 | 2.63E-05    | KIAA1522 | ENSG00000162522 |
| 1 | 33171874 | 33172096 | 33171960 | 9  | 10  | 3 | 3.225884308 | 0.0139466   |          | ENSG00000221423 |

|   |          |          |          |    |    |   |             |             |          |                 |
|---|----------|----------|----------|----|----|---|-------------|-------------|----------|-----------------|
| 1 | 33172255 | 33172526 | 33172390 | 17 | 19 | 6 | 3.351568112 | 0.00134187  |          | ENSG00000221423 |
| 1 | 33201925 | 33202151 | 33202025 | 11 | 11 | 0 | 14.07658607 | 9.02E-05    | RNF19B   | ENSG00000116514 |
| 1 | 33275102 | 33275345 | 33275211 | 9  | 9  | 0 | 11.73048839 | 0.000425898 | AK2      | ENSG00000004455 |
| 1 | 33458124 | 33458320 | 33458222 | 9  | 10 | 1 | 6.451768616 | 0.00135978  | TRIM62   | ENSG00000116525 |
| 1 | 33708757 | 33708960 | 33708862 | 8  | 10 | 0 | 12.90353723 | 0.000195991 | ZSCAN20  | ENSG00000121903 |
| 1 | 34226735 | 34227013 | 34226874 | 9  | 9  | 0 | 11.73048839 | 0.000425898 |          | ENSG00000201148 |
| 1 | 34637228 | 34637407 | 34637358 | 8  | 8  | 3 | 2.639359888 | 0.0415794   | C1orf94  | ENSG00000142698 |
| 1 | 34656362 | 34656566 | 34656449 | 8  | 10 | 0 | 12.90353723 | 0.000195991 | C1orf94  | ENSG00000142698 |
| 1 | 34980933 | 34981142 | 34981039 | 8  | 9  | 1 | 5.865244197 | 0.00272497  | GJB5     | ENSG00000189280 |
| 1 | 35184461 | 35184753 | 35184607 | 15 | 17 | 2 | 7.038293036 | 5.19E-05    | DLGAP3   | ENSG00000116544 |
| 1 | 35714323 | 35714527 | 35714480 | 9  | 9  | 0 | 11.73048839 | 0.000425898 |          | ENSG00000216751 |
| 1 | 35744166 | 35744474 | 35744320 | 8  | 13 | 1 | 8.211341875 | 0.000163445 |          | ENSG00000216751 |
| 1 | 36008108 | 36008318 | 36008170 | 9  | 9  | 3 | 2.932622098 | 0.0242899   | CLSPN    | ENSG00000092853 |
| 1 | 36121182 | 36121363 | 36121275 | 8  | 8  | 1 | 5.278719777 | 0.00542188  | EIF2C1   | ENSG00000092847 |
| 1 | 36326897 | 36327101 | 36326999 | 9  | 9  | 4 | 2.346097679 | 0.050148    | ADPRHL2  | ENSG00000116863 |
| 1 | 36387575 | 36388051 | 36387872 | 8  | 18 | 0 | 22.28792795 | 3.94E-07    | TRAPPC3  | ENSG00000054116 |
| 1 | 36496982 | 36497312 | 36497138 | 9  | 9  | 2 | 3.910162798 | 0.00955088  |          | ENSG00000218941 |
| 1 | 36507236 | 36507484 | 36507365 | 11 | 13 | 4 | 3.28453675  | 0.00629037  |          | ENSG00000218941 |
| 1 | 36659009 | 36659223 | 36659116 | 13 | 14 | 3 | 4.398933147 | 0.00132748  |          | ENSG00000201448 |
| 1 | 36675080 | 36675395 | 36675237 | 10 | 11 | 1 | 7.038293036 | 0.000674435 | C1orf102 | ENSG00000116885 |
| 1 | 36725270 | 36725505 | 36725387 | 8  | 8  | 2 | 3.519146518 | 0.017558    | CSF3R    | ENSG00000119535 |
| 1 | 36955323 | 36955520 | 36955443 | 8  | 8  | 2 | 3.519146518 | 0.017558    |          | ENSG00000220821 |
| 1 | 37276369 | 37276664 | 37276523 | 8  | 9  | 2 | 3.910162798 | 0.00955088  | GRIK3    | ENSG00000163873 |
| 1 | 37338577 | 37338985 | 37338767 | 49 | 61 | 0 | 72.72902804 | 1.26E-21    | GRIK3    | ENSG00000163873 |
| 1 | 37493712 | 37493985 | 37493848 | 10 | 11 | 0 | 14.07658607 | 9.02E-05    |          | ENSG00000210044 |
| 1 | 37722856 | 37723039 | 37722930 | 8  | 8  | 7 | 1.319679944 | 0.283403    |          | ENSG00000188904 |
| 1 | 38049378 | 38049605 | 38049491 | 8  | 10 | 5 | 2.150589539 | 0.0575848   | C1orf122 | ENSG00000197982 |
| 1 | 38072945 | 38073292 | 38073117 | 26 | 31 | 1 | 18.76878143 | 2.99E-10    |          | ENSG00000217771 |
| 1 | 38185143 | 38185531 | 38185352 | 21 | 29 | 0 | 35.19146518 | 7.73E-11    | INPP5B   | ENSG00000204084 |
| 1 | 38228134 | 38228644 | 38228433 | 20 | 29 | 4 | 7.038293036 | 3.41E-07    | SF3A3    | ENSG00000183431 |
| 1 | 38278914 | 38279103 | 38279008 | 8  | 8  | 2 | 3.519146518 | 0.017558    | POU3F1   | ENSG00000185668 |
| 1 | 38286109 | 38286411 | 38286284 | 14 | 18 | 2 | 7.429309316 | 2.63E-05    | POU3F1   | ENSG00000185668 |
| 1 | 38525431 | 38525868 | 38525599 | 16 | 23 | 4 | 5.630634429 | 1.63E-05    |          | ENSG00000200796 |
| 1 | 39111677 | 39111874 | 39111767 | 8  | 9  | 2 | 3.910162798 | 0.00955088  | MYCBP    | ENSG00000214114 |

|   |          |          |          |    |    |   |             |             |          |                 |
|---|----------|----------|----------|----|----|---|-------------|-------------|----------|-----------------|
| 1 | 39341964 | 39342184 | 39342040 | 8  | 9  | 2 | 3.910162798 | 0.00955088  |          | ENSG00000206654 |
| 1 | 39355516 | 39355724 | 39355621 | 8  | 10 | 1 | 6.451768616 | 0.00135978  |          | ENSG00000206654 |
| 1 | 39422009 | 39422229 | 39422118 | 8  | 8  | 2 | 3.519146518 | 0.017558    |          | ENSG00000210142 |
| 1 | 39584946 | 39585522 | 39585302 | 38 | 53 | 0 | 63.34463732 | 6.28E-19    | MACF1    | ENSG00000127603 |
| 1 | 39891287 | 39891466 | 39891376 | 8  | 8  | 0 | 10.55743955 | 0.000925496 | HEYL     | ENSG00000163909 |
| 1 | 40090455 | 40090704 | 40090577 | 10 | 11 | 2 | 4.692195357 | 0.00272444  | TRIT1    | ENSG00000043514 |
| 1 | 40215155 | 40215522 | 40215334 | 22 | 29 | 2 | 11.73048839 | 1.18E-08    |          | ENSG00000217900 |
| 1 | 40496154 | 40496489 | 40496321 | 9  | 14 | 2 | 5.865244197 | 0.000387308 | ZMPSTE24 | ENSG00000084073 |
| 1 | 40612747 | 40612997 | 40612907 | 8  | 11 | 0 | 14.07658607 | 9.02E-05    | SMAP2    | ENSG00000084070 |
| 1 | 40907243 | 40907438 | 40907358 | 9  | 9  | 3 | 2.932622098 | 0.0242899   | RIMS3    | ENSG00000117016 |
| 1 | 40929786 | 40929985 | 40929885 | 9  | 9  | 0 | 11.73048839 | 0.000425898 | NFYC     | ENSG00000066136 |
| 1 | 40949729 | 40950180 | 40949888 | 21 | 30 | 2 | 12.12150467 | 5.77E-09    | NFYC     | ENSG00000066136 |
| 1 | 41008117 | 41008386 | 41008220 | 19 | 21 | 1 | 12.90353723 | 4.95E-07    |          | ENSG00000207962 |
| 1 | 41137805 | 41138260 | 41137981 | 16 | 23 | 2 | 9.384390715 | 8.25E-07    | CITED4   | ENSG00000179862 |
| 1 | 41242044 | 41242233 | 41242138 | 8  | 9  | 3 | 2.932622098 | 0.0242899   | SLFNL1   | ENSG00000171790 |
| 1 | 41506546 | 41506763 | 41506654 | 10 | 10 | 4 | 2.580707446 | 0.0306059   |          | ENSG00000213987 |
| 1 | 41585688 | 41585941 | 41585833 | 9  | 10 | 5 | 2.150589539 | 0.0575848   | FOXO6    | ENSG00000204060 |
| 1 | 41657515 | 41657805 | 41657667 | 8  | 11 | 2 | 4.692195357 | 0.00272444  |          | ENSG00000210279 |
| 1 | 41712110 | 41712400 | 41712255 | 9  | 11 | 0 | 14.07658607 | 9.02E-05    |          | ENSG00000210279 |
| 1 | 41720503 | 41720880 | 41720701 | 45 | 53 | 7 | 7.918079665 | 4.10E-12    | EDN2     | ENSG00000127129 |
| 1 | 41854416 | 41854694 | 41854539 | 12 | 15 | 1 | 9.384390715 | 3.90E-05    |          | ENSG00000217547 |
| 1 | 41956699 | 41956946 | 41956822 | 9  | 9  | 0 | 11.73048839 | 0.000425898 | HIVEP3   | ENSG00000127124 |
| 1 | 42028220 | 42028572 | 42028396 | 10 | 13 | 6 | 2.346097679 | 0.0266147   | HIVEP3   | ENSG00000127124 |
| 1 | 42097362 | 42097581 | 42097471 | 9  | 9  | 1 | 5.865244197 | 0.00272497  | HIVEP3   | ENSG00000127124 |
| 1 | 42098507 | 42098787 | 42098647 | 11 | 13 | 4 | 3.28453675  | 0.00629037  | HIVEP3   | ENSG00000127124 |
| 1 | 42099761 | 42100003 | 42099882 | 12 | 14 | 4 | 3.519146518 | 0.00361132  | HIVEP3   | ENSG00000127124 |
| 1 | 42100089 | 42100383 | 42100235 | 17 | 20 | 8 | 2.737113958 | 0.0036449   | HIVEP3   | ENSG00000127124 |
| 1 | 42100974 | 42101207 | 42101096 | 8  | 9  | 3 | 2.932622098 | 0.0242899   | HIVEP3   | ENSG00000127124 |
| 1 | 42241761 | 42242032 | 42241891 | 11 | 13 | 0 | 16.42268375 | 1.91E-05    |          | ENSG00000216933 |
| 1 | 42404051 | 42404548 | 42404230 | 11 | 20 | 4 | 4.926805125 | 0.00010522  | GUCA2A   | ENSG00000197273 |
| 1 | 42412207 | 42412543 | 42412378 | 20 | 24 | 4 | 5.865244197 | 8.64E-06    | GUCA2A   | ENSG00000197273 |
| 1 | 42771375 | 42771914 | 42771554 | 22 | 35 | 4 | 8.445951643 | 6.26E-09    |          | ENSG00000186409 |
| 1 | 42896602 | 42896833 | 42896717 | 10 | 10 | 5 | 2.150589539 | 0.0575848   | PPIH     | ENSG00000171960 |
| 1 | 42960262 | 42960481 | 42960371 | 8  | 9  | 0 | 11.73048839 | 0.000425898 | CLDN19   | ENSG00000164007 |



|   |          |          |          |     |     |   |             |             |         |                 |
|---|----------|----------|----------|-----|-----|---|-------------|-------------|---------|-----------------|
| 1 | 43181526 | 43181766 | 43181635 | 12  | 13  | 2 | 5.474227917 | 0.000747844 | SLC2A1  | ENSG00000117394 |
| 1 | 43199926 | 43200130 | 43200081 | 8   | 8   | 7 | 1.319679944 | 0.283403    | SLC2A1  | ENSG00000117394 |
| 1 | 43230686 | 43230914 | 43230821 | 10  | 11  | 4 | 2.815317214 | 0.0183428   |         | ENSG00000207256 |
| 1 | 43259751 | 43260057 | 43259901 | 8   | 12  | 2 | 5.083211637 | 0.00143337  |         | ENSG00000207256 |
| 1 | 43391053 | 43391416 | 43391237 | 35  | 42  | 0 | 50.44110009 | 3.21E-15    | FAM183A | ENSG00000186973 |
| 1 | 43508412 | 43508591 | 43508474 | 8   | 8   | 2 | 3.519146518 | 0.017558    | TMEM125 | ENSG00000179178 |
| 1 | 43587006 | 43587243 | 43587124 | 8   | 8   | 0 | 10.55743955 | 0.000925496 | CDC20   | ENSG00000117399 |
| 1 | 43596547 | 43596804 | 43596681 | 10  | 11  | 5 | 2.346097679 | 0.0364013   | CDC20   | ENSG00000117399 |
| 1 | 43788571 | 43788751 | 43788661 | 8   | 8   | 0 | 10.55743955 | 0.000925496 | PTPRF   | ENSG00000142949 |
| 1 | 44263163 | 44263673 | 44263502 | 9   | 19  | 3 | 5.865244197 | 5.72E-05    | SLC6A9  | ENSG00000196517 |
| 1 | 44566136 | 44566443 | 44566294 | 13  | 15  | 3 | 4.692195357 | 0.000718455 | PRNP    | ENSG00000117419 |
| 1 | 44643343 | 44643576 | 44643511 | 9   | 9   | 0 | 11.73048839 | 0.000425898 | RNF220  | ENSG00000187147 |
| 1 | 44969049 | 44969462 | 44969228 | 8   | 16  | 8 | 2.215758919 | 0.0222902   |         | ENSG00000200169 |
| 1 | 44977903 | 44978178 | 44978040 | 9   | 11  | 0 | 14.07658607 | 9.02E-05    | KIF2C   | ENSG00000142945 |
| 1 | 45037929 | 45038630 | 45038169 | 119 | 204 | 4 | 48.09500241 | 5.31E-63    | PLK3    | ENSG00000173846 |
| 1 | 45048447 | 45048638 | 45048554 | 9   | 9   | 1 | 5.865244197 | 0.00272497  |         | ENSG00000222009 |
| 1 | 45058006 | 45058438 | 45058155 | 9   | 16  | 2 | 6.647276756 | 0.000101928 |         | ENSG00000202444 |
| 1 | 45224831 | 45225036 | 45224923 | 8   | 9   | 3 | 2.932622098 | 0.0242899   | EIF2B3  | ENSG00000070785 |
| 1 | 45578493 | 45578789 | 45578656 | 9   | 12  | 2 | 5.083211637 | 0.00143337  | MUTYH   | ENSG00000132781 |
| 1 | 45760071 | 45760509 | 45760344 | 10  | 18  | 6 | 3.183989707 | 0.00227432  | PRDX1   | ENSG00000117450 |
| 1 | 45789243 | 45789481 | 45789346 | 10  | 11  | 3 | 3.519146518 | 0.00788869  | AKR1A1  | ENSG00000117448 |
| 1 | 45795770 | 45796093 | 45795931 | 17  | 21  | 0 | 25.80707446 | 3.84E-08    | AKR1A1  | ENSG00000117448 |
| 1 | 45851533 | 45851929 | 45851772 | 17  | 25  | 1 | 15.24963491 | 2.59E-08    | CCDC17  | ENSG00000159588 |
| 1 | 45926238 | 45926462 | 45926378 | 9   | 10  | 5 | 2.150589539 | 0.0575848   | TMEM69  | ENSG00000159596 |
| 1 | 46195767 | 46195992 | 46195886 | 8   | 10  | 0 | 12.90353723 | 0.000195991 | MAST2   | ENSG00000086015 |
| 1 | 46310202 | 46310500 | 46310346 | 12  | 15  | 0 | 18.76878143 | 4.04E-06    |         | ENSG00000216741 |
| 1 | 46370987 | 46371300 | 46371141 | 10  | 11  | 3 | 3.519146518 | 0.00788869  | PIK3R3  | ENSG00000117461 |
| 1 | 46410203 | 46410457 | 46410351 | 10  | 11  | 0 | 14.07658607 | 9.02E-05    | TSPAN1  | ENSG00000117472 |
| 1 | 46421338 | 46421879 | 46421592 | 22  | 37  | 1 | 22.28792795 | 3.34E-12    | TSPAN1  | ENSG00000117472 |
| 1 | 46456771 | 46457137 | 46456921 | 9   | 16  | 1 | 9.970915134 | 1.89E-05    | POMGNT1 | ENSG00000085998 |
| 1 | 46578815 | 46579194 | 46579078 | 10  | 15  | 2 | 6.256260476 | 0.000199274 | NSUN4   | ENSG00000117481 |
| 1 | 46842289 | 46842481 | 46842404 | 8   | 8   | 2 | 3.519146518 | 0.017558    | MKNK1   | ENSG00000079277 |
| 1 | 46842628 | 46842816 | 46842729 | 8   | 8   | 4 | 2.111487911 | 0.0804809   | MKNK1   | ENSG00000079277 |
| 1 | 46877861 | 46878180 | 46878023 | 13  | 16  | 0 | 19.94183027 | 1.86E-06    | MOBKLC  | ENSG00000142961 |

|   |          |          |          |    |    |    |             |             |          |                 |
|---|----------|----------|----------|----|----|----|-------------|-------------|----------|-----------------|
| 1 | 46957313 | 46957570 | 46957441 | 10 | 11 | 0  | 14.07658607 | 9.02E-05    | KIAA0494 | ENSG00000159658 |
| 1 | 46974011 | 46974193 | 46974127 | 8  | 8  | 3  | 2.639359888 | 0.0415794   |          | ENSG00000217954 |
| 1 | 46995953 | 46996565 | 46996160 | 14 | 28 | 4  | 6.803683268 | 6.55E-07    |          | ENSG00000217954 |
| 1 | 47036069 | 47036625 | 47036455 | 22 | 33 | 1  | 19.94183027 | 6.71E-11    | CYP4B1   | ENSG00000142973 |
| 1 | 48332053 | 48332271 | 48332186 | 12 | 12 | 5  | 2.541605819 | 0.0225912   |          | ENSG00000204015 |
| 1 | 48769105 | 48769332 | 48769197 | 8  | 8  | 1  | 5.278719777 | 0.00542188  |          | ENSG00000220052 |
| 1 | 48935417 | 48935655 | 48935532 | 8  | 8  | 2  | 3.519146518 | 0.017558    | BEND5    | ENSG00000162373 |
| 1 | 50377504 | 50377716 | 50377610 | 9  | 10 | 0  | 12.90353723 | 0.000195991 | ELAVL4   | ENSG00000162374 |
| 1 | 50841808 | 50842165 | 50841986 | 22 | 28 | 1  | 17.00920817 | 2.80E-09    |          | ENSG00000207194 |
| 1 | 51562545 | 51562831 | 51562688 | 11 | 14 | 4  | 3.519146518 | 0.00361132  | TTC39A   | ENSG00000085831 |
| 1 | 51796692 | 51796957 | 51796824 | 9  | 13 | 2  | 5.474227917 | 0.000747844 | OSBPL9   | ENSG00000117859 |
| 1 | 51808117 | 51808459 | 51808288 | 8  | 12 | 10 | 1.386330446 | 0.21117     | OSBPL9   | ENSG00000117859 |
| 1 | 51915772 | 51915956 | 51915864 | 8  | 8  | 0  | 10.55743955 | 0.000925496 |          | ENSG00000219625 |
| 1 | 51930589 | 51930843 | 51930716 | 12 | 14 | 0  | 17.59573259 | 8.79E-06    |          | ENSG00000219625 |
| 1 | 51931935 | 51932283 | 51932109 | 13 | 17 | 0  | 21.11487911 | 8.57E-07    |          | ENSG00000219625 |
| 1 | 52067347 | 52067538 | 52067503 | 8  | 9  | 0  | 11.73048839 | 0.000425898 |          | ENSG00000212076 |
| 1 | 52293376 | 52293628 | 52293464 | 8  | 11 | 7  | 1.759573259 | 0.102361    | TXNDC12  | ENSG00000117862 |
| 1 | 52795185 | 52795470 | 52795359 | 9  | 12 | 0  | 15.24963491 | 4.15E-05    | ZCCHC11  | ENSG00000134744 |
| 1 | 53098911 | 53099216 | 53099053 | 8  | 11 | 1  | 7.038293036 | 0.000674435 | ZYG11A   | ENSG00000203995 |
| 1 | 53159826 | 53160086 | 53159971 | 8  | 10 | 5  | 2.150589539 | 0.0575848   | ECHDC2   | ENSG00000121310 |
| 1 | 53345963 | 53346191 | 53346077 | 9  | 10 | 5  | 2.150589539 | 0.0575848   |          | ENSG00000220146 |
| 1 | 53434953 | 53435159 | 53435078 | 8  | 9  | 0  | 11.73048839 | 0.000425898 | CPT2     | ENSG00000157184 |
| 1 | 53439535 | 53439735 | 53439635 | 9  | 9  | 0  | 11.73048839 | 0.000425898 | CPT2     | ENSG00000157184 |
| 1 | 53458385 | 53458676 | 53458541 | 8  | 10 | 3  | 3.225884308 | 0.0139466   | C1orf123 | ENSG00000162384 |
| 1 | 53476758 | 53477062 | 53476912 | 9  | 11 | 4  | 2.815317214 | 0.0183428   | MAGOH    | ENSG00000162385 |
| 1 | 54192433 | 54192745 | 54192589 | 12 | 14 | 6  | 2.513676084 | 0.016726    | LRRC42   | ENSG00000116212 |
| 1 | 54291680 | 54291862 | 54291718 | 8  | 9  | 3  | 2.932622098 | 0.0242899   | TMEM59   | ENSG00000116209 |
| 1 | 54819951 | 54820264 | 54820103 | 11 | 14 | 1  | 8.797866295 | 8.00E-05    | ACOT11   | ENSG00000162390 |
| 1 | 55298411 | 55298714 | 55298545 | 10 | 12 | 0  | 15.24963491 | 4.15E-05    | PCSK9    | ENSG00000169174 |
| 1 | 56653045 | 56653434 | 56653256 | 8  | 12 | 1  | 7.624817456 | 0.000332769 |          | ENSG00000216893 |
| 1 | 56677972 | 56678272 | 56678118 | 12 | 16 | 0  | 19.94183027 | 1.86E-06    |          | ENSG00000216893 |
| 1 | 56755171 | 56755408 | 56755287 | 8  | 9  | 4  | 2.346097679 | 0.050148    |          | ENSG00000216893 |
| 1 | 56786233 | 56786445 | 56786293 | 8  | 9  | 0  | 11.73048839 | 0.000425898 |          | ENSG00000216893 |
| 1 | 56809204 | 56809432 | 56809320 | 9  | 9  | 5  | 1.955081399 | 0.0892323   | PPAP2B   | ENSG00000162407 |

|   |          |          |          |     |     |   |             |             |           |                 |
|---|----------|----------|----------|-----|-----|---|-------------|-------------|-----------|-----------------|
| 1 | 57057342 | 57057614 | 57057478 | 10  | 13  | 4 | 3.28453675  | 0.00629037  | C1orf168  | ENSG00000187889 |
| 1 | 58062999 | 58063191 | 58063095 | 8   | 10  | 5 | 2.150589539 | 0.0575848   |           | ENSG00000127266 |
| 1 | 58445126 | 58445454 | 58445290 | 17  | 20  | 0 | 24.63402563 | 8.35E-08    |           | ENSG00000216719 |
| 1 | 58815463 | 58815729 | 58815596 | 11  | 13  | 1 | 8.211341875 | 0.000163445 | TACSTD2   | ENSG00000184292 |
| 1 | 59022374 | 59022695 | 59022540 | 9   | 13  | 3 | 4.105670938 | 0.00243034  | JUN       | ENSG00000177606 |
| 1 | 59869887 | 59870158 | 59870022 | 8   | 10  | 1 | 6.451768616 | 0.00135978  | FGGY      | ENSG00000172456 |
| 1 | 59997801 | 59997996 | 59997891 | 8   | 8   | 0 | 10.55743955 | 0.000925496 | HOOK1     | ENSG00000134709 |
| 1 | 60185652 | 60185847 | 60185695 | 8   | 9   | 5 | 1.955081399 | 0.0892323   |           | ENSG00000203270 |
| 1 | 61288101 | 61288385 | 61288243 | 9   | 12  | 1 | 7.624817456 | 0.000332769 | NFIA      | ENSG00000162599 |
| 1 | 61315333 | 61315700 | 61315535 | 10  | 15  | 4 | 3.753756286 | 0.0020497   | NFIA      | ENSG00000162599 |
| 1 | 61318202 | 61318546 | 61318293 | 11  | 16  | 6 | 2.848832895 | 0.00632407  | NFIA      | ENSG00000162599 |
| 1 | 61377818 | 61378009 | 61377913 | 8   | 8   | 0 | 10.55743955 | 0.000925496 | NFIA      | ENSG00000162599 |
| 1 | 61880912 | 61881144 | 61881028 | 8   | 9   | 3 | 2.932622098 | 0.0242899   |           | ENSG00000218038 |
| 1 | 63271566 | 63271789 | 63271657 | 16  | 16  | 0 | 19.94183027 | 1.86E-06    |           | ENSG00000216534 |
| 1 | 64581812 | 64582093 | 64581938 | 9   | 12  | 5 | 2.541605819 | 0.0225912   | CACHD1    | ENSG00000158966 |
| 1 | 65136547 | 65136726 | 65136636 | 8   | 8   | 4 | 2.111487911 | 0.0804809   |           | ENSG00000216314 |
| 1 | 65227885 | 65228066 | 65227961 | 8   | 8   | 4 | 2.111487911 | 0.0804809   |           | ENSG00000185031 |
| 1 | 65313603 | 65313959 | 65313775 | 10  | 14  | 3 | 4.398933147 | 0.00132748  |           | ENSG00000217013 |
| 1 | 66509528 | 66509896 | 66509707 | 8   | 15  | 2 | 6.256260476 | 0.000199274 | PDE4B     | ENSG00000184588 |
| 1 | 66638945 | 66639246 | 66639095 | 8   | 10  | 0 | 12.90353723 | 0.000195991 | PDE4B     | ENSG00000184588 |
| 1 | 67234383 | 67234635 | 67234555 | 9   | 10  | 2 | 4.301179077 | 0.00512919  | SLC35D1   | ENSG00000116704 |
| 1 | 67384838 | 67385294 | 67385003 | 21  | 32  | 0 | 38.7106117  | 7.53E-12    | C1orf141  | ENSG00000203963 |
| 1 | 67614649 | 67615020 | 67614828 | 19  | 27  | 7 | 4.105670938 | 4.08E-05    |           | ENSG00000223263 |
| 1 | 67884368 | 67884689 | 67884533 | 8   | 12  | 2 | 5.083211637 | 0.00143337  |           | ENSG00000210968 |
| 1 | 67923944 | 67924149 | 67924002 | 10  | 11  | 0 | 14.07658607 | 9.02E-05    | GADD45A   | ENSG00000116717 |
| 1 | 67924610 | 67925301 | 67925049 | 90  | 129 | 8 | 16.94403879 | 3.06E-34    | GADD45A   | ENSG00000116717 |
| 1 | 67963411 | 67963750 | 67963637 | 17  | 21  | 1 | 12.90353723 | 4.95E-07    | GADD45A   | ENSG00000116717 |
| 1 | 67976744 | 67977029 | 67976892 | 10  | 13  | 0 | 16.42268375 | 1.91E-05    | GADD45A   | ENSG00000116717 |
| 1 | 68764135 | 68764472 | 68764313 | 11  | 15  | 0 | 18.76878143 | 4.04E-06    |           | ENSG00000218491 |
| 1 | 69293488 | 69294155 | 69293681 | 53  | 72  | 1 | 42.81628264 | 1.00E-23    |           |                 |
| 1 | 72238971 | 72239474 | 72239257 | 118 | 159 | 2 | 62.56260476 | 4.50E-51    | NEGR1     | ENSG00000172260 |
| 1 | 75330415 | 75330694 | 75330554 | 21  | 22  | 2 | 8.993374435 | 1.66E-06    | LHX8      | ENSG00000162624 |
| 1 | 76024517 | 76024731 | 76024584 | 8   | 9   | 3 | 2.932622098 | 0.0242899   | RABGGTB   | ENSG00000137955 |
| 1 | 77157484 | 77157828 | 77157651 | 20  | 24  | 1 | 14.66311049 | 5.43E-08    | ST6GALNA6 | ENSG00000117069 |

|   |          |          |          |     |     |     |             |             |          |                 |
|---|----------|----------|----------|-----|-----|-----|-------------|-------------|----------|-----------------|
| 1 | 77257044 | 77257286 | 77257165 | 9   | 10  | 5   | 2.150589539 | 0.0575848   |          | ENSG00000216814 |
| 1 | 78187365 | 78187632 | 78187501 | 13  | 15  | 1   | 9.384390715 | 3.90E-05    | FUBP1    | ENSG00000162613 |
| 1 | 78217204 | 78217499 | 78217322 | 10  | 11  | 1   | 7.038293036 | 0.000674435 | FUBP1    | ENSG00000162613 |
| 1 | 80455835 | 80456050 | 80455924 | 11  | 11  | 2   | 4.692195357 | 0.00272444  |          | ENSG00000218484 |
| 1 | 81405419 | 81405628 | 81405523 | 9   | 11  | 2   | 4.692195357 | 0.00272444  |          | ENSG00000217652 |
| 1 | 82112758 | 82113046 | 82112898 | 19  | 23  | 0   | 28.15317214 | 8.13E-09    | LPHN2    | ENSG00000117114 |
| 1 | 82118966 | 82119171 | 82119083 | 9   | 9   | 0   | 11.73048839 | 0.000425898 | LPHN2    | ENSG00000117114 |
| 1 | 82464373 | 82464763 | 82464584 | 34  | 43  | 0   | 51.61414893 | 1.48E-15    | LPHN2    | ENSG00000117114 |
| 1 | 82527314 | 82527495 | 82527445 | 8   | 8   | 0   | 10.55743955 | 0.000925496 | LPHN2    | ENSG00000117114 |
| 1 | 83053431 | 83053715 | 83053550 | 13  | 16  | 1   | 9.970915134 | 1.89E-05    |          |                 |
| 1 | 83249526 | 83249936 | 83249757 | 25  | 34  | 2   | 13.68556979 | 3.24E-10    |          |                 |
| 1 | 83304669 | 83305030 | 83304848 | 11  | 18  | 1   | 11.14396397 | 4.44E-06    |          |                 |
| 1 | 84717416 | 84717600 | 84717496 | 9   | 9   | 2   | 3.910162798 | 0.00955088  | BXDC5    | ENSG00000117133 |
| 1 | 84812370 | 84812555 | 84812434 | 8   | 9   | 2   | 3.910162798 | 0.00955088  | CTBS     | ENSG00000117151 |
| 1 | 84824046 | 84824259 | 84824210 | 9   | 11  | 0   | 14.07658607 | 9.02E-05    | CTBS     | ENSG00000117151 |
| 1 | 84873036 | 84873357 | 84873196 | 10  | 15  | 6   | 2.68125449  | 0.0103552   | C1orf180 | ENSG00000180869 |
| 1 | 84929000 | 84929296 | 84929162 | 8   | 11  | 6   | 2.010940867 | 0.0640214   | SSX2IP   | ENSG00000117155 |
| 1 | 85013277 | 85013482 | 85013379 | 8   | 8   | 2   | 3.519146518 | 0.017558    |          | ENSG00000222670 |
| 1 | 85463452 | 85463950 | 85463604 | 8   | 17  | 4   | 4.222975822 | 0.000640773 | SYDE2    | ENSG00000097096 |
| 1 | 85515067 | 85515292 | 85515179 | 11  | 11  | 4   | 2.815317214 | 0.0183428   | BCL10    | ENSG00000142867 |
| 1 | 85820671 | 85820899 | 85820756 | 10  | 12  | 6   | 2.178519273 | 0.0416567   | CYR61    | ENSG00000142871 |
| 1 | 85946610 | 85946881 | 85946720 | 13  | 13  | 2   | 5.474227917 | 0.000747844 | ZNHIT6   | ENSG00000117174 |
| 1 | 86662161 | 86662540 | 86662376 | 23  | 28  | 1   | 17.00920817 | 2.80E-09    | CLCA2    | ENSG00000137975 |
| 1 | 87088397 | 87088642 | 87088519 | 18  | 18  | 0   | 22.28792795 | 3.94E-07    |          | ENSG00000183291 |
| 1 | 87231220 | 87231432 | 87231374 | 9   | 10  | 1   | 6.451768616 | 0.00135978  | HS2ST1   | ENSG00000153936 |
| 1 | 87412973 | 87413391 | 87413196 | 19  | 29  | 1   | 17.59573259 | 1.33E-09    |          | ENSG00000221222 |
| 1 | 87442223 | 87442402 | 87442312 | 8   | 8   | 0   | 10.55743955 | 0.000925496 |          | ENSG00000221222 |
| 1 | 87689162 | 87689519 | 87689340 | 8   | 13  | 3   | 4.105670938 | 0.00243034  |          | ENSG00000199318 |
| 1 | 88885598 | 88885894 | 88885761 | 9   | 11  | 1   | 7.038293036 | 0.000674435 | PKN2     | ENSG00000065243 |
| 1 | 89038769 | 89039055 | 89038888 | 9   | 12  | 1   | 7.624817456 | 0.000332769 |          | ENSG00000207234 |
| 1 | 89040167 | 89040461 | 89040335 | 25  | 29  | 0   | 35.19146518 | 7.73E-11    |          | ENSG00000207234 |
| 1 | 90218756 | 90218935 | 90218845 | 8   | 8   | 1   | 5.278719777 | 0.00542188  | ZNF326   | ENSG00000162664 |
| 1 | 91625228 | 91625838 | 91625558 | 252 | 395 | 312 | 1.484112909 | 7.82E-08    |          | ENSG00000211233 |
| 1 | 91768045 | 91768394 | 91768214 | 48  | 53  | 1   | 31.67231866 | 1.89E-17    |          | ENSG00000185636 |

|   |           |           |           |    |     |    |             |             |         |                 |
|---|-----------|-----------|-----------|----|-----|----|-------------|-------------|---------|-----------------|
| 1 | 91768409  | 91768621  | 91768481  | 10 | 11  | 0  | 14.07658607 | 9.02E-05    |         | ENSG00000185636 |
| 1 | 93070133  | 93070412  | 93070272  | 11 | 13  | 5  | 2.737113958 | 0.0137917   | RPL5    | ENSG00000122406 |
| 1 | 93097128  | 93097312  | 93097210  | 8  | 8   | 0  | 10.55743955 | 0.000925496 |         | ENSG00000207022 |
| 1 | 93153177  | 93153480  | 93153344  | 12 | 13  | 1  | 8.211341875 | 0.000163445 |         | ENSG00000220385 |
| 1 | 93317179  | 93317440  | 93317312  | 8  | 10  | 5  | 2.150589539 | 0.0575848   | MTF2    | ENSG00000143033 |
| 1 | 93461516  | 93461798  | 93461652  | 17 | 18  | 0  | 22.28792795 | 3.94E-07    |         | ENSG00000220257 |
| 1 | 93583842  | 93584208  | 93584070  | 11 | 16  | 8  | 2.215758919 | 0.0222902   | DR1     | ENSG00000117505 |
| 1 | 93823387  | 93823658  | 93823545  | 10 | 13  | 1  | 8.211341875 | 0.000163445 | BCAR3   | ENSG00000137936 |
| 1 | 93835902  | 93836142  | 93836045  | 14 | 16  | 5  | 3.323638378 | 0.00288759  | BCAR3   | ENSG00000137936 |
| 1 | 93867350  | 93867942  | 93867679  | 14 | 29  | 2  | 11.73048839 | 1.18E-08    | BCAR3   | ENSG00000137936 |
| 1 | 94085745  | 94085929  | 94085808  | 10 | 11  | 4  | 2.815317214 | 0.0183428   | BCAR3   | ENSG00000137936 |
| 1 | 94199000  | 94199278  | 94199139  | 11 | 14  | 1  | 8.797866295 | 8.00E-05    |         | ENSG00000216267 |
| 1 | 94339777  | 94340133  | 94339890  | 12 | 16  | 2  | 6.647276756 | 0.000101928 | ABCA4   | ENSG00000198691 |
| 1 | 94341801  | 94342050  | 94341952  | 9  | 13  | 0  | 16.42268375 | 1.91E-05    | ABCA4   | ENSG00000198691 |
| 1 | 94356241  | 94356529  | 94356389  | 15 | 17  | 5  | 3.519146518 | 0.00167472  | ABCA4   | ENSG00000198691 |
| 1 | 94356603  | 94356804  | 94356703  | 8  | 9   | 0  | 11.73048839 | 0.000425898 | ABCA4   | ENSG00000198691 |
| 1 | 94660060  | 94660324  | 94660192  | 15 | 18  | 1  | 11.14396397 | 4.44E-06    | ABCD3   | ENSG00000117528 |
| 1 | 94818084  | 94818302  | 94818148  | 8  | 8   | 1  | 5.278719777 | 0.00542188  | F3      | ENSG00000117525 |
| 1 | 95075133  | 95075400  | 95075264  | 17 | 19  | 2  | 7.820325595 | 1.32E-05    | SLC44A3 | ENSG00000143036 |
| 1 | 95281636  | 95281877  | 95281756  | 8  | 8   | 2  | 3.519146518 | 0.017558    | ALG14   | ENSG00000172339 |
| 1 | 96959363  | 96959607  | 96959484  | 9  | 11  | 1  | 7.038293036 | 0.000674435 | PTBP2   | ENSG00000117569 |
| 1 | 98703215  | 98703431  | 98703280  | 13 | 13  | 0  | 16.42268375 | 1.91E-05    |         | ENSG00000221777 |
| 1 | 98754456  | 98754844  | 98754631  | 17 | 25  | 0  | 30.49926982 | 1.72E-09    |         | ENSG00000221777 |
| 1 | 100004671 | 100005000 | 100004847 | 10 | 13  | 2  | 5.474227917 | 0.000747844 | FRRS1   | ENSG00000156869 |
| 1 | 100203833 | 100204121 | 100203977 | 8  | 11  | 1  | 7.038293036 | 0.000674435 | SLC35A3 | ENSG00000117620 |
| 1 | 100668377 | 100668905 | 100668644 | 76 | 118 | 4  | 27.91856238 | 6.14E-35    |         | ENSG00000216398 |
| 1 | 101764970 | 101765307 | 101765147 | 26 | 29  | 0  | 35.19146518 | 7.73E-11    |         | ENSG00000173810 |
| 1 | 106546308 | 106546645 | 106546476 | 12 | 17  | 10 | 1.919534464 | 0.0400548   |         | ENSG00000217439 |
| 1 | 106576245 | 106576586 | 106576415 | 13 | 18  | 10 | 2.026175268 | 0.0273052   |         | ENSG00000217439 |
| 1 | 106608124 | 106608384 | 106608250 | 13 | 14  | 4  | 3.519146518 | 0.00361132  |         | ENSG00000217439 |
| 1 | 106612283 | 106612615 | 106612452 | 11 | 15  | 13 | 1.340627245 | 0.210788    |         | ENSG00000217439 |
| 1 | 106663784 | 106663980 | 106663882 | 9  | 9   | 4  | 2.346097679 | 0.050148    |         | ENSG00000217439 |
| 1 | 106751675 | 106751920 | 106751760 | 10 | 11  | 7  | 1.759573259 | 0.102361    |         | ENSG00000217439 |
| 1 | 106761908 | 106762107 | 106762007 | 8  | 9   | 3  | 2.932622098 | 0.0242899   |         | ENSG00000217439 |

|   |           |           |           |    |    |    |             |             |                 |
|---|-----------|-----------|-----------|----|----|----|-------------|-------------|-----------------|
| 1 | 106762622 | 106762878 | 106762750 | 8  | 8  | 8  | 1.173048839 | 0.36929     | ENSG00000217439 |
| 1 | 106811404 | 106811656 | 106811499 | 8  | 9  | 6  | 1.675784056 | 0.141978    | ENSG00000220633 |
| 1 | 106833273 | 106833757 | 106833516 | 39 | 59 | 11 | 5.865244197 | 2.04E-11    | ENSG00000220633 |
| 1 | 106850374 | 106850709 | 106850549 | 11 | 14 | 10 | 1.599612054 | 0.114822    | ENSG00000220633 |
| 1 | 106857583 | 106857877 | 106857745 | 10 | 12 | 5  | 2.541605819 | 0.0225912   | ENSG00000220633 |
| 1 | 106871014 | 106871312 | 106871163 | 8  | 9  | 2  | 3.910162798 | 0.00955088  | ENSG00000220633 |
| 1 | 106875686 | 106876014 | 106875850 | 11 | 14 | 11 | 1.466311049 | 0.15926     | ENSG00000220633 |
| 1 | 106878834 | 106879119 | 106878976 | 12 | 15 | 13 | 1.340627245 | 0.210788    | ENSG00000220633 |
| 1 | 106879959 | 106880280 | 106880119 | 14 | 17 | 11 | 1.759573259 | 0.0609179   | ENSG00000220633 |
| 1 | 106887988 | 106888313 | 106888150 | 9  | 12 | 7  | 1.906204364 | 0.0695918   | ENSG00000220633 |
| 1 | 106899782 | 106900023 | 106899880 | 12 | 16 | 10 | 1.812893661 | 0.0578656   | ENSG00000220633 |
| 1 | 106907970 | 106908422 | 106908328 | 9  | 18 | 15 | 1.392995497 | 0.16305     | ENSG00000220633 |
| 1 | 106909414 | 106909617 | 106909515 | 8  | 10 | 6  | 1.843362462 | 0.0964212   | ENSG00000220633 |
| 1 | 106928831 | 106929132 | 106928960 | 15 | 17 | 10 | 1.919534464 | 0.0400548   | ENSG00000220633 |
| 1 | 106946693 | 106947027 | 106946860 | 14 | 19 | 9  | 2.346097679 | 0.0107159   | ENSG00000220633 |
| 1 | 106953927 | 106954149 | 106954038 | 8  | 10 | 13 | 0.921681231 | 0.585856    | ENSG00000220633 |
| 1 | 106958099 | 106958424 | 106958273 | 8  | 12 | 16 | 0.897037348 | 0.621544    | ENSG00000220633 |
| 1 | 106959660 | 106960101 | 106959837 | 11 | 17 | 7  | 2.639359888 | 0.00777415  | ENSG00000220633 |
| 1 | 106966590 | 106966889 | 106966728 | 9  | 11 | 12 | 1.082814313 | 0.424156    | ENSG00000220633 |
| 1 | 106991599 | 106991778 | 106991734 | 8  | 8  | 5  | 1.759573259 | 0.13508     | ENSG00000220633 |
| 1 | 106993882 | 106994062 | 106993972 | 8  | 9  | 6  | 1.675784056 | 0.141978    | ENSG00000220633 |
| 1 | 107021848 | 107022059 | 107021907 | 9  | 9  | 5  | 1.955081399 | 0.0892323   | ENSG00000220633 |
| 1 | 107062689 | 107062868 | 107062768 | 8  | 9  | 2  | 3.910162798 | 0.00955088  | ENSG00000220633 |
| 1 | 107066115 | 107066329 | 107066215 | 8  | 9  | 4  | 2.346097679 | 0.050148    | ENSG00000220633 |
| 1 | 107084558 | 107084782 | 107084670 | 8  | 10 | 2  | 4.301179077 | 0.00512919  | ENSG00000220633 |
| 1 | 107090834 | 107091212 | 107091033 | 8  | 15 | 8  | 2.085420159 | 0.0338693   | ENSG00000220633 |
| 1 | 107094125 | 107094432 | 107094271 | 20 | 23 | 6  | 4.021881735 | 0.000148535 | ENSG00000220633 |
| 1 | 107099890 | 107100133 | 107099986 | 8  | 11 | 6  | 2.010940867 | 0.0640214   | ENSG00000220633 |
| 1 | 107100327 | 107100560 | 107100443 | 8  | 9  | 6  | 1.675784056 | 0.141978    | ENSG00000220633 |
| 1 | 107117079 | 107117294 | 107117208 | 8  | 8  | 6  | 1.508205651 | 0.203852    | ENSG00000220633 |
| 1 | 107117626 | 107117818 | 107117722 | 8  | 8  | 5  | 1.759573259 | 0.13508     | ENSG00000220633 |
| 1 | 107133693 | 107133909 | 107133801 | 8  | 10 | 3  | 3.225884308 | 0.0139466   | ENSG00000220633 |
| 1 | 107136562 | 107136934 | 107136741 | 9  | 14 | 11 | 1.466311049 | 0.15926     | ENSG00000220633 |
| 1 | 107142303 | 107142758 | 107142482 | 10 | 20 | 8  | 2.737113958 | 0.0036449   | ENSG00000220633 |

|   |           |           |           |    |    |    |             |            |       |                 |
|---|-----------|-----------|-----------|----|----|----|-------------|------------|-------|-----------------|
| 1 | 107143166 | 107143462 | 107143303 | 14 | 15 | 10 | 1.706252857 | 0.0822346  |       | ENSG00000220633 |
| 1 | 107147018 | 107147205 | 107147111 | 8  | 8  | 6  | 1.508205651 | 0.203852   |       | ENSG00000220633 |
| 1 | 107160371 | 107160663 | 107160513 | 10 | 12 | 7  | 1.906204364 | 0.0695918  |       | ENSG00000216572 |
| 1 | 107162223 | 107162601 | 107162388 | 13 | 18 | 10 | 2.026175268 | 0.0273052  |       | ENSG00000216572 |
| 1 | 107175773 | 107175974 | 107175873 | 10 | 11 | 3  | 3.519146518 | 0.00788869 |       | ENSG00000216572 |
| 1 | 107204458 | 107204681 | 107204596 | 8  | 9  | 4  | 2.346097679 | 0.050148   |       | ENSG00000216572 |
| 1 | 107214403 | 107214806 | 107214467 | 13 | 20 | 1  | 12.31701281 | 1.03E-06   |       | ENSG00000216572 |
| 1 | 107223960 | 107224194 | 107224049 | 9  | 11 | 4  | 2.815317214 | 0.0183428  |       | ENSG00000216572 |
| 1 | 107225045 | 107225322 | 107225176 | 9  | 13 | 10 | 1.49297125  | 0.157311   |       | ENSG00000216572 |
| 1 | 107241812 | 107242023 | 107241865 | 8  | 8  | 3  | 2.639359888 | 0.0415794  |       | ENSG00000216572 |
| 1 | 107243021 | 107243260 | 107243092 | 9  | 9  | 4  | 2.346097679 | 0.050148   |       | ENSG00000216572 |
| 1 | 107268583 | 107268899 | 107268721 | 8  | 12 | 5  | 2.541605819 | 0.0225912  |       | ENSG00000216572 |
| 1 | 107300758 | 107301051 | 107300888 | 8  | 12 | 6  | 2.178519273 | 0.0416567  | PRMT6 | ENSG00000198890 |
| 1 | 107324539 | 107324783 | 107324657 | 10 | 11 | 10 | 1.279689643 | 0.277323   | PRMT6 | ENSG00000198890 |
| 1 | 107346071 | 107346293 | 107346182 | 9  | 9  | 5  | 1.955081399 | 0.0892323  | PRMT6 | ENSG00000198890 |
| 1 | 107348198 | 107348455 | 107348326 | 8  | 11 | 5  | 2.346097679 | 0.0364013  | PRMT6 | ENSG00000198890 |
| 1 | 107371125 | 107371409 | 107371288 | 10 | 11 | 9  | 1.407658607 | 0.210479   | PRMT6 | ENSG00000198890 |
| 1 | 107373792 | 107373971 | 107373873 | 8  | 8  | 5  | 1.759573259 | 0.13508    | PRMT6 | ENSG00000198890 |
| 1 | 107380963 | 107381190 | 107381076 | 8  | 8  | 6  | 1.508205651 | 0.203852   | PRMT6 | ENSG00000198890 |
| 1 | 107399666 | 107399908 | 107399778 | 11 | 13 | 4  | 3.28453675  | 0.00629037 | PRMT6 | ENSG00000198890 |
| 1 | 107400561 | 107401387 | 107400726 | 13 | 36 | 20 | 2.066800336 | 0.00314492 | PRMT6 | ENSG00000198890 |
| 1 | 107425331 | 107425664 | 107425492 | 8  | 11 | 6  | 2.010940867 | 0.0640214  | PRMT6 | ENSG00000198890 |
| 1 | 107443227 | 107443463 | 107443340 | 11 | 12 | 10 | 1.386330446 | 0.21117    | NTNG1 | ENSG00000162631 |
| 1 | 107446538 | 107446756 | 107446578 | 11 | 14 | 8  | 1.955081399 | 0.0506438  | NTNG1 | ENSG00000162631 |
| 1 | 107447409 | 107447624 | 107447516 | 9  | 10 | 10 | 1.173048839 | 0.355733   | NTNG1 | ENSG00000162631 |
| 1 | 107456886 | 107457290 | 107457118 | 9  | 16 | 12 | 1.533986944 | 0.120062   | NTNG1 | ENSG00000162631 |
| 1 | 107465213 | 107465412 | 107465312 | 8  | 9  | 3  | 2.932622098 | 0.0242899  | NTNG1 | ENSG00000162631 |
| 1 | 107479507 | 107479744 | 107479681 | 8  | 10 | 6  | 1.843362462 | 0.0964212  | NTNG1 | ENSG00000162631 |
| 1 | 107485772 | 107486189 | 107486068 | 11 | 21 | 24 | 1.032282979 | 0.459444   | NTNG1 | ENSG00000162631 |
| 1 | 107486204 | 107486567 | 107486383 | 13 | 20 | 29 | 0.821134188 | 0.760976   | NTNG1 | ENSG00000162631 |
| 1 | 107493132 | 107493329 | 107493234 | 8  | 9  | 3  | 2.932622098 | 0.0242899  | NTNG1 | ENSG00000162631 |
| 1 | 107496608 | 107496919 | 107496772 | 8  | 10 | 11 | 1.075294769 | 0.434143   | NTNG1 | ENSG00000162631 |
| 1 | 107497186 | 107497557 | 107497442 | 11 | 15 | 10 | 1.706252857 | 0.0822346  | NTNG1 | ENSG00000162631 |
| 1 | 107497795 | 107498130 | 107497962 | 10 | 14 | 17 | 0.977540699 | 0.52995    | NTNG1 | ENSG00000162631 |

|   |           |           |           |    |    |    |             |             |       |                 |
|---|-----------|-----------|-----------|----|----|----|-------------|-------------|-------|-----------------|
| 1 | 107513973 | 107514203 | 107514054 | 11 | 11 | 11 | 1.173048839 | 0.349489    | NTNG1 | ENSG00000162631 |
| 1 | 107515478 | 107515821 | 107515652 | 10 | 13 | 9  | 1.642268375 | 0.111397    | NTNG1 | ENSG00000162631 |
| 1 | 107517505 | 107517703 | 107517604 | 10 | 10 | 8  | 1.433726359 | 0.209175    | NTNG1 | ENSG00000162631 |
| 1 | 107541197 | 107541481 | 107541308 | 8  | 13 | 7  | 2.052835469 | 0.046392    | NTNG1 | ENSG00000162631 |
| 1 | 107553602 | 107553837 | 107553754 | 9  | 13 | 5  | 2.737113958 | 0.0137917   | NTNG1 | ENSG00000162631 |
| 1 | 107570466 | 107570812 | 107570643 | 8  | 12 | 11 | 1.270802909 | 0.274822    | NTNG1 | ENSG00000162631 |
| 1 | 107570973 | 107571152 | 107571126 | 8  | 8  | 6  | 1.508205651 | 0.203852    | NTNG1 | ENSG00000162631 |
| 1 | 107579357 | 107579642 | 107579486 | 10 | 13 | 11 | 1.368556979 | 0.211388    | NTNG1 | ENSG00000162631 |
| 1 | 107588780 | 107589133 | 107589008 | 8  | 13 | 17 | 0.912371319 | 0.606688    | NTNG1 | ENSG00000162631 |
| 1 | 107598431 | 107598660 | 107598547 | 11 | 11 | 9  | 1.407658607 | 0.210479    | NTNG1 | ENSG00000162631 |
| 1 | 107599765 | 107599976 | 107599870 | 10 | 12 | 11 | 1.270802909 | 0.274822    | NTNG1 | ENSG00000162631 |
| 1 | 107608786 | 107609006 | 107608896 | 8  | 10 | 10 | 1.173048839 | 0.355733    | NTNG1 | ENSG00000162631 |
| 1 | 107621024 | 107621554 | 107621350 | 21 | 34 | 27 | 1.466311049 | 0.0643683   | NTNG1 | ENSG00000162631 |
| 1 | 107646056 | 107646443 | 107646230 | 9  | 14 | 14 | 1.173048839 | 0.332418    | NTNG1 | ENSG00000162631 |
| 1 | 107660178 | 107660435 | 107660298 | 8  | 11 | 13 | 1.005470434 | 0.498567    | NTNG1 | ENSG00000162631 |
| 1 | 107660519 | 107660784 | 107660649 | 8  | 10 | 6  | 1.843362462 | 0.0964212   | NTNG1 | ENSG00000162631 |
| 1 | 107660839 | 107661145 | 107660992 | 9  | 13 | 10 | 1.49297125  | 0.157311    | NTNG1 | ENSG00000162631 |
| 1 | 107662619 | 107662839 | 107662776 | 9  | 9  | 2  | 3.910162798 | 0.00955088  | NTNG1 | ENSG00000162631 |
| 1 | 107668829 | 107669079 | 107668975 | 8  | 10 | 8  | 1.433726359 | 0.209175    | NTNG1 | ENSG00000162631 |
| 1 | 107671627 | 107671937 | 107671792 | 21 | 24 | 2  | 9.775406994 | 4.09E-07    | NTNG1 | ENSG00000162631 |
| 1 | 107683245 | 107683439 | 107683325 | 9  | 11 | 8  | 1.564065119 | 0.151515    | NTNG1 | ENSG00000162631 |
| 1 | 107699886 | 107700213 | 107700042 | 10 | 13 | 5  | 2.737113958 | 0.0137917   | NTNG1 | ENSG00000162631 |
| 1 | 107721496 | 107721740 | 107721604 | 8  | 11 | 13 | 1.005470434 | 0.498567    | NTNG1 | ENSG00000162631 |
| 1 | 107725488 | 107725748 | 107725646 | 9  | 12 | 7  | 1.906204364 | 0.0695918   | NTNG1 | ENSG00000162631 |
| 1 | 107725781 | 107726113 | 107725960 | 8  | 13 | 15 | 1.026417734 | 0.475096    | NTNG1 | ENSG00000162631 |
| 1 | 107914464 | 107914803 | 107914633 | 22 | 22 | 12 | 2.0753941   | 0.0149739   |       | ENSG00000211552 |
| 1 | 107916917 | 107917194 | 107917044 | 9  | 12 | 5  | 2.541605819 | 0.0225912   |       | ENSG00000211552 |
| 1 | 107938037 | 107938340 | 107938192 | 10 | 13 | 7  | 2.052835469 | 0.046392    |       | ENSG00000211552 |
| 1 | 107970432 | 107970913 | 107970734 | 10 | 19 | 9  | 2.346097679 | 0.0107159   |       | ENSG00000211552 |
| 1 | 108021893 | 108022331 | 108022029 | 13 | 21 | 6  | 3.686724924 | 0.000453999 |       | ENSG00000211552 |
| 1 | 108027323 | 108027678 | 108027500 | 12 | 17 | 5  | 3.519146518 | 0.00167472  | VAV3  | ENSG00000134215 |
| 1 | 108033390 | 108033753 | 108033574 | 12 | 19 | 6  | 3.351568112 | 0.00134187  | VAV3  | ENSG00000134215 |
| 1 | 108033951 | 108034199 | 108034075 | 8  | 10 | 1  | 6.451768616 | 0.00135978  | VAV3  | ENSG00000134215 |
| 1 | 108047431 | 108047612 | 108047521 | 8  | 8  | 4  | 2.111487911 | 0.0804809   | VAV3  | ENSG00000134215 |



|   |           |           |           |    |    |    |             |             |          |                 |
|---|-----------|-----------|-----------|----|----|----|-------------|-------------|----------|-----------------|
| 1 | 108066706 | 108067027 | 108066869 | 9  | 10 | 0  | 12.90353723 | 0.000195991 | VAV3     | ENSG00000134215 |
| 1 | 108072150 | 108072331 | 108072283 | 9  | 9  | 5  | 1.955081399 | 0.0892323   | VAV3     | ENSG00000134215 |
| 1 | 108094579 | 108094784 | 108094696 | 11 | 12 | 4  | 3.049926982 | 0.0108184   | VAV3     | ENSG00000134215 |
| 1 | 108235217 | 108235523 | 108235352 | 8  | 11 | 2  | 4.692195357 | 0.00272444  | VAV3     | ENSG00000134215 |
| 1 | 108262196 | 108262453 | 108262327 | 8  | 10 | 0  | 12.90353723 | 0.000195991 | VAV3     | ENSG00000134215 |
| 1 | 108280759 | 108281118 | 108280900 | 9  | 14 | 5  | 2.932622098 | 0.00829617  | VAV3     | ENSG00000134215 |
| 1 | 108455597 | 108455845 | 108455731 | 8  | 9  | 2  | 3.910162798 | 0.00955088  | SLC25A24 | ENSG00000085491 |
| 1 | 108462530 | 108462716 | 108462661 | 9  | 9  | 4  | 2.346097679 | 0.050148    | SLC25A24 | ENSG00000085491 |
| 1 | 108469522 | 108470076 | 108469839 | 16 | 31 | 11 | 3.128130238 | 0.000146711 | SLC25A24 | ENSG00000085491 |
| 1 | 108534907 | 108535125 | 108535016 | 9  | 10 | 1  | 6.451768616 | 0.00135978  | SLC25A24 | ENSG00000085491 |
| 1 | 108543425 | 108543667 | 108543544 | 10 | 11 | 3  | 3.519146518 | 0.00788869  | SLC25A24 | ENSG00000085491 |
| 1 | 108544699 | 108544953 | 108544860 | 8  | 10 | 7  | 1.612942154 | 0.147335    | SLC25A24 | ENSG00000085491 |
| 1 | 108544955 | 108545270 | 108545112 | 17 | 21 | 8  | 2.867452718 | 0.00225035  | SLC25A24 | ENSG00000085491 |
| 1 | 108877614 | 108877962 | 108877788 | 19 | 25 | 8  | 3.388807758 | 0.000297109 |          | ENSG00000217136 |
| 1 | 108898157 | 108898747 | 108898322 | 19 | 32 | 4  | 7.742122339 | 4.68E-08    | FAM102B  | ENSG00000162636 |
| 1 | 108902909 | 108903246 | 108903087 | 10 | 14 | 4  | 3.519146518 | 0.00361132  | FAM102B  | ENSG00000162636 |
| 1 | 108903847 | 108904104 | 108903975 | 9  | 12 | 4  | 3.049926982 | 0.0108184   | FAM102B  | ENSG00000162636 |
| 1 | 108914294 | 108914524 | 108914426 | 13 | 13 | 3  | 4.105670938 | 0.00243034  | FAM102B  | ENSG00000162636 |
| 1 | 108948715 | 108948906 | 108948810 | 8  | 9  | 1  | 5.865244197 | 0.00272497  | FAM102B  | ENSG00000162636 |
| 1 | 108968238 | 108968468 | 108968353 | 10 | 10 | 3  | 3.225884308 | 0.0139466   | C1orf59  | ENSG00000162639 |
| 1 | 108990169 | 108990403 | 108990286 | 8  | 9  | 0  | 11.73048839 | 0.000425898 | C1orf59  | ENSG00000162639 |
| 1 | 109036216 | 109036400 | 109036310 | 8  | 9  | 4  | 2.346097679 | 0.050148    | PRPF38B  | ENSG00000134186 |
| 1 | 109036537 | 109036726 | 109036646 | 8  | 8  | 5  | 1.759573259 | 0.13508     | PRPF38B  | ENSG00000134186 |
| 1 | 109090633 | 109090925 | 109090779 | 8  | 13 | 0  | 16.42268375 | 1.91E-05    | STXBP3   | ENSG00000116266 |
| 1 | 109091481 | 109091674 | 109091561 | 9  | 9  | 1  | 5.865244197 | 0.00272497  | STXBP3   | ENSG00000116266 |
| 1 | 109172550 | 109172777 | 109172655 | 8  | 9  | 1  | 5.865244197 | 0.00272497  | C1orf62  | ENSG00000162641 |
| 1 | 109174716 | 109174940 | 109174828 | 11 | 12 | 8  | 1.694403879 | 0.107291    | C1orf62  | ENSG00000162641 |
| 1 | 109190033 | 109190606 | 109190319 | 48 | 89 | 0  | 105.5743955 | 4.61E-31    | C1orf62  | ENSG00000162641 |
| 1 | 109307542 | 109307793 | 109307667 | 9  | 12 | 8  | 1.694403879 | 0.107291    | CLCC1    | ENSG00000121940 |
| 1 | 109410501 | 109410716 | 109410608 | 9  | 10 | 5  | 2.150589539 | 0.0575848   | TAF13    | ENSG00000197780 |
| 1 | 109433451 | 109433771 | 109433595 | 13 | 15 | 3  | 4.692195357 | 0.000718455 | TMEM167B | ENSG00000162647 |
| 1 | 109434594 | 109435082 | 109434903 | 13 | 25 | 9  | 3.049926982 | 0.000648806 | TMEM167B | ENSG00000162647 |
| 1 | 109440386 | 109440694 | 109440515 | 8  | 11 | 4  | 2.815317214 | 0.0183428   | TMEM167B | ENSG00000162647 |
| 1 | 109444157 | 109444532 | 109444292 | 16 | 22 | 7  | 3.372515413 | 0.000629223 |          | ENSG00000219444 |

|   |           |           |           |    |    |   |             |             |          |                 |
|---|-----------|-----------|-----------|----|----|---|-------------|-------------|----------|-----------------|
| 1 | 109458038 | 109458307 | 109458172 | 9  | 10 | 0 | 12.90353723 | 0.000195991 | KIAA1324 | ENSG00000116299 |
| 1 | 109460579 | 109460811 | 109460681 | 9  | 10 | 8 | 1.433726359 | 0.209175    | KIAA1324 | ENSG00000116299 |
| 1 | 109496410 | 109496611 | 109496510 | 9  | 9  | 8 | 1.303387599 | 0.281715    | KIAA1324 | ENSG00000116299 |
| 1 | 109506502 | 109506772 | 109506636 | 11 | 13 | 1 | 8.211341875 | 0.000163445 | KIAA1324 | ENSG00000116299 |
| 1 | 109542130 | 109542487 | 109542308 | 30 | 35 | 5 | 7.038293036 | 2.84E-08    | KIAA1324 | ENSG00000116299 |
| 1 | 109558423 | 109558808 | 109558629 | 34 | 43 | 5 | 8.602358155 | 1.42E-10    | SARS     | ENSG00000031698 |
| 1 | 109558820 | 109559008 | 109558913 | 9  | 9  | 2 | 3.910162798 | 0.00955088  | SARS     | ENSG00000031698 |
| 1 | 109607303 | 109607737 | 109607558 | 27 | 37 | 0 | 44.57585589 | 1.55E-13    | CELSR2   | ENSG00000143126 |
| 1 | 109607778 | 109608096 | 109607939 | 14 | 17 | 5 | 3.519146518 | 0.00167472  | CELSR2   | ENSG00000143126 |
| 1 | 109618924 | 109619535 | 109619133 | 15 | 33 | 3 | 9.970915134 | 4.56E-09    | PSRC1    | ENSG00000134222 |
| 1 | 109621607 | 109621872 | 109621719 | 13 | 13 | 3 | 4.105670938 | 0.00243034  | PSRC1    | ENSG00000134222 |
| 1 | 109627168 | 109627602 | 109627423 | 13 | 20 | 9 | 2.463402563 | 0.00689886  | PSRC1    | ENSG00000134222 |
| 1 | 109640982 | 109641331 | 109641156 | 13 | 17 | 3 | 5.278719777 | 0.000205462 | MYBPHL   | ENSG00000221986 |
| 1 | 109769953 | 109770177 | 109770024 | 11 | 11 | 3 | 3.519146518 | 0.00788869  | PSMA5    | ENSG00000143106 |
| 1 | 109770750 | 109771047 | 109770892 | 13 | 17 | 5 | 3.519146518 | 0.00167472  | PSMA5    | ENSG00000143106 |
| 1 | 109827745 | 109827935 | 109827840 | 8  | 9  | 3 | 2.932622098 | 0.0242899   | ATXN7L2  | ENSG00000162650 |
| 1 | 109828279 | 109828553 | 109828383 | 10 | 12 | 7 | 1.906204364 | 0.0695918   | ATXN7L2  | ENSG00000162650 |
| 1 | 109838084 | 109838433 | 109838258 | 11 | 16 | 2 | 6.647276756 | 0.000101928 | CYB561D1 | ENSG00000174151 |
| 1 | 109876575 | 109876892 | 109876733 | 11 | 16 | 4 | 3.988366054 | 0.00115141  | GPR61    | ENSG00000156097 |
| 1 | 109892547 | 109892910 | 109892726 | 10 | 17 | 6 | 3.016411301 | 0.00381427  | GNAI3    | ENSG00000065135 |
| 1 | 109910258 | 109910776 | 109910550 | 11 | 21 | 2 | 8.602358155 | 3.33E-06    | GNAI3    | ENSG00000065135 |
| 1 | 109914737 | 109914928 | 109914832 | 10 | 10 | 2 | 4.301179077 | 0.00512919  |          | ENSG00000206832 |
| 1 | 110106143 | 110106382 | 110106242 | 8  | 10 | 0 | 12.90353723 | 0.000195991 | EPS8L3   | ENSG00000198758 |
| 1 | 110136360 | 110136612 | 110136486 | 9  | 11 | 5 | 2.346097679 | 0.0364013   |          | ENSG00000219071 |
| 1 | 110255551 | 110255914 | 110255699 | 15 | 21 | 1 | 12.90353723 | 4.95E-07    | CSF1     | ENSG00000184371 |
| 1 | 110328692 | 110328952 | 110328869 | 9  | 11 | 7 | 1.759573259 | 0.102361    | AHCYL1   | ENSG00000168710 |
| 1 | 110378522 | 110378783 | 110378652 | 11 | 11 | 1 | 7.038293036 | 0.000674435 | FAM40A   | ENSG00000143093 |
| 1 | 110461079 | 110461333 | 110461184 | 10 | 13 | 3 | 4.105670938 | 0.00243034  | UBL4B    | ENSG00000186150 |
| 1 | 110510151 | 110510337 | 110510315 | 9  | 9  | 2 | 3.910162798 | 0.00955088  | SLC6A17  | ENSG00000197106 |
| 1 | 110558667 | 110558916 | 110558839 | 10 | 12 | 4 | 3.049926982 | 0.0108184   | KCNC4    | ENSG00000116396 |
| 1 | 110656801 | 110657006 | 110656903 | 9  | 9  | 2 | 3.910162798 | 0.00955088  | RBM15    | ENSG00000162775 |
| 1 | 110683108 | 110683463 | 110683285 | 8  | 13 | 3 | 4.105670938 | 0.00243034  | RBM15    | ENSG00000162775 |
| 1 | 110751744 | 110752106 | 110751927 | 16 | 21 | 8 | 2.867452718 | 0.00225035  | HBXIP    | ENSG00000134248 |
| 1 | 111125087 | 111125301 | 111125145 | 9  | 10 | 5 | 2.150589539 | 0.0575848   |          | ENSG00000199710 |

|   |           |           |           |     |     |    |             |             |          |                 |
|---|-----------|-----------|-----------|-----|-----|----|-------------|-------------|----------|-----------------|
| 1 | 111483457 | 111483674 | 111483576 | 8   | 8   | 2  | 3.519146518 | 0.017558    | CEPT1    | ENSG00000134255 |
| 1 | 111484372 | 111484558 | 111484453 | 9   | 10  | 5  | 2.150589539 | 0.0575848   | CEPT1    | ENSG00000134255 |
| 1 | 111546578 | 111546906 | 111546731 | 9   | 12  | 1  | 7.624817456 | 0.000332769 | DENND2D  | ENSG00000162777 |
| 1 | 111553085 | 111553269 | 111553177 | 8   | 9   | 3  | 2.932622098 | 0.0242899   | DENND2D  | ENSG00000162777 |
| 1 | 111558321 | 111559330 | 111558801 | 167 | 259 | 1  | 152.4963491 | 3.25E-86    | DENND2D  | ENSG00000162777 |
| 1 | 111567071 | 111567400 | 111567280 | 10  | 14  | 2  | 5.865244197 | 0.000387308 | CHI3L2   | ENSG00000064886 |
| 1 | 111708845 | 111709446 | 111709132 | 102 | 142 | 4  | 33.5491968  | 1.02E-42    |          | ENSG00000217967 |
| 1 | 111723027 | 111723298 | 111723162 | 13  | 15  | 2  | 6.256260476 | 0.000199274 |          | ENSG00000218817 |
| 1 | 111793357 | 111793618 | 111793509 | 9   | 11  | 8  | 1.564065119 | 0.151515    | ATP5F1   | ENSG00000116459 |
| 1 | 111825849 | 111826076 | 111825962 | 10  | 13  | 4  | 3.28453675  | 0.00629037  | C1orf162 | ENSG00000143110 |
| 1 | 111851845 | 111852142 | 111851996 | 10  | 11  | 1  | 7.038293036 | 0.000674435 | ADORA3   | ENSG00000121933 |
| 1 | 111857629 | 111857891 | 111857736 | 8   | 10  | 1  | 6.451768616 | 0.00135978  | ADORA3   | ENSG00000121933 |
| 1 | 111920763 | 111921060 | 111920906 | 13  | 16  | 7  | 2.492728784 | 0.0124193   | ADORA3   | ENSG00000121933 |
| 1 | 112082476 | 112082923 | 112082699 | 39  | 50  | 1  | 29.9127454  | 1.84E-16    | C1orf183 | ENSG00000197852 |
| 1 | 112083009 | 112083551 | 112083330 | 10  | 24  | 7  | 3.665777623 | 0.000215502 | C1orf183 | ENSG00000197852 |
| 1 | 112091346 | 112091677 | 112091511 | 13  | 19  | 6  | 3.351568112 | 0.00134187  | C1orf183 | ENSG00000197852 |
| 1 | 112099850 | 112100151 | 112100000 | 14  | 18  | 5  | 3.714654658 | 0.000961539 | DDX20    | ENSG00000064703 |
| 1 | 112177574 | 112177863 | 112177714 | 14  | 15  | 3  | 4.692195357 | 0.000718455 | DDX20    | ENSG00000064703 |
| 1 | 112179119 | 112179321 | 112179211 | 8   | 8   | 6  | 1.508205651 | 0.203852    | DDX20    | ENSG00000064703 |
| 1 | 112196945 | 112197323 | 112197124 | 8   | 15  | 12 | 1.443752418 | 0.160732    | DDX20    | ENSG00000064703 |
| 1 | 112198442 | 112198621 | 112198531 | 8   | 8   | 3  | 2.639359888 | 0.0415794   | DDX20    | ENSG00000064703 |
| 1 | 112209099 | 112209346 | 112209197 | 10  | 14  | 5  | 2.932622098 | 0.00829617  | DDX20    | ENSG00000064703 |
| 1 | 112213485 | 112213786 | 112213629 | 10  | 13  | 4  | 3.28453675  | 0.00629037  | KCND3    | ENSG00000171385 |
| 1 | 112239921 | 112240377 | 112240202 | 12  | 21  | 14 | 1.720471631 | 0.0496182   | KCND3    | ENSG00000171385 |
| 1 | 112246784 | 112246984 | 112246884 | 8   | 8   | 4  | 2.111487911 | 0.0804809   | KCND3    | ENSG00000171385 |
| 1 | 112252140 | 112252338 | 112252214 | 9   | 9   | 4  | 2.346097679 | 0.050148    | KCND3    | ENSG00000171385 |
| 1 | 112271113 | 112271292 | 112271202 | 9   | 9   | 15 | 0.733155525 | 0.788527    | KCND3    | ENSG00000171385 |
| 1 | 112275862 | 112276041 | 112275951 | 8   | 8   | 4  | 2.111487911 | 0.0804809   | KCND3    | ENSG00000171385 |
| 1 | 112317909 | 112318186 | 112318047 | 9   | 10  | 8  | 1.433726359 | 0.209175    | KCND3    | ENSG00000171385 |
| 1 | 112320718 | 112320945 | 112320867 | 9   | 10  | 12 | 0.992579787 | 0.511743    | KCND3    | ENSG00000171385 |
| 1 | 112321051 | 112321338 | 112321197 | 11  | 14  | 13 | 1.256838042 | 0.269506    | KCND3    | ENSG00000171385 |
| 1 | 112332762 | 112332948 | 112332894 | 9   | 9   | 8  | 1.303387599 | 0.281715    | KCND3    | ENSG00000171385 |
| 1 | 112334797 | 112335144 | 112334966 | 11  | 15  | 4  | 3.753756286 | 0.0020497   | KCND3    | ENSG00000171385 |
| 1 | 112335611 | 112336060 | 112335823 | 11  | 21  | 15 | 1.612942154 | 0.070218    | KCND3    | ENSG00000171385 |

|   |           |           |           |     |     |    |             |             |          |                 |
|---|-----------|-----------|-----------|-----|-----|----|-------------|-------------|----------|-----------------|
| 1 | 112351306 | 112351563 | 112351434 | 8   | 10  | 3  | 3.225884308 | 0.0139466   | KCND3    | ENSG00000171385 |
| 1 | 112357133 | 112357363 | 112357254 | 9   | 11  | 5  | 2.346097679 | 0.0364013   | KCND3    | ENSG00000171385 |
| 1 | 112358843 | 112359110 | 112358966 | 10  | 10  | 2  | 4.301179077 | 0.00512919  | KCND3    | ENSG00000171385 |
| 1 | 112642823 | 112643039 | 112642986 | 8   | 9   | 1  | 5.865244197 | 0.00272497  |          | ENSG00000217202 |
| 1 | 112663841 | 112664154 | 112664004 | 11  | 13  | 0  | 16.42268375 | 1.91E-05    |          | ENSG00000217202 |
| 1 | 112713878 | 112714092 | 112714002 | 9   | 10  | 0  | 12.90353723 | 0.000195991 |          | ENSG00000209263 |
| 1 | 112808635 | 112808965 | 112808793 | 15  | 19  | 2  | 7.820325595 | 1.32E-05    | WNT2B    | ENSG00000134245 |
| 1 | 112810308 | 112810542 | 112810425 | 10  | 12  | 4  | 3.049926982 | 0.0108184   | WNT2B    | ENSG00000134245 |
| 1 | 112852613 | 112852837 | 112852675 | 10  | 10  | 3  | 3.225884308 | 0.0139466   | WNT2B    | ENSG00000134245 |
| 1 | 112963205 | 112963599 | 112963384 | 8   | 16  | 9  | 1.994183027 | 0.0370915   | ST7L     | ENSG00000007341 |
| 1 | 112990401 | 112990773 | 112990563 | 16  | 21  | 1  | 12.90353723 | 4.95E-07    |          | ENSG00000209307 |
| 1 | 113031490 | 113031974 | 113031695 | 143 | 184 | 0  | 217.0140353 | 4.39E-63    | MOV10    | ENSG00000155363 |
| 1 | 113043106 | 113043325 | 113043208 | 14  | 14  | 2  | 5.865244197 | 0.000387308 | RHOC     | ENSG00000155366 |
| 1 | 113047828 | 113048286 | 113048078 | 18  | 32  | 1  | 19.35530585 | 1.42E-10    | RHOC     | ENSG00000155366 |
| 1 | 113049045 | 113049296 | 113049182 | 13  | 14  | 0  | 17.59573259 | 8.79E-06    | RHOC     | ENSG00000155366 |
| 1 | 113049450 | 113049755 | 113049617 | 12  | 14  | 4  | 3.519146518 | 0.00361132  | RHOC     | ENSG00000155366 |
| 1 | 113058182 | 113058456 | 113058319 | 8   | 8   | 1  | 5.278719777 | 0.00542188  | PPM1J    | ENSG00000155367 |
| 1 | 113107020 | 113107668 | 113107361 | 59  | 97  | 0  | 114.9587863 | 9.27E-34    |          | ENSG00000198789 |
| 1 | 113373586 | 113373823 | 113373704 | 8   | 8   | 2  | 3.519146518 | 0.017558    | LRIG2    | ENSG00000198799 |
| 1 | 113416832 | 113417305 | 113417137 | 8   | 16  | 5  | 3.323638378 | 0.00288759  | LRIG2    | ENSG00000198799 |
| 1 | 113615219 | 113615424 | 113615344 | 10  | 10  | 3  | 3.225884308 | 0.0139466   |          | ENSG00000218094 |
| 1 | 113732778 | 113733153 | 113732986 | 14  | 20  | 7  | 3.079253203 | 0.00177418  | MAGI3    | ENSG00000081026 |
| 1 | 113734207 | 113734454 | 113734310 | 8   | 11  | 5  | 2.346097679 | 0.0364013   | MAGI3    | ENSG00000081026 |
| 1 | 113923882 | 113924094 | 113923988 | 8   | 8   | 4  | 2.111487911 | 0.0804809   |          | ENSG00000217056 |
| 1 | 114018823 | 114019065 | 114018967 | 11  | 13  | 6  | 2.346097679 | 0.0266147   |          | ENSG00000217298 |
| 1 | 114102855 | 114103228 | 114103034 | 11  | 18  | 9  | 2.228792795 | 0.0164363   | PHTF1    | ENSG00000116793 |
| 1 | 114103437 | 114103992 | 114103782 | 11  | 25  | 12 | 2.346097679 | 0.00444113  | PHTF1    | ENSG00000116793 |
| 1 | 114136589 | 114136790 | 114136655 | 8   | 9   | 8  | 1.303387599 | 0.281715    | RSBN1    | ENSG00000081019 |
| 1 | 114148969 | 114149236 | 114149102 | 11  | 12  | 6  | 2.178519273 | 0.0416567   | RSBN1    | ENSG00000081019 |
| 1 | 114152839 | 114153021 | 114152930 | 8   | 8   | 6  | 1.508205651 | 0.203852    | RSBN1    | ENSG00000081019 |
| 1 | 114155337 | 114155661 | 114155499 | 13  | 18  | 14 | 1.485861863 | 0.123674    | RSBN1    | ENSG00000081019 |
| 1 | 114155756 | 114157070 | 114156593 | 47  | 118 | 44 | 3.102062486 | 2.51E-12    | RSBN1    | ENSG00000081019 |
| 1 | 114162925 | 114163109 | 114163012 | 8   | 8   | 5  | 1.759573259 | 0.13508     | RSBN1    | ENSG00000081019 |
| 1 | 114229384 | 114229563 | 114229501 | 8   | 8   | 5  | 1.759573259 | 0.13508     | C1orf178 | ENSG00000188761 |

|   |           |           |           |    |     |    |             |             |         |                 |
|---|-----------|-----------|-----------|----|-----|----|-------------|-------------|---------|-----------------|
| 1 | 114247786 | 114248092 | 114247954 | 8  | 11  | 15 | 0.879786629 | 0.637414    | AP4B1   | ENSG00000134262 |
| 1 | 114248562 | 114250027 | 114249341 | 58 | 156 | 38 | 4.722273533 | 4.27E-23    | AP4B1   | ENSG00000134262 |
| 1 | 114261273 | 114261697 | 114261447 | 38 | 46  | 13 | 3.938092532 | 3.17E-07    | DCLRE1B | ENSG00000118655 |
| 1 | 114272243 | 114272610 | 114272450 | 11 | 16  | 15 | 1.246364392 | 0.263987    | HIPK1   | ENSG00000163349 |
| 1 | 114272946 | 114273246 | 114273109 | 8  | 12  | 21 | 0.693165223 | 0.860764    | HIPK1   | ENSG00000163349 |
| 1 | 114273303 | 114273855 | 114273620 | 28 | 46  | 22 | 2.397099802 | 0.000174658 | HIPK1   | ENSG00000163349 |
| 1 | 114274262 | 114274966 | 114274620 | 20 | 46  | 18 | 2.901752392 | 1.57E-05    | HIPK1   | ENSG00000163349 |
| 1 | 114277937 | 114278214 | 114278075 | 9  | 10  | 5  | 2.150589539 | 0.0575848   | HIPK1   | ENSG00000163349 |
| 1 | 114320801 | 114321224 | 114320980 | 17 | 26  | 25 | 1.218166102 | 0.236859    | OLFML3  | ENSG00000116774 |
| 1 | 114321257 | 114321528 | 114321392 | 9  | 13  | 16 | 0.966040221 | 0.542489    | OLFML3  | ENSG00000116774 |
| 1 | 114322977 | 114323290 | 114323118 | 14 | 16  | 16 | 1.173048839 | 0.322157    | OLFML3  | ENSG00000116774 |
| 1 | 114345633 | 114345919 | 114345776 | 11 | 13  | 10 | 1.49297125  | 0.157311    |         | ENSG00000216343 |
| 1 | 114354730 | 114354909 | 114354802 | 8  | 8   | 0  | 10.55743955 | 0.000925496 |         | ENSG00000216343 |
| 1 | 114362052 | 114362270 | 114362161 | 8  | 8   | 5  | 1.759573259 | 0.13508     |         | ENSG00000216343 |
| 1 | 114377335 | 114377942 | 114377564 | 12 | 27  | 16 | 1.932080441 | 0.0141162   |         | ENSG00000216343 |
| 1 | 114384507 | 114384719 | 114384613 | 8  | 9   | 1  | 5.865244197 | 0.00272497  |         | ENSG00000216343 |
| 1 | 114416883 | 114417150 | 114417038 | 8  | 11  | 2  | 4.692195357 | 0.00272444  |         | ENSG00000216343 |
| 1 | 114417988 | 114418187 | 114418091 | 9  | 9   | 10 | 1.066408036 | 0.444985    |         | ENSG00000216343 |
| 1 | 114427156 | 114427542 | 114427335 | 8  | 16  | 6  | 2.848832895 | 0.00632407  | SYT6    | ENSG00000134207 |
| 1 | 114427678 | 114427961 | 114427819 | 9  | 12  | 1  | 7.624817456 | 0.000332769 | SYT6    | ENSG00000134207 |
| 1 | 114434726 | 114434931 | 114434857 | 8  | 9   | 3  | 2.932622098 | 0.0242899   | SYT6    | ENSG00000134207 |
| 1 | 114437763 | 114438212 | 114438052 | 10 | 18  | 9  | 2.228792795 | 0.0164363   | SYT6    | ENSG00000134207 |
| 1 | 114453424 | 114453750 | 114453589 | 8  | 13  | 9  | 1.642268375 | 0.111397    | SYT6    | ENSG00000134207 |
| 1 | 114454683 | 114454871 | 114454777 | 8  | 9   | 3  | 2.932622098 | 0.0242899   | SYT6    | ENSG00000134207 |
| 1 | 114455867 | 114456113 | 114456032 | 8  | 10  | 3  | 3.225884308 | 0.0139466   | SYT6    | ENSG00000134207 |
| 1 | 114460183 | 114460477 | 114460333 | 13 | 17  | 10 | 1.919534464 | 0.0400548   | SYT6    | ENSG00000134207 |
| 1 | 114461321 | 114461561 | 114461441 | 8  | 11  | 4  | 2.815317214 | 0.0183428   | SYT6    | ENSG00000134207 |
| 1 | 114483152 | 114483439 | 114483295 | 8  | 12  | 12 | 1.173048839 | 0.343543    | SYT6    | ENSG00000134207 |
| 1 | 114488171 | 114488360 | 114488220 | 8  | 9   | 8  | 1.303387599 | 0.281715    | SYT6    | ENSG00000134207 |
| 1 | 114491311 | 114491509 | 114491410 | 8  | 10  | 4  | 2.580707446 | 0.0306059   | SYT6    | ENSG00000134207 |
| 1 | 114509404 | 114509685 | 114509513 | 11 | 13  | 7  | 2.052835469 | 0.046392    | SYT6    | ENSG00000134207 |
| 1 | 114517808 | 114518023 | 114517957 | 9  | 11  | 9  | 1.407658607 | 0.210479    | SYT6    | ENSG00000134207 |
| 1 | 114518096 | 114518318 | 114518207 | 8  | 10  | 8  | 1.433726359 | 0.209175    | SYT6    | ENSG00000134207 |
| 1 | 114518334 | 114518770 | 114518513 | 9  | 17  | 16 | 1.242051712 | 0.261202    | SYT6    | ENSG00000134207 |

|   |           |           |           |     |     |    |             |            |      |                 |
|---|-----------|-----------|-----------|-----|-----|----|-------------|------------|------|-----------------|
| 1 | 114518973 | 114519170 | 114519073 | 8   | 8   | 3  | 2.639359888 | 0.0415794  | SYT6 | ENSG00000134207 |
| 1 | 114522013 | 114522227 | 114522120 | 9   | 9   | 11 | 0.977540699 | 0.526123   | SYT6 | ENSG00000134207 |
| 1 | 114546285 | 114546733 | 114546554 | 8   | 17  | 10 | 1.919534464 | 0.0400548  | SYT6 | ENSG00000134207 |
| 1 | 114559622 | 114559851 | 114559736 | 8   | 9   | 8  | 1.303387599 | 0.281715   | SYT6 | ENSG00000134207 |
| 1 | 114563739 | 114564216 | 114563977 | 11  | 20  | 16 | 1.449060331 | 0.126098   | SYT6 | ENSG00000134207 |
| 1 | 114565125 | 114565387 | 114565256 | 12  | 12  | 12 | 1.173048839 | 0.343543   | SYT6 | ENSG00000134207 |
| 1 | 114573545 | 114573762 | 114573669 | 8   | 9   | 12 | 0.902345261 | 0.602772   | SYT6 | ENSG00000134207 |
| 1 | 114574045 | 114574259 | 114574175 | 8   | 10  | 10 | 1.173048839 | 0.355733   | SYT6 | ENSG00000134207 |
| 1 | 114602363 | 114602765 | 114602542 | 12  | 17  | 5  | 3.519146518 | 0.00167472 | SYT6 | ENSG00000134207 |
| 1 | 114605142 | 114605495 | 114605387 | 8   | 12  | 11 | 1.270802909 | 0.274822   | SYT6 | ENSG00000134207 |
| 1 | 114605920 | 114606251 | 114606082 | 10  | 15  | 11 | 1.564065119 | 0.11768    | SYT6 | ENSG00000134207 |
| 1 | 114614799 | 114615119 | 114614959 | 8   | 13  | 12 | 1.263283365 | 0.272203   | SYT6 | ENSG00000134207 |
| 1 | 114619919 | 114620229 | 114620081 | 8   | 12  | 3  | 3.812408728 | 0.004404   | SYT6 | ENSG00000134207 |
| 1 | 114626912 | 114627262 | 114627089 | 19  | 23  | 15 | 1.759573259 | 0.0372968  | SYT6 | ENSG00000134207 |
| 1 | 114631837 | 114632098 | 114631967 | 10  | 12  | 2  | 5.083211637 | 0.00143337 | SYT6 | ENSG00000134207 |
| 1 | 114635690 | 114635898 | 114635794 | 9   | 10  | 6  | 1.843362462 | 0.0964212  | SYT6 | ENSG00000134207 |
| 1 | 114655070 | 114655312 | 114655209 | 8   | 12  | 9  | 1.524963491 | 0.154777   |      | ENSG00000216325 |
| 1 | 114664897 | 114665181 | 114665039 | 9   | 10  | 9  | 1.290353723 | 0.279648   |      | ENSG00000216325 |
| 1 | 114680215 | 114680413 | 114680313 | 8   | 11  | 5  | 2.346097679 | 0.0364013  |      | ENSG00000216325 |
| 1 | 114680416 | 114680981 | 114680693 | 122 | 153 | 17 | 10.03608451 | 4.31E-34   |      | ENSG00000216325 |
| 1 | 114690582 | 114691150 | 114690866 | 55  | 75  | 19 | 4.457585589 | 1.12E-11   |      | ENSG00000216325 |
| 1 | 114698354 | 114698533 | 114698443 | 8   | 8   | 9  | 1.055743955 | 0.456865   |      | ENSG00000216325 |
| 1 | 114722583 | 114722852 | 114722745 | 8   | 11  | 9  | 1.407658607 | 0.210479   |      | ENSG00000216325 |
| 1 | 114730924 | 114731340 | 114731175 | 9   | 15  | 9  | 1.876878143 | 0.0544542  |      | ENSG00000216325 |
| 1 | 114734164 | 114734446 | 114734290 | 8   | 8   | 12 | 0.812110735 | 0.692685   |      | ENSG00000216325 |
| 1 | 114765557 | 114765898 | 114765727 | 8   | 13  | 8  | 1.824742639 | 0.0744168  |      | ENSG00000216325 |
| 1 | 114766412 | 114766702 | 114766552 | 9   | 11  | 10 | 1.279689643 | 0.277323   |      | ENSG00000216325 |
| 1 | 114771762 | 114772081 | 114771921 | 10  | 14  | 21 | 0.799806027 | 0.754204   |      | ENSG00000216325 |
| 1 | 114778825 | 114779204 | 114779025 | 16  | 24  | 4  | 5.865244197 | 8.64E-06   |      | ENSG00000216325 |
| 1 | 114779288 | 114779632 | 114779451 | 24  | 28  | 1  | 17.00920817 | 2.80E-09   |      | ENSG00000216325 |
| 1 | 114793626 | 114793866 | 114793746 | 9   | 9   | 4  | 2.346097679 | 0.050148   |      | ENSG00000216325 |
| 1 | 114799765 | 114800041 | 114799902 | 8   | 9   | 10 | 1.066408036 | 0.444985   |      | ENSG00000216325 |
| 1 | 114803428 | 114803658 | 114803524 | 9   | 12  | 5  | 2.541605819 | 0.0225912  |      | ENSG00000216325 |
| 1 | 114834398 | 114834661 | 114834542 | 12  | 12  | 4  | 3.049926982 | 0.0108184  |      | ENSG00000201114 |

|   |           |           |           |    |    |    |             |             |         |                 |
|---|-----------|-----------|-----------|----|----|----|-------------|-------------|---------|-----------------|
| 1 | 114837053 | 114837232 | 114837091 | 8  | 8  | 6  | 1.508205651 | 0.203852    |         | ENSG00000201114 |
| 1 | 114847768 | 114847997 | 114847932 | 8  | 10 | 6  | 1.843362462 | 0.0964212   | TRIM33  | ENSG00000197323 |
| 1 | 114849282 | 114849752 | 114849547 | 18 | 29 | 10 | 3.199224107 | 0.000186763 | TRIM33  | ENSG00000197323 |
| 1 | 114852519 | 114852814 | 114852643 | 9  | 10 | 8  | 1.433726359 | 0.209175    | TRIM33  | ENSG00000197323 |
| 1 | 114853995 | 114854201 | 114854130 | 8  | 10 | 6  | 1.843362462 | 0.0964212   | TRIM33  | ENSG00000197323 |
| 1 | 114854206 | 114854954 | 114854775 | 11 | 30 | 24 | 1.454580561 | 0.0803614   | TRIM33  | ENSG00000197323 |
| 1 | 114855310 | 114856230 | 114855538 | 31 | 80 | 38 | 2.436332205 | 9.98E-07    | TRIM33  | ENSG00000197323 |
| 1 | 114856244 | 114856723 | 114856494 | 10 | 18 | 8  | 2.476436439 | 0.00924552  | TRIM33  | ENSG00000197323 |
| 1 | 114857203 | 114857427 | 114857305 | 11 | 12 | 6  | 2.178519273 | 0.0416567   | TRIM33  | ENSG00000197323 |
| 1 | 114857864 | 114858120 | 114857992 | 8  | 8  | 7  | 1.319679944 | 0.283403    | TRIM33  | ENSG00000197323 |
| 1 | 114858874 | 114859090 | 114858982 | 11 | 11 | 9  | 1.407658607 | 0.210479    | TRIM33  | ENSG00000197323 |
| 1 | 114866450 | 114866640 | 114866556 | 9  | 9  | 5  | 1.955081399 | 0.0892323   | TRIM33  | ENSG00000197323 |
| 1 | 114873344 | 114873709 | 114873523 | 11 | 18 | 1  | 11.14396397 | 4.44E-06    |         | ENSG00000216823 |
| 1 | 114894396 | 114894705 | 114894568 | 8  | 12 | 14 | 1.016642327 | 0.486402    |         | ENSG00000216823 |
| 1 | 114898553 | 114898969 | 114898728 | 12 | 20 | 10 | 2.239456875 | 0.0121685   |         | ENSG00000216823 |
| 1 | 114902749 | 114902970 | 114902838 | 8  | 10 | 6  | 1.843362462 | 0.0964212   |         | ENSG00000216823 |
| 1 | 114908877 | 114909145 | 114908995 | 8  | 9  | 6  | 1.675784056 | 0.141978    | BCAS2   | ENSG00000116752 |
| 1 | 114910120 | 114910356 | 114910261 | 12 | 12 | 6  | 2.178519273 | 0.0416567   | BCAS2   | ENSG00000116752 |
| 1 | 114925337 | 114926171 | 114925846 | 40 | 86 | 31 | 3.189226532 | 9.08E-10    | BCAS2   | ENSG00000116752 |
| 1 | 114948045 | 114948285 | 114948106 | 8  | 11 | 11 | 1.173048839 | 0.349489    | BCAS2   | ENSG00000116752 |
| 1 | 114951411 | 114951642 | 114951526 | 10 | 12 | 19 | 0.762481746 | 0.784291    | BCAS2   | ENSG00000116752 |
| 1 | 114954810 | 114955167 | 114954988 | 19 | 25 | 6  | 4.357038546 | 4.72E-05    | BCAS2   | ENSG00000116752 |
| 1 | 114964640 | 114964847 | 114964743 | 10 | 11 | 8  | 1.564065119 | 0.151515    | BCAS2   | ENSG00000116752 |
| 1 | 115013402 | 115014544 | 115014148 | 18 | 58 | 34 | 1.977425186 | 0.000540051 | DENND2C | ENSG00000175984 |
| 1 | 115027772 | 115028054 | 115027900 | 8  | 10 | 2  | 4.301179077 | 0.00512919  | AMPD1   | ENSG00000116748 |
| 1 | 115031792 | 115032077 | 115031934 | 11 | 14 | 9  | 1.759573259 | 0.0786014   | AMPD1   | ENSG00000116748 |
| 1 | 115039659 | 115039862 | 115039724 | 8  | 8  | 2  | 3.519146518 | 0.017558    | AMPD1   | ENSG00000116748 |
| 1 | 115044387 | 115044566 | 115044460 | 8  | 8  | 6  | 1.508205651 | 0.203852    |         | ENSG00000223048 |
| 1 | 115046862 | 115047258 | 115047020 | 11 | 17 | 4  | 4.222975822 | 0.000640773 |         | ENSG00000223048 |
| 1 | 115047380 | 115047630 | 115047510 | 8  | 10 | 7  | 1.612942154 | 0.147335    |         | ENSG00000223048 |
| 1 | 115060531 | 115061331 | 115060861 | 31 | 62 | 33 | 2.173590496 | 8.51E-05    | NRAS    | ENSG00000213281 |
| 1 | 115083895 | 115084085 | 115083945 | 8  | 8  | 2  | 3.519146518 | 0.017558    | CSDE1   | ENSG00000009307 |
| 1 | 115093505 | 115093720 | 115093609 | 8  | 9  | 7  | 1.466311049 | 0.20706     | CSDE1   | ENSG00000009307 |
| 1 | 115100700 | 115101022 | 115100861 | 9  | 13 | 11 | 1.368556979 | 0.211388    | CSDE1   | ENSG00000009307 |

|   |           |           |           |     |     |    |             |             |          |                 |
|---|-----------|-----------|-----------|-----|-----|----|-------------|-------------|----------|-----------------|
| 1 | 115101388 | 115102646 | 115102271 | 27  | 115 | 46 | 2.895184369 | 3.77E-11    | CSDE1    | ENSG00000009307 |
| 1 | 115113020 | 115113256 | 115113132 | 11  | 11  | 6  | 2.010940867 | 0.0640214   | CSDE1    | ENSG00000009307 |
| 1 | 115124151 | 115124523 | 115124344 | 11  | 17  | 8  | 2.346097679 | 0.0144542   |          | ENSG00000052723 |
| 1 | 115124583 | 115125157 | 115124814 | 31  | 56  | 15 | 4.17898649  | 8.69E-09    |          | ENSG00000052723 |
| 1 | 115141602 | 115141802 | 115141702 | 8   | 9   | 3  | 2.932622098 | 0.0242899   |          | ENSG00000052723 |
| 1 | 115147323 | 115147599 | 115147442 | 10  | 11  | 6  | 2.010940867 | 0.0640214   |          | ENSG00000052723 |
| 1 | 115300790 | 115301061 | 115300923 | 10  | 14  | 6  | 2.513676084 | 0.016726    | TSHB     | ENSG00000134200 |
| 1 | 115317048 | 115317252 | 115317160 | 8   | 9   | 6  | 1.675784056 | 0.141978    | TSHB     | ENSG00000134200 |
| 1 | 115381231 | 115381549 | 115381372 | 18  | 22  | 9  | 2.69801233  | 0.00276236  | TSHB     | ENSG00000134200 |
| 1 | 115385809 | 115386039 | 115385920 | 9   | 11  | 3  | 3.519146518 | 0.00788869  | TSHB     | ENSG00000134200 |
| 1 | 115396554 | 115396910 | 115396732 | 11  | 16  | 5  | 3.323638378 | 0.00288759  | TSHB     | ENSG00000134200 |
| 1 | 115432408 | 115432591 | 115432499 | 8   | 8   | 3  | 2.639359888 | 0.0415794   | TSPAN2   | ENSG00000134198 |
| 1 | 115483131 | 115483394 | 115483262 | 10  | 12  | 5  | 2.541605819 | 0.0225912   | TSPAN2   | ENSG00000134198 |
| 1 | 115538661 | 115539049 | 115538885 | 9   | 16  | 13 | 1.424416448 | 0.161813    | TSPAN2   | ENSG00000134198 |
| 1 | 115619445 | 115619624 | 115619534 | 8   | 8   | 4  | 2.111487911 | 0.0804809   | NGF      | ENSG00000134259 |
| 1 | 115644712 | 115644993 | 115644850 | 9   | 11  | 0  | 14.07658607 | 9.02E-05    | NGF      | ENSG00000134259 |
| 1 | 115661782 | 115661996 | 115661851 | 8   | 8   | 12 | 0.812110735 | 0.692685    | NGF      | ENSG00000134259 |
| 1 | 115713820 | 115714144 | 115713982 | 9   | 14  | 0  | 17.59573259 | 8.79E-06    | NGF      | ENSG00000134259 |
| 1 | 115778657 | 115778848 | 115778723 | 8   | 9   | 0  | 11.73048839 | 0.000425898 |          | ENSG00000216304 |
| 1 | 115802777 | 115803000 | 115802893 | 8   | 10  | 6  | 1.843362462 | 0.0964212   |          | ENSG00000216304 |
| 1 | 115891931 | 115892275 | 115892101 | 9   | 12  | 2  | 5.083211637 | 0.00143337  |          | ENSG00000219215 |
| 1 | 115940019 | 115940413 | 115940238 | 12  | 20  | 3  | 6.158506406 | 2.99E-05    |          | ENSG00000222797 |
| 1 | 115952366 | 115952669 | 115952504 | 11  | 13  | 1  | 8.211341875 | 0.000163445 |          | ENSG00000222797 |
| 1 | 116050966 | 116051176 | 116051071 | 10  | 10  | 4  | 2.580707446 | 0.0306059   | VANGL1   | ENSG00000173218 |
| 1 | 116055513 | 116055745 | 116055629 | 16  | 18  | 3  | 5.571981987 | 0.000108726 | CASQ2    | ENSG00000118729 |
| 1 | 116057325 | 116057740 | 116057532 | 12  | 20  | 16 | 1.449060331 | 0.126098    | CASQ2    | ENSG00000118729 |
| 1 | 116058947 | 116059357 | 116059224 | 12  | 20  | 9  | 2.463402563 | 0.00689886  | CASQ2    | ENSG00000118729 |
| 1 | 116115841 | 116116431 | 116116133 | 38  | 58  | 3  | 17.30247038 | 8.05E-17    | CASQ2    | ENSG00000118729 |
| 1 | 116155284 | 116155597 | 116155440 | 14  | 16  | 0  | 19.94183027 | 1.86E-06    | NHLH2    | ENSG00000177551 |
| 1 | 116159938 | 116160207 | 116160088 | 8   | 11  | 4  | 2.815317214 | 0.0183428   | NHLH2    | ENSG00000177551 |
| 1 | 116183162 | 116184186 | 116183563 | 138 | 240 | 5  | 47.11746171 | 1.96E-73    | NHLH2    | ENSG00000177551 |
| 1 | 116221625 | 116221977 | 116221801 | 28  | 34  | 1  | 20.52835469 | 3.17E-11    |          | ENSG00000219640 |
| 1 | 116325602 | 116325979 | 116325844 | 11  | 16  | 5  | 3.323638378 | 0.00288759  | SLC22A15 | ENSG00000163393 |
| 1 | 116454429 | 116454807 | 116454537 | 9   | 17  | 9  | 2.111487911 | 0.0248715   | C1orf161 | ENSG00000173212 |



|   |           |           |           |     |     |    |             |             |          |                 |
|---|-----------|-----------|-----------|-----|-----|----|-------------|-------------|----------|-----------------|
| 1 | 116457345 | 116457672 | 116457508 | 17  | 21  | 5  | 4.301179077 | 0.000172642 | C1orf161 | ENSG00000173212 |
| 1 | 116476198 | 116476535 | 116476366 | 9   | 15  | 1  | 9.384390715 | 3.90E-05    | C1orf161 | ENSG00000173212 |
| 1 | 116483181 | 116483687 | 116483360 | 18  | 28  | 6  | 4.859773763 | 8.07E-06    | C1orf161 | ENSG00000173212 |
| 1 | 116495642 | 116495888 | 116495752 | 10  | 10  | 1  | 6.451768616 | 0.00135978  | C1orf161 | ENSG00000173212 |
| 1 | 116538985 | 116539222 | 116539103 | 9   | 10  | 2  | 4.301179077 | 0.00512919  |          | ENSG00000209230 |
| 1 | 116612355 | 116612681 | 116612514 | 14  | 17  | 13 | 1.508205651 | 0.12204     |          | ENSG00000209170 |
| 1 | 116656169 | 116656829 | 116656279 | 13  | 27  | 15 | 2.052835469 | 0.00908649  |          | ENSG00000209170 |
| 1 | 116678160 | 116678356 | 116678257 | 9   | 11  | 1  | 7.038293036 | 0.000674435 | ATP1A1   | ENSG00000163399 |
| 1 | 116717235 | 116717435 | 116717323 | 8   | 8   | 3  | 2.639359888 | 0.0415794   | ATP1A1   | ENSG00000163399 |
| 1 | 116719046 | 116719515 | 116719225 | 9   | 16  | 12 | 1.533986944 | 0.120062    | ATP1A1   | ENSG00000163399 |
| 1 | 116728060 | 116728256 | 116728180 | 8   | 8   | 2  | 3.519146518 | 0.017558    | ATP1A1   | ENSG00000163399 |
| 1 | 116739292 | 116739589 | 116739470 | 11  | 13  | 3  | 4.105670938 | 0.00243034  | ATP1A1   | ENSG00000163399 |
| 1 | 116762634 | 116762869 | 116762751 | 12  | 13  | 3  | 4.105670938 | 0.00243034  |          | ENSG00000203865 |
| 1 | 116795853 | 116796130 | 116795976 | 8   | 11  | 1  | 7.038293036 | 0.000674435 |          | ENSG00000200547 |
| 1 | 116796199 | 116796530 | 116796366 | 8   | 13  | 9  | 1.642268375 | 0.111397    |          | ENSG00000200547 |
| 1 | 116797749 | 116798005 | 116797877 | 16  | 18  | 14 | 1.485861863 | 0.123674    |          | ENSG00000200547 |
| 1 | 116810591 | 116810819 | 116810705 | 11  | 12  | 6  | 2.178519273 | 0.0416567   |          | ENSG00000200547 |
| 1 | 116811462 | 116811648 | 116811602 | 8   | 9   | 0  | 11.73048839 | 0.000425898 |          | ENSG00000200547 |
| 1 | 116816644 | 116817046 | 116816895 | 8   | 16  | 4  | 3.988366054 | 0.00115141  |          | ENSG00000200547 |
| 1 | 116829479 | 116829799 | 116829639 | 9   | 13  | 4  | 3.28453675  | 0.00629037  |          | ENSG00000200547 |
| 1 | 116843247 | 116843530 | 116843388 | 10  | 13  | 10 | 1.49297125  | 0.157311    |          | ENSG00000177173 |
| 1 | 116883325 | 116883527 | 116883419 | 8   | 8   | 0  | 10.55743955 | 0.000925496 |          | ENSG00000177173 |
| 1 | 116918724 | 116919081 | 116918902 | 14  | 18  | 9  | 2.228792795 | 0.0164363   | CD58     | ENSG00000116815 |
| 1 | 117010881 | 117011355 | 117011153 | 8   | 18  | 3  | 5.571981987 | 0.000108726 | IGSF3    | ENSG00000143061 |
| 1 | 117018872 | 117019361 | 117019051 | 14  | 25  | 8  | 3.388807758 | 0.000297109 |          | ENSG00000211543 |
| 1 | 117052675 | 117052965 | 117052820 | 8   | 13  | 3  | 4.105670938 | 0.00243034  |          | ENSG00000219018 |
| 1 | 117108220 | 117108551 | 117108385 | 9   | 14  | 3  | 4.398933147 | 0.00132748  | CD2      | ENSG00000116824 |
| 1 | 117122378 | 117122557 | 117122448 | 9   | 9   | 1  | 5.865244197 | 0.00272497  |          | ENSG00000220126 |
| 1 | 117161806 | 117162047 | 117161920 | 8   | 9   | 7  | 1.466311049 | 0.20706     |          | ENSG00000220126 |
| 1 | 117186764 | 117187007 | 117186885 | 8   | 9   | 1  | 5.865244197 | 0.00272497  |          | ENSG00000221425 |
| 1 | 117197886 | 117198164 | 117198025 | 18  | 20  | 3  | 6.158506406 | 2.99E-05    |          | ENSG00000221425 |
| 1 | 117222065 | 117224226 | 117223437 | 197 | 405 | 20 | 22.67894423 | 6.59E-109   |          | ENSG00000221425 |
| 1 | 117251102 | 117251351 | 117251214 | 8   | 8   | 4  | 2.111487911 | 0.0804809   |          | ENSG00000221425 |
| 1 | 117357424 | 117357784 | 117357605 | 19  | 26  | 8  | 3.519146518 | 0.000175368 | IGSF2    | ENSG00000134256 |

|   |           |           |           |    |    |    |             |             |        |                 |
|---|-----------|-----------|-----------|----|----|----|-------------|-------------|--------|-----------------|
| 1 | 117359910 | 117360194 | 117360057 | 9  | 11 | 4  | 2.815317214 | 0.0183428   | IGSF2  | ENSG00000134256 |
| 1 | 117378575 | 117378767 | 117378671 | 8  | 8  | 3  | 2.639359888 | 0.0415794   | TTF2   | ENSG00000116830 |
| 1 | 117399526 | 117399779 | 117399652 | 8  | 10 | 2  | 4.301179077 | 0.00512919  | TTF2   | ENSG00000116830 |
| 1 | 117403589 | 117403773 | 117403681 | 8  | 9  | 7  | 1.466311049 | 0.20706     | TTF2   | ENSG00000116830 |
| 1 | 117403865 | 117404432 | 117404118 | 9  | 23 | 16 | 1.65606895  | 0.0532464   | TTF2   | ENSG00000116830 |
| 1 | 117404498 | 117404690 | 117404641 | 8  | 9  | 5  | 1.955081399 | 0.0892323   | TTF2   | ENSG00000116830 |
| 1 | 117411994 | 117412232 | 117412070 | 9  | 12 | 6  | 2.178519273 | 0.0416567   | TTF2   | ENSG00000116830 |
| 1 | 117413543 | 117413812 | 117413713 | 9  | 11 | 5  | 2.346097679 | 0.0364013   | TTF2   | ENSG00000116830 |
| 1 | 117432884 | 117433175 | 117433042 | 9  | 10 | 5  | 2.150589539 | 0.0575848   |        | ENSG00000215930 |
| 1 | 117466133 | 117466567 | 117466419 | 11 | 17 | 8  | 2.346097679 | 0.0144542   | TRIM45 | ENSG00000134253 |
| 1 | 117523631 | 117523879 | 117523745 | 9  | 10 | 1  | 6.451768616 | 0.00135978  | VTCN1  | ENSG00000134258 |
| 1 | 117555003 | 117555341 | 117555165 | 9  | 13 | 8  | 1.824742639 | 0.0744168   | VTCN1  | ENSG00000134258 |
| 1 | 117612767 | 117613427 | 117613142 | 16 | 34 | 14 | 2.737113958 | 0.000281523 |        | ENSG00000223204 |
| 1 | 117628706 | 117629037 | 117628873 | 10 | 14 | 6  | 2.513676084 | 0.016726    |        | ENSG00000223204 |
| 1 | 117743878 | 117744171 | 117744043 | 8  | 8  | 3  | 2.639359888 | 0.0415794   | MAN1A2 | ENSG00000198162 |
| 1 | 117885159 | 117885538 | 117885359 | 13 | 19 | 3  | 5.865244197 | 5.72E-05    |        | ENSG00000217774 |
| 1 | 117925051 | 117925291 | 117925171 | 8  | 8  | 0  | 10.55743955 | 0.000925496 | FAM46C | ENSG00000183508 |
| 1 | 117935439 | 117935755 | 117935597 | 13 | 17 | 5  | 3.519146518 | 0.00167472  | FAM46C | ENSG00000183508 |
| 1 | 117936286 | 117936697 | 117936495 | 8  | 17 | 9  | 2.111487911 | 0.0248715   | FAM46C | ENSG00000183508 |
| 1 | 117949232 | 117949517 | 117949382 | 8  | 13 | 2  | 5.474227917 | 0.000747844 | FAM46C | ENSG00000183508 |
| 1 | 117949649 | 117949873 | 117949792 | 8  | 9  | 0  | 11.73048839 | 0.000425898 | FAM46C | ENSG00000183508 |
| 1 | 117971897 | 117972243 | 117972073 | 18 | 23 | 5  | 4.692195357 | 5.29E-05    |        | ENSG00000213262 |
| 1 | 117999357 | 117999640 | 117999523 | 9  | 11 | 10 | 1.279689643 | 0.277323    |        | ENSG00000213262 |
| 1 | 118001241 | 118001455 | 118001348 | 10 | 10 | 3  | 3.225884308 | 0.0139466   |        | ENSG00000213262 |
| 1 | 118018763 | 118018958 | 118018830 | 8  | 8  | 4  | 2.111487911 | 0.0804809   |        | ENSG00000212266 |
| 1 | 118103029 | 118103471 | 118103208 | 12 | 20 | 5  | 4.105670938 | 0.000308509 |        | ENSG00000218616 |
| 1 | 118191245 | 118191716 | 118191424 | 16 | 24 | 8  | 3.258468998 | 0.000499412 |        | ENSG00000218616 |
| 1 | 118239749 | 118239969 | 118239859 | 10 | 11 | 4  | 2.815317214 | 0.0183428   | GDAP2  | ENSG00000196505 |
| 1 | 118425585 | 118425930 | 118425757 | 10 | 15 | 2  | 6.256260476 | 0.000199274 | SPAG17 | ENSG00000155761 |
| 1 | 118901104 | 118901333 | 118901218 | 9  | 10 | 2  | 4.301179077 | 0.00512919  |        | ENSG00000218441 |
| 1 | 118980209 | 118980398 | 118980303 | 11 | 11 | 2  | 4.692195357 | 0.00272444  |        | ENSG00000218441 |
| 1 | 119484269 | 119484461 | 119484355 | 9  | 9  | 3  | 2.932622098 | 0.0242899   | WARS2  | ENSG00000116874 |
| 1 | 119484590 | 119484982 | 119484863 | 9  | 15 | 7  | 2.346097679 | 0.0195693   | WARS2  | ENSG00000116874 |
| 1 | 119685565 | 119685859 | 119685710 | 14 | 15 | 2  | 6.256260476 | 0.000199274 |        | ENSG00000194297 |

|   |           |           |           |     |      |      |             |             |         |                 |
|---|-----------|-----------|-----------|-----|------|------|-------------|-------------|---------|-----------------|
| 1 | 119702914 | 119703226 | 119703057 | 17  | 20   | 4    | 4.926805125 | 0.00010522  | HAO2    | ENSG00000116882 |
| 1 | 119718508 | 119718815 | 119718661 | 13  | 14   | 4    | 3.519146518 | 0.00361132  | HAO2    | ENSG00000116882 |
| 1 | 119732513 | 119732917 | 119732738 | 11  | 18   | 6    | 3.183989707 | 0.00227432  | HAO2    | ENSG00000116882 |
| 1 | 120018996 | 120019212 | 120019104 | 9   | 11   | 2    | 4.692195357 | 0.00272444  | PHGDH   | ENSG00000092621 |
| 1 | 120030961 | 120031172 | 120031066 | 8   | 9    | 7    | 1.466311049 | 0.20706     | PHGDH   | ENSG00000092621 |
| 1 | 120056226 | 120056418 | 120056301 | 8   | 9    | 3    | 2.932622098 | 0.0242899   | PHGDH   | ENSG00000092621 |
| 1 | 120056501 | 120056810 | 120056645 | 8   | 9    | 1    | 5.865244197 | 0.00272497  | PHGDH   | ENSG00000092621 |
| 1 | 120093264 | 120093474 | 120093378 | 8   | 9    | 2    | 3.910162798 | 0.00955088  | HMGCS2  | ENSG00000134240 |
| 1 | 120123994 | 120124441 | 120124221 | 21  | 29   | 13   | 2.513676084 | 0.00141455  | HMGCS2  | ENSG00000134240 |
| 1 | 120230392 | 120230579 | 120230531 | 9   | 9    | 6    | 1.675784056 | 0.141978    |         | ENSG00000219683 |
| 1 | 120261491 | 120261804 | 120261647 | 11  | 13   | 2    | 5.474227917 | 0.000747844 | ADAM30  | ENSG00000134249 |
| 1 | 120281984 | 120282219 | 120282069 | 8   | 8    | 2    | 3.519146518 | 0.017558    | ADAM30  | ENSG00000134249 |
| 1 | 120292540 | 120293079 | 120292969 | 15  | 25   | 8    | 3.388807758 | 0.000297109 | ADAM30  | ENSG00000134249 |
| 1 | 120312103 | 120312437 | 120312270 | 9   | 14   | 8    | 1.955081399 | 0.0506438   |         | ENSG00000209009 |
| 1 | 120405744 | 120405945 | 120405823 | 8   | 10   | 3    | 3.225884308 | 0.0139466   | NOTCH2  | ENSG00000134250 |
| 1 | 120987274 | 120987659 | 120987446 | 17  | 24   | 0    | 29.32622098 | 3.74E-09    |         | ENSG00000216725 |
| 1 | 121185538 | 121187107 | 121186578 | 489 | 2119 | 2756 | 0.902017969 | 0.999827    |         | ENSG00000216725 |
| 1 | 141477170 | 141477424 | 141477297 | 8   | 10   | 6    | 1.843362462 | 0.0964212   |         | ENSG00000221652 |
| 1 | 141480235 | 141480424 | 141480329 | 9   | 9    | 7    | 1.466311049 | 0.20706     |         | ENSG00000221652 |
| 1 | 141775739 | 141775920 | 141775791 | 9   | 9    | 0    | 11.73048839 | 0.000425898 |         | ENSG00000217764 |
| 1 | 141832647 | 141832826 | 141832736 | 8   | 8    | 0    | 10.55743955 | 0.000925496 |         | ENSG00000217764 |
| 1 | 142310670 | 142311011 | 142310840 | 10  | 15   | 1    | 9.384390715 | 3.90E-05    |         | ENSG00000222289 |
| 1 | 142719537 | 142719791 | 142719669 | 17  | 19   | 11   | 1.955081399 | 0.0295891   |         | ENSG00000196369 |
| 1 | 142720966 | 142721178 | 142721040 | 9   | 10   | 8    | 1.433726359 | 0.209175    |         | ENSG00000196369 |
| 1 | 142721309 | 142723014 | 142722209 | 475 | 710  | 49   | 16.6807545  | 8.69E-176   |         | ENSG00000196369 |
| 1 | 142724882 | 142725109 | 142724995 | 9   | 12   | 12   | 1.173048839 | 0.343543    |         | ENSG00000196369 |
| 1 | 143245265 | 143245822 | 143245590 | 20  | 40   | 25   | 1.849807785 | 0.00619803  |         | ENSG00000201699 |
| 1 | 143597963 | 143598184 | 143598073 | 10  | 10   | 4    | 2.580707446 | 0.0306059   | PDE4DIP | ENSG00000178104 |
| 1 | 143628763 | 143628962 | 143628933 | 8   | 9    | 4    | 2.346097679 | 0.050148    | PDE4DIP | ENSG00000178104 |
| 1 | 143638953 | 143639308 | 143639154 | 8   | 13   | 8    | 1.824742639 | 0.0744168   | PDE4DIP | ENSG00000178104 |
| 1 | 143641808 | 143642127 | 143641987 | 9   | 13   | 11   | 1.368556979 | 0.211388    | PDE4DIP | ENSG00000178104 |
| 1 | 143642296 | 143643002 | 143642631 | 10  | 32   | 15   | 2.419413231 | 0.0012352   | PDE4DIP | ENSG00000178104 |
| 1 | 143643195 | 143644488 | 143643944 | 27  | 119  | 46   | 2.995018313 | 6.18E-12    | PDE4DIP | ENSG00000178104 |
| 1 | 143644542 | 143644783 | 143644656 | 10  | 13   | 8    | 1.824742639 | 0.0744168   | PDE4DIP | ENSG00000178104 |

|   |           |           |           |    |    |    |             |             |         |                 |
|---|-----------|-----------|-----------|----|----|----|-------------|-------------|---------|-----------------|
| 1 | 143657868 | 143658202 | 143658024 | 10 | 15 | 2  | 6.256260476 | 0.000199274 |         | ENSG00000222788 |
| 1 | 143698211 | 143698489 | 143698353 | 9  | 11 | 8  | 1.564065119 | 0.151515    | PDE4DIP | ENSG00000178104 |
| 1 | 143700487 | 143700762 | 143700624 | 12 | 14 | 11 | 1.466311049 | 0.15926     | PDE4DIP | ENSG00000178104 |
| 1 | 143700857 | 143701505 | 143701295 | 8  | 24 | 22 | 1.275053086 | 0.200162    | PDE4DIP | ENSG00000178104 |
| 1 | 143701651 | 143701841 | 143701746 | 8  | 9  | 9  | 1.173048839 | 0.362316    | PDE4DIP | ENSG00000178104 |
| 1 | 143703158 | 143703477 | 143703307 | 8  | 11 | 7  | 1.759573259 | 0.102361    | PDE4DIP | ENSG00000178104 |
| 1 | 143703817 | 143704623 | 143704045 | 17 | 48 | 29 | 1.915979771 | 0.00209077  | PDE4DIP | ENSG00000178104 |
| 1 | 143704668 | 143705013 | 143704840 | 9  | 15 | 16 | 1.104045966 | 0.390393    | PDE4DIP | ENSG00000178104 |
| 1 | 143706202 | 143706694 | 143706315 | 12 | 24 | 17 | 1.629234499 | 0.0548227   | PDE4DIP | ENSG00000178104 |
| 1 | 143706853 | 143707227 | 143707031 | 8  | 14 | 13 | 1.256838042 | 0.269506    | PDE4DIP | ENSG00000178104 |
| 1 | 143707654 | 143707892 | 143707807 | 10 | 11 | 10 | 1.279689643 | 0.277323    | PDE4DIP | ENSG00000178104 |
| 1 | 143710141 | 143710566 | 143710353 | 13 | 22 | 16 | 1.587066077 | 0.071956    | PDE4DIP | ENSG00000178104 |
| 1 | 143717618 | 143717845 | 143717731 | 8  | 10 | 12 | 0.992579787 | 0.511743    | PDE4DIP | ENSG00000178104 |
| 1 | 143727871 | 143728220 | 143728045 | 10 | 16 | 21 | 0.90644683  | 0.624241    | PDE4DIP | ENSG00000178104 |
| 1 | 143728886 | 143729100 | 143728978 | 8  | 9  | 9  | 1.173048839 | 0.362316    | PDE4DIP | ENSG00000178104 |
| 1 | 143736614 | 143736830 | 143736722 | 9  | 9  | 12 | 0.902345261 | 0.602772    | PDE4DIP | ENSG00000178104 |
| 1 | 143737744 | 143737951 | 143737819 | 9  | 9  | 18 | 0.617394126 | 0.901359    | PDE4DIP | ENSG00000178104 |
| 1 | 143740082 | 143740520 | 143740151 | 10 | 19 | 9  | 2.346097679 | 0.0107159   | PDE4DIP | ENSG00000178104 |
| 1 | 143740560 | 143740942 | 143740763 | 11 | 18 | 6  | 3.183989707 | 0.00227432  | PDE4DIP | ENSG00000178104 |
| 1 | 143741285 | 143741693 | 143741464 | 16 | 25 | 25 | 1.173048839 | 0.283523    | PDE4DIP | ENSG00000178104 |
| 1 | 143743570 | 143744044 | 143743874 | 10 | 19 | 10 | 2.132816071 | 0.01835     | PDE4DIP | ENSG00000178104 |
| 1 | 143744215 | 143744623 | 143744371 | 10 | 17 | 15 | 1.319679944 | 0.209239    | PDE4DIP | ENSG00000178104 |
| 1 | 143745333 | 143745588 | 143745488 | 10 | 12 | 13 | 1.089259637 | 0.414883    | PDE4DIP | ENSG00000178104 |
| 1 | 143750482 | 143751702 | 143751085 | 20 | 78 | 50 | 1.817075653 | 0.00036393  | PDE4DIP | ENSG00000178104 |
| 1 | 143751730 | 143751927 | 143751828 | 9  | 10 | 11 | 1.075294769 | 0.434143    | PDE4DIP | ENSG00000178104 |
| 1 | 143754646 | 143754996 | 143754787 | 8  | 13 | 10 | 1.49297125  | 0.157311    | PDE4DIP | ENSG00000178104 |
| 1 | 143757559 | 143757882 | 143757720 | 8  | 11 | 16 | 0.828034475 | 0.698553    | PDE4DIP | ENSG00000178104 |
| 1 | 143757889 | 143758155 | 143758045 | 8  | 12 | 14 | 1.016642327 | 0.486402    | PDE4DIP | ENSG00000178104 |
| 1 | 143766775 | 143766988 | 143766881 | 9  | 11 | 18 | 0.740872951 | 0.800189    | PDE4DIP | ENSG00000178104 |
| 1 | 143770096 | 143770804 | 143770450 | 22 | 45 | 35 | 1.498895739 | 0.0335424   | PDE4DIP | ENSG00000178104 |
| 1 | 143774946 | 143775162 | 143775054 | 8  | 9  | 5  | 1.955081399 | 0.0892323   | PDE4DIP | ENSG00000178104 |
| 1 | 143776184 | 143776600 | 143776363 | 15 | 24 | 13 | 2.09473007  | 0.011141    | PDE4DIP | ENSG00000178104 |
| 1 | 143780977 | 143781230 | 143781102 | 8  | 11 | 11 | 1.173048839 | 0.349489    | PDE4DIP | ENSG00000178104 |
| 1 | 143783144 | 143783449 | 143783278 | 8  | 13 | 20 | 0.78203256  | 0.76897     | PDE4DIP | ENSG00000178104 |

|   |           |           |           |    |     |    |             |             |          |                 |
|---|-----------|-----------|-----------|----|-----|----|-------------|-------------|----------|-----------------|
| 1 | 143787372 | 143787595 | 143787483 | 8  | 9   | 10 | 1.066408036 | 0.444985    | PDE4DIP  | ENSG00000178104 |
| 1 | 143792277 | 143792460 | 143792368 | 8  | 8   | 3  | 2.639359888 | 0.0415794   | PDE4DIP  | ENSG00000178104 |
| 1 | 143801201 | 143801482 | 143801341 | 8  | 10  | 7  | 1.612942154 | 0.147335    |          | ENSG00000218759 |
| 1 | 143802262 | 143802441 | 143802351 | 8  | 8   | 4  | 2.111487911 | 0.0804809   |          | ENSG00000218759 |
| 1 | 143807601 | 143808006 | 143807740 | 15 | 25  | 18 | 1.605224727 | 0.0562573   |          | ENSG00000218759 |
| 1 | 143826938 | 143827727 | 143827108 | 11 | 31  | 36 | 1.014528726 | 0.478595    |          | ENSG00000218759 |
| 1 | 143920150 | 143920493 | 143920320 | 17 | 20  | 0  | 24.63402563 | 8.35E-08    | NOTCH2NL | ENSG00000213240 |
| 1 | 143921512 | 143921694 | 143921661 | 9  | 9   | 3  | 2.932622098 | 0.0242899   | NOTCH2NL | ENSG00000213240 |
| 1 | 143928314 | 143928505 | 143928397 | 8  | 8   | 1  | 5.278719777 | 0.00542188  | NOTCH2NL | ENSG00000213240 |
| 1 | 143988808 | 143988994 | 143988837 | 8  | 8   | 8  | 1.173048839 | 0.36929     |          | ENSG00000208961 |
| 1 | 144002033 | 144002247 | 144002140 | 8  | 10  | 12 | 0.992579787 | 0.511743    | NBPF10   | ENSG00000163386 |
| 1 | 144093989 | 144094701 | 144094283 | 28 | 54  | 17 | 3.584315898 | 1.47E-07    |          | ENSG00000201558 |
| 1 | 144106718 | 144107173 | 144106945 | 17 | 28  | 23 | 1.417434014 | 0.101931    |          | ENSG00000201558 |
| 1 | 144108011 | 144108357 | 144108184 | 14 | 20  | 15 | 1.539626602 | 0.0943825   |          | ENSG00000201558 |
| 1 | 144108565 | 144109481 | 144109216 | 15 | 43  | 25 | 1.985159574 | 0.00226191  |          | ENSG00000201558 |
| 1 | 144110328 | 144110930 | 144110706 | 28 | 52  | 30 | 2.005535112 | 0.000809045 | HFE2     | ENSG00000168509 |
| 1 | 144113318 | 144113655 | 144113566 | 10 | 14  | 13 | 1.256838042 | 0.269506    | HFE2     | ENSG00000168509 |
| 1 | 144133046 | 144133271 | 144133173 | 14 | 17  | 9  | 2.111487911 | 0.0248715   | HFE2     | ENSG00000168509 |
| 1 | 144138706 | 144139151 | 144138862 | 13 | 19  | 22 | 1.020042469 | 0.477122    | TXNIP    | ENSG00000117289 |
| 1 | 144149235 | 144149414 | 144149407 | 8  | 8   | 3  | 2.639359888 | 0.0415794   | TXNIP    | ENSG00000117289 |
| 1 | 144149479 | 144150201 | 144149801 | 28 | 54  | 15 | 4.032355385 | 2.59E-08    | TXNIP    | ENSG00000117289 |
| 1 | 144151175 | 144151406 | 144151241 | 9  | 11  | 5  | 2.346097679 | 0.0364013   | TXNIP    | ENSG00000117289 |
| 1 | 144155458 | 144155671 | 144155564 | 9  | 9   | 0  | 11.73048839 | 0.000425898 | TXNIP    | ENSG00000117289 |
| 1 | 144166349 | 144167355 | 144166831 | 22 | 59  | 40 | 1.716656838 | 0.00344236  | POLR3GL  | ENSG00000121851 |
| 1 | 144168674 | 144168902 | 144168788 | 13 | 16  | 10 | 1.812893661 | 0.0578656   | POLR3GL  | ENSG00000121851 |
| 1 | 144181446 | 144182087 | 144181638 | 22 | 45  | 16 | 3.174132153 | 6.18E-06    | POLR3GL  | ENSG00000121851 |
| 1 | 144183900 | 144184099 | 144183999 | 8  | 9   | 3  | 2.932622098 | 0.0242899   | ANKRD34A | ENSG00000181039 |
| 1 | 144188201 | 144188520 | 144188360 | 8  | 12  | 7  | 1.906204364 | 0.0695918   | LIX1L    | ENSG00000152022 |
| 1 | 144218428 | 144219395 | 144218801 | 14 | 42  | 24 | 2.017644004 | 0.002103    | RBM8A    | ENSG00000131795 |
| 1 | 144227229 | 144227894 | 144227573 | 23 | 51  | 27 | 2.178519273 | 0.000306518 | GNRHR2   | ENSG00000211451 |
| 1 | 144236121 | 144236386 | 144236253 | 9  | 12  | 6  | 2.178519273 | 0.0416567   | ITGA10   | ENSG00000143127 |
| 1 | 144253979 | 144255447 | 144254335 | 31 | 115 | 43 | 3.092583304 | 5.07E-12    | ANKRD35  | ENSG00000198483 |
| 1 | 144255670 | 144255987 | 144255828 | 8  | 9   | 1  | 5.865244197 | 0.00272497  | ANKRD35  | ENSG00000198483 |
| 1 | 144259999 | 144260216 | 144260107 | 8  | 9   | 10 | 1.066408036 | 0.444985    | ANKRD35  | ENSG00000198483 |

|   |           |           |           |    |    |    |             |             |        |                 |
|---|-----------|-----------|-----------|----|----|----|-------------|-------------|--------|-----------------|
| 1 | 144286693 | 144287632 | 144287190 | 13 | 45 | 15 | 3.372515413 | 2.88E-06    | PIAS3  | ENSG00000131788 |
| 1 | 144300515 | 144301173 | 144300881 | 18 | 39 | 22 | 2.040084938 | 0.0025741   | NUDT17 | ENSG00000186364 |
| 1 | 144321981 | 144322488 | 144322396 | 19 | 36 | 7  | 5.425350882 | 2.04E-07    | RNF115 | ENSG00000121848 |
| 1 | 144405741 | 144406086 | 144405913 | 19 | 24 | 12 | 2.255863153 | 0.00673318  | CD160  | ENSG00000117281 |
| 1 | 144424838 | 144425261 | 144425130 | 8  | 14 | 6  | 2.513676084 | 0.016726    | CD160  | ENSG00000117281 |
| 1 | 144434895 | 144435094 | 144434945 | 9  | 10 | 5  | 2.150589539 | 0.0575848   | CD160  | ENSG00000117281 |
| 1 | 144455243 | 144455443 | 144455404 | 8  | 10 | 0  | 12.90353723 | 0.000195991 | PDZK1  | ENSG00000174827 |
| 1 | 145022500 | 145022815 | 145022671 | 8  | 10 | 8  | 1.433726359 | 0.209175    |        | ENSG00000200838 |
| 1 | 145058039 | 145058284 | 145058157 | 8  | 9  | 4  | 2.346097679 | 0.050148    |        | ENSG00000216758 |
| 1 | 145058686 | 145058872 | 145058752 | 8  | 8  | 0  | 10.55743955 | 0.000925496 |        | ENSG00000216758 |
| 1 | 145109875 | 145110115 | 145109995 | 8  | 12 | 3  | 3.812408728 | 0.004404    | PRKAB2 | ENSG00000131791 |
| 1 | 145110249 | 145111163 | 145110678 | 29 | 61 | 12 | 5.594540618 | 2.02E-11    | PRKAB2 | ENSG00000131791 |
| 1 | 145111510 | 145111751 | 145111647 | 9  | 10 | 6  | 1.843362462 | 0.0964212   | PRKAB2 | ENSG00000131791 |
| 1 | 145162164 | 145162396 | 145162317 | 8  | 8  | 2  | 3.519146518 | 0.017558    |        | ENSG00000216253 |
| 1 | 145163362 | 145163568 | 145163465 | 9  | 11 | 7  | 1.759573259 | 0.102361    | FMO5   | ENSG00000131781 |
| 1 | 145163640 | 145163911 | 145163791 | 8  | 10 | 6  | 1.843362462 | 0.0964212   | FMO5   | ENSG00000131781 |
| 1 | 145172554 | 145172827 | 145172690 | 9  | 11 | 2  | 4.692195357 | 0.00272444  | CHD1L  | ENSG00000131778 |
| 1 | 145175932 | 145176204 | 145176068 | 8  | 11 | 3  | 3.519146518 | 0.00788869  | CHD1L  | ENSG00000131778 |
| 1 | 145180454 | 145180965 | 145180817 | 17 | 31 | 16 | 2.208091933 | 0.00315316  | CHD1L  | ENSG00000131778 |
| 1 | 145181319 | 145181508 | 145181413 | 8  | 9  | 6  | 1.675784056 | 0.141978    | CHD1L  | ENSG00000131778 |
| 1 | 145183402 | 145183669 | 145183535 | 8  | 11 | 12 | 1.082814313 | 0.424156    | CHD1L  | ENSG00000131778 |
| 1 | 145212297 | 145212524 | 145212410 | 9  | 10 | 2  | 4.301179077 | 0.00512919  | CHD1L  | ENSG00000131778 |
| 1 | 145328528 | 145328739 | 145328598 | 10 | 11 | 3  | 3.519146518 | 0.00788869  |        | ENSG00000207209 |
| 1 | 145433526 | 145433731 | 145433628 | 10 | 11 | 3  | 3.519146518 | 0.00788869  |        | ENSG00000221166 |
| 1 | 145476874 | 145477149 | 145476985 | 11 | 13 | 4  | 3.28453675  | 0.00629037  | BCL9   | ENSG00000116128 |
| 1 | 145550797 | 145551106 | 145550951 | 17 | 21 | 6  | 3.686724924 | 0.000453999 | ACP6   | ENSG00000162836 |
| 1 | 145566013 | 145566265 | 145566180 | 14 | 17 | 3  | 5.278719777 | 0.000205462 | ACP6   | ENSG00000162836 |
| 1 | 145579089 | 145579468 | 145579333 | 12 | 17 | 7  | 2.639359888 | 0.00777415  | ACP6   | ENSG00000162836 |
| 1 | 145580149 | 145580329 | 145580239 | 8  | 8  | 3  | 2.639359888 | 0.0415794   | ACP6   | ENSG00000162836 |
| 1 | 145580453 | 145580830 | 145580651 | 12 | 19 | 10 | 2.132816071 | 0.01835     | ACP6   | ENSG00000162836 |
| 1 | 145587353 | 145587578 | 145587465 | 8  | 9  | 7  | 1.466311049 | 0.20706     | ACP6   | ENSG00000162836 |
| 1 | 145608287 | 145608517 | 145608402 | 10 | 12 | 4  | 3.049926982 | 0.0108184   | ACP6   | ENSG00000162836 |
| 1 | 145608583 | 145608875 | 145608729 | 9  | 13 | 10 | 1.49297125  | 0.157311    | ACP6   | ENSG00000162836 |
| 1 | 145609001 | 145609611 | 145609174 | 13 | 30 | 16 | 2.13908906  | 0.00465307  | ACP6   | ENSG00000162836 |

|   |           |           |           |    |    |    |             |             |           |                 |
|---|-----------|-----------|-----------|----|----|----|-------------|-------------|-----------|-----------------|
| 1 | 145652426 | 145652650 | 145652539 | 8  | 8  | 2  | 3.519146518 | 0.017558    |           | ENSG00000208881 |
| 1 | 145655706 | 145656102 | 145655943 | 23 | 28 | 19 | 1.700920817 | 0.031791    |           | ENSG00000208881 |
| 1 | 145662637 | 145662923 | 145662756 | 9  | 12 | 11 | 1.270802909 | 0.274822    |           | ENSG00000208881 |
| 1 | 145748652 | 145748923 | 145748787 | 10 | 12 | 2  | 5.083211637 | 0.00143337  |           | ENSG00000216883 |
| 1 | 145781323 | 145781537 | 145781430 | 9  | 10 | 3  | 3.225884308 | 0.0139466   |           | ENSG00000216883 |
| 1 | 145828915 | 145829185 | 145829069 | 9  | 10 | 5  | 2.150589539 | 0.0575848   | GJA8      | ENSG00000121634 |
| 1 | 145831490 | 145831742 | 145831616 | 8  | 11 | 6  | 2.010940867 | 0.0640214   | GJA8      | ENSG00000121634 |
| 1 | 146193791 | 146194232 | 146194053 | 12 | 21 | 15 | 1.612942154 | 0.070218    |           | ENSG00000199879 |
| 1 | 146202057 | 146203047 | 146202551 | 22 | 64 | 21 | 3.465826116 | 2.30E-08    |           | ENSG00000199879 |
| 1 | 146203917 | 146204136 | 146204059 | 11 | 13 | 9  | 1.642268375 | 0.111397    |           | ENSG00000199879 |
| 1 | 146272946 | 146273840 | 146273369 | 25 | 58 | 20 | 3.295708644 | 2.10E-07    |           | ENSG00000202408 |
| 1 | 146467344 | 146467528 | 146467436 | 8  | 9  | 1  | 5.865244197 | 0.00272497  |           | ENSG00000220427 |
| 1 | 146607993 | 146608293 | 146608148 | 18 | 19 | 6  | 3.351568112 | 0.00134187  |           | ENSG00000207501 |
| 1 | 146823333 | 146823593 | 146823463 | 9  | 10 | 4  | 2.580707446 | 0.0306059   | NBPF15    | ENSG00000219481 |
| 1 | 147489879 | 147490077 | 147489979 | 9  | 10 | 6  | 1.843362462 | 0.0964212   |           | ENSG00000206737 |
| 1 | 147490107 | 147490804 | 147490497 | 41 | 89 | 43 | 2.39941808  | 3.87E-07    |           | ENSG00000206737 |
| 1 | 147491084 | 147491356 | 147491220 | 14 | 17 | 9  | 2.111487911 | 0.0248715   |           | ENSG00000206737 |
| 1 | 147539559 | 147539739 | 147539649 | 8  | 8  | 1  | 5.278719777 | 0.00542188  |           | ENSG00000208707 |
| 1 | 147561270 | 147561465 | 147561367 | 8  | 9  | 2  | 3.910162798 | 0.00955088  |           | ENSG00000208696 |
| 1 | 147565084 | 147565284 | 147565184 | 9  | 9  | 1  | 5.865244197 | 0.00272497  |           | ENSG00000208696 |
| 1 | 147978277 | 147978628 | 147978452 | 11 | 15 | 4  | 3.753756286 | 0.0020497   |           | ENSG00000212053 |
| 1 | 148123454 | 148123693 | 148123540 | 11 | 13 | 7  | 2.052835469 | 0.046392    | HIST2H2BE | ENSG00000184678 |
| 1 | 148123910 | 148124275 | 148124088 | 14 | 21 | 14 | 1.720471631 | 0.0496182   | HIST2H2BE | ENSG00000184678 |
| 1 | 148124660 | 148125270 | 148125091 | 12 | 28 | 11 | 2.834868028 | 0.000626961 | BOLA1     | ENSG00000178096 |
| 1 | 148125480 | 148125915 | 148125700 | 13 | 23 | 12 | 2.165628626 | 0.0100985   | HIST2H2AE | ENSG00000184270 |
| 1 | 148125975 | 148126922 | 148126750 | 20 | 47 | 25 | 2.165628626 | 0.000534104 | HIST2H2AE | ENSG00000184270 |
| 1 | 148127243 | 148127433 | 148127336 | 9  | 11 | 6  | 2.010940867 | 0.0640214   | HIST2H2AE | ENSG00000184270 |
| 1 | 148137570 | 148138113 | 148137749 | 14 | 29 | 18 | 1.852182378 | 0.015944    | BOLA1     | ENSG00000178096 |
| 1 | 148165973 | 148166972 | 148166447 | 22 | 59 | 19 | 3.519146518 | 5.83E-08    | SF3B4     | ENSG00000143368 |
| 1 | 148175188 | 148175660 | 148175483 | 15 | 24 | 14 | 1.955081399 | 0.0175993   | MTMR11    | ENSG00000014914 |
| 1 | 148175711 | 148176252 | 148176039 | 14 | 31 | 10 | 3.412505714 | 6.73E-05    | MTMR11    | ENSG00000014914 |
| 1 | 148177519 | 148178193 | 148178015 | 19 | 48 | 10 | 5.225399375 | 4.82E-09    | MTMR11    | ENSG00000014914 |
| 1 | 148249122 | 148249541 | 148249362 | 20 | 28 | 3  | 8.504604085 | 1.43E-07    | OTUD7B    | ENSG00000163113 |
| 1 | 148259968 | 148260270 | 148260134 | 13 | 15 | 1  | 9.384390715 | 3.90E-05    | OTUD7B    | ENSG00000163113 |

|   |           |           |           |    |    |    |             |             |          |                 |
|---|-----------|-----------|-----------|----|----|----|-------------|-------------|----------|-----------------|
| 1 | 148260502 | 148260790 | 148260670 | 14 | 16 | 1  | 9.970915134 | 1.89E-05    | OTUD7B   | ENSG00000163113 |
| 1 | 148289221 | 148289546 | 148289383 | 14 | 19 | 5  | 3.910162798 | 0.000546977 |          | ENSG00000219469 |
| 1 | 148306014 | 148306613 | 148306434 | 23 | 45 | 8  | 5.995582957 | 2.73E-09    | VPS45    | ENSG00000136631 |
| 1 | 148352078 | 148352315 | 148352233 | 8  | 9  | 0  | 11.73048839 | 0.000425898 | PLEKHO1  | ENSG00000023902 |
| 1 | 148404822 | 148405097 | 148404965 | 10 | 11 | 7  | 1.759573259 | 0.102361    | PLEKHO1  | ENSG00000023902 |
| 1 | 148407819 | 148408156 | 148407979 | 15 | 18 | 5  | 3.714654658 | 0.000961539 | PLEKHO1  | ENSG00000023902 |
| 1 | 148422741 | 148423188 | 148422964 | 16 | 26 | 4  | 6.334463732 | 2.40E-06    |          | ENSG00000222828 |
| 1 | 148452346 | 148453313 | 148452877 | 11 | 38 | 26 | 1.694403879 | 0.0163717   |          | ENSG00000222828 |
| 1 | 148473375 | 148473606 | 148473503 | 8  | 9  | 3  | 2.932622098 | 0.0242899   | ANP32E   | ENSG00000143401 |
| 1 | 148474562 | 148475160 | 148474981 | 16 | 30 | 24 | 1.454580561 | 0.0803614   | ANP32E   | ENSG00000143401 |
| 1 | 148475244 | 148475557 | 148475454 | 11 | 15 | 11 | 1.564065119 | 0.11768     | ANP32E   | ENSG00000143401 |
| 1 | 148494435 | 148494696 | 148494573 | 9  | 10 | 10 | 1.173048839 | 0.355733    | CA14     | ENSG00000118298 |
| 1 | 148494921 | 148495316 | 148495139 | 17 | 24 | 12 | 2.255863153 | 0.00673318  | CA14     | ENSG00000118298 |
| 1 | 148498978 | 148499349 | 148499171 | 8  | 14 | 7  | 2.199466574 | 0.0303778   |          | ENSG00000208660 |
| 1 | 148507834 | 148508182 | 148508008 | 15 | 21 | 11 | 2.150589539 | 0.0135908   | APH1A    | ENSG00000117362 |
| 1 | 148508367 | 148508617 | 148508465 | 8  | 11 | 7  | 1.759573259 | 0.102361    | APH1A    | ENSG00000117362 |
| 1 | 148520303 | 148520663 | 148520520 | 18 | 25 | 8  | 3.388807758 | 0.000297109 | C1orf51  | ENSG00000159208 |
| 1 | 148521238 | 148521438 | 148521298 | 9  | 11 | 9  | 1.407658607 | 0.210479    | C1orf51  | ENSG00000159208 |
| 1 | 148521443 | 148521772 | 148521607 | 11 | 16 | 12 | 1.533986944 | 0.120062    | C1orf51  | ENSG00000159208 |
| 1 | 148532748 | 148533229 | 148532857 | 11 | 23 | 17 | 1.564065119 | 0.0735049   | MRPS21   | ENSG00000221879 |
| 1 | 148560510 | 148560840 | 148560675 | 13 | 14 | 8  | 1.955081399 | 0.0506438   | PRPF3    | ENSG00000117360 |
| 1 | 148602423 | 148603521 | 148602931 | 21 | 60 | 28 | 2.467447559 | 1.49E-05    | RPRD2    | ENSG00000163125 |
| 1 | 148604098 | 148604347 | 148604216 | 8  | 11 | 4  | 2.815317214 | 0.0183428   | RPRD2    | ENSG00000163125 |
| 1 | 148703408 | 148703744 | 148703576 | 10 | 15 | 1  | 9.384390715 | 3.90E-05    | TARS2    | ENSG00000143374 |
| 1 | 148726159 | 148726715 | 148726373 | 40 | 58 | 16 | 4.071169501 | 7.41E-09    | TARS2    | ENSG00000143374 |
| 1 | 148726961 | 148727243 | 148727076 | 9  | 11 | 5  | 2.346097679 | 0.0364013   | TARS2    | ENSG00000143374 |
| 1 | 148754307 | 148754778 | 148754570 | 14 | 23 | 12 | 2.165628626 | 0.0100985   | ECM1     | ENSG00000143369 |
| 1 | 148754829 | 148755032 | 148754945 | 8  | 9  | 10 | 1.066408036 | 0.444985    | ECM1     | ENSG00000143369 |
| 1 | 148771737 | 148772039 | 148771888 | 10 | 13 | 8  | 1.824742639 | 0.0744168   | ADAMTSL4 | ENSG00000143382 |
| 1 | 148799099 | 148799373 | 148799278 | 8  | 12 | 7  | 1.906204364 | 0.0695918   | C1orf138 | ENSG00000203804 |
| 1 | 148800103 | 148800852 | 148800694 | 16 | 44 | 23 | 2.199466574 | 0.000639852 | C1orf138 | ENSG00000203804 |
| 1 | 148800948 | 148801513 | 148801230 | 17 | 31 | 11 | 3.128130238 | 0.000146711 | C1orf138 | ENSG00000203804 |
| 1 | 148802738 | 148803081 | 148802902 | 9  | 14 | 7  | 2.199466574 | 0.0303778   | C1orf138 | ENSG00000203804 |
| 1 | 148807201 | 148807393 | 148807309 | 8  | 9  | 9  | 1.173048839 | 0.362316    |          | ENSG00000223014 |



|   |           |           |           |     |     |    |             |             |         |                 |
|---|-----------|-----------|-----------|-----|-----|----|-------------|-------------|---------|-----------------|
| 1 | 148807422 | 148807676 | 148807539 | 10  | 14  | 10 | 1.599612054 | 0.114822    |         | ENSG00000223014 |
| 1 | 148816308 | 148816487 | 148816397 | 9   | 9   | 8  | 1.303387599 | 0.281715    | MCL1    | ENSG00000143384 |
| 1 | 148817251 | 148817521 | 148817386 | 9   | 12  | 9  | 1.524963491 | 0.154777    | MCL1    | ENSG00000143384 |
| 1 | 148817665 | 148817934 | 148817799 | 8   | 10  | 5  | 2.150589539 | 0.0575848   | MCL1    | ENSG00000143384 |
| 1 | 148818529 | 148818852 | 148818693 | 13  | 15  | 8  | 2.085420159 | 0.0338693   | MCL1    | ENSG00000143384 |
| 1 | 148843831 | 148844053 | 148843935 | 8   | 9   | 9  | 1.173048839 | 0.362316    |         | ENSG00000208652 |
| 1 | 148860690 | 148860966 | 148860796 | 9   | 12  | 5  | 2.541605819 | 0.0225912   | ENSA    | ENSG00000143420 |
| 1 | 148863289 | 148863703 | 148863468 | 44  | 53  | 5  | 10.55743955 | 1.56E-13    | ENSA    | ENSG00000143420 |
| 1 | 148868221 | 148868875 | 148868599 | 13  | 30  | 20 | 1.731643525 | 0.0242039   | ENSA    | ENSG00000143420 |
| 1 | 148889259 | 148889703 | 148889478 | 15  | 26  | 12 | 2.436332205 | 0.00289956  | ENSA    | ENSG00000143420 |
| 1 | 148936191 | 148936433 | 148936312 | 9   | 12  | 7  | 1.906204364 | 0.0695918   | GOLPH3L | ENSG00000143457 |
| 1 | 148936437 | 148936797 | 148936618 | 10  | 17  | 5  | 3.519146518 | 0.00167472  | GOLPH3L | ENSG00000143457 |
| 1 | 149052111 | 149052524 | 149052401 | 12  | 18  | 11 | 1.857327329 | 0.0427732   |         | ENSG00000200175 |
| 1 | 149115641 | 149116026 | 149115847 | 14  | 21  | 12 | 1.985159574 | 0.021936    | ARNT    | ENSG00000143437 |
| 1 | 149145381 | 149145900 | 149145640 | 15  | 27  | 9  | 3.28453675  | 0.000236424 |         | ENSG00000198962 |
| 1 | 149161657 | 149161959 | 149161823 | 10  | 13  | 10 | 1.49297125  | 0.157311    | SETDB1  | ENSG00000143379 |
| 1 | 149165286 | 149165699 | 149165465 | 13  | 24  | 20 | 1.396486713 | 0.128495    | SETDB1  | ENSG00000143379 |
| 1 | 149218504 | 149218905 | 149218729 | 15  | 24  | 9  | 2.932622098 | 0.00106136  | ANXA9   | ENSG00000143412 |
| 1 | 149220168 | 149220496 | 149220332 | 8   | 14  | 9  | 1.759573259 | 0.0786014   | ANXA9   | ENSG00000143412 |
| 1 | 149220844 | 149221540 | 149221289 | 12  | 27  | 20 | 1.564065119 | 0.0587454   | ANXA9   | ENSG00000143412 |
| 1 | 149245569 | 149245864 | 149245745 | 8   | 11  | 6  | 2.010940867 | 0.0640214   | FAM63A  | ENSG00000143409 |
| 1 | 149245952 | 149246131 | 149246041 | 8   | 8   | 9  | 1.055743955 | 0.456865    | FAM63A  | ENSG00000143409 |
| 1 | 149247209 | 149247674 | 149247458 | 11  | 22  | 10 | 2.452738482 | 0.00515848  | PRUNE   | ENSG00000143363 |
| 1 | 149248153 | 149248496 | 149248324 | 10  | 16  | 6  | 2.848832895 | 0.00632407  | PRUNE   | ENSG00000143363 |
| 1 | 149263795 | 149264037 | 149263905 | 10  | 10  | 6  | 1.843362462 | 0.0964212   | PRUNE   | ENSG00000143363 |
| 1 | 149275547 | 149275790 | 149275655 | 11  | 12  | 7  | 1.906204364 | 0.0695918   | BNIP1   | ENSG00000163141 |
| 1 | 149286428 | 149286618 | 149286523 | 8   | 8   | 5  | 1.759573259 | 0.13508     | C1orf56 | ENSG00000143443 |
| 1 | 149286653 | 149287493 | 149286813 | 13  | 37  | 14 | 2.971723726 | 6.95E-05    | C1orf56 | ENSG00000143443 |
| 1 | 149287522 | 149287914 | 149287689 | 10  | 17  | 9  | 2.111487911 | 0.0248715   | C1orf56 | ENSG00000143443 |
| 1 | 149297725 | 149298203 | 149297937 | 115 | 133 | 15 | 9.824284029 | 1.06E-29    | MLLT11  | ENSG00000213190 |
| 1 | 149298340 | 149298808 | 149298587 | 16  | 26  | 12 | 2.436332205 | 0.00289956  | MLLT11  | ENSG00000213190 |
| 1 | 149309314 | 149310022 | 149309759 | 28  | 50  | 18 | 3.148710042 | 2.36E-06    |         | ENSG00000143458 |
| 1 | 149310181 | 149310493 | 149310335 | 12  | 17  | 7  | 2.639359888 | 0.00777415  |         | ENSG00000143458 |
| 1 | 149383638 | 149383872 | 149383782 | 8   | 8   | 3  | 2.639359888 | 0.0415794   | SEMA6C  | ENSG00000143434 |

|   |           |           |           |    |    |    |             |             |           |                 |
|---|-----------|-----------|-----------|----|----|----|-------------|-------------|-----------|-----------------|
| 1 | 149385716 | 149386217 | 149385857 | 11 | 22 | 8  | 2.997791478 | 0.00137524  | SEMA6C    | ENSG00000143434 |
| 1 | 149395211 | 149395431 | 149395353 | 11 | 13 | 4  | 3.28453675  | 0.00629037  | TNFAIP8L2 | ENSG00000163154 |
| 1 | 149404873 | 149405383 | 149405139 | 26 | 39 | 12 | 3.609381044 | 5.48E-06    | SCNM1     | ENSG00000163156 |
| 1 | 149429099 | 149429555 | 149429369 | 23 | 37 | 12 | 3.428911992 | 1.55E-05    | VPS72     | ENSG00000163159 |
| 1 | 149434326 | 149434690 | 149434523 | 21 | 27 | 9  | 3.28453675  | 0.000236424 | PIP5K1A   | ENSG00000143398 |
| 1 | 149435267 | 149435453 | 149435393 | 8  | 8  | 8  | 1.173048839 | 0.36929     | PIP5K1A   | ENSG00000143398 |
| 1 | 149435471 | 149435776 | 149435623 | 9  | 14 | 5  | 2.932622098 | 0.00829617  | PIP5K1A   | ENSG00000143398 |
| 1 | 149437147 | 149437621 | 149437428 | 11 | 22 | 12 | 2.0753941   | 0.0149739   | PIP5K1A   | ENSG00000143398 |
| 1 | 149454729 | 149454939 | 149454868 | 9  | 9  | 2  | 3.910162798 | 0.00955088  | PIP5K1A   | ENSG00000143398 |
| 1 | 149461207 | 149461418 | 149461295 | 8  | 8  | 2  | 3.519146518 | 0.017558    | PIP5K1A   | ENSG00000143398 |
| 1 | 149490821 | 149491060 | 149490940 | 14 | 14 | 2  | 5.865244197 | 0.000387308 | PSMD4     | ENSG00000159352 |
| 1 | 149493524 | 149493924 | 149493745 | 16 | 24 | 4  | 5.865244197 | 8.64E-06    | PSMD4     | ENSG00000159352 |
| 1 | 149520322 | 149521981 | 149520499 | 14 | 76 | 23 | 3.763531693 | 2.55E-10    | ZNF687    | ENSG00000143373 |
| 1 | 149531179 | 149531493 | 149531319 | 9  | 13 | 4  | 3.28453675  | 0.00629037  |           | ENSG00000222803 |
| 1 | 149540055 | 149540270 | 149540132 | 12 | 13 | 5  | 2.737113958 | 0.0137917   |           | ENSG00000222803 |
| 1 | 149550681 | 149550950 | 149550815 | 11 | 14 | 10 | 1.599612054 | 0.114822    |           | ENSG00000222803 |
| 1 | 149566034 | 149566220 | 149566127 | 8  | 9  | 7  | 1.466311049 | 0.20706     | PI4KB     | ENSG00000143393 |
| 1 | 149566382 | 149567055 | 149566795 | 14 | 36 | 17 | 2.411267059 | 0.000703324 | PI4KB     | ENSG00000143393 |
| 1 | 149567163 | 149567454 | 149567280 | 14 | 17 | 9  | 2.111487911 | 0.0248715   | PI4KB     | ENSG00000143393 |
| 1 | 149569258 | 149569457 | 149569357 | 9  | 9  | 6  | 1.675784056 | 0.141978    | PI4KB     | ENSG00000143393 |
| 1 | 149579961 | 149580223 | 149580116 | 10 | 13 | 12 | 1.263283365 | 0.272203    | RFX5      | ENSG00000143390 |
| 1 | 149580240 | 149580422 | 149580276 | 8  | 9  | 9  | 1.173048839 | 0.362316    | RFX5      | ENSG00000143390 |
| 1 | 149586079 | 149586326 | 149586202 | 10 | 13 | 3  | 4.105670938 | 0.00243034  | RFX5      | ENSG00000143390 |
| 1 | 149586448 | 149586736 | 149586587 | 12 | 16 | 4  | 3.988366054 | 0.00115141  | RFX5      | ENSG00000143390 |
| 1 | 149586738 | 149586955 | 149586790 | 10 | 13 | 5  | 2.737113958 | 0.0137917   | RFX5      | ENSG00000143390 |
| 1 | 149589118 | 149589342 | 149589230 | 9  | 11 | 6  | 2.010940867 | 0.0640214   | RFX5      | ENSG00000143390 |
| 1 | 149611570 | 149611948 | 149611769 | 20 | 29 | 18 | 1.852182378 | 0.015944    | SELENBP1  | ENSG00000143416 |
| 1 | 149623998 | 149624354 | 149624176 | 8  | 14 | 2  | 5.865244197 | 0.000387308 | SELENBP1  | ENSG00000143416 |
| 1 | 149637344 | 149637527 | 149637456 | 8  | 8  | 0  | 10.55743955 | 0.000925496 | PSMB4     | ENSG00000159377 |
| 1 | 149638394 | 149639195 | 149638573 | 27 | 51 | 14 | 4.06656931  | 5.25E-08    | PSMB4     | ENSG00000159377 |
| 1 | 149640287 | 149640473 | 149640367 | 8  | 9  | 8  | 1.303387599 | 0.281715    | PSMB4     | ENSG00000159377 |
| 1 | 149682984 | 149683318 | 149683151 | 19 | 23 | 5  | 4.692195357 | 5.29E-05    | POGZ      | ENSG00000143442 |
| 1 | 149697302 | 149697633 | 149697474 | 14 | 16 | 6  | 2.848832895 | 0.00632407  | POGZ      | ENSG00000143442 |
| 1 | 149698515 | 149699023 | 149698844 | 11 | 24 | 18 | 1.543485315 | 0.0748829   | POGZ      | ENSG00000143442 |

|   |           |           |           |    |    |    |             |             |       |                 |
|---|-----------|-----------|-----------|----|----|----|-------------|-------------|-------|-----------------|
| 1 | 149750342 | 149750990 | 149750467 | 10 | 25 | 5  | 5.083211637 | 1.58E-05    | CGN   | ENSG00000143375 |
| 1 | 149752139 | 149752544 | 149752367 | 37 | 50 | 7  | 7.478186351 | 2.92E-11    | CGN   | ENSG00000143375 |
| 1 | 149759173 | 149759358 | 149759283 | 8  | 9  | 2  | 3.910162798 | 0.00955088  | CGN   | ENSG00000143375 |
| 1 | 149763229 | 149763558 | 149763429 | 9  | 13 | 8  | 1.824742639 | 0.0744168   | CGN   | ENSG00000143375 |
| 1 | 149773732 | 149774082 | 149773907 | 15 | 20 | 9  | 2.463402563 | 0.00689886  | TUFT1 | ENSG00000143367 |
| 1 | 149778416 | 149779109 | 149778930 | 17 | 44 | 13 | 3.770514126 | 9.25E-07    | TUFT1 | ENSG00000143367 |
| 1 | 149779368 | 149779727 | 149779547 | 15 | 22 | 7  | 3.372515413 | 0.000629223 | TUFT1 | ENSG00000143367 |
| 1 | 149786891 | 149787086 | 149786988 | 10 | 10 | 3  | 3.225884308 | 0.0139466   |       | ENSG00000207606 |
| 1 | 149787922 | 149788243 | 149788085 | 17 | 19 | 14 | 1.564065119 | 0.0925887   |       | ENSG00000207606 |
| 1 | 149818104 | 149818353 | 149818274 | 10 | 13 | 3  | 4.105670938 | 0.00243034  |       | ENSG00000219893 |
| 1 | 149818603 | 149818813 | 149818727 | 8  | 8  | 3  | 2.639359888 | 0.0415794   |       | ENSG00000219893 |
| 1 | 149821068 | 149821451 | 149821247 | 18 | 25 | 6  | 4.357038546 | 4.72E-05    |       | ENSG00000219893 |
| 1 | 149824840 | 149825243 | 149825014 | 13 | 19 | 13 | 1.675784056 | 0.0660887   | SNX27 | ENSG00000143376 |
| 1 | 149833016 | 149833635 | 149833380 | 16 | 30 | 14 | 2.424300935 | 0.00163956  | SNX27 | ENSG00000143376 |
| 1 | 149847489 | 149847761 | 149847640 | 13 | 15 | 8  | 2.085420159 | 0.0338693   | SNX27 | ENSG00000143376 |
| 1 | 149850951 | 149851130 | 149851035 | 8  | 8  | 6  | 1.508205651 | 0.203852    | SNX27 | ENSG00000143376 |
| 1 | 149863973 | 149864189 | 149864095 | 9  | 10 | 10 | 1.173048839 | 0.355733    |       | ENSG00000206635 |
| 1 | 149952867 | 149953329 | 149953114 | 26 | 36 | 6  | 6.200401008 | 5.86E-08    | TNRC4 | ENSG00000159409 |
| 1 | 149955923 | 149956354 | 149956087 | 11 | 20 | 4  | 4.926805125 | 0.00010522  | TNRC4 | ENSG00000159409 |
| 1 | 149956675 | 149956854 | 149956784 | 8  | 8  | 7  | 1.319679944 | 0.283403    | TNRC4 | ENSG00000159409 |
| 1 | 149957251 | 149957520 | 149957382 | 9  | 11 | 4  | 2.815317214 | 0.0183428   | TNRC4 | ENSG00000159409 |
| 1 | 149957656 | 149958021 | 149957835 | 12 | 18 | 10 | 2.026175268 | 0.0273052   | TNRC4 | ENSG00000159409 |
| 1 | 149962865 | 149963414 | 149963235 | 13 | 28 | 12 | 2.616801257 | 0.00120123  | TNRC4 | ENSG00000159409 |
| 1 | 149972367 | 149972695 | 149972504 | 9  | 13 | 5  | 2.737113958 | 0.0137917   |       | ENSG00000206980 |
| 1 | 149974006 | 149974566 | 149974390 | 19 | 32 | 9  | 3.87106117  | 1.67E-05    |       | ENSG00000206980 |
| 1 | 149979009 | 149979612 | 149979188 | 29 | 44 | 10 | 4.798836161 | 5.09E-08    |       | ENSG00000206980 |
| 1 | 150002345 | 150002865 | 150002689 | 17 | 31 | 7  | 4.692195357 | 4.07E-06    | MRPL9 | ENSG00000143436 |
| 1 | 150007474 | 150007653 | 150007563 | 8  | 9  | 1  | 5.865244197 | 0.00272497  | OAZ3  | ENSG00000143450 |
| 1 | 150029181 | 150029526 | 150029431 | 10 | 15 | 5  | 3.128130238 | 0.00492422  | TDRKH | ENSG00000182134 |
| 1 | 150029795 | 150030285 | 150029974 | 16 | 26 | 16 | 1.863077568 | 0.0200163   | TDRKH | ENSG00000182134 |
| 1 | 150060128 | 150060444 | 150060282 | 12 | 13 | 7  | 2.052835469 | 0.046392    | RORC  | ENSG00000143365 |
| 1 | 150068140 | 150068499 | 150068318 | 10 | 16 | 1  | 9.970915134 | 1.89E-05    | RORC  | ENSG00000143365 |
| 1 | 150075517 | 150076304 | 150076023 | 16 | 49 | 20 | 2.792973427 | 1.48E-05    |       | ENSG00000201134 |
| 1 | 150078625 | 150079238 | 150079011 | 11 | 27 | 11 | 2.737113958 | 0.00100133  |       | ENSG00000201134 |

|   |           |           |           |    |     |    |             |             |         |                 |
|---|-----------|-----------|-----------|----|-----|----|-------------|-------------|---------|-----------------|
| 1 | 150079324 | 150079618 | 150079471 | 11 | 14  | 7  | 2.199466574 | 0.0303778   |         | ENSG00000201134 |
| 1 | 150079703 | 150079935 | 150079836 | 8  | 9   | 2  | 3.910162798 | 0.00955088  |         | ENSG00000201134 |
| 1 | 150097301 | 150097597 | 150097455 | 13 | 14  | 10 | 1.599612054 | 0.114822    | THEM5   | ENSG00000196407 |
| 1 | 150110458 | 150111046 | 150110637 | 12 | 26  | 16 | 1.863077568 | 0.0200163   | THEM5   | ENSG00000196407 |
| 1 | 150120531 | 150120874 | 150120695 | 14 | 18  | 4  | 4.457585589 | 0.000353565 | THEM5   | ENSG00000196407 |
| 1 | 150144543 | 150144735 | 150144639 | 8  | 8   | 2  | 3.519146518 | 0.017558    | THEM4   | ENSG00000159445 |
| 1 | 150148279 | 150148489 | 150148365 | 9  | 9   | 2  | 3.910162798 | 0.00955088  | THEM4   | ENSG00000159445 |
| 1 | 150148550 | 150149028 | 150148728 | 23 | 33  | 15 | 2.492728784 | 0.000807271 | THEM4   | ENSG00000159445 |
| 1 | 150164475 | 150164703 | 150164589 | 8  | 9   | 8  | 1.303387599 | 0.281715    | THEM4   | ENSG00000159445 |
| 1 | 150173195 | 150173560 | 150173374 | 15 | 22  | 12 | 2.0753941   | 0.0149739   |         | ENSG00000215843 |
| 1 | 150184918 | 150185244 | 150185081 | 14 | 18  | 11 | 1.857327329 | 0.0427732   |         | ENSG00000215843 |
| 1 | 150205171 | 150205658 | 150205350 | 9  | 17  | 10 | 1.919534464 | 0.0400548   |         | ENSG00000215843 |
| 1 | 150207162 | 150207468 | 150207322 | 13 | 17  | 15 | 1.319679944 | 0.209239    |         | ENSG00000215843 |
| 1 | 150212087 | 150212401 | 150212264 | 8  | 13  | 7  | 2.052835469 | 0.046392    | S100A10 | ENSG00000197747 |
| 1 | 150219674 | 150219902 | 150219777 | 10 | 13  | 13 | 1.173048839 | 0.337862    | S100A10 | ENSG00000197747 |
| 1 | 150227612 | 150227869 | 150227740 | 10 | 14  | 10 | 1.599612054 | 0.114822    | S100A10 | ENSG00000197747 |
| 1 | 150228610 | 150228947 | 150228778 | 21 | 26  | 8  | 3.519146518 | 0.000175368 | S100A10 | ENSG00000197747 |
| 1 | 150229163 | 150230218 | 150229609 | 25 | 85  | 26 | 3.736377784 | 3.03E-11    | S100A10 | ENSG00000197747 |
| 1 | 150231307 | 150231975 | 150231556 | 39 | 66  | 17 | 4.366348457 | 2.36E-10    | S100A10 | ENSG00000197747 |
| 1 | 150232288 | 150232665 | 150232486 | 8  | 15  | 11 | 1.564065119 | 0.11768     | S100A10 | ENSG00000197747 |
| 1 | 150233794 | 150233973 | 150233936 | 9  | 9   | 2  | 3.910162798 | 0.00955088  | S100A10 | ENSG00000197747 |
| 1 | 150240885 | 150241188 | 150241016 | 12 | 16  | 9  | 1.994183027 | 0.0370915   | S100A10 | ENSG00000197747 |
| 1 | 150252699 | 150252942 | 150252820 | 10 | 11  | 2  | 4.692195357 | 0.00272444  |         | ENSG00000216988 |
| 1 | 150273456 | 150274712 | 150274329 | 78 | 157 | 40 | 4.520529673 | 1.80E-22    | S100A11 | ENSG00000163191 |
| 1 | 150275048 | 150275557 | 150275387 | 11 | 23  | 18 | 1.481745902 | 0.0984143   | S100A11 | ENSG00000163191 |
| 1 | 150275977 | 150276313 | 150276145 | 21 | 26  | 7  | 3.959039833 | 7.16E-05    | S100A11 | ENSG00000163191 |
| 1 | 150277858 | 150278076 | 150277967 | 8  | 9   | 7  | 1.466311049 | 0.20706     | S100A11 | ENSG00000163191 |
| 1 | 150286791 | 150287843 | 150287150 | 33 | 94  | 33 | 3.277636463 | 8.39E-11    | S100A11 | ENSG00000163191 |
| 1 | 150291761 | 150292171 | 150291940 | 18 | 26  | 15 | 1.979519916 | 0.0131534   | S100A11 | ENSG00000163191 |
| 1 | 150349510 | 150350042 | 150349676 | 11 | 22  | 12 | 2.0753941   | 0.0149739   | TCHH    | ENSG00000159450 |
| 1 | 150381177 | 150381408 | 150381292 | 10 | 12  | 11 | 1.270802909 | 0.274822    | RPTN    | ENSG00000215853 |
| 1 | 150406878 | 150407186 | 150407032 | 14 | 18  | 4  | 4.457585589 | 0.000353565 | RPTN    | ENSG00000215853 |
| 1 | 150424682 | 150424978 | 150424821 | 11 | 14  | 4  | 3.519146518 | 0.00361132  | RPTN    | ENSG00000215853 |
| 1 | 150427823 | 150428082 | 150427952 | 8  | 9   | 6  | 1.675784056 | 0.141978    | RPTN    | ENSG00000215853 |

|   |           |           |           |    |    |    |             |             |         |                 |
|---|-----------|-----------|-----------|----|----|----|-------------|-------------|---------|-----------------|
| 1 | 150429091 | 150429364 | 150429217 | 11 | 12 | 8  | 1.694403879 | 0.107291    | RPTN    | ENSG00000215853 |
| 1 | 150564390 | 150564648 | 150564532 | 9  | 11 | 5  | 2.346097679 | 0.0364013   | FLG     | ENSG00000143631 |
| 1 | 150606547 | 150606780 | 150606668 | 9  | 10 | 7  | 1.612942154 | 0.147335    | FLG2    | ENSG00000143520 |
| 1 | 150631934 | 150632316 | 150632113 | 17 | 26 | 8  | 3.519146518 | 0.000175368 |         | ENSG00000183586 |
| 1 | 150638178 | 150638500 | 150638339 | 13 | 19 | 5  | 3.910162798 | 0.000546977 |         | ENSG00000183586 |
| 1 | 150679971 | 150680276 | 150680123 | 15 | 19 | 13 | 1.675784056 | 0.0660887   | CRNN    | ENSG00000143536 |
| 1 | 150680282 | 150680461 | 150680371 | 8  | 8  | 8  | 1.173048839 | 0.36929     | CRNN    | ENSG00000143536 |
| 1 | 150697548 | 150697817 | 150697652 | 13 | 15 | 7  | 2.346097679 | 0.0195693   | CRNN    | ENSG00000143536 |
| 1 | 150700616 | 150700983 | 150700795 | 10 | 17 | 4  | 4.222975822 | 0.000640773 | CRNN    | ENSG00000143536 |
| 1 | 150716701 | 150716899 | 150716800 | 8  | 9  | 0  | 11.73048839 | 0.000425898 | LCE5A   | ENSG00000186207 |
| 1 | 150957369 | 150957553 | 150957461 | 9  | 9  | 3  | 2.932622098 | 0.0242899   | C1orf68 | ENSG00000198854 |
| 1 | 150982368 | 150982868 | 150982616 | 12 | 23 | 2  | 9.384390715 | 8.25E-07    |         | ENSG00000220175 |
| 1 | 151025086 | 151025520 | 151025311 | 24 | 34 | 1  | 20.52835469 | 3.17E-11    | LCE1E   | ENSG00000186226 |
| 1 | 151050178 | 151050425 | 151050296 | 12 | 12 | 0  | 15.24963491 | 4.15E-05    | LCE1B   | ENSG00000196734 |
| 1 | 151237136 | 151237423 | 151237302 | 9  | 12 | 4  | 3.049926982 | 0.0108184   | SPRR3   | ENSG00000163209 |
| 1 | 151362024 | 151362361 | 151362192 | 27 | 29 | 2  | 11.73048839 | 1.18E-08    | SPRR2F  | ENSG00000213163 |
| 1 | 151431975 | 151432162 | 151432068 | 8  | 8  | 4  | 2.111487911 | 0.0804809   | LLEP1   | ENSG00000203784 |
| 1 | 151594656 | 151594912 | 151594782 | 9  | 11 | 8  | 1.564065119 | 0.151515    | S100A9  | ENSG00000163220 |
| 1 | 151603394 | 151603663 | 151603552 | 8  | 12 | 3  | 3.812408728 | 0.004404    | S100A9  | ENSG00000163220 |
| 1 | 151604426 | 151604982 | 151604584 | 9  | 19 | 7  | 2.932622098 | 0.00293566  | S100A9  | ENSG00000163220 |
| 1 | 151765256 | 151765645 | 151765422 | 24 | 31 | 2  | 12.51252095 | 2.82E-09    | S100A6  | ENSG00000197956 |
| 1 | 151783212 | 151783487 | 151783363 | 8  | 9  | 2  | 3.910162798 | 0.00955088  | S100A4  | ENSG00000196154 |
| 1 | 151805626 | 151806045 | 151805805 | 27 | 37 | 3  | 11.14396397 | 2.78E-10    | S100A2  | ENSG00000196754 |
| 1 | 151806616 | 151807052 | 151806811 | 43 | 53 | 2  | 21.11487911 | 2.91E-16    | S100A2  | ENSG00000196754 |
| 1 | 151807571 | 151807926 | 151807748 | 9  | 15 | 11 | 1.564065119 | 0.11768     | S100A2  | ENSG00000196754 |
| 1 | 151811694 | 151812012 | 151811853 | 9  | 13 | 5  | 2.737113958 | 0.0137917   | S100A2  | ENSG00000196754 |
| 1 | 151866415 | 151867032 | 151866614 | 16 | 32 | 5  | 6.451768616 | 1.97E-07    | S100A13 | ENSG00000189171 |
| 1 | 151872845 | 151873585 | 151873428 | 9  | 26 | 19 | 1.583615933 | 0.0575614   | S100A13 | ENSG00000189171 |
| 1 | 151910188 | 151910513 | 151910355 | 13 | 16 | 15 | 1.246364392 | 0.263987    | ILF2    | ENSG00000143621 |
| 1 | 151966910 | 151967140 | 151967077 | 8  | 11 | 1  | 7.038293036 | 0.000674435 | INTS3   | ENSG00000143624 |
| 1 | 151993801 | 151994025 | 151993913 | 8  | 8  | 0  | 10.55743955 | 0.000925496 |         | ENSG00000208567 |
| 1 | 152013928 | 152014216 | 152014072 | 10 | 11 | 1  | 7.038293036 | 0.000674435 |         | ENSG00000216243 |
| 1 | 152036442 | 152036631 | 152036520 | 9  | 9  | 0  | 11.73048839 | 0.000425898 |         | ENSG00000219979 |
| 1 | 152161707 | 152161920 | 152161813 | 8  | 8  | 2  | 3.519146518 | 0.017558    | GATAD2B | ENSG00000143614 |

|   |           |           |           |    |     |    |             |             |         |                 |
|---|-----------|-----------|-----------|----|-----|----|-------------|-------------|---------|-----------------|
| 1 | 152162302 | 152162997 | 152162518 | 11 | 32  | 14 | 2.580707446 | 0.000690197 | GATAD2B | ENSG00000143614 |
| 1 | 152185751 | 152186110 | 152185931 | 10 | 17  | 9  | 2.111487911 | 0.0248715   | DENND4B | ENSG00000198837 |
| 1 | 152197629 | 152197984 | 152197806 | 16 | 21  | 9  | 2.580707446 | 0.00438951  | CRTC2   | ENSG00000160741 |
| 1 | 152202712 | 152202955 | 152202872 | 8  | 10  | 2  | 4.301179077 | 0.00512919  | SLC39A1 | ENSG00000143570 |
| 1 | 152202966 | 152203315 | 152203140 | 8  | 14  | 5  | 2.932622098 | 0.00829617  | SLC39A1 | ENSG00000143570 |
| 1 | 152206162 | 152206737 | 152206388 | 9  | 22  | 9  | 2.69801233  | 0.00276236  | SLC39A1 | ENSG00000143570 |
| 1 | 152206969 | 152207226 | 152207133 | 8  | 11  | 5  | 2.346097679 | 0.0364013   | CREB3L4 | ENSG00000143578 |
| 1 | 152216566 | 152216859 | 152216690 | 8  | 12  | 4  | 3.049926982 | 0.0108184   | JTB     | ENSG00000143543 |
| 1 | 152225038 | 152225240 | 152225202 | 8  | 8   | 0  | 10.55743955 | 0.000925496 | RAB13   | ENSG00000143545 |
| 1 | 152225903 | 152226146 | 152226024 | 13 | 14  | 3  | 4.398933147 | 0.00132748  | RAB13   | ENSG00000143545 |
| 1 | 152229661 | 152230109 | 152229905 | 18 | 30  | 8  | 4.040501558 | 1.98E-05    | RPS27   | ENSG00000177954 |
| 1 | 152343943 | 152344136 | 152344039 | 8  | 8   | 1  | 5.278719777 | 0.00542188  |         | ENSG00000208550 |
| 1 | 152422475 | 152422691 | 152422564 | 9  | 11  | 2  | 4.692195357 | 0.00272444  | TPM3    | ENSG00000143549 |
| 1 | 152436126 | 152436454 | 152436278 | 12 | 16  | 1  | 9.970915134 | 1.89E-05    |         | ENSG00000215938 |
| 1 | 152459714 | 152459912 | 152459832 | 8  | 9   | 4  | 2.346097679 | 0.050148    | C1orf43 | ENSG00000143612 |
| 1 | 152511539 | 152511872 | 152511705 | 11 | 15  | 8  | 2.085420159 | 0.0338693   | HAX1    | ENSG00000143575 |
| 1 | 152565324 | 152565594 | 152565459 | 8  | 10  | 5  | 2.150589539 | 0.0575848   | ATP8B2  | ENSG00000143515 |
| 1 | 152644153 | 152644385 | 152644246 | 8  | 10  | 2  | 4.301179077 | 0.00512919  | IL6R    | ENSG00000160712 |
| 1 | 152645499 | 152645727 | 152645613 | 8  | 10  | 4  | 2.580707446 | 0.0306059   | IL6R    | ENSG00000160712 |
| 1 | 152666339 | 152666693 | 152666516 | 12 | 17  | 0  | 21.11487911 | 8.57E-07    |         | ENSG00000219049 |
| 1 | 152797783 | 152798075 | 152797929 | 10 | 12  | 3  | 3.812408728 | 0.004404    | UBE2Q1  | ENSG00000160714 |
| 1 | 153052381 | 153053015 | 153052742 | 65 | 113 | 6  | 19.10393824 | 3.55E-31    | KCNN3   | ENSG00000143603 |
| 1 | 153098946 | 153099283 | 153099114 | 23 | 25  | 0  | 30.49926982 | 1.72E-09    | KCNN3   | ENSG00000143603 |
| 1 | 153175656 | 153175919 | 153175801 | 12 | 14  | 6  | 2.513676084 | 0.016726    | PMVK    | ENSG00000163344 |
| 1 | 153176237 | 153176554 | 153176395 | 11 | 15  | 9  | 1.876878143 | 0.0544542   | PMVK    | ENSG00000163344 |
| 1 | 153211757 | 153212167 | 153211988 | 17 | 26  | 3  | 7.918079665 | 5.55E-07    | SHC1    | ENSG00000160691 |
| 1 | 153212703 | 153213091 | 153212912 | 9  | 18  | 2  | 7.429309316 | 2.63E-05    | SHC1    | ENSG00000160691 |
| 1 | 153214391 | 153214647 | 153214483 | 8  | 10  | 3  | 3.225884308 | 0.0139466   | CKS1B   | ENSG00000173207 |
| 1 | 153238119 | 153238608 | 153238304 | 15 | 24  | 6  | 4.18946014  | 8.40E-05    | ZBTB7B  | ENSG00000160685 |
| 1 | 153239930 | 153240512 | 153240333 | 14 | 28  | 13 | 2.429886881 | 0.00217891  | ZBTB7B  | ENSG00000160685 |
| 1 | 153240966 | 153241305 | 153241129 | 10 | 14  | 3  | 4.398933147 | 0.00132748  | ZBTB7B  | ENSG00000160685 |
| 1 | 153242137 | 153242327 | 153242232 | 10 | 11  | 3  | 3.519146518 | 0.00788869  | ZBTB7B  | ENSG00000160685 |
| 1 | 153242649 | 153243204 | 153243036 | 29 | 43  | 5  | 8.602358155 | 1.42E-10    | ZBTB7B  | ENSG00000160685 |
| 1 | 153244307 | 153244487 | 153244378 | 8  | 8   | 0  | 10.55743955 | 0.000925496 | ZBTB7B  | ENSG00000160685 |

|   |           |           |           |    |    |    |             |             |          |                 |
|---|-----------|-----------|-----------|----|----|----|-------------|-------------|----------|-----------------|
| 1 | 153256401 | 153256916 | 153256760 | 15 | 28 | 2  | 11.33947211 | 2.41E-08    | ZBTB7B   | ENSG00000160685 |
| 1 | 153284090 | 153284283 | 153284147 | 8  | 9  | 2  | 3.910162798 | 0.00955088  | ADAM15   | ENSG00000143537 |
| 1 | 153302625 | 153302841 | 153302731 | 9  | 10 | 1  | 6.451768616 | 0.00135978  | EFNA4    | ENSG00000143620 |
| 1 | 153323713 | 153324242 | 153324006 | 10 | 22 | 9  | 2.69801233  | 0.00276236  | EFNA3    | ENSG00000143590 |
| 1 | 153330485 | 153330805 | 153330634 | 8  | 11 | 6  | 2.010940867 | 0.0640214   | EFNA3    | ENSG00000143590 |
| 1 | 153356732 | 153357160 | 153356935 | 13 | 21 | 9  | 2.580707446 | 0.00438951  |          | ENSG00000202027 |
| 1 | 153363642 | 153364023 | 153363851 | 11 | 18 | 3  | 5.571981987 | 0.000108726 | EFNA1    | ENSG00000169242 |
| 1 | 153369012 | 153369253 | 153369132 | 10 | 13 | 7  | 2.052835469 | 0.046392    | EFNA1    | ENSG00000169242 |
| 1 | 153374174 | 153374444 | 153374307 | 12 | 16 | 5  | 3.323638378 | 0.00288759  | RAG1AP1  | ENSG00000169241 |
| 1 | 153374826 | 153375079 | 153374981 | 9  | 10 | 3  | 3.225884308 | 0.0139466   | RAG1AP1  | ENSG00000169241 |
| 1 | 153379485 | 153379822 | 153379656 | 9  | 13 | 5  | 2.737113958 | 0.0137917   | DPM3     | ENSG00000179085 |
| 1 | 153415723 | 153416055 | 153415889 | 13 | 16 | 10 | 1.812893661 | 0.0578656   | TRIM46   | ENSG00000163462 |
| 1 | 153416320 | 153416784 | 153416452 | 12 | 20 | 10 | 2.239456875 | 0.0121685   | TRIM46   | ENSG00000163462 |
| 1 | 153425170 | 153425417 | 153425255 | 9  | 11 | 0  | 14.07658607 | 9.02E-05    | MUC1     | ENSG00000185499 |
| 1 | 153429851 | 153430213 | 153430030 | 12 | 19 | 4  | 4.692195357 | 0.000193572 | MUC1     | ENSG00000185499 |
| 1 | 153461064 | 153461360 | 153461200 | 8  | 10 | 3  | 3.225884308 | 0.0139466   |          | ENSG00000160766 |
| 1 | 153463062 | 153463386 | 153463224 | 15 | 19 | 5  | 3.910162798 | 0.000546977 |          | ENSG00000160766 |
| 1 | 153463837 | 153464080 | 153463929 | 9  | 10 | 6  | 1.843362462 | 0.0964212   |          | ENSG00000160766 |
| 1 | 153481140 | 153481516 | 153481318 | 8  | 13 | 0  | 16.42268375 | 1.91E-05    | GBA      | ENSG00000177628 |
| 1 | 153491819 | 153491998 | 153491908 | 8  | 8  | 5  | 1.759573259 | 0.13508     | C1orf2   | ENSG00000160767 |
| 1 | 153498596 | 153499014 | 153498775 | 9  | 17 | 7  | 2.639359888 | 0.00777415  | SCAMP3   | ENSG00000116521 |
| 1 | 153509219 | 153509398 | 153509344 | 8  | 8  | 3  | 2.639359888 | 0.0415794   | CLK2     | ENSG00000176444 |
| 1 | 153545052 | 153545245 | 153545192 | 8  | 9  | 2  | 3.910162798 | 0.00955088  | FDPS     | ENSG00000160752 |
| 1 | 153559599 | 153559985 | 153559778 | 11 | 19 | 2  | 7.820325595 | 1.32E-05    | RUSC1    | ENSG00000160753 |
| 1 | 153799149 | 153799480 | 153799314 | 8  | 13 | 7  | 2.052835469 | 0.046392    | ASH1L    | ENSG00000116539 |
| 1 | 153799486 | 153799722 | 153799561 | 8  | 12 | 5  | 2.541605819 | 0.0225912   | ASH1L    | ENSG00000116539 |
| 1 | 153887854 | 153888130 | 153887958 | 9  | 13 | 3  | 4.105670938 | 0.00243034  | ERVK5    | ENSG00000198358 |
| 1 | 154170624 | 154170875 | 154170749 | 10 | 11 | 7  | 1.759573259 | 0.102361    | KIAA0907 | ENSG00000132680 |
| 1 | 154174634 | 154174864 | 154174741 | 12 | 13 | 7  | 2.052835469 | 0.046392    | RXFP4    | ENSG00000173080 |
| 1 | 154216590 | 154216818 | 154216729 | 9  | 12 | 1  | 7.624817456 | 0.000332769 | ARHGEF2  | ENSG00000116584 |
| 1 | 154291095 | 154291460 | 154291242 | 14 | 19 | 11 | 1.955081399 | 0.0295891   | ROBLD3   | ENSG00000116586 |
| 1 | 154297339 | 154297715 | 154297506 | 10 | 16 | 6  | 2.848832895 | 0.00632407  | RAB25    | ENSG00000132698 |
| 1 | 154350946 | 154351169 | 154351077 | 9  | 11 | 0  | 14.07658607 | 9.02E-05    | LMNA     | ENSG00000160789 |
| 1 | 154351506 | 154351963 | 154351784 | 9  | 17 | 3  | 5.278719777 | 0.000205462 | LMNA     | ENSG00000160789 |

|   |           |           |           |     |     |     |             |             |          |                 |
|---|-----------|-----------|-----------|-----|-----|-----|-------------|-------------|----------|-----------------|
| 1 | 154359823 | 154360579 | 154360319 | 99  | 140 | 8   | 18.37776515 | 1.12E-37    |          | ENSG00000203263 |
| 1 | 154389807 | 154390144 | 154389969 | 11  | 16  | 4   | 3.988366054 | 0.00115141  | SEMA4A   | ENSG00000196189 |
| 1 | 154430303 | 154430676 | 154430587 | 11  | 17  | 4   | 4.222975822 | 0.000640773 | SLC25A44 | ENSG00000160785 |
| 1 | 154452704 | 154453427 | 154452881 | 109 | 235 | 154 | 1.786061459 | 6.42E-09    |          | ENSG00000203262 |
| 1 | 154461878 | 154462131 | 154462013 | 16  | 17  | 5   | 3.519146518 | 0.00167472  |          | ENSG00000203262 |
| 1 | 154519192 | 154519543 | 154519367 | 19  | 25  | 5   | 5.083211637 | 1.58E-05    | TMEM79   | ENSG00000163472 |
| 1 | 154520569 | 154520859 | 154520690 | 11  | 14  | 5   | 2.932622098 | 0.00829617  | TMEM79   | ENSG00000163472 |
| 1 | 154531890 | 154532220 | 154532060 | 9   | 13  | 3   | 4.105670938 | 0.00243034  | C1orf85  | ENSG00000198715 |
| 1 | 154538190 | 154538382 | 154538304 | 10  | 10  | 2   | 4.301179077 | 0.00512919  | VHLL     | ENSG00000189030 |
| 1 | 154593411 | 154593713 | 154593568 | 12  | 14  | 8   | 1.955081399 | 0.0506438   | CCT3     | ENSG00000163468 |
| 1 | 154604698 | 154604939 | 154604787 | 11  | 14  | 4   | 3.519146518 | 0.00361132  | CCT3     | ENSG00000163468 |
| 1 | 154622048 | 154622261 | 154622176 | 9   | 10  | 7   | 1.612942154 | 0.147335    | RHBG     | ENSG00000132677 |
| 1 | 154658186 | 154658487 | 154658336 | 9   | 14  | 3   | 4.398933147 | 0.00132748  |          | ENSG00000207933 |
| 1 | 154693468 | 154693987 | 154693639 | 9   | 19  | 9   | 2.346097679 | 0.0107159   |          | ENSG00000206651 |
| 1 | 154707999 | 154708424 | 154708245 | 14  | 22  | 10  | 2.452738482 | 0.00515848  |          | ENSG00000206651 |
| 1 | 154737616 | 154737852 | 154737734 | 8   | 9   | 6   | 1.675784056 | 0.141978    | MEF2D    | ENSG00000116604 |
| 1 | 154741648 | 154741931 | 154741789 | 9   | 11  | 2   | 4.692195357 | 0.00272444  | MEF2D    | ENSG00000116604 |
| 1 | 154837534 | 154838132 | 154837944 | 15  | 28  | 8   | 3.779824038 | 5.98E-05    | GPATCH4  | ENSG00000160818 |
| 1 | 154839160 | 154839423 | 154839291 | 10  | 11  | 0   | 14.07658607 | 9.02E-05    | GPATCH4  | ENSG00000160818 |
| 1 | 154852941 | 154853203 | 154853072 | 11  | 14  | 7   | 2.199466574 | 0.0303778   | HAPLN2   | ENSG00000132702 |
| 1 | 154896513 | 154896692 | 154896588 | 8   | 8   | 7   | 1.319679944 | 0.283403    | NES      | ENSG00000132688 |
| 1 | 154929092 | 154929351 | 154929207 | 12  | 13  | 2   | 5.474227917 | 0.000747844 | CRABP2   | ENSG00000143320 |
| 1 | 154942537 | 154942811 | 154942639 | 9   | 11  | 2   | 4.692195357 | 0.00272444  | CRABP2   | ENSG00000143320 |
| 1 | 154948982 | 154949193 | 154949090 | 8   | 9   | 4   | 2.346097679 | 0.050148    | CRABP2   | ENSG00000143320 |
| 1 | 154962228 | 154962473 | 154962371 | 9   | 10  | 4   | 2.580707446 | 0.0306059   | ISG20L2  | ENSG00000143319 |
| 1 | 154977326 | 154978093 | 154977752 | 12  | 38  | 25  | 1.759573259 | 0.011673    | MRPL24   | ENSG00000143314 |
| 1 | 154988125 | 154988336 | 154988280 | 11  | 12  | 2   | 5.083211637 | 0.00143337  | HDGF     | ENSG00000143321 |
| 1 | 155003524 | 155003843 | 155003657 | 9   | 13  | 10  | 1.49297125  | 0.157311    | PRCC     | ENSG00000143294 |
| 1 | 155162731 | 155162968 | 155162807 | 9   | 9   | 2   | 3.910162798 | 0.00955088  | C1orf92  | ENSG00000160838 |
| 1 | 155310572 | 155310927 | 155310760 | 12  | 16  | 2   | 6.647276756 | 0.000101928 |          | ENSG00000220759 |
| 1 | 155337795 | 155337998 | 155337938 | 8   | 10  | 0   | 12.90353723 | 0.000195991 | ETV3L    | ENSG00000172018 |
| 1 | 155368848 | 155369416 | 155369276 | 18  | 30  | 6   | 5.194930574 | 2.42E-06    |          | ENSG00000219338 |
| 1 | 155389004 | 155389183 | 155389100 | 8   | 8   | 3   | 2.639359888 | 0.0415794   | ETV3     | ENSG00000117036 |
| 1 | 156361487 | 156361736 | 156361611 | 11  | 13  | 7   | 2.052835469 | 0.046392    |          | ENSG00000212882 |



|   |           |           |           |    |    |    |             |             |          |                 |
|---|-----------|-----------|-----------|----|----|----|-------------|-------------|----------|-----------------|
| 1 | 157152574 | 157152770 | 157152706 | 10 | 11 | 1  | 7.038293036 | 0.000674435 | PYHIN1   | ENSG00000163564 |
| 1 | 157413727 | 157413947 | 157413858 | 12 | 12 | 6  | 2.178519273 | 0.0416567   |          | ENSG00000208478 |
| 1 | 158017013 | 158017509 | 158017192 | 14 | 23 | 5  | 4.692195357 | 5.29E-05    | DUSP23   | ENSG00000158716 |
| 1 | 158136861 | 158137158 | 158136988 | 26 | 29 | 6  | 5.027352168 | 4.43E-06    | CCDC19   | ENSG00000213085 |
| 1 | 158152770 | 158152974 | 158152872 | 10 | 12 | 2  | 5.083211637 | 0.00143337  | TAGLN2   | ENSG00000158710 |
| 1 | 158182405 | 158182832 | 158182584 | 12 | 21 | 4  | 5.161414893 | 5.68E-05    | IGSF9    | ENSG00000085552 |
| 1 | 158268295 | 158268540 | 158268417 | 8  | 10 | 6  | 1.843362462 | 0.0964212   | PIGM     | ENSG00000143315 |
| 1 | 158498897 | 158499101 | 158499025 | 10 | 10 | 7  | 1.612942154 | 0.147335    | WDR42A   | ENSG00000132716 |
| 1 | 158651311 | 158651615 | 158651461 | 9  | 12 | 1  | 7.624817456 | 0.000332769 | VANGL2   | ENSG00000162738 |
| 1 | 159017813 | 159017996 | 159017944 | 8  | 8  | 3  | 2.639359888 | 0.0415794   | LY9      | ENSG00000122224 |
| 1 | 159187838 | 159188051 | 159187938 | 10 | 12 | 5  | 2.541605819 | 0.0225912   | ITLN2    | ENSG00000158764 |
| 1 | 159277970 | 159278179 | 159278074 | 8  | 9  | 2  | 3.910162798 | 0.00955088  | USF1     | ENSG00000158773 |
| 1 | 159282130 | 159282683 | 159282417 | 14 | 26 | 7  | 3.959039833 | 7.16E-05    | USF1     | ENSG00000158773 |
| 1 | 159311076 | 159311392 | 159311241 | 14 | 17 | 1  | 10.55743955 | 9.18E-06    | ARHGAP30 | ENSG00000186517 |
| 1 | 159319976 | 159320265 | 159320120 | 9  | 13 | 4  | 3.28453675  | 0.00629037  | PVRL4    | ENSG00000143217 |
| 1 | 159325090 | 159325288 | 159325207 | 8  | 8  | 3  | 2.639359888 | 0.0415794   | PVRL4    | ENSG00000143217 |
| 1 | 159325778 | 159326055 | 159325916 | 14 | 15 | 4  | 3.753756286 | 0.0020497   | PVRL4    | ENSG00000143217 |
| 1 | 159341058 | 159341262 | 159341160 | 8  | 8  | 1  | 5.278719777 | 0.00542188  | KLHDC9   | ENSG00000162755 |
| 1 | 159413565 | 159413884 | 159413739 | 10 | 12 | 4  | 3.049926982 | 0.0108184   | B4GALT3  | ENSG00000158850 |
| 1 | 159438477 | 159438769 | 159438631 | 11 | 12 | 4  | 3.049926982 | 0.0108184   | NDUFS2   | ENSG00000158864 |
| 1 | 159462006 | 159462406 | 159462185 | 12 | 19 | 5  | 3.910162798 | 0.000546977 | TOMM40L  | ENSG00000158882 |
| 1 | 159528085 | 159528264 | 159528174 | 8  | 8  | 2  | 3.519146518 | 0.017558    | MPZ      | ENSG00000158887 |
| 1 | 159626123 | 159626484 | 159626302 | 11 | 17 | 5  | 3.519146518 | 0.00167472  |          | ENSG00000217421 |
| 1 | 159635750 | 159636006 | 159635878 | 10 | 13 | 2  | 5.474227917 | 0.000747844 |          | ENSG00000206921 |
| 1 | 159636241 | 159636531 | 159636366 | 11 | 13 | 5  | 2.737113958 | 0.0137917   |          | ENSG00000206921 |
| 1 | 159658351 | 159658613 | 159658456 | 9  | 12 | 5  | 2.541605819 | 0.0225912   |          | ENSG00000208455 |
| 1 | 159664138 | 159664615 | 159664451 | 19 | 30 | 14 | 2.424300935 | 0.00163956  |          | ENSG00000208455 |
| 1 | 159760224 | 159760420 | 159760322 | 8  | 9  | 5  | 1.955081399 | 0.0892323   | HSPA6    | ENSG00000173110 |
| 1 | 159767363 | 159767700 | 159767606 | 11 | 16 | 6  | 2.848832895 | 0.00632407  | HSPA6    | ENSG00000173110 |
| 1 | 159776619 | 159776876 | 159776747 | 12 | 12 | 4  | 3.049926982 | 0.0108184   |          | ENSG00000219527 |
| 1 | 159928261 | 159928602 | 159928464 | 11 | 15 | 3  | 4.692195357 | 0.000718455 |          | ENSG00000213075 |
| 1 | 160002553 | 160002926 | 160002732 | 8  | 15 | 6  | 2.68125449  | 0.0103552   | ATF6     | ENSG00000118217 |
| 1 | 160330765 | 160331206 | 160330943 | 21 | 30 | 6  | 5.194930574 | 2.42E-06    | NOS1AP   | ENSG00000198929 |
| 1 | 160388719 | 160389014 | 160388866 | 11 | 14 | 4  | 3.519146518 | 0.00361132  | NOS1AP   | ENSG00000198929 |

|   |           |           |           |    |    |   |             |             |          |                 |
|---|-----------|-----------|-----------|----|----|---|-------------|-------------|----------|-----------------|
| 1 | 160395949 | 160396216 | 160396093 | 17 | 19 | 1 | 11.73048839 | 2.14E-06    | NOS1AP   | ENSG00000198929 |
| 1 | 160404684 | 160404925 | 160404804 | 11 | 14 | 2 | 5.865244197 | 0.000387308 | NOS1AP   | ENSG00000198929 |
| 1 | 160823804 | 160823993 | 160823898 | 8  | 8  | 3 | 2.639359888 | 0.0415794   | UAP1     | ENSG00000117143 |
| 1 | 161083370 | 161083621 | 161083470 | 8  | 10 | 2 | 4.301179077 | 0.00512919  | C1orf110 | ENSG00000185860 |
| 1 | 161149811 | 161150061 | 161149936 | 9  | 11 | 1 | 7.038293036 | 0.000674435 | C1orf110 | ENSG00000185860 |
| 1 | 161558135 | 161558457 | 161558293 | 14 | 17 | 6 | 3.016411301 | 0.00381427  | NUF2     | ENSG00000143228 |
| 1 | 161838873 | 161839077 | 161838975 | 8  | 8  | 0 | 10.55743955 | 0.000925496 |          | ENSG00000212527 |
| 1 | 162059970 | 162060240 | 162060105 | 18 | 20 | 0 | 24.63402563 | 8.35E-08    |          | ENSG00000219510 |
| 1 | 162834586 | 162834866 | 162834733 | 10 | 12 | 3 | 3.812408728 | 0.004404    |          | ENSG00000215839 |
| 1 | 162837895 | 162838160 | 162838049 | 17 | 18 | 4 | 4.457585589 | 0.000353565 |          | ENSG00000215839 |
| 1 | 162847678 | 162847935 | 162847806 | 11 | 12 | 6 | 2.178519273 | 0.0416567   |          | ENSG00000215839 |
| 1 | 162937124 | 162937383 | 162937241 | 9  | 12 | 0 | 15.24963491 | 4.15E-05    |          | ENSG00000208426 |
| 1 | 162942990 | 162943169 | 162943079 | 8  | 9  | 4 | 2.346097679 | 0.050148    |          | ENSG00000208426 |
| 1 | 162984397 | 162984677 | 162984564 | 10 | 14 | 1 | 8.797866295 | 8.00E-05    |          | ENSG00000208426 |
| 1 | 163008675 | 163008894 | 163008831 | 9  | 11 | 5 | 2.346097679 | 0.0364013   |          | ENSG00000208426 |
| 1 | 163023092 | 163023471 | 163023295 | 8  | 15 | 7 | 2.346097679 | 0.0195693   |          | ENSG00000201987 |
| 1 | 163127558 | 163127818 | 163127653 | 9  | 11 | 2 | 4.692195357 | 0.00272444  |          | ENSG00000217172 |
| 1 | 163398491 | 163398742 | 163398618 | 10 | 12 | 3 | 3.812408728 | 0.004404    | LMX1A    | ENSG00000162761 |
| 1 | 163398756 | 163399034 | 163398895 | 11 | 16 | 3 | 4.985457567 | 0.000385643 | LMX1A    | ENSG00000162761 |
| 1 | 163603370 | 163603569 | 163603400 | 9  | 9  | 0 | 11.73048839 | 0.000425898 | LMX1A    | ENSG00000162761 |
| 1 | 163732428 | 163732607 | 163732517 | 8  | 9  | 6 | 1.675784056 | 0.141978    |          | ENSG00000220111 |
| 1 | 163828878 | 163829057 | 163828972 | 8  | 8  | 3 | 2.639359888 | 0.0415794   |          | ENSG00000208402 |
| 1 | 164064847 | 164065058 | 164064971 | 8  | 9  | 7 | 1.466311049 | 0.20706     | UCK2     | ENSG00000143179 |
| 1 | 164094238 | 164094547 | 164094397 | 15 | 18 | 1 | 11.14396397 | 4.44E-06    | UCK2     | ENSG00000143179 |
| 1 | 164139761 | 164139945 | 164139889 | 8  | 8  | 2 | 3.519146518 | 0.017558    | UCK2     | ENSG00000143179 |
| 1 | 164839222 | 164839423 | 164839342 | 9  | 9  | 0 | 11.73048839 | 0.000425898 | FMO9P    | ENSG00000215834 |
| 1 | 165112083 | 165112423 | 165112222 | 15 | 19 | 2 | 7.820325595 | 1.32E-05    | TADA1L   | ENSG00000152382 |
| 1 | 165146380 | 165146581 | 165146480 | 8  | 8  | 1 | 5.278719777 | 0.00542188  | TADA1L   | ENSG00000152382 |
| 1 | 165249047 | 165249348 | 165249197 | 13 | 14 | 1 | 8.797866295 | 8.00E-05    |          | ENSG00000200036 |
| 1 | 165302478 | 165302657 | 165302584 | 8  | 8  | 4 | 2.111487911 | 0.0804809   | GPA33    | ENSG00000143167 |
| 1 | 165458217 | 165458413 | 165458315 | 9  | 10 | 1 | 6.451768616 | 0.00135978  | POU2F1   | ENSG00000143190 |
| 1 | 165951400 | 165951649 | 165951516 | 8  | 9  | 5 | 1.955081399 | 0.0892323   | MPZL1    | ENSG00000197965 |
| 1 | 166162418 | 166162768 | 166162590 | 9  | 12 | 2 | 5.083211637 | 0.00143337  | BRP44    | ENSG00000143158 |
| 1 | 166171997 | 166172228 | 166172071 | 8  | 11 | 4 | 2.815317214 | 0.0183428   | BRP44    | ENSG00000143158 |

|   |           |           |           |    |    |    |             |             |          |                 |
|---|-----------|-----------|-----------|----|----|----|-------------|-------------|----------|-----------------|
| 1 | 166334558 | 166334859 | 166334708 | 9  | 12 | 4  | 3.049926982 | 0.0108184   | GPR161   | ENSG00000143147 |
| 1 | 166336354 | 166336567 | 166336460 | 8  | 8  | 4  | 2.111487911 | 0.0804809   | GPR161   | ENSG00000143147 |
| 1 | 166414588 | 166415013 | 166414707 | 9  | 16 | 5  | 3.323638378 | 0.00288759  | TIPRL    | ENSG00000143155 |
| 1 | 166557942 | 166558151 | 166558046 | 8  | 8  | 1  | 5.278719777 | 0.00542188  | TBX19    | ENSG00000143178 |
| 1 | 166578641 | 166578826 | 166578733 | 8  | 8  | 3  | 2.639359888 | 0.0415794   |          | ENSG00000218085 |
| 1 | 166641667 | 166642084 | 166641918 | 10 | 16 | 3  | 4.985457567 | 0.000385643 |          | ENSG00000207974 |
| 1 | 166675669 | 166675898 | 166675776 | 14 | 17 | 7  | 2.639359888 | 0.00777415  |          | ENSG00000215833 |
| 1 | 166839470 | 166839649 | 166839573 | 8  | 8  | 0  | 10.55743955 | 0.000925496 |          | ENSG00000216686 |
| 1 | 167002525 | 167002879 | 167002702 | 8  | 12 | 10 | 1.386330446 | 0.21117     |          | ENSG00000221578 |
| 1 | 167100183 | 167100458 | 167100320 | 8  | 12 | 0  | 15.24963491 | 4.15E-05    |          | ENSG00000220043 |
| 1 | 167142921 | 167143279 | 167143100 | 16 | 22 | 8  | 2.997791478 | 0.00137524  |          | ENSG00000220043 |
| 1 | 167227537 | 167228147 | 167227803 | 26 | 46 | 8  | 6.125921716 | 1.47E-09    |          | ENSG00000213063 |
| 1 | 167344777 | 167345103 | 167344940 | 10 | 15 | 6  | 2.68125449  | 0.0103552   | ATP1B1   | ENSG00000143153 |
| 1 | 167438740 | 167439205 | 167438959 | 53 | 65 | 0  | 77.42122339 | 5.67E-23    | ATP1B1   | ENSG00000143153 |
| 1 | 167603781 | 167604214 | 167604054 | 12 | 17 | 3  | 5.278719777 | 0.000205462 | BLZF1    | ENSG00000117475 |
| 1 | 167721883 | 167722214 | 167722048 | 9  | 14 | 5  | 2.932622098 | 0.00829617  |          | ENSG00000213062 |
| 1 | 167765238 | 167765542 | 167765390 | 16 | 18 | 10 | 2.026175268 | 0.0273052   |          | ENSG00000213062 |
| 1 | 167820426 | 167820688 | 167820552 | 9  | 10 | 2  | 4.301179077 | 0.00512919  | F5       | ENSG00000198734 |
| 1 | 168030515 | 168030830 | 168030672 | 9  | 14 | 5  | 2.932622098 | 0.00829617  | C1orf156 | ENSG00000171806 |
| 1 | 168030882 | 168031061 | 168030971 | 10 | 11 | 1  | 7.038293036 | 0.000674435 | C1orf112 | ENSG00000000460 |
| 1 | 168127090 | 168127441 | 168127265 | 17 | 22 | 9  | 2.69801233  | 0.00276236  | SCYL3    | ENSG00000000457 |
| 1 | 168402556 | 168402735 | 168402629 | 8  | 8  | 1  | 5.278719777 | 0.00542188  | METTL11B | ENSG00000203740 |
| 1 | 168767459 | 168768127 | 168767949 | 11 | 30 | 12 | 2.797270309 | 0.000480593 | SCYL1BP1 | ENSG00000120370 |
| 1 | 169490968 | 169491185 | 169491076 | 8  | 10 | 5  | 2.150589539 | 0.0575848   |          | ENSG00000206692 |
| 1 | 169557905 | 169558210 | 169558073 | 12 | 16 | 3  | 4.985457567 | 0.000385643 | FMO4     | ENSG00000076258 |
| 1 | 169721117 | 169721413 | 169721235 | 8  | 12 | 4  | 3.049926982 | 0.0108184   | BAT2D1   | ENSG00000117523 |
| 1 | 169734048 | 169734305 | 169734176 | 8  | 10 | 1  | 6.451768616 | 0.00135978  |          | ENSG00000208362 |
| 1 | 169891353 | 169891532 | 169891442 | 8  | 8  | 3  | 2.639359888 | 0.0415794   | MYOC     | ENSG00000034971 |
| 1 | 169977896 | 169978163 | 169978036 | 15 | 18 | 6  | 3.183989707 | 0.00227432  | VAMP4    | ENSG00000117533 |
| 1 | 169990139 | 169990561 | 169990317 | 17 | 24 | 1  | 14.66311049 | 5.43E-08    |          | ENSG00000218993 |
| 1 | 170016855 | 170017104 | 170016979 | 9  | 10 | 10 | 1.173048839 | 0.355733    | KIAA0859 | ENSG00000010165 |
| 1 | 170442772 | 170443082 | 170442927 | 25 | 27 | 4  | 6.5690735   | 1.26E-06    |          | ENSG00000208024 |
| 1 | 170659114 | 170659493 | 170659339 | 49 | 53 | 1  | 31.67231866 | 1.89E-17    | C1orf105 | ENSG00000180999 |
| 1 | 170679658 | 170680001 | 170679829 | 10 | 15 | 0  | 18.76878143 | 4.04E-06    |          | ENSG00000212919 |

|   |           |           |           |    |    |    |             |             |          |                 |
|---|-----------|-----------|-----------|----|----|----|-------------|-------------|----------|-----------------|
| 1 | 170685777 | 170685972 | 170685863 | 8  | 10 | 6  | 1.843362462 | 0.0964212   | C1orf105 | ENSG00000180999 |
| 1 | 170712039 | 170712374 | 170712208 | 22 | 25 | 1  | 15.24963491 | 2.59E-08    | C1orf105 | ENSG00000180999 |
| 1 | 170739674 | 170739853 | 170739763 | 8  | 8  | 0  | 10.55743955 | 0.000925496 | C1orf9   | ENSG00000094975 |
| 1 | 170765812 | 170766195 | 170765986 | 21 | 27 | 10 | 2.9859425   | 0.000503424 | C1orf9   | ENSG00000094975 |
| 1 | 170768190 | 170768435 | 170768316 | 8  | 10 | 12 | 0.992579787 | 0.511743    | C1orf9   | ENSG00000094975 |
| 1 | 170768545 | 170768745 | 170768645 | 8  | 9  | 4  | 2.346097679 | 0.050148    | C1orf9   | ENSG00000094975 |
| 1 | 171248503 | 171248737 | 171248618 | 8  | 9  | 1  | 5.865244197 | 0.00272497  | TNFSF18  | ENSG00000120337 |
| 1 | 171510780 | 171510988 | 171510902 | 8  | 10 | 5  | 2.150589539 | 0.0575848   | TNFSF4   | ENSG00000117586 |
| 1 | 171592392 | 171592609 | 171592500 | 8  | 9  | 2  | 3.910162798 | 0.00955088  |          | ENSG00000218557 |
| 1 | 171712675 | 171712916 | 171712795 | 9  | 9  | 2  | 3.910162798 | 0.00955088  | PRDX6    | ENSG00000117592 |
| 1 | 171724963 | 171725152 | 171725060 | 8  | 8  | 2  | 3.519146518 | 0.017558    | PRDX6    | ENSG00000117592 |
| 1 | 171950486 | 171950769 | 171950627 | 18 | 19 | 5  | 3.910162798 | 0.000546977 | KLHL20   | ENSG00000076321 |
| 1 | 172060169 | 172060357 | 172060263 | 10 | 10 | 1  | 6.451768616 | 0.00135978  | CENPL    | ENSG00000120334 |
| 1 | 172060441 | 172060678 | 172060562 | 8  | 9  | 5  | 1.955081399 | 0.0892323   | DARS2    | ENSG00000117593 |
| 1 | 172103544 | 172103861 | 172103702 | 20 | 25 | 18 | 1.605224727 | 0.0562573   | ZBTB37   | ENSG00000185278 |
| 1 | 172104575 | 172104862 | 172104746 | 9  | 12 | 5  | 2.541605819 | 0.0225912   | ZBTB37   | ENSG00000185278 |
| 1 | 172129873 | 172130286 | 172130052 | 13 | 20 | 2  | 8.211341875 | 6.65E-06    | SERPINC1 | ENSG00000117601 |
| 1 | 172161178 | 172161404 | 172161291 | 8  | 8  | 3  | 2.639359888 | 0.0415794   | SERPINC1 | ENSG00000117601 |
| 1 | 172395254 | 172395485 | 172395411 | 9  | 10 | 5  | 2.150589539 | 0.0575848   | RABGAP1L | ENSG00000152061 |
| 1 | 172642262 | 172642553 | 172642398 | 17 | 20 | 2  | 8.211341875 | 6.65E-06    |          | ENSG00000218489 |
| 1 | 173119231 | 173119467 | 173119349 | 10 | 10 | 2  | 4.301179077 | 0.00512919  | RABGAP1L | ENSG00000152061 |
| 1 | 173234343 | 173234766 | 173234628 | 9  | 14 | 5  | 2.932622098 | 0.00829617  | CACYBP   | ENSG00000116161 |
| 1 | 173235153 | 173235785 | 173235438 | 13 | 30 | 6  | 5.194930574 | 2.42E-06    | CACYBP   | ENSG00000116161 |
| 1 | 173258974 | 173259351 | 173259153 | 8  | 15 | 5  | 3.128130238 | 0.00492422  | MRPS14   | ENSG00000120333 |
| 1 | 173413960 | 173414159 | 173414047 | 8  | 9  | 1  | 5.865244197 | 0.00272497  | TNN      | ENSG00000120332 |
| 1 | 173414342 | 173414613 | 173414491 | 10 | 13 | 2  | 5.474227917 | 0.000747844 | TNN      | ENSG00000120332 |
| 1 | 173507108 | 173507301 | 173507184 | 8  | 8  | 3  | 2.639359888 | 0.0415794   |          | ENSG00000219660 |
| 1 | 173555069 | 173555377 | 173555202 | 9  | 12 | 6  | 2.178519273 | 0.0416567   |          | ENSG00000219660 |
| 1 | 173766633 | 173767049 | 173766799 | 10 | 18 | 5  | 3.714654658 | 0.000961539 | TNR      | ENSG00000116147 |
| 1 | 173978797 | 173979020 | 173978869 | 10 | 11 | 1  | 7.038293036 | 0.000674435 | TNR      | ENSG00000116147 |
| 1 | 174123716 | 174123957 | 174123839 | 10 | 10 | 2  | 4.301179077 | 0.00512919  |          | ENSG00000218113 |
| 1 | 174443054 | 174443392 | 174443214 | 16 | 21 | 7  | 3.225884308 | 0.00106152  | RFWD2    | ENSG00000143207 |
| 1 | 174443492 | 174443688 | 174443579 | 8  | 9  | 4  | 2.346097679 | 0.050148    | RFWD2    | ENSG00000143207 |
| 1 | 174795707 | 174795937 | 174795811 | 9  | 10 | 3  | 3.225884308 | 0.0139466   |          | ENSG00000172760 |

|   |           |           |           |    |    |    |             |             |         |                 |
|---|-----------|-----------|-----------|----|----|----|-------------|-------------|---------|-----------------|
| 1 | 174927469 | 174927711 | 174927599 | 9  | 11 | 4  | 2.815317214 | 0.0183428   |         | ENSG00000172760 |
| 1 | 174979935 | 174980268 | 174980099 | 8  | 12 | 2  | 5.083211637 | 0.00143337  |         | ENSG00000172760 |
| 1 | 174981621 | 174982052 | 174981800 | 8  | 17 | 4  | 4.222975822 | 0.000640773 |         | ENSG00000172760 |
| 1 | 174988440 | 174988679 | 174988559 | 11 | 11 | 7  | 1.759573259 | 0.102361    |         | ENSG00000172760 |
| 1 | 175133642 | 175133845 | 175133720 | 8  | 10 | 7  | 1.612942154 | 0.147335    |         | ENSG00000202609 |
| 1 | 175184876 | 175185186 | 175185031 | 12 | 15 | 5  | 3.128130238 | 0.00492422  |         | ENSG00000202609 |
| 1 | 175406516 | 175406895 | 175406692 | 13 | 19 | 1  | 11.73048839 | 2.14E-06    | FAM5B   | ENSG00000198797 |
| 1 | 175421781 | 175421972 | 175421914 | 9  | 9  | 3  | 2.932622098 | 0.0242899   |         | ENSG00000222749 |
| 1 | 175492170 | 175492489 | 175492329 | 15 | 19 | 3  | 5.865244197 | 5.72E-05    |         | ENSG00000222749 |
| 1 | 175540899 | 175541100 | 175540995 | 9  | 11 | 3  | 3.519146518 | 0.00788869  |         | ENSG00000222749 |
| 1 | 175676648 | 175676900 | 175676774 | 8  | 9  | 3  | 2.932622098 | 0.0242899   |         | ENSG00000222749 |
| 1 | 175678391 | 175678595 | 175678482 | 8  | 9  | 13 | 0.837892028 | 0.672794    |         | ENSG00000222749 |
| 1 | 175684519 | 175685099 | 175684698 | 18 | 34 | 14 | 2.737113958 | 0.000281523 |         | ENSG00000222749 |
| 1 | 175686854 | 175687091 | 175686980 | 9  | 10 | 3  | 3.225884308 | 0.0139466   |         | ENSG00000222749 |
| 1 | 175723224 | 175723470 | 175723396 | 8  | 11 | 3  | 3.519146518 | 0.00788869  |         | ENSG00000222749 |
| 1 | 175821317 | 175821810 | 175821496 | 19 | 35 | 18 | 2.222618853 | 0.00178073  | SEC16B  | ENSG00000120341 |
| 1 | 175824917 | 175825297 | 175825073 | 17 | 22 | 4  | 5.396024661 | 3.05E-05    | SEC16B  | ENSG00000120341 |
| 1 | 175834912 | 175835140 | 175835052 | 8  | 10 | 2  | 4.301179077 | 0.00512919  | SEC16B  | ENSG00000120341 |
| 1 | 175846774 | 175847227 | 175846999 | 12 | 22 | 6  | 3.854303329 | 0.000260696 | SEC16B  | ENSG00000120341 |
| 1 | 176142797 | 176142976 | 176142934 | 8  | 8  | 3  | 2.639359888 | 0.0415794   | SEC16B  | ENSG00000120341 |
| 1 | 176148887 | 176149218 | 176149154 | 12 | 17 | 4  | 4.222975822 | 0.000640773 | SEC16B  | ENSG00000120341 |
| 1 | 176149393 | 176149792 | 176149559 | 9  | 15 | 5  | 3.128130238 | 0.00492422  | SEC16B  | ENSG00000120341 |
| 1 | 176150771 | 176150952 | 176150796 | 9  | 10 | 0  | 12.90353723 | 0.000195991 | SEC16B  | ENSG00000120341 |
| 1 | 176181643 | 176181992 | 176181817 | 20 | 25 | 5  | 5.083211637 | 1.58E-05    | SEC16B  | ENSG00000120341 |
| 1 | 176184074 | 176184452 | 176184253 | 12 | 19 | 5  | 3.910162798 | 0.000546977 | SEC16B  | ENSG00000120341 |
| 1 | 176220025 | 176220205 | 176220115 | 8  | 8  | 6  | 1.508205651 | 0.203852    | SEC16B  | ENSG00000120341 |
| 1 | 176231170 | 176231413 | 176231291 | 8  | 8  | 1  | 5.278719777 | 0.00542188  | SEC16B  | ENSG00000120341 |
| 1 | 176329141 | 176329605 | 176329375 | 9  | 20 | 6  | 3.519146518 | 0.000784044 | RASAL2  | ENSG00000075391 |
| 1 | 176330263 | 176330533 | 176330383 | 8  | 11 | 4  | 2.815317214 | 0.0183428   | RASAL2  | ENSG00000075391 |
| 1 | 176513899 | 176514235 | 176514067 | 22 | 23 | 1  | 14.07658607 | 1.14E-07    | RASAL2  | ENSG00000075391 |
| 1 | 176546371 | 176546550 | 176546503 | 8  | 8  | 1  | 5.278719777 | 0.00542188  | RASAL2  | ENSG00000075391 |
| 1 | 176891437 | 176891847 | 176891616 | 9  | 17 | 5  | 3.519146518 | 0.00167472  | RALGPS2 | ENSG00000116191 |
| 1 | 177252790 | 177253138 | 177252993 | 10 | 14 | 4  | 3.519146518 | 0.00361132  | FAM20B  | ENSG00000116199 |
| 1 | 177262858 | 177263037 | 177262995 | 8  | 8  | 0  | 10.55743955 | 0.000925496 | FAM20B  | ENSG00000116199 |

|   |           |           |           |     |     |    |             |             |          |                 |
|---|-----------|-----------|-----------|-----|-----|----|-------------|-------------|----------|-----------------|
| 1 | 177274632 | 177275331 | 177274945 | 49  | 69  | 5  | 13.68556979 | 2.14E-18    |          | ENSG00000217530 |
| 1 | 177317404 | 177317851 | 177317568 | 11  | 19  | 3  | 5.865244197 | 5.72E-05    | TOR3A    | ENSG00000186283 |
| 1 | 177318664 | 177318922 | 177318787 | 8   | 10  | 4  | 2.580707446 | 0.0306059   | TOR3A    | ENSG00000186283 |
| 1 | 177341118 | 177341441 | 177341267 | 14  | 18  | 4  | 4.457585589 | 0.000353565 | TOR3A    | ENSG00000186283 |
| 1 | 177601330 | 177601867 | 177601537 | 9   | 23  | 12 | 2.165628626 | 0.0100985   | C1orf125 | ENSG00000162779 |
| 1 | 177616204 | 177616435 | 177616315 | 8   | 9   | 4  | 2.346097679 | 0.050148    | C1orf125 | ENSG00000162779 |
| 1 | 177634235 | 177634452 | 177634343 | 10  | 10  | 2  | 4.301179077 | 0.00512919  | C1orf125 | ENSG00000162779 |
| 1 | 177822020 | 177822258 | 177822139 | 8   | 12  | 5  | 2.541605819 | 0.0225912   |          | ENSG00000217660 |
| 1 | 177827861 | 177828133 | 177827997 | 8   | 11  | 1  | 7.038293036 | 0.000674435 | TDRD5    | ENSG00000162782 |
| 1 | 177942134 | 177942385 | 177942275 | 10  | 11  | 5  | 2.346097679 | 0.0364013   |          | ENSG00000221547 |
| 1 | 178050491 | 178051014 | 178050842 | 12  | 23  | 9  | 2.815317214 | 0.00172056  |          | ENSG00000218839 |
| 1 | 178113414 | 178113595 | 178113502 | 10  | 11  | 6  | 2.010940867 | 0.0640214   |          | ENSG00000218839 |
| 1 | 178113711 | 178113928 | 178113804 | 8   | 9   | 8  | 1.303387599 | 0.281715    | TOR1AIP2 | ENSG00000169905 |
| 1 | 178117596 | 178117910 | 178117753 | 8   | 13  | 5  | 2.737113958 | 0.0137917   | TOR1AIP1 | ENSG00000143337 |
| 1 | 178117971 | 178118302 | 178118144 | 10  | 14  | 8  | 1.955081399 | 0.0506438   | TOR1AIP1 | ENSG00000143337 |
| 1 | 178118329 | 178118732 | 178118500 | 25  | 33  | 6  | 5.697665791 | 3.83E-07    | TOR1AIP1 | ENSG00000143337 |
| 1 | 178190139 | 178190588 | 178190441 | 12  | 24  | 14 | 1.955081399 | 0.0175993   | CEP350   | ENSG00000135837 |
| 1 | 178362188 | 178362376 | 178362235 | 8   | 8   | 1  | 5.278719777 | 0.00542188  | QSOX1    | ENSG00000116260 |
| 1 | 178390086 | 178390432 | 178390256 | 17  | 22  | 4  | 5.396024661 | 3.05E-05    | QSOX1    | ENSG00000116260 |
| 1 | 178403651 | 178404104 | 178403917 | 13  | 23  | 16 | 1.65606895  | 0.0532464   | QSOX1    | ENSG00000116260 |
| 1 | 178409686 | 178409868 | 178409719 | 8   | 8   | 4  | 2.111487911 | 0.0804809   | QSOX1    | ENSG00000116260 |
| 1 | 178414575 | 178414809 | 178414685 | 8   | 10  | 9  | 1.290353723 | 0.279648    | QSOX1    | ENSG00000116260 |
| 1 | 178423895 | 178424265 | 178424074 | 10  | 17  | 8  | 2.346097679 | 0.0144542   | QSOX1    | ENSG00000116260 |
| 1 | 178505626 | 178505805 | 178505715 | 9   | 9   | 2  | 3.910162798 | 0.00955088  | LHX4     | ENSG00000121454 |
| 1 | 178735563 | 178735894 | 178735730 | 28  | 32  | 4  | 7.742122339 | 4.68E-08    | ACBD6    | ENSG00000135847 |
| 1 | 178738471 | 178738818 | 178738606 | 10  | 15  | 4  | 3.753756286 | 0.0020497   | ACBD6    | ENSG00000135847 |
| 1 | 178751326 | 178751535 | 178751422 | 9   | 12  | 5  | 2.541605819 | 0.0225912   |          | ENSG00000206905 |
| 1 | 178751574 | 178752298 | 178751872 | 100 | 196 | 10 | 21.0082383  | 2.77E-53    |          | ENSG00000206905 |
| 1 | 178757694 | 178758308 | 178758040 | 48  | 85  | 2  | 33.62740006 | 1.17E-26    |          | ENSG00000206905 |
| 1 | 178791207 | 178791513 | 178791360 | 17  | 20  | 8  | 2.737113958 | 0.0036449   |          | ENSG00000206905 |
| 1 | 178816121 | 178816430 | 178816273 | 8   | 12  | 4  | 3.049926982 | 0.0108184   | XPR1     | ENSG00000143324 |
| 1 | 178821283 | 178821646 | 178821467 | 33  | 40  | 7  | 6.011875301 | 1.73E-08    | XPR1     | ENSG00000143324 |
| 1 | 179098862 | 179099111 | 179098963 | 8   | 11  | 5  | 2.346097679 | 0.0364013   | KIAA1614 | ENSG00000135835 |
| 1 | 179117710 | 179117927 | 179117818 | 9   | 9   | 9  | 1.173048839 | 0.362316    | KIAA1614 | ENSG00000135835 |

|   |           |           |           |      |      |    |             |             |         |                 |
|---|-----------|-----------|-----------|------|------|----|-------------|-------------|---------|-----------------|
| 1 | 179188335 | 179188539 | 179188437 | 8    | 10   | 2  | 4.301179077 | 0.00512919  |         | ENSG00000220772 |
| 1 | 179198058 | 179198407 | 179198232 | 11   | 16   | 4  | 3.988366054 | 0.00115141  |         | ENSG00000220772 |
| 1 | 179257593 | 179257781 | 179257639 | 8    | 8    | 9  | 1.055743955 | 0.456865    | STX6    | ENSG00000135823 |
| 1 | 179258749 | 179259043 | 179258884 | 10   | 13   | 4  | 3.28453675  | 0.00629037  | STX6    | ENSG00000135823 |
| 1 | 179268925 | 179269517 | 179269093 | 10   | 23   | 11 | 2.346097679 | 0.00594236  | MR1     | ENSG00000153029 |
| 1 | 179269555 | 179269806 | 179269721 | 10   | 14   | 9  | 1.759573259 | 0.0786014   | MR1     | ENSG00000153029 |
| 1 | 179274274 | 179274575 | 179274445 | 10   | 12   | 7  | 1.906204364 | 0.0695918   | MR1     | ENSG00000153029 |
| 1 | 179276249 | 179276634 | 179276428 | 9    | 17   | 3  | 5.278719777 | 0.000205462 | MR1     | ENSG00000153029 |
| 1 | 179320082 | 179320568 | 179320261 | 24   | 35   | 9  | 4.222975822 | 3.17E-06    | IER5    | ENSG00000162783 |
| 1 | 179324159 | 179324678 | 179324522 | 18   | 28   | 13 | 2.429886881 | 0.00217891  | IER5    | ENSG00000162783 |
| 1 | 179325392 | 179326001 | 179325688 | 13   | 27   | 8  | 3.649485278 | 0.000102745 | IER5    | ENSG00000162783 |
| 1 | 179331648 | 179331875 | 179331761 | 9    | 11   | 2  | 4.692195357 | 0.00272444  | IER5    | ENSG00000162783 |
| 1 | 179333711 | 179333961 | 179333809 | 8    | 10   | 4  | 2.580707446 | 0.0306059   | IER5    | ENSG00000162783 |
| 1 | 179335060 | 179336175 | 179335522 | 90   | 140  | 12 | 12.72306818 | 4.33E-34    | IER5    | ENSG00000162783 |
| 1 | 179336214 | 179336597 | 179336486 | 8    | 14   | 12 | 1.353517892 | 0.211235    | IER5    | ENSG00000162783 |
| 1 | 179337740 | 179337959 | 179337849 | 9    | 11   | 1  | 7.038293036 | 0.000674435 | IER5    | ENSG00000162783 |
| 1 | 179340036 | 179340303 | 179340170 | 9    | 14   | 4  | 3.519146518 | 0.00361132  | IER5    | ENSG00000162783 |
| 1 | 179344287 | 179344516 | 179344352 | 8    | 10   | 7  | 1.612942154 | 0.147335    | IER5    | ENSG00000162783 |
| 1 | 179348024 | 179348711 | 179348353 | 15   | 37   | 10 | 4.052350536 | 2.71E-06    | IER5    | ENSG00000162783 |
| 1 | 179353319 | 179353933 | 179353579 | 44   | 75   | 9  | 8.915171179 | 4.29E-17    | IER5    | ENSG00000162783 |
| 1 | 179354850 | 179355679 | 179355247 | 46   | 77   | 18 | 4.815674182 | 1.31E-12    | IER5    | ENSG00000162783 |
| 1 | 179356580 | 179356858 | 179356713 | 10   | 13   | 8  | 1.824742639 | 0.0744168   | IER5    | ENSG00000162783 |
| 1 | 179362816 | 179363269 | 179363042 | 27   | 36   | 16 | 2.553106297 | 0.000397168 | IER5    | ENSG00000162783 |
| 1 | 179369382 | 179369676 | 179369543 | 8    | 11   | 3  | 3.519146518 | 0.00788869  | IER5    | ENSG00000162783 |
| 1 | 179369748 | 179369966 | 179369857 | 8    | 8    | 7  | 1.319679944 | 0.283403    | IER5    | ENSG00000162783 |
| 1 | 179370216 | 179371683 | 179370888 | 1067 | 1468 | 26 | 63.82254611 | 0           | IER5    | ENSG00000162783 |
| 1 | 179371798 | 179372111 | 179371934 | 10   | 13   | 4  | 3.28453675  | 0.00629037  | IER5    | ENSG00000162783 |
| 1 | 179378204 | 179378638 | 179378383 | 19   | 28   | 10 | 3.092583304 | 0.000307818 | IER5    | ENSG00000162783 |
| 1 | 179387624 | 179387976 | 179387800 | 8    | 13   | 5  | 2.737113958 | 0.0137917   | IER5    | ENSG00000162783 |
| 1 | 179394352 | 179394536 | 179394471 | 8    | 9    | 2  | 3.910162798 | 0.00955088  | IER5    | ENSG00000162783 |
| 1 | 179402340 | 179402587 | 179402466 | 13   | 16   | 3  | 4.985457567 | 0.000385643 |         | ENSG00000179452 |
| 1 | 179547144 | 179547474 | 179547309 | 9    | 13   | 3  | 4.105670938 | 0.00243034  |         | ENSG00000179452 |
| 1 | 179592287 | 179592472 | 179592379 | 8    | 8    | 1  | 5.278719777 | 0.00542188  | CACNA1E | ENSG00000198216 |
| 1 | 179626558 | 179626756 | 179626650 | 8    | 10   | 5  | 2.150589539 | 0.0575848   | CACNA1E | ENSG00000198216 |

|   |           |           |           |     |     |    |             |             |         |                 |
|---|-----------|-----------|-----------|-----|-----|----|-------------|-------------|---------|-----------------|
| 1 | 179633625 | 179633808 | 179633716 | 8   | 8   | 1  | 5.278719777 | 0.00542188  | CACNA1E | ENSG00000198216 |
| 1 | 179659248 | 179659565 | 179659406 | 11  | 15  | 7  | 2.346097679 | 0.0195693   |         | ENSG00000208272 |
| 1 | 179660567 | 179661107 | 179660811 | 28  | 42  | 10 | 4.585554554 | 1.62E-07    |         | ENSG00000208272 |
| 1 | 179705621 | 179705862 | 179705714 | 9   | 11  | 1  | 7.038293036 | 0.000674435 | CACNA1E | ENSG00000198216 |
| 1 | 179715050 | 179715311 | 179715170 | 8   | 10  | 7  | 1.612942154 | 0.147335    | CACNA1E | ENSG00000198216 |
| 1 | 179721499 | 179721747 | 179721623 | 10  | 11  | 4  | 2.815317214 | 0.0183428   | CACNA1E | ENSG00000198216 |
| 1 | 179757151 | 179757384 | 179757267 | 8   | 10  | 1  | 6.451768616 | 0.00135978  | CACNA1E | ENSG00000198216 |
| 1 | 179757444 | 179757987 | 179757758 | 102 | 134 | 9  | 15.83615933 | 7.34E-35    | CACNA1E | ENSG00000198216 |
| 1 | 180265113 | 180265404 | 180265258 | 14  | 17  | 1  | 10.55743955 | 9.18E-06    | ZNF648  | ENSG00000179930 |
| 1 | 180337228 | 180337442 | 180337335 | 9   | 10  | 3  | 3.225884308 | 0.0139466   | ZNF648  | ENSG00000179930 |
| 1 | 180382076 | 180382451 | 180382248 | 41  | 50  | 4  | 11.96509816 | 2.00E-13    |         | ENSG00000217074 |
| 1 | 180551119 | 180551303 | 180551207 | 9   | 9   | 3  | 2.932622098 | 0.0242899   |         | ENSG00000206764 |
| 1 | 180824839 | 180825018 | 180824926 | 8   | 8   | 7  | 1.319679944 | 0.283403    | RNASEL  | ENSG00000135828 |
| 1 | 180839105 | 180839340 | 180839222 | 12  | 14  | 1  | 8.797866295 | 8.00E-05    | RGS16   | ENSG00000143333 |
| 1 | 180840099 | 180840320 | 180840247 | 9   | 11  | 4  | 2.815317214 | 0.0183428   | RGS16   | ENSG00000143333 |
| 1 | 180840322 | 180840512 | 180840417 | 8   | 10  | 2  | 4.301179077 | 0.00512919  | RGS16   | ENSG00000143333 |
| 1 | 180850509 | 180851118 | 180850813 | 9   | 22  | 6  | 3.854303329 | 0.000260696 | RGS16   | ENSG00000143333 |
| 1 | 180852083 | 180852279 | 180852181 | 11  | 12  | 2  | 5.083211637 | 0.00143337  | RGS16   | ENSG00000143333 |
| 1 | 180869496 | 180870043 | 180869661 | 22  | 37  | 15 | 2.785990993 | 0.000136587 | RGS16   | ENSG00000143333 |
| 1 | 180879136 | 180879332 | 180879271 | 9   | 9   | 1  | 5.865244197 | 0.00272497  | RGS8    | ENSG00000135824 |
| 1 | 180879344 | 180879907 | 180879670 | 165 | 220 | 6  | 37.03482764 | 1.45E-65    | RGS8    | ENSG00000135824 |
| 1 | 180882555 | 180882808 | 180882655 | 15  | 18  | 1  | 11.14396397 | 4.44E-06    | RGS8    | ENSG00000135824 |
| 1 | 180923123 | 180923440 | 180923273 | 16  | 20  | 2  | 8.211341875 | 6.65E-06    | RGS8    | ENSG00000135824 |
| 1 | 180996851 | 180997629 | 180997282 | 209 | 281 | 0  | 330.7997727 | 8.84E-96    | NPL     | ENSG00000135838 |
| 1 | 181018087 | 181018402 | 181018244 | 9   | 13  | 2  | 5.474227917 | 0.000747844 | NPL     | ENSG00000135838 |
| 1 | 181020406 | 181020585 | 181020566 | 8   | 8   | 6  | 1.508205651 | 0.203852    | NPL     | ENSG00000135838 |
| 1 | 181042146 | 181042352 | 181042249 | 8   | 10  | 4  | 2.580707446 | 0.0306059   | NPL     | ENSG00000135838 |
| 1 | 181048048 | 181048249 | 181048177 | 8   | 10  | 1  | 6.451768616 | 0.00135978  | NPL     | ENSG00000135838 |
| 1 | 181075074 | 181075298 | 181075171 | 11  | 11  | 2  | 4.692195357 | 0.00272444  | DHX9    | ENSG00000135829 |
| 1 | 181104972 | 181105416 | 181105242 | 18  | 26  | 3  | 7.918079665 | 5.55E-07    | DHX9    | ENSG00000135829 |
| 1 | 181198312 | 181198757 | 181198529 | 46  | 60  | 5  | 11.92599653 | 1.21E-15    |         | ENSG00000176855 |
| 1 | 181205331 | 181205594 | 181205451 | 12  | 14  | 4  | 3.519146518 | 0.00361132  |         | ENSG00000176855 |
| 1 | 181258215 | 181258499 | 181258386 | 8   | 13  | 3  | 4.105670938 | 0.00243034  | LAMC1   | ENSG00000135862 |
| 1 | 181259609 | 181259945 | 181259777 | 11  | 15  | 2  | 6.256260476 | 0.000199274 | LAMC1   | ENSG00000135862 |



|   |           |           |           |    |    |    |             |             |         |                 |
|---|-----------|-----------|-----------|----|----|----|-------------|-------------|---------|-----------------|
| 1 | 181277851 | 181278044 | 181277947 | 10 | 10 | 0  | 12.90353723 | 0.000195991 | LAMC1   | ENSG00000135862 |
| 1 | 181287491 | 181287805 | 181287648 | 8  | 13 | 6  | 2.346097679 | 0.0266147   | LAMC1   | ENSG00000135862 |
| 1 | 181288633 | 181288915 | 181288800 | 10 | 14 | 2  | 5.865244197 | 0.000387308 | LAMC1   | ENSG00000135862 |
| 1 | 181363832 | 181364090 | 181363961 | 8  | 10 | 6  | 1.843362462 | 0.0964212   | LAMC2   | ENSG00000058085 |
| 1 | 181395748 | 181396119 | 181395927 | 20 | 27 | 10 | 2.9859425   | 0.000503424 | LAMC2   | ENSG00000058085 |
| 1 | 181448741 | 181448955 | 181448848 | 8  | 10 | 1  | 6.451768616 | 0.00135978  | LAMC2   | ENSG00000058085 |
| 1 | 181493846 | 181494103 | 181493959 | 9  | 10 | 2  | 4.301179077 | 0.00512919  |         | ENSG00000219772 |
| 1 | 181550097 | 181550307 | 181550202 | 10 | 10 | 1  | 6.451768616 | 0.00135978  | NMNAT2  | ENSG00000157064 |
| 1 | 181585096 | 181585479 | 181585300 | 10 | 17 | 4  | 4.222975822 | 0.000640773 | NMNAT2  | ENSG00000157064 |
| 1 | 181697165 | 181697441 | 181697296 | 12 | 13 | 6  | 2.346097679 | 0.0266147   | SMG7    | ENSG00000116698 |
| 1 | 181706088 | 181706316 | 181706201 | 8  | 10 | 5  | 2.150589539 | 0.0575848   | SMG7    | ENSG00000116698 |
| 1 | 181707586 | 181708186 | 181707765 | 15 | 30 | 16 | 2.13908906  | 0.00465307  | SMG7    | ENSG00000116698 |
| 1 | 181816108 | 181816509 | 181816330 | 9  | 16 | 7  | 2.492728784 | 0.0124193   | NCF2    | ENSG00000116701 |
| 1 | 181871302 | 181871622 | 181871463 | 9  | 12 | 8  | 1.694403879 | 0.107291    | ARPC5   | ENSG00000162704 |
| 1 | 181891237 | 181891863 | 181891532 | 9  | 22 | 10 | 2.452738482 | 0.00515848  | APOBEC4 | ENSG00000173627 |
| 1 | 182005690 | 182005972 | 182005833 | 16 | 18 | 6  | 3.183989707 | 0.00227432  | RGL1    | ENSG00000143344 |
| 1 | 182287070 | 182287501 | 182287355 | 10 | 17 | 6  | 3.016411301 | 0.00381427  | TSEN15  | ENSG00000198860 |
| 1 | 182623596 | 182623776 | 182623686 | 8  | 9  | 2  | 3.910162798 | 0.00955088  | C1orf21 | ENSG00000116667 |
| 1 | 182629053 | 182629264 | 182629157 | 9  | 11 | 0  | 14.07658607 | 9.02E-05    | C1orf21 | ENSG00000116667 |
| 1 | 182644388 | 182644819 | 182644544 | 9  | 17 | 14 | 1.407658607 | 0.162567    |         | ENSG00000221414 |
| 1 | 182654319 | 182654604 | 182654461 | 17 | 22 | 4  | 5.396024661 | 3.05E-05    |         | ENSG00000221414 |
| 1 | 182659990 | 182660241 | 182660138 | 19 | 20 | 2  | 8.211341875 | 6.65E-06    |         | ENSG00000221414 |
| 1 | 182693410 | 182693630 | 182693520 | 9  | 11 | 4  | 2.815317214 | 0.0183428   |         | ENSG00000221414 |
| 1 | 182718948 | 182719354 | 182719131 | 10 | 21 | 5  | 4.301179077 | 0.000172642 |         | ENSG00000221414 |
| 1 | 182781416 | 182781649 | 182781532 | 9  | 11 | 6  | 2.010940867 | 0.0640214   |         | ENSG00000217919 |
| 1 | 182799123 | 182799388 | 182799283 | 9  | 14 | 3  | 4.398933147 | 0.00132748  |         | ENSG00000217919 |
| 1 | 182802763 | 182802967 | 182802865 | 8  | 8  | 6  | 1.508205651 | 0.203852    |         | ENSG00000217919 |
| 1 | 182871608 | 182871851 | 182871729 | 8  | 11 | 1  | 7.038293036 | 0.000674435 | C1orf21 | ENSG00000116667 |
| 1 | 182920536 | 182920731 | 182920657 | 10 | 11 | 0  | 14.07658607 | 9.02E-05    | EDEM3   | ENSG00000116406 |
| 1 | 182922464 | 182922657 | 182922608 | 9  | 11 | 2  | 4.692195357 | 0.00272444  | EDEM3   | ENSG00000116406 |
| 1 | 182989768 | 182990120 | 182989944 | 9  | 15 | 4  | 3.753756286 | 0.0020497   | EDEM3   | ENSG00000116406 |
| 1 | 182990429 | 182990936 | 182990596 | 11 | 20 | 6  | 3.519146518 | 0.000784044 | EDEM3   | ENSG00000116406 |
| 1 | 183041368 | 183041583 | 183041475 | 8  | 9  | 1  | 5.865244197 | 0.00272497  | EDEM3   | ENSG00000116406 |
| 1 | 183074279 | 183074897 | 183074568 | 18 | 33 | 9  | 3.988366054 | 9.65E-06    | FAM129A | ENSG00000135842 |

|   |           |           |           |    |    |    |             |             |          |                 |
|---|-----------|-----------|-----------|----|----|----|-------------|-------------|----------|-----------------|
| 1 | 183125253 | 183125455 | 183125347 | 9  | 9  | 1  | 5.865244197 | 0.00272497  | FAM129A  | ENSG00000135842 |
| 1 | 183140967 | 183141154 | 183141093 | 10 | 10 | 8  | 1.433726359 | 0.209175    | FAM129A  | ENSG00000135842 |
| 1 | 183141350 | 183141716 | 183141529 | 12 | 19 | 1  | 11.73048839 | 2.14E-06    | FAM129A  | ENSG00000135842 |
| 1 | 183165726 | 183166060 | 183165893 | 13 | 18 | 6  | 3.183989707 | 0.00227432  | FAM129A  | ENSG00000135842 |
| 1 | 183222117 | 183222361 | 183222239 | 11 | 12 | 1  | 7.624817456 | 0.000332769 | FAM129A  | ENSG00000135842 |
| 1 | 183392643 | 183392897 | 183392770 | 9  | 11 | 8  | 1.564065119 | 0.151515    | C1orf26  | ENSG00000116668 |
| 1 | 183553163 | 183553449 | 183553306 | 12 | 14 | 7  | 2.199466574 | 0.0303778   | IVNS1ABP | ENSG00000116679 |
| 1 | 183724815 | 183724994 | 183724885 | 8  | 8  | 0  | 10.55743955 | 0.000925496 |          | ENSG00000207108 |
| 1 | 183727477 | 183727710 | 183727615 | 11 | 11 | 2  | 4.692195357 | 0.00272444  |          | ENSG00000207108 |
| 1 | 183882034 | 183882321 | 183882177 | 26 | 29 | 2  | 11.73048839 | 1.18E-08    |          | ENSG00000201596 |
| 1 | 183932530 | 183932792 | 183932681 | 8  | 10 | 2  | 4.301179077 | 0.00512919  | HMCN1    | ENSG00000143341 |
| 1 | 183969751 | 183970143 | 183969930 | 9  | 17 | 3  | 5.278719777 | 0.000205462 | HMCN1    | ENSG00000143341 |
| 1 | 183987719 | 183987898 | 183987777 | 8  | 8  | 0  | 10.55743955 | 0.000925496 | HMCN1    | ENSG00000143341 |
| 1 | 184388436 | 184388903 | 184388610 | 18 | 27 | 8  | 3.649485278 | 0.000102745 | PRG4     | ENSG00000116690 |
| 1 | 184448268 | 184448621 | 184448444 | 10 | 16 | 6  | 2.848832895 | 0.00632407  | PRG4     | ENSG00000116690 |
| 1 | 184610739 | 184611408 | 184611229 | 15 | 33 | 10 | 3.625787322 | 2.36E-05    | TPR      | ENSG00000047410 |
| 1 | 184975303 | 184975663 | 184975501 | 16 | 20 | 0  | 24.63402563 | 8.35E-08    | PTGS2    | ENSG00000073756 |
| 1 | 184987158 | 184987376 | 184987257 | 11 | 11 | 2  | 4.692195357 | 0.00272444  | PTGS2    | ENSG00000073756 |
| 1 | 185163665 | 185163918 | 185163791 | 12 | 14 | 6  | 2.513676084 | 0.016726    | PLA2G4A  | ENSG00000116711 |
| 1 | 185498525 | 185498800 | 185498639 | 13 | 16 | 0  | 19.94183027 | 1.86E-06    |          | ENSG00000203918 |
| 1 | 185500755 | 185500976 | 185500865 | 9  | 9  | 2  | 3.910162798 | 0.00955088  |          | ENSG00000203918 |
| 1 | 185643914 | 185644346 | 185644121 | 33 | 46 | 2  | 18.37776515 | 5.11E-14    |          | ENSG00000203918 |
| 1 | 185712512 | 185712811 | 185712661 | 9  | 11 | 5  | 2.346097679 | 0.0364013   |          | ENSG00000203918 |
| 1 | 185866371 | 185866727 | 185866549 | 31 | 37 | 0  | 44.57585589 | 1.55E-13    |          | ENSG00000217211 |
| 1 | 185874382 | 185875024 | 185874688 | 45 | 62 | 2  | 24.63402563 | 3.62E-19    |          | ENSG00000217712 |
| 1 | 186353237 | 186353449 | 186353343 | 8  | 9  | 1  | 5.865244197 | 0.00272497  |          | ENSG00000222240 |
| 1 | 186608592 | 186608860 | 186608751 | 15 | 15 | 2  | 6.256260476 | 0.000199274 |          | ENSG00000219094 |
| 1 | 186668186 | 186668384 | 186668318 | 8  | 8  | 8  | 1.173048839 | 0.36929     |          | ENSG00000219094 |
| 1 | 186725030 | 186725505 | 186725208 | 15 | 24 | 27 | 1.047365035 | 0.435612    |          | ENSG00000217509 |
| 1 | 186768988 | 186769167 | 186769077 | 8  | 8  | 3  | 2.639359888 | 0.0415794   |          | ENSG00000217509 |
| 1 | 186886993 | 186887214 | 186887103 | 9  | 10 | 1  | 6.451768616 | 0.00135978  |          | ENSG00000217509 |
| 1 | 187005712 | 187005916 | 187005830 | 8  | 8  | 1  | 5.278719777 | 0.00542188  |          | ENSG00000218573 |
| 1 | 187101854 | 187102041 | 187101947 | 8  | 9  | 3  | 2.932622098 | 0.0242899   |          | ENSG00000218573 |
| 1 | 187385432 | 187385816 | 187385611 | 13 | 18 | 4  | 4.457585589 | 0.000353565 |          | ENSG00000219973 |

|   |           |           |           |    |    |    |             |             |         |                 |
|---|-----------|-----------|-----------|----|----|----|-------------|-------------|---------|-----------------|
| 1 | 187425519 | 187425782 | 187425667 | 9  | 9  | 1  | 5.865244197 | 0.00272497  |         | ENSG00000219973 |
| 1 | 187666548 | 187666727 | 187666637 | 8  | 8  | 1  | 5.278719777 | 0.00542188  |         | ENSG00000219973 |
| 1 | 188165322 | 188165527 | 188165382 | 10 | 11 | 4  | 2.815317214 | 0.0183428   |         | ENSG00000217253 |
| 1 | 188688584 | 188688781 | 188688638 | 8  | 8  | 1  | 5.278719777 | 0.00542188  | FAM5C   | ENSG00000162670 |
| 1 | 188869864 | 188870097 | 188869980 | 9  | 10 | 3  | 3.225884308 | 0.0139466   |         | ENSG00000218693 |
| 1 | 188905592 | 188905790 | 188905685 | 8  | 9  | 4  | 2.346097679 | 0.050148    |         | ENSG00000218693 |
| 1 | 189108204 | 189108421 | 189108348 | 8  | 8  | 1  | 5.278719777 | 0.00542188  |         | ENSG00000219198 |
| 1 | 189515215 | 189515561 | 189515388 | 8  | 12 | 3  | 3.812408728 | 0.004404    |         | ENSG00000217637 |
| 1 | 189888977 | 189889166 | 189889114 | 8  | 8  | 5  | 1.759573259 | 0.13508     |         |                 |
| 1 | 189926775 | 189926961 | 189926868 | 9  | 10 | 3  | 3.225884308 | 0.0139466   | RGS18   | ENSG00000150681 |
| 1 | 189937767 | 189938104 | 189937935 | 10 | 15 | 7  | 2.346097679 | 0.0195693   | RGS18   | ENSG00000150681 |
| 1 | 190137420 | 190137733 | 190137576 | 17 | 20 | 1  | 12.31701281 | 1.03E-06    | RGS18   | ENSG00000150681 |
| 1 | 190299707 | 190299938 | 190299822 | 11 | 11 | 1  | 7.038293036 | 0.000674435 | RGS18   | ENSG00000150681 |
| 1 | 191084048 | 191084228 | 191084152 | 8  | 8  | 3  | 2.639359888 | 0.0415794   |         | ENSG00000223075 |
| 1 | 191137299 | 191137669 | 191137492 | 34 | 40 | 3  | 12.0237506  | 3.35E-11    |         | ENSG00000223075 |
| 1 | 191295019 | 191295459 | 191295198 | 26 | 38 | 13 | 3.26777891  | 2.05E-05    | UCHL5   | ENSG00000116750 |
| 1 | 191357462 | 191358116 | 191357661 | 14 | 35 | 8  | 4.692195357 | 1.14E-06    | CDC73   | ENSG00000134371 |
| 1 | 192141130 | 192141348 | 192141239 | 11 | 13 | 3  | 4.105670938 | 0.00243034  |         | ENSG00000219380 |
| 1 | 192771061 | 192771496 | 192771286 | 66 | 79 | 2  | 31.28130238 | 1.07E-24    |         | ENSG00000208230 |
| 1 | 193433855 | 193434124 | 193433996 | 8  | 9  | 2  | 3.910162798 | 0.00955088  |         | ENSG00000219853 |
| 1 | 193554404 | 193554673 | 193554580 | 10 | 11 | 0  | 14.07658607 | 9.02E-05    |         |                 |
| 1 | 194175579 | 194175906 | 194175745 | 10 | 12 | 0  | 15.24963491 | 4.15E-05    |         |                 |
| 1 | 194596850 | 194597050 | 194596950 | 10 | 11 | 5  | 2.346097679 | 0.0364013   | KCNT2   | ENSG00000162687 |
| 1 | 194959312 | 194959492 | 194959402 | 9  | 9  | 4  | 2.346097679 | 0.050148    | CFHR3   | ENSG00000116785 |
| 1 | 195260274 | 195260586 | 195260430 | 10 | 12 | 4  | 3.049926982 | 0.0108184   | F13B    | ENSG00000143278 |
| 1 | 195382561 | 195382740 | 195382672 | 8  | 8  | 3  | 2.639359888 | 0.0415794   | ASPM    | ENSG00000066279 |
| 1 | 195436962 | 195437540 | 195437361 | 19 | 31 | 15 | 2.346097679 | 0.00187452  | ZBTB41  | ENSG00000177888 |
| 1 | 195592763 | 195593041 | 195592902 | 10 | 11 | 9  | 1.407658607 | 0.210479    |         | ENSG00000219706 |
| 1 | 195635881 | 195636093 | 195636027 | 9  | 10 | 5  | 2.150589539 | 0.0575848   | CRB1    | ENSG00000134376 |
| 1 | 195721555 | 195721987 | 195721770 | 9  | 18 | 6  | 3.183989707 | 0.00227432  | CRB1    | ENSG00000134376 |
| 1 | 195722837 | 195723026 | 195722964 | 9  | 11 | 1  | 7.038293036 | 0.000674435 | CRB1    | ENSG00000134376 |
| 1 | 195851011 | 195851218 | 195851098 | 8  | 9  | 9  | 1.173048839 | 0.362316    |         | ENSG00000213047 |
| 1 | 195996576 | 195996956 | 195996782 | 15 | 21 | 2  | 8.602358155 | 3.33E-06    | DENND1B | ENSG00000162701 |
| 1 | 196011190 | 196011440 | 196011314 | 10 | 10 | 9  | 1.290353723 | 0.279648    | DENND1B | ENSG00000162701 |

|   |           |           |           |     |     |    |             |             |          |                 |
|---|-----------|-----------|-----------|-----|-----|----|-------------|-------------|----------|-----------------|
| 1 | 196151562 | 196151801 | 196151695 | 11  | 12  | 7  | 1.906204364 | 0.0695918   | LHX9     | ENSG00000143355 |
| 1 | 196308050 | 196308268 | 196308159 | 8   | 9   | 1  | 5.865244197 | 0.00272497  | NEK7     | ENSG00000151414 |
| 1 | 196391922 | 196392258 | 196392131 | 10  | 15  | 8  | 2.085420159 | 0.0338693   | NEK7     | ENSG00000151414 |
| 1 | 196393548 | 196393727 | 196393637 | 8   | 8   | 7  | 1.319679944 | 0.283403    | NEK7     | ENSG00000151414 |
| 1 | 196582034 | 196582278 | 196582156 | 16  | 17  | 4  | 4.222975822 | 0.000640773 | NEK7     | ENSG00000151414 |
| 1 | 196659457 | 196659776 | 196659598 | 16  | 19  | 2  | 7.820325595 | 1.32E-05    | ATP6V1G3 | ENSG00000151418 |
| 1 | 196905088 | 196905428 | 196905259 | 10  | 15  | 6  | 2.68125449  | 0.0103552   |          | ENSG00000219393 |
| 1 | 197069498 | 197069803 | 197069650 | 8   | 9   | 3  | 2.932622098 | 0.0242899   |          | ENSG00000207975 |
| 1 | 197126379 | 197126621 | 197126448 | 9   | 12  | 5  | 2.541605819 | 0.0225912   |          | ENSG00000207759 |
| 1 | 197139081 | 197139319 | 197139191 | 11  | 13  | 7  | 2.052835469 | 0.046392    |          | ENSG00000207759 |
| 1 | 197168439 | 197168813 | 197168618 | 17  | 24  | 9  | 2.932622098 | 0.00106136  |          | ENSG00000177287 |
| 1 | 197171164 | 197171621 | 197171486 | 18  | 26  | 10 | 2.879301697 | 0.000816629 |          | ENSG00000177287 |
| 1 | 197175010 | 197175432 | 197175181 | 25  | 36  | 8  | 4.822534117 | 6.35E-07    |          | ENSG00000177287 |
| 1 | 197349170 | 197349368 | 197349237 | 10  | 11  | 11 | 1.173048839 | 0.349489    |          | ENSG00000177287 |
| 1 | 197410459 | 197410645 | 197410552 | 8   | 8   | 0  | 10.55743955 | 0.000925496 |          | ENSG00000220028 |
| 1 | 197479345 | 197479606 | 197479475 | 8   | 9   | 0  | 11.73048839 | 0.000425898 |          | ENSG00000220028 |
| 1 | 198144764 | 198145382 | 198145062 | 25  | 47  | 5  | 9.384390715 | 9.52E-12    |          | ENSG00000216458 |
| 1 | 198184672 | 198185162 | 198184917 | 160 | 211 | 5  | 41.44772566 | 6.23E-64    |          | ENSG00000216458 |
| 1 | 198252645 | 198253110 | 198252852 | 8   | 17  | 4  | 4.222975822 | 0.000640773 |          | ENSG00000202329 |
| 1 | 198275643 | 198275848 | 198275745 | 11  | 11  | 2  | 4.692195357 | 0.00272444  | NR5A2    | ENSG00000116833 |
| 1 | 198311867 | 198312199 | 198312033 | 8   | 12  | 6  | 2.178519273 | 0.0416567   |          | ENSG00000208220 |
| 1 | 198326066 | 198326311 | 198326188 | 10  | 12  | 4  | 3.049926982 | 0.0108184   |          | ENSG00000208220 |
| 1 | 198386511 | 198386829 | 198386690 | 14  | 17  | 8  | 2.346097679 | 0.0144542   |          | ENSG00000220390 |
| 1 | 198396263 | 198396502 | 198396382 | 9   | 11  | 4  | 2.815317214 | 0.0183428   |          | ENSG00000220390 |
| 1 | 198397656 | 198397961 | 198397808 | 12  | 15  | 7  | 2.346097679 | 0.0195693   |          | ENSG00000220390 |
| 1 | 198419933 | 198420249 | 198420096 | 14  | 17  | 8  | 2.346097679 | 0.0144542   |          | ENSG00000217193 |
| 1 | 198478649 | 198478831 | 198478740 | 8   | 8   | 1  | 5.278719777 | 0.00542188  |          | ENSG00000217193 |
| 1 | 198502315 | 198502513 | 198502428 | 8   | 8   | 2  | 3.519146518 | 0.017558    |          | ENSG00000217193 |
| 1 | 198531866 | 198532246 | 198532039 | 9   | 13  | 4  | 3.28453675  | 0.00629037  |          | ENSG00000213045 |
| 1 | 198555342 | 198555554 | 198555465 | 9   | 10  | 2  | 4.301179077 | 0.00512919  |          | ENSG00000213045 |
| 1 | 198555734 | 198555936 | 198555896 | 10  | 12  | 1  | 7.624817456 | 0.000332769 |          | ENSG00000213045 |
| 1 | 198612794 | 198613041 | 198612917 | 10  | 13  | 5  | 2.737113958 | 0.0137917   | C1orf98  | ENSG00000203721 |
| 1 | 198645707 | 198645951 | 198645803 | 11  | 14  | 9  | 1.759573259 | 0.0786014   | ZNF281   | ENSG00000162702 |
| 1 | 198646451 | 198646678 | 198646605 | 9   | 10  | 6  | 1.843362462 | 0.0964212   | ZNF281   | ENSG00000162702 |

|   |           |           |           |    |    |    |             |             |           |                 |
|---|-----------|-----------|-----------|----|----|----|-------------|-------------|-----------|-----------------|
| 1 | 198713644 | 198713890 | 198713752 | 9  | 10 | 13 | 0.921681231 | 0.585856    | ZNF281    | ENSG00000162702 |
| 1 | 198719279 | 198719526 | 198719402 | 10 | 11 | 3  | 3.519146518 | 0.00788869  | ZNF281    | ENSG00000162702 |
| 1 | 198724497 | 198724802 | 198724649 | 17 | 22 | 10 | 2.452738482 | 0.00515848  | ZNF281    | ENSG00000162702 |
| 1 | 198856393 | 198856837 | 198856615 | 12 | 22 | 9  | 2.69801233  | 0.00276236  | KIF14     | ENSG00000118193 |
| 1 | 198905237 | 198906075 | 198905931 | 10 | 32 | 12 | 2.977739361 | 0.000186314 | DDX59     | ENSG00000118197 |
| 1 | 198923454 | 198923854 | 198923677 | 11 | 17 | 1  | 10.55743955 | 9.18E-06    | DDX59     | ENSG00000118197 |
| 1 | 198941332 | 198941511 | 198941472 | 8  | 8  | 0  | 10.55743955 | 0.000925496 | CAMSAP1L1 | ENSG00000118200 |
| 1 | 198974661 | 198974905 | 198974772 | 13 | 13 | 4  | 3.28453675  | 0.00629037  | CAMSAP1L1 | ENSG00000118200 |
| 1 | 198974965 | 198975263 | 198975134 | 12 | 13 | 7  | 2.052835469 | 0.046392    | CAMSAP1L1 | ENSG00000118200 |
| 1 | 198977741 | 198977935 | 198977837 | 8  | 9  | 5  | 1.955081399 | 0.0892323   | CAMSAP1L1 | ENSG00000118200 |
| 1 | 199038605 | 199038942 | 199038766 | 8  | 13 | 11 | 1.368556979 | 0.211388    | RPL34P1   | ENSG00000218506 |
| 1 | 199130393 | 199130617 | 199130505 | 8  | 8  | 4  | 2.111487911 | 0.0804809   | C1orf106  | ENSG00000163362 |
| 1 | 199207795 | 199208004 | 199207871 | 10 | 11 | 5  | 2.346097679 | 0.0364013   |           | ENSG00000201032 |
| 1 | 199278687 | 199278948 | 199278833 | 10 | 12 | 8  | 1.694403879 | 0.107291    | KIF21B    | ENSG00000116852 |
| 1 | 199315903 | 199316128 | 199316039 | 10 | 10 | 5  | 2.150589539 | 0.0575848   | CACNA1S   | ENSG00000081248 |
| 1 | 199329032 | 199329211 | 199329153 | 8  | 8  | 2  | 3.519146518 | 0.017558    | CACNA1S   | ENSG00000081248 |
| 1 | 199349904 | 199350505 | 199350074 | 21 | 43 | 4  | 10.32282979 | 2.63E-11    |           | ENSG00000217218 |
| 1 | 199354931 | 199355238 | 199355076 | 10 | 13 | 5  | 2.737113958 | 0.0137917   |           | ENSG00000217218 |
| 1 | 199412836 | 199413040 | 199412969 | 8  | 8  | 0  | 10.55743955 | 0.000925496 | TMEM9     | ENSG00000116857 |
| 1 | 199420561 | 199420982 | 199420839 | 14 | 21 | 6  | 3.686724924 | 0.000453999 | TMEM9     | ENSG00000116857 |
| 1 | 199443435 | 199443614 | 199443605 | 8  | 9  | 1  | 5.865244197 | 0.00272497  | IGFN1     | ENSG00000163395 |
| 1 | 199458555 | 199459138 | 199458821 | 11 | 24 | 12 | 2.255863153 | 0.00673318  | IGFN1     | ENSG00000163395 |
| 1 | 199495135 | 199495316 | 199495233 | 8  | 8  | 2  | 3.519146518 | 0.017558    | PKP1      | ENSG00000081277 |
| 1 | 199518101 | 199518356 | 199518228 | 13 | 15 | 4  | 3.753756286 | 0.0020497   | PKP1      | ENSG00000081277 |
| 1 | 199521387 | 199521910 | 199521711 | 15 | 28 | 6  | 4.859773763 | 8.07E-06    | PKP1      | ENSG00000081277 |
| 1 | 199524499 | 199524779 | 199524603 | 12 | 15 | 1  | 9.384390715 | 3.90E-05    | PKP1      | ENSG00000081277 |
| 1 | 199543365 | 199543991 | 199543701 | 11 | 28 | 15 | 2.126151021 | 0.00621236  | PKP1      | ENSG00000081277 |
| 1 | 199545117 | 199545609 | 199545373 | 19 | 34 | 10 | 3.732428125 | 1.39E-05    | PKP1      | ENSG00000081277 |
| 1 | 199582445 | 199582660 | 199582600 | 11 | 13 | 10 | 1.49297125  | 0.157311    | TNNT2     | ENSG00000118194 |
| 1 | 199583950 | 199584147 | 199584045 | 9  | 10 | 6  | 1.843362462 | 0.0964212   | TNNT2     | ENSG00000118194 |
| 1 | 199606516 | 199606710 | 199606613 | 9  | 11 | 3  | 3.519146518 | 0.00788869  | TNNT2     | ENSG00000118194 |
| 1 | 199616884 | 199617167 | 199617025 | 20 | 21 | 7  | 3.225884308 | 0.00106152  | TNNT2     | ENSG00000118194 |
| 1 | 199621087 | 199621562 | 199621383 | 10 | 18 | 10 | 2.026175268 | 0.0273052   | TNNT2     | ENSG00000118194 |
| 1 | 199628920 | 199629181 | 199629062 | 9  | 10 | 5  | 2.150589539 | 0.0575848   | LAD1      | ENSG00000159166 |

|   |           |           |           |     |     |    |             |             |        |                 |
|---|-----------|-----------|-----------|-----|-----|----|-------------|-------------|--------|-----------------|
| 1 | 199635407 | 199635762 | 199635584 | 10  | 15  | 3  | 4.692195357 | 0.000718455 | LAD1   | ENSG00000159166 |
| 1 | 199671494 | 199671784 | 199671639 | 13  | 14  | 3  | 4.398933147 | 0.00132748  | TNNI1  | ENSG00000159173 |
| 1 | 199683732 | 199683966 | 199683849 | 8   | 10  | 2  | 4.301179077 | 0.00512919  | TNNI1  | ENSG00000159173 |
| 1 | 199683998 | 199684371 | 199684243 | 8   | 14  | 4  | 3.519146518 | 0.00361132  | TNNI1  | ENSG00000159173 |
| 1 | 199696842 | 199697199 | 199697020 | 12  | 18  | 4  | 4.457585589 | 0.000353565 | PHLDA3 | ENSG00000174307 |
| 1 | 199697415 | 199697981 | 199697857 | 9   | 21  | 5  | 4.301179077 | 0.000172642 | PHLDA3 | ENSG00000174307 |
| 1 | 199703526 | 199703768 | 199703692 | 8   | 9   | 5  | 1.955081399 | 0.0892323   | PHLDA3 | ENSG00000174307 |
| 1 | 199703772 | 199704152 | 199703973 | 14  | 23  | 9  | 2.815317214 | 0.00172056  | PHLDA3 | ENSG00000174307 |
| 1 | 199704162 | 199705086 | 199704880 | 202 | 241 | 9  | 28.38778191 | 1.02E-68    | PHLDA3 | ENSG00000174307 |
| 1 | 199705103 | 199705548 | 199705295 | 12  | 21  | 7  | 3.225884308 | 0.00106152  | PHLDA3 | ENSG00000174307 |
| 1 | 199716041 | 199716837 | 199716493 | 22  | 51  | 13 | 4.357038546 | 2.02E-08    | PHLDA3 | ENSG00000174307 |
| 1 | 199717742 | 199718251 | 199717996 | 17  | 29  | 7  | 4.398933147 | 1.30E-05    | PHLDA3 | ENSG00000174307 |
| 1 | 199747816 | 199748036 | 199747931 | 14  | 16  | 6  | 2.848832895 | 0.00632407  | CSRP1  | ENSG00000159176 |
| 1 | 199748081 | 199748324 | 199748202 | 10  | 13  | 5  | 2.737113958 | 0.0137917   | CSRP1  | ENSG00000159176 |
| 1 | 199748735 | 199749063 | 199748908 | 23  | 26  | 12 | 2.436332205 | 0.00289956  | CSRP1  | ENSG00000159176 |
| 1 | 199753479 | 199753678 | 199753625 | 10  | 12  | 1  | 7.624817456 | 0.000332769 |        | ENSG00000218820 |
| 1 | 199758982 | 199759207 | 199759082 | 9   | 9   | 3  | 2.932622098 | 0.0242899   |        | ENSG00000218820 |
| 1 | 199773473 | 199773685 | 199773543 | 8   | 8   | 8  | 1.173048839 | 0.36929     |        | ENSG00000218820 |
| 1 | 199776636 | 199777133 | 199776954 | 12  | 23  | 9  | 2.815317214 | 0.00172056  |        | ENSG00000218820 |
| 1 | 199795349 | 199795748 | 199795528 | 18  | 26  | 10 | 2.879301697 | 0.000816629 |        | ENSG00000218820 |
| 1 | 199829129 | 199829364 | 199829246 | 8   | 10  | 2  | 4.301179077 | 0.00512919  | NAV1   | ENSG00000134369 |
| 1 | 199830370 | 199830753 | 199830611 | 9   | 14  | 6  | 2.513676084 | 0.016726    | NAV1   | ENSG00000134369 |
| 1 | 199833585 | 199833868 | 199833726 | 13  | 16  | 9  | 1.994183027 | 0.0370915   | NAV1   | ENSG00000134369 |
| 1 | 199859525 | 199859816 | 199859662 | 8   | 9   | 6  | 1.675784056 | 0.141978    | NAV1   | ENSG00000134369 |
| 1 | 199886073 | 199886505 | 199886351 | 11  | 19  | 4  | 4.692195357 | 0.000193572 | NAV1   | ENSG00000134369 |
| 1 | 199940010 | 199940303 | 199940156 | 12  | 15  | 3  | 4.692195357 | 0.000718455 |        | ENSG00000184965 |
| 1 | 199943862 | 199944043 | 199943952 | 8   | 8   | 2  | 3.519146518 | 0.017558    |        | ENSG00000184965 |
| 1 | 199945278 | 199945563 | 199945441 | 8   | 12  | 3  | 3.812408728 | 0.004404    |        | ENSG00000184965 |
| 1 | 199977802 | 199978013 | 199977907 | 8   | 9   | 6  | 1.675784056 | 0.141978    | NAV1   | ENSG00000134369 |
| 1 | 200113714 | 200113893 | 200113813 | 8   | 8   | 1  | 5.278719777 | 0.00542188  | SHISA4 | ENSG00000198892 |
| 1 | 200222842 | 200223056 | 200222949 | 9   | 10  | 0  | 12.90353723 | 0.000195991 | RNPEP  | ENSG00000176393 |
| 1 | 200245945 | 200246180 | 200246062 | 9   | 10  | 2  | 4.301179077 | 0.00512919  | ELF3   | ENSG00000163435 |
| 1 | 200254225 | 200255044 | 200254640 | 28  | 62  | 19 | 3.695103844 | 1.25E-08    | ELF3   | ENSG00000163435 |
| 1 | 200258408 | 200258597 | 200258512 | 8   | 8   | 7  | 1.319679944 | 0.283403    |        | ENSG00000220486 |

|   |           |           |           |     |     |    |             |             |          |                 |
|---|-----------|-----------|-----------|-----|-----|----|-------------|-------------|----------|-----------------|
| 1 | 200258699 | 200259423 | 200258970 | 23  | 45  | 23 | 2.248343609 | 0.000435705 |          | ENSG00000220486 |
| 1 | 200270574 | 200270808 | 200270685 | 9   | 11  | 7  | 1.759573259 | 0.102361    |          | ENSG00000217849 |
| 1 | 200281825 | 200282968 | 200282238 | 34  | 80  | 40 | 2.317486731 | 2.80E-06    |          | ENSG00000217849 |
| 1 | 200292311 | 200293193 | 200292520 | 96  | 179 | 22 | 9.180382221 | 4.32E-38    |          | ENSG00000217849 |
| 1 | 200294015 | 200294622 | 200294194 | 10  | 26  | 8  | 3.519146518 | 0.000175368 |          | ENSG00000217849 |
| 1 | 200321744 | 200321942 | 200321913 | 10  | 11  | 3  | 3.519146518 | 0.00788869  |          | ENSG00000216268 |
| 1 | 200322613 | 200323100 | 200322861 | 13  | 22  | 13 | 1.927151665 | 0.0235996   |          | ENSG00000216268 |
| 1 | 200326739 | 200326993 | 200326866 | 8   | 11  | 6  | 2.010940867 | 0.0640214   |          | ENSG00000216268 |
| 1 | 200336966 | 200337219 | 200337062 | 8   | 11  | 11 | 1.173048839 | 0.349489    |          | ENSG00000216268 |
| 1 | 200341270 | 200341999 | 200341801 | 12  | 29  | 13 | 2.513676084 | 0.00141455  |          | ENSG00000216268 |
| 1 | 200342052 | 200342421 | 200342231 | 16  | 23  | 9  | 2.815317214 | 0.00172056  |          | ENSG00000216268 |
| 1 | 200342446 | 200342677 | 200342559 | 8   | 11  | 6  | 2.010940867 | 0.0640214   |          | ENSG00000216268 |
| 1 | 200343033 | 200343439 | 200343276 | 13  | 21  | 7  | 3.225884308 | 0.00106152  |          | ENSG00000216268 |
| 1 | 200344062 | 200344444 | 200344265 | 10  | 17  | 8  | 2.346097679 | 0.0144542   |          | ENSG00000216268 |
| 1 | 200349866 | 200350045 | 200349955 | 8   | 8   | 5  | 1.759573259 | 0.13508     | GPR37L1  | ENSG00000170075 |
| 1 | 200354811 | 200355085 | 200354940 | 14  | 15  | 5  | 3.128130238 | 0.00492422  | GPR37L1  | ENSG00000170075 |
| 1 | 200367813 | 200368603 | 200367976 | 12  | 32  | 14 | 2.580707446 | 0.000690197 | GPR37L1  | ENSG00000170075 |
| 1 | 200370984 | 200371183 | 200371083 | 10  | 10  | 3  | 3.225884308 | 0.0139466   | ARL8A    | ENSG00000143862 |
| 1 | 200371185 | 200371369 | 200371236 | 8   | 8   | 3  | 2.639359888 | 0.0415794   | ARL8A    | ENSG00000143862 |
| 1 | 200379511 | 200379771 | 200379641 | 17  | 18  | 5  | 3.714654658 | 0.000961539 | ARL8A    | ENSG00000143862 |
| 1 | 200390516 | 200390945 | 200390677 | 9   | 16  | 4  | 3.988366054 | 0.00115141  | PTPN7    | ENSG00000143851 |
| 1 | 200390976 | 200391415 | 200391155 | 11  | 20  | 8  | 2.737113958 | 0.0036449   | PTPN7    | ENSG00000143851 |
| 1 | 200406726 | 200406937 | 200406831 | 8   | 9   | 1  | 5.865244197 | 0.00272497  |          | ENSG00000216731 |
| 1 | 200420495 | 200420675 | 200420612 | 8   | 8   | 7  | 1.319679944 | 0.283403    | LGR6     | ENSG00000133067 |
| 1 | 200472154 | 200472655 | 200472415 | 13  | 26  | 14 | 2.111487911 | 0.00831019  |          | ENSG00000208209 |
| 1 | 200472824 | 200473599 | 200473065 | 116 | 142 | 10 | 15.24963491 | 2.02E-36    |          | ENSG00000208209 |
| 1 | 200551433 | 200551660 | 200551516 | 12  | 15  | 9  | 1.876878143 | 0.0544542   | UBE2T    | ENSG00000077152 |
| 1 | 200577813 | 200578038 | 200577923 | 14  | 15  | 8  | 2.085420159 | 0.0338693   | UBE2T    | ENSG00000077152 |
| 1 | 200584160 | 200584558 | 200584359 | 17  | 26  | 11 | 2.639359888 | 0.0015854   | PPP1R12B | ENSG00000077157 |
| 1 | 200589999 | 200590358 | 200590169 | 21  | 26  | 7  | 3.959039833 | 7.16E-05    | PPP1R12B | ENSG00000077157 |
| 1 | 200615671 | 200616127 | 200615929 | 8   | 17  | 7  | 2.639359888 | 0.00777415  |          | ENSG00000220897 |
| 1 | 200646608 | 200646795 | 200646701 | 9   | 9   | 4  | 2.346097679 | 0.050148    |          | ENSG00000201103 |
| 1 | 200811959 | 200812373 | 200812210 | 14  | 20  | 6  | 3.519146518 | 0.000784044 |          | ENSG00000212880 |
| 1 | 200836008 | 200836214 | 200836138 | 10  | 10  | 5  | 2.150589539 | 0.0575848   |          | ENSG00000212880 |

|   |           |           |           |    |    |    |             |             |          |                 |
|---|-----------|-----------|-----------|----|----|----|-------------|-------------|----------|-----------------|
| 1 | 200907108 | 200907424 | 200907274 | 11 | 15 | 5  | 3.128130238 | 0.00492422  | SYT2     | ENSG00000143858 |
| 1 | 200955380 | 200955643 | 200955511 | 13 | 14 | 6  | 2.513676084 | 0.016726    | SYT2     | ENSG00000143858 |
| 1 | 201032166 | 201032363 | 201032253 | 8  | 8  | 1  | 5.278719777 | 0.00542188  |          | ENSG00000216668 |
| 1 | 201044091 | 201044552 | 201044280 | 9  | 17 | 8  | 2.346097679 | 0.0144542   | JARID1B  | ENSG00000117139 |
| 1 | 201046302 | 201046725 | 201046518 | 13 | 23 | 6  | 4.021881735 | 0.000148535 | JARID1B  | ENSG00000117139 |
| 1 | 201048397 | 201048719 | 201048562 | 9  | 12 | 4  | 3.049926982 | 0.0108184   | JARID1B  | ENSG00000117139 |
| 1 | 201070878 | 201071322 | 201071122 | 8  | 17 | 2  | 7.038293036 | 5.19E-05    |          | ENSG00000184774 |
| 1 | 201071987 | 201072207 | 201072097 | 9  | 11 | 9  | 1.407658607 | 0.210479    |          | ENSG00000184774 |
| 1 | 201072255 | 201072681 | 201072499 | 28 | 40 | 13 | 3.435357315 | 7.45E-06    |          | ENSG00000184774 |
| 1 | 201080040 | 201080274 | 201080106 | 11 | 14 | 0  | 17.59573259 | 8.79E-06    |          | ENSG00000220471 |
| 1 | 201096474 | 201096817 | 201096645 | 16 | 21 | 7  | 3.225884308 | 0.00106152  |          | ENSG00000220471 |
| 1 | 201123577 | 201123777 | 201123724 | 8  | 9  | 4  | 2.346097679 | 0.050148    | RABIF    | ENSG00000183155 |
| 1 | 201124162 | 201124359 | 201124297 | 8  | 9  | 1  | 5.865244197 | 0.00272497  | RABIF    | ENSG00000183155 |
| 1 | 201124580 | 201124904 | 201124742 | 11 | 15 | 14 | 1.251252095 | 0.26676     | RABIF    | ENSG00000183155 |
| 1 | 201124986 | 201125177 | 201125081 | 8  | 10 | 15 | 0.806471077 | 0.716145    | RABIF    | ENSG00000183155 |
| 1 | 201162499 | 201163230 | 201162781 | 19 | 47 | 13 | 4.021881735 | 1.84E-07    | KLHL12   | ENSG00000117153 |
| 1 | 201174205 | 201174514 | 201174395 | 10 | 14 | 2  | 5.865244197 | 0.000387308 | KLHL12   | ENSG00000117153 |
| 1 | 201194240 | 201194485 | 201194376 | 9  | 11 | 6  | 2.010940867 | 0.0640214   | ADIPOR1  | ENSG00000159346 |
| 1 | 201203712 | 201203918 | 201203815 | 8  | 9  | 1  | 5.865244197 | 0.00272497  | CYB5R1   | ENSG00000159348 |
| 1 | 201211535 | 201211834 | 201211684 | 10 | 12 | 0  | 15.24963491 | 4.15E-05    | CYB5R1   | ENSG00000159348 |
| 1 | 201234972 | 201235309 | 201235138 | 14 | 17 | 7  | 2.639359888 | 0.00777415  |          | ENSG00000218804 |
| 1 | 201238201 | 201238787 | 201238437 | 71 | 97 | 5  | 19.15979771 | 3.89E-27    |          | ENSG00000218804 |
| 1 | 201242870 | 201243154 | 201243012 | 11 | 14 | 11 | 1.466311049 | 0.15926     | TMEM183B | ENSG00000163444 |
| 1 | 201261728 | 201262193 | 201262026 | 13 | 21 | 5  | 4.301179077 | 0.000172642 | PPFIA4   | ENSG00000143847 |
| 1 | 201275187 | 201275636 | 201275373 | 9  | 17 | 9  | 2.111487911 | 0.0248715   | PPFIA4   | ENSG00000143847 |
| 1 | 201292277 | 201292599 | 201292398 | 13 | 17 | 8  | 2.346097679 | 0.0144542   | PPFIA4   | ENSG00000143847 |
| 1 | 201365438 | 201366054 | 201365707 | 13 | 29 | 15 | 2.199466574 | 0.00420562  | ADORA1   | ENSG00000163485 |
| 1 | 201402224 | 201402541 | 201402382 | 14 | 19 | 4  | 4.692195357 | 0.000193572 | MYBPH    | ENSG00000133055 |
| 1 | 201407996 | 201408203 | 201408074 | 10 | 12 | 6  | 2.178519273 | 0.0416567   | MYBPH    | ENSG00000133055 |
| 1 | 201503023 | 201503441 | 201503155 | 14 | 24 | 15 | 1.832888811 | 0.0266638   | NECAP1   | ENSG00000219801 |
| 1 | 201503458 | 201503805 | 201503664 | 11 | 16 | 10 | 1.812893661 | 0.0578656   | NECAP1   | ENSG00000219801 |
| 1 | 201504805 | 201505224 | 201505049 | 15 | 21 | 10 | 2.346097679 | 0.00796926  | NECAP1   | ENSG00000219801 |
| 1 | 201508694 | 201509273 | 201508988 | 17 | 35 | 8  | 4.692195357 | 1.14E-06    | NECAP1   | ENSG00000219801 |
| 1 | 201516908 | 201517224 | 201517049 | 12 | 15 | 6  | 2.68125449  | 0.0103552   | BTG2     | ENSG00000159388 |



|   |           |           |           |    |     |    |             |             |         |                 |
|---|-----------|-----------|-----------|----|-----|----|-------------|-------------|---------|-----------------|
| 1 | 201517994 | 201518314 | 201518143 | 17 | 20  | 4  | 4.926805125 | 0.00010522  | BTG2    | ENSG00000159388 |
| 1 | 201540758 | 201541036 | 201540926 | 12 | 15  | 13 | 1.340627245 | 0.210788    | BTG2    | ENSG00000159388 |
| 1 | 201541130 | 201541514 | 201541321 | 58 | 69  | 6  | 11.73048839 | 1.48E-17    | BTG2    | ENSG00000159388 |
| 1 | 201542096 | 201542925 | 201542469 | 80 | 114 | 10 | 12.26369241 | 6.94E-28    | BTG2    | ENSG00000159388 |
| 1 | 201552166 | 201553012 | 201552576 | 33 | 68  | 12 | 6.226182301 | 2.79E-13    |         | ENSG00000202300 |
| 1 | 201562844 | 201563431 | 201563241 | 16 | 35  | 10 | 3.839068929 | 8.08E-06    |         | ENSG00000202300 |
| 1 | 201563563 | 201564147 | 201563944 | 8  | 23  | 5  | 4.692195357 | 5.29E-05    |         | ENSG00000202300 |
| 1 | 201575825 | 201576227 | 201575954 | 10 | 15  | 13 | 1.340627245 | 0.210788    | FMOD    | ENSG00000122176 |
| 1 | 201590336 | 201590601 | 201590501 | 9  | 9   | 4  | 2.346097679 | 0.050148    |         | ENSG00000219588 |
| 1 | 201716408 | 201716866 | 201716587 | 11 | 21  | 7  | 3.225884308 | 0.00106152  | PRELP   | ENSG00000188783 |
| 1 | 201723148 | 201723640 | 201723406 | 9  | 19  | 9  | 2.346097679 | 0.0107159   | OPTC    | ENSG00000188770 |
| 1 | 201785074 | 201785376 | 201785234 | 13 | 15  | 9  | 1.876878143 | 0.0544542   | OPTC    | ENSG00000188770 |
| 1 | 201861401 | 201861863 | 201861580 | 16 | 28  | 10 | 3.092583304 | 0.000307818 | ATP2B4  | ENSG00000058668 |
| 1 | 201862003 | 201862652 | 201862499 | 12 | 28  | 16 | 2.001083314 | 0.00984958  | ATP2B4  | ENSG00000058668 |
| 1 | 201864313 | 201864891 | 201864479 | 10 | 22  | 2  | 8.993374435 | 1.66E-06    | ATP2B4  | ENSG00000058668 |
| 1 | 201886130 | 201886395 | 201886238 | 15 | 15  | 3  | 4.692195357 | 0.000718455 |         | ENSG00000217902 |
| 1 | 201886594 | 201886781 | 201886637 | 9  | 9   | 3  | 2.932622098 | 0.0242899   |         | ENSG00000217902 |
| 1 | 201909920 | 201910145 | 201910061 | 10 | 11  | 8  | 1.564065119 | 0.151515    | ATP2B4  | ENSG00000058668 |
| 1 | 202031123 | 202031591 | 202031282 | 11 | 17  | 6  | 3.016411301 | 0.00381427  | ZC3H11A | ENSG00000058673 |
| 1 | 202074868 | 202075090 | 202074979 | 8  | 11  | 5  | 2.346097679 | 0.0364013   |         | ENSG00000216908 |
| 1 | 202097075 | 202097647 | 202097284 | 25 | 39  | 7  | 5.865244197 | 3.22E-08    | SNRPEL1 | ENSG00000182004 |
| 1 | 202106845 | 202107076 | 202106935 | 9  | 12  | 8  | 1.694403879 | 0.107291    |         | ENSG00000216997 |
| 1 | 202142791 | 202142977 | 202142860 | 9  | 9   | 2  | 3.910162798 | 0.00955088  |         | ENSG00000184655 |
| 1 | 202165573 | 202165816 | 202165694 | 12 | 13  | 8  | 1.824742639 | 0.0744168   |         | ENSG00000218299 |
| 1 | 202167642 | 202168001 | 202167822 | 16 | 23  | 1  | 14.07658607 | 1.14E-07    |         | ENSG00000218299 |
| 1 | 202231968 | 202232166 | 202232067 | 8  | 9   | 4  | 2.346097679 | 0.050148    |         | ENSG00000211554 |
| 1 | 202237366 | 202237592 | 202237439 | 8  | 10  | 5  | 2.150589539 | 0.0575848   |         | ENSG00000211554 |
| 1 | 202308795 | 202309152 | 202308973 | 15 | 21  | 5  | 4.301179077 | 0.000172642 | SOX13   | ENSG00000143842 |
| 1 | 202309480 | 202309660 | 202309602 | 9  | 9   | 3  | 2.932622098 | 0.0242899   | SOX13   | ENSG00000143842 |
| 1 | 202316154 | 202316561 | 202316355 | 14 | 26  | 3  | 7.918079665 | 5.55E-07    | SOX13   | ENSG00000143842 |
| 1 | 202319148 | 202319392 | 202319227 | 8  | 11  | 5  | 2.346097679 | 0.0364013   | SOX13   | ENSG00000143842 |
| 1 | 202320017 | 202320431 | 202320255 | 13 | 19  | 7  | 2.932622098 | 0.00293566  | SOX13   | ENSG00000143842 |
| 1 | 202320715 | 202320913 | 202320814 | 8  | 9   | 2  | 3.910162798 | 0.00955088  | SOX13   | ENSG00000143842 |
| 1 | 202339980 | 202340290 | 202340131 | 11 | 15  | 3  | 4.692195357 | 0.000718455 | SOX13   | ENSG00000143842 |

|   |           |           |           |    |    |    |             |             |          |                 |
|---|-----------|-----------|-----------|----|----|----|-------------|-------------|----------|-----------------|
| 1 | 202364817 | 202365147 | 202364982 | 10 | 15 | 1  | 9.384390715 | 3.90E-05    | ETNK2    | ENSG00000143845 |
| 1 | 202365295 | 202365597 | 202365456 | 11 | 14 | 9  | 1.759573259 | 0.0786014   | ETNK2    | ENSG00000143845 |
| 1 | 202366018 | 202366316 | 202366177 | 8  | 10 | 8  | 1.433726359 | 0.209175    | ETNK2    | ENSG00000143845 |
| 1 | 202366788 | 202367337 | 202367096 | 19 | 36 | 12 | 3.338677466 | 2.58E-05    | ETNK2    | ENSG00000143845 |
| 1 | 202376853 | 202377101 | 202376993 | 8  | 10 | 5  | 2.150589539 | 0.0575848   | ETNK2    | ENSG00000143845 |
| 1 | 202384882 | 202385344 | 202385061 | 22 | 34 | 7  | 5.132088672 | 6.85E-07    | ETNK2    | ENSG00000143845 |
| 1 | 202398219 | 202398489 | 202398348 | 14 | 17 | 10 | 1.919534464 | 0.0400548   | REN      | ENSG00000143839 |
| 1 | 202419788 | 202420029 | 202419908 | 9  | 9  | 0  | 11.73048839 | 0.000425898 |          | ENSG00000218951 |
| 1 | 202434389 | 202434581 | 202434422 | 8  | 9  | 7  | 1.466311049 | 0.20706     | KISS1    | ENSG00000170498 |
| 1 | 202442806 | 202443134 | 202442957 | 11 | 13 | 5  | 2.737113958 | 0.0137917   | GOLT1A   | ENSG00000174567 |
| 1 | 202449526 | 202450333 | 202449794 | 17 | 44 | 13 | 3.770514126 | 9.25E-07    | GOLT1A   | ENSG00000174567 |
| 1 | 202461949 | 202462132 | 202462058 | 8  | 8  | 2  | 3.519146518 | 0.017558    | GOLT1A   | ENSG00000174567 |
| 1 | 202462192 | 202462480 | 202462336 | 16 | 18 | 5  | 3.714654658 | 0.000961539 | GOLT1A   | ENSG00000174567 |
| 1 | 202494258 | 202494508 | 202494425 | 10 | 12 | 3  | 3.812408728 | 0.004404    | GOLT1A   | ENSG00000174567 |
| 1 | 202522632 | 202523337 | 202523056 | 13 | 32 | 17 | 2.150589539 | 0.00349111  |          | ENSG00000219133 |
| 1 | 202537400 | 202537639 | 202537509 | 13 | 15 | 8  | 2.085420159 | 0.0338693   |          | ENSG00000219133 |
| 1 | 202548129 | 202548338 | 202548191 | 8  | 10 | 3  | 3.225884308 | 0.0139466   |          | ENSG00000219133 |
| 1 | 202550034 | 202550433 | 202550288 | 9  | 16 | 9  | 1.994183027 | 0.0370915   |          | ENSG00000219133 |
| 1 | 202552024 | 202552310 | 202552135 | 11 | 14 | 9  | 1.759573259 | 0.0786014   |          | ENSG00000219133 |
| 1 | 202552719 | 202552931 | 202552836 | 9  | 10 | 2  | 4.301179077 | 0.00512919  |          | ENSG00000219133 |
| 1 | 202553001 | 202553265 | 202553133 | 10 | 12 | 4  | 3.049926982 | 0.0108184   |          | ENSG00000219133 |
| 1 | 202555263 | 202555614 | 202555438 | 20 | 25 | 10 | 2.772660893 | 0.00131329  |          | ENSG00000219133 |
| 1 | 202577012 | 202577459 | 202577191 | 8  | 18 | 2  | 7.429309316 | 2.63E-05    |          | ENSG00000219133 |
| 1 | 202598467 | 202598687 | 202598577 | 8  | 9  | 4  | 2.346097679 | 0.050148    | PLEKHA6  | ENSG00000143850 |
| 1 | 202599283 | 202599748 | 202599542 | 18 | 28 | 11 | 2.834868028 | 0.000626961 | PLEKHA6  | ENSG00000143850 |
| 1 | 202613849 | 202614214 | 202614028 | 18 | 25 | 8  | 3.388807758 | 0.000297109 |          | ENSG00000220782 |
| 1 | 202616224 | 202616642 | 202616465 | 30 | 39 | 6  | 6.703136225 | 8.68E-09    |          | ENSG00000220782 |
| 1 | 202634328 | 202634657 | 202634487 | 18 | 23 | 8  | 3.128130238 | 0.000832453 |          | ENSG00000220782 |
| 1 | 202647024 | 202647875 | 202647661 | 14 | 42 | 15 | 3.152568756 | 1.28E-05    | PPP1R15B | ENSG00000158615 |
| 1 | 202652820 | 202653810 | 202652989 | 23 | 64 | 17 | 4.236009698 | 7.14E-10    | PPP1R15B | ENSG00000158615 |
| 1 | 202654794 | 202655229 | 202655081 | 11 | 19 | 15 | 1.466311049 | 0.125014    | PPP1R15B | ENSG00000158615 |
| 1 | 202678989 | 202679354 | 202679175 | 10 | 17 | 8  | 2.346097679 | 0.0144542   | PIK3C2B  | ENSG00000133056 |
| 1 | 202715289 | 202715871 | 202715583 | 19 | 34 | 17 | 2.280928299 | 0.00159255  | PIK3C2B  | ENSG00000133056 |
| 1 | 202728886 | 202729116 | 202729022 | 8  | 9  | 4  | 2.346097679 | 0.050148    | PIK3C2B  | ENSG00000133056 |

|   |           |           |           |     |     |    |             |             |         |                 |
|---|-----------|-----------|-----------|-----|-----|----|-------------|-------------|---------|-----------------|
| 1 | 202729908 | 202730120 | 202730014 | 8   | 9   | 7  | 1.466311049 | 0.20706     | PIK3C2B | ENSG00000133056 |
| 1 | 202733133 | 202733312 | 202733222 | 8   | 8   | 8  | 1.173048839 | 0.36929     | PIK3C2B | ENSG00000133056 |
| 1 | 202742184 | 202742557 | 202742357 | 12  | 18  | 27 | 0.795997427 | 0.784443    | MDM4    | ENSG00000198625 |
| 1 | 202742573 | 202743035 | 202742872 | 16  | 26  | 23 | 1.319679944 | 0.160955    | MDM4    | ENSG00000198625 |
| 1 | 202745085 | 202745525 | 202745319 | 75  | 96  | 0  | 113.7857374 | 2.01E-33    | MDM4    | ENSG00000198625 |
| 1 | 202751864 | 202752377 | 202752130 | 18  | 33  | 11 | 3.323638378 | 5.37E-05    | MDM4    | ENSG00000198625 |
| 1 | 202760479 | 202761161 | 202760848 | 250 | 324 | 12 | 29.32622098 | 6.58E-92    | MDM4    | ENSG00000198625 |
| 1 | 202801371 | 202801944 | 202801547 | 23  | 35  | 9  | 4.222975822 | 3.17E-06    |         | ENSG00000200408 |
| 1 | 202811994 | 202812176 | 202812085 | 8   | 9   | 2  | 3.910162798 | 0.00955088  |         | ENSG00000200408 |
| 1 | 202857294 | 202857530 | 202857412 | 8   | 9   | 3  | 2.932622098 | 0.0242899   | LRRN2   | ENSG00000170382 |
| 1 | 202938039 | 202938218 | 202938128 | 8   | 8   | 4  | 2.111487911 | 0.0804809   |         | ENSG00000208201 |
| 1 | 202953349 | 202953593 | 202953459 | 9   | 11  | 4  | 2.815317214 | 0.0183428   |         | ENSG00000208201 |
| 1 | 202966738 | 202967147 | 202966917 | 10  | 17  | 12 | 1.62422147  | 0.088135    |         | ENSG00000221071 |
| 1 | 202982681 | 202982929 | 202982805 | 11  | 12  | 3  | 3.812408728 | 0.004404    |         | ENSG00000221071 |
| 1 | 203042345 | 203042524 | 203042434 | 8   | 8   | 5  | 1.759573259 | 0.13508     | NFASC   | ENSG00000163531 |
| 1 | 203043057 | 203043306 | 203043220 | 12  | 15  | 12 | 1.443752418 | 0.160732    | NFASC   | ENSG00000163531 |
| 1 | 203043906 | 203044122 | 203043984 | 11  | 11  | 6  | 2.010940867 | 0.0640214   | NFASC   | ENSG00000163531 |
| 1 | 203062814 | 203063082 | 203062954 | 9   | 11  | 5  | 2.346097679 | 0.0364013   | NFASC   | ENSG00000163531 |
| 1 | 203073310 | 203073607 | 203073458 | 8   | 12  | 6  | 2.178519273 | 0.0416567   | NFASC   | ENSG00000163531 |
| 1 | 203160075 | 203160603 | 203160454 | 15  | 25  | 14 | 2.033284655 | 0.0121606   | NFASC   | ENSG00000163531 |
| 1 | 203177474 | 203177718 | 203177602 | 11  | 13  | 4  | 3.28453675  | 0.00629037  | NFASC   | ENSG00000163531 |
| 1 | 203211399 | 203211691 | 203211552 | 12  | 15  | 7  | 2.346097679 | 0.0195693   | NFASC   | ENSG00000163531 |
| 1 | 203225155 | 203225379 | 203225243 | 9   | 10  | 11 | 1.075294769 | 0.434143    | NFASC   | ENSG00000163531 |
| 1 | 203239265 | 203239659 | 203239396 | 14  | 20  | 9  | 2.463402563 | 0.00689886  | CNTN2   | ENSG00000184144 |
| 1 | 203249760 | 203250184 | 203249990 | 78  | 91  | 5  | 17.98674887 | 3.02E-25    | CNTN2   | ENSG00000184144 |
| 1 | 203297415 | 203297606 | 203297510 | 9   | 10  | 10 | 1.173048839 | 0.355733    | CNTN2   | ENSG00000184144 |
| 1 | 203303915 | 203304094 | 203304062 | 8   | 8   | 3  | 2.639359888 | 0.0415794   | TMEM81  | ENSG00000174529 |
| 1 | 203312519 | 203312781 | 203312657 | 9   | 12  | 4  | 3.049926982 | 0.0108184   | TMEM81  | ENSG00000174529 |
| 1 | 203357553 | 203358229 | 203358032 | 31  | 59  | 13 | 5.027352168 | 2.07E-10    | RBBP5   | ENSG00000117222 |
| 1 | 203411276 | 203411493 | 203411384 | 10  | 10  | 6  | 1.843362462 | 0.0964212   |         | ENSG00000213041 |
| 1 | 203446985 | 203447758 | 203447485 | 52  | 77  | 9  | 9.149780947 | 1.13E-17    | RIPK5   | ENSG00000133059 |
| 1 | 203465316 | 203465547 | 203465431 | 11  | 12  | 5  | 2.541605819 | 0.0225912   | TMCC2   | ENSG00000133069 |
| 1 | 203491964 | 203492243 | 203492103 | 12  | 15  | 3  | 4.692195357 | 0.000718455 | TMCC2   | ENSG00000133069 |
| 1 | 203509238 | 203509534 | 203509399 | 12  | 16  | 5  | 3.323638378 | 0.00288759  | TMCC2   | ENSG00000133069 |

|   |           |           |           |    |    |    |             |             |         |                 |
|---|-----------|-----------|-----------|----|----|----|-------------|-------------|---------|-----------------|
| 1 | 203530107 | 203530286 | 203530196 | 8  | 8  | 0  | 10.55743955 | 0.000925496 | NUAK2   | ENSG00000163545 |
| 1 | 203553358 | 203553659 | 203553527 | 9  | 13 | 5  | 2.737113958 | 0.0137917   | NUAK2   | ENSG00000163545 |
| 1 | 203561246 | 203561602 | 203561423 | 9  | 14 | 10 | 1.599612054 | 0.114822    | NUAK2   | ENSG00000163545 |
| 1 | 203571448 | 203571893 | 203571627 | 10 | 18 | 11 | 1.857327329 | 0.0427732   | NUAK2   | ENSG00000163545 |
| 1 | 203590188 | 203590484 | 203590317 | 9  | 11 | 4  | 2.815317214 | 0.0183428   | KLHDC8A | ENSG00000162873 |
| 1 | 203632751 | 203632956 | 203632853 | 8  | 8  | 4  | 2.111487911 | 0.0804809   | LEMD1   | ENSG00000186007 |
| 1 | 203674611 | 203674875 | 203674768 | 12 | 14 | 7  | 2.199466574 | 0.0303778   |         | ENSG00000199059 |
| 1 | 203713596 | 203714040 | 203713818 | 20 | 30 | 4  | 7.272902804 | 1.76E-07    | PCTK3   | ENSG00000117266 |
| 1 | 203721333 | 203721702 | 203721512 | 8  | 15 | 8  | 2.085420159 | 0.0338693   | PCTK3   | ENSG00000117266 |
| 1 | 203723962 | 203724150 | 203724056 | 8  | 9  | 7  | 1.466311049 | 0.20706     | PCTK3   | ENSG00000117266 |
| 1 | 203740293 | 203740609 | 203740451 | 8  | 11 | 4  | 2.815317214 | 0.0183428   | PCTK3   | ENSG00000117266 |
| 1 | 203751788 | 203751983 | 203751885 | 9  | 11 | 2  | 4.692195357 | 0.00272444  | PCTK3   | ENSG00000117266 |
| 1 | 203758208 | 203758397 | 203758302 | 8  | 9  | 0  | 11.73048839 | 0.000425898 | PCTK3   | ENSG00000117266 |
| 1 | 203764805 | 203765131 | 203764958 | 9  | 14 | 7  | 2.199466574 | 0.0303778   | PCTK3   | ENSG00000117266 |
| 1 | 203779013 | 203779330 | 203779155 | 19 | 21 | 10 | 2.346097679 | 0.00796926  | MFSD4   | ENSG00000174514 |
| 1 | 203799623 | 203799891 | 203799728 | 17 | 19 | 9  | 2.346097679 | 0.0107159   | MFSD4   | ENSG00000174514 |
| 1 | 203812437 | 203812734 | 203812565 | 11 | 14 | 5  | 2.932622098 | 0.00829617  | MFSD4   | ENSG00000174514 |
| 1 | 203827529 | 203828092 | 203827859 | 22 | 38 | 11 | 3.812408728 | 3.92E-06    |         | ENSG00000206762 |
| 1 | 203866704 | 203867119 | 203866874 | 8  | 14 | 5  | 2.932622098 | 0.00829617  | ELK4    | ENSG00000158711 |
| 1 | 203867647 | 203868167 | 203867859 | 19 | 36 | 5  | 7.233801176 | 1.48E-08    | ELK4    | ENSG00000158711 |
| 1 | 203871334 | 203871895 | 203871724 | 17 | 27 | 3  | 8.211341875 | 2.82E-07    | ELK4    | ENSG00000158711 |
| 1 | 203894610 | 203894983 | 203894776 | 12 | 17 | 11 | 1.759573259 | 0.0609179   | SLC45A3 | ENSG00000158715 |
| 1 | 203900130 | 203900366 | 203900248 | 10 | 12 | 1  | 7.624817456 | 0.000332769 | SLC45A3 | ENSG00000158715 |
| 1 | 203907780 | 203908036 | 203907915 | 8  | 12 | 6  | 2.178519273 | 0.0416567   | SLC45A3 | ENSG00000158715 |
| 1 | 203933202 | 203933408 | 203933242 | 8  | 9  | 2  | 3.910162798 | 0.00955088  | SLC45A3 | ENSG00000158715 |
| 1 | 203984621 | 203985478 | 203985308 | 21 | 52 | 18 | 3.272188868 | 8.89E-07    | NUCKS1  | ENSG00000069275 |
| 1 | 203985541 | 203986529 | 203985720 | 28 | 77 | 9  | 9.149780947 | 1.13E-17    | NUCKS1  | ENSG00000069275 |
| 1 | 203998278 | 203998462 | 203998370 | 8  | 8  | 9  | 1.055743955 | 0.456865    | RAB7L1  | ENSG00000117280 |
| 1 | 204006389 | 204006649 | 204006482 | 9  | 12 | 11 | 1.270802909 | 0.274822    | RAB7L1  | ENSG00000117280 |
| 1 | 204010952 | 204011231 | 204011086 | 8  | 12 | 2  | 5.083211637 | 0.00143337  | RAB7L1  | ENSG00000117280 |
| 1 | 204034317 | 204034687 | 204034510 | 16 | 21 | 10 | 2.346097679 | 0.00796926  | SLC41A1 | ENSG00000133065 |
| 1 | 204035563 | 204035840 | 204035747 | 8  | 12 | 5  | 2.541605819 | 0.0225912   | SLC41A1 | ENSG00000133065 |
| 1 | 204046960 | 204047140 | 204047042 | 8  | 8  | 1  | 5.278719777 | 0.00542188  | SLC41A1 | ENSG00000133065 |
| 1 | 204052565 | 204052863 | 204052726 | 8  | 10 | 4  | 2.580707446 | 0.0306059   | SLC41A1 | ENSG00000133065 |

|   |           |           |           |    |    |    |             |             |          |                 |
|---|-----------|-----------|-----------|----|----|----|-------------|-------------|----------|-----------------|
| 1 | 204060015 | 204060240 | 204060127 | 8  | 8  | 0  | 10.55743955 | 0.000925496 | SLC41A1  | ENSG00000133065 |
| 1 | 204063390 | 204063645 | 204063562 | 10 | 13 | 0  | 16.42268375 | 1.91E-05    | SLC41A1  | ENSG00000133065 |
| 1 | 204154846 | 204155066 | 204154956 | 9  | 9  | 7  | 1.466311049 | 0.20706     | SLC26A9  | ENSG00000174502 |
| 1 | 204175530 | 204175718 | 204175624 | 8  | 10 | 3  | 3.225884308 | 0.0139466   | SLC26A9  | ENSG00000174502 |
| 1 | 204182783 | 204183121 | 204182949 | 21 | 23 | 5  | 4.692195357 | 5.29E-05    | SLC26A9  | ENSG00000174502 |
| 1 | 204401084 | 204401371 | 204401227 | 14 | 16 | 7  | 2.492728784 | 0.0124193   | AVPR1B   | ENSG00000198049 |
| 1 | 204456159 | 204456357 | 204456269 | 8  | 8  | 2  | 3.519146518 | 0.017558    | C1orf186 | ENSG00000196533 |
| 1 | 204477022 | 204477379 | 204477200 | 21 | 27 | 9  | 3.28453675  | 0.000236424 | CTSE     | ENSG00000196188 |
| 1 | 204688436 | 204688770 | 204688603 | 9  | 13 | 11 | 1.368556979 | 0.211388    | IKBKE    | ENSG00000143466 |
| 1 | 204710241 | 204710466 | 204710381 | 9  | 11 | 7  | 1.759573259 | 0.102361    | IKBKE    | ENSG00000143466 |
| 1 | 204718376 | 204718593 | 204718463 | 8  | 9  | 4  | 2.346097679 | 0.050148    | IKBKE    | ENSG00000143466 |
| 1 | 204719593 | 204719788 | 204719672 | 8  | 9  | 5  | 1.955081399 | 0.0892323   | IKBKE    | ENSG00000143466 |
| 1 | 204722660 | 204722882 | 204722769 | 9  | 11 | 6  | 2.010940867 | 0.0640214   | IKBKE    | ENSG00000143466 |
| 1 | 204729970 | 204730382 | 204730149 | 11 | 20 | 7  | 3.079253203 | 0.00177418  | C1orf147 | ENSG00000162888 |
| 1 | 204761211 | 204761484 | 204761347 | 18 | 19 | 7  | 2.932622098 | 0.00293566  |          | ENSG00000218386 |
| 1 | 204784788 | 204785084 | 204784931 | 11 | 14 | 10 | 1.599612054 | 0.114822    | RASSF5   | ENSG00000136653 |
| 1 | 204796986 | 204797232 | 204797109 | 11 | 13 | 2  | 5.474227917 | 0.000747844 | RASSF5   | ENSG00000136653 |
| 1 | 204826604 | 204827098 | 204826904 | 25 | 36 | 12 | 3.338677466 | 2.58E-05    | LGTN     | ENSG00000143486 |
| 1 | 204852030 | 204852897 | 204852419 | 29 | 57 | 18 | 3.580885931 | 7.17E-08    | LGTN     | ENSG00000143486 |
| 1 | 204887102 | 204887516 | 204887346 | 14 | 21 | 2  | 8.602358155 | 3.33E-06    | DYRK3    | ENSG00000143479 |
| 1 | 204903544 | 204903825 | 204903742 | 9  | 13 | 3  | 4.105670938 | 0.00243034  | MAPKAPK2 | ENSG00000162889 |
| 1 | 204904207 | 204904464 | 204904335 | 10 | 12 | 3  | 3.812408728 | 0.004404    | MAPKAPK2 | ENSG00000162889 |
| 1 | 204949268 | 204949476 | 204949372 | 8  | 8  | 4  | 2.111487911 | 0.0804809   |          | ENSG00000216783 |
| 1 | 204954645 | 204955036 | 204954905 | 12 | 18 | 5  | 3.714654658 | 0.000961539 |          | ENSG00000216783 |
| 1 | 204978906 | 204979215 | 204979048 | 8  | 11 | 5  | 2.346097679 | 0.0364013   |          | ENSG00000199349 |
| 1 | 204979430 | 204979721 | 204979599 | 10 | 13 | 5  | 2.737113958 | 0.0137917   |          | ENSG00000199349 |
| 1 | 205048734 | 205048928 | 205048831 | 10 | 10 | 11 | 1.075294769 | 0.434143    | IL19     | ENSG00000142224 |
| 1 | 205049510 | 205049775 | 205049642 | 12 | 13 | 6  | 2.346097679 | 0.0266147   | IL19     | ENSG00000142224 |
| 1 | 205066361 | 205067036 | 205066713 | 40 | 65 | 5  | 12.90353723 | 3.61E-17    | IL19     | ENSG00000142224 |
| 1 | 205082032 | 205082228 | 205082142 | 9  | 10 | 12 | 0.992579787 | 0.511743    | IL19     | ENSG00000142224 |
| 1 | 205083618 | 205084081 | 205083873 | 14 | 24 | 3  | 7.331555246 | 2.13E-06    | IL19     | ENSG00000142224 |
| 1 | 205087495 | 205087837 | 205087700 | 8  | 12 | 3  | 3.812408728 | 0.004404    | IL20     | ENSG00000162891 |
| 1 | 205087945 | 205088296 | 205088122 | 13 | 18 | 6  | 3.183989707 | 0.00227432  | IL20     | ENSG00000162891 |
| 1 | 205096492 | 205096694 | 205096593 | 8  | 8  | 2  | 3.519146518 | 0.017558    | IL20     | ENSG00000162891 |

|   |           |           |           |    |    |    |             |             |        |                 |
|---|-----------|-----------|-----------|----|----|----|-------------|-------------|--------|-----------------|
| 1 | 205104833 | 205105756 | 205105199 | 32 | 91 | 34 | 3.083442663 | 7.16E-10    | IL20   | ENSG00000162891 |
| 1 | 205105820 | 205106038 | 205105886 | 9  | 12 | 5  | 2.541605819 | 0.0225912   | IL20   | ENSG00000162891 |
| 1 | 205113736 | 205114163 | 205113950 | 25 | 36 | 6  | 6.200401008 | 5.86E-08    | IL20   | ENSG00000162891 |
| 1 | 205125565 | 205125841 | 205125675 | 10 | 15 | 4  | 3.753756286 | 0.0020497   | IL24   | ENSG00000162892 |
| 1 | 205130373 | 205130675 | 205130524 | 9  | 11 | 8  | 1.564065119 | 0.151515    | IL24   | ENSG00000162892 |
| 1 | 205135147 | 205136079 | 205135477 | 17 | 47 | 22 | 2.448101926 | 0.000115871 | IL24   | ENSG00000162892 |
| 1 | 205138624 | 205138917 | 205138751 | 9  | 11 | 3  | 3.519146518 | 0.00788869  | IL24   | ENSG00000162892 |
| 1 | 205140446 | 205140673 | 205140577 | 9  | 9  | 6  | 1.675784056 | 0.141978    | IL24   | ENSG00000162892 |
| 1 | 205141113 | 205141679 | 205141449 | 12 | 26 | 9  | 3.167231866 | 0.000393236 | IL24   | ENSG00000162892 |
| 1 | 205143404 | 205144060 | 205143742 | 30 | 58 | 36 | 1.870537338 | 0.00117291  |        | ENSG00000217798 |
| 1 | 205144324 | 205144546 | 205144442 | 9  | 9  | 11 | 0.977540699 | 0.526123    |        | ENSG00000217798 |
| 1 | 205148999 | 205149538 | 205149268 | 15 | 29 | 8  | 3.910162798 | 3.45E-05    |        | ENSG00000217798 |
| 1 | 205149693 | 205149971 | 205149814 | 12 | 15 | 4  | 3.753756286 | 0.0020497   |        | ENSG00000217798 |
| 1 | 205152546 | 205152783 | 205152664 | 14 | 15 | 6  | 2.68125449  | 0.0103552   |        | ENSG00000217798 |
| 1 | 205201325 | 205202238 | 205201832 | 59 | 98 | 14 | 7.742122339 | 2.37E-20    | FCAMR  | ENSG00000162897 |
| 1 | 205244758 | 205245165 | 205244937 | 8  | 14 | 7  | 2.199466574 | 0.0303778   |        | ENSG00000208197 |
| 1 | 205292781 | 205293157 | 205292978 | 17 | 25 | 9  | 3.049926982 | 0.000648806 | YOD1   | ENSG00000180667 |
| 1 | 205293271 | 205293604 | 205293437 | 10 | 14 | 5  | 2.932622098 | 0.00829617  | PFKFB2 | ENSG00000123836 |
| 1 | 205317854 | 205318037 | 205317945 | 8  | 8  | 5  | 1.759573259 | 0.13508     | C4BPB  | ENSG00000123843 |
| 1 | 205472595 | 205472816 | 205472669 | 9  | 9  | 2  | 3.910162798 | 0.00955088  |        | ENSG00000218808 |
| 1 | 205480645 | 205481415 | 205480824 | 22 | 45 | 12 | 4.150788201 | 2.16E-07    |        | ENSG00000218808 |
| 1 | 205556103 | 205556354 | 205556228 | 14 | 14 | 3  | 4.398933147 | 0.00132748  | CD55   | ENSG00000196352 |
| 1 | 205556498 | 205556927 | 205556748 | 37 | 52 | 13 | 4.440827749 | 1.15E-08    | CD55   | ENSG00000196352 |
| 1 | 205560915 | 205561744 | 205561566 | 21 | 61 | 7  | 9.091128505 | 2.01E-14    | CD55   | ENSG00000196352 |
| 1 | 205561962 | 205562357 | 205562120 | 11 | 16 | 4  | 3.988366054 | 0.00115141  | CD55   | ENSG00000196352 |
| 1 | 205705783 | 205706036 | 205705909 | 8  | 9  | 1  | 5.865244197 | 0.00272497  | CR2    | ENSG00000117322 |
| 1 | 205739490 | 205739715 | 205739593 | 9  | 10 | 6  | 1.843362462 | 0.0964212   | CR1    | ENSG00000203710 |
| 1 | 205947240 | 205947644 | 205947377 | 22 | 30 | 0  | 36.36451402 | 3.56E-11    | CR1L   | ENSG00000197721 |
| 1 | 206063956 | 206064188 | 206064033 | 13 | 13 | 1  | 8.211341875 | 0.000163445 |        | ENSG00000207790 |
| 1 | 206068554 | 206068746 | 206068631 | 9  | 9  | 2  | 3.910162798 | 0.00955088  |        | ENSG00000207790 |
| 1 | 206453660 | 206454081 | 206453902 | 18 | 28 | 0  | 34.01841634 | 1.68E-10    | PLXNA2 | ENSG00000076356 |
| 1 | 206459248 | 206459585 | 206459416 | 17 | 21 | 0  | 25.80707446 | 3.84E-08    | PLXNA2 | ENSG00000076356 |
| 1 | 206661485 | 206661670 | 206661577 | 8  | 8  | 1  | 5.278719777 | 0.00542188  |        | ENSG00000216499 |
| 1 | 206736448 | 206736631 | 206736539 | 8  | 8  | 2  | 3.519146518 | 0.017558    |        | ENSG00000217293 |

|   |           |           |           |     |     |   |             |             |         |                 |
|---|-----------|-----------|-----------|-----|-----|---|-------------|-------------|---------|-----------------|
| 1 | 207623800 | 207624243 | 207624045 | 58  | 67  | 3 | 19.94183027 | 1.12E-19    |         | ENSG00000207623 |
| 1 | 207651660 | 207651998 | 207651829 | 15  | 21  | 0 | 25.80707446 | 3.84E-08    |         | ENSG00000207623 |
| 1 | 207670938 | 207671303 | 207671142 | 18  | 24  | 1 | 14.66311049 | 5.43E-08    |         | ENSG00000207623 |
| 1 | 207673215 | 207673458 | 207673345 | 9   | 10  | 2 | 4.301179077 | 0.00512919  |         | ENSG00000207623 |
| 1 | 207827782 | 207828043 | 207827922 | 9   | 11  | 0 | 14.07658607 | 9.02E-05    | CAMK1G  | ENSG00000008118 |
| 1 | 208056400 | 208056798 | 208056625 | 15  | 21  | 0 | 25.80707446 | 3.84E-08    | IRF6    | ENSG00000117595 |
| 1 | 208561288 | 208561886 | 208561662 | 101 | 124 | 4 | 29.32622098 | 7.06E-37    | HHAT    | ENSG00000054392 |
| 1 | 208640672 | 208640979 | 208640825 | 9   | 11  | 1 | 7.038293036 | 0.000674435 |         | ENSG00000200972 |
| 1 | 208651686 | 208651959 | 208651805 | 11  | 14  | 2 | 5.865244197 | 0.000387308 | HHAT    | ENSG00000054392 |
| 1 | 209585827 | 209586096 | 209585959 | 9   | 12  | 1 | 7.624817456 | 0.000332769 | TRAF5   | ENSG00000082512 |
| 1 | 209817148 | 209817805 | 209817419 | 30  | 53  | 1 | 31.67231866 | 1.89E-17    | SLC30A1 | ENSG00000170385 |
| 1 | 209945445 | 209945655 | 209945550 | 9   | 9   | 1 | 5.865244197 | 0.00272497  | NEK2    | ENSG00000117650 |
| 1 | 210168118 | 210168521 | 210168330 | 18  | 27  | 1 | 16.42268375 | 5.88E-09    |         | ENSG00000218132 |
| 1 | 210169009 | 210169362 | 210169185 | 9   | 13  | 3 | 4.105670938 | 0.00243034  |         | ENSG00000218132 |
| 1 | 210184786 | 210185006 | 210184896 | 10  | 11  | 1 | 7.038293036 | 0.000674435 |         | ENSG00000218132 |
| 1 | 210835901 | 210836731 | 210836496 | 72  | 111 | 4 | 26.276294   | 1.11E-32    | ATF3    | ENSG00000162772 |
| 1 | 210848321 | 210848799 | 210848656 | 15  | 23  | 4 | 5.630634429 | 1.63E-05    | ATF3    | ENSG00000162772 |
| 1 | 211031689 | 211031905 | 211031748 | 10  | 10  | 2 | 4.301179077 | 0.00512919  | NSL1    | ENSG00000117697 |
| 1 | 212456695 | 212457117 | 212456938 | 12  | 21  | 4 | 5.161414893 | 5.68E-05    | SMYD2   | ENSG00000143499 |
| 1 | 212501462 | 212501812 | 212501617 | 10  | 15  | 2 | 6.256260476 | 0.000199274 | SMYD2   | ENSG00000143499 |
| 1 | 212679372 | 212679944 | 212679609 | 236 | 303 | 3 | 89.15171179 | 2.57E-97    |         | ENSG00000213036 |
| 1 | 212756354 | 212756681 | 212756510 | 10  | 13  | 0 | 16.42268375 | 1.91E-05    |         | ENSG00000215819 |
| 1 | 212791234 | 212791442 | 212791371 | 8   | 9   | 1 | 5.865244197 | 0.00272497  | PTPN14  | ENSG00000152104 |
| 1 | 212885685 | 212885907 | 212885814 | 8   | 8   | 3 | 2.639359888 | 0.0415794   | CENPF   | ENSG00000117724 |
| 1 | 212898742 | 212899189 | 212898906 | 12  | 21  | 9 | 2.580707446 | 0.00438951  | CENPF   | ENSG00000117724 |
| 1 | 213112418 | 213112597 | 213112473 | 8   | 8   | 4 | 2.111487911 | 0.0804809   |         | ENSG00000185221 |
| 1 | 213241630 | 213242075 | 213241825 | 39  | 55  | 4 | 13.138147   | 5.86E-15    | KCNK2   | ENSG00000082482 |
| 1 | 213243683 | 213244042 | 213243883 | 12  | 17  | 6 | 3.016411301 | 0.00381427  | KCNK2   | ENSG00000082482 |
| 1 | 213354021 | 213354273 | 213354147 | 8   | 11  | 5 | 2.346097679 | 0.0364013   | KCNK2   | ENSG00000082482 |
| 1 | 213483315 | 213483525 | 213483374 | 12  | 12  | 4 | 3.049926982 | 0.0108184   |         | ENSG00000217162 |
| 1 | 213488687 | 213488895 | 213488739 | 11  | 11  | 4 | 2.815317214 | 0.0183428   |         | ENSG00000217162 |
| 1 | 213492557 | 213492759 | 213492694 | 12  | 12  | 1 | 7.624817456 | 0.000332769 |         | ENSG00000217162 |
| 1 | 213570608 | 213570811 | 213570709 | 8   | 9   | 2 | 3.910162798 | 0.00955088  |         | ENSG00000217162 |
| 1 | 213640794 | 213641043 | 213640904 | 10  | 10  | 6 | 1.843362462 | 0.0964212   |         | ENSG00000217162 |

|   |           |           |           |    |    |    |             |             |         |                 |
|---|-----------|-----------|-----------|----|----|----|-------------|-------------|---------|-----------------|
| 1 | 213722057 | 213722433 | 213722254 | 11 | 18 | 8  | 2.476436439 | 0.00924552  | KCTD3   | ENSG00000136636 |
| 1 | 213729759 | 213730049 | 213729887 | 8  | 11 | 3  | 3.519146518 | 0.00788869  | KCTD3   | ENSG00000136636 |
| 1 | 213757573 | 213757828 | 213757721 | 8  | 10 | 4  | 2.580707446 | 0.0306059   | KCTD3   | ENSG00000136636 |
| 1 | 213770438 | 213770620 | 213770552 | 8  | 9  | 6  | 1.675784056 | 0.141978    | KCTD3   | ENSG00000136636 |
| 1 | 213780130 | 213780474 | 213780330 | 11 | 15 | 6  | 2.68125449  | 0.0103552   | KCTD3   | ENSG00000136636 |
| 1 | 213806897 | 213807477 | 213807218 | 20 | 38 | 12 | 3.519146518 | 9.23E-06    | KCTD3   | ENSG00000136636 |
| 1 | 213876593 | 213876772 | 213876682 | 8  | 8  | 0  | 10.55743955 | 0.000925496 |         | ENSG00000202498 |
| 1 | 213926945 | 213927124 | 213927035 | 8  | 8  | 2  | 3.519146518 | 0.017558    |         | ENSG00000202498 |
| 1 | 214683810 | 214684025 | 214683917 | 10 | 11 | 4  | 2.815317214 | 0.0183428   | USH2A   | ENSG00000042781 |
| 1 | 215058263 | 215058496 | 215058379 | 8  | 8  | 2  | 3.519146518 | 0.017558    | ESRRG   | ENSG00000196482 |
| 1 | 215330411 | 215330600 | 215330498 | 8  | 9  | 6  | 1.675784056 | 0.141978    | ESRRG   | ENSG00000196482 |
| 1 | 215365904 | 215366152 | 215366028 | 10 | 12 | 1  | 7.624817456 | 0.000332769 | ESRRG   | ENSG00000196482 |
| 1 | 215413702 | 215413915 | 215413780 | 8  | 9  | 2  | 3.910162798 | 0.00955088  | ESRRG   | ENSG00000196482 |
| 1 | 215417885 | 215418085 | 215417955 | 8  | 8  | 1  | 5.278719777 | 0.00542188  | ESRRG   | ENSG00000196482 |
| 1 | 215563748 | 215564177 | 215563998 | 11 | 18 | 8  | 2.476436439 | 0.00924552  |         | ENSG00000201753 |
| 1 | 215571761 | 215571950 | 215571854 | 9  | 9  | 4  | 2.346097679 | 0.050148    |         | ENSG00000201753 |
| 1 | 215573754 | 215574163 | 215574004 | 17 | 23 | 8  | 3.128130238 | 0.000832453 |         | ENSG00000201753 |
| 1 | 215664952 | 215665160 | 215665056 | 9  | 9  | 2  | 3.910162798 | 0.00955088  |         | ENSG00000201753 |
| 1 | 215697118 | 215697339 | 215697205 | 8  | 8  | 1  | 5.278719777 | 0.00542188  |         | ENSG00000201753 |
| 1 | 215814607 | 215814929 | 215814768 | 25 | 27 | 8  | 3.649485278 | 0.000102745 | GPATCH2 | ENSG00000092978 |
| 1 | 215870782 | 215871557 | 215871169 | 12 | 35 | 26 | 1.564065119 | 0.0380712   | SPATA17 | ENSG00000162814 |
| 1 | 215900430 | 215900696 | 215900563 | 9  | 13 | 1  | 8.211341875 | 0.000163445 | SPATA17 | ENSG00000162814 |
| 1 | 216121807 | 216121986 | 216121870 | 8  | 8  | 6  | 1.508205651 | 0.203852    | UBBP2   | ENSG00000220297 |
| 1 | 216129395 | 216129723 | 216129559 | 9  | 14 | 5  | 2.932622098 | 0.00829617  | UBBP2   | ENSG00000220297 |
| 1 | 216133778 | 216134042 | 216133954 | 14 | 17 | 4  | 4.222975822 | 0.000640773 | UBBP2   | ENSG00000220297 |
| 1 | 216157550 | 216157812 | 216157684 | 13 | 13 | 7  | 2.052835469 | 0.046392    | UBBP2   | ENSG00000220297 |
| 1 | 216158328 | 216158571 | 216158449 | 10 | 10 | 4  | 2.580707446 | 0.0306059   | UBBP2   | ENSG00000220297 |
| 1 | 216185007 | 216185189 | 216185149 | 8  | 8  | 1  | 5.278719777 | 0.00542188  | UBBP2   | ENSG00000220297 |
| 1 | 216193390 | 216193767 | 216193508 | 11 | 16 | 15 | 1.246364392 | 0.263987    | UBBP2   | ENSG00000220297 |
| 1 | 216193936 | 216194317 | 216194115 | 18 | 26 | 10 | 2.879301697 | 0.000816629 | UBBP2   | ENSG00000220297 |
| 1 | 216396613 | 216396872 | 216396698 | 8  | 10 | 6  | 1.843362462 | 0.0964212   |         | ENSG00000201493 |
| 1 | 216524920 | 216525501 | 216525197 | 25 | 49 | 17 | 3.258468998 | 1.83E-06    | RRP15   | ENSG00000067533 |
| 1 | 216603279 | 216603495 | 216603328 | 8  | 10 | 3  | 3.225884308 | 0.0139466   | TGFB2   | ENSG00000092969 |
| 1 | 216614472 | 216614728 | 216614600 | 11 | 14 | 3  | 4.398933147 | 0.00132748  | TGFB2   | ENSG00000092969 |



|   |           |           |           |     |     |    |             |             |         |                 |
|---|-----------|-----------|-----------|-----|-----|----|-------------|-------------|---------|-----------------|
| 1 | 216620344 | 216620803 | 216620624 | 22  | 32  | 13 | 2.765043693 | 0.00036798  | TGFB2   | ENSG00000092969 |
| 1 | 216626018 | 216626197 | 216626107 | 8   | 8   | 5  | 1.759573259 | 0.13508     | TGFB2   | ENSG00000092969 |
| 1 | 216636308 | 216636593 | 216636450 | 10  | 12  | 3  | 3.812408728 | 0.004404    | TGFB2   | ENSG00000092969 |
| 1 | 216649331 | 216649513 | 216649447 | 8   | 8   | 1  | 5.278719777 | 0.00542188  | TGFB2   | ENSG00000092969 |
| 1 | 216699813 | 216700167 | 216699961 | 13  | 17  | 7  | 2.639359888 | 0.00777415  |         | ENSG00000222824 |
| 1 | 216720724 | 216720989 | 216720847 | 13  | 16  | 1  | 9.970915134 | 1.89E-05    |         | ENSG00000222824 |
| 1 | 216730242 | 216730559 | 216730400 | 8   | 11  | 2  | 4.692195357 | 0.00272444  |         | ENSG00000222824 |
| 1 | 216734372 | 216734625 | 216734498 | 8   | 8   | 4  | 2.111487911 | 0.0804809   |         | ENSG00000222824 |
| 1 | 216793245 | 216793596 | 216793420 | 9   | 13  | 9  | 1.642268375 | 0.111397    |         | ENSG00000212610 |
| 1 | 216840782 | 216841453 | 216841207 | 193 | 280 | 6  | 47.08953198 | 3.56E-85    |         | ENSG00000212610 |
| 1 | 216874126 | 216874456 | 216874291 | 18  | 22  | 0  | 26.9801233  | 1.77E-08    |         | ENSG00000212610 |
| 1 | 217146474 | 217146653 | 217146563 | 8   | 8   | 6  | 1.508205651 | 0.203852    |         | ENSG00000218763 |
| 1 | 217207391 | 217207625 | 217207511 | 9   | 10  | 1  | 6.451768616 | 0.00135978  |         | ENSG00000218763 |
| 1 | 217234247 | 217234459 | 217234353 | 8   | 8   | 3  | 2.639359888 | 0.0415794   |         | ENSG00000218763 |
| 1 | 217557928 | 217558123 | 217558003 | 9   | 10  | 8  | 1.433726359 | 0.209175    |         | ENSG00000222634 |
| 1 | 217563385 | 217563584 | 217563484 | 8   | 8   | 4  | 2.111487911 | 0.0804809   |         | ENSG00000222634 |
| 1 | 217625853 | 217626093 | 217625973 | 12  | 12  | 10 | 1.386330446 | 0.21117     |         | ENSG00000222634 |
| 1 | 217710699 | 217710919 | 217710794 | 10  | 12  | 5  | 2.541605819 | 0.0225912   |         | ENSG00000222634 |
| 1 | 217756994 | 217757207 | 217757100 | 8   | 10  | 5  | 2.150589539 | 0.0575848   | ZC3H11B | ENSG00000215817 |
| 1 | 217771194 | 217771499 | 217771346 | 12  | 16  | 8  | 2.215758919 | 0.0222902   | ZC3H11B | ENSG00000215817 |
| 1 | 217807365 | 217807672 | 217807518 | 9   | 12  | 9  | 1.524963491 | 0.154777    | ZC3H11B | ENSG00000215817 |
| 1 | 217825646 | 217826322 | 217825984 | 53  | 86  | 7  | 12.75690613 | 6.93E-22    | ZC3H11B | ENSG00000215817 |
| 1 | 218576306 | 218576699 | 218576532 | 14  | 21  | 1  | 12.90353723 | 4.95E-07    |         | ENSG00000218105 |
| 1 | 218577157 | 218577582 | 218577336 | 12  | 20  | 0  | 24.63402563 | 8.35E-08    |         | ENSG00000218105 |
| 1 | 219016726 | 219016949 | 219016837 | 9   | 9   | 1  | 5.865244197 | 0.00272497  | MOSC1   | ENSG00000186205 |
| 1 | 220407189 | 220407380 | 220407284 | 9   | 9   | 4  | 2.346097679 | 0.050148    |         | ENSG00000217821 |
| 1 | 221045836 | 221046198 | 221046022 | 23  | 28  | 0  | 34.01841634 | 1.68E-10    | DISP1   | ENSG00000154309 |
| 1 | 221270460 | 221270680 | 221270545 | 10  | 11  | 2  | 4.692195357 | 0.00272444  |         | ENSG00000218136 |
| 1 | 221288155 | 221288339 | 221288222 | 8   | 9   | 0  | 11.73048839 | 0.000425898 | TLR5    | ENSG00000187554 |
| 1 | 221661689 | 221661938 | 221661813 | 9   | 10  | 0  | 12.90353723 | 0.000195991 | C1orf65 | ENSG00000178395 |
| 1 | 221771751 | 221772002 | 221771876 | 11  | 11  | 1  | 7.038293036 | 0.000674435 |         | ENSG00000218790 |
| 1 | 221962386 | 221962760 | 221962521 | 20  | 28  | 1  | 17.00920817 | 2.80E-09    | CAPN2   | ENSG00000162909 |
| 1 | 222458118 | 222458328 | 222458218 | 8   | 8   | 7  | 1.319679944 | 0.283403    | DEGS1   | ENSG00000143753 |
| 1 | 222459184 | 222459402 | 222459308 | 8   | 8   | 3  | 2.639359888 | 0.0415794   | DEGS1   | ENSG00000143753 |

|   |           |           |           |    |    |   |             |             |         |                 |
|---|-----------|-----------|-----------|----|----|---|-------------|-------------|---------|-----------------|
| 1 | 222689204 | 222689390 | 222689252 | 8  | 9  | 6 | 1.675784056 | 0.141978    | WDR26   | ENSG00000162923 |
| 1 | 223700453 | 223700674 | 223700516 | 9  | 9  | 0 | 11.73048839 | 0.000425898 | LBR     | ENSG00000143815 |
| 1 | 224026692 | 224026943 | 224026829 | 10 | 11 | 7 | 1.759573259 | 0.102361    | SRP9    | ENSG00000143742 |
| 1 | 224075134 | 224075468 | 224075301 | 33 | 38 | 2 | 15.24963491 | 1.78E-11    | EPHX1   | ENSG00000143819 |
| 1 | 224080671 | 224081005 | 224080838 | 19 | 22 | 2 | 8.993374435 | 1.66E-06    | EPHX1   | ENSG00000143819 |
| 1 | 224137416 | 224137608 | 224137496 | 8  | 8  | 0 | 10.55743955 | 0.000925496 | TMEM63A | ENSG00000196187 |
| 1 | 224253589 | 224253883 | 224253727 | 9  | 11 | 7 | 1.759573259 | 0.102361    | C1orf55 | ENSG00000143751 |
| 1 | 224254028 | 224254207 | 224254120 | 8  | 8  | 2 | 3.519146518 | 0.017558    | C1orf55 | ENSG00000143751 |
| 1 | 224468880 | 224469119 | 224468999 | 9  | 13 | 1 | 8.211341875 | 0.000163445 | MIXL1   | ENSG00000185155 |
| 1 | 224569377 | 224569613 | 224569495 | 8  | 10 | 0 | 12.90353723 | 0.000195991 |         | ENSG00000208161 |
| 1 | 224733777 | 224734226 | 224734001 | 26 | 36 | 4 | 8.680561411 | 3.18E-09    |         | ENSG00000177770 |
| 1 | 224802052 | 224802316 | 224802148 | 8  | 9  | 5 | 1.955081399 | 0.0892323   | C1orf95 | ENSG00000203685 |
| 1 | 225167065 | 225167256 | 225167186 | 8  | 9  | 2 | 3.910162798 | 0.00955088  | CABC1   | ENSG00000163050 |
| 1 | 225194798 | 225195088 | 225194966 | 8  | 12 | 0 | 15.24963491 | 4.15E-05    | CABC1   | ENSG00000163050 |
| 1 | 225977841 | 225978312 | 225978076 | 15 | 27 | 1 | 16.42268375 | 5.88E-09    | SNAP47  | ENSG00000143740 |
| 1 | 225982420 | 225982709 | 225982564 | 10 | 10 | 1 | 6.451768616 | 0.00135978  | SNAP47  | ENSG00000143740 |
| 1 | 226042171 | 226042493 | 226042337 | 19 | 22 | 3 | 6.745030826 | 8.05E-06    |         | ENSG00000185888 |
| 1 | 226200647 | 226200848 | 226200750 | 9  | 11 | 1 | 7.038293036 | 0.000674435 | WNT9A   | ENSG00000143816 |
| 1 | 226661081 | 226661300 | 226661190 | 8  | 8  | 3 | 2.639359888 | 0.0415794   | TRIM11  | ENSG00000154370 |
| 1 | 226749732 | 226749990 | 226749858 | 8  | 10 | 1 | 6.451768616 | 0.00135978  | RNF187  | ENSG00000168159 |
| 1 | 227105607 | 227105840 | 227105716 | 9  | 11 | 5 | 2.346097679 | 0.0364013   |         | ENSG00000181413 |
| 1 | 227240540 | 227240771 | 227240683 | 8  | 8  | 3 | 2.639359888 | 0.0415794   |         | ENSG00000181413 |
| 1 | 227272674 | 227272947 | 227272798 | 9  | 12 | 3 | 3.812408728 | 0.004404    |         | ENSG00000181413 |
| 1 | 227297154 | 227297333 | 227297243 | 8  | 8  | 2 | 3.519146518 | 0.017558    |         | ENSG00000181413 |
| 1 | 227364681 | 227365024 | 227364852 | 11 | 15 | 7 | 2.346097679 | 0.0195693   |         | ENSG00000208134 |
| 1 | 227433092 | 227433284 | 227433188 | 8  | 9  | 2 | 3.910162798 | 0.00955088  | TMEM78  | ENSG00000177800 |
| 1 | 227433798 | 227434020 | 227433906 | 10 | 10 | 2 | 4.301179077 | 0.00512919  | TMEM78  | ENSG00000177800 |
| 1 | 227441045 | 227441349 | 227441205 | 23 | 25 | 0 | 30.49926982 | 1.72E-09    | TMEM78  | ENSG00000177800 |
| 1 | 228046282 | 228046463 | 228046390 | 8  | 9  | 1 | 5.865244197 | 0.00272497  |         | ENSG00000219709 |
| 1 | 228047028 | 228047355 | 228047201 | 17 | 21 | 5 | 4.301179077 | 0.000172642 |         | ENSG00000219709 |
| 1 | 228830171 | 228830533 | 228830371 | 29 | 34 | 1 | 20.52835469 | 3.17E-11    | COG2    | ENSG00000135775 |
| 1 | 229342211 | 229342744 | 229342477 | 11 | 22 | 2 | 8.993374435 | 1.66E-06    |         | ENSG00000220221 |
| 1 | 229374007 | 229374338 | 229374163 | 42 | 44 | 3 | 13.19679944 | 1.95E-12    | TRIM67  | ENSG00000119283 |
| 1 | 229730999 | 229731275 | 229731130 | 9  | 11 | 3 | 3.519146518 | 0.00788869  | TSNAX   | ENSG00000116918 |

|   |           |           |           |     |     |   |             |             |          |                 |
|---|-----------|-----------|-----------|-----|-----|---|-------------|-------------|----------|-----------------|
| 1 | 229828911 | 229829156 | 229829021 | 8   | 9   | 0 | 11.73048839 | 0.000425898 | DISC1    | ENSG00000162946 |
| 1 | 229980481 | 229980695 | 229980609 | 8   | 9   | 3 | 2.932622098 | 0.0242899   | DISC1    | ENSG00000162946 |
| 1 | 230189280 | 230189517 | 230189398 | 10  | 10  | 2 | 4.301179077 | 0.00512919  |          | ENSG00000217276 |
| 1 | 230333283 | 230333569 | 230333426 | 15  | 16  | 0 | 19.94183027 | 1.86E-06    |          | ENSG00000217276 |
| 1 | 230831592 | 230831810 | 230831721 | 9   | 9   | 2 | 3.910162798 | 0.00955088  | SIPA1L2  | ENSG00000116991 |
| 1 | 230951396 | 230951592 | 230951451 | 12  | 13  | 0 | 16.42268375 | 1.91E-05    |          | ENSG00000208118 |
| 1 | 231155180 | 231155611 | 231155442 | 88  | 106 | 1 | 62.7581129  | 5.04E-35    | C1orf57  | ENSG00000135778 |
| 1 | 231381958 | 231382374 | 231382143 | 23  | 31  | 0 | 37.53756286 | 1.64E-11    | PCNXL2   | ENSG00000135749 |
| 1 | 231597328 | 231597511 | 231597419 | 8   | 8   | 3 | 2.639359888 | 0.0415794   |          | ENSG00000143674 |
| 1 | 231867209 | 231867475 | 231867344 | 9   | 11  | 2 | 4.692195357 | 0.00272444  | KCNK1    | ENSG00000135750 |
| 1 | 231907591 | 231907822 | 231907706 | 9   | 10  | 3 | 3.225884308 | 0.0139466   | KCNK1    | ENSG00000135750 |
| 1 | 232595606 | 232595915 | 232595760 | 40  | 44  | 7 | 6.598399721 | 1.39E-09    | C1orf31  | ENSG00000168275 |
| 1 | 232806309 | 232806569 | 232806430 | 8   | 10  | 2 | 4.301179077 | 0.00512919  | IRF2BP2  | ENSG00000168264 |
| 1 | 232813042 | 232813237 | 232813144 | 9   | 10  | 3 | 3.225884308 | 0.0139466   | IRF2BP2  | ENSG00000168264 |
| 1 | 232820721 | 232821302 | 232820959 | 111 | 138 | 0 | 163.0537887 | 1.40E-47    | IRF2BP2  | ENSG00000168264 |
| 1 | 232926577 | 232926882 | 232926730 | 9   | 13  | 3 | 4.105670938 | 0.00243034  |          | ENSG00000201638 |
| 1 | 233597195 | 233597446 | 233597283 | 9   | 10  | 2 | 4.301179077 | 0.00512919  | TBCE     | ENSG00000116957 |
| 1 | 233899709 | 233900172 | 233899950 | 12  | 21  | 3 | 6.451768616 | 1.56E-05    | GNG4     | ENSG00000168243 |
| 1 | 233904884 | 233905457 | 233905134 | 41  | 60  | 0 | 71.5559792  | 2.75E-21    | GNG4     | ENSG00000168243 |
| 1 | 236549910 | 236550130 | 236550020 | 8   | 8   | 0 | 10.55743955 | 0.000925496 |          | ENSG00000208075 |
| 1 | 238109408 | 238109653 | 238109518 | 12  | 12  | 1 | 7.624817456 | 0.000332769 |          | ENSG00000215805 |
| 1 | 239166913 | 239167134 | 239167004 | 16  | 18  | 0 | 22.28792795 | 3.94E-07    |          | ENSG00000220141 |
| 1 | 239749714 | 239749915 | 239749811 | 8   | 9   | 1 | 5.865244197 | 0.00272497  | FH       | ENSG00000091483 |
| 1 | 239936951 | 239937292 | 239937121 | 13  | 17  | 2 | 7.038293036 | 5.19E-05    | WDR64    | ENSG00000162843 |
| 1 | 239979957 | 239980160 | 239980058 | 10  | 10  | 0 | 12.90353723 | 0.000195991 |          | ENSG00000220413 |
| 1 | 240430039 | 240430377 | 240430208 | 17  | 20  | 0 | 24.63402563 | 8.35E-08    |          | ENSG00000222120 |
| 1 | 240455726 | 240455981 | 240455853 | 8   | 9   | 4 | 2.346097679 | 0.050148    |          | ENSG00000222120 |
| 1 | 242469282 | 242469775 | 242469506 | 42  | 64  | 1 | 38.12408728 | 4.44E-21    | C1orf100 | ENSG00000173728 |
| 1 | 242965295 | 242965813 | 242965520 | 95  | 116 | 0 | 137.2467142 | 3.65E-40    |          | ENSG00000218614 |
| 1 | 243027097 | 243027281 | 243027173 | 8   | 8   | 2 | 3.519146518 | 0.017558    |          | ENSG00000215797 |
| 1 | 243117318 | 243117513 | 243117452 | 9   | 9   | 2 | 3.910162798 | 0.00955088  | HNRNPU   | ENSG00000153187 |
| 1 | 243201162 | 243201412 | 243201287 | 8   | 9   | 2 | 3.910162798 | 0.00955088  |          | ENSG00000179576 |
| 1 | 243338952 | 243339150 | 243339051 | 9   | 9   | 0 | 11.73048839 | 0.000425898 |          | ENSG00000216496 |
| 1 | 243719795 | 243720079 | 243719908 | 25  | 26  | 2 | 10.55743955 | 9.97E-08    | KIF26B   | ENSG00000162849 |

|    |           |           |           |    |    |    |             |             |           |                 |
|----|-----------|-----------|-----------|----|----|----|-------------|-------------|-----------|-----------------|
| 1  | 244230996 | 244231400 | 244231221 | 24 | 33 | 0  | 39.88366054 | 3.46E-12    | SMYD3     | ENSG00000185420 |
| 1  | 245161743 | 245162137 | 245161940 | 10 | 18 | 4  | 4.457585589 | 0.000353565 | AHCTF1P   | ENSG00000153207 |
| 1  | 245343106 | 245343412 | 245343270 | 14 | 18 | 1  | 11.14396397 | 4.44E-06    |           | ENSG00000216290 |
| 1  | 245602747 | 245602992 | 245602869 | 9  | 10 | 1  | 6.451768616 | 0.00135978  | ZNF496    | ENSG00000162714 |
| 1  | 245620100 | 245620412 | 245620265 | 9  | 10 | 3  | 3.225884308 | 0.0139466   | NLRP3     | ENSG00000162711 |
| 1  | 247134833 | 247135307 | 247135151 | 14 | 25 | 5  | 5.083211637 | 1.58E-05    | ZNF692    | ENSG00000171163 |
| 10 | 266750    | 266938    | 266836    | 9  | 9  | 3  | 2.932622098 | 0.0242899   | ZMYND11   | ENSG00000015171 |
| 10 | 270667    | 271027    | 270843    | 18 | 24 | 3  | 7.331555246 | 2.13E-06    |           | ENSG00000201861 |
| 10 | 365396    | 365703    | 365549    | 10 | 13 | 3  | 4.105670938 | 0.00243034  | DIP2C     | ENSG00000151240 |
| 10 | 406490    | 406725    | 406607    | 11 | 12 | 4  | 3.049926982 | 0.0108184   | DIP2C     | ENSG00000151240 |
| 10 | 409548    | 409892    | 409720    | 16 | 21 | 3  | 6.451768616 | 1.56E-05    | DIP2C     | ENSG00000151240 |
| 10 | 441929    | 442140    | 442034    | 10 | 10 | 5  | 2.150589539 | 0.0575848   |           | ENSG00000209361 |
| 10 | 472205    | 472431    | 472318    | 9  | 12 | 4  | 3.049926982 | 0.0108184   |           | ENSG00000209361 |
| 10 | 514380    | 514605    | 514512    | 10 | 12 | 4  | 3.049926982 | 0.0108184   | DIP2C     | ENSG00000151240 |
| 10 | 547022    | 547292    | 547165    | 15 | 18 | 6  | 3.183989707 | 0.00227432  | DIP2C     | ENSG00000151240 |
| 10 | 556382    | 556793    | 556554    | 32 | 41 | 5  | 8.211341875 | 5.42E-10    | DIP2C     | ENSG00000151240 |
| 10 | 582848    | 583185    | 583014    | 22 | 26 | 6  | 4.524616952 | 2.63E-05    | DIP2C     | ENSG00000151240 |
| 10 | 649076    | 649541    | 649362    | 17 | 28 | 10 | 3.092583304 | 0.000307818 | C10orf108 | ENSG00000180525 |
| 10 | 931328    | 931523    | 931425    | 8  | 8  | 7  | 1.319679944 | 0.283403    | LARP5     | ENSG00000107929 |
| 10 | 1092133   | 1092316   | 1092249   | 8  | 8  | 1  | 5.278719777 | 0.00542188  | WDR37     | ENSG00000047056 |
| 10 | 1301084   | 1301328   | 1301206   | 14 | 15 | 0  | 18.76878143 | 4.04E-06    | ADARB2    | ENSG00000185736 |
| 10 | 1453129   | 1453468   | 1453292   | 8  | 12 | 4  | 3.049926982 | 0.0108184   | ADARB2    | ENSG00000185736 |
| 10 | 1480803   | 1481026   | 1480914   | 13 | 15 | 3  | 4.692195357 | 0.000718455 | ADARB2    | ENSG00000185736 |
| 10 | 1748015   | 1748235   | 1748126   | 8  | 9  | 7  | 1.466311049 | 0.20706     | ADARB2    | ENSG00000185736 |
| 10 | 1757082   | 1757562   | 1757351   | 39 | 60 | 3  | 17.8889948  | 1.88E-17    | ADARB2    | ENSG00000185736 |
| 10 | 2960570   | 2960811   | 2960690   | 8  | 10 | 0  | 12.90353723 | 0.000195991 |           | ENSG00000218235 |
| 10 | 3127519   | 3127825   | 3127692   | 8  | 10 | 2  | 4.301179077 | 0.00512919  | PFKP      | ENSG00000067057 |
| 10 | 3205249   | 3205441   | 3205348   | 8  | 8  | 1  | 5.278719777 | 0.00542188  | PITRM1    | ENSG00000107959 |
| 10 | 3206205   | 3206384   | 3206276   | 8  | 8  | 3  | 2.639359888 | 0.0415794   | PITRM1    | ENSG00000107959 |
| 10 | 3514597   | 3514821   | 3514758   | 8  | 11 | 4  | 2.815317214 | 0.0183428   | KLF6      | ENSG00000067082 |
| 10 | 3809318   | 3809660   | 3809489   | 10 | 15 | 6  | 2.68125449  | 0.0103552   | KLF6      | ENSG00000067082 |
| 10 | 3816001   | 3816396   | 3816180   | 8  | 17 | 7  | 2.639359888 | 0.00777415  | KLF6      | ENSG00000067082 |
| 10 | 3838578   | 3838757   | 3838671   | 8  | 8  | 0  | 10.55743955 | 0.000925496 | KLF6      | ENSG00000067082 |
| 10 | 3887300   | 3887493   | 3887374   | 8  | 8  | 2  | 3.519146518 | 0.017558    | KLF6      | ENSG00000067082 |

|    |         |         |         |    |    |    |             |             |          |                 |
|----|---------|---------|---------|----|----|----|-------------|-------------|----------|-----------------|
| 10 | 4765394 | 4765633 | 4765532 | 9  | 10 | 0  | 12.90353723 | 0.000195991 | AKR1CL2  | ENSG00000165568 |
| 10 | 4881860 | 4882284 | 4882034 | 15 | 22 | 2  | 8.993374435 | 1.66E-06    | AKR1CL2  | ENSG00000165568 |
| 10 | 4943292 | 4943690 | 4943468 | 23 | 34 | 0  | 41.05670938 | 1.59E-12    |          | ENSG00000151631 |
| 10 | 4950478 | 4950754 | 4950628 | 8  | 9  | 1  | 5.865244197 | 0.00272497  |          | ENSG00000151631 |
| 10 | 5315547 | 5315855 | 5315697 | 8  | 12 | 2  | 5.083211637 | 0.00143337  |          | ENSG00000215267 |
| 10 | 5478406 | 5478626 | 5478523 | 8  | 11 | 3  | 3.519146518 | 0.00788869  | NET1     | ENSG00000173848 |
| 10 | 5525671 | 5526187 | 5525839 | 15 | 23 | 16 | 1.65606895  | 0.0532464   | CALML5   | ENSG00000178372 |
| 10 | 5535313 | 5535740 | 5535561 | 16 | 26 | 3  | 7.918079665 | 5.55E-07    | CALML5   | ENSG00000178372 |
| 10 | 5576480 | 5576677 | 5576522 | 8  | 10 | 1  | 6.451768616 | 0.00135978  | CALML3   | ENSG00000178363 |
| 10 | 5583130 | 5583405 | 5583229 | 13 | 15 | 3  | 4.692195357 | 0.000718455 | CALML3   | ENSG00000178363 |
| 10 | 5705174 | 5705402 | 5705288 | 9  | 11 | 9  | 1.407658607 | 0.210479    |          | ENSG00000216230 |
| 10 | 5711885 | 5712114 | 5712007 | 9  | 9  | 4  | 2.346097679 | 0.050148    |          | ENSG00000222233 |
| 10 | 5766437 | 5766909 | 5766730 | 12 | 24 | 6  | 4.18946014  | 8.40E-05    | C10orf18 | ENSG00000108021 |
| 10 | 5875618 | 5875801 | 5875709 | 8  | 8  | 0  | 10.55743955 | 0.000925496 | GDI2     | ENSG00000057608 |
| 10 | 5926591 | 5926785 | 5926688 | 8  | 9  | 2  | 3.910162798 | 0.00955088  | GDI2     | ENSG00000057608 |
| 10 | 5926864 | 5927148 | 5927006 | 9  | 11 | 2  | 4.692195357 | 0.00272444  | GDI2     | ENSG00000057608 |
| 10 | 6104617 | 6104849 | 6104735 | 8  | 9  | 1  | 5.865244197 | 0.00272497  |          | ENSG00000209380 |
| 10 | 6170692 | 6170926 | 6170809 | 12 | 12 | 9  | 1.524963491 | 0.154777    | RBM17    | ENSG00000134453 |
| 10 | 6321209 | 6321634 | 6321460 | 12 | 19 | 6  | 3.351568112 | 0.00134187  |          | ENSG00000213994 |
| 10 | 6379021 | 6379282 | 6379157 | 10 | 13 | 1  | 8.211341875 | 0.000163445 |          | ENSG00000219056 |
| 10 | 6379952 | 6380144 | 6379987 | 8  | 8  | 0  | 10.55743955 | 0.000925496 |          | ENSG00000219056 |
| 10 | 6655426 | 6655731 | 6655578 | 13 | 16 | 0  | 19.94183027 | 1.86E-06    | PRKCQ    | ENSG00000065675 |
| 10 | 7002007 | 7002321 | 7002181 | 10 | 11 | 1  | 7.038293036 | 0.000674435 | PRKCQ    | ENSG00000065675 |
| 10 | 7315376 | 7315689 | 7315532 | 8  | 11 | 2  | 4.692195357 | 0.00272444  |          | ENSG00000220641 |
| 10 | 7769293 | 7769516 | 7769412 | 9  | 10 | 4  | 2.580707446 | 0.0306059   | ITIH2    | ENSG00000151655 |
| 10 | 7838476 | 7838661 | 7838500 | 9  | 9  | 4  | 2.346097679 | 0.050148    | KIN      | ENSG00000151657 |
| 10 | 7856071 | 7856268 | 7856194 | 8  | 10 | 3  | 3.225884308 | 0.0139466   | KIN      | ENSG00000151657 |
| 10 | 7869816 | 7870028 | 7869911 | 8  | 10 | 6  | 1.843362462 | 0.0964212   | KIN      | ENSG00000151657 |
| 10 | 7900278 | 7900653 | 7900498 | 10 | 15 | 7  | 2.346097679 | 0.0195693   | TAF3     | ENSG00000165632 |
| 10 | 8024863 | 8025182 | 8025038 | 9  | 11 | 2  | 4.692195357 | 0.00272444  |          | ENSG00000216815 |
| 10 | 8132465 | 8132949 | 8132786 | 20 | 31 | 4  | 7.507512572 | 9.10E-08    |          | ENSG00000197308 |
| 10 | 8135279 | 8135501 | 8135388 | 9  | 10 | 3  | 3.225884308 | 0.0139466   |          | ENSG00000197308 |
| 10 | 8136000 | 8136329 | 8136167 | 8  | 12 | 9  | 1.524963491 | 0.154777    | GATA3    | ENSG00000107485 |
| 10 | 8136629 | 8136974 | 8136801 | 12 | 17 | 8  | 2.346097679 | 0.0144542   | GATA3    | ENSG00000107485 |

|    |          |          |          |    |    |    |             |             |          |                 |
|----|----------|----------|----------|----|----|----|-------------|-------------|----------|-----------------|
| 10 | 8139677  | 8139942  | 8139809  | 8  | 10 | 5  | 2.150589539 | 0.0575848   | GATA3    | ENSG00000107485 |
| 10 | 8140462  | 8140687  | 8140552  | 8  | 8  | 2  | 3.519146518 | 0.017558    | GATA3    | ENSG00000107485 |
| 10 | 8143293  | 8143520  | 8143381  | 9  | 10 | 0  | 12.90353723 | 0.000195991 | GATA3    | ENSG00000107485 |
| 10 | 8166605  | 8166898  | 8166737  | 9  | 13 | 3  | 4.105670938 | 0.00243034  | GATA3    | ENSG00000107485 |
| 10 | 8166919  | 8167098  | 8167008  | 9  | 9  | 2  | 3.910162798 | 0.00955088  | GATA3    | ENSG00000107485 |
| 10 | 8382924  | 8383277  | 8383100  | 8  | 14 | 6  | 2.513676084 | 0.016726    |          | ENSG00000217532 |
| 10 | 8443555  | 8443746  | 8443630  | 8  | 8  | 3  | 2.639359888 | 0.0415794   |          | ENSG00000220584 |
| 10 | 8489542  | 8489946  | 8489721  | 10 | 17 | 3  | 5.278719777 | 0.000205462 |          | ENSG00000220584 |
| 10 | 8664026  | 8664208  | 8664101  | 8  | 9  | 11 | 0.977540699 | 0.526123    |          | ENSG00000219750 |
| 10 | 8710342  | 8710706  | 8710521  | 18 | 25 | 7  | 3.812408728 | 0.00012465  |          | ENSG00000219750 |
| 10 | 8808017  | 8808250  | 8808136  | 16 | 18 | 4  | 4.457585589 | 0.000353565 |          | ENSG00000212505 |
| 10 | 8845991  | 8846505  | 8846314  | 64 | 78 | 2  | 30.8902861  | 2.27E-24    |          | ENSG00000212505 |
| 10 | 8938281  | 8938462  | 8938294  | 8  | 9  | 5  | 1.955081399 | 0.0892323   |          | ENSG00000212505 |
| 10 | 8938849  | 8939204  | 8939026  | 8  | 14 | 10 | 1.599612054 | 0.114822    |          | ENSG00000212505 |
| 10 | 8944116  | 8944449  | 8944232  | 9  | 13 | 9  | 1.642268375 | 0.111397    |          | ENSG00000212505 |
| 10 | 8950047  | 8950337  | 8950175  | 12 | 13 | 7  | 2.052835469 | 0.046392    |          | ENSG00000212505 |
| 10 | 9053408  | 9053874  | 9053650  | 14 | 25 | 11 | 2.541605819 | 0.00248721  |          | ENSG00000212505 |
| 10 | 9057579  | 9057976  | 9057757  | 14 | 21 | 6  | 3.686724924 | 0.000453999 |          | ENSG00000212505 |
| 10 | 9120263  | 9120637  | 9120458  | 12 | 19 | 3  | 5.865244197 | 5.72E-05    |          | ENSG00000212505 |
| 10 | 9270004  | 9270266  | 9270165  | 9  | 10 | 2  | 4.301179077 | 0.00512919  |          |                 |
| 10 | 9270413  | 9271003  | 9270686  | 48 | 75 | 20 | 4.245319609 | 2.95E-11    |          |                 |
| 10 | 9291123  | 9291472  | 9291300  | 12 | 16 | 11 | 1.661819189 | 0.0853913   |          |                 |
| 10 | 9907465  | 9907669  | 9907587  | 9  | 10 | 0  | 12.90353723 | 0.000195991 |          | ENSG00000203336 |
| 10 | 11153529 | 11154068 | 11153764 | 15 | 27 | 6  | 4.692195357 | 1.46E-05    | CUGBP2   | ENSG00000048740 |
| 10 | 11352611 | 11352814 | 11352707 | 8  | 9  | 2  | 3.910162798 | 0.00955088  | C10orf31 | ENSG00000181800 |
| 10 | 11509551 | 11509763 | 11509657 | 8  | 8  | 1  | 5.278719777 | 0.00542188  | C10orf31 | ENSG00000181800 |
| 10 | 11840023 | 11840256 | 11840139 | 9  | 12 | 2  | 5.083211637 | 0.00143337  | ECHDC3   | ENSG00000134463 |
| 10 | 11956715 | 11956949 | 11956832 | 11 | 13 | 6  | 2.346097679 | 0.0266147   | C10orf47 | ENSG00000148426 |
| 10 | 12124959 | 12125183 | 12125071 | 9  | 11 | 2  | 4.692195357 | 0.00272444  | UPF2     | ENSG00000151461 |
| 10 | 12277649 | 12277878 | 12277763 | 8  | 11 | 3  | 3.519146518 | 0.00788869  | NUDT5    | ENSG00000165609 |
| 10 | 12278151 | 12278399 | 12278275 | 8  | 10 | 6  | 1.843362462 | 0.0964212   | CDC123   | ENSG00000151465 |
| 10 | 12416190 | 12416461 | 12416338 | 11 | 14 | 2  | 5.865244197 | 0.000387308 | CAMK1D   | ENSG00000183049 |
| 10 | 12585534 | 12585761 | 12585683 | 9  | 10 | 4  | 2.580707446 | 0.0306059   | CAMK1D   | ENSG00000183049 |
| 10 | 12687559 | 12688105 | 12687878 | 26 | 39 | 6  | 6.703136225 | 8.68E-09    |          | ENSG00000221331 |

|    |          |          |          |     |     |    |             |             |         |                 |
|----|----------|----------|----------|-----|-----|----|-------------|-------------|---------|-----------------|
| 10 | 12699579 | 12699859 | 12699710 | 8   | 11  | 3  | 3.519146518 | 0.00788869  |         | ENSG00000221331 |
| 10 | 12713203 | 12713477 | 12713371 | 16  | 19  | 3  | 5.865244197 | 5.72E-05    |         | ENSG00000221331 |
| 10 | 12747710 | 12748172 | 12747882 | 17  | 26  | 5  | 5.278719777 | 8.57E-06    |         | ENSG00000221331 |
| 10 | 12867624 | 12867815 | 12867752 | 8   | 8   | 7  | 1.319679944 | 0.283403    |         | ENSG00000221331 |
| 10 | 12931945 | 12932144 | 12932031 | 8   | 8   | 2  | 3.519146518 | 0.017558    |         | ENSG00000212499 |
| 10 | 12957222 | 12957441 | 12957331 | 10  | 11  | 4  | 2.815317214 | 0.0183428   |         | ENSG00000212499 |
| 10 | 12963852 | 12964339 | 12964123 | 20  | 31  | 7  | 4.692195357 | 4.07E-06    |         | ENSG00000212499 |
| 10 | 13668738 | 13669134 | 13668917 | 16  | 24  | 12 | 2.255863153 | 0.00673318  | PRPF18  | ENSG00000165630 |
| 10 | 13690288 | 13690502 | 13690358 | 8   | 9   | 4  | 2.346097679 | 0.050148    |         | ENSG00000217518 |
| 10 | 13692099 | 13692278 | 13692193 | 8   | 8   | 2  | 3.519146518 | 0.017558    |         | ENSG00000217518 |
| 10 | 13754960 | 13755417 | 13755104 | 9   | 17  | 2  | 7.038293036 | 5.19E-05    |         | ENSG00000222235 |
| 10 | 13785166 | 13785432 | 13785299 | 9   | 10  | 3  | 3.225884308 | 0.0139466   |         | ENSG00000222235 |
| 10 | 13790800 | 13790986 | 13790893 | 11  | 12  | 0  | 15.24963491 | 4.15E-05    |         | ENSG00000222235 |
| 10 | 13799703 | 13799918 | 13799747 | 8   | 10  | 0  | 12.90353723 | 0.000195991 |         | ENSG00000199407 |
| 10 | 13840284 | 13840892 | 13840559 | 105 | 139 | 3  | 41.05670938 | 4.94E-43    |         | ENSG00000199407 |
| 10 | 13840945 | 13841352 | 13841192 | 8   | 14  | 0  | 17.59573259 | 8.79E-06    |         | ENSG00000199407 |
| 10 | 13869720 | 13869913 | 13869862 | 8   | 8   | 0  | 10.55743955 | 0.000925496 |         | ENSG00000199407 |
| 10 | 13952984 | 13953261 | 13953107 | 14  | 18  | 3  | 5.571981987 | 0.000108726 |         | ENSG00000215227 |
| 10 | 14581091 | 14581389 | 14581240 | 8   | 10  | 1  | 6.451768616 | 0.00135978  | FAM107B | ENSG00000065809 |
| 10 | 14683586 | 14683770 | 14683678 | 9   | 9   | 2  | 3.910162798 | 0.00955088  | FAM107B | ENSG00000065809 |
| 10 | 14735736 | 14736244 | 14735915 | 25  | 40  | 4  | 9.619000482 | 2.08E-10    |         | ENSG00000201766 |
| 10 | 14919574 | 14919962 | 14919873 | 8   | 14  | 5  | 2.932622098 | 0.00829617  | ARMETL1 | ENSG00000185267 |
| 10 | 15036114 | 15036417 | 15036266 | 8   | 12  | 2  | 5.083211637 | 0.00143337  | DCLRE1C | ENSG00000152457 |
| 10 | 15041947 | 15042238 | 15042107 | 10  | 13  | 0  | 16.42268375 | 1.91E-05    | MEIG1   | ENSG00000197889 |
| 10 | 15179134 | 15179330 | 15179195 | 8   | 8   | 3  | 2.639359888 | 0.0415794   | RPP38   | ENSG00000152464 |
| 10 | 15205734 | 15206405 | 15206070 | 66  | 105 | 0  | 124.343177  | 1.86E-36    | RPP38   | ENSG00000152464 |
| 10 | 15254513 | 15254776 | 15254648 | 12  | 12  | 4  | 3.049926982 | 0.0108184   |         | ENSG00000216981 |
| 10 | 15807834 | 15808020 | 15807880 | 8   | 8   | 3  | 2.639359888 | 0.0415794   | ITGA8   | ENSG00000077943 |
| 10 | 16278880 | 16279261 | 16279082 | 24  | 31  | 1  | 18.76878143 | 2.99E-10    |         | ENSG00000201260 |
| 10 | 17103922 | 17104137 | 17104033 | 8   | 9   | 1  | 5.865244197 | 0.00272497  | CUBN    | ENSG00000107611 |
| 10 | 17312053 | 17312338 | 17312195 | 12  | 13  | 2  | 5.474227917 | 0.000747844 | VIM     | ENSG00000026025 |
| 10 | 17312469 | 17312735 | 17312602 | 10  | 11  | 9  | 1.407658607 | 0.210479    | VIM     | ENSG00000026025 |
| 10 | 17329293 | 17329687 | 17329486 | 49  | 60  | 1  | 35.7779896  | 9.32E-20    | VIM     | ENSG00000026025 |
| 10 | 17430578 | 17430836 | 17430687 | 9   | 9   | 1  | 5.865244197 | 0.00272497  |         | ENSG00000204832 |

|    |          |          |          |     |     |    |             |             |          |                 |
|----|----------|----------|----------|-----|-----|----|-------------|-------------|----------|-----------------|
| 10 | 17439356 | 17439614 | 17439485 | 10  | 10  | 3  | 3.225884308 | 0.0139466   |          | ENSG00000204832 |
| 10 | 17469761 | 17470532 | 17470434 | 21  | 41  | 7  | 6.158506406 | 9.25E-09    |          | ENSG00000204832 |
| 10 | 17698531 | 17698715 | 17698623 | 8   | 8   | 2  | 3.519146518 | 0.017558    | PTPLA    | ENSG00000165996 |
| 10 | 17725674 | 17725969 | 17725809 | 8   | 11  | 5  | 2.346097679 | 0.0364013   | STAM     | ENSG00000136738 |
| 10 | 18281847 | 18282137 | 18281992 | 8   | 9   | 1  | 5.865244197 | 0.00272497  | SLC39A12 | ENSG00000148482 |
| 10 | 18448756 | 18449019 | 18448881 | 12  | 13  | 0  | 16.42268375 | 1.91E-05    | CACNB2   | ENSG00000165995 |
| 10 | 18562821 | 18563040 | 18562931 | 8   | 9   | 6  | 1.675784056 | 0.141978    | CACNB2   | ENSG00000165995 |
| 10 | 18939516 | 18939780 | 18939648 | 14  | 16  | 3  | 4.985457567 | 0.000385643 | NSUN6    | ENSG00000152487 |
| 10 | 18980372 | 18980797 | 18980546 | 9   | 16  | 4  | 3.988366054 | 0.00115141  | NSUN6    | ENSG00000152487 |
| 10 | 19538296 | 19538659 | 19538462 | 19  | 26  | 11 | 2.639359888 | 0.0015854   |          | ENSG00000204741 |
| 10 | 19561382 | 19561580 | 19561479 | 11  | 11  | 1  | 7.038293036 | 0.000674435 |          | ENSG00000204741 |
| 10 | 19575251 | 19575736 | 19575430 | 17  | 26  | 13 | 2.262308476 | 0.00502778  |          | ENSG00000204741 |
| 10 | 21412887 | 21413245 | 21413066 | 8   | 14  | 3  | 4.398933147 | 0.00132748  |          | ENSG00000216609 |
| 10 | 21520557 | 21520835 | 21520696 | 9   | 13  | 6  | 2.346097679 | 0.0266147   | NEBL     | ENSG00000078114 |
| 10 | 21665807 | 21666121 | 21665957 | 9   | 14  | 4  | 3.519146518 | 0.00361132  |          | ENSG00000207264 |
| 10 | 21679128 | 21679420 | 21679274 | 10  | 14  | 2  | 5.865244197 | 0.000387308 |          | ENSG00000207264 |
| 10 | 21731669 | 21731890 | 21731811 | 10  | 10  | 7  | 1.612942154 | 0.147335    |          | ENSG00000216589 |
| 10 | 21756683 | 21757152 | 21756895 | 53  | 68  | 1  | 40.47018496 | 2.11E-22    |          | ENSG00000216589 |
| 10 | 22056771 | 22057039 | 22056905 | 15  | 17  | 2  | 7.038293036 | 5.19E-05    | MLLT10   | ENSG00000078403 |
| 10 | 22273739 | 22273933 | 22273859 | 10  | 10  | 6  | 1.843362462 | 0.0964212   |          | ENSG00000201364 |
| 10 | 22426242 | 22426514 | 22426378 | 9   | 10  | 2  | 4.301179077 | 0.00512919  |          | ENSG00000218554 |
| 10 | 22558315 | 22558537 | 22558471 | 8   | 8   | 5  | 1.759573259 | 0.13508     |          | ENSG00000218957 |
| 10 | 22962000 | 22962237 | 22962109 | 11  | 14  | 9  | 1.759573259 | 0.0786014   | PIP4K2A  | ENSG00000150867 |
| 10 | 23010750 | 23010987 | 23010840 | 8   | 9   | 2  | 3.910162798 | 0.00955088  | PIP4K2A  | ENSG00000150867 |
| 10 | 23241358 | 23241656 | 23241526 | 12  | 14  | 1  | 8.797866295 | 8.00E-05    | ARMC3    | ENSG00000165309 |
| 10 | 23487333 | 23487526 | 23487452 | 8   | 8   | 3  | 2.639359888 | 0.0415794   |          | ENSG00000209517 |
| 10 | 24071903 | 24072166 | 24072039 | 9   | 11  | 3  | 3.519146518 | 0.00788869  | KIAA1217 | ENSG00000120549 |
| 10 | 24323527 | 24323726 | 24323626 | 12  | 14  | 4  | 3.519146518 | 0.00361132  |          | ENSG00000209529 |
| 10 | 24525460 | 24525677 | 24525563 | 8   | 9   | 5  | 1.955081399 | 0.0892323   | KIAA1217 | ENSG00000120549 |
| 10 | 24567443 | 24567728 | 24567585 | 15  | 17  | 4  | 4.222975822 | 0.000640773 | KIAA1217 | ENSG00000120549 |
| 10 | 24578635 | 24579042 | 24578838 | 15  | 24  | 4  | 5.865244197 | 8.64E-06    |          | ENSG00000207930 |
| 10 | 24580553 | 24580911 | 24580732 | 10  | 16  | 7  | 2.492728784 | 0.0124193   |          | ENSG00000207930 |
| 10 | 24584795 | 24585535 | 24585128 | 137 | 185 | 9  | 21.81870841 | 7.63E-51    |          | ENSG00000207930 |
| 10 | 24617537 | 24618264 | 24617899 | 28  | 57  | 5  | 11.33947211 | 9.77E-15    |          | ENSG00000207930 |



|    |          |          |          |    |    |    |             |             |          |                 |
|----|----------|----------|----------|----|----|----|-------------|-------------|----------|-----------------|
| 10 | 24847961 | 24848184 | 24848048 | 11 | 11 | 4  | 2.815317214 | 0.0183428   | KIAA1217 | ENSG00000120549 |
| 10 | 24852915 | 24853111 | 24853030 | 8  | 8  | 1  | 5.278719777 | 0.00542188  | KIAA1217 | ENSG00000120549 |
| 10 | 24871185 | 24871744 | 24871529 | 9  | 23 | 9  | 2.815317214 | 0.00172056  | KIAA1217 | ENSG00000120549 |
| 10 | 24871757 | 24872434 | 24872296 | 9  | 25 | 8  | 3.388807758 | 0.000297109 | KIAA1217 | ENSG00000120549 |
| 10 | 25064731 | 25064979 | 25064855 | 8  | 10 | 2  | 4.301179077 | 0.00512919  | ARHGAP21 | ENSG00000107863 |
| 10 | 25085264 | 25085645 | 25085467 | 21 | 31 | 1  | 18.76878143 | 2.99E-10    | ARHGAP21 | ENSG00000107863 |
| 10 | 25389002 | 25389352 | 25389177 | 10 | 15 | 3  | 4.692195357 | 0.000718455 | THNSL1   | ENSG00000185875 |
| 10 | 25837111 | 25837326 | 25837218 | 8  | 8  | 1  | 5.278719777 | 0.00542188  |          | ENSG00000222543 |
| 10 | 26752689 | 26752977 | 26752829 | 12 | 14 | 0  | 17.59573259 | 8.79E-06    | APBB1IP  | ENSG00000077420 |
| 10 | 26879695 | 26879903 | 26879811 | 8  | 8  | 3  | 2.639359888 | 0.0415794   |          | ENSG00000199733 |
| 10 | 27189746 | 27190114 | 27189925 | 11 | 18 | 6  | 3.183989707 | 0.00227432  | ABI1     | ENSG00000136754 |
| 10 | 27483246 | 27483467 | 27483356 | 8  | 9  | 4  | 2.346097679 | 0.050148    | YME1L1   | ENSG00000136758 |
| 10 | 27570634 | 27570866 | 27570750 | 9  | 12 | 3  | 3.812408728 | 0.004404    | ACBD5    | ENSG00000107897 |
| 10 | 27571085 | 27571321 | 27571180 | 8  | 9  | 2  | 3.910162798 | 0.00955088  | ACBD5    | ENSG00000107897 |
| 10 | 27572053 | 27572275 | 27572122 | 9  | 10 | 2  | 4.301179077 | 0.00512919  | ACBD5    | ENSG00000107897 |
| 10 | 27689581 | 27689763 | 27689672 | 8  | 8  | 4  | 2.111487911 | 0.0804809   |          | ENSG00000213770 |
| 10 | 27833081 | 27833442 | 27833208 | 10 | 15 | 3  | 4.692195357 | 0.000718455 | RAB18    | ENSG00000099246 |
| 10 | 28194136 | 28194812 | 28194366 | 53 | 85 | 5  | 16.81370003 | 2.30E-23    |          | ENSG00000219432 |
| 10 | 28710778 | 28711091 | 28710934 | 14 | 17 | 15 | 1.319679944 | 0.209239    |          | ENSG00000209609 |
| 10 | 28824903 | 28825082 | 28825007 | 8  | 8  | 4  | 2.111487911 | 0.0804809   | WAC      | ENSG00000095787 |
| 10 | 28825390 | 28825752 | 28825569 | 14 | 21 | 9  | 2.580707446 | 0.00438951  | WAC      | ENSG00000095787 |
| 10 | 28825788 | 28825987 | 28825883 | 8  | 9  | 7  | 1.466311049 | 0.20706     | WAC      | ENSG00000095787 |
| 10 | 28992667 | 28993073 | 28992894 | 10 | 19 | 5  | 3.910162798 | 0.000546977 |          | ENSG00000207483 |
| 10 | 29008810 | 29009027 | 29008968 | 10 | 12 | 5  | 2.541605819 | 0.0225912   | BAMBI    | ENSG00000095739 |
| 10 | 29014152 | 29014543 | 29014383 | 14 | 19 | 6  | 3.351568112 | 0.00134187  | BAMBI    | ENSG00000095739 |
| 10 | 29051333 | 29051517 | 29051435 | 8  | 9  | 1  | 5.865244197 | 0.00272497  |          | ENSG00000201001 |
| 10 | 29298763 | 29299075 | 29298895 | 13 | 17 | 1  | 10.55743955 | 9.18E-06    |          | ENSG00000216946 |
| 10 | 29351537 | 29351799 | 29351637 | 8  | 13 | 5  | 2.737113958 | 0.0137917   |          | ENSG00000216946 |
| 10 | 29421094 | 29421526 | 29421310 | 29 | 42 | 2  | 16.81370003 | 9.62E-13    |          | ENSG00000216946 |
| 10 | 29428116 | 29428320 | 29428228 | 8  | 9  | 2  | 3.910162798 | 0.00955088  | LYZL1    | ENSG00000120563 |
| 10 | 29428451 | 29428680 | 29428565 | 8  | 10 | 4  | 2.580707446 | 0.0306059   | LYZL1    | ENSG00000120563 |
| 10 | 29431371 | 29431576 | 29431413 | 9  | 9  | 1  | 5.865244197 | 0.00272497  | LYZL1    | ENSG00000120563 |
| 10 | 29434082 | 29434273 | 29434151 | 8  | 9  | 8  | 1.303387599 | 0.281715    | LYZL1    | ENSG00000120563 |
| 10 | 29434631 | 29434873 | 29434781 | 8  | 12 | 0  | 15.24963491 | 4.15E-05    | LYZL1    | ENSG00000120563 |

|    |          |          |          |    |    |   |             |             |          |                 |
|----|----------|----------|----------|----|----|---|-------------|-------------|----------|-----------------|
| 10 | 29453736 | 29454261 | 29454049 | 20 | 37 | 7 | 5.571981987 | 1.11E-07    | LYZL1    | ENSG00000120563 |
| 10 | 29461473 | 29461864 | 29461638 | 11 | 19 | 5 | 3.910162798 | 0.000546977 | LYZL1    | ENSG00000120563 |
| 10 | 29470773 | 29471054 | 29470913 | 10 | 14 | 4 | 3.519146518 | 0.00361132  | LYZL1    | ENSG00000120563 |
| 10 | 29479014 | 29479218 | 29479116 | 8  | 9  | 5 | 1.955081399 | 0.0892323   | LYZL1    | ENSG00000120563 |
| 10 | 29605414 | 29605710 | 29605562 | 9  | 9  | 4 | 2.346097679 | 0.050148    | LYZL1    | ENSG00000120563 |
| 10 | 29773081 | 29773412 | 29773246 | 9  | 12 | 1 | 7.624817456 | 0.000332769 |          | ENSG00000207612 |
| 10 | 29963171 | 29963371 | 29963271 | 9  | 9  | 0 | 11.73048839 | 0.000425898 | SVIL     | ENSG00000197321 |
| 10 | 30001645 | 30001844 | 30001793 | 8  | 8  | 2 | 3.519146518 | 0.017558    |          | ENSG00000197474 |
| 10 | 30064806 | 30065004 | 30064905 | 9  | 10 | 1 | 6.451768616 | 0.00135978  | SVIL     | ENSG00000197321 |
| 10 | 30113342 | 30113620 | 30113490 | 22 | 25 | 2 | 10.16642327 | 2.02E-07    | SVIL     | ENSG00000197321 |
| 10 | 30255656 | 30255878 | 30255803 | 12 | 13 | 1 | 8.211341875 | 0.000163445 |          | ENSG00000220159 |
| 10 | 30280680 | 30281000 | 30280852 | 11 | 14 | 1 | 8.797866295 | 8.00E-05    |          | ENSG00000220159 |
| 10 | 30507466 | 30507717 | 30507572 | 8  | 9  | 2 | 3.910162798 | 0.00955088  | KIAA1462 | ENSG00000165757 |
| 10 | 30558937 | 30559460 | 30559207 | 27 | 45 | 1 | 26.9801233  | 8.07E-15    |          | ENSG00000200887 |
| 10 | 30762275 | 30762477 | 30762397 | 10 | 11 | 1 | 7.038293036 | 0.000674435 | MAP3K8   | ENSG00000107968 |
| 10 | 30762655 | 30762896 | 30762788 | 11 | 13 | 5 | 2.737113958 | 0.0137917   | MAP3K8   | ENSG00000107968 |
| 10 | 31048902 | 31049084 | 31049005 | 8  | 8  | 3 | 2.639359888 | 0.0415794   |          | ENSG00000217332 |
| 10 | 31160494 | 31160732 | 31160634 | 10 | 11 | 1 | 7.038293036 | 0.000674435 |          | ENSG00000216260 |
| 10 | 31360585 | 31360764 | 31360684 | 8  | 8  | 2 | 3.519146518 | 0.017558    | ZNF438   | ENSG00000183621 |
| 10 | 31820069 | 31820340 | 31820168 | 8  | 9  | 5 | 1.955081399 | 0.0892323   |          | ENSG00000196960 |
| 10 | 32271855 | 32272120 | 32271976 | 13 | 14 | 2 | 5.865244197 | 0.000387308 | ARHGAP12 | ENSG00000165322 |
| 10 | 32399635 | 32399898 | 32399765 | 15 | 15 | 2 | 6.256260476 | 0.000199274 |          | ENSG00000206660 |
| 10 | 32434806 | 32435038 | 32434922 | 9  | 11 | 0 | 14.07658607 | 9.02E-05    |          | ENSG00000219005 |
| 10 | 32468317 | 32468580 | 32468474 | 14 | 16 | 1 | 9.970915134 | 1.89E-05    |          | ENSG00000216812 |
| 10 | 32500218 | 32500501 | 32500380 | 13 | 15 | 2 | 6.256260476 | 0.000199274 |          | ENSG00000217094 |
| 10 | 32675033 | 32675806 | 32675208 | 13 | 35 | 3 | 10.55743955 | 1.13E-09    |          | ENSG00000222309 |
| 10 | 33269833 | 33270059 | 33269946 | 10 | 13 | 1 | 8.211341875 | 0.000163445 |          | ENSG00000218547 |
| 10 | 33287247 | 33287490 | 33287373 | 11 | 12 | 1 | 7.624817456 | 0.000332769 | ITGB1    | ENSG00000150093 |
| 10 | 33337595 | 33337953 | 33337774 | 10 | 13 | 5 | 2.737113958 | 0.0137917   |          | ENSG00000220900 |
| 10 | 33602284 | 33602669 | 33602463 | 14 | 21 | 0 | 25.80707446 | 3.84E-08    |          | ENSG00000209716 |
| 10 | 33620176 | 33620417 | 33620336 | 10 | 13 | 2 | 5.474227917 | 0.000747844 |          | ENSG00000209716 |
| 10 | 33714013 | 33714202 | 33714120 | 8  | 8  | 0 | 10.55743955 | 0.000925496 | NRP1     | ENSG00000099250 |
| 10 | 33838091 | 33838296 | 33838203 | 8  | 9  | 6 | 1.675784056 | 0.141978    | NRP1     | ENSG00000099250 |
| 10 | 34033366 | 34033798 | 34033646 | 11 | 19 | 1 | 11.73048839 | 2.14E-06    |          | ENSG00000219446 |

|    |          |          |          |     |     |     |             |             |        |                 |
|----|----------|----------|----------|-----|-----|-----|-------------|-------------|--------|-----------------|
| 10 | 34634135 | 34634342 | 34634238 | 11  | 11  | 2   | 4.692195357 | 0.00272444  |        | ENSG00000209724 |
| 10 | 35027875 | 35028220 | 35028047 | 14  | 17  | 3   | 5.278719777 | 0.000205462 |        | ENSG00000215184 |
| 10 | 35048346 | 35048612 | 35048507 | 15  | 16  | 5   | 3.323638378 | 0.00288759  |        | ENSG00000215184 |
| 10 | 35234882 | 35235468 | 35235177 | 29  | 50  | 6   | 8.546498686 | 6.41E-12    |        | ENSG00000223047 |
| 10 | 35283138 | 35283409 | 35283273 | 16  | 17  | 5   | 3.519146518 | 0.00167472  |        | ENSG00000213724 |
| 10 | 35419376 | 35419586 | 35419506 | 8   | 9   | 0   | 11.73048839 | 0.000425898 | CUL2   | ENSG00000108094 |
| 10 | 35456505 | 35456777 | 35456644 | 8   | 9   | 2   | 3.910162798 | 0.00955088  | CREM   | ENSG00000095794 |
| 10 | 35547457 | 35547721 | 35547626 | 9   | 11  | 3   | 3.519146518 | 0.00788869  |        | ENSG00000209753 |
| 10 | 35635772 | 35636177 | 35635920 | 12  | 21  | 6   | 3.686724924 | 0.000453999 | CCNY   | ENSG00000108100 |
| 10 | 36150101 | 36150512 | 36150280 | 18  | 27  | 5   | 5.474227917 | 4.62E-06    |        | ENSG00000218744 |
| 10 | 36201490 | 36201817 | 36201653 | 8   | 11  | 2   | 4.692195357 | 0.00272444  |        | ENSG00000218744 |
| 10 | 36216705 | 36216938 | 36216812 | 8   | 10  | 0   | 12.90353723 | 0.000195991 |        | ENSG00000218744 |
| 10 | 36303800 | 36304127 | 36303963 | 19  | 24  | 1   | 14.66311049 | 5.43E-08    |        | ENSG00000218744 |
| 10 | 36384801 | 36385071 | 36384948 | 18  | 18  | 2   | 7.429309316 | 2.63E-05    |        | ENSG00000218744 |
| 10 | 36402786 | 36403031 | 36402925 | 8   | 11  | 0   | 14.07658607 | 9.02E-05    |        | ENSG00000218688 |
| 10 | 36552849 | 36553036 | 36552967 | 8   | 8   | 1   | 5.278719777 | 0.00542188  |        | ENSG00000218688 |
| 10 | 38305503 | 38305938 | 38305720 | 21  | 31  | 4   | 7.507512572 | 9.10E-08    | ZNF25  | ENSG00000175395 |
| 10 | 38336982 | 38337358 | 38337138 | 25  | 30  | 1   | 18.18225701 | 6.30E-10    | ZNF33A | ENSG00000189180 |
| 10 | 38339567 | 38339802 | 38339681 | 9   | 11  | 2   | 4.692195357 | 0.00272444  | ZNF33A | ENSG00000189180 |
| 10 | 38423074 | 38423380 | 38423227 | 8   | 12  | 5   | 2.541605819 | 0.0225912   | ZNF37A | ENSG00000075407 |
| 10 | 38841082 | 38841339 | 38841231 | 9   | 9   | 5   | 1.955081399 | 0.0892323   |        | ENSG00000219057 |
| 10 | 39134173 | 39134502 | 39134337 | 25  | 26  | 23  | 1.319679944 | 0.160955    |        | ENSG00000217685 |
| 10 | 39163579 | 39163760 | 39163669 | 10  | 12  | 17  | 0.84720194  | 0.681997    |        | ENSG00000217685 |
| 10 | 39186635 | 39186819 | 39186783 | 9   | 9   | 13  | 0.837892028 | 0.672794    |        | ENSG00000217685 |
| 10 | 41683232 | 41683563 | 41683397 | 17  | 17  | 17  | 1.173048839 | 0.317303    |        | ENSG00000220883 |
| 10 | 41684759 | 41685068 | 41684927 | 8   | 9   | 19  | 0.58652442  | 0.925417    |        | ENSG00000220883 |
| 10 | 41699742 | 41700089 | 41699915 | 118 | 119 | 208 | 0.673520865 | 0.999776    |        | ENSG00000220883 |
| 10 | 41700105 | 41700435 | 41700270 | 11  | 14  | 26  | 0.6516938   | 0.91539     |        | ENSG00000220883 |
| 10 | 41705028 | 41705372 | 41705200 | 63  | 64  | 80  | 0.941335488 | 0.643892    |        | ENSG00000220883 |
| 10 | 41705546 | 41705725 | 41705573 | 9   | 9   | 11  | 0.977540699 | 0.526123    |        | ENSG00000220883 |
| 10 | 41716290 | 41716712 | 41716469 | 12  | 21  | 30  | 0.832486273 | 0.749627    |        | ENSG00000220883 |
| 10 | 41716715 | 41717068 | 41716891 | 76  | 80  | 106 | 0.888008934 | 0.792216    |        | ENSG00000220883 |
| 10 | 41718361 | 41718880 | 41718701 | 22  | 37  | 55  | 0.795997427 | 0.864955    |        | ENSG00000220883 |
| 10 | 41719205 | 41719537 | 41719371 | 29  | 34  | 38  | 1.052736138 | 0.414626    |        | ENSG00000220883 |

|    |          |          |          |     |     |     |             |             |           |                 |
|----|----------|----------|----------|-----|-----|-----|-------------|-------------|-----------|-----------------|
| 10 | 41719542 | 41719971 | 41719721 | 21  | 30  | 32  | 1.10195497  | 0.350579    |           | ENSG00000220883 |
| 10 | 41721690 | 41722190 | 41721869 | 21  | 31  | 27  | 1.340627245 | 0.128083    |           | ENSG00000220883 |
| 10 | 41722975 | 41723306 | 41723140 | 12  | 13  | 25  | 0.631641683 | 0.924582    |           | ENSG00000220883 |
| 10 | 41849257 | 41850098 | 41849596 | 68  | 96  | 123 | 0.917626915 | 0.738915    |           | ENSG00000220883 |
| 10 | 41850629 | 41850822 | 41850673 | 10  | 11  | 32  | 0.426563214 | 0.996587    |           | ENSG00000220883 |
| 10 | 41850917 | 41851246 | 41851081 | 21  | 22  | 30  | 0.870326558 | 0.697587    |           | ENSG00000220883 |
| 10 | 41851777 | 41852125 | 41851951 | 52  | 53  | 64  | 0.974532882 | 0.557859    |           | ENSG00000220883 |
| 10 | 41852436 | 41852925 | 41852615 | 14  | 20  | 19  | 1.231701281 | 0.25288     |           | ENSG00000220883 |
| 10 | 42117145 | 42117478 | 42117311 | 20  | 23  | 29  | 0.938439071 | 0.595359    |           | ENSG00000219859 |
| 10 | 42119843 | 42120024 | 42119993 | 10  | 10  | 11  | 1.075294769 | 0.434143    |           | ENSG00000219859 |
| 10 | 42137066 | 42137395 | 42137230 | 13  | 14  | 12  | 1.353517892 | 0.211235    |           | ENSG00000215146 |
| 10 | 42137411 | 42137591 | 42137563 | 9   | 9   | 13  | 0.837892028 | 0.672794    |           | ENSG00000215146 |
| 10 | 42197143 | 42197322 | 42197172 | 9   | 9   | 1   | 5.865244197 | 0.00272497  |           | ENSG00000197120 |
| 10 | 42453414 | 42453834 | 42453598 | 8   | 17  | 10  | 1.919534464 | 0.0400548   | ZNF33B    | ENSG00000196693 |
| 10 | 42456168 | 42456665 | 42456486 | 42  | 53  | 1   | 31.67231866 | 1.89E-17    | ZNF33B    | ENSG00000196693 |
| 10 | 42841526 | 42842222 | 42841812 | 15  | 36  | 5   | 7.233801176 | 1.48E-08    | RET       | ENSG00000165731 |
| 10 | 43165511 | 43165901 | 43165766 | 21  | 30  | 4   | 7.272902804 | 1.76E-07    |           | ENSG00000209850 |
| 10 | 43177511 | 43178035 | 43177672 | 13  | 24  | 5   | 4.887703497 | 2.90E-05    | FXVD4     | ENSG00000150201 |
| 10 | 43211528 | 43211779 | 43211666 | 9   | 10  | 2   | 4.301179077 | 0.00512919  | HNRNPF    | ENSG00000169813 |
| 10 | 43212770 | 43213122 | 43212946 | 11  | 17  | 5   | 3.519146518 | 0.00167472  | HNRNPF    | ENSG00000169813 |
| 10 | 43252295 | 43252536 | 43252415 | 8   | 11  | 2   | 4.692195357 | 0.00272444  | ZNF487    | ENSG00000180812 |
| 10 | 43669447 | 43669929 | 43669750 | 13  | 23  | 3   | 7.038293036 | 4.15E-06    | C10orf136 | ENSG00000204187 |
| 10 | 43728167 | 43728536 | 43728357 | 30  | 37  | 3   | 11.14396397 | 2.78E-10    | C10orf136 | ENSG00000204187 |
| 10 | 43989114 | 43989306 | 43989210 | 8   | 11  | 0   | 14.07658607 | 9.02E-05    | CXCL12    | ENSG00000107562 |
| 10 | 44116607 | 44116910 | 44116758 | 10  | 16  | 7   | 2.492728784 | 0.0124193   | CXCL12    | ENSG00000107562 |
| 10 | 44116938 | 44117335 | 44117159 | 9   | 15  | 4   | 3.753756286 | 0.0020497   | CXCL12    | ENSG00000107562 |
| 10 | 44154657 | 44154948 | 44154816 | 13  | 14  | 6   | 2.513676084 | 0.016726    | CXCL12    | ENSG00000107562 |
| 10 | 44250697 | 44250977 | 44250838 | 9   | 12  | 1   | 7.624817456 | 0.000332769 |           | ENSG00000218699 |
| 10 | 44479603 | 44479852 | 44479727 | 13  | 15  | 1   | 9.384390715 | 3.90E-05    |           | ENSG00000220202 |
| 10 | 44824204 | 44824414 | 44824262 | 8   | 9   | 8   | 1.303387599 | 0.281715    | C10orf25  | ENSG00000165511 |
| 10 | 45253624 | 45254569 | 45254013 | 248 | 345 | 0   | 405.8748984 | 2.37E-117   | 8-Mar     | ENSG00000165406 |
| 10 | 45286110 | 45286327 | 45286226 | 10  | 10  | 8   | 1.433726359 | 0.209175    | 8-Mar     | ENSG00000165406 |
| 10 | 46389477 | 46389760 | 46389618 | 9   | 12  | 2   | 5.083211637 | 0.00143337  | SYT15     | ENSG00000204176 |
| 10 | 46398449 | 46398675 | 46398560 | 8   | 11  | 0   | 14.07658607 | 9.02E-05    | SYT15     | ENSG00000204176 |

|    |          |          |          |     |     |    |             |             |          |                 |
|----|----------|----------|----------|-----|-----|----|-------------|-------------|----------|-----------------|
| 10 | 46403737 | 46404046 | 46403855 | 13  | 17  | 10 | 1.919534464 | 0.0400548   | GPRIN2   | ENSG00000204175 |
| 10 | 46477211 | 46477600 | 46477429 | 12  | 18  | 5  | 3.714654658 | 0.000961539 | PPYR1    | ENSG00000204174 |
| 10 | 46501068 | 46501284 | 46501240 | 10  | 12  | 8  | 1.694403879 | 0.107291    | PPYR1    | ENSG00000204174 |
| 10 | 47937824 | 47938003 | 47937885 | 8   | 8   | 3  | 2.639359888 | 0.0415794   | ZNF488   | ENSG00000165388 |
| 10 | 47952221 | 47952559 | 47952394 | 20  | 23  | 4  | 5.630634429 | 1.63E-05    | ZNF488   | ENSG00000165388 |
| 10 | 47952804 | 47953077 | 47952932 | 17  | 19  | 1  | 11.73048839 | 2.14E-06    | ZNF488   | ENSG00000165388 |
| 10 | 47954437 | 47954654 | 47954564 | 8   | 10  | 5  | 2.150589539 | 0.0575848   | ZNF488   | ENSG00000165388 |
| 10 | 47962576 | 47963317 | 47962930 | 121 | 161 | 6  | 27.14770171 | 1.81E-46    | ZNF488   | ENSG00000165388 |
| 10 | 47981553 | 47981775 | 47981660 | 11  | 11  | 2  | 4.692195357 | 0.00272444  | ZNF488   | ENSG00000165388 |
| 10 | 48104535 | 48104748 | 48104641 | 9   | 11  | 2  | 4.692195357 | 0.00272444  |          | ENSG00000221361 |
| 10 | 49129300 | 49130321 | 49129801 | 69  | 120 | 9  | 14.19389096 | 1.50E-30    | FRMPD2   | ENSG00000170324 |
| 10 | 49165957 | 49166418 | 49166159 | 21  | 30  | 3  | 9.091128505 | 3.63E-08    |          | ENSG00000217494 |
| 10 | 49295345 | 49295822 | 49295616 | 101 | 122 | 5  | 24.04750121 | 4.36E-35    | MAPK8    | ENSG00000107643 |
| 10 | 49354462 | 49354815 | 49354638 | 14  | 19  | 1  | 11.73048839 | 2.14E-06    | ARHGAP22 | ENSG00000128805 |
| 10 | 49467505 | 49467848 | 49467676 | 25  | 28  | 1  | 17.00920817 | 2.80E-09    | ARHGAP22 | ENSG00000128805 |
| 10 | 49495631 | 49495829 | 49495735 | 8   | 8   | 3  | 2.639359888 | 0.0415794   | ARHGAP22 | ENSG00000128805 |
| 10 | 49605268 | 49605471 | 49605429 | 9   | 9   | 2  | 3.910162798 | 0.00955088  | WDFY4    | ENSG00000128815 |
| 10 | 49666653 | 49666910 | 49666781 | 13  | 14  | 3  | 4.398933147 | 0.00132748  | WDFY4    | ENSG00000128815 |
| 10 | 49826661 | 49827103 | 49826853 | 31  | 42  | 3  | 12.61027502 | 8.12E-12    | LRRC18   | ENSG00000165383 |
| 10 | 50285715 | 50286016 | 50285846 | 8   | 8   | 2  | 3.519146518 | 0.017558    | DRGX     | ENSG00000165606 |
| 10 | 50297109 | 50297388 | 50297248 | 19  | 23  | 3  | 7.038293036 | 4.15E-06    | DRGX     | ENSG00000165606 |
| 10 | 50485003 | 50485299 | 50485153 | 10  | 14  | 3  | 4.398933147 | 0.00132748  | CHAT     | ENSG00000070748 |
| 10 | 51751874 | 51752146 | 51752003 | 8   | 10  | 1  | 6.451768616 | 0.00135978  |          | ENSG00000217121 |
| 10 | 51851067 | 51851275 | 51851166 | 8   | 8   | 0  | 10.55743955 | 0.000925496 |          | ENSG00000217121 |
| 10 | 51901410 | 51901665 | 51901537 | 10  | 11  | 3  | 3.519146518 | 0.00788869  |          | ENSG00000209947 |
| 10 | 52051670 | 52052119 | 52051809 | 11  | 17  | 1  | 10.55743955 | 9.18E-06    | SGMS1    | ENSG00000198964 |
| 10 | 52054233 | 52054570 | 52054401 | 10  | 15  | 6  | 2.68125449  | 0.0103552   | SGMS1    | ENSG00000198964 |
| 10 | 53129351 | 53129543 | 53129465 | 8   | 8   | 1  | 5.278719777 | 0.00542188  | CSTF2T   | ENSG00000177613 |
| 10 | 53743400 | 53743693 | 53743546 | 12  | 16  | 6  | 2.848832895 | 0.00632407  | DKK1     | ENSG00000107984 |
| 10 | 53743983 | 53744410 | 53744162 | 8   | 17  | 5  | 3.519146518 | 0.00167472  | DKK1     | ENSG00000107984 |
| 10 | 53873189 | 53873819 | 53873416 | 40  | 65  | 6  | 11.06017477 | 2.37E-16    |          | ENSG00000216209 |
| 10 | 53881672 | 53881867 | 53881752 | 8   | 8   | 1  | 5.278719777 | 0.00542188  |          | ENSG00000216209 |
| 10 | 53902119 | 53902415 | 53902248 | 19  | 21  | 4  | 5.161414893 | 5.68E-05    |          | ENSG00000216209 |
| 10 | 54171650 | 54172048 | 54171823 | 14  | 21  | 0  | 25.80707446 | 3.84E-08    | MBL2     | ENSG00000165471 |

|    |          |          |          |     |     |   |             |             |           |                 |
|----|----------|----------|----------|-----|-----|---|-------------|-------------|-----------|-----------------|
| 10 | 54209980 | 54210243 | 54210135 | 10  | 13  | 2 | 5.474227917 | 0.000747844 | MBL2      | ENSG00000165471 |
| 10 | 55049473 | 55049894 | 55049661 | 70  | 85  | 2 | 33.62740006 | 1.17E-26    |           | ENSG00000217935 |
| 10 | 57061050 | 57061252 | 57061152 | 8   | 9   | 1 | 5.865244197 | 0.00272497  | PCDH15    | ENSG00000150275 |
| 10 | 58013098 | 58013449 | 58013273 | 14  | 19  | 0 | 23.46097679 | 1.81E-07    | ZWINT     | ENSG00000122952 |
| 10 | 58175317 | 58175541 | 58175464 | 14  | 15  | 1 | 9.384390715 | 3.90E-05    | ZWINT     | ENSG00000122952 |
| 10 | 58648094 | 58648423 | 58648258 | 11  | 14  | 2 | 5.865244197 | 0.000387308 |           | ENSG00000218583 |
| 10 | 59053864 | 59054201 | 59054077 | 15  | 20  | 0 | 24.63402563 | 8.35E-08    |           | ENSG00000218583 |
| 10 | 59619089 | 59619461 | 59619275 | 21  | 29  | 4 | 7.038293036 | 3.41E-07    |           | ENSG00000180221 |
| 10 | 59698490 | 59699024 | 59698666 | 10  | 20  | 5 | 4.105670938 | 0.000308509 | CISD1     | ENSG00000122873 |
| 10 | 60211682 | 60211928 | 60211769 | 8   | 9   | 0 | 11.73048839 | 0.000425898 | BICC1     | ENSG00000122870 |
| 10 | 60766948 | 60767415 | 60767175 | 89  | 106 | 3 | 31.37905645 | 2.98E-32    | FAM13C1   | ENSG00000148541 |
| 10 | 61025306 | 61025544 | 61025435 | 9   | 11  | 1 | 7.038293036 | 0.000674435 |           | ENSG00000219119 |
| 10 | 61336261 | 61336887 | 61336418 | 10  | 24  | 4 | 5.865244197 | 8.64E-06    | CCDC6     | ENSG00000108091 |
| 10 | 61395162 | 61395707 | 61395350 | 74  | 96  | 6 | 16.25510534 | 7.52E-26    | CCDC6     | ENSG00000108091 |
| 10 | 61396830 | 61397282 | 61397026 | 20  | 29  | 4 | 7.038293036 | 3.41E-07    | CCDC6     | ENSG00000108091 |
| 10 | 61462576 | 61462834 | 61462705 | 11  | 13  | 6 | 2.346097679 | 0.0266147   | ANK3      | ENSG00000151150 |
| 10 | 61478016 | 61478219 | 61478143 | 9   | 9   | 3 | 2.932622098 | 0.0242899   | ANK3      | ENSG00000151150 |
| 10 | 61605171 | 61605370 | 61605229 | 8   | 11  | 2 | 4.692195357 | 0.00272444  | ANK3      | ENSG00000151150 |
| 10 | 61654089 | 61654285 | 61654152 | 8   | 8   | 2 | 3.519146518 | 0.017558    | ANK3      | ENSG00000151150 |
| 10 | 61712628 | 61712825 | 61712726 | 8   | 9   | 4 | 2.346097679 | 0.050148    | ANK3      | ENSG00000151150 |
| 10 | 61844530 | 61844737 | 61844633 | 8   | 9   | 2 | 3.910162798 | 0.00955088  | ANK3      | ENSG00000151150 |
| 10 | 61858450 | 61858788 | 61858619 | 12  | 16  | 2 | 6.647276756 | 0.000101928 | ANK3      | ENSG00000151150 |
| 10 | 61917862 | 61918243 | 61918047 | 57  | 65  | 0 | 77.42122339 | 5.67E-23    | ANK3      | ENSG00000151150 |
| 10 | 61924721 | 61924973 | 61924842 | 9   | 12  | 0 | 15.24963491 | 4.15E-05    | ANK3      | ENSG00000151150 |
| 10 | 62187194 | 62187653 | 62187488 | 16  | 25  | 1 | 15.24963491 | 2.59E-08    | CDC2      | ENSG00000170312 |
| 10 | 62190407 | 62190964 | 62190653 | 193 | 232 | 4 | 54.66407591 | 3.21E-72    | CDC2      | ENSG00000170312 |
| 10 | 62207829 | 62208326 | 62208103 | 9   | 20  | 8 | 2.737113958 | 0.0036449   | CDC2      | ENSG00000170312 |
| 10 | 62239986 | 62240173 | 62240058 | 8   | 8   | 7 | 1.319679944 | 0.283403    | CDC2      | ENSG00000170312 |
| 10 | 62278501 | 62278707 | 62278604 | 8   | 10  | 4 | 2.580707446 | 0.0306059   |           | ENSG00000223107 |
| 10 | 62312914 | 62313109 | 62312994 | 10  | 11  | 0 | 14.07658607 | 9.02E-05    |           | ENSG00000223107 |
| 10 | 63180700 | 63181024 | 63180860 | 8   | 11  | 1 | 7.038293036 | 0.000674435 | C10orf107 | ENSG00000183346 |
| 10 | 63252786 | 63252993 | 63252879 | 9   | 9   | 2 | 3.910162798 | 0.00955088  | ARID5B    | ENSG00000150347 |
| 10 | 63264384 | 63264614 | 63264468 | 11  | 13  | 6 | 2.346097679 | 0.0266147   | ARID5B    | ENSG00000150347 |
| 10 | 63353295 | 63353475 | 63353385 | 8   | 8   | 1 | 5.278719777 | 0.00542188  |           | ENSG00000221272 |

|    |          |          |          |    |    |    |             |             |         |                 |
|----|----------|----------|----------|----|----|----|-------------|-------------|---------|-----------------|
| 10 | 63441326 | 63441569 | 63441447 | 10 | 13 | 4  | 3.28453675  | 0.00629037  | ARID5B  | ENSG00000150347 |
| 10 | 63478689 | 63479278 | 63479104 | 11 | 24 | 3  | 7.331555246 | 2.13E-06    | ARID5B  | ENSG00000150347 |
| 10 | 63542110 | 63542461 | 63542285 | 16 | 20 | 10 | 2.239456875 | 0.0121685   |         | ENSG00000221094 |
| 10 | 63766210 | 63766546 | 63766378 | 13 | 17 | 0  | 21.11487911 | 8.57E-07    |         | ENSG00000223151 |
| 10 | 64067356 | 64067540 | 64067448 | 8  | 9  | 0  | 11.73048839 | 0.000425898 | ZNF365  | ENSG00000138311 |
| 10 | 64234310 | 64234613 | 64234461 | 9  | 11 | 6  | 2.010940867 | 0.0640214   | ADO     | ENSG00000181915 |
| 10 | 65059138 | 65059450 | 65059294 | 12 | 15 | 4  | 3.753756286 | 0.0020497   |         | ENSG00000220039 |
| 10 | 65063547 | 65063816 | 65063672 | 10 | 11 | 2  | 4.692195357 | 0.00272444  |         | ENSG00000220039 |
| 10 | 65142040 | 65142351 | 65142210 | 9  | 13 | 1  | 8.211341875 | 0.000163445 |         | ENSG00000220039 |
| 10 | 65296284 | 65296489 | 65296416 | 10 | 10 | 2  | 4.301179077 | 0.00512919  |         | ENSG00000213609 |
| 10 | 65302451 | 65302655 | 65302511 | 8  | 8  | 0  | 10.55743955 | 0.000925496 |         | ENSG00000213609 |
| 10 | 65471036 | 65471262 | 65471158 | 9  | 10 | 2  | 4.301179077 | 0.00512919  |         | ENSG00000217682 |
| 10 | 66788381 | 66788590 | 66788529 | 8  | 9  | 0  | 11.73048839 | 0.000425898 |         | ENSG00000219519 |
| 10 | 66849038 | 66849456 | 66849241 | 62 | 78 | 1  | 46.33542915 | 1.03E-25    |         | ENSG00000219519 |
| 10 | 67045135 | 67045420 | 67045267 | 11 | 13 | 1  | 8.211341875 | 0.000163445 |         | ENSG00000219519 |
| 10 | 69193883 | 69194437 | 69194245 | 10 | 23 | 9  | 2.815317214 | 0.00172056  |         | ENSG00000213606 |
| 10 | 69279258 | 69279465 | 69279346 | 8  | 10 | 1  | 6.451768616 | 0.00135978  | DNAJC12 | ENSG00000108176 |
| 10 | 69504805 | 69504986 | 69504890 | 8  | 9  | 2  | 3.910162798 | 0.00955088  | HERC4   | ENSG00000148634 |
| 10 | 69583299 | 69583546 | 69583422 | 9  | 12 | 4  | 3.049926982 | 0.0108184   |         | ENSG00000222371 |
| 10 | 69583549 | 69583790 | 69583669 | 16 | 17 | 7  | 2.639359888 | 0.00777415  |         | ENSG00000222371 |
| 10 | 69761562 | 69762122 | 69761916 | 12 | 26 | 5  | 5.278719777 | 8.57E-06    | HNRNPH3 | ENSG00000096746 |
| 10 | 69989836 | 69990033 | 69989954 | 8  | 8  | 1  | 5.278719777 | 0.00542188  | TET1    | ENSG00000138336 |
| 10 | 70150759 | 70150978 | 70150909 | 8  | 9  | 0  | 11.73048839 | 0.000425898 | CCAR1   | ENSG00000060339 |
| 10 | 70331060 | 70331239 | 70331149 | 8  | 8  | 1  | 5.278719777 | 0.00542188  | DDX50   | ENSG00000107625 |
| 10 | 70609648 | 70609857 | 70609762 | 9  | 10 | 4  | 2.580707446 | 0.0306059   | SUPV3L1 | ENSG00000156502 |
| 10 | 70643554 | 70643782 | 70643656 | 15 | 15 | 2  | 6.256260476 | 0.000199274 | HKDC1   | ENSG00000156510 |
| 10 | 70763021 | 70763384 | 70763200 | 24 | 31 | 8  | 4.170840318 | 1.13E-05    | HK1     | ENSG00000156515 |
| 10 | 70822256 | 70822531 | 70822405 | 15 | 16 | 1  | 9.970915134 | 1.89E-05    | TACR2   | ENSG00000075073 |
| 10 | 70844002 | 70844195 | 70844109 | 8  | 8  | 0  | 10.55743955 | 0.000925496 | TACR2   | ENSG00000075073 |
| 10 | 70855648 | 70855890 | 70855769 | 11 | 14 | 3  | 4.398933147 | 0.00132748  |         | ENSG00000217700 |
| 10 | 70868434 | 70868679 | 70868565 | 10 | 11 | 2  | 4.692195357 | 0.00272444  |         | ENSG00000217700 |
| 10 | 70876465 | 70876966 | 70876656 | 10 | 19 | 12 | 1.804690522 | 0.0452624   | TSPAN15 | ENSG00000099282 |
| 10 | 70888474 | 70888819 | 70888646 | 12 | 17 | 4  | 4.222975822 | 0.000640773 | TSPAN15 | ENSG00000099282 |
| 10 | 71030793 | 71031051 | 71030906 | 8  | 11 | 0  | 14.07658607 | 9.02E-05    |         | ENSG00000220737 |

|    |          |          |          |     |     |   |             |             |           |                 |
|----|----------|----------|----------|-----|-----|---|-------------|-------------|-----------|-----------------|
| 10 | 71230924 | 71231234 | 71231079 | 8   | 9   | 1 | 5.865244197 | 0.00272497  | COL13A1   | ENSG00000197467 |
| 10 | 71482448 | 71482678 | 71482571 | 10  | 10  | 2 | 4.301179077 | 0.00512919  | H2AFY2    | ENSG00000099284 |
| 10 | 71549961 | 71550237 | 71550072 | 11  | 15  | 4 | 3.753756286 | 0.0020497   | AIFM2     | ENSG00000042286 |
| 10 | 71576391 | 71576886 | 71576615 | 14  | 28  | 5 | 5.669736057 | 2.48E-06    | TYSND1    | ENSG00000156521 |
| 10 | 71652211 | 71652459 | 71652358 | 13  | 17  | 3 | 5.278719777 | 0.000205462 | PPA1      | ENSG00000180817 |
| 10 | 71794144 | 71794540 | 71794381 | 13  | 19  | 2 | 7.820325595 | 1.32E-05    | LRRC20    | ENSG00000172731 |
| 10 | 72506801 | 72507057 | 72506936 | 9   | 11  | 3 | 3.519146518 | 0.00788869  | UNC5B     | ENSG00000107731 |
| 10 | 72643160 | 72643350 | 72643247 | 8   | 10  | 1 | 6.451768616 | 0.00135978  | UNC5B     | ENSG00000107731 |
| 10 | 72647249 | 72647476 | 72647351 | 13  | 14  | 0 | 17.59573259 | 8.79E-06    |           | ENSG00000216004 |
| 10 | 72730728 | 72730993 | 72730860 | 13  | 14  | 2 | 5.865244197 | 0.000387308 | SLC29A3   | ENSG00000198246 |
| 10 | 72769734 | 72770192 | 72770013 | 11  | 21  | 6 | 3.686724924 | 0.000453999 |           | ENSG00000210259 |
| 10 | 72942403 | 72943008 | 72942831 | 36  | 61  | 2 | 24.24300935 | 7.63E-19    | CDH23     | ENSG00000107736 |
| 10 | 73150770 | 73151043 | 73150912 | 17  | 19  | 1 | 11.73048839 | 2.14E-06    | C10orf105 | ENSG00000214688 |
| 10 | 73318746 | 73319076 | 73318860 | 9   | 13  | 2 | 5.474227917 | 0.000747844 | PSAP      | ENSG00000197746 |
| 10 | 73478383 | 73478611 | 73478494 | 8   | 10  | 9 | 1.290353723 | 0.279648    | SPOCK2    | ENSG00000107742 |
| 10 | 73563094 | 73563318 | 73563184 | 8   | 8   | 1 | 5.278719777 | 0.00542188  | SPOCK2    | ENSG00000107742 |
| 10 | 73645754 | 73646022 | 73645929 | 10  | 12  | 3 | 3.812408728 | 0.004404    | C10orf104 | ENSG00000166295 |
| 10 | 73690446 | 73690631 | 73690529 | 9   | 9   | 0 | 11.73048839 | 0.000425898 | DDIT4     | ENSG00000168209 |
| 10 | 73700292 | 73700778 | 73700558 | 12  | 25  | 4 | 6.099853964 | 4.56E-06    | DDIT4     | ENSG00000168209 |
| 10 | 73703256 | 73703523 | 73703389 | 13  | 15  | 1 | 9.384390715 | 3.90E-05    | DDIT4     | ENSG00000168209 |
| 10 | 73703883 | 73704071 | 73703984 | 8   | 9   | 2 | 3.910162798 | 0.00955088  | DDIT4     | ENSG00000168209 |
| 10 | 73727654 | 73728604 | 73728129 | 142 | 214 | 5 | 42.03425008 | 6.50E-65    | DDIT4     | ENSG00000168209 |
| 10 | 73740448 | 73740718 | 73740599 | 9   | 10  | 3 | 3.225884308 | 0.0139466   | DDIT4     | ENSG00000168209 |
| 10 | 73761163 | 73762203 | 73761530 | 24  | 69  | 3 | 20.52835469 | 2.58E-20    | DNAJB12   | ENSG00000148719 |
| 10 | 73779078 | 73779440 | 73779239 | 10  | 15  | 1 | 9.384390715 | 3.90E-05    | DNAJB12   | ENSG00000148719 |
| 10 | 73784404 | 73784888 | 73784572 | 8   | 18  | 6 | 3.183989707 | 0.00227432  | DNAJB12   | ENSG00000148719 |
| 10 | 74547713 | 74547987 | 74547850 | 8   | 10  | 1 | 6.451768616 | 0.00135978  | NUDT13    | ENSG00000166321 |
| 10 | 74682121 | 74682657 | 74682436 | 18  | 32  | 2 | 12.90353723 | 1.37E-09    | MRPS16    | ENSG00000182180 |
| 10 | 74959233 | 74959415 | 74959324 | 8   | 8   | 3 | 2.639359888 | 0.0415794   |           | ENSG00000207327 |
| 10 | 75173860 | 75174264 | 75174039 | 11  | 18  | 8 | 2.476436439 | 0.00924552  | SEC24C    | ENSG00000176986 |
| 10 | 75215071 | 75215287 | 75215122 | 10  | 11  | 2 | 4.692195357 | 0.00272444  | KIAA0913  | ENSG00000214655 |
| 10 | 75305873 | 75306156 | 75305993 | 11  | 14  | 1 | 8.797866295 | 8.00E-05    | CAMK2G    | ENSG00000148660 |
| 10 | 75315757 | 75316115 | 75315964 | 11  | 15  | 7 | 2.346097679 | 0.0195693   | CAMK2G    | ENSG00000148660 |
| 10 | 75317163 | 75318045 | 75317588 | 63  | 95  | 8 | 12.51252095 | 8.74E-24    | CAMK2G    | ENSG00000148660 |



|    |          |          |          |    |    |   |             |             |          |                 |
|----|----------|----------|----------|----|----|---|-------------|-------------|----------|-----------------|
| 10 | 75318229 | 75319096 | 75318489 | 26 | 62 | 6 | 10.55743955 | 1.87E-15    | CAMK2G   | ENSG00000148660 |
| 10 | 75349806 | 75350145 | 75349912 | 13 | 17 | 0 | 21.11487911 | 8.57E-07    | C10orf55 | ENSG00000222047 |
| 10 | 75487957 | 75488194 | 75488106 | 9  | 10 | 0 | 12.90353723 | 0.000195991 | VCL      | ENSG00000035403 |
| 10 | 75619841 | 75620115 | 75619981 | 14 | 15 | 1 | 9.384390715 | 3.90E-05    | ADK      | ENSG00000156110 |
| 10 | 75623276 | 75623467 | 75623413 | 9  | 9  | 1 | 5.865244197 | 0.00272497  | ADK      | ENSG00000156110 |
| 10 | 75636479 | 75636734 | 75636658 | 12 | 14 | 1 | 8.797866295 | 8.00E-05    | ADK      | ENSG00000156110 |
| 10 | 76043290 | 76043496 | 76043382 | 8  | 8  | 3 | 2.639359888 | 0.0415794   |          | ENSG00000214626 |
| 10 | 76251384 | 76251627 | 76251505 | 11 | 12 | 2 | 5.083211637 | 0.00143337  | MYST4    | ENSG00000156650 |
| 10 | 76509559 | 76509897 | 76509737 | 17 | 20 | 0 | 24.63402563 | 8.35E-08    |          | ENSG00000217937 |
| 10 | 76639757 | 76639999 | 76639878 | 8  | 11 | 6 | 2.010940867 | 0.0640214   | VDAC2    | ENSG00000165637 |
| 10 | 76665736 | 76666074 | 76665954 | 8  | 13 | 0 | 16.42268375 | 1.91E-05    | COMTD1   | ENSG00000165644 |
| 10 | 76833124 | 76833344 | 76833284 | 8  | 10 | 1 | 6.451768616 | 0.00135978  | ZNF503   | ENSG00000165655 |
| 10 | 76839124 | 76839339 | 76839221 | 9  | 9  | 1 | 5.865244197 | 0.00272497  | ZNF503   | ENSG00000165655 |
| 10 | 77466259 | 77466500 | 77466373 | 10 | 12 | 1 | 7.624817456 | 0.000332769 |          | ENSG00000221232 |
| 10 | 77542490 | 77542782 | 77542632 | 13 | 15 | 8 | 2.085420159 | 0.0338693   |          | ENSG00000221232 |
| 10 | 77544459 | 77544784 | 77544621 | 11 | 14 | 0 | 17.59573259 | 8.79E-06    |          | ENSG00000221232 |
| 10 | 78595497 | 78595876 | 78595745 | 11 | 16 | 3 | 4.985457567 | 0.000385643 | KCNMA1   | ENSG00000156113 |
| 10 | 78820296 | 78820484 | 78820390 | 9  | 9  | 0 | 11.73048839 | 0.000425898 | KCNMA1   | ENSG00000156113 |
| 10 | 78822859 | 78823062 | 78822964 | 8  | 9  | 3 | 2.932622098 | 0.0242899   | KCNMA1   | ENSG00000156113 |
| 10 | 78835552 | 78835755 | 78835682 | 9  | 12 | 4 | 3.049926982 | 0.0108184   | KCNMA1   | ENSG00000156113 |
| 10 | 78840368 | 78840635 | 78840501 | 9  | 10 | 3 | 3.225884308 | 0.0139466   | KCNMA1   | ENSG00000156113 |
| 10 | 78885729 | 78885971 | 78885861 | 8  | 9  | 3 | 2.932622098 | 0.0242899   |          | ENSG00000216801 |
| 10 | 78891399 | 78891769 | 78891552 | 11 | 17 | 0 | 21.11487911 | 8.57E-07    |          | ENSG00000216801 |
| 10 | 78950013 | 78950351 | 78950182 | 12 | 16 | 0 | 19.94183027 | 1.86E-06    |          | ENSG00000199592 |
| 10 | 78963754 | 78963994 | 78963874 | 11 | 13 | 1 | 8.211341875 | 0.000163445 |          | ENSG00000199592 |
| 10 | 78968999 | 78969219 | 78969139 | 13 | 13 | 1 | 8.211341875 | 0.000163445 |          | ENSG00000199592 |
| 10 | 79012449 | 79012739 | 79012593 | 13 | 15 | 3 | 4.692195357 | 0.000718455 |          | ENSG00000199592 |
| 10 | 79036542 | 79036934 | 79036755 | 17 | 24 | 9 | 2.932622098 | 0.00106136  |          | ENSG00000199592 |
| 10 | 79071635 | 79071927 | 79071766 | 13 | 15 | 5 | 3.128130238 | 0.00492422  | KCNMA1   | ENSG00000156113 |
| 10 | 79089087 | 79089416 | 79089237 | 9  | 13 | 1 | 8.211341875 | 0.000163445 | KCNMA1   | ENSG00000156113 |
| 10 | 79328533 | 79328883 | 79328708 | 8  | 14 | 1 | 8.797866295 | 8.00E-05    |          | ENSG00000210457 |
| 10 | 79464072 | 79464251 | 79464127 | 8  | 8  | 0 | 10.55743955 | 0.000925496 | RPS24    | ENSG00000138326 |
| 10 | 79845807 | 79846025 | 79845916 | 8  | 10 | 3 | 3.225884308 | 0.0139466   |          | ENSG00000201393 |
| 10 | 79888719 | 79889067 | 79888893 | 15 | 20 | 2 | 8.211341875 | 6.65E-06    |          | ENSG00000201393 |

|    |          |          |          |    |    |    |             |             |          |                 |
|----|----------|----------|----------|----|----|----|-------------|-------------|----------|-----------------|
| 10 | 80349749 | 80350194 | 80349989 | 30 | 44 | 5  | 8.797866295 | 7.25E-11    | ZMIZ1    | ENSG00000108175 |
| 10 | 80356885 | 80357350 | 80357171 | 10 | 18 | 6  | 3.183989707 | 0.00227432  | ZMIZ1    | ENSG00000108175 |
| 10 | 80377570 | 80377883 | 80377739 | 14 | 18 | 1  | 11.14396397 | 4.44E-06    | ZMIZ1    | ENSG00000108175 |
| 10 | 80391329 | 80391508 | 80391418 | 8  | 8  | 0  | 10.55743955 | 0.000925496 | ZMIZ1    | ENSG00000108175 |
| 10 | 80482540 | 80482778 | 80482668 | 11 | 12 | 1  | 7.624817456 | 0.000332769 | ZMIZ1    | ENSG00000108175 |
| 10 | 80496236 | 80496427 | 80496327 | 8  | 8  | 2  | 3.519146518 | 0.017558    | ZMIZ1    | ENSG00000108175 |
| 10 | 80497083 | 80497426 | 80497211 | 10 | 14 | 1  | 8.797866295 | 8.00E-05    | ZMIZ1    | ENSG00000108175 |
| 10 | 80529691 | 80530063 | 80529889 | 23 | 27 | 0  | 32.8453675  | 3.65E-10    | ZMIZ1    | ENSG00000108175 |
| 10 | 80625219 | 80625497 | 80625366 | 11 | 15 | 2  | 6.256260476 | 0.000199274 | ZMIZ1    | ENSG00000108175 |
| 10 | 80665537 | 80665776 | 80665656 | 10 | 11 | 2  | 4.692195357 | 0.00272444  | ZMIZ1    | ENSG00000108175 |
| 10 | 80667509 | 80667975 | 80667698 | 29 | 43 | 6  | 7.373449847 | 6.53E-10    | ZMIZ1    | ENSG00000108175 |
| 10 | 80669927 | 80670168 | 80670053 | 9  | 10 | 6  | 1.843362462 | 0.0964212   | ZMIZ1    | ENSG00000108175 |
| 10 | 80690634 | 80690881 | 80690784 | 15 | 17 | 1  | 10.55743955 | 9.18E-06    | ZMIZ1    | ENSG00000108175 |
| 10 | 80694737 | 80695006 | 80694900 | 8  | 11 | 4  | 2.815317214 | 0.0183428   | ZMIZ1    | ENSG00000108175 |
| 10 | 81828628 | 81828934 | 81828781 | 9  | 14 | 10 | 1.599612054 | 0.114822    |          | ENSG00000133678 |
| 10 | 81850673 | 81851367 | 81850930 | 13 | 32 | 13 | 2.765043693 | 0.00036798  |          | ENSG00000133678 |
| 10 | 81908376 | 81908612 | 81908494 | 10 | 11 | 5  | 2.346097679 | 0.0364013   | PLAC9    | ENSG00000189129 |
| 10 | 81921097 | 81921344 | 81921193 | 9  | 11 | 7  | 1.759573259 | 0.102361    | ANXA11   | ENSG00000122359 |
| 10 | 82127947 | 82128191 | 82128069 | 15 | 15 | 1  | 9.384390715 | 3.90E-05    | DYDC2    | ENSG00000133665 |
| 10 | 82157956 | 82158218 | 82158047 | 8  | 9  | 3  | 2.932622098 | 0.0242899   | C10orf57 | ENSG00000122378 |
| 10 | 82179486 | 82179756 | 82179628 | 17 | 19 | 0  | 23.46097679 | 1.81E-07    | C10orf57 | ENSG00000122378 |
| 10 | 82186145 | 82186546 | 82186324 | 18 | 26 | 8  | 3.519146518 | 0.000175368 | C10orf57 | ENSG00000122378 |
| 10 | 82210427 | 82210763 | 82210598 | 19 | 24 | 5  | 4.887703497 | 2.90E-05    | TSPAN14  | ENSG00000108219 |
| 10 | 82220782 | 82221288 | 82220966 | 9  | 21 | 2  | 8.602358155 | 3.33E-06    | TSPAN14  | ENSG00000108219 |
| 10 | 82254239 | 82254492 | 82254331 | 8  | 10 | 4  | 2.580707446 | 0.0306059   | SH2D4B   | ENSG00000178217 |
| 10 | 82368756 | 82369209 | 82368985 | 36 | 51 | 2  | 20.33284655 | 1.28E-15    | SH2D4B   | ENSG00000178217 |
| 10 | 82413797 | 82414176 | 82414016 | 12 | 18 | 3  | 5.571981987 | 0.000108726 | SH2D4B   | ENSG00000178217 |
| 10 | 82497275 | 82497529 | 82497402 | 12 | 12 | 1  | 7.624817456 | 0.000332769 |          | ENSG00000217745 |
| 10 | 82555009 | 82555380 | 82555203 | 11 | 17 | 0  | 21.11487911 | 8.57E-07    |          | ENSG00000218551 |
| 10 | 82646232 | 82646714 | 82646405 | 13 | 22 | 6  | 3.854303329 | 0.000260696 |          | ENSG00000220859 |
| 10 | 82647231 | 82647465 | 82647348 | 9  | 9  | 3  | 2.932622098 | 0.0242899   |          | ENSG00000220859 |
| 10 | 82716008 | 82716327 | 82716164 | 19 | 21 | 10 | 2.346097679 | 0.00796926  |          | ENSG00000220859 |
| 10 | 82858401 | 82858849 | 82858580 | 14 | 23 | 2  | 9.384390715 | 8.25E-07    |          | ENSG00000219745 |
| 10 | 82927720 | 82928067 | 82927893 | 33 | 37 | 0  | 44.57585589 | 1.55E-13    |          | ENSG00000219745 |

|    |          |          |          |     |     |    |             |             |           |                 |
|----|----------|----------|----------|-----|-----|----|-------------|-------------|-----------|-----------------|
| 10 | 83057099 | 83057351 | 83057254 | 13  | 15  | 1  | 9.384390715 | 3.90E-05    |           | ENSG00000219745 |
| 10 | 83194006 | 83194370 | 83194184 | 31  | 37  | 2  | 14.85861863 | 3.69E-11    |           | ENSG00000219745 |
| 10 | 83647904 | 83648089 | 83647996 | 10  | 10  | 3  | 3.225884308 | 0.0139466   | NRG3      | ENSG00000185737 |
| 10 | 84213327 | 84213514 | 84213420 | 8   | 9   | 0  | 11.73048839 | 0.000425898 |           | ENSG00000207275 |
| 10 | 84442253 | 84442649 | 84442453 | 8   | 17  | 2  | 7.038293036 | 5.19E-05    |           | ENSG00000207275 |
| 10 | 84577013 | 84577206 | 84577127 | 12  | 12  | 0  | 15.24963491 | 4.15E-05    |           | ENSG00000200774 |
| 10 | 85733136 | 85733766 | 85733535 | 64  | 90  | 3  | 26.68686109 | 4.60E-27    |           | ENSG00000200789 |
| 10 | 85742230 | 85742439 | 85742302 | 9   | 10  | 1  | 6.451768616 | 0.00135978  |           | ENSG00000200789 |
| 10 | 85889155 | 85889390 | 85889282 | 13  | 13  | 6  | 2.346097679 | 0.0266147   | GHITM     | ENSG00000165678 |
| 10 | 85955395 | 85955679 | 85955537 | 8   | 10  | 2  | 4.301179077 | 0.00512919  | PCDH21    | ENSG00000148600 |
| 10 | 86179833 | 86180194 | 86179975 | 8   | 13  | 4  | 3.28453675  | 0.00629037  |           | ENSG00000216576 |
| 10 | 86273244 | 86273517 | 86273380 | 8   | 9   | 2  | 3.910162798 | 0.00955088  |           | ENSG00000178429 |
| 10 | 86274744 | 86275169 | 86274960 | 91  | 112 | 3  | 33.13862971 | 3.32E-34    |           | ENSG00000178429 |
| 10 | 87297840 | 87298315 | 87298049 | 31  | 45  | 2  | 17.98674887 | 1.07E-13    |           | ENSG00000210526 |
| 10 | 87441421 | 87441636 | 87441588 | 9   | 9   | 3  | 2.932622098 | 0.0242899   |           | ENSG00000216996 |
| 10 | 87484710 | 87485073 | 87485002 | 8   | 12  | 0  | 15.24963491 | 4.15E-05    |           | ENSG00000216996 |
| 10 | 87943983 | 87944336 | 87944159 | 13  | 17  | 2  | 7.038293036 | 5.19E-05    |           | ENSG00000199104 |
| 10 | 87969936 | 87970766 | 87970337 | 23  | 46  | 1  | 27.56664772 | 3.79E-15    |           | ENSG00000199104 |
| 10 | 88257263 | 88257501 | 88257382 | 12  | 12  | 4  | 3.049926982 | 0.0108184   | WAPAL     | ENSG00000062650 |
| 10 | 88306508 | 88306715 | 88306611 | 8   | 9   | 0  | 11.73048839 | 0.000425898 | WAPAL     | ENSG00000062650 |
| 10 | 88397595 | 88397786 | 88397686 | 9   | 9   | 2  | 3.910162798 | 0.00955088  | OPN4      | ENSG00000122375 |
| 10 | 88398747 | 88398940 | 88398908 | 8   | 10  | 0  | 12.90353723 | 0.000195991 | OPN4      | ENSG00000122375 |
| 10 | 88689170 | 88689419 | 88689294 | 8   | 10  | 3  | 3.225884308 | 0.0139466   | MMRN2     | ENSG00000173269 |
| 10 | 88718072 | 88718527 | 88718251 | 31  | 44  | 8  | 5.865244197 | 5.07E-09    | C10orf116 | ENSG00000148671 |
| 10 | 89592103 | 89592395 | 89592264 | 23  | 26  | 2  | 10.55743955 | 9.97E-08    |           | ENSG00000213478 |
| 10 | 89592607 | 89593262 | 89593016 | 137 | 168 | 5  | 33.04087564 | 6.40E-50    |           | ENSG00000213478 |
| 10 | 89611808 | 89612324 | 89612154 | 23  | 39  | 7  | 5.865244197 | 3.22E-08    | PTENP1    | ENSG00000171862 |
| 10 | 89612779 | 89613219 | 89613042 | 16  | 24  | 2  | 9.775406994 | 4.09E-07    | PTENP1    | ENSG00000171862 |
| 10 | 89728755 | 89729048 | 89728904 | 11  | 15  | 1  | 9.384390715 | 3.90E-05    |           | ENSG00000200891 |
| 10 | 89881409 | 89882290 | 89881826 | 12  | 37  | 11 | 3.714654658 | 6.69E-06    |           | ENSG00000216533 |
| 10 | 89902483 | 89902724 | 89902609 | 9   | 11  | 5  | 2.346097679 | 0.0364013   |           | ENSG00000216533 |
| 10 | 90003878 | 90004081 | 90003990 | 10  | 11  | 7  | 1.759573259 | 0.102361    |           | ENSG00000216533 |
| 10 | 90010382 | 90010802 | 90010592 | 15  | 23  | 2  | 9.384390715 | 8.25E-07    |           | ENSG00000216533 |
| 10 | 90332945 | 90333188 | 90333122 | 9   | 12  | 2  | 5.083211637 | 0.00143337  | C10orf59  | ENSG00000184719 |

|    |          |          |          |    |     |    |             |             |         |                 |
|----|----------|----------|----------|----|-----|----|-------------|-------------|---------|-----------------|
| 10 | 90453084 | 90453347 | 90453215 | 8  | 12  | 3  | 3.812408728 | 0.004404    | LIPK    | ENSG00000204021 |
| 10 | 90601480 | 90601773 | 90601627 | 9  | 12  | 5  | 2.541605819 | 0.0225912   | ANKRD22 | ENSG00000152766 |
| 10 | 90740371 | 90740710 | 90740540 | 14 | 18  | 4  | 4.457585589 | 0.000353565 | FAS     | ENSG00000026103 |
| 10 | 90740809 | 90741482 | 90741068 | 86 | 118 | 1  | 69.79640594 | 5.05E-39    | FAS     | ENSG00000026103 |
| 10 | 90991589 | 90991769 | 90991634 | 8  | 9   | 0  | 11.73048839 | 0.000425898 | LIPA    | ENSG00000107798 |
| 10 | 91394882 | 91395293 | 91395061 | 21 | 30  | 2  | 12.12150467 | 5.77E-09    | PANK1   | ENSG00000152782 |
| 10 | 91801359 | 91801704 | 91801531 | 15 | 20  | 1  | 12.31701281 | 1.03E-06    |         | ENSG00000148667 |
| 10 | 92342680 | 92342901 | 92342751 | 8  | 9   | 1  | 5.865244197 | 0.00272497  |         | ENSG00000197911 |
| 10 | 92629503 | 92629766 | 92629651 | 8  | 8   | 0  | 10.55743955 | 0.000925496 |         | ENSG00000210652 |
| 10 | 92727010 | 92727492 | 92727315 | 23 | 32  | 2  | 12.90353723 | 1.37E-09    |         | ENSG00000201604 |
| 10 | 92987991 | 92988327 | 92988167 | 12 | 16  | 1  | 9.970915134 | 1.89E-05    | PCGF5   | ENSG00000180628 |
| 10 | 93305215 | 93305401 | 93305308 | 8  | 8   | 1  | 5.278719777 | 0.00542188  | RPS27P1 | ENSG00000218952 |
| 10 | 93306329 | 93306695 | 93306522 | 9  | 13  | 6  | 2.346097679 | 0.0266147   | RPS27P1 | ENSG00000218952 |
| 10 | 93339132 | 93339363 | 93339213 | 10 | 13  | 1  | 8.211341875 | 0.000163445 | PPP1R3C | ENSG00000119938 |
| 10 | 93547870 | 93548152 | 93548011 | 8  | 10  | 1  | 6.451768616 | 0.00135978  | TNKS2   | ENSG00000107854 |
| 10 | 93630177 | 93630662 | 93630493 | 10 | 19  | 2  | 7.820325595 | 1.32E-05    | FGFBP3  | ENSG00000174721 |
| 10 | 93837495 | 93837730 | 93837612 | 10 | 11  | 9  | 1.407658607 | 0.210479    |         | ENSG00000214549 |
| 10 | 94040745 | 94040954 | 94040846 | 9  | 9   | 1  | 5.865244197 | 0.00272497  | CPEB3   | ENSG00000107864 |
| 10 | 94160552 | 94160801 | 94160686 | 9  | 11  | 0  | 14.07658607 | 9.02E-05    |         | ENSG00000220795 |
| 10 | 94324224 | 94324459 | 94324358 | 11 | 11  | 2  | 4.692195357 | 0.00272444  | IDE     | ENSG00000119912 |
| 10 | 94341224 | 94341592 | 94341326 | 8  | 14  | 5  | 2.932622098 | 0.00829617  | KIF11   | ENSG00000138160 |
| 10 | 94887833 | 94888286 | 94888033 | 53 | 67  | 2  | 26.58910702 | 8.66E-21    |         | ENSG00000218488 |
| 10 | 94932451 | 94932659 | 94932555 | 9  | 9   | 0  | 11.73048839 | 0.000425898 |         | ENSG00000218607 |
| 10 | 94993808 | 94994035 | 94993902 | 8  | 8   | 3  | 2.639359888 | 0.0415794   |         | ENSG00000218607 |
| 10 | 95184772 | 95185250 | 95184947 | 25 | 33  | 5  | 6.647276756 | 1.04E-07    | FER1L3  | ENSG00000138119 |
| 10 | 95188543 | 95188954 | 95188776 | 14 | 20  | 8  | 2.737113958 | 0.0036449   | FER1L3  | ENSG00000138119 |
| 10 | 95190535 | 95190850 | 95190673 | 10 | 12  | 9  | 1.524963491 | 0.154777    | FER1L3  | ENSG00000138119 |
| 10 | 95195100 | 95195599 | 95195276 | 10 | 20  | 13 | 1.759573259 | 0.0475388   | FER1L3  | ENSG00000138119 |
| 10 | 95208607 | 95208794 | 95208734 | 9  | 10  | 1  | 6.451768616 | 0.00135978  | FER1L3  | ENSG00000138119 |
| 10 | 95215514 | 95216230 | 95215787 | 17 | 45  | 7  | 6.745030826 | 7.35E-10    | FER1L3  | ENSG00000138119 |
| 10 | 95231888 | 95232469 | 95232186 | 10 | 24  | 4  | 5.865244197 | 8.64E-06    | FER1L3  | ENSG00000138119 |
| 10 | 95452207 | 95452566 | 95452389 | 18 | 24  | 6  | 4.18946014  | 8.40E-05    | C10orf4 | ENSG00000148690 |
| 10 | 95512921 | 95513181 | 95513022 | 21 | 23  | 4  | 5.630634429 | 1.63E-05    | LGI1    | ENSG00000108231 |
| 10 | 96112675 | 96112927 | 96112804 | 9  | 10  | 3  | 3.225884308 | 0.0139466   | NOC3L   | ENSG00000173145 |

|    |          |          |          |     |     |    |             |             |          |                 |
|----|----------|----------|----------|-----|-----|----|-------------|-------------|----------|-----------------|
| 10 | 96151864 | 96152129 | 96152029 | 12  | 14  | 2  | 5.865244197 | 0.000387308 | TBC1D12  | ENSG00000108239 |
| 10 | 96336022 | 96336207 | 96336114 | 9   | 9   | 0  | 11.73048839 | 0.000425898 | HELLS    | ENSG00000119969 |
| 10 | 96484395 | 96484709 | 96484569 | 13  | 17  | 2  | 7.038293036 | 5.19E-05    | CYP2C19  | ENSG00000165841 |
| 10 | 96882783 | 96883040 | 96882948 | 8   | 11  | 1  | 7.038293036 | 0.000674435 |          | ENSG00000219399 |
| 10 | 96933413 | 96933646 | 96933553 | 9   | 11  | 0  | 14.07658607 | 9.02E-05    |          | ENSG00000219399 |
| 10 | 97044731 | 97045384 | 97044998 | 36  | 64  | 2  | 25.41605819 | 8.14E-20    | PDLIM1   | ENSG00000107438 |
| 10 | 97088803 | 97089339 | 97089080 | 21  | 39  | 1  | 23.46097679 | 7.43E-13    |          | ENSG00000210773 |
| 10 | 97262085 | 97262428 | 97262250 | 11  | 16  | 1  | 9.970915134 | 1.89E-05    | SORBS1   | ENSG00000095637 |
| 10 | 97443839 | 97444122 | 97443949 | 14  | 14  | 9  | 1.759573259 | 0.0786014   | TCTN3    | ENSG00000119977 |
| 10 | 97792922 | 97793124 | 97792998 | 8   | 8   | 1  | 5.278719777 | 0.00542188  | CCNJ     | ENSG00000107443 |
| 10 | 97879540 | 97879834 | 97879687 | 9   | 12  | 0  | 15.24963491 | 4.15E-05    | ZNF518A  | ENSG00000177853 |
| 10 | 97979291 | 97979573 | 97979432 | 8   | 11  | 10 | 1.279689643 | 0.277323    |          | ENSG00000216429 |
| 10 | 98021280 | 98021638 | 98021459 | 9   | 15  | 4  | 3.753756286 | 0.0020497   | BLNK     | ENSG00000095585 |
| 10 | 98084666 | 98084867 | 98084766 | 8   | 9   | 7  | 1.466311049 | 0.20706     | OPALIN   | ENSG00000197430 |
| 10 | 98390733 | 98390953 | 98390862 | 11  | 13  | 4  | 3.28453675  | 0.00629037  | PIK3AP1  | ENSG00000155629 |
| 10 | 98470624 | 98470815 | 98470666 | 8   | 8   | 2  | 3.519146518 | 0.017558    | PIK3AP1  | ENSG00000155629 |
| 10 | 98551323 | 98551672 | 98551497 | 9   | 14  | 15 | 1.099733287 | 0.398076    |          | ENSG00000207976 |
| 10 | 98613997 | 98614192 | 98614104 | 8   | 8   | 4  | 2.111487911 | 0.0804809   | LCOR     | ENSG00000196233 |
| 10 | 99041962 | 99042299 | 99042130 | 9   | 13  | 8  | 1.824742639 | 0.0744168   | ARHGAP19 | ENSG00000213390 |
| 10 | 99042422 | 99042634 | 99042528 | 8   | 11  | 3  | 3.519146518 | 0.00788869  | ARHGAP19 | ENSG00000213390 |
| 10 | 99077558 | 99077947 | 99077713 | 10  | 16  | 5  | 3.323638378 | 0.00288759  | FRAT2    | ENSG00000181274 |
| 10 | 99082606 | 99082864 | 99082777 | 12  | 15  | 4  | 3.753756286 | 0.0020497   | FRAT2    | ENSG00000181274 |
| 10 | 99087081 | 99087356 | 99087213 | 14  | 15  | 5  | 3.128130238 | 0.00492422  | FRAT2    | ENSG00000181274 |
| 10 | 99150997 | 99151238 | 99151139 | 8   | 10  | 0  | 12.90353723 | 0.000195991 | RRP12    | ENSG00000052749 |
| 10 | 99213470 | 99213653 | 99213561 | 10  | 10  | 1  | 6.451768616 | 0.00135978  | ZDHC16   | ENSG00000171307 |
| 10 | 99292963 | 99293248 | 99293093 | 9   | 10  | 5  | 2.150589539 | 0.0575848   | ANKRD2   | ENSG00000165887 |
| 10 | 99299692 | 99300170 | 99299931 | 114 | 143 | 4  | 33.78380657 | 4.83E-43    | ANKRD2   | ENSG00000165887 |
| 10 | 99303266 | 99303541 | 99303406 | 11  | 14  | 5  | 2.932622098 | 0.00829617  | ANKRD2   | ENSG00000165887 |
| 10 | 99316219 | 99316430 | 99316324 | 9   | 10  | 1  | 6.451768616 | 0.00135978  | ANKRD2   | ENSG00000165887 |
| 10 | 99321347 | 99321707 | 99321528 | 11  | 18  | 4  | 4.457585589 | 0.000353565 | ANKRD2   | ENSG00000165887 |
| 10 | 99322115 | 99322294 | 99322217 | 8   | 8   | 2  | 3.519146518 | 0.017558    | ANKRD2   | ENSG00000165887 |
| 10 | 99324507 | 99324806 | 99324656 | 10  | 15  | 3  | 4.692195357 | 0.000718455 | ANKRD2   | ENSG00000165887 |
| 10 | 99401411 | 99401915 | 99401696 | 93  | 128 | 2  | 50.44110009 | 8.29E-41    | PI4K2A   | ENSG00000043822 |
| 10 | 99426476 | 99426675 | 99426575 | 9   | 10  | 3  | 3.225884308 | 0.0139466   | AVPI1    | ENSG00000119986 |

|    |           |           |           |    |    |   |             |             |          |                 |
|----|-----------|-----------|-----------|----|----|---|-------------|-------------|----------|-----------------|
| 10 | 99433763  | 99433976  | 99433869  | 9  | 11 | 0 | 14.07658607 | 9.02E-05    | AVPI1    | ENSG00000119986 |
| 10 | 99437232  | 99437439  | 99437358  | 9  | 9  | 1 | 5.865244197 | 0.00272497  | AVPI1    | ENSG00000119986 |
| 10 | 99451230  | 99451800  | 99451314  | 9  | 21 | 1 | 12.90353723 | 4.95E-07    | MARVELD1 | ENSG00000155254 |
| 10 | 99486538  | 99486782  | 99486676  | 9  | 9  | 4 | 2.346097679 | 0.050148    | ZFYVE27  | ENSG00000155256 |
| 10 | 99756471  | 99756682  | 99756550  | 9  | 9  | 1 | 5.865244197 | 0.00272497  | CRTAC1   | ENSG00000095713 |
| 10 | 99795563  | 99795746  | 99795654  | 8  | 8  | 0 | 10.55743955 | 0.000925496 | CRTAC1   | ENSG00000095713 |
| 10 | 100015196 | 100015520 | 100015358 | 15 | 19 | 0 | 23.46097679 | 1.81E-07    | LOXL4    | ENSG00000138131 |
| 10 | 100081811 | 100082003 | 100081907 | 8  | 8  | 3 | 2.639359888 | 0.0415794   |          | ENSG00000221419 |
| 10 | 100126130 | 100126309 | 100126242 | 9  | 9  | 4 | 2.346097679 | 0.050148    |          | ENSG00000221419 |
| 10 | 100332102 | 100332376 | 100332236 | 14 | 15 | 2 | 6.256260476 | 0.000199274 | HPS1     | ENSG00000107521 |
| 10 | 100361680 | 100361863 | 100361748 | 9  | 9  | 2 | 3.910162798 | 0.00955088  | HPS1     | ENSG00000107521 |
| 10 | 100666600 | 100666859 | 100666766 | 11 | 12 | 3 | 3.812408728 | 0.004404    |          | ENSG00000217480 |
| 10 | 100757283 | 100757502 | 100757390 | 8  | 10 | 2 | 4.301179077 | 0.00512919  |          | ENSG00000217480 |
| 10 | 100757759 | 100758121 | 100757870 | 10 | 14 | 5 | 2.932622098 | 0.00829617  |          | ENSG00000217480 |
| 10 | 100758800 | 100759351 | 100759036 | 43 | 60 | 3 | 17.8889948  | 1.88E-17    |          | ENSG00000217480 |
| 10 | 101180896 | 101181223 | 101181055 | 9  | 10 | 3 | 3.225884308 | 0.0139466   | GOT1     | ENSG00000120053 |
| 10 | 101404567 | 101404940 | 101404746 | 18 | 25 | 2 | 10.16642327 | 2.02E-07    | ENTPD7   | ENSG00000198018 |
| 10 | 101481672 | 101481970 | 101481842 | 10 | 13 | 4 | 3.28453675  | 0.00629037  | COX15    | ENSG00000014919 |
| 10 | 101680661 | 101680867 | 101680764 | 10 | 11 | 3 | 3.519146518 | 0.00788869  | DNMBP    | ENSG00000107554 |
| 10 | 101770291 | 101770517 | 101770404 | 8  | 8  | 5 | 1.759573259 | 0.13508     |          | ENSG00000210837 |
| 10 | 101793159 | 101793481 | 101793318 | 42 | 46 | 1 | 27.56664772 | 3.79E-15    |          | ENSG00000210842 |
| 10 | 101935994 | 101936219 | 101936115 | 8  | 9  | 0 | 11.73048839 | 0.000425898 | ERLIN1   | ENSG00000107566 |
| 10 | 101979339 | 101979523 | 101979410 | 9  | 9  | 5 | 1.955081399 | 0.0892323   | CHUK     | ENSG00000213341 |
| 10 | 102017222 | 102017682 | 102017401 | 14 | 22 | 9 | 2.69801233  | 0.00276236  | CWF19L1  | ENSG00000095485 |
| 10 | 102035701 | 102036152 | 102035880 | 46 | 61 | 3 | 18.18225701 | 9.05E-18    | BLOC1S2  | ENSG00000196072 |
| 10 | 102036178 | 102036441 | 102036309 | 11 | 14 | 4 | 3.519146518 | 0.00361132  | BLOC1S2  | ENSG00000196072 |
| 10 | 102098531 | 102098719 | 102098619 | 8  | 9  | 6 | 1.675784056 | 0.141978    | SCD      | ENSG00000099194 |
| 10 | 102114619 | 102114920 | 102114769 | 9  | 14 | 3 | 4.398933147 | 0.00132748  | SCD      | ENSG00000099194 |
| 10 | 102123238 | 102123692 | 102123417 | 10 | 18 | 4 | 4.457585589 | 0.000353565 |          | ENSG00000212325 |
| 10 | 102183518 | 102183848 | 102183679 | 20 | 22 | 7 | 3.372515413 | 0.000629223 | WNT8B    | ENSG00000075290 |
| 10 | 102232353 | 102232542 | 102232447 | 8  | 8  | 1 | 5.278719777 | 0.00542188  | WNT8B    | ENSG00000075290 |
| 10 | 102406212 | 102406460 | 102406336 | 23 | 23 | 1 | 14.07658607 | 1.14E-07    | PAX2     | ENSG00000075891 |
| 10 | 102478864 | 102479105 | 102479008 | 9  | 10 | 2 | 4.301179077 | 0.00512919  | PAX2     | ENSG00000075891 |
| 10 | 102747432 | 102747684 | 102747540 | 8  | 11 | 2 | 4.692195357 | 0.00272444  | LZTS2    | ENSG00000107816 |

|    |           |           |           |    |    |    |             |             |          |                 |
|----|-----------|-----------|-----------|----|----|----|-------------|-------------|----------|-----------------|
| 10 | 102748089 | 102748273 | 102748181 | 8  | 9  | 6  | 1.675784056 | 0.141978    | LZTS2    | ENSG00000107816 |
| 10 | 102762686 | 102762878 | 102762782 | 11 | 12 | 4  | 3.049926982 | 0.0108184   | LZTS2    | ENSG00000107816 |
| 10 | 102782170 | 102782349 | 102782259 | 8  | 8  | 0  | 10.55743955 | 0.000925496 | SFXN3    | ENSG00000107819 |
| 10 | 102792919 | 102793114 | 102792964 | 8  | 9  | 1  | 5.865244197 | 0.00272497  | SFXN3    | ENSG00000107819 |
| 10 | 102810793 | 102810979 | 102810927 | 8  | 9  | 5  | 1.955081399 | 0.0892323   | KAZALD1  | ENSG00000107821 |
| 10 | 102815893 | 102816076 | 102815980 | 8  | 8  | 6  | 1.508205651 | 0.203852    | KAZALD1  | ENSG00000107821 |
| 10 | 102816403 | 102816602 | 102816530 | 9  | 11 | 0  | 14.07658607 | 9.02E-05    | KAZALD1  | ENSG00000107821 |
| 10 | 102845215 | 102845640 | 102845394 | 10 | 18 | 5  | 3.714654658 | 0.000961539 | KAZALD1  | ENSG00000107821 |
| 10 | 102891203 | 102891463 | 102891333 | 9  | 11 | 3  | 3.519146518 | 0.00788869  | TLX1     | ENSG00000107807 |
| 10 | 102971080 | 102971709 | 102971447 | 30 | 49 | 7  | 7.331555246 | 5.59E-11    | LBX1     | ENSG00000138136 |
| 10 | 103103519 | 103103781 | 103103614 | 11 | 13 | 7  | 2.052835469 | 0.046392    | BTRC     | ENSG00000166167 |
| 10 | 103308085 | 103308330 | 103308207 | 11 | 11 | 2  | 4.692195357 | 0.00272444  | POLL     | ENSG00000166169 |
| 10 | 103530771 | 103531192 | 103530950 | 13 | 20 | 3  | 6.158506406 | 2.99E-05    | NPM3     | ENSG00000107833 |
| 10 | 103580380 | 103580565 | 103580472 | 8  | 9  | 7  | 1.466311049 | 0.20706     | KCNIP2   | ENSG00000120049 |
| 10 | 103639518 | 103639714 | 103639619 | 8  | 8  | 2  | 3.519146518 | 0.017558    | KCNIP2   | ENSG00000120049 |
| 10 | 103639999 | 103640309 | 103640154 | 9  | 12 | 1  | 7.624817456 | 0.000332769 | KCNIP2   | ENSG00000120049 |
| 10 | 103805955 | 103806206 | 103806091 | 9  | 11 | 7  | 1.759573259 | 0.102361    | C10orf76 | ENSG00000120029 |
| 10 | 103822749 | 103822929 | 103822799 | 8  | 8  | 7  | 1.319679944 | 0.283403    | HPS6     | ENSG00000166189 |
| 10 | 103862937 | 103863160 | 103863048 | 9  | 10 | 0  | 12.90353723 | 0.000195991 | LDB1     | ENSG00000198728 |
| 10 | 103864677 | 103864871 | 103864774 | 8  | 9  | 4  | 2.346097679 | 0.050148    | LDB1     | ENSG00000198728 |
| 10 | 103882288 | 103882493 | 103882390 | 12 | 13 | 3  | 4.105670938 | 0.00243034  | PPRC1    | ENSG00000148840 |
| 10 | 103994987 | 103995218 | 103995079 | 10 | 10 | 5  | 2.150589539 | 0.0575848   | GBF1     | ENSG00000107862 |
| 10 | 104097043 | 104097245 | 104097144 | 8  | 9  | 0  | 11.73048839 | 0.000425898 | NFKB2    | ENSG00000077150 |
| 10 | 104153544 | 104153782 | 104153649 | 8  | 10 | 1  | 6.451768616 | 0.00135978  | NFKB2    | ENSG00000077150 |
| 10 | 104170567 | 104171087 | 104170731 | 10 | 19 | 8  | 2.606775198 | 0.00583935  | FBXL15   | ENSG00000107872 |
| 10 | 104172522 | 104172737 | 104172629 | 8  | 10 | 6  | 1.843362462 | 0.0964212   | FBXL15   | ENSG00000107872 |
| 10 | 104182253 | 104182570 | 104182411 | 19 | 23 | 11 | 2.346097679 | 0.00594236  | CUEDC2   | ENSG00000107874 |
| 10 | 104210857 | 104211179 | 104210996 | 9  | 13 | 4  | 3.28453675  | 0.00629037  | TMEM180  | ENSG00000138111 |
| 10 | 104252629 | 104252831 | 104252721 | 8  | 10 | 5  | 2.150589539 | 0.0575848   | ACTR1A   | ENSG00000138107 |
| 10 | 104391759 | 104391953 | 104391856 | 8  | 8  | 0  | 10.55743955 | 0.000925496 | TRIM8    | ENSG00000171206 |
| 10 | 104479108 | 104479289 | 104479218 | 8  | 8  | 3  | 2.639359888 | 0.0415794   | SFXN2    | ENSG00000156398 |
| 10 | 104519094 | 104519287 | 104519201 | 8  | 8  | 2  | 3.519146518 | 0.017558    | C10orf26 | ENSG00000166272 |
| 10 | 104519665 | 104519872 | 104519768 | 8  | 9  | 3  | 2.932622098 | 0.0242899   | C10orf26 | ENSG00000166272 |
| 10 | 104603929 | 104604161 | 104604055 | 9  | 10 | 5  | 2.150589539 | 0.0575848   | C10orf32 | ENSG00000166275 |

|    |           |           |           |    |    |    |             |             |                           |
|----|-----------|-----------|-----------|----|----|----|-------------|-------------|---------------------------|
| 10 | 104747776 | 104748000 | 104747888 | 13 | 13 | 3  | 4.105670938 | 0.00243034  | ENSG00000210987           |
| 10 | 104791953 | 104792365 | 104792186 | 25 | 32 | 1  | 19.35530585 | 1.42E-10    | ENSG00000210987           |
| 10 | 104982096 | 104982280 | 104982210 | 8  | 9  | 3  | 2.932622098 | 0.0242899   | ENSG00000213276           |
| 10 | 104990187 | 104990423 | 104990305 | 9  | 11 | 4  | 2.815317214 | 0.0183428   | ENSG00000213276           |
| 10 | 105117438 | 105117674 | 105117533 | 8  | 10 | 4  | 2.580707446 | 0.0306059   | TAF5 ENSG00000148835      |
| 10 | 105235543 | 105235854 | 105235687 | 12 | 15 | 4  | 3.753756286 | 0.0020497   | CALHM3 ENSG00000183128    |
| 10 | 105304531 | 105304711 | 105304671 | 8  | 8  | 3  | 2.639359888 | 0.0415794   | NEURL ENSG00000107954     |
| 10 | 105413568 | 105413853 | 105413688 | 11 | 13 | 1  | 8.211341875 | 0.000163445 | ENSG00000222503           |
| 10 | 105462631 | 105462931 | 105462780 | 8  | 11 | 1  | 7.038293036 | 0.000674435 | SH3PXD2A ENSG00000107957  |
| 10 | 105466077 | 105466329 | 105466181 | 8  | 10 | 2  | 4.301179077 | 0.00512919  | SH3PXD2A ENSG00000107957  |
| 10 | 105573987 | 105574349 | 105574189 | 25 | 31 | 2  | 12.51252095 | 2.82E-09    | SH3PXD2A ENSG00000107957  |
| 10 | 105629132 | 105629461 | 105629283 | 10 | 15 | 1  | 9.384390715 | 3.90E-05    | SH3PXD2A ENSG00000107957  |
| 10 | 105639982 | 105640264 | 105640142 | 15 | 18 | 8  | 2.476436439 | 0.00924552  | OBFC1 ENSG00000107960     |
| 10 | 105871256 | 105871642 | 105871493 | 9  | 15 | 5  | 3.128130238 | 0.00492422  | C10orf78 ENSG00000156384  |
| 10 | 106230567 | 106230857 | 106230699 | 8  | 11 | 5  | 2.346097679 | 0.0364013   | CCDC147 ENSG00000120051   |
| 10 | 106558892 | 106559292 | 106559117 | 17 | 26 | 0  | 31.67231866 | 7.93E-10    | SORCS3 ENSG00000156395    |
| 10 | 107701970 | 107702237 | 107702103 | 9  | 13 | 3  | 4.105670938 | 0.00243034  | ENSG00000213260           |
| 10 | 108189166 | 108189422 | 108189294 | 15 | 15 | 4  | 3.753756286 | 0.0020497   | ENSG00000213257           |
| 10 | 108301779 | 108301977 | 108301878 | 8  | 8  | 1  | 5.278719777 | 0.00542188  | ENSG00000213257           |
| 10 | 109789578 | 109789958 | 109789754 | 26 | 32 | 2  | 12.90353723 | 1.37E-09    | ENSG00000217870           |
| 10 | 111424903 | 111425082 | 111424992 | 9  | 9  | 0  | 11.73048839 | 0.000425898 | ENSG00000216476           |
| 10 | 111634074 | 111634368 | 111634221 | 10 | 14 | 5  | 2.932622098 | 0.00829617  | XPNPEP1 ENSG00000108039   |
| 10 | 111640853 | 111641214 | 111641025 | 38 | 44 | 1  | 26.39359888 | 1.72E-14    | XPNPEP1 ENSG00000108039   |
| 10 | 111652750 | 111653231 | 111652871 | 10 | 21 | 4  | 5.161414893 | 5.68E-05    | XPNPEP1 ENSG00000108039   |
| 10 | 111758442 | 111758671 | 111758556 | 8  | 8  | 2  | 3.519146518 | 0.017558    | ADD3 ENSG00000148700      |
| 10 | 111925159 | 111925492 | 111925325 | 28 | 32 | 0  | 38.7106117  | 7.53E-12    | MXI1 ENSG00000119950      |
| 10 | 111966844 | 111967405 | 111967152 | 22 | 35 | 6  | 6.032822602 | 1.10E-07    | MXI1 ENSG00000119950      |
| 10 | 111975450 | 111975666 | 111975552 | 11 | 11 | 3  | 3.519146518 | 0.00788869  | MXI1 ENSG00000119950      |
| 10 | 112317187 | 112317447 | 112317317 | 9  | 11 | 3  | 3.519146518 | 0.00788869  | SMC3 ENSG00000108055      |
| 10 | 112379432 | 112379669 | 112379538 | 10 | 12 | 4  | 3.049926982 | 0.0108184   | ENSG00000223302           |
| 10 | 112540871 | 112541337 | 112541126 | 9  | 19 | 1  | 11.73048839 | 2.14E-06    | RBM20 ENSG00000203867     |
| 10 | 112553705 | 112553922 | 112553800 | 9  | 10 | 4  | 2.580707446 | 0.0306059   | RBM20 ENSG00000203867     |
| 10 | 112572308 | 112572872 | 112572462 | 9  | 21 | 14 | 1.720471631 | 0.0496182   | RBM20 ENSG00000203867     |
| 10 | 112668711 | 112669106 | 112668957 | 11 | 18 | 5  | 3.714654658 | 0.000961539 | NCRNA0001 ENSG00000214413 |



|    |           |           |           |    |    |   |             |             |          |                 |
|----|-----------|-----------|-----------|----|----|---|-------------|-------------|----------|-----------------|
| 10 | 112806781 | 112807061 | 112806921 | 12 | 15 | 0 | 18.76878143 | 4.04E-06    | ADRA2A   | ENSG00000150594 |
| 10 | 113887266 | 113887538 | 113887402 | 11 | 12 | 0 | 15.24963491 | 4.15E-05    | GPAM     | ENSG00000119927 |
| 10 | 114465875 | 114466212 | 114466054 | 21 | 26 | 1 | 15.83615933 | 1.23E-08    |          | ENSG00000203854 |
| 10 | 114474186 | 114474599 | 114474428 | 14 | 22 | 7 | 3.372515413 | 0.000629223 |          | ENSG00000203854 |
| 10 | 114491497 | 114491712 | 114491619 | 11 | 11 | 1 | 7.038293036 | 0.000674435 |          | ENSG00000203854 |
| 10 | 114515573 | 114515784 | 114515702 | 8  | 8  | 2 | 3.519146518 | 0.017558    |          | ENSG00000203854 |
| 10 | 114560562 | 114560804 | 114560703 | 9  | 11 | 1 | 7.038293036 | 0.000674435 |          | ENSG00000203854 |
| 10 | 114561554 | 114561893 | 114561726 | 10 | 14 | 5 | 2.932622098 | 0.00829617  |          | ENSG00000203854 |
| 10 | 114817317 | 114817636 | 114817486 | 22 | 25 | 0 | 30.49926982 | 1.72E-09    |          | ENSG00000179487 |
| 10 | 116016252 | 116016604 | 116016415 | 18 | 23 | 5 | 4.692195357 | 5.29E-05    |          | ENSG00000219906 |
| 10 | 116056366 | 116056677 | 116056514 | 9  | 13 | 1 | 8.211341875 | 0.000163445 | AFAP1L2  | ENSG00000169129 |
| 10 | 116099810 | 116099989 | 116099877 | 8  | 8  | 8 | 1.173048839 | 0.36929     | AFAP1L2  | ENSG00000169129 |
| 10 | 116350412 | 116350613 | 116350512 | 8  | 8  | 0 | 10.55743955 | 0.000925496 | ABLIM1   | ENSG00000099204 |
| 10 | 116373705 | 116373933 | 116373788 | 9  | 10 | 1 | 6.451768616 | 0.00135978  | ABLIM1   | ENSG00000099204 |
| 10 | 116529559 | 116529758 | 116529654 | 9  | 9  | 2 | 3.910162798 | 0.00955088  |          | ENSG00000220318 |
| 10 | 116529833 | 116530025 | 116529955 | 8  | 8  | 3 | 2.639359888 | 0.0415794   |          | ENSG00000220318 |
| 10 | 116561417 | 116561689 | 116561544 | 9  | 10 | 1 | 6.451768616 | 0.00135978  |          | ENSG00000220318 |
| 10 | 116687797 | 116688034 | 116687915 | 10 | 13 | 3 | 4.105670938 | 0.00243034  | TRUB1    | ENSG00000165832 |
| 10 | 117194959 | 117195221 | 117195080 | 10 | 12 | 0 | 15.24963491 | 4.15E-05    | ATRNL1   | ENSG00000107518 |
| 10 | 117414199 | 117414575 | 117414363 | 9  | 14 | 5 | 2.932622098 | 0.00829617  |          | ENSG00000203279 |
| 10 | 117415709 | 117415926 | 117415817 | 9  | 11 | 2 | 4.692195357 | 0.00272444  |          | ENSG00000203279 |
| 10 | 117794297 | 117794523 | 117794410 | 10 | 10 | 7 | 1.612942154 | 0.147335    |          | ENSG00000222696 |
| 10 | 117808004 | 117808261 | 117808132 | 8  | 9  | 3 | 2.932622098 | 0.0242899   |          | ENSG00000222696 |
| 10 | 117893107 | 117893348 | 117893236 | 8  | 9  | 2 | 3.910162798 | 0.00955088  |          | ENSG00000222696 |
| 10 | 117976764 | 117976978 | 117976850 | 8  | 9  | 1 | 5.865244197 | 0.00272497  | GFRA1    | ENSG00000151892 |
| 10 | 118027750 | 118027958 | 118027865 | 8  | 10 | 1 | 6.451768616 | 0.00135978  | GFRA1    | ENSG00000151892 |
| 10 | 118339456 | 118339664 | 118339560 | 9  | 9  | 1 | 5.865244197 | 0.00272497  | PNLIPRP1 | ENSG00000187021 |
| 10 | 118383853 | 118384348 | 118384137 | 26 | 38 | 5 | 7.624817456 | 3.97E-09    | PNLIPRP2 | ENSG00000165862 |
| 10 | 118419878 | 118420077 | 118419970 | 8  | 8  | 4 | 2.111487911 | 0.0804809   | C10orf82 | ENSG00000165863 |
| 10 | 118598994 | 118599206 | 118599062 | 8  | 9  | 5 | 1.955081399 | 0.0892323   |          | ENSG00000188316 |
| 10 | 118739813 | 118740017 | 118739915 | 9  | 9  | 0 | 11.73048839 | 0.000425898 | KIAA1598 | ENSG00000187164 |
| 10 | 118754506 | 118755019 | 118754673 | 9  | 19 | 6 | 3.351568112 | 0.00134187  | KIAA1598 | ENSG00000187164 |
| 10 | 118966190 | 118966746 | 118966387 | 32 | 54 | 4 | 12.90353723 | 1.19E-14    | KCNK18   | ENSG00000186795 |
| 10 | 119246177 | 119246364 | 119246190 | 8  | 10 | 1 | 6.451768616 | 0.00135978  | EMX2     | ENSG00000170370 |

|    |           |           |           |    |    |    |             |             |           |                 |
|----|-----------|-----------|-----------|----|----|----|-------------|-------------|-----------|-----------------|
| 10 | 119695804 | 119696036 | 119695920 | 9  | 9  | 0  | 11.73048839 | 0.000425898 | RAB11FIP2 | ENSG00000107560 |
| 10 | 119803959 | 119804394 | 119804138 | 15 | 22 | 7  | 3.372515413 | 0.000629223 | CASC2     | ENSG00000177640 |
| 10 | 120272303 | 120272488 | 120272395 | 8  | 8  | 2  | 3.519146518 | 0.017558    |           | ENSG00000203278 |
| 10 | 120293670 | 120293908 | 120293789 | 8  | 9  | 0  | 11.73048839 | 0.000425898 |           | ENSG00000203278 |
| 10 | 120339986 | 120340244 | 120340142 | 13 | 14 | 0  | 17.59573259 | 8.79E-06    | PRLHR     | ENSG00000119973 |
| 10 | 120709621 | 120709988 | 120709800 | 11 | 18 | 0  | 22.28792795 | 3.94E-07    |           | ENSG00000216505 |
| 10 | 120750256 | 120750651 | 120750397 | 15 | 21 | 4  | 5.161414893 | 5.68E-05    |           | ENSG00000215925 |
| 10 | 120753122 | 120753883 | 120753413 | 43 | 72 | 2  | 28.54418842 | 2.05E-22    |           | ENSG00000215925 |
| 10 | 120756297 | 120756772 | 120756490 | 26 | 38 | 3  | 11.43722618 | 1.38E-10    |           | ENSG00000215925 |
| 10 | 121074408 | 121075000 | 121074821 | 36 | 56 | 6  | 9.55196912  | 1.13E-13    |           | ENSG00000211177 |
| 10 | 121166502 | 121166685 | 121166593 | 9  | 9  | 0  | 11.73048839 | 0.000425898 | RGS10     | ENSG00000148908 |
| 10 | 121346469 | 121346875 | 121346648 | 10 | 18 | 2  | 7.429309316 | 2.63E-05    | TIAL1     | ENSG00000151923 |
| 10 | 121357872 | 121358163 | 121358023 | 10 | 12 | 5  | 2.541605819 | 0.0225912   | TIAL1     | ENSG00000151923 |
| 10 | 121413593 | 121414108 | 121413929 | 15 | 24 | 20 | 1.396486713 | 0.128495    | BAG3      | ENSG00000151929 |
| 10 | 121641849 | 121642203 | 121642026 | 10 | 16 | 4  | 3.988366054 | 0.00115141  | SEC23IP   | ENSG00000107651 |
| 10 | 121955160 | 121955494 | 121955317 | 10 | 14 | 2  | 5.865244197 | 0.000387308 |           | ENSG00000221402 |
| 10 | 122002717 | 122002947 | 122002879 | 11 | 13 | 1  | 8.211341875 | 0.000163445 |           | ENSG00000220842 |
| 10 | 122145844 | 122146056 | 122145950 | 11 | 13 | 0  | 16.42268375 | 1.91E-05    |           | ENSG00000218859 |
| 10 | 122207620 | 122207799 | 122207709 | 8  | 8  | 0  | 10.55743955 | 0.000925496 | PPAPDC1A  | ENSG00000203805 |
| 10 | 122253829 | 122254169 | 122253999 | 16 | 18 | 0  | 22.28792795 | 3.94E-07    | PPAPDC1A  | ENSG00000203805 |
| 10 | 122348081 | 122348339 | 122348208 | 10 | 10 | 3  | 3.225884308 | 0.0139466   | C10orf85  | ENSG00000177234 |
| 10 | 122600512 | 122601029 | 122600691 | 15 | 28 | 6  | 4.859773763 | 8.07E-06    | BRWD2     | ENSG00000120008 |
| 10 | 122995382 | 122995561 | 122995471 | 8  | 8  | 4  | 2.111487911 | 0.0804809   |           | ENSG00000220021 |
| 10 | 123082393 | 123082674 | 123082522 | 9  | 11 | 2  | 4.692195357 | 0.00272444  |           | ENSG00000222979 |
| 10 | 123259686 | 123259948 | 123259850 | 11 | 13 | 1  | 8.211341875 | 0.000163445 | FGFR2     | ENSG00000066468 |
| 10 | 123303488 | 123303759 | 123303614 | 11 | 13 | 2  | 5.474227917 | 0.000747844 | FGFR2     | ENSG00000066468 |
| 10 | 123360471 | 123360890 | 123360640 | 51 | 61 | 0  | 72.72902804 | 1.26E-21    | FGFR2     | ENSG00000066468 |
| 10 | 123636523 | 123636743 | 123636625 | 9  | 9  | 2  | 3.910162798 | 0.00955088  |           | ENSG00000201884 |
| 10 | 123677647 | 123677850 | 123677717 | 8  | 10 | 1  | 6.451768616 | 0.00135978  | ATE1      | ENSG00000107669 |
| 10 | 123744085 | 123744822 | 123744658 | 18 | 37 | 6  | 6.367979413 | 3.11E-08    | TACC2     | ENSG00000138162 |
| 10 | 123801199 | 123801389 | 123801312 | 9  | 10 | 1  | 6.451768616 | 0.00135978  | TACC2     | ENSG00000138162 |
| 10 | 123803654 | 123803893 | 123803763 | 9  | 11 | 3  | 3.519146518 | 0.00788869  | TACC2     | ENSG00000138162 |
| 10 | 123892352 | 123892705 | 123892528 | 11 | 16 | 5  | 3.323638378 | 0.00288759  | TACC2     | ENSG00000138162 |
| 10 | 124225806 | 124226123 | 124225964 | 8  | 13 | 0  | 16.42268375 | 1.91E-05    | HTRA1     | ENSG00000166033 |

|    |           |           |           |    |    |    |             |             |           |                 |
|----|-----------|-----------|-----------|----|----|----|-------------|-------------|-----------|-----------------|
| 10 | 124446640 | 124446824 | 124446724 | 8  | 9  | 1  | 5.865244197 | 0.00272497  | C10orf120 | ENSG00000183559 |
| 10 | 124703660 | 124704026 | 124703815 | 16 | 20 | 2  | 8.211341875 | 6.65E-06    | C10orf88  | ENSG00000119965 |
| 10 | 124758231 | 124758429 | 124758330 | 12 | 14 | 4  | 3.519146518 | 0.00361132  | IKZF5     | ENSG00000095574 |
| 10 | 124977372 | 124977587 | 124977479 | 13 | 13 | 1  | 8.211341875 | 0.000163445 |           | ENSG00000216983 |
| 10 | 125195006 | 125195226 | 125195116 | 9  | 9  | 2  | 3.910162798 | 0.00955088  | GPR26     | ENSG00000154478 |
| 10 | 125287826 | 125288009 | 125287917 | 8  | 8  | 0  | 10.55743955 | 0.000925496 | GPR26     | ENSG00000154478 |
| 10 | 125288352 | 125288791 | 125288587 | 50 | 63 | 4  | 15.01502514 | 1.95E-17    | GPR26     | ENSG00000154478 |
| 10 | 125322747 | 125323036 | 125322891 | 13 | 16 | 5  | 3.323638378 | 0.00288759  | GPR26     | ENSG00000154478 |
| 10 | 125371036 | 125371326 | 125371181 | 9  | 12 | 2  | 5.083211637 | 0.00143337  | GPR26     | ENSG00000154478 |
| 10 | 125471293 | 125471587 | 125471440 | 9  | 13 | 2  | 5.474227917 | 0.000747844 |           | ENSG00000221293 |
| 10 | 125493479 | 125493770 | 125493624 | 16 | 20 | 4  | 4.926805125 | 0.00010522  |           | ENSG00000221293 |
| 10 | 125744993 | 125745258 | 125745125 | 8  | 9  | 2  | 3.910162798 | 0.00955088  |           | ENSG00000219465 |
| 10 | 125745317 | 125745506 | 125745470 | 9  | 9  | 1  | 5.865244197 | 0.00272497  |           | ENSG00000219465 |
| 10 | 125813640 | 125813971 | 125813805 | 8  | 13 | 1  | 8.211341875 | 0.000163445 |           | ENSG00000182022 |
| 10 | 125855187 | 125855463 | 125855325 | 10 | 11 | 6  | 2.010940867 | 0.0640214   |           | ENSG00000182022 |
| 10 | 125855981 | 125856354 | 125856175 | 10 | 16 | 4  | 3.988366054 | 0.00115141  |           | ENSG00000182022 |
| 10 | 126369604 | 126370008 | 126369747 | 12 | 19 | 6  | 3.351568112 | 0.00134187  | FAM53B    | ENSG00000189319 |
| 10 | 126372299 | 126372484 | 126372338 | 8  | 8  | 0  | 10.55743955 | 0.000925496 | FAM53B    | ENSG00000189319 |
| 10 | 126743301 | 126743626 | 126743463 | 15 | 20 | 5  | 4.105670938 | 0.000308509 | CTBP2     | ENSG00000175029 |
| 10 | 126766115 | 126766333 | 126766239 | 11 | 11 | 2  | 4.692195357 | 0.00272444  | CTBP2     | ENSG00000175029 |
| 10 | 126839347 | 126839682 | 126839514 | 11 | 15 | 4  | 3.753756286 | 0.0020497   | CTBP2     | ENSG00000175029 |
| 10 | 126975155 | 126975589 | 126975372 | 47 | 56 | 6  | 9.55196912  | 1.13E-13    |           | ENSG00000212946 |
| 10 | 127085844 | 127086146 | 127086002 | 8  | 12 | 1  | 7.624817456 | 0.000332769 |           | ENSG00000220396 |
| 10 | 127131748 | 127131944 | 127131846 | 8  | 8  | 0  | 10.55743955 | 0.000925496 |           | ENSG00000220396 |
| 10 | 127217490 | 127217692 | 127217591 | 8  | 9  | 2  | 3.910162798 | 0.00955088  |           | ENSG00000220396 |
| 10 | 127263489 | 127263753 | 127263656 | 9  | 12 | 5  | 2.541605819 | 0.0225912   |           | ENSG00000214297 |
| 10 | 127303371 | 127303738 | 127303559 | 13 | 21 | 10 | 2.346097679 | 0.00796926  |           | ENSG00000214297 |
| 10 | 127312738 | 127312987 | 127312861 | 10 | 10 | 4  | 2.580707446 | 0.0306059   |           | ENSG00000214297 |
| 10 | 127325071 | 127325268 | 127325169 | 10 | 10 | 3  | 3.225884308 | 0.0139466   |           | ENSG00000214297 |
| 10 | 127515128 | 127515307 | 127515217 | 8  | 8  | 1  | 5.278719777 | 0.00542188  |           | ENSG00000215972 |
| 10 | 127515367 | 127515709 | 127515538 | 11 | 17 | 6  | 3.016411301 | 0.00381427  |           | ENSG00000215972 |
| 10 | 127568083 | 127568406 | 127568244 | 9  | 12 | 7  | 1.906204364 | 0.0695918   |           | ENSG00000222629 |
| 10 | 127574112 | 127574561 | 127574322 | 9  | 18 | 6  | 3.183989707 | 0.00227432  | FANK1     | ENSG00000203780 |
| 10 | 127579638 | 127579868 | 127579734 | 8  | 11 | 1  | 7.038293036 | 0.000674435 | FANK1     | ENSG00000203780 |

|    |           |           |           |     |     |   |             |             |          |                 |
|----|-----------|-----------|-----------|-----|-----|---|-------------|-------------|----------|-----------------|
| 10 | 127646111 | 127646563 | 127646317 | 45  | 61  | 2 | 24.24300935 | 7.63E-19    | FANK1    | ENSG00000203780 |
| 10 | 127923880 | 127924059 | 127923969 | 8   | 8   | 0 | 10.55743955 | 0.000925496 |          | ENSG00000213170 |
| 10 | 128065622 | 128065817 | 128065723 | 8   | 10  | 1 | 6.451768616 | 0.00135978  | ADAM12   | ENSG00000148848 |
| 10 | 128722011 | 128722478 | 128722313 | 14  | 22  | 0 | 26.9801233  | 1.77E-08    |          | ENSG00000202487 |
| 10 | 128732511 | 128732872 | 128732669 | 12  | 18  | 2 | 7.429309316 | 2.63E-05    |          | ENSG00000202487 |
| 10 | 129263011 | 129263570 | 129263240 | 20  | 36  | 2 | 14.46760235 | 7.62E-11    | NPS      | ENSG00000214285 |
| 10 | 129551400 | 129551877 | 129551641 | 89  | 119 | 0 | 140.7658607 | 3.56E-41    | CLRN3    | ENSG00000180745 |
| 10 | 129627868 | 129628467 | 129628172 | 45  | 79  | 1 | 46.92195357 | 4.78E-26    | PTPRE    | ENSG00000132334 |
| 10 | 129699658 | 129699880 | 129699749 | 9   | 11  | 5 | 2.346097679 | 0.0364013   | PTPRE    | ENSG00000132334 |
| 10 | 129900137 | 129900594 | 129900316 | 12  | 22  | 4 | 5.396024661 | 3.05E-05    | MKI67    | ENSG00000148773 |
| 10 | 130012438 | 130012724 | 130012592 | 8   | 9   | 0 | 11.73048839 | 0.000425898 | MKI67    | ENSG00000148773 |
| 10 | 130208691 | 130209003 | 130208847 | 12  | 16  | 1 | 9.970915134 | 1.89E-05    | MKI67    | ENSG00000148773 |
| 10 | 131377799 | 131378346 | 131378072 | 19  | 33  | 9 | 3.988366054 | 9.65E-06    | MGMT     | ENSG00000170430 |
| 10 | 131406952 | 131407341 | 131407104 | 20  | 26  | 1 | 15.83615933 | 1.23E-08    | EBF3     | ENSG00000108001 |
| 10 | 131733314 | 131733640 | 131733477 | 11  | 15  | 2 | 6.256260476 | 0.000199274 |          | ENSG00000172211 |
| 10 | 131826821 | 131827078 | 131826966 | 11  | 11  | 4 | 2.815317214 | 0.0183428   | GLRX3    | ENSG00000108010 |
| 10 | 132078241 | 132078552 | 132078396 | 17  | 20  | 0 | 24.63402563 | 8.35E-08    |          | ENSG00000222997 |
| 10 | 132594682 | 132594902 | 132594792 | 8   | 8   | 0 | 10.55743955 | 0.000925496 |          | ENSG00000211268 |
| 10 | 132782807 | 132783528 | 132783112 | 137 | 166 | 2 | 65.29971872 | 2.14E-53    | TCERG1L  | ENSG00000176769 |
| 10 | 132787418 | 132787612 | 132787515 | 9   | 10  | 4 | 2.580707446 | 0.0306059   | TCERG1L  | ENSG00000176769 |
| 10 | 132817874 | 132818071 | 132817987 | 10  | 10  | 5 | 2.150589539 | 0.0575848   | TCERG1L  | ENSG00000176769 |
| 10 | 132830247 | 132830448 | 132830347 | 10  | 10  | 4 | 2.580707446 | 0.0306059   | TCERG1L  | ENSG00000176769 |
| 10 | 133459789 | 133460374 | 133459984 | 44  | 59  | 2 | 23.46097679 | 3.38E-18    |          | ENSG00000189275 |
| 10 | 133589378 | 133589567 | 133589472 | 8   | 8   | 2 | 3.519146518 | 0.017558    | PPP2R2D  | ENSG00000175470 |
| 10 | 133679305 | 133679558 | 133679431 | 10  | 10  | 1 | 6.451768616 | 0.00135978  | BNIP3    | ENSG00000176171 |
| 10 | 133729358 | 133729641 | 133729499 | 10  | 11  | 1 | 7.038293036 | 0.000674435 | JAKMIP3  | ENSG00000188385 |
| 10 | 134045101 | 134045503 | 134045316 | 33  | 42  | 1 | 25.22055005 | 7.76E-14    | PWWP2B   | ENSG00000171813 |
| 10 | 134061525 | 134061803 | 134061692 | 14  | 16  | 5 | 3.323638378 | 0.00288759  | PWWP2B   | ENSG00000171813 |
| 10 | 134071475 | 134071712 | 134071558 | 14  | 14  | 5 | 2.932622098 | 0.00829617  |          | ENSG00000213154 |
| 10 | 134071927 | 134072341 | 134072220 | 8   | 15  | 0 | 18.76878143 | 4.04E-06    |          | ENSG00000213154 |
| 10 | 134087786 | 134088175 | 134087997 | 15  | 22  | 3 | 6.745030826 | 8.05E-06    |          | ENSG00000197735 |
| 10 | 134180660 | 134180945 | 134180779 | 8   | 10  | 3 | 3.225884308 | 0.0139466   | INPP5A   | ENSG00000068383 |
| 10 | 134238772 | 134238960 | 134238866 | 8   | 8   | 5 | 1.759573259 | 0.13508     | INPP5A   | ENSG00000068383 |
| 10 | 134526939 | 134527266 | 134527102 | 38  | 40  | 1 | 24.04750121 | 3.50E-13    | C10orf92 | ENSG00000108046 |

|    |           |           |           |     |     |   |             |             |          |                 |
|----|-----------|-----------|-----------|-----|-----|---|-------------|-------------|----------|-----------------|
| 10 | 134888931 | 134889263 | 134889097 | 14  | 19  | 1 | 11.73048839 | 2.14E-06    | UTF1     | ENSG00000171794 |
| 10 | 134908275 | 134909008 | 134908662 | 33  | 59  | 0 | 70.38293036 | 5.97E-21    |          | ENSG00000199089 |
| 10 | 134982134 | 134982480 | 134982302 | 10  | 15  | 3 | 4.692195357 | 0.000718455 |          | ENSG00000198050 |
| 11 | 440936    | 441115    | 441021    | 9   | 10  | 0 | 12.90353723 | 0.000195991 | PTDSS2   | ENSG00000174915 |
| 11 | 455908    | 456171    | 456056    | 11  | 13  | 3 | 4.105670938 | 0.00243034  | PTDSS2   | ENSG00000174915 |
| 11 | 524656    | 524872    | 524819    | 8   | 10  | 2 | 4.301179077 | 0.00512919  | HRAS     | ENSG00000174775 |
| 11 | 527415    | 527594    | 527463    | 8   | 8   | 5 | 1.759573259 | 0.13508     | LRRC56   | ENSG00000161328 |
| 11 | 566156    | 566500    | 566328    | 12  | 15  | 4 | 3.753756286 | 0.0020497   | PHRF1    | ENSG00000070047 |
| 11 | 696831    | 697199    | 697007    | 49  | 55  | 3 | 16.42268375 | 7.12E-16    | EPS8L2   | ENSG00000177106 |
| 11 | 794218    | 794701    | 794381    | 27  | 40  | 4 | 9.619000482 | 2.08E-10    | LRDD     | ENSG00000177595 |
| 11 | 1041173   | 1041391   | 1041282   | 8   | 9   | 1 | 5.865244197 | 0.00272497  | MUC6     | ENSG00000184956 |
| 11 | 1197518   | 1197817   | 1197680   | 8   | 11  | 3 | 3.519146518 | 0.00788869  | MUC5B    | ENSG00000117983 |
| 11 | 1633110   | 1633570   | 1633310   | 30  | 40  | 0 | 48.09500241 | 1.51E-14    | FAM99A   | ENSG00000205866 |
| 11 | 1683347   | 1683750   | 1683431   | 9   | 16  | 2 | 6.647276756 | 0.000101928 | KRTAP5-6 | ENSG00000205864 |
| 11 | 1740237   | 1740445   | 1740370   | 9   | 10  | 0 | 12.90353723 | 0.000195991 | CTSD     | ENSG00000117984 |
| 11 | 1774248   | 1774886   | 1774596   | 13  | 28  | 7 | 4.252302043 | 2.31E-05    |          | ENSG00000216482 |
| 11 | 1805060   | 1805312   | 1805176   | 8   | 9   | 0 | 11.73048839 | 0.000425898 | SYT8     | ENSG00000149043 |
| 11 | 1808222   | 1808959   | 1808664   | 128 | 176 | 1 | 103.8148223 | 2.11E-58    | SYT8     | ENSG00000149043 |
| 11 | 1811948   | 1812266   | 1812113   | 13  | 14  | 0 | 17.59573259 | 8.79E-06    | SYT8     | ENSG00000149043 |
| 11 | 2180268   | 2180572   | 2180420   | 16  | 19  | 3 | 5.865244197 | 5.72E-05    | TH       | ENSG00000180176 |
| 11 | 2725347   | 2725605   | 2725497   | 8   | 11  | 4 | 2.815317214 | 0.0183428   |          | ENSG00000218400 |
| 11 | 2978335   | 2978514   | 2978485   | 9   | 10  | 1 | 6.451768616 | 0.00135978  | NAP1L4   | ENSG00000205531 |
| 11 | 3356754   | 3357110   | 3356954   | 12  | 17  | 2 | 7.038293036 | 5.19E-05    | ZNF195   | ENSG00000005801 |
| 11 | 3593683   | 3594182   | 3594017   | 18  | 27  | 1 | 16.42268375 | 5.88E-09    | TRPC2    | ENSG00000215103 |
| 11 | 3602097   | 3602276   | 3602186   | 8   | 9   | 0 | 11.73048839 | 0.000425898 |          | ENSG00000182048 |
| 11 | 3723058   | 3723263   | 3723160   | 10  | 11  | 4 | 2.815317214 | 0.0183428   |          | ENSG00000209091 |
| 11 | 4072320   | 4072634   | 4072469   | 17  | 21  | 1 | 12.90353723 | 4.95E-07    | RRM1     | ENSG00000167325 |
| 11 | 4165287   | 4165548   | 4165417   | 9   | 10  | 4 | 2.580707446 | 0.0306059   |          | ENSG00000186223 |
| 11 | 4431923   | 4432194   | 4432067   | 15  | 17  | 0 | 21.11487911 | 8.57E-07    | OR52K2   | ENSG00000181963 |
| 11 | 4442025   | 4442631   | 4442225   | 100 | 123 | 5 | 24.24300935 | 2.09E-35    | OR52K3P  | ENSG00000205512 |
| 11 | 5454162   | 5454352   | 5454264   | 8   | 8   | 3 | 2.639359888 | 0.0415794   | OR51I1   | ENSG00000167359 |
| 11 | 5668208   | 5668692   | 5668409   | 31  | 48  | 0 | 57.47939313 | 3.05E-17    | TRIM22   | ENSG00000132274 |
| 11 | 5785450   | 5785774   | 5785610   | 22  | 26  | 3 | 7.918079665 | 5.55E-07    | OR52N2   | ENSG00000180988 |
| 11 | 5786331   | 5786519   | 5786451   | 8   | 8   | 4 | 2.111487911 | 0.0804809   | OR52N2   | ENSG00000180988 |

|    |          |          |          |    |    |    |             |             |          |                 |
|----|----------|----------|----------|----|----|----|-------------|-------------|----------|-----------------|
| 11 | 6581199  | 6581561  | 6581402  | 13 | 18 | 6  | 3.183989707 | 0.00227432  | KIAA0409 | ENSG00000132275 |
| 11 | 6589339  | 6589550  | 6589504  | 8  | 9  | 1  | 5.865244197 | 0.00272497  | TAF10    | ENSG00000166337 |
| 11 | 6661242  | 6661479  | 6661364  | 12 | 13 | 4  | 3.28453675  | 0.00629037  | MRPL17   | ENSG00000158042 |
| 11 | 7420437  | 7420616  | 7420538  | 8  | 8  | 0  | 10.55743955 | 0.000925496 | OLFML1   | ENSG00000183801 |
| 11 | 7551678  | 7551909  | 7551773  | 10 | 11 | 10 | 1.279689643 | 0.277323    | PPFIBP2  | ENSG00000166387 |
| 11 | 7555766  | 7555947  | 7555856  | 8  | 8  | 5  | 1.759573259 | 0.13508     | PPFIBP2  | ENSG00000166387 |
| 11 | 7575310  | 7575819  | 7575650  | 20 | 33 | 5  | 6.647276756 | 1.04E-07    | CYB5R2   | ENSG00000166394 |
| 11 | 7578146  | 7578513  | 7578334  | 27 | 34 | 6  | 5.865244197 | 2.06E-07    | CYB5R2   | ENSG00000166394 |
| 11 | 7589879  | 7590274  | 7590095  | 11 | 19 | 5  | 3.910162798 | 0.000546977 | CYB5R2   | ENSG00000166394 |
| 11 | 7590507  | 7590820  | 7590651  | 10 | 12 | 3  | 3.812408728 | 0.004404    | CYB5R2   | ENSG00000166394 |
| 11 | 7771394  | 7771660  | 7771522  | 8  | 8  | 1  | 5.278719777 | 0.00542188  | OR5P2    | ENSG00000183303 |
| 11 | 7965104  | 7965438  | 7965271  | 16 | 21 | 7  | 3.225884308 | 0.00106152  | EIF3F    | ENSG00000175390 |
| 11 | 8116794  | 8117027  | 8116890  | 10 | 11 | 0  | 14.07658607 | 9.02E-05    | RIC3     | ENSG00000166405 |
| 11 | 8314442  | 8314712  | 8314577  | 10 | 14 | 3  | 4.398933147 | 0.00132748  | LMO1     | ENSG00000166407 |
| 11 | 8314718  | 8314969  | 8314817  | 9  | 12 | 1  | 7.624817456 | 0.000332769 | LMO1     | ENSG00000166407 |
| 11 | 8667051  | 8667391  | 8667175  | 9  | 14 | 1  | 8.797866295 | 8.00E-05    |          | ENSG00000212607 |
| 11 | 8937822  | 8938031  | 8937923  | 10 | 10 | 6  | 1.843362462 | 0.0964212   | TMEM9B   | ENSG00000175348 |
| 11 | 9054827  | 9055011  | 9054919  | 8  | 9  | 6  | 1.675784056 | 0.141978    | SCUBE2   | ENSG00000175356 |
| 11 | 9116990  | 9117361  | 9117200  | 13 | 17 | 3  | 5.278719777 | 0.000205462 |          | ENSG00000212788 |
| 11 | 9123098  | 9123736  | 9123249  | 14 | 28 | 4  | 6.803683268 | 6.55E-07    |          | ENSG00000212788 |
| 11 | 9126845  | 9127024  | 9126908  | 8  | 9  | 0  | 11.73048839 | 0.000425898 |          | ENSG00000212788 |
| 11 | 9439046  | 9439271  | 9439135  | 8  | 9  | 2  | 3.910162798 | 0.00955088  | ZNF143   | ENSG00000166478 |
| 11 | 9439353  | 9439542  | 9439447  | 8  | 8  | 3  | 2.639359888 | 0.0415794   | ZNF143   | ENSG00000166478 |
| 11 | 9453531  | 9453968  | 9453710  | 11 | 18 | 0  | 22.28792795 | 3.94E-07    | ZNF143   | ENSG00000166478 |
| 11 | 9544088  | 9544358  | 9544223  | 8  | 12 | 3  | 3.812408728 | 0.004404    | WEE1     | ENSG00000166483 |
| 11 | 9546843  | 9547232  | 9547022  | 9  | 16 | 3  | 4.985457567 | 0.000385643 | WEE1     | ENSG00000166483 |
| 11 | 9551282  | 9551512  | 9551337  | 8  | 10 | 5  | 2.150589539 | 0.0575848   | WEE1     | ENSG00000166483 |
| 11 | 9587954  | 9588471  | 9588214  | 18 | 36 | 1  | 21.70140353 | 7.08E-12    |          | ENSG00000209446 |
| 11 | 9780438  | 9780866  | 9780592  | 24 | 31 | 2  | 12.51252095 | 2.82E-09    |          | ENSG00000201564 |
| 11 | 9846821  | 9847093  | 9846957  | 10 | 11 | 4  | 2.815317214 | 0.0183428   |          | ENSG00000215043 |
| 11 | 9884131  | 9884435  | 9884292  | 9  | 11 | 4  | 2.815317214 | 0.0183428   |          | ENSG00000215043 |
| 11 | 9951112  | 9951293  | 9951202  | 10 | 11 | 1  | 7.038293036 | 0.000674435 |          | ENSG00000215043 |
| 11 | 10022668 | 10023130 | 10022887 | 65 | 80 | 0  | 95.01695598 | 4.98E-28    |          | ENSG00000215043 |
| 11 | 10478378 | 10478595 | 10478537 | 8  | 8  | 2  | 3.519146518 | 0.017558    |          | ENSG00000209455 |

|    |          |          |          |    |    |    |             |             |         |                 |
|----|----------|----------|----------|----|----|----|-------------|-------------|---------|-----------------|
| 11 | 10567161 | 10567367 | 10567264 | 9  | 9  | 4  | 2.346097679 | 0.050148    | LYVE1   | ENSG00000133800 |
| 11 | 10632391 | 10632603 | 10632482 | 9  | 11 | 5  | 2.346097679 | 0.0364013   | MRVI1   | ENSG00000072952 |
| 11 | 10772927 | 10773155 | 10773105 | 9  | 9  | 0  | 11.73048839 | 0.000425898 | EIF4G2  | ENSG00000110321 |
| 11 | 10786834 | 10787155 | 10786999 | 8  | 12 | 1  | 7.624817456 | 0.000332769 | EIF4G2  | ENSG00000110321 |
| 11 | 11006284 | 11006463 | 11006373 | 8  | 8  | 1  | 5.278719777 | 0.00542188  |         | ENSG00000222048 |
| 11 | 11389734 | 11390039 | 11389898 | 10 | 14 | 5  | 2.932622098 | 0.00829617  | GALNTL4 | ENSG00000110328 |
| 11 | 11584234 | 11584430 | 11584332 | 9  | 9  | 4  | 2.346097679 | 0.050148    | GALNTL4 | ENSG00000110328 |
| 11 | 11823297 | 11823476 | 11823386 | 8  | 8  | 2  | 3.519146518 | 0.017558    | USP47   | ENSG00000170242 |
| 11 | 11972055 | 11972248 | 11972151 | 8  | 8  | 0  | 10.55743955 | 0.000925496 | DKK3    | ENSG00000050165 |
| 11 | 12022415 | 12022615 | 12022500 | 9  | 10 | 3  | 3.225884308 | 0.0139466   | DKK3    | ENSG00000050165 |
| 11 | 12044064 | 12044400 | 12044232 | 14 | 17 | 0  | 21.11487911 | 8.57E-07    | MICAL2  | ENSG00000133816 |
| 11 | 12058110 | 12058514 | 12058289 | 8  | 15 | 1  | 9.384390715 | 3.90E-05    | MICAL2  | ENSG00000133816 |
| 11 | 12226598 | 12227012 | 12226777 | 9  | 15 | 4  | 3.753756286 | 0.0020497   | MICALCL | ENSG00000133808 |
| 11 | 12475591 | 12475836 | 12475713 | 9  | 9  | 2  | 3.910162798 | 0.00955088  | PARVA   | ENSG00000197702 |
| 11 | 12701929 | 12702180 | 12702069 | 11 | 13 | 3  | 4.105670938 | 0.00243034  | TEAD1   | ENSG00000187079 |
| 11 | 12780771 | 12781118 | 12780944 | 10 | 16 | 3  | 4.985457567 | 0.000385643 | TEAD1   | ENSG00000187079 |
| 11 | 14227489 | 14227762 | 14227619 | 8  | 10 | 1  | 6.451768616 | 0.00135978  | RRAS2   | ENSG00000133818 |
| 11 | 15593658 | 15593859 | 15593758 | 10 | 10 | 5  | 2.150589539 | 0.0575848   |         |                 |
| 11 | 15747361 | 15747540 | 15747464 | 8  | 8  | 2  | 3.519146518 | 0.017558    |         | ENSG00000221556 |
| 11 | 16611013 | 16611214 | 16611113 | 8  | 8  | 0  | 10.55743955 | 0.000925496 |         | ENSG00000209504 |
| 11 | 16753647 | 16753905 | 16753801 | 11 | 12 | 0  | 15.24963491 | 4.15E-05    | PLEKHA7 | ENSG00000166689 |
| 11 | 16934940 | 16935228 | 16935103 | 10 | 12 | 10 | 1.386330446 | 0.21117     |         | ENSG00000209522 |
| 11 | 16964644 | 16965048 | 16964823 | 13 | 21 | 4  | 5.161414893 | 5.68E-05    |         | ENSG00000209522 |
| 11 | 16965313 | 16965751 | 16965492 | 14 | 22 | 7  | 3.372515413 | 0.000629223 |         | ENSG00000209522 |
| 11 | 17005001 | 17005195 | 17005162 | 8  | 9  | 2  | 3.910162798 | 0.00955088  | PLEKHA7 | ENSG00000166689 |
| 11 | 17055890 | 17056143 | 17056061 | 9  | 12 | 3  | 3.812408728 | 0.004404    | RPS13   | ENSG00000110700 |
| 11 | 17090818 | 17091153 | 17090985 | 22 | 27 | 0  | 32.8453675  | 3.65E-10    |         | ENSG00000201586 |
| 11 | 17185911 | 17186208 | 17186044 | 11 | 15 | 5  | 3.128130238 | 0.00492422  |         | ENSG00000213779 |
| 11 | 17216601 | 17216889 | 17216736 | 14 | 15 | 5  | 3.128130238 | 0.00492422  |         | ENSG00000197149 |
| 11 | 17347951 | 17348296 | 17348126 | 12 | 16 | 0  | 19.94183027 | 1.86E-06    | KCNJ11  | ENSG00000187486 |
| 11 | 17356733 | 17357186 | 17356895 | 18 | 26 | 2  | 10.55743955 | 9.97E-08    | KCNJ11  | ENSG00000187486 |
| 11 | 17789405 | 17789787 | 17789656 | 8  | 14 | 2  | 5.865244197 | 0.000387308 |         | ENSG00000205289 |
| 11 | 17791843 | 17792037 | 17791940 | 8  | 9  | 1  | 5.865244197 | 0.00272497  |         | ENSG00000205289 |
| 11 | 18300218 | 18300512 | 18300337 | 8  | 11 | 1  | 7.038293036 | 0.000674435 | HPS5    | ENSG00000110756 |

|    |          |          |          |    |    |   |             |             |          |                 |
|----|----------|----------|----------|----|----|---|-------------|-------------|----------|-----------------|
| 11 | 18566678 | 18566964 | 18566819 | 9  | 13 | 3 | 4.105670938 | 0.00243034  | UEVLD    | ENSG00000151116 |
| 11 | 19511591 | 19511793 | 19511668 | 9  | 9  | 0 | 11.73048839 | 0.000425898 |          | ENSG00000207407 |
| 11 | 19973235 | 19973660 | 19973495 | 14 | 19 | 6 | 3.351568112 | 0.00134187  | NAV2     | ENSG00000166833 |
| 11 | 20009896 | 20010316 | 20010075 | 8  | 16 | 2 | 6.647276756 | 0.000101928 | NAV2     | ENSG00000166833 |
| 11 | 20462086 | 20462460 | 20462246 | 18 | 24 | 2 | 9.775406994 | 4.09E-07    | PRMT3    | ENSG00000185238 |
| 11 | 22808048 | 22808245 | 22808170 | 9  | 10 | 0 | 12.90353723 | 0.000195991 |          | ENSG00000198168 |
| 11 | 27152203 | 27152422 | 27152322 | 10 | 11 | 0 | 14.07658607 | 9.02E-05    | BBOX1    | ENSG00000129151 |
| 11 | 27180174 | 27180411 | 27180267 | 8  | 10 | 0 | 12.90353723 | 0.000195991 | CCDC34   | ENSG00000109881 |
| 11 | 27484936 | 27485122 | 27485029 | 8  | 10 | 2 | 4.301179077 | 0.00512919  | LIN7C    | ENSG00000148943 |
| 11 | 27679769 | 27680016 | 27679895 | 9  | 10 | 1 | 6.451768616 | 0.00135978  | BDNF     | ENSG00000176697 |
| 11 | 28118002 | 28118348 | 28118175 | 12 | 17 | 2 | 7.038293036 | 5.19E-05    | METT5D1  | ENSG00000169519 |
| 11 | 28118826 | 28119204 | 28119030 | 12 | 18 | 1 | 11.14396397 | 4.44E-06    | METT5D1  | ENSG00000169519 |
| 11 | 28499244 | 28499611 | 28499429 | 79 | 87 | 2 | 34.40943262 | 2.59E-27    |          | ENSG00000216849 |
| 11 | 30175986 | 30176307 | 30176146 | 15 | 20 | 1 | 12.31701281 | 1.03E-06    | FSHB     | ENSG00000131808 |
| 11 | 30466674 | 30467085 | 30466919 | 10 | 17 | 0 | 21.11487911 | 8.57E-07    | MPPED2   | ENSG00000066382 |
| 11 | 32960756 | 32961008 | 32960882 | 8  | 9  | 2 | 3.910162798 | 0.00955088  |          | ENSG00000200615 |
| 11 | 33039563 | 33039883 | 33039723 | 46 | 50 | 0 | 59.82549081 | 6.45E-18    |          | ENSG00000213713 |
| 11 | 33138311 | 33138497 | 33138396 | 8  | 8  | 0 | 10.55743955 | 0.000925496 | CSTF3    | ENSG00000176102 |
| 11 | 33139481 | 33140000 | 33139734 | 8  | 19 | 9 | 2.346097679 | 0.0107159   | CSTF3    | ENSG00000176102 |
| 11 | 33694535 | 33694787 | 33694688 | 9  | 10 | 0 | 12.90353723 | 0.000195991 | C11orf91 | ENSG00000205177 |
| 11 | 33807595 | 33807846 | 33807771 | 10 | 11 | 2 | 4.692195357 | 0.00272444  | LMO2     | ENSG00000135363 |
| 11 | 34008543 | 34008822 | 34008682 | 10 | 12 | 0 | 15.24963491 | 4.15E-05    | CAPRIN1  | ENSG00000135387 |
| 11 | 34083577 | 34083878 | 34083742 | 12 | 17 | 1 | 10.55743955 | 9.18E-06    | NAT10    | ENSG00000135372 |
| 11 | 34144388 | 34144579 | 34144480 | 9  | 9  | 3 | 2.932622098 | 0.0242899   |          | ENSG00000201867 |
| 11 | 34241610 | 34241847 | 34241723 | 9  | 11 | 6 | 2.010940867 | 0.0640214   |          | ENSG00000201867 |
| 11 | 34252853 | 34253317 | 34253038 | 18 | 29 | 7 | 4.398933147 | 1.30E-05    | ABTB2    | ENSG00000166016 |
| 11 | 34337385 | 34337655 | 34337560 | 8  | 12 | 3 | 3.812408728 | 0.004404    | ABTB2    | ENSG00000166016 |
| 11 | 34491128 | 34491457 | 34491326 | 9  | 13 | 5 | 2.737113958 | 0.0137917   | ELF5     | ENSG00000135374 |
| 11 | 34491849 | 34492093 | 34491991 | 9  | 11 | 5 | 2.346097679 | 0.0364013   | ELF5     | ENSG00000135374 |
| 11 | 34549097 | 34549301 | 34549199 | 8  | 9  | 3 | 2.932622098 | 0.0242899   | EHF      | ENSG00000135373 |
| 11 | 34610290 | 34610618 | 34610475 | 9  | 13 | 3 | 4.105670938 | 0.00243034  | EHF      | ENSG00000135373 |
| 11 | 34611800 | 34612035 | 34611917 | 11 | 13 | 5 | 2.737113958 | 0.0137917   | EHF      | ENSG00000135373 |
| 11 | 34614304 | 34614634 | 34614469 | 12 | 15 | 2 | 6.256260476 | 0.000199274 | EHF      | ENSG00000135373 |
| 11 | 34618391 | 34618803 | 34618644 | 11 | 18 | 4 | 4.457585589 | 0.000353565 | EHF      | ENSG00000135373 |



|    |          |          |          |    |    |    |             |             |          |                 |
|----|----------|----------|----------|----|----|----|-------------|-------------|----------|-----------------|
| 11 | 34646234 | 34646712 | 34646473 | 9  | 18 | 2  | 7.429309316 | 2.63E-05    | EHF      | ENSG00000135373 |
| 11 | 34663461 | 34663871 | 34663692 | 39 | 48 | 3  | 14.36984828 | 1.11E-13    | EHF      | ENSG00000135373 |
| 11 | 35121915 | 35122140 | 35121995 | 8  | 10 | 0  | 12.90353723 | 0.000195991 | CD44     | ENSG00000026508 |
| 11 | 35368058 | 35368430 | 35368219 | 11 | 16 | 1  | 9.970915134 | 1.89E-05    |          | ENSG00000209654 |
| 11 | 35872310 | 35872547 | 35872443 | 8  | 11 | 0  | 14.07658607 | 9.02E-05    |          | ENSG00000186082 |
| 11 | 36725216 | 36725459 | 36725303 | 11 | 11 | 2  | 4.692195357 | 0.00272444  | RAG2     | ENSG00000175097 |
| 11 | 38438969 | 38439315 | 38439142 | 10 | 14 | 4  | 3.519146518 | 0.00361132  |          |                 |
| 11 | 38573051 | 38573318 | 38573182 | 12 | 15 | 0  | 18.76878143 | 4.04E-06    |          |                 |
| 11 | 42750008 | 42750203 | 42750105 | 8  | 8  | 0  | 10.55743955 | 0.000925496 |          |                 |
| 11 | 43622174 | 43622514 | 43622344 | 11 | 15 | 0  | 18.76878143 | 4.04E-06    | HSD17B12 | ENSG00000149084 |
| 11 | 44122101 | 44122404 | 44122252 | 9  | 12 | 2  | 5.083211637 | 0.00143337  | EXT2     | ENSG00000151348 |
| 11 | 44280080 | 44280297 | 44280188 | 10 | 10 | 2  | 4.301179077 | 0.00512919  | ALX4     | ENSG00000052850 |
| 11 | 44542774 | 44543097 | 44542943 | 8  | 12 | 6  | 2.178519273 | 0.0416567   | CD82     | ENSG00000085117 |
| 11 | 45714638 | 45714911 | 45714760 | 13 | 13 | 7  | 2.052835469 | 0.046392    |          | ENSG00000205106 |
| 11 | 45821466 | 45821663 | 45821564 | 8  | 8  | 3  | 2.639359888 | 0.0415794   | CRY2     | ENSG00000121671 |
| 11 | 45831036 | 45831221 | 45831128 | 10 | 10 | 2  | 4.301179077 | 0.00512919  | CRY2     | ENSG00000121671 |
| 11 | 45850974 | 45851184 | 45851037 | 8  | 9  | 4  | 2.346097679 | 0.050148    | MAPK8IP1 | ENSG00000121653 |
| 11 | 46099445 | 46099633 | 46099539 | 9  | 9  | 2  | 3.910162798 | 0.00955088  | PHF21A   | ENSG00000135365 |
| 11 | 46194242 | 46194585 | 46194413 | 8  | 14 | 7  | 2.199466574 | 0.0303778   |          | ENSG00000206837 |
| 11 | 46317504 | 46317767 | 46317614 | 8  | 10 | 4  | 2.580707446 | 0.0306059   | DGKZ     | ENSG00000149091 |
| 11 | 46323203 | 46323495 | 46323349 | 13 | 17 | 0  | 21.11487911 | 8.57E-07    | DGKZ     | ENSG00000149091 |
| 11 | 46346438 | 46346683 | 46346537 | 9  | 12 | 3  | 3.812408728 | 0.004404    | DGKZ     | ENSG00000149091 |
| 11 | 46532362 | 46532620 | 46532508 | 11 | 13 | 0  | 16.42268375 | 1.91E-05    | AMBRA1   | ENSG00000110497 |
| 11 | 46572185 | 46572435 | 46572334 | 10 | 13 | 6  | 2.346097679 | 0.0266147   | AMBRA1   | ENSG00000110497 |
| 11 | 46635818 | 46636241 | 46635997 | 22 | 31 | 5  | 6.256260476 | 3.74E-07    | KIAA0652 | ENSG00000175224 |
| 11 | 46678511 | 46678782 | 46678665 | 11 | 13 | 10 | 1.49297125  | 0.157311    | ARHGAP1  | ENSG00000175220 |
| 11 | 46678804 | 46679173 | 46679014 | 14 | 21 | 10 | 2.346097679 | 0.00796926  | ZNF408   | ENSG00000175213 |
| 11 | 46804508 | 46805048 | 46804768 | 11 | 23 | 3  | 7.038293036 | 4.15E-06    | CKAP5    | ENSG00000175216 |
| 11 | 46876910 | 46877104 | 46877003 | 9  | 9  | 2  | 3.910162798 | 0.00955088  | LRP4     | ENSG00000134569 |
| 11 | 46914624 | 46914873 | 46914762 | 9  | 12 | 3  | 3.812408728 | 0.004404    | C11orf49 | ENSG00000149179 |
| 11 | 47121584 | 47121831 | 47121656 | 11 | 14 | 3  | 4.398933147 | 0.00132748  | ARFGAP2  | ENSG00000149182 |
| 11 | 47154760 | 47154939 | 47154815 | 8  | 9  | 2  | 3.910162798 | 0.00955088  | ARFGAP2  | ENSG00000149182 |
| 11 | 47155353 | 47155841 | 47155620 | 16 | 29 | 4  | 7.038293036 | 3.41E-07    | ARFGAP2  | ENSG00000149182 |
| 11 | 47163602 | 47163930 | 47163714 | 8  | 12 | 3  | 3.812408728 | 0.004404    | PAC3IN3  | ENSG00000165912 |

|    |          |          |          |     |     |    |             |             |          |                 |
|----|----------|----------|----------|-----|-----|----|-------------|-------------|----------|-----------------|
| 11 | 47192413 | 47192742 | 47192624 | 11  | 16  | 5  | 3.323638378 | 0.00288759  | DDB2     | ENSG00000134574 |
| 11 | 47192787 | 47193941 | 47193125 | 309 | 419 | 9  | 49.26805125 | 1.33E-126   | DDB2     | ENSG00000134574 |
| 11 | 47194328 | 47194693 | 47194481 | 11  | 17  | 2  | 7.038293036 | 5.19E-05    | DDB2     | ENSG00000134574 |
| 11 | 47208350 | 47208529 | 47208439 | 8   | 8   | 2  | 3.519146518 | 0.017558    | DDB2     | ENSG00000134574 |
| 11 | 47226829 | 47227141 | 47226966 | 16  | 20  | 10 | 2.239456875 | 0.0121685   | ACP2     | ENSG00000134575 |
| 11 | 47247866 | 47248140 | 47248003 | 9   | 12  | 2  | 5.083211637 | 0.00143337  | MADD     | ENSG00000110514 |
| 11 | 47249104 | 47249330 | 47249174 | 9   | 9   | 6  | 1.675784056 | 0.141978    | MADD     | ENSG00000110514 |
| 11 | 47333415 | 47333718 | 47333563 | 19  | 21  | 5  | 4.301179077 | 0.000172642 |          | ENSG00000203453 |
| 11 | 47386359 | 47386699 | 47386547 | 10  | 14  | 2  | 5.865244197 | 0.000387308 | SLC39A13 | ENSG00000165915 |
| 11 | 47387098 | 47387332 | 47387215 | 8   | 10  | 0  | 12.90353723 | 0.000195991 | SLC39A13 | ENSG00000165915 |
| 11 | 47404310 | 47404577 | 47404479 | 16  | 19  | 4  | 4.692195357 | 0.000193572 | PSMC3    | ENSG00000165916 |
| 11 | 47543489 | 47543687 | 47543556 | 8   | 9   | 0  | 11.73048839 | 0.000425898 | PTPMT1   | ENSG00000110536 |
| 11 | 47556992 | 47557284 | 47557153 | 17  | 21  | 10 | 2.346097679 | 0.00796926  | NDUFS3   | ENSG00000213619 |
| 11 | 47567315 | 47567546 | 47567430 | 10  | 10  | 3  | 3.225884308 | 0.0139466   | FAM180B  | ENSG00000196666 |
| 11 | 47620118 | 47620703 | 47620454 | 9   | 22  | 8  | 2.997791478 | 0.00137524  | MTCH2    | ENSG00000109919 |
| 11 | 47703981 | 47704214 | 47704122 | 19  | 19  | 1  | 11.73048839 | 2.14E-06    |          | ENSG00000200090 |
| 11 | 47826296 | 47826558 | 47826437 | 8   | 11  | 10 | 1.279689643 | 0.277323    | NUP160   | ENSG00000030066 |
| 11 | 47894647 | 47894875 | 47894761 | 8   | 10  | 2  | 4.301179077 | 0.00512919  | PTPRJ    | ENSG00000149177 |
| 11 | 47925299 | 47925613 | 47925477 | 10  | 14  | 7  | 2.199466574 | 0.0303778   | PTPRJ    | ENSG00000149177 |
| 11 | 48028074 | 48028342 | 48028208 | 15  | 17  | 1  | 10.55743955 | 9.18E-06    | PTPRJ    | ENSG00000149177 |
| 11 | 48030466 | 48030705 | 48030576 | 13  | 13  | 3  | 4.105670938 | 0.00243034  | PTPRJ    | ENSG00000149177 |
| 11 | 48088011 | 48088306 | 48088158 | 9   | 10  | 1  | 6.451768616 | 0.00135978  | OR4B1    | ENSG00000175619 |
| 11 | 48286021 | 48286249 | 48286135 | 11  | 11  | 7  | 1.759573259 | 0.102361    | OR4S1    | ENSG00000176555 |
| 11 | 48772888 | 48773067 | 48772917 | 10  | 10  | 14 | 0.860235815 | 0.65444     |          | ENSG00000214907 |
| 11 | 48815934 | 48816113 | 48815963 | 8   | 8   | 19 | 0.527871978 | 0.95364     |          | ENSG00000214907 |
| 11 | 48820167 | 48820497 | 48820332 | 26  | 26  | 46 | 0.67387912  | 0.953019    |          | ENSG00000214907 |
| 11 | 48914373 | 48914705 | 48914539 | 23  | 23  | 18 | 1.481745902 | 0.0984143   |          | ENSG00000214907 |
| 11 | 49261441 | 49261667 | 49261559 | 10  | 10  | 2  | 4.301179077 | 0.00512919  | FOLH1    | ENSG00000086205 |
| 11 | 51428561 | 51428890 | 51428725 | 11  | 14  | 8  | 1.955081399 | 0.0506438   | OR4C46   | ENSG00000185926 |
| 11 | 51435885 | 51436216 | 51436050 | 28  | 30  | 23 | 1.515188084 | 0.0616668   | OR4C46   | ENSG00000185926 |
| 11 | 51439857 | 51440186 | 51440021 | 9   | 9   | 2  | 3.910162798 | 0.00955088  | OR4C46   | ENSG00000185926 |
| 11 | 51447743 | 51447927 | 51447896 | 9   | 9   | 12 | 0.902345261 | 0.602772    | OR4C46   | ENSG00000185926 |
| 11 | 55795109 | 55795401 | 55795254 | 10  | 10  | 0  | 12.90353723 | 0.000195991 | OR5T1    | ENSG00000181698 |
| 11 | 57181539 | 57181773 | 57181693 | 10  | 12  | 3  | 3.812408728 | 0.004404    | CLP1     | ENSG00000172409 |

|    |          |          |          |    |    |    |             |             |          |                 |
|----|----------|----------|----------|----|----|----|-------------|-------------|----------|-----------------|
| 11 | 57191536 | 57191940 | 57191715 | 9  | 16 | 2  | 6.647276756 | 0.000101928 | ZDHC5    | ENSG00000156599 |
| 11 | 57285738 | 57285968 | 57285889 | 8  | 9  | 7  | 1.466311049 | 0.20706     | CTNND1   | ENSG00000198561 |
| 11 | 57303442 | 57303739 | 57303590 | 10 | 10 | 0  | 12.90353723 | 0.000195991 | CTNND1   | ENSG00000198561 |
| 11 | 57305679 | 57305916 | 57305791 | 10 | 10 | 7  | 1.612942154 | 0.147335    | CTNND1   | ENSG00000198561 |
| 11 | 57312547 | 57312785 | 57312704 | 10 | 12 | 1  | 7.624817456 | 0.000332769 | CTNND1   | ENSG00000198561 |
| 11 | 58182629 | 58182873 | 58182716 | 8  | 10 | 0  | 12.90353723 | 0.000195991 |          | ENSG00000197254 |
| 11 | 58666853 | 58667067 | 58666960 | 8  | 9  | 1  | 5.865244197 | 0.00272497  | FAM111A  | ENSG00000166801 |
| 11 | 58725441 | 58725744 | 58725592 | 11 | 15 | 0  | 18.76878143 | 4.04E-06    |          | ENSG00000197629 |
| 11 | 59074551 | 59074792 | 59074626 | 12 | 13 | 5  | 2.737113958 | 0.0137917   | OR4D9    | ENSG00000172742 |
| 11 | 59084298 | 59084576 | 59084419 | 10 | 13 | 4  | 3.28453675  | 0.00629037  | OR4D9    | ENSG00000172742 |
| 11 | 59090231 | 59090445 | 59090363 | 8  | 12 | 11 | 1.270802909 | 0.274822    | OSBP     | ENSG00000110048 |
| 11 | 59193356 | 59193573 | 59193450 | 9  | 9  | 3  | 2.932622098 | 0.0242899   | PATL1    | ENSG00000166889 |
| 11 | 59278428 | 59278627 | 59278527 | 9  | 11 | 1  | 7.038293036 | 0.000674435 | STX3     | ENSG00000166900 |
| 11 | 59334792 | 59334973 | 59334872 | 9  | 9  | 1  | 5.865244197 | 0.00272497  | MRPL16   | ENSG00000166902 |
| 11 | 59894879 | 59895365 | 59895058 | 8  | 17 | 4  | 4.222975822 | 0.000640773 | MS4A7    | ENSG00000166927 |
| 11 | 60087625 | 60088110 | 60087862 | 51 | 67 | 2  | 26.58910702 | 8.66E-21    | MS4A13   | ENSG00000204979 |
| 11 | 60355186 | 60355473 | 60355363 | 8  | 11 | 2  | 4.692195357 | 0.00272444  | CCDC86   | ENSG00000110104 |
| 11 | 60430552 | 60430807 | 60430668 | 9  | 12 | 2  | 5.083211637 | 0.00143337  | PRPF19   | ENSG00000110107 |
| 11 | 60437793 | 60438002 | 60437823 | 8  | 11 | 6  | 2.010940867 | 0.0640214   | TMEM109  | ENSG00000110108 |
| 11 | 60459657 | 60459972 | 60459814 | 11 | 16 | 0  | 19.94183027 | 1.86E-06    | TMEM132A | ENSG00000006118 |
| 11 | 60466273 | 60466564 | 60466413 | 8  | 10 | 7  | 1.612942154 | 0.147335    | SLC15A3  | ENSG00000110446 |
| 11 | 60467278 | 60467524 | 60467451 | 10 | 11 | 2  | 4.692195357 | 0.00272444  | SLC15A3  | ENSG00000110446 |
| 11 | 60494508 | 60494691 | 60494599 | 9  | 9  | 3  | 2.932622098 | 0.0242899   | CD6      | ENSG00000013725 |
| 11 | 60653880 | 60654127 | 60654003 | 16 | 16 | 4  | 3.988366054 | 0.00115141  | CD5      | ENSG00000110448 |
| 11 | 60665799 | 60666038 | 60665964 | 8  | 11 | 0  | 14.07658607 | 9.02E-05    | VPS37C   | ENSG00000167987 |
| 11 | 60682675 | 60683001 | 60682838 | 20 | 23 | 7  | 3.519146518 | 0.000369739 | VPS37C   | ENSG00000167987 |
| 11 | 60818420 | 60818613 | 60818516 | 8  | 8  | 0  | 10.55743955 | 0.000925496 | VWCE     | ENSG00000167992 |
| 11 | 60818806 | 60819003 | 60818904 | 10 | 11 | 2  | 4.692195357 | 0.00272444  | VWCE     | ENSG00000167992 |
| 11 | 60821612 | 60821996 | 60821791 | 13 | 21 | 1  | 12.90353723 | 4.95E-07    | VWCE     | ENSG00000167992 |
| 11 | 60824660 | 60824971 | 60824813 | 26 | 29 | 1  | 17.59573259 | 1.33E-09    | VWCE     | ENSG00000167992 |
| 11 | 61012667 | 61012991 | 61012829 | 10 | 15 | 6  | 2.68125449  | 0.0103552   | C11orf66 | ENSG00000162148 |
| 11 | 61091354 | 61091564 | 61091466 | 9  | 10 | 5  | 2.150589539 | 0.0575848   |          | ENSG00000011347 |
| 11 | 61099462 | 61099649 | 61099555 | 8  | 8  | 0  | 10.55743955 | 0.000925496 |          | ENSG00000011347 |
| 11 | 61105444 | 61105687 | 61105569 | 11 | 13 | 3  | 4.105670938 | 0.00243034  |          | ENSG00000011347 |

|    |          |          |          |    |    |   |             |             |          |                 |
|----|----------|----------|----------|----|----|---|-------------|-------------|----------|-----------------|
| 11 | 61110899 | 61111119 | 61110991 | 10 | 10 | 0 | 12.90353723 | 0.000195991 |          | ENSG00000011347 |
| 11 | 61150693 | 61151113 | 61150921 | 24 | 33 | 9 | 3.988366054 | 9.65E-06    |          | ENSG00000213553 |
| 11 | 61267490 | 61267669 | 61267579 | 8  | 8  | 0 | 10.55743955 | 0.000925496 | C11orf9  | ENSG00000124920 |
| 11 | 61282572 | 61282807 | 61282683 | 9  | 10 | 0 | 12.90353723 | 0.000195991 |          | ENSG00000124915 |
| 11 | 61304949 | 61305223 | 61305086 | 13 | 14 | 1 | 8.797866295 | 8.00E-05    | C11orf9  | ENSG00000124920 |
| 11 | 61344188 | 61344543 | 61344366 | 29 | 34 | 3 | 10.26417734 | 2.27E-09    | FADS1    | ENSG00000149485 |
| 11 | 61423151 | 61423446 | 61423325 | 8  | 11 | 1 | 7.038293036 | 0.000674435 | FADS3    | ENSG00000221968 |
| 11 | 61505259 | 61505626 | 61505447 | 22 | 29 | 2 | 11.73048839 | 1.18E-08    | FTH1     | ENSG00000167996 |
| 11 | 61523049 | 61523480 | 61523221 | 27 | 37 | 5 | 7.429309316 | 7.67E-09    | FTH1     | ENSG00000167996 |
| 11 | 61606221 | 61606400 | 61606347 | 8  | 8  | 3 | 2.639359888 | 0.0415794   | INCENP   | ENSG00000149503 |
| 11 | 61746963 | 61747385 | 61747174 | 22 | 30 | 0 | 36.36451402 | 3.56E-11    | SCGB2A1  | ENSG00000124939 |
| 11 | 61766099 | 61766338 | 61766250 | 8  | 9  | 2 | 3.910162798 | 0.00955088  | SCGB1D2  | ENSG00000124935 |
| 11 | 61849022 | 61849233 | 61849147 | 8  | 9  | 4 | 2.346097679 | 0.050148    | ASRGL1   | ENSG00000162174 |
| 11 | 61917490 | 61917833 | 61917661 | 9  | 13 | 2 | 5.474227917 | 0.000747844 | SCGB1A1  | ENSG00000149021 |
| 11 | 62032367 | 62032578 | 62032486 | 10 | 12 | 2 | 5.083211637 | 0.00143337  | AHNAK    | ENSG00000124942 |
| 11 | 62066884 | 62067101 | 62066992 | 9  | 10 | 2 | 4.301179077 | 0.00512919  | AHNAK    | ENSG00000124942 |
| 11 | 62067224 | 62067536 | 62067380 | 10 | 15 | 2 | 6.256260476 | 0.000199274 | AHNAK    | ENSG00000124942 |
| 11 | 62077296 | 62077577 | 62077427 | 10 | 13 | 4 | 3.28453675  | 0.00629037  | AHNAK    | ENSG00000124942 |
| 11 | 62097537 | 62097980 | 62097801 | 13 | 22 | 3 | 6.745030826 | 8.05E-06    | EEF1G    | ENSG00000186676 |
| 11 | 62098018 | 62098463 | 62098295 | 9  | 15 | 8 | 2.085420159 | 0.0338693   | EEF1G    | ENSG00000186676 |
| 11 | 62115441 | 62115854 | 62115662 | 17 | 28 | 4 | 6.803683268 | 6.55E-07    | TUT1     | ENSG00000149016 |
| 11 | 62123184 | 62123577 | 62123392 | 12 | 21 | 5 | 4.301179077 | 0.000172642 | MTA2     | ENSG00000149480 |
| 11 | 62123930 | 62124373 | 62124127 | 62 | 78 | 3 | 23.16771458 | 3.38E-23    | MTA2     | ENSG00000149480 |
| 11 | 62125743 | 62126071 | 62125907 | 13 | 17 | 2 | 7.038293036 | 5.19E-05    | MTA2     | ENSG00000149480 |
| 11 | 62146111 | 62146362 | 62146247 | 13 | 15 | 4 | 3.753756286 | 0.0020497   | B3GAT3   | ENSG00000149541 |
| 11 | 62146376 | 62146598 | 62146489 | 8  | 11 | 7 | 1.759573259 | 0.102361    | B3GAT3   | ENSG00000149541 |
| 11 | 62177340 | 62177603 | 62177486 | 15 | 16 | 6 | 2.848832895 | 0.00632407  | INTS5    | ENSG00000185085 |
| 11 | 62189213 | 62189565 | 62189389 | 11 | 15 | 4 | 3.753756286 | 0.0020497   |          | ENSG00000214756 |
| 11 | 62195486 | 62195832 | 62195660 | 9  | 13 | 3 | 4.105670938 | 0.00243034  | C11orf83 | ENSG00000204922 |
| 11 | 62218840 | 62219179 | 62219009 | 10 | 13 | 1 | 8.211341875 | 0.000163445 | LRRN4CL  | ENSG00000177363 |
| 11 | 62229771 | 62229978 | 62229874 | 8  | 9  | 1 | 5.865244197 | 0.00272497  | BSCL2    | ENSG00000168000 |
| 11 | 62251734 | 62251982 | 62251869 | 8  | 11 | 4 | 2.815317214 | 0.0183428   | TTC9C    | ENSG00000162222 |
| 11 | 62252542 | 62252722 | 62252632 | 9  | 9  | 5 | 1.955081399 | 0.0892323   | TTC9C    | ENSG00000162222 |
| 11 | 62311210 | 62311542 | 62311376 | 10 | 16 | 6 | 2.848832895 | 0.00632407  | TMEM179B | ENSG00000185475 |

|    |          |          |          |    |    |    |             |             |          |                 |
|----|----------|----------|----------|----|----|----|-------------|-------------|----------|-----------------|
| 11 | 62329392 | 62329648 | 62329477 | 8  | 9  | 2  | 3.910162798 | 0.00955088  | NXF1     | ENSG00000162231 |
| 11 | 62355700 | 62355922 | 62355811 | 8  | 8  | 5  | 1.759573259 | 0.13508     | STX5     | ENSG00000162236 |
| 11 | 62365360 | 62365958 | 62365659 | 27 | 54 | 37 | 1.697833846 | 0.00551563  |          | ENSG00000222328 |
| 11 | 62379737 | 62379961 | 62379897 | 11 | 13 | 8  | 1.824742639 | 0.0744168   | SLC3A2   | ENSG00000168003 |
| 11 | 62405371 | 62405842 | 62405592 | 12 | 24 | 6  | 4.18946014  | 8.40E-05    | SLC3A2   | ENSG00000168003 |
| 11 | 63002822 | 63003130 | 63002976 | 12 | 14 | 3  | 4.398933147 | 0.00132748  | HRASLS5  | ENSG00000168004 |
| 11 | 63138293 | 63138529 | 63138411 | 10 | 11 | 4  | 2.815317214 | 0.0183428   | PLA2G16  | ENSG00000176485 |
| 11 | 63146194 | 63146381 | 63146352 | 9  | 9  | 0  | 11.73048839 | 0.000425898 |          | ENSG00000196566 |
| 11 | 63195744 | 63196004 | 63195879 | 13 | 14 | 2  | 5.865244197 | 0.000387308 | ATL3     | ENSG00000184743 |
| 11 | 63315632 | 63315867 | 63315713 | 9  | 9  | 1  | 5.865244197 | 0.00272497  | C11orf84 | ENSG00000168005 |
| 11 | 63371320 | 63371703 | 63371578 | 11 | 16 | 1  | 9.970915134 | 1.89E-05    | MARK2    | ENSG00000072518 |
| 11 | 63393402 | 63393591 | 63393491 | 8  | 11 | 0  | 14.07658607 | 9.02E-05    |          | ENSG00000202089 |
| 11 | 63510284 | 63510529 | 63510385 | 11 | 11 | 3  | 3.519146518 | 0.00788869  | OTUB1    | ENSG00000167770 |
| 11 | 63690550 | 63690784 | 63690704 | 15 | 15 | 2  | 6.256260476 | 0.000199274 | MACROD1  | ENSG00000133315 |
| 11 | 63728660 | 63728846 | 63728754 | 8  | 8  | 2  | 3.519146518 | 0.017558    | FERMT3   | ENSG00000149781 |
| 11 | 63761662 | 63761952 | 63761800 | 14 | 16 | 6  | 2.848832895 | 0.00632407  | VEGFB    | ENSG00000173511 |
| 11 | 63792723 | 63792957 | 63792840 | 13 | 16 | 2  | 6.647276756 | 0.000101928 | BAD      | ENSG00000002330 |
| 11 | 63835256 | 63835542 | 63835363 | 13 | 16 | 1  | 9.970915134 | 1.89E-05    | ESRRA    | ENSG00000173153 |
| 11 | 63841743 | 63841993 | 63841868 | 13 | 16 | 2  | 6.647276756 | 0.000101928 |          | ENSG00000173113 |
| 11 | 63961430 | 63961764 | 63961603 | 12 | 15 | 0  | 18.76878143 | 4.04E-06    |          | ENSG00000181908 |
| 11 | 63973635 | 63974027 | 63973795 | 9  | 15 | 2  | 6.256260476 | 0.000199274 |          | ENSG00000181908 |
| 11 | 64043528 | 64043926 | 64043747 | 12 | 20 | 3  | 6.158506406 | 2.99E-05    |          | ENSG00000220919 |
| 11 | 64228557 | 64228789 | 64228653 | 14 | 14 | 0  | 17.59573259 | 8.79E-06    | NRXN2    | ENSG00000110076 |
| 11 | 64302832 | 64303100 | 64302969 | 8  | 12 | 6  | 2.178519273 | 0.0416567   | SF1      | ENSG00000168066 |
| 11 | 64366837 | 64367420 | 64367241 | 21 | 41 | 1  | 24.63402563 | 1.65E-13    | CDC42BPG | ENSG00000171219 |
| 11 | 64400669 | 64400985 | 64400836 | 12 | 17 | 5  | 3.519146518 | 0.00167472  | EHD1     | ENSG00000110047 |
| 11 | 64401038 | 64401389 | 64401229 | 9  | 14 | 4  | 3.519146518 | 0.00361132  | EHD1     | ENSG00000110047 |
| 11 | 64402873 | 64403068 | 64402940 | 8  | 9  | 1  | 5.865244197 | 0.00272497  | EHD1     | ENSG00000110047 |
| 11 | 64448042 | 64448331 | 64448140 | 10 | 15 | 0  | 18.76878143 | 4.04E-06    | PPP2R5B  | ENSG00000068971 |
| 11 | 64537446 | 64537878 | 64537625 | 8  | 15 | 10 | 1.706252857 | 0.0822346   | ARL2     | ENSG00000213465 |
| 11 | 64551307 | 64551527 | 64551421 | 10 | 11 | 2  | 4.692195357 | 0.00272444  | SNX15    | ENSG00000110025 |
| 11 | 64564966 | 64565531 | 64565374 | 21 | 34 | 3  | 10.26417734 | 2.27E-09    | SAC3D1   | ENSG00000168061 |
| 11 | 64602385 | 64602566 | 64602475 | 9  | 9  | 2  | 3.910162798 | 0.00955088  | CDCA5    | ENSG00000146670 |
| 11 | 64620033 | 64620327 | 64620180 | 17 | 17 | 13 | 1.508205651 | 0.12204     | C11orf2  | ENSG00000149823 |

|    |          |          |          |     |     |    |             |             |          |                 |
|----|----------|----------|----------|-----|-----|----|-------------|-------------|----------|-----------------|
| 11 | 64641478 | 64642031 | 64641858 | 11  | 25  | 8  | 3.388807758 | 0.000297109 | ZNHIT2   | ENSG00000174276 |
| 11 | 64646205 | 64646511 | 64646359 | 9   | 13  | 2  | 5.474227917 | 0.000747844 | MRPL49   | ENSG00000149792 |
| 11 | 64658542 | 64658827 | 64658685 | 16  | 18  | 4  | 4.457585589 | 0.000353565 | SYVN1    | ENSG00000162298 |
| 11 | 64707122 | 64707390 | 64707272 | 11  | 12  | 1  | 7.624817456 | 0.000332769 | CAPN1    | ENSG00000014216 |
| 11 | 64790294 | 64790480 | 64790388 | 8   | 9   | 5  | 1.955081399 | 0.0892323   | POLA2    | ENSG00000014138 |
| 11 | 64857836 | 64858185 | 64858010 | 10  | 15  | 7  | 2.346097679 | 0.0195693   | DPF2     | ENSG00000133884 |
| 11 | 64906187 | 64906555 | 64906366 | 8   | 15  | 2  | 6.256260476 | 0.000199274 | SLC25A45 | ENSG00000162241 |
| 11 | 64942633 | 64943615 | 64942845 | 18  | 52  | 13 | 4.440827749 | 1.15E-08    |          | ENSG00000207727 |
| 11 | 64944022 | 64944441 | 64944198 | 23  | 31  | 3  | 9.384390715 | 1.82E-08    |          | ENSG00000207727 |
| 11 | 64944911 | 64946144 | 64945395 | 354 | 450 | 17 | 29.39139036 | 1.44E-126   |          | ENSG00000207727 |
| 11 | 64946186 | 64946500 | 64946341 | 15  | 19  | 1  | 11.73048839 | 2.14E-06    |          | ENSG00000207727 |
| 11 | 64946552 | 64947064 | 64946885 | 33  | 51  | 5  | 10.16642327 | 6.18E-13    |          | ENSG00000207727 |
| 11 | 64947740 | 64948023 | 64947869 | 10  | 11  | 0  | 14.07658607 | 9.02E-05    |          | ENSG00000207727 |
| 11 | 64953890 | 64954339 | 64954049 | 11  | 20  | 7  | 3.079253203 | 0.00177418  |          | ENSG00000207727 |
| 11 | 64992928 | 64993217 | 64993073 | 16  | 20  | 1  | 12.31701281 | 1.03E-06    |          | ENSG00000173727 |
| 11 | 64996140 | 64996615 | 64996409 | 13  | 23  | 5  | 4.692195357 | 5.29E-05    |          | ENSG00000173727 |
| 11 | 65000947 | 65001126 | 65001036 | 8   | 8   | 4  | 2.111487911 | 0.0804809   |          | ENSG00000173727 |
| 11 | 65001617 | 65001862 | 65001770 | 11  | 13  | 7  | 2.052835469 | 0.046392    |          | ENSG00000173727 |
| 11 | 65011538 | 65012193 | 65011870 | 10  | 27  | 7  | 4.105670938 | 4.08E-05    |          | ENSG00000173727 |
| 11 | 65015805 | 65016167 | 65016027 | 12  | 17  | 4  | 4.222975822 | 0.000640773 | SCYL1    | ENSG00000142186 |
| 11 | 65017932 | 65018166 | 65018066 | 9   | 11  | 4  | 2.815317214 | 0.0183428   | SCYL1    | ENSG00000142186 |
| 11 | 65021305 | 65021979 | 65021753 | 23  | 47  | 7  | 7.038293036 | 2.04E-10    | SCYL1    | ENSG00000142186 |
| 11 | 65022878 | 65023293 | 65023035 | 21  | 29  | 10 | 3.199224107 | 0.000186763 | SCYL1    | ENSG00000142186 |
| 11 | 65031747 | 65031970 | 65031820 | 9   | 11  | 7  | 1.759573259 | 0.102361    | SCYL1    | ENSG00000142186 |
| 11 | 65063844 | 65064122 | 65063975 | 9   | 10  | 3  | 3.225884308 | 0.0139466   | SCYL1    | ENSG00000142186 |
| 11 | 65065765 | 65065966 | 65065853 | 9   | 10  | 8  | 1.433726359 | 0.209175    | LTBP3    | ENSG00000168056 |
| 11 | 65074974 | 65075193 | 65075088 | 9   | 9   | 3  | 2.932622098 | 0.0242899   | LTBP3    | ENSG00000168056 |
| 11 | 65094071 | 65094643 | 65094357 | 9   | 23  | 2  | 9.384390715 | 8.25E-07    | SSSCA1   | ENSG00000173465 |
| 11 | 65138282 | 65138486 | 65138389 | 8   | 9   | 1  | 5.865244197 | 0.00272497  | MAP3K11  | ENSG00000173327 |
| 11 | 65139025 | 65139296 | 65139160 | 8   | 10  | 11 | 1.075294769 | 0.434143    | MAP3K11  | ENSG00000173327 |
| 11 | 65139351 | 65139569 | 65139444 | 8   | 8   | 5  | 1.759573259 | 0.13508     | PCNXL3   | ENSG00000197136 |
| 11 | 65187298 | 65187641 | 65187469 | 10  | 15  | 4  | 3.753756286 | 0.0020497   | RELA     | ENSG00000173039 |
| 11 | 65235936 | 65236498 | 65236182 | 12  | 26  | 6  | 4.524616952 | 2.63E-05    | KAT5     | ENSG00000172977 |
| 11 | 65308035 | 65308390 | 65308212 | 22  | 28  | 2  | 11.33947211 | 2.41E-08    | OVOL1    | ENSG00000172818 |

|    |          |          |          |    |    |    |             |             |         |                 |
|----|----------|----------|----------|----|----|----|-------------|-------------|---------|-----------------|
| 11 | 65308405 | 65308718 | 65308561 | 9  | 12 | 4  | 3.049926982 | 0.0108184   | OVOL1   | ENSG00000172818 |
| 11 | 65317248 | 65317559 | 65317400 | 26 | 31 | 1  | 18.76878143 | 2.99E-10    | OVOL1   | ENSG00000172818 |
| 11 | 65342345 | 65342620 | 65342497 | 10 | 11 | 0  | 14.07658607 | 9.02E-05    | SNX32   | ENSG00000172803 |
| 11 | 65373736 | 65373930 | 65373880 | 9  | 9  | 0  | 11.73048839 | 0.000425898 | CFL1    | ENSG00000172757 |
| 11 | 65382019 | 65382491 | 65382181 | 13 | 19 | 2  | 7.820325595 | 1.32E-05    | CFL1    | ENSG00000172757 |
| 11 | 65383909 | 65384125 | 65384031 | 9  | 10 | 4  | 2.580707446 | 0.0306059   | MUS81   | ENSG00000172732 |
| 11 | 65384308 | 65384721 | 65384457 | 15 | 22 | 8  | 2.997791478 | 0.00137524  | MUS81   | ENSG00000172732 |
| 11 | 65408715 | 65408976 | 65408828 | 11 | 14 | 7  | 2.199466574 | 0.0303778   | FIBP    | ENSG00000172500 |
| 11 | 65412414 | 65412882 | 65412641 | 8  | 17 | 11 | 1.759573259 | 0.0609179   | FIBP    | ENSG00000172500 |
| 11 | 65413837 | 65414016 | 65413926 | 8  | 8  | 0  | 10.55743955 | 0.000925496 | CCDC85B | ENSG00000175602 |
| 11 | 65414957 | 65415136 | 65415065 | 8  | 8  | 0  | 10.55743955 | 0.000925496 | CCDC85B | ENSG00000175602 |
| 11 | 65423083 | 65423642 | 65423302 | 39 | 57 | 3  | 17.00920817 | 1.67E-16    | FOSL1   | ENSG00000175592 |
| 11 | 65526090 | 65526415 | 65526253 | 16 | 20 | 6  | 3.519146518 | 0.000784044 | EIF1AD  | ENSG00000175376 |
| 11 | 65537007 | 65537193 | 65537100 | 8  | 9  | 0  | 11.73048839 | 0.000425898 | CST6    | ENSG00000175315 |
| 11 | 65569272 | 65569586 | 65569429 | 10 | 15 | 6  | 2.68125449  | 0.0103552   | GAL3ST3 | ENSG00000175229 |
| 11 | 65575875 | 65576108 | 65576007 | 8  | 11 | 9  | 1.407658607 | 0.210479    | SF3B2   | ENSG00000087365 |
| 11 | 65576199 | 65576378 | 65576288 | 8  | 8  | 6  | 1.508205651 | 0.203852    | SF3B2   | ENSG00000087365 |
| 11 | 65595384 | 65595729 | 65595556 | 9  | 14 | 5  | 2.932622098 | 0.00829617  | PACS1   | ENSG00000175115 |
| 11 | 65605442 | 65605941 | 65605768 | 10 | 17 | 3  | 5.278719777 | 0.000205462 | PACS1   | ENSG00000175115 |
| 11 | 65607494 | 65607717 | 65607595 | 10 | 12 | 1  | 7.624817456 | 0.000332769 | PACS1   | ENSG00000175115 |
| 11 | 65650857 | 65651171 | 65651014 | 8  | 14 | 3  | 4.398933147 | 0.00132748  |         | ENSG00000210102 |
| 11 | 65651344 | 65651551 | 65651447 | 8  | 9  | 2  | 3.910162798 | 0.00955088  |         | ENSG00000210102 |
| 11 | 65746636 | 65746854 | 65746762 | 8  | 9  | 7  | 1.466311049 | 0.20706     | RAB1B   | ENSG00000174903 |
| 11 | 65781044 | 65781248 | 65781131 | 9  | 9  | 2  | 3.910162798 | 0.00955088  | KLC2    | ENSG00000174996 |
| 11 | 65813556 | 65813769 | 65813687 | 8  | 9  | 2  | 3.910162798 | 0.00955088  | YIF1A   | ENSG00000174851 |
| 11 | 65860935 | 65861291 | 65861124 | 12 | 17 | 5  | 3.519146518 | 0.00167472  | RIN1    | ENSG00000174791 |
| 11 | 65871905 | 65872300 | 65872080 | 14 | 21 | 10 | 2.346097679 | 0.00796926  |         | ENSG00000174684 |
| 11 | 65895718 | 65896218 | 65895823 | 12 | 23 | 4  | 5.630634429 | 1.63E-05    | SLC29A2 | ENSG00000174669 |
| 11 | 65910214 | 65910530 | 65910372 | 10 | 13 | 8  | 1.824742639 | 0.0744168   |         | ENSG00000202317 |
| 11 | 65913031 | 65913217 | 65913171 | 9  | 10 | 4  | 2.580707446 | 0.0306059   |         | ENSG00000202317 |
| 11 | 65932549 | 65932829 | 65932693 | 9  | 11 | 0  | 14.07658607 | 9.02E-05    | NPAS4   | ENSG00000174576 |
| 11 | 65945641 | 65945995 | 65945816 | 29 | 34 | 6  | 5.865244197 | 2.06E-07    | NPAS4   | ENSG00000174576 |
| 11 | 65954065 | 65954319 | 65954202 | 10 | 11 | 6  | 2.010940867 | 0.0640214   |         | ENSG00000201733 |
| 11 | 65962869 | 65963269 | 65963117 | 11 | 19 | 15 | 1.466311049 | 0.125014    | MRPL11  | ENSG00000174547 |

|    |          |          |          |    |    |    |             |             |          |                 |
|----|----------|----------|----------|----|----|----|-------------|-------------|----------|-----------------|
| 11 | 65990572 | 65990787 | 65990679 | 9  | 9  | 1  | 5.865244197 | 0.00272497  | PELI3    | ENSG00000174516 |
| 11 | 66003919 | 66004153 | 66004037 | 9  | 9  | 2  | 3.910162798 | 0.00955088  | DPP3     | ENSG00000221844 |
| 11 | 66004431 | 66004687 | 66004551 | 11 | 14 | 4  | 3.519146518 | 0.00361132  | DPP3     | ENSG00000221844 |
| 11 | 66004840 | 66005065 | 66004952 | 10 | 10 | 7  | 1.612942154 | 0.147335    | DPP3     | ENSG00000221844 |
| 11 | 66034387 | 66034891 | 66034662 | 19 | 30 | 7  | 4.545564252 | 7.31E-06    | BBS1     | ENSG00000174483 |
| 11 | 66140403 | 66141110 | 66140778 | 15 | 31 | 14 | 2.502504191 | 0.00106817  | RBM4     | ENSG00000173933 |
| 11 | 66143231 | 66143726 | 66143487 | 49 | 66 | 4  | 15.71885445 | 2.26E-18    | RBM4     | ENSG00000173933 |
| 11 | 66162597 | 66162943 | 66162775 | 12 | 16 | 12 | 1.533986944 | 0.120062    | RBM4     | ENSG00000173933 |
| 11 | 66201702 | 66202003 | 66201881 | 9  | 12 | 4  | 3.049926982 | 0.0108184   | RBM4B    | ENSG00000173914 |
| 11 | 66202067 | 66202357 | 66202206 | 15 | 17 | 8  | 2.346097679 | 0.0144542   | RBM4B    | ENSG00000173914 |
| 11 | 66218800 | 66219149 | 66218974 | 15 | 20 | 6  | 3.519146518 | 0.000784044 | RBM4B    | ENSG00000173914 |
| 11 | 66242711 | 66243018 | 66242864 | 13 | 16 | 11 | 1.661819189 | 0.0853913   | SPTBN2   | ENSG00000173898 |
| 11 | 66244019 | 66244239 | 66244129 | 8  | 9  | 8  | 1.303387599 | 0.281715    | SPTBN2   | ENSG00000173898 |
| 11 | 66244417 | 66244777 | 66244624 | 10 | 16 | 9  | 1.994183027 | 0.0370915   | SPTBN2   | ENSG00000173898 |
| 11 | 66272909 | 66273170 | 66273063 | 9  | 11 | 4  | 2.815317214 | 0.0183428   |          | ENSG00000213410 |
| 11 | 66313840 | 66314053 | 66313946 | 13 | 14 | 3  | 4.398933147 | 0.00132748  |          | ENSG00000213409 |
| 11 | 66358284 | 66358568 | 66358426 | 9  | 13 | 11 | 1.368556979 | 0.211388    | RCE1     | ENSG00000173653 |
| 11 | 66376338 | 66376546 | 66376431 | 9  | 10 | 1  | 6.451768616 | 0.00135978  | LRFN4    | ENSG00000173621 |
| 11 | 66392818 | 66393149 | 66392983 | 13 | 16 | 11 | 1.661819189 | 0.0853913   | PC       | ENSG00000173599 |
| 11 | 66404831 | 66405276 | 66405097 | 9  | 19 | 9  | 2.346097679 | 0.0107159   | PC       | ENSG00000173599 |
| 11 | 66407296 | 66407555 | 66407425 | 10 | 14 | 6  | 2.513676084 | 0.016726    | PC       | ENSG00000173599 |
| 11 | 66498123 | 66498352 | 66498275 | 8  | 10 | 0  | 12.90353723 | 0.000195991 | C11orf86 | ENSG00000173237 |
| 11 | 66546384 | 66546719 | 66546551 | 14 | 20 | 4  | 4.926805125 | 0.00010522  | SYT12    | ENSG00000173227 |
| 11 | 66551815 | 66552346 | 66552025 | 16 | 33 | 18 | 2.099140028 | 0.00383241  | SYT12    | ENSG00000173227 |
| 11 | 66554896 | 66555618 | 66555315 | 10 | 27 | 12 | 2.526566731 | 0.00187486  | SYT12    | ENSG00000173227 |
| 11 | 66555708 | 66556043 | 66555875 | 13 | 17 | 4  | 4.222975822 | 0.000640773 | SYT12    | ENSG00000173227 |
| 11 | 66578846 | 66579030 | 66578946 | 10 | 11 | 1  | 7.038293036 | 0.000674435 | RHOD     | ENSG00000173156 |
| 11 | 66579044 | 66579660 | 66579481 | 14 | 34 | 13 | 2.932622098 | 0.000144323 | RHOD     | ENSG00000173156 |
| 11 | 66580654 | 66580853 | 66580753 | 8  | 9  | 2  | 3.910162798 | 0.00955088  | RHOD     | ENSG00000173156 |
| 11 | 66581656 | 66582081 | 66581898 | 27 | 41 | 5  | 8.211341875 | 5.42E-10    | RHOD     | ENSG00000173156 |
| 11 | 66586339 | 66586599 | 66586469 | 9  | 10 | 3  | 3.225884308 | 0.0139466   | RHOD     | ENSG00000173156 |
| 11 | 66595762 | 66596005 | 66595872 | 8  | 9  | 0  | 11.73048839 | 0.000425898 | RHOD     | ENSG00000173156 |
| 11 | 66605589 | 66606017 | 66605768 | 16 | 26 | 8  | 3.519146518 | 0.000175368 | RHOD     | ENSG00000173156 |
| 11 | 66606206 | 66606688 | 66606521 | 12 | 19 | 6  | 3.351568112 | 0.00134187  | RHOD     | ENSG00000173156 |



|    |          |          |          |    |    |    |             |             |         |                 |
|----|----------|----------|----------|----|----|----|-------------|-------------|---------|-----------------|
| 11 | 66643160 | 66643502 | 66643331 | 8  | 13 | 1  | 8.211341875 | 0.000163445 | FBXL11  | ENSG00000173120 |
| 11 | 66763989 | 66764309 | 66764156 | 9  | 11 | 7  | 1.759573259 | 0.102361    | ADRBK1  | ENSG00000173020 |
| 11 | 66772726 | 66773000 | 66772876 | 18 | 19 | 11 | 1.955081399 | 0.0295891   | ADRBK1  | ENSG00000173020 |
| 11 | 66777940 | 66778173 | 66778063 | 8  | 10 | 0  | 12.90353723 | 0.000195991 | ADRBK1  | ENSG00000173020 |
| 11 | 66786614 | 66787066 | 66786887 | 12 | 19 | 1  | 11.73048839 | 2.14E-06    | ADRBK1  | ENSG00000173020 |
| 11 | 66834580 | 66834860 | 66834733 | 9  | 10 | 1  | 6.451768616 | 0.00135978  | SSH3    | ENSG00000172830 |
| 11 | 66836854 | 66837191 | 66837022 | 20 | 24 | 6  | 4.18946014  | 8.40E-05    | SSH3    | ENSG00000172830 |
| 11 | 66841589 | 66842121 | 66841765 | 13 | 24 | 6  | 4.18946014  | 8.40E-05    | SSH3    | ENSG00000172830 |
| 11 | 66880980 | 66881208 | 66881116 | 10 | 11 | 5  | 2.346097679 | 0.0364013   | POLD4   | ENSG00000175482 |
| 11 | 66903682 | 66903886 | 66903829 | 10 | 11 | 2  | 4.692195357 | 0.00272444  | CLCF1   | ENSG00000175505 |
| 11 | 66906598 | 66906902 | 66906748 | 10 | 13 | 8  | 1.824742639 | 0.0744168   | CLCF1   | ENSG00000175505 |
| 11 | 66952304 | 66952548 | 66952426 | 11 | 13 | 5  | 2.737113958 | 0.0137917   | RPS6KB2 | ENSG00000175634 |
| 11 | 66963102 | 66963374 | 66963218 | 8  | 11 | 0  | 14.07658607 | 9.02E-05    | PTPRCAP | ENSG00000213402 |
| 11 | 66987368 | 66987567 | 66987474 | 10 | 10 | 5  | 2.150589539 | 0.0575848   | TMEM134 | ENSG00000172663 |
| 11 | 66988039 | 66988718 | 66988218 | 18 | 39 | 10 | 4.265632143 | 8.90E-07    | TMEM134 | ENSG00000172663 |
| 11 | 66988857 | 66989189 | 66989023 | 18 | 23 | 2  | 9.384390715 | 8.25E-07    | TMEM134 | ENSG00000172663 |
| 11 | 66990558 | 66990773 | 66990702 | 10 | 11 | 2  | 4.692195357 | 0.00272444  | TMEM134 | ENSG00000172663 |
| 11 | 66992217 | 66992446 | 66992375 | 8  | 11 | 0  | 14.07658607 | 9.02E-05    | TMEM134 | ENSG00000172663 |
| 11 | 67007074 | 67007574 | 67007214 | 11 | 20 | 11 | 2.052835469 | 0.0201852   | AIP     | ENSG00000110711 |
| 11 | 67029732 | 67029937 | 67029834 | 11 | 13 | 12 | 1.263283365 | 0.272203    | PITPNM1 | ENSG00000110697 |
| 11 | 67029956 | 67030440 | 67030191 | 18 | 30 | 5  | 6.060752336 | 7.05E-07    | PITPNM1 | ENSG00000110697 |
| 11 | 67106531 | 67106829 | 67106677 | 18 | 19 | 5  | 3.910162798 | 0.000546977 | GSTP1   | ENSG00000084207 |
| 11 | 67130861 | 67131126 | 67130993 | 8  | 8  | 4  | 2.111487911 | 0.0804809   | NDUFV1  | ENSG00000167792 |
| 11 | 67154565 | 67155170 | 67154867 | 14 | 28 | 6  | 4.859773763 | 8.07E-06    | NUDT8   | ENSG00000167799 |
| 11 | 67180423 | 67180767 | 67180577 | 13 | 18 | 2  | 7.429309316 | 2.63E-05    | ACY3    | ENSG00000132744 |
| 11 | 67198599 | 67199160 | 67198812 | 17 | 31 | 11 | 3.128130238 | 0.000146711 | ALDH3B2 | ENSG00000132746 |
| 11 | 67219100 | 67219468 | 67219318 | 9  | 14 | 3  | 4.398933147 | 0.00132748  | ALDH3B2 | ENSG00000132746 |
| 11 | 67219797 | 67220091 | 67219938 | 9  | 11 | 3  | 3.519146518 | 0.00788869  | ALDH3B2 | ENSG00000132746 |
| 11 | 67526141 | 67526331 | 67526279 | 8  | 8  | 1  | 5.278719777 | 0.00542188  | UNC93B1 | ENSG00000110057 |
| 11 | 67528148 | 67528432 | 67528290 | 10 | 13 | 2  | 5.474227917 | 0.000747844 | UNC93B1 | ENSG00000110057 |
| 11 | 67553540 | 67553762 | 67553651 | 9  | 9  | 2  | 3.910162798 | 0.00955088  | NDUFS8  | ENSG00000110717 |
| 11 | 67554237 | 67554591 | 67554377 | 10 | 15 | 0  | 18.76878143 | 4.04E-06    | NDUFS8  | ENSG00000110717 |
| 11 | 67597801 | 67598028 | 67597914 | 10 | 11 | 2  | 4.692195357 | 0.00272444  | TCIRG1  | ENSG00000110719 |
| 11 | 67623737 | 67623916 | 67623826 | 8  | 9  | 3  | 2.932622098 | 0.0242899   | CHKA    | ENSG00000110721 |

|    |          |          |          |    |    |    |             |             |          |                 |
|----|----------|----------|----------|----|----|----|-------------|-------------|----------|-----------------|
| 11 | 67671147 | 67671380 | 67671280 | 8  | 9  | 4  | 2.346097679 | 0.050148    | CHKA     | ENSG00000110721 |
| 11 | 67722374 | 67722738 | 67722553 | 47 | 54 | 0  | 64.51768616 | 2.89E-19    | SUV420H1 | ENSG00000110066 |
| 11 | 67733229 | 67733592 | 67733345 | 12 | 19 | 3  | 5.865244197 | 5.72E-05    | SUV420H1 | ENSG00000110066 |
| 11 | 67806202 | 67806402 | 67806302 | 8  | 9  | 4  | 2.346097679 | 0.050148    | C11orf24 | ENSG00000171067 |
| 11 | 67861265 | 67861759 | 67861583 | 17 | 26 | 4  | 6.334463732 | 2.40E-06    | LRP5     | ENSG00000162337 |
| 11 | 67866511 | 67867086 | 67866861 | 23 | 37 | 15 | 2.785990993 | 0.000136587 | LRP5     | ENSG00000162337 |
| 11 | 67878760 | 67878990 | 67878863 | 10 | 10 | 3  | 3.225884308 | 0.0139466   | LRP5     | ENSG00000162337 |
| 11 | 68287206 | 68287589 | 68287397 | 22 | 30 | 6  | 5.194930574 | 2.42E-06    | MTL5     | ENSG00000132749 |
| 11 | 68363232 | 68363759 | 68363438 | 13 | 26 | 6  | 4.524616952 | 2.63E-05    | CPT1A    | ENSG00000110090 |
| 11 | 68414231 | 68414527 | 68414367 | 10 | 14 | 3  | 4.398933147 | 0.00132748  | MRPL21   | ENSG00000197345 |
| 11 | 68415077 | 68415280 | 68415207 | 8  | 9  | 2  | 3.910162798 | 0.00955088  | MRPL21   | ENSG00000197345 |
| 11 | 68427741 | 68428125 | 68427982 | 12 | 18 | 8  | 2.476436439 | 0.00924552  | IGHMBP2  | ENSG00000132740 |
| 11 | 68429790 | 68430118 | 68429954 | 10 | 14 | 3  | 4.398933147 | 0.00132748  | IGHMBP2  | ENSG00000132740 |
| 11 | 68568305 | 68568607 | 68568465 | 11 | 14 | 3  | 4.398933147 | 0.00132748  | TPCN2    | ENSG00000162341 |
| 11 | 68568887 | 68569066 | 68568989 | 8  | 8  | 0  | 10.55743955 | 0.000925496 | TPCN2    | ENSG00000162341 |
| 11 | 68625378 | 68625754 | 68625655 | 8  | 13 | 8  | 1.824742639 | 0.0744168   | TPCN2    | ENSG00000162341 |
| 11 | 68630536 | 68630739 | 68630704 | 10 | 10 | 4  | 2.580707446 | 0.0306059   | TPCN2    | ENSG00000162341 |
| 11 | 68639130 | 68639309 | 68639200 | 8  | 8  | 2  | 3.519146518 | 0.017558    | TPCN2    | ENSG00000162341 |
| 11 | 68645001 | 68645327 | 68645164 | 12 | 17 | 1  | 10.55743955 | 9.18E-06    | TPCN2    | ENSG00000162341 |
| 11 | 68646136 | 68646414 | 68646288 | 9  | 12 | 1  | 7.624817456 | 0.000332769 | TPCN2    | ENSG00000162341 |
| 11 | 68646590 | 68647213 | 68646906 | 18 | 39 | 9  | 4.692195357 | 3.22E-07    | TPCN2    | ENSG00000162341 |
| 11 | 68655680 | 68655957 | 68655831 | 14 | 17 | 3  | 5.278719777 | 0.000205462 | TPCN2    | ENSG00000162341 |
| 11 | 68673773 | 68674058 | 68673932 | 15 | 17 | 0  | 21.11487911 | 8.57E-07    | TPCN2    | ENSG00000162341 |
| 11 | 68825816 | 68826045 | 68825930 | 8  | 10 | 1  | 6.451768616 | 0.00135978  | MYEOV    | ENSG00000172927 |
| 11 | 69018378 | 69018620 | 69018499 | 10 | 13 | 3  | 4.105670938 | 0.00243034  | CCND1    | ENSG00000110092 |
| 11 | 69025567 | 69025908 | 69025737 | 37 | 40 | 0  | 48.09500241 | 1.51E-14    | CCND1    | ENSG00000110092 |
| 11 | 69034472 | 69034810 | 69034641 | 31 | 34 | 2  | 13.68556979 | 3.24E-10    | CCND1    | ENSG00000110092 |
| 11 | 69039274 | 69039607 | 69039438 | 11 | 16 | 4  | 3.988366054 | 0.00115141  | CCND1    | ENSG00000110092 |
| 11 | 69155673 | 69155853 | 69155763 | 8  | 8  | 2  | 3.519146518 | 0.017558    | CCND1    | ENSG00000110092 |
| 11 | 69162918 | 69163291 | 69163097 | 9  | 16 | 1  | 9.970915134 | 1.89E-05    | CCND1    | ENSG00000110092 |
| 11 | 69164976 | 69165338 | 69165159 | 12 | 18 | 3  | 5.571981987 | 0.000108726 | CCND1    | ENSG00000110092 |
| 11 | 69168266 | 69168474 | 69168370 | 10 | 11 | 2  | 4.692195357 | 0.00272444  | CCND1    | ENSG00000110092 |
| 11 | 69178161 | 69178623 | 69178444 | 13 | 23 | 4  | 5.630634429 | 1.63E-05    |          | ENSG00000204579 |
| 11 | 69178680 | 69179085 | 69178911 | 15 | 22 | 8  | 2.997791478 | 0.00137524  |          | ENSG00000204579 |

|    |          |          |          |    |    |   |             |             |          |                 |
|----|----------|----------|----------|----|----|---|-------------|-------------|----------|-----------------|
| 11 | 69221302 | 69221497 | 69221354 | 8  | 9  | 2 | 3.910162798 | 0.00955088  | FGF19    | ENSG00000162344 |
| 11 | 69333432 | 69333840 | 69333601 | 16 | 25 | 1 | 15.24963491 | 2.59E-08    | FGF3     | ENSG00000186895 |
| 11 | 69418249 | 69418458 | 69418353 | 8  | 9  | 7 | 1.466311049 | 0.20706     | FGF3     | ENSG00000186895 |
| 11 | 69489557 | 69489748 | 69489669 | 8  | 8  | 0 | 10.55743955 | 0.000925496 |          | ENSG00000202070 |
| 11 | 69572580 | 69572877 | 69572757 | 11 | 14 | 4 | 3.519146518 | 0.00361132  |          | ENSG00000202070 |
| 11 | 69587372 | 69587669 | 69587524 | 21 | 23 | 2 | 9.384390715 | 8.25E-07    |          | ENSG00000202070 |
| 11 | 69591872 | 69592132 | 69592002 | 12 | 15 | 4 | 3.753756286 | 0.0020497   |          | ENSG00000202070 |
| 11 | 69707354 | 69707836 | 69707569 | 9  | 18 | 6 | 3.183989707 | 0.00227432  | FADD     | ENSG00000168040 |
| 11 | 69757308 | 69757561 | 69757434 | 10 | 12 | 4 | 3.049926982 | 0.0108184   | FADD     | ENSG00000168040 |
| 11 | 69793942 | 69794228 | 69794069 | 10 | 11 | 5 | 2.346097679 | 0.0364013   | PPFIA1   | ENSG00000131626 |
| 11 | 70048836 | 70049251 | 70049051 | 22 | 32 | 1 | 19.35530585 | 1.42E-10    | CTTN     | ENSG00000085733 |
| 11 | 70138013 | 70138274 | 70138120 | 11 | 12 | 0 | 15.24963491 | 4.15E-05    | SHANK2   | ENSG00000162105 |
| 11 | 70167450 | 70168120 | 70167821 | 41 | 74 | 4 | 17.59573259 | 7.00E-21    | SHANK2   | ENSG00000162105 |
| 11 | 70174132 | 70174401 | 70174300 | 10 | 12 | 3 | 3.812408728 | 0.004404    | SHANK2   | ENSG00000162105 |
| 11 | 70279363 | 70279606 | 70279529 | 9  | 12 | 0 | 15.24963491 | 4.15E-05    |          | ENSG00000207196 |
| 11 | 70293311 | 70293618 | 70293464 | 20 | 23 | 1 | 14.07658607 | 1.14E-07    |          | ENSG00000207196 |
| 11 | 70329610 | 70329912 | 70329761 | 15 | 20 | 5 | 4.105670938 | 0.000308509 | C11orf76 | ENSG00000171671 |
| 11 | 70329958 | 70330137 | 70330070 | 8  | 9  | 1 | 5.865244197 | 0.00272497  | C11orf76 | ENSG00000171671 |
| 11 | 70338560 | 70338959 | 70338865 | 9  | 17 | 3 | 5.278719777 | 0.000205462 | C11orf76 | ENSG00000171671 |
| 11 | 70629629 | 70630073 | 70629894 | 8  | 16 | 5 | 3.323638378 | 0.00288759  | SHANK2   | ENSG00000162105 |
| 11 | 70642005 | 70642326 | 70642165 | 11 | 13 | 8 | 1.824742639 | 0.0744168   | SHANK2   | ENSG00000162105 |
| 11 | 70672653 | 70672967 | 70672869 | 9  | 13 | 6 | 2.346097679 | 0.0266147   | SHANK2   | ENSG00000162105 |
| 11 | 70809233 | 70809415 | 70809350 | 8  | 8  | 6 | 1.508205651 | 0.203852    |          | ENSG00000172900 |
| 11 | 70814540 | 70814939 | 70814760 | 10 | 18 | 4 | 4.457585589 | 0.000353565 |          | ENSG00000172900 |
| 11 | 70841818 | 70842185 | 70842016 | 14 | 20 | 7 | 3.079253203 | 0.00177418  | NADSYN1  | ENSG00000172890 |
| 11 | 70859466 | 70859668 | 70859567 | 13 | 14 | 4 | 3.519146518 | 0.00361132  | NADSYN1  | ENSG00000172890 |
| 11 | 70869933 | 70870593 | 70870112 | 22 | 41 | 7 | 6.158506406 | 9.25E-09    | NADSYN1  | ENSG00000172890 |
| 11 | 70876756 | 70877146 | 70876968 | 24 | 30 | 3 | 9.091128505 | 3.63E-08    | NADSYN1  | ENSG00000172890 |
| 11 | 71316935 | 71317321 | 71317066 | 10 | 17 | 6 | 3.016411301 | 0.00381427  |          | ENSG00000196763 |
| 11 | 71333877 | 71334143 | 71333988 | 10 | 11 | 0 | 14.07658607 | 9.02E-05    | RNF121   | ENSG00000137522 |
| 11 | 71413867 | 71414086 | 71413998 | 11 | 13 | 1 | 8.211341875 | 0.000163445 |          | ENSG00000206783 |
| 11 | 71429250 | 71429820 | 71429641 | 11 | 24 | 9 | 2.932622098 | 0.00106136  |          | ENSG00000206783 |
| 11 | 71429971 | 71430727 | 71430456 | 11 | 30 | 9 | 3.636451402 | 4.92E-05    |          | ENSG00000206783 |
| 11 | 71458564 | 71458800 | 71458682 | 9  | 12 | 3 | 3.812408728 | 0.004404    |          | ENSG00000212089 |

|    |          |          |          |    |    |    |             |             |          |                 |
|----|----------|----------|----------|----|----|----|-------------|-------------|----------|-----------------|
| 11 | 71469312 | 71469611 | 71469487 | 12 | 15 | 6  | 2.68125449  | 0.0103552   | LRRC51   | ENSG00000184154 |
| 11 | 71470585 | 71470964 | 71470746 | 16 | 22 | 10 | 2.452738482 | 0.00515848  | LRRC51   | ENSG00000184154 |
| 11 | 71488351 | 71488602 | 71488476 | 9  | 11 | 3  | 3.519146518 | 0.00788869  | C11orf59 | ENSG00000149357 |
| 11 | 71491989 | 71492307 | 71492162 | 13 | 16 | 5  | 3.323638378 | 0.00288759  | C11orf59 | ENSG00000149357 |
| 11 | 71501386 | 71501761 | 71501565 | 11 | 19 | 5  | 3.910162798 | 0.000546977 | C11orf51 | ENSG00000110200 |
| 11 | 71611748 | 71612052 | 71611914 | 12 | 14 | 5  | 2.932622098 | 0.00829617  | INPPL1   | ENSG00000165458 |
| 11 | 71803158 | 71803413 | 71803299 | 9  | 11 | 11 | 1.173048839 | 0.349489    | CLPB     | ENSG00000162129 |
| 11 | 71819719 | 71819923 | 71819790 | 8  | 10 | 2  | 4.301179077 | 0.00512919  | CLPB     | ENSG00000162129 |
| 11 | 71823056 | 71823443 | 71823327 | 8  | 14 | 9  | 1.759573259 | 0.0786014   | CLPB     | ENSG00000162129 |
| 11 | 71859980 | 71860329 | 71860151 | 13 | 18 | 6  | 3.183989707 | 0.00227432  | CLPB     | ENSG00000162129 |
| 11 | 72031735 | 72031994 | 72031820 | 8  | 11 | 1  | 7.038293036 | 0.000674435 | PDE2A    | ENSG00000186642 |
| 11 | 72110576 | 72110994 | 72110838 | 8  | 13 | 0  | 16.42268375 | 1.91E-05    | ARAP1    | ENSG00000186635 |
| 11 | 72169330 | 72169565 | 72169401 | 11 | 13 | 11 | 1.368556979 | 0.211388    | STARD10  | ENSG00000214530 |
| 11 | 72169771 | 72170092 | 72169931 | 8  | 12 | 4  | 3.049926982 | 0.0108184   | STARD10  | ENSG00000214530 |
| 11 | 72175150 | 72175388 | 72175269 | 8  | 9  | 4  | 2.346097679 | 0.050148    | STARD10  | ENSG00000214530 |
| 11 | 72202495 | 72202768 | 72202594 | 8  | 11 | 7  | 1.759573259 | 0.102361    | ATG16L2  | ENSG00000168010 |
| 11 | 72203148 | 72203450 | 72203287 | 10 | 13 | 0  | 16.42268375 | 1.91E-05    | ATG16L2  | ENSG00000168010 |
| 11 | 72203462 | 72203864 | 72203641 | 11 | 19 | 3  | 5.865244197 | 5.72E-05    | ATG16L2  | ENSG00000168010 |
| 11 | 72220212 | 72220842 | 72220592 | 15 | 34 | 7  | 5.132088672 | 6.85E-07    | FCHSD2   | ENSG00000137478 |
| 11 | 72461555 | 72461891 | 72461723 | 10 | 15 | 1  | 9.384390715 | 3.90E-05    | FCHSD2   | ENSG00000137478 |
| 11 | 72530488 | 72530768 | 72530656 | 9  | 12 | 2  | 5.083211637 | 0.00143337  | FCHSD2   | ENSG00000137478 |
| 11 | 72531081 | 72531371 | 72531215 | 11 | 12 | 4  | 3.049926982 | 0.0108184   | FCHSD2   | ENSG00000137478 |
| 11 | 72566758 | 72567046 | 72566899 | 12 | 13 | 1  | 8.211341875 | 0.000163445 | FCHSD2   | ENSG00000137478 |
| 11 | 72574016 | 72574236 | 72574126 | 8  | 9  | 9  | 1.173048839 | 0.362316    | P2RY2    | ENSG00000175591 |
| 11 | 72574504 | 72575396 | 72575206 | 24 | 62 | 8  | 8.211341875 | 4.98E-14    | P2RY2    | ENSG00000175591 |
| 11 | 72576515 | 72576896 | 72576733 | 40 | 48 | 4  | 11.49587863 | 8.11E-13    | P2RY2    | ENSG00000175591 |
| 11 | 72578856 | 72579156 | 72579008 | 8  | 9  | 7  | 1.466311049 | 0.20706     | P2RY2    | ENSG00000175591 |
| 11 | 72581033 | 72581421 | 72581183 | 14 | 20 | 10 | 2.239456875 | 0.0121685   | P2RY2    | ENSG00000175591 |
| 11 | 72582582 | 72582995 | 72582788 | 28 | 40 | 15 | 3.005937651 | 3.36E-05    | P2RY2    | ENSG00000175591 |
| 11 | 72583248 | 72583680 | 72583427 | 22 | 30 | 3  | 9.091128505 | 3.63E-08    | P2RY2    | ENSG00000175591 |
| 11 | 72584045 | 72584530 | 72584351 | 18 | 29 | 6  | 5.027352168 | 4.43E-06    | P2RY2    | ENSG00000175591 |
| 11 | 72606963 | 72607396 | 72607174 | 14 | 24 | 2  | 9.775406994 | 4.09E-07    | P2RY2    | ENSG00000175591 |
| 11 | 72616590 | 72616905 | 72616742 | 24 | 25 | 4  | 6.099853964 | 4.56E-06    | P2RY2    | ENSG00000175591 |
| 11 | 72617004 | 72617310 | 72617142 | 10 | 12 | 3  | 3.812408728 | 0.004404    | P2RY2    | ENSG00000175591 |

|    |          |          |          |    |    |    |             |             |          |                 |
|----|----------|----------|----------|----|----|----|-------------|-------------|----------|-----------------|
| 11 | 72631296 | 72631712 | 72631549 | 22 | 30 | 2  | 12.12150467 | 5.77E-09    | P2RY6    | ENSG00000171631 |
| 11 | 72660631 | 72661188 | 72660829 | 25 | 39 | 6  | 6.703136225 | 8.68E-09    | P2RY6    | ENSG00000171631 |
| 11 | 72664033 | 72664382 | 72664207 | 17 | 23 | 8  | 3.128130238 | 0.000832453 | P2RY6    | ENSG00000171631 |
| 11 | 72695966 | 72696344 | 72696145 | 8  | 14 | 4  | 3.519146518 | 0.00361132  | ARHGEF17 | ENSG00000110237 |
| 11 | 72774889 | 72775068 | 72774985 | 8  | 8  | 0  | 10.55743955 | 0.000925496 | RELT     | ENSG00000054967 |
| 11 | 72867499 | 72867720 | 72867583 | 10 | 12 | 0  | 15.24963491 | 4.15E-05    | RELT     | ENSG00000054967 |
| 11 | 72987201 | 72987529 | 72987365 | 11 | 17 | 2  | 7.038293036 | 5.19E-05    | FAM168A  | ENSG00000054965 |
| 11 | 73048698 | 73048929 | 73048820 | 12 | 12 | 5  | 2.541605819 | 0.0225912   | PLEKHB1  | ENSG00000021300 |
| 11 | 73167961 | 73168555 | 73168272 | 9  | 23 | 14 | 1.876878143 | 0.0251753   | MRPL48   | ENSG00000175581 |
| 11 | 73176433 | 73176901 | 73176611 | 14 | 23 | 10 | 2.559379286 | 0.00330263  | MRPL48   | ENSG00000175581 |
| 11 | 73265435 | 73265879 | 73265700 | 12 | 23 | 8  | 3.128130238 | 0.000832453 | PAAF1    | ENSG00000175575 |
| 11 | 73320092 | 73320331 | 73320253 | 8  | 11 | 5  | 2.346097679 | 0.0364013   | DNAJB13  | ENSG00000187726 |
| 11 | 73335758 | 73336036 | 73335892 | 11 | 14 | 2  | 5.865244197 | 0.000387308 | DNAJB13  | ENSG00000187726 |
| 11 | 73371693 | 73371899 | 73371823 | 10 | 12 | 0  | 15.24963491 | 4.15E-05    | UCP2     | ENSG00000175567 |
| 11 | 73425290 | 73425556 | 73425423 | 9  | 11 | 7  | 1.759573259 | 0.102361    |          | ENSG00000204552 |
| 11 | 73457781 | 73458236 | 73457960 | 23 | 36 | 7  | 5.425350882 | 2.04E-07    |          | ENSG00000204552 |
| 11 | 73523827 | 73524283 | 73524108 | 30 | 40 | 5  | 8.015833735 | 1.06E-09    | C2CD3    | ENSG00000168014 |
| 11 | 73527298 | 73527513 | 73527405 | 11 | 11 | 3  | 3.519146518 | 0.00788869  | C2CD3    | ENSG00000168014 |
| 11 | 73559636 | 73560019 | 73559840 | 10 | 18 | 11 | 1.857327329 | 0.0427732   | C2CD3    | ENSG00000168014 |
| 11 | 73644637 | 73644870 | 73644753 | 8  | 9  | 4  | 2.346097679 | 0.050148    |          | ENSG00000206913 |
| 11 | 73786264 | 73786518 | 73786391 | 8  | 11 | 9  | 1.407658607 | 0.210479    | PGM2L1   | ENSG00000165434 |
| 11 | 73921255 | 73921529 | 73921376 | 18 | 18 | 4  | 4.457585589 | 0.000353565 |          | ENSG00000210380 |
| 11 | 73944871 | 73945069 | 73944966 | 8  | 8  | 0  | 10.55743955 | 0.000925496 |          | ENSG00000210380 |
| 11 | 74091152 | 74091416 | 74091342 | 8  | 12 | 7  | 1.906204364 | 0.0695918   |          | ENSG00000185162 |
| 11 | 74115212 | 74115538 | 74115375 | 13 | 19 | 3  | 5.865244197 | 5.72E-05    | CHRD12   | ENSG00000054938 |
| 11 | 74337567 | 74337969 | 74337790 | 9  | 17 | 4  | 4.222975822 | 0.000640773 | XRRA1    | ENSG00000166435 |
| 11 | 74424857 | 74425082 | 74424957 | 9  | 10 | 0  | 12.90353723 | 0.000195991 |          | ENSG00000213333 |
| 11 | 74536356 | 74536677 | 74536499 | 8  | 12 | 4  | 3.049926982 | 0.0108184   | SLCO2B1  | ENSG00000137491 |
| 11 | 74538984 | 74539163 | 74539073 | 8  | 8  | 3  | 2.639359888 | 0.0415794   | SLCO2B1  | ENSG00000137491 |
| 11 | 74587184 | 74587558 | 74587379 | 24 | 29 | 1  | 17.59573259 | 1.33E-09    | SLCO2B1  | ENSG00000137491 |
| 11 | 74603109 | 74603336 | 74603246 | 12 | 14 | 4  | 3.519146518 | 0.00361132  | SLCO2B1  | ENSG00000137491 |
| 11 | 74622537 | 74622843 | 74622688 | 8  | 9  | 0  | 11.73048839 | 0.000425898 | SLCO2B1  | ENSG00000137491 |
| 11 | 74637416 | 74637672 | 74637529 | 19 | 20 | 4  | 4.926805125 | 0.00010522  |          | ENSG00000199090 |
| 11 | 74717513 | 74717773 | 74717643 | 8  | 12 | 0  | 15.24963491 | 4.15E-05    |          | ENSG00000199090 |

|    |          |          |          |    |    |    |             |             |          |                 |
|----|----------|----------|----------|----|----|----|-------------|-------------|----------|-----------------|
| 11 | 74723235 | 74723563 | 74723399 | 12 | 15 | 9  | 1.876878143 | 0.0544542   |          | ENSG00000199090 |
| 11 | 74731742 | 74731974 | 74731858 | 9  | 10 | 4  | 2.580707446 | 0.0306059   |          | ENSG00000199090 |
| 11 | 74732180 | 74732473 | 74732331 | 13 | 17 | 9  | 2.111487911 | 0.0248715   | ARRB1    | ENSG00000137486 |
| 11 | 74736571 | 74736834 | 74736717 | 9  | 10 | 6  | 1.843362462 | 0.0964212   | ARRB1    | ENSG00000137486 |
| 11 | 74745217 | 74745589 | 74745396 | 8  | 15 | 2  | 6.256260476 | 0.000199274 | ARRB1    | ENSG00000137486 |
| 11 | 74760519 | 74760809 | 74760664 | 10 | 12 | 3  | 3.812408728 | 0.004404    | ARRB1    | ENSG00000137486 |
| 11 | 74761191 | 74761547 | 74761385 | 14 | 19 | 11 | 1.955081399 | 0.0295891   | ARRB1    | ENSG00000137486 |
| 11 | 74765131 | 74765424 | 74765307 | 9  | 11 | 2  | 4.692195357 | 0.00272444  | RPS3     | ENSG00000149273 |
| 11 | 74788000 | 74788613 | 74788246 | 11 | 26 | 12 | 2.436332205 | 0.00289956  | RPS3     | ENSG00000149273 |
| 11 | 74794258 | 74794450 | 74794376 | 8  | 9  | 0  | 11.73048839 | 0.000425898 |          | ENSG00000207445 |
| 11 | 74810962 | 74811254 | 74811092 | 12 | 15 | 1  | 9.384390715 | 3.90E-05    | KLHL35   | ENSG00000149243 |
| 11 | 74834077 | 74834420 | 74834250 | 14 | 17 | 5  | 3.519146518 | 0.00167472  | KLHL35   | ENSG00000149243 |
| 11 | 74889458 | 74889865 | 74889683 | 50 | 66 | 3  | 19.64856806 | 2.33E-19    | GDPD5    | ENSG00000158555 |
| 11 | 74890370 | 74890549 | 74890454 | 8  | 8  | 2  | 3.519146518 | 0.017558    | GDPD5    | ENSG00000158555 |
| 11 | 74897023 | 74897488 | 74897202 | 10 | 18 | 10 | 2.026175268 | 0.0273052   | GDPD5    | ENSG00000158555 |
| 11 | 74920992 | 74921311 | 74921149 | 16 | 19 | 7  | 2.932622098 | 0.00293566  | GDPD5    | ENSG00000158555 |
| 11 | 74936324 | 74936577 | 74936450 | 8  | 9  | 6  | 1.675784056 | 0.141978    | SERPINH1 | ENSG00000149257 |
| 11 | 75180702 | 75180937 | 75180819 | 8  | 8  | 3  | 2.639359888 | 0.0415794   | UVRAG    | ENSG00000198382 |
| 11 | 75191959 | 75192279 | 75192122 | 12 | 17 | 8  | 2.346097679 | 0.0144542   | UVRAG    | ENSG00000198382 |
| 11 | 75203193 | 75203630 | 75203406 | 10 | 21 | 5  | 4.301179077 | 0.000172642 | UVRAG    | ENSG00000198382 |
| 11 | 75229673 | 75229994 | 75229825 | 8  | 11 | 4  | 2.815317214 | 0.0183428   |          | ENSG00000199362 |
| 11 | 75485330 | 75485792 | 75485499 | 22 | 34 | 8  | 4.561856597 | 2.04E-06    | WNT11    | ENSG00000085741 |
| 11 | 75540861 | 75541166 | 75540999 | 8  | 11 | 4  | 2.815317214 | 0.0183428   | WNT11    | ENSG00000085741 |
| 11 | 75623897 | 75624859 | 75624457 | 18 | 49 | 22 | 2.550106172 | 5.01E-05    | WNT11    | ENSG00000085741 |
| 11 | 75707578 | 75707876 | 75707743 | 8  | 10 | 4  | 2.580707446 | 0.0306059   | PRKRIR   | ENSG00000137492 |
| 11 | 75833070 | 75833392 | 75833231 | 9  | 14 | 5  | 2.932622098 | 0.00829617  | C11orf30 | ENSG00000158636 |
| 11 | 75833526 | 75833810 | 75833668 | 10 | 14 | 2  | 5.865244197 | 0.000387308 | C11orf30 | ENSG00000158636 |
| 11 | 76069568 | 76069845 | 76069706 | 10 | 13 | 8  | 1.824742639 | 0.0744168   | LRRC32   | ENSG00000137507 |
| 11 | 76110402 | 76110755 | 76110649 | 12 | 17 | 3  | 5.278719777 | 0.000205462 | GUCY2E   | ENSG00000204529 |
| 11 | 76159716 | 76159933 | 76159824 | 8  | 9  | 1  | 5.865244197 | 0.00272497  | TSKU     | ENSG00000182704 |
| 11 | 76161278 | 76161672 | 76161457 | 20 | 28 | 12 | 2.616801257 | 0.00120123  | TSKU     | ENSG00000182704 |
| 11 | 76173023 | 76173588 | 76173328 | 17 | 31 | 3  | 9.384390715 | 1.82E-08    | TSKU     | ENSG00000182704 |
| 11 | 76177005 | 76177265 | 76177094 | 8  | 11 | 1  | 7.038293036 | 0.000674435 | TSKU     | ENSG00000182704 |
| 11 | 76177360 | 76177710 | 76177536 | 15 | 20 | 8  | 2.737113958 | 0.0036449   | TSKU     | ENSG00000182704 |

|    |          |          |          |    |    |    |             |             |        |                 |
|----|----------|----------|----------|----|----|----|-------------|-------------|--------|-----------------|
| 11 | 76196122 | 76196450 | 76196286 | 14 | 18 | 4  | 4.457585589 | 0.000353565 | TSKU   | ENSG00000182704 |
| 11 | 76213548 | 76214096 | 76213822 | 12 | 20 | 1  | 12.31701281 | 1.03E-06    | PHCA   | ENSG00000078124 |
| 11 | 76308623 | 76308802 | 76308755 | 8  | 8  | 1  | 5.278719777 | 0.00542188  |        | ENSG00000212030 |
| 11 | 76408916 | 76409218 | 76409067 | 12 | 15 | 3  | 4.692195357 | 0.000718455 | B3GNT6 | ENSG00000198488 |
| 11 | 76477275 | 76477652 | 76477473 | 20 | 27 | 8  | 3.649485278 | 0.000102745 | CAPN5  | ENSG00000149260 |
| 11 | 76490004 | 76490360 | 76490182 | 9  | 14 | 4  | 3.519146518 | 0.00361132  | MYO7A  | ENSG00000137474 |
| 11 | 76580727 | 76581021 | 76580874 | 11 | 15 | 6  | 2.68125449  | 0.0103552   | MYO7A  | ENSG00000137474 |
| 11 | 76800524 | 76800795 | 76800659 | 8  | 10 | 2  | 4.301179077 | 0.00512919  | PAK1   | ENSG00000149269 |
| 11 | 76820337 | 76820519 | 76820428 | 9  | 9  | 1  | 5.865244197 | 0.00272497  | PAK1   | ENSG00000149269 |
| 11 | 76904399 | 76904591 | 76904458 | 9  | 10 | 1  | 6.451768616 | 0.00135978  | PAK1   | ENSG00000149269 |
| 11 | 76936990 | 76937284 | 76937137 | 9  | 10 | 3  | 3.225884308 | 0.0139466   | AQP11  | ENSG00000178301 |
| 11 | 77026350 | 77026736 | 77026557 | 32 | 40 | 7  | 6.011875301 | 1.73E-08    | CLNS1A | ENSG00000074201 |
| 11 | 77209441 | 77210217 | 77209594 | 11 | 31 | 11 | 3.128130238 | 0.000146711 | RSF1   | ENSG00000048649 |
| 11 | 77382959 | 77383139 | 77382980 | 8  | 8  | 6  | 1.508205651 | 0.203852    | INTS4  | ENSG00000149262 |
| 11 | 77383372 | 77383619 | 77383495 | 8  | 11 | 11 | 1.173048839 | 0.349489    | INTS4  | ENSG00000149262 |
| 11 | 77388934 | 77389226 | 77389080 | 14 | 16 | 6  | 2.848832895 | 0.00632407  | INTS4  | ENSG00000149262 |
| 11 | 77417261 | 77417478 | 77417332 | 9  | 10 | 0  | 12.90353723 | 0.000195991 | KCTD14 | ENSG00000151364 |
| 11 | 77419257 | 77419485 | 77419371 | 8  | 10 | 7  | 1.612942154 | 0.147335    | KCTD14 | ENSG00000151364 |
| 11 | 77434868 | 77435193 | 77435030 | 14 | 18 | 5  | 3.714654658 | 0.000961539 | THRSP  | ENSG00000151365 |
| 11 | 77468233 | 77468737 | 77468594 | 17 | 27 | 11 | 2.737113958 | 0.00100133  | NDUFC2 | ENSG00000151366 |
| 11 | 77528100 | 77528418 | 77528258 | 12 | 16 | 6  | 2.848832895 | 0.00632407  | ALG8   | ENSG00000159063 |
| 11 | 77804935 | 77805114 | 77805049 | 8  | 8  | 5  | 1.759573259 | 0.13508     | GAB2   | ENSG00000033327 |
| 11 | 77805561 | 77805874 | 77805710 | 12 | 16 | 7  | 2.492728784 | 0.0124193   | GAB2   | ENSG00000033327 |
| 11 | 78098523 | 78098729 | 78098619 | 8  | 8  | 0  | 10.55743955 | 0.000925496 |        | ENSG00000210533 |
| 11 | 78104477 | 78104715 | 78104596 | 9  | 9  | 7  | 1.466311049 | 0.20706     |        | ENSG00000210533 |
| 11 | 78187330 | 78187560 | 78187451 | 9  | 11 | 3  | 3.519146518 | 0.00788869  |        | ENSG00000210533 |
| 11 | 78207056 | 78207314 | 78207187 | 8  | 9  | 5  | 1.955081399 | 0.0892323   |        | ENSG00000210533 |
| 11 | 78220980 | 78221222 | 78221126 | 10 | 13 | 3  | 4.105670938 | 0.00243034  | ODZ4   | ENSG00000149256 |
| 11 | 78387391 | 78387720 | 78387555 | 8  | 12 | 5  | 2.541605819 | 0.0225912   | ODZ4   | ENSG00000149256 |
| 11 | 78448619 | 78449257 | 78449000 | 15 | 31 | 15 | 2.346097679 | 0.00187452  | ODZ4   | ENSG00000149256 |
| 11 | 78449369 | 78449550 | 78449459 | 8  | 8  | 5  | 1.759573259 | 0.13508     | ODZ4   | ENSG00000149256 |
| 11 | 78486914 | 78487148 | 78487010 | 10 | 14 | 2  | 5.865244197 | 0.000387308 |        | ENSG00000212701 |
| 11 | 78506361 | 78506575 | 78506452 | 11 | 11 | 2  | 4.692195357 | 0.00272444  |        | ENSG00000212701 |
| 11 | 78544717 | 78545095 | 78544916 | 27 | 34 | 3  | 10.26417734 | 2.27E-09    |        | ENSG00000212701 |

|    |          |          |          |     |     |     |             |             |          |                 |
|----|----------|----------|----------|-----|-----|-----|-------------|-------------|----------|-----------------|
| 11 | 78557430 | 78557774 | 78557602 | 30  | 32  | 4   | 7.742122339 | 4.68E-08    |          | ENSG00000212701 |
| 11 | 78742455 | 78742746 | 78742578 | 12  | 15  | 11  | 1.564065119 | 0.11768     |          | ENSG00000211997 |
| 11 | 78829946 | 78830179 | 78830062 | 9   | 10  | 7   | 1.612942154 | 0.147335    |          | ENSG00000211997 |
| 11 | 80304983 | 80305248 | 80305116 | 11  | 13  | 1   | 8.211341875 | 0.000163445 |          | ENSG00000200146 |
| 11 | 80422904 | 80423187 | 80423057 | 12  | 13  | 1   | 8.211341875 | 0.000163445 |          |                 |
| 11 | 81411716 | 81411943 | 81411823 | 16  | 16  | 1   | 9.970915134 | 1.89E-05    |          | ENSG00000210568 |
| 11 | 82289125 | 82289328 | 82289207 | 9   | 10  | 0   | 12.90353723 | 0.000195991 | PRCP     | ENSG00000137509 |
| 11 | 82316062 | 82316241 | 82316151 | 8   | 8   | 0   | 10.55743955 | 0.000925496 | C11orf82 | ENSG00000165490 |
| 11 | 82395643 | 82396058 | 82395818 | 8   | 15  | 5   | 3.128130238 | 0.00492422  |          | ENSG00000207221 |
| 11 | 82396771 | 82397078 | 82396949 | 10  | 13  | 1   | 8.211341875 | 0.000163445 |          | ENSG00000207221 |
| 11 | 82414008 | 82414340 | 82414161 | 11  | 14  | 6   | 2.513676084 | 0.016726    |          | ENSG00000207221 |
| 11 | 82460439 | 82460844 | 82460665 | 13  | 22  | 2   | 8.993374435 | 1.66E-06    | RAB30    | ENSG00000137502 |
| 11 | 82481453 | 82481921 | 82481727 | 21  | 34  | 14  | 2.737113958 | 0.000281523 | RAB30    | ENSG00000137502 |
| 11 | 82545216 | 82545454 | 82545329 | 11  | 12  | 2   | 5.083211637 | 0.00143337  | PCF11    | ENSG00000165494 |
| 11 | 82549287 | 82549537 | 82549412 | 17  | 18  | 4   | 4.457585589 | 0.000353565 | PCF11    | ENSG00000165494 |
| 11 | 82582125 | 82582385 | 82582258 | 9   | 10  | 1   | 6.451768616 | 0.00135978  | ANKRD42  | ENSG00000137494 |
| 11 | 82674209 | 82674860 | 82674421 | 29  | 55  | 9   | 6.5690735   | 1.91E-11    | CCDC90B  | ENSG00000137500 |
| 11 | 82674873 | 82675364 | 82675185 | 22  | 35  | 5   | 7.038293036 | 2.84E-08    | CCDC90B  | ENSG00000137500 |
| 11 | 82767898 | 82768081 | 82768014 | 8   | 8   | 0   | 10.55743955 | 0.000925496 |          | ENSG00000210588 |
| 11 | 83050318 | 83050894 | 83050550 | 44  | 64  | 1   | 38.12408728 | 4.44E-21    | DLG2     | ENSG00000150672 |
| 11 | 83564726 | 83564993 | 83564844 | 14  | 16  | 0   | 19.94183027 | 1.86E-06    | DLG2     | ENSG00000150672 |
| 11 | 84060101 | 84060385 | 84060243 | 11  | 13  | 2   | 5.474227917 | 0.000747844 | DLG2     | ENSG00000150672 |
| 11 | 84076267 | 84076470 | 84076342 | 9   | 11  | 3   | 3.519146518 | 0.00788869  | DLG2     | ENSG00000150672 |
| 11 | 84102973 | 84103152 | 84103062 | 8   | 8   | 1   | 5.278719777 | 0.00542188  | DLG2     | ENSG00000150672 |
| 11 | 84294196 | 84294415 | 84294282 | 8   | 8   | 0   | 10.55743955 | 0.000925496 | DLG2     | ENSG00000150672 |
| 11 | 84657884 | 84658105 | 84657981 | 10  | 10  | 1   | 6.451768616 | 0.00135978  | DLG2     | ENSG00000150672 |
| 11 | 84673051 | 84673409 | 84673230 | 18  | 23  | 3   | 7.038293036 | 4.15E-06    | DLG2     | ENSG00000150672 |
| 11 | 84872519 | 84872982 | 84872750 | 183 | 249 | 203 | 1.437559852 | 5.65E-05    |          | ENSG00000210598 |
| 11 | 84984047 | 84984312 | 84984179 | 12  | 12  | 1   | 7.624817456 | 0.000332769 | DLG2     | ENSG00000150672 |
| 11 | 85016454 | 85016801 | 85016627 | 9   | 13  | 8   | 1.824742639 | 0.0744168   | DLG2     | ENSG00000150672 |
| 11 | 85017239 | 85017418 | 85017328 | 8   | 8   | 3   | 2.639359888 | 0.0415794   | TMEM126B | ENSG00000171204 |
| 11 | 85036488 | 85036753 | 85036592 | 10  | 14  | 8   | 1.955081399 | 0.0506438   | TMEM126A | ENSG00000171202 |
| 11 | 85052762 | 85053034 | 85052881 | 8   | 10  | 4   | 2.580707446 | 0.0306059   | CREBZF   | ENSG00000137504 |
| 11 | 85053727 | 85054035 | 85053857 | 8   | 11  | 6   | 2.010940867 | 0.0640214   | CREBZF   | ENSG00000137504 |



|    |          |          |          |     |     |    |             |             |          |                 |
|----|----------|----------|----------|-----|-----|----|-------------|-------------|----------|-----------------|
| 11 | 85195579 | 85196016 | 85195798 | 55  | 71  | 6  | 12.0656452  | 3.68E-18    | CCDC83   | ENSG00000150676 |
| 11 | 85217348 | 85217646 | 85217497 | 10  | 14  | 10 | 1.599612054 | 0.114822    | CCDC83   | ENSG00000150676 |
| 11 | 85219855 | 85220223 | 85220012 | 13  | 18  | 3  | 5.571981987 | 0.000108726 | CCDC83   | ENSG00000150676 |
| 11 | 85457592 | 85458067 | 85457919 | 10  | 21  | 5  | 4.301179077 | 0.000172642 | PICALM   | ENSG00000073921 |
| 11 | 85607171 | 85607474 | 85607301 | 8   | 11  | 2  | 4.692195357 | 0.00272444  | EED      | ENSG00000074266 |
| 11 | 85633250 | 85633500 | 85633375 | 9   | 12  | 2  | 5.083211637 | 0.00143337  | EED      | ENSG00000074266 |
| 11 | 85633516 | 85634318 | 85633918 | 10  | 30  | 9  | 3.636451402 | 4.92E-05    | EED      | ENSG00000074266 |
| 11 | 85680556 | 85680809 | 85680686 | 11  | 12  | 3  | 3.812408728 | 0.004404    | C11orf73 | ENSG00000149196 |
| 11 | 85690757 | 85691216 | 85690940 | 18  | 31  | 7  | 4.692195357 | 4.07E-06    | C11orf73 | ENSG00000149196 |
| 11 | 85723872 | 85724609 | 85724293 | 129 | 207 | 11 | 20.33284655 | 9.93E-56    |          | ENSG00000222550 |
| 11 | 85848660 | 85848986 | 85848823 | 12  | 17  | 7  | 2.639359888 | 0.00777415  | CCDC81   | ENSG00000149201 |
| 11 | 85885897 | 85886193 | 85886045 | 9   | 13  | 3  | 4.105670938 | 0.00243034  | CCDC81   | ENSG00000149201 |
| 11 | 85888538 | 85888889 | 85888713 | 9   | 14  | 6  | 2.513676084 | 0.016726    | CCDC81   | ENSG00000149201 |
| 11 | 85912885 | 85913144 | 85913018 | 9   | 12  | 5  | 2.541605819 | 0.0225912   | ME3      | ENSG00000151376 |
| 11 | 85967865 | 85968324 | 85968040 | 12  | 22  | 3  | 6.745030826 | 8.05E-06    | ME3      | ENSG00000151376 |
| 11 | 85997197 | 85997455 | 85997326 | 8   | 10  | 2  | 4.301179077 | 0.00512919  | ME3      | ENSG00000151376 |
| 11 | 86054899 | 86055233 | 86055066 | 15  | 18  | 1  | 11.14396397 | 4.44E-06    | ME3      | ENSG00000151376 |
| 11 | 86094823 | 86095589 | 86095283 | 14  | 38  | 9  | 4.574890473 | 5.74E-07    | ME3      | ENSG00000151376 |
| 11 | 86130641 | 86130824 | 86130732 | 9   | 9   | 3  | 2.932622098 | 0.0242899   | PRSS23   | ENSG00000150687 |
| 11 | 86191427 | 86191679 | 86191543 | 8   | 9   | 7  | 1.466311049 | 0.20706     | PRSS23   | ENSG00000150687 |
| 11 | 86207196 | 86207452 | 86207324 | 10  | 11  | 4  | 2.815317214 | 0.0183428   |          | ENSG00000197882 |
| 11 | 86323727 | 86323994 | 86323860 | 8   | 9   | 1  | 5.865244197 | 0.00272497  | FZD4     | ENSG00000174804 |
| 11 | 86388830 | 86389123 | 86388976 | 13  | 17  | 4  | 4.222975822 | 0.000640773 | TMEM135  | ENSG00000166575 |
| 11 | 86992882 | 86993213 | 86993047 | 20  | 25  | 2  | 10.16642327 | 2.02E-07    |          | ENSG00000223015 |
| 11 | 93034391 | 93034612 | 93034496 | 8   | 9   | 2  | 3.910162798 | 0.00955088  | KIAA1731 | ENSG00000166004 |
| 11 | 93114102 | 93114298 | 93114200 | 10  | 10  | 0  | 12.90353723 | 0.000195991 | TAF1D    | ENSG00000166012 |
| 11 | 93477610 | 93477849 | 93477756 | 11  | 11  | 0  | 14.07658607 | 9.02E-05    | PANX1    | ENSG00000110218 |
| 11 | 93485454 | 93485774 | 93485614 | 13  | 15  | 1  | 9.384390715 | 3.90E-05    | PANX1    | ENSG00000110218 |
| 11 | 93678051 | 93678372 | 93678223 | 21  | 24  | 2  | 9.775406994 | 4.09E-07    |          | ENSG00000183560 |
| 11 | 94067258 | 94067536 | 94067417 | 12  | 15  | 1  | 9.384390715 | 3.90E-05    | AMOTL1   | ENSG00000166025 |
| 11 | 94113822 | 94114115 | 94113961 | 9   | 10  | 1  | 6.451768616 | 0.00135978  | AMOTL1   | ENSG00000166025 |
| 11 | 94438185 | 94438541 | 94438363 | 36  | 40  | 0  | 48.09500241 | 1.51E-14    |          | ENSG00000180771 |
| 11 | 94627192 | 94627507 | 94627358 | 10  | 13  | 2  | 5.474227917 | 0.000747844 | SESN3    | ENSG00000149212 |
| 11 | 95468692 | 95468978 | 95468811 | 9   | 11  | 0  | 14.07658607 | 9.02E-05    | MAML2    | ENSG00000184384 |

|    |           |           |           |    |     |   |             |             |          |                 |
|----|-----------|-----------|-----------|----|-----|---|-------------|-------------|----------|-----------------|
| 11 | 95580178  | 95580714  | 95580512  | 10 | 22  | 1 | 13.49006165 | 2.37E-07    | MAML2    | ENSG00000184384 |
| 11 | 97937282  | 97937540  | 97937411  | 11 | 12  | 0 | 15.24963491 | 4.15E-05    |          |                 |
| 11 | 100065823 | 100066101 | 100065979 | 10 | 13  | 1 | 8.211341875 | 0.000163445 |          | ENSG00000223242 |
| 11 | 100410121 | 100410413 | 100410267 | 14 | 16  | 6 | 2.848832895 | 0.00632407  | TMEM133  | ENSG00000170647 |
| 11 | 100717780 | 100717973 | 100717835 | 8  | 9   | 2 | 3.910162798 | 0.00955088  | PGR      | ENSG00000082175 |
| 11 | 100810105 | 100810564 | 100810351 | 20 | 32  | 4 | 7.742122339 | 4.68E-08    | TRPC6    | ENSG00000137672 |
| 11 | 100817715 | 100817928 | 100817821 | 8  | 9   | 4 | 2.346097679 | 0.050148    | TRPC6    | ENSG00000137672 |
| 11 | 101486268 | 101486491 | 101486413 | 9  | 12  | 1 | 7.624817456 | 0.000332769 | YAP1     | ENSG00000137693 |
| 11 | 101632158 | 101632585 | 101632392 | 86 | 100 | 0 | 118.4779328 | 9.04E-35    |          | ENSG00000212466 |
| 11 | 102184014 | 102184196 | 102184087 | 8  | 9   | 1 | 5.865244197 | 0.00272497  | MMP1     | ENSG00000196611 |
| 11 | 102485092 | 102485404 | 102485247 | 10 | 14  | 2 | 5.865244197 | 0.000387308 | DYNC2H1  | ENSG00000187240 |
| 11 | 103110303 | 103110482 | 103110365 | 8  | 8   | 0 | 10.55743955 | 0.000925496 | DDI1     | ENSG00000170967 |
| 11 | 105359476 | 105359780 | 105359628 | 14 | 18  | 1 | 11.14396397 | 4.44E-06    | KIAA1826 | ENSG00000170903 |
| 11 | 106165364 | 106165631 | 106165516 | 11 | 12  | 1 | 7.624817456 | 0.000332769 |          | ENSG00000222559 |
| 11 | 106533855 | 106534089 | 106533953 | 9  | 11  | 1 | 7.038293036 | 0.000674435 | GUCY1A2  | ENSG00000152402 |
| 11 | 106534973 | 106535554 | 106535263 | 72 | 99  | 6 | 16.75784056 | 8.73E-27    | GUCY1A2  | ENSG00000152402 |
| 11 | 107711164 | 107711537 | 107711430 | 12 | 19  | 0 | 23.46097679 | 1.81E-07    | ATM      | ENSG00000149311 |
| 11 | 107873351 | 107873629 | 107873473 | 8  | 11  | 2 | 4.692195357 | 0.00272444  | KDEL2    | ENSG00000178202 |
| 11 | 107900516 | 107900744 | 107900630 | 8  | 11  | 0 | 14.07658607 | 9.02E-05    | KDEL2    | ENSG00000178202 |
| 11 | 108024239 | 108024599 | 108024418 | 14 | 21  | 3 | 6.451768616 | 1.56E-05    | DDX10    | ENSG00000178105 |
| 11 | 108324222 | 108324562 | 108324389 | 23 | 26  | 0 | 31.67231866 | 7.93E-10    |          | ENSG00000203334 |
| 11 | 108718214 | 108718485 | 108718349 | 12 | 13  | 2 | 5.474227917 | 0.000747844 | C11orf87 | ENSG00000185742 |
| 11 | 109315235 | 109315417 | 109315270 | 8  | 8   | 4 | 2.111487911 | 0.0804809   | ZC3H12C  | ENSG00000149289 |
| 11 | 109398274 | 109398858 | 109398664 | 19 | 36  | 1 | 21.70140353 | 7.08E-12    | ZC3H12C  | ENSG00000149289 |
| 11 | 110703853 | 110704161 | 110704007 | 8  | 11  | 5 | 2.346097679 | 0.0364013   |          | ENSG00000196167 |
| 11 | 110710587 | 110710976 | 110710797 | 10 | 18  | 4 | 4.457585589 | 0.000353565 | POU2AF1  | ENSG00000110777 |
| 11 | 110802519 | 110802877 | 110802698 | 23 | 29  | 0 | 35.19146518 | 7.73E-11    | POU2AF1  | ENSG00000110777 |
| 11 | 110803347 | 110803571 | 110803459 | 8  | 10  | 2 | 4.301179077 | 0.00512919  | POU2AF1  | ENSG00000110777 |
| 11 | 110886243 | 110886981 | 110886485 | 57 | 84  | 2 | 33.23638378 | 2.48E-26    | BTG4     | ENSG00000137707 |
| 11 | 111656559 | 111656764 | 111656661 | 9  | 10  | 2 | 4.301179077 | 0.00512919  |          | ENSG00000213234 |
| 11 | 111668848 | 111669185 | 111669016 | 8  | 13  | 5 | 2.737113958 | 0.0137917   |          | ENSG00000213234 |
| 11 | 112145077 | 112145264 | 112145170 | 8  | 8   | 1 | 5.278719777 | 0.00542188  |          | ENSG00000211166 |
| 11 | 112720192 | 112720568 | 112720371 | 12 | 20  | 0 | 24.63402563 | 8.35E-08    | TTC12    | ENSG00000149292 |
| 11 | 112760520 | 112760946 | 112760775 | 54 | 64  | 2 | 25.41605819 | 8.14E-20    | ANKK1    | ENSG00000170209 |

|    |           |           |           |    |    |    |             |             |          |                 |
|----|-----------|-----------|-----------|----|----|----|-------------|-------------|----------|-----------------|
| 11 | 112822830 | 112823270 | 112823038 | 71 | 85 | 3  | 25.22055005 | 1.89E-25    | DRD2     | ENSG00000149295 |
| 11 | 113536004 | 113536243 | 113536174 | 12 | 15 | 4  | 3.753756286 | 0.0020497   |          | ENSG00000221112 |
| 11 | 113692053 | 113692232 | 113692092 | 8  | 8  | 0  | 10.55743955 | 0.000925496 | NNMT     | ENSG00000166741 |
| 11 | 113776141 | 113776610 | 113776431 | 11 | 21 | 5  | 4.301179077 | 0.000172642 | C11orf71 | ENSG00000180425 |
| 11 | 114963629 | 114963918 | 114963760 | 17 | 19 | 1  | 11.73048839 | 2.14E-06    |          | ENSG00000211200 |
| 11 | 115678514 | 115678719 | 115678616 | 8  | 8  | 0  | 10.55743955 | 0.000925496 |          | ENSG00000211210 |
| 11 | 116108688 | 116108932 | 116108782 | 8  | 9  | 1  | 5.865244197 | 0.00272497  | BUD13    | ENSG00000137656 |
| 11 | 116212088 | 116212309 | 116212228 | 10 | 11 | 0  | 14.07658607 | 9.02E-05    | APOA1    | ENSG00000118137 |
| 11 | 116471725 | 116471965 | 116471834 | 10 | 10 | 2  | 4.301179077 | 0.00512919  |          | ENSG00000160584 |
| 11 | 116783176 | 116783382 | 116783210 | 8  | 8  | 0  | 10.55743955 | 0.000925496 | CEP164   | ENSG00000110274 |
| 11 | 116882251 | 116882581 | 116882416 | 26 | 28 | 1  | 17.00920817 | 2.80E-09    | CEP164   | ENSG00000110274 |
| 11 | 116930648 | 116930868 | 116930758 | 11 | 12 | 2  | 5.083211637 | 0.00143337  | CEP164   | ENSG00000110274 |
| 11 | 116969423 | 116969603 | 116969449 | 9  | 9  | 1  | 5.865244197 | 0.00272497  | DSCAML1  | ENSG00000177103 |
| 11 | 117079219 | 117079441 | 117079346 | 8  | 10 | 2  | 4.301179077 | 0.00512919  | DSCAML1  | ENSG00000177103 |
| 11 | 117171952 | 117172302 | 117172093 | 9  | 14 | 0  | 17.59573259 | 8.79E-06    | DSCAML1  | ENSG00000177103 |
| 11 | 117276753 | 117277197 | 117277046 | 13 | 18 | 8  | 2.476436439 | 0.00924552  | FXVD6    | ENSG00000137726 |
| 11 | 117305264 | 117305593 | 117305429 | 14 | 18 | 2  | 7.429309316 | 2.63E-05    | TMPRSS13 | ENSG00000137747 |
| 11 | 117433570 | 117434135 | 117433964 | 17 | 33 | 12 | 3.067973887 | 0.000114749 |          | ENSG00000222925 |
| 11 | 117436717 | 117436931 | 117436824 | 8  | 9  | 2  | 3.910162798 | 0.00955088  |          | ENSG00000222925 |
| 11 | 117450786 | 117451111 | 117450948 | 11 | 14 | 0  | 17.59573259 | 8.79E-06    | TMPRSS4  | ENSG00000137648 |
| 11 | 117452685 | 117453204 | 117452890 | 11 | 23 | 12 | 2.165628626 | 0.0100985   | TMPRSS4  | ENSG00000137648 |
| 11 | 117456865 | 117457110 | 117456987 | 8  | 9  | 1  | 5.865244197 | 0.00272497  | TMPRSS4  | ENSG00000137648 |
| 11 | 117468744 | 117469257 | 117469024 | 23 | 35 | 4  | 8.445951643 | 6.26E-09    | TMPRSS4  | ENSG00000137648 |
| 11 | 117521125 | 117521668 | 117521490 | 12 | 22 | 7  | 3.372515413 | 0.000629223 | SCN4B    | ENSG00000177098 |
| 11 | 117532474 | 117532821 | 117532647 | 9  | 14 | 0  | 17.59573259 | 8.79E-06    | SCN4B    | ENSG00000177098 |
| 11 | 117574317 | 117574575 | 117574480 | 8  | 11 | 3  | 3.519146518 | 0.00788869  | AMICA1   | ENSG00000160593 |
| 11 | 117617577 | 117617808 | 117617637 | 11 | 13 | 7  | 2.052835469 | 0.046392    | MPZL3    | ENSG00000160588 |
| 11 | 117640071 | 117640391 | 117640231 | 8  | 12 | 5  | 2.541605819 | 0.0225912   | MPZL2    | ENSG00000149573 |
| 11 | 117651163 | 117651387 | 117651275 | 10 | 10 | 2  | 4.301179077 | 0.00512919  | MPZL2    | ENSG00000149573 |
| 11 | 117735400 | 117735677 | 117735538 | 9  | 12 | 10 | 1.386330446 | 0.21117     | UBE4A    | ENSG00000110344 |
| 11 | 117777250 | 117777554 | 117777402 | 11 | 14 | 5  | 2.932622098 | 0.00829617  | ATP5L    | ENSG00000167283 |
| 11 | 117941813 | 117942163 | 117941988 | 15 | 18 | 7  | 2.785990993 | 0.00480525  | C11orf60 | ENSG00000118096 |
| 11 | 117999061 | 117999581 | 117999427 | 17 | 29 | 4  | 7.038293036 | 3.41E-07    | PHLDB1   | ENSG00000019144 |
| 11 | 118035405 | 118035640 | 118035522 | 12 | 13 | 3  | 4.105670938 | 0.00243034  | TREH     | ENSG00000118094 |

|    |           |           |           |     |     |    |             |             |         |                 |
|----|-----------|-----------|-----------|-----|-----|----|-------------|-------------|---------|-----------------|
| 11 | 118038596 | 118038843 | 118038719 | 10  | 11  | 1  | 7.038293036 | 0.000674435 | TREH    | ENSG00000118094 |
| 11 | 118067954 | 118068174 | 118068069 | 10  | 10  | 1  | 6.451768616 | 0.00135978  |         | ENSG00000207462 |
| 11 | 118167066 | 118167255 | 118167163 | 9   | 10  | 6  | 1.843362462 | 0.0964212   | DDX6    | ENSG00000110367 |
| 11 | 118287660 | 118288230 | 118287839 | 8   | 20  | 4  | 4.926805125 | 0.00010522  | BCL9L   | ENSG00000186174 |
| 11 | 118288287 | 118288664 | 118288466 | 8   | 15  | 17 | 1.042710079 | 0.454615    | BCL9L   | ENSG00000186174 |
| 11 | 118292743 | 118293092 | 118292917 | 17  | 23  | 2  | 9.384390715 | 8.25E-07    | BCL9L   | ENSG00000186174 |
| 11 | 118293586 | 118293866 | 118293689 | 9   | 11  | 6  | 2.010940867 | 0.0640214   | BCL9L   | ENSG00000186174 |
| 11 | 118294092 | 118294345 | 118294218 | 11  | 13  | 6  | 2.346097679 | 0.0266147   | BCL9L   | ENSG00000186174 |
| 11 | 118295748 | 118296103 | 118295825 | 9   | 14  | 4  | 3.519146518 | 0.00361132  | BCL9L   | ENSG00000186174 |
| 11 | 118297255 | 118297475 | 118297365 | 8   | 9   | 6  | 1.675784056 | 0.141978    |         | ENSG00000223272 |
| 11 | 118297985 | 118298251 | 118298118 | 10  | 13  | 2  | 5.474227917 | 0.000747844 |         | ENSG00000223272 |
| 11 | 118303974 | 118304415 | 118304153 | 15  | 25  | 8  | 3.388807758 | 0.000297109 |         | ENSG00000223272 |
| 11 | 118304435 | 118304647 | 118304541 | 8   | 10  | 5  | 2.150589539 | 0.0575848   |         | ENSG00000223272 |
| 11 | 118306024 | 118306484 | 118306254 | 17  | 28  | 5  | 5.669736057 | 2.48E-06    |         | ENSG00000223272 |
| 11 | 118332574 | 118332784 | 118332647 | 9   | 11  | 5  | 2.346097679 | 0.0364013   | UPK2    | ENSG00000110375 |
| 11 | 118364151 | 118364443 | 118364298 | 12  | 12  | 1  | 7.624817456 | 0.000332769 |         | ENSG00000200242 |
| 11 | 118374090 | 118374445 | 118374267 | 10  | 15  | 2  | 6.256260476 | 0.000199274 | CCDC84  | ENSG00000186166 |
| 11 | 118406710 | 118407076 | 118406947 | 15  | 20  | 5  | 4.105670938 | 0.000308509 | SLC37A4 | ENSG00000137700 |
| 11 | 118443552 | 118443869 | 118443710 | 11  | 15  | 7  | 2.346097679 | 0.0195693   | VPS11   | ENSG00000160695 |
| 11 | 118460707 | 118460987 | 118460848 | 10  | 13  | 6  | 2.346097679 | 0.0266147   | HMBS    | ENSG00000149397 |
| 11 | 118461043 | 118461268 | 118461154 | 9   | 11  | 3  | 3.519146518 | 0.00788869  | HMBS    | ENSG00000149397 |
| 11 | 118477690 | 118478331 | 118478152 | 16  | 33  | 13 | 2.848832895 | 0.000231281 | DPAGT1  | ENSG00000172269 |
| 11 | 118736998 | 118737441 | 118737262 | 13  | 22  | 2  | 8.993374435 | 1.66E-06    | USP2    | ENSG00000036672 |
| 11 | 118750981 | 118751185 | 118751034 | 8   | 8   | 0  | 10.55743955 | 0.000925496 | USP2    | ENSG00000036672 |
| 11 | 118752268 | 118752554 | 118752411 | 10  | 11  | 3  | 3.519146518 | 0.00788869  | USP2    | ENSG00000036672 |
| 11 | 118857307 | 118857508 | 118857395 | 11  | 11  | 3  | 3.519146518 | 0.00788869  | THY1    | ENSG00000154096 |
| 11 | 118984820 | 118985092 | 118984976 | 9   | 13  | 0  | 16.42268375 | 1.91E-05    |         | ENSG00000199217 |
| 11 | 118988712 | 118989055 | 118988932 | 10  | 15  | 1  | 9.384390715 | 3.90E-05    |         | ENSG00000199217 |
| 11 | 119071063 | 119071282 | 119071172 | 8   | 9   | 1  | 5.865244197 | 0.00272497  | PVRL1   | ENSG00000110400 |
| 11 | 119072214 | 119072841 | 119072464 | 135 | 182 | 1  | 107.3339688 | 2.07E-60    | PVRL1   | ENSG00000110400 |
| 11 | 119221487 | 119222072 | 119221831 | 57  | 82  | 3  | 24.34076342 | 1.75E-24    | PVRL1   | ENSG00000110400 |
| 11 | 119400187 | 119400497 | 119400342 | 10  | 12  | 0  | 15.24963491 | 4.15E-05    | TRIM29  | ENSG00000137699 |
| 11 | 119400802 | 119401266 | 119401045 | 52  | 72  | 6  | 12.23322361 | 1.83E-18    | TRIM29  | ENSG00000137699 |
| 11 | 119656704 | 119656937 | 119656819 | 8   | 10  | 5  | 2.150589539 | 0.0575848   | POU2F3  | ENSG00000137709 |

|    |           |           |           |     |     |    |             |             |          |                 |
|----|-----------|-----------|-----------|-----|-----|----|-------------|-------------|----------|-----------------|
| 11 | 119660190 | 119660569 | 119660424 | 10  | 14  | 4  | 3.519146518 | 0.00361132  | TMEM136  | ENSG00000181264 |
| 11 | 119677745 | 119678244 | 119677919 | 20  | 30  | 4  | 7.272902804 | 1.76E-07    | TMEM136  | ENSG00000181264 |
| 11 | 119679092 | 119679272 | 119679182 | 9   | 9   | 1  | 5.865244197 | 0.00272497  | TMEM136  | ENSG00000181264 |
| 11 | 119692771 | 119692997 | 119692884 | 10  | 12  | 3  | 3.812408728 | 0.004404    | TMEM136  | ENSG00000181264 |
| 11 | 119978957 | 119979198 | 119979077 | 10  | 11  | 0  | 14.07658607 | 9.02E-05    | GRIK4    | ENSG00000149403 |
| 11 | 120633901 | 120634191 | 120634047 | 16  | 19  | 3  | 5.865244197 | 5.72E-05    | SC5DL    | ENSG00000109929 |
| 11 | 120668691 | 120668880 | 120668766 | 9   | 11  | 0  | 14.07658607 | 9.02E-05    | SC5DL    | ENSG00000109929 |
| 11 | 120822652 | 120822910 | 120822781 | 8   | 11  | 4  | 2.815317214 | 0.0183428   | SORL1    | ENSG00000137642 |
| 11 | 120842480 | 120842781 | 120842630 | 14  | 18  | 3  | 5.571981987 | 0.000108726 | SORL1    | ENSG00000137642 |
| 11 | 120854279 | 120854593 | 120854439 | 8   | 10  | 4  | 2.580707446 | 0.0306059   | SORL1    | ENSG00000137642 |
| 11 | 120858415 | 120858821 | 120858643 | 22  | 29  | 0  | 35.19146518 | 7.73E-11    | SORL1    | ENSG00000137642 |
| 11 | 122438147 | 122438380 | 122438263 | 8   | 9   | 2  | 3.910162798 | 0.00955088  | HSPA8    | ENSG00000109971 |
| 11 | 122459494 | 122459780 | 122459649 | 9   | 12  | 3  | 3.812408728 | 0.004404    |          | ENSG00000166250 |
| 11 | 124015777 | 124016014 | 124015909 | 9   | 10  | 2  | 4.301179077 | 0.00512919  |          | ENSG00000200278 |
| 11 | 124121688 | 124122021 | 124121854 | 11  | 14  | 3  | 4.398933147 | 0.00132748  | VSIG2    | ENSG00000019102 |
| 11 | 124192168 | 124192398 | 124192283 | 8   | 8   | 1  | 5.278719777 | 0.00542188  | C11orf61 | ENSG00000120458 |
| 11 | 124412183 | 124412484 | 124412346 | 8   | 11  | 6  | 2.010940867 | 0.0640214   | SLC37A2  | ENSG00000134955 |
| 11 | 124944363 | 124944559 | 124944418 | 8   | 8   | 0  | 10.55743955 | 0.000925496 | EI24     | ENSG00000149547 |
| 11 | 125000691 | 125000883 | 125000782 | 8   | 9   | 0  | 11.73048839 | 0.000425898 | CHEK1    | ENSG00000149554 |
| 11 | 125491081 | 125491314 | 125491197 | 8   | 11  | 0  | 14.07658607 | 9.02E-05    | CDON     | ENSG00000064309 |
| 11 | 125643972 | 125644154 | 125644063 | 8   | 8   | 1  | 5.278719777 | 0.00542188  | SRPR     | ENSG00000182934 |
| 11 | 129001092 | 129001458 | 129001271 | 24  | 30  | 1  | 18.18225701 | 6.30E-10    | TMEM45B  | ENSG00000151715 |
| 11 | 129016981 | 129017394 | 129017160 | 9   | 18  | 0  | 22.28792795 | 3.94E-07    | TMEM45B  | ENSG00000151715 |
| 11 | 129167883 | 129168079 | 129167982 | 8   | 10  | 0  | 12.90353723 | 0.000195991 | TMEM45B  | ENSG00000151715 |
| 11 | 129215421 | 129215687 | 129215554 | 8   | 9   | 2  | 3.910162798 | 0.00955088  | TMEM45B  | ENSG00000151715 |
| 11 | 129228947 | 129229272 | 129229109 | 11  | 12  | 4  | 3.049926982 | 0.0108184   | TMEM45B  | ENSG00000151715 |
| 11 | 129298476 | 129298675 | 129298592 | 8   | 9   | 1  | 5.865244197 | 0.00272497  | PRDM10   | ENSG00000170325 |
| 11 | 133760867 | 133761282 | 133761121 | 11  | 17  | 2  | 7.038293036 | 5.19E-05    | B3GAT1   | ENSG00000109956 |
| 12 | 36128     | 36333     | 36274     | 8   | 10  | 3  | 3.225884308 | 0.0139466   | IQSEC3   | ENSG00000120645 |
| 12 | 440596    | 440808    | 440702    | 9   | 10  | 0  | 12.90353723 | 0.000195991 | B4GALNT3 | ENSG00000139044 |
| 12 | 503544    | 504357    | 504017    | 111 | 174 | 10 | 18.66214063 | 2.30E-46    | B4GALNT3 | ENSG00000139044 |
| 12 | 577734    | 577975    | 577834    | 16  | 17  | 0  | 21.11487911 | 8.57E-07    | NINJ2    | ENSG00000171840 |
| 12 | 730597    | 730925    | 730761    | 8   | 14  | 6  | 2.513676084 | 0.016726    | WNK1     | ENSG00000060237 |
| 12 | 827256    | 827575    | 827432    | 23  | 25  | 1  | 15.24963491 | 2.59E-08    | WNK1     | ENSG00000060237 |

|    |         |         |         |     |     |   |             |             |          |                 |
|----|---------|---------|---------|-----|-----|---|-------------|-------------|----------|-----------------|
| 12 | 928894  | 929494  | 929297  | 13  | 32  | 3 | 9.677652924 | 9.12E-09    | RAD52    | ENSG00000002016 |
| 12 | 970209  | 970499  | 970331  | 8   | 12  | 3 | 3.812408728 | 0.004404    | ERC1     | ENSG00000082805 |
| 12 | 1562960 | 1563208 | 1563080 | 9   | 10  | 3 | 3.225884308 | 0.0139466   | FBXL14   | ENSG00000171823 |
| 12 | 1585229 | 1585665 | 1585520 | 10  | 16  | 3 | 4.985457567 | 0.000385643 | WNT5B    | ENSG00000111186 |
| 12 | 1770646 | 1770825 | 1770735 | 8   | 9   | 3 | 2.932622098 | 0.0242899   | LRTM2    | ENSG00000166159 |
| 12 | 1810466 | 1810720 | 1810593 | 11  | 12  | 2 | 5.083211637 | 0.00143337  | LRTM2    | ENSG00000166159 |
| 12 | 1887167 | 1887565 | 1887399 | 9   | 14  | 0 | 17.59573259 | 8.79E-06    | CACNA2D4 | ENSG00000151062 |
| 12 | 1915860 | 1916192 | 1916026 | 9   | 12  | 2 | 5.083211637 | 0.00143337  | CACNA2D4 | ENSG00000151062 |
| 12 | 1983663 | 1984462 | 1984090 | 187 | 265 | 2 | 104.0103304 | 2.29E-86    | DCP1B    | ENSG00000151065 |
| 12 | 2031517 | 2031869 | 2031693 | 11  | 14  | 1 | 8.797866295 | 8.00E-05    | CACNA1C  | ENSG00000151067 |
| 12 | 2604000 | 2604274 | 2604132 | 10  | 14  | 3 | 4.398933147 | 0.00132748  |          | ENSG00000216217 |
| 12 | 2676378 | 2676952 | 2676718 | 33  | 48  | 1 | 28.73969656 | 8.36E-16    |          | ENSG00000216217 |
| 12 | 2774132 | 2774315 | 2774227 | 8   | 9   | 3 | 2.932622098 | 0.0242899   | FKBP4    | ENSG00000004478 |
| 12 | 2775350 | 2775595 | 2775515 | 11  | 12  | 2 | 5.083211637 | 0.00143337  | FKBP4    | ENSG00000004478 |
| 12 | 2791866 | 2792302 | 2792029 | 8   | 15  | 7 | 2.346097679 | 0.0195693   | ITFG2    | ENSG00000111203 |
| 12 | 2792324 | 2792523 | 2792375 | 9   | 9   | 2 | 3.910162798 | 0.00955088  | ITFG2    | ENSG00000111203 |
| 12 | 2912699 | 2912878 | 2912819 | 8   | 8   | 5 | 1.759573259 | 0.13508     |          | ENSG00000209043 |
| 12 | 3279387 | 3279705 | 3279546 | 14  | 18  | 1 | 11.14396397 | 4.44E-06    | TSPAN9   | ENSG00000011105 |
| 12 | 3294709 | 3294985 | 3294847 | 15  | 18  | 3 | 5.571981987 | 0.000108726 | TSPAN9   | ENSG00000011105 |
| 12 | 3358247 | 3358462 | 3358354 | 11  | 12  | 0 | 15.24963491 | 4.15E-05    |          | ENSG00000212730 |
| 12 | 3471655 | 3471852 | 3471753 | 8   | 8   | 2 | 3.519146518 | 0.017558    | PRMT8    | ENSG00000111218 |
| 12 | 3579497 | 3579700 | 3579607 | 8   | 8   | 4 | 2.111487911 | 0.0804809   |          | ENSG00000206004 |
| 12 | 3584739 | 3584935 | 3584834 | 8   | 9   | 1 | 5.865244197 | 0.00272497  |          | ENSG00000206004 |
| 12 | 3727604 | 3727911 | 3727757 | 8   | 12  | 6 | 2.178519273 | 0.0416567   | EFCAB4B  | ENSG00000130038 |
| 12 | 3953555 | 3953796 | 3953675 | 12  | 13  | 2 | 5.474227917 | 0.000747844 | PARP11   | ENSG00000111224 |
| 12 | 3978988 | 3979286 | 3979131 | 16  | 20  | 1 | 12.31701281 | 1.03E-06    | PARP11   | ENSG00000111224 |
| 12 | 3993135 | 3993379 | 3993224 | 9   | 11  | 2 | 4.692195357 | 0.00272444  | PARP11   | ENSG00000111224 |
| 12 | 4010893 | 4011126 | 4011015 | 12  | 13  | 2 | 5.474227917 | 0.000747844 | PARP11   | ENSG00000111224 |
| 12 | 4017211 | 4017524 | 4017390 | 10  | 12  | 6 | 2.178519273 | 0.0416567   | PARP11   | ENSG00000111224 |
| 12 | 4122366 | 4122565 | 4122504 | 10  | 10  | 1 | 6.451768616 | 0.00135978  | CCND2    | ENSG00000118971 |
| 12 | 4287281 | 4287664 | 4287451 | 12  | 18  | 4 | 4.457585589 | 0.000353565 | C12orf5  | ENSG00000078237 |
| 12 | 4300582 | 4301303 | 4301090 | 27  | 50  | 2 | 19.94183027 | 2.68E-15    | C12orf5  | ENSG00000078237 |
| 12 | 4462372 | 4462697 | 4462534 | 14  | 16  | 0 | 19.94183027 | 1.86E-06    | FGF6     | ENSG00000111241 |
| 12 | 4996925 | 4997144 | 4997024 | 9   | 10  | 0 | 12.90353723 | 0.000195991 | KCNA5    | ENSG00000130037 |

|    |         |         |         |    |    |    |             |             |          |                 |
|----|---------|---------|---------|----|----|----|-------------|-------------|----------|-----------------|
| 12 | 5119451 | 5119804 | 5119627 | 13 | 19 | 0  | 23.46097679 | 1.81E-07    | KCNA5    | ENSG00000130037 |
| 12 | 5600539 | 5600761 | 5600650 | 8  | 8  | 0  | 10.55743955 | 0.000925496 | NTF3     | ENSG00000185652 |
| 12 | 6179767 | 6179985 | 6179875 | 8  | 9  | 0  | 11.73048839 | 0.000425898 | CD9      | ENSG00000010278 |
| 12 | 6180649 | 6180883 | 6180766 | 11 | 12 | 2  | 5.083211637 | 0.00143337  | CD9      | ENSG00000010278 |
| 12 | 6195313 | 6195629 | 6195471 | 8  | 10 | 9  | 1.290353723 | 0.279648    | CD9      | ENSG00000010278 |
| 12 | 6208308 | 6208522 | 6208452 | 8  | 10 | 2  | 4.301179077 | 0.00512919  |          | ENSG00000202318 |
| 12 | 6214922 | 6215314 | 6215116 | 23 | 32 | 4  | 7.742122339 | 4.68E-08    |          | ENSG00000202318 |
| 12 | 6251980 | 6252529 | 6252317 | 9  | 19 | 3  | 5.865244197 | 5.72E-05    | PLEKHG6  | ENSG00000008323 |
| 12 | 6301314 | 6301712 | 6301533 | 14 | 21 | 5  | 4.301179077 | 0.000172642 | PLEKHG6  | ENSG00000008323 |
| 12 | 6315672 | 6315932 | 6315810 | 11 | 13 | 6  | 2.346097679 | 0.0266147   | TNFRSF1A | ENSG00000067182 |
| 12 | 6321468 | 6321717 | 6321630 | 12 | 14 | 1  | 8.797866295 | 8.00E-05    | TNFRSF1A | ENSG00000067182 |
| 12 | 6356293 | 6356612 | 6356443 | 10 | 13 | 7  | 2.052835469 | 0.046392    | SCNN1A   | ENSG00000111319 |
| 12 | 6403070 | 6403249 | 6403147 | 9  | 9  | 3  | 2.932622098 | 0.0242899   |          | ENSG00000213942 |
| 12 | 6487113 | 6487460 | 6487287 | 37 | 42 | 1  | 25.22055005 | 7.76E-14    | NCAPD2   | ENSG00000010292 |
| 12 | 6642481 | 6642998 | 6642671 | 16 | 31 | 2  | 12.51252095 | 2.82E-09    | ING4     | ENSG00000111653 |
| 12 | 6703383 | 6703666 | 6703556 | 10 | 13 | 4  | 3.28453675  | 0.00629037  | COPS7A   | ENSG00000111652 |
| 12 | 6732356 | 6732550 | 6732458 | 8  | 9  | 0  | 11.73048839 | 0.000425898 | MLF2     | ENSG00000089693 |
| 12 | 6732942 | 6733412 | 6733138 | 14 | 22 | 6  | 3.854303329 | 0.000260696 | MLF2     | ENSG00000089693 |
| 12 | 6758357 | 6758662 | 6758509 | 10 | 14 | 10 | 1.599612054 | 0.114822    |          | ENSG00000209379 |
| 12 | 6831634 | 6831983 | 6831809 | 12 | 16 | 12 | 1.533986944 | 0.120062    | USP5     | ENSG00000111667 |
| 12 | 6846895 | 6847167 | 6847031 | 9  | 12 | 4  | 3.049926982 | 0.0108184   | TPI1     | ENSG00000111669 |
| 12 | 6905394 | 6905602 | 6905498 | 8  | 8  | 5  | 1.759573259 | 0.13508     | ATN1     | ENSG00000111676 |
| 12 | 6917460 | 6917724 | 6917592 | 14 | 17 | 2  | 7.038293036 | 5.19E-05    | ATN1     | ENSG00000111676 |
| 12 | 6922952 | 6923495 | 6923333 | 20 | 33 | 11 | 3.323638378 | 5.37E-05    | C12orf57 | ENSG00000111678 |
| 12 | 6923829 | 6924278 | 6924149 | 15 | 23 | 8  | 3.128130238 | 0.000832453 | C12orf57 | ENSG00000111678 |
| 12 | 6925805 | 6926266 | 6925984 | 9  | 18 | 4  | 4.457585589 | 0.000353565 | PTPN6    | ENSG00000111679 |
| 12 | 6941490 | 6941873 | 6941701 | 11 | 18 | 3  | 5.571981987 | 0.000108726 |          | ENSG00000207713 |
| 12 | 6942255 | 6942443 | 6942411 | 8  | 8  | 2  | 3.519146518 | 0.017558    |          | ENSG00000207713 |
| 12 | 6942472 | 6942661 | 6942566 | 8  | 9  | 2  | 3.910162798 | 0.00955088  |          | ENSG00000207713 |
| 12 | 6943540 | 6943749 | 6943605 | 8  | 10 | 3  | 3.225884308 | 0.0139466   |          | ENSG00000207708 |
| 12 | 6949940 | 6950437 | 6950141 | 18 | 29 | 5  | 5.865244197 | 1.33E-06    | PHB2     | ENSG00000215021 |
| 12 | 7017038 | 7017397 | 7017218 | 18 | 24 | 1  | 14.66311049 | 5.43E-08    | C1S      | ENSG00000182326 |
| 12 | 7263597 | 7263936 | 7263766 | 10 | 12 | 3  | 3.812408728 | 0.004404    | PEX5     | ENSG00000139197 |
| 12 | 7682526 | 7682830 | 7682674 | 12 | 16 | 3  | 4.985457567 | 0.000385643 |          | ENSG00000209109 |

|    |          |          |          |    |    |   |             |             |          |                 |
|----|----------|----------|----------|----|----|---|-------------|-------------|----------|-----------------|
| 12 | 7977135  | 7977338  | 7977219  | 14 | 15 | 4 | 3.753756286 | 0.0020497   | SLC2A3   | ENSG00000059804 |
| 12 | 8125857  | 8126166  | 8126024  | 8  | 11 | 2 | 4.692195357 | 0.00272444  |          | ENSG00000089818 |
| 12 | 8871419  | 8871708  | 8871537  | 8  | 11 | 0 | 14.07658607 | 9.02E-05    | A2ML1    | ENSG00000166535 |
| 12 | 8993945  | 8994180  | 8994049  | 8  | 10 | 5 | 2.150589539 | 0.0575848   | M6PR     | ENSG00000003056 |
| 12 | 9176143  | 9176339  | 9176241  | 8  | 8  | 1 | 5.278719777 | 0.00542188  |          | ENSG00000211542 |
| 12 | 9317140  | 9317344  | 9317242  | 8  | 9  | 5 | 1.955081399 | 0.0892323   |          | ENSG00000212440 |
| 12 | 9692229  | 9692594  | 9692435  | 11 | 15 | 2 | 6.256260476 | 0.000199274 |          | ENSG00000214774 |
| 12 | 9841985  | 9842277  | 9842109  | 9  | 10 | 1 | 6.451768616 | 0.00135978  | KLRF1    | ENSG00000150045 |
| 12 | 9954895  | 9955313  | 9955169  | 26 | 35 | 2 | 14.07658607 | 1.57E-10    | CLEC2A   | ENSG00000188393 |
| 12 | 10405637 | 10405823 | 10405730 | 9  | 9  | 1 | 5.865244197 | 0.00272497  | KLRK1    | ENSG00000213809 |
| 12 | 10657335 | 10657561 | 10657444 | 8  | 10 | 1 | 6.451768616 | 0.00135978  | MAGOHB   | ENSG00000111196 |
| 12 | 10761320 | 10761650 | 10761476 | 14 | 18 | 1 | 11.14396397 | 4.44E-06    | CSDA     | ENSG00000060138 |
| 12 | 10962786 | 10963025 | 10962905 | 11 | 11 | 0 | 14.07658607 | 9.02E-05    | TAS2R13  | ENSG00000212128 |
| 12 | 11452329 | 11452687 | 11452508 | 9  | 15 | 1 | 9.384390715 | 3.90E-05    | PRB2     | ENSG00000121335 |
| 12 | 11624622 | 11624854 | 11624771 | 10 | 12 | 1 | 7.624817456 | 0.000332769 |          | ENSG00000221128 |
| 12 | 11679621 | 11679890 | 11679732 | 17 | 19 | 0 | 23.46097679 | 1.81E-07    | ETV6     | ENSG00000139083 |
| 12 | 12077571 | 12077813 | 12077730 | 12 | 15 | 5 | 3.128130238 | 0.00492422  | BCL2L14  | ENSG00000121380 |
| 12 | 12090634 | 12090958 | 12090796 | 8  | 11 | 1 | 7.038293036 | 0.000674435 | BCL2L14  | ENSG00000121380 |
| 12 | 12091325 | 12091892 | 12091500 | 44 | 58 | 0 | 69.20988152 | 1.30E-20    | BCL2L14  | ENSG00000121380 |
| 12 | 12115153 | 12115345 | 12115260 | 8  | 8  | 1 | 5.278719777 | 0.00542188  | BCL2L14  | ENSG00000121380 |
| 12 | 12490181 | 12490457 | 12490319 | 14 | 16 | 1 | 9.970915134 | 1.89E-05    | LOH12CR1 | ENSG00000165714 |
| 12 | 12513679 | 12514073 | 12513896 | 20 | 28 | 0 | 34.01841634 | 1.68E-10    | DUSP16   | ENSG00000111266 |
| 12 | 12652950 | 12653168 | 12653011 | 11 | 11 | 4 | 2.815317214 | 0.0183428   | CREBL2   | ENSG00000111269 |
| 12 | 12748859 | 12749155 | 12749007 | 13 | 15 | 1 | 9.384390715 | 3.90E-05    | CDKN1B   | ENSG00000111276 |
| 12 | 12761531 | 12761804 | 12761644 | 8  | 11 | 3 | 3.519146518 | 0.00788869  | CDKN1B   | ENSG00000111276 |
| 12 | 12769600 | 12769823 | 12769711 | 8  | 8  | 3 | 2.639359888 | 0.0415794   | APOLD1   | ENSG00000178878 |
| 12 | 12857302 | 12857534 | 12857418 | 9  | 11 | 2 | 4.692195357 | 0.00272444  | DDX47    | ENSG00000213782 |
| 12 | 12916516 | 12916831 | 12916665 | 13 | 17 | 2 | 7.038293036 | 5.19E-05    | GPRC5A   | ENSG00000013588 |
| 12 | 12927559 | 12927944 | 12927765 | 18 | 28 | 5 | 5.669736057 | 2.48E-06    | GPRC5A   | ENSG00000013588 |
| 12 | 13179924 | 13180175 | 13180039 | 14 | 16 | 5 | 3.323638378 | 0.00288759  | EMP1     | ENSG00000134531 |
| 12 | 13299992 | 13300224 | 13300108 | 8  | 8  | 7 | 1.319679944 | 0.283403    | EMP1     | ENSG00000134531 |
| 12 | 14252160 | 14252366 | 14252263 | 9  | 9  | 2 | 3.910162798 | 0.00955088  |          | ENSG00000209525 |
| 12 | 14361525 | 14361914 | 14361736 | 13 | 19 | 0 | 23.46097679 | 1.81E-07    | ATF7IP   | ENSG00000171681 |
| 12 | 14543779 | 14543976 | 14543877 | 8  | 9  | 0 | 11.73048839 | 0.000425898 |          | ENSG00000200830 |



|    |          |          |          |     |     |     |             |             |          |                 |
|----|----------|----------|----------|-----|-----|-----|-------------|-------------|----------|-----------------|
| 12 | 14558533 | 14558723 | 14558614 | 9   | 9   | 0   | 11.73048839 | 0.000425898 |          | ENSG00000200830 |
| 12 | 14815242 | 14815455 | 14815333 | 8   | 9   | 9   | 1.173048839 | 0.362316    | HIST4H4  | ENSG00000197837 |
| 12 | 14930561 | 14930837 | 14930699 | 9   | 10  | 0   | 12.90353723 | 0.000195991 | MGP      | ENSG00000111341 |
| 12 | 14973285 | 14973520 | 14973383 | 16  | 16  | 2   | 6.647276756 | 0.000101928 | ERP27    | ENSG00000139055 |
| 12 | 15055360 | 15055539 | 15055411 | 8   | 9   | 0   | 11.73048839 | 0.000425898 | PDE6H    | ENSG00000139053 |
| 12 | 15207195 | 15207447 | 15207321 | 9   | 10  | 3   | 3.225884308 | 0.0139466   | RERG     | ENSG00000134533 |
| 12 | 15579058 | 15579250 | 15579160 | 8   | 10  | 1   | 6.451768616 | 0.00135978  |          | ENSG00000200105 |
| 12 | 15579511 | 15579898 | 15579705 | 22  | 31  | 0   | 37.53756286 | 1.64E-11    |          | ENSG00000200105 |
| 12 | 15833631 | 15834125 | 15833946 | 10  | 19  | 2   | 7.820325595 | 1.32E-05    | EPS8     | ENSG00000151491 |
| 12 | 15980874 | 15981319 | 15981050 | 101 | 121 | 4   | 28.62239168 | 6.59E-36    | DERA     | ENSG00000023697 |
| 12 | 16840535 | 16840839 | 16840687 | 8   | 13  | 3   | 4.105670938 | 0.00243034  | LMO3     | ENSG00000048540 |
| 12 | 18305528 | 18305754 | 18305663 | 12  | 12  | 3   | 3.812408728 | 0.004404    | PIK3C2G  | ENSG00000139144 |
| 12 | 18394013 | 18394292 | 18394171 | 14  | 17  | 2   | 7.038293036 | 5.19E-05    |          | ENSG00000209542 |
| 12 | 19475919 | 19476560 | 19476248 | 104 | 146 | 0   | 172.4381794 | 2.82E-50    | AEBP2    | ENSG00000139154 |
| 12 | 19617128 | 19617343 | 19617235 | 8   | 10  | 5   | 2.150589539 | 0.0575848   | AEBP2    | ENSG00000139154 |
| 12 | 20257058 | 20257264 | 20257161 | 10  | 10  | 5   | 2.150589539 | 0.0575848   | PDE3A    | ENSG00000172572 |
| 12 | 20595492 | 20595901 | 20595687 | 104 | 145 | 128 | 1.327636671 | 0.00942142  |          | ENSG00000209580 |
| 12 | 21862970 | 21863313 | 21863141 | 11  | 16  | 0   | 19.94183027 | 1.86E-06    | KCNJ8    | ENSG00000121361 |
| 12 | 22588584 | 22588901 | 22588726 | 10  | 12  | 2   | 5.083211637 | 0.00143337  | KIAA0528 | ENSG00000111731 |
| 12 | 22669187 | 22669595 | 22669299 | 12  | 19  | 2   | 7.820325595 | 1.32E-05    | ETNK1    | ENSG00000139163 |
| 12 | 22875139 | 22875592 | 22875413 | 74  | 84  | 2   | 33.23638378 | 2.48E-26    | ETNK1    | ENSG00000139163 |
| 12 | 25098355 | 25098626 | 25098490 | 12  | 13  | 1   | 8.211341875 | 0.000163445 |          | ENSG00000212652 |
| 12 | 25112857 | 25113060 | 25112906 | 8   | 8   | 1   | 5.278719777 | 0.00542188  |          | ENSG00000212652 |
| 12 | 25179658 | 25180307 | 25180087 | 45  | 83  | 5   | 16.42268375 | 9.72E-23    | CASC1    | ENSG00000118307 |
| 12 | 25295136 | 25295322 | 25295230 | 9   | 9   | 3   | 2.932622098 | 0.0242899   | KRAS     | ENSG00000133703 |
| 12 | 25301198 | 25301422 | 25301293 | 11  | 14  | 2   | 5.865244197 | 0.000387308 | KRAS     | ENSG00000133703 |
| 12 | 25320785 | 25321086 | 25320937 | 8   | 11  | 1   | 7.038293036 | 0.000674435 | KRAS     | ENSG00000133703 |
| 12 | 25545766 | 25546080 | 25545923 | 11  | 15  | 6   | 2.68125449  | 0.0103552   | IFLTD1   | ENSG00000152936 |
| 12 | 25568573 | 25569051 | 25568877 | 9   | 18  | 3   | 5.571981987 | 0.000108726 | IFLTD1   | ENSG00000152936 |
| 12 | 25734333 | 25734647 | 25734484 | 9   | 11  | 2   | 4.692195357 | 0.00272444  |          | ENSG00000209624 |
| 12 | 25755475 | 25755828 | 25755638 | 15  | 19  | 1   | 11.73048839 | 2.14E-06    |          | ENSG00000222950 |
| 12 | 26061934 | 26062160 | 26062071 | 11  | 11  | 4   | 2.815317214 | 0.0183428   | RASSF8   | ENSG00000123094 |
| 12 | 26204198 | 26204377 | 26204287 | 8   | 8   | 1   | 5.278719777 | 0.00542188  | BHLHB3   | ENSG00000123095 |
| 12 | 26271234 | 26271436 | 26271335 | 8   | 10  | 4   | 2.580707446 | 0.0306059   | SSPN     | ENSG00000123096 |

|    |          |          |          |    |    |    |             |             |          |                 |
|----|----------|----------|----------|----|----|----|-------------|-------------|----------|-----------------|
| 12 | 26318948 | 26319245 | 26319084 | 9  | 11 | 3  | 3.519146518 | 0.00788869  | SSPN     | ENSG00000123096 |
| 12 | 26391052 | 26391268 | 26391160 | 8  | 10 | 2  | 4.301179077 | 0.00512919  |          | ENSG00000212549 |
| 12 | 26845452 | 26845661 | 26845525 | 9  | 9  | 0  | 11.73048839 | 0.000425898 | ITPR2    | ENSG00000123104 |
| 12 | 27057093 | 27057631 | 27057265 | 32 | 42 | 1  | 25.22055005 | 7.76E-14    | TM7SF3   | ENSG00000064115 |
| 12 | 27121247 | 27121485 | 27121368 | 11 | 11 | 3  | 3.519146518 | 0.00788869  | C12orf71 | ENSG00000214700 |
| 12 | 27347595 | 27347842 | 27347728 | 8  | 10 | 1  | 6.451768616 | 0.00135978  | ARNTL2   | ENSG00000029153 |
| 12 | 27472116 | 27472295 | 27472205 | 8  | 8  | 0  | 10.55743955 | 0.000925496 | C12orf70 | ENSG00000165935 |
| 12 | 27747943 | 27748162 | 27748052 | 8  | 9  | 6  | 1.675784056 | 0.141978    | MRPS35   | ENSG00000061794 |
| 12 | 27754873 | 27755108 | 27754990 | 9  | 11 | 1  | 7.038293036 | 0.000674435 | MRPS35   | ENSG00000061794 |
| 12 | 29425402 | 29425643 | 29425522 | 10 | 13 | 8  | 1.824742639 | 0.0744168   | ERGIC2   | ENSG00000087502 |
| 12 | 30799202 | 30799470 | 30799336 | 13 | 15 | 0  | 18.76878143 | 4.04E-06    | CAPRIN2  | ENSG00000110888 |
| 12 | 30948089 | 30948300 | 30948194 | 8  | 9  | 2  | 3.910162798 | 0.00955088  | TSPAN11  | ENSG00000110900 |
| 12 | 31273751 | 31273930 | 31273840 | 8  | 8  | 2  | 3.519146518 | 0.017558    |          | ENSG00000213703 |
| 12 | 31290526 | 31290894 | 31290694 | 15 | 22 | 3  | 6.745030826 | 8.05E-06    |          | ENSG00000213703 |
| 12 | 31290979 | 31291194 | 31291081 | 8  | 9  | 2  | 3.910162798 | 0.00955088  |          | ENSG00000213703 |
| 12 | 31570525 | 31570766 | 31570645 | 9  | 9  | 4  | 2.346097679 | 0.050148    |          | ENSG00000201228 |
| 12 | 31635815 | 31636017 | 31635916 | 8  | 10 | 5  | 2.150589539 | 0.0575848   | DENND5B  | ENSG00000170456 |
| 12 | 31773193 | 31773602 | 31773372 | 12 | 21 | 3  | 6.451768616 | 1.56E-05    | AMN1     | ENSG00000151743 |
| 12 | 31777114 | 31777427 | 31777270 | 14 | 16 | 2  | 6.647276756 | 0.000101928 | AMN1     | ENSG00000151743 |
| 12 | 31793361 | 31793903 | 31793632 | 22 | 40 | 4  | 9.619000482 | 2.08E-10    | AMN1     | ENSG00000151743 |
| 12 | 32003348 | 32003628 | 32003488 | 14 | 16 | 3  | 4.985457567 | 0.000385643 | C12orf35 | ENSG00000174718 |
| 12 | 32091803 | 32091982 | 32091892 | 8  | 8  | 0  | 10.55743955 | 0.000925496 | BICD1    | ENSG00000151746 |
| 12 | 32293053 | 32293389 | 32293221 | 17 | 22 | 2  | 8.993374435 | 1.66E-06    | BICD1    | ENSG00000151746 |
| 12 | 32579499 | 32579840 | 32579729 | 8  | 13 | 1  | 8.211341875 | 0.000163445 | FGD4     | ENSG00000139132 |
| 12 | 32723226 | 32723592 | 32723471 | 8  | 13 | 1  | 8.211341875 | 0.000163445 | DNM1L    | ENSG00000087470 |
| 12 | 32799343 | 32799553 | 32799448 | 9  | 9  | 3  | 2.932622098 | 0.0242899   | YARS2    | ENSG00000139131 |
| 12 | 32800040 | 32800267 | 32800153 | 9  | 10 | 6  | 1.843362462 | 0.0964212   | YARS2    | ENSG00000139131 |
| 12 | 32800468 | 32800674 | 32800571 | 9  | 11 | 7  | 1.759573259 | 0.102361    | YARS2    | ENSG00000139131 |
| 12 | 32937283 | 32937502 | 32937359 | 12 | 13 | 4  | 3.28453675  | 0.00629037  | PKP2     | ENSG00000057294 |
| 12 | 32941312 | 32941547 | 32941451 | 14 | 14 | 1  | 8.797866295 | 8.00E-05    | PKP2     | ENSG00000057294 |
| 12 | 32945631 | 32945906 | 32945762 | 12 | 15 | 2  | 6.256260476 | 0.000199274 | PKP2     | ENSG00000057294 |
| 12 | 34066261 | 34066729 | 34066495 | 9  | 18 | 3  | 5.571981987 | 0.000108726 | ALG10    | ENSG00000139133 |
| 12 | 34247525 | 34247704 | 34247632 | 8  | 8  | 1  | 5.278719777 | 0.00542188  |          | ENSG00000199654 |
| 12 | 34263745 | 34264084 | 34263914 | 50 | 50 | 45 | 1.300554148 | 0.0979016   |          | ENSG00000209793 |

|    |          |          |          |    |    |    |             |             |          |                 |
|----|----------|----------|----------|----|----|----|-------------|-------------|----------|-----------------|
| 12 | 34308365 | 34308545 | 34308515 | 9  | 9  | 7  | 1.466311049 | 0.20706     |          | ENSG00000209793 |
| 12 | 34333686 | 34333973 | 34333856 | 9  | 11 | 1  | 7.038293036 | 0.000674435 |          | ENSG00000209793 |
| 12 | 34724578 | 34724903 | 34724740 | 12 | 13 | 16 | 0.966040221 | 0.542489    |          | ENSG00000209793 |
| 12 | 34742040 | 34742226 | 34742189 | 9  | 9  | 5  | 1.955081399 | 0.0892323   |          | ENSG00000209793 |
| 12 | 36337993 | 36338230 | 36338146 | 9  | 11 | 6  | 2.010940867 | 0.0640214   |          | ENSG00000209796 |
| 12 | 36730917 | 36731098 | 36731067 | 8  | 8  | 5  | 1.759573259 | 0.13508     |          | ENSG00000209796 |
| 12 | 36829914 | 36830250 | 36830082 | 29 | 30 | 13 | 2.597465287 | 0.000910385 |          | ENSG00000199843 |
| 12 | 36996603 | 36996935 | 36996769 | 10 | 14 | 5  | 2.932622098 | 0.00829617  | ALG10B   | ENSG00000175548 |
| 12 | 38441002 | 38441221 | 38441113 | 8  | 9  | 0  | 11.73048839 | 0.000425898 |          | ENSG00000209839 |
| 12 | 38592505 | 38592962 | 38592684 | 10 | 21 | 0  | 25.80707446 | 3.84E-08    |          | ENSG00000199571 |
| 12 | 38708393 | 38708687 | 38708538 | 18 | 21 | 2  | 8.602358155 | 3.33E-06    |          | ENSG00000219786 |
| 12 | 38766237 | 38766416 | 38766327 | 8  | 8  | 1  | 5.278719777 | 0.00542188  |          | ENSG00000219786 |
| 12 | 39089519 | 39089772 | 39089645 | 15 | 16 | 0  | 19.94183027 | 1.86E-06    |          | ENSG00000214639 |
| 12 | 39154676 | 39155156 | 39154916 | 70 | 93 | 7  | 13.78332386 | 5.07E-24    |          | ENSG00000214639 |
| 12 | 39618793 | 39619008 | 39618900 | 9  | 10 | 1  | 6.451768616 | 0.00135978  | CNTN1    | ENSG00000018236 |
| 12 | 39869716 | 39870031 | 39869880 | 9  | 11 | 1  | 7.038293036 | 0.000674435 | PDZRN4   | ENSG00000165966 |
| 12 | 40824788 | 40824984 | 40824886 | 9  | 9  | 0  | 11.73048839 | 0.000425898 | GLT8D3   | ENSG00000151233 |
| 12 | 41602204 | 41602598 | 41602462 | 12 | 17 | 13 | 1.508205651 | 0.12204     |          | ENSG00000213677 |
| 12 | 42134505 | 42134685 | 42134595 | 9  | 9  | 1  | 5.865244197 | 0.00272497  | ADAMTS20 | ENSG00000173157 |
| 12 | 42266652 | 42267256 | 42266864 | 71 | 96 | 2  | 37.92857914 | 2.90E-30    |          | ENSG00000214615 |
| 12 | 42438787 | 42439216 | 42438966 | 10 | 18 | 7  | 2.785990993 | 0.00480525  | IRAK4    | ENSG00000198001 |
| 12 | 42709316 | 42709619 | 42709467 | 12 | 14 | 1  | 8.797866295 | 8.00E-05    | TMEM117  | ENSG00000139173 |
| 12 | 42998359 | 42998801 | 42998695 | 13 | 24 | 3  | 7.331555246 | 2.13E-06    | TMEM117  | ENSG00000139173 |
| 12 | 43556816 | 43557075 | 43556945 | 9  | 12 | 1  | 7.624817456 | 0.000332769 | NELL2    | ENSG00000184613 |
| 12 | 43628654 | 43629043 | 43628804 | 12 | 19 | 12 | 1.804690522 | 0.0452624   |          | ENSG00000201788 |
| 12 | 43810969 | 43811191 | 43811079 | 9  | 10 | 2  | 4.301179077 | 0.00512919  |          | ENSG00000199556 |
| 12 | 43850492 | 43850819 | 43850655 | 10 | 14 | 6  | 2.513676084 | 0.016726    | PLEKHA9  | ENSG00000134297 |
| 12 | 43895799 | 43896287 | 43896062 | 12 | 22 | 3  | 6.745030826 | 8.05E-06    | PLEKHA9  | ENSG00000134297 |
| 12 | 43913064 | 43913298 | 43913180 | 8  | 9  | 5  | 1.955081399 | 0.0892323   | ANO6     | ENSG00000177119 |
| 12 | 43950117 | 43950306 | 43950239 | 9  | 9  | 0  | 11.73048839 | 0.000425898 | ANO6     | ENSG00000177119 |
| 12 | 43956361 | 43956571 | 43956458 | 11 | 12 | 9  | 1.524963491 | 0.154777    | ANO6     | ENSG00000177119 |
| 12 | 44325013 | 44325397 | 44325192 | 11 | 18 | 1  | 11.14396397 | 4.44E-06    | ARID2    | ENSG00000189079 |
| 12 | 44407246 | 44407911 | 44407499 | 10 | 29 | 4  | 7.038293036 | 3.41E-07    | ARID2    | ENSG00000189079 |
| 12 | 44408757 | 44409104 | 44408929 | 12 | 16 | 2  | 6.647276756 | 0.000101928 | ARID2    | ENSG00000189079 |

|    |          |          |          |    |     |    |             |             |         |                 |
|----|----------|----------|----------|----|-----|----|-------------|-------------|---------|-----------------|
| 12 | 44558669 | 44558990 | 44558835 | 10 | 13  | 4  | 3.28453675  | 0.00629037  |         | ENSG00000209242 |
| 12 | 44670649 | 44671041 | 44670828 | 20 | 27  | 9  | 3.28453675  | 0.000236424 | SFRS2IP | ENSG00000139218 |
| 12 | 44671783 | 44671991 | 44671887 | 8  | 8   | 5  | 1.759573259 | 0.13508     | SFRS2IP | ENSG00000139218 |
| 12 | 44751424 | 44751762 | 44751592 | 31 | 35  | 4  | 8.445951643 | 6.26E-09    | SFRS2IP | ENSG00000139218 |
| 12 | 44752227 | 44752549 | 44752401 | 13 | 18  | 14 | 1.485861863 | 0.123674    | SFRS2IP | ENSG00000139218 |
| 12 | 44787485 | 44788073 | 44787852 | 79 | 103 | 2  | 40.6656931  | 1.45E-32    | SFRS2IP | ENSG00000139218 |
| 12 | 44840788 | 44841133 | 44840960 | 15 | 20  | 5  | 4.105670938 | 0.000308509 | SLC38A1 | ENSG00000111371 |
| 12 | 44844272 | 44844622 | 44844447 | 17 | 22  | 4  | 5.396024661 | 3.05E-05    | SLC38A1 | ENSG00000111371 |
| 12 | 44881434 | 44881777 | 44881605 | 11 | 16  | 9  | 1.994183027 | 0.0370915   | SLC38A1 | ENSG00000111371 |
| 12 | 44890086 | 44890340 | 44890213 | 12 | 15  | 3  | 4.692195357 | 0.000718455 | SLC38A1 | ENSG00000111371 |
| 12 | 44939194 | 44939443 | 44939318 | 12 | 13  | 5  | 2.737113958 | 0.0137917   | SLC38A1 | ENSG00000111371 |
| 12 | 44941200 | 44941466 | 44941352 | 12 | 14  | 6  | 2.513676084 | 0.016726    | SLC38A1 | ENSG00000111371 |
| 12 | 44943721 | 44943936 | 44943840 | 8  | 8   | 2  | 3.519146518 | 0.017558    | SLC38A1 | ENSG00000111371 |
| 12 | 44948768 | 44949266 | 44949084 | 9  | 20  | 9  | 2.463402563 | 0.00689886  | SLC38A1 | ENSG00000111371 |
| 12 | 45022526 | 45022850 | 45022696 | 9  | 13  | 5  | 2.737113958 | 0.0137917   | SLC38A2 | ENSG00000134294 |
| 12 | 45051769 | 45052053 | 45051911 | 8  | 11  | 8  | 1.564065119 | 0.151515    | SLC38A2 | ENSG00000134294 |
| 12 | 45052629 | 45052881 | 45052755 | 10 | 12  | 2  | 5.083211637 | 0.00143337  | SLC38A2 | ENSG00000134294 |
| 12 | 45063283 | 45063725 | 45063533 | 9  | 17  | 1  | 10.55743955 | 9.18E-06    | SLC38A2 | ENSG00000134294 |
| 12 | 45064003 | 45064200 | 45064138 | 8  | 9   | 7  | 1.466311049 | 0.20706     | SLC38A2 | ENSG00000134294 |
| 12 | 45130657 | 45130836 | 45130675 | 8  | 9   | 1  | 5.865244197 | 0.00272497  | SLC38A2 | ENSG00000134294 |
| 12 | 45135794 | 45136176 | 45136059 | 14 | 20  | 6  | 3.519146518 | 0.000784044 | SLC38A2 | ENSG00000134294 |
| 12 | 45153726 | 45154082 | 45153947 | 12 | 17  | 10 | 1.919534464 | 0.0400548   | SLC38A2 | ENSG00000134294 |
| 12 | 45173717 | 45173971 | 45173844 | 9  | 12  | 1  | 7.624817456 | 0.000332769 | SLC38A2 | ENSG00000134294 |
| 12 | 45189247 | 45189451 | 45189360 | 10 | 11  | 2  | 4.692195357 | 0.00272444  | SLC38A2 | ENSG00000134294 |
| 12 | 45257517 | 45257873 | 45257696 | 19 | 24  | 4  | 5.865244197 | 8.64E-06    | SLC38A2 | ENSG00000134294 |
| 12 | 45330563 | 45330771 | 45330667 | 8  | 8   | 6  | 1.508205651 | 0.203852    | SLC38A4 | ENSG00000139209 |
| 12 | 45595282 | 45595461 | 45595371 | 8  | 8   | 0  | 10.55743955 | 0.000925496 | SLC38A4 | ENSG00000139209 |
| 12 | 45630214 | 45630534 | 45630371 | 9  | 12  | 1  | 7.624817456 | 0.000332769 | SLC38A4 | ENSG00000139209 |
| 12 | 45644135 | 45644368 | 45644259 | 13 | 14  | 6  | 2.513676084 | 0.016726    | FAM113B | ENSG00000179715 |
| 12 | 45751370 | 45751556 | 45751450 | 8  | 8   | 4  | 2.111487911 | 0.0804809   | FAM113B | ENSG00000179715 |
| 12 | 45768435 | 45768787 | 45768603 | 16 | 21  | 1  | 12.90353723 | 4.95E-07    | AMIGO2  | ENSG00000139211 |
| 12 | 45777341 | 45777595 | 45777478 | 13 | 15  | 2  | 6.256260476 | 0.000199274 | AMIGO2  | ENSG00000139211 |
| 12 | 45821602 | 45821874 | 45821738 | 11 | 14  | 0  | 17.59573259 | 8.79E-06    | AMIGO2  | ENSG00000139211 |
| 12 | 45927635 | 45927932 | 45927763 | 8  | 10  | 1  | 6.451768616 | 0.00135978  | FAM113B | ENSG00000179715 |

|    |          |          |          |    |    |    |             |                     |                 |
|----|----------|----------|----------|----|----|----|-------------|---------------------|-----------------|
| 12 | 46050499 | 46050796 | 46050641 | 16 | 16 | 7  | 2.492728784 | 0.0124193           | ENSG00000199566 |
| 12 | 46236249 | 46236756 | 46236485 | 76 | 96 | 3  | 28.44643435 | 5.26E-29 RPAP3      | ENSG00000005175 |
| 12 | 46331779 | 46331984 | 46331862 | 9  | 9  | 5  | 1.955081399 | 0.0892323 RPAP3     | ENSG00000005175 |
| 12 | 46422294 | 46422604 | 46422437 | 16 | 19 | 6  | 3.351568112 | 0.00134187 RAPGEF3  | ENSG00000079337 |
| 12 | 46434212 | 46434516 | 46434364 | 12 | 15 | 2  | 6.256260476 | 0.000199274 RAPGEF3 | ENSG00000079337 |
| 12 | 46448448 | 46448904 | 46448640 | 45 | 64 | 9  | 7.624817456 | 5.98E-14 SLC48A1    | ENSG00000211584 |
| 12 | 46459355 | 46459651 | 46459502 | 10 | 12 | 3  | 3.812408728 | 0.004404 SLC48A1    | ENSG00000211584 |
| 12 | 46584671 | 46585041 | 46584912 | 9  | 15 | 3  | 4.692195357 | 0.000718455 VDR     | ENSG00000111424 |
| 12 | 46625058 | 46625419 | 46625237 | 12 | 19 | 8  | 2.606775198 | 0.00583935 TMEM106C | ENSG00000134291 |
| 12 | 46629500 | 46629767 | 46629633 | 9  | 11 | 3  | 3.519146518 | 0.00788869 TMEM106C | ENSG00000134291 |
| 12 | 46630940 | 46631188 | 46631106 | 8  | 11 | 3  | 3.519146518 | 0.00788869 TMEM106C | ENSG00000134291 |
| 12 | 46677480 | 46677666 | 46677573 | 8  | 9  | 3  | 2.932622098 | 0.0242899 COL2A1    | ENSG00000139219 |
| 12 | 46681464 | 46681900 | 46681662 | 9  | 17 | 1  | 10.55743955 | 9.18E-06 COL2A1     | ENSG00000139219 |
| 12 | 46682643 | 46682831 | 46682695 | 8  | 9  | 5  | 1.955081399 | 0.0892323 COL2A1    | ENSG00000139219 |
| 12 | 46701786 | 46702286 | 46702107 | 24 | 40 | 10 | 4.372272947 | 5.06E-07 COL2A1     | ENSG00000139219 |
| 12 | 46703214 | 46703545 | 46703379 | 13 | 17 | 2  | 7.038293036 | 5.19E-05 COL2A1     | ENSG00000139219 |
| 12 | 46786461 | 46786744 | 46786575 | 8  | 10 | 2  | 4.301179077 | 0.00512919 SENP1    | ENSG00000079387 |
| 12 | 46837357 | 46837542 | 46837487 | 8  | 8  | 3  | 2.639359888 | 0.0415794 ASB8      | ENSG00000177981 |
| 12 | 46961982 | 46962292 | 46962134 | 20 | 24 | 2  | 9.775406994 | 4.09E-07 H1FNT      | ENSG00000187166 |
| 12 | 47282247 | 47282718 | 47282419 | 63 | 74 | 8  | 9.775406994 | 1.64E-17 LALBA      | ENSG00000167531 |
| 12 | 47334888 | 47335078 | 47334983 | 9  | 10 | 0  | 12.90353723 | 0.000195991         | ENSG00000221491 |
| 12 | 47362005 | 47362307 | 47362129 | 10 | 14 | 6  | 2.513676084 | 0.016726 C12orf41   | ENSG00000139620 |
| 12 | 47362310 | 47362544 | 47362398 | 8  | 11 | 7  | 1.759573259 | 0.102361 C12orf41   | ENSG00000139620 |
| 12 | 47396575 | 47397182 | 47396706 | 11 | 27 | 5  | 5.474227917 | 4.62E-06 CCNT1      | ENSG00000129315 |
| 12 | 47469736 | 47469943 | 47469844 | 10 | 12 | 2  | 5.083211637 | 0.00143337 ADCY6    | ENSG00000174233 |
| 12 | 47474897 | 47475105 | 47475001 | 10 | 10 | 3  | 3.225884308 | 0.0139466 ADCY6     | ENSG00000174233 |
| 12 | 47475913 | 47476295 | 47475997 | 14 | 21 | 7  | 3.225884308 | 0.00106152 ADCY6    | ENSG00000174233 |
| 12 | 47499191 | 47499392 | 47499291 | 9  | 11 | 1  | 7.038293036 | 0.000674435 CACNB3  | ENSG00000167535 |
| 12 | 47532200 | 47532578 | 47532379 | 10 | 16 | 3  | 4.985457567 | 0.000385643 DDX23   | ENSG00000174243 |
| 12 | 47570759 | 47570986 | 47570872 | 8  | 9  | 4  | 2.346097679 | 0.050148            | ENSG00000199394 |
| 12 | 47675487 | 47675746 | 47675640 | 11 | 14 | 6  | 2.513676084 | 0.016726 DDN        | ENSG00000181418 |
| 12 | 47698378 | 47698630 | 47698504 | 8  | 11 | 2  | 4.692195357 | 0.00272444 PRKAG1   | ENSG00000181929 |
| 12 | 47698665 | 47698916 | 47698815 | 10 | 13 | 5  | 2.737113958 | 0.0137917 PRKAG1    | ENSG00000181929 |
| 12 | 47698932 | 47699173 | 47699052 | 11 | 14 | 4  | 3.519146518 | 0.00361132 PRKAG1   | ENSG00000181929 |

|    |          |          |          |    |     |    |             |             |          |                 |
|----|----------|----------|----------|----|-----|----|-------------|-------------|----------|-----------------|
| 12 | 47740608 | 47741175 | 47741001 | 12 | 28  | 5  | 5.669736057 | 2.48E-06    | MLL2     | ENSG00000167548 |
| 12 | 47768310 | 47768588 | 47768439 | 8  | 10  | 3  | 3.225884308 | 0.0139466   | DHH      | ENSG00000139549 |
| 12 | 47810327 | 47810686 | 47810516 | 15 | 19  | 2  | 7.820325595 | 1.32E-05    | TUBA1B   | ENSG00000123416 |
| 12 | 47868763 | 47869139 | 47868987 | 12 | 18  | 4  | 4.457585589 | 0.000353565 | TUBA1A   | ENSG00000167552 |
| 12 | 47945534 | 47945757 | 47945645 | 9  | 10  | 0  | 12.90353723 | 0.000195991 | TUBA1C   | ENSG00000167553 |
| 12 | 47957116 | 47957400 | 47957266 | 8  | 10  | 8  | 1.433726359 | 0.209175    | TUBA1C   | ENSG00000167553 |
| 12 | 47969069 | 47969395 | 47969232 | 20 | 24  | 4  | 5.865244197 | 8.64E-06    | PRPH     | ENSG00000135406 |
| 12 | 47976630 | 47976851 | 47976740 | 8  | 11  | 2  | 4.692195357 | 0.00272444  | PRPH     | ENSG00000135406 |
| 12 | 48046636 | 48046851 | 48046751 | 11 | 11  | 4  | 2.815317214 | 0.0183428   | SPATS2   | ENSG00000123352 |
| 12 | 48047848 | 48048100 | 48047999 | 8  | 11  | 4  | 2.815317214 | 0.0183428   | SPATS2   | ENSG00000123352 |
| 12 | 48083917 | 48084398 | 48084117 | 25 | 39  | 8  | 5.213550397 | 1.07E-07    | SPATS2   | ENSG00000123352 |
| 12 | 48194218 | 48194439 | 48194314 | 8  | 8   | 6  | 1.508205651 | 0.203852    | KCNH3    | ENSG00000135519 |
| 12 | 48289881 | 48290076 | 48289978 | 8  | 9   | 1  | 5.865244197 | 0.00272497  | FAM186B  | ENSG00000135436 |
| 12 | 48420978 | 48421550 | 48421287 | 12 | 27  | 8  | 3.649485278 | 0.000102745 | TMBIM6   | ENSG00000139644 |
| 12 | 48548136 | 48548360 | 48548302 | 9  | 10  | 3  | 3.225884308 | 0.0139466   |          | ENSG00000214531 |
| 12 | 48549096 | 48549485 | 48549381 | 12 | 18  | 5  | 3.714654658 | 0.000961539 |          | ENSG00000214531 |
| 12 | 48574452 | 48574779 | 48574621 | 11 | 14  | 4  | 3.519146518 | 0.00361132  | FAIM2    | ENSG00000135472 |
| 12 | 48643036 | 48643324 | 48643180 | 11 | 14  | 2  | 5.865244197 | 0.000387308 | AQP5     | ENSG00000161798 |
| 12 | 48647070 | 48647320 | 48647167 | 9  | 12  | 3  | 3.812408728 | 0.004404    | AQP5     | ENSG00000161798 |
| 12 | 48705476 | 48705922 | 48705655 | 15 | 27  | 13 | 2.346097679 | 0.00332578  | RACGAP1  | ENSG00000161800 |
| 12 | 48765058 | 48765315 | 48765186 | 12 | 15  | 8  | 2.085420159 | 0.0338693   | SMARCD1  | ENSG00000066117 |
| 12 | 48791680 | 48791915 | 48791799 | 8  | 9   | 5  | 1.955081399 | 0.0892323   | C12orf62 | ENSG00000178449 |
| 12 | 48792295 | 48792508 | 48792401 | 8  | 8   | 4  | 2.111487911 | 0.0804809   | C12orf62 | ENSG00000178449 |
| 12 | 48812629 | 48812952 | 48812790 | 8  | 12  | 3  | 3.812408728 | 0.004404    | C12orf62 | ENSG00000178449 |
| 12 | 48847497 | 48847896 | 48847773 | 12 | 19  | 6  | 3.351568112 | 0.00134187  | LASS5    | ENSG00000139624 |
| 12 | 48850149 | 48850819 | 48850594 | 94 | 122 | 4  | 28.85700145 | 3.13E-36    | LASS5    | ENSG00000139624 |
| 12 | 48882245 | 48882640 | 48882411 | 16 | 22  | 3  | 6.745030826 | 8.05E-06    |          | ENSG00000221604 |
| 12 | 48902256 | 48902535 | 48902401 | 10 | 10  | 10 | 1.173048839 | 0.355733    |          | ENSG00000221604 |
| 12 | 48932057 | 48932315 | 48932186 | 14 | 15  | 8  | 2.085420159 | 0.0338693   |          | ENSG00000212496 |
| 12 | 48934539 | 48934815 | 48934649 | 16 | 18  | 4  | 4.457585589 | 0.000353565 |          | ENSG00000212496 |
| 12 | 49080686 | 49080979 | 49080838 | 14 | 17  | 4  | 4.222975822 | 0.000640773 | LARP4    | ENSG00000161813 |
| 12 | 49098480 | 49098701 | 49098621 | 12 | 12  | 2  | 5.083211637 | 0.00143337  | LARP4    | ENSG00000161813 |
| 12 | 49212920 | 49213164 | 49213058 | 8  | 8   | 3  | 2.639359888 | 0.0415794   | DIP2B    | ENSG00000066084 |
| 12 | 49318087 | 49318339 | 49318213 | 8  | 9   | 2  | 3.910162798 | 0.00955088  |          | ENSG00000207136 |

|    |          |          |          |     |     |    |             |             |          |                 |
|----|----------|----------|----------|-----|-----|----|-------------|-------------|----------|-----------------|
| 12 | 49445388 | 49445640 | 49445514 | 9   | 12  | 5  | 2.541605819 | 0.0225912   | ATF1     | ENSG00000123268 |
| 12 | 49608378 | 49608826 | 49608582 | 24  | 35  | 1  | 21.11487911 | 1.50E-11    | METTL7A  | ENSG00000185432 |
| 12 | 49685839 | 49686070 | 49685911 | 11  | 12  | 2  | 5.083211637 | 0.00143337  |          | ENSG00000206830 |
| 12 | 49704649 | 49704831 | 49704737 | 8   | 8   | 5  | 1.759573259 | 0.13508     | SLC11A2  | ENSG00000110911 |
| 12 | 49704887 | 49705192 | 49705039 | 16  | 18  | 9  | 2.228792795 | 0.0164363   | SLC11A2  | ENSG00000110911 |
| 12 | 49763556 | 49763834 | 49763680 | 11  | 14  | 2  | 5.865244197 | 0.000387308 | FAM130A1 | ENSG00000110925 |
| 12 | 49918793 | 49919080 | 49918913 | 11  | 14  | 3  | 4.398933147 | 0.00132748  | DAZAP2   | ENSG00000183283 |
| 12 | 50068057 | 50068612 | 50068308 | 26  | 39  | 7  | 5.865244197 | 3.22E-08    | SLC4A8   | ENSG00000050438 |
| 12 | 50211891 | 50212229 | 50212063 | 15  | 20  | 6  | 3.519146518 | 0.000784044 | SLC4A8   | ENSG00000050438 |
| 12 | 50273580 | 50273792 | 50273716 | 11  | 13  | 2  | 5.474227917 | 0.000747844 | SCN8A    | ENSG00000196876 |
| 12 | 50502510 | 50502704 | 50502607 | 8   | 9   | 1  | 5.865244197 | 0.00272497  | FIGNL2   | ENSG00000205432 |
| 12 | 50503946 | 50504275 | 50504100 | 10  | 15  | 7  | 2.346097679 | 0.0195693   | FIGNL2   | ENSG00000205432 |
| 12 | 50673241 | 50673424 | 50673372 | 8   | 8   | 14 | 0.703829304 | 0.807737    |          | ENSG00000206992 |
| 12 | 50763605 | 50763802 | 50763691 | 10  | 10  | 3  | 3.225884308 | 0.0139466   | C12orf44 | ENSG00000123395 |
| 12 | 50823686 | 50823967 | 50823829 | 17  | 20  | 3  | 6.158506406 | 2.99E-05    |          | ENSG00000214487 |
| 12 | 50827545 | 50827750 | 50827644 | 9   | 10  | 1  | 6.451768616 | 0.00135978  | KRT80    | ENSG00000167767 |
| 12 | 50836852 | 50837171 | 50837022 | 11  | 13  | 3  | 4.105670938 | 0.00243034  | KRT80    | ENSG00000167767 |
| 12 | 50844036 | 50844433 | 50844215 | 12  | 21  | 3  | 6.451768616 | 1.56E-05    | KRT80    | ENSG00000167767 |
| 12 | 50856007 | 50856516 | 50856253 | 116 | 133 | 4  | 31.43770889 | 8.57E-40    | KRT80    | ENSG00000167767 |
| 12 | 50871837 | 50872180 | 50871980 | 9   | 14  | 4  | 3.519146518 | 0.00361132  | KRT80    | ENSG00000167767 |
| 12 | 50872182 | 50872718 | 50872402 | 15  | 31  | 8  | 4.170840318 | 1.13E-05    | KRT80    | ENSG00000167767 |
| 12 | 50893587 | 50893799 | 50893685 | 10  | 11  | 3  | 3.519146518 | 0.00788869  | KRT7     | ENSG00000135480 |
| 12 | 50895665 | 50896132 | 50895883 | 19  | 37  | 9  | 4.457585589 | 1.02E-06    | KRT7     | ENSG00000135480 |
| 12 | 50897386 | 50897810 | 50897564 | 18  | 28  | 13 | 2.429886881 | 0.00217891  | KRT7     | ENSG00000135480 |
| 12 | 50908511 | 50908872 | 50908694 | 16  | 22  | 3  | 6.745030826 | 8.05E-06    | KRT7     | ENSG00000135480 |
| 12 | 50915888 | 50916364 | 50916209 | 16  | 25  | 3  | 7.624817456 | 1.09E-06    | KRT7     | ENSG00000135480 |
| 12 | 50924124 | 50924420 | 50924272 | 13  | 14  | 0  | 17.59573259 | 8.79E-06    | KRT7     | ENSG00000135480 |
| 12 | 50934460 | 50934769 | 50934613 | 8   | 11  | 5  | 2.346097679 | 0.0364013   |          | ENSG00000135477 |
| 12 | 51007584 | 51007892 | 51007738 | 15  | 18  | 6  | 3.183989707 | 0.00227432  | KRT83    | ENSG00000170523 |
| 12 | 51018636 | 51019040 | 51018802 | 18  | 25  | 4  | 6.099853964 | 4.56E-06    | KRT83    | ENSG00000170523 |
| 12 | 51024730 | 51024915 | 51024822 | 11  | 11  | 3  | 3.519146518 | 0.00788869  | KRT85    | ENSG00000135443 |
| 12 | 51026026 | 51026232 | 51026073 | 9   | 11  | 3  | 3.519146518 | 0.00788869  | KRT85    | ENSG00000135443 |
| 12 | 51052547 | 51052878 | 51052704 | 11  | 14  | 2  | 5.865244197 | 0.000387308 | KRT85    | ENSG00000135443 |
| 12 | 51262936 | 51263370 | 51263153 | 10  | 20  | 7  | 3.079253203 | 0.00177418  | KRT74    | ENSG00000170484 |

|    |          |          |          |    |    |    |             |             |        |                 |
|----|----------|----------|----------|----|----|----|-------------|-------------|--------|-----------------|
| 12 | 51306945 | 51307262 | 51307094 | 8  | 11 | 5  | 2.346097679 | 0.0364013   | KRT73  | ENSG00000186049 |
| 12 | 51334974 | 51335236 | 51335118 | 9  | 12 | 6  | 2.178519273 | 0.0416567   | KRT2   | ENSG00000172867 |
| 12 | 51335637 | 51336099 | 51335988 | 9  | 17 | 5  | 3.519146518 | 0.00167472  | KRT2   | ENSG00000172867 |
| 12 | 51338800 | 51339099 | 51338949 | 10 | 12 | 0  | 15.24963491 | 4.15E-05    | KRT2   | ENSG00000172867 |
| 12 | 51480939 | 51481238 | 51481088 | 27 | 29 | 7  | 4.398933147 | 1.30E-05    | KRT3   | ENSG00000186442 |
| 12 | 51540054 | 51540638 | 51540232 | 22 | 44 | 8  | 5.865244197 | 5.07E-09    | KRT78  | ENSG00000170423 |
| 12 | 51545285 | 51545664 | 51545520 | 12 | 16 | 7  | 2.492728784 | 0.0124193   | KRT78  | ENSG00000170423 |
| 12 | 51556531 | 51556786 | 51556658 | 12 | 14 | 3  | 4.398933147 | 0.00132748  | KRT78  | ENSG00000170423 |
| 12 | 51559460 | 51559815 | 51559637 | 9  | 13 | 6  | 2.346097679 | 0.0266147   | KRT8   | ENSG00000170421 |
| 12 | 51559987 | 51560326 | 51560156 | 13 | 18 | 7  | 2.785990993 | 0.00480525  | KRT8   | ENSG00000170421 |
| 12 | 51564960 | 51565319 | 51565140 | 8  | 14 | 6  | 2.513676084 | 0.016726    | KRT8   | ENSG00000170421 |
| 12 | 51575260 | 51576001 | 51575479 | 29 | 65 | 17 | 4.301179077 | 4.11E-10    | KRT8   | ENSG00000170421 |
| 12 | 51576173 | 51576915 | 51576285 | 11 | 31 | 23 | 1.564065119 | 0.0471936   | KRT8   | ENSG00000170421 |
| 12 | 51583401 | 51583701 | 51583550 | 9  | 11 | 7  | 1.759573259 | 0.102361    | KRT8   | ENSG00000170421 |
| 12 | 51585028 | 51585630 | 51585268 | 17 | 31 | 6  | 5.36250898  | 1.31E-06    | KRT8   | ENSG00000170421 |
| 12 | 51587136 | 51587564 | 51587374 | 21 | 33 | 10 | 3.625787322 | 2.36E-05    | KRT8   | ENSG00000170421 |
| 12 | 51625601 | 51626498 | 51626142 | 20 | 51 | 23 | 2.541605819 | 3.82E-05    | KRT18  | ENSG00000111057 |
| 12 | 51626500 | 51626726 | 51626664 | 10 | 12 | 3  | 3.812408728 | 0.004404    | KRT18  | ENSG00000111057 |
| 12 | 51626902 | 51627157 | 51627043 | 8  | 11 | 5  | 2.346097679 | 0.0364013   | KRT18  | ENSG00000111057 |
| 12 | 51650000 | 51650844 | 51650413 | 35 | 89 | 28 | 3.640496398 | 2.05E-11    | KRT18  | ENSG00000111057 |
| 12 | 51651533 | 51652488 | 51652196 | 33 | 87 | 14 | 6.881886524 | 2.66E-17    | KRT18  | ENSG00000111057 |
| 12 | 51656366 | 51656611 | 51656488 | 14 | 16 | 4  | 3.988366054 | 0.00115141  | KRT18  | ENSG00000111057 |
| 12 | 51686092 | 51686555 | 51686260 | 15 | 26 | 7  | 3.959039833 | 7.16E-05    | EIF4B  | ENSG00000063046 |
| 12 | 51726897 | 51727211 | 51727053 | 10 | 13 | 1  | 8.211341875 | 0.000163445 | TENC1  | ENSG00000111077 |
| 12 | 51728566 | 51728759 | 51728615 | 8  | 9  | 3  | 2.932622098 | 0.0242899   | TENC1  | ENSG00000111077 |
| 12 | 51759970 | 51760196 | 51760069 | 9  | 10 | 4  | 2.580707446 | 0.0306059   | SPRYD3 | ENSG00000167778 |
| 12 | 51839366 | 51839658 | 51839512 | 9  | 12 | 10 | 1.386330446 | 0.21117     |        | ENSG00000213484 |
| 12 | 51847090 | 51847270 | 51847180 | 8  | 8  | 2  | 3.519146518 | 0.017558    | CSAD   | ENSG00000139631 |
| 12 | 51860299 | 51860509 | 51860392 | 8  | 8  | 5  | 1.759573259 | 0.13508     | CSAD   | ENSG00000139631 |
| 12 | 51870312 | 51870505 | 51870408 | 9  | 10 | 1  | 6.451768616 | 0.00135978  | ZNF740 | ENSG00000139651 |
| 12 | 51874971 | 51875161 | 51875085 | 8  | 8  | 1  | 5.278719777 | 0.00542188  | ZNF740 | ENSG00000139651 |
| 12 | 51910618 | 51910813 | 51910715 | 8  | 9  | 0  | 11.73048839 | 0.000425898 | RARG   | ENSG00000172819 |
| 12 | 51913119 | 51913300 | 51913179 | 8  | 8  | 2  | 3.519146518 | 0.017558    | RARG   | ENSG00000172819 |
| 12 | 51931657 | 51931846 | 51931744 | 8  | 9  | 1  | 5.865244197 | 0.00272497  | MFSD5  | ENSG00000182544 |



|    |          |          |          |    |    |    |             |             |          |                 |
|----|----------|----------|----------|----|----|----|-------------|-------------|----------|-----------------|
| 12 | 51975456 | 51975803 | 51975632 | 13 | 17 | 4  | 4.222975822 | 0.000640773 | PFDN5    | ENSG00000123349 |
| 12 | 52001335 | 52001738 | 52001514 | 9  | 16 | 9  | 1.994183027 | 0.0370915   | AAAS     | ENSG00000094914 |
| 12 | 52004603 | 52005000 | 52004902 | 8  | 14 | 5  | 2.932622098 | 0.00829617  | AAAS     | ENSG00000094914 |
| 12 | 52032836 | 52033077 | 52032949 | 8  | 10 | 3  | 3.225884308 | 0.0139466   | SP7      | ENSG00000170374 |
| 12 | 52050891 | 52051428 | 52051153 | 10 | 22 | 8  | 2.997791478 | 0.00137524  | SP1      | ENSG00000185591 |
| 12 | 52051446 | 52051826 | 52051651 | 9  | 15 | 6  | 2.68125449  | 0.0103552   | SP1      | ENSG00000185591 |
| 12 | 52059475 | 52059792 | 52059679 | 9  | 13 | 9  | 1.642268375 | 0.111397    | SP1      | ENSG00000185591 |
| 12 | 52121105 | 52121549 | 52121260 | 8  | 15 | 6  | 2.68125449  | 0.0103552   | PRR13    | ENSG00000205352 |
| 12 | 52131745 | 52132151 | 52131985 | 23 | 28 | 10 | 3.092583304 | 0.000307818 | PCBP2    | ENSG00000197111 |
| 12 | 52132363 | 52132734 | 52132505 | 8  | 13 | 1  | 8.211341875 | 0.000163445 | PCBP2    | ENSG00000197111 |
| 12 | 52150677 | 52150929 | 52150803 | 8  | 11 | 0  | 14.07658607 | 9.02E-05    | PCBP2    | ENSG00000197111 |
| 12 | 52172873 | 52173240 | 52173040 | 8  | 14 | 4  | 3.519146518 | 0.00361132  | MAP3K12  | ENSG00000139625 |
| 12 | 52178741 | 52179096 | 52178903 | 10 | 15 | 3  | 4.692195357 | 0.000718455 | MAP3K12  | ENSG00000139625 |
| 12 | 52180856 | 52181124 | 52180990 | 10 | 10 | 2  | 4.301179077 | 0.00512919  | TARBP2   | ENSG00000139546 |
| 12 | 52306024 | 52306806 | 52306414 | 15 | 39 | 12 | 3.609381044 | 5.48E-06    | ATF7     | ENSG00000170653 |
| 12 | 52355892 | 52356380 | 52356230 | 8  | 18 | 7  | 2.785990993 | 0.00480525  | ATP5G2   | ENSG00000135390 |
| 12 | 52381888 | 52382112 | 52382007 | 8  | 9  | 2  | 3.910162798 | 0.00955088  | ATP5G2   | ENSG00000135390 |
| 12 | 52407541 | 52407983 | 52407664 | 13 | 21 | 17 | 1.433726359 | 0.126962    | CALCOCO1 | ENSG00000012822 |
| 12 | 52423679 | 52423893 | 52423786 | 11 | 11 | 4  | 2.815317214 | 0.0183428   | CALCOCO1 | ENSG00000012822 |
| 12 | 52426787 | 52427054 | 52426885 | 10 | 13 | 4  | 3.28453675  | 0.00629037  | CALCOCO1 | ENSG00000012822 |
| 12 | 52484529 | 52484877 | 52484703 | 10 | 15 | 8  | 2.085420159 | 0.0338693   |          | ENSG00000223213 |
| 12 | 52505360 | 52505651 | 52505505 | 19 | 21 | 7  | 3.225884308 | 0.00106152  |          | ENSG00000223213 |
| 12 | 52525052 | 52525293 | 52525200 | 15 | 19 | 4  | 4.692195357 | 0.000193572 |          | ENSG00000223213 |
| 12 | 52525593 | 52525870 | 52525731 | 14 | 16 | 6  | 2.848832895 | 0.00632407  |          | ENSG00000223213 |
| 12 | 52525970 | 52526352 | 52526173 | 12 | 17 | 6  | 3.016411301 | 0.00381427  |          | ENSG00000223213 |
| 12 | 52547599 | 52548029 | 52547778 | 17 | 26 | 9  | 3.167231866 | 0.000393236 | HOXC13   | ENSG00000123364 |
| 12 | 52618333 | 52618702 | 52618512 | 10 | 17 | 10 | 1.919534464 | 0.0400548   | HOXC13   | ENSG00000123364 |
| 12 | 52633053 | 52633396 | 52633279 | 8  | 12 | 3  | 3.812408728 | 0.004404    | HOXC12   | ENSG00000123407 |
| 12 | 52664939 | 52665161 | 52665050 | 11 | 11 | 1  | 7.038293036 | 0.000674435 | HOXC10   | ENSG00000180818 |
| 12 | 52696803 | 52696982 | 52696873 | 8  | 8  | 0  | 10.55743955 | 0.000925496 | HOXC4    | ENSG00000198353 |
| 12 | 52897143 | 52897383 | 52897263 | 10 | 11 | 5  | 2.346097679 | 0.0364013   | SMUG1    | ENSG00000123415 |
| 12 | 52960753 | 52961040 | 52960869 | 8  | 10 | 3  | 3.225884308 | 0.0139466   | HNRNPA1  | ENSG00000135486 |
| 12 | 53059648 | 53060045 | 53059818 | 10 | 15 | 3  | 4.692195357 | 0.000718455 | ZNF385A  | ENSG00000161642 |
| 12 | 53067703 | 53067950 | 53067835 | 14 | 15 | 4  | 3.753756286 | 0.0020497   | ZNF385A  | ENSG00000161642 |

|    |          |          |          |    |    |   |             |             |          |                 |
|----|----------|----------|----------|----|----|---|-------------|-------------|----------|-----------------|
| 12 | 53072521 | 53072789 | 53072655 | 12 | 13 | 0 | 16.42268375 | 1.91E-05    | ZNF385A  | ENSG00000161642 |
| 12 | 53207194 | 53207470 | 53207317 | 11 | 13 | 7 | 2.052835469 | 0.046392    | PDE1B    | ENSG00000123360 |
| 12 | 53361339 | 53361541 | 53361440 | 9  | 10 | 2 | 4.301179077 | 0.00512919  | DCD      | ENSG00000161634 |
| 12 | 53699839 | 53700018 | 53699995 | 8  | 8  | 4 | 2.111487911 | 0.0804809   | NEUROD4  | ENSG00000123307 |
| 12 | 53852744 | 53853099 | 53852922 | 32 | 36 | 1 | 21.70140353 | 7.08E-12    | OR9K2    | ENSG00000170605 |
| 12 | 54417209 | 54417405 | 54417307 | 9  | 9  | 2 | 3.910162798 | 0.00955088  | GDF11    | ENSG00000135414 |
| 12 | 54610792 | 54611049 | 54610951 | 8  | 10 | 1 | 6.451768616 | 0.00135978  | DGKA     | ENSG00000065357 |
| 12 | 54613316 | 54613652 | 54613484 | 17 | 21 | 3 | 6.451768616 | 1.56E-05    | DGKA     | ENSG00000065357 |
| 12 | 54646395 | 54646634 | 54646546 | 9  | 9  | 6 | 1.675784056 | 0.141978    | SILV     | ENSG00000185664 |
| 12 | 54646648 | 54646863 | 54646767 | 8  | 10 | 4 | 2.580707446 | 0.0306059   | SILV     | ENSG00000185664 |
| 12 | 54709085 | 54709450 | 54709295 | 15 | 21 | 1 | 12.90353723 | 4.95E-07    | IKZF4    | ENSG00000123411 |
| 12 | 54709703 | 54709920 | 54709832 | 8  | 9  | 2 | 3.910162798 | 0.00955088  | IKZF4    | ENSG00000123411 |
| 12 | 54721582 | 54721798 | 54721690 | 8  | 8  | 7 | 1.319679944 | 0.283403    | RPS26    | ENSG00000197728 |
| 12 | 54721949 | 54722139 | 54722026 | 8  | 8  | 7 | 1.319679944 | 0.283403    | RPS26    | ENSG00000197728 |
| 12 | 54758999 | 54759326 | 54759155 | 10 | 15 | 2 | 6.256260476 | 0.000199274 | ERBB3    | ENSG00000065361 |
| 12 | 54760074 | 54760300 | 54760179 | 8  | 10 | 1 | 6.451768616 | 0.00135978  | ERBB3    | ENSG00000065361 |
| 12 | 54784212 | 54784456 | 54784385 | 9  | 12 | 5 | 2.541605819 | 0.0225912   | PA2G4    | ENSG00000170515 |
| 12 | 54796575 | 54796967 | 54796746 | 11 | 17 | 6 | 3.016411301 | 0.00381427  | ZC3H10   | ENSG00000135482 |
| 12 | 54798119 | 54798404 | 54798261 | 12 | 15 | 5 | 3.128130238 | 0.00492422  | ZC3H10   | ENSG00000135482 |
| 12 | 54806270 | 54806526 | 54806395 | 12 | 14 | 6 | 2.513676084 | 0.016726    | FAM62A   | ENSG00000139641 |
| 12 | 54808070 | 54808329 | 54808199 | 8  | 11 | 2 | 4.692195357 | 0.00272444  | FAM62A   | ENSG00000139641 |
| 12 | 54838324 | 54838534 | 54838399 | 9  | 11 | 3 | 3.519146518 | 0.00788869  | MYL6     | ENSG00000092841 |
| 12 | 54870350 | 54870531 | 54870410 | 9  | 9  | 4 | 2.346097679 | 0.050148    | SMARCC2  | ENSG00000139613 |
| 12 | 54904007 | 54904435 | 54904256 | 10 | 18 | 2 | 7.429309316 | 2.63E-05    | OBFC2B   | ENSG00000139579 |
| 12 | 54946869 | 54947121 | 54947032 | 8  | 10 | 1 | 6.451768616 | 0.00135978  | COQ10A   | ENSG00000135469 |
| 12 | 54971575 | 54971820 | 54971690 | 13 | 16 | 2 | 6.647276756 | 0.000101928 | CS       | ENSG00000062485 |
| 12 | 54995807 | 54996161 | 54995984 | 8  | 14 | 5 | 2.932622098 | 0.00829617  | CNPY2    | ENSG00000144785 |
| 12 | 54996213 | 54996401 | 54996338 | 9  | 10 | 6 | 1.843362462 | 0.0964212   | CNPY2    | ENSG00000144785 |
| 12 | 55014095 | 55014314 | 55014183 | 9  | 9  | 1 | 5.865244197 | 0.00272497  | PAN2     | ENSG00000135473 |
| 12 | 55129514 | 55129720 | 55129617 | 9  | 10 | 2 | 4.301179077 | 0.00512919  | TIMELESS | ENSG00000111602 |
| 12 | 55149116 | 55149326 | 55149246 | 8  | 9  | 1 | 5.865244197 | 0.00272497  | SPRYD4   | ENSG00000176422 |
| 12 | 55310354 | 55310607 | 55310499 | 12 | 13 | 1 | 8.211341875 | 0.000163445 | BAZ2A    | ENSG00000076108 |
| 12 | 55310698 | 55310883 | 55310798 | 8  | 8  | 0 | 10.55743955 | 0.000925496 | BAZ2A    | ENSG00000076108 |
| 12 | 55316934 | 55317187 | 55317026 | 11 | 14 | 8 | 1.955081399 | 0.0506438   | BAZ2A    | ENSG00000076108 |

|    |          |          |          |    |     |   |             |             |          |                 |
|----|----------|----------|----------|----|-----|---|-------------|-------------|----------|-----------------|
| 12 | 55326202 | 55326410 | 55326306 | 9  | 11  | 3 | 3.519146518 | 0.00788869  | ATP5B    | ENSG00000110955 |
| 12 | 55405347 | 55405678 | 55405528 | 9  | 13  | 8 | 1.824742639 | 0.0744168   | NACA     | ENSG00000196531 |
| 12 | 55432381 | 55432670 | 55432535 | 8  | 10  | 2 | 4.301179077 | 0.00512919  | PRIM1    | ENSG00000198056 |
| 12 | 55437579 | 55437800 | 55437689 | 10 | 10  | 6 | 1.843362462 | 0.0964212   | PRIM1    | ENSG00000198056 |
| 12 | 55621511 | 55622017 | 55621729 | 8  | 17  | 0 | 21.11487911 | 8.57E-07    |          | ENSG00000170426 |
| 12 | 55666035 | 55666216 | 55666137 | 9  | 9   | 3 | 2.932622098 | 0.0242899   | GPR182   | ENSG00000166856 |
| 12 | 55711412 | 55711874 | 55711643 | 76 | 98  | 0 | 116.1318351 | 4.27E-34    | TAC3     | ENSG00000166863 |
| 12 | 55766523 | 55766791 | 55766657 | 8  | 10  | 4 | 2.580707446 | 0.0306059   | NAB2     | ENSG00000166886 |
| 12 | 55767154 | 55767347 | 55767234 | 8  | 10  | 7 | 1.612942154 | 0.147335    | NAB2     | ENSG00000166886 |
| 12 | 55775842 | 55776545 | 55776341 | 96 | 117 | 8 | 15.37997367 | 1.61E-30    | NAB2     | ENSG00000166886 |
| 12 | 55791909 | 55792088 | 55791994 | 8  | 8   | 2 | 3.519146518 | 0.017558    | STAT6    | ENSG00000166888 |
| 12 | 55792200 | 55792481 | 55792315 | 8  | 12  | 1 | 7.624817456 | 0.000332769 | STAT6    | ENSG00000166888 |
| 12 | 55807663 | 55808471 | 55807854 | 38 | 65  | 0 | 77.42122339 | 5.67E-23    | LRP1     | ENSG00000123384 |
| 12 | 55863100 | 55863342 | 55863225 | 10 | 11  | 6 | 2.010940867 | 0.0640214   |          | ENSG00000221365 |
| 12 | 56062309 | 56062590 | 56062449 | 9  | 10  | 0 | 12.90353723 | 0.000195991 |          | ENSG00000201198 |
| 12 | 56142633 | 56142907 | 56142770 | 8  | 10  | 7 | 1.612942154 | 0.147335    | GLI1     | ENSG00000111087 |
| 12 | 56167873 | 56168175 | 56168019 | 11 | 15  | 4 | 3.753756286 | 0.0020497   | MARS     | ENSG00000166986 |
| 12 | 56200443 | 56200648 | 56200563 | 8  | 9   | 3 | 2.932622098 | 0.0242899   | DDIT3    | ENSG00000175197 |
| 12 | 56202169 | 56202637 | 56202403 | 21 | 34  | 2 | 13.68556979 | 3.24E-10    | MBD6     | ENSG00000166987 |
| 12 | 56271247 | 56271493 | 56271370 | 8  | 9   | 1 | 5.865244197 | 0.00272497  | PIP4K2C  | ENSG00000166908 |
| 12 | 56374102 | 56374540 | 56374256 | 9  | 15  | 7 | 2.346097679 | 0.0195693   |          | ENSG00000135506 |
| 12 | 56432551 | 56432741 | 56432641 | 8  | 9   | 2 | 3.910162798 | 0.00955088  | CDK4     | ENSG00000135446 |
| 12 | 56452036 | 56452399 | 56452234 | 12 | 16  | 5 | 3.323638378 | 0.00288759  | METTL1   | ENSG00000037897 |
| 12 | 56462652 | 56462941 | 56462796 | 10 | 12  | 7 | 1.906204364 | 0.0695918   | TSFM     | ENSG00000123297 |
| 12 | 56526570 | 56527018 | 56526741 | 14 | 22  | 8 | 2.997791478 | 0.00137524  | CTDSP2   | ENSG00000175215 |
| 12 | 56566789 | 56566968 | 56566844 | 8  | 8   | 1 | 5.278719777 | 0.00542188  |          | ENSG00000210429 |
| 12 | 56585348 | 56585711 | 56585527 | 10 | 16  | 6 | 2.848832895 | 0.00632407  | XRCC6BP1 | ENSG00000166896 |
| 12 | 56621551 | 56621818 | 56621683 | 8  | 11  | 4 | 2.815317214 | 0.0183428   | XRCC6BP1 | ENSG00000166896 |
| 12 | 56942905 | 56943084 | 56942994 | 8  | 8   | 1 | 5.278719777 | 0.00542188  |          | ENSG00000213368 |
| 12 | 57021872 | 57022134 | 57022003 | 13 | 13  | 2 | 5.474227917 | 0.000747844 |          | ENSG00000213368 |
| 12 | 57220623 | 57220847 | 57220735 | 9  | 10  | 4 | 2.580707446 | 0.0306059   | LRIG3    | ENSG00000139263 |
| 12 | 57568163 | 57568490 | 57568331 | 15 | 15  | 1 | 9.384390715 | 3.90E-05    | LRIG3    | ENSG00000139263 |
| 12 | 57587016 | 57587297 | 57587170 | 18 | 20  | 4 | 4.926805125 | 0.00010522  | LRIG3    | ENSG00000139263 |
| 12 | 57845014 | 57845220 | 57845117 | 15 | 16  | 4 | 3.988366054 | 0.00115141  |          | ENSG00000212599 |

|    |          |          |          |    |     |    |             |             |          |                 |
|----|----------|----------|----------|----|-----|----|-------------|-------------|----------|-----------------|
| 12 | 58037814 | 58038390 | 58038040 | 60 | 86  | 1  | 51.02762451 | 2.27E-28    |          | ENSG00000212599 |
| 12 | 58416955 | 58417187 | 58417071 | 15 | 15  | 6  | 2.68125449  | 0.0103552   | SLC16A7  | ENSG00000118596 |
| 12 | 59601226 | 59601673 | 59601396 | 10 | 15  | 3  | 4.692195357 | 0.000718455 |          |                 |
| 12 | 60226470 | 60226696 | 60226583 | 10 | 11  | 2  | 4.692195357 | 0.00272444  |          | ENSG00000214304 |
| 12 | 60334853 | 60335041 | 60334951 | 8  | 8   | 0  | 10.55743955 | 0.000925496 |          | ENSG00000214304 |
| 12 | 60543831 | 60544175 | 60544003 | 8  | 12  | 4  | 3.049926982 | 0.0108184   |          | ENSG00000214304 |
| 12 | 60872611 | 60873474 | 60872969 | 54 | 110 | 11 | 10.85070176 | 6.68E-26    | USP15    | ENSG00000135655 |
| 12 | 60895586 | 60895863 | 60895713 | 10 | 10  | 7  | 1.612942154 | 0.147335    | USP15    | ENSG00000135655 |
| 12 | 60939817 | 60940653 | 60940487 | 16 | 44  | 8  | 5.865244197 | 5.07E-09    | USP15    | ENSG00000135655 |
| 12 | 61146876 | 61147219 | 61147047 | 9  | 15  | 3  | 4.692195357 | 0.000718455 | MON2     | ENSG00000061987 |
| 12 | 61405054 | 61405314 | 61405184 | 13 | 15  | 2  | 6.256260476 | 0.000199274 |          | ENSG00000213352 |
| 12 | 61428861 | 61429040 | 61428950 | 8  | 8   | 1  | 5.278719777 | 0.00542188  |          | ENSG00000213352 |
| 12 | 61479218 | 61479458 | 61479338 | 8  | 8   | 3  | 2.639359888 | 0.0415794   |          | ENSG00000213352 |
| 12 | 61482402 | 61482712 | 61482556 | 22 | 24  | 1  | 14.66311049 | 5.43E-08    |          | ENSG00000213352 |
| 12 | 61553438 | 61553787 | 61553610 | 9  | 13  | 5  | 2.737113958 | 0.0137917   |          | ENSG00000200296 |
| 12 | 61615178 | 61615565 | 61615340 | 13 | 18  | 6  | 3.183989707 | 0.00227432  | PPM1H    | ENSG00000111110 |
| 12 | 61900946 | 61901164 | 61901055 | 11 | 11  | 2  | 4.692195357 | 0.00272444  | AVPR1A   | ENSG00000166148 |
| 12 | 62482150 | 62482366 | 62482282 | 8  | 9   | 3  | 2.932622098 | 0.0242899   | TMEM5    | ENSG00000118600 |
| 12 | 62523938 | 62524129 | 62524021 | 9  | 9   | 2  | 3.910162798 | 0.00955088  | SRGAP1   | ENSG00000196935 |
| 12 | 62542260 | 62542713 | 62542431 | 19 | 26  | 11 | 2.639359888 | 0.0015854   | SRGAP1   | ENSG00000196935 |
| 12 | 62581528 | 62581730 | 62581615 | 8  | 10  | 3  | 3.225884308 | 0.0139466   | SRGAP1   | ENSG00000196935 |
| 12 | 62609142 | 62609321 | 62609234 | 10 | 10  | 1  | 6.451768616 | 0.00135978  | SRGAP1   | ENSG00000196935 |
| 12 | 62698746 | 62699033 | 62698882 | 9  | 11  | 6  | 2.010940867 | 0.0640214   | SRGAP1   | ENSG00000196935 |
| 12 | 62705291 | 62705499 | 62705395 | 8  | 9   | 2  | 3.910162798 | 0.00955088  |          | ENSG00000212298 |
| 12 | 62760690 | 62761007 | 62760848 | 18 | 21  | 12 | 1.985159574 | 0.021936    |          | ENSG00000212298 |
| 12 | 62768582 | 62768779 | 62768680 | 8  | 8   | 2  | 3.519146518 | 0.017558    |          | ENSG00000212298 |
| 12 | 62850077 | 62850372 | 62850227 | 18 | 22  | 1  | 13.49006165 | 2.37E-07    |          | ENSG00000212298 |
| 12 | 62901858 | 62902119 | 62901988 | 10 | 12  | 9  | 1.524963491 | 0.154777    | C12orf66 | ENSG00000174206 |
| 12 | 63084107 | 63084408 | 63084265 | 13 | 16  | 3  | 4.985457567 | 0.000385643 | XPOT     | ENSG00000184575 |
| 12 | 63132934 | 63133325 | 63133168 | 21 | 30  | 6  | 5.194930574 | 2.42E-06    | TBK1     | ENSG00000183735 |
| 12 | 63202136 | 63202615 | 63202447 | 21 | 27  | 7  | 4.105670938 | 4.08E-05    |          | ENSG00000223294 |
| 12 | 63229700 | 63230023 | 63229849 | 10 | 13  | 8  | 1.824742639 | 0.0744168   |          | ENSG00000223294 |
| 12 | 63278543 | 63278750 | 63278625 | 10 | 10  | 1  | 6.451768616 | 0.00135978  | RASSF3   | ENSG00000153179 |
| 12 | 63280211 | 63280414 | 63280305 | 10 | 10  | 2  | 4.301179077 | 0.00512919  | RASSF3   | ENSG00000153179 |

|    |          |          |          |    |     |    |             |             |         |                 |
|----|----------|----------|----------|----|-----|----|-------------|-------------|---------|-----------------|
| 12 | 63288946 | 63289444 | 63289088 | 15 | 24  | 11 | 2.443851749 | 0.00386428  | RASSF3  | ENSG00000153179 |
| 12 | 63305444 | 63305785 | 63305606 | 20 | 24  | 4  | 5.865244197 | 8.64E-06    |         | ENSG00000207546 |
| 12 | 63313893 | 63314359 | 63314185 | 13 | 19  | 3  | 5.865244197 | 5.72E-05    |         | ENSG00000207546 |
| 12 | 63314386 | 63315635 | 63314911 | 70 | 140 | 9  | 16.53998863 | 1.01E-36    |         | ENSG00000207546 |
| 12 | 63336548 | 63336727 | 63336637 | 8  | 8   | 1  | 5.278719777 | 0.00542188  |         | ENSG00000207546 |
| 12 | 63351825 | 63352064 | 63351944 | 8  | 9   | 4  | 2.346097679 | 0.050148    |         | ENSG00000207546 |
| 12 | 63352594 | 63352901 | 63352747 | 9  | 14  | 3  | 4.398933147 | 0.00132748  |         | ENSG00000207546 |
| 12 | 63376544 | 63376775 | 63376646 | 9  | 9   | 5  | 1.955081399 | 0.0892323   | GNS     | ENSG00000135677 |
| 12 | 63378146 | 63378327 | 63378236 | 8  | 10  | 7  | 1.612942154 | 0.147335    | GNS     | ENSG00000135677 |
| 12 | 63387296 | 63387862 | 63387569 | 36 | 53  | 1  | 31.67231866 | 1.89E-17    | GNS     | ENSG00000135677 |
| 12 | 63415094 | 63415362 | 63415236 | 8  | 10  | 5  | 2.150589539 | 0.0575848   | GNS     | ENSG00000135677 |
| 12 | 63439362 | 63439885 | 63439758 | 10 | 21  | 6  | 3.686724924 | 0.000453999 | GNS     | ENSG00000135677 |
| 12 | 63476341 | 63476558 | 63476449 | 10 | 10  | 3  | 3.225884308 | 0.0139466   | TBC1D30 | ENSG00000111490 |
| 12 | 63481348 | 63481644 | 63481519 | 9  | 12  | 5  | 2.541605819 | 0.0225912   | TBC1D30 | ENSG00000111490 |
| 12 | 63494548 | 63494771 | 63494659 | 10 | 10  | 4  | 2.580707446 | 0.0306059   | TBC1D30 | ENSG00000111490 |
| 12 | 63569892 | 63570471 | 63570118 | 25 | 42  | 8  | 5.604566677 | 1.73E-08    |         | ENSG00000210581 |
| 12 | 63570946 | 63571219 | 63571090 | 9  | 12  | 3  | 3.812408728 | 0.004404    |         | ENSG00000210581 |
| 12 | 63663853 | 63664257 | 63664027 | 22 | 33  | 6  | 5.697665791 | 3.83E-07    |         | ENSG00000210581 |
| 12 | 63849309 | 63849891 | 63849653 | 17 | 32  | 8  | 4.301179077 | 6.43E-06    | LEMD3   | ENSG00000174106 |
| 12 | 64236757 | 64237010 | 64236852 | 12 | 13  | 6  | 2.346097679 | 0.0266147   |         | ENSG00000213344 |
| 12 | 64287543 | 64287848 | 64287695 | 9  | 13  | 7  | 2.052835469 | 0.046392    |         | ENSG00000213344 |
| 12 | 64311707 | 64312025 | 64311873 | 14 | 15  | 3  | 4.692195357 | 0.000718455 |         | ENSG00000213344 |
| 12 | 64319679 | 64320150 | 64319858 | 23 | 35  | 3  | 10.55743955 | 1.13E-09    |         | ENSG00000213344 |
| 12 | 64403448 | 64403645 | 64403537 | 8  | 8   | 2  | 3.519146518 | 0.017558    |         | ENSG00000213344 |
| 12 | 64558715 | 64558970 | 64558842 | 11 | 14  | 6  | 2.513676084 | 0.016726    |         | ENSG00000197301 |
| 12 | 64616310 | 64616596 | 64616453 | 9  | 10  | 4  | 2.580707446 | 0.0306059   |         | ENSG00000197301 |
| 12 | 64617198 | 64617434 | 64617316 | 8  | 9   | 3  | 2.932622098 | 0.0242899   |         | ENSG00000197301 |
| 12 | 64638494 | 64638674 | 64638584 | 8  | 8   | 3  | 2.639359888 | 0.0415794   |         | ENSG00000197301 |
| 12 | 64663784 | 64664020 | 64663915 | 9  | 10  | 3  | 3.225884308 | 0.0139466   |         | ENSG00000213343 |
| 12 | 64694924 | 64695338 | 64695163 | 13 | 22  | 5  | 4.496687217 | 9.59E-05    |         | ENSG00000213343 |
| 12 | 64787489 | 64787683 | 64787586 | 8  | 9   | 5  | 1.955081399 | 0.0892323   |         | ENSG00000177747 |
| 12 | 64810604 | 64810948 | 64810777 | 14 | 19  | 4  | 4.692195357 | 0.000193572 | LLPH    | ENSG00000139233 |
| 12 | 64818234 | 64818505 | 64818377 | 13 | 15  | 1  | 9.384390715 | 3.90E-05    |         | ENSG00000214287 |
| 12 | 64849694 | 64850197 | 64850032 | 15 | 31  | 6  | 5.36250898  | 1.31E-06    | TMBIM4  | ENSG00000155957 |

|    |          |          |          |    |    |    |             |             |         |                 |
|----|----------|----------|----------|----|----|----|-------------|-------------|---------|-----------------|
| 12 | 64918047 | 64918251 | 64918144 | 8  | 8  | 2  | 3.519146518 | 0.017558    | RBMS1P  | ENSG00000174082 |
| 12 | 65083852 | 65084161 | 65084006 | 16 | 17 | 6  | 3.016411301 | 0.00381427  |         | ENSG00000210604 |
| 12 | 65089380 | 65089706 | 65089540 | 11 | 15 | 5  | 3.128130238 | 0.00492422  |         | ENSG00000210604 |
| 12 | 65122116 | 65122295 | 65122144 | 8  | 8  | 2  | 3.519146518 | 0.017558    |         | ENSG00000210604 |
| 12 | 65792809 | 65792988 | 65792914 | 8  | 8  | 3  | 2.639359888 | 0.0415794   | CAND1   | ENSG00000111530 |
| 12 | 65841253 | 65841624 | 65841488 | 8  | 13 | 0  | 16.42268375 | 1.91E-05    | CAND1   | ENSG00000111530 |
| 12 | 65948673 | 65949545 | 65949279 | 13 | 35 | 15 | 2.639359888 | 0.000336887 | CAND1   | ENSG00000111530 |
| 12 | 66035705 | 66036063 | 66035865 | 11 | 16 | 4  | 3.988366054 | 0.00115141  |         | ENSG00000210608 |
| 12 | 66121797 | 66122149 | 66122010 | 10 | 15 | 10 | 1.706252857 | 0.0822346   |         | ENSG00000210608 |
| 12 | 66131325 | 66131532 | 66131458 | 10 | 10 | 4  | 2.580707446 | 0.0306059   |         | ENSG00000210608 |
| 12 | 66163952 | 66164154 | 66164053 | 8  | 8  | 3  | 2.639359888 | 0.0415794   |         | ENSG00000210608 |
| 12 | 66199906 | 66200179 | 66200042 | 13 | 15 | 5  | 3.128130238 | 0.00492422  | DYRK2   | ENSG00000127334 |
| 12 | 66221984 | 66222168 | 66222076 | 8  | 8  | 0  | 10.55743955 | 0.000925496 | DYRK2   | ENSG00000127334 |
| 12 | 66273001 | 66273389 | 66273176 | 12 | 18 | 3  | 5.571981987 | 0.000108726 | DYRK2   | ENSG00000127334 |
| 12 | 66275061 | 66275243 | 66275152 | 8  | 8  | 4  | 2.111487911 | 0.0804809   | DYRK2   | ENSG00000127334 |
| 12 | 66275468 | 66275813 | 66275637 | 22 | 27 | 5  | 5.474227917 | 4.62E-06    | DYRK2   | ENSG00000127334 |
| 12 | 66322383 | 66322592 | 66322423 | 8  | 8  | 0  | 10.55743955 | 0.000925496 | DYRK2   | ENSG00000127334 |
| 12 | 66327843 | 66328202 | 66328056 | 11 | 16 | 6  | 2.848832895 | 0.00632407  | DYRK2   | ENSG00000127334 |
| 12 | 66351363 | 66351545 | 66351454 | 9  | 9  | 4  | 2.346097679 | 0.050148    | DYRK2   | ENSG00000127334 |
| 12 | 66605226 | 66605497 | 66605367 | 8  | 10 | 10 | 1.173048839 | 0.355733    | IFNG    | ENSG00000111537 |
| 12 | 66720622 | 66720832 | 66720727 | 11 | 11 | 4  | 2.815317214 | 0.0183428   | IFNG    | ENSG00000111537 |
| 12 | 66722147 | 66722710 | 66722337 | 59 | 78 | 4  | 18.53417166 | 3.83E-22    | IFNG    | ENSG00000111537 |
| 12 | 66748075 | 66748269 | 66748172 | 8  | 8  | 2  | 3.519146518 | 0.017558    | IFNG    | ENSG00000111537 |
| 12 | 66812110 | 66812440 | 66812274 | 24 | 29 | 4  | 7.038293036 | 3.41E-07    | IFNG    | ENSG00000111537 |
| 12 | 66889420 | 66889622 | 66889527 | 9  | 9  | 2  | 3.910162798 | 0.00955088  | IL26    | ENSG00000111536 |
| 12 | 66903198 | 66903464 | 66903331 | 16 | 17 | 14 | 1.407658607 | 0.162567    | IL26    | ENSG00000111536 |
| 12 | 66920123 | 66920455 | 66920297 | 13 | 16 | 1  | 9.970915134 | 1.89E-05    | IL22    | ENSG00000127318 |
| 12 | 67012231 | 67012557 | 67012388 | 10 | 11 | 3  | 3.519146518 | 0.00788869  | MDM1    | ENSG00000111554 |
| 12 | 67038673 | 67039181 | 67039100 | 11 | 21 | 9  | 2.580707446 | 0.00438951  | MDM1    | ENSG00000111554 |
| 12 | 67091367 | 67091640 | 67091523 | 9  | 12 | 1  | 7.624817456 | 0.000332769 | MDM1    | ENSG00000111554 |
| 12 | 67366494 | 67367437 | 67366883 | 18 | 51 | 22 | 2.652110419 | 2.12E-05    | NUP107  | ENSG00000111581 |
| 12 | 67425865 | 67426407 | 67426066 | 9  | 21 | 11 | 2.150589539 | 0.0135908   | SLC35E3 | ENSG00000175782 |
| 12 | 67426885 | 67427132 | 67427008 | 8  | 11 | 2  | 4.692195357 | 0.00272444  | SLC35E3 | ENSG00000175782 |
| 12 | 67460923 | 67461119 | 67461079 | 8  | 8  | 4  | 2.111487911 | 0.0804809   | MDM2    | ENSG00000135679 |

|    |          |          |          |     |      |    |             |             |          |                 |
|----|----------|----------|----------|-----|------|----|-------------|-------------|----------|-----------------|
| 12 | 67461342 | 67461691 | 67461536 | 16  | 20   | 3  | 6.158506406 | 2.99E-05    | MDM2     | ENSG00000135679 |
| 12 | 67467146 | 67467336 | 67467241 | 10  | 10   | 1  | 6.451768616 | 0.00135978  | MDM2     | ENSG00000135679 |
| 12 | 67467391 | 67467971 | 67467793 | 57  | 78   | 5  | 15.44514305 | 3.51E-21    | MDM2     | ENSG00000135679 |
| 12 | 67480043 | 67480351 | 67480197 | 16  | 20   | 1  | 12.31701281 | 1.03E-06    | MDM2     | ENSG00000135679 |
| 12 | 67480354 | 67480656 | 67480533 | 18  | 21   | 2  | 8.602358155 | 3.33E-06    | MDM2     | ENSG00000135679 |
| 12 | 67487558 | 67489430 | 67489008 | 868 | 1150 | 19 | 67.5089607  | 0           | MDM2     | ENSG00000135679 |
| 12 | 67534100 | 67534306 | 67534245 | 8   | 9    | 2  | 3.910162798 | 0.00955088  | MDM2     | ENSG00000135679 |
| 12 | 67548427 | 67548708 | 67548559 | 11  | 13   | 3  | 4.105670938 | 0.00243034  | MDM2     | ENSG00000135679 |
| 12 | 67552046 | 67552314 | 67552180 | 11  | 14   | 2  | 5.865244197 | 0.000387308 | CPM      | ENSG00000135678 |
| 12 | 67688509 | 67688917 | 67688727 | 10  | 18   | 7  | 2.785990993 | 0.00480525  | CPM      | ENSG00000135678 |
| 12 | 67781666 | 67781939 | 67781799 | 10  | 13   | 14 | 1.094845583 | 0.406217    |          | ENSG00000221422 |
| 12 | 67837129 | 67837467 | 67837298 | 20  | 23   | 10 | 2.559379286 | 0.00330263  |          | ENSG00000221422 |
| 12 | 67865589 | 67865801 | 67865663 | 8   | 8    | 0  | 10.55743955 | 0.000925496 |          | ENSG00000221422 |
| 12 | 67950417 | 67950641 | 67950529 | 8   | 8    | 1  | 5.278719777 | 0.00542188  | CPSF6    | ENSG00000111605 |
| 12 | 67966244 | 67966423 | 67966333 | 8   | 8    | 1  | 5.278719777 | 0.00542188  | CPSF6    | ENSG00000111605 |
| 12 | 68039775 | 68039979 | 68039877 | 8   | 9    | 8  | 1.303387599 | 0.281715    | YEATS4   | ENSG00000127337 |
| 12 | 68040058 | 68040451 | 68040277 | 10  | 16   | 7  | 2.492728784 | 0.0124193   | YEATS4   | ENSG00000127337 |
| 12 | 68096395 | 68096618 | 68096506 | 9   | 12   | 8  | 1.694403879 | 0.107291    |          | ENSG00000223320 |
| 12 | 68120072 | 68120430 | 68120251 | 19  | 25   | 7  | 3.812408728 | 0.00012465  | FRS2     | ENSG00000166225 |
| 12 | 68150217 | 68150529 | 68150376 | 10  | 14   | 12 | 1.353517892 | 0.211235    | FRS2     | ENSG00000166225 |
| 12 | 68150901 | 68151235 | 68151074 | 14  | 18   | 8  | 2.476436439 | 0.00924552  |          | ENSG00000205128 |
| 12 | 68183557 | 68183761 | 68183659 | 8   | 8    | 5  | 1.759573259 | 0.13508     | FRS2     | ENSG00000166225 |
| 12 | 68233961 | 68234218 | 68234089 | 11  | 12   | 2  | 5.083211637 | 0.00143337  | FRS2     | ENSG00000166225 |
| 12 | 68246738 | 68247044 | 68246879 | 17  | 20   | 0  | 24.63402563 | 8.35E-08    | CCT2     | ENSG00000166226 |
| 12 | 68265372 | 68265708 | 68265550 | 12  | 16   | 8  | 2.215758919 | 0.0222902   | CCT2     | ENSG00000166226 |
| 12 | 68418349 | 68418719 | 68418509 | 10  | 15   | 7  | 2.346097679 | 0.0195693   | RAB3IP   | ENSG00000127328 |
| 12 | 68419820 | 68420010 | 68419864 | 8   | 8    | 4  | 2.111487911 | 0.0804809   | RAB3IP   | ENSG00000127328 |
| 12 | 68445632 | 68445813 | 68445785 | 8   | 9    | 0  | 11.73048839 | 0.000425898 | RAB3IP   | ENSG00000127328 |
| 12 | 68448158 | 68448356 | 68448233 | 8   | 10   | 2  | 4.301179077 | 0.00512919  | RAB3IP   | ENSG00000127328 |
| 12 | 68559629 | 68559832 | 68559738 | 8   | 9    | 4  | 2.346097679 | 0.050148    | C12orf28 | ENSG00000166268 |
| 12 | 68616327 | 68616678 | 68616502 | 16  | 22   | 13 | 1.927151665 | 0.0235996   | C12orf28 | ENSG00000166268 |
| 12 | 68758233 | 68758561 | 68758398 | 14  | 16   | 4  | 3.988366054 | 0.00115141  | C12orf28 | ENSG00000166268 |
| 12 | 68770966 | 68771670 | 68771284 | 53  | 96   | 1  | 56.89286871 | 1.08E-31    | CNOT2    | ENSG00000111596 |
| 12 | 68922753 | 68923127 | 68922894 | 10  | 16   | 6  | 2.848832895 | 0.00632407  | CNOT2    | ENSG00000111596 |

|    |          |          |          |    |    |    |             |             |         |                 |
|----|----------|----------|----------|----|----|----|-------------|-------------|---------|-----------------|
| 12 | 68923251 | 68923525 | 68923388 | 10 | 11 | 4  | 2.815317214 | 0.0183428   | CNOT2   | ENSG00000111596 |
| 12 | 68924071 | 68924276 | 68924222 | 8  | 9  | 2  | 3.910162798 | 0.00955088  | CNOT2   | ENSG00000111596 |
| 12 | 69200897 | 69201277 | 69201086 | 25 | 33 | 2  | 13.29455351 | 6.68E-10    |         | ENSG00000218665 |
| 12 | 69270097 | 69270370 | 69270205 | 11 | 12 | 2  | 5.083211637 | 0.00143337  | PTPRB   | ENSG00000127329 |
| 12 | 69325971 | 69326279 | 69326125 | 12 | 17 | 3  | 5.278719777 | 0.000205462 | PTPRB   | ENSG00000127329 |
| 12 | 69453472 | 69453689 | 69453580 | 8  | 8  | 1  | 5.278719777 | 0.00542188  | PTPRR   | ENSG00000153233 |
| 12 | 69472710 | 69472970 | 69472851 | 10 | 13 | 0  | 16.42268375 | 1.91E-05    | PTPRR   | ENSG00000153233 |
| 12 | 69503216 | 69503395 | 69503253 | 8  | 8  | 5  | 1.759573259 | 0.13508     | PTPRR   | ENSG00000153233 |
| 12 | 70059039 | 70059273 | 70059156 | 10 | 11 | 3  | 3.519146518 | 0.00788869  | LGR5    | ENSG00000139292 |
| 12 | 70072633 | 70072837 | 70072735 | 8  | 8  | 5  | 1.759573259 | 0.13508     | LGR5    | ENSG00000139292 |
| 12 | 70343693 | 70343875 | 70343816 | 8  | 8  | 3  | 2.639359888 | 0.0415794   | ZFC3H1  | ENSG00000133858 |
| 12 | 70343998 | 70344318 | 70344163 | 11 | 14 | 9  | 1.759573259 | 0.0786014   | THAP2   | ENSG00000173451 |
| 12 | 70366221 | 70366552 | 70366393 | 8  | 12 | 4  | 3.049926982 | 0.0108184   | TMEM19  | ENSG00000139291 |
| 12 | 70405779 | 70406061 | 70405911 | 16 | 17 | 3  | 5.278719777 | 0.000205462 | RAB21   | ENSG00000080371 |
| 12 | 70434503 | 70434795 | 70434618 | 12 | 15 | 7  | 2.346097679 | 0.0195693   | RAB21   | ENSG00000080371 |
| 12 | 70434800 | 70435107 | 70434972 | 8  | 11 | 6  | 2.010940867 | 0.0640214   | RAB21   | ENSG00000080371 |
| 12 | 70519530 | 70519767 | 70519648 | 8  | 11 | 16 | 0.828034475 | 0.698553    | TBC1D15 | ENSG00000121749 |
| 12 | 70618784 | 70619077 | 70618933 | 12 | 14 | 9  | 1.759573259 | 0.0786014   | TPH2    | ENSG00000139287 |
| 12 | 70697154 | 70697336 | 70697272 | 8  | 9  | 6  | 1.675784056 | 0.141978    | TPH2    | ENSG00000139287 |
| 12 | 70888867 | 70889067 | 70888967 | 8  | 9  | 1  | 5.865244197 | 0.00272497  | TRHDE   | ENSG00000072657 |
| 12 | 70959067 | 70959288 | 70959145 | 9  | 9  | 1  | 5.865244197 | 0.00272497  | TRHDE   | ENSG00000072657 |
| 12 | 71231972 | 71232151 | 71232061 | 8  | 8  | 1  | 5.278719777 | 0.00542188  |         | ENSG00000216084 |
| 12 | 71655216 | 71655574 | 71655403 | 20 | 25 | 0  | 30.49926982 | 1.72E-09    |         | ENSG00000216084 |
| 12 | 71870782 | 71871055 | 71870912 | 16 | 17 | 1  | 10.55743955 | 9.18E-06    |         | ENSG00000216084 |
| 12 | 71901199 | 71901415 | 71901310 | 9  | 10 | 6  | 1.843362462 | 0.0964212   |         | ENSG00000216084 |
| 12 | 72063762 | 72064287 | 72063972 | 14 | 28 | 8  | 3.779824038 | 5.98E-05    |         | ENSG00000210684 |
| 12 | 72087906 | 72088131 | 72088018 | 8  | 8  | 2  | 3.519146518 | 0.017558    |         | ENSG00000210684 |
| 12 | 72230134 | 72230376 | 72230223 | 8  | 8  | 5  | 1.759573259 | 0.13508     |         | ENSG00000210684 |
| 12 | 72596729 | 72597019 | 72596874 | 9  | 12 | 4  | 3.049926982 | 0.0108184   |         | ENSG00000215944 |
| 12 | 72615898 | 72616092 | 72616023 | 8  | 9  | 3  | 2.932622098 | 0.0242899   |         | ENSG00000215944 |
| 12 | 72723313 | 72723725 | 72723552 | 11 | 19 | 7  | 2.932622098 | 0.00293566  |         | ENSG00000215944 |
| 12 | 72791665 | 72792026 | 72791844 | 12 | 18 | 6  | 3.183989707 | 0.00227432  |         | ENSG00000215944 |
| 12 | 73217820 | 73218227 | 73217955 | 8  | 14 | 9  | 1.759573259 | 0.0786014   |         | ENSG00000180632 |
| 12 | 73529294 | 73529484 | 73529322 | 8  | 8  | 1  | 5.278719777 | 0.00542188  |         | ENSG00000210718 |



|    |          |          |          |     |     |    |             |             |          |                 |
|----|----------|----------|----------|-----|-----|----|-------------|-------------|----------|-----------------|
| 12 | 73569959 | 73570569 | 73570408 | 10  | 23  | 12 | 2.165628626 | 0.0100985   |          | ENSG00000210718 |
| 12 | 73577518 | 73577789 | 73577667 | 11  | 11  | 0  | 14.07658607 | 9.02E-05    |          | ENSG00000210718 |
| 12 | 73625692 | 73625875 | 73625781 | 8   | 8   | 3  | 2.639359888 | 0.0415794   |          | ENSG00000210718 |
| 12 | 73857982 | 73858398 | 73858160 | 51  | 66  | 0  | 78.59427223 | 2.61E-23    | KCNC2    | ENSG00000166006 |
| 12 | 74010241 | 74010589 | 74010464 | 13  | 17  | 7  | 2.639359888 | 0.00777415  | CAPS2    | ENSG00000180881 |
| 12 | 74014390 | 74014688 | 74014550 | 20  | 20  | 10 | 2.239456875 | 0.0121685   | GLIPR1L1 | ENSG00000173401 |
| 12 | 74071193 | 74071613 | 74071449 | 8   | 15  | 9  | 1.876878143 | 0.0544542   | GLIPR1L2 | ENSG00000180481 |
| 12 | 74191530 | 74191965 | 74191786 | 16  | 25  | 6  | 4.357038546 | 4.72E-05    | KRR1     | ENSG00000111615 |
| 12 | 74400889 | 74401235 | 74401062 | 10  | 15  | 12 | 1.443752418 | 0.160732    | KRR1     | ENSG00000111615 |
| 12 | 74589198 | 74589405 | 74589301 | 8   | 9   | 4  | 2.346097679 | 0.050148    |          | ENSG00000210725 |
| 12 | 74658000 | 74658246 | 74658123 | 17  | 18  | 5  | 3.714654658 | 0.000961539 |          | ENSG00000198923 |
| 12 | 74695248 | 74695522 | 74695385 | 18  | 19  | 0  | 23.46097679 | 1.81E-07    | PHLDA1   | ENSG00000139289 |
| 12 | 74711583 | 74711865 | 74711724 | 12  | 15  | 2  | 6.256260476 | 0.000199274 | PHLDA1   | ENSG00000139289 |
| 12 | 74764469 | 74764663 | 74764566 | 8   | 8   | 5  | 1.759573259 | 0.13508     | NAP1L1   | ENSG00000187109 |
| 12 | 75057038 | 75057282 | 75057195 | 9   | 11  | 0  | 14.07658607 | 9.02E-05    |          | ENSG00000199754 |
| 12 | 75076629 | 75076866 | 75076747 | 13  | 13  | 1  | 8.211341875 | 0.000163445 |          | ENSG00000199754 |
| 12 | 75204421 | 75204738 | 75204565 | 8   | 9   | 1  | 5.865244197 | 0.00272497  |          | ENSG00000223273 |
| 12 | 75266254 | 75266678 | 75266502 | 10  | 18  | 2  | 7.429309316 | 2.63E-05    | BBS10    | ENSG00000179941 |
| 12 | 75361147 | 75361366 | 75361256 | 10  | 10  | 3  | 3.225884308 | 0.0139466   | OSBPL8   | ENSG00000091039 |
| 12 | 75477763 | 75478053 | 75477929 | 13  | 17  | 6  | 3.016411301 | 0.00381427  | OSBPL8   | ENSG00000091039 |
| 12 | 75526146 | 75526374 | 75526303 | 10  | 11  | 0  | 14.07658607 | 9.02E-05    |          | ENSG00000213272 |
| 12 | 75539459 | 75539733 | 75539596 | 9   | 13  | 1  | 8.211341875 | 0.000163445 |          | ENSG00000213272 |
| 12 | 75682177 | 75682387 | 75682282 | 8   | 9   | 4  | 2.346097679 | 0.050148    | ZDHHC17  | ENSG00000186908 |
| 12 | 75717351 | 75717950 | 75717518 | 11  | 24  | 7  | 3.665777623 | 0.000215502 | ZDHHC17  | ENSG00000186908 |
| 12 | 75870962 | 75871239 | 75871099 | 9   | 12  | 0  | 15.24963491 | 4.15E-05    | CSRP2    | ENSG00000175183 |
| 12 | 75983544 | 75984298 | 75984001 | 156 | 237 | 6  | 39.88366054 | 4.17E-71    | E2F7     | ENSG00000165891 |
| 12 | 76051403 | 76051725 | 76051564 | 8   | 12  | 5  | 2.541605819 | 0.0225912   |          | ENSG00000210743 |
| 12 | 76069104 | 76069310 | 76069247 | 11  | 11  | 3  | 3.519146518 | 0.00788869  |          | ENSG00000210743 |
| 12 | 76548317 | 76548695 | 76548490 | 15  | 21  | 3  | 6.451768616 | 1.56E-05    | NAV3     | ENSG00000067798 |
| 12 | 76603088 | 76603317 | 76603208 | 11  | 12  | 4  | 3.049926982 | 0.0108184   | NAV3     | ENSG00000067798 |
| 12 | 76604740 | 76605025 | 76604859 | 9   | 11  | 1  | 7.038293036 | 0.000674435 | NAV3     | ENSG00000067798 |
| 12 | 76843525 | 76843774 | 76843639 | 10  | 11  | 5  | 2.346097679 | 0.0364013   | NAV3     | ENSG00000067798 |
| 12 | 77035998 | 77036193 | 77036103 | 8   | 8   | 2  | 3.519146518 | 0.017558    | NAV3     | ENSG00000067798 |
| 12 | 77037316 | 77037526 | 77037386 | 10  | 11  | 1  | 7.038293036 | 0.000674435 | NAV3     | ENSG00000067798 |

|    |          |          |          |     |     |    |             |             |          |                 |
|----|----------|----------|----------|-----|-----|----|-------------|-------------|----------|-----------------|
| 12 | 77075042 | 77075545 | 77075328 | 104 | 134 | 0  | 158.3615933 | 3.13E-46    | NAV3     | ENSG00000067798 |
| 12 | 77169239 | 77169445 | 77169347 | 8   | 9   | 2  | 3.910162798 | 0.00955088  | NAV3     | ENSG00000067798 |
| 12 | 77401278 | 77401458 | 77401368 | 9   | 9   | 3  | 2.932622098 | 0.0242899   |          | ENSG00000213271 |
| 12 | 77412885 | 77413140 | 77412986 | 10  | 13  | 1  | 8.211341875 | 0.000163445 |          | ENSG00000213271 |
| 12 | 77663942 | 77664341 | 77664141 | 73  | 92  | 4  | 21.81870841 | 1.37E-26    |          | ENSG00000213271 |
| 12 | 77720622 | 77720840 | 77720731 | 8   | 9   | 6  | 1.675784056 | 0.141978    |          | ENSG00000213271 |
| 12 | 77924241 | 77924539 | 77924382 | 8   | 12  | 2  | 5.083211637 | 0.00143337  | SYT1     | ENSG00000067715 |
| 12 | 77963446 | 77963694 | 77963565 | 10  | 12  | 1  | 7.624817456 | 0.000332769 | SYT1     | ENSG00000067715 |
| 12 | 78262901 | 78263089 | 78262995 | 9   | 9   | 9  | 1.173048839 | 0.362316    |          | ENSG00000221788 |
| 12 | 78291885 | 78292105 | 78292030 | 8   | 8   | 0  | 10.55743955 | 0.000925496 |          | ENSG00000221788 |
| 12 | 78441747 | 78441938 | 78441842 | 9   | 9   | 1  | 5.865244197 | 0.00272497  |          | ENSG00000210752 |
| 12 | 78450873 | 78451133 | 78451003 | 8   | 9   | 5  | 1.955081399 | 0.0892323   |          | ENSG00000210752 |
| 12 | 78464957 | 78465151 | 78465054 | 9   | 9   | 2  | 3.910162798 | 0.00955088  |          | ENSG00000210752 |
| 12 | 78465314 | 78465641 | 78465477 | 9   | 15  | 2  | 6.256260476 | 0.000199274 |          | ENSG00000210752 |
| 12 | 78465646 | 78465931 | 78465819 | 9   | 12  | 1  | 7.624817456 | 0.000332769 |          | ENSG00000210752 |
| 12 | 78467267 | 78467446 | 78467356 | 8   | 8   | 1  | 5.278719777 | 0.00542188  |          | ENSG00000210752 |
| 12 | 78608159 | 78608495 | 78608388 | 9   | 13  | 8  | 1.824742639 | 0.0744168   | PAWR     | ENSG00000177425 |
| 12 | 78608690 | 78608996 | 78608843 | 10  | 13  | 3  | 4.105670938 | 0.00243034  | PAWR     | ENSG00000177425 |
| 12 | 78609358 | 78609656 | 78609507 | 8   | 13  | 2  | 5.474227917 | 0.000747844 | PAWR     | ENSG00000177425 |
| 12 | 78852945 | 78853313 | 78853124 | 12  | 19  | 5  | 3.910162798 | 0.000546977 | PPP1R12A | ENSG00000058272 |
| 12 | 79317462 | 79317641 | 79317551 | 8   | 8   | 2  | 3.519146518 | 0.017558    |          | ENSG00000222880 |
| 12 | 79352042 | 79352231 | 79352119 | 8   | 8   | 0  | 10.55743955 | 0.000925496 |          | ENSG00000222880 |
| 12 | 79390858 | 79391050 | 79390928 | 8   | 8   | 4  | 2.111487911 | 0.0804809   |          | ENSG00000222880 |
| 12 | 79630884 | 79631094 | 79630989 | 9   | 10  | 3  | 3.225884308 | 0.0139466   | MYF5     | ENSG00000111049 |
| 12 | 79695881 | 79696535 | 79696178 | 174 | 219 | 10 | 23.46097679 | 1.43E-60    |          | ENSG00000207763 |
| 12 | 79755341 | 79755556 | 79755422 | 8   | 9   | 10 | 1.066408036 | 0.444985    |          | ENSG00000207763 |
| 12 | 79786539 | 79786840 | 79786689 | 20  | 23  | 11 | 2.346097679 | 0.00594236  |          | ENSG00000207763 |
| 12 | 79812825 | 79813016 | 79812896 | 8   | 9   | 0  | 11.73048839 | 0.000425898 |          | ENSG00000208022 |
| 12 | 79843144 | 79843361 | 79843296 | 9   | 9   | 4  | 2.346097679 | 0.050148    |          | ENSG00000208022 |
| 12 | 79854322 | 79854650 | 79854481 | 9   | 14  | 7  | 2.199466574 | 0.0303778   |          | ENSG00000203357 |
| 12 | 79855679 | 79855944 | 79855784 | 10  | 15  | 5  | 3.128130238 | 0.00492422  | LIN7A    | ENSG00000111052 |
| 12 | 80046929 | 80047129 | 80047036 | 8   | 8   | 1  | 5.278719777 | 0.00542188  | ACSS3    | ENSG00000111058 |
| 12 | 80299860 | 80300393 | 80300140 | 14  | 25  | 7  | 3.812408728 | 0.00012465  | ACSS3    | ENSG00000111058 |
| 12 | 81276223 | 81276908 | 81276485 | 19  | 41  | 6  | 7.038293036 | 2.39E-09    | C12orf26 | ENSG00000127720 |

|    |          |          |          |     |     |    |             |             |          |                 |
|----|----------|----------|----------|-----|-----|----|-------------|-------------|----------|-----------------|
| 12 | 81301964 | 81302195 | 81302016 | 10  | 12  | 2  | 5.083211637 | 0.00143337  | C12orf26 | ENSG00000127720 |
| 12 | 81445193 | 81445435 | 81445314 | 8   | 9   | 8  | 1.303387599 | 0.281715    | TMTC2    | ENSG00000179104 |
| 12 | 81600877 | 81601091 | 81600973 | 10  | 11  | 7  | 1.759573259 | 0.102361    | TMTC2    | ENSG00000179104 |
| 12 | 81603577 | 81604011 | 81603756 | 12  | 19  | 5  | 3.910162798 | 0.000546977 | TMTC2    | ENSG00000179104 |
| 12 | 81604248 | 81604490 | 81604369 | 10  | 13  | 6  | 2.346097679 | 0.0266147   | TMTC2    | ENSG00000179104 |
| 12 | 81604679 | 81604926 | 81604832 | 11  | 13  | 2  | 5.474227917 | 0.000747844 | TMTC2    | ENSG00000179104 |
| 12 | 81612254 | 81612549 | 81612408 | 9   | 11  | 9  | 1.407658607 | 0.210479    | TMTC2    | ENSG00000179104 |
| 12 | 81814914 | 81815188 | 81815021 | 13  | 14  | 1  | 8.797866295 | 8.00E-05    |          | ENSG00000212029 |
| 12 | 81849206 | 81849456 | 81849331 | 12  | 15  | 4  | 3.753756286 | 0.0020497   |          | ENSG00000212029 |
| 12 | 82741660 | 82741858 | 82741754 | 10  | 10  | 8  | 1.433726359 | 0.209175    |          | ENSG00000221148 |
| 12 | 83656434 | 83656668 | 83656551 | 9   | 11  | 7  | 1.759573259 | 0.102361    |          | ENSG00000222637 |
| 12 | 84599112 | 84599429 | 84599270 | 10  | 14  | 1  | 8.797866295 | 8.00E-05    |          | ENSG00000213268 |
| 12 | 85182260 | 85182506 | 85182368 | 8   | 8   | 6  | 1.508205651 | 0.203852    | MGAT4C   | ENSG00000182050 |
| 12 | 86149804 | 86150132 | 86149968 | 24  | 28  | 1  | 17.00920817 | 2.80E-09    |          |                 |
| 12 | 86192600 | 86192873 | 86192724 | 9   | 10  | 5  | 2.150589539 | 0.0575848   |          |                 |
| 12 | 86301603 | 86301948 | 86301829 | 12  | 16  | 1  | 9.970915134 | 1.89E-05    |          | ENSG00000205071 |
| 12 | 86357877 | 86358086 | 86357993 | 9   | 10  | 5  | 2.150589539 | 0.0575848   |          | ENSG00000205071 |
| 12 | 86358125 | 86358373 | 86358289 | 13  | 15  | 4  | 3.753756286 | 0.0020497   |          | ENSG00000205071 |
| 12 | 86636827 | 86637052 | 86636903 | 8   | 9   | 2  | 3.910162798 | 0.00955088  |          | ENSG00000205071 |
| 12 | 86766278 | 86766619 | 86766448 | 10  | 15  | 6  | 2.68125449  | 0.0103552   |          | ENSG00000213267 |
| 12 | 86913532 | 86913792 | 86913638 | 11  | 13  | 2  | 5.474227917 | 0.000747844 | C12orf50 | ENSG00000165805 |
| 12 | 87059541 | 87060334 | 87060064 | 11  | 34  | 8  | 4.561856597 | 2.04E-06    | CEP290   | ENSG00000198707 |
| 12 | 87060708 | 87060917 | 87060826 | 10  | 11  | 2  | 4.692195357 | 0.00272444  | TMTC3    | ENSG00000139324 |
| 12 | 87062617 | 87063053 | 87062892 | 15  | 21  | 1  | 12.90353723 | 4.95E-07    | TMTC3    | ENSG00000139324 |
| 12 | 87099887 | 87100067 | 87099977 | 8   | 9   | 2  | 3.910162798 | 0.00955088  | TMTC3    | ENSG00000139324 |
| 12 | 87440988 | 87441167 | 87441077 | 8   | 8   | 0  | 10.55743955 | 0.000925496 |          | ENSG00000205065 |
| 12 | 87463265 | 87463481 | 87463368 | 9   | 10  | 6  | 1.843362462 | 0.0964212   | KITLG    | ENSG00000049130 |
| 12 | 87472283 | 87472545 | 87472414 | 19  | 20  | 3  | 6.158506406 | 2.99E-05    | KITLG    | ENSG00000049130 |
| 12 | 87476305 | 87476607 | 87476456 | 12  | 16  | 2  | 6.647276756 | 0.000101928 | KITLG    | ENSG00000049130 |
| 12 | 87477028 | 87478077 | 87477796 | 646 | 810 | 6  | 135.906087  | 4.37E-261   | KITLG    | ENSG00000049130 |
| 12 | 87479564 | 87479781 | 87479642 | 10  | 12  | 2  | 5.083211637 | 0.00143337  | KITLG    | ENSG00000049130 |
| 12 | 87497144 | 87497337 | 87497276 | 8   | 9   | 3  | 2.932622098 | 0.0242899   | KITLG    | ENSG00000049130 |
| 12 | 87668747 | 87668962 | 87668875 | 9   | 9   | 10 | 1.066408036 | 0.444985    |          | ENSG00000210830 |
| 12 | 87674224 | 87674406 | 87674322 | 8   | 9   | 3  | 2.932622098 | 0.0242899   |          | ENSG00000210830 |

|    |          |          |          |    |     |    |             |             |          |                 |
|----|----------|----------|----------|----|-----|----|-------------|-------------|----------|-----------------|
| 12 | 87681496 | 87682125 | 87681756 | 21 | 37  | 5  | 7.429309316 | 7.67E-09    |          | ENSG00000210830 |
| 12 | 87699863 | 87700262 | 87700086 | 42 | 48  | 3  | 14.36984828 | 1.11E-13    |          | ENSG00000210830 |
| 12 | 87783594 | 87783824 | 87783709 | 11 | 12  | 2  | 5.083211637 | 0.00143337  |          | ENSG00000210830 |
| 12 | 87844006 | 87844242 | 87844124 | 14 | 15  | 3  | 4.692195357 | 0.000718455 |          | ENSG00000210830 |
| 12 | 87935012 | 87935388 | 87935275 | 10 | 14  | 3  | 4.398933147 | 0.00132748  |          | ENSG00000210830 |
| 12 | 88035314 | 88035649 | 88035481 | 14 | 20  | 8  | 2.737113958 | 0.0036449   | DUSP6    | ENSG00000139318 |
| 12 | 88143729 | 88144155 | 88143942 | 17 | 26  | 7  | 3.959039833 | 7.16E-05    | DUSP6    | ENSG00000139318 |
| 12 | 88145695 | 88146040 | 88145873 | 11 | 15  | 3  | 4.692195357 | 0.000718455 | DUSP6    | ENSG00000139318 |
| 12 | 88188278 | 88188481 | 88188386 | 8  | 8   | 0  | 10.55743955 | 0.000925496 | DUSP6    | ENSG00000139318 |
| 12 | 88237030 | 88237385 | 88237209 | 24 | 29  | 5  | 5.865244197 | 1.33E-06    | DUSP6    | ENSG00000139318 |
| 12 | 88270394 | 88270763 | 88270584 | 14 | 21  | 3  | 6.451768616 | 1.56E-05    | DUSP6    | ENSG00000139318 |
| 12 | 88271792 | 88272096 | 88271955 | 9  | 13  | 2  | 5.474227917 | 0.000747844 | DUSP6    | ENSG00000139318 |
| 12 | 88382934 | 88383229 | 88383089 | 10 | 12  | 7  | 1.906204364 | 0.0695918   | WDR51B   | ENSG00000139323 |
| 12 | 88442379 | 88442673 | 88442544 | 9  | 13  | 3  | 4.105670938 | 0.00243034  | WDR51B   | ENSG00000139323 |
| 12 | 88443763 | 88444298 | 88444051 | 12 | 23  | 7  | 3.519146518 | 0.000369739 | WDR51B   | ENSG00000139323 |
| 12 | 88460949 | 88461193 | 88461071 | 10 | 12  | 7  | 1.906204364 | 0.0695918   | WDR51B   | ENSG00000139323 |
| 12 | 88484530 | 88484970 | 88484737 | 13 | 23  | 9  | 2.815317214 | 0.00172056  | WDR51B   | ENSG00000139323 |
| 12 | 88627626 | 88627854 | 88627740 | 8  | 11  | 0  | 14.07658607 | 9.02E-05    |          | ENSG00000210846 |
| 12 | 88680745 | 88680995 | 88680870 | 9  | 11  | 5  | 2.346097679 | 0.0364013   |          | ENSG00000210846 |
| 12 | 88687062 | 88687477 | 88687221 | 14 | 21  | 4  | 5.161414893 | 5.68E-05    |          | ENSG00000210846 |
| 12 | 88693390 | 88693584 | 88693487 | 10 | 10  | 1  | 6.451768616 | 0.00135978  |          | ENSG00000210846 |
| 12 | 88747650 | 88747909 | 88747757 | 8  | 11  | 6  | 2.010940867 | 0.0640214   |          | ENSG00000210846 |
| 12 | 88837347 | 88837688 | 88837517 | 10 | 15  | 5  | 3.128130238 | 0.00492422  |          | ENSG00000210846 |
| 12 | 88869181 | 88869481 | 88869347 | 8  | 10  | 9  | 1.290353723 | 0.279648    |          | ENSG00000210846 |
| 12 | 89152340 | 89152906 | 89152519 | 88 | 112 | 1  | 66.27725942 | 5.05E-37    |          |                 |
| 12 | 89274068 | 89274361 | 89274190 | 9  | 9   | 4  | 2.346097679 | 0.050148    |          |                 |
| 12 | 89277249 | 89277514 | 89277335 | 8  | 8   | 4  | 2.111487911 | 0.0804809   |          |                 |
| 12 | 89544948 | 89545216 | 89545125 | 8  | 10  | 3  | 3.225884308 | 0.0139466   | C12orf37 | ENSG00000196243 |
| 12 | 90299417 | 90299704 | 90299565 | 11 | 13  | 2  | 5.474227917 | 0.000747844 | DCN      | ENSG00000011465 |
| 12 | 90299901 | 90300200 | 90300050 | 11 | 15  | 10 | 1.706252857 | 0.0822346   | DCN      | ENSG00000011465 |
| 12 | 90302353 | 90302594 | 90302475 | 9  | 9   | 2  | 3.910162798 | 0.00955088  | DCN      | ENSG00000011465 |
| 12 | 90306652 | 90306857 | 90306754 | 9  | 10  | 2  | 4.301179077 | 0.00512919  | DCN      | ENSG00000011465 |
| 12 | 90340220 | 90340476 | 90340341 | 8  | 9   | 2  | 3.910162798 | 0.00955088  | DCN      | ENSG00000011465 |
| 12 | 90340777 | 90341047 | 90340947 | 14 | 16  | 3  | 4.985457567 | 0.000385643 | DCN      | ENSG00000011465 |

|    |          |          |          |     |     |    |             |             |         |                 |
|----|----------|----------|----------|-----|-----|----|-------------|-------------|---------|-----------------|
| 12 | 90341630 | 90341890 | 90341766 | 9   | 12  | 7  | 1.906204364 | 0.0695918   | DCN     | ENSG00000011465 |
| 12 | 90811334 | 90811741 | 90811562 | 13  | 20  | 3  | 6.158506406 | 2.99E-05    | BTG1    | ENSG00000133639 |
| 12 | 90820686 | 90821130 | 90820954 | 29  | 36  | 1  | 21.70140353 | 7.08E-12    | BTG1    | ENSG00000133639 |
| 12 | 90838164 | 90838398 | 90838280 | 9   | 10  | 7  | 1.612942154 | 0.147335    | BTG1    | ENSG00000133639 |
| 12 | 90952671 | 90953263 | 90952973 | 175 | 215 | 7  | 31.67231866 | 1.06E-62    | BTG1    | ENSG00000133639 |
| 12 | 90973876 | 90974079 | 90973977 | 11  | 11  | 5  | 2.346097679 | 0.0364013   | BTG1    | ENSG00000133639 |
| 12 | 90998330 | 90998619 | 90998474 | 8   | 10  | 0  | 12.90353723 | 0.000195991 | BTG1    | ENSG00000133639 |
| 12 | 91062383 | 91062596 | 91062489 | 8   | 9   | 2  | 3.910162798 | 0.00955088  | BTG1    | ENSG00000133639 |
| 12 | 91063532 | 91063897 | 91063718 | 14  | 21  | 3  | 6.451768616 | 1.56E-05    | BTG1    | ENSG00000133639 |
| 12 | 91064035 | 91064279 | 91064157 | 9   | 10  | 3  | 3.225884308 | 0.0139466   | BTG1    | ENSG00000133639 |
| 12 | 91452279 | 91452482 | 91452413 | 10  | 10  | 1  | 6.451768616 | 0.00135978  | CLLU1OS | ENSG00000205057 |
| 12 | 91461363 | 91461646 | 91461504 | 32  | 35  | 4  | 8.445951643 | 6.26E-09    | CLLU1OS | ENSG00000205057 |
| 12 | 91471354 | 91471590 | 91471472 | 9   | 11  | 2  | 4.692195357 | 0.00272444  | CLLU1OS | ENSG00000205057 |
| 12 | 91510172 | 91510522 | 91510347 | 50  | 51  | 0  | 60.99853964 | 2.97E-18    |         | ENSG00000214215 |
| 12 | 91520631 | 91520822 | 91520731 | 9   | 9   | 4  | 2.346097679 | 0.050148    |         | ENSG00000214215 |
| 12 | 91521671 | 91521869 | 91521770 | 8   | 9   | 3  | 2.932622098 | 0.0242899   |         | ENSG00000214215 |
| 12 | 91539191 | 91539666 | 91539412 | 50  | 70  | 2  | 27.76215586 | 9.17E-22    |         | ENSG00000214215 |
| 12 | 91566174 | 91566355 | 91566264 | 8   | 8   | 0  | 10.55743955 | 0.000925496 |         | ENSG00000214215 |
| 12 | 91702360 | 91702913 | 91702539 | 74  | 101 | 5  | 19.94183027 | 2.11E-28    | PLEKHG7 | ENSG00000187510 |
| 12 | 91703039 | 91703319 | 91703187 | 21  | 23  | 3  | 7.038293036 | 4.15E-06    | PLEKHG7 | ENSG00000187510 |
| 12 | 91891512 | 91891969 | 91891733 | 74  | 88  | 0  | 104.4013467 | 1.00E-30    |         | ENSG00000202534 |
| 12 | 92005267 | 92005491 | 92005422 | 12  | 13  | 2  | 5.474227917 | 0.000747844 |         | ENSG00000221617 |
| 12 | 92062966 | 92063447 | 92063130 | 16  | 26  | 14 | 2.111487911 | 0.00831019  |         | ENSG00000221617 |
| 12 | 92232312 | 92232691 | 92232512 | 11  | 19  | 4  | 4.692195357 | 0.000193572 |         | ENSG00000210913 |
| 12 | 92233316 | 92233550 | 92233435 | 9   | 12  | 2  | 5.083211637 | 0.00143337  |         | ENSG00000210913 |
| 12 | 92347454 | 92347635 | 92347544 | 8   | 9   | 1  | 5.865244197 | 0.00272497  | UBE2N   | ENSG00000177889 |
| 12 | 92385365 | 92385752 | 92385480 | 13  | 19  | 3  | 5.865244197 | 5.72E-05    | MRPL42  | ENSG00000198015 |
| 12 | 92442728 | 92442941 | 92442856 | 11  | 12  | 2  | 5.083211637 | 0.00143337  |         | ENSG00000214214 |
| 12 | 92454085 | 92454313 | 92454177 | 8   | 8   | 4  | 2.111487911 | 0.0804809   |         | ENSG00000214214 |
| 12 | 92459589 | 92460245 | 92459950 | 19  | 43  | 8  | 5.734905437 | 9.40E-09    |         | ENSG00000214214 |
| 12 | 92482250 | 92482515 | 92482389 | 9   | 11  | 5  | 2.346097679 | 0.0364013   | SOCS2   | ENSG00000120833 |
| 12 | 92491677 | 92491856 | 92491766 | 8   | 9   | 1  | 5.865244197 | 0.00272497  | SOCS2   | ENSG00000120833 |
| 12 | 92542968 | 92543376 | 92543206 | 27  | 34  | 4  | 8.211341875 | 1.23E-08    |         | ENSG00000220515 |
| 12 | 92660444 | 92660713 | 92660568 | 9   | 13  | 6  | 2.346097679 | 0.0266147   | CRADD   | ENSG00000169372 |

|    |          |          |          |    |    |    |             |             |          |                 |
|----|----------|----------|----------|----|----|----|-------------|-------------|----------|-----------------|
| 12 | 92975667 | 92975924 | 92975790 | 9  | 11 | 6  | 2.010940867 | 0.0640214   |          | ENSG00000210951 |
| 12 | 93010795 | 93011125 | 93010960 | 12 | 15 | 7  | 2.346097679 | 0.0195693   | PLXNC1   | ENSG00000136040 |
| 12 | 93120431 | 93120671 | 93120578 | 8  | 10 | 3  | 3.225884308 | 0.0139466   | PLXNC1   | ENSG00000136040 |
| 12 | 93180088 | 93180459 | 93180219 | 8  | 14 | 1  | 8.797866295 | 8.00E-05    |          | ENSG00000223185 |
| 12 | 93390988 | 93391575 | 93391412 | 13 | 30 | 3  | 9.091128505 | 3.63E-08    | CCDC41   | ENSG00000173588 |
| 12 | 93391633 | 93391888 | 93391747 | 9  | 12 | 1  | 7.624817456 | 0.000332769 | CCDC41   | ENSG00000173588 |
| 12 | 93450628 | 93450956 | 93450800 | 8  | 11 | 3  | 3.519146518 | 0.00788869  |          | ENSG00000213249 |
| 12 | 93474352 | 93474535 | 93474441 | 8  | 9  | 1  | 5.865244197 | 0.00272497  |          | ENSG00000187738 |
| 12 | 93628970 | 93629166 | 93629086 | 9  | 10 | 6  | 1.843362462 | 0.0964212   | TMCC3    | ENSG00000057704 |
| 12 | 93921547 | 93921786 | 93921643 | 10 | 12 | 8  | 1.694403879 | 0.107291    | NDUFA12  | ENSG00000184752 |
| 12 | 94135648 | 94135905 | 94135747 | 10 | 13 | 1  | 8.211341875 | 0.000163445 | VEZT     | ENSG00000028203 |
| 12 | 94388260 | 94388558 | 94388414 | 8  | 11 | 2  | 4.692195357 | 0.00272444  | METAP2   | ENSG00000111142 |
| 12 | 94391836 | 94392101 | 94391975 | 13 | 18 | 5  | 3.714654658 | 0.000961539 | METAP2   | ENSG00000111142 |
| 12 | 94541622 | 94541814 | 94541718 | 9  | 9  | 1  | 5.865244197 | 0.00272497  |          | ENSG00000212448 |
| 12 | 94635861 | 94636347 | 94636126 | 11 | 21 | 9  | 2.580707446 | 0.00438951  |          | ENSG00000216285 |
| 12 | 94638866 | 94639083 | 94638957 | 8  | 9  | 6  | 1.675784056 | 0.141978    |          | ENSG00000216285 |
| 12 | 94639251 | 94639593 | 94639422 | 41 | 47 | 6  | 8.04376347  | 4.71E-11    |          | ENSG00000216285 |
| 12 | 94776713 | 94776942 | 94776821 | 10 | 12 | 2  | 5.083211637 | 0.00143337  | SNRPF    | ENSG00000139343 |
| 12 | 94916564 | 94916881 | 94916686 | 12 | 17 | 4  | 4.222975822 | 0.000640773 | HAL      | ENSG00000084110 |
| 12 | 94953698 | 94954057 | 94953876 | 12 | 17 | 14 | 1.407658607 | 0.162567    | LTA4H    | ENSG00000111144 |
| 12 | 94965567 | 94965809 | 94965688 | 9  | 11 | 4  | 2.815317214 | 0.0183428   | LTA4H    | ENSG00000111144 |
| 12 | 95012166 | 95012385 | 95012275 | 9  | 10 | 3  | 3.225884308 | 0.0139466   |          | ENSG00000223104 |
| 12 | 95112366 | 95112607 | 95112481 | 9  | 10 | 1  | 6.451768616 | 0.00135978  | ELK3     | ENSG00000111145 |
| 12 | 95133249 | 95133458 | 95133358 | 8  | 10 | 6  | 1.843362462 | 0.0964212   | ELK3     | ENSG00000111145 |
| 12 | 95137670 | 95138005 | 95137837 | 14 | 17 | 1  | 10.55743955 | 9.18E-06    | ELK3     | ENSG00000111145 |
| 12 | 95491738 | 95491917 | 95491871 | 8  | 8  | 1  | 5.278719777 | 0.00542188  | C12orf63 | ENSG00000188596 |
| 12 | 95670215 | 95670442 | 95670303 | 8  | 10 | 0  | 12.90353723 | 0.000195991 | C12orf63 | ENSG00000188596 |
| 12 | 96066948 | 96067195 | 96067071 | 11 | 11 | 3  | 3.519146518 | 0.00788869  |          | ENSG00000211051 |
| 12 | 96119378 | 96119562 | 96119470 | 9  | 9  | 0  | 11.73048839 | 0.000425898 |          | ENSG00000211051 |
| 12 | 96137036 | 96137291 | 96137163 | 9  | 13 | 4  | 3.28453675  | 0.00629037  |          | ENSG00000211051 |
| 12 | 96322500 | 96322760 | 96322666 | 11 | 13 | 1  | 8.211341875 | 0.000163445 |          | ENSG00000221479 |
| 12 | 96343633 | 96343824 | 96343726 | 8  | 9  | 0  | 11.73048839 | 0.000425898 |          | ENSG00000221479 |
| 12 | 96389673 | 96389852 | 96389762 | 8  | 8  | 2  | 3.519146518 | 0.017558    |          | ENSG00000221479 |
| 12 | 96405472 | 96405711 | 96405557 | 9  | 12 | 0  | 15.24963491 | 4.15E-05    |          | ENSG00000221479 |

|    |           |           |           |    |    |    |             |             |           |                 |
|----|-----------|-----------|-----------|----|----|----|-------------|-------------|-----------|-----------------|
| 12 | 96418529  | 96418762  | 96418616  | 8  | 11 | 0  | 14.07658607 | 9.02E-05    |           | ENSG00000221479 |
| 12 | 96485685  | 96485883  | 96485835  | 8  | 10 | 8  | 1.433726359 | 0.209175    |           | ENSG00000207586 |
| 12 | 96486597  | 96486958  | 96486796  | 14 | 20 | 7  | 3.079253203 | 0.00177418  |           | ENSG00000207586 |
| 12 | 96670138  | 96670327  | 96670232  | 9  | 9  | 2  | 3.910162798 | 0.00955088  |           | ENSG00000206899 |
| 12 | 96767320  | 96767536  | 96767428  | 9  | 9  | 1  | 5.865244197 | 0.00272497  |           | ENSG00000206899 |
| 12 | 96793128  | 96793380  | 96793257  | 15 | 18 | 0  | 22.28792795 | 3.94E-07    |           | ENSG00000206899 |
| 12 | 96920897  | 96921080  | 96920988  | 10 | 10 | 1  | 6.451768616 | 0.00135978  |           | ENSG00000206899 |
| 12 | 97263238  | 97263686  | 97263446  | 49 | 64 | 4  | 15.24963491 | 9.53E-18    |           | ENSG00000201296 |
| 12 | 97315284  | 97315757  | 97315578  | 17 | 24 | 3  | 7.331555246 | 2.13E-06    |           | ENSG00000201296 |
| 12 | 97342829  | 97343019  | 97342908  | 8  | 8  | 1  | 5.278719777 | 0.00542188  |           | ENSG00000201296 |
| 12 | 97408991  | 97409366  | 97409155  | 10 | 16 | 6  | 2.848832895 | 0.00632407  | TMPO      | ENSG00000120802 |
| 12 | 97421295  | 97421562  | 97421394  | 9  | 12 | 14 | 1.016642327 | 0.486402    | TMPO      | ENSG00000120802 |
| 12 | 97421579  | 97421914  | 97421746  | 11 | 17 | 9  | 2.111487911 | 0.0248715   | TMPO      | ENSG00000120802 |
| 12 | 97422089  | 97422272  | 97422220  | 9  | 10 | 9  | 1.290353723 | 0.279648    | TMPO      | ENSG00000120802 |
| 12 | 97433137  | 97433367  | 97433243  | 8  | 9  | 4  | 2.346097679 | 0.050148    | TMPO      | ENSG00000120802 |
| 12 | 97434403  | 97434591  | 97434458  | 9  | 9  | 7  | 1.466311049 | 0.20706     | TMPO      | ENSG00000120802 |
| 12 | 97511475  | 97511732  | 97511583  | 11 | 14 | 5  | 2.932622098 | 0.00829617  | SLC25A3   | ENSG00000075415 |
| 12 | 97562214  | 97562862  | 97562598  | 16 | 30 | 3  | 9.091128505 | 3.63E-08    |           | ENSG00000166130 |
| 12 | 97616864  | 97617061  | 97616948  | 8  | 10 | 3  | 3.225884308 | 0.0139466   | APAF1     | ENSG00000120868 |
| 12 | 98765940  | 98766184  | 98766062  | 17 | 19 | 12 | 1.804690522 | 0.0452624   | ANKS1B    | ENSG00000185046 |
| 12 | 98902972  | 98903355  | 98903122  | 12 | 18 | 3  | 5.571981987 | 0.000108726 | ANKS1B    | ENSG00000185046 |
| 12 | 99041712  | 99042011  | 99041854  | 8  | 10 | 4  | 2.580707446 | 0.0306059   | UHRF1BP1L | ENSG00000111647 |
| 12 | 99117747  | 99118070  | 99117912  | 10 | 11 | 0  | 14.07658607 | 9.02E-05    | ACTR6     | ENSG00000075089 |
| 12 | 99118553  | 99118881  | 99118718  | 14 | 18 | 4  | 4.457585589 | 0.000353565 | ACTR6     | ENSG00000075089 |
| 12 | 99147160  | 99147462  | 99147311  | 16 | 19 | 8  | 2.606775198 | 0.00583935  |           | ENSG00000206790 |
| 12 | 99147828  | 99148105  | 99147969  | 23 | 27 | 8  | 3.649485278 | 0.000102745 |           | ENSG00000206790 |
| 12 | 99388256  | 99388519  | 99388394  | 11 | 11 | 3  | 3.519146518 | 0.00788869  | NR1H4     | ENSG00000012504 |
| 12 | 99491592  | 99491853  | 99491722  | 8  | 9  | 4  | 2.346097679 | 0.050148    | GAS2L3    | ENSG00000139354 |
| 12 | 99589973  | 99590225  | 99590099  | 9  | 9  | 4  | 2.346097679 | 0.050148    | GAS2L3    | ENSG00000139354 |
| 12 | 99844710  | 99844896  | 99844794  | 8  | 8  | 4  | 2.111487911 | 0.0804809   | ANO4      | ENSG00000151572 |
| 12 | 100119827 | 100120022 | 100119881 | 9  | 9  | 0  | 11.73048839 | 0.000425898 |           | ENSG00000207414 |
| 12 | 100139232 | 100139574 | 100139403 | 11 | 15 | 4  | 3.753756286 | 0.0020497   | SLC5A8    | ENSG00000139357 |
| 12 | 100197894 | 100198205 | 100198049 | 9  | 14 | 4  | 3.519146518 | 0.00361132  | UTP20     | ENSG00000120800 |
| 12 | 100325722 | 100326076 | 100325899 | 12 | 18 | 8  | 2.476436439 | 0.00924552  | ARL1      | ENSG00000120805 |

|    |           |           |           |     |     |    |             |             |          |                 |
|----|-----------|-----------|-----------|-----|-----|----|-------------|-------------|----------|-----------------|
| 12 | 100326096 | 100326295 | 100326188 | 8   | 8   | 1  | 5.278719777 | 0.00542188  | ARL1     | ENSG00000120805 |
| 12 | 100377838 | 100378048 | 100377943 | 8   | 9   | 7  | 1.466311049 | 0.20706     |          | ENSG00000202249 |
| 12 | 100577128 | 100577374 | 100577251 | 10  | 11  | 3  | 3.519146518 | 0.00788869  | CHPT1    | ENSG00000111666 |
| 12 | 100691549 | 100691774 | 100691633 | 9   | 11  | 1  | 7.038293036 | 0.000674435 |          | ENSG00000201168 |
| 12 | 100757881 | 100758060 | 100757984 | 8   | 8   | 6  | 1.508205651 | 0.203852    |          | ENSG00000209095 |
| 12 | 100773175 | 100773845 | 100773434 | 89  | 121 | 0  | 143.1119584 | 7.54E-42    |          | ENSG00000211206 |
| 12 | 100794963 | 100795629 | 100795462 | 40  | 63  | 3  | 18.76878143 | 2.10E-18    |          | ENSG00000136048 |
| 12 | 100812668 | 100813005 | 100812836 | 14  | 20  | 5  | 4.105670938 | 0.000308509 |          | ENSG00000211214 |
| 12 | 100872646 | 100872857 | 100872720 | 8   | 11  | 2  | 4.692195357 | 0.00272444  |          | ENSG00000211222 |
| 12 | 101037825 | 101038231 | 101037992 | 9   | 16  | 5  | 3.323638378 | 0.00288759  | C12orf48 | ENSG00000185480 |
| 12 | 101167045 | 101167262 | 101167175 | 8   | 9   | 2  | 3.910162798 | 0.00955088  |          | ENSG00000222513 |
| 12 | 101446385 | 101446622 | 101446469 | 9   | 10  | 2  | 4.301179077 | 0.00512919  | IGF1     | ENSG00000017427 |
| 12 | 101797134 | 101797354 | 101797217 | 8   | 8   | 4  | 2.111487911 | 0.0804809   | PAH      | ENSG00000171759 |
| 12 | 101801082 | 101801285 | 101801183 | 12  | 12  | 8  | 1.694403879 | 0.107291    | PAH      | ENSG00000171759 |
| 12 | 101857826 | 101858005 | 101857884 | 8   | 8   | 2  | 3.519146518 | 0.017558    | ASCL1    | ENSG00000139352 |
| 12 | 102414158 | 102414518 | 102414372 | 9   | 13  | 3  | 4.105670938 | 0.00243034  | C12orf42 | ENSG00000179088 |
| 12 | 102441668 | 102442749 | 102441859 | 130 | 197 | 10 | 21.11487911 | 1.34E-53    | C12orf42 | ENSG00000179088 |
| 12 | 102452661 | 102452905 | 102452783 | 8   | 9   | 1  | 5.865244197 | 0.00272497  | C12orf42 | ENSG00000179088 |
| 12 | 102466614 | 102466819 | 102466760 | 8   | 9   | 0  | 11.73048839 | 0.000425898 | STAB2    | ENSG00000136011 |
| 12 | 102493171 | 102493500 | 102493335 | 9   | 12  | 3  | 3.812408728 | 0.004404    | STAB2    | ENSG00000136011 |
| 12 | 102660482 | 102660695 | 102660588 | 12  | 12  | 6  | 2.178519273 | 0.0416567   |          | ENSG00000211247 |
| 12 | 102795960 | 102796141 | 102796054 | 8   | 8   | 3  | 2.639359888 | 0.0415794   |          | ENSG00000187809 |
| 12 | 102847809 | 102847997 | 102847897 | 9   | 9   | 9  | 1.173048839 | 0.362316    |          | ENSG00000214198 |
| 12 | 102848181 | 102848563 | 102848391 | 8   | 14  | 4  | 3.519146518 | 0.00361132  | HSP90B1  | ENSG00000166598 |
| 12 | 102875004 | 102875422 | 102875237 | 16  | 28  | 5  | 5.669736057 | 2.48E-06    | C12orf73 | ENSG00000204954 |
| 12 | 102883566 | 102883933 | 102883758 | 11  | 17  | 6  | 3.016411301 | 0.00381427  | TDG      | ENSG00000139372 |
| 12 | 102975669 | 102975914 | 102975810 | 9   | 11  | 2  | 4.692195357 | 0.00272444  | HCFC2    | ENSG00000111727 |
| 12 | 102979095 | 102979344 | 102979219 | 8   | 8   | 5  | 1.759573259 | 0.13508     | HCFC2    | ENSG00000111727 |
| 12 | 103055979 | 103056194 | 103056086 | 8   | 9   | 0  | 11.73048839 | 0.000425898 | NFYB     | ENSG00000120837 |
| 12 | 103137417 | 103137809 | 103137700 | 11  | 17  | 5  | 3.519146518 | 0.00167472  | RPL18AP3 | ENSG00000218754 |
| 12 | 103137904 | 103138364 | 103138083 | 25  | 35  | 11 | 3.519146518 | 1.92E-05    | RPL18AP3 | ENSG00000218754 |
| 12 | 103165596 | 103165818 | 103165707 | 11  | 12  | 4  | 3.049926982 | 0.0108184   | RPL18AP3 | ENSG00000218754 |
| 12 | 103206510 | 103206843 | 103206676 | 16  | 20  | 14 | 1.642268375 | 0.06827     | TXNRD1   | ENSG00000198431 |
| 12 | 103213188 | 103213708 | 103213351 | 11  | 22  | 8  | 2.997791478 | 0.00137524  | TXNRD1   | ENSG00000198431 |



|    |           |           |           |    |    |   |             |             |          |                 |
|----|-----------|-----------|-----------|----|----|---|-------------|-------------|----------|-----------------|
| 12 | 103375326 | 103375662 | 103375502 | 9  | 13 | 5 | 2.737113958 | 0.0137917   | CHST11   | ENSG00000171310 |
| 12 | 103385499 | 103385718 | 103385608 | 9  | 9  | 3 | 2.932622098 | 0.0242899   | CHST11   | ENSG00000171310 |
| 12 | 103396790 | 103397090 | 103396940 | 10 | 14 | 1 | 8.797866295 | 8.00E-05    | CHST11   | ENSG00000171310 |
| 12 | 103434894 | 103435074 | 103434984 | 8  | 8  | 2 | 3.519146518 | 0.017558    | CHST11   | ENSG00000171310 |
| 12 | 103464629 | 103464813 | 103464721 | 8  | 8  | 1 | 5.278719777 | 0.00542188  | CHST11   | ENSG00000171310 |
| 12 | 103527497 | 103527693 | 103527595 | 8  | 8  | 2 | 3.519146518 | 0.017558    | CHST11   | ENSG00000171310 |
| 12 | 103530443 | 103530702 | 103530572 | 8  | 8  | 0 | 10.55743955 | 0.000925496 | CHST11   | ENSG00000171310 |
| 12 | 103544610 | 103544955 | 103544782 | 11 | 15 | 2 | 6.256260476 | 0.000199274 | CHST11   | ENSG00000171310 |
| 12 | 103595681 | 103595927 | 103595804 | 15 | 15 | 9 | 1.876878143 | 0.0544542   |          | ENSG00000211260 |
| 12 | 103710628 | 103710854 | 103710741 | 9  | 11 | 3 | 3.519146518 | 0.00788869  |          | ENSG00000211260 |
| 12 | 103711113 | 103711437 | 103711291 | 9  | 12 | 1 | 7.624817456 | 0.000332769 |          | ENSG00000211260 |
| 12 | 103875943 | 103876126 | 103876040 | 10 | 10 | 1 | 6.451768616 | 0.00135978  |          | ENSG00000179821 |
| 12 | 103904008 | 103904461 | 103904165 | 11 | 20 | 6 | 3.519146518 | 0.000784044 | C12orf45 | ENSG00000151131 |
| 12 | 104132609 | 104133023 | 104132774 | 10 | 17 | 5 | 3.519146518 | 0.00167472  | APPL2    | ENSG00000136044 |
| 12 | 104378143 | 104378322 | 104378195 | 8  | 8  | 2 | 3.519146518 | 0.017558    | APPL2    | ENSG00000136044 |
| 12 | 104660055 | 104660240 | 104660092 | 9  | 9  | 3 | 2.932622098 | 0.0242899   | NUAK1    | ENSG00000074590 |
| 12 | 104873150 | 104873668 | 104873478 | 41 | 53 | 2 | 21.11487911 | 2.91E-16    | NUAK1    | ENSG00000074590 |
| 12 | 104903055 | 104903314 | 104903178 | 9  | 11 | 1 | 7.038293036 | 0.000674435 | NUAK1    | ENSG00000074590 |
| 12 | 104949044 | 104949224 | 104949104 | 8  | 8  | 1 | 5.278719777 | 0.00542188  | NUAK1    | ENSG00000074590 |
| 12 | 105096527 | 105096719 | 105096623 | 8  | 9  | 0 | 11.73048839 | 0.000425898 | NUAK1    | ENSG00000074590 |
| 12 | 105263696 | 105263967 | 105263804 | 16 | 17 | 4 | 4.222975822 | 0.000640773 | POLR3B   | ENSG00000013503 |
| 12 | 105275475 | 105275883 | 105275623 | 17 | 21 | 7 | 3.225884308 | 0.00106152  | POLR3B   | ENSG00000013503 |
| 12 | 105691797 | 105692237 | 105692058 | 10 | 18 | 4 | 4.457585589 | 0.000353565 | RIC8B    | ENSG00000111785 |
| 12 | 105692425 | 105692606 | 105692537 | 8  | 9  | 4 | 2.346097679 | 0.050148    | RIC8B    | ENSG00000111785 |
| 12 | 105905888 | 105906141 | 105906053 | 8  | 11 | 4 | 2.815317214 | 0.0183428   | MTERFD3  | ENSG00000120832 |
| 12 | 106009973 | 106010274 | 106010140 | 13 | 16 | 2 | 6.647276756 | 0.000101928 | CRY1     | ENSG00000008405 |
| 12 | 106022705 | 106022884 | 106022794 | 8  | 8  | 2 | 3.519146518 | 0.017558    | CRY1     | ENSG00000008405 |
| 12 | 106236150 | 106236406 | 106236288 | 8  | 11 | 2 | 4.692195357 | 0.00272444  | BTBD11   | ENSG00000151136 |
| 12 | 106236590 | 106236992 | 106236802 | 10 | 18 | 5 | 3.714654658 | 0.000961539 | BTBD11   | ENSG00000151136 |
| 12 | 106298195 | 106298525 | 106298368 | 18 | 22 | 6 | 3.854303329 | 0.000260696 |          | ENSG00000200897 |
| 12 | 106320316 | 106320571 | 106320443 | 12 | 13 | 1 | 8.211341875 | 0.000163445 |          | ENSG00000200897 |
| 12 | 106366220 | 106366462 | 106366290 | 9  | 10 | 3 | 3.225884308 | 0.0139466   |          | ENSG00000211282 |
| 12 | 106403761 | 106404080 | 106403922 | 10 | 11 | 0 | 14.07658607 | 9.02E-05    |          | ENSG00000211282 |
| 12 | 106436933 | 106437326 | 106437149 | 27 | 34 | 3 | 10.26417734 | 2.27E-09    |          | ENSG00000211282 |

|    |           |           |           |    |    |    |             |             |        |                 |
|----|-----------|-----------|-----------|----|----|----|-------------|-------------|--------|-----------------|
| 12 | 106437795 | 106438095 | 106437928 | 9  | 12 | 2  | 5.083211637 | 0.00143337  |        | ENSG00000211282 |
| 12 | 106511712 | 106511920 | 106511816 | 9  | 9  | 2  | 3.910162798 | 0.00955088  | BTBD11 | ENSG00000151136 |
| 12 | 106691463 | 106691876 | 106691679 | 51 | 62 | 2  | 24.63402563 | 3.62E-19    | ASCL4  | ENSG00000187855 |
| 12 | 106706682 | 106706898 | 106706790 | 8  | 9  | 1  | 5.865244197 | 0.00272497  | ASCL4  | ENSG00000187855 |
| 12 | 106908291 | 106908520 | 106908427 | 9  | 9  | 3  | 2.932622098 | 0.0242899   | WSCD2  | ENSG00000075035 |
| 12 | 107074729 | 107075089 | 107074928 | 9  | 13 | 3  | 4.105670938 | 0.00243034  | WSCD2  | ENSG00000075035 |
| 12 | 107271550 | 107271872 | 107271711 | 11 | 16 | 0  | 19.94183027 | 1.86E-06    | CMKLR1 | ENSG00000174600 |
| 12 | 107401512 | 107401740 | 107401604 | 13 | 14 | 3  | 4.398933147 | 0.00132748  | FICD   | ENSG00000198855 |
| 12 | 107417876 | 107418088 | 107417982 | 9  | 9  | 2  | 3.910162798 | 0.00955088  | FICD   | ENSG00000198855 |
| 12 | 107480326 | 107481127 | 107480854 | 25 | 47 | 7  | 7.038293036 | 2.04E-10    | ISCU   | ENSG00000136003 |
| 12 | 107481431 | 107481723 | 107481577 | 10 | 13 | 0  | 16.42268375 | 1.91E-05    | ISCU   | ENSG00000136003 |
| 12 | 107483956 | 107484164 | 107484060 | 10 | 10 | 4  | 2.580707446 | 0.0306059   | ISCU   | ENSG00000136003 |
| 12 | 107582744 | 107583029 | 107582886 | 9  | 11 | 3  | 3.519146518 | 0.00788869  | SELPLG | ENSG00000110876 |
| 12 | 107609344 | 107610043 | 107609701 | 10 | 27 | 5  | 5.474227917 | 4.62E-06    | CORO1C | ENSG00000110880 |
| 12 | 107649536 | 107650031 | 107649868 | 10 | 19 | 4  | 4.692195357 | 0.000193572 | CORO1C | ENSG00000110880 |
| 12 | 107674403 | 107674636 | 107674519 | 10 | 10 | 2  | 4.301179077 | 0.00512919  |        | ENSG00000200060 |
| 12 | 107675834 | 107676073 | 107675953 | 15 | 16 | 1  | 9.970915134 | 1.89E-05    |        | ENSG00000200060 |
| 12 | 107716363 | 107716611 | 107716487 | 8  | 9  | 2  | 3.910162798 | 0.00955088  | SSH1   | ENSG00000084112 |
| 12 | 107776250 | 107776510 | 107776380 | 10 | 11 | 0  | 14.07658607 | 9.02E-05    | SSH1   | ENSG00000084112 |
| 12 | 107825626 | 107825968 | 107825802 | 13 | 17 | 1  | 10.55743955 | 9.18E-06    |        | ENSG00000201324 |
| 12 | 107829895 | 107830118 | 107829965 | 8  | 10 | 5  | 2.150589539 | 0.0575848   |        | ENSG00000201324 |
| 12 | 107857501 | 107857775 | 107857650 | 8  | 9  | 5  | 1.955081399 | 0.0892323   | SVOP   | ENSG00000166111 |
| 12 | 107917806 | 107918078 | 107917962 | 9  | 10 | 0  | 12.90353723 | 0.000195991 | USP30  | ENSG00000135093 |
| 12 | 107942948 | 107943273 | 107943110 | 15 | 19 | 4  | 4.692195357 | 0.000193572 | USP30  | ENSG00000135093 |
| 12 | 107974564 | 107974859 | 107974730 | 16 | 18 | 5  | 3.714654658 | 0.000961539 | USP30  | ENSG00000135093 |
| 12 | 107975763 | 107975989 | 107975831 | 9  | 11 | 2  | 4.692195357 | 0.00272444  | USP30  | ENSG00000135093 |
| 12 | 108015553 | 108015907 | 108015730 | 21 | 27 | 8  | 3.649485278 | 0.000102745 | ALKBH2 | ENSG00000189046 |
| 12 | 108034143 | 108034335 | 108034284 | 8  | 9  | 1  | 5.865244197 | 0.00272497  | UNG    | ENSG00000076248 |
| 12 | 108038617 | 108038896 | 108038736 | 16 | 19 | 10 | 2.132816071 | 0.01835     | UNG    | ENSG00000076248 |
| 12 | 108038907 | 108039108 | 108038951 | 8  | 9  | 2  | 3.910162798 | 0.00955088  | UNG    | ENSG00000076248 |
| 12 | 108056447 | 108056681 | 108056553 | 9  | 11 | 6  | 2.010940867 | 0.0640214   | ACACB  | ENSG00000076555 |
| 12 | 108077154 | 108077561 | 108077322 | 9  | 16 | 4  | 3.988366054 | 0.00115141  | ACACB  | ENSG00000076555 |
| 12 | 108122344 | 108122591 | 108122467 | 11 | 16 | 0  | 19.94183027 | 1.86E-06    | ACACB  | ENSG00000076555 |
| 12 | 108233349 | 108233534 | 108233441 | 8  | 8  | 3  | 2.639359888 | 0.0415794   | FOXN4  | ENSG00000139445 |

|    |           |           |           |    |     |    |             |             |          |                 |
|----|-----------|-----------|-----------|----|-----|----|-------------|-------------|----------|-----------------|
| 12 | 108234057 | 108234435 | 108234236 | 9  | 16  | 11 | 1.661819189 | 0.0853913   | FOXN4    | ENSG00000139445 |
| 12 | 108315961 | 108316222 | 108316091 | 8  | 11  | 1  | 7.038293036 | 0.000674435 | MYO1H    | ENSG00000174527 |
| 12 | 108355084 | 108355274 | 108355179 | 8  | 8   | 3  | 2.639359888 | 0.0415794   | MYO1H    | ENSG00000174527 |
| 12 | 108399600 | 108400004 | 108399779 | 10 | 18  | 9  | 2.228792795 | 0.0164363   | UBE3B    | ENSG00000151148 |
| 12 | 108441052 | 108441296 | 108441174 | 9  | 10  | 4  | 2.580707446 | 0.0306059   | UBE3B    | ENSG00000151148 |
| 12 | 108495363 | 108495571 | 108495473 | 10 | 11  | 2  | 4.692195357 | 0.00272444  | MMAB     | ENSG00000139428 |
| 12 | 108535042 | 108535461 | 108535373 | 11 | 18  | 5  | 3.714654658 | 0.000961539 |          | ENSG00000211344 |
| 12 | 108635683 | 108635970 | 108635826 | 12 | 12  | 4  | 3.049926982 | 0.0108184   | C12orf34 | ENSG00000139438 |
| 12 | 108699836 | 108700104 | 108699996 | 8  | 11  | 2  | 4.692195357 | 0.00272444  |          | ENSG00000211357 |
| 12 | 108727509 | 108727785 | 108727646 | 12 | 14  | 2  | 5.865244197 | 0.000387308 |          | ENSG00000211357 |
| 12 | 108741264 | 108741475 | 108741338 | 9  | 11  | 0  | 14.07658607 | 9.02E-05    | TRPV4    | ENSG00000111199 |
| 12 | 108743076 | 108743743 | 108743333 | 74 | 111 | 1  | 65.690735   | 1.09E-36    | TRPV4    | ENSG00000111199 |
| 12 | 108763694 | 108763879 | 108763852 | 8  | 8   | 3  | 2.639359888 | 0.0415794   | TRPV4    | ENSG00000111199 |
| 12 | 108767462 | 108767850 | 108767744 | 11 | 17  | 6  | 3.016411301 | 0.00381427  | TRPV4    | ENSG00000111199 |
| 12 | 108787207 | 108787479 | 108787343 | 23 | 25  | 3  | 7.624817456 | 1.09E-06    |          | ENSG00000211363 |
| 12 | 108797730 | 108798132 | 108797892 | 17 | 22  | 5  | 4.496687217 | 9.59E-05    | GLTP     | ENSG00000139433 |
| 12 | 108822188 | 108822557 | 108822401 | 13 | 19  | 1  | 11.73048839 | 2.14E-06    | TCHP     | ENSG00000139437 |
| 12 | 108837353 | 108837719 | 108837503 | 18 | 22  | 6  | 3.854303329 | 0.000260696 | TCHP     | ENSG00000139437 |
| 12 | 108921170 | 108921557 | 108921388 | 10 | 16  | 5  | 3.323638378 | 0.00288759  | ANKRD13A | ENSG00000076513 |
| 12 | 108970515 | 108971003 | 108970855 | 10 | 18  | 7  | 2.785990993 | 0.00480525  |          | ENSG00000174456 |
| 12 | 109108683 | 109108862 | 109108772 | 8  | 8   | 2  | 3.519146518 | 0.017558    | IFT81    | ENSG00000122970 |
| 12 | 109262997 | 109263365 | 109263196 | 16 | 22  | 1  | 13.49006165 | 2.37E-07    |          | ENSG00000223337 |
| 12 | 109390374 | 109390903 | 109390759 | 8  | 19  | 10 | 2.132816071 | 0.01835     | C12orf24 | ENSG00000204856 |
| 12 | 109391412 | 109391603 | 109391522 | 10 | 10  | 3  | 3.225884308 | 0.0139466   | C12orf24 | ENSG00000204856 |
| 12 | 109424106 | 109424528 | 109424375 | 8  | 14  | 9  | 1.759573259 | 0.0786014   | RAD9B    | ENSG00000151164 |
| 12 | 109748898 | 109749105 | 109749001 | 8  | 8   | 3  | 2.639359888 | 0.0415794   | CCDC63   | ENSG00000173093 |
| 12 | 109816607 | 109816879 | 109816743 | 9  | 12  | 1  | 7.624817456 | 0.000332769 | MYL2     | ENSG00000111245 |
| 12 | 109887026 | 109887245 | 109887135 | 9  | 10  | 1  | 6.451768616 | 0.00135978  |          | ENSG00000185847 |
| 12 | 109914932 | 109915154 | 109915043 | 11 | 12  | 2  | 5.083211637 | 0.00143337  | CUX2     | ENSG00000111249 |
| 12 | 110056912 | 110057302 | 110057127 | 29 | 36  | 6  | 6.200401008 | 5.86E-08    | CUX2     | ENSG00000111249 |
| 12 | 110078571 | 110078868 | 110078732 | 10 | 13  | 3  | 4.105670938 | 0.00243034  | CUX2     | ENSG00000111249 |
| 12 | 110319225 | 110319479 | 110319352 | 8  | 9   | 1  | 5.865244197 | 0.00272497  | SH2B3    | ENSG00000111252 |
| 12 | 110680318 | 110680978 | 110680684 | 37 | 68  | 5  | 13.49006165 | 4.34E-18    | ALDH2    | ENSG00000111275 |
| 12 | 110764052 | 110764307 | 110764179 | 11 | 14  | 6  | 2.513676084 | 0.016726    | MAPKAPK5 | ENSG00000089022 |

|    |           |           |           |     |     |    |             |             |          |                 |
|----|-----------|-----------|-----------|-----|-----|----|-------------|-------------|----------|-----------------|
| 12 | 111030949 | 111031266 | 111031131 | 9   | 14  | 4  | 3.519146518 | 0.00361132  | C12orf30 | ENSG00000111300 |
| 12 | 111233557 | 111233829 | 111233677 | 11  | 13  | 0  | 16.42268375 | 1.91E-05    | C12orf51 | ENSG00000173064 |
| 12 | 111293363 | 111293542 | 111293442 | 8   | 8   | 0  | 10.55743955 | 0.000925496 | RPL6     | ENSG00000089009 |
| 12 | 111860463 | 111860650 | 111860584 | 8   | 8   | 2  | 3.519146518 | 0.017558    | OAS3     | ENSG00000111331 |
| 12 | 111914989 | 111915216 | 111915102 | 9   | 10  | 1  | 6.451768616 | 0.00135978  | OAS2     | ENSG00000111335 |
| 12 | 112020732 | 112020959 | 112020832 | 9   | 10  | 4  | 2.580707446 | 0.0306059   | RASAL1   | ENSG00000111344 |
| 12 | 112038437 | 112039005 | 112038710 | 189 | 233 | 0  | 274.4934284 | 1.34E-79    | RASAL1   | ENSG00000111344 |
| 12 | 112059064 | 112059357 | 112059210 | 9   | 12  | 1  | 7.624817456 | 0.000332769 | RASAL1   | ENSG00000111344 |
| 12 | 112082231 | 112082608 | 112082419 | 23  | 31  | 2  | 12.51252095 | 2.82E-09    |          | ENSG00000199899 |
| 12 | 112107074 | 112107339 | 112107230 | 8   | 9   | 3  | 2.932622098 | 0.0242899   | DDX54    | ENSG00000123064 |
| 12 | 112107628 | 112107895 | 112107761 | 10  | 11  | 4  | 2.815317214 | 0.0183428   | DDX54    | ENSG00000123064 |
| 12 | 112156727 | 112156906 | 112156762 | 9   | 9   | 2  | 3.910162798 | 0.00955088  |          | ENSG00000186815 |
| 12 | 112168006 | 112168933 | 112168288 | 31  | 61  | 8  | 8.081003115 | 9.63E-14    |          | ENSG00000186815 |
| 12 | 112220637 | 112220816 | 112220726 | 8   | 8   | 2  | 3.519146518 | 0.017558    | TPCN1    | ENSG00000219344 |
| 12 | 112762438 | 112762804 | 112762611 | 24  | 30  | 0  | 36.36451402 | 3.56E-11    |          | ENSG00000211425 |
| 12 | 112888408 | 112888866 | 112888585 | 10  | 16  | 4  | 3.988366054 | 0.00115141  | RBM19    | ENSG00000122965 |
| 12 | 113191359 | 113191776 | 113191563 | 46  | 61  | 2  | 24.24300935 | 7.63E-19    | TBX5     | ENSG00000089225 |
| 12 | 113254765 | 113254999 | 113254873 | 11  | 11  | 0  | 14.07658607 | 9.02E-05    | TBX5     | ENSG00000089225 |
| 12 | 113430733 | 113430987 | 113430856 | 9   | 9   | 3  | 2.932622098 | 0.0242899   |          | ENSG00000223160 |
| 12 | 113522135 | 113522317 | 113522226 | 10  | 10  | 0  | 12.90353723 | 0.000195991 |          | ENSG00000199220 |
| 12 | 113558124 | 113558428 | 113558251 | 12  | 15  | 4  | 3.753756286 | 0.0020497   |          | ENSG00000199220 |
| 12 | 113606483 | 113606827 | 113606616 | 12  | 16  | 10 | 1.812893661 | 0.0578656   | TBX3     | ENSG00000135111 |
| 12 | 113703119 | 113703413 | 113703266 | 21  | 24  | 2  | 9.775406994 | 4.09E-07    |          | ENSG00000209253 |
| 12 | 114307448 | 114307650 | 114307612 | 10  | 11  | 2  | 4.692195357 | 0.00272444  |          | ENSG00000222458 |
| 12 | 114320473 | 114320817 | 114320648 | 21  | 26  | 6  | 4.524616952 | 2.63E-05    |          | ENSG00000222458 |
| 12 | 114397193 | 114397622 | 114397469 | 9   | 19  | 3  | 5.865244197 | 5.72E-05    |          | ENSG00000222458 |
| 12 | 114416187 | 114416379 | 114416283 | 8   | 8   | 3  | 2.639359888 | 0.0415794   |          | ENSG00000222458 |
| 12 | 114464924 | 114465181 | 114465039 | 8   | 10  | 1  | 6.451768616 | 0.00135978  |          | ENSG00000222458 |
| 12 | 114795198 | 114795632 | 114795369 | 17  | 28  | 6  | 4.859773763 | 8.07E-06    |          | ENSG00000200112 |
| 12 | 115044893 | 115045072 | 115045057 | 8   | 8   | 3  | 2.639359888 | 0.0415794   |          | ENSG00000207967 |
| 12 | 115048391 | 115048778 | 115048635 | 8   | 13  | 1  | 8.211341875 | 0.000163445 |          | ENSG00000207967 |
| 12 | 115312191 | 115312535 | 115312363 | 11  | 15  | 4  | 3.753756286 | 0.0020497   | MED13L   | ENSG00000123066 |
| 12 | 115312588 | 115313227 | 115312767 | 16  | 31  | 5  | 6.256260476 | 3.74E-07    | MED13L   | ENSG00000123066 |
| 12 | 115328765 | 115329076 | 115328928 | 15  | 18  | 3  | 5.571981987 | 0.000108726 |          | ENSG00000196668 |

|    |           |           |           |    |    |    |             |             |                          |
|----|-----------|-----------|-----------|----|----|----|-------------|-------------|--------------------------|
| 12 | 115348642 | 115349028 | 115348821 | 11 | 18 | 2  | 7.429309316 | 2.63E-05    | ENSG00000196668          |
| 12 | 115417503 | 115417747 | 115417625 | 8  | 9  | 4  | 2.346097679 | 0.050148    | ENSG00000196668          |
| 12 | 115451401 | 115451645 | 115451521 | 9  | 9  | 1  | 5.865244197 | 0.00272497  | ENSG00000196668          |
| 12 | 115620347 | 115620623 | 115620495 | 16 | 18 | 8  | 2.476436439 | 0.00924552  | C12orf49 ENSG00000111412 |
| 12 | 115625464 | 115625678 | 115625605 | 8  | 9  | 0  | 11.73048839 | 0.000425898 | C12orf49 ENSG00000111412 |
| 12 | 116417276 | 116417504 | 116417427 | 10 | 13 | 0  | 16.42268375 | 1.91E-05    | NOS1 ENSG00000089250     |
| 12 | 116778873 | 116779278 | 116779217 | 9  | 16 | 2  | 6.647276756 | 0.000101928 | KSR2 ENSG00000171435     |
| 12 | 116779281 | 116779579 | 116779438 | 10 | 14 | 2  | 5.865244197 | 0.000387308 | KSR2 ENSG00000171435     |
| 12 | 116779852 | 116780178 | 116779999 | 14 | 14 | 4  | 3.519146518 | 0.00361132  | KSR2 ENSG00000171435     |
| 12 | 116891584 | 116891785 | 116891684 | 8  | 9  | 2  | 3.910162798 | 0.00955088  | RFC5 ENSG00000111445     |
| 12 | 116978566 | 116978783 | 116978674 | 8  | 10 | 1  | 6.451768616 | 0.00135978  | WSB2 ENSG00000176871     |
| 12 | 117058271 | 117058463 | 117058347 | 8  | 10 | 1  | 6.451768616 | 0.00135978  | PEBP1 ENSG00000089220    |
| 12 | 117194045 | 117194313 | 117194179 | 14 | 17 | 3  | 5.278719777 | 0.000205462 | TAOK3 ENSG00000135090    |
| 12 | 117252587 | 117252818 | 117252721 | 11 | 11 | 5  | 2.346097679 | 0.0364013   | TAOK3 ENSG00000135090    |
| 12 | 117298337 | 117298718 | 117298497 | 11 | 15 | 6  | 2.68125449  | 0.0103552   | SUDS3 ENSG00000111707    |
| 12 | 117465592 | 117465917 | 117465754 | 15 | 19 | 1  | 11.73048839 | 2.14E-06    | SUDS3 ENSG00000111707    |
| 12 | 118091502 | 118091737 | 118091604 | 10 | 11 | 3  | 3.519146518 | 0.00788869  | HSPB8 ENSG00000152137    |
| 12 | 118093472 | 118093708 | 118093608 | 14 | 15 | 2  | 6.256260476 | 0.000199274 | HSPB8 ENSG00000152137    |
| 12 | 118101836 | 118102184 | 118102025 | 8  | 12 | 4  | 3.049926982 | 0.0108184   | HSPB8 ENSG00000152137    |
| 12 | 118292080 | 118292594 | 118292259 | 55 | 76 | 2  | 30.10825354 | 1.02E-23    | CCDC60 ENSG00000183273   |
| 12 | 118310157 | 118310722 | 118310392 | 35 | 58 | 4  | 13.8419763  | 6.95E-16    | CCDC60 ENSG00000183273   |
| 12 | 118401508 | 118401970 | 118401686 | 24 | 31 | 7  | 4.692195357 | 4.07E-06    | ENSG00000222647          |
| 12 | 118590023 | 118590430 | 118590202 | 19 | 27 | 1  | 16.42268375 | 5.88E-09    | PRKAB1 ENSG00000111725   |
| 12 | 118863130 | 118863320 | 118863225 | 8  | 8  | 2  | 3.519146518 | 0.017558    | CCDC64 ENSG00000135127   |
| 12 | 119001684 | 119001928 | 119001759 | 10 | 13 | 0  | 16.42268375 | 1.91E-05    | RAB35 ENSG00000111737    |
| 12 | 119123110 | 119123591 | 119123237 | 16 | 29 | 8  | 3.910162798 | 3.45E-05    | RPLP0 ENSG00000089157    |
| 12 | 119151131 | 119151395 | 119151236 | 10 | 11 | 2  | 4.692195357 | 0.00272444  | PXN ENSG00000089159      |
| 12 | 119153870 | 119154273 | 119154049 | 10 | 18 | 8  | 2.476436439 | 0.00924552  | PXN ENSG00000089159      |
| 12 | 119156975 | 119157195 | 119157064 | 8  | 9  | 5  | 1.955081399 | 0.0892323   | PXN ENSG00000089159      |
| 12 | 119213477 | 119214340 | 119213770 | 31 | 74 | 35 | 2.443851749 | 2.24E-06    | RNU4-1B ENSG00000202538  |
| 12 | 119214969 | 119215661 | 119215148 | 21 | 49 | 22 | 2.550106172 | 5.01E-05    | ENSG00000200795          |
| 12 | 119224279 | 119224496 | 119224387 | 13 | 14 | 7  | 2.199466574 | 0.0303778   | SIRT4 ENSG00000089163    |
| 12 | 119224517 | 119224894 | 119224678 | 11 | 17 | 4  | 4.222975822 | 0.000640773 | SIRT4 ENSG00000089163    |
| 12 | 119239522 | 119239887 | 119239708 | 15 | 21 | 7  | 3.225884308 | 0.00106152  | PLA2G1B ENSG00000170890  |

|    |           |           |           |     |     |    |             |             |         |                 |
|----|-----------|-----------|-----------|-----|-----|----|-------------|-------------|---------|-----------------|
| 12 | 119247709 | 119248082 | 119247884 | 13  | 19  | 13 | 1.675784056 | 0.0660887   | PLA2G1B | ENSG00000170890 |
| 12 | 119316784 | 119317169 | 119317000 | 15  | 22  | 10 | 2.452738482 | 0.00515848  | MSI1    | ENSG00000135097 |
| 12 | 119348009 | 119348189 | 119348104 | 8   | 8   | 1  | 5.278719777 | 0.00542188  | COX6A1  | ENSG00000111775 |
| 12 | 119359956 | 119360331 | 119360120 | 11  | 18  | 5  | 3.714654658 | 0.000961539 | COX6A1  | ENSG00000111775 |
| 12 | 119361888 | 119362126 | 119362007 | 10  | 10  | 0  | 12.90353723 | 0.000195991 | COX6A1  | ENSG00000111775 |
| 12 | 119368069 | 119368802 | 119368532 | 179 | 252 | 5  | 49.46355939 | 2.25E-77    | TRIAP1  | ENSG00000170855 |
| 12 | 119396754 | 119397091 | 119396916 | 33  | 37  | 7  | 5.571981987 | 1.11E-07    | DYNLL1  | ENSG00000088986 |
| 12 | 119503705 | 119503972 | 119503850 | 10  | 11  | 2  | 4.692195357 | 0.00272444  | POP5    | ENSG00000167272 |
| 12 | 119552767 | 119553063 | 119552944 | 10  | 12  | 6  | 2.178519273 | 0.0416567   | CABP1   | ENSG00000157782 |
| 12 | 119847939 | 119848556 | 119848220 | 43  | 68  | 3  | 20.23509248 | 5.38E-20    |         | ENSG00000174074 |
| 12 | 120018038 | 120018311 | 120018174 | 11  | 13  | 3  | 4.105670938 | 0.00243034  |         | ENSG00000201945 |
| 12 | 120106631 | 120106875 | 120106753 | 12  | 13  | 0  | 16.42268375 | 1.91E-05    | P2RX4   | ENSG00000135124 |
| 12 | 120149394 | 120149840 | 120149661 | 11  | 19  | 7  | 2.932622098 | 0.00293566  | P2RX4   | ENSG00000135124 |
| 12 | 120217810 | 120218066 | 120217938 | 8   | 8   | 3  | 2.639359888 | 0.0415794   | CAMKK2  | ENSG00000110931 |
| 12 | 120274436 | 120274837 | 120274695 | 13  | 23  | 4  | 5.630634429 | 1.63E-05    | ANAPC5  | ENSG00000089053 |
| 12 | 120321900 | 120322336 | 120322053 | 13  | 24  | 10 | 2.666020089 | 0.00209276  | RNF34   | ENSG00000170633 |
| 12 | 120716606 | 120716797 | 120716706 | 9   | 9   | 4  | 2.346097679 | 0.050148    | RHOF    | ENSG00000139725 |
| 12 | 120717139 | 120717458 | 120717298 | 11  | 13  | 1  | 8.211341875 | 0.000163445 | RHOF    | ENSG00000139725 |
| 12 | 120723297 | 120723476 | 120723388 | 8   | 8   | 2  | 3.519146518 | 0.017558    |         | ENSG00000212694 |
| 12 | 120810717 | 120811176 | 120810876 | 15  | 24  | 5  | 4.887703497 | 2.90E-05    | PSMD9   | ENSG00000110801 |
| 12 | 120923716 | 120924162 | 120923895 | 32  | 42  | 2  | 16.81370003 | 9.62E-13    | BCL7A   | ENSG00000110987 |
| 12 | 121161611 | 121161873 | 121161742 | 15  | 15  | 4  | 3.753756286 | 0.0020497   | MLXIP   | ENSG00000175727 |
| 12 | 121316892 | 121317146 | 121317019 | 10  | 12  | 0  | 15.24963491 | 4.15E-05    | VPS33A  | ENSG00000139719 |
| 12 | 121450907 | 121451234 | 121451063 | 9   | 14  | 2  | 5.865244197 | 0.000387308 | CLIP1   | ENSG00000130779 |
| 12 | 121577385 | 121577844 | 121577614 | 14  | 24  | 6  | 4.18946014  | 8.40E-05    | RSRC2   | ENSG00000111011 |
| 12 | 121803057 | 121803351 | 121803162 | 8   | 12  | 3  | 3.812408728 | 0.004404    | DENR    | ENSG00000139726 |
| 12 | 121938971 | 121939201 | 121939103 | 8   | 9   | 3  | 2.932622098 | 0.0242899   | VPS37B  | ENSG00000139722 |
| 12 | 121958967 | 121959174 | 121959070 | 8   | 8   | 0  | 10.55743955 | 0.000925496 | VPS37B  | ENSG00000139722 |
| 12 | 121997291 | 121997656 | 121997477 | 30  | 37  | 2  | 14.85861863 | 3.69E-11    | ABCB9   | ENSG00000150967 |
| 12 | 122016770 | 122016970 | 122016857 | 9   | 9   | 4  | 2.346097679 | 0.050148    | ABCB9   | ENSG00000150967 |
| 12 | 122025074 | 122025265 | 122025114 | 9   | 9   | 2  | 3.910162798 | 0.00955088  | OGFOD2  | ENSG00000111325 |
| 12 | 122126309 | 122126685 | 122126488 | 9   | 17  | 8  | 2.346097679 | 0.0144542   | PITPNM2 | ENSG00000090975 |
| 12 | 122415786 | 122415995 | 122415921 | 8   | 9   | 5  | 1.955081399 | 0.0892323   | SBNO1   | ENSG00000139697 |
| 12 | 122434292 | 122434519 | 122434405 | 8   | 9   | 2  | 3.910162798 | 0.00955088  | SETD8   | ENSG00000183955 |

|    |           |           |           |     |     |    |             |             |         |                 |
|----|-----------|-----------|-----------|-----|-----|----|-------------|-------------|---------|-----------------|
| 12 | 122434548 | 122434733 | 122434640 | 8   | 8   | 4  | 2.111487911 | 0.0804809   | SETD8   | ENSG00000183955 |
| 12 | 122456591 | 122456794 | 122456703 | 8   | 8   | 0  | 10.55743955 | 0.000925496 | SETD8   | ENSG00000183955 |
| 12 | 122496405 | 122496765 | 122496518 | 10  | 14  | 10 | 1.599612054 | 0.114822    | RILPL2  | ENSG00000150977 |
| 12 | 122508594 | 122508838 | 122508735 | 13  | 13  | 7  | 2.052835469 | 0.046392    |         | ENSG00000184209 |
| 12 | 122563743 | 122563993 | 122563861 | 9   | 11  | 0  | 14.07658607 | 9.02E-05    | RILPL1  | ENSG00000188026 |
| 12 | 122569748 | 122570027 | 122569887 | 10  | 13  | 1  | 8.211341875 | 0.000163445 | RILPL1  | ENSG00000188026 |
| 12 | 122634771 | 122635078 | 122634924 | 8   | 13  | 3  | 4.105670938 | 0.00243034  | TMED2   | ENSG00000086598 |
| 12 | 122684117 | 122684374 | 122684207 | 8   | 11  | 0  | 14.07658607 | 9.02E-05    | EIF2B1  | ENSG00000111361 |
| 12 | 123107129 | 123107313 | 123107221 | 8   | 8   | 1  | 5.278719777 | 0.00542188  | ZNF664  | ENSG00000179195 |
| 12 | 123181160 | 123181511 | 123181335 | 16  | 22  | 4  | 5.396024661 | 3.05E-05    | ZNF664  | ENSG00000179195 |
| 12 | 123193118 | 123193452 | 123193284 | 9   | 13  | 2  | 5.474227917 | 0.000747844 | FAM101A | ENSG00000178882 |
| 12 | 123239038 | 123239240 | 123239175 | 8   | 10  | 1  | 6.451768616 | 0.00135978  | FAM101A | ENSG00000178882 |
| 12 | 123324109 | 123324579 | 123324296 | 67  | 84  | 1  | 49.85457567 | 1.05E-27    | FAM101A | ENSG00000178882 |
| 12 | 123410136 | 123410474 | 123410305 | 18  | 22  | 7  | 3.372515413 | 0.000629223 | FAM101A | ENSG00000178882 |
| 12 | 123443529 | 123444037 | 123443708 | 9   | 20  | 4  | 4.926805125 | 0.00010522  | FAM101A | ENSG00000178882 |
| 12 | 123531452 | 123531715 | 123531583 | 9   | 12  | 0  | 15.24963491 | 4.15E-05    | NCOR2   | ENSG00000196498 |
| 12 | 123567783 | 123568030 | 123567954 | 9   | 11  | 0  | 14.07658607 | 9.02E-05    | NCOR2   | ENSG00000196498 |
| 12 | 123609982 | 123610284 | 123610133 | 10  | 14  | 6  | 2.513676084 | 0.016726    | NCOR2   | ENSG00000196498 |
| 12 | 123622628 | 123622960 | 123622794 | 26  | 27  | 2  | 10.94845583 | 4.90E-08    | NCOR2   | ENSG00000196498 |
| 12 | 123628421 | 123628874 | 123628695 | 23  | 32  | 1  | 19.35530585 | 1.42E-10    | NCOR2   | ENSG00000196498 |
| 12 | 123659552 | 123659935 | 123659749 | 17  | 26  | 6  | 4.524616952 | 2.63E-05    | NCOR2   | ENSG00000196498 |
| 12 | 123736556 | 123736763 | 123736636 | 10  | 10  | 4  | 2.580707446 | 0.0306059   | SCARB1  | ENSG00000073060 |
| 12 | 123740082 | 123740314 | 123740208 | 12  | 13  | 0  | 16.42268375 | 1.91E-05    | SCARB1  | ENSG00000073060 |
| 12 | 123854667 | 123854959 | 123854813 | 9   | 12  | 1  | 7.624817456 | 0.000332769 | SCARB1  | ENSG00000073060 |
| 12 | 123888662 | 123889058 | 123888841 | 9   | 16  | 3  | 4.985457567 | 0.000385643 | SCARB1  | ENSG00000073060 |
| 12 | 123933896 | 123934075 | 123933985 | 8   | 8   | 3  | 2.639359888 | 0.0415794   |         | ENSG00000209201 |
| 12 | 123965160 | 123965467 | 123965315 | 16  | 18  | 8  | 2.476436439 | 0.00924552  | UBC     | ENSG00000150991 |
| 12 | 123966899 | 123967106 | 123967022 | 8   | 10  | 4  | 2.580707446 | 0.0306059   | UBC     | ENSG00000150991 |
| 12 | 123967614 | 123968172 | 123967792 | 16  | 32  | 9  | 3.87106117  | 1.67E-05    | UBC     | ENSG00000150991 |
| 12 | 123972157 | 123972376 | 123972238 | 10  | 11  | 5  | 2.346097679 | 0.0364013   | UBC     | ENSG00000150991 |
| 12 | 123978145 | 123978489 | 123978293 | 8   | 12  | 8  | 1.694403879 | 0.107291    | UBC     | ENSG00000150991 |
| 12 | 123988744 | 123989007 | 123988847 | 8   | 11  | 1  | 7.038293036 | 0.000674435 | UBC     | ENSG00000150991 |
| 12 | 123989039 | 123990819 | 123989268 | 185 | 345 | 25 | 15.61057302 | 2.47E-85    | UBC     | ENSG00000150991 |
| 12 | 123991103 | 123991368 | 123991236 | 8   | 10  | 8  | 1.433726359 | 0.209175    | UBC     | ENSG00000150991 |

|    |           |           |           |    |    |    |             |             |          |                 |
|----|-----------|-----------|-----------|----|----|----|-------------|-------------|----------|-----------------|
| 12 | 124099994 | 124100267 | 124100091 | 8  | 12 | 11 | 1.270802909 | 0.274822    | AACS     | ENSG00000081760 |
| 12 | 124278980 | 124279275 | 124279127 | 10 | 13 | 0  | 16.42268375 | 1.91E-05    |          | ENSG00000222916 |
| 12 | 124734338 | 124734561 | 124734402 | 9  | 9  | 2  | 3.910162798 | 0.00955088  | TMEM132B | ENSG00000139364 |
| 12 | 125946715 | 125946932 | 125946864 | 11 | 13 | 2  | 5.474227917 | 0.000747844 |          | ENSG00000189238 |
| 12 | 126216406 | 126216598 | 126216502 | 13 | 13 | 14 | 1.094845583 | 0.406217    |          | ENSG00000208959 |
| 12 | 126216758 | 126217088 | 126216923 | 46 | 46 | 35 | 1.531480429 | 0.0262294   |          | ENSG00000208959 |
| 12 | 127874451 | 127874723 | 127874587 | 10 | 13 | 1  | 8.211341875 | 0.000163445 | SLC15A4  | ENSG00000139370 |
| 12 | 129077086 | 129077327 | 129077187 | 8  | 9  | 2  | 3.910162798 | 0.00955088  |          | ENSG00000214039 |
| 12 | 129148431 | 129148870 | 129148691 | 11 | 20 | 5  | 4.105670938 | 0.000308509 |          | ENSG00000214039 |
| 12 | 129889900 | 129890096 | 129890043 | 8  | 9  | 2  | 3.910162798 | 0.00955088  | STX2     | ENSG00000111450 |
| 12 | 130073618 | 130073801 | 130073648 | 8  | 8  | 3  | 2.639359888 | 0.0415794   |          | ENSG00000187909 |
| 12 | 130280427 | 130280693 | 130280591 | 9  | 11 | 1  | 7.038293036 | 0.000674435 |          | ENSG00000204603 |
| 12 | 130315312 | 130315613 | 130315465 | 10 | 12 | 1  | 7.624817456 | 0.000332769 |          | ENSG00000212251 |
| 12 | 130333337 | 130333710 | 130333531 | 16 | 23 | 0  | 28.15317214 | 8.13E-09    |          | ENSG00000212251 |
| 12 | 130505316 | 130505506 | 130505368 | 9  | 10 | 1  | 6.451768616 | 0.00135978  |          | ENSG00000212251 |
| 12 | 130734329 | 130734661 | 130734486 | 18 | 20 | 1  | 12.31701281 | 1.03E-06    |          | ENSG00000212154 |
| 12 | 130761348 | 130761763 | 130761504 | 9  | 16 | 7  | 2.492728784 | 0.0124193   | SFRS8    | ENSG00000061936 |
| 12 | 130771390 | 130771738 | 130771614 | 16 | 20 | 0  | 24.63402563 | 8.35E-08    | SFRS8    | ENSG00000061936 |
| 12 | 130834562 | 130834859 | 130834628 | 9  | 13 | 7  | 2.052835469 | 0.046392    |          | ENSG00000200516 |
| 12 | 131134404 | 131134592 | 131134520 | 8  | 10 | 4  | 2.580707446 | 0.0306059   | EP400NL  | ENSG00000185684 |
| 12 | 131209226 | 131209758 | 131209579 | 34 | 48 | 0  | 57.47939313 | 3.05E-17    | NOC4L    | ENSG00000184967 |
| 12 | 131229499 | 131229684 | 131229591 | 8  | 8  | 2  | 3.519146518 | 0.017558    | GALNT9   | ENSG00000182870 |
| 12 | 131361765 | 131361955 | 131361832 | 8  | 8  | 0  | 10.55743955 | 0.000925496 |          | ENSG00000204589 |
| 12 | 131443455 | 131443634 | 131443567 | 8  | 8  | 3  | 2.639359888 | 0.0415794   | GALNT9   | ENSG00000182870 |
| 12 | 131564165 | 131564514 | 131564339 | 16 | 22 | 5  | 4.496687217 | 9.59E-05    | MUC8     | ENSG00000214034 |
| 12 | 131580990 | 131581209 | 131581099 | 8  | 9  | 4  | 2.346097679 | 0.050148    |          | ENSG00000204586 |
| 12 | 131611076 | 131611365 | 131611232 | 12 | 14 | 4  | 3.519146518 | 0.00361132  |          | ENSG00000204586 |
| 12 | 131701609 | 131701858 | 131701744 | 8  | 10 | 7  | 1.612942154 | 0.147335    | P2RX2    | ENSG00000187848 |
| 12 | 131974479 | 131974668 | 131974537 | 8  | 9  | 2  | 3.910162798 | 0.00955088  | CHFR     | ENSG00000072609 |
| 12 | 131995009 | 131995337 | 131995173 | 9  | 14 | 4  | 3.519146518 | 0.00361132  | CHFR     | ENSG00000072609 |
| 12 | 132072949 | 132073158 | 132073053 | 8  | 10 | 6  | 1.843362462 | 0.0964212   | ZNF26    | ENSG00000198393 |
| 13 | 18821209  | 18821440  | 18821324  | 9  | 11 | 1  | 7.038293036 | 0.000674435 |          | ENSG00000219123 |
| 13 | 19059910  | 19060142  | 19060058  | 12 | 12 | 4  | 3.049926982 | 0.0108184   |          | ENSG00000218831 |
| 13 | 19105641  | 19105901  | 19105748  | 10 | 11 | 1  | 7.038293036 | 0.000674435 | MPHOSPH8 | ENSG00000196199 |



|    |          |          |          |    |     |   |             |             |        |                 |
|----|----------|----------|----------|----|-----|---|-------------|-------------|--------|-----------------|
| 13 | 19145716 | 19145967 | 19145841 | 11 | 11  | 5 | 2.346097679 | 0.0364013   |        | ENSG00000203615 |
| 13 | 19254072 | 19254269 | 19254170 | 9  | 9   | 1 | 5.865244197 | 0.00272497  | PSPC1  | ENSG00000121390 |
| 13 | 19266704 | 19267104 | 19266925 | 23 | 30  | 6 | 5.194930574 | 2.42E-06    | PSPC1  | ENSG00000121390 |
| 13 | 19290416 | 19290682 | 19290549 | 12 | 14  | 1 | 8.797866295 | 8.00E-05    |        | ENSG00000220367 |
| 13 | 19335618 | 19335808 | 19335713 | 9  | 10  | 0 | 12.90353723 | 0.000195991 | ZMYM5  | ENSG00000132950 |
| 13 | 19493627 | 19493859 | 19493760 | 12 | 12  | 7 | 1.906204364 | 0.0695918   | ZMYM2  | ENSG00000121741 |
| 13 | 19494104 | 19494297 | 19494219 | 8  | 9   | 9 | 1.173048839 | 0.362316    | ZMYM2  | ENSG00000121741 |
| 13 | 19565816 | 19566004 | 19565910 | 8  | 8   | 3 | 2.639359888 | 0.0415794   |        | ENSG00000217735 |
| 13 | 19592772 | 19592970 | 19592820 | 9  | 10  | 0 | 12.90353723 | 0.000195991 | GJA3   | ENSG00000121743 |
| 13 | 19635653 | 19635891 | 19635756 | 9  | 11  | 4 | 2.815317214 | 0.0183428   | GJA3   | ENSG00000121743 |
| 13 | 19643559 | 19643951 | 19643764 | 11 | 19  | 4 | 4.692195357 | 0.000193572 |        | ENSG00000217490 |
| 13 | 19654497 | 19654706 | 19654601 | 12 | 13  | 8 | 1.824742639 | 0.0744168   |        | ENSG00000217490 |
| 13 | 19746639 | 19746904 | 19746771 | 8  | 9   | 2 | 3.910162798 | 0.00955088  | GJB6   | ENSG00000121742 |
| 13 | 19834671 | 19835272 | 19835002 | 89 | 140 | 5 | 27.56664772 | 7.25E-41    | GJB6   | ENSG00000121742 |
| 13 | 19863687 | 19863916 | 19863811 | 11 | 12  | 3 | 3.812408728 | 0.004404    | CRYL1  | ENSG00000165475 |
| 13 | 19880444 | 19880627 | 19880535 | 9  | 9   | 0 | 11.73048839 | 0.000425898 | CRYL1  | ENSG00000165475 |
| 13 | 19998302 | 19998620 | 19998461 | 11 | 15  | 4 | 3.753756286 | 0.0020497   | CRYL1  | ENSG00000165475 |
| 13 | 20039005 | 20039241 | 20039123 | 8  | 11  | 0 | 14.07658607 | 9.02E-05    | IFT88  | ENSG00000032742 |
| 13 | 20245806 | 20246023 | 20245914 | 8  | 10  | 6 | 1.843362462 | 0.0964212   | N6AMT2 | ENSG00000150456 |
| 13 | 20396958 | 20397178 | 20397068 | 8  | 8   | 1 | 5.278719777 | 0.00542188  |        | ENSG00000218382 |
| 13 | 20411952 | 20412148 | 20412096 | 8  | 11  | 5 | 2.346097679 | 0.0364013   |        | ENSG00000219009 |
| 13 | 20415802 | 20416004 | 20415903 | 8  | 9   | 2 | 3.910162798 | 0.00955088  |        | ENSG00000219009 |
| 13 | 20486786 | 20486997 | 20486891 | 8  | 8   | 0 | 10.55743955 | 0.000925496 |        | ENSG00000201821 |
| 13 | 20533871 | 20534065 | 20533968 | 8  | 9   | 0 | 11.73048839 | 0.000425898 | LATS2  | ENSG00000150457 |
| 13 | 20548259 | 20548572 | 20548407 | 11 | 13  | 0 | 16.42268375 | 1.91E-05    | LATS2  | ENSG00000150457 |
| 13 | 20612507 | 20612805 | 20612647 | 11 | 15  | 2 | 6.256260476 | 0.000199274 | SAP18  | ENSG00000150459 |
| 13 | 20705188 | 20705684 | 20705488 | 50 | 71  | 5 | 14.07658607 | 5.17E-19    |        | ENSG00000215572 |
| 13 | 20770044 | 20770515 | 20770209 | 10 | 19  | 5 | 3.910162798 | 0.000546977 |        | ENSG00000218629 |
| 13 | 20949286 | 20949526 | 20949406 | 10 | 10  | 4 | 2.580707446 | 0.0306059   |        | ENSG00000217248 |
| 13 | 21023064 | 21023356 | 21023210 | 9  | 14  | 2 | 5.865244197 | 0.000387308 |        | ENSG00000207518 |
| 13 | 21110539 | 21110767 | 21110683 | 8  | 10  | 1 | 6.451768616 | 0.00135978  |        | ENSG00000218366 |
| 13 | 21110878 | 21111239 | 21111057 | 22 | 29  | 1 | 17.59573259 | 1.33E-09    |        | ENSG00000218366 |
| 13 | 21142776 | 21143015 | 21142895 | 9  | 9   | 7 | 1.466311049 | 0.20706     | FGF9   | ENSG00000102678 |
| 13 | 21226212 | 21226391 | 21226286 | 8  | 8   | 0 | 10.55743955 | 0.000925496 |        | ENSG00000222286 |

|    |          |          |          |    |    |    |             |             |          |                 |
|----|----------|----------|----------|----|----|----|-------------|-------------|----------|-----------------|
| 13 | 21486767 | 21487033 | 21486879 | 11 | 14 | 2  | 5.865244197 | 0.000387308 |          | ENSG00000217355 |
| 13 | 21580471 | 21580698 | 21580584 | 8  | 9  | 3  | 2.932622098 | 0.0242899   |          | ENSG00000219046 |
| 13 | 21798165 | 21798374 | 21798269 | 10 | 12 | 3  | 3.812408728 | 0.004404    |          | ENSG00000219046 |
| 13 | 22398568 | 22398841 | 22398740 | 9  | 10 | 2  | 4.301179077 | 0.00512919  |          | ENSG00000220711 |
| 13 | 22451276 | 22451885 | 22451527 | 22 | 37 | 13 | 3.183989707 | 3.37E-05    |          | ENSG00000223116 |
| 13 | 22492440 | 22492619 | 22492529 | 8  | 8  | 1  | 5.278719777 | 0.00542188  |          | ENSG00000223116 |
| 13 | 22631428 | 22631679 | 22631544 | 9  | 10 | 2  | 4.301179077 | 0.00512919  |          | ENSG00000207157 |
| 13 | 22632903 | 22633103 | 22633003 | 10 | 11 | 3  | 3.519146518 | 0.00788869  |          | ENSG00000207157 |
| 13 | 22684722 | 22685187 | 22685011 | 16 | 23 | 3  | 7.038293036 | 4.15E-06    |          | ENSG00000219054 |
| 13 | 22797524 | 22797758 | 22797645 | 9  | 11 | 0  | 14.07658607 | 9.02E-05    | SACS     | ENSG00000151835 |
| 13 | 22865106 | 22865411 | 22865258 | 8  | 10 | 0  | 12.90353723 | 0.000195991 | SACS     | ENSG00000151835 |
| 13 | 22871359 | 22871901 | 22871631 | 31 | 53 | 0  | 63.34463732 | 6.28E-19    | SACS     | ENSG00000151835 |
| 13 | 22960730 | 22960956 | 22960835 | 9  | 11 | 1  | 7.038293036 | 0.000674435 | SACS     | ENSG00000151835 |
| 13 | 23101702 | 23101920 | 23101854 | 13 | 13 | 4  | 3.28453675  | 0.00629037  | TNFRSF19 | ENSG00000127863 |
| 13 | 23126284 | 23126501 | 23126392 | 10 | 11 | 1  | 7.038293036 | 0.000674435 | TNFRSF19 | ENSG00000127863 |
| 13 | 23188071 | 23188332 | 23188201 | 8  | 9  | 1  | 5.865244197 | 0.00272497  | MIPEP    | ENSG00000027001 |
| 13 | 23223656 | 23223871 | 23223772 | 11 | 13 | 4  | 3.28453675  | 0.00629037  | MIPEP    | ENSG00000027001 |
| 13 | 23261019 | 23261278 | 23261115 | 9  | 11 | 2  | 4.692195357 | 0.00272444  |          | ENSG00000217247 |
| 13 | 23599376 | 23599842 | 23599746 | 9  | 18 | 6  | 3.183989707 | 0.00227432  |          | ENSG00000218467 |
| 13 | 23621054 | 23621275 | 23621153 | 8  | 8  | 4  | 2.111487911 | 0.0804809   |          | ENSG00000215564 |
| 13 | 23701060 | 23701368 | 23701214 | 9  | 10 | 4  | 2.580707446 | 0.0306059   | SPATA13  | ENSG00000182957 |
| 13 | 23779424 | 23779645 | 23779545 | 8  | 8  | 3  | 2.639359888 | 0.0415794   | C1QTNF9  | ENSG00000205850 |
| 13 | 23983605 | 23983990 | 23983815 | 14 | 19 | 0  | 23.46097679 | 1.81E-07    | PARP4    | ENSG00000102699 |
| 13 | 24099355 | 24099610 | 24099482 | 9  | 10 | 3  | 3.225884308 | 0.0139466   |          | ENSG00000211508 |
| 13 | 24120018 | 24120268 | 24120194 | 8  | 11 | 3  | 3.519146518 | 0.00788869  | ATP12A   | ENSG00000075673 |
| 13 | 24121395 | 24122110 | 24121796 | 50 | 88 | 4  | 20.88026934 | 2.58E-25    | ATP12A   | ENSG00000075673 |
| 13 | 24123979 | 24124240 | 24124109 | 17 | 19 | 4  | 4.692195357 | 0.000193572 | ATP12A   | ENSG00000075673 |
| 13 | 24131434 | 24131627 | 24131530 | 9  | 9  | 3  | 2.932622098 | 0.0242899   | ATP12A   | ENSG00000075673 |
| 13 | 24132200 | 24132491 | 24132348 | 15 | 16 | 0  | 19.94183027 | 1.86E-06    | ATP12A   | ENSG00000075673 |
| 13 | 24143168 | 24143425 | 24143266 | 8  | 9  | 7  | 1.466311049 | 0.20706     | ATP12A   | ENSG00000075673 |
| 13 | 24200189 | 24200472 | 24200333 | 8  | 10 | 3  | 3.225884308 | 0.0139466   |          | ENSG00000218470 |
| 13 | 24347085 | 24347493 | 24347325 | 14 | 20 | 1  | 12.31701281 | 1.03E-06    | RNF17    | ENSG00000132972 |
| 13 | 24386470 | 24386649 | 24386563 | 8  | 8  | 4  | 2.111487911 | 0.0804809   | CENPJ    | ENSG00000151849 |
| 13 | 24394895 | 24395256 | 24395038 | 8  | 13 | 6  | 2.346097679 | 0.0266147   | CENPJ    | ENSG00000151849 |

|    |          |          |          |    |    |    |             |             |         |                 |
|----|----------|----------|----------|----|----|----|-------------|-------------|---------|-----------------|
| 13 | 24473583 | 24473796 | 24473684 | 9  | 11 | 1  | 7.038293036 | 0.000674435 |         | ENSG00000217654 |
| 13 | 24474500 | 24474766 | 24474633 | 8  | 10 | 2  | 4.301179077 | 0.00512919  |         | ENSG00000217654 |
| 13 | 24557394 | 24557584 | 24557453 | 8  | 8  | 4  | 2.111487911 | 0.0804809   | PABPC3  | ENSG00000151846 |
| 13 | 24586363 | 24586576 | 24586475 | 8  | 9  | 6  | 1.675784056 | 0.141978    | PABPC3  | ENSG00000151846 |
| 13 | 24694361 | 24694668 | 24694511 | 22 | 23 | 1  | 14.07658607 | 1.14E-07    |         | ENSG00000220865 |
| 13 | 24705101 | 24705379 | 24705243 | 12 | 12 | 2  | 5.083211637 | 0.00143337  |         | ENSG00000221324 |
| 13 | 24759546 | 24759831 | 24759688 | 10 | 13 | 2  | 5.474227917 | 0.000747844 | MTMR6   | ENSG00000139505 |
| 13 | 24773792 | 24773989 | 24773890 | 8  | 8  | 2  | 3.519146518 | 0.017558    | NUPL1   | ENSG00000139496 |
| 13 | 24863575 | 24863772 | 24863658 | 8  | 8  | 2  | 3.519146518 | 0.017558    | ATP8A2  | ENSG00000132932 |
| 13 | 25046639 | 25046832 | 25046752 | 8  | 9  | 3  | 2.932622098 | 0.0242899   |         | ENSG00000199767 |
| 13 | 25092083 | 25092363 | 25092223 | 8  | 11 | 4  | 2.815317214 | 0.0183428   |         | ENSG00000199767 |
| 13 | 25131201 | 25131697 | 25131539 | 11 | 23 | 9  | 2.815317214 | 0.00172056  |         | ENSG00000199767 |
| 13 | 25453263 | 25453535 | 25453423 | 8  | 11 | 8  | 1.564065119 | 0.151515    |         | ENSG00000223158 |
| 13 | 25658574 | 25658939 | 25658804 | 14 | 19 | 4  | 4.692195357 | 0.000193572 | RNF6    | ENSG00000127870 |
| 13 | 25694306 | 25694696 | 25694474 | 16 | 24 | 4  | 5.865244197 | 8.64E-06    | RNF6    | ENSG00000127870 |
| 13 | 25971461 | 25971652 | 25971552 | 8  | 9  | 5  | 1.955081399 | 0.0892323   | WASF3   | ENSG00000132970 |
| 13 | 26170933 | 26171134 | 26171047 | 8  | 9  | 6  | 1.675784056 | 0.141978    | GPR12   | ENSG00000132975 |
| 13 | 26344828 | 26345177 | 26345002 | 9  | 11 | 9  | 1.407658607 | 0.210479    |         | ENSG00000218019 |
| 13 | 26386906 | 26387443 | 26387114 | 32 | 48 | 3  | 14.36984828 | 1.11E-13    |         | ENSG00000218019 |
| 13 | 26395587 | 26395901 | 26395743 | 10 | 14 | 2  | 5.865244197 | 0.000387308 |         | ENSG00000218019 |
| 13 | 26444360 | 26444652 | 26444506 | 13 | 16 | 4  | 3.988366054 | 0.00115141  |         | ENSG00000218572 |
| 13 | 26457550 | 26457777 | 26457669 | 8  | 9  | 5  | 1.955081399 | 0.0892323   |         | ENSG00000218572 |
| 13 | 26723342 | 26723865 | 26723686 | 13 | 30 | 13 | 2.597465287 | 0.000910385 | RPL21   | ENSG00000122026 |
| 13 | 26742917 | 26743187 | 26743039 | 9  | 12 | 0  | 15.24963491 | 4.15E-05    | RASL11A | ENSG00000122035 |
| 13 | 26756364 | 26756547 | 26756455 | 8  | 8  | 5  | 1.759573259 | 0.13508     | RASL11A | ENSG00000122035 |
| 13 | 26807570 | 26807934 | 26807749 | 26 | 33 | 3  | 9.970915134 | 4.56E-09    |         | ENSG00000209438 |
| 13 | 26831438 | 26831677 | 26831610 | 11 | 14 | 5  | 2.932622098 | 0.00829617  |         | ENSG00000209438 |
| 13 | 26834059 | 26834355 | 26834217 | 9  | 11 | 5  | 2.346097679 | 0.0364013   |         | ENSG00000209438 |
| 13 | 26846897 | 26847105 | 26846976 | 10 | 10 | 4  | 2.580707446 | 0.0306059   |         | ENSG00000201242 |
| 13 | 26852141 | 26852417 | 26852288 | 11 | 14 | 9  | 1.759573259 | 0.0786014   |         | ENSG00000201242 |
| 13 | 26895908 | 26896114 | 26896015 | 8  | 8  | 1  | 5.278719777 | 0.00542188  | GTF3A   | ENSG00000122034 |
| 13 | 26897942 | 26898290 | 26898127 | 9  | 13 | 6  | 2.346097679 | 0.0266147   | GTF3A   | ENSG00000122034 |
| 13 | 26922640 | 26922927 | 26922783 | 12 | 15 | 1  | 9.384390715 | 3.90E-05    | MTIF3   | ENSG00000122033 |
| 13 | 26931591 | 26932111 | 26931751 | 26 | 46 | 46 | 1.173048839 | 0.220277    | MTIF3   | ENSG00000122033 |

|    |          |          |          |    |    |    |             |             |          |                 |
|----|----------|----------|----------|----|----|----|-------------|-------------|----------|-----------------|
| 13 | 27005320 | 27005602 | 27005462 | 9  | 10 | 3  | 3.225884308 | 0.0139466   | MTIF3    | ENSG00000122033 |
| 13 | 27049552 | 27049740 | 27049646 | 9  | 9  | 1  | 5.865244197 | 0.00272497  | LNX2     | ENSG00000139517 |
| 13 | 27091522 | 27091701 | 27091648 | 8  | 8  | 8  | 1.173048839 | 0.36929     | LNX2     | ENSG00000139517 |
| 13 | 27243056 | 27243460 | 27243222 | 40 | 48 | 2  | 19.15979771 | 1.17E-14    | GSX1     | ENSG00000169840 |
| 13 | 27298752 | 27298997 | 27298847 | 10 | 11 | 6  | 2.010940867 | 0.0640214   |          | ENSG00000207330 |
| 13 | 27611459 | 27611641 | 27611550 | 8  | 8  | 3  | 2.639359888 | 0.0415794   | PAN3     | ENSG00000152520 |
| 13 | 27785738 | 27785993 | 27785828 | 8  | 8  | 3  | 2.639359888 | 0.0415794   |          | ENSG00000200840 |
| 13 | 28036255 | 28036649 | 28036421 | 17 | 23 | 3  | 7.038293036 | 4.15E-06    |          | ENSG00000216743 |
| 13 | 28131146 | 28131409 | 28131277 | 9  | 12 | 5  | 2.541605819 | 0.0225912   | POMP     | ENSG00000132963 |
| 13 | 28225704 | 28225939 | 28225821 | 8  | 9  | 2  | 3.910162798 | 0.00955088  |          | ENSG00000220482 |
| 13 | 28328705 | 28328903 | 28328804 | 8  | 10 | 7  | 1.612942154 | 0.147335    |          | ENSG00000220482 |
| 13 | 28506542 | 28506756 | 28506618 | 9  | 9  | 0  | 11.73048839 | 0.000425898 | KIAA0774 | ENSG00000132938 |
| 13 | 28826638 | 28826872 | 28826710 | 8  | 9  | 1  | 5.865244197 | 0.00272497  |          | ENSG00000220322 |
| 13 | 28980406 | 28980734 | 28980618 | 8  | 12 | 1  | 7.624817456 | 0.000332769 |          | ENSG00000179141 |
| 13 | 29066770 | 29066995 | 29066882 | 9  | 10 | 0  | 12.90353723 | 0.000195991 | SLC7A1   | ENSG00000139514 |
| 13 | 29186052 | 29186276 | 29186155 | 8  | 8  | 0  | 10.55743955 | 0.000925496 | UBL3     | ENSG00000122042 |
| 13 | 29205326 | 29205925 | 29205754 | 9  | 20 | 3  | 6.158506406 | 2.99E-05    | UBL3     | ENSG00000122042 |
| 13 | 29313670 | 29314111 | 29313890 | 13 | 22 | 8  | 2.997791478 | 0.00137524  | UBL3     | ENSG00000122042 |
| 13 | 29322474 | 29322706 | 29322582 | 8  | 9  | 4  | 2.346097679 | 0.050148    | UBL3     | ENSG00000122042 |
| 13 | 29378014 | 29378201 | 29378107 | 8  | 8  | 4  | 2.111487911 | 0.0804809   |          | ENSG00000122043 |
| 13 | 29382483 | 29382668 | 29382543 | 8  | 9  | 4  | 2.346097679 | 0.050148    |          | ENSG00000122043 |
| 13 | 29390969 | 29391212 | 29391078 | 10 | 11 | 8  | 1.564065119 | 0.151515    |          | ENSG00000122043 |
| 13 | 29396183 | 29396639 | 29396468 | 22 | 35 | 13 | 3.016411301 | 8.94E-05    |          | ENSG00000122043 |
| 13 | 29494884 | 29495242 | 29495125 | 11 | 15 | 1  | 9.384390715 | 3.90E-05    |          | ENSG00000122043 |
| 13 | 29544555 | 29544998 | 29544715 | 13 | 20 | 7  | 3.079253203 | 0.00177418  |          | ENSG00000122043 |
| 13 | 29551335 | 29551772 | 29551514 | 11 | 19 | 8  | 2.606775198 | 0.00583935  |          | ENSG00000122043 |
| 13 | 29584860 | 29585045 | 29584974 | 8  | 8  | 4  | 2.111487911 | 0.0804809   |          | ENSG00000209486 |
| 13 | 29585213 | 29585456 | 29585328 | 11 | 12 | 7  | 1.906204364 | 0.0695918   |          | ENSG00000209486 |
| 13 | 29597791 | 29597991 | 29597891 | 8  | 10 | 1  | 6.451768616 | 0.00135978  |          | ENSG00000209486 |
| 13 | 29614861 | 29615127 | 29615060 | 8  | 12 | 10 | 1.386330446 | 0.21117     |          | ENSG00000209486 |
| 13 | 29814340 | 29814611 | 29814475 | 10 | 12 | 8  | 1.694403879 | 0.107291    | KATNAL1  | ENSG00000102781 |
| 13 | 29953499 | 29953705 | 29953602 | 8  | 8  | 6  | 1.508205651 | 0.203852    | HMGB1    | ENSG00000189403 |
| 13 | 29958649 | 29959041 | 29958828 | 13 | 21 | 8  | 2.867452718 | 0.00225035  | HMGB1    | ENSG00000189403 |
| 13 | 29977768 | 29977955 | 29977861 | 8  | 9  | 1  | 5.865244197 | 0.00272497  |          | ENSG00000216481 |

|    |          |          |          |    |    |    |             |             |          |                 |
|----|----------|----------|----------|----|----|----|-------------|-------------|----------|-----------------|
| 13 | 30089302 | 30090176 | 30089999 | 26 | 58 | 12 | 5.32383704  | 1.22E-10    | USPL1    | ENSG00000132952 |
| 13 | 30215761 | 30215998 | 30215879 | 9  | 10 | 2  | 4.301179077 | 0.00512919  | ALOX5AP  | ENSG00000132965 |
| 13 | 30275014 | 30275325 | 30275178 | 14 | 17 | 1  | 10.55743955 | 9.18E-06    | ALOX5AP  | ENSG00000132965 |
| 13 | 30337529 | 30337796 | 30337686 | 11 | 11 | 6  | 2.010940867 | 0.0640214   | C13orf33 | ENSG00000102802 |
| 13 | 30504602 | 30504938 | 30504767 | 23 | 26 | 6  | 4.524616952 | 2.63E-05    |          | ENSG00000218269 |
| 13 | 30566898 | 30567106 | 30567002 | 8  | 11 | 2  | 4.692195357 | 0.00272444  |          | ENSG00000218269 |
| 13 | 30634306 | 30634637 | 30634471 | 9  | 14 | 8  | 1.955081399 | 0.0506438   | HSPH1    | ENSG00000120694 |
| 13 | 30896422 | 30896734 | 30896578 | 8  | 10 | 0  | 12.90353723 | 0.000195991 |          | ENSG00000219235 |
| 13 | 31636782 | 31637126 | 31636954 | 9  | 14 | 9  | 1.759573259 | 0.0786014   | FRY      | ENSG00000073910 |
| 13 | 31637874 | 31638259 | 31638053 | 26 | 34 | 1  | 20.52835469 | 3.17E-11    | FRY      | ENSG00000073910 |
| 13 | 31718573 | 31718802 | 31718705 | 8  | 9  | 8  | 1.303387599 | 0.281715    | FRY      | ENSG00000073910 |
| 13 | 31740050 | 31740446 | 31740338 | 10 | 17 | 5  | 3.519146518 | 0.00167472  | FRY      | ENSG00000073910 |
| 13 | 31787347 | 31787958 | 31787652 | 9  | 24 | 5  | 4.887703497 | 2.90E-05    | BRCA2    | ENSG00000139618 |
| 13 | 31788065 | 31788244 | 31788169 | 8  | 8  | 2  | 3.519146518 | 0.017558    | BRCA2    | ENSG00000139618 |
| 13 | 31905000 | 31905284 | 31905142 | 12 | 13 | 2  | 5.474227917 | 0.000747844 | N4BP2L1  | ENSG00000139597 |
| 13 | 32010860 | 32011264 | 32011115 | 9  | 18 | 11 | 1.857327329 | 0.0427732   | N4BP2L2  | ENSG00000139617 |
| 13 | 32302052 | 32302289 | 32302173 | 8  | 9  | 1  | 5.865244197 | 0.00272497  |          | ENSG00000207325 |
| 13 | 32457005 | 32457458 | 32457231 | 16 | 24 | 11 | 2.443851749 | 0.00386428  |          | ENSG00000218413 |
| 13 | 32466180 | 32466383 | 32466281 | 8  | 9  | 3  | 2.932622098 | 0.0242899   | KL       | ENSG00000133116 |
| 13 | 32529780 | 32529976 | 32529841 | 8  | 8  | 4  | 2.111487911 | 0.0804809   | KL       | ENSG00000133116 |
| 13 | 32588772 | 32589077 | 32588913 | 9  | 13 | 3  | 4.105670938 | 0.00243034  | STARD13  | ENSG00000133121 |
| 13 | 32592005 | 32592739 | 32592470 | 34 | 64 | 14 | 5.083211637 | 3.32E-11    | STARD13  | ENSG00000133121 |
| 13 | 32757655 | 32757900 | 32757809 | 9  | 11 | 3  | 3.519146518 | 0.00788869  | STARD13  | ENSG00000133121 |
| 13 | 32817911 | 32818428 | 32818090 | 13 | 26 | 10 | 2.879301697 | 0.000816629 | STARD13  | ENSG00000133121 |
| 13 | 32822515 | 32822759 | 32822672 | 9  | 9  | 1  | 5.865244197 | 0.00272497  | STARD13  | ENSG00000133121 |
| 13 | 32917649 | 32917890 | 32917804 | 8  | 10 | 2  | 4.301179077 | 0.00512919  | STARD13  | ENSG00000133121 |
| 13 | 32919278 | 32919629 | 32919453 | 23 | 29 | 1  | 17.59573259 | 1.33E-09    | STARD13  | ENSG00000133121 |
| 13 | 33014399 | 33015313 | 33014922 | 14 | 42 | 7  | 6.305137511 | 4.93E-09    | STARD13  | ENSG00000133121 |
| 13 | 33114786 | 33115128 | 33114955 | 15 | 19 | 4  | 4.692195357 | 0.000193572 | RFC3     | ENSG00000133119 |
| 13 | 33169217 | 33169535 | 33169376 | 12 | 18 | 6  | 3.183989707 | 0.00227432  | RFC3     | ENSG00000133119 |
| 13 | 33196016 | 33196299 | 33196159 | 9  | 12 | 3  | 3.812408728 | 0.004404    | RFC3     | ENSG00000133119 |
| 13 | 33290040 | 33290488 | 33290224 | 13 | 22 | 5  | 4.496687217 | 9.59E-05    | RFC3     | ENSG00000133119 |
| 13 | 33412967 | 33413484 | 33413210 | 57 | 84 | 2  | 33.23638378 | 2.48E-26    |          | ENSG00000222132 |
| 13 | 33627989 | 33628293 | 33628141 | 11 | 14 | 0  | 17.59573259 | 8.79E-06    |          | ENSG00000199196 |

|    |          |          |          |    |    |    |             |             |          |                 |
|----|----------|----------|----------|----|----|----|-------------|-------------|----------|-----------------|
| 13 | 34405630 | 34405902 | 34405766 | 11 | 12 | 1  | 7.624817456 | 0.000332769 | NBEA     | ENSG00000172915 |
| 13 | 35071442 | 35071847 | 35071668 | 19 | 30 | 3  | 9.091128505 | 3.63E-08    | NBEA     | ENSG00000172915 |
| 13 | 35102857 | 35103196 | 35103032 | 15 | 17 | 2  | 7.038293036 | 5.19E-05    | NBEA     | ENSG00000172915 |
| 13 | 35186447 | 35186650 | 35186577 | 8  | 9  | 3  | 2.932622098 | 0.0242899   | NBEA     | ENSG00000172915 |
| 13 | 35478528 | 35478751 | 35478703 | 11 | 12 | 2  | 5.083211637 | 0.00143337  |          | ENSG00000209518 |
| 13 | 35556250 | 35556595 | 35556422 | 9  | 15 | 5  | 3.128130238 | 0.00492422  |          | ENSG00000209518 |
| 13 | 35602667 | 35602896 | 35602806 | 11 | 12 | 3  | 3.812408728 | 0.004404    | DCLK1    | ENSG00000133083 |
| 13 | 35818794 | 35819078 | 35818936 | 9  | 11 | 2  | 4.692195357 | 0.00272444  |          | ENSG00000120664 |
| 13 | 36208272 | 36208554 | 36208402 | 11 | 12 | 3  | 3.812408728 | 0.004404    |          | ENSG00000220531 |
| 13 | 36472721 | 36473077 | 36472867 | 13 | 17 | 11 | 1.759573259 | 0.0609179   | EXOSC8   | ENSG00000120699 |
| 13 | 37387138 | 37387542 | 37387325 | 35 | 44 | 4  | 10.55743955 | 1.32E-11    | TRPC4    | ENSG00000133107 |
| 13 | 37428777 | 37428966 | 37428871 | 8  | 8  | 1  | 5.278719777 | 0.00542188  |          | ENSG00000217350 |
| 13 | 37662267 | 37662503 | 37662385 | 10 | 10 | 2  | 4.301179077 | 0.00512919  | UFM1     | ENSG00000120686 |
| 13 | 37818895 | 37819230 | 37819063 | 32 | 35 | 0  | 42.22975822 | 7.34E-13    | UFM1     | ENSG00000120686 |
| 13 | 37821741 | 37821946 | 37821914 | 8  | 11 | 3  | 3.519146518 | 0.00788869  | UFM1     | ENSG00000120686 |
| 13 | 37821958 | 37822187 | 37822084 | 10 | 11 | 6  | 2.010940867 | 0.0640214   | UFM1     | ENSG00000120686 |
| 13 | 37990530 | 37990709 | 37990619 | 8  | 8  | 0  | 10.55743955 | 0.000925496 |          | ENSG00000216558 |
| 13 | 38007289 | 38007528 | 38007418 | 8  | 8  | 1  | 5.278719777 | 0.00542188  |          | ENSG00000216558 |
| 13 | 38109003 | 38109223 | 38109113 | 9  | 9  | 8  | 1.303387599 | 0.281715    |          | ENSG00000216558 |
| 13 | 38128857 | 38129065 | 38128986 | 9  | 10 | 2  | 4.301179077 | 0.00512919  | FREM2    | ENSG00000150893 |
| 13 | 38156861 | 38157172 | 38157014 | 19 | 21 | 6  | 3.686724924 | 0.000453999 | FREM2    | ENSG00000150893 |
| 13 | 38158157 | 38158495 | 38158326 | 17 | 20 | 12 | 1.894925048 | 0.0317253   | FREM2    | ENSG00000150893 |
| 13 | 38207832 | 38208110 | 38207971 | 8  | 11 | 10 | 1.279689643 | 0.277323    | FREM2    | ENSG00000150893 |
| 13 | 38235983 | 38236198 | 38236090 | 8  | 8  | 4  | 2.111487911 | 0.0804809   |          | ENSG00000212049 |
| 13 | 38393166 | 38393650 | 38393485 | 27 | 39 | 3  | 11.73048839 | 6.80E-11    |          | ENSG00000217780 |
| 13 | 38509971 | 38510651 | 38510115 | 16 | 36 | 7  | 5.425350882 | 2.04E-07    | C13orf23 | ENSG00000120685 |
| 13 | 38984812 | 38985202 | 38984984 | 19 | 25 | 5  | 5.083211637 | 1.58E-05    |          | ENSG00000209537 |
| 13 | 39184869 | 39185053 | 39184961 | 9  | 10 | 0  | 12.90353723 | 0.000195991 | COG6     | ENSG00000133103 |
| 13 | 39632794 | 39633047 | 39632920 | 9  | 12 | 1  | 7.624817456 | 0.000332769 |          | ENSG00000207458 |
| 13 | 39644407 | 39644717 | 39644553 | 11 | 16 | 2  | 6.647276756 | 0.000101928 |          | ENSG00000207458 |
| 13 | 39705823 | 39706013 | 39705985 | 14 | 15 | 0  | 18.76878143 | 4.04E-06    |          | ENSG00000207458 |
| 13 | 39712387 | 39712713 | 39712550 | 17 | 22 | 0  | 26.9801233  | 1.77E-08    |          | ENSG00000207458 |
| 13 | 39805407 | 39805743 | 39805554 | 29 | 33 | 0  | 39.88366054 | 3.46E-12    |          | ENSG00000207458 |
| 13 | 39857631 | 39858117 | 39857810 | 18 | 29 | 2  | 11.73048839 | 1.18E-08    |          | ENSG00000215483 |

|    |          |          |          |    |    |    |             |             |          |                 |
|----|----------|----------|----------|----|----|----|-------------|-------------|----------|-----------------|
| 13 | 40132343 | 40132547 | 40132406 | 8  | 10 | 1  | 6.451768616 | 0.00135978  | FOXO1    | ENSG00000150907 |
| 13 | 40243209 | 40243522 | 40243362 | 18 | 22 | 9  | 2.69801233  | 0.00276236  | MRPS31   | ENSG00000102738 |
| 13 | 40393813 | 40394121 | 40393967 | 9  | 14 | 4  | 3.519146518 | 0.00361132  | SUGT1L1  | ENSG00000168852 |
| 13 | 40466134 | 40466508 | 40466329 | 17 | 24 | 8  | 3.258468998 | 0.000499412 |          | ENSG00000220844 |
| 13 | 40533261 | 40533665 | 40533546 | 13 | 23 | 6  | 4.021881735 | 0.000148535 | WBP4     | ENSG00000120688 |
| 13 | 40604690 | 40605160 | 40605021 | 15 | 21 | 5  | 4.301179077 | 0.000172642 | KBTBD6   | ENSG00000165572 |
| 13 | 40617604 | 40618036 | 40617857 | 41 | 52 | 3  | 15.54289712 | 6.25E-15    | KBTBD6   | ENSG00000165572 |
| 13 | 40666594 | 40666858 | 40666692 | 9  | 11 | 8  | 1.564065119 | 0.151515    | KBTBD7   | ENSG00000120696 |
| 13 | 40735588 | 40735820 | 40735765 | 8  | 11 | 0  | 14.07658607 | 9.02E-05    | MTRF1    | ENSG00000120662 |
| 13 | 40874679 | 40875111 | 40874848 | 43 | 53 | 4  | 12.66892746 | 2.41E-14    |          | ENSG00000218901 |
| 13 | 40886361 | 40886572 | 40886425 | 9  | 9  | 4  | 2.346097679 | 0.050148    |          | ENSG00000205240 |
| 13 | 40931179 | 40931376 | 40931277 | 8  | 10 | 4  | 2.580707446 | 0.0306059   | C13orf15 | ENSG00000102760 |
| 13 | 41140377 | 41140570 | 41140449 | 10 | 10 | 3  | 3.225884308 | 0.0139466   |          | ENSG00000221194 |
| 13 | 41275138 | 41275532 | 41275353 | 38 | 47 | 1  | 28.15317214 | 1.78E-15    |          | ENSG00000223066 |
| 13 | 41433485 | 41433740 | 41433593 | 9  | 12 | 3  | 3.812408728 | 0.004404    | KIAA0564 | ENSG00000102763 |
| 13 | 41743706 | 41743890 | 41743830 | 8  | 8  | 4  | 2.111487911 | 0.0804809   | AKAP11   | ENSG0000023516  |
| 13 | 41806450 | 41806636 | 41806543 | 9  | 11 | 0  | 14.07658607 | 9.02E-05    |          | ENSG00000174104 |
| 13 | 42356081 | 42356266 | 42356146 | 8  | 8  | 3  | 2.639359888 | 0.0415794   |          | ENSG00000217498 |
| 13 | 42475176 | 42475428 | 42475322 | 9  | 10 | 0  | 12.90353723 | 0.000195991 | EPSTI1   | ENSG00000133106 |
| 13 | 42495669 | 42496026 | 42495847 | 9  | 15 | 2  | 6.256260476 | 0.000199274 | DNAJC15  | ENSG00000120675 |
| 13 | 43259104 | 43259354 | 43259229 | 8  | 10 | 1  | 6.451768616 | 0.00135978  | ENOX1    | ENSG00000120658 |
| 13 | 43352038 | 43352252 | 43352164 | 10 | 10 | 3  | 3.225884308 | 0.0139466   | C13orf31 | ENSG00000179630 |
| 13 | 43613945 | 43614250 | 43614096 | 10 | 13 | 3  | 4.105670938 | 0.00243034  |          | ENSG00000139656 |
| 13 | 43809150 | 43809379 | 43809259 | 10 | 11 | 1  | 7.038293036 | 0.000674435 | SERP2    | ENSG00000151778 |
| 13 | 43875550 | 43876139 | 43875697 | 18 | 30 | 14 | 2.424300935 | 0.00163956  | SERP2    | ENSG00000151778 |
| 13 | 43907361 | 43907744 | 43907512 | 13 | 20 | 4  | 4.926805125 | 0.00010522  | TSC22D1  | ENSG00000102804 |
| 13 | 43908715 | 43908943 | 43908857 | 9  | 10 | 6  | 1.843362462 | 0.0964212   | TSC22D1  | ENSG00000102804 |
| 13 | 43909190 | 43909470 | 43909321 | 11 | 13 | 4  | 3.28453675  | 0.00629037  | TSC22D1  | ENSG00000102804 |
| 13 | 44231012 | 44231439 | 44231211 | 10 | 19 | 0  | 23.46097679 | 1.81E-07    |          | ENSG00000209569 |
| 13 | 44231742 | 44232095 | 44232012 | 8  | 13 | 5  | 2.737113958 | 0.0137917   |          | ENSG00000209569 |
| 13 | 44232232 | 44232411 | 44232321 | 8  | 8  | 1  | 5.278719777 | 0.00542188  |          | ENSG00000209569 |
| 13 | 44232621 | 44232804 | 44232710 | 8  | 8  | 3  | 2.639359888 | 0.0415794   |          | ENSG00000209569 |
| 13 | 44290710 | 44290898 | 44290760 | 8  | 8  | 5  | 1.759573259 | 0.13508     | NUFIP1   | ENSG00000083635 |
| 13 | 44325828 | 44326020 | 44325910 | 8  | 8  | 2  | 3.519146518 | 0.017558    | NUFIP1   | ENSG00000083635 |

|    |          |          |          |    |    |    |             |             |          |                 |
|----|----------|----------|----------|----|----|----|-------------|-------------|----------|-----------------|
| 13 | 44389827 | 44390550 | 44390058 | 18 | 41 | 25 | 1.894925048 | 0.00446278  | NUFIP1   | ENSG00000083635 |
| 13 | 44461525 | 44461799 | 44461633 | 20 | 22 | 6  | 3.854303329 | 0.000260696 | KIAA1704 | ENSG00000133114 |
| 13 | 44592263 | 44592589 | 44592426 | 12 | 17 | 0  | 21.11487911 | 8.57E-07    | GTF2F2   | ENSG00000188342 |
| 13 | 44608886 | 44609165 | 44609025 | 10 | 15 | 0  | 18.76878143 | 4.04E-06    |          | ENSG00000201061 |
| 13 | 44640464 | 44640702 | 44640596 | 10 | 11 | 5  | 2.346097679 | 0.0364013   | KCTD4    | ENSG00000180332 |
| 13 | 44781624 | 44781826 | 44781743 | 10 | 10 | 6  | 1.843362462 | 0.0964212   |          | ENSG00000221163 |
| 13 | 44783193 | 44783461 | 44783282 | 8  | 11 | 6  | 2.010940867 | 0.0640214   |          | ENSG00000221163 |
| 13 | 44813540 | 44813893 | 44813716 | 14 | 19 | 5  | 3.910162798 | 0.000546977 |          | ENSG00000170919 |
| 13 | 44890637 | 44890865 | 44890751 | 10 | 11 | 1  | 7.038293036 | 0.000674435 | SLC25A30 | ENSG00000174032 |
| 13 | 44936713 | 44937030 | 44936877 | 15 | 20 | 5  | 4.105670938 | 0.000308509 | COG3     | ENSG00000136152 |
| 13 | 44983809 | 44984049 | 44983929 | 14 | 15 | 6  | 2.68125449  | 0.0103552   |          | ENSG00000200709 |
| 13 | 44999956 | 45000146 | 45000051 | 8  | 10 | 3  | 3.225884308 | 0.0139466   |          | ENSG00000200709 |
| 13 | 45201030 | 45201224 | 45201153 | 9  | 10 | 2  | 4.301179077 | 0.00512919  |          | ENSG00000209627 |
| 13 | 45245343 | 45245622 | 45245476 | 12 | 14 | 1  | 8.797866295 | 8.00E-05    |          | ENSG00000209627 |
| 13 | 45284112 | 45284374 | 45284217 | 10 | 12 | 5  | 2.541605819 | 0.0225912   |          | ENSG00000215475 |
| 13 | 45324905 | 45325154 | 45325033 | 8  | 9  | 5  | 1.955081399 | 0.0892323   |          | ENSG00000215475 |
| 13 | 45524742 | 45525167 | 45524921 | 24 | 32 | 14 | 2.580707446 | 0.000690197 | ZC3H13   | ENSG00000123200 |
| 13 | 45592206 | 45592588 | 45592385 | 21 | 28 | 15 | 2.126151021 | 0.00621236  | CPB2     | ENSG00000080618 |
| 13 | 45593816 | 45594241 | 45594062 | 15 | 23 | 12 | 2.165628626 | 0.0100985   | CPB2     | ENSG00000080618 |
| 13 | 45598744 | 45598988 | 45598851 | 11 | 13 | 4  | 3.28453675  | 0.00629037  | CPB2     | ENSG00000080618 |
| 13 | 45607258 | 45607680 | 45607507 | 24 | 33 | 13 | 2.848832895 | 0.000231281 | CPB2     | ENSG00000080618 |
| 13 | 45615347 | 45615608 | 45615477 | 15 | 15 | 7  | 2.346097679 | 0.0195693   |          | ENSG00000209631 |
| 13 | 45632697 | 45633033 | 45632865 | 9  | 13 | 6  | 2.346097679 | 0.0266147   |          | ENSG00000209631 |
| 13 | 45654603 | 45654906 | 45654736 | 11 | 14 | 4  | 3.519146518 | 0.00361132  | LCP1     | ENSG00000136167 |
| 13 | 45656585 | 45656828 | 45656705 | 10 | 12 | 2  | 5.083211637 | 0.00143337  | LCP1     | ENSG00000136167 |
| 13 | 46018685 | 46018864 | 46018774 | 8  | 9  | 11 | 0.977540699 | 0.526123    | LRCH1    | ENSG00000136141 |
| 13 | 46023654 | 46024063 | 46023872 | 19 | 28 | 14 | 2.267894423 | 0.00376222  | LRCH1    | ENSG00000136141 |
| 13 | 46024908 | 46025391 | 46025161 | 14 | 25 | 15 | 1.906204364 | 0.0188347   | LRCH1    | ENSG00000136141 |
| 13 | 46026669 | 46027054 | 46026875 | 8  | 16 | 9  | 1.994183027 | 0.0370915   | LRCH1    | ENSG00000136141 |
| 13 | 46087564 | 46088438 | 46087941 | 28 | 70 | 8  | 9.254051955 | 2.43E-16    | LRCH1    | ENSG00000136141 |
| 13 | 46120425 | 46120710 | 46120532 | 14 | 17 | 6  | 3.016411301 | 0.00381427  | LRCH1    | ENSG00000136141 |
| 13 | 46131960 | 46132260 | 46132130 | 19 | 21 | 11 | 2.150589539 | 0.0135908   | LRCH1    | ENSG00000136141 |
| 13 | 46144878 | 46145088 | 46144987 | 9  | 9  | 7  | 1.466311049 | 0.20706     | LRCH1    | ENSG00000136141 |
| 13 | 46160043 | 46160253 | 46160148 | 11 | 12 | 1  | 7.624817456 | 0.000332769 | ESD      | ENSG00000139684 |



|    |          |          |          |     |     |    |             |             |        |                 |
|----|----------|----------|----------|-----|-----|----|-------------|-------------|--------|-----------------|
| 13 | 46177715 | 46177894 | 46177804 | 8   | 8   | 6  | 1.508205651 | 0.203852    | ESD    | ENSG00000139684 |
| 13 | 46189137 | 46189413 | 46189275 | 9   | 11  | 6  | 2.010940867 | 0.0640214   | ESD    | ENSG00000139684 |
| 13 | 46189533 | 46189745 | 46189641 | 10  | 10  | 8  | 1.433726359 | 0.209175    | ESD    | ENSG00000139684 |
| 13 | 46193530 | 46193813 | 46193688 | 8   | 11  | 13 | 1.005470434 | 0.498567    | ESD    | ENSG00000139684 |
| 13 | 46203770 | 46204072 | 46203912 | 12  | 12  | 5  | 2.541605819 | 0.0225912   | ESD    | ENSG00000139684 |
| 13 | 46204903 | 46205099 | 46205001 | 9   | 10  | 7  | 1.612942154 | 0.147335    | ESD    | ENSG00000139684 |
| 13 | 46213946 | 46214125 | 46214057 | 8   | 8   | 2  | 3.519146518 | 0.017558    | ESD    | ENSG00000139684 |
| 13 | 46233393 | 46233693 | 46233543 | 9   | 11  | 6  | 2.010940867 | 0.0640214   | ESD    | ENSG00000139684 |
| 13 | 46236274 | 46236528 | 46236353 | 9   | 11  | 15 | 0.879786629 | 0.637414    | ESD    | ENSG00000139684 |
| 13 | 46268262 | 46268642 | 46268392 | 8   | 13  | 11 | 1.368556979 | 0.211388    | ESD    | ENSG00000139684 |
| 13 | 46268739 | 46269264 | 46268931 | 11  | 25  | 6  | 4.357038546 | 4.72E-05    | ESD    | ENSG00000139684 |
| 13 | 46269313 | 46269569 | 46269446 | 13  | 15  | 7  | 2.346097679 | 0.0195693   | ESD    | ENSG00000139684 |
| 13 | 46269649 | 46269873 | 46269727 | 8   | 8   | 8  | 1.173048839 | 0.36929     | ESD    | ENSG00000139684 |
| 13 | 46271862 | 46272083 | 46271972 | 8   | 12  | 4  | 3.049926982 | 0.0108184   | ESD    | ENSG00000139684 |
| 13 | 46319034 | 46319213 | 46319154 | 8   | 10  | 3  | 3.225884308 | 0.0139466   | HTR2A  | ENSG00000102468 |
| 13 | 46322612 | 46322944 | 46322779 | 9   | 13  | 5  | 2.737113958 | 0.0137917   | HTR2A  | ENSG00000102468 |
| 13 | 46327409 | 46327683 | 46327546 | 8   | 10  | 4  | 2.580707446 | 0.0306059   | HTR2A  | ENSG00000102468 |
| 13 | 46338330 | 46338698 | 46338502 | 12  | 17  | 8  | 2.346097679 | 0.0144542   | HTR2A  | ENSG00000102468 |
| 13 | 46366230 | 46366501 | 46366338 | 11  | 13  | 8  | 1.824742639 | 0.0744168   | HTR2A  | ENSG00000102468 |
| 13 | 46446032 | 46446338 | 46446168 | 9   | 12  | 12 | 1.173048839 | 0.343543    |        | ENSG00000209653 |
| 13 | 46464515 | 46464933 | 46464754 | 12  | 19  | 9  | 2.346097679 | 0.0107159   |        | ENSG00000209653 |
| 13 | 46534683 | 46534894 | 46534737 | 8   | 10  | 1  | 6.451768616 | 0.00135978  |        | ENSG00000209653 |
| 13 | 47538519 | 47539170 | 47538882 | 74  | 112 | 0  | 132.5545188 | 8.15E-39    | MED4   | ENSG00000136146 |
| 13 | 47544386 | 47544820 | 47544591 | 56  | 72  | 0  | 85.63256527 | 2.48E-25    | MED4   | ENSG00000136146 |
| 13 | 47567046 | 47567384 | 47567215 | 9   | 14  | 3  | 4.398933147 | 0.00132748  | MED4   | ENSG00000136146 |
| 13 | 47603720 | 47603900 | 47603836 | 8   | 8   | 1  | 5.278719777 | 0.00542188  |        | ENSG00000214488 |
| 13 | 47628617 | 47628965 | 47628791 | 18  | 22  | 0  | 26.9801233  | 1.77E-08    |        | ENSG00000214488 |
| 13 | 48916430 | 48916669 | 48916533 | 8   | 8   | 0  | 10.55743955 | 0.000925496 | SETDB2 | ENSG00000136169 |
| 13 | 49141980 | 49142191 | 49142125 | 9   | 10  | 1  | 6.451768616 | 0.00135978  |        | ENSG00000203547 |
| 13 | 49685453 | 49686049 | 49685870 | 18  | 36  | 3  | 10.85070176 | 5.62E-10    |        | ENSG00000220558 |
| 13 | 49733767 | 49734050 | 49733943 | 9   | 12  | 3  | 3.812408728 | 0.004404    |        | ENSG00000220558 |
| 13 | 49829982 | 49830205 | 49830093 | 10  | 11  | 5  | 2.346097679 | 0.0364013   |        | ENSG00000217189 |
| 13 | 49900452 | 49900663 | 49900557 | 9   | 10  | 0  | 12.90353723 | 0.000195991 |        | ENSG00000221198 |
| 13 | 50001406 | 50001940 | 50001676 | 111 | 150 | 2  | 59.04345825 | 4.34E-48    |        | ENSG00000221198 |

|    |          |          |          |    |    |   |             |             |        |                 |
|----|----------|----------|----------|----|----|---|-------------|-------------|--------|-----------------|
| 13 | 50116545 | 50116732 | 50116638 | 8  | 9  | 2 | 3.910162798 | 0.00955088  |        | ENSG00000200711 |
| 13 | 50203584 | 50203888 | 50203731 | 24 | 26 | 1 | 15.83615933 | 1.23E-08    |        | ENSG00000200711 |
| 13 | 51055942 | 51056199 | 51056110 | 10 | 13 | 1 | 8.211341875 | 0.000163445 | WDFY2  | ENSG00000139668 |
| 13 | 51068965 | 51069191 | 51069100 | 14 | 15 | 1 | 9.384390715 | 3.90E-05    |        | ENSG00000213991 |
| 13 | 51298772 | 51299069 | 51298925 | 15 | 18 | 3 | 5.571981987 | 0.000108726 |        | ENSG00000180358 |
| 13 | 51498670 | 51499116 | 51498778 | 12 | 20 | 2 | 8.211341875 | 6.65E-06    |        | ENSG00000214320 |
| 13 | 51666462 | 51666673 | 51666615 | 8  | 9  | 3 | 2.932622098 | 0.0242899   |        | ENSG00000220040 |
| 13 | 51683480 | 51683866 | 51683719 | 38 | 45 | 1 | 26.9801233  | 8.07E-15    |        | ENSG00000220040 |
| 13 | 52185981 | 52186160 | 52186070 | 8  | 8  | 3 | 2.639359888 | 0.0415794   | LECT1  | ENSG00000136110 |
| 13 | 52689432 | 52689632 | 52689532 | 8  | 8  | 2 | 3.519146518 | 0.017558    |        | ENSG00000218221 |
| 13 | 54219381 | 54219761 | 54219583 | 9  | 15 | 0 | 18.76878143 | 4.04E-06    |        | ENSG00000136149 |
| 13 | 59801836 | 59802029 | 59801932 | 8  | 10 | 0 | 12.90353723 | 0.000195991 |        | ENSG00000216750 |
| 13 | 59869104 | 59869442 | 59869273 | 8  | 12 | 1 | 7.624817456 | 0.000332769 | TDRD3  | ENSG00000083544 |
| 13 | 64236336 | 64236515 | 64236430 | 8  | 8  | 1 | 5.278719777 | 0.00542188  |        | ENSG00000214269 |
| 13 | 64736305 | 64736581 | 64736428 | 8  | 9  | 0 | 11.73048839 | 0.000425898 |        | ENSG00000214266 |
| 13 | 64890234 | 64890424 | 64890304 | 9  | 9  | 1 | 5.865244197 | 0.00272497  |        | ENSG00000214266 |
| 13 | 65399196 | 65399393 | 65399303 | 8  | 9  | 0 | 11.73048839 | 0.000425898 |        | ENSG00000221685 |
| 13 | 67770257 | 67770496 | 67770376 | 10 | 10 | 0 | 12.90353723 | 0.000195991 |        | ENSG00000220172 |
| 13 | 68399568 | 68399872 | 68399720 | 11 | 13 | 0 | 16.42268375 | 1.91E-05    |        | ENSG00000219035 |
| 13 | 71569721 | 71570099 | 71569881 | 33 | 39 | 1 | 23.46097679 | 7.43E-13    |        | ENSG00000200037 |
| 13 | 72538141 | 72538355 | 72538248 | 9  | 9  | 2 | 3.910162798 | 0.00955088  | KLF5   | ENSG00000102554 |
| 13 | 72759194 | 72759439 | 72759316 | 11 | 12 | 0 | 15.24963491 | 4.15E-05    |        | ENSG00000206697 |
| 13 | 72871494 | 72871707 | 72871604 | 8  | 10 | 2 | 4.301179077 | 0.00512919  |        | ENSG00000218304 |
| 13 | 72985832 | 72986297 | 72986093 | 49 | 62 | 0 | 73.90207688 | 5.82E-22    |        | ENSG00000218304 |
| 13 | 73075793 | 73076155 | 73075988 | 38 | 44 | 0 | 52.78719777 | 6.79E-16    |        | ENSG00000218304 |
| 13 | 73508685 | 73508900 | 73508797 | 9  | 9  | 0 | 11.73048839 | 0.000425898 | KLF12  | ENSG00000118922 |
| 13 | 75044005 | 75044243 | 75044124 | 12 | 14 | 2 | 5.865244197 | 0.000387308 |        | ENSG00000200880 |
| 13 | 75177101 | 75177284 | 75177203 | 8  | 8  | 6 | 1.508205651 | 0.203852    |        | ENSG00000217049 |
| 13 | 75994187 | 75994561 | 75994382 | 15 | 22 | 4 | 5.396024661 | 3.05E-05    | KCTD12 | ENSG00000178695 |
| 13 | 76615652 | 76615931 | 76615806 | 8  | 9  | 1 | 5.865244197 | 0.00272497  | FBXL3  | ENSG00000005812 |
| 13 | 76799263 | 76799456 | 76799359 | 9  | 9  | 1 | 5.865244197 | 0.00272497  | MYCBP2 | ENSG00000005810 |
| 13 | 80614820 | 80615037 | 80614944 | 8  | 9  | 2 | 3.910162798 | 0.00955088  |        | ENSG00000222486 |
| 13 | 81764536 | 81764795 | 81764665 | 8  | 9  | 8 | 1.303387599 | 0.281715    |        |                 |
| 13 | 81777797 | 81777990 | 81777954 | 8  | 8  | 2 | 3.519146518 | 0.017558    |        |                 |

|    |           |           |           |    |    |    |             |             |          |                 |
|----|-----------|-----------|-----------|----|----|----|-------------|-------------|----------|-----------------|
| 13 | 83413768  | 83414223  | 83413982  | 71 | 82 | 3  | 24.34076342 | 1.75E-24    |          | ENSG00000220449 |
| 13 | 84580526  | 84580949  | 84580705  | 31 | 40 | 0  | 48.09500241 | 1.51E-14    |          | ENSG00000207012 |
| 13 | 87855968  | 87856270  | 87856121  | 16 | 17 | 0  | 21.11487911 | 8.57E-07    |          | ENSG00000218326 |
| 13 | 88688765  | 88689090  | 88688925  | 18 | 22 | 2  | 8.993374435 | 1.66E-06    |          | ENSG00000216336 |
| 13 | 90042209  | 90042521  | 90042369  | 14 | 18 | 0  | 22.28792795 | 3.94E-07    |          | ENSG00000209120 |
| 13 | 93795666  | 93795966  | 93795814  | 28 | 30 | 2  | 12.12150467 | 5.77E-09    |          | ENSG00000212057 |
| 13 | 93999856  | 94000214  | 94000035  | 8  | 13 | 4  | 3.28453675  | 0.00629037  | TGDS     | ENSG00000088451 |
| 13 | 94046276  | 94046627  | 94046451  | 13 | 18 | 1  | 11.14396397 | 4.44E-06    | TGDS     | ENSG00000088451 |
| 13 | 94383575  | 94383839  | 94383707  | 10 | 10 | 0  | 12.90353723 | 0.000195991 |          | ENSG00000216894 |
| 13 | 94561480  | 94561697  | 94561604  | 14 | 14 | 0  | 17.59573259 | 8.79E-06    |          | ENSG00000210254 |
| 13 | 94928847  | 94929072  | 94929006  | 10 | 11 | 0  | 14.07658607 | 9.02E-05    | CLDN10   | ENSG00000134873 |
| 13 | 95554898  | 95555083  | 95554990  | 9  | 9  | 0  | 11.73048839 | 0.000425898 | HS6ST3   | ENSG00000185352 |
| 13 | 96560180  | 96560422  | 96560309  | 8  | 9  | 2  | 3.910162798 | 0.00955088  |          | ENSG00000210327 |
| 13 | 96584315  | 96584721  | 96584446  | 9  | 15 | 3  | 4.692195357 | 0.000718455 |          | ENSG00000210327 |
| 13 | 96591911  | 96592205  | 96592058  | 14 | 17 | 10 | 1.919534464 | 0.0400548   | MBNL2    | ENSG00000139793 |
| 13 | 96625415  | 96625599  | 96625554  | 9  | 9  | 3  | 2.932622098 | 0.0242899   | MBNL2    | ENSG00000139793 |
| 13 | 96882906  | 96883246  | 96883082  | 10 | 14 | 1  | 8.797866295 | 8.00E-05    | RAP2A    | ENSG00000125249 |
| 13 | 96883772  | 96883986  | 96883879  | 12 | 12 | 4  | 3.049926982 | 0.0108184   | RAP2A    | ENSG00000125249 |
| 13 | 97866637  | 97867011  | 97866797  | 10 | 17 | 5  | 3.519146518 | 0.00167472  | STK24    | ENSG00000102572 |
| 13 | 98109825  | 98110206  | 98110035  | 18 | 25 | 2  | 10.16642327 | 2.02E-07    |          | ENSG00000223127 |
| 13 | 98284993  | 98285244  | 98285114  | 16 | 17 | 0  | 21.11487911 | 8.57E-07    | DOCK9    | ENSG00000088387 |
| 13 | 98948716  | 98949103  | 98948895  | 8  | 15 | 3  | 4.692195357 | 0.000718455 | TM9SF2   | ENSG00000125304 |
| 13 | 98951223  | 98951837  | 98951400  | 12 | 29 | 7  | 4.398933147 | 1.30E-05    | TM9SF2   | ENSG00000125304 |
| 13 | 98966656  | 98966835  | 98966702  | 8  | 8  | 0  | 10.55743955 | 0.000925496 | TM9SF2   | ENSG00000125304 |
| 13 | 99500637  | 99500983  | 99500810  | 22 | 27 | 2  | 10.94845583 | 4.90E-08    |          | ENSG00000220223 |
| 13 | 99709168  | 99709431  | 99709329  | 9  | 9  | 1  | 5.865244197 | 0.00272497  | PCCA     | ENSG00000175198 |
| 13 | 102047210 | 102047459 | 102047349 | 8  | 11 | 3  | 3.519146518 | 0.00788869  | TPP2     | ENSG00000134900 |
| 13 | 102137901 | 102138203 | 102138052 | 16 | 19 | 1  | 11.73048839 | 2.14E-06    | C13orf39 | ENSG00000139780 |
| 13 | 102295953 | 102296192 | 102296080 | 9  | 10 | 4  | 2.580707446 | 0.0306059   | ERCC5    | ENSG00000134899 |
| 13 | 103153114 | 103153324 | 103153241 | 8  | 10 | 0  | 12.90353723 | 0.000195991 |          | ENSG00000219505 |
| 13 | 106150868 | 106151127 | 106151006 | 11 | 12 | 4  | 3.049926982 | 0.0108184   |          | ENSG00000179360 |
| 13 | 106309867 | 106310232 | 106310053 | 12 | 18 | 5  | 3.714654658 | 0.000961539 |          | ENSG00000174408 |
| 13 | 106311395 | 106311906 | 106311650 | 9  | 19 | 0  | 23.46097679 | 1.81E-07    |          | ENSG00000174408 |
| 13 | 106519798 | 106520045 | 106519872 | 9  | 11 | 2  | 4.692195357 | 0.00272444  |          | ENSG00000221316 |

|    |           |           |           |     |     |    |             |             |         |                 |
|----|-----------|-----------|-----------|-----|-----|----|-------------|-------------|---------|-----------------|
| 13 | 107668552 | 107668834 | 107668689 | 9   | 12  | 5  | 2.541605819 | 0.0225912   | LIG4    | ENSG00000174405 |
| 13 | 107855300 | 107855492 | 107855357 | 9   | 9   | 0  | 11.73048839 | 0.000425898 |         | ENSG00000217251 |
| 13 | 108150911 | 108151117 | 108151021 | 10  | 10  | 4  | 2.580707446 | 0.0306059   | MYO16   | ENSG00000041515 |
| 13 | 108362323 | 108362650 | 108362477 | 8   | 9   | 4  | 2.346097679 | 0.050148    | MYO16   | ENSG00000041515 |
| 13 | 108369460 | 108369742 | 108369571 | 10  | 13  | 11 | 1.368556979 | 0.211388    | MYO16   | ENSG00000041515 |
| 13 | 108369931 | 108370198 | 108370036 | 8   | 11  | 6  | 2.010940867 | 0.0640214   | MYO16   | ENSG00000041515 |
| 13 | 108585432 | 108585631 | 108585575 | 8   | 8   | 6  | 1.508205651 | 0.203852    |         | ENSG00000222110 |
| 13 | 109188666 | 109188885 | 109188752 | 12  | 12  | 3  | 3.812408728 | 0.004404    | IRS2    | ENSG00000185950 |
| 13 | 109449033 | 109449469 | 109449196 | 15  | 24  | 3  | 7.331555246 | 2.13E-06    |         | ENSG00000201161 |
| 13 | 109450652 | 109450831 | 109450738 | 8   | 8   | 0  | 10.55743955 | 0.000925496 |         | ENSG00000201161 |
| 13 | 109573250 | 109573609 | 109573430 | 18  | 24  | 1  | 14.66311049 | 5.43E-08    |         | ENSG00000222584 |
| 13 | 110047774 | 110048031 | 110047883 | 10  | 11  | 4  | 2.815317214 | 0.0183428   | CARKD   | ENSG00000213995 |
| 13 | 110394754 | 110394949 | 110394851 | 8   | 9   | 1  | 5.865244197 | 0.00272497  |         | ENSG00000220095 |
| 13 | 111892398 | 111892593 | 111892495 | 9   | 9   | 0  | 11.73048839 | 0.000425898 | SOX1    | ENSG00000182968 |
| 13 | 112418138 | 112418317 | 112418241 | 8   | 9   | 1  | 5.865244197 | 0.00272497  | ATP11A  | ENSG00000068650 |
| 13 | 112633802 | 112634093 | 112633939 | 10  | 11  | 2  | 4.692195357 | 0.00272444  | MCF2L   | ENSG00000126217 |
| 13 | 112703836 | 112704087 | 112703961 | 8   | 10  | 4  | 2.580707446 | 0.0306059   | MCF2L   | ENSG00000126217 |
| 13 | 112715798 | 112716115 | 112715954 | 14  | 17  | 6  | 3.016411301 | 0.00381427  | MCF2L   | ENSG00000126217 |
| 13 | 113151567 | 113151771 | 113151626 | 8   | 10  | 2  | 4.301179077 | 0.00512919  | ADPRHL1 | ENSG00000153531 |
| 13 | 113241061 | 113241310 | 113241221 | 9   | 11  | 3  | 3.519146518 | 0.00788869  | TFDP1   | ENSG00000198176 |
| 13 | 113573015 | 113574113 | 113573538 | 121 | 200 | 0  | 235.7828167 | 1.77E-68    | GAS6    | ENSG00000183087 |
| 13 | 113815787 | 113816038 | 113815912 | 10  | 10  | 0  | 12.90353723 | 0.000195991 | RASA3   | ENSG00000185989 |
| 13 | 113819343 | 113819785 | 113819513 | 16  | 25  | 3  | 7.624817456 | 1.09E-06    | RASA3   | ENSG00000185989 |
| 13 | 113848957 | 113849163 | 113849060 | 9   | 9   | 2  | 3.910162798 | 0.00955088  | RASA3   | ENSG00000185989 |
| 13 | 113995217 | 113995405 | 113995308 | 8   | 8   | 3  | 2.639359888 | 0.0415794   | CDC16   | ENSG00000130177 |
| 13 | 114018278 | 114018467 | 114018332 | 8   | 9   | 1  | 5.865244197 | 0.00272497  | CDC16   | ENSG00000130177 |
| 13 | 114127673 | 114127925 | 114127825 | 21  | 22  | 0  | 26.9801233  | 1.77E-08    | ZNF828  | ENSG00000198824 |
| 14 | 19843866  | 19844080  | 19843950  | 9   | 12  | 2  | 5.083211637 | 0.00143337  | TTC5    | ENSG00000136319 |
| 14 | 19951191  | 19951752  | 19951468  | 9   | 17  | 3  | 5.278719777 | 0.000205462 | TEP1    | ENSG00000129566 |
| 14 | 20147353  | 20147610  | 20147481  | 9   | 9   | 5  | 1.955081399 | 0.0892323   | RNASE12 | ENSG00000206171 |
| 14 | 20151184  | 20151480  | 20151324  | 11  | 13  | 6  | 2.346097679 | 0.0266147   | RNASE12 | ENSG00000206171 |
| 14 | 20151607  | 20151900  | 20151766  | 8   | 12  | 4  | 3.049926982 | 0.0108184   | RNASE12 | ENSG00000206171 |
| 14 | 20289933  | 20290399  | 20290157  | 56  | 78  | 0  | 92.67085831 | 2.35E-27    | FAM12A  | ENSG00000181562 |
| 14 | 20358327  | 20358802  | 20358564  | 27  | 41  | 0  | 49.26805125 | 6.97E-15    | RNASE1  | ENSG00000129538 |

|    |          |          |          |    |    |    |             |             |          |                 |
|----|----------|----------|----------|----|----|----|-------------|-------------|----------|-----------------|
| 14 | 20578145 | 20578352 | 20578232 | 8  | 8  | 3  | 2.639359888 | 0.0415794   | RNASE7   | ENSG00000165799 |
| 14 | 20580138 | 20580336 | 20580207 | 8  | 8  | 0  | 10.55743955 | 0.000925496 | RNASE7   | ENSG00000165799 |
| 14 | 20582375 | 20582588 | 20582481 | 8  | 9  | 2  | 3.910162798 | 0.00955088  | RNASE7   | ENSG00000165799 |
| 14 | 20635161 | 20635631 | 20635353 | 21 | 36 | 5  | 7.233801176 | 1.48E-08    | ZNF219   | ENSG00000165804 |
| 14 | 20636676 | 20636946 | 20636814 | 18 | 19 | 5  | 3.910162798 | 0.000546977 | ZNF219   | ENSG00000165804 |
| 14 | 20884634 | 20884911 | 20884772 | 9  | 9  | 1  | 5.865244197 | 0.00272497  | RPGRIP1  | ENSG00000092200 |
| 14 | 20922018 | 20922360 | 20922185 | 9  | 14 | 3  | 4.398933147 | 0.00132748  | SUPT16H  | ENSG00000092201 |
| 14 | 20994067 | 20994481 | 20994237 | 14 | 23 | 6  | 4.021881735 | 0.000148535 | TOX4     | ENSG00000092203 |
| 14 | 21095590 | 21095803 | 21095733 | 8  | 11 | 4  | 2.815317214 | 0.0183428   |          | ENSG00000215307 |
| 14 | 21309809 | 21310038 | 21309906 | 10 | 11 | 5  | 2.346097679 | 0.0364013   |          | ENSG00000211780 |
| 14 | 21585295 | 21585483 | 21585428 | 8  | 8  | 5  | 1.759573259 | 0.13508     |          | ENSG00000211801 |
| 14 | 21595875 | 21596075 | 21595972 | 9  | 9  | 0  | 11.73048839 | 0.000425898 |          | ENSG00000211801 |
| 14 | 21638362 | 21638605 | 21638517 | 8  | 10 | 4  | 2.580707446 | 0.0306059   |          | ENSG00000211804 |
| 14 | 21872281 | 21872581 | 21872437 | 14 | 17 | 5  | 3.519146518 | 0.00167472  |          | ENSG00000211820 |
| 14 | 22011980 | 22012181 | 22012131 | 8  | 9  | 3  | 2.932622098 | 0.0242899   |          | ENSG00000211831 |
| 14 | 22058196 | 22058531 | 22058358 | 8  | 12 | 3  | 3.812408728 | 0.004404    |          | ENSG00000211865 |
| 14 | 22075583 | 22076165 | 22075929 | 46 | 65 | 8  | 8.602358155 | 6.85E-15    |          | ENSG00000211882 |
| 14 | 22305422 | 22305812 | 22305633 | 10 | 18 | 5  | 3.714654658 | 0.000961539 | OXA1L    | ENSG00000155463 |
| 14 | 22378206 | 22378547 | 22378381 | 18 | 22 | 0  | 26.9801233  | 1.77E-08    | MMP14    | ENSG00000157227 |
| 14 | 22392148 | 22392515 | 22392289 | 8  | 14 | 11 | 1.466311049 | 0.15926     |          | ENSG00000212335 |
| 14 | 22410240 | 22410968 | 22410580 | 10 | 27 | 3  | 8.211341875 | 2.82E-07    | LRP10    | ENSG00000197324 |
| 14 | 22468529 | 22468772 | 22468650 | 8  | 10 | 7  | 1.612942154 | 0.147335    | PRMT5    | ENSG00000100462 |
| 14 | 22469451 | 22469677 | 22469564 | 9  | 10 | 1  | 6.451768616 | 0.00135978  | PRMT5    | ENSG00000100462 |
| 14 | 22521684 | 22522038 | 22521861 | 13 | 18 | 2  | 7.429309316 | 2.63E-05    | JUB      | ENSG00000129474 |
| 14 | 22545969 | 22546174 | 22546119 | 8  | 10 | 2  | 4.301179077 | 0.00512919  | C14orf93 | ENSG00000100802 |
| 14 | 22573904 | 22574124 | 22574014 | 9  | 12 | 9  | 1.524963491 | 0.154777    | PSMB5    | ENSG00000100804 |
| 14 | 22597141 | 22597423 | 22597282 | 12 | 15 | 3  | 4.692195357 | 0.000718455 | CDH24    | ENSG00000139880 |
| 14 | 22607899 | 22608348 | 22608012 | 8  | 15 | 7  | 2.346097679 | 0.0195693   | ACIN1    | ENSG00000100813 |
| 14 | 22659968 | 22660181 | 22660074 | 8  | 9  | 1  | 5.865244197 | 0.00272497  | CEBPE    | ENSG00000092067 |
| 14 | 23128119 | 23128372 | 23128245 | 8  | 11 | 2  | 4.692195357 | 0.00272444  | JPH4     | ENSG00000092051 |
| 14 | 23170808 | 23171385 | 23171101 | 37 | 60 | 2  | 23.85199307 | 1.61E-18    | DHRS2    | ENSG00000100867 |
| 14 | 23209531 | 23209978 | 23209781 | 39 | 53 | 1  | 31.67231866 | 1.89E-17    | DHRS2    | ENSG00000100867 |
| 14 | 23679971 | 23680300 | 23680135 | 9  | 13 | 3  | 4.105670938 | 0.00243034  | FAM158A  | ENSG00000100908 |
| 14 | 23727874 | 23728090 | 23727982 | 8  | 9  | 4  | 2.346097679 | 0.050148    | IPO4     | ENSG00000196497 |

|    |          |          |          |     |     |   |             |             |           |                 |
|----|----------|----------|----------|-----|-----|---|-------------|-------------|-----------|-----------------|
| 14 | 23752387 | 23752719 | 23752590 | 9   | 13  | 3 | 4.105670938 | 0.00243034  | CHMP4A    | ENSG00000100931 |
| 14 | 23755040 | 23755266 | 23755162 | 13  | 14  | 2 | 5.865244197 | 0.000387308 |           | ENSG00000213920 |
| 14 | 23810165 | 23810539 | 23810360 | 19  | 26  | 2 | 10.55743955 | 9.97E-08    | RABGGTA   | ENSG00000100949 |
| 14 | 23906268 | 23906496 | 23906345 | 8   | 8   | 2 | 3.519146518 | 0.017558    | NFATC4    | ENSG00000100968 |
| 14 | 23935194 | 23935712 | 23935537 | 57  | 77  | 2 | 30.49926982 | 4.81E-24    | KIAA1305  | ENSG00000205978 |
| 14 | 23951252 | 23951451 | 23951351 | 8   | 9   | 0 | 11.73048839 | 0.000425898 |           | ENSG00000092028 |
| 14 | 24218050 | 24218323 | 24218228 | 9   | 11  | 3 | 3.519146518 | 0.00788869  | GZMB      | ENSG00000100453 |
| 14 | 29261164 | 29261400 | 29261265 | 8   | 9   | 0 | 11.73048839 | 0.000425898 |           | ENSG00000209485 |
| 14 | 29762389 | 29762585 | 29762490 | 8   | 8   | 5 | 1.759573259 | 0.13508     | PRKD1     | ENSG00000184304 |
| 14 | 29791951 | 29792315 | 29792163 | 20  | 25  | 0 | 30.49926982 | 1.72E-09    | KIAA1333  | ENSG00000092140 |
| 14 | 29809527 | 29809864 | 29809695 | 10  | 15  | 3 | 4.692195357 | 0.000718455 | KIAA1333  | ENSG00000092140 |
| 14 | 29822892 | 29823109 | 29823000 | 8   | 8   | 4 | 2.111487911 | 0.0804809   | KIAA1333  | ENSG00000092140 |
| 14 | 29834946 | 29835236 | 29835078 | 19  | 19  | 2 | 7.820325595 | 1.32E-05    | KIAA1333  | ENSG00000092140 |
| 14 | 29914319 | 29914546 | 29914432 | 9   | 12  | 2 | 5.083211637 | 0.00143337  | KIAA1333  | ENSG00000092140 |
| 14 | 30097818 | 30098211 | 30098032 | 10  | 17  | 3 | 5.278719777 | 0.000205462 | KIAA1333  | ENSG00000092140 |
| 14 | 30161169 | 30161486 | 30161327 | 9   | 13  | 6 | 2.346097679 | 0.0266147   | SCFD1     | ENSG00000092108 |
| 14 | 30611978 | 30612229 | 30612103 | 10  | 11  | 0 | 14.07658607 | 9.02E-05    | HECTD1    | ENSG00000092148 |
| 14 | 30746914 | 30747200 | 30747033 | 10  | 13  | 5 | 2.737113958 | 0.0137917   | HECTD1    | ENSG00000092148 |
| 14 | 30959634 | 30959842 | 30959740 | 9   | 9   | 3 | 2.932622098 | 0.0242899   | HEATR5A   | ENSG00000129493 |
| 14 | 30988982 | 30989262 | 30989122 | 12  | 15  | 1 | 9.384390715 | 3.90E-05    | C14orf126 | ENSG00000129480 |
| 14 | 30995995 | 30996400 | 30996261 | 12  | 18  | 5 | 3.714654658 | 0.000961539 | C14orf126 | ENSG00000129480 |
| 14 | 31100226 | 31100564 | 31100395 | 10  | 15  | 8 | 2.085420159 | 0.0338693   | NUBPL     | ENSG00000151413 |
| 14 | 31358339 | 31358528 | 31358433 | 8   | 8   | 2 | 3.519146518 | 0.017558    |           | ENSG00000207412 |
| 14 | 31473678 | 31473900 | 31473789 | 8   | 10  | 6 | 1.843362462 | 0.0964212   | C14orf128 | ENSG00000176127 |
| 14 | 31559925 | 31560295 | 31560055 | 24  | 30  | 2 | 12.12150467 | 5.77E-09    | C14orf128 | ENSG00000176127 |
| 14 | 31612627 | 31612894 | 31612745 | 8   | 9   | 7 | 1.466311049 | 0.20706     | C14orf128 | ENSG00000176127 |
| 14 | 31615155 | 31615752 | 31615460 | 16  | 31  | 5 | 6.256260476 | 3.74E-07    | C14orf128 | ENSG00000176127 |
| 14 | 31625090 | 31625290 | 31625131 | 8   | 10  | 1 | 6.451768616 | 0.00135978  | ARHGAP5   | ENSG00000100852 |
| 14 | 31742048 | 31742472 | 31742227 | 13  | 22  | 8 | 2.997791478 | 0.00137524  |           | ENSG00000202337 |
| 14 | 31798698 | 31799062 | 31798877 | 14  | 21  | 2 | 8.602358155 | 3.33E-06    |           | ENSG00000202337 |
| 14 | 31846830 | 31847186 | 31847008 | 12  | 17  | 9 | 2.111487911 | 0.0248715   | AKAP6     | ENSG00000151320 |
| 14 | 31883029 | 31883376 | 31883202 | 22  | 26  | 3 | 7.918079665 | 5.55E-07    | AKAP6     | ENSG00000151320 |
| 14 | 31884190 | 31884885 | 31884464 | 154 | 202 | 7 | 29.7661143  | 1.67E-58    | AKAP6     | ENSG00000151320 |
| 14 | 32099135 | 32099478 | 32099313 | 21  | 25  | 4 | 6.099853964 | 4.56E-06    |           | ENSG00000209554 |

|    |          |          |          |     |     |    |             |             |           |                 |
|----|----------|----------|----------|-----|-----|----|-------------|-------------|-----------|-----------------|
| 14 | 32284528 | 32284821 | 32284672 | 18  | 20  | 1  | 12.31701281 | 1.03E-06    | NPAS3     | ENSG00000151322 |
| 14 | 32532844 | 32533141 | 32532992 | 13  | 18  | 1  | 11.14396397 | 4.44E-06    | NPAS3     | ENSG00000151322 |
| 14 | 32798600 | 32798873 | 32798736 | 11  | 14  | 4  | 3.519146518 | 0.00361132  | NPAS3     | ENSG00000151322 |
| 14 | 33052849 | 33053032 | 33052940 | 8   | 8   | 0  | 10.55743955 | 0.000925496 | NPAS3     | ENSG00000151322 |
| 14 | 33215035 | 33215418 | 33215226 | 11  | 19  | 6  | 3.351568112 | 0.00134187  | EGLN3     | ENSG00000129521 |
| 14 | 33248782 | 33248964 | 33248840 | 10  | 11  | 7  | 1.759573259 | 0.102361    | EGLN3     | ENSG00000129521 |
| 14 | 33266940 | 33267213 | 33267076 | 13  | 14  | 1  | 8.797866295 | 8.00E-05    | EGLN3     | ENSG00000129521 |
| 14 | 33316427 | 33316810 | 33316662 | 9   | 14  | 4  | 3.519146518 | 0.00361132  | EGLN3     | ENSG00000129521 |
| 14 | 33320323 | 33320699 | 33320520 | 17  | 24  | 5  | 4.887703497 | 2.90E-05    | EGLN3     | ENSG00000129521 |
| 14 | 33489863 | 33490316 | 33490232 | 11  | 20  | 1  | 12.31701281 | 1.03E-06    | EGLN3     | ENSG00000129521 |
| 14 | 33617083 | 33617367 | 33617239 | 13  | 16  | 2  | 6.647276756 | 0.000101928 | EGLN3     | ENSG00000129521 |
| 14 | 33652180 | 33652365 | 33652272 | 8   | 9   | 2  | 3.910162798 | 0.00955088  | EGLN3     | ENSG00000129521 |
| 14 | 33666168 | 33666347 | 33666257 | 9   | 9   | 3  | 2.932622098 | 0.0242899   | EGLN3     | ENSG00000129521 |
| 14 | 33718724 | 33719014 | 33718869 | 9   | 13  | 7  | 2.052835469 | 0.046392    | EGLN3     | ENSG00000129521 |
| 14 | 33836555 | 33837209 | 33836914 | 198 | 260 | 4  | 61.23314941 | 1.83E-81    | C14orf147 | ENSG00000165389 |
| 14 | 33837234 | 33837464 | 33837364 | 9   | 11  | 0  | 14.07658607 | 9.02E-05    | C14orf147 | ENSG00000165389 |
| 14 | 33870717 | 33871349 | 33870896 | 13  | 31  | 13 | 2.68125449  | 0.000581082 | C14orf147 | ENSG00000165389 |
| 14 | 33894598 | 33894872 | 33894735 | 13  | 14  | 3  | 4.398933147 | 0.00132748  | C14orf147 | ENSG00000165389 |
| 14 | 33907192 | 33907395 | 33907293 | 8   | 9   | 3  | 2.932622098 | 0.0242899   | C14orf147 | ENSG00000165389 |
| 14 | 33907622 | 33907911 | 33907766 | 10  | 13  | 8  | 1.824742639 | 0.0744168   | C14orf147 | ENSG00000165389 |
| 14 | 34019956 | 34020192 | 34020097 | 11  | 13  | 3  | 4.105670938 | 0.00243034  | C14orf147 | ENSG00000165389 |
| 14 | 34078287 | 34078767 | 34078578 | 12  | 21  | 0  | 25.80707446 | 3.84E-08    | EAPP      | ENSG00000129518 |
| 14 | 34382130 | 34382360 | 34382245 | 12  | 13  | 3  | 4.105670938 | 0.00243034  | BAZ1A     | ENSG00000198604 |
| 14 | 34414052 | 34414454 | 34414295 | 14  | 19  | 7  | 2.932622098 | 0.00293566  | BAZ1A     | ENSG00000198604 |
| 14 | 34660605 | 34661024 | 34660845 | 11  | 20  | 7  | 3.079253203 | 0.00177418  | PPP2R3C   | ENSG00000092020 |
| 14 | 34753358 | 34753675 | 34753512 | 19  | 20  | 3  | 6.158506406 | 2.99E-05    |           | ENSG00000203598 |
| 14 | 34871040 | 34871293 | 34871157 | 10  | 11  | 4  | 2.815317214 | 0.0183428   | PSMA6     | ENSG00000100902 |
| 14 | 34875738 | 34876234 | 34875968 | 21  | 35  | 15 | 2.639359888 | 0.000336887 | PSMA6     | ENSG00000100902 |
| 14 | 34879908 | 34880101 | 34880004 | 9   | 9   | 7  | 1.466311049 | 0.20706     | PSMA6     | ENSG00000100902 |
| 14 | 34880481 | 34880891 | 34880712 | 10  | 18  | 6  | 3.183989707 | 0.00227432  | PSMA6     | ENSG00000100902 |
| 14 | 34880926 | 34881112 | 34880950 | 8   | 9   | 1  | 5.865244197 | 0.00272497  | PSMA6     | ENSG00000100902 |
| 14 | 34881429 | 34881678 | 34881553 | 12  | 13  | 2  | 5.474227917 | 0.000747844 | PSMA6     | ENSG00000100902 |
| 14 | 34892818 | 34893097 | 34892962 | 13  | 14  | 2  | 5.865244197 | 0.000387308 | NFKBIA    | ENSG00000100906 |
| 14 | 34913551 | 34913735 | 34913636 | 9   | 9   | 1  | 5.865244197 | 0.00272497  | NFKBIA    | ENSG00000100906 |

|    |          |          |          |    |     |    |             |             |          |                 |
|----|----------|----------|----------|----|-----|----|-------------|-------------|----------|-----------------|
| 14 | 34924626 | 34924856 | 34924746 | 8  | 11  | 4  | 2.815317214 | 0.0183428   | NFKBIA   | ENSG00000100906 |
| 14 | 34932865 | 34933158 | 34932992 | 8  | 12  | 4  | 3.049926982 | 0.0108184   | NFKBIA   | ENSG00000100906 |
| 14 | 34937153 | 34937409 | 34937281 | 9  | 11  | 9  | 1.407658607 | 0.210479    | NFKBIA   | ENSG00000100906 |
| 14 | 34942620 | 34942883 | 34942729 | 9  | 12  | 2  | 5.083211637 | 0.00143337  | NFKBIA   | ENSG00000100906 |
| 14 | 34943648 | 34943873 | 34943757 | 11 | 11  | 4  | 2.815317214 | 0.0183428   | NFKBIA   | ENSG00000100906 |
| 14 | 35034157 | 35034370 | 35034282 | 10 | 10  | 1  | 6.451768616 | 0.00135978  |          | ENSG00000214927 |
| 14 | 35208842 | 35209281 | 35209029 | 15 | 24  | 7  | 3.665777623 | 0.000215502 |          | ENSG00000209579 |
| 14 | 35359040 | 35359219 | 35359146 | 8  | 8   | 1  | 5.278719777 | 0.00542188  | BRMS1L   | ENSG00000100916 |
| 14 | 35365200 | 35366117 | 35365871 | 17 | 41  | 11 | 4.105670938 | 7.64E-07    | BRMS1L   | ENSG00000100916 |
| 14 | 35423042 | 35423258 | 35423150 | 8  | 11  | 1  | 7.038293036 | 0.000674435 | BRMS1L   | ENSG00000100916 |
| 14 | 35559175 | 35559388 | 35559281 | 8  | 9   | 0  | 11.73048839 | 0.000425898 |          | ENSG00000212071 |
| 14 | 35596645 | 35596916 | 35596785 | 14 | 16  | 1  | 9.970915134 | 1.89E-05    |          | ENSG00000212071 |
| 14 | 35609459 | 35609674 | 35609566 | 8  | 10  | 2  | 4.301179077 | 0.00512919  |          | ENSG00000212071 |
| 14 | 35789176 | 35789414 | 35789295 | 9  | 9   | 1  | 5.865244197 | 0.00272497  |          | ENSG00000209588 |
| 14 | 35859417 | 35859781 | 35859665 | 9  | 15  | 5  | 3.128130238 | 0.00492422  | MBIP     | ENSG00000151332 |
| 14 | 35913046 | 35913285 | 35913151 | 9  | 9   | 6  | 1.675784056 | 0.141978    |          | ENSG00000188831 |
| 14 | 36144067 | 36144259 | 36144163 | 8  | 10  | 3  | 3.225884308 | 0.0139466   |          | ENSG00000201395 |
| 14 | 36200502 | 36201096 | 36200924 | 11 | 25  | 11 | 2.541605819 | 0.00248721  | PAX9     | ENSG00000198807 |
| 14 | 36310306 | 36310485 | 36310389 | 8  | 8   | 2  | 3.519146518 | 0.017558    | PAX9     | ENSG00000198807 |
| 14 | 36359913 | 36360384 | 36360103 | 66 | 82  | 3  | 24.34076342 | 1.75E-24    | PAX9     | ENSG00000198807 |
| 14 | 36394926 | 36395757 | 36395265 | 11 | 34  | 6  | 5.865244197 | 2.06E-07    | PAX9     | ENSG00000198807 |
| 14 | 36483678 | 36483973 | 36483825 | 8  | 11  | 5  | 2.346097679 | 0.0364013   | SLC25A21 | ENSG00000183032 |
| 14 | 36710986 | 36711466 | 36711169 | 18 | 28  | 4  | 6.803683268 | 6.55E-07    | SLC25A21 | ENSG00000183032 |
| 14 | 36975521 | 36975833 | 36975677 | 9  | 11  | 4  | 2.815317214 | 0.0183428   |          | ENSG00000207046 |
| 14 | 36987163 | 36987408 | 36987252 | 9  | 11  | 3  | 3.519146518 | 0.00788869  |          | ENSG00000207046 |
| 14 | 37105635 | 37105931 | 37105783 | 12 | 15  | 4  | 3.753756286 | 0.0020497   | FOXA1    | ENSG00000129514 |
| 14 | 37105955 | 37106371 | 37106134 | 25 | 35  | 9  | 4.222975822 | 3.17E-06    | FOXA1    | ENSG00000129514 |
| 14 | 37122641 | 37122860 | 37122778 | 11 | 13  | 3  | 4.105670938 | 0.00243034  | FOXA1    | ENSG00000129514 |
| 14 | 37123055 | 37123348 | 37123200 | 9  | 13  | 6  | 2.346097679 | 0.0266147   | FOXA1    | ENSG00000129514 |
| 14 | 37127197 | 37127447 | 37127330 | 9  | 11  | 5  | 2.346097679 | 0.0364013   | FOXA1    | ENSG00000129514 |
| 14 | 37128440 | 37128619 | 37128499 | 8  | 9   | 6  | 1.675784056 | 0.141978    | FOXA1    | ENSG00000129514 |
| 14 | 37133104 | 37133646 | 37133283 | 25 | 44  | 17 | 2.932622098 | 2.03E-05    | FOXA1    | ENSG00000129514 |
| 14 | 37134393 | 37135552 | 37135136 | 36 | 104 | 45 | 2.677611481 | 2.48E-09    | FOXA1    | ENSG00000129514 |
| 14 | 37138340 | 37138670 | 37138505 | 10 | 13  | 11 | 1.368556979 | 0.211388    | FOXA1    | ENSG00000129514 |



|    |          |          |          |    |    |    |             |             |          |                 |
|----|----------|----------|----------|----|----|----|-------------|-------------|----------|-----------------|
| 14 | 37138800 | 37139224 | 37139045 | 13 | 21 | 5  | 4.301179077 | 0.000172642 | FOXA1    | ENSG00000129514 |
| 14 | 37140082 | 37140346 | 37140170 | 8  | 9  | 6  | 1.675784056 | 0.141978    | FOXA1    | ENSG00000129514 |
| 14 | 37155790 | 37156193 | 37156004 | 60 | 76 | 5  | 15.05412677 | 1.47E-20    | FOXA1    | ENSG00000129514 |
| 14 | 37162601 | 37162864 | 37162755 | 12 | 15 | 18 | 0.987830602 | 0.518173    | FOXA1    | ENSG00000129514 |
| 14 | 37180070 | 37180439 | 37180277 | 19 | 24 | 26 | 1.086156333 | 0.384927    | FOXA1    | ENSG00000129514 |
| 14 | 37189206 | 37190079 | 37189562 | 25 | 56 | 34 | 1.910393824 | 0.00104911  | FOXA1    | ENSG00000129514 |
| 14 | 37259186 | 37259641 | 37259357 | 9  | 19 | 0  | 23.46097679 | 1.81E-07    |          | ENSG00000200385 |
| 14 | 37384563 | 37384783 | 37384662 | 8  | 10 | 3  | 3.225884308 | 0.0139466   |          | ENSG00000201431 |
| 14 | 37413514 | 37413923 | 37413817 | 8  | 15 | 6  | 2.68125449  | 0.0103552   |          | ENSG00000201431 |
| 14 | 37478665 | 37478849 | 37478770 | 8  | 9  | 7  | 1.466311049 | 0.20706     |          | ENSG00000201431 |
| 14 | 37524854 | 37525073 | 37524963 | 8  | 8  | 2  | 3.519146518 | 0.017558    |          | ENSG00000201431 |
| 14 | 37644109 | 37644365 | 37644252 | 12 | 15 | 7  | 2.346097679 | 0.0195693   | SSTR1    | ENSG00000139874 |
| 14 | 38201842 | 38202140 | 38201991 | 10 | 13 | 3  | 4.105670938 | 0.00243034  |          | ENSG00000199285 |
| 14 | 38255824 | 38256156 | 38255990 | 11 | 15 | 2  | 6.256260476 | 0.000199274 |          | ENSG00000199285 |
| 14 | 38260902 | 38261207 | 38261037 | 9  | 10 | 3  | 3.225884308 | 0.0139466   |          | ENSG00000199285 |
| 14 | 38562553 | 38563387 | 38562965 | 25 | 62 | 1  | 36.95103844 | 2.04E-20    |          | ENSG00000199285 |
| 14 | 38641585 | 38641779 | 38641632 | 8  | 8  | 7  | 1.319679944 | 0.283403    | SEC23A   | ENSG00000100934 |
| 14 | 38642085 | 38642405 | 38642245 | 11 | 14 | 3  | 4.398933147 | 0.00132748  | SEC23A   | ENSG00000100934 |
| 14 | 38709022 | 38709569 | 38709195 | 11 | 26 | 4  | 6.334463732 | 2.40E-06    | TRAPPC6B | ENSG00000182400 |
| 14 | 38713934 | 38714387 | 38714097 | 14 | 20 | 10 | 2.239456875 | 0.0121685   | PNN      | ENSG00000100941 |
| 14 | 38727090 | 38727412 | 38727239 | 34 | 36 | 2  | 14.46760235 | 7.62E-11    | PNN      | ENSG00000100941 |
| 14 | 38805651 | 38806300 | 38805985 | 13 | 28 | 13 | 2.429886881 | 0.00217891  | CTAGE5   | ENSG00000150527 |
| 14 | 38806346 | 38806541 | 38806448 | 9  | 9  | 9  | 1.173048839 | 0.362316    | CTAGE5   | ENSG00000150527 |
| 14 | 38907410 | 38907640 | 38907563 | 12 | 15 | 3  | 4.692195357 | 0.000718455 |          | ENSG00000205900 |
| 14 | 38971596 | 38971834 | 38971715 | 9  | 10 | 5  | 2.150589539 | 0.0575848   | FBXO33   | ENSG00000165355 |
| 14 | 39207230 | 39207529 | 39207379 | 19 | 23 | 1  | 14.07658607 | 1.14E-07    | FBXO33   | ENSG00000165355 |
| 14 | 39423399 | 39423605 | 39423447 | 8  | 8  | 0  | 10.55743955 | 0.000925496 | FBXO33   | ENSG00000165355 |
| 14 | 39752713 | 39752928 | 39752775 | 10 | 10 | 9  | 1.290353723 | 0.279648    |          |                 |
| 14 | 39760437 | 39760704 | 39760570 | 9  | 12 | 5  | 2.541605819 | 0.0225912   |          |                 |
| 14 | 39907384 | 39907661 | 39907540 | 10 | 11 | 8  | 1.564065119 | 0.151515    |          |                 |
| 14 | 39986047 | 39986333 | 39986183 | 13 | 14 | 1  | 8.797866295 | 8.00E-05    |          |                 |
| 14 | 40609486 | 40609683 | 40609544 | 8  | 8  | 1  | 5.278719777 | 0.00542188  |          | ENSG00000221695 |
| 14 | 40676742 | 40677049 | 40676893 | 8  | 10 | 0  | 12.90353723 | 0.000195991 |          | ENSG00000221695 |
| 14 | 41148813 | 41149052 | 41148932 | 9  | 11 | 5  | 2.346097679 | 0.0364013   | LRFN5    | ENSG00000165379 |

|    |          |          |          |     |     |   |             |             |           |                 |
|----|----------|----------|----------|-----|-----|---|-------------|-------------|-----------|-----------------|
| 14 | 41174420 | 41174620 | 41174520 | 8   | 8   | 2 | 3.519146518 | 0.017558    | LRFN5     | ENSG00000165379 |
| 14 | 41175739 | 41175978 | 41175815 | 13  | 15  | 2 | 6.256260476 | 0.000199274 | LRFN5     | ENSG00000165379 |
| 14 | 43042634 | 43042838 | 43042715 | 8   | 8   | 2 | 3.519146518 | 0.017558    |           |                 |
| 14 | 43080147 | 43080370 | 43080231 | 8   | 10  | 1 | 6.451768616 | 0.00135978  |           |                 |
| 14 | 43160217 | 43160569 | 43160393 | 16  | 21  | 0 | 25.80707446 | 3.84E-08    |           | ENSG00000205898 |
| 14 | 43319556 | 43319901 | 43319728 | 9   | 13  | 6 | 2.346097679 | 0.0266147   |           | ENSG00000205898 |
| 14 | 43647531 | 43647896 | 43647710 | 32  | 39  | 1 | 23.46097679 | 7.43E-13    |           | ENSG00000205898 |
| 14 | 43855936 | 43856217 | 43856054 | 9   | 11  | 2 | 4.692195357 | 0.00272444  | FSCB      | ENSG00000189139 |
| 14 | 44452613 | 44452939 | 44452762 | 13  | 15  | 5 | 3.128130238 | 0.00492422  | C14orf28  | ENSG00000179476 |
| 14 | 44500160 | 44500459 | 44500309 | 9   | 12  | 2 | 5.083211637 | 0.00143337  | KLHL28    | ENSG00000179454 |
| 14 | 44623031 | 44623218 | 44623205 | 9   | 10  | 5 | 2.150589539 | 0.0575848   | PRPF39    | ENSG00000185246 |
| 14 | 44672973 | 44673152 | 44673062 | 8   | 8   | 8 | 1.173048839 | 0.36929     | FKBP3     | ENSG00000100442 |
| 14 | 44674630 | 44675051 | 44674840 | 9   | 17  | 8 | 2.346097679 | 0.0144542   | FANCM     | ENSG00000187790 |
| 14 | 44792032 | 44792312 | 44792172 | 12  | 14  | 5 | 2.932622098 | 0.00829617  | C14orf106 | ENSG00000129534 |
| 14 | 44894661 | 44894958 | 44894793 | 16  | 21  | 3 | 6.451768616 | 1.56E-05    |           | ENSG00000199739 |
| 14 | 45254305 | 45254617 | 45254463 | 19  | 20  | 0 | 24.63402563 | 8.35E-08    |           | ENSG00000199739 |
| 14 | 45323968 | 45324727 | 45324504 | 165 | 230 | 2 | 90.32476063 | 1.09E-74    |           |                 |
| 14 | 45332007 | 45332465 | 45332219 | 119 | 156 | 1 | 92.08433389 | 1.03E-51    |           |                 |
| 14 | 45430927 | 45431132 | 45431062 | 9   | 9   | 2 | 3.910162798 | 0.00955088  |           |                 |
| 14 | 45459062 | 45459357 | 45459209 | 8   | 12  | 2 | 5.083211637 | 0.00143337  |           |                 |
| 14 | 45736711 | 45737062 | 45736826 | 10  | 14  | 1 | 8.797866295 | 8.00E-05    | RPL10L    | ENSG00000165496 |
| 14 | 45883339 | 45883606 | 45883453 | 10  | 10  | 1 | 6.451768616 | 0.00135978  | RPL10L    | ENSG00000165496 |
| 14 | 49015769 | 49016301 | 49016122 | 15  | 27  | 4 | 6.5690735   | 1.26E-06    |           | ENSG00000209067 |
| 14 | 49034258 | 49034481 | 49034369 | 9   | 10  | 6 | 1.843362462 | 0.0964212   |           | ENSG00000209067 |
| 14 | 49064647 | 49064834 | 49064740 | 9   | 9   | 0 | 11.73048839 | 0.000425898 |           | ENSG00000209067 |
| 14 | 49123514 | 49123695 | 49123582 | 9   | 9   | 1 | 5.865244197 | 0.00272497  |           | ENSG00000222639 |
| 14 | 49135223 | 49135426 | 49135330 | 9   | 11  | 2 | 4.692195357 | 0.00272444  | PPIL5     | ENSG00000165501 |
| 14 | 49157247 | 49157427 | 49157338 | 8   | 9   | 0 | 11.73048839 | 0.000425898 | MGAT2     | ENSG00000168282 |
| 14 | 49170617 | 49171060 | 49170881 | 9   | 17  | 7 | 2.639359888 | 0.00777415  | C14orf104 | ENSG00000165506 |
| 14 | 49304851 | 49305084 | 49304967 | 8   | 9   | 0 | 11.73048839 | 0.000425898 | KLHDC2    | ENSG00000165516 |
| 14 | 49389262 | 49389783 | 49389428 | 16  | 26  | 6 | 4.524616952 | 2.63E-05    | SDCCAG1   | ENSG00000165525 |
| 14 | 49390353 | 49390548 | 49390455 | 8   | 9   | 2 | 3.910162798 | 0.00955088  |           | ENSG00000222136 |
| 14 | 49398564 | 49398878 | 49398711 | 18  | 21  | 4 | 5.161414893 | 5.68E-05    |           | ENSG00000222619 |
| 14 | 49399339 | 49399691 | 49399515 | 8   | 13  | 4 | 3.28453675  | 0.00629037  |           | ENSG00000222619 |

|    |          |          |          |     |     |    |             |             |           |                 |
|----|----------|----------|----------|-----|-----|----|-------------|-------------|-----------|-----------------|
| 14 | 49429261 | 49429501 | 49429327 | 8   | 11  | 5  | 2.346097679 | 0.0364013   | ARF6      | ENSG00000165527 |
| 14 | 49434525 | 49434826 | 49434675 | 9   | 11  | 3  | 3.519146518 | 0.00788869  | ARF6      | ENSG00000165527 |
| 14 | 49487130 | 49487679 | 49487487 | 57  | 73  | 2  | 28.9352047  | 9.68E-23    |           | ENSG00000175860 |
| 14 | 49502768 | 49503004 | 49502924 | 8   | 8   | 5  | 1.759573259 | 0.13508     |           | ENSG00000175860 |
| 14 | 49535729 | 49536011 | 49535884 | 8   | 9   | 2  | 3.910162798 | 0.00955088  |           | ENSG00000175860 |
| 14 | 49537427 | 49537801 | 49537602 | 15  | 22  | 10 | 2.452738482 | 0.00515848  |           | ENSG00000175860 |
| 14 | 49539946 | 49540139 | 49540059 | 9   | 10  | 1  | 6.451768616 | 0.00135978  |           | ENSG00000175860 |
| 14 | 49583763 | 49583982 | 49583872 | 8   | 9   | 5  | 1.955081399 | 0.0892323   |           | ENSG00000201358 |
| 14 | 49618127 | 49618365 | 49618246 | 12  | 13  | 4  | 3.28453675  | 0.00629037  |           | ENSG00000168260 |
| 14 | 49652805 | 49653258 | 49652977 | 10  | 21  | 1  | 12.90353723 | 4.95E-07    | C14orf138 | ENSG00000100483 |
| 14 | 49769829 | 49770089 | 49769961 | 9   | 11  | 5  | 2.346097679 | 0.0364013   | SOS2      | ENSG00000100485 |
| 14 | 49779115 | 49779319 | 49779222 | 8   | 9   | 2  | 3.910162798 | 0.00955088  | SOS2      | ENSG00000100485 |
| 14 | 49857694 | 49857936 | 49857765 | 10  | 10  | 5  | 2.150589539 | 0.0575848   | ATP5S     | ENSG00000125375 |
| 14 | 50069057 | 50069348 | 50069202 | 11  | 12  | 5  | 2.541605819 | 0.0225912   | MAP4K5    | ENSG0000012983  |
| 14 | 50069654 | 50069857 | 50069755 | 8   | 9   | 4  | 2.346097679 | 0.050148    | MAP4K5    | ENSG0000012983  |
| 14 | 50136483 | 50137619 | 50136836 | 172 | 264 | 8  | 34.53977138 | 2.42E-77    |           | ENSG00000223050 |
| 14 | 50204862 | 50205101 | 50204979 | 9   | 11  | 6  | 2.010940867 | 0.0640214   | SAV1      | ENSG00000151748 |
| 14 | 50205163 | 50205368 | 50205265 | 9   | 10  | 4  | 2.580707446 | 0.0306059   | SAV1      | ENSG00000151748 |
| 14 | 50299830 | 50300369 | 50300156 | 8   | 20  | 11 | 2.052835469 | 0.0201852   | NIN       | ENSG00000100503 |
| 14 | 50310183 | 50310386 | 50310276 | 9   | 9   | 1  | 5.865244197 | 0.00272497  | NIN       | ENSG00000100503 |
| 14 | 50481164 | 50481356 | 50481332 | 8   | 10  | 7  | 1.612942154 | 0.147335    | PYGL      | ENSG00000100504 |
| 14 | 50491789 | 50492508 | 50492125 | 14  | 35  | 9  | 4.222975822 | 3.17E-06    | PYGL      | ENSG00000100504 |
| 14 | 50501250 | 50501456 | 50501362 | 12  | 13  | 3  | 4.105670938 | 0.00243034  | PYGL      | ENSG00000100504 |
| 14 | 50659924 | 50660318 | 50660091 | 25  | 32  | 1  | 19.35530585 | 1.42E-10    | TRIM9     | ENSG00000100505 |
| 14 | 50873930 | 50874231 | 50874073 | 15  | 17  | 1  | 10.55743955 | 9.18E-06    |           | ENSG00000201820 |
| 14 | 50931340 | 50931549 | 50931444 | 12  | 12  | 5  | 2.541605819 | 0.0225912   | FRMD6     | ENSG00000139926 |
| 14 | 50931761 | 50932194 | 50932017 | 25  | 36  | 2  | 14.46760235 | 7.62E-11    | FRMD6     | ENSG00000139926 |
| 14 | 51069697 | 51069960 | 51069828 | 10  | 14  | 2  | 5.865244197 | 0.000387308 | FRMD6     | ENSG00000139926 |
| 14 | 51071152 | 51071541 | 51071362 | 15  | 25  | 4  | 6.099853964 | 4.56E-06    | FRMD6     | ENSG00000139926 |
| 14 | 51081413 | 51081626 | 51081519 | 10  | 10  | 1  | 6.451768616 | 0.00135978  |           | ENSG00000223144 |
| 14 | 51101014 | 51101224 | 51101143 | 9   | 10  | 2  | 4.301179077 | 0.00512919  |           | ENSG00000223144 |
| 14 | 51101475 | 51101964 | 51101654 | 17  | 30  | 4  | 7.272902804 | 1.76E-07    |           | ENSG00000223144 |
| 14 | 51789991 | 51790258 | 51790135 | 9   | 11  | 1  | 7.038293036 | 0.000674435 | PTGDR     | ENSG00000168229 |
| 14 | 51808907 | 51809112 | 51809009 | 8   | 8   | 4  | 2.111487911 | 0.0804809   | PTGDR     | ENSG00000168229 |

|    |          |          |          |    |    |    |             |             |           |                 |
|----|----------|----------|----------|----|----|----|-------------|-------------|-----------|-----------------|
| 14 | 51906705 | 51906914 | 51906809 | 9  | 10 | 1  | 6.451768616 | 0.00135978  | PTGER2    | ENSG00000125384 |
| 14 | 52088826 | 52089143 | 52088984 | 9  | 12 | 0  | 15.24963491 | 4.15E-05    | TXNDC16   | ENSG00000087301 |
| 14 | 52243372 | 52243690 | 52243531 | 14 | 17 | 2  | 7.038293036 | 5.19E-05    | PSMC6     | ENSG00000100519 |
| 14 | 52327912 | 52328094 | 52328003 | 8  | 8  | 3  | 2.639359888 | 0.0415794   | GNPNAT1   | ENSG00000100522 |
| 14 | 52437223 | 52437508 | 52437365 | 14 | 15 | 6  | 2.68125449  | 0.0103552   |           | ENSG00000214855 |
| 14 | 52497574 | 52497879 | 52497716 | 13 | 15 | 9  | 1.876878143 | 0.0544542   | FERMT2    | ENSG00000073712 |
| 14 | 52949305 | 52949622 | 52949465 | 17 | 20 | 2  | 8.211341875 | 6.65E-06    |           | ENSG00000219652 |
| 14 | 53028130 | 53028382 | 53028261 | 11 | 12 | 5  | 2.541605819 | 0.0225912   |           | ENSG00000219652 |
| 14 | 53091006 | 53091354 | 53091180 | 18 | 24 | 6  | 4.18946014  | 8.40E-05    |           | ENSG00000219652 |
| 14 | 53479460 | 53479976 | 53479639 | 11 | 25 | 13 | 2.178519273 | 0.00752428  | BMP4      | ENSG00000125378 |
| 14 | 53493054 | 53493453 | 53493230 | 17 | 25 | 5  | 5.083211637 | 1.58E-05    | BMP4      | ENSG00000125378 |
| 14 | 53500158 | 53500396 | 53500293 | 13 | 14 | 5  | 2.932622098 | 0.00829617  | BMP4      | ENSG00000125378 |
| 14 | 53711767 | 53712100 | 53711933 | 12 | 16 | 2  | 6.647276756 | 0.000101928 |           | ENSG00000219778 |
| 14 | 53848608 | 53848925 | 53848762 | 14 | 18 | 6  | 3.183989707 | 0.00227432  | CDKN3     | ENSG00000100526 |
| 14 | 53977972 | 53978173 | 53978020 | 9  | 10 | 8  | 1.433726359 | 0.209175    | CNIH      | ENSG00000100528 |
| 14 | 54025379 | 54025612 | 54025495 | 8  | 10 | 2  | 4.301179077 | 0.00512919  | GMFB      | ENSG00000197045 |
| 14 | 54025619 | 54025821 | 54025720 | 9  | 10 | 5  | 2.150589539 | 0.0575848   | GMFB      | ENSG00000197045 |
| 14 | 54045971 | 54046453 | 54046293 | 14 | 23 | 7  | 3.519146518 | 0.000369739 | CGRRF1    | ENSG00000100532 |
| 14 | 54046583 | 54046775 | 54046678 | 8  | 8  | 5  | 1.759573259 | 0.13508     | CGRRF1    | ENSG00000100532 |
| 14 | 54210873 | 54211052 | 54210987 | 8  | 8  | 3  | 2.639359888 | 0.0415794   | SAMD4A    | ENSG0000020577  |
| 14 | 54309651 | 54310217 | 54309975 | 8  | 20 | 12 | 1.894925048 | 0.0317253   | SAMD4A    | ENSG0000020577  |
| 14 | 54355185 | 54355403 | 54355294 | 9  | 10 | 6  | 1.843362462 | 0.0964212   |           | ENSG00000209792 |
| 14 | 54429741 | 54429987 | 54429864 | 9  | 10 | 4  | 2.580707446 | 0.0306059   | GCH1      | ENSG00000131979 |
| 14 | 54439060 | 54439339 | 54439182 | 12 | 14 | 3  | 4.398933147 | 0.00132748  | GCH1      | ENSG00000131979 |
| 14 | 54563344 | 54564075 | 54563668 | 19 | 36 | 18 | 2.284358266 | 0.00119913  | SOCS4     | ENSG00000180008 |
| 14 | 54587891 | 54588159 | 54588025 | 12 | 15 | 4  | 3.753756286 | 0.0020497   | MAPK1IP1L | ENSG00000168175 |
| 14 | 54728022 | 54728299 | 54728184 | 11 | 15 | 3  | 4.692195357 | 0.000718455 | DLGAP5    | ENSG00000126787 |
| 14 | 54749126 | 54749511 | 54749333 | 10 | 16 | 2  | 6.647276756 | 0.000101928 | UBE2L7P   | ENSG00000131982 |
| 14 | 54807522 | 54807871 | 54807696 | 19 | 23 | 3  | 7.038293036 | 4.15E-06    | FBXO34    | ENSG00000178974 |
| 14 | 54853149 | 54853405 | 54853310 | 9  | 9  | 5  | 1.955081399 | 0.0892323   |           | ENSG00000209119 |
| 14 | 54872703 | 54872973 | 54872815 | 12 | 13 | 3  | 4.105670938 | 0.00243034  |           | ENSG00000209119 |
| 14 | 54948090 | 54948402 | 54948246 | 14 | 18 | 6  | 3.183989707 | 0.00227432  | KIAA0831  | ENSG00000126775 |
| 14 | 54948408 | 54948754 | 54948584 | 9  | 12 | 7  | 1.906204364 | 0.0695918   | KIAA0831  | ENSG00000126775 |
| 14 | 54964830 | 54965041 | 54964911 | 8  | 8  | 2  | 3.519146518 | 0.017558    | TBPL2     | ENSG00000182521 |

|    |          |          |          |    |     |    |             |             |           |                 |
|----|----------|----------|----------|----|-----|----|-------------|-------------|-----------|-----------------|
| 14 | 54966716 | 54966966 | 54966831 | 8  | 9   | 2  | 3.910162798 | 0.00955088  | TBPL2     | ENSG00000182521 |
| 14 | 54974679 | 54974932 | 54974816 | 9  | 9   | 9  | 1.173048839 | 0.362316    | TBPL2     | ENSG00000182521 |
| 14 | 55093621 | 55093981 | 55093861 | 14 | 20  | 6  | 3.519146518 | 0.000784044 |           | ENSG00000213641 |
| 14 | 55113782 | 55114043 | 55113935 | 9  | 11  | 3  | 3.519146518 | 0.00788869  | C14orf33  | ENSG00000186615 |
| 14 | 55116224 | 55116554 | 55116390 | 8  | 10  | 4  | 2.580707446 | 0.0306059   | C14orf33  | ENSG00000186615 |
| 14 | 55135829 | 55136055 | 55135942 | 9  | 13  | 10 | 1.49297125  | 0.157311    | KTN1      | ENSG00000126777 |
| 14 | 55242085 | 55242517 | 55242310 | 15 | 25  | 6  | 4.357038546 | 4.72E-05    |           | ENSG00000200742 |
| 14 | 55623964 | 55624299 | 55624131 | 9  | 13  | 1  | 8.211341875 | 0.000163445 |           | ENSG00000221254 |
| 14 | 56115846 | 56116409 | 56116075 | 12 | 25  | 7  | 3.812408728 | 0.00012465  | C14orf101 | ENSG00000070269 |
| 14 | 56167302 | 56167554 | 56167439 | 10 | 11  | 3  | 3.519146518 | 0.00788869  | C14orf101 | ENSG00000070269 |
| 14 | 56202561 | 56203262 | 56202940 | 76 | 107 | 3  | 31.67231866 | 1.41E-32    | C14orf101 | ENSG00000070269 |
| 14 | 56252536 | 56252748 | 56252609 | 12 | 13  | 2  | 5.474227917 | 0.000747844 | OTX2      | ENSG00000165588 |
| 14 | 56423055 | 56423280 | 56423202 | 8  | 10  | 3  | 3.225884308 | 0.0139466   |           | ENSG00000200818 |
| 14 | 56463557 | 56463835 | 56463700 | 11 | 12  | 2  | 5.083211637 | 0.00143337  |           | ENSG00000213618 |
| 14 | 56586482 | 56586661 | 56586571 | 8  | 8   | 2  | 3.519146518 | 0.017558    |           | ENSG00000213618 |
| 14 | 56622579 | 56622822 | 56622644 | 9  | 12  | 1  | 7.624817456 | 0.000332769 |           | ENSG00000213618 |
| 14 | 56677342 | 56677629 | 56677463 | 8  | 10  | 2  | 4.301179077 | 0.00512919  |           | ENSG00000212928 |
| 14 | 56704800 | 56705046 | 56704923 | 8  | 9   | 3  | 2.932622098 | 0.0242899   |           | ENSG00000212928 |
| 14 | 56769390 | 56769617 | 56769525 | 8  | 9   | 3  | 2.932622098 | 0.0242899   |           | ENSG00000212928 |
| 14 | 56804773 | 56804990 | 56804881 | 8  | 10  | 4  | 2.580707446 | 0.0306059   | EXOC5     | ENSG00000070367 |
| 14 | 56805251 | 56805773 | 56805594 | 11 | 24  | 12 | 2.255863153 | 0.00673318  | C14orf108 | ENSG00000053770 |
| 14 | 56853780 | 56854008 | 56853891 | 8  | 11  | 1  | 7.038293036 | 0.000674435 | C14orf108 | ENSG00000053770 |
| 14 | 56926901 | 56927119 | 56927010 | 10 | 10  | 6  | 1.843362462 | 0.0964212   | NAT12     | ENSG00000139977 |
| 14 | 56951070 | 56951279 | 56951195 | 8  | 8   | 1  | 5.278719777 | 0.00542188  | NAT12     | ENSG00000139977 |
| 14 | 57014794 | 57015028 | 57014882 | 10 | 11  | 5  | 2.346097679 | 0.0364013   | C14orf105 | ENSG00000100557 |
| 14 | 57037614 | 57037953 | 57037783 | 13 | 19  | 3  | 5.865244197 | 5.72E-05    | C14orf105 | ENSG00000100557 |
| 14 | 57073647 | 57073983 | 57073812 | 11 | 16  | 3  | 4.985457567 | 0.000385643 | C14orf105 | ENSG00000100557 |
| 14 | 57644519 | 57644732 | 57644625 | 12 | 12  | 6  | 2.178519273 | 0.0416567   | C14orf37  | ENSG00000139971 |
| 14 | 57682984 | 57683239 | 57683095 | 17 | 17  | 8  | 2.346097679 | 0.0144542   | C14orf37  | ENSG00000139971 |
| 14 | 57702914 | 57703151 | 57703044 | 11 | 13  | 4  | 3.28453675  | 0.00629037  |           | ENSG00000223002 |
| 14 | 57776213 | 57776504 | 57776368 | 14 | 17  | 13 | 1.508205651 | 0.12204     | PSMA3     | ENSG00000100567 |
| 14 | 57780897 | 57781140 | 57781059 | 10 | 11  | 8  | 1.564065119 | 0.151515    | PSMA3     | ENSG00000100567 |
| 14 | 57834267 | 57834670 | 57834491 | 10 | 16  | 8  | 2.215758919 | 0.0222902   | ARID4A    | ENSG00000032219 |
| 14 | 57932764 | 57933008 | 57932870 | 9  | 10  | 4  | 2.580707446 | 0.0306059   | TOMM20L   | ENSG00000196860 |

|    |          |          |          |    |    |    |             |             |           |                 |
|----|----------|----------|----------|----|----|----|-------------|-------------|-----------|-----------------|
| 14 | 57963694 | 57964312 | 57964030 | 8  | 22 | 29 | 0.899337443 | 0.653223    | TIMM9     | ENSG00000100575 |
| 14 | 57992418 | 57992631 | 57992524 | 14 | 14 | 4  | 3.519146518 | 0.00361132  | KIAA0586  | ENSG00000100578 |
| 14 | 58176397 | 58176665 | 58176531 | 14 | 15 | 1  | 9.384390715 | 3.90E-05    | DACT1     | ENSG00000165617 |
| 14 | 58276702 | 58276935 | 58276818 | 11 | 12 | 1  | 7.624817456 | 0.000332769 |           | ENSG00000221427 |
| 14 | 58401368 | 58401690 | 58401538 | 11 | 14 | 5  | 2.932622098 | 0.00829617  |           | ENSG00000213597 |
| 14 | 58416954 | 58417161 | 58417046 | 9  | 11 | 5  | 2.346097679 | 0.0364013   |           | ENSG00000213597 |
| 14 | 58565152 | 58565356 | 58565281 | 10 | 11 | 0  | 14.07658607 | 9.02E-05    |           | ENSG00000214813 |
| 14 | 58724698 | 58725425 | 58725164 | 10 | 31 | 6  | 5.36250898  | 1.31E-06    | DAAM1     | ENSG00000100592 |
| 14 | 58730453 | 58730704 | 58730578 | 10 | 12 | 2  | 5.083211637 | 0.00143337  | DAAM1     | ENSG00000100592 |
| 14 | 58750541 | 58750774 | 58750657 | 9  | 10 | 4  | 2.580707446 | 0.0306059   | DAAM1     | ENSG00000100592 |
| 14 | 58781036 | 58781385 | 58781210 | 22 | 28 | 1  | 17.00920817 | 2.80E-09    | DAAM1     | ENSG00000100592 |
| 14 | 58790877 | 58791292 | 58791113 | 10 | 19 | 6  | 3.351568112 | 0.00134187  | DAAM1     | ENSG00000100592 |
| 14 | 58848077 | 58848381 | 58848226 | 14 | 17 | 2  | 7.038293036 | 5.19E-05    | DAAM1     | ENSG00000100592 |
| 14 | 58897697 | 58898263 | 58898065 | 15 | 35 | 6  | 6.032822602 | 1.10E-07    | DAAM1     | ENSG00000100592 |
| 14 | 58954783 | 58955068 | 58954925 | 10 | 12 | 2  | 5.083211637 | 0.00143337  | GPR135    | ENSG00000181619 |
| 14 | 58958746 | 58958980 | 58958863 | 8  | 8  | 0  | 10.55743955 | 0.000925496 | GPR135    | ENSG00000181619 |
| 14 | 58980751 | 58980986 | 58980868 | 10 | 11 | 1  | 7.038293036 | 0.000674435 | GPR135    | ENSG00000181619 |
| 14 | 59020463 | 59021180 | 59020642 | 12 | 30 | 9  | 3.636451402 | 4.92E-05    | C14orf149 | ENSG00000126790 |
| 14 | 59043960 | 59044169 | 59044095 | 8  | 9  | 5  | 1.955081399 | 0.0892323   | C14orf100 | ENSG00000050130 |
| 14 | 59224210 | 59224470 | 59224371 | 8  | 11 | 3  | 3.519146518 | 0.00788869  | RTN1      | ENSG00000139970 |
| 14 | 59407214 | 59407552 | 59407383 | 8  | 12 | 1  | 7.624817456 | 0.000332769 | RTN1      | ENSG00000139970 |
| 14 | 59472055 | 59472345 | 59472200 | 18 | 22 | 1  | 13.49006165 | 2.37E-07    | LRRC9     | ENSG00000131951 |
| 14 | 59627989 | 59628666 | 59628285 | 20 | 42 | 10 | 4.585554554 | 1.62E-07    | C14orf135 | ENSG00000126773 |
| 14 | 59759179 | 59759625 | 59759449 | 13 | 24 | 17 | 1.629234499 | 0.0548227   | PPM1A     | ENSG00000100614 |
| 14 | 59784322 | 59784683 | 59784513 | 11 | 16 | 9  | 1.994183027 | 0.0370915   | PPM1A     | ENSG00000100614 |
| 14 | 59785312 | 59785531 | 59785450 | 9  | 10 | 8  | 1.433726359 | 0.209175    | PPM1A     | ENSG00000100614 |
| 14 | 59867651 | 59867939 | 59867782 | 13 | 16 | 1  | 9.970915134 | 1.89E-05    | PPM1A     | ENSG00000100614 |
| 14 | 60112634 | 60112818 | 60112755 | 8  | 8  | 4  | 2.111487911 | 0.0804809   |           | ENSG00000209837 |
| 14 | 60153158 | 60153432 | 60153295 | 17 | 19 | 11 | 1.955081399 | 0.0295891   | SIX1      | ENSG00000126778 |
| 14 | 60154675 | 60154945 | 60154810 | 8  | 11 | 3  | 3.519146518 | 0.00788869  | SIX1      | ENSG00000126778 |
| 14 | 60178006 | 60178269 | 60178137 | 8  | 8  | 1  | 5.278719777 | 0.00542188  | SIX1      | ENSG00000126778 |
| 14 | 60186549 | 60186782 | 60186630 | 9  | 11 | 1  | 7.038293036 | 0.000674435 | SIX1      | ENSG00000126778 |
| 14 | 60193769 | 60193976 | 60193872 | 9  | 12 | 4  | 3.049926982 | 0.0108184   | SIX1      | ENSG00000126778 |
| 14 | 60258236 | 60258547 | 60258391 | 9  | 14 | 6  | 2.513676084 | 0.016726    | SIX4      | ENSG00000100625 |

|    |          |          |          |    |     |    |             |             |         |                 |
|----|----------|----------|----------|----|-----|----|-------------|-------------|---------|-----------------|
| 14 | 60260570 | 60260788 | 60260663 | 11 | 11  | 4  | 2.815317214 | 0.0183428   | SIX4    | ENSG00000100625 |
| 14 | 60271044 | 60271370 | 60271201 | 21 | 25  | 4  | 6.099853964 | 4.56E-06    | MNAT1   | ENSG00000020426 |
| 14 | 60281560 | 60281846 | 60281688 | 8  | 10  | 2  | 4.301179077 | 0.00512919  | MNAT1   | ENSG00000020426 |
| 14 | 60398846 | 60399157 | 60399001 | 24 | 27  | 2  | 10.94845583 | 4.90E-08    |         | ENSG00000214775 |
| 14 | 60415611 | 60416099 | 60415766 | 25 | 34  | 5  | 6.842784896 | 5.43E-08    |         | ENSG00000214775 |
| 14 | 60416209 | 60416452 | 60416308 | 8  | 9   | 1  | 5.865244197 | 0.00272497  |         | ENSG00000214775 |
| 14 | 60517323 | 60517880 | 60517626 | 17 | 30  | 5  | 6.060752336 | 7.05E-07    | SLC38A6 | ENSG00000139974 |
| 14 | 60517888 | 60518095 | 60517965 | 8  | 10  | 2  | 4.301179077 | 0.00512919  | SLC38A6 | ENSG00000139974 |
| 14 | 60561747 | 60561951 | 60561851 | 10 | 10  | 3  | 3.225884308 | 0.0139466   | SLC38A6 | ENSG00000139974 |
| 14 | 60661785 | 60662631 | 60662438 | 85 | 128 | 5  | 25.22055005 | 5.21E-37    | SLC38A6 | ENSG00000139974 |
| 14 | 60758446 | 60758743 | 60758595 | 8  | 10  | 4  | 2.580707446 | 0.0306059   | TMEM30B | ENSG00000182107 |
| 14 | 60764700 | 60764945 | 60764806 | 9  | 9   | 2  | 3.910162798 | 0.00955088  | TMEM30B | ENSG00000182107 |
| 14 | 60789314 | 60789555 | 60789434 | 16 | 17  | 4  | 4.222975822 | 0.000640773 | TMEM30B | ENSG00000182107 |
| 14 | 60857966 | 60858208 | 60858087 | 11 | 12  | 5  | 2.541605819 | 0.0225912   | PRKCH   | ENSG00000027075 |
| 14 | 60892346 | 60892662 | 60892504 | 20 | 23  | 5  | 4.692195357 | 5.29E-05    | PRKCH   | ENSG00000027075 |
| 14 | 60904931 | 60905146 | 60905038 | 8  | 9   | 8  | 1.303387599 | 0.281715    | PRKCH   | ENSG00000027075 |
| 14 | 60924734 | 60924936 | 60924824 | 8  | 10  | 1  | 6.451768616 | 0.00135978  | PRKCH   | ENSG00000027075 |
| 14 | 60975231 | 60975788 | 60975547 | 14 | 27  | 10 | 2.9859425   | 0.000503424 | PRKCH   | ENSG00000027075 |
| 14 | 61060304 | 61060529 | 61060416 | 10 | 10  | 3  | 3.225884308 | 0.0139466   | HIF1A   | ENSG00000100644 |
| 14 | 61061684 | 61062128 | 61061949 | 13 | 22  | 2  | 8.993374435 | 1.66E-06    | HIF1A   | ENSG00000100644 |
| 14 | 61062930 | 61063199 | 61063048 | 13 | 16  | 5  | 3.323638378 | 0.00288759  | HIF1A   | ENSG00000100644 |
| 14 | 61123673 | 61123879 | 61123739 | 9  | 12  | 1  | 7.624817456 | 0.000332769 | HIF1A   | ENSG00000100644 |
| 14 | 61140838 | 61141136 | 61140961 | 8  | 13  | 3  | 4.105670938 | 0.00243034  | HIF1A   | ENSG00000100644 |
| 14 | 61231944 | 61232149 | 61232046 | 8  | 8   | 6  | 1.508205651 | 0.203852    | HIF1A   | ENSG00000100644 |
| 14 | 61248122 | 61248333 | 61248227 | 8  | 10  | 3  | 3.225884308 | 0.0139466   | HIF1A   | ENSG00000100644 |
| 14 | 61298432 | 61298651 | 61298525 | 8  | 10  | 6  | 1.843362462 | 0.0964212   | SNAPC1  | ENSG00000023608 |
| 14 | 61699516 | 61699727 | 61699621 | 11 | 12  | 3  | 3.812408728 | 0.004404    |         | ENSG00000186369 |
| 14 | 62228610 | 62229047 | 62228869 | 32 | 45  | 0  | 53.96024661 | 3.12E-16    | KCNH5   | ENSG00000140015 |
| 14 | 62271345 | 62271630 | 62271487 | 13 | 16  | 1  | 9.970915134 | 1.89E-05    | KCNH5   | ENSG00000140015 |
| 14 | 62716033 | 62716244 | 62716147 | 8  | 8   | 1  | 5.278719777 | 0.00542188  | RHOJ    | ENSG00000126785 |
| 14 | 62716878 | 62717057 | 62716999 | 8  | 9   | 1  | 5.865244197 | 0.00272497  | RHOJ    | ENSG00000126785 |
| 14 | 62974505 | 62974741 | 62974613 | 8  | 10  | 5  | 2.150589539 | 0.0575848   |         | ENSG00000221675 |
| 14 | 63041085 | 63041447 | 63041259 | 13 | 18  | 3  | 5.571981987 | 0.000108726 |         | ENSG00000221675 |
| 14 | 63100128 | 63100418 | 63100294 | 18 | 21  | 5  | 4.301179077 | 0.000172642 |         | ENSG00000205767 |

|    |          |          |          |     |     |    |             |             |          |                 |
|----|----------|----------|----------|-----|-----|----|-------------|-------------|----------|-----------------|
| 14 | 63100656 | 63101014 | 63100835 | 9   | 14  | 2  | 5.865244197 | 0.000387308 |          | ENSG00000205767 |
| 14 | 63101869 | 63102254 | 63102075 | 47  | 54  | 0  | 64.51768616 | 2.89E-19    |          | ENSG00000205767 |
| 14 | 63169477 | 63169691 | 63169613 | 12  | 13  | 1  | 8.211341875 | 0.000163445 |          | ENSG00000207172 |
| 14 | 63177909 | 63179018 | 63178295 | 16  | 61  | 16 | 4.27817812  | 1.43E-09    | WDR89    | ENSG00000140006 |
| 14 | 63210267 | 63210473 | 63210370 | 11  | 11  | 3  | 3.519146518 | 0.00788869  |          | ENSG00000209942 |
| 14 | 63214353 | 63214829 | 63214572 | 31  | 54  | 13 | 4.608406154 | 3.72E-09    |          | ENSG00000209942 |
| 14 | 63225619 | 63225898 | 63225758 | 14  | 16  | 3  | 4.985457567 | 0.000385643 |          | ENSG00000209942 |
| 14 | 63306757 | 63307084 | 63306920 | 8   | 13  | 2  | 5.474227917 | 0.000747844 | SGPP1    | ENSG00000126821 |
| 14 | 63309953 | 63310395 | 63310182 | 118 | 141 | 5  | 27.76215586 | 3.45E-41    | SGPP1    | ENSG00000126821 |
| 14 | 63389754 | 63389947 | 63389850 | 9   | 9   | 1  | 5.865244197 | 0.00272497  | SYNE2    | ENSG0000054654  |
| 14 | 63400826 | 63401129 | 63400971 | 11  | 14  | 6  | 2.513676084 | 0.016726    | SYNE2    | ENSG0000054654  |
| 14 | 63596945 | 63597378 | 63597123 | 39  | 54  | 5  | 10.75294769 | 7.83E-14    | SYNE2    | ENSG0000054654  |
| 14 | 63655445 | 63655678 | 63655604 | 11  | 12  | 6  | 2.178519273 | 0.0416567   |          | ENSG00000221537 |
| 14 | 63750429 | 63750674 | 63750590 | 8   | 9   | 6  | 1.675784056 | 0.141978    | ESR2     | ENSG00000140009 |
| 14 | 63752410 | 63752727 | 63752568 | 10  | 12  | 1  | 7.624817456 | 0.000332769 | ESR2     | ENSG00000140009 |
| 14 | 63839825 | 63840181 | 63840061 | 11  | 16  | 4  | 3.988366054 | 0.00115141  | ESR2     | ENSG00000140009 |
| 14 | 63875265 | 63875492 | 63875378 | 10  | 11  | 6  | 2.010940867 | 0.0640214   |          | ENSG00000214770 |
| 14 | 63924193 | 63924523 | 63924366 | 12  | 16  | 5  | 3.323638378 | 0.00288759  | MTHFD1   | ENSG00000100714 |
| 14 | 64038235 | 64038519 | 64038397 | 8   | 11  | 6  | 2.010940867 | 0.0640214   | ZBTB25   | ENSG00000089775 |
| 14 | 64076487 | 64077405 | 64076751 | 14  | 48  | 20 | 2.737113958 | 2.32E-05    | HSPA2    | ENSG00000126803 |
| 14 | 64147830 | 64148032 | 64147931 | 9   | 10  | 4  | 2.580707446 | 0.0306059   | C14orf50 | ENSG00000165807 |
| 14 | 64173237 | 64173441 | 64173339 | 11  | 12  | 3  | 3.812408728 | 0.004404    | PLEKHG3  | ENSG00000126822 |
| 14 | 64208109 | 64208445 | 64208277 | 11  | 16  | 5  | 3.323638378 | 0.00288759  | PLEKHG3  | ENSG00000126822 |
| 14 | 64216859 | 64217106 | 64216982 | 12  | 12  | 2  | 5.083211637 | 0.00143337  | PLEKHG3  | ENSG00000126822 |
| 14 | 64228688 | 64228927 | 64228819 | 12  | 14  | 2  | 5.865244197 | 0.000387308 | PLEKHG3  | ENSG00000126822 |
| 14 | 64239573 | 64239976 | 64239713 | 11  | 17  | 4  | 4.222975822 | 0.000640773 | PLEKHG3  | ENSG00000126822 |
| 14 | 64245620 | 64245803 | 64245733 | 8   | 8   | 2  | 3.519146518 | 0.017558    | PLEKHG3  | ENSG00000126822 |
| 14 | 64298407 | 64298772 | 64298593 | 12  | 19  | 4  | 4.692195357 | 0.000193572 | SPTB     | ENSG00000070182 |
| 14 | 64301227 | 64301517 | 64301372 | 9   | 9   | 3  | 2.932622098 | 0.0242899   | SPTB     | ENSG00000070182 |
| 14 | 64336554 | 64336797 | 64336684 | 10  | 11  | 1  | 7.038293036 | 0.000674435 | SPTB     | ENSG00000070182 |
| 14 | 64342976 | 64343189 | 64343082 | 9   | 9   | 2  | 3.910162798 | 0.00955088  | SPTB     | ENSG00000070182 |
| 14 | 64353658 | 64353853 | 64353755 | 8   | 8   | 3  | 2.639359888 | 0.0415794   | SPTB     | ENSG00000070182 |
| 14 | 64497310 | 64497735 | 64497510 | 19  | 27  | 11 | 2.737113958 | 0.00100133  | RAB15    | ENSG00000139998 |
| 14 | 64503539 | 64503818 | 64503678 | 23  | 26  | 4  | 6.334463732 | 2.40E-06    | RAB15    | ENSG00000139998 |



|    |          |          |          |     |     |    |             |             |          |                 |
|----|----------|----------|----------|-----|-----|----|-------------|-------------|----------|-----------------|
| 14 | 64523226 | 64523625 | 64523398 | 15  | 21  | 7  | 3.225884308 | 0.00106152  | FNTB     | ENSG00000125954 |
| 14 | 64541895 | 64542286 | 64542116 | 78  | 87  | 3  | 25.80707446 | 4.28E-26    | FNTB     | ENSG00000125954 |
| 14 | 64579552 | 64579762 | 64579657 | 8   | 9   | 8  | 1.303387599 | 0.281715    | FNTB     | ENSG00000125954 |
| 14 | 64606825 | 64607169 | 64606999 | 13  | 17  | 3  | 5.278719777 | 0.000205462 | MAX      | ENSG00000125952 |
| 14 | 64607272 | 64607559 | 64607423 | 8   | 12  | 4  | 3.049926982 | 0.0108184   | MAX      | ENSG00000125952 |
| 14 | 64632316 | 64632583 | 64632430 | 9   | 11  | 9  | 1.407658607 | 0.210479    | MAX      | ENSG00000125952 |
| 14 | 64638848 | 64639150 | 64638999 | 8   | 12  | 5  | 2.541605819 | 0.0225912   | MAX      | ENSG00000125952 |
| 14 | 64639289 | 64639666 | 64639487 | 15  | 22  | 7  | 3.372515413 | 0.000629223 | MAX      | ENSG00000125952 |
| 14 | 64716283 | 64716573 | 64716428 | 9   | 12  | 3  | 3.812408728 | 0.004404    |          | ENSG00000222985 |
| 14 | 64758897 | 64759186 | 64759014 | 8   | 11  | 7  | 1.759573259 | 0.102361    |          | ENSG00000214760 |
| 14 | 64763219 | 64763916 | 64763390 | 17  | 36  | 18 | 2.284358266 | 0.00119913  |          | ENSG00000214760 |
| 14 | 64766321 | 64766506 | 64766465 | 8   | 10  | 7  | 1.612942154 | 0.147335    |          | ENSG00000214760 |
| 14 | 64780083 | 64780554 | 64780429 | 8   | 16  | 4  | 3.988366054 | 0.00115141  |          | ENSG00000214760 |
| 14 | 64791739 | 64792907 | 64791940 | 17  | 68  | 19 | 4.047018496 | 5.21E-10    |          | ENSG00000214760 |
| 14 | 64804465 | 64804679 | 64804572 | 10  | 12  | 3  | 3.812408728 | 0.004404    |          | ENSG00000214760 |
| 14 | 64823030 | 64823265 | 64823146 | 8   | 9   | 4  | 2.346097679 | 0.050148    |          | ENSG00000213511 |
| 14 | 64857977 | 64858195 | 64858046 | 8   | 10  | 5  | 2.150589539 | 0.0575848   |          | ENSG00000213511 |
| 14 | 64871371 | 64871763 | 64871504 | 15  | 20  | 8  | 2.737113958 | 0.0036449   |          | ENSG00000213511 |
| 14 | 64890908 | 64891104 | 64891006 | 8   | 9   | 1  | 5.865244197 | 0.00272497  | FUT8     | ENSG00000033170 |
| 14 | 64893056 | 64893338 | 64893203 | 8   | 12  | 2  | 5.083211637 | 0.00143337  | FUT8     | ENSG00000033170 |
| 14 | 65127266 | 65127454 | 65127415 | 8   | 8   | 1  | 5.278719777 | 0.00542188  | FUT8     | ENSG00000033170 |
| 14 | 65513133 | 65513358 | 65513244 | 8   | 9   | 1  | 5.865244197 | 0.00272497  |          | ENSG00000197907 |
| 14 | 65550630 | 65551133 | 65550964 | 13  | 24  | 2  | 9.775406994 | 4.09E-07    |          | ENSG00000197907 |
| 14 | 65551975 | 65552341 | 65552162 | 15  | 21  | 2  | 8.602358155 | 3.33E-06    |          | ENSG00000197907 |
| 14 | 65640937 | 65641315 | 65641110 | 19  | 24  | 2  | 9.775406994 | 4.09E-07    |          | ENSG00000200860 |
| 14 | 65654144 | 65654425 | 65654320 | 8   | 12  | 5  | 2.541605819 | 0.0225912   |          | ENSG00000200860 |
| 14 | 65896015 | 65896198 | 65896106 | 13  | 13  | 3  | 4.105670938 | 0.00243034  | C14orf53 | ENSG00000196553 |
| 14 | 66039959 | 66040339 | 66040169 | 60  | 66  | 1  | 39.29713612 | 9.69E-22    | GPHN     | ENSG00000171723 |
| 14 | 66043851 | 66044704 | 66044500 | 13  | 44  | 11 | 4.398933147 | 1.43E-07    | GPHN     | ENSG00000171723 |
| 14 | 66045808 | 66046003 | 66045905 | 8   | 10  | 3  | 3.225884308 | 0.0139466   | GPHN     | ENSG00000171723 |
| 14 | 66146679 | 66146914 | 66146820 | 10  | 12  | 5  | 2.541605819 | 0.0225912   | GPHN     | ENSG00000171723 |
| 14 | 66468619 | 66469533 | 66469274 | 360 | 459 | 5  | 89.93374435 | 7.28E-146   | FAM71D   | ENSG00000172717 |
| 14 | 66777121 | 66777569 | 66777406 | 13  | 21  | 12 | 1.985159574 | 0.021936    | MPP5     | ENSG00000072415 |
| 14 | 66777824 | 66778075 | 66777949 | 9   | 10  | 2  | 4.301179077 | 0.00512919  | MPP5     | ENSG00000072415 |

|    |          |          |          |     |     |    |             |             |           |                 |
|----|----------|----------|----------|-----|-----|----|-------------|-------------|-----------|-----------------|
| 14 | 66896103 | 66896966 | 66896686 | 10  | 35  | 11 | 3.519146518 | 1.92E-05    | EIF2S1    | ENSG00000134001 |
| 14 | 66963826 | 66964034 | 66963974 | 8   | 10  | 6  | 1.843362462 | 0.0964212   | PLEK2     | ENSG00000100558 |
| 14 | 66977036 | 66977517 | 66977339 | 13  | 25  | 6  | 4.357038546 | 4.72E-05    | PLEK2     | ENSG00000100558 |
| 14 | 66978900 | 66979230 | 66979076 | 14  | 17  | 10 | 1.919534464 | 0.0400548   | PLEK2     | ENSG00000100558 |
| 14 | 67013742 | 67014066 | 67013864 | 9   | 14  | 4  | 3.519146518 | 0.00361132  | C14orf83  | ENSG00000198133 |
| 14 | 67014094 | 67015408 | 67014669 | 162 | 286 | 25 | 12.9486545  | 2.16E-67    | C14orf83  | ENSG00000198133 |
| 14 | 67016492 | 67016852 | 67016671 | 29  | 37  | 16 | 2.62210917  | 0.000256502 | C14orf83  | ENSG00000198133 |
| 14 | 67039569 | 67039753 | 67039628 | 9   | 9   | 3  | 2.932622098 | 0.0242899   | C14orf83  | ENSG00000198133 |
| 14 | 67083734 | 67084012 | 67083897 | 14  | 17  | 4  | 4.222975822 | 0.000640773 | PLEKHH1   | ENSG00000054690 |
| 14 | 67211049 | 67211359 | 67211189 | 11  | 15  | 3  | 4.692195357 | 0.000718455 | VTI1B     | ENSG00000100568 |
| 14 | 67231958 | 67232354 | 67232163 | 9   | 17  | 4  | 4.222975822 | 0.000640773 | RDH11     | ENSG00000072042 |
| 14 | 67240930 | 67241214 | 67241065 | 10  | 13  | 7  | 2.052835469 | 0.046392    |           | ENSG00000222857 |
| 14 | 67352976 | 67353197 | 67353118 | 8   | 10  | 6  | 1.843362462 | 0.0964212   | ZFYVE26   | ENSG00000072121 |
| 14 | 67356108 | 67356420 | 67356264 | 13  | 15  | 11 | 1.564065119 | 0.11768     | RAD51L1   | ENSG00000182185 |
| 14 | 67470522 | 67470851 | 67470677 | 23  | 28  | 4  | 6.803683268 | 6.55E-07    | RAD51L1   | ENSG00000182185 |
| 14 | 67501456 | 67501674 | 67501513 | 11  | 13  | 9  | 1.642268375 | 0.111397    | RAD51L1   | ENSG00000182185 |
| 14 | 67641050 | 67641314 | 67641212 | 9   | 12  | 1  | 7.624817456 | 0.000332769 |           | ENSG00000210045 |
| 14 | 67674162 | 67674697 | 67674442 | 13  | 28  | 7  | 4.252302043 | 2.31E-05    |           | ENSG00000210045 |
| 14 | 67714491 | 67714720 | 67714641 | 9   | 11  | 5  | 2.346097679 | 0.0364013   |           | ENSG00000210045 |
| 14 | 67792317 | 67792552 | 67792445 | 9   | 12  | 3  | 3.812408728 | 0.004404    |           | ENSG00000210054 |
| 14 | 67843342 | 67843666 | 67843509 | 9   | 14  | 8  | 1.955081399 | 0.0506438   |           | ENSG00000219350 |
| 14 | 67934328 | 67934681 | 67934504 | 14  | 20  | 3  | 6.158506406 | 2.99E-05    |           | ENSG00000213482 |
| 14 | 67995404 | 67996156 | 67995805 | 15  | 33  | 16 | 2.346097679 | 0.00141036  |           | ENSG00000213482 |
| 14 | 68011300 | 68011554 | 68011470 | 8   | 10  | 3  | 3.225884308 | 0.0139466   |           | ENSG00000213482 |
| 14 | 68106385 | 68106656 | 68106529 | 10  | 14  | 11 | 1.466311049 | 0.15926     |           | ENSG00000213482 |
| 14 | 68195556 | 68195791 | 68195656 | 9   | 12  | 1  | 7.624817456 | 0.000332769 |           | ENSG00000207089 |
| 14 | 68205800 | 68206003 | 68205901 | 10  | 11  | 6  | 2.010940867 | 0.0640214   |           | ENSG00000207089 |
| 14 | 68212941 | 68213331 | 68213156 | 8   | 15  | 4  | 3.753756286 | 0.0020497   |           | ENSG00000207089 |
| 14 | 68311250 | 68311579 | 68311414 | 9   | 13  | 5  | 2.737113958 | 0.0137917   | ZFP36L1   | ENSG00000185650 |
| 14 | 68328140 | 68328732 | 68328357 | 19  | 36  | 5  | 7.233801176 | 1.48E-08    | ZFP36L1   | ENSG00000185650 |
| 14 | 68329177 | 68329478 | 68329305 | 9   | 12  | 3  | 3.812408728 | 0.004404    | ZFP36L1   | ENSG00000185650 |
| 14 | 68331932 | 68332152 | 68332042 | 8   | 9   | 2  | 3.910162798 | 0.00955088  | C14orf181 | ENSG00000221899 |
| 14 | 68332497 | 68332715 | 68332606 | 10  | 11  | 4  | 2.815317214 | 0.0183428   | C14orf181 | ENSG00000221899 |
| 14 | 68353189 | 68353430 | 68353307 | 8   | 11  | 6  | 2.010940867 | 0.0640214   | C14orf181 | ENSG00000221899 |

|    |          |          |          |    |    |    |             |             |           |                 |
|----|----------|----------|----------|----|----|----|-------------|-------------|-----------|-----------------|
| 14 | 68361161 | 68361666 | 68361413 | 12 | 22 | 15 | 1.686257707 | 0.051516    | C14orf181 | ENSG00000221899 |
| 14 | 68376845 | 68377026 | 68376935 | 8  | 8  | 1  | 5.278719777 | 0.00542188  |           | ENSG00000214730 |
| 14 | 68380550 | 68380769 | 68380682 | 10 | 11 | 4  | 2.815317214 | 0.0183428   |           | ENSG00000214730 |
| 14 | 68390047 | 68390674 | 68390360 | 18 | 34 | 0  | 41.05670938 | 1.59E-12    |           | ENSG00000214730 |
| 14 | 68399707 | 68400071 | 68399882 | 10 | 16 | 4  | 3.988366054 | 0.00115141  |           | ENSG00000214730 |
| 14 | 68414322 | 68414503 | 68414386 | 8  | 8  | 2  | 3.519146518 | 0.017558    |           | ENSG00000214730 |
| 14 | 68448100 | 68448424 | 68448271 | 15 | 17 | 6  | 3.016411301 | 0.00381427  |           | ENSG00000214730 |
| 14 | 68474382 | 68474601 | 68474502 | 8  | 9  | 1  | 5.865244197 | 0.00272497  | ACTN1     | ENSG00000072110 |
| 14 | 68503246 | 68503480 | 68503365 | 8  | 10 | 1  | 6.451768616 | 0.00135978  | ACTN1     | ENSG00000072110 |
| 14 | 68514626 | 68514829 | 68514767 | 8  | 10 | 3  | 3.225884308 | 0.0139466   | ACTN1     | ENSG00000072110 |
| 14 | 68524270 | 68525216 | 68524884 | 30 | 64 | 6  | 10.89259637 | 4.73E-16    | ACTN1     | ENSG00000072110 |
| 14 | 68538016 | 68538195 | 68538105 | 8  | 8  | 1  | 5.278719777 | 0.00542188  | ACTN1     | ENSG00000072110 |
| 14 | 68593402 | 68593582 | 68593470 | 8  | 8  | 1  | 5.278719777 | 0.00542188  | ACTN1     | ENSG00000072110 |
| 14 | 68642840 | 68643235 | 68643084 | 24 | 28 | 1  | 17.00920817 | 2.80E-09    |           | ENSG00000206768 |
| 14 | 68643878 | 68644224 | 68644053 | 12 | 16 | 5  | 3.323638378 | 0.00288759  |           | ENSG00000206768 |
| 14 | 68665708 | 68665978 | 68665810 | 8  | 11 | 9  | 1.407658607 | 0.210479    |           | ENSG00000206768 |
| 14 | 68688261 | 68688454 | 68688357 | 9  | 10 | 0  | 12.90353723 | 0.000195991 | WDR22     | ENSG00000139990 |
| 14 | 68727763 | 68728145 | 68727968 | 23 | 29 | 8  | 3.910162798 | 3.45E-05    | EXDL2     | ENSG00000081177 |
| 14 | 68728289 | 68728551 | 68728434 | 8  | 10 | 4  | 2.580707446 | 0.0306059   | EXDL2     | ENSG00000081177 |
| 14 | 68871946 | 68872334 | 68872018 | 11 | 17 | 9  | 2.111487911 | 0.0248715   | ERH       | ENSG00000100632 |
| 14 | 68879302 | 68879633 | 68879459 | 10 | 13 | 3  | 4.105670938 | 0.00243034  | ERH       | ENSG00000100632 |
| 14 | 68883170 | 68883353 | 68883298 | 8  | 9  | 1  | 5.865244197 | 0.00272497  | ERH       | ENSG00000100632 |
| 14 | 68887546 | 68887785 | 68887676 | 9  | 10 | 1  | 6.451768616 | 0.00135978  | ERH       | ENSG00000100632 |
| 14 | 68887836 | 68888194 | 68888034 | 20 | 25 | 0  | 30.49926982 | 1.72E-09    | ERH       | ENSG00000100632 |
| 14 | 68890979 | 68891240 | 68891115 | 9  | 10 | 7  | 1.612942154 | 0.147335    | ERH       | ENSG00000100632 |
| 14 | 68894041 | 68894413 | 68894217 | 27 | 34 | 12 | 3.158208414 | 7.02E-05    | ERH       | ENSG00000100632 |
| 14 | 68934514 | 68934961 | 68934693 | 11 | 20 | 9  | 2.463402563 | 0.00689886  | ERH       | ENSG00000100632 |
| 14 | 68935075 | 68935367 | 68935218 | 15 | 17 | 8  | 2.346097679 | 0.0144542   | SLC39A9   | ENSG00000029364 |
| 14 | 68964143 | 68964470 | 68964306 | 19 | 23 | 3  | 7.038293036 | 4.15E-06    | SLC39A9   | ENSG00000029364 |
| 14 | 68996571 | 68996869 | 68996720 | 14 | 15 | 4  | 3.753756286 | 0.0020497   |           | ENSG00000175985 |
| 14 | 69040226 | 69040492 | 69040367 | 9  | 9  | 1  | 5.865244197 | 0.00272497  |           | ENSG00000175985 |
| 14 | 69111175 | 69111354 | 69111265 | 8  | 8  | 8  | 1.173048839 | 0.36929     |           | ENSG00000214724 |
| 14 | 69140126 | 69140306 | 69140216 | 8  | 8  | 2  | 3.519146518 | 0.017558    | KIAA0247  | ENSG00000100647 |
| 14 | 69149060 | 69149675 | 69149412 | 33 | 52 | 8  | 6.907954276 | 3.31E-11    | KIAA0247  | ENSG00000100647 |

|    |          |          |          |     |     |    |             |             |          |                 |
|----|----------|----------|----------|-----|-----|----|-------------|-------------|----------|-----------------|
| 14 | 69149722 | 69149995 | 69149858 | 8   | 11  | 6  | 2.010940867 | 0.0640214   | KIAA0247 | ENSG00000100647 |
| 14 | 69156512 | 69156691 | 69156601 | 9   | 9   | 8  | 1.303387599 | 0.281715    | KIAA0247 | ENSG00000100647 |
| 14 | 69194483 | 69194866 | 69194639 | 10  | 15  | 6  | 2.68125449  | 0.0103552   | KIAA0247 | ENSG00000100647 |
| 14 | 69199434 | 69199681 | 69199592 | 9   | 11  | 10 | 1.279689643 | 0.277323    | KIAA0247 | ENSG00000100647 |
| 14 | 69199711 | 69200018 | 69199888 | 13  | 17  | 9  | 2.111487911 | 0.0248715   | KIAA0247 | ENSG00000100647 |
| 14 | 69219210 | 69219389 | 69219299 | 8   | 8   | 3  | 2.639359888 | 0.0415794   | KIAA0247 | ENSG00000100647 |
| 14 | 69234860 | 69235101 | 69234948 | 8   | 9   | 1  | 5.865244197 | 0.00272497  | SFRS5    | ENSG00000100650 |
| 14 | 69249089 | 69250322 | 69249789 | 77  | 141 | 16 | 9.798407952 | 2.58E-31    | SFRS5    | ENSG00000100650 |
| 14 | 69263483 | 69263669 | 69263590 | 8   | 8   | 3  | 2.639359888 | 0.0415794   | SFRS5    | ENSG00000100650 |
| 14 | 69275949 | 69276370 | 69276191 | 15  | 23  | 1  | 14.07658607 | 1.14E-07    | SFRS5    | ENSG00000100650 |
| 14 | 69303362 | 69303774 | 69303568 | 17  | 27  | 14 | 2.189691167 | 0.00561952  | SFRS5    | ENSG00000100650 |
| 14 | 69304020 | 69304271 | 69304145 | 9   | 11  | 7  | 1.759573259 | 0.102361    | SFRS5    | ENSG00000100650 |
| 14 | 69335017 | 69335274 | 69335158 | 9   | 10  | 2  | 4.301179077 | 0.00512919  | SLC10A1  | ENSG00000100652 |
| 14 | 69457362 | 69457646 | 69457504 | 9   | 9   | 2  | 3.910162798 | 0.00955088  | SMOC1    | ENSG00000198732 |
| 14 | 69508194 | 69508477 | 69508330 | 10  | 10  | 6  | 1.843362462 | 0.0964212   | SMOC1    | ENSG00000198732 |
| 14 | 69534318 | 69534689 | 69534481 | 17  | 23  | 8  | 3.128130238 | 0.000832453 |          | ENSG00000210090 |
| 14 | 69535536 | 69536319 | 69535985 | 49  | 77  | 7  | 11.43722618 | 3.64E-19    |          | ENSG00000210090 |
| 14 | 69547405 | 69548025 | 69547755 | 121 | 168 | 4  | 39.64905077 | 3.39E-51    |          | ENSG00000210090 |
| 14 | 69548062 | 69548288 | 69548234 | 8   | 11  | 3  | 3.519146518 | 0.00788869  |          | ENSG00000210090 |
| 14 | 69549785 | 69549964 | 69549866 | 8   | 8   | 7  | 1.319679944 | 0.283403    |          | ENSG00000210090 |
| 14 | 69564346 | 69564577 | 69564434 | 12  | 13  | 4  | 3.28453675  | 0.00629037  |          | ENSG00000210090 |
| 14 | 69582536 | 69582770 | 69582674 | 17  | 18  | 4  | 4.457585589 | 0.000353565 |          | ENSG00000210090 |
| 14 | 69623622 | 69623869 | 69623782 | 11  | 11  | 3  | 3.519146518 | 0.00788869  | SLC8A3   | ENSG00000100678 |
| 14 | 69725039 | 69725346 | 69725192 | 9   | 12  | 1  | 7.624817456 | 0.000332769 | SLC8A3   | ENSG00000100678 |
| 14 | 69895739 | 69896422 | 69896200 | 37  | 59  | 16 | 4.140172374 | 4.30E-09    | COX16    | ENSG00000133983 |
| 14 | 69953281 | 69953604 | 69953442 | 11  | 13  | 9  | 1.642268375 | 0.111397    | SYNJ2BP  | ENSG00000213463 |
| 14 | 69983700 | 69984077 | 69983879 | 29  | 36  | 0  | 43.40280705 | 3.38E-13    |          | ENSG00000213462 |
| 14 | 69985179 | 69985448 | 69985319 | 8   | 8   | 4  | 2.111487911 | 0.0804809   | ADAM21P  | ENSG00000139985 |
| 14 | 70064111 | 70064314 | 70064201 | 8   | 8   | 1  | 5.278719777 | 0.00542188  | ADAM20   | ENSG00000134007 |
| 14 | 70104353 | 70104532 | 70104514 | 8   | 8   | 1  | 5.278719777 | 0.00542188  |          | ENSG00000214720 |
| 14 | 70177637 | 70177852 | 70177744 | 8   | 9   | 6  | 1.675784056 | 0.141978    | TTC9     | ENSG00000133985 |
| 14 | 70180089 | 70180288 | 70180188 | 8   | 9   | 3  | 2.932622098 | 0.0242899   | TTC9     | ENSG00000133985 |
| 14 | 70201932 | 70202210 | 70202060 | 18  | 22  | 7  | 3.372515413 | 0.000629223 | TTC9     | ENSG00000133985 |
| 14 | 70228772 | 70229063 | 70228917 | 13  | 14  | 1  | 8.797866295 | 8.00E-05    | TTC9     | ENSG00000133985 |

|    |          |          |          |     |     |    |             |             |         |                 |
|----|----------|----------|----------|-----|-----|----|-------------|-------------|---------|-----------------|
| 14 | 70250555 | 70250765 | 70250660 | 8   | 8   | 3  | 2.639359888 | 0.0415794   | TTC9    | ENSG00000133985 |
| 14 | 70354195 | 70354506 | 70354350 | 12  | 16  | 8  | 2.215758919 | 0.0222902   | MAP3K9  | ENSG00000006432 |
| 14 | 70401512 | 70401865 | 70401689 | 35  | 40  | 1  | 24.04750121 | 3.50E-13    | PCNX    | ENSG00000100731 |
| 14 | 70443542 | 70443744 | 70443652 | 12  | 12  | 3  | 3.812408728 | 0.004404    | PCNX    | ENSG00000100731 |
| 14 | 70612706 | 70613599 | 70613154 | 96  | 156 | 6  | 26.30980968 | 7.30E-45    | PCNX    | ENSG00000100731 |
| 14 | 70703017 | 70703196 | 70703106 | 8   | 8   | 6  | 1.508205651 | 0.203852    |         | ENSG00000207444 |
| 14 | 70712145 | 70712381 | 70712263 | 8   | 8   | 1  | 5.278719777 | 0.00542188  |         | ENSG00000207444 |
| 14 | 70856445 | 70856917 | 70856524 | 11  | 19  | 4  | 4.692195357 | 0.000193572 |         | ENSG00000207444 |
| 14 | 70858292 | 70858492 | 70858374 | 11  | 13  | 1  | 8.211341875 | 0.000163445 |         | ENSG00000207444 |
| 14 | 70924796 | 70925088 | 70924942 | 11  | 15  | 5  | 3.128130238 | 0.00492422  |         | ENSG00000207444 |
| 14 | 71006171 | 71006350 | 71006297 | 8   | 8   | 0  | 10.55743955 | 0.000925496 |         | ENSG00000210153 |
| 14 | 71008107 | 71008780 | 71008286 | 15  | 30  | 13 | 2.597465287 | 0.000910385 |         | ENSG00000210153 |
| 14 | 71096718 | 71096897 | 71096807 | 9   | 9   | 0  | 11.73048839 | 0.000425898 | SIPA1L1 | ENSG00000197555 |
| 14 | 71100376 | 71100727 | 71100554 | 15  | 20  | 6  | 3.519146518 | 0.000784044 | SIPA1L1 | ENSG00000197555 |
| 14 | 71175075 | 71175625 | 71175446 | 14  | 29  | 4  | 7.038293036 | 3.41E-07    | SIPA1L1 | ENSG00000197555 |
| 14 | 71183617 | 71183909 | 71183761 | 20  | 23  | 9  | 2.815317214 | 0.00172056  | SIPA1L1 | ENSG00000197555 |
| 14 | 71204133 | 71204351 | 71204219 | 8   | 10  | 1  | 6.451768616 | 0.00135978  | SIPA1L1 | ENSG00000197555 |
| 14 | 71257391 | 71257744 | 71257569 | 14  | 18  | 1  | 11.14396397 | 4.44E-06    | SIPA1L1 | ENSG00000197555 |
| 14 | 71289532 | 71289864 | 71289706 | 11  | 15  | 10 | 1.706252857 | 0.0822346   | RGS6    | ENSG00000182732 |
| 14 | 71310163 | 71311054 | 71310656 | 102 | 164 | 3  | 48.38826462 | 3.00E-51    | RGS6    | ENSG00000182732 |
| 14 | 71340049 | 71340496 | 71340228 | 10  | 19  | 9  | 2.346097679 | 0.0107159   | RGS6    | ENSG00000182732 |
| 14 | 71340525 | 71340849 | 71340689 | 11  | 14  | 4  | 3.519146518 | 0.00361132  | RGS6    | ENSG00000182732 |
| 14 | 71468317 | 71468671 | 71468494 | 8   | 14  | 10 | 1.599612054 | 0.114822    | RGS6    | ENSG00000182732 |
| 14 | 71640439 | 71640767 | 71640603 | 8   | 14  | 2  | 5.865244197 | 0.000387308 |         | ENSG00000200298 |
| 14 | 71735969 | 71736250 | 71736109 | 10  | 11  | 4  | 2.815317214 | 0.0183428   |         | ENSG00000200298 |
| 14 | 71940596 | 71940978 | 71940799 | 24  | 31  | 4  | 7.507512572 | 9.10E-08    | DPF3    | ENSG00000205683 |
| 14 | 71957221 | 71957566 | 71957393 | 11  | 17  | 1  | 10.55743955 | 9.18E-06    | DPF3    | ENSG00000205683 |
| 14 | 71974211 | 71974581 | 71974371 | 15  | 21  | 2  | 8.602358155 | 3.33E-06    | DPF3    | ENSG00000205683 |
| 14 | 72022729 | 72022908 | 72022780 | 8   | 10  | 1  | 6.451768616 | 0.00135978  | DPF3    | ENSG00000205683 |
| 14 | 72032194 | 72032535 | 72032356 | 8   | 13  | 3  | 4.105670938 | 0.00243034  | DPF3    | ENSG00000205683 |
| 14 | 72036909 | 72037235 | 72037088 | 16  | 20  | 8  | 2.737113958 | 0.0036449   | DPF3    | ENSG00000205683 |
| 14 | 72050633 | 72050871 | 72050752 | 10  | 11  | 11 | 1.173048839 | 0.349489    | DPF3    | ENSG00000205683 |
| 14 | 72053429 | 72053645 | 72053537 | 12  | 13  | 9  | 1.642268375 | 0.111397    | DPF3    | ENSG00000205683 |
| 14 | 72097347 | 72097601 | 72097518 | 9   | 11  | 0  | 14.07658607 | 9.02E-05    | DPF3    | ENSG00000205683 |

|    |          |          |          |    |    |    |             |             |          |                 |
|----|----------|----------|----------|----|----|----|-------------|-------------|----------|-----------------|
| 14 | 72144665 | 72144844 | 72144705 | 8  | 8  | 4  | 2.111487911 | 0.0804809   | DPF3     | ENSG00000205683 |
| 14 | 72188098 | 72188279 | 72188191 | 9  | 9  | 2  | 3.910162798 | 0.00955088  | DPF3     | ENSG00000205683 |
| 14 | 72203239 | 72203437 | 72203361 | 8  | 8  | 2  | 3.519146518 | 0.017558    | DPF3     | ENSG00000205683 |
| 14 | 72222529 | 72222761 | 72222629 | 10 | 11 | 0  | 14.07658607 | 9.02E-05    | DPF3     | ENSG00000205683 |
| 14 | 72431165 | 72431450 | 72431276 | 9  | 14 | 3  | 4.398933147 | 0.00132748  | DPF3     | ENSG00000205683 |
| 14 | 72441500 | 72441744 | 72441621 | 10 | 13 | 3  | 4.105670938 | 0.00243034  | DPF3     | ENSG00000205683 |
| 14 | 72460723 | 72461226 | 72460902 | 22 | 38 | 4  | 9.149780947 | 8.17E-10    | WDR21A   | ENSG00000119599 |
| 14 | 72463315 | 72463527 | 72463432 | 9  | 10 | 4  | 2.580707446 | 0.0306059   | WDR21A   | ENSG00000119599 |
| 14 | 72463637 | 72463839 | 72463738 | 9  | 9  | 2  | 3.910162798 | 0.00955088  | WDR21A   | ENSG00000119599 |
| 14 | 72562778 | 72563037 | 72562882 | 8  | 10 | 3  | 3.225884308 | 0.0139466   | ZFYVE1   | ENSG00000165861 |
| 14 | 72563402 | 72563670 | 72563536 | 11 | 14 | 1  | 8.797866295 | 8.00E-05    | ZFYVE1   | ENSG00000165861 |
| 14 | 72594613 | 72595242 | 72594926 | 16 | 31 | 8  | 4.170840318 | 1.13E-05    | RBM25    | ENSG00000119707 |
| 14 | 72595664 | 72595889 | 72595776 | 10 | 12 | 3  | 3.812408728 | 0.004404    | RBM25    | ENSG00000119707 |
| 14 | 72641630 | 72641819 | 72641742 | 9  | 9  | 1  | 5.865244197 | 0.00272497  | PSEN1    | ENSG00000080815 |
| 14 | 73008650 | 73008846 | 73008700 | 10 | 10 | 7  | 1.612942154 | 0.147335    |          | ENSG00000170468 |
| 14 | 73027173 | 73027412 | 73027292 | 8  | 10 | 1  | 6.451768616 | 0.00135978  |          | ENSG00000170468 |
| 14 | 73036850 | 73037088 | 73036957 | 9  | 11 | 4  | 2.815317214 | 0.0183428   |          | ENSG00000170468 |
| 14 | 73063086 | 73063405 | 73063245 | 16 | 19 | 8  | 2.606775198 | 0.00583935  | ACOT1    | ENSG00000184227 |
| 14 | 73169952 | 73170192 | 73170085 | 9  | 10 | 4  | 2.580707446 | 0.0306059   | DNAL1    | ENSG00000119661 |
| 14 | 73181078 | 73181519 | 73181407 | 11 | 21 | 6  | 3.686724924 | 0.000453999 | DNAL1    | ENSG00000119661 |
| 14 | 73198982 | 73199192 | 73199042 | 8  | 9  | 8  | 1.303387599 | 0.281715    | DNAL1    | ENSG00000119661 |
| 14 | 73247043 | 73247259 | 73247192 | 8  | 8  | 1  | 5.278719777 | 0.00542188  | PNMA1    | ENSG00000176903 |
| 14 | 73250597 | 73250837 | 73250676 | 10 | 13 | 4  | 3.28453675  | 0.00629037  | PNMA1    | ENSG00000176903 |
| 14 | 73259150 | 73259466 | 73259308 | 9  | 10 | 1  | 6.451768616 | 0.00135978  |          | ENSG00000183700 |
| 14 | 73260282 | 73260960 | 73260558 | 17 | 39 | 14 | 3.128130238 | 2.65E-05    |          | ENSG00000183700 |
| 14 | 73265259 | 73265470 | 73265364 | 9  | 11 | 2  | 4.692195357 | 0.00272444  |          | ENSG00000183700 |
| 14 | 73277332 | 73277620 | 73277472 | 11 | 13 | 6  | 2.346097679 | 0.0266147   | C14orf43 | ENSG00000156030 |
| 14 | 73289014 | 73289577 | 73289405 | 13 | 27 | 6  | 4.692195357 | 1.46E-05    | C14orf43 | ENSG00000156030 |
| 14 | 73293012 | 73293230 | 73293121 | 8  | 11 | 10 | 1.279689643 | 0.277323    | C14orf43 | ENSG00000156030 |
| 14 | 73294737 | 73295183 | 73295039 | 11 | 19 | 4  | 4.692195357 | 0.000193572 | C14orf43 | ENSG00000156030 |
| 14 | 73296486 | 73296713 | 73296566 | 10 | 11 | 5  | 2.346097679 | 0.0364013   | C14orf43 | ENSG00000156030 |
| 14 | 73299820 | 73300236 | 73299996 | 8  | 15 | 8  | 2.085420159 | 0.0338693   | C14orf43 | ENSG00000156030 |
| 14 | 73312000 | 73312182 | 73312065 | 9  | 10 | 4  | 2.580707446 | 0.0306059   | C14orf43 | ENSG00000156030 |
| 14 | 73313920 | 73314214 | 73314067 | 13 | 16 | 7  | 2.492728784 | 0.0124193   | C14orf43 | ENSG00000156030 |

|    |          |          |          |    |    |    |             |             |           |                 |
|----|----------|----------|----------|----|----|----|-------------|-------------|-----------|-----------------|
| 14 | 73322202 | 73322698 | 73322460 | 18 | 29 | 3  | 8.797866295 | 7.21E-08    | C14orf43  | ENSG00000156030 |
| 14 | 73323041 | 73323349 | 73323195 | 9  | 11 | 9  | 1.407658607 | 0.210479    | C14orf43  | ENSG00000156030 |
| 14 | 73362104 | 73362358 | 73362231 | 12 | 12 | 8  | 1.694403879 | 0.107291    | PTGR2     | ENSG00000140043 |
| 14 | 73387912 | 73388477 | 73388140 | 18 | 29 | 5  | 5.865244197 | 1.33E-06    | PTGR2     | ENSG00000140043 |
| 14 | 73423007 | 73423462 | 73423224 | 15 | 28 | 10 | 3.092583304 | 0.000307818 | ZNF410    | ENSG00000119725 |
| 14 | 73424511 | 73424970 | 73424880 | 9  | 18 | 9  | 2.228792795 | 0.0164363   | ZNF410    | ENSG00000119725 |
| 14 | 73481237 | 73481464 | 73481350 | 9  | 9  | 6  | 1.675784056 | 0.141978    | COQ6      | ENSG00000119723 |
| 14 | 73486386 | 73486578 | 73486553 | 8  | 9  | 5  | 1.955081399 | 0.0892323   | FAM161B   | ENSG00000156050 |
| 14 | 73486592 | 73486901 | 73486746 | 8  | 12 | 10 | 1.386330446 | 0.21117     | COQ6      | ENSG00000119723 |
| 14 | 73620743 | 73621025 | 73620903 | 11 | 14 | 7  | 2.199466574 | 0.0303778   | ALDH6A1   | ENSG00000119711 |
| 14 | 73621106 | 73621603 | 73621354 | 8  | 18 | 11 | 1.857327329 | 0.0427732   | LIN52     | ENSG00000205659 |
| 14 | 73627184 | 73627392 | 73627282 | 8  | 8  | 2  | 3.519146518 | 0.017558    |           | ENSG00000210257 |
| 14 | 73754135 | 73754321 | 73754282 | 9  | 10 | 4  | 2.580707446 | 0.0306059   | VSX2      | ENSG00000119614 |
| 14 | 73788049 | 73788249 | 73788140 | 12 | 13 | 7  | 2.052835469 | 0.046392    | VSX2      | ENSG00000119614 |
| 14 | 73839353 | 73839740 | 73839532 | 11 | 18 | 11 | 1.857327329 | 0.0427732   | ABCD4     | ENSG00000119688 |
| 14 | 73898810 | 73899043 | 73898926 | 10 | 12 | 5  | 2.541605819 | 0.0225912   | C14orf115 | ENSG00000133980 |
| 14 | 74029990 | 74030381 | 74030124 | 8  | 14 | 5  | 2.932622098 | 0.00829617  | ISCA2     | ENSG00000165898 |
| 14 | 74037757 | 74038033 | 74037895 | 10 | 10 | 4  | 2.580707446 | 0.0306059   | ISCA2     | ENSG00000165898 |
| 14 | 74067847 | 74068057 | 74067952 | 8  | 9  | 2  | 3.910162798 | 0.00955088  | ISCA2     | ENSG00000165898 |
| 14 | 74106777 | 74106995 | 74106850 | 12 | 13 | 1  | 8.211341875 | 0.000163445 | LTBP2     | ENSG00000119681 |
| 14 | 74159460 | 74159686 | 74159573 | 11 | 12 | 0  | 15.24963491 | 4.15E-05    | LTBP2     | ENSG00000119681 |
| 14 | 74199301 | 74199576 | 74199438 | 9  | 12 | 5  | 2.541605819 | 0.0225912   |           | ENSG00000222604 |
| 14 | 74249443 | 74249790 | 74249616 | 17 | 23 | 12 | 2.165628626 | 0.0100985   | FCF1      | ENSG00000119616 |
| 14 | 74299567 | 74299749 | 74299698 | 9  | 9  | 3  | 2.932622098 | 0.0242899   | YLPM1     | ENSG00000119596 |
| 14 | 74330326 | 74330555 | 74330440 | 8  | 9  | 2  | 3.910162798 | 0.00955088  | YLPM1     | ENSG00000119596 |
| 14 | 74377979 | 74378191 | 74378051 | 10 | 11 | 0  | 14.07658607 | 9.02E-05    | PROX2     | ENSG00000119608 |
| 14 | 74397353 | 74397598 | 74397500 | 12 | 13 | 8  | 1.824742639 | 0.0744168   | PROX2     | ENSG00000119608 |
| 14 | 74417807 | 74418489 | 74418168 | 10 | 29 | 11 | 2.932622098 | 0.000389335 | DLSTP     | ENSG00000119689 |
| 14 | 74448019 | 74448301 | 74448176 | 9  | 12 | 2  | 5.083211637 | 0.00143337  | RPS6KL1   | ENSG00000198208 |
| 14 | 74481567 | 74481748 | 74481708 | 8  | 8  | 0  | 10.55743955 | 0.000925496 | PGF       | ENSG00000119630 |
| 14 | 74482173 | 74482473 | 74482323 | 11 | 15 | 3  | 4.692195357 | 0.000718455 | PGF       | ENSG00000119630 |
| 14 | 74482881 | 74483183 | 74483042 | 10 | 14 | 6  | 2.513676084 | 0.016726    | PGF       | ENSG00000119630 |
| 14 | 74489440 | 74489857 | 74489648 | 44 | 60 | 2  | 23.85199307 | 1.61E-18    | PGF       | ENSG00000119630 |
| 14 | 74516075 | 74516338 | 74516206 | 11 | 12 | 0  | 15.24963491 | 4.15E-05    | EIF2B2    | ENSG00000119718 |

|    |          |          |          |    |    |    |             |             |         |                 |
|----|----------|----------|----------|----|----|----|-------------|-------------|---------|-----------------|
| 14 | 74539036 | 74539643 | 74539329 | 18 | 37 | 6  | 6.367979413 | 3.11E-08    | EIF2B2  | ENSG00000119718 |
| 14 | 74621090 | 74621396 | 74621243 | 8  | 11 | 3  | 3.519146518 | 0.00788869  | FAM164C | ENSG00000119703 |
| 14 | 74625002 | 74625359 | 74625290 | 12 | 16 | 3  | 4.985457567 | 0.000385643 | FAM164C | ENSG00000119703 |
| 14 | 74712769 | 74713052 | 74712900 | 12 | 14 | 9  | 1.759573259 | 0.0786014   | TMED10  | ENSG00000170348 |
| 14 | 74713219 | 74713537 | 74713378 | 8  | 12 | 11 | 1.270802909 | 0.274822    | TMED10  | ENSG00000170348 |
| 14 | 74719359 | 74719634 | 74719503 | 8  | 11 | 2  | 4.692195357 | 0.00272444  | TMED10  | ENSG00000170348 |
| 14 | 74736906 | 74737332 | 74737125 | 21 | 32 | 18 | 2.037400616 | 0.00555036  |         | ENSG00000210276 |
| 14 | 74758284 | 74758673 | 74758423 | 11 | 18 | 1  | 11.14396397 | 4.44E-06    |         | ENSG00000210276 |
| 14 | 74791448 | 74791867 | 74791657 | 49 | 62 | 15 | 4.618879805 | 3.04E-10    | FOS     | ENSG00000170345 |
| 14 | 74795027 | 74795280 | 74795153 | 11 | 14 | 9  | 1.759573259 | 0.0786014   | FOS     | ENSG00000170345 |
| 14 | 74795362 | 74796057 | 74795795 | 12 | 34 | 9  | 4.105670938 | 5.54E-06    | FOS     | ENSG00000170345 |
| 14 | 74796408 | 74797013 | 74796631 | 30 | 57 | 12 | 5.233602514 | 2.21E-10    | FOS     | ENSG00000170345 |
| 14 | 74800543 | 74800850 | 74800696 | 13 | 17 | 11 | 1.759573259 | 0.0609179   | FOS     | ENSG00000170345 |
| 14 | 74811652 | 74811888 | 74811795 | 10 | 11 | 3  | 3.519146518 | 0.00788869  | FOS     | ENSG00000170345 |
| 14 | 74813624 | 74813845 | 74813734 | 10 | 11 | 3  | 3.519146518 | 0.00788869  | FOS     | ENSG00000170345 |
| 14 | 74814514 | 74815371 | 74814770 | 13 | 42 | 17 | 2.802283338 | 5.11E-05    | FOS     | ENSG00000170345 |
| 14 | 74832201 | 74832513 | 74832417 | 9  | 14 | 6  | 2.513676084 | 0.016726    |         | ENSG00000119660 |
| 14 | 74832518 | 74832858 | 74832692 | 10 | 14 | 8  | 1.955081399 | 0.0506438   |         | ENSG00000119660 |
| 14 | 74840027 | 74840258 | 74840169 | 15 | 15 | 7  | 2.346097679 | 0.0195693   |         | ENSG00000119660 |
| 14 | 74843429 | 74843629 | 74843529 | 9  | 9  | 5  | 1.955081399 | 0.0892323   |         | ENSG00000119660 |
| 14 | 74955902 | 74956163 | 74956032 | 10 | 12 | 2  | 5.083211637 | 0.00143337  | JDP2    | ENSG00000140044 |
| 14 | 74989641 | 74990123 | 74989803 | 15 | 25 | 5  | 5.083211637 | 1.58E-05    | JDP2    | ENSG00000140044 |
| 14 | 75024919 | 75025191 | 75025086 | 11 | 12 | 8  | 1.694403879 | 0.107291    | BATF    | ENSG00000156127 |
| 14 | 75054849 | 75055155 | 75054997 | 13 | 16 | 5  | 3.323638378 | 0.00288759  | BATF    | ENSG00000156127 |
| 14 | 75056391 | 75056632 | 75056517 | 12 | 13 | 7  | 2.052835469 | 0.046392    | BATF    | ENSG00000156127 |
| 14 | 75057284 | 75057907 | 75057647 | 19 | 37 | 12 | 3.428911992 | 1.55E-05    | BATF    | ENSG00000156127 |
| 14 | 75058598 | 75058928 | 75058763 | 9  | 12 | 7  | 1.906204364 | 0.0695918   | BATF    | ENSG00000156127 |
| 14 | 75079085 | 75079313 | 75079182 | 10 | 11 | 1  | 7.038293036 | 0.000674435 | BATF    | ENSG00000156127 |
| 14 | 75090848 | 75091060 | 75090970 | 9  | 11 | 3  | 3.519146518 | 0.00788869  | FLVCR2  | ENSG00000119686 |
| 14 | 75097085 | 75097433 | 75097261 | 11 | 16 | 7  | 2.492728784 | 0.0124193   | FLVCR2  | ENSG00000119686 |
| 14 | 75113845 | 75114072 | 75113958 | 12 | 14 | 5  | 2.932622098 | 0.00829617  | FLVCR2  | ENSG00000119686 |
| 14 | 75114941 | 75115200 | 75115070 | 12 | 16 | 7  | 2.492728784 | 0.0124193   | FLVCR2  | ENSG00000119686 |
| 14 | 75170895 | 75171670 | 75171074 | 9  | 27 | 9  | 3.28453675  | 0.000236424 | C14orf1 | ENSG00000133935 |
| 14 | 75196901 | 75197550 | 75197282 | 17 | 34 | 6  | 5.865244197 | 2.06E-07    | TTLL5   | ENSG00000119685 |



|    |          |          |          |    |    |    |             |             |           |                 |
|----|----------|----------|----------|----|----|----|-------------|-------------|-----------|-----------------|
| 14 | 75245385 | 75245655 | 75245520 | 8  | 9  | 5  | 1.955081399 | 0.0892323   | TTLL5     | ENSG00000119685 |
| 14 | 75270028 | 75270207 | 75270168 | 8  | 8  | 2  | 3.519146518 | 0.017558    | TTLL5     | ENSG00000119685 |
| 14 | 75368169 | 75368480 | 75368373 | 8  | 12 | 2  | 5.083211637 | 0.00143337  | TTLL5     | ENSG00000119685 |
| 14 | 75517835 | 75518022 | 75517962 | 8  | 10 | 1  | 6.451768616 | 0.00135978  | TGFB3     | ENSG00000119699 |
| 14 | 75521778 | 75522024 | 75521901 | 12 | 13 | 3  | 4.105670938 | 0.00243034  | C14orf179 | ENSG00000119650 |
| 14 | 75794447 | 75794912 | 75794777 | 8  | 16 | 7  | 2.492728784 | 0.0124193   | C14orf118 | ENSG00000089916 |
| 14 | 75803620 | 75804024 | 75803799 | 9  | 17 | 9  | 2.111487911 | 0.0248715   | ESRRB     | ENSG00000119715 |
| 14 | 75851814 | 75851993 | 75851957 | 8  | 8  | 1  | 5.278719777 | 0.00542188  | ESRRB     | ENSG00000119715 |
| 14 | 75912558 | 75912806 | 75912653 | 10 | 12 | 5  | 2.541605819 | 0.0225912   | ESRRB     | ENSG00000119715 |
| 14 | 75914871 | 75915161 | 75915023 | 9  | 12 | 2  | 5.083211637 | 0.00143337  | ESRRB     | ENSG00000119715 |
| 14 | 75923306 | 75923505 | 75923405 | 8  | 9  | 5  | 1.955081399 | 0.0892323   | ESRRB     | ENSG00000119715 |
| 14 | 75929858 | 75930436 | 75929982 | 11 | 24 | 3  | 7.331555246 | 2.13E-06    | ESRRB     | ENSG00000119715 |
| 14 | 76083035 | 76083273 | 76083145 | 10 | 11 | 3  | 3.519146518 | 0.00788869  |           | ENSG00000203517 |
| 14 | 76187715 | 76187959 | 76187837 | 8  | 9  | 9  | 1.173048839 | 0.362316    | VASH1     | ENSG00000071246 |
| 14 | 76190077 | 76190352 | 76190214 | 14 | 16 | 2  | 6.647276756 | 0.000101928 | VASH1     | ENSG00000071246 |
| 14 | 76226941 | 76227185 | 76227063 | 8  | 10 | 1  | 6.451768616 | 0.00135978  | VASH1     | ENSG00000071246 |
| 14 | 76320914 | 76321216 | 76321051 | 14 | 16 | 5  | 3.323638378 | 0.00288759  | VASH1     | ENSG00000071246 |
| 14 | 76347124 | 76347331 | 76347227 | 11 | 11 | 2  | 4.692195357 | 0.00272444  | ANGEL1    | ENSG00000013523 |
| 14 | 76348981 | 76349200 | 76349090 | 9  | 9  | 9  | 1.173048839 | 0.362316    | ANGEL1    | ENSG00000013523 |
| 14 | 76409011 | 76409221 | 76409116 | 8  | 9  | 10 | 1.066408036 | 0.444985    |           | ENSG00000213379 |
| 14 | 76412082 | 76412378 | 76412248 | 10 | 12 | 7  | 1.906204364 | 0.0695918   |           | ENSG00000213379 |
| 14 | 76441035 | 76441342 | 76441188 | 11 | 15 | 2  | 6.256260476 | 0.000199274 |           | ENSG00000210304 |
| 14 | 76449761 | 76450028 | 76449894 | 13 | 14 | 8  | 1.955081399 | 0.0506438   |           | ENSG00000210304 |
| 14 | 76450745 | 76451378 | 76450924 | 26 | 45 | 8  | 5.995582957 | 2.73E-09    |           | ENSG00000210304 |
| 14 | 76454783 | 76455111 | 76454936 | 13 | 18 | 2  | 7.429309316 | 2.63E-05    |           | ENSG00000210304 |
| 14 | 76455309 | 76455608 | 76455436 | 8  | 10 | 5  | 2.150589539 | 0.0575848   |           | ENSG00000210304 |
| 14 | 76483287 | 76483477 | 76483382 | 8  | 9  | 9  | 1.173048839 | 0.362316    |           | ENSG00000214657 |
| 14 | 76483506 | 76483901 | 76483764 | 9  | 16 | 8  | 2.215758919 | 0.0222902   |           | ENSG00000214657 |
| 14 | 76489437 | 76490089 | 76489932 | 14 | 34 | 13 | 2.932622098 | 0.000144323 |           | ENSG00000214657 |
| 14 | 76490836 | 76491053 | 76490959 | 8  | 8  | 1  | 5.278719777 | 0.00542188  |           | ENSG00000214657 |
| 14 | 76492478 | 76493031 | 76492881 | 13 | 23 | 4  | 5.630634429 | 1.63E-05    |           | ENSG00000214657 |
| 14 | 76495251 | 76495795 | 76495552 | 54 | 71 | 6  | 12.0656452  | 3.68E-18    |           | ENSG00000214657 |
| 14 | 76497685 | 76498244 | 76497780 | 14 | 26 | 13 | 2.262308476 | 0.00502778  |           | ENSG00000214657 |
| 14 | 76543490 | 76543795 | 76543642 | 11 | 13 | 7  | 2.052835469 | 0.046392    | C14orf4   | ENSG00000119669 |

|    |          |          |          |    |    |    |             |             |           |                 |
|----|----------|----------|----------|----|----|----|-------------|-------------|-----------|-----------------|
| 14 | 76543873 | 76544554 | 76544204 | 30 | 56 | 21 | 3.039262902 | 1.14E-06    | C14orf4   | ENSG00000119669 |
| 14 | 76545260 | 76545489 | 76545405 | 9  | 11 | 1  | 7.038293036 | 0.000674435 | C14orf4   | ENSG00000119669 |
| 14 | 76563693 | 76564091 | 76563872 | 12 | 22 | 10 | 2.452738482 | 0.00515848  | C14orf4   | ENSG00000119669 |
| 14 | 76564808 | 76565159 | 76564983 | 11 | 17 | 13 | 1.508205651 | 0.12204     | C14orf4   | ENSG00000119669 |
| 14 | 76565345 | 76565693 | 76565545 | 14 | 19 | 1  | 11.73048839 | 2.14E-06    | C14orf4   | ENSG00000119669 |
| 14 | 76569012 | 76569745 | 76569491 | 23 | 53 | 18 | 3.33392828  | 5.42E-07    | C14orf4   | ENSG00000119669 |
| 14 | 76570143 | 76570607 | 76570376 | 16 | 31 | 12 | 2.887504835 | 0.000300358 | C14orf4   | ENSG00000119669 |
| 14 | 76576207 | 76576431 | 76576330 | 10 | 11 | 3  | 3.519146518 | 0.00788869  | C14orf4   | ENSG00000119669 |
| 14 | 76576437 | 76576667 | 76576557 | 12 | 16 | 8  | 2.215758919 | 0.0222902   | C14orf4   | ENSG00000119669 |
| 14 | 76576887 | 76577273 | 76577064 | 8  | 14 | 3  | 4.398933147 | 0.00132748  | C14orf4   | ENSG00000119669 |
| 14 | 76582720 | 76583236 | 76583066 | 17 | 30 | 9  | 3.636451402 | 4.92E-05    | C14orf4   | ENSG00000119669 |
| 14 | 76588677 | 76588862 | 76588782 | 8  | 8  | 1  | 5.278719777 | 0.00542188  | C14orf4   | ENSG00000119669 |
| 14 | 76589308 | 76589616 | 76589474 | 11 | 15 | 4  | 3.753756286 | 0.0020497   | C14orf4   | ENSG00000119669 |
| 14 | 76608149 | 76608733 | 76608441 | 9  | 22 | 3  | 6.745030826 | 8.05E-06    | KIAA1737  | ENSG00000198894 |
| 14 | 76624346 | 76624846 | 76624525 | 22 | 36 | 17 | 2.411267059 | 0.000703324 | KIAA1737  | ENSG00000198894 |
| 14 | 76633927 | 76634395 | 76634148 | 15 | 25 | 12 | 2.346097679 | 0.00444113  | KIAA1737  | ENSG00000198894 |
| 14 | 76634408 | 76634602 | 76634563 | 9  | 12 | 5  | 2.541605819 | 0.0225912   | KIAA1737  | ENSG00000198894 |
| 14 | 76669895 | 76670195 | 76670045 | 10 | 13 | 3  | 4.105670938 | 0.00243034  | ZDHHC22   | ENSG00000177108 |
| 14 | 76687671 | 76687994 | 76687843 | 8  | 11 | 1  | 7.038293036 | 0.000674435 | ZDHHC22   | ENSG00000177108 |
| 14 | 76717669 | 76718025 | 76717925 | 8  | 13 | 2  | 5.474227917 | 0.000747844 | TMEM63C   | ENSG00000165548 |
| 14 | 76744868 | 76745208 | 76745038 | 9  | 13 | 10 | 1.49297125  | 0.157311    |           | ENSG00000201384 |
| 14 | 76852095 | 76852389 | 76852242 | 12 | 12 | 0  | 15.24963491 | 4.15E-05    | POMT2     | ENSG00000009830 |
| 14 | 76857009 | 76857296 | 76857132 | 10 | 12 | 6  | 2.178519273 | 0.0416567   | GSTZ1     | ENSG00000100577 |
| 14 | 76864839 | 76865049 | 76865009 | 9  | 11 | 2  | 4.692195357 | 0.00272444  | GSTZ1     | ENSG00000100577 |
| 14 | 76878582 | 76878816 | 76878674 | 8  | 9  | 4  | 2.346097679 | 0.050148    | GSTZ1     | ENSG00000100577 |
| 14 | 76910496 | 76910751 | 76910615 | 11 | 12 | 1  | 7.624817456 | 0.000332769 | TMED8     | ENSG00000100580 |
| 14 | 76993605 | 76994094 | 76993756 | 13 | 25 | 4  | 6.099853964 | 4.56E-06    | C14orf133 | ENSG00000151445 |
| 14 | 76994358 | 76994587 | 76994513 | 8  | 12 | 3  | 3.812408728 | 0.004404    | AHSA1     | ENSG00000100591 |
| 14 | 76994676 | 76994936 | 76994806 | 8  | 12 | 2  | 5.083211637 | 0.00143337  | AHSA1     | ENSG00000100591 |
| 14 | 77140002 | 77140298 | 77140147 | 8  | 11 | 4  | 2.815317214 | 0.0183428   | SPTLC2    | ENSG00000100596 |
| 14 | 77152615 | 77153111 | 77152885 | 13 | 22 | 11 | 2.248343609 | 0.0090389   | SPTLC2    | ENSG00000100596 |
| 14 | 77204177 | 77204399 | 77204282 | 10 | 10 | 8  | 1.433726359 | 0.209175    | ALKBH1    | ENSG00000100601 |
| 14 | 77235559 | 77235857 | 77235716 | 16 | 19 | 3  | 5.865244197 | 5.72E-05    | ALKBH1    | ENSG00000100601 |
| 14 | 77243606 | 77243905 | 77243775 | 8  | 11 | 4  | 2.815317214 | 0.0183428   | ALKBH1    | ENSG00000100601 |

|    |          |          |          |    |    |    |             |             |           |                 |
|----|----------|----------|----------|----|----|----|-------------|-------------|-----------|-----------------|
| 14 | 77243985 | 77244388 | 77244209 | 12 | 18 | 8  | 2.476436439 | 0.00924552  | C14orf156 | ENSG00000119705 |
| 14 | 77296887 | 77297229 | 77297058 | 8  | 12 | 1  | 7.624817456 | 0.000332769 | SNW1      | ENSG00000100603 |
| 14 | 77336002 | 77336289 | 77336128 | 9  | 12 | 1  | 7.624817456 | 0.000332769 | ADCK1     | ENSG00000063761 |
| 14 | 77398365 | 77398735 | 77398603 | 9  | 14 | 3  | 4.398933147 | 0.00132748  |           | ENSG00000199440 |
| 14 | 77692335 | 77692765 | 77692593 | 11 | 17 | 2  | 7.038293036 | 5.19E-05    |           | ENSG00000199454 |
| 14 | 77808041 | 77808295 | 77808134 | 8  | 9  | 4  | 2.346097679 | 0.050148    | NRXN3     | ENSG00000021645 |
| 14 | 77935517 | 77935700 | 77935608 | 8  | 8  | 3  | 2.639359888 | 0.0415794   |           | ENSG00000205585 |
| 14 | 77984542 | 77984823 | 77984687 | 8  | 8  | 6  | 1.508205651 | 0.203852    |           | ENSG00000205585 |
| 14 | 78102747 | 78103035 | 78102891 | 12 | 13 | 7  | 2.052835469 | 0.046392    |           | ENSG00000221178 |
| 14 | 78280843 | 78281056 | 78280937 | 10 | 11 | 1  | 7.038293036 | 0.000674435 | NRXN3     | ENSG00000021645 |
| 14 | 78428071 | 78428263 | 78428167 | 8  | 8  | 5  | 1.759573259 | 0.13508     | NRXN3     | ENSG00000021645 |
| 14 | 78495881 | 78496127 | 78495986 | 10 | 10 | 3  | 3.225884308 | 0.0139466   | NRXN3     | ENSG00000021645 |
| 14 | 78576809 | 78577201 | 78576973 | 21 | 28 | 3  | 8.504604085 | 1.43E-07    | NRXN3     | ENSG00000021645 |
| 14 | 78581321 | 78581633 | 78581499 | 10 | 12 | 0  | 15.24963491 | 4.15E-05    | NRXN3     | ENSG00000021645 |
| 14 | 78613259 | 78613560 | 78613409 | 11 | 13 | 7  | 2.052835469 | 0.046392    | NRXN3     | ENSG00000021645 |
| 14 | 78695734 | 78696299 | 78695978 | 26 | 38 | 3  | 11.43722618 | 1.38E-10    | NRXN3     | ENSG00000021645 |
| 14 | 78697773 | 78698020 | 78697896 | 11 | 15 | 5  | 3.128130238 | 0.00492422  | NRXN3     | ENSG00000021645 |
| 14 | 78814820 | 78815052 | 78814901 | 8  | 11 | 3  | 3.519146518 | 0.00788869  | NRXN3     | ENSG00000021645 |
| 14 | 78878940 | 78879119 | 78879036 | 8  | 8  | 4  | 2.111487911 | 0.0804809   | NRXN3     | ENSG00000021645 |
| 14 | 78949726 | 78950009 | 78949886 | 9  | 12 | 2  | 5.083211637 | 0.00143337  | NRXN3     | ENSG00000021645 |
| 14 | 79066019 | 79066198 | 79066102 | 8  | 8  | 0  | 10.55743955 | 0.000925496 | NRXN3     | ENSG00000021645 |
| 14 | 79080123 | 79080652 | 79080302 | 9  | 21 | 7  | 3.225884308 | 0.00106152  | NRXN3     | ENSG00000021645 |
| 14 | 79169971 | 79170222 | 79170138 | 9  | 9  | 0  | 11.73048839 | 0.000425898 | NRXN3     | ENSG00000021645 |
| 14 | 79349970 | 79350248 | 79350109 | 18 | 18 | 2  | 7.429309316 | 2.63E-05    | DIO2      | ENSG00000211448 |
| 14 | 79533915 | 79534281 | 79534108 | 10 | 16 | 10 | 1.812893661 | 0.0578656   | DIO2      | ENSG00000211448 |
| 14 | 79539260 | 79539484 | 79539364 | 10 | 10 | 7  | 1.612942154 | 0.147335    | DIO2      | ENSG00000211448 |
| 14 | 79926824 | 79927132 | 79926978 | 10 | 13 | 2  | 5.474227917 | 0.000747844 | DIO2      | ENSG00000211448 |
| 14 | 80249334 | 80249595 | 80249496 | 8  | 9  | 4  | 2.346097679 | 0.050148    | C14orf145 | ENSG00000100629 |
| 14 | 80477784 | 80478266 | 80477963 | 15 | 26 | 12 | 2.436332205 | 0.00289956  | C14orf145 | ENSG00000100629 |
| 14 | 80491097 | 80491309 | 80491203 | 8  | 10 | 1  | 6.451768616 | 0.00135978  | TSHR      | ENSG00000165409 |
| 14 | 80700269 | 80700573 | 80700421 | 10 | 14 | 10 | 1.599612054 | 0.114822    |           | ENSG00000210351 |
| 14 | 80706453 | 80706811 | 80706632 | 13 | 19 | 9  | 2.346097679 | 0.0107159   |           | ENSG00000210351 |
| 14 | 80755307 | 80755776 | 80755533 | 11 | 22 | 10 | 2.452738482 | 0.00515848  | GTF2A1    | ENSG00000165417 |
| 14 | 80835054 | 80835394 | 80835224 | 15 | 19 | 2  | 7.820325595 | 1.32E-05    |           | ENSG00000205579 |

|    |          |          |          |    |     |    |             |             |           |                 |
|----|----------|----------|----------|----|-----|----|-------------|-------------|-----------|-----------------|
| 14 | 80860059 | 80860568 | 80860327 | 18 | 29  | 9  | 3.519146518 | 8.36E-05    | STON2     | ENSG00000140022 |
| 14 | 80907869 | 80908228 | 80908037 | 30 | 36  | 7  | 5.425350882 | 2.04E-07    | STON2     | ENSG00000140022 |
| 14 | 80937031 | 80937213 | 80937116 | 8  | 8   | 0  | 10.55743955 | 0.000925496 | STON2     | ENSG00000140022 |
| 14 | 81016736 | 81017006 | 81016871 | 8  | 10  | 1  | 6.451768616 | 0.00135978  | SEL1L     | ENSG00000071537 |
| 14 | 81195374 | 81195553 | 81195431 | 8  | 8   | 1  | 5.278719777 | 0.00542188  |           | ENSG00000222877 |
| 14 | 81474098 | 81474286 | 81474192 | 8  | 8   | 0  | 10.55743955 | 0.000925496 |           | ENSG00000222877 |
| 14 | 82300190 | 82300369 | 82300296 | 8  | 8   | 0  | 10.55743955 | 0.000925496 |           | ENSG00000213346 |
| 14 | 85158300 | 85158486 | 85158393 | 8  | 10  | 2  | 4.301179077 | 0.00512919  | FLRT2     | ENSG00000185070 |
| 14 | 86586010 | 86586323 | 86586166 | 13 | 15  | 8  | 2.085420159 | 0.0338693   |           |                 |
| 14 | 86750545 | 86750805 | 86750686 | 9  | 11  | 2  | 4.692195357 | 0.00272444  |           |                 |
| 14 | 87307173 | 87307725 | 87307449 | 82 | 120 | 93 | 1.5099884   | 0.00128486  | GALC      | ENSG00000054983 |
| 14 | 87704631 | 87704887 | 87704771 | 9  | 11  | 4  | 2.815317214 | 0.0183428   | KCNK10    | ENSG00000100433 |
| 14 | 87725363 | 87725747 | 87725568 | 10 | 17  | 10 | 1.919534464 | 0.0400548   | KCNK10    | ENSG00000100433 |
| 14 | 87921403 | 87921961 | 87921659 | 11 | 21  | 8  | 2.867452718 | 0.00225035  | SPATA7    | ENSG00000042317 |
| 14 | 88005259 | 88005448 | 88005380 | 9  | 10  | 2  | 4.301179077 | 0.00512919  |           | ENSG00000222990 |
| 14 | 88024069 | 88024696 | 88024315 | 60 | 85  | 6  | 14.41174288 | 1.93E-22    |           | ENSG00000222990 |
| 14 | 88028398 | 88028762 | 88028596 | 9  | 14  | 3  | 4.398933147 | 0.00132748  |           | ENSG00000222990 |
| 14 | 88311676 | 88311859 | 88311795 | 8  | 8   | 3  | 2.639359888 | 0.0415794   | EML5      | ENSG00000165521 |
| 14 | 88360194 | 88360940 | 88360517 | 9  | 28  | 15 | 2.126151021 | 0.00621236  | TTC8      | ENSG00000165533 |
| 14 | 88404745 | 88404955 | 88404871 | 8  | 9   | 3  | 2.932622098 | 0.0242899   | TTC8      | ENSG00000165533 |
| 14 | 88576510 | 88576756 | 88576608 | 12 | 13  | 7  | 2.052835469 | 0.046392    | TTC8      | ENSG00000165533 |
| 14 | 88750135 | 88750853 | 88750299 | 12 | 31  | 9  | 3.753756286 | 2.87E-05    |           | ENSG00000214598 |
| 14 | 88751576 | 88751762 | 88751733 | 8  | 8   | 1  | 5.278719777 | 0.00542188  |           | ENSG00000214598 |
| 14 | 88752019 | 88752258 | 88752098 | 8  | 9   | 4  | 2.346097679 | 0.050148    |           | ENSG00000214598 |
| 14 | 88944139 | 88944333 | 88944236 | 8  | 9   | 5  | 1.955081399 | 0.0892323   | FOXN3     | ENSG00000053254 |
| 14 | 88964755 | 88965775 | 88965114 | 92 | 155 | 1  | 91.49780947 | 2.23E-51    | FOXN3     | ENSG00000053254 |
| 14 | 89378034 | 89378258 | 89378188 | 8  | 9   | 0  | 11.73048839 | 0.000425898 |           | ENSG00000210535 |
| 14 | 89451341 | 89451573 | 89451479 | 8  | 10  | 6  | 1.843362462 | 0.0964212   | C14orf143 | ENSG00000140025 |
| 14 | 89490611 | 89490860 | 89490735 | 8  | 12  | 1  | 7.624817456 | 0.000332769 | C14orf143 | ENSG00000140025 |
| 14 | 89491852 | 89492048 | 89491961 | 8  | 11  | 2  | 4.692195357 | 0.00272444  | TDP1      | ENSG00000042088 |
| 14 | 89596499 | 89596789 | 89596658 | 8  | 10  | 7  | 1.612942154 | 0.147335    | KCNK13    | ENSG00000152315 |
| 14 | 89771370 | 89771722 | 89771549 | 11 | 14  | 8  | 1.955081399 | 0.0506438   | PSMC1     | ENSG00000100764 |
| 14 | 89792467 | 89792778 | 89792637 | 12 | 16  | 6  | 2.848832895 | 0.00632407  | PSMC1     | ENSG00000100764 |
| 14 | 89867597 | 89868170 | 89867760 | 12 | 29  | 4  | 7.038293036 | 3.41E-07    | C14orf102 | ENSG00000119720 |

|    |          |          |          |    |    |    |             |             |           |                 |
|----|----------|----------|----------|----|----|----|-------------|-------------|-----------|-----------------|
| 14 | 89868257 | 89868437 | 89868306 | 8  | 8  | 3  | 2.639359888 | 0.0415794   | C14orf102 | ENSG00000119720 |
| 14 | 89911013 | 89911309 | 89911141 | 9  | 10 | 2  | 4.301179077 | 0.00512919  | CALM1     | ENSG00000198668 |
| 14 | 89918963 | 89919739 | 89919367 | 10 | 31 | 10 | 3.412505714 | 6.73E-05    | CALM1     | ENSG00000198668 |
| 14 | 89932763 | 89933014 | 89932900 | 9  | 11 | 4  | 2.815317214 | 0.0183428   | CALM1     | ENSG00000198668 |
| 14 | 89933037 | 89933261 | 89933149 | 10 | 12 | 2  | 5.083211637 | 0.00143337  | CALM1     | ENSG00000198668 |
| 14 | 89934592 | 89934847 | 89934709 | 9  | 11 | 6  | 2.010940867 | 0.0640214   | CALM1     | ENSG00000198668 |
| 14 | 89935676 | 89935975 | 89935852 | 13 | 16 | 8  | 2.215758919 | 0.0222902   | CALM1     | ENSG00000198668 |
| 14 | 89937480 | 89937672 | 89937576 | 8  | 9  | 5  | 1.955081399 | 0.0892323   | CALM1     | ENSG00000198668 |
| 14 | 89990274 | 89990613 | 89990443 | 17 | 21 | 6  | 3.686724924 | 0.000453999 | CALM1     | ENSG00000198668 |
| 14 | 90031528 | 90031721 | 90031624 | 9  | 10 | 2  | 4.301179077 | 0.00512919  | CALM1     | ENSG00000198668 |
| 14 | 90039718 | 90040047 | 90039877 | 14 | 18 | 6  | 3.183989707 | 0.00227432  | CALM1     | ENSG00000198668 |
| 14 | 90044992 | 90045482 | 90045175 | 20 | 36 | 9  | 4.340280705 | 1.80E-06    | CALM1     | ENSG00000198668 |
| 14 | 90049690 | 90050013 | 90049851 | 11 | 16 | 6  | 2.848832895 | 0.00632407  | CALM1     | ENSG00000198668 |
| 14 | 90105729 | 90106017 | 90105886 | 10 | 14 | 3  | 4.398933147 | 0.00132748  | CALM1     | ENSG00000198668 |
| 14 | 90127882 | 90128061 | 90127989 | 8  | 8  | 3  | 2.639359888 | 0.0415794   |           | ENSG00000213315 |
| 14 | 90262572 | 90262925 | 90262748 | 8  | 12 | 6  | 2.178519273 | 0.0416567   |           | ENSG00000213315 |
| 14 | 90333660 | 90333964 | 90333821 | 12 | 16 | 0  | 19.94183027 | 1.86E-06    | TTC7B     | ENSG00000165914 |
| 14 | 90334012 | 90334430 | 90334191 | 9  | 18 | 8  | 2.476436439 | 0.00924552  | TTC7B     | ENSG00000165914 |
| 14 | 90356249 | 90356496 | 90356317 | 8  | 12 | 4  | 3.049926982 | 0.0108184   | TTC7B     | ENSG00000165914 |
| 14 | 90407172 | 90407376 | 90407274 | 10 | 11 | 1  | 7.038293036 | 0.000674435 | TTC7B     | ENSG00000165914 |
| 14 | 90407796 | 90407998 | 90407942 | 8  | 9  | 3  | 2.932622098 | 0.0242899   | TTC7B     | ENSG00000165914 |
| 14 | 90419839 | 90420341 | 90420063 | 15 | 24 | 4  | 5.865244197 | 8.64E-06    | TTC7B     | ENSG00000165914 |
| 14 | 90439357 | 90439610 | 90439483 | 8  | 10 | 5  | 2.150589539 | 0.0575848   | TTC7B     | ENSG00000165914 |
| 14 | 90596545 | 90596949 | 90596799 | 11 | 18 | 10 | 2.026175268 | 0.0273052   | RPS6KA5   | ENSG00000100784 |
| 14 | 90597067 | 90597318 | 90597176 | 8  | 10 | 7  | 1.612942154 | 0.147335    | RPS6KA5   | ENSG00000100784 |
| 14 | 90645499 | 90645753 | 90645620 | 10 | 13 | 8  | 1.824742639 | 0.0744168   | C14orf159 | ENSG00000133943 |
| 14 | 90652003 | 90652483 | 90652304 | 24 | 34 | 5  | 6.842784896 | 5.43E-08    | C14orf159 | ENSG00000133943 |
| 14 | 90663531 | 90664056 | 90663739 | 22 | 41 | 9  | 4.926805125 | 9.99E-08    |           | ENSG00000221102 |
| 14 | 90674588 | 90674913 | 90674741 | 9  | 11 | 3  | 3.519146518 | 0.00788869  |           | ENSG00000221102 |
| 14 | 90694044 | 90694594 | 90694361 | 29 | 47 | 7  | 7.038293036 | 2.04E-10    |           | ENSG00000221102 |
| 14 | 90709242 | 90709478 | 90709342 | 11 | 13 | 3  | 4.105670938 | 0.00243034  |           | ENSG00000221102 |
| 14 | 90713513 | 90713731 | 90713622 | 14 | 14 | 6  | 2.513676084 | 0.016726    |           | ENSG00000221102 |
| 14 | 90742995 | 90743174 | 90743063 | 8  | 9  | 5  | 1.955081399 | 0.0892323   | GPR68     | ENSG00000119714 |
| 14 | 90812293 | 90813013 | 90812642 | 15 | 36 | 12 | 3.338677466 | 2.58E-05    | CCDC88C   | ENSG00000015133 |

|    |          |          |          |    |     |    |             |             |          |                 |
|----|----------|----------|----------|----|-----|----|-------------|-------------|----------|-----------------|
| 14 | 90816594 | 90816788 | 90816734 | 8  | 10  | 5  | 2.150589539 | 0.0575848   | CCDC88C  | ENSG00000015133 |
| 14 | 90822537 | 90822843 | 90822677 | 15 | 17  | 11 | 1.759573259 | 0.0609179   | CCDC88C  | ENSG00000015133 |
| 14 | 90862004 | 90862336 | 90862170 | 11 | 16  | 8  | 2.215758919 | 0.0222902   | CCDC88C  | ENSG00000015133 |
| 14 | 90867408 | 90867621 | 90867514 | 8  | 10  | 2  | 4.301179077 | 0.00512919  | CCDC88C  | ENSG00000015133 |
| 14 | 90906215 | 90906458 | 90906336 | 8  | 10  | 1  | 6.451768616 | 0.00135978  | CCDC88C  | ENSG00000015133 |
| 14 | 90906675 | 90906935 | 90906805 | 9  | 11  | 7  | 1.759573259 | 0.102361    | CCDC88C  | ENSG00000015133 |
| 14 | 90932027 | 90932715 | 90932316 | 50 | 74  | 7  | 10.99733287 | 2.89E-18    | CCDC88C  | ENSG00000015133 |
| 14 | 90954599 | 90954962 | 90954760 | 8  | 13  | 9  | 1.642268375 | 0.111397    | CCDC88C  | ENSG00000015133 |
| 14 | 91045073 | 91045869 | 91045626 | 87 | 158 | 11 | 15.54289712 | 1.89E-40    | SMEK1    | ENSG00000100796 |
| 14 | 91046223 | 91046795 | 91046474 | 18 | 35  | 6  | 6.032822602 | 1.10E-07    | SMEK1    | ENSG00000100796 |
| 14 | 91109965 | 91110244 | 91110140 | 8  | 12  | 4  | 3.049926982 | 0.0108184   |          | ENSG00000178069 |
| 14 | 91268715 | 91269003 | 91268869 | 8  | 9   | 5  | 1.955081399 | 0.0892323   | CATSPERB | ENSG00000133962 |
| 14 | 91365651 | 91365892 | 91365771 | 13 | 16  | 4  | 3.988366054 | 0.00115141  | TC2N     | ENSG00000165929 |
| 14 | 91366960 | 91367176 | 91367081 | 8  | 8   | 4  | 2.111487911 | 0.0804809   | TC2N     | ENSG00000165929 |
| 14 | 91408730 | 91409049 | 91408840 | 13 | 18  | 4  | 4.457585589 | 0.000353565 | TC2N     | ENSG00000165929 |
| 14 | 91575932 | 91576381 | 91576202 | 13 | 22  | 7  | 3.372515413 | 0.000629223 | TRIP11   | ENSG00000100815 |
| 14 | 91639494 | 91640001 | 91639684 | 64 | 82  | 3  | 24.34076342 | 1.75E-24    | ATXN3    | ENSG00000066427 |
| 14 | 91642130 | 91642361 | 91642303 | 9  | 12  | 4  | 3.049926982 | 0.0108184   | ATXN3    | ENSG00000066427 |
| 14 | 91657775 | 91658234 | 91657943 | 14 | 22  | 8  | 2.997791478 | 0.00137524  | NDUFB1   | ENSG00000183648 |
| 14 | 91712641 | 91712860 | 91712750 | 9  | 10  | 3  | 3.225884308 | 0.0139466   | CPSF2    | ENSG00000165934 |
| 14 | 91789592 | 91789809 | 91789700 | 8  | 10  | 2  | 4.301179077 | 0.00512919  |          | ENSG00000201097 |
| 14 | 91884187 | 91884616 | 91884348 | 10 | 17  | 6  | 3.016411301 | 0.00381427  | SLC24A4  | ENSG00000140090 |
| 14 | 91888611 | 91888947 | 91888777 | 8  | 12  | 5  | 2.541605819 | 0.0225912   | SLC24A4  | ENSG00000140090 |
| 14 | 92047152 | 92047345 | 92047202 | 8  | 8   | 0  | 10.55743955 | 0.000925496 | RIN3     | ENSG00000100599 |
| 14 | 92134519 | 92134955 | 92134776 | 38 | 47  | 3  | 14.07658607 | 2.28E-13    | RIN3     | ENSG00000100599 |
| 14 | 92187021 | 92187266 | 92187129 | 8  | 11  | 3  | 3.519146518 | 0.00788869  | LGMN     | ENSG00000100600 |
| 14 | 92217281 | 92217525 | 92217421 | 8  | 10  | 11 | 1.075294769 | 0.434143    | LGMN     | ENSG00000100600 |
| 14 | 92223047 | 92223282 | 92223160 | 11 | 11  | 1  | 7.038293036 | 0.000674435 | LGMN     | ENSG00000100600 |
| 14 | 92226487 | 92226714 | 92226600 | 14 | 15  | 5  | 3.128130238 | 0.00492422  | LGMN     | ENSG00000100600 |
| 14 | 92259568 | 92259817 | 92259641 | 8  | 10  | 6  | 1.843362462 | 0.0964212   | LGMN     | ENSG00000100600 |
| 14 | 92330292 | 92330600 | 92330467 | 10 | 13  | 13 | 1.173048839 | 0.337862    | GOLGA5   | ENSG00000066455 |
| 14 | 92368044 | 92368226 | 92368135 | 10 | 10  | 3  | 3.225884308 | 0.0139466   | GOLGA5   | ENSG00000066455 |
| 14 | 92371275 | 92371454 | 92371364 | 8  | 8   | 0  | 10.55743955 | 0.000925496 | GOLGA5   | ENSG00000066455 |
| 14 | 92416973 | 92417190 | 92417081 | 8  | 8   | 6  | 1.508205651 | 0.203852    | CHGA     | ENSG00000100604 |

|    |          |          |          |    |    |    |             |             |           |                 |
|----|----------|----------|----------|----|----|----|-------------|-------------|-----------|-----------------|
| 14 | 92450281 | 92450535 | 92450424 | 8  | 10 | 5  | 2.150589539 | 0.0575848   | CHGA      | ENSG00000100604 |
| 14 | 92453449 | 92453727 | 92453580 | 13 | 17 | 5  | 3.519146518 | 0.00167472  | CHGA      | ENSG00000100604 |
| 14 | 92509318 | 92509646 | 92509476 | 10 | 15 | 7  | 2.346097679 | 0.0195693   | CHGA      | ENSG00000100604 |
| 14 | 92509791 | 92510558 | 92510128 | 19 | 42 | 15 | 3.152568756 | 1.28E-05    | CHGA      | ENSG00000100604 |
| 14 | 92547633 | 92548281 | 92547901 | 25 | 51 | 6  | 8.714077092 | 3.28E-12    | CHGA      | ENSG00000100604 |
| 14 | 92569185 | 92569447 | 92569316 | 12 | 15 | 2  | 6.256260476 | 0.000199274 | ITPK1     | ENSG00000100605 |
| 14 | 92573522 | 92573885 | 92573772 | 10 | 15 | 5  | 3.128130238 | 0.00492422  | ITPK1     | ENSG00000100605 |
| 14 | 92579557 | 92579962 | 92579690 | 13 | 21 | 10 | 2.346097679 | 0.00796926  | ITPK1     | ENSG00000100605 |
| 14 | 92596052 | 92596273 | 92596168 | 12 | 13 | 1  | 8.211341875 | 0.000163445 | ITPK1     | ENSG00000100605 |
| 14 | 92631326 | 92631615 | 92631470 | 8  | 10 | 3  | 3.225884308 | 0.0139466   | ITPK1     | ENSG00000100605 |
| 14 | 92648868 | 92649290 | 92649047 | 10 | 19 | 13 | 1.675784056 | 0.0660887   | ITPK1     | ENSG00000100605 |
| 14 | 92649382 | 92649788 | 92649561 | 17 | 26 | 11 | 2.639359888 | 0.0015854   | ITPK1     | ENSG00000100605 |
| 14 | 92666613 | 92666911 | 92666762 | 8  | 10 | 3  | 3.225884308 | 0.0139466   | ITPK1     | ENSG00000100605 |
| 14 | 92668602 | 92668839 | 92668733 | 8  | 10 | 4  | 2.580707446 | 0.0306059   | ITPK1     | ENSG00000100605 |
| 14 | 92671564 | 92671943 | 92671764 | 19 | 27 | 13 | 2.346097679 | 0.00332578  | ITPK1     | ENSG00000100605 |
| 14 | 92672000 | 92672414 | 92672244 | 14 | 23 | 8  | 3.128130238 | 0.000832453 | ITPK1     | ENSG00000100605 |
| 14 | 92674452 | 92674631 | 92674541 | 8  | 8  | 2  | 3.519146518 | 0.017558    | ITPK1     | ENSG00000100605 |
| 14 | 92675332 | 92675634 | 92675479 | 24 | 26 | 9  | 3.167231866 | 0.000393236 | ITPK1     | ENSG00000100605 |
| 14 | 92696428 | 92696681 | 92696588 | 15 | 17 | 6  | 3.016411301 | 0.00381427  | MOAP1     | ENSG00000165943 |
| 14 | 92743047 | 92743586 | 92743315 | 11 | 25 | 13 | 2.178519273 | 0.00752428  | C14orf142 | ENSG00000170270 |
| 14 | 92755281 | 92755467 | 92755370 | 8  | 8  | 1  | 5.278719777 | 0.00542188  |           | ENSG00000213263 |
| 14 | 92798574 | 92798762 | 92798668 | 9  | 10 | 8  | 1.433726359 | 0.209175    | BTBD7     | ENSG00000011114 |
| 14 | 93068121 | 93068330 | 93068188 | 8  | 10 | 4  | 2.580707446 | 0.0306059   |           | ENSG00000202306 |
| 14 | 93184915 | 93185222 | 93185068 | 12 | 14 | 3  | 4.398933147 | 0.00132748  | PRIMA1    | ENSG00000175785 |
| 14 | 93284347 | 93284560 | 93284524 | 8  | 9  | 2  | 3.910162798 | 0.00955088  | PRIMA1    | ENSG00000175785 |
| 14 | 93429171 | 93429353 | 93429276 | 8  | 8  | 2  | 3.519146518 | 0.017558    | FAM181A   | ENSG00000140067 |
| 14 | 93442905 | 93443144 | 93443024 | 11 | 13 | 8  | 1.824742639 | 0.0744168   | FAM181A   | ENSG00000140067 |
| 14 | 93535518 | 93535985 | 93535857 | 11 | 20 | 14 | 1.642268375 | 0.06827     | C14orf48  | ENSG00000175699 |
| 14 | 93537949 | 93538165 | 93537992 | 8  | 9  | 4  | 2.346097679 | 0.050148    | C14orf48  | ENSG00000175699 |
| 14 | 93703188 | 93703529 | 93703358 | 11 | 12 | 3  | 3.812408728 | 0.004404    | PPP4R4    | ENSG00000119698 |
| 14 | 93764134 | 93764418 | 93764288 | 9  | 9  | 1  | 5.865244197 | 0.00272497  | PPP4R4    | ENSG00000119698 |
| 14 | 93856263 | 93856670 | 93856502 | 11 | 17 | 2  | 7.038293036 | 5.19E-05    | SERPINA6  | ENSG00000170099 |
| 14 | 93870978 | 93871279 | 93871128 | 11 | 14 | 1  | 8.797866295 | 8.00E-05    | SERPINA6  | ENSG00000170099 |
| 14 | 93959649 | 93959974 | 93959819 | 11 | 14 | 5  | 2.932622098 | 0.00829617  | SERPINA11 | ENSG00000186910 |

|    |          |          |          |    |    |    |             |             |           |                 |
|----|----------|----------|----------|----|----|----|-------------|-------------|-----------|-----------------|
| 14 | 93962592 | 93962982 | 93962808 | 14 | 19 | 1  | 11.73048839 | 2.14E-06    | SERPINA11 | ENSG00000186910 |
| 14 | 93970110 | 93970351 | 93970230 | 8  | 10 | 7  | 1.612942154 | 0.147335    | SERPINA11 | ENSG00000186910 |
| 14 | 94001898 | 94002214 | 94002051 | 14 | 19 | 2  | 7.820325595 | 1.32E-05    | SERPINA9  | ENSG00000170054 |
| 14 | 94002788 | 94003157 | 94002958 | 15 | 20 | 7  | 3.079253203 | 0.00177418  | SERPINA9  | ENSG00000170054 |
| 14 | 94022332 | 94022606 | 94022469 | 10 | 14 | 3  | 4.398933147 | 0.00132748  | SERPINA9  | ENSG00000170054 |
| 14 | 94085585 | 94085846 | 94085729 | 9  | 11 | 1  | 7.038293036 | 0.000674435 | SERPINA4  | ENSG00000100665 |
| 14 | 94238915 | 94239169 | 94239042 | 9  | 11 | 7  | 1.759573259 | 0.102361    | SERPINA13 | ENSG00000187483 |
| 14 | 94360173 | 94360352 | 94360262 | 8  | 8  | 1  | 5.278719777 | 0.00542188  | GSC       | ENSG00000133937 |
| 14 | 94592553 | 94592979 | 94592728 | 18 | 26 | 5  | 5.278719777 | 8.57E-06    | DICER1    | ENSG00000100697 |
| 14 | 94635168 | 94635390 | 94635279 | 9  | 11 | 7  | 1.759573259 | 0.102361    | DICER1    | ENSG00000100697 |
| 14 | 94693691 | 94694094 | 94693865 | 10 | 15 | 7  | 2.346097679 | 0.0195693   | DICER1    | ENSG00000100697 |
| 14 | 94733628 | 94734073 | 94733863 | 24 | 35 | 2  | 14.07658607 | 1.57E-10    |           | ENSG00000198411 |
| 14 | 94748555 | 94748901 | 94748728 | 8  | 13 | 8  | 1.824742639 | 0.0744168   |           | ENSG00000198411 |
| 14 | 94777376 | 94777944 | 94777654 | 11 | 26 | 10 | 2.879301697 | 0.000816629 |           | ENSG00000198411 |
| 14 | 94791693 | 94791999 | 94791832 | 10 | 14 | 6  | 2.513676084 | 0.016726    | CLMN      | ENSG00000165959 |
| 14 | 94801631 | 94802022 | 94801834 | 20 | 29 | 6  | 5.027352168 | 4.43E-06    | CLMN      | ENSG00000165959 |
| 14 | 94831362 | 94831565 | 94831463 | 8  | 9  | 1  | 5.865244197 | 0.00272497  | CLMN      | ENSG00000165959 |
| 14 | 94839829 | 94840013 | 94839939 | 8  | 8  | 1  | 5.278719777 | 0.00542188  | CLMN      | ENSG00000165959 |
| 14 | 94850744 | 94851124 | 94850945 | 15 | 22 | 8  | 2.997791478 | 0.00137524  | CLMN      | ENSG00000165959 |
| 14 | 94855384 | 94855628 | 94855481 | 10 | 12 | 1  | 7.624817456 | 0.000332769 | CLMN      | ENSG00000165959 |
| 14 | 94860135 | 94860400 | 94860267 | 8  | 8  | 5  | 1.759573259 | 0.13508     | CLMN      | ENSG00000165959 |
| 14 | 94876321 | 94876704 | 94876549 | 12 | 16 | 10 | 1.812893661 | 0.0578656   | CLMN      | ENSG00000165959 |
| 14 | 94978724 | 94978903 | 94978813 | 8  | 8  | 8  | 1.173048839 | 0.36929     | C14orf49  | ENSG00000176438 |
| 14 | 95027132 | 95027459 | 95027295 | 8  | 12 | 6  | 2.178519273 | 0.0416567   | C14orf49  | ENSG00000176438 |
| 14 | 95070727 | 95070922 | 95070824 | 9  | 9  | 8  | 1.303387599 | 0.281715    | GLRX5     | ENSG00000182512 |
| 14 | 95097144 | 95097323 | 95097233 | 8  | 8  | 6  | 1.508205651 | 0.203852    | GLRX5     | ENSG00000182512 |
| 14 | 95148613 | 95148812 | 95148712 | 8  | 8  | 3  | 2.639359888 | 0.0415794   | TCL6      | ENSG00000187621 |
| 14 | 95277072 | 95277668 | 95277459 | 20 | 36 | 13 | 3.100200504 | 5.51E-05    | TCL1A     | ENSG00000100721 |
| 14 | 95364859 | 95365125 | 95364992 | 14 | 16 | 2  | 6.647276756 | 0.000101928 | TCL1A     | ENSG00000100721 |
| 14 | 95575937 | 95576129 | 95576075 | 8  | 8  | 0  | 10.55743955 | 0.000925496 | BDKRB2    | ENSG00000168398 |
| 14 | 95587968 | 95588166 | 95588036 | 8  | 10 | 2  | 4.301179077 | 0.00512919  | BDKRB2    | ENSG00000168398 |
| 14 | 95590857 | 95591113 | 95590985 | 10 | 10 | 4  | 2.580707446 | 0.0306059   | BDKRB2    | ENSG00000168398 |
| 14 | 95595673 | 95595862 | 95595767 | 8  | 8  | 8  | 1.173048839 | 0.36929     | BDKRB2    | ENSG00000168398 |
| 14 | 95601612 | 95602204 | 95601834 | 25 | 47 | 11 | 4.692195357 | 2.58E-08    | BDKRB2    | ENSG00000168398 |



|    |          |          |          |    |    |    |             |             |           |                 |
|----|----------|----------|----------|----|----|----|-------------|-------------|-----------|-----------------|
| 14 | 95619046 | 95619307 | 95619188 | 13 | 14 | 3  | 4.398933147 | 0.00132748  | BDKRB2    | ENSG00000168398 |
| 14 | 95619716 | 95620226 | 95619956 | 21 | 35 | 7  | 5.278719777 | 3.74E-07    | BDKRB2    | ENSG00000168398 |
| 14 | 95622261 | 95622460 | 95622360 | 10 | 11 | 3  | 3.519146518 | 0.00788869  | BDKRB2    | ENSG00000168398 |
| 14 | 95631790 | 95632531 | 95632134 | 29 | 57 | 14 | 4.535788845 | 1.87E-09    | BDKRB2    | ENSG00000168398 |
| 14 | 95633103 | 95633392 | 95633265 | 8  | 9  | 2  | 3.910162798 | 0.00955088  | BDKRB2    | ENSG00000168398 |
| 14 | 95634773 | 95635188 | 95635048 | 13 | 20 | 8  | 2.737113958 | 0.0036449   | BDKRB2    | ENSG00000168398 |
| 14 | 95636593 | 95637032 | 95636772 | 14 | 22 | 4  | 5.396024661 | 3.05E-05    | BDKRB2    | ENSG00000168398 |
| 14 | 95653312 | 95653596 | 95653454 | 11 | 15 | 9  | 1.876878143 | 0.0544542   | BDKRB2    | ENSG00000168398 |
| 14 | 95740669 | 95740940 | 95740798 | 17 | 17 | 4  | 4.222975822 | 0.000640773 | BDKRB2    | ENSG00000168398 |
| 14 | 95752167 | 95752677 | 95752282 | 13 | 23 | 3  | 7.038293036 | 4.15E-06    | BDKRB2    | ENSG00000168398 |
| 14 | 95900052 | 95900350 | 95900213 | 10 | 13 | 1  | 8.211341875 | 0.000163445 | C14orf129 | ENSG00000100744 |
| 14 | 95900560 | 95900806 | 95900647 | 8  | 10 | 6  | 1.843362462 | 0.0964212   | C14orf129 | ENSG00000100744 |
| 14 | 95959066 | 95959357 | 95959211 | 10 | 11 | 2  | 4.692195357 | 0.00272444  | AK7       | ENSG00000140057 |
| 14 | 95960467 | 95960693 | 95960580 | 12 | 12 | 1  | 7.624817456 | 0.000332769 | AK7       | ENSG00000140057 |
| 14 | 96016446 | 96016759 | 96016625 | 12 | 14 | 3  | 4.398933147 | 0.00132748  | PAPOLA    | ENSG00000090060 |
| 14 | 96037689 | 96038163 | 96037984 | 16 | 28 | 6  | 4.859773763 | 8.07E-06    | PAPOLA    | ENSG00000090060 |
| 14 | 96038361 | 96038622 | 96038486 | 11 | 14 | 5  | 2.932622098 | 0.00829617  | PAPOLA    | ENSG00000090060 |
| 14 | 96038925 | 96039180 | 96039052 | 8  | 10 | 1  | 6.451768616 | 0.00135978  | PAPOLA    | ENSG00000090060 |
| 14 | 96110892 | 96111229 | 96111060 | 10 | 14 | 4  | 3.519146518 | 0.00361132  | PAPOLA    | ENSG00000090060 |
| 14 | 96277509 | 96277756 | 96277632 | 9  | 10 | 2  | 4.301179077 | 0.00512919  | VRK1      | ENSG00000100749 |
| 14 | 96333198 | 96333567 | 96333410 | 13 | 17 | 6  | 3.016411301 | 0.00381427  | VRK1      | ENSG00000100749 |
| 14 | 96512855 | 96513057 | 96512904 | 8  | 8  | 1  | 5.278719777 | 0.00542188  | VRK1      | ENSG00000100749 |
| 14 | 96613433 | 96613621 | 96613488 | 8  | 8  | 2  | 3.519146518 | 0.017558    | VRK1      | ENSG00000100749 |
| 14 | 96716540 | 96716741 | 96716640 | 8  | 8  | 4  | 2.111487911 | 0.0804809   |           | ENSG00000210655 |
| 14 | 96838462 | 96838741 | 96838633 | 8  | 11 | 7  | 1.759573259 | 0.102361    |           | ENSG00000210655 |
| 14 | 96867633 | 96867950 | 96867755 | 10 | 14 | 4  | 3.519146518 | 0.00361132  |           | ENSG00000210655 |
| 14 | 96868112 | 96868369 | 96868240 | 16 | 17 | 4  | 4.222975822 | 0.000640773 |           | ENSG00000210655 |
| 14 | 97035899 | 97036732 | 97036315 | 32 | 61 | 13 | 5.194930574 | 6.39E-11    |           | ENSG00000210655 |
| 14 | 97226198 | 97226473 | 97226312 | 12 | 15 | 2  | 6.256260476 | 0.000199274 |           | ENSG00000197176 |
| 14 | 97313015 | 97313372 | 97313193 | 22 | 27 | 8  | 3.649485278 | 0.000102745 |           | ENSG00000205477 |
| 14 | 97328053 | 97328288 | 97328170 | 10 | 13 | 7  | 2.052835469 | 0.046392    |           | ENSG00000205477 |
| 14 | 97345430 | 97345609 | 97345459 | 9  | 9  | 1  | 5.865244197 | 0.00272497  |           | ENSG00000205477 |
| 14 | 97514531 | 97514762 | 97514625 | 10 | 11 | 5  | 2.346097679 | 0.0364013   |           | ENSG00000205477 |
| 14 | 97613262 | 97613706 | 97613471 | 30 | 45 | 5  | 8.993374435 | 3.69E-11    |           | ENSG00000222066 |

|    |          |          |          |    |    |    |             |             |           |                 |
|----|----------|----------|----------|----|----|----|-------------|-------------|-----------|-----------------|
| 14 | 97674816 | 97675004 | 97674877 | 9  | 10 | 3  | 3.225884308 | 0.0139466   |           | ENSG00000222066 |
| 14 | 97769828 | 97770490 | 97770007 | 23 | 48 | 0  | 57.47939313 | 3.05E-17    |           | ENSG00000222066 |
| 14 | 98034505 | 98034832 | 98034682 | 19 | 23 | 2  | 9.384390715 | 8.25E-07    |           | ENSG00000210657 |
| 14 | 98344625 | 98345044 | 98344797 | 11 | 18 | 4  | 4.457585589 | 0.000353565 | C14orf177 | ENSG00000176605 |
| 14 | 98355612 | 98355992 | 98355813 | 12 | 20 | 7  | 3.079253203 | 0.00177418  | C14orf177 | ENSG00000176605 |
| 14 | 98421244 | 98421514 | 98421356 | 9  | 11 | 5  | 2.346097679 | 0.0364013   |           | ENSG00000218496 |
| 14 | 98439525 | 98439951 | 98439772 | 11 | 19 | 3  | 5.865244197 | 5.72E-05    |           | ENSG00000218496 |
| 14 | 98439961 | 98440249 | 98440077 | 8  | 12 | 1  | 7.624817456 | 0.000332769 |           | ENSG00000218496 |
| 14 | 98442633 | 98442854 | 98442742 | 11 | 11 | 4  | 2.815317214 | 0.0183428   |           | ENSG00000218496 |
| 14 | 98445314 | 98445646 | 98445480 | 17 | 21 | 3  | 6.451768616 | 1.56E-05    |           | ENSG00000218496 |
| 14 | 98449891 | 98450243 | 98450067 | 33 | 38 | 1  | 22.87445237 | 1.58E-12    |           | ENSG00000218496 |
| 14 | 98540288 | 98540621 | 98540454 | 10 | 12 | 3  | 3.812408728 | 0.004404    |           | ENSG00000220591 |
| 14 | 98604171 | 98604402 | 98604306 | 8  | 10 | 2  | 4.301179077 | 0.00512919  |           | ENSG00000220591 |
| 14 | 98743551 | 98743861 | 98743706 | 11 | 15 | 1  | 9.384390715 | 3.90E-05    | BCL11B    | ENSG00000127152 |
| 14 | 98802702 | 98803025 | 98802863 | 11 | 15 | 4  | 3.753756286 | 0.0020497   | BCL11B    | ENSG00000127152 |
| 14 | 98808279 | 98808564 | 98808421 | 16 | 18 | 4  | 4.457585589 | 0.000353565 | BCL11B    | ENSG00000127152 |
| 14 | 98810761 | 98811095 | 98810898 | 15 | 19 | 3  | 5.865244197 | 5.72E-05    | BCL11B    | ENSG00000127152 |
| 14 | 98868135 | 98868466 | 98868297 | 20 | 20 | 1  | 12.31701281 | 1.03E-06    |           | ENSG00000216173 |
| 14 | 98869061 | 98869567 | 98869388 | 18 | 30 | 0  | 36.36451402 | 3.56E-11    |           | ENSG00000216173 |
| 14 | 98929183 | 98929467 | 98929335 | 10 | 13 | 4  | 3.28453675  | 0.00629037  |           | ENSG00000216173 |
| 14 | 99011372 | 99011663 | 99011525 | 8  | 10 | 4  | 2.580707446 | 0.0306059   | SETD3     | ENSG00000183576 |
| 14 | 99017134 | 99017444 | 99017300 | 11 | 15 | 6  | 2.68125449  | 0.0103552   | CCNK      | ENSG00000090061 |
| 14 | 99017501 | 99017854 | 99017642 | 10 | 15 | 5  | 3.128130238 | 0.00492422  | CCNK      | ENSG00000090061 |
| 14 | 99018103 | 99018308 | 99018224 | 8  | 10 | 3  | 3.225884308 | 0.0139466   | CCNK      | ENSG00000090061 |
| 14 | 99020289 | 99020578 | 99020420 | 18 | 20 | 0  | 24.63402563 | 8.35E-08    | CCNK      | ENSG00000090061 |
| 14 | 99054545 | 99054920 | 99054725 | 16 | 24 | 12 | 2.255863153 | 0.00673318  | CCNK      | ENSG00000090061 |
| 14 | 99055020 | 99055339 | 99055179 | 19 | 20 | 3  | 6.158506406 | 2.99E-05    | CCNK      | ENSG00000090061 |
| 14 | 99061003 | 99061271 | 99061109 | 8  | 10 | 2  | 4.301179077 | 0.00512919  | CCNK      | ENSG00000090061 |
| 14 | 99102215 | 99102537 | 99102376 | 8  | 12 | 4  | 3.049926982 | 0.0108184   |           | ENSG00000200506 |
| 14 | 99110306 | 99110687 | 99110508 | 13 | 20 | 4  | 4.926805125 | 0.00010522  |           | ENSG00000200506 |
| 14 | 99115296 | 99115547 | 99115397 | 20 | 23 | 4  | 5.630634429 | 1.63E-05    |           | ENSG00000200506 |
| 14 | 99141041 | 99141389 | 99141216 | 8  | 12 | 1  | 7.624817456 | 0.000332769 |           | ENSG00000205476 |
| 14 | 99141541 | 99141826 | 99141666 | 8  | 10 | 6  | 1.843362462 | 0.0964212   |           | ENSG00000205476 |
| 14 | 99158109 | 99158414 | 99158261 | 28 | 33 | 5  | 6.647276756 | 1.04E-07    |           | ENSG00000205476 |

|    |          |          |          |    |    |    |             |             |          |                 |
|----|----------|----------|----------|----|----|----|-------------|-------------|----------|-----------------|
| 14 | 99164868 | 99165262 | 99165083 | 12 | 19 | 6  | 3.351568112 | 0.00134187  | HHIPL1   | ENSG00000182218 |
| 14 | 99183056 | 99183260 | 99183170 | 8  | 8  | 0  | 10.55743955 | 0.000925496 | HHIPL1   | ENSG00000182218 |
| 14 | 99190373 | 99190735 | 99190650 | 8  | 14 | 4  | 3.519146518 | 0.00361132  | HHIPL1   | ENSG00000182218 |
| 14 | 99190779 | 99191209 | 99190958 | 12 | 20 | 16 | 1.449060331 | 0.126098    | HHIPL1   | ENSG00000182218 |
| 14 | 99215525 | 99215715 | 99215639 | 9  | 9  | 14 | 0.78203256  | 0.734892    | CYP46A1  | ENSG00000036530 |
| 14 | 99218841 | 99219090 | 99218930 | 11 | 12 | 4  | 3.049926982 | 0.0108184   | CYP46A1  | ENSG00000036530 |
| 14 | 99219934 | 99220180 | 99220057 | 8  | 8  | 5  | 1.759573259 | 0.13508     | CYP46A1  | ENSG00000036530 |
| 14 | 99346094 | 99346293 | 99346193 | 9  | 9  | 3  | 2.932622098 | 0.0242899   | EML1     | ENSG00000066629 |
| 14 | 99478181 | 99478481 | 99478313 | 10 | 13 | 0  | 16.42268375 | 1.91E-05    |          | ENSG00000199836 |
| 14 | 99498337 | 99498689 | 99498513 | 17 | 22 | 5  | 4.496687217 | 9.59E-05    |          | ENSG00000213220 |
| 14 | 99502184 | 99502363 | 99502287 | 8  | 8  | 1  | 5.278719777 | 0.00542188  |          | ENSG00000213220 |
| 14 | 99518510 | 99518789 | 99518632 | 8  | 9  | 7  | 1.466311049 | 0.20706     | EVL      | ENSG00000196405 |
| 14 | 99531912 | 99532159 | 99532035 | 11 | 13 | 4  | 3.28453675  | 0.00629037  | EVL      | ENSG00000196405 |
| 14 | 99560984 | 99561210 | 99561038 | 8  | 10 | 8  | 1.433726359 | 0.209175    | EVL      | ENSG00000196405 |
| 14 | 99561289 | 99561508 | 99561406 | 9  | 11 | 5  | 2.346097679 | 0.0364013   | EVL      | ENSG00000196405 |
| 14 | 99595557 | 99595941 | 99595769 | 25 | 32 | 7  | 4.838826462 | 2.26E-06    | EVL      | ENSG00000196405 |
| 14 | 99612351 | 99612602 | 99612496 | 10 | 13 | 4  | 3.28453675  | 0.00629037  | EVL      | ENSG00000196405 |
| 14 | 99632549 | 99632994 | 99632769 | 11 | 21 | 13 | 1.843362462 | 0.0337179   |          | ENSG00000199082 |
| 14 | 99673335 | 99673560 | 99673447 | 8  | 8  | 10 | 0.959767232 | 0.541959    | DEGS2    | ENSG00000168350 |
| 14 | 99692117 | 99692364 | 99692257 | 12 | 13 | 7  | 2.052835469 | 0.046392    | DEGS2    | ENSG00000168350 |
| 14 | 99712822 | 99713098 | 99712960 | 11 | 12 | 6  | 2.178519273 | 0.0416567   | DEGS2    | ENSG00000168350 |
| 14 | 99728496 | 99728719 | 99728661 | 8  | 10 | 3  | 3.225884308 | 0.0139466   | DEGS2    | ENSG00000168350 |
| 14 | 99728747 | 99729438 | 99729262 | 13 | 37 | 9  | 4.457585589 | 1.02E-06    | DEGS2    | ENSG00000168350 |
| 14 | 99750311 | 99750596 | 99750470 | 10 | 13 | 4  | 3.28453675  | 0.00629037  | YY1      | ENSG00000100811 |
| 14 | 99782819 | 99783221 | 99783032 | 8  | 16 | 9  | 1.994183027 | 0.0370915   | YY1      | ENSG00000100811 |
| 14 | 99807448 | 99807715 | 99807581 | 10 | 13 | 5  | 2.737113958 | 0.0137917   | YY1      | ENSG00000100811 |
| 14 | 99838835 | 99839065 | 99838908 | 8  | 11 | 5  | 2.346097679 | 0.0364013   | SLC25A29 | ENSG00000197119 |
| 14 | 99839311 | 99839558 | 99839405 | 8  | 9  | 8  | 1.303387599 | 0.281715    | SLC25A29 | ENSG00000197119 |
| 14 | 99844189 | 99844537 | 99844358 | 15 | 19 | 8  | 2.606775198 | 0.00583935  |          | ENSG00000198984 |
| 14 | 99856537 | 99856933 | 99856739 | 26 | 35 | 7  | 5.278719777 | 3.74E-07    |          | ENSG00000223312 |
| 14 | 99861840 | 99862063 | 99861913 | 9  | 11 | 6  | 2.010940867 | 0.0640214   | C14orf68 | ENSG00000140107 |
| 14 | 99912255 | 99912488 | 99912404 | 13 | 14 | 7  | 2.199466574 | 0.0303778   | WARS     | ENSG00000140105 |
| 14 | 99913919 | 99914218 | 99914085 | 13 | 16 | 5  | 3.323638378 | 0.00288759  | WDR25    | ENSG00000176473 |
| 14 | 99934190 | 99934484 | 99934346 | 16 | 17 | 0  | 21.11487911 | 8.57E-07    | WDR25    | ENSG00000176473 |

|    |           |           |           |    |    |    |             |             |          |                 |
|----|-----------|-----------|-----------|----|----|----|-------------|-------------|----------|-----------------|
| 14 | 99953645  | 99953940  | 99953764  | 11 | 15 | 4  | 3.753756286 | 0.0020497   | WDR25    | ENSG00000176473 |
| 14 | 99975457  | 99975720  | 99975559  | 13 | 16 | 2  | 6.647276756 | 0.000101928 | WDR25    | ENSG00000176473 |
| 14 | 99976269  | 99976560  | 99976414  | 14 | 17 | 6  | 3.016411301 | 0.00381427  | WDR25    | ENSG00000176473 |
| 14 | 100122602 | 100122895 | 100122780 | 11 | 14 | 2  | 5.865244197 | 0.000387308 | BEGAIN   | ENSG00000183092 |
| 14 | 100182058 | 100182277 | 100182209 | 13 | 13 | 4  | 3.28453675  | 0.00629037  | C14orf70 | ENSG00000196273 |
| 14 | 100199427 | 100199649 | 100199546 | 8  | 8  | 5  | 1.759573259 | 0.13508     | C14orf70 | ENSG00000196273 |
| 14 | 100214135 | 100214401 | 100214261 | 9  | 10 | 4  | 2.580707446 | 0.0306059   | C14orf70 | ENSG00000196273 |
| 14 | 100239961 | 100240221 | 100240091 | 14 | 18 | 0  | 22.28792795 | 3.94E-07    | DLK1     | ENSG00000185559 |
| 14 | 100244512 | 100244849 | 100244676 | 8  | 13 | 8  | 1.824742639 | 0.0744168   | DLK1     | ENSG00000185559 |
| 14 | 100248536 | 100248854 | 100248676 | 16 | 20 | 0  | 24.63402563 | 8.35E-08    | DLK1     | ENSG00000185559 |
| 14 | 100250771 | 100250969 | 100250867 | 8  | 10 | 0  | 12.90353723 | 0.000195991 | DLK1     | ENSG00000185559 |
| 14 | 100252036 | 100252250 | 100252185 | 11 | 11 | 2  | 4.692195357 | 0.00272444  | DLK1     | ENSG00000185559 |
| 14 | 100272344 | 100272596 | 100272461 | 8  | 9  | 7  | 1.466311049 | 0.20706     | DLK1     | ENSG00000185559 |
| 14 | 100318984 | 100319163 | 100319061 | 8  | 8  | 3  | 2.639359888 | 0.0415794   |          | ENSG00000214548 |
| 14 | 100353352 | 100353588 | 100353470 | 9  | 10 | 1  | 6.451768616 | 0.00135978  |          | ENSG00000214548 |
| 14 | 100370060 | 100370248 | 100370123 | 8  | 10 | 3  | 3.225884308 | 0.0139466   |          | ENSG00000214515 |
| 14 | 100387334 | 100387602 | 100387470 | 10 | 13 | 7  | 2.052835469 | 0.046392    |          | ENSG00000211574 |
| 14 | 100446938 | 100447189 | 100447048 | 10 | 13 | 0  | 16.42268375 | 1.91E-05    |          | ENSG00000199005 |
| 14 | 100609286 | 100609699 | 100609465 | 8  | 16 | 7  | 2.492728784 | 0.0124193   |          | ENSG00000207959 |
| 14 | 100619955 | 100620263 | 100620119 | 9  | 11 | 6  | 2.010940867 | 0.0640214   |          | ENSG00000207959 |
| 14 | 100684504 | 100684870 | 100684770 | 11 | 15 | 2  | 6.256260476 | 0.000199274 |          | ENSG00000206761 |
| 14 | 100771368 | 100771690 | 100771546 | 10 | 13 | 1  | 8.211341875 | 0.000163445 |          | ENSG00000206761 |
| 14 | 100938744 | 100938979 | 100938911 | 8  | 9  | 0  | 11.73048839 | 0.000425898 |          | ENSG00000198348 |
| 14 | 101201616 | 101201877 | 101201746 | 9  | 12 | 4  | 3.049926982 | 0.0108184   | PPP2R5C  | ENSG00000078304 |
| 14 | 101274251 | 101274430 | 101274340 | 8  | 8  | 6  | 1.508205651 | 0.203852    | PPP2R5C  | ENSG00000078304 |
| 14 | 101346071 | 101346581 | 101346338 | 15 | 28 | 11 | 2.834868028 | 0.000626961 | PPP2R5C  | ENSG00000078304 |
| 14 | 101359791 | 101360000 | 101359895 | 9  | 10 | 4  | 2.580707446 | 0.0306059   | PPP2R5C  | ENSG00000078304 |
| 14 | 101376807 | 101377114 | 101376948 | 8  | 10 | 3  | 3.225884308 | 0.0139466   | PPP2R5C  | ENSG00000078304 |
| 14 | 101379800 | 101379983 | 101379834 | 9  | 9  | 3  | 2.932622098 | 0.0242899   | PPP2R5C  | ENSG00000078304 |
| 14 | 101484177 | 101484674 | 101484504 | 10 | 22 | 22 | 1.173048839 | 0.295277    | DYNC1H1  | ENSG00000197102 |
| 14 | 101500675 | 101500870 | 101500813 | 10 | 10 | 1  | 6.451768616 | 0.00135978  | DYNC1H1  | ENSG00000197102 |
| 14 | 101516786 | 101517113 | 101516929 | 19 | 23 | 3  | 7.038293036 | 4.15E-06    | DYNC1H1  | ENSG00000197102 |
| 14 | 101582541 | 101582936 | 101582712 | 13 | 18 | 8  | 2.476436439 | 0.00924552  |          | ENSG00000211198 |
| 14 | 101599251 | 101599530 | 101599394 | 10 | 12 | 5  | 2.541605819 | 0.0225912   |          | ENSG00000211198 |

|    |           |           |           |     |     |    |             |             |          |                 |
|----|-----------|-----------|-----------|-----|-----|----|-------------|-------------|----------|-----------------|
| 14 | 101623025 | 101623204 | 101623114 | 8   | 8   | 2  | 3.519146518 | 0.017558    | HSP90AA2 | ENSG00000080824 |
| 14 | 101632772 | 101632955 | 101632867 | 8   | 9   | 3  | 2.932622098 | 0.0242899   | HSP90AA2 | ENSG00000080824 |
| 14 | 101633557 | 101634184 | 101633765 | 19  | 33  | 10 | 3.625787322 | 2.36E-05    | HSP90AA2 | ENSG00000080824 |
| 14 | 101675876 | 101676108 | 101675992 | 12  | 13  | 7  | 2.052835469 | 0.046392    | WDR20    | ENSG00000140153 |
| 14 | 101723872 | 101724079 | 101723975 | 8   | 9   | 3  | 2.932622098 | 0.0242899   | RAGE     | ENSG00000080823 |
| 14 | 101726724 | 101727139 | 101726903 | 19  | 27  | 0  | 32.8453675  | 3.65E-10    | RAGE     | ENSG00000080823 |
| 14 | 101815726 | 101816033 | 101815871 | 11  | 14  | 6  | 2.513676084 | 0.016726    | RAGE     | ENSG00000080823 |
| 14 | 101850343 | 101850593 | 101850456 | 9   | 11  | 12 | 1.082814313 | 0.424156    | ZNF839   | ENSG00000022976 |
| 14 | 101852847 | 101853427 | 101853137 | 15  | 31  | 11 | 3.128130238 | 0.000146711 | ZNF839   | ENSG00000022976 |
| 14 | 101854121 | 101854308 | 101854214 | 8   | 9   | 0  | 11.73048839 | 0.000425898 | ZNF839   | ENSG00000022976 |
| 14 | 101855644 | 101855899 | 101855779 | 16  | 17  | 3  | 5.278719777 | 0.000205462 | ZNF839   | ENSG00000022976 |
| 14 | 101898781 | 101899137 | 101898959 | 9   | 15  | 3  | 4.692195357 | 0.000718455 |          | ENSG00000100865 |
| 14 | 101974099 | 101974374 | 101974236 | 9   | 12  | 0  | 15.24963491 | 4.15E-05    |          | ENSG00000212330 |
| 14 | 102008996 | 102009355 | 102009129 | 9   | 15  | 4  | 3.753756286 | 0.0020497   |          | ENSG00000212330 |
| 14 | 102017982 | 102018274 | 102018128 | 15  | 17  | 1  | 10.55743955 | 9.18E-06    |          | ENSG00000212330 |
| 14 | 102044508 | 102044855 | 102044681 | 8   | 14  | 3  | 4.398933147 | 0.00132748  | ANKRD9   | ENSG00000156381 |
| 14 | 102060618 | 102061353 | 102060783 | 13  | 36  | 14 | 2.89352047  | 0.000111563 | ANKRD9   | ENSG00000156381 |
| 14 | 102082013 | 102082217 | 102082083 | 9   | 9   | 3  | 2.932622098 | 0.0242899   | ANKRD9   | ENSG00000156381 |
| 14 | 102227031 | 102227306 | 102227165 | 12  | 12  | 6  | 2.178519273 | 0.0416567   |          | ENSG00000202459 |
| 14 | 102230666 | 102230919 | 102230778 | 9   | 9   | 4  | 2.346097679 | 0.050148    |          | ENSG00000202459 |
| 14 | 102262276 | 102262723 | 102262566 | 14  | 21  | 10 | 2.346097679 | 0.00796926  |          | ENSG00000202459 |
| 14 | 102310867 | 102311127 | 102310997 | 8   | 9   | 7  | 1.466311049 | 0.20706     | TRAF3    | ENSG00000131323 |
| 14 | 102374366 | 102374771 | 102374464 | 8   | 14  | 2  | 5.865244197 | 0.000387308 |          | ENSG00000206969 |
| 14 | 102522993 | 102523773 | 102523518 | 71  | 101 | 4  | 23.93019632 | 1.81E-29    |          | ENSG00000213176 |
| 14 | 102553922 | 102554101 | 102553987 | 10  | 10  | 1  | 6.451768616 | 0.00135978  |          | ENSG00000213176 |
| 14 | 102614410 | 102614665 | 102614537 | 14  | 14  | 5  | 2.932622098 | 0.00829617  | CDC42BPB | ENSG00000198752 |
| 14 | 102641151 | 102641438 | 102641284 | 11  | 13  | 5  | 2.737113958 | 0.0137917   | C14orf73 | ENSG00000205436 |
| 14 | 102745329 | 102745618 | 102745473 | 9   | 14  | 0  | 17.59573259 | 8.79E-06    | TNFAIP2  | ENSG00000185215 |
| 14 | 102779954 | 102780549 | 102780350 | 107 | 132 | 0  | 156.0154956 | 1.48E-45    |          | ENSG00000199528 |
| 14 | 102868210 | 102868410 | 102868310 | 8   | 8   | 2  | 3.519146518 | 0.017558    | EIF5     | ENSG00000100664 |
| 14 | 102869875 | 102870157 | 102870015 | 9   | 14  | 5  | 2.932622098 | 0.00829617  | EIF5     | ENSG00000100664 |
| 14 | 102890953 | 102891219 | 102891073 | 8   | 11  | 6  | 2.010940867 | 0.0640214   |          | ENSG00000213173 |
| 14 | 102894001 | 102894329 | 102894170 | 17  | 22  | 1  | 13.49006165 | 2.37E-07    |          | ENSG00000213173 |
| 14 | 103036117 | 103036592 | 103036413 | 12  | 20  | 6  | 3.519146518 | 0.000784044 | CKB      | ENSG00000166165 |

|    |           |           |           |    |    |    |             |             |           |                 |
|----|-----------|-----------|-----------|----|----|----|-------------|-------------|-----------|-----------------|
| 14 | 103057205 | 103057483 | 103057341 | 9  | 11 | 1  | 7.038293036 | 0.000674435 | CKB       | ENSG00000166165 |
| 14 | 103163128 | 103163510 | 103163307 | 16 | 22 | 5  | 4.496687217 | 9.59E-05    | KLC1      | ENSG00000126214 |
| 14 | 103229512 | 103229915 | 103229747 | 17 | 22 | 1  | 13.49006165 | 2.37E-07    | XRCC3     | ENSG00000126215 |
| 14 | 103266206 | 103266417 | 103266311 | 8  | 9  | 1  | 5.865244197 | 0.00272497  | ZFYVE21   | ENSG00000100711 |
| 14 | 103272448 | 103272696 | 103272572 | 9  | 11 | 3  | 3.519146518 | 0.00788869  | ZFYVE21   | ENSG00000100711 |
| 14 | 103403625 | 103404006 | 103403827 | 8  | 13 | 1  | 8.211341875 | 0.000163445 | PPP1R13B  | ENSG00000088808 |
| 14 | 103416229 | 103416454 | 103416319 | 8  | 9  | 5  | 1.955081399 | 0.0892323   | PPP1R13B  | ENSG00000088808 |
| 14 | 103427459 | 103427872 | 103427706 | 8  | 13 | 3  | 4.105670938 | 0.00243034  | C14orf2   | ENSG00000156411 |
| 14 | 103437215 | 103437563 | 103437389 | 12 | 15 | 4  | 3.753756286 | 0.0020497   | C14orf2   | ENSG00000156411 |
| 14 | 103446368 | 103446792 | 103446614 | 11 | 19 | 2  | 7.820325595 | 1.32E-05    | C14orf2   | ENSG00000156411 |
| 14 | 103457550 | 103457885 | 103457717 | 18 | 20 | 7  | 3.079253203 | 0.00177418  | C14orf2   | ENSG00000156411 |
| 14 | 103614092 | 103614423 | 103614257 | 15 | 19 | 14 | 1.564065119 | 0.0925887   |           | ENSG00000166183 |
| 14 | 103636992 | 103637455 | 103637171 | 9  | 18 | 1  | 11.14396397 | 4.44E-06    |           | ENSG00000166183 |
| 14 | 103738375 | 103738573 | 103738474 | 8  | 8  | 4  | 2.111487911 | 0.0804809   | KIF26A    | ENSG00000066735 |
| 14 | 103879353 | 103879705 | 103879529 | 17 | 23 | 4  | 5.630634429 | 1.63E-05    |           | ENSG00000222761 |
| 14 | 103879741 | 103879938 | 103879829 | 10 | 10 | 2  | 4.301179077 | 0.00512919  |           | ENSG00000222761 |
| 14 | 103882269 | 103882501 | 103882366 | 8  | 10 | 0  | 12.90353723 | 0.000195991 |           | ENSG00000222761 |
| 14 | 103882590 | 103882960 | 103882838 | 10 | 14 | 3  | 4.398933147 | 0.00132748  |           | ENSG00000222761 |
| 14 | 103883583 | 103884070 | 103883849 | 12 | 23 | 7  | 3.519146518 | 0.000369739 |           | ENSG00000222761 |
| 14 | 103972195 | 103972856 | 103972510 | 24 | 43 | 2  | 17.20471631 | 4.62E-13    |           | ENSG00000213159 |
| 14 | 104086884 | 104087256 | 104087059 | 12 | 18 | 2  | 7.429309316 | 2.63E-05    | C14orf180 | ENSG00000184601 |
| 14 | 104101462 | 104101682 | 104101516 | 10 | 11 | 4  | 2.815317214 | 0.0183428   | C14orf180 | ENSG00000184601 |
| 14 | 104177445 | 104177660 | 104177586 | 10 | 11 | 4  | 2.815317214 | 0.0183428   |           | ENSG00000203486 |
| 14 | 104225154 | 104225576 | 104225284 | 9  | 19 | 3  | 5.865244197 | 5.72E-05    | INF2      | ENSG00000203485 |
| 14 | 104225964 | 104226281 | 104226105 | 10 | 12 | 3  | 3.812408728 | 0.004404    | INF2      | ENSG00000203485 |
| 14 | 104290036 | 104290564 | 104290176 | 11 | 20 | 7  | 3.079253203 | 0.00177418  | SIVA1     | ENSG00000184990 |
| 14 | 104311763 | 104312102 | 104311932 | 14 | 19 | 4  | 4.692195357 | 0.000193572 | AKT1      | ENSG00000142208 |
| 14 | 104338298 | 104338607 | 104338452 | 19 | 21 | 1  | 12.90353723 | 4.95E-07    |           | ENSG00000179627 |
| 14 | 104338760 | 104338980 | 104338855 | 9  | 10 | 4  | 2.580707446 | 0.0306059   |           | ENSG00000179627 |
| 14 | 104342726 | 104342996 | 104342852 | 13 | 14 | 0  | 17.59573259 | 8.79E-06    |           | ENSG00000179627 |
| 14 | 104353276 | 104353675 | 104353473 | 12 | 20 | 2  | 8.211341875 | 6.65E-06    |           | ENSG00000179627 |
| 14 | 104358119 | 104358427 | 104358262 | 10 | 13 | 2  | 5.474227917 | 0.000747844 | RPS2P4    | ENSG00000196183 |
| 14 | 104401412 | 104401604 | 104401475 | 9  | 10 | 5  | 2.150589539 | 0.0575848   | KIAA0284  | ENSG00000099814 |
| 14 | 104403373 | 104403629 | 104403451 | 8  | 10 | 1  | 6.451768616 | 0.00135978  | KIAA0284  | ENSG00000099814 |

|    |           |           |           |    |    |    |             |             |            |                 |
|----|-----------|-----------|-----------|----|----|----|-------------|-------------|------------|-----------------|
| 14 | 104423045 | 104423324 | 104423158 | 8  | 10 | 3  | 3.225884308 | 0.0139466   | KIAA0284   | ENSG00000099814 |
| 14 | 104433813 | 104434008 | 104433962 | 9  | 9  | 1  | 5.865244197 | 0.00272497  | KIAA0284   | ENSG00000099814 |
| 14 | 104506328 | 104506639 | 104506495 | 9  | 13 | 4  | 3.28453675  | 0.00629037  | AHNAK2     | ENSG00000185567 |
| 14 | 104513593 | 104513814 | 104513655 | 11 | 13 | 8  | 1.824742639 | 0.0744168   | AHNAK2     | ENSG00000185567 |
| 14 | 104520153 | 104520668 | 104520326 | 29 | 40 | 2  | 16.03166747 | 4.15E-12    | C14orf79   | ENSG00000140104 |
| 14 | 104533186 | 104533383 | 104533324 | 8  | 10 | 1  | 6.451768616 | 0.00135978  | C14orf79   | ENSG00000140104 |
| 14 | 104558868 | 104559251 | 104559072 | 8  | 15 | 7  | 2.346097679 | 0.0195693   | CDCA4      | ENSG00000170779 |
| 14 | 104583214 | 104583443 | 104583311 | 14 | 15 | 2  | 6.256260476 | 0.000199274 | GPR132     | ENSG00000183484 |
| 14 | 104629001 | 104629277 | 104629156 | 13 | 15 | 4  | 3.753756286 | 0.0020497   | GPR132     | ENSG00000183484 |
| 14 | 104734670 | 104734870 | 104734738 | 8  | 9  | 1  | 5.865244197 | 0.00272497  | NUDT14     | ENSG00000183828 |
| 14 | 104740458 | 104740680 | 104740569 | 10 | 11 | 3  | 3.519146518 | 0.00788869  | NUDT14     | ENSG00000183828 |
| 14 | 104838472 | 104838935 | 104838756 | 9  | 19 | 8  | 2.606775198 | 0.00583935  | BRF1       | ENSG00000185024 |
| 14 | 104846592 | 104846932 | 104846788 | 12 | 17 | 7  | 2.639359888 | 0.00777415  | PACS2      | ENSG00000179364 |
| 14 | 104852757 | 104852999 | 104852878 | 10 | 11 | 4  | 2.815317214 | 0.0183428   | PACS2      | ENSG00000179364 |
| 14 | 104889672 | 104889861 | 104889766 | 8  | 8  | 4  | 2.111487911 | 0.0804809   | PACS2      | ENSG00000179364 |
| 14 | 104891684 | 104891988 | 104891836 | 14 | 18 | 7  | 2.785990993 | 0.00480525  | PACS2      | ENSG00000179364 |
| 14 | 104908286 | 104908501 | 104908434 | 9  | 12 | 7  | 1.906204364 | 0.0695918   | MTA1       | ENSG00000182979 |
| 14 | 104935688 | 104935893 | 104935796 | 8  | 9  | 0  | 11.73048839 | 0.000425898 | MTA1       | ENSG00000182979 |
| 14 | 104960025 | 104960409 | 104960240 | 10 | 16 | 14 | 1.329455351 | 0.210108    | MTA1       | ENSG00000182979 |
| 14 | 105004553 | 105004993 | 105004803 | 14 | 23 | 0  | 28.15317214 | 8.13E-09    | CRIP2      | ENSG00000182809 |
| 14 | 105006024 | 105006265 | 105006154 | 9  | 9  | 0  | 11.73048839 | 0.000425898 | CRIP2      | ENSG00000182809 |
| 14 | 105011380 | 105011745 | 105011589 | 8  | 14 | 5  | 2.932622098 | 0.00829617  | CRIP2      | ENSG00000182809 |
| 14 | 105016963 | 105017156 | 105017059 | 8  | 9  | 8  | 1.303387599 | 0.281715    | CRIP2      | ENSG00000182809 |
| 14 | 105018275 | 105018691 | 105018454 | 20 | 31 | 2  | 12.51252095 | 2.82E-09    |            | ENSG00000182351 |
| 14 | 105019245 | 105019842 | 105019576 | 10 | 25 | 3  | 7.624817456 | 1.09E-06    |            | ENSG00000182351 |
| 14 | 105027087 | 105027553 | 105027385 | 9  | 17 | 7  | 2.639359888 | 0.00777415  | C14orf80   | ENSG00000185347 |
| 14 | 105028215 | 105028634 | 105028348 | 9  | 15 | 4  | 3.753756286 | 0.0020497   | C14orf80   | ENSG00000185347 |
| 14 | 105105665 | 105105864 | 105105744 | 8  | 8  | 0  | 10.55743955 | 0.000925496 |            | ENSG00000219311 |
| 14 | 105215505 | 105215765 | 105215609 | 8  | 8  | 2  | 3.519146518 | 0.017558    |            | ENSG00000213140 |
| 14 | 105225032 | 105225514 | 105225359 | 12 | 19 | 3  | 5.865244197 | 5.72E-05    |            | ENSG00000183545 |
| 14 | 105338592 | 105338904 | 105338737 | 10 | 15 | 3  | 4.692195357 | 0.000718455 | IGHG3      | ENSG00000211897 |
| 14 | 105481790 | 105482177 | 105482045 | 12 | 20 | 2  | 8.211341875 | 6.65E-06    | IGHVII-1-1 | ENSG00000217515 |
| 14 | 105560125 | 105560313 | 105560219 | 8  | 8  | 1  | 5.278719777 | 0.00542188  |            | ENSG00000211937 |
| 14 | 105566756 | 105566984 | 105566871 | 11 | 13 | 3  | 4.105670938 | 0.00243034  | IGHVIII-5- | ENSG00000219606 |

|    |           |           |           |    |    |   |             |             |            |                 |
|----|-----------|-----------|-----------|----|----|---|-------------|-------------|------------|-----------------|
| 14 | 105738122 | 105738681 | 105738418 | 27 | 50 | 7 | 7.478186351 | 2.92E-11    |            | ENSG00000211946 |
| 14 | 105795974 | 105796211 | 105796096 | 9  | 10 | 6 | 1.843362462 | 0.0964212   | IGHV@      | ENSG00000211949 |
| 14 | 105858658 | 105859086 | 105858914 | 14 | 21 | 5 | 4.301179077 | 0.000172642 | IGHV3-29   | ENSG00000218736 |
| 14 | 105864660 | 105864914 | 105864800 | 8  | 8  | 4 | 2.111487911 | 0.0804809   |            | ENSG00000211953 |
| 14 | 105874614 | 105874816 | 105874715 | 8  | 10 | 4 | 2.580707446 | 0.0306059   |            | ENSG00000211954 |
| 14 | 105944528 | 105944719 | 105944623 | 8  | 8  | 0 | 10.55743955 | 0.000925496 | IGHVIII-38 | ENSG00000220458 |
| 14 | 106032123 | 106032344 | 106032233 | 8  | 8  | 3 | 2.639359888 | 0.0415794   |            | ENSG00000211961 |
| 14 | 106091141 | 106091381 | 106091257 | 13 | 14 | 5 | 2.932622098 | 0.00829617  | IGHVII-49- | ENSG00000220648 |
| 14 | 106139027 | 106139665 | 106139339 | 35 | 63 | 6 | 10.72501796 | 9.41E-16    | IGHV7-56   | ENSG00000218845 |
| 14 | 106164775 | 106164985 | 106164880 | 8  | 8  | 7 | 1.319679944 | 0.283403    | IGHVII-60- | ENSG00000217663 |
| 14 | 106179702 | 106180002 | 106179852 | 13 | 16 | 4 | 3.988366054 | 0.00115141  | IGHV3-63   | ENSG00000216414 |
| 14 | 106206653 | 106206917 | 106206785 | 8  | 8  | 4 | 2.111487911 | 0.0804809   | IGHV1-67   | ENSG00000216920 |
| 14 | 106269740 | 106269938 | 106269839 | 9  | 9  | 3 | 2.932622098 | 0.0242899   |            | ENSG00000211975 |
| 14 | 106323231 | 106323571 | 106323392 | 11 | 15 | 1 | 9.384390715 | 3.90E-05    |            | ENSG00000211978 |
| 14 | 106324540 | 106324741 | 106324640 | 8  | 10 | 3 | 3.225884308 | 0.0139466   |            | ENSG00000211978 |
| 14 | 106327628 | 106327828 | 106327728 | 10 | 10 | 0 | 12.90353723 | 0.000195991 |            | ENSG00000211978 |
| 14 | 106339868 | 106340075 | 106340018 | 8  | 8  | 1 | 5.278719777 | 0.00542188  | IGHVII-78- | ENSG00000218789 |
| 14 | 106352144 | 106352538 | 106352334 | 12 | 20 | 5 | 4.105670938 | 0.000308509 | IGHV4-80   | ENSG00000220689 |
| 14 | 106358508 | 106358757 | 106358632 | 8  | 9  | 7 | 1.466311049 | 0.20706     | IGHVIII-82 | ENSG00000218325 |
| 15 | 18277779  | 18277960  | 18277810  | 8  | 8  | 6 | 1.508205651 | 0.203852    |            | ENSG00000215409 |
| 15 | 19145919  | 19146185  | 19146034  | 11 | 13 | 4 | 3.28453675  | 0.00629037  |            | ENSG00000187646 |
| 15 | 19179351  | 19179746  | 19179530  | 14 | 22 | 3 | 6.745030826 | 8.05E-06    |            | ENSG00000187646 |
| 15 | 19180716  | 19180981  | 19180838  | 10 | 13 | 2 | 5.474227917 | 0.000747844 |            | ENSG00000187646 |
| 15 | 19254356  | 19254693  | 19254524  | 15 | 20 | 0 | 24.63402563 | 8.35E-08    |            | ENSG00000214319 |
| 15 | 19281982  | 19282299  | 19282140  | 9  | 10 | 0 | 12.90353723 | 0.000195991 |            | ENSG00000214319 |
| 15 | 19988073  | 19988491  | 19988338  | 11 | 16 | 8 | 2.215758919 | 0.0222902   | VSIG6      | ENSG00000189039 |
| 15 | 20384804  | 20385029  | 20384960  | 9  | 11 | 2 | 4.692195357 | 0.00272444  | TUBGCP5    | ENSG00000153575 |
| 15 | 21328288  | 21328549  | 21328418  | 12 | 15 | 3 | 4.692195357 | 0.000718455 | MKRN3      | ENSG00000179455 |
| 15 | 23878665  | 23878905  | 23878749  | 8  | 10 | 1 | 6.451768616 | 0.00135978  |            | ENSG00000212604 |
| 15 | 25613349  | 25613715  | 25613528  | 27 | 34 | 0 | 41.05670938 | 1.59E-12    |            | ENSG00000210015 |
| 15 | 27770520  | 27770884  | 27770699  | 10 | 17 | 1 | 10.55743955 | 9.18E-06    |            | ENSG00000212769 |
| 15 | 27825848  | 27826102  | 27825975  | 15 | 16 | 0 | 19.94183027 | 1.86E-06    |            | ENSG00000212769 |
| 15 | 27891800  | 27892082  | 27891941  | 10 | 12 | 0 | 15.24963491 | 4.15E-05    | TJP1       | ENSG00000104067 |
| 15 | 28015170  | 28015408  | 28015289  | 9  | 9  | 4 | 2.346097679 | 0.050148    |            | ENSG00000215315 |



|    |          |          |          |    |    |   |             |             |         |                 |
|----|----------|----------|----------|----|----|---|-------------|-------------|---------|-----------------|
| 15 | 29230160 | 29230580 | 29230373 | 61 | 73 | 0 | 86.80561411 | 1.14E-25    | TRPM1   | ENSG00000134160 |
| 15 | 29276923 | 29277228 | 29277075 | 9  | 12 | 2 | 5.083211637 | 0.00143337  | TRPM1   | ENSG00000134160 |
| 15 | 29477427 | 29477848 | 29477606 | 16 | 27 | 0 | 32.8453675  | 3.65E-10    | KLF13   | ENSG00000169926 |
| 15 | 31148169 | 31148509 | 31148339 | 12 | 16 | 2 | 6.647276756 | 0.000101928 | FMN1    | ENSG00000186031 |
| 15 | 31225043 | 31225478 | 31225238 | 63 | 81 | 1 | 48.09500241 | 1.04E-26    |         | ENSG00000206125 |
| 15 | 31945650 | 31945843 | 31945746 | 9  | 10 | 4 | 2.580707446 | 0.0306059   | CHRM5   | ENSG00000184984 |
| 15 | 32422637 | 32422840 | 32422767 | 10 | 10 | 2 | 4.301179077 | 0.00512919  | NOP10   | ENSG00000182117 |
| 15 | 32811819 | 32812407 | 32812088 | 50 | 65 | 4 | 15.48424468 | 4.65E-18    | GJD2    | ENSG00000159248 |
| 15 | 33049234 | 33049418 | 33049326 | 8  | 8  | 3 | 2.639359888 | 0.0415794   | AQR     | ENSG00000021776 |
| 15 | 33067849 | 33068053 | 33067933 | 10 | 11 | 4 | 2.815317214 | 0.0183428   | ZNF770  | ENSG00000198146 |
| 15 | 33336046 | 33336327 | 33336186 | 10 | 13 | 0 | 16.42268375 | 1.91E-05    |         | ENSG00000214149 |
| 15 | 33587867 | 33588090 | 33587966 | 10 | 10 | 0 | 12.90353723 | 0.000195991 | ATPBD4  | ENSG00000134146 |
| 15 | 34085417 | 34085643 | 34085529 | 10 | 10 | 0 | 12.90353723 | 0.000195991 | ATPBD4  | ENSG00000134146 |
| 15 | 36533480 | 36533705 | 36533590 | 10 | 12 | 3 | 3.812408728 | 0.004404    | FAM98B  | ENSG00000171262 |
| 15 | 37700701 | 37701038 | 37700828 | 10 | 14 | 1 | 8.797866295 | 8.00E-05    | THBS1   | ENSG00000137801 |
| 15 | 37984238 | 37984455 | 37984346 | 10 | 10 | 2 | 4.301179077 | 0.00512919  | GPR176  | ENSG00000166073 |
| 15 | 38081888 | 38082260 | 38082107 | 12 | 16 | 2 | 6.647276756 | 0.000101928 | SRP14   | ENSG00000140319 |
| 15 | 38234755 | 38235072 | 38234913 | 9  | 12 | 0 | 15.24963491 | 4.15E-05    | BUB1B   | ENSG00000156970 |
| 15 | 38557417 | 38557684 | 38557521 | 8  | 10 | 1 | 6.451768616 | 0.00135978  |         | ENSG00000214089 |
| 15 | 38673611 | 38673796 | 38673703 | 8  | 9  | 4 | 2.346097679 | 0.050148    | CASC5   | ENSG00000137812 |
| 15 | 38945476 | 38945756 | 38945627 | 13 | 15 | 0 | 18.76878143 | 4.04E-06    | RHOV    | ENSG00000104140 |
| 15 | 38971430 | 38971612 | 38971573 | 8  | 10 | 2 | 4.301179077 | 0.00512919  | VPS18   | ENSG00000104142 |
| 15 | 39098019 | 39098336 | 39098159 | 17 | 20 | 2 | 8.211341875 | 6.65E-06    | CHAC1   | ENSG00000128965 |
| 15 | 39490682 | 39490885 | 39490779 | 8  | 9  | 1 | 5.865244197 | 0.00272497  | RTF1    | ENSG00000137815 |
| 15 | 39883955 | 39884134 | 39884064 | 8  | 8  | 2 | 3.519146518 | 0.017558    | PLA2G4B | ENSG00000168970 |
| 15 | 39917999 | 39918229 | 39918109 | 8  | 8  | 2 | 3.519146518 | 0.017558    | PLA2G4B | ENSG00000168970 |
| 15 | 40007619 | 40007843 | 40007731 | 9  | 9  | 2 | 3.910162798 | 0.00955088  | SPTBN5  | ENSG00000137877 |
| 15 | 40110696 | 40111097 | 40110862 | 13 | 21 | 0 | 25.80707446 | 3.84E-08    | PLA2G4E | ENSG00000188089 |
| 15 | 40174040 | 40174248 | 40174144 | 9  | 11 | 3 | 3.519146518 | 0.00788869  | PLA2G4D | ENSG00000159337 |
| 15 | 40174299 | 40174593 | 40174475 | 15 | 18 | 2 | 7.429309316 | 2.63E-05    | PLA2G4D | ENSG00000159337 |
| 15 | 40350718 | 40350897 | 40350807 | 8  | 8  | 0 | 10.55743955 | 0.000925496 | TMEM87A | ENSG00000103978 |
| 15 | 40750889 | 40751367 | 40751088 | 29 | 40 | 0 | 48.09500241 | 1.51E-14    | STARD9  | ENSG00000166917 |
| 15 | 40938095 | 40938300 | 40938197 | 11 | 12 | 0 | 15.24963491 | 4.15E-05    | TTBK2   | ENSG00000128881 |
| 15 | 41185483 | 41185662 | 41185572 | 8  | 8  | 1 | 5.278719777 | 0.00542188  | UBR1    | ENSG00000159459 |

|    |          |          |          |     |     |    |             |             |          |                 |
|----|----------|----------|----------|-----|-----|----|-------------|-------------|----------|-----------------|
| 15 | 41298896 | 41299110 | 41299003 | 13  | 13  | 1  | 8.211341875 | 0.000163445 | EPB42    | ENSG00000166947 |
| 15 | 41856765 | 41857104 | 41856934 | 8   | 13  | 1  | 8.211341875 | 0.000163445 | ELL3     | ENSG00000128886 |
| 15 | 41903995 | 41904241 | 41904146 | 9   | 12  | 2  | 5.083211637 | 0.00143337  | MFAP1    | ENSG00000140259 |
| 15 | 42322736 | 42322934 | 42322835 | 8   | 9   | 0  | 11.73048839 | 0.000425898 |          | ENSG00000203578 |
| 15 | 42506830 | 42507021 | 42506925 | 8   | 8   | 5  | 1.759573259 | 0.13508     | CTDSPL2  | ENSG00000137770 |
| 15 | 43162799 | 43163057 | 43162951 | 17  | 18  | 1  | 11.14396397 | 4.44E-06    | DUOX2    | ENSG00000140279 |
| 15 | 43277959 | 43278226 | 43278078 | 9   | 10  | 3  | 3.225884308 | 0.0139466   | SHF      | ENSG00000138606 |
| 15 | 43279706 | 43280054 | 43279877 | 9   | 14  | 7  | 2.199466574 | 0.0303778   | SHF      | ENSG00000138606 |
| 15 | 43666638 | 43666817 | 43666767 | 8   | 8   | 2  | 3.519146518 | 0.017558    | PLDN     | ENSG00000104164 |
| 15 | 46947455 | 46947841 | 46947664 | 19  | 26  | 0  | 31.67231866 | 7.93E-10    | SHC4     | ENSG00000185634 |
| 15 | 47042935 | 47043120 | 47043060 | 9   | 9   | 1  | 5.865244197 | 0.00272497  | SHC4     | ENSG00000185634 |
| 15 | 47112263 | 47112481 | 47112372 | 8   | 9   | 1  | 5.865244197 | 0.00272497  |          | ENSG00000223176 |
| 15 | 47235147 | 47235396 | 47235288 | 17  | 19  | 1  | 11.73048839 | 2.14E-06    | GALK2    | ENSG00000156958 |
| 15 | 47345428 | 47345879 | 47345662 | 28  | 42  | 0  | 50.44110009 | 3.21E-15    |          | ENSG00000210823 |
| 15 | 47539185 | 47539435 | 47539325 | 9   | 12  | 5  | 2.541605819 | 0.0225912   | FGF7P2   | ENSG00000140285 |
| 15 | 47547940 | 47548548 | 47548244 | 14  | 27  | 16 | 1.932080441 | 0.0141162   | FGF7P2   | ENSG00000140285 |
| 15 | 47585833 | 47586247 | 47586025 | 51  | 60  | 6  | 10.22228274 | 7.38E-15    | FGF7P2   | ENSG00000140285 |
| 15 | 47600730 | 47601020 | 47600857 | 8   | 11  | 4  | 2.815317214 | 0.0183428   | FGF7P2   | ENSG00000140285 |
| 15 | 47611097 | 47611284 | 47611190 | 8   | 8   | 6  | 1.508205651 | 0.203852    | C15orf33 | ENSG00000166262 |
| 15 | 47633813 | 47634068 | 47633964 | 8   | 10  | 3  | 3.225884308 | 0.0139466   | C15orf33 | ENSG00000166262 |
| 15 | 47639388 | 47639620 | 47639502 | 9   | 11  | 12 | 1.082814313 | 0.424156    | C15orf33 | ENSG00000166262 |
| 15 | 47645213 | 47645517 | 47645368 | 12  | 13  | 4  | 3.28453675  | 0.00629037  | C15orf33 | ENSG00000166262 |
| 15 | 47659638 | 47659889 | 47659763 | 8   | 8   | 7  | 1.319679944 | 0.283403    | C15orf33 | ENSG00000166262 |
| 15 | 47683924 | 47684103 | 47683937 | 8   | 8   | 2  | 3.519146518 | 0.017558    | C15orf33 | ENSG00000166262 |
| 15 | 47700087 | 47701135 | 47700498 | 75  | 149 | 42 | 4.092030835 | 9.03E-20    | DTWD1    | ENSG00000104047 |
| 15 | 47702740 | 47703082 | 47702907 | 8   | 12  | 6  | 2.178519273 | 0.0416567   | DTWD1    | ENSG00000104047 |
| 15 | 47703559 | 47703816 | 47703687 | 8   | 11  | 0  | 14.07658607 | 9.02E-05    | DTWD1    | ENSG00000104047 |
| 15 | 47705014 | 47705614 | 47705356 | 360 | 445 | 8  | 58.13108693 | 1.43E-136   | DTWD1    | ENSG00000104047 |
| 15 | 47725542 | 47725904 | 47725651 | 9   | 14  | 9  | 1.759573259 | 0.0786014   | DTWD1    | ENSG00000104047 |
| 15 | 47726153 | 47726381 | 47726267 | 8   | 9   | 9  | 1.173048839 | 0.362316    | DTWD1    | ENSG00000104047 |
| 15 | 47743538 | 47743745 | 47743641 | 9   | 9   | 2  | 3.910162798 | 0.00955088  | DTWD1    | ENSG00000104047 |
| 15 | 47752766 | 47753033 | 47752899 | 9   | 13  | 6  | 2.346097679 | 0.0266147   | DTWD1    | ENSG00000104047 |
| 15 | 47754657 | 47755030 | 47754851 | 9   | 16  | 12 | 1.533986944 | 0.120062    | DTWD1    | ENSG00000104047 |
| 15 | 47764085 | 47764445 | 47764266 | 11  | 17  | 4  | 4.222975822 | 0.000640773 | DTWD1    | ENSG00000104047 |

|    |          |          |          |    |    |    |             |             |        |                 |
|----|----------|----------|----------|----|----|----|-------------|-------------|--------|-----------------|
| 15 | 47768834 | 47769211 | 47769132 | 14 | 19 | 19 | 1.173048839 | 0.308076    | DTWD1  | ENSG00000104047 |
| 15 | 47791799 | 47791988 | 47791906 | 8  | 9  | 2  | 3.910162798 | 0.00955088  |        | ENSG00000214966 |
| 15 | 47794823 | 47795037 | 47794930 | 14 | 16 | 7  | 2.492728784 | 0.0124193   |        | ENSG00000214966 |
| 15 | 47795607 | 47795883 | 47795745 | 10 | 12 | 11 | 1.270802909 | 0.274822    |        | ENSG00000214966 |
| 15 | 47810131 | 47810325 | 47810262 | 8  | 8  | 8  | 1.173048839 | 0.36929     |        | ENSG00000214966 |
| 15 | 47814340 | 47814555 | 47814418 | 8  | 9  | 3  | 2.932622098 | 0.0242899   |        | ENSG00000214966 |
| 15 | 47828478 | 47829012 | 47828607 | 10 | 23 | 8  | 3.128130238 | 0.000832453 |        | ENSG00000214966 |
| 15 | 47831935 | 47832243 | 47832104 | 9  | 11 | 10 | 1.279689643 | 0.277323    |        | ENSG00000214966 |
| 15 | 47854880 | 47855062 | 47854985 | 8  | 8  | 10 | 0.959767232 | 0.541959    |        | ENSG00000214966 |
| 15 | 47881737 | 47882078 | 47881907 | 15 | 19 | 3  | 5.865244197 | 5.72E-05    |        | ENSG00000214966 |
| 15 | 47885984 | 47886481 | 47886310 | 10 | 19 | 16 | 1.380057458 | 0.163303    |        | ENSG00000214966 |
| 15 | 47912095 | 47912390 | 47912251 | 11 | 14 | 9  | 1.759573259 | 0.0786014   |        | ENSG00000214966 |
| 15 | 47932435 | 47932624 | 47932529 | 8  | 9  | 4  | 2.346097679 | 0.050148    | ATP8B4 | ENSG00000104043 |
| 15 | 47932880 | 47933100 | 47932990 | 8  | 9  | 7  | 1.466311049 | 0.20706     | ATP8B4 | ENSG00000104043 |
| 15 | 47945128 | 47945375 | 47945245 | 8  | 10 | 7  | 1.612942154 | 0.147335    | ATP8B4 | ENSG00000104043 |
| 15 | 47945614 | 47946131 | 47945862 | 11 | 22 | 17 | 1.498895739 | 0.097269    | ATP8B4 | ENSG00000104043 |
| 15 | 47950855 | 47951115 | 47950980 | 8  | 11 | 9  | 1.407658607 | 0.210479    | ATP8B4 | ENSG00000104043 |
| 15 | 47955002 | 47955274 | 47955138 | 10 | 13 | 11 | 1.368556979 | 0.211388    | ATP8B4 | ENSG00000104043 |
| 15 | 47956171 | 47956657 | 47956332 | 11 | 19 | 26 | 0.868925066 | 0.687875    | ATP8B4 | ENSG00000104043 |
| 15 | 47965415 | 47965601 | 47965508 | 8  | 8  | 6  | 1.508205651 | 0.203852    | ATP8B4 | ENSG00000104043 |
| 15 | 47969687 | 47970109 | 47969865 | 8  | 14 | 14 | 1.173048839 | 0.332418    | ATP8B4 | ENSG00000104043 |
| 15 | 48002717 | 48003154 | 48002975 | 9  | 18 | 7  | 2.785990993 | 0.00480525  | ATP8B4 | ENSG00000104043 |
| 15 | 48005885 | 48006186 | 48006035 | 10 | 15 | 8  | 2.085420159 | 0.0338693   | ATP8B4 | ENSG00000104043 |
| 15 | 48006870 | 48007366 | 48007188 | 16 | 27 | 17 | 1.824742639 | 0.0211436   | ATP8B4 | ENSG00000104043 |
| 15 | 48064016 | 48064499 | 48064167 | 17 | 23 | 10 | 2.559379286 | 0.00330263  |        | ENSG00000201086 |
| 15 | 48070495 | 48070771 | 48070638 | 12 | 13 | 9  | 1.642268375 | 0.111397    |        | ENSG00000201086 |
| 15 | 48076140 | 48076330 | 48076235 | 8  | 9  | 3  | 2.932622098 | 0.0242899   |        | ENSG00000201086 |
| 15 | 48083056 | 48083977 | 48083350 | 42 | 79 | 30 | 3.027222811 | 1.22E-08    |        | ENSG00000201086 |
| 15 | 48092638 | 48092893 | 48092765 | 10 | 10 | 2  | 4.301179077 | 0.00512919  |        | ENSG00000201086 |
| 15 | 48126521 | 48126725 | 48126611 | 8  | 9  | 4  | 2.346097679 | 0.050148    |        | ENSG00000201086 |
| 15 | 48127153 | 48127412 | 48127243 | 9  | 11 | 7  | 1.759573259 | 0.102361    |        | ENSG00000201086 |
| 15 | 48131378 | 48131593 | 48131462 | 11 | 13 | 11 | 1.368556979 | 0.211388    | ATP8B4 | ENSG00000104043 |
| 15 | 48138501 | 48138791 | 48138648 | 10 | 13 | 10 | 1.49297125  | 0.157311    | ATP8B4 | ENSG00000104043 |
| 15 | 48153669 | 48154024 | 48153846 | 15 | 20 | 3  | 6.158506406 | 2.99E-05    | ATP8B4 | ENSG00000104043 |

|    |          |          |          |    |    |    |             |             |         |                 |
|----|----------|----------|----------|----|----|----|-------------|-------------|---------|-----------------|
| 15 | 48154221 | 48154401 | 48154326 | 9  | 9  | 7  | 1.466311049 | 0.20706     | ATP8B4  | ENSG00000104043 |
| 15 | 48154831 | 48155078 | 48154954 | 9  | 12 | 10 | 1.386330446 | 0.21117     | ATP8B4  | ENSG00000104043 |
| 15 | 48188527 | 48188720 | 48188623 | 9  | 10 | 7  | 1.612942154 | 0.147335    | ATP8B4  | ENSG00000104043 |
| 15 | 48188831 | 48189163 | 48189009 | 16 | 19 | 16 | 1.380057458 | 0.163303    | ATP8B4  | ENSG00000104043 |
| 15 | 48190552 | 48190733 | 48190627 | 10 | 10 | 9  | 1.290353723 | 0.279648    | ATP8B4  | ENSG00000104043 |
| 15 | 48192770 | 48192993 | 48192897 | 8  | 8  | 11 | 0.879786629 | 0.621301    | ATP8B4  | ENSG00000104043 |
| 15 | 48196023 | 48196351 | 48196176 | 8  | 13 | 18 | 0.864351776 | 0.666373    | ATP8B4  | ENSG00000104043 |
| 15 | 48198547 | 48198772 | 48198616 | 8  | 10 | 8  | 1.433726359 | 0.209175    | ATP8B4  | ENSG00000104043 |
| 15 | 48201998 | 48202318 | 48202161 | 9  | 12 | 7  | 1.906204364 | 0.0695918   | ATP8B4  | ENSG00000104043 |
| 15 | 48207415 | 48207714 | 48207564 | 13 | 16 | 14 | 1.329455351 | 0.210108    | ATP8B4  | ENSG00000104043 |
| 15 | 48207828 | 48208060 | 48207947 | 8  | 10 | 6  | 1.843362462 | 0.0964212   | ATP8B4  | ENSG00000104043 |
| 15 | 48208867 | 48209210 | 48209038 | 9  | 14 | 5  | 2.932622098 | 0.00829617  | ATP8B4  | ENSG00000104043 |
| 15 | 48213876 | 48214089 | 48213982 | 8  | 8  | 8  | 1.173048839 | 0.36929     | ATP8B4  | ENSG00000104043 |
| 15 | 48217414 | 48217593 | 48217503 | 8  | 8  | 10 | 0.959767232 | 0.541959    | ATP8B4  | ENSG00000104043 |
| 15 | 48221879 | 48222188 | 48222033 | 11 | 14 | 12 | 1.353517892 | 0.211235    | ATP8B4  | ENSG00000104043 |
| 15 | 48224779 | 48225148 | 48224993 | 12 | 19 | 11 | 1.955081399 | 0.0295891   | ATP8B4  | ENSG00000104043 |
| 15 | 48227805 | 48228202 | 48228023 | 16 | 24 | 8  | 3.258468998 | 0.000499412 | ATP8B4  | ENSG00000104043 |
| 15 | 48228679 | 48229044 | 48228887 | 19 | 25 | 11 | 2.541605819 | 0.00248721  | ATP8B4  | ENSG00000104043 |
| 15 | 48261365 | 48261826 | 48261544 | 14 | 25 | 11 | 2.541605819 | 0.00248721  | SLC27A2 | ENSG00000140284 |
| 15 | 48261910 | 48262344 | 48262016 | 11 | 18 | 5  | 3.714654658 | 0.000961539 | SLC27A2 | ENSG00000140284 |
| 15 | 48262913 | 48263104 | 48263014 | 11 | 11 | 19 | 0.703829304 | 0.840485    | SLC27A2 | ENSG00000140284 |
| 15 | 48266898 | 48267379 | 48267188 | 9  | 18 | 10 | 2.026175268 | 0.0273052   | SLC27A2 | ENSG00000140284 |
| 15 | 48272447 | 48272958 | 48272626 | 24 | 44 | 22 | 2.295095555 | 0.000389587 | SLC27A2 | ENSG00000140284 |
| 15 | 48284674 | 48285032 | 48284853 | 9  | 15 | 6  | 2.68125449  | 0.0103552   |         | ENSG00000200605 |
| 15 | 48285275 | 48285568 | 48285370 | 16 | 20 | 12 | 1.894925048 | 0.0317253   |         | ENSG00000200605 |
| 15 | 48287650 | 48287840 | 48287778 | 8  | 8  | 5  | 1.759573259 | 0.13508     |         | ENSG00000200605 |
| 15 | 48288595 | 48288970 | 48288744 | 10 | 16 | 6  | 2.848832895 | 0.00632407  |         | ENSG00000200605 |
| 15 | 48289259 | 48289542 | 48289407 | 10 | 13 | 7  | 2.052835469 | 0.046392    |         | ENSG00000200605 |
| 15 | 48290133 | 48290312 | 48290222 | 8  | 8  | 2  | 3.519146518 | 0.017558    |         | ENSG00000200605 |
| 15 | 48299344 | 48299530 | 48299486 | 8  | 9  | 10 | 1.066408036 | 0.444985    |         | ENSG00000200605 |
| 15 | 48304099 | 48304344 | 48304221 | 9  | 11 | 5  | 2.346097679 | 0.0364013   |         | ENSG00000200605 |
| 15 | 48306506 | 48307284 | 48306825 | 13 | 34 | 14 | 2.737113958 | 0.000281523 |         | ENSG00000200605 |
| 15 | 48308140 | 48308912 | 48308660 | 14 | 41 | 40 | 1.201659787 | 0.201904    |         | ENSG00000200605 |
| 15 | 48311961 | 48312140 | 48312099 | 8  | 8  | 5  | 1.759573259 | 0.13508     |         | ENSG00000200605 |

|    |          |          |          |    |     |    |             |             |        |                 |
|----|----------|----------|----------|----|-----|----|-------------|-------------|--------|-----------------|
| 15 | 48314322 | 48314589 | 48314485 | 9  | 11  | 15 | 0.879786629 | 0.637414    |        | ENSG00000210855 |
| 15 | 48325964 | 48326238 | 48326084 | 9  | 12  | 7  | 1.906204364 | 0.0695918   |        | ENSG00000210855 |
| 15 | 48327349 | 48327726 | 48327533 | 20 | 28  | 15 | 2.126151021 | 0.00621236  |        | ENSG00000210855 |
| 15 | 48329276 | 48329501 | 48329430 | 9  | 10  | 6  | 1.843362462 | 0.0964212   |        | ENSG00000210855 |
| 15 | 48329647 | 48329840 | 48329699 | 9  | 9   | 8  | 1.303387599 | 0.281715    |        | ENSG00000210855 |
| 15 | 48330656 | 48330880 | 48330763 | 8  | 10  | 8  | 1.433726359 | 0.209175    |        | ENSG00000210855 |
| 15 | 48332426 | 48332704 | 48332591 | 10 | 12  | 3  | 3.812408728 | 0.004404    |        | ENSG00000210855 |
| 15 | 48335626 | 48335956 | 48335768 | 8  | 12  | 20 | 0.726173091 | 0.825666    | HDC    | ENSG00000140287 |
| 15 | 48336034 | 48336244 | 48336139 | 12 | 16  | 14 | 1.329455351 | 0.210108    | HDC    | ENSG00000140287 |
| 15 | 48336330 | 48336549 | 48336381 | 8  | 10  | 14 | 0.860235815 | 0.65444     | HDC    | ENSG00000140287 |
| 15 | 48345249 | 48345428 | 48345321 | 8  | 8   | 10 | 0.959767232 | 0.541959    | HDC    | ENSG00000140287 |
| 15 | 48355463 | 48355645 | 48355554 | 10 | 11  | 5  | 2.346097679 | 0.0364013   | HDC    | ENSG00000140287 |
| 15 | 48393946 | 48394300 | 48394123 | 12 | 17  | 15 | 1.319679944 | 0.209239    |        | ENSG00000207498 |
| 15 | 48410418 | 48410635 | 48410546 | 8  | 10  | 2  | 4.301179077 | 0.00512919  |        | ENSG00000207498 |
| 15 | 48423546 | 48423732 | 48423617 | 8  | 9   | 3  | 2.932622098 | 0.0242899   |        | ENSG00000207498 |
| 15 | 48433359 | 48433880 | 48433619 | 20 | 35  | 18 | 2.222618853 | 0.00178073  | GABPB1 | ENSG00000104064 |
| 15 | 48434174 | 48435519 | 48434844 | 33 | 111 | 32 | 3.981256667 | 6.72E-15    | GABPB1 | ENSG00000104064 |
| 15 | 48438268 | 48438662 | 48438483 | 15 | 23  | 13 | 2.010940867 | 0.0163115   | GABPB1 | ENSG00000104064 |
| 15 | 48441180 | 48441363 | 48441337 | 8  | 8   | 8  | 1.173048839 | 0.36929     | GABPB1 | ENSG00000104064 |
| 15 | 48444353 | 48444606 | 48444480 | 8  | 10  | 4  | 2.580707446 | 0.0306059   | GABPB1 | ENSG00000104064 |
| 15 | 48470296 | 48470780 | 48470601 | 23 | 38  | 16 | 2.691112043 | 0.000164514 | USP8   | ENSG00000138592 |
| 15 | 48503470 | 48504381 | 48503990 | 20 | 59  | 33 | 2.070086187 | 0.000251419 | USP8   | ENSG00000138592 |
| 15 | 48506135 | 48506410 | 48506272 | 8  | 11  | 8  | 1.564065119 | 0.151515    | USP8   | ENSG00000138592 |
| 15 | 48532359 | 48532544 | 48532433 | 8  | 8   | 6  | 1.508205651 | 0.203852    | USP8   | ENSG00000138592 |
| 15 | 48558741 | 48558937 | 48558803 | 8  | 10  | 3  | 3.225884308 | 0.0139466   | USP8   | ENSG00000138592 |
| 15 | 48607927 | 48608170 | 48608031 | 8  | 10  | 8  | 1.433726359 | 0.209175    | USP50  | ENSG00000170236 |
| 15 | 48642584 | 48642817 | 48642685 | 9  | 10  | 5  | 2.150589539 | 0.0575848   | USP50  | ENSG00000170236 |
| 15 | 48701803 | 48702032 | 48701926 | 8  | 9   | 9  | 1.173048839 | 0.362316    | TRPM7  | ENSG00000092439 |
| 15 | 48728158 | 48728466 | 48728312 | 11 | 15  | 8  | 2.085420159 | 0.0338693   | TRPM7  | ENSG00000092439 |
| 15 | 48757765 | 48757982 | 48757844 | 8  | 10  | 0  | 12.90353723 | 0.000195991 | TRPM7  | ENSG00000092439 |
| 15 | 48765271 | 48766288 | 48766125 | 16 | 50  | 24 | 2.393019632 | 0.00010052  | TRPM7  | ENSG00000092439 |
| 15 | 48766390 | 48767009 | 48766581 | 16 | 30  | 18 | 1.91392179  | 0.0113254   | TRPM7  | ENSG00000092439 |
| 15 | 48798427 | 48798653 | 48798540 | 10 | 11  | 4  | 2.815317214 | 0.0183428   |        | ENSG00000222751 |
| 15 | 48832685 | 48833026 | 48832855 | 18 | 23  | 9  | 2.815317214 | 0.00172056  |        | ENSG00000138600 |

|    |          |          |          |     |     |    |             |             |                           |
|----|----------|----------|----------|-----|-----|----|-------------|-------------|---------------------------|
| 15 | 48843850 | 48844163 | 48844017 | 8   | 12  | 8  | 1.694403879 | 0.107291    | ENSG00000138600           |
| 15 | 48844337 | 48844901 | 48844722 | 14  | 29  | 21 | 1.599612054 | 0.0452774   | ENSG00000138600           |
| 15 | 48844941 | 48845607 | 48845243 | 18  | 44  | 12 | 4.060553675 | 3.75E-07    | ENSG00000138600           |
| 15 | 48846130 | 48846309 | 48846259 | 8   | 8   | 1  | 5.278719777 | 0.00542188  | ENSG00000138600           |
| 15 | 48854150 | 48854371 | 48854260 | 9   | 11  | 8  | 1.564065119 | 0.151515    | ENSG00000138600           |
| 15 | 48857621 | 48858063 | 48857819 | 35  | 50  | 14 | 3.988366054 | 9.04E-08    | ENSG00000138600           |
| 15 | 48877321 | 48877847 | 48877611 | 253 | 303 | 15 | 22.28792795 | 6.73E-82    | ENSG00000138600           |
| 15 | 48877972 | 48878575 | 48878318 | 19  | 36  | 9  | 4.340280705 | 1.80E-06    | ENSG00000138600           |
| 15 | 48895493 | 48896057 | 48895849 | 61  | 83  | 37 | 2.593055329 | 1.68E-07    | ENSG00000138600           |
| 15 | 48905321 | 48905502 | 48905414 | 8   | 9   | 2  | 3.910162798 | 0.00955088  | ENSG00000138600           |
| 15 | 48908350 | 48908589 | 48908447 | 9   | 10  | 6  | 1.843362462 | 0.0964212   | ENSG00000138600           |
| 15 | 48911134 | 48911399 | 48911248 | 10  | 10  | 7  | 1.612942154 | 0.147335    | ENSG00000138600           |
| 15 | 48934042 | 48934514 | 48934263 | 27  | 43  | 26 | 1.911635146 | 0.00339404  | AP4E1 ENSG00000081014     |
| 15 | 48934565 | 48934964 | 48934720 | 15  | 21  | 10 | 2.346097679 | 0.00796926  | AP4E1 ENSG00000081014     |
| 15 | 48935071 | 48935295 | 48935183 | 9   | 10  | 13 | 0.921681231 | 0.585856    | AP4E1 ENSG00000081014     |
| 15 | 48938985 | 48939164 | 48939074 | 8   | 8   | 2  | 3.519146518 | 0.017558    | AP4E1 ENSG00000081014     |
| 15 | 48956218 | 48956819 | 48956570 | 32  | 50  | 34 | 1.709299737 | 0.00665899  | AP4E1 ENSG00000081014     |
| 15 | 48965267 | 48965654 | 48965466 | 21  | 29  | 9  | 3.519146518 | 8.36E-05    | AP4E1 ENSG00000081014     |
| 15 | 48987451 | 48987730 | 48987612 | 10  | 13  | 16 | 0.966040221 | 0.542489    | AP4E1 ENSG00000081014     |
| 15 | 48987855 | 48988839 | 48988083 | 33  | 68  | 28 | 2.791047238 | 4.86E-07    | AP4E1 ENSG00000081014     |
| 15 | 49017066 | 49017249 | 49017232 | 9   | 10  | 5  | 2.150589539 | 0.0575848   | AP4E1 ENSG00000081014     |
| 15 | 49121865 | 49122044 | 49121907 | 8   | 9   | 6  | 1.675784056 | 0.141978    | TNFAIP8L3 ENSG00000183578 |
| 15 | 49131264 | 49131503 | 49131402 | 10  | 11  | 11 | 1.173048839 | 0.349489    | TNFAIP8L3 ENSG00000183578 |
| 15 | 49133253 | 49133493 | 49133350 | 10  | 10  | 4  | 2.580707446 | 0.0306059   | TNFAIP8L3 ENSG00000183578 |
| 15 | 49159763 | 49160171 | 49159999 | 25  | 34  | 9  | 4.105670938 | 5.54E-06    | TNFAIP8L3 ENSG00000183578 |
| 15 | 49160905 | 49161159 | 49161032 | 8   | 9   | 2  | 3.910162798 | 0.00955088  | TNFAIP8L3 ENSG00000183578 |
| 15 | 49169329 | 49169616 | 49169472 | 9   | 13  | 4  | 3.28453675  | 0.00629037  | TNFAIP8L3 ENSG00000183578 |
| 15 | 49177415 | 49177594 | 49177500 | 8   | 8   | 2  | 3.519146518 | 0.017558    | TNFAIP8L3 ENSG00000183578 |
| 15 | 49180072 | 49180252 | 49180171 | 8   | 8   | 8  | 1.173048839 | 0.36929     | TNFAIP8L3 ENSG00000183578 |
| 15 | 49191691 | 49191912 | 49191816 | 8   | 11  | 10 | 1.279689643 | 0.277323    | TNFAIP8L3 ENSG00000183578 |
| 15 | 49212309 | 49212694 | 49212488 | 17  | 26  | 7  | 3.959039833 | 7.16E-05    | TNFAIP8L3 ENSG00000183578 |
| 15 | 49212715 | 49212933 | 49212857 | 8   | 10  | 4  | 2.580707446 | 0.0306059   | TNFAIP8L3 ENSG00000183578 |
| 15 | 49215068 | 49215296 | 49215182 | 9   | 11  | 1  | 7.038293036 | 0.000674435 | TNFAIP8L3 ENSG00000183578 |
| 15 | 49237185 | 49237395 | 49237290 | 8   | 10  | 6  | 1.843362462 | 0.0964212   | TNFAIP8L3 ENSG00000183578 |

|    |          |          |          |    |    |    |             |             |           |                 |
|----|----------|----------|----------|----|----|----|-------------|-------------|-----------|-----------------|
| 15 | 49242390 | 49243098 | 49242605 | 15 | 37 | 20 | 2.122659804 | 0.00217107  | TNFAIP8L3 | ENSG00000183578 |
| 15 | 49270365 | 49270582 | 49270473 | 8  | 8  | 3  | 2.639359888 | 0.0415794   | CYP19A1   | ENSG00000137869 |
| 15 | 49271995 | 49272708 | 49272330 | 19 | 40 | 26 | 1.781296386 | 0.00893439  | CYP19A1   | ENSG00000137869 |
| 15 | 49291498 | 49291790 | 49291644 | 10 | 13 | 8  | 1.824742639 | 0.0744168   | CYP19A1   | ENSG00000137869 |
| 15 | 49309386 | 49309609 | 49309497 | 8  | 10 | 9  | 1.290353723 | 0.279648    | CYP19A1   | ENSG00000137869 |
| 15 | 49319314 | 49319532 | 49319423 | 8  | 11 | 3  | 3.519146518 | 0.00788869  | CYP19A1   | ENSG00000137869 |
| 15 | 49319553 | 49319832 | 49319715 | 8  | 12 | 2  | 5.083211637 | 0.00143337  | CYP19A1   | ENSG00000137869 |
| 15 | 49335322 | 49335616 | 49335469 | 9  | 12 | 4  | 3.049926982 | 0.0108184   | CYP19A1   | ENSG00000137869 |
| 15 | 49338434 | 49338658 | 49338541 | 8  | 9  | 6  | 1.675784056 | 0.141978    | CYP19A1   | ENSG00000137869 |
| 15 | 49353838 | 49354029 | 49353937 | 8  | 8  | 5  | 1.759573259 | 0.13508     | CYP19A1   | ENSG00000137869 |
| 15 | 49360887 | 49361150 | 49361007 | 13 | 14 | 9  | 1.759573259 | 0.0786014   | CYP19A1   | ENSG00000137869 |
| 15 | 49366455 | 49366783 | 49366619 | 9  | 11 | 10 | 1.279689643 | 0.277323    | CYP19A1   | ENSG00000137869 |
| 15 | 49370319 | 49370642 | 49370480 | 10 | 13 | 9  | 1.642268375 | 0.111397    | CYP19A1   | ENSG00000137869 |
| 15 | 49370855 | 49371034 | 49370944 | 8  | 8  | 6  | 1.508205651 | 0.203852    | CYP19A1   | ENSG00000137869 |
| 15 | 49395009 | 49395263 | 49395136 | 9  | 11 | 7  | 1.759573259 | 0.102361    | CYP19A1   | ENSG00000137869 |
| 15 | 49395538 | 49395839 | 49395688 | 16 | 19 | 2  | 7.820325595 | 1.32E-05    | CYP19A1   | ENSG00000137869 |
| 15 | 49399073 | 49399252 | 49399162 | 8  | 8  | 4  | 2.111487911 | 0.0804809   | CYP19A1   | ENSG00000137869 |
| 15 | 49399348 | 49399542 | 49399433 | 8  | 10 | 2  | 4.301179077 | 0.00512919  | CYP19A1   | ENSG00000137869 |
| 15 | 49400835 | 49401238 | 49401014 | 9  | 18 | 13 | 1.591994853 | 0.0905191   | CYP19A1   | ENSG00000137869 |
| 15 | 49403313 | 49403632 | 49403471 | 9  | 11 | 0  | 14.07658607 | 9.02E-05    | CYP19A1   | ENSG00000137869 |
| 15 | 49406948 | 49407196 | 49407072 | 9  | 10 | 6  | 1.843362462 | 0.0964212   | CYP19A1   | ENSG00000137869 |
| 15 | 49415546 | 49415760 | 49415653 | 11 | 13 | 8  | 1.824742639 | 0.0744168   | CYP19A1   | ENSG00000137869 |
| 15 | 49419689 | 49419902 | 49419795 | 9  | 10 | 8  | 1.433726359 | 0.209175    | GLDN      | ENSG00000186417 |
| 15 | 49419921 | 49420264 | 49420093 | 10 | 15 | 9  | 1.876878143 | 0.0544542   | GLDN      | ENSG00000186417 |
| 15 | 49422754 | 49423007 | 49422908 | 9  | 11 | 3  | 3.519146518 | 0.00788869  | GLDN      | ENSG00000186417 |
| 15 | 49423039 | 49423255 | 49423147 | 9  | 12 | 1  | 7.624817456 | 0.000332769 | GLDN      | ENSG00000186417 |
| 15 | 49423260 | 49423483 | 49423325 | 9  | 9  | 3  | 2.932622098 | 0.0242899   | GLDN      | ENSG00000186417 |
| 15 | 49438741 | 49438920 | 49438844 | 9  | 9  | 2  | 3.910162798 | 0.00955088  | GLDN      | ENSG00000186417 |
| 15 | 49453636 | 49453849 | 49453808 | 8  | 10 | 5  | 2.150589539 | 0.0575848   | GLDN      | ENSG00000186417 |
| 15 | 49460651 | 49461045 | 49460866 | 25 | 35 | 20 | 2.010940867 | 0.0045186   | GLDN      | ENSG00000186417 |
| 15 | 49462290 | 49462626 | 49462458 | 16 | 21 | 10 | 2.346097679 | 0.00796926  | GLDN      | ENSG00000186417 |
| 15 | 49464178 | 49464455 | 49464332 | 8  | 10 | 6  | 1.843362462 | 0.0964212   | GLDN      | ENSG00000186417 |
| 15 | 49481492 | 49481744 | 49481642 | 12 | 14 | 6  | 2.513676084 | 0.016726    | GLDN      | ENSG00000186417 |
| 15 | 49482662 | 49483120 | 49482952 | 10 | 19 | 10 | 2.132816071 | 0.01835     | GLDN      | ENSG00000186417 |

|    |          |          |          |    |    |    |             |             |        |                 |
|----|----------|----------|----------|----|----|----|-------------|-------------|--------|-----------------|
| 15 | 49490298 | 49490608 | 49490461 | 9  | 12 | 8  | 1.694403879 | 0.107291    | GLDN   | ENSG00000186417 |
| 15 | 49504272 | 49504641 | 49504435 | 9  | 15 | 12 | 1.443752418 | 0.160732    | GLDN   | ENSG00000186417 |
| 15 | 49505221 | 49505529 | 49505398 | 16 | 18 | 7  | 2.785990993 | 0.00480525  | GLDN   | ENSG00000186417 |
| 15 | 49564838 | 49565032 | 49564933 | 8  | 8  | 1  | 5.278719777 | 0.00542188  | GLDN   | ENSG00000186417 |
| 15 | 49574366 | 49574695 | 49574524 | 9  | 12 | 15 | 0.953102182 | 0.555895    | GLDN   | ENSG00000186417 |
| 15 | 49578866 | 49579488 | 49579036 | 23 | 43 | 18 | 2.716534154 | 6.16E-05    | GLDN   | ENSG00000186417 |
| 15 | 49605060 | 49605274 | 49605167 | 8  | 9  | 9  | 1.173048839 | 0.362316    | DMXL2  | ENSG00000104093 |
| 15 | 49616535 | 49616736 | 49616640 | 9  | 11 | 6  | 2.010940867 | 0.0640214   | DMXL2  | ENSG00000104093 |
| 15 | 49656195 | 49656840 | 49656517 | 9  | 24 | 15 | 1.832888811 | 0.0266638   | DMXL2  | ENSG00000104093 |
| 15 | 49669356 | 49669690 | 49669523 | 11 | 16 | 3  | 4.985457567 | 0.000385643 | DMXL2  | ENSG00000104093 |
| 15 | 49701421 | 49702484 | 49701586 | 11 | 43 | 25 | 1.985159574 | 0.00226191  | DMXL2  | ENSG00000104093 |
| 15 | 49702503 | 49702836 | 49702669 | 8  | 11 | 11 | 1.173048839 | 0.349489    | DMXL2  | ENSG00000104093 |
| 15 | 49726162 | 49726376 | 49726269 | 8  | 8  | 11 | 0.879786629 | 0.621301    | DMXL2  | ENSG00000104093 |
| 15 | 49729340 | 49729754 | 49729575 | 14 | 22 | 11 | 2.248343609 | 0.0090389   | DMXL2  | ENSG00000104093 |
| 15 | 49752940 | 49753146 | 49753063 | 8  | 8  | 5  | 1.759573259 | 0.13508     | SCG3   | ENSG00000104112 |
| 15 | 49767979 | 49768296 | 49768132 | 9  | 12 | 3  | 3.812408728 | 0.004404    | SCG3   | ENSG00000104112 |
| 15 | 49778338 | 49778570 | 49778426 | 8  | 9  | 5  | 1.955081399 | 0.0892323   | SCG3   | ENSG00000104112 |
| 15 | 49787308 | 49787611 | 49787459 | 10 | 14 | 6  | 2.513676084 | 0.016726    | SCG3   | ENSG00000104112 |
| 15 | 49791741 | 49791949 | 49791856 | 9  | 9  | 5  | 1.955081399 | 0.0892323   | LYSMD2 | ENSG00000140280 |
| 15 | 49799698 | 49800005 | 49799871 | 14 | 19 | 11 | 1.955081399 | 0.0295891   | LYSMD2 | ENSG00000140280 |
| 15 | 49801707 | 49802047 | 49801870 | 10 | 14 | 3  | 4.398933147 | 0.00132748  | LYSMD2 | ENSG00000140280 |
| 15 | 49805781 | 49806594 | 49806010 | 28 | 55 | 28 | 2.265197759 | 0.000108837 | LYSMD2 | ENSG00000140280 |
| 15 | 49808513 | 49808828 | 49808672 | 12 | 14 | 13 | 1.256838042 | 0.269506    | LYSMD2 | ENSG00000140280 |
| 15 | 49811192 | 49811428 | 49811349 | 9  | 9  | 12 | 0.902345261 | 0.602772    | LYSMD2 | ENSG00000140280 |
| 15 | 49816341 | 49816698 | 49816519 | 11 | 15 | 11 | 1.564065119 | 0.11768     | LYSMD2 | ENSG00000140280 |
| 15 | 49817401 | 49817690 | 49817551 | 13 | 16 | 4  | 3.988366054 | 0.00115141  | LYSMD2 | ENSG00000140280 |
| 15 | 49818536 | 49818924 | 49818767 | 39 | 51 | 13 | 4.357038546 | 2.02E-08    | LYSMD2 | ENSG00000140280 |
| 15 | 49830495 | 49831008 | 49830792 | 20 | 35 | 14 | 2.815317214 | 0.000177835 | TMOD2  | ENSG00000128872 |
| 15 | 49835960 | 49836284 | 49836126 | 12 | 13 | 11 | 1.368556979 | 0.211388    | TMOD2  | ENSG00000128872 |
| 15 | 49855568 | 49856014 | 49855747 | 12 | 21 | 22 | 1.122046716 | 0.351409    | TMOD2  | ENSG00000128872 |
| 15 | 49856202 | 49856840 | 49856695 | 22 | 35 | 11 | 3.519146518 | 1.92E-05    | TMOD2  | ENSG00000128872 |
| 15 | 49865819 | 49866129 | 49865974 | 11 | 12 | 9  | 1.524963491 | 0.154777    | TMOD2  | ENSG00000128872 |
| 15 | 49880925 | 49881168 | 49881063 | 10 | 11 | 14 | 0.938439071 | 0.570297    | TMOD3  | ENSG00000138594 |
| 15 | 49908828 | 49909387 | 49909193 | 17 | 30 | 19 | 1.818225701 | 0.0168067   | TMOD3  | ENSG00000138594 |



|    |          |          |          |    |     |    |             |             |         |                 |
|----|----------|----------|----------|----|-----|----|-------------|-------------|---------|-----------------|
| 15 | 49909621 | 49910221 | 49909967 | 14 | 27  | 21 | 1.49297125  | 0.078146    | TMOD3   | ENSG00000138594 |
| 15 | 49910493 | 49910672 | 49910541 | 8  | 8   | 2  | 3.519146518 | 0.017558    | TMOD3   | ENSG00000138594 |
| 15 | 49935299 | 49935541 | 49935420 | 8  | 10  | 3  | 3.225884308 | 0.0139466   | TMOD3   | ENSG00000138594 |
| 15 | 49943648 | 49944543 | 49944175 | 82 | 139 | 14 | 10.94845583 | 3.31E-32    |         | ENSG00000207484 |
| 15 | 49948679 | 49948894 | 49948769 | 13 | 13  | 6  | 2.346097679 | 0.0266147   |         | ENSG00000207484 |
| 15 | 49967821 | 49968016 | 49967906 | 9  | 9   | 7  | 1.466311049 | 0.20706     |         | ENSG00000207484 |
| 15 | 49985385 | 49985652 | 49985526 | 13 | 14  | 10 | 1.599612054 | 0.114822    |         | ENSG00000202323 |
| 15 | 49987201 | 49987421 | 49987363 | 8  | 8   | 10 | 0.959767232 | 0.541959    |         | ENSG00000202323 |
| 15 | 49997047 | 49997336 | 49997184 | 11 | 14  | 4  | 3.519146518 | 0.00361132  |         | ENSG00000202323 |
| 15 | 50003562 | 50003797 | 50003693 | 10 | 11  | 8  | 1.564065119 | 0.151515    |         | ENSG00000202323 |
| 15 | 50049215 | 50049633 | 50049454 | 9  | 16  | 7  | 2.492728784 | 0.0124193   | LEO1    | ENSG00000166477 |
| 15 | 50050944 | 50051682 | 50051340 | 42 | 81  | 29 | 3.206333494 | 2.34E-09    | LEO1    | ENSG00000166477 |
| 15 | 50061572 | 50062004 | 50061786 | 13 | 25  | 12 | 2.346097679 | 0.00444113  | LEO1    | ENSG00000166477 |
| 15 | 50069531 | 50069757 | 50069644 | 9  | 12  | 4  | 3.049926982 | 0.0108184   | LEO1    | ENSG00000166477 |
| 15 | 50070754 | 50070991 | 50070870 | 14 | 15  | 3  | 4.692195357 | 0.000718455 | LEO1    | ENSG00000166477 |
| 15 | 50084327 | 50084655 | 50084491 | 15 | 19  | 10 | 2.132816071 | 0.01835     | MAPK6   | ENSG00000069956 |
| 15 | 50087776 | 50087955 | 50087790 | 8  | 8   | 3  | 2.639359888 | 0.0415794   | MAPK6   | ENSG00000069956 |
| 15 | 50098417 | 50098912 | 50098595 | 13 | 29  | 10 | 3.199224107 | 0.000186763 | MAPK6   | ENSG00000069956 |
| 15 | 50099337 | 50100332 | 50099529 | 19 | 54  | 28 | 2.224747799 | 0.000159491 | MAPK6   | ENSG00000069956 |
| 15 | 50100630 | 50100914 | 50100772 | 15 | 19  | 6  | 3.351568112 | 0.00134187  | MAPK6   | ENSG00000069956 |
| 15 | 50147132 | 50147466 | 50147289 | 9  | 13  | 5  | 2.737113958 | 0.0137917   | MAPK6   | ENSG00000069956 |
| 15 | 50147500 | 50147736 | 50147635 | 8  | 10  | 8  | 1.433726359 | 0.209175    | MAPK6   | ENSG00000069956 |
| 15 | 50156567 | 50156796 | 50156681 | 8  | 9   | 6  | 1.675784056 | 0.141978    | MAPK6   | ENSG00000069956 |
| 15 | 50157946 | 50158127 | 50158036 | 9  | 9   | 6  | 1.675784056 | 0.141978    | MAPK6   | ENSG00000069956 |
| 15 | 50158251 | 50158711 | 50158430 | 13 | 22  | 18 | 1.42000649  | 0.127634    | MAPK6   | ENSG00000069956 |
| 15 | 50163343 | 50163736 | 50163514 | 8  | 14  | 6  | 2.513676084 | 0.016726    | MAPK6   | ENSG00000069956 |
| 15 | 50176851 | 50177149 | 50177000 | 9  | 12  | 6  | 2.178519273 | 0.0416567   | BCL2L10 | ENSG00000137875 |
| 15 | 50193843 | 50194056 | 50193944 | 8  | 8   | 8  | 1.173048839 | 0.36929     | BCL2L10 | ENSG00000137875 |
| 15 | 50219371 | 50219723 | 50219547 | 16 | 22  | 10 | 2.452738482 | 0.00515848  |         | ENSG00000206995 |
| 15 | 50223939 | 50224150 | 50224004 | 9  | 9   | 9  | 1.173048839 | 0.362316    |         | ENSG00000206995 |
| 15 | 50228298 | 50228723 | 50228410 | 10 | 16  | 16 | 1.173048839 | 0.322157    |         | ENSG00000206995 |
| 15 | 50257672 | 50259042 | 50258876 | 13 | 53  | 33 | 1.863077568 | 0.00189177  | GNB5    | ENSG00000069966 |
| 15 | 50259573 | 50259845 | 50259706 | 10 | 10  | 8  | 1.433726359 | 0.209175    | GNB5    | ENSG00000069966 |
| 15 | 50263066 | 50263381 | 50263221 | 10 | 14  | 18 | 0.926091189 | 0.59273     | GNB5    | ENSG00000069966 |

|    |          |          |          |    |     |    |             |            |       |                 |
|----|----------|----------|----------|----|-----|----|-------------|------------|-------|-----------------|
| 15 | 50264027 | 50264304 | 50264165 | 8  | 11  | 7  | 1.759573259 | 0.102361   | GNB5  | ENSG00000069966 |
| 15 | 50276488 | 50276783 | 50276649 | 15 | 17  | 5  | 3.519146518 | 0.00167472 | GNB5  | ENSG00000069966 |
| 15 | 50287857 | 50288232 | 50288039 | 16 | 24  | 15 | 1.832888811 | 0.0266638  | GNB5  | ENSG00000069966 |
| 15 | 50296552 | 50296921 | 50296771 | 11 | 16  | 14 | 1.329455351 | 0.210108   | GNB5  | ENSG00000069966 |
| 15 | 50300482 | 50300718 | 50300613 | 10 | 10  | 8  | 1.433726359 | 0.209175   | GNB5  | ENSG00000069966 |
| 15 | 50306987 | 50307421 | 50307144 | 15 | 22  | 10 | 2.452738482 | 0.00515848 | GNB5  | ENSG00000069966 |
| 15 | 50335725 | 50336197 | 50336008 | 19 | 30  | 14 | 2.424300935 | 0.00163956 |       | ENSG00000221052 |
| 15 | 50367402 | 50368442 | 50367978 | 26 | 73  | 21 | 3.945709732 | 2.17E-10   | MYO5C | ENSG00000128833 |
| 15 | 50373024 | 50373257 | 50373140 | 8  | 8   | 4  | 2.111487911 | 0.0804809  | MYO5C | ENSG00000128833 |
| 15 | 50373813 | 50374246 | 50374067 | 9  | 18  | 6  | 3.183989707 | 0.00227432 | MYO5C | ENSG00000128833 |
| 15 | 50374274 | 50374686 | 50374511 | 8  | 14  | 9  | 1.759573259 | 0.0786014  | MYO5C | ENSG00000128833 |
| 15 | 50375067 | 50375444 | 50375265 | 25 | 32  | 16 | 2.277094806 | 0.00211782 | MYO5C | ENSG00000128833 |
| 15 | 50398661 | 50398909 | 50398797 | 11 | 13  | 7  | 2.052835469 | 0.046392   | MYO5C | ENSG00000128833 |
| 15 | 50402774 | 50403000 | 50402928 | 9  | 10  | 5  | 2.150589539 | 0.0575848  | MYO5C | ENSG00000128833 |
| 15 | 50410848 | 50411442 | 50411137 | 25 | 42  | 13 | 3.602935721 | 2.65E-06   | MYO5A | ENSG00000197535 |
| 15 | 50414281 | 50414631 | 50414480 | 16 | 20  | 2  | 8.211341875 | 6.65E-06   | MYO5A | ENSG00000197535 |
| 15 | 50415912 | 50416325 | 50416160 | 15 | 19  | 9  | 2.346097679 | 0.0107159  | MYO5A | ENSG00000197535 |
| 15 | 50419255 | 50419563 | 50419384 | 8  | 11  | 9  | 1.407658607 | 0.210479   | MYO5A | ENSG00000197535 |
| 15 | 50419598 | 50420537 | 50420303 | 49 | 100 | 16 | 6.969290163 | 1.09E-19   | MYO5A | ENSG00000197535 |
| 15 | 50420581 | 50420775 | 50420663 | 9  | 10  | 6  | 1.843362462 | 0.0964212  | MYO5A | ENSG00000197535 |
| 15 | 50428685 | 50428895 | 50428755 | 9  | 12  | 13 | 1.089259637 | 0.414883   | MYO5A | ENSG00000197535 |
| 15 | 50429970 | 50430315 | 50430142 | 9  | 14  | 1  | 8.797866295 | 8.00E-05   | MYO5A | ENSG00000197535 |
| 15 | 50437439 | 50437623 | 50437583 | 8  | 8   | 8  | 1.173048839 | 0.36929    | MYO5A | ENSG00000197535 |
| 15 | 50440098 | 50440449 | 50440196 | 9  | 13  | 8  | 1.824742639 | 0.0744168  | MYO5A | ENSG00000197535 |
| 15 | 50446635 | 50446935 | 50446769 | 8  | 12  | 9  | 1.524963491 | 0.154777   | MYO5A | ENSG00000197535 |
| 15 | 50471787 | 50472193 | 50472014 | 13 | 23  | 15 | 1.759573259 | 0.0372968  | MYO5A | ENSG00000197535 |
| 15 | 50473589 | 50473846 | 50473717 | 10 | 10  | 8  | 1.433726359 | 0.209175   | MYO5A | ENSG00000197535 |
| 15 | 50515908 | 50516111 | 50516009 | 8  | 9   | 4  | 2.346097679 | 0.050148   | MYO5A | ENSG00000197535 |
| 15 | 50565589 | 50566039 | 50565860 | 9  | 18  | 7  | 2.785990993 | 0.00480525 |       | ENSG00000174057 |
| 15 | 50605232 | 50605454 | 50605298 | 8  | 9   | 4  | 2.346097679 | 0.050148   | MYO5A | ENSG00000197535 |
| 15 | 50607831 | 50608169 | 50608000 | 9  | 14  | 4  | 3.519146518 | 0.00361132 | MYO5A | ENSG00000197535 |
| 15 | 50609188 | 50609427 | 50609262 | 12 | 14  | 8  | 1.955081399 | 0.0506438  | MYO5A | ENSG00000197535 |
| 15 | 50609725 | 50609960 | 50609839 | 8  | 9   | 11 | 0.977540699 | 0.526123   | MYO5A | ENSG00000197535 |
| 15 | 50637587 | 50638220 | 50637863 | 31 | 49  | 15 | 3.665777623 | 3.70E-07   |       | ENSG00000128989 |

|    |          |          |          |     |     |    |             |             |                          |
|----|----------|----------|----------|-----|-----|----|-------------|-------------|--------------------------|
| 15 | 50639179 | 50639358 | 50639268 | 8   | 8   | 2  | 3.519146518 | 0.017558    | ENSG00000128989          |
| 15 | 50643179 | 50643386 | 50643282 | 10  | 10  | 5  | 2.150589539 | 0.0575848   | ENSG00000128989          |
| 15 | 50646788 | 50646999 | 50646922 | 8   | 9   | 8  | 1.303387599 | 0.281715    | ENSG00000128989          |
| 15 | 50647674 | 50648161 | 50647991 | 13  | 23  | 22 | 1.224050963 | 0.244738    | ENSG00000128989          |
| 15 | 50648359 | 50648812 | 50648657 | 28  | 36  | 15 | 2.712675441 | 0.000215253 | ENSG00000128989          |
| 15 | 50691025 | 50691204 | 50691129 | 8   | 9   | 6  | 1.675784056 | 0.141978    | KIAA1370 ENSG00000047346 |
| 15 | 50712645 | 50712966 | 50712800 | 10  | 13  | 8  | 1.824742639 | 0.0744168   | KIAA1370 ENSG00000047346 |
| 15 | 50716739 | 50717049 | 50716878 | 12  | 14  | 3  | 4.398933147 | 0.00132748  | KIAA1370 ENSG00000047346 |
| 15 | 50726993 | 50727210 | 50727104 | 8   | 11  | 14 | 0.938439071 | 0.570297    | KIAA1370 ENSG00000047346 |
| 15 | 50732676 | 50733048 | 50732869 | 16  | 23  | 14 | 1.876878143 | 0.0251753   | KIAA1370 ENSG00000047346 |
| 15 | 50733901 | 50734167 | 50734053 | 8   | 11  | 10 | 1.279689643 | 0.277323    | KIAA1370 ENSG00000047346 |
| 15 | 50735117 | 50735331 | 50735226 | 8   | 9   | 3  | 2.932622098 | 0.0242899   | KIAA1370 ENSG00000047346 |
| 15 | 50743006 | 50743680 | 50743258 | 106 | 158 | 8  | 20.72386283 | 2.43E-43    | KIAA1370 ENSG00000047346 |
| 15 | 50743780 | 50744048 | 50743966 | 8   | 12  | 8  | 1.694403879 | 0.107291    | KIAA1370 ENSG00000047346 |
| 15 | 50747546 | 50747725 | 50747679 | 8   | 8   | 1  | 5.278719777 | 0.00542188  | KIAA1370 ENSG00000047346 |
| 15 | 50757577 | 50758661 | 50757787 | 24  | 68  | 30 | 2.610979675 | 1.64E-06    | KIAA1370 ENSG00000047346 |
| 15 | 50758706 | 50759305 | 50759118 | 26  | 60  | 15 | 4.4722487   | 9.42E-10    | KIAA1370 ENSG00000047346 |
| 15 | 50774703 | 50775058 | 50774880 | 19  | 23  | 19 | 1.407658607 | 0.128138    | KIAA1370 ENSG00000047346 |
| 15 | 50775355 | 50775616 | 50775491 | 12  | 13  | 7  | 2.052835469 | 0.046392    | KIAA1370 ENSG00000047346 |
| 15 | 50779035 | 50779253 | 50779144 | 12  | 12  | 9  | 1.524963491 | 0.154777    | KIAA1370 ENSG00000047346 |
| 15 | 50788339 | 50788790 | 50788497 | 9   | 18  | 6  | 3.183989707 | 0.00227432  | KIAA1370 ENSG00000047346 |
| 15 | 50789001 | 50789744 | 50789446 | 14  | 40  | 13 | 3.435357315 | 7.45E-06    | ONECUT1 ENSG00000169856  |
| 15 | 50791619 | 50792142 | 50791999 | 8   | 19  | 13 | 1.675784056 | 0.0660887   | ONECUT1 ENSG00000169856  |
| 15 | 50802736 | 50803166 | 50803001 | 11  | 19  | 9  | 2.346097679 | 0.0107159   | ONECUT1 ENSG00000169856  |
| 15 | 50807470 | 50807676 | 50807583 | 9   | 10  | 4  | 2.580707446 | 0.0306059   | ONECUT1 ENSG00000169856  |
| 15 | 50809639 | 50809963 | 50809801 | 9   | 12  | 8  | 1.694403879 | 0.107291    | ONECUT1 ENSG00000169856  |
| 15 | 50810227 | 50810431 | 50810345 | 8   | 8   | 8  | 1.173048839 | 0.36929     | ONECUT1 ENSG00000169856  |
| 15 | 50814905 | 50815307 | 50815143 | 15  | 21  | 14 | 1.720471631 | 0.0496182   | ONECUT1 ENSG00000169856  |
| 15 | 50839625 | 50839832 | 50839698 | 8   | 9   | 8  | 1.303387599 | 0.281715    | ONECUT1 ENSG00000169856  |
| 15 | 50841324 | 50841544 | 50841471 | 9   | 10  | 3  | 3.225884308 | 0.0139466   | ONECUT1 ENSG00000169856  |
| 15 | 50842740 | 50842956 | 50842848 | 9   | 10  | 9  | 1.290353723 | 0.279648    | ONECUT1 ENSG00000169856  |
| 15 | 50845356 | 50845558 | 50845451 | 9   | 10  | 7  | 1.612942154 | 0.147335    | ONECUT1 ENSG00000169856  |
| 15 | 50859355 | 50859769 | 50859573 | 14  | 24  | 7  | 3.665777623 | 0.000215502 | ONECUT1 ENSG00000169856  |
| 15 | 50860022 | 50860334 | 50860178 | 14  | 17  | 18 | 1.111309427 | 0.376188    | ONECUT1 ENSG00000169856  |

|    |          |          |          |    |     |    |             |             |         |                 |
|----|----------|----------|----------|----|-----|----|-------------|-------------|---------|-----------------|
| 15 | 50866545 | 50866764 | 50866695 | 8  | 12  | 4  | 3.049926982 | 0.0108184   | ONECUT1 | ENSG00000169856 |
| 15 | 50869325 | 50869620 | 50869475 | 12 | 15  | 2  | 6.256260476 | 0.000199274 | ONECUT1 | ENSG00000169856 |
| 15 | 50882105 | 50882505 | 50882234 | 12 | 21  | 15 | 1.612942154 | 0.070218    | ONECUT1 | ENSG00000169856 |
| 15 | 50882729 | 50882963 | 50882831 | 9  | 11  | 4  | 2.815317214 | 0.0183428   | ONECUT1 | ENSG00000169856 |
| 15 | 50884474 | 50884675 | 50884584 | 8  | 9   | 6  | 1.675784056 | 0.141978    | ONECUT1 | ENSG00000169856 |
| 15 | 50902803 | 50903025 | 50902914 | 9  | 11  | 5  | 2.346097679 | 0.0364013   | ONECUT1 | ENSG00000169856 |
| 15 | 50935977 | 50936228 | 50936105 | 8  | 10  | 2  | 4.301179077 | 0.00512919  |         | ENSG00000214896 |
| 15 | 50941362 | 50941602 | 50941487 | 10 | 10  | 6  | 1.843362462 | 0.0964212   |         | ENSG00000214896 |
| 15 | 50969362 | 50969565 | 50969463 | 9  | 9   | 1  | 5.865244197 | 0.00272497  |         | ENSG00000214896 |
| 15 | 51002175 | 51002382 | 51002317 | 8  | 8   | 2  | 3.519146518 | 0.017558    |         | ENSG00000221274 |
| 15 | 51002884 | 51003166 | 51003021 | 8  | 10  | 9  | 1.290353723 | 0.279648    |         | ENSG00000221274 |
| 15 | 51011823 | 51012231 | 51011999 | 9  | 15  | 15 | 1.173048839 | 0.32719     |         | ENSG00000221274 |
| 15 | 51023390 | 51023570 | 51023480 | 8  | 10  | 5  | 2.150589539 | 0.0575848   |         | ENSG00000221274 |
| 15 | 51039864 | 51040070 | 51040018 | 11 | 12  | 11 | 1.270802909 | 0.274822    |         | ENSG00000221274 |
| 15 | 51081863 | 51082285 | 51082040 | 13 | 19  | 9  | 2.346097679 | 0.0107159   |         | ENSG00000221274 |
| 15 | 51149464 | 51149760 | 51149588 | 9  | 12  | 8  | 1.694403879 | 0.107291    |         | ENSG00000221274 |
| 15 | 51150569 | 51150870 | 51150709 | 12 | 13  | 15 | 1.026417734 | 0.475096    |         | ENSG00000221274 |
| 15 | 51151197 | 51152145 | 51151611 | 69 | 190 | 32 | 6.789464494 | 6.74E-35    |         | ENSG00000221274 |
| 15 | 51155355 | 51155943 | 51155534 | 8  | 21  | 10 | 2.346097679 | 0.00796926  |         | ENSG00000221274 |
| 15 | 51158836 | 51159138 | 51158987 | 28 | 32  | 13 | 2.765043693 | 0.00036798  |         | ENSG00000221274 |
| 15 | 51159204 | 51159393 | 51159298 | 9  | 9   | 9  | 1.173048839 | 0.362316    |         | ENSG00000221274 |
| 15 | 51161179 | 51161386 | 51161282 | 9  | 11  | 6  | 2.010940867 | 0.0640214   |         | ENSG00000221274 |
| 15 | 51162114 | 51162411 | 51162242 | 8  | 13  | 4  | 3.28453675  | 0.00629037  |         | ENSG00000221274 |
| 15 | 51162789 | 51163155 | 51163007 | 12 | 16  | 7  | 2.492728784 | 0.0124193   |         | ENSG00000221274 |
| 15 | 51226568 | 51226844 | 51226706 | 8  | 11  | 2  | 4.692195357 | 0.00272444  |         | ENSG00000221274 |
| 15 | 51234195 | 51234407 | 51234326 | 8  | 10  | 3  | 3.225884308 | 0.0139466   |         | ENSG00000221274 |
| 15 | 51258466 | 51258737 | 51258601 | 8  | 12  | 5  | 2.541605819 | 0.0225912   |         | ENSG00000221274 |
| 15 | 51272672 | 51272957 | 51272818 | 15 | 17  | 12 | 1.62422147  | 0.088135    |         | ENSG00000221274 |
| 15 | 51276353 | 51276823 | 51276511 | 9  | 18  | 11 | 1.857327329 | 0.0427732   |         | ENSG00000221274 |
| 15 | 51276835 | 51277255 | 51276984 | 19 | 29  | 12 | 2.707035783 | 0.000762953 |         | ENSG00000221274 |
| 15 | 51291490 | 51291763 | 51291626 | 9  | 11  | 5  | 2.346097679 | 0.0364013   |         | ENSG00000221274 |
| 15 | 51377423 | 51377777 | 51377600 | 10 | 13  | 8  | 1.824742639 | 0.0744168   |         | ENSG00000210932 |
| 15 | 51435957 | 51436201 | 51436079 | 8  | 9   | 1  | 5.865244197 | 0.00272497  |         | ENSG00000210932 |
| 15 | 51463947 | 51464285 | 51464205 | 11 | 15  | 12 | 1.443752418 | 0.160732    |         | ENSG00000210932 |

|    |          |          |          |     |     |    |             |             |          |                 |
|----|----------|----------|----------|-----|-----|----|-------------|-------------|----------|-----------------|
| 15 | 51477534 | 51477864 | 51477648 | 14  | 18  | 2  | 7.429309316 | 2.63E-05    |          | ENSG00000210932 |
| 15 | 51539594 | 51539851 | 51539735 | 9   | 10  | 5  | 2.150589539 | 0.0575848   |          | ENSG00000210932 |
| 15 | 51556167 | 51556506 | 51556336 | 8   | 14  | 5  | 2.932622098 | 0.00829617  |          | ENSG00000210932 |
| 15 | 51598765 | 51598991 | 51598878 | 10  | 10  | 9  | 1.290353723 | 0.279648    |          | ENSG00000210932 |
| 15 | 51602468 | 51602669 | 51602610 | 9   | 11  | 6  | 2.010940867 | 0.0640214   |          | ENSG00000210932 |
| 15 | 51615452 | 51615668 | 51615571 | 9   | 11  | 2  | 4.692195357 | 0.00272444  |          | ENSG00000210932 |
| 15 | 51666325 | 51666668 | 51666496 | 16  | 22  | 2  | 8.993374435 | 1.66E-06    |          | ENSG00000210932 |
| 15 | 51714520 | 51714750 | 51714604 | 8   | 10  | 1  | 6.451768616 | 0.00135978  |          | ENSG00000210932 |
| 15 | 51735064 | 51735272 | 51735167 | 8   | 9   | 5  | 1.955081399 | 0.0892323   |          | ENSG00000210932 |
| 15 | 51755283 | 51755630 | 51755456 | 17  | 22  | 2  | 8.993374435 | 1.66E-06    |          | ENSG00000210932 |
| 15 | 51757896 | 51758083 | 51757989 | 8   | 8   | 3  | 2.639359888 | 0.0415794   |          | ENSG00000210932 |
| 15 | 51796489 | 51796726 | 51796607 | 8   | 10  | 9  | 1.290353723 | 0.279648    | WDR72    | ENSG00000166415 |
| 15 | 51802051 | 51802354 | 51802200 | 9   | 12  | 3  | 3.812408728 | 0.004404    | WDR72    | ENSG00000166415 |
| 15 | 51871617 | 51871888 | 51871730 | 8   | 9   | 2  | 3.910162798 | 0.00955088  |          | ENSG00000206641 |
| 15 | 51916661 | 51917178 | 51916954 | 21  | 33  | 10 | 3.625787322 | 2.36E-05    |          | ENSG00000206641 |
| 15 | 51989321 | 51990237 | 51989830 | 158 | 228 | 6  | 38.37545489 | 3.59E-68    |          | ENSG00000206641 |
| 15 | 52030080 | 52030307 | 52030193 | 10  | 10  | 4  | 2.580707446 | 0.0306059   |          | ENSG00000206641 |
| 15 | 52038534 | 52038752 | 52038598 | 8   | 8   | 1  | 5.278719777 | 0.00542188  |          | ENSG00000206641 |
| 15 | 52042367 | 52042816 | 52042524 | 12  | 18  | 9  | 2.228792795 | 0.0164363   |          | ENSG00000206641 |
| 15 | 52056364 | 52056558 | 52056461 | 8   | 9   | 5  | 1.955081399 | 0.0892323   |          | ENSG00000206641 |
| 15 | 52150012 | 52150335 | 52150184 | 11  | 13  | 7  | 2.052835469 | 0.046392    | UNC13C   | ENSG00000137766 |
| 15 | 52162911 | 52163173 | 52163042 | 8   | 11  | 5  | 2.346097679 | 0.0364013   | UNC13C   | ENSG00000137766 |
| 15 | 52185313 | 52185630 | 52185483 | 9   | 12  | 2  | 5.083211637 | 0.00143337  | UNC13C   | ENSG00000137766 |
| 15 | 52291567 | 52291746 | 52291578 | 8   | 8   | 2  | 3.519146518 | 0.017558    | UNC13C   | ENSG00000137766 |
| 15 | 53121361 | 53121667 | 53121514 | 11  | 13  | 0  | 16.42268375 | 1.91E-05    | C15orf15 | ENSG00000137876 |
| 15 | 53297193 | 53297440 | 53297304 | 10  | 11  | 5  | 2.346097679 | 0.0364013   | C15orf15 | ENSG00000137876 |
| 15 | 53398380 | 53398830 | 53398651 | 12  | 22  | 6  | 3.854303329 | 0.000260696 | PIGB     | ENSG00000069943 |
| 15 | 53606125 | 53606304 | 53606214 | 8   | 9   | 6  | 1.675784056 | 0.141978    | DYX1C1   | ENSG00000128845 |
| 15 | 53712185 | 53712394 | 53712289 | 9   | 9   | 1  | 5.865244197 | 0.00272497  | PYGO1    | ENSG00000171016 |
| 15 | 53848406 | 53848622 | 53848489 | 8   | 11  | 0  | 14.07658607 | 9.02E-05    |          | ENSG00000221218 |
| 15 | 53854845 | 53855082 | 53854988 | 8   | 10  | 3  | 3.225884308 | 0.0139466   |          | ENSG00000221218 |
| 15 | 53868588 | 53868809 | 53868698 | 10  | 11  | 2  | 4.692195357 | 0.00272444  |          | ENSG00000221218 |
| 15 | 54281845 | 54282057 | 54281951 | 8   | 9   | 2  | 3.910162798 | 0.00955088  | RFX7     | ENSG00000181827 |
| 15 | 54284615 | 54285052 | 54284793 | 43  | 54  | 1  | 32.25884308 | 8.88E-18    | RFX7     | ENSG00000181827 |

|    |          |          |          |    |    |   |             |             |         |                 |
|----|----------|----------|----------|----|----|---|-------------|-------------|---------|-----------------|
| 15 | 54319903 | 54320283 | 54320093 | 39 | 48 | 1 | 28.73969656 | 8.36E-16    | RFX7    | ENSG00000181827 |
| 15 | 54325545 | 54325913 | 54325724 | 16 | 23 | 6 | 4.021881735 | 0.000148535 | RFX7    | ENSG00000181827 |
| 15 | 54341293 | 54341519 | 54341428 | 8  | 10 | 5 | 2.150589539 | 0.0575848   |         | ENSG00000199784 |
| 15 | 54445661 | 54445872 | 54445802 | 10 | 11 | 5 | 2.346097679 | 0.0364013   | TEX9    | ENSG00000151575 |
| 15 | 54448903 | 54449164 | 54448992 | 12 | 14 | 3 | 4.398933147 | 0.00132748  | TEX9    | ENSG00000151575 |
| 15 | 54570704 | 54570922 | 54570761 | 9  | 9  | 1 | 5.865244197 | 0.00272497  | MNS1    | ENSG00000138587 |
| 15 | 54709868 | 54710185 | 54710030 | 16 | 20 | 1 | 12.31701281 | 1.03E-06    |         | ENSG00000211017 |
| 15 | 54901357 | 54901536 | 54901439 | 8  | 9  | 1 | 5.865244197 | 0.00272497  |         | ENSG00000140238 |
| 15 | 55147015 | 55147319 | 55147162 | 12 | 15 | 2 | 6.256260476 | 0.000199274 |         | ENSG00000222586 |
| 15 | 55585420 | 55585623 | 55585521 | 11 | 11 | 0 | 14.07658607 | 9.02E-05    | GRINL1A | ENSG00000137878 |
| 15 | 55785945 | 55786212 | 55786078 | 13 | 15 | 3 | 4.692195357 | 0.000718455 | GRINL1A | ENSG00000137878 |
| 15 | 56851428 | 56851622 | 56851525 | 8  | 8  | 3 | 2.639359888 | 0.0415794   | FAM63B  | ENSG00000128923 |
| 15 | 57245169 | 57245810 | 57245398 | 62 | 87 | 1 | 51.61414893 | 1.06E-28    |         | ENSG00000221096 |
| 15 | 57363542 | 57363723 | 57363619 | 8  | 9  | 7 | 1.466311049 | 0.20706     |         | ENSG00000199512 |
| 15 | 57535707 | 57535975 | 57535841 | 13 | 17 | 2 | 7.038293036 | 5.19E-05    | FAM81A  | ENSG00000157470 |
| 15 | 57572396 | 57572575 | 57572465 | 8  | 8  | 2 | 3.519146518 | 0.017558    | FAM81A  | ENSG00000157470 |
| 15 | 57650911 | 57651228 | 57651068 | 14 | 17 | 0 | 21.11487911 | 8.57E-07    |         | ENSG00000201704 |
| 15 | 57698925 | 57699283 | 57699104 | 12 | 18 | 3 | 5.571981987 | 0.000108726 | GCNT3   | ENSG00000140297 |
| 15 | 58138641 | 58139043 | 58138842 | 33 | 41 | 1 | 24.63402563 | 1.65E-13    | FOXB1   | ENSG00000171956 |
| 15 | 58183869 | 58184071 | 58183970 | 9  | 10 | 0 | 12.90353723 | 0.000195991 | FOXB1   | ENSG00000171956 |
| 15 | 58283391 | 58283570 | 58283480 | 8  | 8  | 2 | 3.519146518 | 0.017558    | ANXA2P2 | ENSG00000182718 |
| 15 | 58396284 | 58396781 | 58396602 | 49 | 61 | 1 | 36.36451402 | 4.36E-20    | ANXA2P2 | ENSG00000182718 |
| 15 | 58454268 | 58454510 | 58454424 | 8  | 10 | 6 | 1.843362462 | 0.0964212   | ANXA2P2 | ENSG00000182718 |
| 15 | 58472646 | 58472867 | 58472758 | 9  | 12 | 2 | 5.083211637 | 0.00143337  | ANXA2P2 | ENSG00000182718 |
| 15 | 58558630 | 58558851 | 58558705 | 8  | 11 | 0 | 14.07658607 | 9.02E-05    | NARG2   | ENSG00000128915 |
| 15 | 58988379 | 58988686 | 58988539 | 12 | 14 | 0 | 17.59573259 | 8.79E-06    |         | ENSG00000212625 |
| 15 | 58998142 | 58998390 | 58998266 | 9  | 11 | 1 | 7.038293036 | 0.000674435 |         | ENSG00000212625 |
| 15 | 59112481 | 59112734 | 59112650 | 9  | 10 | 5 | 2.150589539 | 0.0575848   | RORA    | ENSG00000069667 |
| 15 | 59488427 | 59488855 | 59488692 | 24 | 32 | 3 | 9.677652924 | 9.12E-09    | RORA    | ENSG00000069667 |
| 15 | 59847895 | 59848093 | 59847994 | 8  | 8  | 1 | 5.278719777 | 0.00542188  | VPS13C  | ENSG00000129003 |
| 15 | 60155486 | 60155700 | 60155576 | 9  | 9  | 1 | 5.865244197 | 0.00272497  | FAM148A | ENSG00000198535 |
| 15 | 60341920 | 60342645 | 60342282 | 50 | 72 | 1 | 42.81628264 | 1.00E-23    |         | ENSG00000166104 |
| 15 | 60649722 | 60649952 | 60649862 | 9  | 11 | 6 | 2.010940867 | 0.0640214   | TLN2    | ENSG00000171914 |
| 15 | 60861305 | 60861582 | 60861456 | 12 | 13 | 3 | 4.105670938 | 0.00243034  |         | ENSG00000211137 |

|    |          |          |          |     |     |    |             |             |         |                 |
|----|----------|----------|----------|-----|-----|----|-------------|-------------|---------|-----------------|
| 15 | 60911498 | 60911825 | 60911658 | 12  | 16  | 3  | 4.985457567 | 0.000385643 |         | ENSG00000211137 |
| 15 | 60922837 | 60923036 | 60922936 | 8   | 9   | 0  | 11.73048839 | 0.000425898 |         | ENSG00000211137 |
| 15 | 60975805 | 60976839 | 60976378 | 16  | 42  | 12 | 3.880084622 | 1.11E-06    |         | ENSG00000213712 |
| 15 | 61236036 | 61236987 | 61236557 | 361 | 597 | 5  | 116.9138677 | 8.17E-192   | RPS27L  | ENSG00000185088 |
| 15 | 61268319 | 61268600 | 61268459 | 10  | 12  | 4  | 3.049926982 | 0.0108184   | RAB8B   | ENSG00000166128 |
| 15 | 61458775 | 61459007 | 61458891 | 15  | 17  | 12 | 1.62422147  | 0.088135    | CA12    | ENSG00000074410 |
| 15 | 61469146 | 61469523 | 61469262 | 8   | 14  | 7  | 2.199466574 | 0.0303778   | CA12    | ENSG00000074410 |
| 15 | 61507607 | 61507851 | 61507755 | 11  | 13  | 0  | 16.42268375 | 1.91E-05    | CA12    | ENSG00000074410 |
| 15 | 61529006 | 61529307 | 61529154 | 8   | 11  | 7  | 1.759573259 | 0.102361    | USP3    | ENSG00000140455 |
| 15 | 61566621 | 61566921 | 61566771 | 11  | 13  | 5  | 2.737113958 | 0.0137917   | USP3    | ENSG00000140455 |
| 15 | 61576278 | 61576499 | 61576339 | 9   | 11  | 4  | 2.815317214 | 0.0183428   | USP3    | ENSG00000140455 |
| 15 | 61582637 | 61582878 | 61582757 | 8   | 8   | 2  | 3.519146518 | 0.017558    | USP3    | ENSG00000140455 |
| 15 | 61583684 | 61583957 | 61583828 | 18  | 18  | 5  | 3.714654658 | 0.000961539 | USP3    | ENSG00000140455 |
| 15 | 61689404 | 61689682 | 61689543 | 10  | 12  | 2  | 5.083211637 | 0.00143337  | FBXL22  | ENSG00000197361 |
| 15 | 61913102 | 61913473 | 61913164 | 8   | 14  | 4  | 3.519146518 | 0.00361132  | HERC1   | ENSG00000103657 |
| 15 | 62172626 | 62173321 | 62173161 | 13  | 31  | 6  | 5.36250898  | 1.31E-06    | FAM96A  | ENSG00000166797 |
| 15 | 62232828 | 62233052 | 62232940 | 8   | 10  | 12 | 0.992579787 | 0.511743    | SNX22   | ENSG00000157734 |
| 15 | 62242452 | 62242817 | 62242646 | 15  | 21  | 8  | 2.867452718 | 0.00225035  | PPIB    | ENSG00000166794 |
| 15 | 62243110 | 62243328 | 62243248 | 8   | 9   | 2  | 3.910162798 | 0.00955088  | PPIB    | ENSG00000166794 |
| 15 | 62434011 | 62434728 | 62434342 | 24  | 45  | 8  | 5.995582957 | 2.73E-09    | CSNK1G1 | ENSG00000169118 |
| 15 | 62435152 | 62435573 | 62435394 | 13  | 22  | 4  | 5.396024661 | 3.05E-05    | CSNK1G1 | ENSG00000169118 |
| 15 | 62466769 | 62467154 | 62466976 | 16  | 25  | 5  | 5.083211637 | 1.58E-05    | TRIP4   | ENSG00000103671 |
| 15 | 62539606 | 62539853 | 62539730 | 14  | 16  | 4  | 3.988366054 | 0.00115141  |         | ENSG00000206781 |
| 15 | 62594493 | 62594767 | 62594622 | 8   | 11  | 1  | 7.038293036 | 0.000674435 | ZNF609  | ENSG00000180357 |
| 15 | 62651216 | 62651571 | 62651416 | 16  | 21  | 6  | 3.686724924 | 0.000453999 | ZNF609  | ENSG00000180357 |
| 15 | 62760747 | 62760963 | 62760826 | 12  | 12  | 0  | 15.24963491 | 4.15E-05    | OAZ2    | ENSG00000180304 |
| 15 | 62846346 | 62846803 | 62846525 | 25  | 36  | 3  | 10.85070176 | 5.62E-10    |         | ENSG00000221033 |
| 15 | 63069341 | 63069667 | 63069515 | 12  | 15  | 4  | 3.753756286 | 0.0020497   | SPG21   | ENSG00000090487 |
| 15 | 63133762 | 63133980 | 63133879 | 12  | 12  | 2  | 5.083211637 | 0.00143337  |         | ENSG00000186198 |
| 15 | 63325686 | 63326162 | 63325858 | 15  | 26  | 3  | 7.918079665 | 5.55E-07    |         | ENSG00000201709 |
| 15 | 63350437 | 63350629 | 63350526 | 8   | 8   | 5  | 1.759573259 | 0.13508     |         | ENSG00000206903 |
| 15 | 63375279 | 63375885 | 63375552 | 20  | 33  | 20 | 1.89922193  | 0.00909124  |         | ENSG00000199568 |
| 15 | 63377156 | 63377422 | 63377254 | 9   | 10  | 1  | 6.451768616 | 0.00135978  |         | ENSG00000199568 |
| 15 | 63383250 | 63383843 | 63383587 | 8   | 22  | 9  | 2.69801233  | 0.00276236  | RNU5B-1 | ENSG00000200156 |

|    |          |          |          |    |    |    |             |             |          |                 |
|----|----------|----------|----------|----|----|----|-------------|-------------|----------|-----------------|
| 15 | 63383994 | 63384863 | 63384325 | 20 | 52 | 30 | 2.005535112 | 0.000809045 | RNU5B-1  | ENSG00000200156 |
| 15 | 63444682 | 63445063 | 63444828 | 12 | 17 | 7  | 2.639359888 | 0.00777415  | PUNC     | ENSG00000174498 |
| 15 | 63447127 | 63447357 | 63447242 | 8  | 9  | 6  | 1.675784056 | 0.141978    | PUNC     | ENSG00000174498 |
| 15 | 63464197 | 63464640 | 63464461 | 12 | 21 | 3  | 6.451768616 | 1.56E-05    | PUNC     | ENSG00000174498 |
| 15 | 63464669 | 63464924 | 63464791 | 8  | 13 | 1  | 8.211341875 | 0.000163445 | PUNC     | ENSG00000174498 |
| 15 | 63597021 | 63597252 | 63597136 | 9  | 10 | 3  | 3.225884308 | 0.0139466   | DPP8     | ENSG00000074603 |
| 15 | 63690373 | 63690816 | 63690594 | 22 | 34 | 8  | 4.561856597 | 2.04E-06    | C15orf44 | ENSG00000138614 |
| 15 | 63718002 | 63718332 | 63718167 | 11 | 14 | 3  | 4.398933147 | 0.00132748  | SLC24A1  | ENSG00000074621 |
| 15 | 63911937 | 63912378 | 63912148 | 28 | 42 | 8  | 5.604566677 | 1.73E-08    | RAB11A   | ENSG00000103769 |
| 15 | 63936290 | 63936517 | 63936393 | 9  | 9  | 3  | 2.932622098 | 0.0242899   | RAB11A   | ENSG00000103769 |
| 15 | 63948360 | 63948630 | 63948513 | 10 | 13 | 7  | 2.052835469 | 0.046392    | RAB11A   | ENSG00000103769 |
| 15 | 63948742 | 63949031 | 63948881 | 10 | 12 | 5  | 2.541605819 | 0.0225912   | RAB11A   | ENSG00000103769 |
| 15 | 63949806 | 63950193 | 63949993 | 12 | 20 | 3  | 6.158506406 | 2.99E-05    | RAB11A   | ENSG00000103769 |
| 15 | 63981833 | 63982067 | 63981950 | 13 | 15 | 5  | 3.128130238 | 0.00492422  | RAB11A   | ENSG00000103769 |
| 15 | 63985816 | 63986004 | 63985910 | 8  | 8  | 4  | 2.111487911 | 0.0804809   | RAB11A   | ENSG00000103769 |
| 15 | 64031978 | 64032232 | 64032122 | 9  | 10 | 8  | 1.433726359 | 0.209175    | RAB11A   | ENSG00000103769 |
| 15 | 64118178 | 64118432 | 64118292 | 8  | 10 | 4  | 2.580707446 | 0.0306059   | RAB11A   | ENSG00000103769 |
| 15 | 64194295 | 64194535 | 64194415 | 12 | 14 | 1  | 8.797866295 | 8.00E-05    | MEGF11   | ENSG00000157890 |
| 15 | 64331164 | 64331359 | 64331258 | 8  | 10 | 7  | 1.612942154 | 0.147335    | MEGF11   | ENSG00000157890 |
| 15 | 64435922 | 64436304 | 64436081 | 11 | 15 | 3  | 4.692195357 | 0.000718455 | TIPIN    | ENSG00000075131 |
| 15 | 64442289 | 64442501 | 64442327 | 9  | 11 | 1  | 7.038293036 | 0.000674435 | TIPIN    | ENSG00000075131 |
| 15 | 64466029 | 64466244 | 64466136 | 10 | 12 | 3  | 3.812408728 | 0.004404    | MAP2K1   | ENSG00000169032 |
| 15 | 64577252 | 64577441 | 64577316 | 8  | 8  | 2  | 3.519146518 | 0.017558    | SNAPC5   | ENSG00000174446 |
| 15 | 64584020 | 64584453 | 64584306 | 8  | 15 | 7  | 2.346097679 | 0.0195693   | RPL4     | ENSG00000174444 |
| 15 | 64726625 | 64726804 | 64726742 | 9  | 9  | 2  | 3.910162798 | 0.00955088  | SMAD6    | ENSG00000137834 |
| 15 | 64753135 | 64753336 | 64753235 | 10 | 10 | 4  | 2.580707446 | 0.0306059   | SMAD6    | ENSG00000137834 |
| 15 | 64768295 | 64768474 | 64768384 | 8  | 8  | 2  | 3.519146518 | 0.017558    | SMAD6    | ENSG00000137834 |
| 15 | 64780082 | 64780308 | 64780195 | 9  | 9  | 2  | 3.910162798 | 0.00955088  | SMAD6    | ENSG00000137834 |
| 15 | 64781551 | 64781806 | 64781678 | 12 | 13 | 2  | 5.474227917 | 0.000747844 | SMAD6    | ENSG00000137834 |
| 15 | 64843081 | 64843329 | 64843205 | 9  | 12 | 4  | 3.049926982 | 0.0108184   | SMAD6    | ENSG00000137834 |
| 15 | 64845224 | 64845445 | 64845396 | 8  | 10 | 5  | 2.150589539 | 0.0575848   | SMAD6    | ENSG00000137834 |
| 15 | 64930723 | 64930923 | 64930856 | 8  | 10 | 3  | 3.225884308 | 0.0139466   | SMAD6    | ENSG00000137834 |
| 15 | 64983174 | 64983389 | 64983273 | 8  | 9  | 3  | 2.932622098 | 0.0242899   |          | ENSG00000213670 |
| 15 | 65011035 | 65011614 | 65011353 | 8  | 20 | 9  | 2.463402563 | 0.00689886  |          | ENSG00000213670 |



|    |          |          |          |    |    |    |             |             |          |                 |
|----|----------|----------|----------|----|----|----|-------------|-------------|----------|-----------------|
| 15 | 65103713 | 65104101 | 65103922 | 17 | 24 | 4  | 5.865244197 | 8.64E-06    |          | ENSG00000205438 |
| 15 | 65128048 | 65128469 | 65128227 | 34 | 43 | 3  | 12.90353723 | 3.99E-12    |          | ENSG00000205438 |
| 15 | 65161652 | 65161962 | 65161800 | 11 | 15 | 1  | 9.384390715 | 3.90E-05    | SMAD3    | ENSG00000166949 |
| 15 | 65204881 | 65205197 | 65205025 | 17 | 21 | 10 | 2.346097679 | 0.00796926  | SMAD3    | ENSG00000166949 |
| 15 | 65227619 | 65227943 | 65227783 | 13 | 17 | 5  | 3.519146518 | 0.00167472  | SMAD3    | ENSG00000166949 |
| 15 | 65245661 | 65245989 | 65245825 | 22 | 25 | 1  | 15.24963491 | 2.59E-08    |          | ENSG00000103591 |
| 15 | 65333991 | 65334286 | 65334152 | 19 | 22 | 0  | 26.9801233  | 1.77E-08    | IQCH     | ENSG00000103599 |
| 15 | 65600744 | 65601079 | 65600911 | 10 | 14 | 2  | 5.865244197 | 0.000387308 | C15orf61 | ENSG00000189227 |
| 15 | 65825953 | 65826158 | 65826040 | 8  | 8  | 7  | 1.319679944 | 0.283403    | LBXCOR1  | ENSG00000188779 |
| 15 | 65918193 | 65918462 | 65918313 | 8  | 10 | 5  | 2.150589539 | 0.0575848   |          | ENSG00000206625 |
| 15 | 65919257 | 65919458 | 65919325 | 8  | 9  | 9  | 1.173048839 | 0.362316    |          | ENSG00000206625 |
| 15 | 65994797 | 65995353 | 65995174 | 13 | 25 | 10 | 2.772660893 | 0.00131329  |          | ENSG00000206625 |
| 15 | 66077997 | 66078323 | 66078160 | 10 | 14 | 4  | 3.519146518 | 0.00361132  | PIAS1    | ENSG00000033800 |
| 15 | 66122106 | 66122404 | 66122255 | 12 | 14 | 7  | 2.199466574 | 0.0303778   | PIAS1    | ENSG00000033800 |
| 15 | 66133350 | 66133553 | 66133449 | 9  | 10 | 4  | 2.580707446 | 0.0306059   | PIAS1    | ENSG00000033800 |
| 15 | 66218439 | 66218624 | 66218531 | 8  | 9  | 1  | 5.865244197 | 0.00272497  | CALML4   | ENSG00000129007 |
| 15 | 66307824 | 66308140 | 66307974 | 8  | 12 | 2  | 5.083211637 | 0.00143337  | CLN6     | ENSG00000128973 |
| 15 | 66332279 | 66332652 | 66332473 | 12 | 20 | 2  | 8.211341875 | 6.65E-06    |          | ENSG00000213656 |
| 15 | 66351288 | 66351703 | 66351467 | 11 | 21 | 1  | 12.90353723 | 4.95E-07    | FEM1B    | ENSG00000169018 |
| 15 | 66356878 | 66357327 | 66357162 | 13 | 21 | 8  | 2.867452718 | 0.00225035  | FEM1B    | ENSG00000169018 |
| 15 | 66386112 | 66386326 | 66386224 | 8  | 8  | 3  | 2.639359888 | 0.0415794   | FEM1B    | ENSG00000169018 |
| 15 | 66424117 | 66424306 | 66424244 | 8  | 10 | 1  | 6.451768616 | 0.00135978  | FEM1B    | ENSG00000169018 |
| 15 | 66753473 | 66753672 | 66753551 | 8  | 9  | 0  | 11.73048839 | 0.000425898 | CORO2B   | ENSG00000103647 |
| 15 | 66771151 | 66771431 | 66771262 | 11 | 13 | 4  | 3.28453675  | 0.00629037  |          | ENSG00000214746 |
| 15 | 66809934 | 66810217 | 66810075 | 14 | 15 | 4  | 3.753756286 | 0.0020497   |          | ENSG00000214746 |
| 15 | 66867261 | 66867480 | 66867319 | 8  | 8  | 8  | 1.173048839 | 0.36929     |          | ENSG00000214746 |
| 15 | 66892362 | 66892572 | 66892419 | 10 | 11 | 4  | 2.815317214 | 0.0183428   | ANP32A   | ENSG00000140350 |
| 15 | 66900150 | 66900401 | 66900243 | 8  | 10 | 2  | 4.301179077 | 0.00512919  | ANP32A   | ENSG00000140350 |
| 15 | 66901436 | 66901699 | 66901567 | 15 | 18 | 4  | 4.457585589 | 0.000353565 | ANP32A   | ENSG00000140350 |
| 15 | 66955303 | 66955542 | 66955422 | 9  | 9  | 1  | 5.865244197 | 0.00272497  | NOX5     | ENSG00000137808 |
| 15 | 67138573 | 67138841 | 67138722 | 12 | 14 | 5  | 2.932622098 | 0.00829617  | TMEM84   | ENSG00000212766 |
| 15 | 67154213 | 67154578 | 67154371 | 9  | 15 | 0  | 18.76878143 | 4.04E-06    | TMEM84   | ENSG00000212766 |
| 15 | 67239659 | 67239852 | 67239755 | 9  | 9  | 3  | 2.932622098 | 0.0242899   | GLCE     | ENSG00000138604 |
| 15 | 67408220 | 67408456 | 67408338 | 8  | 8  | 3  | 2.639359888 | 0.0415794   |          | ENSG00000221376 |

|    |          |          |          |    |    |    |             |             |       |                 |
|----|----------|----------|----------|----|----|----|-------------|-------------|-------|-----------------|
| 15 | 67467597 | 67467911 | 67467754 | 8  | 13 | 4  | 3.28453675  | 0.00629037  |       | ENSG00000207395 |
| 15 | 67494798 | 67495059 | 67494928 | 10 | 10 | 2  | 4.301179077 | 0.00512919  | KIF23 | ENSG00000137807 |
| 15 | 67532565 | 67532975 | 67532687 | 9  | 17 | 5  | 3.519146518 | 0.00167472  | RPLP1 | ENSG00000137818 |
| 15 | 67542081 | 67542577 | 67542251 | 15 | 23 | 8  | 3.128130238 | 0.000832453 |       | ENSG00000207119 |
| 15 | 67545529 | 67545789 | 67545659 | 11 | 13 | 2  | 5.474227917 | 0.000747844 |       | ENSG00000207119 |
| 15 | 67547090 | 67547391 | 67547251 | 16 | 20 | 12 | 1.894925048 | 0.0317253   |       | ENSG00000207119 |
| 15 | 67555164 | 67555460 | 67555327 | 11 | 15 | 6  | 2.68125449  | 0.0103552   |       | ENSG00000207119 |
| 15 | 67562073 | 67562663 | 67562314 | 20 | 35 | 13 | 3.016411301 | 8.94E-05    |       | ENSG00000207119 |
| 15 | 67673679 | 67674590 | 67674134 | 12 | 43 | 9  | 5.161414893 | 3.05E-08    |       | ENSG00000207119 |
| 15 | 67682996 | 67683245 | 67683104 | 8  | 9  | 5  | 1.955081399 | 0.0892323   |       | ENSG00000207119 |
| 15 | 67683301 | 67683776 | 67683479 | 12 | 21 | 14 | 1.720471631 | 0.0496182   |       | ENSG00000207119 |
| 15 | 67842200 | 67842393 | 67842331 | 8  | 8  | 3  | 2.639359888 | 0.0415794   |       | ENSG00000215958 |
| 15 | 67927874 | 67928393 | 67928050 | 20 | 33 | 4  | 7.976732107 | 2.40E-08    |       | ENSG00000215958 |
| 15 | 67962535 | 67962802 | 67962653 | 9  | 12 | 4  | 3.049926982 | 0.0108184   |       | ENSG00000215958 |
| 15 | 68030974 | 68031214 | 68031081 | 8  | 9  | 2  | 3.910162798 | 0.00955088  |       | ENSG00000207965 |
| 15 | 68052604 | 68053007 | 68052741 | 9  | 15 | 8  | 2.085420159 | 0.0338693   |       | ENSG00000207965 |
| 15 | 68067230 | 68067663 | 68067381 | 27 | 34 | 12 | 3.158208414 | 7.02E-05    |       | ENSG00000207965 |
| 15 | 68088349 | 68088573 | 68088477 | 8  | 10 | 1  | 6.451768616 | 0.00135978  |       | ENSG00000207965 |
| 15 | 68094853 | 68095043 | 68094949 | 8  | 8  | 3  | 2.639359888 | 0.0415794   |       | ENSG00000207965 |
| 15 | 68171393 | 68171661 | 68171507 | 9  | 10 | 8  | 1.433726359 | 0.209175    | TLE3  | ENSG00000140332 |
| 15 | 68171902 | 68172084 | 68171968 | 9  | 9  | 1  | 5.865244197 | 0.00272497  | TLE3  | ENSG00000140332 |
| 15 | 68172873 | 68173376 | 68173197 | 17 | 29 | 9  | 3.519146518 | 8.36E-05    | TLE3  | ENSG00000140332 |
| 15 | 68173747 | 68173991 | 68173843 | 8  | 8  | 1  | 5.278719777 | 0.00542188  | TLE3  | ENSG00000140332 |
| 15 | 68177077 | 68177288 | 68177176 | 8  | 10 | 3  | 3.225884308 | 0.0139466   | TLE3  | ENSG00000140332 |
| 15 | 68181076 | 68181367 | 68181219 | 10 | 15 | 6  | 2.68125449  | 0.0103552   | TLE3  | ENSG00000140332 |
| 15 | 68190772 | 68191012 | 68190874 | 13 | 15 | 4  | 3.753756286 | 0.0020497   | TLE3  | ENSG00000140332 |
| 15 | 68275810 | 68276268 | 68276089 | 22 | 35 | 8  | 4.692195357 | 1.14E-06    |       | ENSG00000200216 |
| 15 | 68277264 | 68277576 | 68277420 | 8  | 10 | 5  | 2.150589539 | 0.0575848   |       | ENSG00000200216 |
| 15 | 68320025 | 68320204 | 68320045 | 8  | 8  | 1  | 5.278719777 | 0.00542188  |       | ENSG00000200216 |
| 15 | 68368793 | 68369257 | 68369121 | 22 | 33 | 10 | 3.625787322 | 2.36E-05    |       | ENSG00000200216 |
| 15 | 68403318 | 68404029 | 68403766 | 22 | 44 | 19 | 2.639359888 | 7.33E-05    |       | ENSG00000200216 |
| 15 | 68454541 | 68454857 | 68454678 | 13 | 16 | 1  | 9.970915134 | 1.89E-05    |       | ENSG00000200216 |
| 15 | 68457551 | 68457950 | 68457782 | 12 | 19 | 6  | 3.351568112 | 0.00134187  |       | ENSG00000200216 |
| 15 | 68474920 | 68475137 | 68475030 | 8  | 9  | 1  | 5.865244197 | 0.00272497  |       | ENSG00000200216 |

|    |          |          |          |    |    |    |             |                   |                 |
|----|----------|----------|----------|----|----|----|-------------|-------------------|-----------------|
| 15 | 68506533 | 68506781 | 68506657 | 11 | 11 | 0  | 14.07658607 | 9.02E-05          | ENSG00000200216 |
| 15 | 68507105 | 68507472 | 68507303 | 12 | 19 | 9  | 2.346097679 | 0.0107159         | ENSG00000200216 |
| 15 | 68539554 | 68540021 | 68539714 | 11 | 18 | 10 | 2.026175268 | 0.0273052 UACA    | ENSG00000137831 |
| 15 | 68541887 | 68542904 | 68542062 | 16 | 53 | 12 | 4.872664409 | 2.32E-09 UACA     | ENSG00000137831 |
| 15 | 68545214 | 68545642 | 68545358 | 12 | 18 | 7  | 2.785990993 | 0.00480525 UACA   | ENSG00000137831 |
| 15 | 68567473 | 68567673 | 68567532 | 10 | 10 | 3  | 3.225884308 | 0.0139466 UACA    | ENSG00000137831 |
| 15 | 68574413 | 68574618 | 68574524 | 9  | 9  | 2  | 3.910162798 | 0.00955088 UACA   | ENSG00000137831 |
| 15 | 68587247 | 68587600 | 68587423 | 11 | 16 | 4  | 3.988366054 | 0.00115141 UACA   | ENSG00000137831 |
| 15 | 68592254 | 68592477 | 68592365 | 8  | 9  | 5  | 1.955081399 | 0.0892323 UACA    | ENSG00000137831 |
| 15 | 68605250 | 68605571 | 68605410 | 8  | 11 | 6  | 2.010940867 | 0.0640214 UACA    | ENSG00000137831 |
| 15 | 68606042 | 68606300 | 68606171 | 10 | 11 | 2  | 4.692195357 | 0.00272444 UACA   | ENSG00000137831 |
| 15 | 68648690 | 68648901 | 68648801 | 9  | 10 | 2  | 4.301179077 | 0.00512919 UACA   | ENSG00000137831 |
| 15 | 68842001 | 68842180 | 68842090 | 9  | 9  | 3  | 2.932622098 | 0.0242899 UACA    | ENSG00000137831 |
| 15 | 68842455 | 68842657 | 68842556 | 8  | 9  | 1  | 5.865244197 | 0.00272497 UACA   | ENSG00000137831 |
| 15 | 68842771 | 68843155 | 68842898 | 9  | 16 | 4  | 3.988366054 | 0.00115141 UACA   | ENSG00000137831 |
| 15 | 68892677 | 68892970 | 68892823 | 9  | 12 | 0  | 15.24963491 | 4.15E-05          | ENSG00000156577 |
| 15 | 68904457 | 68904946 | 68904801 | 10 | 19 | 2  | 7.820325595 | 1.32E-05          | ENSG00000156577 |
| 15 | 68971773 | 68972187 | 68972016 | 11 | 18 | 8  | 2.476436439 | 0.00924552 LRRC49 | ENSG00000137821 |
| 15 | 69101176 | 69101371 | 69101279 | 8  | 9  | 6  | 1.675784056 | 0.141978          | ENSG00000214727 |
| 15 | 69158757 | 69159091 | 69158924 | 10 | 15 | 3  | 4.692195357 | 0.000718455       | ENSG00000214727 |
| 15 | 69159153 | 69159499 | 69159326 | 9  | 15 | 1  | 9.384390715 | 3.90E-05          | ENSG00000214727 |
| 15 | 69176118 | 69176436 | 69176286 | 23 | 27 | 10 | 2.9859425   | 0.000503424 THSD4 | ENSG00000187720 |
| 15 | 69182393 | 69182838 | 69182572 | 39 | 53 | 3  | 15.83615933 | 3.03E-15 THSD4    | ENSG00000187720 |
| 15 | 69183196 | 69183375 | 69183270 | 8  | 8  | 5  | 1.759573259 | 0.13508 THSD4     | ENSG00000187720 |
| 15 | 69184127 | 69184447 | 69184280 | 16 | 16 | 4  | 3.988366054 | 0.00115141 THSD4  | ENSG00000187720 |
| 15 | 69193603 | 69193965 | 69193805 | 10 | 15 | 3  | 4.692195357 | 0.000718455 THSD4 | ENSG00000187720 |
| 15 | 69194194 | 69194381 | 69194266 | 8  | 8  | 4  | 2.111487911 | 0.0804809 THSD4   | ENSG00000187720 |
| 15 | 69194460 | 69194857 | 69194598 | 9  | 14 | 5  | 2.932622098 | 0.00829617 THSD4  | ENSG00000187720 |
| 15 | 69331459 | 69331837 | 69331658 | 12 | 18 | 16 | 1.311054585 | 0.208218          | ENSG00000175333 |
| 15 | 69374771 | 69375010 | 69374890 | 9  | 10 | 5  | 2.150589539 | 0.0575848         | ENSG00000175333 |
| 15 | 69416742 | 69417014 | 69416878 | 20 | 22 | 7  | 3.372515413 | 0.000629223       | ENSG00000175333 |
| 15 | 69443450 | 69444099 | 69443705 | 41 | 63 | 6  | 10.72501796 | 9.41E-16          | ENSG00000175333 |
| 15 | 69528164 | 69528392 | 69528276 | 8  | 10 | 0  | 12.90353723 | 0.000195991 THSD4 | ENSG00000187720 |
| 15 | 69550987 | 69551199 | 69551093 | 8  | 10 | 0  | 12.90353723 | 0.000195991 THSD4 | ENSG00000187720 |

|    |          |          |          |     |     |    |             |             |        |                 |
|----|----------|----------|----------|-----|-----|----|-------------|-------------|--------|-----------------|
| 15 | 69553948 | 69554174 | 69554061 | 10  | 10  | 2  | 4.301179077 | 0.00512919  | THSD4  | ENSG00000187720 |
| 15 | 69564572 | 69564846 | 69564709 | 9   | 10  | 3  | 3.225884308 | 0.0139466   | THSD4  | ENSG00000187720 |
| 15 | 69612454 | 69612682 | 69612568 | 10  | 11  | 4  | 2.815317214 | 0.0183428   | THSD4  | ENSG00000187720 |
| 15 | 69652242 | 69652446 | 69652344 | 12  | 13  | 1  | 8.211341875 | 0.000163445 |        | ENSG00000203498 |
| 15 | 69680554 | 69680820 | 69680677 | 9   | 9   | 1  | 5.865244197 | 0.00272497  |        | ENSG00000203497 |
| 15 | 69685331 | 69685519 | 69685425 | 8   | 9   | 1  | 5.865244197 | 0.00272497  |        | ENSG00000203497 |
| 15 | 69689206 | 69689542 | 69689376 | 20  | 24  | 1  | 14.66311049 | 5.43E-08    |        | ENSG00000203497 |
| 15 | 69810060 | 69810239 | 69810160 | 8   | 8   | 3  | 2.639359888 | 0.0415794   |        | ENSG00000203496 |
| 15 | 69827030 | 69827271 | 69827150 | 9   | 12  | 6  | 2.178519273 | 0.0416567   |        | ENSG00000203496 |
| 15 | 69859904 | 69860105 | 69860020 | 9   | 9   | 2  | 3.910162798 | 0.00955088  |        | ENSG00000203496 |
| 15 | 70054957 | 70055170 | 70055063 | 10  | 11  | 6  | 2.010940867 | 0.0640214   |        | ENSG00000214713 |
| 15 | 70197566 | 70197961 | 70197782 | 14  | 21  | 4  | 5.161414893 | 5.68E-05    | SENP8  | ENSG00000166192 |
| 15 | 70234538 | 70234915 | 70234717 | 8   | 14  | 4  | 3.519146518 | 0.00361132  | SENP8  | ENSG00000166192 |
| 15 | 70254195 | 70254578 | 70254462 | 10  | 16  | 5  | 3.323638378 | 0.00288759  | GRAMD2 | ENSG00000175318 |
| 15 | 70257603 | 70257839 | 70257721 | 11  | 12  | 3  | 3.812408728 | 0.004404    | GRAMD2 | ENSG00000175318 |
| 15 | 70279157 | 70279433 | 70279295 | 12  | 15  | 3  | 4.692195357 | 0.000718455 | GRAMD2 | ENSG00000175318 |
| 15 | 70301743 | 70301932 | 70301849 | 9   | 9   | 3  | 2.932622098 | 0.0242899   | PKM2   | ENSG00000067225 |
| 15 | 70306050 | 70306387 | 70306218 | 9   | 14  | 7  | 2.199466574 | 0.0303778   | PKM2   | ENSG00000067225 |
| 15 | 70310652 | 70310930 | 70310791 | 9   | 10  | 2  | 4.301179077 | 0.00512919  | PKM2   | ENSG00000067225 |
| 15 | 70438379 | 70438564 | 70438458 | 8   | 8   | 4  | 2.111487911 | 0.0804809   | HEXA   | ENSG00000213614 |
| 15 | 70455303 | 70455656 | 70455479 | 10  | 16  | 6  | 2.848832895 | 0.00632407  | HEXA   | ENSG00000213614 |
| 15 | 70539860 | 70540099 | 70540030 | 8   | 10  | 10 | 1.173048839 | 0.355733    | ARIH1  | ENSG00000166233 |
| 15 | 70553430 | 70553753 | 70553644 | 11  | 15  | 6  | 2.68125449  | 0.0103552   | ARIH1  | ENSG00000166233 |
| 15 | 70765555 | 70766035 | 70765729 | 11  | 23  | 7  | 3.519146518 | 0.000369739 | BBS4   | ENSG00000140463 |
| 15 | 70863810 | 70864056 | 70863913 | 9   | 11  | 9  | 1.407658607 | 0.210479    | ADPGK  | ENSG00000159322 |
| 15 | 70935962 | 70936304 | 70936133 | 13  | 19  | 1  | 11.73048839 | 2.14E-06    | ADPGK  | ENSG00000159322 |
| 15 | 71132530 | 71132796 | 71132647 | 11  | 11  | 3  | 3.519146518 | 0.00788869  | NEO1   | ENSG00000067141 |
| 15 | 71160847 | 71161046 | 71160901 | 8   | 9   | 4  | 2.346097679 | 0.050148    | NEO1   | ENSG00000067141 |
| 15 | 71244939 | 71245914 | 71245331 | 153 | 226 | 0  | 266.2820865 | 3.06E-77    | NEO1   | ENSG00000067141 |
| 15 | 71323805 | 71323985 | 71323895 | 8   | 8   | 5  | 1.759573259 | 0.13508     | HCN4   | ENSG00000138622 |
| 15 | 71345027 | 71345219 | 71345142 | 8   | 8   | 4  | 2.111487911 | 0.0804809   | HCN4   | ENSG00000138622 |
| 15 | 71411999 | 71412275 | 71412116 | 10  | 11  | 4  | 2.815317214 | 0.0183428   | HCN4   | ENSG00000138622 |
| 15 | 71426202 | 71426471 | 71426316 | 12  | 15  | 5  | 3.128130238 | 0.00492422  | HCN4   | ENSG00000138622 |
| 15 | 71454659 | 71454838 | 71454758 | 8   | 8   | 1  | 5.278719777 | 0.00542188  | HCN4   | ENSG00000138622 |

|    |          |          |          |    |    |    |             |             |          |                 |
|----|----------|----------|----------|----|----|----|-------------|-------------|----------|-----------------|
| 15 | 71603355 | 71603601 | 71603510 | 9  | 10 | 3  | 3.225884308 | 0.0139466   | C15orf60 | ENSG00000183324 |
| 15 | 71681273 | 71681600 | 71681447 | 13 | 16 | 4  | 3.988366054 | 0.00115141  | NPTN     | ENSG00000156642 |
| 15 | 71726797 | 71726989 | 71726893 | 8  | 9  | 0  | 11.73048839 | 0.000425898 | NPTN     | ENSG00000156642 |
| 15 | 71779587 | 71780007 | 71779759 | 10 | 16 | 5  | 3.323638378 | 0.00288759  | CD276    | ENSG00000103855 |
| 15 | 71789146 | 71789515 | 71789399 | 11 | 17 | 2  | 7.038293036 | 5.19E-05    | CD276    | ENSG00000103855 |
| 15 | 71789556 | 71789902 | 71789729 | 18 | 23 | 10 | 2.559379286 | 0.00330263  | CD276    | ENSG00000103855 |
| 15 | 71791469 | 71791713 | 71791609 | 10 | 10 | 5  | 2.150589539 | 0.0575848   | CD276    | ENSG00000103855 |
| 15 | 71822216 | 71822422 | 71822333 | 8  | 9  | 4  | 2.346097679 | 0.050148    | C15orf59 | ENSG00000205363 |
| 15 | 71822532 | 71822893 | 71822749 | 9  | 13 | 8  | 1.824742639 | 0.0744168   | C15orf59 | ENSG00000205363 |
| 15 | 71824838 | 71825017 | 71824927 | 8  | 8  | 1  | 5.278719777 | 0.00542188  | C15orf59 | ENSG00000205363 |
| 15 | 71833086 | 71833565 | 71833387 | 8  | 18 | 5  | 3.714654658 | 0.000961539 | C15orf59 | ENSG00000205363 |
| 15 | 71987860 | 71988071 | 71987955 | 8  | 9  | 3  | 2.932622098 | 0.0242899   |          | ENSG00000222064 |
| 15 | 72073906 | 72074193 | 72074055 | 8  | 13 | 6  | 2.346097679 | 0.0266147   | PML      | ENSG00000140464 |
| 15 | 72074451 | 72074897 | 72074730 | 10 | 16 | 3  | 4.985457567 | 0.000385643 | PML      | ENSG00000140464 |
| 15 | 72224924 | 72225235 | 72225062 | 14 | 17 | 0  | 21.11487911 | 8.57E-07    | ISLR2    | ENSG00000167178 |
| 15 | 72319325 | 72319665 | 72319495 | 14 | 20 | 12 | 1.894925048 | 0.0317253   | CCDC33   | ENSG00000140481 |
| 15 | 72319784 | 72320039 | 72319940 | 9  | 12 | 1  | 7.624817456 | 0.000332769 | CCDC33   | ENSG00000140481 |
| 15 | 72324730 | 72325004 | 72324905 | 10 | 14 | 2  | 5.865244197 | 0.000387308 | CCDC33   | ENSG00000140481 |
| 15 | 72344478 | 72344666 | 72344572 | 8  | 8  | 3  | 2.639359888 | 0.0415794   | CCDC33   | ENSG00000140481 |
| 15 | 72376350 | 72376588 | 72376418 | 9  | 12 | 1  | 7.624817456 | 0.000332769 | CCDC33   | ENSG00000140481 |
| 15 | 72376766 | 72377183 | 72376936 | 15 | 24 | 3  | 7.331555246 | 2.13E-06    | CCDC33   | ENSG00000140481 |
| 15 | 72391386 | 72391575 | 72391480 | 8  | 8  | 1  | 5.278719777 | 0.00542188  | CCDC33   | ENSG00000140481 |
| 15 | 72625450 | 72625850 | 72625702 | 13 | 18 | 4  | 4.457585589 | 0.000353565 | ARID3B   | ENSG00000179361 |
| 15 | 72677868 | 72678282 | 72678113 | 8  | 15 | 2  | 6.256260476 | 0.000199274 | CLK3     | ENSG00000179335 |
| 15 | 72700460 | 72700732 | 72700596 | 9  | 12 | 4  | 3.049926982 | 0.0108184   | CLK3     | ENSG00000179335 |
| 15 | 72711373 | 72711591 | 72711482 | 8  | 9  | 0  | 11.73048839 | 0.000425898 |          | ENSG00000214697 |
| 15 | 72775181 | 72775474 | 72775359 | 11 | 13 | 3  | 4.105670938 | 0.00243034  | EDC3     | ENSG00000179151 |
| 15 | 72803350 | 72803619 | 72803484 | 8  | 10 | 2  | 4.301179077 | 0.00512919  | CYP1A1   | ENSG00000140465 |
| 15 | 72812331 | 72812510 | 72812460 | 8  | 9  | 2  | 3.910162798 | 0.00955088  | CYP1A1   | ENSG00000140465 |
| 15 | 72850505 | 72850753 | 72850629 | 17 | 18 | 7  | 2.785990993 | 0.00480525  | CSK      | ENSG00000103653 |
| 15 | 72867228 | 72867531 | 72867379 | 10 | 15 | 1  | 9.384390715 | 3.90E-05    | CSK      | ENSG00000103653 |
| 15 | 72868872 | 72869180 | 72869015 | 12 | 14 | 1  | 8.797866295 | 8.00E-05    | CSK      | ENSG00000103653 |
| 15 | 72879004 | 72879492 | 72879313 | 54 | 69 | 2  | 27.37113958 | 1.94E-21    | LMAN1L   | ENSG00000140506 |
| 15 | 72879572 | 72879852 | 72879712 | 12 | 13 | 4  | 3.28453675  | 0.00629037  | LMAN1L   | ENSG00000140506 |

|    |          |          |          |    |     |    |             |             |          |                 |
|----|----------|----------|----------|----|-----|----|-------------|-------------|----------|-----------------|
| 15 | 72896566 | 72897102 | 72896924 | 23 | 33  | 4  | 7.976732107 | 2.40E-08    | CPLX3    | ENSG00000213578 |
| 15 | 72898038 | 72898358 | 72898191 | 8  | 12  | 2  | 5.083211637 | 0.00143337  | CPLX3    | ENSG00000213578 |
| 15 | 72908492 | 72908682 | 72908551 | 9  | 9   | 13 | 0.837892028 | 0.672794    | CPLX3    | ENSG00000213578 |
| 15 | 72914670 | 72914866 | 72914768 | 8  | 9   | 2  | 3.910162798 | 0.00955088  | ULK3     | ENSG00000140474 |
| 15 | 72922030 | 72922355 | 72922192 | 12 | 15  | 7  | 2.346097679 | 0.0195693   | ULK3     | ENSG00000140474 |
| 15 | 72952859 | 72953236 | 72953027 | 11 | 17  | 5  | 3.519146518 | 0.00167472  | SCAMP2   | ENSG00000140497 |
| 15 | 72971725 | 72971942 | 72971833 | 9  | 10  | 2  | 4.301179077 | 0.00512919  | MPI      | ENSG00000178802 |
| 15 | 72981043 | 72981375 | 72981202 | 11 | 16  | 5  | 3.323638378 | 0.00288759  | C15orf17 | ENSG00000178761 |
| 15 | 73033856 | 73034045 | 73034023 | 8  | 8   | 1  | 5.278719777 | 0.00542188  | RPP25    | ENSG00000178718 |
| 15 | 73074619 | 73074945 | 73074782 | 10 | 13  | 5  | 2.737113958 | 0.0137917   | SCAMP5   | ENSG00000198794 |
| 15 | 73108732 | 73109152 | 73108911 | 9  | 17  | 6  | 3.016411301 | 0.00381427  | PPCDC    | ENSG00000138621 |
| 15 | 73115664 | 73116034 | 73115769 | 11 | 16  | 4  | 3.988366054 | 0.00115141  | PPCDC    | ENSG00000138621 |
| 15 | 73184152 | 73184414 | 73184258 | 11 | 13  | 2  | 5.474227917 | 0.000747844 |          | ENSG00000213573 |
| 15 | 73260263 | 73260546 | 73260389 | 10 | 14  | 5  | 2.932622098 | 0.00829617  | C15orf39 | ENSG00000167173 |
| 15 | 73284096 | 73284389 | 73284224 | 9  | 10  | 1  | 6.451768616 | 0.00135978  | C15orf39 | ENSG00000167173 |
| 15 | 73387457 | 73387662 | 73387562 | 9  | 9   | 4  | 2.346097679 | 0.050148    |          | ENSG00000217988 |
| 15 | 73447823 | 73448212 | 73448033 | 20 | 28  | 11 | 2.834868028 | 0.000626961 | MAN2C1   | ENSG00000140400 |
| 15 | 73531202 | 73531457 | 73531315 | 11 | 14  | 8  | 1.955081399 | 0.0506438   | SIN3A    | ENSG00000169375 |
| 15 | 73533242 | 73533531 | 73533393 | 12 | 14  | 5  | 2.932622098 | 0.00829617  | SIN3A    | ENSG00000169375 |
| 15 | 73717657 | 73717885 | 73717769 | 8  | 10  | 0  | 12.90353723 | 0.000195991 | IMP3     | ENSG00000177971 |
| 15 | 73719491 | 73719957 | 73719670 | 9  | 19  | 7  | 2.932622098 | 0.00293566  | IMP3     | ENSG00000177971 |
| 15 | 73728072 | 73728293 | 73728162 | 9  | 10  | 2  | 4.301179077 | 0.00512919  | IMP3     | ENSG00000177971 |
| 15 | 73752829 | 73753015 | 73752931 | 10 | 11  | 7  | 1.759573259 | 0.102361    |          | ENSG00000198165 |
| 15 | 73800566 | 73800756 | 73800641 | 8  | 8   | 4  | 2.111487911 | 0.0804809   | ODF3L1   | ENSG00000182950 |
| 15 | 73889470 | 73889674 | 73889527 | 8  | 8   | 3  | 2.639359888 | 0.0415794   |          | ENSG00000214677 |
| 15 | 73920220 | 73920458 | 73920339 | 8  | 11  | 5  | 2.346097679 | 0.0364013   | UBE2Q2   | ENSG00000140367 |
| 15 | 73983079 | 73984046 | 73983534 | 49 | 115 | 7  | 17.00920817 | 7.94E-31    | FBXO22   | ENSG00000167196 |
| 15 | 74218866 | 74219158 | 74218991 | 11 | 14  | 5  | 2.932622098 | 0.00829617  | C15orf27 | ENSG00000169758 |
| 15 | 74230294 | 74230565 | 74230427 | 9  | 11  | 3  | 3.519146518 | 0.00788869  | C15orf27 | ENSG00000169758 |
| 15 | 74342214 | 74342403 | 74342352 | 8  | 8   | 1  | 5.278719777 | 0.00542188  | ETFA     | ENSG00000140374 |
| 15 | 74364704 | 74364883 | 74364777 | 8  | 8   | 1  | 5.278719777 | 0.00542188  | ETFA     | ENSG00000140374 |
| 15 | 74390643 | 74390913 | 74390740 | 12 | 14  | 2  | 5.865244197 | 0.000387308 | ETFA     | ENSG00000140374 |
| 15 | 74392190 | 74392509 | 74392349 | 18 | 22  | 2  | 8.993374435 | 1.66E-06    | ETFA     | ENSG00000140374 |
| 15 | 74409808 | 74410004 | 74409906 | 8  | 9   | 2  | 3.910162798 | 0.00955088  | ISL2     | ENSG00000159556 |

|    |          |          |          |    |    |    |             |             |         |                 |
|----|----------|----------|----------|----|----|----|-------------|-------------|---------|-----------------|
| 15 | 74920387 | 74920576 | 74920485 | 8  | 9  | 1  | 5.865244197 | 0.00272497  | SCAPER  | ENSG00000140386 |
| 15 | 75146812 | 75147045 | 75146897 | 10 | 11 | 3  | 3.519146518 | 0.00788869  | TSPAN3  | ENSG00000140391 |
| 15 | 75240590 | 75240869 | 75240705 | 11 | 14 | 2  | 5.865244197 | 0.000387308 | TSPAN3  | ENSG00000140391 |
| 15 | 75391993 | 75392390 | 75392214 | 27 | 34 | 3  | 10.26417734 | 2.27E-09    |         | ENSG00000186690 |
| 15 | 75576418 | 75576964 | 75576795 | 12 | 27 | 11 | 2.737113958 | 0.00100133  | HMG20A  | ENSG00000140382 |
| 15 | 75580279 | 75580732 | 75580557 | 11 | 21 | 2  | 8.602358155 | 3.33E-06    | HMG20A  | ENSG00000140382 |
| 15 | 75582647 | 75582953 | 75582800 | 17 | 20 | 6  | 3.519146518 | 0.000784044 | HMG20A  | ENSG00000140382 |
| 15 | 75584943 | 75585402 | 75585137 | 35 | 52 | 5  | 10.36193141 | 3.11E-13    | HMG20A  | ENSG00000140382 |
| 15 | 75606567 | 75607040 | 75606746 | 12 | 21 | 8  | 2.867452718 | 0.00225035  | LINGO1  | ENSG00000169783 |
| 15 | 75622780 | 75623036 | 75622929 | 16 | 16 | 7  | 2.492728784 | 0.0124193   | LINGO1  | ENSG00000169783 |
| 15 | 75712899 | 75713146 | 75713022 | 11 | 11 | 3  | 3.519146518 | 0.00788869  | LINGO1  | ENSG00000169783 |
| 15 | 76083106 | 76083355 | 76083230 | 8  | 10 | 1  | 6.451768616 | 0.00135978  |         | ENSG00000221476 |
| 15 | 76118434 | 76118623 | 76118526 | 8  | 8  | 0  | 10.55743955 | 0.000925496 |         | ENSG00000221476 |
| 15 | 76136358 | 76136537 | 76136447 | 8  | 8  | 5  | 1.759573259 | 0.13508     |         | ENSG00000221476 |
| 15 | 76146789 | 76147139 | 76146964 | 12 | 18 | 3  | 5.571981987 | 0.000108726 | TBC1D2B | ENSG00000167202 |
| 15 | 76180969 | 76181469 | 76181290 | 10 | 20 | 2  | 8.211341875 | 6.65E-06    | SH2D7   | ENSG00000183476 |
| 15 | 76226374 | 76226657 | 76226503 | 11 | 14 | 0  | 17.59573259 | 8.79E-06    | IDH3A   | ENSG00000166411 |
| 15 | 76226666 | 76226850 | 76226756 | 8  | 8  | 1  | 5.278719777 | 0.00542188  | IDH3A   | ENSG00000166411 |
| 15 | 76275151 | 76275412 | 76275286 | 9  | 12 | 6  | 2.178519273 | 0.0416567   | ACSBG1  | ENSG00000103740 |
| 15 | 76296133 | 76296593 | 76296363 | 17 | 28 | 4  | 6.803683268 | 6.55E-07    | ACSBG1  | ENSG00000103740 |
| 15 | 76357862 | 76358089 | 76358014 | 10 | 12 | 2  | 5.083211637 | 0.00143337  | DNAJA4  | ENSG00000140403 |
| 15 | 76371018 | 76371382 | 76371241 | 12 | 18 | 5  | 3.714654658 | 0.000961539 | WDR61   | ENSG00000140395 |
| 15 | 76378283 | 76378750 | 76378519 | 9  | 19 | 7  | 2.932622098 | 0.00293566  | WDR61   | ENSG00000140395 |
| 15 | 76517402 | 76517775 | 76517574 | 12 | 19 | 3  | 5.865244197 | 5.72E-05    | IREB2   | ENSG00000136381 |
| 15 | 76536564 | 76536800 | 76536682 | 10 | 10 | 7  | 1.612942154 | 0.147335    | IREB2   | ENSG00000136381 |
| 15 | 76586671 | 76587021 | 76586846 | 10 | 15 | 2  | 6.256260476 | 0.000199274 |         | ENSG00000188266 |
| 15 | 76619790 | 76620009 | 76619900 | 8  | 10 | 7  | 1.612942154 | 0.147335    | PSMA4   | ENSG00000041357 |
| 15 | 76697061 | 76697378 | 76697211 | 20 | 22 | 1  | 13.49006165 | 2.37E-07    | CHRNA3  | ENSG00000080644 |
| 15 | 76764106 | 76764392 | 76764221 | 8  | 10 | 4  | 2.580707446 | 0.0306059   | CHRNA4  | ENSG00000117971 |
| 15 | 76939447 | 76939763 | 76939605 | 10 | 12 | 2  | 5.083211637 | 0.00143337  | MORF4   | ENSG00000185787 |
| 15 | 77009303 | 77009608 | 77009455 | 13 | 15 | 3  | 4.692195357 | 0.000718455 | CTSH    | ENSG00000103811 |
| 15 | 77010333 | 77010643 | 77010477 | 26 | 30 | 0  | 36.36451402 | 3.56E-11    | CTSH    | ENSG00000103811 |
| 15 | 77029041 | 77029312 | 77029162 | 10 | 11 | 1  | 7.038293036 | 0.000674435 | CTSH    | ENSG00000103811 |
| 15 | 77031382 | 77031645 | 77031525 | 15 | 18 | 1  | 11.14396397 | 4.44E-06    | CTSH    | ENSG00000103811 |

|    |          |          |          |    |     |    |             |             |          |                 |
|----|----------|----------|----------|----|-----|----|-------------|-------------|----------|-----------------|
| 15 | 77059120 | 77059432 | 77059276 | 10 | 15  | 9  | 1.876878143 | 0.0544542   |          | ENSG00000177699 |
| 15 | 77107855 | 77108078 | 77107967 | 8  | 8   | 8  | 1.173048839 | 0.36929     | RASGRF1  | ENSG00000058335 |
| 15 | 77169402 | 77169810 | 77169631 | 8  | 16  | 2  | 6.647276756 | 0.000101928 | RASGRF1  | ENSG00000058335 |
| 15 | 77181712 | 77181930 | 77181842 | 9  | 9   | 4  | 2.346097679 | 0.050148    | RASGRF1  | ENSG00000058335 |
| 15 | 77258567 | 77258849 | 77258708 | 18 | 20  | 5  | 4.105670938 | 0.000308509 |          | ENSG00000207695 |
| 15 | 77301153 | 77301376 | 77301203 | 9  | 9   | 6  | 1.675784056 | 0.141978    |          | ENSG00000207695 |
| 15 | 77363043 | 77363266 | 77363154 | 12 | 14  | 5  | 2.932622098 | 0.00829617  | TMED3    | ENSG00000166557 |
| 15 | 77394238 | 77394497 | 77394367 | 9  | 11  | 3  | 3.519146518 | 0.00788869  | TMED3    | ENSG00000166557 |
| 15 | 77396378 | 77396635 | 77396506 | 11 | 11  | 5  | 2.346097679 | 0.0364013   | TMED3    | ENSG00000166557 |
| 15 | 77412595 | 77412867 | 77412746 | 8  | 8   | 3  | 2.639359888 | 0.0415794   | TMED3    | ENSG00000166557 |
| 15 | 77675505 | 77675710 | 77675602 | 8  | 8   | 3  | 2.639359888 | 0.0415794   |          | ENSG00000213527 |
| 15 | 77976656 | 77976835 | 77976745 | 8  | 8   | 3  | 2.639359888 | 0.0415794   | MTHFS    | ENSG00000136371 |
| 15 | 78082513 | 78083005 | 78082750 | 95 | 142 | 0  | 167.745984  | 6.30E-49    |          | ENSG00000180725 |
| 15 | 78138537 | 78138886 | 78138766 | 10 | 14  | 5  | 2.932622098 | 0.00829617  | ZFAND6   | ENSG00000086666 |
| 15 | 78247604 | 78248204 | 78247984 | 35 | 48  | 4  | 11.49587863 | 8.11E-13    | FAH      | ENSG00000103876 |
| 15 | 78320825 | 78321088 | 78320957 | 11 | 12  | 3  | 3.812408728 | 0.004404    | FAH      | ENSG00000103876 |
| 15 | 78564651 | 78565192 | 78564972 | 69 | 95  | 3  | 28.15317214 | 1.11E-28    | ARNT2    | ENSG00000172379 |
| 15 | 78592132 | 78592385 | 78592258 | 11 | 14  | 2  | 5.865244197 | 0.000387308 | ARNT2    | ENSG00000172379 |
| 15 | 78647109 | 78647346 | 78647227 | 10 | 10  | 2  | 4.301179077 | 0.00512919  |          | ENSG00000222139 |
| 15 | 78659693 | 78659891 | 78659814 | 8  | 9   | 0  | 11.73048839 | 0.000425898 |          | ENSG00000222139 |
| 15 | 78713140 | 78713367 | 78713282 | 9  | 9   | 3  | 2.932622098 | 0.0242899   |          | ENSG00000222139 |
| 15 | 78758937 | 78759292 | 78759146 | 10 | 15  | 5  | 3.128130238 | 0.00492422  | FAM108C1 | ENSG00000136379 |
| 15 | 78822518 | 78822873 | 78822695 | 12 | 18  | 10 | 2.026175268 | 0.0273052   | KIAA1199 | ENSG00000103888 |
| 15 | 78828869 | 78829367 | 78829197 | 23 | 36  | 13 | 3.100200504 | 5.51E-05    | KIAA1199 | ENSG00000103888 |
| 15 | 78841167 | 78841452 | 78841309 | 15 | 17  | 3  | 5.278719777 | 0.000205462 | KIAA1199 | ENSG00000103888 |
| 15 | 78883982 | 78884210 | 78884148 | 9  | 10  | 2  | 4.301179077 | 0.00512919  | KIAA1199 | ENSG00000103888 |
| 15 | 78884450 | 78884941 | 78884762 | 19 | 31  | 6  | 5.36250898  | 1.31E-06    | KIAA1199 | ENSG00000103888 |
| 15 | 78936450 | 78936842 | 78936629 | 10 | 17  | 7  | 2.639359888 | 0.00777415  |          | ENSG00000208003 |
| 15 | 78959576 | 78959807 | 78959691 | 13 | 15  | 3  | 4.692195357 | 0.000718455 |          | ENSG00000208003 |
| 15 | 78985213 | 78985456 | 78985300 | 9  | 9   | 2  | 3.910162798 | 0.00955088  |          | ENSG00000208003 |
| 15 | 78985900 | 78986240 | 78986073 | 18 | 23  | 5  | 4.692195357 | 5.29E-05    |          | ENSG00000208003 |
| 15 | 79049510 | 79049726 | 79049618 | 13 | 13  | 1  | 8.211341875 | 0.000163445 | MESDC2   | ENSG00000117899 |
| 15 | 79056878 | 79057228 | 79057057 | 9  | 13  | 7  | 2.052835469 | 0.046392    | MESDC2   | ENSG00000117899 |
| 15 | 79080141 | 79080404 | 79080292 | 9  | 10  | 2  | 4.301179077 | 0.00512919  | MESDC1   | ENSG00000140406 |



|    |          |          |          |     |     |    |             |             |          |                 |
|----|----------|----------|----------|-----|-----|----|-------------|-------------|----------|-----------------|
| 15 | 79112247 | 79112450 | 79112346 | 10  | 11  | 3  | 3.519146518 | 0.00788869  | MESDC1   | ENSG00000140406 |
| 15 | 79235093 | 79235330 | 79235211 | 12  | 13  | 6  | 2.346097679 | 0.0266147   | C15orf26 | ENSG00000156206 |
| 15 | 79360173 | 79360408 | 79360295 | 9   | 9   | 4  | 2.346097679 | 0.050148    | IL16     | ENSG00000172349 |
| 15 | 79361398 | 79361722 | 79361559 | 11  | 14  | 5  | 2.932622098 | 0.00829617  | IL16     | ENSG00000172349 |
| 15 | 79383176 | 79383741 | 79383576 | 13  | 25  | 8  | 3.388807758 | 0.000297109 | IL16     | ENSG00000172349 |
| 15 | 79512502 | 79512946 | 79512630 | 14  | 21  | 3  | 6.451768616 | 1.56E-05    | TMC3     | ENSG00000188869 |
| 15 | 79959736 | 79959959 | 79959847 | 9   | 9   | 0  | 11.73048839 | 0.000425898 |          | ENSG00000222992 |
| 15 | 80101225 | 80101835 | 80101641 | 143 | 195 | 1  | 114.9587863 | 9.18E-65    |          | ENSG00000222521 |
| 15 | 80118844 | 80119023 | 80118933 | 8   | 8   | 1  | 5.278719777 | 0.00542188  |          | ENSG00000222521 |
| 15 | 80120273 | 80120484 | 80120378 | 8   | 9   | 0  | 11.73048839 | 0.000425898 |          | ENSG00000222521 |
| 15 | 80125467 | 80125656 | 80125549 | 8   | 8   | 0  | 10.55743955 | 0.000925496 | MEX3B    | ENSG00000183496 |
| 15 | 80126597 | 80126820 | 80126708 | 11  | 14  | 0  | 17.59573259 | 8.79E-06    | MEX3B    | ENSG00000183496 |
| 15 | 80170355 | 80170669 | 80170512 | 8   | 14  | 1  | 8.797866295 | 8.00E-05    | MEX3B    | ENSG00000183496 |
| 15 | 80187966 | 80188193 | 80188086 | 9   | 9   | 0  | 11.73048839 | 0.000425898 | MEX3B    | ENSG00000183496 |
| 15 | 81146083 | 81146568 | 81146389 | 8   | 14  | 10 | 1.599612054 | 0.114822    | AP3B2    | ENSG00000103723 |
| 15 | 81207766 | 81208417 | 81208052 | 45  | 76  | 2  | 30.10825354 | 1.02E-23    |          | ENSG00000222483 |
| 15 | 81216073 | 81216478 | 81216331 | 11  | 18  | 10 | 2.026175268 | 0.0273052   |          | ENSG00000222483 |
| 15 | 81275220 | 81275574 | 81275410 | 10  | 15  | 3  | 4.692195357 | 0.000718455 | WHDC1    | ENSG00000156232 |
| 15 | 81315447 | 81315700 | 81315584 | 10  | 11  | 9  | 1.407658607 | 0.210479    | WHDC1    | ENSG00000156232 |
| 15 | 81378890 | 81379219 | 81379044 | 14  | 17  | 4  | 4.222975822 | 0.000640773 |          | ENSG00000214555 |
| 15 | 81402410 | 81402745 | 81402577 | 19  | 24  | 4  | 5.865244197 | 8.64E-06    | HOMER2   | ENSG00000103942 |
| 15 | 81410609 | 81410825 | 81410721 | 8   | 9   | 5  | 1.955081399 | 0.0892323   | HOMER2   | ENSG00000103942 |
| 15 | 81471193 | 81471742 | 81471372 | 11  | 24  | 8  | 3.258468998 | 0.000499412 | C15orf40 | ENSG00000169609 |
| 15 | 81527232 | 81527567 | 81527361 | 11  | 16  | 2  | 6.647276756 | 0.000101928 | BTBD1    | ENSG00000064726 |
| 15 | 81609580 | 81609909 | 81609744 | 8   | 9   | 5  | 1.955081399 | 0.0892323   | TM6SF1   | ENSG00000136404 |
| 15 | 81670432 | 81670744 | 81670574 | 13  | 17  | 5  | 3.519146518 | 0.00167472  |          | ENSG00000166503 |
| 15 | 81708254 | 81708437 | 81708291 | 8   | 9   | 2  | 3.910162798 | 0.00955088  | BNC1     | ENSG00000169594 |
| 15 | 81812605 | 81812861 | 81812733 | 10  | 12  | 0  | 15.24963491 | 4.15E-05    | BNC1     | ENSG00000169594 |
| 15 | 81840307 | 81840704 | 81840525 | 24  | 31  | 2  | 12.51252095 | 2.82E-09    | SH3GL3   | ENSG00000140600 |
| 15 | 81898487 | 81898773 | 81898611 | 11  | 13  | 2  | 5.474227917 | 0.000747844 | SH3GL3   | ENSG00000140600 |
| 15 | 82213717 | 82214206 | 82213923 | 10  | 20  | 8  | 2.737113958 | 0.0036449   |          | ENSG00000212374 |
| 15 | 82414681 | 82414945 | 82414813 | 9   | 11  | 2  | 4.692195357 | 0.00272444  |          | ENSG00000221484 |
| 15 | 82571849 | 82572092 | 82571999 | 8   | 10  | 0  | 12.90353723 | 0.000195991 |          | ENSG00000205242 |
| 15 | 82944725 | 82944957 | 82944869 | 8   | 10  | 3  | 3.225884308 | 0.0139466   | ZSCAN2   | ENSG00000176371 |

|    |          |          |          |    |    |    |             |             |         |                 |
|----|----------|----------|----------|----|----|----|-------------|-------------|---------|-----------------|
| 15 | 82975749 | 82975985 | 82975867 | 8  | 9  | 2  | 3.910162798 | 0.00955088  | SCAND2  | ENSG00000176700 |
| 15 | 82982396 | 82982589 | 82982492 | 9  | 9  | 6  | 1.675784056 | 0.141978    | SCAND2  | ENSG00000176700 |
| 15 | 82998161 | 82998343 | 82998295 | 9  | 10 | 13 | 0.921681231 | 0.585856    | WDR73   | ENSG00000177082 |
| 15 | 82999109 | 82999485 | 82999288 | 14 | 21 | 6  | 3.686724924 | 0.000453999 | WDR73   | ENSG00000177082 |
| 15 | 83002547 | 83002854 | 83002700 | 8  | 13 | 2  | 5.474227917 | 0.000747844 | NMB     | ENSG00000197696 |
| 15 | 83060144 | 83060905 | 83060323 | 18 | 43 | 15 | 3.225884308 | 7.82E-06    | SEC11A  | ENSG00000140612 |
| 15 | 83091732 | 83091961 | 83091809 | 12 | 13 | 3  | 4.105670938 | 0.00243034  | SEC11A  | ENSG00000140612 |
| 15 | 83199569 | 83199796 | 83199682 | 10 | 11 | 7  | 1.759573259 | 0.102361    |         | ENSG00000200991 |
| 15 | 83203476 | 83203712 | 83203594 | 8  | 10 | 7  | 1.612942154 | 0.147335    |         | ENSG00000200991 |
| 15 | 83222686 | 83223033 | 83222859 | 16 | 20 | 7  | 3.079253203 | 0.00177418  | SLC28A1 | ENSG00000156222 |
| 15 | 83234372 | 83234878 | 83234587 | 31 | 48 | 4  | 11.49587863 | 8.11E-13    | SLC28A1 | ENSG00000156222 |
| 15 | 83259119 | 83259614 | 83259353 | 13 | 22 | 6  | 3.854303329 | 0.000260696 |         | ENSG00000207037 |
| 15 | 83272327 | 83272722 | 83272574 | 13 | 18 | 6  | 3.183989707 | 0.00227432  |         | ENSG00000207037 |
| 15 | 83274236 | 83274754 | 83274415 | 20 | 30 | 5  | 6.060752336 | 7.05E-07    |         | ENSG00000207037 |
| 15 | 83299619 | 83299868 | 83299743 | 10 | 11 | 8  | 1.564065119 | 0.151515    |         | ENSG00000212388 |
| 15 | 83307223 | 83307756 | 83307493 | 11 | 23 | 12 | 2.165628626 | 0.0100985   | PDE8A   | ENSG00000073417 |
| 15 | 83324478 | 83324925 | 83324652 | 11 | 21 | 16 | 1.518063204 | 0.0959332   | PDE8A   | ENSG00000073417 |
| 15 | 83325442 | 83325743 | 83325592 | 12 | 17 | 3  | 5.278719777 | 0.000205462 | PDE8A   | ENSG00000073417 |
| 15 | 83326894 | 83327156 | 83327050 | 8  | 11 | 7  | 1.759573259 | 0.102361    | PDE8A   | ENSG00000073417 |
| 15 | 83424862 | 83425081 | 83424934 | 8  | 8  | 3  | 2.639359888 | 0.0415794   | PDE8A   | ENSG00000073417 |
| 15 | 83675314 | 83675628 | 83675459 | 14 | 17 | 5  | 3.519146518 | 0.00167472  | AKAP13  | ENSG00000170776 |
| 15 | 83887277 | 83887605 | 83887441 | 8  | 13 | 2  | 5.474227917 | 0.000747844 | AKAP13  | ENSG00000170776 |
| 15 | 84108214 | 84108488 | 84108355 | 12 | 12 | 3  | 3.812408728 | 0.004404    |         | ENSG00000221634 |
| 15 | 84133403 | 84133680 | 84133549 | 11 | 13 | 3  | 4.105670938 | 0.00243034  | KLHL25  | ENSG00000183655 |
| 15 | 84169982 | 84170261 | 84170115 | 9  | 12 | 8  | 1.694403879 | 0.107291    | KLHL25  | ENSG00000183655 |
| 15 | 84203031 | 84203262 | 84203146 | 8  | 10 | 2  | 4.301179077 | 0.00512919  | KLHL25  | ENSG00000183655 |
| 15 | 84625824 | 84626003 | 84625923 | 8  | 8  | 3  | 2.639359888 | 0.0415794   | AGBL1   | ENSG00000166748 |
| 15 | 84968887 | 84969123 | 84969005 | 10 | 11 | 5  | 2.346097679 | 0.0364013   | AGBL1   | ENSG00000166748 |
| 15 | 85208332 | 85208546 | 85208439 | 14 | 15 | 7  | 2.346097679 | 0.0195693   |         |                 |
| 15 | 85221462 | 85221842 | 85221720 | 9  | 15 | 8  | 2.085420159 | 0.0338693   |         |                 |
| 15 | 85389809 | 85390514 | 85390243 | 8  | 25 | 7  | 3.812408728 | 0.00012465  |         | ENSG00000207150 |
| 15 | 85534639 | 85535008 | 85534804 | 10 | 15 | 9  | 1.876878143 | 0.0544542   |         | ENSG00000207150 |
| 15 | 85556251 | 85556576 | 85556411 | 8  | 11 | 2  | 4.692195357 | 0.00272444  |         | ENSG00000207150 |
| 15 | 85557385 | 85557607 | 85557496 | 9  | 9  | 0  | 11.73048839 | 0.000425898 |         | ENSG00000207150 |

|    |          |          |          |     |     |    |             |             |        |                 |
|----|----------|----------|----------|-----|-----|----|-------------|-------------|--------|-----------------|
| 15 | 85631414 | 85631632 | 85631523 | 12  | 13  | 6  | 2.346097679 | 0.0266147   |        | ENSG00000207150 |
| 15 | 85710205 | 85710523 | 85710364 | 8   | 14  | 2  | 5.865244197 | 0.000387308 |        | ENSG00000207150 |
| 15 | 85754558 | 85754750 | 85754651 | 9   | 9   | 1  | 5.865244197 | 0.00272497  |        | ENSG00000207150 |
| 15 | 85815172 | 85815440 | 85815306 | 13  | 14  | 4  | 3.519146518 | 0.00361132  |        | ENSG00000207150 |
| 15 | 85864935 | 85865227 | 85865073 | 9   | 13  | 8  | 1.824742639 | 0.0744168   |        | ENSG00000207150 |
| 15 | 85867158 | 85867609 | 85867337 | 10  | 19  | 12 | 1.804690522 | 0.0452624   |        | ENSG00000207150 |
| 15 | 85900822 | 85901012 | 85900913 | 8   | 8   | 4  | 2.111487911 | 0.0804809   | TMEM83 | ENSG00000219654 |
| 15 | 85921555 | 85921822 | 85921704 | 8   | 8   | 4  | 2.111487911 | 0.0804809   | TMEM83 | ENSG00000219654 |
| 15 | 86016747 | 86016930 | 86016834 | 10  | 11  | 2  | 4.692195357 | 0.00272444  | TMEM83 | ENSG00000219654 |
| 15 | 86152303 | 86152529 | 86152416 | 9   | 10  | 3  | 3.225884308 | 0.0139466   | TMEM83 | ENSG00000219654 |
| 15 | 86422036 | 86422344 | 86422190 | 12  | 14  | 3  | 4.398933147 | 0.00132748  | NTRK3  | ENSG00000140538 |
| 15 | 86433243 | 86433575 | 86433440 | 10  | 14  | 2  | 5.865244197 | 0.000387308 | NTRK3  | ENSG00000140538 |
| 15 | 86434170 | 86434487 | 86434328 | 8   | 11  | 0  | 14.07658607 | 9.02E-05    | NTRK3  | ENSG00000140538 |
| 15 | 86591038 | 86591381 | 86591215 | 11  | 16  | 3  | 4.985457567 | 0.000385643 | NTRK3  | ENSG00000140538 |
| 15 | 86618784 | 86619057 | 86618914 | 13  | 13  | 2  | 5.474227917 | 0.000747844 | NTRK3  | ENSG00000140538 |
| 15 | 86633247 | 86633470 | 86633306 | 8   | 8   | 1  | 5.278719777 | 0.00542188  | NTRK3  | ENSG00000140538 |
| 15 | 86799266 | 86799523 | 86799352 | 10  | 12  | 8  | 1.694403879 | 0.107291    | MRPL46 | ENSG00000173867 |
| 15 | 86811472 | 86811917 | 86811648 | 10  | 18  | 10 | 2.026175268 | 0.0273052   | MRPL46 | ENSG00000173867 |
| 15 | 86890626 | 86891132 | 86890953 | 18  | 31  | 4  | 7.507512572 | 9.10E-08    | DET1   | ENSG00000140543 |
| 15 | 86958779 | 86958977 | 86958878 | 9   | 10  | 1  | 6.451768616 | 0.00135978  |        | ENSG00000207703 |
| 15 | 86965199 | 86966090 | 86965528 | 236 | 324 | 6  | 54.46298183 | 1.24E-99    | AEN    | ENSG00000181026 |
| 15 | 86966306 | 86966542 | 86966460 | 9   | 12  | 2  | 5.083211637 | 0.00143337  | AEN    | ENSG00000181026 |
| 15 | 86982777 | 86983472 | 86982927 | 16  | 36  | 2  | 14.46760235 | 7.62E-11    | ISG20  | ENSG00000172183 |
| 15 | 87001711 | 87002015 | 87001863 | 11  | 12  | 8  | 1.694403879 | 0.107291    | ISG20  | ENSG00000172183 |
| 15 | 87223015 | 87223360 | 87223187 | 11  | 16  | 1  | 9.970915134 | 1.89E-05    | HAPLN3 | ENSG00000140511 |
| 15 | 87248918 | 87249301 | 87249122 | 10  | 16  | 6  | 2.848832895 | 0.00632407  | MFGE8  | ENSG00000140545 |
| 15 | 87257862 | 87258056 | 87257954 | 8   | 9   | 0  | 11.73048839 | 0.000425898 | MFGE8  | ENSG00000140545 |
| 15 | 87361880 | 87362153 | 87362016 | 10  | 13  | 6  | 2.346097679 | 0.0266147   |        | ENSG00000214448 |
| 15 | 87411526 | 87411780 | 87411653 | 19  | 21  | 5  | 4.301179077 | 0.000172642 | ABHD2  | ENSG00000140526 |
| 15 | 87432521 | 87432721 | 87432573 | 8   | 9   | 3  | 2.932622098 | 0.0242899   | ABHD2  | ENSG00000140526 |
| 15 | 87452343 | 87452545 | 87452458 | 8   | 9   | 3  | 2.932622098 | 0.0242899   | ABHD2  | ENSG00000140526 |
| 15 | 87465618 | 87466012 | 87465795 | 17  | 25  | 5  | 5.083211637 | 1.58E-05    | ABHD2  | ENSG00000140526 |
| 15 | 87483880 | 87484139 | 87484013 | 9   | 10  | 0  | 12.90353723 | 0.000195991 | ABHD2  | ENSG00000140526 |
| 15 | 87587739 | 87588279 | 87588135 | 14  | 22  | 9  | 2.69801233  | 0.00276236  | FANCI  | ENSG00000140525 |

|    |          |          |          |    |    |    |             |             |          |                 |
|----|----------|----------|----------|----|----|----|-------------|-------------|----------|-----------------|
| 15 | 87588458 | 87588658 | 87588589 | 10 | 10 | 3  | 3.225884308 | 0.0139466   | FANCI    | ENSG00000140525 |
| 15 | 87678829 | 87679790 | 87679281 | 25 | 58 | 23 | 2.883745063 | 1.75E-06    | POLG     | ENSG00000140521 |
| 15 | 87702831 | 87703090 | 87702945 | 11 | 14 | 2  | 5.865244197 | 0.000387308 |          | ENSG00000207819 |
| 15 | 87722804 | 87723036 | 87722876 | 15 | 16 | 3  | 4.985457567 | 0.000385643 |          | ENSG00000207819 |
| 15 | 87723636 | 87724037 | 87723894 | 12 | 18 | 3  | 5.571981987 | 0.000108726 |          | ENSG00000207819 |
| 15 | 87724084 | 87724427 | 87724261 | 21 | 25 | 5  | 5.083211637 | 1.58E-05    |          | ENSG00000207819 |
| 15 | 87727858 | 87728058 | 87727959 | 10 | 11 | 4  | 2.815317214 | 0.0183428   |          | ENSG00000207819 |
| 15 | 87755647 | 87756139 | 87755927 | 42 | 59 | 6  | 10.05470434 | 1.46E-14    |          | ENSG00000207819 |
| 15 | 87760440 | 87760763 | 87760605 | 9  | 12 | 4  | 3.049926982 | 0.0108184   |          | ENSG00000207819 |
| 15 | 87774995 | 87775248 | 87775133 | 8  | 11 | 3  | 3.519146518 | 0.00788869  |          | ENSG00000207819 |
| 15 | 87817088 | 87817312 | 87817200 | 10 | 10 | 9  | 1.290353723 | 0.279648    | RHCG     | ENSG00000140519 |
| 15 | 87840498 | 87840745 | 87840621 | 8  | 10 | 1  | 6.451768616 | 0.00135978  | RHCG     | ENSG00000140519 |
| 15 | 87847485 | 87847667 | 87847578 | 8  | 8  | 3  | 2.639359888 | 0.0415794   | RHCG     | ENSG00000140519 |
| 15 | 87857546 | 87857875 | 87857710 | 11 | 16 | 1  | 9.970915134 | 1.89E-05    | RHCG     | ENSG00000140519 |
| 15 | 87919182 | 87919553 | 87919351 | 8  | 13 | 7  | 2.052835469 | 0.046392    | C15orf42 | ENSG00000140534 |
| 15 | 88084382 | 88084682 | 88084547 | 13 | 15 | 2  | 6.256260476 | 0.000199274 | MESP1    | ENSG00000166823 |
| 15 | 88099123 | 88099345 | 88099234 | 8  | 9  | 2  | 3.910162798 | 0.00955088  | MESP1    | ENSG00000166823 |
| 15 | 88238134 | 88238459 | 88238283 | 17 | 19 | 9  | 2.346097679 | 0.0107159   | AP3S2    | ENSG00000157823 |
| 15 | 88238692 | 88238871 | 88238781 | 8  | 9  | 7  | 1.466311049 | 0.20706     | AP3S2    | ENSG00000157823 |
| 15 | 88242928 | 88243135 | 88243031 | 9  | 9  | 1  | 5.865244197 | 0.00272497  | AP3S2    | ENSG00000157823 |
| 15 | 88250244 | 88250977 | 88250702 | 23 | 47 | 11 | 4.692195357 | 2.58E-08    |          | ENSG00000214445 |
| 15 | 88261172 | 88261372 | 88261265 | 9  | 10 | 4  | 2.580707446 | 0.0306059   | C15orf38 | ENSG00000214446 |
| 15 | 88302219 | 88302696 | 88302473 | 46 | 63 | 7  | 9.384390715 | 5.23E-15    | ZNF710   | ENSG00000140548 |
| 15 | 88379861 | 88380082 | 88379947 | 9  | 11 | 4  | 2.815317214 | 0.0183428   | ZNF710   | ENSG00000140548 |
| 15 | 88391118 | 88391414 | 88391266 | 18 | 19 | 3  | 5.865244197 | 5.72E-05    | ZNF710   | ENSG00000140548 |
| 15 | 88439704 | 88440293 | 88440118 | 19 | 37 | 10 | 4.052350536 | 2.71E-06    | IDH2     | ENSG00000182054 |
| 15 | 88445319 | 88445542 | 88445430 | 9  | 11 | 5  | 2.346097679 | 0.0364013   | IDH2     | ENSG00000182054 |
| 15 | 88448755 | 88449142 | 88449002 | 13 | 19 | 6  | 3.351568112 | 0.00134187  | IDH2     | ENSG00000182054 |
| 15 | 88487552 | 88487754 | 88487655 | 9  | 11 | 2  | 4.692195357 | 0.00272444  |          | ENSG00000222141 |
| 15 | 88509871 | 88510318 | 88510139 | 11 | 21 | 8  | 2.867452718 | 0.00225035  |          | ENSG00000208939 |
| 15 | 88609711 | 88610004 | 88609857 | 8  | 12 | 8  | 1.694403879 | 0.107291    | NGRN     | ENSG00000182768 |
| 15 | 88610157 | 88610397 | 88610320 | 10 | 11 | 6  | 2.010940867 | 0.0640214   | NGRN     | ENSG00000182768 |
| 15 | 88660417 | 88660731 | 88660573 | 14 | 18 | 5  | 3.714654658 | 0.000961539 |          | ENSG00000221309 |
| 15 | 88664291 | 88664545 | 88664418 | 19 | 19 | 9  | 2.346097679 | 0.0107159   |          | ENSG00000221309 |

|    |          |          |          |    |    |    |             |                    |                 |
|----|----------|----------|----------|----|----|----|-------------|--------------------|-----------------|
| 15 | 88678605 | 88678916 | 88678760 | 22 | 24 | 2  | 9.775406994 | 4.09E-07           | ENSG00000173683 |
| 15 | 88680994 | 88681236 | 88681072 | 10 | 11 | 7  | 1.759573259 | 0.102361           | ENSG00000173683 |
| 15 | 88684619 | 88684913 | 88684766 | 12 | 14 | 6  | 2.513676084 | 0.016726           | ENSG00000173683 |
| 15 | 88706365 | 88706653 | 88706526 | 10 | 12 | 10 | 1.386330446 | 0.21117 ZNF774     | ENSG00000196391 |
| 15 | 88776589 | 88776768 | 88776682 | 8  | 8  | 1  | 5.278719777 | 0.00542188 IQGAP1  | ENSG00000140575 |
| 15 | 88823441 | 88823687 | 88823550 | 10 | 11 | 5  | 2.346097679 | 0.0364013 CRT3     | ENSG00000140577 |
| 15 | 88823994 | 88824263 | 88824128 | 20 | 20 | 7  | 3.079253203 | 0.00177418 CRT3    | ENSG00000140577 |
| 15 | 88826651 | 88826879 | 88826802 | 8  | 9  | 4  | 2.346097679 | 0.050148 CRT3      | ENSG00000140577 |
| 15 | 88833729 | 88834585 | 88833957 | 51 | 81 | 17 | 5.343889157 | 4.29E-14 CRT3      | ENSG00000140577 |
| 15 | 89050757 | 89051026 | 89050891 | 9  | 11 | 7  | 1.759573259 | 0.102361 BLM       | ENSG00000197299 |
| 15 | 89275964 | 89276252 | 89276108 | 9  | 13 | 2  | 5.474227917 | 0.000747844 HDDC3  | ENSG00000184508 |
| 15 | 89276349 | 89276985 | 89276811 | 14 | 30 | 4  | 7.272902804 | 1.76E-07 HDDC3     | ENSG00000184508 |
| 15 | 89278543 | 89278862 | 89278705 | 10 | 14 | 4  | 3.519146518 | 0.00361132 UNC45A  | ENSG00000140553 |
| 15 | 89300739 | 89301014 | 89300876 | 9  | 13 | 3  | 4.105670938 | 0.00243034 RCCD1   | ENSG00000166965 |
| 15 | 89338756 | 89339033 | 89338929 | 9  | 13 | 3  | 4.105670938 | 0.00243034 PRC1    | ENSG00000198901 |
| 15 | 89366579 | 89366980 | 89366732 | 10 | 17 | 0  | 21.11487911 | 8.57E-07 VPS33B    | ENSG00000184056 |
| 15 | 89389136 | 89389338 | 89389237 | 9  | 9  | 0  | 11.73048839 | 0.000425898        | ENSG00000208919 |
| 15 | 89633643 | 89633881 | 89633762 | 9  | 10 | 3  | 3.225884308 | 0.0139466 SV2B     | ENSG00000185518 |
| 15 | 89775547 | 89775939 | 89775740 | 14 | 22 | 3  | 6.745030826 | 8.05E-06 SV2B      | ENSG00000185518 |
| 15 | 89789976 | 89790271 | 89790123 | 11 | 13 | 4  | 3.28453675  | 0.00629037 SV2B    | ENSG00000185518 |
| 15 | 89835353 | 89835690 | 89835521 | 16 | 20 | 1  | 12.31701281 | 1.03E-06 SV2B      | ENSG00000185518 |
| 15 | 89866918 | 89867116 | 89867066 | 9  | 10 | 2  | 4.301179077 | 0.00512919 SV2B    | ENSG00000185518 |
| 15 | 89875089 | 89875547 | 89875412 | 11 | 19 | 4  | 4.692195357 | 0.000193572 SV2B   | ENSG00000185518 |
| 15 | 90200238 | 90200487 | 90200376 | 9  | 11 | 3  | 3.519146518 | 0.00788869 SLCO3A1 | ENSG00000176463 |
| 15 | 90441950 | 90442129 | 90442048 | 8  | 9  | 3  | 2.932622098 | 0.0242899          | ENSG00000221154 |
| 15 | 90532223 | 90532746 | 90532573 | 17 | 25 | 6  | 4.357038546 | 4.72E-05           | ENSG00000213443 |
| 15 | 90735986 | 90736181 | 90736083 | 10 | 10 | 3  | 3.225884308 | 0.0139466 ST8SIA2  | ENSG00000140557 |
| 15 | 90982589 | 90982829 | 90982681 | 8  | 11 | 4  | 2.815317214 | 0.0183428 FAM174B  | ENSG00000185442 |
| 15 | 90988471 | 90988690 | 90988569 | 9  | 12 | 11 | 1.270802909 | 0.274822 FAM174B   | ENSG00000185442 |
| 15 | 90989229 | 90989553 | 90989396 | 15 | 19 | 7  | 2.932622098 | 0.00293566 FAM174B | ENSG00000185442 |
| 15 | 90989600 | 90990073 | 90989771 | 14 | 29 | 7  | 4.398933147 | 1.30E-05 FAM174B   | ENSG00000185442 |
| 15 | 91011477 | 91011665 | 91011562 | 8  | 9  | 6  | 1.675784056 | 0.141978 FAM174B   | ENSG00000185442 |
| 15 | 91040456 | 91040652 | 91040554 | 12 | 12 | 4  | 3.049926982 | 0.0108184          | ENSG00000157576 |
| 15 | 91095821 | 91096006 | 91095888 | 10 | 11 | 4  | 2.815317214 | 0.0183428          | ENSG00000213440 |

|    |          |          |          |     |     |    |             |             |         |                 |
|----|----------|----------|----------|-----|-----|----|-------------|-------------|---------|-----------------|
| 15 | 91146534 | 91146965 | 91146730 | 20  | 28  | 2  | 11.33947211 | 2.41E-08    |         | ENSG00000213440 |
| 15 | 91153231 | 91153469 | 91153301 | 8   | 10  | 6  | 1.843362462 | 0.0964212   |         | ENSG00000213440 |
| 15 | 91153567 | 91153794 | 91153672 | 9   | 11  | 4  | 2.815317214 | 0.0183428   |         | ENSG00000213440 |
| 15 | 91153888 | 91154108 | 91153998 | 8   | 10  | 6  | 1.843362462 | 0.0964212   |         | ENSG00000213440 |
| 15 | 91164767 | 91165323 | 91164923 | 11  | 23  | 5  | 4.692195357 | 5.29E-05    | CHD2    | ENSG00000173575 |
| 15 | 91213545 | 91213852 | 91213718 | 11  | 15  | 5  | 3.128130238 | 0.00492422  | CHD2    | ENSG00000173575 |
| 15 | 91248627 | 91248832 | 91248713 | 9   | 11  | 1  | 7.038293036 | 0.000674435 | CHD2    | ENSG00000173575 |
| 15 | 91262126 | 91262463 | 91262295 | 8   | 13  | 1  | 8.211341875 | 0.000163445 | CHD2    | ENSG00000173575 |
| 15 | 91293958 | 91294541 | 91294345 | 121 | 158 | 2  | 62.17158848 | 9.66E-51    | CHD2    | ENSG00000173575 |
| 15 | 91374954 | 91375255 | 91375119 | 11  | 13  | 4  | 3.28453675  | 0.00629037  |         | ENSG00000213438 |
| 15 | 91432018 | 91432703 | 91432342 | 12  | 35  | 10 | 3.839068929 | 8.08E-06    | RGMA    | ENSG00000182175 |
| 15 | 92373736 | 92373999 | 92373875 | 9   | 12  | 1  | 7.624817456 | 0.000332769 |         | ENSG00000212022 |
| 15 | 92455095 | 92455274 | 92455184 | 8   | 8   | 1  | 5.278719777 | 0.00542188  |         | ENSG00000212022 |
| 15 | 92464181 | 92464457 | 92464319 | 11  | 13  | 1  | 8.211341875 | 0.000163445 |         | ENSG00000212022 |
| 15 | 92886597 | 92886776 | 92886634 | 8   | 8   | 0  | 10.55743955 | 0.000925496 | MCTP2   | ENSG00000140563 |
| 15 | 93036998 | 93037259 | 93037138 | 8   | 9   | 1  | 5.865244197 | 0.00272497  |         | ENSG00000176070 |
| 15 | 93136426 | 93136716 | 93136571 | 11  | 14  | 10 | 1.599612054 | 0.114822    |         | ENSG00000176070 |
| 15 | 93571091 | 93571480 | 93571353 | 14  | 21  | 0  | 25.80707446 | 3.84E-08    |         | ENSG00000176070 |
| 15 | 93591386 | 93591698 | 93591527 | 21  | 24  | 5  | 4.887703497 | 2.90E-05    |         | ENSG00000176070 |
| 15 | 94033749 | 94034094 | 94033921 | 21  | 25  | 2  | 10.16642327 | 2.02E-07    |         | ENSG00000222076 |
| 15 | 94195140 | 94195338 | 94195247 | 10  | 10  | 1  | 6.451768616 | 0.00135978  |         | ENSG00000208900 |
| 15 | 94219687 | 94219913 | 94219800 | 8   | 10  | 7  | 1.612942154 | 0.147335    |         | ENSG00000208900 |
| 15 | 94238668 | 94238914 | 94238797 | 11  | 12  | 4  | 3.049926982 | 0.0108184   |         | ENSG00000208900 |
| 15 | 94239778 | 94240088 | 94239933 | 10  | 13  | 8  | 1.824742639 | 0.0744168   |         | ENSG00000208900 |
| 15 | 94255979 | 94256231 | 94256105 | 8   | 11  | 9  | 1.407658607 | 0.210479    |         | ENSG00000208900 |
| 15 | 94670269 | 94670593 | 94670431 | 15  | 18  | 7  | 2.785990993 | 0.00480525  | NR2F2   | ENSG00000185551 |
| 15 | 94671533 | 94671771 | 94671684 | 11  | 15  | 5  | 3.128130238 | 0.00492422  | NR2F2   | ENSG00000185551 |
| 15 | 96306488 | 96306745 | 96306648 | 10  | 11  | 6  | 2.010940867 | 0.0640214   | ARRDC4  | ENSG00000140450 |
| 15 | 96396133 | 96396336 | 96396269 | 8   | 8   | 1  | 5.278719777 | 0.00542188  |         | ENSG00000222361 |
| 15 | 96538789 | 96539064 | 96538942 | 8   | 11  | 4  | 2.815317214 | 0.0183428   |         | ENSG00000222361 |
| 15 | 96782376 | 96782641 | 96782514 | 8   | 10  | 4  | 2.580707446 | 0.0306059   | FAM169B | ENSG00000185087 |
| 15 | 97106852 | 97107047 | 97106946 | 10  | 11  | 2  | 4.692195357 | 0.00272444  | IGF1R   | ENSG00000140443 |
| 15 | 97109898 | 97110221 | 97110055 | 8   | 10  | 1  | 6.451768616 | 0.00135978  | IGF1R   | ENSG00000140443 |
| 15 | 97110373 | 97110667 | 97110520 | 10  | 12  | 2  | 5.083211637 | 0.00143337  | IGF1R   | ENSG00000140443 |

|    |          |          |          |    |    |   |             |             |          |                 |
|----|----------|----------|----------|----|----|---|-------------|-------------|----------|-----------------|
| 15 | 97140436 | 97140750 | 97140593 | 9  | 13 | 5 | 2.737113958 | 0.0137917   | IGF1R    | ENSG00000140443 |
| 15 | 97211717 | 97212059 | 97211888 | 9  | 13 | 4 | 3.28453675  | 0.00629037  |          | ENSG00000183571 |
| 15 | 97213107 | 97213372 | 97213239 | 8  | 10 | 3 | 3.225884308 | 0.0139466   |          | ENSG00000183571 |
| 15 | 97213825 | 97214248 | 97214004 | 13 | 20 | 2 | 8.211341875 | 6.65E-06    |          | ENSG00000183571 |
| 15 | 97229206 | 97229618 | 97229335 | 17 | 26 | 4 | 6.334463732 | 2.40E-06    |          | ENSG00000183571 |
| 15 | 97257739 | 97258050 | 97257873 | 17 | 21 | 5 | 4.301179077 | 0.000172642 |          | ENSG00000183571 |
| 15 | 97265255 | 97265580 | 97265417 | 14 | 16 | 7 | 2.492728784 | 0.0124193   |          | ENSG00000183571 |
| 15 | 97375522 | 97375760 | 97375641 | 8  | 10 | 0 | 12.90353723 | 0.000195991 |          | ENSG00000183571 |
| 15 | 97437528 | 97437890 | 97437707 | 10 | 17 | 4 | 4.222975822 | 0.000640773 | SYNM     | ENSG00000182253 |
| 15 | 97481673 | 97481896 | 97481727 | 9  | 12 | 3 | 3.812408728 | 0.004404    | SYNM     | ENSG00000182253 |
| 15 | 97495016 | 97495297 | 97495174 | 9  | 10 | 0 | 12.90353723 | 0.000195991 | SYNM     | ENSG00000182253 |
| 15 | 97535498 | 97535739 | 97535618 | 11 | 12 | 0 | 15.24963491 | 4.15E-05    | TTC23    | ENSG00000103852 |
| 15 | 97608693 | 97608875 | 97608736 | 9  | 9  | 5 | 1.955081399 | 0.0892323   | TTC23    | ENSG00000103852 |
| 15 | 97608957 | 97609157 | 97609056 | 9  | 9  | 2 | 3.910162798 | 0.00955088  | TTC23    | ENSG00000103852 |
| 15 | 97609201 | 97609391 | 97609296 | 8  | 9  | 2 | 3.910162798 | 0.00955088  | LRRC28   | ENSG00000168904 |
| 15 | 97621965 | 97622295 | 97622135 | 20 | 24 | 4 | 5.865244197 | 8.64E-06    | HSP90B2P | ENSG00000205141 |
| 15 | 97628358 | 97628717 | 97628545 | 12 | 17 | 1 | 10.55743955 | 9.18E-06    | HSP90B2P | ENSG00000205141 |
| 15 | 97834287 | 97834513 | 97834400 | 10 | 10 | 2 | 4.301179077 | 0.00512919  | MEF2A    | ENSG00000068305 |
| 15 | 97923446 | 97923737 | 97923601 | 8  | 10 | 4 | 2.580707446 | 0.0306059   | MEF2A    | ENSG00000068305 |
| 15 | 98066254 | 98066488 | 98066371 | 10 | 11 | 2 | 4.692195357 | 0.00272444  | LYSMD4   | ENSG00000183060 |
| 15 | 98325509 | 98325938 | 98325731 | 29 | 43 | 2 | 17.20471631 | 4.62E-13    |          | ENSG00000208876 |
| 15 | 98400791 | 98401076 | 98400933 | 8  | 9  | 5 | 1.955081399 | 0.0892323   |          | ENSG00000208876 |
| 15 | 98604957 | 98605326 | 98605117 | 9  | 14 | 5 | 2.932622098 | 0.00829617  | ADAMTS17 | ENSG00000140470 |
| 15 | 98821322 | 98821673 | 98821497 | 11 | 17 | 6 | 3.016411301 | 0.00381427  | LASS3    | ENSG00000154227 |
| 15 | 98959725 | 98959959 | 98959842 | 10 | 12 | 4 | 3.049926982 | 0.0108184   | LINS1    | ENSG00000140471 |
| 15 | 98960080 | 98960322 | 98960190 | 8  | 10 | 9 | 1.290353723 | 0.279648    | ASB7     | ENSG00000183475 |
| 15 | 99051296 | 99051482 | 99051373 | 8  | 9  | 2 | 3.910162798 | 0.00955088  |          | ENSG00000212306 |
| 15 | 99079582 | 99079991 | 99079726 | 10 | 17 | 0 | 21.11487911 | 8.57E-07    |          | ENSG00000212306 |
| 15 | 99094500 | 99094688 | 99094579 | 8  | 8  | 0 | 10.55743955 | 0.000925496 |          | ENSG00000212306 |
| 15 | 99117525 | 99117724 | 99117624 | 9  | 9  | 1 | 5.865244197 | 0.00272497  | ALDH1A3  | ENSG00000184254 |
| 15 | 99230851 | 99231081 | 99231014 | 9  | 11 | 3 | 3.519146518 | 0.00788869  | ALDH1A3  | ENSG00000184254 |
| 15 | 99235145 | 99235594 | 99235342 | 44 | 59 | 2 | 23.46097679 | 3.38E-18    | ALDH1A3  | ENSG00000184254 |
| 15 | 99286688 | 99287022 | 99286855 | 14 | 19 | 9 | 2.346097679 | 0.0107159   | LRRK1    | ENSG00000154237 |
| 15 | 99364645 | 99364893 | 99364790 | 10 | 12 | 6 | 2.178519273 | 0.0416567   | LRRK1    | ENSG00000154237 |

|    |           |           |           |    |    |    |             |             |           |                 |
|----|-----------|-----------|-----------|----|----|----|-------------|-------------|-----------|-----------------|
| 15 | 99366193  | 99366447  | 99366330  | 12 | 14 | 6  | 2.513676084 | 0.016726    | LRRK1     | ENSG00000154237 |
| 15 | 99525540  | 99525828  | 99525686  | 16 | 19 | 3  | 5.865244197 | 5.72E-05    | CHSY1     | ENSG00000131873 |
| 15 | 99606027  | 99606306  | 99606166  | 10 | 12 | 1  | 7.624817456 | 0.000332769 | CHSY1     | ENSG00000131873 |
| 15 | 100010158 | 100010340 | 100010284 | 8  | 8  | 6  | 1.508205651 | 0.203852    | TM2D3     | ENSG00000184277 |
| 16 | 61439     | 61727     | 61596     | 9  | 13 | 4  | 3.28453675  | 0.00629037  | RHBDF1    | ENSG00000007384 |
| 16 | 86968     | 87227     | 87097     | 13 | 14 | 0  | 17.59573259 | 8.79E-06    | MPG       | ENSG00000103152 |
| 16 | 307225    | 307502    | 307363    | 9  | 13 | 1  | 8.211341875 | 0.000163445 | PDIA2     | ENSG00000185615 |
| 16 | 314420    | 314646    | 314534    | 9  | 9  | 5  | 1.955081399 | 0.0892323   | AXIN1     | ENSG00000103126 |
| 16 | 342995    | 343197    | 343094    | 8  | 8  | 1  | 5.278719777 | 0.00542188  | AXIN1     | ENSG00000103126 |
| 16 | 360538    | 360751    | 360644    | 10 | 11 | 0  | 14.07658607 | 9.02E-05    | MRPL28    | ENSG00000086504 |
| 16 | 415386    | 415582    | 415484    | 8  | 9  | 4  | 2.346097679 | 0.050148    | RAB11FIP3 | ENSG00000090565 |
| 16 | 577945    | 578141    | 578012    | 8  | 10 | 0  | 12.90353723 | 0.000195991 | RAB40C    | ENSG00000197562 |
| 16 | 583488    | 583800    | 583644    | 15 | 19 | 0  | 23.46097679 | 1.81E-07    | RAB40C    | ENSG00000197562 |
| 16 | 626329    | 626652    | 626476    | 12 | 15 | 4  | 3.753756286 | 0.0020497   | C16orf13  | ENSG00000130731 |
| 16 | 650611    | 650979    | 650811    | 13 | 18 | 0  | 22.28792795 | 3.94E-07    | WDR90     | ENSG00000161996 |
| 16 | 658030    | 658218    | 658162    | 9  | 9  | 0  | 11.73048839 | 0.000425898 | RHOT2     | ENSG00000140983 |
| 16 | 663193    | 663431    | 663275    | 11 | 13 | 0  | 16.42268375 | 1.91E-05    | RHBDL1    | ENSG00000103269 |
| 16 | 674601    | 674847    | 674733    | 8  | 9  | 0  | 11.73048839 | 0.000425898 | JMJD8     | ENSG00000161999 |
| 16 | 680274    | 680587    | 680446    | 11 | 12 | 5  | 2.541605819 | 0.0225912   | WDR24     | ENSG00000127580 |
| 16 | 702744    | 703009    | 702876    | 8  | 11 | 2  | 4.692195357 | 0.00272444  | METRN     | ENSG00000103260 |
| 16 | 730937    | 731519    | 731162    | 8  | 22 | 4  | 5.396024661 | 3.05E-05    | NARFL     | ENSG00000103245 |
| 16 | 785604    | 785963    | 785741    | 12 | 16 | 5  | 3.323638378 | 0.00288759  | GNG13     | ENSG00000127588 |
| 16 | 786876    | 787068    | 787006    | 8  | 9  | 2  | 3.910162798 | 0.00955088  | GNG13     | ENSG00000127588 |
| 16 | 1073099   | 1073391   | 1073242   | 17 | 20 | 0  | 24.63402563 | 8.35E-08    | SSTR5     | ENSG00000162009 |
| 16 | 1287027   | 1287212   | 1287120   | 8  | 8  | 1  | 5.278719777 | 0.00542188  | UBE2I     | ENSG00000103275 |
| 16 | 1289447   | 1289796   | 1289621   | 11 | 17 | 2  | 7.038293036 | 5.19E-05    | UBE2I     | ENSG00000103275 |
| 16 | 1353429   | 1353760   | 1353594   | 10 | 14 | 2  | 5.865244197 | 0.000387308 | UNKL      | ENSG00000059145 |
| 16 | 1483407   | 1483713   | 1483575   | 9  | 11 | 0  | 14.07658607 | 9.02E-05    | TELO2     | ENSG00000100726 |
| 16 | 1601934   | 1602173   | 1602053   | 10 | 11 | 1  | 7.038293036 | 0.000674435 | CRAMP1L   | ENSG00000007545 |
| 16 | 1635959   | 1636576   | 1636138   | 18 | 31 | 12 | 2.887504835 | 0.000300358 | CRAMP1L   | ENSG00000007545 |
| 16 | 1691424   | 1691846   | 1691634   | 30 | 39 | 9  | 4.692195357 | 3.22E-07    | MAPK8IP3  | ENSG00000138834 |
| 16 | 1763008   | 1763270   | 1763102   | 10 | 10 | 1  | 6.451768616 | 0.00135978  | MRPS34    | ENSG00000074071 |
| 16 | 1817124   | 1817448   | 1817291   | 14 | 19 | 10 | 2.132816071 | 0.01835     | FAHD1     | ENSG00000180185 |
| 16 | 1824185   | 1824402   | 1824230   | 10 | 11 | 6  | 2.010940867 | 0.0640214   | FAHD1     | ENSG00000180185 |



|    |         |         |         |    |    |    |             |             |         |                 |
|----|---------|---------|---------|----|----|----|-------------|-------------|---------|-----------------|
| 16 | 1900396 | 1900575 | 1900485 | 8  | 8  | 0  | 10.55743955 | 0.000925496 | HS3ST6  | ENSG00000162040 |
| 16 | 1903208 | 1903687 | 1903447 | 20 | 33 | 1  | 19.94183027 | 6.71E-11    | HS3ST6  | ENSG00000162040 |
| 16 | 1949110 | 1949386 | 1949248 | 9  | 10 | 2  | 4.301179077 | 0.00512919  | NDUFB10 | ENSG00000140990 |
| 16 | 1954698 | 1954909 | 1954794 | 11 | 11 | 2  | 4.692195357 | 0.00272444  | RPS2    | ENSG00000140988 |
| 16 | 1973210 | 1973465 | 1973337 | 8  | 11 | 1  | 7.038293036 | 0.000674435 | GFER    | ENSG00000127554 |
| 16 | 1993949 | 1994132 | 1994040 | 8  | 8  | 1  | 5.278719777 | 0.00542188  | ZNF598  | ENSG00000167962 |
| 16 | 1999944 | 2000128 | 1999986 | 8  | 9  | 3  | 2.932622098 | 0.0242899   | ZNF598  | ENSG00000167962 |
| 16 | 2143490 | 2143760 | 2143622 | 10 | 12 | 4  | 3.049926982 | 0.0108184   |         | ENSG00000206630 |
| 16 | 2145367 | 2145593 | 2145502 | 9  | 11 | 5  | 2.346097679 | 0.0364013   | TRAF7   | ENSG00000131653 |
| 16 | 2188269 | 2188831 | 2188448 | 9  | 22 | 5  | 4.496687217 | 9.59E-05    | CASKIN1 | ENSG00000167971 |
| 16 | 2195509 | 2195693 | 2195565 | 8  | 8  | 2  | 3.519146518 | 0.017558    |         | ENSG00000167965 |
| 16 | 2213280 | 2213667 | 2213459 | 9  | 16 | 5  | 3.323638378 | 0.00288759  | E4F1    | ENSG00000167967 |
| 16 | 2258033 | 2258314 | 2258157 | 9  | 12 | 3  | 3.812408728 | 0.004404    | RNPS1   | ENSG00000205937 |
| 16 | 2672370 | 2672616 | 2672493 | 15 | 15 | 5  | 3.128130238 | 0.00492422  | KCTD5   | ENSG00000167977 |
| 16 | 2730105 | 2730469 | 2730316 | 17 | 23 | 0  | 28.15317214 | 8.13E-09    |         | ENSG00000205913 |
| 16 | 2820032 | 2820247 | 2820139 | 8  | 9  | 2  | 3.910162798 | 0.00955088  |         | ENSG00000162078 |
| 16 | 2828945 | 2829293 | 2829118 | 11 | 13 | 8  | 1.824742639 | 0.0744168   |         | ENSG00000172460 |
| 16 | 2858087 | 2858299 | 2858161 | 9  | 9  | 4  | 2.346097679 | 0.050148    | PRSS22  | ENSG00000005001 |
| 16 | 2894201 | 2894553 | 2894377 | 11 | 17 | 8  | 2.346097679 | 0.0144542   | FLYWCH1 | ENSG00000059122 |
| 16 | 2895286 | 2895602 | 2895431 | 11 | 15 | 2  | 6.256260476 | 0.000199274 | FLYWCH1 | ENSG00000059122 |
| 16 | 2901737 | 2901961 | 2901849 | 10 | 11 | 1  | 7.038293036 | 0.000674435 | FLYWCH1 | ENSG00000059122 |
| 16 | 2906087 | 2906363 | 2906231 | 10 | 13 | 1  | 8.211341875 | 0.000163445 | FLYWCH1 | ENSG00000059122 |
| 16 | 2951729 | 2951966 | 2951864 | 8  | 9  | 1  | 5.865244197 | 0.00272497  | KREMEN2 | ENSG00000131650 |
| 16 | 2954975 | 2955182 | 2955078 | 9  | 11 | 3  | 3.519146518 | 0.00788869  | KREMEN2 | ENSG00000131650 |
| 16 | 2999693 | 3000255 | 3000007 | 16 | 34 | 12 | 3.158208414 | 7.02E-05    | CLDN9   | ENSG00000213937 |
| 16 | 3014056 | 3014413 | 3014234 | 10 | 15 | 6  | 2.68125449  | 0.0103552   | HCFC1R1 | ENSG00000103145 |
| 16 | 3090245 | 3090600 | 3090422 | 18 | 22 | 2  | 8.993374435 | 1.66E-06    | ZSCAN10 | ENSG00000130182 |
| 16 | 3102384 | 3102681 | 3102513 | 12 | 15 | 4  | 3.753756286 | 0.0020497   | ZNF205  | ENSG00000122386 |
| 16 | 3108200 | 3108404 | 3108302 | 9  | 9  | 1  | 5.865244197 | 0.00272497  | ZNF205  | ENSG00000122386 |
| 16 | 3114642 | 3114896 | 3114769 | 11 | 13 | 5  | 2.737113958 | 0.0137917   | ZNF213  | ENSG00000085644 |
| 16 | 3140498 | 3141102 | 3140673 | 17 | 32 | 6  | 5.530087385 | 7.11E-07    |         | ENSG00000209495 |
| 16 | 3142816 | 3143177 | 3142986 | 14 | 20 | 8  | 2.737113958 | 0.0036449   |         | ENSG00000209495 |
| 16 | 3147286 | 3147534 | 3147410 | 11 | 13 | 11 | 1.368556979 | 0.211388    |         | ENSG00000209495 |
| 16 | 3148690 | 3149094 | 3148918 | 10 | 18 | 7  | 2.785990993 | 0.00480525  |         | ENSG00000209495 |

|    |         |         |         |     |     |   |             |             |                         |
|----|---------|---------|---------|-----|-----|---|-------------|-------------|-------------------------|
| 16 | 3165600 | 3165860 | 3165691 | 9   | 11  | 8 | 1.564065119 | 0.151515    | ENSG00000209496         |
| 16 | 3181770 | 3182056 | 3181910 | 10  | 12  | 4 | 3.049926982 | 0.0108184   | ENSG00000209499         |
| 16 | 3225249 | 3225449 | 3225349 | 8   | 8   | 2 | 3.519146518 | 0.017558    | ZNF200 ENSG00000010539  |
| 16 | 3256996 | 3257213 | 3257104 | 8   | 8   | 6 | 1.508205651 | 0.203852    | MEFV ENSG00000103313    |
| 16 | 3273326 | 3273560 | 3273443 | 8   | 9   | 4 | 2.346097679 | 0.050148    | ZNF263 ENSG00000006194  |
| 16 | 3490789 | 3491024 | 3490886 | 12  | 15  | 2 | 6.256260476 | 0.000199274 | CLUAP1 ENSG00000103351  |
| 16 | 3503863 | 3504473 | 3504164 | 23  | 45  | 5 | 8.993374435 | 3.69E-11    | CLUAP1 ENSG00000103351  |
| 16 | 3636294 | 3636685 | 3636506 | 15  | 24  | 6 | 4.18946014  | 8.40E-05    | DNASE1 ENSG00000213918  |
| 16 | 3644371 | 3644557 | 3644464 | 10  | 10  | 3 | 3.225884308 | 0.0139466   | DNASE1 ENSG00000213918  |
| 16 | 3686945 | 3687136 | 3687040 | 8   | 8   | 1 | 5.278719777 | 0.00542188  | TRAP1 ENSG00000126602   |
| 16 | 3732994 | 3733173 | 3733083 | 8   | 8   | 1 | 5.278719777 | 0.00542188  | TRAP1 ENSG00000126602   |
| 16 | 3761586 | 3761765 | 3761675 | 8   | 8   | 4 | 2.111487911 | 0.0804809   | TRAP1 ENSG00000126602   |
| 16 | 3762442 | 3762643 | 3762542 | 8   | 8   | 1 | 5.278719777 | 0.00542188  | TRAP1 ENSG00000126602   |
| 16 | 3810174 | 3810400 | 3810275 | 9   | 10  | 2 | 4.301179077 | 0.00512919  | CREBBP ENSG00000005339  |
| 16 | 3973140 | 3973364 | 3973252 | 8   | 8   | 2 | 3.519146518 | 0.017558    | CREBBP ENSG00000005339  |
| 16 | 4011132 | 4011417 | 4011274 | 16  | 17  | 3 | 5.278719777 | 0.000205462 | ADCY9 ENSG00000162104   |
| 16 | 4130473 | 4131438 | 4130875 | 252 | 304 | 1 | 178.889948  | 2.59E-101   | ADCY9 ENSG00000162104   |
| 16 | 4132230 | 4132719 | 4132540 | 15  | 25  | 6 | 4.357038546 | 4.72E-05    | ADCY9 ENSG00000162104   |
| 16 | 4142174 | 4142756 | 4142472 | 28  | 42  | 3 | 12.61027502 | 8.12E-12    | ADCY9 ENSG00000162104   |
| 16 | 4190273 | 4190686 | 4190582 | 10  | 16  | 4 | 3.988366054 | 0.00115141  | SRL ENSG00000185739     |
| 16 | 4243894 | 4244296 | 4244179 | 11  | 18  | 7 | 2.785990993 | 0.00480525  | SRL ENSG00000185739     |
| 16 | 4278415 | 4278638 | 4278526 | 9   | 10  | 1 | 6.451768616 | 0.00135978  | TFAP4 ENSG00000090447   |
| 16 | 4283930 | 4284124 | 4284017 | 9   | 11  | 2 | 4.692195357 | 0.00272444  | GLIS2 ENSG00000126603   |
| 16 | 4365046 | 4365251 | 4365148 | 8   | 9   | 2 | 3.910162798 | 0.00955088  | VASN ENSG00000168140    |
| 16 | 4464637 | 4464846 | 4464685 | 8   | 9   | 1 | 5.865244197 | 0.00272497  | NMRAL1 ENSG00000153406  |
| 16 | 4603159 | 4603378 | 4603268 | 8   | 8   | 5 | 1.759573259 | 0.13508     | FAM100A ENSG00000153443 |
| 16 | 4604876 | 4605057 | 4604927 | 8   | 8   | 3 | 2.639359888 | 0.0415794   | FAM100A ENSG00000153443 |
| 16 | 4615856 | 4616212 | 4616034 | 33  | 39  | 1 | 23.46097679 | 7.43E-13    | MGRN1 ENSG00000102858   |
| 16 | 4758740 | 4759032 | 4758886 | 8   | 11  | 7 | 1.759573259 | 0.102361    | ZNF500 ENSG00000103199  |
| 16 | 4792008 | 4792222 | 4792080 | 8   | 9   | 4 | 2.346097679 | 0.050148    | ROGDI ENSG00000067836   |
| 16 | 4840391 | 4840581 | 4840539 | 8   | 8   | 1 | 5.278719777 | 0.00542188  | UBN1 ENSG00000118900    |
| 16 | 4887402 | 4887660 | 4887523 | 14  | 14  | 2 | 5.865244197 | 0.000387308 | PPL ENSG00000118898     |
| 16 | 4935551 | 4935896 | 4935723 | 8   | 13  | 1 | 8.211341875 | 0.000163445 | ENSG00000200980         |
| 16 | 5321328 | 5321643 | 5321469 | 15  | 20  | 1 | 12.31701281 | 1.03E-06    | ENSG00000215086         |

|    |          |          |          |    |    |    |             |             |          |                 |
|----|----------|----------|----------|----|----|----|-------------|-------------|----------|-----------------|
| 16 | 5395706  | 5396435  | 5395968  | 41 | 60 | 2  | 23.85199307 | 1.61E-18    |          | ENSG00000215086 |
| 16 | 8557752  | 8558050  | 8557901  | 14 | 14 | 2  | 5.865244197 | 0.000387308 | C16orf68 | ENSG00000067365 |
| 16 | 8680662  | 8680929  | 8680795  | 11 | 13 | 2  | 5.474227917 | 0.000747844 |          | ENSG00000222538 |
| 16 | 8869971  | 8870182  | 8870091  | 9  | 10 | 1  | 6.451768616 | 0.00135978  | CARHSP1  | ENSG00000153048 |
| 16 | 8913221  | 8913451  | 8913351  | 11 | 12 | 0  | 15.24963491 | 4.15E-05    | USP7     | ENSG00000187555 |
| 16 | 9049014  | 9049409  | 9049190  | 21 | 29 | 2  | 11.73048839 | 1.18E-08    |          | ENSG00000209566 |
| 16 | 9092415  | 9092658  | 9092543  | 11 | 11 | 2  | 4.692195357 | 0.00272444  | C16orf72 | ENSG00000182831 |
| 16 | 9161572  | 9161913  | 9161656  | 8  | 13 | 8  | 1.824742639 | 0.0744168   |          | ENSG00000220793 |
| 16 | 9276861  | 9277040  | 9276950  | 8  | 8  | 1  | 5.278719777 | 0.00542188  |          | ENSG00000220793 |
| 16 | 9366767  | 9367002  | 9366887  | 9  | 9  | 0  | 11.73048839 | 0.000425898 |          | ENSG00000200468 |
| 16 | 10370369 | 10370744 | 10370548 | 21 | 29 | 4  | 7.038293036 | 3.41E-07    | ATF7IP2  | ENSG00000166669 |
| 16 | 10387349 | 10387531 | 10387440 | 8  | 9  | 0  | 11.73048839 | 0.000425898 | ATF7IP2  | ENSG00000166669 |
| 16 | 10580113 | 10580335 | 10580224 | 8  | 9  | 4  | 2.346097679 | 0.050148    | EMP2     | ENSG00000213853 |
| 16 | 10595815 | 10596474 | 10596161 | 52 | 80 | 11 | 7.918079665 | 3.42E-17    | EMP2     | ENSG00000213853 |
| 16 | 10617747 | 10617970 | 10617809 | 8  | 11 | 5  | 2.346097679 | 0.0364013   | EMP2     | ENSG00000213853 |
| 16 | 10618575 | 10618963 | 10618754 | 15 | 24 | 5  | 4.887703497 | 2.90E-05    | EMP2     | ENSG00000213853 |
| 16 | 10629511 | 10629905 | 10629688 | 12 | 17 | 3  | 5.278719777 | 0.000205462 | EMP2     | ENSG00000213853 |
| 16 | 10825917 | 10826193 | 10826055 | 12 | 13 | 3  | 4.105670938 | 0.00243034  | FAM18A   | ENSG00000166676 |
| 16 | 10835649 | 10835956 | 10835805 | 20 | 21 | 1  | 12.90353723 | 4.95E-07    | FAM18A   | ENSG00000166676 |
| 16 | 10945700 | 10946078 | 10945875 | 9  | 14 | 3  | 4.398933147 | 0.00132748  | CLEC16A  | ENSG00000038532 |
| 16 | 10972910 | 10973196 | 10973060 | 12 | 13 | 6  | 2.346097679 | 0.0266147   | CLEC16A  | ENSG00000038532 |
| 16 | 11156780 | 11156988 | 11156884 | 8  | 11 | 2  | 4.692195357 | 0.00272444  | CLEC16A  | ENSG00000038532 |
| 16 | 11294683 | 11294956 | 11294810 | 12 | 14 | 4  | 3.519146518 | 0.00361132  |          | ENSG00000209625 |
| 16 | 11297998 | 11298194 | 11298118 | 8  | 8  | 1  | 5.278719777 | 0.00542188  |          | ENSG00000209625 |
| 16 | 11298208 | 11298521 | 11298364 | 9  | 13 | 3  | 4.105670938 | 0.00243034  |          | ENSG00000209625 |
| 16 | 11360797 | 11361190 | 11361011 | 15 | 23 | 3  | 7.038293036 | 4.15E-06    | C16orf75 | ENSG00000175643 |
| 16 | 11498635 | 11499218 | 11498913 | 43 | 59 | 7  | 8.797866295 | 7.67E-14    |          | ENSG00000188897 |
| 16 | 11563749 | 11564244 | 11563971 | 22 | 34 | 2  | 13.68556979 | 3.24E-10    |          | ENSG00000209636 |
| 16 | 11566896 | 11567220 | 11567052 | 10 | 14 | 1  | 8.797866295 | 8.00E-05    |          | ENSG00000209636 |
| 16 | 11585451 | 11585637 | 11585544 | 8  | 9  | 4  | 2.346097679 | 0.050148    | LITAF    | ENSG00000189067 |
| 16 | 11678273 | 11678545 | 11678384 | 10 | 11 | 2  | 4.692195357 | 0.00272444  | SNN      | ENSG00000184602 |
| 16 | 11917331 | 11917578 | 11917502 | 9  | 11 | 3  | 3.519146518 | 0.00788869  | GSPT1    | ENSG00000103342 |
| 16 | 11918076 | 11918288 | 11918124 | 8  | 10 | 5  | 2.150589539 | 0.0575848   | GSPT1    | ENSG00000103342 |
| 16 | 11995924 | 11996120 | 11996006 | 8  | 8  | 0  | 10.55743955 | 0.000925496 | RUNDC2A  | ENSG00000140660 |

|    |          |          |          |    |     |    |             |             |          |                 |
|----|----------|----------|----------|----|-----|----|-------------|-------------|----------|-----------------|
| 16 | 12196772 | 12196954 | 12196863 | 8  | 8   | 3  | 2.639359888 | 0.0415794   |          | ENSG00000205782 |
| 16 | 12290651 | 12290867 | 12290759 | 13 | 13  | 1  | 8.211341875 | 0.000163445 |          | ENSG00000205782 |
| 16 | 12341918 | 12342116 | 12342030 | 8  | 8   | 1  | 5.278719777 | 0.00542188  |          | ENSG00000205782 |
| 16 | 12539758 | 12540309 | 12540060 | 41 | 58  | 0  | 69.20988152 | 1.30E-20    | SNX29    | ENSG00000048471 |
| 16 | 12804782 | 12805201 | 12805027 | 8  | 17  | 4  | 4.222975822 | 0.000640773 |          | ENSG00000103381 |
| 16 | 12805232 | 12805484 | 12805358 | 9  | 11  | 1  | 7.038293036 | 0.000674435 |          | ENSG00000103381 |
| 16 | 12900890 | 12901275 | 12901096 | 14 | 22  | 7  | 3.372515413 | 0.000629223 |          | ENSG00000199474 |
| 16 | 12941516 | 12941802 | 12941659 | 11 | 14  | 2  | 5.865244197 | 0.000387308 |          | ENSG00000199474 |
| 16 | 13187340 | 13187535 | 13187437 | 9  | 9   | 1  | 5.865244197 | 0.00272497  |          | ENSG00000199474 |
| 16 | 13454453 | 13455193 | 13454896 | 79 | 106 | 0  | 125.5162258 | 8.58E-37    | ERCC4    | ENSG00000175595 |
| 16 | 13455299 | 13455554 | 13455417 | 9  | 10  | 4  | 2.580707446 | 0.0306059   | ERCC4    | ENSG00000175595 |
| 16 | 13709747 | 13710043 | 13709895 | 8  | 12  | 4  | 3.049926982 | 0.0108184   | ERCC4    | ENSG00000175595 |
| 16 | 13958757 | 13959175 | 13958966 | 9  | 17  | 1  | 10.55743955 | 9.18E-06    | ERCC4    | ENSG00000175595 |
| 16 | 13959214 | 13959512 | 13959367 | 12 | 14  | 5  | 2.932622098 | 0.00829617  | ERCC4    | ENSG00000175595 |
| 16 | 14098654 | 14098841 | 14098738 | 9  | 9   | 5  | 1.955081399 | 0.0892323   | MKL2     | ENSG00000186260 |
| 16 | 14308215 | 14308554 | 14308384 | 8  | 13  | 1  | 8.211341875 | 0.000163445 |          | ENSG00000199130 |
| 16 | 14310723 | 14311215 | 14310995 | 17 | 27  | 5  | 5.474227917 | 4.62E-06    |          | ENSG00000199130 |
| 16 | 14371695 | 14371922 | 14371808 | 9  | 10  | 2  | 4.301179077 | 0.00512919  |          | ENSG00000199130 |
| 16 | 14401895 | 14402155 | 14402024 | 10 | 12  | 2  | 5.083211637 | 0.00143337  |          | ENSG00000198388 |
| 16 | 14488234 | 14488633 | 14488413 | 26 | 42  | 46 | 1.073214896 | 0.370487    |          | ENSG00000212739 |
| 16 | 15057547 | 15057763 | 15057655 | 8  | 9   | 2  | 3.910162798 | 0.00955088  | NTAN1    | ENSG00000157045 |
| 16 | 15483728 | 15483918 | 15483823 | 10 | 10  | 1  | 6.451768616 | 0.00135978  | C16orf45 | ENSG00000166780 |
| 16 | 15592229 | 15592456 | 15592382 | 8  | 10  | 4  | 2.580707446 | 0.0306059   | KIAA0430 | ENSG00000166783 |
| 16 | 15645560 | 15645915 | 15645738 | 15 | 20  | 0  | 24.63402563 | 8.35E-08    |          | ENSG00000202641 |
| 16 | 15880436 | 15880652 | 15880544 | 9  | 9   | 1  | 5.865244197 | 0.00272497  |          | ENSG00000206778 |
| 16 | 16084535 | 16084714 | 16084669 | 9  | 9   | 2  | 3.910162798 | 0.00955088  | ABCC6    | ENSG00000091262 |
| 16 | 16150171 | 16150357 | 16150264 | 9  | 10  | 2  | 4.301179077 | 0.00512919  | ABCC6    | ENSG00000091262 |
| 16 | 16196323 | 16196633 | 16196488 | 13 | 16  | 1  | 9.970915134 | 1.89E-05    | ABCC6    | ENSG00000091262 |
| 16 | 16862854 | 16863460 | 16863187 | 53 | 83  | 4  | 19.7072205  | 1.00E-23    |          | ENSG00000205748 |
| 16 | 17236556 | 17236801 | 17236646 | 11 | 13  | 1  | 8.211341875 | 0.000163445 |          | ENSG00000205748 |
| 16 | 17256807 | 17257042 | 17256875 | 8  | 8   | 1  | 5.278719777 | 0.00542188  |          | ENSG00000205748 |
| 16 | 17305870 | 17306094 | 17305984 | 9  | 11  | 7  | 1.759573259 | 0.102361    | XYLT1    | ENSG00000103489 |
| 16 | 17314357 | 17314560 | 17314503 | 8  | 10  | 3  | 3.225884308 | 0.0139466   | XYLT1    | ENSG00000103489 |
| 16 | 17317268 | 17317594 | 17317434 | 9  | 14  | 1  | 8.797866295 | 8.00E-05    | XYLT1    | ENSG00000103489 |

|    |          |          |          |    |    |   |             |             |          |                 |
|----|----------|----------|----------|----|----|---|-------------|-------------|----------|-----------------|
| 16 | 17329043 | 17329227 | 17329147 | 8  | 8  | 3 | 2.639359888 | 0.0415794   | XYLT1    | ENSG00000103489 |
| 16 | 17557919 | 17558261 | 17558055 | 9  | 14 | 7 | 2.199466574 | 0.0303778   | XYLT1    | ENSG00000103489 |
| 16 | 17634440 | 17634915 | 17634641 | 23 | 34 | 7 | 5.132088672 | 6.85E-07    | XYLT1    | ENSG00000103489 |
| 16 | 17785518 | 17785760 | 17785599 | 16 | 17 | 1 | 10.55743955 | 9.18E-06    |          | ENSG00000221687 |
| 16 | 18011008 | 18011333 | 18011170 | 18 | 21 | 3 | 6.451768616 | 1.56E-05    |          | ENSG00000221687 |
| 16 | 18708971 | 18709400 | 18709255 | 9  | 16 | 2 | 6.647276756 | 0.000101928 | RPS15A   | ENSG00000134419 |
| 16 | 18719247 | 18719551 | 18719399 | 9  | 10 | 4 | 2.580707446 | 0.0306059   | ARL6IP1  | ENSG00000170540 |
| 16 | 18720319 | 18720908 | 18720670 | 18 | 33 | 5 | 6.647276756 | 1.04E-07    | ARL6IP1  | ENSG00000170540 |
| 16 | 18864961 | 18865202 | 18865135 | 8  | 9  | 7 | 1.466311049 | 0.20706     |          | ENSG00000157106 |
| 16 | 18902581 | 18902847 | 18902705 | 11 | 13 | 1 | 8.211341875 | 0.000163445 | TMC7     | ENSG00000170537 |
| 16 | 18917645 | 18917879 | 18917762 | 8  | 10 | 2 | 4.301179077 | 0.00512919  |          | ENSG00000207167 |
| 16 | 18991240 | 18991480 | 18991346 | 8  | 8  | 7 | 1.319679944 | 0.283403    | COQ7     | ENSG00000167186 |
| 16 | 19005445 | 19005860 | 19005652 | 16 | 24 | 5 | 4.887703497 | 2.90E-05    | COQ7     | ENSG00000167186 |
| 16 | 19029712 | 19030137 | 19029968 | 15 | 21 | 3 | 6.451768616 | 1.56E-05    | ITPRIPL2 | ENSG00000205730 |
| 16 | 19032454 | 19032832 | 19032576 | 9  | 15 | 1 | 9.384390715 | 3.90E-05    | ITPRIPL2 | ENSG00000205730 |
| 16 | 19035592 | 19035880 | 19035736 | 12 | 14 | 5 | 2.932622098 | 0.00829617  | ITPRIPL2 | ENSG00000205730 |
| 16 | 19054733 | 19055333 | 19055191 | 12 | 26 | 7 | 3.959039833 | 7.16E-05    | SYT17    | ENSG00000103528 |
| 16 | 19096026 | 19096227 | 19096067 | 9  | 9  | 1 | 5.865244197 | 0.00272497  | SYT17    | ENSG00000103528 |
| 16 | 19098812 | 19099017 | 19098891 | 9  | 11 | 3 | 3.519146518 | 0.00788869  | SYT17    | ENSG00000103528 |
| 16 | 19185874 | 19186164 | 19186007 | 9  | 12 | 0 | 15.24963491 | 4.15E-05    |          | ENSG00000188477 |
| 16 | 19329312 | 19329620 | 19329453 | 10 | 12 | 5 | 2.541605819 | 0.0225912   | TMC5     | ENSG00000103534 |
| 16 | 19365186 | 19365394 | 19365302 | 9  | 10 | 0 | 12.90353723 | 0.000195991 | TMC5     | ENSG00000103534 |
| 16 | 19382662 | 19382861 | 19382761 | 8  | 8  | 0 | 10.55743955 | 0.000925496 | TMC5     | ENSG00000103534 |
| 16 | 19421525 | 19421772 | 19421633 | 14 | 15 | 5 | 3.128130238 | 0.00492422  |          | ENSG00000222750 |
| 16 | 19444088 | 19444313 | 19444194 | 9  | 10 | 4 | 2.580707446 | 0.0306059   |          | ENSG00000103540 |
| 16 | 19635081 | 19635426 | 19635253 | 19 | 24 | 9 | 2.932622098 | 0.00106136  | IQCK     | ENSG00000174628 |
| 16 | 19637087 | 19637342 | 19637214 | 9  | 12 | 1 | 7.624817456 | 0.000332769 | C16orf88 | ENSG00000103550 |
| 16 | 19805206 | 19805516 | 19805358 | 13 | 17 | 8 | 2.346097679 | 0.0144542   | GPRC5B   | ENSG00000167191 |
| 16 | 19968708 | 19969008 | 19968858 | 15 | 19 | 8 | 2.606775198 | 0.00583935  | GPR139   | ENSG00000180269 |
| 16 | 19995294 | 19995532 | 19995448 | 9  | 9  | 1 | 5.865244197 | 0.00272497  | GPR139   | ENSG00000180269 |
| 16 | 20003500 | 20003785 | 20003642 | 12 | 16 | 1 | 9.970915134 | 1.89E-05    | GPR139   | ENSG00000180269 |
| 16 | 20102702 | 20102995 | 20102823 | 23 | 26 | 2 | 10.55743955 | 9.97E-08    | GPR139   | ENSG00000180269 |
| 16 | 20219288 | 20219530 | 20219405 | 10 | 11 | 2 | 4.692195357 | 0.00272444  | GP2      | ENSG00000169347 |
| 16 | 20594479 | 20594762 | 20594649 | 8  | 11 | 6 | 2.010940867 | 0.0640214   | ACSM1    | ENSG00000166743 |

|    |          |          |          |    |     |    |             |             |         |                 |
|----|----------|----------|----------|----|-----|----|-------------|-------------|---------|-----------------|
| 16 | 20725132 | 20725436 | 20725284 | 12 | 17  | 4  | 4.222975822 | 0.000640773 | EXOD1   | ENSG00000196678 |
| 16 | 20784437 | 20785160 | 20784747 | 89 | 133 | 1  | 78.59427223 | 4.99E-44    | DCUN1D3 | ENSG00000188215 |
| 16 | 20793741 | 20793959 | 20793818 | 8  | 9   | 3  | 2.932622098 | 0.0242899   | DCUN1D3 | ENSG00000188215 |
| 16 | 21091397 | 21091576 | 21091486 | 8  | 8   | 2  | 3.519146518 | 0.017558    | DNAH3   | ENSG00000158486 |
| 16 | 21135395 | 21135840 | 21135661 | 10 | 18  | 1  | 11.14396397 | 4.44E-06    | ZP2     | ENSG00000103310 |
| 16 | 21219285 | 21219801 | 21219507 | 13 | 30  | 13 | 2.597465287 | 0.000910385 |         | ENSG00000189149 |
| 16 | 21220082 | 21220367 | 21220240 | 12 | 13  | 1  | 8.211341875 | 0.000163445 |         | ENSG00000189149 |
| 16 | 21473742 | 21474034 | 21473885 | 14 | 16  | 5  | 3.323638378 | 0.00288759  |         | ENSG00000214873 |
| 16 | 21871871 | 21872281 | 21872105 | 8  | 15  | 6  | 2.68125449  | 0.0103552   | UQCRC2  | ENSG00000140740 |
| 16 | 21984053 | 21984368 | 21984191 | 11 | 15  | 2  | 6.256260476 | 0.000199274 | VWA3A   | ENSG00000175267 |
| 16 | 21989416 | 21989624 | 21989489 | 8  | 9   | 3  | 2.932622098 | 0.0242899   | VWA3A   | ENSG00000175267 |
| 16 | 22109320 | 22109622 | 22109458 | 8  | 9   | 4  | 2.346097679 | 0.050148    | EEF2K   | ENSG00000103319 |
| 16 | 22124766 | 22124995 | 22124873 | 11 | 11  | 4  | 2.815317214 | 0.0183428   | EEF2K   | ENSG00000103319 |
| 16 | 22151544 | 22151896 | 22151720 | 17 | 22  | 3  | 6.745030826 | 8.05E-06    | EEF2K   | ENSG00000103319 |
| 16 | 22215773 | 22216242 | 22216056 | 19 | 34  | 8  | 4.561856597 | 2.04E-06    | POLR3E  | ENSG00000058600 |
| 16 | 22217115 | 22217561 | 22217332 | 17 | 30  | 7  | 4.545564252 | 7.31E-06    | POLR3E  | ENSG00000058600 |
| 16 | 22240266 | 22240453 | 22240370 | 8  | 8   | 6  | 1.508205651 | 0.203852    | POLR3E  | ENSG00000058600 |
| 16 | 22287387 | 22287724 | 22287558 | 9  | 12  | 2  | 5.083211637 | 0.00143337  | CDR2    | ENSG00000140743 |
| 16 | 22293634 | 22293818 | 22293726 | 8  | 8   | 4  | 2.111487911 | 0.0804809   | CDR2    | ENSG00000140743 |
| 16 | 22599516 | 22599907 | 22599711 | 14 | 22  | 11 | 2.248343609 | 0.0090389   | HS3ST2  | ENSG00000122254 |
| 16 | 22817714 | 22818035 | 22817881 | 9  | 13  | 8  | 1.824742639 | 0.0744168   | HS3ST2  | ENSG00000122254 |
| 16 | 22998450 | 22998648 | 22998567 | 8  | 9   | 5  | 1.955081399 | 0.0892323   | USP31   | ENSG00000103404 |
| 16 | 23001074 | 23001420 | 23001247 | 24 | 29  | 5  | 5.865244197 | 1.33E-06    | USP31   | ENSG00000103404 |
| 16 | 23056831 | 23057018 | 23056897 | 8  | 9   | 1  | 5.865244197 | 0.00272497  | USP31   | ENSG00000103404 |
| 16 | 23068308 | 23068700 | 23068548 | 18 | 26  | 3  | 7.918079665 | 5.55E-07    | USP31   | ENSG00000103404 |
| 16 | 23068702 | 23068912 | 23068813 | 12 | 14  | 3  | 4.398933147 | 0.00132748  | USP31   | ENSG00000103404 |
| 16 | 23071640 | 23071954 | 23071797 | 9  | 13  | 7  | 2.052835469 | 0.046392    | USP31   | ENSG00000103404 |
| 16 | 23203385 | 23203849 | 23203691 | 13 | 22  | 7  | 3.372515413 | 0.000629223 | SCNN1B  | ENSG00000168447 |
| 16 | 23342314 | 23342643 | 23342479 | 15 | 18  | 10 | 2.026175268 | 0.0273052   |         | ENSG00000209795 |
| 16 | 23343403 | 23343789 | 23343574 | 10 | 16  | 3  | 4.985457567 | 0.000385643 |         | ENSG00000209795 |
| 16 | 23354276 | 23354602 | 23354429 | 12 | 16  | 9  | 1.994183027 | 0.0370915   |         | ENSG00000209795 |
| 16 | 23405463 | 23405722 | 23405592 | 11 | 13  | 3  | 4.105670938 | 0.00243034  | GGA2    | ENSG00000103365 |
| 16 | 23560119 | 23560521 | 23560298 | 11 | 18  | 2  | 7.429309316 | 2.63E-05    | DCTN5   | ENSG00000166847 |
| 16 | 23597407 | 23597639 | 23597545 | 11 | 13  | 0  | 16.42268375 | 1.91E-05    | PLK1    | ENSG00000166851 |

|    |          |          |          |     |     |    |             |             |          |                 |
|----|----------|----------|----------|-----|-----|----|-------------|-------------|----------|-----------------|
| 16 | 23628398 | 23628644 | 23628507 | 12  | 14  | 0  | 17.59573259 | 8.79E-06    | ERN2     | ENSG00000134398 |
| 16 | 23915435 | 23915799 | 23915596 | 9   | 14  | 6  | 2.513676084 | 0.016726    | PRKCB    | ENSG00000166501 |
| 16 | 23924956 | 23925194 | 23925039 | 10  | 11  | 3  | 3.519146518 | 0.00788869  | PRKCB    | ENSG00000166501 |
| 16 | 23929378 | 23929565 | 23929494 | 8   | 8   | 3  | 2.639359888 | 0.0415794   | PRKCB    | ENSG00000166501 |
| 16 | 23960970 | 23961183 | 23961076 | 14  | 14  | 2  | 5.865244197 | 0.000387308 | PRKCB    | ENSG00000166501 |
| 16 | 23976434 | 23976658 | 23976581 | 8   | 9   | 3  | 2.932622098 | 0.0242899   | CACNG3   | ENSG00000006116 |
| 16 | 24300529 | 24301136 | 24300832 | 36  | 59  | 5  | 11.73048839 | 2.43E-15    |          | ENSG00000201541 |
| 16 | 24458434 | 24458645 | 24458539 | 8   | 10  | 5  | 2.150589539 | 0.0575848   | RBBP6    | ENSG00000122257 |
| 16 | 24648021 | 24648506 | 24648286 | 14  | 23  | 5  | 4.692195357 | 5.29E-05    | TNRC6A   | ENSG00000090905 |
| 16 | 24753420 | 24753599 | 24753509 | 8   | 8   | 6  | 1.508205651 | 0.203852    | SLC5A11  | ENSG00000158865 |
| 16 | 24763378 | 24763588 | 24763519 | 8   | 9   | 1  | 5.865244197 | 0.00272497  | SLC5A11  | ENSG00000158865 |
| 16 | 24772737 | 24773118 | 24772882 | 10  | 15  | 12 | 1.443752418 | 0.160732    | SLC5A11  | ENSG00000158865 |
| 16 | 24863123 | 24863403 | 24863263 | 8   | 9   | 0  | 11.73048839 | 0.000425898 | ARHGAP17 | ENSG00000140750 |
| 16 | 24959529 | 24959711 | 24959680 | 8   | 10  | 4  | 2.580707446 | 0.0306059   | ARHGAP17 | ENSG00000140750 |
| 16 | 25025669 | 25026115 | 25025892 | 13  | 22  | 6  | 3.854303329 | 0.000260696 | LCMT1    | ENSG00000205629 |
| 16 | 25038465 | 25038751 | 25038574 | 14  | 18  | 7  | 2.785990993 | 0.00480525  | LCMT1    | ENSG00000205629 |
| 16 | 25152691 | 25152925 | 25152808 | 11  | 11  | 5  | 2.346097679 | 0.0364013   | AQP8     | ENSG00000103375 |
| 16 | 25176180 | 25176380 | 25176294 | 9   | 10  | 7  | 1.612942154 | 0.147335    | ZKSCAN2  | ENSG00000155592 |
| 16 | 25176851 | 25177411 | 25177104 | 13  | 26  | 5  | 5.278719777 | 8.57E-06    | ZKSCAN2  | ENSG00000155592 |
| 16 | 25472356 | 25472983 | 25472786 | 108 | 139 | 5  | 27.37113958 | 1.52E-40    | HS3ST4   | ENSG00000182601 |
| 16 | 25487790 | 25488290 | 25488040 | 43  | 59  | 2  | 23.46097679 | 3.38E-18    | HS3ST4   | ENSG00000182601 |
| 16 | 26941897 | 26942260 | 26942062 | 26  | 33  | 0  | 39.88366054 | 3.46E-12    |          | ENSG00000213704 |
| 16 | 27098464 | 27098643 | 27098553 | 8   | 8   | 1  | 5.278719777 | 0.00542188  | JMJD5    | ENSG00000155666 |
| 16 | 27122190 | 27122588 | 27122377 | 15  | 24  | 8  | 3.258468998 | 0.000499412 | JMJD5    | ENSG00000155666 |
| 16 | 27283599 | 27283842 | 27283720 | 8   | 11  | 5  | 2.346097679 | 0.0364013   | IL4R     | ENSG00000077238 |
| 16 | 27327610 | 27327909 | 27327759 | 26  | 28  | 2  | 11.33947211 | 2.41E-08    | IL21R    | ENSG00000103522 |
| 16 | 27333658 | 27333840 | 27333749 | 8   | 8   | 1  | 5.278719777 | 0.00542188  | IL21R    | ENSG00000103522 |
| 16 | 27524440 | 27524619 | 27524529 | 8   | 8   | 0  | 10.55743955 | 0.000925496 | KIAA0556 | ENSG00000047578 |
| 16 | 27558581 | 27558922 | 27558744 | 9   | 13  | 7  | 2.052835469 | 0.046392    |          | ENSG00000221528 |
| 16 | 27642419 | 27643308 | 27642978 | 70  | 141 | 5  | 27.76215586 | 3.45E-41    |          | ENSG00000201371 |
| 16 | 27714854 | 27715196 | 27715025 | 10  | 13  | 7  | 2.052835469 | 0.046392    |          | ENSG00000212382 |
| 16 | 27715709 | 27715969 | 27715839 | 13  | 14  | 1  | 8.797866295 | 8.00E-05    |          | ENSG00000212382 |
| 16 | 27816767 | 27817097 | 27816935 | 20  | 25  | 4  | 6.099853964 | 4.56E-06    | GSG1L    | ENSG00000169181 |
| 16 | 27839334 | 27839827 | 27839559 | 12  | 24  | 8  | 3.258468998 | 0.000499412 | GSG1L    | ENSG00000169181 |

|    |          |          |          |    |    |    |             |             |          |                 |
|----|----------|----------|----------|----|----|----|-------------|-------------|----------|-----------------|
| 16 | 27841410 | 27841611 | 27841510 | 10 | 10 | 2  | 4.301179077 | 0.00512919  | GSG1L    | ENSG00000169181 |
| 16 | 27912205 | 27912813 | 27912562 | 44 | 77 | 6  | 13.07111564 | 5.49E-20    |          | ENSG00000207266 |
| 16 | 28011770 | 28012012 | 28011855 | 9  | 9  | 8  | 1.303387599 | 0.281715    | GSG1L    | ENSG00000169181 |
| 16 | 28410761 | 28411063 | 28410912 | 11 | 14 | 8  | 1.955081399 | 0.0506438   | CLN3     | ENSG00000188603 |
| 16 | 28423983 | 28424182 | 28424082 | 9  | 10 | 1  | 6.451768616 | 0.00135978  | IL27     | ENSG00000197272 |
| 16 | 28455934 | 28456527 | 28456156 | 46 | 67 | 5  | 13.29455351 | 8.80E-18    |          | ENSG00000176046 |
| 16 | 28472557 | 28473047 | 28472898 | 15 | 25 | 4  | 6.099853964 | 4.56E-06    | CCDC101  | ENSG00000176476 |
| 16 | 28473111 | 28473301 | 28473206 | 8  | 9  | 3  | 2.932622098 | 0.0242899   | CCDC101  | ENSG00000176476 |
| 16 | 28742967 | 28743180 | 28743077 | 9  | 11 | 6  | 2.010940867 | 0.0640214   | ATXN2L   | ENSG00000168488 |
| 16 | 28764461 | 28764640 | 28764550 | 8  | 8  | 5  | 1.759573259 | 0.13508     | TUFM     | ENSG00000178952 |
| 16 | 28765108 | 28765448 | 28765278 | 15 | 20 | 2  | 8.211341875 | 6.65E-06    | TUFM     | ENSG00000178952 |
| 16 | 28782063 | 28782369 | 28782216 | 17 | 20 | 3  | 6.158506406 | 2.99E-05    | SH2B1    | ENSG00000178188 |
| 16 | 28798255 | 28798437 | 28798317 | 8  | 9  | 8  | 1.303387599 | 0.281715    | ATP2A1   | ENSG00000196296 |
| 16 | 28818818 | 28819186 | 28818997 | 12 | 19 | 0  | 23.46097679 | 1.81E-07    | ATP2A1   | ENSG00000196296 |
| 16 | 28819322 | 28819600 | 28819461 | 8  | 10 | 1  | 6.451768616 | 0.00135978  | ATP2A1   | ENSG00000196296 |
| 16 | 28864364 | 28864762 | 28864543 | 9  | 16 | 11 | 1.661819189 | 0.0853913   | NFATC2IP | ENSG00000176953 |
| 16 | 28869639 | 28869845 | 28869742 | 8  | 10 | 4  | 2.580707446 | 0.0306059   | NFATC2IP | ENSG00000176953 |
| 16 | 28893470 | 28893719 | 28893585 | 10 | 13 | 5  | 2.737113958 | 0.0137917   | SPNS1    | ENSG00000169682 |
| 16 | 29562167 | 29562435 | 29562301 | 13 | 15 | 0  | 18.76878143 | 4.04E-06    |          | ENSG00000217794 |
| 16 | 29597671 | 29598191 | 29597860 | 9  | 19 | 8  | 2.606775198 | 0.00583935  | QPRT     | ENSG00000103485 |
| 16 | 29637850 | 29638093 | 29637971 | 10 | 11 | 0  | 14.07658607 | 9.02E-05    |          | ENSG00000222375 |
| 16 | 29648147 | 29648391 | 29648269 | 9  | 11 | 5  | 2.346097679 | 0.0364013   |          | ENSG00000222375 |
| 16 | 29657412 | 29657751 | 29657605 | 21 | 25 | 6  | 4.357038546 | 4.72E-05    | C16orf54 | ENSG00000185905 |
| 16 | 29709158 | 29709646 | 29709389 | 11 | 21 | 10 | 2.346097679 | 0.00796926  | KIF22    | ENSG00000079616 |
| 16 | 29723892 | 29724523 | 29724360 | 15 | 29 | 15 | 2.199466574 | 0.00420562  | MAZ      | ENSG00000103495 |
| 16 | 29734650 | 29734976 | 29734813 | 15 | 20 | 5  | 4.105670938 | 0.000308509 | C16orf53 | ENSG00000185928 |
| 16 | 29782182 | 29782617 | 29782422 | 12 | 24 | 13 | 2.09473007  | 0.011141    |          | ENSG00000214725 |
| 16 | 29845132 | 29845365 | 29845215 | 11 | 13 | 6  | 2.346097679 | 0.0266147   | KCTD13   | ENSG00000174943 |
| 16 | 29892064 | 29892664 | 29892533 | 11 | 25 | 7  | 3.812408728 | 0.00012465  | TAOK2    | ENSG00000149930 |
| 16 | 29914201 | 29914461 | 29914301 | 8  | 11 | 4  | 2.815317214 | 0.0183428   | HIRIP3   | ENSG00000149929 |
| 16 | 29914754 | 29915231 | 29915052 | 11 | 20 | 8  | 2.737113958 | 0.0036449   | INO80E   | ENSG00000169592 |
| 16 | 29923688 | 29923950 | 29923823 | 8  | 8  | 5  | 1.759573259 | 0.13508     | DOC2A    | ENSG00000149927 |
| 16 | 29940107 | 29940707 | 29940532 | 10 | 22 | 6  | 3.854303329 | 0.000260696 |          | ENSG00000167194 |
| 16 | 29965179 | 29965375 | 29965287 | 9  | 11 | 8  | 1.564065119 | 0.151515    | ALDOA    | ENSG00000149925 |



|    |          |          |          |    |    |    |             |             |          |                 |
|----|----------|----------|----------|----|----|----|-------------|-------------|----------|-----------------|
| 16 | 29971755 | 29972046 | 29971914 | 10 | 13 | 9  | 1.642268375 | 0.111397    | ALDOA    | ENSG00000149925 |
| 16 | 29979889 | 29980098 | 29979993 | 10 | 11 | 8  | 1.564065119 | 0.151515    | ALDOA    | ENSG00000149925 |
| 16 | 29983939 | 29984736 | 29984217 | 12 | 31 | 14 | 2.502504191 | 0.00106817  | ALDOA    | ENSG00000149925 |
| 16 | 29994633 | 29994946 | 29994789 | 8  | 13 | 1  | 8.211341875 | 0.000163445 | PPP4C    | ENSG00000149923 |
| 16 | 30008690 | 30008958 | 30008806 | 9  | 9  | 3  | 2.932622098 | 0.0242899   | TBX6     | ENSG00000149922 |
| 16 | 30009982 | 30010183 | 30010082 | 8  | 8  | 4  | 2.111487911 | 0.0804809   | TBX6     | ENSG00000149922 |
| 16 | 30010592 | 30010845 | 30010718 | 8  | 10 | 0  | 12.90353723 | 0.000195991 | TBX6     | ENSG00000149922 |
| 16 | 30023350 | 30023633 | 30023491 | 16 | 18 | 4  | 4.457585589 | 0.000353565 | YPEL3    | ENSG00000090238 |
| 16 | 30103916 | 30104095 | 30103956 | 8  | 8  | 3  | 2.639359888 | 0.0415794   | CORO1A   | ENSG00000102879 |
| 16 | 30273959 | 30274356 | 30274066 | 9  | 15 | 11 | 1.564065119 | 0.11768     | CD2BP2   | ENSG00000169217 |
| 16 | 30278663 | 30278909 | 30278786 | 9  | 12 | 2  | 5.083211637 | 0.00143337  | TBC1D10B | ENSG00000169221 |
| 16 | 30347964 | 30348210 | 30348097 | 9  | 10 | 5  | 2.150589539 | 0.0575848   |          | ENSG00000179958 |
| 16 | 30348899 | 30349293 | 30349120 | 10 | 16 | 13 | 1.424416448 | 0.161813    |          | ENSG00000179958 |
| 16 | 30356286 | 30356465 | 30356347 | 8  | 8  | 1  | 5.278719777 | 0.00542188  |          | ENSG00000179958 |
| 16 | 30364490 | 30364980 | 30364820 | 14 | 23 | 9  | 2.815317214 | 0.00172056  | SEPHS2   | ENSG00000179918 |
| 16 | 30446189 | 30446581 | 30446402 | 8  | 16 | 8  | 2.215758919 | 0.0222902   | ZNF768   | ENSG00000169957 |
| 16 | 30446611 | 30446947 | 30446785 | 14 | 19 | 4  | 4.692195357 | 0.000193572 | ZNF768   | ENSG00000169957 |
| 16 | 30453561 | 30453894 | 30453719 | 9  | 14 | 0  | 17.59573259 | 8.79E-06    | ZNF747   | ENSG00000169955 |
| 16 | 30477103 | 30477450 | 30477276 | 11 | 17 | 8  | 2.346097679 | 0.0144542   | ZNF764   | ENSG00000169951 |
| 16 | 30490652 | 30491223 | 30490903 | 10 | 23 | 10 | 2.559379286 | 0.00330263  | ZNF785   | ENSG00000197162 |
| 16 | 30504412 | 30504733 | 30504572 | 11 | 15 | 9  | 1.876878143 | 0.0544542   | ZNF785   | ENSG00000197162 |
| 16 | 30529117 | 30529468 | 30529292 | 12 | 18 | 2  | 7.429309316 | 2.63E-05    | ZNF689   | ENSG00000156853 |
| 16 | 30547605 | 30547906 | 30547755 | 8  | 9  | 8  | 1.303387599 | 0.281715    | ZNF689   | ENSG00000156853 |
| 16 | 30553101 | 30553347 | 30553244 | 11 | 13 | 3  | 4.105670938 | 0.00243034  | PRR14    | ENSG00000156858 |
| 16 | 30569317 | 30569796 | 30569584 | 9  | 18 | 8  | 2.476436439 | 0.00924552  | PRR14    | ENSG00000156858 |
| 16 | 30576826 | 30577193 | 30576991 | 8  | 13 | 9  | 1.642268375 | 0.111397    | FBRS     | ENSG00000156860 |
| 16 | 30577361 | 30577964 | 30577580 | 13 | 28 | 9  | 3.401841634 | 0.000141067 | FBRS     | ENSG00000156860 |
| 16 | 30659161 | 30659495 | 30659338 | 19 | 22 | 8  | 2.997791478 | 0.00137524  | PHKG2    | ENSG00000156873 |
| 16 | 30680785 | 30680965 | 30680870 | 8  | 9  | 6  | 1.675784056 | 0.141978    |          | ENSG00000196118 |
| 16 | 30694238 | 30694455 | 30694346 | 12 | 14 | 5  | 2.932622098 | 0.00829617  | ZNF629   | ENSG00000102870 |
| 16 | 30724216 | 30724530 | 30724373 | 12 | 16 | 11 | 1.661819189 | 0.0853913   |          | ENSG00000183355 |
| 16 | 30732958 | 30733212 | 30733118 | 8  | 11 | 2  | 4.692195357 | 0.00272444  |          | ENSG00000183355 |
| 16 | 30775611 | 30775953 | 30775778 | 11 | 16 | 8  | 2.215758919 | 0.0222902   |          | ENSG00000183355 |
| 16 | 30793642 | 30793892 | 30793723 | 10 | 13 | 4  | 3.28453675  | 0.00629037  | CTF1     | ENSG00000150281 |

|    |          |          |          |    |    |    |             |             |           |                 |
|----|----------|----------|----------|----|----|----|-------------|-------------|-----------|-----------------|
| 16 | 30794112 | 30794420 | 30794266 | 8  | 12 | 6  | 2.178519273 | 0.0416567   | CTF1      | ENSG00000150281 |
| 16 | 30813692 | 30813883 | 30813787 | 9  | 9  | 7  | 1.466311049 | 0.20706     | BCL7C     | ENSG00000099385 |
| 16 | 30840500 | 30840925 | 30840679 | 10 | 19 | 8  | 2.606775198 | 0.00583935  |           | ENSG00000212972 |
| 16 | 30841198 | 30841628 | 30841449 | 18 | 29 | 12 | 2.707035783 | 0.000762953 |           | ENSG00000212972 |
| 16 | 30841849 | 30842042 | 30841945 | 8  | 9  | 3  | 2.932622098 | 0.0242899   |           | ENSG00000212972 |
| 16 | 30842129 | 30842427 | 30842265 | 13 | 16 | 2  | 6.647276756 | 0.000101928 |           | ENSG00000212972 |
| 16 | 30868710 | 30869372 | 30869134 | 35 | 56 | 11 | 5.571981987 | 1.27E-10    | ORAI3     | ENSG00000175938 |
| 16 | 30876066 | 30876455 | 30876234 | 11 | 18 | 3  | 5.571981987 | 0.000108726 | SETD1A    | ENSG00000099381 |
| 16 | 30904300 | 30904648 | 30904474 | 12 | 15 | 3  | 4.692195357 | 0.000718455 | HSD3B7    | ENSG00000099377 |
| 16 | 30921069 | 30921431 | 30921241 | 11 | 16 | 6  | 2.848832895 | 0.00632407  | STX1B     | ENSG00000099365 |
| 16 | 30992978 | 30993343 | 30993164 | 23 | 30 | 15 | 2.272782126 | 0.00282041  | ZNF646    | ENSG00000167395 |
| 16 | 31036383 | 31036617 | 31036500 | 8  | 10 | 3  | 3.225884308 | 0.0139466   | MYST1     | ENSG00000103510 |
| 16 | 31036875 | 31037176 | 31037028 | 14 | 16 | 1  | 9.970915134 | 1.89E-05    | MYST1     | ENSG00000103510 |
| 16 | 31049763 | 31050029 | 31049899 | 11 | 13 | 4  | 3.28453675  | 0.00629037  | PRSS8     | ENSG00000052344 |
| 16 | 31061061 | 31061490 | 31061320 | 11 | 17 | 2  | 7.038293036 | 5.19E-05    | PRSS8     | ENSG00000052344 |
| 16 | 31189155 | 31189484 | 31189350 | 11 | 15 | 0  | 18.76878143 | 4.04E-06    | ITGAM     | ENSG00000169896 |
| 16 | 31189676 | 31189881 | 31189778 | 8  | 9  | 2  | 3.910162798 | 0.00955088  | ITGAM     | ENSG00000169896 |
| 16 | 31192148 | 31192348 | 31192249 | 11 | 12 | 2  | 5.083211637 | 0.00143337  | ITGAM     | ENSG00000169896 |
| 16 | 31192449 | 31193033 | 31192763 | 71 | 98 | 3  | 29.03295877 | 1.18E-29    | ITGAM     | ENSG00000169896 |
| 16 | 31193868 | 31194050 | 31193924 | 10 | 11 | 1  | 7.038293036 | 0.000674435 | ITGAM     | ENSG00000169896 |
| 16 | 31301799 | 31301990 | 31301945 | 8  | 9  | 0  | 11.73048839 | 0.000425898 | ITGAD     | ENSG00000156886 |
| 16 | 31361871 | 31362182 | 31362026 | 17 | 19 | 5  | 3.910162798 | 0.000546977 | ZNF843    | ENSG00000176723 |
| 16 | 31370477 | 31370861 | 31370696 | 17 | 22 | 5  | 4.496687217 | 9.59E-05    | ARMC5     | ENSG00000140691 |
| 16 | 31395631 | 31395905 | 31395749 | 8  | 9  | 6  | 1.675784056 | 0.141978    | TGFB1I1   | ENSG00000140682 |
| 16 | 31411874 | 31412103 | 31411988 | 11 | 12 | 0  | 15.24963491 | 4.15E-05    | SLC5A2    | ENSG00000140675 |
| 16 | 31632091 | 31632309 | 31632161 | 8  | 9  | 2  | 3.910162798 | 0.00955088  | ZNF720    | ENSG00000197302 |
| 16 | 32440672 | 32440853 | 32440699 | 9  | 11 | 9  | 1.407658607 | 0.210479    |           | ENSG00000197605 |
| 16 | 32784232 | 32784462 | 32784347 | 12 | 13 | 0  | 16.42268375 | 1.91E-05    | IGHV2OR1C | ENSG00000214618 |
| 16 | 33526511 | 33526735 | 33526668 | 8  | 11 | 1  | 7.038293036 | 0.000674435 |           | ENSG00000185520 |
| 16 | 33796734 | 33797066 | 33796900 | 30 | 31 | 49 | 0.750751257 | 0.901516    |           | ENSG00000207986 |
| 16 | 33842763 | 33842954 | 33842858 | 8  | 8  | 2  | 3.519146518 | 0.017558    |           | ENSG00000207986 |
| 16 | 33857576 | 33858008 | 33857836 | 24 | 31 | 36 | 1.014528726 | 0.478595    |           | ENSG00000207986 |
| 16 | 33858575 | 33858803 | 33858689 | 12 | 13 | 19 | 0.821134188 | 0.720637    |           | ENSG00000207986 |
| 16 | 33860101 | 33860316 | 33860265 | 8  | 9  | 12 | 0.902345261 | 0.602772    |           | ENSG00000207986 |

|    |          |          |          |     |     |     |             |             |                        |
|----|----------|----------|----------|-----|-----|-----|-------------|-------------|------------------------|
| 16 | 33860422 | 33860911 | 33860727 | 38  | 57  | 65  | 1.030861101 | 0.434628    | ENSG00000207986        |
| 16 | 33863279 | 33863503 | 33863338 | 10  | 11  | 15  | 0.879786629 | 0.637414    | ENSG00000207986        |
| 16 | 33863753 | 33864273 | 33864042 | 23  | 45  | 15  | 3.372515413 | 2.88E-06    | ENSG00000207986        |
| 16 | 33864454 | 33865103 | 33864778 | 43  | 74  | 92  | 0.946007128 | 0.641693    | ENSG00000207986        |
| 16 | 33866565 | 33867145 | 33866744 | 26  | 48  | 57  | 0.991024019 | 0.520661    | ENSG00000207986        |
| 16 | 33868617 | 33868826 | 33868768 | 29  | 31  | 20  | 1.787502993 | 0.0176346   | ENSG00000207986        |
| 16 | 33869913 | 33871756 | 33870864 | 134 | 611 | 435 | 1.646573141 | 4.87E-16    | ENSG00000200002        |
| 16 | 33872299 | 33872618 | 33872458 | 22  | 22  | 21  | 1.226369241 | 0.247426    | ENSG00000200434        |
| 16 | 33872805 | 33873289 | 33872984 | 48  | 62  | 26  | 2.737113958 | 1.98E-06    | ENSG00000200434        |
| 16 | 33881683 | 33881963 | 33881833 | 13  | 14  | 14  | 1.173048839 | 0.332418    | ENSG00000200434        |
| 16 | 33930061 | 33930395 | 33930228 | 36  | 36  | 61  | 0.700045275 | 0.960051    | ENSG00000200434        |
| 16 | 34400509 | 34400818 | 34400663 | 12  | 16  | 1   | 9.970915134 | 1.89E-05    | ENSG00000221532        |
| 16 | 34618087 | 34618356 | 34618221 | 8   | 13  | 2   | 5.474227917 | 0.000747844 | ENSG00000213543        |
| 16 | 34651941 | 34652172 | 34652037 | 8   | 9   | 3   | 2.932622098 | 0.0242899   | ENSG00000213543        |
| 16 | 44944132 | 44944335 | 44944161 | 10  | 11  | 16  | 0.828034475 | 0.698553    | ENSG00000199448        |
| 16 | 44946020 | 44946200 | 44946059 | 8   | 10  | 14  | 0.860235815 | 0.65444     | ENSG00000199448        |
| 16 | 44949111 | 44949540 | 44949361 | 17  | 24  | 21  | 1.333010045 | 0.162162    | ENSG00000199448        |
| 16 | 44951930 | 44952124 | 44951961 | 12  | 12  | 16  | 0.897037348 | 0.621544    | ENSG00000199448        |
| 16 | 44985014 | 44985273 | 44985110 | 8   | 9   | 25  | 0.451172631 | 0.988793    | ENSG00000199448        |
| 16 | 46096076 | 46096416 | 46096246 | 27  | 30  | 17  | 2.020250779 | 0.0073882   | ENSG00000210173        |
| 16 | 46096669 | 46096856 | 46096705 | 9   | 9   | 7   | 1.466311049 | 0.20706     | ENSG00000210177        |
| 16 | 46646583 | 46646830 | 46646706 | 8   | 8   | 3   | 2.639359888 | 0.0415794   | ABCC12 ENSG00000140798 |
| 16 | 46756797 | 46757130 | 46756966 | 10  | 15  | 4   | 3.753756286 | 0.0020497   | ABCC12 ENSG00000140798 |
| 16 | 46975349 | 46975579 | 46975464 | 8   | 9   | 1   | 5.865244197 | 0.00272497  | SIAH1 ENSG00000196470  |
| 16 | 48856697 | 48856895 | 48856721 | 8   | 10  | 1   | 6.451768616 | 0.00135978  | ADCY7 ENSG00000121281  |
| 16 | 49260001 | 49260293 | 49260147 | 9   | 9   | 0   | 11.73048839 | 0.000425898 | SNX20 ENSG00000167208  |
| 16 | 49546901 | 49547155 | 49547050 | 8   | 10  | 1   | 6.451768616 | 0.00135978  | ENSG00000199771        |
| 16 | 49595302 | 49595548 | 49595425 | 16  | 16  | 1   | 9.970915134 | 1.89E-05    | ENSG00000199771        |
| 16 | 49904652 | 49904902 | 49904767 | 10  | 11  | 0   | 14.07658607 | 9.02E-05    | SALL1 ENSG00000103449  |
| 16 | 51633012 | 51633449 | 51633230 | 21  | 33  | 3   | 9.970915134 | 4.56E-09    | CHD9 ENSG00000177200   |
| 16 | 51643897 | 51644430 | 51644067 | 43  | 59  | 0   | 70.38293036 | 5.97E-21    | CHD9 ENSG00000177200   |
| 16 | 51646327 | 51646654 | 51646490 | 8   | 13  | 2   | 5.474227917 | 0.000747844 | CHD9 ENSG00000177200   |
| 16 | 51691000 | 51691340 | 51691170 | 12  | 17  | 9   | 2.111487911 | 0.0248715   | CHD9 ENSG00000177200   |
| 16 | 51969190 | 51969449 | 51969319 | 9   | 9   | 2   | 3.910162798 | 0.00955088  | ENSG00000202193        |

|    |          |          |          |    |    |   |             |             |          |                 |
|----|----------|----------|----------|----|----|---|-------------|-------------|----------|-----------------|
| 16 | 51969551 | 51969968 | 51969730 | 31 | 41 | 0 | 49.26805125 | 6.97E-15    |          | ENSG00000202193 |
| 16 | 52024996 | 52025393 | 52025161 | 16 | 21 | 0 | 25.80707446 | 3.84E-08    | RBL2     | ENSG00000103479 |
| 16 | 52041148 | 52041596 | 52041396 | 45 | 58 | 0 | 69.20988152 | 1.30E-20    | RBL2     | ENSG00000103479 |
| 16 | 52323901 | 52324274 | 52324019 | 11 | 16 | 6 | 2.848832895 | 0.00632407  | FTO      | ENSG00000140718 |
| 16 | 52364616 | 52364801 | 52364708 | 8  | 8  | 1 | 5.278719777 | 0.00542188  | FTO      | ENSG00000140718 |
| 16 | 52367592 | 52367872 | 52367732 | 9  | 11 | 3 | 3.519146518 | 0.00788869  | FTO      | ENSG00000140718 |
| 16 | 52540929 | 52541171 | 52541036 | 11 | 11 | 3 | 3.519146518 | 0.00788869  | FTO      | ENSG00000140718 |
| 16 | 52544729 | 52544952 | 52544840 | 8  | 9  | 0 | 11.73048839 | 0.000425898 | FTO      | ENSG00000140718 |
| 16 | 52763481 | 52763856 | 52763658 | 14 | 21 | 8 | 2.867452718 | 0.00225035  | FTO      | ENSG00000140718 |
| 16 | 52930541 | 52930889 | 52930715 | 11 | 15 | 2 | 6.256260476 | 0.000199274 | IRX3     | ENSG00000177508 |
| 16 | 52999136 | 52999380 | 52999251 | 14 | 16 | 1 | 9.970915134 | 1.89E-05    | IRX3     | ENSG00000177508 |
| 16 | 53014073 | 53014334 | 53014203 | 9  | 11 | 1 | 7.038293036 | 0.000674435 | IRX3     | ENSG00000177508 |
| 16 | 53080858 | 53081086 | 53080956 | 8  | 8  | 0 | 10.55743955 | 0.000925496 | IRX3     | ENSG00000177508 |
| 16 | 54962386 | 54962584 | 54962464 | 9  | 9  | 4 | 2.346097679 | 0.050148    | AMFR     | ENSG00000159461 |
| 16 | 54963675 | 54963913 | 54963802 | 9  | 12 | 2 | 5.083211637 | 0.00143337  | AMFR     | ENSG00000159461 |
| 16 | 54964385 | 54964596 | 54964463 | 8  | 8  | 1 | 5.278719777 | 0.00542188  | AMFR     | ENSG00000159461 |
| 16 | 55241303 | 55241514 | 55241390 | 9  | 9  | 0 | 11.73048839 | 0.000425898 | MT1CP    | ENSG00000205360 |
| 16 | 55452614 | 55452807 | 55452731 | 9  | 11 | 2 | 4.692195357 | 0.00272444  |          | ENSG00000207649 |
| 16 | 56009413 | 56009692 | 56009552 | 10 | 12 | 2 | 5.083211637 | 0.00143337  | CCL17    | ENSG00000102970 |
| 16 | 56038754 | 56038950 | 56038867 | 8  | 9  | 1 | 5.865244197 | 0.00272497  | CIAPIN1  | ENSG00000005194 |
| 16 | 56075507 | 56075698 | 56075602 | 10 | 10 | 1 | 6.451768616 | 0.00135978  | DOK4     | ENSG00000125170 |
| 16 | 56210982 | 56211175 | 56211078 | 9  | 9  | 3 | 2.932622098 | 0.0242899   | GPR56    | ENSG00000205336 |
| 16 | 56720859 | 56721283 | 56721038 | 8  | 16 | 1 | 9.970915134 | 1.89E-05    | C16orf80 | ENSG00000070761 |
| 16 | 57244201 | 57244509 | 57244355 | 10 | 14 | 4 | 3.519146518 | 0.00361132  | CNOT1    | ENSG00000125107 |
| 16 | 57252707 | 57252912 | 57252809 | 8  | 9  | 2 | 3.910162798 | 0.00955088  | SLC38A7  | ENSG00000103042 |
| 16 | 57325629 | 57325898 | 57325759 | 9  | 13 | 0 | 16.42268375 | 1.91E-05    | GOT2     | ENSG00000125166 |
| 16 | 58580078 | 58580440 | 58580237 | 14 | 19 | 1 | 11.73048839 | 2.14E-06    |          | ENSG00000200911 |
| 16 | 61445418 | 61445678 | 61445548 | 8  | 10 | 0 | 12.90353723 | 0.000195991 |          | ENSG00000223123 |
| 16 | 63029126 | 63029316 | 63029221 | 8  | 8  | 0 | 10.55743955 | 0.000925496 |          |                 |
| 16 | 63691044 | 63691298 | 63691171 | 10 | 11 | 0 | 14.07658607 | 9.02E-05    | CDH11    | ENSG00000140937 |
| 16 | 64347775 | 64348014 | 64347894 | 11 | 11 | 0 | 14.07658607 | 9.02E-05    |          |                 |
| 16 | 64360445 | 64360884 | 64360699 | 62 | 80 | 0 | 95.01695598 | 4.98E-28    |          |                 |
| 16 | 64362268 | 64362678 | 64362402 | 18 | 23 | 0 | 28.15317214 | 8.13E-09    |          |                 |
| 16 | 64779491 | 64779684 | 64779587 | 8  | 8  | 1 | 5.278719777 | 0.00542188  |          | ENSG00000201999 |

|    |          |          |          |    |    |   |             |             |                 |                 |
|----|----------|----------|----------|----|----|---|-------------|-------------|-----------------|-----------------|
| 16 | 64918295 | 64918577 | 64918465 | 8  | 11 | 0 | 14.07658607 | 9.02E-05    | ENSG00000201999 |                 |
| 16 | 65099573 | 65099762 | 65099667 | 10 | 11 | 2 | 4.692195357 | 0.00272444  | ENSG00000166546 |                 |
| 16 | 65519086 | 65519710 | 65519488 | 40 | 62 | 4 | 14.78041538 | 4.00E-17    | RRAD            | ENSG00000166592 |
| 16 | 65996159 | 65996406 | 65996282 | 16 | 18 | 1 | 11.14396397 | 4.44E-06    | TPPP3           | ENSG00000159713 |
| 16 | 66000791 | 66001235 | 66000926 | 13 | 19 | 1 | 11.73048839 | 2.14E-06    | ZDHC1           | ENSG00000159714 |
| 16 | 66019650 | 66019871 | 66019781 | 8  | 9  | 4 | 2.346097679 | 0.050148    | HSD11B2         | ENSG00000176387 |
| 16 | 66072401 | 66072714 | 66072557 | 8  | 12 | 3 | 3.812408728 | 0.004404    |                 | ENSG00000214430 |
| 16 | 66112560 | 66112749 | 66112689 | 8  | 9  | 2 | 3.910162798 | 0.00955088  | FAM65A          | ENSG00000039523 |
| 16 | 66135856 | 66136190 | 66136023 | 16 | 20 | 0 | 24.63402563 | 8.35E-08    | FAM65A          | ENSG00000039523 |
| 16 | 66267960 | 66268274 | 66268117 | 14 | 18 | 0 | 22.28792795 | 3.94E-07    | C16orf86        | ENSG00000159761 |
| 16 | 66310885 | 66311064 | 66310974 | 8  | 8  | 4 | 2.111487911 | 0.0804809   | GFOD2           | ENSG00000141098 |
| 16 | 66397961 | 66398243 | 66398092 | 10 | 12 | 0 | 15.24963491 | 4.15E-05    | RANBP10         | ENSG00000141084 |
| 16 | 66407908 | 66408329 | 66408150 | 11 | 19 | 5 | 3.910162798 | 0.000546977 | TSNAXIP1        | ENSG00000102904 |
| 16 | 66438122 | 66438357 | 66438204 | 8  | 10 | 1 | 6.451768616 | 0.00135978  | NUTF2           | ENSG00000102898 |
| 16 | 66464321 | 66464541 | 66464431 | 10 | 10 | 1 | 6.451768616 | 0.00135978  | EDC4            | ENSG00000038358 |
| 16 | 66539579 | 66539860 | 66539719 | 9  | 14 | 0 | 17.59573259 | 8.79E-06    | LCAT            | ENSG00000213398 |
| 16 | 66552874 | 66553532 | 66553222 | 14 | 33 | 3 | 9.970915134 | 4.56E-09    | SLC12A4         | ENSG00000124067 |
| 16 | 66557508 | 66558176 | 66557733 | 69 | 93 | 3 | 27.56664772 | 4.93E-28    | SLC12A4         | ENSG00000124067 |
| 16 | 66614434 | 66614782 | 66614608 | 14 | 18 | 2 | 7.429309316 | 2.63E-05    | DUS2L           | ENSG00000167264 |
| 16 | 66656173 | 66656371 | 66656272 | 10 | 11 | 1 | 7.038293036 | 0.000674435 |                 | ENSG00000221789 |
| 16 | 66683035 | 66683481 | 66683239 | 58 | 70 | 6 | 11.8980668  | 7.38E-18    |                 | ENSG00000201850 |
| 16 | 66825450 | 66825984 | 66825699 | 16 | 30 | 6 | 5.194930574 | 2.42E-06    | RBM35B          | ENSG00000103067 |
| 16 | 66829014 | 66829432 | 66829193 | 8  | 15 | 6 | 2.68125449  | 0.0103552   | RBM35B          | ENSG00000103067 |
| 16 | 66836412 | 66836882 | 66836591 | 12 | 20 | 1 | 12.31701281 | 1.03E-06    | PLA2G15         | ENSG00000103066 |
| 16 | 66867108 | 66867422 | 66867259 | 19 | 22 | 2 | 8.993374435 | 1.66E-06    |                 | ENSG00000210531 |
| 16 | 66879422 | 66879601 | 66879511 | 8  | 8  | 0 | 10.55743955 | 0.000925496 |                 | ENSG00000210531 |
| 16 | 66920067 | 66920325 | 66920179 | 9  | 10 | 6 | 1.843362462 | 0.0964212   |                 | ENSG00000222177 |
| 16 | 66969157 | 66969423 | 66969290 | 9  | 11 | 5 | 2.346097679 | 0.0364013   |                 | ENSG00000214388 |
| 16 | 66973722 | 66974042 | 66973864 | 9  | 12 | 2 | 5.083211637 | 0.00143337  |                 | ENSG00000214388 |
| 16 | 66984778 | 66985101 | 66984948 | 13 | 15 | 1 | 9.384390715 | 3.90E-05    |                 | ENSG00000214388 |
| 16 | 67007871 | 67008070 | 67007970 | 8  | 9  | 6 | 1.675784056 | 0.141978    | SMPD3           | ENSG00000103056 |
| 16 | 67112074 | 67112472 | 67112205 | 9  | 16 | 1 | 9.970915134 | 1.89E-05    |                 | ENSG00000201164 |
| 16 | 67120077 | 67120438 | 67120266 | 16 | 22 | 5 | 4.496687217 | 9.59E-05    |                 | ENSG00000201164 |
| 16 | 67149648 | 67149980 | 67149836 | 12 | 16 | 3 | 4.985457567 | 0.000385643 | ZFP90           | ENSG00000184939 |

|    |          |          |          |    |     |    |             |             |         |                 |
|----|----------|----------|----------|----|-----|----|-------------|-------------|---------|-----------------|
| 16 | 67170658 | 67170850 | 67170761 | 8  | 8   | 0  | 10.55743955 | 0.000925496 | ZFP90   | ENSG00000184939 |
| 16 | 67236351 | 67236569 | 67236502 | 8  | 10  | 1  | 6.451768616 | 0.00135978  | CDH3    | ENSG00000062038 |
| 16 | 67249614 | 67249982 | 67249803 | 10 | 15  | 4  | 3.753756286 | 0.0020497   | CDH3    | ENSG00000062038 |
| 16 | 67295778 | 67296029 | 67295903 | 8  | 10  | 3  | 3.225884308 | 0.0139466   | CDH1    | ENSG00000039068 |
| 16 | 67323583 | 67323794 | 67323652 | 8  | 9   | 4  | 2.346097679 | 0.050148    | CDH1    | ENSG00000039068 |
| 16 | 67329893 | 67330072 | 67329972 | 8  | 9   | 1  | 5.865244197 | 0.00272497  | CDH1    | ENSG00000039068 |
| 16 | 67336199 | 67336493 | 67336331 | 22 | 24  | 9  | 2.932622098 | 0.00106136  |         | ENSG00000200558 |
| 16 | 67390033 | 67390221 | 67390127 | 8  | 9   | 1  | 5.865244197 | 0.00272497  | TMCO7   | ENSG00000103047 |
| 16 | 67391834 | 67392051 | 67391942 | 8  | 9   | 2  | 3.910162798 | 0.00955088  | TMCO7   | ENSG00000103047 |
| 16 | 67493958 | 67494151 | 67494018 | 9  | 10  | 0  | 12.90353723 | 0.000195991 |         | ENSG00000199979 |
| 16 | 67528055 | 67528678 | 67528365 | 85 | 136 | 4  | 32.1415382  | 9.11E-41    |         | ENSG00000203389 |
| 16 | 67550526 | 67550739 | 67550632 | 8  | 10  | 3  | 3.225884308 | 0.0139466   |         | ENSG00000203389 |
| 16 | 67741631 | 67741810 | 67741720 | 8  | 8   | 5  | 1.759573259 | 0.13508     | CIRH1A  | ENSG00000141076 |
| 16 | 67778298 | 67778623 | 67778460 | 9  | 13  | 7  | 2.052835469 | 0.046392    | SNTB2   | ENSG00000168807 |
| 16 | 67779479 | 67779699 | 67779589 | 11 | 11  | 1  | 7.038293036 | 0.000674435 | SNTB2   | ENSG00000168807 |
| 16 | 68086428 | 68086621 | 68086524 | 8  | 8   | 3  | 2.639359888 | 0.0415794   | NFAT5   | ENSG00000102908 |
| 16 | 68300881 | 68301116 | 68300998 | 8  | 9   | 2  | 3.910162798 | 0.00955088  |         | ENSG00000210650 |
| 16 | 68880871 | 68881092 | 68881010 | 11 | 14  | 0  | 17.59573259 | 8.79E-06    | AARS    | ENSG00000090861 |
| 16 | 68972207 | 68972499 | 68972353 | 9  | 12  | 2  | 5.083211637 | 0.00143337  | ST3GAL2 | ENSG00000157350 |
| 16 | 69030616 | 69030974 | 69030795 | 9  | 15  | 2  | 6.256260476 | 0.000199274 | ST3GAL2 | ENSG00000157350 |
| 16 | 69153080 | 69153352 | 69153214 | 9  | 12  | 7  | 1.906204364 | 0.0695918   |         | ENSG00000221066 |
| 16 | 69288277 | 69288826 | 69288569 | 14 | 29  | 7  | 4.398933147 | 1.30E-05    |         | ENSG00000177242 |
| 16 | 69298564 | 69298827 | 69298731 | 12 | 15  | 5  | 3.128130238 | 0.00492422  |         | ENSG00000177242 |
| 16 | 69305183 | 69305464 | 69305323 | 9  | 10  | 5  | 2.150589539 | 0.0575848   |         | ENSG00000177242 |
| 16 | 69306530 | 69306884 | 69306707 | 17 | 23  | 3  | 7.038293036 | 4.15E-06    |         | ENSG00000177242 |
| 16 | 69370436 | 69370720 | 69370547 | 11 | 14  | 7  | 2.199466574 | 0.0303778   | VAC14   | ENSG00000103043 |
| 16 | 69467960 | 69468209 | 69468071 | 11 | 11  | 14 | 0.938439071 | 0.570297    |         | ENSG00000223316 |
| 16 | 69530887 | 69531095 | 69530991 | 9  | 10  | 7  | 1.612942154 | 0.147335    | HYDIN2  | ENSG00000157423 |
| 16 | 69550978 | 69551181 | 69551079 | 9  | 11  | 5  | 2.346097679 | 0.0364013   | HYDIN2  | ENSG00000157423 |
| 16 | 69559568 | 69559830 | 69559699 | 11 | 12  | 9  | 1.524963491 | 0.154777    | HYDIN2  | ENSG00000157423 |
| 16 | 69581252 | 69581459 | 69581355 | 9  | 10  | 4  | 2.580707446 | 0.0306059   | HYDIN2  | ENSG00000157423 |
| 16 | 69591146 | 69591491 | 69591318 | 14 | 20  | 26 | 0.912371319 | 0.627883    | HYDIN2  | ENSG00000157423 |
| 16 | 69610455 | 69610931 | 69610634 | 20 | 34  | 23 | 1.710696224 | 0.0199099   | HYDIN2  | ENSG00000157423 |
| 16 | 69616043 | 69616308 | 69616175 | 8  | 11  | 9  | 1.407658607 | 0.210479    | HYDIN2  | ENSG00000157423 |

|    |          |          |          |    |    |    |             |             |          |                 |
|----|----------|----------|----------|----|----|----|-------------|-------------|----------|-----------------|
| 16 | 69620595 | 69620802 | 69620666 | 8  | 8  | 2  | 3.519146518 | 0.017558    | HYDIN2   | ENSG00000157423 |
| 16 | 69629310 | 69629739 | 69629560 | 10 | 20 | 14 | 1.642268375 | 0.06827     | HYDIN2   | ENSG00000157423 |
| 16 | 69636349 | 69636626 | 69636458 | 9  | 12 | 6  | 2.178519273 | 0.0416567   | HYDIN2   | ENSG00000157423 |
| 16 | 69637687 | 69637919 | 69637837 | 8  | 8  | 6  | 1.508205651 | 0.203852    | HYDIN2   | ENSG00000157423 |
| 16 | 69659868 | 69660086 | 69659977 | 8  | 9  | 4  | 2.346097679 | 0.050148    | HYDIN2   | ENSG00000157423 |
| 16 | 69725906 | 69726547 | 69726085 | 26 | 45 | 16 | 3.174132153 | 6.18E-06    | HYDIN2   | ENSG00000157423 |
| 16 | 69734440 | 69734704 | 69734575 | 10 | 12 | 3  | 3.812408728 | 0.004404    | HYDIN2   | ENSG00000157423 |
| 16 | 69757052 | 69757644 | 69757465 | 20 | 39 | 10 | 4.265632143 | 8.90E-07    | HYDIN2   | ENSG00000157423 |
| 16 | 69757757 | 69758004 | 69757851 | 12 | 13 | 4  | 3.28453675  | 0.00629037  | HYDIN2   | ENSG00000157423 |
| 16 | 69881091 | 69881365 | 69881228 | 9  | 10 | 3  | 3.225884308 | 0.0139466   | FTSJD1   | ENSG00000180917 |
| 16 | 69903018 | 69903258 | 69903153 | 8  | 11 | 5  | 2.346097679 | 0.0364013   |          | ENSG00000221237 |
| 16 | 70003568 | 70003750 | 70003656 | 8  | 8  | 2  | 3.519146518 | 0.017558    | ZNF23    | ENSG00000167377 |
| 16 | 70053398 | 70053723 | 70053560 | 11 | 15 | 4  | 3.753756286 | 0.0020497   | ZNF23    | ENSG00000167377 |
| 16 | 70059240 | 70059437 | 70059338 | 8  | 9  | 2  | 3.910162798 | 0.00955088  | ZNF23    | ENSG00000167377 |
| 16 | 70129142 | 70129378 | 70129260 | 14 | 14 | 10 | 1.599612054 | 0.114822    | CHST4    | ENSG00000140835 |
| 16 | 70156849 | 70157274 | 70157123 | 8  | 16 | 7  | 2.492728784 | 0.0124193   | TAT      | ENSG00000198650 |
| 16 | 70185626 | 70185810 | 70185718 | 8  | 8  | 2  | 3.519146518 | 0.017558    | TAT      | ENSG00000198650 |
| 16 | 70202414 | 70202660 | 70202549 | 9  | 10 | 2  | 4.301179077 | 0.00512919  | MARVELD3 | ENSG00000140832 |
| 16 | 70203013 | 70203234 | 70203123 | 8  | 8  | 4  | 2.111487911 | 0.0804809   | MARVELD3 | ENSG00000140832 |
| 16 | 70217498 | 70217701 | 70217669 | 10 | 11 | 1  | 7.038293036 | 0.000674435 | MARVELD3 | ENSG00000140832 |
| 16 | 70222169 | 70222505 | 70222338 | 13 | 17 | 3  | 5.278719777 | 0.000205462 | MARVELD3 | ENSG00000140832 |
| 16 | 70235237 | 70235449 | 70235391 | 11 | 13 | 4  | 3.28453675  | 0.00629037  | MARVELD3 | ENSG00000140832 |
| 16 | 70237017 | 70237203 | 70237110 | 8  | 8  | 5  | 1.759573259 | 0.13508     | MARVELD3 | ENSG00000140832 |
| 16 | 70400283 | 70400624 | 70400478 | 12 | 16 | 13 | 1.424416448 | 0.161813    | AP1G1    | ENSG00000166747 |
| 16 | 70437162 | 70437454 | 70437287 | 14 | 18 | 6  | 3.183989707 | 0.00227432  | AP1G1    | ENSG00000166747 |
| 16 | 70486537 | 70487090 | 70486708 | 13 | 24 | 6  | 4.18946014  | 8.40E-05    | KIAA0174 | ENSG00000182149 |
| 16 | 70487328 | 70487542 | 70487421 | 9  | 10 | 4  | 2.580707446 | 0.0306059   | KIAA0174 | ENSG00000182149 |
| 16 | 70520482 | 70520761 | 70520621 | 12 | 12 | 5  | 2.541605819 | 0.0225912   | KIAA0174 | ENSG00000182149 |
| 16 | 70552933 | 70553119 | 70553024 | 10 | 10 | 7  | 1.612942154 | 0.147335    | PKD1L3   | ENSG00000187008 |
| 16 | 70599812 | 70600106 | 70599931 | 8  | 13 | 2  | 5.474227917 | 0.000747844 | DHODH    | ENSG00000102967 |
| 16 | 70600232 | 70600469 | 70600359 | 8  | 9  | 2  | 3.910162798 | 0.00955088  | DHODH    | ENSG00000102967 |
| 16 | 70684840 | 70685406 | 70685301 | 11 | 21 | 10 | 2.346097679 | 0.00796926  | DHX38    | ENSG00000140829 |
| 16 | 70685457 | 70685703 | 70685580 | 8  | 11 | 6  | 2.010940867 | 0.0640214   | DHX38    | ENSG00000140829 |
| 16 | 70716425 | 70716617 | 70716521 | 8  | 8  | 3  | 2.639359888 | 0.0415794   | DHX38    | ENSG00000140829 |

|    |          |          |          |    |     |    |             |             |          |                 |
|----|----------|----------|----------|----|-----|----|-------------|-------------|----------|-----------------|
| 16 | 71058632 | 71058824 | 71058728 | 8  | 8   | 4  | 2.111487911 | 0.0804809   |          | ENSG00000207514 |
| 16 | 71226608 | 71226800 | 71226704 | 9  | 10  | 0  | 12.90353723 | 0.000195991 |          | ENSG00000221286 |
| 16 | 71256562 | 71256891 | 71256736 | 8  | 13  | 7  | 2.052835469 | 0.046392    |          | ENSG00000221286 |
| 16 | 71362604 | 71362796 | 71362681 | 9  | 9   | 0  | 11.73048839 | 0.000425898 |          | ENSG00000221286 |
| 16 | 71423987 | 71424295 | 71424107 | 10 | 15  | 5  | 3.128130238 | 0.00492422  |          | ENSG00000221799 |
| 16 | 71440099 | 71440278 | 71440221 | 8  | 8   | 4  | 2.111487911 | 0.0804809   |          | ENSG00000221799 |
| 16 | 71520945 | 71521209 | 71521062 | 9  | 10  | 3  | 3.225884308 | 0.0139466   |          | ENSG00000221799 |
| 16 | 71544345 | 71544919 | 71544714 | 11 | 25  | 10 | 2.772660893 | 0.00131329  |          | ENSG00000221799 |
| 16 | 71575409 | 71575704 | 71575556 | 22 | 23  | 5  | 4.692195357 | 5.29E-05    |          | ENSG00000221799 |
| 16 | 71578934 | 71579370 | 71579195 | 16 | 25  | 4  | 6.099853964 | 4.56E-06    |          | ENSG00000221799 |
| 16 | 71584710 | 71584893 | 71584789 | 9  | 9   | 4  | 2.346097679 | 0.050148    |          | ENSG00000221799 |
| 16 | 71588097 | 71588325 | 71588211 | 12 | 14  | 11 | 1.466311049 | 0.15926     |          | ENSG00000221799 |
| 16 | 71588401 | 71588980 | 71588628 | 23 | 40  | 14 | 3.206333494 | 1.62E-05    |          | ENSG00000221799 |
| 16 | 71590756 | 71590971 | 71590863 | 13 | 13  | 4  | 3.28453675  | 0.00629037  |          | ENSG00000221799 |
| 16 | 71607033 | 71607293 | 71607149 | 16 | 18  | 6  | 3.183989707 | 0.00227432  |          | ENSG00000221799 |
| 16 | 71631387 | 71631983 | 71631823 | 17 | 31  | 2  | 12.51252095 | 2.82E-09    | ZFH3     | ENSG00000140836 |
| 16 | 71638994 | 71639181 | 71639087 | 8  | 8   | 4  | 2.111487911 | 0.0804809   | ZFH3     | ENSG00000140836 |
| 16 | 71645107 | 71645452 | 71645283 | 8  | 11  | 2  | 4.692195357 | 0.00272444  | ZFH3     | ENSG00000140836 |
| 16 | 71646161 | 71646932 | 71646605 | 15 | 34  | 4  | 8.211341875 | 1.23E-08    | ZFH3     | ENSG00000140836 |
| 16 | 71661793 | 71662318 | 71662139 | 10 | 22  | 6  | 3.854303329 | 0.000260696 | ZFH3     | ENSG00000140836 |
| 16 | 71762258 | 71762500 | 71762379 | 9  | 10  | 8  | 1.433726359 | 0.209175    | C16orf47 | ENSG00000197445 |
| 16 | 71788147 | 71788329 | 71788274 | 9  | 9   | 2  | 3.910162798 | 0.00955088  | C16orf47 | ENSG00000197445 |
| 16 | 72107438 | 72107621 | 72107529 | 8  | 8   | 0  | 10.55743955 | 0.000925496 | C16orf47 | ENSG00000197445 |
| 16 | 72156783 | 72156986 | 72156883 | 9  | 10  | 5  | 2.150589539 | 0.0575848   |          | ENSG00000184543 |
| 16 | 72157304 | 72157594 | 72157449 | 12 | 14  | 5  | 2.932622098 | 0.00829617  |          | ENSG00000184543 |
| 16 | 72305639 | 72305840 | 72305802 | 8  | 9   | 0  | 11.73048839 | 0.000425898 |          | ENSG00000184543 |
| 16 | 72699083 | 72699289 | 72699222 | 9  | 9   | 7  | 1.466311049 | 0.20706     |          | ENSG00000222127 |
| 16 | 72824431 | 72824666 | 72824548 | 9  | 11  | 4  | 2.815317214 | 0.0183428   | PSMD7    | ENSG00000103035 |
| 16 | 72887914 | 72888183 | 72888078 | 8  | 10  | 4  | 2.580707446 | 0.0306059   | PSMD7    | ENSG00000103035 |
| 16 | 72889699 | 72889888 | 72889741 | 9  | 9   | 2  | 3.910162798 | 0.00955088  | PSMD7    | ENSG00000103035 |
| 16 | 73022672 | 73023406 | 73022916 | 87 | 131 | 7  | 19.35530585 | 7.66E-36    |          | ENSG00000140839 |
| 16 | 73071570 | 73071812 | 73071727 | 10 | 12  | 10 | 1.386330446 | 0.21117     |          | ENSG00000207525 |
| 16 | 73077395 | 73077757 | 73077562 | 13 | 18  | 0  | 22.28792795 | 3.94E-07    |          | ENSG00000207525 |
| 16 | 73258224 | 73258445 | 73258340 | 11 | 12  | 3  | 3.812408728 | 0.004404    | RFWD3    | ENSG00000168411 |



|    |          |          |          |    |    |    |             |             |       |                 |
|----|----------|----------|----------|----|----|----|-------------|-------------|-------|-----------------|
| 16 | 73320902 | 73321099 | 73321000 | 8  | 8  | 2  | 3.519146518 | 0.017558    | MLKL  | ENSG00000168404 |
| 16 | 73321289 | 73322138 | 73321547 | 44 | 98 | 6  | 16.59026216 | 1.79E-26    | MLKL  | ENSG00000168404 |
| 16 | 73330810 | 73331353 | 73331076 | 20 | 33 | 0  | 39.88366054 | 3.46E-12    | FA2H  | ENSG00000103089 |
| 16 | 73335049 | 73335335 | 73335163 | 8  | 11 | 5  | 2.346097679 | 0.0364013   | FA2H  | ENSG00000103089 |
| 16 | 73404481 | 73404894 | 73404660 | 14 | 24 | 12 | 2.255863153 | 0.00673318  | FA2H  | ENSG00000103089 |
| 16 | 73409314 | 73409522 | 73409378 | 10 | 10 | 4  | 2.580707446 | 0.0306059   | FA2H  | ENSG00000103089 |
| 16 | 73428488 | 73428825 | 73428656 | 9  | 13 | 5  | 2.737113958 | 0.0137917   | FA2H  | ENSG00000103089 |
| 16 | 73454079 | 73454531 | 73454376 | 16 | 25 | 3  | 7.624817456 | 1.09E-06    | FA2H  | ENSG00000103089 |
| 16 | 73459150 | 73459474 | 73459296 | 14 | 18 | 1  | 11.14396397 | 4.44E-06    | FA2H  | ENSG00000103089 |
| 16 | 73476126 | 73476305 | 73476201 | 9  | 9  | 2  | 3.910162798 | 0.00955088  | WDR59 | ENSG00000103091 |
| 16 | 73590132 | 73590398 | 73590248 | 8  | 11 | 2  | 4.692195357 | 0.00272444  | ZNRF1 | ENSG00000186187 |
| 16 | 73591310 | 73591642 | 73591472 | 10 | 15 | 8  | 2.085420159 | 0.0338693   | ZNRF1 | ENSG00000186187 |
| 16 | 73591816 | 73592111 | 73591951 | 9  | 13 | 6  | 2.346097679 | 0.0266147   | ZNRF1 | ENSG00000186187 |
| 16 | 73594873 | 73595139 | 73595006 | 9  | 12 | 6  | 2.178519273 | 0.0416567   | ZNRF1 | ENSG00000186187 |
| 16 | 73603610 | 73603905 | 73603767 | 8  | 10 | 5  | 2.150589539 | 0.0575848   | ZNRF1 | ENSG00000186187 |
| 16 | 73621179 | 73621531 | 73621327 | 15 | 20 | 4  | 4.926805125 | 0.00010522  | ZNRF1 | ENSG00000186187 |
| 16 | 73636394 | 73636781 | 73636604 | 32 | 40 | 15 | 3.005937651 | 3.36E-05    | ZNRF1 | ENSG00000186187 |
| 16 | 73645587 | 73645920 | 73645743 | 11 | 16 | 6  | 2.848832895 | 0.00632407  | ZNRF1 | ENSG00000186187 |
| 16 | 73650863 | 73651172 | 73651020 | 12 | 16 | 11 | 1.661819189 | 0.0853913   | LDHD  | ENSG00000166816 |
| 16 | 73655934 | 73656195 | 73656064 | 10 | 13 | 4  | 3.28453675  | 0.00629037  | LDHD  | ENSG00000166816 |
| 16 | 73656247 | 73656560 | 73656408 | 10 | 11 | 4  | 2.815317214 | 0.0183428   | LDHD  | ENSG00000166816 |
| 16 | 73661925 | 73662300 | 73662104 | 11 | 17 | 5  | 3.519146518 | 0.00167472  | LDHD  | ENSG00000166816 |
| 16 | 73678498 | 73679092 | 73678785 | 46 | 77 | 10 | 8.317982679 | 5.43E-17    | LDHD  | ENSG00000166816 |
| 16 | 73687087 | 73687308 | 73687197 | 10 | 11 | 5  | 2.346097679 | 0.0364013   | LDHD  | ENSG00000166816 |
| 16 | 73688143 | 73688416 | 73688279 | 33 | 36 | 14 | 2.89352047  | 0.000111563 | LDHD  | ENSG00000166816 |
| 16 | 73701986 | 73702238 | 73702112 | 9  | 10 | 7  | 1.612942154 | 0.147335    | LDHD  | ENSG00000166816 |
| 16 | 73702400 | 73702957 | 73702770 | 17 | 36 | 11 | 3.616900588 | 1.14E-05    | LDHD  | ENSG00000166816 |
| 16 | 73707442 | 73707659 | 73707550 | 9  | 10 | 1  | 6.451768616 | 0.00135978  | LDHD  | ENSG00000166816 |
| 16 | 73707731 | 73708182 | 73708003 | 9  | 17 | 5  | 3.519146518 | 0.00167472  | LDHD  | ENSG00000166816 |
| 16 | 73739922 | 73740145 | 73740014 | 12 | 14 | 3  | 4.398933147 | 0.00132748  | ZFP1  | ENSG00000184517 |
| 16 | 73780098 | 73780799 | 73780432 | 14 | 31 | 6  | 5.36250898  | 1.31E-06    |       | ENSG00000213318 |
| 16 | 73843228 | 73843509 | 73843358 | 8  | 12 | 12 | 1.173048839 | 0.343543    | BCAR1 | ENSG00000050820 |
| 16 | 73859253 | 73859717 | 73859489 | 16 | 26 | 9  | 3.167231866 | 0.000393236 | BCAR1 | ENSG00000050820 |
| 16 | 73871598 | 73871889 | 73871743 | 8  | 11 | 8  | 1.564065119 | 0.151515    | BCAR1 | ENSG00000050820 |

|    |          |          |          |    |    |    |             |             |           |                 |
|----|----------|----------|----------|----|----|----|-------------|-------------|-----------|-----------------|
| 16 | 73896693 | 73897186 | 73896926 | 36 | 56 | 16 | 3.933163755 | 2.18E-08    | BCAR1     | ENSG00000050820 |
| 16 | 74024228 | 74024461 | 74024344 | 9  | 10 | 9  | 1.290353723 | 0.279648    | CFDP1     | ENSG00000153774 |
| 16 | 74025030 | 74025743 | 74025386 | 10 | 30 | 15 | 2.272782126 | 0.00282041  | CFDP1     | ENSG00000153774 |
| 16 | 74049725 | 74049951 | 74049847 | 11 | 11 | 3  | 3.519146518 | 0.00788869  | TMEM170A  | ENSG00000166822 |
| 16 | 74056084 | 74056425 | 74056247 | 20 | 25 | 10 | 2.772660893 | 0.00131329  | TMEM170A  | ENSG00000166822 |
| 16 | 74063257 | 74063538 | 74063430 | 11 | 12 | 8  | 1.694403879 | 0.107291    | TMEM170A  | ENSG00000166822 |
| 16 | 74074632 | 74074892 | 74074750 | 8  | 10 | 3  | 3.225884308 | 0.0139466   | CHST6     | ENSG00000183196 |
| 16 | 74077353 | 74077805 | 74077588 | 37 | 50 | 3  | 14.9563727  | 2.64E-14    | CHST6     | ENSG00000183196 |
| 16 | 74083421 | 74083741 | 74083566 | 25 | 28 | 9  | 3.401841634 | 0.000141067 | CHST6     | ENSG00000183196 |
| 16 | 74108457 | 74108672 | 74108567 | 9  | 10 | 2  | 4.301179077 | 0.00512919  | CHST5     | ENSG00000135702 |
| 16 | 74108786 | 74109064 | 74108925 | 13 | 16 | 12 | 1.533986944 | 0.120062    | CHST5     | ENSG00000135702 |
| 16 | 74111363 | 74111695 | 74111529 | 11 | 15 | 2  | 6.256260476 | 0.000199274 | CHST5     | ENSG00000135702 |
| 16 | 74112762 | 74113036 | 74112890 | 14 | 14 | 9  | 1.759573259 | 0.0786014   | CHST5     | ENSG00000135702 |
| 16 | 74141772 | 74142078 | 74141925 | 8  | 11 | 8  | 1.564065119 | 0.151515    |           | ENSG00000205084 |
| 16 | 74146642 | 74147002 | 74146847 | 13 | 17 | 11 | 1.759573259 | 0.0609179   |           | ENSG00000205084 |
| 16 | 74156347 | 74156723 | 74156593 | 12 | 18 | 5  | 3.714654658 | 0.000961539 | GABARAPL2 | ENSG00000034713 |
| 16 | 74157372 | 74157666 | 74157532 | 11 | 14 | 5  | 2.932622098 | 0.00829617  | GABARAPL2 | ENSG00000034713 |
| 16 | 74214117 | 74214302 | 74214209 | 8  | 9  | 3  | 2.932622098 | 0.0242899   | ADAT1     | ENSG00000065457 |
| 16 | 74214494 | 74214850 | 74214672 | 13 | 18 | 4  | 4.457585589 | 0.000353565 | ADAT1     | ENSG00000065457 |
| 16 | 74238801 | 74239358 | 74239075 | 15 | 26 | 19 | 1.583615933 | 0.0575614   | KARS      | ENSG00000065427 |
| 16 | 74239749 | 74240275 | 74239872 | 9  | 20 | 9  | 2.463402563 | 0.00689886  | TERF2IP   | ENSG00000166848 |
| 16 | 74259912 | 74260206 | 74260033 | 14 | 18 | 5  | 3.714654658 | 0.000961539 | TERF2IP   | ENSG00000166848 |
| 16 | 74286757 | 74287030 | 74286852 | 9  | 11 | 3  | 3.519146518 | 0.00788869  |           | ENSG00000210774 |
| 16 | 74355625 | 74355932 | 74355782 | 8  | 12 | 7  | 1.906204364 | 0.0695918   |           | ENSG00000213308 |
| 16 | 74361292 | 74361566 | 74361429 | 10 | 14 | 3  | 4.398933147 | 0.00132748  |           | ENSG00000213308 |
| 16 | 74494841 | 74495384 | 74495090 | 15 | 27 | 5  | 5.474227917 | 4.62E-06    |           | ENSG00000199299 |
| 16 | 75781965 | 75782244 | 75782104 | 12 | 14 | 4  | 3.519146518 | 0.00361132  | MON1B     | ENSG00000103111 |
| 16 | 75827487 | 75827778 | 75827632 | 20 | 21 | 5  | 4.301179077 | 0.000172642 |           | ENSG00000205078 |
| 16 | 75965860 | 75966154 | 75966007 | 10 | 12 | 4  | 3.049926982 | 0.0108184   | ADAMTS18  | ENSG00000140873 |
| 16 | 75979301 | 75979480 | 75979390 | 8  | 8  | 7  | 1.319679944 | 0.283403    | ADAMTS18  | ENSG00000140873 |
| 16 | 76177472 | 76177710 | 76177591 | 8  | 9  | 3  | 2.932622098 | 0.0242899   |           | ENSG00000221226 |
| 16 | 76278015 | 76278207 | 76278173 | 8  | 10 | 1  | 6.451768616 | 0.00135978  |           | ENSG00000221226 |
| 16 | 76374143 | 76374437 | 76374290 | 9  | 11 | 6  | 2.010940867 | 0.0640214   | VAT1L     | ENSG00000171724 |
| 16 | 76379711 | 76379925 | 76379832 | 8  | 9  | 5  | 1.955081399 | 0.0892323   | VAT1L     | ENSG00000171724 |

|    |          |          |          |     |     |   |             |             |        |                 |
|----|----------|----------|----------|-----|-----|---|-------------|-------------|--------|-----------------|
| 16 | 76485733 | 76485998 | 76485865 | 9   | 9   | 0 | 11.73048839 | 0.000425898 | VAT1L  | ENSG00000171724 |
| 16 | 76496668 | 76497283 | 76497144 | 14  | 34  | 6 | 5.865244197 | 2.06E-07    | CLEC3A | ENSG00000166509 |
| 16 | 76562915 | 76563347 | 76563080 | 11  | 17  | 6 | 3.016411301 | 0.00381427  | CLEC3A | ENSG00000166509 |
| 16 | 76569930 | 76570280 | 76570105 | 11  | 16  | 3 | 4.985457567 | 0.000385643 | CLEC3A | ENSG00000166509 |
| 16 | 76578924 | 76579392 | 76579213 | 8   | 19  | 7 | 2.932622098 | 0.00293566  | CLEC3A | ENSG00000166509 |
| 16 | 76582975 | 76583557 | 76583228 | 136 | 178 | 4 | 41.99514845 | 1.81E-54    | CLEC3A | ENSG00000166509 |
| 16 | 76584698 | 76584926 | 76584812 | 9   | 11  | 3 | 3.519146518 | 0.00788869  | CLEC3A | ENSG00000166509 |
| 16 | 76587196 | 76587749 | 76587392 | 98  | 120 | 9 | 14.19389096 | 1.50E-30    | CLEC3A | ENSG00000166509 |
| 16 | 76594301 | 76594731 | 76594552 | 15  | 23  | 6 | 4.021881735 | 0.000148535 | CLEC3A | ENSG00000166509 |
| 16 | 76637396 | 76637677 | 76637559 | 14  | 18  | 2 | 7.429309316 | 2.63E-05    | CLEC3A | ENSG00000166509 |
| 16 | 76642206 | 76642431 | 76642366 | 8   | 11  | 5 | 2.346097679 | 0.0364013   | CLEC3A | ENSG00000166509 |
| 16 | 76690670 | 76691275 | 76691008 | 24  | 45  | 9 | 5.396024661 | 9.20E-09    | WVOX   | ENSG00000186153 |
| 16 | 76696949 | 76697178 | 76697063 | 10  | 11  | 3 | 3.519146518 | 0.00788869  | WVOX   | ENSG00000186153 |
| 16 | 76728651 | 76728936 | 76728776 | 8   | 10  | 5 | 2.150589539 | 0.0575848   | WVOX   | ENSG00000186153 |
| 16 | 76789426 | 76789721 | 76789573 | 8   | 8   | 1 | 5.278719777 | 0.00542188  | WVOX   | ENSG00000186153 |
| 16 | 76899436 | 76899857 | 76899576 | 9   | 17  | 1 | 10.55743955 | 9.18E-06    | WVOX   | ENSG00000186153 |
| 16 | 77196608 | 77196857 | 77196705 | 8   | 11  | 0 | 14.07658607 | 9.02E-05    | WVOX   | ENSG00000186153 |
| 16 | 77254999 | 77255178 | 77255088 | 8   | 8   | 2 | 3.519146518 | 0.017558    | WVOX   | ENSG00000186153 |
| 16 | 77339731 | 77340113 | 77339938 | 8   | 15  | 2 | 6.256260476 | 0.000199274 | WVOX   | ENSG00000186153 |
| 16 | 77457746 | 77457993 | 77457918 | 8   | 11  | 2 | 4.692195357 | 0.00272444  |        | ENSG00000222244 |
| 16 | 77629509 | 77629998 | 77629672 | 13  | 21  | 3 | 6.451768616 | 1.56E-05    |        | ENSG00000222244 |
| 16 | 77638713 | 77638944 | 77638841 | 8   | 9   | 4 | 2.346097679 | 0.050148    |        | ENSG00000222244 |
| 16 | 77641624 | 77641919 | 77641771 | 13  | 16  | 0 | 19.94183027 | 1.86E-06    |        | ENSG00000222244 |
| 16 | 77853032 | 77853212 | 77853078 | 9   | 9   | 1 | 5.865244197 | 0.00272497  |        | ENSG00000222244 |
| 16 | 78122181 | 78122439 | 78122309 | 10  | 12  | 5 | 2.541605819 | 0.0225912   | MAF    | ENSG00000178573 |
| 16 | 78151657 | 78151856 | 78151761 | 8   | 8   | 0 | 10.55743955 | 0.000925496 | MAF    | ENSG00000178573 |
| 16 | 78192057 | 78192516 | 78192372 | 9   | 17  | 2 | 7.038293036 | 5.19E-05    | MAF    | ENSG00000178573 |
| 16 | 78193661 | 78193874 | 78193798 | 8   | 10  | 2 | 4.301179077 | 0.00512919  | MAF    | ENSG00000178573 |
| 16 | 78223835 | 78224014 | 78223892 | 8   | 8   | 3 | 2.639359888 | 0.0415794   | MAF    | ENSG00000178573 |
| 16 | 78231230 | 78231543 | 78231386 | 8   | 9   | 9 | 1.173048839 | 0.362316    |        | ENSG00000221330 |
| 16 | 78361764 | 78362008 | 78361918 | 8   | 9   | 2 | 3.910162798 | 0.00955088  |        | ENSG00000221330 |
| 16 | 78362162 | 78362420 | 78362292 | 9   | 10  | 3 | 3.225884308 | 0.0139466   |        | ENSG00000221330 |
| 16 | 78380443 | 78380711 | 78380607 | 10  | 13  | 1 | 8.211341875 | 0.000163445 |        | ENSG00000221330 |
| 16 | 78491473 | 78491675 | 78491578 | 8   | 8   | 1 | 5.278719777 | 0.00542188  |        | ENSG00000221330 |

|    |          |          |          |    |    |    |             |             |          |                 |
|----|----------|----------|----------|----|----|----|-------------|-------------|----------|-----------------|
| 16 | 78590154 | 78590333 | 78590243 | 8  | 8  | 2  | 3.519146518 | 0.017558    |          | ENSG00000221330 |
| 16 | 78615426 | 78615688 | 78615578 | 10 | 12 | 2  | 5.083211637 | 0.00143337  |          | ENSG00000221330 |
| 16 | 78618342 | 78618848 | 78618613 | 31 | 50 | 5  | 9.970915134 | 1.23E-12    |          | ENSG00000221330 |
| 16 | 78890750 | 78890997 | 78890896 | 10 | 13 | 8  | 1.824742639 | 0.0744168   | DYNLRB2  | ENSG00000168589 |
| 16 | 79118791 | 79119034 | 79118913 | 11 | 13 | 6  | 2.346097679 | 0.0266147   | DYNLRB2  | ENSG00000168589 |
| 16 | 79132020 | 79132558 | 79132199 | 10 | 23 | 15 | 1.759573259 | 0.0372968   | DYNLRB2  | ENSG00000168589 |
| 16 | 79205275 | 79205808 | 79205529 | 36 | 61 | 14 | 4.848601869 | 1.90E-10    | DYNLRB2  | ENSG00000168589 |
| 16 | 79207187 | 79207533 | 79207360 | 16 | 21 | 14 | 1.720471631 | 0.0496182   | DYNLRB2  | ENSG00000168589 |
| 16 | 79211280 | 79211733 | 79211491 | 11 | 22 | 10 | 2.452738482 | 0.00515848  | DYNLRB2  | ENSG00000168589 |
| 16 | 79309707 | 79310369 | 79310075 | 25 | 52 | 8  | 6.907954276 | 3.31E-11    | CDYL2    | ENSG00000166446 |
| 16 | 79342708 | 79342964 | 79342797 | 13 | 15 | 5  | 3.128130238 | 0.00492422  | CDYL2    | ENSG00000166446 |
| 16 | 79394720 | 79394927 | 79394844 | 8  | 10 | 2  | 4.301179077 | 0.00512919  | CDYL2    | ENSG00000166446 |
| 16 | 79396328 | 79396578 | 79396485 | 10 | 11 | 1  | 7.038293036 | 0.000674435 | CDYL2    | ENSG00000166446 |
| 16 | 79429058 | 79429480 | 79429228 | 16 | 24 | 7  | 3.665777623 | 0.000215502 | CDYL2    | ENSG00000166446 |
| 16 | 79540278 | 79540653 | 79540521 | 8  | 14 | 2  | 5.865244197 | 0.000387308 | CENPN    | ENSG00000166451 |
| 16 | 79598591 | 79598869 | 79598730 | 10 | 12 | 1  | 7.624817456 | 0.000332769 | CENPN    | ENSG00000166451 |
| 16 | 79668203 | 79668598 | 79668425 | 12 | 20 | 5  | 4.105670938 | 0.000308509 | C16orf46 | ENSG00000166455 |
| 16 | 79687585 | 79687800 | 79687725 | 9  | 10 | 6  | 1.843362462 | 0.0964212   | GCSH     | ENSG00000140905 |
| 16 | 79868747 | 79869140 | 79868966 | 15 | 21 | 6  | 3.686724924 | 0.000453999 | GAN      | ENSG00000127688 |
| 16 | 80090690 | 80091217 | 80090950 | 59 | 87 | 6  | 14.74689969 | 4.65E-23    |          | ENSG00000213288 |
| 16 | 80122618 | 80122915 | 80122752 | 11 | 12 | 3  | 3.812408728 | 0.004404    |          | ENSG00000213288 |
| 16 | 80214502 | 80214753 | 80214670 | 9  | 10 | 5  | 2.150589539 | 0.0575848   |          | ENSG00000153815 |
| 16 | 80288464 | 80288788 | 80288632 | 8  | 12 | 2  | 5.083211637 | 0.00143337  | PLCG2    | ENSG00000197943 |
| 16 | 80329062 | 80329434 | 80329178 | 13 | 19 | 3  | 5.865244197 | 5.72E-05    | PLCG2    | ENSG00000197943 |
| 16 | 80337282 | 80337582 | 80337449 | 15 | 16 | 2  | 6.647276756 | 0.000101928 | PLCG2    | ENSG00000197943 |
| 16 | 80402042 | 80402415 | 80402221 | 14 | 23 | 2  | 9.384390715 | 8.25E-07    | PLCG2    | ENSG00000197943 |
| 16 | 80481504 | 80481735 | 80481633 | 9  | 10 | 3  | 3.225884308 | 0.0139466   |          | ENSG00000200543 |
| 16 | 80488143 | 80488365 | 80488246 | 8  | 9  | 1  | 5.865244197 | 0.00272497  |          | ENSG00000200543 |
| 16 | 80520261 | 80520502 | 80520381 | 10 | 11 | 1  | 7.038293036 | 0.000674435 |          | ENSG00000200543 |
| 16 | 80729639 | 80729961 | 80729800 | 10 | 16 | 10 | 1.812893661 | 0.0578656   |          | ENSG00000210850 |
| 16 | 80743665 | 80744156 | 80743977 | 17 | 29 | 3  | 8.797866295 | 7.21E-08    | MPHOSPH6 | ENSG00000135698 |
| 16 | 80822633 | 80822822 | 80822738 | 10 | 10 | 4  | 2.580707446 | 0.0306059   | MPHOSPH6 | ENSG00000135698 |
| 16 | 80920943 | 80921331 | 80921122 | 11 | 18 | 8  | 2.476436439 | 0.00924552  |          | ENSG00000210858 |
| 16 | 80949830 | 80950012 | 80949931 | 9  | 9  | 8  | 1.303387599 | 0.281715    |          | ENSG00000210858 |

|    |          |          |          |    |    |    |             |             |                 |                 |
|----|----------|----------|----------|----|----|----|-------------|-------------|-----------------|-----------------|
| 16 | 80959108 | 80959392 | 80959250 | 15 | 18 | 2  | 7.429309316 | 2.63E-05    | ENSG00000210858 |                 |
| 16 | 81717422 | 81717681 | 81717547 | 9  | 9  | 0  | 11.73048839 | 0.000425898 | ENSG00000210864 |                 |
| 16 | 82065069 | 82065248 | 82065224 | 8  | 9  | 1  | 5.865244197 | 0.00272497  | ENSG00000222299 |                 |
| 16 | 82145303 | 82145577 | 82145440 | 8  | 11 | 2  | 4.692195357 | 0.00272444  | ENSG00000222299 |                 |
| 16 | 82227964 | 82228474 | 82228201 | 23 | 38 | 1  | 22.87445237 | 1.58E-12    | HSBP1           | ENSG00000166530 |
| 16 | 82393295 | 82393609 | 82393452 | 14 | 19 | 5  | 3.910162798 | 0.000546977 | HSBP1           | ENSG00000166530 |
| 16 | 82398956 | 82399270 | 82399113 | 12 | 14 | 2  | 5.865244197 | 0.000387308 | HSBP1           | ENSG00000166530 |
| 16 | 82438741 | 82439155 | 82438920 | 47 | 58 | 8  | 7.689986836 | 6.87E-13    | HSBP1           | ENSG00000166530 |
| 16 | 82469961 | 82470242 | 82470101 | 12 | 14 | 5  | 2.932622098 | 0.00829617  | MLYCD           | ENSG00000103150 |
| 16 | 82517853 | 82518132 | 82517992 | 10 | 13 | 3  | 4.105670938 | 0.00243034  | OSGIN1          | ENSG00000140961 |
| 16 | 82518146 | 82518408 | 82518300 | 10 | 12 | 8  | 1.694403879 | 0.107291    | OSGIN1          | ENSG00000140961 |
| 16 | 82544232 | 82544487 | 82544342 | 18 | 20 | 5  | 4.105670938 | 0.000308509 | OSGIN1          | ENSG00000140961 |
| 16 | 82547905 | 82548129 | 82548017 | 8  | 10 | 7  | 1.612942154 | 0.147335    | OSGIN1          | ENSG00000140961 |
| 16 | 82605429 | 82605681 | 82605555 | 9  | 11 | 3  | 3.519146518 | 0.00788869  |                 | ENSG00000199350 |
| 16 | 82605697 | 82605934 | 82605815 | 9  | 12 | 8  | 1.694403879 | 0.107291    |                 | ENSG00000199350 |
| 16 | 82653837 | 82654140 | 82653990 | 10 | 13 | 0  | 16.42268375 | 1.91E-05    | SLC38A8         | ENSG00000166558 |
| 16 | 82675961 | 82676207 | 82676084 | 10 | 12 | 2  | 5.083211637 | 0.00143337  | MBTPS1          | ENSG00000140943 |
| 16 | 82687722 | 82688002 | 82687862 | 11 | 15 | 4  | 3.753756286 | 0.0020497   | MBTPS1          | ENSG00000140943 |
| 16 | 82694729 | 82695132 | 82694953 | 13 | 23 | 4  | 5.630634429 | 1.63E-05    | MBTPS1          | ENSG00000140943 |
| 16 | 82697460 | 82697728 | 82697586 | 11 | 14 | 1  | 8.797866295 | 8.00E-05    | MBTPS1          | ENSG00000140943 |
| 16 | 82707864 | 82708345 | 82708006 | 12 | 22 | 5  | 4.496687217 | 9.59E-05    | MBTPS1          | ENSG00000140943 |
| 16 | 82710663 | 82710944 | 82710793 | 8  | 13 | 6  | 2.346097679 | 0.0266147   | MBTPS1          | ENSG00000140943 |
| 16 | 82768234 | 82768530 | 82768382 | 13 | 13 | 2  | 5.474227917 | 0.000747844 | TAF1C           | ENSG00000103168 |
| 16 | 82777838 | 82778451 | 82778144 | 9  | 22 | 11 | 2.248343609 | 0.0090389   | TAF1C           | ENSG00000103168 |
| 16 | 82868394 | 82868573 | 82868454 | 8  | 9  | 1  | 5.865244197 | 0.00272497  |                 | ENSG00000201361 |
| 16 | 82961022 | 82961235 | 82961128 | 9  | 10 | 4  | 2.580707446 | 0.0306059   | ATP2C2          | ENSG00000064270 |
| 16 | 82971174 | 82971408 | 82971317 | 10 | 12 | 1  | 7.624817456 | 0.000332769 | ATP2C2          | ENSG00000064270 |
| 16 | 82998867 | 82999206 | 82999028 | 13 | 18 | 4  | 4.457585589 | 0.000353565 | ATP2C2          | ENSG00000064270 |
| 16 | 83075779 | 83075999 | 83075895 | 8  | 9  | 8  | 1.303387599 | 0.281715    | KIAA1609        | ENSG00000140950 |
| 16 | 83095535 | 83095753 | 83095684 | 12 | 13 | 6  | 2.346097679 | 0.0266147   | KIAA1609        | ENSG00000140950 |
| 16 | 83263487 | 83263748 | 83263585 | 9  | 12 | 6  | 2.178519273 | 0.0416567   | KLHL36          | ENSG00000135686 |
| 16 | 83321537 | 83321862 | 83321685 | 12 | 17 | 5  | 3.519146518 | 0.00167472  | USP10           | ENSG00000103194 |
| 16 | 83323805 | 83324012 | 83323874 | 8  | 8  | 1  | 5.278719777 | 0.00542188  | USP10           | ENSG00000103194 |
| 16 | 83324105 | 83324345 | 83324254 | 13 | 13 | 2  | 5.474227917 | 0.000747844 | USP10           | ENSG00000103194 |

|    |          |          |          |    |    |    |             |             |          |                 |
|----|----------|----------|----------|----|----|----|-------------|-------------|----------|-----------------|
| 16 | 83329526 | 83329867 | 83329696 | 11 | 16 | 7  | 2.492728784 | 0.0124193   | USP10    | ENSG00000103194 |
| 16 | 83345583 | 83345808 | 83345731 | 12 | 12 | 4  | 3.049926982 | 0.0108184   | USP10    | ENSG00000103194 |
| 16 | 83397683 | 83398018 | 83397850 | 10 | 14 | 2  | 5.865244197 | 0.000387308 | CRISPLD2 | ENSG00000103196 |
| 16 | 83433168 | 83433396 | 83433279 | 10 | 11 | 5  | 2.346097679 | 0.0364013   | CRISPLD2 | ENSG00000103196 |
| 16 | 83442373 | 83442720 | 83442546 | 13 | 19 | 2  | 7.820325595 | 1.32E-05    | CRISPLD2 | ENSG00000103196 |
| 16 | 83475709 | 83476044 | 83475876 | 12 | 15 | 6  | 2.68125449  | 0.0103552   |          | ENSG00000213275 |
| 16 | 83497327 | 83497520 | 83497382 | 9  | 10 | 3  | 3.225884308 | 0.0139466   |          | ENSG00000213275 |
| 16 | 83516411 | 83516651 | 83516531 | 11 | 12 | 10 | 1.386330446 | 0.21117     |          | ENSG00000213275 |
| 16 | 83543326 | 83543505 | 83543465 | 8  | 9  | 5  | 1.955081399 | 0.0892323   |          | ENSG00000213275 |
| 16 | 83561691 | 83562009 | 83561850 | 8  | 12 | 5  | 2.541605819 | 0.0225912   | ZDHHC7   | ENSG00000153786 |
| 16 | 83585326 | 83585572 | 83585449 | 9  | 9  | 1  | 5.865244197 | 0.00272497  | ZDHHC7   | ENSG00000153786 |
| 16 | 83585982 | 83586217 | 83586099 | 9  | 11 | 1  | 7.038293036 | 0.000674435 | ZDHHC7   | ENSG00000153786 |
| 16 | 83590282 | 83590522 | 83590420 | 8  | 10 | 9  | 1.290353723 | 0.279648    | ZDHHC7   | ENSG00000153786 |
| 16 | 83592096 | 83592388 | 83592231 | 14 | 18 | 8  | 2.476436439 | 0.00924552  | ZDHHC7   | ENSG00000153786 |
| 16 | 83602689 | 83602939 | 83602848 | 8  | 10 | 6  | 1.843362462 | 0.0964212   | ZDHHC7   | ENSG00000153786 |
| 16 | 83606964 | 83607244 | 83607135 | 10 | 13 | 2  | 5.474227917 | 0.000747844 | ZDHHC7   | ENSG00000153786 |
| 16 | 83620676 | 83620917 | 83620796 | 10 | 11 | 2  | 4.692195357 | 0.00272444  | KIAA0513 | ENSG00000135709 |
| 16 | 83729843 | 83730113 | 83729978 | 10 | 12 | 3  | 3.812408728 | 0.004404    | FAM92B   | ENSG00000153789 |
| 16 | 83735072 | 83735678 | 83735289 | 24 | 52 | 8  | 6.907954276 | 3.31E-11    | FAM92B   | ENSG00000153789 |
| 16 | 83738418 | 83738953 | 83738597 | 15 | 28 | 8  | 3.779824038 | 5.98E-05    | FAM92B   | ENSG00000153789 |
| 16 | 83742764 | 83743178 | 83742882 | 13 | 22 | 5  | 4.496687217 | 9.59E-05    | FAM92B   | ENSG00000153789 |
| 16 | 83743771 | 83744134 | 83743955 | 25 | 32 | 1  | 19.35530585 | 1.42E-10    | FAM92B   | ENSG00000153789 |
| 16 | 83763664 | 83764015 | 83763839 | 12 | 18 | 4  | 4.457585589 | 0.000353565 | FAM92B   | ENSG00000153789 |
| 16 | 83811589 | 83811928 | 83811764 | 18 | 23 | 6  | 4.021881735 | 0.000148535 | TMEM148  | ENSG00000179219 |
| 16 | 83866661 | 83866939 | 83866772 | 8  | 10 | 8  | 1.433726359 | 0.209175    | TMEM148  | ENSG00000179219 |
| 16 | 83886431 | 83886619 | 83886457 | 10 | 11 | 5  | 2.346097679 | 0.0364013   | TMEM148  | ENSG00000179219 |
| 16 | 83893089 | 83893268 | 83893092 | 8  | 10 | 1  | 6.451768616 | 0.00135978  |          | ENSG00000220991 |
| 16 | 83897283 | 83897578 | 83897440 | 17 | 18 | 7  | 2.785990993 | 0.00480525  |          | ENSG00000220991 |
| 16 | 83907593 | 83907895 | 83907742 | 8  | 11 | 1  | 7.038293036 | 0.000674435 |          | ENSG00000220991 |
| 16 | 83921912 | 83922220 | 83922069 | 9  | 12 | 13 | 1.089259637 | 0.414883    |          | ENSG00000220991 |
| 16 | 83940391 | 83940688 | 83940539 | 8  | 13 | 4  | 3.28453675  | 0.00629037  |          | ENSG00000220991 |
| 16 | 83940740 | 83941014 | 83940861 | 11 | 13 | 5  | 2.737113958 | 0.0137917   |          | ENSG00000220991 |
| 16 | 83941882 | 83942519 | 83942303 | 38 | 57 | 15 | 4.252302043 | 5.01E-09    |          | ENSG00000220991 |
| 16 | 83944847 | 83945448 | 83945154 | 29 | 47 | 11 | 4.692195357 | 2.58E-08    |          | ENSG00000220991 |

|    |          |          |          |    |    |    |             |             |          |                 |
|----|----------|----------|----------|----|----|----|-------------|-------------|----------|-----------------|
| 16 | 83951720 | 83951945 | 83951832 | 10 | 11 | 0  | 14.07658607 | 9.02E-05    |          | ENSG00000220991 |
| 16 | 83956425 | 83956756 | 83956590 | 51 | 54 | 5  | 10.75294769 | 7.83E-14    |          | ENSG00000220991 |
| 16 | 83975630 | 83976444 | 83976174 | 48 | 91 | 6  | 15.41721332 | 2.69E-24    |          | ENSG00000220991 |
| 16 | 83984721 | 83985051 | 83984886 | 8  | 14 | 5  | 2.932622098 | 0.00829617  |          | ENSG00000220991 |
| 16 | 83986601 | 83986784 | 83986630 | 9  | 10 | 8  | 1.433726359 | 0.209175    |          | ENSG00000220991 |
| 16 | 84007512 | 84007898 | 84007732 | 9  | 16 | 11 | 1.661819189 | 0.0853913   |          | ENSG00000220991 |
| 16 | 84012011 | 84012240 | 84012125 | 12 | 13 | 6  | 2.346097679 | 0.0266147   |          | ENSG00000220991 |
| 16 | 84028465 | 84029112 | 84028644 | 9  | 23 | 15 | 1.759573259 | 0.0372968   |          | ENSG00000220991 |
| 16 | 84049999 | 84050301 | 84050149 | 14 | 17 | 9  | 2.111487911 | 0.0248715   |          | ENSG00000220991 |
| 16 | 84050324 | 84050658 | 84050479 | 10 | 13 | 3  | 4.105670938 | 0.00243034  |          | ENSG00000220991 |
| 16 | 84053066 | 84053419 | 84053242 | 10 | 16 | 4  | 3.988366054 | 0.00115141  |          | ENSG00000220991 |
| 16 | 84053453 | 84053751 | 84053622 | 9  | 12 | 4  | 3.049926982 | 0.0108184   |          | ENSG00000220991 |
| 16 | 84057049 | 84057460 | 84057222 | 21 | 26 | 10 | 2.879301697 | 0.000816629 | KIAA0182 | ENSG00000131149 |
| 16 | 84063080 | 84063310 | 84063195 | 14 | 17 | 11 | 1.759573259 | 0.0609179   | KIAA0182 | ENSG00000131149 |
| 16 | 84063316 | 84063554 | 84063458 | 8  | 9  | 6  | 1.675784056 | 0.141978    | KIAA0182 | ENSG00000131149 |
| 16 | 84083097 | 84083487 | 84083293 | 20 | 29 | 7  | 4.398933147 | 1.30E-05    | KIAA0182 | ENSG00000131149 |
| 16 | 84105717 | 84106428 | 84105960 | 12 | 31 | 10 | 3.412505714 | 6.73E-05    | KIAA0182 | ENSG00000131149 |
| 16 | 84111954 | 84112360 | 84112131 | 22 | 31 | 16 | 2.208091933 | 0.00315316  | KIAA0182 | ENSG00000131149 |
| 16 | 84149316 | 84149660 | 84149545 | 14 | 18 | 1  | 11.14396397 | 4.44E-06    | KIAA0182 | ENSG00000131149 |
| 16 | 84150425 | 84150998 | 84150663 | 13 | 29 | 6  | 5.027352168 | 4.43E-06    | KIAA0182 | ENSG00000131149 |
| 16 | 84155577 | 84155911 | 84155774 | 8  | 12 | 7  | 1.906204364 | 0.0695918   | KIAA0182 | ENSG00000131149 |
| 16 | 84161501 | 84161967 | 84161748 | 19 | 31 | 6  | 5.36250898  | 1.31E-06    | KIAA0182 | ENSG00000131149 |
| 16 | 84201552 | 84201981 | 84201726 | 17 | 29 | 5  | 5.865244197 | 1.33E-06    | KIAA0182 | ENSG00000131149 |
| 16 | 84202107 | 84202348 | 84202231 | 9  | 10 | 7  | 1.612942154 | 0.147335    | KIAA0182 | ENSG00000131149 |
| 16 | 84202862 | 84203316 | 84203137 | 27 | 36 | 3  | 10.85070176 | 5.62E-10    | KIAA0182 | ENSG00000131149 |
| 16 | 84204174 | 84204435 | 84204306 | 12 | 14 | 5  | 2.932622098 | 0.00829617  | KIAA0182 | ENSG00000131149 |
| 16 | 84236243 | 84236725 | 84236540 | 15 | 31 | 8  | 4.170840318 | 1.13E-05    |          | ENSG00000222516 |
| 16 | 84279892 | 84280081 | 84280024 | 9  | 10 | 1  | 6.451768616 | 0.00135978  | GINS2    | ENSG00000131153 |
| 16 | 84336350 | 84336533 | 84336441 | 8  | 9  | 2  | 3.910162798 | 0.00955088  |          | ENSG00000222190 |
| 16 | 84337463 | 84337660 | 84337578 | 9  | 9  | 6  | 1.675784056 | 0.141978    | C16orf74 | ENSG00000154102 |
| 16 | 84341367 | 84341553 | 84341454 | 8  | 9  | 2  | 3.910162798 | 0.00955088  | C16orf74 | ENSG00000154102 |
| 16 | 84344267 | 84344500 | 84344323 | 11 | 14 | 3  | 4.398933147 | 0.00132748  | C16orf74 | ENSG00000154102 |
| 16 | 84344504 | 84344822 | 84344663 | 9  | 12 | 5  | 2.541605819 | 0.0225912   | C16orf74 | ENSG00000154102 |
| 16 | 84350979 | 84351201 | 84351090 | 12 | 13 | 1  | 8.211341875 | 0.000163445 | C16orf74 | ENSG00000154102 |

|    |          |          |          |    |    |    |             |             |          |                 |
|----|----------|----------|----------|----|----|----|-------------|-------------|----------|-----------------|
| 16 | 84369041 | 84369396 | 84369218 | 14 | 19 | 4  | 4.692195357 | 0.000193572 | COX4NB   | ENSG00000131148 |
| 16 | 84390534 | 84390948 | 84390732 | 8  | 17 | 2  | 7.038293036 | 5.19E-05    | COX4I1   | ENSG00000131143 |
| 16 | 84412528 | 84412886 | 84412695 | 13 | 18 | 8  | 2.476436439 | 0.00924552  |          | ENSG00000214259 |
| 16 | 84480600 | 84480779 | 84480727 | 8  | 9  | 1  | 5.865244197 | 0.00272497  | IRF8     | ENSG00000140968 |
| 16 | 84482527 | 84483004 | 84482706 | 20 | 30 | 4  | 7.272902804 | 1.76E-07    | IRF8     | ENSG00000140968 |
| 16 | 84485502 | 84485867 | 84485689 | 11 | 17 | 15 | 1.319679944 | 0.209239    | IRF8     | ENSG00000140968 |
| 16 | 84607431 | 84607830 | 84607723 | 12 | 18 | 3  | 5.571981987 | 0.000108726 | IRF8     | ENSG00000140968 |
| 16 | 84710311 | 84710588 | 84710488 | 8  | 8  | 2  | 3.519146518 | 0.017558    |          | ENSG00000199949 |
| 16 | 84716464 | 84716794 | 84716629 | 11 | 14 | 1  | 8.797866295 | 8.00E-05    |          | ENSG00000199949 |
| 16 | 84814083 | 84814309 | 84814213 | 9  | 10 | 1  | 6.451768616 | 0.00135978  |          | ENSG00000199949 |
| 16 | 85093331 | 85093891 | 85093676 | 57 | 76 | 5  | 15.05412677 | 1.47E-20    | FOXF1    | ENSG00000103241 |
| 16 | 85100585 | 85100813 | 85100702 | 8  | 8  | 3  | 2.639359888 | 0.0415794   | FOXF1    | ENSG00000103241 |
| 16 | 85154857 | 85155457 | 85155124 | 17 | 36 | 13 | 3.100200504 | 5.51E-05    | MTHFSD   | ENSG00000103248 |
| 16 | 85216097 | 85216637 | 85216384 | 27 | 46 | 7  | 6.891661931 | 3.87E-10    | FOXL1    | ENSG00000176678 |
| 16 | 85267294 | 85267621 | 85267459 | 13 | 17 | 1  | 10.55743955 | 9.18E-06    | FOXL1    | ENSG00000176678 |
| 16 | 85384674 | 85384855 | 85384763 | 8  | 8  | 3  | 2.639359888 | 0.0415794   | FOXL1    | ENSG00000176678 |
| 16 | 85397941 | 85398202 | 85398072 | 8  | 10 | 5  | 2.150589539 | 0.0575848   | FOXL1    | ENSG00000176678 |
| 16 | 85435872 | 85436417 | 85436051 | 25 | 37 | 7  | 5.571981987 | 1.11E-07    | FOXL1    | ENSG00000176678 |
| 16 | 85456861 | 85457228 | 85457034 | 15 | 21 | 6  | 3.686724924 | 0.000453999 | FOXL1    | ENSG00000176678 |
| 16 | 85483890 | 85484154 | 85484040 | 8  | 10 | 4  | 2.580707446 | 0.0306059   | FOXL1    | ENSG00000176678 |
| 16 | 85492483 | 85493409 | 85492912 | 13 | 49 | 14 | 3.910162798 | 1.55E-07    | FOXL1    | ENSG00000176678 |
| 16 | 85629151 | 85629330 | 85629240 | 8  | 8  | 3  | 2.639359888 | 0.0415794   |          | ENSG00000210934 |
| 16 | 85706716 | 85706988 | 85706852 | 11 | 12 | 3  | 3.812408728 | 0.004404    |          | ENSG00000210934 |
| 16 | 85794267 | 85794606 | 85794436 | 11 | 15 | 6  | 2.68125449  | 0.0103552   |          | ENSG00000210934 |
| 16 | 85824872 | 85825089 | 85824971 | 9  | 9  | 1  | 5.865244197 | 0.00272497  |          | ENSG00000210934 |
| 16 | 85831968 | 85832350 | 85832095 | 16 | 22 | 7  | 3.372515413 | 0.000629223 |          | ENSG00000210934 |
| 16 | 85858386 | 85858665 | 85858557 | 8  | 8  | 4  | 2.111487911 | 0.0804809   |          | ENSG00000210934 |
| 16 | 85867538 | 85867905 | 85867808 | 8  | 12 | 2  | 5.083211637 | 0.00143337  |          | ENSG00000210934 |
| 16 | 85869645 | 85869959 | 85869802 | 9  | 12 | 3  | 3.812408728 | 0.004404    |          | ENSG00000210934 |
| 16 | 85908507 | 85908804 | 85908655 | 10 | 12 | 1  | 7.624817456 | 0.000332769 |          | ENSG00000131152 |
| 16 | 85975004 | 85975288 | 85975145 | 11 | 13 | 10 | 1.49297125  | 0.157311    | FBXO31   | ENSG00000103264 |
| 16 | 85979271 | 85979890 | 85979493 | 11 | 25 | 7  | 3.812408728 | 0.00012465  | MAP1LC3B | ENSG00000140941 |
| 16 | 85985570 | 85985854 | 85985704 | 10 | 13 | 4  | 3.28453675  | 0.00629037  | MAP1LC3B | ENSG00000140941 |
| 16 | 86052530 | 86052942 | 86052763 | 8  | 16 | 7  | 2.492728784 | 0.0124193   | ZCCHC14  | ENSG00000140948 |



|    |          |          |          |    |     |    |             |             |          |                 |
|----|----------|----------|----------|----|-----|----|-------------|-------------|----------|-----------------|
| 16 | 86226631 | 86226913 | 86226772 | 8  | 10  | 2  | 4.301179077 | 0.00512919  | JPH3     | ENSG00000154118 |
| 16 | 86297635 | 86297839 | 86297737 | 8  | 10  | 1  | 6.451768616 | 0.00135978  |          | ENSG00000205047 |
| 16 | 86319589 | 86319775 | 86319682 | 8  | 9   | 2  | 3.910162798 | 0.00955088  |          | ENSG00000205047 |
| 16 | 86336336 | 86336553 | 86336484 | 12 | 13  | 4  | 3.28453675  | 0.00629037  | KLHDC4   | ENSG00000104731 |
| 16 | 86356933 | 86357350 | 86357154 | 22 | 34  | 3  | 10.26417734 | 2.27E-09    | KLHDC4   | ENSG00000104731 |
| 16 | 86369017 | 86369488 | 86369267 | 8  | 17  | 8  | 2.346097679 | 0.0144542   | KLHDC4   | ENSG00000104731 |
| 16 | 86370257 | 86370642 | 86370436 | 13 | 20  | 5  | 4.105670938 | 0.000308509 | KLHDC4   | ENSG00000104731 |
| 16 | 86380656 | 86382083 | 86381234 | 37 | 126 | 22 | 6.477269678 | 2.64E-23    | KLHDC4   | ENSG00000104731 |
| 16 | 86397859 | 86398424 | 86398246 | 12 | 25  | 13 | 2.178519273 | 0.00752428  | KLHDC4   | ENSG00000104731 |
| 16 | 86425591 | 86425985 | 86425764 | 13 | 20  | 8  | 2.737113958 | 0.0036449   | SLC7A5   | ENSG00000103257 |
| 16 | 86442975 | 86443219 | 86443118 | 8  | 10  | 6  | 1.843362462 | 0.0964212   | SLC7A5   | ENSG00000103257 |
| 16 | 86444328 | 86445064 | 86444755 | 49 | 72  | 17 | 4.757364737 | 8.05E-12    | SLC7A5   | ENSG00000103257 |
| 16 | 86445397 | 86445615 | 86445515 | 13 | 15  | 4  | 3.753756286 | 0.0020497   | SLC7A5   | ENSG00000103257 |
| 16 | 86462677 | 86462958 | 86462851 | 12 | 15  | 10 | 1.706252857 | 0.0822346   | SLC7A5   | ENSG00000103257 |
| 16 | 86536533 | 86537212 | 86536977 | 24 | 53  | 6  | 9.049233903 | 8.57E-13    | BANP     | ENSG00000172530 |
| 16 | 86541895 | 86542413 | 86542061 | 20 | 31  | 13 | 2.68125449  | 0.000581082 | BANP     | ENSG00000172530 |
| 16 | 86543588 | 86543772 | 86543738 | 8  | 10  | 6  | 1.843362462 | 0.0964212   | BANP     | ENSG00000172530 |
| 16 | 86856039 | 86856300 | 86856202 | 11 | 13  | 3  | 4.105670938 | 0.00243034  |          | ENSG00000205037 |
| 16 | 86976337 | 86976662 | 86976499 | 17 | 20  | 4  | 4.926805125 | 0.00010522  | ZFPM1    | ENSG00000179588 |
| 16 | 87031300 | 87031540 | 87031420 | 9  | 11  | 1  | 7.038293036 | 0.000674435 | ZFPM1    | ENSG00000179588 |
| 16 | 87036922 | 87037283 | 87037136 | 8  | 13  | 11 | 1.368556979 | 0.211388    | ZFPM1    | ENSG00000179588 |
| 16 | 87048983 | 87049252 | 87049117 | 11 | 12  | 2  | 5.083211637 | 0.00143337  | ZFPM1    | ENSG00000179588 |
| 16 | 87104192 | 87104563 | 87104427 | 11 | 17  | 3  | 5.278719777 | 0.000205462 | ZFPM1    | ENSG00000179588 |
| 16 | 87152996 | 87153265 | 87153105 | 9  | 10  | 5  | 2.150589539 | 0.0575848   | C16orf85 | ENSG00000205036 |
| 16 | 87256840 | 87257190 | 87257015 | 10 | 16  | 3  | 4.985457567 | 0.000385643 | MVD      | ENSG00000167508 |
| 16 | 87281992 | 87282359 | 87282160 | 15 | 19  | 3  | 5.865244197 | 5.72E-05    | SNAI3    | ENSG00000185669 |
| 16 | 87292083 | 87292264 | 87292184 | 8  | 9   | 0  | 11.73048839 | 0.000425898 | RNF166   | ENSG00000158717 |
| 16 | 87331314 | 87331590 | 87331452 | 11 | 13  | 2  | 5.474227917 | 0.000747844 |          | ENSG00000197539 |
| 16 | 87332996 | 87333377 | 87333168 | 11 | 15  | 7  | 2.346097679 | 0.0195693   |          | ENSG00000197539 |
| 16 | 87341829 | 87342104 | 87341926 | 9  | 12  | 11 | 1.270802909 | 0.274822    |          | ENSG00000182376 |
| 16 | 87358945 | 87359154 | 87359049 | 9  | 9   | 5  | 1.955081399 | 0.0892323   |          | ENSG00000182376 |
| 16 | 87364700 | 87365238 | 87365063 | 20 | 32  | 6  | 5.530087385 | 7.11E-07    |          | ENSG00000182376 |
| 16 | 87403137 | 87403335 | 87403261 | 8  | 9   | 5  | 1.955081399 | 0.0892323   | APRT     | ENSG00000198931 |
| 16 | 87450923 | 87451332 | 87451102 | 9  | 17  | 3  | 5.278719777 | 0.000205462 | TRAPPC2L | ENSG00000167515 |

|    |          |          |          |     |     |    |             |             |          |                 |
|----|----------|----------|----------|-----|-----|----|-------------|-------------|----------|-----------------|
| 16 | 87451635 | 87451914 | 87451780 | 9   | 13  | 10 | 1.49297125  | 0.157311    | TRAPPC2L | ENSG00000167515 |
| 16 | 87501704 | 87501913 | 87501830 | 9   | 9   | 6  | 1.675784056 | 0.141978    |          | ENSG00000205018 |
| 16 | 87519014 | 87519479 | 87519193 | 9   | 21  | 10 | 2.346097679 | 0.00796926  |          | ENSG00000205018 |
| 16 | 87519491 | 87519782 | 87519628 | 9   | 12  | 4  | 3.049926982 | 0.0108184   |          | ENSG00000205018 |
| 16 | 87520819 | 87521188 | 87520949 | 12  | 17  | 4  | 4.222975822 | 0.000640773 |          | ENSG00000205018 |
| 16 | 87522334 | 87522635 | 87522475 | 12  | 12  | 8  | 1.694403879 | 0.107291    |          | ENSG00000205018 |
| 16 | 87603887 | 87604068 | 87603977 | 8   | 9   | 2  | 3.910162798 | 0.00955088  | CBFA2T3  | ENSG00000129993 |
| 16 | 87631547 | 87631797 | 87631685 | 8   | 10  | 2  | 4.301179077 | 0.00512919  | ACSF3    | ENSG00000176715 |
| 16 | 87646728 | 87646910 | 87646819 | 9   | 9   | 1  | 5.865244197 | 0.00272497  | ACSF3    | ENSG00000176715 |
| 16 | 87678593 | 87678828 | 87678722 | 8   | 9   | 4  | 2.346097679 | 0.050148    | ACSF3    | ENSG00000176715 |
| 16 | 87699598 | 87699877 | 87699743 | 13  | 15  | 2  | 6.256260476 | 0.000199274 | ACSF3    | ENSG00000176715 |
| 16 | 87716184 | 87716732 | 87716362 | 27  | 43  | 5  | 8.602358155 | 1.42E-10    | ACSF3    | ENSG00000176715 |
| 16 | 87744051 | 87744380 | 87744218 | 20  | 23  | 2  | 9.384390715 | 8.25E-07    | C16orf81 | ENSG00000180422 |
| 16 | 87747876 | 87748235 | 87748055 | 13  | 19  | 4  | 4.692195357 | 0.000193572 | C16orf81 | ENSG00000180422 |
| 16 | 87761388 | 87761748 | 87761595 | 11  | 16  | 2  | 6.647276756 | 0.000101928 |          | ENSG00000205015 |
| 16 | 87810452 | 87810725 | 87810620 | 12  | 15  | 10 | 1.706252857 | 0.0822346   | ZNF778   | ENSG00000170100 |
| 16 | 87811219 | 87811398 | 87811308 | 8   | 9   | 3  | 2.932622098 | 0.0242899   | ZNF778   | ENSG00000170100 |
| 16 | 87834723 | 87835269 | 87835090 | 8   | 20  | 7  | 3.079253203 | 0.00177418  |          | ENSG00000205014 |
| 16 | 87883478 | 87883668 | 87883573 | 8   | 8   | 8  | 1.173048839 | 0.36929     | ANKRD11  | ENSG00000167522 |
| 16 | 87912747 | 87913005 | 87912898 | 8   | 8   | 1  | 5.278719777 | 0.00542188  | ANKRD11  | ENSG00000167522 |
| 16 | 87913122 | 87913392 | 87913226 | 11  | 13  | 6  | 2.346097679 | 0.0266147   | ANKRD11  | ENSG00000167522 |
| 16 | 87913930 | 87914144 | 87913988 | 9   | 11  | 9  | 1.407658607 | 0.210479    | ANKRD11  | ENSG00000167522 |
| 16 | 87914261 | 87914610 | 87914370 | 12  | 17  | 8  | 2.346097679 | 0.0144542   | ANKRD11  | ENSG00000167522 |
| 16 | 87964073 | 87964443 | 87964264 | 9   | 15  | 5  | 3.128130238 | 0.00492422  |          | ENSG00000210946 |
| 16 | 87976992 | 87977177 | 87977084 | 8   | 10  | 4  | 2.580707446 | 0.0306059   |          | ENSG00000210946 |
| 16 | 87989092 | 87989357 | 87989225 | 11  | 14  | 5  | 2.932622098 | 0.00829617  |          | ENSG00000210946 |
| 16 | 87998414 | 87998754 | 87998581 | 14  | 19  | 2  | 7.820325595 | 1.32E-05    |          | ENSG00000210946 |
| 16 | 88004808 | 88004996 | 88004880 | 8   | 8   | 3  | 2.639359888 | 0.0415794   |          | ENSG00000210946 |
| 16 | 88035841 | 88036591 | 88036136 | 66  | 95  | 7  | 14.07658607 | 1.23E-24    | ANKRD11  | ENSG00000167522 |
| 16 | 88037295 | 88037696 | 88037495 | 10  | 18  | 5  | 3.714654658 | 0.000961539 | ANKRD11  | ENSG00000167522 |
| 16 | 88052327 | 88053003 | 88052581 | 178 | 236 | 2  | 92.67085831 | 1.09E-76    | ANKRD11  | ENSG00000167522 |
| 16 | 88053017 | 88053280 | 88053148 | 9   | 13  | 6  | 2.346097679 | 0.0266147   | ANKRD11  | ENSG00000167522 |
| 16 | 88084770 | 88084950 | 88084848 | 8   | 8   | 6  | 1.508205651 | 0.203852    | ANKRD11  | ENSG00000167522 |
| 16 | 88154254 | 88154757 | 88154582 | 17  | 28  | 5  | 5.669736057 | 2.48E-06    | RPL13    | ENSG00000167526 |

|    |          |          |          |    |    |    |             |             |         |                 |
|----|----------|----------|----------|----|----|----|-------------|-------------|---------|-----------------|
| 16 | 88159563 | 88159876 | 88159700 | 16 | 20 | 8  | 2.737113958 | 0.0036449   |         | ENSG00000200084 |
| 16 | 88193345 | 88193581 | 88193483 | 10 | 10 | 6  | 1.843362462 | 0.0964212   | DPEP1   | ENSG00000015413 |
| 16 | 88194390 | 88194608 | 88194513 | 13 | 14 | 5  | 2.932622098 | 0.00829617  | DPEP1   | ENSG00000015413 |
| 16 | 88226935 | 88227196 | 88227065 | 13 | 13 | 2  | 5.474227917 | 0.000747844 | DPEP1   | ENSG00000015413 |
| 16 | 88293980 | 88294481 | 88294323 | 12 | 23 | 9  | 2.815317214 | 0.00172056  | SPATA2L | ENSG00000158792 |
| 16 | 88296083 | 88296303 | 88296136 | 8  | 9  | 8  | 1.303387599 | 0.281715    | SPATA2L | ENSG00000158792 |
| 16 | 88299898 | 88300199 | 88300052 | 21 | 23 | 1  | 14.07658607 | 1.14E-07    | SPATA2L | ENSG00000158792 |
| 16 | 88306141 | 88306320 | 88306230 | 8  | 8  | 5  | 1.759573259 | 0.13508     | C16orf7 | ENSG00000075399 |
| 16 | 88316160 | 88316396 | 88316261 | 8  | 9  | 8  | 1.303387599 | 0.281715    | ZNF276  | ENSG00000158805 |
| 16 | 88427686 | 88427980 | 88427827 | 10 | 14 | 1  | 8.797866295 | 8.00E-05    | SPIRE2  | ENSG00000204991 |
| 16 | 88436603 | 88436992 | 88436758 | 8  | 13 | 7  | 2.052835469 | 0.046392    | SPIRE2  | ENSG00000204991 |
| 16 | 88466926 | 88467139 | 88467034 | 8  | 9  | 2  | 3.910162798 | 0.00955088  | TCF25   | ENSG00000141002 |
| 16 | 88467528 | 88467892 | 88467632 | 9  | 14 | 3  | 4.398933147 | 0.00132748  | TCF25   | ENSG00000141002 |
| 16 | 88468011 | 88468248 | 88468162 | 8  | 11 | 1  | 7.038293036 | 0.000674435 | TCF25   | ENSG00000141002 |
| 16 | 88511770 | 88512014 | 88511924 | 10 | 13 | 6  | 2.346097679 | 0.0266147   | MC1R    | ENSG00000198211 |
| 16 | 88512206 | 88512489 | 88512347 | 9  | 12 | 1  | 7.624817456 | 0.000332769 | MC1R    | ENSG00000198211 |
| 16 | 88512632 | 88512870 | 88512757 | 8  | 9  | 7  | 1.466311049 | 0.20706     | MC1R    | ENSG00000198211 |
| 16 | 88520315 | 88520660 | 88520483 | 8  | 12 | 1  | 7.624817456 | 0.000332769 | MC1R    | ENSG00000198211 |
| 16 | 88616300 | 88616553 | 88616403 | 10 | 12 | 5  | 2.541605819 | 0.0225912   | GAS8    | ENSG00000141013 |
| 16 | 88617207 | 88617386 | 88617234 | 8  | 8  | 8  | 1.173048839 | 0.36929     | GAS8    | ENSG00000141013 |
| 16 | 88671223 | 88671658 | 88671500 | 11 | 19 | 9  | 2.346097679 | 0.0107159   | PRDM7   | ENSG00000126856 |
| 16 | 88675833 | 88676215 | 88676036 | 19 | 27 | 6  | 4.692195357 | 1.46E-05    | PRDM7   | ENSG00000126856 |
| 17 | 729627   | 729926   | 729771   | 9  | 13 | 5  | 2.737113958 | 0.0137917   | NXN     | ENSG00000167693 |
| 17 | 846793   | 847085   | 846956   | 9  | 12 | 3  | 3.812408728 | 0.004404    | TIMM22  | ENSG00000177370 |
| 17 | 851606   | 851907   | 851773   | 8  | 9  | 5  | 1.955081399 | 0.0892323   | TIMM22  | ENSG00000177370 |
| 17 | 937683   | 937966   | 937824   | 11 | 14 | 10 | 1.599612054 | 0.114822    | ABR     | ENSG00000159842 |
| 17 | 973154   | 973382   | 973278   | 9  | 9  | 3  | 2.932622098 | 0.0242899   | ABR     | ENSG00000159842 |
| 17 | 1037310  | 1037541  | 1037416  | 13 | 14 | 0  | 17.59573259 | 8.79E-06    | ABR     | ENSG00000159842 |
| 17 | 1053769  | 1053978  | 1053873  | 9  | 9  | 0  | 11.73048839 | 0.000425898 | ABR     | ENSG00000159842 |
| 17 | 1215579  | 1215789  | 1215641  | 9  | 10 | 5  | 2.150589539 | 0.0575848   | YWHAE   | ENSG00000108953 |
| 17 | 1250155  | 1250418  | 1250250  | 11 | 14 | 3  | 4.398933147 | 0.00132748  | YWHAE   | ENSG00000108953 |
| 17 | 1478907  | 1479132  | 1479031  | 8  | 9  | 2  | 3.910162798 | 0.00955088  | SLC43A2 | ENSG00000167703 |
| 17 | 1563822  | 1564170  | 1563996  | 9  | 15 | 2  | 6.256260476 | 0.000199274 |         | ENSG00000199060 |
| 17 | 1567304  | 1567671  | 1567483  | 14 | 21 | 5  | 4.301179077 | 0.000172642 | WDR81   | ENSG00000167716 |

|    |         |         |         |    |    |    |             |             |          |                 |
|----|---------|---------|---------|----|----|----|-------------|-------------|----------|-----------------|
| 17 | 1620133 | 1620559 | 1620383 | 16 | 23 | 3  | 7.038293036 | 4.15E-06    | SERPINF1 | ENSG00000132386 |
| 17 | 1847362 | 1847751 | 1847572 | 56 | 68 | 2  | 26.9801233  | 4.10E-21    | DPH1     | ENSG00000108963 |
| 17 | 1861487 | 1862126 | 1861723 | 17 | 36 | 11 | 3.616900588 | 1.14E-05    | DPH1     | ENSG00000108963 |
| 17 | 1875362 | 1875616 | 1875488 | 10 | 12 | 1  | 7.624817456 | 0.000332769 | DPH1     | ENSG00000108963 |
| 17 | 1876105 | 1876331 | 1876190 | 10 | 11 | 2  | 4.692195357 | 0.00272444  | DPH1     | ENSG00000108963 |
| 17 | 1880706 | 1880987 | 1880846 | 10 | 13 | 2  | 5.474227917 | 0.000747844 | DPH1     | ENSG00000108963 |
| 17 | 2094800 | 2095033 | 2094911 | 10 | 11 | 0  | 14.07658607 | 9.02E-05    | SMG6     | ENSG00000070366 |
| 17 | 2196508 | 2196786 | 2196647 | 9  | 13 | 4  | 3.28453675  | 0.00629037  | SGSM2    | ENSG00000141258 |
| 17 | 2211463 | 2211645 | 2211565 | 8  | 8  | 0  | 10.55743955 | 0.000925496 | SGSM2    | ENSG00000141258 |
| 17 | 2224907 | 2225136 | 2225021 | 9  | 10 | 11 | 1.075294769 | 0.434143    | SGSM2    | ENSG00000141258 |
| 17 | 2251004 | 2251223 | 2251090 | 11 | 11 | 1  | 7.038293036 | 0.000674435 | MNT      | ENSG00000070444 |
| 17 | 2251560 | 2251826 | 2251705 | 15 | 17 | 11 | 1.759573259 | 0.0609179   | MNT      | ENSG00000070444 |
| 17 | 2266199 | 2266398 | 2266298 | 12 | 12 | 3  | 3.812408728 | 0.004404    |          | ENSG00000205821 |
| 17 | 2561873 | 2562136 | 2562004 | 8  | 9  | 3  | 2.932622098 | 0.0242899   | KIAA0664 | ENSG00000132361 |
| 17 | 2636389 | 2636604 | 2636488 | 11 | 12 | 2  | 5.083211637 | 0.00143337  | GARNL4   | ENSG00000132359 |
| 17 | 2775983 | 2776457 | 2776219 | 27 | 36 | 0  | 43.40280705 | 3.38E-13    |          | ENSG00000203592 |
| 17 | 2810297 | 2810477 | 2810387 | 8  | 8  | 2  | 3.519146518 | 0.017558    |          | ENSG00000203592 |
| 17 | 2825480 | 2825723 | 2825594 | 14 | 14 | 3  | 4.398933147 | 0.00132748  |          | ENSG00000203592 |
| 17 | 2854322 | 2854598 | 2854460 | 14 | 15 | 4  | 3.753756286 | 0.0020497   |          | ENSG00000203592 |
| 17 | 3809462 | 3809656 | 3809598 | 10 | 10 | 2  | 4.301179077 | 0.00512919  | ATP2A3   | ENSG00000074370 |
| 17 | 3924949 | 3925225 | 3925087 | 14 | 17 | 3  | 5.278719777 | 0.000205462 |          | ENSG00000209497 |
| 17 | 4011110 | 4012032 | 4011746 | 18 | 43 | 6  | 7.373449847 | 6.53E-10    | CYB5D2   | ENSG00000167740 |
| 17 | 4037196 | 4037486 | 4037341 | 13 | 18 | 2  | 7.429309316 | 2.63E-05    |          | ENSG00000207390 |
| 17 | 4069271 | 4069670 | 4069461 | 45 | 55 | 1  | 32.8453675  | 4.16E-18    |          | ENSG00000207390 |
| 17 | 4080274 | 4080482 | 4080341 | 9  | 9  | 1  | 5.865244197 | 0.00272497  | ANKFY1   | ENSG00000185722 |
| 17 | 4247077 | 4247260 | 4247168 | 8  | 8  | 2  | 3.519146518 | 0.017558    | UBE2G1   | ENSG00000132388 |
| 17 | 4365695 | 4366032 | 4365865 | 13 | 17 | 1  | 10.55743955 | 9.18E-06    | SPNS2    | ENSG00000183018 |
| 17 | 4410563 | 4410902 | 4410732 | 15 | 19 | 1  | 11.73048839 | 2.14E-06    | GGT6     | ENSG00000167741 |
| 17 | 4429754 | 4430030 | 4429896 | 16 | 17 | 2  | 7.038293036 | 5.19E-05    | SMTNL2   | ENSG00000188176 |
| 17 | 4581577 | 4581923 | 4581750 | 8  | 14 | 7  | 2.199466574 | 0.0303778   | MED11    | ENSG00000161920 |
| 17 | 4646117 | 4646452 | 4646284 | 12 | 18 | 3  | 5.571981987 | 0.000108726 | PSMB6    | ENSG00000142507 |
| 17 | 4683294 | 4683508 | 4683400 | 9  | 9  | 4  | 2.346097679 | 0.050148    |          | ENSG00000216765 |
| 17 | 4703811 | 4704160 | 4703958 | 19 | 23 | 0  | 28.15317214 | 8.13E-09    |          | ENSG00000216765 |
| 17 | 4708407 | 4708617 | 4708516 | 9  | 9  | 1  | 5.865244197 | 0.00272497  |          | ENSG00000216765 |

|    |         |         |         |    |    |    |             |             |           |                 |
|----|---------|---------|---------|----|----|----|-------------|-------------|-----------|-----------------|
| 17 | 4733164 | 4733467 | 4733311 | 8  | 11 | 4  | 2.815317214 | 0.0183428   | MINK1     | ENSG00000141503 |
| 17 | 4753153 | 4753485 | 4753319 | 8  | 12 | 8  | 1.694403879 | 0.107291    | CHRNE     | ENSG00000108556 |
| 17 | 4810533 | 4810936 | 4810705 | 10 | 14 | 3  | 4.398933147 | 0.00132748  | SPAG7     | ENSG00000091640 |
| 17 | 4811770 | 4812100 | 4811873 | 8  | 13 | 5  | 2.737113958 | 0.0137917   | SPAG7     | ENSG00000091640 |
| 17 | 4879334 | 4879518 | 4879426 | 8  | 8  | 1  | 5.278719777 | 0.00542188  | GPR172B   | ENSG00000132517 |
| 17 | 5099296 | 5099566 | 5099442 | 9  | 10 | 5  | 2.150589539 | 0.0575848   | C17orf87  | ENSG00000161929 |
| 17 | 5104774 | 5105003 | 5104890 | 9  | 10 | 1  | 6.451768616 | 0.00135978  | RABEP1    | ENSG00000029725 |
| 17 | 5144505 | 5144684 | 5144594 | 8  | 8  | 1  | 5.278719777 | 0.00542188  | RABEP1    | ENSG00000029725 |
| 17 | 5313030 | 5313219 | 5313124 | 8  | 8  | 0  | 10.55743955 | 0.000925496 | DHX33     | ENSG00000005100 |
| 17 | 5672100 | 5672386 | 5672243 | 12 | 14 | 1  | 8.797866295 | 8.00E-05    | WSCD1     | ENSG00000179314 |
| 17 | 5681103 | 5681306 | 5681204 | 8  | 8  | 3  | 2.639359888 | 0.0415794   | WSCD1     | ENSG00000179314 |
| 17 | 5912985 | 5913165 | 5913127 | 8  | 8  | 4  | 2.111487911 | 0.0804809   | WSCD1     | ENSG00000179314 |
| 17 | 6037024 | 6037380 | 6037199 | 14 | 19 | 2  | 7.820325595 | 1.32E-05    |           | ENSG00000206618 |
| 17 | 6221241 | 6221448 | 6221325 | 8  | 9  | 5  | 1.955081399 | 0.0892323   | AIPL1     | ENSG00000129221 |
| 17 | 6411630 | 6411935 | 6411782 | 12 | 16 | 4  | 3.988366054 | 0.00115141  | PITPNM3   | ENSG00000091622 |
| 17 | 6484806 | 6485218 | 6485039 | 9  | 19 | 8  | 2.606775198 | 0.00583935  | KIAA0753  | ENSG00000198920 |
| 17 | 6495473 | 6495709 | 6495578 | 11 | 11 | 3  | 3.519146518 | 0.00788869  | MED31     | ENSG00000108590 |
| 17 | 6499183 | 6499475 | 6499325 | 9  | 13 | 2  | 5.474227917 | 0.000747844 | C17orf100 | ENSG00000212734 |
| 17 | 6856224 | 6856492 | 6856328 | 8  | 10 | 10 | 1.173048839 | 0.355733    |           | ENSG00000215067 |
| 17 | 6858523 | 6858843 | 6858683 | 11 | 15 | 4  | 3.753756286 | 0.0020497   | C17orf49  | ENSG00000161939 |
| 17 | 6863936 | 6864168 | 6864052 | 10 | 12 | 1  | 7.624817456 | 0.000332769 |           | ENSG00000207791 |
| 17 | 6879524 | 6879778 | 6879651 | 8  | 8  | 0  | 10.55743955 | 0.000925496 | SLC16A13  | ENSG00000174327 |
| 17 | 6890253 | 6890530 | 6890424 | 8  | 11 | 2  | 4.692195357 | 0.00272444  | SLC16A11  | ENSG00000174326 |
| 17 | 7078620 | 7078799 | 7078751 | 8  | 8  | 1  | 5.278719777 | 0.00542188  | DVL2      | ENSG00000004975 |
| 17 | 7083629 | 7084030 | 7083874 | 8  | 16 | 6  | 2.848832895 | 0.00632407  | PHF23     | ENSG00000040633 |
| 17 | 7096281 | 7096478 | 7096431 | 8  | 8  | 3  | 2.639359888 | 0.0415794   | C17orf81  | ENSG00000170291 |
| 17 | 7106250 | 7106567 | 7106408 | 9  | 11 | 1  | 7.038293036 | 0.000674435 | CLDN7     | ENSG00000181885 |
| 17 | 7127206 | 7127437 | 7127320 | 9  | 12 | 1  | 7.624817456 | 0.000332769 | SLC2A4    | ENSG00000181856 |
| 17 | 7150870 | 7151117 | 7151021 | 8  | 9  | 4  | 2.346097679 | 0.050148    | EIF5A11   | ENSG00000132507 |
| 17 | 7173443 | 7173824 | 7173633 | 13 | 22 | 4  | 5.396024661 | 3.05E-05    |           | ENSG00000215041 |
| 17 | 7196092 | 7196331 | 7196257 | 10 | 13 | 1  | 8.211341875 | 0.000163445 | KCTD11    | ENSG00000213859 |
| 17 | 7196398 | 7196606 | 7196469 | 8  | 9  | 0  | 11.73048839 | 0.000425898 | KCTD11    | ENSG00000213859 |
| 17 | 7198389 | 7198584 | 7198484 | 9  | 9  | 1  | 5.865244197 | 0.00272497  | TMEM95    | ENSG00000182896 |
| 17 | 7328260 | 7328945 | 7328556 | 11 | 33 | 15 | 2.492728784 | 0.000807271 | POLR2A    | ENSG00000181222 |

|    |         |         |         |    |    |    |             |             |          |                 |
|----|---------|---------|---------|----|----|----|-------------|-------------|----------|-----------------|
| 17 | 7402043 | 7402559 | 7402216 | 14 | 23 | 6  | 4.021881735 | 0.000148535 | TNFSF12  | ENSG00000161955 |
| 17 | 7405299 | 7405507 | 7405451 | 8  | 9  | 6  | 1.675784056 | 0.141978    | SENP3    | ENSG00000161956 |
| 17 | 7416378 | 7416573 | 7416478 | 8  | 10 | 11 | 1.075294769 | 0.434143    | EIF4A1   | ENSG00000161960 |
| 17 | 7427574 | 7427915 | 7427744 | 10 | 15 | 4  | 3.753756286 | 0.0020497   | MPDU1    | ENSG00000129255 |
| 17 | 7427917 | 7428165 | 7428080 | 11 | 13 | 2  | 5.474227917 | 0.000747844 | MPDU1    | ENSG00000129255 |
| 17 | 7529938 | 7530142 | 7530085 | 9  | 10 | 4  | 2.580707446 | 0.0306059   | TP53     | ENSG00000141510 |
| 17 | 7561165 | 7561584 | 7561307 | 12 | 20 | 3  | 6.158506406 | 2.99E-05    | DNAH2    | ENSG00000183914 |
| 17 | 7680822 | 7681171 | 7680996 | 9  | 14 | 10 | 1.599612054 | 0.114822    | JMJD3    | ENSG00000132510 |
| 17 | 7700987 | 7701189 | 7701088 | 8  | 11 | 0  | 14.07658607 | 9.02E-05    | LSMD1    | ENSG00000183011 |
| 17 | 7711841 | 7712064 | 7711952 | 8  | 10 | 1  | 6.451768616 | 0.00135978  |          | ENSG00000205498 |
| 17 | 7731347 | 7732049 | 7731873 | 10 | 25 | 11 | 2.541605819 | 0.00248721  | CHD3     | ENSG00000170004 |
| 17 | 7732365 | 7732571 | 7732468 | 10 | 10 | 6  | 1.843362462 | 0.0964212   | CHD3     | ENSG00000170004 |
| 17 | 7733267 | 7733531 | 7733399 | 10 | 13 | 6  | 2.346097679 | 0.0266147   | CHD3     | ENSG00000170004 |
| 17 | 7759473 | 7759725 | 7759592 | 8  | 11 | 2  | 4.692195357 | 0.00272444  |          | ENSG00000179859 |
| 17 | 7900494 | 7900818 | 7900598 | 8  | 12 | 2  | 5.083211637 | 0.00143337  | ALOX15B  | ENSG00000179593 |
| 17 | 7964086 | 7964505 | 7964346 | 9  | 14 | 6  | 2.513676084 | 0.016726    | ALOXE3   | ENSG00000179148 |
| 17 | 7982662 | 7983065 | 7982908 | 19 | 26 | 7  | 3.959039833 | 7.16E-05    | PER1     | ENSG00000179094 |
| 17 | 7983335 | 7983591 | 7983464 | 8  | 11 | 2  | 4.692195357 | 0.00272444  | PER1     | ENSG00000179094 |
| 17 | 8017223 | 8017791 | 8017465 | 14 | 31 | 16 | 2.208091933 | 0.00315316  |          | ENSG00000200463 |
| 17 | 8030316 | 8030541 | 8030377 | 12 | 13 | 6  | 2.346097679 | 0.0266147   | C17orf59 | ENSG00000196544 |
| 17 | 8030890 | 8031194 | 8031026 | 9  | 12 | 11 | 1.270802909 | 0.274822    | C17orf59 | ENSG00000196544 |
| 17 | 8031673 | 8031965 | 8031842 | 15 | 18 | 9  | 2.228792795 | 0.0164363   | C17orf59 | ENSG00000196544 |
| 17 | 8065511 | 8065720 | 8065615 | 8  | 8  | 3  | 2.639359888 | 0.0415794   | C17orf44 | ENSG00000178977 |
| 17 | 8066204 | 8066444 | 8066299 | 13 | 14 | 8  | 1.955081399 | 0.0506438   | C17orf44 | ENSG00000178977 |
| 17 | 8070339 | 8070539 | 8070439 | 8  | 9  | 12 | 0.902345261 | 0.602772    | C17orf44 | ENSG00000178977 |
| 17 | 8070976 | 8071304 | 8071135 | 8  | 12 | 10 | 1.386330446 | 0.21117     | C17orf44 | ENSG00000178977 |
| 17 | 8081208 | 8081583 | 8081422 | 11 | 17 | 2  | 7.038293036 | 5.19E-05    | C17orf68 | ENSG00000178971 |
| 17 | 8144775 | 8145033 | 8144867 | 11 | 13 | 3  | 4.105670938 | 0.00243034  | SLC25A35 | ENSG00000125434 |
| 17 | 8227122 | 8227530 | 8227301 | 11 | 18 | 5  | 3.714654658 | 0.000961539 | RPL26    | ENSG00000161970 |
| 17 | 8254473 | 8254679 | 8254576 | 8  | 8  | 1  | 5.278719777 | 0.00542188  |          | ENSG00000189051 |
| 17 | 8279555 | 8279846 | 8279700 | 8  | 12 | 2  | 5.083211637 | 0.00143337  | NDEL1    | ENSG00000166579 |
| 17 | 8425359 | 8425673 | 8425514 | 15 | 15 | 4  | 3.753756286 | 0.0020497   |          | ENSG00000223093 |
| 17 | 8449117 | 8449346 | 8449231 | 9  | 11 | 0  | 14.07658607 | 9.02E-05    | MYH10    | ENSG00000133026 |
| 17 | 8664924 | 8665103 | 8665073 | 9  | 9  | 2  | 3.910162798 | 0.00955088  | MFSD6L   | ENSG00000185156 |

|    |          |          |          |    |    |   |             |             |          |                 |
|----|----------|----------|----------|----|----|---|-------------|-------------|----------|-----------------|
| 17 | 8977218  | 8977419  | 8977322  | 11 | 11 | 3 | 3.519146518 | 0.00788869  |          | ENSG00000216007 |
| 17 | 9040476  | 9040784  | 9040639  | 9  | 11 | 4 | 2.815317214 | 0.0183428   |          | ENSG00000216007 |
| 17 | 9488479  | 9488844  | 9488787  | 13 | 19 | 4 | 4.692195357 | 0.000193572 | USP43    | ENSG00000154914 |
| 17 | 9963829  | 9964128  | 9963990  | 14 | 16 | 4 | 3.988366054 | 0.00115141  |          | ENSG00000221486 |
| 17 | 10049612 | 10050053 | 10049784 | 42 | 54 | 0 | 64.51768616 | 2.89E-19    | GAS7     | ENSG00000007237 |
| 17 | 10054298 | 10054586 | 10054469 | 10 | 13 | 5 | 2.737113958 | 0.0137917   | GAS7     | ENSG00000007237 |
| 17 | 10141137 | 10141542 | 10141337 | 34 | 43 | 0 | 51.61414893 | 1.48E-15    | MYH13    | ENSG00000006788 |
| 17 | 10195713 | 10196044 | 10195878 | 11 | 15 | 0 | 18.76878143 | 4.04E-06    | MYH13    | ENSG00000006788 |
| 17 | 10541404 | 10541746 | 10541575 | 8  | 12 | 1 | 7.624817456 | 0.000332769 | SCO1     | ENSG00000133028 |
| 17 | 10581255 | 10581496 | 10581347 | 8  | 9  | 4 | 2.346097679 | 0.050148    | TMEM220  | ENSG00000187824 |
| 17 | 10659540 | 10659775 | 10659681 | 10 | 11 | 3 | 3.519146518 | 0.00788869  |          | ENSG00000205351 |
| 17 | 12746798 | 12746994 | 12746896 | 8  | 8  | 2 | 3.519146518 | 0.017558    |          | ENSG00000006740 |
| 17 | 12868515 | 12868694 | 12868632 | 8  | 8  | 1 | 5.278719777 | 0.00542188  | ELAC2    | ENSG00000006744 |
| 17 | 13019238 | 13019521 | 13019373 | 12 | 13 | 1 | 8.211341875 | 0.000163445 | ELAC2    | ENSG00000006744 |
| 17 | 14050066 | 14050354 | 14050224 | 14 | 17 | 5 | 3.519146518 | 0.00167472  |          | ENSG00000217974 |
| 17 | 14463869 | 14464186 | 14464013 | 28 | 31 | 0 | 37.53756286 | 1.64E-11    |          | ENSG00000217265 |
| 17 | 14657830 | 14658036 | 14657933 | 8  | 10 | 7 | 1.612942154 | 0.147335    |          | ENSG00000205325 |
| 17 | 15807757 | 15808218 | 15807998 | 50 | 64 | 3 | 19.06204364 | 1.01E-18    | ADORA2B  | ENSG00000170425 |
| 17 | 16015715 | 16015950 | 16015832 | 9  | 9  | 3 | 2.932622098 | 0.0242899   |          | ENSG00000222695 |
| 17 | 16061045 | 16061363 | 16061204 | 11 | 17 | 5 | 3.519146518 | 0.00167472  | PIGL     | ENSG00000108474 |
| 17 | 16224873 | 16225180 | 16225026 | 10 | 14 | 3 | 4.398933147 | 0.00132748  | UBB      | ENSG00000170315 |
| 17 | 16282950 | 16283281 | 16283118 | 8  | 12 | 7 | 1.906204364 | 0.0695918   | C17orf45 | ENSG00000175061 |
| 17 | 16360685 | 16360911 | 16360799 | 8  | 8  | 0 | 10.55743955 | 0.000925496 | C17orf76 | ENSG00000181350 |
| 17 | 16380823 | 16381060 | 16380911 | 8  | 10 | 5 | 2.150589539 | 0.0575848   | ZNF287   | ENSG00000141040 |
| 17 | 16428344 | 16428732 | 16428472 | 14 | 20 | 6 | 3.519146518 | 0.000784044 | ZNF287   | ENSG00000141040 |
| 17 | 16433325 | 16433635 | 16433480 | 10 | 12 | 3 | 3.812408728 | 0.004404    | ZNF287   | ENSG00000141040 |
| 17 | 16862715 | 16863023 | 16862869 | 22 | 25 | 2 | 10.16642327 | 2.02E-07    | MPRIP    | ENSG00000133030 |
| 17 | 16864158 | 16864488 | 16864323 | 20 | 25 | 0 | 30.49926982 | 1.72E-09    | MPRIP    | ENSG00000133030 |
| 17 | 16922481 | 16922843 | 16922660 | 9  | 13 | 8 | 1.824742639 | 0.0744168   | MPRIP    | ENSG00000133030 |
| 17 | 17030143 | 17030351 | 17030240 | 8  | 10 | 2 | 4.301179077 | 0.00512919  |          | ENSG00000209051 |
| 17 | 17033627 | 17033995 | 17033806 | 47 | 56 | 1 | 33.43189192 | 1.95E-18    |          | ENSG00000209051 |
| 17 | 17140474 | 17140680 | 17140577 | 10 | 10 | 2 | 4.301179077 | 0.00512919  | NT5M     | ENSG00000205309 |
| 17 | 17200135 | 17200499 | 17200320 | 9  | 14 | 4 | 3.519146518 | 0.00361132  |          | ENSG00000220296 |
| 17 | 17435503 | 17435938 | 17435831 | 10 | 18 | 3 | 5.571981987 | 0.000108726 | PEMT     | ENSG00000133027 |

|    |          |          |          |    |     |    |             |             |        |                 |
|----|----------|----------|----------|----|-----|----|-------------|-------------|--------|-----------------|
| 17 | 17521422 | 17521658 | 17521584 | 10 | 12  | 1  | 7.624817456 | 0.000332769 | RAI1   | ENSG00000108557 |
| 17 | 17555031 | 17555256 | 17555108 | 8  | 9   | 3  | 2.932622098 | 0.0242899   | RAI1   | ENSG00000108557 |
| 17 | 17683930 | 17684145 | 17684011 | 9  | 9   | 3  | 2.932622098 | 0.0242899   | SREBF1 | ENSG00000072310 |
| 17 | 17757938 | 17758248 | 17758093 | 12 | 14  | 5  | 2.932622098 | 0.00829617  |        | ENSG00000212937 |
| 17 | 17931793 | 17932027 | 17931910 | 11 | 11  | 6  | 2.010940867 | 0.0640214   | DRG2   | ENSG00000108591 |
| 17 | 18038914 | 18039112 | 18039013 | 8  | 8   | 0  | 10.55743955 | 0.000925496 | ALKBH5 | ENSG00000091542 |
| 17 | 18218330 | 18218554 | 18218479 | 9  | 10  | 0  | 12.90353723 | 0.000195991 | EVPLL  | ENSG00000214860 |
| 17 | 19091932 | 19092348 | 19092225 | 13 | 19  | 3  | 5.865244197 | 5.72E-05    | EPN2   | ENSG00000072134 |
| 17 | 19231892 | 19232262 | 19232107 | 15 | 20  | 1  | 12.31701281 | 1.03E-06    | MFAP4  | ENSG00000166482 |
| 17 | 19351970 | 19352243 | 19352079 | 8  | 9   | 8  | 1.303387599 | 0.281715    |        | ENSG00000220507 |
| 17 | 19596953 | 19597456 | 19597220 | 82 | 108 | 4  | 25.5724647  | 1.03E-31    |        | ENSG00000219014 |
| 17 | 19597782 | 19598084 | 19597937 | 19 | 23  | 0  | 28.15317214 | 8.13E-09    |        | ENSG00000219014 |
| 17 | 19666970 | 19667211 | 19667086 | 11 | 12  | 6  | 2.178519273 | 0.0416567   |        | ENSG00000217843 |
| 17 | 19711019 | 19711207 | 19711113 | 9  | 10  | 2  | 4.301179077 | 0.00512919  | ULK2   | ENSG00000083290 |
| 17 | 19802106 | 19802402 | 19802256 | 9  | 11  | 3  | 3.519146518 | 0.00788869  | AKAP10 | ENSG00000108599 |
| 17 | 19830727 | 19831117 | 19830904 | 27 | 35  | 0  | 42.22975822 | 7.34E-13    | AKAP10 | ENSG00000108599 |
| 17 | 19852948 | 19853281 | 19853115 | 8  | 12  | 0  | 15.24963491 | 4.15E-05    | SPECC1 | ENSG00000128487 |
| 17 | 19939308 | 19939541 | 19939420 | 11 | 12  | 1  | 7.624817456 | 0.000332769 | SPECC1 | ENSG00000128487 |
| 17 | 20067736 | 20067993 | 20067864 | 10 | 13  | 0  | 16.42268375 | 1.91E-05    | SPECC1 | ENSG00000128487 |
| 17 | 20752674 | 20753049 | 20752853 | 8  | 15  | 5  | 3.128130238 | 0.00492422  |        | ENSG00000205212 |
| 17 | 20836792 | 20837125 | 20836961 | 14 | 18  | 4  | 4.457585589 | 0.000353565 |        | ENSG00000218004 |
| 17 | 21240081 | 21240591 | 21240361 | 25 | 43  | 6  | 7.373449847 | 6.53E-10    | KCNJ12 | ENSG00000184185 |
| 17 | 21254924 | 21255189 | 21255071 | 9  | 10  | 2  | 4.301179077 | 0.00512919  | KCNJ12 | ENSG00000184185 |
| 17 | 21301017 | 21301302 | 21301153 | 9  | 11  | 3  | 3.519146518 | 0.00788869  |        | ENSG00000214799 |
| 17 | 21944679 | 21945026 | 21944852 | 53 | 53  | 85 | 0.73656555  | 0.96314     |        | ENSG00000209244 |
| 17 | 22289152 | 22289414 | 22289252 | 13 | 15  | 11 | 1.564065119 | 0.11768     |        | ENSG00000210006 |
| 17 | 22592821 | 22593062 | 22592941 | 10 | 13  | 6  | 2.346097679 | 0.0266147   |        | ENSG00000213664 |
| 17 | 22598675 | 22598859 | 22598741 | 9  | 9   | 4  | 2.346097679 | 0.050148    |        | ENSG00000213664 |
| 17 | 22682269 | 22682832 | 22682527 | 66 | 95  | 0  | 112.6126886 | 4.38E-33    | WSB1   | ENSG00000109046 |
| 17 | 22683678 | 22683918 | 22683839 | 9  | 11  | 0  | 14.07658607 | 9.02E-05    | WSB1   | ENSG00000109046 |
| 17 | 22683946 | 22684246 | 22684096 | 10 | 13  | 0  | 16.42268375 | 1.91E-05    | WSB1   | ENSG00000109046 |
| 17 | 23005862 | 23006064 | 23005963 | 8  | 9   | 5  | 1.955081399 | 0.0892323   |        | ENSG00000168937 |
| 17 | 23224911 | 23225415 | 23225086 | 14 | 22  | 8  | 2.997791478 | 0.00137524  |        | ENSG00000205191 |
| 17 | 23602550 | 23603061 | 23602811 | 13 | 27  | 7  | 4.105670938 | 4.08E-05    |        | ENSG00000203479 |



|    |          |          |          |     |     |    |             |             |          |                 |
|----|----------|----------|----------|-----|-----|----|-------------|-------------|----------|-----------------|
| 17 | 23633732 | 23634157 | 23633983 | 28  | 39  | 1  | 23.46097679 | 7.43E-13    |          | ENSG00000203478 |
| 17 | 23686482 | 23686865 | 23686661 | 11  | 19  | 6  | 3.351568112 | 0.00134187  | IFT20    | ENSG00000109083 |
| 17 | 23759218 | 23759402 | 23759318 | 8   | 9   | 3  | 2.932622098 | 0.0242899   | SLC46A1  | ENSG00000076351 |
| 17 | 23774591 | 23774818 | 23774768 | 12  | 14  | 0  | 17.59573259 | 8.79E-06    |          | ENSG00000203468 |
| 17 | 23849115 | 23849337 | 23849226 | 13  | 15  | 1  | 9.384390715 | 3.90E-05    |          | ENSG00000203466 |
| 17 | 23849543 | 23849734 | 23849620 | 8   | 8   | 2  | 3.519146518 | 0.017558    |          | ENSG00000203466 |
| 17 | 23879042 | 23879344 | 23879199 | 10  | 13  | 2  | 5.474227917 | 0.000747844 | FOXN1    | ENSG00000109101 |
| 17 | 23887988 | 23888246 | 23888117 | 8   | 12  | 2  | 5.083211637 | 0.00143337  |          | ENSG00000205180 |
| 17 | 23899349 | 23899530 | 23899419 | 8   | 8   | 1  | 5.278719777 | 0.00542188  | UNC119   | ENSG00000109103 |
| 17 | 23985580 | 23985872 | 23985726 | 15  | 18  | 7  | 2.785990993 | 0.00480525  | KIAA0100 | ENSG00000007202 |
| 17 | 24078111 | 24078416 | 24078263 | 11  | 15  | 5  | 3.128130238 | 0.00492422  | TLCD1    | ENSG00000160606 |
| 17 | 24080031 | 24080407 | 24080268 | 9   | 14  | 7  | 2.199466574 | 0.0303778   | NEK8     | ENSG00000160602 |
| 17 | 24094086 | 24095083 | 24094340 | 157 | 226 | 4  | 53.2564173  | 3.05E-70    | TRAF4    | ENSG00000076604 |
| 17 | 24097531 | 24097747 | 24097581 | 8   | 11  | 2  | 4.692195357 | 0.00272444  | TRAF4    | ENSG00000076604 |
| 17 | 24097993 | 24098239 | 24098117 | 10  | 12  | 6  | 2.178519273 | 0.0416567   | TRAF4    | ENSG00000076604 |
| 17 | 24101283 | 24101561 | 24101422 | 13  | 16  | 7  | 2.492728784 | 0.0124193   | TRAF4    | ENSG00000076604 |
| 17 | 24303550 | 24303877 | 24303714 | 10  | 14  | 15 | 1.099733287 | 0.398076    | PHF12    | ENSG00000109118 |
| 17 | 24347369 | 24347673 | 24347498 | 8   | 10  | 1  | 6.451768616 | 0.00135978  | SEZ6     | ENSG00000063015 |
| 17 | 24741288 | 24741657 | 24741478 | 8   | 15  | 10 | 1.706252857 | 0.0822346   | TAOK1    | ENSG00000160551 |
| 17 | 24931550 | 24931793 | 24931680 | 10  | 11  | 2  | 4.692195357 | 0.00272444  | TP53I13  | ENSG00000167543 |
| 17 | 24938237 | 24938515 | 24938376 | 12  | 15  | 1  | 9.384390715 | 3.90E-05    | GIT1     | ENSG00000108262 |
| 17 | 24942918 | 24943191 | 24943054 | 13  | 15  | 3  | 4.692195357 | 0.000718455 | ANKRD13B | ENSG00000198720 |
| 17 | 24969158 | 24969337 | 24969247 | 8   | 8   | 2  | 3.519146518 | 0.017558    | CORO6    | ENSG00000167549 |
| 17 | 25095965 | 25096189 | 25096077 | 12  | 12  | 6  | 2.178519273 | 0.0416567   | SSH2     | ENSG00000141298 |
| 17 | 25355117 | 25355519 | 25355326 | 33  | 44  | 3  | 13.19679944 | 1.95E-12    |          | ENSG00000207011 |
| 17 | 25391786 | 25392199 | 25392063 | 13  | 19  | 0  | 23.46097679 | 1.81E-07    |          | ENSG00000207011 |
| 17 | 25578091 | 25578296 | 25578139 | 8   | 9   | 0  | 11.73048839 | 0.000425898 | SLC6A4   | ENSG00000108576 |
| 17 | 25588063 | 25588257 | 25588160 | 9   | 9   | 1  | 5.865244197 | 0.00272497  | SLC6A4   | ENSG00000108576 |
| 17 | 25823631 | 25824002 | 25823824 | 22  | 28  | 1  | 17.00920817 | 2.80E-09    | GOSR1    | ENSG00000108587 |
| 17 | 25828374 | 25828634 | 25828504 | 10  | 11  | 0  | 14.07658607 | 9.02E-05    | GOSR1    | ENSG00000108587 |
| 17 | 26257316 | 26257555 | 26257442 | 11  | 13  | 0  | 16.42268375 | 1.91E-05    | C17orf42 | ENSG00000172171 |
| 17 | 26423341 | 26423719 | 26423503 | 37  | 44  | 2  | 17.59573259 | 2.22E-13    | NF1      | ENSG00000196712 |
| 17 | 26625354 | 26625701 | 26625527 | 25  | 29  | 2  | 11.73048839 | 1.18E-08    |          | ENSG00000210267 |
| 17 | 26901057 | 26901405 | 26901231 | 15  | 20  | 12 | 1.894925048 | 0.0317253   |          | ENSG00000207614 |

|    |          |          |          |     |     |     |             |             |          |                 |
|----|----------|----------|----------|-----|-----|-----|-------------|-------------|----------|-----------------|
| 17 | 26917777 | 26918016 | 26917896 | 8   | 9   | 4   | 2.346097679 | 0.050148    |          | ENSG00000221038 |
| 17 | 27252645 | 27252834 | 27252750 | 8   | 8   | 5   | 1.759573259 | 0.13508     | UTP6     | ENSG00000108651 |
| 17 | 27508333 | 27508613 | 27508496 | 10  | 12  | 10  | 1.386330446 | 0.21117     |          | ENSG00000214708 |
| 17 | 27693225 | 27693433 | 27693317 | 10  | 11  | 0   | 14.07658607 | 9.02E-05    | C17orf75 | ENSG00000108666 |
| 17 | 28173588 | 28174143 | 28173968 | 32  | 43  | 20  | 2.457816616 | 0.000201157 |          | ENSG00000201178 |
| 17 | 28934528 | 28935002 | 28934823 | 33  | 41  | 2   | 16.42268375 | 2.00E-12    | ACCN1    | ENSG00000108684 |
| 17 | 29130348 | 29130597 | 29130478 | 8   | 9   | 0   | 11.73048839 | 0.000425898 |          | ENSG00000221699 |
| 17 | 29551138 | 29551380 | 29551215 | 8   | 9   | 8   | 1.303387599 | 0.281715    | ACCN1    | ENSG00000108684 |
| 17 | 29557761 | 29558147 | 29557954 | 25  | 34  | 1   | 20.52835469 | 3.17E-11    | CCL2     | ENSG00000108691 |
| 17 | 29752394 | 29752705 | 29752549 | 13  | 16  | 1   | 9.970915134 | 1.89E-05    |          | ENSG00000210356 |
| 17 | 29961303 | 29961541 | 29961445 | 10  | 11  | 2   | 4.692195357 | 0.00272444  | TMEM132E | ENSG00000181291 |
| 17 | 30268585 | 30268811 | 30268698 | 10  | 11  | 5   | 2.346097679 | 0.0364013   | CCT6B    | ENSG00000132141 |
| 17 | 30350856 | 30351059 | 30350957 | 11  | 11  | 0   | 14.07658607 | 9.02E-05    | LIG3     | ENSG00000005156 |
| 17 | 30502096 | 30502616 | 30502273 | 106 | 163 | 101 | 1.886078526 | 1.52E-07    | UNC45B   | ENSG00000141161 |
| 17 | 30510800 | 30511072 | 30510903 | 11  | 12  | 0   | 15.24963491 | 4.15E-05    | UNC45B   | ENSG00000141161 |
| 17 | 30608482 | 30608730 | 30608594 | 10  | 11  | 2   | 4.692195357 | 0.00272444  | SLFN5    | ENSG00000166750 |
| 17 | 30724022 | 30724278 | 30724134 | 10  | 13  | 3   | 4.105670938 | 0.00243034  | SLFN11   | ENSG00000172716 |
| 17 | 30929644 | 30929841 | 30929691 | 8   | 9   | 0   | 11.73048839 | 0.000425898 | PEX12    | ENSG00000108733 |
| 17 | 31381564 | 31381902 | 31381724 | 13  | 16  | 0   | 19.94183027 | 1.86E-06    | CCL23    | ENSG00000167236 |
| 17 | 32161655 | 32161904 | 32161833 | 10  | 12  | 3   | 3.812408728 | 0.004404    |          | ENSG00000223276 |
| 17 | 32162395 | 32162591 | 32162493 | 8   | 8   | 0   | 10.55743955 | 0.000925496 |          | ENSG00000223276 |
| 17 | 32470611 | 32470941 | 32470771 | 11  | 14  | 1   | 8.797866295 | 8.00E-05    | AATF     | ENSG00000108270 |
| 17 | 32608261 | 32608577 | 32608433 | 11  | 13  | 0   | 16.42268375 | 1.91E-05    | ACACA    | ENSG00000132142 |
| 17 | 32925394 | 32925742 | 32925568 | 13  | 19  | 3   | 5.865244197 | 5.72E-05    | DUSP14   | ENSG00000161326 |
| 17 | 33135670 | 33135941 | 33135804 | 11  | 11  | 1   | 7.038293036 | 0.000674435 | HNF1B    | ENSG00000108753 |
| 17 | 33151327 | 33151551 | 33151395 | 9   | 10  | 2   | 4.301179077 | 0.00512919  | HNF1B    | ENSG00000108753 |
| 17 | 33761020 | 33761204 | 33761108 | 8   | 8   | 0   | 10.55743955 | 0.000925496 | SOCS7    | ENSG00000174111 |
| 17 | 33919249 | 33919440 | 33919296 | 9   | 10  | 1   | 6.451768616 | 0.00135978  | ARHGAP23 | ENSG00000167433 |
| 17 | 33968093 | 33968283 | 33968161 | 9   | 10  | 2   | 4.301179077 | 0.00512919  |          | ENSG00000017373 |
| 17 | 34008386 | 34008625 | 34008521 | 13  | 13  | 5   | 2.737113958 | 0.0137917   |          | ENSG00000017373 |
| 17 | 34113516 | 34113915 | 34113782 | 14  | 21  | 2   | 8.602358155 | 3.33E-06    | MLLT6    | ENSG00000108292 |
| 17 | 34159437 | 34159823 | 34159647 | 14  | 19  | 2   | 7.820325595 | 1.32E-05    | PCGF2    | ENSG00000056661 |
| 17 | 34162181 | 34162564 | 34162385 | 12  | 19  | 6   | 3.351568112 | 0.00134187  | PSMB3    | ENSG00000108294 |
| 17 | 34263297 | 34263830 | 34263563 | 9   | 20  | 10  | 2.239456875 | 0.0121685   | RPL23    | ENSG00000125691 |

|    |          |          |          |     |     |   |             |             |                          |
|----|----------|----------|----------|-----|-----|---|-------------|-------------|--------------------------|
| 17 | 34456204 | 34457056 | 34456663 | 208 | 264 | 5 | 51.80965707 | 2.55E-81    | ENSG00000214553          |
| 17 | 34502139 | 34502379 | 34502272 | 9   | 10  | 2 | 4.301179077 | 0.00512919  | ENSG00000222494          |
| 17 | 34562698 | 34562901 | 34562767 | 8   | 9   | 5 | 1.955081399 | 0.0892323   | PLXDC1 ENSG00000161381   |
| 17 | 34562944 | 34563123 | 34563033 | 9   | 9   | 1 | 5.865244197 | 0.00272497  | PLXDC1 ENSG00000161381   |
| 17 | 34563951 | 34564385 | 34564119 | 10  | 17  | 7 | 2.639359888 | 0.00777415  | PLXDC1 ENSG00000161381   |
| 17 | 34576343 | 34576552 | 34576403 | 11  | 11  | 1 | 7.038293036 | 0.000674435 | ARL5C ENSG00000141748    |
| 17 | 34609740 | 34609955 | 34609850 | 8   | 10  | 5 | 2.150589539 | 0.0575848   | RPL19 ENSG00000108298    |
| 17 | 34860941 | 34861242 | 34861085 | 15  | 18  | 2 | 7.429309316 | 2.63E-05    | MED1 ENSG00000125686     |
| 17 | 35031863 | 35032089 | 35032021 | 8   | 10  | 1 | 6.451768616 | 0.00135978  | ENSG00000214546          |
| 17 | 35115598 | 35115881 | 35115739 | 12  | 15  | 4 | 3.753756286 | 0.0020497   | ERBB2 ENSG00000141736    |
| 17 | 35147611 | 35147969 | 35147790 | 11  | 14  | 5 | 2.932622098 | 0.00829617  | GRB7 ENSG00000141738     |
| 17 | 35159773 | 35160329 | 35159988 | 54  | 80  | 3 | 23.754239   | 7.70E-24    | GRB7 ENSG00000141738     |
| 17 | 35179711 | 35180036 | 35179835 | 14  | 19  | 3 | 5.865244197 | 5.72E-05    | GRB7 ENSG00000141738     |
| 17 | 35282608 | 35282879 | 35282743 | 13  | 14  | 7 | 2.199466574 | 0.0303778   | ZBP2 ENSG00000186075     |
| 17 | 35390258 | 35390650 | 35390473 | 12  | 20  | 6 | 3.519146518 | 0.000784044 | PSMD3 ENSG00000108344    |
| 17 | 35604121 | 35604435 | 35604266 | 18  | 20  | 0 | 24.63402563 | 8.35E-08    | RAPGEFL1 ENSG00000108352 |
| 17 | 35716791 | 35717192 | 35716970 | 10  | 17  | 2 | 7.038293036 | 5.19E-05    | RARA ENSG00000131759     |
| 17 | 35724029 | 35724721 | 35724190 | 20  | 44  | 1 | 26.39359888 | 1.72E-14    | RARA ENSG00000131759     |
| 17 | 35726363 | 35726644 | 35726541 | 9   | 13  | 3 | 4.105670938 | 0.00243034  | RARA ENSG00000131759     |
| 17 | 35732112 | 35732379 | 35732245 | 10  | 12  | 4 | 3.049926982 | 0.0108184   | RARA ENSG00000131759     |
| 17 | 35768353 | 35768560 | 35768408 | 8   | 9   | 2 | 3.910162798 | 0.00955088  | GJD3 ENSG00000183153     |
| 17 | 35827757 | 35828036 | 35827896 | 9   | 13  | 4 | 3.28453675  | 0.00629037  | TOP2A ENSG00000131747    |
| 17 | 35850882 | 35851069 | 35850947 | 9   | 10  | 1 | 6.451768616 | 0.00135978  | IGFBP4 ENSG00000141753   |
| 17 | 35858525 | 35858726 | 35858631 | 8   | 8   | 5 | 1.759573259 | 0.13508     | IGFBP4 ENSG00000141753   |
| 17 | 35881123 | 35881529 | 35881283 | 9   | 16  | 1 | 9.970915134 | 1.89E-05    | TNS4 ENSG00000131746     |
| 17 | 35947786 | 35948288 | 35947965 | 25  | 40  | 1 | 24.04750121 | 3.50E-13    | CCR7 ENSG00000126353     |
| 17 | 35957278 | 35957658 | 35957436 | 42  | 50  | 2 | 19.94183027 | 2.68E-15    | CCR7 ENSG00000126353     |
| 17 | 35970066 | 35970322 | 35970194 | 17  | 18  | 2 | 7.429309316 | 2.63E-05    | CCR7 ENSG00000126353     |
| 17 | 35992061 | 35992445 | 35992254 | 54  | 63  | 2 | 25.02504191 | 1.72E-19    | CCR7 ENSG00000126353     |
| 17 | 36028747 | 36029025 | 36028886 | 10  | 13  | 2 | 5.474227917 | 0.000747844 | ENSG00000180193          |
| 17 | 36095948 | 36096300 | 36096124 | 12  | 17  | 3 | 5.278719777 | 0.000205462 | ENSG00000220264          |
| 17 | 36104476 | 36104677 | 36104569 | 11  | 12  | 6 | 2.178519273 | 0.0416567   | ENSG00000220264          |
| 17 | 36213339 | 36213598 | 36213460 | 9   | 10  | 1 | 6.451768616 | 0.00135978  | KRT28 ENSG00000173908    |
| 17 | 36313385 | 36313600 | 36313513 | 8   | 9   | 4 | 2.346097679 | 0.050148    | KRT20 ENSG00000171431    |

|    |          |          |          |    |    |    |             |             |          |                 |
|----|----------|----------|----------|----|----|----|-------------|-------------|----------|-----------------|
| 17 | 36319139 | 36319347 | 36319204 | 8  | 10 | 1  | 6.451768616 | 0.00135978  | KRT20    | ENSG00000171431 |
| 17 | 36320083 | 36320543 | 36320364 | 13 | 20 | 9  | 2.463402563 | 0.00689886  | KRT20    | ENSG00000171431 |
| 17 | 36367897 | 36368146 | 36368021 | 8  | 10 | 6  | 1.843362462 | 0.0964212   | KRT39    | ENSG00000196859 |
| 17 | 36419245 | 36419425 | 36419328 | 9  | 9  | 4  | 2.346097679 | 0.050148    | KRTAP3-1 | ENSG00000213418 |
| 17 | 36758059 | 36758365 | 36758194 | 8  | 11 | 1  | 7.038293036 | 0.000674435 | KRT33A   | ENSG00000006059 |
| 17 | 36929294 | 36929951 | 36929459 | 21 | 37 | 8  | 4.952872877 | 3.52E-07    | KRT15    | ENSG00000171346 |
| 17 | 36931081 | 36931274 | 36931177 | 8  | 9  | 4  | 2.346097679 | 0.050148    | KRT15    | ENSG00000171346 |
| 17 | 36935005 | 36935252 | 36935091 | 8  | 11 | 1  | 7.038293036 | 0.000674435 | KRT15    | ENSG00000171346 |
| 17 | 36937910 | 36938206 | 36938058 | 13 | 17 | 2  | 7.038293036 | 5.19E-05    | KRT19    | ENSG00000171345 |
| 17 | 36939446 | 36939652 | 36939549 | 11 | 11 | 2  | 4.692195357 | 0.00272444  | KRT19    | ENSG00000171345 |
| 17 | 36945705 | 36946113 | 36945955 | 27 | 35 | 3  | 10.55743955 | 1.13E-09    | KRT19    | ENSG00000171345 |
| 17 | 36946949 | 36947186 | 36947051 | 8  | 9  | 1  | 5.865244197 | 0.00272497  | KRT19    | ENSG00000171345 |
| 17 | 36949072 | 36949286 | 36949173 | 11 | 12 | 5  | 2.541605819 | 0.0225912   | KRT19    | ENSG00000171345 |
| 17 | 36958293 | 36958615 | 36958454 | 10 | 15 | 5  | 3.128130238 | 0.00492422  | KRT19    | ENSG00000171345 |
| 17 | 36958716 | 36958978 | 36958847 | 13 | 15 | 5  | 3.128130238 | 0.00492422  | KRT19    | ENSG00000171345 |
| 17 | 36959025 | 36959269 | 36959135 | 9  | 10 | 2  | 4.301179077 | 0.00512919  | KRT19    | ENSG00000171345 |
| 17 | 37058519 | 37058768 | 37058655 | 9  | 12 | 3  | 3.812408728 | 0.004404    | KRT42P   | ENSG00000214514 |
| 17 | 37075593 | 37075959 | 37075772 | 12 | 18 | 2  | 7.429309316 | 2.63E-05    | EIF1     | ENSG00000173812 |
| 17 | 37147731 | 37148093 | 37147910 | 9  | 16 | 12 | 1.533986944 | 0.120062    | HAP1     | ENSG00000173805 |
| 17 | 37182061 | 37182341 | 37182201 | 18 | 21 | 4  | 5.161414893 | 5.68E-05    | JUP      | ENSG00000173801 |
| 17 | 37187302 | 37187693 | 37187481 | 16 | 23 | 13 | 2.010940867 | 0.0163115   | JUP      | ENSG00000173801 |
| 17 | 37194087 | 37194310 | 37194198 | 9  | 12 | 2  | 5.083211637 | 0.00143337  | JUP      | ENSG00000173801 |
| 17 | 37195759 | 37195997 | 37195898 | 8  | 9  | 1  | 5.865244197 | 0.00272497  | JUP      | ENSG00000173801 |
| 17 | 37196807 | 37197059 | 37196933 | 8  | 10 | 7  | 1.612942154 | 0.147335    | JUP      | ENSG00000173801 |
| 17 | 37205815 | 37206127 | 37205966 | 11 | 13 | 6  | 2.346097679 | 0.0266147   | JUP      | ENSG00000173801 |
| 17 | 37430526 | 37430715 | 37430620 | 9  | 10 | 2  | 4.301179077 | 0.00512919  | ZNF385C  | ENSG00000187595 |
| 17 | 37456998 | 37457387 | 37457177 | 12 | 20 | 1  | 12.31701281 | 1.03E-06    | ZNF385C  | ENSG00000187595 |
| 17 | 37599902 | 37600125 | 37599965 | 10 | 11 | 3  | 3.519146518 | 0.00788869  | GHDC     | ENSG00000167925 |
| 17 | 37728356 | 37728624 | 37728521 | 15 | 16 | 4  | 3.988366054 | 0.00115141  | STAT5A   | ENSG00000126561 |
| 17 | 37794122 | 37794505 | 37794341 | 18 | 25 | 6  | 4.357038546 | 4.72E-05    | STAT3    | ENSG00000168610 |
| 17 | 37953775 | 37953964 | 37953857 | 8  | 9  | 0  | 11.73048839 | 0.000425898 | HSD17B1  | ENSG00000108786 |
| 17 | 37968019 | 37968210 | 37968114 | 8  | 8  | 3  | 2.639359888 | 0.0415794   | COASY    | ENSG00000068120 |
| 17 | 37983979 | 37984196 | 37984109 | 10 | 11 | 2  | 4.692195357 | 0.00272444  | PSMC3IP  | ENSG00000131470 |
| 17 | 38081464 | 38081711 | 38081576 | 10 | 10 | 1  | 6.451768616 | 0.00135978  | PLEKHH3  | ENSG00000068137 |

|    |          |          |          |    |     |    |             |             |          |                 |
|----|----------|----------|----------|----|-----|----|-------------|-------------|----------|-----------------|
| 17 | 38178688 | 38179095 | 38178833 | 11 | 18  | 8  | 2.476436439 | 0.00924552  | VPS25    | ENSG00000131475 |
| 17 | 38225576 | 38225819 | 38225687 | 9  | 9   | 3  | 2.932622098 | 0.0242899   | BECN1    | ENSG00000126581 |
| 17 | 38403652 | 38404047 | 38403818 | 19 | 26  | 5  | 5.278719777 | 8.57E-06    | RPL27    | ENSG00000131469 |
| 17 | 38575874 | 38576101 | 38575996 | 8  | 10  | 3  | 3.225884308 | 0.0139466   |          | ENSG00000188554 |
| 17 | 38577041 | 38577220 | 38577113 | 8  | 8   | 2  | 3.519146518 | 0.017558    |          | ENSG00000188554 |
| 17 | 38719132 | 38719313 | 38719222 | 8  | 9   | 1  | 5.865244197 | 0.00272497  | TMEM106A | ENSG00000184988 |
| 17 | 38737126 | 38737838 | 38737600 | 27 | 66  | 43 | 1.78623346  | 0.00119904  | TMEM106A | ENSG00000184988 |
| 17 | 38742668 | 38743066 | 38742847 | 15 | 21  | 7  | 3.225884308 | 0.00106152  | TMEM106A | ENSG00000184988 |
| 17 | 38748694 | 38749060 | 38748873 | 11 | 18  | 27 | 0.795997427 | 0.784443    | TMEM106A | ENSG00000184988 |
| 17 | 38755559 | 38756716 | 38756037 | 19 | 68  | 91 | 0.879786629 | 0.791814    | TMEM106A | ENSG00000184988 |
| 17 | 38793682 | 38794363 | 38794054 | 23 | 44  | 17 | 2.932622098 | 2.03E-05    |          | ENSG00000210609 |
| 17 | 38800659 | 38801142 | 38800886 | 14 | 28  | 11 | 2.834868028 | 0.000626961 |          | ENSG00000210609 |
| 17 | 38821214 | 38822063 | 38821715 | 20 | 47  | 28 | 1.941598079 | 0.00196509  |          | ENSG00000204733 |
| 17 | 38827032 | 38827243 | 38827135 | 9  | 9   | 3  | 2.932622098 | 0.0242899   |          | ENSG00000210627 |
| 17 | 38916489 | 38916979 | 38916811 | 9  | 17  | 7  | 2.639359888 | 0.00777415  | DHX8     | ENSG00000067596 |
| 17 | 38945652 | 38945899 | 38945756 | 8  | 8   | 1  | 5.278719777 | 0.00542188  | DHX8     | ENSG00000067596 |
| 17 | 38963767 | 38963976 | 38963871 | 8  | 8   | 0  | 10.55743955 | 0.000925496 | ETV4     | ENSG00000175832 |
| 17 | 38980792 | 38981180 | 38981001 | 17 | 25  | 0  | 30.49926982 | 1.72E-09    | ETV4     | ENSG00000175832 |
| 17 | 39193267 | 39193607 | 39193437 | 13 | 18  | 5  | 3.714654658 | 0.000961539 | SOST     | ENSG00000167941 |
| 17 | 39272785 | 39273079 | 39272908 | 15 | 18  | 4  | 4.457585589 | 0.000353565 | MPP3     | ENSG00000161647 |
| 17 | 39275008 | 39275199 | 39275118 | 8  | 8   | 4  | 2.111487911 | 0.0804809   | CD300LG  | ENSG00000161649 |
| 17 | 39305129 | 39305581 | 39305374 | 84 | 97  | 1  | 57.47939313 | 5.00E-32    | CD300LG  | ENSG00000161649 |
| 17 | 39330743 | 39331017 | 39330880 | 8  | 9   | 3  | 2.932622098 | 0.0242899   | MPP2     | ENSG00000108852 |
| 17 | 39376906 | 39377168 | 39377015 | 9  | 11  | 3  | 3.519146518 | 0.00788869  | PPY      | ENSG00000108849 |
| 17 | 39447753 | 39448156 | 39447931 | 14 | 20  | 4  | 4.926805125 | 0.00010522  | TMEM101  | ENSG00000091947 |
| 17 | 39503475 | 39503738 | 39503589 | 9  | 13  | 4  | 3.28453675  | 0.00629037  | G6PC3    | ENSG00000141349 |
| 17 | 39556625 | 39556947 | 39556781 | 12 | 15  | 3  | 4.692195357 | 0.000718455 | HDAC5    | ENSG00000108840 |
| 17 | 39574543 | 39574835 | 39574689 | 16 | 17  | 4  | 4.222975822 | 0.000640773 | C17orf53 | ENSG00000125319 |
| 17 | 39585747 | 39586214 | 39585991 | 84 | 106 | 0  | 125.5162258 | 8.58E-37    | C17orf53 | ENSG00000125319 |
| 17 | 39619577 | 39619963 | 39619743 | 12 | 18  | 3  | 5.571981987 | 0.000108726 | C17orf65 | ENSG00000168597 |
| 17 | 39626485 | 39626844 | 39626659 | 13 | 18  | 6  | 3.183989707 | 0.00227432  | ATXN7L3  | ENSG00000087152 |
| 17 | 39655611 | 39655883 | 39655738 | 11 | 14  | 7  | 2.199466574 | 0.0303778   | UBTF     | ENSG00000108312 |
| 17 | 39741375 | 39741580 | 39741496 | 8  | 11  | 4  | 2.815317214 | 0.0183428   | RUNDC3A  | ENSG00000108309 |
| 17 | 39777735 | 39778263 | 39777981 | 12 | 25  | 4  | 6.099853964 | 4.56E-06    | GRN      | ENSG00000030582 |

|    |          |          |          |    |    |   |             |             |          |                 |
|----|----------|----------|----------|----|----|---|-------------|-------------|----------|-----------------|
| 17 | 39783732 | 39783956 | 39783844 | 8  | 10 | 0 | 12.90353723 | 0.000195991 | GRN      | ENSG00000030582 |
| 17 | 39989852 | 39990042 | 39989947 | 8  | 8  | 1 | 5.278719777 | 0.00542188  | FZD2     | ENSG00000180340 |
| 17 | 40122724 | 40122974 | 40122887 | 9  | 10 | 2 | 4.301179077 | 0.00512919  | CCDC43   | ENSG00000180329 |
| 17 | 40141395 | 40141754 | 40141595 | 8  | 14 | 1 | 8.797866295 | 8.00E-05    | DBF4B    | ENSG00000161692 |
| 17 | 40207711 | 40207955 | 40207861 | 8  | 9  | 4 | 2.346097679 | 0.050148    | ADAM11   | ENSG00000073670 |
| 17 | 40380633 | 40380982 | 40380807 | 12 | 17 | 3 | 5.278719777 | 0.000205462 | KIF18B   | ENSG00000186185 |
| 17 | 40476244 | 40476553 | 40476419 | 9  | 13 | 3 | 4.105670938 | 0.00243034  | DCAKD    | ENSG00000172992 |
| 17 | 40480172 | 40480433 | 40480302 | 29 | 30 | 2 | 12.12150467 | 5.77E-09    | DCAKD    | ENSG00000172992 |
| 17 | 40483351 | 40483566 | 40483444 | 9  | 10 | 4 | 2.580707446 | 0.0306059   | DCAKD    | ENSG00000172992 |
| 17 | 40494234 | 40494519 | 40494352 | 9  | 12 | 1 | 7.624817456 | 0.000332769 | NMT1     | ENSG00000136448 |
| 17 | 40560372 | 40560880 | 40560551 | 40 | 63 | 1 | 37.53756286 | 9.51E-21    | PLCD3    | ENSG00000161714 |
| 17 | 40568205 | 40568591 | 40568343 | 9  | 15 | 7 | 2.346097679 | 0.0195693   | ACBD4    | ENSG00000181513 |
| 17 | 40580771 | 40581140 | 40580920 | 14 | 19 | 5 | 3.910162798 | 0.000546977 | HEXIM1   | ENSG00000186834 |
| 17 | 40581254 | 40582028 | 40581747 | 15 | 40 | 4 | 9.619000482 | 2.08E-10    | HEXIM1   | ENSG00000186834 |
| 17 | 40582332 | 40582596 | 40582467 | 11 | 12 | 8 | 1.694403879 | 0.107291    | HEXIM1   | ENSG00000186834 |
| 17 | 40594727 | 40594920 | 40594863 | 8  | 11 | 5 | 2.346097679 | 0.0364013   | HEXIM2   | ENSG00000168517 |
| 17 | 40604541 | 40604720 | 40604636 | 8  | 8  | 3 | 2.639359888 | 0.0415794   | HEXIM2   | ENSG00000168517 |
| 17 | 40631067 | 40631269 | 40631168 | 10 | 11 | 6 | 2.010940867 | 0.0640214   | FMNL1    | ENSG00000184922 |
| 17 | 40710478 | 40710675 | 40710565 | 9  | 9  | 2 | 3.910162798 | 0.00955088  | MAP3K14  | ENSG00000006062 |
| 17 | 40717369 | 40717579 | 40717482 | 12 | 12 | 3 | 3.812408728 | 0.004404    | MAP3K14  | ENSG00000006062 |
| 17 | 40751958 | 40752434 | 40752135 | 9  | 17 | 3 | 5.278719777 | 0.000205462 | MAP3K14  | ENSG00000006062 |
| 17 | 40754141 | 40754394 | 40754240 | 12 | 15 | 1 | 9.384390715 | 3.90E-05    | MAP3K14  | ENSG00000006062 |
| 17 | 40818794 | 40818995 | 40818894 | 10 | 12 | 4 | 3.049926982 | 0.0108184   | ARHGAP27 | ENSG00000185602 |
| 17 | 40901626 | 40901898 | 40901793 | 10 | 13 | 2 | 5.474227917 | 0.000747844 | PLEKHM1  | ENSG00000141342 |
| 17 | 41073611 | 41073792 | 41073701 | 8  | 8  | 3 | 2.639359888 | 0.0415794   | C17orf69 | ENSG00000167159 |
| 17 | 41133919 | 41134154 | 41134036 | 10 | 13 | 0 | 16.42268375 | 1.91E-05    | C17orf69 | ENSG00000167159 |
| 17 | 41136001 | 41136196 | 41136077 | 8  | 8  | 3 | 2.639359888 | 0.0415794   | C17orf69 | ENSG00000167159 |
| 17 | 41265326 | 41265531 | 41265428 | 8  | 9  | 2 | 3.910162798 | 0.00955088  |          | ENSG00000185294 |
| 17 | 41336287 | 41336509 | 41336334 | 8  | 10 | 2 | 4.301179077 | 0.00512919  | MAPT     | ENSG00000186868 |
| 17 | 41627226 | 41627428 | 41627327 | 10 | 11 | 1 | 7.038293036 | 0.000674435 |          | ENSG00000214401 |
| 17 | 42191228 | 42191535 | 42191381 | 8  | 10 | 6 | 1.843362462 | 0.0964212   |          | ENSG00000213326 |
| 17 | 42308840 | 42309136 | 42308988 | 14 | 16 | 3 | 4.985457567 | 0.000385643 | WNT9B    | ENSG00000158955 |
| 17 | 42333058 | 42333291 | 42333224 | 8  | 9  | 0 | 11.73048839 | 0.000425898 |          | ENSG00000210709 |
| 17 | 42355271 | 42355554 | 42355426 | 13 | 16 | 7 | 2.492728784 | 0.0124193   | GOSR2    | ENSG00000108433 |

|    |          |          |          |    |    |    |             |             |          |                 |
|----|----------|----------|----------|----|----|----|-------------|-------------|----------|-----------------|
| 17 | 42411817 | 42412000 | 42411901 | 8  | 8  | 4  | 2.111487911 | 0.0804809   | RPRML    | ENSG00000179673 |
| 17 | 42567792 | 42568317 | 42568146 | 16 | 27 | 32 | 0.995314167 | 0.51007     |          | ENSG00000221016 |
| 17 | 42568628 | 42569150 | 42568807 | 28 | 44 | 84 | 0.621025856 | 0.99598     |          | ENSG00000221016 |
| 17 | 42569388 | 42569858 | 42569565 | 35 | 40 | 67 | 0.707279447 | 0.962853    |          | ENSG00000221016 |
| 17 | 42574217 | 42574427 | 42574275 | 10 | 10 | 27 | 0.460840615 | 0.98972     |          | ENSG00000221016 |
| 17 | 42576110 | 42576431 | 42576270 | 11 | 13 | 14 | 1.094845583 | 0.406217    |          | ENSG00000221016 |
| 17 | 42590435 | 42590809 | 42590600 | 11 | 15 | 24 | 0.750751257 | 0.821554    | CDC27    | ENSG00000004897 |
| 17 | 42613805 | 42613985 | 42613895 | 8  | 8  | 24 | 0.422297582 | 0.991496    | CDC27    | ENSG00000004897 |
| 17 | 42621385 | 42621784 | 42621551 | 16 | 23 | 12 | 2.165628626 | 0.0100985   | CDC27    | ENSG00000004897 |
| 17 | 42621888 | 42622130 | 42621983 | 9  | 9  | 3  | 2.932622098 | 0.0242899   | CDC27    | ENSG00000004897 |
| 17 | 42755722 | 42756040 | 42755883 | 9  | 11 | 4  | 2.815317214 | 0.0183428   | C17orf57 | ENSG00000178852 |
| 17 | 43253756 | 43254000 | 43253878 | 8  | 8  | 2  | 3.519146518 | 0.017558    | OSBPL7   | ENSG00000006025 |
| 17 | 43254104 | 43254350 | 43254182 | 8  | 10 | 1  | 6.451768616 | 0.00135978  | OSBPL7   | ENSG00000006025 |
| 17 | 43263764 | 43264279 | 43263877 | 9  | 19 | 3  | 5.865244197 | 5.72E-05    | MRPL10   | ENSG00000159111 |
| 17 | 43273532 | 43273885 | 43273708 | 9  | 15 | 6  | 2.68125449  | 0.0103552   | SCRN2    | ENSG00000141295 |
| 17 | 43337518 | 43337889 | 43337710 | 12 | 18 | 4  | 4.457585589 | 0.000353565 | SP2      | ENSG00000167182 |
| 17 | 43373843 | 43374093 | 43373979 | 9  | 10 | 3  | 3.225884308 | 0.0139466   | PNPO     | ENSG00000108439 |
| 17 | 43379299 | 43379568 | 43379412 | 8  | 11 | 5  | 2.346097679 | 0.0364013   | PNPO     | ENSG00000108439 |
| 17 | 43389997 | 43390539 | 43390176 | 13 | 24 | 5  | 4.887703497 | 2.90E-05    | ATAD4    | ENSG00000167183 |
| 17 | 43458877 | 43459076 | 43458981 | 8  | 10 | 1  | 6.451768616 | 0.00135978  |          | ENSG00000207947 |
| 17 | 43479986 | 43480465 | 43480286 | 8  | 19 | 5  | 3.910162798 | 0.000546977 | NFE2L1   | ENSG00000082641 |
| 17 | 43593038 | 43593262 | 43593170 | 10 | 11 | 1  | 7.038293036 | 0.000674435 |          | ENSG00000221739 |
| 17 | 44026247 | 44026628 | 44026410 | 14 | 18 | 3  | 5.571981987 | 0.000108726 | HOXB5    | ENSG00000120075 |
| 17 | 44051042 | 44051278 | 44051218 | 9  | 11 | 2  | 4.692195357 | 0.00272444  | HOXB8    | ENSG00000120068 |
| 17 | 44110844 | 44111255 | 44111031 | 37 | 50 | 2  | 19.94183027 | 2.68E-15    | C17orf92 | ENSG00000159182 |
| 17 | 44111260 | 44111469 | 44111364 | 9  | 10 | 1  | 6.451768616 | 0.00135978  | C17orf92 | ENSG00000159182 |
| 17 | 44324634 | 44324813 | 44324717 | 8  | 8  | 4  | 2.111487911 | 0.0804809   | ATP5G1   | ENSG00000159199 |
| 17 | 44325149 | 44325354 | 44325251 | 8  | 8  | 4  | 2.111487911 | 0.0804809   | ATP5G1   | ENSG00000159199 |
| 17 | 44464595 | 44464833 | 44464714 | 10 | 12 | 4  | 3.049926982 | 0.0108184   |          | ENSG00000207346 |
| 17 | 44533436 | 44533903 | 44533724 | 14 | 23 | 1  | 14.07658607 | 1.14E-07    | B4GALNT2 | ENSG00000167080 |
| 17 | 44534064 | 44534246 | 44534188 | 8  | 8  | 1  | 5.278719777 | 0.00542188  | B4GALNT2 | ENSG00000167080 |
| 17 | 44624804 | 44625220 | 44624983 | 14 | 23 | 8  | 3.128130238 | 0.000832453 | GNGT2    | ENSG00000167083 |
| 17 | 44658269 | 44658595 | 44658432 | 13 | 16 | 0  | 19.94183027 | 1.86E-06    | PHOSPHO1 | ENSG00000173868 |
| 17 | 44840382 | 44840739 | 44840480 | 9  | 13 | 4  | 3.28453675  | 0.00629037  | PHB      | ENSG00000167085 |

|    |          |          |          |    |     |    |             |             |          |                 |
|----|----------|----------|----------|----|-----|----|-------------|-------------|----------|-----------------|
| 17 | 44847223 | 44847511 | 44847367 | 10 | 13  | 4  | 3.28453675  | 0.00629037  | PHB      | ENSG00000167085 |
| 17 | 44847517 | 44847736 | 44847626 | 9  | 10  | 2  | 4.301179077 | 0.00512919  | PHB      | ENSG00000167085 |
| 17 | 44940648 | 44941129 | 44940956 | 15 | 26  | 11 | 2.639359888 | 0.0015854   | NGFR     | ENSG00000064300 |
| 17 | 44980937 | 44981235 | 44981086 | 10 | 13  | 9  | 1.642268375 | 0.111397    | NXPH3    | ENSG00000182575 |
| 17 | 45002492 | 45002707 | 45002546 | 8  | 11  | 4  | 2.815317214 | 0.0183428   | NXPH3    | ENSG00000182575 |
| 17 | 45220775 | 45221013 | 45220894 | 13 | 16  | 4  | 3.988366054 | 0.00115141  | MYST2    | ENSG00000136504 |
| 17 | 45293559 | 45293804 | 45293681 | 12 | 13  | 6  | 2.346097679 | 0.0266147   | TAC4     | ENSG00000176358 |
| 17 | 45319472 | 45319961 | 45319774 | 23 | 35  | 2  | 14.07658607 | 1.57E-10    | TAC4     | ENSG00000176358 |
| 17 | 45408273 | 45408491 | 45408325 | 8  | 9   | 4  | 2.346097679 | 0.050148    | DLX4     | ENSG00000108813 |
| 17 | 45427545 | 45427841 | 45427693 | 8  | 11  | 5  | 2.346097679 | 0.0364013   | DLX3     | ENSG00000064195 |
| 17 | 45487299 | 45487712 | 45487599 | 11 | 16  | 3  | 4.985457567 | 0.000385643 | ITGA3    | ENSG00000005884 |
| 17 | 45487899 | 45488498 | 45488248 | 10 | 22  | 8  | 2.997791478 | 0.00137524  | ITGA3    | ENSG00000005884 |
| 17 | 45494803 | 45495265 | 45495007 | 44 | 58  | 6  | 9.887125931 | 2.89E-14    | ITGA3    | ENSG00000005884 |
| 17 | 45526621 | 45526845 | 45526733 | 10 | 12  | 2  | 5.083211637 | 0.00143337  | PDK2     | ENSG00000005882 |
| 17 | 45572099 | 45572438 | 45572273 | 8  | 13  | 3  | 4.105670938 | 0.00243034  | SAMD14   | ENSG00000167100 |
| 17 | 45584401 | 45584669 | 45584527 | 12 | 14  | 4  | 3.519146518 | 0.00361132  | PPP1R9B  | ENSG00000108819 |
| 17 | 45610760 | 45610983 | 45610870 | 9  | 10  | 4  | 2.580707446 | 0.0306059   | HILS1    | ENSG00000188662 |
| 17 | 45699117 | 45699309 | 45699217 | 8  | 8   | 1  | 5.278719777 | 0.00542188  | TMEM92   | ENSG00000167105 |
| 17 | 45729786 | 45730026 | 45729902 | 8  | 10  | 2  | 4.301179077 | 0.00512919  | TMEM92   | ENSG00000167105 |
| 17 | 45748517 | 45748752 | 45748634 | 8  | 9   | 0  | 11.73048839 | 0.000425898 | XYLT2    | ENSG00000015532 |
| 17 | 45749548 | 45749993 | 45749770 | 9  | 18  | 6  | 3.183989707 | 0.00227432  | XYLT2    | ENSG00000015532 |
| 17 | 45803856 | 45804434 | 45804108 | 95 | 136 | 8  | 17.85641011 | 2.00E-36    | MRPL27   | ENSG00000108826 |
| 17 | 45805273 | 45805697 | 45805372 | 14 | 20  | 8  | 2.737113958 | 0.0036449   | MRPL27   | ENSG00000108826 |
| 17 | 45829829 | 45830021 | 45829925 | 10 | 10  | 4  | 2.580707446 | 0.0306059   | LRRC59   | ENSG00000108829 |
| 17 | 45911407 | 45911600 | 45911450 | 8  | 8   | 4  | 2.111487911 | 0.0804809   | RSAD1    | ENSG00000136444 |
| 17 | 45964771 | 45965202 | 45965037 | 19 | 25  | 3  | 7.624817456 | 1.09E-06    | EPN3     | ENSG00000049283 |
| 17 | 45966726 | 45967274 | 45966962 | 10 | 22  | 1  | 13.49006165 | 2.37E-07    | EPN3     | ENSG00000049283 |
| 17 | 45979245 | 45979536 | 45979390 | 9  | 11  | 6  | 2.010940867 | 0.0640214   | SPATA20  | ENSG00000006282 |
| 17 | 46062998 | 46063311 | 46063155 | 9  | 13  | 2  | 5.474227917 | 0.000747844 | ABCC3    | ENSG00000108846 |
| 17 | 46071552 | 46072024 | 46071715 | 16 | 25  | 3  | 7.624817456 | 1.09E-06    | ABCC3    | ENSG00000108846 |
| 17 | 46113689 | 46113934 | 46113845 | 11 | 12  | 5  | 2.541605819 | 0.0225912   |          | ENSG00000201340 |
| 17 | 46140190 | 46140557 | 46140345 | 11 | 15  | 8  | 2.085420159 | 0.0338693   | ANKRD40  | ENSG00000154945 |
| 17 | 46219433 | 46219816 | 46219593 | 17 | 22  | 2  | 8.993374435 | 1.66E-06    | C17orf73 | ENSG00000167117 |
| 17 | 46238136 | 46238544 | 46238315 | 24 | 31  | 0  | 37.53756286 | 1.64E-11    | WFIKKN2  | ENSG00000173714 |



|    |          |          |          |     |     |    |             |             |          |                 |
|----|----------|----------|----------|-----|-----|----|-------------|-------------|----------|-----------------|
| 17 | 46298945 | 46299188 | 46299066 | 12  | 14  | 9  | 1.759573259 | 0.0786014   | TOB1     | ENSG00000141232 |
| 17 | 46299388 | 46300336 | 46300171 | 16  | 47  | 8  | 6.256260476 | 7.85E-10    | TOB1     | ENSG00000141232 |
| 17 | 46336687 | 46337574 | 46337037 | 19  | 56  | 12 | 5.143367988 | 4.00E-10    | TOB1     | ENSG00000141232 |
| 17 | 46337771 | 46338117 | 46337944 | 9   | 15  | 12 | 1.443752418 | 0.160732    | TOB1     | ENSG00000141232 |
| 17 | 46340761 | 46340954 | 46340862 | 8   | 10  | 1  | 6.451768616 | 0.00135978  | TOB1     | ENSG00000141232 |
| 17 | 46352412 | 46352666 | 46352588 | 8   | 10  | 3  | 3.225884308 | 0.0139466   | TOB1     | ENSG00000141232 |
| 17 | 46376735 | 46377204 | 46377090 | 10  | 19  | 2  | 7.820325595 | 1.32E-05    | TOB1     | ENSG00000141232 |
| 17 | 46380629 | 46380831 | 46380754 | 9   | 10  | 2  | 4.301179077 | 0.00512919  | TOB1     | ENSG00000141232 |
| 17 | 46381477 | 46382234 | 46382061 | 59  | 80  | 5  | 15.83615933 | 8.38E-22    | TOB1     | ENSG00000141232 |
| 17 | 46382726 | 46382976 | 46382819 | 8   | 11  | 3  | 3.519146518 | 0.00788869  | TOB1     | ENSG00000141232 |
| 17 | 46386447 | 46387210 | 46386778 | 117 | 164 | 5  | 32.25884308 | 1.27E-48    | TOB1     | ENSG00000141232 |
| 17 | 46389179 | 46389413 | 46389293 | 10  | 11  | 4  | 2.815317214 | 0.0183428   | SPAG9    | ENSG00000008294 |
| 17 | 46553364 | 46553604 | 46553486 | 8   | 9   | 3  | 2.932622098 | 0.0242899   | SPAG9    | ENSG00000008294 |
| 17 | 46585530 | 46586405 | 46585849 | 24  | 58  | 14 | 4.613992101 | 1.06E-09    | NME2     | ENSG00000011052 |
| 17 | 46692551 | 46692861 | 46692706 | 8   | 13  | 3  | 4.105670938 | 0.00243034  | UTP18    | ENSG00000011260 |
| 17 | 46839889 | 46840198 | 46840067 | 13  | 16  | 4  | 3.988366054 | 0.00115141  |          | ENSG00000187504 |
| 17 | 47046326 | 47046685 | 47046505 | 14  | 20  | 1  | 12.31701281 | 1.03E-06    |          | ENSG00000187504 |
| 17 | 47135966 | 47136291 | 47136104 | 9   | 13  | 4  | 3.28453675  | 0.00629037  |          | ENSG00000187504 |
| 17 | 47139626 | 47139874 | 47139764 | 18  | 20  | 2  | 8.211341875 | 6.65E-06    |          | ENSG00000187504 |
| 17 | 47196816 | 47197058 | 47196915 | 10  | 13  | 2  | 5.474227917 | 0.000747844 |          | ENSG00000187504 |
| 17 | 47552895 | 47553160 | 47553032 | 10  | 12  | 0  | 15.24963491 | 4.15E-05    | CA10     | ENSG00000154975 |
| 17 | 50400982 | 50401243 | 50401112 | 8   | 11  | 4  | 2.815317214 | 0.0183428   | STXBP4   | ENSG00000166263 |
| 17 | 50741176 | 50741403 | 50741289 | 11  | 11  | 0  | 14.07658607 | 9.02E-05    |          | ENSG00000204772 |
| 17 | 50776910 | 50777110 | 50777010 | 9   | 10  | 3  | 3.225884308 | 0.0139466   |          | ENSG00000204772 |
| 17 | 50865574 | 50865946 | 50865729 | 13  | 18  | 6  | 3.183989707 | 0.00227432  | MMD      | ENSG00000108960 |
| 17 | 51976183 | 51976405 | 51976276 | 8   | 8   | 0  | 10.55743955 | 0.000925496 | NOG      | ENSG00000183691 |
| 17 | 52131497 | 52131972 | 52131810 | 8   | 18  | 8  | 2.476436439 | 0.00924552  | NOG      | ENSG00000183691 |
| 17 | 52148304 | 52148673 | 52148480 | 9   | 14  | 5  | 2.932622098 | 0.00829617  | C17orf67 | ENSG00000214226 |
| 17 | 52149586 | 52150502 | 52150044 | 63  | 91  | 5  | 17.98674887 | 3.02E-25    | C17orf67 | ENSG00000214226 |
| 17 | 52265552 | 52265747 | 52265649 | 8   | 9   | 4  | 2.346097679 | 0.050148    | C17orf67 | ENSG00000214226 |
| 17 | 52393286 | 52393533 | 52393396 | 9   | 12  | 3  | 3.812408728 | 0.004404    | COIL     | ENSG00000121058 |
| 17 | 52435299 | 52435534 | 52435430 | 11  | 14  | 0  | 17.59573259 | 8.79E-06    | SCPEP1   | ENSG00000121064 |
| 17 | 52465681 | 52465962 | 52465838 | 8   | 12  | 4  | 3.049926982 | 0.0108184   |          | ENSG00000185036 |
| 17 | 52517133 | 52517409 | 52517289 | 10  | 11  | 5  | 2.346097679 | 0.0364013   | AKAP1    | ENSG00000121057 |

|    |          |          |          |     |     |    |             |             |        |                 |
|----|----------|----------|----------|-----|-----|----|-------------|-------------|--------|-----------------|
| 17 | 52559051 | 52559253 | 52559202 | 8   | 8   | 4  | 2.111487911 | 0.0804809   | AKAP1  | ENSG00000121057 |
| 17 | 52563133 | 52563350 | 52563190 | 9   | 10  | 6  | 1.843362462 | 0.0964212   | AKAP1  | ENSG00000121057 |
| 17 | 52563427 | 52563747 | 52563598 | 8   | 11  | 7  | 1.759573259 | 0.102361    | AKAP1  | ENSG00000121057 |
| 17 | 52599106 | 52599332 | 52599219 | 11  | 13  | 5  | 2.737113958 | 0.0137917   |        | ENSG00000210853 |
| 17 | 52628502 | 52628882 | 52628703 | 21  | 30  | 1  | 18.18225701 | 6.30E-10    |        | ENSG00000210853 |
| 17 | 52647687 | 52647929 | 52647805 | 11  | 12  | 4  | 3.049926982 | 0.0108184   |        | ENSG00000210853 |
| 17 | 52669290 | 52669616 | 52669450 | 15  | 17  | 0  | 21.11487911 | 8.57E-07    |        | ENSG00000210853 |
| 17 | 52675514 | 52675828 | 52675678 | 11  | 14  | 3  | 4.398933147 | 0.00132748  | MSI2   | ENSG00000153944 |
| 17 | 52690668 | 52690848 | 52690757 | 8   | 9   | 7  | 1.466311049 | 0.20706     | MSI2   | ENSG00000153944 |
| 17 | 52719137 | 52719344 | 52719244 | 10  | 11  | 4  | 2.815317214 | 0.0183428   |        | ENSG00000197862 |
| 17 | 52772977 | 52773522 | 52773184 | 12  | 24  | 8  | 3.258468998 | 0.000499412 |        | ENSG00000197862 |
| 17 | 52775261 | 52775485 | 52775374 | 9   | 11  | 5  | 2.346097679 | 0.0364013   |        | ENSG00000197862 |
| 17 | 52787913 | 52788191 | 52788052 | 9   | 11  | 7  | 1.759573259 | 0.102361    |        | ENSG00000197862 |
| 17 | 52789921 | 52790176 | 52790052 | 14  | 17  | 7  | 2.639359888 | 0.00777415  |        | ENSG00000197862 |
| 17 | 52790440 | 52790788 | 52790617 | 24  | 29  | 11 | 2.932622098 | 0.000389335 |        | ENSG00000197862 |
| 17 | 52802409 | 52802881 | 52802629 | 26  | 35  | 5  | 7.038293036 | 2.84E-08    |        | ENSG00000197862 |
| 17 | 52804505 | 52804796 | 52804650 | 17  | 20  | 7  | 3.079253203 | 0.00177418  |        | ENSG00000197862 |
| 17 | 52808153 | 52808708 | 52808421 | 27  | 44  | 9  | 5.278719777 | 1.68E-08    |        | ENSG00000197862 |
| 17 | 52811023 | 52811264 | 52811143 | 8   | 8   | 2  | 3.519146518 | 0.017558    |        | ENSG00000197862 |
| 17 | 52840003 | 52840494 | 52840330 | 10  | 20  | 6  | 3.519146518 | 0.000784044 |        | ENSG00000197862 |
| 17 | 52877406 | 52877661 | 52877507 | 16  | 19  | 1  | 11.73048839 | 2.14E-06    |        | ENSG00000197862 |
| 17 | 52955013 | 52955194 | 52955100 | 8   | 9   | 1  | 5.865244197 | 0.00272497  |        | ENSG00000210857 |
| 17 | 52956267 | 52956924 | 52956501 | 300 | 385 | 2  | 150.932284  | 1.71E-126   |        | ENSG00000210857 |
| 17 | 53005219 | 53005569 | 53005418 | 12  | 16  | 0  | 19.94183027 | 1.86E-06    |        | ENSG00000210857 |
| 17 | 53010523 | 53010870 | 53010696 | 8   | 13  | 3  | 4.105670938 | 0.00243034  |        | ENSG00000210857 |
| 17 | 53015290 | 53015551 | 53015412 | 11  | 12  | 3  | 3.812408728 | 0.004404    |        | ENSG00000210857 |
| 17 | 53030138 | 53030478 | 53030308 | 8   | 13  | 11 | 1.368556979 | 0.211388    |        | ENSG00000210857 |
| 17 | 53038048 | 53038268 | 53038160 | 8   | 9   | 1  | 5.865244197 | 0.00272497  |        | ENSG00000210857 |
| 17 | 53104280 | 53104497 | 53104388 | 8   | 10  | 4  | 2.580707446 | 0.0306059   |        | ENSG00000210857 |
| 17 | 53215626 | 53215841 | 53215691 | 10  | 11  | 6  | 2.010940867 | 0.0640214   |        | ENSG00000222976 |
| 17 | 53265824 | 53266084 | 53265954 | 9   | 12  | 7  | 1.906204364 | 0.0695918   | MRPS23 | ENSG00000181610 |
| 17 | 53282309 | 53283024 | 53282515 | 19  | 43  | 22 | 2.244093432 | 0.000576277 | MRPS23 | ENSG00000181610 |
| 17 | 53300360 | 53300780 | 53300598 | 41  | 51  | 3  | 15.24963491 | 1.29E-14    | MRPS23 | ENSG00000181610 |
| 17 | 53332054 | 53332558 | 53332379 | 22  | 31  | 11 | 3.128130238 | 0.000146711 | CUEDC1 | ENSG00000180891 |

|    |          |          |          |    |     |    |             |             |          |                 |
|----|----------|----------|----------|----|-----|----|-------------|-------------|----------|-----------------|
| 17 | 53333575 | 53334364 | 53333939 | 90 | 134 | 8  | 17.59573259 | 8.44E-36    | CUEDC1   | ENSG00000180891 |
| 17 | 53350803 | 53351005 | 53350904 | 10 | 10  | 5  | 2.150589539 | 0.0575848   | CUEDC1   | ENSG00000180891 |
| 17 | 53427806 | 53428063 | 53427932 | 13 | 15  | 3  | 4.692195357 | 0.000718455 | VEZF1    | ENSG00000136451 |
| 17 | 53439389 | 53439767 | 53439615 | 11 | 17  | 7  | 2.639359888 | 0.00777415  | SFRS1    | ENSG00000136450 |
| 17 | 53439775 | 53440250 | 53439951 | 10 | 20  | 5  | 4.105670938 | 0.000308509 | SFRS1    | ENSG00000136450 |
| 17 | 53455387 | 53455821 | 53455547 | 20 | 29  | 11 | 2.932622098 | 0.000389335 | SFRS1    | ENSG00000136450 |
| 17 | 53525347 | 53525727 | 53525510 | 29 | 35  | 3  | 10.55743955 | 1.13E-09    | DYNLL2   | ENSG00000121083 |
| 17 | 53569081 | 53569380 | 53569235 | 9  | 12  | 8  | 1.694403879 | 0.107291    | OR4D1    | ENSG00000141194 |
| 17 | 53632412 | 53632673 | 53632542 | 8  | 9   | 2  | 3.910162798 | 0.00955088  | EPX      | ENSG00000121053 |
| 17 | 53651662 | 53651920 | 53651784 | 8  | 9   | 4  | 2.346097679 | 0.050148    | MKS1     | ENSG00000011143 |
| 17 | 53784004 | 53785237 | 53784708 | 10 | 48  | 18 | 3.025231217 | 6.15E-06    | SUPT4H1  | ENSG00000213246 |
| 17 | 53809743 | 53809963 | 53809853 | 11 | 11  | 4  | 2.815317214 | 0.0183428   | SUPT4H1  | ENSG00000213246 |
| 17 | 53820153 | 53820503 | 53820328 | 23 | 29  | 9  | 3.519146518 | 8.36E-05    | RNF43    | ENSG00000108375 |
| 17 | 53821082 | 53821385 | 53821235 | 14 | 15  | 9  | 1.876878143 | 0.0544542   | RNF43    | ENSG00000108375 |
| 17 | 53823814 | 53824240 | 53824066 | 20 | 30  | 9  | 3.636451402 | 4.92E-05    | RNF43    | ENSG00000108375 |
| 17 | 53849778 | 53850231 | 53850038 | 24 | 32  | 16 | 2.277094806 | 0.00211782  | RNF43    | ENSG00000108375 |
| 17 | 53865585 | 53865846 | 53865726 | 11 | 11  | 2  | 4.692195357 | 0.00272444  | RNF43    | ENSG00000108375 |
| 17 | 53879937 | 53880174 | 53880111 | 11 | 14  | 7  | 2.199466574 | 0.0303778   | RNF43    | ENSG00000108375 |
| 17 | 53950549 | 53950823 | 53950707 | 11 | 14  | 9  | 1.759573259 | 0.0786014   | MTMR4    | ENSG00000108389 |
| 17 | 53950988 | 53951425 | 53951143 | 12 | 20  | 9  | 2.463402563 | 0.00689886  | MTMR4    | ENSG00000108389 |
| 17 | 53997313 | 53997566 | 53997461 | 9  | 11  | 10 | 1.279689643 | 0.277323    | C17orf47 | ENSG00000181013 |
| 17 | 53998152 | 53998502 | 53998326 | 14 | 18  | 17 | 1.238218219 | 0.258417    | C17orf47 | ENSG00000181013 |
| 17 | 53999719 | 54000303 | 54000124 | 10 | 23  | 21 | 1.279689643 | 0.201655    | C17orf47 | ENSG00000181013 |
| 17 | 54000677 | 54001230 | 54000941 | 10 | 21  | 18 | 1.358267077 | 0.163254    | C17orf47 | ENSG00000181013 |
| 17 | 54006946 | 54007333 | 54007185 | 10 | 14  | 13 | 1.256838042 | 0.269506    | C17orf47 | ENSG00000181013 |
| 17 | 54007947 | 54008387 | 54008137 | 12 | 23  | 21 | 1.279689643 | 0.201655    | C17orf47 | ENSG00000181013 |
| 17 | 54009883 | 54010612 | 54010247 | 20 | 40  | 22 | 2.091087061 | 0.00178999  | C17orf47 | ENSG00000181013 |
| 17 | 54011067 | 54011352 | 54011209 | 13 | 16  | 6  | 2.848832895 | 0.00632407  | C17orf47 | ENSG00000181013 |
| 17 | 54011933 | 54012155 | 54012019 | 9  | 11  | 15 | 0.879786629 | 0.637414    | C17orf47 | ENSG00000181013 |
| 17 | 54012245 | 54012486 | 54012365 | 9  | 10  | 11 | 1.075294769 | 0.434143    | C17orf47 | ENSG00000181013 |
| 17 | 54019920 | 54020395 | 54020233 | 26 | 34  | 20 | 1.955081399 | 0.00643758  | C17orf47 | ENSG00000181013 |
| 17 | 54023381 | 54023638 | 54023509 | 10 | 12  | 8  | 1.694403879 | 0.107291    |          | ENSG00000212195 |
| 17 | 54027666 | 54028182 | 54027841 | 11 | 20  | 21 | 1.119728438 | 0.357221    |          | ENSG00000212195 |
| 17 | 54031682 | 54031872 | 54031772 | 8  | 8   | 11 | 0.879786629 | 0.621301    |          | ENSG00000212195 |

|    |          |          |          |     |     |     |             |             |                 |
|----|----------|----------|----------|-----|-----|-----|-------------|-------------|-----------------|
| 17 | 54039664 | 54040017 | 54039840 | 11  | 17  | 6   | 3.016411301 | 0.00381427  | ENSG00000212195 |
| 17 | 54041021 | 54041244 | 54041103 | 9   | 11  | 16  | 0.828034475 | 0.698553    | ENSG00000212195 |
| 17 | 54041997 | 54042187 | 54042096 | 8   | 8   | 3   | 2.639359888 | 0.0415794   | ENSG00000212195 |
| 17 | 54043981 | 54044278 | 54044129 | 9   | 13  | 27  | 0.58652442  | 0.955084    | ENSG00000212195 |
| 17 | 54044358 | 54044664 | 54044511 | 11  | 15  | 10  | 1.706252857 | 0.0822346   | ENSG00000212195 |
| 17 | 54047395 | 54047575 | 54047495 | 8   | 9   | 7   | 1.466311049 | 0.20706     | ENSG00000212195 |
| 17 | 54051262 | 54051524 | 54051393 | 10  | 11  | 10  | 1.279689643 | 0.277323    | ENSG00000212195 |
| 17 | 54057130 | 54057546 | 54057298 | 8   | 13  | 9   | 1.642268375 | 0.111397    | ENSG00000212195 |
| 17 | 54059298 | 54059801 | 54059533 | 10  | 21  | 22  | 1.122046716 | 0.351409    | ENSG00000212195 |
| 17 | 54061269 | 54061575 | 54061414 | 11  | 15  | 11  | 1.564065119 | 0.11768     | ENSG00000212195 |
| 17 | 54062756 | 54063052 | 54062904 | 14  | 17  | 20  | 1.005470434 | 0.496566    | ENSG00000212195 |
| 17 | 54063069 | 54063357 | 54063213 | 9   | 12  | 10  | 1.386330446 | 0.21117     | ENSG00000212195 |
| 17 | 54063380 | 54065219 | 54064117 | 131 | 314 | 206 | 1.785074321 | 2.59E-11    | ENSG00000212195 |
| 17 | 54065249 | 54065563 | 54065406 | 9   | 13  | 22  | 0.714029728 | 0.84749     | ENSG00000212195 |
| 17 | 54066802 | 54067153 | 54066977 | 16  | 21  | 26  | 0.955817573 | 0.566095    | ENSG00000212195 |
| 17 | 54069870 | 54070072 | 54069983 | 8   | 9   | 15  | 0.733155525 | 0.788527    | ENSG00000212195 |
| 17 | 54072003 | 54072493 | 54072225 | 56  | 76  | 43  | 2.052835469 | 4.78E-05    | ENSG00000212195 |
| 17 | 54072520 | 54073550 | 54072854 | 21  | 75  | 50  | 1.74807278  | 0.000878808 | ENSG00000212195 |
| 17 | 54074440 | 54074987 | 54074591 | 11  | 22  | 28  | 0.930349079 | 0.605811    | ENSG00000212195 |
| 17 | 54075491 | 54076024 | 54075772 | 17  | 31  | 23  | 1.564065119 | 0.0471936   | ENSG00000212195 |
| 17 | 54076391 | 54076703 | 54076547 | 12  | 15  | 19  | 0.938439071 | 0.579569    | ENSG00000212195 |
| 17 | 54078606 | 54078793 | 54078702 | 8   | 8   | 11  | 0.879786629 | 0.621301    | ENSG00000202077 |
| 17 | 54080480 | 54080959 | 54080780 | 12  | 22  | 24  | 1.079204932 | 0.398105    | ENSG00000202077 |
| 17 | 54083142 | 54083361 | 54083282 | 10  | 11  | 17  | 0.78203256  | 0.752912    | ENSG00000202077 |
| 17 | 54083437 | 54083942 | 54083763 | 18  | 28  | 21  | 1.546291652 | 0.0598186   | ENSG00000202077 |
| 17 | 54084219 | 54084490 | 54084361 | 8   | 10  | 9   | 1.290353723 | 0.279648    | ENSG00000202077 |
| 17 | 54088007 | 54088196 | 54088060 | 8   | 8   | 10  | 0.959767232 | 0.541959    | ENSG00000202077 |
| 17 | 54089688 | 54090027 | 54089857 | 10  | 15  | 12  | 1.443752418 | 0.160732    | ENSG00000202077 |
| 17 | 54090976 | 54092274 | 54091562 | 149 | 313 | 149 | 2.455582237 | 2.56E-21    | ENSG00000202077 |
| 17 | 54092883 | 54093154 | 54093018 | 10  | 13  | 16  | 0.966040221 | 0.542489    | ENSG00000202077 |
| 17 | 54093233 | 54093579 | 54093406 | 8   | 11  | 7   | 1.759573259 | 0.102361    | ENSG00000202077 |
| 17 | 54093633 | 54093931 | 54093766 | 11  | 13  | 11  | 1.368556979 | 0.211388    | ENSG00000202077 |
| 17 | 54094197 | 54094427 | 54094337 | 8   | 11  | 10  | 1.279689643 | 0.277323    | ENSG00000202077 |
| 17 | 54096453 | 54096659 | 54096586 | 9   | 10  | 17  | 0.71686318  | 0.816679    | ENSG00000199426 |

|    |          |          |          |     |     |     |             |            |        |                 |
|----|----------|----------|----------|-----|-----|-----|-------------|------------|--------|-----------------|
| 17 | 54097318 | 54098011 | 54097665 | 21  | 51  | 19  | 3.049926982 | 2.99E-06   |        | ENSG00000199426 |
| 17 | 54098802 | 54099051 | 54098920 | 10  | 12  | 18  | 0.802612364 | 0.736387   |        | ENSG00000199426 |
| 17 | 54099295 | 54099905 | 54099730 | 16  | 35  | 23  | 1.759573259 | 0.0146505  |        | ENSG00000199426 |
| 17 | 54100119 | 54100668 | 54100489 | 11  | 26  | 13  | 2.262308476 | 0.00502778 |        | ENSG00000199426 |
| 17 | 54100694 | 54101338 | 54100883 | 12  | 30  | 24  | 1.454580561 | 0.0803614  |        | ENSG00000199426 |
| 17 | 54101645 | 54101916 | 54101770 | 11  | 11  | 6   | 2.010940867 | 0.0640214  |        | ENSG00000199426 |
| 17 | 54102227 | 54102529 | 54102378 | 8   | 14  | 18  | 0.926091189 | 0.59273    |        | ENSG00000199426 |
| 17 | 54103611 | 54104105 | 54103926 | 15  | 25  | 19  | 1.524963491 | 0.0761063  |        | ENSG00000199426 |
| 17 | 54107969 | 54108344 | 54108111 | 9   | 15  | 12  | 1.443752418 | 0.160732   |        | ENSG00000206917 |
| 17 | 54109567 | 54109971 | 54109743 | 13  | 21  | 22  | 1.122046716 | 0.351409   |        | ENSG00000206917 |
| 17 | 54111485 | 54112730 | 54111973 | 39  | 136 | 96  | 1.656780319 | 6.07E-05   |        | ENSG00000200997 |
| 17 | 54114956 | 54115366 | 54115187 | 11  | 19  | 19  | 1.173048839 | 0.308076   |        | ENSG00000200997 |
| 17 | 54117187 | 54117412 | 54117299 | 10  | 10  | 6   | 1.843362462 | 0.0964212  |        | ENSG00000200997 |
| 17 | 54117797 | 54118101 | 54117953 | 10  | 14  | 15  | 1.099733287 | 0.398076   |        | ENSG00000200997 |
| 17 | 54118475 | 54118751 | 54118613 | 8   | 12  | 22  | 0.663027605 | 0.890045   | TEX14  | ENSG00000121101 |
| 17 | 54119399 | 54119803 | 54119560 | 14  | 20  | 19  | 1.231701281 | 0.25288    | TEX14  | ENSG00000121101 |
| 17 | 54123156 | 54123361 | 54123258 | 8   | 11  | 12  | 1.082814313 | 0.424156   | TEX14  | ENSG00000121101 |
| 17 | 54123946 | 54126520 | 54125778 | 168 | 528 | 159 | 3.878392725 | 2.15E-61   | RAD51C | ENSG00000108384 |
| 17 | 54126819 | 54127002 | 54126955 | 8   | 10  | 12  | 0.992579787 | 0.511743   | RAD51C | ENSG00000108384 |
| 17 | 54128963 | 54129535 | 54129358 | 12  | 25  | 39  | 0.762481746 | 0.864096   | RAD51C | ENSG00000108384 |
| 17 | 54134425 | 54134621 | 54134510 | 8   | 11  | 15  | 0.879786629 | 0.637414   | RAD51C | ENSG00000108384 |
| 17 | 54136809 | 54137069 | 54136943 | 16  | 17  | 21  | 0.959767232 | 0.55532    | RAD51C | ENSG00000108384 |
| 17 | 54139310 | 54139565 | 54139455 | 12  | 13  | 13  | 1.173048839 | 0.337862   | RAD51C | ENSG00000108384 |
| 17 | 54140254 | 54140617 | 54140433 | 8   | 16  | 14  | 1.329455351 | 0.210108   | RAD51C | ENSG00000108384 |
| 17 | 54142933 | 54143660 | 54143498 | 20  | 40  | 34  | 1.374142926 | 0.082956   | RAD51C | ENSG00000108384 |
| 17 | 54157315 | 54157755 | 54157425 | 10  | 17  | 18  | 1.111309427 | 0.376188   | PPM1E  | ENSG00000175175 |
| 17 | 54166348 | 54166689 | 54166510 | 9   | 13  | 16  | 0.966040221 | 0.542489   | PPM1E  | ENSG00000175175 |
| 17 | 54173426 | 54173727 | 54173563 | 19  | 23  | 18  | 1.481745902 | 0.0984143  | PPM1E  | ENSG00000175175 |
| 17 | 54173735 | 54174006 | 54173842 | 11  | 13  | 17  | 0.912371319 | 0.606688   | PPM1E  | ENSG00000175175 |
| 17 | 54178935 | 54179114 | 54179024 | 8   | 8   | 2   | 3.519146518 | 0.017558   | PPM1E  | ENSG00000175175 |
| 17 | 54179261 | 54179512 | 54179386 | 8   | 12  | 12  | 1.173048839 | 0.343543   | PPM1E  | ENSG00000175175 |
| 17 | 54180049 | 54180275 | 54180162 | 8   | 9   | 12  | 0.902345261 | 0.602772   | PPM1E  | ENSG00000175175 |
| 17 | 54183355 | 54183788 | 54183511 | 8   | 17  | 19  | 1.055743955 | 0.436418   | PPM1E  | ENSG00000175175 |
| 17 | 54187382 | 54188190 | 54188015 | 18  | 48  | 22  | 2.499104049 | 7.64E-05   | PPM1E  | ENSG00000175175 |

|    |          |          |          |    |     |    |             |            |       |                 |
|----|----------|----------|----------|----|-----|----|-------------|------------|-------|-----------------|
| 17 | 54188211 | 54188651 | 54188375 | 19 | 28  | 12 | 2.616801257 | 0.00120123 | PPM1E | ENSG00000175175 |
| 17 | 54188767 | 54189692 | 54189229 | 18 | 54  | 36 | 1.743721248 | 0.00399079 | PPM1E | ENSG00000175175 |
| 17 | 54189706 | 54189994 | 54189862 | 10 | 12  | 11 | 1.270802909 | 0.274822   | PPM1E | ENSG00000175175 |
| 17 | 54195527 | 54196314 | 54195861 | 34 | 54  | 33 | 1.897579005 | 0.00137124 | PPM1E | ENSG00000175175 |
| 17 | 54198759 | 54198938 | 54198894 | 8  | 8   | 6  | 1.508205651 | 0.203852   | PPM1E | ENSG00000175175 |
| 17 | 54204889 | 54205147 | 54205044 | 8  | 11  | 4  | 2.815317214 | 0.0183428  | PPM1E | ENSG00000175175 |
| 17 | 54209352 | 54209715 | 54209498 | 9  | 14  | 10 | 1.599612054 | 0.114822   | PPM1E | ENSG00000175175 |
| 17 | 54218028 | 54218288 | 54218190 | 8  | 10  | 12 | 0.992579787 | 0.511743   | PPM1E | ENSG00000175175 |
| 17 | 54219303 | 54219574 | 54219422 | 11 | 13  | 13 | 1.173048839 | 0.337862   | PPM1E | ENSG00000175175 |
| 17 | 54222780 | 54222960 | 54222916 | 8  | 8   | 10 | 0.959767232 | 0.541959   | PPM1E | ENSG00000175175 |
| 17 | 54230017 | 54230313 | 54230165 | 9  | 11  | 8  | 1.564065119 | 0.151515   |       | ENSG00000210940 |
| 17 | 54241103 | 54241284 | 54241193 | 8  | 9   | 8  | 1.303387599 | 0.281715   |       | ENSG00000210940 |
| 17 | 54242387 | 54242589 | 54242479 | 8  | 8   | 5  | 1.759573259 | 0.13508    |       | ENSG00000210940 |
| 17 | 54247066 | 54247339 | 54247162 | 10 | 11  | 13 | 1.005470434 | 0.498567   |       | ENSG00000210940 |
| 17 | 54264200 | 54264512 | 54264353 | 9  | 13  | 8  | 1.824742639 | 0.0744168  |       | ENSG00000210940 |
| 17 | 54291036 | 54291389 | 54291212 | 13 | 18  | 21 | 1.013087634 | 0.486601   |       | ENSG00000210940 |
| 17 | 54293583 | 54293896 | 54293719 | 15 | 16  | 6  | 2.848832895 | 0.00632407 |       | ENSG00000210940 |
| 17 | 54301828 | 54302121 | 54301974 | 12 | 16  | 8  | 2.215758919 | 0.0222902  |       | ENSG00000210940 |
| 17 | 54302895 | 54303209 | 54303031 | 12 | 16  | 20 | 0.949610965 | 0.567123   |       | ENSG00000210940 |
| 17 | 54306091 | 54306331 | 54306197 | 9  | 10  | 12 | 0.992579787 | 0.511743   |       | ENSG00000210940 |
| 17 | 54309122 | 54309359 | 54309240 | 9  | 9   | 4  | 2.346097679 | 0.050148   |       | ENSG00000210940 |
| 17 | 54314466 | 54314670 | 54314554 | 8  | 8   | 2  | 3.519146518 | 0.017558   |       | ENSG00000210940 |
| 17 | 54315930 | 54316202 | 54316100 | 9  | 11  | 5  | 2.346097679 | 0.0364013  |       | ENSG00000210940 |
| 17 | 54316654 | 54316837 | 54316727 | 8  | 10  | 10 | 1.173048839 | 0.355733   |       | ENSG00000210940 |
| 17 | 54319730 | 54320061 | 54319906 | 9  | 14  | 13 | 1.256838042 | 0.269506   |       | ENSG00000210940 |
| 17 | 54335231 | 54335684 | 54335410 | 11 | 20  | 29 | 0.821134188 | 0.760976   |       | ENSG00000210952 |
| 17 | 54344045 | 54344554 | 54344345 | 42 | 63  | 11 | 6.256260476 | 1.73E-12   |       | ENSG00000210952 |
| 17 | 54349665 | 54349995 | 54349830 | 8  | 11  | 12 | 1.082814313 | 0.424156   |       | ENSG00000210952 |
| 17 | 54363870 | 54364158 | 54364032 | 9  | 13  | 9  | 1.642268375 | 0.111397   |       | ENSG00000210952 |
| 17 | 54379859 | 54380226 | 54380067 | 9  | 13  | 17 | 0.912371319 | 0.606688   |       | ENSG00000210961 |
| 17 | 54392064 | 54392781 | 54392464 | 52 | 100 | 32 | 3.590240387 | 1.99E-12   |       | ENSG00000210961 |
| 17 | 54394709 | 54394954 | 54394816 | 10 | 12  | 8  | 1.694403879 | 0.107291   |       | ENSG00000210961 |
| 17 | 54396172 | 54396432 | 54396302 | 8  | 9   | 20 | 0.558594685 | 0.944249   |       | ENSG00000210961 |
| 17 | 54396559 | 54396824 | 54396692 | 9  | 13  | 14 | 1.094845583 | 0.406217   |       | ENSG00000210961 |

|    |          |          |          |    |    |    |             |           |                 |
|----|----------|----------|----------|----|----|----|-------------|-----------|-----------------|
| 17 | 54397477 | 54398049 | 54397723 | 8  | 22 | 35 | 0.74944787  | 0.865446  | ENSG00000210961 |
| 17 | 54400377 | 54400825 | 54400674 | 16 | 23 | 18 | 1.481745902 | 0.0984143 | ENSG00000210961 |
| 17 | 54401660 | 54401892 | 54401754 | 11 | 12 | 13 | 1.089259637 | 0.414883  | ENSG00000210961 |
| 17 | 54402950 | 54403138 | 54403044 | 8  | 8  | 7  | 1.319679944 | 0.283403  | ENSG00000216168 |
| 17 | 54404900 | 54405079 | 54404973 | 9  | 10 | 14 | 0.860235815 | 0.65444   | ENSG00000216168 |
| 17 | 54407373 | 54407633 | 54407503 | 8  | 12 | 10 | 1.386330446 | 0.21117   | ENSG00000216168 |
| 17 | 54407669 | 54408413 | 54407848 | 14 | 36 | 47 | 0.904225147 | 0.680533  | ENSG00000216168 |
| 17 | 54408473 | 54408717 | 54408647 | 12 | 13 | 22 | 0.714029728 | 0.84749   | ENSG00000216168 |
| 17 | 54408721 | 54409042 | 54408881 | 11 | 17 | 12 | 1.62422147  | 0.088135  | ENSG00000216168 |
| 17 | 54409724 | 54409982 | 54409829 | 8  | 10 | 5  | 2.150589539 | 0.0575848 | ENSG00000216168 |
| 17 | 54411259 | 54411449 | 54411335 | 8  | 8  | 9  | 1.055743955 | 0.456865  | ENSG00000216168 |
| 17 | 54412028 | 54412252 | 54412104 | 9  | 12 | 14 | 1.016642327 | 0.486402  | ENSG00000216168 |
| 17 | 54412277 | 54412456 | 54412342 | 8  | 9  | 5  | 1.955081399 | 0.0892323 | ENSG00000216168 |
| 17 | 54413409 | 54413736 | 54413565 | 14 | 18 | 17 | 1.238218219 | 0.258417  | ENSG00000216168 |
| 17 | 54414178 | 54414394 | 54414255 | 9  | 10 | 15 | 0.806471077 | 0.716145  | ENSG00000216168 |
| 17 | 54416281 | 54416689 | 54416510 | 10 | 18 | 13 | 1.591994853 | 0.0905191 | ENSG00000216168 |
| 17 | 54417411 | 54418213 | 54417818 | 14 | 43 | 53 | 0.955817573 | 0.59057   | ENSG00000216168 |
| 17 | 54419108 | 54419554 | 54419281 | 8  | 15 | 18 | 0.987830602 | 0.518173  | ENSG00000216168 |
| 17 | 54421800 | 54422172 | 54421941 | 10 | 15 | 19 | 0.938439071 | 0.579569  | ENSG00000216168 |
| 17 | 54423717 | 54424102 | 54423888 | 13 | 19 | 22 | 1.020042469 | 0.477122  | ENSG00000216168 |
| 17 | 54424900 | 54425134 | 54425052 | 9  | 11 | 13 | 1.005470434 | 0.498567  | ENSG00000216168 |
| 17 | 54425551 | 54425730 | 54425684 | 8  | 9  | 20 | 0.558594685 | 0.944249  | ENSG00000216168 |
| 17 | 54427854 | 54428089 | 54427946 | 8  | 8  | 10 | 0.959767232 | 0.541959  | ENSG00000216168 |
| 17 | 54429278 | 54429629 | 54429453 | 8  | 13 | 23 | 0.68427849  | 0.878142  | ENSG00000216168 |
| 17 | 54430070 | 54430411 | 54430240 | 8  | 13 | 21 | 0.746485625 | 0.811212  | ENSG00000216168 |
| 17 | 54431078 | 54431355 | 54431194 | 9  | 12 | 20 | 0.726173091 | 0.825666  | ENSG00000216168 |
| 17 | 54431435 | 54431923 | 54431674 | 8  | 19 | 17 | 1.303387599 | 0.207073  | ENSG00000216168 |
| 17 | 54433465 | 54433858 | 54433689 | 8  | 15 | 19 | 0.938439071 | 0.579569  | ENSG00000216168 |
| 17 | 54434614 | 54435151 | 54434742 | 10 | 21 | 31 | 0.806471077 | 0.786558  | ENSG00000216168 |
| 17 | 54435426 | 54435660 | 54435538 | 9  | 11 | 9  | 1.407658607 | 0.210479  | ENSG00000216168 |
| 17 | 54436728 | 54437420 | 54437184 | 25 | 51 | 56 | 1.070149818 | 0.363326  | ENSG00000216168 |
| 17 | 54437597 | 54437832 | 54437714 | 11 | 13 | 7  | 2.052835469 | 0.046392  | ENSG00000216168 |
| 17 | 54439519 | 54439854 | 54439678 | 10 | 14 | 22 | 0.765031852 | 0.797133  | ENSG00000216168 |
| 17 | 54439862 | 54440245 | 54440081 | 11 | 18 | 18 | 1.173048839 | 0.312613  | ENSG00000216168 |

|    |          |          |          |    |    |    |             |           |                        |
|----|----------|----------|----------|----|----|----|-------------|-----------|------------------------|
| 17 | 54440959 | 54441310 | 54441134 | 8  | 14 | 8  | 1.955081399 | 0.0506438 | ENSG00000216168        |
| 17 | 54442062 | 54442733 | 54442407 | 10 | 23 | 25 | 1.082814313 | 0.391389  | ENSG00000216168        |
| 17 | 54447675 | 54447974 | 54447853 | 8  | 11 | 15 | 0.879786629 | 0.637414  | ENSG00000216168        |
| 17 | 54454309 | 54454810 | 54454488 | 8  | 18 | 15 | 1.392995497 | 0.16305   | ENSG00000216168        |
| 17 | 54456899 | 54457197 | 54457024 | 10 | 12 | 18 | 0.802612364 | 0.736387  | ENSG00000216168        |
| 17 | 54458249 | 54458467 | 54458358 | 8  | 10 | 18 | 0.679133539 | 0.855647  | ENSG00000216168        |
| 17 | 54459607 | 54460433 | 54460159 | 17 | 37 | 30 | 1.437930835 | 0.0657032 | ENSG00000216168        |
| 17 | 54460502 | 54460888 | 54460681 | 13 | 19 | 22 | 1.020042469 | 0.477122  | ENSG00000216168        |
| 17 | 54467970 | 54468651 | 54468132 | 12 | 27 | 24 | 1.3138147   | 0.160245  | ENSG00000216168        |
| 17 | 54475571 | 54475946 | 54475750 | 11 | 19 | 29 | 0.78203256  | 0.808559  | ENSG00000216168        |
| 17 | 54479807 | 54480193 | 54480014 | 16 | 26 | 24 | 1.266892746 | 0.197079  | TRIM37 ENSG00000108395 |
| 17 | 54480245 | 54480485 | 54480365 | 12 | 15 | 15 | 1.173048839 | 0.32719   | TRIM37 ENSG00000108395 |
| 17 | 54481361 | 54481893 | 54481596 | 9  | 20 | 20 | 1.173048839 | 0.303681  | TRIM37 ENSG00000108395 |
| 17 | 54482013 | 54482532 | 54482343 | 10 | 21 | 16 | 1.518063204 | 0.0959332 | TRIM37 ENSG00000108395 |
| 17 | 54483932 | 54484115 | 54484023 | 8  | 10 | 12 | 0.992579787 | 0.511743  | TRIM37 ENSG00000108395 |
| 17 | 54484385 | 54484765 | 54484586 | 9  | 16 | 17 | 1.107879459 | 0.383112  | TRIM37 ENSG00000108395 |
| 17 | 54488349 | 54488545 | 54488447 | 9  | 10 | 8  | 1.433726359 | 0.209175  | TRIM37 ENSG00000108395 |
| 17 | 54489936 | 54490124 | 54489992 | 8  | 9  | 3  | 2.932622098 | 0.0242899 | TRIM37 ENSG00000108395 |
| 17 | 54491938 | 54492478 | 54492117 | 9  | 22 | 35 | 0.74944787  | 0.865446  | TRIM37 ENSG00000108395 |
| 17 | 54494362 | 54494641 | 54494501 | 11 | 14 | 14 | 1.173048839 | 0.332418  | TRIM37 ENSG00000108395 |
| 17 | 54495509 | 54495819 | 54495758 | 8  | 12 | 3  | 3.812408728 | 0.004404  | TRIM37 ENSG00000108395 |
| 17 | 54501649 | 54502027 | 54501825 | 9  | 15 | 11 | 1.564065119 | 0.11768   | TRIM37 ENSG00000108395 |
| 17 | 54511420 | 54511633 | 54511491 | 8  | 8  | 11 | 0.879786629 | 0.621301  | TRIM37 ENSG00000108395 |
| 17 | 54513189 | 54513498 | 54513351 | 13 | 16 | 9  | 1.994183027 | 0.0370915 | TRIM37 ENSG00000108395 |
| 17 | 54513587 | 54513905 | 54513746 | 13 | 18 | 12 | 1.714455996 | 0.0636479 | TRIM37 ENSG00000108395 |
| 17 | 54514546 | 54514835 | 54514690 | 12 | 15 | 11 | 1.564065119 | 0.11768   | TRIM37 ENSG00000108395 |
| 17 | 54516992 | 54517179 | 54517069 | 8  | 8  | 7  | 1.319679944 | 0.283403  | TRIM37 ENSG00000108395 |
| 17 | 54517944 | 54518180 | 54518073 | 8  | 9  | 9  | 1.173048839 | 0.362316  | TRIM37 ENSG00000108395 |
| 17 | 54518910 | 54519135 | 54519020 | 8  | 10 | 12 | 0.992579787 | 0.511743  | TRIM37 ENSG00000108395 |
| 17 | 54520990 | 54521493 | 54521169 | 12 | 20 | 11 | 2.052835469 | 0.0201852 | TRIM37 ENSG00000108395 |
| 17 | 54525223 | 54526373 | 54525723 | 13 | 53 | 53 | 1.173048839 | 0.204123  | TRIM37 ENSG00000108395 |
| 17 | 54526516 | 54527087 | 54526769 | 11 | 23 | 34 | 0.804376347 | 0.799304  | TRIM37 ENSG00000108395 |
| 17 | 54527153 | 54527408 | 54527292 | 9  | 11 | 17 | 0.78203256  | 0.752912  | TRIM37 ENSG00000108395 |
| 17 | 54527413 | 54527735 | 54527574 | 11 | 17 | 21 | 0.959767232 | 0.55532   | TRIM37 ENSG00000108395 |



|    |          |          |          |    |     |     |             |             |          |                 |
|----|----------|----------|----------|----|-----|-----|-------------|-------------|----------|-----------------|
| 17 | 54532597 | 54532914 | 54532736 | 10 | 15  | 16  | 1.104045966 | 0.390393    | TRIM37   | ENSG00000108395 |
| 17 | 54536173 | 54536610 | 54536352 | 14 | 22  | 33  | 0.793533038 | 0.809383    | TRIM37   | ENSG00000108395 |
| 17 | 54536702 | 54536910 | 54536806 | 8  | 9   | 11  | 0.977540699 | 0.526123    | TRIM37   | ENSG00000108395 |
| 17 | 54537323 | 54537592 | 54537441 | 10 | 15  | 24  | 0.750751257 | 0.821554    | TRIM37   | ENSG00000108395 |
| 17 | 54537600 | 54537924 | 54537762 | 12 | 18  | 25  | 0.857227998 | 0.700223    | TRIM37   | ENSG00000108395 |
| 17 | 54537989 | 54539772 | 54538987 | 61 | 283 | 141 | 2.346097679 | 4.48E-18    | TRIM37   | ENSG00000108395 |
| 17 | 54540304 | 54541081 | 54540747 | 14 | 35  | 21  | 1.919534464 | 0.00687348  | TRIM37   | ENSG00000108395 |
| 17 | 54542540 | 54542787 | 54542663 | 8  | 9   | 5   | 1.955081399 | 0.0892323   | TRIM37   | ENSG00000108395 |
| 17 | 54543695 | 54543933 | 54543814 | 9  | 12  | 9   | 1.524963491 | 0.154777    | TRIM37   | ENSG00000108395 |
| 17 | 54546694 | 54546960 | 54546826 | 11 | 12  | 19  | 0.762481746 | 0.784291    | TRIM37   | ENSG00000108395 |
| 17 | 54550990 | 54551245 | 54551117 | 14 | 14  | 26  | 0.6516938   | 0.91539     | TRIM37   | ENSG00000108395 |
| 17 | 54552777 | 54552996 | 54552893 | 8  | 9   | 11  | 0.977540699 | 0.526123    | TRIM37   | ENSG00000108395 |
| 17 | 54586962 | 54587809 | 54587348 | 14 | 37  | 21  | 2.026175268 | 0.00340881  | FAM33A   | ENSG00000182628 |
| 17 | 54641974 | 54642310 | 54642136 | 23 | 27  | 9   | 3.28453675  | 0.000236424 | C17orf71 | ENSG00000167447 |
| 17 | 54652487 | 54652686 | 54652593 | 10 | 11  | 4   | 2.815317214 | 0.0183428   | GDPD1    | ENSG00000153982 |
| 17 | 54653145 | 54653409 | 54653291 | 8  | 9   | 0   | 11.73048839 | 0.000425898 | GDPD1    | ENSG00000153982 |
| 17 | 54759694 | 54760070 | 54759858 | 8  | 14  | 2   | 5.865244197 | 0.000387308 | YPEL2    | ENSG00000175155 |
| 17 | 54761850 | 54762056 | 54761971 | 8  | 9   | 4   | 2.346097679 | 0.050148    | YPEL2    | ENSG00000175155 |
| 17 | 54798824 | 54799406 | 54799232 | 11 | 22  | 11  | 2.248343609 | 0.0090389   | YPEL2    | ENSG00000175155 |
| 17 | 54838956 | 54839274 | 54839115 | 8  | 14  | 10  | 1.599612054 | 0.114822    | YPEL2    | ENSG00000175155 |
| 17 | 54850931 | 54851232 | 54851081 | 17 | 20  | 9   | 2.463402563 | 0.00689886  | YPEL2    | ENSG00000175155 |
| 17 | 54872989 | 54873399 | 54873143 | 12 | 20  | 6   | 3.519146518 | 0.000784044 |          | ENSG00000200889 |
| 17 | 54953702 | 54953939 | 54953813 | 10 | 12  | 2   | 5.083211637 | 0.00143337  |          | ENSG00000200889 |
| 17 | 54997524 | 54997852 | 54997688 | 14 | 20  | 5   | 4.105670938 | 0.000308509 | DHX40    | ENSG00000108406 |
| 17 | 54998406 | 54998604 | 54998505 | 8  | 10  | 4   | 2.580707446 | 0.0306059   | DHX40    | ENSG00000108406 |
| 17 | 55047369 | 55047550 | 55047455 | 8  | 8   | 1   | 5.278719777 | 0.00542188  | CLTC     | ENSG00000141367 |
| 17 | 55051091 | 55052159 | 55051931 | 18 | 54  | 17  | 3.584315898 | 1.47E-07    | CLTC     | ENSG00000141367 |
| 17 | 55139280 | 55139847 | 55139597 | 9  | 24  | 14  | 1.955081399 | 0.0175993   |          | ENSG00000214225 |
| 17 | 55185720 | 55185922 | 55185827 | 8  | 8   | 2   | 3.519146518 | 0.017558    | TMEM49   | ENSG00000062716 |
| 17 | 55218704 | 55219025 | 55218864 | 12 | 15  | 5   | 3.128130238 | 0.00492422  |          | ENSG00000199004 |
| 17 | 55261643 | 55262005 | 55261822 | 10 | 16  | 23  | 0.830909595 | 0.726247    |          | ENSG00000199004 |
| 17 | 55262069 | 55262286 | 55262146 | 8  | 9   | 16  | 0.690028729 | 0.833766    |          | ENSG00000199004 |
| 17 | 55263980 | 55264378 | 55264279 | 9  | 16  | 23  | 0.830909595 | 0.726247    |          | ENSG00000199004 |
| 17 | 55264940 | 55265460 | 55265118 | 19 | 30  | 24  | 1.454580561 | 0.0803614   |          | ENSG00000199004 |

|    |          |          |          |     |     |     |             |             |         |                 |
|----|----------|----------|----------|-----|-----|-----|-------------|-------------|---------|-----------------|
| 17 | 55268561 | 55268956 | 55268777 | 23  | 29  | 15  | 2.199466574 | 0.00420562  |         | ENSG00000199004 |
| 17 | 55269239 | 55271221 | 55269634 | 137 | 381 | 149 | 2.987364377 | 9.46E-34    |         | ENSG00000199004 |
| 17 | 55271325 | 55271706 | 55271502 | 19  | 25  | 18  | 1.605224727 | 0.0562573   |         | ENSG00000199004 |
| 17 | 55271844 | 55272529 | 55272023 | 16  | 35  | 58  | 0.715758614 | 0.946519    |         | ENSG00000199004 |
| 17 | 55272592 | 55273108 | 55272768 | 10  | 21  | 33  | 0.759031602 | 0.848745    |         | ENSG00000199004 |
| 17 | 55273374 | 55273795 | 55273605 | 8   | 17  | 20  | 1.005470434 | 0.496566    |         | ENSG00000199004 |
| 17 | 55275267 | 55275792 | 55275446 | 35  | 51  | 32  | 1.848440595 | 0.00246854  |         | ENSG00000199004 |
| 17 | 55275801 | 55276539 | 55276174 | 13  | 31  | 24  | 1.501502514 | 0.0624568   |         | ENSG00000199004 |
| 17 | 55276723 | 55279392 | 55278615 | 67  | 402 | 208 | 2.261907571 | 2.66E-23    |         | ENSG00000201524 |
| 17 | 55279591 | 55280363 | 55279983 | 47  | 86  | 58  | 1.729749983 | 0.000498152 |         | ENSG00000201524 |
| 17 | 55281762 | 55282161 | 55281895 | 9   | 14  | 26  | 0.6516938   | 0.91539     |         | ENSG00000201524 |
| 17 | 55283603 | 55283916 | 55283759 | 11  | 16  | 39  | 0.498545757 | 0.994224    |         | ENSG00000201524 |
| 17 | 55283975 | 55284284 | 55284083 | 10  | 15  | 36  | 0.507264363 | 0.991368    |         | ENSG00000201524 |
| 17 | 55284286 | 55284478 | 55284356 | 8   | 8   | 19  | 0.527871978 | 0.95364     |         | ENSG00000201524 |
| 17 | 55285224 | 55286020 | 55285527 | 69  | 109 | 30  | 4.162431365 | 3.21E-15    |         | ENSG00000201524 |
| 17 | 55287702 | 55288127 | 55287948 | 13  | 19  | 14  | 1.564065119 | 0.0925887   |         | ENSG00000201524 |
| 17 | 55288925 | 55289961 | 55289653 | 41  | 117 | 89  | 1.537997367 | 0.000978929 |         | ENSG00000201524 |
| 17 | 55290387 | 55290869 | 55290641 | 11  | 20  | 35  | 0.68427849  | 0.922019    |         | ENSG00000201524 |
| 17 | 55290955 | 55291341 | 55291134 | 10  | 17  | 16  | 1.242051712 | 0.261202    |         | ENSG00000201524 |
| 17 | 55291580 | 55292632 | 55291982 | 21  | 69  | 59  | 1.368556979 | 0.0368883   |         | ENSG00000201524 |
| 17 | 55293546 | 55293792 | 55293663 | 8   | 11  | 6   | 2.010940867 | 0.0640214   |         | ENSG00000201524 |
| 17 | 55301526 | 55301915 | 55301729 | 13  | 21  | 17  | 1.433726359 | 0.126962    |         | ENSG00000201524 |
| 17 | 55301952 | 55302297 | 55302118 | 9   | 14  | 9   | 1.759573259 | 0.0786014   |         | ENSG00000201524 |
| 17 | 55302465 | 55303064 | 55302785 | 19  | 32  | 30  | 1.24872941  | 0.187449    | TUBD1   | ENSG00000108423 |
| 17 | 55303078 | 55303462 | 55303257 | 11  | 17  | 14  | 1.407658607 | 0.162567    | TUBD1   | ENSG00000108423 |
| 17 | 55303558 | 55303885 | 55303721 | 17  | 22  | 18  | 1.42000649  | 0.127634    | TUBD1   | ENSG00000108423 |
| 17 | 55306550 | 55306889 | 55306719 | 15  | 18  | 21  | 1.013087634 | 0.486601    | TUBD1   | ENSG00000108423 |
| 17 | 55307833 | 55308012 | 55307971 | 8   | 8   | 7   | 1.319679944 | 0.283403    | TUBD1   | ENSG00000108423 |
| 17 | 55310163 | 55310625 | 55310342 | 10  | 22  | 31  | 0.843128853 | 0.73853     | TUBD1   | ENSG00000108423 |
| 17 | 55317561 | 55318107 | 55317812 | 9   | 21  | 28  | 0.889899119 | 0.664396    | TUBD1   | ENSG00000108423 |
| 17 | 55318208 | 55318628 | 55318377 | 12  | 21  | 31  | 0.806471077 | 0.786558    | TUBD1   | ENSG00000108423 |
| 17 | 55319596 | 55319969 | 55319775 | 9   | 15  | 22  | 0.816033975 | 0.739972    | TUBD1   | ENSG00000108423 |
| 17 | 55324292 | 55326470 | 55325296 | 51  | 215 | 185 | 1.362250265 | 0.000978208 | RPS6KB1 | ENSG00000108443 |
| 17 | 55326472 | 55326780 | 55326626 | 11  | 15  | 16  | 1.104045966 | 0.390393    | RPS6KB1 | ENSG00000108443 |

|    |          |          |          |    |     |    |             |             |         |                 |
|----|----------|----------|----------|----|-----|----|-------------|-------------|---------|-----------------|
| 17 | 55328638 | 55328942 | 55328790 | 9  | 11  | 16 | 0.828034475 | 0.698553    | RPS6KB1 | ENSG00000108443 |
| 17 | 55332183 | 55332398 | 55332297 | 8  | 9   | 4  | 2.346097679 | 0.050148    | RPS6KB1 | ENSG00000108443 |
| 17 | 55334742 | 55334980 | 55334890 | 8  | 9   | 11 | 0.977540699 | 0.526123    | RPS6KB1 | ENSG00000108443 |
| 17 | 55337467 | 55337688 | 55337607 | 9  | 12  | 15 | 0.953102182 | 0.555895    | RPS6KB1 | ENSG00000108443 |
| 17 | 55343236 | 55343607 | 55343405 | 8  | 13  | 10 | 1.49297125  | 0.157311    | RPS6KB1 | ENSG00000108443 |
| 17 | 55345193 | 55345448 | 55345340 | 10 | 12  | 12 | 1.173048839 | 0.343543    | RPS6KB1 | ENSG00000108443 |
| 17 | 55346427 | 55346845 | 55346591 | 12 | 20  | 25 | 0.947462524 | 0.576741    | RPS6KB1 | ENSG00000108443 |
| 17 | 55348432 | 55348954 | 55348775 | 11 | 22  | 27 | 0.963575832 | 0.555868    | RPS6KB1 | ENSG00000108443 |
| 17 | 55350694 | 55350957 | 55350781 | 9  | 11  | 2  | 4.692195357 | 0.00272444  | RPS6KB1 | ENSG00000108443 |
| 17 | 55351906 | 55352238 | 55352072 | 8  | 13  | 12 | 1.263283365 | 0.272203    | RPS6KB1 | ENSG00000108443 |
| 17 | 55379456 | 55379636 | 55379546 | 10 | 10  | 2  | 4.301179077 | 0.00512919  | RNFT1   | ENSG00000189050 |
| 17 | 55383921 | 55384197 | 55384054 | 11 | 13  | 20 | 0.78203256  | 0.76897     | RNFT1   | ENSG00000189050 |
| 17 | 55394909 | 55395406 | 55395179 | 11 | 20  | 21 | 1.119728438 | 0.357221    | RNFT1   | ENSG00000189050 |
| 17 | 55395571 | 55395818 | 55395694 | 10 | 11  | 18 | 0.740872951 | 0.800189    | RNFT1   | ENSG00000189050 |
| 17 | 55395924 | 55397476 | 55397114 | 43 | 182 | 89 | 2.385199307 | 1.27E-12    | RNFT1   | ENSG00000189050 |
| 17 | 55398320 | 55398784 | 55398613 | 9  | 17  | 5  | 3.519146518 | 0.00167472  | RNFT1   | ENSG00000189050 |
| 17 | 55400011 | 55400352 | 55400181 | 8  | 14  | 12 | 1.353517892 | 0.211235    | RNFT1   | ENSG00000189050 |
| 17 | 55466779 | 55466960 | 55466869 | 9  | 10  | 4  | 2.580707446 | 0.0306059   |         | ENSG00000204471 |
| 17 | 55469001 | 55469855 | 55469410 | 60 | 121 | 57 | 2.467447559 | 1.88E-09    |         | ENSG00000204471 |
| 17 | 55471186 | 55472729 | 55472078 | 16 | 82  | 75 | 1.281092811 | 0.059264    |         | ENSG00000204471 |
| 17 | 55472865 | 55473114 | 55472988 | 8  | 10  | 17 | 0.71686318  | 0.816679    |         | ENSG00000204471 |
| 17 | 55473530 | 55473978 | 55473679 | 18 | 25  | 23 | 1.270802909 | 0.198634    |         | ENSG00000204471 |
| 17 | 55475237 | 55475464 | 55475350 | 10 | 12  | 10 | 1.386330446 | 0.21117     |         | ENSG00000204471 |
| 17 | 55478889 | 55479174 | 55479018 | 12 | 16  | 7  | 2.492728784 | 0.0124193   |         | ENSG00000204471 |
| 17 | 55480625 | 55480838 | 55480749 | 8  | 11  | 16 | 0.828034475 | 0.698553    |         | ENSG00000204471 |
| 17 | 55481525 | 55481824 | 55481678 | 12 | 13  | 14 | 1.094845583 | 0.406217    | HEATR6  | ENSG0000068097  |
| 17 | 55483029 | 55483298 | 55483150 | 11 | 12  | 17 | 0.84720194  | 0.681997    | HEATR6  | ENSG0000068097  |
| 17 | 55483366 | 55483707 | 55483528 | 11 | 16  | 8  | 2.215758919 | 0.0222902   | HEATR6  | ENSG0000068097  |
| 17 | 55484184 | 55484738 | 55484363 | 8  | 20  | 20 | 1.173048839 | 0.303681    | HEATR6  | ENSG0000068097  |
| 17 | 55485065 | 55485256 | 55485182 | 8  | 10  | 11 | 1.075294769 | 0.434143    | HEATR6  | ENSG0000068097  |
| 17 | 55485839 | 55486338 | 55486018 | 10 | 20  | 6  | 3.519146518 | 0.000784044 | HEATR6  | ENSG0000068097  |
| 17 | 55487685 | 55487943 | 55487821 | 8  | 9   | 8  | 1.303387599 | 0.281715    | HEATR6  | ENSG0000068097  |
| 17 | 55488091 | 55488286 | 55488142 | 8  | 8   | 18 | 0.555654713 | 0.936835    | HEATR6  | ENSG0000068097  |
| 17 | 55489120 | 55489409 | 55489246 | 10 | 14  | 18 | 0.926091189 | 0.59273     | HEATR6  | ENSG0000068097  |

|    |          |          |          |    |     |    |             |            |        |                 |
|----|----------|----------|----------|----|-----|----|-------------|------------|--------|-----------------|
| 17 | 55490439 | 55490680 | 55490587 | 8  | 10  | 20 | 0.614454154 | 0.913752   | HEATR6 | ENSG00000068097 |
| 17 | 55494496 | 55494850 | 55494673 | 14 | 19  | 25 | 0.902345261 | 0.639556   | HEATR6 | ENSG00000068097 |
| 17 | 55498724 | 55499075 | 55498899 | 10 | 16  | 15 | 1.246364392 | 0.263987   | HEATR6 | ENSG00000068097 |
| 17 | 55499468 | 55499906 | 55499617 | 13 | 19  | 19 | 1.173048839 | 0.308076   | HEATR6 | ENSG00000068097 |
| 17 | 55500000 | 55500812 | 55500226 | 10 | 32  | 29 | 1.290353723 | 0.155959   | HEATR6 | ENSG00000068097 |
| 17 | 55503288 | 55503481 | 55503384 | 8  | 8   | 10 | 0.959767232 | 0.541959   | HEATR6 | ENSG00000068097 |
| 17 | 55504732 | 55505043 | 55504877 | 10 | 11  | 15 | 0.879786629 | 0.637414   | HEATR6 | ENSG00000068097 |
| 17 | 55505430 | 55506089 | 55505867 | 17 | 33  | 41 | 0.949610965 | 0.591605   | HEATR6 | ENSG00000068097 |
| 17 | 55509142 | 55509378 | 55509204 | 9  | 11  | 22 | 0.612025481 | 0.924393   | HEATR6 | ENSG00000068097 |
| 17 | 55509437 | 55509889 | 55509584 | 9  | 19  | 28 | 0.8089992   | 0.772581   | HEATR6 | ENSG00000068097 |
| 17 | 55510018 | 55511316 | 55510901 | 31 | 106 | 68 | 1.819075736 | 4.13E-05   | HEATR6 | ENSG00000068097 |
| 17 | 55511509 | 55512405 | 55511679 | 31 | 70  | 61 | 1.343330122 | 0.0444403  | HEATR6 | ENSG00000068097 |
| 17 | 55514024 | 55514258 | 55514191 | 10 | 13  | 16 | 0.966040221 | 0.542489   | HEATR6 | ENSG00000068097 |
| 17 | 55514420 | 55514617 | 55514564 | 9  | 9   | 10 | 1.066408036 | 0.444985   | HEATR6 | ENSG00000068097 |
| 17 | 55515920 | 55516142 | 55516031 | 11 | 12  | 15 | 0.953102182 | 0.555895   | HEATR6 | ENSG00000068097 |
| 17 | 55516963 | 55517395 | 55517132 | 13 | 24  | 25 | 1.127931576 | 0.335219   | HEATR6 | ENSG00000068097 |
| 17 | 55517820 | 55518097 | 55517938 | 9  | 13  | 24 | 0.65690735  | 0.903651   | HEATR6 | ENSG00000068097 |
| 17 | 55519097 | 55519493 | 55519238 | 8  | 13  | 26 | 0.608247546 | 0.94153    | HEATR6 | ENSG00000068097 |
| 17 | 55520109 | 55520695 | 55520457 | 14 | 28  | 26 | 1.259941346 | 0.193908   | HEATR6 | ENSG00000068097 |
| 17 | 55521598 | 55522009 | 55521882 | 10 | 20  | 33 | 0.724530165 | 0.88296    | HEATR6 | ENSG00000068097 |
| 17 | 55522754 | 55523105 | 55522929 | 9  | 14  | 18 | 0.926091189 | 0.59273    | HEATR6 | ENSG00000068097 |
| 17 | 55526924 | 55527193 | 55527069 | 12 | 12  | 10 | 1.386330446 | 0.21117    | HEATR6 | ENSG00000068097 |
| 17 | 55534959 | 55535138 | 55535048 | 9  | 9   | 5  | 1.955081399 | 0.0892323  | HEATR6 | ENSG00000068097 |
| 17 | 55540078 | 55540257 | 55540162 | 8  | 8   | 9  | 1.055743955 | 0.456865   | HEATR6 | ENSG00000068097 |
| 17 | 55540839 | 55541051 | 55540981 | 9  | 10  | 13 | 0.921681231 | 0.585856   | HEATR6 | ENSG00000068097 |
| 17 | 55559702 | 55560190 | 55560011 | 13 | 24  | 17 | 1.629234499 | 0.0548227  | CA4    | ENSG00000167434 |
| 17 | 55560554 | 55561079 | 55560722 | 12 | 21  | 30 | 0.832486273 | 0.749627   | CA4    | ENSG00000167434 |
| 17 | 55561256 | 55561622 | 55561463 | 8  | 14  | 11 | 1.466311049 | 0.15926    | CA4    | ENSG00000167434 |
| 17 | 55564037 | 55564243 | 55564106 | 9  | 11  | 23 | 0.58652442  | 0.942313   | CA4    | ENSG00000167434 |
| 17 | 55564707 | 55564987 | 55564847 | 10 | 12  | 17 | 0.84720194  | 0.681997   | CA4    | ENSG00000167434 |
| 17 | 55566399 | 55566578 | 55566500 | 9  | 10  | 6  | 1.843362462 | 0.0964212  | CA4    | ENSG00000167434 |
| 17 | 55567051 | 55568333 | 55567884 | 32 | 102 | 81 | 1.473463786 | 0.00424214 | CA4    | ENSG00000167434 |
| 17 | 55568488 | 55568817 | 55568658 | 10 | 14  | 21 | 0.799806027 | 0.754204   | CA4    | ENSG00000167434 |
| 17 | 55569257 | 55569545 | 55569401 | 11 | 13  | 25 | 0.631641683 | 0.924582   | CA4    | ENSG00000167434 |

|    |          |          |          |    |     |     |             |             |     |                 |
|----|----------|----------|----------|----|-----|-----|-------------|-------------|-----|-----------------|
| 17 | 55569841 | 55570265 | 55569934 | 8  | 16  | 10  | 1.812893661 | 0.0578656   | CA4 | ENSG00000167434 |
| 17 | 55571216 | 55572461 | 55572090 | 41 | 86  | 52  | 1.925570736 | 6.26E-05    | CA4 | ENSG00000167434 |
| 17 | 55572506 | 55572795 | 55572651 | 11 | 12  | 12  | 1.173048839 | 0.343543    | CA4 | ENSG00000167434 |
| 17 | 55572939 | 55573118 | 55572981 | 8  | 8   | 8   | 1.173048839 | 0.36929     | CA4 | ENSG00000167434 |
| 17 | 55574355 | 55575701 | 55575190 | 50 | 135 | 100 | 1.579550912 | 0.000226371 | CA4 | ENSG00000167434 |
| 17 | 55577633 | 55578630 | 55578387 | 11 | 43  | 36  | 1.394976998 | 0.0670811   | CA4 | ENSG00000167434 |
| 17 | 55579349 | 55580428 | 55580114 | 15 | 51  | 65  | 0.924220298 | 0.667144    | CA4 | ENSG00000167434 |
| 17 | 55580442 | 55580778 | 55580610 | 12 | 16  | 19  | 0.997091513 | 0.507069    | CA4 | ENSG00000167434 |
| 17 | 55581218 | 55581728 | 55581397 | 14 | 25  | 34  | 0.871407709 | 0.706709    | CA4 | ENSG00000167434 |
| 17 | 55582774 | 55584234 | 55583028 | 17 | 77  | 76  | 1.18828324  | 0.141862    | CA4 | ENSG00000167434 |
| 17 | 55584484 | 55584864 | 55584646 | 11 | 17  | 17  | 1.173048839 | 0.317303    | CA4 | ENSG00000167434 |
| 17 | 55585657 | 55586095 | 55585916 | 11 | 22  | 14  | 1.798674887 | 0.0355729   | CA4 | ENSG00000167434 |
| 17 | 55586422 | 55587654 | 55586971 | 21 | 74  | 52  | 1.659974773 | 0.00215034  | CA4 | ENSG00000167434 |
| 17 | 55587957 | 55588204 | 55588099 | 12 | 15  | 14  | 1.251252095 | 0.26676     | CA4 | ENSG00000167434 |
| 17 | 55588819 | 55589111 | 55588965 | 9  | 14  | 11  | 1.466311049 | 0.15926     |     | ENSG00000221779 |
| 17 | 55589160 | 55589345 | 55589252 | 8  | 8   | 6   | 1.508205651 | 0.203852    |     | ENSG00000221779 |
| 17 | 55589636 | 55589990 | 55589813 | 8  | 13  | 9   | 1.642268375 | 0.111397    |     | ENSG00000221779 |
| 17 | 55590385 | 55590752 | 55590573 | 9  | 15  | 14  | 1.251252095 | 0.26676     |     | ENSG00000221779 |
| 17 | 55591682 | 55591945 | 55591813 | 10 | 11  | 12  | 1.082814313 | 0.424156    |     | ENSG00000221779 |
| 17 | 55592291 | 55592518 | 55592404 | 8  | 9   | 14  | 0.78203256  | 0.734892    |     | ENSG00000221779 |
| 17 | 55593558 | 55594481 | 55594144 | 24 | 62  | 41  | 1.759573259 | 0.00199911  |     | ENSG00000221779 |
| 17 | 55595015 | 55596116 | 55595466 | 13 | 50  | 43  | 1.359670246 | 0.067187    |     | ENSG00000221779 |
| 17 | 55596843 | 55597560 | 55597006 | 16 | 37  | 35  | 1.238218219 | 0.179382    |     | ENSG00000221779 |
| 17 | 55597705 | 55597963 | 55597841 | 8  | 11  | 20  | 0.670313622 | 0.874201    |     | ENSG00000221779 |
| 17 | 55598091 | 55598425 | 55598268 | 13 | 17  | 12  | 1.62422147  | 0.088135    |     | ENSG00000221779 |
| 17 | 55598516 | 55598813 | 55598673 | 8  | 10  | 13  | 0.921681231 | 0.585856    |     | ENSG00000221779 |
| 17 | 55599380 | 55600062 | 55599725 | 17 | 38  | 29  | 1.524963491 | 0.0399379   |     | ENSG00000221779 |
| 17 | 55600094 | 55600320 | 55600226 | 10 | 12  | 12  | 1.173048839 | 0.343543    |     | ENSG00000221779 |
| 17 | 55602889 | 55603897 | 55603718 | 12 | 44  | 49  | 1.055743955 | 0.397606    |     | ENSG00000221779 |
| 17 | 55604143 | 55604466 | 55604304 | 8  | 13  | 18  | 0.864351776 | 0.666373    |     | ENSG00000221779 |
| 17 | 55604474 | 55604737 | 55604634 | 12 | 15  | 16  | 1.104045966 | 0.390393    |     | ENSG00000221779 |
| 17 | 55606847 | 55607271 | 55607017 | 11 | 19  | 13  | 1.675784056 | 0.0660887   |     | ENSG00000221779 |
| 17 | 55625889 | 55626098 | 55626000 | 8  | 9   | 15  | 0.733155525 | 0.788527    |     | ENSG00000221779 |
| 17 | 55656234 | 55656530 | 55656382 | 11 | 14  | 16  | 1.035043094 | 0.464533    |     | ENSG00000222433 |

|    |          |          |          |    |    |    |             |           |                 |
|----|----------|----------|----------|----|----|----|-------------|-----------|-----------------|
| 17 | 55661117 | 55661960 | 55661719 | 21 | 46 | 41 | 1.312697511 | 0.0997346 | ENSG00000211027 |
| 17 | 55662728 | 55662925 | 55662868 | 8  | 8  | 15 | 0.659839972 | 0.851443  | ENSG00000221009 |
| 17 | 55663357 | 55663755 | 55663532 | 23 | 30 | 44 | 0.808100312 | 0.823634  | ENSG00000221009 |
| 17 | 55667993 | 55668372 | 55668221 | 12 | 18 | 17 | 1.238218219 | 0.258417  | ENSG00000221009 |
| 17 | 55673529 | 55673793 | 55673661 | 10 | 13 | 16 | 0.966040221 | 0.542489  | ENSG00000221009 |
| 17 | 55674820 | 55675287 | 55675125 | 8  | 14 | 13 | 1.256838042 | 0.269506  | ENSG00000221009 |
| 17 | 55681220 | 55681525 | 55681352 | 8  | 12 | 26 | 0.564801293 | 0.961411  | ENSG00000221009 |
| 17 | 55682766 | 55682957 | 55682899 | 8  | 8  | 12 | 0.812110735 | 0.692685  | ENSG00000221009 |
| 17 | 55686497 | 55686837 | 55686667 | 10 | 16 | 8  | 2.215758919 | 0.0222902 | ENSG00000221009 |
| 17 | 55689333 | 55689686 | 55689509 | 9  | 13 | 17 | 0.912371319 | 0.606688  | ENSG00000212648 |
| 17 | 55690174 | 55690479 | 55690326 | 12 | 16 | 25 | 0.766993472 | 0.808934  | ENSG00000212648 |
| 17 | 55691495 | 55691921 | 55691638 | 11 | 17 | 14 | 1.407658607 | 0.162567  | ENSG00000212648 |
| 17 | 55694878 | 55695287 | 55695108 | 8  | 16 | 17 | 1.107879459 | 0.383112  | ENSG00000212648 |
| 17 | 55701444 | 55701650 | 55701539 | 9  | 11 | 12 | 1.082814313 | 0.424156  | ENSG00000212648 |
| 17 | 55705225 | 55705572 | 55705394 | 13 | 17 | 11 | 1.759573259 | 0.0609179 | ENSG00000212648 |
| 17 | 55706430 | 55706686 | 55706530 | 8  | 11 | 9  | 1.407658607 | 0.210479  | ENSG00000212648 |
| 17 | 55706991 | 55707266 | 55707137 | 10 | 11 | 13 | 1.005470434 | 0.498567  | ENSG00000212648 |
| 17 | 55710032 | 55710366 | 55710192 | 8  | 12 | 5  | 2.541605819 | 0.0225912 | ENSG00000212648 |
| 17 | 55710392 | 55710732 | 55710562 | 9  | 15 | 13 | 1.340627245 | 0.210788  | ENSG00000212648 |
| 17 | 55713865 | 55714156 | 55714002 | 11 | 14 | 16 | 1.035043094 | 0.464533  | ENSG00000212648 |
| 17 | 55714793 | 55715294 | 55715168 | 10 | 21 | 16 | 1.518063204 | 0.0959332 | ENSG00000212648 |
| 17 | 55716896 | 55717155 | 55717033 | 9  | 12 | 27 | 0.544629818 | 0.970983  | ENSG00000212648 |
| 17 | 55718299 | 55718800 | 55718471 | 11 | 21 | 17 | 1.433726359 | 0.126962  | ENSG00000212648 |
| 17 | 55719642 | 55719822 | 55719732 | 8  | 9  | 18 | 0.617394126 | 0.901359  | ENSG00000212648 |
| 17 | 55722032 | 55722479 | 55722340 | 9  | 17 | 12 | 1.62422147  | 0.088135  | ENSG00000212648 |
| 17 | 55723216 | 55723410 | 55723280 | 8  | 9  | 13 | 0.837892028 | 0.672794  | ENSG00000212648 |
| 17 | 55724941 | 55725262 | 55725117 | 10 | 14 | 14 | 1.173048839 | 0.332418  | ENSG00000212648 |
| 17 | 55727606 | 55727839 | 55727722 | 10 | 11 | 9  | 1.407658607 | 0.210479  | ENSG00000212648 |
| 17 | 55728713 | 55729052 | 55728882 | 8  | 13 | 15 | 1.026417734 | 0.475096  | ENSG00000212648 |
| 17 | 55730008 | 55730498 | 55730187 | 8  | 17 | 32 | 0.639844821 | 0.942101  | ENSG00000212648 |
| 17 | 55732753 | 55733080 | 55732905 | 10 | 12 | 13 | 1.089259637 | 0.414883  | ENSG00000212648 |
| 17 | 55733666 | 55733952 | 55733775 | 10 | 13 | 15 | 1.026417734 | 0.475096  | ENSG00000212648 |
| 17 | 55735216 | 55735601 | 55735381 | 12 | 18 | 23 | 0.928663664 | 0.599426  | ENSG00000212648 |
| 17 | 55735709 | 55736161 | 55735858 | 9  | 18 | 15 | 1.392995497 | 0.16305   | ENSG00000212648 |

|    |          |          |          |    |     |    |             |             |                       |
|----|----------|----------|----------|----|-----|----|-------------|-------------|-----------------------|
| 17 | 55736977 | 55737234 | 55737114 | 8  | 10  | 8  | 1.433726359 | 0.209175    | ENSG00000212648       |
| 17 | 55738312 | 55738606 | 55738455 | 10 | 11  | 7  | 1.759573259 | 0.102361    | ENSG00000212648       |
| 17 | 55740207 | 55740446 | 55740324 | 9  | 11  | 10 | 1.279689643 | 0.277323    | ENSG00000212648       |
| 17 | 55740978 | 55741157 | 55741083 | 8  | 8   | 8  | 1.173048839 | 0.36929     | ENSG00000212648       |
| 17 | 55747592 | 55748196 | 55748043 | 20 | 33  | 27 | 1.424416448 | 0.0817823   | ENSG00000212648       |
| 17 | 55748952 | 55749131 | 55749017 | 8  | 8   | 8  | 1.173048839 | 0.36929     | ENSG00000212648       |
| 17 | 55750560 | 55750934 | 55750760 | 13 | 17  | 20 | 1.005470434 | 0.496566    | ENSG00000212648       |
| 17 | 55751138 | 55751398 | 55751298 | 8  | 9   | 11 | 0.977540699 | 0.526123    | ENSG00000212648       |
| 17 | 55752615 | 55752880 | 55752720 | 11 | 12  | 11 | 1.270802909 | 0.274822    | ENSG00000212648       |
| 17 | 55752963 | 55753190 | 55753076 | 8  | 10  | 17 | 0.71686318  | 0.816679    | ENSG00000212648       |
| 17 | 55753253 | 55753604 | 55753492 | 8  | 13  | 27 | 0.58652442  | 0.955084    | ENSG00000212648       |
| 17 | 55754423 | 55754743 | 55754583 | 8  | 12  | 9  | 1.524963491 | 0.154777    | ENSG00000212648       |
| 17 | 55755525 | 55755807 | 55755656 | 8  | 9   | 10 | 1.066408036 | 0.444985    | ENSG00000212648       |
| 17 | 55757515 | 55757815 | 55757665 | 9  | 12  | 11 | 1.270802909 | 0.274822    | ENSG00000212648       |
| 17 | 55761964 | 55762567 | 55762278 | 12 | 25  | 20 | 1.452346182 | 0.100215    | ENSG00000212648       |
| 17 | 55764884 | 55765088 | 55764986 | 10 | 11  | 3  | 3.519146518 | 0.00788869  | ENSG00000212648       |
| 17 | 55765175 | 55765421 | 55765271 | 8  | 9   | 12 | 0.902345261 | 0.602772    | ENSG00000212648       |
| 17 | 55776866 | 55777865 | 55777553 | 36 | 86  | 41 | 2.429886881 | 4.45E-07    | USP32 ENSG00000170832 |
| 17 | 55784649 | 55785573 | 55784984 | 26 | 60  | 55 | 1.277785343 | 0.0925873   | USP32 ENSG00000170832 |
| 17 | 55785929 | 55786264 | 55786096 | 13 | 18  | 11 | 1.857327329 | 0.0427732   | USP32 ENSG00000170832 |
| 17 | 55788047 | 55789407 | 55788250 | 43 | 120 | 88 | 1.594819209 | 0.000375385 | USP32 ENSG00000170832 |
| 17 | 55789428 | 55789635 | 55789471 | 8  | 9   | 12 | 0.902345261 | 0.602772    | USP32 ENSG00000170832 |
| 17 | 55789726 | 55790000 | 55789871 | 11 | 12  | 6  | 2.178519273 | 0.0416567   | USP32 ENSG00000170832 |
| 17 | 55790105 | 55790296 | 55790221 | 8  | 8   | 2  | 3.519146518 | 0.017558    | USP32 ENSG00000170832 |
| 17 | 55791217 | 55791415 | 55791347 | 8  | 10  | 20 | 0.614454154 | 0.913752    | USP32 ENSG00000170832 |
| 17 | 55791656 | 55792089 | 55791835 | 10 | 17  | 15 | 1.319679944 | 0.209239    | USP32 ENSG00000170832 |
| 17 | 55793291 | 55793495 | 55793362 | 8  | 8   | 7  | 1.319679944 | 0.283403    | USP32 ENSG00000170832 |
| 17 | 55796303 | 55796818 | 55796476 | 10 | 19  | 22 | 1.020042469 | 0.477122    | USP32 ENSG00000170832 |
| 17 | 55802795 | 55802987 | 55802891 | 10 | 11  | 3  | 3.519146518 | 0.00788869  | USP32 ENSG00000170832 |
| 17 | 55804050 | 55804247 | 55804156 | 8  | 10  | 18 | 0.679133539 | 0.855647    | USP32 ENSG00000170832 |
| 17 | 55804888 | 55805514 | 55805201 | 12 | 26  | 16 | 1.863077568 | 0.0200163   | USP32 ENSG00000170832 |
| 17 | 55814028 | 55814770 | 55814330 | 21 | 51  | 31 | 1.906204364 | 0.00169307  | USP32 ENSG00000170832 |
| 17 | 55816379 | 55816665 | 55816517 | 9  | 10  | 13 | 0.921681231 | 0.585856    | USP32 ENSG00000170832 |
| 17 | 55818778 | 55819057 | 55818920 | 13 | 16  | 24 | 0.797673211 | 0.770106    | USP32 ENSG00000170832 |

|    |          |          |          |    |     |     |             |             |          |                 |
|----|----------|----------|----------|----|-----|-----|-------------|-------------|----------|-----------------|
| 17 | 55820435 | 55820809 | 55820614 | 13 | 19  | 18  | 1.234788252 | 0.255641    | USP32    | ENSG00000170832 |
| 17 | 55821689 | 55821913 | 55821801 | 9  | 10  | 5   | 2.150589539 | 0.0575848   | USP32    | ENSG00000170832 |
| 17 | 55822346 | 55822718 | 55822565 | 18 | 23  | 14  | 1.876878143 | 0.0251753   | USP32    | ENSG00000170832 |
| 17 | 55823007 | 55825929 | 55824342 | 46 | 289 | 189 | 1.790442965 | 1.24E-10    | USP32    | ENSG00000170832 |
| 17 | 55826196 | 55826707 | 55826398 | 8  | 19  | 25  | 0.902345261 | 0.639556    | USP32    | ENSG00000170832 |
| 17 | 55827507 | 55828025 | 55827885 | 8  | 19  | 18  | 1.234788252 | 0.255641    | USP32    | ENSG00000170832 |
| 17 | 55829011 | 55829190 | 55829149 | 8  | 8   | 10  | 0.959767232 | 0.541959    | USP32    | ENSG00000170832 |
| 17 | 55831173 | 55831407 | 55831290 | 9  | 11  | 6   | 2.010940867 | 0.0640214   | USP32    | ENSG00000170832 |
| 17 | 55832712 | 55833167 | 55832891 | 8  | 15  | 16  | 1.104045966 | 0.390393    | USP32    | ENSG00000170832 |
| 17 | 55834741 | 55835120 | 55834881 | 11 | 16  | 20  | 0.949610965 | 0.567123    | USP32    | ENSG00000170832 |
| 17 | 55839050 | 55839513 | 55839322 | 11 | 21  | 26  | 0.955817573 | 0.566095    | USP32    | ENSG00000170832 |
| 17 | 55841549 | 55841765 | 55841666 | 8  | 9   | 9   | 1.173048839 | 0.362316    | C17orf64 | ENSG00000141371 |
| 17 | 55844815 | 55845000 | 55844911 | 8  | 8   | 15  | 0.659839972 | 0.851443    | C17orf64 | ENSG00000141371 |
| 17 | 55845335 | 55845609 | 55845462 | 10 | 13  | 22  | 0.714029728 | 0.84749     | C17orf64 | ENSG00000141371 |
| 17 | 55847225 | 55847784 | 55847610 | 11 | 24  | 25  | 1.127931576 | 0.335219    | C17orf64 | ENSG00000141371 |
| 17 | 55853141 | 55853405 | 55853239 | 11 | 15  | 12  | 1.443752418 | 0.160732    | C17orf64 | ENSG00000141371 |
| 17 | 55858248 | 55858698 | 55858427 | 9  | 18  | 26  | 0.825478813 | 0.744556    | C17orf64 | ENSG00000141371 |
| 17 | 55859193 | 55859592 | 55859413 | 13 | 20  | 15  | 1.539626602 | 0.0943825   | C17orf64 | ENSG00000141371 |
| 17 | 55860288 | 55860512 | 55860400 | 12 | 14  | 14  | 1.173048839 | 0.332418    | C17orf64 | ENSG00000141371 |
| 17 | 55861278 | 55861594 | 55861436 | 12 | 17  | 19  | 1.055743955 | 0.436418    |          | ENSG00000213228 |
| 17 | 55863792 | 55864167 | 55863971 | 10 | 16  | 27  | 0.712208224 | 0.871901    |          | ENSG00000213228 |
| 17 | 55865139 | 55865331 | 55865251 | 9  | 9   | 4   | 2.346097679 | 0.050148    |          | ENSG00000213228 |
| 17 | 55866446 | 55866780 | 55866607 | 12 | 15  | 8   | 2.085420159 | 0.0338693   |          | ENSG00000213228 |
| 17 | 55867776 | 55868523 | 55868253 | 64 | 100 | 52  | 2.235432694 | 4.96E-07    |          | ENSG00000213228 |
| 17 | 55870251 | 55870456 | 55870335 | 9  | 10  | 13  | 0.921681231 | 0.585856    |          | ENSG00000213228 |
| 17 | 55870754 | 55871043 | 55870865 | 11 | 12  | 4   | 3.049926982 | 0.0108184   |          | ENSG00000213228 |
| 17 | 55871496 | 55871871 | 55871664 | 9  | 15  | 7   | 2.346097679 | 0.0195693   |          | ENSG00000213228 |
| 17 | 55873276 | 55873464 | 55873377 | 8  | 9   | 14  | 0.78203256  | 0.734892    |          | ENSG00000213228 |
| 17 | 55874002 | 55874643 | 55874322 | 10 | 26  | 39  | 0.791807967 | 0.83043     |          | ENSG00000213228 |
| 17 | 55874884 | 55875122 | 55875024 | 11 | 12  | 15  | 0.953102182 | 0.555895    |          | ENSG00000213228 |
| 17 | 55876413 | 55876883 | 55876493 | 11 | 22  | 27  | 0.963575832 | 0.555868    |          | ENSG00000213228 |
| 17 | 55877764 | 55878226 | 55878061 | 8  | 17  | 22  | 0.918038222 | 0.611544    |          | ENSG00000213228 |
| 17 | 55880053 | 55880412 | 55880289 | 16 | 20  | 5   | 4.105670938 | 0.000308509 |          | ENSG00000213228 |
| 17 | 55884176 | 55884485 | 55884331 | 11 | 13  | 20  | 0.78203256  | 0.76897     |          | ENSG00000213228 |



|    |          |          |          |     |     |     |             |           |        |                 |
|----|----------|----------|----------|-----|-----|-----|-------------|-----------|--------|-----------------|
| 17 | 55887566 | 55887820 | 55887647 | 10  | 13  | 7   | 2.052835469 | 0.046392  |        | ENSG00000213228 |
| 17 | 55890057 | 55890294 | 55890175 | 8   | 9   | 7   | 1.466311049 | 0.20706   |        | ENSG00000213228 |
| 17 | 55896416 | 55896719 | 55896567 | 9   | 12  | 11  | 1.270802909 | 0.274822  |        | ENSG00000213228 |
| 17 | 55897130 | 55897438 | 55897285 | 9   | 13  | 11  | 1.368556979 | 0.211388  |        | ENSG00000213228 |
| 17 | 55898436 | 55898918 | 55898613 | 9   | 16  | 26  | 0.738586306 | 0.842793  |        | ENSG00000213228 |
| 17 | 55900549 | 55900918 | 55900725 | 9   | 14  | 14  | 1.173048839 | 0.332418  |        | ENSG00000213228 |
| 17 | 55901931 | 55902510 | 55902095 | 24  | 37  | 30  | 1.437930835 | 0.0657032 |        | ENSG00000213228 |
| 17 | 55904685 | 55904937 | 55904783 | 8   | 10  | 14  | 0.860235815 | 0.65444   |        | ENSG00000213228 |
| 17 | 55907953 | 55908187 | 55908070 | 8   | 10  | 20  | 0.614454154 | 0.913752  |        | ENSG00000213228 |
| 17 | 55908900 | 55909150 | 55908992 | 9   | 12  | 15  | 0.953102182 | 0.555895  |        | ENSG00000213228 |
| 17 | 55909170 | 55909376 | 55909248 | 10  | 11  | 15  | 0.879786629 | 0.637414  |        | ENSG00000213228 |
| 17 | 55909838 | 55910057 | 55909947 | 10  | 10  | 10  | 1.173048839 | 0.355733  |        | ENSG00000213228 |
| 17 | 55910498 | 55910745 | 55910624 | 10  | 11  | 19  | 0.703829304 | 0.840485  |        | ENSG00000213228 |
| 17 | 55911199 | 55911493 | 55911344 | 9   | 12  | 18  | 0.802612364 | 0.736387  |        | ENSG00000213228 |
| 17 | 55911884 | 55912234 | 55912059 | 9   | 14  | 8   | 1.955081399 | 0.0506438 |        | ENSG00000213228 |
| 17 | 55912816 | 55913132 | 55912954 | 12  | 16  | 24  | 0.797673211 | 0.770106  | APPBP2 | ENSG00000062725 |
| 17 | 55913138 | 55913446 | 55913289 | 17  | 20  | 37  | 0.648263832 | 0.949591  | APPBP2 | ENSG00000062725 |
| 17 | 55923882 | 55924201 | 55924041 | 11  | 15  | 10  | 1.706252857 | 0.0822346 | APPBP2 | ENSG00000062725 |
| 17 | 55931210 | 55931419 | 55931314 | 8   | 10  | 5   | 2.150589539 | 0.0575848 | APPBP2 | ENSG00000062725 |
| 17 | 55936406 | 55936640 | 55936497 | 9   | 12  | 9   | 1.524963491 | 0.154777  | APPBP2 | ENSG00000062725 |
| 17 | 55936929 | 55937147 | 55937041 | 12  | 12  | 11  | 1.270802909 | 0.274822  | APPBP2 | ENSG00000062725 |
| 17 | 55938447 | 55938717 | 55938570 | 11  | 13  | 15  | 1.026417734 | 0.475096  | APPBP2 | ENSG00000062725 |
| 17 | 55940429 | 55940892 | 55940643 | 8   | 18  | 26  | 0.825478813 | 0.744556  | APPBP2 | ENSG00000062725 |
| 17 | 55941462 | 55941796 | 55941631 | 8   | 12  | 8   | 1.694403879 | 0.107291  | APPBP2 | ENSG00000062725 |
| 17 | 55943844 | 55944080 | 55943913 | 8   | 10  | 10  | 1.173048839 | 0.355733  | APPBP2 | ENSG00000062725 |
| 17 | 55945089 | 55945407 | 55945252 | 11  | 14  | 14  | 1.173048839 | 0.332418  | APPBP2 | ENSG00000062725 |
| 17 | 55947569 | 55947956 | 55947666 | 11  | 17  | 21  | 0.959767232 | 0.55532   | APPBP2 | ENSG00000062725 |
| 17 | 55949333 | 55949648 | 55949583 | 9   | 13  | 12  | 1.263283365 | 0.272203  | APPBP2 | ENSG00000062725 |
| 17 | 55950069 | 55950475 | 55950222 | 8   | 14  | 8   | 1.955081399 | 0.0506438 | APPBP2 | ENSG00000062725 |
| 17 | 55954878 | 55955069 | 55955015 | 8   | 8   | 5   | 1.759573259 | 0.13508   | APPBP2 | ENSG00000062725 |
| 17 | 55955408 | 55955669 | 55955521 | 10  | 12  | 5   | 2.541605819 | 0.0225912 | APPBP2 | ENSG00000062725 |
| 17 | 55956640 | 55959206 | 55958390 | 87  | 334 | 149 | 2.619809074 | 5.70E-25  | APPBP2 | ENSG00000062725 |
| 17 | 55960068 | 55960537 | 55960302 | 17  | 30  | 17  | 2.020250779 | 0.0073882 | APPBP2 | ENSG00000062725 |
| 17 | 55960803 | 55962657 | 55962194 | 514 | 752 | 40  | 21.54404332 | 1.32E-197 | APPBP2 | ENSG00000062725 |

|    |          |          |          |    |    |    |             |             |        |                 |
|----|----------|----------|----------|----|----|----|-------------|-------------|--------|-----------------|
| 17 | 55966702 | 55966886 | 55966767 | 8  | 9  | 6  | 1.675784056 | 0.141978    | APPBP2 | ENSG00000062725 |
| 17 | 55967540 | 55968350 | 55967901 | 11 | 34 | 28 | 1.415748599 | 0.0821128   | APPBP2 | ENSG00000062725 |
| 17 | 55969371 | 55969629 | 55969494 | 19 | 21 | 8  | 2.867452718 | 0.00225035  | APPBP2 | ENSG00000062725 |
| 17 | 55970034 | 55970366 | 55970200 | 14 | 19 | 9  | 2.346097679 | 0.0107159   | APPBP2 | ENSG00000062725 |
| 17 | 55974429 | 55974654 | 55974565 | 8  | 11 | 7  | 1.759573259 | 0.102361    | APPBP2 | ENSG00000062725 |
| 17 | 55975768 | 55976035 | 55975901 | 8  | 11 | 8  | 1.564065119 | 0.151515    | APPBP2 | ENSG00000062725 |
| 17 | 55976631 | 55977566 | 55976810 | 25 | 62 | 21 | 3.359185313 | 6.24E-08    | APPBP2 | ENSG00000062725 |
| 17 | 55977838 | 55978135 | 55977986 | 9  | 14 | 25 | 0.676758946 | 0.893106    | APPBP2 | ENSG00000062725 |
| 17 | 55978254 | 55978873 | 55978547 | 8  | 23 | 22 | 1.224050963 | 0.244738    | APPBP2 | ENSG00000062725 |
| 17 | 55979696 | 55980008 | 55979861 | 8  | 13 | 12 | 1.263283365 | 0.272203    | APPBP2 | ENSG00000062725 |
| 17 | 55985155 | 55985364 | 55985221 | 8  | 11 | 19 | 0.703829304 | 0.840485    | APPBP2 | ENSG00000062725 |
| 17 | 55985381 | 55985560 | 55985470 | 8  | 8  | 16 | 0.621025856 | 0.886834    | APPBP2 | ENSG00000062725 |
| 17 | 55986401 | 55986682 | 55986538 | 9  | 11 | 17 | 0.78203256  | 0.752912    | APPBP2 | ENSG00000062725 |
| 17 | 55989438 | 55989852 | 55989617 | 10 | 20 | 33 | 0.724530165 | 0.88296     | APPBP2 | ENSG00000062725 |
| 17 | 55990005 | 55990349 | 55990177 | 12 | 16 | 10 | 1.812893661 | 0.0578656   | APPBP2 | ENSG00000062725 |
| 17 | 55990536 | 55990937 | 55990677 | 13 | 18 | 18 | 1.173048839 | 0.312613    | APPBP2 | ENSG00000062725 |
| 17 | 55991967 | 55992193 | 55992040 | 8  | 11 | 8  | 1.564065119 | 0.151515    | APPBP2 | ENSG00000062725 |
| 17 | 55994052 | 55994459 | 55994291 | 12 | 17 | 14 | 1.407658607 | 0.162567    | APPBP2 | ENSG00000062725 |
| 17 | 55995821 | 55996050 | 55995900 | 10 | 13 | 16 | 0.966040221 | 0.542489    | PPM1D  | ENSG00000170836 |
| 17 | 55996836 | 55997070 | 55996953 | 10 | 11 | 5  | 2.346097679 | 0.0364013   | PPM1D  | ENSG00000170836 |
| 17 | 55997478 | 55997787 | 55997613 | 16 | 17 | 5  | 3.519146518 | 0.00167472  | PPM1D  | ENSG00000170836 |
| 17 | 56000073 | 56000551 | 56000278 | 15 | 28 | 23 | 1.417434014 | 0.101931    | PPM1D  | ENSG00000170836 |
| 17 | 56000568 | 56000892 | 56000730 | 11 | 16 | 16 | 1.173048839 | 0.322157    | PPM1D  | ENSG00000170836 |
| 17 | 56001043 | 56001371 | 56001207 | 11 | 15 | 11 | 1.564065119 | 0.11768     | PPM1D  | ENSG00000170836 |
| 17 | 56001643 | 56002335 | 56002033 | 33 | 63 | 35 | 2.085420159 | 0.00014577  | PPM1D  | ENSG00000170836 |
| 17 | 56003399 | 56003982 | 56003656 | 13 | 29 | 34 | 1.005470434 | 0.493838    | PPM1D  | ENSG00000170836 |
| 17 | 56009392 | 56010135 | 56009711 | 15 | 42 | 46 | 1.073214896 | 0.370487    | PPM1D  | ENSG00000170836 |
| 17 | 56011328 | 56011683 | 56011505 | 8  | 12 | 10 | 1.386330446 | 0.21117     | PPM1D  | ENSG00000170836 |
| 17 | 56013181 | 56013447 | 56013292 | 9  | 11 | 10 | 1.279689643 | 0.277323    | PPM1D  | ENSG00000170836 |
| 17 | 56013705 | 56013906 | 56013805 | 8  | 10 | 11 | 1.075294769 | 0.434143    | PPM1D  | ENSG00000170836 |
| 17 | 56014914 | 56015437 | 56015128 | 8  | 19 | 5  | 3.910162798 | 0.000546977 | PPM1D  | ENSG00000170836 |
| 17 | 56016070 | 56016283 | 56016176 | 8  | 10 | 14 | 0.860235815 | 0.65444     | PPM1D  | ENSG00000170836 |
| 17 | 56018196 | 56019014 | 56018652 | 43 | 91 | 34 | 3.083442663 | 7.16E-10    | PPM1D  | ENSG00000170836 |
| 17 | 56019610 | 56019941 | 56019784 | 9  | 11 | 20 | 0.670313622 | 0.874201    | PPM1D  | ENSG00000170836 |

|    |          |          |          |     |      |     |             |            |       |                 |
|----|----------|----------|----------|-----|------|-----|-------------|------------|-------|-----------------|
| 17 | 56022342 | 56022981 | 56022521 | 13  | 29   | 36  | 0.951120681 | 0.58393    | PPM1D | ENSG00000170836 |
| 17 | 56023314 | 56024184 | 56023666 | 14  | 44   | 39  | 1.319679944 | 0.100549   | PPM1D | ENSG00000170836 |
| 17 | 56025082 | 56025400 | 56025241 | 10  | 14   | 6   | 2.513676084 | 0.016726   | PPM1D | ENSG00000170836 |
| 17 | 56026996 | 56027421 | 56027167 | 10  | 16   | 28  | 0.68764932  | 0.896593   | PPM1D | ENSG00000170836 |
| 17 | 56029033 | 56029378 | 56029191 | 16  | 20   | 17  | 1.368556979 | 0.163361   | PPM1D | ENSG00000170836 |
| 17 | 56030432 | 56030832 | 56030697 | 11  | 19   | 27  | 0.837892028 | 0.732314   | PPM1D | ENSG00000170836 |
| 17 | 56031318 | 56033835 | 56032421 | 646 | 1234 | 185 | 7.788792024 | 2.27E-229  | PPM1D | ENSG00000170836 |
| 17 | 56033976 | 56034820 | 56034145 | 16  | 49   | 61  | 0.946007128 | 0.617312   | PPM1D | ENSG00000170836 |
| 17 | 56034835 | 56035462 | 56035024 | 13  | 29   | 37  | 0.926091189 | 0.626749   | PPM1D | ENSG00000170836 |
| 17 | 56036624 | 56036960 | 56036792 | 11  | 16   | 18  | 1.049570014 | 0.445264   | PPM1D | ENSG00000170836 |
| 17 | 56037212 | 56037483 | 56037347 | 14  | 17   | 23  | 0.879786629 | 0.664328   | PPM1D | ENSG00000170836 |
| 17 | 56038247 | 56038529 | 56038388 | 10  | 13   | 12  | 1.263283365 | 0.272203   | PPM1D | ENSG00000170836 |
| 17 | 56039057 | 56039284 | 56039171 | 8   | 9    | 9   | 1.173048839 | 0.362316   | PPM1D | ENSG00000170836 |
| 17 | 56040405 | 56040612 | 56040506 | 9   | 9    | 4   | 2.346097679 | 0.050148   | PPM1D | ENSG00000170836 |
| 17 | 56041455 | 56041683 | 56041588 | 8   | 8    | 7   | 1.319679944 | 0.283403   | PPM1D | ENSG00000170836 |
| 17 | 56042410 | 56042634 | 56042522 | 9   | 11   | 18  | 0.740872951 | 0.800189   | PPM1D | ENSG00000170836 |
| 17 | 56042653 | 56042838 | 56042765 | 8   | 8    | 18  | 0.555654713 | 0.936835   | PPM1D | ENSG00000170836 |
| 17 | 56045036 | 56045258 | 56045147 | 9   | 11   | 11  | 1.173048839 | 0.349489   | PPM1D | ENSG00000170836 |
| 17 | 56049626 | 56049899 | 56049744 | 9   | 14   | 14  | 1.173048839 | 0.332418   | PPM1D | ENSG00000170836 |
| 17 | 56050170 | 56050866 | 56050687 | 11  | 28   | 24  | 1.360736654 | 0.128766   | PPM1D | ENSG00000170836 |
| 17 | 56051162 | 56051445 | 56051298 | 9   | 11   | 3   | 3.519146518 | 0.00788869 | PPM1D | ENSG00000170836 |
| 17 | 56053216 | 56053507 | 56053361 | 8   | 8    | 5   | 1.759573259 | 0.13508    | PPM1D | ENSG00000170836 |
| 17 | 56055635 | 56055876 | 56055749 | 8   | 12   | 14  | 1.016642327 | 0.486402   | PPM1D | ENSG00000170836 |
| 17 | 56056107 | 56056351 | 56056238 | 9   | 12   | 5   | 2.541605819 | 0.0225912  | PPM1D | ENSG00000170836 |
| 17 | 56061524 | 56061865 | 56061694 | 8   | 14   | 14  | 1.173048839 | 0.332418   | PPM1D | ENSG00000170836 |
| 17 | 56062491 | 56062835 | 56062667 | 11  | 15   | 12  | 1.443752418 | 0.160732   | PPM1D | ENSG00000170836 |
| 17 | 56063816 | 56064068 | 56063960 | 8   | 10   | 18  | 0.679133539 | 0.855647   |       | ENSG00000200013 |
| 17 | 56067918 | 56068433 | 56068230 | 12  | 23   | 27  | 1.005470434 | 0.495068   |       | ENSG00000200013 |
| 17 | 56069642 | 56069853 | 56069692 | 8   | 9    | 14  | 0.78203256  | 0.734892   |       | ENSG00000200013 |
| 17 | 56069954 | 56070285 | 56070119 | 8   | 13   | 13  | 1.173048839 | 0.337862   |       | ENSG00000200013 |
| 17 | 56070779 | 56071559 | 56071056 | 30  | 56   | 38  | 1.714455996 | 0.00428433 |       | ENSG00000200013 |
| 17 | 56072504 | 56073057 | 56072812 | 16  | 28   | 16  | 2.001083314 | 0.00984958 |       | ENSG00000200013 |
| 17 | 56073869 | 56074367 | 56074116 | 27  | 49   | 33  | 1.725071823 | 0.00643319 |       | ENSG00000200013 |
| 17 | 56075708 | 56075967 | 56075827 | 11  | 13   | 19  | 0.821134188 | 0.720637   |       | ENSG00000200013 |

|    |          |          |          |    |     |     |             |            |                       |
|----|----------|----------|----------|----|-----|-----|-------------|------------|-----------------------|
| 17 | 56077095 | 56077286 | 56077190 | 8  | 9   | 13  | 0.837892028 | 0.672794   | ENSG00000200013       |
| 17 | 56078169 | 56078689 | 56078499 | 9  | 22  | 32  | 0.817579494 | 0.775827   | ENSG00000200013       |
| 17 | 56078768 | 56079275 | 56078992 | 11 | 24  | 31  | 0.916444406 | 0.631915   | ENSG00000200013       |
| 17 | 56079785 | 56080292 | 56080113 | 11 | 22  | 21  | 1.226369241 | 0.247426   | ENSG00000200013       |
| 17 | 56084961 | 56085336 | 56085159 | 12 | 18  | 14  | 1.485861863 | 0.123674   | ENSG00000200013       |
| 17 | 56088644 | 56089137 | 56088798 | 13 | 22  | 27  | 0.963575832 | 0.555868   | ENSG00000200013       |
| 17 | 56090345 | 56090528 | 56090436 | 8  | 8   | 7   | 1.319679944 | 0.283403   | ENSG00000200013       |
| 17 | 56095494 | 56095712 | 56095603 | 9  | 9   | 14  | 0.78203256  | 0.734892   | ENSG00000200013       |
| 17 | 56095734 | 56096023 | 56095878 | 10 | 14  | 17  | 0.977540699 | 0.52995    | ENSG00000200013       |
| 17 | 56097639 | 56097836 | 56097718 | 8  | 9   | 10  | 1.066408036 | 0.444985   | ENSG00000200013       |
| 17 | 56097893 | 56098314 | 56098138 | 9  | 18  | 23  | 0.928663664 | 0.599426   | ENSG00000200013       |
| 17 | 56099979 | 56100178 | 56100134 | 10 | 11  | 4   | 2.815317214 | 0.0183428  | ENSG00000200013       |
| 17 | 56101778 | 56102249 | 56102070 | 9  | 17  | 11  | 1.759573259 | 0.0609179  | ENSG00000200013       |
| 17 | 56102276 | 56102624 | 56102450 | 9  | 13  | 13  | 1.173048839 | 0.337862   | BCAS3 ENSG00000141376 |
| 17 | 56103397 | 56104142 | 56103839 | 11 | 30  | 25  | 1.398635155 | 0.102563   | BCAS3 ENSG00000141376 |
| 17 | 56106470 | 56106701 | 56106607 | 8  | 11  | 8   | 1.564065119 | 0.151515   | BCAS3 ENSG00000141376 |
| 17 | 56109091 | 56110777 | 56109471 | 55 | 229 | 123 | 2.175816396 | 3.61E-13   | BCAS3 ENSG00000141376 |
| 17 | 56111448 | 56111732 | 56111590 | 8  | 10  | 11  | 1.075294769 | 0.434143   | BCAS3 ENSG00000141376 |
| 17 | 56114999 | 56115366 | 56115154 | 12 | 18  | 15  | 1.392995497 | 0.16305    | BCAS3 ENSG00000141376 |
| 17 | 56117664 | 56117910 | 56117817 | 8  | 10  | 7   | 1.612942154 | 0.147335   | BCAS3 ENSG00000141376 |
| 17 | 56118441 | 56118824 | 56118645 | 15 | 24  | 18  | 1.543485315 | 0.0748829  | BCAS3 ENSG00000141376 |
| 17 | 56118830 | 56119122 | 56118976 | 12 | 15  | 6   | 2.68125449  | 0.0103552  | BCAS3 ENSG00000141376 |
| 17 | 56121022 | 56121297 | 56121159 | 10 | 12  | 9   | 1.524963491 | 0.154777   | ENSG00000211041       |
| 17 | 56122101 | 56122349 | 56122215 | 8  | 10  | 2   | 4.301179077 | 0.00512919 | ENSG00000211041       |
| 17 | 56128053 | 56128356 | 56128202 | 10 | 15  | 11  | 1.564065119 | 0.11768    | ENSG00000211041       |
| 17 | 56128629 | 56128945 | 56128787 | 11 | 15  | 12  | 1.443752418 | 0.160732   | ENSG00000211041       |
| 17 | 56132381 | 56132702 | 56132535 | 10 | 15  | 18  | 0.987830602 | 0.518173   | ENSG00000211041       |
| 17 | 56134376 | 56134620 | 56134523 | 8  | 9   | 14  | 0.78203256  | 0.734892   | ENSG00000211041       |
| 17 | 56140164 | 56140343 | 56140201 | 9  | 9   | 12  | 0.902345261 | 0.602772   | ENSG00000211041       |
| 17 | 56141702 | 56141987 | 56141847 | 9  | 10  | 8   | 1.433726359 | 0.209175   | ENSG00000211041       |
| 17 | 56145237 | 56145643 | 56145406 | 10 | 16  | 29  | 0.664727676 | 0.917277   | ENSG00000175090       |
| 17 | 56151180 | 56151517 | 56151355 | 9  | 13  | 14  | 1.094845583 | 0.406217   | ENSG00000175090       |
| 17 | 56151745 | 56152145 | 56151992 | 10 | 16  | 17  | 1.107879459 | 0.383112   | ENSG00000175090       |
| 17 | 56152787 | 56153383 | 56153123 | 33 | 59  | 47  | 1.466311049 | 0.0234546  | ENSG00000175090       |

|    |          |          |          |    |    |    |             |           |                 |
|----|----------|----------|----------|----|----|----|-------------|-----------|-----------------|
| 17 | 56153586 | 56153880 | 56153745 | 8  | 11 | 12 | 1.082814313 | 0.424156  | ENSG00000175090 |
| 17 | 56162127 | 56162380 | 56162271 | 10 | 12 | 27 | 0.544629818 | 0.970983  | ENSG00000175090 |
| 17 | 56162544 | 56162761 | 56162652 | 8  | 10 | 16 | 0.759031602 | 0.770272  | ENSG00000175090 |
| 17 | 56165378 | 56165691 | 56165534 | 10 | 13 | 13 | 1.173048839 | 0.337862  | ENSG00000175090 |
| 17 | 56170864 | 56171044 | 56170975 | 8  | 9  | 8  | 1.303387599 | 0.281715  | ENSG00000201988 |
| 17 | 56173238 | 56173529 | 56173383 | 8  | 10 | 15 | 0.806471077 | 0.716145  | ENSG00000201988 |
| 17 | 56175971 | 56176340 | 56176161 | 26 | 34 | 31 | 1.283022168 | 0.15401   | ENSG00000201988 |
| 17 | 56176710 | 56177127 | 56176960 | 15 | 22 | 19 | 1.349006165 | 0.163006  | ENSG00000201988 |
| 17 | 56177834 | 56178090 | 56177961 | 11 | 12 | 15 | 0.953102182 | 0.555895  | ENSG00000201988 |
| 17 | 56179274 | 56179601 | 56179437 | 9  | 14 | 22 | 0.765031852 | 0.797133  | ENSG00000201988 |
| 17 | 56179622 | 56180240 | 56179820 | 11 | 27 | 44 | 0.729897056 | 0.909171  | ENSG00000201988 |
| 17 | 56180377 | 56180754 | 56180556 | 8  | 15 | 26 | 0.695140053 | 0.88251   | ENSG00000201988 |
| 17 | 56181299 | 56181631 | 56181465 | 9  | 14 | 26 | 0.6516938   | 0.91539   | ENSG00000201988 |
| 17 | 56182811 | 56183103 | 56182939 | 11 | 14 | 21 | 0.799806027 | 0.754204  | ENSG00000201988 |
| 17 | 56186744 | 56186984 | 56186847 | 8  | 12 | 15 | 0.953102182 | 0.555895  | ENSG00000201988 |
| 17 | 56192700 | 56192963 | 56192831 | 8  | 10 | 20 | 0.614454154 | 0.913752  | ENSG00000201988 |
| 17 | 56192978 | 56193178 | 56193082 | 9  | 9  | 17 | 0.6516938   | 0.871116  | ENSG00000201988 |
| 17 | 56200052 | 56200365 | 56200192 | 12 | 16 | 21 | 0.90644683  | 0.624241  | ENSG00000211058 |
| 17 | 56200736 | 56200937 | 56200900 | 10 | 10 | 20 | 0.614454154 | 0.913752  | ENSG00000211058 |
| 17 | 56200952 | 56201235 | 56201060 | 10 | 14 | 21 | 0.799806027 | 0.754204  | ENSG00000211058 |
| 17 | 56201443 | 56202001 | 56201826 | 10 | 22 | 24 | 1.079204932 | 0.398105  | ENSG00000211058 |
| 17 | 56202199 | 56202427 | 56202288 | 10 | 12 | 11 | 1.270802909 | 0.274822  | ENSG00000211058 |
| 17 | 56203598 | 56203859 | 56203728 | 10 | 11 | 5  | 2.346097679 | 0.0364013 | ENSG00000211058 |
| 17 | 56204973 | 56205326 | 56205149 | 12 | 18 | 18 | 1.173048839 | 0.312613  | ENSG00000211058 |
| 17 | 56205504 | 56206183 | 56205859 | 9  | 26 | 25 | 1.218166102 | 0.236859  | ENSG00000211058 |
| 17 | 56206908 | 56207378 | 56207055 | 9  | 17 | 17 | 1.173048839 | 0.317303  | ENSG00000211058 |
| 17 | 56213448 | 56214051 | 56213627 | 33 | 54 | 7  | 8.06471077  | 2.12E-12  | ENSG00000211058 |
| 17 | 56214141 | 56214415 | 56214280 | 13 | 16 | 8  | 2.215758919 | 0.0222902 | ENSG00000211058 |
| 17 | 56222305 | 56222582 | 56222448 | 8  | 12 | 9  | 1.524963491 | 0.154777  | ENSG00000211058 |
| 17 | 56223688 | 56223880 | 56223735 | 10 | 11 | 14 | 0.938439071 | 0.570297  | ENSG00000211058 |
| 17 | 56224270 | 56224491 | 56224431 | 9  | 11 | 4  | 2.815317214 | 0.0183428 | ENSG00000211058 |
| 17 | 56231353 | 56231668 | 56231510 | 10 | 15 | 11 | 1.564065119 | 0.11768   | ENSG00000214207 |
| 17 | 56277435 | 56278069 | 56277706 | 26 | 49 | 5  | 9.775406994 | 2.43E-12  | ENSG00000211515 |
| 17 | 56404035 | 56404392 | 56404218 | 11 | 16 | 8  | 2.215758919 | 0.0222902 | ENSG00000211066 |

|    |          |          |          |     |     |     |             |           |                 |
|----|----------|----------|----------|-----|-----|-----|-------------|-----------|-----------------|
| 17 | 56434385 | 56434698 | 56434553 | 9   | 12  | 5   | 2.541605819 | 0.0225912 | ENSG00000211066 |
| 17 | 56633338 | 56633715 | 56633516 | 23  | 28  | 6   | 4.859773763 | 8.07E-06  | ENSG00000213227 |
| 17 | 56642559 | 56644043 | 56643669 | 23  | 90  | 85  | 1.241249353 | 0.075428  | ENSG00000213227 |
| 17 | 56644339 | 56644600 | 56644481 | 8   | 11  | 16  | 0.828034475 | 0.698553  | ENSG00000213227 |
| 17 | 56645820 | 56646095 | 56645924 | 9   | 12  | 23  | 0.635401455 | 0.914098  | ENSG00000213227 |
| 17 | 56648123 | 56648739 | 56648583 | 10  | 23  | 25  | 1.082814313 | 0.391389  | ENSG00000213227 |
| 17 | 56649482 | 56649804 | 56649630 | 12  | 16  | 21  | 0.90644683  | 0.624241  | ENSG00000213227 |
| 17 | 56650083 | 56651132 | 56650290 | 19  | 71  | 90  | 0.928126554 | 0.684003  | ENSG00000213227 |
| 17 | 56651143 | 56652226 | 56651717 | 89  | 165 | 92  | 2.093829111 | 2.45E-09  | ENSG00000213227 |
| 17 | 56652632 | 56652927 | 56652779 | 9   | 14  | 26  | 0.6516938   | 0.91539   | ENSG00000213227 |
| 17 | 56653299 | 56654104 | 56653506 | 12  | 32  | 52  | 0.7303889   | 0.925685  | ENSG00000213227 |
| 17 | 56654334 | 56654690 | 56654512 | 12  | 17  | 20  | 1.005470434 | 0.496566  | ENSG00000213227 |
| 17 | 56654733 | 56655351 | 56655042 | 18  | 39  | 36  | 1.268160907 | 0.14882   | ENSG00000213227 |
| 17 | 56656495 | 56657739 | 56657368 | 17  | 71  | 78  | 1.069107803 | 0.342119  | ENSG00000213227 |
| 17 | 56658845 | 56659553 | 56659156 | 16  | 34  | 48  | 0.837892028 | 0.791746  | ENSG00000213227 |
| 17 | 56659650 | 56659953 | 56659784 | 13  | 15  | 35  | 0.52135504  | 0.988408  | ENSG00000213227 |
| 17 | 56659981 | 56660361 | 56660154 | 13  | 19  | 40  | 0.572218946 | 0.983149  | ENSG00000213227 |
| 17 | 56660583 | 56660982 | 56660762 | 8   | 15  | 23  | 0.78203256  | 0.783431  | ENSG00000213227 |
| 17 | 56661701 | 56661996 | 56661837 | 13  | 17  | 18  | 1.111309427 | 0.376188  | ENSG00000213227 |
| 17 | 56662877 | 56663966 | 56663607 | 39  | 128 | 80  | 1.868188892 | 3.65E-06  | ENSG00000213227 |
| 17 | 56664426 | 56664848 | 56664627 | 12  | 23  | 28  | 0.970799039 | 0.54603   | ENSG00000213227 |
| 17 | 56664963 | 56666119 | 56665909 | 20  | 73  | 98  | 0.876824385 | 0.806196  | ENSG00000213227 |
| 17 | 56666252 | 56667118 | 56666694 | 28  | 69  | 61  | 1.32440998  | 0.0533216 | ENSG00000213227 |
| 17 | 56667273 | 56668599 | 56668192 | 202 | 436 | 158 | 3.224039892 | 4.81E-42  | ENSG00000213227 |
| 17 | 56668699 | 56670086 | 56669042 | 20  | 74  | 75  | 1.157613986 | 0.184901  | ENSG00000213227 |
| 17 | 56670605 | 56671821 | 56670935 | 26  | 86  | 82  | 1.229581313 | 0.089136  | ENSG00000213227 |
| 17 | 56671823 | 56672578 | 56672312 | 18  | 41  | 50  | 0.966040221 | 0.568354  | ENSG00000213227 |
| 17 | 56673058 | 56673298 | 56673126 | 9   | 12  | 16  | 0.897037348 | 0.621544  | ENSG00000213227 |
| 17 | 56674645 | 56674831 | 56674738 | 8   | 9   | 28  | 0.4044996   | 0.99613   | ENSG00000213227 |
| 17 | 56678013 | 56678314 | 56678137 | 9   | 13  | 17  | 0.912371319 | 0.606688  | ENSG00000213227 |
| 17 | 56678650 | 56679176 | 56678822 | 11  | 25  | 22  | 1.32605521  | 0.161597  | ENSG00000213227 |
| 17 | 56679571 | 56681001 | 56679770 | 18  | 77  | 103 | 0.879786629 | 0.806023  | ENSG00000213227 |
| 17 | 56681382 | 56681735 | 56681615 | 9   | 13  | 32  | 0.497657083 | 0.989389  | ENSG00000213227 |
| 17 | 56682102 | 56682754 | 56682575 | 20  | 40  | 45  | 1.045543531 | 0.419744  | ENSG00000213227 |

|    |          |          |          |     |      |     |             |                  |                 |
|----|----------|----------|----------|-----|------|-----|-------------|------------------|-----------------|
| 17 | 56682791 | 56683080 | 56682907 | 15  | 20   | 25  | 0.947462524 | 0.576741         | ENSG00000213227 |
| 17 | 56683124 | 56683442 | 56683284 | 9   | 14   | 9   | 1.759573259 | 0.0786014        | ENSG00000213227 |
| 17 | 56683709 | 56683972 | 56683824 | 14  | 15   | 17  | 1.042710079 | 0.454615         | ENSG00000213227 |
| 17 | 56684377 | 56685143 | 56684839 | 15  | 42   | 38  | 1.293361541 | 0.122166         | ENSG00000213227 |
| 17 | 56685710 | 56685948 | 56685790 | 11  | 14   | 29  | 0.58652442  | 0.960286         | ENSG00000213227 |
| 17 | 56686002 | 56686653 | 56686267 | 14  | 33   | 56  | 0.699713343 | 0.953744         | ENSG00000213227 |
| 17 | 56687216 | 56687504 | 56687342 | 11  | 15   | 32  | 0.568750952 | 0.973063         | ENSG00000213227 |
| 17 | 56687514 | 56688124 | 56687828 | 21  | 39   | 43  | 1.066408036 | 0.385991         | ENSG00000213227 |
| 17 | 56688282 | 56688490 | 56688386 | 8   | 10   | 8   | 1.433726359 | 0.209175         | ENSG00000213227 |
| 17 | 56688662 | 56689354 | 56688962 | 12  | 28   | 35  | 0.944956009 | 0.592981         | ENSG00000213227 |
| 17 | 56689966 | 56690367 | 56690145 | 9   | 17   | 31  | 0.659839972 | 0.927052         | ENSG00000213227 |
| 17 | 56690379 | 56690596 | 56690466 | 8   | 10   | 21  | 0.58652442  | 0.934469         | ENSG00000213227 |
| 17 | 56690622 | 56691333 | 56691170 | 10  | 29   | 47  | 0.733155525 | 0.91319          | ENSG00000213227 |
| 17 | 56691362 | 56691946 | 56691767 | 14  | 34   | 40  | 1.001383156 | 0.500033         | ENSG00000213227 |
| 17 | 56692473 | 56693107 | 56692700 | 14  | 29   | 41  | 0.837892028 | 0.774502         | ENSG00000213227 |
| 17 | 56693149 | 56693587 | 56693380 | 11  | 21   | 19  | 1.290353723 | 0.204499         | ENSG00000213227 |
| 17 | 56695306 | 56696220 | 56695593 | 16  | 45   | 48  | 1.101229523 | 0.320619         | ENSG00000213227 |
| 17 | 56697599 | 56697826 | 56697751 | 8   | 11   | 26  | 0.52135504  | 0.975812         | ENSG00000213227 |
| 17 | 56698130 | 56698736 | 56698475 | 12  | 27   | 31  | 1.026417734 | 0.462337 BCAS3   | ENSG00000141376 |
| 17 | 56698811 | 56699089 | 56698920 | 8   | 11   | 16  | 0.828034475 | 0.698553 BCAS3   | ENSG00000141376 |
| 17 | 56699990 | 56700600 | 56700221 | 15  | 30   | 37  | 0.956960895 | 0.575127 BCAS3   | ENSG00000141376 |
| 17 | 56704148 | 56704395 | 56704271 | 12  | 14   | 11  | 1.466311049 | 0.15926 BCAS3    | ENSG00000141376 |
| 17 | 56704893 | 56705289 | 56705012 | 11  | 18   | 24  | 0.891517118 | 0.651693 BCAS3   | ENSG00000141376 |
| 17 | 56705670 | 56706007 | 56705858 | 12  | 17   | 20  | 1.005470434 | 0.496566 BCAS3   | ENSG00000141376 |
| 17 | 56706818 | 56707324 | 56706997 | 15  | 26   | 29  | 1.055743955 | 0.421202 BCAS3   | ENSG00000141376 |
| 17 | 56707355 | 56707550 | 56707459 | 8   | 8    | 9   | 1.055743955 | 0.456865 BCAS3   | ENSG00000141376 |
| 17 | 56707620 | 56708071 | 56707892 | 9   | 20   | 35  | 0.68427849  | 0.922019 BCAS3   | ENSG00000141376 |
| 17 | 56709104 | 56709376 | 56709266 | 8   | 13   | 15  | 1.026417734 | 0.475096 BCAS3   | ENSG00000141376 |
| 17 | 56711514 | 56712762 | 56711976 | 25  | 95   | 78  | 1.425477071 | 0.00957373 BCAS3 | ENSG00000141376 |
| 17 | 56712903 | 56713298 | 56713082 | 9   | 16   | 20  | 0.949610965 | 0.567123 BCAS3   | ENSG00000141376 |
| 17 | 56713925 | 56714212 | 56714049 | 9   | 10   | 11  | 1.075294769 | 0.434143 BCAS3   | ENSG00000141376 |
| 17 | 56714372 | 56714786 | 56714619 | 13  | 23   | 26  | 1.042710079 | 0.443237 BCAS3   | ENSG00000141376 |
| 17 | 56716496 | 56718774 | 56717002 | 601 | 1024 | 131 | 9.108901972 | 2.96E-205 BCAS3  | ENSG00000141376 |
| 17 | 56719452 | 56719771 | 56719600 | 11  | 15   | 10  | 1.706252857 | 0.0822346 BCAS3  | ENSG00000141376 |

|    |          |          |          |    |     |     |             |           |       |                 |
|----|----------|----------|----------|----|-----|-----|-------------|-----------|-------|-----------------|
| 17 | 56719813 | 56720373 | 56720201 | 14 | 28  | 35  | 0.944956009 | 0.592981  | BCAS3 | ENSG00000141376 |
| 17 | 56720442 | 56722531 | 56722064 | 21 | 131 | 131 | 1.173048839 | 0.097706  | BCAS3 | ENSG00000141376 |
| 17 | 56722709 | 56722969 | 56722839 | 9  | 9   | 19  | 0.58652442  | 0.925417  | BCAS3 | ENSG00000141376 |
| 17 | 56723459 | 56724072 | 56723746 | 11 | 27  | 52  | 0.619723915 | 0.98246   | BCAS3 | ENSG00000141376 |
| 17 | 56724176 | 56724586 | 56724336 | 13 | 19  | 19  | 1.173048839 | 0.308076  | BCAS3 | ENSG00000141376 |
| 17 | 56724761 | 56725131 | 56724952 | 13 | 20  | 15  | 1.539626602 | 0.0943825 | BCAS3 | ENSG00000141376 |
| 17 | 56725221 | 56725585 | 56725400 | 15 | 21  | 28  | 0.889899119 | 0.664396  | BCAS3 | ENSG00000141376 |
| 17 | 56725671 | 56725956 | 56725799 | 9  | 12  | 20  | 0.726173091 | 0.825666  | BCAS3 | ENSG00000141376 |
| 17 | 56726287 | 56727757 | 56727080 | 17 | 74  | 63  | 1.374666609 | 0.0303975 | BCAS3 | ENSG00000141376 |
| 17 | 56728138 | 56728682 | 56728443 | 12 | 23  | 32  | 0.853126429 | 0.727681  | BCAS3 | ENSG00000141376 |
| 17 | 56728728 | 56728931 | 56728801 | 8  | 9   | 12  | 0.902345261 | 0.602772  | BCAS3 | ENSG00000141376 |
| 17 | 56728990 | 56729241 | 56729115 | 9  | 11  | 13  | 1.005470434 | 0.498567  | BCAS3 | ENSG00000141376 |
| 17 | 56729334 | 56729922 | 56729603 | 17 | 34  | 33  | 1.207550276 | 0.217308  | BCAS3 | ENSG00000141376 |
| 17 | 56730074 | 56730407 | 56730232 | 14 | 19  | 18  | 1.234788252 | 0.255641  | BCAS3 | ENSG00000141376 |
| 17 | 56730475 | 56730895 | 56730720 | 10 | 19  | 23  | 0.977540699 | 0.533404  | BCAS3 | ENSG00000141376 |
| 17 | 56731613 | 56731989 | 56731785 | 14 | 21  | 27  | 0.921681231 | 0.616644  | BCAS3 | ENSG00000141376 |
| 17 | 56732209 | 56732843 | 56732537 | 12 | 30  | 47  | 0.757594042 | 0.890211  | BCAS3 | ENSG00000141376 |
| 17 | 56732907 | 56733116 | 56733011 | 10 | 13  | 16  | 0.966040221 | 0.542489  | BCAS3 | ENSG00000141376 |
| 17 | 56733252 | 56733457 | 56733354 | 8  | 9   | 12  | 0.902345261 | 0.602772  | BCAS3 | ENSG00000141376 |
| 17 | 56733706 | 56734270 | 56734086 | 11 | 27  | 28  | 1.132598879 | 0.320597  | BCAS3 | ENSG00000141376 |
| 17 | 56734620 | 56735060 | 56734895 | 9  | 17  | 15  | 1.319679944 | 0.209239  | BCAS3 | ENSG00000141376 |
| 17 | 56735077 | 56735262 | 56735169 | 8  | 8   | 14  | 0.703829304 | 0.807737  | BCAS3 | ENSG00000141376 |
| 17 | 56735344 | 56735611 | 56735456 | 12 | 15  | 17  | 1.042710079 | 0.454615  | BCAS3 | ENSG00000141376 |
| 17 | 56735843 | 56736730 | 56736325 | 19 | 59  | 51  | 1.353517892 | 0.0546504 | BCAS3 | ENSG00000141376 |
| 17 | 56738004 | 56738307 | 56738137 | 8  | 12  | 14  | 1.016642327 | 0.486402  | BCAS3 | ENSG00000141376 |
| 17 | 56738380 | 56738814 | 56738635 | 11 | 20  | 17  | 1.368556979 | 0.163361  | BCAS3 | ENSG00000141376 |
| 17 | 56739229 | 56739441 | 56739368 | 10 | 13  | 19  | 0.821134188 | 0.720637  | BCAS3 | ENSG00000141376 |
| 17 | 56739977 | 56740769 | 56740353 | 20 | 42  | 38  | 1.293361541 | 0.122166  | BCAS3 | ENSG00000141376 |
| 17 | 56740779 | 56741048 | 56740916 | 10 | 14  | 13  | 1.256838042 | 0.269506  | BCAS3 | ENSG00000141376 |
| 17 | 56741057 | 56741383 | 56741236 | 15 | 20  | 21  | 1.119728438 | 0.357221  | BCAS3 | ENSG00000141376 |
| 17 | 56741559 | 56741930 | 56741788 | 9  | 15  | 30  | 0.605444562 | 0.95448   | BCAS3 | ENSG00000141376 |
| 17 | 56741975 | 56742359 | 56742210 | 9  | 15  | 24  | 0.750751257 | 0.821554  | BCAS3 | ENSG00000141376 |
| 17 | 56742713 | 56743280 | 56742934 | 20 | 34  | 31  | 1.283022168 | 0.15401   | BCAS3 | ENSG00000141376 |
| 17 | 56743461 | 56743735 | 56743582 | 13 | 14  | 15  | 1.099733287 | 0.398076  | BCAS3 | ENSG00000141376 |



|    |          |          |          |     |     |     |             |             |       |                 |
|----|----------|----------|----------|-----|-----|-----|-------------|-------------|-------|-----------------|
| 17 | 56744237 | 56747368 | 56746789 | 490 | 992 | 261 | 4.445944647 | 3.24E-128   | BCAS3 | ENSG00000141376 |
| 17 | 56747438 | 56748130 | 56747776 | 14  | 30  | 27  | 1.298732644 | 0.157794    | BCAS3 | ENSG00000141376 |
| 17 | 56748900 | 56749186 | 56749043 | 12  | 15  | 12  | 1.443752418 | 0.160732    | BCAS3 | ENSG00000141376 |
| 17 | 56749286 | 56750547 | 56750152 | 18  | 68  | 65  | 1.226369241 | 0.118181    | BCAS3 | ENSG00000141376 |
| 17 | 56750589 | 56751574 | 56750751 | 13  | 45  | 39  | 1.349006165 | 0.082572    | BCAS3 | ENSG00000141376 |
| 17 | 56752353 | 56752567 | 56752460 | 9   | 11  | 16  | 0.828034475 | 0.698553    | BCAS3 | ENSG00000141376 |
| 17 | 56753425 | 56753831 | 56753604 | 12  | 20  | 24  | 0.985361025 | 0.523192    | BCAS3 | ENSG00000141376 |
| 17 | 56754384 | 56754628 | 56754545 | 9   | 11  | 15  | 0.879786629 | 0.637414    | BCAS3 | ENSG00000141376 |
| 17 | 56754740 | 56754947 | 56754837 | 9   | 9   | 18  | 0.617394126 | 0.901359    | BCAS3 | ENSG00000141376 |
| 17 | 56755231 | 56755706 | 56755397 | 12  | 22  | 37  | 0.710003245 | 0.907893    | BCAS3 | ENSG00000141376 |
| 17 | 56755972 | 56757027 | 56756241 | 13  | 49  | 77  | 0.751954384 | 0.944928    | BCAS3 | ENSG00000141376 |
| 17 | 56757485 | 56758102 | 56757852 | 12  | 28  | 40  | 0.829717472 | 0.783482    | BCAS3 | ENSG00000141376 |
| 17 | 56758280 | 56758965 | 56758622 | 10  | 29  | 47  | 0.733155525 | 0.91319     | BCAS3 | ENSG00000141376 |
| 17 | 56760800 | 56761011 | 56760905 | 8   | 8   | 4   | 2.111487911 | 0.0804809   | BCAS3 | ENSG00000141376 |
| 17 | 56761842 | 56762227 | 56762021 | 11  | 17  | 21  | 0.959767232 | 0.55532     | BCAS3 | ENSG00000141376 |
| 17 | 56762834 | 56764669 | 56764378 | 14  | 84  | 100 | 0.98721932  | 0.536457    | BCAS3 | ENSG00000141376 |
| 17 | 56764982 | 56765345 | 56765178 | 15  | 21  | 18  | 1.358267077 | 0.163254    | BCAS3 | ENSG00000141376 |
| 17 | 56765581 | 56765851 | 56765721 | 9   | 11  | 11  | 1.173048839 | 0.349489    | BCAS3 | ENSG00000141376 |
| 17 | 56766091 | 56766501 | 56766269 | 20  | 31  | 27  | 1.340627245 | 0.128083    | BCAS3 | ENSG00000141376 |
| 17 | 56766699 | 56767771 | 56767592 | 18  | 50  | 45  | 1.300554148 | 0.0979016   | BCAS3 | ENSG00000141376 |
| 17 | 56767971 | 56768941 | 56768291 | 57  | 104 | 69  | 1.759573259 | 0.000102575 | BCAS3 | ENSG00000141376 |
| 17 | 56769250 | 56769984 | 56769421 | 16  | 39  | 46  | 0.998339438 | 0.505379    | BCAS3 | ENSG00000141376 |
| 17 | 56770008 | 56770708 | 56770232 | 16  | 40  | 48  | 0.981530661 | 0.5375      | BCAS3 | ENSG00000141376 |
| 17 | 56770736 | 56771556 | 56771129 | 22  | 54  | 46  | 1.372716727 | 0.0548708   | BCAS3 | ENSG00000141376 |
| 17 | 56771827 | 56772083 | 56771955 | 9   | 12  | 11  | 1.270802909 | 0.274822    | BCAS3 | ENSG00000141376 |
| 17 | 56772640 | 56773119 | 56772830 | 12  | 25  | 36  | 0.82430459  | 0.779524    | BCAS3 | ENSG00000141376 |
| 17 | 56773239 | 56773685 | 56773518 | 10  | 18  | 24  | 0.891517118 | 0.651693    | BCAS3 | ENSG00000141376 |
| 17 | 56775660 | 56776093 | 56775918 | 8   | 17  | 27  | 0.754102825 | 0.831231    | BCAS3 | ENSG00000141376 |
| 17 | 56776096 | 56776353 | 56776224 | 16  | 20  | 17  | 1.368556979 | 0.163361    | BCAS3 | ENSG00000141376 |
| 17 | 56776510 | 56776862 | 56776667 | 12  | 17  | 26  | 0.78203256  | 0.796561    | BCAS3 | ENSG00000141376 |
| 17 | 56777043 | 56777979 | 56777461 | 9   | 34  | 57  | 0.7078743   | 0.950185    | BCAS3 | ENSG00000141376 |
| 17 | 56778077 | 56778948 | 56778538 | 15  | 48  | 55  | 1.026417734 | 0.448843    | BCAS3 | ENSG00000141376 |
| 17 | 56778952 | 56779273 | 56779172 | 11  | 16  | 11  | 1.661819189 | 0.0853913   | BCAS3 | ENSG00000141376 |
| 17 | 56779603 | 56780370 | 56779890 | 12  | 38  | 36  | 1.236456885 | 0.177787    | BCAS3 | ENSG00000141376 |

|    |          |          |          |     |     |     |             |           |       |                 |
|----|----------|----------|----------|-----|-----|-----|-------------|-----------|-------|-----------------|
| 17 | 56780376 | 56780872 | 56780693 | 11  | 25  | 27  | 1.089259637 | 0.378702  | BCAS3 | ENSG00000141376 |
| 17 | 56781172 | 56782129 | 56781680 | 14  | 49  | 66  | 0.875409582 | 0.764723  | BCAS3 | ENSG00000141376 |
| 17 | 56782558 | 56782846 | 56782706 | 9   | 10  | 8   | 1.433726359 | 0.209175  | BCAS3 | ENSG00000141376 |
| 17 | 56783065 | 56785386 | 56784460 | 27  | 144 | 152 | 1.111712952 | 0.181069  | BCAS3 | ENSG00000141376 |
| 17 | 56785626 | 56786157 | 56785805 | 12  | 27  | 27  | 1.173048839 | 0.276183  | BCAS3 | ENSG00000141376 |
| 17 | 56786288 | 56787218 | 56786868 | 12  | 38  | 55  | 0.816944727 | 0.837526  | BCAS3 | ENSG00000141376 |
| 17 | 56787244 | 56787846 | 56787515 | 17  | 39  | 49  | 0.938439071 | 0.620532  | BCAS3 | ENSG00000141376 |
| 17 | 56788398 | 56789499 | 56789016 | 109 | 221 | 97  | 2.657314718 | 1.53E-17  | BCAS3 | ENSG00000141376 |
| 17 | 56790452 | 56790678 | 56790589 | 8   | 10  | 9   | 1.290353723 | 0.279648  | BCAS3 | ENSG00000141376 |
| 17 | 56790693 | 56791319 | 56791083 | 18  | 36  | 25  | 1.669338733 | 0.0212579 | BCAS3 | ENSG00000141376 |
| 17 | 56791377 | 56791622 | 56791499 | 8   | 11  | 19  | 0.703829304 | 0.840485  | BCAS3 | ENSG00000141376 |
| 17 | 56792387 | 56793125 | 56792634 | 12  | 35  | 36  | 1.141344817 | 0.287276  | BCAS3 | ENSG00000141376 |
| 17 | 56793248 | 56793624 | 56793446 | 14  | 20  | 14  | 1.642268375 | 0.06827   | BCAS3 | ENSG00000141376 |
| 17 | 56793758 | 56794895 | 56794143 | 16  | 61  | 59  | 1.212150467 | 0.144355  | BCAS3 | ENSG00000141376 |
| 17 | 56795054 | 56795588 | 56795409 | 12  | 25  | 54  | 0.554532179 | 0.994918  | BCAS3 | ENSG00000141376 |
| 17 | 56795727 | 56795983 | 56795844 | 8   | 11  | 27  | 0.502735217 | 0.982212  | BCAS3 | ENSG00000141376 |
| 17 | 56796003 | 56796573 | 56796304 | 14  | 28  | 22  | 1.47906158  | 0.0789867 | BCAS3 | ENSG00000141376 |
| 17 | 56796907 | 56797108 | 56797029 | 8   | 8   | 16  | 0.621025856 | 0.886834  | BCAS3 | ENSG00000141376 |
| 17 | 56797131 | 56797454 | 56797292 | 13  | 18  | 23  | 0.928663664 | 0.599426  | BCAS3 | ENSG00000141376 |
| 17 | 56798324 | 56799543 | 56798686 | 13  | 50  | 51  | 1.150490208 | 0.239308  | BCAS3 | ENSG00000141376 |
| 17 | 56800159 | 56800554 | 56800375 | 12  | 20  | 19  | 1.231701281 | 0.25288   | BCAS3 | ENSG00000141376 |
| 17 | 56800613 | 56801062 | 56800792 | 13  | 25  | 21  | 1.386330446 | 0.128722  | BCAS3 | ENSG00000141376 |
| 17 | 56801447 | 56801865 | 56801686 | 8   | 17  | 15  | 1.319679944 | 0.209239  | BCAS3 | ENSG00000141376 |
| 17 | 56802024 | 56802230 | 56802156 | 8   | 10  | 19  | 0.645176862 | 0.887754  | BCAS3 | ENSG00000141376 |
| 17 | 56802955 | 56803560 | 56803180 | 11  | 30  | 44  | 0.808100312 | 0.823634  | BCAS3 | ENSG00000141376 |
| 17 | 56803835 | 56805005 | 56804134 | 18  | 65  | 59  | 1.290353723 | 0.0763514 | BCAS3 | ENSG00000141376 |
| 17 | 56805522 | 56806084 | 56805728 | 52  | 73  | 9   | 8.680561411 | 1.62E-16  | BCAS3 | ENSG00000141376 |
| 17 | 56806571 | 56806976 | 56806813 | 12  | 19  | 18  | 1.234788252 | 0.255641  | BCAS3 | ENSG00000141376 |
| 17 | 56807092 | 56807776 | 56807356 | 13  | 33  | 29  | 1.329455351 | 0.127332  | BCAS3 | ENSG00000141376 |
| 17 | 56808177 | 56808466 | 56808333 | 14  | 19  | 27  | 0.837892028 | 0.732314  | BCAS3 | ENSG00000141376 |
| 17 | 56808475 | 56809040 | 56808639 | 12  | 24  | 30  | 0.946007128 | 0.585264  | BCAS3 | ENSG00000141376 |
| 17 | 56809057 | 56809982 | 56809410 | 12  | 41  | 36  | 1.331568953 | 0.101604  | BCAS3 | ENSG00000141376 |
| 17 | 56810143 | 56810915 | 56810556 | 12  | 39  | 31  | 1.466311049 | 0.0522376 | BCAS3 | ENSG00000141376 |
| 17 | 56811376 | 56811977 | 56811682 | 13  | 29  | 28  | 1.213498799 | 0.229275  | BCAS3 | ENSG00000141376 |

|    |          |          |          |     |     |     |             |             |          |                 |
|----|----------|----------|----------|-----|-----|-----|-------------|-------------|----------|-----------------|
| 17 | 56812024 | 56812686 | 56812318 | 12  | 30  | 36  | 0.982824703 | 0.53112     | BCAS3    | ENSG00000141376 |
| 17 | 56812691 | 56813084 | 56812905 | 12  | 19  | 36  | 0.634080454 | 0.95473     | BCAS3    | ENSG00000141376 |
| 17 | 56813116 | 56814049 | 56813182 | 15  | 52  | 56  | 1.090729623 | 0.325826    | BCAS3    | ENSG00000141376 |
| 17 | 56815051 | 56815444 | 56815256 | 11  | 20  | 30  | 0.794645988 | 0.79747     | BCAS3    | ENSG00000141376 |
| 17 | 56815619 | 56815948 | 56815776 | 11  | 16  | 24  | 0.797673211 | 0.770106    | BCAS3    | ENSG00000141376 |
| 17 | 56816411 | 56817102 | 56816590 | 11  | 30  | 47  | 0.757594042 | 0.890211    | BCAS3    | ENSG00000141376 |
| 17 | 56817190 | 56817598 | 56817432 | 12  | 20  | 27  | 0.879786629 | 0.67594     | BCAS3    | ENSG00000141376 |
| 17 | 56817668 | 56818441 | 56817937 | 15  | 37  | 35  | 1.238218219 | 0.179382    | BCAS3    | ENSG00000141376 |
| 17 | 56818457 | 56818782 | 56818619 | 10  | 15  | 23  | 0.78203256  | 0.783431    | BCAS3    | ENSG00000141376 |
| 17 | 56819642 | 56820070 | 56819810 | 10  | 17  | 26  | 0.78203256  | 0.796561    | BCAS3    | ENSG00000141376 |
| 17 | 56820453 | 56820982 | 56820695 | 8   | 18  | 24  | 0.891517118 | 0.651693    | BCAS3    | ENSG00000141376 |
| 17 | 56820999 | 56821635 | 56821355 | 11  | 28  | 39  | 0.850460409 | 0.75086     | BCAS3    | ENSG00000141376 |
| 17 | 56821706 | 56822593 | 56822208 | 54  | 96  | 70  | 1.60261602  | 0.00115846  | BCAS3    | ENSG00000141376 |
| 17 | 56822704 | 56823227 | 56822871 | 12  | 27  | 25  | 1.263283365 | 0.195501    | TBX2     | ENSG00000121068 |
| 17 | 56823316 | 56823543 | 56823414 | 8   | 10  | 19  | 0.645176862 | 0.887754    | TBX2     | ENSG00000121068 |
| 17 | 56823804 | 56824005 | 56823977 | 8   | 10  | 13  | 0.921681231 | 0.585856    | TBX2     | ENSG00000121068 |
| 17 | 56824022 | 56826969 | 56825888 | 116 | 372 | 171 | 2.543879169 | 2.20E-26    | TBX2     | ENSG00000121068 |
| 17 | 56826972 | 56827964 | 56827151 | 18  | 52  | 62  | 0.986850611 | 0.530385    | TBX2     | ENSG00000121068 |
| 17 | 56827988 | 56828389 | 56828167 | 13  | 21  | 22  | 1.122046716 | 0.351409    | TBX2     | ENSG00000121068 |
| 17 | 56828717 | 56829151 | 56828974 | 10  | 16  | 22  | 0.867036099 | 0.677498    | TBX2     | ENSG00000121068 |
| 17 | 56829682 | 56830344 | 56829861 | 10  | 25  | 35  | 0.84720194  | 0.744739    | TBX2     | ENSG00000121068 |
| 17 | 56830356 | 56832136 | 56831961 | 59  | 221 | 108 | 2.389145342 | 5.77E-15    | TBX2     | ENSG00000121068 |
| 17 | 56832533 | 56834462 | 56832929 | 22  | 117 | 89  | 1.537997367 | 0.000978929 | TBX2     | ENSG00000121068 |
| 17 | 56834636 | 56835170 | 56834739 | 12  | 21  | 23  | 1.075294769 | 0.4051      | TBX2     | ENSG00000121068 |
| 17 | 56835228 | 56836142 | 56835673 | 19  | 58  | 38  | 1.774612347 | 0.00238579  | TBX2     | ENSG00000121068 |
| 17 | 56836261 | 56836894 | 56836565 | 15  | 36  | 26  | 1.607511372 | 0.0289951   | TBX2     | ENSG00000121068 |
| 17 | 56837046 | 56837300 | 56837211 | 8   | 11  | 13  | 1.005470434 | 0.498567    | TBX2     | ENSG00000121068 |
| 17 | 56837869 | 56838889 | 56838443 | 12  | 46  | 38  | 1.413674242 | 0.0542535   | C17orf82 | ENSG00000187013 |
| 17 | 56838898 | 56840197 | 56839673 | 28  | 80  | 63  | 1.484639937 | 0.00875262  | C17orf82 | ENSG00000187013 |
| 17 | 56840604 | 56841282 | 56840835 | 16  | 40  | 41  | 1.145119105 | 0.269579    | C17orf82 | ENSG00000187013 |
| 17 | 56841341 | 56841695 | 56841518 | 24  | 30  | 18  | 1.91392179  | 0.0113254   | C17orf82 | ENSG00000187013 |
| 17 | 56841820 | 56842384 | 56842187 | 14  | 28  | 28  | 1.173048839 | 0.272646    | C17orf82 | ENSG00000187013 |
| 17 | 56842544 | 56846082 | 56844476 | 307 | 963 | 228 | 4.93807459  | 1.76E-135   | C17orf82 | ENSG00000187013 |
| 17 | 56846309 | 56847268 | 56847090 | 15  | 46  | 45  | 1.198549901 | 0.191787    | C17orf82 | ENSG00000187013 |

|    |          |          |          |    |     |     |             |             |          |                 |
|----|----------|----------|----------|----|-----|-----|-------------|-------------|----------|-----------------|
| 17 | 56847349 | 56850331 | 56849186 | 84 | 286 | 179 | 1.870361205 | 1.07E-11    | C17orf82 | ENSG00000187013 |
| 17 | 56850604 | 56850996 | 56850732 | 9  | 15  | 15  | 1.173048839 | 0.32719     | C17orf82 | ENSG00000187013 |
| 17 | 56851004 | 56851513 | 56851357 | 8  | 19  | 32  | 0.71093869  | 0.891662    | C17orf82 | ENSG00000187013 |
| 17 | 56851520 | 56851921 | 56851700 | 8  | 16  | 29  | 0.664727676 | 0.917277    | C17orf82 | ENSG00000187013 |
| 17 | 56852033 | 56852352 | 56852175 | 11 | 13  | 13  | 1.173048839 | 0.337862    | C17orf82 | ENSG00000187013 |
| 17 | 56852418 | 56852784 | 56852553 | 8  | 12  | 13  | 1.089259637 | 0.414883    | C17orf82 | ENSG00000187013 |
| 17 | 56852956 | 56853352 | 56853128 | 13 | 22  | 29  | 0.899337443 | 0.653223    | C17orf82 | ENSG00000187013 |
| 17 | 56853506 | 56854281 | 56853964 | 15 | 37  | 35  | 1.238218219 | 0.179382    | C17orf82 | ENSG00000187013 |
| 17 | 56854345 | 56854668 | 56854502 | 8  | 12  | 18  | 0.802612364 | 0.736387    | C17orf82 | ENSG00000187013 |
| 17 | 56855416 | 56855606 | 56855511 | 11 | 11  | 7   | 1.759573259 | 0.102361    | C17orf82 | ENSG00000187013 |
| 17 | 56856100 | 56856909 | 56856402 | 24 | 55  | 49  | 1.3138147   | 0.0800746   | C17orf82 | ENSG00000187013 |
| 17 | 56856970 | 56858548 | 56858378 | 26 | 93  | 96  | 1.136768978 | 0.188568    | C17orf82 | ENSG00000187013 |
| 17 | 56858817 | 56859171 | 56858994 | 9  | 13  | 12  | 1.263283365 | 0.272203    | C17orf82 | ENSG00000187013 |
| 17 | 56859286 | 56859789 | 56859537 | 14 | 26  | 34  | 0.90492339  | 0.655516    | C17orf82 | ENSG00000187013 |
| 17 | 56862152 | 56862413 | 56862272 | 8  | 8   | 16  | 0.621025856 | 0.886834    | C17orf82 | ENSG00000187013 |
| 17 | 56863817 | 56864431 | 56863959 | 12 | 26  | 48  | 0.64637385  | 0.969227    | C17orf82 | ENSG00000187013 |
| 17 | 56866068 | 56866480 | 56866271 | 19 | 29  | 20  | 1.675784056 | 0.0328812   | TBX4     | ENSG00000121075 |
| 17 | 56866882 | 56867077 | 56866925 | 8  | 10  | 10  | 1.173048839 | 0.355733    | TBX4     | ENSG00000121075 |
| 17 | 56868485 | 56868689 | 56868567 | 10 | 11  | 15  | 0.879786629 | 0.637414    | TBX4     | ENSG00000121075 |
| 17 | 56869811 | 56870510 | 56869990 | 16 | 38  | 48  | 0.933651117 | 0.628369    | TBX4     | ENSG00000121075 |
| 17 | 56871754 | 56872930 | 56871933 | 19 | 76  | 92  | 0.971233985 | 0.576943    | TBX4     | ENSG00000121075 |
| 17 | 56873113 | 56873854 | 56873450 | 11 | 36  | 61  | 0.700045275 | 0.960051    | TBX4     | ENSG00000121075 |
| 17 | 56874201 | 56874410 | 56874267 | 8  | 11  | 20  | 0.670313622 | 0.874201    | TBX4     | ENSG00000121075 |
| 17 | 56874412 | 56875226 | 56874591 | 19 | 48  | 77  | 0.736915296 | 0.955593    | TBX4     | ENSG00000121075 |
| 17 | 56875317 | 56875624 | 56875482 | 12 | 16  | 24  | 0.797673211 | 0.770106    | TBX4     | ENSG00000121075 |
| 17 | 56875737 | 56876341 | 56875930 | 13 | 31  | 37  | 0.987830602 | 0.523017    | TBX4     | ENSG00000121075 |
| 17 | 56876508 | 56877505 | 56876805 | 17 | 55  | 72  | 0.899873082 | 0.726347    | TBX4     | ENSG00000121075 |
| 17 | 56877761 | 56878191 | 56877997 | 12 | 21  | 16  | 1.518063204 | 0.0959332   | TBX4     | ENSG00000121075 |
| 17 | 56879040 | 56880533 | 56879403 | 17 | 82  | 95  | 1.014198476 | 0.46403     | TBX4     | ENSG00000121075 |
| 17 | 56880610 | 56880801 | 56880634 | 8  | 10  | 23  | 0.537647385 | 0.963335    | TBX4     | ENSG00000121075 |
| 17 | 56881434 | 56883803 | 56882559 | 55 | 227 | 185 | 1.437930835 | 0.000112276 | TBX4     | ENSG00000121075 |
| 17 | 56883904 | 56884162 | 56883993 | 9  | 11  | 10  | 1.279689643 | 0.277323    | TBX4     | ENSG00000121075 |
| 17 | 56884570 | 56884774 | 56884724 | 8  | 10  | 11  | 1.075294769 | 0.434143    | TBX4     | ENSG00000121075 |
| 17 | 56885749 | 56886007 | 56885837 | 8  | 11  | 17  | 0.78203256  | 0.752912    | TBX4     | ENSG00000121075 |

|    |          |          |          |    |     |     |             |            |      |                 |
|----|----------|----------|----------|----|-----|-----|-------------|------------|------|-----------------|
| 17 | 56886055 | 56886318 | 56886230 | 12 | 15  | 11  | 1.564065119 | 0.11768    | TBX4 | ENSG00000121075 |
| 17 | 56886376 | 56886634 | 56886531 | 10 | 12  | 12  | 1.173048839 | 0.343543   | TBX4 | ENSG00000121075 |
| 17 | 56887197 | 56887506 | 56887351 | 15 | 19  | 18  | 1.234788252 | 0.255641   | TBX4 | ENSG00000121075 |
| 17 | 56887654 | 56888030 | 56887833 | 15 | 22  | 24  | 1.079204932 | 0.398105   | TBX4 | ENSG00000121075 |
| 17 | 56888136 | 56888686 | 56888313 | 15 | 29  | 24  | 1.407658607 | 0.102291   | TBX4 | ENSG00000121075 |
| 17 | 56888823 | 56889094 | 56888958 | 13 | 15  | 12  | 1.443752418 | 0.160732   | TBX4 | ENSG00000121075 |
| 17 | 56889437 | 56889686 | 56889561 | 10 | 12  | 21  | 0.693165223 | 0.860764   | TBX4 | ENSG00000121075 |
| 17 | 56889939 | 56890430 | 56890294 | 12 | 20  | 29  | 0.821134188 | 0.760976   | TBX4 | ENSG00000121075 |
| 17 | 56890537 | 56891912 | 56891224 | 20 | 79  | 81  | 1.144437892 | 0.196003   | TBX4 | ENSG00000121075 |
| 17 | 56891918 | 56892310 | 56892161 | 9  | 17  | 26  | 0.78203256  | 0.796561   | TBX4 | ENSG00000121075 |
| 17 | 56892388 | 56894603 | 56893250 | 22 | 132 | 132 | 1.173048839 | 0.0968625  | TBX4 | ENSG00000121075 |
| 17 | 56894624 | 56896287 | 56895676 | 14 | 76  | 82  | 1.088250128 | 0.297598   | TBX4 | ENSG00000121075 |
| 17 | 56896475 | 56898304 | 56897992 | 17 | 99  | 93  | 1.247924297 | 0.0616115  | TBX4 | ENSG00000121075 |
| 17 | 56898359 | 56898842 | 56898538 | 16 | 27  | 35  | 0.912371319 | 0.645679   | TBX4 | ENSG00000121075 |
| 17 | 56898930 | 56900980 | 56899797 | 62 | 167 | 149 | 1.3138147   | 0.00750037 | TBX4 | ENSG00000121075 |
| 17 | 56900999 | 56901222 | 56901063 | 9  | 12  | 20  | 0.726173091 | 0.825666   | TBX4 | ENSG00000121075 |
| 17 | 56902287 | 56903150 | 56902973 | 13 | 44  | 60  | 0.865363898 | 0.772282   | TBX4 | ENSG00000121075 |
| 17 | 56903171 | 56903477 | 56903324 | 14 | 18  | 24  | 0.891517118 | 0.651693   | TBX4 | ENSG00000121075 |
| 17 | 56904307 | 56904823 | 56904486 | 15 | 25  | 33  | 0.897037348 | 0.665614   | TBX4 | ENSG00000121075 |
| 17 | 56904871 | 56905540 | 56905050 | 17 | 32  | 44  | 0.860235815 | 0.748179   | TBX4 | ENSG00000121075 |
| 17 | 56905633 | 56906035 | 56905812 | 14 | 24  | 27  | 1.047365035 | 0.435612   | TBX4 | ENSG00000121075 |
| 17 | 56906052 | 56907516 | 56906655 | 17 | 87  | 78  | 1.306687315 | 0.042024   | TBX4 | ENSG00000121075 |
| 17 | 56907528 | 56908163 | 56907699 | 11 | 29  | 25  | 1.353517892 | 0.128607   | TBX4 | ENSG00000121075 |
| 17 | 56908176 | 56908692 | 56908520 | 10 | 21  | 40  | 0.629440841 | 0.964454   | TBX4 | ENSG00000121075 |
| 17 | 56908808 | 56909341 | 56909162 | 10 | 23  | 43  | 0.639844821 | 0.964845   | TBX4 | ENSG00000121075 |
| 17 | 56909345 | 56909624 | 56909460 | 9  | 11  | 15  | 0.879786629 | 0.637414   | TBX4 | ENSG00000121075 |
| 17 | 56910646 | 56911055 | 56910789 | 10 | 18  | 28  | 0.76854924  | 0.819816   | TBX4 | ENSG00000121075 |
| 17 | 56911434 | 56911986 | 56911651 | 12 | 25  | 20  | 1.452346182 | 0.100215   | TBX4 | ENSG00000121075 |
| 17 | 56912086 | 56913388 | 56912830 | 14 | 60  | 73  | 0.966972692 | 0.579065   | TBX4 | ENSG00000121075 |
| 17 | 56913467 | 56913840 | 56913646 | 10 | 18  | 18  | 1.173048839 | 0.312613   | TBX4 | ENSG00000121075 |
| 17 | 56914368 | 56914595 | 56914488 | 8  | 10  | 27  | 0.460840615 | 0.98972    | TBX4 | ENSG00000121075 |
| 17 | 56914597 | 56914861 | 56914722 | 8  | 12  | 22  | 0.663027605 | 0.890045   | TBX4 | ENSG00000121075 |
| 17 | 56914945 | 56915343 | 56915065 | 8  | 16  | 32  | 0.604297887 | 0.959754   | TBX4 | ENSG00000121075 |
| 17 | 56915735 | 56916898 | 56916685 | 15 | 57  | 64  | 1.046720503 | 0.401784   | TBX4 | ENSG00000121075 |

|    |          |          |          |    |     |    |             |           |      |                 |
|----|----------|----------|----------|----|-----|----|-------------|-----------|------|-----------------|
| 17 | 56917190 | 56917534 | 56917313 | 11 | 16  | 23 | 0.830909595 | 0.726247  | TBX4 | ENSG00000121075 |
| 17 | 56917562 | 56918664 | 56918260 | 17 | 73  | 58 | 1.471281595 | 0.0130748 | TBX4 | ENSG00000121075 |
| 17 | 56918805 | 56919201 | 56919030 | 14 | 21  | 31 | 0.806471077 | 0.786558  | TBX4 | ENSG00000121075 |
| 17 | 56919305 | 56920096 | 56919631 | 15 | 44  | 49 | 1.055743955 | 0.397606  | TBX4 | ENSG00000121075 |
| 17 | 56920127 | 56920488 | 56920309 | 9  | 16  | 22 | 0.867036099 | 0.677498  | TBX4 | ENSG00000121075 |
| 17 | 56920496 | 56921044 | 56920771 | 13 | 28  | 29 | 1.133947211 | 0.316017  | TBX4 | ENSG00000121075 |
| 17 | 56921551 | 56923257 | 56922262 | 15 | 83  | 97 | 1.005470434 | 0.486908  | TBX4 | ENSG00000121075 |
| 17 | 56924009 | 56924532 | 56924161 | 10 | 21  | 45 | 0.561023358 | 0.989682  | TBX4 | ENSG00000121075 |
| 17 | 56924600 | 56924958 | 56924779 | 9  | 15  | 24 | 0.750751257 | 0.821554  | TBX4 | ENSG00000121075 |
| 17 | 56924983 | 56926118 | 56925836 | 14 | 57  | 70 | 0.958265249 | 0.597356  | TBX4 | ENSG00000121075 |
| 17 | 56926276 | 56927106 | 56926770 | 14 | 39  | 42 | 1.091208223 | 0.347076  | TBX4 | ENSG00000121075 |
| 17 | 56927146 | 56927549 | 56927297 | 13 | 21  | 30 | 0.832486273 | 0.749627  | TBX4 | ENSG00000121075 |
| 17 | 56927657 | 56928040 | 56927862 | 15 | 22  | 24 | 1.079204932 | 0.398105  | TBX4 | ENSG00000121075 |
| 17 | 56928414 | 56928707 | 56928560 | 15 | 18  | 30 | 0.718965418 | 0.877492  | TBX4 | ENSG00000121075 |
| 17 | 56928719 | 56930044 | 56929538 | 15 | 66  | 85 | 0.913886886 | 0.712052  | TBX4 | ENSG00000121075 |
| 17 | 56930487 | 56931044 | 56930651 | 15 | 26  | 42 | 0.73656555  | 0.89825   | TBX4 | ENSG00000121075 |
| 17 | 56931238 | 56931536 | 56931387 | 11 | 16  | 15 | 1.246364392 | 0.263987  | TBX4 | ENSG00000121075 |
| 17 | 56931718 | 56932956 | 56932042 | 29 | 87  | 74 | 1.376377305 | 0.0207675 | TBX4 | ENSG00000121075 |
| 17 | 56933042 | 56933248 | 56933129 | 11 | 11  | 29 | 0.469219536 | 0.990608  | TBX4 | ENSG00000121075 |
| 17 | 56933863 | 56934820 | 56934151 | 24 | 59  | 75 | 0.926091189 | 0.67407   | TBX4 | ENSG00000121075 |
| 17 | 56935814 | 56937585 | 56937014 | 40 | 134 | 90 | 1.740237289 | 1.76E-05  | TBX4 | ENSG00000121075 |
| 17 | 56937963 | 56938537 | 56938288 | 16 | 31  | 33 | 1.104045966 | 0.345468  | TBX4 | ENSG00000121075 |
| 17 | 56938886 | 56939631 | 56939304 | 18 | 45  | 37 | 1.42000649  | 0.0540658 | TBX4 | ENSG00000121075 |
| 17 | 56939700 | 56940103 | 56939866 | 12 | 20  | 38 | 0.631641683 | 0.959905  | TBX4 | ENSG00000121075 |
| 17 | 56940301 | 56940677 | 56940476 | 15 | 21  | 27 | 0.921681231 | 0.616644  | TBX4 | ENSG00000121075 |
| 17 | 56940925 | 56941491 | 56941280 | 34 | 49  | 40 | 1.430547365 | 0.043889  | TBX4 | ENSG00000121075 |
| 17 | 56941867 | 56942904 | 56942383 | 19 | 56  | 77 | 0.857227998 | 0.814489  | TBX4 | ENSG00000121075 |
| 17 | 56943086 | 56944249 | 56943750 | 20 | 65  | 63 | 1.209706616 | 0.139244  | TBX4 | ENSG00000121075 |
| 17 | 56944676 | 56945124 | 56944956 | 14 | 23  | 23 | 1.173048839 | 0.291252  | TBX4 | ENSG00000121075 |
| 17 | 56945408 | 56945617 | 56945562 | 8  | 11  | 15 | 0.879786629 | 0.637414  | TBX4 | ENSG00000121075 |
| 17 | 56946336 | 56947035 | 56946783 | 24 | 46  | 37 | 1.450876196 | 0.0431771 | TBX4 | ENSG00000121075 |
| 17 | 56947522 | 56947882 | 56947665 | 12 | 17  | 16 | 1.242051712 | 0.261202  | TBX4 | ENSG00000121075 |
| 17 | 56948647 | 56948846 | 56948746 | 8  | 9   | 13 | 0.837892028 | 0.672794  | TBX4 | ENSG00000121075 |
| 17 | 56949380 | 56949732 | 56949556 | 16 | 22  | 23 | 1.124171804 | 0.345816  | TBX4 | ENSG00000121075 |

|    |          |          |          |    |    |    |             |           |       |                 |
|----|----------|----------|----------|----|----|----|-------------|-----------|-------|-----------------|
| 17 | 56950976 | 56951616 | 56951242 | 12 | 30 | 52 | 0.686122906 | 0.955769  | TBX4  | ENSG00000121075 |
| 17 | 56951719 | 56952109 | 56951937 | 11 | 18 | 16 | 1.311054585 | 0.208218  | TBX4  | ENSG00000121075 |
| 17 | 56952857 | 56953262 | 56953151 | 10 | 17 | 14 | 1.407658607 | 0.162567  | TBX4  | ENSG00000121075 |
| 17 | 56955323 | 56955528 | 56955422 | 9  | 9  | 21 | 0.533204018 | 0.958771  | TBX4  | ENSG00000121075 |
| 17 | 56955900 | 56956667 | 56956293 | 14 | 39 | 28 | 1.617998399 | 0.0230422 | NACA2 | ENSG00000196861 |
| 17 | 56956857 | 56958143 | 56957964 | 31 | 75 | 79 | 1.114396397 | 0.25039   | NACA2 | ENSG00000196861 |
| 17 | 56958239 | 56958561 | 56958391 | 12 | 16 | 36 | 0.538968386 | 0.986174  | NACA2 | ENSG00000196861 |
| 17 | 56958635 | 56959059 | 56958911 | 11 | 17 | 23 | 0.879786629 | 0.664328  | NACA2 | ENSG00000196861 |
| 17 | 56959941 | 56960192 | 56960066 | 9  | 9  | 10 | 1.066408036 | 0.444985  | NACA2 | ENSG00000196861 |
| 17 | 56960949 | 56961576 | 56961379 | 8  | 21 | 28 | 0.889899119 | 0.664396  | NACA2 | ENSG00000196861 |
| 17 | 56961589 | 56961875 | 56961701 | 8  | 12 | 13 | 1.089259637 | 0.414883  | NACA2 | ENSG00000196861 |
| 17 | 56961999 | 56962507 | 56962136 | 9  | 17 | 27 | 0.754102825 | 0.831231  | NACA2 | ENSG00000196861 |
| 17 | 56963926 | 56964136 | 56963988 | 8  | 9  | 19 | 0.58652442  | 0.925417  | NACA2 | ENSG00000196861 |
| 17 | 56964227 | 56964465 | 56964304 | 11 | 13 | 23 | 0.68427849  | 0.878142  | NACA2 | ENSG00000196861 |
| 17 | 56964758 | 56964981 | 56964870 | 14 | 15 | 29 | 0.625626048 | 0.94154   | NACA2 | ENSG00000196861 |
| 17 | 56964985 | 56965177 | 56965025 | 9  | 11 | 39 | 0.351914652 | 0.99974   | NACA2 | ENSG00000196861 |
| 17 | 56965333 | 56965763 | 56965548 | 16 | 26 | 30 | 1.021687699 | 0.47008   | NACA2 | ENSG00000196861 |
| 17 | 56965954 | 56966372 | 56966110 | 10 | 16 | 18 | 1.049570014 | 0.445264  | NACA2 | ENSG00000196861 |
| 17 | 56968790 | 56969136 | 56968963 | 10 | 16 | 18 | 1.049570014 | 0.445264  | NACA2 | ENSG00000196861 |
| 17 | 56969536 | 56970028 | 56969763 | 10 | 19 | 18 | 1.234788252 | 0.255641  | NACA2 | ENSG00000196861 |
| 17 | 56970614 | 56971137 | 56970844 | 8  | 17 | 18 | 1.111309427 | 0.376188  | NACA2 | ENSG00000196861 |
| 17 | 56971818 | 56972025 | 56971946 | 9  | 11 | 11 | 1.173048839 | 0.349489  | NACA2 | ENSG00000196861 |
| 17 | 56972714 | 56972983 | 56972848 | 11 | 11 | 12 | 1.082814313 | 0.424156  | NACA2 | ENSG00000196861 |
| 17 | 56976137 | 56976342 | 56976256 | 8  | 8  | 5  | 1.759573259 | 0.13508   | NACA2 | ENSG00000196861 |
| 17 | 56976617 | 56977248 | 56977043 | 10 | 25 | 28 | 1.051698959 | 0.428274  | NACA2 | ENSG00000196861 |
| 17 | 56980840 | 56981213 | 56981019 | 9  | 17 | 16 | 1.242051712 | 0.261202  | NACA2 | ENSG00000196861 |
| 17 | 56982164 | 56982410 | 56982287 | 9  | 11 | 18 | 0.740872951 | 0.800189  | NACA2 | ENSG00000196861 |
| 17 | 56982525 | 56982785 | 56982655 | 11 | 13 | 27 | 0.58652442  | 0.955084  | NACA2 | ENSG00000196861 |
| 17 | 56982877 | 56983169 | 56983025 | 9  | 12 | 17 | 0.84720194  | 0.681997  | NACA2 | ENSG00000196861 |
| 17 | 56983231 | 56983855 | 56983506 | 44 | 68 | 53 | 1.498895739 | 0.012506  | NACA2 | ENSG00000196861 |
| 17 | 56985343 | 56985762 | 56985501 | 9  | 18 | 31 | 0.696497748 | 0.900299  | NACA2 | ENSG00000196861 |
| 17 | 56986182 | 56986789 | 56986361 | 18 | 33 | 27 | 1.424416448 | 0.0817823 | NACA2 | ENSG00000196861 |
| 17 | 56986916 | 56987962 | 56987436 | 29 | 81 | 99 | 0.961900048 | 0.604669  | NACA2 | ENSG00000196861 |
| 17 | 56988353 | 56989131 | 56988807 | 35 | 74 | 62 | 1.396486713 | 0.0249697 | NACA2 | ENSG00000196861 |

|    |          |          |          |    |     |     |             |           |       |                 |
|----|----------|----------|----------|----|-----|-----|-------------|-----------|-------|-----------------|
| 17 | 56989560 | 56989747 | 56989640 | 8  | 9   | 11  | 0.977540699 | 0.526123  | NACA2 | ENSG00000196861 |
| 17 | 56989968 | 56990785 | 56990594 | 10 | 33  | 48  | 0.813952256 | 0.82584   | NACA2 | ENSG00000196861 |
| 17 | 56991222 | 56992003 | 56991594 | 13 | 37  | 29  | 1.485861863 | 0.0513049 | NACA2 | ENSG00000196861 |
| 17 | 56992379 | 56992936 | 56992557 | 11 | 24  | 30  | 0.946007128 | 0.585264  | NACA2 | ENSG00000196861 |
| 17 | 56993872 | 56994350 | 56994122 | 17 | 29  | 35  | 0.977540699 | 0.539462  | NACA2 | ENSG00000196861 |
| 17 | 56994371 | 56994904 | 56994568 | 12 | 28  | 27  | 1.214943441 | 0.231769  | NACA2 | ENSG00000196861 |
| 17 | 56995711 | 56995999 | 56995855 | 12 | 14  | 19  | 0.879786629 | 0.651591  | NACA2 | ENSG00000196861 |
| 17 | 56996881 | 56997423 | 56997244 | 14 | 27  | 34  | 0.938439071 | 0.602291  | NACA2 | ENSG00000196861 |
| 17 | 56997844 | 56998110 | 56997977 | 8  | 11  | 7   | 1.759573259 | 0.102361  | NACA2 | ENSG00000196861 |
| 17 | 56999793 | 57000238 | 57000027 | 10 | 20  | 23  | 1.026417734 | 0.468083  | NACA2 | ENSG00000196861 |
| 17 | 57000556 | 57001407 | 57000950 | 64 | 140 | 72  | 2.265751868 | 2.37E-09  | NACA2 | ENSG00000196861 |
| 17 | 57001554 | 57001873 | 57001707 | 10 | 15  | 13  | 1.340627245 | 0.210788  | NACA2 | ENSG00000196861 |
| 17 | 57002282 | 57002817 | 57002514 | 13 | 25  | 30  | 0.983847414 | 0.527416  | NACA2 | ENSG00000196861 |
| 17 | 57003240 | 57003502 | 57003371 | 9  | 12  | 21  | 0.693165223 | 0.860764  | NACA2 | ENSG00000196861 |
| 17 | 57004521 | 57004864 | 57004695 | 8  | 12  | 16  | 0.897037348 | 0.621544  | NACA2 | ENSG00000196861 |
| 17 | 57005012 | 57005500 | 57005191 | 18 | 30  | 21  | 1.652932455 | 0.0339016 | NACA2 | ENSG00000196861 |
| 17 | 57005926 | 57006153 | 57006023 | 9  | 11  | 20  | 0.670313622 | 0.874201  | NACA2 | ENSG00000196861 |
| 17 | 57006167 | 57006836 | 57006346 | 15 | 33  | 39  | 0.997091513 | 0.507485  | NACA2 | ENSG00000196861 |
| 17 | 57006850 | 57008014 | 57007244 | 85 | 155 | 92  | 1.967694827 | 6.68E-08  | NACA2 | ENSG00000196861 |
| 17 | 57008031 | 57008475 | 57008210 | 8  | 16  | 32  | 0.604297887 | 0.959754  | NACA2 | ENSG00000196861 |
| 17 | 57009633 | 57009935 | 57009780 | 10 | 12  | 15  | 0.953102182 | 0.555895  | NACA2 | ENSG00000196861 |
| 17 | 57010334 | 57010516 | 57010425 | 8  | 8   | 18  | 0.555654713 | 0.936835  | NACA2 | ENSG00000196861 |
| 17 | 57010622 | 57010801 | 57010711 | 8  | 8   | 19  | 0.527871978 | 0.95364   | NACA2 | ENSG00000196861 |
| 17 | 57011401 | 57012877 | 57011713 | 15 | 69  | 91  | 0.89253716  | 0.765628  | NACA2 | ENSG00000196861 |
| 17 | 57013069 | 57013611 | 57013441 | 10 | 24  | 39  | 0.733155525 | 0.893358  | NACA2 | ENSG00000196861 |
| 17 | 57013997 | 57014492 | 57014176 | 8  | 19  | 21  | 1.066408036 | 0.420026  | NACA2 | ENSG00000196861 |
| 17 | 57014996 | 57015988 | 57015568 | 30 | 71  | 63  | 1.319679944 | 0.0529552 | NACA2 | ENSG00000196861 |
| 17 | 57017074 | 57017441 | 57017253 | 11 | 18  | 26  | 0.825478813 | 0.744556  | NACA2 | ENSG00000196861 |
| 17 | 57018985 | 57019176 | 57019097 | 12 | 12  | 6   | 2.178519273 | 0.0416567 | NACA2 | ENSG00000196861 |
| 17 | 57019502 | 57020928 | 57020073 | 13 | 58  | 100 | 0.685246352 | 0.990596  | NACA2 | ENSG00000196861 |
| 17 | 57021427 | 57022563 | 57021604 | 16 | 64  | 83  | 0.907716364 | 0.723492  | NACA2 | ENSG00000196861 |
| 17 | 57023278 | 57023685 | 57023506 | 9  | 18  | 29  | 0.742930932 | 0.850763  | NACA2 | ENSG00000196861 |
| 17 | 57024098 | 57024957 | 57024668 | 14 | 37  | 51  | 0.857227998 | 0.768351  | NACA2 | ENSG00000196861 |
| 17 | 57025513 | 57025739 | 57025626 | 10 | 11  | 23  | 0.58652442  | 0.942313  | NACA2 | ENSG00000196861 |



|    |          |          |          |    |     |    |             |           |       |                 |
|----|----------|----------|----------|----|-----|----|-------------|-----------|-------|-----------------|
| 17 | 57025850 | 57026124 | 57025987 | 9  | 11  | 26 | 0.52135504  | 0.975812  | NACA2 | ENSG00000196861 |
| 17 | 57027562 | 57028425 | 57027796 | 18 | 51  | 60 | 0.99997606  | 0.502052  | NACA2 | ENSG00000196861 |
| 17 | 57028524 | 57028932 | 57028753 | 14 | 20  | 40 | 0.600829893 | 0.975148  | NACA2 | ENSG00000196861 |
| 17 | 57029750 | 57030610 | 57030013 | 15 | 43  | 52 | 0.973851867 | 0.554069  | NACA2 | ENSG00000196861 |
| 17 | 57031054 | 57032213 | 57031280 | 15 | 61  | 68 | 1.054043885 | 0.38326   | NACA2 | ENSG00000196861 |
| 17 | 57032230 | 57033055 | 57032600 | 12 | 39  | 62 | 0.744792914 | 0.930883  | NACA2 | ENSG00000196861 |
| 17 | 57033716 | 57034007 | 57033861 | 10 | 13  | 15 | 1.026417734 | 0.475096  | NACA2 | ENSG00000196861 |
| 17 | 57034264 | 57034527 | 57034395 | 9  | 10  | 11 | 1.075294769 | 0.434143  | NACA2 | ENSG00000196861 |
| 17 | 57034934 | 57035509 | 57035214 | 16 | 30  | 43 | 0.826466228 | 0.796029  | NACA2 | ENSG00000196861 |
| 17 | 57035993 | 57036186 | 57036090 | 8  | 8   | 7  | 1.319679944 | 0.283403  | NACA2 | ENSG00000196861 |
| 17 | 57036556 | 57036735 | 57036632 | 8  | 9   | 8  | 1.303387599 | 0.281715  | NACA2 | ENSG00000196861 |
| 17 | 57038460 | 57038917 | 57038608 | 9  | 20  | 21 | 1.119728438 | 0.357221  | NACA2 | ENSG00000196861 |
| 17 | 57039038 | 57039322 | 57039180 | 11 | 13  | 18 | 0.864351776 | 0.666373  | NACA2 | ENSG00000196861 |
| 17 | 57040420 | 57040605 | 57040512 | 8  | 8   | 8  | 1.173048839 | 0.36929   | NACA2 | ENSG00000196861 |
| 17 | 57041184 | 57041474 | 57041306 | 8  | 10  | 12 | 0.992579787 | 0.511743  | NACA2 | ENSG00000196861 |
| 17 | 57043826 | 57044417 | 57044059 | 11 | 25  | 45 | 0.663027605 | 0.957117  | NACA2 | ENSG00000196861 |
| 17 | 57047423 | 57047682 | 57047552 | 10 | 12  | 6  | 2.178519273 | 0.0416567 | NACA2 | ENSG00000196861 |
| 17 | 57047955 | 57048161 | 57048058 | 10 | 12  | 17 | 0.84720194  | 0.681997  | NACA2 | ENSG00000196861 |
| 17 | 57048178 | 57048535 | 57048356 | 9  | 14  | 29 | 0.58652442  | 0.960286  | NACA2 | ENSG00000196861 |
| 17 | 57048831 | 57049143 | 57048970 | 8  | 12  | 13 | 1.089259637 | 0.414883  | NACA2 | ENSG00000196861 |
| 17 | 57049154 | 57049341 | 57049228 | 8  | 8   | 14 | 0.703829304 | 0.807737  | NACA2 | ENSG00000196861 |
| 17 | 57050158 | 57050393 | 57050251 | 12 | 13  | 9  | 1.642268375 | 0.111397  | NACA2 | ENSG00000196861 |
| 17 | 57051039 | 57051329 | 57051184 | 10 | 14  | 12 | 1.353517892 | 0.211235  | NACA2 | ENSG00000196861 |
| 17 | 57051742 | 57051977 | 57051892 | 10 | 13  | 12 | 1.263283365 | 0.272203  | NACA2 | ENSG00000196861 |
| 17 | 57053440 | 57053722 | 57053580 | 8  | 11  | 27 | 0.502735217 | 0.982212  | NACA2 | ENSG00000196861 |
| 17 | 57053743 | 57055336 | 57054676 | 42 | 112 | 75 | 1.744138406 | 7.26E-05  | NACA2 | ENSG00000196861 |
| 17 | 57057748 | 57058049 | 57057898 | 10 | 13  | 9  | 1.642268375 | 0.111397  | NACA2 | ENSG00000196861 |
| 17 | 57059914 | 57060290 | 57060067 | 16 | 21  | 20 | 1.228908308 | 0.250141  | NACA2 | ENSG00000196861 |
| 17 | 57061424 | 57061735 | 57061583 | 12 | 17  | 12 | 1.62422147  | 0.088135  | NACA2 | ENSG00000196861 |
| 17 | 57061923 | 57062166 | 57061991 | 11 | 14  | 13 | 1.256838042 | 0.269506  | NACA2 | ENSG00000196861 |
| 17 | 57062480 | 57062805 | 57062635 | 14 | 18  | 21 | 1.013087634 | 0.486601  | NACA2 | ENSG00000196861 |
| 17 | 57063007 | 57063305 | 57063173 | 9  | 13  | 16 | 0.966040221 | 0.542489  | NACA2 | ENSG00000196861 |
| 17 | 57067926 | 57068677 | 57068312 | 41 | 76  | 65 | 1.368556979 | 0.0303851 | NACA2 | ENSG00000196861 |
| 17 | 57068893 | 57069106 | 57069035 | 8  | 8   | 15 | 0.659839972 | 0.851443  | NACA2 | ENSG00000196861 |

|    |          |          |          |    |    |    |             |           |       |                 |
|----|----------|----------|----------|----|----|----|-------------|-----------|-------|-----------------|
| 17 | 57073109 | 57073356 | 57073232 | 13 | 13 | 7  | 2.052835469 | 0.046392  | NACA2 | ENSG00000196861 |
| 17 | 57074195 | 57074619 | 57074440 | 9  | 18 | 24 | 0.891517118 | 0.651693  | NACA2 | ENSG00000196861 |
| 17 | 57076245 | 57076454 | 57076338 | 9  | 10 | 16 | 0.759031602 | 0.770272  | NACA2 | ENSG00000196861 |
| 17 | 57077172 | 57077523 | 57077347 | 10 | 15 | 25 | 0.721876209 | 0.854481  | NACA2 | ENSG00000196861 |
| 17 | 57079873 | 57080217 | 57080045 | 8  | 13 | 10 | 1.49297125  | 0.157311  | NACA2 | ENSG00000196861 |
| 17 | 57081790 | 57082095 | 57081942 | 9  | 12 | 18 | 0.802612364 | 0.736387  | NACA2 | ENSG00000196861 |
| 17 | 57082863 | 57083564 | 57083202 | 12 | 35 | 53 | 0.78203256  | 0.877338  | NACA2 | ENSG00000196861 |
| 17 | 57083839 | 57084575 | 57084228 | 15 | 38 | 46 | 0.973380952 | 0.552102  | NACA2 | ENSG00000196861 |
| 17 | 57084718 | 57084915 | 57084816 | 11 | 11 | 22 | 0.612025481 | 0.924393  | NACA2 | ENSG00000196861 |
| 17 | 57086836 | 57087193 | 57087014 | 11 | 17 | 24 | 0.844595164 | 0.713005  | NACA2 | ENSG00000196861 |
| 17 | 57087566 | 57087763 | 57087664 | 8  | 10 | 15 | 0.806471077 | 0.716145  | NACA2 | ENSG00000196861 |
| 17 | 57089853 | 57090140 | 57089996 | 10 | 15 | 6  | 2.68125449  | 0.0103552 | NACA2 | ENSG00000196861 |
| 17 | 57091068 | 57091696 | 57091517 | 13 | 32 | 38 | 0.992579787 | 0.515143  | NACA2 | ENSG00000196861 |
| 17 | 57092699 | 57093452 | 57093159 | 12 | 32 | 53 | 0.71686318  | 0.937832  | NACA2 | ENSG00000196861 |
| 17 | 57093791 | 57094026 | 57093918 | 10 | 11 | 17 | 0.78203256  | 0.752912  | NACA2 | ENSG00000196861 |
| 17 | 57094041 | 57094836 | 57094702 | 17 | 44 | 38 | 1.353517892 | 0.0827086 | NACA2 | ENSG00000196861 |
| 17 | 57094972 | 57095303 | 57095132 | 9  | 13 | 11 | 1.368556979 | 0.211388  | NACA2 | ENSG00000196861 |
| 17 | 57095447 | 57095886 | 57095661 | 14 | 25 | 38 | 0.78203256  | 0.83915   | NACA2 | ENSG00000196861 |
| 17 | 57095916 | 57096099 | 57096013 | 8  | 9  | 18 | 0.617394126 | 0.901359  | NACA2 | ENSG00000196861 |
| 17 | 57100936 | 57101355 | 57101111 | 9  | 16 | 42 | 0.463763495 | 0.997714  | NACA2 | ENSG00000196861 |
| 17 | 57101877 | 57102245 | 57102047 | 14 | 20 | 18 | 1.296527665 | 0.205827  | NACA2 | ENSG00000196861 |
| 17 | 57102743 | 57103310 | 57103001 | 11 | 24 | 27 | 1.047365035 | 0.435612  | NACA2 | ENSG00000196861 |
| 17 | 57104320 | 57104672 | 57104496 | 9  | 13 | 30 | 0.529763992 | 0.980654  | NACA2 | ENSG00000196861 |
| 17 | 57110535 | 57110819 | 57110677 | 10 | 14 | 22 | 0.765031852 | 0.797133  | NACA2 | ENSG00000196861 |
| 17 | 57113445 | 57113747 | 57113623 | 8  | 11 | 21 | 0.639844821 | 0.901936  | NACA2 | ENSG00000196861 |
| 17 | 57113885 | 57114219 | 57114052 | 8  | 13 | 23 | 0.68427849  | 0.878142  | NACA2 | ENSG00000196861 |
| 17 | 57115647 | 57116346 | 57116192 | 15 | 34 | 47 | 0.855348112 | 0.762682  | NACA2 | ENSG00000196861 |
| 17 | 57116417 | 57116676 | 57116529 | 9  | 12 | 15 | 0.953102182 | 0.555895  | NACA2 | ENSG00000196861 |
| 17 | 57117148 | 57117455 | 57117291 | 8  | 12 | 20 | 0.726173091 | 0.825666  | NACA2 | ENSG00000196861 |
| 17 | 57117544 | 57117894 | 57117717 | 11 | 16 | 21 | 0.90644683  | 0.624241  | NACA2 | ENSG00000196861 |
| 17 | 57118637 | 57119033 | 57118870 | 10 | 16 | 22 | 0.867036099 | 0.677498  | NACA2 | ENSG00000196861 |
| 17 | 57119473 | 57120479 | 57119875 | 13 | 45 | 63 | 0.843128853 | 0.814573  | NACA2 | ENSG00000196861 |
| 17 | 57121377 | 57121701 | 57121539 | 8  | 14 | 21 | 0.799806027 | 0.754204  | NACA2 | ENSG00000196861 |
| 17 | 57122130 | 57122433 | 57122257 | 11 | 15 | 17 | 1.042710079 | 0.454615  | NACA2 | ENSG00000196861 |

|    |          |          |          |    |     |     |             |            |       |                 |
|----|----------|----------|----------|----|-----|-----|-------------|------------|-------|-----------------|
| 17 | 57123799 | 57124294 | 57123959 | 9  | 16  | 20  | 0.949610965 | 0.567123   | NACA2 | ENSG00000196861 |
| 17 | 57124569 | 57124951 | 57124805 | 10 | 16  | 22  | 0.867036099 | 0.677498   | NACA2 | ENSG00000196861 |
| 17 | 57125263 | 57125676 | 57125437 | 10 | 19  | 22  | 1.020042469 | 0.477122   | NACA2 | ENSG00000196861 |
| 17 | 57126347 | 57126641 | 57126489 | 11 | 12  | 20  | 0.726173091 | 0.825666   | NACA2 | ENSG00000196861 |
| 17 | 57126698 | 57126955 | 57126835 | 11 | 13  | 15  | 1.026417734 | 0.475096   | NACA2 | ENSG00000196861 |
| 17 | 57127265 | 57127513 | 57127389 | 8  | 9   | 19  | 0.58652442  | 0.925417   | NACA2 | ENSG00000196861 |
| 17 | 57130428 | 57130694 | 57130561 | 11 | 14  | 14  | 1.173048839 | 0.332418   | NACA2 | ENSG00000196861 |
| 17 | 57131736 | 57132232 | 57132053 | 15 | 27  | 54  | 0.5971885   | 0.989      | NACA2 | ENSG00000196861 |
| 17 | 57132522 | 57133195 | 57133034 | 11 | 26  | 38  | 0.812110735 | 0.801731   | NACA2 | ENSG00000196861 |
| 17 | 57133575 | 57134507 | 57133867 | 18 | 54  | 37  | 1.697833846 | 0.00551563 | NACA2 | ENSG00000196861 |
| 17 | 57136206 | 57136419 | 57136353 | 8  | 11  | 8   | 1.564065119 | 0.151515   | NACA2 | ENSG00000196861 |
| 17 | 57138109 | 57138366 | 57138237 | 8  | 8   | 9   | 1.055743955 | 0.456865   | NACA2 | ENSG00000196861 |
| 17 | 57140558 | 57141485 | 57141017 | 12 | 40  | 45  | 1.045543531 | 0.419744   | NACA2 | ENSG00000196861 |
| 17 | 57142310 | 57142525 | 57142424 | 10 | 11  | 14  | 0.938439071 | 0.570297   | NACA2 | ENSG00000196861 |
| 17 | 57142628 | 57143027 | 57142827 | 9  | 18  | 13  | 1.591994853 | 0.0905191  | NACA2 | ENSG00000196861 |
| 17 | 57143045 | 57143335 | 57143206 | 12 | 14  | 17  | 0.977540699 | 0.52995    | NACA2 | ENSG00000196861 |
| 17 | 57148945 | 57149185 | 57149065 | 8  | 10  | 5   | 2.150589539 | 0.0575848  | NACA2 | ENSG00000196861 |
| 17 | 57149694 | 57149905 | 57149826 | 9  | 10  | 13  | 0.921681231 | 0.585856   | NACA2 | ENSG00000196861 |
| 17 | 57150025 | 57150690 | 57150471 | 20 | 40  | 41  | 1.145119105 | 0.269579   | NACA2 | ENSG00000196861 |
| 17 | 57151898 | 57152286 | 57152051 | 9  | 15  | 15  | 1.173048839 | 0.32719    | NACA2 | ENSG00000196861 |
| 17 | 57152621 | 57153058 | 57152894 | 12 | 18  | 20  | 1.061329902 | 0.42802    | NACA2 | ENSG00000196861 |
| 17 | 57153232 | 57153511 | 57153361 | 8  | 10  | 9   | 1.290353723 | 0.279648   | NACA2 | ENSG00000196861 |
| 17 | 57154404 | 57154658 | 57154520 | 8  | 11  | 16  | 0.828034475 | 0.698553   | NACA2 | ENSG00000196861 |
| 17 | 57155020 | 57156234 | 57155499 | 56 | 124 | 104 | 1.396486713 | 0.00569912 | NACA2 | ENSG00000196861 |
| 17 | 57156306 | 57156747 | 57156443 | 10 | 19  | 14  | 1.564065119 | 0.0925887  | NACA2 | ENSG00000196861 |
| 17 | 57156801 | 57157704 | 57157206 | 31 | 73  | 62  | 1.377866891 | 0.0303936  | NACA2 | ENSG00000196861 |
| 17 | 57157720 | 57158112 | 57157899 | 9  | 16  | 16  | 1.173048839 | 0.322157   | NACA2 | ENSG00000196861 |
| 17 | 57158466 | 57158794 | 57158630 | 14 | 18  | 25  | 0.857227998 | 0.700223   | NACA2 | ENSG00000196861 |
| 17 | 57159175 | 57159697 | 57159333 | 13 | 21  | 22  | 1.122046716 | 0.351409   | NACA2 | ENSG00000196861 |
| 17 | 57160506 | 57161166 | 57160871 | 19 | 45  | 51  | 1.03769705  | 0.429307   | BRIP1 | ENSG00000136492 |
| 17 | 57161573 | 57162225 | 57161997 | 17 | 36  | 37  | 1.142179133 | 0.283572   | BRIP1 | ENSG00000136492 |
| 17 | 57162464 | 57162783 | 57162635 | 12 | 17  | 26  | 0.78203256  | 0.796561   | BRIP1 | ENSG00000136492 |
| 17 | 57162985 | 57163892 | 57163650 | 15 | 50  | 72  | 0.819527271 | 0.865353   | BRIP1 | ENSG00000136492 |
| 17 | 57164289 | 57164901 | 57164649 | 9  | 22  | 20  | 1.284767776 | 0.203104   | BRIP1 | ENSG00000136492 |

|    |          |          |          |    |    |    |             |             |       |                 |
|----|----------|----------|----------|----|----|----|-------------|-------------|-------|-----------------|
| 17 | 57165222 | 57165549 | 57165385 | 11 | 17 | 16 | 1.242051712 | 0.261202    | BRIP1 | ENSG00000136492 |
| 17 | 57166370 | 57166950 | 57166725 | 11 | 23 | 30 | 0.908166843 | 0.642402    | BRIP1 | ENSG00000136492 |
| 17 | 57167128 | 57167820 | 57167489 | 12 | 34 | 32 | 1.244142708 | 0.184209    | BRIP1 | ENSG00000136492 |
| 17 | 57168221 | 57168515 | 57168348 | 8  | 12 | 11 | 1.270802909 | 0.274822    | BRIP1 | ENSG00000136492 |
| 17 | 57169122 | 57169430 | 57169286 | 8  | 12 | 13 | 1.089259637 | 0.414883    | BRIP1 | ENSG00000136492 |
| 17 | 57169854 | 57170490 | 57170166 | 40 | 65 | 39 | 1.935530585 | 0.000382859 | BRIP1 | ENSG00000136492 |
| 17 | 57170603 | 57170855 | 57170728 | 9  | 12 | 31 | 0.476551091 | 0.991445    | BRIP1 | ENSG00000136492 |
| 17 | 57171310 | 57171829 | 57171527 | 13 | 27 | 35 | 0.912371319 | 0.645679    | BRIP1 | ENSG00000136492 |
| 17 | 57171848 | 57172139 | 57171986 | 9  | 14 | 12 | 1.353517892 | 0.211235    | BRIP1 | ENSG00000136492 |
| 17 | 57172155 | 57172660 | 57172262 | 16 | 27 | 35 | 0.912371319 | 0.645679    | BRIP1 | ENSG00000136492 |
| 17 | 57173164 | 57173451 | 57173286 | 8  | 10 | 13 | 0.921681231 | 0.585856    | BRIP1 | ENSG00000136492 |
| 17 | 57174537 | 57174786 | 57174661 | 11 | 13 | 12 | 1.263283365 | 0.272203    | BRIP1 | ENSG00000136492 |
| 17 | 57174989 | 57175296 | 57175161 | 11 | 15 | 13 | 1.340627245 | 0.210788    | BRIP1 | ENSG00000136492 |
| 17 | 57176507 | 57177013 | 57176864 | 9  | 18 | 17 | 1.238218219 | 0.258417    | BRIP1 | ENSG00000136492 |
| 17 | 57177715 | 57177968 | 57177866 | 8  | 10 | 17 | 0.71686318  | 0.816679    | BRIP1 | ENSG00000136492 |
| 17 | 57179093 | 57179370 | 57179231 | 8  | 12 | 19 | 0.762481746 | 0.784291    | BRIP1 | ENSG00000136492 |
| 17 | 57182863 | 57183222 | 57183042 | 10 | 17 | 24 | 0.844595164 | 0.713005    | BRIP1 | ENSG00000136492 |
| 17 | 57183330 | 57183616 | 57183473 | 9  | 10 | 16 | 0.759031602 | 0.770272    | BRIP1 | ENSG00000136492 |
| 17 | 57184405 | 57184672 | 57184538 | 10 | 11 | 8  | 1.564065119 | 0.151515    | BRIP1 | ENSG00000136492 |
| 17 | 57184981 | 57185733 | 57185451 | 11 | 32 | 45 | 0.841535037 | 0.779206    | BRIP1 | ENSG00000136492 |
| 17 | 57185992 | 57186799 | 57186395 | 12 | 38 | 51 | 0.879786629 | 0.730619    | BRIP1 | ENSG00000136492 |
| 17 | 57187791 | 57188116 | 57187955 | 18 | 22 | 23 | 1.124171804 | 0.345816    | BRIP1 | ENSG00000136492 |
| 17 | 57188197 | 57188530 | 57188363 | 9  | 15 | 22 | 0.816033975 | 0.739972    | BRIP1 | ENSG00000136492 |
| 17 | 57188734 | 57189120 | 57188948 | 9  | 15 | 28 | 0.64719936  | 0.925559    | BRIP1 | ENSG00000136492 |
| 17 | 57189327 | 57189556 | 57189458 | 8  | 10 | 22 | 0.561023358 | 0.950736    | BRIP1 | ENSG00000136492 |
| 17 | 57196133 | 57196715 | 57196446 | 21 | 37 | 40 | 1.087215997 | 0.356783    | BRIP1 | ENSG00000136492 |
| 17 | 57197041 | 57197298 | 57197168 | 10 | 12 | 14 | 1.016642327 | 0.486402    | BRIP1 | ENSG00000136492 |
| 17 | 57198216 | 57199220 | 57198422 | 13 | 43 | 44 | 1.146981087 | 0.259856    | BRIP1 | ENSG00000136492 |
| 17 | 57199787 | 57200027 | 57199907 | 9  | 11 | 12 | 1.082814313 | 0.424156    | BRIP1 | ENSG00000136492 |
| 17 | 57201083 | 57201511 | 57201339 | 16 | 26 | 30 | 1.021687699 | 0.47008     | BRIP1 | ENSG00000136492 |
| 17 | 57201739 | 57202019 | 57201887 | 10 | 13 | 20 | 0.78203256  | 0.76897     | BRIP1 | ENSG00000136492 |
| 17 | 57202143 | 57202584 | 57202405 | 14 | 23 | 28 | 0.970799039 | 0.54603     | BRIP1 | ENSG00000136492 |
| 17 | 57202598 | 57202871 | 57202771 | 8  | 11 | 13 | 1.005470434 | 0.498567    | BRIP1 | ENSG00000136492 |
| 17 | 57204897 | 57205210 | 57205043 | 9  | 13 | 18 | 0.864351776 | 0.666373    | BRIP1 | ENSG00000136492 |

|    |          |          |          |    |    |    |             |           |       |                 |
|----|----------|----------|----------|----|----|----|-------------|-----------|-------|-----------------|
| 17 | 57206915 | 57207197 | 57207040 | 8  | 9  | 26 | 0.434462533 | 0.992078  | BRIP1 | ENSG00000136492 |
| 17 | 57208492 | 57209557 | 57208712 | 21 | 58 | 49 | 1.38419763  | 0.0448815 | BRIP1 | ENSG00000136492 |
| 17 | 57209838 | 57210338 | 57210190 | 10 | 23 | 20 | 1.340627245 | 0.162636  | BRIP1 | ENSG00000136492 |
| 17 | 57210419 | 57210694 | 57210548 | 8  | 11 | 9  | 1.407658607 | 0.210479  | BRIP1 | ENSG00000136492 |
| 17 | 57210817 | 57211134 | 57210975 | 15 | 17 | 13 | 1.508205651 | 0.12204   | BRIP1 | ENSG00000136492 |
| 17 | 57211743 | 57211971 | 57211903 | 8  | 11 | 13 | 1.005470434 | 0.498567  | BRIP1 | ENSG00000136492 |
| 17 | 57212019 | 57212476 | 57212333 | 13 | 23 | 28 | 0.970799039 | 0.54603   | BRIP1 | ENSG00000136492 |
| 17 | 57213123 | 57213460 | 57213283 | 10 | 15 | 27 | 0.670313622 | 0.906047  | BRIP1 | ENSG00000136492 |
| 17 | 57214414 | 57214617 | 57214515 | 9  | 9  | 9  | 1.173048839 | 0.362316  | BRIP1 | ENSG00000136492 |
| 17 | 57215020 | 57215258 | 57215130 | 12 | 12 | 16 | 0.897037348 | 0.621544  | BRIP1 | ENSG00000136492 |
| 17 | 57215356 | 57215761 | 57215495 | 11 | 16 | 14 | 1.329455351 | 0.210108  | BRIP1 | ENSG00000136492 |
| 17 | 57216528 | 57217135 | 57216967 | 11 | 27 | 31 | 1.026417734 | 0.462337  | BRIP1 | ENSG00000136492 |
| 17 | 57218182 | 57218392 | 57218287 | 8  | 9  | 19 | 0.58652442  | 0.925417  | BRIP1 | ENSG00000136492 |
| 17 | 57220026 | 57220258 | 57220142 | 13 | 14 | 9  | 1.759573259 | 0.0786014 | BRIP1 | ENSG00000136492 |
| 17 | 57220453 | 57220722 | 57220548 | 10 | 12 | 8  | 1.694403879 | 0.107291  | BRIP1 | ENSG00000136492 |
| 17 | 57221186 | 57221511 | 57221348 | 8  | 12 | 10 | 1.386330446 | 0.21117   | BRIP1 | ENSG00000136492 |
| 17 | 57222016 | 57222469 | 57222290 | 11 | 18 | 33 | 0.655527293 | 0.935584  | BRIP1 | ENSG00000136492 |
| 17 | 57222942 | 57223408 | 57223121 | 11 | 21 | 17 | 1.433726359 | 0.126962  | BRIP1 | ENSG00000136492 |
| 17 | 57223633 | 57223906 | 57223757 | 14 | 17 | 18 | 1.111309427 | 0.376188  | BRIP1 | ENSG00000136492 |
| 17 | 57224675 | 57224990 | 57224846 | 12 | 16 | 19 | 0.997091513 | 0.507069  | BRIP1 | ENSG00000136492 |
| 17 | 57225132 | 57225415 | 57225246 | 9  | 11 | 13 | 1.005470434 | 0.498567  | BRIP1 | ENSG00000136492 |
| 17 | 57228629 | 57228874 | 57228767 | 11 | 13 | 13 | 1.173048839 | 0.337862  | BRIP1 | ENSG00000136492 |
| 17 | 57229459 | 57229840 | 57229638 | 11 | 18 | 25 | 0.857227998 | 0.700223  | BRIP1 | ENSG00000136492 |
| 17 | 57230174 | 57230374 | 57230319 | 8  | 8  | 7  | 1.319679944 | 0.283403  | BRIP1 | ENSG00000136492 |
| 17 | 57230988 | 57231207 | 57231133 | 8  | 11 | 13 | 1.005470434 | 0.498567  | BRIP1 | ENSG00000136492 |
| 17 | 57231212 | 57231818 | 57231374 | 12 | 24 | 25 | 1.127931576 | 0.335219  | BRIP1 | ENSG00000136492 |
| 17 | 57232363 | 57232925 | 57232773 | 17 | 36 | 33 | 1.276553149 | 0.151977  | BRIP1 | ENSG00000136492 |
| 17 | 57233387 | 57233825 | 57233510 | 14 | 22 | 29 | 0.899337443 | 0.653223  | BRIP1 | ENSG00000136492 |
| 17 | 57233877 | 57234093 | 57233985 | 9  | 11 | 15 | 0.879786629 | 0.637414  | BRIP1 | ENSG00000136492 |
| 17 | 57234194 | 57234486 | 57234327 | 13 | 16 | 14 | 1.329455351 | 0.210108  | BRIP1 | ENSG00000136492 |
| 17 | 57235106 | 57235692 | 57235287 | 9  | 23 | 16 | 1.65606895  | 0.0532464 | BRIP1 | ENSG00000136492 |
| 17 | 57237514 | 57237995 | 57237676 | 10 | 19 | 27 | 0.837892028 | 0.732314  | BRIP1 | ENSG00000136492 |
| 17 | 57238120 | 57238772 | 57238299 | 16 | 35 | 40 | 1.029994103 | 0.450668  | BRIP1 | ENSG00000136492 |
| 17 | 57240547 | 57240880 | 57240713 | 11 | 17 | 21 | 0.959767232 | 0.55532   | BRIP1 | ENSG00000136492 |

|    |          |          |          |    |     |    |             |           |       |                 |
|----|----------|----------|----------|----|-----|----|-------------|-----------|-------|-----------------|
| 17 | 57241171 | 57241396 | 57241315 | 9  | 9   | 17 | 0.6516938   | 0.871116  | BRIP1 | ENSG00000136492 |
| 17 | 57241795 | 57242377 | 57242277 | 15 | 30  | 41 | 0.865821762 | 0.732444  | BRIP1 | ENSG00000136492 |
| 17 | 57243172 | 57243550 | 57243351 | 8  | 15  | 13 | 1.340627245 | 0.210788  | BRIP1 | ENSG00000136492 |
| 17 | 57244495 | 57244784 | 57244609 | 8  | 11  | 15 | 0.879786629 | 0.637414  | BRIP1 | ENSG00000136492 |
| 17 | 57245266 | 57245485 | 57245433 | 8  | 10  | 11 | 1.075294769 | 0.434143  | BRIP1 | ENSG00000136492 |
| 17 | 57245683 | 57246053 | 57245875 | 8  | 14  | 14 | 1.173048839 | 0.332418  | BRIP1 | ENSG00000136492 |
| 17 | 57248062 | 57248496 | 57248223 | 11 | 21  | 42 | 0.600164522 | 0.977922  | BRIP1 | ENSG00000136492 |
| 17 | 57248558 | 57248760 | 57248681 | 9  | 11  | 21 | 0.639844821 | 0.901936  | BRIP1 | ENSG00000136492 |
| 17 | 57249983 | 57250395 | 57250203 | 12 | 21  | 22 | 1.122046716 | 0.351409  | BRIP1 | ENSG00000136492 |
| 17 | 57250489 | 57250872 | 57250701 | 9  | 16  | 16 | 1.173048839 | 0.322157  | BRIP1 | ENSG00000136492 |
| 17 | 57252216 | 57252410 | 57252346 | 9  | 9   | 12 | 0.902345261 | 0.602772  | BRIP1 | ENSG00000136492 |
| 17 | 57252559 | 57252742 | 57252647 | 8  | 9   | 17 | 0.6516938   | 0.871116  | BRIP1 | ENSG00000136492 |
| 17 | 57254500 | 57254977 | 57254663 | 11 | 21  | 30 | 0.832486273 | 0.749627  | BRIP1 | ENSG00000136492 |
| 17 | 57255110 | 57255340 | 57255195 | 10 | 10  | 16 | 0.759031602 | 0.770272  | BRIP1 | ENSG00000136492 |
| 17 | 57255447 | 57255685 | 57255550 | 9  | 10  | 12 | 0.992579787 | 0.511743  | BRIP1 | ENSG00000136492 |
| 17 | 57263270 | 57263521 | 57263405 | 8  | 9   | 12 | 0.902345261 | 0.602772  | BRIP1 | ENSG00000136492 |
| 17 | 57263845 | 57264039 | 57263987 | 8  | 9   | 11 | 0.977540699 | 0.526123  | BRIP1 | ENSG00000136492 |
| 17 | 57264725 | 57264929 | 57264778 | 11 | 13  | 16 | 0.966040221 | 0.542489  | BRIP1 | ENSG00000136492 |
| 17 | 57265146 | 57265664 | 57265375 | 10 | 21  | 28 | 0.889899119 | 0.664396  | BRIP1 | ENSG00000136492 |
| 17 | 57265701 | 57267201 | 57265893 | 49 | 115 | 72 | 1.864022813 | 1.11E-05  | BRIP1 | ENSG00000136492 |
| 17 | 57267560 | 57268129 | 57267966 | 12 | 25  | 26 | 1.129602586 | 0.330188  | BRIP1 | ENSG00000136492 |
| 17 | 57268504 | 57268905 | 57268736 | 8  | 15  | 12 | 1.443752418 | 0.160732  | BRIP1 | ENSG00000136492 |
| 17 | 57268961 | 57269734 | 57269538 | 40 | 74  | 63 | 1.374666609 | 0.0303975 | BRIP1 | ENSG00000136492 |
| 17 | 57269781 | 57270118 | 57269949 | 10 | 15  | 22 | 0.816033975 | 0.739972  | BRIP1 | ENSG00000136492 |
| 17 | 57272946 | 57273303 | 57273174 | 8  | 12  | 14 | 1.016642327 | 0.486402  | BRIP1 | ENSG00000136492 |
| 17 | 57273850 | 57274038 | 57273944 | 8  | 9   | 4  | 2.346097679 | 0.050148  | BRIP1 | ENSG00000136492 |
| 17 | 57275170 | 57275448 | 57275334 | 9  | 11  | 16 | 0.828034475 | 0.698553  | BRIP1 | ENSG00000136492 |
| 17 | 57275453 | 57275659 | 57275545 | 8  | 10  | 14 | 0.860235815 | 0.65444   | BRIP1 | ENSG00000136492 |
| 17 | 57276787 | 57276990 | 57276875 | 8  | 9   | 28 | 0.4044996   | 0.99613   | BRIP1 | ENSG00000136492 |
| 17 | 57277713 | 57277989 | 57277846 | 11 | 13  | 19 | 0.821134188 | 0.720637  | BRIP1 | ENSG00000136492 |
| 17 | 57278329 | 57278686 | 57278508 | 10 | 14  | 8  | 1.955081399 | 0.0506438 | BRIP1 | ENSG00000136492 |
| 17 | 57279009 | 57279426 | 57279186 | 11 | 18  | 31 | 0.696497748 | 0.900299  | BRIP1 | ENSG00000136492 |
| 17 | 57279873 | 57280179 | 57280010 | 9  | 12  | 15 | 0.953102182 | 0.555895  | BRIP1 | ENSG00000136492 |
| 17 | 57280201 | 57280485 | 57280380 | 12 | 16  | 15 | 1.246364392 | 0.263987  | BRIP1 | ENSG00000136492 |

|    |          |          |          |    |     |     |             |            |       |                 |
|----|----------|----------|----------|----|-----|-----|-------------|------------|-------|-----------------|
| 17 | 57280494 | 57280760 | 57280627 | 10 | 14  | 14  | 1.173048839 | 0.332418   | BRIP1 | ENSG00000136492 |
| 17 | 57281074 | 57281333 | 57281203 | 15 | 15  | 7   | 2.346097679 | 0.0195693  | BRIP1 | ENSG00000136492 |
| 17 | 57281797 | 57282179 | 57281976 | 15 | 22  | 20  | 1.284767776 | 0.203104   | BRIP1 | ENSG00000136492 |
| 17 | 57283526 | 57283800 | 57283663 | 9  | 12  | 22  | 0.663027605 | 0.890045   | BRIP1 | ENSG00000136492 |
| 17 | 57283813 | 57284210 | 57284031 | 15 | 23  | 39  | 0.703829304 | 0.918198   | BRIP1 | ENSG00000136492 |
| 17 | 57285393 | 57285614 | 57285503 | 10 | 11  | 13  | 1.005470434 | 0.498567   | BRIP1 | ENSG00000136492 |
| 17 | 57286179 | 57286475 | 57286327 | 9  | 11  | 28  | 0.48539952  | 0.987025   | BRIP1 | ENSG00000136492 |
| 17 | 57287024 | 57287395 | 57287242 | 8  | 14  | 22  | 0.765031852 | 0.797133   | BRIP1 | ENSG00000136492 |
| 17 | 57287737 | 57288101 | 57287923 | 8  | 14  | 25  | 0.676758946 | 0.893106   | BRIP1 | ENSG00000136492 |
| 17 | 57289072 | 57289712 | 57289251 | 14 | 36  | 18  | 2.284358266 | 0.00119913 | BRIP1 | ENSG00000136492 |
| 17 | 57292414 | 57292649 | 57292531 | 12 | 13  | 12  | 1.263283365 | 0.272203   | BRIP1 | ENSG00000136492 |
| 17 | 57293636 | 57294891 | 57294267 | 14 | 66  | 88  | 0.88308171  | 0.78145    | BRIP1 | ENSG00000136492 |
| 17 | 57294897 | 57296906 | 57295847 | 59 | 279 | 163 | 2.002766311 | 2.69E-13   | BRIP1 | ENSG00000136492 |
| 17 | 57301621 | 57302191 | 57301989 | 21 | 35  | 31  | 1.319679944 | 0.126399   |       | ENSG00000202361 |
| 17 | 57302376 | 57302810 | 57302631 | 21 | 30  | 28  | 1.253948759 | 0.190688   |       | ENSG00000202361 |
| 17 | 57302906 | 57303113 | 57302962 | 11 | 12  | 13  | 1.089259637 | 0.414883   |       | ENSG00000202361 |
| 17 | 57304438 | 57304678 | 57304558 | 8  | 11  | 17  | 0.78203256  | 0.752912   |       | ENSG00000202361 |
| 17 | 57304792 | 57305036 | 57304884 | 11 | 13  | 7   | 2.052835469 | 0.046392   |       | ENSG00000202361 |
| 17 | 57306236 | 57306495 | 57306365 | 8  | 10  | 21  | 0.58652442  | 0.934469   |       | ENSG00000202361 |
| 17 | 57308008 | 57308200 | 57308024 | 8  | 9   | 1   | 5.865244197 | 0.00272497 |       | ENSG00000202361 |
| 17 | 57308781 | 57308985 | 57308882 | 8  | 10  | 10  | 1.173048839 | 0.355733   |       | ENSG00000202361 |
| 17 | 57309063 | 57309478 | 57309270 | 8  | 17  | 22  | 0.918038222 | 0.611544   |       | ENSG00000202361 |
| 17 | 57309513 | 57309815 | 57309664 | 15 | 18  | 29  | 0.742930932 | 0.850763   |       | ENSG00000202361 |
| 17 | 57309982 | 57310208 | 57310073 | 9  | 11  | 24  | 0.563063443 | 0.956421   |       | ENSG00000202361 |
| 17 | 57311258 | 57311708 | 57311419 | 12 | 22  | 31  | 0.843128853 | 0.73853    |       | ENSG00000202361 |
| 17 | 57312410 | 57312615 | 57312506 | 9  | 10  | 3   | 3.225884308 | 0.0139466  |       | ENSG00000202361 |
| 17 | 57313248 | 57313576 | 57313421 | 14 | 19  | 20  | 1.117189371 | 0.363272   |       | ENSG00000202361 |
| 17 | 57313696 | 57314162 | 57313957 | 11 | 25  | 21  | 1.386330446 | 0.128722   |       | ENSG00000202361 |
| 17 | 57315259 | 57315601 | 57315432 | 12 | 16  | 21  | 0.90644683  | 0.624241   |       | ENSG00000202361 |
| 17 | 57315927 | 57316491 | 57316349 | 9  | 22  | 21  | 1.226369241 | 0.247426   |       | ENSG00000202361 |
| 17 | 57316908 | 57317480 | 57317345 | 10 | 22  | 47  | 0.562085902 | 0.990785   |       | ENSG00000202361 |
| 17 | 57318366 | 57318866 | 57318523 | 15 | 26  | 25  | 1.218166102 | 0.236859   |       | ENSG00000202361 |
| 17 | 57321945 | 57322380 | 57322201 | 11 | 19  | 48  | 0.478795445 | 0.998258   |       | ENSG00000202361 |
| 17 | 57322392 | 57322589 | 57322457 | 9  | 11  | 11  | 1.173048839 | 0.349489   |       | ENSG00000202361 |

|    |          |          |          |    |    |    |             |             |         |                 |
|----|----------|----------|----------|----|----|----|-------------|-------------|---------|-----------------|
| 17 | 57323617 | 57324003 | 57323824 | 12 | 19 | 19 | 1.173048839 | 0.308076    |         | ENSG00000202361 |
| 17 | 57324379 | 57324673 | 57324548 | 10 | 14 | 19 | 0.879786629 | 0.651591    |         | ENSG00000202361 |
| 17 | 57325906 | 57326236 | 57326071 | 8  | 14 | 19 | 0.879786629 | 0.651591    |         | ENSG00000202361 |
| 17 | 57326546 | 57326736 | 57326694 | 8  | 8  | 9  | 1.055743955 | 0.456865    |         | ENSG00000202361 |
| 17 | 57326798 | 57327040 | 57326944 | 9  | 11 | 16 | 0.828034475 | 0.698553    |         | ENSG00000202361 |
| 17 | 57329466 | 57329804 | 57329635 | 10 | 16 | 21 | 0.90644683  | 0.624241    |         | ENSG00000202361 |
| 17 | 57329809 | 57330230 | 57329994 | 10 | 18 | 28 | 0.76854924  | 0.819816    |         | ENSG00000202361 |
| 17 | 57332135 | 57332478 | 57332286 | 12 | 17 | 36 | 0.570672408 | 0.978722    |         | ENSG00000202361 |
| 17 | 57332504 | 57332922 | 57332683 | 9  | 17 | 26 | 0.78203256  | 0.796561    | INTS2   | ENSG00000108506 |
| 17 | 57333906 | 57334525 | 57334346 | 11 | 27 | 25 | 1.263283365 | 0.195501    | INTS2   | ENSG00000108506 |
| 17 | 57334534 | 57334886 | 57334731 | 9  | 14 | 23 | 0.733155525 | 0.834412    | INTS2   | ENSG00000108506 |
| 17 | 57335371 | 57335745 | 57335539 | 13 | 17 | 21 | 0.959767232 | 0.55532     | INTS2   | ENSG00000108506 |
| 17 | 57336296 | 57336482 | 57336389 | 11 | 11 | 13 | 1.005470434 | 0.498567    | INTS2   | ENSG00000108506 |
| 17 | 57339431 | 57339888 | 57339709 | 12 | 23 | 29 | 0.938439071 | 0.595359    | INTS2   | ENSG00000108506 |
| 17 | 57340563 | 57340829 | 57340651 | 13 | 16 | 18 | 1.049570014 | 0.445264    | INTS2   | ENSG00000108506 |
| 17 | 57340884 | 57341131 | 57341007 | 8  | 11 | 15 | 0.879786629 | 0.637414    | INTS2   | ENSG00000108506 |
| 17 | 57359817 | 57360231 | 57360028 | 17 | 26 | 9  | 3.167231866 | 0.000393236 | INTS2   | ENSG00000108506 |
| 17 | 57436631 | 57436874 | 57436778 | 9  | 13 | 22 | 0.714029728 | 0.84749     |         | ENSG00000211085 |
| 17 | 57450021 | 57450582 | 57450388 | 11 | 24 | 16 | 1.725071823 | 0.0388966   |         | ENSG00000221302 |
| 17 | 57498100 | 57498404 | 57498252 | 16 | 19 | 6  | 3.351568112 | 0.00134187  | MED13   | ENSG00000108510 |
| 17 | 57541520 | 57542003 | 57541774 | 16 | 26 | 8  | 3.519146518 | 0.000175368 |         | ENSG00000207123 |
| 17 | 57542965 | 57543724 | 57543360 | 16 | 38 | 39 | 1.143722618 | 0.276418    |         | ENSG00000207123 |
| 17 | 57543781 | 57544222 | 57544043 | 12 | 22 | 29 | 0.899337443 | 0.653223    |         | ENSG00000207123 |
| 17 | 57544328 | 57544728 | 57544507 | 11 | 18 | 31 | 0.696497748 | 0.900299    |         | ENSG00000207123 |
| 17 | 57545257 | 57545439 | 57545348 | 8  | 8  | 5  | 1.759573259 | 0.13508     |         | ENSG00000207123 |
| 17 | 57562623 | 57563573 | 57563113 | 15 | 44 | 41 | 1.256838042 | 0.143408    |         | ENSG00000207123 |
| 17 | 57568185 | 57568572 | 57568411 | 10 | 16 | 20 | 0.949610965 | 0.567123    |         | ENSG00000207123 |
| 17 | 57575730 | 57575992 | 57575840 | 11 | 13 | 1  | 8.211341875 | 0.000163445 |         | ENSG00000207123 |
| 17 | 57576179 | 57576670 | 57576358 | 77 | 85 | 0  | 100.8822002 | 1.03E-29    |         | ENSG00000207123 |
| 17 | 57582647 | 57582891 | 57582769 | 9  | 10 | 5  | 2.150589539 | 0.0575848   |         | ENSG00000207123 |
| 17 | 57595975 | 57596293 | 57596134 | 23 | 27 | 7  | 4.105670938 | 4.08E-05    |         | ENSG00000207123 |
| 17 | 57600807 | 57601106 | 57600963 | 10 | 11 | 2  | 4.692195357 | 0.00272444  |         | ENSG00000207123 |
| 17 | 57854766 | 57855099 | 57854932 | 9  | 13 | 3  | 4.105670938 | 0.00243034  | METTL2A | ENSG00000087995 |
| 17 | 57901866 | 57902123 | 57901994 | 10 | 11 | 1  | 7.038293036 | 0.000674435 | TLK2    | ENSG00000146872 |



|    |          |          |          |    |    |    |             |             |        |                  |
|----|----------|----------|----------|----|----|----|-------------|-------------|--------|------------------|
| 17 | 58056000 | 58056195 | 58056130 | 8  | 9  | 2  | 3.910162798 | 0.00955088  | MRC2   | ENSG00000011028  |
| 17 | 58103500 | 58103788 | 58103635 | 14 | 16 | 7  | 2.492728784 | 0.0124193   |        | ENSG000000207382 |
| 17 | 58135590 | 58135817 | 58135647 | 8  | 12 | 4  | 3.049926982 | 0.0108184   |        | ENSG000000199697 |
| 17 | 58147700 | 58148208 | 58147942 | 65 | 91 | 6  | 15.41721332 | 2.69E-24    |        | ENSG000000199697 |
| 17 | 58149271 | 58149919 | 58149731 | 11 | 31 | 16 | 2.208091933 | 0.00315316  |        | ENSG000000199697 |
| 17 | 58157002 | 58157537 | 58157194 | 16 | 27 | 9  | 3.28453675  | 0.000236424 |        | ENSG000000199697 |
| 17 | 58163343 | 58163721 | 58163522 | 62 | 69 | 3  | 20.52835469 | 2.58E-20    |        | ENSG000000199697 |
| 17 | 58168883 | 58169076 | 58168979 | 9  | 9  | 2  | 3.910162798 | 0.00955088  |        | ENSG000000199697 |
| 17 | 58231708 | 58232052 | 58231880 | 16 | 22 | 8  | 2.997791478 | 0.00137524  | 10-Mar | ENSG000000173838 |
| 17 | 58252301 | 58252575 | 58252433 | 11 | 14 | 11 | 1.466311049 | 0.15926     | 10-Mar | ENSG000000173838 |
| 17 | 58291852 | 58292342 | 58292163 | 27 | 40 | 22 | 2.091087061 | 0.00178999  | 10-Mar | ENSG000000173838 |
| 17 | 58381012 | 58381619 | 58381347 | 30 | 46 | 10 | 5.012117768 | 1.58E-08    |        | ENSG000000207552 |
| 17 | 58394306 | 58394789 | 58394510 | 13 | 27 | 46 | 0.698837606 | 0.937621    |        | ENSG000000207552 |
| 17 | 58394803 | 58395009 | 58394888 | 8  | 8  | 3  | 2.639359888 | 0.0415794   |        | ENSG000000207552 |
| 17 | 58396228 | 58396499 | 58396321 | 12 | 15 | 14 | 1.251252095 | 0.26676     |        | ENSG000000207552 |
| 17 | 58396507 | 58397179 | 58396686 | 14 | 34 | 28 | 1.415748599 | 0.0821128   |        | ENSG000000207552 |
| 17 | 58399514 | 58399995 | 58399705 | 20 | 34 | 12 | 3.158208414 | 7.02E-05    |        | ENSG000000207552 |
| 17 | 58433030 | 58433397 | 58433218 | 10 | 17 | 26 | 0.78203256  | 0.796561    | TANC2  | ENSG000000170921 |
| 17 | 58543991 | 58544236 | 58544075 | 8  | 10 | 2  | 4.301179077 | 0.00512919  | TANC2  | ENSG000000170921 |
| 17 | 58557760 | 58557984 | 58557872 | 8  | 9  | 2  | 3.910162798 | 0.00955088  | TANC2  | ENSG000000170921 |
| 17 | 58604437 | 58604629 | 58604536 | 8  | 8  | 5  | 1.759573259 | 0.13508     | TANC2  | ENSG000000170921 |
| 17 | 58613090 | 58613707 | 58613309 | 60 | 84 | 3  | 24.92728784 | 3.97E-25    | TANC2  | ENSG000000170921 |
| 17 | 58836827 | 58837056 | 58836989 | 10 | 11 | 3  | 3.519146518 | 0.00788869  | CYB561 | ENSG00000008283  |
| 17 | 58837863 | 58838097 | 58837980 | 8  | 12 | 2  | 5.083211637 | 0.00143337  | CYB561 | ENSG00000008283  |
| 17 | 58856534 | 58856810 | 58856669 | 13 | 15 | 5  | 3.128130238 | 0.00492422  | CYB561 | ENSG00000008283  |
| 17 | 58864304 | 58864619 | 58864474 | 17 | 22 | 2  | 8.993374435 | 1.66E-06    | CYB561 | ENSG00000008283  |
| 17 | 58866476 | 58866670 | 58866573 | 8  | 10 | 6  | 1.843362462 | 0.0964212   | CYB561 | ENSG00000008283  |
| 17 | 58877772 | 58878054 | 58877922 | 11 | 14 | 2  | 5.865244197 | 0.000387308 | CYB561 | ENSG00000008283  |
| 17 | 58878145 | 58878595 | 58878306 | 10 | 17 | 10 | 1.919534464 | 0.0400548   | CYB561 | ENSG00000008283  |
| 17 | 58954176 | 58954366 | 58954271 | 8  | 8  | 2  | 3.519146518 | 0.017558    | KCNH6  | ENSG000000173826 |
| 17 | 58981180 | 58981404 | 58981334 | 9  | 11 | 4  | 2.815317214 | 0.0183428   | WDR68  | ENSG000000136485 |
| 17 | 58981545 | 58981778 | 58981687 | 10 | 13 | 14 | 1.094845583 | 0.406217    | WDR68  | ENSG000000136485 |
| 17 | 59031814 | 59032118 | 59031962 | 17 | 20 | 13 | 1.759573259 | 0.0475388   | CCDC44 | ENSG000000136463 |
| 17 | 59043443 | 59043725 | 59043571 | 9  | 10 | 2  | 4.301179077 | 0.00512919  | MAP3K3 | ENSG000000198909 |

|    |          |          |          |    |    |    |             |             |         |                 |
|----|----------|----------|----------|----|----|----|-------------|-------------|---------|-----------------|
| 17 | 59052784 | 59053291 | 59053005 | 13 | 25 | 11 | 2.541605819 | 0.00248721  | MAP3K3  | ENSG00000198909 |
| 17 | 59172609 | 59173288 | 59172919 | 14 | 32 | 8  | 4.301179077 | 6.43E-06    | STRADA  | ENSG00000125695 |
| 17 | 59183864 | 59184120 | 59183992 | 19 | 19 | 6  | 3.351568112 | 0.00134187  | STRADA  | ENSG00000125695 |
| 17 | 59201334 | 59201657 | 59201495 | 14 | 19 | 7  | 2.932622098 | 0.00293566  | CCDC47  | ENSG00000108588 |
| 17 | 59204980 | 59205497 | 59205133 | 9  | 18 | 5  | 3.714654658 | 0.000961539 | DDX42   | ENSG00000198231 |
| 17 | 59223508 | 59223815 | 59223668 | 12 | 16 | 5  | 3.323638378 | 0.00288759  | DDX42   | ENSG00000198231 |
| 17 | 59258550 | 59258834 | 59258689 | 8  | 11 | 5  | 2.346097679 | 0.0364013   | PSMC5   | ENSG00000087191 |
| 17 | 59260330 | 59260537 | 59260433 | 8  | 9  | 1  | 5.865244197 | 0.00272497  | PSMC5   | ENSG00000087191 |
| 17 | 59269631 | 59270134 | 59269810 | 20 | 31 | 9  | 3.753756286 | 2.87E-05    | SMARCD2 | ENSG00000108604 |
| 17 | 59270437 | 59270633 | 59270525 | 8  | 9  | 3  | 2.932622098 | 0.0242899   | SMARCD2 | ENSG00000108604 |
| 17 | 59272830 | 59273026 | 59272917 | 8  | 8  | 11 | 0.879786629 | 0.621301    | SMARCD2 | ENSG00000108604 |
| 17 | 59273737 | 59274114 | 59273909 | 37 | 43 | 10 | 4.692195357 | 9.10E-08    | SMARCD2 | ENSG00000108604 |
| 17 | 59513082 | 59513427 | 59513254 | 8  | 14 | 2  | 5.865244197 | 0.000387308 | ERN1    | ENSG00000178607 |
| 17 | 59576629 | 59577274 | 59577095 | 14 | 34 | 10 | 3.732428125 | 1.39E-05    |         | ENSG00000199753 |
| 17 | 59578990 | 59579220 | 59579119 | 8  | 9  | 7  | 1.466311049 | 0.20706     |         | ENSG00000221462 |
| 17 | 59590599 | 59590805 | 59590716 | 8  | 9  | 3  | 2.932622098 | 0.0242899   |         | ENSG00000221462 |
| 17 | 59641804 | 59642074 | 59641962 | 15 | 15 | 0  | 18.76878143 | 4.04E-06    | TEX2    | ENSG00000136478 |
| 17 | 59693257 | 59693436 | 59693366 | 8  | 8  | 6  | 1.508205651 | 0.203852    | TEX2    | ENSG00000136478 |
| 17 | 59694460 | 59694686 | 59694582 | 12 | 14 | 8  | 1.955081399 | 0.0506438   | TEX2    | ENSG00000136478 |
| 17 | 59738077 | 59738312 | 59738223 | 12 | 12 | 3  | 3.812408728 | 0.004404    |         | ENSG00000220588 |
| 17 | 59742159 | 59742372 | 59742265 | 8  | 10 | 7  | 1.612942154 | 0.147335    |         | ENSG00000220588 |
| 17 | 59743036 | 59743378 | 59743207 | 9  | 15 | 18 | 0.987830602 | 0.518173    |         | ENSG00000220588 |
| 17 | 59743916 | 59744429 | 59744087 | 13 | 22 | 17 | 1.498895739 | 0.097269    |         | ENSG00000220588 |
| 17 | 59746263 | 59746688 | 59746509 | 9  | 14 | 18 | 0.926091189 | 0.59273     |         | ENSG00000220588 |
| 17 | 59748383 | 59748577 | 59748480 | 8  | 9  | 8  | 1.303387599 | 0.281715    |         | ENSG00000220588 |
| 17 | 59750434 | 59750834 | 59750604 | 8  | 14 | 15 | 1.099733287 | 0.398076    |         | ENSG00000220588 |
| 17 | 59751805 | 59751989 | 59751897 | 8  | 8  | 21 | 0.479883616 | 0.975807    |         | ENSG00000220588 |
| 17 | 59752061 | 59752549 | 59752359 | 36 | 61 | 46 | 1.547426128 | 0.0114581   |         | ENSG00000220588 |
| 17 | 59754358 | 59754557 | 59754430 | 8  | 9  | 13 | 0.837892028 | 0.672794    |         | ENSG00000220588 |
| 17 | 59758083 | 59758447 | 59758262 | 9  | 15 | 16 | 1.104045966 | 0.390393    |         | ENSG00000220588 |
| 17 | 59759401 | 59759724 | 59759558 | 12 | 17 | 21 | 0.959767232 | 0.55532     |         | ENSG00000220588 |
| 17 | 59760095 | 59760328 | 59760211 | 10 | 12 | 14 | 1.016642327 | 0.486402    |         | ENSG00000220588 |
| 17 | 59762559 | 59762796 | 59762674 | 8  | 11 | 9  | 1.407658607 | 0.210479    |         | ENSG00000220588 |
| 17 | 59762799 | 59763068 | 59762889 | 12 | 16 | 9  | 1.994183027 | 0.0370915   |         | ENSG00000220588 |

|    |          |          |          |     |     |    |             |             |        |                 |
|----|----------|----------|----------|-----|-----|----|-------------|-------------|--------|-----------------|
| 17 | 59763187 | 59763567 | 59763366 | 9   | 18  | 19 | 1.114396397 | 0.369586    |        | ENSG00000220588 |
| 17 | 59765057 | 59765519 | 59765369 | 15  | 22  | 28 | 0.930349079 | 0.605811    |        | ENSG00000220588 |
| 17 | 59766520 | 59766833 | 59766694 | 12  | 16  | 22 | 0.867036099 | 0.677498    |        | ENSG00000220588 |
| 17 | 59767627 | 59767813 | 59767696 | 8   | 9   | 10 | 1.066408036 | 0.444985    | PECAM1 | ENSG00000198802 |
| 17 | 59768148 | 59769051 | 59768771 | 12  | 40  | 49 | 0.961900048 | 0.57571     | PECAM1 | ENSG00000198802 |
| 17 | 59770135 | 59770824 | 59770479 | 11  | 26  | 35 | 0.879786629 | 0.696575    | PECAM1 | ENSG00000198802 |
| 17 | 59771315 | 59771637 | 59771476 | 10  | 14  | 21 | 0.799806027 | 0.754204    | PECAM1 | ENSG00000198802 |
| 17 | 59771704 | 59771906 | 59771805 | 8   | 9   | 7  | 1.466311049 | 0.20706     | PECAM1 | ENSG00000198802 |
| 17 | 59774463 | 59774815 | 59774639 | 8   | 14  | 17 | 0.977540699 | 0.52995     | PECAM1 | ENSG00000198802 |
| 17 | 59774839 | 59775073 | 59774956 | 8   | 10  | 12 | 0.992579787 | 0.511743    | PECAM1 | ENSG00000198802 |
| 17 | 59775241 | 59775580 | 59775410 | 10  | 15  | 16 | 1.104045966 | 0.390393    | PECAM1 | ENSG00000198802 |
| 17 | 59775674 | 59776252 | 59775890 | 10  | 25  | 33 | 0.897037348 | 0.665614    | PECAM1 | ENSG00000198802 |
| 17 | 59893118 | 59893299 | 59893152 | 8   | 8   | 5  | 1.759573259 | 0.13508     |        | ENSG00000222478 |
| 17 | 59923529 | 59923932 | 59923730 | 11  | 19  | 10 | 2.132816071 | 0.01835     | POLG2  | ENSG00000136480 |
| 17 | 59932720 | 59933767 | 59933588 | 15  | 47  | 11 | 4.692195357 | 2.58E-08    | DDX5   | ENSG00000108654 |
| 17 | 59933898 | 59934132 | 59933982 | 12  | 15  | 5  | 3.128130238 | 0.00492422  | DDX5   | ENSG00000108654 |
| 17 | 59934257 | 59934472 | 59934349 | 10  | 12  | 3  | 3.812408728 | 0.004404    | DDX5   | ENSG00000108654 |
| 17 | 60075783 | 60076057 | 60075903 | 9   | 11  | 2  | 4.692195357 | 0.00272444  | SMURF2 | ENSG00000108854 |
| 17 | 60089184 | 60089445 | 60089314 | 8   | 11  | 3  | 3.519146518 | 0.00788869  | SMURF2 | ENSG00000108854 |
| 17 | 60201014 | 60201380 | 60201140 | 12  | 17  | 2  | 7.038293036 | 5.19E-05    |        | ENSG00000214176 |
| 17 | 60388529 | 60388708 | 60388618 | 8   | 9   | 3  | 2.932622098 | 0.0242899   |        | ENSG00000204399 |
| 17 | 60401254 | 60402214 | 60401591 | 24  | 71  | 6  | 12.0656452  | 3.68E-18    |        | ENSG00000204399 |
| 17 | 60411775 | 60412164 | 60411937 | 16  | 23  | 2  | 9.384390715 | 8.25E-07    |        | ENSG00000214174 |
| 17 | 60478182 | 60478361 | 60478291 | 8   | 8   | 0  | 10.55743955 | 0.000925496 | GNA13  | ENSG00000120063 |
| 17 | 60485171 | 60485595 | 60485394 | 109 | 131 | 6  | 22.12034954 | 7.10E-37    | GNA13  | ENSG00000120063 |
| 17 | 60489235 | 60489480 | 60489341 | 8   | 8   | 2  | 3.519146518 | 0.017558    | GNA13  | ENSG00000120063 |
| 17 | 60490994 | 60491224 | 60491074 | 8   | 10  | 3  | 3.225884308 | 0.0139466   | GNA13  | ENSG00000120063 |
| 17 | 60501409 | 60501742 | 60501565 | 14  | 17  | 7  | 2.639359888 | 0.00777415  |        | ENSG00000211170 |
| 17 | 60527138 | 60527377 | 60527289 | 8   | 11  | 0  | 14.07658607 | 9.02E-05    |        | ENSG00000211170 |
| 17 | 60549865 | 60550089 | 60549978 | 8   | 9   | 4  | 2.346097679 | 0.050148    | RGS9   | ENSG00000108370 |
| 17 | 60760229 | 60760414 | 60760321 | 8   | 9   | 1  | 5.865244197 | 0.00272497  | RGS9   | ENSG00000108370 |
| 17 | 60856854 | 60857057 | 60856986 | 8   | 8   | 0  | 10.55743955 | 0.000925496 | AXIN2  | ENSG00000168646 |
| 17 | 60911990 | 60912203 | 60912090 | 9   | 10  | 4  | 2.580707446 | 0.0306059   | AXIN2  | ENSG00000168646 |
| 17 | 60969346 | 60969548 | 60969447 | 10  | 11  | 2  | 4.692195357 | 0.00272444  | AXIN2  | ENSG00000168646 |

|    |          |          |          |    |    |    |             |             |         |                 |
|----|----------|----------|----------|----|----|----|-------------|-------------|---------|-----------------|
| 17 | 60983688 | 60983953 | 60983816 | 9  | 10 | 4  | 2.580707446 | 0.0306059   | AXIN2   | ENSG00000168646 |
| 17 | 60996181 | 60996425 | 60996303 | 8  | 10 | 1  | 6.451768616 | 0.00135978  | AXIN2   | ENSG00000168646 |
| 17 | 61054778 | 61055128 | 61054953 | 18 | 23 | 5  | 4.692195357 | 5.29E-05    | AXIN2   | ENSG00000168646 |
| 17 | 61149949 | 61150166 | 61150069 | 9  | 10 | 3  | 3.225884308 | 0.0139466   | CCDC46  | ENSG00000154240 |
| 17 | 61414651 | 61414933 | 61414824 | 11 | 15 | 4  | 3.753756286 | 0.0020497   | CCDC46  | ENSG00000154240 |
| 17 | 61427213 | 61427532 | 61427421 | 9  | 13 | 5  | 2.737113958 | 0.0137917   | CCDC46  | ENSG00000154240 |
| 17 | 61467040 | 61467228 | 61467096 | 8  | 8  | 1  | 5.278719777 | 0.00542188  | CCDC46  | ENSG00000154240 |
| 17 | 61627292 | 61627511 | 61627422 | 9  | 11 | 3  | 3.519146518 | 0.00788869  | CCDC46  | ENSG00000154240 |
| 17 | 61722897 | 61723153 | 61723025 | 15 | 17 | 4  | 4.222975822 | 0.000640773 | PRKCA   | ENSG00000154229 |
| 17 | 61778808 | 61779011 | 61778909 | 10 | 10 | 1  | 6.451768616 | 0.00135978  |         | ENSG00000211174 |
| 17 | 61843987 | 61844297 | 61844142 | 13 | 16 | 3  | 4.985457567 | 0.000385643 |         | ENSG00000211174 |
| 17 | 61887069 | 61887293 | 61887181 | 11 | 12 | 0  | 15.24963491 | 4.15E-05    |         | ENSG00000211174 |
| 17 | 61944326 | 61944508 | 61944417 | 8  | 9  | 1  | 5.865244197 | 0.00272497  |         | ENSG00000211176 |
| 17 | 61993821 | 61994030 | 61993925 | 9  | 11 | 4  | 2.815317214 | 0.0183428   |         | ENSG00000211176 |
| 17 | 62087719 | 62088021 | 62087870 | 13 | 15 | 3  | 4.692195357 | 0.000718455 |         | ENSG00000211176 |
| 17 | 62088079 | 62088395 | 62088225 | 8  | 11 | 5  | 2.346097679 | 0.0364013   |         | ENSG00000211176 |
| 17 | 62088503 | 62088828 | 62088665 | 8  | 12 | 14 | 1.016642327 | 0.486402    |         | ENSG00000211176 |
| 17 | 62100549 | 62100909 | 62100757 | 16 | 20 | 6  | 3.519146518 | 0.000784044 |         | ENSG00000211176 |
| 17 | 62102890 | 62103352 | 62103135 | 30 | 41 | 8  | 5.474227917 | 3.19E-08    |         | ENSG00000211176 |
| 17 | 62113420 | 62113669 | 62113576 | 8  | 10 | 3  | 3.225884308 | 0.0139466   |         | ENSG00000211176 |
| 17 | 62142406 | 62142670 | 62142538 | 12 | 13 | 6  | 2.346097679 | 0.0266147   |         | ENSG00000207943 |
| 17 | 62154602 | 62154790 | 62154696 | 8  | 9  | 5  | 1.955081399 | 0.0892323   |         | ENSG00000207943 |
| 17 | 62256148 | 62256447 | 62256297 | 9  | 12 | 4  | 3.049926982 | 0.0108184   |         | ENSG00000207943 |
| 17 | 62341619 | 62342026 | 62341866 | 10 | 15 | 2  | 6.256260476 | 0.000199274 | CACNG5  | ENSG00000075429 |
| 17 | 62378250 | 62378429 | 62378339 | 8  | 8  | 4  | 2.111487911 | 0.0804809   | CACNG4  | ENSG00000075461 |
| 17 | 62540256 | 62540467 | 62540361 | 8  | 9  | 6  | 1.675784056 | 0.141978    | CACNG1  | ENSG00000108878 |
| 17 | 62627435 | 62627621 | 62627551 | 10 | 10 | 0  | 12.90353723 | 0.000195991 |         | ENSG00000213180 |
| 17 | 62639878 | 62640281 | 62640106 | 15 | 21 | 3  | 6.451768616 | 1.56E-05    |         | ENSG00000213180 |
| 17 | 62647759 | 62648080 | 62647908 | 10 | 14 | 3  | 4.398933147 | 0.00132748  |         | ENSG00000213180 |
| 17 | 62671843 | 62672168 | 62672005 | 17 | 22 | 0  | 26.9801233  | 1.77E-08    | HELZ    | ENSG00000198265 |
| 17 | 62673218 | 62673544 | 62673381 | 12 | 16 | 5  | 3.323638378 | 0.00288759  | HELZ    | ENSG00000198265 |
| 17 | 62706875 | 62707060 | 62706967 | 8  | 9  | 0  | 11.73048839 | 0.000425898 |         | ENSG00000207410 |
| 17 | 62805304 | 62805500 | 62805390 | 8  | 9  | 1  | 5.865244197 | 0.00272497  | PITPNC1 | ENSG00000154217 |
| 17 | 62894262 | 62894496 | 62894362 | 8  | 8  | 3  | 2.639359888 | 0.0415794   |         | ENSG00000207688 |

|    |          |          |          |    |    |    |             |             |         |                 |
|----|----------|----------|----------|----|----|----|-------------|-------------|---------|-----------------|
| 17 | 62934401 | 62934741 | 62934571 | 10 | 15 | 1  | 9.384390715 | 3.90E-05    |         | ENSG00000207688 |
| 17 | 63033062 | 63033668 | 63033353 | 11 | 22 | 6  | 3.854303329 | 0.000260696 | NOL11   | ENSG00000130935 |
| 17 | 63036678 | 63037018 | 63036848 | 10 | 14 | 10 | 1.599612054 | 0.114822    | NOL11   | ENSG00000130935 |
| 17 | 63056531 | 63056845 | 63056688 | 8  | 10 | 5  | 2.150589539 | 0.0575848   | NOL11   | ENSG00000130935 |
| 17 | 63064375 | 63064935 | 63064655 | 28 | 44 | 11 | 4.398933147 | 1.43E-07    | NOL11   | ENSG00000130935 |
| 17 | 63144106 | 63144685 | 63144373 | 23 | 42 | 22 | 2.193091308 | 0.000846736 | NOL11   | ENSG00000130935 |
| 17 | 63227095 | 63227274 | 63227193 | 8  | 8  | 2  | 3.519146518 | 0.017558    |         | ENSG00000213179 |
| 17 | 63251976 | 63252177 | 63252049 | 8  | 8  | 1  | 5.278719777 | 0.00542188  | BPTF    | ENSG00000171634 |
| 17 | 63446295 | 63446674 | 63446460 | 25 | 31 | 11 | 3.128130238 | 0.000146711 | KPNA2   | ENSG00000182481 |
| 17 | 63460756 | 63461020 | 63460922 | 8  | 10 | 3  | 3.225884308 | 0.0139466   | KPNA2   | ENSG00000182481 |
| 17 | 63461824 | 63462049 | 63461954 | 9  | 10 | 1  | 6.451768616 | 0.00135978  | KPNA2   | ENSG00000182481 |
| 17 | 63705095 | 63705299 | 63705197 | 8  | 9  | 1  | 5.865244197 | 0.00272497  |         | ENSG00000183600 |
| 17 | 63713163 | 63713376 | 63713271 | 9  | 9  | 1  | 5.865244197 | 0.00272497  |         | ENSG00000183600 |
| 17 | 63755790 | 63756108 | 63755949 | 12 | 15 | 5  | 3.128130238 | 0.00492422  | AMZ2    | ENSG00000196704 |
| 17 | 63756195 | 63756664 | 63756374 | 12 | 22 | 4  | 5.396024661 | 3.05E-05    | AMZ2    | ENSG00000196704 |
| 17 | 63797717 | 63797919 | 63797818 | 8  | 9  | 3  | 2.932622098 | 0.0242899   | SLC16A6 | ENSG00000108932 |
| 17 | 63804032 | 63804220 | 63804126 | 10 | 11 | 3  | 3.519146518 | 0.00788869  | SLC16A6 | ENSG00000108932 |
| 17 | 63836480 | 63836765 | 63836622 | 17 | 19 | 9  | 2.346097679 | 0.0107159   | ARSG    | ENSG00000141337 |
| 17 | 63886440 | 63886657 | 63886548 | 11 | 14 | 3  | 4.398933147 | 0.00132748  |         | ENSG00000207561 |
| 17 | 63906804 | 63907174 | 63907012 | 13 | 18 | 3  | 5.571981987 | 0.000108726 |         | ENSG00000207561 |
| 17 | 63970727 | 63971067 | 63970897 | 8  | 13 | 5  | 2.737113958 | 0.0137917   | WIPI1   | ENSG00000070540 |
| 17 | 63973808 | 63974158 | 63973983 | 9  | 13 | 4  | 3.28453675  | 0.00629037  | WIPI1   | ENSG00000070540 |
| 17 | 64019257 | 64019489 | 64019363 | 8  | 8  | 2  | 3.519146518 | 0.017558    | PRKAR1A | ENSG00000108946 |
| 17 | 64020953 | 64021153 | 64021053 | 9  | 10 | 3  | 3.225884308 | 0.0139466   | PRKAR1A | ENSG00000108946 |
| 17 | 64041997 | 64042256 | 64042154 | 10 | 11 | 3  | 3.519146518 | 0.00788869  | FAM20A  | ENSG00000108950 |
| 17 | 64047334 | 64047580 | 64047457 | 8  | 10 | 4  | 2.580707446 | 0.0306059   | FAM20A  | ENSG00000108950 |
| 17 | 64122635 | 64122843 | 64122739 | 10 | 11 | 4  | 2.815317214 | 0.0183428   | FAM20A  | ENSG00000108950 |
| 17 | 64205484 | 64206074 | 64205718 | 36 | 63 | 2  | 25.02504191 | 1.72E-19    | FAM20A  | ENSG00000108950 |
| 17 | 64267615 | 64267995 | 64267789 | 16 | 22 | 9  | 2.69801233  | 0.00276236  | FAM20A  | ENSG00000108950 |
| 17 | 64279672 | 64279997 | 64279837 | 10 | 13 | 2  | 5.474227917 | 0.000747844 | FAM20A  | ENSG00000108950 |
| 17 | 64357469 | 64357739 | 64357604 | 8  | 9  | 4  | 2.346097679 | 0.050148    | ABCA8   | ENSG00000141338 |
| 17 | 64743250 | 64743448 | 64743349 | 9  | 9  | 3  | 2.932622098 | 0.0242899   | ABCA10  | ENSG00000154263 |
| 17 | 64835088 | 64835353 | 64835216 | 9  | 10 | 3  | 3.225884308 | 0.0139466   | ABCA5   | ENSG00000154265 |
| 17 | 64866710 | 64866907 | 64866808 | 8  | 9  | 2  | 3.910162798 | 0.00955088  |         | ENSG00000211230 |

|    |          |          |          |     |     |   |             |             |          |                 |
|----|----------|----------|----------|-----|-----|---|-------------|-------------|----------|-----------------|
| 17 | 64938149 | 64938562 | 64938368 | 69  | 83  | 3 | 24.63402563 | 8.34E-25    | MAP2K6   | ENSG00000108984 |
| 17 | 64974302 | 64974567 | 64974434 | 8   | 9   | 1 | 5.865244197 | 0.00272497  | MAP2K6   | ENSG00000108984 |
| 17 | 65114825 | 65115706 | 65115100 | 537 | 621 | 6 | 104.2337683 | 4.57E-198   | MAP2K6   | ENSG00000108984 |
| 17 | 65117318 | 65117603 | 65117445 | 14  | 16  | 6 | 2.848832895 | 0.00632407  | MAP2K6   | ENSG00000108984 |
| 17 | 65635137 | 65635418 | 65635286 | 8   | 10  | 1 | 6.451768616 | 0.00135978  | KCNJ16   | ENSG00000153822 |
| 17 | 66966094 | 66966453 | 66966285 | 19  | 25  | 6 | 4.357038546 | 4.72E-05    |          | ENSG00000211255 |
| 17 | 67391044 | 67391243 | 67391117 | 11  | 11  | 5 | 2.346097679 | 0.0364013   |          | ENSG00000218389 |
| 17 | 67634245 | 67634531 | 67634362 | 9   | 11  | 4 | 2.815317214 | 0.0183428   | SOX9     | ENSG00000125398 |
| 17 | 67642322 | 67642600 | 67642461 | 12  | 15  | 7 | 2.346097679 | 0.0195693   | SOX9     | ENSG00000125398 |
| 17 | 67781423 | 67781755 | 67781589 | 18  | 22  | 4 | 5.396024661 | 3.05E-05    |          | ENSG00000211264 |
| 17 | 67859686 | 67860055 | 67859900 | 8   | 12  | 7 | 1.906204364 | 0.0695918   |          | ENSG00000211264 |
| 17 | 67985461 | 67985647 | 67985554 | 8   | 9   | 1 | 5.865244197 | 0.00272497  |          | ENSG00000211264 |
| 17 | 68064740 | 68065059 | 68064901 | 11  | 13  | 3 | 4.105670938 | 0.00243034  |          | ENSG00000200783 |
| 17 | 68184448 | 68184627 | 68184455 | 8   | 8   | 0 | 10.55743955 | 0.000925496 |          | ENSG00000200783 |
| 17 | 68191625 | 68192035 | 68191875 | 12  | 20  | 8 | 2.737113958 | 0.0036449   |          | ENSG00000200783 |
| 17 | 68600329 | 68600613 | 68600468 | 10  | 12  | 2 | 5.083211637 | 0.00143337  | SLC39A11 | ENSG00000133195 |
| 17 | 68732502 | 68732831 | 68732662 | 10  | 15  | 3 | 4.692195357 | 0.000718455 | FAM104A  | ENSG00000133193 |
| 17 | 68763595 | 68763785 | 68763651 | 8   | 8   | 4 | 2.111487911 | 0.0804809   | CPSF4L   | ENSG00000187959 |
| 17 | 68786035 | 68786295 | 68786157 | 9   | 10  | 4 | 2.580707446 | 0.0306059   | CPSF4L   | ENSG00000187959 |
| 17 | 68786467 | 68786688 | 68786577 | 8   | 10  | 4 | 2.580707446 | 0.0306059   | CPSF4L   | ENSG00000187959 |
| 17 | 68815984 | 68816372 | 68816143 | 14  | 20  | 6 | 3.519146518 | 0.000784044 | CDC42EP4 | ENSG00000179604 |
| 17 | 68818786 | 68819177 | 68819032 | 8   | 13  | 1 | 8.211341875 | 0.000163445 | CDC42EP4 | ENSG00000179604 |
| 17 | 68867828 | 68868058 | 68867895 | 9   | 12  | 2 | 5.083211637 | 0.00143337  | SDK2     | ENSG00000069188 |
| 17 | 69049540 | 69049800 | 69049670 | 11  | 13  | 1 | 8.211341875 | 0.000163445 | SDK2     | ENSG00000069188 |
| 17 | 69070725 | 69070945 | 69070835 | 11  | 12  | 1 | 7.624817456 | 0.000332769 | SDK2     | ENSG00000069188 |
| 17 | 69094719 | 69094965 | 69094878 | 9   | 10  | 3 | 3.225884308 | 0.0139466   | SDK2     | ENSG00000069188 |
| 17 | 69121941 | 69122317 | 69122156 | 28  | 34  | 4 | 8.211341875 | 1.23E-08    | SDK2     | ENSG00000069188 |
| 17 | 69124050 | 69124501 | 69124213 | 10  | 16  | 2 | 6.647276756 | 0.000101928 | SDK2     | ENSG00000069188 |
| 17 | 69464375 | 69464599 | 69464472 | 8   | 9   | 4 | 2.346097679 | 0.050148    | C17orf54 | ENSG00000177338 |
| 17 | 69506453 | 69506691 | 69506572 | 9   | 11  | 2 | 4.692195357 | 0.00272444  | C17orf54 | ENSG00000177338 |
| 17 | 69553361 | 69553544 | 69553463 | 8   | 8   | 2 | 3.519146518 | 0.017558    | RPL38    | ENSG00000172809 |
| 17 | 69632950 | 69633491 | 69633129 | 9   | 20  | 2 | 8.211341875 | 6.65E-06    | RPL38    | ENSG00000172809 |
| 17 | 69684540 | 69684866 | 69684673 | 8   | 12  | 2 | 5.083211637 | 0.00143337  | RPL38    | ENSG00000172809 |
| 17 | 69700769 | 69701156 | 69700915 | 11  | 16  | 4 | 3.988366054 | 0.00115141  | RPL38    | ENSG00000172809 |

|    |          |          |          |    |    |    |             |             |          |                 |
|----|----------|----------|----------|----|----|----|-------------|-------------|----------|-----------------|
| 17 | 69711189 | 69711534 | 69711347 | 13 | 17 | 3  | 5.278719777 | 0.000205462 | RPL38    | ENSG00000172809 |
| 17 | 69902956 | 69903212 | 69903046 | 9  | 11 | 4  | 2.815317214 | 0.0183428   |          | ENSG00000200021 |
| 17 | 70001140 | 70001370 | 70001221 | 8  | 10 | 1  | 6.451768616 | 0.00135978  | CD300A   | ENSG00000167851 |
| 17 | 70110559 | 70110738 | 70110648 | 8  | 8  | 0  | 10.55743955 | 0.000925496 | CD300LD  | ENSG00000204345 |
| 17 | 70179023 | 70179325 | 70179164 | 9  | 12 | 0  | 15.24963491 | 4.15E-05    | RAB37    | ENSG00000172794 |
| 17 | 70246846 | 70247031 | 70246919 | 8  | 8  | 3  | 2.639359888 | 0.0415794   | RAB37    | ENSG00000172794 |
| 17 | 70266085 | 70266941 | 70266571 | 14 | 41 | 10 | 4.47891375  | 2.87E-07    | SLC9A3R1 | ENSG00000109062 |
| 17 | 70267709 | 70267996 | 70267868 | 15 | 19 | 2  | 7.820325595 | 1.32E-05    | SLC9A3R1 | ENSG00000109062 |
| 17 | 70268284 | 70268788 | 70268640 | 13 | 21 | 6  | 3.686724924 | 0.000453999 | SLC9A3R1 | ENSG00000109062 |
| 17 | 70277449 | 70278037 | 70277899 | 8  | 19 | 10 | 2.132816071 | 0.01835     | NAT9     | ENSG00000109065 |
| 17 | 70288778 | 70289021 | 70288945 | 9  | 12 | 1  | 7.624817456 | 0.000332769 | TMEM104  | ENSG00000109066 |
| 17 | 70380491 | 70380780 | 70380635 | 13 | 18 | 2  | 7.429309316 | 2.63E-05    | FDXR     | ENSG00000161513 |
| 17 | 70380879 | 70381364 | 70381033 | 8  | 16 | 5  | 3.323638378 | 0.00288759  | FDXR     | ENSG00000161513 |
| 17 | 70465724 | 70465961 | 70465888 | 10 | 10 | 2  | 4.301179077 | 0.00512919  | C17orf28 | ENSG00000167861 |
| 17 | 70469316 | 70469595 | 70469428 | 11 | 15 | 2  | 6.256260476 | 0.000199274 | C17orf28 | ENSG00000167861 |
| 17 | 70476299 | 70476495 | 70476350 | 8  | 8  | 9  | 1.055743955 | 0.456865    | C17orf28 | ENSG00000167861 |
| 17 | 70516949 | 70517235 | 70517115 | 9  | 12 | 1  | 7.624817456 | 0.000332769 | ICT1     | ENSG00000167862 |
| 17 | 70528139 | 70528325 | 70528232 | 8  | 8  | 1  | 5.278719777 | 0.00542188  | ICT1     | ENSG00000167862 |
| 17 | 70541273 | 70541604 | 70541438 | 10 | 15 | 3  | 4.692195357 | 0.000718455 |          | ENSG00000222347 |
| 17 | 70542642 | 70543081 | 70542870 | 15 | 26 | 3  | 7.918079665 | 5.55E-07    |          | ENSG00000222347 |
| 17 | 70591599 | 70591778 | 70591704 | 8  | 8  | 6  | 1.508205651 | 0.203852    | SLC16A5  | ENSG00000170190 |
| 17 | 70613327 | 70613679 | 70613503 | 10 | 16 | 3  | 4.985457567 | 0.000385643 | ARMC7    | ENSG00000125449 |
| 17 | 70617401 | 70617790 | 70617528 | 9  | 13 | 1  | 8.211341875 | 0.000163445 | ARMC7    | ENSG00000125449 |
| 17 | 70713108 | 70713413 | 70713260 | 9  | 14 | 6  | 2.513676084 | 0.016726    | NUP85    | ENSG00000125450 |
| 17 | 70746355 | 70746670 | 70746522 | 12 | 14 | 6  | 2.513676084 | 0.016726    | GGA3     | ENSG00000125447 |
| 17 | 70769330 | 70769639 | 70769469 | 14 | 18 | 7  | 2.785990993 | 0.00480525  | MRPS7    | ENSG00000125445 |
| 17 | 70797714 | 70797993 | 70797878 | 10 | 14 | 3  | 4.398933147 | 0.00132748  | SLC25A19 | ENSG00000125454 |
| 17 | 70901507 | 70901931 | 70901686 | 15 | 25 | 7  | 3.812408728 | 0.00012465  | GRB2     | ENSG00000177885 |
| 17 | 70912075 | 70912267 | 70912171 | 8  | 8  | 8  | 1.173048839 | 0.36929     | GRB2     | ENSG00000177885 |
| 17 | 70915576 | 70915764 | 70915670 | 8  | 8  | 6  | 1.508205651 | 0.203852    |          | ENSG00000223217 |
| 17 | 70963883 | 70964296 | 70964062 | 17 | 26 | 16 | 1.863077568 | 0.0200163   | KIAA0195 | ENSG00000177728 |
| 17 | 70967147 | 70967393 | 70967246 | 12 | 13 | 2  | 5.474227917 | 0.000747844 | KIAA0195 | ENSG00000177728 |
| 17 | 70979759 | 70979988 | 70979914 | 9  | 10 | 2  | 4.301179077 | 0.00512919  | KIAA0195 | ENSG00000177728 |
| 17 | 71023413 | 71023625 | 71023530 | 10 | 11 | 3  | 3.519146518 | 0.00788869  | CASKIN2  | ENSG00000177303 |

|    |          |          |          |    |     |    |             |             |          |                 |
|----|----------|----------|----------|----|-----|----|-------------|-------------|----------|-----------------|
| 17 | 71023964 | 71024183 | 71024073 | 10 | 10  | 0  | 12.90353723 | 0.000195991 | TSEN54   | ENSG00000182173 |
| 17 | 71048122 | 71048422 | 71048250 | 16 | 19  | 2  | 7.820325595 | 1.32E-05    | LLGL2    | ENSG00000073350 |
| 17 | 71057008 | 71057229 | 71057142 | 12 | 14  | 5  | 2.932622098 | 0.00829617  | LLGL2    | ENSG00000073350 |
| 17 | 71065487 | 71065714 | 71065605 | 8  | 10  | 3  | 3.225884308 | 0.0139466   |          | ENSG00000204326 |
| 17 | 71097276 | 71097516 | 71097395 | 9  | 10  | 1  | 6.451768616 | 0.00135978  |          | ENSG00000204326 |
| 17 | 71140653 | 71141133 | 71140832 | 15 | 24  | 4  | 5.865244197 | 8.64E-06    |          | ENSG00000204323 |
| 17 | 71141582 | 71141774 | 71141678 | 13 | 14  | 2  | 5.865244197 | 0.000387308 |          | ENSG00000204323 |
| 17 | 71153212 | 71153439 | 71153315 | 12 | 13  | 7  | 2.052835469 | 0.046392    |          | ENSG00000204323 |
| 17 | 71187675 | 71187883 | 71187779 | 8  | 8   | 5  | 1.759573259 | 0.13508     | SAP30BP  | ENSG00000161526 |
| 17 | 71291141 | 71291368 | 71291268 | 9  | 10  | 4  | 2.580707446 | 0.0306059   | UNK      | ENSG00000132478 |
| 17 | 71292147 | 71292431 | 71292315 | 8  | 10  | 7  | 1.612942154 | 0.147335    | UNK      | ENSG00000132478 |
| 17 | 71292742 | 71293416 | 71293264 | 15 | 38  | 6  | 6.535557819 | 1.65E-08    | UNK      | ENSG00000132478 |
| 17 | 71352479 | 71352777 | 71352628 | 10 | 13  | 5  | 2.737113958 | 0.0137917   | UNC13D   | ENSG00000092929 |
| 17 | 71412666 | 71412954 | 71412810 | 11 | 14  | 1  | 8.797866295 | 8.00E-05    | MRPL38   | ENSG00000204316 |
| 17 | 71467207 | 71467400 | 71467303 | 9  | 11  | 2  | 4.692195357 | 0.00272444  | FBF1     | ENSG00000188878 |
| 17 | 71487367 | 71487577 | 71487436 | 8  | 10  | 1  | 6.451768616 | 0.00135978  | ACOX1    | ENSG00000161533 |
| 17 | 71580149 | 71580360 | 71580278 | 12 | 13  | 0  | 16.42268375 | 1.91E-05    | SRP68    | ENSG00000167881 |
| 17 | 71639886 | 71640634 | 71640084 | 32 | 66  | 2  | 26.19809074 | 1.83E-20    | FOXJ1    | ENSG00000129654 |
| 17 | 71861630 | 71861848 | 71861735 | 9  | 10  | 2  | 4.301179077 | 0.00512919  | PRPSAP1  | ENSG00000161542 |
| 17 | 72009183 | 72009425 | 72009302 | 8  | 8   | 5  | 1.759573259 | 0.13508     | RHBDF2   | ENSG00000129667 |
| 17 | 72048459 | 72048796 | 72048627 | 10 | 14  | 5  | 2.932622098 | 0.00829617  | PRCD     | ENSG00000214140 |
| 17 | 72058725 | 72059264 | 72058944 | 29 | 47  | 0  | 56.30634429 | 6.62E-17    |          | ENSG00000204303 |
| 17 | 72065162 | 72065525 | 72065414 | 11 | 18  | 5  | 3.714654658 | 0.000961539 |          | ENSG00000204303 |
| 17 | 72149268 | 72149562 | 72149415 | 12 | 16  | 5  | 3.323638378 | 0.00288759  | ST6GALNA | ENSG00000070526 |
| 17 | 72179470 | 72179767 | 72179638 | 11 | 14  | 5  | 2.932622098 | 0.00829617  |          | ENSG00000199735 |
| 17 | 72180091 | 72180344 | 72180217 | 9  | 10  | 10 | 1.173048839 | 0.355733    |          | ENSG00000199735 |
| 17 | 72244939 | 72245559 | 72245285 | 12 | 28  | 2  | 11.33947211 | 2.41E-08    | MFSD11   | ENSG00000092931 |
| 17 | 72426571 | 72426825 | 72426679 | 8  | 11  | 1  | 7.038293036 | 0.000674435 | MGAT5B   | ENSG00000167889 |
| 17 | 72596360 | 72596609 | 72596489 | 8  | 11  | 2  | 4.692195357 | 0.00272444  |          | ENSG00000212386 |
| 17 | 72682603 | 72682865 | 72682758 | 15 | 15  | 1  | 9.384390715 | 3.90E-05    |          | ENSG00000211400 |
| 17 | 72777810 | 72778025 | 72777969 | 10 | 12  | 4  | 3.049926982 | 0.0108184   | 9-Sep    | ENSG00000184640 |
| 17 | 72789395 | 72789592 | 72789493 | 8  | 8   | 0  | 10.55743955 | 0.000925496 | 9-Sep    | ENSG00000184640 |
| 17 | 72793702 | 72794925 | 72793926 | 77 | 155 | 10 | 16.63596536 | 1.93E-40    | 9-Sep    | ENSG00000184640 |
| 17 | 72795285 | 72795640 | 72795462 | 9  | 15  | 4  | 3.753756286 | 0.0020497   | 9-Sep    | ENSG00000184640 |



|    |          |          |          |    |    |   |             |             |          |                 |
|----|----------|----------|----------|----|----|---|-------------|-------------|----------|-----------------|
| 17 | 72796418 | 72796790 | 72796676 | 12 | 18 | 2 | 7.429309316 | 2.63E-05    | 9-Sep    | ENSG00000184640 |
| 17 | 72985142 | 72985496 | 72985288 | 10 | 15 | 1 | 9.384390715 | 3.90E-05    |          | ENSG00000203307 |
| 17 | 73100256 | 73100451 | 73100343 | 8  | 8  | 1 | 5.278719777 | 0.00542188  |          | ENSG00000203307 |
| 17 | 73434225 | 73434418 | 73434321 | 8  | 8  | 2 | 3.519146518 | 0.017558    |          | ENSG00000204283 |
| 17 | 73546640 | 73546865 | 73546808 | 11 | 11 | 0 | 14.07658607 | 9.02E-05    | TNRC6C   | ENSG00000078687 |
| 17 | 73694942 | 73695296 | 73695120 | 14 | 17 | 2 | 7.038293036 | 5.19E-05    | AFMID    | ENSG00000183077 |
| 17 | 73706627 | 73706994 | 73706782 | 9  | 13 | 1 | 8.211341875 | 0.000163445 | AFMID    | ENSG00000183077 |
| 17 | 73797530 | 73797740 | 73797623 | 13 | 13 | 3 | 4.105670938 | 0.00243034  |          | ENSG00000204277 |
| 17 | 73815526 | 73815774 | 73815643 | 8  | 10 | 2 | 4.301179077 | 0.00512919  |          | ENSG00000204277 |
| 17 | 73859428 | 73859645 | 73859536 | 9  | 10 | 1 | 6.451768616 | 0.00135978  | SOCS3    | ENSG00000184557 |
| 17 | 73929756 | 73929950 | 73929828 | 9  | 9  | 3 | 2.932622098 | 0.0242899   | PGS1     | ENSG00000087157 |
| 17 | 74299726 | 74300174 | 74299950 | 23 | 35 | 2 | 14.07658607 | 1.57E-10    | CYTH1    | ENSG00000108669 |
| 17 | 74348497 | 74348724 | 74348610 | 9  | 11 | 1 | 7.038293036 | 0.000674435 | USP36    | ENSG00000055483 |
| 17 | 74373429 | 74373709 | 74373578 | 10 | 13 | 5 | 2.737113958 | 0.0137917   | USP36    | ENSG00000055483 |
| 17 | 74513005 | 74513318 | 74513157 | 13 | 13 | 5 | 2.737113958 | 0.0137917   | CANT1    | ENSG00000171302 |
| 17 | 74622573 | 74622812 | 74622718 | 12 | 12 | 6 | 2.178519273 | 0.0416567   |          | ENSG00000167280 |
| 17 | 74735869 | 74736406 | 74736039 | 17 | 26 | 1 | 15.83615933 | 1.23E-08    |          | ENSG00000167280 |
| 17 | 75247351 | 75247572 | 75247420 | 9  | 9  | 1 | 5.865244197 | 0.00272497  |          | ENSG00000214105 |
| 17 | 75253477 | 75253776 | 75253599 | 10 | 14 | 6 | 2.513676084 | 0.016726    |          | ENSG00000214105 |
| 17 | 75385241 | 75385690 | 75385420 | 11 | 20 | 3 | 6.158506406 | 2.99E-05    | CBX8     | ENSG00000141570 |
| 17 | 75403000 | 75403179 | 75403094 | 8  | 8  | 1 | 5.278719777 | 0.00542188  | CBX8     | ENSG00000141570 |
| 17 | 75410258 | 75410451 | 75410354 | 9  | 9  | 0 | 11.73048839 | 0.000425898 | CBX4     | ENSG00000141582 |
| 17 | 75480859 | 75481040 | 75480979 | 9  | 10 | 1 | 6.451768616 | 0.00135978  |          | ENSG00000184247 |
| 17 | 75491958 | 75492205 | 75492093 | 8  | 9  | 3 | 2.932622098 | 0.0242899   |          | ENSG00000184247 |
| 17 | 75594277 | 75594603 | 75594440 | 12 | 13 | 4 | 3.28453675  | 0.00629037  | TBC1D16  | ENSG00000167291 |
| 17 | 75619099 | 75619424 | 75619252 | 9  | 14 | 2 | 5.865244197 | 0.000387308 | TBC1D16  | ENSG00000167291 |
| 17 | 75758270 | 75758483 | 75758355 | 10 | 11 | 1 | 7.038293036 | 0.000674435 | CARD14   | ENSG00000141527 |
| 17 | 75806305 | 75806523 | 75806414 | 8  | 10 | 1 | 6.451768616 | 0.00135978  | SGSH     | ENSG00000181523 |
| 17 | 75843043 | 75843509 | 75843279 | 16 | 26 | 4 | 6.334463732 | 2.40E-06    | KIAA1618 | ENSG00000180843 |
| 17 | 76015307 | 76015562 | 76015425 | 9  | 10 | 0 | 12.90353723 | 0.000195991 |          | ENSG00000173818 |
| 17 | 76036162 | 76036591 | 76036433 | 15 | 21 | 4 | 5.161414893 | 5.68E-05    | NPTX1    | ENSG00000171246 |
| 17 | 76133054 | 76133365 | 76133233 | 17 | 21 | 5 | 4.301179077 | 0.000172642 |          | ENSG00000141564 |
| 17 | 76163810 | 76164031 | 76163920 | 12 | 12 | 2 | 5.083211637 | 0.00143337  |          | ENSG00000216958 |
| 17 | 76282497 | 76283069 | 76282690 | 50 | 70 | 0 | 83.28646759 | 1.17E-24    |          | ENSG00000216958 |

|    |          |          |          |    |    |    |             |             |          |                 |
|----|----------|----------|----------|----|----|----|-------------|-------------|----------|-----------------|
| 17 | 76623514 | 76623708 | 76623611 | 9  | 9  | 1  | 5.865244197 | 0.00272497  | BAIAP2   | ENSG00000175866 |
| 17 | 76625711 | 76626076 | 76625890 | 13 | 20 | 4  | 4.926805125 | 0.00010522  | BAIAP2   | ENSG00000175866 |
| 17 | 76645444 | 76645748 | 76645596 | 8  | 12 | 2  | 5.083211637 | 0.00143337  | BAIAP2   | ENSG00000175866 |
| 17 | 76690220 | 76690455 | 76690315 | 9  | 10 | 3  | 3.225884308 | 0.0139466   |          | ENSG00000207736 |
| 17 | 76828064 | 76828520 | 76828257 | 40 | 54 | 2  | 21.50589539 | 1.39E-16    | C17orf56 | ENSG00000167302 |
| 17 | 76865707 | 76866058 | 76865882 | 13 | 19 | 2  | 7.820325595 | 1.32E-05    | SLC38A10 | ENSG00000157637 |
| 17 | 76894845 | 76895279 | 76895014 | 20 | 28 | 3  | 8.504604085 | 1.43E-07    | C17orf55 | ENSG00000185168 |
| 17 | 76897818 | 76898037 | 76897904 | 8  | 8  | 5  | 1.759573259 | 0.13508     | C17orf55 | ENSG00000185168 |
| 17 | 76917862 | 76918331 | 76918092 | 15 | 24 | 8  | 3.258468998 | 0.000499412 | TMEM105  | ENSG00000185332 |
| 17 | 76982338 | 76982765 | 76982500 | 22 | 31 | 9  | 3.753756286 | 2.87E-05    |          | ENSG00000171282 |
| 17 | 76983693 | 76983911 | 76983830 | 9  | 11 | 1  | 7.038293036 | 0.000674435 |          | ENSG00000171282 |
| 17 | 77144269 | 77144541 | 77144415 | 13 | 15 | 2  | 6.256260476 | 0.000199274 |          | ENSG00000207021 |
| 17 | 77299581 | 77299958 | 77299792 | 17 | 23 | 2  | 9.384390715 | 8.25E-07    | SLC25A10 | ENSG00000183048 |
| 17 | 77301037 | 77301609 | 77301332 | 18 | 36 | 7  | 5.425350882 | 2.04E-07    | SLC25A10 | ENSG00000183048 |
| 17 | 77531281 | 77531578 | 77531446 | 10 | 11 | 1  | 7.038293036 | 0.000674435 | ASPSCR1  | ENSG00000169696 |
| 17 | 77657404 | 77657783 | 77657625 | 12 | 18 | 2  | 7.429309316 | 2.63E-05    | FASN     | ENSG00000169710 |
| 17 | 77757099 | 77757294 | 77757196 | 8  | 9  | 1  | 5.865244197 | 0.00272497  | CCDC57   | ENSG00000176155 |
| 17 | 77767947 | 77768235 | 77768091 | 10 | 13 | 5  | 2.737113958 | 0.0137917   | CCDC57   | ENSG00000176155 |
| 17 | 77849423 | 77849608 | 77849524 | 9  | 9  | 2  | 3.910162798 | 0.00955088  | CD7      | ENSG00000173762 |
| 17 | 77935761 | 77936217 | 77935959 | 19 | 29 | 2  | 11.73048839 | 1.18E-08    | UTS2R    | ENSG00000181408 |
| 17 | 78045718 | 78046129 | 78045888 | 14 | 22 | 9  | 2.69801233  | 0.00276236  | FOXK2    | ENSG00000141568 |
| 17 | 78046842 | 78047442 | 78047217 | 71 | 98 | 6  | 16.59026216 | 1.79E-26    | FOXK2    | ENSG00000141568 |
| 17 | 78085496 | 78085743 | 78085580 | 9  | 12 | 3  | 3.812408728 | 0.004404    | FOXK2    | ENSG00000141568 |
| 17 | 78085779 | 78086089 | 78085932 | 18 | 21 | 1  | 12.90353723 | 4.95E-07    | FOXK2    | ENSG00000141568 |
| 17 | 78332935 | 78333284 | 78333109 | 20 | 26 | 2  | 10.55743955 | 9.97E-08    | TBCD     | ENSG00000141556 |
| 17 | 78390976 | 78391419 | 78391240 | 18 | 28 | 4  | 6.803683268 | 6.55E-07    | ZNF750   | ENSG00000141579 |
| 17 | 78391652 | 78391949 | 78391800 | 18 | 19 | 6  | 3.351568112 | 0.00134187  | ZNF750   | ENSG00000141579 |
| 17 | 78409520 | 78409841 | 78409680 | 18 | 23 | 8  | 3.128130238 | 0.000832453 | ZNF750   | ENSG00000141579 |
| 17 | 78426474 | 78426726 | 78426594 | 8  | 11 | 4  | 2.815317214 | 0.0183428   | ZNF750   | ENSG00000141579 |
| 17 | 78427270 | 78427488 | 78427353 | 9  | 9  | 4  | 2.346097679 | 0.050148    | ZNF750   | ENSG00000141579 |
| 17 | 78440159 | 78440604 | 78440455 | 9  | 17 | 6  | 3.016411301 | 0.00381427  | ZNF750   | ENSG00000141579 |
| 17 | 78440643 | 78441010 | 78440805 | 13 | 19 | 10 | 2.132816071 | 0.01835     | ZNF750   | ENSG00000141579 |
| 17 | 78620726 | 78621062 | 78620887 | 10 | 13 | 0  | 16.42268375 | 1.91E-05    | METRNL   | ENSG00000176845 |
| 17 | 78640512 | 78640755 | 78640609 | 13 | 14 | 6  | 2.513676084 | 0.016726    | METRNL   | ENSG00000176845 |

|    |          |          |          |     |     |     |             |             |          |                 |
|----|----------|----------|----------|-----|-----|-----|-------------|-------------|----------|-----------------|
| 17 | 78648057 | 78648417 | 78648260 | 12  | 18  | 4   | 4.457585589 | 0.000353565 | METRNL   | ENSG00000176845 |
| 18 | 97615    | 97820    | 97719    | 8   | 10  | 9   | 1.290353723 | 0.279648    |          | ENSG00000215585 |
| 18 | 98070    | 98624    | 98389    | 46  | 74  | 76  | 1.142580038 | 0.206401    |          | ENSG00000215585 |
| 18 | 98706    | 99662    | 99306    | 38  | 93  | 119 | 0.918888257 | 0.73236     |          | ENSG00000215585 |
| 18 | 486895   | 487197   | 487054   | 9   | 14  | 1   | 8.797866295 | 8.00E-05    | COLEC12  | ENSG00000158270 |
| 18 | 579398   | 579588   | 579492   | 8   | 9   | 0   | 11.73048839 | 0.000425898 |          | ENSG00000222174 |
| 18 | 587032   | 587227   | 587129   | 10  | 12  | 3   | 3.812408728 | 0.004404    | CLUL1    | ENSG00000079101 |
| 18 | 594769   | 594987   | 594931   | 9   | 10  | 4   | 2.580707446 | 0.0306059   | CLUL1    | ENSG00000079101 |
| 18 | 647323   | 647656   | 647494   | 12  | 15  | 3   | 4.692195357 | 0.000718455 | TYMS     | ENSG00000176890 |
| 18 | 647958   | 648639   | 648298   | 100 | 135 | 8   | 17.72607135 | 4.11E-36    | C18orf56 | ENSG00000176912 |
| 18 | 802421   | 802636   | 802528   | 8   | 8   | 2   | 3.519146518 | 0.017558    | YES1     | ENSG00000176105 |
| 18 | 893767   | 893954   | 893860   | 8   | 9   | 0   | 11.73048839 | 0.000425898 | ADCYAP1  | ENSG00000141433 |
| 18 | 995744   | 995944   | 995844   | 8   | 9   | 0   | 11.73048839 | 0.000425898 | ADCYAP1  | ENSG00000141433 |
| 18 | 2503659  | 2503838  | 2503727  | 8   | 8   | 1   | 5.278719777 | 0.00542188  | METTL4   | ENSG00000101574 |
| 18 | 2561103  | 2561286  | 2561203  | 8   | 10  | 4   | 2.580707446 | 0.0306059   | METTL4   | ENSG00000101574 |
| 18 | 2561292  | 2561750  | 2561578  | 12  | 21  | 8   | 2.867452718 | 0.00225035  | NDC80    | ENSG00000080986 |
| 18 | 2645052  | 2645387  | 2645217  | 8   | 12  | 4   | 3.049926982 | 0.0108184   |          | ENSG00000180715 |
| 18 | 2867008  | 2867254  | 2867131  | 16  | 18  | 3   | 5.571981987 | 0.000108726 | EMILIN2  | ENSG00000132205 |
| 18 | 2922233  | 2922412  | 2922325  | 8   | 8   | 1   | 5.278719777 | 0.00542188  | LPIN2    | ENSG00000101577 |
| 18 | 2984611  | 2984824  | 2984739  | 8   | 8   | 1   | 5.278719777 | 0.00542188  | LPIN2    | ENSG00000101577 |
| 18 | 3034600  | 3035687  | 3034952  | 47  | 99  | 4   | 23.46097679 | 7.93E-29    | LPIN2    | ENSG00000101577 |
| 18 | 3036319  | 3036498  | 3036402  | 8   | 8   | 2   | 3.519146518 | 0.017558    | LPIN2    | ENSG00000101577 |
| 18 | 3048402  | 3048731  | 3048568  | 15  | 19  | 5   | 3.910162798 | 0.000546977 | LPIN2    | ENSG00000101577 |
| 18 | 3063544  | 3063813  | 3063686  | 13  | 15  | 1   | 9.384390715 | 3.90E-05    | LPIN2    | ENSG00000101577 |
| 18 | 3226417  | 3226761  | 3226583  | 20  | 25  | 13  | 2.178519273 | 0.00752428  |          | ENSG00000101608 |
| 18 | 3235947  | 3236342  | 3236085  | 11  | 18  | 15  | 1.392995497 | 0.16305     |          | ENSG00000101608 |
| 18 | 3236852  | 3237342  | 3237163  | 11  | 18  | 9   | 2.228792795 | 0.0164363   |          | ENSG00000101608 |
| 18 | 3237519  | 3237836  | 3237678  | 20  | 23  | 11  | 2.346097679 | 0.00594236  |          | ENSG00000101608 |
| 18 | 3238057  | 3238243  | 3238143  | 8   | 9   | 3   | 2.932622098 | 0.0242899   |          | ENSG00000101608 |
| 18 | 3247427  | 3247625  | 3247546  | 9   | 10  | 3   | 3.225884308 | 0.0139466   |          | ENSG00000118680 |
| 18 | 3251625  | 3251823  | 3251724  | 10  | 11  | 2   | 4.692195357 | 0.00272444  |          | ENSG00000118680 |
| 18 | 3252126  | 3252543  | 3252244  | 9   | 17  | 6   | 3.016411301 | 0.00381427  |          | ENSG00000118680 |
| 18 | 3252598  | 3253088  | 3252921  | 13  | 21  | 3   | 6.451768616 | 1.56E-05    |          | ENSG00000118680 |
| 18 | 3287285  | 3287661  | 3287525  | 20  | 26  | 9   | 3.167231866 | 0.000393236 |          | ENSG00000118680 |

|    |          |          |          |    |    |    |             |             |         |                 |
|----|----------|----------|----------|----|----|----|-------------|-------------|---------|-----------------|
| 18 | 3320701  | 3321183  | 3320932  | 10 | 20 | 6  | 3.519146518 | 0.000784044 |         | ENSG00000118680 |
| 18 | 3387025  | 3387488  | 3387204  | 17 | 30 | 10 | 3.305864911 | 0.000112487 | TGIF1   | ENSG00000177426 |
| 18 | 3437873  | 3438506  | 3438033  | 20 | 40 | 5  | 8.015833735 | 1.06E-09    | TGIF1   | ENSG00000177426 |
| 18 | 3440553  | 3440743  | 3440619  | 8  | 9  | 4  | 2.346097679 | 0.050148    | TGIF1   | ENSG00000177426 |
| 18 | 3502050  | 3502363  | 3502206  | 9  | 13 | 6  | 2.346097679 | 0.0266147   | TGIF1   | ENSG00000177426 |
| 18 | 3583206  | 3583490  | 3583353  | 8  | 11 | 4  | 2.815317214 | 0.0183428   |         | ENSG00000177337 |
| 18 | 3583552  | 3584331  | 3583776  | 45 | 96 | 12 | 8.752749032 | 4.31E-21    |         | ENSG00000177337 |
| 18 | 3584337  | 3584611  | 3584467  | 12 | 16 | 12 | 1.533986944 | 0.120062    |         | ENSG00000177337 |
| 18 | 3593058  | 3593266  | 3593145  | 9  | 9  | 5  | 1.955081399 | 0.0892323   |         | ENSG00000177337 |
| 18 | 3593547  | 3593829  | 3593688  | 11 | 13 | 4  | 3.28453675  | 0.00629037  |         | ENSG00000177337 |
| 18 | 3656327  | 3656561  | 3656444  | 12 | 13 | 4  | 3.28453675  | 0.00629037  |         | ENSG00000177337 |
| 18 | 3749706  | 3749885  | 3749795  | 9  | 9  | 6  | 1.675784056 | 0.141978    |         | ENSG00000209562 |
| 18 | 3761440  | 3761790  | 3761625  | 10 | 14 | 4  | 3.519146518 | 0.00361132  |         | ENSG00000209562 |
| 18 | 6984105  | 6984309  | 6984190  | 9  | 9  | 0  | 11.73048839 | 0.000425898 | LAMA1   | ENSG00000101680 |
| 18 | 7024969  | 7025306  | 7025123  | 16 | 20 | 3  | 6.158506406 | 2.99E-05    | LAMA1   | ENSG00000101680 |
| 18 | 7718385  | 7718669  | 7718524  | 14 | 17 | 0  | 21.11487911 | 8.57E-07    |         | ENSG00000221631 |
| 18 | 7723721  | 7724037  | 7723888  | 14 | 16 | 1  | 9.970915134 | 1.89E-05    |         | ENSG00000221631 |
| 18 | 8306163  | 8306365  | 8306295  | 8  | 9  | 0  | 11.73048839 | 0.000425898 |         | ENSG00000212067 |
| 18 | 8890550  | 8890752  | 8890651  | 8  | 8  | 0  | 10.55743955 | 0.000925496 |         | ENSG00000209617 |
| 18 | 9063751  | 9063930  | 9063860  | 8  | 8  | 2  | 3.519146518 | 0.017558    | NDUFV2  | ENSG00000178127 |
| 18 | 9126321  | 9126656  | 9126482  | 8  | 11 | 6  | 2.010940867 | 0.0640214   | ANKRD12 | ENSG00000101745 |
| 18 | 9280063  | 9280551  | 9280354  | 31 | 47 | 1  | 28.15317214 | 1.78E-15    |         | ENSG00000209637 |
| 18 | 9356330  | 9356575  | 9356451  | 12 | 13 | 3  | 4.105670938 | 0.00243034  | TWSG1   | ENSG00000128791 |
| 18 | 9464883  | 9465107  | 9464995  | 8  | 10 | 5  | 2.150589539 | 0.0575848   | RALBP1  | ENSG00000017797 |
| 18 | 9465113  | 9465395  | 9465254  | 11 | 16 | 3  | 4.985457567 | 0.000385643 | RALBP1  | ENSG00000017797 |
| 18 | 9635959  | 9636151  | 9636035  | 8  | 8  | 2  | 3.519146518 | 0.017558    |         | ENSG00000212572 |
| 18 | 9733578  | 9733769  | 9733696  | 8  | 8  | 1  | 5.278719777 | 0.00542188  | RAB31   | ENSG00000168461 |
| 18 | 9787154  | 9787399  | 9787274  | 9  | 11 | 11 | 1.173048839 | 0.349489    | RAB31   | ENSG00000168461 |
| 18 | 9839423  | 9839841  | 9839602  | 8  | 15 | 5  | 3.128130238 | 0.00492422  |         | ENSG00000209655 |
| 18 | 9941362  | 9941580  | 9941495  | 9  | 11 | 5  | 2.346097679 | 0.0364013   |         | ENSG00000223138 |
| 18 | 9961340  | 9961583  | 9961478  | 8  | 11 | 2  | 4.692195357 | 0.00272444  |         | ENSG00000223138 |
| 18 | 10084375 | 10084606 | 10084501 | 8  | 9  | 0  | 11.73048839 | 0.000425898 |         | ENSG00000223138 |
| 18 | 10199362 | 10199712 | 10199537 | 20 | 25 | 0  | 30.49926982 | 1.72E-09    |         | ENSG00000209662 |
| 18 | 10311423 | 10311602 | 10311443 | 8  | 10 | 2  | 4.301179077 | 0.00512919  |         | ENSG00000209662 |

|    |          |          |          |    |    |   |             |             |          |                 |
|----|----------|----------|----------|----|----|---|-------------|-------------|----------|-----------------|
| 18 | 10480770 | 10480968 | 10480842 | 8  | 9  | 5 | 1.955081399 | 0.0892323   | NAPG     | ENSG00000134265 |
| 18 | 10510137 | 10510359 | 10510223 | 9  | 11 | 7 | 1.759573259 | 0.102361    | NAPG     | ENSG00000134265 |
| 18 | 10515856 | 10516139 | 10516009 | 12 | 14 | 2 | 5.865244197 | 0.000387308 | NAPG     | ENSG00000134265 |
| 18 | 10548722 | 10548992 | 10548857 | 9  | 11 | 5 | 2.346097679 | 0.0364013   | NAPG     | ENSG00000134265 |
| 18 | 10677641 | 10677859 | 10677748 | 11 | 12 | 2 | 5.083211637 | 0.00143337  | FAM38B   | ENSG00000154864 |
| 18 | 11032192 | 11032439 | 11032315 | 10 | 11 | 2 | 4.692195357 | 0.00272444  | C18orf58 | ENSG00000168738 |
| 18 | 11040252 | 11040552 | 11040405 | 13 | 16 | 1 | 9.970915134 | 1.89E-05    | C18orf58 | ENSG00000168738 |
| 18 | 11126341 | 11126653 | 11126497 | 10 | 14 | 3 | 4.398933147 | 0.00132748  | C18orf58 | ENSG00000168738 |
| 18 | 11186071 | 11186327 | 11186205 | 8  | 8  | 1 | 5.278719777 | 0.00542188  | C18orf58 | ENSG00000168738 |
| 18 | 11377886 | 11378178 | 11378032 | 9  | 12 | 2 | 5.083211637 | 0.00143337  |          | ENSG00000153081 |
| 18 | 11645328 | 11645600 | 11645451 | 9  | 12 | 2 | 5.083211637 | 0.00143337  |          | ENSG00000153081 |
| 18 | 11679030 | 11679217 | 11679098 | 9  | 9  | 2 | 3.910162798 | 0.00955088  | GNAL     | ENSG00000141404 |
| 18 | 11841248 | 11841489 | 11841385 | 8  | 11 | 5 | 2.346097679 | 0.0364013   | MPPE1    | ENSG00000154889 |
| 18 | 11971002 | 11971230 | 11971128 | 9  | 12 | 0 | 15.24963491 | 4.15E-05    | IMPA2    | ENSG00000141401 |
| 18 | 11972236 | 11972445 | 11972340 | 11 | 11 | 2 | 4.692195357 | 0.00272444  | IMPA2    | ENSG00000141401 |
| 18 | 12028985 | 12029276 | 12029130 | 8  | 13 | 4 | 3.28453675  | 0.00629037  |          | ENSG00000212712 |
| 18 | 12261610 | 12262092 | 12261913 | 11 | 20 | 3 | 6.158506406 | 2.99E-05    | CIDEA    | ENSG00000176194 |
| 18 | 12299545 | 12300268 | 12300052 | 33 | 55 | 5 | 10.94845583 | 3.92E-14    | TUBB6    | ENSG00000176014 |
| 18 | 12413989 | 12414173 | 12414080 | 8  | 9  | 3 | 2.932622098 | 0.0242899   | SLMO1    | ENSG00000141391 |
| 18 | 12521855 | 12522087 | 12521929 | 9  | 10 | 1 | 6.451768616 | 0.00135978  |          | ENSG00000209679 |
| 18 | 12635521 | 12635709 | 12635642 | 8  | 8  | 5 | 1.759573259 | 0.13508     | SPIRE1   | ENSG00000134278 |
| 18 | 12635760 | 12636050 | 12635914 | 10 | 13 | 7 | 2.052835469 | 0.046392    | SPIRE1   | ENSG00000134278 |
| 18 | 12648589 | 12648956 | 12648786 | 9  | 16 | 2 | 6.647276756 | 0.000101928 |          | ENSG00000215527 |
| 18 | 12688332 | 12688512 | 12688422 | 8  | 8  | 0 | 10.55743955 | 0.000925496 | PSMG2    | ENSG00000128789 |
| 18 | 12688515 | 12688700 | 12688596 | 8  | 8  | 0 | 10.55743955 | 0.000925496 | PSMG2    | ENSG00000128789 |
| 18 | 12731347 | 12731687 | 12731517 | 23 | 27 | 4 | 6.5690735   | 1.26E-06    |          | ENSG00000201466 |
| 18 | 12734125 | 12734389 | 12734257 | 10 | 10 | 2 | 4.301179077 | 0.00512919  |          | ENSG00000201466 |
| 18 | 12773160 | 12773620 | 12773372 | 17 | 26 | 1 | 15.83615933 | 1.23E-08    |          | ENSG00000201466 |
| 18 | 12845952 | 12846210 | 12846065 | 8  | 11 | 4 | 2.815317214 | 0.0183428   | PTPN2    | ENSG00000175354 |
| 18 | 12938161 | 12938388 | 12938274 | 10 | 10 | 3 | 3.225884308 | 0.0139466   | SEH1L    | ENSG00000085415 |
| 18 | 12980809 | 12981335 | 12981156 | 9  | 20 | 6 | 3.519146518 | 0.000784044 | CEP192   | ENSG00000101639 |
| 18 | 13103123 | 13103342 | 13103277 | 12 | 12 | 6 | 2.178519273 | 0.0416567   |          | ENSG00000215235 |
| 18 | 13206186 | 13206510 | 13206341 | 10 | 13 | 5 | 2.737113958 | 0.0137917   | C18orf1  | ENSG00000168675 |
| 18 | 13243684 | 13243951 | 13243817 | 12 | 13 | 3 | 4.105670938 | 0.00243034  | C18orf1  | ENSG00000168675 |

|    |          |          |          |    |    |     |             |             |          |                 |
|----|----------|----------|----------|----|----|-----|-------------|-------------|----------|-----------------|
| 18 | 13716477 | 13716685 | 13716581 | 9  | 9  | 2   | 3.910162798 | 0.00955088  | C18orf19 | ENSG00000177150 |
| 18 | 13791003 | 13791262 | 13791145 | 12 | 16 | 4   | 3.988366054 | 0.00115141  |          | ENSG00000211528 |
| 18 | 13973524 | 13973757 | 13973633 | 10 | 12 | 2   | 5.083211637 | 0.00143337  | MC2R     | ENSG00000185231 |
| 18 | 14076683 | 14076893 | 14076788 | 9  | 10 | 0   | 12.90353723 | 0.000195991 | ZNF519   | ENSG00000175322 |
| 18 | 16765512 | 16766511 | 16765691 | 37 | 88 | 113 | 0.915801287 | 0.73496     |          | ENSG00000216205 |
| 18 | 16766804 | 16767533 | 16767048 | 43 | 64 | 119 | 0.635401455 | 0.998698    |          | ENSG00000216205 |
| 18 | 16767616 | 16767797 | 16767641 | 9  | 9  | 18  | 0.617394126 | 0.901359    |          | ENSG00000216205 |
| 18 | 16768027 | 16768357 | 16768192 | 11 | 12 | 13  | 1.089259637 | 0.414883    |          | ENSG00000216205 |
| 18 | 16770000 | 16771055 | 16770179 | 28 | 59 | 131 | 0.533204018 | 0.999986    |          | ENSG00000216205 |
| 18 | 16771307 | 16771566 | 16771436 | 8  | 8  | 22  | 0.459019111 | 0.982776    |          | ENSG00000216205 |
| 18 | 16771778 | 16772422 | 16772134 | 66 | 86 | 134 | 0.755964808 | 0.980294    |          | ENSG00000216205 |
| 18 | 16772555 | 16772737 | 16772640 | 10 | 12 | 15  | 0.953102182 | 0.555895    |          | ENSG00000216205 |
| 18 | 16772749 | 16773141 | 16772967 | 28 | 37 | 56  | 0.78203256  | 0.883568    |          | ENSG00000216205 |
| 18 | 16773689 | 16773946 | 16773841 | 17 | 19 | 23  | 0.977540699 | 0.533404    |          | ENSG00000216205 |
| 18 | 16773992 | 16774448 | 16774273 | 42 | 51 | 80  | 0.753068391 | 0.94736     |          | ENSG00000216205 |
| 18 | 17018396 | 17018669 | 17018533 | 12 | 16 | 13  | 1.424416448 | 0.161813    | KIAA1772 | ENSG00000141449 |
| 18 | 17238412 | 17238768 | 17238527 | 8  | 12 | 4   | 3.049926982 | 0.0108184   |          | ENSG00000221139 |
| 18 | 17382637 | 17382874 | 17382745 | 8  | 10 | 2   | 4.301179077 | 0.00512919  | ESCO1    | ENSG00000141446 |
| 18 | 17446080 | 17446345 | 17446212 | 12 | 14 | 1   | 8.797866295 | 8.00E-05    | SNRPD1   | ENSG00000167088 |
| 18 | 17699800 | 17699993 | 17699899 | 8  | 8  | 1   | 5.278719777 | 0.00542188  |          | ENSG00000207694 |
| 18 | 18097330 | 18097556 | 18097443 | 8  | 9  | 0   | 11.73048839 | 0.000425898 |          | ENSG00000209762 |
| 18 | 18212785 | 18212976 | 18212880 | 9  | 10 | 1   | 6.451768616 | 0.00135978  | CTAGE1   | ENSG00000212710 |
| 18 | 18300547 | 18300918 | 18300641 | 11 | 18 | 3   | 5.571981987 | 0.000108726 |          | ENSG00000181358 |
| 18 | 18747828 | 18748131 | 18747996 | 13 | 13 | 4   | 3.28453675  | 0.00629037  | RBBP8    | ENSG00000101773 |
| 18 | 18766990 | 18767239 | 18767111 | 8  | 9  | 1   | 5.865244197 | 0.00272497  | RBBP8    | ENSG00000101773 |
| 18 | 18965718 | 18965914 | 18965877 | 9  | 9  | 3   | 2.932622098 | 0.0242899   | CABLES1  | ENSG00000134508 |
| 18 | 19091707 | 19091911 | 19091850 | 8  | 9  | 6   | 1.675784056 | 0.141978    | CABLES1  | ENSG00000134508 |
| 18 | 19093767 | 19094034 | 19093881 | 9  | 10 | 2   | 4.301179077 | 0.00512919  | CABLES1  | ENSG00000134508 |
| 18 | 19094337 | 19094771 | 19094500 | 10 | 18 | 5   | 3.714654658 | 0.000961539 | CABLES1  | ENSG00000134508 |
| 18 | 19111342 | 19112022 | 19111574 | 26 | 44 | 3   | 13.19679944 | 1.95E-12    | CABLES1  | ENSG00000134508 |
| 18 | 19116072 | 19116275 | 19116173 | 9  | 10 | 5   | 2.150589539 | 0.0575848   | CABLES1  | ENSG00000134508 |
| 18 | 19147063 | 19147566 | 19147278 | 24 | 38 | 3   | 11.43722618 | 1.38E-10    | C18orf45 | ENSG00000134490 |
| 18 | 19165183 | 19165599 | 19165362 | 16 | 25 | 10  | 2.772660893 | 0.00131329  | C18orf45 | ENSG00000134490 |
| 18 | 19337051 | 19337276 | 19337163 | 8  | 9  | 3   | 2.932622098 | 0.0242899   | C18orf8  | ENSG00000141452 |

|    |          |          |          |    |    |   |             |             |         |                 |
|----|----------|----------|----------|----|----|---|-------------|-------------|---------|-----------------|
| 18 | 19349875 | 19350164 | 19350036 | 12 | 15 | 3 | 4.692195357 | 0.000718455 | C18orf8 | ENSG00000141452 |
| 18 | 19364479 | 19364679 | 19364579 | 8  | 8  | 1 | 5.278719777 | 0.00542188  | C18orf8 | ENSG00000141452 |
| 18 | 19420574 | 19420857 | 19420693 | 11 | 13 | 5 | 2.737113958 | 0.0137917   | NPC1    | ENSG00000141458 |
| 18 | 19537111 | 19537347 | 19537229 | 9  | 11 | 1 | 7.038293036 | 0.000674435 |         | ENSG00000215051 |
| 18 | 19553718 | 19554132 | 19553897 | 10 | 19 | 3 | 5.865244197 | 5.72E-05    |         | ENSG00000215051 |
| 18 | 19717482 | 19717871 | 19717692 | 20 | 28 | 0 | 34.01841634 | 1.68E-10    |         | ENSG00000221389 |
| 18 | 19828486 | 19828751 | 19828633 | 9  | 11 | 3 | 3.519146518 | 0.00788869  | TTC39C  | ENSG00000168234 |
| 18 | 19857435 | 19857795 | 19857632 | 13 | 18 | 7 | 2.785990993 | 0.00480525  |         | ENSG00000176309 |
| 18 | 19910262 | 19910506 | 19910384 | 11 | 13 | 0 | 16.42268375 | 1.91E-05    |         | ENSG00000215504 |
| 18 | 19972824 | 19973177 | 19973000 | 13 | 17 | 2 | 7.038293036 | 5.19E-05    | CABYR   | ENSG00000154040 |
| 18 | 20106018 | 20106223 | 20106150 | 9  | 9  | 5 | 1.955081399 | 0.0892323   | OSBPL1A | ENSG00000141447 |
| 18 | 20193761 | 20194037 | 20193875 | 8  | 9  | 1 | 5.865244197 | 0.00272497  | OSBPL1A | ENSG00000141447 |
| 18 | 20196697 | 20197140 | 20196961 | 19 | 27 | 6 | 4.692195357 | 1.46E-05    | OSBPL1A | ENSG00000141447 |
| 18 | 20231757 | 20232267 | 20231864 | 10 | 20 | 6 | 3.519146518 | 0.000784044 | OSBPL1A | ENSG00000141447 |
| 18 | 20260388 | 20260567 | 20260477 | 8  | 8  | 2 | 3.519146518 | 0.017558    | IMPACT  | ENSG00000154059 |
| 18 | 20868089 | 20868379 | 20868229 | 19 | 20 | 2 | 8.211341875 | 6.65E-06    |         | ENSG00000216836 |
| 18 | 21185962 | 21186185 | 21186073 | 9  | 9  | 3 | 2.932622098 | 0.0242899   | ZNF521  | ENSG00000198795 |
| 18 | 21337726 | 21337955 | 21337860 | 9  | 10 | 5 | 2.150589539 | 0.0575848   | ZNF521  | ENSG00000198795 |
| 18 | 21367093 | 21367616 | 21367333 | 49 | 69 | 3 | 20.52835469 | 2.58E-20    | ZNF521  | ENSG00000198795 |
| 18 | 21730228 | 21730417 | 21730322 | 9  | 9  | 1 | 5.865244197 | 0.00272497  |         | ENSG00000209859 |
| 18 | 21751494 | 21751749 | 21751591 | 9  | 11 | 2 | 4.692195357 | 0.00272444  |         | ENSG00000209859 |
| 18 | 21924983 | 21925247 | 21925142 | 9  | 12 | 8 | 1.694403879 | 0.107291    | SS18    | ENSG00000141380 |
| 18 | 21931458 | 21931864 | 21931661 | 31 | 40 | 4 | 9.619000482 | 2.08E-10    | SS18    | ENSG00000141380 |
| 18 | 21986727 | 21986912 | 21986819 | 9  | 9  | 0 | 11.73048839 | 0.000425898 | DHFR    | ENSG00000188985 |
| 18 | 22060040 | 22060340 | 22060190 | 10 | 14 | 0 | 17.59573259 | 8.79E-06    | TAF4B   | ENSG00000141384 |
| 18 | 22141271 | 22141451 | 22141280 | 8  | 9  | 3 | 2.932622098 | 0.0242899   |         | ENSG00000209863 |
| 18 | 22275477 | 22275728 | 22275602 | 8  | 11 | 6 | 2.010940867 | 0.0640214   |         | ENSG00000207160 |
| 18 | 22294726 | 22295158 | 22294907 | 24 | 34 | 8 | 4.561856597 | 2.04E-06    | KCTD1   | ENSG00000134504 |
| 18 | 22338739 | 22338918 | 22338797 | 8  | 8  | 1 | 5.278719777 | 0.00542188  | KCTD1   | ENSG00000134504 |
| 18 | 22382473 | 22382688 | 22382581 | 8  | 9  | 4 | 2.346097679 | 0.050148    | KCTD1   | ENSG00000134504 |
| 18 | 22383560 | 22384079 | 22383825 | 8  | 21 | 5 | 4.301179077 | 0.000172642 | KCTD1   | ENSG00000134504 |
| 18 | 22384237 | 22384677 | 22384464 | 24 | 38 | 4 | 9.149780947 | 8.17E-10    | KCTD1   | ENSG00000134504 |
| 18 | 22409396 | 22409575 | 22409485 | 9  | 9  | 8 | 1.303387599 | 0.281715    |         | ENSG00000214993 |
| 18 | 22455475 | 22455707 | 22455591 | 8  | 10 | 3 | 3.225884308 | 0.0139466   | KCTD1   | ENSG00000134504 |

|    |          |          |          |    |    |   |             |             |          |                 |
|----|----------|----------|----------|----|----|---|-------------|-------------|----------|-----------------|
| 18 | 23381091 | 23381368 | 23381233 | 19 | 22 | 0 | 26.9801233  | 1.77E-08    |          | ENSG00000215499 |
| 18 | 23439227 | 23439452 | 23439339 | 9  | 9  | 1 | 5.865244197 | 0.00272497  |          | ENSG00000215499 |
| 18 | 26261769 | 26262341 | 26262129 | 13 | 27 | 4 | 6.5690735   | 1.26E-06    |          |                 |
| 18 | 26991435 | 26991728 | 26991587 | 13 | 17 | 7 | 2.639359888 | 0.00777415  | DSC1     | ENSG00000134765 |
| 18 | 27075838 | 27076261 | 27076015 | 20 | 31 | 9 | 3.753756286 | 2.87E-05    | DSG1     | ENSG00000134760 |
| 18 | 27078690 | 27078884 | 27078771 | 9  | 9  | 0 | 11.73048839 | 0.000425898 | DSG1     | ENSG00000134760 |
| 18 | 27347609 | 27347819 | 27347695 | 8  | 8  | 2 | 3.519146518 | 0.017558    | DSG2     | ENSG00000046604 |
| 18 | 27547301 | 27547727 | 27547510 | 34 | 47 | 2 | 18.76878143 | 2.45E-14    |          | ENSG00000200472 |
| 18 | 27776909 | 27777246 | 27777077 | 13 | 18 | 4 | 4.457585589 | 0.000353565 | KIAA1012 | ENSG00000153339 |
| 18 | 27992107 | 27992313 | 27992210 | 10 | 11 | 3 | 3.519146518 | 0.00788869  |          | ENSG00000199373 |
| 18 | 28119011 | 28119333 | 28119172 | 22 | 24 | 0 | 29.32622098 | 3.74E-09    |          | ENSG00000222395 |
| 18 | 28206527 | 28206899 | 28206666 | 9  | 16 | 3 | 4.985457567 | 0.000385643 |          | ENSG00000215492 |
| 18 | 29394608 | 29395017 | 29394853 | 13 | 18 | 1 | 11.14396397 | 4.44E-06    | ASXL3    | ENSG00000141431 |
| 18 | 31013559 | 31013858 | 31013720 | 20 | 22 | 0 | 26.9801233  | 1.77E-08    | ZNF397   | ENSG00000186812 |
| 18 | 31123810 | 31124122 | 31123966 | 8  | 12 | 6 | 2.178519273 | 0.0416567   |          | ENSG00000215490 |
| 18 | 31124136 | 31124423 | 31124275 | 9  | 14 | 4 | 3.519146518 | 0.00361132  | ZNF271   | ENSG00000118267 |
| 18 | 31177842 | 31178104 | 31177973 | 8  | 12 | 3 | 3.812408728 | 0.004404    | ZNF24    | ENSG00000172466 |
| 18 | 31189064 | 31189316 | 31189153 | 8  | 10 | 0 | 12.90353723 | 0.000195991 | ZNF24    | ENSG00000172466 |
| 18 | 31331827 | 31332073 | 31331979 | 10 | 13 | 7 | 2.052835469 | 0.046392    | INO80C   | ENSG00000153391 |
| 18 | 31531504 | 31531691 | 31531635 | 9  | 9  | 1 | 5.865244197 | 0.00272497  | GALNT1   | ENSG00000141429 |
| 18 | 31580865 | 31581045 | 31581021 | 8  | 8  | 0 | 10.55743955 | 0.000925496 | GALNT1   | ENSG00000141429 |
| 18 | 31695823 | 31696401 | 31696222 | 39 | 56 | 1 | 33.43189192 | 1.95E-18    |          | ENSG00000207797 |
| 18 | 31806355 | 31806740 | 31806565 | 13 | 19 | 2 | 7.820325595 | 1.32E-05    | C18orf21 | ENSG00000141428 |
| 18 | 31933360 | 31933552 | 31933456 | 8  | 9  | 2 | 3.910162798 | 0.00955088  | SLC39A6  | ENSG00000141424 |
| 18 | 31958934 | 31959242 | 31959090 | 11 | 13 | 1 | 8.211341875 | 0.000163445 | SLC39A6  | ENSG00000141424 |
| 18 | 31963076 | 31963385 | 31963217 | 12 | 16 | 3 | 4.985457567 | 0.000385643 | SLC39A6  | ENSG00000141424 |
| 18 | 31963390 | 31963826 | 31963647 | 13 | 21 | 4 | 5.161414893 | 5.68E-05    | ELP2     | ENSG00000134759 |
| 18 | 32021502 | 32021778 | 32021658 | 9  | 12 | 0 | 15.24963491 | 4.15E-05    | MOCOS    | ENSG00000075643 |
| 18 | 32649552 | 32649865 | 32649730 | 11 | 14 | 1 | 8.797866295 | 8.00E-05    | C18orf10 | ENSG00000134779 |
| 18 | 33116540 | 33116732 | 33116636 | 8  | 8  | 1 | 5.278719777 | 0.00542188  | BRUNOL4  | ENSG00000101489 |
| 18 | 33133435 | 33133743 | 33133589 | 10 | 14 | 4 | 3.519146518 | 0.00361132  | BRUNOL4  | ENSG00000101489 |
| 18 | 34554277 | 34554519 | 34554398 | 9  | 10 | 0 | 12.90353723 | 0.000195991 |          | ENSG00000222704 |
| 18 | 36049952 | 36050305 | 36050128 | 23 | 28 | 1 | 17.00920817 | 2.80E-09    |          |                 |
| 18 | 40565760 | 40565965 | 40565862 | 8  | 10 | 3 | 3.225884308 | 0.0139466   | SETBP1   | ENSG00000152217 |



|    |          |          |          |    |    |    |             |             |          |                 |
|----|----------|----------|----------|----|----|----|-------------|-------------|----------|-----------------|
| 18 | 41193413 | 41193749 | 41193581 | 10 | 16 | 4  | 3.988366054 | 0.00115141  | SLC14A2  | ENSG00000132874 |
| 18 | 41525326 | 41525577 | 41525452 | 10 | 13 | 5  | 2.737113958 | 0.0137917   | SLC14A1  | ENSG00000141469 |
| 18 | 41544202 | 41544381 | 41544215 | 8  | 8  | 0  | 10.55743955 | 0.000925496 | SLC14A1  | ENSG00000141469 |
| 18 | 41572613 | 41573045 | 41572799 | 9  | 17 | 5  | 3.519146518 | 0.00167472  | SLC14A1  | ENSG00000141469 |
| 18 | 41573205 | 41573459 | 41573332 | 10 | 13 | 8  | 1.824742639 | 0.0744168   | SLC14A1  | ENSG00000141469 |
| 18 | 41594520 | 41594895 | 41594703 | 16 | 24 | 7  | 3.665777623 | 0.000215502 | SLC14A1  | ENSG00000141469 |
| 18 | 41610421 | 41610645 | 41610477 | 8  | 9  | 8  | 1.303387599 | 0.281715    | SIGLEC15 | ENSG00000197046 |
| 18 | 41627015 | 41627678 | 41627419 | 22 | 41 | 18 | 2.593055329 | 0.000148738 | SIGLEC15 | ENSG00000197046 |
| 18 | 41635425 | 41635693 | 41635541 | 9  | 11 | 0  | 14.07658607 | 9.02E-05    | SIGLEC15 | ENSG00000197046 |
| 18 | 41636479 | 41637355 | 41636846 | 35 | 62 | 21 | 3.359185313 | 6.24E-08    | SIGLEC15 | ENSG00000197046 |
| 18 | 41711457 | 41711727 | 41711592 | 8  | 9  | 6  | 1.675784056 | 0.141978    | KIAA1632 | ENSG00000152223 |
| 18 | 41713961 | 41714414 | 41714140 | 10 | 18 | 10 | 2.026175268 | 0.0273052   | KIAA1632 | ENSG00000152223 |
| 18 | 41801228 | 41801629 | 41801386 | 9  | 13 | 6  | 2.346097679 | 0.0266147   | KIAA1632 | ENSG00000152223 |
| 18 | 41867624 | 41867893 | 41867763 | 15 | 16 | 2  | 6.647276756 | 0.000101928 | PSTPIP2  | ENSG00000152229 |
| 18 | 41902773 | 41903095 | 41902948 | 13 | 17 | 1  | 10.55743955 | 9.18E-06    | PSTPIP2  | ENSG00000152229 |
| 18 | 41903537 | 41904152 | 41903710 | 36 | 54 | 8  | 7.168631796 | 9.17E-12    | PSTPIP2  | ENSG00000152229 |
| 18 | 41906055 | 41906276 | 41906165 | 9  | 10 | 0  | 12.90353723 | 0.000195991 | PSTPIP2  | ENSG00000152229 |
| 18 | 41907787 | 41908016 | 41907865 | 10 | 11 | 8  | 1.564065119 | 0.151515    | PSTPIP2  | ENSG00000152229 |
| 18 | 41932109 | 41932543 | 41932364 | 19 | 30 | 7  | 4.545564252 | 7.31E-06    | ATP5A1   | ENSG00000152234 |
| 18 | 41937917 | 41938531 | 41938087 | 11 | 22 | 6  | 3.854303329 | 0.000260696 | ATP5A1   | ENSG00000152234 |
| 18 | 41947697 | 41948061 | 41947876 | 12 | 19 | 6  | 3.351568112 | 0.00134187  |          | ENSG00000200088 |
| 18 | 41992576 | 41992789 | 41992682 | 10 | 11 | 5  | 2.346097679 | 0.0364013   | C18orf25 | ENSG00000152242 |
| 18 | 42007303 | 42008229 | 42007940 | 16 | 48 | 22 | 2.499104049 | 7.64E-05    | C18orf25 | ENSG00000152242 |
| 18 | 42033574 | 42033919 | 42033742 | 13 | 18 | 2  | 7.429309316 | 2.63E-05    | C18orf25 | ENSG00000152242 |
| 18 | 42047395 | 42047588 | 42047475 | 8  | 8  | 3  | 2.639359888 | 0.0415794   | C18orf25 | ENSG00000152242 |
| 18 | 42084357 | 42084731 | 42084536 | 18 | 25 | 4  | 6.099853964 | 4.56E-06    | C18orf25 | ENSG00000152242 |
| 18 | 42107852 | 42108129 | 42108002 | 12 | 16 | 12 | 1.533986944 | 0.120062    | RNF165   | ENSG00000141622 |
| 18 | 42115197 | 42115458 | 42115327 | 14 | 14 | 4  | 3.519146518 | 0.00361132  | RNF165   | ENSG00000141622 |
| 18 | 42127768 | 42127947 | 42127878 | 8  | 9  | 2  | 3.910162798 | 0.00955088  | RNF165   | ENSG00000141622 |
| 18 | 42158508 | 42158861 | 42158684 | 8  | 12 | 3  | 3.812408728 | 0.004404    | RNF165   | ENSG00000141622 |
| 18 | 42246170 | 42246382 | 42246277 | 8  | 10 | 2  | 4.301179077 | 0.00512919  | RNF165   | ENSG00000141622 |
| 18 | 42302440 | 42302762 | 42302587 | 27 | 32 | 2  | 12.90353723 | 1.37E-09    | LOXHD1   | ENSG00000167210 |
| 18 | 42303391 | 42303886 | 42303710 | 24 | 36 | 19 | 2.170140353 | 0.00197388  | LOXHD1   | ENSG00000167210 |
| 18 | 42308103 | 42308327 | 42308215 | 8  | 10 | 3  | 3.225884308 | 0.0139466   | LOXHD1   | ENSG00000167210 |

|    |          |          |          |    |    |    |             |             |          |                 |
|----|----------|----------|----------|----|----|----|-------------|-------------|----------|-----------------|
| 18 | 42312711 | 42313050 | 42312881 | 11 | 14 | 3  | 4.398933147 | 0.00132748  | LOXHD1   | ENSG00000167210 |
| 18 | 42352389 | 42352633 | 42352520 | 9  | 10 | 1  | 6.451768616 | 0.00135978  | LOXHD1   | ENSG00000167210 |
| 18 | 42376500 | 42376779 | 42376627 | 12 | 13 | 3  | 4.105670938 | 0.00243034  | LOXHD1   | ENSG00000167210 |
| 18 | 42457397 | 42457726 | 42457557 | 18 | 23 | 3  | 7.038293036 | 4.15E-06    | LOXHD1   | ENSG00000167210 |
| 18 | 42465687 | 42465894 | 42465832 | 8  | 8  | 5  | 1.759573259 | 0.13508     | LOXHD1   | ENSG00000167210 |
| 18 | 42492188 | 42492465 | 42492337 | 9  | 13 | 8  | 1.824742639 | 0.0744168   | LOXHD1   | ENSG00000167210 |
| 18 | 42511651 | 42511869 | 42511760 | 8  | 8  | 6  | 1.508205651 | 0.203852    | LOXHD1   | ENSG00000167210 |
| 18 | 42569705 | 42569956 | 42569805 | 23 | 24 | 1  | 14.66311049 | 5.43E-08    | ST8SIA5  | ENSG00000101638 |
| 18 | 42615907 | 42616146 | 42616015 | 8  | 10 | 0  | 12.90353723 | 0.000195991 | ST8SIA5  | ENSG00000101638 |
| 18 | 42702136 | 42702620 | 42702369 | 15 | 29 | 0  | 35.19146518 | 7.73E-11    | PIAS2    | ENSG00000078043 |
| 18 | 42707840 | 42708019 | 42707893 | 8  | 8  | 1  | 5.278719777 | 0.00542188  | PIAS2    | ENSG00000078043 |
| 18 | 42711319 | 42711721 | 42711524 | 29 | 38 | 2  | 15.24963491 | 1.78E-11    | PIAS2    | ENSG00000078043 |
| 18 | 42953064 | 42953307 | 42953149 | 9  | 9  | 0  | 11.73048839 | 0.000425898 | IER3IP1  | ENSG00000134049 |
| 18 | 42955129 | 42955386 | 42955257 | 8  | 10 | 1  | 6.451768616 | 0.00135978  | IER3IP1  | ENSG00000134049 |
| 18 | 43047031 | 43047279 | 43047142 | 9  | 10 | 6  | 1.843362462 | 0.0964212   |          | ENSG00000215474 |
| 18 | 43376224 | 43376546 | 43376373 | 12 | 16 | 2  | 6.647276756 | 0.000101928 |          | ENSG00000184125 |
| 18 | 43553045 | 43553277 | 43553159 | 9  | 11 | 2  | 4.692195357 | 0.00272444  |          | ENSG00000210133 |
| 18 | 43804134 | 43804436 | 43804300 | 20 | 23 | 6  | 4.021881735 | 0.000148535 | ZBTB7C   | ENSG00000184828 |
| 18 | 43809011 | 43809371 | 43809158 | 12 | 17 | 10 | 1.919534464 | 0.0400548   | ZBTB7C   | ENSG00000184828 |
| 18 | 43880559 | 43880771 | 43880665 | 9  | 9  | 1  | 5.865244197 | 0.00272497  | ZBTB7C   | ENSG00000184828 |
| 18 | 43887677 | 43887881 | 43887767 | 10 | 11 | 4  | 2.815317214 | 0.0183428   |          | ENSG00000206944 |
| 18 | 43905898 | 43906162 | 43905998 | 8  | 9  | 3  | 2.932622098 | 0.0242899   |          | ENSG00000206944 |
| 18 | 43913066 | 43913336 | 43913217 | 11 | 14 | 1  | 8.797866295 | 8.00E-05    |          | ENSG00000206944 |
| 18 | 43914045 | 43914473 | 43914294 | 24 | 35 | 16 | 2.484103424 | 0.000610563 |          | ENSG00000206944 |
| 18 | 43938260 | 43938508 | 43938396 | 10 | 10 | 0  | 12.90353723 | 0.000195991 |          | ENSG00000206944 |
| 18 | 44088486 | 44088700 | 44088593 | 9  | 10 | 1  | 6.451768616 | 0.00135978  |          | ENSG00000206944 |
| 18 | 44110338 | 44110810 | 44110570 | 43 | 61 | 1  | 36.36451402 | 4.36E-20    |          | ENSG00000200872 |
| 18 | 44110880 | 44111187 | 44111057 | 9  | 13 | 4  | 3.28453675  | 0.00629037  |          | ENSG00000200872 |
| 18 | 44192779 | 44193053 | 44192914 | 8  | 10 | 3  | 3.225884308 | 0.0139466   |          | ENSG00000200872 |
| 18 | 44227047 | 44227250 | 44227148 | 8  | 9  | 4  | 2.346097679 | 0.050148    |          | ENSG00000200872 |
| 18 | 44235260 | 44235521 | 44235390 | 8  | 10 | 3  | 3.225884308 | 0.0139466   |          | ENSG00000200872 |
| 18 | 44328478 | 44328886 | 44328740 | 8  | 15 | 4  | 3.753756286 | 0.0020497   | KIAA0427 | ENSG00000134030 |
| 18 | 44396380 | 44397188 | 44396559 | 22 | 46 | 6  | 7.876185064 | 9.12E-11    | KIAA0427 | ENSG00000134030 |
| 18 | 44442803 | 44443016 | 44442909 | 9  | 9  | 1  | 5.865244197 | 0.00272497  | KIAA0427 | ENSG00000134030 |

|    |          |          |          |    |    |    |             |             |          |                 |
|----|----------|----------|----------|----|----|----|-------------|-------------|----------|-----------------|
| 18 | 44492277 | 44492568 | 44492435 | 8  | 11 | 7  | 1.759573259 | 0.102361    | KIAA0427 | ENSG00000134030 |
| 18 | 44513082 | 44513494 | 44513315 | 18 | 26 | 3  | 7.918079665 | 5.55E-07    | KIAA0427 | ENSG00000134030 |
| 18 | 44600585 | 44600764 | 44600674 | 8  | 8  | 2  | 3.519146518 | 0.017558    | SMAD7    | ENSG00000101665 |
| 18 | 44608516 | 44608746 | 44608607 | 9  | 9  | 3  | 2.932622098 | 0.0242899   | SMAD7    | ENSG00000101665 |
| 18 | 44628871 | 44629426 | 44629209 | 32 | 48 | 5  | 9.579898854 | 4.82E-12    | SMAD7    | ENSG00000101665 |
| 18 | 44682405 | 44682606 | 44682505 | 10 | 12 | 0  | 15.24963491 | 4.15E-05    | SMAD7    | ENSG00000101665 |
| 18 | 44728726 | 44729043 | 44728892 | 11 | 13 | 2  | 5.474227917 | 0.000747844 | SMAD7    | ENSG00000101665 |
| 18 | 44763421 | 44763646 | 44763531 | 8  | 9  | 3  | 2.932622098 | 0.0242899   | SMAD7    | ENSG00000101665 |
| 18 | 44771229 | 44771470 | 44771389 | 9  | 12 | 1  | 7.624817456 | 0.000332769 | SMAD7    | ENSG00000101665 |
| 18 | 44777360 | 44777675 | 44777517 | 10 | 12 | 0  | 15.24963491 | 4.15E-05    | SMAD7    | ENSG00000101665 |
| 18 | 44800886 | 44801124 | 44801005 | 8  | 10 | 1  | 6.451768616 | 0.00135978  | SMAD7    | ENSG00000101665 |
| 18 | 44801925 | 44802584 | 44802094 | 15 | 33 | 10 | 3.625787322 | 2.36E-05    | SMAD7    | ENSG00000101665 |
| 18 | 45213932 | 45214266 | 45214097 | 11 | 12 | 2  | 5.083211637 | 0.00143337  | DYM      | ENSG00000141627 |
| 18 | 45267486 | 45267777 | 45267605 | 11 | 15 | 3  | 4.692195357 | 0.000718455 | C18orf32 | ENSG00000177576 |
| 18 | 45272628 | 45272999 | 45272807 | 8  | 15 | 6  | 2.68125449  | 0.0103552   |          | ENSG00000206696 |
| 18 | 45390285 | 45390485 | 45390439 | 8  | 10 | 1  | 6.451768616 | 0.00135978  | LIPG     | ENSG00000101670 |
| 18 | 45427409 | 45427618 | 45427498 | 8  | 9  | 0  | 11.73048839 | 0.000425898 | LIPG     | ENSG00000101670 |
| 18 | 45503968 | 45504174 | 45504071 | 9  | 11 | 1  | 7.038293036 | 0.000674435 | ACAA2    | ENSG00000167315 |
| 18 | 45594440 | 45594639 | 45594581 | 8  | 9  | 2  | 3.910162798 | 0.00955088  |          | ENSG00000212352 |
| 18 | 45866911 | 45867218 | 45867064 | 8  | 12 | 1  | 7.624817456 | 0.000332769 | MYO5B    | ENSG00000167306 |
| 18 | 45892233 | 45892450 | 45892348 | 11 | 11 | 8  | 1.564065119 | 0.151515    | MYO5B    | ENSG00000167306 |
| 18 | 45939188 | 45939693 | 45939514 | 9  | 22 | 4  | 5.396024661 | 3.05E-05    | MYO5B    | ENSG00000167306 |
| 18 | 45943074 | 45943314 | 45943194 | 9  | 10 | 1  | 6.451768616 | 0.00135978  | MYO5B    | ENSG00000167306 |
| 18 | 45974163 | 45974342 | 45974246 | 8  | 8  | 0  | 10.55743955 | 0.000925496 | MYO5B    | ENSG00000167306 |
| 18 | 46061531 | 46062124 | 46062011 | 9  | 21 | 5  | 4.301179077 | 0.000172642 | MBD1     | ENSG00000141644 |
| 18 | 46068196 | 46068376 | 46068290 | 8  | 8  | 2  | 3.519146518 | 0.017558    | CXXC1    | ENSG00000154832 |
| 18 | 46155099 | 46155646 | 46155384 | 9  | 22 | 5  | 4.496687217 | 9.59E-05    | C18orf24 | ENSG00000154839 |
| 18 | 46391825 | 46392115 | 46391980 | 14 | 16 | 4  | 3.988366054 | 0.00115141  | MAPK4    | ENSG00000141639 |
| 18 | 46409552 | 46410488 | 46409786 | 23 | 61 | 7  | 9.091128505 | 2.01E-14    | MAPK4    | ENSG00000141639 |
| 18 | 46425190 | 46425525 | 46425357 | 9  | 12 | 7  | 1.906204364 | 0.0695918   | MAPK4    | ENSG00000141639 |
| 18 | 50016364 | 50016543 | 50016453 | 8  | 8  | 2  | 3.519146518 | 0.017558    | MBD2     | ENSG00000134046 |
| 18 | 50027514 | 50027726 | 50027617 | 9  | 10 | 2  | 4.301179077 | 0.00512919  | POLI     | ENSG00000101751 |
| 18 | 51901839 | 51902019 | 51901984 | 9  | 9  | 0  | 11.73048839 | 0.000425898 |          | ENSG00000201816 |
| 18 | 52469422 | 52469607 | 52469493 | 8  | 8  | 3  | 2.639359888 | 0.0415794   | WDR7     | ENSG00000091157 |

|    |          |          |          |     |     |   |             |             |         |                 |
|----|----------|----------|----------|-----|-----|---|-------------|-------------|---------|-----------------|
| 18 | 53068481 | 53068724 | 53068660 | 9   | 11  | 2 | 4.692195357 | 0.00272444  |         | ENSG00000202240 |
| 18 | 53172174 | 53172354 | 53172241 | 8   | 9   | 3 | 2.932622098 | 0.0242899   | ST8SIA3 | ENSG00000177511 |
| 18 | 53255828 | 53256361 | 53255966 | 8   | 17  | 3 | 5.278719777 | 0.000205462 | ONECUT2 | ENSG00000119547 |
| 18 | 53376146 | 53376353 | 53376249 | 10  | 11  | 3 | 3.519146518 | 0.00788869  | FECH    | ENSG00000066926 |
| 18 | 53439935 | 53440341 | 53440114 | 11  | 18  | 4 | 4.457585589 | 0.000353565 | NARS    | ENSG00000134440 |
| 18 | 53448462 | 53448780 | 53448621 | 10  | 15  | 3 | 4.692195357 | 0.000718455 | NARS    | ENSG00000134440 |
| 18 | 53508490 | 53508716 | 53508603 | 11  | 12  | 1 | 7.624817456 | 0.000332769 |         | ENSG00000209025 |
| 18 | 53590549 | 53590742 | 53590628 | 8   | 9   | 5 | 1.955081399 | 0.0892323   |         | ENSG00000202159 |
| 18 | 53621374 | 53621658 | 53621518 | 9   | 12  | 3 | 3.812408728 | 0.004404    |         | ENSG00000141650 |
| 18 | 53777610 | 53777815 | 53777675 | 9   | 9   | 4 | 2.346097679 | 0.050148    |         | ENSG00000172186 |
| 18 | 53788716 | 53788933 | 53788790 | 9   | 10  | 8 | 1.433726359 | 0.209175    |         | ENSG00000172186 |
| 18 | 53798691 | 53799374 | 53799009 | 142 | 178 | 5 | 34.99595704 | 3.61E-53    |         | ENSG00000172186 |
| 18 | 53861947 | 53862132 | 53862096 | 9   | 10  | 7 | 1.612942154 | 0.147335    | NEDD4L  | ENSG00000049759 |
| 18 | 53895741 | 53895939 | 53895788 | 8   | 10  | 0 | 12.90353723 | 0.000195991 | NEDD4L  | ENSG00000049759 |
| 18 | 53909639 | 53909826 | 53909732 | 10  | 11  | 3 | 3.519146518 | 0.00788869  | NEDD4L  | ENSG00000049759 |
| 18 | 54034332 | 54034615 | 54034449 | 8   | 10  | 2 | 4.301179077 | 0.00512919  | NEDD4L  | ENSG00000049759 |
| 18 | 54081252 | 54081630 | 54081366 | 11  | 16  | 4 | 3.988366054 | 0.00115141  | NEDD4L  | ENSG00000049759 |
| 18 | 54586630 | 54587263 | 54587019 | 16  | 35  | 4 | 8.445951643 | 6.26E-09    |         | ENSG00000223035 |
| 18 | 55007218 | 55007602 | 55007394 | 9   | 15  | 0 | 18.76878143 | 4.04E-06    | GRP     | ENSG00000134443 |
| 18 | 55220646 | 55220980 | 55220813 | 9   | 14  | 4 | 3.519146518 | 0.00361132  | LMAN1   | ENSG00000074695 |
| 18 | 55515599 | 55515790 | 55515694 | 10  | 10  | 3 | 3.225884308 | 0.0139466   | CCBE1   | ENSG00000183287 |
| 18 | 55717715 | 55718339 | 55717908 | 20  | 35  | 3 | 10.55743955 | 1.13E-09    | PMAIP1  | ENSG00000141682 |
| 18 | 55736668 | 55736883 | 55736786 | 9   | 10  | 1 | 6.451768616 | 0.00135978  | PMAIP1  | ENSG00000141682 |
| 18 | 55750942 | 55751121 | 55750994 | 8   | 8   | 1 | 5.278719777 | 0.00542188  | PMAIP1  | ENSG00000141682 |
| 18 | 57359821 | 57360123 | 57359979 | 24  | 27  | 0 | 32.8453675  | 3.65E-10    | CDH20   | ENSG00000101542 |
| 18 | 57369803 | 57370019 | 57369911 | 9   | 9   | 1 | 5.865244197 | 0.00272497  | CDH20   | ENSG00000101542 |
| 18 | 57458258 | 57458449 | 57458360 | 8   | 10  | 4 | 2.580707446 | 0.0306059   | CDH20   | ENSG00000101542 |
| 18 | 57470063 | 57470338 | 57470200 | 15  | 18  | 2 | 7.429309316 | 2.63E-05    | CDH20   | ENSG00000101542 |
| 18 | 57617343 | 57617564 | 57617482 | 8   | 11  | 2 | 4.692195357 | 0.00272444  | RNF152  | ENSG00000176641 |
| 18 | 58243971 | 58244154 | 58244073 | 8   | 8   | 4 | 2.111487911 | 0.0804809   |         | ENSG00000210475 |
| 18 | 58303903 | 58304297 | 58304034 | 13  | 18  | 5 | 3.714654658 | 0.000961539 | ZCCHC2  | ENSG00000141664 |
| 18 | 58340969 | 58341164 | 58341066 | 8   | 8   | 0 | 10.55743955 | 0.000925496 | ZCCHC2  | ENSG00000141664 |
| 18 | 58390675 | 58391059 | 58390880 | 42  | 52  | 3 | 15.54289712 | 6.25E-15    | ZCCHC2  | ENSG00000141664 |
| 18 | 58402607 | 58402809 | 58402708 | 8   | 9   | 6 | 1.675784056 | 0.141978    | ZCCHC2  | ENSG00000141664 |

|    |          |          |          |     |     |    |             |             |           |                 |
|----|----------|----------|----------|-----|-----|----|-------------|-------------|-----------|-----------------|
| 18 | 58456635 | 58456946 | 58456772 | 13  | 15  | 2  | 6.256260476 | 0.000199274 |           | ENSG00000210478 |
| 18 | 58481937 | 58482398 | 58482105 | 12  | 19  | 11 | 1.955081399 | 0.0295891   |           | ENSG00000222223 |
| 18 | 58490925 | 58491104 | 58491021 | 8   | 8   | 0  | 10.55743955 | 0.000925496 |           | ENSG00000222223 |
| 18 | 58533128 | 58533584 | 58533405 | 14  | 24  | 10 | 2.666020089 | 0.00209276  | PHLPP     | ENSG00000081913 |
| 18 | 58797179 | 58797380 | 58797279 | 8   | 8   | 1  | 5.278719777 | 0.00542188  | PHLPP     | ENSG00000081913 |
| 18 | 58882268 | 58882459 | 58882384 | 8   | 8   | 2  | 3.519146518 | 0.017558    | PHLPP     | ENSG00000081913 |
| 18 | 58891758 | 58891984 | 58891871 | 8   | 11  | 2  | 4.692195357 | 0.00272444  | BCL2      | ENSG00000171791 |
| 18 | 58893132 | 58893668 | 58893410 | 13  | 27  | 10 | 2.9859425   | 0.000503424 | BCL2      | ENSG00000171791 |
| 18 | 58946117 | 58946325 | 58946221 | 8   | 9   | 5  | 1.955081399 | 0.0892323   | BCL2      | ENSG00000171791 |
| 18 | 58949457 | 58949893 | 58949636 | 10  | 17  | 18 | 1.111309427 | 0.376188    | BCL2      | ENSG00000171791 |
| 18 | 58967766 | 58968008 | 58967857 | 8   | 8   | 4  | 2.111487911 | 0.0804809   | BCL2      | ENSG00000171791 |
| 18 | 58973497 | 58974034 | 58973659 | 14  | 30  | 15 | 2.272782126 | 0.00282041  | BCL2      | ENSG00000171791 |
| 18 | 58978865 | 58979062 | 58978942 | 8   | 8   | 0  | 10.55743955 | 0.000925496 | BCL2      | ENSG00000171791 |
| 18 | 59020657 | 59020858 | 59020762 | 9   | 9   | 1  | 5.865244197 | 0.00272497  | BCL2      | ENSG00000171791 |
| 18 | 59055681 | 59055931 | 59055805 | 9   | 11  | 7  | 1.759573259 | 0.102361    | BCL2      | ENSG00000171791 |
| 18 | 59056256 | 59056612 | 59056426 | 16  | 21  | 1  | 12.90353723 | 4.95E-07    | BCL2      | ENSG00000171791 |
| 18 | 59059648 | 59059921 | 59059807 | 10  | 12  | 10 | 1.386330446 | 0.21117     | BCL2      | ENSG00000171791 |
| 18 | 59059998 | 59060178 | 59060149 | 8   | 9   | 12 | 0.902345261 | 0.602772    | BCL2      | ENSG00000171791 |
| 18 | 59072947 | 59073298 | 59073079 | 21  | 25  | 16 | 1.794074695 | 0.0280669   | BCL2      | ENSG00000171791 |
| 18 | 59075491 | 59075809 | 59075630 | 8   | 12  | 17 | 0.84720194  | 0.681997    | BCL2      | ENSG00000171791 |
| 18 | 59076084 | 59076383 | 59076233 | 10  | 14  | 10 | 1.599612054 | 0.114822    | BCL2      | ENSG00000171791 |
| 18 | 59131279 | 59131584 | 59131438 | 11  | 12  | 2  | 5.083211637 | 0.00143337  | BCL2      | ENSG00000171791 |
| 18 | 59140743 | 59141103 | 59140900 | 9   | 14  | 6  | 2.513676084 | 0.016726    | BCL2      | ENSG00000171791 |
| 18 | 59141237 | 59141515 | 59141401 | 16  | 18  | 10 | 2.026175268 | 0.0273052   | BCL2      | ENSG00000171791 |
| 18 | 59160498 | 59160742 | 59160628 | 11  | 12  | 6  | 2.178519273 | 0.0416567   | BCL2      | ENSG00000171791 |
| 18 | 59180105 | 59180434 | 59180269 | 23  | 25  | 4  | 6.099853964 | 4.56E-06    | KDSR      | ENSG00000119537 |
| 18 | 59185653 | 59186192 | 59185923 | 38  | 52  | 16 | 3.657152264 | 1.80E-07    | KDSR      | ENSG00000119537 |
| 18 | 59240593 | 59240958 | 59240785 | 10  | 16  | 10 | 1.812893661 | 0.0578656   | VPS4B     | ENSG00000119541 |
| 18 | 59294721 | 59295344 | 59294974 | 118 | 152 | 3  | 44.8691181  | 2.66E-47    | SERPINB5  | ENSG00000206075 |
| 18 | 59329505 | 59329932 | 59329806 | 9   | 17  | 10 | 1.919534464 | 0.0400548   |           | ENSG00000214318 |
| 18 | 59396737 | 59396947 | 59396842 | 8   | 9   | 1  | 5.865244197 | 0.00272497  | SERPINB13 | ENSG00000197641 |
| 18 | 59503115 | 59503308 | 59503235 | 9   | 9   | 2  | 3.910162798 | 0.00955088  | SERPINB11 | ENSG00000206072 |
| 18 | 59572687 | 59572907 | 59572766 | 9   | 9   | 3  | 2.932622098 | 0.0242899   | SERPINB7  | ENSG00000166396 |
| 18 | 59754401 | 59754648 | 59754493 | 8   | 8   | 2  | 3.519146518 | 0.017558    | HMSD      | ENSG00000221887 |

|    |          |          |          |    |    |   |             |             |          |                 |
|----|----------|----------|----------|----|----|---|-------------|-------------|----------|-----------------|
| 18 | 59788575 | 59788923 | 59788749 | 10 | 15 | 0 | 18.76878143 | 4.04E-06    | SERPINB8 | ENSG00000166401 |
| 18 | 59792911 | 59793128 | 59792990 | 9  | 10 | 2 | 4.301179077 | 0.00512919  | SERPINB8 | ENSG00000166401 |
| 18 | 60441122 | 60441448 | 60441270 | 12 | 16 | 0 | 19.94183027 | 1.86E-06    |          | ENSG00000210488 |
| 18 | 61694637 | 61694832 | 61694732 | 8  | 10 | 1 | 6.451768616 | 0.00135978  | CDH7     | ENSG00000081138 |
| 18 | 69593079 | 69593352 | 69593204 | 8  | 10 | 0 | 12.90353723 | 0.000195991 |          | ENSG00000210546 |
| 18 | 69856025 | 69856264 | 69856116 | 9  | 10 | 0 | 12.90353723 | 0.000195991 | FBXO15   | ENSG00000141665 |
| 18 | 69967990 | 69968483 | 69968289 | 35 | 53 | 4 | 12.66892746 | 2.41E-14    | C18orf55 | ENSG00000075336 |
| 18 | 70061018 | 70061249 | 70061101 | 8  | 9  | 3 | 2.932622098 | 0.0242899   |          | ENSG00000210553 |
| 18 | 70110244 | 70110493 | 70110338 | 9  | 11 | 3 | 3.519146518 | 0.00788869  | CYB5A    | ENSG00000166347 |
| 18 | 71972837 | 71973118 | 71973004 | 13 | 16 | 0 | 19.94183027 | 1.86E-06    | ZNF516   | ENSG00000101493 |
| 18 | 72461351 | 72461577 | 72461464 | 8  | 8  | 2 | 3.519146518 | 0.017558    |          | ENSG00000220032 |
| 18 | 72684192 | 72684381 | 72684286 | 9  | 10 | 0 | 12.90353723 | 0.000195991 | ZNF236   | ENSG00000130856 |
| 18 | 74403223 | 74403591 | 74403401 | 24 | 31 | 2 | 12.51252095 | 2.82E-09    |          | ENSG00000201723 |
| 18 | 74814600 | 74814809 | 74814704 | 8  | 10 | 0 | 12.90353723 | 0.000195991 | SALL3    | ENSG00000151514 |
| 18 | 74819130 | 74819309 | 74819219 | 8  | 8  | 2 | 3.519146518 | 0.017558    | SALL3    | ENSG00000151514 |
| 18 | 75991068 | 75991441 | 75991239 | 13 | 19 | 5 | 3.910162798 | 0.000546977 | ADNP2    | ENSG00000101544 |
| 19 | 457823   | 458018   | 457918   | 8  | 8  | 5 | 1.759573259 | 0.13508     | C19orf20 | ENSG00000141933 |
| 19 | 461658   | 461874   | 461768   | 8  | 9  | 0 | 11.73048839 | 0.000425898 | C19orf20 | ENSG00000141933 |
| 19 | 522079   | 522357   | 522236   | 14 | 14 | 2 | 5.865244197 | 0.000387308 | BSG      | ENSG00000172270 |
| 19 | 751343   | 751565   | 751454   | 8  | 9  | 0 | 11.73048839 | 0.000425898 | PTBP1    | ENSG00000011304 |
| 19 | 884381   | 884949   | 884597   | 21 | 41 | 0 | 49.26805125 | 6.97E-15    | ARID3A   | ENSG00000116017 |
| 19 | 913274   | 913479   | 913422   | 8  | 10 | 0 | 12.90353723 | 0.000195991 | WDR18    | ENSG00000065268 |
| 19 | 972359   | 972668   | 972510   | 9  | 13 | 8 | 1.824742639 | 0.0744168   |          | ENSG00000207357 |
| 19 | 1132631  | 1133038  | 1132918  | 12 | 17 | 9 | 2.111487911 | 0.0248715   | SBNO2    | ENSG00000064932 |
| 19 | 1161345  | 1161672  | 1161508  | 11 | 17 | 0 | 21.11487911 | 8.57E-07    | STK11    | ENSG00000118046 |
| 19 | 1345504  | 1345892  | 1345756  | 8  | 14 | 2 | 5.865244197 | 0.000387308 |          | ENSG00000176936 |
| 19 | 2009389  | 2009772  | 2009622  | 19 | 25 | 0 | 30.49926982 | 1.72E-09    | MKNK2    | ENSG00000099875 |
| 19 | 2012625  | 2012869  | 2012703  | 8  | 10 | 2 | 4.301179077 | 0.00512919  | MKNK2    | ENSG00000099875 |
| 19 | 2040183  | 2040470  | 2040352  | 14 | 16 | 1 | 9.970915134 | 1.89E-05    | C19orf36 | ENSG00000099840 |
| 19 | 2102804  | 2102999  | 2102901  | 8  | 9  | 2 | 3.910162798 | 0.00955088  | AP3D1    | ENSG00000065000 |
| 19 | 2105586  | 2105813  | 2105701  | 9  | 10 | 3 | 3.225884308 | 0.0139466   | AP3D1    | ENSG00000065000 |
| 19 | 2279429  | 2279687  | 2279604  | 8  | 10 | 4 | 2.580707446 | 0.0306059   |          | ENSG00000005206 |
| 19 | 2414085  | 2414348  | 2414219  | 8  | 10 | 5 | 2.150589539 | 0.0575848   | LMNB2    | ENSG00000176619 |
| 19 | 2458250  | 2458446  | 2458348  | 8  | 9  | 1 | 5.865244197 | 0.00272497  |          | ENSG00000209575 |

|    |         |         |         |     |     |   |             |                    |                 |
|----|---------|---------|---------|-----|-----|---|-------------|--------------------|-----------------|
| 19 | 2479846 | 2480068 | 2479994 | 9   | 11  | 5 | 2.346097679 | 0.0364013          | ENSG00000214571 |
| 19 | 2530433 | 2530845 | 2530625 | 22  | 32  | 5 | 6.451768616 | 1.97E-07 GNG7      | ENSG00000213611 |
| 19 | 2553397 | 2553675 | 2553552 | 12  | 13  | 1 | 8.211341875 | 0.000163445 GNG7   | ENSG00000213611 |
| 19 | 2599541 | 2599794 | 2599628 | 9   | 10  | 4 | 2.580707446 | 0.0306059          | ENSG00000176533 |
| 19 | 2691178 | 2691381 | 2691279 | 9   | 10  | 3 | 3.225884308 | 0.0139466 SLC39A3  | ENSG00000141873 |
| 19 | 2904251 | 2904491 | 2904371 | 12  | 12  | 1 | 7.624817456 | 0.000332769 ZNF77  | ENSG00000175691 |
| 19 | 3272334 | 3272539 | 3272464 | 8   | 8   | 0 | 10.55743955 | 0.000925496 NFIC   | ENSG00000141905 |
| 19 | 3348592 | 3348792 | 3348692 | 10  | 10  | 3 | 3.225884308 | 0.0139466 NFIC     | ENSG00000141905 |
| 19 | 3672535 | 3672716 | 3672625 | 8   | 8   | 3 | 2.639359888 | 0.0415794 TJP3     | ENSG00000105289 |
| 19 | 3677048 | 3677402 | 3677160 | 9   | 13  | 0 | 16.42268375 | 1.91E-05 TJP3      | ENSG00000105289 |
| 19 | 3712649 | 3712836 | 3712742 | 9   | 9   | 2 | 3.910162798 | 0.00955088 APBA3   | ENSG00000011132 |
| 19 | 3936342 | 3936524 | 3936443 | 8   | 8   | 2 | 3.519146518 | 0.017558 EEF2      | ENSG00000167658 |
| 19 | 3956747 | 3956964 | 3956855 | 8   | 8   | 7 | 1.319679944 | 0.283403 PIAS4     | ENSG00000105229 |
| 19 | 3993746 | 3993981 | 3993864 | 11  | 14  | 0 | 17.59573259 | 8.79E-06           | ENSG00000188205 |
| 19 | 4091469 | 4091662 | 4091518 | 8   | 9   | 5 | 1.955081399 | 0.0892323 CREB3L3  | ENSG00000060566 |
| 19 | 4197753 | 4198094 | 4197923 | 14  | 18  | 9 | 2.228792795 | 0.0164363 CCDC94   | ENSG00000105248 |
| 19 | 4289869 | 4290052 | 4289923 | 8   | 8   | 2 | 3.519146518 | 0.017558 STAP2     | ENSG00000178078 |
| 19 | 4293646 | 4293902 | 4293774 | 10  | 13  | 5 | 2.737113958 | 0.0137917 MPND     | ENSG00000008382 |
| 19 | 4470914 | 4471236 | 4471075 | 13  | 16  | 1 | 9.970915134 | 1.89E-05 KIAA1881  | ENSG00000167676 |
| 19 | 4487829 | 4488170 | 4488006 | 8   | 11  | 5 | 2.346097679 | 0.0364013          | ENSG00000214456 |
| 19 | 4575780 | 4576161 | 4575970 | 36  | 45  | 1 | 26.9801233  | 8.07E-15 TNFAIP8L1 | ENSG00000185361 |
| 19 | 4751877 | 4752158 | 4752017 | 14  | 16  | 2 | 6.647276756 | 0.000101928 FEM1A  | ENSG00000141965 |
| 19 | 4923898 | 4924204 | 4924051 | 16  | 20  | 3 | 6.158506406 | 2.99E-05 JMJD2B    | ENSG00000127663 |
| 19 | 4941344 | 4941576 | 4941446 | 10  | 12  | 3 | 3.812408728 | 0.004404 JMJD2B    | ENSG00000127663 |
| 19 | 4942951 | 4943264 | 4943101 | 10  | 11  | 2 | 4.692195357 | 0.00272444 JMJD2B  | ENSG00000127663 |
| 19 | 4997459 | 4997714 | 4997586 | 8   | 10  | 2 | 4.301179077 | 0.00512919 JMJD2B  | ENSG00000127663 |
| 19 | 5355122 | 5355396 | 5355273 | 10  | 10  | 6 | 1.843362462 | 0.0964212 ZNRF4    | ENSG00000105428 |
| 19 | 5421387 | 5421796 | 5421566 | 25  | 33  | 2 | 13.29455351 | 6.68E-10 ZNRF4     | ENSG00000105428 |
| 19 | 5641149 | 5641472 | 5641305 | 11  | 14  | 4 | 3.519146518 | 0.00361132 RPL36   | ENSG00000130255 |
| 19 | 5971616 | 5971817 | 5971716 | 8   | 8   | 1 | 5.278719777 | 0.00542188 RANBP3  | ENSG00000031823 |
| 19 | 6187955 | 6188191 | 6188060 | 10  | 12  | 3 | 3.812408728 | 0.004404 MLLT1     | ENSG00000130382 |
| 19 | 6284600 | 6284852 | 6284702 | 8   | 9   | 0 | 11.73048839 | 0.000425898 ASAH3  | ENSG00000167769 |
| 19 | 6344123 | 6344331 | 6344245 | 8   | 9   | 1 | 5.865244197 | 0.00272497 GTF2F1  | ENSG00000125651 |
| 19 | 6528279 | 6529040 | 6528630 | 163 | 222 | 1 | 130.7949456 | 8.27E-74           | ENSG00000199223 |

|    |          |          |          |    |    |   |             |             |          |                 |
|----|----------|----------|----------|----|----|---|-------------|-------------|----------|-----------------|
| 19 | 6694849  | 6695197  | 6695023  | 44 | 48 | 2 | 19.15979771 | 1.17E-14    | TRIP10   | ENSG00000125733 |
| 19 | 6695983  | 6696289  | 6696138  | 10 | 14 | 1 | 8.797866295 | 8.00E-05    | TRIP10   | ENSG00000125733 |
| 19 | 6717072  | 6717308  | 6717197  | 16 | 16 | 3 | 4.985457567 | 0.000385643 | SH2D3A   | ENSG00000125731 |
| 19 | 6814605  | 6814818  | 6814701  | 9  | 9  | 1 | 5.865244197 | 0.00272497  | EMR1     | ENSG00000174837 |
| 19 | 7049921  | 7050274  | 7050097  | 8  | 14 | 1 | 8.797866295 | 8.00E-05    | ZNF557   | ENSG00000130544 |
| 19 | 7089888  | 7090263  | 7090152  | 12 | 17 | 0 | 21.11487911 | 8.57E-07    | ZNF557   | ENSG00000130544 |
| 19 | 7386558  | 7386841  | 7386686  | 8  | 9  | 1 | 5.865244197 | 0.00272497  | ARHGEF18 | ENSG00000104880 |
| 19 | 7392908  | 7393101  | 7392987  | 9  | 10 | 4 | 2.580707446 | 0.0306059   | ARHGEF18 | ENSG00000104880 |
| 19 | 7561266  | 7561493  | 7561379  | 9  | 10 | 8 | 1.433726359 | 0.209175    | KIAA1543 | ENSG00000076826 |
| 19 | 7590082  | 7590308  | 7590195  | 8  | 9  | 4 | 2.346097679 | 0.050148    | XAB2     | ENSG00000076924 |
| 19 | 7719678  | 7719958  | 7719797  | 13 | 14 | 7 | 2.199466574 | 0.0303778   | CD209    | ENSG00000090659 |
| 19 | 7763219  | 7763447  | 7763333  | 9  | 10 | 1 | 6.451768616 | 0.00135978  | CLEC4GP1 | ENSG00000205680 |
| 19 | 7914640  | 7915026  | 7914826  | 8  | 16 | 4 | 3.988366054 | 0.00115141  | TIMM44   | ENSG00000104980 |
| 19 | 8223910  | 8224145  | 8224027  | 9  | 12 | 0 | 15.24963491 | 4.15E-05    | LASS4    | ENSG00000090661 |
| 19 | 8332984  | 8333217  | 8333104  | 8  | 9  | 2 | 3.910162798 | 0.00955088  | ANGPTL4  | ENSG00000167772 |
| 19 | 9011426  | 9011742  | 9011573  | 39 | 43 | 1 | 25.80707446 | 3.65E-14    | OR1M1    | ENSG00000170929 |
| 19 | 9026474  | 9026828  | 9026653  | 13 | 17 | 2 | 7.038293036 | 5.19E-05    | OR1M1    | ENSG00000170929 |
| 19 | 9047377  | 9047558  | 9047461  | 8  | 8  | 3 | 2.639359888 | 0.0415794   | OR1M1    | ENSG00000170929 |
| 19 | 9593473  | 9593923  | 9593714  | 46 | 58 | 0 | 69.20988152 | 1.30E-20    | ZNF561   | ENSG00000171469 |
| 19 | 9594245  | 9594619  | 9594420  | 28 | 35 | 0 | 42.22975822 | 7.34E-13    | ZNF561   | ENSG00000171469 |
| 19 | 9740275  | 9740471  | 9740376  | 10 | 10 | 3 | 3.225884308 | 0.0139466   | ZNF846   | ENSG00000196605 |
| 19 | 9885994  | 9886267  | 9886130  | 11 | 12 | 0 | 15.24963491 | 4.15E-05    | OLFM2    | ENSG00000105088 |
| 19 | 9999293  | 9999513  | 9999403  | 9  | 10 | 3 | 3.225884308 | 0.0139466   |          | ENSG00000167798 |
| 19 | 10084666 | 10084944 | 10084805 | 8  | 9  | 4 | 2.346097679 | 0.050148    | P2RY11   | ENSG00000221830 |
| 19 | 10091507 | 10091768 | 10091628 | 13 | 14 | 3 | 4.398933147 | 0.00132748  | EIF3G    | ENSG00000130811 |
| 19 | 10223639 | 10223854 | 10223746 | 9  | 10 | 5 | 2.150589539 | 0.0575848   | MRPL4    | ENSG00000105364 |
| 19 | 10241220 | 10241489 | 10241377 | 8  | 9  | 1 | 5.865244197 | 0.00272497  | ICAM1    | ENSG00000090339 |
| 19 | 10257729 | 10258028 | 10257878 | 12 | 16 | 2 | 6.647276756 | 0.000101928 | ICAM4    | ENSG00000105371 |
| 19 | 10360607 | 10360808 | 10360707 | 9  | 9  | 6 | 1.675784056 | 0.141978    | TYK2     | ENSG00000105397 |
| 19 | 10389620 | 10389922 | 10389772 | 11 | 13 | 2 | 5.474227917 | 0.000747844 | PDE4A    | ENSG00000065989 |
| 19 | 10433091 | 10433678 | 10433384 | 8  | 21 | 4 | 5.161414893 | 5.68E-05    | PDE4A    | ENSG00000065989 |
| 19 | 10473737 | 10473928 | 10473832 | 9  | 9  | 1 | 5.865244197 | 0.00272497  | KEAP1    | ENSG00000079999 |
| 19 | 10481346 | 10481579 | 10481453 | 8  | 9  | 0 | 11.73048839 | 0.000425898 | KEAP1    | ENSG00000079999 |
| 19 | 10540689 | 10540999 | 10540867 | 9  | 13 | 7 | 2.052835469 | 0.046392    | CDKN2D   | ENSG00000129355 |



|    |          |          |          |    |    |    |             |             |          |                 |
|----|----------|----------|----------|----|----|----|-------------|-------------|----------|-----------------|
| 19 | 10552746 | 10553083 | 10552914 | 10 | 13 | 2  | 5.474227917 | 0.000747844 | AP1M2    | ENSG00000129354 |
| 19 | 10575128 | 10575341 | 10575234 | 12 | 12 | 2  | 5.083211637 | 0.00143337  | AP1M2    | ENSG00000129354 |
| 19 | 10673014 | 10673205 | 10673083 | 8  | 8  | 4  | 2.111487911 | 0.0804809   | QTRT1    | ENSG00000213339 |
| 19 | 10688948 | 10689246 | 10689097 | 11 | 13 | 12 | 1.263283365 | 0.272203    | DNM2     | ENSG00000079805 |
| 19 | 10720756 | 10720980 | 10720864 | 9  | 11 | 2  | 4.692195357 | 0.00272444  |          | ENSG00000207972 |
| 19 | 10807955 | 10808149 | 10807995 | 8  | 8  | 1  | 5.278719777 | 0.00542188  | TMED1    | ENSG00000099203 |
| 19 | 10808207 | 10808393 | 10808312 | 8  | 8  | 1  | 5.278719777 | 0.00542188  | TMED1    | ENSG00000099203 |
| 19 | 10900326 | 10900718 | 10900491 | 12 | 18 | 5  | 3.714654658 | 0.000961539 | C19orf52 | ENSG00000142444 |
| 19 | 10913805 | 10914025 | 10913888 | 9  | 11 | 1  | 7.038293036 | 0.000674435 | C19orf52 | ENSG00000142444 |
| 19 | 10924483 | 10924884 | 10924705 | 14 | 21 | 7  | 3.225884308 | 0.00106152  | SMARCA4  | ENSG00000127616 |
| 19 | 11007532 | 11007761 | 11007656 | 10 | 11 | 2  | 4.692195357 | 0.00272444  |          | ENSG00000209664 |
| 19 | 11109446 | 11109832 | 11109593 | 12 | 18 | 7  | 2.785990993 | 0.00480525  | SPC24    | ENSG00000161888 |
| 19 | 11114972 | 11115294 | 11115163 | 10 | 14 | 5  | 2.932622098 | 0.00829617  | SPC24    | ENSG00000161888 |
| 19 | 11237285 | 11237730 | 11237541 | 12 | 22 | 3  | 6.745030826 | 8.05E-06    | DOCK6    | ENSG00000130158 |
| 19 | 11265400 | 11265727 | 11265562 | 11 | 13 | 2  | 5.474227917 | 0.000747844 | TSPAN16  | ENSG00000130167 |
| 19 | 11295950 | 11296404 | 11296177 | 24 | 33 | 1  | 19.94183027 | 6.71E-11    | RAB3D    | ENSG00000105514 |
| 19 | 11316051 | 11316335 | 11316181 | 12 | 14 | 10 | 1.599612054 | 0.114822    |          | ENSG00000183401 |
| 19 | 11346335 | 11346697 | 11346508 | 10 | 16 | 3  | 4.985457567 | 0.000385643 | C19orf39 | ENSG00000173928 |
| 19 | 11406904 | 11407096 | 11406976 | 8  | 9  | 1  | 5.865244197 | 0.00272497  | CCDC151  | ENSG00000198003 |
| 19 | 11454243 | 11454500 | 11454368 | 8  | 8  | 0  | 10.55743955 | 0.000925496 | ELAVL3   | ENSG00000196361 |
| 19 | 11468348 | 11468527 | 11468432 | 8  | 8  | 2  | 3.519146518 | 0.017558    | ZNF653   | ENSG00000161914 |
| 19 | 11530927 | 11531439 | 11531220 | 9  | 18 | 7  | 2.785990993 | 0.00480525  | ELOF1    | ENSG00000130165 |
| 19 | 11532432 | 11532623 | 11532515 | 9  | 10 | 4  | 2.580707446 | 0.0306059   | ELOF1    | ENSG00000130165 |
| 19 | 11552997 | 11553258 | 11553172 | 8  | 10 | 6  | 1.843362462 | 0.0964212   | ACP5     | ENSG00000102575 |
| 19 | 12007455 | 12007784 | 12007614 | 13 | 17 | 2  | 7.038293036 | 5.19E-05    | ZNF433   | ENSG00000197647 |
| 19 | 12031445 | 12031656 | 12031550 | 9  | 10 | 2  | 4.301179077 | 0.00512919  |          | ENSG00000209113 |
| 19 | 12265671 | 12265869 | 12265720 | 10 | 11 | 1  | 7.038293036 | 0.000674435 | ZNF44    | ENSG00000197857 |
| 19 | 12266679 | 12266886 | 12266772 | 9  | 11 | 4  | 2.815317214 | 0.0183428   | ZNF44    | ENSG00000197857 |
| 19 | 12372821 | 12373133 | 12372959 | 10 | 14 | 2  | 5.865244197 | 0.000387308 | ZNF799   | ENSG00000196466 |
| 19 | 12467107 | 12467403 | 12467229 | 14 | 18 | 4  | 4.457585589 | 0.000353565 | ZNF709   | ENSG00000196826 |
| 19 | 12523351 | 12523696 | 12523523 | 11 | 15 | 4  | 3.753756286 | 0.0020497   | ZNF564   | ENSG00000220949 |
| 19 | 12641060 | 12641530 | 12641359 | 14 | 26 | 11 | 2.639359888 | 0.0015854   | C19orf56 | ENSG00000105583 |
| 19 | 12653501 | 12653862 | 12653706 | 14 | 20 | 7  | 3.079253203 | 0.00177418  | DHPS     | ENSG00000095059 |
| 19 | 12668301 | 12668648 | 12668474 | 13 | 18 | 25 | 0.857227998 | 0.700223    | FBXW9    | ENSG00000132004 |

|    |          |          |          |    |    |    |             |             |           |                 |
|----|----------|----------|----------|----|----|----|-------------|-------------|-----------|-----------------|
| 19 | 12694267 | 12694809 | 12694565 | 12 | 26 | 7  | 3.959039833 | 7.16E-05    | TNPO2     | ENSG00000105576 |
| 19 | 12695319 | 12695529 | 12695424 | 8  | 10 | 3  | 3.225884308 | 0.0139466   | TNPO2     | ENSG00000105576 |
| 19 | 12706303 | 12706630 | 12706466 | 11 | 14 | 5  | 2.932622098 | 0.00829617  | C19orf43  | ENSG00000123144 |
| 19 | 12709161 | 12709395 | 12709230 | 8  | 11 | 6  | 2.010940867 | 0.0640214   | ASNA1     | ENSG00000198356 |
| 19 | 12729494 | 12729716 | 12729605 | 10 | 11 | 1  | 7.038293036 | 0.000674435 | BEST2     | ENSG00000039987 |
| 19 | 12732375 | 12732635 | 12732502 | 8  | 9  | 6  | 1.675784056 | 0.141978    | BEST2     | ENSG00000039987 |
| 19 | 12745361 | 12745673 | 12745517 | 10 | 13 | 6  | 2.346097679 | 0.0266147   | HOOK2     | ENSG00000095066 |
| 19 | 12746852 | 12747210 | 12747031 | 13 | 19 | 15 | 1.466311049 | 0.125014    | HOOK2     | ENSG00000095066 |
| 19 | 12747360 | 12747665 | 12747516 | 19 | 22 | 4  | 5.396024661 | 3.05E-05    | HOOK2     | ENSG00000095066 |
| 19 | 12749376 | 12749835 | 12749704 | 11 | 21 | 12 | 1.985159574 | 0.021936    | HOOK2     | ENSG00000095066 |
| 19 | 12753975 | 12754216 | 12754095 | 8  | 10 | 2  | 4.301179077 | 0.00512919  | HOOK2     | ENSG00000095066 |
| 19 | 12758402 | 12758700 | 12758551 | 13 | 16 | 4  | 3.988366054 | 0.00115141  | JUNB      | ENSG00000171223 |
| 19 | 12760367 | 12760826 | 12760546 | 10 | 19 | 16 | 1.380057458 | 0.163303    | JUNB      | ENSG00000171223 |
| 19 | 12761017 | 12761267 | 12761120 | 8  | 10 | 1  | 6.451768616 | 0.00135978  | JUNB      | ENSG00000171223 |
| 19 | 12761777 | 12762063 | 12761890 | 10 | 13 | 5  | 2.737113958 | 0.0137917   | JUNB      | ENSG00000171223 |
| 19 | 12762891 | 12763124 | 12763027 | 11 | 12 | 1  | 7.624817456 | 0.000332769 | JUNB      | ENSG00000171223 |
| 19 | 12763128 | 12763504 | 12763307 | 20 | 27 | 7  | 4.105670938 | 4.08E-05    | JUNB      | ENSG00000171223 |
| 19 | 12764364 | 12764745 | 12764566 | 9  | 16 | 6  | 2.848832895 | 0.00632407  | JUNB      | ENSG00000171223 |
| 19 | 12764768 | 12764953 | 12764856 | 8  | 8  | 7  | 1.319679944 | 0.283403    | JUNB      | ENSG00000171223 |
| 19 | 12765106 | 12765588 | 12765451 | 14 | 28 | 13 | 2.429886881 | 0.00217891  | JUNB      | ENSG00000171223 |
| 19 | 12765644 | 12765879 | 12765761 | 11 | 11 | 9  | 1.407658607 | 0.210479    | JUNB      | ENSG00000171223 |
| 19 | 12768402 | 12768602 | 12768492 | 8  | 9  | 8  | 1.303387599 | 0.281715    | PRDX2     | ENSG00000167815 |
| 19 | 12773435 | 12773634 | 12773543 | 9  | 9  | 3  | 2.932622098 | 0.0242899   | PRDX2     | ENSG00000167815 |
| 19 | 12773908 | 12774249 | 12774086 | 11 | 15 | 6  | 2.68125449  | 0.0103552   | PRDX2     | ENSG00000167815 |
| 19 | 12804439 | 12804639 | 12804562 | 8  | 9  | 5  | 1.955081399 | 0.0892323   | RTBDN     | ENSG00000132026 |
| 19 | 12807925 | 12808352 | 12808104 | 12 | 19 | 9  | 2.346097679 | 0.0107159   | RTBDN     | ENSG00000132026 |
| 19 | 12853306 | 12853620 | 12853466 | 12 | 14 | 2  | 5.865244197 | 0.000387308 | DNASE2    | ENSG00000105612 |
| 19 | 12856814 | 12857153 | 12856983 | 16 | 21 | 1  | 12.90353723 | 4.95E-07    | KLF1      | ENSG00000105610 |
| 19 | 12905482 | 12905948 | 12905651 | 15 | 22 | 9  | 2.69801233  | 0.00276236  | FARSA     | ENSG00000179115 |
| 19 | 12909929 | 12910120 | 12910024 | 8  | 9  | 10 | 1.066408036 | 0.444985    | CALR      | ENSG00000179218 |
| 19 | 12910234 | 12910464 | 12910387 | 10 | 13 | 4  | 3.28453675  | 0.00629037  | CALR      | ENSG00000179218 |
| 19 | 12912227 | 12912583 | 12912448 | 10 | 14 | 2  | 5.865244197 | 0.000387308 | CALR      | ENSG00000179218 |
| 19 | 12917958 | 12918251 | 12918108 | 9  | 10 | 3  | 3.225884308 | 0.0139466   | RAD23A    | ENSG00000179262 |
| 19 | 12928969 | 12929397 | 12929148 | 9  | 18 | 5  | 3.714654658 | 0.000961539 | GADD45GII | ENSG00000179271 |

|    |          |          |          |    |    |    |             |             |          |                 |
|----|----------|----------|----------|----|----|----|-------------|-------------|----------|-----------------|
| 19 | 12936800 | 12937003 | 12936901 | 10 | 10 | 8  | 1.433726359 | 0.209175    | DAND5    | ENSG00000179284 |
| 19 | 12937222 | 12937472 | 12937347 | 8  | 11 | 6  | 2.010940867 | 0.0640214   | DAND5    | ENSG00000179284 |
| 19 | 12949712 | 12949929 | 12949872 | 9  | 11 | 3  | 3.519146518 | 0.00788869  | DAND5    | ENSG00000179284 |
| 19 | 13008111 | 13008502 | 13008290 | 9  | 16 | 1  | 9.970915134 | 1.89E-05    | NFIX     | ENSG00000008441 |
| 19 | 13023456 | 13023778 | 13023613 | 14 | 16 | 7  | 2.492728784 | 0.0124193   | NFIX     | ENSG00000008441 |
| 19 | 13065718 | 13065914 | 13065816 | 9  | 9  | 1  | 5.865244197 | 0.00272497  | LYL1     | ENSG00000104903 |
| 19 | 13088405 | 13088624 | 13088514 | 8  | 10 | 3  | 3.225884308 | 0.0139466   | TRMT1    | ENSG00000104907 |
| 19 | 13121825 | 13122395 | 13122216 | 18 | 31 | 4  | 7.507512572 | 9.10E-08    | IER2     | ENSG00000160888 |
| 19 | 13123386 | 13123631 | 13123465 | 8  | 9  | 8  | 1.303387599 | 0.281715    | IER2     | ENSG00000160888 |
| 19 | 13126707 | 13126942 | 13126795 | 14 | 15 | 5  | 3.128130238 | 0.00492422  | IER2     | ENSG00000160888 |
| 19 | 13134474 | 13134956 | 13134686 | 13 | 22 | 4  | 5.396024661 | 3.05E-05    |          | ENSG00000213253 |
| 19 | 13141689 | 13141884 | 13141766 | 9  | 9  | 3  | 2.932622098 | 0.0242899   |          | ENSG00000213253 |
| 19 | 13400212 | 13400410 | 13400311 | 9  | 11 | 4  | 2.815317214 | 0.0183428   | CACNA1A  | ENSG00000141837 |
| 19 | 13561077 | 13561331 | 13561201 | 12 | 13 | 1  | 8.211341875 | 0.000163445 | CACNA1A  | ENSG00000141837 |
| 19 | 13625746 | 13626064 | 13625908 | 18 | 22 | 1  | 13.49006165 | 2.37E-07    | CCDC130  | ENSG00000104957 |
| 19 | 13642737 | 13642987 | 13642862 | 10 | 10 | 7  | 1.612942154 | 0.147335    | CCDC130  | ENSG00000104957 |
| 19 | 13737397 | 13737740 | 13737568 | 20 | 23 | 6  | 4.021881735 | 0.000148535 |          | ENSG00000037757 |
| 19 | 13746072 | 13746354 | 13746213 | 8  | 12 | 3  | 3.812408728 | 0.004404    | C19orf53 | ENSG00000104979 |
| 19 | 13815419 | 13815762 | 13815590 | 17 | 23 | 1  | 14.07658607 | 1.14E-07    |          | ENSG00000205463 |
| 19 | 13834076 | 13834317 | 13834219 | 9  | 10 | 3  | 3.225884308 | 0.0139466   |          | ENSG00000207613 |
| 19 | 13984404 | 13984646 | 13984477 | 8  | 10 | 0  | 12.90353723 | 0.000195991 | RFX1     | ENSG00000132005 |
| 19 | 13995436 | 13995653 | 13995566 | 8  | 8  | 5  | 1.759573259 | 0.13508     | RLN3     | ENSG00000171136 |
| 19 | 14043938 | 14044193 | 14044054 | 10 | 12 | 4  | 3.049926982 | 0.0108184   |          | ENSG00000141854 |
| 19 | 14053086 | 14053564 | 14053409 | 8  | 16 | 15 | 1.246364392 | 0.263987    | C19orf67 | ENSG00000188032 |
| 19 | 14179135 | 14179438 | 14179286 | 8  | 10 | 1  | 6.451768616 | 0.00135978  | LPHN1    | ENSG00000072071 |
| 19 | 14389837 | 14390104 | 14389970 | 9  | 10 | 3  | 3.225884308 | 0.0139466   | DDX39    | ENSG00000123136 |
| 19 | 14497642 | 14497909 | 14497771 | 9  | 9  | 2  | 3.910162798 | 0.00955088  |          | ENSG00000207707 |
| 19 | 14543851 | 14544142 | 14543971 | 13 | 14 | 7  | 2.199466574 | 0.0303778   | NDUFB7   | ENSG00000099795 |
| 19 | 15021586 | 15021822 | 15021721 | 11 | 11 | 2  | 4.692195357 | 0.00272444  | CASP14   | ENSG00000105141 |
| 19 | 15108152 | 15108368 | 15108259 | 8  | 10 | 2  | 4.301179077 | 0.00512919  |          | ENSG00000209740 |
| 19 | 15167849 | 15168077 | 15167972 | 9  | 11 | 3  | 3.519146518 | 0.00788869  | NOTCH3   | ENSG00000074181 |
| 19 | 15352156 | 15352364 | 15352260 | 8  | 9  | 5  | 1.955081399 | 0.0892323   | AKAP8    | ENSG00000105127 |
| 19 | 15390524 | 15391256 | 15391058 | 12 | 31 | 9  | 3.753756286 | 2.87E-05    | AKAP8L   | ENSG00000011243 |
| 19 | 15451495 | 15451847 | 15451671 | 10 | 14 | 2  | 5.865244197 | 0.000387308 | PGLYRP2  | ENSG00000161031 |

|    |          |          |          |    |    |    |             |             |          |                 |
|----|----------|----------|----------|----|----|----|-------------|-------------|----------|-----------------|
| 19 | 15460287 | 15460891 | 15460601 | 17 | 32 | 7  | 4.838826462 | 2.26E-06    | PGLYRP2  | ENSG00000161031 |
| 19 | 15527480 | 15528011 | 15527659 | 9  | 21 | 5  | 4.301179077 | 0.000172642 | CYP4F22  | ENSG00000171954 |
| 19 | 15528246 | 15528542 | 15528394 | 8  | 12 | 2  | 5.083211637 | 0.00143337  | CYP4F22  | ENSG00000171954 |
| 19 | 15535152 | 15535342 | 15535253 | 9  | 10 | 7  | 1.612942154 | 0.147335    | CYP4F22  | ENSG00000171954 |
| 19 | 15612054 | 15612318 | 15612206 | 9  | 10 | 4  | 2.580707446 | 0.0306059   | CYP4F3   | ENSG00000186529 |
| 19 | 15618414 | 15618766 | 15618590 | 24 | 29 | 2  | 11.73048839 | 1.18E-08    | CYP4F3   | ENSG00000186529 |
| 19 | 15731850 | 15732032 | 15731941 | 8  | 8  | 1  | 5.278719777 | 0.00542188  | OR10H3   | ENSG00000171936 |
| 19 | 15808735 | 15809141 | 15809035 | 9  | 17 | 3  | 5.278719777 | 0.000205462 |          | ENSG00000214049 |
| 19 | 15864473 | 15864973 | 15864678 | 34 | 55 | 4  | 13.138147   | 5.86E-15    | CYP4F2   | ENSG00000186115 |
| 19 | 15947584 | 15947991 | 15947812 | 15 | 24 | 14 | 1.955081399 | 0.0175993   | HSH2D    | ENSG00000196684 |
| 19 | 16013388 | 16013609 | 16013448 | 8  | 10 | 3  | 3.225884308 | 0.0139466   |          | ENSG00000167459 |
| 19 | 16115345 | 16115627 | 16115493 | 8  | 11 | 6  | 2.010940867 | 0.0640214   | HSH2D    | ENSG00000196684 |
| 19 | 16144826 | 16145122 | 16144974 | 15 | 19 | 7  | 2.932622098 | 0.00293566  | CIB3     | ENSG00000141977 |
| 19 | 16169445 | 16169666 | 16169556 | 9  | 10 | 1  | 6.451768616 | 0.00135978  | AP1M1    | ENSG00000072958 |
| 19 | 16225691 | 16226022 | 16225856 | 8  | 12 | 2  | 5.083211637 | 0.00143337  | AP1M1    | ENSG00000072958 |
| 19 | 16354987 | 16355250 | 16355162 | 8  | 10 | 3  | 3.225884308 | 0.0139466   |          | ENSG00000209747 |
| 19 | 16435694 | 16436132 | 16435873 | 16 | 29 | 6  | 5.027352168 | 4.43E-06    | EPS15L1  | ENSG00000127527 |
| 19 | 16467949 | 16468245 | 16468076 | 8  | 12 | 3  | 3.812408728 | 0.004404    | CALR3    | ENSG00000141979 |
| 19 | 16536652 | 16536957 | 16536803 | 11 | 12 | 6  | 2.178519273 | 0.0416567   | SLC35E1  | ENSG00000127526 |
| 19 | 16544308 | 16544643 | 16544435 | 9  | 13 | 1  | 8.211341875 | 0.000163445 | SLC35E1  | ENSG00000127526 |
| 19 | 16631972 | 16632234 | 16632103 | 9  | 11 | 1  | 7.038293036 | 0.000674435 | C19orf42 | ENSG00000214046 |
| 19 | 16928953 | 16929323 | 16929132 | 16 | 22 | 4  | 5.396024661 | 3.05E-05    |          | ENSG00000223132 |
| 19 | 17047131 | 17047503 | 17047336 | 8  | 14 | 5  | 2.932622098 | 0.00829617  |          | ENSG00000131351 |
| 19 | 17186976 | 17187348 | 17187086 | 9  | 14 | 0  | 17.59573259 | 8.79E-06    | USE1     | ENSG00000053501 |
| 19 | 17265691 | 17265898 | 17265804 | 9  | 9  | 0  | 11.73048839 | 0.000425898 | ABHD8    | ENSG00000127220 |
| 19 | 17277231 | 17277458 | 17277344 | 10 | 11 | 4  | 2.815317214 | 0.0183428   | MRPL34   | ENSG00000130312 |
| 19 | 17306570 | 17306779 | 17306694 | 8  | 9  | 3  | 2.932622098 | 0.0242899   | ANO8     | ENSG00000074855 |
| 19 | 17626774 | 17627235 | 17627004 | 15 | 26 | 5  | 5.278719777 | 8.57E-06    | UNC13A   | ENSG00000130477 |
| 19 | 17763132 | 17763311 | 17763221 | 8  | 8  | 1  | 5.278719777 | 0.00542188  | B3GNT3   | ENSG00000179913 |
| 19 | 17861471 | 17861728 | 17861599 | 12 | 13 | 2  | 5.474227917 | 0.000747844 | SLC5A5   | ENSG00000105641 |
| 19 | 17874540 | 17874810 | 17874675 | 10 | 14 | 0  | 17.59573259 | 8.79E-06    | SLC5A5   | ENSG00000105641 |
| 19 | 17904335 | 17904584 | 17904459 | 12 | 13 | 8  | 1.824742639 | 0.0744168   | CCDC124  | ENSG00000007080 |
| 19 | 18001587 | 18001991 | 18001812 | 14 | 22 | 2  | 8.993374435 | 1.66E-06    | ARRDC2   | ENSG00000105643 |
| 19 | 18006729 | 18007187 | 18006976 | 52 | 62 | 2  | 24.63402563 | 3.62E-19    | ARRDC2   | ENSG00000105643 |

|    |          |          |          |     |     |    |             |             |          |                 |
|----|----------|----------|----------|-----|-----|----|-------------|-------------|----------|-----------------|
| 19 | 18016826 | 18017113 | 18016995 | 9   | 12  | 3  | 3.812408728 | 0.004404    | ARRDC2   | ENSG00000105643 |
| 19 | 18065228 | 18065675 | 18065496 | 9   | 19  | 2  | 7.820325595 | 1.32E-05    | MAST3    | ENSG00000099308 |
| 19 | 18084804 | 18085094 | 18084949 | 11  | 12  | 6  | 2.178519273 | 0.0416567   | MAST3    | ENSG00000099308 |
| 19 | 18128901 | 18129375 | 18129232 | 9   | 16  | 7  | 2.492728784 | 0.0124193   | PIK3R2   | ENSG00000105647 |
| 19 | 18145493 | 18145762 | 18145656 | 11  | 14  | 0  | 17.59573259 | 8.79E-06    | IFI30    | ENSG00000216490 |
| 19 | 18195762 | 18196958 | 18196461 | 143 | 211 | 5  | 41.44772566 | 6.23E-64    | PDE4C    | ENSG00000105650 |
| 19 | 18244267 | 18244544 | 18244405 | 9   | 9   | 0  | 11.73048839 | 0.000425898 | KIAA1683 | ENSG00000130518 |
| 19 | 18263688 | 18264101 | 18263924 | 8   | 13  | 5  | 2.737113958 | 0.0137917   | JUND     | ENSG00000130522 |
| 19 | 18294963 | 18295233 | 18295097 | 11  | 13  | 3  | 4.105670938 | 0.00243034  | LSM4     | ENSG00000130520 |
| 19 | 18321445 | 18321687 | 18321566 | 10  | 11  | 1  | 7.038293036 | 0.000674435 | PGPEP1   | ENSG00000130517 |
| 19 | 18328355 | 18328676 | 18328507 | 13  | 15  | 0  | 18.76878143 | 4.04E-06    | PGPEP1   | ENSG00000130517 |
| 19 | 18336304 | 18337308 | 18336806 | 376 | 542 | 7  | 79.62068997 | 3.67E-170   | GDF15    | ENSG00000130513 |
| 19 | 18345327 | 18346260 | 18345767 | 285 | 392 | 2  | 153.669398  | 7.75E-129   | GDF15    | ENSG00000130513 |
| 19 | 18351903 | 18352386 | 18352054 | 17  | 29  | 2  | 11.73048839 | 1.18E-08    | GDF15    | ENSG00000130513 |
| 19 | 18357779 | 18358224 | 18358009 | 68  | 83  | 3  | 24.63402563 | 8.34E-25    | GDF15    | ENSG00000130513 |
| 19 | 18360317 | 18360558 | 18360437 | 9   | 10  | 1  | 6.451768616 | 0.00135978  | GDF15    | ENSG00000130513 |
| 19 | 18382464 | 18382643 | 18382564 | 8   | 8   | 4  | 2.111487911 | 0.0804809   |          | ENSG00000221167 |
| 19 | 18410397 | 18410860 | 18410681 | 29  | 38  | 1  | 22.87445237 | 1.58E-12    | ISYNA1   | ENSG00000105655 |
| 19 | 18515687 | 18516010 | 18515852 | 8   | 12  | 6  | 2.178519273 | 0.0416567   | FKBP8    | ENSG00000105701 |
| 19 | 18523545 | 18523768 | 18523596 | 8   | 10  | 1  | 6.451768616 | 0.00135978  | C19orf50 | ENSG00000105700 |
| 19 | 18529278 | 18529546 | 18529417 | 11  | 13  | 4  | 3.28453675  | 0.00629037  | C19orf50 | ENSG00000105700 |
| 19 | 18530185 | 18530378 | 18530274 | 8   | 9   | 1  | 5.865244197 | 0.00272497  | C19orf50 | ENSG00000105700 |
| 19 | 18649743 | 18650009 | 18649858 | 12  | 13  | 0  | 16.42268375 | 1.91E-05    | CRTC1    | ENSG00000105662 |
| 19 | 18654881 | 18655095 | 18654988 | 8   | 9   | 1  | 5.865244197 | 0.00272497  | CRTC1    | ENSG00000105662 |
| 19 | 18655454 | 18655672 | 18655563 | 9   | 9   | 0  | 11.73048839 | 0.000425898 | CRTC1    | ENSG00000105662 |
| 19 | 18728717 | 18729198 | 18729011 | 38  | 54  | 1  | 32.25884308 | 8.88E-18    | COMP     | ENSG00000105664 |
| 19 | 18891370 | 18891701 | 18891535 | 10  | 14  | 4  | 3.519146518 | 0.00361132  | DDX49    | ENSG00000105671 |
| 19 | 18958644 | 18958840 | 18958778 | 8   | 8   | 3  | 2.639359888 | 0.0415794   |          | ENSG00000209787 |
| 19 | 19146877 | 19147090 | 19146956 | 8   | 8   | 1  | 5.278719777 | 0.00542188  | MEF2B    | ENSG00000064489 |
| 19 | 19175016 | 19175318 | 19175157 | 9   | 13  | 4  | 3.28453675  | 0.00629037  | NR2C2AP  | ENSG00000184162 |
| 19 | 19338648 | 19338903 | 19338746 | 9   | 11  | 10 | 1.279689643 | 0.277323    | KIAA0892 | ENSG00000129933 |
| 19 | 19349627 | 19349896 | 19349761 | 12  | 13  | 3  | 4.105670938 | 0.00243034  | GATAD2A  | ENSG00000167491 |
| 19 | 19381147 | 19381370 | 19381268 | 12  | 12  | 3  | 3.812408728 | 0.004404    | GATAD2A  | ENSG00000167491 |
| 19 | 19462227 | 19462420 | 19462323 | 9   | 9   | 3  | 2.932622098 | 0.0242899   | TSSK6    | ENSG00000178093 |

|    |          |          |          |     |     |     |             |             |         |                 |
|----|----------|----------|----------|-----|-----|-----|-------------|-------------|---------|-----------------|
| 19 | 19487906 | 19488242 | 19488050 | 10  | 15  | 9   | 1.876878143 | 0.0544542   | NDUFA13 | ENSG00000130288 |
| 19 | 19704981 | 19705235 | 19705132 | 8   | 10  | 5   | 2.150589539 | 0.0575848   | ZNF14   | ENSG00000105708 |
| 19 | 19747895 | 19748164 | 19748029 | 8   | 9   | 3   | 2.932622098 | 0.0242899   | ZNF14   | ENSG00000105708 |
| 19 | 19748182 | 19748792 | 19748447 | 101 | 142 | 8   | 18.63844267 | 2.64E-38    | ZNF14   | ENSG00000105708 |
| 19 | 20008602 | 20008791 | 20008683 | 8   | 8   | 0   | 10.55743955 | 0.000925496 | ZNF682  | ENSG00000197124 |
| 19 | 21457560 | 21457847 | 21457703 | 13  | 16  | 4   | 3.988366054 | 0.00115141  | ZNF429  | ENSG00000197013 |
| 19 | 21733120 | 21733299 | 21733208 | 8   | 9   | 0   | 11.73048839 | 0.000425898 | ZNF100  | ENSG00000197020 |
| 19 | 21987049 | 21987230 | 21987170 | 8   | 8   | 1   | 5.278719777 | 0.00542188  | ZNF208  | ENSG00000160321 |
| 19 | 23262370 | 23262628 | 23262483 | 11  | 14  | 3   | 4.398933147 | 0.00132748  |         | ENSG00000213971 |
| 19 | 23797377 | 23797683 | 23797484 | 9   | 13  | 3   | 4.105670938 | 0.00243034  |         | ENSG00000205246 |
| 19 | 23974127 | 23974306 | 23974241 | 8   | 8   | 2   | 3.519146518 | 0.017558    |         | ENSG00000211551 |
| 19 | 23975337 | 23975716 | 23975537 | 26  | 34  | 12  | 3.158208414 | 7.02E-05    |         | ENSG00000211551 |
| 19 | 23975782 | 23976120 | 23975951 | 24  | 27  | 21  | 1.49297125  | 0.078146    |         | ENSG00000211551 |
| 19 | 23976481 | 23976982 | 23976660 | 22  | 35  | 12  | 3.24844294  | 4.27E-05    |         | ENSG00000211551 |
| 19 | 23982035 | 23982214 | 23982124 | 8   | 8   | 5   | 1.759573259 | 0.13508     |         | ENSG00000201966 |
| 19 | 24317867 | 24318059 | 24318030 | 11  | 11  | 34  | 0.402188173 | 0.998318    | ZNF254  | ENSG00000213096 |
| 19 | 32423698 | 32424165 | 32423867 | 96  | 118 | 158 | 0.877942213 | 0.860319    |         |                 |
| 19 | 32424168 | 32424780 | 32424347 | 39  | 72  | 113 | 0.751162853 | 0.973449    |         |                 |
| 19 | 32425032 | 32425532 | 32425242 | 39  | 53  | 62  | 1.005470434 | 0.49019     |         |                 |
| 19 | 32425939 | 32426786 | 32426608 | 56  | 88  | 129 | 0.803087282 | 0.946307    |         |                 |
| 19 | 32426893 | 32427531 | 32427069 | 52  | 63  | 62  | 1.191668662 | 0.162027    |         |                 |
| 19 | 32427598 | 32427930 | 32427764 | 19  | 24  | 22  | 1.275053086 | 0.200162    |         |                 |
| 19 | 32428343 | 32428994 | 32428614 | 86  | 111 | 136 | 0.958988832 | 0.630387    |         |                 |
| 19 | 32429598 | 32429808 | 32429634 | 9   | 11  | 14  | 0.938439071 | 0.570297    |         |                 |
| 19 | 32430010 | 32430541 | 32430323 | 176 | 186 | 235 | 0.929492089 | 0.773717    |         |                 |
| 19 | 32431013 | 32431209 | 32431177 | 10  | 11  | 24  | 0.563063443 | 0.956421    |         |                 |
| 19 | 32449095 | 32449274 | 32449123 | 8   | 8   | 5   | 1.759573259 | 0.13508     |         |                 |
| 19 | 32494079 | 32494258 | 32494108 | 9   | 9   | 20  | 0.558594685 | 0.944249    |         |                 |
| 19 | 32561992 | 32562322 | 32562157 | 16  | 16  | 15  | 1.246364392 | 0.263987    |         |                 |
| 19 | 32571357 | 32571547 | 32571509 | 10  | 10  | 9   | 1.290353723 | 0.279648    |         |                 |
| 19 | 32574941 | 32575140 | 32575040 | 8   | 9   | 2   | 3.910162798 | 0.00955088  |         |                 |
| 19 | 32658823 | 32659152 | 32658987 | 15  | 15  | 37  | 0.493915301 | 0.993614    |         |                 |
| 19 | 33664832 | 33665250 | 33665072 | 40  | 52  | 2   | 20.72386283 | 6.10E-16    |         | ENSG00000205243 |
| 19 | 34572172 | 34572703 | 34572529 | 16  | 32  | 8   | 4.301179077 | 6.43E-06    | VSTM2B  | ENSG00000187135 |

|    |          |          |          |    |    |   |             |             |          |                 |
|----|----------|----------|----------|----|----|---|-------------|-------------|----------|-----------------|
| 19 | 34770143 | 34770333 | 34770260 | 8  | 9  | 7 | 1.466311049 | 0.20706     | POP4     | ENSG00000105171 |
| 19 | 34788811 | 34789178 | 34788990 | 15 | 22 | 7 | 3.372515413 | 0.000629223 | POP4     | ENSG00000105171 |
| 19 | 34851124 | 34851367 | 34851284 | 11 | 13 | 0 | 16.42268375 | 1.91E-05    | PLEKHF1  | ENSG00000166289 |
| 19 | 34851502 | 34851722 | 34851608 | 9  | 10 | 1 | 6.451768616 | 0.00135978  | PLEKHF1  | ENSG00000166289 |
| 19 | 34854080 | 34854260 | 34854170 | 10 | 10 | 2 | 4.301179077 | 0.00512919  | PLEKHF1  | ENSG00000166289 |
| 19 | 34899286 | 34899576 | 34899437 | 9  | 10 | 2 | 4.301179077 | 0.00512919  | C19orf12 | ENSG00000131943 |
| 19 | 34975050 | 34975229 | 34975090 | 8  | 8  | 4 | 2.111487911 | 0.0804809   | CCNE1    | ENSG00000105173 |
| 19 | 35500605 | 35500787 | 35500711 | 8  | 8  | 0 | 10.55743955 | 0.000925496 | ZNF536   | ENSG00000198597 |
| 19 | 35678155 | 35678564 | 35678334 | 13 | 20 | 2 | 8.211341875 | 6.65E-06    |          | ENSG00000223148 |
| 19 | 35852239 | 35852553 | 35852382 | 8  | 11 | 3 | 3.519146518 | 0.00788869  |          | ENSG00000223148 |
| 19 | 35879225 | 35879573 | 35879399 | 8  | 12 | 1 | 7.624817456 | 0.000332769 |          | ENSG00000223148 |
| 19 | 36000810 | 36001059 | 36000880 | 9  | 12 | 0 | 15.24963491 | 4.15E-05    |          | ENSG00000223148 |
| 19 | 36437096 | 36437284 | 36437190 | 8  | 10 | 1 | 6.451768616 | 0.00135978  | TSHZ3    | ENSG00000121297 |
| 19 | 36561103 | 36561341 | 36561166 | 9  | 11 | 0 | 14.07658607 | 9.02E-05    | TSHZ3    | ENSG00000121297 |
| 19 | 36738814 | 36739012 | 36738913 | 8  | 9  | 0 | 11.73048839 | 0.000425898 | TSHZ3    | ENSG00000121297 |
| 19 | 36755578 | 36755964 | 36755858 | 9  | 16 | 4 | 3.988366054 | 0.00115141  |          | ENSG00000201894 |
| 19 | 37556542 | 37556932 | 37556713 | 13 | 20 | 2 | 8.211341875 | 6.65E-06    | ZNF507   | ENSG00000168813 |
| 19 | 38263715 | 38264117 | 38263874 | 11 | 17 | 2 | 7.038293036 | 5.19E-05    | GPATCH1  | ENSG00000076650 |
| 19 | 38359758 | 38360124 | 38359890 | 11 | 16 | 9 | 1.994183027 | 0.0370915   | LRP3     | ENSG00000130881 |
| 19 | 38360163 | 38360352 | 38360257 | 8  | 10 | 1 | 6.451768616 | 0.00135978  | LRP3     | ENSG00000130881 |
| 19 | 38481262 | 38481624 | 38481441 | 24 | 31 | 3 | 9.384390715 | 1.82E-08    | CEBPA    | ENSG00000184771 |
| 19 | 38531512 | 38531704 | 38531615 | 9  | 9  | 3 | 2.932622098 | 0.0242899   | CEBPG    | ENSG00000153879 |
| 19 | 38533227 | 38533520 | 38533311 | 10 | 14 | 0 | 17.59573259 | 8.79E-06    | CEBPG    | ENSG00000153879 |
| 19 | 38557062 | 38557244 | 38557086 | 10 | 10 | 0 | 12.90353723 | 0.000195991 | CEBPG    | ENSG00000153879 |
| 19 | 38724601 | 38724816 | 38724683 | 8  | 10 | 3 | 3.225884308 | 0.0139466   | PEPD     | ENSG00000124299 |
| 19 | 38786162 | 38786517 | 38786406 | 14 | 19 | 0 | 23.46097679 | 1.81E-07    | CHST8    | ENSG00000124302 |
| 19 | 38789358 | 38789537 | 38789459 | 8  | 9  | 3 | 2.932622098 | 0.0242899   | CHST8    | ENSG00000124302 |
| 19 | 38867011 | 38867246 | 38867120 | 9  | 11 | 4 | 2.815317214 | 0.0183428   | CHST8    | ENSG00000124302 |
| 19 | 39066961 | 39067140 | 39067049 | 8  | 8  | 3 | 2.639359888 | 0.0415794   |          | ENSG00000209919 |
| 19 | 39268168 | 39268485 | 39268324 | 10 | 14 | 8 | 1.955081399 | 0.0506438   |          | ENSG00000186008 |
| 19 | 39316898 | 39317177 | 39317037 | 9  | 11 | 3 | 3.519146518 | 0.00788869  | LSM14A   | ENSG00000105216 |
| 19 | 39401026 | 39401333 | 39401179 | 9  | 13 | 2 | 5.474227917 | 0.000747844 | KIAA0355 | ENSG00000166398 |
| 19 | 39424282 | 39424616 | 39424449 | 11 | 16 | 5 | 3.323638378 | 0.00288759  | KIAA0355 | ENSG00000166398 |
| 19 | 39610862 | 39611229 | 39611041 | 9  | 15 | 1 | 9.384390715 | 3.90E-05    | UBA2     | ENSG00000126261 |

|    |          |          |          |    |    |    |             |             |          |                 |
|----|----------|----------|----------|----|----|----|-------------|-------------|----------|-----------------|
| 19 | 39684382 | 39684576 | 39684479 | 9  | 9  | 8  | 1.303387599 | 0.281715    | WTIP     | ENSG00000142279 |
| 19 | 39916824 | 39917036 | 39916964 | 8  | 10 | 2  | 4.301179077 | 0.00512919  | ZNF181   | ENSG00000197841 |
| 19 | 39955765 | 39956011 | 39955888 | 10 | 11 | 3  | 3.519146518 | 0.00788869  | ZNF599   | ENSG00000153896 |
| 19 | 40109759 | 40109949 | 40109861 | 9  | 9  | 3  | 2.932622098 | 0.0242899   | ZNF30    | ENSG00000168661 |
| 19 | 40155967 | 40156223 | 40156095 | 9  | 10 | 4  | 2.580707446 | 0.0306059   | ZNF792   | ENSG00000180884 |
| 19 | 40195807 | 40195989 | 40195942 | 8  | 9  | 1  | 5.865244197 | 0.00272497  | GRAMD1A  | ENSG00000089351 |
| 19 | 40231866 | 40232054 | 40231960 | 8  | 8  | 2  | 3.519146518 | 0.017558    | HPN      | ENSG00000105707 |
| 19 | 40249912 | 40250149 | 40250027 | 11 | 12 | 2  | 5.083211637 | 0.00143337  |          | ENSG00000179066 |
| 19 | 40298855 | 40299108 | 40298993 | 9  | 11 | 5  | 2.346097679 | 0.0364013   | FXVD3    | ENSG00000089356 |
| 19 | 40307157 | 40307412 | 40307283 | 10 | 12 | 7  | 1.906204364 | 0.0695918   | FXVD3    | ENSG00000089356 |
| 19 | 40318325 | 40318509 | 40318414 | 8  | 8  | 2  | 3.519146518 | 0.017558    | LGI4     | ENSG00000153902 |
| 19 | 40399336 | 40399529 | 40399432 | 8  | 8  | 2  | 3.519146518 | 0.017558    | FAM187B  | ENSG00000177558 |
| 19 | 40431397 | 40431759 | 40431597 | 8  | 14 | 2  | 5.865244197 | 0.000387308 | LSR      | ENSG00000105699 |
| 19 | 40632360 | 40632846 | 40632539 | 9  | 17 | 6  | 3.016411301 | 0.00381427  | FFAR2    | ENSG00000126262 |
| 19 | 40651586 | 40651767 | 40651619 | 9  | 9  | 1  | 5.865244197 | 0.00272497  | FFAR2    | ENSG00000126262 |
| 19 | 40661760 | 40661947 | 40661874 | 8  | 9  | 4  | 2.346097679 | 0.050148    | KRTDAP   | ENSG00000188508 |
| 19 | 40668290 | 40668517 | 40668401 | 13 | 14 | 1  | 8.797866295 | 8.00E-05    | KRTDAP   | ENSG00000188508 |
| 19 | 40758315 | 40758728 | 40758551 | 49 | 54 | 43 | 1.466311049 | 0.0285368   |          | ENSG00000209925 |
| 19 | 40795358 | 40795540 | 40795501 | 8  | 9  | 1  | 5.865244197 | 0.00272497  | KIAA0841 | ENSG00000089336 |
| 19 | 40811636 | 40811848 | 40811717 | 9  | 10 | 2  | 4.301179077 | 0.00512919  | RBM42    | ENSG00000126254 |
| 19 | 40826223 | 40826716 | 40826597 | 11 | 19 | 5  | 3.910162798 | 0.000546977 | ETV2     | ENSG00000105672 |
| 19 | 40899703 | 40899931 | 40899820 | 10 | 13 | 2  | 5.474227917 | 0.000747844 |          | ENSG00000105663 |
| 19 | 40931082 | 40931287 | 40931201 | 8  | 10 | 4  | 2.580707446 | 0.0306059   | LIN37    | ENSG00000188223 |
| 19 | 40940646 | 40941056 | 40940843 | 11 | 19 | 2  | 7.820325595 | 1.32E-05    | C19orf55 | ENSG00000167595 |
| 19 | 41011501 | 41011796 | 41011648 | 9  | 11 | 0  | 14.07658607 | 9.02E-05    | PRODH2   | ENSG00000221873 |
| 19 | 41310578 | 41310958 | 41310726 | 10 | 15 | 5  | 3.128130238 | 0.00492422  | CAPNS1   | ENSG00000126247 |
| 19 | 41315315 | 41315499 | 41315407 | 9  | 9  | 1  | 5.865244197 | 0.00272497  | CAPNS1   | ENSG00000126247 |
| 19 | 41319669 | 41320112 | 41319894 | 12 | 22 | 6  | 3.854303329 | 0.000260696 | CAPNS1   | ENSG00000126247 |
| 19 | 41397491 | 41397691 | 41397591 | 8  | 9  | 2  | 3.910162798 | 0.00955088  | ZNF565   | ENSG00000196357 |
| 19 | 41397740 | 41397965 | 41397863 | 8  | 10 | 3  | 3.225884308 | 0.0139466   | ZNF146   | ENSG00000167635 |
| 19 | 41756015 | 41756194 | 41756089 | 8  | 8  | 4  | 2.111487911 | 0.0804809   | ZNF529   | ENSG00000186020 |
| 19 | 41849459 | 41849700 | 41849547 | 8  | 11 | 4  | 2.815317214 | 0.0183428   | ZNF461   | ENSG00000197808 |
| 19 | 41870121 | 41870316 | 41870218 | 10 | 11 | 2  | 4.692195357 | 0.00272444  | ZNF567   | ENSG00000189042 |
| 19 | 42099046 | 42099249 | 42099147 | 8  | 9  | 4  | 2.346097679 | 0.050148    | ZNF568   | ENSG00000198453 |



|    |          |          |          |    |    |    |             |             |          |                 |
|----|----------|----------|----------|----|----|----|-------------|-------------|----------|-----------------|
| 19 | 42393061 | 42393261 | 42393161 | 9  | 10 | 2  | 4.301179077 | 0.00512919  | ZNF585B  | ENSG00000197800 |
| 19 | 42400416 | 42400834 | 42400512 | 14 | 21 | 2  | 8.602358155 | 3.33E-06    | ZNF383   | ENSG00000188283 |
| 19 | 42400858 | 42401174 | 42401022 | 12 | 15 | 0  | 18.76878143 | 4.04E-06    | ZNF383   | ENSG00000188283 |
| 19 | 42553525 | 42553919 | 42553650 | 12 | 17 | 3  | 5.278719777 | 0.000205462 | ZNF527   | ENSG00000189164 |
| 19 | 42650102 | 42650548 | 42650275 | 13 | 21 | 4  | 5.161414893 | 5.68E-05    | ZNF569   | ENSG00000196437 |
| 19 | 42652014 | 42652341 | 42652165 | 13 | 17 | 0  | 21.11487911 | 8.57E-07    | ZNF570   | ENSG00000171827 |
| 19 | 42688871 | 42689108 | 42688989 | 11 | 12 | 6  | 2.178519273 | 0.0416567   | ZNF793   | ENSG00000188227 |
| 19 | 42689394 | 42689827 | 42689648 | 12 | 20 | 7  | 3.079253203 | 0.00177418  | ZNF793   | ENSG00000188227 |
| 19 | 42961766 | 42962198 | 42962019 | 10 | 18 | 3  | 5.571981987 | 0.000108726 | ZNF573   | ENSG00000189144 |
| 19 | 43058604 | 43058862 | 43058781 | 8  | 11 | 2  | 4.692195357 | 0.00272444  | WDR87    | ENSG00000171804 |
| 19 | 43148531 | 43149044 | 43148841 | 31 | 45 | 2  | 17.98674887 | 1.07E-13    | SIPA1L3  | ENSG00000105738 |
| 19 | 43152108 | 43152489 | 43152311 | 16 | 25 | 3  | 7.624817456 | 1.09E-06    | SIPA1L3  | ENSG00000105738 |
| 19 | 43162182 | 43162663 | 43162398 | 19 | 32 | 0  | 38.7106117  | 7.53E-12    | SIPA1L3  | ENSG00000105738 |
| 19 | 43164457 | 43164844 | 43164704 | 13 | 19 | 6  | 3.351568112 | 0.00134187  |          | ENSG00000221258 |
| 19 | 43183667 | 43183932 | 43183762 | 8  | 10 | 1  | 6.451768616 | 0.00135978  |          | ENSG00000221258 |
| 19 | 43473436 | 43473679 | 43473557 | 13 | 14 | 3  | 4.398933147 | 0.00132748  |          | ENSG00000200209 |
| 19 | 43483102 | 43483566 | 43483387 | 8  | 17 | 0  | 21.11487911 | 8.57E-07    | C19orf33 | ENSG00000167644 |
| 19 | 43486629 | 43486855 | 43486729 | 9  | 10 | 2  | 4.301179077 | 0.00512919  | C19orf33 | ENSG00000167644 |
| 19 | 43525215 | 43525463 | 43525338 | 8  | 9  | 1  | 5.865244197 | 0.00272497  | C19orf15 | ENSG00000099338 |
| 19 | 43556787 | 43557474 | 43556993 | 12 | 27 | 16 | 1.932080441 | 0.0141162   | PSMD8    | ENSG00000099341 |
| 19 | 43697518 | 43697862 | 43697690 | 10 | 15 | 1  | 9.384390715 | 3.90E-05    | RYR1     | ENSG00000196218 |
| 19 | 43801519 | 43801738 | 43801628 | 10 | 10 | 7  | 1.612942154 | 0.147335    | EIF3K    | ENSG00000178982 |
| 19 | 43840508 | 43840689 | 43840670 | 8  | 9  | 2  | 3.910162798 | 0.00955088  | ACTN4    | ENSG00000130402 |
| 19 | 43841166 | 43841398 | 43841222 | 11 | 14 | 4  | 3.519146518 | 0.00361132  | ACTN4    | ENSG00000130402 |
| 19 | 43844509 | 43844856 | 43844680 | 15 | 20 | 7  | 3.079253203 | 0.00177418  | ACTN4    | ENSG00000130402 |
| 19 | 43857438 | 43857736 | 43857571 | 11 | 14 | 1  | 8.797866295 | 8.00E-05    | ACTN4    | ENSG00000130402 |
| 19 | 43881587 | 43881768 | 43881677 | 8  | 9  | 1  | 5.865244197 | 0.00272497  | CAPN12   | ENSG00000182472 |
| 19 | 43957905 | 43958280 | 43958101 | 27 | 36 | 0  | 43.40280705 | 3.38E-13    | LGALS7   | ENSG00000205076 |
| 19 | 44014254 | 44014462 | 44014396 | 9  | 11 | 4  | 2.815317214 | 0.0183428   | ECH1     | ENSG00000104823 |
| 19 | 44017932 | 44018147 | 44018049 | 13 | 13 | 1  | 8.211341875 | 0.000163445 | ECH1     | ENSG00000104823 |
| 19 | 44019425 | 44019803 | 44019624 | 33 | 42 | 2  | 16.81370003 | 9.62E-13    | ECH1     | ENSG00000104823 |
| 19 | 44020040 | 44020625 | 44020293 | 26 | 47 | 11 | 4.692195357 | 2.58E-08    | ECH1     | ENSG00000104823 |
| 19 | 44113420 | 44113621 | 44113520 | 12 | 12 | 3  | 3.812408728 | 0.004404    | MRPS12   | ENSG00000128626 |
| 19 | 44144656 | 44144952 | 44144787 | 11 | 14 | 4  | 3.519146518 | 0.00361132  | FBXO17   | ENSG00000161241 |

|    |          |          |          |     |     |    |             |             |          |                 |
|----|----------|----------|----------|-----|-----|----|-------------|-------------|----------|-----------------|
| 19 | 44171459 | 44171696 | 44171567 | 8   | 8   | 9  | 1.055743955 | 0.456865    | FBXO17   | ENSG00000161241 |
| 19 | 44213942 | 44214293 | 44214116 | 10  | 15  | 1  | 9.384390715 | 3.90E-05    | FBXO27   | ENSG00000161243 |
| 19 | 44216065 | 44216295 | 44216180 | 11  | 12  | 0  | 15.24963491 | 4.15E-05    | FBXO27   | ENSG00000161243 |
| 19 | 44307863 | 44308071 | 44307956 | 8   | 10  | 4  | 2.580707446 | 0.0306059   | PAK4     | ENSG00000130669 |
| 19 | 44337270 | 44337629 | 44337454 | 11  | 16  | 2  | 6.647276756 | 0.000101928 | PAK4     | ENSG00000130669 |
| 19 | 44342807 | 44343156 | 44343061 | 12  | 17  | 5  | 3.519146518 | 0.00167472  | PAK4     | ENSG00000130669 |
| 19 | 44349506 | 44349781 | 44349630 | 10  | 11  | 0  | 14.07658607 | 9.02E-05    | PAK4     | ENSG00000130669 |
| 19 | 44350096 | 44350460 | 44350226 | 9   | 13  | 5  | 2.737113958 | 0.0137917   | PAK4     | ENSG00000130669 |
| 19 | 44420292 | 44420563 | 44420387 | 9   | 12  | 1  | 7.624817456 | 0.000332769 | IL28B    | ENSG00000197110 |
| 19 | 44478540 | 44478821 | 44478680 | 8   | 11  | 5  | 2.346097679 | 0.0364013   | IL29     | ENSG00000182393 |
| 19 | 44591842 | 44592082 | 44591985 | 10  | 11  | 9  | 1.407658607 | 0.210479    | ZFP36    | ENSG00000128016 |
| 19 | 44618293 | 44618576 | 44618434 | 8   | 11  | 3  | 3.519146518 | 0.00788869  | RPS16    | ENSG00000105193 |
| 19 | 44627824 | 44628165 | 44627987 | 14  | 18  | 8  | 2.476436439 | 0.00924552  | SUPT5H   | ENSG00000196235 |
| 19 | 44663056 | 44663313 | 44663165 | 8   | 9   | 5  | 1.955081399 | 0.0892323   | TIMM50   | ENSG00000105197 |
| 19 | 44740304 | 44740600 | 44740473 | 11  | 14  | 7  | 2.199466574 | 0.0303778   | EID2     | ENSG00000176396 |
| 19 | 44781691 | 44781894 | 44781792 | 8   | 8   | 2  | 3.519146518 | 0.017558    | LGALS13  | ENSG00000105198 |
| 19 | 44975550 | 44975813 | 44975681 | 11  | 12  | 3  | 3.812408728 | 0.004404    | LEUTX    | ENSG00000213921 |
| 19 | 45049713 | 45049905 | 45049864 | 8   | 9   | 0  | 11.73048839 | 0.000425898 | FBL      | ENSG00000105202 |
| 19 | 45167009 | 45167301 | 45167173 | 9   | 12  | 1  | 7.624817456 | 0.000332769 | PSMC4    | ENSG0000013275  |
| 19 | 45337766 | 45337959 | 45337821 | 8   | 8   | 5  | 1.759573259 | 0.13508     |          | ENSG00000210014 |
| 19 | 45483123 | 45483404 | 45483266 | 8   | 10  | 2  | 4.301179077 | 0.00512919  | AKT2     | ENSG00000105221 |
| 19 | 45500002 | 45500635 | 45500181 | 33  | 54  | 1  | 32.25884308 | 8.88E-18    |          | ENSG00000206674 |
| 19 | 45503185 | 45503395 | 45503262 | 8   | 8   | 3  | 2.639359888 | 0.0415794   |          | ENSG00000206674 |
| 19 | 45520656 | 45520848 | 45520722 | 8   | 9   | 2  | 3.910162798 | 0.00955088  |          | ENSG00000207281 |
| 19 | 45521528 | 45521747 | 45521637 | 13  | 14  | 10 | 1.599612054 | 0.114822    |          | ENSG00000207281 |
| 19 | 45528736 | 45529366 | 45529041 | 100 | 137 | 4  | 32.37614797 | 4.31E-41    |          | ENSG00000207281 |
| 19 | 45546169 | 45546350 | 45546259 | 8   | 9   | 1  | 5.865244197 | 0.00272497  | C19orf47 | ENSG00000160392 |
| 19 | 45590752 | 45590965 | 45590858 | 8   | 8   | 3  | 2.639359888 | 0.0415794   | HIPK4    | ENSG00000160396 |
| 19 | 45623470 | 45624223 | 45623909 | 57  | 88  | 10 | 9.491031518 | 3.62E-20    | SERTAD1  | ENSG00000197019 |
| 19 | 45624226 | 45624420 | 45624323 | 8   | 10  | 2  | 4.301179077 | 0.00512919  | SERTAD1  | ENSG00000197019 |
| 19 | 45631365 | 45631727 | 45631557 | 11  | 17  | 5  | 3.519146518 | 0.00167472  | SERTAD1  | ENSG00000197019 |
| 19 | 45662240 | 45662656 | 45662419 | 12  | 19  | 1  | 11.73048839 | 2.14E-06    | BLVRB    | ENSG00000090013 |
| 19 | 45767842 | 45768054 | 45767965 | 10  | 10  | 0  | 12.90353723 | 0.000195991 | SHKBP1   | ENSG00000160410 |
| 19 | 45774542 | 45774781 | 45774621 | 8   | 11  | 4  | 2.815317214 | 0.0183428   | SHKBP1   | ENSG00000160410 |

|    |          |          |          |     |     |    |             |             |          |                 |
|----|----------|----------|----------|-----|-----|----|-------------|-------------|----------|-----------------|
| 19 | 45832244 | 45832510 | 45832418 | 11  | 15  | 4  | 3.753756286 | 0.0020497   | LTBP4    | ENSG00000090006 |
| 19 | 45916566 | 45916860 | 45916713 | 12  | 14  | 3  | 4.398933147 | 0.00132748  | ITPKC    | ENSG00000086544 |
| 19 | 46143324 | 46143897 | 46143503 | 18  | 31  | 3  | 9.384390715 | 1.82E-08    | CYP2B7P1 | ENSG00000197573 |
| 19 | 46229643 | 46229943 | 46229794 | 12  | 15  | 2  | 6.256260476 | 0.000199274 | CYP2A7P1 | ENSG00000213908 |
| 19 | 46416273 | 46416622 | 46416447 | 16  | 22  | 3  | 6.745030826 | 8.05E-06    | AXL      | ENSG00000167601 |
| 19 | 46459678 | 46460391 | 46459935 | 27  | 58  | 5  | 11.53498025 | 4.87E-15    | HNRNPUL1 | ENSG00000105323 |
| 19 | 46461344 | 46461705 | 46461545 | 8   | 14  | 5  | 2.932622098 | 0.00829617  | HNRNPUL1 | ENSG00000105323 |
| 19 | 46461805 | 46462329 | 46462037 | 11  | 22  | 6  | 3.854303329 | 0.000260696 | HNRNPUL1 | ENSG00000105323 |
| 19 | 46507813 | 46508283 | 46507992 | 11  | 20  | 1  | 12.31701281 | 1.03E-06    | CCDC97   | ENSG00000142039 |
| 19 | 46607095 | 46607319 | 46607205 | 8   | 8   | 1  | 5.278719777 | 0.00542188  | BCKDHA   | ENSG00000142046 |
| 19 | 46637439 | 46637819 | 46637632 | 8   | 16  | 3  | 4.985457567 | 0.000385643 | ATP5SL   | ENSG00000105341 |
| 19 | 46725931 | 46726145 | 46726010 | 12  | 13  | 0  | 16.42268375 | 1.91E-05    | CEACAM21 | ENSG00000007129 |
| 19 | 46726155 | 46726983 | 46726547 | 146 | 204 | 0  | 240.4750121 | 7.96E-70    | CEACAM21 | ENSG00000007129 |
| 19 | 46793514 | 46793751 | 46793634 | 8   | 10  | 3  | 3.225884308 | 0.0139466   | CEACAM21 | ENSG00000007129 |
| 19 | 46942466 | 46942660 | 46942563 | 9   | 9   | 3  | 2.932622098 | 0.0242899   | CEACAM6  | ENSG00000086548 |
| 19 | 46981392 | 46981727 | 46981552 | 10  | 14  | 2  | 5.865244197 | 0.000387308 | CEACAM3  | ENSG00000170956 |
| 19 | 47055262 | 47055789 | 47055641 | 21  | 34  | 8  | 4.561856597 | 2.04E-06    | RPS19    | ENSG00000105372 |
| 19 | 47055950 | 47056980 | 47056129 | 52  | 101 | 6  | 17.09299737 | 2.07E-27    | RPS19    | ENSG00000105372 |
| 19 | 47069123 | 47069456 | 47069289 | 9   | 13  | 5  | 2.737113958 | 0.0137917   | CD79A    | ENSG00000105369 |
| 19 | 47079872 | 47080388 | 47080188 | 19  | 27  | 13 | 2.346097679 | 0.00332578  | ARHGEF1  | ENSG00000076928 |
| 19 | 47153824 | 47154040 | 47153894 | 9   | 10  | 3  | 3.225884308 | 0.0139466   | RABAC1   | ENSG00000105404 |
| 19 | 47416115 | 47416360 | 47416231 | 8   | 10  | 3  | 3.225884308 | 0.0139466   | ZNF526   | ENSG00000167625 |
| 19 | 47439110 | 47439524 | 47439274 | 10  | 18  | 5  | 3.714654658 | 0.000961539 |          | ENSG00000204957 |
| 19 | 47440695 | 47441113 | 47440934 | 9   | 19  | 10 | 2.132816071 | 0.01835     |          | ENSG00000204957 |
| 19 | 47464615 | 47464844 | 47464712 | 8   | 10  | 6  | 1.843362462 | 0.0964212   | ERF      | ENSG00000105722 |
| 19 | 47466772 | 47467023 | 47466897 | 8   | 10  | 0  | 12.90353723 | 0.000195991 | CIC      | ENSG00000079432 |
| 19 | 47487478 | 47487720 | 47487605 | 8   | 10  | 1  | 6.451768616 | 0.00135978  | CIC      | ENSG00000079432 |
| 19 | 47521164 | 47521375 | 47521253 | 8   | 10  | 1  | 6.451768616 | 0.00135978  | MEGF8    | ENSG00000105429 |
| 19 | 47548031 | 47548535 | 47548371 | 14  | 23  | 2  | 9.384390715 | 8.25E-07    | MEGF8    | ENSG00000105429 |
| 19 | 47592984 | 47593419 | 47593240 | 8   | 17  | 1  | 10.55743955 | 9.18E-06    | CNFN     | ENSG00000105427 |
| 19 | 47616270 | 47616462 | 47616283 | 10  | 12  | 2  | 5.083211637 | 0.00143337  | LIPE     | ENSG00000079435 |
| 19 | 47629731 | 47629936 | 47629833 | 9   | 10  | 0  | 12.90353723 | 0.000195991 | LIPE     | ENSG00000079435 |
| 19 | 48325402 | 48325617 | 48325492 | 9   | 10  | 1  | 6.451768616 | 0.00135978  | CEACAMP9 | ENSG00000219038 |
| 19 | 48651696 | 48652074 | 48651875 | 9   | 16  | 4  | 3.988366054 | 0.00115141  | LYPD3    | ENSG00000124466 |

|    |          |          |          |    |     |    |             |             |          |                 |
|----|----------|----------|----------|----|-----|----|-------------|-------------|----------|-----------------|
| 19 | 48715525 | 48715728 | 48715666 | 9  | 10  | 0  | 12.90353723 | 0.000195991 | ETHE1    | ENSG00000105755 |
| 19 | 48792329 | 48792613 | 48792453 | 17 | 19  | 6  | 3.351568112 | 0.00134187  | ZNF576   | ENSG00000124444 |
| 19 | 48878895 | 48879108 | 48879001 | 8  | 8   | 2  | 3.519146518 | 0.017558    | PLAUR    | ENSG00000011422 |
| 19 | 48950644 | 48950908 | 48950737 | 8  | 12  | 0  | 15.24963491 | 4.15E-05    | C19orf61 | ENSG00000105771 |
| 19 | 48978608 | 48979282 | 48978964 | 67 | 101 | 6  | 17.09299737 | 2.07E-27    | KCNN4    | ENSG00000104783 |
| 19 | 48980272 | 48980713 | 48980541 | 24 | 32  | 4  | 7.742122339 | 4.68E-08    | KCNN4    | ENSG00000104783 |
| 19 | 48981073 | 48981547 | 48981290 | 23 | 38  | 4  | 9.149780947 | 8.17E-10    | KCNN4    | ENSG00000104783 |
| 19 | 49023015 | 49023352 | 49023174 | 10 | 15  | 5  | 3.128130238 | 0.00492422  | ZNF283   | ENSG00000176232 |
| 19 | 49146916 | 49147239 | 49147077 | 8  | 12  | 2  | 5.083211637 | 0.00143337  | ZNF221   | ENSG00000018607 |
| 19 | 49309163 | 49309403 | 49309275 | 13 | 14  | 2  | 5.865244197 | 0.000387308 | ZNF225   | ENSG00000159904 |
| 19 | 49360765 | 49361170 | 49360944 | 12 | 19  | 5  | 3.910162798 | 0.000546977 | ZNF226   | ENSG00000167380 |
| 19 | 49455851 | 49456102 | 49456001 | 13 | 14  | 1  | 8.797866295 | 8.00E-05    | ZNF233   | ENSG00000159915 |
| 19 | 49860775 | 49861049 | 49860912 | 15 | 16  | 6  | 2.848832895 | 0.00632407  | CEACAM19 | ENSG00000186567 |
| 19 | 49918991 | 49919242 | 49919077 | 11 | 14  | 5  | 2.932622098 | 0.00829617  | CEACAM16 | ENSG00000213892 |
| 19 | 49936652 | 49936837 | 49936744 | 8  | 9   | 4  | 2.346097679 | 0.050148    | BCL3     | ENSG00000069399 |
| 19 | 49937072 | 49937427 | 49937249 | 26 | 32  | 6  | 5.530087385 | 7.11E-07    | BCL3     | ENSG00000069399 |
| 19 | 49942404 | 49942713 | 49942552 | 10 | 14  | 5  | 2.932622098 | 0.00829617  | BCL3     | ENSG00000069399 |
| 19 | 49965837 | 49966174 | 49966012 | 26 | 30  | 6  | 5.194930574 | 2.42E-06    |          | ENSG00000216919 |
| 19 | 50039911 | 50040212 | 50040045 | 9  | 13  | 7  | 2.052835469 | 0.046392    | PVRL2    | ENSG00000130202 |
| 19 | 50040814 | 50041057 | 50040935 | 9  | 11  | 0  | 14.07658607 | 9.02E-05    | PVRL2    | ENSG00000130202 |
| 19 | 50272548 | 50272730 | 50272585 | 9  | 9   | 1  | 5.865244197 | 0.00272497  | ZNF296   | ENSG00000170684 |
| 19 | 50286469 | 50286669 | 50286569 | 9  | 11  | 6  | 2.010940867 | 0.0640214   | LRRC68   | ENSG00000104866 |
| 19 | 50286695 | 50287154 | 50286882 | 11 | 23  | 6  | 4.021881735 | 0.000148535 | LRRC68   | ENSG00000104866 |
| 19 | 50287858 | 50288257 | 50288079 | 9  | 16  | 5  | 3.323638378 | 0.00288759  | LRRC68   | ENSG00000104866 |
| 19 | 50308623 | 50308981 | 50308802 | 8  | 13  | 1  | 8.211341875 | 0.000163445 |          | ENSG00000213043 |
| 19 | 50318478 | 50318921 | 50318623 | 13 | 22  | 8  | 2.997791478 | 0.00137524  |          | ENSG00000213043 |
| 19 | 50331206 | 50331628 | 50331449 | 9  | 17  | 2  | 7.038293036 | 5.19E-05    |          | ENSG00000213043 |
| 19 | 50501230 | 50501598 | 50501408 | 18 | 23  | 4  | 5.630634429 | 1.63E-05    | CKM      | ENSG00000104879 |
| 19 | 50521592 | 50521771 | 50521671 | 8  | 8   | 2  | 3.519146518 | 0.017558    | CKM      | ENSG00000104879 |
| 19 | 50595362 | 50595644 | 50595501 | 18 | 21  | 2  | 8.602358155 | 3.33E-06    | PPP1R13L | ENSG00000104881 |
| 19 | 50599350 | 50599655 | 50599502 | 11 | 14  | 8  | 1.955081399 | 0.0506438   | PPP1R13L | ENSG00000104881 |
| 19 | 50599971 | 50600358 | 50600188 | 13 | 19  | 7  | 2.932622098 | 0.00293566  | PPP1R13L | ENSG00000104881 |
| 19 | 50600776 | 50601160 | 50600982 | 10 | 15  | 1  | 9.384390715 | 3.90E-05    | CD3EAP   | ENSG00000117877 |
| 19 | 50601469 | 50601716 | 50601619 | 13 | 14  | 13 | 1.256838042 | 0.269506    | CD3EAP   | ENSG00000117877 |

|    |          |          |          |    |    |    |             |             |         |                  |
|----|----------|----------|----------|----|----|----|-------------|-------------|---------|------------------|
| 19 | 50618857 | 50619099 | 50618969 | 11 | 13 | 3  | 4.105670938 | 0.00243034  | ERCC1   | ENSG00000012061  |
| 19 | 50673441 | 50673965 | 50673620 | 8  | 20 | 6  | 3.519146518 | 0.000784044 |         | ENSG000000213889 |
| 19 | 50680286 | 50680607 | 50680464 | 10 | 12 | 1  | 7.624817456 | 0.000332769 |         | ENSG000000213889 |
| 19 | 50688333 | 50688572 | 50688397 | 10 | 13 | 1  | 8.211341875 | 0.000163445 | RTN2    | ENSG000000125744 |
| 19 | 50827315 | 50827891 | 50827717 | 67 | 84 | 6  | 14.24416448 | 3.92E-22    |         | ENSG000000199066 |
| 19 | 50837389 | 50837581 | 50837459 | 8  | 8  | 3  | 2.639359888 | 0.0415794   | EML2    | ENSG000000125746 |
| 19 | 50863954 | 50864277 | 50864111 | 8  | 12 | 2  | 5.083211637 | 0.00143337  | GIPR    | ENSG00000010310  |
| 19 | 50925933 | 50926183 | 50926082 | 14 | 17 | 3  | 5.278719777 | 0.000205462 |         | ENSG000000177051 |
| 19 | 51012332 | 51012589 | 51012460 | 8  | 8  | 4  | 2.111487911 | 0.0804809   | RSHL1   | ENSG000000104941 |
| 19 | 51056004 | 51056262 | 51056133 | 8  | 11 | 5  | 2.346097679 | 0.0364013   | SYMPK   | ENSG000000125755 |
| 19 | 51078524 | 51078724 | 51078597 | 8  | 9  | 1  | 5.865244197 | 0.00272497  | IRF2BP1 | ENSG000000170604 |
| 19 | 51122865 | 51123129 | 51122995 | 8  | 10 | 5  | 2.150589539 | 0.0575848   | NANOS2  | ENSG000000188425 |
| 19 | 51147772 | 51147964 | 51147906 | 8  | 9  | 2  | 3.910162798 | 0.00955088  | NOVA2   | ENSG000000104967 |
| 19 | 51224101 | 51224369 | 51224265 | 8  | 11 | 3  | 3.519146518 | 0.00788869  | PGLYRP1 | ENSG00000008438  |
| 19 | 51236293 | 51236546 | 51236417 | 9  | 11 | 2  | 4.692195357 | 0.00272444  | IGFL4   | ENSG000000204869 |
| 19 | 51272676 | 51272863 | 51272763 | 8  | 9  | 5  | 1.955081399 | 0.0892323   |         | ENSG000000203347 |
| 19 | 51328475 | 51329112 | 51328682 | 57 | 88 | 1  | 52.20067335 | 4.91E-29    | IGFL3   | ENSG000000188624 |
| 19 | 51354545 | 51354870 | 51354709 | 17 | 21 | 2  | 8.602358155 | 3.33E-06    | IGFL3   | ENSG000000188624 |
| 19 | 51401478 | 51401711 | 51401616 | 11 | 11 | 1  | 7.038293036 | 0.000674435 | IGFL1   | ENSG000000188293 |
| 19 | 51494102 | 51494281 | 51494191 | 8  | 8  | 0  | 10.55743955 | 0.000925496 | HIF3A   | ENSG000000124440 |
| 19 | 51568767 | 51569191 | 51568979 | 9  | 19 | 2  | 7.820325595 | 1.32E-05    | PPP5C   | ENSG00000011485  |
| 19 | 51628834 | 51629017 | 51628904 | 8  | 8  | 0  | 10.55743955 | 0.000925496 | CCDC8   | ENSG000000169515 |
| 19 | 51683009 | 51683225 | 51683142 | 8  | 10 | 0  | 12.90353723 | 0.000195991 |         | ENSG000000204850 |
| 19 | 51715620 | 51715803 | 51715699 | 8  | 9  | 1  | 5.865244197 | 0.00272497  |         | ENSG000000204851 |
| 19 | 51737791 | 51738027 | 51737909 | 8  | 9  | 6  | 1.675784056 | 0.141978    |         | ENSG000000204851 |
| 19 | 51741633 | 51741813 | 51741723 | 8  | 9  | 4  | 2.346097679 | 0.050148    |         | ENSG000000204851 |
| 19 | 51796111 | 51796307 | 51796209 | 8  | 8  | 2  | 3.519146518 | 0.017558    | CALM3   | ENSG000000160014 |
| 19 | 51892526 | 51892812 | 51892669 | 9  | 11 | 3  | 3.519146518 | 0.00788869  |         | ENSG000000210172 |
| 19 | 51961707 | 51961910 | 51961822 | 8  | 8  | 2  | 3.519146518 | 0.017558    | STRN4   | ENSG000000090372 |
| 19 | 51966073 | 51966256 | 51966187 | 8  | 8  | 2  | 3.519146518 | 0.017558    | SLC1A5  | ENSG000000105281 |
| 19 | 52045896 | 52046170 | 52046033 | 12 | 15 | 14 | 1.251252095 | 0.26676     | AP2S1   | ENSG000000042753 |
| 19 | 52051405 | 52051612 | 52051508 | 9  | 10 | 7  | 1.612942154 | 0.147335    | AP2S1   | ENSG000000042753 |
| 19 | 52054999 | 52055593 | 52055422 | 11 | 25 | 6  | 4.357038546 | 4.72E-05    | AP2S1   | ENSG000000042753 |
| 19 | 52061868 | 52062216 | 52062081 | 13 | 18 | 13 | 1.591994853 | 0.0905191   | AP2S1   | ENSG000000042753 |

|    |          |          |          |     |     |    |             |             |         |                 |
|----|----------|----------|----------|-----|-----|----|-------------|-------------|---------|-----------------|
| 19 | 52069515 | 52069695 | 52069565 | 8   | 9   | 2  | 3.910162798 | 0.00955088  | AP2S1   | ENSG00000042753 |
| 19 | 52097378 | 52097677 | 52097516 | 8   | 10  | 1  | 6.451768616 | 0.00135978  | GRLF1   | ENSG00000160007 |
| 19 | 52120393 | 52120586 | 52120495 | 8   | 11  | 5  | 2.346097679 | 0.0364013   | GRLF1   | ENSG00000160007 |
| 19 | 52186296 | 52186537 | 52186449 | 8   | 9   | 2  | 3.910162798 | 0.00955088  | NPAS1   | ENSG00000130751 |
| 19 | 52227408 | 52227645 | 52227584 | 8   | 10  | 2  | 4.301179077 | 0.00512919  | NPAS1   | ENSG00000130751 |
| 19 | 52230579 | 52231293 | 52231016 | 15  | 37  | 13 | 3.183989707 | 3.37E-05    | TMEM160 | ENSG00000130748 |
| 19 | 52251817 | 52252157 | 52251987 | 23  | 27  | 1  | 16.42268375 | 5.88E-09    | TMEM160 | ENSG00000130748 |
| 19 | 52274581 | 52274837 | 52274686 | 11  | 12  | 1  | 7.624817456 | 0.000332769 | TMEM160 | ENSG00000130748 |
| 19 | 52291430 | 52291670 | 52291554 | 9   | 11  | 1  | 7.038293036 | 0.000674435 | ZC3H4   | ENSG00000130749 |
| 19 | 52302490 | 52302981 | 52302659 | 10  | 16  | 3  | 4.985457567 | 0.000385643 | ZC3H4   | ENSG00000130749 |
| 19 | 52304812 | 52305290 | 52305051 | 10  | 21  | 4  | 5.161414893 | 5.68E-05    | ZC3H4   | ENSG00000130749 |
| 19 | 52307229 | 52307493 | 52307379 | 11  | 13  | 6  | 2.346097679 | 0.0266147   | ZC3H4   | ENSG00000130749 |
| 19 | 52308173 | 52308398 | 52308291 | 11  | 12  | 1  | 7.624817456 | 0.000332769 | ZC3H4   | ENSG00000130749 |
| 19 | 52347357 | 52347689 | 52347523 | 18  | 23  | 3  | 7.038293036 | 4.15E-06    | SAE1    | ENSG00000142230 |
| 19 | 52347693 | 52348057 | 52347881 | 43  | 50  | 4  | 11.96509816 | 2.00E-13    | SAE1    | ENSG00000142230 |
| 19 | 52426312 | 52427062 | 52426480 | 128 | 178 | 2  | 69.99191408 | 2.21E-57    | BBC3    | ENSG00000105327 |
| 19 | 52427444 | 52427946 | 52427674 | 67  | 95  | 1  | 56.30634429 | 2.31E-31    | BBC3    | ENSG00000105327 |
| 19 | 52432217 | 52432535 | 52432376 | 10  | 14  | 0  | 17.59573259 | 8.79E-06    | BBC3    | ENSG00000105327 |
| 19 | 52436116 | 52436527 | 52436295 | 18  | 27  | 4  | 6.5690735   | 1.26E-06    | BBC3    | ENSG00000105327 |
| 19 | 52439368 | 52439606 | 52439487 | 13  | 14  | 3  | 4.398933147 | 0.00132748  | BBC3    | ENSG00000105327 |
| 19 | 52452370 | 52452599 | 52452525 | 8   | 12  | 3  | 3.812408728 | 0.004404    | CCDC9   | ENSG00000105321 |
| 19 | 52452791 | 52452970 | 52452901 | 8   | 9   | 0  | 11.73048839 | 0.000425898 | CCDC9   | ENSG00000105321 |
| 19 | 52484930 | 52485303 | 52485142 | 9   | 15  | 2  | 6.256260476 | 0.000199274 | C5AR1   | ENSG00000197405 |
| 19 | 52544156 | 52544494 | 52544318 | 8   | 11  | 6  | 2.010940867 | 0.0640214   | DHX34   | ENSG00000134815 |
| 19 | 52679241 | 52679509 | 52679375 | 9   | 12  | 3  | 3.812408728 | 0.004404    | KPTN    | ENSG00000118162 |
| 19 | 52710325 | 52710757 | 52710580 | 15  | 23  | 6  | 4.021881735 | 0.000148535 | NAPA    | ENSG00000105402 |
| 19 | 52819059 | 52819379 | 52819223 | 14  | 16  | 3  | 4.985457567 | 0.000385643 |         | ENSG00000223326 |
| 19 | 52837210 | 52837460 | 52837335 | 10  | 12  | 1  | 7.624817456 | 0.000332769 | GLTSCR1 | ENSG00000063169 |
| 19 | 52843083 | 52843819 | 52843534 | 14  | 31  | 18 | 1.975661203 | 0.00796595  | GLTSCR1 | ENSG00000063169 |
| 19 | 52893276 | 52893464 | 52893356 | 8   | 8   | 5  | 1.759573259 | 0.13508     | EHD2    | ENSG00000024422 |
| 19 | 52940400 | 52940658 | 52940569 | 8   | 11  | 5  | 2.346097679 | 0.0364013   | GLTSCR2 | ENSG00000105373 |
| 19 | 52973495 | 52973714 | 52973651 | 8   | 10  | 2  | 4.301179077 | 0.00512919  | SEPW1   | ENSG00000178980 |
| 19 | 53091810 | 53092289 | 53092116 | 33  | 41  | 0  | 49.26805125 | 6.97E-15    |         | ENSG00000221072 |
| 19 | 53208212 | 53208487 | 53208302 | 12  | 16  | 2  | 6.647276756 | 0.000101928 | ELSPBP1 | ENSG00000169393 |

|    |          |          |          |    |    |    |             |             |         |                 |
|----|----------|----------|----------|----|----|----|-------------|-------------|---------|-----------------|
| 19 | 53359719 | 53359999 | 53359841 | 9  | 10 | 3  | 3.225884308 | 0.0139466   | LIG1    | ENSG00000105486 |
| 19 | 53364974 | 53365314 | 53365144 | 12 | 17 | 3  | 5.278719777 | 0.000205462 | LIG1    | ENSG00000105486 |
| 19 | 53398872 | 53399144 | 53399028 | 8  | 10 | 1  | 6.451768616 | 0.00135978  |         | ENSG00000196223 |
| 19 | 53399167 | 53399369 | 53399200 | 8  | 9  | 1  | 5.865244197 | 0.00272497  |         | ENSG00000196223 |
| 19 | 53465179 | 53465433 | 53465315 | 8  | 10 | 2  | 4.301179077 | 0.00512919  | ZNF114  | ENSG00000178150 |
| 19 | 53486261 | 53486557 | 53486440 | 10 | 13 | 2  | 5.474227917 | 0.000747844 | ZNF114  | ENSG00000178150 |
| 19 | 53515135 | 53515380 | 53515257 | 8  | 8  | 1  | 5.278719777 | 0.00542188  | CCDC114 | ENSG00000105479 |
| 19 | 53527619 | 53527984 | 53527805 | 14 | 21 | 6  | 3.686724924 | 0.000453999 | EMP3    | ENSG00000142227 |
| 19 | 53598766 | 53598947 | 53598856 | 8  | 8  | 1  | 5.278719777 | 0.00542188  | GRIN2D  | ENSG00000105464 |
| 19 | 53622883 | 53623233 | 53623054 | 16 | 20 | 1  | 12.31701281 | 1.03E-06    | GRWD1   | ENSG00000105447 |
| 19 | 53663798 | 53663984 | 53663891 | 8  | 8  | 5  | 1.759573259 | 0.13508     | CYTH2   | ENSG00000105443 |
| 19 | 53683156 | 53683484 | 53683320 | 16 | 20 | 5  | 4.105670938 | 0.000308509 | CYTH2   | ENSG00000105443 |
| 19 | 53687976 | 53688280 | 53688106 | 8  | 11 | 1  | 7.038293036 | 0.000674435 | LMTK3   | ENSG00000142235 |
| 19 | 53708774 | 53709084 | 53708929 | 10 | 16 | 4  | 3.988366054 | 0.00115141  | LMTK3   | ENSG00000142235 |
| 19 | 53738290 | 53738537 | 53738413 | 8  | 11 | 2  | 4.692195357 | 0.00272444  | SULT2B1 | ENSG00000088002 |
| 19 | 53738559 | 53738784 | 53738665 | 12 | 12 | 5  | 2.541605819 | 0.0225912   | SULT2B1 | ENSG00000088002 |
| 19 | 53746996 | 53747397 | 53747234 | 12 | 17 | 3  | 5.278719777 | 0.000205462 | SULT2B1 | ENSG00000088002 |
| 19 | 53748833 | 53749034 | 53748979 | 9  | 10 | 9  | 1.290353723 | 0.279648    | SULT2B1 | ENSG00000088002 |
| 19 | 53803905 | 53804103 | 53803986 | 10 | 10 | 3  | 3.225884308 | 0.0139466   | SPACA4  | ENSG00000177202 |
| 19 | 53814026 | 53814593 | 53814357 | 20 | 35 | 10 | 3.839068929 | 8.08E-06    | SPHK2   | ENSG00000063176 |
| 19 | 53830455 | 53830638 | 53830546 | 8  | 8  | 1  | 5.278719777 | 0.00542188  | DBP     | ENSG00000105516 |
| 19 | 53832547 | 53832742 | 53832644 | 8  | 10 | 0  | 12.90353723 | 0.000195991 | DBP     | ENSG00000105516 |
| 19 | 53915758 | 53915956 | 53915832 | 9  | 10 | 1  | 6.451768616 | 0.00135978  |         | ENSG00000176909 |
| 19 | 53948101 | 53948381 | 53948250 | 9  | 12 | 6  | 2.178519273 | 0.0416567   | FUT1    | ENSG00000174951 |
| 19 | 53990515 | 53990793 | 53990662 | 9  | 10 | 2  | 4.301179077 | 0.00512919  |         | ENSG00000206758 |
| 19 | 54007245 | 54007609 | 54007430 | 10 | 17 | 6  | 3.016411301 | 0.00381427  | BCAT2   | ENSG00000105552 |
| 19 | 54011118 | 54011333 | 54011225 | 8  | 9  | 5  | 1.955081399 | 0.0892323   | BCAT2   | ENSG00000105552 |
| 19 | 54095071 | 54095339 | 54095195 | 10 | 13 | 6  | 2.346097679 | 0.0266147   | NUCB1   | ENSG00000104805 |
| 19 | 54128783 | 54128984 | 54128895 | 9  | 10 | 0  | 12.90353723 | 0.000195991 | DHDH    | ENSG00000104808 |
| 19 | 54149562 | 54149958 | 54149801 | 13 | 19 | 1  | 11.73048839 | 2.14E-06    | BAX     | ENSG00000087088 |
| 19 | 54150064 | 54150490 | 54150277 | 81 | 99 | 1  | 58.65244197 | 1.08E-32    | BAX     | ENSG00000087088 |
| 19 | 54251056 | 54251360 | 54251208 | 18 | 22 | 3  | 6.745030826 | 8.05E-06    | CGB7    | ENSG00000196337 |
| 19 | 54292827 | 54293069 | 54292948 | 10 | 11 | 7  | 1.759573259 | 0.102361    | SNRNP70 | ENSG00000104852 |
| 19 | 54344653 | 54344875 | 54344826 | 9  | 10 | 0  | 12.90353723 | 0.000195991 | HRC     | ENSG00000130528 |

|    |          |          |          |    |    |    |             |             |          |                 |
|----|----------|----------|----------|----|----|----|-------------|-------------|----------|-----------------|
| 19 | 54345462 | 54345737 | 54345612 | 9  | 12 | 3  | 3.812408728 | 0.004404    | HRC      | ENSG00000130528 |
| 19 | 54346217 | 54346420 | 54346310 | 8  | 9  | 2  | 3.910162798 | 0.00955088  | HRC      | ENSG00000130528 |
| 19 | 54346908 | 54347193 | 54347039 | 8  | 11 | 3  | 3.519146518 | 0.00788869  | HRC      | ENSG00000130528 |
| 19 | 54467174 | 54467618 | 54467396 | 49 | 62 | 6  | 10.55743955 | 1.87E-15    | SLC6A16  | ENSG00000063127 |
| 19 | 54558526 | 54558956 | 54558777 | 10 | 17 | 3  | 5.278719777 | 0.000205462 | DKKL1    | ENSG00000104901 |
| 19 | 54587004 | 54587252 | 54587122 | 10 | 11 | 1  | 7.038293036 | 0.000674435 | CCDC155  | ENSG00000161609 |
| 19 | 54638160 | 54638404 | 54638282 | 9  | 12 | 1  | 7.624817456 | 0.000332769 | SLC17A7  | ENSG00000104888 |
| 19 | 54673944 | 54674349 | 54674021 | 9  | 17 | 2  | 7.038293036 | 5.19E-05    | FLT3LG   | ENSG00000090554 |
| 19 | 54691051 | 54691554 | 54691375 | 12 | 24 | 6  | 4.18946014  | 8.40E-05    | RPS11    | ENSG00000142534 |
| 19 | 54741919 | 54742187 | 54742033 | 9  | 11 | 8  | 1.564065119 | 0.151515    | RCN3     | ENSG00000142552 |
| 19 | 54775580 | 54775829 | 54775704 | 18 | 19 | 3  | 5.865244197 | 5.72E-05    | NOSIP    | ENSG00000142546 |
| 19 | 54785288 | 54785607 | 54785447 | 11 | 14 | 1  | 8.797866295 | 8.00E-05    | PRR12    | ENSG00000126464 |
| 19 | 54960535 | 54960866 | 54960700 | 8  | 12 | 2  | 5.083211637 | 0.00143337  |          | ENSG00000206599 |
| 19 | 54961553 | 54961770 | 54961591 | 8  | 11 | 1  | 7.038293036 | 0.000674435 | AP2A1    | ENSG00000196961 |
| 19 | 55012347 | 55012666 | 55012489 | 8  | 11 | 9  | 1.407658607 | 0.210479    | MED25    | ENSG00000104973 |
| 19 | 55062308 | 55062576 | 55062461 | 11 | 12 | 3  | 3.812408728 | 0.004404    | PNKP     | ENSG00000039650 |
| 19 | 55124595 | 55124809 | 55124702 | 9  | 11 | 0  | 14.07658607 | 9.02E-05    | IL4I1    | ENSG00000104951 |
| 19 | 55182167 | 55182721 | 55182427 | 18 | 35 | 8  | 4.692195357 | 1.14E-06    |          | ENSG00000213863 |
| 19 | 55220431 | 55220706 | 55220577 | 13 | 16 | 4  | 3.988366054 | 0.00115141  | VRK3     | ENSG00000105053 |
| 19 | 55242027 | 55242261 | 55242131 | 9  | 9  | 2  | 3.910162798 | 0.00955088  |          | ENSG00000204666 |
| 19 | 55246124 | 55247110 | 55246767 | 46 | 91 | 3  | 26.9801233  | 2.19E-27    |          | ENSG00000204666 |
| 19 | 55410325 | 55410574 | 55410427 | 8  | 9  | 5  | 1.955081399 | 0.0892323   | MYH14    | ENSG00000105357 |
| 19 | 55571336 | 55571571 | 55571453 | 8  | 11 | 8  | 1.564065119 | 0.151515    | NR1H2    | ENSG00000131408 |
| 19 | 55656391 | 55656610 | 55656435 | 9  | 10 | 1  | 6.451768616 | 0.00135978  | C19orf63 | ENSG00000161671 |
| 19 | 55674249 | 55674432 | 55674340 | 8  | 8  | 3  | 2.639359888 | 0.0415794   | FAM71E1  | ENSG00000142530 |
| 19 | 55706373 | 55706583 | 55706452 | 8  | 10 | 2  | 4.301179077 | 0.00512919  | JOSD2    | ENSG00000161677 |
| 19 | 55732862 | 55733078 | 55732970 | 10 | 10 | 5  | 2.150589539 | 0.0575848   |          | ENSG00000204653 |
| 19 | 55999687 | 55999945 | 55999816 | 11 | 11 | 12 | 1.082814313 | 0.424156    | C19orf48 | ENSG00000167747 |
| 19 | 56091614 | 56091975 | 56091796 | 34 | 41 | 0  | 49.26805125 | 6.97E-15    | KLKP1    | ENSG00000197588 |
| 19 | 56266095 | 56266317 | 56266191 | 8  | 9  | 4  | 2.346097679 | 0.050148    | KLK13    | ENSG00000167759 |
| 19 | 56303374 | 56303669 | 56303541 | 12 | 16 | 2  | 6.647276756 | 0.000101928 | ATPBD3   | ENSG00000142544 |
| 19 | 56475433 | 56475733 | 56475583 | 15 | 17 | 0  | 21.11487911 | 8.57E-07    |          | ENSG00000179213 |
| 19 | 56562829 | 56563142 | 56562985 | 8  | 9  | 0  | 11.73048839 | 0.000425898 | CLDND2   | ENSG00000160318 |
| 19 | 56603997 | 56604313 | 56604173 | 9  | 12 | 9  | 1.524963491 | 0.154777    | SIGLEC10 | ENSG00000142512 |



|    |          |          |          |    |     |   |             |             |          |                 |
|----|----------|----------|----------|----|-----|---|-------------|-------------|----------|-----------------|
| 19 | 56617162 | 56617361 | 56617242 | 9  | 9   | 3 | 2.932622098 | 0.0242899   | SIGLEC10 | ENSG00000142512 |
| 19 | 56803042 | 56803401 | 56803221 | 19 | 26  | 8 | 3.519146518 | 0.000175368 |          | ENSG00000213818 |
| 19 | 56827295 | 56827559 | 56827395 | 10 | 13  | 7 | 2.052835469 | 0.046392    | SIGLEC5  | ENSG00000105501 |
| 19 | 56842021 | 56842240 | 56842125 | 9  | 9   | 1 | 5.865244197 | 0.00272497  | SIGLEC14 | ENSG00000197865 |
| 19 | 56851978 | 56852268 | 56852123 | 10 | 13  | 1 | 8.211341875 | 0.000163445 | SIGLEC14 | ENSG00000197865 |
| 19 | 56897325 | 56897583 | 56897426 | 10 | 12  | 2 | 5.083211637 | 0.00143337  |          | ENSG00000182310 |
| 19 | 56897682 | 56897888 | 56897739 | 8  | 10  | 3 | 3.225884308 | 0.0139466   |          | ENSG00000182310 |
| 19 | 56900162 | 56900382 | 56900272 | 8  | 11  | 3 | 3.519146518 | 0.00788869  |          | ENSG00000182310 |
| 19 | 56994547 | 56994726 | 56994636 | 8  | 9   | 3 | 2.932622098 | 0.0242899   | FPR3     | ENSG00000187474 |
| 19 | 57384075 | 57384262 | 57384153 | 8  | 9   | 2 | 3.910162798 | 0.00955088  | PPP2R1A  | ENSG00000105568 |
| 19 | 57932926 | 57933350 | 57933109 | 14 | 24  | 2 | 9.775406994 | 4.09E-07    |          | ENSG00000175885 |
| 19 | 58085075 | 58085377 | 58085226 | 9  | 13  | 2 | 5.474227917 | 0.000747844 | ZNF320   | ENSG00000182986 |
| 19 | 58157390 | 58157666 | 58157552 | 11 | 11  | 3 | 3.519146518 | 0.00788869  | ZNF320   | ENSG00000182986 |
| 19 | 58390433 | 58390681 | 58390543 | 8  | 9   | 0 | 11.73048839 | 0.000425898 | ZNF665   | ENSG00000197497 |
| 19 | 58489992 | 58490561 | 58490351 | 98 | 127 | 4 | 30.03005029 | 7.55E-38    | BIRC8    | ENSG00000180152 |
| 19 | 58676083 | 58676412 | 58676247 | 23 | 27  | 3 | 8.211341875 | 2.82E-07    | ZNF813   | ENSG00000198346 |
| 19 | 58715756 | 58716256 | 58715924 | 11 | 20  | 9 | 2.463402563 | 0.00689886  | ZNF331   | ENSG00000130844 |
| 19 | 58817053 | 58817363 | 58817208 | 11 | 15  | 1 | 9.384390715 | 3.90E-05    |          | ENSG00000210416 |
| 19 | 58988134 | 58988322 | 58988228 | 8  | 8   | 3 | 2.639359888 | 0.0415794   |          | ENSG00000199143 |
| 19 | 59064593 | 59064789 | 59064648 | 9  | 11  | 2 | 4.692195357 | 0.00272444  | MYADM    | ENSG00000179820 |
| 19 | 59175280 | 59175461 | 59175317 | 8  | 8   | 0 | 10.55743955 | 0.000925496 |          | ENSG00000215998 |
| 19 | 59226251 | 59226440 | 59226345 | 8  | 9   | 1 | 5.865244197 | 0.00272497  | VSTM1    | ENSG00000189068 |
| 19 | 59297550 | 59297826 | 59297688 | 10 | 14  | 0 | 17.59573259 | 8.79E-06    | OSCAR    | ENSG00000170909 |
| 19 | 59310342 | 59310668 | 59310505 | 9  | 14  | 2 | 5.865244197 | 0.000387308 | TFPT     | ENSG00000105619 |
| 19 | 59310739 | 59311024 | 59310881 | 10 | 13  | 2 | 5.474227917 | 0.000747844 | TFPT     | ENSG00000105619 |
| 19 | 59352548 | 59352848 | 59352698 | 14 | 16  | 4 | 3.988366054 | 0.00115141  | LENG1    | ENSG00000105617 |
| 19 | 59354750 | 59355016 | 59354883 | 8  | 8   | 3 | 2.639359888 | 0.0415794   | LENG1    | ENSG00000105617 |
| 19 | 59355460 | 59355763 | 59355611 | 9  | 12  | 1 | 7.624817456 | 0.000332769 | LENG1    | ENSG00000105617 |
| 19 | 59368140 | 59368596 | 59368417 | 14 | 21  | 7 | 3.225884308 | 0.00106152  | TMC4     | ENSG00000167608 |
| 19 | 59392736 | 59392959 | 59392847 | 9  | 9   | 0 | 11.73048839 | 0.000425898 | RPS9     | ENSG00000170889 |
| 19 | 59528319 | 59528554 | 59528443 | 9  | 9   | 4 | 2.346097679 | 0.050148    |          | ENSG00000217003 |
| 19 | 59634467 | 59634810 | 59634634 | 9  | 14  | 0 | 17.59573259 | 8.79E-06    | TTYH1    | ENSG00000167614 |
| 19 | 60012330 | 60012521 | 60012384 | 8  | 9   | 2 | 3.910162798 | 0.00955088  | KIR2DL4  | ENSG00000189013 |
| 19 | 60076886 | 60077105 | 60076993 | 14 | 14  | 2 | 5.865244197 | 0.000387308 | FCAR     | ENSG00000186431 |

|    |          |          |          |     |     |    |             |             |                          |
|----|----------|----------|----------|-----|-----|----|-------------|-------------|--------------------------|
| 19 | 60370053 | 60370236 | 60370144 | 9   | 9   | 3  | 2.932622098 | 0.0242899   | ENSG00000210696          |
| 19 | 60419687 | 60419942 | 60419814 | 12  | 14  | 0  | 17.59573259 | 8.79E-06    | PTPRH ENSG00000080031    |
| 19 | 60462352 | 60462774 | 60462521 | 17  | 24  | 2  | 9.775406994 | 4.09E-07    | SAPS1 ENSG00000105063    |
| 19 | 60504906 | 60505204 | 60505075 | 8   | 11  | 3  | 3.519146518 | 0.00788869  | BRSK1 ENSG00000160469    |
| 19 | 60541801 | 60542157 | 60541948 | 10  | 14  | 4  | 3.519146518 | 0.00361132  | SUV420H2 ENSG00000133247 |
| 19 | 60542925 | 60543119 | 60543019 | 9   | 10  | 4  | 2.580707446 | 0.0306059   | SUV420H2 ENSG00000133247 |
| 19 | 60547671 | 60548184 | 60547926 | 46  | 66  | 4  | 15.71885445 | 2.26E-18    | SUV420H2 ENSG00000133247 |
| 19 | 60588368 | 60588558 | 60588463 | 8   | 9   | 5  | 1.955081399 | 0.0892323   | RPL28 ENSG00000108107    |
| 19 | 60588675 | 60588906 | 60588770 | 12  | 14  | 5  | 2.932622098 | 0.00829617  | RPL28 ENSG00000108107    |
| 19 | 60589043 | 60589296 | 60589169 | 8   | 10  | 4  | 2.580707446 | 0.0306059   | RPL28 ENSG00000108107    |
| 19 | 60592969 | 60593231 | 60593128 | 8   | 8   | 0  | 10.55743955 | 0.000925496 | RPL28 ENSG00000108107    |
| 19 | 60610991 | 60611262 | 60611126 | 8   | 12  | 0  | 15.24963491 | 4.15E-05    | UBE2S ENSG00000108106    |
| 19 | 60784011 | 60784279 | 60784145 | 16  | 17  | 3  | 5.278719777 | 0.000205462 | ZNF579 ENSG00000218891   |
| 19 | 60802322 | 60802643 | 60802482 | 8   | 13  | 7  | 2.052835469 | 0.046392    | FIZ1 ENSG00000179943     |
| 19 | 60802692 | 60802883 | 60802785 | 8   | 9   | 0  | 11.73048839 | 0.000425898 | FIZ1 ENSG00000179943     |
| 19 | 60804083 | 60805060 | 60804598 | 55  | 105 | 10 | 11.30392518 | 3.47E-25    | ZNF524 ENSG00000171443   |
| 19 | 60846644 | 60846911 | 60846806 | 8   | 10  | 4  | 2.580707446 | 0.0306059   | ZNF581 ENSG00000171425   |
| 19 | 60862994 | 60863175 | 60863084 | 10  | 10  | 3  | 3.225884308 | 0.0139466   | U2AF2 ENSG00000063244    |
| 19 | 61104656 | 61104857 | 61104743 | 8   | 9   | 0  | 11.73048839 | 0.000425898 | NLRP13 ENSG00000173572   |
| 19 | 61344152 | 61344415 | 61344283 | 16  | 18  | 5  | 3.714654658 | 0.000961539 | ZNF444 ENSG00000167685   |
| 19 | 62817272 | 62817517 | 62817380 | 9   | 10  | 1  | 6.451768616 | 0.00135978  | ZNF134 ENSG00000213762   |
| 19 | 63022794 | 63022973 | 63022883 | 8   | 8   | 1  | 5.278719777 | 0.00542188  | ZNF552 ENSG00000178935   |
| 19 | 63590299 | 63590712 | 63590548 | 8   | 15  | 4  | 3.753756286 | 0.0020497   | RPS5 ENSG00000083845     |
| 19 | 63722888 | 63723290 | 63723101 | 8   | 16  | 3  | 4.985457567 | 0.000385643 | ZBTB45 ENSG00000119574   |
| 2  | 25847    | 26278    | 26007    | 15  | 23  | 5  | 4.692195357 | 5.29E-05    | FAM110C ENSG00000184731  |
| 2  | 36921    | 37233    | 37089    | 10  | 10  | 2  | 4.301179077 | 0.00512919  | FAM110C ENSG00000184731  |
| 2  | 132171   | 132389   | 132280   | 11  | 11  | 4  | 2.815317214 | 0.0183428   | FAM110C ENSG00000184731  |
| 2  | 519465   | 519659   | 519562   | 8   | 8   | 4  | 2.111487911 | 0.0804809   | TMEM18 ENSG00000151353   |
| 2  | 545449   | 545724   | 545567   | 8   | 10  | 0  | 12.90353723 | 0.000195991 | TMEM18 ENSG00000151353   |
| 2  | 1471436  | 1472494  | 1471896  | 266 | 428 | 3  | 125.809488  | 5.27E-139   | TPO ENSG00000115705      |
| 2  | 1608042  | 1608305  | 1608173  | 8   | 10  | 3  | 3.225884308 | 0.0139466   | PXDN ENSG00000130508     |
| 2  | 1687730  | 1688130  | 1687930  | 79  | 94  | 3  | 27.85990993 | 2.34E-28    | PXDN ENSG00000130508     |
| 2  | 1957273  | 1957452  | 1957364  | 8   | 9   | 0  | 11.73048839 | 0.000425898 | ENSG00000214874          |
| 2  | 2066226  | 2066405  | 2066270  | 9   | 9   | 2  | 3.910162798 | 0.00955088  | ENSG00000214874          |

|   |          |          |          |    |    |    |             |             |        |                 |
|---|----------|----------|----------|----|----|----|-------------|-------------|--------|-----------------|
| 2 | 2974143  | 2974524  | 2974351  | 25 | 32 | 4  | 7.742122339 | 4.68E-08    | TSSC1  | ENSG00000032389 |
| 2 | 3338103  | 3338329  | 3338216  | 8  | 8  | 0  | 10.55743955 | 0.000925496 | TSSC1  | ENSG00000032389 |
| 2 | 3406760  | 3406952  | 3406877  | 8  | 8  | 1  | 5.278719777 | 0.00542188  |        | ENSG00000210538 |
| 2 | 3426602  | 3426874  | 3426758  | 11 | 13 | 0  | 16.42268375 | 1.91E-05    |        | ENSG00000210538 |
| 2 | 3600534  | 3600907  | 3600693  | 15 | 20 | 10 | 2.239456875 | 0.0121685   | RPS7   | ENSG00000171863 |
| 2 | 3676471  | 3676731  | 3676620  | 9  | 10 | 5  | 2.150589539 | 0.0575848   | ALLC   | ENSG00000151360 |
| 2 | 3684667  | 3684904  | 3684785  | 11 | 12 | 0  | 15.24963491 | 4.15E-05    | ALLC   | ENSG00000151360 |
| 2 | 3830604  | 3830831  | 3830751  | 8  | 9  | 1  | 5.865244197 | 0.00272497  |        | ENSG00000214866 |
| 2 | 5500454  | 5500655  | 5500554  | 8  | 9  | 6  | 1.675784056 | 0.141978    |        | ENSG00000219497 |
| 2 | 5770804  | 5771000  | 5770943  | 12 | 13 | 2  | 5.474227917 | 0.000747844 | SOX11  | ENSG00000176887 |
| 2 | 5834780  | 5835012  | 5834887  | 10 | 10 | 4  | 2.580707446 | 0.0306059   | SOX11  | ENSG00000176887 |
| 2 | 7089286  | 7089667  | 7089488  | 8  | 15 | 5  | 3.128130238 | 0.00492422  |        | ENSG00000223145 |
| 2 | 7095411  | 7095625  | 7095518  | 8  | 9  | 2  | 3.910162798 | 0.00955088  |        | ENSG00000223145 |
| 2 | 7330115  | 7330333  | 7330165  | 8  | 9  | 3  | 2.932622098 | 0.0242899   |        | ENSG00000213774 |
| 2 | 7435764  | 7435965  | 7435902  | 8  | 8  | 3  | 2.639359888 | 0.0415794   |        | ENSG00000213774 |
| 2 | 7803034  | 7803228  | 7803071  | 8  | 9  | 2  | 3.910162798 | 0.00955088  |        | ENSG00000220722 |
| 2 | 7806704  | 7806884  | 7806798  | 8  | 8  | 0  | 10.55743955 | 0.000925496 |        | ENSG00000220722 |
| 2 | 8284473  | 8284665  | 8284612  | 8  | 9  | 0  | 11.73048839 | 0.000425898 |        | ENSG00000182367 |
| 2 | 8412807  | 8412994  | 8412921  | 8  | 9  | 0  | 11.73048839 | 0.000425898 |        | ENSG00000182367 |
| 2 | 8597559  | 8597793  | 8597671  | 11 | 12 | 7  | 1.906204364 | 0.0695918   |        | ENSG00000182367 |
| 2 | 8629653  | 8629945  | 8629771  | 9  | 13 | 0  | 16.42268375 | 1.91E-05    |        | ENSG00000182367 |
| 2 | 8631158  | 8631380  | 8631317  | 9  | 10 | 1  | 6.451768616 | 0.00135978  |        | ENSG00000182367 |
| 2 | 8735410  | 8735803  | 8735589  | 11 | 19 | 3  | 5.865244197 | 5.72E-05    | ID2    | ENSG00000115738 |
| 2 | 8743567  | 8743796  | 8743628  | 8  | 9  | 1  | 5.865244197 | 0.00272497  | ID2    | ENSG00000115738 |
| 2 | 8768589  | 8768822  | 8768731  | 10 | 10 | 0  | 12.90353723 | 0.000195991 | ID2    | ENSG00000115738 |
| 2 | 9139784  | 9140064  | 9139926  | 15 | 18 | 0  | 22.28792795 | 3.94E-07    | MBOAT2 | ENSG00000143797 |
| 2 | 9391316  | 9391510  | 9391423  | 9  | 9  | 1  | 5.865244197 | 0.00272497  |        | ENSG00000213772 |
| 2 | 9702223  | 9702573  | 9702398  | 12 | 18 | 5  | 3.714654658 | 0.000961539 | YWHAQ  | ENSG00000134308 |
| 2 | 9713220  | 9713444  | 9713330  | 8  | 8  | 2  | 3.519146518 | 0.017558    | YWHAQ  | ENSG00000134308 |
| 2 | 9866621  | 9866844  | 9866717  | 14 | 15 | 2  | 6.256260476 | 0.000199274 | TAF1B  | ENSG00000115750 |
| 2 | 9887980  | 9888232  | 9888106  | 16 | 17 | 6  | 3.016411301 | 0.00381427  | TAF1B  | ENSG00000115750 |
| 2 | 9900881  | 9901065  | 9901004  | 8  | 9  | 0  | 11.73048839 | 0.000425898 | TAF1B  | ENSG00000115750 |
| 2 | 10009331 | 10009519 | 10009413 | 8  | 8  | 0  | 10.55743955 | 0.000925496 | GRHL1  | ENSG00000134317 |
| 2 | 10032797 | 10033144 | 10033043 | 9  | 14 | 3  | 4.398933147 | 0.00132748  | GRHL1  | ENSG00000134317 |

|   |          |          |          |    |     |    |             |             |                 |                 |
|---|----------|----------|----------|----|-----|----|-------------|-------------|-----------------|-----------------|
| 2 | 10153588 | 10153873 | 10153750 | 20 | 23  | 3  | 7.038293036 | 4.15E-06    | ENSG00000212558 |                 |
| 2 | 10548411 | 10548628 | 10548519 | 11 | 12  | 3  | 3.812408728 | 0.004404    | ENSG00000217258 |                 |
| 2 | 10655474 | 10655765 | 10655619 | 11 | 11  | 1  | 7.038293036 | 0.000674435 | NOL10           | ENSG00000115761 |
| 2 | 10809873 | 10810224 | 10810048 | 11 | 16  | 4  | 3.988366054 | 0.00115141  | ATP6V1C2        | ENSG00000143882 |
| 2 | 11174312 | 11174525 | 11174418 | 10 | 12  | 3  | 3.812408728 | 0.004404    | ENSG00000145063 |                 |
| 2 | 11212397 | 11212669 | 11212545 | 10 | 12  | 1  | 7.624817456 | 0.000332769 | PQLC3           | ENSG00000162976 |
| 2 | 11403081 | 11403260 | 11403184 | 8  | 8   | 6  | 1.508205651 | 0.203852    | ROCK2           | ENSG00000134318 |
| 2 | 11504210 | 11504459 | 11504348 | 9  | 11  | 3  | 3.519146518 | 0.00788869  | E2F6            | ENSG00000169016 |
| 2 | 11523743 | 11523961 | 11523853 | 17 | 17  | 5  | 3.519146518 | 0.00167472  | E2F6            | ENSG00000169016 |
| 2 | 11556143 | 11556490 | 11556316 | 18 | 23  | 2  | 9.384390715 | 8.25E-07    | ENSG00000201610 |                 |
| 2 | 11588502 | 11588949 | 11588700 | 24 | 35  | 3  | 10.55743955 | 1.13E-09    | ENSG00000196208 |                 |
| 2 | 11589933 | 11590430 | 11590150 | 38 | 59  | 11 | 5.865244197 | 2.04E-11    | ENSG00000196208 |                 |
| 2 | 11592082 | 11592273 | 11592176 | 8  | 8   | 5  | 1.759573259 | 0.13508     | ENSG00000196208 |                 |
| 2 | 11596881 | 11597419 | 11597188 | 21 | 35  | 12 | 3.24844294  | 4.27E-05    | ENSG00000196208 |                 |
| 2 | 11597525 | 11597741 | 11597633 | 8  | 9   | 4  | 2.346097679 | 0.050148    | ENSG00000196208 |                 |
| 2 | 11640302 | 11640500 | 11640401 | 8  | 8   | 7  | 1.319679944 | 0.283403    | ENSG00000210722 |                 |
| 2 | 11689089 | 11689409 | 11689247 | 28 | 32  | 3  | 9.677652924 | 9.12E-09    | ENSG00000196208 |                 |
| 2 | 11746022 | 11746276 | 11746149 | 13 | 13  | 1  | 8.211341875 | 0.000163445 | NTSR2           | ENSG00000169006 |
| 2 | 11750578 | 11750870 | 11750738 | 9  | 10  | 7  | 1.612942154 | 0.147335    | NTSR2           | ENSG00000169006 |
| 2 | 11801630 | 11802021 | 11801843 | 12 | 22  | 2  | 8.993374435 | 1.66E-06    | LPIN1           | ENSG00000134324 |
| 2 | 11804896 | 11805122 | 11804984 | 8  | 8   | 3  | 2.639359888 | 0.0415794   | LPIN1           | ENSG00000134324 |
| 2 | 11822027 | 11822218 | 11822156 | 10 | 10  | 4  | 2.580707446 | 0.0306059   | LPIN1           | ENSG00000134324 |
| 2 | 12021450 | 12021798 | 12021624 | 18 | 24  | 2  | 9.775406994 | 4.09E-07    | LPIN1           | ENSG00000134324 |
| 2 | 12233807 | 12234128 | 12233959 | 9  | 14  | 3  | 4.398933147 | 0.00132748  | ENSG00000207183 |                 |
| 2 | 12566295 | 12566485 | 12566390 | 9  | 9   | 0  | 11.73048839 | 0.000425898 | ENSG00000207183 |                 |
| 2 | 13754329 | 13754716 | 13754508 | 24 | 30  | 0  | 36.36451402 | 3.56E-11    |                 |                 |
| 2 | 13897877 | 13898185 | 13898031 | 10 | 11  | 1  | 7.038293036 | 0.000674435 | ENSG00000210748 |                 |
| 2 | 14345605 | 14346141 | 14345784 | 96 | 118 | 1  | 69.79640594 | 5.05E-39    | ENSG00000210748 |                 |
| 2 | 14686472 | 14686887 | 14686708 | 29 | 40  | 4  | 9.619000482 | 2.08E-10    | FAM84A          | ENSG00000162981 |
| 2 | 14693153 | 14693379 | 14693266 | 8  | 8   | 2  | 3.519146518 | 0.017558    | FAM84A          | ENSG00000162981 |
| 2 | 15159659 | 15159873 | 15159759 | 8  | 10  | 0  | 12.90353723 | 0.000195991 | ENSG00000151779 |                 |
| 2 | 15618725 | 15619032 | 15618853 | 12 | 15  | 3  | 4.692195357 | 0.000718455 | ENSG00000151779 |                 |
| 2 | 15649261 | 15649529 | 15649383 | 15 | 16  | 5  | 3.323638378 | 0.00288759  | DDX1            | ENSG00000079785 |
| 2 | 15649775 | 15649970 | 15649870 | 8  | 9   | 1  | 5.865244197 | 0.00272497  | DDX1            | ENSG00000079785 |

|   |          |          |          |     |     |    |             |             |         |                 |
|---|----------|----------|----------|-----|-----|----|-------------|-------------|---------|-----------------|
| 2 | 15788001 | 15788305 | 15788159 | 8   | 10  | 2  | 4.301179077 | 0.00512919  |         | ENSG00000202160 |
| 2 | 15895357 | 15895706 | 15895531 | 9   | 10  | 0  | 12.90353723 | 0.000195991 |         | ENSG00000202160 |
| 2 | 15997402 | 15997703 | 15997573 | 8   | 9   | 4  | 2.346097679 | 0.050148    | MYCN    | ENSG00000134323 |
| 2 | 16665347 | 16665619 | 16665483 | 10  | 11  | 0  | 14.07658607 | 9.02E-05    | FAM49A  | ENSG00000197872 |
| 2 | 16697575 | 16698027 | 16697873 | 17  | 24  | 2  | 9.775406994 | 4.09E-07    | FAM49A  | ENSG00000197872 |
| 2 | 16726103 | 16726303 | 16726205 | 8   | 8   | 4  | 2.111487911 | 0.0804809   | FAM49A  | ENSG00000197872 |
| 2 | 16945227 | 16945460 | 16945339 | 10  | 10  | 3  | 3.225884308 | 0.0139466   |         | ENSG00000219877 |
| 2 | 17005828 | 17006061 | 17005904 | 9   | 11  | 1  | 7.038293036 | 0.000674435 |         | ENSG00000219877 |
| 2 | 17859394 | 17859573 | 17859483 | 8   | 8   | 1  | 5.278719777 | 0.00542188  | MSGN1   | ENSG00000151379 |
| 2 | 17860235 | 17860813 | 17860562 | 51  | 76  | 1  | 45.16238031 | 4.73E-25    | MSGN1   | ENSG00000151379 |
| 2 | 17875430 | 17875641 | 17875522 | 8   | 8   | 3  | 2.639359888 | 0.0415794   | MSGN1   | ENSG00000151379 |
| 2 | 17945981 | 17946171 | 17946076 | 9   | 11  | 2  | 4.692195357 | 0.00272444  | KCNS3   | ENSG00000170745 |
| 2 | 18092630 | 18092897 | 18092802 | 9   | 12  | 2  | 5.083211637 | 0.00143337  |         | ENSG00000212455 |
| 2 | 18869219 | 18869415 | 18869317 | 8   | 8   | 1  | 5.278719777 | 0.00542188  | NT5C1B  | ENSG00000185013 |
| 2 | 19036760 | 19037003 | 19036879 | 11  | 11  | 6  | 2.010940867 | 0.0640214   | OSR1    | ENSG00000143867 |
| 2 | 19112110 | 19112330 | 19112220 | 9   | 10  | 4  | 2.580707446 | 0.0306059   | OSR1    | ENSG00000143867 |
| 2 | 19122228 | 19122594 | 19122439 | 16  | 21  | 3  | 6.451768616 | 1.56E-05    | OSR1    | ENSG00000143867 |
| 2 | 19136875 | 19137274 | 19137005 | 15  | 22  | 12 | 2.0753941   | 0.0149739   | OSR1    | ENSG00000143867 |
| 2 | 19195211 | 19195453 | 19195332 | 8   | 10  | 3  | 3.225884308 | 0.0139466   | OSR1    | ENSG00000143867 |
| 2 | 19204115 | 19204416 | 19204281 | 12  | 16  | 7  | 2.492728784 | 0.0124193   | OSR1    | ENSG00000143867 |
| 2 | 19291779 | 19292665 | 19292173 | 147 | 238 | 6  | 40.05123894 | 1.97E-71    | OSR1    | ENSG00000143867 |
| 2 | 19426008 | 19426220 | 19426114 | 8   | 11  | 5  | 2.346097679 | 0.0364013   | OSR1    | ENSG00000143867 |
| 2 | 19717931 | 19718325 | 19718114 | 23  | 37  | 0  | 44.57585589 | 1.55E-13    | CISD1B  | ENSG00000143880 |
| 2 | 19964978 | 19965380 | 19965209 | 12  | 19  | 5  | 3.910162798 | 0.000546977 | TTC32   | ENSG00000183891 |
| 2 | 20019160 | 20019360 | 20019260 | 9   | 11  | 4  | 2.815317214 | 0.0183428   | WDR35   | ENSG00000118965 |
| 2 | 20024139 | 20024404 | 20024254 | 15  | 17  | 1  | 10.55743955 | 9.18E-06    | WDR35   | ENSG00000118965 |
| 2 | 20113926 | 20114166 | 20114047 | 10  | 12  | 2  | 5.083211637 | 0.00143337  | LAPTM4A | ENSG00000068697 |
| 2 | 20134950 | 20135176 | 20135094 | 10  | 11  | 4  | 2.815317214 | 0.0183428   | LAPTM4A | ENSG00000068697 |
| 2 | 20156908 | 20157102 | 20157027 | 12  | 12  | 3  | 3.812408728 | 0.004404    | LAPTM4A | ENSG00000068697 |
| 2 | 20177344 | 20177663 | 20177513 | 8   | 11  | 8  | 1.564065119 | 0.151515    |         | ENSG00000213729 |
| 2 | 20259938 | 20260310 | 20260070 | 16  | 20  | 5  | 4.105670938 | 0.000308509 |         | ENSG00000200763 |
| 2 | 20271497 | 20271706 | 20271601 | 8   | 8   | 5  | 1.759573259 | 0.13508     | SDC1    | ENSG00000115884 |
| 2 | 20276360 | 20276664 | 20276507 | 12  | 15  | 11 | 1.564065119 | 0.11768     | SDC1    | ENSG00000115884 |
| 2 | 20294805 | 20295157 | 20294994 | 9   | 14  | 4  | 3.519146518 | 0.00361132  | SDC1    | ENSG00000115884 |

|   |          |          |          |    |    |   |             |             |         |                 |
|---|----------|----------|----------|----|----|---|-------------|-------------|---------|-----------------|
| 2 | 20295726 | 20295909 | 20295878 | 8  | 8  | 5 | 1.759573259 | 0.13508     | SDC1    | ENSG00000115884 |
| 2 | 20510191 | 20510407 | 20510257 | 11 | 13 | 4 | 3.28453675  | 0.00629037  | RHOB    | ENSG00000143878 |
| 2 | 20521040 | 20521377 | 20521208 | 8  | 13 | 6 | 2.346097679 | 0.0266147   | RHOB    | ENSG00000143878 |
| 2 | 20529236 | 20529701 | 20529467 | 13 | 26 | 5 | 5.278719777 | 8.57E-06    |         | ENSG00000200829 |
| 2 | 20529704 | 20529917 | 20529810 | 8  | 9  | 4 | 2.346097679 | 0.050148    |         | ENSG00000200829 |
| 2 | 20532176 | 20532460 | 20532307 | 13 | 13 | 6 | 2.346097679 | 0.0266147   |         | ENSG00000200829 |
| 2 | 20535494 | 20535750 | 20535628 | 8  | 8  | 4 | 2.111487911 | 0.0804809   |         | ENSG00000200829 |
| 2 | 20559602 | 20559878 | 20559641 | 8  | 12 | 7 | 1.906204364 | 0.0695918   |         | ENSG00000200829 |
| 2 | 20647851 | 20648102 | 20648017 | 9  | 12 | 5 | 2.541605819 | 0.0225912   |         | ENSG00000219263 |
| 2 | 20740711 | 20740924 | 20740817 | 8  | 9  | 0 | 11.73048839 | 0.000425898 | GDF7    | ENSG00000143869 |
| 2 | 21357338 | 21357590 | 21357475 | 12 | 12 | 1 | 7.624817456 | 0.000332769 |         | ENSG00000218819 |
| 2 | 23731174 | 23731503 | 23731332 | 27 | 32 | 1 | 19.35530585 | 1.42E-10    | KBTBD9  | ENSG00000119771 |
| 2 | 24003563 | 24003818 | 24003717 | 8  | 11 | 4 | 2.815317214 | 0.0183428   | UBXN2A  | ENSG00000173960 |
| 2 | 24152671 | 24152913 | 24152792 | 14 | 15 | 3 | 4.692195357 | 0.000718455 |         | ENSG00000115128 |
| 2 | 24153590 | 24153899 | 24153763 | 8  | 10 | 1 | 6.451768616 | 0.00135978  |         | ENSG00000115128 |
| 2 | 24160532 | 24160964 | 24160711 | 29 | 39 | 3 | 11.73048839 | 6.80E-11    | TP53I3  | ENSG00000115129 |
| 2 | 24161096 | 24161283 | 24161194 | 8  | 9  | 3 | 2.932622098 | 0.0242899   | TP53I3  | ENSG00000115129 |
| 2 | 24200377 | 24200575 | 24200476 | 8  | 9  | 1 | 5.865244197 | 0.00272497  |         | ENSG00000186453 |
| 2 | 24220958 | 24221165 | 24220991 | 9  | 10 | 1 | 6.451768616 | 0.00135978  |         | ENSG00000186453 |
| 2 | 24498119 | 24498307 | 24498213 | 8  | 8  | 4 | 2.111487911 | 0.0804809   |         | ENSG00000211550 |
| 2 | 24869665 | 24869870 | 24869767 | 10 | 11 | 4 | 2.815317214 | 0.0183428   | C2orf79 | ENSG00000184924 |
| 2 | 24905037 | 24905374 | 24905261 | 12 | 16 | 3 | 4.985457567 | 0.000385643 | ADCY3   | ENSG00000138031 |
| 2 | 24961375 | 24961793 | 24961614 | 16 | 25 | 1 | 15.24963491 | 2.59E-08    | ADCY3   | ENSG00000138031 |
| 2 | 25242642 | 25242821 | 25242685 | 8  | 8  | 1 | 5.278719777 | 0.00542188  | POMC    | ENSG00000115138 |
| 2 | 25260910 | 25261124 | 25260974 | 9  | 10 | 3 | 3.225884308 | 0.0139466   | POMC    | ENSG00000115138 |
| 2 | 25305230 | 25305445 | 25305337 | 9  | 10 | 2 | 4.301179077 | 0.00512919  | DNMT3A  | ENSG00000119772 |
| 2 | 25748121 | 25748405 | 25748264 | 10 | 13 | 4 | 3.28453675  | 0.00629037  | DTNB    | ENSG00000138101 |
| 2 | 25774569 | 25774769 | 25774692 | 8  | 10 | 4 | 2.580707446 | 0.0306059   |         | ENSG00000201160 |
| 2 | 26043005 | 26043193 | 26043072 | 9  | 11 | 3 | 3.519146518 | 0.00788869  | KIF3C   | ENSG00000084731 |
| 2 | 26085217 | 26085477 | 26085340 | 11 | 13 | 5 | 2.737113958 | 0.0137917   |         | ENSG00000220917 |
| 2 | 26088612 | 26088941 | 26088762 | 14 | 18 | 4 | 4.457585589 | 0.000353565 |         | ENSG00000220917 |
| 2 | 26134938 | 26135180 | 26135066 | 8  | 9  | 1 | 5.865244197 | 0.00272497  |         | ENSG00000199872 |
| 2 | 26221528 | 26221756 | 26221642 | 12 | 12 | 4 | 3.049926982 | 0.0108184   |         | ENSG00000219820 |
| 2 | 26350534 | 26350869 | 26350698 | 11 | 16 | 6 | 2.848832895 | 0.00632407  | HADHB   | ENSG00000138029 |

|   |          |          |          |    |    |   |             |             |          |                 |
|---|----------|----------|----------|----|----|---|-------------|-------------|----------|-----------------|
| 2 | 26431876 | 26432145 | 26432013 | 9  | 12 | 1 | 7.624817456 | 0.000332769 |          | ENSG00000138018 |
| 2 | 26449706 | 26449912 | 26449809 | 8  | 8  | 2 | 3.519146518 | 0.017558    |          | ENSG00000138018 |
| 2 | 26763792 | 26764023 | 26763929 | 10 | 12 | 1 | 7.624817456 | 0.000332769 | KCNK3    | ENSG00000171303 |
| 2 | 26885582 | 26885881 | 26885731 | 10 | 11 | 2 | 4.692195357 | 0.00272444  |          | ENSG00000217550 |
| 2 | 27093184 | 27093427 | 27093305 | 9  | 11 | 0 | 14.07658607 | 9.02E-05    | MAPRE3   | ENSG00000084764 |
| 2 | 27126894 | 27127455 | 27127195 | 21 | 34 | 9 | 4.105670938 | 5.54E-06    | AGBL5    | ENSG00000084693 |
| 2 | 27157622 | 27157883 | 27157705 | 11 | 12 | 3 | 3.812408728 | 0.004404    | EMILIN1  | ENSG00000138080 |
| 2 | 27162862 | 27163105 | 27162981 | 11 | 12 | 2 | 5.083211637 | 0.00143337  | KHK      | ENSG00000138030 |
| 2 | 27175055 | 27175273 | 27175164 | 9  | 10 | 8 | 1.433726359 | 0.209175    | CGREF1   | ENSG00000138028 |
| 2 | 27241702 | 27242115 | 27241873 | 36 | 42 | 6 | 7.205871442 | 1.25E-09    |          | ENSG00000216392 |
| 2 | 27286190 | 27286402 | 27286347 | 9  | 9  | 2 | 3.910162798 | 0.00955088  | SLC5A6   | ENSG00000138074 |
| 2 | 27288424 | 27288739 | 27288567 | 11 | 14 | 3 | 4.398933147 | 0.00132748  | SLC5A6   | ENSG00000138074 |
| 2 | 27293498 | 27293690 | 27293554 | 8  | 9  | 2 | 3.910162798 | 0.00955088  | CAD      | ENSG00000084774 |
| 2 | 27293745 | 27293973 | 27293896 | 10 | 11 | 2 | 4.692195357 | 0.00272444  | CAD      | ENSG00000084774 |
| 2 | 27369682 | 27370037 | 27369911 | 9  | 14 | 6 | 2.513676084 | 0.016726    | TRIM54   | ENSG00000138100 |
| 2 | 27397416 | 27397705 | 27397558 | 14 | 16 | 4 | 3.988366054 | 0.00115141  | MPV17    | ENSG00000115204 |
| 2 | 27399245 | 27399594 | 27399419 | 14 | 18 | 6 | 3.183989707 | 0.00227432  | MPV17    | ENSG00000115204 |
| 2 | 27433035 | 27433620 | 27433175 | 11 | 22 | 9 | 2.69801233  | 0.00276236  | GTF3C2   | ENSG00000115207 |
| 2 | 27446726 | 27446986 | 27446819 | 9  | 11 | 2 | 4.692195357 | 0.00272444  | EIF2B4   | ENSG00000115211 |
| 2 | 27471889 | 27472126 | 27472007 | 14 | 16 | 0 | 19.94183027 | 1.86E-06    | FTHL3P   | ENSG00000213453 |
| 2 | 27565999 | 27566186 | 27566070 | 9  | 9  | 5 | 1.955081399 | 0.0892323   | IFT172   | ENSG00000138002 |
| 2 | 27739621 | 27739948 | 27739784 | 9  | 11 | 1 | 7.038293036 | 0.000674435 | SLC4A1AP | ENSG00000163798 |
| 2 | 27740004 | 27740247 | 27740142 | 10 | 13 | 0 | 16.42268375 | 1.91E-05    | SUPT7L   | ENSG00000119760 |
| 2 | 27782335 | 27782897 | 27782720 | 28 | 43 | 2 | 17.20471631 | 4.62E-13    |          | ENSG00000205334 |
| 2 | 27782962 | 27783172 | 27783076 | 10 | 10 | 0 | 12.90353723 | 0.000195991 |          | ENSG00000205334 |
| 2 | 27830571 | 27830794 | 27830682 | 9  | 11 | 3 | 3.519146518 | 0.00788869  | MRPL33   | ENSG00000163797 |
| 2 | 27847802 | 27848252 | 27848079 | 8  | 15 | 1 | 9.384390715 | 3.90E-05    | MRPL33   | ENSG00000163797 |
| 2 | 28248682 | 28249092 | 28248914 | 52 | 68 | 2 | 26.9801233  | 4.10E-21    |          | ENSG00000197918 |
| 2 | 28359895 | 28360147 | 28359991 | 11 | 11 | 2 | 4.692195357 | 0.00272444  | FOSL2    | ENSG00000075426 |
| 2 | 28360310 | 28360795 | 28360469 | 17 | 25 | 3 | 7.624817456 | 1.09E-06    | FOSL2    | ENSG00000075426 |
| 2 | 28453896 | 28454299 | 28454075 | 8  | 15 | 1 | 9.384390715 | 3.90E-05    | FOSL2    | ENSG00000075426 |
| 2 | 28468060 | 28468436 | 28468211 | 8  | 14 | 3 | 4.398933147 | 0.00132748  | FOSL2    | ENSG00000075426 |
| 2 | 28469109 | 28469353 | 28469231 | 15 | 15 | 3 | 4.692195357 | 0.000718455 | FOSL2    | ENSG00000075426 |
| 2 | 28470964 | 28471187 | 28471013 | 9  | 9  | 1 | 5.865244197 | 0.00272497  | FOSL2    | ENSG00000075426 |

|   |          |          |          |     |     |   |             |             |         |                 |
|---|----------|----------|----------|-----|-----|---|-------------|-------------|---------|-----------------|
| 2 | 28848828 | 28849017 | 28848946 | 8   | 8   | 3 | 2.639359888 | 0.0415794   | PPP1CB  | ENSG00000213639 |
| 2 | 28971567 | 28971902 | 28971742 | 15  | 18  | 1 | 11.14396397 | 4.44E-06    | WDR43   | ENSG00000163811 |
| 2 | 29098627 | 29098806 | 29098716 | 8   | 8   | 0 | 10.55743955 | 0.000925496 | FAM179A | ENSG00000189350 |
| 2 | 29145003 | 29145202 | 29145051 | 10  | 11  | 0 | 14.07658607 | 9.02E-05    | C2orf71 | ENSG00000179270 |
| 2 | 29273234 | 29273489 | 29273386 | 11  | 13  | 4 | 3.28453675  | 0.00629037  | CLIP4   | ENSG00000115295 |
| 2 | 29309837 | 29310216 | 29310003 | 11  | 18  | 6 | 3.183989707 | 0.00227432  | CLIP4   | ENSG00000115295 |
| 2 | 29540018 | 29540197 | 29540107 | 8   | 9   | 0 | 11.73048839 | 0.000425898 |         | ENSG00000215990 |
| 2 | 29715109 | 29715403 | 29715258 | 12  | 14  | 0 | 17.59573259 | 8.79E-06    |         | ENSG00000222996 |
| 2 | 30042441 | 30043141 | 30042772 | 135 | 180 | 0 | 212.3218399 | 9.78E-62    | ALK     | ENSG00000171094 |
| 2 | 30294283 | 30294529 | 30294367 | 10  | 13  | 6 | 2.346097679 | 0.0266147   |         | ENSG00000217617 |
| 2 | 30788038 | 30788303 | 30788170 | 8   | 12  | 2 | 5.083211637 | 0.00143337  |         | ENSG00000219426 |
| 2 | 30790510 | 30790754 | 30790632 | 8   | 9   | 4 | 2.346097679 | 0.050148    |         | ENSG00000219426 |
| 2 | 30832328 | 30832826 | 30832666 | 10  | 21  | 8 | 2.867452718 | 0.00225035  |         | ENSG00000219426 |
| 2 | 30848802 | 30849058 | 30848930 | 10  | 12  | 0 | 15.24963491 | 4.15E-05    |         | ENSG00000219426 |
| 2 | 31001799 | 31002000 | 31001899 | 11  | 13  | 0 | 16.42268375 | 1.91E-05    |         | ENSG00000216093 |
| 2 | 31066133 | 31066506 | 31066327 | 12  | 19  | 4 | 4.692195357 | 0.000193572 |         | ENSG00000216093 |
| 2 | 31310210 | 31310417 | 31310362 | 10  | 12  | 1 | 7.624817456 | 0.000332769 | CAPN14  | ENSG00000214711 |
| 2 | 31310427 | 31310659 | 31310541 | 8   | 9   | 3 | 2.932622098 | 0.0242899   | EHD3    | ENSG00000013016 |
| 2 | 32244182 | 32244438 | 32244310 | 10  | 12  | 8 | 1.694403879 | 0.107291    | SLC30A6 | ENSG00000152683 |
| 2 | 33010719 | 33010982 | 33010850 | 9   | 10  | 4 | 2.580707446 | 0.0306059   |         | ENSG00000206951 |
| 2 | 33026439 | 33026672 | 33026552 | 8   | 8   | 2 | 3.519146518 | 0.017558    | LTBP1   | ENSG00000049323 |
| 2 | 33092958 | 33093254 | 33093106 | 20  | 24  | 0 | 29.32622098 | 3.74E-09    |         | ENSG00000217182 |
| 2 | 33369981 | 33370234 | 33370078 | 12  | 14  | 2 | 5.865244197 | 0.000387308 |         | ENSG00000212204 |
| 2 | 33490332 | 33490566 | 33490449 | 8   | 11  | 4 | 2.815317214 | 0.0183428   | RASGRP3 | ENSG00000152689 |
| 2 | 33554311 | 33554636 | 33554462 | 16  | 18  | 5 | 3.714654658 | 0.000961539 | RASGRP3 | ENSG00000152689 |
| 2 | 33677826 | 33678138 | 33677991 | 10  | 12  | 1 | 7.624817456 | 0.000332769 | FAM98A  | ENSG00000119812 |
| 2 | 34103847 | 34104069 | 34103958 | 9   | 11  | 5 | 2.346097679 | 0.0364013   |         | ENSG00000219819 |
| 2 | 35375987 | 35376292 | 35376140 | 11  | 16  | 5 | 3.323638378 | 0.00288759  |         | ENSG00000217899 |
| 2 | 35377107 | 35377354 | 35377270 | 12  | 14  | 5 | 2.932622098 | 0.00829617  |         | ENSG00000217899 |
| 2 | 35507215 | 35507455 | 35507310 | 8   | 8   | 1 | 5.278719777 | 0.00542188  |         | ENSG00000207255 |
| 2 | 36782171 | 36782435 | 36782303 | 13  | 16  | 8 | 2.215758919 | 0.0222902   | VIT     | ENSG00000205221 |
| 2 | 37086274 | 37086456 | 37086358 | 9   | 9   | 1 | 5.865244197 | 0.00272497  | STRN    | ENSG00000115808 |
| 2 | 37277142 | 37277572 | 37277316 | 13  | 21  | 2 | 8.602358155 | 3.33E-06    | SULT6B1 | ENSG00000138068 |
| 2 | 37312101 | 37312341 | 37312221 | 9   | 11  | 8 | 1.564065119 | 0.151515    | CEBPZ   | ENSG00000115816 |



|   |          |          |          |    |    |    |             |             |          |                 |
|---|----------|----------|----------|----|----|----|-------------|-------------|----------|-----------------|
| 2 | 37442038 | 37442312 | 37442164 | 14 | 16 | 1  | 9.970915134 | 1.89E-05    | QPCT     | ENSG00000115828 |
| 2 | 37734605 | 37735123 | 37734871 | 48 | 71 | 4  | 16.89190329 | 6.15E-20    | CDC42EP3 | ENSG00000163171 |
| 2 | 37867533 | 37868095 | 37867734 | 82 | 99 | 2  | 39.10162798 | 3.00E-31    |          | ENSG00000213595 |
| 2 | 37971544 | 37971876 | 37971710 | 12 | 14 | 7  | 2.199466574 | 0.0303778   | FAM82A1  | ENSG00000115841 |
| 2 | 38005984 | 38006337 | 38006160 | 12 | 17 | 6  | 3.016411301 | 0.00381427  | FAM82A1  | ENSG00000115841 |
| 2 | 38107517 | 38108069 | 38107696 | 40 | 61 | 2  | 24.24300935 | 7.63E-19    | CYP1B1   | ENSG00000138061 |
| 2 | 38176891 | 38177188 | 38177059 | 13 | 16 | 4  | 3.988366054 | 0.00115141  | CYP1B1   | ENSG00000138061 |
| 2 | 38662398 | 38662586 | 38662492 | 8  | 8  | 0  | 10.55743955 | 0.000925496 | HNRPLL   | ENSG00000143889 |
| 2 | 38683502 | 38683689 | 38683595 | 9  | 10 | 3  | 3.225884308 | 0.0139466   | HNRPLL   | ENSG00000143889 |
| 2 | 38697134 | 38697363 | 38697248 | 16 | 16 | 2  | 6.647276756 | 0.000101928 | HNRPLL   | ENSG00000143889 |
| 2 | 38765490 | 38765706 | 38765590 | 8  | 9  | 1  | 5.865244197 | 0.00272497  | GALM     | ENSG00000143891 |
| 2 | 38771275 | 38771832 | 38771656 | 20 | 31 | 5  | 6.256260476 | 3.74E-07    | GALM     | ENSG00000143891 |
| 2 | 38831832 | 38832237 | 38832063 | 10 | 18 | 3  | 5.571981987 | 0.000108726 | SFRS7    | ENSG00000115875 |
| 2 | 38986844 | 38987135 | 38986987 | 19 | 20 | 1  | 12.31701281 | 1.03E-06    |          | ENSG00000214694 |
| 2 | 39149032 | 39149211 | 39149133 | 8  | 8  | 1  | 5.278719777 | 0.00542188  |          | ENSG00000206985 |
| 2 | 39201642 | 39201902 | 39201787 | 10 | 11 | 4  | 2.815317214 | 0.0183428   | SOS1     | ENSG00000115904 |
| 2 | 39204920 | 39205215 | 39205059 | 11 | 14 | 5  | 2.932622098 | 0.00829617  | SOS1     | ENSG00000115904 |
| 2 | 39260942 | 39261252 | 39261108 | 13 | 15 | 2  | 6.256260476 | 0.000199274 | CDKL4    | ENSG00000205111 |
| 2 | 39485919 | 39486257 | 39486088 | 28 | 30 | 1  | 18.18225701 | 6.30E-10    | MAP4K3   | ENSG00000011566 |
| 2 | 39674531 | 39674749 | 39674688 | 9  | 9  | 5  | 1.955081399 | 0.0892323   | TMEM178  | ENSG00000152154 |
| 2 | 40117936 | 40118186 | 40118075 | 8  | 8  | 0  | 10.55743955 | 0.000925496 |          | ENSG00000217059 |
| 2 | 40175757 | 40175998 | 40175864 | 8  | 9  | 5  | 1.955081399 | 0.0892323   |          | ENSG00000217059 |
| 2 | 40412770 | 40412959 | 40412903 | 8  | 8  | 2  | 3.519146518 | 0.017558    | SLC8A1   | ENSG00000183023 |
| 2 | 41537658 | 41538037 | 41537858 | 11 | 18 | 10 | 2.026175268 | 0.0273052   |          | ENSG00000221372 |
| 2 | 41803415 | 41803758 | 41803592 | 30 | 32 | 1  | 19.35530585 | 1.42E-10    |          | ENSG00000213574 |
| 2 | 41803823 | 41804033 | 41803956 | 8  | 8  | 0  | 10.55743955 | 0.000925496 |          | ENSG00000213574 |
| 2 | 41854743 | 41855121 | 41854942 | 11 | 18 | 5  | 3.714654658 | 0.000961539 |          | ENSG00000213574 |
| 2 | 41872300 | 41872556 | 41872392 | 9  | 9  | 0  | 11.73048839 | 0.000425898 |          | ENSG00000213574 |
| 2 | 41921396 | 41921624 | 41921510 | 8  | 9  | 4  | 2.346097679 | 0.050148    |          | ENSG00000218827 |
| 2 | 41962498 | 41962677 | 41962587 | 8  | 8  | 1  | 5.278719777 | 0.00542188  |          | ENSG00000214691 |
| 2 | 42135567 | 42135792 | 42135699 | 8  | 8  | 2  | 3.519146518 | 0.017558    |          | ENSG00000162878 |
| 2 | 42167186 | 42167478 | 42167325 | 11 | 13 | 2  | 5.474227917 | 0.000747844 |          | ENSG00000162878 |
| 2 | 42187575 | 42187754 | 42187664 | 8  | 8  | 0  | 10.55743955 | 0.000925496 |          | ENSG00000162878 |
| 2 | 42213647 | 42213959 | 42213803 | 16 | 18 | 6  | 3.183989707 | 0.00227432  | EML4     | ENSG00000143924 |

|   |          |          |          |    |     |    |             |             |         |                 |
|---|----------|----------|----------|----|-----|----|-------------|-------------|---------|-----------------|
| 2 | 42381291 | 42381564 | 42381417 | 10 | 11  | 2  | 4.692195357 | 0.00272444  | EML4    | ENSG00000143924 |
| 2 | 42423209 | 42423388 | 42423298 | 8  | 8   | 6  | 1.508205651 | 0.203852    | COX7A2L | ENSG00000115944 |
| 2 | 42441884 | 42442107 | 42441972 | 9  | 10  | 6  | 1.843362462 | 0.0964212   | COX7A2L | ENSG00000115944 |
| 2 | 42465912 | 42466103 | 42465976 | 8  | 8   | 2  | 3.519146518 | 0.017558    | COX7A2L | ENSG00000115944 |
| 2 | 42575500 | 42575745 | 42575624 | 9  | 11  | 16 | 0.828034475 | 0.698553    | MTA3    | ENSG00000057935 |
| 2 | 42626336 | 42626641 | 42626488 | 21 | 23  | 4  | 5.630634429 | 1.63E-05    |         | ENSG00000217380 |
| 2 | 42639577 | 42639960 | 42639755 | 9  | 15  | 1  | 9.384390715 | 3.90E-05    | MTA3    | ENSG00000057935 |
| 2 | 42643192 | 42643491 | 42643336 | 10 | 12  | 7  | 1.906204364 | 0.0695918   | MTA3    | ENSG00000057935 |
| 2 | 42823879 | 42824122 | 42824000 | 9  | 10  | 1  | 6.451768616 | 0.00135978  | OXER1   | ENSG00000162881 |
| 2 | 42832928 | 42833114 | 42833011 | 8  | 9   | 2  | 3.910162798 | 0.00955088  | OXER1   | ENSG00000162881 |
| 2 | 42876620 | 42877385 | 42876846 | 87 | 131 | 0  | 154.8424468 | 3.21E-45    |         | ENSG00000217155 |
| 2 | 42891102 | 42891546 | 42891313 | 16 | 27  | 10 | 2.9859425   | 0.000503424 |         | ENSG00000217155 |
| 2 | 43259484 | 43259666 | 43259602 | 8  | 10  | 2  | 4.301179077 | 0.00512919  | ZFP36L2 | ENSG00000152518 |
| 2 | 43259698 | 43259882 | 43259745 | 9  | 9   | 1  | 5.865244197 | 0.00272497  | ZFP36L2 | ENSG00000152518 |
| 2 | 43300467 | 43300777 | 43300622 | 11 | 16  | 6  | 2.848832895 | 0.00632407  | ZFP36L2 | ENSG00000152518 |
| 2 | 43310227 | 43310449 | 43310401 | 9  | 11  | 2  | 4.692195357 | 0.00272444  |         | ENSG00000178006 |
| 2 | 43507095 | 43507378 | 43507238 | 13 | 14  | 12 | 1.353517892 | 0.211235    |         | ENSG00000211259 |
| 2 | 43524091 | 43524286 | 43524188 | 10 | 11  | 3  | 3.519146518 | 0.00788869  |         | ENSG00000211259 |
| 2 | 43553868 | 43554116 | 43553992 | 8  | 8   | 2  | 3.519146518 | 0.017558    |         | ENSG00000211259 |
| 2 | 43559260 | 43559447 | 43559321 | 8  | 9   | 0  | 11.73048839 | 0.000425898 |         | ENSG00000211259 |
| 2 | 43677004 | 43677183 | 43677093 | 8  | 8   | 5  | 1.759573259 | 0.13508     | THADA   | ENSG00000115970 |
| 2 | 43978983 | 43979166 | 43979092 | 8  | 8   | 3  | 2.639359888 | 0.0415794   |         | ENSG00000200924 |
| 2 | 44629827 | 44630012 | 44629911 | 8  | 10  | 1  | 6.451768616 | 0.00135978  | C2orf34 | ENSG00000143919 |
| 2 | 45036321 | 45036558 | 45036414 | 9  | 11  | 0  | 14.07658607 | 9.02E-05    | SIX3    | ENSG00000138083 |
| 2 | 45090087 | 45090390 | 45090216 | 9  | 14  | 2  | 5.865244197 | 0.000387308 | SIX2    | ENSG00000170577 |
| 2 | 45339933 | 45340112 | 45340009 | 8  | 8   | 3  | 2.639359888 | 0.0415794   |         | ENSG00000205054 |
| 2 | 45731641 | 45731831 | 45731710 | 8  | 8   | 0  | 10.55743955 | 0.000925496 | PRKCE   | ENSG00000171132 |
| 2 | 45756123 | 45756375 | 45756232 | 10 | 13  | 5  | 2.737113958 | 0.0137917   | PRKCE   | ENSG00000171132 |
| 2 | 45833225 | 45833632 | 45833343 | 8  | 15  | 7  | 2.346097679 | 0.0195693   | PRKCE   | ENSG00000171132 |
| 2 | 45846543 | 45846889 | 45846716 | 16 | 22  | 1  | 13.49006165 | 2.37E-07    | PRKCE   | ENSG00000171132 |
| 2 | 45930094 | 45930508 | 45930273 | 41 | 52  | 2  | 20.72386283 | 6.10E-16    | PRKCE   | ENSG00000171132 |
| 2 | 46017089 | 46017334 | 46017244 | 9  | 12  | 4  | 3.049926982 | 0.0108184   | PRKCE   | ENSG00000171132 |
| 2 | 46019199 | 46019829 | 46019504 | 11 | 30  | 14 | 2.424300935 | 0.00163956  | PRKCE   | ENSG00000171132 |
| 2 | 46089046 | 46089418 | 46089205 | 20 | 26  | 0  | 31.67231866 | 7.93E-10    |         | ENSG00000217939 |

|   |          |          |          |    |     |   |             |             |          |                 |
|---|----------|----------|----------|----|-----|---|-------------|-------------|----------|-----------------|
| 2 | 46171363 | 46171564 | 46171509 | 8  | 8   | 0 | 10.55743955 | 0.000925496 |          | ENSG00000217939 |
| 2 | 46215096 | 46215545 | 46215259 | 19 | 28  | 6 | 4.859773763 | 8.07E-06    |          | ENSG00000217939 |
| 2 | 46215585 | 46215986 | 46215785 | 9  | 17  | 7 | 2.639359888 | 0.00777415  |          | ENSG00000217939 |
| 2 | 46252206 | 46252478 | 46252327 | 8  | 9   | 1 | 5.865244197 | 0.00272497  | EPAS1    | ENSG00000116016 |
| 2 | 46252675 | 46253436 | 46253084 | 62 | 102 | 9 | 12.08240304 | 4.42E-25    | EPAS1    | ENSG00000116016 |
| 2 | 46416730 | 46416918 | 46416808 | 8  | 9   | 1 | 5.865244197 | 0.00272497  | EPAS1    | ENSG00000116016 |
| 2 | 46515680 | 46515999 | 46515839 | 11 | 16  | 2 | 6.647276756 | 0.000101928 |          | ENSG00000211311 |
| 2 | 46580557 | 46580808 | 46580682 | 10 | 10  | 5 | 2.150589539 | 0.0575848   | ATP6V1E2 | ENSG00000171142 |
| 2 | 46725878 | 46726060 | 46725912 | 8  | 8   | 2 | 3.519146518 | 0.017558    |          | ENSG00000203445 |
| 2 | 46726278 | 46726732 | 46726505 | 20 | 35  | 2 | 14.07658607 | 1.57E-10    |          | ENSG00000203445 |
| 2 | 46727711 | 46728094 | 46727933 | 24 | 33  | 2 | 13.29455351 | 6.68E-10    |          | ENSG00000203445 |
| 2 | 46731344 | 46731558 | 46731409 | 9  | 9   | 3 | 2.932622098 | 0.0242899   |          | ENSG00000203445 |
| 2 | 47048595 | 47048904 | 47048749 | 12 | 15  | 1 | 9.384390715 | 3.90E-05    | TTC7A    | ENSG00000068724 |
| 2 | 47099909 | 47100088 | 47099998 | 8  | 8   | 1 | 5.278719777 | 0.00542188  | TTC7A    | ENSG00000068724 |
| 2 | 47256879 | 47257062 | 47256970 | 8  | 9   | 6 | 1.675784056 | 0.141978    | CALM2    | ENSG00000143933 |
| 2 | 47420502 | 47420741 | 47420633 | 8  | 9   | 2 | 3.910162798 | 0.00955088  | TACSTD1  | ENSG00000119888 |
| 2 | 47420819 | 47421091 | 47420934 | 15 | 17  | 9 | 2.111487911 | 0.0248715   | TACSTD1  | ENSG00000119888 |
| 2 | 47556994 | 47557202 | 47557127 | 10 | 10  | 2 | 4.301179077 | 0.00512919  | MSH2     | ENSG00000095002 |
| 2 | 47986984 | 47987171 | 47987077 | 8  | 8   | 0 | 10.55743955 | 0.000925496 | FBXO11   | ENSG00000138081 |
| 2 | 47987405 | 47987805 | 47987584 | 12 | 19  | 3 | 5.865244197 | 5.72E-05    | FBXO11   | ENSG00000138081 |
| 2 | 48191895 | 48192365 | 48192074 | 11 | 24  | 4 | 5.865244197 | 8.64E-06    |          | ENSG00000201010 |
| 2 | 48394758 | 48395184 | 48395057 | 10 | 16  | 3 | 4.985457567 | 0.000385643 | FOXN2    | ENSG00000170802 |
| 2 | 48396131 | 48396342 | 48396189 | 9  | 10  | 2 | 4.301179077 | 0.00512919  | FOXN2    | ENSG00000170802 |
| 2 | 48682079 | 48682307 | 48682194 | 8  | 10  | 0 | 12.90353723 | 0.000195991 | GTF2A1L  | ENSG00000068781 |
| 2 | 48830383 | 48830635 | 48830512 | 9  | 12  | 6 | 2.178519273 | 0.0416567   | LHCGR    | ENSG00000138039 |
| 2 | 48849314 | 48849769 | 48849493 | 18 | 27  | 4 | 6.5690735   | 1.26E-06    | TCEB2    | ENSG00000217429 |
| 2 | 48859682 | 48859930 | 48859791 | 10 | 11  | 2 | 4.692195357 | 0.00272444  | TCEB2    | ENSG00000217429 |
| 2 | 48921787 | 48922228 | 48921997 | 41 | 55  | 2 | 21.89691167 | 6.60E-17    | TCEB2    | ENSG00000217429 |
| 2 | 49027257 | 49027449 | 49027353 | 9  | 9   | 0 | 11.73048839 | 0.000425898 |          | ENSG00000214602 |
| 2 | 49571481 | 49571667 | 49571530 | 8  | 8   | 0 | 10.55743955 | 0.000925496 |          | ENSG00000206915 |
| 2 | 54205462 | 54205695 | 54205553 | 8  | 9   | 0 | 11.73048839 | 0.000425898 | ACYP2    | ENSG00000170634 |
| 2 | 54660376 | 54660718 | 54660547 | 13 | 15  | 6 | 2.68125449  | 0.0103552   | SPTBN1   | ENSG00000115306 |
| 2 | 54700255 | 54700550 | 54700402 | 13 | 17  | 4 | 4.222975822 | 0.000640773 | SPTBN1   | ENSG00000115306 |
| 2 | 54700694 | 54701005 | 54700839 | 18 | 22  | 1 | 13.49006165 | 2.37E-07    | SPTBN1   | ENSG00000115306 |

|   |          |          |          |    |     |    |             |                    |                 |
|---|----------|----------|----------|----|-----|----|-------------|--------------------|-----------------|
| 2 | 54803868 | 54804456 | 54804183 | 8  | 21  | 2  | 8.602358155 | 3.33E-06           | ENSG00000214595 |
| 2 | 54919230 | 54919486 | 54919358 | 13 | 14  | 1  | 8.797866295 | 8.00E-05           | ENSG00000143940 |
| 2 | 55033971 | 55034165 | 55034073 | 8  | 8   | 3  | 2.639359888 | 0.0415794          | ENSG00000143940 |
| 2 | 55079916 | 55080119 | 55080091 | 9  | 10  | 3  | 3.225884308 | 0.0139466 RTN4     | ENSG00000115310 |
| 2 | 55090752 | 55090956 | 55090860 | 8  | 8   | 3  | 2.639359888 | 0.0415794 RTN4     | ENSG00000115310 |
| 2 | 55093560 | 55093785 | 55093672 | 13 | 13  | 2  | 5.474227917 | 0.000747844        | ENSG00000200086 |
| 2 | 55130158 | 55130340 | 55130236 | 8  | 9   | 3  | 2.932622098 | 0.0242899 RTN4     | ENSG00000115310 |
| 2 | 55158864 | 55159168 | 55159016 | 20 | 21  | 1  | 12.90353723 | 4.95E-07 RTN4      | ENSG00000115310 |
| 2 | 55312728 | 55313090 | 55312907 | 8  | 16  | 8  | 2.215758919 | 0.0222902 C2orf63  | ENSG00000162994 |
| 2 | 55349756 | 55350039 | 55349911 | 17 | 20  | 1  | 12.31701281 | 1.03E-06 MTIF2     | ENSG00000085760 |
| 2 | 55698123 | 55698711 | 55698286 | 16 | 28  | 12 | 2.616801257 | 0.00120123 SMEK2   | ENSG00000138041 |
| 2 | 55860400 | 55860636 | 55860518 | 11 | 11  | 6  | 2.010940867 | 0.0640214 PNPT1    | ENSG00000138035 |
| 2 | 55919818 | 55920225 | 55920046 | 11 | 19  | 4  | 4.692195357 | 0.000193572 EFEMP1 | ENSG00000115380 |
| 2 | 56024121 | 56024439 | 56024280 | 16 | 19  | 2  | 7.820325595 | 1.32E-05           | ENSG00000202344 |
| 2 | 56041952 | 56042257 | 56042086 | 9  | 11  | 6  | 2.010940867 | 0.0640214          | ENSG00000202344 |
| 2 | 56459717 | 56460059 | 56459888 | 29 | 34  | 4  | 8.211341875 | 1.23E-08           | ENSG00000199395 |
| 2 | 60580576 | 60580944 | 60580820 | 10 | 15  | 1  | 9.384390715 | 3.90E-05 BCL11A    | ENSG00000119866 |
| 2 | 61095509 | 61095688 | 61095598 | 8  | 8   | 0  | 10.55743955 | 0.000925496 PUS10  | ENSG00000162927 |
| 2 | 61097681 | 61098067 | 61097860 | 14 | 22  | 3  | 6.745030826 | 8.05E-06 PEX13     | ENSG00000162928 |
| 2 | 61358430 | 61358855 | 61358609 | 15 | 25  | 0  | 30.49926982 | 1.72E-09 AHSA2     | ENSG00000173209 |
| 2 | 61507051 | 61507250 | 61507096 | 9  | 9   | 2  | 3.910162798 | 0.00955088         | ENSG00000206937 |
| 2 | 61552016 | 61552216 | 61552096 | 8  | 9   | 0  | 11.73048839 | 0.000425898 USP34  | ENSG00000115464 |
| 2 | 61618758 | 61619215 | 61618990 | 14 | 25  | 7  | 3.812408728 | 0.00012465 XPO1    | ENSG00000082898 |
| 2 | 61619285 | 61619500 | 61619401 | 9  | 10  | 1  | 6.451768616 | 0.00135978 XPO1    | ENSG00000082898 |
| 2 | 61844468 | 61844648 | 61844558 | 8  | 8   | 4  | 2.111487911 | 0.0804809          | ENSG00000213486 |
| 2 | 61844962 | 61845199 | 61845022 | 8  | 12  | 7  | 1.906204364 | 0.0695918          | ENSG00000213486 |
| 2 | 61969450 | 61969629 | 61969477 | 8  | 8   | 4  | 2.111487911 | 0.0804809 CCT4     | ENSG00000115484 |
| 2 | 62040511 | 62041007 | 62040709 | 88 | 111 | 1  | 65.690735   | 1.09E-36           | ENSG00000209229 |
| 2 | 62041890 | 62042305 | 62042097 | 51 | 65  | 1  | 38.7106117  | 2.08E-21           | ENSG00000209229 |
| 2 | 62123625 | 62123846 | 62123735 | 9  | 9   | 1  | 5.865244197 | 0.00272497         | ENSG00000220214 |
| 2 | 62387580 | 62388049 | 62387767 | 17 | 31  | 8  | 4.170840318 | 1.13E-05           | ENSG00000209133 |
| 2 | 62586451 | 62586721 | 62586622 | 11 | 13  | 2  | 5.474227917 | 0.000747844 TMEM17 | ENSG00000186889 |
| 2 | 62785687 | 62786347 | 62785902 | 9  | 27  | 9  | 3.28453675  | 0.000236424 EHBP1  | ENSG00000115504 |
| 2 | 62806001 | 62806199 | 62806066 | 8  | 9   | 4  | 2.346097679 | 0.050148 EHBP1     | ENSG00000115504 |

|   |          |          |          |    |    |   |             |             |         |                 |
|---|----------|----------|----------|----|----|---|-------------|-------------|---------|-----------------|
| 2 | 63669162 | 63669387 | 63669334 | 8  | 11 | 1 | 7.038293036 | 0.000674435 |         | ENSG00000143951 |
| 2 | 63922791 | 63923110 | 63922941 | 12 | 13 | 2 | 5.474227917 | 0.000747844 | UGP2    | ENSG00000169764 |
| 2 | 64130396 | 64130655 | 64130525 | 8  | 10 | 4 | 2.580707446 | 0.0306059   | VPS54   | ENSG00000143952 |
| 2 | 64314838 | 64315121 | 64314966 | 13 | 15 | 0 | 18.76878143 | 4.04E-06    | PELI1   | ENSG00000197329 |
| 2 | 64563829 | 64564008 | 64563964 | 8  | 8  | 0 | 10.55743955 | 0.000925496 |         | ENSG00000119862 |
| 2 | 64568728 | 64568965 | 64568846 | 10 | 11 | 0 | 14.07658607 | 9.02E-05    |         | ENSG00000119862 |
| 2 | 64604636 | 64605025 | 64604783 | 11 | 17 | 4 | 4.222975822 | 0.000640773 | AFTPH   | ENSG00000119844 |
| 2 | 64687203 | 64687430 | 64687316 | 8  | 8  | 0 | 10.55743955 | 0.000925496 |         | ENSG00000209305 |
| 2 | 64688464 | 64688695 | 64688579 | 13 | 14 | 5 | 2.932622098 | 0.00829617  |         | ENSG00000209305 |
| 2 | 64725168 | 64725492 | 64725336 | 12 | 13 | 3 | 4.105670938 | 0.00243034  | SERTAD2 | ENSG00000179833 |
| 2 | 64802003 | 64802253 | 64802176 | 9  | 11 | 3 | 3.519146518 | 0.00788869  | SERTAD2 | ENSG00000179833 |
| 2 | 64816249 | 64816460 | 64816354 | 9  | 10 | 2 | 4.301179077 | 0.00512919  |         | ENSG00000209316 |
| 2 | 64832255 | 64832667 | 64832492 | 10 | 18 | 4 | 4.457585589 | 0.000353565 |         | ENSG00000209316 |
| 2 | 64912369 | 64912730 | 64912562 | 16 | 21 | 4 | 5.161414893 | 5.68E-05    |         | ENSG00000199964 |
| 2 | 64929095 | 64929336 | 64929215 | 11 | 12 | 1 | 7.624817456 | 0.000332769 |         | ENSG00000199964 |
| 2 | 64946073 | 64946322 | 64946197 | 8  | 8  | 4 | 2.111487911 | 0.0804809   |         | ENSG00000199964 |
| 2 | 65121354 | 65121533 | 65121443 | 8  | 9  | 4 | 2.346097679 | 0.050148    | CEP68   | ENSG00000011523 |
| 2 | 65136867 | 65137061 | 65136952 | 8  | 8  | 3 | 2.639359888 | 0.0415794   | CEP68   | ENSG00000011523 |
| 2 | 65149433 | 65149868 | 65149590 | 52 | 60 | 1 | 35.7779896  | 9.32E-20    | CEP68   | ENSG00000011523 |
| 2 | 65152098 | 65152436 | 65152315 | 9  | 14 | 1 | 8.797866295 | 8.00E-05    | CEP68   | ENSG00000011523 |
| 2 | 65210586 | 65210784 | 65210693 | 8  | 11 | 4 | 2.815317214 | 0.0183428   | RAB1A   | ENSG00000138069 |
| 2 | 65308113 | 65308477 | 65308252 | 10 | 15 | 8 | 2.085420159 | 0.0338693   | ACTR2   | ENSG00000138071 |
| 2 | 65390302 | 65390701 | 65390522 | 13 | 20 | 5 | 4.105670938 | 0.000308509 | ACTR2   | ENSG00000138071 |
| 2 | 65431411 | 65431702 | 65431556 | 9  | 11 | 0 | 14.07658607 | 9.02E-05    | SPRED2  | ENSG00000198369 |
| 2 | 65458346 | 65458547 | 65458499 | 9  | 10 | 9 | 1.290353723 | 0.279648    | SPRED2  | ENSG00000198369 |
| 2 | 65487301 | 65487542 | 65487421 | 12 | 15 | 2 | 6.256260476 | 0.000199274 | SPRED2  | ENSG00000198369 |
| 2 | 65513133 | 65513640 | 65513461 | 10 | 21 | 4 | 5.161414893 | 5.68E-05    | SPRED2  | ENSG00000198369 |
| 2 | 65618630 | 65619173 | 65618964 | 59 | 74 | 1 | 43.98933147 | 2.18E-24    |         | ENSG00000208992 |
| 2 | 65721105 | 65721326 | 65721235 | 8  | 9  | 0 | 11.73048839 | 0.000425898 |         | ENSG00000214533 |
| 2 | 65744507 | 65744687 | 65744565 | 8  | 8  | 1 | 5.278719777 | 0.00542188  |         | ENSG00000214533 |
| 2 | 66342922 | 66343145 | 66343079 | 9  | 10 | 1 | 6.451768616 | 0.00135978  |         | ENSG00000221107 |
| 2 | 67927140 | 67927346 | 67927243 | 8  | 8  | 2 | 3.519146518 | 0.017558    |         | ENSG00000219288 |
| 2 | 68332031 | 68332249 | 68332140 | 9  | 10 | 3 | 3.225884308 | 0.0139466   | PPP3R1  | ENSG00000115953 |
| 2 | 68332966 | 68333150 | 68333058 | 8  | 8  | 1 | 5.278719777 | 0.00542188  | PPP3R1  | ENSG00000115953 |

|   |          |          |          |    |     |   |             |             |          |                 |
|---|----------|----------|----------|----|-----|---|-------------|-------------|----------|-----------------|
| 2 | 68545413 | 68545606 | 68545509 | 9  | 9   | 1 | 5.865244197 | 0.00272497  | FBXO48   | ENSG00000204923 |
| 2 | 68825098 | 68825529 | 68825270 | 16 | 27  | 1 | 16.42268375 | 5.88E-09    | ARHGAP25 | ENSG00000163219 |
| 2 | 69489926 | 69490196 | 69490061 | 10 | 12  | 0 | 15.24963491 | 4.15E-05    | GFPT1    | ENSG00000198380 |
| 2 | 69728958 | 69729353 | 69729175 | 14 | 20  | 0 | 24.63402563 | 8.35E-08    |          | ENSG00000220011 |
| 2 | 69805459 | 69805698 | 69805566 | 8  | 9   | 4 | 2.346097679 | 0.050148    | ANXA4    | ENSG00000196975 |
| 2 | 69822545 | 69822816 | 69822680 | 13 | 14  | 4 | 3.519146518 | 0.00361132  | ANXA4    | ENSG00000196975 |
| 2 | 69843377 | 69843565 | 69843471 | 8  | 9   | 3 | 2.932622098 | 0.0242899   | ANXA4    | ENSG00000196975 |
| 2 | 69910006 | 69910233 | 69910131 | 10 | 13  | 5 | 2.737113958 | 0.0137917   | GMCL1L   | ENSG00000087338 |
| 2 | 69974473 | 69974713 | 69974601 | 14 | 14  | 1 | 8.797866295 | 8.00E-05    | SNRNP27  | ENSG00000124380 |
| 2 | 70013037 | 70013253 | 70013091 | 8  | 9   | 0 | 11.73048839 | 0.000425898 | MXD1     | ENSG00000059728 |
| 2 | 70166704 | 70167067 | 70166876 | 9  | 15  | 6 | 2.68125449  | 0.0103552   | PCBP1    | ENSG00000169564 |
| 2 | 70204755 | 70205003 | 70204879 | 10 | 11  | 6 | 2.010940867 | 0.0640214   | PCBP1    | ENSG00000169564 |
| 2 | 70221705 | 70222166 | 70221935 | 17 | 28  | 2 | 11.33947211 | 2.41E-08    | C2orf42  | ENSG00000115998 |
| 2 | 70271591 | 70271859 | 70271725 | 8  | 10  | 0 | 12.90353723 | 0.000195991 | C2orf42  | ENSG00000115998 |
| 2 | 70329244 | 70329773 | 70329396 | 11 | 21  | 8 | 2.867452718 | 0.00225035  | TIA1     | ENSG00000116001 |
| 2 | 70374141 | 70374491 | 70374316 | 12 | 18  | 4 | 4.457585589 | 0.000353565 | SNRPG    | ENSG00000143977 |
| 2 | 70500747 | 70500951 | 70500864 | 8  | 8   | 6 | 1.508205651 | 0.203852    |          | ENSG00000215996 |
| 2 | 70677355 | 70678060 | 70677724 | 99 | 140 | 4 | 33.07997727 | 4.57E-42    | TGFA     | ENSG00000163235 |
| 2 | 70696984 | 70697183 | 70697043 | 11 | 12  | 6 | 2.178519273 | 0.0416567   | TGFA     | ENSG00000163235 |
| 2 | 70980950 | 70981144 | 70981047 | 8  | 9   | 5 | 1.955081399 | 0.0892323   | VAX2     | ENSG00000116035 |
| 2 | 71148789 | 71149073 | 71148931 | 8  | 12  | 8 | 1.694403879 | 0.107291    | NAGK     | ENSG00000124357 |
| 2 | 71149135 | 71149412 | 71149291 | 11 | 14  | 5 | 2.932622098 | 0.00829617  | NAGK     | ENSG00000124357 |
| 2 | 71210442 | 71210688 | 71210565 | 9  | 12  | 5 | 2.541605819 | 0.0225912   | MCEE     | ENSG00000124370 |
| 2 | 71211005 | 71211331 | 71211165 | 14 | 18  | 3 | 5.571981987 | 0.000108726 | MPHOSPH1 | ENSG00000124383 |
| 2 | 71412170 | 71412378 | 71412298 | 8  | 10  | 2 | 4.301179077 | 0.00512919  | ZNF638   | ENSG00000075292 |
| 2 | 71499746 | 71499946 | 71499846 | 8  | 8   | 1 | 5.278719777 | 0.00542188  | ZNF638   | ENSG00000075292 |
| 2 | 71572866 | 71573075 | 71572970 | 8  | 9   | 1 | 5.865244197 | 0.00272497  | DYSF     | ENSG00000135636 |
| 2 | 71808235 | 71808712 | 71808533 | 19 | 29  | 3 | 8.797866295 | 7.21E-08    | DYSF     | ENSG00000135636 |
| 2 | 71827592 | 71827858 | 71827725 | 17 | 19  | 5 | 3.910162798 | 0.000546977 | DYSF     | ENSG00000135636 |
| 2 | 71828184 | 71828572 | 71828411 | 12 | 17  | 5 | 3.519146518 | 0.00167472  | DYSF     | ENSG00000135636 |
| 2 | 71961544 | 71961799 | 71961689 | 19 | 20  | 2 | 8.211341875 | 6.65E-06    | CYP26B1  | ENSG00000003137 |
| 2 | 72011348 | 72011528 | 72011438 | 8  | 9   | 5 | 1.955081399 | 0.0892323   | CYP26B1  | ENSG00000003137 |
| 2 | 72033338 | 72033580 | 72033459 | 8  | 10  | 2 | 4.301179077 | 0.00512919  | CYP26B1  | ENSG00000003137 |
| 2 | 72075786 | 72076057 | 72075921 | 10 | 10  | 6 | 1.843362462 | 0.0964212   | CYP26B1  | ENSG00000003137 |

|   |          |          |          |    |    |    |             |             |         |                 |
|---|----------|----------|----------|----|----|----|-------------|-------------|---------|-----------------|
| 2 | 72196137 | 72196529 | 72196302 | 19 | 26 | 2  | 10.55743955 | 9.97E-08    | CYP26B1 | ENSG00000003137 |
| 2 | 72943239 | 72943513 | 72943406 | 9  | 11 | 4  | 2.815317214 | 0.0183428   | SPR     | ENSG00000116096 |
| 2 | 72968437 | 72968795 | 72968597 | 10 | 15 | 6  | 2.68125449  | 0.0103552   | SPR     | ENSG00000116096 |
| 2 | 72974464 | 72975077 | 72974641 | 14 | 33 | 0  | 39.88366054 | 3.46E-12    | SPR     | ENSG00000116096 |
| 2 | 72999120 | 72999457 | 72999281 | 8  | 13 | 1  | 8.211341875 | 0.000163445 | EMX1    | ENSG00000135638 |
| 2 | 73152322 | 73152555 | 73152465 | 9  | 12 | 5  | 2.541605819 | 0.0225912   | SFXN5   | ENSG00000144040 |
| 2 | 73257813 | 73258154 | 73257978 | 9  | 14 | 2  | 5.865244197 | 0.000387308 | NOTO    | ENSG00000214513 |
| 2 | 73284964 | 73285183 | 73285049 | 8  | 10 | 4  | 2.580707446 | 0.0306059   | NOTO    | ENSG00000214513 |
| 2 | 73293218 | 73293412 | 73293282 | 8  | 9  | 4  | 2.346097679 | 0.050148    | SMYD5   | ENSG00000135632 |
| 2 | 73294658 | 73294999 | 73294822 | 11 | 15 | 3  | 4.692195357 | 0.000718455 | SMYD5   | ENSG00000135632 |
| 2 | 73324739 | 73324923 | 73324831 | 9  | 9  | 4  | 2.346097679 | 0.050148    | CCT7    | ENSG00000135624 |
| 2 | 73324952 | 73325165 | 73325058 | 9  | 11 | 0  | 14.07658607 | 9.02E-05    | CCT7    | ENSG00000135624 |
| 2 | 73375634 | 73375838 | 73375736 | 8  | 8  | 2  | 3.519146518 | 0.017558    | EGR4    | ENSG00000135625 |
| 2 | 73533165 | 73533422 | 73533292 | 9  | 11 | 1  | 7.038293036 | 0.000674435 |         | ENSG00000221087 |
| 2 | 73817925 | 73818147 | 73818075 | 8  | 8  | 6  | 1.508205651 | 0.203852    | TPRKB   | ENSG00000144034 |
| 2 | 73837998 | 73838284 | 73838138 | 10 | 11 | 1  | 7.038293036 | 0.000674435 | TPRKB   | ENSG00000144034 |
| 2 | 74001935 | 74002243 | 74002089 | 8  | 8  | 2  | 3.519146518 | 0.017558    | DGUOK   | ENSG00000114956 |
| 2 | 74007272 | 74007595 | 74007433 | 10 | 16 | 5  | 3.323638378 | 0.00288759  | DGUOK   | ENSG00000114956 |
| 2 | 74064230 | 74064653 | 74064409 | 31 | 41 | 10 | 4.47891375  | 2.87E-07    |         | ENSG00000201876 |
| 2 | 74090927 | 74091264 | 74091091 | 30 | 33 | 5  | 6.647276756 | 1.04E-07    | TET3    | ENSG00000187605 |
| 2 | 74268915 | 74269234 | 74269076 | 19 | 22 | 2  | 8.993374435 | 1.66E-06    | MOBKL1B | ENSG00000114978 |
| 2 | 74347751 | 74348013 | 74347896 | 9  | 12 | 3  | 3.812408728 | 0.004404    | SLC4A5  | ENSG00000188687 |
| 2 | 74472498 | 74472711 | 74472606 | 8  | 8  | 3  | 2.639359888 | 0.0415794   | DCTN1   | ENSG00000204843 |
| 2 | 74493724 | 74493925 | 74493764 | 10 | 11 | 0  | 14.07658607 | 9.02E-05    | C2orf81 | ENSG00000159239 |
| 2 | 74535309 | 74535714 | 74535611 | 9  | 16 | 7  | 2.492728784 | 0.0124193   | INO80B  | ENSG00000221956 |
| 2 | 74553165 | 74553474 | 74553302 | 12 | 17 | 9  | 2.111487911 | 0.0248715   | MRPL53  | ENSG00000204822 |
| 2 | 74589304 | 74589491 | 74589371 | 8  | 8  | 1  | 5.278719777 | 0.00542188  | PCGF1   | ENSG00000115289 |
| 2 | 74606701 | 74607233 | 74607104 | 16 | 32 | 4  | 7.742122339 | 4.68E-08    | DQX1    | ENSG00000144045 |
| 2 | 74915886 | 74916065 | 74915975 | 8  | 8  | 1  | 5.278719777 | 0.00542188  | HK2     | ENSG00000159399 |
| 2 | 74926123 | 74926308 | 74926215 | 8  | 9  | 4  | 2.346097679 | 0.050148    | HK2     | ENSG00000159399 |
| 2 | 75460573 | 75460767 | 75460670 | 9  | 10 | 0  | 12.90353723 | 0.000195991 |         | ENSG00000208916 |
| 2 | 75630190 | 75630627 | 75630369 | 12 | 21 | 7  | 3.225884308 | 0.00106152  | FAM176A | ENSG00000115363 |
| 2 | 75689749 | 75689994 | 75689902 | 9  | 9  | 2  | 3.910162798 | 0.00955088  |         | ENSG00000221638 |
| 2 | 75727181 | 75727476 | 75727329 | 14 | 15 | 4  | 3.753756286 | 0.0020497   | MRPL19  | ENSG00000115364 |

|   |          |          |          |    |    |    |             |             |         |                 |
|---|----------|----------|----------|----|----|----|-------------|-------------|---------|-----------------|
| 2 | 76062693 | 76062930 | 76062864 | 8  | 10 | 3  | 3.225884308 | 0.0139466   | C2orf3  | ENSG00000005436 |
| 2 | 83903748 | 83903991 | 83903877 | 13 | 15 | 3  | 4.692195357 | 0.000718455 |         | ENSG00000199295 |
| 2 | 84136539 | 84136768 | 84136655 | 10 | 10 | 1  | 6.451768616 | 0.00135978  |         | ENSG00000182814 |
| 2 | 84516651 | 84516869 | 84516731 | 8  | 8  | 0  | 10.55743955 | 0.000925496 | SUCLG1  | ENSG00000163541 |
| 2 | 84540195 | 84540448 | 84540291 | 8  | 9  | 5  | 1.955081399 | 0.0892323   | SUCLG1  | ENSG00000163541 |
| 2 | 84944718 | 84944949 | 84944793 | 8  | 9  | 0  | 11.73048839 | 0.000425898 |         | ENSG00000208827 |
| 2 | 84974662 | 84975100 | 84974921 | 24 | 33 | 12 | 3.067973887 | 0.000114749 | TMSB10  | ENSG00000034510 |
| 2 | 85006266 | 85006774 | 85006616 | 21 | 31 | 9  | 3.753756286 | 2.87E-05    |         | ENSG00000213399 |
| 2 | 85007687 | 85007919 | 85007820 | 12 | 14 | 3  | 4.398933147 | 0.00132748  |         | ENSG00000213399 |
| 2 | 85040504 | 85040806 | 85040642 | 8  | 10 | 3  | 3.225884308 | 0.0139466   | KCMF1   | ENSG00000176407 |
| 2 | 85095304 | 85095737 | 85095523 | 47 | 57 | 2  | 22.67894423 | 1.50E-17    | KCMF1   | ENSG00000176407 |
| 2 | 85147515 | 85147759 | 85147650 | 10 | 12 | 3  | 3.812408728 | 0.004404    | KCMF1   | ENSG00000176407 |
| 2 | 85187348 | 85187581 | 85187475 | 8  | 10 | 4  | 2.580707446 | 0.0306059   | TCF7L1  | ENSG00000152284 |
| 2 | 85187585 | 85187793 | 85187654 | 9  | 9  | 3  | 2.932622098 | 0.0242899   | TCF7L1  | ENSG00000152284 |
| 2 | 85336954 | 85337153 | 85337009 | 9  | 9  | 1  | 5.865244197 | 0.00272497  |         | ENSG00000221579 |
| 2 | 85339873 | 85340215 | 85340044 | 18 | 23 | 7  | 3.519146518 | 0.000369739 |         | ENSG00000221579 |
| 2 | 85408531 | 85408938 | 85408609 | 10 | 20 | 6  | 3.519146518 | 0.000784044 | TGOLN2  | ENSG00000152291 |
| 2 | 85435075 | 85435589 | 85435276 | 19 | 31 | 12 | 2.887504835 | 0.000300358 | ELMOD3  | ENSG00000115459 |
| 2 | 85441847 | 85442076 | 85441961 | 8  | 9  | 7  | 1.466311049 | 0.20706     | ELMOD3  | ENSG00000115459 |
| 2 | 85450297 | 85450611 | 85450499 | 9  | 13 | 5  | 2.737113958 | 0.0137917   |         | ENSG00000208809 |
| 2 | 85471954 | 85472138 | 85472111 | 8  | 11 | 4  | 2.815317214 | 0.0183428   | CAPG    | ENSG00000042493 |
| 2 | 85477274 | 85477959 | 85477623 | 19 | 42 | 9  | 5.044110009 | 5.53E-08    | CAPG    | ENSG00000042493 |
| 2 | 85498759 | 85499029 | 85498894 | 8  | 9  | 1  | 5.865244197 | 0.00272497  | CAPG    | ENSG00000042493 |
| 2 | 85501343 | 85501621 | 85501505 | 13 | 15 | 2  | 6.256260476 | 0.000199274 | SH2D6   | ENSG00000152292 |
| 2 | 85556897 | 85557330 | 85557053 | 10 | 16 | 1  | 9.970915134 | 1.89E-05    |         | ENSG00000199936 |
| 2 | 85597363 | 85597542 | 85597472 | 8  | 8  | 3  | 2.639359888 | 0.0415794   | MAT2A   | ENSG00000168906 |
| 2 | 85604964 | 85605689 | 85605379 | 15 | 35 | 6  | 6.032822602 | 1.10E-07    | MAT2A   | ENSG00000168906 |
| 2 | 85618925 | 85619152 | 85619072 | 8  | 9  | 7  | 1.466311049 | 0.20706     | MAT2A   | ENSG00000168906 |
| 2 | 85619288 | 85619662 | 85619486 | 12 | 17 | 7  | 2.639359888 | 0.00777415  | MAT2A   | ENSG00000168906 |
| 2 | 85619827 | 85620086 | 85619927 | 12 | 13 | 7  | 2.052835469 | 0.046392    | MAT2A   | ENSG00000168906 |
| 2 | 85620834 | 85621109 | 85620968 | 11 | 12 | 3  | 3.812408728 | 0.004404    | MAT2A   | ENSG00000168906 |
| 2 | 85632767 | 85633000 | 85632883 | 11 | 11 | 3  | 3.519146518 | 0.00788869  | GGCX    | ENSG00000115486 |
| 2 | 85642041 | 85642323 | 85642182 | 13 | 16 | 4  | 3.988366054 | 0.00115141  | GGCX    | ENSG00000115486 |
| 2 | 85683674 | 85683881 | 85683768 | 9  | 9  | 7  | 1.466311049 | 0.20706     | TMEM150 | ENSG00000168890 |



|   |          |          |          |    |     |    |             |             |         |                 |
|---|----------|----------|----------|----|-----|----|-------------|-------------|---------|-----------------|
| 2 | 85809676 | 85809889 | 85809782 | 11 | 11  | 2  | 4.692195357 | 0.00272444  |         | ENSG00000199687 |
| 2 | 85823170 | 85823463 | 85823316 | 16 | 19  | 6  | 3.351568112 | 0.00134187  | ATOH8   | ENSG00000168874 |
| 2 | 86035560 | 86035945 | 86035766 | 9  | 17  | 4  | 4.222975822 | 0.000640773 | ST3GAL5 | ENSG00000115525 |
| 2 | 86037025 | 86037245 | 86037153 | 8  | 9   | 0  | 11.73048839 | 0.000425898 | ST3GAL5 | ENSG00000115525 |
| 2 | 86153099 | 86153480 | 86153270 | 9  | 15  | 4  | 3.753756286 | 0.0020497   | POLR1A  | ENSG00000068654 |
| 2 | 86186175 | 86186775 | 86186607 | 9  | 23  | 10 | 2.559379286 | 0.00330263  | POLR1A  | ENSG00000068654 |
| 2 | 86279945 | 86280309 | 86280118 | 12 | 17  | 8  | 2.346097679 | 0.0144542   | MRPL35  | ENSG00000132313 |
| 2 | 86448951 | 86449281 | 86449116 | 12 | 16  | 3  | 4.985457567 | 0.000385643 |         | ENSG00000202537 |
| 2 | 86506926 | 86507303 | 86507124 | 45 | 53  | 7  | 7.918079665 | 4.10E-12    | JMJD1A  | ENSG00000115548 |
| 2 | 86507418 | 86507725 | 86507571 | 9  | 13  | 10 | 1.49297125  | 0.157311    | JMJD1A  | ENSG00000115548 |
| 2 | 86521593 | 86521916 | 86521754 | 19 | 23  | 5  | 4.692195357 | 5.29E-05    | JMJD1A  | ENSG00000115548 |
| 2 | 86643261 | 86643471 | 86643366 | 8  | 10  | 3  | 3.225884308 | 0.0139466   | VPS24   | ENSG00000115561 |
| 2 | 86643504 | 86643859 | 86643681 | 9  | 15  | 6  | 2.68125449  | 0.0103552   | VPS24   | ENSG00000115561 |
| 2 | 86644031 | 86644427 | 86644192 | 17 | 22  | 6  | 3.854303329 | 0.000260696 | VPS24   | ENSG00000115561 |
| 2 | 86712609 | 86712935 | 86712772 | 12 | 18  | 6  | 3.183989707 | 0.00227432  | VPS24   | ENSG00000115561 |
| 2 | 86713429 | 86713623 | 86713526 | 9  | 9   | 2  | 3.910162798 | 0.00955088  | VPS24   | ENSG00000115561 |
| 2 | 86888030 | 86888297 | 86888158 | 12 | 14  | 3  | 4.398933147 | 0.00132748  | CD8A    | ENSG00000153563 |
| 2 | 86888802 | 86889314 | 86889067 | 10 | 23  | 12 | 2.165628626 | 0.0100985   | CD8A    | ENSG00000153563 |
| 2 | 88096740 | 88097024 | 88096882 | 8  | 12  | 9  | 1.524963491 | 0.154777    |         | ENSG00000222724 |
| 2 | 88097038 | 88097421 | 88097225 | 13 | 21  | 9  | 2.580707446 | 0.00438951  |         | ENSG00000222724 |
| 2 | 88267810 | 88268059 | 88267938 | 8  | 11  | 2  | 4.692195357 | 0.00272444  | THNSL2  | ENSG00000144115 |
| 2 | 88272134 | 88272608 | 88272396 | 93 | 118 | 7  | 17.44910148 | 9.18E-32    | THNSL2  | ENSG00000144115 |
| 2 | 88431504 | 88431716 | 88431652 | 10 | 10  | 3  | 3.225884308 | 0.0139466   |         | ENSG00000212133 |
| 2 | 88535456 | 88535661 | 88535603 | 8  | 8   | 2  | 3.519146518 | 0.017558    |         | ENSG00000214336 |
| 2 | 88584973 | 88585321 | 88585147 | 10 | 14  | 0  | 17.59573259 | 8.79E-06    | C2orf51 | ENSG00000172073 |
| 2 | 88618879 | 88619547 | 88619097 | 77 | 111 | 0  | 131.38147   | 1.77E-38    | C2orf51 | ENSG00000172073 |
| 2 | 88620280 | 88620461 | 88620310 | 8  | 8   | 0  | 10.55743955 | 0.000925496 | C2orf51 | ENSG00000172073 |
| 2 | 88707929 | 88708256 | 88708092 | 11 | 17  | 5  | 3.519146518 | 0.00167472  | EIF2AK3 | ENSG00000172071 |
| 2 | 88708531 | 88708772 | 88708643 | 13 | 16  | 5  | 3.323638378 | 0.00288759  | EIF2AK3 | ENSG00000172071 |
| 2 | 88739773 | 88740097 | 88739927 | 11 | 15  | 5  | 3.128130238 | 0.00492422  | EIF2AK3 | ENSG00000172071 |
| 2 | 88740188 | 88740600 | 88740366 | 22 | 29  | 15 | 2.199466574 | 0.00420562  | RPIA    | ENSG00000153574 |
| 2 | 88752468 | 88752739 | 88752603 | 13 | 14  | 8  | 1.955081399 | 0.0506438   | RPIA    | ENSG00000153574 |
| 2 | 88772168 | 88772506 | 88772337 | 10 | 15  | 3  | 4.692195357 | 0.000718455 | RPIA    | ENSG00000153574 |
| 2 | 88797395 | 88797715 | 88797555 | 8  | 11  | 1  | 7.038293036 | 0.000674435 | RPIA    | ENSG00000153574 |

|   |          |          |          |     |     |     |             |             |                       |
|---|----------|----------|----------|-----|-----|-----|-------------|-------------|-----------------------|
| 2 | 89048562 | 89048864 | 89048733 | 26  | 29  | 4   | 7.038293036 | 3.41E-07    | ENSG00000211601       |
| 2 | 91124285 | 91124490 | 91124402 | 9   | 9   | 3   | 2.932622098 | 0.0242899   | ENSG00000213356       |
| 2 | 91163031 | 91163312 | 91163158 | 12  | 14  | 7   | 2.199466574 | 0.0303778   | ENSG00000212975       |
| 2 | 91166957 | 91167136 | 91167046 | 8   | 9   | 5   | 1.955081399 | 0.0892323   | ENSG00000212975       |
| 2 | 91167503 | 91167739 | 91167624 | 11  | 11  | 4   | 2.815317214 | 0.0183428   | ENSG00000212975       |
| 2 | 91178315 | 91179116 | 91178946 | 30  | 52  | 16  | 3.657152264 | 1.80E-07    | ENSG00000212975       |
| 2 | 91180141 | 91180846 | 91180616 | 20  | 48  | 36  | 1.553497112 | 0.0207027   | ENSG00000212975       |
| 2 | 91180938 | 91181227 | 91181063 | 14  | 18  | 8   | 2.476436439 | 0.00924552  | ENSG00000212975       |
| 2 | 91182302 | 91182674 | 91182480 | 18  | 25  | 8   | 3.388807758 | 0.000297109 | ENSG00000212975       |
| 2 | 91636542 | 91636722 | 91636690 | 9   | 11  | 12  | 1.082814313 | 0.424156    | ENSG00000198710       |
| 2 | 91636857 | 91637186 | 91637021 | 8   | 11  | 9   | 1.407658607 | 0.210479    | ENSG00000198710       |
| 2 | 91639297 | 91639476 | 91639424 | 11  | 13  | 7   | 2.052835469 | 0.046392    | ENSG00000198710       |
| 2 | 91639513 | 91639846 | 91639679 | 45  | 47  | 63  | 0.879786629 | 0.751804    | ENSG00000198710       |
| 2 | 91639883 | 91640214 | 91640048 | 27  | 27  | 44  | 0.729897056 | 0.909171    | ENSG00000198710       |
| 2 | 91644891 | 91645241 | 91645066 | 92  | 94  | 66  | 1.663278205 | 0.00063339  | ENSG00000198710       |
| 2 | 91647909 | 91648239 | 91648074 | 22  | 22  | 23  | 1.124171804 | 0.345816    | ENSG00000198710       |
| 2 | 91653969 | 91654443 | 91654265 | 116 | 150 | 148 | 1.188794461 | 0.0673223   | ENSG00000198710       |
| 2 | 91654855 | 91655185 | 91655020 | 14  | 17  | 31  | 0.659839972 | 0.927052    | ENSG00000198710       |
| 2 | 91660302 | 91660749 | 91660572 | 54  | 62  | 115 | 0.63708687  | 0.998388    | ENSG00000198710       |
| 2 | 91667642 | 91667822 | 91667672 | 12  | 12  | 19  | 0.762481746 | 0.784291    | ENSG00000198710       |
| 2 | 91669313 | 91669673 | 91669489 | 141 | 148 | 157 | 1.106229602 | 0.188991    | ENSG00000198710       |
| 2 | 91669820 | 91670070 | 91669985 | 10  | 14  | 11  | 1.466311049 | 0.15926     | ENSG00000198710       |
| 2 | 91681309 | 91681649 | 91681479 | 43  | 43  | 55  | 0.921681231 | 0.66001     | ENSG00000198710       |
| 2 | 91685080 | 91685261 | 91685170 | 8   | 9   | 5   | 1.955081399 | 0.0892323   | ENSG00000198710       |
| 2 | 91686986 | 91687467 | 91687165 | 53  | 58  | 89  | 0.768998684 | 0.943987    | ENSG00000198710       |
| 2 | 94899435 | 94899622 | 94899528 | 8   | 8   | 2   | 3.519146518 | 0.017558    | TEKT4 ENSG00000163060 |
| 2 | 95046585 | 95046835 | 95046710 | 8   | 9   | 3   | 2.932622098 | 0.0242899   | MAL ENSG00000172005   |
| 2 | 95046893 | 95047084 | 95046988 | 9   | 9   | 3   | 2.932622098 | 0.0242899   | MAL ENSG00000172005   |
| 2 | 95049867 | 95050144 | 95050005 | 11  | 14  | 4   | 3.519146518 | 0.00361132  | MAL ENSG00000172005   |
| 2 | 95050564 | 95050813 | 95050660 | 12  | 14  | 2   | 5.865244197 | 0.000387308 | MAL ENSG00000172005   |
| 2 | 95063707 | 95064047 | 95063877 | 10  | 14  | 2   | 5.865244197 | 0.000387308 | MAL ENSG00000172005   |
| 2 | 95092299 | 95092491 | 95092393 | 8   | 9   | 1   | 5.865244197 | 0.00272497  | MAL ENSG00000172005   |
| 2 | 95144836 | 95145057 | 95144937 | 8   | 10  | 8   | 1.433726359 | 0.209175    | MRPS5 ENSG00000144029 |
| 2 | 95195153 | 95195440 | 95195302 | 8   | 9   | 9   | 1.173048839 | 0.362316    | ZNF2 ENSG00000163067  |

|   |          |          |          |    |    |    |             |             |          |                 |
|---|----------|----------|----------|----|----|----|-------------|-------------|----------|-----------------|
| 2 | 95236430 | 95236623 | 95236526 | 9  | 10 | 4  | 2.580707446 | 0.0306059   | ZNF2     | ENSG00000163067 |
| 2 | 95236675 | 95237060 | 95236849 | 15 | 22 | 7  | 3.372515413 | 0.000629223 | ZNF2     | ENSG00000163067 |
| 2 | 95289488 | 95289765 | 95289616 | 12 | 14 | 1  | 8.797866295 | 8.00E-05    | PROM2    | ENSG00000155066 |
| 2 | 95303208 | 95303688 | 95303434 | 10 | 20 | 2  | 8.211341875 | 6.65E-06    | PROM2    | ENSG00000155066 |
| 2 | 95303804 | 95304191 | 95303983 | 19 | 27 | 3  | 8.211341875 | 2.82E-07    | PROM2    | ENSG00000155066 |
| 2 | 95335881 | 95336060 | 95335973 | 8  | 8  | 0  | 10.55743955 | 0.000925496 | KCNIP3   | ENSG00000115041 |
| 2 | 95342954 | 95343243 | 95343110 | 11 | 15 | 1  | 9.384390715 | 3.90E-05    | KCNIP3   | ENSG00000115041 |
| 2 | 95375007 | 95375399 | 95375183 | 9  | 13 | 4  | 3.28453675  | 0.00629037  | KCNIP3   | ENSG00000115041 |
| 2 | 95758467 | 95758707 | 95758587 | 9  | 9  | 2  | 3.910162798 | 0.00955088  |          | ENSG00000204699 |
| 2 | 96129697 | 96130058 | 96129866 | 16 | 22 | 3  | 6.745030826 | 8.05E-06    | ADRA2B   | ENSG00000222040 |
| 2 | 96176533 | 96176796 | 96176664 | 14 | 15 | 4  | 3.753756286 | 0.0020497   | DUSP2    | ENSG00000158050 |
| 2 | 96238358 | 96238607 | 96238477 | 9  | 11 | 8  | 1.564065119 | 0.151515    |          | ENSG00000204685 |
| 2 | 96270135 | 96270468 | 96270294 | 15 | 19 | 5  | 3.910162798 | 0.000546977 | TMEM127  | ENSG00000135956 |
| 2 | 96289839 | 96290170 | 96290007 | 15 | 19 | 5  | 3.910162798 | 0.000546977 | TMEM127  | ENSG00000135956 |
| 2 | 96296644 | 96296896 | 96296784 | 9  | 12 | 1  | 7.624817456 | 0.000332769 | CIAO1    | ENSG00000144021 |
| 2 | 96436879 | 96437094 | 96436986 | 10 | 12 | 3  | 3.812408728 | 0.004404    | NCAPH    | ENSG00000121152 |
| 2 | 96538828 | 96539164 | 96538996 | 11 | 14 | 3  | 4.398933147 | 0.00132748  |          | ENSG00000163121 |
| 2 | 96561533 | 96562013 | 96561711 | 8  | 15 | 8  | 2.085420159 | 0.0338693   | ARID5A   | ENSG00000196843 |
| 2 | 96631086 | 96631334 | 96631210 | 8  | 8  | 1  | 5.278719777 | 0.00542188  | KIAA1310 | ENSG00000114982 |
| 2 | 96636736 | 96637036 | 96636887 | 8  | 11 | 5  | 2.346097679 | 0.0364013   | KIAA1310 | ENSG00000114982 |
| 2 | 96667705 | 96668002 | 96667853 | 18 | 22 | 5  | 4.496687217 | 9.59E-05    | KIAA1310 | ENSG00000114982 |
| 2 | 96709430 | 96709774 | 96709607 | 17 | 20 | 12 | 1.894925048 | 0.0317253   | FER1L5   | ENSG00000214272 |
| 2 | 96744009 | 96744290 | 96744157 | 8  | 12 | 4  | 3.049926982 | 0.0108184   | FER1L5   | ENSG00000214272 |
| 2 | 96801338 | 96801616 | 96801477 | 20 | 22 | 6  | 3.854303329 | 0.000260696 | CNNM4    | ENSG00000158158 |
| 2 | 96848549 | 96849121 | 96848833 | 12 | 28 | 13 | 2.429886881 | 0.00217891  | CNNM3    | ENSG00000168763 |
| 2 | 96853627 | 96853980 | 96853735 | 9  | 13 | 5  | 2.737113958 | 0.0137917   | CNNM3    | ENSG00000168763 |
| 2 | 96886628 | 96886841 | 96886686 | 8  | 9  | 4  | 2.346097679 | 0.050148    | ANKRD39  | ENSG00000213337 |
| 2 | 96887248 | 96887711 | 96887568 | 11 | 20 | 4  | 4.926805125 | 0.00010522  | ANKRD39  | ENSG00000213337 |
| 2 | 96893939 | 96894119 | 96894036 | 8  | 9  | 3  | 2.932622098 | 0.0242899   | SEMA4C   | ENSG00000168758 |
| 2 | 96897207 | 96897437 | 96897322 | 8  | 11 | 2  | 4.692195357 | 0.00272444  | SEMA4C   | ENSG00000168758 |
| 2 | 96899565 | 96900034 | 96899673 | 11 | 20 | 1  | 12.31701281 | 1.03E-06    | SEMA4C   | ENSG00000168758 |
| 2 | 96900434 | 96900761 | 96900597 | 10 | 15 | 6  | 2.68125449  | 0.0103552   | SEMA4C   | ENSG00000168758 |
| 2 | 96901951 | 96902150 | 96902033 | 9  | 9  | 5  | 1.955081399 | 0.0892323   | SEMA4C   | ENSG00000168758 |
| 2 | 96902434 | 96902905 | 96902609 | 16 | 27 | 13 | 2.346097679 | 0.00332578  | SEMA4C   | ENSG00000168758 |

|   |          |          |          |    |    |    |             |             |         |                 |
|---|----------|----------|----------|----|----|----|-------------|-------------|---------|-----------------|
| 2 | 96912238 | 96912530 | 96912359 | 9  | 12 | 2  | 5.083211637 | 0.00143337  | FAM178B | ENSG00000168754 |
| 2 | 96913832 | 96914163 | 96913997 | 9  | 14 | 2  | 5.865244197 | 0.000387308 | FAM178B | ENSG00000168754 |
| 2 | 96915615 | 96916188 | 96916009 | 19 | 34 | 7  | 5.132088672 | 6.85E-07    | FAM178B | ENSG00000168754 |
| 2 | 96917974 | 96918399 | 96918194 | 24 | 35 | 7  | 5.278719777 | 3.74E-07    | FAM178B | ENSG00000168754 |
| 2 | 96927181 | 96927368 | 96927274 | 8  | 9  | 4  | 2.346097679 | 0.050148    | FAM178B | ENSG00000168754 |
| 2 | 96960079 | 96960382 | 96960230 | 8  | 14 | 11 | 1.466311049 | 0.15926     |         | ENSG00000208682 |
| 2 | 96962905 | 96963281 | 96963084 | 9  | 16 | 8  | 2.215758919 | 0.0222902   |         | ENSG00000208682 |
| 2 | 96980035 | 96980377 | 96980206 | 8  | 12 | 8  | 1.694403879 | 0.107291    |         | ENSG00000208682 |
| 2 | 96980638 | 96980902 | 96980774 | 8  | 8  | 5  | 1.759573259 | 0.13508     |         | ENSG00000208682 |
| 2 | 96990609 | 96991004 | 96990825 | 14 | 20 | 2  | 8.211341875 | 6.65E-06    |         | ENSG00000208682 |
| 2 | 96994160 | 96994596 | 96994339 | 15 | 23 | 11 | 2.346097679 | 0.00594236  | FAM178B | ENSG00000168754 |
| 2 | 97142955 | 97143287 | 97143121 | 9  | 10 | 3  | 3.225884308 | 0.0139466   |         | ENSG00000204693 |
| 2 | 97628498 | 97629007 | 97628731 | 11 | 23 | 11 | 2.346097679 | 0.00594236  | COX5B   | ENSG00000135940 |
| 2 | 97646120 | 97646308 | 97646200 | 8  | 9  | 1  | 5.865244197 | 0.00272497  | ACTR1B  | ENSG00000115073 |
| 2 | 97646955 | 97647366 | 97647126 | 18 | 29 | 7  | 4.398933147 | 1.30E-05    | ACTR1B  | ENSG00000115073 |
| 2 | 97831264 | 97831628 | 97831443 | 10 | 16 | 1  | 9.970915134 | 1.89E-05    |         | ENSG00000198875 |
| 2 | 97889335 | 97889736 | 97889535 | 10 | 18 | 1  | 11.14396397 | 4.44E-06    | TMEM131 | ENSG00000075568 |
| 2 | 97918908 | 97919087 | 97918988 | 8  | 8  | 4  | 2.111487911 | 0.0804809   | TMEM131 | ENSG00000075568 |
| 2 | 97980719 | 97981025 | 97980872 | 12 | 14 | 2  | 5.865244197 | 0.000387308 | TMEM131 | ENSG00000075568 |
| 2 | 98238491 | 98238690 | 98238590 | 9  | 9  | 0  | 11.73048839 | 0.000425898 | VWA3B   | ENSG00000168658 |
| 2 | 98252063 | 98252242 | 98252188 | 8  | 8  | 2  | 3.519146518 | 0.017558    | VWA3B   | ENSG00000168658 |
| 2 | 98252646 | 98252885 | 98252765 | 9  | 10 | 2  | 4.301179077 | 0.00512919  | VWA3B   | ENSG00000168658 |
| 2 | 98272093 | 98272375 | 98272234 | 16 | 19 | 1  | 11.73048839 | 2.14E-06    |         | ENSG00000216112 |
| 2 | 98418651 | 98418942 | 98418818 | 14 | 16 | 0  | 19.94183027 | 1.86E-06    | INPP4A  | ENSG00000040933 |
| 2 | 98427357 | 98427637 | 98427497 | 9  | 9  | 2  | 3.910162798 | 0.00955088  | INPP4A  | ENSG00000040933 |
| 2 | 98741082 | 98741306 | 98741194 | 11 | 11 | 2  | 4.692195357 | 0.00272444  |         | ENSG00000201070 |
| 2 | 98776227 | 98776467 | 98776347 | 10 | 10 | 0  | 12.90353723 | 0.000195991 |         | ENSG00000201070 |
| 2 | 98776970 | 98777591 | 98777321 | 16 | 29 | 6  | 5.027352168 | 4.43E-06    |         | ENSG00000201070 |
| 2 | 98814680 | 98814929 | 98814790 | 8  | 8  | 5  | 1.759573259 | 0.13508     |         | ENSG00000201070 |
| 2 | 98852814 | 98853109 | 98852952 | 12 | 13 | 5  | 2.737113958 | 0.0137917   | C2orf55 | ENSG00000196872 |
| 2 | 99023589 | 99023979 | 99023802 | 32 | 37 | 0  | 44.57585589 | 1.55E-13    | TSGA10  | ENSG00000135951 |
| 2 | 99124040 | 99124224 | 99124174 | 8  | 10 | 4  | 2.580707446 | 0.0306059   | TSGA10  | ENSG00000135951 |
| 2 | 99124629 | 99124926 | 99124777 | 9  | 13 | 5  | 2.737113958 | 0.0137917   | C2orf15 | ENSG00000170534 |
| 2 | 99137870 | 99138452 | 99138150 | 9  | 22 | 4  | 5.396024661 | 3.05E-05    | MRPL30  | ENSG00000185414 |

|   |           |           |           |    |    |    |             |             |        |                 |
|---|-----------|-----------|-----------|----|----|----|-------------|-------------|--------|-----------------|
| 2 | 99163828  | 99164208  | 99164051  | 20 | 25 | 10 | 2.772660893 | 0.00131329  | MRPL30 | ENSG00000185414 |
| 2 | 99294460  | 99294734  | 99294599  | 10 | 11 | 1  | 7.038293036 | 0.000674435 | LYG1   | ENSG00000144214 |
| 2 | 99319966  | 99320326  | 99320151  | 8  | 14 | 12 | 1.353517892 | 0.211235    | EIF5B  | ENSG00000158417 |
| 2 | 99382032  | 99382325  | 99382178  | 14 | 17 | 2  | 7.038293036 | 5.19E-05    | TXNDC9 | ENSG00000115514 |
| 2 | 99387316  | 99387657  | 99387491  | 12 | 17 | 9  | 2.111487911 | 0.0248715   | TXNDC9 | ENSG00000115514 |
| 2 | 99473056  | 99473518  | 99473339  | 10 | 21 | 7  | 3.225884308 | 0.00106152  | REV1   | ENSG00000135945 |
| 2 | 99514614  | 99514799  | 99514732  | 8  | 8  | 6  | 1.508205651 | 0.203852    |        | ENSG00000222274 |
| 2 | 99542124  | 99542334  | 99542260  | 10 | 11 | 3  | 3.519146518 | 0.00788869  |        | ENSG00000222274 |
| 2 | 99598723  | 99598918  | 99598804  | 8  | 9  | 1  | 5.865244197 | 0.00272497  |        | ENSG00000222274 |
| 2 | 99600696  | 99600919  | 99600830  | 9  | 10 | 5  | 2.150589539 | 0.0575848   |        | ENSG00000222274 |
| 2 | 99619405  | 99619869  | 99619690  | 34 | 46 | 14 | 3.67555303  | 7.62E-07    |        | ENSG00000222274 |
| 2 | 99639794  | 99640305  | 99639973  | 13 | 26 | 11 | 2.639359888 | 0.0015854   |        | ENSG00000222274 |
| 2 | 99682560  | 99682804  | 99682682  | 8  | 8  | 2  | 3.519146518 | 0.017558    |        | ENSG00000222274 |
| 2 | 99683485  | 99683773  | 99683629  | 9  | 11 | 4  | 2.815317214 | 0.0183428   |        | ENSG00000222274 |
| 2 | 99691145  | 99691450  | 99691297  | 8  | 12 | 4  | 3.049926982 | 0.0108184   |        | ENSG00000222274 |
| 2 | 99710088  | 99710363  | 99710240  | 9  | 11 | 3  | 3.519146518 | 0.00788869  |        | ENSG00000222274 |
| 2 | 99748903  | 99749235  | 99749069  | 25 | 30 | 3  | 9.091128505 | 3.63E-08    |        | ENSG00000222274 |
| 2 | 99789704  | 99790019  | 99789855  | 16 | 19 | 7  | 2.932622098 | 0.00293566  |        | ENSG00000222274 |
| 2 | 99794435  | 99794759  | 99794597  | 8  | 9  | 1  | 5.865244197 | 0.00272497  |        | ENSG00000222274 |
| 2 | 99960618  | 99961265  | 99960977  | 41 | 64 | 1  | 38.12408728 | 4.44E-21    | AFF3   | ENSG00000144218 |
| 2 | 100039590 | 100039869 | 100039761 | 8  | 11 | 2  | 4.692195357 | 0.00272444  | AFF3   | ENSG00000144218 |
| 2 | 100049744 | 100050185 | 100050006 | 13 | 24 | 11 | 2.443851749 | 0.00386428  | AFF3   | ENSG00000144218 |
| 2 | 100050726 | 100050948 | 100050868 | 8  | 11 | 6  | 2.010940867 | 0.0640214   | AFF3   | ENSG00000144218 |
| 2 | 100225896 | 100226082 | 100225989 | 8  | 9  | 5  | 1.955081399 | 0.0892323   | LONRF2 | ENSG00000170500 |
| 2 | 100232011 | 100232470 | 100232213 | 34 | 48 | 2  | 19.15979771 | 1.17E-14    | LONRF2 | ENSG00000170500 |
| 2 | 100250720 | 100251169 | 100250899 | 13 | 21 | 10 | 2.346097679 | 0.00796926  | LONRF2 | ENSG00000170500 |
| 2 | 100273933 | 100274293 | 100274122 | 18 | 24 | 5  | 4.887703497 | 2.90E-05    | LONRF2 | ENSG00000170500 |
| 2 | 100274911 | 100275302 | 100275123 | 17 | 25 | 6  | 4.357038546 | 4.72E-05    | LONRF2 | ENSG00000170500 |
| 2 | 100288404 | 100288595 | 100288431 | 8  | 8  | 1  | 5.278719777 | 0.00542188  | LONRF2 | ENSG00000170500 |
| 2 | 100364128 | 100364556 | 100364264 | 13 | 19 | 3  | 5.865244197 | 5.72E-05    | CHST10 | ENSG00000115526 |
| 2 | 100405322 | 100405531 | 100405413 | 9  | 10 | 7  | 1.612942154 | 0.147335    |        | ENSG00000204641 |
| 2 | 100545522 | 100545886 | 100545694 | 13 | 19 | 7  | 2.932622098 | 0.00293566  | PDCL3  | ENSG00000115539 |
| 2 | 100723060 | 100723313 | 100723214 | 11 | 11 | 2  | 4.692195357 | 0.00272444  | NPAS2  | ENSG00000170485 |
| 2 | 100769224 | 100769404 | 100769299 | 8  | 8  | 5  | 1.759573259 | 0.13508     | NPAS2  | ENSG00000170485 |

|   |           |           |           |     |     |   |             |             |         |                 |
|---|-----------|-----------|-----------|-----|-----|---|-------------|-------------|---------|-----------------|
| 2 | 100870704 | 100871285 | 100870850 | 12  | 22  | 7 | 3.372515413 | 0.000629223 | NPAS2   | ENSG00000170485 |
| 2 | 100886834 | 100887069 | 100886951 | 8   | 10  | 4 | 2.580707446 | 0.0306059   | NPAS2   | ENSG00000170485 |
| 2 | 100984940 | 100985253 | 100985096 | 9   | 13  | 3 | 4.105670938 | 0.00243034  | RPL31   | ENSG00000071082 |
| 2 | 101093384 | 101093715 | 101093549 | 18  | 20  | 6 | 3.519146518 | 0.000784044 | TBC1D8  | ENSG00000204634 |
| 2 | 101096181 | 101096695 | 101096360 | 47  | 64  | 3 | 19.06204364 | 1.01E-18    | TBC1D8  | ENSG00000204634 |
| 2 | 101096913 | 101097100 | 101096969 | 8   | 8   | 3 | 2.639359888 | 0.0415794   | TBC1D8  | ENSG00000204634 |
| 2 | 101103400 | 101103760 | 101103562 | 9   | 15  | 5 | 3.128130238 | 0.00492422  | TBC1D8  | ENSG00000204634 |
| 2 | 101107829 | 101108237 | 101108031 | 13  | 22  | 8 | 2.997791478 | 0.00137524  | TBC1D8  | ENSG00000204634 |
| 2 | 101118569 | 101118905 | 101118737 | 10  | 15  | 4 | 3.753756286 | 0.0020497   | TBC1D8  | ENSG00000204634 |
| 2 | 101135756 | 101135995 | 101135875 | 11  | 11  | 3 | 3.519146518 | 0.00788869  | TBC1D8  | ENSG00000204634 |
| 2 | 101142425 | 101142929 | 101142638 | 29  | 41  | 2 | 16.42268375 | 2.00E-12    | TBC1D8  | ENSG00000204634 |
| 2 | 101168030 | 101168480 | 101168209 | 18  | 30  | 3 | 9.091128505 | 3.63E-08    | TBC1D8  | ENSG00000204634 |
| 2 | 101234622 | 101235011 | 101234794 | 9   | 14  | 1 | 8.797866295 | 8.00E-05    | C2orf29 | ENSG00000158435 |
| 2 | 101235271 | 101235853 | 101235798 | 10  | 25  | 2 | 10.16642327 | 2.02E-07    | C2orf29 | ENSG00000158435 |
| 2 | 101291738 | 101291941 | 101291839 | 9   | 10  | 4 | 2.580707446 | 0.0306059   | RNF149  | ENSG00000163162 |
| 2 | 101310659 | 101311065 | 101310822 | 28  | 37  | 8 | 4.952872877 | 3.52E-07    | RNF149  | ENSG00000163162 |
| 2 | 101549644 | 101550227 | 101549902 | 10  | 20  | 4 | 4.926805125 | 0.00010522  |         | ENSG00000196460 |
| 2 | 101679484 | 101679715 | 101679567 | 8   | 11  | 3 | 3.519146518 | 0.00788869  | MAP4K4  | ENSG00000071054 |
| 2 | 101686867 | 101687411 | 101687119 | 192 | 229 | 2 | 89.93374435 | 2.34E-74    | MAP4K4  | ENSG00000071054 |
| 2 | 101806139 | 101806417 | 101806278 | 10  | 11  | 2 | 4.692195357 | 0.00272444  | MAP4K4  | ENSG00000071054 |
| 2 | 102139012 | 102139340 | 102139175 | 10  | 12  | 4 | 3.049926982 | 0.0108184   | IL1R1   | ENSG00000115594 |
| 2 | 102173134 | 102173314 | 102173262 | 8   | 8   | 3 | 2.639359888 | 0.0415794   | IL1RL2  | ENSG00000115598 |
| 2 | 102210782 | 102211085 | 102210955 | 9   | 12  | 2 | 5.083211637 | 0.00143337  |         | ENSG00000205716 |
| 2 | 102254853 | 102255065 | 102254953 | 8   | 8   | 2 | 3.519146518 | 0.017558    |         | ENSG00000205716 |
| 2 | 102488284 | 102488558 | 102488407 | 13  | 15  | 1 | 9.384390715 | 3.90E-05    | SLC9A4  | ENSG00000180251 |
| 2 | 102719536 | 102719750 | 102719573 | 10  | 11  | 4 | 2.815317214 | 0.0183428   | MFSD9   | ENSG00000135953 |
| 2 | 102719808 | 102720158 | 102719980 | 8   | 12  | 3 | 3.812408728 | 0.004404    | TMEM182 | ENSG00000170417 |
| 2 | 102918753 | 102918944 | 102918848 | 11  | 11  | 1 | 7.038293036 | 0.000674435 | TMEM182 | ENSG00000170417 |
| 2 | 102959009 | 102959245 | 102959136 | 8   | 10  | 4 | 2.580707446 | 0.0306059   | TMEM182 | ENSG00000170417 |
| 2 | 102966663 | 102967066 | 102966872 | 46  | 56  | 2 | 22.28792795 | 3.14E-17    | TMEM182 | ENSG00000170417 |
| 2 | 103620653 | 103621096 | 103620912 | 43  | 56  | 0 | 66.86378384 | 6.12E-20    |         |                 |
| 2 | 104417330 | 104417704 | 104417605 | 12  | 19  | 1 | 11.73048839 | 2.14E-06    |         | ENSG00000199727 |
| 2 | 104464398 | 104464667 | 104464546 | 14  | 17  | 5 | 3.519146518 | 0.00167472  |         | ENSG00000199727 |
| 2 | 104686376 | 104686849 | 104686652 | 45  | 60  | 4 | 14.31119584 | 1.67E-16    |         | ENSG00000207249 |

|   |           |           |           |    |    |   |             |             |          |                 |
|---|-----------|-----------|-----------|----|----|---|-------------|-------------|----------|-----------------|
| 2 | 104836045 | 104836241 | 104836152 | 8  | 10 | 2 | 4.301179077 | 0.00512919  | POU3F3   | ENSG00000198914 |
| 2 | 104836944 | 104837402 | 104837123 | 8  | 16 | 5 | 3.323638378 | 0.00288759  | POU3F3   | ENSG00000198914 |
| 2 | 104927446 | 104927705 | 104927566 | 8  | 10 | 3 | 3.225884308 | 0.0139466   | POU3F3   | ENSG00000198914 |
| 2 | 104988594 | 104988873 | 104988733 | 9  | 13 | 3 | 4.105670938 | 0.00243034  | MRPS9    | ENSG00000135972 |
| 2 | 105020530 | 105020729 | 105020629 | 10 | 11 | 2 | 4.692195357 | 0.00272444  | MRPS9    | ENSG00000135972 |
| 2 | 105021017 | 105021298 | 105021155 | 9  | 11 | 2 | 4.692195357 | 0.00272444  | MRPS9    | ENSG00000135972 |
| 2 | 105097492 | 105097696 | 105097594 | 9  | 9  | 5 | 1.955081399 | 0.0892323   | MRPS9    | ENSG00000135972 |
| 2 | 105170015 | 105170252 | 105170133 | 8  | 9  | 4 | 2.346097679 | 0.050148    | GPR45    | ENSG00000135973 |
| 2 | 105170536 | 105170756 | 105170606 | 9  | 11 | 2 | 4.692195357 | 0.00272444  | GPR45    | ENSG00000135973 |
| 2 | 105278931 | 105279126 | 105279028 | 9  | 9  | 2 | 3.910162798 | 0.00955088  | TGFBRAP1 | ENSG00000135966 |
| 2 | 105311629 | 105311849 | 105311712 | 8  | 11 | 8 | 1.564065119 | 0.151515    | TGFBRAP1 | ENSG00000135966 |
| 2 | 105320028 | 105320364 | 105320196 | 12 | 17 | 5 | 3.519146518 | 0.00167472  | C2orf49  | ENSG00000135974 |
| 2 | 105352622 | 105352985 | 105352863 | 14 | 19 | 4 | 4.692195357 | 0.000193572 | FHL2     | ENSG00000115641 |
| 2 | 105387126 | 105387412 | 105387269 | 18 | 20 | 1 | 12.31701281 | 1.03E-06    | FHL2     | ENSG00000115641 |
| 2 | 105411727 | 105411920 | 105411769 | 9  | 10 | 0 | 12.90353723 | 0.000195991 | FHL2     | ENSG00000115641 |
| 2 | 105505597 | 105505867 | 105505732 | 11 | 13 | 6 | 2.346097679 | 0.0266147   | FHL2     | ENSG00000115641 |
| 2 | 105529434 | 105529818 | 105529684 | 13 | 19 | 6 | 3.351568112 | 0.00134187  | FHL2     | ENSG00000115641 |
| 2 | 105633345 | 105633613 | 105633468 | 17 | 18 | 4 | 4.457585589 | 0.000353565 | NCK2     | ENSG00000071051 |
| 2 | 105719227 | 105719544 | 105719385 | 8  | 11 | 0 | 14.07658607 | 9.02E-05    | NCK2     | ENSG00000071051 |
| 2 | 105823824 | 105824156 | 105823990 | 18 | 23 | 2 | 9.384390715 | 8.25E-07    | NCK2     | ENSG00000071051 |
| 2 | 105836518 | 105836884 | 105836695 | 19 | 25 | 6 | 4.357038546 | 4.72E-05    | NCK2     | ENSG00000071051 |
| 2 | 106011924 | 106012144 | 106012047 | 9  | 9  | 1 | 5.865244197 | 0.00272497  | C2orf40  | ENSG00000119147 |
| 2 | 106068378 | 106068575 | 106068476 | 8  | 8  | 2 | 3.519146518 | 0.017558    | C2orf40  | ENSG00000119147 |
| 2 | 106126557 | 106126759 | 106126620 | 8  | 8  | 0 | 10.55743955 | 0.000925496 | UXS1     | ENSG00000115652 |
| 2 | 106559037 | 106559221 | 106559129 | 8  | 8  | 3 | 2.639359888 | 0.0415794   | CD8BP    | ENSG00000169664 |
| 2 | 106562906 | 106563262 | 106563084 | 10 | 15 | 3 | 4.692195357 | 0.000718455 | CD8BP    | ENSG00000169664 |
| 2 | 106689143 | 106689516 | 106689303 | 10 | 16 | 0 | 19.94183027 | 1.86E-06    |          | ENSG00000214199 |
| 2 | 106822851 | 106823032 | 106822941 | 9  | 9  | 2 | 3.910162798 | 0.00955088  | ST6GAL2  | ENSG00000144057 |
| 2 | 108347580 | 108347855 | 108347717 | 34 | 37 | 2 | 14.85861863 | 3.69E-11    | SULT1C4  | ENSG00000198075 |
| 2 | 108387716 | 108388051 | 108387883 | 11 | 14 | 0 | 17.59573259 | 8.79E-06    | SULT1C4  | ENSG00000198075 |
| 2 | 108400236 | 108400440 | 108400306 | 9  | 9  | 5 | 1.955081399 | 0.0892323   | GCC2     | ENSG00000135968 |
| 2 | 108427932 | 108428523 | 108428282 | 45 | 68 | 1 | 40.47018496 | 2.11E-22    | GCC2     | ENSG00000135968 |
| 2 | 108431926 | 108432176 | 108432062 | 11 | 13 | 4 | 3.28453675  | 0.00629037  | GCC2     | ENSG00000135968 |
| 2 | 108516717 | 108517051 | 108516876 | 11 | 15 | 6 | 2.68125449  | 0.0103552   |          | ENSG00000176120 |

|   |           |           |           |    |    |    |             |             |         |                 |
|---|-----------|-----------|-----------|----|----|----|-------------|-------------|---------|-----------------|
| 2 | 108769244 | 108769532 | 108769396 | 12 | 17 | 3  | 5.278719777 | 0.000205462 | CCDC138 | ENSG00000163006 |
| 2 | 108832251 | 108832549 | 108832378 | 18 | 20 | 1  | 12.31701281 | 1.03E-06    | CCDC138 | ENSG00000163006 |
| 2 | 108852599 | 108852788 | 108852693 | 8  | 8  | 4  | 2.111487911 | 0.0804809   | CCDC138 | ENSG00000163006 |
| 2 | 108888104 | 108888296 | 108888279 | 8  | 10 | 2  | 4.301179077 | 0.00512919  | EDAR    | ENSG00000135960 |
| 2 | 108965297 | 108965616 | 108965456 | 16 | 18 | 4  | 4.457585589 | 0.000353565 | EDAR    | ENSG00000135960 |
| 2 | 108984128 | 108984481 | 108984304 | 10 | 15 | 0  | 18.76878143 | 4.04E-06    | EDAR    | ENSG00000135960 |
| 2 | 109254179 | 109254397 | 109254288 | 8  | 8  | 0  | 10.55743955 | 0.000925496 |         | ENSG00000172985 |
| 2 | 109379791 | 109380051 | 109379916 | 8  | 10 | 1  | 6.451768616 | 0.00135978  |         | ENSG00000172985 |
| 2 | 109390652 | 109390951 | 109390798 | 11 | 13 | 4  | 3.28453675  | 0.00629037  |         | ENSG00000172985 |
| 2 | 109432376 | 109432608 | 109432484 | 12 | 14 | 2  | 5.865244197 | 0.000387308 |         | ENSG00000172985 |
| 2 | 109673467 | 109673666 | 109673563 | 8  | 10 | 2  | 4.301179077 | 0.00512919  | 10-Sep  | ENSG00000186522 |
| 2 | 109759418 | 109759804 | 109759625 | 10 | 17 | 2  | 7.038293036 | 5.19E-05    | ANKRD57 | ENSG00000198142 |
| 2 | 109765040 | 109765291 | 109765148 | 10 | 11 | 2  | 4.692195357 | 0.00272444  | ANKRD57 | ENSG00000198142 |
| 2 | 109805712 | 109806039 | 109805861 | 17 | 21 | 4  | 5.161414893 | 5.68E-05    |         | ENSG00000183998 |
| 2 | 110186771 | 110187136 | 110186957 | 12 | 19 | 13 | 1.675784056 | 0.0660887   | MALL    | ENSG00000144063 |
| 2 | 110198633 | 110198842 | 110198745 | 9  | 11 | 8  | 1.564065119 | 0.151515    | MALL    | ENSG00000144063 |
| 2 | 110230646 | 110230867 | 110230756 | 12 | 14 | 2  | 5.865244197 | 0.000387308 | MALL    | ENSG00000144063 |
| 2 | 111152097 | 111152441 | 111152267 | 8  | 13 | 4  | 3.28453675  | 0.00629037  | BUB1    | ENSG00000169679 |
| 2 | 111362094 | 111362503 | 111362324 | 18 | 28 | 2  | 11.33947211 | 2.41E-08    | ACOXL   | ENSG00000153093 |
| 2 | 111542648 | 111542867 | 111542748 | 9  | 10 | 4  | 2.580707446 | 0.0306059   |         | ENSG00000204581 |
| 2 | 111590987 | 111591877 | 111591413 | 10 | 34 | 9  | 4.105670938 | 5.54E-06    | BCL2L11 | ENSG00000153094 |
| 2 | 112420693 | 112420988 | 112420868 | 15 | 17 | 6  | 3.016411301 | 0.00381427  |         | ENSG00000208643 |
| 2 | 112505945 | 112506350 | 112506171 | 20 | 31 | 4  | 7.507512572 | 9.10E-08    | TMEM87B | ENSG00000153214 |
| 2 | 112529317 | 112529645 | 112529481 | 10 | 13 | 6  | 2.346097679 | 0.0266147   | TMEM87B | ENSG00000153214 |
| 2 | 112703378 | 112703774 | 112703572 | 43 | 52 | 1  | 31.08579424 | 4.04E-17    | ZC3H8   | ENSG00000144161 |
| 2 | 112956491 | 112956737 | 112956632 | 8  | 10 | 0  | 12.90353723 | 0.000195991 | TTL     | ENSG00000114999 |
| 2 | 113015973 | 113016221 | 113016097 | 15 | 19 | 2  | 7.820325595 | 1.32E-05    | POLR1B  | ENSG00000125630 |
| 2 | 113058646 | 113058887 | 113058746 | 9  | 10 | 4  | 2.580707446 | 0.0306059   | CHCHD5  | ENSG00000125611 |
| 2 | 113119464 | 113119662 | 113119563 | 8  | 9  | 1  | 5.865244197 | 0.00272497  | SLC20A1 | ENSG00000144136 |
| 2 | 113133225 | 113133470 | 113133343 | 9  | 10 | 4  | 2.580707446 | 0.0306059   | SLC20A1 | ENSG00000144136 |
| 2 | 113136085 | 113136365 | 113136218 | 9  | 13 | 1  | 8.211341875 | 0.000163445 | SLC20A1 | ENSG00000144136 |
| 2 | 113165088 | 113165304 | 113165224 | 10 | 11 | 1  | 7.038293036 | 0.000674435 |         | ENSG00000223139 |
| 2 | 113166551 | 113167119 | 113166777 | 53 | 74 | 4  | 17.59573259 | 7.00E-21    |         | ENSG00000223139 |
| 2 | 113167161 | 113167368 | 113167253 | 8  | 9  | 1  | 5.865244197 | 0.00272497  |         | ENSG00000223139 |



|   |           |           |           |    |    |   |             |             |        |                 |
|---|-----------|-----------|-----------|----|----|---|-------------|-------------|--------|-----------------|
| 2 | 113200842 | 113201125 | 113201003 | 12 | 15 | 3 | 4.692195357 | 0.000718455 | NT5DC4 | ENSG00000144130 |
| 2 | 113269899 | 113270093 | 113269957 | 8  | 10 | 8 | 1.433726359 | 0.209175    | IL1A   | ENSG00000115008 |
| 2 | 113288297 | 113288802 | 113288554 | 47 | 73 | 7 | 10.85070176 | 5.75E-18    | IL1B   | ENSG00000125538 |
| 2 | 113342028 | 113342519 | 113342155 | 13 | 22 | 5 | 4.496687217 | 9.59E-05    |        | ENSG00000163098 |
| 2 | 113415903 | 113416119 | 113416011 | 10 | 10 | 4 | 2.580707446 | 0.0306059   | IL1F7  | ENSG00000125571 |
| 2 | 113553346 | 113553663 | 113553502 | 13 | 16 | 3 | 4.985457567 | 0.000385643 | IL1F10 | ENSG00000136697 |
| 2 | 113591607 | 113591838 | 113591722 | 9  | 11 | 0 | 14.07658607 | 9.02E-05    | IL1RN  | ENSG00000136689 |
| 2 | 113612452 | 113612712 | 113612582 | 8  | 9  | 3 | 2.932622098 | 0.0242899   | IL1RN  | ENSG00000136689 |
| 2 | 113673186 | 113673429 | 113673326 | 8  | 11 | 6 | 2.010940867 | 0.0640214   | PSD4   | ENSG00000125637 |
| 2 | 113723150 | 113723467 | 113723303 | 10 | 14 | 5 | 2.932622098 | 0.00829617  | PAX8   | ENSG00000125618 |
| 2 | 113804193 | 113804401 | 113804297 | 9  | 10 | 0 | 12.90353723 | 0.000195991 | PAX8   | ENSG00000125618 |
| 2 | 114137887 | 114138066 | 114137955 | 8  | 8  | 0 | 10.55743955 | 0.000925496 |        | ENSG00000175509 |
| 2 | 114280722 | 114280910 | 114280817 | 9  | 10 | 4 | 2.580707446 | 0.0306059   |        | ENSG00000208621 |
| 2 | 114350582 | 114351145 | 114351016 | 10 | 22 | 9 | 2.69801233  | 0.00276236  | ACTR3  | ENSG00000115091 |
| 2 | 114363621 | 114364141 | 114363853 | 28 | 42 | 9 | 5.044110009 | 5.53E-08    | ACTR3  | ENSG00000115091 |
| 2 | 114370826 | 114371135 | 114370983 | 8  | 9  | 4 | 2.346097679 | 0.050148    | ACTR3  | ENSG00000115091 |
| 2 | 114439826 | 114440059 | 114439931 | 9  | 10 | 1 | 6.451768616 | 0.00135978  |        | ENSG00000215984 |
| 2 | 115231778 | 115232016 | 115231928 | 9  | 10 | 4 | 2.580707446 | 0.0306059   |        | ENSG00000208611 |
| 2 | 115411437 | 115411768 | 115411602 | 15 | 15 | 7 | 2.346097679 | 0.0195693   |        | ENSG00000208611 |
| 2 | 118288406 | 118288846 | 118288631 | 20 | 29 | 8 | 3.910162798 | 3.45E-05    | DDX18  | ENSG00000088205 |
| 2 | 118432289 | 118432551 | 118432424 | 22 | 22 | 3 | 6.745030826 | 8.05E-06    |        | ENSG00000218814 |
| 2 | 118520791 | 118521035 | 118520946 | 9  | 10 | 0 | 12.90353723 | 0.000195991 |        | ENSG00000208551 |
| 2 | 118562393 | 118562595 | 118562496 | 8  | 8  | 1 | 5.278719777 | 0.00542188  | INSIG2 | ENSG00000125629 |
| 2 | 118589608 | 118590210 | 118590018 | 57 | 77 | 6 | 13.07111564 | 5.49E-20    | INSIG2 | ENSG00000125629 |
| 2 | 119329635 | 119329929 | 119329787 | 9  | 13 | 1 | 8.211341875 | 0.000163445 | EN1    | ENSG00000163064 |
| 2 | 119355540 | 119355818 | 119355679 | 8  | 12 | 3 | 3.812408728 | 0.004404    | EN1    | ENSG00000163064 |
| 2 | 119356770 | 119357003 | 119356886 | 8  | 10 | 3 | 3.225884308 | 0.0139466   | EN1    | ENSG00000163064 |
| 2 | 119547970 | 119548258 | 119548106 | 15 | 19 | 4 | 4.692195357 | 0.000193572 | C1QL2  | ENSG00000144119 |
| 2 | 119580417 | 119580645 | 119580534 | 8  | 10 | 5 | 2.150589539 | 0.0575848   | C1QL2  | ENSG00000144119 |
| 2 | 119604099 | 119604314 | 119604210 | 8  | 9  | 5 | 1.955081399 | 0.0892323   | C1QL2  | ENSG00000144119 |
| 2 | 119641237 | 119641482 | 119641359 | 8  | 11 | 1 | 7.038293036 | 0.000674435 |        | ENSG00000208545 |
| 2 | 119648567 | 119648787 | 119648681 | 14 | 16 | 4 | 3.988366054 | 0.00115141  |        | ENSG00000208545 |
| 2 | 119691105 | 119691660 | 119691284 | 18 | 38 | 4 | 9.149780947 | 8.17E-10    | STEAP3 | ENSG00000115107 |
| 2 | 119691866 | 119692056 | 119691893 | 8  | 9  | 2 | 3.910162798 | 0.00955088  | STEAP3 | ENSG00000115107 |

|   |           |           |           |     |     |    |             |             |         |                 |
|---|-----------|-----------|-----------|-----|-----|----|-------------|-------------|---------|-----------------|
| 2 | 119692116 | 119693157 | 119692563 | 294 | 416 | 14 | 32.61075773 | 3.59E-119   | STEAP3  | ENSG00000115107 |
| 2 | 119714369 | 119715191 | 119714733 | 65  | 117 | 3  | 34.60494076 | 7.79E-36    | STEAP3  | ENSG00000115107 |
| 2 | 119757820 | 119758045 | 119757961 | 11  | 13  | 0  | 16.42268375 | 1.91E-05    | STEAP3  | ENSG00000115107 |
| 2 | 119764992 | 119765187 | 119765109 | 10  | 10  | 3  | 3.225884308 | 0.0139466   | STEAP3  | ENSG00000115107 |
| 2 | 119824303 | 119824768 | 119824463 | 9   | 17  | 3  | 5.278719777 | 0.000205462 | C2orf76 | ENSG00000186132 |
| 2 | 119840735 | 119841143 | 119840998 | 14  | 22  | 7  | 3.372515413 | 0.000629223 | DBI     | ENSG00000155368 |
| 2 | 119889802 | 119890100 | 119889951 | 12  | 15  | 7  | 2.346097679 | 0.0195693   | TMEM37  | ENSG00000171227 |
| 2 | 119950434 | 119950630 | 119950502 | 11  | 12  | 2  | 5.083211637 | 0.00143337  |         | ENSG00000216097 |
| 2 | 119966343 | 119966544 | 119966443 | 8   | 8   | 1  | 5.278719777 | 0.00542188  | SCTR    | ENSG00000080293 |
| 2 | 120152159 | 120152604 | 120152314 | 14  | 22  | 3  | 6.745030826 | 8.05E-06    | TMEM177 | ENSG00000144120 |
| 2 | 120233671 | 120234140 | 120233800 | 11  | 20  | 9  | 2.463402563 | 0.00689886  | PTPN4   | ENSG00000088179 |
| 2 | 120312141 | 120312322 | 120312297 | 8   | 9   | 1  | 5.865244197 | 0.00272497  |         | ENSG00000208541 |
| 2 | 120312394 | 120312739 | 120312566 | 15  | 21  | 2  | 8.602358155 | 3.33E-06    |         | ENSG00000208541 |
| 2 | 120477720 | 120477950 | 120477835 | 8   | 10  | 2  | 4.301179077 | 0.00512919  | EPB41L5 | ENSG00000115109 |
| 2 | 120486779 | 120487088 | 120486920 | 9   | 11  | 3  | 3.519146518 | 0.00788869  | EPB41L5 | ENSG00000115109 |
| 2 | 120488638 | 120488849 | 120488743 | 9   | 9   | 1  | 5.865244197 | 0.00272497  | EPB41L5 | ENSG00000115109 |
| 2 | 120540869 | 120541545 | 120541140 | 15  | 36  | 9  | 4.340280705 | 1.80E-06    | EPB41L5 | ENSG00000115109 |
| 2 | 120582148 | 120582420 | 120582275 | 10  | 12  | 3  | 3.812408728 | 0.004404    |         | ENSG00000202046 |
| 2 | 120726559 | 120726916 | 120726737 | 12  | 18  | 2  | 7.429309316 | 2.63E-05    | RALB    | ENSG00000144118 |
| 2 | 120765463 | 120765748 | 120765620 | 13  | 15  | 12 | 1.443752418 | 0.160732    | RALB    | ENSG00000144118 |
| 2 | 120877916 | 120878353 | 120878095 | 8   | 16  | 4  | 3.988366054 | 0.00115141  | INHBB   | ENSG00000163083 |
| 2 | 120896802 | 120896994 | 120896898 | 8   | 8   | 1  | 5.278719777 | 0.00542188  | INHBB   | ENSG00000163083 |
| 2 | 120944746 | 120944937 | 120944902 | 8   | 8   | 2  | 3.519146518 | 0.017558    | INHBB   | ENSG00000163083 |
| 2 | 120949251 | 120949563 | 120949407 | 8   | 10  | 2  | 4.301179077 | 0.00512919  | INHBB   | ENSG00000163083 |
| 2 | 121026883 | 121027409 | 121027081 | 12  | 23  | 4  | 5.630634429 | 1.63E-05    |         | ENSG00000201006 |
| 2 | 121094454 | 121094744 | 121094599 | 13  | 16  | 4  | 3.988366054 | 0.00115141  |         | ENSG00000201006 |
| 2 | 121104228 | 121104857 | 121104407 | 10  | 25  | 7  | 3.812408728 | 0.00012465  |         | ENSG00000201006 |
| 2 | 121149667 | 121149879 | 121149815 | 8   | 9   | 5  | 1.955081399 | 0.0892323   |         | ENSG00000201006 |
| 2 | 121169750 | 121170065 | 121169924 | 10  | 15  | 3  | 4.692195357 | 0.000718455 |         | ENSG00000201006 |
| 2 | 121510397 | 121510673 | 121510535 | 8   | 11  | 6  | 2.010940867 | 0.0640214   |         | ENSG00000221321 |
| 2 | 121549508 | 121549692 | 121549547 | 8   | 9   | 1  | 5.865244197 | 0.00272497  |         | ENSG00000201584 |
| 2 | 121551128 | 121551334 | 121551231 | 8   | 10  | 4  | 2.580707446 | 0.0306059   |         | ENSG00000201584 |
| 2 | 121771590 | 121771848 | 121771735 | 9   | 12  | 5  | 2.541605819 | 0.0225912   | TFCP2L1 | ENSG00000115112 |
| 2 | 121832619 | 121832884 | 121832765 | 9   | 11  | 2  | 4.692195357 | 0.00272444  | TFCP2L1 | ENSG00000115112 |

|   |           |           |           |    |    |    |             |             |         |                 |
|---|-----------|-----------|-----------|----|----|----|-------------|-------------|---------|-----------------|
| 2 | 121963370 | 121963591 | 121963479 | 10 | 10 | 1  | 6.451768616 | 0.00135978  | CLASP1  | ENSG00000074054 |
| 2 | 122004263 | 122004598 | 122004422 | 8  | 11 | 2  | 4.692195357 | 0.00272444  |         | ENSG00000208506 |
| 2 | 122004796 | 122005309 | 122004975 | 20 | 31 | 15 | 2.346097679 | 0.00187452  |         | ENSG00000208506 |
| 2 | 122062475 | 122062783 | 122062614 | 14 | 18 | 1  | 11.14396397 | 4.44E-06    |         | ENSG00000222467 |
| 2 | 122070276 | 122070480 | 122070435 | 9  | 9  | 1  | 5.865244197 | 0.00272497  |         | ENSG00000222467 |
| 2 | 122123562 | 122123879 | 122123720 | 8  | 13 | 3  | 4.105670938 | 0.00243034  | CLASP1  | ENSG00000074054 |
| 2 | 122123902 | 122124244 | 122124073 | 11 | 17 | 10 | 1.919534464 | 0.0400548   | CLASP1  | ENSG00000074054 |
| 2 | 122157897 | 122158241 | 122158069 | 14 | 19 | 2  | 7.820325595 | 1.32E-05    |         | ENSG00000213239 |
| 2 | 122210760 | 122210983 | 122210835 | 9  | 12 | 5  | 2.541605819 | 0.0225912   | MKI67IP | ENSG00000155438 |
| 2 | 122251764 | 122251943 | 122251853 | 8  | 8  | 1  | 5.278719777 | 0.00542188  | TSN     | ENSG00000211460 |
| 2 | 122362272 | 122362492 | 122362382 | 8  | 9  | 2  | 3.910162798 | 0.00955088  | TSN     | ENSG00000211460 |
| 2 | 122473336 | 122473882 | 122473612 | 18 | 29 | 4  | 7.038293036 | 3.41E-07    | TSN     | ENSG00000211460 |
| 2 | 122518032 | 122518453 | 122518252 | 16 | 26 | 1  | 15.83615933 | 1.23E-08    | TSN     | ENSG00000211460 |
| 2 | 122710644 | 122710920 | 122710806 | 13 | 14 | 3  | 4.398933147 | 0.00132748  | TSN     | ENSG00000211460 |
| 2 | 122889058 | 122889266 | 122889143 | 9  | 9  | 4  | 2.346097679 | 0.050148    |         |                 |
| 2 | 122965154 | 122965537 | 122965333 | 8  | 13 | 6  | 2.346097679 | 0.0266147   |         |                 |
| 2 | 122993904 | 122994255 | 122994077 | 20 | 25 | 2  | 10.16642327 | 2.02E-07    |         |                 |
| 2 | 125925306 | 125925528 | 125925417 | 8  | 9  | 0  | 11.73048839 | 0.000425898 |         | ENSG00000201853 |
| 2 | 127002224 | 127002416 | 127002320 | 8  | 9  | 2  | 3.910162798 | 0.00955088  |         | ENSG00000213236 |
| 2 | 127251524 | 127251850 | 127251679 | 9  | 12 | 5  | 2.541605819 | 0.0225912   |         | ENSG00000206963 |
| 2 | 127670916 | 127671233 | 127671064 | 10 | 13 | 6  | 2.346097679 | 0.0266147   | CYP27C1 | ENSG00000186684 |
| 2 | 127671930 | 127672154 | 127672039 | 9  | 11 | 3  | 3.519146518 | 0.00788869  | CYP27C1 | ENSG00000186684 |
| 2 | 127700572 | 127701042 | 127700863 | 17 | 26 | 12 | 2.436332205 | 0.00289956  | CYP27C1 | ENSG00000186684 |
| 2 | 127862165 | 127862439 | 127862302 | 11 | 12 | 4  | 3.049926982 | 0.0108184   | MAP3K2  | ENSG00000169967 |
| 2 | 127872323 | 127872653 | 127872473 | 18 | 23 | 11 | 2.346097679 | 0.00594236  | MAP3K2  | ENSG00000169967 |
| 2 | 128175182 | 128175661 | 128175447 | 9  | 20 | 7  | 3.079253203 | 0.00177418  | SFT2D3  | ENSG00000173349 |
| 2 | 128332267 | 128332555 | 128332415 | 8  | 12 | 3  | 3.812408728 | 0.004404    | POLR2D  | ENSG00000144231 |
| 2 | 128333768 | 128334098 | 128333933 | 10 | 15 | 4  | 3.753756286 | 0.0020497   | POLR2D  | ENSG00000144231 |
| 2 | 128502270 | 128502551 | 128502419 | 8  | 11 | 4  | 2.815317214 | 0.0183428   | SAP130  | ENSG00000136715 |
| 2 | 128516851 | 128517206 | 128517075 | 16 | 21 | 0  | 25.80707446 | 3.84E-08    | SAP130  | ENSG00000136715 |
| 2 | 128517222 | 128517408 | 128517315 | 8  | 10 | 0  | 12.90353723 | 0.000195991 | SAP130  | ENSG00000136715 |
| 2 | 128565050 | 128565296 | 128565173 | 10 | 13 | 6  | 2.346097679 | 0.0266147   | UGCGL1  | ENSG00000136731 |
| 2 | 128779161 | 128779576 | 128779368 | 21 | 29 | 7  | 4.398933147 | 1.30E-05    | HS6ST1  | ENSG00000136720 |
| 2 | 128779926 | 128780146 | 128780036 | 9  | 10 | 4  | 2.580707446 | 0.0306059   | HS6ST1  | ENSG00000136720 |

|   |           |           |           |    |     |     |             |             |         |                 |
|---|-----------|-----------|-----------|----|-----|-----|-------------|-------------|---------|-----------------|
| 2 | 128780371 | 128780750 | 128780572 | 8  | 15  | 0   | 18.76878143 | 4.04E-06    | HS6ST1  | ENSG00000136720 |
| 2 | 128790976 | 128791211 | 128791126 | 8  | 10  | 1   | 6.451768616 | 0.00135978  | HS6ST1  | ENSG00000136720 |
| 2 | 129045994 | 129046401 | 129046231 | 14 | 23  | 1   | 14.07658607 | 1.14E-07    |         | ENSG00000208433 |
| 2 | 129069183 | 129069427 | 129069305 | 12 | 13  | 2   | 5.474227917 | 0.000747844 |         | ENSG00000208433 |
| 2 | 129498989 | 129499224 | 129499068 | 8  | 9   | 0   | 11.73048839 | 0.000425898 |         | ENSG00000204460 |
| 2 | 129530214 | 129530636 | 129530425 | 31 | 43  | 4   | 10.32282979 | 2.63E-11    |         | ENSG00000204460 |
| 2 | 129586607 | 129586839 | 129586692 | 10 | 10  | 6   | 1.843362462 | 0.0964212   |         | ENSG00000204460 |
| 2 | 129800716 | 129801093 | 129800882 | 10 | 17  | 0   | 21.11487911 | 8.57E-07    |         | ENSG00000204460 |
| 2 | 129871271 | 129871466 | 129871395 | 8  | 8   | 1   | 5.278719777 | 0.00542188  |         | ENSG00000208427 |
| 2 | 129871488 | 129871667 | 129871551 | 8  | 8   | 0   | 10.55743955 | 0.000925496 |         | ENSG00000208427 |
| 2 | 130000946 | 130001227 | 130001086 | 12 | 14  | 4   | 3.519146518 | 0.00361132  |         | ENSG00000208427 |
| 2 | 130222687 | 130223037 | 130222862 | 13 | 17  | 3   | 5.278719777 | 0.000205462 |         | ENSG00000204459 |
| 2 | 130655596 | 130655865 | 130655726 | 8  | 10  | 2   | 4.301179077 | 0.00512919  | SMPD4   | ENSG00000136699 |
| 2 | 130806514 | 130806953 | 130806686 | 10 | 17  | 8   | 2.346097679 | 0.0144542   | CCDC115 | ENSG00000136710 |
| 2 | 130811009 | 130811655 | 130811316 | 15 | 29  | 12  | 2.707035783 | 0.000762953 | CCDC115 | ENSG00000136710 |
| 2 | 130816114 | 130816309 | 130816237 | 9  | 11  | 4   | 2.815317214 | 0.0183428   | CCDC115 | ENSG00000136710 |
| 2 | 130865662 | 130865852 | 130865757 | 8  | 9   | 2   | 3.910162798 | 0.00955088  | PTPN18  | ENSG00000072135 |
| 2 | 131201454 | 131201692 | 131201573 | 10 | 11  | 8   | 1.564065119 | 0.151515    | GPR148  | ENSG00000173302 |
| 2 | 131438543 | 131438871 | 131438707 | 10 | 14  | 3   | 4.398933147 | 0.00132748  | ARHGEF4 | ENSG00000136002 |
| 2 | 131567619 | 131567832 | 131567725 | 10 | 11  | 1   | 7.038293036 | 0.000674435 | FAM168B | ENSG00000152102 |
| 2 | 131887277 | 131887470 | 131887363 | 8  | 9   | 4   | 2.346097679 | 0.050148    |         | ENSG00000214077 |
| 2 | 131960715 | 131960946 | 131960775 | 9  | 10  | 2   | 4.301179077 | 0.00512919  | FAM128A | ENSG00000173272 |
| 2 | 132142846 | 132143309 | 132143130 | 13 | 20  | 1   | 12.31701281 | 1.03E-06    | ACTBL3  | ENSG00000204434 |
| 2 | 132156474 | 132156766 | 132156602 | 9  | 10  | 3   | 3.225884308 | 0.0139466   | C2orf27 | ENSG00000197927 |
| 2 | 132712634 | 132713275 | 132712954 | 19 | 29  | 41  | 0.837892028 | 0.774502    |         | ENSG00000202174 |
| 2 | 132719634 | 132719968 | 132719801 | 26 | 26  | 32  | 0.959767232 | 0.566062    |         | ENSG00000202174 |
| 2 | 132728302 | 132728691 | 132728459 | 56 | 64  | 32  | 2.310550744 | 2.47E-05    |         | ENSG00000202174 |
| 2 | 132728866 | 132730151 | 132729340 | 86 | 255 | 192 | 1.555961155 | 1.51E-06    |         | ENSG00000200236 |
| 2 | 132731511 | 132731941 | 132731685 | 42 | 52  | 37  | 1.636094434 | 0.0096109   |         | ENSG00000221288 |
| 2 | 132733030 | 132733432 | 132733253 | 22 | 30  | 55  | 0.649366322 | 0.976014    |         | ENSG00000221288 |
| 2 | 132733464 | 132733897 | 132733718 | 14 | 24  | 28  | 1.011248999 | 0.486424    |         | ENSG00000221288 |
| 2 | 132735100 | 132735692 | 132735399 | 28 | 42  | 54  | 0.917110911 | 0.667485    |         | ENSG00000221288 |
| 2 | 132735904 | 132736770 | 132736575 | 19 | 57  | 80  | 0.839960897 | 0.847509    |         | ENSG00000221288 |
| 2 | 132737364 | 132737734 | 132737542 | 12 | 18  | 28  | 0.76854924  | 0.819816    |         | ENSG00000221288 |

|   |           |           |           |    |     |     |             |             |                       |
|---|-----------|-----------|-----------|----|-----|-----|-------------|-------------|-----------------------|
| 2 | 132739514 | 132740058 | 132739691 | 15 | 27  | 42  | 0.763845756 | 0.871062    | ENSG00000221288       |
| 2 | 132741486 | 132742480 | 132742272 | 32 | 94  | 118 | 0.936467561 | 0.685175    | ENSG00000221288       |
| 2 | 132742696 | 132742932 | 132742861 | 11 | 14  | 10  | 1.599612054 | 0.114822    | ENSG00000221288       |
| 2 | 132743019 | 132743674 | 132743218 | 29 | 54  | 95  | 0.672059231 | 0.991727    | ENSG00000211547       |
| 2 | 132743813 | 132744144 | 132743978 | 14 | 14  | 31  | 0.549866643 | 0.977004    | ENSG00000211547       |
| 2 | 132744740 | 132745079 | 132744909 | 37 | 39  | 59  | 0.78203256  | 0.88942     | ENSG00000211547       |
| 2 | 132745583 | 132746535 | 132746144 | 48 | 107 | 111 | 1.131154238 | 0.181062    | ENSG00000211547       |
| 2 | 132746589 | 132747882 | 132747064 | 39 | 118 | 182 | 0.762802251 | 0.989945    | ENSG00000211547       |
| 2 | 132747989 | 132748320 | 132748154 | 17 | 22  | 33  | 0.793533038 | 0.809383    | ENSG00000211547       |
| 2 | 132748981 | 132749316 | 132749144 | 16 | 18  | 27  | 0.795997427 | 0.784443    | ENSG00000211547       |
| 2 | 132749369 | 132750199 | 132749855 | 21 | 54  | 52  | 1.217314833 | 0.153802    | ENSG00000211547       |
| 2 | 132750610 | 132751386 | 132750938 | 38 | 72  | 92  | 0.920780272 | 0.703364    | ENSG00000211547       |
| 2 | 132751906 | 132752510 | 132752331 | 14 | 31  | 27  | 1.340627245 | 0.128083    | ENSG00000211547       |
| 2 | 132752913 | 132753170 | 132753019 | 8  | 11  | 7   | 1.759573259 | 0.102361    | ENSG00000211547       |
| 2 | 132753996 | 132754177 | 132754027 | 8  | 8   | 3   | 2.639359888 | 0.0415794   | ENSG00000211547       |
| 2 | 132754590 | 132754798 | 132754680 | 33 | 34  | 11  | 3.421392448 | 3.22E-05    | ENSG00000211547       |
| 2 | 132755379 | 132755595 | 132755434 | 9  | 12  | 16  | 0.897037348 | 0.621544    | ENSG00000211547       |
| 2 | 132755606 | 132755789 | 132755635 | 10 | 10  | 11  | 1.075294769 | 0.434143    | ENSG00000211547       |
| 2 | 132771863 | 132772123 | 132771993 | 15 | 16  | 0   | 19.94183027 | 1.86E-06    | ENSG00000211547       |
| 2 | 132820797 | 132821018 | 132820907 | 8  | 9   | 2   | 3.910162798 | 0.00955088  | ENSG00000199460       |
| 2 | 132821188 | 132821854 | 132821523 | 12 | 29  | 6   | 5.027352168 | 4.43E-06    | ENSG00000199460       |
| 2 | 132890567 | 132890991 | 132890812 | 9  | 16  | 7   | 2.492728784 | 0.0124193   | GPR39 ENSG00000183840 |
| 2 | 133017209 | 133017656 | 133017462 | 68 | 80  | 0   | 95.01695598 | 4.98E-28    | ENSG00000221142       |
| 2 | 133018161 | 133018390 | 133018275 | 20 | 21  | 0   | 25.80707446 | 3.84E-08    | ENSG00000221142       |
| 2 | 133144705 | 133144993 | 133144826 | 8  | 9   | 0   | 11.73048839 | 0.000425898 | LYPD1 ENSG00000150551 |
| 2 | 133190554 | 133190784 | 133190625 | 8  | 8   | 1   | 5.278719777 | 0.00542188  | LYPD1 ENSG00000150551 |
| 2 | 133430587 | 133430930 | 133430774 | 14 | 19  | 0   | 23.46097679 | 1.81E-07    | LYPD1 ENSG00000150551 |
| 2 | 133645588 | 133645818 | 133645714 | 8  | 10  | 4   | 2.580707446 | 0.0306059   | ENSG00000176771       |
| 2 | 133737037 | 133737278 | 133737113 | 12 | 15  | 6   | 2.68125449  | 0.0103552   | ENSG00000176771       |
| 2 | 133737281 | 133737513 | 133737379 | 9  | 12  | 9   | 1.524963491 | 0.154777    | ENSG00000176771       |
| 2 | 133909412 | 133909680 | 133909520 | 9  | 12  | 7   | 1.906204364 | 0.0695918   | ENSG00000208316       |
| 2 | 133978958 | 133979307 | 133979132 | 8  | 14  | 1   | 8.797866295 | 8.00E-05    | ENSG00000176771       |
| 2 | 133979423 | 133979672 | 133979536 | 8  | 8   | 4   | 2.111487911 | 0.0804809   | ENSG00000176771       |
| 2 | 134115528 | 134115935 | 134115707 | 23 | 30  | 9   | 3.636451402 | 4.92E-05    | ENSG00000200708       |

|   |           |           |           |    |    |   |             |             |                          |
|---|-----------|-----------|-----------|----|----|---|-------------|-------------|--------------------------|
| 2 | 134273442 | 134273867 | 134273688 | 40 | 52 | 5 | 10.36193141 | 3.11E-13    | ENSG00000200708          |
| 2 | 134318388 | 134318633 | 134318494 | 11 | 13 | 5 | 2.737113958 | 0.0137917   | ENSG00000200708          |
| 2 | 134360713 | 134361057 | 134360859 | 10 | 15 | 7 | 2.346097679 | 0.0195693   | MGAT5 ENSG00000152127    |
| 2 | 134374904 | 134375110 | 134375006 | 9  | 10 | 2 | 4.301179077 | 0.00512919  | MGAT5 ENSG00000152127    |
| 2 | 134397570 | 134397753 | 134397661 | 8  | 8  | 0 | 10.55743955 | 0.000925496 | MGAT5 ENSG00000152127    |
| 2 | 134592413 | 134592599 | 134592503 | 12 | 12 | 2 | 5.083211637 | 0.00143337  | MGAT5 ENSG00000152127    |
| 2 | 134924971 | 134925327 | 134925132 | 10 | 15 | 1 | 9.384390715 | 3.90E-05    | MGAT5 ENSG00000152127    |
| 2 | 134965817 | 134966056 | 134965934 | 10 | 13 | 5 | 2.737113958 | 0.0137917   | TMEM163 ENSG00000152128  |
| 2 | 135064772 | 135065256 | 135065014 | 55 | 74 | 0 | 87.97866295 | 5.25E-26    | TMEM163 ENSG00000152128  |
| 2 | 135478388 | 135478746 | 135478556 | 10 | 14 | 5 | 2.932622098 | 0.00829617  | YSK4 ENSG00000176601     |
| 2 | 135548265 | 135548610 | 135548438 | 8  | 11 | 1 | 7.038293036 | 0.000674435 | RAB3GAP1 ENSG00000115839 |
| 2 | 135719299 | 135719484 | 135719405 | 9  | 9  | 4 | 2.346097679 | 0.050148    | RAB3GAP1 ENSG00000115839 |
| 2 | 136004928 | 136005427 | 136005101 | 11 | 20 | 2 | 8.211341875 | 6.65E-06    | ZRANB3 ENSG00000121988   |
| 2 | 136196069 | 136196248 | 136196158 | 8  | 8  | 4 | 2.111487911 | 0.0804809   | UBXN4 ENSG00000144224    |
| 2 | 136215805 | 136215995 | 136215853 | 8  | 10 | 2 | 4.301179077 | 0.00512919  | UBXN4 ENSG00000144224    |
| 2 | 136271676 | 136271855 | 136271754 | 8  | 8  | 0 | 10.55743955 | 0.000925496 | ENSG00000200664          |
| 2 | 136271982 | 136272241 | 136272099 | 8  | 11 | 0 | 14.07658607 | 9.02E-05    | ENSG00000200664          |
| 2 | 136459501 | 136459689 | 136459595 | 8  | 8  | 4 | 2.111487911 | 0.0804809   | DARS ENSG00000115866     |
| 2 | 136650866 | 136651054 | 136650960 | 8  | 9  | 4 | 2.346097679 | 0.050148    | CXCR4 ENSG00000121966    |
| 2 | 136801338 | 136801775 | 136801482 | 12 | 18 | 2 | 7.429309316 | 2.63E-05    | CXCR4 ENSG00000121966    |
| 2 | 136849632 | 136850130 | 136849831 | 65 | 85 | 2 | 33.62740006 | 1.17E-26    | ENSG00000216081          |
| 2 | 136852781 | 136853073 | 136852933 | 8  | 11 | 2 | 4.692195357 | 0.00272444  | ENSG00000216081          |
| 2 | 136858780 | 136859004 | 136858954 | 9  | 10 | 5 | 2.150589539 | 0.0575848   | ENSG00000216081          |
| 2 | 137131430 | 137131871 | 137131609 | 17 | 29 | 0 | 35.19146518 | 7.73E-11    | ENSG00000221762          |
| 2 | 137348316 | 137348527 | 137348424 | 8  | 8  | 5 | 1.759573259 | 0.13508     | THSD7B ENSG00000144229   |
| 2 | 137505984 | 137506259 | 137506121 | 14 | 16 | 0 | 19.94183027 | 1.86E-06    | THSD7B ENSG00000144229   |
| 2 | 137642719 | 137642926 | 137642822 | 9  | 10 | 2 | 4.301179077 | 0.00512919  | THSD7B ENSG00000144229   |
| 2 | 138138613 | 138138913 | 138138736 | 8  | 10 | 5 | 2.150589539 | 0.0575848   | ENSG00000222394          |
| 2 | 138150097 | 138150282 | 138150180 | 11 | 11 | 6 | 2.010940867 | 0.0640214   | ENSG00000222394          |
| 2 | 138449571 | 138449849 | 138449701 | 11 | 13 | 2 | 5.474227917 | 0.000747844 | HNMT ENSG00000150540     |
| 2 | 138546339 | 138546656 | 138546513 | 20 | 22 | 2 | 8.993374435 | 1.66E-06    | HNMT ENSG00000150540     |
| 2 | 138749246 | 138749472 | 138749366 | 8  | 9  | 3 | 2.932622098 | 0.0242899   | ENSG00000181399          |
| 2 | 138765919 | 138766111 | 138765969 | 8  | 9  | 4 | 2.346097679 | 0.050148    | ENSG00000181399          |
| 2 | 138848057 | 138848299 | 138848173 | 9  | 11 | 4 | 2.815317214 | 0.0183428   | ENSG00000181399          |

|   |           |           |           |    |    |   |             |             |          |                 |
|---|-----------|-----------|-----------|----|----|---|-------------|-------------|----------|-----------------|
| 2 | 138895953 | 138896228 | 138896131 | 9  | 12 | 4 | 3.049926982 | 0.0108184   | SPOPL    | ENSG00000144228 |
| 2 | 138909781 | 138910057 | 138909915 | 13 | 13 | 6 | 2.346097679 | 0.0266147   | SPOPL    | ENSG00000144228 |
| 2 | 138911757 | 138912103 | 138911931 | 16 | 19 | 0 | 23.46097679 | 1.81E-07    | SPOPL    | ENSG00000144228 |
| 2 | 138965296 | 138965485 | 138965430 | 9  | 9  | 1 | 5.865244197 | 0.00272497  | SPOPL    | ENSG00000144228 |
| 2 | 138967615 | 138967838 | 138967715 | 9  | 9  | 2 | 3.910162798 | 0.00955088  | SPOPL    | ENSG00000144228 |
| 2 | 139651156 | 139651362 | 139651260 | 8  | 8  | 1 | 5.278719777 | 0.00542188  |          | ENSG00000222826 |
| 2 | 140247834 | 140248042 | 140247986 | 9  | 10 | 2 | 4.301179077 | 0.00512919  |          | ENSG00000221074 |
| 2 | 140338893 | 140339190 | 140339052 | 12 | 14 | 1 | 8.797866295 | 8.00E-05    |          | ENSG00000221074 |
| 2 | 141551538 | 141551800 | 141551656 | 9  | 10 | 2 | 4.301179077 | 0.00512919  |          | ENSG00000201892 |
| 2 | 141929320 | 141929552 | 141929434 | 11 | 12 | 1 | 7.624817456 | 0.000332769 |          | ENSG00000201892 |
| 2 | 142374815 | 142375071 | 142374943 | 14 | 16 | 0 | 19.94183027 | 1.86E-06    | LRP1B    | ENSG00000168702 |
| 2 | 143331273 | 143331690 | 143331452 | 8  | 16 | 3 | 4.985457567 | 0.000385643 | KYNU     | ENSG00000115919 |
| 2 | 143448410 | 143448657 | 143448539 | 11 | 12 | 3 | 3.812408728 | 0.004404    |          | ENSG00000221169 |
| 2 | 143810870 | 143811201 | 143811035 | 16 | 19 | 7 | 2.932622098 | 0.00293566  | ARHGAP15 | ENSG00000075884 |
| 2 | 143872249 | 143872485 | 143872412 | 8  | 10 | 0 | 12.90353723 | 0.000195991 | ARHGAP15 | ENSG00000075884 |
| 2 | 143872515 | 143873119 | 143872940 | 42 | 59 | 5 | 11.73048839 | 2.43E-15    | ARHGAP15 | ENSG00000075884 |
| 2 | 144576386 | 144576787 | 144576634 | 19 | 28 | 4 | 6.803683268 | 6.55E-07    | GTDC1    | ENSG00000121964 |
| 2 | 145137474 | 145137773 | 145137628 | 13 | 15 | 0 | 18.76878143 | 4.04E-06    | ZEB2     | ENSG00000169554 |
| 2 | 147171200 | 147171705 | 147171489 | 26 | 40 | 3 | 12.0237506  | 3.35E-11    | PABPCP2  | ENSG00000198526 |
| 2 | 147856442 | 147856856 | 147856579 | 21 | 31 | 3 | 9.384390715 | 1.82E-08    |          | ENSG00000207225 |
| 2 | 148286487 | 148286696 | 148286591 | 10 | 10 | 3 | 3.225884308 | 0.0139466   | ACVR2A   | ENSG00000121989 |
| 2 | 148494918 | 148495298 | 148495171 | 9  | 15 | 6 | 2.68125449  | 0.0103552   | MBD5     | ENSG00000204406 |
| 2 | 148730089 | 148730324 | 148730205 | 16 | 17 | 0 | 21.11487911 | 8.57E-07    |          | ENSG00000212181 |
| 2 | 148983506 | 148983775 | 148983640 | 11 | 13 | 5 | 2.737113958 | 0.0137917   | MBD5     | ENSG00000204406 |
| 2 | 149068191 | 149068559 | 149068380 | 11 | 18 | 3 | 5.571981987 | 0.000108726 | EPC2     | ENSG00000135999 |
| 2 | 149369745 | 149370032 | 149369875 | 23 | 24 | 3 | 7.331555246 | 2.13E-06    |          | ENSG00000218198 |
| 2 | 149571889 | 149572366 | 149572098 | 54 | 64 | 6 | 10.89259637 | 4.73E-16    | LYPD6B   | ENSG00000150556 |
| 2 | 149634078 | 149634423 | 149634256 | 10 | 14 | 2 | 5.865244197 | 0.000387308 | LYPD6B   | ENSG00000150556 |
| 2 | 149690028 | 149690213 | 149690105 | 9  | 9  | 3 | 2.932622098 | 0.0242899   | LYPD6B   | ENSG00000150556 |
| 2 | 149734487 | 149734749 | 149734618 | 9  | 12 | 0 | 15.24963491 | 4.15E-05    | LYPD6B   | ENSG00000150556 |
| 2 | 149893920 | 149894152 | 149894014 | 13 | 13 | 2 | 5.474227917 | 0.000747844 | LYPD6    | ENSG00000187123 |
| 2 | 149894622 | 149894848 | 149894739 | 8  | 11 | 2 | 4.692195357 | 0.00272444  | LYPD6    | ENSG00000187123 |
| 2 | 150152294 | 150152512 | 150152403 | 10 | 10 | 3 | 3.225884308 | 0.0139466   | C2orf25  | ENSG00000168288 |
| 2 | 150152610 | 150152846 | 150152717 | 8  | 9  | 3 | 2.932622098 | 0.0242899   | C2orf25  | ENSG00000168288 |

|   |           |           |           |    |    |   |             |             |         |                 |
|---|-----------|-----------|-----------|----|----|---|-------------|-------------|---------|-----------------|
| 2 | 150176035 | 150176305 | 150176178 | 12 | 15 | 2 | 6.256260476 | 0.000199274 |         | ENSG00000207270 |
| 2 | 150554347 | 150554619 | 150554483 | 12 | 15 | 2 | 6.256260476 | 0.000199274 |         | ENSG00000162947 |
| 2 | 150731182 | 150731449 | 150731344 | 9  | 11 | 2 | 4.692195357 | 0.00272444  |         | ENSG00000208244 |
| 2 | 150858375 | 150858955 | 150858755 | 24 | 37 | 2 | 14.85861863 | 3.69E-11    |         | ENSG00000208244 |
| 2 | 151051753 | 151052010 | 151051881 | 12 | 15 | 2 | 6.256260476 | 0.000199274 | RND3    | ENSG00000115963 |
| 2 | 151052384 | 151052629 | 151052471 | 12 | 12 | 8 | 1.694403879 | 0.107291    | RND3    | ENSG00000115963 |
| 2 | 151117427 | 151117733 | 151117561 | 11 | 15 | 1 | 9.384390715 | 3.90E-05    | RND3    | ENSG00000115963 |
| 2 | 151473782 | 151474210 | 151473961 | 20 | 31 | 2 | 12.51252095 | 2.82E-09    |         | ENSG00000222031 |
| 2 | 152740503 | 152740897 | 152740736 | 10 | 16 | 5 | 3.323638378 | 0.00288759  | STAM2   | ENSG00000115145 |
| 2 | 152765378 | 152765615 | 152765511 | 10 | 10 | 4 | 2.580707446 | 0.0306059   | STAM2   | ENSG00000115145 |
| 2 | 153265921 | 153266427 | 153266140 | 34 | 47 | 0 | 56.30634429 | 6.62E-17    | PRPF40A | ENSG00000196504 |
| 2 | 153282761 | 153282994 | 153282868 | 8  | 10 | 5 | 2.150589539 | 0.0575848   | PRPF40A | ENSG00000196504 |
| 2 | 153624484 | 153624757 | 153624620 | 17 | 18 | 2 | 7.429309316 | 2.63E-05    |         | ENSG00000214025 |
| 2 | 153793864 | 153794175 | 153794019 | 13 | 15 | 6 | 2.68125449  | 0.0103552   |         | ENSG00000214025 |
| 2 | 153969971 | 153970280 | 153970125 | 13 | 15 | 0 | 18.76878143 | 4.04E-06    |         | ENSG00000214024 |
| 2 | 154335329 | 154335599 | 154335464 | 8  | 10 | 1 | 6.451768616 | 0.00135978  | GALNT13 | ENSG00000144278 |
| 2 | 155479420 | 155479768 | 155479594 | 10 | 16 | 3 | 4.985457567 | 0.000385643 |         | ENSG00000219170 |
| 2 | 156746912 | 156747255 | 156747083 | 20 | 23 | 8 | 3.128130238 | 0.000832453 | NR4A2   | ENSG00000153234 |
| 2 | 156898049 | 156898251 | 156898150 | 8  | 8  | 1 | 5.278719777 | 0.00542188  | NR4A2   | ENSG00000153234 |
| 2 | 156899461 | 156899736 | 156899557 | 8  | 13 | 1 | 8.211341875 | 0.000163445 | NR4A2   | ENSG00000153234 |
| 2 | 156900284 | 156900601 | 156900448 | 11 | 13 | 2 | 5.474227917 | 0.000747844 | NR4A2   | ENSG00000153234 |
| 2 | 157082224 | 157082460 | 157082342 | 8  | 10 | 1 | 6.451768616 | 0.00135978  | GPD2    | ENSG00000115159 |
| 2 | 157344145 | 157344497 | 157344321 | 17 | 22 | 9 | 2.69801233  | 0.00276236  | GPD2    | ENSG00000115159 |
| 2 | 157344697 | 157344878 | 157344729 | 8  | 9  | 2 | 3.910162798 | 0.00955088  | GPD2    | ENSG00000115159 |
| 2 | 157441497 | 157441696 | 157441572 | 8  | 9  | 0 | 11.73048839 | 0.000425898 |         | ENSG00000213194 |
| 2 | 157457030 | 157457570 | 157457386 | 50 | 65 | 6 | 11.06017477 | 2.37E-16    |         | ENSG00000213194 |
| 2 | 157520947 | 157521171 | 157521059 | 10 | 10 | 1 | 6.451768616 | 0.00135978  |         | ENSG00000213194 |
| 2 | 158390614 | 158390883 | 158390712 | 10 | 13 | 4 | 3.28453675  | 0.00629037  | ACVR1   | ENSG00000115170 |
| 2 | 158678648 | 158678932 | 158678790 | 15 | 18 | 1 | 11.14396397 | 4.44E-06    | UPP2    | ENSG00000007001 |
| 2 | 158767332 | 158767526 | 158767452 | 8  | 9  | 3 | 2.932622098 | 0.0242899   | UPP2    | ENSG00000007001 |
| 2 | 158880331 | 158880516 | 158880423 | 9  | 9  | 0 | 11.73048839 | 0.000425898 | CCDC148 | ENSG00000153237 |
| 2 | 158886099 | 158886444 | 158886271 | 17 | 22 | 0 | 26.9801233  | 1.77E-08    | CCDC148 | ENSG00000153237 |
| 2 | 158949637 | 158949816 | 158949769 | 8  | 8  | 0 | 10.55743955 | 0.000925496 | CCDC148 | ENSG00000153237 |
| 2 | 159288023 | 159288721 | 159288271 | 25 | 48 | 5 | 9.579898854 | 4.82E-12    |         | ENSG00000204380 |



|   |           |           |           |    |    |   |             |             |          |                 |
|---|-----------|-----------|-----------|----|----|---|-------------|-------------|----------|-----------------|
| 2 | 159288732 | 159289148 | 159288983 | 21 | 31 | 7 | 4.692195357 | 4.07E-06    |          | ENSG00000204380 |
| 2 | 159457887 | 159458112 | 159458039 | 10 | 13 | 1 | 8.211341875 | 0.000163445 |          | ENSG00000208221 |
| 2 | 159533498 | 159533910 | 159533640 | 12 | 19 | 1 | 11.73048839 | 2.14E-06    | TANC1    | ENSG00000115183 |
| 2 | 159850774 | 159851002 | 159850909 | 8  | 8  | 1 | 5.278719777 | 0.00542188  | WDSUB1   | ENSG00000196151 |
| 2 | 159964672 | 159965045 | 159964931 | 9  | 13 | 5 | 2.737113958 | 0.0137917   | WDSUB1   | ENSG00000196151 |
| 2 | 160280360 | 160280582 | 160280471 | 12 | 13 | 2 | 5.474227917 | 0.000747844 | 7-Mar    | ENSG00000136536 |
| 2 | 160730780 | 160731074 | 160730920 | 8  | 11 | 5 | 2.346097679 | 0.0364013   | ITGB6    | ENSG00000115221 |
| 2 | 160770348 | 160770610 | 160770453 | 9  | 11 | 1 | 7.038293036 | 0.000674435 | ITGB6    | ENSG00000115221 |
| 2 | 160788896 | 160789142 | 160789021 | 13 | 15 | 1 | 9.384390715 | 3.90E-05    | ITGB6    | ENSG00000115221 |
| 2 | 160806607 | 160806898 | 160806761 | 10 | 13 | 9 | 1.642268375 | 0.111397    | ITGB6    | ENSG00000115221 |
| 2 | 160917306 | 160917553 | 160917429 | 19 | 20 | 1 | 12.31701281 | 1.03E-06    |          | ENSG00000208218 |
| 2 | 160998483 | 160998865 | 160998686 | 27 | 34 | 6 | 5.865244197 | 2.06E-07    | RBMS1    | ENSG00000153250 |
| 2 | 161126339 | 161126618 | 161126482 | 14 | 16 | 3 | 4.985457567 | 0.000385643 | RBMS1    | ENSG00000153250 |
| 2 | 161197317 | 161197518 | 161197433 | 8  | 8  | 3 | 2.639359888 | 0.0415794   | RBMS1    | ENSG00000153250 |
| 2 | 161440890 | 161441097 | 161440989 | 10 | 11 | 2 | 4.692195357 | 0.00272444  |          | ENSG00000222605 |
| 2 | 161483697 | 161483947 | 161483818 | 10 | 12 | 5 | 2.541605819 | 0.0225912   |          | ENSG00000208217 |
| 2 | 161559234 | 161559482 | 161559343 | 8  | 10 | 4 | 2.580707446 | 0.0306059   |          | ENSG00000208217 |
| 2 | 161979155 | 161979388 | 161979239 | 9  | 11 | 0 | 14.07658607 | 9.02E-05    | TBR1     | ENSG00000136535 |
| 2 | 162656133 | 162656380 | 162656269 | 13 | 16 | 0 | 19.94183027 | 1.86E-06    | DPP4     | ENSG00000197635 |
| 2 | 162785858 | 162786064 | 162786015 | 8  | 8  | 1 | 5.278719777 | 0.00542188  | FAP      | ENSG00000078098 |
| 2 | 162898716 | 162898962 | 162898828 | 9  | 9  | 2 | 3.910162798 | 0.00955088  | GCA      | ENSG00000115271 |
| 2 | 163054762 | 163055151 | 163054976 | 47 | 53 | 0 | 63.34463732 | 6.28E-19    |          | ENSG00000212312 |
| 2 | 163089079 | 163089294 | 163089170 | 9  | 9  | 1 | 5.865244197 | 0.00272497  |          | ENSG00000212312 |
| 2 | 163147222 | 163147545 | 163147383 | 15 | 20 | 6 | 3.519146518 | 0.000784044 |          | ENSG00000212312 |
| 2 | 163275178 | 163275414 | 163275311 | 8  | 9  | 4 | 2.346097679 | 0.050148    | KCNH7    | ENSG00000184611 |
| 2 | 164343127 | 164343342 | 164343236 | 8  | 8  | 1 | 5.278719777 | 0.00542188  | FIGN     | ENSG00000182263 |
| 2 | 164518127 | 164518546 | 164518306 | 56 | 66 | 0 | 78.59427223 | 2.61E-23    | FIGN     | ENSG00000182263 |
| 2 | 165079434 | 165079672 | 165079531 | 16 | 17 | 1 | 10.55743955 | 9.18E-06    | GRB14    | ENSG00000115290 |
| 2 | 165322812 | 165323001 | 165322906 | 8  | 8  | 1 | 5.278719777 | 0.00542188  |          | ENSG00000208214 |
| 2 | 165391392 | 165391587 | 165391489 | 8  | 9  | 0 | 11.73048839 | 0.000425898 | COBLL1   | ENSG00000082438 |
| 2 | 165406859 | 165407260 | 165406960 | 13 | 19 | 4 | 4.692195357 | 0.000193572 | COBLL1   | ENSG00000082438 |
| 2 | 165556459 | 165556648 | 165556553 | 8  | 9  | 0 | 11.73048839 | 0.000425898 | SLC38A11 | ENSG00000169507 |
| 2 | 165804008 | 165804207 | 165804133 | 9  | 9  | 0 | 11.73048839 | 0.000425898 | SCN2A    | ENSG00000136531 |
| 2 | 166358913 | 166359136 | 166359024 | 9  | 12 | 6 | 2.178519273 | 0.0416567   | GALNT3   | ENSG00000115339 |

|   |           |           |           |     |     |    |             |             |          |                 |
|---|-----------|-----------|-----------|-----|-----|----|-------------|-------------|----------|-----------------|
| 2 | 166369594 | 166369796 | 166369695 | 8   | 8   | 1  | 5.278719777 | 0.00542188  |          | ENSG00000221234 |
| 2 | 166518929 | 166519119 | 166519024 | 11  | 11  | 1  | 7.038293036 | 0.000674435 | TTC21B   | ENSG00000123607 |
| 2 | 168901675 | 168901855 | 168901796 | 8   | 8   | 2  | 3.519146518 | 0.017558    | STK39    | ENSG00000198648 |
| 2 | 169017411 | 169018038 | 169017710 | 117 | 155 | 2  | 60.99853964 | 9.55E-50    |          | ENSG00000208206 |
| 2 | 169148520 | 169148809 | 169148688 | 13  | 16  | 3  | 4.985457567 | 0.000385643 |          | ENSG00000199348 |
| 2 | 169172996 | 169173270 | 169173133 | 12  | 14  | 0  | 17.59573259 | 8.79E-06    |          | ENSG00000199348 |
| 2 | 169455214 | 169455395 | 169455304 | 8   | 9   | 3  | 2.932622098 | 0.0242899   | SPC25    | ENSG00000152253 |
| 2 | 169526453 | 169526707 | 169526580 | 11  | 11  | 1  | 7.038293036 | 0.000674435 | G6PC2    | ENSG00000152254 |
| 2 | 169958018 | 169958408 | 169958197 | 16  | 25  | 10 | 2.772660893 | 0.00131329  | LRP2     | ENSG00000081479 |
| 2 | 170043979 | 170044185 | 170044100 | 8   | 9   | 1  | 5.865244197 | 0.00272497  | BBS5     | ENSG00000163093 |
| 2 | 170138317 | 170138723 | 170138544 | 11  | 18  | 5  | 3.714654658 | 0.000961539 | FASTKD1  | ENSG00000138399 |
| 2 | 170518717 | 170519094 | 170518915 | 12  | 19  | 1  | 11.73048839 | 2.14E-06    | UBR3     | ENSG00000144357 |
| 2 | 170786344 | 170787313 | 170786613 | 114 | 173 | 5  | 34.01841634 | 1.52E-51    | MYO3B    | ENSG00000071909 |
| 2 | 170803536 | 170803896 | 170803715 | 27  | 34  | 5  | 6.842784896 | 5.43E-08    | MYO3B    | ENSG00000071909 |
| 2 | 170886180 | 170886680 | 170886432 | 67  | 90  | 0  | 106.7474444 | 2.12E-31    | MYO3B    | ENSG00000071909 |
| 2 | 170889336 | 170889746 | 170889567 | 13  | 21  | 10 | 2.346097679 | 0.00796926  | MYO3B    | ENSG00000071909 |
| 2 | 171380470 | 171380749 | 171380586 | 11  | 14  | 3  | 4.398933147 | 0.00132748  | GAD1     | ENSG00000128683 |
| 2 | 171493640 | 171493845 | 171493718 | 10  | 10  | 2  | 4.301179077 | 0.00512919  | GORASP2  | ENSG00000115806 |
| 2 | 171719205 | 171719422 | 171719319 | 10  | 10  | 1  | 6.451768616 | 0.00135978  | TLK1     | ENSG00000198586 |
| 2 | 171836736 | 171836989 | 171836862 | 10  | 12  | 1  | 7.624817456 | 0.000332769 |          | ENSG00000218900 |
| 2 | 171851771 | 171852409 | 171852139 | 38  | 61  | 9  | 7.272902804 | 4.16E-13    |          | ENSG00000218900 |
| 2 | 171974903 | 171975140 | 171975066 | 12  | 13  | 4  | 3.28453675  | 0.00629037  | METTL8   | ENSG00000123600 |
| 2 | 171995810 | 171996111 | 171995938 | 14  | 17  | 1  | 10.55743955 | 9.18E-06    | METTL8   | ENSG00000123600 |
| 2 | 172272541 | 172272834 | 172272667 | 19  | 22  | 0  | 26.9801233  | 1.77E-08    | DYNC1I2  | ENSG00000077380 |
| 2 | 172375996 | 172376184 | 172376090 | 11  | 12  | 2  | 5.083211637 | 0.00143337  | SLC25A12 | ENSG00000115840 |
| 2 | 172573015 | 172573322 | 172573168 | 8   | 10  | 2  | 4.301179077 | 0.00512919  |          | ENSG00000172878 |
| 2 | 172658469 | 172658692 | 172658576 | 8   | 8   | 0  | 10.55743955 | 0.000925496 | DLX1     | ENSG00000144355 |
| 2 | 172676941 | 172677150 | 172677072 | 8   | 9   | 3  | 2.932622098 | 0.0242899   | DLX2     | ENSG00000115844 |
| 2 | 172981405 | 172981707 | 172981551 | 16  | 20  | 0  | 24.63402563 | 8.35E-08    | ITGA6    | ENSG00000091409 |
| 2 | 173009942 | 173010219 | 173010068 | 17  | 18  | 8  | 2.476436439 | 0.00924552  | ITGA6    | ENSG00000091409 |
| 2 | 173028174 | 173028367 | 173028270 | 8   | 9   | 2  | 3.910162798 | 0.00955088  | ITGA6    | ENSG00000091409 |
| 2 | 173038764 | 173039122 | 173038947 | 13  | 18  | 7  | 2.785990993 | 0.00480525  | ITGA6    | ENSG00000091409 |
| 2 | 173363494 | 173363708 | 173363601 | 8   | 10  | 2  | 4.301179077 | 0.00512919  | RAPGEF4  | ENSG00000091428 |
| 2 | 173527184 | 173527387 | 173527285 | 10  | 11  | 4  | 2.815317214 | 0.0183428   | RAPGEF4  | ENSG00000091428 |

|   |           |           |           |     |     |    |             |             |        |                 |
|---|-----------|-----------|-----------|-----|-----|----|-------------|-------------|--------|-----------------|
| 2 | 173571572 | 173571751 | 173571661 | 8   | 8   | 1  | 5.278719777 | 0.00542188  |        | ENSG00000091436 |
| 2 | 173697497 | 173697748 | 173697622 | 11  | 11  | 4  | 2.815317214 | 0.0183428   |        | ENSG00000091436 |
| 2 | 173864450 | 173864738 | 173864622 | 10  | 13  | 0  | 16.42268375 | 1.91E-05    | CDCA7  | ENSG00000144354 |
| 2 | 173975468 | 173975702 | 173975585 | 12  | 12  | 2  | 5.083211637 | 0.00143337  |        | ENSG00000213148 |
| 2 | 174225760 | 174225999 | 174225879 | 9   | 12  | 5  | 2.541605819 | 0.0225912   |        | ENSG00000170226 |
| 2 | 174253791 | 174254015 | 174253929 | 8   | 9   | 2  | 3.910162798 | 0.00955088  |        | ENSG00000170226 |
| 2 | 174401872 | 174402096 | 174401984 | 11  | 12  | 2  | 5.083211637 | 0.00143337  | SP3    | ENSG00000172845 |
| 2 | 174424333 | 174424566 | 174424406 | 8   | 9   | 6  | 1.675784056 | 0.141978    | SP3    | ENSG00000172845 |
| 2 | 174445766 | 174446118 | 174445879 | 10  | 14  | 3  | 4.398933147 | 0.00132748  | SP3    | ENSG00000172845 |
| 2 | 174536792 | 174537015 | 174536889 | 8   | 10  | 1  | 6.451768616 | 0.00135978  | SP3    | ENSG00000172845 |
| 2 | 174537642 | 174537897 | 174537769 | 9   | 10  | 1  | 6.451768616 | 0.00135978  | SP3    | ENSG00000172845 |
| 2 | 174538317 | 174538526 | 174538421 | 9   | 9   | 7  | 1.466311049 | 0.20706     | SP3    | ENSG00000172845 |
| 2 | 174538836 | 174539312 | 174539015 | 8   | 16  | 6  | 2.848832895 | 0.00632407  | SP3    | ENSG00000172845 |
| 2 | 174555883 | 174556485 | 174556190 | 91  | 125 | 2  | 49.26805125 | 8.12E-40    | SP3    | ENSG00000172845 |
| 2 | 174612935 | 174613315 | 174613107 | 10  | 16  | 6  | 2.848832895 | 0.00632407  | SP3    | ENSG00000172845 |
| 2 | 174636744 | 174637084 | 174636922 | 18  | 22  | 2  | 8.993374435 | 1.66E-06    | SP3    | ENSG00000172845 |
| 2 | 174739323 | 174739553 | 174739438 | 8   | 10  | 1  | 6.451768616 | 0.00135978  |        | ENSG00000208199 |
| 2 | 175060267 | 175060553 | 175060430 | 9   | 12  | 4  | 3.049926982 | 0.0108184   | GPR155 | ENSG00000163328 |
| 2 | 175083722 | 175084032 | 175083877 | 14  | 17  | 2  | 7.038293036 | 5.19E-05    |        | ENSG00000179997 |
| 2 | 175119949 | 175120261 | 175120117 | 9   | 12  | 3  | 3.812408728 | 0.004404    |        | ENSG00000206965 |
| 2 | 175699688 | 175699924 | 175699806 | 9   | 11  | 2  | 4.692195357 | 0.00272444  | ATF2   | ENSG00000115966 |
| 2 | 175754225 | 175754435 | 175754372 | 9   | 10  | 2  | 4.301179077 | 0.00512919  | ATP5G3 | ENSG00000154518 |
| 2 | 175882871 | 175883057 | 175882947 | 9   | 9   | 3  | 2.932622098 | 0.0242899   |        | ENSG00000221347 |
| 2 | 175885414 | 175885596 | 175885505 | 9   | 10  | 1  | 6.451768616 | 0.00135978  |        | ENSG00000221347 |
| 2 | 176659133 | 176659313 | 176659261 | 8   | 9   | 3  | 2.932622098 | 0.0242899   | EVX2   | ENSG00000174279 |
| 2 | 176670757 | 176670988 | 176670815 | 8   | 11  | 2  | 4.692195357 | 0.00272444  | HOXD12 | ENSG00000170178 |
| 2 | 176842412 | 176842817 | 176842638 | 8   | 17  | 0  | 21.11487911 | 8.57E-07    | MTX2   | ENSG00000128654 |
| 2 | 177104009 | 177104223 | 177104069 | 8   | 8   | 1  | 5.278719777 | 0.00542188  |        | ENSG00000163364 |
| 2 | 177739089 | 177739269 | 177739179 | 8   | 8   | 0  | 10.55743955 | 0.000925496 |        | ENSG00000208195 |
| 2 | 177742964 | 177743766 | 177743338 | 216 | 278 | 11 | 27.27338551 | 2.68E-78    |        | ENSG00000201102 |
| 2 | 177744420 | 177744638 | 177744472 | 9   | 11  | 3  | 3.519146518 | 0.00788869  |        | ENSG00000201102 |
| 2 | 177815492 | 177815705 | 177815598 | 10  | 12  | 1  | 7.624817456 | 0.000332769 | NFE2L2 | ENSG00000222043 |
| 2 | 177836364 | 177836669 | 177836512 | 18  | 21  | 5  | 4.301179077 | 0.000172642 | NFE2L2 | ENSG00000222043 |
| 2 | 177886435 | 177886823 | 177886614 | 23  | 31  | 1  | 18.76878143 | 2.99E-10    |        | ENSG00000208194 |

|   |           |           |           |    |    |    |             |             |         |                  |
|---|-----------|-----------|-----------|----|----|----|-------------|-------------|---------|------------------|
| 2 | 177967293 | 177967501 | 177967368 | 9  | 10 | 3  | 3.225884308 | 0.0139466   | AGPS    | ENSG00000018510  |
| 2 | 178685195 | 178685587 | 178685374 | 10 | 18 | 2  | 7.429309316 | 2.63E-05    | RBM45   | ENSG000000155636 |
| 2 | 179052072 | 179052376 | 179052232 | 11 | 15 | 5  | 3.128130238 | 0.00492422  | FKBP7   | ENSG00000079150  |
| 2 | 179792035 | 179792270 | 179792138 | 9  | 9  | 2  | 3.910162798 | 0.00955088  | SESTD1  | ENSG000000187231 |
| 2 | 179841361 | 179841633 | 179841461 | 10 | 13 | 3  | 4.105670938 | 0.00243034  | SESTD1  | ENSG000000187231 |
| 2 | 179880298 | 179880534 | 179880416 | 15 | 15 | 4  | 3.753756286 | 0.0020497   | SESTD1  | ENSG000000187231 |
| 2 | 180147180 | 180147546 | 180147396 | 8  | 14 | 8  | 1.955081399 | 0.0506438   | ZNF385B | ENSG000000144331 |
| 2 | 182148005 | 182148298 | 182148172 | 10 | 13 | 2  | 5.474227917 | 0.000747844 |         | ENSG000000197819 |
| 2 | 183501121 | 183501469 | 183501295 | 13 | 17 | 3  | 5.278719777 | 0.000205462 |         | ENSG000000207178 |
| 2 | 183651642 | 183651821 | 183651751 | 8  | 8  | 2  | 3.519146518 | 0.017558    | DUSP19  | ENSG000000162999 |
| 2 | 183652130 | 183652352 | 183652241 | 10 | 11 | 0  | 14.07658607 | 9.02E-05    | DUSP19  | ENSG000000162999 |
| 2 | 184565772 | 184566087 | 184565929 | 20 | 24 | 5  | 4.887703497 | 2.90E-05    |         | ENSG000000208184 |
| 2 | 185219248 | 185219567 | 185219407 | 15 | 17 | 0  | 21.11487911 | 8.57E-07    | ZNF804A | ENSG000000170396 |
| 2 | 186140947 | 186141363 | 186141143 | 43 | 57 | 2  | 22.67894423 | 1.50E-17    |         | ENSG000000212581 |
| 2 | 187162465 | 187163145 | 187163005 | 11 | 24 | 3  | 7.331555246 | 2.13E-06    | ITGAV   | ENSG000000138448 |
| 2 | 187344851 | 187345205 | 187345028 | 12 | 18 | 0  | 22.28792795 | 3.94E-07    | ZSWIM2  | ENSG000000163012 |
| 2 | 187353973 | 187354191 | 187354082 | 9  | 10 | 4  | 2.580707446 | 0.0306059   | ZSWIM2  | ENSG000000163012 |
| 2 | 188073859 | 188074346 | 188074002 | 9  | 18 | 7  | 2.785990993 | 0.00480525  | TFPI    | ENSG000000003436 |
| 2 | 188150311 | 188150591 | 188150451 | 11 | 12 | 5  | 2.541605819 | 0.0225912   | TFPI    | ENSG000000003436 |
| 2 | 188449597 | 188449835 | 188449690 | 9  | 10 | 2  | 4.301179077 | 0.00512919  | TFPI    | ENSG000000003436 |
| 2 | 188864723 | 188864944 | 188864787 | 9  | 11 | 3  | 3.519146518 | 0.00788869  | GULP1   | ENSG000000144366 |
| 2 | 189153700 | 189153909 | 189153826 | 8  | 9  | 0  | 11.73048839 | 0.000425898 | DIRC1   | ENSG000000174325 |
| 2 | 189266192 | 189266385 | 189266288 | 8  | 9  | 2  | 3.910162798 | 0.00955088  | DIRC1   | ENSG000000174325 |
| 2 | 189299926 | 189300152 | 189300063 | 9  | 10 | 3  | 3.225884308 | 0.0139466   | DIRC1   | ENSG000000174325 |
| 2 | 189884422 | 189884601 | 189884438 | 8  | 8  | 0  | 10.55743955 | 0.000925496 | WDR75   | ENSG000000115368 |
| 2 | 190013909 | 190014107 | 190014002 | 9  | 10 | 9  | 1.290353723 | 0.279648    | WDR75   | ENSG000000115368 |
| 2 | 190014261 | 190014473 | 190014333 | 9  | 11 | 4  | 2.815317214 | 0.0183428   | WDR75   | ENSG000000115368 |
| 2 | 190129004 | 190129263 | 190129112 | 11 | 12 | 1  | 7.624817456 | 0.000332769 | SLC40A1 | ENSG000000138449 |
| 2 | 190158379 | 190158719 | 190158545 | 28 | 31 | 1  | 18.76878143 | 2.99E-10    | SLC40A1 | ENSG000000138449 |
| 2 | 190234129 | 190234570 | 190234443 | 8  | 16 | 10 | 1.812893661 | 0.0578656   | ASNSD1  | ENSG000000138381 |
| 2 | 190357611 | 190357850 | 190357691 | 8  | 10 | 1  | 6.451768616 | 0.00135978  | PMS1    | ENSG000000064933 |
| 2 | 190892662 | 190893145 | 190892968 | 20 | 32 | 6  | 5.530087385 | 7.11E-07    | HIBCH   | ENSG000000198130 |
| 2 | 191042063 | 191042458 | 191042298 | 10 | 15 | 6  | 2.68125449  | 0.0103552   | MFSD6   | ENSG000000151690 |
| 2 | 191201944 | 191202261 | 191202108 | 9  | 13 | 0  | 16.42268375 | 1.91E-05    | NAB1    | ENSG000000138386 |

|   |           |           |           |    |    |    |             |             |          |                 |
|---|-----------|-----------|-----------|----|----|----|-------------|-------------|----------|-----------------|
| 2 | 191217277 | 191217470 | 191217373 | 8  | 8  | 1  | 5.278719777 | 0.00542188  | NAB1     | ENSG00000138386 |
| 2 | 191359498 | 191359770 | 191359654 | 11 | 14 | 3  | 4.398933147 | 0.00132748  | GLS      | ENSG00000115419 |
| 2 | 191553033 | 191553508 | 191553212 | 11 | 23 | 5  | 4.692195357 | 5.29E-05    | STAT1    | ENSG00000115415 |
| 2 | 191593145 | 191593442 | 191593293 | 13 | 16 | 3  | 4.985457567 | 0.000385643 | STAT1    | ENSG00000115415 |
| 2 | 191743337 | 191743552 | 191743434 | 9  | 9  | 0  | 11.73048839 | 0.000425898 | STAT4    | ENSG00000138378 |
| 2 | 191791335 | 191791642 | 191791480 | 9  | 12 | 2  | 5.083211637 | 0.00143337  | MYO1B    | ENSG00000128641 |
| 2 | 191875687 | 191875961 | 191875826 | 9  | 10 | 5  | 2.150589539 | 0.0575848   | MYO1B    | ENSG00000128641 |
| 2 | 191902730 | 191903180 | 191902955 | 22 | 33 | 4  | 7.976732107 | 2.40E-08    |          | ENSG00000208171 |
| 2 | 191931285 | 191931634 | 191931459 | 10 | 15 | 3  | 4.692195357 | 0.000718455 |          | ENSG00000208171 |
| 2 | 191955830 | 191956141 | 191955965 | 9  | 11 | 3  | 3.519146518 | 0.00788869  |          | ENSG00000208171 |
| 2 | 192204865 | 192205044 | 192204955 | 8  | 8  | 4  | 2.111487911 | 0.0804809   | OBFC2A   | ENSG00000173559 |
| 2 | 192269254 | 192269454 | 192269376 | 8  | 8  | 0  | 10.55743955 | 0.000925496 | OBFC2A   | ENSG00000173559 |
| 2 | 192417778 | 192418366 | 192417972 | 26 | 41 | 6  | 7.038293036 | 2.39E-09    | SDPR     | ENSG00000168497 |
| 2 | 193046454 | 193046672 | 193046577 | 9  | 9  | 1  | 5.865244197 | 0.00272497  | TMEFF2   | ENSG00000144339 |
| 2 | 193073945 | 193074174 | 193074049 | 9  | 9  | 2  | 3.910162798 | 0.00955088  | TMEFF2   | ENSG00000144339 |
| 2 | 193117413 | 193118023 | 193117850 | 62 | 91 | 0  | 107.9204932 | 9.76E-32    | TMEFF2   | ENSG00000144339 |
| 2 | 193314961 | 193315183 | 193315123 | 8  | 9  | 4  | 2.346097679 | 0.050148    |          |                 |
| 2 | 193322709 | 193322956 | 193322804 | 8  | 9  | 6  | 1.675784056 | 0.141978    |          |                 |
| 2 | 193726611 | 193726802 | 193726706 | 8  | 8  | 0  | 10.55743955 | 0.000925496 |          |                 |
| 2 | 194916071 | 194916476 | 194916275 | 25 | 33 | 1  | 19.94183027 | 6.71E-11    |          | ENSG00000208170 |
| 2 | 195418536 | 195418752 | 195418636 | 10 | 10 | 4  | 2.580707446 | 0.0306059   |          | ENSG00000208170 |
| 2 | 195895441 | 195895692 | 195895589 | 11 | 11 | 7  | 1.759573259 | 0.102361    |          | ENSG00000202206 |
| 2 | 196229654 | 196230423 | 196229963 | 10 | 25 | 15 | 1.906204364 | 0.0188347   | SLC39A10 | ENSG00000196950 |
| 2 | 196744375 | 196744694 | 196744534 | 8  | 11 | 0  | 14.07658607 | 9.02E-05    | STK17B   | ENSG00000081320 |
| 2 | 196806006 | 196806258 | 196806132 | 15 | 17 | 0  | 21.11487911 | 8.57E-07    |          | ENSG00000208167 |
| 2 | 196865416 | 196865649 | 196865541 | 9  | 11 | 2  | 4.692195357 | 0.00272444  |          | ENSG00000222866 |
| 2 | 197215189 | 197215368 | 197215301 | 8  | 8  | 1  | 5.278719777 | 0.00542188  | CCDC150  | ENSG00000144395 |
| 2 | 197372507 | 197372780 | 197372643 | 11 | 13 | 4  | 3.28453675  | 0.00629037  | GTF3C3   | ENSG00000119041 |
| 2 | 197774840 | 197775309 | 197775106 | 21 | 34 | 1  | 20.52835469 | 3.17E-11    | ANKRD44  | ENSG00000065413 |
| 2 | 198008016 | 198008214 | 198008070 | 11 | 13 | 4  | 3.28453675  | 0.00629037  | SF3B1    | ENSG00000115524 |
| 2 | 198025923 | 198026275 | 198026158 | 11 | 15 | 5  | 3.128130238 | 0.00492422  | COQ10B   | ENSG00000115520 |
| 2 | 198072788 | 198073318 | 198073035 | 13 | 25 | 11 | 2.541605819 | 0.00248721  | HSPE1    | ENSG00000115541 |
| 2 | 198088762 | 198089095 | 198088928 | 17 | 22 | 7  | 3.372515413 | 0.000629223 | MOBKL3   | ENSG00000115540 |
| 2 | 198883474 | 198883674 | 198883574 | 9  | 9  | 0  | 11.73048839 | 0.000425898 | PLCL1    | ENSG00000115896 |

|   |           |           |           |    |    |    |             |             |          |                 |
|---|-----------|-----------|-----------|----|----|----|-------------|-------------|----------|-----------------|
| 2 | 200424383 | 200424564 | 200424473 | 10 | 10 | 3  | 3.225884308 | 0.0139466   |          | ENSG00000208157 |
| 2 | 200466440 | 200466619 | 200466524 | 9  | 9  | 3  | 2.932622098 | 0.0242899   |          | ENSG00000208157 |
| 2 | 200484735 | 200485107 | 200484877 | 9  | 15 | 0  | 18.76878143 | 4.04E-06    | C2orf69  | ENSG00000178074 |
| 2 | 200757933 | 200758255 | 200758101 | 10 | 15 | 5  | 3.128130238 | 0.00492422  |          | ENSG00000196141 |
| 2 | 200832538 | 200832783 | 200832621 | 11 | 13 | 11 | 1.368556979 | 0.211388    |          | ENSG00000196141 |
| 2 | 200851603 | 200852065 | 200851773 | 10 | 19 | 5  | 3.910162798 | 0.000546977 |          | ENSG00000196141 |
| 2 | 200861755 | 200861992 | 200861868 | 14 | 15 | 4  | 3.753756286 | 0.0020497   |          | ENSG00000196141 |
| 2 | 200873412 | 200874080 | 200873799 | 50 | 86 | 3  | 25.51381226 | 9.00E-26    |          | ENSG00000196141 |
| 2 | 201082986 | 201083181 | 201083098 | 10 | 10 | 1  | 6.451768616 | 0.00135978  | KCTD18   | ENSG00000155729 |
| 2 | 201099148 | 201099327 | 201099232 | 8  | 8  | 0  | 10.55743955 | 0.000925496 | SGOL2    | ENSG00000163535 |
| 2 | 201110770 | 201110971 | 201110870 | 8  | 9  | 3  | 2.932622098 | 0.0242899   | SGOL2    | ENSG00000163535 |
| 2 | 201308738 | 201308976 | 201308849 | 10 | 13 | 3  | 4.105670938 | 0.00243034  |          | ENSG00000201737 |
| 2 | 201462106 | 201462465 | 201462276 | 9  | 14 | 4  | 3.519146518 | 0.00361132  | PPIL3    | ENSG00000115934 |
| 2 | 201474619 | 201474907 | 201474767 | 10 | 10 | 10 | 1.173048839 | 0.355733    |          | ENSG00000203300 |
| 2 | 201478772 | 201478951 | 201478861 | 8  | 8  | 9  | 1.055743955 | 0.456865    |          | ENSG00000203300 |
| 2 | 201536163 | 201536342 | 201536252 | 8  | 9  | 2  | 3.910162798 | 0.00955088  | ORC2L    | ENSG00000115942 |
| 2 | 201536641 | 201536948 | 201536787 | 8  | 11 | 7  | 1.759573259 | 0.102361    | ORC2L    | ENSG00000115942 |
| 2 | 201644737 | 201644988 | 201644822 | 8  | 12 | 8  | 1.694403879 | 0.107291    | NDUFB3   | ENSG00000119013 |
| 2 | 201691417 | 201692111 | 201691764 | 30 | 55 | 4  | 13.138147   | 5.86E-15    | CFLAR    | ENSG00000003402 |
| 2 | 202013266 | 202013496 | 202013381 | 10 | 11 | 2  | 4.692195357 | 0.00272444  | TRAK2    | ENSG00000115993 |
| 2 | 202215640 | 202215907 | 202215800 | 12 | 15 | 0  | 18.76878143 | 4.04E-06    | ALS2CR4  | ENSG00000155755 |
| 2 | 202353861 | 202354368 | 202354025 | 13 | 22 | 5  | 4.496687217 | 9.59E-05    | ALS2     | ENSG00000003393 |
| 2 | 202354948 | 202355159 | 202355079 | 8  | 10 | 0  | 12.90353723 | 0.000195991 | ALS2     | ENSG00000003393 |
| 2 | 202686590 | 202686836 | 202686717 | 13 | 16 | 0  | 19.94183027 | 1.86E-06    |          | ENSG00000222035 |
| 2 | 202838568 | 202838932 | 202838753 | 9  | 16 | 4  | 3.988366054 | 0.00115141  |          | ENSG00000055044 |
| 2 | 202948696 | 202948972 | 202948842 | 13 | 14 | 3  | 4.398933147 | 0.00132748  | BMPR2    | ENSG00000204217 |
| 2 | 202981797 | 202982041 | 202981919 | 10 | 12 | 0  | 15.24963491 | 4.15E-05    | BMPR2    | ENSG00000204217 |
| 2 | 203161695 | 203161898 | 203161751 | 10 | 12 | 6  | 2.178519273 | 0.0416567   |          | ENSG00000208133 |
| 2 | 203207534 | 203207775 | 203207640 | 9  | 10 | 4  | 2.580707446 | 0.0306059   | FAM117B  | ENSG00000138439 |
| 2 | 203266550 | 203266752 | 203266653 | 8  | 9  | 0  | 11.73048839 | 0.000425898 | FAM117B  | ENSG00000138439 |
| 2 | 203484944 | 203485298 | 203485121 | 8  | 13 | 3  | 4.105670938 | 0.00243034  | WDR12    | ENSG00000138442 |
| 2 | 203587522 | 203587721 | 203587654 | 8  | 8  | 1  | 5.278719777 | 0.00542188  | ALS2CR16 | ENSG00000163597 |
| 2 | 203811713 | 203811936 | 203811799 | 11 | 12 | 5  | 2.541605819 | 0.0225912   | CYP20A1  | ENSG00000119004 |
| 2 | 204152112 | 204152412 | 204152262 | 21 | 23 | 9  | 2.815317214 | 0.00172056  | RAPH1    | ENSG00000173166 |

|   |           |           |           |    |    |   |             |             |         |                 |
|---|-----------|-----------|-----------|----|----|---|-------------|-------------|---------|-----------------|
| 2 | 204155485 | 204155681 | 204155623 | 8  | 10 | 4 | 2.580707446 | 0.0306059   | RAPH1   | ENSG00000173166 |
| 2 | 204599996 | 204600303 | 204600149 | 14 | 18 | 0 | 22.28792795 | 3.94E-07    | ICOS    | ENSG00000163600 |
| 2 | 204682599 | 204683022 | 204682843 | 15 | 22 | 4 | 5.396024661 | 3.05E-05    | ICOS    | ENSG00000163600 |
| 2 | 204898485 | 204898705 | 204898595 | 9  | 10 | 6 | 1.843362462 | 0.0964212   | PARD3B  | ENSG00000116117 |
| 2 | 205021479 | 205021827 | 205021653 | 8  | 14 | 0 | 17.59573259 | 8.79E-06    | PARD3B  | ENSG00000116117 |
| 2 | 205056531 | 205056842 | 205056704 | 9  | 12 | 7 | 1.906204364 | 0.0695918   | PARD3B  | ENSG00000116117 |
| 2 | 205337209 | 205337603 | 205337388 | 23 | 33 | 0 | 39.88366054 | 3.46E-12    | PARD3B  | ENSG00000116117 |
| 2 | 205756628 | 205757051 | 205756904 | 11 | 18 | 3 | 5.571981987 | 0.000108726 |         | ENSG00000208122 |
| 2 | 206243280 | 206243677 | 206243456 | 38 | 46 | 2 | 18.37776515 | 5.11E-14    | NRP2    | ENSG00000118257 |
| 2 | 206251805 | 206252067 | 206251946 | 9  | 11 | 1 | 7.038293036 | 0.000674435 | NRP2    | ENSG00000118257 |
| 2 | 206253038 | 206253246 | 206253143 | 9  | 9  | 7 | 1.466311049 | 0.20706     | NRP2    | ENSG00000118257 |
| 2 | 206803238 | 206803848 | 206803472 | 47 | 71 | 3 | 21.11487911 | 5.92E-21    |         | ENSG00000222496 |
| 2 | 207338394 | 207338678 | 207338533 | 9  | 11 | 1 | 7.038293036 | 0.000674435 | FASTKD2 | ENSG00000118246 |
| 2 | 207739210 | 207739389 | 207739336 | 8  | 8  | 2 | 3.519146518 | 0.017558    | KLF7    | ENSG00000118263 |
| 2 | 207981466 | 207981688 | 207981558 | 11 | 12 | 4 | 3.049926982 | 0.0108184   |         | ENSG00000215942 |
| 2 | 208102506 | 208102819 | 208102662 | 8  | 11 | 1 | 7.038293036 | 0.000674435 | CREB1   | ENSG00000118260 |
| 2 | 208303064 | 208303312 | 208303188 | 8  | 8  | 2 | 3.519146518 | 0.017558    | CCNYL1  | ENSG00000163249 |
| 2 | 208306657 | 208306895 | 208306738 | 10 | 11 | 1 | 7.038293036 | 0.000674435 | CCNYL1  | ENSG00000163249 |
| 2 | 208402063 | 208402252 | 208402197 | 9  | 10 | 2 | 4.301179077 | 0.00512919  |         | ENSG00000188519 |
| 2 | 208481629 | 208482069 | 208481861 | 12 | 21 | 1 | 12.90353723 | 4.95E-07    |         | ENSG00000220999 |
| 2 | 208598335 | 208598767 | 208598613 | 13 | 20 | 1 | 12.31701281 | 1.03E-06    | PLEKHM3 | ENSG00000178385 |
| 2 | 208685902 | 208686308 | 208686131 | 17 | 23 | 3 | 7.038293036 | 4.15E-06    | CRYGD   | ENSG00000118231 |
| 2 | 208748323 | 208748652 | 208748487 | 10 | 14 | 3 | 4.398933147 | 0.00132748  | CRYGA   | ENSG00000168582 |
| 2 | 208838876 | 208839209 | 208839038 | 16 | 19 | 7 | 2.932622098 | 0.00293566  | PIP5K3  | ENSG00000115020 |
| 2 | 208972347 | 208972725 | 208972508 | 12 | 16 | 2 | 6.647276756 | 0.000101928 | PTH2R   | ENSG00000144407 |
| 2 | 209340113 | 209340332 | 209340241 | 8  | 8  | 0 | 10.55743955 | 0.000925496 |         | ENSG00000202164 |
| 2 | 209782231 | 209782422 | 209782340 | 8  | 8  | 1 | 5.278719777 | 0.00542188  | MAP2    | ENSG00000078018 |
| 2 | 209941934 | 209942202 | 209942068 | 8  | 11 | 2 | 4.692195357 | 0.00272444  | MAP2    | ENSG00000078018 |
| 2 | 210761755 | 210762030 | 210761899 | 13 | 15 | 1 | 9.384390715 | 3.90E-05    | C2orf67 | ENSG00000144445 |
| 2 | 210799244 | 210799486 | 210799319 | 12 | 15 | 2 | 6.256260476 | 0.000199274 | ACADL   | ENSG00000115361 |
| 2 | 211730948 | 211731155 | 211731051 | 9  | 10 | 4 | 2.580707446 | 0.0306059   |         | ENSG00000199585 |
| 2 | 211821906 | 211822331 | 211822075 | 11 | 19 | 2 | 7.820325595 | 1.32E-05    |         | ENSG00000199585 |
| 2 | 211986936 | 211987172 | 211987060 | 9  | 11 | 0 | 14.07658607 | 9.02E-05    |         | ENSG00000199585 |
| 2 | 212339845 | 212340095 | 212339970 | 9  | 11 | 5 | 2.346097679 | 0.0364013   |         | ENSG00000208105 |

|   |           |           |           |     |     |    |             |             |                           |
|---|-----------|-----------|-----------|-----|-----|----|-------------|-------------|---------------------------|
| 2 | 212453452 | 212453665 | 212453558 | 12  | 12  | 0  | 15.24963491 | 4.15E-05    | ENSG00000208089           |
| 2 | 212474469 | 212474862 | 212474648 | 20  | 27  | 0  | 32.8453675  | 3.65E-10    | ENSG00000208089           |
| 2 | 212500448 | 212500771 | 212500609 | 11  | 15  | 1  | 9.384390715 | 3.90E-05    | ENSG00000208089           |
| 2 | 212727370 | 212727707 | 212727538 | 25  | 29  | 2  | 11.73048839 | 1.18E-08    | ENSG00000221782           |
| 2 | 213201695 | 213201883 | 213201760 | 9   | 10  | 0  | 12.90353723 | 0.000195991 | ERBB4<br>ENSG00000178568  |
| 2 | 213478925 | 213479178 | 213479089 | 12  | 14  | 10 | 1.599612054 | 0.114822    | ENSG00000221388           |
| 2 | 213485486 | 213485680 | 213485586 | 8   | 9   | 1  | 5.865244197 | 0.00272497  | ENSG00000221388           |
| 2 | 213529646 | 213529918 | 213529800 | 9   | 10  | 10 | 1.173048839 | 0.355733    | IKZF2<br>ENSG00000030419  |
| 2 | 213548096 | 213548317 | 213548187 | 10  | 11  | 0  | 14.07658607 | 9.02E-05    | IKZF2<br>ENSG00000030419  |
| 2 | 213552785 | 213553082 | 213552933 | 14  | 15  | 0  | 18.76878143 | 4.04E-06    | IKZF2<br>ENSG00000030419  |
| 2 | 213725326 | 213725510 | 213725418 | 8   | 9   | 2  | 3.910162798 | 0.00955088  | IKZF2<br>ENSG00000030419  |
| 2 | 214951507 | 214952095 | 214951952 | 13  | 28  | 6  | 4.859773763 | 8.07E-06    | ENSG00000174453           |
| 2 | 215709922 | 215710265 | 215710129 | 14  | 18  | 7  | 2.785990993 | 0.00480525  | ABCA12<br>ENSG00000144452 |
| 2 | 215710673 | 215711880 | 215710924 | 144 | 221 | 15 | 16.27605265 | 3.08E-56    | ABCA12<br>ENSG00000144452 |
| 2 | 215789846 | 215790127 | 215789986 | 17  | 19  | 3  | 5.865244197 | 5.72E-05    | ABCA12<br>ENSG00000144452 |
| 2 | 215791487 | 215791833 | 215791645 | 8   | 13  | 3  | 4.105670938 | 0.00243034  | ABCA12<br>ENSG00000144452 |
| 2 | 215842815 | 215843097 | 215842920 | 11  | 14  | 3  | 4.398933147 | 0.00132748  | ENSG00000208081           |
| 2 | 216071497 | 216071745 | 216071610 | 12  | 14  | 0  | 17.59573259 | 8.79E-06    | FN1<br>ENSG00000115414    |
| 2 | 216235719 | 216235908 | 216235813 | 8   | 9   | 3  | 2.932622098 | 0.0242899   | ENSG00000216721           |
| 2 | 216504246 | 216504471 | 216504386 | 8   | 11  | 3  | 3.519146518 | 0.00788869  | ENSG00000212055           |
| 2 | 216546272 | 216546844 | 216546459 | 14  | 31  | 3  | 9.384390715 | 1.82E-08    | MREG<br>ENSG00000118242   |
| 2 | 216552586 | 216553021 | 216552765 | 13  | 22  | 16 | 1.587066077 | 0.071956    | MREG<br>ENSG00000118242   |
| 2 | 216555495 | 216555879 | 216555700 | 19  | 26  | 7  | 3.959039833 | 7.16E-05    | MREG<br>ENSG00000118242   |
| 2 | 216586587 | 216586887 | 216586737 | 10  | 14  | 2  | 5.865244197 | 0.000387308 | MREG<br>ENSG00000118242   |
| 2 | 216682091 | 216682489 | 216682310 | 9   | 16  | 7  | 2.492728784 | 0.0124193   | XRCC5<br>ENSG00000079246  |
| 2 | 216712950 | 216713133 | 216713019 | 8   | 8   | 4  | 2.111487911 | 0.0804809   | XRCC5<br>ENSG00000079246  |
| 2 | 217112974 | 217113356 | 217113117 | 13  | 18  | 3  | 5.571981987 | 0.000108726 | RPL37A<br>ENSG00000197756 |
| 2 | 217124164 | 217124580 | 217124366 | 14  | 22  | 2  | 8.993374435 | 1.66E-06    | RPL37A<br>ENSG00000197756 |
| 2 | 217124649 | 217125082 | 217124876 | 55  | 74  | 3  | 21.99466574 | 6.49E-22    | RPL37A<br>ENSG00000197756 |
| 2 | 217125936 | 217126135 | 217126068 | 10  | 10  | 3  | 3.225884308 | 0.0139466   | RPL37A<br>ENSG00000197756 |
| 2 | 217265563 | 217265789 | 217265694 | 8   | 9   | 1  | 5.865244197 | 0.00272497  | IGFBP5<br>ENSG00000115461 |
| 2 | 217268394 | 217268703 | 217268548 | 18  | 22  | 9  | 2.69801233  | 0.00276236  | IGFBP5<br>ENSG00000115461 |
| 2 | 217271871 | 217272148 | 217272033 | 8   | 11  | 3  | 3.519146518 | 0.00788869  | IGFBP5<br>ENSG00000115461 |
| 2 | 217286692 | 217286974 | 217286822 | 16  | 18  | 0  | 22.28792795 | 3.94E-07    | IGFBP5<br>ENSG00000115461 |



|   |           |           |           |    |     |    |             |             |        |                 |
|---|-----------|-----------|-----------|----|-----|----|-------------|-------------|--------|-----------------|
| 2 | 217665590 | 217665812 | 217665701 | 8  | 10  | 4  | 2.580707446 | 0.0306059   | TNP1   | ENSG00000118245 |
| 2 | 217904469 | 217905007 | 217904756 | 13 | 25  | 2  | 10.16642327 | 2.02E-07    | TNP1   | ENSG00000118245 |
| 2 | 218258280 | 218258467 | 218258373 | 9  | 10  | 4  | 2.580707446 | 0.0306059   | TNS1   | ENSG00000079308 |
| 2 | 218280172 | 218280507 | 218280337 | 11 | 15  | 8  | 2.085420159 | 0.0338693   | TNS1   | ENSG00000079308 |
| 2 | 218560888 | 218561282 | 218561103 | 12 | 19  | 4  | 4.692195357 | 0.000193572 | TNS1   | ENSG00000079308 |
| 2 | 218791899 | 218792443 | 218792078 | 19 | 30  | 2  | 12.12150467 | 5.77E-09    | ARPC2  | ENSG00000163466 |
| 2 | 218867936 | 218868365 | 218868186 | 11 | 20  | 10 | 2.239456875 | 0.0121685   | TMBIM1 | ENSG00000135926 |
| 2 | 218907807 | 218908092 | 218907949 | 17 | 19  | 2  | 7.820325595 | 1.32E-05    |        | ENSG00000212106 |
| 2 | 218970765 | 218970995 | 218970880 | 13 | 14  | 9  | 1.759573259 | 0.0786014   | CTDSP1 | ENSG00000144579 |
| 2 | 218972688 | 218972877 | 218972782 | 8  | 8   | 1  | 5.278719777 | 0.00542188  | CTDSP1 | ENSG00000144579 |
| 2 | 219017577 | 219018011 | 219017707 | 24 | 32  | 4  | 7.742122339 | 4.68E-08    | VIL1   | ENSG00000127831 |
| 2 | 219018388 | 219019021 | 219018686 | 11 | 27  | 6  | 4.692195357 | 1.46E-05    | VIL1   | ENSG00000127831 |
| 2 | 219022000 | 219022376 | 219022197 | 10 | 19  | 5  | 3.910162798 | 0.000546977 | VIL1   | ENSG00000127831 |
| 2 | 219141553 | 219141763 | 219141647 | 8  | 10  | 12 | 0.992579787 | 0.511743    | RQCD1  | ENSG00000144580 |
| 2 | 219481999 | 219482281 | 219482140 | 11 | 12  | 5  | 2.541605819 | 0.0225912   |        | ENSG00000200029 |
| 2 | 219699452 | 219699757 | 219699622 | 12 | 16  | 11 | 1.661819189 | 0.0853913   |        | ENSG00000223334 |
| 2 | 219790897 | 219791252 | 219791074 | 17 | 23  | 3  | 7.038293036 | 4.15E-06    | ABCB6  | ENSG00000115657 |
| 2 | 219791681 | 219792274 | 219791995 | 9  | 24  | 3  | 7.331555246 | 2.13E-06    | ABCB6  | ENSG00000115657 |
| 2 | 219802681 | 219802946 | 219802834 | 11 | 14  | 13 | 1.256838042 | 0.269506    | ANKZF1 | ENSG00000163516 |
| 2 | 219850655 | 219850923 | 219850828 | 11 | 15  | 4  | 3.753756286 | 0.0020497   | DNAJB2 | ENSG00000135924 |
| 2 | 219852191 | 219852441 | 219852313 | 11 | 13  | 1  | 8.211341875 | 0.000163445 | DNAJB2 | ENSG00000135924 |
| 2 | 219859461 | 219859763 | 219859612 | 8  | 13  | 0  | 16.42268375 | 1.91E-05    | DNAJB2 | ENSG00000135924 |
| 2 | 219867917 | 219868122 | 219868019 | 11 | 11  | 1  | 7.038293036 | 0.000674435 |        | ENSG00000207647 |
| 2 | 219971793 | 219972284 | 219972038 | 18 | 29  | 12 | 2.707035783 | 0.000762953 | DNPEP  | ENSG00000123992 |
| 2 | 219973156 | 219973544 | 219973301 | 12 | 16  | 5  | 3.323638378 | 0.00288759  | DNPEP  | ENSG00000123992 |
| 2 | 220110940 | 220111119 | 220111029 | 8  | 8   | 4  | 2.111487911 | 0.0804809   | CHPF   | ENSG00000123989 |
| 2 | 220144509 | 220144693 | 220144601 | 8  | 10  | 1  | 6.451768616 | 0.00135978  | OBSL1  | ENSG00000124006 |
| 2 | 220215415 | 220215674 | 220215544 | 10 | 13  | 4  | 3.28453675  | 0.00629037  | SLC4A3 | ENSG00000114923 |
| 2 | 220257457 | 220258521 | 220257756 | 60 | 111 | 5  | 21.89691167 | 1.41E-31    |        | ENSG00000216281 |
| 2 | 220306097 | 220306631 | 220306276 | 55 | 74  | 1  | 43.98933147 | 2.18E-24    |        | ENSG00000216666 |
| 2 | 220382609 | 220382917 | 220382744 | 10 | 14  | 0  | 17.59573259 | 8.79E-06    |        | ENSG00000216666 |
| 2 | 220541816 | 220542147 | 220541987 | 14 | 17  | 2  | 7.038293036 | 5.19E-05    |        | ENSG00000221199 |
| 2 | 220752264 | 220752647 | 220752410 | 11 | 17  | 5  | 3.519146518 | 0.00167472  |        | ENSG00000221199 |
| 2 | 220771947 | 220772337 | 220772158 | 33 | 43  | 0  | 51.61414893 | 1.48E-15    |        | ENSG00000221199 |

|   |           |           |           |     |     |    |             |             |                         |
|---|-----------|-----------|-----------|-----|-----|----|-------------|-------------|-------------------------|
| 2 | 220797947 | 220798500 | 220798292 | 14  | 26  | 4  | 6.334463732 | 2.40E-06    | ENSG00000221199         |
| 2 | 220846074 | 220846269 | 220846171 | 8   | 10  | 6  | 1.843362462 | 0.0964212   | ENSG00000221199         |
| 2 | 220848355 | 220848545 | 220848458 | 8   | 9   | 2  | 3.910162798 | 0.00955088  | ENSG00000221199         |
| 2 | 220850451 | 220850905 | 220850606 | 11  | 22  | 9  | 2.69801233  | 0.00276236  | ENSG00000221199         |
| 2 | 221003447 | 221003626 | 221003556 | 8   | 8   | 0  | 10.55743955 | 0.000925496 | ENSG00000222096         |
| 2 | 221051664 | 221051947 | 221051835 | 10  | 12  | 5  | 2.541605819 | 0.0225912   | ENSG00000222096         |
| 2 | 221192534 | 221192820 | 221192677 | 11  | 14  | 1  | 8.797866295 | 8.00E-05    | ENSG00000222096         |
| 2 | 221255685 | 221255994 | 221255820 | 19  | 23  | 6  | 4.021881735 | 0.000148535 | ENSG00000222096         |
| 2 | 221428229 | 221428484 | 221428366 | 8   | 10  | 3  | 3.225884308 | 0.0139466   | ENSG00000208071         |
| 2 | 222103062 | 222103360 | 222103211 | 21  | 22  | 4  | 5.396024661 | 3.05E-05    | ENSG00000221432         |
| 2 | 222661430 | 222661762 | 222661596 | 16  | 21  | 2  | 8.602358155 | 3.33E-06    | ENSG00000208070         |
| 2 | 222732255 | 222732495 | 222732399 | 11  | 11  | 1  | 7.038293036 | 0.000674435 | ENSG00000208070         |
| 2 | 223410644 | 223410936 | 223410773 | 9   | 11  | 2  | 4.692195357 | 0.00272444  | ACSL3 ENSG00000123983   |
| 2 | 223760114 | 223760329 | 223760229 | 10  | 12  | 0  | 15.24963491 | 4.15E-05    | ENSG00000222485         |
| 2 | 223760349 | 223760631 | 223760525 | 9   | 13  | 0  | 16.42268375 | 1.91E-05    | ENSG00000222485         |
| 2 | 224112170 | 224112355 | 224112262 | 9   | 9   | 0  | 11.73048839 | 0.000425898 | SCG2 ENSG00000171951    |
| 2 | 224460181 | 224460458 | 224460319 | 14  | 15  | 1  | 9.384390715 | 3.90E-05    | AP1S3 ENSG00000152056   |
| 2 | 225094908 | 225095235 | 225095081 | 14  | 16  | 1  | 9.970915134 | 1.89E-05    | CUL3 ENSG00000036257    |
| 2 | 225111771 | 225112003 | 225111885 | 14  | 15  | 2  | 6.256260476 | 0.000199274 | CUL3 ENSG00000036257    |
| 2 | 226187873 | 226188104 | 226187994 | 12  | 12  | 4  | 3.049926982 | 0.0108184   | ENSG00000144460         |
| 2 | 226188476 | 226189019 | 226188709 | 110 | 134 | 1  | 79.18079665 | 2.31E-44    | ENSG00000144460         |
| 2 | 226189215 | 226189698 | 226189449 | 70  | 90  | 0  | 106.7474444 | 2.12E-31    | ENSG00000144460         |
| 2 | 226209700 | 226209894 | 226209797 | 11  | 12  | 1  | 7.624817456 | 0.000332769 | ENSG00000144460         |
| 2 | 226219751 | 226219936 | 226219843 | 8   | 8   | 0  | 10.55743955 | 0.000925496 | ENSG00000144460         |
| 2 | 226393827 | 226394121 | 226393984 | 8   | 11  | 1  | 7.038293036 | 0.000674435 | ENSG00000144460         |
| 2 | 226697639 | 226697878 | 226697759 | 13  | 14  | 5  | 2.932622098 | 0.00829617  | ENSG00000208062         |
| 2 | 226728218 | 226728399 | 226728320 | 8   | 8   | 0  | 10.55743955 | 0.000925496 | ENSG00000208062         |
| 2 | 227372543 | 227372747 | 227372645 | 9   | 10  | 2  | 4.301179077 | 0.00512919  | IRS1 ENSG00000169047    |
| 2 | 228039188 | 228039460 | 228039324 | 10  | 13  | 2  | 5.474227917 | 0.000747844 | AGFG1 ENSG00000173744   |
| 2 | 228039597 | 228040190 | 228039903 | 21  | 35  | 2  | 14.07658607 | 1.57E-10    | AGFG1 ENSG00000173744   |
| 2 | 228044961 | 228045183 | 228045089 | 9   | 9   | 1  | 5.865244197 | 0.00272497  | AGFG1 ENSG00000173744   |
| 2 | 229753581 | 229754011 | 229753832 | 99  | 136 | 72 | 2.201475219 | 1.02E-08    | ENSG00000208058         |
| 2 | 231850252 | 231850460 | 231850356 | 8   | 8   | 0  | 10.55743955 | 0.000925496 | ARMC9 ENSG00000135931   |
| 2 | 232087067 | 232087290 | 232087178 | 8   | 11  | 1  | 7.038293036 | 0.000674435 | C2orf52 ENSG00000181798 |

|   |           |           |           |    |    |   |             |             |         |                 |
|---|-----------|-----------|-----------|----|----|---|-------------|-------------|---------|-----------------|
| 2 | 232185466 | 232185719 | 232185595 | 10 | 12 | 1 | 7.624817456 | 0.000332769 | C2orf57 | ENSG00000177673 |
| 2 | 232215660 | 232215895 | 232215777 | 10 | 12 | 2 | 5.083211637 | 0.00143337  |         | ENSG00000208049 |
| 2 | 232235139 | 232235368 | 232235261 | 11 | 11 | 1 | 7.038293036 | 0.000674435 |         | ENSG00000208049 |
| 2 | 232239371 | 232239697 | 232239538 | 11 | 14 | 1 | 8.797866295 | 8.00E-05    |         | ENSG00000208049 |
| 2 | 232280020 | 232280283 | 232280177 | 8  | 10 | 2 | 4.301179077 | 0.00512919  | PTMAP4  | ENSG00000187514 |
| 2 | 232286817 | 232287170 | 232286993 | 10 | 13 | 2 | 5.474227917 | 0.000747844 |         | ENSG00000200067 |
| 2 | 232359255 | 232359546 | 232359388 | 13 | 16 | 3 | 4.985457567 | 0.000385643 | COPS7B  | ENSG00000144524 |
| 2 | 232368542 | 232368771 | 232368655 | 9  | 10 | 2 | 4.301179077 | 0.00512919  | COPS7B  | ENSG00000144524 |
| 2 | 232968924 | 232969183 | 232969036 | 8  | 9  | 0 | 11.73048839 | 0.000425898 | ECEL1P2 | ENSG00000204121 |
| 2 | 233196827 | 233197051 | 233196939 | 10 | 11 | 2 | 4.692195357 | 0.00272444  | EFHD1   | ENSG00000115468 |
| 2 | 233349376 | 233349580 | 233349478 | 8  | 9  | 0 | 11.73048839 | 0.000425898 | KCNJ13  | ENSG00000115474 |
| 2 | 233633452 | 233633656 | 233633554 | 8  | 8  | 2 | 3.519146518 | 0.017558    | INPP5D  | ENSG00000168918 |
| 2 | 233824926 | 233825289 | 233825142 | 9  | 14 | 2 | 5.865244197 | 0.000387308 | ATG16L1 | ENSG00000085978 |
| 2 | 233862218 | 233862414 | 233862316 | 8  | 8  | 3 | 2.639359888 | 0.0415794   |         | ENSG00000212616 |
| 2 | 234066207 | 234066414 | 234066342 | 10 | 11 | 0 | 14.07658607 | 9.02E-05    | USP40   | ENSG00000085982 |
| 2 | 234264765 | 234264965 | 234264873 | 9  | 10 | 3 | 3.225884308 | 0.0139466   | UGT1A3  | ENSG00000167165 |
| 2 | 234736314 | 234736618 | 234736458 | 14 | 17 | 5 | 3.519146518 | 0.00167472  |         | ENSG00000220908 |
| 2 | 234940345 | 234940524 | 234940401 | 8  | 8  | 0 | 10.55743955 | 0.000925496 |         | ENSG00000220908 |
| 2 | 235037478 | 235037758 | 235037611 | 13 | 14 | 4 | 3.519146518 | 0.00361132  | ARL4C   | ENSG00000188042 |
| 2 | 235204216 | 235204433 | 235204325 | 8  | 10 | 1 | 6.451768616 | 0.00135978  | ARL4C   | ENSG00000188042 |
| 2 | 235207227 | 235207696 | 235207406 | 16 | 23 | 3 | 7.038293036 | 4.15E-06    | ARL4C   | ENSG00000188042 |
| 2 | 235400739 | 235401000 | 235400904 | 8  | 10 | 0 | 12.90353723 | 0.000195991 | SH3BP4  | ENSG00000130147 |
| 2 | 235723956 | 235724182 | 235724069 | 8  | 10 | 3 | 3.225884308 | 0.0139466   | SH3BP4  | ENSG00000130147 |
| 2 | 235898505 | 235898882 | 235898703 | 27 | 35 | 0 | 42.22975822 | 7.34E-13    |         | ENSG00000216002 |
| 2 | 236116183 | 236116373 | 236116278 | 9  | 9  | 2 | 3.910162798 | 0.00955088  |         | ENSG00000221704 |
| 2 | 236239799 | 236240125 | 236239962 | 13 | 17 | 5 | 3.519146518 | 0.00167472  | AGAP1   | ENSG00000157985 |
| 2 | 236274675 | 236275083 | 236274858 | 15 | 23 | 6 | 4.021881735 | 0.000148535 | AGAP1   | ENSG00000157985 |
| 2 | 236735411 | 236735736 | 236735573 | 17 | 21 | 0 | 25.80707446 | 3.84E-08    | GBX2    | ENSG00000168505 |
| 2 | 237022736 | 237023027 | 237022867 | 10 | 15 | 2 | 6.256260476 | 0.000199274 | IQCA1   | ENSG00000132321 |
| 2 | 237305428 | 237305693 | 237305553 | 14 | 17 | 2 | 7.038293036 | 5.19E-05    | CXCR7   | ENSG00000144476 |
| 2 | 237448311 | 237448516 | 237448413 | 8  | 9  | 2 | 3.910162798 | 0.00955088  |         | ENSG00000202341 |
| 2 | 238076013 | 238076278 | 238076167 | 8  | 9  | 1 | 5.865244197 | 0.00272497  | MLPH    | ENSG00000115648 |
| 2 | 238132264 | 238132760 | 238132443 | 22 | 37 | 5 | 7.429309316 | 7.67E-09    |         | ENSG00000208040 |
| 2 | 238145448 | 238145769 | 238145594 | 11 | 13 | 1 | 8.211341875 | 0.000163445 | PRLH    | ENSG00000071677 |

|    |           |           |           |    |     |    |             |             |           |                 |
|----|-----------|-----------|-----------|----|-----|----|-------------|-------------|-----------|-----------------|
| 2  | 238513133 | 238513548 | 238513375 | 44 | 50  | 0  | 59.82549081 | 6.45E-18    | UBE2F     | ENSG00000184182 |
| 2  | 238513560 | 238513901 | 238513730 | 9  | 11  | 2  | 4.692195357 | 0.00272444  | UBE2F     | ENSG00000184182 |
| 2  | 238540219 | 238540426 | 238540322 | 11 | 11  | 1  | 7.038293036 | 0.000674435 | UBE2F     | ENSG00000184182 |
| 2  | 238829999 | 238830240 | 238830119 | 8  | 10  | 2  | 4.301179077 | 0.00512919  | HES6      | ENSG00000144485 |
| 2  | 238840746 | 238840960 | 238840852 | 11 | 12  | 1  | 7.624817456 | 0.000332769 | PER2      | ENSG00000132326 |
| 2  | 238963316 | 238964080 | 238963823 | 63 | 119 | 2  | 46.92195357 | 7.77E-38    |           | ENSG00000202099 |
| 2  | 239258277 | 239258495 | 239258386 | 10 | 10  | 1  | 6.451768616 | 0.00135978  |           | ENSG00000201897 |
| 2  | 242481781 | 242481973 | 242481906 | 8  | 10  | 0  | 12.90353723 | 0.000195991 |           | ENSG00000216921 |
| 2  | 242486508 | 242486817 | 242486664 | 26 | 29  | 1  | 17.59573259 | 1.33E-09    |           | ENSG00000216921 |
| 2  | 242487077 | 242487326 | 242487207 | 8  | 9   | 2  | 3.910162798 | 0.00955088  |           | ENSG00000216921 |
| 20 | 164628    | 164863    | 164744    | 12 | 12  | 4  | 3.049926982 | 0.0108184   | DEFB129   | ENSG00000125903 |
| 20 | 668765    | 668988    | 668876    | 9  | 9   | 0  | 11.73048839 | 0.000425898 | C20orf54  | ENSG00000101276 |
| 20 | 831573    | 832291    | 831850    | 67 | 126 | 1  | 74.4886013  | 1.08E-41    | ANGPT4    | ENSG00000101280 |
| 20 | 1046969   | 1047257   | 1047122   | 14 | 16  | 4  | 3.988366054 | 0.00115141  | PSMF1     | ENSG00000125818 |
| 20 | 1428229   | 1428445   | 1428338   | 11 | 11  | 0  | 14.07658607 | 9.02E-05    | SIRPB2    | ENSG00000196209 |
| 20 | 1429169   | 1429386   | 1429311   | 15 | 17  | 0  | 21.11487911 | 8.57E-07    | SIRPB2    | ENSG00000196209 |
| 20 | 2031047   | 2031265   | 2031215   | 9  | 9   | 2  | 3.910162798 | 0.00955088  | STK35     | ENSG00000125834 |
| 20 | 2399348   | 2399641   | 2399494   | 9  | 13  | 2  | 5.474227917 | 0.000747844 | SNRPB     | ENSG00000125835 |
| 20 | 2450402   | 2450607   | 2450545   | 8  | 8   | 3  | 2.639359888 | 0.0415794   | ZNF343    | ENSG00000088876 |
| 20 | 2592743   | 2593020   | 2592897   | 10 | 13  | 7  | 2.052835469 | 0.046392    | IDH3B     | ENSG00000101365 |
| 20 | 3336687   | 3336894   | 3336794   | 10 | 10  | 2  | 4.301179077 | 0.00512919  | C20orf194 | ENSG00000088854 |
| 20 | 3422837   | 3423274   | 3423016   | 44 | 56  | 2  | 22.28792795 | 3.14E-17    | SF3A3P1   | ENSG00000217305 |
| 20 | 3710049   | 3710396   | 3710222   | 14 | 19  | 9  | 2.346097679 | 0.0107159   | SPEF1     | ENSG00000101222 |
| 20 | 3724673   | 3724927   | 3724852   | 8  | 12  | 4  | 3.049926982 | 0.0108184   | CDC25B    | ENSG00000101224 |
| 20 | 3736121   | 3736486   | 3736332   | 18 | 24  | 3  | 7.331555246 | 2.13E-06    | CDC25B    | ENSG00000101224 |
| 20 | 3740165   | 3740854   | 3740513   | 21 | 42  | 10 | 4.585554554 | 1.62E-07    | C20orf29  | ENSG00000125843 |
| 20 | 3748708   | 3749050   | 3748879   | 8  | 14  | 4  | 3.519146518 | 0.00361132  | C20orf29  | ENSG00000125843 |
| 20 | 3822104   | 3822473   | 3822283   | 29 | 36  | 1  | 21.70140353 | 7.08E-12    | PANK2     | ENSG00000125779 |
| 20 | 4037398   | 4037594   | 4037496   | 8  | 8   | 6  | 1.508205651 | 0.203852    |           | ENSG00000205300 |
| 20 | 4380155   | 4380487   | 4380321   | 8  | 11  | 1  | 7.038293036 | 0.000674435 | RPL7AL2   | ENSG00000219900 |
| 20 | 4471113   | 4471297   | 4471184   | 8  | 8   | 0  | 10.55743955 | 0.000925496 | RPL7AL2   | ENSG00000219900 |
| 20 | 4700344   | 4700710   | 4700519   | 11 | 16  | 0  | 19.94183027 | 1.86E-06    | RASSF2    | ENSG00000101265 |
| 20 | 4708477   | 4708656   | 4708566   | 8  | 8   | 2  | 3.519146518 | 0.017558    | RASSF2    | ENSG00000101265 |
| 20 | 5048591   | 5049089   | 5048836   | 62 | 89  | 4  | 21.11487911 | 1.24E-25    | PCNA      | ENSG00000132646 |

|    |          |          |          |    |    |   |             |             |           |                 |
|----|----------|----------|----------|----|----|---|-------------|-------------|-----------|-----------------|
| 20 | 6006113  | 6006329  | 6006221  | 10 | 10 | 3 | 3.225884308 | 0.0139466   |           | ENSG00000198145 |
| 20 | 6362840  | 6363111  | 6362974  | 11 | 15 | 1 | 9.384390715 | 3.90E-05    |           | ENSG00000221449 |
| 20 | 6583512  | 6583946  | 6583683  | 8  | 15 | 1 | 9.384390715 | 3.90E-05    | BMP2      | ENSG00000125845 |
| 20 | 7264907  | 7265091  | 7265016  | 8  | 8  | 1 | 5.278719777 | 0.00542188  |           | ENSG00000209691 |
| 20 | 7530111  | 7530392  | 7530244  | 12 | 12 | 2 | 5.083211637 | 0.00143337  |           | ENSG00000209691 |
| 20 | 7595939  | 7596128  | 7596028  | 9  | 9  | 4 | 2.346097679 | 0.050148    |           | ENSG00000221726 |
| 20 | 7640247  | 7640430  | 7640338  | 8  | 8  | 1 | 5.278719777 | 0.00542188  |           | ENSG00000221726 |
| 20 | 7700929  | 7701387  | 7701194  | 28 | 41 | 2 | 16.42268375 | 2.00E-12    |           | ENSG00000215586 |
| 20 | 7787992  | 7788197  | 7788094  | 8  | 9  | 6 | 1.675784056 | 0.141978    |           | ENSG00000215586 |
| 20 | 8050460  | 8050643  | 8050556  | 8  | 8  | 2 | 3.519146518 | 0.017558    | PLCB1     | ENSG00000182621 |
| 20 | 8785568  | 8785914  | 8785747  | 14 | 19 | 0 | 23.46097679 | 1.81E-07    |           | ENSG00000201348 |
| 20 | 8831333  | 8831688  | 8831510  | 18 | 23 | 1 | 14.07658607 | 1.14E-07    |           | ENSG00000219276 |
| 20 | 8996286  | 8996697  | 8996572  | 10 | 18 | 5 | 3.714654658 | 0.000961539 | PLCB4     | ENSG00000101333 |
| 20 | 8998053  | 8998337  | 8998195  | 8  | 11 | 2 | 4.692195357 | 0.00272444  | PLCB4     | ENSG00000101333 |
| 20 | 9437984  | 9438163  | 9438073  | 8  | 8  | 0 | 10.55743955 | 0.000925496 | C20orf103 | ENSG00000125869 |
| 20 | 9526233  | 9526466  | 9526367  | 15 | 16 | 1 | 9.970915134 | 1.89E-05    | C20orf103 | ENSG00000125869 |
| 20 | 9907146  | 9907351  | 9907209  | 8  | 9  | 1 | 5.865244197 | 0.00272497  |           | ENSG00000209705 |
| 20 | 10008664 | 10008955 | 10008805 | 9  | 10 | 2 | 4.301179077 | 0.00512919  | ANKRD5    | ENSG00000132623 |
| 20 | 10047938 | 10048401 | 10048172 | 49 | 62 | 2 | 24.63402563 | 3.62E-19    | ANKRD5    | ENSG00000132623 |
| 20 | 10060244 | 10060513 | 10060378 | 8  | 9  | 3 | 2.932622098 | 0.0242899   | SNAP25    | ENSG00000132639 |
| 20 | 10060719 | 10060993 | 10060819 | 11 | 14 | 3 | 4.398933147 | 0.00132748  | SNAP25    | ENSG00000132639 |
| 20 | 10317294 | 10317599 | 10317447 | 23 | 25 | 3 | 7.624817456 | 1.09E-06    |           | ENSG00000218202 |
| 20 | 10481466 | 10481769 | 10481615 | 11 | 13 | 1 | 8.211341875 | 0.000163445 |           | ENSG00000125881 |
| 20 | 10593258 | 10593437 | 10593360 | 8  | 8  | 0 | 10.55743955 | 0.000925496 | JAG1      | ENSG00000101384 |
| 20 | 10593816 | 10594228 | 10594026 | 24 | 36 | 1 | 21.70140353 | 7.08E-12    | JAG1      | ENSG00000101384 |
| 20 | 10661846 | 10662289 | 10662041 | 43 | 59 | 0 | 70.38293036 | 5.97E-21    | JAG1      | ENSG00000101384 |
| 20 | 12776483 | 12776782 | 12776632 | 8  | 8  | 1 | 5.278719777 | 0.00542188  |           | ENSG00000223307 |
| 20 | 12853876 | 12854164 | 12854014 | 8  | 12 | 2 | 5.083211637 | 0.00143337  | SPTLC3    | ENSG00000172296 |
| 20 | 12937824 | 12938080 | 12937952 | 9  | 9  | 8 | 1.303387599 | 0.281715    | SPTLC3    | ENSG00000172296 |
| 20 | 12975333 | 12975512 | 12975422 | 8  | 8  | 0 | 10.55743955 | 0.000925496 | SPTLC3    | ENSG00000172296 |
| 20 | 13213574 | 13214006 | 13213789 | 48 | 69 | 0 | 82.11341875 | 2.54E-24    | C20orf82  | ENSG00000101230 |
| 20 | 13215256 | 13215624 | 13215443 | 19 | 27 | 3 | 8.211341875 | 2.82E-07    | C20orf82  | ENSG00000101230 |
| 20 | 13713460 | 13713845 | 13713567 | 13 | 20 | 6 | 3.519146518 | 0.000784044 | ESF1      | ENSG00000089048 |
| 20 | 13729390 | 13729772 | 13729567 | 34 | 39 | 3 | 11.73048839 | 6.80E-11    | C20orf7   | ENSG00000101247 |

|    |          |          |          |    |    |    |             |             |          |                 |
|----|----------|----------|----------|----|----|----|-------------|-------------|----------|-----------------|
| 20 | 14266134 | 14266594 | 14266289 | 12 | 22 | 2  | 8.993374435 | 1.66E-06    | FLRT3    | ENSG00000125848 |
| 20 | 14520541 | 14520881 | 14520711 | 34 | 38 | 3  | 11.43722618 | 1.38E-10    |          | ENSG00000216947 |
| 20 | 14693531 | 14693786 | 14693658 | 11 | 11 | 3  | 3.519146518 | 0.00788869  | RPS10P2  | ENSG00000220654 |
| 20 | 14704459 | 14704785 | 14704623 | 8  | 12 | 7  | 1.906204364 | 0.0695918   | RPS10P2  | ENSG00000220654 |
| 20 | 14774015 | 14774387 | 14774194 | 8  | 15 | 8  | 2.085420159 | 0.0338693   | RPS10P2  | ENSG00000220654 |
| 20 | 14848591 | 14848778 | 14848719 | 8  | 8  | 2  | 3.519146518 | 0.017558    |          | ENSG00000199803 |
| 20 | 14848848 | 14849059 | 14848953 | 8  | 9  | 2  | 3.910162798 | 0.00955088  |          | ENSG00000199803 |
| 20 | 14990543 | 14990923 | 14990757 | 8  | 13 | 2  | 5.474227917 | 0.000747844 |          | ENSG00000201180 |
| 20 | 15225202 | 15225399 | 15225300 | 8  | 10 | 1  | 6.451768616 | 0.00135978  |          | ENSG00000222500 |
| 20 | 15225696 | 15225974 | 15225822 | 10 | 12 | 3  | 3.812408728 | 0.004404    |          | ENSG00000222500 |
| 20 | 15226718 | 15226994 | 15226856 | 8  | 10 | 8  | 1.433726359 | 0.209175    |          | ENSG00000222500 |
| 20 | 15233021 | 15233467 | 15233266 | 33 | 49 | 0  | 58.65244197 | 1.40E-17    |          | ENSG00000222500 |
| 20 | 15582855 | 15583074 | 15582961 | 9  | 11 | 7  | 1.759573259 | 0.102361    |          | ENSG00000219216 |
| 20 | 15743648 | 15744089 | 15743918 | 11 | 17 | 7  | 2.639359888 | 0.00777415  | MACROD2  | ENSG00000172264 |
| 20 | 15936698 | 15936877 | 15936788 | 8  | 9  | 4  | 2.346097679 | 0.050148    | MACROD2  | ENSG00000172264 |
| 20 | 16054499 | 16054714 | 16054606 | 11 | 11 | 2  | 4.692195357 | 0.00272444  | PPIAP17  | ENSG00000218057 |
| 20 | 16362854 | 16363033 | 16362943 | 8  | 8  | 2  | 3.519146518 | 0.017558    |          | ENSG00000221448 |
| 20 | 16447054 | 16447307 | 16447180 | 9  | 13 | 2  | 5.474227917 | 0.000747844 | KIF16B   | ENSG00000089177 |
| 20 | 16471153 | 16471585 | 16471437 | 10 | 19 | 5  | 3.910162798 | 0.000546977 | KIF16B   | ENSG00000089177 |
| 20 | 16658416 | 16658750 | 16658542 | 13 | 17 | 12 | 1.62422147  | 0.088135    | SNRPB2   | ENSG00000125870 |
| 20 | 16696975 | 16697231 | 16697096 | 9  | 11 | 1  | 7.038293036 | 0.000674435 | OTOR     | ENSG00000125879 |
| 20 | 16732709 | 16732892 | 16732800 | 9  | 9  | 0  | 11.73048839 | 0.000425898 | OTOR     | ENSG00000125879 |
| 20 | 16899770 | 16899949 | 16899863 | 8  | 8  | 2  | 3.519146518 | 0.017558    |          | ENSG00000212165 |
| 20 | 17100282 | 17100473 | 17100378 | 9  | 10 | 3  | 3.225884308 | 0.0139466   |          | ENSG00000220540 |
| 20 | 17254293 | 17254650 | 17254462 | 25 | 30 | 1  | 18.18225701 | 6.30E-10    | PCSK2    | ENSG00000125851 |
| 20 | 17356264 | 17356662 | 17356443 | 12 | 19 | 3  | 5.865244197 | 5.72E-05    | TCTE1P   | ENSG00000216727 |
| 20 | 17360467 | 17360813 | 17360640 | 8  | 13 | 6  | 2.346097679 | 0.0266147   | TCTE1P   | ENSG00000216727 |
| 20 | 17433633 | 17433860 | 17433689 | 8  | 10 | 3  | 3.225884308 | 0.0139466   | RPS27AP2 | ENSG00000216375 |
| 20 | 17486346 | 17486575 | 17486460 | 13 | 15 | 3  | 4.692195357 | 0.000718455 | BFSP1    | ENSG00000125864 |
| 20 | 17497763 | 17498005 | 17497865 | 10 | 12 | 5  | 2.541605819 | 0.0225912   | DSTN     | ENSG00000125868 |
| 20 | 17498373 | 17498616 | 17498494 | 10 | 10 | 2  | 4.301179077 | 0.00512919  | DSTN     | ENSG00000125868 |
| 20 | 17499116 | 17499333 | 17499275 | 9  | 9  | 1  | 5.865244197 | 0.00272497  | DSTN     | ENSG00000125868 |
| 20 | 17499335 | 17499620 | 17499481 | 10 | 14 | 4  | 3.519146518 | 0.00361132  | DSTN     | ENSG00000125868 |
| 20 | 17500837 | 17501243 | 17500891 | 8  | 15 | 2  | 6.256260476 | 0.000199274 | DSTN     | ENSG00000125868 |

|    |          |          |          |    |    |    |             |             |          |                 |
|----|----------|----------|----------|----|----|----|-------------|-------------|----------|-----------------|
| 20 | 17523151 | 17523474 | 17523303 | 17 | 19 | 8  | 2.606775198 | 0.00583935  |          | ENSG00000219283 |
| 20 | 17533988 | 17534410 | 17534167 | 10 | 17 | 5  | 3.519146518 | 0.00167472  |          | ENSG00000219283 |
| 20 | 17778826 | 17779156 | 17778991 | 23 | 28 | 1  | 17.00920817 | 2.80E-09    |          | ENSG00000221220 |
| 20 | 17897354 | 17897733 | 17897554 | 8  | 15 | 7  | 2.346097679 | 0.0195693   | SNX5     | ENSG00000089006 |
| 20 | 17897959 | 17898650 | 17898296 | 31 | 56 | 6  | 9.55196912  | 1.13E-13    | C20orf72 | ENSG00000125871 |
| 20 | 17986506 | 17986816 | 17986643 | 10 | 13 | 4  | 3.28453675  | 0.00629037  | OVOL2    | ENSG00000125850 |
| 20 | 17987530 | 17987742 | 17987681 | 8  | 10 | 0  | 12.90353723 | 0.000195991 | OVOL2    | ENSG00000125850 |
| 20 | 18216646 | 18217029 | 18216776 | 14 | 20 | 3  | 6.158506406 | 2.99E-05    | ZNF133   | ENSG00000125846 |
| 20 | 18395846 | 18396292 | 18395972 | 14 | 22 | 1  | 13.49006165 | 2.37E-07    | POLR3F   | ENSG00000132664 |
| 20 | 18425697 | 18426120 | 18425876 | 8  | 14 | 7  | 2.199466574 | 0.0303778   | RBBP9    | ENSG00000089050 |
| 20 | 18435989 | 18436576 | 18436205 | 9  | 24 | 9  | 2.932622098 | 0.00106136  | SEC23B   | ENSG00000101310 |
| 20 | 18560836 | 18561144 | 18561007 | 10 | 10 | 2  | 4.301179077 | 0.00512919  |          | ENSG00000217650 |
| 20 | 18573982 | 18574271 | 18574150 | 8  | 11 | 1  | 7.038293036 | 0.000674435 |          | ENSG00000217650 |
| 20 | 18673715 | 18673894 | 18673866 | 8  | 9  | 2  | 3.910162798 | 0.00955088  |          | ENSG00000220165 |
| 20 | 18722466 | 18722787 | 18722626 | 8  | 11 | 3  | 3.519146518 | 0.00788869  |          | ENSG00000179935 |
| 20 | 18781009 | 18781385 | 18781188 | 24 | 31 | 0  | 37.53756286 | 1.64E-11    | C20orf78 | ENSG00000149443 |
| 20 | 18918604 | 18918807 | 18918721 | 8  | 9  | 2  | 3.910162798 | 0.00955088  | C20orf78 | ENSG00000149443 |
| 20 | 19336423 | 19336758 | 19336590 | 11 | 16 | 2  | 6.647276756 | 0.000101928 |          | ENSG00000221748 |
| 20 | 19356243 | 19356504 | 19356373 | 11 | 13 | 2  | 5.474227917 | 0.000747844 |          | ENSG00000221748 |
| 20 | 19420848 | 19421084 | 19420966 | 12 | 12 | 2  | 5.083211637 | 0.00143337  |          | ENSG00000216017 |
| 20 | 19695836 | 19696018 | 19695927 | 8  | 8  | 2  | 3.519146518 | 0.017558    |          | ENSG00000125822 |
| 20 | 19704243 | 19704535 | 19704389 | 9  | 12 | 5  | 2.541605819 | 0.0225912   |          | ENSG00000125822 |
| 20 | 19712738 | 19713044 | 19712874 | 9  | 12 | 1  | 7.624817456 | 0.000332769 |          | ENSG00000125822 |
| 20 | 19731332 | 19731514 | 19731444 | 9  | 9  | 2  | 3.910162798 | 0.00955088  |          | ENSG00000125822 |
| 20 | 19864415 | 19864837 | 19864702 | 14 | 22 | 4  | 5.396024661 | 3.05E-05    | RIN2     | ENSG00000132669 |
| 20 | 19886967 | 19887247 | 19887107 | 12 | 14 | 3  | 4.398933147 | 0.00132748  | NAT5     | ENSG00000173418 |
| 20 | 19921774 | 19922096 | 19921935 | 9  | 12 | 4  | 3.049926982 | 0.0108184   | NAT5     | ENSG00000173418 |
| 20 | 19945762 | 19946073 | 19945924 | 10 | 14 | 10 | 1.599612054 | 0.114822    | NAT5     | ENSG00000173418 |
| 20 | 20094301 | 20094493 | 20094397 | 8  | 8  | 3  | 2.639359888 | 0.0415794   | C20orf26 | ENSG00000089101 |
| 20 | 20289113 | 20289462 | 20289290 | 23 | 26 | 6  | 4.524616952 | 2.63E-05    | INSM1    | ENSG00000173404 |
| 20 | 20532052 | 20532425 | 20532223 | 17 | 24 | 1  | 14.66311049 | 5.43E-08    | C20orf74 | ENSG00000188559 |
| 20 | 20788913 | 20789125 | 20789019 | 9  | 9  | 3  | 2.932622098 | 0.0242899   | MRPS11P1 | ENSG00000218888 |
| 20 | 20956359 | 20956619 | 20956476 | 8  | 10 | 2  | 4.301179077 | 0.00512919  | RPL24P2  | ENSG00000217629 |
| 20 | 20977533 | 20977772 | 20977626 | 9  | 10 | 4  | 2.580707446 | 0.0306059   | RPL24P2  | ENSG00000217629 |

|    |          |          |          |     |     |   |             |             |          |                 |
|----|----------|----------|----------|-----|-----|---|-------------|-------------|----------|-----------------|
| 20 | 21024902 | 21025122 | 21025011 | 10  | 10  | 0 | 12.90353723 | 0.000195991 | RPL24P2  | ENSG00000217629 |
| 20 | 21054353 | 21054753 | 21054507 | 9   | 15  | 2 | 6.256260476 | 0.000199274 | NCRNA001 | ENSG00000088970 |
| 20 | 21164248 | 21164477 | 21164362 | 9   | 11  | 2 | 4.692195357 | 0.00272444  |          | ENSG00000217505 |
| 20 | 21164732 | 21164972 | 21164852 | 10  | 13  | 2 | 5.474227917 | 0.000747844 |          | ENSG00000217505 |
| 20 | 21425115 | 21425464 | 21425289 | 27  | 32  | 2 | 12.90353723 | 1.37E-09    | GSTM3P   | ENSG00000220966 |
| 20 | 21572108 | 21572406 | 21572260 | 8   | 11  | 1 | 7.038293036 | 0.000674435 | PAX1     | ENSG00000125813 |
| 20 | 21590383 | 21590565 | 21590501 | 9   | 9   | 4 | 2.346097679 | 0.050148    | PAX1     | ENSG00000125813 |
| 20 | 21696336 | 21696528 | 21696487 | 8   | 8   | 1 | 5.278719777 | 0.00542188  | RPL41P1  | ENSG00000219787 |
| 20 | 22308115 | 22308420 | 22308267 | 12  | 17  | 3 | 5.278719777 | 0.000205462 |          | ENSG00000204684 |
| 20 | 22516208 | 22516441 | 22516324 | 8   | 8   | 1 | 5.278719777 | 0.00542188  | FOXA2    | ENSG00000125798 |
| 20 | 22620458 | 22620699 | 22620560 | 10  | 11  | 3 | 3.519146518 | 0.00788869  |          | ENSG00000215553 |
| 20 | 22731082 | 22731413 | 22731247 | 9   | 15  | 6 | 2.68125449  | 0.0103552   |          | ENSG00000199583 |
| 20 | 22979527 | 22979755 | 22979641 | 10  | 11  | 3 | 3.519146518 | 0.00788869  | THBD     | ENSG00000178726 |
| 20 | 23028627 | 23028878 | 23028750 | 8   | 11  | 2 | 4.692195357 | 0.00272444  | CD93     | ENSG00000125810 |
| 20 | 23028937 | 23029459 | 23029245 | 143 | 181 | 4 | 42.69897775 | 1.88E-55    | CD93     | ENSG00000125810 |
| 20 | 23068165 | 23068501 | 23068333 | 11  | 16  | 0 | 19.94183027 | 1.86E-06    |          | ENSG00000201527 |
| 20 | 23083675 | 23084026 | 23083850 | 28  | 33  | 1 | 19.94183027 | 6.71E-11    |          | ENSG00000201527 |
| 20 | 23174361 | 23174640 | 23174513 | 9   | 13  | 4 | 3.28453675  | 0.00629037  |          | ENSG00000201527 |
| 20 | 23261156 | 23261349 | 23261210 | 8   | 9   | 0 | 11.73048839 | 0.000425898 | NXT1     | ENSG00000132661 |
| 20 | 23278599 | 23278811 | 23278688 | 8   | 10  | 1 | 6.451768616 | 0.00135978  | NXT1     | ENSG00000132661 |
| 20 | 23286453 | 23286761 | 23286607 | 8   | 12  | 5 | 2.541605819 | 0.0225912   | GZF1     | ENSG00000125812 |
| 20 | 23963526 | 23963810 | 23963668 | 13  | 16  | 7 | 2.492728784 | 0.0124193   |          | ENSG00000167390 |
| 20 | 24029428 | 24029618 | 24029523 | 8   | 8   | 3 | 2.639359888 | 0.0415794   |          | ENSG00000167390 |
| 20 | 24054263 | 24054550 | 24054411 | 17  | 18  | 1 | 11.14396397 | 4.44E-06    |          | ENSG00000200231 |
| 20 | 24321993 | 24322231 | 24322130 | 9   | 10  | 1 | 6.451768616 | 0.00135978  |          | ENSG00000217065 |
| 20 | 24388196 | 24388671 | 24388504 | 38  | 48  | 2 | 19.15979771 | 1.17E-14    | C20orf39 | ENSG00000101463 |
| 20 | 24558354 | 24558594 | 24558474 | 10  | 13  | 1 | 8.211341875 | 0.000163445 | C20orf39 | ENSG00000101463 |
| 20 | 24578605 | 24578810 | 24578704 | 8   | 9   | 5 | 1.955081399 | 0.0892323   | C20orf39 | ENSG00000101463 |
| 20 | 24623854 | 24624033 | 24623943 | 8   | 8   | 3 | 2.639359888 | 0.0415794   | C20orf39 | ENSG00000101463 |
| 20 | 24681327 | 24681570 | 24681448 | 10  | 12  | 1 | 7.624817456 | 0.000332769 | CST7     | ENSG00000077984 |
| 20 | 24697030 | 24697215 | 24697092 | 8   | 8   | 0 | 10.55743955 | 0.000925496 | CST7     | ENSG00000077984 |
| 20 | 24800231 | 24800438 | 24800311 | 8   | 9   | 0 | 11.73048839 | 0.000425898 | CST7     | ENSG00000077984 |
| 20 | 24801108 | 24801313 | 24801162 | 9   | 10  | 3 | 3.225884308 | 0.0139466   | CST7     | ENSG00000077984 |
| 20 | 24825766 | 24825979 | 24825919 | 8   | 8   | 4 | 2.111487911 | 0.0804809   | CST7     | ENSG00000077984 |



|    |          |          |          |     |     |     |             |             |         |                 |
|----|----------|----------|----------|-----|-----|-----|-------------|-------------|---------|-----------------|
| 20 | 24846964 | 24847300 | 24847132 | 10  | 14  | 3   | 4.398933147 | 0.00132748  | CST7    | ENSG00000077984 |
| 20 | 24859156 | 24859337 | 24859246 | 8   | 8   | 2   | 3.519146518 | 0.017558    | CST7    | ENSG00000077984 |
| 20 | 24881516 | 24881869 | 24881692 | 18  | 24  | 0   | 29.32622098 | 3.74E-09    | CST7    | ENSG00000077984 |
| 20 | 24921322 | 24921617 | 24921469 | 12  | 15  | 2   | 6.256260476 | 0.000199274 | C20orf3 | ENSG00000101474 |
| 20 | 24928944 | 24929268 | 24929106 | 12  | 14  | 10  | 1.599612054 | 0.114822    | C20orf3 | ENSG00000101474 |
| 20 | 24945955 | 24946344 | 24946230 | 15  | 22  | 5   | 4.496687217 | 9.59E-05    | C20orf3 | ENSG00000101474 |
| 20 | 24951967 | 24952173 | 24952090 | 8   | 9   | 1   | 5.865244197 | 0.00272497  | C20orf3 | ENSG00000101474 |
| 20 | 24994449 | 24994744 | 24994596 | 9   | 14  | 6   | 2.513676084 | 0.016726    | ACSS1   | ENSG00000154930 |
| 20 | 25005429 | 25005698 | 25005581 | 9   | 11  | 4   | 2.815317214 | 0.0183428   | VSX1    | ENSG00000100987 |
| 20 | 25107866 | 25108105 | 25107960 | 9   | 11  | 2   | 4.692195357 | 0.00272444  | ENTPD6  | ENSG00000197586 |
| 20 | 25125177 | 25125446 | 25125311 | 9   | 12  | 2   | 5.083211637 | 0.00143337  | ENTPD6  | ENSG00000197586 |
| 20 | 25175845 | 25176215 | 25176016 | 10  | 18  | 4   | 4.457585589 | 0.000353565 | PYGB    | ENSG00000100994 |
| 20 | 25208690 | 25209088 | 25208869 | 11  | 17  | 5   | 3.519146518 | 0.00167472  | PYGB    | ENSG00000100994 |
| 20 | 25270083 | 25270586 | 25270334 | 8   | 18  | 5   | 3.714654658 | 0.000961539 | ABHD12  | ENSG00000100997 |
| 20 | 25289344 | 25289567 | 25289455 | 10  | 12  | 0   | 15.24963491 | 4.15E-05    | PPIAP2  | ENSG00000218176 |
| 20 | 25319569 | 25319779 | 25319683 | 10  | 10  | 3   | 3.225884308 | 0.0139466   | ABHD12  | ENSG00000100997 |
| 20 | 25336181 | 25336517 | 25336349 | 14  | 19  | 6   | 3.351568112 | 0.00134187  | GINS1   | ENSG00000101003 |
| 20 | 25482469 | 25482678 | 25482573 | 14  | 14  | 4   | 3.519146518 | 0.00361132  |         | ENSG00000101004 |
| 20 | 25624531 | 25625078 | 25624769 | 25  | 40  | 9   | 4.809500241 | 1.80E-07    | ZNF337  | ENSG00000130684 |
| 20 | 26136566 | 26137616 | 26137038 | 64  | 175 | 98  | 2.085420159 | 1.01E-09    |         | ENSG00000207985 |
| 20 | 26137642 | 26138646 | 26138030 | 143 | 224 | 119 | 2.199466574 | 3.56E-13    |         | ENSG00000207985 |
| 20 | 26244364 | 26244543 | 26244393 | 8   | 10  | 9   | 1.290353723 | 0.279648    |         | ENSG00000207985 |
| 20 | 26264993 | 26265174 | 26265141 | 10  | 10  | 21  | 0.58652442  | 0.934469    |         | ENSG00000207985 |
| 20 | 26266316 | 26266506 | 26266464 | 8   | 9   | 22  | 0.510021234 | 0.969818    |         | ENSG00000207985 |
| 20 | 26267261 | 26267599 | 26267430 | 192 | 193 | 174 | 1.300408428 | 0.00583878  |         | ENSG00000207985 |
| 20 | 28225383 | 28225693 | 28225560 | 9   | 14  | 6   | 2.513676084 | 0.016726    |         | ENSG00000215548 |
| 20 | 28251979 | 28252320 | 28252043 | 10  | 14  | 14  | 1.173048839 | 0.332418    | MLLT10L | ENSG00000217081 |
| 20 | 28266891 | 28267224 | 28267057 | 8   | 11  | 4   | 2.815317214 | 0.0183428   | MLLT10L | ENSG00000217081 |
| 20 | 29287455 | 29287784 | 29287608 | 16  | 16  | 14  | 1.329455351 | 0.210108    | DEFB115 | ENSG00000215547 |
| 20 | 29548222 | 29548414 | 29548358 | 8   | 9   | 10  | 1.066408036 | 0.444985    | HM13    | ENSG00000101294 |
| 20 | 29554560 | 29554790 | 29554675 | 8   | 9   | 2   | 3.910162798 | 0.00955088  | HM13    | ENSG00000101294 |
| 20 | 29598735 | 29598994 | 29598897 | 8   | 11  | 3   | 3.519146518 | 0.00788869  |         | ENSG00000219431 |
| 20 | 29611490 | 29611759 | 29611643 | 12  | 14  | 12  | 1.353517892 | 0.211235    |         | ENSG00000219431 |
| 20 | 29614296 | 29614661 | 29614475 | 11  | 17  | 5   | 3.519146518 | 0.00167472  |         | ENSG00000219431 |

|    |          |          |          |     |     |    |             |                    |                 |
|----|----------|----------|----------|-----|-----|----|-------------|--------------------|-----------------|
| 20 | 29621046 | 29621269 | 29621157 | 8   | 9   | 4  | 2.346097679 | 0.050148           | ENSG00000201770 |
| 20 | 29621279 | 29621458 | 29621335 | 8   | 9   | 5  | 1.955081399 | 0.0892323          | ENSG00000201770 |
| 20 | 29624262 | 29624577 | 29624440 | 14  | 19  | 2  | 7.820325595 | 1.32E-05           | ENSG00000201770 |
| 20 | 29644691 | 29645238 | 29644965 | 13  | 29  | 8  | 3.910162798 | 3.45E-05 ID1       | ENSG00000125968 |
| 20 | 29655567 | 29656022 | 29655746 | 12  | 21  | 7  | 3.225884308 | 0.00106152 ID1     | ENSG00000125968 |
| 20 | 29656634 | 29656956 | 29656795 | 10  | 14  | 9  | 1.759573259 | 0.0786014 ID1      | ENSG00000125968 |
| 20 | 29659852 | 29660200 | 29660053 | 9   | 13  | 3  | 4.105670938 | 0.00243034 ID1     | ENSG00000125968 |
| 20 | 29662258 | 29662547 | 29662403 | 14  | 15  | 5  | 3.128130238 | 0.00492422 ID1     | ENSG00000125968 |
| 20 | 29664336 | 29664625 | 29664457 | 17  | 21  | 16 | 1.518063204 | 0.0959332 ID1      | ENSG00000125968 |
| 20 | 29713148 | 29713953 | 29713603 | 11  | 29  | 8  | 3.910162798 | 3.45E-05 COX4I2    | ENSG00000131055 |
| 20 | 29726376 | 29726555 | 29726532 | 8   | 8   | 1  | 5.278719777 | 0.00542188 COX4I2  | ENSG00000131055 |
| 20 | 29729905 | 29730592 | 29730251 | 242 | 292 | 9  | 34.37033099 | 3.53E-85 COX4I2    | ENSG00000131055 |
| 20 | 29731395 | 29732144 | 29731651 | 25  | 59  | 13 | 5.027352168 | 2.07E-10 BCL2L1    | ENSG00000171552 |
| 20 | 29750749 | 29751013 | 29750881 | 12  | 14  | 1  | 8.797866295 | 8.00E-05 BCL2L1    | ENSG00000171552 |
| 20 | 29760262 | 29760520 | 29760412 | 10  | 13  | 3  | 4.105670938 | 0.00243034 BCL2L1  | ENSG00000171552 |
| 20 | 29762031 | 29762427 | 29762207 | 21  | 28  | 10 | 3.092583304 | 0.000307818 BCL2L1 | ENSG00000171552 |
| 20 | 29770799 | 29771326 | 29771093 | 13  | 26  | 7  | 3.959039833 | 7.16E-05 BCL2L1    | ENSG00000171552 |
| 20 | 29774173 | 29774688 | 29774400 | 13  | 23  | 7  | 3.519146518 | 0.000369739 BCL2L1 | ENSG00000171552 |
| 20 | 29775048 | 29775711 | 29775562 | 10  | 23  | 6  | 4.021881735 | 0.000148535 BCL2L1 | ENSG00000171552 |
| 20 | 29790103 | 29790311 | 29790207 | 9   | 11  | 6  | 2.010940867 | 0.0640214 TPX2     | ENSG00000088325 |
| 20 | 29790470 | 29790756 | 29790623 | 14  | 18  | 9  | 2.228792795 | 0.0164363 TPX2     | ENSG00000088325 |
| 20 | 29790774 | 29790956 | 29790892 | 8   | 10  | 4  | 2.580707446 | 0.0306059 TPX2     | ENSG00000088325 |
| 20 | 29904286 | 29904520 | 29904403 | 9   | 10  | 3  | 3.225884308 | 0.0139466 DUSP15   | ENSG00000149599 |
| 20 | 29931236 | 29931475 | 29931353 | 10  | 11  | 5  | 2.346097679 | 0.0364013 TTLL9    | ENSG00000131044 |
| 20 | 29931511 | 29931862 | 29931686 | 15  | 20  | 3  | 6.158506406 | 2.99E-05 TTLL9     | ENSG00000131044 |
| 20 | 29949274 | 29949474 | 29949323 | 8   | 9   | 4  | 2.346097679 | 0.050148           | ENSG00000199497 |
| 20 | 30003321 | 30003865 | 30003593 | 13  | 22  | 8  | 2.997791478 | 0.00137524 PDRG1   | ENSG00000088356 |
| 20 | 30019886 | 30020199 | 30020043 | 13  | 14  | 4  | 3.519146518 | 0.00361132 XKR7    | ENSG00000101321 |
| 20 | 30080404 | 30080734 | 30080570 | 11  | 15  | 1  | 9.384390715 | 3.90E-05 C20orf160 | ENSG00000101331 |
| 20 | 30187578 | 30187918 | 30187744 | 11  | 16  | 8  | 2.215758919 | 0.0222902 TM9SF4   | ENSG00000101337 |
| 20 | 30328901 | 30329123 | 30329012 | 9   | 10  | 2  | 4.301179077 | 0.00512919 KIF3B   | ENSG00000101350 |
| 20 | 30377407 | 30377647 | 30377515 | 11  | 14  | 5  | 2.932622098 | 0.00829617 ASXL1   | ENSG00000171456 |
| 20 | 30619832 | 30620017 | 30619949 | 9   | 9   | 1  | 5.865244197 | 0.00272497         | ENSG00000204393 |
| 20 | 30725809 | 30726050 | 30725929 | 8   | 10  | 5  | 2.150589539 | 0.0575848          | ENSG00000198179 |

|    |          |          |          |    |    |   |             |             |           |                 |
|----|----------|----------|----------|----|----|---|-------------|-------------|-----------|-----------------|
| 20 | 30746671 | 30746928 | 30746781 | 9  | 13 | 4 | 3.28453675  | 0.00629037  |           | ENSG00000198179 |
| 20 | 30841603 | 30841916 | 30841740 | 8  | 10 | 1 | 6.451768616 | 0.00135978  | DNMT3B    | ENSG00000088305 |
| 20 | 30945609 | 30945810 | 30945736 | 8  | 8  | 0 | 10.55743955 | 0.000925496 | EFCAB8    | ENSG00000215529 |
| 20 | 31023416 | 31023771 | 31023593 | 14 | 20 | 1 | 12.31701281 | 1.03E-06    | SPAG4L    | ENSG00000167098 |
| 20 | 31261235 | 31261558 | 31261396 | 11 | 14 | 2 | 5.865244197 | 0.000387308 | C20orf71  | ENSG00000131059 |
| 20 | 31263346 | 31263565 | 31263455 | 8  | 8  | 2 | 3.519146518 | 0.017558    | C20orf71  | ENSG00000131059 |
| 20 | 31314165 | 31314421 | 31314293 | 9  | 12 | 1 | 7.624817456 | 0.000332769 | RPL12P3   | ENSG00000217037 |
| 20 | 31350805 | 31351020 | 31350911 | 8  | 9  | 1 | 5.865244197 | 0.00272497  | C20orf114 | ENSG00000125999 |
| 20 | 31361271 | 31361622 | 31361450 | 8  | 11 | 1 | 7.038293036 | 0.000674435 |           | ENSG00000216386 |
| 20 | 31388676 | 31388889 | 31388813 | 10 | 11 | 4 | 2.815317214 | 0.0183428   |           | ENSG00000125997 |
| 20 | 31411083 | 31411351 | 31411258 | 9  | 12 | 1 | 7.624817456 | 0.000332769 |           | ENSG00000131062 |
| 20 | 31425491 | 31425670 | 31425617 | 8  | 9  | 3 | 2.932622098 | 0.0242899   |           | ENSG00000131062 |
| 20 | 31452904 | 31453141 | 31453022 | 12 | 13 | 5 | 2.737113958 | 0.0137917   | CDK5RAP1  | ENSG00000101391 |
| 20 | 31508711 | 31508924 | 31508871 | 9  | 12 | 6 | 2.178519273 | 0.0416567   | SNTA1     | ENSG00000101400 |
| 20 | 31606458 | 31606857 | 31606589 | 8  | 14 | 3 | 4.398933147 | 0.00132748  | CBFA2T2   | ENSG00000078699 |
| 20 | 31608964 | 31609290 | 31609127 | 9  | 11 | 1 | 7.038293036 | 0.000674435 | CBFA2T2   | ENSG00000078699 |
| 20 | 31702568 | 31702781 | 31702674 | 8  | 10 | 2 | 4.301179077 | 0.00512919  | C20orf144 | ENSG00000149609 |
| 20 | 31718026 | 31718411 | 31718205 | 9  | 17 | 0 | 21.11487911 | 8.57E-07    | C20orf134 | ENSG00000182584 |
| 20 | 31784387 | 31784593 | 31784484 | 9  | 9  | 2 | 3.910162798 | 0.00955088  | ZNF341    | ENSG00000131061 |
| 20 | 31889567 | 31889974 | 31889770 | 17 | 25 | 3 | 7.624817456 | 1.09E-06    | CHMP4B    | ENSG00000101421 |
| 20 | 32354446 | 32354777 | 32354622 | 12 | 16 | 3 | 4.985457567 | 0.000385643 | AHCY      | ENSG00000101444 |
| 20 | 32366028 | 32366238 | 32366109 | 8  | 9  | 2 | 3.910162798 | 0.00955088  | AHCY      | ENSG00000101444 |
| 20 | 32387185 | 32387434 | 32387309 | 8  | 10 | 2 | 4.301179077 | 0.00512919  |           | ENSG00000216910 |
| 20 | 32392082 | 32392555 | 32392220 | 9  | 19 | 2 | 7.820325595 | 1.32E-05    |           | ENSG00000216910 |
| 20 | 32574422 | 32574624 | 32574533 | 8  | 8  | 3 | 2.639359888 | 0.0415794   |           | ENSG00000206582 |
| 20 | 32577372 | 32577782 | 32577626 | 18 | 23 | 7 | 3.519146518 | 0.000369739 |           | ENSG00000206582 |
| 20 | 32754992 | 32755208 | 32755114 | 13 | 13 | 2 | 5.474227917 | 0.000747844 | TP53INP2  | ENSG00000078804 |
| 20 | 32925607 | 32925789 | 32925698 | 8  | 8  | 7 | 1.319679944 | 0.283403    | ACSS2     | ENSG00000131069 |
| 20 | 32959194 | 32959387 | 32959228 | 8  | 8  | 0 | 10.55743955 | 0.000925496 | ACSS2     | ENSG00000131069 |
| 20 | 33006615 | 33007225 | 33007033 | 14 | 28 | 3 | 8.504604085 | 1.43E-07    | GSS       | ENSG00000100983 |
| 20 | 33144242 | 33144582 | 33144412 | 10 | 15 | 3 | 4.692195357 | 0.000718455 | TRPC4AP   | ENSG00000100991 |
| 20 | 33223172 | 33223475 | 33223323 | 17 | 20 | 1 | 12.31701281 | 1.03E-06    | PROCR     | ENSG00000101000 |
| 20 | 33359376 | 33359774 | 33359575 | 79 | 92 | 3 | 27.27338551 | 1.04E-27    | FAM83C    | ENSG00000125998 |
| 20 | 33463050 | 33463460 | 33463232 | 17 | 25 | 8 | 3.388807758 | 0.000297109 | UQCC      | ENSG00000101019 |

|    |          |          |          |     |     |    |             |             |           |                 |
|----|----------|----------|----------|-----|-----|----|-------------|-------------|-----------|-----------------|
| 20 | 33502396 | 33502949 | 33502659 | 270 | 328 | 9  | 38.59330681 | 7.22E-97    |           | ENSG00000221763 |
| 20 | 33506335 | 33506634 | 33506484 | 13  | 17  | 2  | 7.038293036 | 5.19E-05    | CEP250    | ENSG00000126001 |
| 20 | 33678041 | 33678260 | 33678150 | 10  | 11  | 6  | 2.010940867 | 0.0640214   | SPAG4     | ENSG00000061656 |
| 20 | 33793354 | 33793928 | 33793724 | 23  | 44  | 11 | 4.398933147 | 1.43E-07    | RBM39     | ENSG00000131051 |
| 20 | 33904768 | 33905084 | 33904925 | 17  | 19  | 0  | 23.46097679 | 1.81E-07    |           | ENSG00000199676 |
| 20 | 34005677 | 34006232 | 34005815 | 15  | 24  | 6  | 4.18946014  | 8.40E-05    | SCAND1    | ENSG00000171222 |
| 20 | 34046363 | 34046649 | 34046522 | 16  | 20  | 4  | 4.926805125 | 0.00010522  | C20orf152 | ENSG00000149646 |
| 20 | 34102196 | 34102422 | 34102309 | 10  | 10  | 2  | 4.301179077 | 0.00512919  |           | ENSG00000220639 |
| 20 | 34137101 | 34137500 | 34137321 | 9   | 16  | 2  | 6.647276756 | 0.000101928 | EPB41L1   | ENSG00000088367 |
| 20 | 34173756 | 34173991 | 34173865 | 10  | 12  | 2  | 5.083211637 | 0.00143337  |           | ENSG00000210299 |
| 20 | 34287669 | 34287995 | 34287844 | 11  | 14  | 3  | 4.398933147 | 0.00132748  | C20orf4   | ENSG00000131043 |
| 20 | 34461540 | 34461813 | 34461661 | 11  | 12  | 1  | 7.624817456 | 0.000332769 | DLGAP4    | ENSG00000080845 |
| 20 | 34523506 | 34523768 | 34523646 | 9   | 10  | 2  | 4.301179077 | 0.00512919  | DLGAP4    | ENSG00000080845 |
| 20 | 34535748 | 34536048 | 34535913 | 9   | 12  | 4  | 3.049926982 | 0.0108184   | DLGAP4    | ENSG00000080845 |
| 20 | 34618323 | 34618617 | 34618476 | 16  | 19  | 1  | 11.73048839 | 2.14E-06    | MYL9      | ENSG00000101335 |
| 20 | 34647245 | 34647611 | 34647477 | 18  | 24  | 7  | 3.665777623 | 0.000215502 | TGIF2     | ENSG00000118707 |
| 20 | 34649025 | 34649404 | 34649285 | 12  | 20  | 3  | 6.158506406 | 2.99E-05    | TGIF2     | ENSG00000118707 |
| 20 | 34660604 | 34660917 | 34660738 | 9   | 13  | 1  | 8.211341875 | 0.000163445 | C20orf24  | ENSG00000101084 |
| 20 | 34667283 | 34667498 | 34667409 | 10  | 11  | 1  | 7.038293036 | 0.000674435 | C20orf24  | ENSG00000101084 |
| 20 | 34708520 | 34708862 | 34708691 | 53  | 57  | 3  | 17.00920817 | 1.67E-16    | SLA2      | ENSG00000101082 |
| 20 | 34831026 | 34831236 | 34831131 | 8   | 8   | 1  | 5.278719777 | 0.00542188  | DSN1      | ENSG00000149636 |
| 20 | 34835988 | 34836242 | 34836115 | 10  | 14  | 8  | 1.955081399 | 0.0506438   | DSN1      | ENSG00000149636 |
| 20 | 34875076 | 34875288 | 34875182 | 9   | 10  | 2  | 4.301179077 | 0.00512919  | DSN1      | ENSG00000149636 |
| 20 | 34897113 | 34897755 | 34897350 | 50  | 77  | 7  | 11.43722618 | 3.64E-19    | C20orf117 | ENSG00000149639 |
| 20 | 34923857 | 34924189 | 34924015 | 18  | 22  | 0  | 26.9801233  | 1.77E-08    | C20orf117 | ENSG00000149639 |
| 20 | 35157794 | 35158003 | 35157898 | 8   | 8   | 4  | 2.111487911 | 0.0804809   | RBL1      | ENSG00000080839 |
| 20 | 35240113 | 35240428 | 35240270 | 15  | 18  | 5  | 3.714654658 | 0.000961539 | RPN2      | ENSG00000118705 |
| 20 | 35254208 | 35254398 | 35254286 | 8   | 8   | 2  | 3.519146518 | 0.017558    | C20orf132 | ENSG00000101353 |
| 20 | 35257461 | 35257725 | 35257572 | 9   | 11  | 7  | 1.759573259 | 0.102361    | C20orf132 | ENSG00000101353 |
| 20 | 35351319 | 35351690 | 35351433 | 10  | 15  | 3  | 4.692195357 | 0.000718455 | MANBAL    | ENSG00000101363 |
| 20 | 35456558 | 35457256 | 35456846 | 206 | 263 | 1  | 154.8424468 | 1.48E-87    | SRC       | ENSG00000197122 |
| 20 | 35588235 | 35588433 | 35588299 | 9   | 9   | 1  | 5.865244197 | 0.00272497  | BLCAP     | ENSG00000166619 |
| 20 | 35596135 | 35596329 | 35596217 | 8   | 8   | 2  | 3.519146518 | 0.017558    | PPIAP3    | ENSG00000217329 |
| 20 | 35713732 | 35713920 | 35713847 | 9   | 10  | 2  | 4.301179077 | 0.00512919  |           | ENSG00000204117 |

|    |          |          |          |    |    |    |             |             |           |                 |
|----|----------|----------|----------|----|----|----|-------------|-------------|-----------|-----------------|
| 20 | 35755622 | 35755859 | 35755800 | 8  | 11 | 0  | 14.07658607 | 9.02E-05    | CTNNBL1   | ENSG00000132792 |
| 20 | 35885178 | 35885441 | 35885309 | 10 | 10 | 2  | 4.301179077 | 0.00512919  | CTNNBL1   | ENSG00000132792 |
| 20 | 36066298 | 36066557 | 36066436 | 10 | 11 | 3  | 3.519146518 | 0.00788869  | KIAA0406  | ENSG00000101407 |
| 20 | 36075501 | 36075740 | 36075657 | 9  | 9  | 0  | 11.73048839 | 0.000425898 | KIAA0406  | ENSG00000101407 |
| 20 | 36119405 | 36119584 | 36119517 | 8  | 8  | 3  | 2.639359888 | 0.0415794   |           | ENSG00000199507 |
| 20 | 36497285 | 36497585 | 36497489 | 17 | 21 | 5  | 4.301179077 | 0.000172642 |           | ENSG00000196756 |
| 20 | 36508406 | 36508895 | 36508659 | 11 | 21 | 2  | 8.602358155 | 3.33E-06    | C20orf198 | ENSG00000174365 |
| 20 | 36666995 | 36667320 | 36667157 | 11 | 15 | 0  | 18.76878143 | 4.04E-06    |           | ENSG00000213959 |
| 20 | 36990028 | 36990333 | 36990164 | 8  | 12 | 2  | 5.083211637 | 0.00143337  | FAM83D    | ENSG00000101447 |
| 20 | 37143244 | 37143450 | 37143347 | 8  | 8  | 2  | 3.519146518 | 0.017558    | NPM1P19   | ENSG00000219662 |
| 20 | 37172825 | 37173013 | 37172919 | 8  | 8  | 0  | 10.55743955 | 0.000925496 | NPM1P19   | ENSG00000219662 |
| 20 | 37630208 | 37630387 | 37630297 | 8  | 8  | 1  | 5.278719777 | 0.00542188  |           | ENSG00000210455 |
| 20 | 37685714 | 37685922 | 37685818 | 8  | 9  | 0  | 11.73048839 | 0.000425898 |           | ENSG00000210455 |
| 20 | 37874225 | 37874598 | 37874430 | 24 | 30 | 3  | 9.091128505 | 3.63E-08    | HSPEP1    | ENSG00000219645 |
| 20 | 38337069 | 38337474 | 38337318 | 17 | 26 | 5  | 5.278719777 | 8.57E-06    | HSPEP1    | ENSG00000219645 |
| 20 | 38348897 | 38349606 | 38349224 | 16 | 33 | 3  | 9.970915134 | 4.56E-09    | HSPEP1    | ENSG00000219645 |
| 20 | 38421572 | 38421871 | 38421721 | 13 | 18 | 5  | 3.714654658 | 0.000961539 | MAFB      | ENSG00000204103 |
| 20 | 38459772 | 38460140 | 38459939 | 16 | 21 | 1  | 12.90353723 | 4.95E-07    | MAFB      | ENSG00000204103 |
| 20 | 38525364 | 38525688 | 38525526 | 11 | 15 | 1  | 9.384390715 | 3.90E-05    | MAFB      | ENSG00000204103 |
| 20 | 38735573 | 38735779 | 38735635 | 9  | 9  | 7  | 1.466311049 | 0.20706     | MAFB      | ENSG00000204103 |
| 20 | 38918796 | 38919009 | 38918918 | 10 | 10 | 0  | 12.90353723 | 0.000195991 |           | ENSG00000222612 |
| 20 | 38922792 | 38922987 | 38922908 | 8  | 10 | 2  | 4.301179077 | 0.00512919  |           | ENSG00000222612 |
| 20 | 38965501 | 38965763 | 38965632 | 17 | 19 | 8  | 2.606775198 | 0.00583935  |           | ENSG00000222612 |
| 20 | 38968260 | 38968528 | 38968401 | 8  | 11 | 5  | 2.346097679 | 0.0364013   |           | ENSG00000222612 |
| 20 | 39008004 | 39008318 | 39008154 | 15 | 18 | 9  | 2.228792795 | 0.0164363   |           | ENSG00000222612 |
| 20 | 39020668 | 39021076 | 39020901 | 15 | 21 | 10 | 2.346097679 | 0.00796926  |           | ENSG00000222612 |
| 20 | 39025097 | 39025320 | 39025208 | 12 | 13 | 5  | 2.737113958 | 0.0137917   |           | ENSG00000222612 |
| 20 | 39025510 | 39025696 | 39025603 | 8  | 9  | 3  | 2.932622098 | 0.0242899   |           | ENSG00000222612 |
| 20 | 39028296 | 39028476 | 39028386 | 8  | 8  | 1  | 5.278719777 | 0.00542188  |           | ENSG00000222612 |
| 20 | 39030830 | 39031182 | 39031006 | 10 | 16 | 9  | 1.994183027 | 0.0370915   |           | ENSG00000222612 |
| 20 | 39040881 | 39041238 | 39041059 | 31 | 37 | 7  | 5.571981987 | 1.11E-07    |           | ENSG00000222612 |
| 20 | 39052357 | 39052985 | 39052806 | 39 | 56 | 9  | 6.686378384 | 1.01E-11    |           | ENSG00000222612 |
| 20 | 39053789 | 39053982 | 39053885 | 8  | 9  | 3  | 2.932622098 | 0.0242899   |           | ENSG00000222612 |
| 20 | 39065318 | 39065552 | 39065479 | 8  | 11 | 7  | 1.759573259 | 0.102361    |           | ENSG00000222612 |

|    |          |          |          |    |    |    |             |             |                       |
|----|----------|----------|----------|----|----|----|-------------|-------------|-----------------------|
| 20 | 39067587 | 39067834 | 39067710 | 9  | 11 | 4  | 2.815317214 | 0.0183428   | ENSG00000222612       |
| 20 | 39079784 | 39080308 | 39079913 | 11 | 22 | 13 | 1.927151665 | 0.0235996   | ENSG00000222612       |
| 20 | 39085991 | 39086313 | 39086152 | 9  | 9  | 4  | 2.346097679 | 0.050148    | ENSG00000222612       |
| 20 | 39090413 | 39090713 | 39090547 | 12 | 16 | 7  | 2.492728784 | 0.0124193   | TOP1 ENSG00000198900  |
| 20 | 39113634 | 39113824 | 39113729 | 8  | 8  | 2  | 3.519146518 | 0.017558    | TOP1 ENSG00000198900  |
| 20 | 39140516 | 39140895 | 39140645 | 15 | 19 | 13 | 1.675784056 | 0.0660887   | TOP1 ENSG00000198900  |
| 20 | 39148939 | 39149564 | 39149254 | 20 | 38 | 11 | 3.812408728 | 3.92E-06    | PLCG1 ENSG00000124181 |
| 20 | 39196909 | 39197201 | 39197055 | 11 | 12 | 8  | 1.694403879 | 0.107291    | PLCG1 ENSG00000124181 |
| 20 | 39197353 | 39197624 | 39197513 | 13 | 16 | 6  | 2.848832895 | 0.00632407  | PLCG1 ENSG00000124181 |
| 20 | 39198578 | 39198932 | 39198721 | 9  | 14 | 5  | 2.932622098 | 0.00829617  | PLCG1 ENSG00000124181 |
| 20 | 39200300 | 39200516 | 39200452 | 8  | 9  | 8  | 1.303387599 | 0.281715    | PLCG1 ENSG00000124181 |
| 20 | 39235281 | 39235565 | 39235444 | 11 | 13 | 5  | 2.737113958 | 0.0137917   | ENSG00000216278       |
| 20 | 39236112 | 39236342 | 39236227 | 8  | 10 | 5  | 2.150589539 | 0.0575848   | ENSG00000216278       |
| 20 | 39294938 | 39295223 | 39295116 | 8  | 12 | 0  | 15.24963491 | 4.15E-05    | ZHX3 ENSG00000174306  |
| 20 | 39379913 | 39380202 | 39380043 | 12 | 13 | 12 | 1.263283365 | 0.272203    | ENSG00000218353       |
| 20 | 39401969 | 39402531 | 39402217 | 17 | 36 | 15 | 2.712675441 | 0.000215253 | LPIN3 ENSG00000132793 |
| 20 | 39402796 | 39403029 | 39402941 | 11 | 12 | 6  | 2.178519273 | 0.0416567   | LPIN3 ENSG00000132793 |
| 20 | 39406637 | 39406884 | 39406722 | 14 | 15 | 4  | 3.753756286 | 0.0020497   | LPIN3 ENSG00000132793 |
| 20 | 39407021 | 39407210 | 39407115 | 9  | 9  | 3  | 2.932622098 | 0.0242899   | LPIN3 ENSG00000132793 |
| 20 | 39455044 | 39455348 | 39455193 | 10 | 13 | 3  | 4.105670938 | 0.00243034  | ENSG00000219721       |
| 20 | 39455459 | 39455750 | 39455608 | 17 | 19 | 6  | 3.351568112 | 0.00134187  | ENSG00000219721       |
| 20 | 39455814 | 39456364 | 39456172 | 8  | 21 | 9  | 2.580707446 | 0.00438951  | ENSG00000219721       |
| 20 | 39461633 | 39461883 | 39461758 | 10 | 13 | 11 | 1.368556979 | 0.211388    | ENSG00000219721       |
| 20 | 39538039 | 39538571 | 39538397 | 19 | 31 | 11 | 3.128130238 | 0.000146711 | ENSG00000217365       |
| 20 | 39616261 | 39616531 | 39616409 | 14 | 14 | 1  | 8.797866295 | 8.00E-05    | ENSG00000196775       |
| 20 | 39633983 | 39634291 | 39634137 | 8  | 11 | 10 | 1.279689643 | 0.277323    | ENSG00000196775       |
| 20 | 39662868 | 39663089 | 39662978 | 9  | 10 | 5  | 2.150589539 | 0.0575848   | CHD6 ENSG00000124177  |
| 20 | 39680321 | 39680653 | 39680487 | 21 | 24 | 6  | 4.18946014  | 8.40E-05    | CHD6 ENSG00000124177  |
| 20 | 39681540 | 39681756 | 39681685 | 8  | 8  | 7  | 1.319679944 | 0.283403    | CHD6 ENSG00000124177  |
| 20 | 39705708 | 39706010 | 39705869 | 8  | 9  | 4  | 2.346097679 | 0.050148    | CHD6 ENSG00000124177  |
| 20 | 39711594 | 39711911 | 39711752 | 10 | 12 | 7  | 1.906204364 | 0.0695918   | CHD6 ENSG00000124177  |
| 20 | 39712263 | 39712506 | 39712393 | 9  | 10 | 12 | 0.992579787 | 0.511743    | CHD6 ENSG00000124177  |
| 20 | 39712611 | 39712938 | 39712774 | 20 | 26 | 18 | 1.66696414  | 0.0417523   | CHD6 ENSG00000124177  |
| 20 | 39716924 | 39717158 | 39717041 | 8  | 10 | 3  | 3.225884308 | 0.0139466   | ENSG00000210486       |

|    |          |          |          |    |    |    |             |             |                        |
|----|----------|----------|----------|----|----|----|-------------|-------------|------------------------|
| 20 | 39722141 | 39722372 | 39722230 | 9  | 11 | 5  | 2.346097679 | 0.0364013   | ENSG00000210486        |
| 20 | 39754925 | 39755297 | 39755065 | 10 | 16 | 10 | 1.812893661 | 0.0578656   | ENSG00000199287        |
| 20 | 39755386 | 39755863 | 39755565 | 33 | 46 | 14 | 3.67555303  | 7.62E-07    | ENSG00000199287        |
| 20 | 39759893 | 39760164 | 39760028 | 9  | 11 | 5  | 2.346097679 | 0.0364013   | ENSG00000199287        |
| 20 | 39796521 | 39796804 | 39796627 | 8  | 11 | 5  | 2.346097679 | 0.0364013   | ENSG00000212224        |
| 20 | 39800577 | 39801063 | 39800891 | 16 | 26 | 14 | 2.111487911 | 0.00831019  | ENSG00000212224        |
| 20 | 39884685 | 39884924 | 39884830 | 9  | 12 | 6  | 2.178519273 | 0.0416567   | ENSG00000212224        |
| 20 | 39927982 | 39928435 | 39928221 | 49 | 66 | 5  | 13.09904537 | 1.78E-17    | ENSG00000220309        |
| 20 | 39951268 | 39951708 | 39951444 | 10 | 18 | 13 | 1.591994853 | 0.0905191   | ENSG00000220309        |
| 20 | 40018450 | 40018662 | 40018560 | 10 | 10 | 7  | 1.612942154 | 0.147335    | ENSG00000220309        |
| 20 | 40018925 | 40019184 | 40019095 | 8  | 10 | 6  | 1.843362462 | 0.0964212   | ENSG00000220309        |
| 20 | 40081163 | 40081346 | 40081255 | 10 | 10 | 9  | 1.290353723 | 0.279648    | ENSG00000220309        |
| 20 | 40086665 | 40086874 | 40086769 | 8  | 10 | 2  | 4.301179077 | 0.00512919  | ENSG00000220309        |
| 20 | 40103181 | 40103428 | 40103304 | 8  | 10 | 2  | 4.301179077 | 0.00512919  | ENSG00000220309        |
| 20 | 40253396 | 40253934 | 40253783 | 12 | 23 | 31 | 0.879786629 | 0.686638    | ENSG00000220309        |
| 20 | 40254113 | 40254323 | 40254196 | 9  | 10 | 5  | 2.150589539 | 0.0575848   | ENSG00000220309        |
| 20 | 40266247 | 40266899 | 40266573 | 20 | 37 | 17 | 2.476436439 | 0.000462122 | ENSG00000220309        |
| 20 | 40432275 | 40432634 | 40432472 | 9  | 14 | 0  | 17.59573259 | 8.79E-06    | ENSG00000217390        |
| 20 | 40437098 | 40437419 | 40437258 | 8  | 11 | 12 | 1.082814313 | 0.424156    | ENSG00000217390        |
| 20 | 40442107 | 40442388 | 40442247 | 13 | 15 | 8  | 2.085420159 | 0.0338693   | ENSG00000217390        |
| 20 | 40442405 | 40442613 | 40442509 | 9  | 10 | 5  | 2.150589539 | 0.0575848   | ENSG00000217390        |
| 20 | 40444709 | 40444959 | 40444834 | 8  | 8  | 6  | 1.508205651 | 0.203852    | ENSG00000217390        |
| 20 | 40449165 | 40449415 | 40449290 | 8  | 9  | 5  | 1.955081399 | 0.0892323   | ENSG00000217390        |
| 20 | 40530872 | 40531173 | 40530998 | 17 | 21 | 2  | 8.602358155 | 3.33E-06    | ENSG00000217390        |
| 20 | 40531443 | 40531839 | 40531622 | 23 | 32 | 3  | 9.677652924 | 9.12E-09    | ENSG00000217390        |
| 20 | 40592949 | 40593244 | 40593096 | 12 | 16 | 7  | 2.492728784 | 0.0124193   | ENSG00000217390        |
| 20 | 40740868 | 40741204 | 40741036 | 10 | 15 | 11 | 1.564065119 | 0.11768     | ENSG00000217390        |
| 20 | 41519899 | 41520114 | 41519974 | 8  | 8  | 3  | 2.639359888 | 0.0415794   | SFRS6 ENSG00000124193  |
| 20 | 41554232 | 41554459 | 41554345 | 15 | 15 | 1  | 9.384390715 | 3.90E-05    | ENSG00000201372        |
| 20 | 41591563 | 41591874 | 41591736 | 15 | 18 | 0  | 22.28792795 | 3.94E-07    | L3MBTL ENSG00000185513 |
| 20 | 41600232 | 41600448 | 41600357 | 8  | 8  | 1  | 5.278719777 | 0.00542188  | L3MBTL ENSG00000185513 |
| 20 | 41609559 | 41609865 | 41609709 | 8  | 11 | 2  | 4.692195357 | 0.00272444  | SGK2 ENSG00000101049   |
| 20 | 41652746 | 41652976 | 41652861 | 8  | 11 | 4  | 2.815317214 | 0.0183428   | IFT52 ENSG00000101052  |
| 20 | 41719426 | 41719770 | 41719598 | 11 | 17 | 4  | 4.222975822 | 0.000640773 | ENSG00000215467        |

|    |          |          |          |    |    |    |             |             |           |                 |
|----|----------|----------|----------|----|----|----|-------------|-------------|-----------|-----------------|
| 20 | 41790058 | 41790344 | 41790179 | 16 | 20 | 4  | 4.926805125 | 0.00010522  | GTSF1L    | ENSG00000124196 |
| 20 | 41911913 | 41912287 | 41912086 | 8  | 15 | 4  | 3.753756286 | 0.0020497   |           | ENSG00000206801 |
| 20 | 41973256 | 41973473 | 41973364 | 9  | 9  | 0  | 11.73048839 | 0.000425898 | TOX2      | ENSG00000124191 |
| 20 | 42142871 | 42143152 | 42143011 | 8  | 12 | 3  | 3.812408728 | 0.004404    |           | ENSG00000222893 |
| 20 | 42152136 | 42152381 | 42152258 | 11 | 14 | 4  | 3.519146518 | 0.00361132  |           | ENSG00000222893 |
| 20 | 42152810 | 42153136 | 42152973 | 10 | 15 | 1  | 9.384390715 | 3.90E-05    |           | ENSG00000222893 |
| 20 | 42167294 | 42167524 | 42167367 | 9  | 10 | 5  | 2.150589539 | 0.0575848   | JPH2      | ENSG00000149596 |
| 20 | 42178768 | 42179017 | 42178876 | 13 | 16 | 4  | 3.988366054 | 0.00115141  | JPH2      | ENSG00000149596 |
| 20 | 42219392 | 42219578 | 42219512 | 8  | 8  | 0  | 10.55743955 | 0.000925496 | JPH2      | ENSG00000149596 |
| 20 | 42235281 | 42235467 | 42235441 | 8  | 8  | 2  | 3.519146518 | 0.017558    | JPH2      | ENSG00000149596 |
| 20 | 42252358 | 42252696 | 42252535 | 15 | 18 | 8  | 2.476436439 | 0.00924552  | JPH2      | ENSG00000149596 |
| 20 | 42266187 | 42266443 | 42266315 | 12 | 13 | 5  | 2.737113958 | 0.0137917   | C20orf111 | ENSG00000132823 |
| 20 | 42272652 | 42273153 | 42272797 | 14 | 25 | 13 | 2.178519273 | 0.00752428  | C20orf111 | ENSG00000132823 |
| 20 | 42279459 | 42279657 | 42279503 | 9  | 9  | 3  | 2.932622098 | 0.0242899   | C20orf111 | ENSG00000132823 |
| 20 | 42290561 | 42290858 | 42290706 | 9  | 11 | 7  | 1.759573259 | 0.102361    | C20orf111 | ENSG00000132823 |
| 20 | 42364520 | 42364720 | 42364664 | 9  | 10 | 1  | 6.451768616 | 0.00135978  | C20orf142 | ENSG00000197296 |
| 20 | 42373162 | 42373534 | 42373341 | 9  | 17 | 6  | 3.016411301 | 0.00381427  | C20orf142 | ENSG00000197296 |
| 20 | 42392923 | 42393155 | 42393019 | 12 | 12 | 0  | 15.24963491 | 4.15E-05    | R3HDML    | ENSG00000101074 |
| 20 | 42446496 | 42446928 | 42446675 | 8  | 15 | 9  | 1.876878143 | 0.0544542   | HNF4A     | ENSG00000101076 |
| 20 | 42450492 | 42450882 | 42450671 | 11 | 20 | 7  | 3.079253203 | 0.00177418  | HNF4A     | ENSG00000101076 |
| 20 | 42634898 | 42635084 | 42635040 | 9  | 9  | 1  | 5.865244197 | 0.00272497  | PKIG      | ENSG00000168734 |
| 20 | 42686926 | 42687130 | 42687028 | 9  | 9  | 0  | 11.73048839 | 0.000425898 | PKIG      | ENSG00000168734 |
| 20 | 42703375 | 42703765 | 42703643 | 17 | 25 | 4  | 6.099853964 | 4.56E-06    | ADA       | ENSG00000196839 |
| 20 | 42740280 | 42740728 | 42740475 | 64 | 87 | 3  | 25.80707446 | 4.28E-26    |           | ENSG00000132832 |
| 20 | 42740826 | 42741167 | 42741000 | 8  | 13 | 4  | 3.28453675  | 0.00629037  |           | ENSG00000132832 |
| 20 | 42747318 | 42747566 | 42747443 | 8  | 10 | 6  | 1.843362462 | 0.0964212   |           | ENSG00000132832 |
| 20 | 42776612 | 42776926 | 42776769 | 8  | 11 | 3  | 3.519146518 | 0.00788869  | WISP2     | ENSG00000064205 |
| 20 | 42778959 | 42779176 | 42779088 | 8  | 9  | 7  | 1.466311049 | 0.20706     | WISP2     | ENSG00000064205 |
| 20 | 42790784 | 42791160 | 42790981 | 11 | 17 | 9  | 2.111487911 | 0.0248715   | WISP2     | ENSG00000064205 |
| 20 | 42791167 | 42791618 | 42791341 | 14 | 23 | 6  | 4.021881735 | 0.000148535 | WISP2     | ENSG00000064205 |
| 20 | 42986678 | 42986973 | 42986807 | 9  | 11 | 1  | 7.038293036 | 0.000674435 | PABPC1L   | ENSG00000101104 |
| 20 | 43028350 | 43028551 | 43028455 | 9  | 9  | 1  | 5.865244197 | 0.00272497  | STK4      | ENSG00000101109 |
| 20 | 43028553 | 43028741 | 43028629 | 8  | 9  | 0  | 11.73048839 | 0.000425898 | STK4      | ENSG00000101109 |
| 20 | 43061953 | 43062327 | 43062084 | 18 | 24 | 0  | 29.32622098 | 3.74E-09    | STK4      | ENSG00000101109 |



|    |          |          |          |    |    |    |             |             |         |                 |
|----|----------|----------|----------|----|----|----|-------------|-------------|---------|-----------------|
| 20 | 43179758 | 43179937 | 43179847 | 8  | 8  | 2  | 3.519146518 | 0.017558    | WFDC5   | ENSG00000175121 |
| 20 | 43200875 | 43201060 | 43200991 | 8  | 9  | 4  | 2.346097679 | 0.050148    | WFDC12  | ENSG00000168703 |
| 20 | 43383921 | 43384251 | 43384086 | 11 | 15 | 2  | 6.256260476 | 0.000199274 |         | ENSG00000210619 |
| 20 | 43401250 | 43401581 | 43401420 | 26 | 30 | 1  | 18.18225701 | 6.30E-10    | SDC4    | ENSG00000124145 |
| 20 | 43406234 | 43406559 | 43406396 | 11 | 14 | 3  | 4.398933147 | 0.00132748  | SDC4    | ENSG00000124145 |
| 20 | 43407593 | 43408055 | 43407882 | 14 | 23 | 7  | 3.519146518 | 0.000369739 | SDC4    | ENSG00000124145 |
| 20 | 43435862 | 43436220 | 43436041 | 12 | 18 | 0  | 22.28792795 | 3.94E-07    | TP53TG5 | ENSG00000124251 |
| 20 | 43518843 | 43519022 | 43518912 | 8  | 8  | 5  | 1.759573259 | 0.13508     | WFDC2   | ENSG00000101443 |
| 20 | 43841051 | 43841310 | 43841182 | 13 | 13 | 4  | 3.28453675  | 0.00629037  |         | ENSG00000210634 |
| 20 | 43884984 | 43885169 | 43885076 | 8  | 9  | 1  | 5.865244197 | 0.00272497  | TNNC2   | ENSG00000101470 |
| 20 | 43934831 | 43935068 | 43934949 | 8  | 9  | 3  | 2.932622098 | 0.0242899   | ZSWIM1  | ENSG00000168612 |
| 20 | 44033904 | 44034491 | 44034398 | 12 | 25 | 15 | 1.906204364 | 0.0188347   | ZNF335  | ENSG00000198026 |
| 20 | 44055502 | 44055913 | 44055681 | 10 | 19 | 5  | 3.910162798 | 0.000546977 | MMP9    | ENSG00000100985 |
| 20 | 44057533 | 44057943 | 44057766 | 21 | 29 | 7  | 4.398933147 | 1.30E-05    | MMP9    | ENSG00000100985 |
| 20 | 44075898 | 44076226 | 44076049 | 8  | 13 | 6  | 2.346097679 | 0.0266147   |         | ENSG00000203346 |
| 20 | 44150671 | 44150958 | 44150814 | 11 | 14 | 3  | 4.398933147 | 0.00132748  | NCOA5   | ENSG00000124160 |
| 20 | 44272850 | 44273029 | 44272861 | 8  | 8  | 2  | 3.519146518 | 0.017558    | CDH22   | ENSG00000149654 |
| 20 | 44317518 | 44317857 | 44317681 | 16 | 19 | 1  | 11.73048839 | 2.14E-06    | CDH22   | ENSG00000149654 |
| 20 | 44675777 | 44676076 | 44675925 | 14 | 16 | 2  | 6.647276756 | 0.000101928 | SLC13A3 | ENSG00000158296 |
| 20 | 44761877 | 44762082 | 44761979 | 8  | 9  | 3  | 2.932622098 | 0.0242899   | SLC2A10 | ENSG00000197496 |
| 20 | 44876696 | 44876973 | 44876835 | 11 | 14 | 1  | 8.797866295 | 8.00E-05    |         | ENSG00000222874 |
| 20 | 45187964 | 45188234 | 45188099 | 15 | 18 | 1  | 11.14396397 | 4.44E-06    |         | ENSG00000215450 |
| 20 | 45203424 | 45203746 | 45203577 | 8  | 11 | 16 | 0.828034475 | 0.698553    |         | ENSG00000215450 |
| 20 | 45204175 | 45204564 | 45204391 | 10 | 19 | 16 | 1.380057458 | 0.163303    |         | ENSG00000215450 |
| 20 | 45205020 | 45205245 | 45205164 | 8  | 10 | 20 | 0.614454154 | 0.913752    |         | ENSG00000215450 |
| 20 | 45211969 | 45212565 | 45212234 | 14 | 31 | 25 | 1.443752418 | 0.0809131   |         | ENSG00000215450 |
| 20 | 45218771 | 45219100 | 45218935 | 13 | 16 | 16 | 1.173048839 | 0.322157    |         | ENSG00000215450 |
| 20 | 45220595 | 45220908 | 45220751 | 13 | 17 | 22 | 0.918038222 | 0.611544    |         | ENSG00000215450 |
| 20 | 45221055 | 45221326 | 45221197 | 8  | 11 | 14 | 0.938439071 | 0.570297    |         | ENSG00000215450 |
| 20 | 45221389 | 45221683 | 45221517 | 12 | 16 | 15 | 1.246364392 | 0.263987    |         | ENSG00000215450 |
| 20 | 45230529 | 45230988 | 45230707 | 13 | 23 | 31 | 0.879786629 | 0.686638    |         | ENSG00000215450 |
| 20 | 45231076 | 45231379 | 45231227 | 9  | 13 | 26 | 0.608247546 | 0.94153     |         | ENSG00000215450 |
| 20 | 45232681 | 45233427 | 45232907 | 10 | 31 | 56 | 0.658553734 | 0.973631    |         | ENSG00000215450 |
| 20 | 45233551 | 45233763 | 45233657 | 8  | 10 | 27 | 0.460840615 | 0.98972     |         | ENSG00000215450 |

|    |          |          |          |     |     |    |             |            |                 |
|----|----------|----------|----------|-----|-----|----|-------------|------------|-----------------|
| 20 | 45235071 | 45235365 | 45235226 | 9   | 13  | 17 | 0.912371319 | 0.606688   | ENSG00000215450 |
| 20 | 45235676 | 45236235 | 45236022 | 19  | 34  | 32 | 1.244142708 | 0.184209   | ENSG00000215450 |
| 20 | 45236281 | 45237071 | 45236693 | 33  | 69  | 54 | 1.49297125  | 0.012631   | ENSG00000215450 |
| 20 | 45237531 | 45238079 | 45237930 | 21  | 32  | 36 | 1.046232749 | 0.427232   | ENSG00000215450 |
| 20 | 45238567 | 45238861 | 45238710 | 8   | 11  | 13 | 1.005470434 | 0.498567   | ENSG00000215450 |
| 20 | 45239606 | 45240082 | 45239903 | 13  | 22  | 32 | 0.817579494 | 0.775827   | ENSG00000215450 |
| 20 | 45240324 | 45240619 | 45240471 | 11  | 14  | 17 | 0.977540699 | 0.52995    | ENSG00000215450 |
| 20 | 45242653 | 45243804 | 45243486 | 52  | 120 | 96 | 1.463287727 | 0.00250623 | ENSG00000215450 |
| 20 | 45245855 | 45246303 | 45246034 | 17  | 27  | 32 | 0.995314167 | 0.51007    | ENSG00000215450 |
| 20 | 45248170 | 45248394 | 45248282 | 9   | 12  | 7  | 1.906204364 | 0.0695918  | ENSG00000215450 |
| 20 | 45248631 | 45248890 | 45248780 | 10  | 13  | 8  | 1.824742639 | 0.0744168  | ENSG00000215450 |
| 20 | 45249473 | 45249690 | 45249642 | 8   | 10  | 17 | 0.71686318  | 0.816679   | ENSG00000215450 |
| 20 | 45249923 | 45250274 | 45250098 | 9   | 15  | 16 | 1.104045966 | 0.390393   | ENSG00000215450 |
| 20 | 45250397 | 45250704 | 45250550 | 9   | 14  | 32 | 0.533204018 | 0.982704   | ENSG00000215450 |
| 20 | 45251362 | 45251812 | 45251537 | 11  | 21  | 21 | 1.173048839 | 0.299417   | ENSG00000215450 |
| 20 | 45252019 | 45252464 | 45252241 | 9   | 17  | 21 | 0.959767232 | 0.55532    | ENSG00000215450 |
| 20 | 45252516 | 45253168 | 45252863 | 12  | 29  | 37 | 0.926091189 | 0.626749   | ENSG00000215450 |
| 20 | 45253240 | 45253912 | 45253404 | 11  | 25  | 43 | 0.693165223 | 0.935347   | ENSG00000215450 |
| 20 | 45255911 | 45256291 | 45256090 | 9   | 17  | 11 | 1.759573259 | 0.0609179  | ENSG00000215450 |
| 20 | 45256367 | 45256570 | 45256465 | 9   | 10  | 10 | 1.173048839 | 0.355733   | ENSG00000215450 |
| 20 | 45256957 | 45257201 | 45257053 | 11  | 13  | 25 | 0.631641683 | 0.924582   | ENSG00000215450 |
| 20 | 45257487 | 45257878 | 45257660 | 13  | 20  | 30 | 0.794645988 | 0.79747    | ENSG00000215450 |
| 20 | 45257898 | 45258151 | 45257999 | 9   | 13  | 18 | 0.864351776 | 0.666373   | ENSG00000215450 |
| 20 | 45258155 | 45258985 | 45258610 | 105 | 172 | 71 | 2.818575683 | 3.24E-15   | ENSG00000215450 |
| 20 | 45259174 | 45259374 | 45259274 | 9   | 11  | 25 | 0.541407157 | 0.967387   | ENSG00000215450 |
| 20 | 45260321 | 45260938 | 45260759 | 17  | 35  | 44 | 0.938439071 | 0.614808   | ENSG00000215450 |
| 20 | 45262656 | 45262965 | 45262794 | 9   | 11  | 16 | 0.828034475 | 0.698553   | ENSG00000215450 |
| 20 | 45263242 | 45263538 | 45263390 | 12  | 16  | 21 | 0.90644683  | 0.624241   | ENSG00000215450 |
| 20 | 45263541 | 45263811 | 45263654 | 10  | 13  | 19 | 0.821134188 | 0.720637   | ENSG00000215450 |
| 20 | 45264048 | 45264257 | 45264152 | 9   | 10  | 5  | 2.150589539 | 0.0575848  | ENSG00000215450 |
| 20 | 45264511 | 45265019 | 45264792 | 15  | 27  | 23 | 1.368556979 | 0.128845   | ENSG00000215450 |
| 20 | 45265679 | 45265953 | 45265816 | 10  | 15  | 9  | 1.876878143 | 0.0544542  | ENSG00000215450 |
| 20 | 45266174 | 45267054 | 45266592 | 50  | 99  | 52 | 2.213299697 | 7.16E-07   | ENSG00000215450 |
| 20 | 45267372 | 45268483 | 45267854 | 52  | 125 | 71 | 2.052835469 | 3.08E-07   | ENSG00000215450 |

|    |          |          |          |    |     |    |             |           |                        |
|----|----------|----------|----------|----|-----|----|-------------|-----------|------------------------|
| 20 | 45268871 | 45269186 | 45269028 | 11 | 15  | 24 | 0.750751257 | 0.821554  | ENSG00000215450        |
| 20 | 45270678 | 45271068 | 45270889 | 9  | 16  | 14 | 1.329455351 | 0.210108  | ENSG00000215450        |
| 20 | 45272887 | 45273384 | 45273205 | 12 | 21  | 39 | 0.645176862 | 0.955337  | ENSG00000215450        |
| 20 | 45273402 | 45273649 | 45273525 | 11 | 11  | 24 | 0.563063443 | 0.956421  | ENSG00000215450        |
| 20 | 45273777 | 45274193 | 45273934 | 12 | 19  | 24 | 0.938439071 | 0.587839  | ENSG00000215450        |
| 20 | 45274437 | 45274638 | 45274537 | 10 | 10  | 18 | 0.679133539 | 0.855647  | ENSG00000215450        |
| 20 | 45274934 | 45275446 | 45275268 | 12 | 23  | 23 | 1.173048839 | 0.291252  | ENSG00000215450        |
| 20 | 45275820 | 45276140 | 45275980 | 11 | 16  | 23 | 0.830909595 | 0.726247  | ENSG00000215450        |
| 20 | 45276200 | 45276551 | 45276375 | 11 | 17  | 31 | 0.659839972 | 0.927052  | ENSG00000215450        |
| 20 | 45277719 | 45277976 | 45277847 | 9  | 11  | 13 | 1.005470434 | 0.498567  | ENSG00000215450        |
| 20 | 45279140 | 45279424 | 45279282 | 9  | 12  | 31 | 0.476551091 | 0.991445  | ENSG00000215450        |
| 20 | 45279626 | 45279837 | 45279731 | 8  | 9   | 8  | 1.303387599 | 0.281715  | ENSG00000215450        |
| 20 | 45279890 | 45280099 | 45280014 | 11 | 13  | 12 | 1.263283365 | 0.272203  | ENSG00000215450        |
| 20 | 45280117 | 45280557 | 45280419 | 12 | 22  | 18 | 1.42000649  | 0.127634  | ENSG00000215450        |
| 20 | 45280700 | 45281006 | 45280832 | 9  | 13  | 22 | 0.714029728 | 0.84749   | ENSG00000215450        |
| 20 | 45281515 | 45282599 | 45282420 | 20 | 65  | 70 | 1.090439766 | 0.307477  | ENSG00000215450        |
| 20 | 45284658 | 45285071 | 45284771 | 10 | 17  | 30 | 0.681125133 | 0.908846  | ENSG00000215450        |
| 20 | 45288251 | 45288927 | 45288632 | 21 | 46  | 32 | 1.670705923 | 0.0110764 | ENSG00000215450        |
| 20 | 45289340 | 45289725 | 45289456 | 9  | 16  | 29 | 0.664727676 | 0.917277  | ENSG00000215450        |
| 20 | 45289745 | 45289999 | 45289918 | 9  | 12  | 14 | 1.016642327 | 0.486402  | ENSG00000215450        |
| 20 | 45290869 | 45291186 | 45291027 | 16 | 19  | 19 | 1.173048839 | 0.308076  | ENSG00000215450        |
| 20 | 45291490 | 45292367 | 45291788 | 14 | 38  | 39 | 1.143722618 | 0.276418  | ENSG00000215450        |
| 20 | 45292829 | 45293414 | 45293083 | 16 | 35  | 29 | 1.407658607 | 0.0823813 | ENSG00000215450        |
| 20 | 45293437 | 45293650 | 45293543 | 9  | 12  | 11 | 1.270802909 | 0.274822  | ENSG00000215450        |
| 20 | 45294495 | 45294843 | 45294669 | 9  | 14  | 19 | 0.879786629 | 0.651591  | ENSG00000215450        |
| 20 | 45295596 | 45295817 | 45295720 | 10 | 10  | 15 | 0.806471077 | 0.716145  | ENSG00000215450        |
| 20 | 45296036 | 45296219 | 45296159 | 8  | 9   | 10 | 1.066408036 | 0.444985  | ENSG00000215450        |
| 20 | 45296659 | 45297088 | 45296909 | 8  | 17  | 20 | 1.005470434 | 0.496566  | ENSG00000215450        |
| 20 | 45297935 | 45298800 | 45298443 | 12 | 38  | 36 | 1.236456885 | 0.177787  | ENSG00000215450        |
| 20 | 45298942 | 45300472 | 45299427 | 48 | 150 | 60 | 2.903776635 | 5.08E-14  | ENSG00000215450        |
| 20 | 45300789 | 45301159 | 45300933 | 12 | 18  | 18 | 1.173048839 | 0.312613  | ENSG00000215450        |
| 20 | 45303485 | 45303804 | 45303644 | 17 | 21  | 36 | 0.697488499 | 0.915016  | ZMYND8 ENSG00000101040 |
| 20 | 45304366 | 45304976 | 45304818 | 23 | 46  | 36 | 1.490089066 | 0.0338948 | ZMYND8 ENSG00000101040 |
| 20 | 45305052 | 45305945 | 45305319 | 18 | 46  | 44 | 1.225184343 | 0.165397  | ZMYND8 ENSG00000101040 |

|    |          |          |          |    |     |    |             |             |        |                 |
|----|----------|----------|----------|----|-----|----|-------------|-------------|--------|-----------------|
| 20 | 45306017 | 45306568 | 45306133 | 8  | 18  | 25 | 0.857227998 | 0.700223    | ZMYND8 | ENSG00000101040 |
| 20 | 45306578 | 45306944 | 45306765 | 12 | 18  | 14 | 1.485861863 | 0.123674    | ZMYND8 | ENSG00000101040 |
| 20 | 45307893 | 45308382 | 45308030 | 10 | 21  | 26 | 0.955817573 | 0.566095    | ZMYND8 | ENSG00000101040 |
| 20 | 45308471 | 45308735 | 45308616 | 8  | 11  | 20 | 0.670313622 | 0.874201    | ZMYND8 | ENSG00000101040 |
| 20 | 45308989 | 45309622 | 45309302 | 17 | 33  | 27 | 1.424416448 | 0.0817823   | ZMYND8 | ENSG00000101040 |
| 20 | 45310215 | 45310972 | 45310695 | 10 | 29  | 38 | 0.902345261 | 0.667504    | ZMYND8 | ENSG00000101040 |
| 20 | 45311243 | 45311628 | 45311449 | 16 | 23  | 23 | 1.173048839 | 0.291252    | ZMYND8 | ENSG00000101040 |
| 20 | 45312044 | 45312407 | 45312223 | 12 | 19  | 10 | 2.132816071 | 0.01835     | ZMYND8 | ENSG00000101040 |
| 20 | 45312723 | 45313097 | 45312902 | 11 | 17  | 23 | 0.879786629 | 0.664328    | ZMYND8 | ENSG00000101040 |
| 20 | 45313223 | 45313513 | 45313368 | 12 | 16  | 9  | 1.994183027 | 0.0370915   | ZMYND8 | ENSG00000101040 |
| 20 | 45314396 | 45314808 | 45314557 | 16 | 23  | 22 | 1.224050963 | 0.244738    | ZMYND8 | ENSG00000101040 |
| 20 | 45315902 | 45316272 | 45316142 | 9  | 15  | 30 | 0.605444562 | 0.95448     | ZMYND8 | ENSG00000101040 |
| 20 | 45316276 | 45316895 | 45316455 | 18 | 35  | 38 | 1.082814313 | 0.36701     | ZMYND8 | ENSG00000101040 |
| 20 | 45318155 | 45318406 | 45318272 | 8  | 11  | 4  | 2.815317214 | 0.0183428   | ZMYND8 | ENSG00000101040 |
| 20 | 45318776 | 45319382 | 45319083 | 19 | 36  | 41 | 1.033400168 | 0.444158    | ZMYND8 | ENSG00000101040 |
| 20 | 45320386 | 45320569 | 45320477 | 8  | 8   | 10 | 0.959767232 | 0.541959    | ZMYND8 | ENSG00000101040 |
| 20 | 45320712 | 45321374 | 45321091 | 10 | 23  | 38 | 0.721876209 | 0.900668    | ZMYND8 | ENSG00000101040 |
| 20 | 45321476 | 45321703 | 45321568 | 8  | 9   | 16 | 0.690028729 | 0.833766    | ZMYND8 | ENSG00000101040 |
| 20 | 45321745 | 45322481 | 45321910 | 10 | 28  | 35 | 0.944956009 | 0.592981    | ZMYND8 | ENSG00000101040 |
| 20 | 45322648 | 45323042 | 45322863 | 17 | 26  | 19 | 1.583615933 | 0.0575614   | ZMYND8 | ENSG00000101040 |
| 20 | 45324209 | 45324549 | 45324379 | 10 | 16  | 26 | 0.738586306 | 0.842793    | ZMYND8 | ENSG00000101040 |
| 20 | 45324770 | 45325177 | 45324956 | 12 | 21  | 22 | 1.122046716 | 0.351409    | ZMYND8 | ENSG00000101040 |
| 20 | 45325295 | 45325554 | 45325426 | 8  | 12  | 14 | 1.016642327 | 0.486402    | ZMYND8 | ENSG00000101040 |
| 20 | 45325664 | 45326070 | 45325843 | 9  | 17  | 23 | 0.879786629 | 0.664328    | ZMYND8 | ENSG00000101040 |
| 20 | 45327996 | 45328189 | 45328091 | 8  | 8   | 15 | 0.659839972 | 0.851443    | ZMYND8 | ENSG00000101040 |
| 20 | 45328576 | 45328794 | 45328670 | 10 | 12  | 12 | 1.173048839 | 0.343543    | ZMYND8 | ENSG00000101040 |
| 20 | 45329125 | 45329334 | 45329206 | 8  | 10  | 18 | 0.679133539 | 0.855647    | ZMYND8 | ENSG00000101040 |
| 20 | 45329776 | 45330474 | 45330103 | 11 | 30  | 18 | 1.91392179  | 0.0113254   | ZMYND8 | ENSG00000101040 |
| 20 | 45331268 | 45331633 | 45331454 | 8  | 15  | 13 | 1.340627245 | 0.210788    | ZMYND8 | ENSG00000101040 |
| 20 | 45331793 | 45332148 | 45331963 | 10 | 15  | 27 | 0.670313622 | 0.906047    | ZMYND8 | ENSG00000101040 |
| 20 | 45332559 | 45332764 | 45332709 | 8  | 10  | 7  | 1.612942154 | 0.147335    | ZMYND8 | ENSG00000101040 |
| 20 | 45333329 | 45333545 | 45333410 | 9  | 10  | 18 | 0.679133539 | 0.855647    | ZMYND8 | ENSG00000101040 |
| 20 | 45334634 | 45335574 | 45335146 | 56 | 110 | 75 | 1.7132687   | 0.000126004 | ZMYND8 | ENSG00000101040 |
| 20 | 45335778 | 45336333 | 45335982 | 12 | 24  | 20 | 1.396486713 | 0.128495    | ZMYND8 | ENSG00000101040 |

|    |          |          |          |    |    |    |             |            |        |                 |
|----|----------|----------|----------|----|----|----|-------------|------------|--------|-----------------|
| 20 | 45336494 | 45337013 | 45336763 | 16 | 30 | 42 | 0.845686373 | 0.765623   | ZMYND8 | ENSG00000101040 |
| 20 | 45337068 | 45337248 | 45337158 | 8  | 8  | 22 | 0.459019111 | 0.982776   | ZMYND8 | ENSG00000101040 |
| 20 | 45337969 | 45338247 | 45338108 | 12 | 14 | 16 | 1.035043094 | 0.464533   | ZMYND8 | ENSG00000101040 |
| 20 | 45338631 | 45339211 | 45339032 | 11 | 24 | 28 | 1.011248999 | 0.486424   | ZMYND8 | ENSG00000101040 |
| 20 | 45339268 | 45339811 | 45339447 | 12 | 28 | 34 | 0.971954753 | 0.548057   | ZMYND8 | ENSG00000101040 |
| 20 | 45340154 | 45340680 | 45340274 | 10 | 22 | 31 | 0.843128853 | 0.73853    | ZMYND8 | ENSG00000101040 |
| 20 | 45340711 | 45341398 | 45341251 | 19 | 43 | 34 | 1.474689969 | 0.0422167  | ZMYND8 | ENSG00000101040 |
| 20 | 45341516 | 45341947 | 45341768 | 11 | 18 | 21 | 1.013087634 | 0.486601   | ZMYND8 | ENSG00000101040 |
| 20 | 45342179 | 45342788 | 45342554 | 14 | 33 | 27 | 1.424416448 | 0.0817823  | ZMYND8 | ENSG00000101040 |
| 20 | 45342855 | 45343337 | 45343181 | 12 | 22 | 22 | 1.173048839 | 0.295277   | ZMYND8 | ENSG00000101040 |
| 20 | 45343605 | 45344140 | 45343967 | 13 | 28 | 39 | 0.850460409 | 0.75086    | ZMYND8 | ENSG00000101040 |
| 20 | 45344188 | 45344582 | 45344403 | 9  | 18 | 28 | 0.76854924  | 0.819816   | ZMYND8 | ENSG00000101040 |
| 20 | 45345228 | 45345709 | 45345532 | 8  | 17 | 41 | 0.502735217 | 0.99478    | ZMYND8 | ENSG00000101040 |
| 20 | 45346807 | 45347075 | 45346924 | 8  | 9  | 27 | 0.418946014 | 0.994443   | ZMYND8 | ENSG00000101040 |
| 20 | 45347303 | 45347631 | 45347467 | 12 | 16 | 26 | 0.738586306 | 0.842793   | ZMYND8 | ENSG00000101040 |
| 20 | 45349039 | 45349888 | 45349532 | 11 | 34 | 60 | 0.673060809 | 0.971878   | ZMYND8 | ENSG00000101040 |
| 20 | 45351262 | 45352009 | 45351795 | 13 | 34 | 27 | 1.466311049 | 0.0643683  | ZMYND8 | ENSG00000101040 |
| 20 | 45352351 | 45352623 | 45352516 | 9  | 12 | 20 | 0.726173091 | 0.825666   | ZMYND8 | ENSG00000101040 |
| 20 | 45353265 | 45354134 | 45353980 | 14 | 38 | 57 | 0.78877422  | 0.877776   | ZMYND8 | ENSG00000101040 |
| 20 | 45354235 | 45354612 | 45354414 | 11 | 17 | 19 | 1.055743955 | 0.436418   | ZMYND8 | ENSG00000101040 |
| 20 | 45355468 | 45355783 | 45355625 | 9  | 13 | 20 | 0.78203256  | 0.76897    | ZMYND8 | ENSG00000101040 |
| 20 | 45357466 | 45357746 | 45357580 | 9  | 12 | 8  | 1.694403879 | 0.107291   | ZMYND8 | ENSG00000101040 |
| 20 | 45357801 | 45358138 | 45357969 | 10 | 16 | 21 | 0.90644683  | 0.624241   | ZMYND8 | ENSG00000101040 |
| 20 | 45358187 | 45359703 | 45359285 | 32 | 93 | 69 | 1.575237013 | 0.00185806 | ZMYND8 | ENSG00000101040 |
| 20 | 45359923 | 45360129 | 45360026 | 9  | 10 | 12 | 0.992579787 | 0.511743   | ZMYND8 | ENSG00000101040 |
| 20 | 45360432 | 45360815 | 45360664 | 8  | 17 | 31 | 0.659839972 | 0.927052   | ZMYND8 | ENSG00000101040 |
| 20 | 45360838 | 45361750 | 45361247 | 8  | 33 | 35 | 1.107879459 | 0.335679   | ZMYND8 | ENSG00000101040 |
| 20 | 45362115 | 45362505 | 45362243 | 12 | 19 | 22 | 1.020042469 | 0.477122   | ZMYND8 | ENSG00000101040 |
| 20 | 45363215 | 45363434 | 45363324 | 10 | 10 | 4  | 2.580707446 | 0.0306059  | ZMYND8 | ENSG00000101040 |
| 20 | 45363681 | 45363938 | 45363798 | 9  | 12 | 5  | 2.541605819 | 0.0225912  | ZMYND8 | ENSG00000101040 |
| 20 | 45364740 | 45364997 | 45364830 | 8  | 13 | 33 | 0.48302011  | 0.992226   | ZMYND8 | ENSG00000101040 |
| 20 | 45365006 | 45365511 | 45365254 | 11 | 20 | 46 | 0.524128205 | 0.994905   | ZMYND8 | ENSG00000101040 |
| 20 | 45365695 | 45366906 | 45366543 | 20 | 76 | 73 | 1.220604873 | 0.110587   | ZMYND8 | ENSG00000101040 |
| 20 | 45367006 | 45367285 | 45367126 | 10 | 14 | 20 | 0.837892028 | 0.705607   | ZMYND8 | ENSG00000101040 |

|    |          |          |          |     |     |     |             |            |        |                 |
|----|----------|----------|----------|-----|-----|-----|-------------|------------|--------|-----------------|
| 20 | 45367953 | 45368422 | 45368158 | 11  | 23  | 13  | 2.010940867 | 0.0163115  | ZMYND8 | ENSG00000101040 |
| 20 | 45368466 | 45368647 | 45368514 | 8   | 9   | 9   | 1.173048839 | 0.362316   | ZMYND8 | ENSG00000101040 |
| 20 | 45368861 | 45369358 | 45369040 | 9   | 20  | 28  | 0.84944916  | 0.720413   | ZMYND8 | ENSG00000101040 |
| 20 | 45370994 | 45371346 | 45371170 | 12  | 18  | 29  | 0.742930932 | 0.850763   | ZMYND8 | ENSG00000101040 |
| 20 | 45371678 | 45372490 | 45372024 | 12  | 39  | 31  | 1.466311049 | 0.0522376  | ZMYND8 | ENSG00000101040 |
| 20 | 45373043 | 45373322 | 45373182 | 8   | 13  | 17  | 0.912371319 | 0.606688   | ZMYND8 | ENSG00000101040 |
| 20 | 45374047 | 45374561 | 45374382 | 15  | 30  | 37  | 0.956960895 | 0.575127   | ZMYND8 | ENSG00000101040 |
| 20 | 45376108 | 45376322 | 45376215 | 8   | 10  | 17  | 0.71686318  | 0.816679   | ZMYND8 | ENSG00000101040 |
| 20 | 45376619 | 45378124 | 45377062 | 26  | 105 | 103 | 1.195607471 | 0.0980363  | ZMYND8 | ENSG00000101040 |
| 20 | 45378467 | 45378737 | 45378636 | 9   | 13  | 5   | 2.737113958 | 0.0137917  | ZMYND8 | ENSG00000101040 |
| 20 | 45378984 | 45382547 | 45382123 | 110 | 370 | 251 | 1.726988569 | 6.35E-12   | ZMYND8 | ENSG00000101040 |
| 20 | 45382738 | 45384058 | 45383771 | 32  | 99  | 76  | 1.523440051 | 0.00259979 | ZMYND8 | ENSG00000101040 |
| 20 | 45384137 | 45384998 | 45384561 | 9   | 31  | 25  | 1.443752418 | 0.0809131  | ZMYND8 | ENSG00000101040 |
| 20 | 45385240 | 45385475 | 45385357 | 10  | 13  | 15  | 1.026417734 | 0.475096   | ZMYND8 | ENSG00000101040 |
| 20 | 45385545 | 45386050 | 45385910 | 16  | 30  | 30  | 1.173048839 | 0.265818   | ZMYND8 | ENSG00000101040 |
| 20 | 45386666 | 45387110 | 45386931 | 15  | 22  | 27  | 0.963575832 | 0.555868   | ZMYND8 | ENSG00000101040 |
| 20 | 45387391 | 45387859 | 45387570 | 13  | 23  | 38  | 0.721876209 | 0.900668   | ZMYND8 | ENSG00000101040 |
| 20 | 45388551 | 45389516 | 45389107 | 28  | 65  | 43  | 1.759573259 | 0.00161092 | ZMYND8 | ENSG00000101040 |
| 20 | 45389631 | 45390128 | 45389758 | 12  | 23  | 18  | 1.481745902 | 0.0984143  | ZMYND8 | ENSG00000101040 |
| 20 | 45390175 | 45390649 | 45390432 | 21  | 34  | 35  | 1.140464149 | 0.29107    | ZMYND8 | ENSG00000101040 |
| 20 | 45390840 | 45391545 | 45391367 | 17  | 44  | 43  | 1.19970904  | 0.19575    | ZMYND8 | ENSG00000101040 |
| 20 | 45391854 | 45392329 | 45392088 | 18  | 31  | 27  | 1.340627245 | 0.128083   | ZMYND8 | ENSG00000101040 |
| 20 | 45392525 | 45392718 | 45392601 | 11  | 12  | 6   | 2.178519273 | 0.0416567  | ZMYND8 | ENSG00000101040 |
| 20 | 45392830 | 45393395 | 45393235 | 17  | 31  | 36  | 1.014528726 | 0.478595   | ZMYND8 | ENSG00000101040 |
| 20 | 45393508 | 45393804 | 45393656 | 12  | 16  | 16  | 1.173048839 | 0.322157   | ZMYND8 | ENSG00000101040 |
| 20 | 45395153 | 45395338 | 45395245 | 9   | 9   | 23  | 0.48877035  | 0.978114   | ZMYND8 | ENSG00000101040 |
| 20 | 45396246 | 45396514 | 45396386 | 8   | 12  | 19  | 0.762481746 | 0.784291   | ZMYND8 | ENSG00000101040 |
| 20 | 45396518 | 45396733 | 45396625 | 8   | 10  | 14  | 0.860235815 | 0.65444    | ZMYND8 | ENSG00000101040 |
| 20 | 45397534 | 45397891 | 45397676 | 12  | 17  | 12  | 1.62422147  | 0.088135   | ZMYND8 | ENSG00000101040 |
| 20 | 45397932 | 45399113 | 45398688 | 13  | 58  | 45  | 1.504562642 | 0.0182927  | ZMYND8 | ENSG00000101040 |
| 20 | 45399693 | 45400126 | 45399964 | 10  | 17  | 18  | 1.111309427 | 0.376188   | ZMYND8 | ENSG00000101040 |
| 20 | 45400233 | 45400415 | 45400282 | 8   | 10  | 13  | 0.921681231 | 0.585856   | ZMYND8 | ENSG00000101040 |
| 20 | 45400431 | 45400940 | 45400730 | 14  | 27  | 27  | 1.173048839 | 0.276183   | ZMYND8 | ENSG00000101040 |
| 20 | 45401079 | 45401261 | 45401135 | 8   | 8   | 3   | 2.639359888 | 0.0415794  | ZMYND8 | ENSG00000101040 |

|    |          |          |          |      |      |     |             |            |        |                 |
|----|----------|----------|----------|------|------|-----|-------------|------------|--------|-----------------|
| 20 | 45402913 | 45403510 | 45403196 | 11   | 25   | 34  | 0.871407709 | 0.706709   | ZMYND8 | ENSG00000101040 |
| 20 | 45405377 | 45405676 | 45405526 | 10   | 13   | 12  | 1.263283365 | 0.272203   | ZMYND8 | ENSG00000101040 |
| 20 | 45406940 | 45407684 | 45407527 | 11   | 31   | 25  | 1.443752418 | 0.0809131  | ZMYND8 | ENSG00000101040 |
| 20 | 45408193 | 45408573 | 45408408 | 10   | 17   | 20  | 1.005470434 | 0.496566   | ZMYND8 | ENSG00000101040 |
| 20 | 45409311 | 45409830 | 45409534 | 17   | 31   | 32  | 1.137501905 | 0.303042   | ZMYND8 | ENSG00000101040 |
| 20 | 45409912 | 45410382 | 45410090 | 20   | 31   | 39  | 0.938439071 | 0.608748   | ZMYND8 | ENSG00000101040 |
| 20 | 45410390 | 45410590 | 45410490 | 9    | 9    | 16  | 0.690028729 | 0.833766   | ZMYND8 | ENSG00000101040 |
| 20 | 45410699 | 45411391 | 45411152 | 10   | 28   | 37  | 0.895221483 | 0.676978   | ZMYND8 | ENSG00000101040 |
| 20 | 45411481 | 45412519 | 45411773 | 10   | 39   | 59  | 0.78203256  | 0.88942    | ZMYND8 | ENSG00000101040 |
| 20 | 45412876 | 45413135 | 45413005 | 9    | 10   | 24  | 0.516141489 | 0.97297    | ZMYND8 | ENSG00000101040 |
| 20 | 45413216 | 45413672 | 45413395 | 9    | 16   | 40  | 0.486386104 | 0.995735   | ZMYND8 | ENSG00000101040 |
| 20 | 45413722 | 45414429 | 45414250 | 18   | 42   | 58  | 0.8549339   | 0.78612    | ZMYND8 | ENSG00000101040 |
| 20 | 45414451 | 45416870 | 45415048 | 19   | 148  | 131 | 1.324123311 | 0.00933821 | ZMYND8 | ENSG00000101040 |
| 20 | 45417092 | 45417440 | 45417270 | 19   | 24   | 28  | 1.011248999 | 0.486424   | ZMYND8 | ENSG00000101040 |
| 20 | 45417499 | 45418003 | 45417826 | 13   | 27   | 40  | 0.801106524 | 0.821751   | ZMYND8 | ENSG00000101040 |
| 20 | 45418029 | 45418352 | 45418190 | 16   | 17   | 26  | 0.78203256  | 0.796561   | ZMYND8 | ENSG00000101040 |
| 20 | 45418524 | 45420310 | 45419837 | 76   | 243  | 154 | 1.846605915 | 6.51E-10   | ZMYND8 | ENSG00000101040 |
| 20 | 45420414 | 45424051 | 45422974 | 87   | 533  | 237 | 2.631966724 | 6.95E-39   | ZMYND8 | ENSG00000101040 |
| 20 | 45424589 | 45425061 | 45424890 | 18   | 33   | 29  | 1.329455351 | 0.127332   | ZMYND8 | ENSG00000101040 |
| 20 | 45427485 | 45427673 | 45427570 | 8    | 10   | 11  | 1.075294769 | 0.434143   | ZMYND8 | ENSG00000101040 |
| 20 | 45429051 | 45429350 | 45429200 | 19   | 22   | 20  | 1.284767776 | 0.203104   | ZMYND8 | ENSG00000101040 |
| 20 | 45431327 | 45431665 | 45431496 | 17   | 23   | 30  | 0.908166843 | 0.642402   | ZMYND8 | ENSG00000101040 |
| 20 | 45432988 | 45433578 | 45433167 | 14   | 28   | 31  | 1.063075511 | 0.407785   | ZMYND8 | ENSG00000101040 |
| 20 | 45434791 | 45435912 | 45435371 | 40   | 104  | 67  | 1.811325414 | 5.31E-05   | ZMYND8 | ENSG00000101040 |
| 20 | 45437246 | 45437680 | 45437501 | 8    | 16   | 16  | 1.173048839 | 0.322157   | ZMYND8 | ENSG00000101040 |
| 20 | 45438630 | 45440539 | 45439471 | 1028 | 1483 | 58  | 29.50516064 | 0          | ZMYND8 | ENSG00000101040 |
| 20 | 45440759 | 45441406 | 45441082 | 12   | 32   | 33  | 1.138547403 | 0.298948   | ZMYND8 | ENSG00000101040 |
| 20 | 45442098 | 45442410 | 45442239 | 11   | 15   | 23  | 0.78203256  | 0.783431   | ZMYND8 | ENSG00000101040 |
| 20 | 45442822 | 45443032 | 45442927 | 9    | 9    | 15  | 0.733155525 | 0.788527   | ZMYND8 | ENSG00000101040 |
| 20 | 45444497 | 45445502 | 45444814 | 15   | 46   | 47  | 1.148610322 | 0.25071    | ZMYND8 | ENSG00000101040 |
| 20 | 45445659 | 45446036 | 45445838 | 9    | 16   | 18  | 1.049570014 | 0.445264   | ZMYND8 | ENSG00000101040 |
| 20 | 45446044 | 45446754 | 45446375 | 103  | 164  | 75  | 2.54675077  | 9.79E-13   | ZMYND8 | ENSG00000101040 |
| 20 | 45446786 | 45447426 | 45447318 | 12   | 27   | 33  | 0.966040221 | 0.556918   | ZMYND8 | ENSG00000101040 |
| 20 | 45450195 | 45450754 | 45450374 | 13   | 25   | 29  | 1.016642327 | 0.478103   | ZMYND8 | ENSG00000101040 |

|    |          |          |          |    |     |    |             |             |         |                 |
|----|----------|----------|----------|----|-----|----|-------------|-------------|---------|-----------------|
| 20 | 45451847 | 45452608 | 45452417 | 72 | 121 | 38 | 3.669537395 | 6.23E-15    | ZMYND8  | ENSG00000101040 |
| 20 | 45453002 | 45453308 | 45453155 | 11 | 12  | 8  | 1.694403879 | 0.107291    | ZMYND8  | ENSG00000101040 |
| 20 | 45453449 | 45453758 | 45453599 | 8  | 12  | 11 | 1.270802909 | 0.274822    | ZMYND8  | ENSG00000101040 |
| 20 | 45453963 | 45455367 | 45454460 | 22 | 86  | 75 | 1.342832224 | 0.0299893   | ZMYND8  | ENSG00000101040 |
| 20 | 45455566 | 45456212 | 45455888 | 13 | 28  | 12 | 2.616801257 | 0.00120123  | ZMYND8  | ENSG00000101040 |
| 20 | 45458434 | 45458798 | 45458603 | 10 | 14  | 22 | 0.765031852 | 0.797133    | ZMYND8  | ENSG00000101040 |
| 20 | 45459227 | 45459613 | 45459390 | 15 | 19  | 19 | 1.173048839 | 0.308076    | ZMYND8  | ENSG00000101040 |
| 20 | 45459732 | 45460027 | 45459879 | 8  | 11  | 12 | 1.082814313 | 0.424156    | ZMYND8  | ENSG00000101040 |
| 20 | 45460076 | 45460460 | 45460255 | 12 | 20  | 27 | 0.879786629 | 0.67594     | ZMYND8  | ENSG00000101040 |
| 20 | 45461078 | 45461539 | 45461208 | 8  | 16  | 22 | 0.867036099 | 0.677498    | ZMYND8  | ENSG00000101040 |
| 20 | 45461757 | 45462198 | 45462020 | 22 | 31  | 10 | 3.412505714 | 6.73E-05    | ZMYND8  | ENSG00000101040 |
| 20 | 45462944 | 45463230 | 45463087 | 17 | 21  | 26 | 0.955817573 | 0.566095    | ZMYND8  | ENSG00000101040 |
| 20 | 45465992 | 45466256 | 45466082 | 11 | 13  | 18 | 0.864351776 | 0.666373    | ZMYND8  | ENSG00000101040 |
| 20 | 45466468 | 45466844 | 45466647 | 10 | 18  | 8  | 2.476436439 | 0.00924552  | ZMYND8  | ENSG00000101040 |
| 20 | 45468258 | 45468590 | 45468424 | 10 | 16  | 15 | 1.246364392 | 0.263987    | ZMYND8  | ENSG00000101040 |
| 20 | 45469330 | 45469790 | 45469652 | 11 | 18  | 26 | 0.825478813 | 0.744556    | ZMYND8  | ENSG00000101040 |
| 20 | 45470151 | 45470369 | 45470260 | 9  | 12  | 11 | 1.270802909 | 0.274822    | ZMYND8  | ENSG00000101040 |
| 20 | 45470758 | 45471105 | 45470931 | 10 | 12  | 13 | 1.089259637 | 0.414883    | ZMYND8  | ENSG00000101040 |
| 20 | 45472632 | 45472825 | 45472684 | 10 | 10  | 20 | 0.614454154 | 0.913752    | ZMYND8  | ENSG00000101040 |
| 20 | 45473250 | 45473777 | 45473540 | 14 | 31  | 25 | 1.443752418 | 0.0809131   | ZMYND8  | ENSG00000101040 |
| 20 | 45474962 | 45475898 | 45475152 | 24 | 55  | 42 | 1.527691512 | 0.0176394   | ZMYND8  | ENSG00000101040 |
| 20 | 45477437 | 45477892 | 45477661 | 11 | 22  | 32 | 0.817579494 | 0.775827    | ZMYND8  | ENSG00000101040 |
| 20 | 45478389 | 45478572 | 45478480 | 8  | 9   | 7  | 1.466311049 | 0.20706     | ZMYND8  | ENSG00000101040 |
| 20 | 45478772 | 45479156 | 45478951 | 18 | 27  | 26 | 1.216495093 | 0.234297    | ZMYND8  | ENSG00000101040 |
| 20 | 45479977 | 45480364 | 45480204 | 13 | 19  | 29 | 0.78203256  | 0.808559    | RPL35AP | ENSG00000217854 |
| 20 | 45480467 | 45480717 | 45480592 | 9  | 10  | 19 | 0.645176862 | 0.887754    | RPL35AP | ENSG00000217854 |
| 20 | 45481850 | 45482623 | 45482288 | 14 | 40  | 20 | 2.29023821  | 0.000682165 | RPL35AP | ENSG00000217854 |
| 20 | 45483069 | 45483392 | 45483230 | 11 | 15  | 14 | 1.251252095 | 0.26676     | RPL35AP | ENSG00000217854 |
| 20 | 45483403 | 45483732 | 45483579 | 9  | 13  | 10 | 1.49297125  | 0.157311    | RPL35AP | ENSG00000217854 |
| 20 | 45484793 | 45485468 | 45484960 | 13 | 28  | 57 | 0.58652442  | 0.992281    | RPL35AP | ENSG00000217854 |
| 20 | 45488418 | 45488682 | 45488564 | 11 | 12  | 9  | 1.524963491 | 0.154777    | RPL35AP | ENSG00000217854 |
| 20 | 45489126 | 45489582 | 45489403 | 13 | 24  | 22 | 1.275053086 | 0.200162    | RPL35AP | ENSG00000217854 |
| 20 | 45489877 | 45490130 | 45490003 | 13 | 16  | 19 | 0.997091513 | 0.507069    | RPL35AP | ENSG00000217854 |
| 20 | 45490246 | 45490851 | 45490570 | 11 | 27  | 26 | 1.216495093 | 0.234297    | RPL35AP | ENSG00000217854 |



|    |          |          |          |     |     |     |             |            |         |                 |
|----|----------|----------|----------|-----|-----|-----|-------------|------------|---------|-----------------|
| 20 | 45492919 | 45493556 | 45493396 | 8   | 22  | 19  | 1.349006165 | 0.163006   | RPL35AP | ENSG00000217854 |
| 20 | 45494614 | 45494910 | 45494762 | 10  | 12  | 19  | 0.762481746 | 0.784291   | RPL35AP | ENSG00000217854 |
| 20 | 45495117 | 45495526 | 45495348 | 9   | 16  | 15  | 1.246364392 | 0.263987   | RPL35AP | ENSG00000217854 |
| 20 | 45495638 | 45495888 | 45495730 | 11  | 14  | 14  | 1.173048839 | 0.332418   | RPL35AP | ENSG00000217854 |
| 20 | 45496028 | 45496652 | 45496458 | 22  | 42  | 47  | 1.050856252 | 0.408415   | RPL35AP | ENSG00000217854 |
| 20 | 45496786 | 45497147 | 45496930 | 9   | 14  | 17  | 0.977540699 | 0.52995    | RPL35AP | ENSG00000217854 |
| 20 | 45497615 | 45498362 | 45497784 | 13  | 28  | 31  | 1.063075511 | 0.407785   | RPL35AP | ENSG00000217854 |
| 20 | 45500143 | 45500435 | 45500289 | 10  | 11  | 11  | 1.173048839 | 0.349489   | RPL35AP | ENSG00000217854 |
| 20 | 45500754 | 45501745 | 45500987 | 18  | 61  | 70  | 1.024352508 | 0.446623   | RPL35AP | ENSG00000217854 |
| 20 | 45502411 | 45502591 | 45502501 | 8   | 8   | 10  | 0.959767232 | 0.541959   | RPL35AP | ENSG00000217854 |
| 20 | 45503301 | 45503522 | 45503404 | 9   | 11  | 14  | 0.938439071 | 0.570297   | RPL35AP | ENSG00000217854 |
| 20 | 45504564 | 45504866 | 45504743 | 15  | 19  | 13  | 1.675784056 | 0.0660887  | RPL35AP | ENSG00000217854 |
| 20 | 45505181 | 45505379 | 45505280 | 10  | 10  | 7   | 1.612942154 | 0.147335   | RPL35AP | ENSG00000217854 |
| 20 | 45510595 | 45510820 | 45510707 | 9   | 10  | 20  | 0.614454154 | 0.913752   | RPL35AP | ENSG00000217854 |
| 20 | 45511655 | 45512018 | 45511814 | 12  | 19  | 6   | 3.351568112 | 0.00134187 | RPL35AP | ENSG00000217854 |
| 20 | 45513191 | 45513626 | 45513370 | 8   | 16  | 19  | 0.997091513 | 0.507069   | RPL35AP | ENSG00000217854 |
| 20 | 45513671 | 45513879 | 45513837 | 8   | 10  | 15  | 0.806471077 | 0.716145   | RPL35AP | ENSG00000217854 |
| 20 | 45513883 | 45514077 | 45513964 | 8   | 9   | 11  | 0.977540699 | 0.526123   | RPL35AP | ENSG00000217854 |
| 20 | 45514810 | 45515114 | 45514989 | 14  | 19  | 15  | 1.466311049 | 0.125014   | RPL35AP | ENSG00000217854 |
| 20 | 45515156 | 45515835 | 45515335 | 14  | 33  | 38  | 1.022657962 | 0.464235   | RPL35AP | ENSG00000217854 |
| 20 | 45516847 | 45518068 | 45517463 | 67  | 149 | 69  | 2.513676084 | 1.59E-11   | RPL35AP | ENSG00000217854 |
| 20 | 45518114 | 45518904 | 45518725 | 16  | 41  | 39  | 1.231701281 | 0.173058   | RPL35AP | ENSG00000217854 |
| 20 | 45519191 | 45519685 | 45519362 | 9   | 19  | 33  | 0.690028729 | 0.911874   | RPL35AP | ENSG00000217854 |
| 20 | 45519695 | 45519973 | 45519849 | 10  | 13  | 19  | 0.821134188 | 0.720637   | RPL35AP | ENSG00000217854 |
| 20 | 45520400 | 45520590 | 45520520 | 9   | 10  | 10  | 1.173048839 | 0.355733   | RPL35AP | ENSG00000217854 |
| 20 | 45521440 | 45522101 | 45521852 | 18  | 45  | 42  | 1.254889456 | 0.142316   | RPL35AP | ENSG00000217854 |
| 20 | 45522956 | 45523239 | 45523117 | 11  | 15  | 13  | 1.340627245 | 0.210788   | RPL35AP | ENSG00000217854 |
| 20 | 45523320 | 45523723 | 45523555 | 13  | 21  | 25  | 0.992579787 | 0.513422   | RPL35AP | ENSG00000217854 |
| 20 | 45524457 | 45524644 | 45524564 | 8   | 8   | 9   | 1.055743955 | 0.456865   | RPL35AP | ENSG00000217854 |
| 20 | 45524879 | 45525179 | 45525049 | 11  | 14  | 12  | 1.353517892 | 0.211235   | RPL35AP | ENSG00000217854 |
| 20 | 45525721 | 45526019 | 45525870 | 10  | 14  | 16  | 1.035043094 | 0.464533   | RPL35AP | ENSG00000217854 |
| 20 | 45526072 | 45527252 | 45526787 | 184 | 353 | 125 | 3.295708644 | 2.51E-35   | RPL35AP | ENSG00000217854 |
| 20 | 45527609 | 45527821 | 45527680 | 9   | 11  | 13  | 1.005470434 | 0.498567   | RPL35AP | ENSG00000217854 |
| 20 | 45527869 | 45528462 | 45528172 | 11  | 28  | 30  | 1.097368269 | 0.361281   | RPL35AP | ENSG00000217854 |

|    |          |          |          |     |     |     |             |           |         |                 |
|----|----------|----------|----------|-----|-----|-----|-------------|-----------|---------|-----------------|
| 20 | 45528472 | 45529089 | 45528780 | 12  | 27  | 30  | 1.059527984 | 0.414378  | RPL35AP | ENSG00000217854 |
| 20 | 45529568 | 45529771 | 45529666 | 8   | 8   | 7   | 1.319679944 | 0.283403  | RPL35AP | ENSG00000217854 |
| 20 | 45530182 | 45531421 | 45530804 | 72  | 190 | 46  | 4.767070815 | 7.38E-28  | RPL35AP | ENSG00000217854 |
| 20 | 45531869 | 45532293 | 45532012 | 12  | 19  | 26  | 0.868925066 | 0.687875  | RPL35AP | ENSG00000217854 |
| 20 | 45533040 | 45533399 | 45533180 | 8   | 12  | 15  | 0.953102182 | 0.555895  | RPL35AP | ENSG00000217854 |
| 20 | 45533665 | 45534222 | 45533936 | 10  | 22  | 30  | 0.870326558 | 0.697587  | RPL35AP | ENSG00000217854 |
| 20 | 45536764 | 45536951 | 45536857 | 8   | 8   | 6   | 1.508205651 | 0.203852  | RPL35AP | ENSG00000217854 |
| 20 | 45537759 | 45538012 | 45537885 | 11  | 14  | 9   | 1.759573259 | 0.0786014 | RPL35AP | ENSG00000217854 |
| 20 | 45538503 | 45539244 | 45538994 | 9   | 27  | 34  | 0.938439071 | 0.602291  | RPL35AP | ENSG00000217854 |
| 20 | 45540362 | 45540808 | 45540629 | 13  | 21  | 13  | 1.843362462 | 0.0337179 | RPL35AP | ENSG00000217854 |
| 20 | 45541256 | 45541668 | 45541489 | 9   | 18  | 21  | 1.013087634 | 0.486601  | RPL35AP | ENSG00000217854 |
| 20 | 45541737 | 45542198 | 45541916 | 15  | 26  | 33  | 0.931538784 | 0.611874  | RPL35AP | ENSG00000217854 |
| 20 | 45542308 | 45542614 | 45542444 | 10  | 12  | 7   | 1.906204364 | 0.0695918 | RPL35AP | ENSG00000217854 |
| 20 | 45543681 | 45544551 | 45544144 | 65  | 119 | 40  | 3.433313676 | 8.31E-14  |         | ENSG00000202186 |
| 20 | 45545056 | 45545649 | 45545481 | 12  | 27  | 22  | 1.428059457 | 0.101472  |         | ENSG00000202186 |
| 20 | 45546480 | 45547101 | 45546735 | 20  | 39  | 35  | 1.303387599 | 0.124126  |         | ENSG00000202186 |
| 20 | 45547256 | 45547494 | 45547375 | 8   | 13  | 11  | 1.368556979 | 0.211388  |         | ENSG00000202186 |
| 20 | 45549136 | 45550178 | 45549852 | 29  | 69  | 62  | 1.303387599 | 0.063349  |         | ENSG00000202186 |
| 20 | 45553007 | 45553292 | 45553143 | 8   | 12  | 16  | 0.897037348 | 0.621544  |         | ENSG00000201742 |
| 20 | 45554370 | 45554736 | 45554596 | 8   | 14  | 23  | 0.733155525 | 0.834412  |         | ENSG00000201742 |
| 20 | 45554993 | 45556439 | 45556191 | 83  | 283 | 109 | 3.028598822 | 4.83E-26  |         | ENSG00000201742 |
| 20 | 45556737 | 45557072 | 45556944 | 8   | 13  | 14  | 1.094845583 | 0.406217  |         | ENSG00000201742 |
| 20 | 45557432 | 45557917 | 45557611 | 11  | 19  | 24  | 0.938439071 | 0.587839  |         | ENSG00000201742 |
| 20 | 45558247 | 45558574 | 45558395 | 10  | 13  | 19  | 0.821134188 | 0.720637  |         | ENSG00000201742 |
| 20 | 45559087 | 45559440 | 45559263 | 11  | 16  | 8   | 2.215758919 | 0.0222902 |         | ENSG00000201742 |
| 20 | 45559581 | 45560014 | 45559930 | 8   | 15  | 18  | 0.987830602 | 0.518173  | NCOA3   | ENSG00000124151 |
| 20 | 45561371 | 45561626 | 45561487 | 9   | 13  | 12  | 1.263283365 | 0.272203  | NCOA3   | ENSG00000124151 |
| 20 | 45562455 | 45565638 | 45564069 | 92  | 413 | 241 | 2.006786031 | 7.28E-19  | NCOA3   | ENSG00000124151 |
| 20 | 45565651 | 45566222 | 45565830 | 9   | 21  | 46  | 0.549086691 | 0.992086  | NCOA3   | ENSG00000124151 |
| 20 | 45566408 | 45566735 | 45566558 | 10  | 12  | 17  | 0.84720194  | 0.681997  | NCOA3   | ENSG00000124151 |
| 20 | 45567461 | 45567771 | 45567616 | 12  | 15  | 23  | 0.78203256  | 0.783431  | NCOA3   | ENSG00000124151 |
| 20 | 45568137 | 45569211 | 45568752 | 105 | 165 | 108 | 1.786478049 | 9.05E-07  | NCOA3   | ENSG00000124151 |
| 20 | 45569440 | 45569828 | 45569581 | 12  | 17  | 24  | 0.844595164 | 0.713005  | NCOA3   | ENSG00000124151 |
| 20 | 45570415 | 45570696 | 45570564 | 8   | 11  | 16  | 0.828034475 | 0.698553  | NCOA3   | ENSG00000124151 |

|    |          |          |          |    |    |    |             |            |       |                 |
|----|----------|----------|----------|----|----|----|-------------|------------|-------|-----------------|
| 20 | 45572601 | 45573535 | 45573157 | 11 | 41 | 43 | 1.119728438 | 0.301304   | NCOA3 | ENSG00000124151 |
| 20 | 45575790 | 45576036 | 45575926 | 9  | 11 | 13 | 1.005470434 | 0.498567   | NCOA3 | ENSG00000124151 |
| 20 | 45577926 | 45578200 | 45578070 | 8  | 10 | 9  | 1.290353723 | 0.279648   | NCOA3 | ENSG00000124151 |
| 20 | 45578317 | 45578507 | 45578438 | 8  | 9  | 14 | 0.78203256  | 0.734892   | NCOA3 | ENSG00000124151 |
| 20 | 45579920 | 45580148 | 45580060 | 8  | 12 | 14 | 1.016642327 | 0.486402   | NCOA3 | ENSG00000124151 |
| 20 | 45581465 | 45581874 | 45581644 | 8  | 14 | 14 | 1.173048839 | 0.332418   | NCOA3 | ENSG00000124151 |
| 20 | 45584875 | 45585070 | 45584949 | 8  | 8  | 8  | 1.173048839 | 0.36929    | NCOA3 | ENSG00000124151 |
| 20 | 45585455 | 45585752 | 45585620 | 11 | 15 | 7  | 2.346097679 | 0.0195693  | NCOA3 | ENSG00000124151 |
| 20 | 45586442 | 45586869 | 45586649 | 9  | 17 | 14 | 1.407658607 | 0.162567   | NCOA3 | ENSG00000124151 |
| 20 | 45592019 | 45592271 | 45592145 | 11 | 13 | 12 | 1.263283365 | 0.272203   | NCOA3 | ENSG00000124151 |
| 20 | 45593606 | 45593896 | 45593721 | 10 | 12 | 23 | 0.635401455 | 0.914098   | NCOA3 | ENSG00000124151 |
| 20 | 45593978 | 45594231 | 45594118 | 8  | 10 | 13 | 0.921681231 | 0.585856   | NCOA3 | ENSG00000124151 |
| 20 | 45594259 | 45594889 | 45594437 | 14 | 30 | 25 | 1.398635155 | 0.102563   | NCOA3 | ENSG00000124151 |
| 20 | 45595531 | 45595836 | 45595657 | 10 | 15 | 16 | 1.104045966 | 0.390393   | NCOA3 | ENSG00000124151 |
| 20 | 45596132 | 45596715 | 45596493 | 10 | 24 | 21 | 1.333010045 | 0.162162   | NCOA3 | ENSG00000124151 |
| 20 | 45597187 | 45597582 | 45597403 | 14 | 24 | 19 | 1.466311049 | 0.0993901  | NCOA3 | ENSG00000124151 |
| 20 | 45601454 | 45602455 | 45601942 | 14 | 52 | 48 | 1.268807928 | 0.114795   |       | ENSG00000221294 |
| 20 | 45602586 | 45602821 | 45602688 | 8  | 11 | 13 | 1.005470434 | 0.498567   |       | ENSG00000221294 |
| 20 | 45603109 | 45603491 | 45603341 | 20 | 25 | 18 | 1.605224727 | 0.0562573  |       | ENSG00000221294 |
| 20 | 45604336 | 45604689 | 45604512 | 10 | 15 | 14 | 1.251252095 | 0.26676    |       | ENSG00000221294 |
| 20 | 45604895 | 45605512 | 45605192 | 17 | 30 | 27 | 1.298732644 | 0.157794   |       | ENSG00000221294 |
| 20 | 45606373 | 45606854 | 45606599 | 21 | 35 | 19 | 2.111487911 | 0.00288271 |       | ENSG00000221294 |
| 20 | 45606944 | 45607370 | 45607251 | 12 | 19 | 17 | 1.303387599 | 0.207073   |       | ENSG00000221294 |
| 20 | 45607627 | 45607878 | 45607753 | 8  | 10 | 16 | 0.759031602 | 0.770272   |       | ENSG00000221294 |
| 20 | 45608152 | 45608785 | 45608556 | 28 | 47 | 21 | 2.559379286 | 6.58E-05   |       | ENSG00000221294 |
| 20 | 45608898 | 45609193 | 45609065 | 13 | 16 | 17 | 1.107879459 | 0.383112   |       | ENSG00000221294 |
| 20 | 45609269 | 45609487 | 45609411 | 8  | 9  | 9  | 1.173048839 | 0.362316   |       | ENSG00000221294 |
| 20 | 45610114 | 45610481 | 45610238 | 11 | 16 | 13 | 1.424416448 | 0.161813   |       | ENSG00000221294 |
| 20 | 45611603 | 45611835 | 45611768 | 8  | 10 | 17 | 0.71686318  | 0.816679   |       | ENSG00000221294 |
| 20 | 45613420 | 45613679 | 45613549 | 8  | 10 | 24 | 0.516141489 | 0.97297    |       | ENSG00000221294 |
| 20 | 45614035 | 45614323 | 45614183 | 12 | 15 | 14 | 1.251252095 | 0.26676    |       | ENSG00000221294 |
| 20 | 45614752 | 45615087 | 45614914 | 8  | 12 | 17 | 0.84720194  | 0.681997   |       | ENSG00000221294 |
| 20 | 45615256 | 45615483 | 45615339 | 8  | 10 | 11 | 1.075294769 | 0.434143   |       | ENSG00000221294 |
| 20 | 45617578 | 45617824 | 45617704 | 9  | 13 | 16 | 0.966040221 | 0.542489   |       | ENSG00000221294 |

|    |          |          |          |    |     |    |             |            |                 |
|----|----------|----------|----------|----|-----|----|-------------|------------|-----------------|
| 20 | 45619902 | 45620103 | 45619996 | 8  | 9   | 8  | 1.303387599 | 0.281715   | ENSG00000221294 |
| 20 | 45620801 | 45621343 | 45620966 | 11 | 25  | 39 | 0.762481746 | 0.864096   | ENSG00000221294 |
| 20 | 45622475 | 45622725 | 45622600 | 9  | 9   | 9  | 1.173048839 | 0.362316   | ENSG00000221294 |
| 20 | 45623612 | 45624088 | 45623982 | 8  | 16  | 16 | 1.173048839 | 0.322157   | ENSG00000221294 |
| 20 | 45625068 | 45625375 | 45625205 | 10 | 13  | 17 | 0.912371319 | 0.606688   | ENSG00000221294 |
| 20 | 45627733 | 45627942 | 45627823 | 9  | 9   | 17 | 0.6516938   | 0.871116   | ENSG00000221294 |
| 20 | 45628386 | 45628642 | 45628554 | 8  | 10  | 12 | 0.992579787 | 0.511743   | ENSG00000221294 |
| 20 | 45630030 | 45630511 | 45630275 | 39 | 51  | 30 | 1.967694827 | 0.00113922 | ENSG00000221294 |
| 20 | 45635670 | 45636459 | 45635950 | 20 | 48  | 53 | 1.064433206 | 0.377392   | ENSG00000221294 |
| 20 | 45636788 | 45637465 | 45637296 | 20 | 37  | 22 | 1.938080691 | 0.00520068 | ENSG00000221294 |
| 20 | 45638580 | 45639790 | 45638923 | 66 | 166 | 75 | 2.577620476 | 4.33E-13   | ENSG00000221294 |
| 20 | 45640661 | 45641078 | 45640818 | 12 | 20  | 20 | 1.173048839 | 0.303681   | ENSG00000221294 |
| 20 | 45641258 | 45641438 | 45641348 | 8  | 9   | 15 | 0.733155525 | 0.788527   | ENSG00000221294 |
| 20 | 45641482 | 45641706 | 45641621 | 8  | 10  | 20 | 0.614454154 | 0.913752   | ENSG00000221294 |
| 20 | 45641865 | 45642076 | 45642026 | 9  | 10  | 21 | 0.58652442  | 0.934469   | ENSG00000221294 |
| 20 | 45642087 | 45642463 | 45642266 | 15 | 22  | 26 | 0.999263826 | 0.504058   | ENSG00000221294 |
| 20 | 45642715 | 45643178 | 45642923 | 8  | 17  | 8  | 2.346097679 | 0.0144542  | ENSG00000221294 |
| 20 | 45643451 | 45643771 | 45643622 | 10 | 14  | 16 | 1.035043094 | 0.464533   | ENSG00000221294 |
| 20 | 45645298 | 45645727 | 45645567 | 10 | 19  | 24 | 0.938439071 | 0.587839   | ENSG00000221294 |
| 20 | 45645825 | 45646073 | 45645949 | 8  | 11  | 8  | 1.564065119 | 0.151515   | ENSG00000221294 |
| 20 | 45647528 | 45647912 | 45647722 | 10 | 18  | 28 | 0.76854924  | 0.819816   | ENSG00000221294 |
| 20 | 45648812 | 45649307 | 45648991 | 14 | 24  | 18 | 1.543485315 | 0.0748829  | ENSG00000221294 |
| 20 | 45651177 | 45651422 | 45651329 | 8  | 10  | 11 | 1.075294769 | 0.434143   | ENSG00000221294 |
| 20 | 45651442 | 45651662 | 45651508 | 8  | 9   | 9  | 1.173048839 | 0.362316   | ENSG00000221294 |
| 20 | 45651956 | 45652222 | 45652107 | 9  | 11  | 14 | 0.938439071 | 0.570297   | ENSG00000221294 |
| 20 | 45654990 | 45655191 | 45655082 | 8  | 8   | 6  | 1.508205651 | 0.203852   | ENSG00000221294 |
| 20 | 45657509 | 45657781 | 45657645 | 16 | 17  | 9  | 2.111487911 | 0.0248715  | ENSG00000221294 |
| 20 | 45658153 | 45658663 | 45658494 | 8  | 17  | 11 | 1.759573259 | 0.0609179  | ENSG00000221294 |
| 20 | 45661860 | 45662134 | 45661960 | 8  | 11  | 9  | 1.407658607 | 0.210479   | ENSG00000221294 |
| 20 | 45664720 | 45664954 | 45664844 | 10 | 11  | 22 | 0.612025481 | 0.924393   | ENSG00000218714 |
| 20 | 45666685 | 45666976 | 45666830 | 10 | 14  | 12 | 1.353517892 | 0.211235   | ENSG00000218714 |
| 20 | 45667675 | 45668330 | 45668160 | 11 | 25  | 30 | 0.983847414 | 0.527416   | ENSG00000218714 |
| 20 | 45668394 | 45668757 | 45668497 | 9  | 15  | 22 | 0.816033975 | 0.739972   | ENSG00000218714 |
| 20 | 45670465 | 45670662 | 45670521 | 8  | 8   | 9  | 1.055743955 | 0.456865   | ENSG00000218714 |

|    |          |          |          |    |    |    |             |           |                       |
|----|----------|----------|----------|----|----|----|-------------|-----------|-----------------------|
| 20 | 45670905 | 45671190 | 45671081 | 9  | 12 | 16 | 0.897037348 | 0.621544  | ENSG00000218714       |
| 20 | 45671935 | 45672219 | 45672077 | 11 | 15 | 12 | 1.443752418 | 0.160732  | ENSG00000218714       |
| 20 | 45672645 | 45673639 | 45672815 | 13 | 43 | 37 | 1.358267077 | 0.0828177 | ENSG00000218714       |
| 20 | 45674746 | 45675212 | 45675033 | 13 | 24 | 14 | 1.955081399 | 0.0175993 | ENSG00000218714       |
| 20 | 45676126 | 45676395 | 45676234 | 10 | 12 | 14 | 1.016642327 | 0.486402  | ENSG00000218714       |
| 20 | 45676423 | 45676802 | 45676602 | 8  | 15 | 20 | 0.893751497 | 0.63757   | ENSG00000218714       |
| 20 | 45676818 | 45677189 | 45677010 | 14 | 21 | 23 | 1.075294769 | 0.4051    | ENSG00000218714       |
| 20 | 45680713 | 45680934 | 45680829 | 12 | 13 | 6  | 2.346097679 | 0.0266147 | ENSG00000218714       |
| 20 | 45682953 | 45683679 | 45683509 | 20 | 44 | 38 | 1.353517892 | 0.0827086 | ENSG00000218714       |
| 20 | 45684344 | 45684555 | 45684442 | 8  | 9  | 13 | 0.837892028 | 0.672794  | ENSG00000218714       |
| 20 | 45688602 | 45688959 | 45688780 | 10 | 15 | 23 | 0.78203256  | 0.783431  | ENSG00000218714       |
| 20 | 45689661 | 45690046 | 45689973 | 9  | 16 | 26 | 0.738586306 | 0.842793  | ENSG00000218714       |
| 20 | 45692051 | 45692383 | 45692213 | 16 | 20 | 23 | 1.026417734 | 0.468083  | ENSG00000218714       |
| 20 | 45694226 | 45694413 | 45694319 | 10 | 10 | 18 | 0.679133539 | 0.855647  | ENSG00000218714       |
| 20 | 45695319 | 45695507 | 45695413 | 8  | 9  | 10 | 1.066408036 | 0.444985  | ENSG00000218714       |
| 20 | 45695806 | 45695991 | 45695939 | 8  | 9  | 10 | 1.066408036 | 0.444985  | ENSG00000218714       |
| 20 | 45696034 | 45696443 | 45696342 | 9  | 17 | 18 | 1.111309427 | 0.376188  | ENSG00000218714       |
| 20 | 45698133 | 45698895 | 45698660 | 11 | 31 | 40 | 0.915550314 | 0.649172  | ENSG00000218714       |
| 20 | 45702240 | 45702572 | 45702406 | 9  | 15 | 18 | 0.987830602 | 0.518173  | ENSG00000218714       |
| 20 | 45704039 | 45704266 | 45704142 | 10 | 12 | 16 | 0.897037348 | 0.621544  | ENSG00000218714       |
| 20 | 45704341 | 45704717 | 45704497 | 12 | 18 | 19 | 1.114396397 | 0.369586  | ENSG00000218714       |
| 20 | 45704727 | 45705079 | 45704903 | 17 | 23 | 24 | 1.126126886 | 0.340424  | ENSG00000218714       |
| 20 | 45706094 | 45706407 | 45706250 | 8  | 11 | 7  | 1.759573259 | 0.102361  | ENSG00000218714       |
| 20 | 45706616 | 45706935 | 45706766 | 9  | 12 | 12 | 1.173048839 | 0.343543  | ENSG00000218714       |
| 20 | 45707141 | 45707538 | 45707339 | 10 | 20 | 19 | 1.231701281 | 0.25288   | ENSG00000218714       |
| 20 | 45708391 | 45709124 | 45708855 | 16 | 36 | 34 | 1.240080202 | 0.180985  | ENSG00000218714       |
| 20 | 45709311 | 45709701 | 45709490 | 13 | 20 | 19 | 1.231701281 | 0.25288   | ENSG00000218714       |
| 20 | 45711349 | 45711605 | 45711444 | 11 | 12 | 10 | 1.386330446 | 0.21117   | SULF2 ENSG00000196562 |
| 20 | 45711961 | 45712193 | 45712077 | 9  | 12 | 16 | 0.897037348 | 0.621544  | SULF2 ENSG00000196562 |
| 20 | 45712271 | 45712501 | 45712386 | 8  | 10 | 9  | 1.290353723 | 0.279648  | SULF2 ENSG00000196562 |
| 20 | 45713624 | 45713909 | 45713765 | 12 | 15 | 13 | 1.340627245 | 0.210788  | SULF2 ENSG00000196562 |
| 20 | 45714239 | 45714740 | 45714457 | 13 | 24 | 26 | 1.086156333 | 0.384927  | SULF2 ENSG00000196562 |
| 20 | 45715393 | 45716134 | 45715815 | 10 | 30 | 32 | 1.10195497  | 0.350579  | SULF2 ENSG00000196562 |
| 20 | 45716378 | 45716836 | 45716708 | 12 | 23 | 23 | 1.173048839 | 0.291252  | SULF2 ENSG00000196562 |

|    |          |          |          |     |     |     |             |             |       |                 |
|----|----------|----------|----------|-----|-----|-----|-------------|-------------|-------|-----------------|
| 20 | 45717208 | 45717642 | 45717331 | 11  | 20  | 22  | 1.071044592 | 0.412397    | SULF2 | ENSG00000196562 |
| 20 | 45718489 | 45718712 | 45718596 | 10  | 10  | 13  | 0.921681231 | 0.585856    | SULF2 | ENSG00000196562 |
| 20 | 45719186 | 45719416 | 45719325 | 9   | 12  | 11  | 1.270802909 | 0.274822    | SULF2 | ENSG00000196562 |
| 20 | 45720012 | 45720693 | 45720328 | 12  | 32  | 34  | 1.106017477 | 0.340504    | SULF2 | ENSG00000196562 |
| 20 | 45720818 | 45721074 | 45720934 | 9   | 11  | 19  | 0.703829304 | 0.840485    | SULF2 | ENSG00000196562 |
| 20 | 45721110 | 45721309 | 45721209 | 8   | 9   | 10  | 1.066408036 | 0.444985    | SULF2 | ENSG00000196562 |
| 20 | 45721318 | 45721644 | 45721481 | 8   | 12  | 14  | 1.016642327 | 0.486402    | SULF2 | ENSG00000196562 |
| 20 | 45721957 | 45722384 | 45722136 | 11  | 20  | 26  | 0.912371319 | 0.627883    | SULF2 | ENSG00000196562 |
| 20 | 45722399 | 45722735 | 45722568 | 9   | 14  | 25  | 0.676758946 | 0.893106    | SULF2 | ENSG00000196562 |
| 20 | 45723398 | 45724649 | 45723818 | 19  | 78  | 49  | 1.853417166 | 0.000256056 | SULF2 | ENSG00000196562 |
| 20 | 45724767 | 45725257 | 45724945 | 15  | 26  | 22  | 1.377057333 | 0.128834    | SULF2 | ENSG00000196562 |
| 20 | 45725262 | 45725688 | 45725501 | 15  | 27  | 10  | 2.9859425   | 0.000503424 | SULF2 | ENSG00000196562 |
| 20 | 45725690 | 45728470 | 45727574 | 498 | 829 | 141 | 6.856553075 | 6.64E-145   | SULF2 | ENSG00000196562 |
| 20 | 45728664 | 45729839 | 45729192 | 12  | 54  | 74  | 0.860235815 | 0.804662    | SULF2 | ENSG00000196562 |
| 20 | 45729877 | 45730143 | 45730015 | 10  | 14  | 22  | 0.765031852 | 0.797133    | SULF2 | ENSG00000196562 |
| 20 | 45730378 | 45730583 | 45730511 | 8   | 11  | 13  | 1.005470434 | 0.498567    | SULF2 | ENSG00000196562 |
| 20 | 45730862 | 45731081 | 45730971 | 8   | 10  | 13  | 0.921681231 | 0.585856    | SULF2 | ENSG00000196562 |
| 20 | 45732175 | 45732374 | 45732277 | 9   | 10  | 16  | 0.759031602 | 0.770272    | SULF2 | ENSG00000196562 |
| 20 | 45733192 | 45733601 | 45733369 | 9   | 17  | 21  | 0.959767232 | 0.55532     | SULF2 | ENSG00000196562 |
| 20 | 45734330 | 45734576 | 45734467 | 9   | 11  | 15  | 0.879786629 | 0.637414    | SULF2 | ENSG00000196562 |
| 20 | 45735181 | 45735541 | 45735321 | 16  | 21  | 18  | 1.358267077 | 0.163254    | SULF2 | ENSG00000196562 |
| 20 | 45735592 | 45735829 | 45735692 | 10  | 12  | 9   | 1.524963491 | 0.154777    | SULF2 | ENSG00000196562 |
| 20 | 45735889 | 45736452 | 45736179 | 13  | 29  | 23  | 1.466311049 | 0.0797221   | SULF2 | ENSG00000196562 |
| 20 | 45736523 | 45736824 | 45736654 | 12  | 15  | 16  | 1.104045966 | 0.390393    | SULF2 | ENSG00000196562 |
| 20 | 45737078 | 45737366 | 45737175 | 8   | 12  | 19  | 0.762481746 | 0.784291    | SULF2 | ENSG00000196562 |
| 20 | 45738335 | 45739602 | 45738715 | 14  | 60  | 58  | 1.212813207 | 0.145665    | SULF2 | ENSG00000196562 |
| 20 | 45739756 | 45740764 | 45740189 | 48  | 110 | 87  | 1.47964115  | 0.00289853  | SULF2 | ENSG00000196562 |
| 20 | 45740790 | 45741094 | 45740944 | 13  | 15  | 12  | 1.443752418 | 0.160732    | SULF2 | ENSG00000196562 |
| 20 | 45741167 | 45741994 | 45741517 | 16  | 44  | 31  | 1.64959993  | 0.0142651   | SULF2 | ENSG00000196562 |
| 20 | 45742019 | 45742384 | 45742205 | 8   | 14  | 18  | 0.926091189 | 0.59273     | SULF2 | ENSG00000196562 |
| 20 | 45742724 | 45743460 | 45743097 | 15  | 37  | 22  | 1.938080691 | 0.00520068  | SULF2 | ENSG00000196562 |
| 20 | 45743567 | 45743933 | 45743649 | 11  | 17  | 7   | 2.639359888 | 0.00777415  | SULF2 | ENSG00000196562 |
| 20 | 45744093 | 45744640 | 45744272 | 13  | 26  | 26  | 1.173048839 | 0.279807    | SULF2 | ENSG00000196562 |
| 20 | 45744665 | 45745072 | 45744972 | 8   | 16  | 20  | 0.949610965 | 0.567123    | SULF2 | ENSG00000196562 |

|    |          |          |          |    |    |    |             |            |       |                 |
|----|----------|----------|----------|----|----|----|-------------|------------|-------|-----------------|
| 20 | 45745203 | 45745434 | 45745316 | 11 | 11 | 14 | 0.938439071 | 0.570297   | SULF2 | ENSG00000196562 |
| 20 | 45745545 | 45745817 | 45745687 | 14 | 17 | 12 | 1.62422147  | 0.088135   | SULF2 | ENSG00000196562 |
| 20 | 45745823 | 45746182 | 45746002 | 10 | 17 | 20 | 1.005470434 | 0.496566   | SULF2 | ENSG00000196562 |
| 20 | 45746275 | 45746473 | 45746321 | 8  | 9  | 11 | 0.977540699 | 0.526123   | SULF2 | ENSG00000196562 |
| 20 | 45746486 | 45746707 | 45746616 | 8  | 10 | 17 | 0.71686318  | 0.816679   | SULF2 | ENSG00000196562 |
| 20 | 45747114 | 45747393 | 45747220 | 9  | 12 | 7  | 1.906204364 | 0.0695918  | SULF2 | ENSG00000196562 |
| 20 | 45747869 | 45748432 | 45748235 | 12 | 27 | 23 | 1.368556979 | 0.128845   | SULF2 | ENSG00000196562 |
| 20 | 45750218 | 45750621 | 45750397 | 10 | 18 | 19 | 1.114396397 | 0.369586   | SULF2 | ENSG00000196562 |
| 20 | 45750648 | 45750890 | 45750731 | 9  | 11 | 13 | 1.005470434 | 0.498567   | SULF2 | ENSG00000196562 |
| 20 | 45751069 | 45751412 | 45751240 | 9  | 15 | 21 | 0.853126429 | 0.691243   | SULF2 | ENSG00000196562 |
| 20 | 45751955 | 45752376 | 45752106 | 10 | 20 | 16 | 1.449060331 | 0.126098   | SULF2 | ENSG00000196562 |
| 20 | 45753401 | 45753933 | 45753754 | 14 | 24 | 34 | 0.837892028 | 0.754916   | SULF2 | ENSG00000196562 |
| 20 | 45754746 | 45755177 | 45754921 | 9  | 17 | 17 | 1.173048839 | 0.317303   | SULF2 | ENSG00000196562 |
| 20 | 45756349 | 45756703 | 45756600 | 8  | 13 | 16 | 0.966040221 | 0.542489   | SULF2 | ENSG00000196562 |
| 20 | 45756841 | 45757568 | 45757189 | 16 | 37 | 41 | 1.061329902 | 0.396992   | SULF2 | ENSG00000196562 |
| 20 | 45758103 | 45758439 | 45758300 | 12 | 17 | 22 | 0.918038222 | 0.611544   | SULF2 | ENSG00000196562 |
| 20 | 45760090 | 45760471 | 45760218 | 9  | 16 | 16 | 1.173048839 | 0.322157   | SULF2 | ENSG00000196562 |
| 20 | 45760641 | 45760872 | 45760756 | 8  | 11 | 11 | 1.173048839 | 0.349489   | SULF2 | ENSG00000196562 |
| 20 | 45761106 | 45761495 | 45761316 | 9  | 16 | 22 | 0.867036099 | 0.677498   | SULF2 | ENSG00000196562 |
| 20 | 45762099 | 45762746 | 45762277 | 12 | 28 | 38 | 0.872267086 | 0.715311   | SULF2 | ENSG00000196562 |
| 20 | 45763226 | 45763814 | 45763635 | 13 | 29 | 31 | 1.099733287 | 0.355847   | SULF2 | ENSG00000196562 |
| 20 | 45763835 | 45764152 | 45763947 | 9  | 14 | 21 | 0.799806027 | 0.754204   | SULF2 | ENSG00000196562 |
| 20 | 45765366 | 45765580 | 45765512 | 10 | 12 | 16 | 0.897037348 | 0.621544   | SULF2 | ENSG00000196562 |
| 20 | 45765616 | 45765821 | 45765757 | 8  | 10 | 13 | 0.921681231 | 0.585856   | SULF2 | ENSG00000196562 |
| 20 | 45765870 | 45766416 | 45766057 | 8  | 21 | 22 | 1.122046716 | 0.351409   | SULF2 | ENSG00000196562 |
| 20 | 45766693 | 45767722 | 45767557 | 14 | 49 | 31 | 1.832888811 | 0.00322084 | SULF2 | ENSG00000196562 |
| 20 | 45767736 | 45768079 | 45767907 | 8  | 12 | 5  | 2.541605819 | 0.0225912  | SULF2 | ENSG00000196562 |
| 20 | 45768271 | 45768623 | 45768447 | 8  | 14 | 12 | 1.353517892 | 0.211235   | SULF2 | ENSG00000196562 |
| 20 | 45768828 | 45769183 | 45769005 | 12 | 18 | 16 | 1.311054585 | 0.208218   | SULF2 | ENSG00000196562 |
| 20 | 45769829 | 45770239 | 45770004 | 8  | 15 | 15 | 1.173048839 | 0.32719    | SULF2 | ENSG00000196562 |
| 20 | 45770584 | 45771194 | 45771098 | 8  | 21 | 37 | 0.679133539 | 0.930927   | SULF2 | ENSG00000196562 |
| 20 | 45771302 | 45771527 | 45771462 | 12 | 14 | 10 | 1.599612054 | 0.114822   | SULF2 | ENSG00000196562 |
| 20 | 45772494 | 45772949 | 45772673 | 10 | 20 | 24 | 0.985361025 | 0.523192   | SULF2 | ENSG00000196562 |
| 20 | 45773795 | 45774129 | 45773962 | 14 | 19 | 14 | 1.564065119 | 0.0925887  | SULF2 | ENSG00000196562 |

|    |          |          |          |    |     |    |             |             |       |                 |
|----|----------|----------|----------|----|-----|----|-------------|-------------|-------|-----------------|
| 20 | 45774242 | 45775037 | 45774749 | 29 | 62  | 45 | 1.606566889 | 0.00679509  | SULF2 | ENSG00000196562 |
| 20 | 45775214 | 45775643 | 45775393 | 10 | 17  | 18 | 1.111309427 | 0.376188    | SULF2 | ENSG00000196562 |
| 20 | 45775872 | 45776374 | 45776217 | 8  | 18  | 19 | 1.114396397 | 0.369586    | SULF2 | ENSG00000196562 |
| 20 | 45777301 | 45777625 | 45777463 | 9  | 12  | 12 | 1.173048839 | 0.343543    | SULF2 | ENSG00000196562 |
| 20 | 45779584 | 45779939 | 45779761 | 12 | 16  | 27 | 0.712208224 | 0.871901    | SULF2 | ENSG00000196562 |
| 20 | 45780425 | 45781050 | 45780749 | 17 | 34  | 31 | 1.283022168 | 0.15401     | SULF2 | ENSG00000196562 |
| 20 | 45781465 | 45781699 | 45781565 | 8  | 11  | 19 | 0.703829304 | 0.840485    | SULF2 | ENSG00000196562 |
| 20 | 45781707 | 45782104 | 45781940 | 12 | 18  | 17 | 1.238218219 | 0.258417    | SULF2 | ENSG00000196562 |
| 20 | 45782755 | 45783134 | 45782934 | 9  | 18  | 17 | 1.238218219 | 0.258417    | SULF2 | ENSG00000196562 |
| 20 | 45783497 | 45783717 | 45783607 | 8  | 10  | 12 | 0.992579787 | 0.511743    | SULF2 | ENSG00000196562 |
| 20 | 45783951 | 45784510 | 45784259 | 13 | 24  | 19 | 1.466311049 | 0.0993901   | SULF2 | ENSG00000196562 |
| 20 | 45785928 | 45786305 | 45786126 | 12 | 19  | 18 | 1.234788252 | 0.255641    | SULF2 | ENSG00000196562 |
| 20 | 45786468 | 45786678 | 45786573 | 8  | 10  | 22 | 0.561023358 | 0.950736    | SULF2 | ENSG00000196562 |
| 20 | 45786919 | 45788343 | 45787736 | 59 | 128 | 94 | 1.592876845 | 0.000258582 | SULF2 | ENSG00000196562 |
| 20 | 45788511 | 45788877 | 45788690 | 9  | 16  | 19 | 0.997091513 | 0.507069    | SULF2 | ENSG00000196562 |
| 20 | 45788917 | 45789316 | 45789212 | 10 | 17  | 14 | 1.407658607 | 0.162567    | SULF2 | ENSG00000196562 |
| 20 | 45790690 | 45790869 | 45790772 | 8  | 8   | 6  | 1.508205651 | 0.203852    | SULF2 | ENSG00000196562 |
| 20 | 45791417 | 45791766 | 45791591 | 10 | 16  | 23 | 0.830909595 | 0.726247    | SULF2 | ENSG00000196562 |
| 20 | 45791882 | 45792692 | 45792408 | 10 | 32  | 22 | 1.683070074 | 0.0259874   | SULF2 | ENSG00000196562 |
| 20 | 45796004 | 45796846 | 45796320 | 23 | 54  | 50 | 1.26505267  | 0.113244    | SULF2 | ENSG00000196562 |
| 20 | 45797093 | 45797887 | 45797569 | 11 | 33  | 33 | 1.173048839 | 0.256133    | SULF2 | ENSG00000196562 |
| 20 | 45798805 | 45799837 | 45799684 | 15 | 51  | 27 | 2.178519273 | 0.000306518 | SULF2 | ENSG00000196562 |
| 20 | 45800049 | 45800577 | 45800313 | 17 | 36  | 14 | 2.89352047  | 0.000111563 | SULF2 | ENSG00000196562 |
| 20 | 45801305 | 45801775 | 45801484 | 13 | 21  | 23 | 1.075294769 | 0.4051      | SULF2 | ENSG00000196562 |
| 20 | 45802152 | 45803440 | 45802763 | 14 | 63  | 69 | 1.072501796 | 0.344165    | SULF2 | ENSG00000196562 |
| 20 | 45803911 | 45804351 | 45804058 | 9  | 17  | 29 | 0.703829304 | 0.887065    | SULF2 | ENSG00000196562 |
| 20 | 45805206 | 45805554 | 45805385 | 8  | 12  | 11 | 1.270802909 | 0.274822    | SULF2 | ENSG00000196562 |
| 20 | 45805754 | 45806307 | 45805929 | 14 | 28  | 20 | 1.619924588 | 0.0441949   | SULF2 | ENSG00000196562 |
| 20 | 45806702 | 45806961 | 45806838 | 9  | 12  | 17 | 0.84720194  | 0.681997    | SULF2 | ENSG00000196562 |
| 20 | 45806969 | 45807214 | 45807085 | 9  | 11  | 22 | 0.612025481 | 0.924393    | SULF2 | ENSG00000196562 |
| 20 | 45807248 | 45807539 | 45807401 | 13 | 15  | 11 | 1.564065119 | 0.11768     | SULF2 | ENSG00000196562 |
| 20 | 45808029 | 45808676 | 45808376 | 11 | 29  | 22 | 1.530063703 | 0.0607898   | SULF2 | ENSG00000196562 |
| 20 | 45809267 | 45809793 | 45809436 | 17 | 29  | 22 | 1.530063703 | 0.0607898   | SULF2 | ENSG00000196562 |
| 20 | 45809924 | 45810192 | 45810044 | 13 | 14  | 8  | 1.955081399 | 0.0506438   | SULF2 | ENSG00000196562 |



|    |          |          |          |     |     |    |             |             |       |                 |
|----|----------|----------|----------|-----|-----|----|-------------|-------------|-------|-----------------|
| 20 | 45810301 | 45810500 | 45810329 | 8   | 8   | 18 | 0.555654713 | 0.936835    | SULF2 | ENSG00000196562 |
| 20 | 45810922 | 45811724 | 45811199 | 15  | 34  | 55 | 0.733155525 | 0.928893    | SULF2 | ENSG00000196562 |
| 20 | 45811774 | 45812096 | 45811921 | 11  | 15  | 16 | 1.104045966 | 0.390393    | SULF2 | ENSG00000196562 |
| 20 | 45812754 | 45812933 | 45812861 | 8   | 8   | 6  | 1.508205651 | 0.203852    | SULF2 | ENSG00000196562 |
| 20 | 45813602 | 45813792 | 45813721 | 8   | 9   | 7  | 1.466311049 | 0.20706     | SULF2 | ENSG00000196562 |
| 20 | 45814135 | 45814314 | 45814224 | 8   | 8   | 6  | 1.508205651 | 0.203852    | SULF2 | ENSG00000196562 |
| 20 | 45818444 | 45818708 | 45818576 | 9   | 11  | 14 | 0.938439071 | 0.570297    | SULF2 | ENSG00000196562 |
| 20 | 45825182 | 45825513 | 45825347 | 8   | 14  | 18 | 0.926091189 | 0.59273     | SULF2 | ENSG00000196562 |
| 20 | 45826308 | 45826529 | 45826424 | 9   | 10  | 14 | 0.860235815 | 0.65444     | SULF2 | ENSG00000196562 |
| 20 | 45826962 | 45827241 | 45827126 | 12  | 16  | 6  | 2.848832895 | 0.00632407  | SULF2 | ENSG00000196562 |
| 20 | 45827262 | 45827655 | 45827520 | 8   | 15  | 3  | 4.692195357 | 0.000718455 | SULF2 | ENSG00000196562 |
| 20 | 45827810 | 45828136 | 45827968 | 8   | 13  | 15 | 1.026417734 | 0.475096    | SULF2 | ENSG00000196562 |
| 20 | 45828328 | 45828817 | 45828507 | 9   | 19  | 8  | 2.606775198 | 0.00583935  | SULF2 | ENSG00000196562 |
| 20 | 45828920 | 45829244 | 45829094 | 8   | 13  | 6  | 2.346097679 | 0.0266147   | SULF2 | ENSG00000196562 |
| 20 | 45829258 | 45829541 | 45829381 | 14  | 19  | 5  | 3.910162798 | 0.000546977 | SULF2 | ENSG00000196562 |
| 20 | 45830055 | 45830651 | 45830334 | 9   | 23  | 18 | 1.481745902 | 0.0984143   | SULF2 | ENSG00000196562 |
| 20 | 45830730 | 45830959 | 45830843 | 8   | 10  | 15 | 0.806471077 | 0.716145    | SULF2 | ENSG00000196562 |
| 20 | 45833139 | 45833368 | 45833257 | 9   | 11  | 13 | 1.005470434 | 0.498567    | SULF2 | ENSG00000196562 |
| 20 | 45838006 | 45838199 | 45838090 | 8   | 9   | 7  | 1.466311049 | 0.20706     | SULF2 | ENSG00000196562 |
| 20 | 45844119 | 45844330 | 45844254 | 8   | 9   | 13 | 0.837892028 | 0.672794    | SULF2 | ENSG00000196562 |
| 20 | 45844798 | 45845287 | 45845108 | 13  | 24  | 14 | 1.955081399 | 0.0175993   | SULF2 | ENSG00000196562 |
| 20 | 45845352 | 45847306 | 45847051 | 186 | 349 | 57 | 7.078742996 | 1.51E-63    | SULF2 | ENSG00000196562 |
| 20 | 45848039 | 45849661 | 45848796 | 49  | 140 | 79 | 2.067498579 | 5.28E-08    | SULF2 | ENSG00000196562 |
| 20 | 45850358 | 45850639 | 45850534 | 8   | 12  | 11 | 1.270802909 | 0.274822    | SULF2 | ENSG00000196562 |
| 20 | 45850976 | 45851462 | 45851283 | 14  | 27  | 21 | 1.49297125  | 0.078146    | SULF2 | ENSG00000196562 |
| 20 | 45851470 | 45851938 | 45851759 | 10  | 19  | 27 | 0.837892028 | 0.732314    | SULF2 | ENSG00000196562 |
| 20 | 45852278 | 45852658 | 45852479 | 11  | 19  | 18 | 1.234788252 | 0.255641    | SULF2 | ENSG00000196562 |
| 20 | 45860557 | 45860788 | 45860633 | 9   | 10  | 4  | 2.580707446 | 0.0306059   | SULF2 | ENSG00000196562 |
| 20 | 45862722 | 45863402 | 45862881 | 10  | 23  | 8  | 3.128130238 | 0.000832453 | SULF2 | ENSG00000196562 |
| 20 | 45863599 | 45863847 | 45863723 | 8   | 9   | 11 | 0.977540699 | 0.526123    | SULF2 | ENSG00000196562 |
| 20 | 45868646 | 45868861 | 45868780 | 8   | 10  | 4  | 2.580707446 | 0.0306059   | SULF2 | ENSG00000196562 |
| 20 | 45868947 | 45869301 | 45869124 | 8   | 14  | 14 | 1.173048839 | 0.332418    | SULF2 | ENSG00000196562 |
| 20 | 45871824 | 45872137 | 45871961 | 13  | 17  | 9  | 2.111487911 | 0.0248715   | SULF2 | ENSG00000196562 |
| 20 | 45872538 | 45872899 | 45872717 | 11  | 19  | 10 | 2.132816071 | 0.01835     | SULF2 | ENSG00000196562 |

|    |          |          |          |    |    |    |             |             |       |                 |
|----|----------|----------|----------|----|----|----|-------------|-------------|-------|-----------------|
| 20 | 45873417 | 45873687 | 45873551 | 8  | 9  | 10 | 1.066408036 | 0.444985    | SULF2 | ENSG00000196562 |
| 20 | 45873829 | 45874106 | 45873967 | 8  | 11 | 18 | 0.740872951 | 0.800189    | SULF2 | ENSG00000196562 |
| 20 | 45876502 | 45877498 | 45877114 | 10 | 42 | 33 | 1.483561767 | 0.0418338   | SULF2 | ENSG00000196562 |
| 20 | 45877621 | 45877847 | 45877772 | 8  | 11 | 8  | 1.564065119 | 0.151515    | SULF2 | ENSG00000196562 |
| 20 | 45878641 | 45878821 | 45878731 | 8  | 8  | 9  | 1.055743955 | 0.456865    | SULF2 | ENSG00000196562 |
| 20 | 45879243 | 45879515 | 45879373 | 8  | 11 | 6  | 2.010940867 | 0.0640214   | SULF2 | ENSG00000196562 |
| 20 | 45879739 | 45880197 | 45879918 | 14 | 26 | 22 | 1.377057333 | 0.128834    | SULF2 | ENSG00000196562 |
| 20 | 45881602 | 45882100 | 45881840 | 9  | 21 | 10 | 2.346097679 | 0.00796926  | SULF2 | ENSG00000196562 |
| 20 | 45900396 | 45900595 | 45900456 | 12 | 13 | 1  | 8.211341875 | 0.000163445 |       | ENSG00000215448 |
| 20 | 45914792 | 45915105 | 45914971 | 9  | 12 | 13 | 1.089259637 | 0.414883    |       | ENSG00000215448 |
| 20 | 45916582 | 45916797 | 45916689 | 8  | 9  | 13 | 0.837892028 | 0.672794    |       | ENSG00000215448 |
| 20 | 45916842 | 45917447 | 45917104 | 18 | 34 | 29 | 1.368556979 | 0.102922    |       | ENSG00000215448 |
| 20 | 45917958 | 45918170 | 45918064 | 9  | 9  | 7  | 1.466311049 | 0.20706     |       | ENSG00000215448 |
| 20 | 45919234 | 45919916 | 45919413 | 11 | 30 | 15 | 2.272782126 | 0.00282041  |       | ENSG00000215448 |
| 20 | 45920406 | 45920676 | 45920541 | 8  | 12 | 15 | 0.953102182 | 0.555895    |       | ENSG00000215448 |
| 20 | 45922332 | 45922526 | 45922491 | 8  | 11 | 5  | 2.346097679 | 0.0364013   |       | ENSG00000215448 |
| 20 | 45923044 | 45923282 | 45923163 | 8  | 8  | 5  | 1.759573259 | 0.13508     |       | ENSG00000215448 |
| 20 | 45924486 | 45925039 | 45924786 | 8  | 20 | 15 | 1.539626602 | 0.0943825   |       | ENSG00000215448 |
| 20 | 45930483 | 45930755 | 45930626 | 9  | 13 | 16 | 0.966040221 | 0.542489    |       | ENSG00000215448 |
| 20 | 45931544 | 45931945 | 45931720 | 10 | 15 | 10 | 1.706252857 | 0.0822346   |       | ENSG00000215448 |
| 20 | 45935735 | 45935976 | 45935855 | 9  | 11 | 8  | 1.564065119 | 0.151515    |       | ENSG00000215448 |
| 20 | 45939375 | 45939602 | 45939488 | 11 | 13 | 13 | 1.173048839 | 0.337862    |       | ENSG00000215448 |
| 20 | 45940044 | 45940271 | 45940177 | 8  | 9  | 15 | 0.733155525 | 0.788527    |       | ENSG00000215448 |
| 20 | 45940400 | 45940650 | 45940525 | 9  | 10 | 12 | 0.992579787 | 0.511743    |       | ENSG00000215448 |
| 20 | 45941748 | 45941987 | 45941860 | 11 | 13 | 6  | 2.346097679 | 0.0266147   |       | ENSG00000215448 |
| 20 | 45956730 | 45956919 | 45956903 | 9  | 9  | 10 | 1.066408036 | 0.444985    |       | ENSG00000215448 |
| 20 | 45956924 | 45957553 | 45957103 | 17 | 40 | 30 | 1.551451691 | 0.0313513   |       | ENSG00000215448 |
| 20 | 45957628 | 45958135 | 45957956 | 11 | 21 | 18 | 1.358267077 | 0.163254    |       | ENSG00000215448 |
| 20 | 45977382 | 45977854 | 45977707 | 13 | 27 | 14 | 2.189691167 | 0.00561952  |       | ENSG00000215448 |
| 20 | 45981418 | 45981620 | 45981519 | 10 | 10 | 2  | 4.301179077 | 0.00512919  |       | ENSG00000215448 |
| 20 | 45981790 | 45982204 | 45982124 | 9  | 16 | 12 | 1.533986944 | 0.120062    |       | ENSG00000215448 |
| 20 | 45984375 | 45984729 | 45984552 | 8  | 13 | 4  | 3.28453675  | 0.00629037  |       | ENSG00000215448 |
| 20 | 45985918 | 45986256 | 45986087 | 8  | 11 | 15 | 0.879786629 | 0.637414    |       | ENSG00000215448 |
| 20 | 45989848 | 45990270 | 45990017 | 8  | 15 | 26 | 0.695140053 | 0.88251     |       | ENSG00000215448 |

|    |          |          |          |    |    |    |             |            |                 |
|----|----------|----------|----------|----|----|----|-------------|------------|-----------------|
| 20 | 45990474 | 45990847 | 45990668 | 8  | 15 | 17 | 1.042710079 | 0.454615   | ENSG00000215448 |
| 20 | 45996750 | 45997008 | 45996869 | 8  | 11 | 10 | 1.279689643 | 0.277323   | ENSG00000215448 |
| 20 | 46002295 | 46002503 | 46002421 | 8  | 9  | 10 | 1.066408036 | 0.444985   | ENSG00000215448 |
| 20 | 46002609 | 46002791 | 46002736 | 8  | 10 | 7  | 1.612942154 | 0.147335   | ENSG00000215448 |
| 20 | 46004048 | 46004440 | 46004274 | 9  | 15 | 15 | 1.173048839 | 0.32719    | ENSG00000215448 |
| 20 | 46006745 | 46006980 | 46006845 | 13 | 14 | 8  | 1.955081399 | 0.0506438  | ENSG00000215448 |
| 20 | 46007257 | 46007552 | 46007404 | 8  | 12 | 12 | 1.173048839 | 0.343543   | ENSG00000215448 |
| 20 | 46007690 | 46007941 | 46007815 | 11 | 12 | 14 | 1.016642327 | 0.486402   | ENSG00000215448 |
| 20 | 46010017 | 46010277 | 46010127 | 10 | 13 | 12 | 1.263283365 | 0.272203   | ENSG00000215448 |
| 20 | 46012051 | 46012266 | 46012158 | 9  | 10 | 5  | 2.150589539 | 0.0575848  | ENSG00000215448 |
| 20 | 46013682 | 46013878 | 46013822 | 8  | 8  | 10 | 0.959767232 | 0.541959   | ENSG00000215448 |
| 20 | 46014198 | 46014693 | 46014514 | 8  | 18 | 12 | 1.714455996 | 0.0636479  | ENSG00000215448 |
| 20 | 46014843 | 46015209 | 46014918 | 8  | 14 | 10 | 1.599612054 | 0.114822   | ENSG00000215448 |
| 20 | 46015512 | 46015769 | 46015638 | 9  | 12 | 9  | 1.524963491 | 0.154777   | ENSG00000215448 |
| 20 | 46015818 | 46016038 | 46015928 | 9  | 12 | 4  | 3.049926982 | 0.0108184  | ENSG00000215448 |
| 20 | 46016948 | 46017177 | 46017062 | 12 | 14 | 14 | 1.173048839 | 0.332418   | ENSG00000215448 |
| 20 | 46018059 | 46018323 | 46018191 | 13 | 16 | 9  | 1.994183027 | 0.0370915  | ENSG00000215448 |
| 20 | 46018513 | 46018811 | 46018662 | 11 | 15 | 20 | 0.893751497 | 0.63757    | ENSG00000215448 |
| 20 | 46018924 | 46019383 | 46019054 | 8  | 15 | 10 | 1.706252857 | 0.0822346  | ENSG00000215448 |
| 20 | 46021756 | 46021952 | 46021891 | 8  | 8  | 12 | 0.812110735 | 0.692685   | ENSG00000215448 |
| 20 | 46022705 | 46022929 | 46022804 | 8  | 9  | 4  | 2.346097679 | 0.050148   | ENSG00000215448 |
| 20 | 46023040 | 46023313 | 46023185 | 15 | 16 | 16 | 1.173048839 | 0.322157   | ENSG00000215448 |
| 20 | 46024355 | 46024889 | 46024622 | 8  | 19 | 18 | 1.234788252 | 0.255641   | ENSG00000215448 |
| 20 | 46027813 | 46028011 | 46027875 | 8  | 9  | 6  | 1.675784056 | 0.141978   | ENSG00000215448 |
| 20 | 46028737 | 46028921 | 46028838 | 10 | 10 | 6  | 1.843362462 | 0.0964212  | ENSG00000215448 |
| 20 | 46031275 | 46031583 | 46031433 | 11 | 15 | 8  | 2.085420159 | 0.0338693  | ENSG00000215448 |
| 20 | 46034249 | 46034656 | 46034486 | 14 | 24 | 12 | 2.255863153 | 0.00673318 | ENSG00000215448 |
| 20 | 46036263 | 46036482 | 46036358 | 8  | 9  | 2  | 3.910162798 | 0.00955088 | ENSG00000215448 |
| 20 | 46036876 | 46037324 | 46037145 | 12 | 19 | 9  | 2.346097679 | 0.0107159  | ENSG00000215448 |
| 20 | 46039020 | 46039420 | 46039280 | 12 | 19 | 12 | 1.804690522 | 0.0452624  | ENSG00000215448 |
| 20 | 46042056 | 46042259 | 46042205 | 9  | 10 | 11 | 1.075294769 | 0.434143   | ENSG00000215448 |
| 20 | 46046098 | 46047120 | 46046563 | 11 | 41 | 27 | 1.759573259 | 0.00931814 | ENSG00000215448 |
| 20 | 46047364 | 46047565 | 46047441 | 8  | 11 | 11 | 1.173048839 | 0.349489   | ENSG00000215448 |
| 20 | 46050851 | 46051522 | 46051063 | 12 | 29 | 17 | 1.955081399 | 0.0105966  | ENSG00000215448 |

|    |          |          |          |     |     |     |             |            |                 |
|----|----------|----------|----------|-----|-----|-----|-------------|------------|-----------------|
| 20 | 46051962 | 46052727 | 46052226 | 29  | 70  | 30  | 2.686660245 | 6.94E-07   | ENSG00000215448 |
| 20 | 46052773 | 46055844 | 46055403 | 486 | 863 | 104 | 9.652516164 | 9.94E-178  | ENSG00000215448 |
| 20 | 46055855 | 46056650 | 46056102 | 10  | 31  | 19  | 1.876878143 | 0.0120343  | ENSG00000215448 |
| 20 | 46065707 | 46066019 | 46065796 | 8   | 12  | 15  | 0.953102182 | 0.555895   | ENSG00000215448 |
| 20 | 46067982 | 46068288 | 46068141 | 10  | 14  | 7   | 2.199466574 | 0.0303778  | ENSG00000215448 |
| 20 | 46069178 | 46069448 | 46069283 | 14  | 17  | 7   | 2.639359888 | 0.00777415 | ENSG00000215448 |
| 20 | 46069582 | 46069778 | 46069680 | 8   | 9   | 8   | 1.303387599 | 0.281715   | ENSG00000215448 |
| 20 | 46069832 | 46070109 | 46069963 | 9   | 11  | 12  | 1.082814313 | 0.424156   | ENSG00000215448 |
| 20 | 46070488 | 46070919 | 46070777 | 15  | 22  | 8   | 2.997791478 | 0.00137524 | ENSG00000215448 |
| 20 | 46074055 | 46075981 | 46074860 | 41  | 123 | 56  | 2.551895721 | 4.87E-10   | ENSG00000215448 |
| 20 | 46076696 | 46077029 | 46076862 | 14  | 18  | 14  | 1.485861863 | 0.123674   | ENSG00000215448 |
| 20 | 46078958 | 46079301 | 46079129 | 10  | 14  | 13  | 1.256838042 | 0.269506   | ENSG00000215448 |
| 20 | 46081628 | 46082209 | 46081807 | 10  | 21  | 8   | 2.867452718 | 0.00225035 | ENSG00000215448 |
| 20 | 46083255 | 46083434 | 46083344 | 8   | 8   | 6   | 1.508205651 | 0.203852   | ENSG00000215448 |
| 20 | 46085854 | 46086332 | 46086153 | 8   | 19  | 17  | 1.303387599 | 0.207073   | ENSG00000215448 |
| 20 | 46088922 | 46089383 | 46089217 | 11  | 20  | 22  | 1.071044592 | 0.412397   | ENSG00000215448 |
| 20 | 46092100 | 46092419 | 46092268 | 13  | 16  | 4   | 3.988366054 | 0.00115141 | ENSG00000215448 |
| 20 | 46092564 | 46093020 | 46092853 | 12  | 23  | 23  | 1.173048839 | 0.291252   | ENSG00000215448 |
| 20 | 46093269 | 46093896 | 46093717 | 10  | 26  | 27  | 1.131154238 | 0.325317   | ENSG00000215448 |
| 20 | 46093903 | 46094094 | 46093998 | 8   | 9   | 8   | 1.303387599 | 0.281715   | ENSG00000215448 |
| 20 | 46096923 | 46097252 | 46097077 | 10  | 14  | 16  | 1.035043094 | 0.464533   | ENSG00000215448 |
| 20 | 46097641 | 46097948 | 46097776 | 10  | 12  | 8   | 1.694403879 | 0.107291   | ENSG00000215448 |
| 20 | 46098260 | 46098532 | 46098396 | 8   | 11  | 19  | 0.703829304 | 0.840485   | ENSG00000215448 |
| 20 | 46099116 | 46099379 | 46099240 | 10  | 13  | 7   | 2.052835469 | 0.046392   | ENSG00000215448 |
| 20 | 46099518 | 46099779 | 46099632 | 11  | 13  | 14  | 1.094845583 | 0.406217   | ENSG00000215448 |
| 20 | 46100132 | 46100556 | 46100262 | 8   | 14  | 8   | 1.955081399 | 0.0506438  | ENSG00000215448 |
| 20 | 46102200 | 46103000 | 46102550 | 12  | 35  | 40  | 1.029994103 | 0.450668   | ENSG00000215448 |
| 20 | 46103097 | 46103293 | 46103195 | 10  | 11  | 6   | 2.010940867 | 0.0640214  | ENSG00000215448 |
| 20 | 46103456 | 46103645 | 46103477 | 8   | 10  | 13  | 0.921681231 | 0.585856   | ENSG00000215448 |
| 20 | 46103819 | 46104172 | 46103995 | 9   | 15  | 15  | 1.173048839 | 0.32719    | ENSG00000215448 |
| 20 | 46104390 | 46104605 | 46104493 | 9   | 10  | 13  | 0.921681231 | 0.585856   | ENSG00000215448 |
| 20 | 46105480 | 46105706 | 46105589 | 10  | 13  | 11  | 1.368556979 | 0.211388   | ENSG00000215448 |
| 20 | 46107168 | 46107364 | 46107292 | 8   | 8   | 5   | 1.759573259 | 0.13508    | ENSG00000215448 |
| 20 | 46108834 | 46109186 | 46108960 | 13  | 17  | 14  | 1.407658607 | 0.162567   | ENSG00000215448 |

|    |          |          |          |    |    |    |             |            |                 |
|----|----------|----------|----------|----|----|----|-------------|------------|-----------------|
| 20 | 46109513 | 46109737 | 46109625 | 9  | 11 | 15 | 0.879786629 | 0.637414   | ENSG00000215448 |
| 20 | 46111397 | 46111589 | 46111493 | 8  | 8  | 13 | 0.754102825 | 0.754933   | ENSG00000215448 |
| 20 | 46113437 | 46115042 | 46114797 | 16 | 90 | 83 | 1.270802909 | 0.056568   | ENSG00000215448 |
| 20 | 46116100 | 46116426 | 46116263 | 10 | 16 | 24 | 0.797673211 | 0.770106   | ENSG00000215448 |
| 20 | 46117104 | 46117339 | 46117221 | 10 | 11 | 16 | 0.828034475 | 0.698553   | ENSG00000215448 |
| 20 | 46117454 | 46117947 | 46117633 | 11 | 22 | 20 | 1.284767776 | 0.203104   | ENSG00000215448 |
| 20 | 46118255 | 46118779 | 46118434 | 8  | 19 | 32 | 0.71093869  | 0.891662   | ENSG00000215448 |
| 20 | 46118816 | 46119295 | 46119118 | 13 | 24 | 16 | 1.725071823 | 0.0388966  | ENSG00000215448 |
| 20 | 46120407 | 46120623 | 46120497 | 9  | 10 | 8  | 1.433726359 | 0.209175   | ENSG00000215448 |
| 20 | 46125411 | 46126177 | 46125802 | 12 | 35 | 31 | 1.319679944 | 0.126399   | ENSG00000215448 |
| 20 | 46126223 | 46126519 | 46126378 | 9  | 11 | 16 | 0.828034475 | 0.698553   | ENSG00000215448 |
| 20 | 46126789 | 46127435 | 46127313 | 12 | 30 | 33 | 1.06954453  | 0.395234   | ENSG00000215448 |
| 20 | 46128676 | 46128955 | 46128806 | 9  | 12 | 14 | 1.016642327 | 0.486402   | ENSG00000215448 |
| 20 | 46132642 | 46132917 | 46132809 | 8  | 12 | 13 | 1.089259637 | 0.414883   | ENSG00000215448 |
| 20 | 46134547 | 46134832 | 46134708 | 14 | 16 | 13 | 1.424416448 | 0.161813   | ENSG00000215448 |
| 20 | 46136036 | 46136404 | 46136225 | 8  | 14 | 17 | 0.977540699 | 0.52995    | ENSG00000215448 |
| 20 | 46138065 | 46138535 | 46138249 | 9  | 20 | 18 | 1.296527665 | 0.205827   | ENSG00000215448 |
| 20 | 46140101 | 46140385 | 46140270 | 13 | 15 | 12 | 1.443752418 | 0.160732   | ENSG00000215448 |
| 20 | 46141984 | 46142304 | 46142144 | 11 | 13 | 9  | 1.642268375 | 0.111397   | ENSG00000215448 |
| 20 | 46143616 | 46143852 | 46143775 | 8  | 10 | 13 | 0.921681231 | 0.585856   | ENSG00000215448 |
| 20 | 46148518 | 46148718 | 46148618 | 8  | 10 | 3  | 3.225884308 | 0.0139466  | ENSG00000215448 |
| 20 | 46150302 | 46150562 | 46150404 | 8  | 10 | 10 | 1.173048839 | 0.355733   | ENSG00000215448 |
| 20 | 46152506 | 46152905 | 46152741 | 9  | 16 | 12 | 1.533986944 | 0.120062   | ENSG00000215448 |
| 20 | 46155464 | 46155766 | 46155615 | 9  | 12 | 14 | 1.016642327 | 0.486402   | ENSG00000215448 |
| 20 | 46156167 | 46156421 | 46156332 | 9  | 11 | 3  | 3.519146518 | 0.00788869 | ENSG00000215448 |
| 20 | 46156566 | 46156801 | 46156675 | 9  | 9  | 11 | 0.977540699 | 0.526123   | ENSG00000215448 |
| 20 | 46159404 | 46159767 | 46159504 | 10 | 15 | 8  | 2.085420159 | 0.0338693  | ENSG00000215448 |
| 20 | 46160580 | 46160796 | 46160689 | 9  | 10 | 10 | 1.173048839 | 0.355733   | ENSG00000215448 |
| 20 | 46161737 | 46161998 | 46161845 | 9  | 9  | 10 | 1.066408036 | 0.444985   | ENSG00000215448 |
| 20 | 46162508 | 46162746 | 46162658 | 8  | 10 | 8  | 1.433726359 | 0.209175   | ENSG00000215448 |
| 20 | 46164670 | 46164873 | 46164771 | 9  | 10 | 10 | 1.173048839 | 0.355733   | ENSG00000215448 |
| 20 | 46166066 | 46166509 | 46166330 | 13 | 21 | 18 | 1.358267077 | 0.163254   | ENSG00000215448 |
| 20 | 46168438 | 46169220 | 46168747 | 58 | 92 | 30 | 3.519146518 | 2.25E-11   | ENSG00000215448 |
| 20 | 46172302 | 46172590 | 46172464 | 10 | 13 | 7  | 2.052835469 | 0.046392   | ENSG00000215448 |

|    |          |          |          |    |    |    |             |             |                       |
|----|----------|----------|----------|----|----|----|-------------|-------------|-----------------------|
| 20 | 46172688 | 46173045 | 46172866 | 8  | 13 | 6  | 2.346097679 | 0.0266147   | ENSG00000215448       |
| 20 | 46174591 | 46174898 | 46174744 | 13 | 18 | 15 | 1.392995497 | 0.16305     | ENSG00000215448       |
| 20 | 46190671 | 46191020 | 46190845 | 9  | 15 | 5  | 3.128130238 | 0.00492422  | ENSG00000215448       |
| 20 | 46191204 | 46191484 | 46191344 | 13 | 13 | 8  | 1.824742639 | 0.0744168   | ENSG00000215448       |
| 20 | 46197463 | 46197754 | 46197624 | 11 | 15 | 12 | 1.443752418 | 0.160732    | ENSG00000215448       |
| 20 | 46204412 | 46204837 | 46204658 | 24 | 33 | 7  | 4.985457567 | 1.25E-06    | ENSG00000215448       |
| 20 | 46229128 | 46229390 | 46229269 | 8  | 10 | 7  | 1.612942154 | 0.147335    | ENSG00000215448       |
| 20 | 46238646 | 46238888 | 46238798 | 8  | 10 | 3  | 3.225884308 | 0.0139466   | ENSG00000215448       |
| 20 | 46242891 | 46243087 | 46242961 | 8  | 8  | 4  | 2.111487911 | 0.0804809   | ENSG00000215448       |
| 20 | 46244259 | 46244485 | 46244315 | 8  | 9  | 8  | 1.303387599 | 0.281715    | ENSG00000215448       |
| 20 | 46251164 | 46251750 | 46251571 | 22 | 40 | 13 | 3.435357315 | 7.45E-06    | ENSG00000215448       |
| 20 | 46252482 | 46252682 | 46252582 | 8  | 10 | 2  | 4.301179077 | 0.00512919  | ENSG00000215448       |
| 20 | 46254620 | 46254859 | 46254716 | 10 | 12 | 4  | 3.049926982 | 0.0108184   | ENSG00000215448       |
| 20 | 46262036 | 46262244 | 46262140 | 8  | 9  | 9  | 1.173048839 | 0.362316    | ENSG00000215448       |
| 20 | 46267546 | 46268139 | 46267779 | 17 | 34 | 15 | 2.566044336 | 0.000523463 | ENSG00000215448       |
| 20 | 46277486 | 46277926 | 46277665 | 8  | 17 | 11 | 1.759573259 | 0.0609179   | ENSG00000215448       |
| 20 | 46297170 | 46297424 | 46297290 | 8  | 9  | 5  | 1.955081399 | 0.0892323   | ENSG00000215448       |
| 20 | 46304924 | 46305129 | 46305018 | 9  | 9  | 2  | 3.910162798 | 0.00955088  | ENSG00000215448       |
| 20 | 46308729 | 46309412 | 46308969 | 12 | 33 | 15 | 2.492728784 | 0.000807271 | ENSG00000215448       |
| 20 | 46310220 | 46310497 | 46310333 | 8  | 11 | 7  | 1.759573259 | 0.102361    | ENSG00000215448       |
| 20 | 46310703 | 46310946 | 46310824 | 11 | 12 | 5  | 2.541605819 | 0.0225912   | ENSG00000215448       |
| 20 | 46315390 | 46315572 | 46315481 | 8  | 8  | 2  | 3.519146518 | 0.017558    | ENSG00000215448       |
| 20 | 46318855 | 46319054 | 46318971 | 11 | 12 | 2  | 5.083211637 | 0.00143337  | ENSG00000215448       |
| 20 | 46325488 | 46325738 | 46325582 | 8  | 10 | 5  | 2.150589539 | 0.0575848   | PREX1 ENSG00000124126 |
| 20 | 46337406 | 46337596 | 46337490 | 8  | 8  | 7  | 1.319679944 | 0.283403    | PREX1 ENSG00000124126 |
| 20 | 46344937 | 46345165 | 46345050 | 8  | 8  | 7  | 1.319679944 | 0.283403    | PREX1 ENSG00000124126 |
| 20 | 46345952 | 46346243 | 46346097 | 9  | 10 | 10 | 1.173048839 | 0.355733    | PREX1 ENSG00000124126 |
| 20 | 46351130 | 46351438 | 46351288 | 10 | 13 | 5  | 2.737113958 | 0.0137917   | PREX1 ENSG00000124126 |
| 20 | 46357617 | 46358177 | 46357856 | 18 | 33 | 17 | 2.215758919 | 0.00236789  | PREX1 ENSG00000124126 |
| 20 | 46358229 | 46358443 | 46358370 | 8  | 10 | 7  | 1.612942154 | 0.147335    | PREX1 ENSG00000124126 |
| 20 | 46359195 | 46359374 | 46359316 | 8  | 8  | 2  | 3.519146518 | 0.017558    | PREX1 ENSG00000124126 |
| 20 | 46360494 | 46360753 | 46360618 | 14 | 17 | 6  | 3.016411301 | 0.00381427  | PREX1 ENSG00000124126 |
| 20 | 46360835 | 46361709 | 46361456 | 19 | 63 | 35 | 2.085420159 | 0.00014577  | PREX1 ENSG00000124126 |
| 20 | 46371691 | 46371940 | 46371815 | 8  | 9  | 6  | 1.675784056 | 0.141978    | PREX1 ENSG00000124126 |

|    |          |          |          |    |    |    |             |             |       |                 |
|----|----------|----------|----------|----|----|----|-------------|-------------|-------|-----------------|
| 20 | 46375560 | 46375805 | 46375684 | 10 | 12 | 6  | 2.178519273 | 0.0416567   | PREX1 | ENSG00000124126 |
| 20 | 46378733 | 46379174 | 46379021 | 9  | 17 | 14 | 1.407658607 | 0.162567    | PREX1 | ENSG00000124126 |
| 20 | 46379275 | 46379771 | 46379470 | 9  | 20 | 5  | 4.105670938 | 0.000308509 | PREX1 | ENSG00000124126 |
| 20 | 46393691 | 46394636 | 46394457 | 14 | 44 | 31 | 1.64959993  | 0.0142651   | PREX1 | ENSG00000124126 |
| 20 | 46394655 | 46394986 | 46394820 | 11 | 16 | 16 | 1.173048839 | 0.322157    | PREX1 | ENSG00000124126 |
| 20 | 46395009 | 46395312 | 46395162 | 8  | 13 | 14 | 1.094845583 | 0.406217    | PREX1 | ENSG00000124126 |
| 20 | 46395527 | 46395853 | 46395691 | 9  | 12 | 7  | 1.906204364 | 0.0695918   | PREX1 | ENSG00000124126 |
| 20 | 46398817 | 46399159 | 46398988 | 13 | 18 | 13 | 1.591994853 | 0.0905191   | PREX1 | ENSG00000124126 |
| 20 | 46404308 | 46404565 | 46404436 | 9  | 12 | 7  | 1.906204364 | 0.0695918   | PREX1 | ENSG00000124126 |
| 20 | 46411990 | 46412169 | 46412075 | 10 | 10 | 6  | 1.843362462 | 0.0964212   | PREX1 | ENSG00000124126 |
| 20 | 46412282 | 46412489 | 46412436 | 8  | 8  | 3  | 2.639359888 | 0.0415794   | PREX1 | ENSG00000124126 |
| 20 | 46414351 | 46414530 | 46414440 | 8  | 8  | 6  | 1.508205651 | 0.203852    | PREX1 | ENSG00000124126 |
| 20 | 46420454 | 46420634 | 46420544 | 8  | 9  | 2  | 3.910162798 | 0.00955088  | PREX1 | ENSG00000124126 |
| 20 | 46432427 | 46432716 | 46432553 | 9  | 12 | 8  | 1.694403879 | 0.107291    | PREX1 | ENSG00000124126 |
| 20 | 46437650 | 46437906 | 46437810 | 8  | 10 | 6  | 1.843362462 | 0.0964212   | PREX1 | ENSG00000124126 |
| 20 | 46446180 | 46446436 | 46446308 | 10 | 10 | 4  | 2.580707446 | 0.0306059   | PREX1 | ENSG00000124126 |
| 20 | 46457579 | 46457913 | 46457746 | 10 | 14 | 3  | 4.398933147 | 0.00132748  | PREX1 | ENSG00000124126 |
| 20 | 46461256 | 46461523 | 46461374 | 10 | 13 | 8  | 1.824742639 | 0.0744168   | PREX1 | ENSG00000124126 |
| 20 | 46467371 | 46467626 | 46467536 | 8  | 10 | 4  | 2.580707446 | 0.0306059   | PREX1 | ENSG00000124126 |
| 20 | 46502862 | 46503078 | 46502962 | 9  | 10 | 5  | 2.150589539 | 0.0575848   | PREX1 | ENSG00000124126 |
| 20 | 46509754 | 46510090 | 46509940 | 9  | 14 | 11 | 1.466311049 | 0.15926     | PREX1 | ENSG00000124126 |
| 20 | 46511340 | 46511595 | 46511422 | 8  | 12 | 9  | 1.524963491 | 0.154777    | PREX1 | ENSG00000124126 |
| 20 | 46514217 | 46514524 | 46514370 | 9  | 12 | 9  | 1.524963491 | 0.154777    | PREX1 | ENSG00000124126 |
| 20 | 46517440 | 46517689 | 46517610 | 9  | 9  | 5  | 1.955081399 | 0.0892323   | PREX1 | ENSG00000124126 |
| 20 | 46517700 | 46518011 | 46517869 | 11 | 15 | 10 | 1.706252857 | 0.0822346   | PREX1 | ENSG00000124126 |
| 20 | 46520148 | 46520512 | 46520327 | 14 | 21 | 15 | 1.612942154 | 0.070218    | PREX1 | ENSG00000124126 |
| 20 | 46522177 | 46522891 | 46522436 | 15 | 32 | 35 | 1.075294769 | 0.383446    | PREX1 | ENSG00000124126 |
| 20 | 46523087 | 46523595 | 46523266 | 11 | 25 | 11 | 2.541605819 | 0.00248721  | PREX1 | ENSG00000124126 |
| 20 | 46524305 | 46524501 | 46524403 | 11 | 12 | 7  | 1.906204364 | 0.0695918   | PREX1 | ENSG00000124126 |
| 20 | 46525059 | 46525422 | 46525237 | 8  | 13 | 7  | 2.052835469 | 0.046392    | PREX1 | ENSG00000124126 |
| 20 | 46525758 | 46525998 | 46525878 | 8  | 11 | 12 | 1.082814313 | 0.424156    | PREX1 | ENSG00000124126 |
| 20 | 46530086 | 46530511 | 46530265 | 8  | 16 | 11 | 1.661819189 | 0.0853913   | PREX1 | ENSG00000124126 |
| 20 | 46533454 | 46533670 | 46533598 | 9  | 9  | 4  | 2.346097679 | 0.050148    | PREX1 | ENSG00000124126 |
| 20 | 46533945 | 46534185 | 46534065 | 8  | 9  | 3  | 2.932622098 | 0.0242899   | PREX1 | ENSG00000124126 |

|    |          |          |          |    |    |    |             |             |       |                 |
|----|----------|----------|----------|----|----|----|-------------|-------------|-------|-----------------|
| 20 | 46538306 | 46538770 | 46538473 | 9  | 16 | 5  | 3.323638378 | 0.00288759  | PREX1 | ENSG00000124126 |
| 20 | 46540980 | 46541319 | 46541138 | 9  | 14 | 12 | 1.353517892 | 0.211235    | PREX1 | ENSG00000124126 |
| 20 | 46547022 | 46547275 | 46547141 | 9  | 10 | 9  | 1.290353723 | 0.279648    | PREX1 | ENSG00000124126 |
| 20 | 46564503 | 46564701 | 46564602 | 9  | 11 | 9  | 1.407658607 | 0.210479    | PREX1 | ENSG00000124126 |
| 20 | 46565037 | 46566443 | 46565329 | 29 | 97 | 59 | 1.915979771 | 2.63E-05    | PREX1 | ENSG00000124126 |
| 20 | 46573107 | 46573486 | 46573273 | 31 | 37 | 16 | 2.62210917  | 0.000256502 | PREX1 | ENSG00000124126 |
| 20 | 46576799 | 46577131 | 46576965 | 11 | 15 | 4  | 3.753756286 | 0.0020497   | PREX1 | ENSG00000124126 |
| 20 | 46586150 | 46586468 | 46586315 | 16 | 18 | 13 | 1.591994853 | 0.0905191   | PREX1 | ENSG00000124126 |
| 20 | 46586731 | 46586917 | 46586824 | 8  | 8  | 3  | 2.639359888 | 0.0415794   | PREX1 | ENSG00000124126 |
| 20 | 46588293 | 46588854 | 46588566 | 30 | 51 | 23 | 2.541605819 | 3.82E-05    | PREX1 | ENSG00000124126 |
| 20 | 46600514 | 46600767 | 46600616 | 8  | 10 | 8  | 1.433726359 | 0.209175    | PREX1 | ENSG00000124126 |
| 20 | 46615112 | 46615364 | 46615238 | 9  | 13 | 3  | 4.105670938 | 0.00243034  | PREX1 | ENSG00000124126 |
| 20 | 46617504 | 46617813 | 46617640 | 8  | 12 | 6  | 2.178519273 | 0.0416567   | PREX1 | ENSG00000124126 |
| 20 | 46617921 | 46618351 | 46618072 | 26 | 37 | 13 | 3.183989707 | 3.37E-05    | PREX1 | ENSG00000124126 |
| 20 | 46619769 | 46620219 | 46619948 | 10 | 21 | 8  | 2.867452718 | 0.00225035  | PREX1 | ENSG00000124126 |
| 20 | 46620434 | 46620729 | 46620581 | 10 | 13 | 2  | 5.474227917 | 0.000747844 | PREX1 | ENSG00000124126 |
| 20 | 46621300 | 46621492 | 46621396 | 10 | 10 | 8  | 1.433726359 | 0.209175    | PREX1 | ENSG00000124126 |
| 20 | 46622047 | 46622478 | 46622299 | 12 | 21 | 14 | 1.720471631 | 0.0496182   | PREX1 | ENSG00000124126 |
| 20 | 46623425 | 46623681 | 46623553 | 9  | 11 | 12 | 1.082814313 | 0.424156    | PREX1 | ENSG00000124126 |
| 20 | 46632231 | 46632468 | 46632341 | 8  | 8  | 2  | 3.519146518 | 0.017558    | PREX1 | ENSG00000124126 |
| 20 | 46633908 | 46634131 | 46634019 | 8  | 9  | 6  | 1.675784056 | 0.141978    | PREX1 | ENSG00000124126 |
| 20 | 46644688 | 46644940 | 46644814 | 8  | 12 | 15 | 0.953102182 | 0.555895    | PREX1 | ENSG00000124126 |
| 20 | 46647918 | 46648135 | 46648094 | 9  | 10 | 9  | 1.290353723 | 0.279648    | PREX1 | ENSG00000124126 |
| 20 | 46654265 | 46654501 | 46654408 | 10 | 12 | 12 | 1.173048839 | 0.343543    | PREX1 | ENSG00000124126 |
| 20 | 46655525 | 46655730 | 46655627 | 8  | 9  | 2  | 3.910162798 | 0.00955088  | PREX1 | ENSG00000124126 |
| 20 | 46665724 | 46665928 | 46665802 | 8  | 10 | 7  | 1.612942154 | 0.147335    | PREX1 | ENSG00000124126 |
| 20 | 46667915 | 46668094 | 46667958 | 8  | 8  | 3  | 2.639359888 | 0.0415794   | PREX1 | ENSG00000124126 |
| 20 | 46669465 | 46669910 | 46669701 | 13 | 22 | 12 | 2.0753941   | 0.0149739   | PREX1 | ENSG00000124126 |
| 20 | 46670320 | 46670819 | 46670627 | 25 | 38 | 16 | 2.691112043 | 0.000164514 | PREX1 | ENSG00000124126 |
| 20 | 46670872 | 46671672 | 46671051 | 30 | 56 | 20 | 3.183989707 | 5.58E-07    | PREX1 | ENSG00000124126 |
| 20 | 46672777 | 46672974 | 46672823 | 8  | 8  | 8  | 1.173048839 | 0.36929     | PREX1 | ENSG00000124126 |
| 20 | 46685750 | 46686309 | 46685979 | 22 | 37 | 10 | 4.052350536 | 2.71E-06    | PREX1 | ENSG00000124126 |
| 20 | 46698430 | 46698819 | 46698652 | 12 | 19 | 4  | 4.692195357 | 0.000193572 | PREX1 | ENSG00000124126 |
| 20 | 46701949 | 46702237 | 46702093 | 9  | 10 | 4  | 2.580707446 | 0.0306059   | PREX1 | ENSG00000124126 |



|    |          |          |          |    |    |    |             |            |       |                 |
|----|----------|----------|----------|----|----|----|-------------|------------|-------|-----------------|
| 20 | 46705186 | 46705450 | 46705305 | 11 | 12 | 7  | 1.906204364 | 0.0695918  | PREX1 | ENSG00000124126 |
| 20 | 46707567 | 46708101 | 46707831 | 29 | 45 | 19 | 2.69801233  | 4.72E-05   | PREX1 | ENSG00000124126 |
| 20 | 46708496 | 46708827 | 46708658 | 14 | 16 | 5  | 3.323638378 | 0.00288759 | PREX1 | ENSG00000124126 |
| 20 | 46713493 | 46713721 | 46713618 | 10 | 11 | 7  | 1.759573259 | 0.102361   | PREX1 | ENSG00000124126 |
| 20 | 46713744 | 46714052 | 46713898 | 16 | 19 | 8  | 2.606775198 | 0.00583935 | PREX1 | ENSG00000124126 |
| 20 | 46720983 | 46721370 | 46721142 | 11 | 16 | 8  | 2.215758919 | 0.0222902  | PREX1 | ENSG00000124126 |
| 20 | 46729372 | 46729992 | 46729903 | 12 | 29 | 23 | 1.466311049 | 0.0797221  | PREX1 | ENSG00000124126 |
| 20 | 46730681 | 46731188 | 46730837 | 8  | 18 | 14 | 1.485861863 | 0.123674   | PREX1 | ENSG00000124126 |
| 20 | 46731969 | 46732279 | 46732110 | 8  | 12 | 8  | 1.694403879 | 0.107291   | PREX1 | ENSG00000124126 |
| 20 | 46734830 | 46735091 | 46734960 | 8  | 8  | 19 | 0.527871978 | 0.95364    | PREX1 | ENSG00000124126 |
| 20 | 46735965 | 46736736 | 46736314 | 24 | 61 | 15 | 4.545564252 | 5.36E-10   | PREX1 | ENSG00000124126 |
| 20 | 46741461 | 46741770 | 46741615 | 10 | 12 | 3  | 3.812408728 | 0.004404   |       | ENSG00000212716 |
| 20 | 46742367 | 46742713 | 46742490 | 8  | 13 | 12 | 1.263283365 | 0.272203   |       | ENSG00000212716 |
| 20 | 46745127 | 46745368 | 46745247 | 10 | 12 | 6  | 2.178519273 | 0.0416567  |       | ENSG00000212716 |
| 20 | 46745673 | 46745899 | 46745779 | 9  | 11 | 3  | 3.519146518 | 0.00788869 |       | ENSG00000212716 |
| 20 | 46747655 | 46748267 | 46747968 | 25 | 40 | 28 | 1.658448359 | 0.0174052  |       | ENSG00000212716 |
| 20 | 46748810 | 46749109 | 46748959 | 9  | 11 | 22 | 0.612025481 | 0.924393   |       | ENSG00000212716 |
| 20 | 46750929 | 46751182 | 46751054 | 10 | 10 | 7  | 1.612942154 | 0.147335   |       | ENSG00000212716 |
| 20 | 46753610 | 46753834 | 46753722 | 9  | 10 | 10 | 1.173048839 | 0.355733   |       | ENSG00000212716 |
| 20 | 46755120 | 46755588 | 46755299 | 12 | 22 | 23 | 1.124171804 | 0.345816   |       | ENSG00000212716 |
| 20 | 46755699 | 46756085 | 46755923 | 8  | 15 | 17 | 1.042710079 | 0.454615   |       | ENSG00000212716 |
| 20 | 46760454 | 46760644 | 46760497 | 8  | 8  | 5  | 1.759573259 | 0.13508    |       | ENSG00000212716 |
| 20 | 46771350 | 46771536 | 46771443 | 8  | 8  | 3  | 2.639359888 | 0.0415794  |       | ENSG00000212716 |
| 20 | 46772204 | 46772459 | 46772347 | 8  | 9  | 8  | 1.303387599 | 0.281715   |       | ENSG00000212716 |
| 20 | 46780455 | 46780673 | 46780564 | 8  | 9  | 2  | 3.910162798 | 0.00955088 |       | ENSG00000212716 |
| 20 | 46783162 | 46783397 | 46783318 | 8  | 8  | 5  | 1.759573259 | 0.13508    |       | ENSG00000212716 |
| 20 | 46786614 | 46786853 | 46786733 | 8  | 10 | 12 | 0.992579787 | 0.511743   |       | ENSG00000212716 |
| 20 | 46789326 | 46789520 | 46789485 | 10 | 10 | 5  | 2.150589539 | 0.0575848  |       | ENSG00000212716 |
| 20 | 46795711 | 46795905 | 46795862 | 9  | 10 | 3  | 3.225884308 | 0.0139466  |       | ENSG00000212716 |
| 20 | 46799283 | 46799536 | 46799408 | 8  | 12 | 4  | 3.049926982 | 0.0108184  |       | ENSG00000212716 |
| 20 | 46799919 | 46800132 | 46800025 | 9  | 10 | 9  | 1.290353723 | 0.279648   |       | ENSG00000212716 |
| 20 | 46805575 | 46805756 | 46805582 | 10 | 11 | 10 | 1.279689643 | 0.277323   |       | ENSG00000212716 |
| 20 | 46807496 | 46808241 | 46807868 | 8  | 26 | 15 | 1.979519916 | 0.0131534  |       | ENSG00000212716 |
| 20 | 46819507 | 46819723 | 46819615 | 8  | 9  | 17 | 0.6516938   | 0.871116   | PREX1 | ENSG00000124126 |

|    |          |          |          |    |    |    |             |             |         |                 |
|----|----------|----------|----------|----|----|----|-------------|-------------|---------|-----------------|
| 20 | 46820024 | 46820445 | 46820203 | 9  | 16 | 7  | 2.492728784 | 0.0124193   | PREX1   | ENSG00000124126 |
| 20 | 46821222 | 46821415 | 46821373 | 8  | 9  | 8  | 1.303387599 | 0.281715    | PREX1   | ENSG00000124126 |
| 20 | 46825332 | 46825513 | 46825422 | 8  | 9  | 4  | 2.346097679 | 0.050148    | PREX1   | ENSG00000124126 |
| 20 | 46834533 | 46834724 | 46834628 | 9  | 10 | 2  | 4.301179077 | 0.00512919  | PREX1   | ENSG00000124126 |
| 20 | 46851146 | 46851473 | 46851309 | 9  | 14 | 7  | 2.199466574 | 0.0303778   | PREX1   | ENSG00000124126 |
| 20 | 46852460 | 46852640 | 46852550 | 8  | 9  | 4  | 2.346097679 | 0.050148    | PREX1   | ENSG00000124126 |
| 20 | 46855153 | 46855439 | 46855270 | 12 | 14 | 6  | 2.513676084 | 0.016726    | PREX1   | ENSG00000124126 |
| 20 | 46858159 | 46858492 | 46858318 | 18 | 23 | 9  | 2.815317214 | 0.00172056  | PREX1   | ENSG00000124126 |
| 20 | 46858587 | 46858934 | 46858760 | 9  | 15 | 10 | 1.706252857 | 0.0822346   | PREX1   | ENSG00000124126 |
| 20 | 46859458 | 46859737 | 46859610 | 9  | 11 | 6  | 2.010940867 | 0.0640214   | PREX1   | ENSG00000124126 |
| 20 | 46861990 | 46862227 | 46862162 | 8  | 11 | 4  | 2.815317214 | 0.0183428   | PREX1   | ENSG00000124126 |
| 20 | 46862563 | 46863104 | 46862833 | 15 | 27 | 14 | 2.189691167 | 0.00561952  | PREX1   | ENSG00000124126 |
| 20 | 46865477 | 46865812 | 46865644 | 12 | 16 | 4  | 3.988366054 | 0.00115141  | PREX1   | ENSG00000124126 |
| 20 | 46866025 | 46866467 | 46866204 | 8  | 15 | 18 | 0.987830602 | 0.518173    | PREX1   | ENSG00000124126 |
| 20 | 46866972 | 46867422 | 46867200 | 11 | 21 | 11 | 2.150589539 | 0.0135908   | PREX1   | ENSG00000124126 |
| 20 | 46867815 | 46868024 | 46867931 | 8  | 9  | 7  | 1.466311049 | 0.20706     | PREX1   | ENSG00000124126 |
| 20 | 46869835 | 46870024 | 46869902 | 9  | 10 | 9  | 1.290353723 | 0.279648    | PREX1   | ENSG00000124126 |
| 20 | 46870201 | 46870536 | 46870377 | 9  | 13 | 6  | 2.346097679 | 0.0266147   | PREX1   | ENSG00000124126 |
| 20 | 46873965 | 46874303 | 46874134 | 12 | 15 | 9  | 1.876878143 | 0.0544542   | PREX1   | ENSG00000124126 |
| 20 | 46875026 | 46875395 | 46875205 | 11 | 18 | 19 | 1.114396397 | 0.369586    | PREX1   | ENSG00000124126 |
| 20 | 46876866 | 46877377 | 46877095 | 15 | 29 | 10 | 3.199224107 | 0.000186763 | PREX1   | ENSG00000124126 |
| 20 | 46877490 | 46877677 | 46877574 | 8  | 8  | 2  | 3.519146518 | 0.017558    | PREX1   | ENSG00000124126 |
| 20 | 46878203 | 46879120 | 46878701 | 12 | 37 | 16 | 2.62210917  | 0.000256502 | PREX1   | ENSG00000124126 |
| 20 | 46884115 | 46884304 | 46884209 | 8  | 8  | 4  | 2.111487911 | 0.0804809   | PREX1   | ENSG00000124126 |
| 20 | 46896429 | 46896629 | 46896529 | 9  | 10 | 3  | 3.225884308 | 0.0139466   | PREX1   | ENSG00000124126 |
| 20 | 46902137 | 46902430 | 46902314 | 10 | 12 | 5  | 2.541605819 | 0.0225912   | PREX1   | ENSG00000124126 |
| 20 | 46904730 | 46904948 | 46904839 | 8  | 10 | 5  | 2.150589539 | 0.0575848   | PREX1   | ENSG00000124126 |
| 20 | 46908132 | 46908430 | 46908281 | 10 | 13 | 13 | 1.173048839 | 0.337862    | PREX1   | ENSG00000124126 |
| 20 | 46911551 | 46911766 | 46911643 | 10 | 11 | 7  | 1.759573259 | 0.102361    | PREX1   | ENSG00000124126 |
| 20 | 46914333 | 46915048 | 46914843 | 26 | 45 | 42 | 1.254889456 | 0.142316    | PREX1   | ENSG00000124126 |
| 20 | 46920176 | 46920403 | 46920289 | 9  | 9  | 5  | 1.955081399 | 0.0892323   | PREX1   | ENSG00000124126 |
| 20 | 46927365 | 46927671 | 46927520 | 9  | 11 | 11 | 1.173048839 | 0.349489    | ARFGEF2 | ENSG00000124198 |
| 20 | 46937005 | 46937184 | 46937089 | 8  | 8  | 8  | 1.173048839 | 0.36929     | ARFGEF2 | ENSG00000124198 |
| 20 | 46940401 | 46940759 | 46940580 | 10 | 15 | 8  | 2.085420159 | 0.0338693   | ARFGEF2 | ENSG00000124198 |

|    |          |          |          |    |    |    |             |             |           |                 |
|----|----------|----------|----------|----|----|----|-------------|-------------|-----------|-----------------|
| 20 | 46942726 | 46943088 | 46942912 | 8  | 12 | 12 | 1.173048839 | 0.343543    | ARFGEF2   | ENSG00000124198 |
| 20 | 46952050 | 46952310 | 46952180 | 8  | 10 | 4  | 2.580707446 | 0.0306059   | ARFGEF2   | ENSG00000124198 |
| 20 | 46954640 | 46955521 | 46955120 | 28 | 60 | 31 | 2.23612435  | 6.98E-05    | ARFGEF2   | ENSG00000124198 |
| 20 | 46956387 | 46956802 | 46956665 | 12 | 19 | 11 | 1.955081399 | 0.0295891   | ARFGEF2   | ENSG00000124198 |
| 20 | 46958057 | 46958293 | 46958171 | 8  | 9  | 6  | 1.675784056 | 0.141978    | ARFGEF2   | ENSG00000124198 |
| 20 | 46961633 | 46961859 | 46961742 | 8  | 9  | 8  | 1.303387599 | 0.281715    | ARFGEF2   | ENSG00000124198 |
| 20 | 46971240 | 46971737 | 46971526 | 32 | 46 | 21 | 2.506058884 | 0.000100479 | ARFGEF2   | ENSG00000124198 |
| 20 | 46971763 | 46972707 | 46972082 | 28 | 69 | 23 | 3.421392448 | 9.04E-09    | ARFGEF2   | ENSG00000124198 |
| 20 | 46972957 | 46973193 | 46973107 | 11 | 12 | 13 | 1.089259637 | 0.414883    | ARFGEF2   | ENSG00000124198 |
| 20 | 46995866 | 46996260 | 46996038 | 22 | 29 | 6  | 5.027352168 | 4.43E-06    | ARFGEF2   | ENSG00000124198 |
| 20 | 47093055 | 47093274 | 47093181 | 9  | 11 | 1  | 7.038293036 | 0.000674435 | CSE1L     | ENSG00000124207 |
| 20 | 47238406 | 47238605 | 47238490 | 8  | 9  | 0  | 11.73048839 | 0.000425898 | STAU1     | ENSG00000124214 |
| 20 | 47328019 | 47328213 | 47328120 | 8  | 9  | 3  | 2.932622098 | 0.0242899   | C20orf199 | ENSG00000177410 |
| 20 | 47338950 | 47339150 | 47339050 | 8  | 8  | 4  | 2.111487911 | 0.0804809   |           | ENSG00000212304 |
| 20 | 47346455 | 47346679 | 47346626 | 8  | 8  | 4  | 2.111487911 | 0.0804809   |           | ENSG00000212304 |
| 20 | 47425269 | 47425513 | 47425391 | 9  | 9  | 0  | 11.73048839 | 0.000425898 |           | ENSG00000212304 |
| 20 | 47534060 | 47534306 | 47534219 | 10 | 11 | 2  | 4.692195357 | 0.00272444  | KCNB1     | ENSG00000158445 |
| 20 | 47582696 | 47582915 | 47582764 | 10 | 10 | 5  | 2.150589539 | 0.0575848   | PTGIS     | ENSG00000124212 |
| 20 | 47591662 | 47592036 | 47591866 | 15 | 21 | 12 | 1.985159574 | 0.021936    | PTGIS     | ENSG00000124212 |
| 20 | 47654571 | 47654915 | 47654743 | 12 | 18 | 3  | 5.571981987 | 0.000108726 | PTGIS     | ENSG00000124212 |
| 20 | 47658897 | 47659123 | 47659004 | 10 | 11 | 5  | 2.346097679 | 0.0364013   | PTGIS     | ENSG00000124212 |
| 20 | 47682501 | 47682822 | 47682661 | 15 | 20 | 0  | 24.63402563 | 8.35E-08    | PTGIS     | ENSG00000124212 |
| 20 | 47820031 | 47820755 | 47820277 | 19 | 39 | 5  | 7.820325595 | 2.05E-09    | SNRPPF1   | ENSG00000217373 |
| 20 | 47862587 | 47863018 | 47862831 | 10 | 19 | 7  | 2.932622098 | 0.00293566  | SLC9A8    | ENSG00000197818 |
| 20 | 47884924 | 47885386 | 47885207 | 54 | 66 | 1  | 39.29713612 | 9.69E-22    |           | ENSG00000220552 |
| 20 | 47909713 | 47910107 | 47909966 | 18 | 23 | 17 | 1.564065119 | 0.0735049   |           | ENSG00000220552 |
| 20 | 47917454 | 47917646 | 47917526 | 8  | 8  | 4  | 2.111487911 | 0.0804809   |           | ENSG00000220552 |
| 20 | 47965426 | 47965710 | 47965581 | 11 | 13 | 6  | 2.346097679 | 0.0266147   | SPATA2    | ENSG00000158480 |
| 20 | 47966413 | 47966742 | 47966573 | 10 | 14 | 7  | 2.199466574 | 0.0303778   | SPATA2    | ENSG00000158480 |
| 20 | 47978742 | 47979004 | 47978873 | 10 | 13 | 5  | 2.737113958 | 0.0137917   | RNF114    | ENSG00000124226 |
| 20 | 47986002 | 47986300 | 47986151 | 8  | 11 | 1  | 7.038293036 | 0.000674435 | RNF114    | ENSG00000124226 |
| 20 | 48032922 | 48033107 | 48033014 | 8  | 8  | 2  | 3.519146518 | 0.017558    | SNAI1     | ENSG00000124216 |
| 20 | 48069528 | 48069811 | 48069669 | 11 | 13 | 1  | 8.211341875 | 0.000163445 | SNAI1     | ENSG00000124216 |
| 20 | 48069884 | 48070222 | 48070053 | 11 | 16 | 1  | 9.970915134 | 1.89E-05    | SNAI1     | ENSG00000124216 |

|    |          |          |          |    |     |    |             |             |         |                 |
|----|----------|----------|----------|----|-----|----|-------------|-------------|---------|-----------------|
| 20 | 48088681 | 48088991 | 48088829 | 8  | 11  | 5  | 2.346097679 | 0.0364013   | TMEM189 | ENSG00000124208 |
| 20 | 48135351 | 48135654 | 48135524 | 10 | 12  | 7  | 1.906204364 | 0.0695918   | TMEM189 | ENSG00000124208 |
| 20 | 48163038 | 48163354 | 48163217 | 9  | 11  | 2  | 4.692195357 | 0.00272444  | TMEM189 | ENSG00000124208 |
| 20 | 48176631 | 48176981 | 48176806 | 14 | 19  | 5  | 3.910162798 | 0.000546977 | TMEM189 | ENSG00000124208 |
| 20 | 48201010 | 48201252 | 48201112 | 11 | 13  | 5  | 2.737113958 | 0.0137917   | TMEM189 | ENSG00000124208 |
| 20 | 48215786 | 48216244 | 48216095 | 17 | 25  | 6  | 4.357038546 | 4.72E-05    | TMEM189 | ENSG00000124208 |
| 20 | 48219288 | 48219563 | 48219425 | 12 | 14  | 8  | 1.955081399 | 0.0506438   | TMEM189 | ENSG00000124208 |
| 20 | 48410076 | 48410509 | 48410255 | 11 | 21  | 1  | 12.90353723 | 4.95E-07    |         | ENSG00000203999 |
| 20 | 48421928 | 48422395 | 48422200 | 43 | 57  | 3  | 17.00920817 | 1.67E-16    |         | ENSG00000210745 |
| 20 | 48422704 | 48422960 | 48422833 | 8  | 10  | 4  | 2.580707446 | 0.0306059   |         | ENSG00000210745 |
| 20 | 48477837 | 48478416 | 48478056 | 20 | 37  | 6  | 6.367979413 | 3.11E-08    |         | ENSG00000210745 |
| 20 | 48549514 | 48549778 | 48549643 | 8  | 9   | 4  | 2.346097679 | 0.050148    | PTPN1   | ENSG00000196396 |
| 20 | 48560262 | 48560526 | 48560394 | 9  | 12  | 1  | 7.624817456 | 0.000332769 | PTPN1   | ENSG00000196396 |
| 20 | 48638150 | 48638376 | 48638288 | 10 | 10  | 2  | 4.301179077 | 0.00512919  |         | ENSG00000208018 |
| 20 | 48674528 | 48674929 | 48674680 | 28 | 36  | 5  | 7.233801176 | 1.48E-08    | RPL36P2 | ENSG00000216679 |
| 20 | 48682421 | 48682677 | 48682560 | 9  | 11  | 0  | 14.07658607 | 9.02E-05    | FAM65C  | ENSG00000042062 |
| 20 | 48685800 | 48686140 | 48685970 | 13 | 16  | 6  | 2.848832895 | 0.00632407  | FAM65C  | ENSG00000042062 |
| 20 | 48695626 | 48695818 | 48695716 | 8  | 9   | 2  | 3.910162798 | 0.00955088  | FAM65C  | ENSG00000042062 |
| 20 | 48720015 | 48721038 | 48720587 | 75 | 169 | 50 | 3.910162798 | 2.81E-21    | FAM65C  | ENSG00000042062 |
| 20 | 48721136 | 48721617 | 48721345 | 9  | 17  | 26 | 0.78203256  | 0.796561    | FAM65C  | ENSG00000042062 |
| 20 | 48721865 | 48722395 | 48722044 | 13 | 26  | 17 | 1.759573259 | 0.0293871   | FAM65C  | ENSG00000042062 |
| 20 | 48722483 | 48722662 | 48722572 | 8  | 8   | 13 | 0.754102825 | 0.754933    | FAM65C  | ENSG00000042062 |
| 20 | 48723327 | 48723619 | 48723473 | 9  | 13  | 10 | 1.49297125  | 0.157311    | FAM65C  | ENSG00000042062 |
| 20 | 48723764 | 48724516 | 48724134 | 11 | 33  | 40 | 0.972772208 | 0.550092    | FAM65C  | ENSG00000042062 |
| 20 | 48725041 | 48725310 | 48725199 | 10 | 12  | 15 | 0.953102182 | 0.555895    | FAM65C  | ENSG00000042062 |
| 20 | 48725341 | 48726378 | 48726241 | 11 | 42  | 45 | 1.096545654 | 0.333384    | FAM65C  | ENSG00000042062 |
| 20 | 48726866 | 48727278 | 48727035 | 12 | 20  | 23 | 1.026417734 | 0.468083    | FAM65C  | ENSG00000042062 |
| 20 | 48727923 | 48728789 | 48728097 | 19 | 65  | 50 | 1.518063204 | 0.0120951   | FAM65C  | ENSG00000042062 |
| 20 | 48729726 | 48730888 | 48730225 | 19 | 74  | 79 | 1.099733287 | 0.278136    | FAM65C  | ENSG00000042062 |
| 20 | 48731291 | 48732372 | 48731518 | 19 | 69  | 63 | 1.283022168 | 0.0746904   | FAM65C  | ENSG00000042062 |
| 20 | 48734116 | 48734669 | 48734379 | 11 | 22  | 35 | 0.74944787  | 0.865446    | FAM65C  | ENSG00000042062 |
| 20 | 48735636 | 48736063 | 48735894 | 11 | 18  | 20 | 1.061329902 | 0.42802     | FAM65C  | ENSG00000042062 |
| 20 | 48736666 | 48737424 | 48737264 | 15 | 38  | 36 | 1.236456885 | 0.177787    | FAM65C  | ENSG00000042062 |
| 20 | 48737943 | 48738215 | 48738079 | 8  | 10  | 10 | 1.173048839 | 0.355733    | FAM65C  | ENSG00000042062 |

|    |          |          |          |    |     |     |             |            |        |                 |
|----|----------|----------|----------|----|-----|-----|-------------|------------|--------|-----------------|
| 20 | 48738388 | 48738924 | 48738631 | 9  | 20  | 31  | 0.769813301 | 0.829881   | FAM65C | ENSG00000042062 |
| 20 | 48738979 | 48739171 | 48739075 | 8  | 9   | 13  | 0.837892028 | 0.672794   | FAM65C | ENSG00000042062 |
| 20 | 48739400 | 48741274 | 48740112 | 24 | 132 | 109 | 1.418322688 | 0.00325406 | FAM65C | ENSG00000042062 |
| 20 | 48741291 | 48741706 | 48741532 | 10 | 20  | 22  | 1.071044592 | 0.412397   | FAM65C | ENSG00000042062 |
| 20 | 48741723 | 48742455 | 48742025 | 10 | 27  | 34  | 0.938439071 | 0.602291   | FAM65C | ENSG00000042062 |
| 20 | 48742475 | 48742720 | 48742601 | 11 | 13  | 18  | 0.864351776 | 0.666373   | FAM65C | ENSG00000042062 |
| 20 | 48745097 | 48745955 | 48745520 | 16 | 46  | 53  | 1.020986953 | 0.460483   | FAM65C | ENSG00000042062 |
| 20 | 48746649 | 48747175 | 48746952 | 12 | 24  | 25  | 1.127931576 | 0.335219   | FAM65C | ENSG00000042062 |
| 20 | 48747981 | 48748293 | 48748146 | 9  | 12  | 16  | 0.897037348 | 0.621544   | FAM65C | ENSG00000042062 |
| 20 | 48748752 | 48749050 | 48748908 | 8  | 11  | 8   | 1.564065119 | 0.151515   | FAM65C | ENSG00000042062 |
| 20 | 48749320 | 48750071 | 48749658 | 9  | 28  | 36  | 0.919416658 | 0.636093   | FAM65C | ENSG00000042062 |
| 20 | 48750452 | 48750678 | 48750595 | 13 | 14  | 22  | 0.765031852 | 0.797133   | FAM65C | ENSG00000042062 |
| 20 | 48751187 | 48751804 | 48751496 | 12 | 25  | 41  | 0.726173091 | 0.904993   | FAM65C | ENSG00000042062 |
| 20 | 48752383 | 48752765 | 48752586 | 13 | 20  | 19  | 1.231701281 | 0.25288    | FAM65C | ENSG00000042062 |
| 20 | 48753534 | 48753913 | 48753723 | 10 | 18  | 26  | 0.825478813 | 0.744556   | FAM65C | ENSG00000042062 |
| 20 | 48754462 | 48755294 | 48754956 | 14 | 44  | 40  | 1.287492629 | 0.120774   | FAM65C | ENSG00000042062 |
| 20 | 48756196 | 48756387 | 48756259 | 9  | 9   | 5   | 1.955081399 | 0.0892323  | FAM65C | ENSG00000042062 |
| 20 | 48757637 | 48758191 | 48757837 | 11 | 28  | 28  | 1.173048839 | 0.272646   | FAM65C | ENSG00000042062 |
| 20 | 48758882 | 48759607 | 48759021 | 15 | 36  | 32  | 1.315236577 | 0.125876   | FAM65C | ENSG00000042062 |
| 20 | 48760210 | 48760539 | 48760374 | 9  | 15  | 12  | 1.443752418 | 0.160732   | FAM65C | ENSG00000042062 |
| 20 | 48760581 | 48760920 | 48760750 | 8  | 14  | 16  | 1.035043094 | 0.464533   | FAM65C | ENSG00000042062 |
| 20 | 48761014 | 48761601 | 48761341 | 50 | 85  | 51  | 1.940042311 | 5.90E-05   | FAM65C | ENSG00000042062 |
| 20 | 48762046 | 48762398 | 48762222 | 8  | 14  | 30  | 0.567604277 | 0.969659   | PARD6B | ENSG00000124171 |
| 20 | 48762502 | 48762984 | 48762823 | 8  | 17  | 28  | 0.72809928  | 0.86131    | PARD6B | ENSG00000124171 |
| 20 | 48763443 | 48764057 | 48763805 | 23 | 42  | 50  | 0.989041178 | 0.523513   | PARD6B | ENSG00000124171 |
| 20 | 48764792 | 48764982 | 48764906 | 8  | 8   | 9   | 1.055743955 | 0.456865   | PARD6B | ENSG00000124171 |
| 20 | 48765068 | 48765301 | 48765197 | 9  | 12  | 19  | 0.762481746 | 0.784291   | PARD6B | ENSG00000124171 |
| 20 | 48765634 | 48766146 | 48765842 | 17 | 29  | 25  | 1.353517892 | 0.128607   | PARD6B | ENSG00000124171 |
| 20 | 48766280 | 48766812 | 48766485 | 15 | 32  | 30  | 1.24872941  | 0.187449   | PARD6B | ENSG00000124171 |
| 20 | 48767585 | 48767852 | 48767736 | 9  | 9   | 9   | 1.173048839 | 0.362316   | PARD6B | ENSG00000124171 |
| 20 | 48768020 | 48768397 | 48768208 | 15 | 24  | 38  | 0.751954384 | 0.872183   | PARD6B | ENSG00000124171 |
| 20 | 48768446 | 48768968 | 48768692 | 15 | 26  | 40  | 0.772495577 | 0.855992   | PARD6B | ENSG00000124171 |
| 20 | 48769749 | 48769959 | 48769917 | 8  | 10  | 18  | 0.679133539 | 0.855647   | PARD6B | ENSG00000124171 |
| 20 | 48770435 | 48770800 | 48770598 | 9  | 14  | 17  | 0.977540699 | 0.52995    | PARD6B | ENSG00000124171 |

|    |          |          |          |     |     |     |             |            |        |                 |
|----|----------|----------|----------|-----|-----|-----|-------------|------------|--------|-----------------|
| 20 | 48772389 | 48772748 | 48772568 | 11  | 18  | 25  | 0.857227998 | 0.700223   | PARD6B | ENSG00000124171 |
| 20 | 48772752 | 48773497 | 48773300 | 19  | 42  | 43  | 1.146388638 | 0.26303    | PARD6B | ENSG00000124171 |
| 20 | 48774427 | 48775411 | 48774995 | 50  | 114 | 77  | 1.729495084 | 7.78E-05   | PARD6B | ENSG00000124171 |
| 20 | 48775430 | 48775622 | 48775486 | 8   | 10  | 17  | 0.71686318  | 0.816679   | PARD6B | ENSG00000124171 |
| 20 | 48776567 | 48776869 | 48776760 | 17  | 21  | 24  | 1.032282979 | 0.459444   | PARD6B | ENSG00000124171 |
| 20 | 48776892 | 48778281 | 48777550 | 41  | 147 | 126 | 1.367017545 | 0.00479325 | PARD6B | ENSG00000124171 |
| 20 | 48778374 | 48778726 | 48778550 | 10  | 15  | 48  | 0.383036356 | 0.999839   | PARD6B | ENSG00000124171 |
| 20 | 48778735 | 48782730 | 48779685 | 333 | 841 | 297 | 3.314453432 | 1.28E-81   | PARD6B | ENSG00000124171 |
| 20 | 48782977 | 48783173 | 48783075 | 10  | 10  | 13  | 0.921681231 | 0.585856   | PARD6B | ENSG00000124171 |
| 20 | 48783276 | 48783778 | 48783501 | 21  | 36  | 32  | 1.315236577 | 0.125876   | PARD6B | ENSG00000124171 |
| 20 | 48783848 | 48784764 | 48783931 | 10  | 35  | 43  | 0.959767232 | 0.575258   | PARD6B | ENSG00000124171 |
| 20 | 48785215 | 48786244 | 48785616 | 15  | 58  | 66  | 1.032983306 | 0.429537   | PARD6B | ENSG00000124171 |
| 20 | 48786349 | 48786699 | 48786524 | 11  | 16  | 31  | 0.623182196 | 0.948409   | PARD6B | ENSG00000124171 |
| 20 | 48787076 | 48787959 | 48787567 | 12  | 38  | 47  | 0.953102182 | 0.590871   | PARD6B | ENSG00000124171 |
| 20 | 48788144 | 48788498 | 48788321 | 10  | 13  | 17  | 0.912371319 | 0.606688   | PARD6B | ENSG00000124171 |
| 20 | 48788773 | 48789271 | 48788947 | 10  | 21  | 21  | 1.173048839 | 0.299417   | PARD6B | ENSG00000124171 |
| 20 | 48789371 | 48790136 | 48789753 | 13  | 34  | 45  | 0.89253716  | 0.697288   | PARD6B | ENSG00000124171 |
| 20 | 48790745 | 48791041 | 48790893 | 12  | 14  | 17  | 0.977540699 | 0.52995    | PARD6B | ENSG00000124171 |
| 20 | 48791109 | 48791520 | 48791381 | 10  | 17  | 25  | 0.812110735 | 0.75715    | PARD6B | ENSG00000124171 |
| 20 | 48791885 | 48792145 | 48792006 | 12  | 15  | 7   | 2.346097679 | 0.0195693  | PARD6B | ENSG00000124171 |
| 20 | 48792464 | 48793540 | 48793342 | 26  | 73  | 57  | 1.496648519 | 0.0103607  | PARD6B | ENSG00000124171 |
| 20 | 48794186 | 48795200 | 48794497 | 69  | 140 | 66  | 2.46865502  | 1.17E-10   | PARD6B | ENSG00000124171 |
| 20 | 48795924 | 48796504 | 48796290 | 16  | 35  | 54  | 0.767813786 | 0.894997   | PARD6B | ENSG00000124171 |
| 20 | 48796526 | 48796785 | 48796701 | 9   | 12  | 25  | 0.58652442  | 0.949135   | PARD6B | ENSG00000124171 |
| 20 | 48797616 | 48798008 | 48797795 | 11  | 18  | 25  | 0.857227998 | 0.700223   | PARD6B | ENSG00000124171 |
| 20 | 48798288 | 48798954 | 48798677 | 19  | 34  | 38  | 1.052736138 | 0.414626   | PARD6B | ENSG00000124171 |
| 20 | 48799281 | 48799535 | 48799406 | 13  | 14  | 18  | 0.926091189 | 0.59273    | PARD6B | ENSG00000124171 |
| 20 | 48799619 | 48800329 | 48799844 | 13  | 31  | 39  | 0.938439071 | 0.608748   | PARD6B | ENSG00000124171 |
| 20 | 48800638 | 48800956 | 48800782 | 12  | 15  | 8   | 2.085420159 | 0.0338693  | PARD6B | ENSG00000124171 |
| 20 | 48803156 | 48803408 | 48803312 | 8   | 10  | 14  | 0.860235815 | 0.65444    | PARD6B | ENSG00000124171 |
| 20 | 48803715 | 48804112 | 48803883 | 9   | 17  | 10  | 1.919534464 | 0.0400548  | PARD6B | ENSG00000124171 |
| 20 | 48804321 | 48804607 | 48804442 | 8   | 11  | 24  | 0.563063443 | 0.956421   | PARD6B | ENSG00000124171 |
| 20 | 48805032 | 48805628 | 48805419 | 12  | 27  | 34  | 0.938439071 | 0.602291   | PARD6B | ENSG00000124171 |
| 20 | 48806264 | 48806576 | 48806417 | 16  | 19  | 29  | 0.78203256  | 0.808559   | PARD6B | ENSG00000124171 |

|    |          |          |          |     |     |     |             |             |        |                 |
|----|----------|----------|----------|-----|-----|-----|-------------|-------------|--------|-----------------|
| 20 | 48806580 | 48806874 | 48806706 | 14  | 18  | 27  | 0.795997427 | 0.784443    | PARD6B | ENSG00000124171 |
| 20 | 48807169 | 48807371 | 48807273 | 9   | 10  | 8   | 1.433726359 | 0.209175    | PARD6B | ENSG00000124171 |
| 20 | 48808434 | 48809197 | 48809020 | 16  | 43  | 48  | 1.053349978 | 0.402948    | PARD6B | ENSG00000124171 |
| 20 | 48809793 | 48810256 | 48810030 | 14  | 26  | 20  | 1.508205651 | 0.0771897   | PARD6B | ENSG00000124171 |
| 20 | 48810511 | 48810822 | 48810665 | 16  | 18  | 21  | 1.013087634 | 0.486601    | PARD6B | ENSG00000124171 |
| 20 | 48811197 | 48813346 | 48811770 | 185 | 551 | 194 | 3.320630561 | 2.23E-54    | PARD6B | ENSG00000124171 |
| 20 | 48813555 | 48813765 | 48813660 | 8   | 9   | 12  | 0.902345261 | 0.602772    | BCAS4  | ENSG00000124243 |
| 20 | 48813941 | 48814810 | 48814270 | 119 | 204 | 75  | 3.164144896 | 2.37E-20    | BCAS4  | ENSG00000124243 |
| 20 | 48815341 | 48815545 | 48815444 | 8   | 8   | 9   | 1.055743955 | 0.456865    | BCAS4  | ENSG00000124243 |
| 20 | 48815828 | 48816088 | 48815947 | 8   | 10  | 15  | 0.806471077 | 0.716145    | BCAS4  | ENSG00000124243 |
| 20 | 48816186 | 48816697 | 48816450 | 20  | 32  | 21  | 1.759573259 | 0.0184275   | BCAS4  | ENSG00000124243 |
| 20 | 48816840 | 48817682 | 48817170 | 20  | 48  | 27  | 2.052835469 | 0.000915676 | BCAS4  | ENSG00000124243 |
| 20 | 48822407 | 48822692 | 48822549 | 11  | 15  | 17  | 1.042710079 | 0.454615    | BCAS4  | ENSG00000124243 |
| 20 | 48822716 | 48822970 | 48822849 | 10  | 11  | 10  | 1.279689643 | 0.277323    | BCAS4  | ENSG00000124243 |
| 20 | 48825028 | 48825403 | 48825232 | 11  | 17  | 14  | 1.407658607 | 0.162567    | BCAS4  | ENSG00000124243 |
| 20 | 48826293 | 48826864 | 48826472 | 13  | 29  | 25  | 1.353517892 | 0.128607    | BCAS4  | ENSG00000124243 |
| 20 | 48828839 | 48829084 | 48828961 | 8   | 11  | 5   | 2.346097679 | 0.0364013   | BCAS4  | ENSG00000124243 |
| 20 | 48829594 | 48829823 | 48829720 | 8   | 9   | 13  | 0.837892028 | 0.672794    | BCAS4  | ENSG00000124243 |
| 20 | 48830091 | 48830273 | 48830182 | 8   | 10  | 20  | 0.614454154 | 0.913752    | BCAS4  | ENSG00000124243 |
| 20 | 48831316 | 48832111 | 48831730 | 14  | 36  | 39  | 1.085070176 | 0.361828    | BCAS4  | ENSG00000124243 |
| 20 | 48832670 | 48832883 | 48832776 | 8   | 11  | 12  | 1.082814313 | 0.424156    | BCAS4  | ENSG00000124243 |
| 20 | 48833209 | 48833551 | 48833380 | 9   | 14  | 14  | 1.173048839 | 0.332418    | BCAS4  | ENSG00000124243 |
| 20 | 48833917 | 48834101 | 48834009 | 8   | 8   | 20  | 0.502735217 | 0.96634     | BCAS4  | ENSG00000124243 |
| 20 | 48834104 | 48834507 | 48834283 | 9   | 17  | 34  | 0.60328226  | 0.964376    | BCAS4  | ENSG00000124243 |
| 20 | 48837807 | 48839004 | 48838146 | 93  | 167 | 92  | 2.119055968 | 1.23E-09    | BCAS4  | ENSG00000124243 |
| 20 | 48839837 | 48841554 | 48840787 | 129 | 285 | 146 | 2.282258286 | 2.35E-17    | BCAS4  | ENSG00000124243 |
| 20 | 48842588 | 48843962 | 48843711 | 29  | 91  | 71  | 1.498895739 | 0.00483913  | BCAS4  | ENSG00000124243 |
| 20 | 48844360 | 48846116 | 48844729 | 37  | 160 | 107 | 1.748711696 | 2.66E-06    | BCAS4  | ENSG00000124243 |
| 20 | 48846941 | 48847317 | 48847096 | 16  | 22  | 33  | 0.793533038 | 0.809383    | BCAS4  | ENSG00000124243 |
| 20 | 48847323 | 48847550 | 48847451 | 8   | 12  | 22  | 0.663027605 | 0.890045    | BCAS4  | ENSG00000124243 |
| 20 | 48848329 | 48849805 | 48849202 | 13  | 66  | 61  | 1.267649552 | 0.0891542   | BCAS4  | ENSG00000124243 |
| 20 | 48849870 | 48850515 | 48850337 | 10  | 27  | 39  | 0.821134188 | 0.79256     | BCAS4  | ENSG00000124243 |
| 20 | 48850885 | 48851127 | 48851006 | 9   | 13  | 16  | 0.966040221 | 0.542489    | BCAS4  | ENSG00000124243 |
| 20 | 48851743 | 48852030 | 48851885 | 9   | 13  | 15  | 1.026417734 | 0.475096    | BCAS4  | ENSG00000124243 |

|    |          |          |          |    |    |    |             |             |        |                 |
|----|----------|----------|----------|----|----|----|-------------|-------------|--------|-----------------|
| 20 | 48853721 | 48854015 | 48853816 | 11 | 15 | 14 | 1.251252095 | 0.26676     | BCAS4  | ENSG00000124243 |
| 20 | 48854502 | 48854957 | 48854710 | 11 | 20 | 27 | 0.879786629 | 0.67594     | BCAS4  | ENSG00000124243 |
| 20 | 48855025 | 48855629 | 48855450 | 14 | 29 | 33 | 1.035043094 | 0.447618    | BCAS4  | ENSG00000124243 |
| 20 | 48856100 | 48856679 | 48856218 | 13 | 27 | 24 | 1.3138147   | 0.160245    | BCAS4  | ENSG00000124243 |
| 20 | 48860051 | 48860537 | 48860278 | 9  | 19 | 26 | 0.868925066 | 0.687875    | BCAS4  | ENSG00000124243 |
| 20 | 48860757 | 48861115 | 48860882 | 10 | 14 | 10 | 1.599612054 | 0.114822    | BCAS4  | ENSG00000124243 |
| 20 | 48868430 | 48868630 | 48868543 | 8  | 10 | 8  | 1.433726359 | 0.209175    | TMSL6  | ENSG00000189262 |
| 20 | 48889008 | 48889339 | 48889183 | 10 | 13 | 1  | 8.211341875 | 0.000163445 | TMSL6  | ENSG00000189262 |
| 20 | 48906179 | 48906366 | 48906277 | 11 | 11 | 3  | 3.519146518 | 0.00788869  | TMSL6  | ENSG00000189262 |
| 20 | 48979346 | 48979681 | 48979499 | 15 | 20 | 5  | 4.105670938 | 0.000308509 | ADNP   | ENSG00000101126 |
| 20 | 48981306 | 48981521 | 48981413 | 8  | 10 | 3  | 3.225884308 | 0.0139466   | ADNP   | ENSG00000101126 |
| 20 | 49008516 | 49008855 | 49008685 | 8  | 12 | 4  | 3.049926982 | 0.0108184   | MOCS3  | ENSG00000124217 |
| 20 | 49042315 | 49042644 | 49042518 | 12 | 16 | 3  | 4.985457567 | 0.000385643 | KCNG1  | ENSG00000026559 |
| 20 | 49065113 | 49065398 | 49065255 | 11 | 12 | 5  | 2.541605819 | 0.0225912   | KCNG1  | ENSG00000026559 |
| 20 | 49165995 | 49166334 | 49166173 | 11 | 15 | 1  | 9.384390715 | 3.90E-05    |        | ENSG00000219218 |
| 20 | 49192451 | 49192740 | 49192583 | 12 | 13 | 2  | 5.474227917 | 0.000747844 |        | ENSG00000219218 |
| 20 | 49210382 | 49210655 | 49210491 | 9  | 10 | 3  | 3.225884308 | 0.0139466   |        | ENSG00000219218 |
| 20 | 49214071 | 49214250 | 49214140 | 8  | 8  | 4  | 2.111487911 | 0.0804809   |        | ENSG00000219218 |
| 20 | 49356633 | 49356813 | 49356723 | 8  | 8  | 1  | 5.278719777 | 0.00542188  |        | ENSG00000219218 |
| 20 | 49422317 | 49422501 | 49422415 | 9  | 9  | 3  | 2.932622098 | 0.0242899   | NFATC2 | ENSG00000101096 |
| 20 | 49437491 | 49437879 | 49437654 | 12 | 17 | 7  | 2.639359888 | 0.00777415  | NFATC2 | ENSG00000101096 |
| 20 | 49496931 | 49497344 | 49497230 | 8  | 16 | 3  | 4.985457567 | 0.000385643 | NFATC2 | ENSG00000101096 |
| 20 | 49506340 | 49506948 | 49506785 | 15 | 31 | 4  | 7.507512572 | 9.10E-08    | NFATC2 | ENSG00000101096 |
| 20 | 49645008 | 49645305 | 49645139 | 11 | 13 | 4  | 3.28453675  | 0.00629037  | NFATC2 | ENSG00000101096 |
| 20 | 49689362 | 49689635 | 49689397 | 8  | 13 | 5  | 2.737113958 | 0.0137917   |        | ENSG00000215444 |
| 20 | 49750777 | 49751136 | 49750893 | 11 | 16 | 3  | 4.985457567 | 0.000385643 |        | ENSG00000215444 |
| 20 | 49775663 | 49775952 | 49775807 | 8  | 11 | 12 | 1.082814313 | 0.424156    |        | ENSG00000215444 |
| 20 | 49785111 | 49785293 | 49785208 | 8  | 9  | 1  | 5.865244197 | 0.00272497  |        | ENSG00000215444 |
| 20 | 49789590 | 49789839 | 49789756 | 8  | 12 | 5  | 2.541605819 | 0.0225912   |        | ENSG00000215444 |
| 20 | 49794565 | 49794823 | 49794744 | 10 | 13 | 2  | 5.474227917 | 0.000747844 |        | ENSG00000215444 |
| 20 | 49802125 | 49802486 | 49802285 | 8  | 13 | 3  | 4.105670938 | 0.00243034  | ATP9A  | ENSG00000054793 |
| 20 | 49816898 | 49817330 | 49817084 | 14 | 25 | 5  | 5.083211637 | 1.58E-05    | ATP9A  | ENSG00000054793 |
| 20 | 49850041 | 49850648 | 49850220 | 16 | 32 | 8  | 4.301179077 | 6.43E-06    | SALL4  | ENSG00000101115 |
| 20 | 49851413 | 49851737 | 49851568 | 9  | 12 | 9  | 1.524963491 | 0.154777    | SALL4  | ENSG00000101115 |



|    |          |          |          |     |     |     |             |             |         |                 |
|----|----------|----------|----------|-----|-----|-----|-------------|-------------|---------|-----------------|
| 20 | 49853101 | 49853435 | 49853267 | 10  | 15  | 11  | 1.564065119 | 0.11768     | SALL4   | ENSG00000101115 |
| 20 | 49883322 | 49883919 | 49883497 | 20  | 34  | 15  | 2.566044336 | 0.000523463 | SALL4   | ENSG00000101115 |
| 20 | 49955929 | 49956259 | 49956080 | 9   | 12  | 2   | 5.083211637 | 0.00143337  |         | ENSG00000210768 |
| 20 | 49968064 | 49968382 | 49968223 | 11  | 16  | 4   | 3.988366054 | 0.00115141  |         | ENSG00000210768 |
| 20 | 49968393 | 49968751 | 49968572 | 9   | 14  | 5   | 2.932622098 | 0.00829617  |         | ENSG00000210768 |
| 20 | 50012162 | 50012576 | 50012421 | 9   | 14  | 18  | 0.926091189 | 0.59273     |         | ENSG00000210768 |
| 20 | 50012606 | 50012849 | 50012728 | 10  | 10  | 7   | 1.612942154 | 0.147335    |         | ENSG00000210768 |
| 20 | 50016272 | 50016648 | 50016502 | 17  | 22  | 7   | 3.372515413 | 0.000629223 |         | ENSG00000210768 |
| 20 | 50021036 | 50021519 | 50021162 | 15  | 26  | 1   | 15.83615933 | 1.23E-08    |         | ENSG00000210768 |
| 20 | 50027894 | 50028453 | 50028269 | 62  | 84  | 1   | 49.85457567 | 1.05E-27    |         | ENSG00000210768 |
| 20 | 50111066 | 50111275 | 50111170 | 9   | 9   | 3   | 2.932622098 | 0.0242899   | ZFP64   | ENSG00000020256 |
| 20 | 50178574 | 50178785 | 50178679 | 11  | 11  | 7   | 1.759573259 | 0.102361    | ZFP64   | ENSG00000020256 |
| 20 | 50363184 | 50363557 | 50363385 | 12  | 17  | 17  | 1.173048839 | 0.317303    | ZFP64   | ENSG00000020256 |
| 20 | 50423052 | 50423312 | 50423182 | 10  | 10  | 2   | 4.301179077 | 0.00512919  |         | ENSG00000221024 |
| 20 | 51124696 | 51124899 | 51124797 | 8   | 9   | 3   | 2.932622098 | 0.0242899   |         | ENSG00000199218 |
| 20 | 51482978 | 51483157 | 51483081 | 8   | 8   | 1   | 5.278719777 | 0.00542188  | PPIAP10 | ENSG00000216445 |
| 20 | 51516483 | 51516662 | 51516508 | 8   | 8   | 2   | 3.519146518 | 0.017558    | PPIAP10 | ENSG00000216445 |
| 20 | 51586345 | 51586679 | 51586512 | 8   | 13  | 1   | 8.211341875 | 0.000163445 |         | ENSG00000206959 |
| 20 | 51615647 | 51616088 | 51615909 | 12  | 21  | 21  | 1.173048839 | 0.299417    |         | ENSG00000197670 |
| 20 | 51617195 | 51618747 | 51618439 | 13  | 64  | 107 | 0.706001616 | 0.987911    | ZNF217  | ENSG00000171940 |
| 20 | 51618831 | 51619199 | 51619020 | 12  | 19  | 34  | 0.670313622 | 0.928882    | ZNF217  | ENSG00000171940 |
| 20 | 51620077 | 51621103 | 51620590 | 22  | 78  | 71  | 1.287095254 | 0.0605764   | ZNF217  | ENSG00000171940 |
| 20 | 51621532 | 51621917 | 51621711 | 13  | 19  | 21  | 1.066408036 | 0.420026    | ZNF217  | ENSG00000171940 |
| 20 | 51622376 | 51623038 | 51622626 | 13  | 27  | 66  | 0.490229366 | 0.999548    | ZNF217  | ENSG00000171940 |
| 20 | 51624055 | 51624477 | 51624203 | 16  | 25  | 33  | 0.897037348 | 0.665614    | ZNF217  | ENSG00000171940 |
| 20 | 51624735 | 51625072 | 51624903 | 20  | 26  | 24  | 1.266892746 | 0.197079    | ZNF217  | ENSG00000171940 |
| 20 | 51625243 | 51625785 | 51625616 | 14  | 29  | 34  | 1.005470434 | 0.493838    | ZNF217  | ENSG00000171940 |
| 20 | 51625998 | 51626333 | 51626155 | 10  | 13  | 20  | 0.78203256  | 0.76897     | ZNF217  | ENSG00000171940 |
| 20 | 51626371 | 51627250 | 51626787 | 18  | 56  | 63  | 1.044746623 | 0.406626    | ZNF217  | ENSG00000171940 |
| 20 | 51627959 | 51631345 | 51628839 | 131 | 341 | 289 | 1.383388631 | 2.30E-05    | ZNF217  | ENSG00000171940 |
| 20 | 51631361 | 51631965 | 51631842 | 19  | 38  | 55  | 0.816944727 | 0.837526    | ZNF217  | ENSG00000171940 |
| 20 | 51631971 | 51633214 | 51633022 | 20  | 74  | 90  | 0.966798494 | 0.587572    | ZNF217  | ENSG00000171940 |
| 20 | 51635637 | 51635995 | 51635816 | 8   | 14  | 12  | 1.353517892 | 0.211235    | ZNF217  | ENSG00000171940 |
| 20 | 51636027 | 51636376 | 51636201 | 11  | 15  | 13  | 1.340627245 | 0.210788    | ZNF217  | ENSG00000171940 |

|    |          |          |          |     |     |     |             |            |        |                 |
|----|----------|----------|----------|-----|-----|-----|-------------|------------|--------|-----------------|
| 20 | 51636447 | 51637084 | 51636707 | 21  | 37  | 39  | 1.114396397 | 0.317631   | ZNF217 | ENSG00000171940 |
| 20 | 51638595 | 51638818 | 51638679 | 9   | 12  | 14  | 1.016642327 | 0.486402   | ZNF217 | ENSG00000171940 |
| 20 | 51639272 | 51639604 | 51639438 | 9   | 12  | 11  | 1.270802909 | 0.274822   | ZNF217 | ENSG00000171940 |
| 20 | 51639739 | 51640268 | 51639935 | 15  | 27  | 24  | 1.3138147   | 0.160245   | ZNF217 | ENSG00000171940 |
| 20 | 51640723 | 51641018 | 51640883 | 11  | 13  | 15  | 1.026417734 | 0.475096   | ZNF217 | ENSG00000171940 |
| 20 | 51641339 | 51641518 | 51641428 | 8   | 8   | 15  | 0.659839972 | 0.851443   | ZNF217 | ENSG00000171940 |
| 20 | 51641931 | 51642403 | 51642231 | 13  | 25  | 26  | 1.129602586 | 0.330188   | ZNF217 | ENSG00000171940 |
| 20 | 51642441 | 51643580 | 51642674 | 22  | 72  | 38  | 2.195706802 | 2.18E-05   | ZNF217 | ENSG00000171940 |
| 20 | 51643838 | 51644320 | 51644146 | 15  | 28  | 5   | 5.669736057 | 2.48E-06   | ZNF217 | ENSG00000171940 |
| 20 | 51644507 | 51645462 | 51644780 | 47  | 100 | 57  | 2.042722979 | 4.49E-06   | ZNF217 | ENSG00000171940 |
| 20 | 51645564 | 51645943 | 51645764 | 9   | 18  | 10  | 2.026175268 | 0.0273052  | ZNF217 | ENSG00000171940 |
| 20 | 51646039 | 51646232 | 51646174 | 10  | 12  | 9   | 1.524963491 | 0.154777   | ZNF217 | ENSG00000171940 |
| 20 | 51646234 | 51646625 | 51646446 | 17  | 25  | 28  | 1.051698959 | 0.428274   | ZNF217 | ENSG00000171940 |
| 20 | 51646668 | 51651409 | 51647305 | 151 | 510 | 380 | 1.573301724 | 7.81E-12   | ZNF217 | ENSG00000171940 |
| 20 | 51653757 | 51654088 | 51653922 | 9   | 15  | 15  | 1.173048839 | 0.32719    | ZNF217 | ENSG00000171940 |
| 20 | 51656065 | 51657080 | 51656531 | 22  | 68  | 64  | 1.24523646  | 0.102338   | ZNF217 | ENSG00000171940 |
| 20 | 51657930 | 51659326 | 51658945 | 20  | 92  | 93  | 1.160569596 | 0.154833   | ZNF217 | ENSG00000171940 |
| 20 | 51659332 | 51660439 | 51660260 | 23  | 78  | 105 | 0.87425338  | 0.819315   | ZNF217 | ENSG00000171940 |
| 20 | 51660624 | 51660811 | 51660717 | 9   | 9   | 5   | 1.955081399 | 0.0892323  | ZNF217 | ENSG00000171940 |
| 20 | 51661151 | 51662175 | 51661670 | 21  | 68  | 66  | 1.208065223 | 0.135545   | ZNF217 | ENSG00000171940 |
| 20 | 51662422 | 51662892 | 51662601 | 21  | 31  | 50  | 0.736030644 | 0.917048   | ZNF217 | ENSG00000171940 |
| 20 | 51662990 | 51664015 | 51663453 | 23  | 65  | 73  | 1.046232749 | 0.396231   | ZNF217 | ENSG00000171940 |
| 20 | 51665477 | 51666154 | 51665844 | 15  | 33  | 27  | 1.424416448 | 0.0817823  | ZNF217 | ENSG00000171940 |
| 20 | 51666444 | 51666629 | 51666575 | 10  | 11  | 3   | 3.519146518 | 0.00788869 | ZNF217 | ENSG00000171940 |
| 20 | 51667220 | 51667584 | 51667399 | 12  | 19  | 18  | 1.234788252 | 0.255641   | ZNF217 | ENSG00000171940 |
| 20 | 51667692 | 51668298 | 51667990 | 10  | 25  | 29  | 1.016642327 | 0.478103   | ZNF217 | ENSG00000171940 |
| 20 | 51669323 | 51669977 | 51669619 | 15  | 32  | 42  | 0.900246784 | 0.678564   | ZNF217 | ENSG00000171940 |
| 20 | 51671249 | 51674582 | 51673562 | 84  | 569 | 446 | 1.49583409  | 7.51E-11   | ZNF217 | ENSG00000171940 |
| 20 | 51675320 | 51675551 | 51675396 | 9   | 11  | 13  | 1.005470434 | 0.498567   | ZNF217 | ENSG00000171940 |
| 20 | 51676404 | 51676885 | 51676576 | 15  | 26  | 29  | 1.055743955 | 0.421202   | ZNF217 | ENSG00000171940 |
| 20 | 51676890 | 51677189 | 51677017 | 8   | 9   | 8   | 1.303387599 | 0.281715   | ZNF217 | ENSG00000171940 |
| 20 | 51677695 | 51678383 | 51678114 | 21  | 37  | 32  | 1.350783512 | 0.102597   | ZNF217 | ENSG00000171940 |
| 20 | 51678804 | 51679108 | 51678956 | 10  | 13  | 19  | 0.821134188 | 0.720637   | ZNF217 | ENSG00000171940 |
| 20 | 51679474 | 51679987 | 51679812 | 12  | 23  | 28  | 0.970799039 | 0.54603    | ZNF217 | ENSG00000171940 |

|    |          |          |          |    |     |     |             |             |        |                 |
|----|----------|----------|----------|----|-----|-----|-------------|-------------|--------|-----------------|
| 20 | 51680079 | 51680335 | 51680170 | 9  | 11  | 15  | 0.879786629 | 0.637414    | ZNF217 | ENSG00000171940 |
| 20 | 51681474 | 51681788 | 51681627 | 13 | 15  | 17  | 1.042710079 | 0.454615    | ZNF217 | ENSG00000171940 |
| 20 | 51681859 | 51682483 | 51682034 | 21 | 46  | 52  | 1.040250858 | 0.423728    | ZNF217 | ENSG00000171940 |
| 20 | 51683894 | 51684611 | 51684344 | 19 | 50  | 78  | 0.757284694 | 0.941876    | ZNF217 | ENSG00000171940 |
| 20 | 51684799 | 51685689 | 51685419 | 21 | 60  | 68  | 1.037043177 | 0.419615    | ZNF217 | ENSG00000171940 |
| 20 | 51686040 | 51686627 | 51686448 | 25 | 44  | 35  | 1.466311049 | 0.0425671   | ZNF217 | ENSG00000171940 |
| 20 | 51686799 | 51687245 | 51687005 | 16 | 24  | 30  | 0.946007128 | 0.585264    | ZNF217 | ENSG00000171940 |
| 20 | 51687372 | 51687688 | 51687517 | 12 | 15  | 17  | 1.042710079 | 0.454615    | ZNF217 | ENSG00000171940 |
| 20 | 51687911 | 51688324 | 51688085 | 16 | 24  | 21  | 1.333010045 | 0.162162    | ZNF217 | ENSG00000171940 |
| 20 | 51688371 | 51690391 | 51689588 | 21 | 130 | 152 | 1.00437515  | 0.486612    | ZNF217 | ENSG00000171940 |
| 20 | 51690844 | 51691099 | 51690967 | 9  | 10  | 19  | 0.645176862 | 0.887754    | ZNF217 | ENSG00000171940 |
| 20 | 51691193 | 51691378 | 51691310 | 8  | 8   | 7   | 1.319679944 | 0.283403    | ZNF217 | ENSG00000171940 |
| 20 | 51692016 | 51692353 | 51692190 | 21 | 26  | 24  | 1.266892746 | 0.197079    | ZNF217 | ENSG00000171940 |
| 20 | 51692385 | 51693573 | 51692954 | 20 | 80  | 83  | 1.131154238 | 0.215145    | ZNF217 | ENSG00000171940 |
| 20 | 51693615 | 51694361 | 51693783 | 12 | 29  | 22  | 1.530063703 | 0.0607898   | ZNF217 | ENSG00000171940 |
| 20 | 51694614 | 51694862 | 51694739 | 9  | 11  | 12  | 1.082814313 | 0.424156    | ZNF217 | ENSG00000171940 |
| 20 | 51695246 | 51695973 | 51695425 | 14 | 34  | 52  | 0.774654894 | 0.883466    | ZNF217 | ENSG00000171940 |
| 20 | 51696708 | 51696901 | 51696804 | 9  | 10  | 15  | 0.806471077 | 0.716145    | ZNF217 | ENSG00000171940 |
| 20 | 51697060 | 51697402 | 51697231 | 13 | 19  | 15  | 1.466311049 | 0.125014    | ZNF217 | ENSG00000171940 |
| 20 | 51697474 | 51698395 | 51697773 | 23 | 55  | 45  | 1.428059457 | 0.0360517   | ZNF217 | ENSG00000171940 |
| 20 | 51699264 | 51699614 | 51699439 | 14 | 20  | 13  | 1.759573259 | 0.0475388   | ZNF217 | ENSG00000171940 |
| 20 | 51700832 | 51701172 | 51701002 | 8  | 14  | 7   | 2.199466574 | 0.0303778   | ZNF217 | ENSG00000171940 |
| 20 | 51701333 | 51701535 | 51701434 | 10 | 11  | 6   | 2.010940867 | 0.0640214   | ZNF217 | ENSG00000171940 |
| 20 | 51701666 | 51703657 | 51703325 | 20 | 119 | 147 | 0.951120681 | 0.6599      | ZNF217 | ENSG00000171940 |
| 20 | 51703958 | 51704150 | 51704054 | 8  | 8   | 10  | 0.959767232 | 0.541959    | ZNF217 | ENSG00000171940 |
| 20 | 51704281 | 51704753 | 51704430 | 14 | 26  | 25  | 1.218166102 | 0.236859    | ZNF217 | ENSG00000171940 |
| 20 | 51704770 | 51705724 | 51705050 | 63 | 128 | 93  | 1.609822343 | 0.000198866 | ZNF217 | ENSG00000171940 |
| 20 | 51705888 | 51709433 | 51706372 | 45 | 274 | 299 | 1.075294769 | 0.192857    | ZNF217 | ENSG00000171940 |
| 20 | 51709559 | 51710042 | 51709869 | 10 | 17  | 28  | 0.72809928  | 0.86131     | ZNF217 | ENSG00000171940 |
| 20 | 51710162 | 51710534 | 51710355 | 14 | 21  | 26  | 0.955817573 | 0.566095    | ZNF217 | ENSG00000171940 |
| 20 | 51710557 | 51712112 | 51711693 | 25 | 116 | 157 | 0.86865009  | 0.877607    | ZNF217 | ENSG00000171940 |
| 20 | 51712285 | 51712992 | 51712582 | 16 | 37  | 35  | 1.238218219 | 0.179382    | ZNF217 | ENSG00000171940 |
| 20 | 51713101 | 51713329 | 51713215 | 11 | 13  | 22  | 0.714029728 | 0.84749     | ZNF217 | ENSG00000171940 |
| 20 | 51713338 | 51713635 | 51713486 | 9  | 14  | 18  | 0.926091189 | 0.59273     | ZNF217 | ENSG00000171940 |

|    |          |          |          |    |     |     |             |            |        |                 |
|----|----------|----------|----------|----|-----|-----|-------------|------------|--------|-----------------|
| 20 | 51713976 | 51714867 | 51714206 | 19 | 49  | 62  | 0.930991142 | 0.649675   | ZNF217 | ENSG00000171940 |
| 20 | 51714995 | 51715400 | 51715174 | 14 | 22  | 21  | 1.226369241 | 0.247426   | ZNF217 | ENSG00000171940 |
| 20 | 51716015 | 51716323 | 51716169 | 9  | 13  | 23  | 0.68427849  | 0.878142   | ZNF217 | ENSG00000171940 |
| 20 | 51716339 | 51716594 | 51716466 | 13 | 17  | 21  | 0.959767232 | 0.55532    | ZNF217 | ENSG00000171940 |
| 20 | 51716987 | 51717449 | 51717166 | 19 | 27  | 33  | 0.966040221 | 0.556918   | ZNF217 | ENSG00000171940 |
| 20 | 51717979 | 51718446 | 51718177 | 21 | 31  | 40  | 0.915550314 | 0.649172   | ZNF217 | ENSG00000171940 |
| 20 | 51718942 | 51719754 | 51719217 | 31 | 73  | 52  | 1.637841776 | 0.00280329 | ZNF217 | ENSG00000171940 |
| 20 | 51719909 | 51720228 | 51720068 | 11 | 14  | 13  | 1.256838042 | 0.269506   | ZNF217 | ENSG00000171940 |
| 20 | 51721172 | 51721838 | 51721486 | 19 | 40  | 43  | 1.093068237 | 0.342401   | ZNF217 | ENSG00000171940 |
| 20 | 51721986 | 51722408 | 51722142 | 10 | 18  | 15  | 1.392995497 | 0.16305    | ZNF217 | ENSG00000171940 |
| 20 | 51722416 | 51723054 | 51722875 | 24 | 42  | 43  | 1.146388638 | 0.26303    | ZNF217 | ENSG00000171940 |
| 20 | 51723280 | 51723816 | 51723549 | 18 | 31  | 27  | 1.340627245 | 0.128083   | ZNF217 | ENSG00000171940 |
| 20 | 51724579 | 51724842 | 51724710 | 8  | 13  | 21  | 0.746485625 | 0.811212   | ZNF217 | ENSG00000171940 |
| 20 | 51726423 | 51727222 | 51726714 | 14 | 36  | 60  | 0.711521427 | 0.95206    | ZNF217 | ENSG00000171940 |
| 20 | 51727247 | 51728630 | 51728128 | 25 | 99  | 137 | 0.850035391 | 0.893908   | ZNF217 | ENSG00000171940 |
| 20 | 51728704 | 51730393 | 51729845 | 53 | 181 | 181 | 1.173048839 | 0.0641682  | ZNF217 | ENSG00000171940 |
| 20 | 51730507 | 51731183 | 51730671 | 19 | 46  | 40  | 1.344714523 | 0.0824098  | ZNF217 | ENSG00000171940 |
| 20 | 51731207 | 51731537 | 51731372 | 13 | 17  | 25  | 0.812110735 | 0.75715    | ZNF217 | ENSG00000171940 |
| 20 | 51731792 | 51732388 | 51731971 | 16 | 29  | 26  | 1.303387599 | 0.158657   | ZNF217 | ENSG00000171940 |
| 20 | 51732463 | 51732995 | 51732846 | 11 | 23  | 33  | 0.828034475 | 0.765279   | ZNF217 | ENSG00000171940 |
| 20 | 51733529 | 51733969 | 51733706 | 17 | 30  | 49  | 0.72729028  | 0.92235    | ZNF217 | ENSG00000171940 |
| 20 | 51734753 | 51735436 | 51735133 | 19 | 47  | 49  | 1.126126886 | 0.279426   | ZNF217 | ENSG00000171940 |
| 20 | 51735451 | 51735686 | 51735572 | 13 | 16  | 28  | 0.68764932  | 0.896593   | ZNF217 | ENSG00000171940 |
| 20 | 51735769 | 51736411 | 51736121 | 27 | 50  | 62  | 0.949610965 | 0.610542   | ZNF217 | ENSG00000171940 |
| 20 | 51737086 | 51737317 | 51737179 | 8  | 10  | 16  | 0.759031602 | 0.770272   | ZNF217 | ENSG00000171940 |
| 20 | 51737443 | 51737754 | 51737604 | 16 | 19  | 25  | 0.902345261 | 0.639556   | ZNF217 | ENSG00000171940 |
| 20 | 51737906 | 51738545 | 51738270 | 13 | 35  | 40  | 1.029994103 | 0.450668   | ZNF217 | ENSG00000171940 |
| 20 | 51739098 | 51739289 | 51739135 | 9  | 9   | 11  | 0.977540699 | 0.526123   | ZNF217 | ENSG00000171940 |
| 20 | 51740251 | 51740807 | 51740480 | 12 | 26  | 31  | 0.989759958 | 0.518595   | ZNF217 | ENSG00000171940 |
| 20 | 51740903 | 51742290 | 51741684 | 87 | 234 | 156 | 1.755837435 | 1.58E-08   | ZNF217 | ENSG00000171940 |
| 20 | 51742333 | 51743613 | 51743099 | 18 | 83  | 81  | 1.201659787 | 0.118644   | ZNF217 | ENSG00000171940 |
| 20 | 51744483 | 51744964 | 51744650 | 22 | 31  | 26  | 1.390280106 | 0.102755   | ZNF217 | ENSG00000171940 |
| 20 | 51745103 | 51745383 | 51745220 | 12 | 15  | 4   | 3.753756286 | 0.0020497  | ZNF217 | ENSG00000171940 |
| 20 | 51745453 | 51746629 | 51746463 | 24 | 79  | 77  | 1.203127015 | 0.122903   | ZNF217 | ENSG00000171940 |

|    |          |          |          |    |     |     |             |            |        |                 |
|----|----------|----------|----------|----|-----|-----|-------------|------------|--------|-----------------|
| 20 | 51746706 | 51747081 | 51746882 | 8  | 14  | 14  | 1.173048839 | 0.332418   | ZNF217 | ENSG00000171940 |
| 20 | 51747943 | 51748283 | 51748113 | 25 | 30  | 24  | 1.454580561 | 0.0803614  | ZNF217 | ENSG00000171940 |
| 20 | 51748498 | 51748809 | 51748653 | 18 | 22  | 22  | 1.173048839 | 0.295277   | ZNF217 | ENSG00000171940 |
| 20 | 51749101 | 51750307 | 51749638 | 14 | 57  | 90  | 0.747657502 | 0.960456   | ZNF217 | ENSG00000171940 |
| 20 | 51750860 | 51751204 | 51751032 | 19 | 24  | 24  | 1.173048839 | 0.287336   | ZNF217 | ENSG00000171940 |
| 20 | 51751229 | 51751934 | 51751755 | 12 | 29  | 43  | 0.799806027 | 0.831697   | ZNF217 | ENSG00000171940 |
| 20 | 51752426 | 51752697 | 51752561 | 9  | 12  | 16  | 0.897037348 | 0.621544   | ZNF217 | ENSG00000171940 |
| 20 | 51754769 | 51754974 | 51754876 | 9  | 9   | 22  | 0.510021234 | 0.969818   | ZNF217 | ENSG00000171940 |
| 20 | 51755852 | 51756075 | 51756005 | 8  | 9   | 11  | 0.977540699 | 0.526123   | ZNF217 | ENSG00000171940 |
| 20 | 51756081 | 51758928 | 51758471 | 30 | 204 | 260 | 0.921360199 | 0.811169   | ZNF217 | ENSG00000171940 |
| 20 | 51759793 | 51760202 | 51759948 | 11 | 17  | 20  | 1.005470434 | 0.496566   | ZNF217 | ENSG00000171940 |
| 20 | 51760327 | 51760520 | 51760423 | 8  | 9   | 2   | 3.910162798 | 0.00955088 | ZNF217 | ENSG00000171940 |
| 20 | 51761050 | 51763181 | 51762382 | 29 | 171 | 164 | 1.222814548 | 0.0325131  | ZNF217 | ENSG00000171940 |
| 20 | 51763256 | 51765074 | 51763794 | 18 | 110 | 122 | 1.05860505  | 0.332841   | ZNF217 | ENSG00000171940 |
| 20 | 51765174 | 51765771 | 51765401 | 29 | 57  | 44  | 1.511929615 | 0.0180861  | ZNF217 | ENSG00000171940 |
| 20 | 51766241 | 51766861 | 51766420 | 16 | 37  | 39  | 1.114396397 | 0.317631   | ZNF217 | ENSG00000171940 |
| 20 | 51767194 | 51767406 | 51767300 | 10 | 12  | 15  | 0.953102182 | 0.555895   | ZNF217 | ENSG00000171940 |
| 20 | 51767915 | 51769205 | 51768510 | 16 | 70  | 94  | 0.876699659 | 0.801632   | ZNF217 | ENSG00000171940 |
| 20 | 51769453 | 51769826 | 51769632 | 12 | 20  | 29  | 0.821134188 | 0.760976   | ZNF217 | ENSG00000171940 |
| 20 | 51770729 | 51771435 | 51771058 | 13 | 33  | 32  | 1.208595774 | 0.219635   | ZNF217 | ENSG00000171940 |
| 20 | 51771447 | 51771764 | 51771605 | 9  | 14  | 13  | 1.256838042 | 0.269506   | ZNF217 | ENSG00000171940 |
| 20 | 51772069 | 51772490 | 51772279 | 13 | 22  | 36  | 0.729192522 | 0.888257   | ZNF217 | ENSG00000171940 |
| 20 | 51772499 | 51773356 | 51772835 | 11 | 35  | 73  | 0.570672408 | 0.997824   | ZNF217 | ENSG00000171940 |
| 20 | 51773434 | 51774040 | 51773837 | 23 | 43  | 54  | 0.938439071 | 0.625965   | ZNF217 | ENSG00000171940 |
| 20 | 51774182 | 51774456 | 51774282 | 11 | 15  | 10  | 1.706252857 | 0.0822346  | ZNF217 | ENSG00000171940 |
| 20 | 51774936 | 51775543 | 51775315 | 29 | 59  | 41  | 1.675784056 | 0.00470562 | ZNF217 | ENSG00000171940 |
| 20 | 51775999 | 51776345 | 51776172 | 17 | 22  | 37  | 0.710003245 | 0.907893   | ZNF217 | ENSG00000171940 |
| 20 | 51776629 | 51776992 | 51776813 | 11 | 18  | 21  | 1.013087634 | 0.486601   | ZNF217 | ENSG00000171940 |
| 20 | 51777001 | 51777214 | 51777107 | 11 | 13  | 11  | 1.368556979 | 0.211388   | ZNF217 | ENSG00000171940 |
| 20 | 51777513 | 51778856 | 51778023 | 22 | 85  | 78  | 1.276989876 | 0.058261   | ZNF217 | ENSG00000171940 |
| 20 | 51779128 | 51779330 | 51779245 | 9  | 10  | 9   | 1.290353723 | 0.279648   | ZNF217 | ENSG00000171940 |
| 20 | 51779531 | 51779975 | 51779717 | 20 | 31  | 43  | 0.853126429 | 0.756848   | ZNF217 | ENSG00000171940 |
| 20 | 51780331 | 51780960 | 51780792 | 18 | 38  | 41  | 1.089259637 | 0.351868   | ZNF217 | ENSG00000171940 |
| 20 | 51781338 | 51781982 | 51781517 | 10 | 27  | 52  | 0.619723915 | 0.98246    | ZNF217 | ENSG00000171940 |

|    |          |          |          |    |     |     |             |            |        |                 |
|----|----------|----------|----------|----|-----|-----|-------------|------------|--------|-----------------|
| 20 | 51782497 | 51782861 | 51782676 | 11 | 18  | 19  | 1.114396397 | 0.369586   | ZNF217 | ENSG00000171940 |
| 20 | 51782870 | 51783636 | 51783166 | 18 | 42  | 68  | 0.731030436 | 0.949539   | ZNF217 | ENSG00000171940 |
| 20 | 51783857 | 51784698 | 51784474 | 24 | 69  | 68  | 1.190049547 | 0.152967   | ZNF217 | ENSG00000171940 |
| 20 | 51785419 | 51786145 | 51785626 | 13 | 34  | 81  | 0.500691578 | 0.999827   |        | ENSG00000149617 |
| 20 | 51786159 | 51786500 | 51786336 | 24 | 29  | 41  | 0.837892028 | 0.774502   |        | ENSG00000149617 |
| 20 | 51786523 | 51791158 | 51788602 | 40 | 412 | 450 | 1.074211021 | 0.147062   |        | ENSG00000149617 |
| 20 | 51791320 | 51791564 | 51791410 | 16 | 19  | 22  | 1.020042469 | 0.477122   |        | ENSG00000149617 |
| 20 | 51791592 | 51792047 | 51791785 | 21 | 34  | 43  | 0.933107031 | 0.623126   |        | ENSG00000149617 |
| 20 | 51792178 | 51793179 | 51792737 | 11 | 38  | 57  | 0.78877422  | 0.877776   |        | ENSG00000149617 |
| 20 | 51793336 | 51793974 | 51793655 | 19 | 40  | 57  | 0.82922418  | 0.82418    |        | ENSG00000149617 |
| 20 | 51794215 | 51795032 | 51794623 | 12 | 39  | 56  | 0.823192168 | 0.830853   |        | ENSG00000149617 |
| 20 | 51795839 | 51796652 | 51796352 | 17 | 40  | 47  | 1.001979217 | 0.498529   |        | ENSG00000149617 |
| 20 | 51796824 | 51797259 | 51797003 | 15 | 25  | 20  | 1.452346182 | 0.100215   |        | ENSG00000149617 |
| 20 | 51797900 | 51800378 | 51798243 | 51 | 212 | 194 | 1.281330271 | 0.00616594 |        | ENSG00000149617 |
| 20 | 51800490 | 51805353 | 51801017 | 80 | 491 | 437 | 1.317671299 | 1.31E-05   |        | ENSG00000149617 |
| 20 | 51805632 | 51806976 | 51806299 | 22 | 89  | 93  | 1.123131867 | 0.216316   |        | ENSG00000149617 |
| 20 | 51807406 | 51807699 | 51807552 | 11 | 15  | 17  | 1.042710079 | 0.454615   |        | ENSG00000149617 |
| 20 | 51807704 | 51808135 | 51807883 | 12 | 20  | 33  | 0.724530165 | 0.88296    |        | ENSG00000149617 |
| 20 | 51808484 | 51809075 | 51808771 | 20 | 37  | 54  | 0.810470107 | 0.844193   |        | ENSG00000149617 |
| 20 | 51809800 | 51810692 | 51810372 | 19 | 57  | 60  | 1.115357913 | 0.276898   |        | ENSG00000149617 |
| 20 | 51810795 | 51811136 | 51811002 | 12 | 16  | 24  | 0.797673211 | 0.770106   |        | ENSG00000149617 |
| 20 | 51811186 | 51811693 | 51811397 | 16 | 29  | 30  | 1.135208554 | 0.31157    |        | ENSG00000149617 |
| 20 | 51811797 | 51812517 | 51812028 | 14 | 32  | 41  | 0.921681231 | 0.640302   |        | ENSG00000149617 |
| 20 | 51813087 | 51814731 | 51813684 | 26 | 121 | 177 | 0.803999766 | 0.969444   |        | ENSG00000149617 |
| 20 | 51816008 | 51816748 | 51816282 | 20 | 54  | 38  | 1.654299645 | 0.00750849 |        | ENSG00000149617 |
| 20 | 51816855 | 51819445 | 51818403 | 25 | 181 | 203 | 1.046543572 | 0.328618   |        | ENSG00000149617 |
| 20 | 51820248 | 51820614 | 51820343 | 11 | 18  | 29  | 0.742930932 | 0.850763   |        | ENSG00000149617 |
| 20 | 51820884 | 51821327 | 51821063 | 14 | 22  | 24  | 1.079204932 | 0.398105   |        | ENSG00000149617 |
| 20 | 51821468 | 51822026 | 51821824 | 12 | 26  | 42  | 0.73656555  | 0.89825    |        | ENSG00000149617 |
| 20 | 51822227 | 51822742 | 51822473 | 19 | 31  | 34  | 1.072501796 | 0.389251   |        | ENSG00000149617 |
| 20 | 51822886 | 51823112 | 51822965 | 11 | 14  | 15  | 1.099733287 | 0.398076   |        | ENSG00000149617 |
| 20 | 51823185 | 51825373 | 51823865 | 35 | 214 | 225 | 1.115953542 | 0.12521    |        | ENSG00000149617 |
| 20 | 51825614 | 51826001 | 51825902 | 12 | 21  | 51  | 0.496289894 | 0.99806    |        | ENSG00000149617 |
| 20 | 51826254 | 51826906 | 51826424 | 14 | 32  | 35  | 1.075294769 | 0.383446   |        | ENSG00000149617 |

|    |          |          |          |     |     |     |             |            |                 |
|----|----------|----------|----------|-----|-----|-----|-------------|------------|-----------------|
| 20 | 51827210 | 51827492 | 51827336 | 8   | 11  | 20  | 0.670313622 | 0.874201   | ENSG00000149617 |
| 20 | 51827519 | 51829003 | 51828330 | 38  | 121 | 103 | 1.376076523 | 0.00824392 | ENSG00000149617 |
| 20 | 51829253 | 51830314 | 51830135 | 20  | 62  | 55  | 1.319679944 | 0.0652059  | ENSG00000149617 |
| 20 | 51830953 | 51831200 | 51831076 | 8   | 10  | 14  | 0.860235815 | 0.65444    | ENSG00000149617 |
| 20 | 51831597 | 51831952 | 51831799 | 8   | 12  | 18  | 0.802612364 | 0.736387   | ENSG00000149617 |
| 20 | 51832476 | 51833376 | 51832655 | 13  | 43  | 60  | 0.846133589 | 0.804198   | ENSG00000149617 |
| 20 | 51833841 | 51834085 | 51833985 | 9   | 12  | 17  | 0.84720194  | 0.681997   | ENSG00000149617 |
| 20 | 51834147 | 51835066 | 51834836 | 12  | 42  | 49  | 1.008822002 | 0.485288   | ENSG00000149617 |
| 20 | 51835100 | 51838316 | 51836202 | 218 | 615 | 322 | 2.237145774 | 7.18E-34   | ENSG00000149617 |
| 20 | 51839104 | 51839299 | 51839216 | 8   | 9   | 12  | 0.902345261 | 0.602772   | ENSG00000149617 |
| 20 | 51839439 | 51841493 | 51841193 | 80  | 318 | 222 | 1.678038474 | 1.04E-09   | ENSG00000149617 |
| 20 | 51841526 | 51841734 | 51841630 | 8   | 9   | 12  | 0.902345261 | 0.602772   | ENSG00000149617 |
| 20 | 51841952 | 51842566 | 51842272 | 33  | 55  | 43  | 1.49297125  | 0.0226542  | ENSG00000149617 |
| 20 | 51842667 | 51843577 | 51843160 | 24  | 71  | 85  | 0.9820874   | 0.546857   | ENSG00000149617 |
| 20 | 51843582 | 51845046 | 51843921 | 292 | 489 | 117 | 4.871135011 | 2.77E-69   | ENSG00000149617 |
| 20 | 51845169 | 51845496 | 51845319 | 16  | 21  | 16  | 1.518063204 | 0.0959332  | ENSG00000149617 |
| 20 | 51845770 | 51846315 | 51846057 | 12  | 21  | 18  | 1.358267077 | 0.163254   | ENSG00000149617 |
| 20 | 51846417 | 51846825 | 51846566 | 12  | 21  | 13  | 1.843362462 | 0.0337179  | ENSG00000149617 |
| 20 | 51846840 | 51848137 | 51847251 | 20  | 74  | 79  | 1.099733287 | 0.278136   | ENSG00000149617 |
| 20 | 51848198 | 51848414 | 51848328 | 10  | 10  | 20  | 0.614454154 | 0.913752   | ENSG00000149617 |
| 20 | 51848487 | 51848688 | 51848615 | 9   | 12  | 29  | 0.508321164 | 0.983999   | ENSG00000149617 |
| 20 | 51848766 | 51849331 | 51848963 | 21  | 43  | 42  | 1.200329045 | 0.197773   | ENSG00000149617 |
| 20 | 51849550 | 51851717 | 51850680 | 23  | 160 | 179 | 1.049227017 | 0.329811   | ENSG00000149617 |
| 20 | 51851838 | 51852600 | 51851992 | 13  | 33  | 37  | 1.049570014 | 0.420838   | ENSG00000149617 |
| 20 | 51852679 | 51853409 | 51852903 | 26  | 58  | 55  | 1.235890741 | 0.12832    | ENSG00000149617 |
| 20 | 51853585 | 51854293 | 51854098 | 12  | 33  | 38  | 1.022657962 | 0.464235   | ENSG00000149617 |
| 20 | 51854576 | 51854817 | 51854748 | 9   | 12  | 16  | 0.897037348 | 0.621544   | ENSG00000149617 |
| 20 | 51854849 | 51856760 | 51855929 | 162 | 429 | 203 | 2.472602946 | 8.59E-29   | ENSG00000149617 |
| 20 | 51856794 | 51857397 | 51856973 | 27  | 57  | 63  | 1.063075511 | 0.369367   | ENSG00000149617 |
| 20 | 51857838 | 51858068 | 51857939 | 12  | 13  | 14  | 1.094845583 | 0.406217   | ENSG00000149617 |
| 20 | 51858268 | 51858470 | 51858342 | 8   | 8   | 19  | 0.527871978 | 0.95364    | ENSG00000149617 |
| 20 | 51858747 | 51859722 | 51859026 | 21  | 63  | 111 | 0.670313622 | 0.995367   | ENSG00000149617 |
| 20 | 51859912 | 51861167 | 51860481 | 19  | 68  | 78  | 1.024561644 | 0.443045   | ENSG00000149617 |
| 20 | 51861435 | 51862070 | 51861636 | 20  | 50  | 39  | 1.49563727  | 0.0275357  | ENSG00000149617 |

|    |          |          |          |    |     |     |             |           |                 |
|----|----------|----------|----------|----|-----|-----|-------------|-----------|-----------------|
| 20 | 51862655 | 51863029 | 51862839 | 11 | 20  | 18  | 1.296527665 | 0.205827  | ENSG00000149617 |
| 20 | 51863050 | 51864314 | 51863352 | 23 | 79  | 99  | 0.938439071 | 0.666044  | ENSG00000149617 |
| 20 | 51864488 | 51864667 | 51864638 | 8  | 8   | 12  | 0.812110735 | 0.692685  | ENSG00000149617 |
| 20 | 51864695 | 51865356 | 51864874 | 20 | 43  | 55  | 0.921681231 | 0.66001   | ENSG00000149617 |
| 20 | 51867308 | 51867490 | 51867414 | 9  | 9   | 5   | 1.955081399 | 0.0892323 | ENSG00000149617 |
| 20 | 51868602 | 51868896 | 51868749 | 8  | 12  | 11  | 1.270802909 | 0.274822  | ENSG00000149617 |
| 20 | 51869093 | 51870915 | 51869759 | 74 | 248 | 73  | 3.947150824 | 1.68E-30  | ENSG00000149617 |
| 20 | 51871160 | 51871377 | 51871224 | 9  | 11  | 6   | 2.010940867 | 0.0640214 | ENSG00000149617 |
| 20 | 51871445 | 51872092 | 51871938 | 19 | 35  | 30  | 1.362250265 | 0.102862  | ENSG00000149617 |
| 20 | 51872513 | 51873880 | 51873532 | 22 | 87  | 80  | 1.27442343  | 0.0575861 | ENSG00000149617 |
| 20 | 51874335 | 51875041 | 51874700 | 11 | 35  | 63  | 0.659839972 | 0.979437  | ENSG00000149617 |
| 20 | 51875173 | 51876579 | 51875814 | 25 | 92  | 111 | 0.974049483 | 0.575973  | ENSG00000149617 |
| 20 | 51876582 | 51880246 | 51878819 | 38 | 344 | 341 | 1.183338741 | 0.0137478 | ENSG00000149617 |
| 20 | 51880282 | 51880528 | 51880408 | 16 | 18  | 27  | 0.795997427 | 0.784443  | ENSG00000149617 |
| 20 | 51880598 | 51880865 | 51880721 | 14 | 16  | 7   | 2.492728784 | 0.0124193 | ENSG00000149617 |
| 20 | 51880979 | 51881460 | 51881158 | 10 | 20  | 15  | 1.539626602 | 0.0943825 | ENSG00000149617 |
| 20 | 51881760 | 51882884 | 51882552 | 21 | 76  | 79  | 1.129059508 | 0.22435   | ENSG00000149617 |
| 20 | 51883008 | 51884652 | 51883815 | 21 | 95  | 113 | 0.987830602 | 0.536754  | ENSG00000149617 |
| 20 | 51884701 | 51885026 | 51884863 | 12 | 17  | 15  | 1.319679944 | 0.209239  | ENSG00000149617 |
| 20 | 51885229 | 51885966 | 51885789 | 15 | 39  | 39  | 1.173048839 | 0.238487  | ENSG00000149617 |
| 20 | 51886557 | 51887501 | 51886995 | 18 | 64  | 69  | 1.089259637 | 0.311015  | ENSG00000149617 |
| 20 | 51888255 | 51888832 | 51888561 | 23 | 39  | 30  | 1.513611406 | 0.0404707 | ENSG00000149617 |
| 20 | 51889235 | 51890234 | 51889681 | 17 | 59  | 66  | 1.050491498 | 0.392358  | ENSG00000149617 |
| 20 | 51890360 | 51890757 | 51890539 | 17 | 27  | 27  | 1.173048839 | 0.276183  | ENSG00000149617 |
| 20 | 51890783 | 51891070 | 51890926 | 9  | 13  | 21  | 0.746485625 | 0.811212  | ENSG00000149617 |
| 20 | 51891923 | 51892296 | 51892132 | 9  | 16  | 18  | 1.049570014 | 0.445264  | ENSG00000149617 |
| 20 | 51892386 | 51892984 | 51892782 | 9  | 26  | 46  | 0.67387912  | 0.953019  | ENSG00000149617 |
| 20 | 51893494 | 51893968 | 51893839 | 9  | 20  | 22  | 1.071044592 | 0.412397  | ENSG00000149617 |
| 20 | 51894108 | 51894721 | 51894331 | 15 | 33  | 31  | 1.246364392 | 0.185828  | ENSG00000149617 |
| 20 | 51895121 | 51895357 | 51895239 | 9  | 12  | 15  | 0.953102182 | 0.555895  | ENSG00000149617 |
| 20 | 51895920 | 51897398 | 51896119 | 26 | 121 | 84  | 1.683670099 | 9.64E-05  | ENSG00000149617 |
| 20 | 51897401 | 51898754 | 51898020 | 24 | 97  | 141 | 0.809568917 | 0.947803  | ENSG00000149617 |
| 20 | 51899251 | 51900067 | 51899453 | 17 | 50  | 51  | 1.150490208 | 0.239308  | ENSG00000149617 |
| 20 | 51900177 | 51900718 | 51900462 | 22 | 37  | 38  | 1.142970664 | 0.279954  | ENSG00000149617 |



|    |          |          |          |     |      |     |             |            |                 |
|----|----------|----------|----------|-----|------|-----|-------------|------------|-----------------|
| 20 | 51901471 | 51902487 | 51901900 | 31  | 101  | 93  | 1.272882783 | 0.0456959  | ENSG00000149617 |
| 20 | 51902579 | 51903525 | 51903346 | 25  | 68   | 69  | 1.156290999 | 0.196676   | ENSG00000149617 |
| 20 | 51905178 | 51905456 | 51905300 | 9   | 10   | 15  | 0.806471077 | 0.716145   | ENSG00000149617 |
| 20 | 51905855 | 51907183 | 51906548 | 18  | 76   | 139 | 0.645176862 | 0.999193   | ENSG00000149617 |
| 20 | 51907432 | 51908338 | 51907874 | 21  | 66   | 88  | 0.88308171  | 0.78145    | ENSG00000149617 |
| 20 | 51909101 | 51909387 | 51909244 | 10  | 11   | 10  | 1.279689643 | 0.277323   | ENSG00000149617 |
| 20 | 51909453 | 51911182 | 51910014 | 17  | 95   | 112 | 0.996572465 | 0.511358   | ENSG00000149617 |
| 20 | 51911239 | 51911561 | 51911399 | 12  | 15   | 19  | 0.938439071 | 0.579569   | ENSG00000149617 |
| 20 | 51911702 | 51912271 | 51911860 | 13  | 30   | 55  | 0.649366322 | 0.976014   | ENSG00000149617 |
| 20 | 51912616 | 51918334 | 51916331 | 195 | 1379 | 759 | 2.130009735 | 2.15E-66   | ENSG00000149617 |
| 20 | 51919295 | 51921069 | 51919876 | 127 | 284  | 178 | 1.867703459 | 1.37E-11   | ENSG00000149617 |
| 20 | 51921278 | 51922176 | 51921670 | 20  | 50   | 72  | 0.819527271 | 0.865353   | ENSG00000149617 |
| 20 | 51922179 | 51922829 | 51922424 | 14  | 37   | 64  | 0.685782398 | 0.970342   | ENSG00000149617 |
| 20 | 51923125 | 51924029 | 51923483 | 22  | 60   | 50  | 1.403058416 | 0.0366273  | ENSG00000149617 |
| 20 | 51924100 | 51924543 | 51924365 | 12  | 19   | 28  | 0.8089992   | 0.772581   | ENSG00000149617 |
| 20 | 51924642 | 51925012 | 51924841 | 18  | 24   | 28  | 1.011248999 | 0.486424   | ENSG00000149617 |
| 20 | 51925313 | 51926168 | 51925492 | 12  | 36   | 58  | 0.735640798 | 0.931974   | ENSG00000149617 |
| 20 | 51926327 | 51926842 | 51926513 | 12  | 26   | 28  | 1.092148919 | 0.372696   | ENSG00000149617 |
| 20 | 51927020 | 51927315 | 51927184 | 11  | 15   | 27  | 0.670313622 | 0.906047   | ENSG00000149617 |
| 20 | 51927318 | 51927501 | 51927413 | 8   | 9    | 14  | 0.78203256  | 0.734892   | ENSG00000149617 |
| 20 | 51927607 | 51928151 | 51927868 | 10  | 24   | 35  | 0.81461725  | 0.78935    | ENSG00000149617 |
| 20 | 51928225 | 51929411 | 51928836 | 21  | 76   | 92  | 0.971233985 | 0.576943   | ENSG00000149617 |
| 20 | 51929719 | 51930326 | 51930119 | 28  | 52   | 44  | 1.381590855 | 0.0548442  | ENSG00000149617 |
| 20 | 51930349 | 51930634 | 51930490 | 11  | 13   | 19  | 0.821134188 | 0.720637   | ENSG00000149617 |
| 20 | 51931214 | 51931760 | 51931482 | 21  | 41   | 24  | 1.97072205  | 0.00298351 | ENSG00000149617 |
| 20 | 51933359 | 51933643 | 51933497 | 11  | 15   | 17  | 1.042710079 | 0.454615   | ENSG00000149617 |
| 20 | 51933954 | 51935582 | 51934593 | 19  | 115  | 122 | 1.106289962 | 0.218332   | ENSG00000149617 |
| 20 | 51935828 | 51936542 | 51936374 | 11  | 30   | 35  | 1.010125389 | 0.4861     | ENSG00000149617 |
| 20 | 51936821 | 51937335 | 51937000 | 8   | 19   | 28  | 0.8089992   | 0.772581   | ENSG00000149617 |
| 20 | 51937599 | 51938142 | 51937862 | 12  | 26   | 15  | 1.979519916 | 0.0131534  | ENSG00000149617 |
| 20 | 51938645 | 51939361 | 51939003 | 9   | 29   | 58  | 0.596465512 | 0.991243   | ENSG00000149617 |
| 20 | 51939459 | 51940076 | 51939716 | 15  | 34   | 42  | 0.954807195 | 0.583336   | ENSG00000149617 |
| 20 | 51940436 | 51941086 | 51940615 | 19  | 44   | 47  | 1.099733287 | 0.324779   | ENSG00000149617 |
| 20 | 51941232 | 51942394 | 51941867 | 14  | 61   | 83  | 0.865821762 | 0.8079     | ENSG00000149617 |

|    |          |          |          |     |     |     |             |            |                 |
|----|----------|----------|----------|-----|-----|-----|-------------|------------|-----------------|
| 20 | 51942802 | 51943588 | 51943221 | 18  | 50  | 42  | 1.391290484 | 0.0547394  | ENSG00000149617 |
| 20 | 51944818 | 51946004 | 51945435 | 13  | 53  | 81  | 0.772495577 | 0.93232    | ENSG00000149617 |
| 20 | 51946182 | 51946970 | 51946481 | 17  | 43  | 53  | 0.955817573 | 0.59057    | ENSG00000149617 |
| 20 | 51947071 | 51947608 | 51947380 | 10  | 20  | 21  | 1.119728438 | 0.357221   | ENSG00000149617 |
| 20 | 51947685 | 51950153 | 51948355 | 89  | 281 | 204 | 1.613657428 | 7.32E-08   | ENSG00000149617 |
| 20 | 51950835 | 51951363 | 51951168 | 26  | 45  | 51  | 1.03769705  | 0.429307   | ENSG00000149617 |
| 20 | 51951373 | 51952480 | 51951984 | 15  | 58  | 82  | 0.833853994 | 0.85981    | ENSG00000149617 |
| 20 | 51953420 | 51954179 | 51953599 | 18  | 45  | 70  | 0.760003473 | 0.929532   | ENSG00000149617 |
| 20 | 51954495 | 51954688 | 51954626 | 11  | 12  | 13  | 1.089259637 | 0.414883   | ENSG00000149617 |
| 20 | 51954974 | 51955428 | 51955153 | 20  | 32  | 37  | 1.018700308 | 0.471311   | ENSG00000149617 |
| 20 | 51955442 | 51955703 | 51955580 | 10  | 12  | 20  | 0.726173091 | 0.825666   | ENSG00000149617 |
| 20 | 51955707 | 51956618 | 51956163 | 29  | 76  | 53  | 1.672680752 | 0.00168889 | ENSG00000149617 |
| 20 | 51956789 | 51957394 | 51956995 | 13  | 30  | 44  | 0.808100312 | 0.823634   | ENSG00000149617 |
| 20 | 51957728 | 51958338 | 51957921 | 16  | 33  | 51  | 0.766993472 | 0.889544   | ENSG00000149617 |
| 20 | 51959221 | 51959670 | 51959440 | 12  | 21  | 28  | 0.889899119 | 0.664396   | ENSG00000149617 |
| 20 | 51960302 | 51960978 | 51960721 | 12  | 33  | 44  | 0.886303567 | 0.70587    | ENSG00000149617 |
| 20 | 51961181 | 51961565 | 51961327 | 10  | 16  | 32  | 0.604297887 | 0.959754   | ENSG00000149617 |
| 20 | 51961573 | 51962744 | 51962035 | 19  | 58  | 85  | 0.804766064 | 0.903299   | ENSG00000149617 |
| 20 | 51963283 | 51963645 | 51963478 | 9   | 14  | 22  | 0.765031852 | 0.797133   | ENSG00000149617 |
| 20 | 51964084 | 51966463 | 51965870 | 110 | 363 | 245 | 1.735730803 | 6.83E-12   | ENSG00000149617 |
| 20 | 51966782 | 51967440 | 51966961 | 16  | 40  | 52  | 0.907452876 | 0.682753   | ENSG00000149617 |
| 20 | 51967455 | 51968391 | 51968067 | 19  | 57  | 66  | 1.015475115 | 0.467671   | ENSG00000149617 |
| 20 | 51968660 | 51969230 | 51968991 | 28  | 45  | 40  | 1.316103576 | 0.100152   | ENSG00000149617 |
| 20 | 51969605 | 51970019 | 51969807 | 14  | 23  | 23  | 1.173048839 | 0.291252   | ENSG00000149617 |
| 20 | 51970033 | 51970501 | 51970212 | 13  | 22  | 45  | 0.58652442  | 0.984656   | ENSG00000149617 |
| 20 | 51970613 | 51972081 | 51971565 | 22  | 102 | 94  | 1.271831899 | 0.04543    | ENSG00000149617 |
| 20 | 51972148 | 51972618 | 51972327 | 9   | 17  | 17  | 1.173048839 | 0.317303   | ENSG00000149617 |
| 20 | 51972839 | 51973396 | 51973183 | 14  | 30  | 34  | 1.038986115 | 0.44061    | ENSG00000149617 |
| 20 | 51973427 | 51974360 | 51973781 | 17  | 54  | 87  | 0.733155525 | 0.966675   | ENSG00000149617 |
| 20 | 51975167 | 51975762 | 51975479 | 11  | 25  | 39  | 0.762481746 | 0.864096   | ENSG00000149617 |
| 20 | 51975765 | 51976405 | 51976085 | 10  | 28  | 38  | 0.872267086 | 0.715311   | ENSG00000149617 |
| 20 | 51976484 | 51977135 | 51976638 | 14  | 32  | 53  | 0.71686318  | 0.937832   | ENSG00000149617 |
| 20 | 51977507 | 51978255 | 51977938 | 14  | 36  | 53  | 0.803755686 | 0.85085    | ENSG00000149617 |
| 20 | 51979212 | 51981318 | 51979391 | 22  | 132 | 173 | 0.896640779 | 0.829871   | ENSG00000149617 |

|    |          |          |          |     |     |     |             |            |                 |
|----|----------|----------|----------|-----|-----|-----|-------------|------------|-----------------|
| 20 | 51981588 | 51981958 | 51981767 | 20  | 27  | 15  | 2.052835469 | 0.00908649 | ENSG00000149617 |
| 20 | 51982372 | 51982692 | 51982532 | 12  | 16  | 13  | 1.424416448 | 0.161813   | ENSG00000149617 |
| 20 | 51983081 | 51983951 | 51983513 | 21  | 61  | 66  | 1.085507881 | 0.322005   | ENSG00000149617 |
| 20 | 51983970 | 51984933 | 51984650 | 15  | 52  | 83  | 0.740137958 | 0.959238   | ENSG00000149617 |
| 20 | 51985044 | 51986045 | 51985848 | 23  | 61  | 52  | 1.372245812 | 0.0449213  | ENSG00000149617 |
| 20 | 51986095 | 51986437 | 51986325 | 8   | 13  | 13  | 1.173048839 | 0.337862   | ENSG00000149617 |
| 20 | 51986712 | 51990888 | 51990009 | 121 | 453 | 351 | 1.512966401 | 2.29E-09   | ENSG00000149617 |
| 20 | 51991128 | 51991788 | 51991307 | 15  | 35  | 54  | 0.767813786 | 0.894997   | ENSG00000149617 |
| 20 | 51991823 | 51992836 | 51992636 | 19  | 55  | 83  | 0.78203256  | 0.925636   | ENSG00000149617 |
| 20 | 51992858 | 51993379 | 51993200 | 13  | 26  | 35  | 0.879786629 | 0.696575   | ENSG00000149617 |
| 20 | 51993525 | 51994416 | 51993919 | 38  | 98  | 104 | 1.106017477 | 0.23683    | ENSG00000149617 |
| 20 | 51994565 | 51995198 | 51994844 | 16  | 40  | 61  | 0.775725845 | 0.899988   | ENSG00000149617 |
| 20 | 51995519 | 51995953 | 51995634 | 12  | 18  | 30  | 0.718965418 | 0.877492   | ENSG00000149617 |
| 20 | 51996121 | 51996381 | 51996251 | 13  | 15  | 26  | 0.695140053 | 0.88251    | ENSG00000149617 |
| 20 | 51996993 | 52000928 | 51997517 | 23  | 213 | 227 | 1.101019525 | 0.156526   | ENSG00000149617 |
| 20 | 52000957 | 52001246 | 52001101 | 11  | 14  | 15  | 1.099733287 | 0.398076   | ENSG00000149617 |
| 20 | 52001348 | 52001978 | 52001718 | 13  | 30  | 38  | 0.932423436 | 0.617637   | ENSG00000149617 |
| 20 | 52002049 | 52003494 | 52002294 | 19  | 87  | 105 | 0.973851867 | 0.574572   | ENSG00000149617 |
| 20 | 52003512 | 52004106 | 52003629 | 11  | 28  | 49  | 0.680368327 | 0.954371   | ENSG00000149617 |
| 20 | 52004134 | 52004425 | 52004288 | 13  | 18  | 28  | 0.76854924  | 0.819816   | ENSG00000149617 |
| 20 | 52004515 | 52005682 | 52004842 | 17  | 64  | 97  | 0.778042598 | 0.943928   | ENSG00000149617 |
| 20 | 52005960 | 52006598 | 52006345 | 18  | 35  | 46  | 0.898505494 | 0.688843   | ENSG00000149617 |
| 20 | 52006802 | 52007190 | 52006879 | 15  | 23  | 44  | 0.625626048 | 0.97199    | ENSG00000149617 |
| 20 | 52007275 | 52008457 | 52007951 | 29  | 85  | 89  | 1.120913335 | 0.225365   | ENSG00000149617 |
| 20 | 52008520 | 52009019 | 52008867 | 15  | 25  | 33  | 0.897037348 | 0.665614   | ENSG00000149617 |
| 20 | 52009604 | 52010468 | 52010289 | 19  | 52  | 86  | 0.71461596  | 0.975061   | ENSG00000149617 |
| 20 | 52011392 | 52012011 | 52011674 | 16  | 34  | 35  | 1.140464149 | 0.29107    | ENSG00000149617 |
| 20 | 52012015 | 52012272 | 52012141 | 10  | 13  | 15  | 1.026417734 | 0.475096   | ENSG00000149617 |
| 20 | 52012552 | 52012764 | 52012642 | 9   | 11  | 16  | 0.828034475 | 0.698553   | ENSG00000149617 |
| 20 | 52013502 | 52014973 | 52013667 | 18  | 83  | 106 | 0.920898154 | 0.716088   | ENSG00000149617 |
| 20 | 52015028 | 52015299 | 52015163 | 9   | 11  | 28  | 0.48539952  | 0.987025   | ENSG00000149617 |
| 20 | 52015531 | 52015971 | 52015709 | 10  | 19  | 23  | 0.977540699 | 0.533404   | ENSG00000149617 |
| 20 | 52016572 | 52018046 | 52017341 | 15  | 71  | 88  | 0.948983331 | 0.631455   | ENSG00000149617 |
| 20 | 52018208 | 52018450 | 52018330 | 10  | 12  | 32  | 0.462110149 | 0.993811   | ENSG00000149617 |

|    |          |          |          |    |     |     |             |                |                 |
|----|----------|----------|----------|----|-----|-----|-------------|----------------|-----------------|
| 20 | 52018522 | 52019201 | 52019022 | 20 | 43  | 70  | 0.726959844 | 0.954567       | ENSG00000149617 |
| 20 | 52019426 | 52020019 | 52019605 | 15 | 28  | 36  | 0.919416658 | 0.636093       | ENSG00000149617 |
| 20 | 52020158 | 52021758 | 52021172 | 14 | 70  | 107 | 0.771170996 | 0.957447       | ENSG00000149617 |
| 20 | 52022133 | 52022941 | 52022412 | 16 | 44  | 44  | 1.173048839 | 0.225251       | ENSG00000149617 |
| 20 | 52023458 | 52023751 | 52023604 | 15 | 17  | 28  | 0.72809928  | 0.86131 BCAS1  | ENSG00000064787 |
| 20 | 52024331 | 52024935 | 52024556 | 16 | 31  | 38  | 0.962501612 | 0.56656 BCAS1  | ENSG00000064787 |
| 20 | 52024938 | 52025465 | 52025286 | 15 | 30  | 45  | 0.790532913 | 0.84847 BCAS1  | ENSG00000064787 |
| 20 | 52025810 | 52026211 | 52026033 | 13 | 23  | 37  | 0.740872951 | 0.880242 BCAS1 | ENSG00000064787 |
| 20 | 52026417 | 52026898 | 52026574 | 11 | 19  | 24  | 0.938439071 | 0.587839 BCAS1 | ENSG00000064787 |
| 20 | 52027141 | 52027410 | 52027279 | 12 | 14  | 19  | 0.879786629 | 0.651591 BCAS1 | ENSG00000064787 |
| 20 | 52028652 | 52029412 | 52028831 | 15 | 47  | 67  | 0.828034475 | 0.84479 BCAS1  | ENSG00000064787 |
| 20 | 52029429 | 52029714 | 52029571 | 9  | 13  | 28  | 0.56629944  | 0.965798 BCAS1 | ENSG00000064787 |
| 20 | 52029881 | 52030203 | 52030029 | 8  | 13  | 35  | 0.45618566  | 0.995909 BCAS1 | ENSG00000064787 |
| 20 | 52030925 | 52031780 | 52031120 | 11 | 36  | 68  | 0.629026189 | 0.990208 BCAS1 | ENSG00000064787 |
| 20 | 52031827 | 52032574 | 52032031 | 12 | 36  | 38  | 1.112892489 | 0.321968 BCAS1 | ENSG00000064787 |
| 20 | 52032720 | 52033741 | 52033217 | 14 | 50  | 66  | 0.892917773 | 0.731709 BCAS1 | ENSG00000064787 |
| 20 | 52034188 | 52035126 | 52034854 | 12 | 44  | 64  | 0.812110735 | 0.861774 BCAS1 | ENSG00000064787 |
| 20 | 52035203 | 52035792 | 52035434 | 8  | 22  | 30  | 0.870326558 | 0.697587 BCAS1 | ENSG00000064787 |
| 20 | 52035796 | 52036368 | 52035975 | 13 | 31  | 54  | 0.682501143 | 0.960526 BCAS1 | ENSG00000064787 |
| 20 | 52036419 | 52036645 | 52036596 | 9  | 12  | 10  | 1.386330446 | 0.21117 BCAS1  | ENSG00000064787 |
| 20 | 52036841 | 52037094 | 52036990 | 11 | 12  | 34  | 0.435703855 | 0.996825 BCAS1 | ENSG00000064787 |
| 20 | 52037140 | 52038811 | 52037889 | 20 | 86  | 147 | 0.689562493 | 0.997422 BCAS1 | ENSG00000064787 |
| 20 | 52039118 | 52039826 | 52039592 | 19 | 39  | 34  | 1.340627245 | 0.102169 BCAS1 | ENSG00000064787 |
| 20 | 52040020 | 52040481 | 52040199 | 13 | 22  | 24  | 1.079204932 | 0.398105 BCAS1 | ENSG00000064787 |
| 20 | 52040664 | 52041775 | 52041030 | 19 | 62  | 85  | 0.859326475 | 0.822345 BCAS1 | ENSG00000064787 |
| 20 | 52041871 | 52042084 | 52041977 | 8  | 8   | 10  | 0.959767232 | 0.541959 BCAS1 | ENSG00000064787 |
| 20 | 52042163 | 52044602 | 52043229 | 19 | 136 | 144 | 1.108328903 | 0.194687 BCAS1 | ENSG00000064787 |
| 20 | 52044641 | 52045088 | 52044793 | 10 | 18  | 22  | 0.969040346 | 0.544098 BCAS1 | ENSG00000064787 |
| 20 | 52045305 | 52045657 | 52045481 | 10 | 16  | 31  | 0.623182196 | 0.948409 BCAS1 | ENSG00000064787 |
| 20 | 52045660 | 52046316 | 52045948 | 13 | 30  | 54  | 0.661172982 | 0.970431 BCAS1 | ENSG00000064787 |
| 20 | 52046359 | 52047275 | 52046801 | 14 | 48  | 57  | 0.991024019 | 0.520661 BCAS1 | ENSG00000064787 |
| 20 | 52047320 | 52047851 | 52047693 | 15 | 26  | 22  | 1.377057333 | 0.128834 BCAS1 | ENSG00000064787 |
| 20 | 52047866 | 52048198 | 52048032 | 14 | 19  | 19  | 1.173048839 | 0.308076 BCAS1 | ENSG00000064787 |
| 20 | 52049293 | 52049713 | 52049614 | 9  | 15  | 29  | 0.625626048 | 0.94154 BCAS1  | ENSG00000064787 |

|    |          |          |          |    |     |    |             |           |       |                 |
|----|----------|----------|----------|----|-----|----|-------------|-----------|-------|-----------------|
| 20 | 52049879 | 52050253 | 52050088 | 8  | 13  | 18 | 0.864351776 | 0.666373  | BCAS1 | ENSG00000064787 |
| 20 | 52050322 | 52050544 | 52050433 | 9  | 12  | 16 | 0.897037348 | 0.621544  | BCAS1 | ENSG00000064787 |
| 20 | 52051803 | 52052196 | 52052028 | 9  | 17  | 40 | 0.514997051 | 0.993     | BCAS1 | ENSG00000064787 |
| 20 | 52052223 | 52052567 | 52052395 | 11 | 17  | 34 | 0.60328226  | 0.964376  | BCAS1 | ENSG00000064787 |
| 20 | 52053372 | 52053686 | 52053538 | 9  | 13  | 31 | 0.513208867 | 0.98562   | BCAS1 | ENSG00000064787 |
| 20 | 52053880 | 52054113 | 52053992 | 10 | 11  | 27 | 0.502735217 | 0.982212  | BCAS1 | ENSG00000064787 |
| 20 | 52054182 | 52054409 | 52054271 | 9  | 9   | 11 | 0.977540699 | 0.526123  | BCAS1 | ENSG00000064787 |
| 20 | 52054436 | 52055202 | 52054593 | 13 | 36  | 28 | 1.496648519 | 0.0507654 | BCAS1 | ENSG00000064787 |
| 20 | 52055431 | 52055830 | 52055610 | 10 | 17  | 19 | 1.055743955 | 0.436418  | BCAS1 | ENSG00000064787 |
| 20 | 52055851 | 52056269 | 52056030 | 10 | 19  | 29 | 0.78203256  | 0.808559  | BCAS1 | ENSG00000064787 |
| 20 | 52056630 | 52056931 | 52056780 | 14 | 15  | 17 | 1.042710079 | 0.454615  | BCAS1 | ENSG00000064787 |
| 20 | 52056971 | 52057288 | 52057129 | 15 | 17  | 18 | 1.111309427 | 0.376188  | BCAS1 | ENSG00000064787 |
| 20 | 52057517 | 52057929 | 52057871 | 11 | 20  | 24 | 0.985361025 | 0.523192  | BCAS1 | ENSG00000064787 |
| 20 | 52057936 | 52058156 | 52057996 | 10 | 12  | 19 | 0.762481746 | 0.784291  | BCAS1 | ENSG00000064787 |
| 20 | 52060789 | 52061050 | 52060920 | 8  | 10  | 19 | 0.645176862 | 0.887754  | BCAS1 | ENSG00000064787 |
| 20 | 52061331 | 52061578 | 52061465 | 8  | 9   | 12 | 0.902345261 | 0.602772  | BCAS1 | ENSG00000064787 |
| 20 | 52061620 | 52061835 | 52061754 | 8  | 11  | 12 | 1.082814313 | 0.424156  | BCAS1 | ENSG00000064787 |
| 20 | 52061848 | 52062321 | 52062014 | 12 | 21  | 27 | 0.921681231 | 0.616644  | BCAS1 | ENSG00000064787 |
| 20 | 52062437 | 52063019 | 52062686 | 15 | 29  | 31 | 1.099733287 | 0.355847  | BCAS1 | ENSG00000064787 |
| 20 | 52063131 | 52063726 | 52063285 | 12 | 28  | 35 | 0.944956009 | 0.592981  | BCAS1 | ENSG00000064787 |
| 20 | 52063877 | 52064277 | 52064171 | 13 | 21  | 28 | 0.889899119 | 0.664396  | BCAS1 | ENSG00000064787 |
| 20 | 52064389 | 52066169 | 52065279 | 63 | 160 | 87 | 2.146146172 | 1.62E-09  | BCAS1 | ENSG00000064787 |
| 20 | 52066412 | 52067290 | 52066706 | 11 | 36  | 52 | 0.818920888 | 0.828269  | BCAS1 | ENSG00000064787 |
| 20 | 52067725 | 52068253 | 52067900 | 18 | 34  | 29 | 1.368556979 | 0.102922  | BCAS1 | ENSG00000064787 |
| 20 | 52068642 | 52068910 | 52068776 | 13 | 17  | 24 | 0.844595164 | 0.713005  | BCAS1 | ENSG00000064787 |
| 20 | 52070056 | 52070334 | 52070185 | 8  | 11  | 13 | 1.005470434 | 0.498567  | BCAS1 | ENSG00000064787 |
| 20 | 52071754 | 52072173 | 52071888 | 13 | 21  | 16 | 1.518063204 | 0.0959332 | BCAS1 | ENSG00000064787 |
| 20 | 52072479 | 52072710 | 52072559 | 8  | 10  | 11 | 1.075294769 | 0.434143  | BCAS1 | ENSG00000064787 |
| 20 | 52072760 | 52073112 | 52072936 | 16 | 22  | 23 | 1.124171804 | 0.345816  | BCAS1 | ENSG00000064787 |
| 20 | 52073211 | 52073898 | 52073726 | 11 | 29  | 46 | 0.748754578 | 0.896605  | BCAS1 | ENSG00000064787 |
| 20 | 52074384 | 52074900 | 52074588 | 11 | 21  | 34 | 0.737344985 | 0.874215  | BCAS1 | ENSG00000064787 |
| 20 | 52074988 | 52075265 | 52075122 | 10 | 11  | 17 | 0.78203256  | 0.752912  | BCAS1 | ENSG00000064787 |
| 20 | 52075572 | 52075868 | 52075721 | 8  | 12  | 15 | 0.953102182 | 0.555895  | BCAS1 | ENSG00000064787 |
| 20 | 52076246 | 52076670 | 52076343 | 9  | 16  | 19 | 0.997091513 | 0.507069  | BCAS1 | ENSG00000064787 |

|    |          |          |          |    |     |     |             |           |       |                 |
|----|----------|----------|----------|----|-----|-----|-------------|-----------|-------|-----------------|
| 20 | 52076807 | 52077029 | 52076960 | 8  | 10  | 13  | 0.921681231 | 0.585856  | BCAS1 | ENSG00000064787 |
| 20 | 52078855 | 52080059 | 52079404 | 13 | 58  | 48  | 1.412446562 | 0.0364407 | BCAS1 | ENSG00000064787 |
| 20 | 52080856 | 52081078 | 52081034 | 9  | 12  | 23  | 0.635401455 | 0.914098  | BCAS1 | ENSG00000064787 |
| 20 | 52081279 | 52081486 | 52081380 | 9  | 10  | 22  | 0.561023358 | 0.950736  | BCAS1 | ENSG00000064787 |
| 20 | 52081539 | 52081883 | 52081711 | 10 | 16  | 24  | 0.797673211 | 0.770106  | BCAS1 | ENSG00000064787 |
| 20 | 52086329 | 52086685 | 52086507 | 11 | 15  | 21  | 0.853126429 | 0.691243  | BCAS1 | ENSG00000064787 |
| 20 | 52087604 | 52087823 | 52087719 | 8  | 10  | 29  | 0.430117908 | 0.994811  | BCAS1 | ENSG00000064787 |
| 20 | 52088066 | 52088396 | 52088231 | 9  | 15  | 27  | 0.670313622 | 0.906047  | BCAS1 | ENSG00000064787 |
| 20 | 52088757 | 52089257 | 52088873 | 14 | 23  | 42  | 0.654724934 | 0.956152  | BCAS1 | ENSG00000064787 |
| 20 | 52089284 | 52089711 | 52089532 | 9  | 18  | 22  | 0.969040346 | 0.544098  | BCAS1 | ENSG00000064787 |
| 20 | 52091179 | 52091442 | 52091338 | 11 | 14  | 21  | 0.799806027 | 0.754204  | BCAS1 | ENSG00000064787 |
| 20 | 52092620 | 52092843 | 52092675 | 8  | 11  | 21  | 0.639844821 | 0.901936  | BCAS1 | ENSG00000064787 |
| 20 | 52093080 | 52093334 | 52093179 | 11 | 13  | 15  | 1.026417734 | 0.475096  | BCAS1 | ENSG00000064787 |
| 20 | 52093411 | 52093797 | 52093618 | 13 | 20  | 22  | 1.071044592 | 0.412397  | BCAS1 | ENSG00000064787 |
| 20 | 52093818 | 52094543 | 52094275 | 11 | 28  | 29  | 1.133947211 | 0.316017  | BCAS1 | ENSG00000064787 |
| 20 | 52095410 | 52095643 | 52095526 | 8  | 10  | 17  | 0.71686318  | 0.816679  | BCAS1 | ENSG00000064787 |
| 20 | 52096405 | 52096670 | 52096527 | 9  | 10  | 8   | 1.433726359 | 0.209175  | BCAS1 | ENSG00000064787 |
| 20 | 52096764 | 52097318 | 52096936 | 14 | 26  | 26  | 1.173048839 | 0.279807  | BCAS1 | ENSG00000064787 |
| 20 | 52097320 | 52097776 | 52097477 | 10 | 19  | 25  | 0.902345261 | 0.639556  | BCAS1 | ENSG00000064787 |
| 20 | 52098721 | 52099164 | 52098887 | 10 | 17  | 14  | 1.407658607 | 0.162567  | BCAS1 | ENSG00000064787 |
| 20 | 52099679 | 52100676 | 52099857 | 12 | 41  | 55  | 0.879786629 | 0.738024  | BCAS1 | ENSG00000064787 |
| 20 | 52101077 | 52101646 | 52101452 | 10 | 23  | 26  | 1.042710079 | 0.443237  | BCAS1 | ENSG00000064787 |
| 20 | 52102905 | 52103084 | 52102994 | 9  | 9   | 14  | 0.78203256  | 0.734892  | BCAS1 | ENSG00000064787 |
| 20 | 52103365 | 52103556 | 52103416 | 8  | 11  | 10  | 1.279689643 | 0.277323  | BCAS1 | ENSG00000064787 |
| 20 | 52103575 | 52103772 | 52103693 | 8  | 9   | 11  | 0.977540699 | 0.526123  | BCAS1 | ENSG00000064787 |
| 20 | 52106564 | 52107228 | 52106652 | 11 | 28  | 37  | 0.895221483 | 0.676978  | BCAS1 | ENSG00000064787 |
| 20 | 52107601 | 52108396 | 52108217 | 14 | 37  | 41  | 1.061329902 | 0.396992  | BCAS1 | ENSG00000064787 |
| 20 | 52109863 | 52110170 | 52110040 | 11 | 15  | 31  | 0.58652442  | 0.964845  | BCAS1 | ENSG00000064787 |
| 20 | 52111031 | 52111250 | 52111140 | 10 | 10  | 26  | 0.477908786 | 0.985694  | BCAS1 | ENSG00000064787 |
| 20 | 52111390 | 52111646 | 52111563 | 9  | 11  | 30  | 0.454083422 | 0.993251  | BCAS1 | ENSG00000064787 |
| 20 | 52112577 | 52113695 | 52112863 | 49 | 109 | 105 | 1.217314833 | 0.0744125 | BCAS1 | ENSG00000064787 |
| 20 | 52113969 | 52114159 | 52114064 | 8  | 8   | 25  | 0.406055367 | 0.994096  | BCAS1 | ENSG00000064787 |
| 20 | 52114260 | 52114934 | 52114758 | 19 | 42  | 35  | 1.401141669 | 0.0669496 | BCAS1 | ENSG00000064787 |
| 20 | 52115190 | 52116065 | 52115676 | 16 | 45  | 46  | 1.148090353 | 0.253698  | BCAS1 | ENSG00000064787 |

|    |          |          |          |    |     |     |             |            |       |                 |
|----|----------|----------|----------|----|-----|-----|-------------|------------|-------|-----------------|
| 20 | 52116356 | 52116955 | 52116480 | 9  | 21  | 41  | 0.614454154 | 0.971896   | BCAS1 | ENSG00000064787 |
| 20 | 52117428 | 52119501 | 52117779 | 74 | 224 | 155 | 1.691897364 | 1.68E-07   | BCAS1 | ENSG00000064787 |
| 20 | 52119533 | 52121508 | 52120664 | 43 | 185 | 115 | 1.880923139 | 2.77E-08   | BCAS1 | ENSG00000064787 |
| 20 | 52121582 | 52121921 | 52121751 | 16 | 21  | 31  | 0.806471077 | 0.786558   | BCAS1 | ENSG00000064787 |
| 20 | 52123131 | 52123508 | 52123292 | 8  | 14  | 17  | 0.977540699 | 0.52995    | BCAS1 | ENSG00000064787 |
| 20 | 52123598 | 52124293 | 52123945 | 14 | 28  | 54  | 0.618516661 | 0.984374   | BCAS1 | ENSG00000064787 |
| 20 | 52124514 | 52125038 | 52124871 | 15 | 30  | 21  | 1.652932455 | 0.0339016  | BCAS1 | ENSG00000064787 |
| 20 | 52125131 | 52125725 | 52125456 | 13 | 30  | 42  | 0.845686373 | 0.765623   | BCAS1 | ENSG00000064787 |
| 20 | 52126071 | 52126589 | 52126411 | 29 | 50  | 44  | 1.329455351 | 0.0815422  | BCAS1 | ENSG00000064787 |
| 20 | 52126820 | 52127346 | 52127171 | 12 | 23  | 35  | 0.78203256  | 0.829742   | BCAS1 | ENSG00000064787 |
| 20 | 52128190 | 52128597 | 52128418 | 8  | 16  | 29  | 0.664727676 | 0.917277   | BCAS1 | ENSG00000064787 |
| 20 | 52128606 | 52128976 | 52128785 | 10 | 18  | 23  | 0.928663664 | 0.599426   | BCAS1 | ENSG00000064787 |
| 20 | 52128984 | 52129368 | 52129189 | 10 | 18  | 23  | 0.928663664 | 0.599426   | BCAS1 | ENSG00000064787 |
| 20 | 52129732 | 52130050 | 52129885 | 9  | 13  | 17  | 0.912371319 | 0.606688   | BCAS1 | ENSG00000064787 |
| 20 | 52130311 | 52131026 | 52130895 | 14 | 31  | 33  | 1.104045966 | 0.345468   | BCAS1 | ENSG00000064787 |
| 20 | 52131257 | 52131752 | 52131436 | 10 | 21  | 23  | 1.075294769 | 0.4051     | BCAS1 | ENSG00000064787 |
| 20 | 52132128 | 52132943 | 52132307 | 15 | 36  | 33  | 1.276553149 | 0.151977   | BCAS1 | ENSG00000064787 |
| 20 | 52133700 | 52133906 | 52133768 | 9  | 10  | 25  | 0.496289894 | 0.980252   | BCAS1 | ENSG00000064787 |
| 20 | 52134007 | 52136391 | 52135200 | 51 | 205 | 132 | 1.816902714 | 2.53E-08   | BCAS1 | ENSG00000064787 |
| 20 | 52136399 | 52136691 | 52136545 | 12 | 17  | 19  | 1.055743955 | 0.436418   | BCAS1 | ENSG00000064787 |
| 20 | 52136709 | 52137328 | 52137229 | 13 | 32  | 36  | 1.046232749 | 0.427232   | BCAS1 | ENSG00000064787 |
| 20 | 52137567 | 52138036 | 52137741 | 17 | 28  | 20  | 1.619924588 | 0.0441949  | BCAS1 | ENSG00000064787 |
| 20 | 52138053 | 52139011 | 52138463 | 12 | 41  | 53  | 0.912371319 | 0.675066   | BCAS1 | ENSG00000064787 |
| 20 | 52139022 | 52139284 | 52139157 | 11 | 14  | 10  | 1.599612054 | 0.114822   | BCAS1 | ENSG00000064787 |
| 20 | 52139286 | 52139642 | 52139464 | 14 | 20  | 15  | 1.539626602 | 0.0943825  | BCAS1 | ENSG00000064787 |
| 20 | 52139739 | 52140454 | 52140136 | 11 | 32  | 46  | 0.823630036 | 0.807606   | BCAS1 | ENSG00000064787 |
| 20 | 52140547 | 52141128 | 52140726 | 17 | 33  | 42  | 0.927526989 | 0.631622   | BCAS1 | ENSG00000064787 |
| 20 | 52141903 | 52142581 | 52142242 | 14 | 33  | 37  | 1.049570014 | 0.420838   | BCAS1 | ENSG00000064787 |
| 20 | 52143379 | 52143829 | 52143558 | 14 | 24  | 34  | 0.837892028 | 0.754916   | BCAS1 | ENSG00000064787 |
| 20 | 52144233 | 52144769 | 52144549 | 16 | 34  | 26  | 1.520618866 | 0.0495232  | BCAS1 | ENSG00000064787 |
| 20 | 52145775 | 52146387 | 52145954 | 9  | 23  | 40  | 0.686662735 | 0.933101   | BCAS1 | ENSG00000064787 |
| 20 | 52146391 | 52147745 | 52146851 | 43 | 114 | 80  | 1.66543971  | 0.00018996 | BCAS1 | ENSG00000064787 |
| 20 | 52147883 | 52148922 | 52148516 | 19 | 55  | 64  | 1.010626692 | 0.478737   | BCAS1 | ENSG00000064787 |
| 20 | 52148940 | 52150089 | 52149788 | 17 | 58  | 51  | 1.33095926  | 0.0660785  | BCAS1 | ENSG00000064787 |

|    |          |          |          |     |     |     |             |             |         |                 |
|----|----------|----------|----------|-----|-----|-----|-------------|-------------|---------|-----------------|
| 20 | 52151733 | 52153101 | 52152944 | 16  | 72  | 80  | 1.057192164 | 0.366521    | BCAS1   | ENSG00000064787 |
| 20 | 52153225 | 52153758 | 52153535 | 71  | 102 | 58  | 2.047864923 | 3.44E-06    | BCAS1   | ENSG00000064787 |
| 20 | 52153765 | 52154327 | 52154115 | 13  | 30  | 30  | 1.173048839 | 0.265818    | BCAS1   | ENSG00000064787 |
| 20 | 52154388 | 52155066 | 52154727 | 9   | 28  | 45  | 0.73953079  | 0.902928    | BCAS1   | ENSG00000064787 |
| 20 | 52155177 | 52155482 | 52155329 | 8   | 13  | 21  | 0.746485625 | 0.811212    | BCAS1   | ENSG00000064787 |
| 20 | 52155559 | 52155932 | 52155736 | 8   | 15  | 25  | 0.721876209 | 0.854481    | BCAS1   | ENSG00000064787 |
| 20 | 52156153 | 52156419 | 52156280 | 14  | 16  | 13  | 1.424416448 | 0.161813    | BCAS1   | ENSG00000064787 |
| 20 | 52156645 | 52156988 | 52156816 | 10  | 13  | 21  | 0.746485625 | 0.811212    | BCAS1   | ENSG00000064787 |
| 20 | 52157035 | 52158198 | 52157314 | 38  | 109 | 80  | 1.593029288 | 0.000670839 | BCAS1   | ENSG00000064787 |
| 20 | 52159155 | 52159758 | 52159506 | 12  | 32  | 33  | 1.138547403 | 0.298948    | BCAS1   | ENSG00000064787 |
| 20 | 52159891 | 52161091 | 52160112 | 53  | 154 | 65  | 2.754887426 | 2.00E-13    | BCAS1   | ENSG00000064787 |
| 20 | 52161552 | 52162934 | 52162106 | 12  | 59  | 86  | 0.8089992   | 0.899416    | BCAS1   | ENSG00000064787 |
| 20 | 52163281 | 52163757 | 52163460 | 8   | 20  | 31  | 0.769813301 | 0.829881    | BCAS1   | ENSG00000064787 |
| 20 | 52163978 | 52164492 | 52164157 | 21  | 34  | 32  | 1.244142708 | 0.184209    | BCAS1   | ENSG00000064787 |
| 20 | 52164496 | 52165783 | 52164675 | 15  | 70  | 78  | 1.054259083 | 0.374678    | BCAS1   | ENSG00000064787 |
| 20 | 52166396 | 52166834 | 52166615 | 12  | 22  | 23  | 1.124171804 | 0.345816    | BCAS1   | ENSG00000064787 |
| 20 | 52166843 | 52167194 | 52167018 | 13  | 19  | 30  | 0.756805703 | 0.840281    | BCAS1   | ENSG00000064787 |
| 20 | 52167240 | 52167915 | 52167757 | 17  | 33  | 41  | 0.949610965 | 0.591605    | BCAS1   | ENSG00000064787 |
| 20 | 52167943 | 52168904 | 52168725 | 12  | 41  | 48  | 1.005470434 | 0.491834    | BCAS1   | ENSG00000064787 |
| 20 | 52169972 | 52170288 | 52170130 | 10  | 15  | 21  | 0.853126429 | 0.691243    | BCAS1   | ENSG00000064787 |
| 20 | 52171029 | 52171356 | 52171192 | 9   | 14  | 19  | 0.879786629 | 0.651591    | BCAS1   | ENSG00000064787 |
| 20 | 52171463 | 52172034 | 52171671 | 12  | 29  | 34  | 1.005470434 | 0.493838    | CYP24A1 | ENSG00000019186 |
| 20 | 52172178 | 52172540 | 52172373 | 12  | 17  | 27  | 0.754102825 | 0.831231    | CYP24A1 | ENSG00000019186 |
| 20 | 52172640 | 52174552 | 52173845 | 147 | 432 | 164 | 3.07836453  | 1.96E-39    | CYP24A1 | ENSG00000019186 |
| 20 | 52174626 | 52174825 | 52174743 | 8   | 9   | 4   | 2.346097679 | 0.050148    | CYP24A1 | ENSG00000019186 |
| 20 | 52174862 | 52175272 | 52175058 | 14  | 23  | 25  | 1.082814313 | 0.391389    | CYP24A1 | ENSG00000019186 |
| 20 | 52175436 | 52175768 | 52175602 | 12  | 14  | 19  | 0.879786629 | 0.651591    | CYP24A1 | ENSG00000019186 |
| 20 | 52176607 | 52178447 | 52177120 | 23  | 103 | 106 | 1.14015962  | 0.171018    | CYP24A1 | ENSG00000019186 |
| 20 | 52178533 | 52178839 | 52178702 | 14  | 16  | 21  | 0.90644683  | 0.624241    | CYP24A1 | ENSG00000019186 |
| 20 | 52178997 | 52179181 | 52179089 | 8   | 8   | 9   | 1.055743955 | 0.456865    | CYP24A1 | ENSG00000019186 |
| 20 | 52179425 | 52179899 | 52179599 | 11  | 23  | 27  | 1.005470434 | 0.495068    | CYP24A1 | ENSG00000019186 |
| 20 | 52180218 | 52180528 | 52180373 | 11  | 15  | 36  | 0.507264363 | 0.991368    | CYP24A1 | ENSG00000019186 |
| 20 | 52180586 | 52180923 | 52180754 | 11  | 15  | 25  | 0.721876209 | 0.854481    | CYP24A1 | ENSG00000019186 |
| 20 | 52181508 | 52181759 | 52181661 | 9   | 11  | 18  | 0.740872951 | 0.800189    | CYP24A1 | ENSG00000019186 |



|    |          |          |          |    |     |     |             |           |         |                 |
|----|----------|----------|----------|----|-----|-----|-------------|-----------|---------|-----------------|
| 20 | 52182037 | 52182224 | 52182121 | 9  | 9   | 21  | 0.533204018 | 0.958771  | CYP24A1 | ENSG00000019186 |
| 20 | 52182535 | 52183871 | 52182900 | 31 | 104 | 95  | 1.283022168 | 0.0387161 | CYP24A1 | ENSG00000019186 |
| 20 | 52183876 | 52185143 | 52184964 | 13 | 55  | 61  | 1.059527984 | 0.378399  | CYP24A1 | ENSG00000019186 |
| 20 | 52185158 | 52185384 | 52185271 | 13 | 15  | 15  | 1.173048839 | 0.32719   | CYP24A1 | ENSG00000019186 |
| 20 | 52186440 | 52186739 | 52186645 | 9  | 13  | 24  | 0.65690735  | 0.903651  | CYP24A1 | ENSG00000019186 |
| 20 | 52186863 | 52187398 | 52187125 | 13 | 28  | 28  | 1.173048839 | 0.272646  | CYP24A1 | ENSG00000019186 |
| 20 | 52187485 | 52187852 | 52187637 | 11 | 17  | 22  | 0.918038222 | 0.611544  | CYP24A1 | ENSG00000019186 |
| 20 | 52188840 | 52189038 | 52188939 | 8  | 10  | 13  | 0.921681231 | 0.585856  | CYP24A1 | ENSG00000019186 |
| 20 | 52189348 | 52189584 | 52189482 | 8  | 10  | 18  | 0.679133539 | 0.855647  | CYP24A1 | ENSG00000019186 |
| 20 | 52189938 | 52190329 | 52190207 | 9  | 15  | 27  | 0.670313622 | 0.906047  | CYP24A1 | ENSG00000019186 |
| 20 | 52190514 | 52190756 | 52190646 | 8  | 10  | 21  | 0.58652442  | 0.934469  | CYP24A1 | ENSG00000019186 |
| 20 | 52190912 | 52191263 | 52191085 | 8  | 13  | 25  | 0.631641683 | 0.924582  | CYP24A1 | ENSG00000019186 |
| 20 | 52191437 | 52191877 | 52191593 | 11 | 19  | 31  | 0.733155525 | 0.8679    | CYP24A1 | ENSG00000019186 |
| 20 | 52193175 | 52193471 | 52193351 | 8  | 11  | 14  | 0.938439071 | 0.570297  | CYP24A1 | ENSG00000019186 |
| 20 | 52193914 | 52194272 | 52194093 | 12 | 17  | 18  | 1.111309427 | 0.376188  | CYP24A1 | ENSG00000019186 |
| 20 | 52194929 | 52195196 | 52195078 | 8  | 9   | 25  | 0.451172631 | 0.988793  | CYP24A1 | ENSG00000019186 |
| 20 | 52195600 | 52196063 | 52195772 | 11 | 19  | 32  | 0.71093869  | 0.891662  | CYP24A1 | ENSG00000019186 |
| 20 | 52196224 | 52196481 | 52196342 | 13 | 16  | 25  | 0.766993472 | 0.808934  | CYP24A1 | ENSG00000019186 |
| 20 | 52196575 | 52197118 | 52196939 | 13 | 27  | 37  | 0.864351776 | 0.724938  | CYP24A1 | ENSG00000019186 |
| 20 | 52197262 | 52197568 | 52197475 | 9  | 13  | 17  | 0.912371319 | 0.606688  | CYP24A1 | ENSG00000019186 |
| 20 | 52198208 | 52198640 | 52198387 | 14 | 21  | 42  | 0.600164522 | 0.977922  | CYP24A1 | ENSG00000019186 |
| 20 | 52198720 | 52200361 | 52199221 | 87 | 208 | 146 | 1.667804132 | 7.93E-07  | CYP24A1 | ENSG00000019186 |
| 20 | 52200535 | 52200953 | 52200705 | 11 | 19  | 25  | 0.902345261 | 0.639556  | CYP24A1 | ENSG00000019186 |
| 20 | 52201274 | 52201537 | 52201405 | 8  | 10  | 9   | 1.290353723 | 0.279648  | CYP24A1 | ENSG00000019186 |
| 20 | 52201680 | 52203355 | 52202183 | 20 | 97  | 85  | 1.336730073 | 0.0245617 | CYP24A1 | ENSG00000019186 |
| 20 | 52203829 | 52204164 | 52203996 | 10 | 15  | 22  | 0.816033975 | 0.739972  | CYP24A1 | ENSG00000019186 |
| 20 | 52204175 | 52204709 | 52204530 | 9  | 20  | 53  | 0.45618566  | 0.999372  | CYP24A1 | ENSG00000019186 |
| 20 | 52204954 | 52205483 | 52205307 | 12 | 23  | 41  | 0.670313622 | 0.94566   | CYP24A1 | ENSG00000019186 |
| 20 | 52206055 | 52207859 | 52206566 | 24 | 94  | 87  | 1.266359542 | 0.055205  | CYP24A1 | ENSG00000019186 |
| 20 | 52207941 | 52208498 | 52208393 | 14 | 27  | 31  | 1.026417734 | 0.462337  | CYP24A1 | ENSG00000019186 |
| 20 | 52208601 | 52208830 | 52208705 | 9  | 11  | 22  | 0.612025481 | 0.924393  | CYP24A1 | ENSG00000019186 |
| 20 | 52208847 | 52209315 | 52209136 | 9  | 19  | 25  | 0.902345261 | 0.639556  | CYP24A1 | ENSG00000019186 |
| 20 | 52209483 | 52209677 | 52209602 | 8  | 8   | 8   | 1.173048839 | 0.36929   | CYP24A1 | ENSG00000019186 |
| 20 | 52209963 | 52210359 | 52210126 | 13 | 21  | 29  | 0.860235815 | 0.708841  | CYP24A1 | ENSG00000019186 |

|    |          |          |          |    |     |    |             |            |         |                  |
|----|----------|----------|----------|----|-----|----|-------------|------------|---------|------------------|
| 20 | 52210378 | 52210562 | 52210492 | 10 | 12  | 28 | 0.52584948  | 0.978365   | CYP24A1 | ENSG00000019186  |
| 20 | 52210571 | 52210929 | 52210750 | 22 | 28  | 21 | 1.546291652 | 0.0598186  | CYP24A1 | ENSG00000019186  |
| 20 | 52210931 | 52211619 | 52211444 | 15 | 32  | 41 | 0.921681231 | 0.640302   | CYP24A1 | ENSG00000019186  |
| 20 | 52211629 | 52212952 | 52212137 | 14 | 63  | 79 | 0.938439071 | 0.64982    | CYP24A1 | ENSG00000019186  |
| 20 | 52212977 | 52213246 | 52213129 | 11 | 13  | 23 | 0.68427849  | 0.878142   | CYP24A1 | ENSG00000019186  |
| 20 | 52214169 | 52214413 | 52214280 | 9  | 12  | 20 | 0.726173091 | 0.825666   | CYP24A1 | ENSG00000019186  |
| 20 | 52214421 | 52214766 | 52214593 | 20 | 26  | 22 | 1.377057333 | 0.128834   | CYP24A1 | ENSG00000019186  |
| 20 | 52215619 | 52216650 | 52216058 | 13 | 40  | 59 | 0.801583374 | 0.866067   | CYP24A1 | ENSG00000019186  |
| 20 | 52216977 | 52217410 | 52217156 | 10 | 18  | 26 | 0.825478813 | 0.744556   | CYP24A1 | ENSG00000019186  |
| 20 | 52217745 | 52218570 | 52218161 | 13 | 41  | 35 | 1.368556979 | 0.0829439  | CYP24A1 | ENSG00000019186  |
| 20 | 52219096 | 52219326 | 52219266 | 12 | 14  | 16 | 1.035043094 | 0.464533   | CYP24A1 | ENSG00000019186  |
| 20 | 52219587 | 52220200 | 52219873 | 13 | 31  | 42 | 0.872966578 | 0.723447   | CYP24A1 | ENSG00000019186  |
| 20 | 52220221 | 52220792 | 52220630 | 15 | 28  | 36 | 0.919416658 | 0.636093   | CYP24A1 | ENSG00000019186  |
| 20 | 52220939 | 52222190 | 52221881 | 15 | 61  | 85 | 0.845686373 | 0.845495   | CYP24A1 | ENSG00000019186  |
| 20 | 52222232 | 52223250 | 52222646 | 21 | 61  | 64 | 1.118908124 | 0.264408   | CYP24A1 | ENSG00000019186  |
| 20 | 52223297 | 52225245 | 52224146 | 21 | 123 | 99 | 1.454580561 | 0.00255331 | CYP24A1 | ENSG00000019186  |
| 20 | 52226431 | 52227117 | 52226706 | 17 | 31  | 34 | 1.072501796 | 0.389251   | CYP24A1 | ENSG00000019186  |
| 20 | 52227336 | 52227737 | 52227502 | 15 | 23  | 32 | 0.853126429 | 0.727681   | CYP24A1 | ENSG00000019186  |
| 20 | 52228536 | 52228851 | 52228693 | 10 | 13  | 25 | 0.631641683 | 0.924582   | CYP24A1 | ENSG00000019186  |
| 20 | 52228940 | 52229156 | 52229048 | 8  | 10  | 18 | 0.679133539 | 0.855647   | CYP24A1 | ENSG00000019186  |
| 20 | 52229170 | 52229433 | 52229301 | 12 | 15  | 13 | 1.340627245 | 0.210788   | CYP24A1 | ENSG00000019186  |
| 20 | 52229865 | 52231014 | 52230577 | 13 | 57  | 57 | 1.173048839 | 0.195667   | CYP24A1 | ENSG00000019186  |
| 20 | 52231329 | 52231973 | 52231587 | 21 | 45  | 59 | 0.899337443 | 0.708798   | CYP24A1 | ENSG00000019186  |
| 20 | 52232383 | 52232728 | 52232555 | 11 | 17  | 18 | 1.111309427 | 0.376188   | CYP24A1 | ENSG00000019186  |
| 20 | 52232738 | 52233109 | 52232917 | 13 | 20  | 24 | 0.985361025 | 0.523192   | CYP24A1 | ENSG00000019186  |
| 20 | 52233577 | 52233866 | 52233754 | 11 | 14  | 11 | 1.466311049 | 0.15926    | CYP24A1 | ENSG00000019186  |
| 20 | 52234004 | 52235296 | 52234947 | 27 | 88  | 77 | 1.338478804 | 0.0298558  | CYP24A1 | ENSG00000019186  |
| 20 | 52235377 | 52236275 | 52235835 | 21 | 53  | 57 | 1.092148919 | 0.321854   | CYP24A1 | ENSG00000019186  |
| 20 | 52236608 | 52237030 | 52236869 | 12 | 20  | 39 | 0.615850641 | 0.968328   | CYP24A1 | ENSG00000019186  |
| 20 | 52237470 | 52237764 | 52237617 | 11 | 16  | 15 | 1.246364392 | 0.263987   | CYP24A1 | ENSG00000019186  |
| 20 | 52238097 | 52238928 | 52238541 | 17 | 49  | 57 | 1.011248999 | 0.478845   | CYP24A1 | ENSG00000019186  |
| 20 | 52239142 | 52239495 | 52239318 | 13 | 17  | 26 | 0.78203256  | 0.796561   | CYP24A1 | ENSG00000019186  |
| 20 | 52239555 | 52240566 | 52240167 | 22 | 60  | 45 | 1.555564765 | 0.011282   | CYP24A1 | ENSG00000019186  |
| 20 | 52241250 | 52241777 | 52241598 | 16 | 30  | 25 | 1.398635155 | 0.102563   | PFDN4   | ENSG000000101132 |

|    |          |          |          |    |     |     |             |           |       |                 |
|----|----------|----------|----------|----|-----|-----|-------------|-----------|-------|-----------------|
| 20 | 52241892 | 52242237 | 52242064 | 13 | 18  | 16  | 1.311054585 | 0.208218  | PFDN4 | ENSG00000101132 |
| 20 | 52242631 | 52244157 | 52242805 | 15 | 69  | 82  | 0.989318298 | 0.528174  | PFDN4 | ENSG00000101132 |
| 20 | 52244582 | 52246230 | 52245436 | 28 | 135 | 112 | 1.411810992 | 0.0032812 | PFDN4 | ENSG00000101132 |
| 20 | 52246250 | 52246520 | 52246402 | 12 | 16  | 18  | 1.049570014 | 0.445264  | PFDN4 | ENSG00000101132 |
| 20 | 52247047 | 52247495 | 52247271 | 19 | 30  | 39  | 0.90911285  | 0.658237  | PFDN4 | ENSG00000101132 |
| 20 | 52247606 | 52248724 | 52248132 | 29 | 67  | 54  | 1.450314929 | 0.0197064 | PFDN4 | ENSG00000101132 |
| 20 | 52248742 | 52248980 | 52248919 | 9  | 12  | 12  | 1.173048839 | 0.343543  | PFDN4 | ENSG00000101132 |
| 20 | 52248988 | 52251684 | 52251137 | 97 | 391 | 201 | 2.276411609 | 5.59E-23  | PFDN4 | ENSG00000101132 |
| 20 | 52251764 | 52252028 | 52251893 | 9  | 10  | 3   | 3.225884308 | 0.0139466 | PFDN4 | ENSG00000101132 |
| 20 | 52254007 | 52254270 | 52254176 | 9  | 13  | 13  | 1.173048839 | 0.337862  | PFDN4 | ENSG00000101132 |
| 20 | 52254435 | 52255137 | 52254972 | 10 | 25  | 21  | 1.386330446 | 0.128722  | PFDN4 | ENSG00000101132 |
| 20 | 52256040 | 52256690 | 52256515 | 9  | 24  | 26  | 1.086156333 | 0.384927  | PFDN4 | ENSG00000101132 |
| 20 | 52257163 | 52259679 | 52257886 | 57 | 238 | 146 | 1.907201854 | 1.79E-10  | PFDN4 | ENSG00000101132 |
| 20 | 52259688 | 52259900 | 52259794 | 8  | 12  | 15  | 0.953102182 | 0.555895  | PFDN4 | ENSG00000101132 |
| 20 | 52259969 | 52260472 | 52260220 | 13 | 24  | 28  | 1.011248999 | 0.486424  | PFDN4 | ENSG00000101132 |
| 20 | 52261126 | 52261341 | 52261254 | 8  | 10  | 11  | 1.075294769 | 0.434143  | PFDN4 | ENSG00000101132 |
| 20 | 52262199 | 52262674 | 52262331 | 13 | 21  | 32  | 0.78203256  | 0.819578  | PFDN4 | ENSG00000101132 |
| 20 | 52262850 | 52263113 | 52263009 | 8  | 12  | 11  | 1.270802909 | 0.274822  | PFDN4 | ENSG00000101132 |
| 20 | 52263119 | 52263573 | 52263298 | 10 | 20  | 17  | 1.368556979 | 0.163361  | PFDN4 | ENSG00000101132 |
| 20 | 52264583 | 52264907 | 52264745 | 9  | 14  | 17  | 0.977540699 | 0.52995   | PFDN4 | ENSG00000101132 |
| 20 | 52265538 | 52265988 | 52265809 | 12 | 22  | 29  | 0.899337443 | 0.653223  | PFDN4 | ENSG00000101132 |
| 20 | 52266933 | 52267379 | 52267232 | 11 | 17  | 25  | 0.812110735 | 0.75715   | PFDN4 | ENSG00000101132 |
| 20 | 52267595 | 52268126 | 52267952 | 9  | 20  | 20  | 1.173048839 | 0.303681  | PFDN4 | ENSG00000101132 |
| 20 | 52268356 | 52268633 | 52268494 | 11 | 14  | 26  | 0.6516938   | 0.91539   | PFDN4 | ENSG00000101132 |
| 20 | 52269569 | 52270127 | 52269941 | 15 | 32  | 31  | 1.209706616 | 0.221995  | PFDN4 | ENSG00000101132 |
| 20 | 52270622 | 52271185 | 52270831 | 17 | 31  | 40  | 0.915550314 | 0.649172  | PFDN4 | ENSG00000101132 |
| 20 | 52271368 | 52271687 | 52271510 | 8  | 12  | 15  | 0.953102182 | 0.555895  | PFDN4 | ENSG00000101132 |
| 20 | 52272387 | 52272777 | 52272623 | 12 | 20  | 22  | 1.071044592 | 0.412397  | PFDN4 | ENSG00000101132 |
| 20 | 52272878 | 52273122 | 52273047 | 8  | 11  | 13  | 1.005470434 | 0.498567  | PFDN4 | ENSG00000101132 |
| 20 | 52273670 | 52274157 | 52273909 | 8  | 19  | 17  | 1.303387599 | 0.207073  | PFDN4 | ENSG00000101132 |
| 20 | 52274210 | 52274422 | 52274316 | 9  | 10  | 9   | 1.290353723 | 0.279648  | PFDN4 | ENSG00000101132 |
| 20 | 52274897 | 52275077 | 52274992 | 9  | 9   | 7   | 1.466311049 | 0.20706   | PFDN4 | ENSG00000101132 |
| 20 | 52276964 | 52277206 | 52277085 | 11 | 12  | 22  | 0.663027605 | 0.890045  | PFDN4 | ENSG00000101132 |
| 20 | 52278811 | 52279286 | 52278929 | 9  | 19  | 24  | 0.938439071 | 0.587839  | PFDN4 | ENSG00000101132 |

|    |          |          |          |    |     |     |             |             |       |                 |
|----|----------|----------|----------|----|-----|-----|-------------|-------------|-------|-----------------|
| 20 | 52279310 | 52279530 | 52279374 | 9  | 12  | 24  | 0.609985396 | 0.933574    | PFDN4 | ENSG00000101132 |
| 20 | 52279642 | 52280063 | 52279894 | 12 | 20  | 25  | 0.947462524 | 0.576741    | PFDN4 | ENSG00000101132 |
| 20 | 52280187 | 52280497 | 52280336 | 9  | 13  | 16  | 0.966040221 | 0.542489    | PFDN4 | ENSG00000101132 |
| 20 | 52281228 | 52281449 | 52281360 | 9  | 12  | 13  | 1.089259637 | 0.414883    | PFDN4 | ENSG00000101132 |
| 20 | 52281928 | 52282442 | 52282307 | 8  | 18  | 33  | 0.655527293 | 0.935584    | PFDN4 | ENSG00000101132 |
| 20 | 52285175 | 52285362 | 52285324 | 9  | 12  | 17  | 0.84720194  | 0.681997    | PFDN4 | ENSG00000101132 |
| 20 | 52286077 | 52286429 | 52286253 | 14 | 19  | 19  | 1.173048839 | 0.308076    | PFDN4 | ENSG00000101132 |
| 20 | 52286486 | 52286680 | 52286583 | 8  | 8   | 18  | 0.555654713 | 0.936835    | PFDN4 | ENSG00000101132 |
| 20 | 52287121 | 52287604 | 52287431 | 8  | 18  | 22  | 0.969040346 | 0.544098    | PFDN4 | ENSG00000101132 |
| 20 | 52288024 | 52288229 | 52288191 | 9  | 11  | 14  | 0.938439071 | 0.570297    | PFDN4 | ENSG00000101132 |
| 20 | 52288318 | 52288601 | 52288458 | 9  | 11  | 7   | 1.759573259 | 0.102361    | PFDN4 | ENSG00000101132 |
| 20 | 52288775 | 52289740 | 52289257 | 10 | 36  | 19  | 2.170140353 | 0.00197388  | PFDN4 | ENSG00000101132 |
| 20 | 52294587 | 52294768 | 52294725 | 8  | 8   | 11  | 0.879786629 | 0.621301    | PFDN4 | ENSG00000101132 |
| 20 | 52296576 | 52297051 | 52296907 | 9  | 17  | 14  | 1.407658607 | 0.162567    | PFDN4 | ENSG00000101132 |
| 20 | 52297099 | 52297333 | 52297232 | 9  | 12  | 8   | 1.694403879 | 0.107291    | PFDN4 | ENSG00000101132 |
| 20 | 52297475 | 52298281 | 52297678 | 16 | 41  | 44  | 1.094845583 | 0.337839    | PFDN4 | ENSG00000101132 |
| 20 | 52300709 | 52301462 | 52300965 | 20 | 45  | 39  | 1.349006165 | 0.082572    | PFDN4 | ENSG00000101132 |
| 20 | 52301655 | 52302141 | 52301881 | 11 | 22  | 23  | 1.124171804 | 0.345816    | PFDN4 | ENSG00000101132 |
| 20 | 52302281 | 52302562 | 52302437 | 9  | 11  | 16  | 0.828034475 | 0.698553    | PFDN4 | ENSG00000101132 |
| 20 | 52302614 | 52303051 | 52302793 | 10 | 20  | 29  | 0.821134188 | 0.760976    | PFDN4 | ENSG00000101132 |
| 20 | 52303514 | 52303693 | 52303603 | 11 | 11  | 6   | 2.010940867 | 0.0640214   | PFDN4 | ENSG00000101132 |
| 20 | 52304720 | 52304904 | 52304779 | 8  | 8   | 6   | 1.508205651 | 0.203852    | PFDN4 | ENSG00000101132 |
| 20 | 52305150 | 52305536 | 52305329 | 9  | 16  | 23  | 0.830909595 | 0.726247    | PFDN4 | ENSG00000101132 |
| 20 | 52305971 | 52306660 | 52306092 | 13 | 27  | 30  | 1.059527984 | 0.414378    | PFDN4 | ENSG00000101132 |
| 20 | 52306791 | 52307011 | 52306901 | 11 | 14  | 12  | 1.353517892 | 0.211235    | PFDN4 | ENSG00000101132 |
| 20 | 52307193 | 52307496 | 52307357 | 10 | 14  | 17  | 0.977540699 | 0.52995     | PFDN4 | ENSG00000101132 |
| 20 | 52308024 | 52308366 | 52308195 | 8  | 13  | 21  | 0.746485625 | 0.811212    | PFDN4 | ENSG00000101132 |
| 20 | 52308570 | 52308858 | 52308735 | 10 | 12  | 10  | 1.386330446 | 0.21117     | PFDN4 | ENSG00000101132 |
| 20 | 52311024 | 52311577 | 52311420 | 16 | 26  | 30  | 1.021687699 | 0.47008     | PFDN4 | ENSG00000101132 |
| 20 | 52312884 | 52313318 | 52313139 | 13 | 21  | 23  | 1.075294769 | 0.4051      | PFDN4 | ENSG00000101132 |
| 20 | 52314416 | 52314751 | 52314583 | 10 | 14  | 21  | 0.799806027 | 0.754204    | PFDN4 | ENSG00000101132 |
| 20 | 52315277 | 52315498 | 52315368 | 9  | 10  | 15  | 0.806471077 | 0.716145    | PFDN4 | ENSG00000101132 |
| 20 | 52316745 | 52318665 | 52317838 | 61 | 235 | 125 | 2.197139096 | 1.05E-13    | PFDN4 | ENSG00000101132 |
| 20 | 52318916 | 52319379 | 52319095 | 23 | 37  | 17  | 2.476436439 | 0.000462122 | PFDN4 | ENSG00000101132 |

|    |          |          |          |    |    |    |             |             |       |                 |
|----|----------|----------|----------|----|----|----|-------------|-------------|-------|-----------------|
| 20 | 52319926 | 52320408 | 52320263 | 14 | 22 | 27 | 0.963575832 | 0.555868    | PFDN4 | ENSG00000101132 |
| 20 | 52320521 | 52320700 | 52320610 | 8  | 8  | 5  | 1.759573259 | 0.13508     | PFDN4 | ENSG00000101132 |
| 20 | 52321401 | 52321841 | 52321554 | 13 | 20 | 23 | 1.026417734 | 0.468083    | PFDN4 | ENSG00000101132 |
| 20 | 52323120 | 52323503 | 52323299 | 10 | 19 | 26 | 0.868925066 | 0.687875    | PFDN4 | ENSG00000101132 |
| 20 | 52325148 | 52325701 | 52325379 | 10 | 21 | 27 | 0.921681231 | 0.616644    | PFDN4 | ENSG00000101132 |
| 20 | 52328675 | 52328861 | 52328768 | 9  | 9  | 14 | 0.78203256  | 0.734892    | PFDN4 | ENSG00000101132 |
| 20 | 52329388 | 52329738 | 52329563 | 9  | 14 | 24 | 0.703829304 | 0.866274    | PFDN4 | ENSG00000101132 |
| 20 | 52330097 | 52330486 | 52330236 | 11 | 16 | 16 | 1.173048839 | 0.322157    | PFDN4 | ENSG00000101132 |
| 20 | 52331915 | 52332344 | 52332094 | 10 | 18 | 19 | 1.114396397 | 0.369586    | PFDN4 | ENSG00000101132 |
| 20 | 52332511 | 52333110 | 52332596 | 11 | 25 | 32 | 0.924220298 | 0.621744    | PFDN4 | ENSG00000101132 |
| 20 | 52333125 | 52333654 | 52333302 | 9  | 21 | 28 | 0.889899119 | 0.664396    | PFDN4 | ENSG00000101132 |
| 20 | 52334799 | 52335086 | 52334930 | 9  | 12 | 12 | 1.173048839 | 0.343543    | PFDN4 | ENSG00000101132 |
| 20 | 52335391 | 52335996 | 52335570 | 12 | 29 | 42 | 0.818406167 | 0.804544    | PFDN4 | ENSG00000101132 |
| 20 | 52337741 | 52337941 | 52337848 | 8  | 10 | 13 | 0.921681231 | 0.585856    | PFDN4 | ENSG00000101132 |
| 20 | 52338906 | 52339890 | 52339085 | 14 | 42 | 40 | 1.230270734 | 0.171503    | PFDN4 | ENSG00000101132 |
| 20 | 52340003 | 52340369 | 52340161 | 9  | 14 | 21 | 0.799806027 | 0.754204    | PFDN4 | ENSG00000101132 |
| 20 | 52341574 | 52342727 | 52342436 | 10 | 45 | 56 | 0.946670993 | 0.61147     | PFDN4 | ENSG00000101132 |
| 20 | 52342844 | 52343291 | 52343112 | 15 | 28 | 17 | 1.889912019 | 0.0150469   | PFDN4 | ENSG00000101132 |
| 20 | 52343422 | 52343872 | 52343705 | 10 | 19 | 21 | 1.066408036 | 0.420026    | PFDN4 | ENSG00000101132 |
| 20 | 52344150 | 52344340 | 52344246 | 8  | 11 | 13 | 1.005470434 | 0.498567    | PFDN4 | ENSG00000101132 |
| 20 | 52344826 | 52345042 | 52344934 | 8  | 10 | 3  | 3.225884308 | 0.0139466   | PFDN4 | ENSG00000101132 |
| 20 | 52345052 | 52345280 | 52345111 | 8  | 12 | 7  | 1.906204364 | 0.0695918   | PFDN4 | ENSG00000101132 |
| 20 | 52345476 | 52345787 | 52345616 | 8  | 11 | 12 | 1.082814313 | 0.424156    | PFDN4 | ENSG00000101132 |
| 20 | 52348230 | 52348694 | 52348401 | 9  | 17 | 24 | 0.844595164 | 0.713005    | PFDN4 | ENSG00000101132 |
| 20 | 52350072 | 52350261 | 52350233 | 9  | 9  | 11 | 0.977540699 | 0.526123    | PFDN4 | ENSG00000101132 |
| 20 | 52350311 | 52350689 | 52350510 | 9  | 16 | 21 | 0.90644683  | 0.624241    | PFDN4 | ENSG00000101132 |
| 20 | 52353300 | 52353639 | 52353469 | 14 | 17 | 16 | 1.242051712 | 0.261202    | PFDN4 | ENSG00000101132 |
| 20 | 52355435 | 52355656 | 52355545 | 9  | 11 | 13 | 1.005470434 | 0.498567    | PFDN4 | ENSG00000101132 |
| 20 | 52356425 | 52356728 | 52356576 | 9  | 12 | 15 | 0.953102182 | 0.555895    | PFDN4 | ENSG00000101132 |
| 20 | 52356885 | 52357425 | 52357274 | 10 | 22 | 19 | 1.349006165 | 0.163006    | PFDN4 | ENSG00000101132 |
| 20 | 52357971 | 52358237 | 52358104 | 11 | 15 | 5  | 3.128130238 | 0.00492422  | PFDN4 | ENSG00000101132 |
| 20 | 52358903 | 52359263 | 52359087 | 9  | 15 | 18 | 0.987830602 | 0.518173    | PFDN4 | ENSG00000101132 |
| 20 | 52361134 | 52361395 | 52361282 | 8  | 11 | 1  | 7.038293036 | 0.000674435 | PFDN4 | ENSG00000101132 |
| 20 | 52362638 | 52363101 | 52362813 | 14 | 21 | 16 | 1.518063204 | 0.0959332   | PFDN4 | ENSG00000101132 |

|    |          |          |          |    |    |    |             |            |       |                 |
|----|----------|----------|----------|----|----|----|-------------|------------|-------|-----------------|
| 20 | 52364220 | 52365000 | 52364596 | 10 | 31 | 41 | 0.893751497 | 0.687492   | PFDN4 | ENSG00000101132 |
| 20 | 52365869 | 52366458 | 52366108 | 12 | 29 | 13 | 2.513676084 | 0.00141455 | PFDN4 | ENSG00000101132 |
| 20 | 52368040 | 52368261 | 52368182 | 11 | 12 | 14 | 1.016642327 | 0.486402   | PFDN4 | ENSG00000101132 |
| 20 | 52369970 | 52370391 | 52370136 | 14 | 23 | 30 | 0.908166843 | 0.642402   | PFDN4 | ENSG00000101132 |
| 20 | 52370809 | 52371025 | 52370871 | 10 | 11 | 15 | 0.879786629 | 0.637414   | PFDN4 | ENSG00000101132 |
| 20 | 52372574 | 52372989 | 52372859 | 13 | 19 | 16 | 1.380057458 | 0.163303   | PFDN4 | ENSG00000101132 |
| 20 | 52373128 | 52373593 | 52373414 | 9  | 18 | 22 | 0.969040346 | 0.544098   | PFDN4 | ENSG00000101132 |
| 20 | 52373774 | 52374080 | 52373906 | 11 | 16 | 13 | 1.424416448 | 0.161813   | PFDN4 | ENSG00000101132 |
| 20 | 52374947 | 52375150 | 52375001 | 9  | 11 | 8  | 1.564065119 | 0.151515   | PFDN4 | ENSG00000101132 |
| 20 | 52375201 | 52375439 | 52375320 | 9  | 12 | 19 | 0.762481746 | 0.784291   | PFDN4 | ENSG00000101132 |
| 20 | 52375609 | 52376032 | 52375853 | 9  | 16 | 26 | 0.738586306 | 0.842793   | PFDN4 | ENSG00000101132 |
| 20 | 52376588 | 52376782 | 52376677 | 8  | 9  | 11 | 0.977540699 | 0.526123   | PFDN4 | ENSG00000101132 |
| 20 | 52376844 | 52377173 | 52377008 | 14 | 18 | 22 | 0.969040346 | 0.544098   | PFDN4 | ENSG00000101132 |
| 20 | 52377492 | 52377743 | 52377659 | 9  | 11 | 15 | 0.879786629 | 0.637414   | PFDN4 | ENSG00000101132 |
| 20 | 52378166 | 52378375 | 52378226 | 9  | 11 | 3  | 3.519146518 | 0.00788869 | PFDN4 | ENSG00000101132 |
| 20 | 52379947 | 52380133 | 52380061 | 9  | 9  | 4  | 2.346097679 | 0.050148   | PFDN4 | ENSG00000101132 |
| 20 | 52380544 | 52380811 | 52380685 | 8  | 9  | 7  | 1.466311049 | 0.20706    | PFDN4 | ENSG00000101132 |
| 20 | 52381954 | 52382273 | 52382113 | 11 | 15 | 26 | 0.695140053 | 0.88251    | PFDN4 | ENSG00000101132 |
| 20 | 52382521 | 52382774 | 52382647 | 8  | 11 | 15 | 0.879786629 | 0.637414   | PFDN4 | ENSG00000101132 |
| 20 | 52383052 | 52383462 | 52383231 | 11 | 17 | 13 | 1.508205651 | 0.12204    | PFDN4 | ENSG00000101132 |
| 20 | 52384756 | 52385001 | 52384878 | 9  | 14 | 16 | 1.035043094 | 0.464533   | PFDN4 | ENSG00000101132 |
| 20 | 52385070 | 52385292 | 52385153 | 10 | 13 | 16 | 0.966040221 | 0.542489   | PFDN4 | ENSG00000101132 |
| 20 | 52385421 | 52385635 | 52385485 | 8  | 9  | 12 | 0.902345261 | 0.602772   | PFDN4 | ENSG00000101132 |
| 20 | 52385794 | 52386064 | 52385932 | 8  | 10 | 14 | 0.860235815 | 0.65444    | PFDN4 | ENSG00000101132 |
| 20 | 52387754 | 52388059 | 52387908 | 8  | 13 | 13 | 1.173048839 | 0.337862   | PFDN4 | ENSG00000101132 |
| 20 | 52388482 | 52389151 | 52388661 | 9  | 25 | 30 | 0.983847414 | 0.527416   | PFDN4 | ENSG00000101132 |
| 20 | 52389277 | 52389795 | 52389512 | 16 | 27 | 17 | 1.824742639 | 0.0211436  | PFDN4 | ENSG00000101132 |
| 20 | 52390129 | 52391059 | 52390594 | 16 | 49 | 60 | 0.961515442 | 0.583825   | PFDN4 | ENSG00000101132 |
| 20 | 52392945 | 52393338 | 52393159 | 8  | 15 | 18 | 0.987830602 | 0.518173   | DOK5  | ENSG00000101134 |
| 20 | 52394021 | 52394261 | 52394129 | 8  | 9  | 10 | 1.066408036 | 0.444985   | DOK5  | ENSG00000101134 |
| 20 | 52395029 | 52395524 | 52395345 | 19 | 31 | 29 | 1.251252095 | 0.18907    | DOK5  | ENSG00000101134 |
| 20 | 52395754 | 52396174 | 52395995 | 18 | 28 | 20 | 1.619924588 | 0.0441949  | DOK5  | ENSG00000101134 |
| 20 | 52396202 | 52396502 | 52396359 | 14 | 16 | 17 | 1.107879459 | 0.383112   | DOK5  | ENSG00000101134 |
| 20 | 52400379 | 52400688 | 52400533 | 15 | 18 | 11 | 1.857327329 | 0.0427732  | DOK5  | ENSG00000101134 |

|    |          |          |          |    |    |    |             |            |      |                 |
|----|----------|----------|----------|----|----|----|-------------|------------|------|-----------------|
| 20 | 52401321 | 52402236 | 52401562 | 12 | 42 | 26 | 1.868188892 | 0.00472208 | DOK5 | ENSG00000101134 |
| 20 | 52403369 | 52403597 | 52403429 | 8  | 10 | 18 | 0.679133539 | 0.855647   | DOK5 | ENSG00000101134 |
| 20 | 52405527 | 52405972 | 52405695 | 13 | 23 | 28 | 0.970799039 | 0.54603    | DOK5 | ENSG00000101134 |
| 20 | 52406931 | 52407396 | 52407241 | 15 | 25 | 29 | 1.016642327 | 0.478103   | DOK5 | ENSG00000101134 |
| 20 | 52408176 | 52409062 | 52408787 | 11 | 38 | 40 | 1.115826945 | 0.313401   | DOK5 | ENSG00000101134 |
| 20 | 52411504 | 52411815 | 52411666 | 9  | 13 | 25 | 0.631641683 | 0.924582   | DOK5 | ENSG00000101134 |
| 20 | 52412202 | 52412573 | 52412309 | 11 | 17 | 20 | 1.005470434 | 0.496566   | DOK5 | ENSG00000101134 |
| 20 | 52412811 | 52413178 | 52412999 | 11 | 18 | 14 | 1.485861863 | 0.123674   | DOK5 | ENSG00000101134 |
| 20 | 52413866 | 52414282 | 52414103 | 9  | 16 | 9  | 1.994183027 | 0.0370915  | DOK5 | ENSG00000101134 |
| 20 | 52415376 | 52415959 | 52415682 | 9  | 23 | 22 | 1.224050963 | 0.244738   | DOK5 | ENSG00000101134 |
| 20 | 52415961 | 52416316 | 52416138 | 10 | 15 | 12 | 1.443752418 | 0.160732   | DOK5 | ENSG00000101134 |
| 20 | 52418206 | 52418993 | 52418594 | 11 | 37 | 62 | 0.707553268 | 0.957021   | DOK5 | ENSG00000101134 |
| 20 | 52419219 | 52419511 | 52419348 | 11 | 15 | 19 | 0.938439071 | 0.579569   | DOK5 | ENSG00000101134 |
| 20 | 52421998 | 52422295 | 52422146 | 8  | 11 | 14 | 0.938439071 | 0.570297   | DOK5 | ENSG00000101134 |
| 20 | 52422771 | 52423201 | 52423031 | 9  | 16 | 16 | 1.173048839 | 0.322157   | DOK5 | ENSG00000101134 |
| 20 | 52427230 | 52427443 | 52427388 | 8  | 9  | 10 | 1.066408036 | 0.444985   | DOK5 | ENSG00000101134 |
| 20 | 52427985 | 52428358 | 52428179 | 10 | 16 | 19 | 0.997091513 | 0.507069   | DOK5 | ENSG00000101134 |
| 20 | 52429848 | 52430154 | 52430001 | 16 | 20 | 19 | 1.231701281 | 0.25288    | DOK5 | ENSG00000101134 |
| 20 | 52430763 | 52431071 | 52430909 | 10 | 12 | 11 | 1.270802909 | 0.274822   | DOK5 | ENSG00000101134 |
| 20 | 52432272 | 52433002 | 52432623 | 41 | 72 | 49 | 1.712651305 | 0.00149682 | DOK5 | ENSG00000101134 |
| 20 | 52433017 | 52433390 | 52433196 | 13 | 19 | 15 | 1.466311049 | 0.125014   | DOK5 | ENSG00000101134 |
| 20 | 52433394 | 52433749 | 52433571 | 13 | 19 | 18 | 1.234788252 | 0.255641   | DOK5 | ENSG00000101134 |
| 20 | 52434491 | 52434853 | 52434724 | 14 | 20 | 24 | 0.985361025 | 0.523192   | DOK5 | ENSG00000101134 |
| 20 | 52435049 | 52435278 | 52435140 | 13 | 15 | 16 | 1.104045966 | 0.390393   | DOK5 | ENSG00000101134 |
| 20 | 52435870 | 52436190 | 52436035 | 12 | 16 | 16 | 1.173048839 | 0.322157   | DOK5 | ENSG00000101134 |
| 20 | 52436683 | 52436885 | 52436797 | 9  | 10 | 10 | 1.173048839 | 0.355733   | DOK5 | ENSG00000101134 |
| 20 | 52436962 | 52437172 | 52437067 | 8  | 10 | 7  | 1.612942154 | 0.147335   | DOK5 | ENSG00000101134 |
| 20 | 52437313 | 52437826 | 52437647 | 9  | 21 | 27 | 0.921681231 | 0.616644   | DOK5 | ENSG00000101134 |
| 20 | 52437839 | 52438633 | 52438276 | 13 | 40 | 50 | 0.943039263 | 0.612838   | DOK5 | ENSG00000101134 |
| 20 | 52438910 | 52439245 | 52439073 | 9  | 13 | 13 | 1.173048839 | 0.337862   | DOK5 | ENSG00000101134 |
| 20 | 52440009 | 52440509 | 52440341 | 9  | 19 | 32 | 0.71093869  | 0.891662   | DOK5 | ENSG00000101134 |
| 20 | 52440549 | 52440734 | 52440657 | 8  | 9  | 19 | 0.58652442  | 0.925417   | DOK5 | ENSG00000101134 |
| 20 | 52441595 | 52441796 | 52441737 | 8  | 10 | 13 | 0.921681231 | 0.585856   | DOK5 | ENSG00000101134 |
| 20 | 52445506 | 52445891 | 52445682 | 8  | 16 | 22 | 0.867036099 | 0.677498   | DOK5 | ENSG00000101134 |

|    |          |          |          |    |    |    |             |            |      |                 |
|----|----------|----------|----------|----|----|----|-------------|------------|------|-----------------|
| 20 | 52447416 | 52447684 | 52447585 | 14 | 15 | 15 | 1.173048839 | 0.32719    | DOK5 | ENSG00000101134 |
| 20 | 52447803 | 52448026 | 52447914 | 8  | 11 | 11 | 1.173048839 | 0.349489   | DOK5 | ENSG00000101134 |
| 20 | 52448267 | 52448461 | 52448353 | 8  | 8  | 8  | 1.173048839 | 0.36929    | DOK5 | ENSG00000101134 |
| 20 | 52449606 | 52450238 | 52450007 | 10 | 25 | 22 | 1.32605521  | 0.161597   | DOK5 | ENSG00000101134 |
| 20 | 52450742 | 52451003 | 52450860 | 8  | 10 | 25 | 0.496289894 | 0.980252   | DOK5 | ENSG00000101134 |
| 20 | 52452089 | 52452539 | 52452335 | 13 | 22 | 9  | 2.69801233  | 0.00276236 | DOK5 | ENSG00000101134 |
| 20 | 52453475 | 52453770 | 52453615 | 8  | 12 | 13 | 1.089259637 | 0.414883   | DOK5 | ENSG00000101134 |
| 20 | 52456052 | 52456344 | 52456228 | 9  | 11 | 10 | 1.279689643 | 0.277323   | DOK5 | ENSG00000101134 |
| 20 | 52456947 | 52457355 | 52457163 | 12 | 20 | 23 | 1.026417734 | 0.468083   | DOK5 | ENSG00000101134 |
| 20 | 52457385 | 52457754 | 52457577 | 12 | 19 | 21 | 1.066408036 | 0.420026   | DOK5 | ENSG00000101134 |
| 20 | 52458218 | 52458510 | 52458372 | 8  | 11 | 15 | 0.879786629 | 0.637414   | DOK5 | ENSG00000101134 |
| 20 | 52462122 | 52462610 | 52462431 | 9  | 20 | 28 | 0.84944916  | 0.720413   | DOK5 | ENSG00000101134 |
| 20 | 52463208 | 52463529 | 52463368 | 10 | 15 | 9  | 1.876878143 | 0.0544542  | DOK5 | ENSG00000101134 |
| 20 | 52464999 | 52465403 | 52465178 | 15 | 25 | 20 | 1.452346182 | 0.100215   | DOK5 | ENSG00000101134 |
| 20 | 52466786 | 52467094 | 52466940 | 13 | 17 | 25 | 0.812110735 | 0.75715    | DOK5 | ENSG00000101134 |
| 20 | 52467743 | 52467936 | 52467845 | 8  | 8  | 6  | 1.508205651 | 0.203852   | DOK5 | ENSG00000101134 |
| 20 | 52469060 | 52469327 | 52469204 | 8  | 10 | 13 | 0.921681231 | 0.585856   | DOK5 | ENSG00000101134 |
| 20 | 52469842 | 52470103 | 52469951 | 11 | 14 | 20 | 0.837892028 | 0.705607   | DOK5 | ENSG00000101134 |
| 20 | 52470434 | 52471231 | 52470564 | 12 | 34 | 39 | 1.026417734 | 0.457358   | DOK5 | ENSG00000101134 |
| 20 | 52472354 | 52472575 | 52472412 | 8  | 10 | 12 | 0.992579787 | 0.511743   | DOK5 | ENSG00000101134 |
| 20 | 52473512 | 52473786 | 52473651 | 11 | 14 | 18 | 0.926091189 | 0.59273    | DOK5 | ENSG00000101134 |
| 20 | 52474577 | 52474823 | 52474700 | 8  | 10 | 12 | 0.992579787 | 0.511743   | DOK5 | ENSG00000101134 |
| 20 | 52480146 | 52480325 | 52480235 | 8  | 9  | 3  | 2.932622098 | 0.0242899  | DOK5 | ENSG00000101134 |
| 20 | 52481210 | 52481432 | 52481321 | 8  | 9  | 23 | 0.48877035  | 0.978114   | DOK5 | ENSG00000101134 |
| 20 | 52483528 | 52484375 | 52484109 | 11 | 37 | 39 | 1.114396397 | 0.317631   | DOK5 | ENSG00000101134 |
| 20 | 52484738 | 52485002 | 52484883 | 11 | 14 | 13 | 1.256838042 | 0.269506   | DOK5 | ENSG00000101134 |
| 20 | 52485203 | 52485559 | 52485381 | 11 | 17 | 22 | 0.918038222 | 0.611544   | DOK5 | ENSG00000101134 |
| 20 | 52485642 | 52486000 | 52485803 | 11 | 15 | 6  | 2.68125449  | 0.0103552  | DOK5 | ENSG00000101134 |
| 20 | 52486830 | 52487030 | 52486949 | 8  | 9  | 12 | 0.902345261 | 0.602772   | DOK5 | ENSG00000101134 |
| 20 | 52487167 | 52487604 | 52487345 | 12 | 19 | 23 | 0.977540699 | 0.533404   | DOK5 | ENSG00000101134 |
| 20 | 52488099 | 52488347 | 52488253 | 8  | 9  | 9  | 1.173048839 | 0.362316   | DOK5 | ENSG00000101134 |
| 20 | 52489185 | 52489394 | 52489289 | 8  | 9  | 10 | 1.066408036 | 0.444985   | DOK5 | ENSG00000101134 |
| 20 | 52489868 | 52490088 | 52489978 | 10 | 11 | 6  | 2.010940867 | 0.0640214  | DOK5 | ENSG00000101134 |
| 20 | 52492055 | 52492243 | 52492149 | 8  | 9  | 13 | 0.837892028 | 0.672794   | DOK5 | ENSG00000101134 |



|    |          |          |          |    |    |    |             |           |      |                 |
|----|----------|----------|----------|----|----|----|-------------|-----------|------|-----------------|
| 20 | 52492608 | 52492835 | 52492730 | 10 | 10 | 14 | 0.860235815 | 0.65444   | DOK5 | ENSG00000101134 |
| 20 | 52493555 | 52493748 | 52493652 | 8  | 8  | 5  | 1.759573259 | 0.13508   | DOK5 | ENSG00000101134 |
| 20 | 52496724 | 52496935 | 52496836 | 10 | 12 | 3  | 3.812408728 | 0.004404  | DOK5 | ENSG00000101134 |
| 20 | 52497850 | 52498092 | 52497971 | 9  | 11 | 25 | 0.541407157 | 0.967387  | DOK5 | ENSG00000101134 |
| 20 | 52499118 | 52499477 | 52499338 | 11 | 17 | 17 | 1.173048839 | 0.317303  | DOK5 | ENSG00000101134 |
| 20 | 52499833 | 52500075 | 52499914 | 8  | 10 | 7  | 1.612942154 | 0.147335  | DOK5 | ENSG00000101134 |
| 20 | 52500112 | 52500630 | 52500453 | 8  | 17 | 11 | 1.759573259 | 0.0609179 | DOK5 | ENSG00000101134 |
| 20 | 52501152 | 52501440 | 52501267 | 10 | 14 | 8  | 1.955081399 | 0.0506438 | DOK5 | ENSG00000101134 |
| 20 | 52501450 | 52501873 | 52501629 | 22 | 31 | 9  | 3.753756286 | 2.87E-05  | DOK5 | ENSG00000101134 |
| 20 | 52501993 | 52502509 | 52502269 | 9  | 21 | 16 | 1.518063204 | 0.0959332 | DOK5 | ENSG00000101134 |
| 20 | 52504259 | 52504464 | 52504401 | 8  | 8  | 12 | 0.812110735 | 0.692685  | DOK5 | ENSG00000101134 |
| 20 | 52504994 | 52505226 | 52505135 | 8  | 10 | 10 | 1.173048839 | 0.355733  | DOK5 | ENSG00000101134 |
| 20 | 52505934 | 52506148 | 52506030 | 11 | 12 | 13 | 1.089259637 | 0.414883  | DOK5 | ENSG00000101134 |
| 20 | 52506275 | 52506893 | 52506584 | 35 | 62 | 51 | 1.421193786 | 0.0298062 | DOK5 | ENSG00000101134 |
| 20 | 52507014 | 52507570 | 52507193 | 13 | 27 | 24 | 1.3138147   | 0.160245  | DOK5 | ENSG00000101134 |
| 20 | 52507824 | 52508462 | 52508147 | 10 | 27 | 36 | 0.887712635 | 0.686666  | DOK5 | ENSG00000101134 |
| 20 | 52509218 | 52509704 | 52509374 | 10 | 20 | 12 | 1.894925048 | 0.0317253 | DOK5 | ENSG00000101134 |
| 20 | 52510049 | 52510287 | 52510168 | 10 | 11 | 10 | 1.279689643 | 0.277323  | DOK5 | ENSG00000101134 |
| 20 | 52510892 | 52511276 | 52511001 | 16 | 21 | 14 | 1.720471631 | 0.0496182 | DOK5 | ENSG00000101134 |
| 20 | 52512554 | 52513478 | 52513016 | 10 | 34 | 36 | 1.109640794 | 0.330986  | DOK5 | ENSG00000101134 |
| 20 | 52515205 | 52515400 | 52515314 | 11 | 12 | 7  | 1.906204364 | 0.0695918 | DOK5 | ENSG00000101134 |
| 20 | 52515929 | 52516261 | 52516097 | 9  | 13 | 22 | 0.714029728 | 0.84749   | DOK5 | ENSG00000101134 |
| 20 | 52516645 | 52517063 | 52516846 | 13 | 23 | 29 | 0.938439071 | 0.595359  | DOK5 | ENSG00000101134 |
| 20 | 52517395 | 52517673 | 52517573 | 8  | 11 | 16 | 0.828034475 | 0.698553  | DOK5 | ENSG00000101134 |
| 20 | 52517768 | 52518276 | 52517929 | 9  | 20 | 28 | 0.84944916  | 0.720413  | DOK5 | ENSG00000101134 |
| 20 | 52519227 | 52519549 | 52519397 | 9  | 13 | 13 | 1.173048839 | 0.337862  | DOK5 | ENSG00000101134 |
| 20 | 52519724 | 52520259 | 52519959 | 12 | 27 | 25 | 1.263283365 | 0.195501  | DOK5 | ENSG00000101134 |
| 20 | 52520285 | 52520523 | 52520404 | 9  | 10 | 16 | 0.759031602 | 0.770272  | DOK5 | ENSG00000101134 |
| 20 | 52521678 | 52521936 | 52521807 | 11 | 13 | 10 | 1.49297125  | 0.157311  | DOK5 | ENSG00000101134 |
| 20 | 52522461 | 52522997 | 52522733 | 15 | 30 | 27 | 1.298732644 | 0.157794  | DOK5 | ENSG00000101134 |
| 20 | 52523332 | 52523844 | 52523500 | 11 | 21 | 15 | 1.612942154 | 0.070218  | DOK5 | ENSG00000101134 |
| 20 | 52524440 | 52524721 | 52524580 | 11 | 15 | 23 | 0.78203256  | 0.783431  | DOK5 | ENSG00000101134 |
| 20 | 52525152 | 52525373 | 52525255 | 8  | 10 | 20 | 0.614454154 | 0.913752  | DOK5 | ENSG00000101134 |
| 20 | 52525633 | 52525926 | 52525752 | 8  | 11 | 13 | 1.005470434 | 0.498567  | DOK5 | ENSG00000101134 |

|    |          |          |          |    |    |    |             |            |      |                 |
|----|----------|----------|----------|----|----|----|-------------|------------|------|-----------------|
| 20 | 52526277 | 52526908 | 52526634 | 11 | 28 | 30 | 1.097368269 | 0.361281   | DOK5 | ENSG00000101134 |
| 20 | 52528178 | 52528774 | 52528604 | 16 | 30 | 21 | 1.652932455 | 0.0339016  | DOK5 | ENSG00000101134 |
| 20 | 52529158 | 52529952 | 52529773 | 31 | 60 | 54 | 1.301017804 | 0.0783112  | DOK5 | ENSG00000101134 |
| 20 | 52531201 | 52531525 | 52531359 | 8  | 10 | 9  | 1.290353723 | 0.279648   | DOK5 | ENSG00000101134 |
| 20 | 52532471 | 52533154 | 52532891 | 13 | 32 | 24 | 1.548424468 | 0.0480379  | DOK5 | ENSG00000101134 |
| 20 | 52533707 | 52533990 | 52533859 | 13 | 17 | 9  | 2.111487911 | 0.0248715  | DOK5 | ENSG00000101134 |
| 20 | 52535508 | 52535978 | 52535650 | 10 | 19 | 30 | 0.756805703 | 0.840281   | DOK5 | ENSG00000101134 |
| 20 | 52536415 | 52536749 | 52536582 | 14 | 18 | 13 | 1.591994853 | 0.0905191  | DOK5 | ENSG00000101134 |
| 20 | 52537993 | 52538466 | 52538136 | 12 | 24 | 20 | 1.396486713 | 0.128495   | DOK5 | ENSG00000101134 |
| 20 | 52540791 | 52541175 | 52540943 | 11 | 17 | 12 | 1.62422147  | 0.088135   | DOK5 | ENSG00000101134 |
| 20 | 52544061 | 52544962 | 52544601 | 12 | 41 | 45 | 1.071044592 | 0.37553    | DOK5 | ENSG00000101134 |
| 20 | 52546804 | 52547109 | 52546935 | 10 | 13 | 18 | 0.864351776 | 0.666373   | DOK5 | ENSG00000101134 |
| 20 | 52549289 | 52549574 | 52549408 | 16 | 19 | 17 | 1.303387599 | 0.207073   | DOK5 | ENSG00000101134 |
| 20 | 52551441 | 52551645 | 52551543 | 8  | 10 | 8  | 1.433726359 | 0.209175   | DOK5 | ENSG00000101134 |
| 20 | 52553556 | 52554485 | 52554060 | 8  | 31 | 33 | 1.104045966 | 0.345468   | DOK5 | ENSG00000101134 |
| 20 | 52554623 | 52555022 | 52554886 | 8  | 15 | 24 | 0.750751257 | 0.821554   | DOK5 | ENSG00000101134 |
| 20 | 52555737 | 52556276 | 52556110 | 9  | 19 | 30 | 0.756805703 | 0.840281   | DOK5 | ENSG00000101134 |
| 20 | 52557370 | 52557878 | 52557624 | 8  | 19 | 25 | 0.902345261 | 0.639556   | DOK5 | ENSG00000101134 |
| 20 | 52557899 | 52558201 | 52558060 | 13 | 16 | 10 | 1.812893661 | 0.0578656  | DOK5 | ENSG00000101134 |
| 20 | 52562709 | 52563249 | 52562850 | 17 | 36 | 23 | 1.808450294 | 0.010684   | DOK5 | ENSG00000101134 |
| 20 | 52564386 | 52564804 | 52564515 | 11 | 21 | 19 | 1.290353723 | 0.204499   | DOK5 | ENSG00000101134 |
| 20 | 52565689 | 52565935 | 52565812 | 9  | 10 | 18 | 0.679133539 | 0.855647   | DOK5 | ENSG00000101134 |
| 20 | 52566987 | 52567202 | 52567094 | 9  | 10 | 13 | 0.921681231 | 0.585856   | DOK5 | ENSG00000101134 |
| 20 | 52571517 | 52572052 | 52571873 | 9  | 21 | 26 | 0.955817573 | 0.566095   | DOK5 | ENSG00000101134 |
| 20 | 52572103 | 52572429 | 52572280 | 15 | 18 | 10 | 2.026175268 | 0.0273052  | DOK5 | ENSG00000101134 |
| 20 | 52573054 | 52573240 | 52573193 | 8  | 9  | 12 | 0.902345261 | 0.602772   | DOK5 | ENSG00000101134 |
| 20 | 52573898 | 52574239 | 52574174 | 8  | 13 | 27 | 0.58652442  | 0.955084   | DOK5 | ENSG00000101134 |
| 20 | 52574423 | 52574651 | 52574503 | 8  | 10 | 6  | 1.843362462 | 0.0964212  | DOK5 | ENSG00000101134 |
| 20 | 52574807 | 52575013 | 52574900 | 8  | 10 | 15 | 0.806471077 | 0.716145   | DOK5 | ENSG00000101134 |
| 20 | 52575810 | 52576034 | 52575938 | 8  | 10 | 20 | 0.614454154 | 0.913752   | DOK5 | ENSG00000101134 |
| 20 | 52576384 | 52576661 | 52576512 | 12 | 15 | 11 | 1.564065119 | 0.11768    | DOK5 | ENSG00000101134 |
| 20 | 52577355 | 52577621 | 52577488 | 11 | 13 | 26 | 0.608247546 | 0.94153    | DOK5 | ENSG00000101134 |
| 20 | 52578590 | 52579029 | 52578850 | 8  | 16 | 21 | 0.90644683  | 0.624241   | DOK5 | ENSG00000101134 |
| 20 | 52581300 | 52581720 | 52581565 | 12 | 18 | 7  | 2.785990993 | 0.00480525 | DOK5 | ENSG00000101134 |

|    |          |          |          |    |    |    |             |            |      |                 |
|----|----------|----------|----------|----|----|----|-------------|------------|------|-----------------|
| 20 | 52581754 | 52582024 | 52581890 | 9  | 12 | 14 | 1.016642327 | 0.486402   | DOK5 | ENSG00000101134 |
| 20 | 52582300 | 52583367 | 52582784 | 24 | 65 | 44 | 1.720471631 | 0.00222874 | DOK5 | ENSG00000101134 |
| 20 | 52585029 | 52585461 | 52585282 | 9  | 15 | 13 | 1.340627245 | 0.210788   | DOK5 | ENSG00000101134 |
| 20 | 52585503 | 52585986 | 52585669 | 9  | 17 | 16 | 1.242051712 | 0.261202   | DOK5 | ENSG00000101134 |
| 20 | 52586063 | 52586305 | 52586221 | 10 | 11 | 14 | 0.938439071 | 0.570297   | DOK5 | ENSG00000101134 |
| 20 | 52586327 | 52587145 | 52586664 | 9  | 30 | 23 | 1.515188084 | 0.0616668  | DOK5 | ENSG00000101134 |
| 20 | 52589384 | 52590212 | 52589670 | 19 | 42 | 47 | 1.050856252 | 0.408415   | DOK5 | ENSG00000101134 |
| 20 | 52590960 | 52591421 | 52591134 | 8  | 14 | 18 | 0.926091189 | 0.59273    | DOK5 | ENSG00000101134 |
| 20 | 52591663 | 52591909 | 52591821 | 8  | 11 | 8  | 1.564065119 | 0.151515   | DOK5 | ENSG00000101134 |
| 20 | 52594397 | 52594712 | 52594537 | 8  | 11 | 14 | 0.938439071 | 0.570297   | DOK5 | ENSG00000101134 |
| 20 | 52595058 | 52595720 | 52595180 | 9  | 25 | 22 | 1.32605521  | 0.161597   | DOK5 | ENSG00000101134 |
| 20 | 52596447 | 52596777 | 52596606 | 11 | 12 | 15 | 0.953102182 | 0.555895   | DOK5 | ENSG00000101134 |
| 20 | 52596913 | 52597526 | 52597187 | 9  | 24 | 23 | 1.221925874 | 0.24208    | DOK5 | ENSG00000101134 |
| 20 | 52597783 | 52598145 | 52597973 | 11 | 16 | 13 | 1.424416448 | 0.161813   | DOK5 | ENSG00000101134 |
| 20 | 52598760 | 52599102 | 52598931 | 16 | 21 | 16 | 1.518063204 | 0.0959332  | DOK5 | ENSG00000101134 |
| 20 | 52599521 | 52599703 | 52599612 | 8  | 9  | 12 | 0.902345261 | 0.602772   | DOK5 | ENSG00000101134 |
| 20 | 52602698 | 52602897 | 52602861 | 8  | 9  | 9  | 1.173048839 | 0.362316   | DOK5 | ENSG00000101134 |
| 20 | 52604178 | 52604583 | 52604357 | 9  | 19 | 18 | 1.234788252 | 0.255641   | DOK5 | ENSG00000101134 |
| 20 | 52604728 | 52605670 | 52605324 | 9  | 37 | 54 | 0.810470107 | 0.844193   | DOK5 | ENSG00000101134 |
| 20 | 52605834 | 52606292 | 52605989 | 12 | 22 | 22 | 1.173048839 | 0.295277   | DOK5 | ENSG00000101134 |
| 20 | 52608770 | 52609028 | 52608899 | 8  | 11 | 6  | 2.010940867 | 0.0640214  | DOK5 | ENSG00000101134 |
| 20 | 52610418 | 52610613 | 52610515 | 8  | 9  | 6  | 1.675784056 | 0.141978   | DOK5 | ENSG00000101134 |
| 20 | 52610925 | 52611130 | 52610986 | 8  | 11 | 7  | 1.759573259 | 0.102361   | DOK5 | ENSG00000101134 |
| 20 | 52612722 | 52612923 | 52612822 | 8  | 9  | 10 | 1.066408036 | 0.444985   | DOK5 | ENSG00000101134 |
| 20 | 52613070 | 52613394 | 52613244 | 9  | 13 | 11 | 1.368556979 | 0.211388   | DOK5 | ENSG00000101134 |
| 20 | 52613568 | 52613826 | 52613683 | 11 | 12 | 7  | 1.906204364 | 0.0695918  | DOK5 | ENSG00000101134 |
| 20 | 52614646 | 52614948 | 52614797 | 11 | 14 | 14 | 1.173048839 | 0.332418   | DOK5 | ENSG00000101134 |
| 20 | 52622461 | 52623393 | 52622927 | 12 | 41 | 28 | 1.698898319 | 0.0130397  | DOK5 | ENSG00000101134 |
| 20 | 52623809 | 52624481 | 52623988 | 16 | 33 | 32 | 1.208595774 | 0.219635   | DOK5 | ENSG00000101134 |
| 20 | 52627402 | 52627966 | 52627581 | 9  | 23 | 37 | 0.740872951 | 0.880242   | DOK5 | ENSG00000101134 |
| 20 | 52628734 | 52628953 | 52628866 | 9  | 10 | 6  | 1.843362462 | 0.0964212  | DOK5 | ENSG00000101134 |
| 20 | 52635422 | 52635698 | 52635609 | 10 | 14 | 19 | 0.879786629 | 0.651591   | DOK5 | ENSG00000101134 |
| 20 | 52636579 | 52636899 | 52636728 | 10 | 14 | 22 | 0.765031852 | 0.797133   | DOK5 | ENSG00000101134 |
| 20 | 52637417 | 52637890 | 52637653 | 11 | 21 | 17 | 1.433726359 | 0.126962   | DOK5 | ENSG00000101134 |

|    |          |          |          |    |    |    |             |            |      |                 |
|----|----------|----------|----------|----|----|----|-------------|------------|------|-----------------|
| 20 | 52638312 | 52638504 | 52638445 | 9  | 10 | 21 | 0.58652442  | 0.934469   | DOK5 | ENSG00000101134 |
| 20 | 52639332 | 52639786 | 52639511 | 8  | 18 | 17 | 1.238218219 | 0.258417   | DOK5 | ENSG00000101134 |
| 20 | 52646104 | 52646574 | 52646303 | 9  | 18 | 34 | 0.636797941 | 0.948834   | DOK5 | ENSG00000101134 |
| 20 | 52647989 | 52648646 | 52648271 | 12 | 31 | 33 | 1.104045966 | 0.345468   | DOK5 | ENSG00000101134 |
| 20 | 52651511 | 52651696 | 52651633 | 9  | 9  | 19 | 0.58652442  | 0.925417   | DOK5 | ENSG00000101134 |
| 20 | 52651754 | 52652170 | 52651933 | 12 | 21 | 31 | 0.806471077 | 0.786558   | DOK5 | ENSG00000101134 |
| 20 | 52653673 | 52653922 | 52653784 | 11 | 13 | 9  | 1.642268375 | 0.111397   | DOK5 | ENSG00000101134 |
| 20 | 52654259 | 52654671 | 52654494 | 9  | 16 | 16 | 1.173048839 | 0.322157   | DOK5 | ENSG00000101134 |
| 20 | 52656146 | 52656432 | 52656286 | 9  | 12 | 12 | 1.173048839 | 0.343543   | DOK5 | ENSG00000101134 |
| 20 | 52656614 | 52657089 | 52656793 | 11 | 20 | 26 | 0.912371319 | 0.627883   | DOK5 | ENSG00000101134 |
| 20 | 52658341 | 52658578 | 52658494 | 9  | 10 | 9  | 1.290353723 | 0.279648   | DOK5 | ENSG00000101134 |
| 20 | 52658943 | 52659226 | 52659102 | 8  | 12 | 15 | 0.953102182 | 0.555895   | DOK5 | ENSG00000101134 |
| 20 | 52659782 | 52660264 | 52660118 | 10 | 19 | 32 | 0.71093869  | 0.891662   | DOK5 | ENSG00000101134 |
| 20 | 52660831 | 52661090 | 52660960 | 8  | 11 | 16 | 0.828034475 | 0.698553   | DOK5 | ENSG00000101134 |
| 20 | 52662112 | 52662783 | 52662272 | 10 | 24 | 35 | 0.81461725  | 0.78935    | DOK5 | ENSG00000101134 |
| 20 | 52664684 | 52665448 | 52665273 | 13 | 33 | 30 | 1.286569695 | 0.154997   | DOK5 | ENSG00000101134 |
| 20 | 52665855 | 52666034 | 52665947 | 8  | 8  | 5  | 1.759573259 | 0.13508    | DOK5 | ENSG00000101134 |
| 20 | 52667864 | 52668180 | 52668022 | 14 | 17 | 15 | 1.319679944 | 0.209239   | DOK5 | ENSG00000101134 |
| 20 | 52671660 | 52671927 | 52671793 | 11 | 14 | 11 | 1.466311049 | 0.15926    | DOK5 | ENSG00000101134 |
| 20 | 52672222 | 52672732 | 52672401 | 13 | 24 | 30 | 0.946007128 | 0.585264   | DOK5 | ENSG00000101134 |
| 20 | 52672867 | 52673070 | 52672953 | 10 | 11 | 22 | 0.612025481 | 0.924393   | DOK5 | ENSG00000101134 |
| 20 | 52673742 | 52674044 | 52673893 | 9  | 11 | 4  | 2.815317214 | 0.0183428  | DOK5 | ENSG00000101134 |
| 20 | 52674697 | 52675241 | 52675071 | 11 | 25 | 33 | 0.897037348 | 0.665614   | DOK5 | ENSG00000101134 |
| 20 | 52675259 | 52675463 | 52675339 | 8  | 11 | 16 | 0.828034475 | 0.698553   | DOK5 | ENSG00000101134 |
| 20 | 52675477 | 52675828 | 52675652 | 13 | 18 | 15 | 1.392995497 | 0.16305    | DOK5 | ENSG00000101134 |
| 20 | 52676692 | 52677075 | 52676819 | 14 | 19 | 20 | 1.117189371 | 0.363272   | DOK5 | ENSG00000101134 |
| 20 | 52677216 | 52677751 | 52677395 | 10 | 23 | 20 | 1.340627245 | 0.162636   | DOK5 | ENSG00000101134 |
| 20 | 52678254 | 52678711 | 52678532 | 14 | 25 | 10 | 2.772660893 | 0.00131329 | DOK5 | ENSG00000101134 |
| 20 | 52679840 | 52680304 | 52679994 | 16 | 23 | 33 | 0.828034475 | 0.765279   | DOK5 | ENSG00000101134 |
| 20 | 52680315 | 52680510 | 52680387 | 15 | 15 | 15 | 1.173048839 | 0.32719    | DOK5 | ENSG00000101134 |
| 20 | 52682445 | 52682724 | 52682584 | 11 | 13 | 17 | 0.912371319 | 0.606688   | DOK5 | ENSG00000101134 |
| 20 | 52683184 | 52683678 | 52683360 | 14 | 23 | 27 | 1.005470434 | 0.495068   | DOK5 | ENSG00000101134 |
| 20 | 52683794 | 52684229 | 52684050 | 15 | 25 | 22 | 1.32605521  | 0.161597   | DOK5 | ENSG00000101134 |
| 20 | 52684885 | 52685188 | 52685036 | 8  | 10 | 10 | 1.173048839 | 0.355733   | DOK5 | ENSG00000101134 |

|    |          |          |          |    |     |     |             |           |      |                 |
|----|----------|----------|----------|----|-----|-----|-------------|-----------|------|-----------------|
| 20 | 52685906 | 52686312 | 52686057 | 8  | 13  | 10  | 1.49297125  | 0.157311  | DOK5 | ENSG00000101134 |
| 20 | 52686637 | 52686911 | 52686744 | 8  | 11  | 21  | 0.639844821 | 0.901936  | DOK5 | ENSG00000101134 |
| 20 | 52688953 | 52689553 | 52689265 | 13 | 26  | 17  | 1.759573259 | 0.0293871 | DOK5 | ENSG00000101134 |
| 20 | 52690088 | 52690560 | 52690267 | 17 | 27  | 28  | 1.132598879 | 0.320597  | DOK5 | ENSG00000101134 |
| 20 | 52691222 | 52691441 | 52691309 | 8  | 9   | 15  | 0.733155525 | 0.788527  | DOK5 | ENSG00000101134 |
| 20 | 52691877 | 52692367 | 52692025 | 16 | 27  | 18  | 1.728703553 | 0.0306274 | DOK5 | ENSG00000101134 |
| 20 | 52692684 | 52692881 | 52692782 | 11 | 13  | 15  | 1.026417734 | 0.475096  | DOK5 | ENSG00000101134 |
| 20 | 52693939 | 52694167 | 52694101 | 9  | 10  | 25  | 0.496289894 | 0.980252  | DOK5 | ENSG00000101134 |
| 20 | 52694669 | 52694905 | 52694815 | 11 | 11  | 5   | 2.346097679 | 0.0364013 | DOK5 | ENSG00000101134 |
| 20 | 52695027 | 52695289 | 52695158 | 9  | 9   | 8   | 1.303387599 | 0.281715  | DOK5 | ENSG00000101134 |
| 20 | 52695789 | 52696032 | 52695963 | 8  | 11  | 14  | 0.938439071 | 0.570297  | DOK5 | ENSG00000101134 |
| 20 | 52696644 | 52697208 | 52697004 | 25 | 43  | 55  | 0.921681231 | 0.66001   | DOK5 | ENSG00000101134 |
| 20 | 52697560 | 52698018 | 52697789 | 10 | 21  | 29  | 0.860235815 | 0.708841  | DOK5 | ENSG00000101134 |
| 20 | 52698102 | 52699863 | 52698893 | 87 | 250 | 141 | 2.073487737 | 5.66E-13  | DOK5 | ENSG00000101134 |
| 20 | 52700106 | 52700557 | 52700380 | 10 | 20  | 23  | 1.026417734 | 0.468083  | DOK5 | ENSG00000101134 |
| 20 | 52701736 | 52702670 | 52702054 | 13 | 39  | 40  | 1.144437892 | 0.272961  | DOK5 | ENSG00000101134 |
| 20 | 52702778 | 52702990 | 52702915 | 8  | 9   | 11  | 0.977540699 | 0.526123  | DOK5 | ENSG00000101134 |
| 20 | 52703447 | 52703707 | 52703602 | 9  | 12  | 16  | 0.897037348 | 0.621544  | DOK5 | ENSG00000101134 |
| 20 | 52705563 | 52705954 | 52705775 | 10 | 17  | 13  | 1.508205651 | 0.12204   | DOK5 | ENSG00000101134 |
| 20 | 52706001 | 52706196 | 52706165 | 8  | 9   | 7   | 1.466311049 | 0.20706   | DOK5 | ENSG00000101134 |
| 20 | 52707354 | 52707862 | 52707713 | 11 | 21  | 24  | 1.032282979 | 0.459444  | DOK5 | ENSG00000101134 |
| 20 | 52708268 | 52708452 | 52708360 | 8  | 9   | 8   | 1.303387599 | 0.281715  | DOK5 | ENSG00000101134 |
| 20 | 52708488 | 52709121 | 52708877 | 8  | 23  | 37  | 0.740872951 | 0.880242  | DOK5 | ENSG00000101134 |
| 20 | 52709128 | 52709631 | 52709489 | 11 | 22  | 32  | 0.817579494 | 0.775827  | DOK5 | ENSG00000101134 |
| 20 | 52712194 | 52712394 | 52712277 | 10 | 12  | 17  | 0.84720194  | 0.681997  | DOK5 | ENSG00000101134 |
| 20 | 52712510 | 52712732 | 52712612 | 9  | 11  | 23  | 0.58652442  | 0.942313  | DOK5 | ENSG00000101134 |
| 20 | 52712949 | 52713214 | 52713081 | 8  | 12  | 17  | 0.84720194  | 0.681997  | DOK5 | ENSG00000101134 |
| 20 | 52713833 | 52714075 | 52714005 | 8  | 11  | 20  | 0.670313622 | 0.874201  | DOK5 | ENSG00000101134 |
| 20 | 52714700 | 52715019 | 52714851 | 11 | 15  | 12  | 1.443752418 | 0.160732  | DOK5 | ENSG00000101134 |
| 20 | 52715101 | 52715439 | 52715260 | 11 | 15  | 13  | 1.340627245 | 0.210788  | DOK5 | ENSG00000101134 |
| 20 | 52715449 | 52715689 | 52715569 | 10 | 14  | 13  | 1.256838042 | 0.269506  | DOK5 | ENSG00000101134 |
| 20 | 52718173 | 52719247 | 52718710 | 25 | 79  | 87  | 1.066408036 | 0.339843  |      | ENSG00000210815 |
| 20 | 52721020 | 52721293 | 52721186 | 13 | 16  | 15  | 1.246364392 | 0.263987  |      | ENSG00000210815 |
| 20 | 52721506 | 52721867 | 52721688 | 14 | 20  | 20  | 1.173048839 | 0.303681  |      | ENSG00000210815 |

|    |          |          |          |    |     |    |             |            |                 |
|----|----------|----------|----------|----|-----|----|-------------|------------|-----------------|
| 20 | 52723104 | 52723389 | 52723228 | 9  | 13  | 10 | 1.49297125  | 0.157311   | ENSG00000210815 |
| 20 | 52723673 | 52723866 | 52723737 | 8  | 9   | 16 | 0.690028729 | 0.833766   | ENSG00000210815 |
| 20 | 52727374 | 52727758 | 52727519 | 9  | 16  | 15 | 1.246364392 | 0.263987   | ENSG00000210815 |
| 20 | 52728220 | 52728588 | 52728415 | 14 | 19  | 25 | 0.902345261 | 0.639556   | ENSG00000210815 |
| 20 | 52730437 | 52731889 | 52730965 | 33 | 106 | 85 | 1.459490998 | 0.00436134 | ENSG00000210815 |
| 20 | 52731935 | 52732188 | 52732061 | 12 | 15  | 13 | 1.340627245 | 0.210788   | ENSG00000210815 |
| 20 | 52732509 | 52732806 | 52732632 | 14 | 17  | 17 | 1.173048839 | 0.317303   | ENSG00000210815 |
| 20 | 52733013 | 52733281 | 52733127 | 14 | 17  | 20 | 1.005470434 | 0.496566   | ENSG00000210815 |
| 20 | 52733595 | 52733793 | 52733659 | 8  | 9   | 19 | 0.58652442  | 0.925417   | ENSG00000210815 |
| 20 | 52733829 | 52735455 | 52734594 | 54 | 126 | 71 | 2.069127814 | 2.19E-07   | ENSG00000210815 |
| 20 | 52738800 | 52739013 | 52738946 | 8  | 9   | 7  | 1.466311049 | 0.20706    | ENSG00000210815 |
| 20 | 52741443 | 52741717 | 52741580 | 13 | 17  | 21 | 0.959767232 | 0.55532    | ENSG00000210815 |
| 20 | 52741845 | 52742201 | 52742023 | 12 | 18  | 10 | 2.026175268 | 0.0273052  | ENSG00000210815 |
| 20 | 52743159 | 52743541 | 52743338 | 11 | 20  | 21 | 1.119728438 | 0.357221   | ENSG00000210815 |
| 20 | 52743580 | 52743857 | 52743739 | 14 | 16  | 15 | 1.246364392 | 0.263987   | ENSG00000210815 |
| 20 | 52744281 | 52744713 | 52744561 | 8  | 14  | 12 | 1.353517892 | 0.211235   | ENSG00000210815 |
| 20 | 52749297 | 52749581 | 52749469 | 8  | 12  | 16 | 0.897037348 | 0.621544   | ENSG00000210815 |
| 20 | 52750722 | 52751060 | 52750891 | 9  | 13  | 18 | 0.864351776 | 0.666373   | ENSG00000210815 |
| 20 | 52751797 | 52752132 | 52751964 | 13 | 18  | 17 | 1.238218219 | 0.258417   | ENSG00000210815 |
| 20 | 52753230 | 52753486 | 52753361 | 8  | 9   | 20 | 0.558594685 | 0.944249   | ENSG00000210815 |
| 20 | 52753794 | 52754036 | 52753913 | 12 | 14  | 11 | 1.466311049 | 0.15926    | ENSG00000210815 |
| 20 | 52754052 | 52754547 | 52754201 | 14 | 26  | 21 | 1.439650848 | 0.100904   | ENSG00000210815 |
| 20 | 52756259 | 52756475 | 52756367 | 9  | 12  | 15 | 0.953102182 | 0.555895   | ENSG00000210815 |
| 20 | 52756534 | 52756863 | 52756692 | 8  | 12  | 11 | 1.270802909 | 0.274822   | ENSG00000210815 |
| 20 | 52757015 | 52757242 | 52757097 | 8  | 10  | 10 | 1.173048839 | 0.355733   | ENSG00000210815 |
| 20 | 52758448 | 52758760 | 52758604 | 12 | 14  | 14 | 1.173048839 | 0.332418   | ENSG00000210815 |
| 20 | 52760875 | 52761195 | 52761022 | 8  | 11  | 16 | 0.828034475 | 0.698553   | ENSG00000210815 |
| 20 | 52762284 | 52762688 | 52762463 | 8  | 16  | 23 | 0.830909595 | 0.726247   | ENSG00000210815 |
| 20 | 52762753 | 52763071 | 52762928 | 9  | 12  | 17 | 0.84720194  | 0.681997   | ENSG00000210815 |
| 20 | 52763694 | 52764084 | 52763905 | 12 | 19  | 21 | 1.066408036 | 0.420026   | ENSG00000210815 |
| 20 | 52764583 | 52764862 | 52764722 | 9  | 12  | 11 | 1.270802909 | 0.274822   | ENSG00000210815 |
| 20 | 52764892 | 52765340 | 52765205 | 12 | 20  | 19 | 1.231701281 | 0.25288    | ENSG00000210815 |
| 20 | 52765824 | 52766038 | 52765931 | 8  | 10  | 6  | 1.843362462 | 0.0964212  | ENSG00000210815 |
| 20 | 52766201 | 52766438 | 52766298 | 8  | 11  | 17 | 0.78203256  | 0.752912   | ENSG00000210815 |

|    |          |          |          |    |    |    |             |           |                 |
|----|----------|----------|----------|----|----|----|-------------|-----------|-----------------|
| 20 | 52766562 | 52767152 | 52766973 | 9  | 22 | 26 | 0.999263826 | 0.504058  | ENSG00000210815 |
| 20 | 52769267 | 52769473 | 52769398 | 9  | 9  | 8  | 1.303387599 | 0.281715  | ENSG00000210815 |
| 20 | 52771795 | 52772168 | 52771973 | 11 | 17 | 27 | 0.754102825 | 0.831231  | ENSG00000210815 |
| 20 | 52772613 | 52772862 | 52772730 | 8  | 10 | 13 | 0.921681231 | 0.585856  | ENSG00000210815 |
| 20 | 52775799 | 52776279 | 52776044 | 10 | 20 | 12 | 1.894925048 | 0.0317253 | ENSG00000210815 |
| 20 | 52776514 | 52777197 | 52776860 | 18 | 38 | 41 | 1.089259637 | 0.351868  | ENSG00000210815 |
| 20 | 52779530 | 52779784 | 52779669 | 9  | 12 | 15 | 0.953102182 | 0.555895  | ENSG00000210815 |
| 20 | 52780031 | 52780296 | 52780167 | 10 | 12 | 18 | 0.802612364 | 0.736387  | ENSG00000210815 |
| 20 | 52783771 | 52784147 | 52784016 | 9  | 15 | 26 | 0.695140053 | 0.88251   | ENSG00000210815 |
| 20 | 52785340 | 52785613 | 52785435 | 12 | 15 | 14 | 1.251252095 | 0.26676   | ENSG00000210815 |
| 20 | 52790582 | 52790928 | 52790755 | 12 | 18 | 20 | 1.061329902 | 0.42802   | ENSG00000210815 |
| 20 | 52796842 | 52797223 | 52797021 | 8  | 16 | 22 | 0.867036099 | 0.677498  | ENSG00000210815 |
| 20 | 52800224 | 52800601 | 52800403 | 8  | 15 | 19 | 0.938439071 | 0.579569  | ENSG00000210815 |
| 20 | 52809271 | 52809773 | 52809653 | 15 | 28 | 39 | 0.850460409 | 0.75086   | ENSG00000210815 |
| 20 | 52813234 | 52813426 | 52813330 | 9  | 9  | 10 | 1.066408036 | 0.444985  | ENSG00000210815 |
| 20 | 52815595 | 52816045 | 52815866 | 12 | 22 | 20 | 1.284767776 | 0.203104  | ENSG00000210815 |
| 20 | 52816297 | 52816606 | 52816454 | 9  | 13 | 12 | 1.263283365 | 0.272203  | ENSG00000210815 |
| 20 | 52817170 | 52817426 | 52817310 | 9  | 11 | 11 | 1.173048839 | 0.349489  | ENSG00000210815 |
| 20 | 52820949 | 52821196 | 52821056 | 8  | 11 | 22 | 0.612025481 | 0.924393  | ENSG00000210815 |
| 20 | 52821689 | 52821938 | 52821813 | 11 | 12 | 15 | 0.953102182 | 0.555895  | ENSG00000210815 |
| 20 | 52822657 | 52822995 | 52822814 | 8  | 13 | 9  | 1.642268375 | 0.111397  | ENSG00000210815 |
| 20 | 52825608 | 52825842 | 52825725 | 10 | 12 | 6  | 2.178519273 | 0.0416567 | ENSG00000210815 |
| 20 | 52826444 | 52826848 | 52826675 | 9  | 15 | 22 | 0.816033975 | 0.739972  | ENSG00000210815 |
| 20 | 52827768 | 52827947 | 52827816 | 8  | 9  | 16 | 0.690028729 | 0.833766  | ENSG00000210815 |
| 20 | 52829352 | 52829584 | 52829502 | 11 | 14 | 19 | 0.879786629 | 0.651591  | ENSG00000210815 |
| 20 | 52830473 | 52830698 | 52830589 | 10 | 10 | 11 | 1.075294769 | 0.434143  | ENSG00000210815 |
| 20 | 52831041 | 52831314 | 52831177 | 8  | 11 | 7  | 1.759573259 | 0.102361  | ENSG00000210815 |
| 20 | 52843502 | 52844073 | 52843793 | 13 | 28 | 17 | 1.889912019 | 0.0150469 | ENSG00000210815 |
| 20 | 52845831 | 52846145 | 52845980 | 11 | 14 | 8  | 1.955081399 | 0.0506438 | ENSG00000210815 |
| 20 | 52850275 | 52850477 | 52850436 | 8  | 9  | 16 | 0.690028729 | 0.833766  | ENSG00000210815 |
| 20 | 52852580 | 52852760 | 52852667 | 8  | 8  | 20 | 0.502735217 | 0.96634   | ENSG00000210815 |
| 20 | 52853269 | 52853625 | 52853447 | 9  | 15 | 4  | 3.753756286 | 0.0020497 | ENSG00000210815 |
| 20 | 52854452 | 52854806 | 52854629 | 9  | 15 | 24 | 0.750751257 | 0.821554  | ENSG00000210815 |
| 20 | 52856644 | 52856872 | 52856758 | 13 | 14 | 15 | 1.099733287 | 0.398076  | ENSG00000210815 |

|    |          |          |          |    |    |    |             |           |                 |
|----|----------|----------|----------|----|----|----|-------------|-----------|-----------------|
| 20 | 52858002 | 52858489 | 52858253 | 10 | 23 | 23 | 1.173048839 | 0.291252  | ENSG00000210815 |
| 20 | 52858491 | 52858682 | 52858625 | 10 | 11 | 15 | 0.879786629 | 0.637414  | ENSG00000210815 |
| 20 | 52858789 | 52859227 | 52859148 | 9  | 17 | 14 | 1.407658607 | 0.162567  | ENSG00000210815 |
| 20 | 52867428 | 52868070 | 52867668 | 16 | 42 | 31 | 1.576284378 | 0.0245637 | ENSG00000210815 |
| 20 | 52868175 | 52868429 | 52868302 | 9  | 12 | 7  | 1.906204364 | 0.0695918 | ENSG00000210815 |
| 20 | 52868558 | 52868837 | 52868685 | 8  | 12 | 4  | 3.049926982 | 0.0108184 | ENSG00000210815 |
| 20 | 52871148 | 52871625 | 52871452 | 8  | 16 | 14 | 1.329455351 | 0.210108  | ENSG00000210815 |
| 20 | 52872511 | 52872763 | 52872668 | 12 | 13 | 16 | 0.966040221 | 0.542489  | ENSG00000210815 |
| 20 | 52873631 | 52873818 | 52873698 | 8  | 8  | 8  | 1.173048839 | 0.36929   | ENSG00000210815 |
| 20 | 52875794 | 52876122 | 52875971 | 12 | 16 | 12 | 1.533986944 | 0.120062  | ENSG00000210815 |
| 20 | 52876159 | 52876568 | 52876362 | 19 | 27 | 20 | 1.564065119 | 0.0587454 | ENSG00000210815 |
| 20 | 52877225 | 52877534 | 52877370 | 10 | 14 | 10 | 1.599612054 | 0.114822  | ENSG00000210815 |
| 20 | 52877911 | 52878121 | 52878016 | 11 | 12 | 14 | 1.016642327 | 0.486402  | ENSG00000210815 |
| 20 | 52879175 | 52879798 | 52879420 | 9  | 23 | 25 | 1.082814313 | 0.391389  | ENSG00000210815 |
| 20 | 52880495 | 52881172 | 52880858 | 8  | 23 | 20 | 1.340627245 | 0.162636  | ENSG00000210815 |
| 20 | 52883406 | 52883801 | 52883603 | 10 | 19 | 28 | 0.8089992   | 0.772581  | ENSG00000210815 |
| 20 | 52884089 | 52884517 | 52884268 | 9  | 19 | 19 | 1.173048839 | 0.308076  | ENSG00000210815 |
| 20 | 52885582 | 52885788 | 52885647 | 9  | 9  | 6  | 1.675784056 | 0.141978  | ENSG00000210815 |
| 20 | 52886184 | 52886426 | 52886309 | 10 | 11 | 19 | 0.703829304 | 0.840485  | ENSG00000210815 |
| 20 | 52887287 | 52887557 | 52887395 | 13 | 14 | 19 | 0.879786629 | 0.651591  | ENSG00000210815 |
| 20 | 52887776 | 52887995 | 52887839 | 8  | 10 | 15 | 0.806471077 | 0.716145  | ENSG00000210815 |
| 20 | 52889061 | 52889356 | 52889209 | 11 | 14 | 16 | 1.035043094 | 0.464533  | ENSG00000210815 |
| 20 | 52889439 | 52889730 | 52889567 | 11 | 15 | 22 | 0.816033975 | 0.739972  | ENSG00000210815 |
| 20 | 52890804 | 52891205 | 52891026 | 12 | 20 | 21 | 1.119728438 | 0.357221  | ENSG00000210815 |
| 20 | 52893916 | 52894242 | 52894076 | 14 | 19 | 17 | 1.303387599 | 0.207073  | ENSG00000210815 |
| 20 | 52897233 | 52897466 | 52897349 | 9  | 9  | 14 | 0.78203256  | 0.734892  | ENSG00000210815 |
| 20 | 52898811 | 52899159 | 52898982 | 9  | 13 | 22 | 0.714029728 | 0.84749   | ENSG00000210815 |
| 20 | 52900016 | 52900260 | 52900145 | 10 | 13 | 19 | 0.821134188 | 0.720637  | ENSG00000210815 |
| 20 | 52900759 | 52900947 | 52900853 | 9  | 9  | 6  | 1.675784056 | 0.141978  | ENSG00000210815 |
| 20 | 52902347 | 52902665 | 52902513 | 11 | 15 | 17 | 1.042710079 | 0.454615  | ENSG00000210815 |
| 20 | 52903534 | 52903738 | 52903631 | 11 | 11 | 13 | 1.005470434 | 0.498567  | ENSG00000210815 |
| 20 | 52905719 | 52905954 | 52905851 | 9  | 12 | 9  | 1.524963491 | 0.154777  | ENSG00000210815 |
| 20 | 52906055 | 52906334 | 52906195 | 8  | 12 | 12 | 1.173048839 | 0.343543  | ENSG00000210815 |
| 20 | 52906336 | 52906750 | 52906624 | 10 | 18 | 21 | 1.013087634 | 0.486601  | ENSG00000210815 |



|    |          |          |          |    |    |    |             |            |                 |
|----|----------|----------|----------|----|----|----|-------------|------------|-----------------|
| 20 | 52910952 | 52911417 | 52911238 | 10 | 19 | 26 | 0.868925066 | 0.687875   | ENSG00000210815 |
| 20 | 52911940 | 52912291 | 52912115 | 9  | 15 | 21 | 0.853126429 | 0.691243   | ENSG00000210815 |
| 20 | 52912813 | 52913280 | 52913047 | 9  | 21 | 31 | 0.806471077 | 0.786558   | ENSG00000210815 |
| 20 | 52914506 | 52914777 | 52914641 | 14 | 14 | 17 | 0.977540699 | 0.52995    | ENSG00000210815 |
| 20 | 52915323 | 52915630 | 52915502 | 10 | 14 | 14 | 1.173048839 | 0.332418   | ENSG00000210815 |
| 20 | 52918519 | 52918808 | 52918692 | 10 | 12 | 9  | 1.524963491 | 0.154777   | ENSG00000210815 |
| 20 | 52919431 | 52919638 | 52919534 | 8  | 9  | 13 | 0.837892028 | 0.672794   | ENSG00000210815 |
| 20 | 52919833 | 52920028 | 52919930 | 9  | 9  | 20 | 0.558594685 | 0.944249   | ENSG00000210815 |
| 20 | 52926696 | 52927353 | 52926875 | 13 | 30 | 20 | 1.731643525 | 0.0242039  | ENSG00000210815 |
| 20 | 52927877 | 52928068 | 52927937 | 9  | 9  | 7  | 1.466311049 | 0.20706    | ENSG00000210815 |
| 20 | 52929058 | 52929823 | 52929594 | 11 | 30 | 28 | 1.253948759 | 0.190688   | ENSG00000210815 |
| 20 | 52936584 | 52937193 | 52936925 | 12 | 26 | 21 | 1.439650848 | 0.100904   | ENSG00000210815 |
| 20 | 52938336 | 52938582 | 52938459 | 12 | 13 | 10 | 1.49297125  | 0.157311   | ENSG00000210815 |
| 20 | 52939164 | 52939453 | 52939324 | 8  | 12 | 29 | 0.508321164 | 0.983999   | ENSG00000210815 |
| 20 | 52940136 | 52940457 | 52940296 | 8  | 13 | 17 | 0.912371319 | 0.606688   | ENSG00000210815 |
| 20 | 52942563 | 52942877 | 52942727 | 11 | 15 | 12 | 1.443752418 | 0.160732   | ENSG00000210815 |
| 20 | 52946493 | 52946769 | 52946631 | 12 | 14 | 9  | 1.759573259 | 0.0786014  | ENSG00000210815 |
| 20 | 52946943 | 52947234 | 52947061 | 8  | 12 | 14 | 1.016642327 | 0.486402   | ENSG00000210815 |
| 20 | 52947549 | 52947769 | 52947654 | 9  | 10 | 9  | 1.290353723 | 0.279648   | ENSG00000210815 |
| 20 | 52948307 | 52948624 | 52948465 | 14 | 20 | 14 | 1.642268375 | 0.06827    | ENSG00000210815 |
| 20 | 52948633 | 52948914 | 52948759 | 11 | 15 | 18 | 0.987830602 | 0.518173   | ENSG00000210815 |
| 20 | 52949163 | 52949581 | 52949402 | 11 | 20 | 16 | 1.449060331 | 0.126098   | ENSG00000210815 |
| 20 | 52963744 | 52964620 | 52964209 | 34 | 69 | 25 | 3.158208414 | 4.05E-08   | ENSG00000210815 |
| 20 | 52965394 | 52966016 | 52965797 | 13 | 28 | 29 | 1.133947211 | 0.316017   | ENSG00000210815 |
| 20 | 52966622 | 52966808 | 52966715 | 8  | 9  | 7  | 1.466311049 | 0.20706    | ENSG00000210815 |
| 20 | 52966819 | 52967131 | 52966975 | 11 | 16 | 5  | 3.323638378 | 0.00288759 | ENSG00000210815 |
| 20 | 52967170 | 52967525 | 52967306 | 8  | 13 | 8  | 1.824742639 | 0.0744168  | ENSG00000210815 |
| 20 | 52969655 | 52970063 | 52969884 | 11 | 19 | 26 | 0.868925066 | 0.687875   | ENSG00000210815 |
| 20 | 52970298 | 52970937 | 52970764 | 10 | 27 | 29 | 1.094845583 | 0.366894   | ENSG00000210815 |
| 20 | 52971135 | 52971706 | 52971447 | 11 | 23 | 26 | 1.042710079 | 0.443237   | ENSG00000210815 |
| 20 | 52972741 | 52973062 | 52972973 | 8  | 12 | 18 | 0.802612364 | 0.736387   | ENSG00000210815 |
| 20 | 52973257 | 52973481 | 52973359 | 9  | 12 | 17 | 0.84720194  | 0.681997   | ENSG00000210815 |
| 20 | 52975135 | 52975374 | 52975260 | 10 | 11 | 18 | 0.740872951 | 0.800189   | ENSG00000210815 |
| 20 | 52975656 | 52975973 | 52975815 | 9  | 13 | 9  | 1.642268375 | 0.111397   | ENSG00000210815 |

|    |          |          |          |    |    |    |             |             |           |                 |
|----|----------|----------|----------|----|----|----|-------------|-------------|-----------|-----------------|
| 20 | 52981173 | 52981538 | 52981389 | 8  | 12 | 18 | 0.802612364 | 0.736387    |           | ENSG00000210815 |
| 20 | 52986045 | 52986320 | 52986167 | 16 | 19 | 15 | 1.466311049 | 0.125014    |           | ENSG00000210815 |
| 20 | 52988538 | 52989040 | 52988715 | 18 | 32 | 25 | 1.488869681 | 0.0631665   |           | ENSG00000210815 |
| 20 | 53465681 | 53465877 | 53465816 | 9  | 9  | 2  | 3.910162798 | 0.00955088  |           | ENSG00000185834 |
| 20 | 53585610 | 53586065 | 53585837 | 20 | 34 | 36 | 1.109640794 | 0.330986    | CBLN4     | ENSG00000054803 |
| 20 | 53586168 | 53586901 | 53586553 | 9  | 30 | 32 | 1.10195497  | 0.350579    | CBLN4     | ENSG00000054803 |
| 20 | 53587279 | 53588481 | 53587737 | 18 | 65 | 42 | 1.800493567 | 0.00114892  | CBLN4     | ENSG00000054803 |
| 20 | 53588824 | 53589240 | 53589024 | 9  | 18 | 23 | 0.928663664 | 0.599426    | CBLN4     | ENSG00000054803 |
| 20 | 53590134 | 53590349 | 53590241 | 8  | 9  | 10 | 1.066408036 | 0.444985    | CBLN4     | ENSG00000054803 |
| 20 | 53590873 | 53591314 | 53591145 | 13 | 21 | 20 | 1.228908308 | 0.250141    | CBLN4     | ENSG00000054803 |
| 20 | 53592706 | 53592909 | 53592854 | 10 | 11 | 10 | 1.279689643 | 0.277323    | CBLN4     | ENSG00000054803 |
| 20 | 53593921 | 53594263 | 53594092 | 9  | 14 | 13 | 1.256838042 | 0.269506    | CBLN4     | ENSG00000054803 |
| 20 | 53897349 | 53897638 | 53897493 | 10 | 10 | 3  | 3.225884308 | 0.0139466   | CBLN4     | ENSG00000054803 |
| 20 | 54257799 | 54258136 | 54258001 | 10 | 15 | 8  | 2.085420159 | 0.0338693   | MC3R      | ENSG00000124089 |
| 20 | 54333751 | 54334099 | 54333951 | 9  | 13 | 3  | 4.105670938 | 0.00243034  | C20orf108 | ENSG00000124098 |
| 20 | 54337462 | 54337736 | 54337606 | 8  | 10 | 2  | 4.301179077 | 0.00512919  | C20orf108 | ENSG00000124098 |
| 20 | 54367908 | 54368614 | 54368441 | 13 | 27 | 10 | 2.9859425   | 0.000503424 | C20orf108 | ENSG00000124098 |
| 20 | 54399768 | 54399969 | 54399868 | 8  | 8  | 7  | 1.319679944 | 0.283403    | AURKA     | ENSG00000087586 |
| 20 | 54400026 | 54400236 | 54400170 | 8  | 8  | 3  | 2.639359888 | 0.0415794   | AURKA     | ENSG00000087586 |
| 20 | 54400793 | 54401297 | 54400972 | 15 | 32 | 9  | 3.87106117  | 1.67E-05    | CSTF1     | ENSG00000101138 |
| 20 | 54476791 | 54477126 | 54476969 | 9  | 14 | 6  | 2.513676084 | 0.016726    | C20orf43  | ENSG00000022277 |
| 20 | 54495563 | 54495785 | 54495674 | 9  | 9  | 1  | 5.865244197 | 0.00272497  |           | ENSG00000210826 |
| 20 | 54504530 | 54504798 | 54504650 | 9  | 10 | 2  | 4.301179077 | 0.00512919  |           | ENSG00000210826 |
| 20 | 54559153 | 54559468 | 54559306 | 16 | 20 | 5  | 4.105670938 | 0.000308509 | C20orf107 | ENSG00000213714 |
| 20 | 54563451 | 54563871 | 54563624 | 9  | 17 | 8  | 2.346097679 | 0.0144542   | C20orf107 | ENSG00000213714 |
| 20 | 54574753 | 54575486 | 54575226 | 14 | 32 | 9  | 3.87106117  | 1.67E-05    | C20orf107 | ENSG00000213714 |
| 20 | 54600828 | 54601124 | 54600970 | 18 | 21 | 4  | 5.161414893 | 5.68E-05    |           | ENSG00000219489 |
| 20 | 54615041 | 54615305 | 54615177 | 15 | 15 | 4  | 3.753756286 | 0.0020497   |           | ENSG00000210831 |
| 20 | 54634884 | 54635182 | 54634967 | 8  | 12 | 3  | 3.812408728 | 0.004404    | TFAP2C    | ENSG00000087510 |
| 20 | 54638429 | 54638709 | 54638569 | 22 | 24 | 6  | 4.18946014  | 8.40E-05    | TFAP2C    | ENSG00000087510 |
| 20 | 54689292 | 54689478 | 54689385 | 8  | 8  | 1  | 5.278719777 | 0.00542188  |           | ENSG00000210843 |
| 20 | 54691550 | 54691856 | 54691680 | 17 | 22 | 7  | 3.372515413 | 0.000629223 |           | ENSG00000210843 |
| 20 | 54691953 | 54692210 | 54692083 | 12 | 13 | 9  | 1.642268375 | 0.111397    |           | ENSG00000210843 |
| 20 | 54697876 | 54698138 | 54698049 | 9  | 11 | 11 | 1.173048839 | 0.349489    |           | ENSG00000210843 |

|    |          |          |          |    |    |    |             |             |                      |
|----|----------|----------|----------|----|----|----|-------------|-------------|----------------------|
| 20 | 54698783 | 54699392 | 54699026 | 9  | 21 | 11 | 2.150589539 | 0.0135908   | ENSG00000210843      |
| 20 | 54700764 | 54701002 | 54700926 | 10 | 10 | 0  | 12.90353723 | 0.000195991 | ENSG00000210843      |
| 20 | 54725351 | 54725593 | 54725470 | 10 | 11 | 2  | 4.692195357 | 0.00272444  | ENSG00000221416      |
| 20 | 54743475 | 54743719 | 54743620 | 11 | 12 | 13 | 1.089259637 | 0.414883    | ENSG00000221416      |
| 20 | 54743725 | 54744185 | 54743904 | 14 | 25 | 6  | 4.357038546 | 4.72E-05    | ENSG00000221416      |
| 20 | 54757365 | 54757700 | 54757532 | 10 | 12 | 9  | 1.524963491 | 0.154777    | ENSG00000221416      |
| 20 | 54757838 | 54758061 | 54757949 | 8  | 8  | 7  | 1.319679944 | 0.283403    | ENSG00000221416      |
| 20 | 54760882 | 54761279 | 54761120 | 11 | 15 | 13 | 1.340627245 | 0.210788    | ENSG00000207158      |
| 20 | 54766965 | 54767197 | 54767081 | 12 | 13 | 6  | 2.346097679 | 0.0266147   | ENSG00000207158      |
| 20 | 54767422 | 54767660 | 54767578 | 8  | 10 | 9  | 1.290353723 | 0.279648    | ENSG00000207158      |
| 20 | 54787758 | 54787937 | 54787847 | 8  | 9  | 2  | 3.910162798 | 0.00955088  | ENSG00000207158      |
| 20 | 54796078 | 54796361 | 54796219 | 10 | 13 | 4  | 3.28453675  | 0.00629037  | ENSG00000207158      |
| 20 | 54812807 | 54813252 | 54813073 | 19 | 30 | 6  | 5.194930574 | 2.42E-06    | ENSG00000207158      |
| 20 | 54817180 | 54817767 | 54817445 | 23 | 43 | 13 | 3.686724924 | 1.57E-06    | ENSG00000207158      |
| 20 | 54837958 | 54838261 | 54838084 | 9  | 12 | 8  | 1.694403879 | 0.107291    | ENSG00000207158      |
| 20 | 54883330 | 54883509 | 54883379 | 8  | 9  | 1  | 5.865244197 | 0.00272497  | ENSG00000207158      |
| 20 | 54883591 | 54883979 | 54883849 | 8  | 13 | 5  | 2.737113958 | 0.0137917   | ENSG00000207158      |
| 20 | 54898505 | 54898859 | 54898681 | 30 | 34 | 4  | 8.211341875 | 1.23E-08    | ENSG00000207158      |
| 20 | 54930932 | 54931299 | 54931107 | 17 | 22 | 7  | 3.372515413 | 0.000629223 | ENSG00000207158      |
| 20 | 54982838 | 54983160 | 54983028 | 8  | 12 | 4  | 3.049926982 | 0.0108184   | ENSG00000207158      |
| 20 | 55004099 | 55004300 | 55004248 | 10 | 12 | 4  | 3.049926982 | 0.0108184   | ENSG00000207158      |
| 20 | 55022329 | 55022683 | 55022506 | 11 | 16 | 4  | 3.988366054 | 0.00115141  | ENSG00000207158      |
| 20 | 55051691 | 55051877 | 55051784 | 8  | 9  | 1  | 5.865244197 | 0.00272497  | BMP7 ENSG00000101144 |
| 20 | 55055938 | 55056149 | 55056043 | 8  | 11 | 3  | 3.519146518 | 0.00788869  | BMP7 ENSG00000101144 |
| 20 | 55056418 | 55056911 | 55056743 | 10 | 21 | 3  | 6.451768616 | 1.56E-05    | BMP7 ENSG00000101144 |
| 20 | 55069862 | 55070068 | 55069965 | 8  | 9  | 6  | 1.675784056 | 0.141978    | BMP7 ENSG00000101144 |
| 20 | 55080114 | 55080308 | 55080165 | 9  | 9  | 12 | 0.902345261 | 0.602772    | BMP7 ENSG00000101144 |
| 20 | 55083436 | 55084061 | 55083740 | 11 | 24 | 8  | 3.258468998 | 0.000499412 | BMP7 ENSG00000101144 |
| 20 | 55084606 | 55085038 | 55084706 | 10 | 18 | 8  | 2.476436439 | 0.00924552  | BMP7 ENSG00000101144 |
| 20 | 55100624 | 55100861 | 55100742 | 9  | 12 | 5  | 2.541605819 | 0.0225912   | BMP7 ENSG00000101144 |
| 20 | 55109064 | 55109514 | 55109335 | 11 | 22 | 38 | 0.691798033 | 0.924629    | BMP7 ENSG00000101144 |
| 20 | 55110089 | 55111423 | 55110927 | 17 | 83 | 78 | 1.247292437 | 0.0793363   | BMP7 ENSG00000101144 |
| 20 | 55111576 | 55112171 | 55111878 | 9  | 21 | 38 | 0.661719858 | 0.944262    | BMP7 ENSG00000101144 |
| 20 | 55112688 | 55114155 | 55113008 | 17 | 77 | 73 | 1.236456885 | 0.0955707   | BMP7 ENSG00000101144 |

|    |          |          |          |    |     |     |             |           |      |                 |
|----|----------|----------|----------|----|-----|-----|-------------|-----------|------|-----------------|
| 20 | 55114587 | 55114896 | 55114741 | 12 | 13  | 31  | 0.513208867 | 0.98562   | BMP7 | ENSG00000101144 |
| 20 | 55115004 | 55115562 | 55115172 | 10 | 22  | 35  | 0.74944787  | 0.865446  | BMP7 | ENSG00000101144 |
| 20 | 55115960 | 55116212 | 55116113 | 12 | 14  | 27  | 0.628419021 | 0.933656  | BMP7 | ENSG00000101144 |
| 20 | 55116381 | 55116915 | 55116684 | 19 | 35  | 43  | 0.959767232 | 0.575258  | BMP7 | ENSG00000101144 |
| 20 | 55116955 | 55118025 | 55117572 | 16 | 55  | 70  | 0.92522162  | 0.670636  | BMP7 | ENSG00000101144 |
| 20 | 55118083 | 55118445 | 55118262 | 11 | 18  | 46  | 0.474211233 | 0.99809   | BMP7 | ENSG00000101144 |
| 20 | 55119520 | 55120306 | 55119841 | 13 | 35  | 46  | 0.898505494 | 0.688843  | BMP7 | ENSG00000101144 |
| 20 | 55120332 | 55121599 | 55121098 | 16 | 63  | 65  | 1.137501905 | 0.232213  | BMP7 | ENSG00000101144 |
| 20 | 55122435 | 55122614 | 55122573 | 8  | 9   | 20  | 0.558594685 | 0.944249  | BMP7 | ENSG00000101144 |
| 20 | 55122635 | 55123006 | 55122835 | 13 | 19  | 25  | 0.902345261 | 0.639556  | BMP7 | ENSG00000101144 |
| 20 | 55123052 | 55124160 | 55123213 | 20 | 69  | 73  | 1.109640794 | 0.26733   | BMP7 | ENSG00000101144 |
| 20 | 55124264 | 55124652 | 55124473 | 18 | 25  | 33  | 0.897037348 | 0.665614  | BMP7 | ENSG00000101144 |
| 20 | 55124738 | 55125351 | 55125172 | 19 | 38  | 45  | 0.994541407 | 0.512389  | BMP7 | ENSG00000101144 |
| 20 | 55125414 | 55126098 | 55125901 | 16 | 38  | 35  | 1.270802909 | 0.149884  | BMP7 | ENSG00000101144 |
| 20 | 55126798 | 55127150 | 55126974 | 8  | 12  | 14  | 1.016642327 | 0.486402  | BMP7 | ENSG00000101144 |
| 20 | 55127236 | 55127422 | 55127329 | 8  | 8   | 18  | 0.555654713 | 0.936835  | BMP7 | ENSG00000101144 |
| 20 | 55127792 | 55127990 | 55127955 | 8  | 9   | 12  | 0.902345261 | 0.602772  | BMP7 | ENSG00000101144 |
| 20 | 55128109 | 55128301 | 55128205 | 10 | 12  | 24  | 0.609985396 | 0.933574  | BMP7 | ENSG00000101144 |
| 20 | 55128413 | 55129172 | 55128993 | 13 | 34  | 51  | 0.789552103 | 0.864107  | BMP7 | ENSG00000101144 |
| 20 | 55129185 | 55129491 | 55129338 | 10 | 14  | 33  | 0.517521547 | 0.987086  | BMP7 | ENSG00000101144 |
| 20 | 55129727 | 55130262 | 55130000 | 12 | 25  | 38  | 0.78203256  | 0.83915   | BMP7 | ENSG00000101144 |
| 20 | 55130607 | 55130850 | 55130717 | 15 | 16  | 14  | 1.329455351 | 0.210108  | BMP7 | ENSG00000101144 |
| 20 | 55130853 | 55131959 | 55131401 | 21 | 77  | 69  | 1.307111564 | 0.0517179 | BMP7 | ENSG00000101144 |
| 20 | 55131964 | 55132724 | 55132153 | 20 | 42  | 42  | 1.173048839 | 0.230401  | BMP7 | ENSG00000101144 |
| 20 | 55133161 | 55133502 | 55133331 | 9  | 15  | 28  | 0.64719936  | 0.925559  | BMP7 | ENSG00000101144 |
| 20 | 55133619 | 55134146 | 55133861 | 13 | 27  | 29  | 1.094845583 | 0.366894  | BMP7 | ENSG00000101144 |
| 20 | 55134169 | 55137579 | 55135293 | 24 | 180 | 187 | 1.129371489 | 0.121797  | BMP7 | ENSG00000101144 |
| 20 | 55137665 | 55138148 | 55137977 | 14 | 24  | 21  | 1.333010045 | 0.162162  | BMP7 | ENSG00000101144 |
| 20 | 55138319 | 55138571 | 55138382 | 8  | 12  | 12  | 1.173048839 | 0.343543  | BMP7 | ENSG00000101144 |
| 20 | 55138646 | 55139244 | 55138835 | 24 | 42  | 44  | 1.120913335 | 0.297456  | BMP7 | ENSG00000101144 |
| 20 | 55139383 | 55141217 | 55139775 | 19 | 105 | 91  | 1.351556271 | 0.0170694 | BMP7 | ENSG00000101144 |
| 20 | 55141284 | 55141705 | 55141463 | 12 | 20  | 29  | 0.821134188 | 0.760976  | BMP7 | ENSG00000101144 |
| 20 | 55142223 | 55144004 | 55142613 | 17 | 89  | 124 | 0.844595164 | 0.891159  | BMP7 | ENSG00000101144 |
| 20 | 55144176 | 55144807 | 55144395 | 10 | 26  | 49  | 0.633446373 | 0.97531   | BMP7 | ENSG00000101144 |

|    |          |          |          |    |     |     |             |             |      |                 |
|----|----------|----------|----------|----|-----|-----|-------------|-------------|------|-----------------|
| 20 | 55144821 | 55145199 | 55145097 | 10 | 17  | 29  | 0.703829304 | 0.887065    | BMP7 | ENSG00000101144 |
| 20 | 55145469 | 55145690 | 55145551 | 8  | 9   | 15  | 0.733155525 | 0.788527    | BMP7 | ENSG00000101144 |
| 20 | 55145974 | 55146361 | 55146080 | 14 | 20  | 21  | 1.119728438 | 0.357221    | BMP7 | ENSG00000101144 |
| 20 | 55146594 | 55146996 | 55146817 | 18 | 26  | 25  | 1.218166102 | 0.236859    | BMP7 | ENSG00000101144 |
| 20 | 55147825 | 55149537 | 55148371 | 18 | 89  | 110 | 0.951120681 | 0.639864    | BMP7 | ENSG00000101144 |
| 20 | 55149657 | 55149989 | 55149823 | 10 | 15  | 27  | 0.670313622 | 0.906047    | BMP7 | ENSG00000101144 |
| 20 | 55150011 | 55150617 | 55150190 | 19 | 36  | 48  | 0.885771573 | 0.71459     | BMP7 | ENSG00000101144 |
| 20 | 55150633 | 55151588 | 55151006 | 13 | 44  | 62  | 0.837892028 | 0.820896    | BMP7 | ENSG00000101144 |
| 20 | 55151835 | 55152755 | 55152204 | 14 | 41  | 55  | 0.879786629 | 0.738024    | BMP7 | ENSG00000101144 |
| 20 | 55153042 | 55153455 | 55153279 | 12 | 19  | 22  | 1.020042469 | 0.477122    | BMP7 | ENSG00000101144 |
| 20 | 55153865 | 55154807 | 55154284 | 22 | 57  | 46  | 1.447592185 | 0.0291162   | BMP7 | ENSG00000101144 |
| 20 | 55154881 | 55155352 | 55155173 | 15 | 26  | 34  | 0.90492339  | 0.655516    | BMP7 | ENSG00000101144 |
| 20 | 55155361 | 55155642 | 55155501 | 10 | 13  | 39  | 0.410567094 | 0.998947    | BMP7 | ENSG00000101144 |
| 20 | 55155863 | 55156466 | 55156028 | 13 | 28  | 51  | 0.654200314 | 0.969789    | BMP7 | ENSG00000101144 |
| 20 | 55156556 | 55157199 | 55157023 | 14 | 36  | 58  | 0.735640798 | 0.931974    | BMP7 | ENSG00000101144 |
| 20 | 55157338 | 55157584 | 55157448 | 11 | 12  | 30  | 0.491923707 | 0.988257    | BMP7 | ENSG00000101144 |
| 20 | 55157605 | 55158210 | 55157783 | 10 | 24  | 28  | 1.011248999 | 0.486424    | BMP7 | ENSG00000101144 |
| 20 | 55158302 | 55158709 | 55158500 | 12 | 20  | 17  | 1.368556979 | 0.163361    | BMP7 | ENSG00000101144 |
| 20 | 55159093 | 55159327 | 55159210 | 9  | 10  | 26  | 0.477908786 | 0.985694    | BMP7 | ENSG00000101144 |
| 20 | 55161198 | 55161642 | 55161463 | 11 | 19  | 35  | 0.6516938   | 0.943048    | BMP7 | ENSG00000101144 |
| 20 | 55161778 | 55162262 | 55161990 | 14 | 28  | 37  | 0.895221483 | 0.676978    | BMP7 | ENSG00000101144 |
| 20 | 55162338 | 55162747 | 55162512 | 19 | 26  | 22  | 1.377057333 | 0.128834    | BMP7 | ENSG00000101144 |
| 20 | 55162830 | 55163712 | 55163539 | 14 | 44  | 65  | 0.799806027 | 0.879414    | BMP7 | ENSG00000101144 |
| 20 | 55163743 | 55164390 | 55164049 | 9  | 25  | 38  | 0.78203256  | 0.83915     | BMP7 | ENSG00000101144 |
| 20 | 55164444 | 55165099 | 55164687 | 10 | 27  | 37  | 0.864351776 | 0.724938    | BMP7 | ENSG00000101144 |
| 20 | 55165306 | 55166312 | 55166032 | 21 | 65  | 60  | 1.269200384 | 0.0897322   | BMP7 | ENSG00000101144 |
| 20 | 55166612 | 55168714 | 55168167 | 24 | 161 | 126 | 1.496330016 | 0.000314802 | BMP7 | ENSG00000101144 |
| 20 | 55168728 | 55169273 | 55168907 | 14 | 32  | 51  | 0.74443484  | 0.911653    | BMP7 | ENSG00000101144 |
| 20 | 55169365 | 55169579 | 55169460 | 10 | 12  | 9   | 1.524963491 | 0.154777    | BMP7 | ENSG00000101144 |
| 20 | 55170085 | 55171071 | 55170513 | 11 | 45  | 54  | 0.981095393 | 0.540326    | BMP7 | ENSG00000101144 |
| 20 | 55171194 | 55172162 | 55171657 | 13 | 47  | 74  | 0.750751257 | 0.942378    | BMP7 | ENSG00000101144 |
| 20 | 55172171 | 55172355 | 55172263 | 8  | 8   | 19  | 0.527871978 | 0.95364     | BMP7 | ENSG00000101144 |
| 20 | 55172586 | 55173068 | 55172790 | 12 | 22  | 36  | 0.729192522 | 0.888257    | BMP7 | ENSG00000101144 |
| 20 | 55173151 | 55173675 | 55173403 | 14 | 28  | 42  | 0.791125961 | 0.839784    | BMP7 | ENSG00000101144 |

|    |          |          |          |    |     |     |             |            |      |                 |
|----|----------|----------|----------|----|-----|-----|-------------|------------|------|-----------------|
| 20 | 55173819 | 55174190 | 55173963 | 14 | 20  | 30  | 0.794645988 | 0.79747    | BMP7 | ENSG00000101144 |
| 20 | 55174366 | 55174807 | 55174650 | 10 | 20  | 31  | 0.769813301 | 0.829881   | BMP7 | ENSG00000101144 |
| 20 | 55175419 | 55176500 | 55175844 | 24 | 73  | 60  | 1.423042854 | 0.0202752  | BMP7 | ENSG00000101144 |
| 20 | 55176601 | 55177651 | 55177076 | 16 | 48  | 72  | 0.787388947 | 0.90531    | BMP7 | ENSG00000101144 |
| 20 | 55177674 | 55177888 | 55177794 | 8  | 10  | 27  | 0.460840615 | 0.98972    | BMP7 | ENSG00000101144 |
| 20 | 55178602 | 55178931 | 55178766 | 13 | 18  | 29  | 0.742930932 | 0.850763   | BMP7 | ENSG00000101144 |
| 20 | 55178962 | 55179608 | 55179302 | 14 | 30  | 38  | 0.932423436 | 0.617637   | BMP7 | ENSG00000101144 |
| 20 | 55179637 | 55180385 | 55180111 | 19 | 42  | 76  | 0.655079222 | 0.988462   | BMP7 | ENSG00000101144 |
| 20 | 55180757 | 55182038 | 55181321 | 17 | 70  | 87  | 0.946437132 | 0.637039   | BMP7 | ENSG00000101144 |
| 20 | 55182166 | 55184643 | 55182710 | 18 | 121 | 120 | 1.182743458 | 0.0957146  | BMP7 | ENSG00000101144 |
| 20 | 55184937 | 55185972 | 55185551 | 19 | 59  | 56  | 1.234788252 | 0.127277   | BMP7 | ENSG00000101144 |
| 20 | 55186146 | 55187255 | 55186535 | 14 | 59  | 73  | 0.951120681 | 0.615706   | BMP7 | ENSG00000101144 |
| 20 | 55187259 | 55188548 | 55188271 | 12 | 58  | 82  | 0.833853994 | 0.85981    | BMP7 | ENSG00000101144 |
| 20 | 55188560 | 55188753 | 55188658 | 8  | 11  | 11  | 1.173048839 | 0.349489   | BMP7 | ENSG00000101144 |
| 20 | 55188889 | 55189799 | 55189205 | 14 | 49  | 60  | 0.961515442 | 0.583825   | BMP7 | ENSG00000101144 |
| 20 | 55189944 | 55190223 | 55190051 | 10 | 13  | 17  | 0.912371319 | 0.606688   | BMP7 | ENSG00000101144 |
| 20 | 55190364 | 55190637 | 55190488 | 11 | 14  | 28  | 0.6067494   | 0.948447   | BMP7 | ENSG00000101144 |
| 20 | 55190755 | 55191500 | 55191321 | 10 | 31  | 46  | 0.79867155  | 0.840921   | BMP7 | ENSG00000101144 |
| 20 | 55191781 | 55192098 | 55191927 | 10 | 14  | 20  | 0.837892028 | 0.705607   | BMP7 | ENSG00000101144 |
| 20 | 55192179 | 55194319 | 55193195 | 20 | 123 | 102 | 1.412214137 | 0.00469306 | BMP7 | ENSG00000101144 |
| 20 | 55194810 | 55195140 | 55194975 | 12 | 16  | 38  | 0.511328981 | 0.992224   | BMP7 | ENSG00000101144 |
| 20 | 55195292 | 55197004 | 55196185 | 18 | 92  | 117 | 0.924521543 | 0.716197   | BMP7 | ENSG00000101144 |
| 20 | 55197072 | 55198411 | 55197653 | 18 | 73  | 83  | 1.033400168 | 0.419839   | BMP7 | ENSG00000101144 |
| 20 | 55198416 | 55198734 | 55198590 | 19 | 23  | 17  | 1.564065119 | 0.0735049  | BMP7 | ENSG00000101144 |
| 20 | 55198958 | 55200038 | 55199665 | 24 | 72  | 67  | 1.25930243  | 0.0856683  | BMP7 | ENSG00000101144 |
| 20 | 55201216 | 55201729 | 55201395 | 12 | 22  | 48  | 0.550614761 | 0.992917   | BMP7 | ENSG00000101144 |
| 20 | 55202065 | 55203038 | 55202521 | 12 | 43  | 56  | 0.905511385 | 0.692499   | BMP7 | ENSG00000101144 |
| 20 | 55203060 | 55204478 | 55204047 | 13 | 59  | 72  | 0.964149731 | 0.585085   | BMP7 | ENSG00000101144 |
| 20 | 55204543 | 55205277 | 55204710 | 16 | 34  | 57  | 0.7078743   | 0.950185   | BMP7 | ENSG00000101144 |
| 20 | 55205675 | 55206973 | 55205849 | 21 | 79  | 84  | 1.104045966 | 0.263548   | BMP7 | ENSG00000101144 |
| 20 | 55207354 | 55209121 | 55208237 | 18 | 98  | 121 | 0.951900288 | 0.643935   | BMP7 | ENSG00000101144 |
| 20 | 55209148 | 55210145 | 55209618 | 20 | 61  | 85  | 0.845686373 | 0.845495   | BMP7 | ENSG00000101144 |
| 20 | 55210166 | 55210703 | 55210445 | 13 | 25  | 27  | 1.089259637 | 0.378702   | BMP7 | ENSG00000101144 |
| 20 | 55211174 | 55211926 | 55211747 | 14 | 36  | 45  | 0.943539284 | 0.606664   | BMP7 | ENSG00000101144 |

|    |          |          |          |    |     |     |             |             |      |                 |
|----|----------|----------|----------|----|-----|-----|-------------|-------------|------|-----------------|
| 20 | 55212117 | 55214977 | 55214656 | 19 | 151 | 178 | 0.996108512 | 0.515286    | BMP7 | ENSG00000101144 |
| 20 | 55215188 | 55215901 | 55215637 | 15 | 41  | 64  | 0.757970019 | 0.922543    | BMP7 | ENSG00000101144 |
| 20 | 55215924 | 55216283 | 55216144 | 9  | 15  | 16  | 1.104045966 | 0.390393    | BMP7 | ENSG00000101144 |
| 20 | 55216529 | 55217219 | 55216838 | 9  | 26  | 30  | 1.021687699 | 0.47008     | BMP7 | ENSG00000101144 |
| 20 | 55217905 | 55218096 | 55218000 | 9  | 10  | 18  | 0.679133539 | 0.855647    | BMP7 | ENSG00000101144 |
| 20 | 55218167 | 55218719 | 55218494 | 19 | 35  | 54  | 0.767813786 | 0.894997    | BMP7 | ENSG00000101144 |
| 20 | 55218730 | 55219569 | 55219058 | 14 | 42  | 57  | 0.869674139 | 0.759361    | BMP7 | ENSG00000101144 |
| 20 | 55219597 | 55221264 | 55220708 | 15 | 90  | 87  | 1.213039141 | 0.0984401   | BMP7 | ENSG00000101144 |
| 20 | 55221598 | 55222605 | 55222314 | 15 | 53  | 86  | 0.72809928  | 0.968626    | BMP7 | ENSG00000101144 |
| 20 | 55222636 | 55223777 | 55223206 | 12 | 53  | 77  | 0.812110735 | 0.883076    | BMP7 | ENSG00000101144 |
| 20 | 55224259 | 55224911 | 55224438 | 10 | 24  | 35  | 0.81461725  | 0.78935     | BMP7 | ENSG00000101144 |
| 20 | 55224983 | 55226974 | 55225905 | 17 | 101 | 75  | 1.574355021 | 0.00126948  | BMP7 | ENSG00000101144 |
| 20 | 55227497 | 55227728 | 55227612 | 8  | 9   | 12  | 0.902345261 | 0.602772    | BMP7 | ENSG00000101144 |
| 20 | 55227793 | 55230036 | 55229295 | 25 | 144 | 184 | 0.919416658 | 0.777139    | BMP7 | ENSG00000101144 |
| 20 | 55230183 | 55230935 | 55230332 | 12 | 34  | 47  | 0.855348112 | 0.762682    | BMP7 | ENSG00000101144 |
| 20 | 55230982 | 55231269 | 55231120 | 16 | 18  | 35  | 0.61910911  | 0.959665    | BMP7 | ENSG00000101144 |
| 20 | 55231325 | 55231529 | 55231433 | 8  | 9   | 20  | 0.558594685 | 0.944249    | BMP7 | ENSG00000101144 |
| 20 | 55231755 | 55235178 | 55232182 | 39 | 276 | 209 | 1.547307279 | 7.87E-07    | BMP7 | ENSG00000101144 |
| 20 | 55235464 | 55235658 | 55235583 | 8  | 8   | 9   | 1.055743955 | 0.456865    | BMP7 | ENSG00000101144 |
| 20 | 55235787 | 55236362 | 55236088 | 22 | 45  | 37  | 1.42000649  | 0.0540658   | BMP7 | ENSG00000101144 |
| 20 | 55236637 | 55238922 | 55238144 | 38 | 152 | 154 | 1.157912725 | 0.0994869   | BMP7 | ENSG00000101144 |
| 20 | 55239587 | 55241001 | 55240692 | 15 | 72  | 78  | 1.083956522 | 0.310904    | BMP7 | ENSG00000101144 |
| 20 | 55241590 | 55242383 | 55241744 | 16 | 47  | 38  | 1.443752418 | 0.04344     | BMP7 | ENSG00000101144 |
| 20 | 55242400 | 55243797 | 55243458 | 12 | 64  | 84  | 0.897037348 | 0.747647    | BMP7 | ENSG00000101144 |
| 20 | 55243819 | 55245229 | 55244086 | 17 | 81  | 80  | 1.187530924 | 0.136688    | BMP7 | ENSG00000101144 |
| 20 | 55245358 | 55245649 | 55245503 | 9  | 12  | 21  | 0.693165223 | 0.860764    | BMP7 | ENSG00000101144 |
| 20 | 55245651 | 55245985 | 55245818 | 11 | 17  | 23  | 0.879786629 | 0.664328    | BMP7 | ENSG00000101144 |
| 20 | 55246001 | 55247178 | 55246341 | 13 | 54  | 62  | 1.024090257 | 0.450456    | BMP7 | ENSG00000101144 |
| 20 | 55249442 | 55249669 | 55249573 | 9  | 11  | 15  | 0.879786629 | 0.637414    | BMP7 | ENSG00000101144 |
| 20 | 55249677 | 55250606 | 55249980 | 11 | 40  | 59  | 0.801583374 | 0.866067    | BMP7 | ENSG00000101144 |
| 20 | 55250865 | 55251140 | 55250982 | 12 | 15  | 24  | 0.750751257 | 0.821554    | BMP7 | ENSG00000101144 |
| 20 | 55251887 | 55253855 | 55253514 | 30 | 200 | 162 | 1.446520348 | 0.000218875 | BMP7 | ENSG00000101144 |
| 20 | 55254422 | 55255172 | 55254813 | 17 | 50  | 46  | 1.272882783 | 0.116332    | BMP7 | ENSG00000101144 |
| 20 | 55255473 | 55257145 | 55256321 | 28 | 136 | 137 | 1.164548485 | 0.103645    | BMP7 | ENSG00000101144 |

|    |          |          |          |     |      |     |             |             |          |                 |
|----|----------|----------|----------|-----|------|-----|-------------|-------------|----------|-----------------|
| 20 | 55257147 | 55257350 | 55257248 | 9   | 11   | 12  | 1.082814313 | 0.424156    | BMP7     | ENSG00000101144 |
| 20 | 55257534 | 55258744 | 55258047 | 21  | 70   | 102 | 0.808606481 | 0.918107    | BMP7     | ENSG00000101144 |
| 20 | 55259093 | 55260162 | 55259763 | 20  | 78   | 57  | 1.597773419 | 0.00312663  | BMP7     | ENSG00000101144 |
| 20 | 55260393 | 55262585 | 55261198 | 68  | 230  | 198 | 1.361679808 | 0.000690872 | BMP7     | ENSG00000101144 |
| 20 | 55262823 | 55263984 | 55263100 | 21  | 65   | 76  | 1.005470434 | 0.488768    | BMP7     | ENSG00000101144 |
| 20 | 55264312 | 55265120 | 55264473 | 19  | 55   | 63  | 1.026417734 | 0.445085    | BMP7     | ENSG00000101144 |
| 20 | 55265358 | 55265889 | 55265637 | 16  | 32   | 44  | 0.860235815 | 0.748179    | BMP7     | ENSG00000101144 |
| 20 | 55266029 | 55267070 | 55266664 | 19  | 70   | 75  | 1.095874574 | 0.290649    | BMP7     | ENSG00000101144 |
| 20 | 55267248 | 55273341 | 55271860 | 264 | 1188 | 549 | 2.535918309 | 3.53E-79    | BMP7     | ENSG00000101144 |
| 20 | 55273498 | 55274613 | 55274434 | 25  | 90   | 58  | 1.809278718 | 0.000157195 | BMP7     | ENSG00000101144 |
| 20 | 55274764 | 55278371 | 55274963 | 37  | 314  | 285 | 1.291994351 | 0.000848263 | BMP7     | ENSG00000101144 |
| 20 | 55278379 | 55282421 | 55281291 | 28  | 288  | 302 | 1.118848563 | 0.0863434   | BMP7     | ENSG00000101144 |
| 20 | 55282651 | 55285065 | 55283568 | 24  | 187  | 211 | 1.040250858 | 0.347718    | BMP7     | ENSG00000101144 |
| 20 | 55285242 | 55286231 | 55285496 | 26  | 78   | 85  | 1.07756812  | 0.316987    | BMP7     | ENSG00000101144 |
| 20 | 55286286 | 55287334 | 55287155 | 17  | 64   | 58  | 1.292341942 | 0.0767554   | BMP7     | ENSG00000101144 |
| 20 | 55287613 | 55288199 | 55287986 | 14  | 30   | 38  | 0.932423436 | 0.617637    | BMP7     | ENSG00000101144 |
| 20 | 55314041 | 55314387 | 55314214 | 9   | 13   | 10  | 1.49297125  | 0.157311    |          | ENSG00000217823 |
| 20 | 55335062 | 55335729 | 55335241 | 27  | 42   | 17  | 2.802283338 | 5.11E-05    |          | ENSG00000217823 |
| 20 | 55379731 | 55380085 | 55379906 | 10  | 15   | 2   | 6.256260476 | 0.000199274 |          | ENSG00000210879 |
| 20 | 55444184 | 55444465 | 55444323 | 10  | 13   | 2   | 5.474227917 | 0.000747844 | RBM38    | ENSG00000132819 |
| 20 | 55503695 | 55503932 | 55503813 | 9   | 9    | 6   | 1.675784056 | 0.141978    | HMG1L1   | ENSG00000124097 |
| 20 | 55522786 | 55523097 | 55522938 | 11  | 14   | 4   | 3.519146518 | 0.00361132  | CTCFL    | ENSG00000124092 |
| 20 | 55575398 | 55575614 | 55575535 | 9   | 10   | 1   | 6.451768616 | 0.00135978  | PCK1     | ENSG00000124253 |
| 20 | 55610226 | 55610619 | 55610405 | 9   | 16   | 2   | 6.647276756 | 0.000101928 | ZBP1     | ENSG00000124256 |
| 20 | 55727018 | 55727213 | 55727115 | 8   | 10   | 5   | 2.150589539 | 0.0575848   | PMEPA1   | ENSG00000124225 |
| 20 | 55757002 | 55757192 | 55757097 | 9   | 10   | 4   | 2.580707446 | 0.0306059   | PMEPA1   | ENSG00000124225 |
| 20 | 55757230 | 55757510 | 55757370 | 13  | 16   | 6   | 2.848832895 | 0.00632407  | PMEPA1   | ENSG00000124225 |
| 20 | 55780776 | 55781461 | 55781189 | 18  | 35   | 7   | 5.278719777 | 3.74E-07    | PMEPA1   | ENSG00000124225 |
| 20 | 55787925 | 55788198 | 55788061 | 10  | 14   | 2   | 5.865244197 | 0.000387308 | PMEPA1   | ENSG00000124225 |
| 20 | 56005842 | 56006055 | 56005948 | 10  | 11   | 4   | 2.815317214 | 0.0183428   |          | ENSG00000221451 |
| 20 | 56063181 | 56063407 | 56063252 | 9   | 10   | 2   | 4.301179077 | 0.00512919  |          | ENSG00000221385 |
| 20 | 56120643 | 56121002 | 56120810 | 17  | 23   | 6   | 4.021881735 | 0.000148535 | C20orf85 | ENSG00000124237 |
| 20 | 56178095 | 56178288 | 56178191 | 8   | 8    | 3   | 2.639359888 | 0.0415794   | C20orf85 | ENSG00000124237 |
| 20 | 56260619 | 56260887 | 56260753 | 11  | 15   | 5   | 3.128130238 | 0.00492422  | PPP4R1L  | ENSG00000124224 |



|    |          |          |          |    |    |    |             |             |           |                 |
|----|----------|----------|----------|----|----|----|-------------|-------------|-----------|-----------------|
| 20 | 56302061 | 56302261 | 56302141 | 9  | 9  | 11 | 0.977540699 | 0.526123    | PPP4R1L   | ENSG00000124224 |
| 20 | 56456298 | 56456532 | 56456448 | 8  | 11 | 9  | 1.407658607 | 0.210479    | VAPB      | ENSG00000124164 |
| 20 | 56619614 | 56620090 | 56619807 | 33 | 46 | 15 | 3.445830965 | 1.74E-06    |           | ENSG00000221174 |
| 20 | 56620231 | 56620427 | 56620288 | 9  | 9  | 6  | 1.675784056 | 0.141978    |           | ENSG00000221174 |
| 20 | 56659305 | 56660084 | 56659670 | 35 | 73 | 17 | 4.822534117 | 4.54E-12    | STX16     | ENSG00000124222 |
| 20 | 56682340 | 56682519 | 56682429 | 8  | 8  | 1  | 5.278719777 | 0.00542188  | NPEPL1    | ENSG00000215440 |
| 20 | 56848041 | 56848355 | 56848198 | 15 | 18 | 2  | 7.429309316 | 2.63E-05    |           | ENSG00000213705 |
| 20 | 56864334 | 56864844 | 56864621 | 18 | 32 | 13 | 2.765043693 | 0.00036798  | GNAS      | ENSG00000087460 |
| 20 | 56872757 | 56873051 | 56872904 | 10 | 14 | 2  | 5.865244197 | 0.000387308 | GNAS      | ENSG00000087460 |
| 20 | 56878741 | 56879030 | 56878871 | 8  | 11 | 3  | 3.519146518 | 0.00788869  | GNAS      | ENSG00000087460 |
| 20 | 56893461 | 56893694 | 56893577 | 9  | 9  | 2  | 3.910162798 | 0.00955088  | GNAS      | ENSG00000087460 |
| 20 | 56904491 | 56904686 | 56904627 | 9  | 11 | 2  | 4.692195357 | 0.00272444  | GNAS      | ENSG00000087460 |
| 20 | 56914470 | 56914661 | 56914565 | 9  | 9  | 7  | 1.466311049 | 0.20706     | GNAS      | ENSG00000087460 |
| 20 | 56916224 | 56916553 | 56916388 | 8  | 13 | 11 | 1.368556979 | 0.211388    | GNAS      | ENSG00000087460 |
| 20 | 56920642 | 56920922 | 56920777 | 9  | 11 | 3  | 3.519146518 | 0.00788869  | GNAS      | ENSG00000087460 |
| 20 | 57072577 | 57073095 | 57072867 | 44 | 63 | 9  | 7.507512572 | 1.14E-13    | SLMO2     | ENSG00000101166 |
| 20 | 57216194 | 57216462 | 57216326 | 14 | 16 | 3  | 4.985457567 | 0.000385643 | ZNF831    | ENSG00000124203 |
| 20 | 57231139 | 57231369 | 57231254 | 10 | 11 | 3  | 3.519146518 | 0.00788869  | ZNF831    | ENSG00000124203 |
| 20 | 57348564 | 57348857 | 57348721 | 8  | 8  | 3  | 2.639359888 | 0.0415794   | EDN3      | ENSG00000124205 |
| 20 | 57463933 | 57464141 | 57464074 | 8  | 9  | 2  | 3.910162798 | 0.00955088  | C20orf83  | ENSG00000157033 |
| 20 | 57464286 | 57464487 | 57464400 | 9  | 9  | 5  | 1.955081399 | 0.0892323   | C20orf83  | ENSG00000157033 |
| 20 | 57534058 | 57534424 | 57534234 | 10 | 16 | 6  | 2.848832895 | 0.00632407  | PHACTR3   | ENSG00000087495 |
| 20 | 57607167 | 57607376 | 57607302 | 9  | 9  | 5  | 1.955081399 | 0.0892323   | PHACTR3   | ENSG00000087495 |
| 20 | 57759562 | 57759770 | 57759669 | 8  | 8  | 1  | 5.278719777 | 0.00542188  | PHACTR3   | ENSG00000087495 |
| 20 | 57791623 | 57791839 | 57791731 | 9  | 10 | 10 | 1.173048839 | 0.355733    | PHACTR3   | ENSG00000087495 |
| 20 | 57934433 | 57934734 | 57934574 | 14 | 17 | 11 | 1.759573259 | 0.0609179   | SYCP2     | ENSG00000196074 |
| 20 | 57949121 | 57949360 | 57949240 | 13 | 15 | 6  | 2.68125449  | 0.0103552   | C20orf177 | ENSG00000196227 |
| 20 | 57957632 | 57957811 | 57957721 | 8  | 8  | 3  | 2.639359888 | 0.0415794   | C20orf177 | ENSG00000196227 |
| 20 | 57963731 | 57963954 | 57963775 | 8  | 11 | 7  | 1.759573259 | 0.102361    | CDH26     | ENSG00000124215 |
| 20 | 58058805 | 58059035 | 58058920 | 8  | 10 | 7  | 1.612942154 | 0.147335    | C20orf197 | ENSG00000176659 |
| 20 | 58065928 | 58066178 | 58066032 | 14 | 15 | 5  | 3.128130238 | 0.00492422  | C20orf197 | ENSG00000176659 |
| 20 | 58219649 | 58219871 | 58219760 | 9  | 10 | 6  | 1.843362462 | 0.0964212   |           | ENSG00000207802 |
| 20 | 58236572 | 58237140 | 58236962 | 30 | 42 | 9  | 5.044110009 | 5.53E-08    |           | ENSG00000207802 |
| 20 | 58278755 | 58278935 | 58278845 | 8  | 8  | 9  | 1.055743955 | 0.456865    |           | ENSG00000207802 |

|    |          |          |          |    |    |    |             |             |           |                 |
|----|----------|----------|----------|----|----|----|-------------|-------------|-----------|-----------------|
| 20 | 58281148 | 58281581 | 58281417 | 16 | 25 | 10 | 2.772660893 | 0.00131329  |           | ENSG00000207802 |
| 20 | 58373612 | 58373836 | 58373724 | 13 | 14 | 2  | 5.865244197 | 0.000387308 |           | ENSG00000203961 |
| 20 | 58598143 | 58598326 | 58598229 | 9  | 10 | 0  | 12.90353723 | 0.000195991 |           | ENSG00000215435 |
| 20 | 58860322 | 58860556 | 58860439 | 9  | 10 | 2  | 4.301179077 | 0.00512919  |           | ENSG00000215435 |
| 20 | 59518129 | 59518308 | 59518218 | 8  | 8  | 0  | 10.55743955 | 0.000925496 |           | ENSG00000179253 |
| 20 | 60019396 | 60019575 | 60019531 | 8  | 8  | 0  | 10.55743955 | 0.000925496 |           | ENSG00000220133 |
| 20 | 60191291 | 60191522 | 60191424 | 9  | 11 | 7  | 1.759573259 | 0.102361    | GTPBP5    | ENSG00000101181 |
| 20 | 60240669 | 60241211 | 60240926 | 18 | 30 | 7  | 4.545564252 | 7.31E-06    |           | ENSG00000203951 |
| 20 | 60386575 | 60386931 | 60386753 | 17 | 22 | 0  | 26.9801233  | 1.77E-08    | RPS21     | ENSG00000171858 |
| 20 | 60416088 | 60416335 | 60416212 | 8  | 11 | 6  | 2.010940867 | 0.0640214   | CABLES2   | ENSG00000149679 |
| 20 | 60435929 | 60436271 | 60436100 | 24 | 27 | 8  | 3.649485278 | 0.000102745 | C20orf151 | ENSG00000130701 |
| 20 | 60508728 | 60509076 | 60508902 | 10 | 14 | 2  | 5.865244197 | 0.000387308 | GATA5     | ENSG00000130700 |
| 20 | 60753985 | 60754655 | 60754388 | 9  | 24 | 7  | 3.665777623 | 0.000215502 | SLCO4A1   | ENSG00000101187 |
| 20 | 60770348 | 60770537 | 60770442 | 8  | 9  | 1  | 5.865244197 | 0.00272497  | SLCO4A1   | ENSG00000101187 |
| 20 | 60805342 | 60805598 | 60805470 | 8  | 13 | 4  | 3.28453675  | 0.00629037  | NTSR1     | ENSG00000101188 |
| 20 | 60806405 | 60806595 | 60806500 | 8  | 10 | 4  | 2.580707446 | 0.0306059   | NTSR1     | ENSG00000101188 |
| 20 | 60840231 | 60840589 | 60840429 | 13 | 17 | 3  | 5.278719777 | 0.000205462 | NTSR1     | ENSG00000101188 |
| 20 | 60893265 | 60893520 | 60893373 | 12 | 15 | 2  | 6.256260476 | 0.000199274 | C20orf20  | ENSG00000101189 |
| 20 | 60924662 | 60924881 | 60924771 | 9  | 11 | 2  | 4.692195357 | 0.00272444  | COL9A3    | ENSG00000092758 |
| 20 | 61121209 | 61121421 | 61121315 | 8  | 8  | 4  | 2.111487911 | 0.0804809   |           | ENSG00000203905 |
| 20 | 61285289 | 61285492 | 61285359 | 9  | 10 | 3  | 3.225884308 | 0.0139466   |           | ENSG00000207598 |
| 20 | 61357770 | 61358528 | 61357984 | 48 | 73 | 2  | 28.9352047  | 9.68E-23    | NKAIN4    | ENSG00000101198 |
| 20 | 61639672 | 61639890 | 61639781 | 9  | 11 | 3  | 3.519146518 | 0.00788869  | PTK6      | ENSG00000101213 |
| 20 | 61730087 | 61730406 | 61730257 | 19 | 21 | 3  | 6.451768616 | 1.56E-05    | GMEB2     | ENSG00000101216 |
| 20 | 61759304 | 61759670 | 61759491 | 10 | 17 | 14 | 1.407658607 | 0.162567    | TNFRSF6B  | ENSG0000026036  |
| 20 | 61759687 | 61760196 | 61759971 | 8  | 20 | 15 | 1.539626602 | 0.0943825   | TNFRSF6B  | ENSG0000026036  |
| 20 | 61766559 | 61767352 | 61766955 | 22 | 59 | 33 | 2.070086187 | 0.000251419 | TNFRSF6B  | ENSG0000026036  |
| 20 | 61783729 | 61784050 | 61783907 | 8  | 11 | 3  | 3.519146518 | 0.00788869  | TNFRSF6B  | ENSG0000026036  |
| 20 | 61784257 | 61784512 | 61784377 | 13 | 14 | 3  | 4.398933147 | 0.00132748  | TNFRSF6B  | ENSG0000026036  |
| 20 | 61966014 | 61966317 | 61966096 | 9  | 13 | 1  | 8.211341875 | 0.000163445 | TPD52L2   | ENSG00000101150 |
| 20 | 61966731 | 61966925 | 61966828 | 10 | 10 | 2  | 4.301179077 | 0.00512919  | TPD52L2   | ENSG00000101150 |
| 20 | 61967018 | 61967232 | 61967112 | 9  | 9  | 4  | 2.346097679 | 0.050148    | TPD52L2   | ENSG00000101150 |
| 20 | 61998597 | 61998789 | 61998627 | 8  | 9  | 1  | 5.865244197 | 0.00272497  | DNAJC5    | ENSG00000101152 |
| 20 | 62080536 | 62080881 | 62080708 | 8  | 12 | 2  | 5.083211637 | 0.00143337  | SAMD10    | ENSG00000130590 |

|    |          |          |          |    |    |    |             |             |          |                 |
|----|----------|----------|----------|----|----|----|-------------|-------------|----------|-----------------|
| 20 | 62082735 | 62083049 | 62082900 | 13 | 15 | 6  | 2.68125449  | 0.0103552   | PRPF6    | ENSG00000101161 |
| 21 | 9739609  | 9739812  | 9739721  | 9  | 9  | 3  | 2.932622098 | 0.0242899   |          | ENSG00000169861 |
| 21 | 9772484  | 9772811  | 9772647  | 11 | 13 | 8  | 1.824742639 | 0.0744168   |          | ENSG00000169861 |
| 21 | 9874124  | 9874303  | 9874277  | 8  | 8  | 9  | 1.055743955 | 0.456865    |          | ENSG00000169861 |
| 21 | 10130900 | 10131388 | 10131032 | 13 | 22 | 10 | 2.452738482 | 0.00515848  | BAGE4    | ENSG00000187172 |
| 21 | 10142905 | 10143157 | 10143015 | 10 | 10 | 8  | 1.433726359 | 0.209175    | BAGE4    | ENSG00000187172 |
| 21 | 10152555 | 10152780 | 10152719 | 8  | 10 | 8  | 1.433726359 | 0.209175    | VN1R7P   | ENSG00000217858 |
| 21 | 15158875 | 15159113 | 15158978 | 10 | 13 | 4  | 3.28453675  | 0.00629037  |          | ENSG00000217388 |
| 21 | 15161063 | 15161460 | 15161258 | 48 | 61 | 0  | 72.72902804 | 1.26E-21    |          | ENSG00000217388 |
| 21 | 15458959 | 15459242 | 15459095 | 12 | 15 | 1  | 9.384390715 | 3.90E-05    | NRIP1    | ENSG00000180530 |
| 21 | 15504377 | 15504618 | 15504520 | 8  | 9  | 3  | 2.932622098 | 0.0242899   | NRIP1    | ENSG00000180530 |
| 21 | 15505839 | 15506020 | 15505929 | 8  | 8  | 3  | 2.639359888 | 0.0415794   | NRIP1    | ENSG00000180530 |
| 21 | 15587335 | 15587600 | 15587467 | 9  | 11 | 1  | 7.038293036 | 0.000674435 | CYCSP42  | ENSG00000216735 |
| 21 | 17748683 | 17748947 | 17748815 | 13 | 14 | 7  | 2.199466574 | 0.0303778   |          | ENSG00000209722 |
| 21 | 17831532 | 17831749 | 17831604 | 9  | 9  | 1  | 5.865244197 | 0.00272497  | CXADR    | ENSG00000154639 |
| 21 | 17901857 | 17902273 | 17902095 | 41 | 53 | 3  | 15.83615933 | 3.03E-15    | BTG3     | ENSG00000154640 |
| 21 | 17961504 | 17961865 | 17961651 | 22 | 28 | 0  | 34.01841634 | 1.68E-10    | BTG3     | ENSG00000154640 |
| 21 | 18002640 | 18003035 | 18002856 | 51 | 64 | 0  | 76.24817456 | 1.23E-22    | BTG3     | ENSG00000154640 |
| 21 | 20886617 | 20887025 | 20886796 | 35 | 46 | 1  | 27.56664772 | 3.79E-15    | RPS3AP1  | ENSG00000189005 |
| 21 | 21533211 | 21533416 | 21533313 | 9  | 11 | 0  | 14.07658607 | 9.02E-05    | NCAM2    | ENSG00000154654 |
| 21 | 21729693 | 21729983 | 21729838 | 12 | 13 | 1  | 8.211341875 | 0.000163445 |          | ENSG00000221210 |
| 21 | 22191574 | 22192002 | 22191823 | 44 | 60 | 0  | 71.5559792  | 2.75E-21    | C21orf74 | ENSG00000184856 |
| 21 | 24308947 | 24309210 | 24309078 | 10 | 12 | 0  | 15.24963491 | 4.15E-05    |          | ENSG00000197382 |
| 21 | 25901542 | 25902006 | 25901846 | 8  | 14 | 5  | 2.932622098 | 0.00829617  | MRPL39   | ENSG00000154719 |
| 21 | 26463305 | 26463484 | 26463394 | 8  | 8  | 0  | 10.55743955 | 0.000925496 | APP      | ENSG00000142192 |
| 21 | 26464036 | 26464247 | 26464106 | 8  | 9  | 0  | 11.73048839 | 0.000425898 | APP      | ENSG00000142192 |
| 21 | 26684273 | 26684879 | 26684704 | 15 | 31 | 4  | 7.507512572 | 9.10E-08    |          | ENSG00000197934 |
| 21 | 26735318 | 26735701 | 26735496 | 16 | 22 | 0  | 26.9801233  | 1.77E-08    |          | ENSG00000197934 |
| 21 | 28993799 | 28994107 | 28993954 | 16 | 17 | 0  | 21.11487911 | 8.57E-07    | N6AMT1   | ENSG00000156239 |
| 21 | 29179233 | 29179494 | 29179377 | 10 | 12 | 3  | 3.812408728 | 0.004404    | N6AMT1   | ENSG00000156239 |
| 21 | 29287295 | 29287493 | 29287370 | 8  | 8  | 5  | 1.759573259 | 0.13508     | ZNF294   | ENSG00000198862 |
| 21 | 29367848 | 29368233 | 29368083 | 8  | 14 | 0  | 17.59573259 | 8.79E-06    | CCT8     | ENSG00000156261 |
| 21 | 29680460 | 29680665 | 29680546 | 8  | 9  | 8  | 1.303387599 | 0.281715    |          | ENSG00000209835 |
| 21 | 29698128 | 29698467 | 29698297 | 11 | 15 | 1  | 9.384390715 | 3.90E-05    |          | ENSG00000209835 |

|    |          |          |          |    |     |    |             |             |           |                 |
|----|----------|----------|----------|----|-----|----|-------------|-------------|-----------|-----------------|
| 21 | 30772189 | 30772626 | 30772356 | 25 | 33  | 2  | 13.29455351 | 6.68E-10    | KRTAP19-1 | ENSG00000184351 |
| 21 | 32864045 | 32864259 | 32864105 | 8  | 9   | 1  | 5.865244197 | 0.00272497  | C21orf77  | ENSG00000186842 |
| 21 | 33065997 | 33066403 | 33066198 | 14 | 22  | 3  | 6.745030826 | 8.05E-06    | C21orf49  | ENSG00000205930 |
| 21 | 33120898 | 33121077 | 33120987 | 8  | 8   | 0  | 10.55743955 | 0.000925496 | C21orf62  | ENSG00000205929 |
| 21 | 33425581 | 33425789 | 33425673 | 10 | 10  | 0  | 12.90353723 | 0.000195991 | OLIG1     | ENSG00000184221 |
| 21 | 33661366 | 33661917 | 33661550 | 99 | 130 | 1  | 76.83469898 | 5.01E-43    |           | ENSG00000217665 |
| 21 | 34095882 | 34096202 | 34096042 | 11 | 16  | 5  | 3.323638378 | 0.00288759  | ITSN1     | ENSG00000205726 |
| 21 | 34148967 | 34149258 | 34149141 | 10 | 11  | 0  | 14.07658607 | 9.02E-05    | ATP5O     | ENSG00000159186 |
| 21 | 34241743 | 34241932 | 34241819 | 9  | 10  | 0  | 12.90353723 | 0.000195991 |           | ENSG00000205673 |
| 21 | 34270395 | 34270587 | 34270491 | 8  | 8   | 1  | 5.278719777 | 0.00542188  |           | ENSG00000215975 |
| 21 | 34381047 | 34381254 | 34381196 | 9  | 9   | 1  | 5.865244197 | 0.00272497  | MRPS6     | ENSG00000214955 |
| 21 | 34780192 | 34780495 | 34780343 | 11 | 12  | 0  | 15.24963491 | 4.15E-05    | KCNE1     | ENSG00000180509 |
| 21 | 34876698 | 34876887 | 34876810 | 8  | 8   | 2  | 3.519146518 | 0.017558    | RCAN1     | ENSG00000159200 |
| 21 | 34969365 | 34969777 | 34969602 | 28 | 35  | 2  | 14.07658607 | 1.57E-10    | CLIC6     | ENSG00000159212 |
| 21 | 35140803 | 35141013 | 35140964 | 8  | 11  | 7  | 1.759573259 | 0.102361    | RUNX1     | ENSG00000159216 |
| 21 | 35239356 | 35239853 | 35239586 | 12 | 21  | 5  | 4.301179077 | 0.000172642 | RUNX1     | ENSG00000159216 |
| 21 | 35357661 | 35358107 | 35357839 | 13 | 20  | 0  | 24.63402563 | 8.35E-08    | RUNX1     | ENSG00000159216 |
| 21 | 35550807 | 35551078 | 35550949 | 9  | 12  | 6  | 2.178519273 | 0.0416567   | RUNX1     | ENSG00000159216 |
| 21 | 35694737 | 35694998 | 35694871 | 8  | 10  | 3  | 3.225884308 | 0.0139466   | RPL34P3   | ENSG00000217393 |
| 21 | 36482229 | 36482520 | 36482374 | 10 | 13  | 3  | 4.105670938 | 0.00243034  | RPL3P1    | ENSG00000219887 |
| 21 | 36482585 | 36482804 | 36482712 | 8  | 10  | 1  | 6.451768616 | 0.00135978  | RPL3P1    | ENSG00000219887 |
| 21 | 36804276 | 36804495 | 36804368 | 9  | 11  | 1  | 7.038293036 | 0.000674435 | PSMD15    | ENSG00000216430 |
| 21 | 37561614 | 37562096 | 37561804 | 9  | 19  | 4  | 4.692195357 | 0.000193572 | DSCR3     | ENSG00000157538 |
| 21 | 38059391 | 38059575 | 38059483 | 9  | 9   | 0  | 11.73048839 | 0.000425898 | KCNJ6     | ENSG00000157542 |
| 21 | 38420688 | 38420950 | 38420803 | 10 | 10  | 4  | 2.580707446 | 0.0306059   | DSCR8     | ENSG00000198054 |
| 21 | 38433612 | 38434092 | 38433842 | 11 | 19  | 4  | 4.692195357 | 0.000193572 | DSCR8     | ENSG00000198054 |
| 21 | 38453311 | 38453505 | 38453447 | 8  | 9   | 5  | 1.955081399 | 0.0892323   | DSCR8     | ENSG00000198054 |
| 21 | 38464825 | 38465067 | 38464946 | 9  | 11  | 10 | 1.279689643 | 0.277323    |           | ENSG00000209982 |
| 21 | 38885551 | 38885813 | 38885676 | 12 | 14  | 2  | 5.865244197 | 0.000387308 | ERG       | ENSG00000157554 |
| 21 | 39006005 | 39006332 | 39006168 | 12 | 16  | 8  | 2.215758919 | 0.0222902   | ERG       | ENSG00000157554 |
| 21 | 39081334 | 39081652 | 39081490 | 23 | 28  | 3  | 8.504604085 | 1.43E-07    | ETS2      | ENSG00000157557 |
| 21 | 39098427 | 39098674 | 39098541 | 8  | 11  | 1  | 7.038293036 | 0.000674435 | ETS2      | ENSG00000157557 |
| 21 | 39099368 | 39099768 | 39099547 | 9  | 17  | 6  | 3.016411301 | 0.00381427  | ETS2      | ENSG00000157557 |
| 21 | 39197492 | 39197985 | 39197779 | 13 | 26  | 2  | 10.55743955 | 9.97E-08    |           | ENSG00000220397 |

|    |          |          |          |    |    |    |             |             |         |                 |
|----|----------|----------|----------|----|----|----|-------------|-------------|---------|-----------------|
| 21 | 39200854 | 39201315 | 39201033 | 12 | 21 | 10 | 2.346097679 | 0.00796926  |         | ENSG00000220397 |
| 21 | 39205454 | 39205633 | 39205542 | 8  | 8  | 0  | 10.55743955 | 0.000925496 |         | ENSG00000220397 |
| 21 | 39208437 | 39208739 | 39208599 | 13 | 14 | 4  | 3.519146518 | 0.00361132  |         | ENSG00000220397 |
| 21 | 39210765 | 39211023 | 39210894 | 9  | 9  | 3  | 2.932622098 | 0.0242899   |         | ENSG00000205622 |
| 21 | 39228885 | 39229125 | 39229061 | 9  | 10 | 0  | 12.90353723 | 0.000195991 |         | ENSG00000205622 |
| 21 | 39287430 | 39287715 | 39287572 | 8  | 8  | 3  | 2.639359888 | 0.0415794   |         | ENSG00000205622 |
| 21 | 39477369 | 39477626 | 39477532 | 9  | 12 | 1  | 7.624817456 | 0.000332769 | PSMG1   | ENSG00000183527 |
| 21 | 39607426 | 39607692 | 39607557 | 14 | 15 | 1  | 9.384390715 | 3.90E-05    | BRWD1   | ENSG00000185658 |
| 21 | 39608404 | 39608702 | 39608555 | 8  | 11 | 5  | 2.346097679 | 0.0364013   | BRWD1   | ENSG00000185658 |
| 21 | 39611181 | 39611551 | 39611372 | 13 | 18 | 5  | 3.714654658 | 0.000961539 | BRWD1   | ENSG00000185658 |
| 21 | 39615325 | 39615670 | 39615438 | 15 | 19 | 10 | 2.132816071 | 0.01835     | BRWD1   | ENSG00000185658 |
| 21 | 39642132 | 39642360 | 39642226 | 10 | 10 | 0  | 12.90353723 | 0.000195991 | HGMN1   | ENSG00000205581 |
| 21 | 39673908 | 39674097 | 39674010 | 8  | 9  | 3  | 2.932622098 | 0.0242899   | WRB     | ENSG00000182093 |
| 21 | 39682167 | 39682346 | 39682317 | 8  | 8  | 10 | 0.959767232 | 0.541959    | WRB     | ENSG00000182093 |
| 21 | 39682363 | 39682624 | 39682493 | 8  | 9  | 4  | 2.346097679 | 0.050148    | WRB     | ENSG00000182093 |
| 21 | 39738574 | 39738792 | 39738683 | 8  | 10 | 2  | 4.301179077 | 0.00512919  | LCA5L   | ENSG00000157578 |
| 21 | 39739657 | 39739950 | 39739796 | 10 | 11 | 5  | 2.346097679 | 0.0364013   | SH3BGR  | ENSG00000185437 |
| 21 | 39856492 | 39856868 | 39856639 | 8  | 13 | 5  | 2.737113958 | 0.0137917   | B3GALT5 | ENSG00000183778 |
| 21 | 39969933 | 39970266 | 39970099 | 9  | 15 | 0  | 18.76878143 | 4.04E-06    | B3GALT5 | ENSG00000183778 |
| 21 | 40031421 | 40031638 | 40031539 | 9  | 11 | 4  | 2.815317214 | 0.0183428   | IGSF5   | ENSG00000183067 |
| 21 | 40082192 | 40082701 | 40082321 | 10 | 21 | 13 | 1.843362462 | 0.0337179   | IGSF5   | ENSG00000183067 |
| 21 | 40145969 | 40146192 | 40146108 | 8  | 8  | 2  | 3.519146518 | 0.017558    | PCP4    | ENSG00000183036 |
| 21 | 40160996 | 40161195 | 40161119 | 8  | 8  | 5  | 1.759573259 | 0.13508     | PCP4    | ENSG00000183036 |
| 21 | 40348200 | 40348564 | 40348321 | 9  | 15 | 11 | 1.564065119 | 0.11768     | PCP4    | ENSG00000183036 |
| 21 | 40424295 | 40424785 | 40424540 | 39 | 62 | 3  | 18.47551922 | 4.36E-18    | PCP4    | ENSG00000183036 |
| 21 | 40509774 | 40510019 | 40509896 | 13 | 14 | 3  | 4.398933147 | 0.00132748  |         | ENSG00000207147 |
| 21 | 40572223 | 40572603 | 40572410 | 20 | 28 | 3  | 8.504604085 | 1.43E-07    |         | ENSG00000207147 |
| 21 | 40604798 | 40604977 | 40604887 | 8  | 8  | 2  | 3.519146518 | 0.017558    |         | ENSG00000207147 |
| 21 | 40614556 | 40614745 | 40614693 | 8  | 8  | 2  | 3.519146518 | 0.017558    |         | ENSG00000207147 |
| 21 | 40617970 | 40618466 | 40618324 | 12 | 20 | 14 | 1.642268375 | 0.06827     |         | ENSG00000207147 |
| 21 | 40618594 | 40618932 | 40618763 | 12 | 17 | 8  | 2.346097679 | 0.0144542   |         | ENSG00000207147 |
| 21 | 40632518 | 40632700 | 40632614 | 8  | 9  | 3  | 2.932622098 | 0.0242899   |         | ENSG00000207147 |
| 21 | 40676185 | 40677009 | 40676765 | 15 | 39 | 13 | 3.351568112 | 1.24E-05    |         | ENSG00000207147 |
| 21 | 40679650 | 40679830 | 40679731 | 8  | 8  | 8  | 1.173048839 | 0.36929     |         | ENSG00000207147 |

|    |          |          |          |    |    |    |             |             |           |                 |
|----|----------|----------|----------|----|----|----|-------------|-------------|-----------|-----------------|
| 21 | 40680139 | 40680569 | 40680390 | 9  | 19 | 8  | 2.606775198 | 0.00583935  |           | ENSG00000207147 |
| 21 | 40680909 | 40681285 | 40681077 | 17 | 23 | 10 | 2.559379286 | 0.00330263  |           | ENSG00000207147 |
| 21 | 40687061 | 40687282 | 40687123 | 10 | 12 | 1  | 7.624817456 | 0.000332769 |           | ENSG00000207147 |
| 21 | 40954298 | 40954558 | 40954385 | 9  | 11 | 1  | 7.038293036 | 0.000674435 | DSCAM     | ENSG00000171587 |
| 21 | 41135507 | 41135946 | 41135676 | 8  | 15 | 3  | 4.692195357 | 0.000718455 | DSCAM     | ENSG00000171587 |
| 21 | 41138810 | 41139062 | 41138948 | 12 | 13 | 1  | 8.211341875 | 0.000163445 | DSCAM     | ENSG00000171587 |
| 21 | 41415582 | 41415990 | 41415831 | 11 | 17 | 2  | 7.038293036 | 5.19E-05    | BACE2     | ENSG00000182240 |
| 21 | 41459173 | 41459411 | 41459292 | 8  | 9  | 4  | 2.346097679 | 0.050148    | BACE2     | ENSG00000182240 |
| 21 | 41654013 | 41654282 | 41654121 | 8  | 8  | 5  | 1.759573259 | 0.13508     | MX2       | ENSG00000183486 |
| 21 | 41714440 | 41714624 | 41714539 | 8  | 8  | 3  | 2.639359888 | 0.0415794   | MX1       | ENSG00000157601 |
| 21 | 41754453 | 41754668 | 41754595 | 10 | 11 | 1  | 7.038293036 | 0.000674435 | MX1       | ENSG00000157601 |
| 21 | 41830204 | 41830531 | 41830366 | 15 | 20 | 6  | 3.519146518 | 0.000784044 |           | ENSG00000207503 |
| 21 | 41898809 | 41899086 | 41898948 | 9  | 11 | 0  | 14.07658607 | 9.02E-05    |           | ENSG00000207503 |
| 21 | 41906118 | 41906528 | 41906349 | 14 | 23 | 5  | 4.692195357 | 5.29E-05    |           | ENSG00000207503 |
| 21 | 41971571 | 41971826 | 41971698 | 8  | 13 | 1  | 8.211341875 | 0.000163445 | RIPK4     | ENSG00000183421 |
| 21 | 41973817 | 41974002 | 41973909 | 8  | 8  | 4  | 2.111487911 | 0.0804809   | RIPK4     | ENSG00000183421 |
| 21 | 41974481 | 41974989 | 41974668 | 26 | 41 | 10 | 4.47891375  | 2.87E-07    | RIPK4     | ENSG00000183421 |
| 21 | 41975563 | 41975913 | 41975771 | 8  | 12 | 2  | 5.083211637 | 0.00143337  | RIPK4     | ENSG00000183421 |
| 21 | 41976223 | 41976449 | 41976310 | 8  | 10 | 3  | 3.225884308 | 0.0139466   | RIPK4     | ENSG00000183421 |
| 21 | 41977802 | 41978107 | 41977940 | 8  | 12 | 2  | 5.083211637 | 0.00143337  | RIPK4     | ENSG00000183421 |
| 21 | 42044760 | 42045026 | 42044893 | 13 | 14 | 1  | 8.797866295 | 8.00E-05    | RIPK4     | ENSG00000183421 |
| 21 | 42076779 | 42077031 | 42076908 | 10 | 11 | 6  | 2.010940867 | 0.0640214   | RIPK4     | ENSG00000183421 |
| 21 | 42129742 | 42130035 | 42129860 | 11 | 14 | 5  | 2.932622098 | 0.00829617  | PRDM15    | ENSG00000141956 |
| 21 | 42156526 | 42156734 | 42156630 | 8  | 9  | 3  | 2.932622098 | 0.0242899   | PRDM15    | ENSG00000141956 |
| 21 | 42249489 | 42249675 | 42249582 | 9  | 9  | 4  | 2.346097679 | 0.050148    | C2CD2     | ENSG00000157617 |
| 21 | 42267141 | 42267375 | 42267299 | 11 | 11 | 5  | 2.346097679 | 0.0364013   | C2CD2     | ENSG00000157617 |
| 21 | 42303040 | 42303259 | 42303174 | 9  | 10 | 5  | 2.150589539 | 0.0575848   | ZNF295    | ENSG00000173276 |
| 21 | 42303367 | 42303577 | 42303472 | 8  | 8  | 6  | 1.508205651 | 0.203852    | ZNF295    | ENSG00000173276 |
| 21 | 42348044 | 42348224 | 42348134 | 10 | 10 | 2  | 4.301179077 | 0.00512919  | UMODL1    | ENSG00000177398 |
| 21 | 42350075 | 42350621 | 42350400 | 13 | 32 | 6  | 5.530087385 | 7.11E-07    | UMODL1    | ENSG00000177398 |
| 21 | 42358001 | 42358241 | 42358121 | 8  | 10 | 2  | 4.301179077 | 0.00512919  | UMODL1    | ENSG00000177398 |
| 21 | 42372063 | 42372427 | 42372249 | 19 | 25 | 1  | 15.24963491 | 2.59E-08    | UMODL1    | ENSG00000177398 |
| 21 | 42400922 | 42401311 | 42401170 | 14 | 20 | 5  | 4.105670938 | 0.000308509 | C21orf128 | ENSG00000184385 |
| 21 | 42410654 | 42410895 | 42410774 | 10 | 10 | 7  | 1.612942154 | 0.147335    | UMODL1    | ENSG00000177398 |

|    |          |          |          |    |    |   |             |             |          |                 |
|----|----------|----------|----------|----|----|---|-------------|-------------|----------|-----------------|
| 21 | 42413273 | 42413517 | 42413398 | 9  | 9  | 8 | 1.303387599 | 0.281715    | UMODL1   | ENSG00000177398 |
| 21 | 42415102 | 42415289 | 42415195 | 8  | 9  | 2 | 3.910162798 | 0.00955088  | UMODL1   | ENSG00000177398 |
| 21 | 42438837 | 42439035 | 42438936 | 8  | 9  | 2 | 3.910162798 | 0.00955088  | UMODL1   | ENSG00000177398 |
| 21 | 42457451 | 42457630 | 42457498 | 8  | 8  | 5 | 1.759573259 | 0.13508     | ABCG1    | ENSG00000160179 |
| 21 | 42457735 | 42457939 | 42457837 | 9  | 9  | 9 | 1.173048839 | 0.362316    | ABCG1    | ENSG00000160179 |
| 21 | 42485424 | 42485647 | 42485477 | 8  | 8  | 1 | 5.278719777 | 0.00542188  | ABCG1    | ENSG00000160179 |
| 21 | 42494820 | 42495160 | 42494997 | 15 | 19 | 1 | 11.73048839 | 2.14E-06    | ABCG1    | ENSG00000160179 |
| 21 | 42531825 | 42532134 | 42531979 | 13 | 16 | 4 | 3.988366054 | 0.00115141  | ABCG1    | ENSG00000160179 |
| 21 | 42631088 | 42631384 | 42631239 | 14 | 16 | 2 | 6.647276756 | 0.000101928 | TFF2     | ENSG00000160181 |
| 21 | 42650687 | 42650977 | 42650864 | 13 | 16 | 1 | 9.970915134 | 1.89E-05    | TFF2     | ENSG00000160181 |
| 21 | 42656728 | 42656913 | 42656817 | 8  | 8  | 5 | 1.759573259 | 0.13508     | TFF1     | ENSG00000160182 |
| 21 | 42659778 | 42660072 | 42659914 | 9  | 12 | 3 | 3.812408728 | 0.004404    | TFF1     | ENSG00000160182 |
| 21 | 42669513 | 42669811 | 42669662 | 12 | 15 | 6 | 2.68125449  | 0.0103552   | TFF1     | ENSG00000160182 |
| 21 | 42723050 | 42723230 | 42723163 | 8  | 8  | 0 | 10.55743955 | 0.000925496 |          | ENSG00000210031 |
| 21 | 42743210 | 42743506 | 42743358 | 9  | 13 | 1 | 8.211341875 | 0.000163445 |          | ENSG00000210031 |
| 21 | 43172765 | 43173006 | 43172832 | 9  | 12 | 6 | 2.178519273 | 0.0416567   | WDR4     | ENSG00000160193 |
| 21 | 43186086 | 43186450 | 43186265 | 10 | 17 | 4 | 4.222975822 | 0.000640773 | NDUFV3   | ENSG00000160194 |
| 21 | 43186470 | 43186662 | 43186543 | 10 | 11 | 1 | 7.038293036 | 0.000674435 | NDUFV3   | ENSG00000160194 |
| 21 | 43248976 | 43249226 | 43249100 | 11 | 13 | 1 | 8.211341875 | 0.000163445 | PKNOX1   | ENSG00000160199 |
| 21 | 43267188 | 43267399 | 43267346 | 9  | 10 | 6 | 1.843362462 | 0.0964212   | PKNOX1   | ENSG00000160199 |
| 21 | 43338864 | 43339131 | 43338978 | 9  | 11 | 3 | 3.519146518 | 0.00788869  | CBS      | ENSG00000160200 |
| 21 | 43532025 | 43532398 | 43532235 | 11 | 16 | 2 | 6.647276756 | 0.000101928 | CRYAA    | ENSG00000160202 |
| 21 | 43577446 | 43577687 | 43577532 | 11 | 11 | 8 | 1.564065119 | 0.151515    | SNF1LK   | ENSG00000142178 |
| 21 | 43577714 | 43577904 | 43577849 | 10 | 11 | 8 | 1.564065119 | 0.151515    | SNF1LK   | ENSG00000142178 |
| 21 | 43577948 | 43578188 | 43578053 | 8  | 9  | 3 | 2.932622098 | 0.0242899   | SNF1LK   | ENSG00000142178 |
| 21 | 43588736 | 43589125 | 43588917 | 16 | 25 | 3 | 7.624817456 | 1.09E-06    | SNF1LK   | ENSG00000142178 |
| 21 | 43761139 | 43761467 | 43761288 | 15 | 19 | 3 | 5.865244197 | 5.72E-05    |          | ENSG00000214326 |
| 21 | 43854069 | 43854383 | 43854226 | 17 | 22 | 7 | 3.372515413 | 0.000629223 | H2BFS    | ENSG00000197597 |
| 21 | 43891042 | 43891242 | 43891112 | 10 | 12 | 4 | 3.049926982 | 0.0108184   | HSF2BP   | ENSG00000160207 |
| 21 | 43971132 | 43971527 | 43971298 | 13 | 18 | 0 | 22.28792795 | 3.94E-07    | PDXK     | ENSG00000160209 |
| 21 | 44055151 | 44055396 | 44055282 | 8  | 10 | 2 | 4.301179077 | 0.00512919  |          | ENSG00000215458 |
| 21 | 44183379 | 44183649 | 44183481 | 10 | 13 | 2 | 5.474227917 | 0.000747844 | AGPAT3   | ENSG00000160216 |
| 21 | 44382357 | 44382636 | 44382496 | 9  | 11 | 1 | 7.038293036 | 0.000674435 | C21orf33 | ENSG00000160221 |
| 21 | 44452386 | 44452623 | 44452504 | 13 | 15 | 2 | 6.256260476 | 0.000199274 | ICOSLG   | ENSG00000160223 |

|    |          |          |          |     |     |   |             |             |           |                 |
|----|----------|----------|----------|-----|-----|---|-------------|-------------|-----------|-----------------|
| 21 | 44494172 | 44494397 | 44494275 | 9   | 9   | 1 | 5.865244197 | 0.00272497  | ICOSLG    | ENSG00000160223 |
| 21 | 44560062 | 44560261 | 44560180 | 9   | 10  | 1 | 6.451768616 | 0.00135978  | PFKL      | ENSG00000141959 |
| 21 | 44582607 | 44582880 | 44582779 | 8   | 11  | 3 | 3.519146518 | 0.00788869  | C21orf2   | ENSG00000160226 |
| 21 | 44736783 | 44737176 | 44736997 | 12  | 19  | 3 | 5.865244197 | 5.72E-05    |           | ENSG00000210065 |
| 21 | 44793394 | 44793757 | 44793579 | 32  | 37  | 1 | 22.28792795 | 3.34E-12    | KRTAP10-2 | ENSG00000205445 |
| 21 | 44838256 | 44838612 | 44838441 | 33  | 38  | 0 | 45.74890473 | 7.15E-14    | KRTAP10-6 | ENSG00000188155 |
| 21 | 44842271 | 44842787 | 44842450 | 34  | 45  | 2 | 17.98674887 | 1.07E-13    | KRTAP10-7 | ENSG00000205441 |
| 21 | 44954032 | 44954717 | 44954407 | 152 | 214 | 3 | 63.05137511 | 9.19E-68    | C21orf29  | ENSG00000175894 |
| 21 | 44955983 | 44956318 | 44956150 | 28  | 31  | 4 | 7.507512572 | 9.10E-08    | C21orf29  | ENSG00000175894 |
| 21 | 44997248 | 44997640 | 44997427 | 13  | 21  | 2 | 8.602358155 | 3.33E-06    | UBE2G2    | ENSG00000184787 |
| 21 | 45009870 | 45010398 | 45010107 | 21  | 38  | 5 | 7.624817456 | 3.97E-09    | UBE2G2    | ENSG00000184787 |
| 21 | 45010517 | 45011085 | 45010799 | 110 | 141 | 3 | 41.6432338  | 1.09E-43    | UBE2G2    | ENSG00000184787 |
| 21 | 45017986 | 45018361 | 45018165 | 15  | 22  | 6 | 3.854303329 | 0.000260696 | UBE2G2    | ENSG00000184787 |
| 21 | 45317782 | 45318035 | 45317917 | 17  | 18  | 8 | 2.476436439 | 0.00924552  | ADARB1    | ENSG00000197381 |
| 21 | 45369742 | 45369978 | 45369866 | 8   | 9   | 2 | 3.910162798 | 0.00955088  | ADARB1    | ENSG00000197381 |
| 21 | 45578040 | 45578320 | 45578171 | 13  | 17  | 3 | 5.278719777 | 0.000205462 | C21orf93  | ENSG00000184274 |
| 21 | 45652307 | 45652494 | 45652400 | 8   | 8   | 1 | 5.278719777 | 0.00542188  | COL18A1   | ENSG00000182871 |
| 21 | 45683842 | 45684058 | 45683968 | 11  | 12  | 2 | 5.083211637 | 0.00143337  | C21orf123 | ENSG00000183535 |
| 21 | 45699690 | 45700002 | 45699846 | 8   | 12  | 4 | 3.049926982 | 0.0108184   | COL18A1   | ENSG00000182871 |
| 21 | 45800290 | 45800803 | 45800479 | 12  | 25  | 0 | 30.49926982 | 1.72E-09    | SLC19A1   | ENSG00000173638 |
| 21 | 45876934 | 45877468 | 45877254 | 52  | 71  | 7 | 10.55743955 | 2.27E-17    | PCBP3     | ENSG00000183570 |
| 21 | 45981600 | 45981779 | 45981689 | 9   | 9   | 4 | 2.346097679 | 0.050148    | PCBP3     | ENSG00000183570 |
| 21 | 46124948 | 46125536 | 46125127 | 13  | 30  | 2 | 12.12150467 | 5.77E-09    | PCBP3     | ENSG00000183570 |
| 21 | 46160583 | 46160762 | 46160672 | 8   | 10  | 2 | 4.301179077 | 0.00512919  | PCBP3OT   | ENSG00000215427 |
| 21 | 46569637 | 46569840 | 46569709 | 8   | 8   | 0 | 10.55743955 | 0.000925496 | PCNT      | ENSG00000160299 |
| 21 | 46942631 | 46942844 | 46942768 | 9   | 10  | 2 | 4.301179077 | 0.00512919  | RPL23AP4  | ENSG00000212932 |
| 22 | 15658888 | 15659069 | 15658978 | 8   | 8   | 0 | 10.55743955 | 0.000925496 | XKR3      | ENSG00000172967 |
| 22 | 16091045 | 16091615 | 16091405 | 81  | 103 | 2 | 40.6656931  | 1.45E-32    | CECR1     | ENSG00000093072 |
| 22 | 16190079 | 16190359 | 16190195 | 13  | 14  | 4 | 3.519146518 | 0.00361132  |           | ENSG00000209324 |
| 22 | 16208682 | 16209123 | 16208951 | 13  | 19  | 3 | 5.865244197 | 5.72E-05    |           | ENSG00000209324 |
| 22 | 16241426 | 16241878 | 16241605 | 11  | 17  | 2 | 7.038293036 | 5.19E-05    |           | ENSG00000209324 |
| 22 | 16463770 | 16464075 | 16463911 | 12  | 16  | 4 | 3.988366054 | 0.00115141  | ATP6V1E1  | ENSG00000131100 |
| 22 | 16491341 | 16491615 | 16491493 | 8   | 11  | 2 | 4.692195357 | 0.00272444  | ATP6V1E1  | ENSG00000131100 |
| 22 | 16569422 | 16569652 | 16569570 | 10  | 12  | 6 | 2.178519273 | 0.0416567   | BCL2L13   | ENSG00000099968 |



|    |          |          |          |    |    |    |             |             |          |                 |
|----|----------|----------|----------|----|----|----|-------------|-------------|----------|-----------------|
| 22 | 16605275 | 16605473 | 16605374 | 8  | 8  | 4  | 2.111487911 | 0.0804809   | BID      | ENSG00000015475 |
| 22 | 16938881 | 16939280 | 16939055 | 9  | 14 | 9  | 1.759573259 | 0.0786014   | PEX26    | ENSG00000215193 |
| 22 | 17258449 | 17258643 | 17258615 | 8  | 9  | 11 | 0.977540699 | 0.526123    | DGCR6    | ENSG00000183628 |
| 22 | 17297082 | 17297417 | 17297240 | 21 | 24 | 0  | 29.32622098 | 3.74E-09    | PRODH    | ENSG00000100033 |
| 22 | 17301218 | 17301665 | 17301493 | 8  | 15 | 3  | 4.692195357 | 0.000718455 | PRODH    | ENSG00000100033 |
| 22 | 17997584 | 17997792 | 17997653 | 9  | 11 | 5  | 2.346097679 | 0.0364013   |          | ENSG00000219886 |
| 22 | 18111291 | 18111612 | 18111451 | 19 | 23 | 0  | 28.15317214 | 8.13E-09    | TBX1     | ENSG00000184058 |
| 22 | 18173983 | 18174435 | 18174214 | 21 | 35 | 2  | 14.07658607 | 1.57E-10    |          | ENSG00000219300 |
| 22 | 18217332 | 18217574 | 18217453 | 17 | 18 | 5  | 3.714654658 | 0.000961539 | GNB1L    | ENSG00000185838 |
| 22 | 18236367 | 18236765 | 18236571 | 23 | 33 | 0  | 39.88366054 | 3.46E-12    | GNB1L    | ENSG00000185838 |
| 22 | 18242096 | 18242355 | 18242225 | 16 | 18 | 0  | 22.28792795 | 3.94E-07    |          | ENSG00000217984 |
| 22 | 18330451 | 18330792 | 18330665 | 15 | 19 | 2  | 7.820325595 | 1.32E-05    | COMT     | ENSG00000093010 |
| 22 | 18484703 | 18484886 | 18484805 | 8  | 9  | 1  | 5.865244197 | 0.00272497  | TRMT2A   | ENSG00000099899 |
| 22 | 18605500 | 18606007 | 18605654 | 31 | 40 | 2  | 16.03166747 | 4.15E-12    |          | ENSG00000221039 |
| 22 | 18676470 | 18676663 | 18676518 | 8  | 8  | 0  | 10.55743955 | 0.000925496 |          | ENSG00000161132 |
| 22 | 19102492 | 19102722 | 19102607 | 8  | 10 | 4  | 2.580707446 | 0.0306059   |          | ENSG00000207343 |
| 22 | 19248677 | 19248901 | 19248789 | 8  | 9  | 0  | 11.73048839 | 0.000425898 |          | ENSG00000220624 |
| 22 | 19251794 | 19252000 | 19251897 | 9  | 10 | 5  | 2.150589539 | 0.0575848   |          | ENSG00000220624 |
| 22 | 19269880 | 19270118 | 19269999 | 9  | 11 | 2  | 4.692195357 | 0.00272444  |          | ENSG00000220624 |
| 22 | 19275822 | 19276028 | 19275894 | 8  | 10 | 4  | 2.580707446 | 0.0306059   |          | ENSG00000220624 |
| 22 | 19461957 | 19462558 | 19462136 | 12 | 23 | 5  | 4.692195357 | 5.29E-05    | SERPIND1 | ENSG00000099937 |
| 22 | 19527884 | 19528093 | 19527976 | 12 | 13 | 7  | 2.052835469 | 0.046392    | PI4KA    | ENSG00000133511 |
| 22 | 19543294 | 19543564 | 19543429 | 8  | 12 | 1  | 7.624817456 | 0.000332769 | SNAP29   | ENSG00000099940 |
| 22 | 19570162 | 19570403 | 19570243 | 11 | 15 | 4  | 3.753756286 | 0.0020497   | SNAP29   | ENSG00000099940 |
| 22 | 19571637 | 19572093 | 19571877 | 12 | 20 | 6  | 3.519146518 | 0.000784044 | SNAP29   | ENSG00000099940 |
| 22 | 19601450 | 19601658 | 19601560 | 9  | 10 | 2  | 4.301179077 | 0.00512919  | CRKL     | ENSG00000099942 |
| 22 | 19602153 | 19602397 | 19602275 | 8  | 10 | 0  | 12.90353723 | 0.000195991 | CRKL     | ENSG00000099942 |
| 22 | 19606615 | 19606821 | 19606674 | 8  | 8  | 0  | 10.55743955 | 0.000925496 | CRKL     | ENSG00000099942 |
| 22 | 19711671 | 19711941 | 19711806 | 8  | 10 | 1  | 6.451768616 | 0.00135978  | SLC7A4   | ENSG00000099960 |
| 22 | 20267630 | 20267926 | 20267755 | 10 | 14 | 2  | 5.865244197 | 0.000387308 | UBE2L3   | ENSG00000185651 |
| 22 | 20667106 | 20667338 | 20667222 | 10 | 10 | 11 | 1.075294769 | 0.434143    | TOP3B    | ENSG00000100038 |
| 22 | 21081536 | 21081793 | 21081664 | 9  | 11 | 5  | 2.346097679 | 0.0364013   | IGLVI-42 | ENSG00000217544 |
| 22 | 21819832 | 21820097 | 21819967 | 24 | 24 | 4  | 5.865244197 | 8.64E-06    | RAB36    | ENSG00000100228 |
| 22 | 21941890 | 21942070 | 21941941 | 8  | 8  | 1  | 5.278719777 | 0.00542188  | FBXW4P1  | ENSG00000218644 |

|    |          |          |          |    |    |    |             |             |          |                 |
|----|----------|----------|----------|----|----|----|-------------|-------------|----------|-----------------|
| 22 | 22498134 | 22498677 | 22498405 | 15 | 30 | 2  | 12.12150467 | 5.77E-09    | DERL3    | ENSG00000099958 |
| 22 | 22521780 | 22522102 | 22521941 | 13 | 18 | 4  | 4.457585589 | 0.000353565 | SLC2A11  | ENSG00000133460 |
| 22 | 22529801 | 22530274 | 22530111 | 10 | 17 | 5  | 3.519146518 | 0.00167472  | SLC2A11  | ENSG00000133460 |
| 22 | 22915716 | 22915916 | 22915816 | 9  | 9  | 10 | 1.066408036 | 0.444985    | SUSD2    | ENSG00000099994 |
| 22 | 23028957 | 23029352 | 23029179 | 8  | 13 | 4  | 3.28453675  | 0.00629037  | ADORA2A  | ENSG00000128271 |
| 22 | 23029428 | 23029687 | 23029582 | 14 | 15 | 4  | 3.753756286 | 0.0020497   | ADORA2A  | ENSG00000128271 |
| 22 | 23251469 | 23251651 | 23251587 | 8  | 9  | 4  | 2.346097679 | 0.050148    | C22orf13 | ENSG00000138867 |
| 22 | 23252197 | 23252505 | 23252351 | 11 | 15 | 2  | 6.256260476 | 0.000199274 | C22orf13 | ENSG00000138867 |
| 22 | 23281250 | 23281442 | 23281383 | 8  | 8  | 3  | 2.639359888 | 0.0415794   | C22orf13 | ENSG00000138867 |
| 22 | 23561011 | 23561255 | 23561133 | 10 | 11 | 1  | 7.038293036 | 0.000674435 | SGSM1    | ENSG00000167037 |
| 22 | 23576184 | 23576504 | 23576344 | 14 | 15 | 9  | 1.876878143 | 0.0544542   | SGSM1    | ENSG00000167037 |
| 22 | 23676313 | 23676705 | 23676492 | 9  | 16 | 2  | 6.647276756 | 0.000101928 | TMEM211  | ENSG00000206069 |
| 22 | 23722666 | 23722933 | 23722809 | 13 | 17 | 3  | 5.278719777 | 0.000205462 |          | ENSG00000197077 |
| 22 | 23778126 | 23778345 | 23778219 | 8  | 8  | 7  | 1.319679944 | 0.283403    |          | ENSG00000197077 |
| 22 | 23787630 | 23787986 | 23787808 | 28 | 34 | 2  | 13.68556979 | 3.24E-10    |          | ENSG00000197077 |
| 22 | 23961862 | 23962056 | 23961930 | 11 | 11 | 3  | 3.519146518 | 0.00788869  | CRYBB2   | ENSG00000100058 |
| 22 | 24555236 | 24555466 | 24555311 | 9  | 12 | 1  | 7.624817456 | 0.000332769 | MYO18B   | ENSG00000133454 |
| 22 | 25093823 | 25094037 | 25093929 | 8  | 8  | 1  | 5.278719777 | 0.00542188  |          | ENSG00000209347 |
| 22 | 25124548 | 25124729 | 25124638 | 8  | 8  | 0  | 10.55743955 | 0.000925496 |          | ENSG00000209347 |
| 22 | 25238401 | 25238589 | 25238473 | 8  | 9  | 2  | 3.910162798 | 0.00955088  | TFIP11   | ENSG00000100109 |
| 22 | 25260116 | 25260465 | 25260313 | 10 | 15 | 2  | 6.256260476 | 0.000199274 |          | ENSG00000221760 |
| 22 | 25275003 | 25275327 | 25275156 | 33 | 37 | 2  | 14.85861863 | 3.69E-11    |          | ENSG00000221760 |
| 22 | 25343941 | 25344155 | 25344048 | 8  | 8  | 1  | 5.278719777 | 0.00542188  | CRYBB1   | ENSG00000100122 |
| 22 | 25371246 | 25371534 | 25371378 | 14 | 16 | 5  | 3.323638378 | 0.00288759  |          | ENSG00000218556 |
| 22 | 25398605 | 25399091 | 25398912 | 11 | 21 | 9  | 2.580707446 | 0.00438951  |          | ENSG00000206028 |
| 22 | 25462427 | 25462631 | 25462529 | 8  | 8  | 0  | 10.55743955 | 0.000925496 |          | ENSG00000206028 |
| 22 | 25503513 | 25503714 | 25503613 | 9  | 9  | 3  | 2.932622098 | 0.0242899   |          | ENSG00000206028 |
| 22 | 25509784 | 25510101 | 25509953 | 8  | 11 | 1  | 7.038293036 | 0.000674435 |          | ENSG00000219956 |
| 22 | 25620976 | 25621160 | 25621068 | 8  | 8  | 1  | 5.278719777 | 0.00542188  |          | ENSG00000219956 |
| 22 | 25819836 | 25820258 | 25820086 | 18 | 27 | 1  | 16.42268375 | 5.88E-09    |          | ENSG00000200443 |
| 22 | 26445069 | 26445297 | 26445192 | 10 | 13 | 1  | 8.211341875 | 0.000163445 | MN1      | ENSG00000169184 |
| 22 | 26445307 | 26445982 | 26445664 | 55 | 81 | 0  | 96.19000482 | 2.29E-28    | MN1      | ENSG00000169184 |
| 22 | 26500094 | 26500426 | 26500260 | 12 | 14 | 1  | 8.797866295 | 8.00E-05    | MN1      | ENSG00000169184 |
| 22 | 26612533 | 26612712 | 26612622 | 8  | 8  | 1  | 5.278719777 | 0.00542188  | PITPNB   | ENSG00000180957 |

|    |          |          |          |     |     |    |             |             |         |                 |
|----|----------|----------|----------|-----|-----|----|-------------|-------------|---------|-----------------|
| 22 | 27040932 | 27041277 | 27041104 | 16  | 20  | 3  | 6.158506406 | 2.99E-05    | TTC28   | ENSG00000100154 |
| 22 | 27041912 | 27042451 | 27042204 | 200 | 236 | 0  | 278.0125749 | 1.30E-80    | TTC28   | ENSG00000100154 |
| 22 | 27467648 | 27468001 | 27467824 | 8   | 14  | 7  | 2.199466574 | 0.0303778   | CHEK2   | ENSG00000183765 |
| 22 | 27468400 | 27468735 | 27468576 | 10  | 13  | 3  | 4.105670938 | 0.00243034  | HSCB    | ENSG00000100209 |
| 22 | 27498286 | 27498760 | 27498581 | 10  | 19  | 6  | 3.351568112 | 0.00134187  | CCDC117 | ENSG00000159873 |
| 22 | 27510064 | 27510316 | 27510225 | 11  | 12  | 2  | 5.083211637 | 0.00143337  | CCDC117 | ENSG00000159873 |
| 22 | 27544336 | 27544962 | 27544709 | 20  | 36  | 12 | 3.338677466 | 2.58E-05    |         | ENSG00000216570 |
| 22 | 27545536 | 27545845 | 27545668 | 9   | 13  | 4  | 3.28453675  | 0.00629037  |         | ENSG00000216570 |
| 22 | 27548785 | 27549254 | 27549092 | 18  | 26  | 8  | 3.519146518 | 0.000175368 |         | ENSG00000216570 |
| 22 | 27644165 | 27644353 | 27644265 | 9   | 9   | 3  | 2.932622098 | 0.0242899   | ZNRF3   | ENSG00000183579 |
| 22 | 27649958 | 27650162 | 27650060 | 8   | 9   | 1  | 5.865244197 | 0.00272497  | ZNRF3   | ENSG00000183579 |
| 22 | 27708929 | 27709641 | 27709361 | 110 | 151 | 2  | 59.43447453 | 2.02E-48    | ZNRF3   | ENSG00000183579 |
| 22 | 27709679 | 27710075 | 27709940 | 16  | 22  | 2  | 8.993374435 | 1.66E-06    | ZNRF3   | ENSG00000183579 |
| 22 | 27712349 | 27712619 | 27712465 | 13  | 14  | 1  | 8.797866295 | 8.00E-05    | ZNRF3   | ENSG00000183579 |
| 22 | 27729938 | 27730117 | 27730079 | 8   | 8   | 1  | 5.278719777 | 0.00542188  | ZNRF3   | ENSG00000183579 |
| 22 | 27766778 | 27766957 | 27766926 | 8   | 8   | 6  | 1.508205651 | 0.203852    |         | ENSG00000218478 |
| 22 | 27994238 | 27994452 | 27994346 | 12  | 12  | 2  | 5.083211637 | 0.00143337  | EWSR1   | ENSG00000182944 |
| 22 | 28032294 | 28032521 | 28032445 | 10  | 12  | 2  | 5.083211637 | 0.00143337  | GAS2L1  | ENSG00000185340 |
| 22 | 28060997 | 28061182 | 28061114 | 8   | 9   | 5  | 1.955081399 | 0.0892323   | RASL10A | ENSG00000100276 |
| 22 | 28070141 | 28070409 | 28070260 | 13  | 14  | 3  | 4.398933147 | 0.00132748  | AP1B1   | ENSG00000100280 |
| 22 | 28103178 | 28103431 | 28103337 | 10  | 12  | 0  | 15.24963491 | 4.15E-05    | AP1B1   | ENSG00000100280 |
| 22 | 28194827 | 28195442 | 28195092 | 30  | 51  | 2  | 20.33284655 | 1.28E-15    | NEFH    | ENSG00000100285 |
| 22 | 28196330 | 28196509 | 28196485 | 8   | 9   | 4  | 2.346097679 | 0.050148    | NEFH    | ENSG00000100285 |
| 22 | 28279626 | 28280026 | 28279787 | 13  | 19  | 5  | 3.910162798 | 0.000546977 | THOC5   | ENSG00000100296 |
| 22 | 28416578 | 28416946 | 28416799 | 8   | 14  | 3  | 4.398933147 | 0.00132748  | CABP7   | ENSG00000100314 |
| 22 | 28521683 | 28521996 | 28521839 | 21  | 24  | 3  | 7.331555246 | 2.13E-06    | ZMAT5   | ENSG00000100319 |
| 22 | 28525173 | 28525535 | 28525326 | 8   | 13  | 3  | 4.105670938 | 0.00243034  | ZMAT5   | ENSG00000100319 |
| 22 | 28540079 | 28540435 | 28540257 | 15  | 19  | 1  | 11.73048839 | 2.14E-06    | ZMAT5   | ENSG00000100319 |
| 22 | 28547224 | 28547542 | 28547398 | 16  | 20  | 2  | 8.211341875 | 6.65E-06    | ZMAT5   | ENSG00000100319 |
| 22 | 28633826 | 28634101 | 28633963 | 14  | 16  | 6  | 2.848832895 | 0.00632407  |         | ENSG00000207455 |
| 22 | 28971553 | 28972500 | 28971890 | 190 | 274 | 2  | 107.5294769 | 2.27E-89    | LIF     | ENSG00000128342 |
| 22 | 28982065 | 28982259 | 28982162 | 8   | 10  | 2  | 4.301179077 | 0.00512919  | LIF     | ENSG00000128342 |
| 22 | 29318105 | 29318315 | 29318241 | 8   | 10  | 3  | 3.225884308 | 0.0139466   | PES1    | ENSG00000100029 |
| 22 | 29361355 | 29361545 | 29361450 | 8   | 8   | 1  | 5.278719777 | 0.00542188  | SLC35E4 | ENSG00000100036 |

|    |          |          |          |    |     |    |             |             |          |                 |
|----|----------|----------|----------|----|-----|----|-------------|-------------|----------|-----------------|
| 22 | 29394347 | 29394568 | 29394457 | 9  | 10  | 2  | 4.301179077 | 0.00512919  | DUSP18   | ENSG00000167065 |
| 22 | 29481431 | 29481644 | 29481537 | 8  | 9   | 9  | 1.173048839 | 0.362316    | OSBP2    | ENSG00000184792 |
| 22 | 29509087 | 29509334 | 29509209 | 11 | 13  | 1  | 8.211341875 | 0.000163445 | OSBP2    | ENSG00000184792 |
| 22 | 29807165 | 29807572 | 29807439 | 12 | 19  | 6  | 3.351568112 | 0.00134187  | SMTN     | ENSG00000183963 |
| 22 | 29808625 | 29808848 | 29808746 | 8  | 10  | 3  | 3.225884308 | 0.0139466   | SMTN     | ENSG00000183963 |
| 22 | 29833496 | 29833973 | 29833734 | 9  | 18  | 5  | 3.714654658 | 0.000961539 |          | ENSG00000198832 |
| 22 | 29848934 | 29849215 | 29849074 | 8  | 10  | 0  | 12.90353723 | 0.000195991 | INPP5J   | ENSG00000185133 |
| 22 | 29856964 | 29857221 | 29857055 | 9  | 10  | 3  | 3.225884308 | 0.0139466   | INPP5J   | ENSG00000185133 |
| 22 | 29857714 | 29858146 | 29857893 | 10 | 18  | 17 | 1.238218219 | 0.258417    | INPP5J   | ENSG00000185133 |
| 22 | 29875066 | 29875291 | 29875178 | 11 | 11  | 1  | 7.038293036 | 0.000674435 |          | ENSG00000214125 |
| 22 | 29903482 | 29903755 | 29903618 | 10 | 11  | 5  | 2.346097679 | 0.0364013   | RNF185   | ENSG00000138942 |
| 22 | 29933253 | 29933487 | 29933363 | 9  | 10  | 2  | 4.301179077 | 0.00512919  |          | ENSG00000184726 |
| 22 | 29944870 | 29945268 | 29945089 | 37 | 46  | 2  | 18.37776515 | 5.11E-14    |          | ENSG00000209392 |
| 22 | 29975006 | 29975346 | 29975176 | 16 | 21  | 2  | 8.602358155 | 3.33E-06    | LIMK2    | ENSG00000182541 |
| 22 | 29979915 | 29980386 | 29980150 | 98 | 120 | 2  | 47.31296985 | 3.63E-38    | LIMK2    | ENSG00000182541 |
| 22 | 30018251 | 30018608 | 30018429 | 15 | 21  | 3  | 6.451768616 | 1.56E-05    | PIK3IP1  | ENSG00000100100 |
| 22 | 30032582 | 30032887 | 30032740 | 15 | 18  | 4  | 4.457585589 | 0.000353565 |          | ENSG00000212542 |
| 22 | 30039351 | 30039686 | 30039512 | 20 | 24  | 5  | 4.887703497 | 2.90E-05    |          | ENSG00000212542 |
| 22 | 30069208 | 30069637 | 30069458 | 18 | 27  | 7  | 4.105670938 | 4.08E-05    | PATZ1    | ENSG00000100105 |
| 22 | 30069922 | 30070115 | 30070018 | 8  | 8   | 1  | 5.278719777 | 0.00542188  | PATZ1    | ENSG00000100105 |
| 22 | 30125513 | 30125729 | 30125581 | 8  | 9   | 4  | 2.346097679 | 0.050148    | DRG1     | ENSG00000185721 |
| 22 | 30287387 | 30287579 | 30287491 | 8  | 9   | 1  | 5.865244197 | 0.00272497  |          | ENSG00000214093 |
| 22 | 30312393 | 30312612 | 30312467 | 9  | 9   | 2  | 3.910162798 | 0.00955088  |          | ENSG00000214093 |
| 22 | 30372567 | 30372924 | 30372774 | 8  | 13  | 0  | 16.42268375 | 1.91E-05    | PISD     | ENSG00000100141 |
| 22 | 30388036 | 30388478 | 30388175 | 11 | 17  | 5  | 3.519146518 | 0.00167472  | PISD     | ENSG00000100141 |
| 22 | 30409205 | 30409537 | 30409371 | 25 | 29  | 0  | 35.19146518 | 7.73E-11    | PISD     | ENSG00000100141 |
| 22 | 30479608 | 30479797 | 30479741 | 9  | 9   | 1  | 5.865244197 | 0.00272497  | DEPDC5   | ENSG00000100150 |
| 22 | 30673356 | 30673541 | 30673473 | 8  | 8   | 7  | 1.319679944 | 0.283403    | C22orf24 | ENSG00000128254 |
| 22 | 30696084 | 30696365 | 30696228 | 10 | 11  | 1  | 7.038293036 | 0.000674435 |          | ENSG00000209414 |
| 22 | 30696602 | 30696930 | 30696766 | 8  | 13  | 3  | 4.105670938 | 0.00243034  |          | ENSG00000209414 |
| 22 | 30703208 | 30703480 | 30703344 | 10 | 13  | 4  | 3.28453675  | 0.00629037  |          | ENSG00000209414 |
| 22 | 30776729 | 30777120 | 30776908 | 14 | 20  | 6  | 3.519146518 | 0.000784044 | SLC5A1   | ENSG00000100170 |
| 22 | 30805089 | 30805323 | 30805256 | 13 | 14  | 3  | 4.398933147 | 0.00132748  | SLC5A1   | ENSG00000100170 |
| 22 | 30832987 | 30833348 | 30833160 | 30 | 36  | 3  | 10.85070176 | 5.62E-10    |          | ENSG00000216309 |

|    |          |          |          |    |    |   |             |             |          |                 |
|----|----------|----------|----------|----|----|---|-------------|-------------|----------|-----------------|
| 22 | 31138107 | 31138378 | 31138242 | 8  | 12 | 1 | 7.624817456 | 0.000332769 | C22orf28 | ENSG00000100220 |
| 22 | 31200500 | 31200835 | 31200668 | 9  | 13 | 2 | 5.474227917 | 0.000747844 | FBXO7    | ENSG00000100225 |
| 22 | 31253822 | 31254065 | 31253917 | 8  | 8  | 2 | 3.519146518 | 0.017558    | FBXO7    | ENSG00000100225 |
| 22 | 31283355 | 31283709 | 31283532 | 21 | 27 | 1 | 16.42268375 | 5.88E-09    |          | ENSG00000209417 |
| 22 | 31423845 | 31424080 | 31423962 | 12 | 12 | 4 | 3.049926982 | 0.0108184   |          | ENSG00000209417 |
| 22 | 31717773 | 31718020 | 31717896 | 11 | 12 | 2 | 5.083211637 | 0.00143337  | SYN3     | ENSG00000185666 |
| 22 | 31775153 | 31775367 | 31775303 | 10 | 10 | 3 | 3.225884308 | 0.0139466   | SYN3     | ENSG00000185666 |
| 22 | 32833516 | 32833821 | 32833668 | 15 | 17 | 1 | 10.55743955 | 9.18E-06    | LARGE    | ENSG00000133424 |
| 22 | 32969038 | 32969457 | 32969211 | 10 | 16 | 0 | 19.94183027 | 1.86E-06    | LARGE    | ENSG00000133424 |
| 22 | 33008254 | 33008484 | 33008369 | 8  | 8  | 0 | 10.55743955 | 0.000925496 |          | ENSG00000220899 |
| 22 | 33140907 | 33141109 | 33141007 | 9  | 10 | 5 | 2.150589539 | 0.0575848   |          | ENSG00000220899 |
| 22 | 33487230 | 33487486 | 33487331 | 13 | 15 | 2 | 6.256260476 | 0.000199274 |          | ENSG00000220899 |
| 22 | 34098062 | 34098294 | 34098178 | 9  | 10 | 0 | 12.90353723 | 0.000195991 | HMOX1    | ENSG00000100292 |
| 22 | 34125760 | 34125939 | 34125880 | 8  | 8  | 0 | 10.55743955 | 0.000925496 | MCM5     | ENSG00000100297 |
| 22 | 34315290 | 34315508 | 34315444 | 9  | 10 | 3 | 3.225884308 | 0.0139466   | MB       | ENSG00000198125 |
| 22 | 34348569 | 34348805 | 34348686 | 10 | 12 | 3 | 3.812408728 | 0.004404    | MB       | ENSG00000198125 |
| 22 | 34382407 | 34382702 | 34382533 | 12 | 13 | 2 | 5.474227917 | 0.000747844 |          | ENSG00000221963 |
| 22 | 34643680 | 34643861 | 34643836 | 9  | 9  | 1 | 5.865244197 | 0.00272497  |          | ENSG00000220163 |
| 22 | 35256134 | 35256319 | 35256226 | 9  | 9  | 0 | 11.73048839 | 0.000425898 | EIF3D    | ENSG00000100353 |
| 22 | 35534925 | 35535332 | 35535090 | 28 | 37 | 2 | 14.85861863 | 3.69E-11    | PVALB    | ENSG00000100362 |
| 22 | 35869264 | 35869443 | 35869416 | 8  | 8  | 2 | 3.519146518 | 0.017558    | IL2RB    | ENSG00000100385 |
| 22 | 35923637 | 35924004 | 35923816 | 11 | 17 | 2 | 7.038293036 | 5.19E-05    | C1QTNF6  | ENSG00000133466 |
| 22 | 36089602 | 36089953 | 36089778 | 20 | 23 | 0 | 28.15317214 | 8.13E-09    |          | ENSG00000197900 |
| 22 | 36264812 | 36265021 | 36264916 | 10 | 11 | 4 | 2.815317214 | 0.0183428   | CARD10   | ENSG00000100065 |
| 22 | 36296139 | 36296364 | 36296228 | 8  | 9  | 1 | 5.865244197 | 0.00272497  | LGALS2   | ENSG00000100079 |
| 22 | 36318582 | 36318768 | 36318651 | 8  | 8  | 5 | 1.759573259 | 0.13508     | LGALS2   | ENSG00000100079 |
| 22 | 36333012 | 36333460 | 36333191 | 11 | 17 | 3 | 5.278719777 | 0.000205462 | GGA1     | ENSG00000100083 |
| 22 | 36334468 | 36334743 | 36334606 | 10 | 13 | 3 | 4.105670938 | 0.00243034  | GGA1     | ENSG00000100083 |
| 22 | 36503272 | 36503514 | 36503393 | 12 | 14 | 3 | 4.398933147 | 0.00132748  |          | ENSG00000209462 |
| 22 | 36510749 | 36511086 | 36510926 | 19 | 22 | 2 | 8.993374435 | 1.66E-06    |          | ENSG00000209462 |
| 22 | 36570256 | 36570517 | 36570385 | 8  | 9  | 3 | 2.932622098 | 0.0242899   |          | ENSG00000207945 |
| 22 | 36613779 | 36613959 | 36613876 | 8  | 8  | 2 | 3.519146518 | 0.017558    |          | ENSG00000207227 |
| 22 | 36624649 | 36625125 | 36624879 | 62 | 89 | 0 | 105.5743955 | 4.61E-31    | MICALL1  | ENSG00000100139 |
| 22 | 36783100 | 36783443 | 36783346 | 8  | 13 | 3 | 4.105670938 | 0.00243034  | PICK1    | ENSG00000100151 |

|    |          |          |          |    |    |   |             |             |          |                 |
|----|----------|----------|----------|----|----|---|-------------|-------------|----------|-----------------|
| 22 | 36972321 | 36972544 | 36972443 | 8  | 8  | 2 | 3.519146518 | 0.017558    | TMEM184B | ENSG00000198792 |
| 22 | 37275035 | 37275247 | 37275146 | 9  | 10 | 2 | 4.301179077 | 0.00512919  | DMC1     | ENSG00000100206 |
| 22 | 37650192 | 37650380 | 37650286 | 8  | 8  | 1 | 5.278719777 | 0.00542188  | APOBEC3A | ENSG00000128383 |
| 22 | 37661080 | 37661415 | 37661247 | 9  | 14 | 0 | 17.59573259 | 8.79E-06    | APOBEC3A | ENSG00000128383 |
| 22 | 37823013 | 37823450 | 37823231 | 56 | 70 | 4 | 16.65729352 | 1.27E-19    | APOBEC3H | ENSG00000100298 |
| 22 | 37823940 | 37824153 | 37823980 | 11 | 13 | 0 | 16.42268375 | 1.91E-05    | APOBEC3H | ENSG00000100298 |
| 22 | 37900643 | 37900860 | 37900771 | 8  | 9  | 4 | 2.346097679 | 0.050148    |          | ENSG00000218071 |
| 22 | 38019737 | 38019989 | 38019868 | 11 | 11 | 2 | 4.692195357 | 0.00272444  |          | ENSG00000209480 |
| 22 | 38045427 | 38045723 | 38045578 | 11 | 14 | 2 | 5.865244197 | 0.000387308 | RPL3     | ENSG00000100316 |
| 22 | 38069567 | 38069784 | 38069679 | 8  | 9  | 1 | 5.865244197 | 0.00272497  | SYNGR1   | ENSG00000100321 |
| 22 | 38255055 | 38255479 | 38255307 | 15 | 22 | 1 | 13.49006165 | 2.37E-07    | RPS19BP1 | ENSG00000187051 |
| 22 | 38360745 | 38360985 | 38360836 | 10 | 11 | 2 | 4.692195357 | 0.00272444  |          | ENSG00000203593 |
| 22 | 38658819 | 38658998 | 38658908 | 8  | 8  | 0 | 10.55743955 | 0.000925496 | GRAP2    | ENSG00000100351 |
| 22 | 38882103 | 38882310 | 38882259 | 8  | 10 | 6 | 1.843362462 | 0.0964212   | TNRC6B   | ENSG00000100354 |
| 22 | 39113882 | 39114062 | 39113972 | 8  | 8  | 0 | 10.55743955 | 0.000925496 | SGSM3    | ENSG00000100359 |
| 22 | 39122888 | 39123122 | 39123005 | 12 | 14 | 3 | 4.398933147 | 0.00132748  | SGSM3    | ENSG00000100359 |
| 22 | 39377603 | 39378036 | 39377782 | 9  | 18 | 8 | 2.476436439 | 0.00924552  | MKL1     | ENSG00000196588 |
| 22 | 39402599 | 39402896 | 39402738 | 11 | 13 | 1 | 8.211341875 | 0.000163445 | MCHR1    | ENSG00000128285 |
| 22 | 39406617 | 39406817 | 39406716 | 8  | 8  | 0 | 10.55743955 | 0.000925496 | MCHR1    | ENSG00000128285 |
| 22 | 39437609 | 39437825 | 39437717 | 10 | 11 | 4 | 2.815317214 | 0.0183428   | MCHR1    | ENSG00000128285 |
| 22 | 39447982 | 39448195 | 39448073 | 8  | 9  | 3 | 2.932622098 | 0.0242899   | MCHR1    | ENSG00000128285 |
| 22 | 39454882 | 39455120 | 39455001 | 19 | 20 | 0 | 24.63402563 | 8.35E-08    | MCHR1    | ENSG00000128285 |
| 22 | 39458623 | 39459015 | 39458848 | 13 | 18 | 4 | 4.457585589 | 0.000353565 | SLC25A17 | ENSG00000100372 |
| 22 | 40006140 | 40006388 | 40006260 | 8  | 8  | 1 | 5.278719777 | 0.00542188  | RANGAP1  | ENSG00000100401 |
| 22 | 40014300 | 40014861 | 40014689 | 15 | 32 | 0 | 38.7106117  | 7.53E-12    | RANGAP1  | ENSG00000100401 |
| 22 | 40172749 | 40172928 | 40172838 | 8  | 8  | 6 | 1.508205651 | 0.203852    | TOB2     | ENSG00000183864 |
| 22 | 40315917 | 40316157 | 40316037 | 8  | 8  | 1 | 5.278719777 | 0.00542188  | PMM1     | ENSG00000100417 |
| 22 | 40408367 | 40408656 | 40408508 | 8  | 10 | 3 | 3.225884308 | 0.0139466   | NHP2L1   | ENSG00000100138 |
| 22 | 40414577 | 40414802 | 40414689 | 8  | 9  | 0 | 11.73048839 | 0.000425898 | NHP2L1   | ENSG00000100138 |
| 22 | 40558536 | 40558849 | 40558689 | 9  | 13 | 3 | 4.105670938 | 0.00243034  | SREBF2   | ENSG00000198911 |
| 22 | 40564912 | 40565199 | 40565041 | 11 | 13 | 2 | 5.474227917 | 0.000747844 |          | ENSG00000184068 |
| 22 | 41341262 | 41341548 | 41341405 | 14 | 18 | 4 | 4.457585589 | 0.000353565 |          | ENSG00000199382 |
| 22 | 41437183 | 41437459 | 41437301 | 22 | 22 | 2 | 8.993374435 | 1.66E-06    | A4GALT   | ENSG00000128274 |
| 22 | 41460384 | 41460734 | 41460587 | 25 | 30 | 1 | 18.18225701 | 6.30E-10    | A4GALT   | ENSG00000128274 |

|    |          |          |          |    |     |   |             |             |          |                 |
|----|----------|----------|----------|----|-----|---|-------------|-------------|----------|-----------------|
| 22 | 41570785 | 41571138 | 41570961 | 10 | 12  | 4 | 3.049926982 | 0.0108184   |          | ENSG00000216407 |
| 22 | 41593723 | 41593978 | 41593836 | 9  | 10  | 1 | 6.451768616 | 0.00135978  | ARFGAP3  | ENSG00000100262 |
| 22 | 41719879 | 41720082 | 41719980 | 8  | 8   | 5 | 1.759573259 | 0.13508     | PACSIN2  | ENSG00000100266 |
| 22 | 41821760 | 41822070 | 41821915 | 10 | 12  | 0 | 15.24963491 | 4.15E-05    |          | ENSG00000218619 |
| 22 | 41869385 | 41869564 | 41869474 | 8  | 8   | 0 | 10.55743955 | 0.000925496 | MCAT     | ENSG00000100294 |
| 22 | 42249045 | 42249261 | 42249140 | 8  | 8   | 4 | 2.111487911 | 0.0804809   | MPPED1   | ENSG00000186732 |
| 22 | 43460098 | 43460398 | 43460248 | 19 | 21  | 0 | 25.80707446 | 3.84E-08    | PRR5     | ENSG00000186654 |
| 22 | 43461910 | 43462127 | 43462018 | 8  | 9   | 1 | 5.865244197 | 0.00272497  | PRR5     | ENSG00000186654 |
| 22 | 43534085 | 43534301 | 43534195 | 12 | 12  | 6 | 2.178519273 | 0.0416567   | PRR5     | ENSG00000186654 |
| 22 | 43570253 | 43570573 | 43570411 | 24 | 26  | 0 | 31.67231866 | 7.93E-10    | PRR5     | ENSG00000186654 |
| 22 | 43847503 | 43848186 | 43847897 | 44 | 69  | 0 | 82.11341875 | 2.54E-24    | PHF21B   | ENSG00000056487 |
| 22 | 44005837 | 44006100 | 44005938 | 12 | 13  | 1 | 8.211341875 | 0.000163445 | C22orf9  | ENSG00000100364 |
| 22 | 44243977 | 44244213 | 44244095 | 9  | 9   | 0 | 11.73048839 | 0.000425898 | FBLN1    | ENSG00000077942 |
| 22 | 44244284 | 44244771 | 44244528 | 35 | 55  | 2 | 21.89691167 | 6.60E-17    | FBLN1    | ENSG00000077942 |
| 22 | 44686456 | 44686684 | 44686561 | 9  | 11  | 3 | 3.519146518 | 0.00788869  | WNT7B    | ENSG00000188064 |
| 22 | 44704910 | 44705137 | 44705023 | 8  | 10  | 1 | 6.451768616 | 0.00135978  | WNT7B    | ENSG00000188064 |
| 22 | 44788293 | 44788675 | 44788541 | 11 | 15  | 4 | 3.753756286 | 0.0020497   | WNT7B    | ENSG00000188064 |
| 22 | 44844204 | 44844730 | 44844551 | 11 | 22  | 7 | 3.372515413 | 0.000629223 | C22orf26 | ENSG00000182257 |
| 22 | 45165258 | 45165464 | 45165363 | 10 | 10  | 1 | 6.451768616 | 0.00135978  | TRMU     | ENSG00000100416 |
| 22 | 45332391 | 45332596 | 45332493 | 8  | 8   | 2 | 3.519146518 | 0.017558    | CELSR1   | ENSG00000075275 |
| 22 | 45517457 | 45517733 | 45517595 | 10 | 13  | 9 | 1.642268375 | 0.111397    | CERK     | ENSG00000100422 |
| 22 | 45536885 | 45537397 | 45537167 | 13 | 23  | 5 | 4.692195357 | 5.29E-05    | TBC1D22A | ENSG00000054611 |
| 22 | 45548462 | 45548924 | 45548693 | 13 | 23  | 5 | 4.692195357 | 5.29E-05    | TBC1D22A | ENSG00000054611 |
| 22 | 45573275 | 45573462 | 45573359 | 10 | 10  | 1 | 6.451768616 | 0.00135978  | TBC1D22A | ENSG00000054611 |
| 22 | 45617231 | 45617627 | 45617431 | 47 | 57  | 1 | 34.01841634 | 9.11E-19    |          | ENSG00000221672 |
| 22 | 45622400 | 45622703 | 45622551 | 12 | 13  | 0 | 16.42268375 | 1.91E-05    |          | ENSG00000221672 |
| 22 | 45840490 | 45840684 | 45840591 | 8  | 8   | 0 | 10.55743955 | 0.000925496 |          | ENSG00000221672 |
| 22 | 45904117 | 45904679 | 45904339 | 84 | 111 | 3 | 32.8453675  | 7.04E-34    |          | ENSG00000221672 |
| 22 | 47368499 | 47368763 | 47368649 | 11 | 13  | 4 | 3.28453675  | 0.00629037  |          | ENSG00000170714 |
| 22 | 47701196 | 47701512 | 47701354 | 9  | 11  | 1 | 7.038293036 | 0.000674435 |          | ENSG00000205632 |
| 22 | 48539996 | 48540341 | 48540167 | 18 | 22  | 1 | 13.49006165 | 2.37E-07    |          | ENSG00000218799 |
| 22 | 48710634 | 48710877 | 48710755 | 8  | 8   | 0 | 10.55743955 | 0.000925496 | CRELD2   | ENSG00000184164 |
| 22 | 48730863 | 48731299 | 48731062 | 10 | 19  | 2 | 7.820325595 | 1.32E-05    | PIM3     | ENSG00000198355 |
| 22 | 48786958 | 48787137 | 48787048 | 8  | 8   | 2 | 3.519146518 | 0.017558    | IL17REL  | ENSG00000188263 |

|    |          |          |          |     |     |    |             |             |         |                 |
|----|----------|----------|----------|-----|-----|----|-------------|-------------|---------|-----------------|
| 22 | 48808223 | 48808461 | 48808323 | 10  | 12  | 2  | 5.083211637 | 0.00143337  | IL17REL | ENSG00000188263 |
| 22 | 49086350 | 49086761 | 49086588 | 56  | 65  | 0  | 77.42122339 | 5.67E-23    | PLXNB2  | ENSG00000196576 |
| 22 | 49127788 | 49127983 | 49127885 | 8   | 8   | 5  | 1.759573259 | 0.13508     | SAPS2   | ENSG00000100239 |
| 22 | 49262117 | 49262411 | 49262283 | 27  | 30  | 1  | 18.18225701 | 6.30E-10    | SBF1    | ENSG00000100241 |
| 22 | 49293408 | 49293737 | 49293572 | 9   | 11  | 0  | 14.07658607 | 9.02E-05    | NCAPH2  | ENSG00000025770 |
| 22 | 49560514 | 49560782 | 49560648 | 10  | 11  | 0  | 14.07658607 | 9.02E-05    | RABL2B  | ENSG00000079974 |
| 3  | 127626   | 128596   | 127999   | 103 | 165 | 15 | 12.17038171 | 3.58E-39    | CHL1    | ENSG00000134121 |
| 3  | 592005   | 592202   | 592103   | 9   | 10  | 8  | 1.433726359 | 0.209175    | CHL1    | ENSG00000134121 |
| 3  | 594175   | 594487   | 594320   | 8   | 12  | 9  | 1.524963491 | 0.154777    | CHL1    | ENSG00000134121 |
| 3  | 634791   | 635159   | 634990   | 8   | 13  | 6  | 2.346097679 | 0.0266147   | CHL1    | ENSG00000134121 |
| 3  | 1085907  | 1086277  | 1086086  | 11  | 19  | 1  | 11.73048839 | 2.14E-06    |         | ENSG00000209700 |
| 3  | 3217384  | 3217694  | 3217539  | 12  | 14  | 6  | 2.513676084 | 0.016726    | CRBN    | ENSG00000113851 |
| 3  | 3576416  | 3576954  | 3576676  | 83  | 117 | 3  | 34.60494076 | 7.79E-36    |         | ENSG00000223036 |
| 3  | 3630325  | 3630504  | 3630451  | 8   | 8   | 1  | 5.278719777 | 0.00542188  |         | ENSG00000223036 |
| 3  | 3653312  | 3654145  | 3653688  | 53  | 90  | 10 | 9.704313125 | 9.43E-21    |         | ENSG00000223036 |
| 3  | 3769427  | 3769704  | 3769550  | 8   | 11  | 0  | 14.07658607 | 9.02E-05    | LRRN1   | ENSG00000175928 |
| 3  | 4392957  | 4393204  | 4393080  | 9   | 10  | 2  | 4.301179077 | 0.00512919  | SETMAR  | ENSG00000170364 |
| 3  | 4426109  | 4426343  | 4426174  | 8   | 9   | 1  | 5.865244197 | 0.00272497  | SUMF1   | ENSG00000144455 |
| 3  | 4455036  | 4455293  | 4455164  | 10  | 11  | 3  | 3.519146518 | 0.00788869  | SUMF1   | ENSG00000144455 |
| 3  | 4483679  | 4484079  | 4483903  | 17  | 24  | 4  | 5.865244197 | 8.64E-06    | SUMF1   | ENSG00000144455 |
| 3  | 4508927  | 4509294  | 4509115  | 9   | 16  | 7  | 2.492728784 | 0.0124193   | ITPR1   | ENSG00000150995 |
| 3  | 4509649  | 4510307  | 4510128  | 11  | 28  | 12 | 2.616801257 | 0.00120123  | ITPR1   | ENSG00000150995 |
| 3  | 4541087  | 4541458  | 4541304  | 9   | 15  | 6  | 2.68125449  | 0.0103552   | ITPR1   | ENSG00000150995 |
| 3  | 4550594  | 4550801  | 4550685  | 9   | 10  | 3  | 3.225884308 | 0.0139466   | ITPR1   | ENSG00000150995 |
| 3  | 4598356  | 4598580  | 4598468  | 9   | 10  | 3  | 3.225884308 | 0.0139466   | ITPR1   | ENSG00000150995 |
| 3  | 4598808  | 4599170  | 4598987  | 61  | 68  | 5  | 13.49006165 | 4.34E-18    | ITPR1   | ENSG00000150995 |
| 3  | 4650046  | 4650349  | 4650179  | 12  | 15  | 7  | 2.346097679 | 0.0195693   | ITPR1   | ENSG00000150995 |
| 3  | 4672733  | 4673146  | 4672903  | 13  | 17  | 11 | 1.759573259 | 0.0609179   | ITPR1   | ENSG00000150995 |
| 3  | 4703414  | 4703699  | 4703570  | 9   | 10  | 5  | 2.150589539 | 0.0575848   |         | ENSG00000209718 |
| 3  | 4703923  | 4704257  | 4704080  | 33  | 37  | 11 | 3.714654658 | 6.69E-06    |         | ENSG00000209718 |
| 3  | 4704955  | 4705479  | 4705233  | 38  | 57  | 14 | 4.535788845 | 1.87E-09    |         | ENSG00000209718 |
| 3  | 4728147  | 4728351  | 4728305  | 11  | 11  | 4  | 2.815317214 | 0.0183428   |         | ENSG00000209718 |
| 3  | 4737364  | 4737738  | 4737541  | 12  | 17  | 4  | 4.222975822 | 0.000640773 |         | ENSG00000209718 |
| 3  | 4758314  | 4758681  | 4758488  | 13  | 19  | 4  | 4.692195357 | 0.000193572 |         | ENSG00000209718 |



|   |         |         |         |    |    |    |             |             |        |                 |
|---|---------|---------|---------|----|----|----|-------------|-------------|--------|-----------------|
| 3 | 4761195 | 4761488 | 4761341 | 8  | 12 | 4  | 3.049926982 | 0.0108184   |        | ENSG00000209718 |
| 3 | 4776832 | 4777057 | 4776944 | 8  | 9  | 2  | 3.910162798 | 0.00955088  |        | ENSG00000209718 |
| 3 | 4794851 | 4795076 | 4794987 | 8  | 9  | 1  | 5.865244197 | 0.00272497  |        | ENSG00000209718 |
| 3 | 4884930 | 4885148 | 4885039 | 8  | 9  | 5  | 1.955081399 | 0.0892323   |        | ENSG00000209718 |
| 3 | 4885322 | 4885632 | 4885492 | 10 | 13 | 0  | 16.42268375 | 1.91E-05    |        | ENSG00000209718 |
| 3 | 4922869 | 4923115 | 4922993 | 10 | 10 | 8  | 1.433726359 | 0.209175    |        | ENSG00000209718 |
| 3 | 4992870 | 4993169 | 4992990 | 15 | 19 | 13 | 1.675784056 | 0.0660887   | BHLHB2 | ENSG00000134107 |
| 3 | 4994080 | 4994283 | 4994142 | 8  | 9  | 6  | 1.675784056 | 0.141978    | BHLHB2 | ENSG00000134107 |
| 3 | 4995240 | 4995554 | 4995402 | 11 | 16 | 0  | 19.94183027 | 1.86E-06    | BHLHB2 | ENSG00000134107 |
| 3 | 4995556 | 4995738 | 4995581 | 8  | 9  | 2  | 3.910162798 | 0.00955088  | BHLHB2 | ENSG00000134107 |
| 3 | 4996968 | 4997180 | 4997074 | 8  | 11 | 4  | 2.815317214 | 0.0183428   | BHLHB2 | ENSG00000134107 |
| 3 | 4997978 | 4998204 | 4998087 | 8  | 11 | 3  | 3.519146518 | 0.00788869  | BHLHB2 | ENSG00000134107 |
| 3 | 4998509 | 4998822 | 4998665 | 10 | 12 | 8  | 1.694403879 | 0.107291    | BHLHB2 | ENSG00000134107 |
| 3 | 5003442 | 5004113 | 5003727 | 21 | 38 | 9  | 4.574890473 | 5.74E-07    | BHLHB2 | ENSG00000134107 |
| 3 | 5011413 | 5012088 | 5011831 | 36 | 55 | 5  | 10.94845583 | 3.92E-14    | BHLHB2 | ENSG00000134107 |
| 3 | 5016450 | 5016982 | 5016716 | 51 | 75 | 6  | 12.73595883 | 2.24E-19    | BHLHB2 | ENSG00000134107 |
| 3 | 5042789 | 5042996 | 5042892 | 11 | 11 | 6  | 2.010940867 | 0.0640214   | BHLHB2 | ENSG00000134107 |
| 3 | 5049733 | 5049976 | 5049858 | 11 | 13 | 9  | 1.642268375 | 0.111397    |        | ENSG00000207283 |
| 3 | 5074547 | 5074789 | 5074668 | 9  | 10 | 2  | 4.301179077 | 0.00512919  |        | ENSG00000207283 |
| 3 | 5076820 | 5077019 | 5076919 | 9  | 9  | 2  | 3.910162798 | 0.00955088  |        | ENSG00000207283 |
| 3 | 5123124 | 5123476 | 5123299 | 15 | 20 | 0  | 24.63402563 | 8.35E-08    | ARL8B  | ENSG00000134108 |
| 3 | 5153469 | 5153673 | 5153571 | 11 | 12 | 2  | 5.083211637 | 0.00143337  | ARL8B  | ENSG00000134108 |
| 3 | 5255283 | 5255557 | 5255433 | 8  | 11 | 1  | 7.038293036 | 0.000674435 |        | ENSG00000209727 |
| 3 | 5267645 | 5267938 | 5267792 | 8  | 12 | 0  | 15.24963491 | 4.15E-05    |        | ENSG00000209727 |
| 3 | 5271341 | 5271731 | 5271552 | 18 | 28 | 7  | 4.252302043 | 2.31E-05    |        | ENSG00000209727 |
| 3 | 5322024 | 5322212 | 5322088 | 8  | 9  | 4  | 2.346097679 | 0.050148    |        | ENSG00000209727 |
| 3 | 5828438 | 5828787 | 5828612 | 8  | 13 | 2  | 5.474227917 | 0.000747844 |        |                 |
| 3 | 8311112 | 8311314 | 8311213 | 12 | 13 | 6  | 2.346097679 | 0.0266147   |        | ENSG00000209729 |
| 3 | 8344625 | 8344944 | 8344786 | 11 | 14 | 1  | 8.797866295 | 8.00E-05    |        | ENSG00000209729 |
| 3 | 8368485 | 8369009 | 8368658 | 12 | 23 | 1  | 14.07658607 | 1.14E-07    |        | ENSG00000209729 |
| 3 | 8458806 | 8459013 | 8458909 | 10 | 10 | 3  | 3.225884308 | 0.0139466   | LMCD1  | ENSG00000071282 |
| 3 | 8461089 | 8461431 | 8461260 | 15 | 20 | 7  | 3.079253203 | 0.00177418  | LMCD1  | ENSG00000071282 |
| 3 | 8473059 | 8473372 | 8473215 | 13 | 17 | 4  | 4.222975822 | 0.000640773 | LMCD1  | ENSG00000071282 |
| 3 | 8506264 | 8506443 | 8506346 | 9  | 9  | 5  | 1.955081399 | 0.0892323   | LMCD1  | ENSG00000071282 |

|   |         |         |         |    |    |   |             |             |         |                 |
|---|---------|---------|---------|----|----|---|-------------|-------------|---------|-----------------|
| 3 | 8517337 | 8517626 | 8517481 | 12 | 14 | 4 | 3.519146518 | 0.00361132  | LMCD1   | ENSG00000071282 |
| 3 | 8518472 | 8518705 | 8518588 | 10 | 13 | 5 | 2.737113958 | 0.0137917   | LMCD1   | ENSG00000071282 |
| 3 | 8519217 | 8519457 | 8519318 | 10 | 11 | 2 | 4.692195357 | 0.00272444  | LMCD1   | ENSG00000071282 |
| 3 | 8522337 | 8522663 | 8522500 | 11 | 16 | 6 | 2.848832895 | 0.00632407  | LMCD1   | ENSG00000071282 |
| 3 | 8542572 | 8542846 | 8542730 | 12 | 15 | 5 | 3.128130238 | 0.00492422  | LMCD1   | ENSG00000071282 |
| 3 | 8620065 | 8620264 | 8620187 | 8  | 9  | 8 | 1.303387599 | 0.281715    | C3orf32 | ENSG00000125046 |
| 3 | 8624297 | 8624510 | 8624451 | 9  | 11 | 3 | 3.519146518 | 0.00788869  | C3orf32 | ENSG00000125046 |
| 3 | 8636291 | 8636489 | 8636430 | 8  | 8  | 3 | 2.639359888 | 0.0415794   | C3orf32 | ENSG00000125046 |
| 3 | 8646163 | 8646479 | 8646321 | 16 | 20 | 2 | 8.211341875 | 6.65E-06    | C3orf32 | ENSG00000125046 |
| 3 | 8708017 | 8708324 | 8708170 | 10 | 10 | 0 | 12.90353723 | 0.000195991 |         | ENSG00000215160 |
| 3 | 8720064 | 8720246 | 8720198 | 9  | 9  | 1 | 5.865244197 | 0.00272497  |         | ENSG00000215160 |
| 3 | 8732420 | 8732759 | 8732589 | 19 | 23 | 0 | 28.15317214 | 8.13E-09    | CAV3    | ENSG00000182533 |
| 3 | 8786095 | 8786448 | 8786271 | 9  | 14 | 7 | 2.199466574 | 0.0303778   | OXTR    | ENSG00000180914 |
| 3 | 9096403 | 9096810 | 9096582 | 9  | 18 | 5 | 3.714654658 | 0.000961539 | RAD18   | ENSG00000070950 |
| 3 | 9115238 | 9115753 | 9115574 | 18 | 30 | 7 | 4.545564252 | 7.31E-06    | RAD18   | ENSG00000070950 |
| 3 | 9129646 | 9129887 | 9129814 | 8  | 10 | 1 | 6.451768616 | 0.00135978  | SRGAP3  | ENSG00000196220 |
| 3 | 9138623 | 9138820 | 9138699 | 8  | 9  | 0 | 11.73048839 | 0.000425898 | SRGAP3  | ENSG00000196220 |
| 3 | 9146984 | 9147180 | 9147093 | 8  | 9  | 5 | 1.955081399 | 0.0892323   | SRGAP3  | ENSG00000196220 |
| 3 | 9147592 | 9147810 | 9147678 | 8  | 9  | 4 | 2.346097679 | 0.050148    | SRGAP3  | ENSG00000196220 |
| 3 | 9166086 | 9166605 | 9166347 | 34 | 57 | 4 | 13.60736654 | 1.42E-15    | SRGAP3  | ENSG00000196220 |
| 3 | 9189609 | 9189808 | 9189703 | 8  | 9  | 2 | 3.910162798 | 0.00955088  | SRGAP3  | ENSG00000196220 |
| 3 | 9220949 | 9221290 | 9221106 | 9  | 14 | 1 | 8.797866295 | 8.00E-05    | SRGAP3  | ENSG00000196220 |
| 3 | 9260461 | 9260658 | 9260529 | 9  | 9  | 3 | 2.932622098 | 0.0242899   | SRGAP3  | ENSG00000196220 |
| 3 | 9266059 | 9266499 | 9266320 | 8  | 16 | 7 | 2.492728784 | 0.0124193   | SRGAP3  | ENSG00000196220 |
| 3 | 9331672 | 9332120 | 9331848 | 9  | 18 | 3 | 5.571981987 | 0.000108726 |         | ENSG00000214041 |
| 3 | 9379567 | 9379821 | 9379694 | 10 | 15 | 2 | 6.256260476 | 0.000199274 | THUMPD3 | ENSG00000134077 |
| 3 | 9379952 | 9380192 | 9380064 | 8  | 12 | 6 | 2.178519273 | 0.0416567   | THUMPD3 | ENSG00000134077 |
| 3 | 9413082 | 9413278 | 9413180 | 9  | 11 | 4 | 2.815317214 | 0.0183428   |         | ENSG00000206573 |
| 3 | 9413353 | 9414193 | 9414014 | 13 | 38 | 8 | 5.083211637 | 1.94E-07    |         | ENSG00000206573 |
| 3 | 9416548 | 9416755 | 9416668 | 8  | 8  | 3 | 2.639359888 | 0.0415794   | SETD5   | ENSG00000168137 |
| 3 | 9439361 | 9439693 | 9439527 | 10 | 15 | 7 | 2.346097679 | 0.0195693   | SETD5   | ENSG00000168137 |
| 3 | 9665938 | 9666157 | 9666047 | 11 | 11 | 4 | 2.815317214 | 0.0183428   | MTMR14  | ENSG00000163719 |
| 3 | 9732625 | 9732819 | 9732722 | 8  | 8  | 2 | 3.519146518 | 0.017558    |         | ENSG00000214033 |
| 3 | 9748033 | 9748424 | 9748261 | 15 | 22 | 2 | 8.993374435 | 1.66E-06    | BRPF1   | ENSG00000156983 |

|   |          |          |          |    |    |    |             |             |         |                 |
|---|----------|----------|----------|----|----|----|-------------|-------------|---------|-----------------|
| 3 | 9808927  | 9809188  | 9809091  | 8  | 11 | 7  | 1.759573259 | 0.102361    | ARPC4   | ENSG00000214021 |
| 3 | 9809504  | 9809887  | 9809657  | 11 | 17 | 6  | 3.016411301 | 0.00381427  | ARPC4   | ENSG00000214021 |
| 3 | 9817436  | 9817615  | 9817525  | 8  | 8  | 2  | 3.519146518 | 0.017558    | ARPC4   | ENSG00000214021 |
| 3 | 9933661  | 9933848  | 9933736  | 8  | 9  | 6  | 1.675784056 | 0.141978    | IL17RC  | ENSG00000163702 |
| 3 | 9949522  | 9949818  | 9949685  | 10 | 15 | 2  | 6.256260476 | 0.000199274 | CRELD1  | ENSG00000163703 |
| 3 | 9950111  | 9950759  | 9950296  | 14 | 32 | 7  | 4.838826462 | 2.26E-06    | CRELD1  | ENSG00000163703 |
| 3 | 9968645  | 9968833  | 9968739  | 8  | 9  | 3  | 2.932622098 | 0.0242899   | PRRT3   | ENSG00000163704 |
| 3 | 9971924  | 9972283  | 9972054  | 8  | 14 | 6  | 2.513676084 | 0.016726    | PRRT3   | ENSG00000163704 |
| 3 | 10027650 | 10027871 | 10027762 | 8  | 11 | 4  | 2.815317214 | 0.0183428   |         | ENSG00000206567 |
| 3 | 10042888 | 10043401 | 10043009 | 8  | 16 | 8  | 2.215758919 | 0.0222902   |         | ENSG00000186162 |
| 3 | 10043527 | 10043735 | 10043631 | 9  | 9  | 2  | 3.910162798 | 0.00955088  | FANCD2  | ENSG00000144554 |
| 3 | 10158443 | 10158703 | 10158572 | 8  | 9  | 3  | 2.932622098 | 0.0242899   | VHL     | ENSG00000134086 |
| 3 | 10211275 | 10211500 | 10211387 | 8  | 8  | 2  | 3.519146518 | 0.017558    |         | ENSG00000222348 |
| 3 | 10303644 | 10303873 | 10303758 | 10 | 11 | 8  | 1.564065119 | 0.151515    | GHRL    | ENSG00000157017 |
| 3 | 10337608 | 10337997 | 10337826 | 9  | 15 | 7  | 2.346097679 | 0.0195693   | SEC13   | ENSG00000157020 |
| 3 | 10387764 | 10388026 | 10387895 | 12 | 13 | 3  | 4.105670938 | 0.00243034  |         | ENSG00000216135 |
| 3 | 10449026 | 10449348 | 10449187 | 12 | 17 | 7  | 2.639359888 | 0.00777415  | ATP2B2  | ENSG00000157087 |
| 3 | 10476854 | 10477182 | 10477023 | 15 | 19 | 10 | 2.132816071 | 0.01835     | ATP2B2  | ENSG00000157087 |
| 3 | 10511860 | 10512090 | 10511989 | 9  | 9  | 4  | 2.346097679 | 0.050148    | ATP2B2  | ENSG00000157087 |
| 3 | 10564912 | 10565139 | 10565025 | 8  | 10 | 2  | 4.301179077 | 0.00512919  | ATP2B2  | ENSG00000157087 |
| 3 | 10770729 | 10770939 | 10770815 | 11 | 13 | 2  | 5.474227917 | 0.000747844 | ATP2B2  | ENSG00000157087 |
| 3 | 10800130 | 10800329 | 10800229 | 12 | 12 | 7  | 1.906204364 | 0.0695918   | SLC6A11 | ENSG00000132164 |
| 3 | 10919747 | 10920133 | 10919950 | 33 | 42 | 3  | 12.61027502 | 8.12E-12    | SLC6A11 | ENSG00000132164 |
| 3 | 10962366 | 10962554 | 10962443 | 9  | 9  | 3  | 2.932622098 | 0.0242899   | SLC6A1  | ENSG00000157103 |
| 3 | 10979208 | 10979458 | 10979329 | 9  | 10 | 5  | 2.150589539 | 0.0575848   | SLC6A1  | ENSG00000157103 |
| 3 | 11076266 | 11076534 | 11076400 | 13 | 16 | 9  | 1.994183027 | 0.0370915   | SLC6A1  | ENSG00000157103 |
| 3 | 11077415 | 11077716 | 11077565 | 10 | 12 | 1  | 7.624817456 | 0.000332769 | SLC6A1  | ENSG00000157103 |
| 3 | 11253440 | 11253637 | 11253538 | 9  | 9  | 1  | 5.865244197 | 0.00272497  |         | ENSG00000213964 |
| 3 | 11271635 | 11271814 | 11271730 | 8  | 8  | 0  | 10.55743955 | 0.000925496 | HRH1    | ENSG00000196639 |
| 3 | 11288895 | 11289151 | 11289023 | 14 | 16 | 3  | 4.985457567 | 0.000385643 | ATG7    | ENSG00000197548 |
| 3 | 11299939 | 11300321 | 11300118 | 11 | 18 | 6  | 3.183989707 | 0.00227432  | ATG7    | ENSG00000197548 |
| 3 | 11470970 | 11471276 | 11471123 | 16 | 19 | 5  | 3.910162798 | 0.000546977 | ATG7    | ENSG00000197548 |
| 3 | 11495158 | 11495338 | 11495248 | 8  | 8  | 2  | 3.519146518 | 0.017558    | ATG7    | ENSG00000197548 |
| 3 | 11525681 | 11525937 | 11525849 | 8  | 10 | 3  | 3.225884308 | 0.0139466   | VGLL4   | ENSG00000144560 |

|   |          |          |          |    |    |    |             |             |         |                 |
|---|----------|----------|----------|----|----|----|-------------|-------------|---------|-----------------|
| 3 | 11555705 | 11555897 | 11555758 | 10 | 11 | 6  | 2.010940867 | 0.0640214   | VGLL4   | ENSG00000144560 |
| 3 | 11556211 | 11556469 | 11556304 | 11 | 13 | 4  | 3.28453675  | 0.00629037  | VGLL4   | ENSG00000144560 |
| 3 | 11570198 | 11570514 | 11570356 | 10 | 13 | 4  | 3.28453675  | 0.00629037  | VGLL4   | ENSG00000144560 |
| 3 | 11580880 | 11581133 | 11581006 | 8  | 11 | 2  | 4.692195357 | 0.00272444  | VGLL4   | ENSG00000144560 |
| 3 | 11678965 | 11679154 | 11679059 | 8  | 8  | 0  | 10.55743955 | 0.000925496 | VGLL4   | ENSG00000144560 |
| 3 | 11786720 | 11786967 | 11786871 | 8  | 12 | 3  | 3.812408728 | 0.004404    | VGLL4   | ENSG00000144560 |
| 3 | 11787008 | 11788066 | 11787250 | 23 | 75 | 11 | 7.429309316 | 8.71E-16    | VGLL4   | ENSG00000144560 |
| 3 | 11790897 | 11791139 | 11791025 | 8  | 9  | 5  | 1.955081399 | 0.0892323   | VGLL4   | ENSG00000144560 |
| 3 | 11792025 | 11792278 | 11792158 | 8  | 10 | 2  | 4.301179077 | 0.00512919  | VGLL4   | ENSG00000144560 |
| 3 | 11792869 | 11793147 | 11792999 | 21 | 21 | 4  | 5.161414893 | 5.68E-05    | VGLL4   | ENSG00000144560 |
| 3 | 11863277 | 11863528 | 11863402 | 12 | 14 | 3  | 4.398933147 | 0.00132748  | C3orf31 | ENSG00000144559 |
| 3 | 11864055 | 11864443 | 11864289 | 11 | 20 | 1  | 12.31701281 | 1.03E-06    | C3orf31 | ENSG00000144559 |
| 3 | 12151659 | 12151849 | 12151761 | 8  | 8  | 2  | 3.519146518 | 0.017558    | TIMP4   | ENSG00000157150 |
| 3 | 12205611 | 12205815 | 12205713 | 8  | 9  | 0  | 11.73048839 | 0.000425898 | TIMP4   | ENSG00000157150 |
| 3 | 12252322 | 12252534 | 12252428 | 8  | 10 | 5  | 2.150589539 | 0.0575848   | PPARG   | ENSG00000132170 |
| 3 | 12270189 | 12270481 | 12270335 | 8  | 10 | 5  | 2.150589539 | 0.0575848   | PPARG   | ENSG00000132170 |
| 3 | 12388146 | 12388529 | 12388325 | 10 | 16 | 3  | 4.985457567 | 0.000385643 | PPARG   | ENSG00000132170 |
| 3 | 12441483 | 12441703 | 12441578 | 10 | 10 | 4  | 2.580707446 | 0.0306059   | TSEN2   | ENSG00000154743 |
| 3 | 12500519 | 12501298 | 12501010 | 15 | 40 | 10 | 4.372272947 | 5.06E-07    | TSEN2   | ENSG00000154743 |
| 3 | 12573249 | 12573601 | 12573425 | 17 | 23 | 8  | 3.128130238 | 0.000832453 | MKRN2   | ENSG00000075975 |
| 3 | 12596551 | 12596730 | 12596634 | 8  | 8  | 2  | 3.519146518 | 0.017558    | MKRN2   | ENSG00000075975 |
| 3 | 12680413 | 12681103 | 12680771 | 12 | 35 | 10 | 3.839068929 | 8.08E-06    | RAF1    | ENSG00000132155 |
| 3 | 12723051 | 12723356 | 12723222 | 9  | 13 | 6  | 2.346097679 | 0.0266147   | RAF1    | ENSG00000132155 |
| 3 | 12770219 | 12770398 | 12770308 | 8  | 8  | 2  | 3.519146518 | 0.017558    | TMEM40  | ENSG00000088726 |
| 3 | 12775738 | 12776188 | 12775938 | 20 | 32 | 1  | 19.35530585 | 1.42E-10    | TMEM40  | ENSG00000088726 |
| 3 | 12857839 | 12858494 | 12858347 | 17 | 33 | 8  | 4.431517837 | 3.63E-06    | RPL32   | ENSG00000144713 |
| 3 | 12908340 | 12908768 | 12908615 | 12 | 19 | 10 | 2.132816071 | 0.01835     | RPL32   | ENSG00000144713 |
| 3 | 13003602 | 13003925 | 13003763 | 12 | 15 | 9  | 1.876878143 | 0.0544542   | IQSEC1  | ENSG00000144711 |
| 3 | 13011027 | 13011206 | 13011126 | 8  | 8  | 2  | 3.519146518 | 0.017558    | IQSEC1  | ENSG00000144711 |
| 3 | 13011336 | 13011691 | 13011513 | 11 | 16 | 5  | 3.323638378 | 0.00288759  | IQSEC1  | ENSG00000144711 |
| 3 | 13246098 | 13246427 | 13246262 | 21 | 24 | 8  | 3.258468998 | 0.000499412 | NUP210  | ENSG00000132182 |
| 3 | 13318056 | 13318847 | 13318291 | 44 | 78 | 3  | 23.16771458 | 3.38E-23    | NUP210  | ENSG00000132182 |
| 3 | 13325068 | 13325249 | 13325158 | 9  | 9  | 4  | 2.346097679 | 0.050148    | NUP210  | ENSG00000132182 |
| 3 | 13363104 | 13363300 | 13363200 | 8  | 8  | 3  | 2.639359888 | 0.0415794   | NUP210  | ENSG00000132182 |

|   |          |          |          |     |     |    |             |             |        |                 |
|---|----------|----------|----------|-----|-----|----|-------------|-------------|--------|-----------------|
| 3 | 13391223 | 13391471 | 13391327 | 8   | 9   | 6  | 1.675784056 | 0.141978    | NUP210 | ENSG00000132182 |
| 3 | 13441396 | 13441708 | 13441552 | 11  | 12  | 2  | 5.083211637 | 0.00143337  | NUP210 | ENSG00000132182 |
| 3 | 13468070 | 13468253 | 13468161 | 8   | 8   | 10 | 0.959767232 | 0.541959    | HDAC11 | ENSG00000163517 |
| 3 | 13468428 | 13468687 | 13468557 | 9   | 11  | 6  | 2.010940867 | 0.0640214   | HDAC11 | ENSG00000163517 |
| 3 | 13469312 | 13469730 | 13469574 | 14  | 26  | 7  | 3.959039833 | 7.16E-05    | HDAC11 | ENSG00000163517 |
| 3 | 13471595 | 13472204 | 13471973 | 56  | 75  | 1  | 44.57585589 | 1.01E-24    | HDAC11 | ENSG00000163517 |
| 3 | 13492607 | 13492968 | 13492781 | 18  | 24  | 12 | 2.255863153 | 0.00673318  | HDAC11 | ENSG00000163517 |
| 3 | 13501705 | 13501995 | 13501850 | 11  | 14  | 2  | 5.865244197 | 0.000387308 | HDAC11 | ENSG00000163517 |
| 3 | 13512919 | 13513179 | 13513049 | 9   | 11  | 7  | 1.759573259 | 0.102361    | HDAC11 | ENSG00000163517 |
| 3 | 13542376 | 13543001 | 13542678 | 32  | 58  | 0  | 69.20988152 | 1.30E-20    | FBLN2  | ENSG00000163520 |
| 3 | 13674358 | 13674559 | 13674458 | 8   | 9   | 0  | 11.73048839 | 0.000425898 |        | ENSG00000221645 |
| 3 | 13895179 | 13895365 | 13895334 | 8   | 8   | 0  | 10.55743955 | 0.000925496 | WNT7A  | ENSG00000154764 |
| 3 | 13895437 | 13895747 | 13895573 | 10  | 14  | 0  | 17.59573259 | 8.79E-06    | WNT7A  | ENSG00000154764 |
| 3 | 13907326 | 13907628 | 13907477 | 20  | 23  | 2  | 9.384390715 | 8.25E-07    | WNT7A  | ENSG00000154764 |
| 3 | 13911692 | 13911898 | 13911834 | 10  | 11  | 0  | 14.07658607 | 9.02E-05    | WNT7A  | ENSG00000154764 |
| 3 | 13911902 | 13912321 | 13912142 | 13  | 21  | 3  | 6.451768616 | 1.56E-05    | WNT7A  | ENSG00000154764 |
| 3 | 13913122 | 13913349 | 13913235 | 14  | 15  | 6  | 2.68125449  | 0.0103552   | WNT7A  | ENSG00000154764 |
| 3 | 14017174 | 14017537 | 14017337 | 9   | 15  | 1  | 9.384390715 | 3.90E-05    | TPRXL  | ENSG00000180438 |
| 3 | 14130953 | 14131190 | 14131071 | 10  | 11  | 4  | 2.815317214 | 0.0183428   | CHCHD4 | ENSG00000163528 |
| 3 | 14141314 | 14141509 | 14141411 | 10  | 10  | 1  | 6.451768616 | 0.00135978  | CHCHD4 | ENSG00000163528 |
| 3 | 14141514 | 14141878 | 14141700 | 13  | 18  | 10 | 2.026175268 | 0.0273052   | TMEM43 | ENSG00000170876 |
| 3 | 14161178 | 14161519 | 14161348 | 8   | 12  | 4  | 3.049926982 | 0.0108184   | TMEM43 | ENSG00000170876 |
| 3 | 14162987 | 14163275 | 14163131 | 11  | 15  | 2  | 6.256260476 | 0.000199274 | TMEM43 | ENSG00000170876 |
| 3 | 14172798 | 14173038 | 14172920 | 11  | 13  | 10 | 1.49297125  | 0.157311    | XPC    | ENSG00000154767 |
| 3 | 14194315 | 14195586 | 14195074 | 103 | 194 | 13 | 16.33889455 | 9.78E-50    | XPC    | ENSG00000154767 |
| 3 | 14219941 | 14220228 | 14220096 | 13  | 14  | 4  | 3.519146518 | 0.00361132  | LSM3   | ENSG00000170860 |
| 3 | 14260319 | 14260542 | 14260430 | 10  | 12  | 0  | 15.24963491 | 4.15E-05    | LSM3   | ENSG00000170860 |
| 3 | 14261650 | 14261835 | 14261665 | 8   | 8   | 5  | 1.759573259 | 0.13508     | LSM3   | ENSG00000170860 |
| 3 | 14265488 | 14265865 | 14265667 | 10  | 17  | 10 | 1.919534464 | 0.0400548   | LSM3   | ENSG00000170860 |
| 3 | 14270350 | 14270536 | 14270419 | 9   | 9   | 5  | 1.955081399 | 0.0892323   | LSM3   | ENSG00000170860 |
| 3 | 14273070 | 14273466 | 14273233 | 10  | 16  | 4  | 3.988366054 | 0.00115141  | LSM3   | ENSG00000170860 |
| 3 | 14277569 | 14278009 | 14277796 | 11  | 20  | 5  | 4.105670938 | 0.000308509 | LSM3   | ENSG00000170860 |
| 3 | 14281801 | 14282622 | 14282337 | 20  | 49  | 9  | 5.865244197 | 8.04E-10    | LSM3   | ENSG00000170860 |
| 3 | 14284667 | 14284901 | 14284814 | 8   | 10  | 8  | 1.433726359 | 0.209175    | LSM3   | ENSG00000170860 |

|   |          |          |          |    |    |    |             |             |         |                 |
|---|----------|----------|----------|----|----|----|-------------|-------------|---------|-----------------|
| 3 | 14295219 | 14295525 | 14295396 | 8  | 12 | 1  | 7.624817456 | 0.000332769 | LSM3    | ENSG00000170860 |
| 3 | 14342283 | 14342662 | 14342485 | 30 | 36 | 5  | 7.233801176 | 1.48E-08    |         | ENSG00000199609 |
| 3 | 14388410 | 14388760 | 14388585 | 14 | 18 | 8  | 2.476436439 | 0.00924552  |         | ENSG00000199609 |
| 3 | 14418648 | 14419157 | 14418928 | 13 | 23 | 5  | 4.692195357 | 5.29E-05    | SLC6A6  | ENSG00000131389 |
| 3 | 14422513 | 14422714 | 14422613 | 11 | 12 | 2  | 5.083211637 | 0.00143337  | SLC6A6  | ENSG00000131389 |
| 3 | 14427685 | 14427923 | 14427749 | 9  | 12 | 4  | 3.049926982 | 0.0108184   | SLC6A6  | ENSG00000131389 |
| 3 | 14448732 | 14449043 | 14448871 | 12 | 16 | 8  | 2.215758919 | 0.0222902   | SLC6A6  | ENSG00000131389 |
| 3 | 14455904 | 14456242 | 14456073 | 8  | 14 | 6  | 2.513676084 | 0.016726    | SLC6A6  | ENSG00000131389 |
| 3 | 14477832 | 14478051 | 14477912 | 8  | 9  | 1  | 5.865244197 | 0.00272497  | SLC6A6  | ENSG00000131389 |
| 3 | 14478298 | 14478540 | 14478363 | 11 | 13 | 1  | 8.211341875 | 0.000163445 | SLC6A6  | ENSG00000131389 |
| 3 | 14505138 | 14505541 | 14505335 | 17 | 25 | 1  | 15.24963491 | 2.59E-08    |         | ENSG00000207163 |
| 3 | 14525318 | 14525639 | 14525478 | 9  | 13 | 5  | 2.737113958 | 0.0137917   |         | ENSG00000207163 |
| 3 | 14564908 | 14565138 | 14565023 | 9  | 10 | 4  | 2.580707446 | 0.0306059   | GRIP2   | ENSG00000144596 |
| 3 | 14636608 | 14636787 | 14636697 | 8  | 8  | 3  | 2.639359888 | 0.0415794   | C3orf19 | ENSG00000154781 |
| 3 | 14667899 | 14668359 | 14668146 | 16 | 27 | 12 | 2.526566731 | 0.00187486  | C3orf19 | ENSG00000154781 |
| 3 | 14787937 | 14788129 | 14788029 | 8  | 9  | 2  | 3.910162798 | 0.00955088  | FGD5    | ENSG00000154783 |
| 3 | 14797450 | 14797759 | 14797604 | 13 | 14 | 13 | 1.256838042 | 0.269506    | FGD5    | ENSG00000154783 |
| 3 | 14839571 | 14839797 | 14839684 | 8  | 11 | 8  | 1.564065119 | 0.151515    | FGD5    | ENSG00000154783 |
| 3 | 14874062 | 14874395 | 14874228 | 13 | 17 | 2  | 7.038293036 | 5.19E-05    | FGD5    | ENSG00000154783 |
| 3 | 14900696 | 14900882 | 14900789 | 8  | 11 | 5  | 2.346097679 | 0.0364013   | NR2C2   | ENSG00000177463 |
| 3 | 14937641 | 14938014 | 14937835 | 11 | 18 | 7  | 2.785990993 | 0.00480525  | NR2C2   | ENSG00000177463 |
| 3 | 15060338 | 15060540 | 15060439 | 9  | 10 | 3  | 3.225884308 | 0.0139466   | MRPS25  | ENSG00000131368 |
| 3 | 15068144 | 15068481 | 15068309 | 8  | 12 | 2  | 5.083211637 | 0.00143337  | MRPS25  | ENSG00000131368 |
| 3 | 15081687 | 15081873 | 15081780 | 8  | 9  | 7  | 1.466311049 | 0.20706     | MRPS25  | ENSG00000131368 |
| 3 | 15115393 | 15115995 | 15115677 | 22 | 38 | 13 | 3.26777891  | 2.05E-05    | ZFYVE20 | ENSG00000131381 |
| 3 | 15126921 | 15127125 | 15127053 | 8  | 8  | 2  | 3.519146518 | 0.017558    | ZFYVE20 | ENSG00000131381 |
| 3 | 15189370 | 15189712 | 15189541 | 20 | 25 | 2  | 10.16642327 | 2.02E-07    | CAPN7   | ENSG00000131375 |
| 3 | 15219261 | 15219535 | 15219395 | 13 | 14 | 2  | 5.865244197 | 0.000387308 | CAPN7   | ENSG00000131375 |
| 3 | 15284531 | 15284791 | 15284686 | 14 | 17 | 9  | 2.111487911 | 0.0248715   | SH3BP5  | ENSG00000131370 |
| 3 | 15296188 | 15296461 | 15296295 | 9  | 10 | 2  | 4.301179077 | 0.00512919  | SH3BP5  | ENSG00000131370 |
| 3 | 15309386 | 15310007 | 15309520 | 17 | 31 | 8  | 4.170840318 | 1.13E-05    | SH3BP5  | ENSG00000131370 |
| 3 | 15323563 | 15324049 | 15323794 | 50 | 66 | 1  | 39.29713612 | 9.69E-22    | SH3BP5  | ENSG00000131370 |
| 3 | 15327100 | 15327333 | 15327244 | 11 | 13 | 6  | 2.346097679 | 0.0266147   | SH3BP5  | ENSG00000131370 |
| 3 | 15327370 | 15327934 | 15327549 | 12 | 24 | 8  | 3.258468998 | 0.000499412 | SH3BP5  | ENSG00000131370 |

|   |          |          |          |    |    |    |             |             |        |                 |
|---|----------|----------|----------|----|----|----|-------------|-------------|--------|-----------------|
| 3 | 15341832 | 15342015 | 15341923 | 8  | 9  | 4  | 2.346097679 | 0.050148    | SH3BP5 | ENSG00000131370 |
| 3 | 15349231 | 15349469 | 15349350 | 9  | 12 | 3  | 3.812408728 | 0.004404    | SH3BP5 | ENSG00000131370 |
| 3 | 15380558 | 15380873 | 15380715 | 9  | 12 | 1  | 7.624817456 | 0.000332769 |        | ENSG00000201162 |
| 3 | 15394708 | 15395107 | 15394928 | 11 | 18 | 8  | 2.476436439 | 0.00924552  |        | ENSG00000201162 |
| 3 | 15536741 | 15536988 | 15536864 | 8  | 9  | 3  | 2.932622098 | 0.0242899   | COLQ   | ENSG00000206561 |
| 3 | 15574153 | 15574374 | 15574263 | 10 | 12 | 2  | 5.083211637 | 0.00143337  | COLQ   | ENSG00000206561 |
| 3 | 15617853 | 15618624 | 15618032 | 16 | 38 | 13 | 3.26777891  | 2.05E-05    | HACL1  | ENSG00000131373 |
| 3 | 15650701 | 15650919 | 15650810 | 8  | 10 | 1  | 6.451768616 | 0.00135978  | BTD    | ENSG00000169814 |
| 3 | 15702435 | 15702691 | 15702563 | 12 | 14 | 6  | 2.513676084 | 0.016726    |        | ENSG00000222873 |
| 3 | 16263707 | 16264055 | 16263847 | 9  | 13 | 1  | 8.211341875 | 0.000163445 | DPH3   | ENSG00000154813 |
| 3 | 16281221 | 16281674 | 16281593 | 10 | 20 | 5  | 4.105670938 | 0.000308509 | DPH3   | ENSG00000154813 |
| 3 | 16323786 | 16323984 | 16323885 | 9  | 9  | 1  | 5.865244197 | 0.00272497  | OXNAD1 | ENSG00000154814 |
| 3 | 17746822 | 17747172 | 17746997 | 9  | 14 | 4  | 3.519146518 | 0.00361132  | TBC1D5 | ENSG00000131374 |
| 3 | 18003686 | 18003872 | 18003785 | 9  | 10 | 1  | 6.451768616 | 0.00135978  |        | ENSG00000213890 |
| 3 | 18248850 | 18249047 | 18248948 | 8  | 8  | 1  | 5.278719777 | 0.00542188  | SATB1  | ENSG00000182568 |
| 3 | 18251475 | 18251780 | 18251627 | 14 | 17 | 1  | 10.55743955 | 9.18E-06    | SATB1  | ENSG00000182568 |
| 3 | 18515757 | 18516124 | 18515939 | 22 | 30 | 1  | 18.18225701 | 6.30E-10    | SATB1  | ENSG00000182568 |
| 3 | 18729927 | 18730200 | 18730063 | 9  | 12 | 0  | 15.24963491 | 4.15E-05    |        | ENSG00000209918 |
| 3 | 18774494 | 18774786 | 18774640 | 12 | 14 | 4  | 3.519146518 | 0.00361132  |        | ENSG00000209918 |
| 3 | 18807974 | 18808178 | 18808096 | 8  | 9  | 1  | 5.865244197 | 0.00272497  |        | ENSG00000209918 |
| 3 | 18859732 | 18860018 | 18859875 | 9  | 12 | 2  | 5.083211637 | 0.00143337  |        | ENSG00000209918 |
| 3 | 18963011 | 18963366 | 18963188 | 13 | 18 | 4  | 4.457585589 | 0.000353565 |        | ENSG00000209918 |
| 3 | 18981125 | 18981377 | 18981235 | 11 | 14 | 2  | 5.865244197 | 0.000387308 |        | ENSG00000209918 |
| 3 | 19163370 | 19163579 | 19163474 | 10 | 11 | 1  | 7.038293036 | 0.000674435 | KCNH8  | ENSG00000183960 |
| 3 | 19473998 | 19474283 | 19474151 | 12 | 12 | 2  | 5.083211637 | 0.00143337  | KCNH8  | ENSG00000183960 |
| 3 | 19883344 | 19883549 | 19883446 | 8  | 8  | 2  | 3.519146518 | 0.017558    | EFHB   | ENSG00000163576 |
| 3 | 19901939 | 19902185 | 19902095 | 9  | 9  | 2  | 3.910162798 | 0.00955088  | EFHB   | ENSG00000163576 |
| 3 | 19963224 | 19963668 | 19963484 | 14 | 25 | 9  | 3.049926982 | 0.000648806 | EFHB   | ENSG00000163576 |
| 3 | 20057212 | 20057520 | 20057366 | 8  | 13 | 0  | 16.42268375 | 1.91E-05    | KAT2B  | ENSG00000114166 |
| 3 | 20057981 | 20058266 | 20058123 | 11 | 14 | 9  | 1.759573259 | 0.0786014   | KAT2B  | ENSG00000114166 |
| 3 | 20060122 | 20060517 | 20060301 | 10 | 17 | 6  | 3.016411301 | 0.00381427  | KAT2B  | ENSG00000114166 |
| 3 | 20073431 | 20074069 | 20073757 | 13 | 28 | 7  | 4.252302043 | 2.31E-05    | KAT2B  | ENSG00000114166 |
| 3 | 20094798 | 20095224 | 20095020 | 55 | 66 | 3  | 19.64856806 | 2.33E-19    | KAT2B  | ENSG00000114166 |
| 3 | 20202529 | 20203341 | 20203190 | 9  | 28 | 10 | 3.092583304 | 0.000307818 | SGOL1  | ENSG00000129810 |

|   |          |          |          |    |    |   |             |             |         |                 |
|---|----------|----------|----------|----|----|---|-------------|-------------|---------|-----------------|
| 3 | 23337459 | 23337758 | 23337608 | 8  | 11 | 1 | 7.038293036 | 0.000674435 |         | ENSG00000206728 |
| 3 | 23662817 | 23663115 | 23662943 | 8  | 11 | 2 | 4.692195357 | 0.00272444  |         | ENSG00000212269 |
| 3 | 23933702 | 23933908 | 23933797 | 8  | 10 | 2 | 4.301179077 | 0.00512919  | RPL15   | ENSG00000174748 |
| 3 | 24165505 | 24165735 | 24165631 | 9  | 9  | 0 | 11.73048839 | 0.000425898 | THRB    | ENSG00000151090 |
| 3 | 24504202 | 24504416 | 24504329 | 8  | 9  | 0 | 11.73048839 | 0.000425898 | THRB    | ENSG00000151090 |
| 3 | 24512141 | 24512375 | 24512278 | 8  | 10 | 4 | 2.580707446 | 0.0306059   | THRB    | ENSG00000151090 |
| 3 | 24742142 | 24742574 | 24742291 | 11 | 18 | 6 | 3.183989707 | 0.00227432  | THRB    | ENSG00000151090 |
| 3 | 24849434 | 24849648 | 24849517 | 10 | 10 | 0 | 12.90353723 | 0.000195991 |         | ENSG00000210001 |
| 3 | 25050013 | 25050192 | 25050102 | 8  | 8  | 1 | 5.278719777 | 0.00542188  |         | ENSG00000201713 |
| 3 | 25309083 | 25309453 | 25309264 | 13 | 21 | 0 | 25.80707446 | 3.84E-08    |         | ENSG00000213877 |
| 3 | 25664636 | 25664925 | 25664793 | 11 | 13 | 4 | 3.28453675  | 0.00629037  | TOP2B   | ENSG00000077097 |
| 3 | 25707724 | 25708002 | 25707884 | 13 | 16 | 2 | 6.647276756 | 0.000101928 | TOP2B   | ENSG00000077097 |
| 3 | 25978813 | 25979008 | 25978910 | 9  | 10 | 3 | 3.225884308 | 0.0139466   | OXSM    | ENSG00000151093 |
| 3 | 26298105 | 26298376 | 26298240 | 11 | 13 | 0 | 16.42268375 | 1.91E-05    | LRRC3B  | ENSG00000179796 |
| 3 | 27108160 | 27108453 | 27108310 | 15 | 15 | 5 | 3.128130238 | 0.00492422  | NEK10   | ENSG00000163491 |
| 3 | 27501080 | 27501369 | 27501256 | 13 | 15 | 1 | 9.384390715 | 3.90E-05    | SLC4A7  | ENSG00000033867 |
| 3 | 27769452 | 27769682 | 27769619 | 8  | 9  | 2 | 3.910162798 | 0.00955088  | EOMES   | ENSG00000163508 |
| 3 | 27784701 | 27784890 | 27784795 | 11 | 12 | 0 | 15.24963491 | 4.15E-05    | EOMES   | ENSG00000163508 |
| 3 | 27858774 | 27858988 | 27858905 | 8  | 8  | 1 | 5.278719777 | 0.00542188  | EOMES   | ENSG00000163508 |
| 3 | 28614644 | 28614968 | 28614814 | 12 | 15 | 2 | 6.256260476 | 0.000199274 | C3orf53 | ENSG00000178811 |
| 3 | 29297276 | 29297525 | 29297388 | 9  | 10 | 3 | 3.225884308 | 0.0139466   | RBMS3   | ENSG00000144642 |
| 3 | 29957439 | 29957661 | 29957562 | 9  | 9  | 4 | 2.346097679 | 0.050148    |         | ENSG00000203652 |
| 3 | 30110086 | 30110415 | 30110239 | 26 | 28 | 3 | 8.504604085 | 1.43E-07    |         | ENSG00000203652 |
| 3 | 30244405 | 30244633 | 30244502 | 9  | 10 | 0 | 12.90353723 | 0.000195991 |         | ENSG00000199927 |
| 3 | 30534570 | 30534831 | 30534700 | 9  | 12 | 2 | 5.083211637 | 0.00143337  | TGFBR2  | ENSG00000163513 |
| 3 | 30534919 | 30535181 | 30535050 | 9  | 11 | 1 | 7.038293036 | 0.000674435 | TGFBR2  | ENSG00000163513 |
| 3 | 30710060 | 30710303 | 30710179 | 10 | 11 | 3 | 3.519146518 | 0.00788869  | TGFBR2  | ENSG00000163513 |
| 3 | 30981216 | 30981453 | 30981325 | 8  | 9  | 1 | 5.865244197 | 0.00272497  | GADL1   | ENSG00000144644 |
| 3 | 31749609 | 31749822 | 31749745 | 8  | 8  | 1 | 5.278719777 | 0.00542188  | STT3B   | ENSG00000163527 |
| 3 | 31964146 | 31964359 | 31964245 | 8  | 9  | 4 | 2.346097679 | 0.050148    | OSBPL10 | ENSG00000144645 |
| 3 | 31997897 | 31998103 | 31998039 | 9  | 10 | 3 | 3.225884308 | 0.0139466   | OSBPL10 | ENSG00000144645 |
| 3 | 32053562 | 32053866 | 32053685 | 10 | 15 | 2 | 6.256260476 | 0.000199274 |         | ENSG00000201701 |
| 3 | 32126806 | 32127227 | 32127048 | 24 | 35 | 6 | 6.032822602 | 1.10E-07    | GPD1L   | ENSG00000152642 |
| 3 | 32149244 | 32149514 | 32149368 | 21 | 25 | 1 | 15.24963491 | 2.59E-08    | GPD1L   | ENSG00000152642 |



|   |          |          |          |    |    |   |             |             |          |                 |
|---|----------|----------|----------|----|----|---|-------------|-------------|----------|-----------------|
| 3 | 32352700 | 32352930 | 32352808 | 8  | 10 | 7 | 1.612942154 | 0.147335    | CMTM7    | ENSG00000153551 |
| 3 | 32423351 | 32424007 | 32423670 | 38 | 67 | 2 | 26.58910702 | 8.66E-21    | CMTM7    | ENSG00000153551 |
| 3 | 32574235 | 32574429 | 32574335 | 8  | 8  | 2 | 3.519146518 | 0.017558    | DYNC1LI1 | ENSG00000144635 |
| 3 | 32861630 | 32861809 | 32861710 | 8  | 8  | 2 | 3.519146518 | 0.017558    | TRIM71   | ENSG00000206557 |
| 3 | 32881968 | 32882147 | 32882057 | 8  | 8  | 2 | 3.519146518 | 0.017558    | TRIM71   | ENSG00000206557 |
| 3 | 33130956 | 33131282 | 33131119 | 10 | 12 | 6 | 2.178519273 | 0.0416567   | CRTAP    | ENSG00000170275 |
| 3 | 33484272 | 33484677 | 33484464 | 41 | 57 | 0 | 68.03683268 | 2.82E-20    |          | ENSG00000202175 |
| 3 | 33498676 | 33499008 | 33498847 | 11 | 16 | 6 | 2.848832895 | 0.00632407  |          | ENSG00000202175 |
| 3 | 33675521 | 33675751 | 33675602 | 8  | 10 | 1 | 6.451768616 | 0.00135978  | CLASP2   | ENSG00000163539 |
| 3 | 33733285 | 33733508 | 33733396 | 10 | 10 | 1 | 6.451768616 | 0.00135978  | CLASP2   | ENSG00000163539 |
| 3 | 34033529 | 34033777 | 34033652 | 10 | 13 | 0 | 16.42268375 | 1.91E-05    | PDCD6IP  | ENSG00000170248 |
| 3 | 34041372 | 34041649 | 34041500 | 18 | 18 | 1 | 11.14396397 | 4.44E-06    | PDCD6IP  | ENSG00000170248 |
| 3 | 34052542 | 34052862 | 34052696 | 9  | 10 | 1 | 6.451768616 | 0.00135978  | PDCD6IP  | ENSG00000170248 |
| 3 | 34384121 | 34384336 | 34384237 | 13 | 13 | 3 | 4.105670938 | 0.00243034  |          |                 |
| 3 | 34697081 | 34697319 | 34697213 | 8  | 9  | 1 | 5.865244197 | 0.00272497  |          |                 |
| 3 | 35456183 | 35456592 | 35456352 | 9  | 15 | 1 | 9.384390715 | 3.90E-05    |          | ENSG00000212442 |
| 3 | 36949385 | 36949750 | 36949571 | 34 | 41 | 1 | 24.63402563 | 1.65E-13    |          | ENSG00000210181 |
| 3 | 36986281 | 36986701 | 36986460 | 27 | 39 | 2 | 15.64065119 | 8.61E-12    |          | ENSG00000210181 |
| 3 | 37009924 | 37010167 | 37010045 | 9  | 10 | 4 | 2.580707446 | 0.0306059   | MLH1     | ENSG00000076242 |
| 3 | 37375197 | 37375397 | 37375297 | 8  | 9  | 0 | 11.73048839 | 0.000425898 |          | ENSG00000222208 |
| 3 | 37557296 | 37557554 | 37557425 | 9  | 11 | 2 | 4.692195357 | 0.00272444  | ITGA9    | ENSG00000144668 |
| 3 | 37611827 | 37612158 | 37612035 | 9  | 13 | 1 | 8.211341875 | 0.000163445 | ITGA9    | ENSG00000144668 |
| 3 | 37644564 | 37644874 | 37644719 | 12 | 15 | 0 | 18.76878143 | 4.04E-06    | ITGA9    | ENSG00000144668 |
| 3 | 37677206 | 37677613 | 37677385 | 19 | 28 | 3 | 8.504604085 | 1.43E-07    | CTDSPL   | ENSG00000144677 |
| 3 | 37775520 | 37775818 | 37775669 | 11 | 15 | 2 | 6.256260476 | 0.000199274 | CTDSPL   | ENSG00000144677 |
| 3 | 37871984 | 37872345 | 37872149 | 11 | 17 | 5 | 3.519146518 | 0.00167472  | CTDSPL   | ENSG00000144677 |
| 3 | 37962587 | 37963019 | 37962744 | 11 | 17 | 3 | 5.278719777 | 0.000205462 |          | ENSG00000199075 |
| 3 | 38040831 | 38041114 | 38040972 | 12 | 14 | 2 | 5.865244197 | 0.000387308 | PLCD1    | ENSG00000187091 |
| 3 | 38181279 | 38181575 | 38181427 | 13 | 15 | 3 | 4.692195357 | 0.000718455 | OXR1     | ENSG00000172939 |
| 3 | 38181789 | 38182029 | 38181939 | 8  | 10 | 2 | 4.301179077 | 0.00512919  | OXR1     | ENSG00000172939 |
| 3 | 38537969 | 38538234 | 38538118 | 9  | 9  | 0 | 11.73048839 | 0.000425898 |          | ENSG00000207512 |
| 3 | 38547190 | 38547464 | 38547332 | 14 | 16 | 3 | 4.985457567 | 0.000385643 |          | ENSG00000207512 |
| 3 | 38667802 | 38668093 | 38667960 | 9  | 12 | 4 | 3.049926982 | 0.0108184   | SCN5A    | ENSG00000183873 |
| 3 | 38860470 | 38860666 | 38860570 | 8  | 9  | 4 | 2.346097679 | 0.050148    |          | ENSG00000222719 |

|   |          |          |          |    |     |   |             |             |         |                 |
|---|----------|----------|----------|----|-----|---|-------------|-------------|---------|-----------------|
| 3 | 39142308 | 39142636 | 39142477 | 12 | 17  | 4 | 4.222975822 | 0.000640773 | GORASP1 | ENSG00000114745 |
| 3 | 39157749 | 39158022 | 39157885 | 10 | 13  | 3 | 4.105670938 | 0.00243034  | AXUD1   | ENSG00000144655 |
| 3 | 39163654 | 39163925 | 39163789 | 11 | 12  | 6 | 2.178519273 | 0.0416567   | AXUD1   | ENSG00000144655 |
| 3 | 39206291 | 39206601 | 39206446 | 10 | 12  | 5 | 2.541605819 | 0.0225912   | XIRP1   | ENSG00000168334 |
| 3 | 39304882 | 39305069 | 39304975 | 9  | 9   | 6 | 1.675784056 | 0.141978    | CX3CR1  | ENSG00000168329 |
| 3 | 39999554 | 39999783 | 39999673 | 8  | 9   | 5 | 1.955081399 | 0.0892323   |         | ENSG00000201570 |
| 3 | 40007156 | 40007335 | 40007250 | 8  | 8   | 3 | 2.639359888 | 0.0415794   |         | ENSG00000201570 |
| 3 | 40061183 | 40061525 | 40061354 | 10 | 16  | 2 | 6.647276756 | 0.000101928 |         | ENSG00000201570 |
| 3 | 40325889 | 40326199 | 40326049 | 19 | 21  | 2 | 8.602358155 | 3.33E-06    | EIF1B   | ENSG00000114784 |
| 3 | 40466293 | 40466524 | 40466405 | 8  | 9   | 0 | 11.73048839 | 0.000425898 | RPL14   | ENSG00000188846 |
| 3 | 40469663 | 40469969 | 40469805 | 8  | 11  | 3 | 3.519146518 | 0.00788869  | RPL14   | ENSG00000188846 |
| 3 | 40473614 | 40473890 | 40473762 | 9  | 13  | 6 | 2.346097679 | 0.0266147   | RPL14   | ENSG00000188846 |
| 3 | 40493639 | 40493828 | 40493733 | 8  | 8   | 4 | 2.111487911 | 0.0804809   | ZNF619  | ENSG00000177873 |
| 3 | 40541313 | 40541524 | 40541432 | 8  | 9   | 2 | 3.910162798 | 0.00955088  | ZNF621  | ENSG00000172888 |
| 3 | 40698296 | 40698483 | 40698368 | 8  | 8   | 0 | 10.55743955 | 0.000925496 | ZNF621  | ENSG00000172888 |
| 3 | 41001847 | 41002067 | 41001963 | 13 | 14  | 5 | 2.932622098 | 0.00829617  | CTNNB1  | ENSG00000168036 |
| 3 | 41041083 | 41041322 | 41041170 | 10 | 11  | 2 | 4.692195357 | 0.00272444  | CTNNB1  | ENSG00000168036 |
| 3 | 41215881 | 41216146 | 41216013 | 9  | 11  | 2 | 4.692195357 | 0.00272444  | CTNNB1  | ENSG00000168036 |
| 3 | 41257394 | 41257623 | 41257464 | 8  | 8   | 2 | 3.519146518 | 0.017558    | CTNNB1  | ENSG00000168036 |
| 3 | 41284589 | 41284830 | 41284730 | 8  | 11  | 1 | 7.038293036 | 0.000674435 | CTNNB1  | ENSG00000168036 |
| 3 | 41344131 | 41344456 | 41344293 | 10 | 13  | 2 | 5.474227917 | 0.000747844 | CTNNB1  | ENSG00000168036 |
| 3 | 41487926 | 41488154 | 41488040 | 10 | 11  | 1 | 7.038293036 | 0.000674435 |         | ENSG00000221337 |
| 3 | 41978454 | 41978750 | 41978622 | 8  | 9   | 6 | 1.675784056 | 0.141978    | ULK4    | ENSG00000168038 |
| 3 | 42493370 | 42493598 | 42493507 | 12 | 13  | 2 | 5.474227917 | 0.000747844 | VIPR1   | ENSG00000114812 |
| 3 | 42718150 | 42718350 | 42718250 | 8  | 9   | 3 | 2.932622098 | 0.0242899   | HHATL   | ENSG0000010282  |
| 3 | 42839562 | 42840239 | 42840037 | 92 | 131 | 4 | 30.96848936 | 3.82E-39    | CCBP2   | ENSG00000144648 |
| 3 | 43786023 | 43786255 | 43786139 | 11 | 13  | 2 | 5.474227917 | 0.000747844 | ABHD5   | ENSG0000011198  |
| 3 | 44354566 | 44354824 | 44354741 | 8  | 10  | 0 | 12.90353723 | 0.000195991 | C3orf23 | ENSG00000179152 |
| 3 | 44354859 | 44355263 | 44355035 | 11 | 17  | 2 | 7.038293036 | 5.19E-05    | C3orf23 | ENSG00000179152 |
| 3 | 44641292 | 44641511 | 44641429 | 8  | 9   | 1 | 5.865244197 | 0.00272497  | ZNF197  | ENSG00000186448 |
| 3 | 45183986 | 45184338 | 45184190 | 9  | 13  | 4 | 3.28453675  | 0.00629037  | CDCP1   | ENSG00000163814 |
| 3 | 45777709 | 45777953 | 45777828 | 9  | 11  | 1 | 7.038293036 | 0.000674435 |         | ENSG00000223285 |
| 3 | 45796778 | 45797104 | 45796941 | 17 | 20  | 5 | 4.105670938 | 0.000308509 | SLC6A20 | ENSG00000163817 |
| 3 | 45955351 | 45955548 | 45955431 | 9  | 9   | 4 | 2.346097679 | 0.050148    | CXCR6   | ENSG00000172215 |

|   |          |          |          |    |     |   |             |             |         |                 |
|---|----------|----------|----------|----|-----|---|-------------|-------------|---------|-----------------|
| 3 | 46646389 | 46646869 | 46646700 | 21 | 35  | 4 | 8.445951643 | 6.26E-09    |         | ENSG00000203651 |
| 3 | 46676978 | 46677704 | 46677467 | 77 | 111 | 4 | 26.276294   | 1.11E-32    | ALS2CL  | ENSG00000178038 |
| 3 | 46779685 | 46779976 | 46779830 | 23 | 26  | 0 | 31.67231866 | 7.93E-10    |         | ENSG00000206549 |
| 3 | 46926120 | 46926320 | 46926163 | 8  | 8   | 2 | 3.519146518 | 0.017558    | PTHR1   | ENSG00000160801 |
| 3 | 46952007 | 46952315 | 46952161 | 9  | 13  | 3 | 4.105670938 | 0.00243034  | CCDC12  | ENSG00000160799 |
| 3 | 46992666 | 46992853 | 46992801 | 8  | 8   | 0 | 10.55743955 | 0.000925496 | CCDC12  | ENSG00000160799 |
| 3 | 47492435 | 47492770 | 47492602 | 9  | 11  | 2 | 4.692195357 | 0.00272444  | SCAP    | ENSG00000114650 |
| 3 | 47529847 | 47530140 | 47529976 | 10 | 12  | 4 | 3.049926982 | 0.0108184   | TMEM103 | ENSG00000163832 |
| 3 | 47798431 | 47798709 | 47798570 | 8  | 10  | 5 | 2.150589539 | 0.0575848   | SMARCC1 | ENSG00000173473 |
| 3 | 47819579 | 47819762 | 47819670 | 8  | 8   | 0 | 10.55743955 | 0.000925496 | DHX30   | ENSG00000132153 |
| 3 | 48257477 | 48257702 | 48257589 | 9  | 11  | 5 | 2.346097679 | 0.0364013   | ZNF589  | ENSG00000164048 |
| 3 | 48448945 | 48449319 | 48449124 | 50 | 59  | 0 | 70.38293036 | 5.97E-21    | PLXNB1  | ENSG00000164050 |
| 3 | 48489562 | 48489764 | 48489663 | 8  | 9   | 0 | 11.73048839 | 0.000425898 | SHISA5  | ENSG00000164054 |
| 3 | 48519901 | 48520305 | 48520080 | 11 | 18  | 4 | 4.457585589 | 0.000353565 | SHISA5  | ENSG00000164054 |
| 3 | 48721637 | 48721897 | 48721767 | 11 | 11  | 0 | 14.07658607 | 9.02E-05    | IHPK2   | ENSG00000068745 |
| 3 | 49019410 | 49019611 | 49019510 | 9  | 9   | 1 | 5.865244197 | 0.00272497  | WDR6    | ENSG00000178252 |
| 3 | 49026620 | 49026802 | 49026711 | 8  | 8   | 2 | 3.519146518 | 0.017558    | DALRD3  | ENSG00000178149 |
| 3 | 49200255 | 49200551 | 49200403 | 8  | 10  | 1 | 6.451768616 | 0.00135978  | KLHDC8B | ENSG00000185909 |
| 3 | 49231112 | 49231362 | 49231237 | 9  | 10  | 0 | 12.90353723 | 0.000195991 | CCDC36  | ENSG00000173421 |
| 3 | 49441613 | 49441889 | 49441751 | 9  | 11  | 1 | 7.038293036 | 0.000674435 | NICN1   | ENSG00000145029 |
| 3 | 49474033 | 49474306 | 49474177 | 10 | 13  | 3 | 4.105670938 | 0.00243034  |         | ENSG00000201301 |
| 3 | 49681879 | 49682058 | 49681968 | 8  | 8   | 0 | 10.55743955 | 0.000925496 | APEH    | ENSG00000164062 |
| 3 | 50158978 | 50159345 | 50159157 | 28 | 35  | 2 | 14.07658607 | 1.57E-10    | SEMA3F  | ENSG00000001617 |
| 3 | 50163163 | 50163745 | 50163439 | 13 | 32  | 6 | 5.530087385 | 7.11E-07    | SEMA3F  | ENSG00000001617 |
| 3 | 50170359 | 50170619 | 50170503 | 9  | 11  | 2 | 4.692195357 | 0.00272444  | SEMA3F  | ENSG00000001617 |
| 3 | 50281267 | 50281669 | 50281446 | 11 | 19  | 5 | 3.910162798 | 0.000546977 | SEMA3B  | ENSG00000012171 |
| 3 | 50333895 | 50334118 | 50334045 | 9  | 10  | 2 | 4.301179077 | 0.00512919  | HYAL2   | ENSG00000068001 |
| 3 | 50349878 | 50350057 | 50349976 | 8  | 8   | 0 | 10.55743955 | 0.000925496 | RASSF1  | ENSG00000068028 |
| 3 | 50614394 | 50614591 | 50614460 | 8  | 8   | 2 | 3.519146518 | 0.017558    | CISH    | ENSG00000114737 |
| 3 | 50615196 | 50615478 | 50615337 | 11 | 14  | 2 | 5.865244197 | 0.000387308 | CISH    | ENSG00000114737 |
| 3 | 50828401 | 50828580 | 50828517 | 8  | 8   | 2 | 3.519146518 | 0.017558    |         | ENSG00000188420 |
| 3 | 50863613 | 50863883 | 50863748 | 11 | 13  | 0 | 16.42268375 | 1.91E-05    |         | ENSG00000188420 |
| 3 | 51397332 | 51397511 | 51397416 | 8  | 8   | 3 | 2.639359888 | 0.0415794   | ARMET   | ENSG00000145050 |
| 3 | 51401110 | 51401414 | 51401245 | 19 | 22  | 4 | 5.396024661 | 3.05E-05    | RBM15B  | ENSG00000179837 |

|   |          |          |          |    |     |    |             |             |          |                 |
|---|----------|----------|----------|----|-----|----|-------------|-------------|----------|-----------------|
| 3 | 51681087 | 51681280 | 51681167 | 8  | 10  | 2  | 4.301179077 | 0.00512919  | TEX264   | ENSG00000164081 |
| 3 | 51728278 | 51728461 | 51728367 | 8  | 8   | 1  | 5.278719777 | 0.00542188  |          | ENSG00000221068 |
| 3 | 52004860 | 52005181 | 52005039 | 18 | 22  | 4  | 5.396024661 | 3.05E-05    | RPL29    | ENSG00000162244 |
| 3 | 52116029 | 52116397 | 52116246 | 21 | 27  | 0  | 32.8453675  | 3.65E-10    | C3orf74  | ENSG00000221939 |
| 3 | 52137212 | 52137409 | 52137310 | 8  | 9   | 2  | 3.910162798 | 0.00955088  | WDR51A   | ENSG00000164087 |
| 3 | 53144021 | 53144207 | 53144163 | 8  | 11  | 9  | 1.407658607 | 0.210479    | RFT1     | ENSG00000163933 |
| 3 | 53164720 | 53165204 | 53164860 | 10 | 21  | 5  | 4.301179077 | 0.000172642 | PRKCD    | ENSG00000163932 |
| 3 | 53278929 | 53279498 | 53279126 | 73 | 107 | 1  | 63.34463732 | 2.34E-35    |          | ENSG00000210751 |
| 3 | 53356602 | 53356863 | 53356757 | 11 | 13  | 12 | 1.263283365 | 0.272203    | DCP1A    | ENSG00000162290 |
| 3 | 53540839 | 53541072 | 53540955 | 10 | 12  | 2  | 5.083211637 | 0.00143337  | CACNA1D  | ENSG00000157388 |
| 3 | 53592263 | 53592553 | 53592408 | 15 | 16  | 2  | 6.647276756 | 0.000101928 | CACNA1D  | ENSG00000157388 |
| 3 | 54331548 | 54331775 | 54331601 | 8  | 10  | 4  | 2.580707446 | 0.0306059   | CACNA2D3 | ENSG00000157445 |
| 3 | 54363056 | 54363518 | 54363307 | 10 | 21  | 3  | 6.451768616 | 1.56E-05    | CACNA2D3 | ENSG00000157445 |
| 3 | 54367604 | 54367835 | 54367730 | 8  | 10  | 1  | 6.451768616 | 0.00135978  | CACNA2D3 | ENSG00000157445 |
| 3 | 54662626 | 54662808 | 54662717 | 8  | 9   | 0  | 11.73048839 | 0.000425898 | CACNA2D3 | ENSG00000157445 |
| 3 | 54663259 | 54663571 | 54663413 | 11 | 14  | 0  | 17.59573259 | 8.79E-06    | CACNA2D3 | ENSG00000157445 |
| 3 | 54866492 | 54866868 | 54866630 | 9  | 15  | 1  | 9.384390715 | 3.90E-05    | LRTM1    | ENSG00000144771 |
| 3 | 54872917 | 54873161 | 54873063 | 10 | 11  | 0  | 14.07658607 | 9.02E-05    | LRTM1    | ENSG00000144771 |
| 3 | 54900740 | 54901072 | 54900905 | 13 | 16  | 5  | 3.323638378 | 0.00288759  | LRTM1    | ENSG00000144771 |
| 3 | 54996705 | 54997078 | 54996904 | 17 | 23  | 2  | 9.384390715 | 8.25E-07    | LRTM1    | ENSG00000144771 |
| 3 | 55578189 | 55578565 | 55578363 | 11 | 15  | 4  | 3.753756286 | 0.0020497   | WNT5A    | ENSG00000114251 |
| 3 | 56141351 | 56141574 | 56141462 | 8  | 11  | 0  | 14.07658607 | 9.02E-05    |          | ENSG00000200238 |
| 3 | 56403133 | 56403322 | 56403216 | 8  | 8   | 0  | 10.55743955 | 0.000925496 | ERC2     | ENSG00000187672 |
| 3 | 56566143 | 56566341 | 56566242 | 8  | 8   | 4  | 2.111487911 | 0.0804809   | CCDC66   | ENSG00000180376 |
| 3 | 56792769 | 56793565 | 56793104 | 81 | 123 | 0  | 145.4580561 | 1.60E-42    | ARHGEF3  | ENSG00000163947 |
| 3 | 56849545 | 56849745 | 56849653 | 8  | 8   | 1  | 5.278719777 | 0.00542188  | ARHGEF3  | ENSG00000163947 |
| 3 | 57013354 | 57013548 | 57013451 | 8  | 8   | 0  | 10.55743955 | 0.000925496 | ARHGEF3  | ENSG00000163947 |
| 3 | 57024140 | 57024558 | 57024354 | 62 | 81  | 4  | 19.23800096 | 4.31E-23    | ARHGEF3  | ENSG00000163947 |
| 3 | 57050627 | 57050863 | 57050733 | 12 | 13  | 3  | 4.105670938 | 0.00243034  | ARHGEF3  | ENSG00000163947 |
| 3 | 57156238 | 57156532 | 57156395 | 8  | 12  | 1  | 7.624817456 | 0.000332769 | IL17RD   | ENSG00000144730 |
| 3 | 57499322 | 57499512 | 57499401 | 11 | 11  | 2  | 4.692195357 | 0.00272444  |          | ENSG00000202428 |
| 3 | 57716699 | 57717178 | 57716878 | 10 | 21  | 5  | 4.301179077 | 0.000172642 | SLMAP    | ENSG00000163681 |
| 3 | 57764395 | 57764596 | 57764528 | 9  | 9   | 2  | 3.910162798 | 0.00955088  | SLMAP    | ENSG00000163681 |
| 3 | 58072725 | 58072949 | 58072837 | 13 | 14  | 1  | 8.797866295 | 8.00E-05    |          | ENSG00000197750 |

|   |          |          |          |    |    |    |             |             |          |                 |
|---|----------|----------|----------|----|----|----|-------------|-------------|----------|-----------------|
| 3 | 58168948 | 58169127 | 58169037 | 9  | 9  | 1  | 5.865244197 | 0.00272497  | DNASE1L3 | ENSG00000163687 |
| 3 | 58432120 | 58432454 | 58432288 | 9  | 13 | 5  | 2.737113958 | 0.0137917   | KCTD6    | ENSG00000168301 |
| 3 | 58835245 | 58835452 | 58835360 | 8  | 8  | 1  | 5.278719777 | 0.00542188  | C3orf67  | ENSG00000163689 |
| 3 | 59281002 | 59281303 | 59281152 | 11 | 12 | 2  | 5.083211637 | 0.00143337  | C3orf67  | ENSG00000163689 |
| 3 | 59354519 | 59354926 | 59354748 | 41 | 50 | 0  | 59.82549081 | 6.45E-18    | C3orf67  | ENSG00000163689 |
| 3 | 59536149 | 59536358 | 59536184 | 8  | 9  | 1  | 5.865244197 | 0.00272497  |          |                 |
| 3 | 59759635 | 59759881 | 59759759 | 10 | 13 | 0  | 16.42268375 | 1.91E-05    |          |                 |
| 3 | 59937102 | 59937372 | 59937209 | 8  | 10 | 2  | 4.301179077 | 0.00512919  |          |                 |
| 3 | 60047721 | 60047909 | 60047815 | 11 | 11 | 1  | 7.038293036 | 0.000674435 | FHIT     | ENSG00000189283 |
| 3 | 61342588 | 61342790 | 61342675 | 8  | 8  | 0  | 10.55743955 | 0.000925496 | PTPRG    | ENSG00000144724 |
| 3 | 61588571 | 61588851 | 61588697 | 15 | 19 | 12 | 1.804690522 | 0.0452624   | PTPRG    | ENSG00000144724 |
| 3 | 61595188 | 61595405 | 61595296 | 8  | 8  | 4  | 2.111487911 | 0.0804809   | PTPRG    | ENSG00000144724 |
| 3 | 61595414 | 61595983 | 61595593 | 22 | 38 | 15 | 2.859306546 | 8.61E-05    | PTPRG    | ENSG00000144724 |
| 3 | 61597806 | 61598361 | 61598091 | 12 | 25 | 16 | 1.794074695 | 0.0280669   | PTPRG    | ENSG00000144724 |
| 3 | 61610459 | 61610776 | 61610617 | 8  | 13 | 14 | 1.094845583 | 0.406217    | PTPRG    | ENSG00000144724 |
| 3 | 61615744 | 61616039 | 61615904 | 20 | 21 | 7  | 3.225884308 | 0.00106152  | PTPRG    | ENSG00000144724 |
| 3 | 61618760 | 61619010 | 61618875 | 8  | 11 | 17 | 0.78203256  | 0.752912    | PTPRG    | ENSG00000144724 |
| 3 | 61619964 | 61620358 | 61620142 | 9  | 14 | 13 | 1.256838042 | 0.269506    | PTPRG    | ENSG00000144724 |
| 3 | 61620920 | 61621105 | 61620971 | 8  | 8  | 10 | 0.959767232 | 0.541959    | PTPRG    | ENSG00000144724 |
| 3 | 61623425 | 61623706 | 61623557 | 11 | 14 | 1  | 8.797866295 | 8.00E-05    | PTPRG    | ENSG00000144724 |
| 3 | 61625658 | 61625868 | 61625763 | 8  | 9  | 7  | 1.466311049 | 0.20706     | PTPRG    | ENSG00000144724 |
| 3 | 61628984 | 61629198 | 61629095 | 8  | 8  | 3  | 2.639359888 | 0.0415794   | PTPRG    | ENSG00000144724 |
| 3 | 61630395 | 61630695 | 61630536 | 8  | 11 | 5  | 2.346097679 | 0.0364013   | PTPRG    | ENSG00000144724 |
| 3 | 61639050 | 61639654 | 61639475 | 8  | 20 | 8  | 2.737113958 | 0.0036449   | PTPRG    | ENSG00000144724 |
| 3 | 61640517 | 61640909 | 61640736 | 9  | 13 | 8  | 1.824742639 | 0.0744168   | PTPRG    | ENSG00000144724 |
| 3 | 61643279 | 61643562 | 61643432 | 10 | 15 | 7  | 2.346097679 | 0.0195693   | PTPRG    | ENSG00000144724 |
| 3 | 61643719 | 61643967 | 61643795 | 9  | 10 | 17 | 0.71686318  | 0.816679    | PTPRG    | ENSG00000144724 |
| 3 | 61648559 | 61648837 | 61648698 | 13 | 17 | 8  | 2.346097679 | 0.0144542   | PTPRG    | ENSG00000144724 |
| 3 | 61657863 | 61658410 | 61658157 | 19 | 34 | 10 | 3.732428125 | 1.39E-05    | PTPRG    | ENSG00000144724 |
| 3 | 61661589 | 61661997 | 61661818 | 9  | 16 | 14 | 1.329455351 | 0.210108    | PTPRG    | ENSG00000144724 |
| 3 | 61663276 | 61663523 | 61663399 | 8  | 9  | 5  | 1.955081399 | 0.0892323   | PTPRG    | ENSG00000144724 |
| 3 | 61665538 | 61665969 | 61665656 | 8  | 15 | 23 | 0.78203256  | 0.783431    | PTPRG    | ENSG00000144724 |
| 3 | 61666730 | 61667329 | 61667183 | 11 | 25 | 16 | 1.794074695 | 0.0280669   | PTPRG    | ENSG00000144724 |
| 3 | 61669527 | 61669959 | 61669687 | 12 | 19 | 10 | 2.132816071 | 0.01835     | PTPRG    | ENSG00000144724 |

|   |          |          |          |    |    |    |             |             |       |                 |
|---|----------|----------|----------|----|----|----|-------------|-------------|-------|-----------------|
| 3 | 61680307 | 61680604 | 61680455 | 9  | 10 | 10 | 1.173048839 | 0.355733    | PTPRG | ENSG00000144724 |
| 3 | 61686900 | 61687137 | 61687018 | 8  | 9  | 6  | 1.675784056 | 0.141978    | PTPRG | ENSG00000144724 |
| 3 | 61688538 | 61689102 | 61688827 | 11 | 26 | 12 | 2.436332205 | 0.00289956  | PTPRG | ENSG00000144724 |
| 3 | 61716181 | 61716548 | 61716374 | 9  | 15 | 13 | 1.340627245 | 0.210788    | PTPRG | ENSG00000144724 |
| 3 | 61718136 | 61718394 | 61718279 | 8  | 9  | 13 | 0.837892028 | 0.672794    | PTPRG | ENSG00000144724 |
| 3 | 61735486 | 61735705 | 61735595 | 10 | 12 | 5  | 2.541605819 | 0.0225912   | PTPRG | ENSG00000144724 |
| 3 | 61737035 | 61737303 | 61737177 | 8  | 9  | 13 | 0.837892028 | 0.672794    | PTPRG | ENSG00000144724 |
| 3 | 61739508 | 61739720 | 61739556 | 10 | 10 | 3  | 3.225884308 | 0.0139466   | PTPRG | ENSG00000144724 |
| 3 | 61743082 | 61743310 | 61743196 | 8  | 9  | 5  | 1.955081399 | 0.0892323   | PTPRG | ENSG00000144724 |
| 3 | 61762986 | 61763169 | 61763081 | 8  | 8  | 0  | 10.55743955 | 0.000925496 | PTPRG | ENSG00000144724 |
| 3 | 61763297 | 61763489 | 61763357 | 8  | 10 | 5  | 2.150589539 | 0.0575848   | PTPRG | ENSG00000144724 |
| 3 | 61764782 | 61765299 | 61765141 | 10 | 21 | 12 | 1.985159574 | 0.021936    | PTPRG | ENSG00000144724 |
| 3 | 61765416 | 61765759 | 61765587 | 10 | 14 | 10 | 1.599612054 | 0.114822    | PTPRG | ENSG00000144724 |
| 3 | 61765864 | 61766045 | 61765954 | 8  | 8  | 2  | 3.519146518 | 0.017558    | PTPRG | ENSG00000144724 |
| 3 | 61768437 | 61768930 | 61768699 | 16 | 30 | 16 | 2.13908906  | 0.00465307  | PTPRG | ENSG00000144724 |
| 3 | 61769283 | 61769535 | 61769455 | 8  | 10 | 16 | 0.759031602 | 0.770272    | PTPRG | ENSG00000144724 |
| 3 | 61774927 | 61775111 | 61775019 | 8  | 8  | 7  | 1.319679944 | 0.283403    | PTPRG | ENSG00000144724 |
| 3 | 61775115 | 61775335 | 61775225 | 9  | 12 | 8  | 1.694403879 | 0.107291    | PTPRG | ENSG00000144724 |
| 3 | 61785696 | 61785875 | 61785813 | 8  | 8  | 9  | 1.055743955 | 0.456865    | PTPRG | ENSG00000144724 |
| 3 | 61798609 | 61798862 | 61798735 | 9  | 12 | 6  | 2.178519273 | 0.0416567   | PTPRG | ENSG00000144724 |
| 3 | 61814463 | 61814657 | 61814565 | 8  | 9  | 12 | 0.902345261 | 0.602772    | PTPRG | ENSG00000144724 |
| 3 | 61818060 | 61818348 | 61818204 | 11 | 12 | 13 | 1.089259637 | 0.414883    | PTPRG | ENSG00000144724 |
| 3 | 61821955 | 61822137 | 61822067 | 8  | 8  | 8  | 1.173048839 | 0.36929     | PTPRG | ENSG00000144724 |
| 3 | 61826434 | 61826744 | 61826589 | 9  | 12 | 9  | 1.524963491 | 0.154777    | PTPRG | ENSG00000144724 |
| 3 | 61837890 | 61838357 | 61838055 | 8  | 17 | 10 | 1.919534464 | 0.0400548   | PTPRG | ENSG00000144724 |
| 3 | 61842904 | 61843115 | 61843060 | 8  | 10 | 6  | 1.843362462 | 0.0964212   | PTPRG | ENSG00000144724 |
| 3 | 61855722 | 61855955 | 61855865 | 9  | 10 | 9  | 1.290353723 | 0.279648    | PTPRG | ENSG00000144724 |
| 3 | 61860120 | 61860358 | 61860235 | 10 | 11 | 3  | 3.519146518 | 0.00788869  | PTPRG | ENSG00000144724 |
| 3 | 61869192 | 61869711 | 61869344 | 10 | 23 | 3  | 7.038293036 | 4.15E-06    | PTPRG | ENSG00000144724 |
| 3 | 61869719 | 61869916 | 61869817 | 8  | 9  | 6  | 1.675784056 | 0.141978    | PTPRG | ENSG00000144724 |
| 3 | 61879430 | 61879666 | 61879548 | 10 | 11 | 3  | 3.519146518 | 0.00788869  | PTPRG | ENSG00000144724 |
| 3 | 61880085 | 61880334 | 61880210 | 11 | 12 | 15 | 0.953102182 | 0.555895    | PTPRG | ENSG00000144724 |
| 3 | 61888717 | 61889033 | 61888859 | 8  | 11 | 3  | 3.519146518 | 0.00788869  | PTPRG | ENSG00000144724 |
| 3 | 61893758 | 61893950 | 61893922 | 9  | 10 | 5  | 2.150589539 | 0.0575848   | PTPRG | ENSG00000144724 |

|   |          |          |          |    |    |    |             |             |         |                 |
|---|----------|----------|----------|----|----|----|-------------|-------------|---------|-----------------|
| 3 | 61897101 | 61897369 | 61897264 | 12 | 13 | 11 | 1.368556979 | 0.211388    | PTPRG   | ENSG00000144724 |
| 3 | 61899815 | 61900130 | 61899965 | 9  | 12 | 9  | 1.524963491 | 0.154777    | PTPRG   | ENSG00000144724 |
| 3 | 61914646 | 61915015 | 61914838 | 10 | 16 | 16 | 1.173048839 | 0.322157    | PTPRG   | ENSG00000144724 |
| 3 | 61925234 | 61925479 | 61925356 | 9  | 12 | 10 | 1.386330446 | 0.21117     | PTPRG   | ENSG00000144724 |
| 3 | 61957515 | 61957992 | 61957688 | 12 | 23 | 14 | 1.876878143 | 0.0251753   | PTPRG   | ENSG00000144724 |
| 3 | 61964720 | 61965126 | 61964899 | 9  | 16 | 10 | 1.812893661 | 0.0578656   | PTPRG   | ENSG00000144724 |
| 3 | 61965448 | 61965677 | 61965624 | 8  | 10 | 3  | 3.225884308 | 0.0139466   | PTPRG   | ENSG00000144724 |
| 3 | 61967744 | 61968557 | 61968322 | 12 | 37 | 23 | 1.857327329 | 0.00772401  | PTPRG   | ENSG00000144724 |
| 3 | 61970397 | 61970633 | 61970488 | 12 | 13 | 4  | 3.28453675  | 0.00629037  | PTPRG   | ENSG00000144724 |
| 3 | 61971865 | 61972212 | 61972038 | 12 | 18 | 11 | 1.857327329 | 0.0427732   | PTPRG   | ENSG00000144724 |
| 3 | 61974486 | 61974698 | 61974617 | 8  | 8  | 15 | 0.659839972 | 0.851443    | PTPRG   | ENSG00000144724 |
| 3 | 61979542 | 61979753 | 61979589 | 8  | 11 | 3  | 3.519146518 | 0.00788869  | PTPRG   | ENSG00000144724 |
| 3 | 61982751 | 61982967 | 61982859 | 10 | 10 | 1  | 6.451768616 | 0.00135978  | PTPRG   | ENSG00000144724 |
| 3 | 61992343 | 61992685 | 61992514 | 8  | 14 | 9  | 1.759573259 | 0.0786014   | PTPRG   | ENSG00000144724 |
| 3 | 61995876 | 61996126 | 61995970 | 10 | 14 | 3  | 4.398933147 | 0.00132748  | PTPRG   | ENSG00000144724 |
| 3 | 62012357 | 62012613 | 62012497 | 17 | 18 | 13 | 1.591994853 | 0.0905191   | PTPRG   | ENSG00000144724 |
| 3 | 62019824 | 62020115 | 62019949 | 8  | 10 | 6  | 1.843362462 | 0.0964212   | PTPRG   | ENSG00000144724 |
| 3 | 62028383 | 62028661 | 62028522 | 8  | 11 | 5  | 2.346097679 | 0.0364013   | PTPRG   | ENSG00000144724 |
| 3 | 62073858 | 62074088 | 62073973 | 12 | 14 | 6  | 2.513676084 | 0.016726    | PTPRG   | ENSG00000144724 |
| 3 | 62076637 | 62076841 | 62076726 | 10 | 11 | 4  | 2.815317214 | 0.0183428   | PTPRG   | ENSG00000144724 |
| 3 | 62079889 | 62080187 | 62080012 | 9  | 14 | 3  | 4.398933147 | 0.00132748  | PTPRG   | ENSG00000144724 |
| 3 | 62080861 | 62081112 | 62081009 | 10 | 12 | 4  | 3.049926982 | 0.0108184   | PTPRG   | ENSG00000144724 |
| 3 | 62104286 | 62104643 | 62104464 | 9  | 13 | 7  | 2.052835469 | 0.046392    | PTPRG   | ENSG00000144724 |
| 3 | 62128568 | 62128747 | 62128618 | 8  | 9  | 4  | 2.346097679 | 0.050148    | C3orf14 | ENSG00000114405 |
| 3 | 62140446 | 62140779 | 62140608 | 11 | 16 | 6  | 2.848832895 | 0.00632407  | C3orf14 | ENSG00000114405 |
| 3 | 62144505 | 62144912 | 62144733 | 13 | 21 | 7  | 3.225884308 | 0.00106152  | C3orf14 | ENSG00000114405 |
| 3 | 62149578 | 62149985 | 62149757 | 18 | 25 | 12 | 2.346097679 | 0.00444113  | C3orf14 | ENSG00000114405 |
| 3 | 62162905 | 62163117 | 62162991 | 9  | 12 | 3  | 3.812408728 | 0.004404    | C3orf14 | ENSG00000114405 |
| 3 | 62170230 | 62170513 | 62170361 | 8  | 10 | 5  | 2.150589539 | 0.0575848   | C3orf14 | ENSG00000114405 |
| 3 | 62177450 | 62177677 | 62177589 | 11 | 12 | 1  | 7.624817456 | 0.000332769 | C3orf14 | ENSG00000114405 |
| 3 | 62180195 | 62180379 | 62180287 | 8  | 9  | 3  | 2.932622098 | 0.0242899   | C3orf14 | ENSG00000114405 |
| 3 | 62193375 | 62193639 | 62193507 | 8  | 10 | 2  | 4.301179077 | 0.00512919  | C3orf14 | ENSG00000114405 |
| 3 | 62202185 | 62202406 | 62202295 | 9  | 10 | 3  | 3.225884308 | 0.0139466   | C3orf14 | ENSG00000114405 |
| 3 | 62212954 | 62213133 | 62213043 | 8  | 8  | 5  | 1.759573259 | 0.13508     | C3orf14 | ENSG00000114405 |

|   |          |          |          |    |    |    |             |             |         |                 |
|---|----------|----------|----------|----|----|----|-------------|-------------|---------|-----------------|
| 3 | 62245494 | 62245806 | 62245645 | 8  | 11 | 3  | 3.519146518 | 0.00788869  | C3orf14 | ENSG00000114405 |
| 3 | 62278960 | 62279277 | 62279118 | 10 | 15 | 9  | 1.876878143 | 0.0544542   | C3orf14 | ENSG00000114405 |
| 3 | 62279844 | 62280420 | 62280241 | 13 | 31 | 24 | 1.501502514 | 0.0624568   | C3orf14 | ENSG00000114405 |
| 3 | 62280572 | 62280939 | 62280760 | 22 | 31 | 13 | 2.68125449  | 0.000581082 | C3orf14 | ENSG00000114405 |
| 3 | 62357355 | 62357601 | 62357478 | 9  | 11 | 3  | 3.519146518 | 0.00788869  | FEZF2   | ENSG00000153266 |
| 3 | 62364967 | 62365146 | 62365131 | 8  | 8  | 2  | 3.519146518 | 0.017558    | FEZF2   | ENSG00000153266 |
| 3 | 62398782 | 62399069 | 62398925 | 11 | 11 | 5  | 2.346097679 | 0.0364013   | FEZF2   | ENSG00000153266 |
| 3 | 62400630 | 62400964 | 62400808 | 9  | 12 | 6  | 2.178519273 | 0.0416567   | FEZF2   | ENSG00000153266 |
| 3 | 62405948 | 62406176 | 62406053 | 8  | 9  | 9  | 1.173048839 | 0.362316    | FEZF2   | ENSG00000153266 |
| 3 | 62406526 | 62406766 | 62406641 | 10 | 12 | 4  | 3.049926982 | 0.0108184   | FEZF2   | ENSG00000153266 |
| 3 | 62414472 | 62414651 | 62414519 | 8  | 10 | 15 | 0.806471077 | 0.716145    | FEZF2   | ENSG00000153266 |
| 3 | 62426838 | 62427057 | 62427012 | 8  | 9  | 1  | 5.865244197 | 0.00272497  | FEZF2   | ENSG00000153266 |
| 3 | 62434846 | 62435043 | 62434944 | 8  | 8  | 4  | 2.111487911 | 0.0804809   | FEZF2   | ENSG00000153266 |
| 3 | 62454241 | 62454525 | 62454383 | 9  | 11 | 9  | 1.407658607 | 0.210479    | FEZF2   | ENSG00000153266 |
| 3 | 62463700 | 62463953 | 62463826 | 10 | 12 | 4  | 3.049926982 | 0.0108184   | FEZF2   | ENSG00000153266 |
| 3 | 62473927 | 62474236 | 62474081 | 9  | 12 | 7  | 1.906204364 | 0.0695918   | FEZF2   | ENSG00000153266 |
| 3 | 62490027 | 62490393 | 62490246 | 12 | 18 | 9  | 2.228792795 | 0.0164363   | FEZF2   | ENSG00000153266 |
| 3 | 62514539 | 62514761 | 62514676 | 8  | 10 | 7  | 1.612942154 | 0.147335    | FEZF2   | ENSG00000153266 |
| 3 | 62536623 | 62536850 | 62536736 | 10 | 12 | 12 | 1.173048839 | 0.343543    | FEZF2   | ENSG00000153266 |
| 3 | 62548078 | 62548355 | 62548216 | 9  | 11 | 7  | 1.759573259 | 0.102361    |         | ENSG00000210876 |
| 3 | 62549921 | 62550100 | 62550010 | 8  | 8  | 0  | 10.55743955 | 0.000925496 |         | ENSG00000210876 |
| 3 | 62567675 | 62567898 | 62567723 | 8  | 9  | 4  | 2.346097679 | 0.050148    |         | ENSG00000210876 |
| 3 | 62568567 | 62568773 | 62568670 | 8  | 10 | 3  | 3.225884308 | 0.0139466   |         | ENSG00000210876 |
| 3 | 62583279 | 62583709 | 62583497 | 14 | 25 | 13 | 2.178519273 | 0.00752428  |         | ENSG00000210876 |
| 3 | 62594256 | 62594557 | 62594406 | 9  | 12 | 7  | 1.906204364 | 0.0695918   |         | ENSG00000210876 |
| 3 | 62620402 | 62620634 | 62620520 | 8  | 10 | 8  | 1.433726359 | 0.209175    |         | ENSG00000210876 |
| 3 | 62626605 | 62626924 | 62626763 | 10 | 13 | 14 | 1.094845583 | 0.406217    |         | ENSG00000210876 |
| 3 | 62628476 | 62628727 | 62628593 | 8  | 11 | 4  | 2.815317214 | 0.0183428   |         | ENSG00000210876 |
| 3 | 62629459 | 62629762 | 62629610 | 8  | 13 | 2  | 5.474227917 | 0.000747844 |         | ENSG00000210876 |
| 3 | 62684380 | 62684695 | 62684537 | 8  | 10 | 1  | 6.451768616 | 0.00135978  |         | ENSG00000210876 |
| 3 | 62692740 | 62692919 | 62692863 | 9  | 9  | 5  | 1.955081399 | 0.0892323   |         | ENSG00000210876 |
| 3 | 62793417 | 62793878 | 62793576 | 10 | 18 | 11 | 1.857327329 | 0.0427732   |         | ENSG00000210884 |
| 3 | 62836598 | 62837198 | 62837072 | 12 | 25 | 11 | 2.541605819 | 0.00248721  | CADPS   | ENSG00000163618 |
| 3 | 62848970 | 62849275 | 62849124 | 11 | 15 | 13 | 1.340627245 | 0.210788    | CADPS   | ENSG00000163618 |



|   |          |          |          |    |    |    |             |             |       |                 |
|---|----------|----------|----------|----|----|----|-------------|-------------|-------|-----------------|
| 3 | 62859841 | 62860153 | 62859997 | 11 | 15 | 4  | 3.753756286 | 0.0020497   | CADPS | ENSG00000163618 |
| 3 | 62878200 | 62878536 | 62878368 | 8  | 12 | 4  | 3.049926982 | 0.0108184   | CADPS | ENSG00000163618 |
| 3 | 62922649 | 62922828 | 62922765 | 8  | 8  | 6  | 1.508205651 | 0.203852    | CADPS | ENSG00000163618 |
| 3 | 62926109 | 62926315 | 62926200 | 9  | 11 | 13 | 1.005470434 | 0.498567    | CADPS | ENSG00000163618 |
| 3 | 63002722 | 63002952 | 63002805 | 9  | 10 | 7  | 1.612942154 | 0.147335    | CADPS | ENSG00000163618 |
| 3 | 63022201 | 63022587 | 63022463 | 9  | 15 | 6  | 2.68125449  | 0.0103552   | CADPS | ENSG00000163618 |
| 3 | 63028704 | 63029050 | 63028877 | 18 | 24 | 7  | 3.665777623 | 0.000215502 | CADPS | ENSG00000163618 |
| 3 | 63065635 | 63065843 | 63065697 | 8  | 8  | 7  | 1.319679944 | 0.283403    | CADPS | ENSG00000163618 |
| 3 | 63087895 | 63088192 | 63088043 | 8  | 10 | 4  | 2.580707446 | 0.0306059   |       | ENSG00000222622 |
| 3 | 63128973 | 63129181 | 63129104 | 8  | 10 | 4  | 2.580707446 | 0.0306059   |       | ENSG00000222622 |
| 3 | 63163397 | 63163603 | 63163500 | 8  | 9  | 11 | 0.977540699 | 0.526123    |       | ENSG00000222622 |
| 3 | 63166102 | 63166340 | 63166241 | 8  | 8  | 3  | 2.639359888 | 0.0415794   |       | ENSG00000222622 |
| 3 | 63189369 | 63189731 | 63189570 | 9  | 15 | 9  | 1.876878143 | 0.0544542   |       | ENSG00000222622 |
| 3 | 63203128 | 63203448 | 63203280 | 11 | 14 | 13 | 1.256838042 | 0.269506    |       | ENSG00000222622 |
| 3 | 63239456 | 63239726 | 63239591 | 9  | 10 | 5  | 2.150589539 | 0.0575848   |       | ENSG00000222622 |
| 3 | 63304427 | 63304811 | 63304589 | 11 | 16 | 9  | 1.994183027 | 0.0370915   |       | ENSG00000222622 |
| 3 | 63311829 | 63312239 | 63312075 | 17 | 24 | 10 | 2.666020089 | 0.00209276  |       | ENSG00000222622 |
| 3 | 63364439 | 63364638 | 63364538 | 9  | 10 | 2  | 4.301179077 | 0.00512919  |       | ENSG00000222622 |
| 3 | 63375021 | 63375218 | 63375106 | 8  | 9  | 0  | 11.73048839 | 0.000425898 | SYNPR | ENSG00000163630 |
| 3 | 63376416 | 63376651 | 63376533 | 8  | 10 | 4  | 2.580707446 | 0.0306059   | SYNPR | ENSG00000163630 |
| 3 | 63389335 | 63389625 | 63389495 | 14 | 16 | 5  | 3.323638378 | 0.00288759  | SYNPR | ENSG00000163630 |
| 3 | 63418957 | 63419364 | 63419221 | 9  | 15 | 10 | 1.706252857 | 0.0822346   | SYNPR | ENSG00000163630 |
| 3 | 63432428 | 63432625 | 63432563 | 8  | 10 | 1  | 6.451768616 | 0.00135978  | SYNPR | ENSG00000163630 |
| 3 | 63450885 | 63451064 | 63450974 | 8  | 8  | 4  | 2.111487911 | 0.0804809   | SYNPR | ENSG00000163630 |
| 3 | 63471763 | 63472147 | 63471977 | 9  | 15 | 6  | 2.68125449  | 0.0103552   | SYNPR | ENSG00000163630 |
| 3 | 63479400 | 63479675 | 63479570 | 9  | 10 | 4  | 2.580707446 | 0.0306059   |       | ENSG00000210887 |
| 3 | 63483694 | 63484073 | 63483894 | 8  | 15 | 12 | 1.443752418 | 0.160732    |       | ENSG00000210887 |
| 3 | 63525642 | 63525854 | 63525736 | 9  | 10 | 7  | 1.612942154 | 0.147335    |       | ENSG00000210887 |
| 3 | 63527253 | 63527461 | 63527352 | 9  | 10 | 6  | 1.843362462 | 0.0964212   |       | ENSG00000210887 |
| 3 | 63537545 | 63537957 | 63537724 | 27 | 36 | 11 | 3.616900588 | 1.14E-05    |       | ENSG00000210887 |
| 3 | 63603021 | 63603266 | 63603118 | 10 | 12 | 4  | 3.049926982 | 0.0108184   |       | ENSG00000188817 |
| 3 | 63604799 | 63605127 | 63604952 | 14 | 19 | 7  | 2.932622098 | 0.00293566  |       | ENSG00000188817 |
| 3 | 63605456 | 63605887 | 63605635 | 9  | 17 | 9  | 2.111487911 | 0.0248715   |       | ENSG00000188817 |
| 3 | 63612980 | 63613198 | 63613051 | 10 | 12 | 3  | 3.812408728 | 0.004404    |       | ENSG00000188817 |

|   |          |          |          |    |    |    |             |            |         |                 |
|---|----------|----------|----------|----|----|----|-------------|------------|---------|-----------------|
| 3 | 63623204 | 63623527 | 63623361 | 14 | 17 | 8  | 2.346097679 | 0.0144542  |         | ENSG00000188817 |
| 3 | 63627327 | 63627556 | 63627463 | 8  | 9  | 2  | 3.910162798 | 0.00955088 |         | ENSG00000188817 |
| 3 | 63635123 | 63635349 | 63635236 | 8  | 9  | 12 | 0.902345261 | 0.602772   |         | ENSG00000188817 |
| 3 | 63648541 | 63648773 | 63648657 | 10 | 10 | 6  | 1.843362462 | 0.0964212  |         | ENSG00000188817 |
| 3 | 63678149 | 63678339 | 63678244 | 8  | 8  | 13 | 0.754102825 | 0.754933   |         | ENSG00000188817 |
| 3 | 63679910 | 63680150 | 63680049 | 11 | 13 | 19 | 0.821134188 | 0.720637   |         | ENSG00000188817 |
| 3 | 63680191 | 63680507 | 63680351 | 8  | 13 | 21 | 0.746485625 | 0.811212   |         | ENSG00000188817 |
| 3 | 63681066 | 63681280 | 63681110 | 9  | 11 | 26 | 0.52135504  | 0.975812   |         | ENSG00000188817 |
| 3 | 63685289 | 63685493 | 63685395 | 8  | 8  | 25 | 0.406055367 | 0.994096   |         | ENSG00000188817 |
| 3 | 63685848 | 63686119 | 63686015 | 8  | 10 | 11 | 1.075294769 | 0.434143   |         | ENSG00000188817 |
| 3 | 63686480 | 63686882 | 63686703 | 10 | 18 | 17 | 1.238218219 | 0.258417   |         | ENSG00000188817 |
| 3 | 63687281 | 63687972 | 63687793 | 10 | 26 | 41 | 0.754102825 | 0.878542   |         | ENSG00000188817 |
| 3 | 63688021 | 63688209 | 63688111 | 9  | 10 | 18 | 0.679133539 | 0.855647   |         | ENSG00000188817 |
| 3 | 63688357 | 63688766 | 63688536 | 11 | 17 | 19 | 1.055743955 | 0.436418   |         | ENSG00000188817 |
| 3 | 63689016 | 63689239 | 63689127 | 8  | 9  | 7  | 1.466311049 | 0.20706    |         | ENSG00000188817 |
| 3 | 63689344 | 63689667 | 63689497 | 8  | 12 | 17 | 0.84720194  | 0.681997   |         | ENSG00000188817 |
| 3 | 63690620 | 63691068 | 63690889 | 15 | 26 | 22 | 1.377057333 | 0.128834   |         | ENSG00000188817 |
| 3 | 63691088 | 63691485 | 63691212 | 8  | 16 | 20 | 0.949610965 | 0.567123   |         | ENSG00000188817 |
| 3 | 63700732 | 63701559 | 63701145 | 15 | 43 | 53 | 0.955817573 | 0.59057    | C3orf49 | ENSG00000163632 |
| 3 | 63702745 | 63703121 | 63702942 | 15 | 22 | 28 | 0.930349079 | 0.605811   | C3orf49 | ENSG00000163632 |
| 3 | 63703336 | 63703609 | 63703515 | 8  | 11 | 5  | 2.346097679 | 0.0364013  | C3orf49 | ENSG00000163632 |
| 3 | 63703803 | 63704182 | 63703982 | 12 | 19 | 15 | 1.466311049 | 0.125014   | C3orf49 | ENSG00000163632 |
| 3 | 63704240 | 63704730 | 63704496 | 10 | 20 | 23 | 1.026417734 | 0.468083   | C3orf49 | ENSG00000163632 |
| 3 | 63707118 | 63707440 | 63707279 | 10 | 15 | 21 | 0.853126429 | 0.691243   | C3orf49 | ENSG00000163632 |
| 3 | 63707690 | 63707904 | 63707791 | 9  | 11 | 10 | 1.279689643 | 0.277323   | C3orf49 | ENSG00000163632 |
| 3 | 63710852 | 63711206 | 63711029 | 10 | 16 | 11 | 1.661819189 | 0.0853913  | C3orf49 | ENSG00000163632 |
| 3 | 63711610 | 63711952 | 63711781 | 14 | 20 | 31 | 0.769813301 | 0.829881   | C3orf49 | ENSG00000163632 |
| 3 | 63713618 | 63713889 | 63713724 | 9  | 10 | 8  | 1.433726359 | 0.209175   | C3orf49 | ENSG00000163632 |
| 3 | 63714140 | 63714684 | 63714505 | 33 | 51 | 36 | 1.64860918  | 0.00936783 | C3orf49 | ENSG00000163632 |
| 3 | 63714840 | 63715281 | 63715003 | 15 | 26 | 26 | 1.173048839 | 0.279807   | C3orf49 | ENSG00000163632 |
| 3 | 63716572 | 63716862 | 63716751 | 9  | 12 | 17 | 0.84720194  | 0.681997   | C3orf49 | ENSG00000163632 |
| 3 | 63720977 | 63721185 | 63721064 | 9  | 10 | 5  | 2.150589539 | 0.0575848  | C3orf49 | ENSG00000163632 |
| 3 | 63752787 | 63753046 | 63752916 | 14 | 15 | 15 | 1.173048839 | 0.32719    | C3orf49 | ENSG00000163632 |
| 3 | 63756234 | 63756672 | 63756403 | 12 | 22 | 12 | 2.0753941   | 0.0149739  | C3orf49 | ENSG00000163632 |

|   |          |          |          |    |    |    |             |             |         |                 |
|---|----------|----------|----------|----|----|----|-------------|-------------|---------|-----------------|
| 3 | 63772817 | 63773396 | 63773123 | 45 | 56 | 2  | 22.28792795 | 3.14E-17    | C3orf49 | ENSG00000163632 |
| 3 | 63779270 | 63779619 | 63779444 | 26 | 31 | 29 | 1.251252095 | 0.18907     | C3orf49 | ENSG00000163632 |
| 3 | 63781493 | 63781768 | 63781599 | 9  | 13 | 4  | 3.28453675  | 0.00629037  | C3orf49 | ENSG00000163632 |
| 3 | 63800254 | 63800485 | 63800369 | 8  | 10 | 4  | 2.580707446 | 0.0306059   | THOC7   | ENSG00000163634 |
| 3 | 63808480 | 63808770 | 63808618 | 13 | 15 | 4  | 3.753756286 | 0.0020497   | THOC7   | ENSG00000163634 |
| 3 | 63808993 | 63809189 | 63809144 | 8  | 9  | 12 | 0.902345261 | 0.602772    | THOC7   | ENSG00000163634 |
| 3 | 63812873 | 63813114 | 63812969 | 8  | 10 | 4  | 2.580707446 | 0.0306059   | THOC7   | ENSG00000163634 |
| 3 | 63820037 | 63820503 | 63820373 | 10 | 18 | 16 | 1.311054585 | 0.208218    | THOC7   | ENSG00000163634 |
| 3 | 63825163 | 63825566 | 63825428 | 13 | 19 | 15 | 1.466311049 | 0.125014    | ATXN7   | ENSG00000163635 |
| 3 | 63825582 | 63825816 | 63825721 | 11 | 13 | 20 | 0.78203256  | 0.76897     | ATXN7   | ENSG00000163635 |
| 3 | 63825986 | 63826240 | 63826085 | 10 | 12 | 6  | 2.178519273 | 0.0416567   | ATXN7   | ENSG00000163635 |
| 3 | 63833017 | 63833597 | 63833418 | 11 | 26 | 16 | 1.863077568 | 0.0200163   | ATXN7   | ENSG00000163635 |
| 3 | 63835422 | 63835629 | 63835479 | 8  | 8  | 4  | 2.111487911 | 0.0804809   | ATXN7   | ENSG00000163635 |
| 3 | 63838439 | 63838718 | 63838549 | 8  | 11 | 4  | 2.815317214 | 0.0183428   | ATXN7   | ENSG00000163635 |
| 3 | 63839257 | 63839455 | 63839350 | 8  | 10 | 9  | 1.290353723 | 0.279648    | ATXN7   | ENSG00000163635 |
| 3 | 63853363 | 63853589 | 63853486 | 8  | 8  | 10 | 0.959767232 | 0.541959    | ATXN7   | ENSG00000163635 |
| 3 | 63854740 | 63854981 | 63854860 | 10 | 10 | 5  | 2.150589539 | 0.0575848   | ATXN7   | ENSG00000163635 |
| 3 | 63867140 | 63867362 | 63867251 | 9  | 10 | 5  | 2.150589539 | 0.0575848   | ATXN7   | ENSG00000163635 |
| 3 | 63867844 | 63868094 | 63867969 | 9  | 10 | 1  | 6.451768616 | 0.00135978  | ATXN7   | ENSG00000163635 |
| 3 | 63868828 | 63869154 | 63868991 | 20 | 25 | 9  | 3.049926982 | 0.000648806 | ATXN7   | ENSG00000163635 |
| 3 | 63870959 | 63871158 | 63871054 | 8  | 9  | 6  | 1.675784056 | 0.141978    | ATXN7   | ENSG00000163635 |
| 3 | 63871749 | 63871954 | 63871851 | 9  | 9  | 5  | 1.955081399 | 0.0892323   | ATXN7   | ENSG00000163635 |
| 3 | 63872428 | 63872845 | 63872666 | 27 | 37 | 19 | 2.228792795 | 0.00134089  | ATXN7   | ENSG00000163635 |
| 3 | 63873163 | 63873363 | 63873263 | 8  | 8  | 0  | 10.55743955 | 0.000925496 | ATXN7   | ENSG00000163635 |
| 3 | 63873626 | 63874251 | 63873805 | 11 | 25 | 16 | 1.794074695 | 0.0280669   | ATXN7   | ENSG00000163635 |
| 3 | 63874634 | 63874863 | 63874772 | 10 | 12 | 13 | 1.089259637 | 0.414883    | ATXN7   | ENSG00000163635 |
| 3 | 63874974 | 63875510 | 63875236 | 18 | 31 | 20 | 1.787502993 | 0.0176346   | ATXN7   | ENSG00000163635 |
| 3 | 63878772 | 63878968 | 63878862 | 10 | 11 | 9  | 1.407658607 | 0.210479    | ATXN7   | ENSG00000163635 |
| 3 | 63892622 | 63892801 | 63892708 | 8  | 8  | 4  | 2.111487911 | 0.0804809   | ATXN7   | ENSG00000163635 |
| 3 | 63893498 | 63894057 | 63893785 | 15 | 31 | 17 | 2.085420159 | 0.00510205  | ATXN7   | ENSG00000163635 |
| 3 | 63897145 | 63897573 | 63897394 | 15 | 25 | 21 | 1.386330446 | 0.128722    | ATXN7   | ENSG00000163635 |
| 3 | 63898764 | 63899032 | 63898882 | 10 | 12 | 10 | 1.386330446 | 0.21117     | ATXN7   | ENSG00000163635 |
| 3 | 63899133 | 63899352 | 63899242 | 9  | 10 | 5  | 2.150589539 | 0.0575848   | ATXN7   | ENSG00000163635 |
| 3 | 63899986 | 63900225 | 63900105 | 8  | 9  | 11 | 0.977540699 | 0.526123    | ATXN7   | ENSG00000163635 |

|   |          |          |          |    |     |    |             |            |       |                 |
|---|----------|----------|----------|----|-----|----|-------------|------------|-------|-----------------|
| 3 | 63903940 | 63904152 | 63904053 | 9  | 10  | 9  | 1.290353723 | 0.279648   | ATXN7 | ENSG00000163635 |
| 3 | 63904522 | 63904749 | 63904635 | 9  | 9   | 10 | 1.066408036 | 0.444985   | ATXN7 | ENSG00000163635 |
| 3 | 63953779 | 63954982 | 63954535 | 43 | 92  | 71 | 1.515188084 | 0.00386432 | PSMD6 | ENSG00000163636 |
| 3 | 63955571 | 63955914 | 63955742 | 13 | 19  | 26 | 0.868925066 | 0.687875   | PSMD6 | ENSG00000163636 |
| 3 | 63956797 | 63957725 | 63956976 | 13 | 42  | 42 | 1.173048839 | 0.230401   | PSMD6 | ENSG00000163636 |
| 3 | 63958708 | 63959128 | 63958972 | 8  | 15  | 22 | 0.816033975 | 0.739972   | PSMD6 | ENSG00000163636 |
| 3 | 63959643 | 63959895 | 63959784 | 13 | 15  | 28 | 0.64719936  | 0.925559   | PSMD6 | ENSG00000163636 |
| 3 | 63959944 | 63960391 | 63960212 | 10 | 20  | 31 | 0.769813301 | 0.829881   | PSMD6 | ENSG00000163636 |
| 3 | 63960407 | 63960655 | 63960531 | 11 | 13  | 25 | 0.631641683 | 0.924582   | PSMD6 | ENSG00000163636 |
| 3 | 63960782 | 63961174 | 63960978 | 10 | 19  | 23 | 0.977540699 | 0.533404   | PSMD6 | ENSG00000163636 |
| 3 | 63962006 | 63962415 | 63962163 | 12 | 17  | 22 | 0.918038222 | 0.611544   | PSMD6 | ENSG00000163636 |
| 3 | 63964336 | 63964636 | 63964486 | 8  | 12  | 24 | 0.609985396 | 0.933574   | PSMD6 | ENSG00000163636 |
| 3 | 63964769 | 63965398 | 63964989 | 11 | 26  | 22 | 1.377057333 | 0.128834   | PSMD6 | ENSG00000163636 |
| 3 | 63965417 | 63965737 | 63965595 | 10 | 15  | 15 | 1.173048839 | 0.32719    | PSMD6 | ENSG00000163636 |
| 3 | 63965817 | 63966405 | 63966239 | 15 | 27  | 40 | 0.801106524 | 0.821751   | PSMD6 | ENSG00000163636 |
| 3 | 63966486 | 63966774 | 63966630 | 10 | 14  | 9  | 1.759573259 | 0.0786014  | PSMD6 | ENSG00000163636 |
| 3 | 63966838 | 63967485 | 63967328 | 14 | 34  | 36 | 1.109640794 | 0.330986   | PSMD6 | ENSG00000163636 |
| 3 | 63967746 | 63968210 | 63967917 | 11 | 21  | 21 | 1.173048839 | 0.299417   | PSMD6 | ENSG00000163636 |
| 3 | 63968217 | 63968531 | 63968362 | 9  | 14  | 23 | 0.733155525 | 0.834412   | PSMD6 | ENSG00000163636 |
| 3 | 63970230 | 63970455 | 63970342 | 9  | 12  | 19 | 0.762481746 | 0.784291   | PSMD6 | ENSG00000163636 |
| 3 | 63970765 | 63971015 | 63970886 | 8  | 10  | 11 | 1.075294769 | 0.434143   | PSMD6 | ENSG00000163636 |
| 3 | 63971086 | 63971340 | 63971178 | 10 | 11  | 10 | 1.279689643 | 0.277323   | PSMD6 | ENSG00000163636 |
| 3 | 63972237 | 63972668 | 63972489 | 12 | 20  | 26 | 0.912371319 | 0.627883   | PSMD6 | ENSG00000163636 |
| 3 | 63972933 | 63973236 | 63973084 | 10 | 16  | 19 | 0.997091513 | 0.507069   | PSMD6 | ENSG00000163636 |
| 3 | 63973258 | 63973499 | 63973392 | 9  | 11  | 23 | 0.58652442  | 0.942313   | PSMD6 | ENSG00000163636 |
| 3 | 63973706 | 63973923 | 63973814 | 8  | 11  | 14 | 0.938439071 | 0.570297   | PSMD6 | ENSG00000163636 |
| 3 | 63974439 | 63974680 | 63974543 | 8  | 12  | 15 | 0.953102182 | 0.555895   | PSMD6 | ENSG00000163636 |
| 3 | 63975553 | 63975800 | 63975669 | 9  | 11  | 20 | 0.670313622 | 0.874201   | PSMD6 | ENSG00000163636 |
| 3 | 63978049 | 63978254 | 63978125 | 9  | 10  | 9  | 1.290353723 | 0.279648   | PSMD6 | ENSG00000163636 |
| 3 | 63978400 | 63978778 | 63978560 | 8  | 14  | 9  | 1.759573259 | 0.0786014  | PSMD6 | ENSG00000163636 |
| 3 | 63978958 | 63979233 | 63979095 | 8  | 12  | 20 | 0.726173091 | 0.825666   | PSMD6 | ENSG00000163636 |
| 3 | 63981878 | 63982123 | 63981999 | 10 | 11  | 10 | 1.279689643 | 0.277323   | PSMD6 | ENSG00000163636 |
| 3 | 63983007 | 63984922 | 63984259 | 84 | 211 | 98 | 2.511983373 | 1.59E-15   | PSMD6 | ENSG00000163636 |
| 3 | 63985069 | 63985333 | 63985220 | 8  | 8   | 14 | 0.703829304 | 0.807737   | PSMD6 | ENSG00000163636 |

|   |          |          |          |    |     |    |             |           |       |                 |
|---|----------|----------|----------|----|-----|----|-------------|-----------|-------|-----------------|
| 3 | 63985416 | 63986055 | 63985724 | 11 | 24  | 22 | 1.275053086 | 0.200162  | PSMD6 | ENSG00000163636 |
| 3 | 63987953 | 63988170 | 63988068 | 8  | 11  | 15 | 0.879786629 | 0.637414  | PSMD6 | ENSG00000163636 |
| 3 | 63988299 | 63988692 | 63988522 | 12 | 19  | 23 | 0.977540699 | 0.533404  | PSMD6 | ENSG00000163636 |
| 3 | 63988960 | 63989287 | 63989123 | 12 | 15  | 14 | 1.251252095 | 0.26676   | PSMD6 | ENSG00000163636 |
| 3 | 63989596 | 63990018 | 63989850 | 10 | 18  | 19 | 1.114396397 | 0.369586  | PSMD6 | ENSG00000163636 |
| 3 | 63990075 | 63990362 | 63990212 | 14 | 15  | 11 | 1.564065119 | 0.11768   | PSMD6 | ENSG00000163636 |
| 3 | 63991021 | 63992213 | 63991586 | 62 | 131 | 74 | 2.064565957 | 1.40E-07  | PSMD6 | ENSG00000163636 |
| 3 | 63992331 | 63992627 | 63992477 | 11 | 14  | 18 | 0.926091189 | 0.59273   | PSMD6 | ENSG00000163636 |
| 3 | 63992650 | 63993342 | 63992996 | 10 | 26  | 37 | 0.83348207  | 0.769832  | PSMD6 | ENSG00000163636 |
| 3 | 63993807 | 63994118 | 63993967 | 10 | 13  | 10 | 1.49297125  | 0.157311  | PSMD6 | ENSG00000163636 |
| 3 | 63995000 | 63995182 | 63995102 | 8  | 9   | 16 | 0.690028729 | 0.833766  | PSMD6 | ENSG00000163636 |
| 3 | 63997228 | 63997600 | 63997363 | 10 | 16  | 18 | 1.049570014 | 0.445264  | PSMD6 | ENSG00000163636 |
| 3 | 63997750 | 63998268 | 63998071 | 15 | 27  | 35 | 0.912371319 | 0.645679  | PSMD6 | ENSG00000163636 |
| 3 | 63999053 | 63999380 | 63999216 | 10 | 15  | 19 | 0.938439071 | 0.579569  | PSMD6 | ENSG00000163636 |
| 3 | 63999434 | 63999630 | 63999486 | 9  | 9   | 13 | 0.837892028 | 0.672794  | PSMD6 | ENSG00000163636 |
| 3 | 63999921 | 64000668 | 64000280 | 11 | 30  | 33 | 1.06954453  | 0.395234  | PSMD6 | ENSG00000163636 |
| 3 | 64000782 | 64001012 | 64000897 | 9  | 11  | 20 | 0.670313622 | 0.874201  | PSMD6 | ENSG00000163636 |
| 3 | 64005038 | 64005261 | 64005186 | 10 | 12  | 14 | 1.016642327 | 0.486402  | PSMD6 | ENSG00000163636 |
| 3 | 64006128 | 64006405 | 64006243 | 12 | 14  | 14 | 1.173048839 | 0.332418  | PSMD6 | ENSG00000163636 |
| 3 | 64006719 | 64006967 | 64006841 | 9  | 11  | 8  | 1.564065119 | 0.151515  | PSMD6 | ENSG00000163636 |
| 3 | 64007049 | 64007419 | 64007240 | 8  | 15  | 23 | 0.78203256  | 0.783431  | PSMD6 | ENSG00000163636 |
| 3 | 64008628 | 64009493 | 64009134 | 15 | 38  | 40 | 1.115826945 | 0.313401  |       | ENSG00000200222 |
| 3 | 64009606 | 64009905 | 64009755 | 10 | 12  | 16 | 0.897037348 | 0.621544  |       | ENSG00000200222 |
| 3 | 64009914 | 64011125 | 64010281 | 13 | 51  | 50 | 1.196049797 | 0.182335  |       | ENSG00000200222 |
| 3 | 64012060 | 64012399 | 64012229 | 11 | 17  | 20 | 1.005470434 | 0.496566  |       | ENSG00000200222 |
| 3 | 64012894 | 64013153 | 64013023 | 12 | 15  | 24 | 0.750751257 | 0.821554  |       | ENSG00000200222 |
| 3 | 64014234 | 64015332 | 64014783 | 15 | 56  | 66 | 0.997966923 | 0.506431  |       | ENSG00000200222 |
| 3 | 64015734 | 64016106 | 64015927 | 11 | 19  | 12 | 1.804690522 | 0.0452624 |       | ENSG00000200222 |
| 3 | 64016182 | 64016662 | 64016361 | 12 | 22  | 20 | 1.284767776 | 0.203104  |       | ENSG00000200222 |
| 3 | 64017303 | 64017556 | 64017429 | 12 | 14  | 17 | 0.977540699 | 0.52995   |       | ENSG00000200222 |
| 3 | 64017607 | 64018186 | 64018060 | 9  | 23  | 27 | 1.005470434 | 0.495068  |       | ENSG00000200222 |
| 3 | 64018714 | 64019065 | 64018889 | 8  | 14  | 12 | 1.353517892 | 0.211235  |       | ENSG00000200222 |
| 3 | 64019370 | 64019664 | 64019517 | 11 | 14  | 15 | 1.099733287 | 0.398076  |       | ENSG00000200222 |
| 3 | 64021089 | 64021498 | 64021319 | 8  | 15  | 30 | 0.605444562 | 0.95448   |       | ENSG00000200222 |

|   |          |          |          |    |    |    |             |           |                 |
|---|----------|----------|----------|----|----|----|-------------|-----------|-----------------|
| 3 | 64022824 | 64023159 | 64022991 | 14 | 19 | 33 | 0.690028729 | 0.911874  | ENSG00000200222 |
| 3 | 64023174 | 64023778 | 64023514 | 13 | 28 | 38 | 0.872267086 | 0.715311  | ENSG00000200222 |
| 3 | 64024073 | 64024560 | 64024415 | 15 | 27 | 29 | 1.094845583 | 0.366894  | ENSG00000200222 |
| 3 | 64024654 | 64025135 | 64024894 | 17 | 29 | 37 | 0.926091189 | 0.626749  | ENSG00000200222 |
| 3 | 64025728 | 64026022 | 64025898 | 9  | 11 | 14 | 0.938439071 | 0.570297  | ENSG00000200222 |
| 3 | 64028018 | 64028302 | 64028160 | 9  | 13 | 9  | 1.642268375 | 0.111397  | ENSG00000200222 |
| 3 | 64028701 | 64028939 | 64028841 | 9  | 12 | 17 | 0.84720194  | 0.681997  | ENSG00000200222 |
| 3 | 64029432 | 64029762 | 64029597 | 9  | 13 | 10 | 1.49297125  | 0.157311  | ENSG00000200222 |
| 3 | 64032116 | 64032421 | 64032280 | 9  | 12 | 16 | 0.897037348 | 0.621544  | ENSG00000200222 |
| 3 | 64033173 | 64033382 | 64033277 | 11 | 11 | 22 | 0.612025481 | 0.924393  | ENSG00000200222 |
| 3 | 64033620 | 64033801 | 64033724 | 9  | 9  | 17 | 0.6516938   | 0.871116  | ENSG00000200222 |
| 3 | 64033841 | 64034709 | 64034327 | 25 | 55 | 51 | 1.263283365 | 0.112464  | ENSG00000200222 |
| 3 | 64034838 | 64035595 | 64035252 | 8  | 27 | 25 | 1.263283365 | 0.195501  | ENSG00000200222 |
| 3 | 64037301 | 64037858 | 64037581 | 8  | 20 | 30 | 0.794645988 | 0.79747   | ENSG00000200222 |
| 3 | 64038420 | 64038776 | 64038498 | 10 | 15 | 20 | 0.893751497 | 0.63757   | ENSG00000200222 |
| 3 | 64039625 | 64039881 | 64039753 | 16 | 17 | 16 | 1.242051712 | 0.261202  | ENSG00000200222 |
| 3 | 64039940 | 64040240 | 64040083 | 9  | 13 | 19 | 0.821134188 | 0.720637  | ENSG00000200222 |
| 3 | 64040957 | 64041264 | 64041119 | 12 | 14 | 35 | 0.48877035  | 0.992949  | ENSG00000189196 |
| 3 | 64041500 | 64041771 | 64041627 | 8  | 10 | 13 | 0.921681231 | 0.585856  | ENSG00000189196 |
| 3 | 64041982 | 64042213 | 64042099 | 9  | 12 | 8  | 1.694403879 | 0.107291  | ENSG00000189196 |
| 3 | 64043039 | 64043506 | 64043329 | 18 | 27 | 28 | 1.132598879 | 0.320597  | ENSG00000189196 |
| 3 | 64044199 | 64044676 | 64044497 | 9  | 19 | 34 | 0.670313622 | 0.928882  | ENSG00000189196 |
| 3 | 64044688 | 64044914 | 64044801 | 10 | 12 | 24 | 0.609985396 | 0.933574  | ENSG00000189196 |
| 3 | 64045541 | 64045876 | 64045712 | 12 | 15 | 14 | 1.251252095 | 0.26676   | ENSG00000189196 |
| 3 | 64047026 | 64047708 | 64047232 | 15 | 37 | 30 | 1.437930835 | 0.0657032 | ENSG00000189196 |
| 3 | 64049315 | 64049783 | 64049652 | 10 | 21 | 23 | 1.075294769 | 0.4051    | ENSG00000189196 |
| 3 | 64049947 | 64050233 | 64050090 | 12 | 12 | 17 | 0.84720194  | 0.681997  | ENSG00000189196 |
| 3 | 64050978 | 64051360 | 64051157 | 15 | 23 | 26 | 1.042710079 | 0.443237  | ENSG00000189196 |
| 3 | 64052050 | 64052247 | 64052161 | 8  | 9  | 13 | 0.837892028 | 0.672794  | ENSG00000189196 |
| 3 | 64052407 | 64052589 | 64052466 | 8  | 9  | 15 | 0.733155525 | 0.788527  | ENSG00000189196 |
| 3 | 64052871 | 64053058 | 64052917 | 8  | 10 | 11 | 1.075294769 | 0.434143  | ENSG00000189196 |
| 3 | 64053307 | 64053545 | 64053410 | 10 | 10 | 15 | 0.806471077 | 0.716145  | ENSG00000189196 |
| 3 | 64053670 | 64053864 | 64053767 | 10 | 10 | 12 | 0.992579787 | 0.511743  | ENSG00000189196 |
| 3 | 64054362 | 64054756 | 64054600 | 8  | 15 | 25 | 0.721876209 | 0.854481  | ENSG00000189196 |

|   |          |          |          |    |    |    |             |            |                 |
|---|----------|----------|----------|----|----|----|-------------|------------|-----------------|
| 3 | 64055472 | 64056118 | 64055994 | 9  | 26 | 40 | 0.772495577 | 0.855992   | ENSG00000189196 |
| 3 | 64056486 | 64056807 | 64056646 | 12 | 16 | 33 | 0.58652442  | 0.968848   | ENSG00000189196 |
| 3 | 64057907 | 64058813 | 64058472 | 20 | 50 | 50 | 1.173048839 | 0.210822   | ENSG00000189196 |
| 3 | 64058881 | 64059101 | 64058991 | 11 | 11 | 8  | 1.564065119 | 0.151515   | ENSG00000189196 |
| 3 | 64059528 | 64060039 | 64059803 | 10 | 23 | 27 | 1.005470434 | 0.495068   | ENSG00000189196 |
| 3 | 64060889 | 64061195 | 64061042 | 12 | 17 | 7  | 2.639359888 | 0.00777415 | ENSG00000189196 |
| 3 | 64061804 | 64062296 | 64062152 | 8  | 17 | 20 | 1.005470434 | 0.496566   | ENSG00000189196 |
| 3 | 64063990 | 64064284 | 64064144 | 9  | 13 | 21 | 0.746485625 | 0.811212   | ENSG00000189196 |
| 3 | 64064662 | 64065863 | 64065332 | 14 | 56 | 54 | 1.215705161 | 0.151037   | ENSG00000189196 |
| 3 | 64065941 | 64066598 | 64066490 | 13 | 31 | 36 | 1.014528726 | 0.478595   | ENSG00000189196 |
| 3 | 64067226 | 64067855 | 64067405 | 12 | 30 | 29 | 1.212150467 | 0.226815   | ENSG00000189196 |
| 3 | 64069217 | 64069576 | 64069396 | 15 | 22 | 11 | 2.248343609 | 0.0090389  | ENSG00000189196 |
| 3 | 64069721 | 64070361 | 64070182 | 15 | 32 | 25 | 1.488869681 | 0.0631665  | ENSG00000189196 |
| 3 | 64070625 | 64071428 | 64070918 | 12 | 33 | 29 | 1.329455351 | 0.127332   | ENSG00000189196 |
| 3 | 64071672 | 64071876 | 64071774 | 8  | 10 | 12 | 0.992579787 | 0.511743   | ENSG00000189196 |
| 3 | 64072031 | 64073156 | 64072823 | 21 | 60 | 56 | 1.255368056 | 0.108551   | ENSG00000189196 |
| 3 | 64073500 | 64073914 | 64073679 | 10 | 21 | 15 | 1.612942154 | 0.070218   | ENSG00000189196 |
| 3 | 64081139 | 64082032 | 64081468 | 9  | 34 | 39 | 1.026417734 | 0.457358   | ENSG00000189196 |
| 3 | 64082289 | 64082930 | 64082751 | 25 | 49 | 32 | 1.777346726 | 0.00459284 | ENSG00000189196 |
| 3 | 64082942 | 64083380 | 64083121 | 13 | 23 | 14 | 1.876878143 | 0.0251753  | ENSG00000189196 |
| 3 | 64084440 | 64084649 | 64084527 | 8  | 10 | 6  | 1.843362462 | 0.0964212  | ENSG00000189196 |
| 3 | 64087667 | 64087899 | 64087802 | 9  | 10 | 9  | 1.290353723 | 0.279648   | ENSG00000189196 |
| 3 | 64088313 | 64088600 | 64088480 | 8  | 10 | 23 | 0.537647385 | 0.963335   | ENSG00000189196 |
| 3 | 64091470 | 64092999 | 64092853 | 24 | 81 | 46 | 2.046595847 | 3.02E-05   | ENSG00000189196 |
| 3 | 64093727 | 64094732 | 64094115 | 36 | 86 | 46 | 2.171388277 | 5.18E-06   | ENSG00000189196 |
| 3 | 64094742 | 64095026 | 64094897 | 11 | 15 | 16 | 1.104045966 | 0.390393   | ENSG00000189196 |
| 3 | 64095651 | 64096520 | 64095842 | 14 | 39 | 25 | 1.804690522 | 0.00854049 | ENSG00000189196 |
| 3 | 64098235 | 64098473 | 64098365 | 10 | 12 | 7  | 1.906204364 | 0.0695918  | ENSG00000189196 |
| 3 | 64098598 | 64098810 | 64098704 | 8  | 11 | 9  | 1.407658607 | 0.210479   | ENSG00000189196 |
| 3 | 64101110 | 64101411 | 64101275 | 14 | 17 | 22 | 0.918038222 | 0.611544   | ENSG00000189196 |
| 3 | 64101567 | 64101825 | 64101686 | 10 | 11 | 13 | 1.005470434 | 0.498567   | ENSG00000189196 |
| 3 | 64101926 | 64102140 | 64102033 | 8  | 9  | 9  | 1.173048839 | 0.362316   | ENSG00000189196 |
| 3 | 64102627 | 64102991 | 64102812 | 8  | 13 | 10 | 1.49297125  | 0.157311   | ENSG00000189196 |
| 3 | 64104582 | 64105040 | 64104821 | 8  | 19 | 15 | 1.466311049 | 0.125014   | ENSG00000189196 |

|   |          |          |          |    |     |    |             |             |          |                 |
|---|----------|----------|----------|----|-----|----|-------------|-------------|----------|-----------------|
| 3 | 64105335 | 64105739 | 64105502 | 9  | 14  | 14 | 1.173048839 | 0.332418    |          | ENSG00000189196 |
| 3 | 64108087 | 64108285 | 64108234 | 10 | 11  | 7  | 1.759573259 | 0.102361    |          | ENSG00000189196 |
| 3 | 64110201 | 64110469 | 64110349 | 8  | 11  | 13 | 1.005470434 | 0.498567    |          | ENSG00000189196 |
| 3 | 64110794 | 64111053 | 64110923 | 11 | 14  | 18 | 0.926091189 | 0.59273     |          | ENSG00000189196 |
| 3 | 64111124 | 64111421 | 64111271 | 8  | 12  | 22 | 0.663027605 | 0.890045    |          | ENSG00000189196 |
| 3 | 64111589 | 64113446 | 64112062 | 23 | 132 | 97 | 1.591994853 | 0.000214714 |          | ENSG00000189196 |
| 3 | 64113454 | 64113868 | 64113697 | 9  | 17  | 36 | 0.570672408 | 0.978722    |          | ENSG00000189196 |
| 3 | 64116857 | 64117429 | 64117232 | 12 | 30  | 23 | 1.515188084 | 0.0616668   | PRICKLE2 | ENSG00000163637 |
| 3 | 64117451 | 64118770 | 64118211 | 52 | 166 | 93 | 2.084033576 | 2.65E-09    | PRICKLE2 | ENSG00000163637 |
| 3 | 64118873 | 64119563 | 64119218 | 31 | 63  | 52 | 1.416511806 | 0.0299079   | PRICKLE2 | ENSG00000163637 |
| 3 | 64120661 | 64121301 | 64121122 | 10 | 26  | 24 | 1.266892746 | 0.197079    | PRICKLE2 | ENSG00000163637 |
| 3 | 64121974 | 64123062 | 64122507 | 24 | 62  | 66 | 1.103016073 | 0.2893      | PRICKLE2 | ENSG00000163637 |
| 3 | 64123564 | 64123990 | 64123821 | 12 | 19  | 18 | 1.234788252 | 0.255641    | PRICKLE2 | ENSG00000163637 |
| 3 | 64124224 | 64124426 | 64124291 | 8  | 9   | 8  | 1.303387599 | 0.281715    | PRICKLE2 | ENSG00000163637 |
| 3 | 64124536 | 64124910 | 64124714 | 8  | 14  | 10 | 1.599612054 | 0.114822    | PRICKLE2 | ENSG00000163637 |
| 3 | 64125816 | 64126084 | 64125963 | 9  | 10  | 15 | 0.806471077 | 0.716145    | PRICKLE2 | ENSG00000163637 |
| 3 | 64127020 | 64127235 | 64127171 | 9  | 10  | 14 | 0.860235815 | 0.65444     | PRICKLE2 | ENSG00000163637 |
| 3 | 64127402 | 64127885 | 64127597 | 35 | 54  | 27 | 2.304203077 | 9.73E-05    | PRICKLE2 | ENSG00000163637 |
| 3 | 64128154 | 64128569 | 64128311 | 8  | 15  | 17 | 1.042710079 | 0.454615    | PRICKLE2 | ENSG00000163637 |
| 3 | 64128981 | 64129752 | 64129457 | 10 | 30  | 16 | 2.13908906  | 0.00465307  | PRICKLE2 | ENSG00000163637 |
| 3 | 64130940 | 64131184 | 64131069 | 8  | 11  | 8  | 1.564065119 | 0.151515    | PRICKLE2 | ENSG00000163637 |
| 3 | 64132210 | 64132612 | 64132435 | 9  | 15  | 18 | 0.987830602 | 0.518173    | PRICKLE2 | ENSG00000163637 |
| 3 | 64135435 | 64135680 | 64135557 | 9  | 12  | 9  | 1.524963491 | 0.154777    | PRICKLE2 | ENSG00000163637 |
| 3 | 64136561 | 64136952 | 64136773 | 11 | 19  | 26 | 0.868925066 | 0.687875    | PRICKLE2 | ENSG00000163637 |
| 3 | 64139003 | 64139578 | 64139182 | 16 | 31  | 19 | 1.876878143 | 0.0120343   | PRICKLE2 | ENSG00000163637 |
| 3 | 64140035 | 64140550 | 64140214 | 17 | 28  | 17 | 1.889912019 | 0.0150469   | PRICKLE2 | ENSG00000163637 |
| 3 | 64145558 | 64145965 | 64145686 | 8  | 12  | 13 | 1.089259637 | 0.414883    | PRICKLE2 | ENSG00000163637 |
| 3 | 64146247 | 64146502 | 64146374 | 8  | 11  | 10 | 1.279689643 | 0.277323    | PRICKLE2 | ENSG00000163637 |
| 3 | 64147536 | 64148432 | 64147839 | 46 | 102 | 29 | 4.027467682 | 5.49E-14    | PRICKLE2 | ENSG00000163637 |
| 3 | 64148709 | 64148954 | 64148785 | 8  | 11  | 14 | 0.938439071 | 0.570297    | PRICKLE2 | ENSG00000163637 |
| 3 | 64149446 | 64149757 | 64149601 | 10 | 16  | 24 | 0.797673211 | 0.770106    | PRICKLE2 | ENSG00000163637 |
| 3 | 64149773 | 64150313 | 64149984 | 13 | 25  | 23 | 1.270802909 | 0.198634    | PRICKLE2 | ENSG00000163637 |
| 3 | 64151247 | 64151648 | 64151476 | 10 | 17  | 12 | 1.62422147  | 0.088135    | PRICKLE2 | ENSG00000163637 |
| 3 | 64153568 | 64154034 | 64153873 | 12 | 20  | 19 | 1.231701281 | 0.25288     | PRICKLE2 | ENSG00000163637 |



|   |          |          |          |    |    |    |             |            |          |                 |
|---|----------|----------|----------|----|----|----|-------------|------------|----------|-----------------|
| 3 | 64154713 | 64155048 | 64154879 | 8  | 12 | 8  | 1.694403879 | 0.107291   | PRICKLE2 | ENSG00000163637 |
| 3 | 64155718 | 64155932 | 64155871 | 9  | 10 | 6  | 1.843362462 | 0.0964212  | PRICKLE2 | ENSG00000163637 |
| 3 | 64156960 | 64157169 | 64157096 | 9  | 9  | 12 | 0.902345261 | 0.602772   | PRICKLE2 | ENSG00000163637 |
| 3 | 64158975 | 64159161 | 64159062 | 11 | 11 | 11 | 1.173048839 | 0.349489   | PRICKLE2 | ENSG00000163637 |
| 3 | 64162639 | 64162824 | 64162757 | 8  | 9  | 9  | 1.173048839 | 0.362316   | PRICKLE2 | ENSG00000163637 |
| 3 | 64165722 | 64166004 | 64165863 | 8  | 14 | 15 | 1.099733287 | 0.398076   | PRICKLE2 | ENSG00000163637 |
| 3 | 64168079 | 64168300 | 64168167 | 12 | 13 | 20 | 0.78203256  | 0.76897    | PRICKLE2 | ENSG00000163637 |
| 3 | 64170653 | 64170870 | 64170730 | 8  | 11 | 12 | 1.082814313 | 0.424156   | PRICKLE2 | ENSG00000163637 |
| 3 | 64170892 | 64171338 | 64171071 | 9  | 18 | 12 | 1.714455996 | 0.0636479  | PRICKLE2 | ENSG00000163637 |
| 3 | 64171620 | 64171828 | 64171724 | 8  | 11 | 3  | 3.519146518 | 0.00788869 | PRICKLE2 | ENSG00000163637 |
| 3 | 64172878 | 64173212 | 64173045 | 10 | 14 | 6  | 2.513676084 | 0.016726   | PRICKLE2 | ENSG00000163637 |
| 3 | 64174503 | 64174757 | 64174592 | 10 | 13 | 17 | 0.912371319 | 0.606688   | PRICKLE2 | ENSG00000163637 |
| 3 | 64175410 | 64175657 | 64175517 | 8  | 10 | 9  | 1.290353723 | 0.279648   | PRICKLE2 | ENSG00000163637 |
| 3 | 64175884 | 64176141 | 64176018 | 9  | 10 | 19 | 0.645176862 | 0.887754   | PRICKLE2 | ENSG00000163637 |
| 3 | 64176694 | 64177096 | 64176850 | 8  | 15 | 19 | 0.938439071 | 0.579569   | PRICKLE2 | ENSG00000163637 |
| 3 | 64177358 | 64177540 | 64177449 | 8  | 9  | 12 | 0.902345261 | 0.602772   | PRICKLE2 | ENSG00000163637 |
| 3 | 64178373 | 64178882 | 64178750 | 10 | 22 | 22 | 1.173048839 | 0.295277   | PRICKLE2 | ENSG00000163637 |
| 3 | 64179780 | 64180017 | 64179936 | 9  | 12 | 20 | 0.726173091 | 0.825666   | PRICKLE2 | ENSG00000163637 |
| 3 | 64180446 | 64180838 | 64180617 | 9  | 15 | 19 | 0.938439071 | 0.579569   | PRICKLE2 | ENSG00000163637 |
| 3 | 64180860 | 64181247 | 64181068 | 21 | 29 | 23 | 1.466311049 | 0.0797221  | PRICKLE2 | ENSG00000163637 |
| 3 | 64181384 | 64181900 | 64181733 | 12 | 20 | 21 | 1.119728438 | 0.357221   | PRICKLE2 | ENSG00000163637 |
| 3 | 64182884 | 64183356 | 64183196 | 9  | 18 | 24 | 0.891517118 | 0.651693   | PRICKLE2 | ENSG00000163637 |
| 3 | 64183361 | 64183847 | 64183559 | 12 | 25 | 22 | 1.32605521  | 0.161597   | PRICKLE2 | ENSG00000163637 |
| 3 | 64183962 | 64184157 | 64184056 | 9  | 9  | 7  | 1.466311049 | 0.20706    | PRICKLE2 | ENSG00000163637 |
| 3 | 64184363 | 64184616 | 64184489 | 8  | 11 | 7  | 1.759573259 | 0.102361   | PRICKLE2 | ENSG00000163637 |
| 3 | 64185766 | 64186040 | 64185905 | 10 | 11 | 8  | 1.564065119 | 0.151515   | PRICKLE2 | ENSG00000163637 |
| 3 | 64186633 | 64187057 | 64186812 | 8  | 15 | 18 | 0.987830602 | 0.518173   | PRICKLE2 | ENSG00000163637 |
| 3 | 64187581 | 64187956 | 64187689 | 12 | 17 | 20 | 1.005470434 | 0.496566   | PRICKLE2 | ENSG00000163637 |
| 3 | 64188671 | 64188928 | 64188799 | 8  | 11 | 6  | 2.010940867 | 0.0640214  | PRICKLE2 | ENSG00000163637 |
| 3 | 64191430 | 64191734 | 64191592 | 10 | 13 | 17 | 0.912371319 | 0.606688   | PRICKLE2 | ENSG00000163637 |
| 3 | 64192513 | 64192909 | 64192692 | 10 | 17 | 21 | 0.959767232 | 0.55532    | PRICKLE2 | ENSG00000163637 |
| 3 | 64193446 | 64193691 | 64193568 | 10 | 11 | 16 | 0.828034475 | 0.698553   | PRICKLE2 | ENSG00000163637 |
| 3 | 64195333 | 64195551 | 64195442 | 11 | 11 | 16 | 0.828034475 | 0.698553   | PRICKLE2 | ENSG00000163637 |
| 3 | 64195823 | 64196002 | 64195935 | 8  | 8  | 5  | 1.759573259 | 0.13508    | PRICKLE2 | ENSG00000163637 |

|   |          |          |          |    |     |    |             |            |          |                 |
|---|----------|----------|----------|----|-----|----|-------------|------------|----------|-----------------|
| 3 | 64196181 | 64196638 | 64196403 | 9  | 18  | 17 | 1.238218219 | 0.258417   | PRICKLE2 | ENSG00000163637 |
| 3 | 64196640 | 64196877 | 64196797 | 9  | 12  | 6  | 2.178519273 | 0.0416567  | PRICKLE2 | ENSG00000163637 |
| 3 | 64199903 | 64200225 | 64200068 | 8  | 11  | 11 | 1.173048839 | 0.349489   | PRICKLE2 | ENSG00000163637 |
| 3 | 64200326 | 64200506 | 64200407 | 8  | 8   | 9  | 1.055743955 | 0.456865   | PRICKLE2 | ENSG00000163637 |
| 3 | 64201435 | 64201759 | 64201597 | 11 | 16  | 19 | 0.997091513 | 0.507069   | PRICKLE2 | ENSG00000163637 |
| 3 | 64202207 | 64202452 | 64202321 | 8  | 8   | 9  | 1.055743955 | 0.456865   | PRICKLE2 | ENSG00000163637 |
| 3 | 64202852 | 64203079 | 64202998 | 10 | 12  | 8  | 1.694403879 | 0.107291   | PRICKLE2 | ENSG00000163637 |
| 3 | 64203251 | 64203527 | 64203389 | 14 | 17  | 13 | 1.508205651 | 0.12204    | PRICKLE2 | ENSG00000163637 |
| 3 | 64204748 | 64205027 | 64204884 | 8  | 12  | 23 | 0.635401455 | 0.914098   | PRICKLE2 | ENSG00000163637 |
| 3 | 64205029 | 64205548 | 64205208 | 13 | 25  | 40 | 0.74388463  | 0.885978   | PRICKLE2 | ENSG00000163637 |
| 3 | 64206271 | 64206487 | 64206437 | 8  | 10  | 23 | 0.537647385 | 0.963335   | PRICKLE2 | ENSG00000163637 |
| 3 | 64207383 | 64207638 | 64207487 | 8  | 12  | 7  | 1.906204364 | 0.0695918  | PRICKLE2 | ENSG00000163637 |
| 3 | 64211209 | 64211452 | 64211292 | 9  | 11  | 12 | 1.082814313 | 0.424156   | PRICKLE2 | ENSG00000163637 |
| 3 | 64211976 | 64212272 | 64212123 | 8  | 11  | 18 | 0.740872951 | 0.800189   | PRICKLE2 | ENSG00000163637 |
| 3 | 64213971 | 64214296 | 64214138 | 9  | 14  | 21 | 0.799806027 | 0.754204   | PRICKLE2 | ENSG00000163637 |
| 3 | 64214434 | 64214786 | 64214607 | 10 | 14  | 16 | 1.035043094 | 0.464533   | PRICKLE2 | ENSG00000163637 |
| 3 | 64215243 | 64215497 | 64215339 | 10 | 13  | 14 | 1.094845583 | 0.406217   | PRICKLE2 | ENSG00000163637 |
| 3 | 64215507 | 64216800 | 64216342 | 27 | 73  | 52 | 1.637841776 | 0.00280329 | PRICKLE2 | ENSG00000163637 |
| 3 | 64217549 | 64217806 | 64217698 | 8  | 11  | 10 | 1.279689643 | 0.277323   | PRICKLE2 | ENSG00000163637 |
| 3 | 64217913 | 64218113 | 64218056 | 9  | 11  | 12 | 1.082814313 | 0.424156   | PRICKLE2 | ENSG00000163637 |
| 3 | 64219856 | 64220211 | 64220035 | 8  | 13  | 6  | 2.346097679 | 0.0266147  | PRICKLE2 | ENSG00000163637 |
| 3 | 64222394 | 64222658 | 64222501 | 10 | 12  | 13 | 1.089259637 | 0.414883   | PRICKLE2 | ENSG00000163637 |
| 3 | 64222777 | 64223670 | 64223431 | 19 | 49  | 48 | 1.196988612 | 0.18604    | PRICKLE2 | ENSG00000163637 |
| 3 | 64223873 | 64224173 | 64224006 | 9  | 13  | 15 | 1.026417734 | 0.475096   | PRICKLE2 | ENSG00000163637 |
| 3 | 64224407 | 64225939 | 64225204 | 35 | 119 | 72 | 1.928299462 | 3.23E-06   | PRICKLE2 | ENSG00000163637 |
| 3 | 64226062 | 64226362 | 64226227 | 11 | 16  | 14 | 1.329455351 | 0.210108   | PRICKLE2 | ENSG00000163637 |
| 3 | 64227184 | 64227438 | 64227317 | 12 | 15  | 16 | 1.104045966 | 0.390393   | PRICKLE2 | ENSG00000163637 |
| 3 | 64227441 | 64227745 | 64227593 | 10 | 15  | 16 | 1.104045966 | 0.390393   | PRICKLE2 | ENSG00000163637 |
| 3 | 64229077 | 64229351 | 64229221 | 10 | 12  | 19 | 0.762481746 | 0.784291   | PRICKLE2 | ENSG00000163637 |
| 3 | 64230855 | 64231143 | 64230999 | 8  | 12  | 11 | 1.270802909 | 0.274822   | PRICKLE2 | ENSG00000163637 |
| 3 | 64231864 | 64232327 | 64232148 | 9  | 18  | 9  | 2.228792795 | 0.0164363  | PRICKLE2 | ENSG00000163637 |
| 3 | 64232340 | 64232616 | 64232474 | 15 | 17  | 21 | 0.959767232 | 0.55532    | PRICKLE2 | ENSG00000163637 |
| 3 | 64233202 | 64233403 | 64233326 | 9  | 10  | 12 | 0.992579787 | 0.511743   | PRICKLE2 | ENSG00000163637 |
| 3 | 64233465 | 64233985 | 64233740 | 15 | 32  | 13 | 2.765043693 | 0.00036798 | PRICKLE2 | ENSG00000163637 |

|   |          |          |          |    |     |    |             |            |          |                 |
|---|----------|----------|----------|----|-----|----|-------------|------------|----------|-----------------|
| 3 | 64234356 | 64234819 | 64234506 | 18 | 28  | 17 | 1.889912019 | 0.0150469  | PRICKLE2 | ENSG00000163637 |
| 3 | 64236402 | 64236618 | 64236542 | 8  | 10  | 12 | 0.992579787 | 0.511743   | PRICKLE2 | ENSG00000163637 |
| 3 | 64236703 | 64237370 | 64237032 | 69 | 106 | 24 | 5.020649032 | 4.41E-17   | PRICKLE2 | ENSG00000163637 |
| 3 | 64237411 | 64237718 | 64237564 | 9  | 13  | 17 | 0.912371319 | 0.606688   | PRICKLE2 | ENSG00000163637 |
| 3 | 64238720 | 64238909 | 64238867 | 8  | 9   | 11 | 0.977540699 | 0.526123   | PRICKLE2 | ENSG00000163637 |
| 3 | 64239909 | 64240155 | 64240029 | 9  | 12  | 12 | 1.173048839 | 0.343543   | PRICKLE2 | ENSG00000163637 |
| 3 | 64240576 | 64240841 | 64240708 | 9  | 10  | 6  | 1.843362462 | 0.0964212  | PRICKLE2 | ENSG00000163637 |
| 3 | 64243258 | 64243469 | 64243392 | 8  | 9   | 9  | 1.173048839 | 0.362316   | PRICKLE2 | ENSG00000163637 |
| 3 | 64245835 | 64246323 | 64246092 | 11 | 20  | 23 | 1.026417734 | 0.468083   | PRICKLE2 | ENSG00000163637 |
| 3 | 64246882 | 64247279 | 64247085 | 8  | 16  | 18 | 1.049570014 | 0.445264   | PRICKLE2 | ENSG00000163637 |
| 3 | 64251877 | 64252077 | 64251975 | 11 | 12  | 14 | 1.016642327 | 0.486402   | PRICKLE2 | ENSG00000163637 |
| 3 | 64252186 | 64252569 | 64252396 | 10 | 17  | 11 | 1.759573259 | 0.0609179  | PRICKLE2 | ENSG00000163637 |
| 3 | 64252616 | 64253099 | 64252931 | 10 | 21  | 9  | 2.580707446 | 0.00438951 | PRICKLE2 | ENSG00000163637 |
| 3 | 64253752 | 64254281 | 64254016 | 8  | 19  | 14 | 1.564065119 | 0.0925887  | PRICKLE2 | ENSG00000163637 |
| 3 | 64257776 | 64257984 | 64257907 | 9  | 9   | 5  | 1.955081399 | 0.0892323  | PRICKLE2 | ENSG00000163637 |
| 3 | 64263001 | 64263631 | 64263327 | 9  | 22  | 23 | 1.124171804 | 0.345816   | PRICKLE2 | ENSG00000163637 |
| 3 | 64263674 | 64264063 | 64263825 | 11 | 16  | 14 | 1.329455351 | 0.210108   | PRICKLE2 | ENSG00000163637 |
| 3 | 64264277 | 64264532 | 64264382 | 9  | 11  | 8  | 1.564065119 | 0.151515   | PRICKLE2 | ENSG00000163637 |
| 3 | 64265279 | 64265517 | 64265353 | 9  | 11  | 7  | 1.759573259 | 0.102361   | PRICKLE2 | ENSG00000163637 |
| 3 | 64266014 | 64266243 | 64266128 | 8  | 11  | 11 | 1.173048839 | 0.349489   | PRICKLE2 | ENSG00000163637 |
| 3 | 64269420 | 64269693 | 64269555 | 8  | 11  | 7  | 1.759573259 | 0.102361   | PRICKLE2 | ENSG00000163637 |
| 3 | 64276700 | 64277059 | 64276868 | 8  | 14  | 6  | 2.513676084 | 0.016726   | PRICKLE2 | ENSG00000163637 |
| 3 | 64277796 | 64278109 | 64277952 | 13 | 17  | 13 | 1.508205651 | 0.12204    | PRICKLE2 | ENSG00000163637 |
| 3 | 64279133 | 64279397 | 64279265 | 9  | 12  | 18 | 0.802612364 | 0.736387   | PRICKLE2 | ENSG00000163637 |
| 3 | 64279656 | 64279856 | 64279756 | 8  | 9   | 8  | 1.303387599 | 0.281715   | PRICKLE2 | ENSG00000163637 |
| 3 | 64280355 | 64281038 | 64280696 | 11 | 25  | 21 | 1.386330446 | 0.128722   | PRICKLE2 | ENSG00000163637 |
| 3 | 64282338 | 64282612 | 64282490 | 16 | 18  | 13 | 1.591994853 | 0.0905191  | PRICKLE2 | ENSG00000163637 |
| 3 | 64284290 | 64284494 | 64284392 | 8  | 9   | 11 | 0.977540699 | 0.526123   | PRICKLE2 | ENSG00000163637 |
| 3 | 64289461 | 64290061 | 64289894 | 14 | 29  | 28 | 1.213498799 | 0.229275   | PRICKLE2 | ENSG00000163637 |
| 3 | 64292276 | 64292605 | 64292440 | 13 | 19  | 19 | 1.173048839 | 0.308076   | PRICKLE2 | ENSG00000163637 |
| 3 | 64298480 | 64298774 | 64298609 | 10 | 13  | 13 | 1.173048839 | 0.337862   | PRICKLE2 | ENSG00000163637 |
| 3 | 64301359 | 64301594 | 64301501 | 8  | 11  | 10 | 1.279689643 | 0.277323   | PRICKLE2 | ENSG00000163637 |
| 3 | 64301637 | 64301895 | 64301766 | 11 | 12  | 13 | 1.089259637 | 0.414883   | PRICKLE2 | ENSG00000163637 |
| 3 | 64304581 | 64304841 | 64304711 | 10 | 12  | 12 | 1.173048839 | 0.343543   | PRICKLE2 | ENSG00000163637 |

|   |          |          |          |    |    |    |             |            |          |                 |
|---|----------|----------|----------|----|----|----|-------------|------------|----------|-----------------|
| 3 | 64304919 | 64305199 | 64305057 | 9  | 12 | 12 | 1.173048839 | 0.343543   | PRICKLE2 | ENSG00000163637 |
| 3 | 64305541 | 64306287 | 64305820 | 14 | 32 | 20 | 1.843362462 | 0.012722   | PRICKLE2 | ENSG00000163637 |
| 3 | 64306977 | 64308075 | 64307422 | 11 | 42 | 36 | 1.363272975 | 0.0828969  | PRICKLE2 | ENSG00000163637 |
| 3 | 64311907 | 64312142 | 64312024 | 14 | 15 | 7  | 2.346097679 | 0.0195693  | PRICKLE2 | ENSG00000163637 |
| 3 | 64312555 | 64312790 | 64312672 | 8  | 10 | 15 | 0.806471077 | 0.716145   | PRICKLE2 | ENSG00000163637 |
| 3 | 64312981 | 64313206 | 64313100 | 11 | 14 | 3  | 4.398933147 | 0.00132748 | PRICKLE2 | ENSG00000163637 |
| 3 | 64313213 | 64313549 | 64313384 | 13 | 17 | 9  | 2.111487911 | 0.0248715  | PRICKLE2 | ENSG00000163637 |
| 3 | 64314173 | 64314377 | 64314255 | 9  | 10 | 9  | 1.290353723 | 0.279648   | PRICKLE2 | ENSG00000163637 |
| 3 | 64315151 | 64315433 | 64315295 | 11 | 15 | 11 | 1.564065119 | 0.11768    | PRICKLE2 | ENSG00000163637 |
| 3 | 64316177 | 64316439 | 64316267 | 9  | 13 | 12 | 1.263283365 | 0.272203   | PRICKLE2 | ENSG00000163637 |
| 3 | 64316942 | 64317136 | 64317012 | 8  | 9  | 14 | 0.78203256  | 0.734892   | PRICKLE2 | ENSG00000163637 |
| 3 | 64317520 | 64317707 | 64317683 | 8  | 9  | 11 | 0.977540699 | 0.526123   | PRICKLE2 | ENSG00000163637 |
| 3 | 64320919 | 64321315 | 64321136 | 12 | 22 | 18 | 1.42000649  | 0.127634   | PRICKLE2 | ENSG00000163637 |
| 3 | 64322137 | 64322515 | 64322336 | 8  | 15 | 16 | 1.104045966 | 0.390393   | PRICKLE2 | ENSG00000163637 |
| 3 | 64324017 | 64324259 | 64324180 | 13 | 15 | 4  | 3.753756286 | 0.0020497  | PRICKLE2 | ENSG00000163637 |
| 3 | 64324582 | 64325064 | 64324885 | 9  | 19 | 16 | 1.380057458 | 0.163303   | PRICKLE2 | ENSG00000163637 |
| 3 | 64325433 | 64325741 | 64325587 | 8  | 13 | 7  | 2.052835469 | 0.046392   | PRICKLE2 | ENSG00000163637 |
| 3 | 64329644 | 64329849 | 64329746 | 8  | 9  | 11 | 0.977540699 | 0.526123   |          | ENSG00000212340 |
| 3 | 64331273 | 64331756 | 64331504 | 9  | 19 | 16 | 1.380057458 | 0.163303   |          | ENSG00000212340 |
| 3 | 64335173 | 64335652 | 64335291 | 10 | 20 | 22 | 1.071044592 | 0.412397   |          | ENSG00000212340 |
| 3 | 64340589 | 64340924 | 64340803 | 8  | 12 | 9  | 1.524963491 | 0.154777   |          | ENSG00000212340 |
| 3 | 64341198 | 64341405 | 64341292 | 11 | 11 | 12 | 1.082814313 | 0.424156   |          | ENSG00000212340 |
| 3 | 64342176 | 64342629 | 64342450 | 8  | 17 | 19 | 1.055743955 | 0.436418   |          | ENSG00000212340 |
| 3 | 64343668 | 64344069 | 64343930 | 9  | 15 | 12 | 1.443752418 | 0.160732   |          | ENSG00000212340 |
| 3 | 64346806 | 64347140 | 64346973 | 9  | 14 | 9  | 1.759573259 | 0.0786014  |          | ENSG00000212340 |
| 3 | 64348422 | 64348643 | 64348532 | 12 | 12 | 9  | 1.524963491 | 0.154777   |          | ENSG00000212340 |
| 3 | 64355566 | 64355783 | 64355674 | 8  | 10 | 12 | 0.992579787 | 0.511743   |          | ENSG00000212340 |
| 3 | 64358408 | 64358705 | 64358569 | 10 | 13 | 11 | 1.368556979 | 0.211388   |          | ENSG00000212340 |
| 3 | 64359909 | 64360458 | 64360185 | 27 | 44 | 31 | 1.64959993  | 0.0142651  |          | ENSG00000212340 |
| 3 | 64360474 | 64360820 | 64360641 | 11 | 15 | 6  | 2.68125449  | 0.0103552  |          | ENSG00000212340 |
| 3 | 64363917 | 64364129 | 64363958 | 8  | 10 | 12 | 0.992579787 | 0.511743   |          | ENSG00000212340 |
| 3 | 64364620 | 64364920 | 64364770 | 11 | 13 | 10 | 1.49297125  | 0.157311   |          | ENSG00000212340 |
| 3 | 64365562 | 64365874 | 64365718 | 10 | 13 | 21 | 0.746485625 | 0.811212   |          | ENSG00000212340 |
| 3 | 64365877 | 64366173 | 64366025 | 10 | 13 | 14 | 1.094845583 | 0.406217   |          | ENSG00000212340 |

|   |          |          |          |    |    |    |             |           |                 |
|---|----------|----------|----------|----|----|----|-------------|-----------|-----------------|
| 3 | 64366317 | 64366555 | 64366436 | 11 | 12 | 17 | 0.84720194  | 0.681997  | ENSG00000212340 |
| 3 | 64367270 | 64367509 | 64367377 | 9  | 11 | 12 | 1.082814313 | 0.424156  | ENSG00000212340 |
| 3 | 64368023 | 64368255 | 64368162 | 9  | 10 | 13 | 0.921681231 | 0.585856  | ENSG00000212340 |
| 3 | 64368412 | 64368885 | 64368724 | 11 | 23 | 18 | 1.481745902 | 0.0984143 | ENSG00000212340 |
| 3 | 64371947 | 64372397 | 64372123 | 9  | 17 | 10 | 1.919534464 | 0.0400548 | ENSG00000212340 |
| 3 | 64378419 | 64378867 | 64378709 | 9  | 16 | 10 | 1.812893661 | 0.0578656 | ENSG00000212340 |
| 3 | 64384875 | 64385224 | 64385028 | 8  | 13 | 9  | 1.642268375 | 0.111397  | ENSG00000212340 |
| 3 | 64385344 | 64385545 | 64385444 | 11 | 14 | 10 | 1.599612054 | 0.114822  | ENSG00000212340 |
| 3 | 64386919 | 64387206 | 64387065 | 8  | 12 | 7  | 1.906204364 | 0.0695918 | ENSG00000212340 |
| 3 | 64387345 | 64387602 | 64387473 | 10 | 13 | 9  | 1.642268375 | 0.111397  | ENSG00000212340 |
| 3 | 64387823 | 64388016 | 64387904 | 8  | 8  | 3  | 2.639359888 | 0.0415794 | ENSG00000212340 |
| 3 | 64390426 | 64390651 | 64390604 | 8  | 10 | 5  | 2.150589539 | 0.0575848 | ENSG00000212340 |
| 3 | 64391594 | 64391806 | 64391700 | 9  | 10 | 5  | 2.150589539 | 0.0575848 | ENSG00000212340 |
| 3 | 64392678 | 64392857 | 64392751 | 8  | 8  | 14 | 0.703829304 | 0.807737  | ENSG00000212340 |
| 3 | 64392966 | 64393452 | 64393091 | 8  | 17 | 19 | 1.055743955 | 0.436418  | ENSG00000212340 |
| 3 | 64397993 | 64398294 | 64398143 | 9  | 10 | 12 | 0.992579787 | 0.511743  | ENSG00000212340 |
| 3 | 64400648 | 64400885 | 64400777 | 10 | 12 | 9  | 1.524963491 | 0.154777  | ENSG00000212340 |
| 3 | 64401149 | 64401600 | 64401376 | 14 | 26 | 19 | 1.583615933 | 0.0575614 | ENSG00000212340 |
| 3 | 64403129 | 64403309 | 64403192 | 8  | 8  | 15 | 0.659839972 | 0.851443  | ENSG00000212340 |
| 3 | 64404033 | 64404230 | 64404157 | 9  | 9  | 3  | 2.932622098 | 0.0242899 | ENSG00000212340 |
| 3 | 64404655 | 64404843 | 64404749 | 8  | 9  | 11 | 0.977540699 | 0.526123  | ENSG00000212340 |
| 3 | 64405345 | 64405674 | 64405541 | 9  | 14 | 11 | 1.466311049 | 0.15926   | ENSG00000212340 |
| 3 | 64406238 | 64406789 | 64406610 | 13 | 26 | 15 | 1.979519916 | 0.0131534 | ENSG00000212340 |
| 3 | 64406896 | 64407182 | 64407046 | 8  | 11 | 11 | 1.173048839 | 0.349489  | ENSG00000212340 |
| 3 | 64408452 | 64408880 | 64408618 | 10 | 17 | 10 | 1.919534464 | 0.0400548 | ENSG00000212340 |
| 3 | 64408994 | 64409365 | 64409227 | 11 | 16 | 9  | 1.994183027 | 0.0370915 | ENSG00000212340 |
| 3 | 64409760 | 64410007 | 64409877 | 10 | 13 | 8  | 1.824742639 | 0.0744168 | ENSG00000212340 |
| 3 | 64411134 | 64411408 | 64411271 | 8  | 12 | 19 | 0.762481746 | 0.784291  | ENSG00000212340 |
| 3 | 64411445 | 64411724 | 64411617 | 9  | 12 | 14 | 1.016642327 | 0.486402  | ENSG00000212340 |
| 3 | 64412545 | 64412746 | 64412719 | 8  | 10 | 8  | 1.433726359 | 0.209175  | ENSG00000212340 |
| 3 | 64413177 | 64413386 | 64413348 | 8  | 11 | 8  | 1.564065119 | 0.151515  | ENSG00000212340 |
| 3 | 64413701 | 64414199 | 64413843 | 8  | 17 | 16 | 1.242051712 | 0.261202  | ENSG00000212340 |
| 3 | 64414222 | 64414529 | 64414433 | 9  | 13 | 6  | 2.346097679 | 0.0266147 | ENSG00000212340 |
| 3 | 64416943 | 64417122 | 64417027 | 8  | 8  | 15 | 0.659839972 | 0.851443  | ENSG00000212340 |

|   |          |          |          |    |    |    |             |            |                 |
|---|----------|----------|----------|----|----|----|-------------|------------|-----------------|
| 3 | 64417955 | 64418235 | 64418073 | 8  | 10 | 12 | 0.992579787 | 0.511743   | ENSG00000212340 |
| 3 | 64420120 | 64420429 | 64420297 | 9  | 12 | 8  | 1.694403879 | 0.107291   | ENSG00000212340 |
| 3 | 64420909 | 64421102 | 64421005 | 10 | 10 | 13 | 0.921681231 | 0.585856   | ENSG00000212340 |
| 3 | 64421744 | 64422185 | 64421919 | 9  | 17 | 8  | 2.346097679 | 0.0144542  | ENSG00000212340 |
| 3 | 64423205 | 64423475 | 64423340 | 8  | 11 | 11 | 1.173048839 | 0.349489   | ENSG00000212340 |
| 3 | 64424214 | 64424652 | 64424393 | 13 | 23 | 18 | 1.481745902 | 0.0984143  | ENSG00000212340 |
| 3 | 64425012 | 64425363 | 64425187 | 9  | 15 | 12 | 1.443752418 | 0.160732   | ENSG00000212340 |
| 3 | 64425717 | 64426124 | 64425945 | 8  | 17 | 17 | 1.173048839 | 0.317303   | ENSG00000212340 |
| 3 | 64431194 | 64431436 | 64431275 | 10 | 12 | 5  | 2.541605819 | 0.0225912  | ENSG00000212340 |
| 3 | 64442784 | 64443051 | 64442917 | 12 | 13 | 8  | 1.824742639 | 0.0744168  | ENSG00000212340 |
| 3 | 64444885 | 64445584 | 64445315 | 36 | 60 | 41 | 1.70371379  | 0.0035577  | ENSG00000212340 |
| 3 | 64445722 | 64445967 | 64445844 | 12 | 16 | 8  | 2.215758919 | 0.0222902  | ENSG00000212340 |
| 3 | 64447225 | 64447590 | 64447378 | 13 | 17 | 14 | 1.407658607 | 0.162567   | ENSG00000212340 |
| 3 | 64448363 | 64448659 | 64448498 | 8  | 10 | 4  | 2.580707446 | 0.0306059  | ENSG00000212340 |
| 3 | 64449357 | 64449561 | 64449459 | 9  | 9  | 18 | 0.617394126 | 0.901359   | ENSG00000212340 |
| 3 | 64449657 | 64449913 | 64449777 | 9  | 11 | 20 | 0.670313622 | 0.874201   | ENSG00000212340 |
| 3 | 64451276 | 64451550 | 64451437 | 11 | 15 | 11 | 1.564065119 | 0.11768    | ENSG00000212340 |
| 3 | 64452419 | 64453115 | 64452767 | 13 | 32 | 36 | 1.046232749 | 0.427232   | ENSG00000212340 |
| 3 | 64455641 | 64455869 | 64455742 | 9  | 9  | 16 | 0.690028729 | 0.833766   | ENSG00000212340 |
| 3 | 64458166 | 64458476 | 64458321 | 9  | 14 | 12 | 1.353517892 | 0.211235   | ENSG00000212340 |
| 3 | 64461677 | 64462698 | 64462394 | 20 | 54 | 51 | 1.240724734 | 0.132554   | ENSG00000212340 |
| 3 | 64462977 | 64463431 | 64463272 | 15 | 22 | 17 | 1.498895739 | 0.097269   | ENSG00000212340 |
| 3 | 64466235 | 64466585 | 64466379 | 9  | 13 | 15 | 1.026417734 | 0.475096   | ENSG00000212340 |
| 3 | 64467113 | 64467339 | 64467212 | 8  | 9  | 12 | 0.902345261 | 0.602772   | ENSG00000212340 |
| 3 | 64468868 | 64469393 | 64469030 | 19 | 29 | 15 | 2.199466574 | 0.00420562 | ENSG00000212340 |
| 3 | 64469969 | 64470257 | 64470113 | 9  | 10 | 6  | 1.843362462 | 0.0964212  | ENSG00000212340 |
| 3 | 64473739 | 64473940 | 64473836 | 8  | 8  | 14 | 0.703829304 | 0.807737   | ENSG00000212340 |
| 3 | 64476667 | 64477099 | 64476883 | 10 | 19 | 14 | 1.564065119 | 0.0925887  | ENSG00000212340 |
| 3 | 64478810 | 64479182 | 64478989 | 9  | 16 | 21 | 0.90644683  | 0.624241   | ENSG00000212340 |
| 3 | 64490988 | 64491520 | 64491351 | 28 | 40 | 14 | 3.206333494 | 1.62E-05   | ENSG00000212340 |
| 3 | 64493756 | 64494092 | 64493924 | 14 | 19 | 17 | 1.303387599 | 0.207073   | ENSG00000212340 |
| 3 | 64494220 | 64494847 | 64494509 | 53 | 87 | 48 | 2.106699956 | 8.82E-06   | ENSG00000212340 |
| 3 | 64498088 | 64498546 | 64498220 | 10 | 20 | 15 | 1.539626602 | 0.0943825  | ENSG00000212340 |
| 3 | 64507600 | 64507782 | 64507732 | 8  | 9  | 3  | 2.932622098 | 0.0242899  | ENSG00000212340 |

|   |          |          |          |    |    |    |             |            |                 |
|---|----------|----------|----------|----|----|----|-------------|------------|-----------------|
| 3 | 64507794 | 64507998 | 64507886 | 8  | 10 | 5  | 2.150589539 | 0.0575848  | ENSG00000212340 |
| 3 | 64510238 | 64510591 | 64510416 | 11 | 16 | 10 | 1.812893661 | 0.0578656  | ENSG00000212340 |
| 3 | 64512637 | 64512895 | 64512730 | 10 | 13 | 6  | 2.346097679 | 0.0266147  | ENSG00000212340 |
| 3 | 64515645 | 64515961 | 64515731 | 11 | 15 | 13 | 1.340627245 | 0.210788   | ENSG00000212340 |
| 3 | 64518595 | 64518874 | 64518734 | 8  | 13 | 10 | 1.49297125  | 0.157311   | ENSG00000212340 |
| 3 | 64519186 | 64519422 | 64519345 | 8  | 10 | 10 | 1.173048839 | 0.355733   | ENSG00000212340 |
| 3 | 64519537 | 64519828 | 64519682 | 10 | 12 | 11 | 1.270802909 | 0.274822   | ENSG00000212340 |
| 3 | 64520836 | 64521328 | 64521015 | 9  | 19 | 31 | 0.733155525 | 0.8679     | ENSG00000212340 |
| 3 | 64521760 | 64522157 | 64521988 | 12 | 18 | 8  | 2.476436439 | 0.00924552 | ENSG00000212340 |
| 3 | 64522251 | 64522511 | 64522429 | 14 | 16 | 6  | 2.848832895 | 0.00632407 | ENSG00000212340 |
| 3 | 64523440 | 64523619 | 64523529 | 8  | 9  | 5  | 1.955081399 | 0.0892323  | ENSG00000212340 |
| 3 | 64524345 | 64524774 | 64524480 | 10 | 19 | 16 | 1.380057458 | 0.163303   | ENSG00000212340 |
| 3 | 64524832 | 64525067 | 64524949 | 13 | 15 | 8  | 2.085420159 | 0.0338693  | ENSG00000212340 |
| 3 | 64527648 | 64528079 | 64527900 | 13 | 21 | 20 | 1.228908308 | 0.250141   | ENSG00000212340 |
| 3 | 64528248 | 64528433 | 64528336 | 8  | 10 | 9  | 1.290353723 | 0.279648   | ENSG00000212340 |
| 3 | 64528461 | 64528686 | 64528638 | 8  | 11 | 25 | 0.541407157 | 0.967387   | ENSG00000212340 |
| 3 | 64528872 | 64529195 | 64529017 | 10 | 14 | 20 | 0.837892028 | 0.705607   | ENSG00000212340 |
| 3 | 64529278 | 64529645 | 64529440 | 8  | 14 | 19 | 0.879786629 | 0.651591   | ENSG00000212340 |
| 3 | 64532197 | 64532872 | 64532700 | 11 | 26 | 27 | 1.131154238 | 0.325317   | ENSG00000212340 |
| 3 | 64532942 | 64533316 | 64533108 | 9  | 15 | 23 | 0.78203256  | 0.783431   | ENSG00000212340 |
| 3 | 64536138 | 64536782 | 64536411 | 31 | 56 | 49 | 1.337275677 | 0.066446   | ENSG00000212340 |
| 3 | 64538591 | 64538939 | 64538765 | 11 | 17 | 16 | 1.242051712 | 0.261202   | ENSG00000212340 |
| 3 | 64538955 | 64539622 | 64539260 | 14 | 37 | 25 | 1.714455996 | 0.015821   | ENSG00000212340 |
| 3 | 64539790 | 64540102 | 64539949 | 10 | 13 | 12 | 1.263283365 | 0.272203   | ENSG00000212340 |
| 3 | 64540541 | 64540797 | 64540626 | 8  | 10 | 12 | 0.992579787 | 0.511743   | ENSG00000212340 |
| 3 | 64541660 | 64541839 | 64541749 | 8  | 8  | 9  | 1.055743955 | 0.456865   | ENSG00000212340 |
| 3 | 64542288 | 64542560 | 64542464 | 8  | 11 | 10 | 1.279689643 | 0.277323   | ENSG00000212340 |
| 3 | 64543297 | 64543542 | 64543429 | 9  | 10 | 12 | 0.992579787 | 0.511743   | ENSG00000212340 |
| 3 | 64544029 | 64544304 | 64544161 | 12 | 15 | 18 | 0.987830602 | 0.518173   | ENSG00000212340 |
| 3 | 64544657 | 64545057 | 64544878 | 11 | 18 | 18 | 1.173048839 | 0.312613   | ENSG00000212340 |
| 3 | 64545983 | 64546191 | 64546087 | 8  | 8  | 19 | 0.527871978 | 0.95364    | ENSG00000212340 |
| 3 | 64547681 | 64547894 | 64547787 | 8  | 10 | 9  | 1.290353723 | 0.279648   | ENSG00000212340 |
| 3 | 64550275 | 64550642 | 64550452 | 8  | 13 | 15 | 1.026417734 | 0.475096   | ENSG00000212340 |
| 3 | 64556210 | 64556661 | 64556525 | 12 | 19 | 17 | 1.303387599 | 0.207073   | ENSG00000212340 |

|   |          |          |          |    |    |    |             |            |                         |
|---|----------|----------|----------|----|----|----|-------------|------------|-------------------------|
| 3 | 64557655 | 64558083 | 64557904 | 10 | 19 | 21 | 1.066408036 | 0.420026   | ENSG00000212340         |
| 3 | 64559595 | 64559810 | 64559702 | 9  | 12 | 6  | 2.178519273 | 0.0416567  | ENSG00000212340         |
| 3 | 64560216 | 64560617 | 64560322 | 8  | 14 | 21 | 0.799806027 | 0.754204   | ENSG00000212340         |
| 3 | 64560904 | 64561138 | 64561021 | 9  | 11 | 18 | 0.740872951 | 0.800189   | ADAMTS9 ENSG00000163638 |
| 3 | 64562894 | 64563145 | 64563036 | 9  | 10 | 7  | 1.612942154 | 0.147335   | ADAMTS9 ENSG00000163638 |
| 3 | 64565342 | 64566019 | 64565680 | 11 | 27 | 17 | 1.824742639 | 0.0211436  | ADAMTS9 ENSG00000163638 |
| 3 | 64567033 | 64567457 | 64567212 | 9  | 18 | 21 | 1.013087634 | 0.486601   | ADAMTS9 ENSG00000163638 |
| 3 | 64567846 | 64568079 | 64567921 | 9  | 12 | 25 | 0.58652442  | 0.949135   | ADAMTS9 ENSG00000163638 |
| 3 | 64568336 | 64568665 | 64568500 | 8  | 13 | 12 | 1.263283365 | 0.272203   | ADAMTS9 ENSG00000163638 |
| 3 | 64569447 | 64569717 | 64569582 | 11 | 11 | 12 | 1.082814313 | 0.424156   | ADAMTS9 ENSG00000163638 |
| 3 | 64572268 | 64572659 | 64572529 | 8  | 13 | 10 | 1.49297125  | 0.157311   | ADAMTS9 ENSG00000163638 |
| 3 | 64573172 | 64574499 | 64573887 | 16 | 73 | 54 | 1.578283893 | 0.00487236 | ADAMTS9 ENSG00000163638 |
| 3 | 64576648 | 64576985 | 64576816 | 14 | 18 | 15 | 1.392995497 | 0.16305    | ADAMTS9 ENSG00000163638 |
| 3 | 64579189 | 64579416 | 64579302 | 8  | 9  | 7  | 1.466311049 | 0.20706    | ADAMTS9 ENSG00000163638 |
| 3 | 64583245 | 64583442 | 64583319 | 10 | 12 | 18 | 0.802612364 | 0.736387   | ADAMTS9 ENSG00000163638 |
| 3 | 64583807 | 64584148 | 64583977 | 9  | 14 | 15 | 1.099733287 | 0.398076   | ADAMTS9 ENSG00000163638 |
| 3 | 64586317 | 64586740 | 64586577 | 11 | 17 | 11 | 1.759573259 | 0.0609179  | ADAMTS9 ENSG00000163638 |
| 3 | 64586856 | 64587108 | 64586972 | 8  | 10 | 7  | 1.612942154 | 0.147335   | ADAMTS9 ENSG00000163638 |
| 3 | 64587396 | 64587865 | 64587732 | 14 | 25 | 22 | 1.32605521  | 0.161597   | ADAMTS9 ENSG00000163638 |
| 3 | 64588248 | 64588971 | 64588427 | 11 | 30 | 33 | 1.06954453  | 0.395234   | ADAMTS9 ENSG00000163638 |
| 3 | 64589294 | 64589667 | 64589488 | 9  | 15 | 9  | 1.876878143 | 0.0544542  | ADAMTS9 ENSG00000163638 |
| 3 | 64592780 | 64592972 | 64592831 | 8  | 8  | 5  | 1.759573259 | 0.13508    | ADAMTS9 ENSG00000163638 |
| 3 | 64593062 | 64593310 | 64593186 | 9  | 9  | 9  | 1.173048839 | 0.362316   | ADAMTS9 ENSG00000163638 |
| 3 | 64593356 | 64593615 | 64593485 | 11 | 14 | 12 | 1.353517892 | 0.211235   | ADAMTS9 ENSG00000163638 |
| 3 | 64594158 | 64594384 | 64594271 | 8  | 10 | 26 | 0.477908786 | 0.985694   | ADAMTS9 ENSG00000163638 |
| 3 | 64594873 | 64595071 | 64595032 | 9  | 10 | 19 | 0.645176862 | 0.887754   | ADAMTS9 ENSG00000163638 |
| 3 | 64595925 | 64596748 | 64596128 | 11 | 34 | 29 | 1.368556979 | 0.102922   | ADAMTS9 ENSG00000163638 |
| 3 | 64597126 | 64597363 | 64597224 | 8  | 11 | 17 | 0.78203256  | 0.752912   | ADAMTS9 ENSG00000163638 |
| 3 | 64597727 | 64597963 | 64597860 | 8  | 9  | 10 | 1.066408036 | 0.444985   | ADAMTS9 ENSG00000163638 |
| 3 | 64602374 | 64602889 | 64602634 | 11 | 21 | 7  | 3.225884308 | 0.00106152 | ADAMTS9 ENSG00000163638 |
| 3 | 64603289 | 64603876 | 64603536 | 11 | 27 | 23 | 1.368556979 | 0.128845   | ADAMTS9 ENSG00000163638 |
| 3 | 64605348 | 64605543 | 64605445 | 8  | 8  | 10 | 0.959767232 | 0.541959   | ADAMTS9 ENSG00000163638 |
| 3 | 64610297 | 64610606 | 64610451 | 8  | 12 | 13 | 1.089259637 | 0.414883   | ADAMTS9 ENSG00000163638 |
| 3 | 64610678 | 64610907 | 64610769 | 8  | 10 | 15 | 0.806471077 | 0.716145   | ADAMTS9 ENSG00000163638 |



|   |          |          |          |    |     |    |             |            |         |                 |
|---|----------|----------|----------|----|-----|----|-------------|------------|---------|-----------------|
| 3 | 64614071 | 64614296 | 64614195 | 10 | 13  | 4  | 3.28453675  | 0.00629037 | ADAMTS9 | ENSG00000163638 |
| 3 | 64617594 | 64618073 | 64617864 | 13 | 22  | 11 | 2.248343609 | 0.0090389  | ADAMTS9 | ENSG00000163638 |
| 3 | 64619134 | 64619544 | 64619304 | 9  | 17  | 28 | 0.72809928  | 0.86131    | ADAMTS9 | ENSG00000163638 |
| 3 | 64626054 | 64626583 | 64626318 | 10 | 22  | 10 | 2.452738482 | 0.00515848 | ADAMTS9 | ENSG00000163638 |
| 3 | 64627871 | 64628282 | 64628024 | 9  | 16  | 9  | 1.994183027 | 0.0370915  | ADAMTS9 | ENSG00000163638 |
| 3 | 64628794 | 64629030 | 64628934 | 8  | 9   | 16 | 0.690028729 | 0.833766   | ADAMTS9 | ENSG00000163638 |
| 3 | 64629896 | 64630128 | 64630012 | 8  | 11  | 9  | 1.407658607 | 0.210479   | ADAMTS9 | ENSG00000163638 |
| 3 | 64631585 | 64631788 | 64631686 | 8  | 8   | 13 | 0.754102825 | 0.754933   | ADAMTS9 | ENSG00000163638 |
| 3 | 64632665 | 64632940 | 64632813 | 9  | 11  | 16 | 0.828034475 | 0.698553   | ADAMTS9 | ENSG00000163638 |
| 3 | 64633842 | 64634089 | 64633965 | 8  | 10  | 8  | 1.433726359 | 0.209175   | ADAMTS9 | ENSG00000163638 |
| 3 | 64638699 | 64638972 | 64638834 | 13 | 15  | 20 | 0.893751497 | 0.63757    | ADAMTS9 | ENSG00000163638 |
| 3 | 64639081 | 64639428 | 64639254 | 8  | 14  | 16 | 1.035043094 | 0.464533   | ADAMTS9 | ENSG00000163638 |
| 3 | 64639917 | 64640158 | 64640064 | 8  | 11  | 11 | 1.173048839 | 0.349489   | ADAMTS9 | ENSG00000163638 |
| 3 | 64640432 | 64640850 | 64640544 | 9  | 18  | 15 | 1.392995497 | 0.16305    | ADAMTS9 | ENSG00000163638 |
| 3 | 64641152 | 64641682 | 64641331 | 13 | 24  | 18 | 1.543485315 | 0.0748829  | ADAMTS9 | ENSG00000163638 |
| 3 | 64643391 | 64643707 | 64643539 | 9  | 12  | 20 | 0.726173091 | 0.825666   | ADAMTS9 | ENSG00000163638 |
| 3 | 64644086 | 64644326 | 64644174 | 8  | 10  | 16 | 0.759031602 | 0.770272   | ADAMTS9 | ENSG00000163638 |
| 3 | 64644413 | 64644634 | 64644589 | 8  | 10  | 11 | 1.075294769 | 0.434143   | ADAMTS9 | ENSG00000163638 |
| 3 | 64645021 | 64645312 | 64645167 | 12 | 15  | 10 | 1.706252857 | 0.0822346  | ADAMTS9 | ENSG00000163638 |
| 3 | 64645356 | 64645696 | 64645526 | 9  | 13  | 13 | 1.173048839 | 0.337862   | ADAMTS9 | ENSG00000163638 |
| 3 | 64645808 | 64646069 | 64645932 | 9  | 11  | 13 | 1.005470434 | 0.498567   | ADAMTS9 | ENSG00000163638 |
| 3 | 64646219 | 64648162 | 64647383 | 18 | 104 | 59 | 2.052835469 | 2.64E-06   | ADAMTS9 | ENSG00000163638 |
| 3 | 64648512 | 64649642 | 64649381 | 11 | 48  | 50 | 1.127046924 | 0.276041   | ADAMTS9 | ENSG00000163638 |
| 3 | 64651354 | 64651700 | 64651527 | 9  | 14  | 10 | 1.599612054 | 0.114822   | ADAMTS9 | ENSG00000163638 |
| 3 | 64651854 | 64652154 | 64652004 | 10 | 13  | 11 | 1.368556979 | 0.211388   | ADAMTS9 | ENSG00000163638 |
| 3 | 64652541 | 64653125 | 64652809 | 17 | 31  | 24 | 1.501502514 | 0.0624568  | ADAMTS9 | ENSG00000163638 |
| 3 | 64653648 | 64653936 | 64653775 | 17 | 20  | 13 | 1.759573259 | 0.0475388  | ADAMTS9 | ENSG00000163638 |
| 3 | 64654563 | 64654796 | 64654683 | 8  | 9   | 20 | 0.558594685 | 0.944249   | ADAMTS9 | ENSG00000163638 |
| 3 | 64654812 | 64655198 | 64655019 | 10 | 18  | 23 | 0.928663664 | 0.599426   | ADAMTS9 | ENSG00000163638 |
| 3 | 64655809 | 64656114 | 64655953 | 9  | 12  | 16 | 0.897037348 | 0.621544   | ADAMTS9 | ENSG00000163638 |
| 3 | 64659056 | 64659326 | 64659191 | 9  | 10  | 12 | 0.992579787 | 0.511743   | ADAMTS9 | ENSG00000163638 |
| 3 | 64660256 | 64660464 | 64660360 | 9  | 10  | 13 | 0.921681231 | 0.585856   | ADAMTS9 | ENSG00000163638 |
| 3 | 64661617 | 64661913 | 64661763 | 10 | 13  | 23 | 0.68427849  | 0.878142   | ADAMTS9 | ENSG00000163638 |
| 3 | 64661916 | 64662121 | 64661976 | 9  | 12  | 16 | 0.897037348 | 0.621544   | ADAMTS9 | ENSG00000163638 |

|   |          |          |          |    |    |    |             |            |         |                 |
|---|----------|----------|----------|----|----|----|-------------|------------|---------|-----------------|
| 3 | 64663644 | 64663870 | 64663757 | 10 | 11 | 8  | 1.564065119 | 0.151515   | ADAMTS9 | ENSG00000163638 |
| 3 | 64665154 | 64665415 | 64665284 | 9  | 10 | 6  | 1.843362462 | 0.0964212  | ADAMTS9 | ENSG00000163638 |
| 3 | 64666048 | 64666362 | 64666205 | 8  | 12 | 10 | 1.386330446 | 0.21117    | ADAMTS9 | ENSG00000163638 |
| 3 | 64670122 | 64670669 | 64670219 | 10 | 24 | 29 | 0.977540699 | 0.536554   | ADAMTS9 | ENSG00000163638 |
| 3 | 64671228 | 64671684 | 64671407 | 16 | 27 | 17 | 1.824742639 | 0.0211436  | ADAMTS9 | ENSG00000163638 |
| 3 | 64671706 | 64671915 | 64671810 | 11 | 12 | 10 | 1.386330446 | 0.21117    | ADAMTS9 | ENSG00000163638 |
| 3 | 64672391 | 64672824 | 64672544 | 13 | 23 | 21 | 1.279689643 | 0.201655   | ADAMTS9 | ENSG00000163638 |
| 3 | 64672879 | 64673420 | 64673058 | 16 | 31 | 35 | 1.042710079 | 0.433819   | ADAMTS9 | ENSG00000163638 |
| 3 | 64673541 | 64673753 | 64673648 | 8  | 9  | 12 | 0.902345261 | 0.602772   | ADAMTS9 | ENSG00000163638 |
| 3 | 64676291 | 64676807 | 64676639 | 11 | 20 | 10 | 2.239456875 | 0.0121685  | ADAMTS9 | ENSG00000163638 |
| 3 | 64676901 | 64677153 | 64677024 | 8  | 12 | 12 | 1.173048839 | 0.343543   | ADAMTS9 | ENSG00000163638 |
| 3 | 64678301 | 64678549 | 64678440 | 9  | 10 | 10 | 1.173048839 | 0.355733   | ADAMTS9 | ENSG00000163638 |
| 3 | 64678564 | 64678765 | 64678599 | 8  | 8  | 9  | 1.055743955 | 0.456865   | ADAMTS9 | ENSG00000163638 |
| 3 | 64679714 | 64679906 | 64679828 | 8  | 8  | 17 | 0.58652442  | 0.914929   | ADAMTS9 | ENSG00000163638 |
| 3 | 64681750 | 64681934 | 64681842 | 8  | 8  | 3  | 2.639359888 | 0.0415794  | ADAMTS9 | ENSG00000163638 |
| 3 | 64682863 | 64683197 | 64683030 | 12 | 18 | 22 | 0.969040346 | 0.544098   | ADAMTS9 | ENSG00000163638 |
| 3 | 64685384 | 64685836 | 64685675 | 11 | 16 | 26 | 0.738586306 | 0.842793   | ADAMTS9 | ENSG00000163638 |
| 3 | 64686430 | 64686705 | 64686558 | 9  | 13 | 13 | 1.173048839 | 0.337862   | ADAMTS9 | ENSG00000163638 |
| 3 | 64686897 | 64687322 | 64687076 | 10 | 19 | 15 | 1.466311049 | 0.125014   | ADAMTS9 | ENSG00000163638 |
| 3 | 64687444 | 64687807 | 64687614 | 15 | 22 | 21 | 1.226369241 | 0.247426   | ADAMTS9 | ENSG00000163638 |
| 3 | 64689441 | 64689620 | 64689518 | 8  | 8  | 7  | 1.319679944 | 0.283403   | ADAMTS9 | ENSG00000163638 |
| 3 | 64690514 | 64690696 | 64690536 | 8  | 9  | 8  | 1.303387599 | 0.281715   | ADAMTS9 | ENSG00000163638 |
| 3 | 64691416 | 64691608 | 64691549 | 9  | 10 | 8  | 1.433726359 | 0.209175   | ADAMTS9 | ENSG00000163638 |
| 3 | 64691767 | 64692018 | 64691892 | 8  | 10 | 14 | 0.860235815 | 0.65444    | ADAMTS9 | ENSG00000163638 |
| 3 | 64692043 | 64692308 | 64692202 | 12 | 14 | 12 | 1.353517892 | 0.211235   | ADAMTS9 | ENSG00000163638 |
| 3 | 64694177 | 64694621 | 64694455 | 9  | 16 | 9  | 1.994183027 | 0.0370915  | ADAMTS9 | ENSG00000163638 |
| 3 | 64695052 | 64695395 | 64695154 | 10 | 15 | 7  | 2.346097679 | 0.0195693  | ADAMTS9 | ENSG00000163638 |
| 3 | 64698610 | 64699026 | 64698847 | 13 | 20 | 14 | 1.642268375 | 0.06827    | ADAMTS9 | ENSG00000163638 |
| 3 | 64700744 | 64701170 | 64701041 | 9  | 16 | 15 | 1.246364392 | 0.263987   | ADAMTS9 | ENSG00000163638 |
| 3 | 64701873 | 64702135 | 64702037 | 10 | 12 | 20 | 0.726173091 | 0.825666   | ADAMTS9 | ENSG00000163638 |
| 3 | 64703635 | 64704115 | 64703814 | 9  | 19 | 10 | 2.132816071 | 0.01835    | ADAMTS9 | ENSG00000163638 |
| 3 | 64707952 | 64708353 | 64708043 | 10 | 17 | 19 | 1.055743955 | 0.436418   | ADAMTS9 | ENSG00000163638 |
| 3 | 64710333 | 64710696 | 64710511 | 10 | 16 | 6  | 2.848832895 | 0.00632407 | ADAMTS9 | ENSG00000163638 |
| 3 | 64711603 | 64711813 | 64711745 | 9  | 11 | 18 | 0.740872951 | 0.800189   | ADAMTS9 | ENSG00000163638 |

|   |          |          |          |    |    |    |             |           |         |                 |
|---|----------|----------|----------|----|----|----|-------------|-----------|---------|-----------------|
| 3 | 64715019 | 64715702 | 64715198 | 11 | 25 | 20 | 1.452346182 | 0.100215  | ADAMTS9 | ENSG00000163638 |
| 3 | 64716919 | 64717520 | 64717348 | 11 | 27 | 27 | 1.173048839 | 0.276183  | ADAMTS9 | ENSG00000163638 |
| 3 | 64717578 | 64717908 | 64717731 | 9  | 13 | 25 | 0.631641683 | 0.924582  | ADAMTS9 | ENSG00000163638 |
| 3 | 64719588 | 64719874 | 64719744 | 9  | 10 | 9  | 1.290353723 | 0.279648  | ADAMTS9 | ENSG00000163638 |
| 3 | 64720310 | 64720607 | 64720436 | 10 | 13 | 19 | 0.821134188 | 0.720637  | ADAMTS9 | ENSG00000163638 |
| 3 | 64721427 | 64721886 | 64721640 | 9  | 19 | 28 | 0.8089992   | 0.772581  | ADAMTS9 | ENSG00000163638 |
| 3 | 64722046 | 64722305 | 64722138 | 11 | 13 | 16 | 0.966040221 | 0.542489  | ADAMTS9 | ENSG00000163638 |
| 3 | 64723490 | 64723868 | 64723689 | 10 | 18 | 11 | 1.857327329 | 0.0427732 | ADAMTS9 | ENSG00000163638 |
| 3 | 64724526 | 64725029 | 64724814 | 11 | 23 | 22 | 1.224050963 | 0.244738  | ADAMTS9 | ENSG00000163638 |
| 3 | 64726491 | 64726713 | 64726626 | 9  | 11 | 22 | 0.612025481 | 0.924393  | ADAMTS9 | ENSG00000163638 |
| 3 | 64727481 | 64727662 | 64727566 | 10 | 10 | 6  | 1.843362462 | 0.0964212 | ADAMTS9 | ENSG00000163638 |
| 3 | 64729176 | 64729501 | 64729338 | 9  | 14 | 17 | 0.977540699 | 0.52995   | ADAMTS9 | ENSG00000163638 |
| 3 | 64729736 | 64730005 | 64729909 | 16 | 18 | 16 | 1.311054585 | 0.208218  | ADAMTS9 | ENSG00000163638 |
| 3 | 64730393 | 64730730 | 64730561 | 11 | 17 | 26 | 0.78203256  | 0.796561  | ADAMTS9 | ENSG00000163638 |
| 3 | 64731864 | 64732236 | 64732078 | 8  | 13 | 10 | 1.49297125  | 0.157311  | ADAMTS9 | ENSG00000163638 |
| 3 | 64732650 | 64733048 | 64732822 | 13 | 18 | 14 | 1.485861863 | 0.123674  | ADAMTS9 | ENSG00000163638 |
| 3 | 64734203 | 64734458 | 64734353 | 9  | 12 | 12 | 1.173048839 | 0.343543  | ADAMTS9 | ENSG00000163638 |
| 3 | 64734980 | 64735298 | 64735124 | 12 | 17 | 17 | 1.173048839 | 0.317303  | ADAMTS9 | ENSG00000163638 |
| 3 | 64735373 | 64735608 | 64735535 | 10 | 13 | 12 | 1.263283365 | 0.272203  | ADAMTS9 | ENSG00000163638 |
| 3 | 64736569 | 64737117 | 64736821 | 12 | 25 | 16 | 1.794074695 | 0.0280669 | ADAMTS9 | ENSG00000163638 |
| 3 | 64744061 | 64744369 | 64744229 | 9  | 14 | 8  | 1.955081399 | 0.0506438 | ADAMTS9 | ENSG00000163638 |
| 3 | 64749732 | 64750225 | 64749831 | 9  | 19 | 24 | 0.938439071 | 0.587839  | ADAMTS9 | ENSG00000163638 |
| 3 | 64751472 | 64751813 | 64751642 | 8  | 14 | 8  | 1.955081399 | 0.0506438 | ADAMTS9 | ENSG00000163638 |
| 3 | 64752232 | 64752513 | 64752341 | 12 | 15 | 13 | 1.340627245 | 0.210788  | ADAMTS9 | ENSG00000163638 |
| 3 | 64752833 | 64753090 | 64753000 | 9  | 13 | 18 | 0.864351776 | 0.666373  | ADAMTS9 | ENSG00000163638 |
| 3 | 64757511 | 64757707 | 64757609 | 8  | 10 | 10 | 1.173048839 | 0.355733  | ADAMTS9 | ENSG00000163638 |
| 3 | 64759200 | 64759488 | 64759344 | 12 | 16 | 17 | 1.107879459 | 0.383112  | ADAMTS9 | ENSG00000163638 |
| 3 | 64759754 | 64760812 | 64760124 | 13 | 43 | 47 | 1.075294769 | 0.365563  | ADAMTS9 | ENSG00000163638 |
| 3 | 64762283 | 64762522 | 64762416 | 8  | 10 | 16 | 0.759031602 | 0.770272  | ADAMTS9 | ENSG00000163638 |
| 3 | 64764481 | 64764972 | 64764793 | 8  | 20 | 24 | 0.985361025 | 0.523192  | ADAMTS9 | ENSG00000163638 |
| 3 | 64765906 | 64766170 | 64766038 | 10 | 12 | 11 | 1.270802909 | 0.274822  | ADAMTS9 | ENSG00000163638 |
| 3 | 64769034 | 64769302 | 64769168 | 8  | 11 | 11 | 1.173048839 | 0.349489  | ADAMTS9 | ENSG00000163638 |
| 3 | 64771097 | 64771566 | 64771253 | 10 | 21 | 21 | 1.173048839 | 0.299417  | ADAMTS9 | ENSG00000163638 |
| 3 | 64774766 | 64774945 | 64774855 | 8  | 8  | 20 | 0.502735217 | 0.96634   | ADAMTS9 | ENSG00000163638 |

|   |          |          |          |     |     |    |             |           |         |                 |
|---|----------|----------|----------|-----|-----|----|-------------|-----------|---------|-----------------|
| 3 | 64775110 | 64775469 | 64775320 | 8   | 14  | 23 | 0.733155525 | 0.834412  | ADAMTS9 | ENSG00000163638 |
| 3 | 64776049 | 64776316 | 64776194 | 8   | 11  | 20 | 0.670313622 | 0.874201  | ADAMTS9 | ENSG00000163638 |
| 3 | 64777067 | 64777528 | 64777319 | 12  | 23  | 14 | 1.876878143 | 0.0251753 | ADAMTS9 | ENSG00000163638 |
| 3 | 64777547 | 64778099 | 64777920 | 9   | 19  | 23 | 0.977540699 | 0.533404  | ADAMTS9 | ENSG00000163638 |
| 3 | 64778179 | 64778358 | 64778268 | 8   | 8   | 17 | 0.58652442  | 0.914929  | ADAMTS9 | ENSG00000163638 |
| 3 | 64778777 | 64779248 | 64779119 | 11  | 20  | 16 | 1.449060331 | 0.126098  | ADAMTS9 | ENSG00000163638 |
| 3 | 64783812 | 64784211 | 64784080 | 12  | 20  | 13 | 1.759573259 | 0.0475388 | ADAMTS9 | ENSG00000163638 |
| 3 | 64785002 | 64785490 | 64785181 | 9   | 21  | 17 | 1.433726359 | 0.126962  | ADAMTS9 | ENSG00000163638 |
| 3 | 64786129 | 64786422 | 64786244 | 8   | 11  | 18 | 0.740872951 | 0.800189  | ADAMTS9 | ENSG00000163638 |
| 3 | 64787095 | 64787447 | 64787271 | 11  | 17  | 21 | 0.959767232 | 0.55532   | ADAMTS9 | ENSG00000163638 |
| 3 | 64788314 | 64788586 | 64788489 | 9   | 13  | 33 | 0.48302011  | 0.992226  | ADAMTS9 | ENSG00000163638 |
| 3 | 64788599 | 64788864 | 64788731 | 8   | 11  | 15 | 0.879786629 | 0.637414  | ADAMTS9 | ENSG00000163638 |
| 3 | 64790715 | 64790894 | 64790804 | 8   | 8   | 6  | 1.508205651 | 0.203852  | ADAMTS9 | ENSG00000163638 |
| 3 | 64792330 | 64792556 | 64792430 | 8   | 10  | 11 | 1.075294769 | 0.434143  | ADAMTS9 | ENSG00000163638 |
| 3 | 64792573 | 64792775 | 64792750 | 8   | 10  | 6  | 1.843362462 | 0.0964212 | ADAMTS9 | ENSG00000163638 |
| 3 | 64794934 | 64795682 | 64795113 | 9   | 28  | 28 | 1.173048839 | 0.272646  | ADAMTS9 | ENSG00000163638 |
| 3 | 64795899 | 64796086 | 64795992 | 8   | 9   | 15 | 0.733155525 | 0.788527  | ADAMTS9 | ENSG00000163638 |
| 3 | 64796231 | 64796514 | 64796364 | 12  | 15  | 11 | 1.564065119 | 0.11768   | ADAMTS9 | ENSG00000163638 |
| 3 | 64796624 | 64797879 | 64796991 | 115 | 210 | 32 | 7.500403185 | 2.30E-40  | ADAMTS9 | ENSG00000163638 |
| 3 | 64797956 | 64798457 | 64798135 | 21  | 34  | 18 | 2.160879441 | 0.0026233 | ADAMTS9 | ENSG00000163638 |
| 3 | 64800538 | 64800892 | 64800715 | 9   | 15  | 10 | 1.706252857 | 0.0822346 | ADAMTS9 | ENSG00000163638 |
| 3 | 64800950 | 64801176 | 64801093 | 11  | 14  | 10 | 1.599612054 | 0.114822  | ADAMTS9 | ENSG00000163638 |
| 3 | 64801951 | 64802130 | 64802040 | 8   | 8   | 14 | 0.703829304 | 0.807737  | ADAMTS9 | ENSG00000163638 |
| 3 | 64807637 | 64807894 | 64807766 | 9   | 11  | 17 | 0.78203256  | 0.752912  | ADAMTS9 | ENSG00000163638 |
| 3 | 64807975 | 64808232 | 64808092 | 8   | 8   | 10 | 0.959767232 | 0.541959  | ADAMTS9 | ENSG00000163638 |
| 3 | 64808781 | 64809392 | 64809142 | 13  | 28  | 25 | 1.308400628 | 0.159476  | ADAMTS9 | ENSG00000163638 |
| 3 | 64810990 | 64811326 | 64811158 | 15  | 19  | 15 | 1.466311049 | 0.125014  | ADAMTS9 | ENSG00000163638 |
| 3 | 64812641 | 64812919 | 64812810 | 11  | 14  | 11 | 1.466311049 | 0.15926   | ADAMTS9 | ENSG00000163638 |
| 3 | 64814186 | 64814436 | 64814351 | 12  | 15  | 12 | 1.443752418 | 0.160732  | ADAMTS9 | ENSG00000163638 |
| 3 | 64814627 | 64814953 | 64814802 | 9   | 14  | 14 | 1.173048839 | 0.332418  | ADAMTS9 | ENSG00000163638 |
| 3 | 64814965 | 64815246 | 64815114 | 8   | 12  | 8  | 1.694403879 | 0.107291  | ADAMTS9 | ENSG00000163638 |
| 3 | 64815585 | 64815872 | 64815694 | 9   | 11  | 11 | 1.173048839 | 0.349489  | ADAMTS9 | ENSG00000163638 |
| 3 | 64817535 | 64817861 | 64817698 | 9   | 12  | 9  | 1.524963491 | 0.154777  | ADAMTS9 | ENSG00000163638 |
| 3 | 64818242 | 64818621 | 64818464 | 9   | 15  | 10 | 1.706252857 | 0.0822346 | ADAMTS9 | ENSG00000163638 |

|   |          |          |          |    |    |    |             |           |         |                 |
|---|----------|----------|----------|----|----|----|-------------|-----------|---------|-----------------|
| 3 | 64819729 | 64820059 | 64819894 | 10 | 14 | 13 | 1.256838042 | 0.269506  | ADAMTS9 | ENSG00000163638 |
| 3 | 64821976 | 64822177 | 64822092 | 8  | 9  | 14 | 0.78203256  | 0.734892  | ADAMTS9 | ENSG00000163638 |
| 3 | 64822918 | 64823102 | 64822986 | 8  | 8  | 8  | 1.173048839 | 0.36929   | ADAMTS9 | ENSG00000163638 |
| 3 | 64823637 | 64823931 | 64823762 | 8  | 12 | 17 | 0.84720194  | 0.681997  | ADAMTS9 | ENSG00000163638 |
| 3 | 64824635 | 64824899 | 64824767 | 13 | 15 | 15 | 1.173048839 | 0.32719   | ADAMTS9 | ENSG00000163638 |
| 3 | 64825690 | 64825891 | 64825790 | 8  | 9  | 15 | 0.733155525 | 0.788527  | ADAMTS9 | ENSG00000163638 |
| 3 | 64827980 | 64828263 | 64828121 | 8  | 10 | 22 | 0.561023358 | 0.950736  | ADAMTS9 | ENSG00000163638 |
| 3 | 64828582 | 64828801 | 64828716 | 8  | 10 | 10 | 1.173048839 | 0.355733  | ADAMTS9 | ENSG00000163638 |
| 3 | 64834198 | 64834467 | 64834332 | 10 | 12 | 17 | 0.84720194  | 0.681997  | ADAMTS9 | ENSG00000163638 |
| 3 | 64835231 | 64835589 | 64835410 | 8  | 13 | 20 | 0.78203256  | 0.76897   | ADAMTS9 | ENSG00000163638 |
| 3 | 64836361 | 64836579 | 64836448 | 10 | 10 | 8  | 1.433726359 | 0.209175  | ADAMTS9 | ENSG00000163638 |
| 3 | 64838103 | 64838394 | 64838279 | 9  | 12 | 18 | 0.802612364 | 0.736387  | ADAMTS9 | ENSG00000163638 |
| 3 | 64838773 | 64839149 | 64838945 | 8  | 14 | 7  | 2.199466574 | 0.0303778 | ADAMTS9 | ENSG00000163638 |
| 3 | 64845465 | 64845964 | 64845710 | 13 | 25 | 18 | 1.605224727 | 0.0562573 | ADAMTS9 | ENSG00000163638 |
| 3 | 64847605 | 64847883 | 64847744 | 9  | 12 | 14 | 1.016642327 | 0.486402  | ADAMTS9 | ENSG00000163638 |
| 3 | 64849665 | 64850100 | 64849972 | 9  | 18 | 10 | 2.026175268 | 0.0273052 | ADAMTS9 | ENSG00000163638 |
| 3 | 64850798 | 64851104 | 64850936 | 11 | 15 | 20 | 0.893751497 | 0.63757   | ADAMTS9 | ENSG00000163638 |
| 3 | 64853700 | 64854017 | 64853858 | 13 | 18 | 26 | 0.825478813 | 0.744556  | ADAMTS9 | ENSG00000163638 |
| 3 | 64854895 | 64855294 | 64854986 | 8  | 15 | 10 | 1.706252857 | 0.0822346 | ADAMTS9 | ENSG00000163638 |
| 3 | 64855491 | 64855697 | 64855551 | 9  | 9  | 13 | 0.837892028 | 0.672794  | ADAMTS9 | ENSG00000163638 |
| 3 | 64855946 | 64856177 | 64856061 | 10 | 11 | 19 | 0.703829304 | 0.840485  | ADAMTS9 | ENSG00000163638 |
| 3 | 64856301 | 64856493 | 64856455 | 8  | 10 | 12 | 0.992579787 | 0.511743  | ADAMTS9 | ENSG00000163638 |
| 3 | 64856794 | 64857179 | 64856973 | 11 | 18 | 17 | 1.238218219 | 0.258417  | ADAMTS9 | ENSG00000163638 |
| 3 | 64857244 | 64857504 | 64857370 | 8  | 12 | 15 | 0.953102182 | 0.555895  | ADAMTS9 | ENSG00000163638 |
| 3 | 64859195 | 64859515 | 64859337 | 16 | 20 | 24 | 0.985361025 | 0.523192  | ADAMTS9 | ENSG00000163638 |
| 3 | 64859524 | 64859739 | 64859604 | 9  | 11 | 13 | 1.005470434 | 0.498567  | ADAMTS9 | ENSG00000163638 |
| 3 | 64862208 | 64862669 | 64862490 | 8  | 16 | 21 | 0.90644683  | 0.624241  | ADAMTS9 | ENSG00000163638 |
| 3 | 64864503 | 64864711 | 64864607 | 9  | 11 | 10 | 1.279689643 | 0.277323  | ADAMTS9 | ENSG00000163638 |
| 3 | 64865116 | 64865317 | 64865215 | 8  | 10 | 11 | 1.075294769 | 0.434143  | ADAMTS9 | ENSG00000163638 |
| 3 | 64865572 | 64865942 | 64865776 | 12 | 18 | 13 | 1.591994853 | 0.0905191 | ADAMTS9 | ENSG00000163638 |
| 3 | 64866881 | 64867245 | 64867121 | 11 | 16 | 25 | 0.766993472 | 0.808934  | ADAMTS9 | ENSG00000163638 |
| 3 | 64867873 | 64868118 | 64868001 | 11 | 12 | 13 | 1.089259637 | 0.414883  | ADAMTS9 | ENSG00000163638 |
| 3 | 64868279 | 64868727 | 64868548 | 11 | 20 | 20 | 1.173048839 | 0.303681  | ADAMTS9 | ENSG00000163638 |
| 3 | 64869035 | 64869479 | 64869195 | 8  | 15 | 23 | 0.78203256  | 0.783431  | ADAMTS9 | ENSG00000163638 |

|   |          |          |          |    |    |    |             |            |         |                 |
|---|----------|----------|----------|----|----|----|-------------|------------|---------|-----------------|
| 3 | 64870137 | 64870484 | 64870310 | 18 | 21 | 18 | 1.358267077 | 0.163254   | ADAMTS9 | ENSG00000163638 |
| 3 | 64871492 | 64872130 | 64871991 | 11 | 25 | 23 | 1.270802909 | 0.198634   | ADAMTS9 | ENSG00000163638 |
| 3 | 64873794 | 64874096 | 64873939 | 8  | 11 | 11 | 1.173048839 | 0.349489   | ADAMTS9 | ENSG00000163638 |
| 3 | 64874184 | 64874452 | 64874318 | 9  | 11 | 15 | 0.879786629 | 0.637414   | ADAMTS9 | ENSG00000163638 |
| 3 | 64874723 | 64875068 | 64874895 | 11 | 16 | 11 | 1.661819189 | 0.0853913  | ADAMTS9 | ENSG00000163638 |
| 3 | 64875079 | 64875717 | 64875462 | 12 | 33 | 32 | 1.208595774 | 0.219635   | ADAMTS9 | ENSG00000163638 |
| 3 | 64876593 | 64876822 | 64876769 | 9  | 11 | 17 | 0.78203256  | 0.752912   | ADAMTS9 | ENSG00000163638 |
| 3 | 64877063 | 64877310 | 64877176 | 10 | 12 | 12 | 1.173048839 | 0.343543   | ADAMTS9 | ENSG00000163638 |
| 3 | 64877372 | 64878111 | 64877717 | 9  | 26 | 34 | 0.90492339  | 0.655516   | ADAMTS9 | ENSG00000163638 |
| 3 | 64881174 | 64881650 | 64881471 | 11 | 18 | 29 | 0.742930932 | 0.850763   | ADAMTS9 | ENSG00000163638 |
| 3 | 64882025 | 64882282 | 64882153 | 8  | 10 | 18 | 0.679133539 | 0.855647   | ADAMTS9 | ENSG00000163638 |
| 3 | 64883036 | 64883380 | 64883208 | 9  | 13 | 16 | 0.966040221 | 0.542489   | ADAMTS9 | ENSG00000163638 |
| 3 | 64884977 | 64885312 | 64885144 | 9  | 12 | 17 | 0.84720194  | 0.681997   | ADAMTS9 | ENSG00000163638 |
| 3 | 64885465 | 64885713 | 64885589 | 13 | 14 | 13 | 1.256838042 | 0.269506   | ADAMTS9 | ENSG00000163638 |
| 3 | 64885797 | 64886472 | 64886320 | 13 | 30 | 38 | 0.932423436 | 0.617637   | ADAMTS9 | ENSG00000163638 |
| 3 | 64887032 | 64887358 | 64887192 | 11 | 14 | 12 | 1.353517892 | 0.211235   | ADAMTS9 | ENSG00000163638 |
| 3 | 64888386 | 64888841 | 64888565 | 14 | 23 | 20 | 1.340627245 | 0.162636   | ADAMTS9 | ENSG00000163638 |
| 3 | 64889510 | 64889775 | 64889642 | 16 | 18 | 22 | 0.969040346 | 0.544098   | ADAMTS9 | ENSG00000163638 |
| 3 | 64889854 | 64890128 | 64889991 | 8  | 11 | 11 | 1.173048839 | 0.349489   | ADAMTS9 | ENSG00000163638 |
| 3 | 64890191 | 64890370 | 64890278 | 8  | 9  | 6  | 1.675784056 | 0.141978   | ADAMTS9 | ENSG00000163638 |
| 3 | 64891237 | 64891623 | 64891469 | 10 | 15 | 23 | 0.78203256  | 0.783431   | ADAMTS9 | ENSG00000163638 |
| 3 | 64892058 | 64892251 | 64892154 | 8  | 9  | 12 | 0.902345261 | 0.602772   | ADAMTS9 | ENSG00000163638 |
| 3 | 64892328 | 64892534 | 64892392 | 9  | 9  | 2  | 3.910162798 | 0.00955088 | ADAMTS9 | ENSG00000163638 |
| 3 | 64892955 | 64893194 | 64893074 | 8  | 11 | 8  | 1.564065119 | 0.151515   | ADAMTS9 | ENSG00000163638 |
| 3 | 64895131 | 64895516 | 64895270 | 8  | 14 | 12 | 1.353517892 | 0.211235   | ADAMTS9 | ENSG00000163638 |
| 3 | 64895529 | 64895772 | 64895660 | 11 | 13 | 11 | 1.368556979 | 0.211388   | ADAMTS9 | ENSG00000163638 |
| 3 | 64896166 | 64896348 | 64896257 | 8  | 9  | 16 | 0.690028729 | 0.833766   | ADAMTS9 | ENSG00000163638 |
| 3 | 64897397 | 64897596 | 64897467 | 10 | 11 | 10 | 1.279689643 | 0.277323   | ADAMTS9 | ENSG00000163638 |
| 3 | 64900035 | 64900505 | 64900209 | 11 | 20 | 20 | 1.173048839 | 0.303681   | ADAMTS9 | ENSG00000163638 |
| 3 | 64900641 | 64900944 | 64900795 | 8  | 12 | 10 | 1.386330446 | 0.21117    | ADAMTS9 | ENSG00000163638 |
| 3 | 64901291 | 64901577 | 64901434 | 9  | 13 | 19 | 0.821134188 | 0.720637   | ADAMTS9 | ENSG00000163638 |
| 3 | 64901729 | 64902046 | 64901885 | 14 | 19 | 21 | 1.066408036 | 0.420026   | ADAMTS9 | ENSG00000163638 |
| 3 | 64902411 | 64902634 | 64902522 | 9  | 11 | 10 | 1.279689643 | 0.277323   | ADAMTS9 | ENSG00000163638 |
| 3 | 64903463 | 64903698 | 64903604 | 8  | 10 | 13 | 0.921681231 | 0.585856   | ADAMTS9 | ENSG00000163638 |

|   |          |          |          |     |     |    |             |             |         |                 |
|---|----------|----------|----------|-----|-----|----|-------------|-------------|---------|-----------------|
| 3 | 64904419 | 64905565 | 64905348 | 137 | 201 | 42 | 5.510601524 | 1.76E-32    | ADAMTS9 | ENSG00000163638 |
| 3 | 64905579 | 64906346 | 64905962 | 16  | 40  | 32 | 1.457424316 | 0.0526369   | ADAMTS9 | ENSG00000163638 |
| 3 | 64907131 | 64907566 | 64907296 | 9   | 17  | 23 | 0.879786629 | 0.664328    | ADAMTS9 | ENSG00000163638 |
| 3 | 64908444 | 64908667 | 64908574 | 12  | 15  | 12 | 1.443752418 | 0.160732    | ADAMTS9 | ENSG00000163638 |
| 3 | 64910452 | 64911046 | 64910749 | 13  | 31  | 26 | 1.390280106 | 0.102755    | ADAMTS9 | ENSG00000163638 |
| 3 | 64913986 | 64914199 | 64914099 | 9   | 10  | 19 | 0.645176862 | 0.887754    | ADAMTS9 | ENSG00000163638 |
| 3 | 64914887 | 64915092 | 64915026 | 9   | 11  | 7  | 1.759573259 | 0.102361    | ADAMTS9 | ENSG00000163638 |
| 3 | 64915686 | 64916413 | 64916054 | 8   | 23  | 35 | 0.78203256  | 0.829742    | ADAMTS9 | ENSG00000163638 |
| 3 | 64916578 | 64916791 | 64916684 | 10  | 10  | 11 | 1.075294769 | 0.434143    | ADAMTS9 | ENSG00000163638 |
| 3 | 64917548 | 64917981 | 64917802 | 8   | 15  | 14 | 1.251252095 | 0.26676     | ADAMTS9 | ENSG00000163638 |
| 3 | 64918275 | 64918580 | 64918427 | 8   | 12  | 12 | 1.173048839 | 0.343543    | ADAMTS9 | ENSG00000163638 |
| 3 | 64918741 | 64918937 | 64918836 | 9   | 11  | 17 | 0.78203256  | 0.752912    | ADAMTS9 | ENSG00000163638 |
| 3 | 64919082 | 64919278 | 64919179 | 8   | 10  | 14 | 0.860235815 | 0.65444     | ADAMTS9 | ENSG00000163638 |
| 3 | 64919427 | 64919622 | 64919524 | 9   | 9   | 13 | 0.837892028 | 0.672794    | ADAMTS9 | ENSG00000163638 |
| 3 | 64922899 | 64923114 | 64922953 | 10  | 12  | 18 | 0.802612364 | 0.736387    | ADAMTS9 | ENSG00000163638 |
| 3 | 64924690 | 64924944 | 64924817 | 9   | 11  | 8  | 1.564065119 | 0.151515    | ADAMTS9 | ENSG00000163638 |
| 3 | 64925489 | 64925865 | 64925656 | 8   | 14  | 5  | 2.932622098 | 0.00829617  | ADAMTS9 | ENSG00000163638 |
| 3 | 65914047 | 65914418 | 65914226 | 14  | 21  | 7  | 3.225884308 | 0.00106152  |         | ENSG00000203648 |
| 3 | 66608786 | 66609030 | 66608931 | 8   | 9   | 1  | 5.865244197 | 0.00272497  | LRIG1   | ENSG00000144749 |
| 3 | 66896502 | 66896724 | 66896613 | 16  | 17  | 1  | 10.55743955 | 9.18E-06    |         | ENSG00000214560 |
| 3 | 67246990 | 67247169 | 67247111 | 8   | 8   | 2  | 3.519146518 | 0.017558    | KBTBD8  | ENSG00000163376 |
| 3 | 68112865 | 68113057 | 68112957 | 9   | 10  | 0  | 12.90353723 | 0.000195991 | FAM19A1 | ENSG00000183662 |
| 3 | 69028075 | 69028295 | 69028169 | 8   | 8   | 2  | 3.519146518 | 0.017558    | FAM19A4 | ENSG00000163377 |
| 3 | 69216610 | 69217092 | 69216789 | 8   | 17  | 0  | 21.11487911 | 8.57E-07    | ARL6IP5 | ENSG00000144746 |
| 3 | 69332555 | 69332873 | 69332701 | 12  | 17  | 9  | 2.111487911 | 0.0248715   |         | ENSG00000210965 |
| 3 | 70985925 | 70986491 | 70986266 | 31  | 43  | 1  | 25.80707446 | 3.65E-14    |         | ENSG00000221382 |
| 3 | 71114721 | 71115000 | 71114840 | 10  | 14  | 2  | 5.865244197 | 0.000387308 | FOXP1   | ENSG00000114861 |
| 3 | 71201780 | 71201964 | 71201828 | 8   | 9   | 0  | 11.73048839 | 0.000425898 | FOXP1   | ENSG00000114861 |
| 3 | 71340626 | 71340892 | 71340759 | 9   | 10  | 5  | 2.150589539 | 0.0575848   | FOXP1   | ENSG00000114861 |
| 3 | 71555195 | 71555457 | 71555312 | 10  | 13  | 0  | 16.42268375 | 1.91E-05    |         | ENSG00000221264 |
| 3 | 71579653 | 71579963 | 71579808 | 21  | 25  | 0  | 30.49926982 | 1.72E-09    |         | ENSG00000221264 |
| 3 | 71820092 | 71820289 | 71820170 | 8   | 10  | 1  | 6.451768616 | 0.00135978  | EIF4E3  | ENSG00000163412 |
| 3 | 72309193 | 72309559 | 72309380 | 14  | 20  | 1  | 12.31701281 | 1.03E-06    |         | ENSG00000212070 |
| 3 | 72759895 | 72760275 | 72760085 | 12  | 20  | 5  | 4.105670938 | 0.000308509 |         | ENSG00000199469 |

|   |          |          |          |     |     |     |             |             |         |                 |
|---|----------|----------|----------|-----|-----|-----|-------------|-------------|---------|-----------------|
| 3 | 73074392 | 73074631 | 73074511 | 9   | 9   | 0   | 11.73048839 | 0.000425898 | PPP4R2  | ENSG00000163605 |
| 3 | 73242490 | 73242969 | 73242653 | 12  | 16  | 8   | 2.215758919 | 0.0222902   |         | ENSG00000223247 |
| 3 | 75180567 | 75180891 | 75180729 | 9   | 12  | 0   | 15.24963491 | 4.15E-05    |         | ENSG00000211042 |
| 3 | 75758838 | 75759157 | 75758997 | 19  | 21  | 0   | 25.80707446 | 3.84E-08    |         | ENSG00000172971 |
| 3 | 75781137 | 75781442 | 75781289 | 10  | 13  | 13  | 1.173048839 | 0.337862    | FRG2C   | ENSG00000172969 |
| 3 | 77146302 | 77146481 | 77146391 | 8   | 8   | 0   | 10.55743955 | 0.000925496 | ROBO2   | ENSG00000185008 |
| 3 | 79537905 | 79538303 | 79538083 | 9   | 16  | 0   | 19.94183027 | 1.86E-06    |         | ENSG00000216116 |
| 3 | 79653167 | 79653403 | 79653285 | 9   | 10  | 1   | 6.451768616 | 0.00135978  |         | ENSG00000216116 |
| 3 | 80004370 | 80004677 | 80004525 | 14  | 15  | 2   | 6.256260476 | 0.000199274 | ROBO1   | ENSG00000169855 |
| 3 | 80017272 | 80017590 | 80017428 | 15  | 18  | 2   | 7.429309316 | 2.63E-05    | ROBO1   | ENSG00000169855 |
| 3 | 80018194 | 80018375 | 80018284 | 8   | 8   | 4   | 2.111487911 | 0.0804809   | ROBO1   | ENSG00000169855 |
| 3 | 80828327 | 80828528 | 80828399 | 10  | 11  | 6   | 2.010940867 | 0.0640214   |         | ENSG00000211100 |
| 3 | 81628566 | 81628745 | 81628655 | 8   | 8   | 6   | 1.508205651 | 0.203852    |         | ENSG00000222389 |
| 3 | 81893052 | 81893828 | 81893499 | 31  | 58  | 4   | 13.8419763  | 6.95E-16    | GBE1    | ENSG00000114480 |
| 3 | 82232332 | 82232587 | 82232455 | 18  | 19  | 1   | 11.73048839 | 2.14E-06    | GBE1    | ENSG00000114480 |
| 3 | 82774866 | 82775196 | 82775028 | 11  | 14  | 3   | 4.398933147 | 0.00132748  |         |                 |
| 3 | 83655406 | 83655743 | 83655574 | 13  | 14  | 9   | 1.759573259 | 0.0786014   |         | ENSG00000223141 |
| 3 | 84066166 | 84066710 | 84066486 | 100 | 132 | 3   | 39.00387391 | 9.72E-41    |         | ENSG00000223141 |
| 3 | 85296321 | 85296562 | 85296441 | 12  | 12  | 4   | 3.049926982 | 0.0108184   | CADM2   | ENSG00000175161 |
| 3 | 87201895 | 87202127 | 87201992 | 10  | 12  | 7   | 1.906204364 | 0.0695918   | VGLL3   | ENSG00000206538 |
| 3 | 87465280 | 87465879 | 87465416 | 22  | 37  | 5   | 7.429309316 | 7.67E-09    |         | ENSG00000211155 |
| 3 | 87491720 | 87492016 | 87491858 | 17  | 20  | 8   | 2.737113958 | 0.0036449   |         | ENSG00000211155 |
| 3 | 87499556 | 87499928 | 87499730 | 11  | 16  | 4   | 3.988366054 | 0.00115141  |         | ENSG00000211155 |
| 3 | 87739109 | 87739419 | 87739264 | 13  | 16  | 2   | 6.647276756 | 0.000101928 |         | ENSG00000200703 |
| 3 | 88190864 | 88191083 | 88190967 | 9   | 10  | 5   | 2.150589539 | 0.0575848   | CGGBP1  | ENSG00000163320 |
| 3 | 88281542 | 88281907 | 88281728 | 8   | 15  | 5   | 3.128130238 | 0.00492422  | C3orf38 | ENSG00000179021 |
| 3 | 89129123 | 89129457 | 89129302 | 15  | 18  | 1   | 11.14396397 | 4.44E-06    | EPHA3   | ENSG00000044524 |
| 3 | 89749487 | 89749943 | 89749764 | 14  | 23  | 1   | 14.07658607 | 1.14E-07    |         | ENSG00000211188 |
| 3 | 90530478 | 90530821 | 90530649 | 90  | 90  | 100 | 1.05690539  | 0.352082    |         | ENSG00000189002 |
| 3 | 90573321 | 90573654 | 90573487 | 20  | 20  | 23  | 1.026417734 | 0.468083    |         | ENSG00000189002 |
| 3 | 95264403 | 95264777 | 95264614 | 8   | 14  | 8   | 1.955081399 | 0.0506438   | NSUN3   | ENSG00000178694 |
| 3 | 95726534 | 95726829 | 95726681 | 10  | 11  | 5   | 2.346097679 | 0.0364013   |         | ENSG00000178660 |
| 3 | 95788860 | 95789110 | 95788963 | 12  | 12  | 0   | 15.24963491 | 4.15E-05    |         | ENSG00000178660 |
| 3 | 96163019 | 96163200 | 96163084 | 9   | 9   | 2   | 3.910162798 | 0.00955088  | WDR82P1 | ENSG00000185141 |



|   |           |           |           |    |    |    |             |             |         |                 |
|---|-----------|-----------|-----------|----|----|----|-------------|-------------|---------|-----------------|
| 3 | 98434252  | 98434530  | 98434391  | 8  | 11 | 5  | 2.346097679 | 0.0364013   | EPHA6   | ENSG00000080224 |
| 3 | 98437133  | 98437463  | 98437298  | 10 | 13 | 9  | 1.642268375 | 0.111397    | EPHA6   | ENSG00000080224 |
| 3 | 99115932  | 99116198  | 99116065  | 8  | 10 | 2  | 4.301179077 | 0.00512919  | CRYBG3  | ENSG00000080200 |
| 3 | 99647446  | 99647776  | 99647598  | 20 | 23 | 2  | 9.384390715 | 8.25E-07    | OR5K1   | ENSG00000185408 |
| 3 | 101019092 | 101019498 | 101019249 | 13 | 20 | 2  | 8.211341875 | 6.65E-06    | C3orf26 | ENSG00000184220 |
| 3 | 101111266 | 101111445 | 101111355 | 8  | 8  | 1  | 5.278719777 | 0.00542188  | FILIP1L | ENSG00000168386 |
| 3 | 101462296 | 101462541 | 101462394 | 10 | 12 | 6  | 2.178519273 | 0.0416567   | TBC1D23 | ENSG00000036054 |
| 3 | 101665382 | 101665581 | 101665481 | 8  | 9  | 0  | 11.73048839 | 0.000425898 | TMEM45A | ENSG00000181458 |
| 3 | 101665650 | 101665984 | 101665806 | 9  | 12 | 0  | 15.24963491 | 4.15E-05    | TMEM45A | ENSG00000181458 |
| 3 | 102714028 | 102714355 | 102714191 | 8  | 12 | 2  | 5.083211637 | 0.00143337  | SENP7   | ENSG00000138468 |
| 3 | 102714564 | 102715069 | 102714713 | 9  | 18 | 7  | 2.785990993 | 0.00480525  | SENP7   | ENSG00000138468 |
| 3 | 102763192 | 102763460 | 102763326 | 8  | 11 | 4  | 2.815317214 | 0.0183428   | RG9MTD1 | ENSG00000174173 |
| 3 | 102775531 | 102776459 | 102775937 | 28 | 68 | 7  | 10.11754624 | 1.76E-16    | PCNP    | ENSG00000081154 |
| 3 | 102878623 | 102879048 | 102878955 | 12 | 20 | 5  | 4.105670938 | 0.000308509 | ZBTB11  | ENSG00000066422 |
| 3 | 102888053 | 102888311 | 102888182 | 8  | 9  | 6  | 1.675784056 | 0.141978    | RPL24   | ENSG00000114391 |
| 3 | 103426943 | 103427212 | 103427093 | 12 | 13 | 1  | 8.211341875 | 0.000163445 | ZPLD1   | ENSG00000170044 |
| 3 | 103894333 | 103894638 | 103894485 | 15 | 18 | 0  | 22.28792795 | 3.94E-07    |         | ENSG00000201065 |
| 3 | 106424298 | 106424616 | 106424457 | 30 | 35 | 4  | 8.445951643 | 6.26E-09    | ALCAM   | ENSG00000170017 |
| 3 | 106573989 | 106574291 | 106574164 | 12 | 14 | 3  | 4.398933147 | 0.00132748  | ALCAM   | ENSG00000170017 |
| 3 | 106813098 | 106813342 | 106813220 | 10 | 10 | 0  | 12.90353723 | 0.000195991 | CBLB    | ENSG00000114423 |
| 3 | 107226840 | 107227019 | 107226929 | 8  | 8  | 2  | 3.519146518 | 0.017558    | CBLB    | ENSG00000114423 |
| 3 | 107878827 | 107879106 | 107879000 | 10 | 13 | 1  | 8.211341875 | 0.000163445 |         | ENSG00000200361 |
| 3 | 107882371 | 107882593 | 107882495 | 10 | 13 | 2  | 5.474227917 | 0.000747844 |         | ENSG00000200361 |
| 3 | 107885335 | 107885775 | 107885630 | 13 | 17 | 1  | 10.55743955 | 9.18E-06    |         | ENSG00000200361 |
| 3 | 107887284 | 107887622 | 107887453 | 11 | 15 | 5  | 3.128130238 | 0.00492422  |         | ENSG00000200361 |
| 3 | 108266032 | 108266245 | 108266138 | 10 | 11 | 5  | 2.346097679 | 0.0364013   |         | ENSG00000214403 |
| 3 | 108442862 | 108443051 | 108442958 | 8  | 10 | 2  | 4.301179077 | 0.00512919  |         | ENSG00000220989 |
| 3 | 108466244 | 108466736 | 108466530 | 27 | 43 | 10 | 4.692195357 | 9.10E-08    |         | ENSG00000220989 |
| 3 | 108631557 | 108631737 | 108631632 | 9  | 9  | 5  | 1.955081399 | 0.0892323   | CCDC54  | ENSG00000138483 |
| 3 | 108658008 | 108658321 | 108658164 | 10 | 12 | 3  | 3.812408728 | 0.004404    | BBX     | ENSG00000114439 |
| 3 | 108724345 | 108724644 | 108724494 | 12 | 17 | 4  | 4.222975822 | 0.000640773 | BBX     | ENSG00000114439 |
| 3 | 108955015 | 108955388 | 108955194 | 8  | 16 | 2  | 6.647276756 | 0.000101928 | BBX     | ENSG00000114439 |
| 3 | 109129070 | 109129314 | 109129139 | 10 | 12 | 4  | 3.049926982 | 0.0108184   | CD47    | ENSG00000196776 |
| 3 | 109147013 | 109147242 | 109147127 | 8  | 9  | 0  | 11.73048839 | 0.000425898 | CD47    | ENSG00000196776 |

|   |           |           |           |    |    |    |             |             |          |                 |
|---|-----------|-----------|-----------|----|----|----|-------------|-------------|----------|-----------------|
| 3 | 109177698 | 109178052 | 109177875 | 8  | 13 | 3  | 4.105670938 | 0.00243034  | CD47     | ENSG00000196776 |
| 3 | 109188193 | 109188408 | 109188270 | 10 | 10 | 4  | 2.580707446 | 0.0306059   | CD47     | ENSG00000196776 |
| 3 | 109200895 | 109201266 | 109201091 | 23 | 29 | 7  | 4.398933147 | 1.30E-05    | CD47     | ENSG00000196776 |
| 3 | 109207927 | 109208132 | 109208046 | 10 | 11 | 4  | 2.815317214 | 0.0183428   | CD47     | ENSG00000196776 |
| 3 | 109581882 | 109582072 | 109582000 | 8  | 8  | 3  | 2.639359888 | 0.0415794   |          | ENSG00000213412 |
| 3 | 109790897 | 109791406 | 109791086 | 15 | 31 | 13 | 2.68125449  | 0.000581082 | KIAA1524 | ENSG00000163507 |
| 3 | 109791457 | 109791729 | 109791593 | 8  | 12 | 8  | 1.694403879 | 0.107291    | DZIP3    | ENSG00000198919 |
| 3 | 109795232 | 109795674 | 109795495 | 18 | 28 | 3  | 8.504604085 | 1.43E-07    | DZIP3    | ENSG00000198919 |
| 3 | 109821789 | 109822085 | 109821937 | 9  | 11 | 6  | 2.010940867 | 0.0640214   | DZIP3    | ENSG00000198919 |
| 3 | 109863774 | 109863970 | 109863872 | 8  | 8  | 1  | 5.278719777 | 0.00542188  | DZIP3    | ENSG00000198919 |
| 3 | 109959251 | 109959430 | 109959340 | 8  | 8  | 0  | 10.55743955 | 0.000925496 | RETNLB   | ENSG00000163515 |
| 3 | 110116132 | 110116849 | 110116618 | 32 | 60 | 3  | 17.8889948  | 1.88E-17    | GUCA1C   | ENSG00000138472 |
| 3 | 111587212 | 111587391 | 111587301 | 8  | 8  | 3  | 2.639359888 | 0.0415794   |          | ENSG00000211437 |
| 3 | 111769840 | 111770057 | 111769948 | 8  | 8  | 1  | 5.278719777 | 0.00542188  |          | ENSG00000211437 |
| 3 | 112330140 | 112330439 | 112330265 | 8  | 10 | 1  | 6.451768616 | 0.00135978  | PVRL3    | ENSG00000177707 |
| 3 | 112710866 | 112711195 | 112711036 | 25 | 30 | 2  | 12.12150467 | 5.77E-09    | CD96     | ENSG00000153283 |
| 3 | 112875916 | 112876188 | 112876059 | 9  | 11 | 3  | 3.519146518 | 0.00788869  | PLCXD2   | ENSG00000144824 |
| 3 | 112919157 | 112919363 | 112919260 | 10 | 11 | 1  | 7.038293036 | 0.000674435 | PLCXD2   | ENSG00000144824 |
| 3 | 112983430 | 112983630 | 112983530 | 10 | 10 | 6  | 1.843362462 | 0.0964212   | PLCXD2   | ENSG00000144824 |
| 3 | 113169369 | 113169619 | 113169546 | 8  | 11 | 9  | 1.407658607 | 0.210479    | ABHD10   | ENSG00000144827 |
| 3 | 113180397 | 113180616 | 113180519 | 8  | 10 | 8  | 1.433726359 | 0.209175    | ABHD10   | ENSG00000144827 |
| 3 | 113215211 | 113215405 | 113215299 | 8  | 8  | 6  | 1.508205651 | 0.203852    | TAGLN3   | ENSG00000144834 |
| 3 | 113276521 | 113276928 | 113276707 | 35 | 44 | 2  | 17.59573259 | 2.22E-13    | C3orf52  | ENSG00000114529 |
| 3 | 113338780 | 113338959 | 113338870 | 8  | 8  | 1  | 5.278719777 | 0.00542188  | GCET2    | ENSG00000174500 |
| 3 | 113639238 | 113639420 | 113639313 | 8  | 9  | 1  | 5.865244197 | 0.00272497  | BTLA     | ENSG00000186265 |
| 3 | 113763664 | 113764184 | 113764005 | 10 | 22 | 4  | 5.396024661 | 3.05E-05    | SLC35A5  | ENSG00000138459 |
| 3 | 113936306 | 113936567 | 113936436 | 8  | 9  | 7  | 1.466311049 | 0.20706     | CCDC80   | ENSG00000091986 |
| 3 | 114102536 | 114102921 | 114102742 | 22 | 29 | 1  | 17.59573259 | 1.33E-09    | CD200R1L | ENSG00000206531 |
| 3 | 114349939 | 114350194 | 114350066 | 11 | 14 | 2  | 5.865244197 | 0.000387308 | BOC      | ENSG00000144857 |
| 3 | 114489533 | 114489716 | 114489645 | 8  | 8  | 7  | 1.319679944 | 0.283403    | BOC      | ENSG00000144857 |
| 3 | 114717706 | 114717911 | 114717820 | 9  | 10 | 5  | 2.150589539 | 0.0575848   | CCDC52   | ENSG00000163611 |
| 3 | 114733895 | 114734210 | 114734053 | 8  | 12 | 12 | 1.173048839 | 0.343543    | SIDT1    | ENSG00000072858 |
| 3 | 114738193 | 114738711 | 114738332 | 12 | 24 | 7  | 3.665777623 | 0.000215502 | SIDT1    | ENSG00000072858 |
| 3 | 114827438 | 114827756 | 114827587 | 8  | 12 | 5  | 2.541605819 | 0.0225912   |          | ENSG00000209204 |

|   |           |           |           |    |    |    |             |             |          |                 |
|---|-----------|-----------|-----------|----|----|----|-------------|-------------|----------|-----------------|
| 3 | 114898199 | 114898468 | 114898364 | 11 | 12 | 2  | 5.083211637 | 0.00143337  | KIAA2018 | ENSG00000176542 |
| 3 | 114943804 | 114944017 | 114943941 | 10 | 12 | 0  | 15.24963491 | 4.15E-05    | NAT13    | ENSG00000121579 |
| 3 | 114946692 | 114947110 | 114946871 | 13 | 22 | 3  | 6.745030826 | 8.05E-06    | NAT13    | ENSG00000121579 |
| 3 | 114947337 | 114947606 | 114947481 | 8  | 13 | 9  | 1.642268375 | 0.111397    | NAT13    | ENSG00000121579 |
| 3 | 114955533 | 114955892 | 114955704 | 10 | 16 | 0  | 19.94183027 | 1.86E-06    | ATP6V1A  | ENSG00000114573 |
| 3 | 115040175 | 115040365 | 115040258 | 8  | 9  | 2  | 3.910162798 | 0.00955088  | GRAMD1C  | ENSG00000178075 |
| 3 | 115114540 | 115114776 | 115114652 | 9  | 11 | 10 | 1.279689643 | 0.277323    |          | ENSG00000213387 |
| 3 | 115257830 | 115258406 | 115258118 | 9  | 25 | 17 | 1.694403879 | 0.0403795   | KIAA1407 | ENSG00000163617 |
| 3 | 115380357 | 115380594 | 115380463 | 10 | 13 | 1  | 8.211341875 | 0.000163445 | DRD3     | ENSG00000151577 |
| 3 | 115585339 | 115585609 | 115585473 | 15 | 18 | 5  | 3.714654658 | 0.000961539 | ZBTB20   | ENSG00000181722 |
| 3 | 115651200 | 115651540 | 115651370 | 9  | 15 | 1  | 9.384390715 | 3.90E-05    | ZBTB20   | ENSG00000181722 |
| 3 | 115811948 | 115812127 | 115812037 | 8  | 8  | 7  | 1.319679944 | 0.283403    | ZBTB20   | ENSG00000181722 |
| 3 | 116348956 | 116349365 | 116349190 | 8  | 15 | 5  | 3.128130238 | 0.00492422  | ZBTB20   | ENSG00000181722 |
| 3 | 116349400 | 116349677 | 116349522 | 9  | 10 | 3  | 3.225884308 | 0.0139466   | ZBTB20   | ENSG00000181722 |
| 3 | 116363495 | 116363837 | 116363644 | 14 | 19 | 1  | 11.73048839 | 2.14E-06    | ZBTB20   | ENSG00000181722 |
| 3 | 116894432 | 116894697 | 116894559 | 9  | 9  | 8  | 1.303387599 | 0.281715    |          | ENSG00000221098 |
| 3 | 117819756 | 117819985 | 117819870 | 10 | 11 | 3  | 3.519146518 | 0.00788869  | BZW1L1   | ENSG00000198406 |
| 3 | 118830554 | 118830855 | 118830730 | 8  | 11 | 2  | 4.692195357 | 0.00272444  |          | ENSG00000206889 |
| 3 | 120442318 | 120442583 | 120442425 | 13 | 17 | 2  | 7.038293036 | 5.19E-05    | B4GALT4  | ENSG00000121578 |
| 3 | 120524415 | 120524685 | 120524581 | 10 | 12 | 2  | 5.083211637 | 0.00143337  |          | ENSG00000207310 |
| 3 | 120664939 | 120665311 | 120665151 | 13 | 19 | 5  | 3.910162798 | 0.000546977 | TMEM39A  | ENSG00000176142 |
| 3 | 120699722 | 120700118 | 120700023 | 10 | 17 | 8  | 2.346097679 | 0.0144542   | C3orf1   | ENSG00000113845 |
| 3 | 120781355 | 120781585 | 120781464 | 9  | 11 | 1  | 7.038293036 | 0.000674435 | ADPRH    | ENSG00000144843 |
| 3 | 120840413 | 120840829 | 120840684 | 33 | 39 | 7  | 5.865244197 | 3.22E-08    | POPDC2   | ENSG00000121577 |
| 3 | 120878692 | 120879181 | 120878936 | 12 | 24 | 8  | 3.258468998 | 0.000499412 | COX17    | ENSG00000138495 |
| 3 | 120995552 | 120995883 | 120995717 | 14 | 17 | 1  | 10.55743955 | 9.18E-06    | NR1I2    | ENSG00000144852 |
| 3 | 121288135 | 121288336 | 121288196 | 10 | 11 | 1  | 7.038293036 | 0.000674435 | GSK3B    | ENSG00000082701 |
| 3 | 121296487 | 121297021 | 121296680 | 13 | 24 | 6  | 4.18946014  | 8.40E-05    | GSK3B    | ENSG00000082701 |
| 3 | 121297250 | 121297473 | 121297349 | 9  | 10 | 5  | 2.150589539 | 0.0575848   | GSK3B    | ENSG00000082701 |
| 3 | 121371082 | 121371261 | 121371181 | 8  | 8  | 2  | 3.519146518 | 0.017558    |          | ENSG00000206721 |
| 3 | 121399910 | 121400197 | 121400053 | 10 | 13 | 3  | 4.105670938 | 0.00243034  |          | ENSG00000206721 |
| 3 | 121404640 | 121404921 | 121404801 | 11 | 12 | 1  | 7.624817456 | 0.000332769 |          | ENSG00000206721 |
| 3 | 121618634 | 121619292 | 121618953 | 14 | 36 | 8  | 4.822534117 | 6.35E-07    | FSTL1    | ENSG00000163430 |
| 3 | 121620446 | 121620669 | 121620557 | 10 | 12 | 1  | 7.624817456 | 0.000332769 | FSTL1    | ENSG00000163430 |

|   |           |           |           |     |     |    |             |             |         |                 |
|---|-----------|-----------|-----------|-----|-----|----|-------------|-------------|---------|-----------------|
| 3 | 121871921 | 121872101 | 121872096 | 8   | 8   | 3  | 2.639359888 | 0.0415794   | HGD     | ENSG00000113924 |
| 3 | 121884018 | 121884247 | 121884132 | 11  | 13  | 4  | 3.28453675  | 0.00629037  | HGD     | ENSG00000113924 |
| 3 | 121911983 | 121912240 | 121912111 | 8   | 10  | 5  | 2.150589539 | 0.0575848   |         | ENSG00000209249 |
| 3 | 121944273 | 121944523 | 121944412 | 9   | 12  | 5  | 2.541605819 | 0.0225912   | GTF2E1  | ENSG00000153767 |
| 3 | 122109551 | 122109873 | 122109722 | 11  | 14  | 2  | 5.865244197 | 0.000387308 | STXBP5L | ENSG00000145087 |
| 3 | 122747405 | 122747663 | 122747542 | 11  | 13  | 3  | 4.105670938 | 0.00243034  | POLQ    | ENSG00000051341 |
| 3 | 122932926 | 122933220 | 122933069 | 16  | 19  | 2  | 7.820325595 | 1.32E-05    | GOLGB1  | ENSG00000173230 |
| 3 | 123036755 | 123036981 | 123036832 | 11  | 12  | 5  | 2.541605819 | 0.0225912   | EAF2    | ENSG00000145088 |
| 3 | 123053868 | 123054200 | 123054034 | 16  | 21  | 1  | 12.90353723 | 4.95E-07    | EAF2    | ENSG00000145088 |
| 3 | 123285986 | 123286258 | 123286129 | 9   | 9   | 1  | 5.865244197 | 0.00272497  | CD86    | ENSG00000114013 |
| 3 | 123460424 | 123460619 | 123460529 | 10  | 10  | 4  | 2.580707446 | 0.0306059   | CASR    | ENSG00000036828 |
| 3 | 123523898 | 123524201 | 123524064 | 8   | 11  | 4  | 2.815317214 | 0.0183428   | CSTA    | ENSG00000121552 |
| 3 | 123526492 | 123526698 | 123526588 | 8   | 9   | 4  | 2.346097679 | 0.050148    | CSTA    | ENSG00000121552 |
| 3 | 123554650 | 123554829 | 123554739 | 8   | 8   | 5  | 1.759573259 | 0.13508     | CSTA    | ENSG00000121552 |
| 3 | 123558057 | 123558283 | 123558170 | 8   | 10  | 4  | 2.580707446 | 0.0306059   | CCDC58  | ENSG00000160124 |
| 3 | 123584494 | 123584864 | 123584814 | 10  | 16  | 6  | 2.848832895 | 0.00632407  | CCDC58  | ENSG00000160124 |
| 3 | 123585665 | 123585969 | 123585808 | 12  | 15  | 5  | 3.128130238 | 0.00492422  | FAM162A | ENSG00000114023 |
| 3 | 123594585 | 123594783 | 123594654 | 8   | 9   | 5  | 1.955081399 | 0.0892323   | FAM162A | ENSG00000114023 |
| 3 | 123595684 | 123596184 | 123595915 | 130 | 158 | 0  | 186.5147655 | 2.55E-54    | FAM162A | ENSG00000114023 |
| 3 | 123616462 | 123616641 | 123616518 | 8   | 8   | 2  | 3.519146518 | 0.017558    | WDR5B   | ENSG00000196981 |
| 3 | 123617377 | 123617946 | 123617556 | 16  | 25  | 9  | 3.049926982 | 0.000648806 | WDR5B   | ENSG00000196981 |
| 3 | 123645388 | 123645578 | 123645464 | 9   | 9   | 3  | 2.932622098 | 0.0242899   | WDR5B   | ENSG00000196981 |
| 3 | 123698007 | 123698404 | 123698225 | 48  | 58  | 4  | 13.8419763  | 6.95E-16    | KPNA1   | ENSG00000114030 |
| 3 | 123762302 | 123762510 | 123762389 | 11  | 11  | 5  | 2.346097679 | 0.0364013   | DTX3L   | ENSG00000163840 |
| 3 | 123880916 | 123881103 | 123880932 | 8   | 8   | 8  | 1.173048839 | 0.36929     | PARP14  | ENSG00000173193 |
| 3 | 124002461 | 124002640 | 124002628 | 8   | 8   | 1  | 5.278719777 | 0.00542188  | DIRC2   | ENSG00000138463 |
| 3 | 124091683 | 124092199 | 124091955 | 81  | 105 | 5  | 20.72386283 | 1.14E-29    |         | ENSG00000221211 |
| 3 | 124095661 | 124095896 | 124095778 | 9   | 10  | 1  | 6.451768616 | 0.00135978  |         | ENSG00000221211 |
| 3 | 124135811 | 124136163 | 124135986 | 39  | 44  | 1  | 26.39359888 | 1.72E-14    |         | ENSG00000221211 |
| 3 | 124144515 | 124144754 | 124144646 | 10  | 12  | 4  | 3.049926982 | 0.0108184   |         | ENSG00000221211 |
| 3 | 124487864 | 124488125 | 124487997 | 11  | 12  | 1  | 7.624817456 | 0.000332769 | SEC22A  | ENSG00000121542 |
| 3 | 124646421 | 124646600 | 124646476 | 8   | 8   | 5  | 1.759573259 | 0.13508     | ADCY5   | ENSG00000173175 |
| 3 | 124786590 | 124787152 | 124787015 | 10  | 21  | 11 | 2.150589539 | 0.0135908   | PTPLB   | ENSG00000206527 |
| 3 | 124803800 | 124804295 | 124803977 | 13  | 24  | 5  | 4.887703497 | 2.90E-05    | PTPLB   | ENSG00000206527 |

|   |           |           |           |    |     |    |             |             |       |                 |
|---|-----------|-----------|-----------|----|-----|----|-------------|-------------|-------|-----------------|
| 3 | 124833857 | 124834095 | 124833976 | 9  | 13  | 3  | 4.105670938 | 0.00243034  | PTPLB | ENSG00000206527 |
| 3 | 124843972 | 124844447 | 124844112 | 16 | 23  | 3  | 7.038293036 | 4.15E-06    | PTPLB | ENSG00000206527 |
| 3 | 124845990 | 124846429 | 124846155 | 28 | 37  | 1  | 22.28792795 | 3.34E-12    | PTPLB | ENSG00000206527 |
| 3 | 124924986 | 124925360 | 124925191 | 12 | 17  | 6  | 3.016411301 | 0.00381427  |       | ENSG00000207002 |
| 3 | 125419122 | 125419466 | 125419294 | 23 | 25  | 4  | 6.099853964 | 4.56E-06    | KALRN | ENSG00000160145 |
| 3 | 125468117 | 125468378 | 125468247 | 15 | 17  | 7  | 2.639359888 | 0.00777415  | KALRN | ENSG00000160145 |
| 3 | 125584554 | 125584926 | 125584733 | 15 | 22  | 2  | 8.993374435 | 1.66E-06    | KALRN | ENSG00000160145 |
| 3 | 125585619 | 125585821 | 125585790 | 8  | 9   | 2  | 3.910162798 | 0.00955088  | KALRN | ENSG00000160145 |
| 3 | 125593506 | 125593907 | 125593728 | 20 | 28  | 2  | 11.33947211 | 2.41E-08    | KALRN | ENSG00000160145 |
| 3 | 125597424 | 125597867 | 125597645 | 29 | 41  | 11 | 4.105670938 | 7.64E-07    | KALRN | ENSG00000160145 |
| 3 | 125598090 | 125599000 | 125598789 | 61 | 104 | 8  | 13.68556979 | 1.60E-26    | KALRN | ENSG00000160145 |
| 3 | 125630426 | 125631075 | 125630810 | 19 | 34  | 9  | 4.105670938 | 5.54E-06    | KALRN | ENSG00000160145 |
| 3 | 125694491 | 125694705 | 125694598 | 10 | 10  | 4  | 2.580707446 | 0.0306059   | KALRN | ENSG00000160145 |
| 3 | 125706215 | 125706530 | 125706377 | 9  | 10  | 5  | 2.150589539 | 0.0575848   | KALRN | ENSG00000160145 |
| 3 | 125753888 | 125754180 | 125754056 | 12 | 14  | 6  | 2.513676084 | 0.016726    | KALRN | ENSG00000160145 |
| 3 | 125755185 | 125755364 | 125755237 | 8  | 9   | 4  | 2.346097679 | 0.050148    | KALRN | ENSG00000160145 |
| 3 | 125758963 | 125759331 | 125759142 | 14 | 21  | 3  | 6.451768616 | 1.56E-05    | KALRN | ENSG00000160145 |
| 3 | 125760602 | 125761229 | 125760905 | 10 | 23  | 8  | 3.128130238 | 0.000832453 | KALRN | ENSG00000160145 |
| 3 | 125766501 | 125766819 | 125766660 | 8  | 12  | 5  | 2.541605819 | 0.0225912   | KALRN | ENSG00000160145 |
| 3 | 125775546 | 125775970 | 125775770 | 47 | 61  | 0  | 72.72902804 | 1.26E-21    | KALRN | ENSG00000160145 |
| 3 | 125788589 | 125788814 | 125788676 | 9  | 11  | 1  | 7.038293036 | 0.000674435 | KALRN | ENSG00000160145 |
| 3 | 125794156 | 125794639 | 125794401 | 17 | 27  | 6  | 4.692195357 | 1.46E-05    | KALRN | ENSG00000160145 |
| 3 | 125931724 | 125932171 | 125932073 | 13 | 23  | 9  | 2.815317214 | 0.00172056  | UMPS  | ENSG00000114491 |
| 3 | 125950012 | 125950230 | 125950121 | 8  | 9   | 1  | 5.865244197 | 0.00272497  | UMPS  | ENSG00000114491 |
| 3 | 125975874 | 125976089 | 125975953 | 11 | 12  | 4  | 3.049926982 | 0.0108184   | UMPS  | ENSG00000114491 |
| 3 | 125978898 | 125979131 | 125979004 | 8  | 9   | 2  | 3.910162798 | 0.00955088  | UMPS  | ENSG00000114491 |
| 3 | 125988234 | 125988481 | 125988400 | 9  | 11  | 1  | 7.038293036 | 0.000674435 | UMPS  | ENSG00000114491 |
| 3 | 126010971 | 126011221 | 126011096 | 8  | 10  | 2  | 4.301179077 | 0.00512919  | ITGB5 | ENSG00000082781 |
| 3 | 126016162 | 126016446 | 126016321 | 9  | 10  | 7  | 1.612942154 | 0.147335    | ITGB5 | ENSG00000082781 |
| 3 | 126039085 | 126039707 | 126039399 | 19 | 42  | 11 | 4.203425008 | 4.39E-07    | ITGB5 | ENSG00000082781 |
| 3 | 126047390 | 126047611 | 126047506 | 9  | 9   | 4  | 2.346097679 | 0.050148    | ITGB5 | ENSG00000082781 |
| 3 | 126080251 | 126080521 | 126080394 | 11 | 14  | 3  | 4.398933147 | 0.00132748  | ITGB5 | ENSG00000082781 |
| 3 | 126174049 | 126174308 | 126174184 | 8  | 10  | 1  | 6.451768616 | 0.00135978  | MUC13 | ENSG00000173702 |
| 3 | 126187992 | 126188173 | 126188085 | 8  | 8   | 2  | 3.519146518 | 0.017558    | MUC13 | ENSG00000173702 |

|   |           |           |           |     |     |   |             |             |         |                 |
|---|-----------|-----------|-----------|-----|-----|---|-------------|-------------|---------|-----------------|
| 3 | 126196884 | 126197293 | 126197114 | 9   | 15  | 6 | 2.68125449  | 0.0103552   | HEG1    | ENSG00000173706 |
| 3 | 126398488 | 126398740 | 126398627 | 9   | 11  | 4 | 2.815317214 | 0.0183428   | SLC12A8 | ENSG00000221955 |
| 3 | 126576635 | 126576992 | 126576813 | 15  | 21  | 1 | 12.90353723 | 4.95E-07    | ZNF148  | ENSG00000163848 |
| 3 | 126787250 | 126787429 | 126787288 | 8   | 8   | 3 | 2.639359888 | 0.0415794   | OSBPL11 | ENSG00000144909 |
| 3 | 126797078 | 126797275 | 126797148 | 8   | 10  | 3 | 3.225884308 | 0.0139466   | OSBPL11 | ENSG00000144909 |
| 3 | 126813376 | 126813555 | 126813465 | 8   | 8   | 1 | 5.278719777 | 0.00542188  | OSBPL11 | ENSG00000144909 |
| 3 | 127310000 | 127310270 | 127310142 | 13  | 14  | 3 | 4.398933147 | 0.00132748  | SLC41A3 | ENSG00000114544 |
| 3 | 127320909 | 127321298 | 127321110 | 133 | 144 | 4 | 34.01841634 | 2.29E-43    | SLC41A3 | ENSG00000114544 |
| 3 | 127323248 | 127323469 | 127323319 | 8   | 9   | 5 | 1.955081399 | 0.0892323   | SLC41A3 | ENSG00000114544 |
| 3 | 127413382 | 127413594 | 127413488 | 8   | 9   | 1 | 5.865244197 | 0.00272497  | ALDH1L1 | ENSG00000144908 |
| 3 | 127469183 | 127469393 | 127469288 | 8   | 8   | 3 | 2.639359888 | 0.0415794   | ALDH1L1 | ENSG00000144908 |
| 3 | 127673937 | 127674140 | 127674038 | 9   | 9   | 2 | 3.910162798 | 0.00955088  | ZXDC    | ENSG00000070476 |
| 3 | 127770551 | 127770821 | 127770651 | 13  | 16  | 0 | 19.94183027 | 1.86E-06    |         | ENSG00000206483 |
| 3 | 127782739 | 127782944 | 127782828 | 9   | 10  | 0 | 12.90353723 | 0.000195991 |         | ENSG00000206483 |
| 3 | 127905436 | 127905896 | 127905615 | 13  | 22  | 4 | 5.396024661 | 3.05E-05    | CHCHD6  | ENSG00000159685 |
| 3 | 128037481 | 128037660 | 128037570 | 9   | 9   | 1 | 5.865244197 | 0.00272497  | CHCHD6  | ENSG00000159685 |
| 3 | 128097234 | 128097510 | 128097387 | 10  | 14  | 7 | 2.199466574 | 0.0303778   | PLXNA1  | ENSG00000114554 |
| 3 | 128207390 | 128207657 | 128207523 | 12  | 12  | 0 | 15.24963491 | 4.15E-05    | PLXNA1  | ENSG00000114554 |
| 3 | 128220562 | 128220769 | 128220665 | 8   | 8   | 3 | 2.639359888 | 0.0415794   | PLXNA1  | ENSG00000114554 |
| 3 | 128275645 | 128275871 | 128275758 | 8   | 10  | 7 | 1.612942154 | 0.147335    | PLXNA1  | ENSG00000114554 |
| 3 | 128276551 | 128276811 | 128276681 | 9   | 12  | 1 | 7.624817456 | 0.000332769 | PLXNA1  | ENSG00000114554 |
| 3 | 128327261 | 128327453 | 128327357 | 10  | 10  | 1 | 6.451768616 | 0.00135978  | C3orf56 | ENSG00000214324 |
| 3 | 128607056 | 128607287 | 128607135 | 9   | 11  | 2 | 4.692195357 | 0.00272444  |         | ENSG00000201288 |
| 3 | 128786717 | 128786913 | 128786774 | 8   | 9   | 2 | 3.910162798 | 0.00955088  | GPR175  | ENSG00000163870 |
| 3 | 128896034 | 128896314 | 128896174 | 10  | 12  | 0 | 15.24963491 | 4.15E-05    | ABTB1   | ENSG00000114626 |
| 3 | 128897834 | 128898032 | 128897933 | 8   | 8   | 3 | 2.639359888 | 0.0415794   | ABTB1   | ENSG00000114626 |
| 3 | 129020639 | 129021011 | 129020735 | 11  | 17  | 4 | 4.222975822 | 0.000640773 | MGLL    | ENSG00000074416 |
| 3 | 129209195 | 129209537 | 129209360 | 27  | 31  | 1 | 18.76878143 | 2.99E-10    |         | ENSG00000201210 |
| 3 | 129212690 | 129213014 | 129212852 | 12  | 16  | 3 | 4.985457567 | 0.000385643 | SEC61A1 | ENSG00000058262 |
| 3 | 129296717 | 129297198 | 129296930 | 107 | 134 | 6 | 22.62308476 | 7.89E-38    |         | ENSG00000222627 |
| 3 | 129325347 | 129325741 | 129325562 | 19  | 29  | 7 | 4.398933147 | 1.30E-05    | RUVBL1  | ENSG00000175792 |
| 3 | 129346917 | 129347096 | 129347006 | 8   | 9   | 2 | 3.910162798 | 0.00955088  |         | ENSG00000212344 |
| 3 | 129354796 | 129355053 | 129354924 | 9   | 10  | 2 | 4.301179077 | 0.00512919  | EEFSEC  | ENSG00000132394 |
| 3 | 129418938 | 129419167 | 129419051 | 8   | 8   | 1 | 5.278719777 | 0.00542188  | EEFSEC  | ENSG00000132394 |

|   |           |           |           |    |    |    |             |             |         |                 |
|---|-----------|-----------|-----------|----|----|----|-------------|-------------|---------|-----------------|
| 3 | 129428469 | 129428672 | 129428590 | 8  | 8  | 1  | 5.278719777 | 0.00542188  | EEFSEC  | ENSG00000132394 |
| 3 | 129537047 | 129537382 | 129537214 | 19 | 25 | 7  | 3.812408728 | 0.00012465  |         | ENSG00000221067 |
| 3 | 129563399 | 129563612 | 129563505 | 8  | 8  | 6  | 1.508205651 | 0.203852    |         | ENSG00000221067 |
| 3 | 129699044 | 129699248 | 129699154 | 8  | 9  | 1  | 5.865244197 | 0.00272497  | GATA2   | ENSG00000179348 |
| 3 | 129704721 | 129704918 | 129704834 | 9  | 11 | 1  | 7.038293036 | 0.000674435 | GATA2   | ENSG00000179348 |
| 3 | 129708182 | 129708613 | 129708434 | 8  | 16 | 7  | 2.492728784 | 0.0124193   | GATA2   | ENSG00000179348 |
| 3 | 129708855 | 129709067 | 129708924 | 9  | 10 | 0  | 12.90353723 | 0.000195991 | GATA2   | ENSG00000179348 |
| 3 | 129786003 | 129786263 | 129786148 | 10 | 11 | 7  | 1.759573259 | 0.102361    | C3orf27 | ENSG00000198685 |
| 3 | 129882125 | 129882619 | 129882354 | 17 | 30 | 4  | 7.272902804 | 1.76E-07    |         | ENSG00000208982 |
| 3 | 129911328 | 129911709 | 129911523 | 27 | 35 | 8  | 4.692195357 | 1.14E-06    |         | ENSG00000207130 |
| 3 | 130080737 | 130080986 | 130080861 | 8  | 10 | 6  | 1.843362462 | 0.0964212   | ACAD9   | ENSG00000177646 |
| 3 | 130308200 | 130308401 | 130308251 | 8  | 8  | 1  | 5.278719777 | 0.00542188  | RAB43   | ENSG00000172780 |
| 3 | 130362589 | 130362860 | 130362724 | 10 | 12 | 4  | 3.049926982 | 0.0108184   | ISY1    | ENSG00000221812 |
| 3 | 130385544 | 130385813 | 130385668 | 13 | 16 | 19 | 0.997091513 | 0.507069    | CNBP    | ENSG00000169714 |
| 3 | 130427953 | 130428179 | 130428077 | 12 | 12 | 5  | 2.541605819 | 0.0225912   | COPG    | ENSG00000181789 |
| 3 | 130450893 | 130451200 | 130451046 | 8  | 12 | 1  | 7.624817456 | 0.000332769 | COPG    | ENSG00000181789 |
| 3 | 130480078 | 130480293 | 130480149 | 8  | 11 | 1  | 7.038293036 | 0.000674435 | C3orf37 | ENSG00000183624 |
| 3 | 130481248 | 130481552 | 130481386 | 10 | 13 | 5  | 2.737113958 | 0.0137917   | C3orf37 | ENSG00000183624 |
| 3 | 130515819 | 130516147 | 130515990 | 8  | 12 | 6  | 2.178519273 | 0.0416567   | H1FX    | ENSG00000184897 |
| 3 | 130516498 | 130516702 | 130516622 | 9  | 10 | 3  | 3.225884308 | 0.0139466   | H1FX    | ENSG00000184897 |
| 3 | 130517711 | 130518005 | 130517857 | 10 | 14 | 0  | 17.59573259 | 8.79E-06    | H1FX    | ENSG00000184897 |
| 3 | 130641477 | 130641700 | 130641627 | 9  | 10 | 4  | 2.580707446 | 0.0306059   | IFT122  | ENSG00000163913 |
| 3 | 130687175 | 130687537 | 130687331 | 11 | 15 | 5  | 3.128130238 | 0.00492422  | RHO     | ENSG00000163914 |
| 3 | 130707842 | 130708150 | 130707996 | 10 | 14 | 8  | 1.955081399 | 0.0506438   | RHO     | ENSG00000163914 |
| 3 | 130829271 | 130829823 | 130829714 | 9  | 21 | 6  | 3.686724924 | 0.000453999 | PLXND1  | ENSG00000004399 |
| 3 | 130851885 | 130852089 | 130852028 | 8  | 9  | 2  | 3.910162798 | 0.00955088  | TMCC1   | ENSG00000172765 |
| 3 | 130864707 | 130864974 | 130864824 | 19 | 23 | 5  | 4.692195357 | 5.29E-05    | TMCC1   | ENSG00000172765 |
| 3 | 131047302 | 131047528 | 131047469 | 8  | 10 | 2  | 4.301179077 | 0.00512919  |         | ENSG00000203644 |
| 3 | 131091819 | 131092018 | 131091918 | 8  | 8  | 2  | 3.519146518 | 0.017558    | TMCC1   | ENSG00000172765 |
| 3 | 131143807 | 131144014 | 131143893 | 8  | 8  | 1  | 5.278719777 | 0.00542188  | TRH     | ENSG00000170893 |
| 3 | 131477821 | 131478004 | 131477923 | 8  | 9  | 6  | 1.675784056 | 0.141978    | COL29A1 | ENSG00000172752 |
| 3 | 131948234 | 131948504 | 131948369 | 11 | 12 | 2  | 5.083211637 | 0.00143337  | PIK3R4  | ENSG00000196455 |
| 3 | 132095317 | 132095535 | 132095426 | 9  | 11 | 3  | 3.519146518 | 0.00788869  | ATP2C1  | ENSG00000017260 |
| 3 | 132551640 | 132551835 | 132551756 | 9  | 9  | 1  | 5.865244197 | 0.00272497  | NUDT16P | ENSG00000206369 |

|   |           |           |           |    |    |    |             |             |         |                 |
|---|-----------|-----------|-----------|----|----|----|-------------|-------------|---------|-----------------|
| 3 | 132645680 | 132645903 | 132645827 | 8  | 9  | 0  | 11.73048839 | 0.000425898 |         | ENSG00000208924 |
| 3 | 132698053 | 132698232 | 132698142 | 8  | 8  | 2  | 3.519146518 | 0.017558    | MRPL3   | ENSG00000114686 |
| 3 | 132704357 | 132704657 | 132704507 | 13 | 17 | 4  | 4.222975822 | 0.000640773 | MRPL3   | ENSG00000114686 |
| 3 | 132789387 | 132789584 | 132789422 | 11 | 11 | 0  | 14.07658607 | 9.02E-05    | MRPL3   | ENSG00000114686 |
| 3 | 132930520 | 132930740 | 132930630 | 8  | 9  | 2  | 3.910162798 | 0.00955088  | MRPL3   | ENSG00000114686 |
| 3 | 133230782 | 133231112 | 133230955 | 12 | 16 | 6  | 2.848832895 | 0.00632407  | CPNE4   | ENSG00000196353 |
| 3 | 133381743 | 133382145 | 133381875 | 13 | 20 | 14 | 1.642268375 | 0.06827     | ACPP    | ENSG00000014257 |
| 3 | 133397614 | 133397996 | 133397829 | 12 | 16 | 9  | 1.994183027 | 0.0370915   | ACPP    | ENSG00000014257 |
| 3 | 133519116 | 133519488 | 133519295 | 14 | 22 | 7  | 3.372515413 | 0.000629223 | ACPP    | ENSG00000014257 |
| 3 | 133544646 | 133544892 | 133544769 | 9  | 11 | 4  | 2.815317214 | 0.0183428   | ACPP    | ENSG00000014257 |
| 3 | 133619792 | 133619971 | 133619913 | 8  | 9  | 6  | 1.675784056 | 0.141978    | DNAJC13 | ENSG00000138246 |
| 3 | 133828457 | 133828896 | 133828636 | 47 | 58 | 6  | 9.887125931 | 2.89E-14    | CCRL1   | ENSG00000129048 |
| 3 | 133861691 | 133861873 | 133861782 | 8  | 8  | 5  | 1.759573259 | 0.13508     | UBA5    | ENSG00000081307 |
| 3 | 133870602 | 133870906 | 133870738 | 11 | 14 | 2  | 5.865244197 | 0.000387308 | UBA5    | ENSG00000081307 |
| 3 | 133932630 | 133933030 | 133932809 | 11 | 18 | 6  | 3.183989707 | 0.00227432  | ACAD11  | ENSG00000113971 |
| 3 | 134060297 | 134060533 | 134060446 | 9  | 12 | 4  | 3.049926982 | 0.0108184   | ACAD11  | ENSG00000113971 |
| 3 | 134242738 | 134242960 | 134242849 | 10 | 11 | 4  | 2.815317214 | 0.0183428   | TMEM108 | ENSG00000144868 |
| 3 | 134585914 | 134586367 | 134586199 | 12 | 22 | 7  | 3.372515413 | 0.000629223 | BFSP2   | ENSG00000170819 |
| 3 | 134646086 | 134646299 | 134646132 | 8  | 10 | 5  | 2.150589539 | 0.0575848   |         | ENSG00000208917 |
| 3 | 134654401 | 134654877 | 134654701 | 18 | 30 | 7  | 4.545564252 | 7.31E-06    |         | ENSG00000208917 |
| 3 | 134749145 | 134749377 | 134749258 | 10 | 12 | 1  | 7.624817456 | 0.000332769 |         | ENSG00000201827 |
| 3 | 134774621 | 134774841 | 134774773 | 9  | 10 | 5  | 2.150589539 | 0.0575848   | CDV3    | ENSG00000091527 |
| 3 | 134776019 | 134776229 | 134776110 | 8  | 8  | 0  | 10.55743955 | 0.000925496 | CDV3    | ENSG00000091527 |
| 3 | 134780205 | 134780446 | 134780358 | 8  | 11 | 12 | 1.082814313 | 0.424156    | CDV3    | ENSG00000091527 |
| 3 | 135131968 | 135132307 | 135132137 | 14 | 20 | 8  | 2.737113958 | 0.0036449   | C3orf36 | ENSG00000221972 |
| 3 | 135145116 | 135145396 | 135145223 | 10 | 13 | 1  | 8.211341875 | 0.000163445 | C3orf36 | ENSG00000221972 |
| 3 | 135165999 | 135166287 | 135166149 | 8  | 13 | 6  | 2.346097679 | 0.0266147   | C3orf36 | ENSG00000221972 |
| 3 | 135187823 | 135188017 | 135187972 | 10 | 10 | 5  | 2.150589539 | 0.0575848   | SLCO2A1 | ENSG00000174640 |
| 3 | 135414509 | 135414886 | 135414688 | 14 | 20 | 7  | 3.079253203 | 0.00177418  | RYK     | ENSG00000163785 |
| 3 | 135509944 | 135510283 | 135510113 | 8  | 12 | 6  | 2.178519273 | 0.0416567   | RPL39P5 | ENSG00000214289 |
| 3 | 135513723 | 135513902 | 135513812 | 8  | 8  | 1  | 5.278719777 | 0.00542188  | RPL39P5 | ENSG00000214289 |
| 3 | 135542889 | 135543338 | 135543085 | 30 | 43 | 3  | 12.90353723 | 3.99E-12    | RPL39P5 | ENSG00000214289 |
| 3 | 135552517 | 135552749 | 135552649 | 8  | 10 | 5  | 2.150589539 | 0.0575848   | RPL39P5 | ENSG00000214289 |
| 3 | 135553845 | 135554100 | 135554019 | 17 | 20 | 3  | 6.158506406 | 2.99E-05    | RPL39P5 | ENSG00000214289 |



|   |           |           |           |    |    |    |             |             |         |                 |
|---|-----------|-----------|-----------|----|----|----|-------------|-------------|---------|-----------------|
| 3 | 135559558 | 135559818 | 135559676 | 8  | 8  | 1  | 5.278719777 | 0.00542188  | RPL39P5 | ENSG00000214289 |
| 3 | 135575892 | 135576101 | 135575996 | 9  | 10 | 1  | 6.451768616 | 0.00135978  | AMOTL2  | ENSG00000114019 |
| 3 | 135583357 | 135583757 | 135583578 | 11 | 20 | 4  | 4.926805125 | 0.00010522  | AMOTL2  | ENSG00000114019 |
| 3 | 135675454 | 135675715 | 135675578 | 8  | 11 | 4  | 2.815317214 | 0.0183428   | CEP63   | ENSG00000182923 |
| 3 | 135676411 | 135676857 | 135676622 | 35 | 51 | 1  | 30.49926982 | 8.63E-17    | CEP63   | ENSG00000182923 |
| 3 | 135687522 | 135687744 | 135687633 | 9  | 9  | 4  | 2.346097679 | 0.050148    | CEP63   | ENSG00000182923 |
| 3 | 135906175 | 135906449 | 135906312 | 12 | 14 | 1  | 8.797866295 | 8.00E-05    | KY      | ENSG00000174611 |
| 3 | 135996454 | 135996962 | 135996622 | 9  | 17 | 5  | 3.519146518 | 0.00167472  | EPHB1   | ENSG00000154928 |
| 3 | 136705371 | 136705745 | 136705566 | 11 | 15 | 5  | 3.128130238 | 0.00492422  | PPP2R3A | ENSG00000073711 |
| 3 | 136875919 | 136876644 | 136876334 | 30 | 46 | 4  | 11.02665909 | 3.28E-12    | PPP2R3A | ENSG00000073711 |
| 3 | 137064010 | 137064226 | 137064147 | 8  | 10 | 0  | 12.90353723 | 0.000195991 | PPP2R3A | ENSG00000073711 |
| 3 | 137109376 | 137109722 | 137109549 | 25 | 31 | 11 | 3.128130238 | 0.000146711 | PPP2R3A | ENSG00000073711 |
| 3 | 137119620 | 137120133 | 137119876 | 14 | 29 | 6  | 5.027352168 | 4.43E-06    | PPP2R3A | ENSG00000073711 |
| 3 | 137120204 | 137120485 | 137120348 | 15 | 17 | 4  | 4.222975822 | 0.000640773 | PPP2R3A | ENSG00000073711 |
| 3 | 137128815 | 137129157 | 137128988 | 12 | 16 | 9  | 1.994183027 | 0.0370915   | PPP2R3A | ENSG00000073711 |
| 3 | 137167667 | 137167915 | 137167791 | 8  | 11 | 5  | 2.346097679 | 0.0364013   | PPP2R3A | ENSG00000073711 |
| 3 | 137224158 | 137224706 | 137224425 | 61 | 90 | 8  | 11.86082715 | 2.83E-22    | PPP2R3A | ENSG00000073711 |
| 3 | 137276847 | 137277106 | 137276976 | 15 | 16 | 4  | 3.988366054 | 0.00115141  | PPP2R3A | ENSG00000073711 |
| 3 | 137343512 | 137343994 | 137343686 | 14 | 29 | 7  | 4.398933147 | 1.30E-05    | MSL2    | ENSG00000174579 |
| 3 | 137392983 | 137393179 | 137393081 | 8  | 9  | 0  | 11.73048839 | 0.000425898 | MSL2    | ENSG00000174579 |
| 3 | 137395210 | 137395399 | 137395337 | 8  | 9  | 2  | 3.910162798 | 0.00955088  | MSL2    | ENSG00000174579 |
| 3 | 137396935 | 137397192 | 137397063 | 8  | 10 | 2  | 4.301179077 | 0.00512919  | MSL2    | ENSG00000174579 |
| 3 | 137397899 | 137398667 | 137398250 | 15 | 40 | 12 | 3.69961557  | 3.24E-06    | MSL2    | ENSG00000174579 |
| 3 | 137451631 | 137451994 | 137451860 | 11 | 17 | 6  | 3.016411301 | 0.00381427  | PCCB    | ENSG00000114054 |
| 3 | 137452010 | 137452379 | 137452278 | 11 | 18 | 9  | 2.228792795 | 0.0164363   | PCCB    | ENSG00000114054 |
| 3 | 137452506 | 137452717 | 137452611 | 9  | 10 | 6  | 1.843362462 | 0.0964212   | PCCB    | ENSG00000114054 |
| 3 | 137479271 | 137479473 | 137479352 | 9  | 10 | 6  | 1.843362462 | 0.0964212   | PCCB    | ENSG00000114054 |
| 3 | 137537483 | 137537801 | 137537642 | 9  | 12 | 1  | 7.624817456 | 0.000332769 | PCCB    | ENSG00000114054 |
| 3 | 137545052 | 137545260 | 137545145 | 9  | 9  | 1  | 5.865244197 | 0.00272497  |         | ENSG00000200571 |
| 3 | 137545404 | 137545684 | 137545544 | 13 | 14 | 10 | 1.599612054 | 0.114822    |         | ENSG00000200571 |
| 3 | 137593288 | 137593503 | 137593361 | 10 | 10 | 1  | 6.451768616 | 0.00135978  |         | ENSG00000200571 |
| 3 | 137953807 | 137953996 | 137953892 | 8  | 8  | 2  | 3.519146518 | 0.017558    | STAG1   | ENSG00000118007 |
| 3 | 137954385 | 137954580 | 137954476 | 8  | 10 | 2  | 4.301179077 | 0.00512919  | STAG1   | ENSG00000118007 |
| 3 | 138233845 | 138234192 | 138234018 | 9  | 13 | 7  | 2.052835469 | 0.046392    | IL20RB  | ENSG00000174564 |

|   |           |           |           |    |     |    |             |             |          |                 |
|---|-----------|-----------|-----------|----|-----|----|-------------|-------------|----------|-----------------|
| 3 | 138256455 | 138256861 | 138256631 | 42 | 48  | 4  | 11.49587863 | 8.11E-13    | IL20RB   | ENSG00000174564 |
| 3 | 138533697 | 138534177 | 138533980 | 12 | 21  | 7  | 3.225884308 | 0.00106152  |          | ENSG00000201325 |
| 3 | 138666240 | 138666529 | 138666405 | 10 | 13  | 4  | 3.28453675  | 0.00629037  |          | ENSG00000201325 |
| 3 | 138711339 | 138711604 | 138711475 | 16 | 18  | 1  | 11.14396397 | 4.44E-06    |          | ENSG00000201325 |
| 3 | 139320469 | 139320707 | 139320588 | 10 | 12  | 5  | 2.541605819 | 0.0225912   | DZIP1L   | ENSG00000158163 |
| 3 | 139327182 | 139327455 | 139327349 | 9  | 12  | 7  | 1.906204364 | 0.0695918   | A4GNT    | ENSG00000118017 |
| 3 | 139376103 | 139376541 | 139376280 | 11 | 18  | 5  | 3.714654658 | 0.000961539 | DBR1     | ENSG00000138231 |
| 3 | 139389057 | 139389239 | 139389148 | 8  | 9   | 1  | 5.865244197 | 0.00272497  | ARMC8    | ENSG00000114098 |
| 3 | 139483648 | 139483869 | 139483748 | 9  | 10  | 0  | 12.90353723 | 0.000195991 | ARMC8    | ENSG00000114098 |
| 3 | 139549757 | 139549965 | 139549861 | 8  | 8   | 3  | 2.639359888 | 0.0415794   | MRAS     | ENSG00000158186 |
| 3 | 139585545 | 139585963 | 139585717 | 13 | 20  | 2  | 8.211341875 | 6.65E-06    | MRAS     | ENSG00000158186 |
| 3 | 139657182 | 139657375 | 139657306 | 8  | 8   | 0  | 10.55743955 | 0.000925496 | FAM62C   | ENSG00000158220 |
| 3 | 139681123 | 139681372 | 139681293 | 8  | 11  | 2  | 4.692195357 | 0.00272444  | FAM62C   | ENSG00000158220 |
| 3 | 139795843 | 139796103 | 139795959 | 9  | 12  | 1  | 7.624817456 | 0.000332769 | CEP70    | ENSG00000114107 |
| 3 | 139810817 | 139811009 | 139810955 | 8  | 8   | 0  | 10.55743955 | 0.000925496 | FAIM     | ENSG00000158234 |
| 3 | 139875726 | 139875987 | 139875861 | 8  | 9   | 2  | 3.910162798 | 0.00955088  |          | ENSG00000174715 |
| 3 | 139888372 | 139888561 | 139888453 | 8  | 9   | 7  | 1.466311049 | 0.20706     |          | ENSG00000174715 |
| 3 | 140116640 | 140117130 | 140116784 | 10 | 22  | 5  | 4.496687217 | 9.59E-05    | FOXL2    | ENSG00000183770 |
| 3 | 140137701 | 140137913 | 140137857 | 12 | 14  | 4  | 3.519146518 | 0.00361132  | FOXL2    | ENSG00000183770 |
| 3 | 140425205 | 140425653 | 140425428 | 35 | 49  | 1  | 29.32622098 | 3.92E-16    | MRPS22   | ENSG00000175110 |
| 3 | 140530928 | 140531331 | 140531152 | 11 | 21  | 3  | 6.451768616 | 1.56E-05    | MRPS22   | ENSG00000175110 |
| 3 | 140555550 | 140555732 | 140555662 | 8  | 8   | 3  | 2.639359888 | 0.0415794   | MRPS22   | ENSG00000175110 |
| 3 | 140591049 | 140591314 | 140591181 | 9  | 12  | 9  | 1.524963491 | 0.154777    | COPB2    | ENSG00000184432 |
| 3 | 140591326 | 140591676 | 140591499 | 15 | 20  | 12 | 1.894925048 | 0.0317253   | COPB2    | ENSG00000184432 |
| 3 | 140657975 | 140658183 | 140658124 | 8  | 8   | 3  | 2.639359888 | 0.0415794   | RBP2     | ENSG00000114113 |
| 3 | 140752466 | 140752670 | 140752568 | 8  | 8   | 1  | 5.278719777 | 0.00542188  | RBP1     | ENSG00000114115 |
| 3 | 140917195 | 140917749 | 140917397 | 51 | 72  | 1  | 42.81628264 | 1.00E-23    | NMNAT3   | ENSG00000163864 |
| 3 | 140919929 | 140920246 | 140920087 | 12 | 14  | 5  | 2.932622098 | 0.00829617  | NMNAT3   | ENSG00000163864 |
| 3 | 140934271 | 140934450 | 140934303 | 8  | 8   | 0  | 10.55743955 | 0.000925496 | NMNAT3   | ENSG00000163864 |
| 3 | 141118462 | 141118705 | 141118568 | 11 | 11  | 7  | 1.759573259 | 0.102361    | CLSTN2   | ENSG00000158258 |
| 3 | 141408269 | 141408604 | 141408427 | 12 | 15  | 6  | 2.68125449  | 0.0103552   | CLSTN2   | ENSG00000158258 |
| 3 | 141624713 | 141625440 | 141625233 | 82 | 134 | 1  | 79.18079665 | 2.31E-44    |          | ENSG00000216184 |
| 3 | 142065319 | 142065530 | 142065395 | 8  | 9   | 5  | 1.955081399 | 0.0892323   | SLC25A36 | ENSG00000114120 |
| 3 | 142129303 | 142129592 | 142129428 | 9  | 11  | 6  | 2.010940867 | 0.0640214   | SLC25A36 | ENSG00000114120 |

|   |           |           |           |    |    |    |             |             |          |                 |
|---|-----------|-----------|-----------|----|----|----|-------------|-------------|----------|-----------------|
| 3 | 142142881 | 142143397 | 142143168 | 9  | 17 | 9  | 2.111487911 | 0.0248715   | SLC25A36 | ENSG00000114120 |
| 3 | 142290975 | 142291240 | 142291107 | 8  | 9  | 5  | 1.955081399 | 0.0892323   | SPSB4    | ENSG00000175093 |
| 3 | 142393770 | 142394293 | 142394020 | 12 | 22 | 6  | 3.854303329 | 0.000260696 | ACPL2    | ENSG00000155893 |
| 3 | 142443323 | 142443730 | 142443495 | 8  | 15 | 2  | 6.256260476 | 0.000199274 | ACPL2    | ENSG00000155893 |
| 3 | 142475177 | 142475384 | 142475280 | 8  | 8  | 7  | 1.319679944 | 0.283403    | ACPL2    | ENSG00000155893 |
| 3 | 142476568 | 142476772 | 142476670 | 8  | 10 | 1  | 6.451768616 | 0.00135978  | ACPL2    | ENSG00000155893 |
| 3 | 142477558 | 142477820 | 142477689 | 21 | 21 | 2  | 8.602358155 | 3.33E-06    | ACPL2    | ENSG00000155893 |
| 3 | 142494723 | 142494949 | 142494836 | 8  | 8  | 1  | 5.278719777 | 0.00542188  | ACPL2    | ENSG00000155893 |
| 3 | 142510224 | 142510643 | 142510397 | 26 | 36 | 5  | 7.233801176 | 1.48E-08    | ZBTB38   | ENSG00000177311 |
| 3 | 142513220 | 142513492 | 142513398 | 8  | 11 | 11 | 1.173048839 | 0.349489    | ZBTB38   | ENSG00000177311 |
| 3 | 142562544 | 142562806 | 142562717 | 18 | 20 | 7  | 3.079253203 | 0.00177418  | ZBTB38   | ENSG00000177311 |
| 3 | 142567780 | 142568119 | 142567949 | 17 | 20 | 2  | 8.211341875 | 6.65E-06    | ZBTB38   | ENSG00000177311 |
| 3 | 142661713 | 142661963 | 142661849 | 14 | 16 | 7  | 2.492728784 | 0.0124193   | RASA2    | ENSG00000155903 |
| 3 | 143110919 | 143111169 | 143111014 | 9  | 9  | 2  | 3.910162798 | 0.00955088  |          | ENSG00000200389 |
| 3 | 143141962 | 143142232 | 143142121 | 11 | 15 | 7  | 2.346097679 | 0.0195693   |          | ENSG00000214271 |
| 3 | 143428051 | 143428231 | 143428130 | 9  | 9  | 5  | 1.955081399 | 0.0892323   | GK5      | ENSG00000175066 |
| 3 | 143481567 | 143481858 | 143481737 | 10 | 13 | 2  | 5.474227917 | 0.000747844 | GK5      | ENSG00000175066 |
| 3 | 143649531 | 143649754 | 143649664 | 8  | 10 | 2  | 4.301179077 | 0.00512919  | XRN1     | ENSG00000114127 |
| 3 | 143649877 | 143650056 | 143649977 | 8  | 10 | 3  | 3.225884308 | 0.0139466   | XRN1     | ENSG00000114127 |
| 3 | 143742408 | 143742698 | 143742543 | 8  | 9  | 4  | 2.346097679 | 0.050148    | ATR      | ENSG00000175054 |
| 3 | 143780204 | 143780470 | 143780337 | 13 | 16 | 0  | 19.94183027 | 1.86E-06    | ATR      | ENSG00000175054 |
| 3 | 143797660 | 143798181 | 143797793 | 18 | 28 | 8  | 3.779824038 | 5.98E-05    | ATR      | ENSG00000175054 |
| 3 | 144126805 | 144127020 | 144126912 | 8  | 10 | 1  | 6.451768616 | 0.00135978  | PCOLCE2  | ENSG00000163710 |
| 3 | 144202772 | 144203328 | 144203063 | 19 | 31 | 15 | 2.346097679 | 0.00187452  |          | ENSG00000163714 |
| 3 | 144271916 | 144272096 | 144272006 | 9  | 9  | 0  | 11.73048839 | 0.000425898 | CHST2    | ENSG00000175040 |
| 3 | 144450438 | 144450909 | 144450730 | 31 | 41 | 1  | 24.63402563 | 1.65E-13    |          | ENSG00000181814 |
| 3 | 144465313 | 144465651 | 144465482 | 22 | 26 | 0  | 31.67231866 | 7.93E-10    |          | ENSG00000181814 |
| 3 | 144795908 | 144796244 | 144796076 | 14 | 16 | 4  | 3.988366054 | 0.00115141  | SLC9A9   | ENSG00000181804 |
| 3 | 144803424 | 144804007 | 144803749 | 62 | 85 | 5  | 16.81370003 | 2.30E-23    | SLC9A9   | ENSG00000181804 |
| 3 | 144846111 | 144846310 | 144846169 | 8  | 8  | 4  | 2.111487911 | 0.0804809   | SLC9A9   | ENSG00000181804 |
| 3 | 144875986 | 144876186 | 144876030 | 9  | 9  | 2  | 3.910162798 | 0.00955088  | SLC9A9   | ENSG00000181804 |
| 3 | 145084730 | 145085054 | 145084883 | 19 | 22 | 2  | 8.993374435 | 1.66E-06    | SLC9A9   | ENSG00000181804 |
| 3 | 145085076 | 145085273 | 145085191 | 8  | 10 | 4  | 2.580707446 | 0.0306059   | SLC9A9   | ENSG00000181804 |
| 3 | 145173011 | 145173300 | 145173174 | 12 | 14 | 3  | 4.398933147 | 0.00132748  | C3orf58  | ENSG00000181744 |

|   |           |           |           |    |    |    |             |             |         |                 |
|---|-----------|-----------|-----------|----|----|----|-------------|-------------|---------|-----------------|
| 3 | 145363609 | 145363832 | 145363677 | 9  | 10 | 2  | 4.301179077 | 0.00512919  |         | ENSG00000222778 |
| 3 | 145563683 | 145563862 | 145563783 | 8  | 8  | 3  | 2.639359888 | 0.0415794   |         | ENSG00000212780 |
| 3 | 145633070 | 145633282 | 145633166 | 8  | 10 | 1  | 6.451768616 | 0.00135978  |         | ENSG00000212780 |
| 3 | 145657708 | 145657887 | 145657767 | 9  | 9  | 2  | 3.910162798 | 0.00955088  |         | ENSG00000212780 |
| 3 | 146554693 | 146554895 | 146554810 | 8  | 9  | 0  | 11.73048839 | 0.000425898 |         |                 |
| 3 | 146558240 | 146558601 | 146558433 | 21 | 27 | 2  | 10.94845583 | 4.90E-08    |         |                 |
| 3 | 146828766 | 146829008 | 146828852 | 11 | 13 | 0  | 16.42268375 | 1.91E-05    |         | ENSG00000222350 |
| 3 | 147360740 | 147360948 | 147360871 | 9  | 10 | 2  | 4.301179077 | 0.00512919  | PLOD2   | ENSG00000152952 |
| 3 | 147380888 | 147381219 | 147381043 | 13 | 15 | 3  | 4.692195357 | 0.000718455 | PLOD2   | ENSG00000152952 |
| 3 | 147390153 | 147390332 | 147390242 | 8  | 8  | 3  | 2.639359888 | 0.0415794   | PLOD2   | ENSG00000152952 |
| 3 | 147622312 | 147622676 | 147622497 | 11 | 18 | 8  | 2.476436439 | 0.00924552  | PLSCR2  | ENSG00000163746 |
| 3 | 147622859 | 147623100 | 147622972 | 9  | 11 | 12 | 1.082814313 | 0.424156    | PLSCR2  | ENSG00000163746 |
| 3 | 147745004 | 147745370 | 147745183 | 10 | 17 | 12 | 1.62422147  | 0.088135    | PLSCR1  | ENSG00000188313 |
| 3 | 147782597 | 147783090 | 147782767 | 51 | 62 | 2  | 24.63402563 | 3.62E-19    |         | ENSG00000199812 |
| 3 | 147825877 | 147826068 | 147825954 | 8  | 8  | 6  | 1.508205651 | 0.203852    |         | ENSG00000199812 |
| 3 | 147882696 | 147882895 | 147882795 | 8  | 8  | 0  | 10.55743955 | 0.000925496 |         | ENSG00000199812 |
| 3 | 148488649 | 148488838 | 148488743 | 8  | 8  | 0  | 10.55743955 | 0.000925496 |         | ENSG00000214250 |
| 3 | 148593124 | 148593320 | 148593208 | 9  | 10 | 2  | 4.301179077 | 0.00512919  | ZIC4    | ENSG00000174963 |
| 3 | 149362765 | 149362951 | 149362858 | 10 | 10 | 4  | 2.580707446 | 0.0306059   |         | ENSG00000205412 |
| 3 | 149428055 | 149428384 | 149428219 | 23 | 25 | 5  | 5.083211637 | 1.58E-05    |         | ENSG00000205412 |
| 3 | 150081251 | 150081442 | 150081346 | 8  | 8  | 2  | 3.519146518 | 0.017558    | CPA3    | ENSG00000163751 |
| 3 | 150156001 | 150156246 | 150156086 | 9  | 12 | 1  | 7.624817456 | 0.000332769 |         | ENSG00000174995 |
| 3 | 150286787 | 150287161 | 150286894 | 10 | 16 | 10 | 1.812893661 | 0.0578656   | HLTF    | ENSG00000071794 |
| 3 | 150287168 | 150287374 | 150287234 | 8  | 9  | 9  | 1.173048839 | 0.362316    | HLTF    | ENSG00000071794 |
| 3 | 150329764 | 150330145 | 150329966 | 10 | 17 | 9  | 2.111487911 | 0.0248715   | HPS3    | ENSG00000163755 |
| 3 | 150392321 | 150392781 | 150392608 | 35 | 46 | 0  | 55.13329545 | 1.44E-16    | CP      | ENSG00000047457 |
| 3 | 150412901 | 150413143 | 150413022 | 11 | 13 | 6  | 2.346097679 | 0.0266147   | CP      | ENSG00000047457 |
| 3 | 150447737 | 150447962 | 150447805 | 8  | 11 | 8  | 1.564065119 | 0.151515    | CP      | ENSG00000047457 |
| 3 | 150448303 | 150448482 | 150448419 | 9  | 10 | 1  | 6.451768616 | 0.00135978  | CP      | ENSG00000047457 |
| 3 | 150448618 | 150448874 | 150448754 | 8  | 11 | 5  | 2.346097679 | 0.0364013   | CP      | ENSG00000047457 |
| 3 | 150473630 | 150474012 | 150473809 | 10 | 17 | 4  | 4.222975822 | 0.000640773 | CP      | ENSG00000047457 |
| 3 | 150477949 | 150478340 | 150478181 | 26 | 34 | 8  | 4.561856597 | 2.04E-06    | CP      | ENSG00000047457 |
| 3 | 150483278 | 150483700 | 150483521 | 11 | 19 | 7  | 2.932622098 | 0.00293566  | TM4SF18 | ENSG00000163762 |
| 3 | 150483968 | 150484261 | 150484123 | 11 | 15 | 4  | 3.753756286 | 0.0020497   | TM4SF18 | ENSG00000163762 |

|   |           |           |           |    |    |    |             |             |         |                 |
|---|-----------|-----------|-----------|----|----|----|-------------|-------------|---------|-----------------|
| 3 | 150500590 | 150501055 | 150500763 | 20 | 27 | 12 | 2.526566731 | 0.00187486  | TM4SF18 | ENSG00000163762 |
| 3 | 150540470 | 150540741 | 150540641 | 8  | 12 | 6  | 2.178519273 | 0.0416567   | TM4SF18 | ENSG00000163762 |
| 3 | 150553039 | 150553343 | 150553191 | 17 | 21 | 7  | 3.225884308 | 0.00106152  |         | ENSG00000213216 |
| 3 | 150587083 | 150587479 | 150587273 | 21 | 29 | 10 | 3.199224107 | 0.000186763 | TM4SF1  | ENSG00000169908 |
| 3 | 150593918 | 150594157 | 150593997 | 9  | 12 | 5  | 2.541605819 | 0.0225912   | TM4SF1  | ENSG00000169908 |
| 3 | 150595295 | 150595484 | 150595327 | 8  | 9  | 3  | 2.932622098 | 0.0242899   | TM4SF1  | ENSG00000169908 |
| 3 | 150596255 | 150596641 | 150596466 | 14 | 20 | 15 | 1.539626602 | 0.0943825   | TM4SF1  | ENSG00000169908 |
| 3 | 150601691 | 150602026 | 150601858 | 11 | 14 | 1  | 8.797866295 | 8.00E-05    | TM4SF1  | ENSG00000169908 |
| 3 | 150602049 | 150602364 | 150602206 | 10 | 14 | 4  | 3.519146518 | 0.00361132  | TM4SF1  | ENSG00000169908 |
| 3 | 150655266 | 150655469 | 150655377 | 9  | 10 | 1  | 6.451768616 | 0.00135978  | TM4SF4  | ENSG00000169903 |
| 3 | 150674194 | 150674558 | 150674325 | 10 | 14 | 6  | 2.513676084 | 0.016726    | TM4SF4  | ENSG00000169903 |
| 3 | 150708283 | 150708493 | 150708395 | 8  | 10 | 6  | 1.843362462 | 0.0964212   | TM4SF4  | ENSG00000169903 |
| 3 | 150819143 | 150819486 | 150819292 | 10 | 14 | 8  | 1.955081399 | 0.0506438   | WWTR1   | ENSG00000018408 |
| 3 | 150831254 | 150831466 | 150831360 | 10 | 10 | 3  | 3.225884308 | 0.0139466   | WWTR1   | ENSG00000018408 |
| 3 | 150857865 | 150858099 | 150857983 | 8  | 10 | 5  | 2.150589539 | 0.0575848   | WWTR1   | ENSG00000018408 |
| 3 | 150858521 | 150858809 | 150858651 | 10 | 12 | 4  | 3.049926982 | 0.0108184   | WWTR1   | ENSG00000018408 |
| 3 | 150952904 | 150953309 | 150953077 | 20 | 26 | 5  | 5.278719777 | 8.57E-06    | COMMD2  | ENSG00000114744 |
| 3 | 150984210 | 150984795 | 150984389 | 16 | 32 | 2  | 12.90353723 | 1.37E-09    | C3orf16 | ENSG00000206199 |
| 3 | 151008794 | 151009128 | 151008961 | 11 | 13 | 8  | 1.824742639 | 0.0744168   | RNF13   | ENSG00000082996 |
| 3 | 151013374 | 151014246 | 151014067 | 15 | 40 | 9  | 4.809500241 | 1.80E-07    | RNF13   | ENSG00000082996 |
| 3 | 151014425 | 151014638 | 151014593 | 9  | 11 | 3  | 3.519146518 | 0.00788869  | RNF13   | ENSG00000082996 |
| 3 | 151095857 | 151096036 | 151095946 | 8  | 8  | 7  | 1.319679944 | 0.283403    |         | ENSG00000208760 |
| 3 | 151164627 | 151164845 | 151164736 | 8  | 8  | 5  | 1.759573259 | 0.13508     | PFN2    | ENSG00000070087 |
| 3 | 151282475 | 151282689 | 151282553 | 9  | 10 | 3  | 3.225884308 | 0.0139466   |         | ENSG00000208756 |
| 3 | 151350274 | 151350550 | 151350422 | 10 | 13 | 4  | 3.28453675  | 0.00629037  |         | ENSG00000208756 |
| 3 | 151364263 | 151364616 | 151364441 | 13 | 18 | 9  | 2.228792795 | 0.0164363   |         | ENSG00000222269 |
| 3 | 151428371 | 151428694 | 151428544 | 10 | 14 | 7  | 2.199466574 | 0.0303778   |         | ENSG00000222269 |
| 3 | 151438010 | 151438293 | 151438154 | 19 | 21 | 7  | 3.225884308 | 0.00106152  |         | ENSG00000222269 |
| 3 | 151438621 | 151439281 | 151439072 | 14 | 36 | 20 | 2.066800336 | 0.00314492  |         | ENSG00000222269 |
| 3 | 151439423 | 151439793 | 151439625 | 8  | 13 | 6  | 2.346097679 | 0.0266147   |         | ENSG00000222269 |
| 3 | 151475648 | 151475925 | 151475820 | 8  | 11 | 3  | 3.519146518 | 0.00788869  |         | ENSG00000222269 |
| 3 | 151515051 | 151515404 | 151515207 | 29 | 34 | 4  | 8.211341875 | 1.23E-08    |         | ENSG00000222269 |
| 3 | 151518068 | 151518307 | 151518187 | 12 | 13 | 7  | 2.052835469 | 0.046392    |         | ENSG00000222269 |
| 3 | 151520436 | 151520808 | 151520640 | 8  | 14 | 1  | 8.797866295 | 8.00E-05    |         | ENSG00000222269 |

|   |           |           |           |     |     |    |             |             |         |                 |
|---|-----------|-----------|-----------|-----|-----|----|-------------|-------------|---------|-----------------|
| 3 | 151545667 | 151545882 | 151545786 | 9   | 10  | 5  | 2.150589539 | 0.0575848   | TSC22D2 | ENSG00000196428 |
| 3 | 151549834 | 151550052 | 151549889 | 9   | 9   | 3  | 2.932622098 | 0.0242899   | TSC22D2 | ENSG00000196428 |
| 3 | 151569714 | 151569949 | 151569787 | 11  | 13  | 5  | 2.737113958 | 0.0137917   | TSC22D2 | ENSG00000196428 |
| 3 | 151608767 | 151609060 | 151608913 | 12  | 16  | 4  | 3.988366054 | 0.00115141  | TSC22D2 | ENSG00000196428 |
| 3 | 151622623 | 151622896 | 151622796 | 12  | 15  | 6  | 2.68125449  | 0.0103552   | TSC22D2 | ENSG00000196428 |
| 3 | 151643124 | 151643427 | 151643275 | 11  | 13  | 4  | 3.28453675  | 0.00629037  | TSC22D2 | ENSG00000196428 |
| 3 | 151649712 | 151649990 | 151649850 | 8   | 9   | 3  | 2.932622098 | 0.0242899   | TSC22D2 | ENSG00000196428 |
| 3 | 151670156 | 151670357 | 151670267 | 8   | 9   | 5  | 1.955081399 | 0.0892323   | TSC22D2 | ENSG00000196428 |
| 3 | 151698198 | 151698769 | 151698443 | 12  | 23  | 12 | 2.165628626 | 0.0100985   | SERP1   | ENSG00000120742 |
| 3 | 151746914 | 151747180 | 151747016 | 9   | 12  | 1  | 7.624817456 | 0.000332769 | SERP1   | ENSG00000120742 |
| 3 | 151747185 | 151747510 | 151747347 | 8   | 14  | 3  | 4.398933147 | 0.00132748  | EIF2A   | ENSG00000144895 |
| 3 | 151803530 | 151803833 | 151803681 | 8   | 12  | 3  | 3.812408728 | 0.004404    |         | ENSG00000198843 |
| 3 | 151904327 | 151904720 | 151904468 | 9   | 15  | 2  | 6.256260476 | 0.000199274 | C3orf44 | ENSG00000163645 |
| 3 | 151923354 | 151923722 | 151923556 | 18  | 23  | 4  | 5.630634429 | 1.63E-05    | C3orf44 | ENSG00000163645 |
| 3 | 151925729 | 151925962 | 151925845 | 12  | 14  | 6  | 2.513676084 | 0.016726    | C3orf44 | ENSG00000163645 |
| 3 | 151937681 | 151938236 | 151937958 | 16  | 35  | 14 | 2.815317214 | 0.000177835 | SIAH2   | ENSG00000181788 |
| 3 | 151938751 | 151939177 | 151938930 | 9   | 18  | 9  | 2.228792795 | 0.0164363   | SIAH2   | ENSG00000181788 |
| 3 | 151939181 | 151939456 | 151939308 | 9   | 12  | 5  | 2.541605819 | 0.0225912   | SIAH2   | ENSG00000181788 |
| 3 | 151956905 | 151957152 | 151957052 | 8   | 10  | 6  | 1.843362462 | 0.0964212   | SIAH2   | ENSG00000181788 |
| 3 | 151959806 | 151960044 | 151959925 | 12  | 13  | 0  | 16.42268375 | 1.91E-05    | SIAH2   | ENSG00000181788 |
| 3 | 151963801 | 151964212 | 151963974 | 8   | 15  | 5  | 3.128130238 | 0.00492422  | SIAH2   | ENSG00000181788 |
| 3 | 151988342 | 151988596 | 151988440 | 8   | 10  | 2  | 4.301179077 | 0.00512919  | SIAH2   | ENSG00000181788 |
| 3 | 152045122 | 152045316 | 152045236 | 8   | 8   | 8  | 1.173048839 | 0.36929     |         | ENSG00000214237 |
| 3 | 152106792 | 152106989 | 152106890 | 9   | 10  | 3  | 3.225884308 | 0.0139466   |         | ENSG00000222079 |
| 3 | 152285836 | 152286149 | 152286004 | 11  | 16  | 4  | 3.988366054 | 0.00115141  | MED12L  | ENSG00000144893 |
| 3 | 152287212 | 152287419 | 152287315 | 9   | 9   | 1  | 5.865244197 | 0.00272497  | MED12L  | ENSG00000144893 |
| 3 | 152346504 | 152346770 | 152346605 | 12  | 14  | 3  | 4.398933147 | 0.00132748  |         | ENSG00000199994 |
| 3 | 152351048 | 152351275 | 152351166 | 8   | 8   | 1  | 5.278719777 | 0.00542188  |         | ENSG00000199994 |
| 3 | 152368784 | 152369111 | 152368954 | 12  | 14  | 8  | 1.955081399 | 0.0506438   |         | ENSG00000199994 |
| 3 | 152505461 | 152506166 | 152505747 | 26  | 49  | 9  | 5.865244197 | 8.04E-10    | GPR87   | ENSG00000138271 |
| 3 | 152515462 | 152515713 | 152515587 | 8   | 8   | 3  | 2.639359888 | 0.0415794   | GPR87   | ENSG00000138271 |
| 3 | 152516361 | 152517115 | 152516550 | 100 | 132 | 4  | 31.20309913 | 1.81E-39    | GPR87   | ENSG00000138271 |
| 3 | 152517132 | 152517584 | 152517311 | 40  | 56  | 4  | 13.37275677 | 2.88E-15    | GPR87   | ENSG00000138271 |
| 3 | 152602927 | 152603113 | 152603020 | 8   | 9   | 3  | 2.932622098 | 0.0242899   | P2RY12  | ENSG00000169313 |

|   |           |           |           |     |     |    |             |             |        |                 |
|---|-----------|-----------|-----------|-----|-----|----|-------------|-------------|--------|-----------------|
| 3 | 153037629 | 153037917 | 153037773 | 18  | 20  | 5  | 4.105670938 | 0.000308509 | AADAC  | ENSG00000114771 |
| 3 | 153134048 | 153134323 | 153134185 | 12  | 13  | 0  | 16.42268375 | 1.91E-05    | SUCNR1 | ENSG00000198829 |
| 3 | 153468826 | 153469036 | 153468945 | 9   | 12  | 1  | 7.624817456 | 0.000332769 | MBNL1  | ENSG00000152601 |
| 3 | 153484098 | 153484360 | 153484229 | 12  | 13  | 5  | 2.737113958 | 0.0137917   | MBNL1  | ENSG00000152601 |
| 3 | 153725127 | 153725306 | 153725216 | 8   | 8   | 3  | 2.639359888 | 0.0415794   |        | ENSG00000201217 |
| 3 | 153833256 | 153833435 | 153833397 | 8   | 8   | 3  | 2.639359888 | 0.0415794   |        | ENSG00000201217 |
| 3 | 154034929 | 154035185 | 154035057 | 10  | 11  | 4  | 2.815317214 | 0.0183428   | P2RY1  | ENSG00000169860 |
| 3 | 154170457 | 154170648 | 154170552 | 8   | 8   | 1  | 5.278719777 | 0.00542188  |        | ENSG00000208721 |
| 3 | 154174259 | 154174440 | 154174349 | 8   | 8   | 0  | 10.55743955 | 0.000925496 |        | ENSG00000208721 |
| 3 | 154360732 | 154362634 | 154361280 | 290 | 487 | 15 | 35.7779896  | 6.62E-141   | RAP2B  | ENSG00000181467 |
| 3 | 154362647 | 154362908 | 154362777 | 8   | 10  | 0  | 12.90353723 | 0.000195991 | RAP2B  | ENSG00000181467 |
| 3 | 154410701 | 154410920 | 154410810 | 8   | 10  | 2  | 4.301179077 | 0.00512919  |        | ENSG00000222228 |
| 3 | 154514132 | 154514676 | 154514359 | 55  | 85  | 4  | 20.17644004 | 2.32E-24    |        | ENSG00000222228 |
| 3 | 154603540 | 154603719 | 154603629 | 8   | 8   | 1  | 5.278719777 | 0.00542188  |        | ENSG00000207323 |
| 3 | 154815025 | 154815598 | 154815265 | 120 | 169 | 5  | 33.23638378 | 3.03E-50    |        | ENSG00000200162 |
| 3 | 155260358 | 155260798 | 155260535 | 19  | 26  | 5  | 5.278719777 | 8.57E-06    |        | ENSG00000201398 |
| 3 | 155284983 | 155285169 | 155285076 | 8   | 8   | 4  | 2.111487911 | 0.0804809   |        | ENSG00000114790 |
| 3 | 155289961 | 155290374 | 155290195 | 15  | 22  | 9  | 2.69801233  | 0.00276236  |        | ENSG00000114790 |
| 3 | 155321415 | 155321731 | 155321576 | 12  | 15  | 6  | 2.68125449  | 0.0103552   |        | ENSG00000114790 |
| 3 | 155333535 | 155333847 | 155333704 | 12  | 15  | 4  | 3.753756286 | 0.0020497   |        | ENSG00000114790 |
| 3 | 155415192 | 155415402 | 155415303 | 9   | 9   | 1  | 5.865244197 | 0.00272497  |        | ENSG00000114790 |
| 3 | 155424895 | 155425198 | 155425046 | 14  | 16  | 3  | 4.985457567 | 0.000385643 | DHX36  | ENSG00000174953 |
| 3 | 155621566 | 155621830 | 155621698 | 8   | 11  | 4  | 2.815317214 | 0.0183428   | GPR149 | ENSG00000174948 |
| 3 | 155722669 | 155722860 | 155722742 | 8   | 9   | 5  | 1.955081399 | 0.0892323   | GPR149 | ENSG00000174948 |
| 3 | 155752979 | 155753196 | 155753104 | 9   | 10  | 1  | 6.451768616 | 0.00135978  | GPR149 | ENSG00000174948 |
| 3 | 155845868 | 155846058 | 155845993 | 8   | 8   | 1  | 5.278719777 | 0.00542188  | GPR149 | ENSG00000174948 |
| 3 | 155930777 | 155930980 | 155930917 | 8   | 8   | 5  | 1.759573259 | 0.13508     | GPR149 | ENSG00000174948 |
| 3 | 156104898 | 156105099 | 156104974 | 9   | 10  | 0  | 12.90353723 | 0.000195991 | MME    | ENSG00000196549 |
| 3 | 156140064 | 156140252 | 156140206 | 8   | 8   | 4  | 2.111487911 | 0.0804809   | MME    | ENSG00000196549 |
| 3 | 156224480 | 156224782 | 156224631 | 10  | 12  | 3  | 3.812408728 | 0.004404    | MME    | ENSG00000196549 |
| 3 | 156238171 | 156238406 | 156238286 | 8   | 9   | 1  | 5.865244197 | 0.00272497  | MME    | ENSG00000196549 |
| 3 | 156555342 | 156555521 | 156555431 | 8   | 8   | 3  | 2.639359888 | 0.0415794   |        | ENSG00000208662 |
| 3 | 156571229 | 156571420 | 156571324 | 8   | 8   | 1  | 5.278719777 | 0.00542188  |        | ENSG00000208662 |
| 3 | 156627303 | 156627652 | 156627474 | 27  | 29  | 0  | 35.19146518 | 7.73E-11    |        | ENSG00000208662 |

|   |           |           |           |    |    |    |             |             |         |                 |
|---|-----------|-----------|-----------|----|----|----|-------------|-------------|---------|-----------------|
| 3 | 156928262 | 156928694 | 156928515 | 16 | 28 | 5  | 5.669736057 | 2.48E-06    | PLCH1   | ENSG00000114805 |
| 3 | 156931386 | 156931634 | 156931549 | 12 | 14 | 14 | 1.173048839 | 0.332418    | PLCH1   | ENSG00000114805 |
| 3 | 156944628 | 156944875 | 156944751 | 8  | 10 | 1  | 6.451768616 | 0.00135978  | C3orf33 | ENSG00000174928 |
| 3 | 156945329 | 156945766 | 156945550 | 11 | 20 | 4  | 4.926805125 | 0.00010522  | C3orf33 | ENSG00000174928 |
| 3 | 156946271 | 156946623 | 156946447 | 8  | 13 | 8  | 1.824742639 | 0.0744168   | C3orf33 | ENSG00000174928 |
| 3 | 157006717 | 157007003 | 157006860 | 12 | 16 | 8  | 2.215758919 | 0.0222902   | C3orf33 | ENSG00000174928 |
| 3 | 157054761 | 157055355 | 157055051 | 35 | 48 | 13 | 4.105670938 | 1.07E-07    | SLC33A1 | ENSG00000169359 |
| 3 | 157071021 | 157071206 | 157071108 | 8  | 8  | 2  | 3.519146518 | 0.017558    | GMPS    | ENSG00000163655 |
| 3 | 157072172 | 157072502 | 157072337 | 9  | 13 | 1  | 8.211341875 | 0.000163445 | GMPS    | ENSG00000163655 |
| 3 | 157084822 | 157085108 | 157084993 | 13 | 15 | 5  | 3.128130238 | 0.00492422  | GMPS    | ENSG00000163655 |
| 3 | 157334296 | 157334475 | 157334385 | 8  | 8  | 1  | 5.278719777 | 0.00542188  | KCNAB1  | ENSG00000169282 |
| 3 | 157351074 | 157351271 | 157351139 | 9  | 9  | 5  | 1.955081399 | 0.0892323   | KCNAB1  | ENSG00000169282 |
| 3 | 157352375 | 157352570 | 157352509 | 8  | 9  | 6  | 1.675784056 | 0.141978    | KCNAB1  | ENSG00000169282 |
| 3 | 157418888 | 157419091 | 157418950 | 9  | 9  | 1  | 5.865244197 | 0.00272497  | KCNAB1  | ENSG00000169282 |
| 3 | 157755385 | 157756047 | 157755715 | 9  | 25 | 9  | 3.049926982 | 0.000648806 | SSR3    | ENSG00000114850 |
| 3 | 157780015 | 157780264 | 157780129 | 11 | 13 | 0  | 16.42268375 | 1.91E-05    | SSR3    | ENSG00000114850 |
| 3 | 157874337 | 157874863 | 157874612 | 14 | 26 | 8  | 3.519146518 | 0.000175368 | TIPARP  | ENSG00000163659 |
| 3 | 157875707 | 157875912 | 157875845 | 9  | 9  | 5  | 1.955081399 | 0.0892323   | TIPARP  | ENSG00000163659 |
| 3 | 158002258 | 158002594 | 158002430 | 12 | 16 | 3  | 4.985457567 | 0.000385643 |         | ENSG00000213198 |
| 3 | 158013091 | 158013377 | 158013239 | 16 | 18 | 10 | 2.026175268 | 0.0273052   |         | ENSG00000213198 |
| 3 | 158026546 | 158027003 | 158026659 | 9  | 19 | 7  | 2.932622098 | 0.00293566  | LEKR1   | ENSG00000197980 |
| 3 | 158289214 | 158289568 | 158289391 | 11 | 17 | 4  | 4.222975822 | 0.000640773 |         | ENSG00000201778 |
| 3 | 158289739 | 158289927 | 158289833 | 8  | 8  | 1  | 5.278719777 | 0.00542188  |         | ENSG00000201778 |
| 3 | 158360566 | 158360968 | 158360796 | 19 | 29 | 7  | 4.398933147 | 1.30E-05    | CCNL1   | ENSG00000163660 |
| 3 | 158375124 | 158375755 | 158375514 | 19 | 38 | 8  | 5.083211637 | 1.94E-07    |         | ENSG00000208656 |
| 3 | 158439667 | 158439870 | 158439720 | 10 | 12 | 1  | 7.624817456 | 0.000332769 |         | ENSG00000208656 |
| 3 | 158695018 | 158695314 | 158695166 | 10 | 12 | 7  | 1.906204364 | 0.0695918   | VEPH1   | ENSG00000197415 |
| 3 | 158699900 | 158700273 | 158700075 | 9  | 14 | 8  | 1.955081399 | 0.0506438   | VEPH1   | ENSG00000197415 |
| 3 | 158733218 | 158733428 | 158733317 | 9  | 9  | 5  | 1.955081399 | 0.0892323   | C3orf55 | ENSG00000174899 |
| 3 | 158743825 | 158744053 | 158743939 | 8  | 9  | 1  | 5.865244197 | 0.00272497  | C3orf55 | ENSG00000174899 |
| 3 | 158773141 | 158773429 | 158773285 | 16 | 19 | 6  | 3.351568112 | 0.00134187  | C3orf55 | ENSG00000174899 |
| 3 | 158807089 | 158807308 | 158807198 | 8  | 9  | 3  | 2.932622098 | 0.0242899   | C3orf55 | ENSG00000174899 |
| 3 | 158827368 | 158827579 | 158827473 | 9  | 11 | 9  | 1.407658607 | 0.210479    | C3orf55 | ENSG00000174899 |
| 3 | 158989980 | 158990220 | 158990156 | 9  | 12 | 2  | 5.083211637 | 0.00143337  |         | ENSG00000208653 |



|   |           |           |           |     |     |    |             |             |          |                 |
|---|-----------|-----------|-----------|-----|-----|----|-------------|-------------|----------|-----------------|
| 3 | 159056839 | 159057040 | 159056939 | 8   | 9   | 0  | 11.73048839 | 0.000425898 |          | ENSG00000208653 |
| 3 | 159065921 | 159066152 | 159066091 | 9   | 10  | 8  | 1.433726359 | 0.209175    |          | ENSG00000208653 |
| 3 | 159136741 | 159136969 | 159136855 | 10  | 10  | 2  | 4.301179077 | 0.00512919  |          | ENSG00000208653 |
| 3 | 159205899 | 159206098 | 159206054 | 8   | 8   | 3  | 2.639359888 | 0.0415794   |          | ENSG00000208653 |
| 3 | 159292168 | 159292514 | 159292341 | 8   | 12  | 4  | 3.049926982 | 0.0108184   | SHOX2    | ENSG00000168779 |
| 3 | 159298537 | 159298786 | 159298661 | 8   | 10  | 3  | 3.225884308 | 0.0139466   | SHOX2    | ENSG00000168779 |
| 3 | 159310407 | 159310798 | 159310585 | 20  | 28  | 7  | 4.252302043 | 2.31E-05    | RSRC1    | ENSG00000174891 |
| 3 | 159310810 | 159311327 | 159311051 | 10  | 21  | 8  | 2.867452718 | 0.00225035  | RSRC1    | ENSG00000174891 |
| 3 | 159873074 | 159873487 | 159873224 | 13  | 19  | 7  | 2.932622098 | 0.00293566  | LXN      | ENSG00000079257 |
| 3 | 159923519 | 159924052 | 159923827 | 12  | 23  | 9  | 2.815317214 | 0.00172056  | RARRES1  | ENSG00000118849 |
| 3 | 159925753 | 159926074 | 159925913 | 14  | 17  | 2  | 7.038293036 | 5.19E-05    | RARRES1  | ENSG00000118849 |
| 3 | 160245806 | 160246069 | 160245937 | 13  | 14  | 5  | 2.932622098 | 0.00829617  | IQCJ     | ENSG00000214216 |
| 3 | 160932625 | 160932975 | 160932800 | 9   | 13  | 3  | 4.105670938 | 0.00243034  |          | ENSG00000208651 |
| 3 | 161021561 | 161021945 | 161021740 | 17  | 24  | 0  | 29.32622098 | 3.74E-09    |          | ENSG00000208651 |
| 3 | 161029953 | 161030463 | 161030224 | 265 | 321 | 6  | 53.96024661 | 1.21E-98    |          | ENSG00000208651 |
| 3 | 161059228 | 161059437 | 161059332 | 10  | 10  | 0  | 12.90353723 | 0.000195991 |          | ENSG00000208651 |
| 3 | 161082240 | 161082664 | 161082441 | 36  | 49  | 5  | 9.775406994 | 2.43E-12    |          | ENSG00000208651 |
| 3 | 161142091 | 161142500 | 161142321 | 19  | 27  | 7  | 4.105670938 | 4.08E-05    | IL12A    | ENSG00000168811 |
| 3 | 161955372 | 161955735 | 161955529 | 9   | 13  | 4  | 3.28453675  | 0.00629037  | PPM1L    | ENSG00000163590 |
| 3 | 162229059 | 162229291 | 162229175 | 10  | 10  | 7  | 1.612942154 | 0.147335    | B3GALNT1 | ENSG00000169255 |
| 3 | 162307927 | 162308106 | 162307989 | 8   | 8   | 5  | 1.759573259 | 0.13508     | B3GALNT1 | ENSG00000169255 |
| 3 | 162421514 | 162421842 | 162421678 | 9   | 14  | 9  | 1.759573259 | 0.0786014   | NMD3     | ENSG00000169251 |
| 3 | 162476488 | 162476817 | 162476652 | 17  | 21  | 1  | 12.90353723 | 4.95E-07    | NMD3     | ENSG00000169251 |
| 3 | 162540063 | 162540377 | 162540220 | 12  | 16  | 11 | 1.661819189 | 0.0853913   | C3orf57  | ENSG00000196542 |
| 3 | 162572202 | 162572454 | 162572328 | 15  | 17  | 8  | 2.346097679 | 0.0144542   | C3orf57  | ENSG00000196542 |
| 3 | 162572946 | 162573237 | 162573072 | 10  | 13  | 5  | 2.737113958 | 0.0137917   |          | ENSG00000179522 |
| 3 | 162573242 | 162573765 | 162573421 | 11  | 23  | 13 | 2.010940867 | 0.0163115   |          | ENSG00000179522 |
| 3 | 162590259 | 162590441 | 162590350 | 8   | 8   | 1  | 5.278719777 | 0.00542188  |          | ENSG00000179522 |
| 3 | 162609613 | 162609854 | 162609735 | 15  | 17  | 8  | 2.346097679 | 0.0144542   |          | ENSG00000129973 |
| 3 | 162612305 | 162612903 | 162612671 | 10  | 24  | 14 | 1.955081399 | 0.0175993   |          | ENSG00000129973 |
| 3 | 162616053 | 162616280 | 162616166 | 9   | 10  | 0  | 12.90353723 | 0.000195991 |          | ENSG00000129973 |
| 3 | 162616422 | 162616669 | 162616541 | 16  | 17  | 11 | 1.759573259 | 0.0609179   |          | ENSG00000129973 |
| 3 | 162621202 | 162621898 | 162621464 | 22  | 48  | 12 | 4.421491779 | 4.06E-08    |          | ENSG00000129973 |
| 3 | 162622769 | 162622948 | 162622858 | 8   | 8   | 7  | 1.319679944 | 0.283403    |          | ENSG00000129973 |

|   |           |           |           |    |    |    |             |             |          |                 |
|---|-----------|-----------|-----------|----|----|----|-------------|-------------|----------|-----------------|
| 3 | 162750906 | 162751149 | 162751027 | 9  | 9  | 6  | 1.675784056 | 0.141978    |          | ENSG00000182447 |
| 3 | 162759987 | 162760221 | 162760116 | 9  | 12 | 13 | 1.089259637 | 0.414883    |          | ENSG00000182447 |
| 3 | 162760798 | 162761047 | 162760922 | 8  | 10 | 7  | 1.612942154 | 0.147335    |          | ENSG00000182447 |
| 3 | 162836995 | 162837174 | 162837044 | 8  | 8  | 2  | 3.519146518 | 0.017558    |          | ENSG00000182447 |
| 3 | 162879879 | 162880063 | 162879924 | 9  | 9  | 0  | 11.73048839 | 0.000425898 |          | ENSG00000182447 |
| 3 | 162890195 | 162890414 | 162890272 | 8  | 9  | 1  | 5.865244197 | 0.00272497  |          | ENSG00000182447 |
| 3 | 163222690 | 163222923 | 163222806 | 8  | 8  | 3  | 2.639359888 | 0.0415794   |          |                 |
| 3 | 163622535 | 163622811 | 163622658 | 8  | 11 | 2  | 4.692195357 | 0.00272444  |          |                 |
| 3 | 163798983 | 163799242 | 163799071 | 10 | 13 | 2  | 5.474227917 | 0.000747844 |          |                 |
| 3 | 163833287 | 163833479 | 163833383 | 8  | 8  | 4  | 2.111487911 | 0.0804809   |          |                 |
| 3 | 163919993 | 163920249 | 163920102 | 8  | 10 | 4  | 2.580707446 | 0.0306059   |          |                 |
| 3 | 164212128 | 164212352 | 164212240 | 9  | 11 | 0  | 14.07658607 | 9.02E-05    |          |                 |
| 3 | 164257422 | 164257612 | 164257542 | 9  | 10 | 6  | 1.843362462 | 0.0964212   |          | ENSG00000221205 |
| 3 | 164272240 | 164272565 | 164272416 | 9  | 13 | 9  | 1.642268375 | 0.1111397   |          | ENSG00000221205 |
| 3 | 164690672 | 164691196 | 164690851 | 15 | 23 | 8  | 3.128130238 | 0.000832453 |          | ENSG00000221205 |
| 3 | 164708892 | 164709233 | 164709070 | 9  | 11 | 8  | 1.564065119 | 0.151515    |          | ENSG00000221205 |
| 3 | 164744618 | 164744803 | 164744733 | 8  | 9  | 4  | 2.346097679 | 0.050148    |          | ENSG00000221205 |
| 3 | 165140539 | 165140819 | 165140648 | 9  | 12 | 7  | 1.906204364 | 0.0695918   |          | ENSG00000214210 |
| 3 | 165609684 | 165609917 | 165609778 | 12 | 13 | 1  | 8.211341875 | 0.000163445 |          | ENSG00000221755 |
| 3 | 165617257 | 165617436 | 165617346 | 8  | 8  | 3  | 2.639359888 | 0.0415794   |          | ENSG00000221755 |
| 3 | 166060449 | 166060646 | 166060547 | 9  | 10 | 3  | 3.225884308 | 0.0139466   | SI       | ENSG00000090402 |
| 3 | 166386280 | 166386512 | 166386396 | 9  | 13 | 6  | 2.346097679 | 0.0266147   | SLITRK3  | ENSG00000121871 |
| 3 | 166407280 | 166407511 | 166407422 | 14 | 15 | 10 | 1.706252857 | 0.0822346   | SLITRK3  | ENSG00000121871 |
| 3 | 167625653 | 167625832 | 167625770 | 8  | 8  | 3  | 2.639359888 | 0.0415794   |          | ENSG00000208601 |
| 3 | 167935251 | 167935524 | 167935415 | 10 | 11 | 2  | 4.692195357 | 0.00272444  |          | ENSG00000208599 |
| 3 | 168008538 | 168008969 | 168008797 | 10 | 14 | 5  | 2.932622098 | 0.00829617  |          | ENSG00000185790 |
| 3 | 168030441 | 168030715 | 168030584 | 19 | 20 | 4  | 4.926805125 | 0.00010522  |          | ENSG00000185790 |
| 3 | 168232861 | 168233080 | 168232970 | 12 | 13 | 4  | 3.28453675  | 0.00629037  |          | ENSG00000215922 |
| 3 | 168580426 | 168581032 | 168580731 | 29 | 55 | 11 | 5.474227917 | 2.31E-10    | ZBBX     | ENSG00000169064 |
| 3 | 168693772 | 168694029 | 168693873 | 9  | 13 | 4  | 3.28453675  | 0.00629037  | SERPINI2 | ENSG00000114204 |
| 3 | 168936034 | 168936460 | 168936213 | 10 | 19 | 8  | 2.606775198 | 0.00583935  | SERPINI1 | ENSG00000163536 |
| 3 | 168990677 | 168990983 | 168990830 | 12 | 15 | 6  | 2.68125449  | 0.0103552   | SERPINI1 | ENSG00000163536 |
| 3 | 169015069 | 169015384 | 169015226 | 9  | 11 | 5  | 2.346097679 | 0.0364013   | SERPINI1 | ENSG00000163536 |
| 3 | 169128673 | 169128860 | 169128769 | 8  | 9  | 2  | 3.910162798 | 0.00955088  | GOLIM4   | ENSG00000173905 |

|   |           |           |           |    |    |    |             |             |         |                 |
|---|-----------|-----------|-----------|----|----|----|-------------|-------------|---------|-----------------|
| 3 | 169140816 | 169140999 | 169140907 | 8  | 9  | 3  | 2.932622098 | 0.0242899   | GOLIM4  | ENSG00000173905 |
| 3 | 169174116 | 169174413 | 169174264 | 8  | 9  | 7  | 1.466311049 | 0.20706     | GOLIM4  | ENSG00000173905 |
| 3 | 169178599 | 169178965 | 169178748 | 8  | 12 | 9  | 1.524963491 | 0.154777    | GOLIM4  | ENSG00000173905 |
| 3 | 169247746 | 169248059 | 169247897 | 14 | 18 | 12 | 1.714455996 | 0.0636479   | GOLIM4  | ENSG00000173905 |
| 3 | 169295432 | 169295868 | 169295586 | 9  | 15 | 8  | 2.085420159 | 0.0338693   | GOLIM4  | ENSG00000173905 |
| 3 | 169295987 | 169296202 | 169296104 | 8  | 9  | 2  | 3.910162798 | 0.00955088  | GOLIM4  | ENSG00000173905 |
| 3 | 169296508 | 169297096 | 169296940 | 18 | 32 | 4  | 7.742122339 | 4.68E-08    | GOLIM4  | ENSG00000173905 |
| 3 | 169340525 | 169340767 | 169340648 | 9  | 12 | 5  | 2.541605819 | 0.0225912   | GOLIM4  | ENSG00000173905 |
| 3 | 169443076 | 169443299 | 169443219 | 9  | 10 | 0  | 12.90353723 | 0.000195991 | GOLIM4  | ENSG00000173905 |
| 3 | 169449946 | 169450186 | 169450043 | 8  | 10 | 1  | 6.451768616 | 0.00135978  | GOLIM4  | ENSG00000173905 |
| 3 | 169450255 | 169450691 | 169450434 | 10 | 19 | 3  | 5.865244197 | 5.72E-05    | GOLIM4  | ENSG00000173905 |
| 3 | 169871445 | 169871952 | 169871753 | 13 | 24 | 5  | 4.887703497 | 2.90E-05    |         | ENSG00000207717 |
| 3 | 170067270 | 170067465 | 170067355 | 8  | 9  | 2  | 3.910162798 | 0.00955088  | C3orf50 | ENSG00000206120 |
| 3 | 170071409 | 170071739 | 170071576 | 9  | 14 | 5  | 2.932622098 | 0.00829617  | C3orf50 | ENSG00000206120 |
| 3 | 170078377 | 170078714 | 170078540 | 21 | 25 | 8  | 3.388807758 | 0.000297109 | C3orf50 | ENSG00000206120 |
| 3 | 170090155 | 170090367 | 170090240 | 8  | 8  | 7  | 1.319679944 | 0.283403    | C3orf50 | ENSG00000206120 |
| 3 | 170127813 | 170127992 | 170127949 | 8  | 8  | 0  | 10.55743955 | 0.000925496 | C3orf50 | ENSG00000206120 |
| 3 | 170284437 | 170284619 | 170284528 | 8  | 8  | 2  | 3.519146518 | 0.017558    | EVI1    | ENSG00000085276 |
| 3 | 170286377 | 170286687 | 170286532 | 22 | 25 | 3  | 7.624817456 | 1.09E-06    | EVI1    | ENSG00000085276 |
| 3 | 170349884 | 170350151 | 170350021 | 15 | 17 | 3  | 5.278719777 | 0.000205462 | EVI1    | ENSG00000085276 |
| 3 | 170373683 | 170374034 | 170373858 | 13 | 19 | 6  | 3.351568112 | 0.00134187  | EVI1    | ENSG00000085276 |
| 3 | 170425718 | 170425994 | 170425845 | 16 | 19 | 1  | 11.73048839 | 2.14E-06    | EVI1    | ENSG00000085276 |
| 3 | 170590765 | 170591052 | 170590908 | 8  | 11 | 3  | 3.519146518 | 0.00788869  | MDS1    | ENSG00000206115 |
| 3 | 170647662 | 170647908 | 170647751 | 10 | 11 | 2  | 4.692195357 | 0.00272444  |         | ENSG00000213178 |
| 3 | 170746210 | 170746397 | 170746303 | 8  | 8  | 3  | 2.639359888 | 0.0415794   |         | ENSG00000213178 |
| 3 | 170763626 | 170763843 | 170763717 | 8  | 9  | 4  | 2.346097679 | 0.050148    |         | ENSG00000213178 |
| 3 | 170813473 | 170813760 | 170813623 | 9  | 10 | 4  | 2.580707446 | 0.0306059   |         | ENSG00000184531 |
| 3 | 170857917 | 170858134 | 170858025 | 9  | 11 | 8  | 1.564065119 | 0.151515    |         | ENSG00000184531 |
| 3 | 170861974 | 170862176 | 170862147 | 9  | 9  | 2  | 3.910162798 | 0.00955088  |         | ENSG00000184531 |
| 3 | 170867868 | 170868066 | 170867950 | 8  | 10 | 2  | 4.301179077 | 0.00512919  |         | ENSG00000184531 |
| 3 | 170869568 | 170869846 | 170869707 | 8  | 12 | 6  | 2.178519273 | 0.0416567   |         | ENSG00000184531 |
| 3 | 170949312 | 170949553 | 170949426 | 11 | 14 | 2  | 5.865244197 | 0.000387308 |         | ENSG00000200182 |
| 3 | 170956029 | 170956246 | 170956135 | 8  | 9  | 2  | 3.910162798 | 0.00955088  |         | ENSG00000200182 |
| 3 | 170963473 | 170963719 | 170963601 | 8  | 8  | 2  | 3.519146518 | 0.017558    |         | ENSG00000200182 |

|   |           |           |           |    |    |    |             |             |         |                 |
|---|-----------|-----------|-----------|----|----|----|-------------|-------------|---------|-----------------|
| 3 | 170972305 | 170973054 | 170972771 | 12 | 33 | 22 | 1.734072197 | 0.0191858   | MYNN    | ENSG00000085274 |
| 3 | 170973097 | 170973458 | 170973279 | 12 | 18 | 9  | 2.228792795 | 0.0164363   | MYNN    | ENSG00000085274 |
| 3 | 170973467 | 170973956 | 170973793 | 10 | 18 | 12 | 1.714455996 | 0.0636479   | MYNN    | ENSG00000085274 |
| 3 | 170974037 | 170974349 | 170974183 | 11 | 13 | 7  | 2.052835469 | 0.046392    | MYNN    | ENSG00000085274 |
| 3 | 171063998 | 171064396 | 171064217 | 10 | 16 | 6  | 2.848832895 | 0.00632407  | LRRC31  | ENSG00000114248 |
| 3 | 171167078 | 171167404 | 171167241 | 13 | 17 | 11 | 1.759573259 | 0.0609179   | SEC62   | ENSG00000008952 |
| 3 | 171238211 | 171238481 | 171238346 | 8  | 10 | 4  | 2.580707446 | 0.0306059   | GPR160  | ENSG00000173890 |
| 3 | 171239201 | 171239403 | 171239253 | 8  | 8  | 1  | 5.278719777 | 0.00542188  | GPR160  | ENSG00000173890 |
| 3 | 171247174 | 171247488 | 171247347 | 9  | 13 | 5  | 2.737113958 | 0.0137917   | GPR160  | ENSG00000173890 |
| 3 | 171249900 | 171250148 | 171250023 | 11 | 11 | 5  | 2.346097679 | 0.0364013   |         | ENSG00000201342 |
| 3 | 171382019 | 171382313 | 171382166 | 8  | 10 | 9  | 1.290353723 | 0.279648    | PHC3    | ENSG00000173889 |
| 3 | 171422653 | 171422938 | 171422794 | 14 | 18 | 6  | 3.183989707 | 0.00227432  | PRKCI   | ENSG00000163558 |
| 3 | 171441163 | 171441388 | 171441267 | 8  | 9  | 4  | 2.346097679 | 0.050148    |         | ENSG00000200118 |
| 3 | 171508434 | 171508628 | 171508507 | 9  | 10 | 4  | 2.580707446 | 0.0306059   | SKIL    | ENSG00000136603 |
| 3 | 171510735 | 171510931 | 171510868 | 9  | 9  | 7  | 1.466311049 | 0.20706     | SKIL    | ENSG00000136603 |
| 3 | 171558687 | 171559119 | 171558977 | 15 | 22 | 6  | 3.854303329 | 0.000260696 | SKIL    | ENSG00000136603 |
| 3 | 171614673 | 171614885 | 171614779 | 9  | 9  | 7  | 1.466311049 | 0.20706     | CLDN11  | ENSG00000013297 |
| 3 | 171693327 | 171693713 | 171693527 | 14 | 22 | 8  | 2.997791478 | 0.00137524  | CLDN11  | ENSG00000013297 |
| 3 | 171700165 | 171700356 | 171700260 | 8  | 9  | 4  | 2.346097679 | 0.050148    | CLDN11  | ENSG00000013297 |
| 3 | 171889797 | 171890371 | 171889951 | 28 | 56 | 4  | 13.37275677 | 2.88E-15    |         | ENSG00000213174 |
| 3 | 171928100 | 171928372 | 171928236 | 9  | 9  | 1  | 5.865244197 | 0.00272497  |         | ENSG00000213174 |
| 3 | 171942358 | 171942659 | 171942508 | 8  | 10 | 6  | 1.843362462 | 0.0964212   |         | ENSG00000213174 |
| 3 | 171952165 | 171952402 | 171952290 | 10 | 12 | 7  | 1.906204364 | 0.0695918   |         | ENSG00000208537 |
| 3 | 172012411 | 172012890 | 172012668 | 9  | 18 | 4  | 4.457585589 | 0.000353565 |         | ENSG00000208537 |
| 3 | 172070170 | 172070416 | 172070293 | 8  | 9  | 15 | 0.733155525 | 0.788527    | RPL22L1 | ENSG00000163584 |
| 3 | 172070445 | 172070700 | 172070618 | 10 | 14 | 13 | 1.256838042 | 0.269506    | RPL22L1 | ENSG00000163584 |
| 3 | 172070718 | 172070986 | 172070854 | 8  | 13 | 8  | 1.824742639 | 0.0744168   | RPL22L1 | ENSG00000163584 |
| 3 | 172108904 | 172109085 | 172109030 | 9  | 9  | 2  | 3.910162798 | 0.00955088  | EIF5A2  | ENSG00000163577 |
| 3 | 172193371 | 172193654 | 172193508 | 11 | 13 | 2  | 5.474227917 | 0.000747844 |         | ENSG00000199488 |
| 3 | 172240733 | 172240950 | 172240833 | 8  | 9  | 1  | 5.865244197 | 0.00272497  | SLC2A2  | ENSG00000163581 |
| 3 | 172350299 | 172350489 | 172350469 | 10 | 11 | 6  | 2.010940867 | 0.0640214   |         | ENSG00000207963 |
| 3 | 172368699 | 172368972 | 172368822 | 8  | 12 | 7  | 1.906204364 | 0.0695918   |         | ENSG00000207963 |
| 3 | 172372650 | 172372843 | 172372746 | 8  | 8  | 3  | 2.639359888 | 0.0415794   |         | ENSG00000207963 |
| 3 | 172388242 | 172388506 | 172388408 | 10 | 14 | 4  | 3.519146518 | 0.00361132  |         | ENSG00000207963 |

|   |           |           |           |    |    |    |             |             |         |                 |
|---|-----------|-----------|-----------|----|----|----|-------------|-------------|---------|-----------------|
| 3 | 172443528 | 172443736 | 172443620 | 8  | 8  | 4  | 2.111487911 | 0.0804809   |         | ENSG00000207963 |
| 3 | 172554868 | 172555118 | 172554993 | 8  | 8  | 0  | 10.55743955 | 0.000925496 |         | ENSG00000222506 |
| 3 | 172580589 | 172580822 | 172580719 | 8  | 8  | 2  | 3.519146518 | 0.017558    |         | ENSG00000222506 |
| 3 | 172661035 | 172661277 | 172661156 | 8  | 12 | 2  | 5.083211637 | 0.00143337  | TNIK    | ENSG00000154310 |
| 3 | 172661516 | 172661699 | 172661590 | 8  | 8  | 4  | 2.111487911 | 0.0804809   | TNIK    | ENSG00000154310 |
| 3 | 172840958 | 172841325 | 172841158 | 24 | 30 | 5  | 6.060752336 | 7.05E-07    |         | ENSG00000208522 |
| 3 | 172972875 | 172973277 | 172973114 | 11 | 18 | 12 | 1.714455996 | 0.0636479   |         | ENSG00000183657 |
| 3 | 172989625 | 172989858 | 172989741 | 8  | 11 | 5  | 2.346097679 | 0.0364013   |         | ENSG00000183657 |
| 3 | 172993044 | 172993308 | 172993176 | 11 | 14 | 4  | 3.519146518 | 0.00361132  |         | ENSG00000183657 |
| 3 | 173009695 | 173009958 | 173009850 | 13 | 13 | 5  | 2.737113958 | 0.0137917   |         | ENSG00000183657 |
| 3 | 173030454 | 173030832 | 173030658 | 11 | 17 | 4  | 4.222975822 | 0.000640773 | TMEM212 | ENSG00000186329 |
| 3 | 173235569 | 173235881 | 173235727 | 16 | 18 | 6  | 3.183989707 | 0.00227432  | FNDC3B  | ENSG00000075420 |
| 3 | 173239855 | 173240052 | 173239969 | 9  | 12 | 7  | 1.906204364 | 0.0695918   | FNDC3B  | ENSG00000075420 |
| 3 | 173330470 | 173330681 | 173330575 | 11 | 13 | 3  | 4.105670938 | 0.00243034  | FNDC3B  | ENSG00000075420 |
| 3 | 173339687 | 173339897 | 173339773 | 8  | 8  | 3  | 2.639359888 | 0.0415794   |         | ENSG00000222342 |
| 3 | 173341078 | 173341391 | 173341213 | 8  | 13 | 10 | 1.49297125  | 0.157311    |         | ENSG00000222342 |
| 3 | 173342914 | 173343282 | 173343026 | 13 | 20 | 5  | 4.105670938 | 0.000308509 |         | ENSG00000222342 |
| 3 | 173356791 | 173357124 | 173356963 | 10 | 14 | 8  | 1.955081399 | 0.0506438   |         | ENSG00000222342 |
| 3 | 173532913 | 173533353 | 173533103 | 9  | 19 | 6  | 3.351568112 | 0.00134187  |         | ENSG00000208521 |
| 3 | 173690697 | 173690931 | 173690814 | 10 | 11 | 3  | 3.519146518 | 0.00788869  | TNFSF10 | ENSG00000121858 |
| 3 | 173717236 | 173717884 | 173717550 | 15 | 32 | 16 | 2.277094806 | 0.00211782  | TNFSF10 | ENSG00000121858 |
| 3 | 173737063 | 173737927 | 173737665 | 48 | 97 | 7  | 14.36984828 | 3.00E-25    | TNFSF10 | ENSG00000121858 |
| 3 | 173748498 | 173748723 | 173748622 | 9  | 11 | 2  | 4.692195357 | 0.00272444  | TNFSF10 | ENSG00000121858 |
| 3 | 173796649 | 173796972 | 173796824 | 8  | 10 | 2  | 4.301179077 | 0.00512919  | TNFSF10 | ENSG00000121858 |
| 3 | 173824050 | 173824475 | 173824272 | 8  | 17 | 6  | 3.016411301 | 0.00381427  |         | ENSG00000208518 |
| 3 | 173838524 | 173838741 | 173838580 | 8  | 10 | 3  | 3.225884308 | 0.0139466   |         | ENSG00000208518 |
| 3 | 173847184 | 173847437 | 173847310 | 11 | 13 | 3  | 4.105670938 | 0.00243034  |         | ENSG00000208518 |
| 3 | 173848468 | 173848760 | 173848608 | 12 | 14 | 9  | 1.759573259 | 0.0786014   |         | ENSG00000208518 |
| 3 | 173885900 | 173886465 | 173886230 | 25 | 47 | 6  | 8.04376347  | 4.71E-11    |         | ENSG00000208518 |
| 3 | 173894978 | 173895243 | 173895124 | 8  | 8  | 0  | 10.55743955 | 0.000925496 |         | ENSG00000208518 |
| 3 | 173910646 | 173910893 | 173910757 | 12 | 13 | 7  | 2.052835469 | 0.046392    | AADACL1 | ENSG00000144959 |
| 3 | 173911129 | 173911331 | 173911184 | 8  | 10 | 3  | 3.225884308 | 0.0139466   | AADACL1 | ENSG00000144959 |
| 3 | 173911492 | 173911879 | 173911700 | 17 | 25 | 9  | 3.049926982 | 0.000648806 | AADACL1 | ENSG00000144959 |
| 3 | 173950823 | 173951227 | 173951048 | 13 | 21 | 8  | 2.867452718 | 0.00225035  | ECT2    | ENSG00000114346 |

|   |           |           |           |    |    |    |             |             |          |                 |
|---|-----------|-----------|-----------|----|----|----|-------------|-------------|----------|-----------------|
| 3 | 174487907 | 174488165 | 174488036 | 11 | 13 | 6  | 2.346097679 | 0.0266147   | SPATA16  | ENSG00000144962 |
| 3 | 174729703 | 174729888 | 174729761 | 10 | 10 | 3  | 3.225884308 | 0.0139466   | NLGN1    | ENSG00000169760 |
| 3 | 174911987 | 174912430 | 174912237 | 11 | 20 | 3  | 6.158506406 | 2.99E-05    | NLGN1    | ENSG00000169760 |
| 3 | 175103267 | 175103639 | 175103416 | 8  | 13 | 0  | 16.42268375 | 1.91E-05    | NLGN1    | ENSG00000169760 |
| 3 | 175329315 | 175329718 | 175329494 | 24 | 36 | 0  | 43.40280705 | 3.38E-13    | NLGN1    | ENSG00000169760 |
| 3 | 175360083 | 175360268 | 175360143 | 9  | 10 | 3  | 3.225884308 | 0.0139466   | NLGN1    | ENSG00000169760 |
| 3 | 175609967 | 175610186 | 175610107 | 10 | 10 | 3  | 3.225884308 | 0.0139466   |          | ENSG00000213169 |
| 3 | 175642011 | 175642255 | 175642133 | 8  | 10 | 3  | 3.225884308 | 0.0139466   |          | ENSG00000213169 |
| 3 | 175840489 | 175840807 | 175840643 | 12 | 15 | 5  | 3.128130238 | 0.00492422  |          | ENSG00000213169 |
| 3 | 176059649 | 176059886 | 176059756 | 8  | 10 | 1  | 6.451768616 | 0.00135978  | NAALADL2 | ENSG00000177694 |
| 3 | 176156000 | 176156355 | 176156177 | 9  | 15 | 5  | 3.128130238 | 0.00492422  | NAALADL2 | ENSG00000177694 |
| 3 | 176327836 | 176328074 | 176327955 | 9  | 10 | 3  | 3.225884308 | 0.0139466   | NAALADL2 | ENSG00000177694 |
| 3 | 176425331 | 176425607 | 176425437 | 13 | 15 | 0  | 18.76878143 | 4.04E-06    | NAALADL2 | ENSG00000177694 |
| 3 | 176470835 | 176471203 | 176471024 | 8  | 15 | 7  | 2.346097679 | 0.0195693   |          | ENSG00000199792 |
| 3 | 176536822 | 176537171 | 176536996 | 9  | 15 | 10 | 1.706252857 | 0.0822346   |          | ENSG00000199792 |
| 3 | 176539212 | 176539750 | 176539537 | 14 | 29 | 14 | 2.346097679 | 0.00249491  |          | ENSG00000199792 |
| 3 | 176539809 | 176540025 | 176539919 | 8  | 9  | 3  | 2.932622098 | 0.0242899   |          | ENSG00000199792 |
| 3 | 176547562 | 176547860 | 176547708 | 9  | 12 | 4  | 3.049926982 | 0.0108184   |          | ENSG00000199792 |
| 3 | 176549976 | 176550221 | 176550087 | 9  | 10 | 5  | 2.150589539 | 0.0575848   |          | ENSG00000199792 |
| 3 | 176771578 | 176772079 | 176771828 | 18 | 29 | 6  | 5.027352168 | 4.43E-06    |          | ENSG00000201648 |
| 3 | 176856984 | 176857339 | 176857199 | 14 | 18 | 7  | 2.785990993 | 0.00480525  |          | ENSG00000201648 |
| 3 | 176872932 | 176873111 | 176873012 | 8  | 8  | 9  | 1.055743955 | 0.456865    | UBE2V1P2 | ENSG00000214192 |
| 3 | 176882131 | 176882310 | 176882189 | 8  | 9  | 2  | 3.910162798 | 0.00955088  | UBE2V1P2 | ENSG00000214192 |
| 3 | 176882822 | 176883243 | 176883074 | 14 | 23 | 1  | 14.07658607 | 1.14E-07    | UBE2V1P2 | ENSG00000214192 |
| 3 | 176883260 | 176883585 | 176883422 | 9  | 14 | 2  | 5.865244197 | 0.000387308 | UBE2V1P2 | ENSG00000214192 |
| 3 | 177490119 | 177490298 | 177490203 | 8  | 8  | 2  | 3.519146518 | 0.017558    |          | ENSG00000208490 |
| 3 | 177714842 | 177715021 | 177714931 | 9  | 9  | 0  | 11.73048839 | 0.000425898 |          | ENSG00000208490 |
| 3 | 177988093 | 177988437 | 177988258 | 23 | 28 | 0  | 34.01841634 | 1.68E-10    |          | ENSG00000208490 |
| 3 | 178056461 | 178056756 | 178056630 | 12 | 14 | 2  | 5.865244197 | 0.000387308 |          | ENSG00000208490 |
| 3 | 178546250 | 178546455 | 178546341 | 9  | 9  | 2  | 3.910162798 | 0.00955088  | TBL1XR1  | ENSG00000177565 |
| 3 | 178560438 | 178560868 | 178560572 | 12 | 22 | 3  | 6.745030826 | 8.05E-06    |          | ENSG00000208471 |
| 3 | 178577973 | 178578171 | 178578070 | 10 | 10 | 5  | 2.150589539 | 0.0575848   |          | ENSG00000208471 |
| 3 | 178621272 | 178621656 | 178621481 | 13 | 20 | 3  | 6.158506406 | 2.99E-05    |          | ENSG00000208471 |
| 3 | 178643989 | 178644305 | 178644147 | 10 | 14 | 6  | 2.513676084 | 0.016726    |          | ENSG00000208471 |

|   |           |           |           |     |     |    |             |             |         |                 |
|---|-----------|-----------|-----------|-----|-----|----|-------------|-------------|---------|-----------------|
| 3 | 178648439 | 178648682 | 178648581 | 8   | 10  | 2  | 4.301179077 | 0.00512919  |         | ENSG00000208471 |
| 3 | 178677612 | 178677812 | 178677742 | 9   | 9   | 4  | 2.346097679 | 0.050148    |         | ENSG00000208471 |
| 3 | 178721747 | 178722046 | 178721896 | 11  | 14  | 6  | 2.513676084 | 0.016726    |         | ENSG00000208471 |
| 3 | 178791881 | 178792346 | 178792060 | 18  | 28  | 1  | 17.00920817 | 2.80E-09    |         | ENSG00000203635 |
| 3 | 178797413 | 178797708 | 178797550 | 11  | 12  | 10 | 1.386330446 | 0.21117     |         | ENSG00000203635 |
| 3 | 178819591 | 178820073 | 178819749 | 11  | 18  | 2  | 7.429309316 | 2.63E-05    |         | ENSG00000200288 |
| 3 | 179010655 | 179010878 | 179010766 | 8   | 9   | 5  | 1.955081399 | 0.0892323   |         | ENSG00000200288 |
| 3 | 180269666 | 180269954 | 180269810 | 17  | 17  | 0  | 21.11487911 | 8.57E-07    | ZMAT3   | ENSG00000172667 |
| 3 | 180270323 | 180271040 | 180270676 | 145 | 190 | 5  | 37.34205472 | 4.47E-57    | ZMAT3   | ENSG00000172667 |
| 3 | 180271087 | 180271377 | 180271199 | 8   | 12  | 4  | 3.049926982 | 0.0108184   | ZMAT3   | ENSG00000172667 |
| 3 | 180271430 | 180272114 | 180271771 | 12  | 29  | 9  | 3.519146518 | 8.36E-05    | ZMAT3   | ENSG00000172667 |
| 3 | 180272174 | 180272361 | 180272260 | 8   | 8   | 3  | 2.639359888 | 0.0415794   | ZMAT3   | ENSG00000172667 |
| 3 | 180347667 | 180347962 | 180347800 | 12  | 16  | 7  | 2.492728784 | 0.0124193   | PIK3CA  | ENSG00000121879 |
| 3 | 180348533 | 180348831 | 180348682 | 8   | 11  | 3  | 3.519146518 | 0.00788869  | PIK3CA  | ENSG00000121879 |
| 3 | 180522586 | 180522866 | 180522756 | 8   | 12  | 3  | 3.812408728 | 0.004404    | ZNF639  | ENSG00000121864 |
| 3 | 180523126 | 180523347 | 180523236 | 8   | 9   | 1  | 5.865244197 | 0.00272497  | ZNF639  | ENSG00000121864 |
| 3 | 180523880 | 180524092 | 180523986 | 11  | 11  | 3  | 3.519146518 | 0.00788869  | ZNF639  | ENSG00000121864 |
| 3 | 180726870 | 180727074 | 180726972 | 9   | 10  | 4  | 2.580707446 | 0.0306059   | ACTL6A  | ENSG00000136518 |
| 3 | 180763269 | 180763532 | 180763400 | 11  | 14  | 5  | 2.932622098 | 0.00829617  | ACTL6A  | ENSG00000136518 |
| 3 | 180873271 | 180873645 | 180873533 | 9   | 15  | 6  | 2.68125449  | 0.0103552   | USP13   | ENSG00000058056 |
| 3 | 181170026 | 181170398 | 181170212 | 57  | 65  | 0  | 77.42122339 | 5.67E-23    | PEX5L   | ENSG00000114757 |
| 3 | 181435967 | 181436294 | 181436137 | 19  | 20  | 1  | 12.31701281 | 1.03E-06    |         | ENSG00000213158 |
| 3 | 181496291 | 181496591 | 181496441 | 12  | 13  | 1  | 8.211341875 | 0.000163445 |         | ENSG00000213158 |
| 3 | 181507203 | 181507553 | 181507374 | 13  | 17  | 5  | 3.519146518 | 0.00167472  |         | ENSG00000213158 |
| 3 | 181802392 | 181802670 | 181802557 | 11  | 13  | 5  | 2.737113958 | 0.0137917   | TTC14   | ENSG00000163728 |
| 3 | 181880547 | 181880734 | 181880635 | 8   | 9   | 2  | 3.910162798 | 0.00955088  |         | ENSG00000208425 |
| 3 | 182059633 | 182059842 | 182059737 | 8   | 10  | 0  | 12.90353723 | 0.000195991 |         | ENSG00000213157 |
| 3 | 182190063 | 182190536 | 182190242 | 14  | 25  | 8  | 3.388807758 | 0.000297109 | DNAJC19 | ENSG00000205981 |
| 3 | 182377228 | 182377500 | 182377336 | 12  | 13  | 9  | 1.642268375 | 0.111397    |         | ENSG00000206932 |
| 3 | 182734423 | 182734622 | 182734536 | 8   | 9   | 2  | 3.910162798 | 0.00955088  |         | ENSG00000222466 |
| 3 | 182900987 | 182901253 | 182901143 | 14  | 16  | 2  | 6.647276756 | 0.000101928 |         | ENSG00000222466 |
| 3 | 183174732 | 183175068 | 183174900 | 19  | 22  | 3  | 6.745030826 | 8.05E-06    |         | ENSG00000213155 |
| 3 | 183252919 | 183253098 | 183253020 | 8   | 8   | 6  | 1.508205651 | 0.203852    |         | ENSG00000213155 |
| 3 | 183413040 | 183413271 | 183413155 | 10  | 11  | 4  | 2.815317214 | 0.0183428   |         | ENSG00000213155 |

|   |           |           |           |    |    |    |             |             |         |                 |
|---|-----------|-----------|-----------|----|----|----|-------------|-------------|---------|-----------------|
| 3 | 183939651 | 183939942 | 183939796 | 9  | 14 | 6  | 2.513676084 | 0.016726    | ATP11B  | ENSG00000058063 |
| 3 | 183941324 | 183941537 | 183941446 | 9  | 9  | 1  | 5.865244197 | 0.00272497  | ATP11B  | ENSG00000058063 |
| 3 | 184148326 | 184148540 | 184148433 | 8  | 9  | 4  | 2.346097679 | 0.050148    | DCUN1D1 | ENSG00000043093 |
| 3 | 184299639 | 184299832 | 184299735 | 8  | 8  | 1  | 5.278719777 | 0.00542188  | MCCC1   | ENSG00000078070 |
| 3 | 184299883 | 184300158 | 184300050 | 15 | 19 | 9  | 2.346097679 | 0.0107159   | MCCC1   | ENSG00000078070 |
| 3 | 184300176 | 184300376 | 184300229 | 8  | 8  | 2  | 3.519146518 | 0.017558    | MCCC1   | ENSG00000078070 |
| 3 | 184308531 | 184308747 | 184308662 | 9  | 9  | 7  | 1.466311049 | 0.20706     | MCCC1   | ENSG00000078070 |
| 3 | 184322922 | 184323117 | 184322989 | 11 | 11 | 8  | 1.564065119 | 0.151515    | MCCC1   | ENSG00000078070 |
| 3 | 184394270 | 184394604 | 184394437 | 17 | 21 | 6  | 3.686724924 | 0.000453999 |         | ENSG00000208403 |
| 3 | 184492059 | 184492466 | 184492268 | 15 | 24 | 6  | 4.18946014  | 8.40E-05    |         | ENSG00000202502 |
| 3 | 184495772 | 184496223 | 184495983 | 28 | 43 | 9  | 5.161414893 | 3.05E-08    |         | ENSG00000202502 |
| 3 | 184561528 | 184561779 | 184561663 | 9  | 12 | 2  | 5.083211637 | 0.00143337  | MCF2L2  | ENSG00000053524 |
| 3 | 184673728 | 184673979 | 184673885 | 8  | 10 | 1  | 6.451768616 | 0.00135978  |         | ENSG00000208385 |
| 3 | 184965862 | 184966153 | 184966007 | 12 | 13 | 7  | 2.052835469 | 0.046392    |         | ENSG00000216166 |
| 3 | 185013505 | 185013886 | 185013659 | 19 | 24 | 6  | 4.18946014  | 8.40E-05    |         | ENSG00000212778 |
| 3 | 185056905 | 185057205 | 185057073 | 9  | 9  | 1  | 5.865244197 | 0.00272497  | PARL    | ENSG00000175193 |
| 3 | 185085267 | 185085706 | 185085405 | 21 | 29 | 8  | 3.910162798 | 3.45E-05    | PARL    | ENSG00000175193 |
| 3 | 185166731 | 185167078 | 185166904 | 22 | 27 | 4  | 6.5690735   | 1.26E-06    | ABCC5   | ENSG00000114770 |
| 3 | 185206401 | 185206889 | 185206726 | 20 | 32 | 9  | 3.87106117  | 1.67E-05    | ABCC5   | ENSG00000114770 |
| 3 | 185208560 | 185209050 | 185208827 | 12 | 23 | 14 | 1.876878143 | 0.0251753   | ABCC5   | ENSG00000114770 |
| 3 | 185334532 | 185334872 | 185334702 | 8  | 14 | 4  | 3.519146518 | 0.00361132  | EIF2B5  | ENSG00000145191 |
| 3 | 185335074 | 185335306 | 185335190 | 10 | 12 | 3  | 3.812408728 | 0.004404    | EIF2B5  | ENSG00000145191 |
| 3 | 185335692 | 185335928 | 185335811 | 11 | 11 | 5  | 2.346097679 | 0.0364013   | EIF2B5  | ENSG00000145191 |
| 3 | 185374847 | 185375285 | 185375149 | 10 | 16 | 0  | 19.94183027 | 1.86E-06    | AP2M1   | ENSG00000161203 |
| 3 | 185434808 | 185435075 | 185434944 | 9  | 10 | 1  | 6.451768616 | 0.00135978  | VWA5B2  | ENSG00000145198 |
| 3 | 185442403 | 185442608 | 185442483 | 8  | 9  | 5  | 1.955081399 | 0.0892323   |         | ENSG00000221120 |
| 3 | 185449315 | 185449641 | 185449471 | 20 | 21 | 5  | 4.301179077 | 0.000172642 | ALG3    | ENSG00000214160 |
| 3 | 185450053 | 185450337 | 185450195 | 11 | 13 | 6  | 2.346097679 | 0.0266147   | ECE2    | ENSG00000145194 |
| 3 | 185450794 | 185451048 | 185450922 | 12 | 15 | 5  | 3.128130238 | 0.00492422  | ECE2    | ENSG00000145194 |
| 3 | 185485137 | 185485516 | 185485296 | 8  | 14 | 7  | 2.199466574 | 0.0303778   | ECE2    | ENSG00000145194 |
| 3 | 185499320 | 185499563 | 185499411 | 10 | 12 | 2  | 5.083211637 | 0.00143337  | PSMD2   | ENSG00000175166 |
| 3 | 185500295 | 185500480 | 185500387 | 8  | 8  | 4  | 2.111487911 | 0.0804809   | PSMD2   | ENSG00000175166 |
| 3 | 185514712 | 185515005 | 185514858 | 12 | 15 | 0  | 18.76878143 | 4.04E-06    | EIF4G1  | ENSG00000114867 |
| 3 | 185515683 | 185515942 | 185515812 | 9  | 10 | 0  | 12.90353723 | 0.000195991 | EIF4G1  | ENSG00000114867 |



|   |           |           |           |    |    |    |             |             |         |                 |
|---|-----------|-----------|-----------|----|----|----|-------------|-------------|---------|-----------------|
| 3 | 185520580 | 185520819 | 185520734 | 8  | 10 | 0  | 12.90353723 | 0.000195991 | EIF4G1  | ENSG00000114867 |
| 3 | 185546243 | 185546486 | 185546379 | 15 | 15 | 7  | 2.346097679 | 0.0195693   | FAM131A | ENSG00000175182 |
| 3 | 185563083 | 185563307 | 185563205 | 8  | 10 | 3  | 3.225884308 | 0.0139466   | POLR2H  | ENSG00000163882 |
| 3 | 185563495 | 185564035 | 185563664 | 13 | 27 | 6  | 4.692195357 | 1.46E-05    | POLR2H  | ENSG00000163882 |
| 3 | 185618365 | 185618638 | 185618512 | 11 | 15 | 3  | 4.692195357 | 0.000718455 | CHRD    | ENSG00000090539 |
| 3 | 185643959 | 185644209 | 185644112 | 12 | 14 | 6  | 2.513676084 | 0.016726    | CHRD    | ENSG00000090539 |
| 3 | 185644366 | 185644672 | 185644533 | 12 | 14 | 3  | 4.398933147 | 0.00132748  | CHRD    | ENSG00000090539 |
| 3 | 185649326 | 185649588 | 185649457 | 12 | 13 | 4  | 3.28453675  | 0.00629037  | CHRD    | ENSG00000090539 |
| 3 | 185672049 | 185672378 | 185672212 | 15 | 19 | 2  | 7.820325595 | 1.32E-05    | CHRD    | ENSG00000090539 |
| 3 | 185714221 | 185714495 | 185714358 | 11 | 13 | 3  | 4.105670938 | 0.00243034  | EPHB3   | ENSG00000182580 |
| 3 | 185761782 | 185762035 | 185761908 | 10 | 11 | 6  | 2.010940867 | 0.0640214   | EPHB3   | ENSG00000182580 |
| 3 | 185765618 | 185765828 | 185765773 | 9  | 10 | 3  | 3.225884308 | 0.0139466   | EPHB3   | ENSG00000182580 |
| 3 | 185766079 | 185766614 | 185766496 | 24 | 41 | 12 | 3.789850096 | 1.90E-06    | EPHB3   | ENSG00000182580 |
| 3 | 185912564 | 185912748 | 185912656 | 8  | 8  | 4  | 2.111487911 | 0.0804809   | MAGEF1  | ENSG00000177383 |
| 3 | 185960865 | 185961061 | 185960947 | 9  | 9  | 0  | 11.73048839 | 0.000425898 | MAGEF1  | ENSG00000177383 |
| 3 | 185967076 | 185967564 | 185967284 | 65 | 91 | 4  | 21.58409864 | 2.86E-26    | VPS8    | ENSG00000156931 |
| 3 | 185978280 | 185978515 | 185978356 | 11 | 11 | 2  | 4.692195357 | 0.00272444  | VPS8    | ENSG00000156931 |
| 3 | 185982789 | 185983193 | 185983020 | 48 | 55 | 0  | 65.690735   | 1.33E-19    | VPS8    | ENSG00000156931 |
| 3 | 186003821 | 186004065 | 186003951 | 11 | 14 | 2  | 5.865244197 | 0.000387308 | VPS8    | ENSG00000156931 |
| 3 | 186053204 | 186053411 | 186053307 | 10 | 10 | 2  | 4.301179077 | 0.00512919  | VPS8    | ENSG00000156931 |
| 3 | 186377251 | 186377506 | 186377389 | 10 | 11 | 3  | 3.519146518 | 0.00788869  | C3orf70 | ENSG00000187068 |
| 3 | 186508705 | 186508910 | 186508774 | 11 | 11 | 3  | 3.519146518 | 0.00788869  | MAP3K13 | ENSG00000073803 |
| 3 | 186536332 | 186536663 | 186536497 | 13 | 16 | 7  | 2.492728784 | 0.0124193   | MAP3K13 | ENSG00000073803 |
| 3 | 186564200 | 186564411 | 186564300 | 8  | 9  | 0  | 11.73048839 | 0.000425898 | MAP3K13 | ENSG00000073803 |
| 3 | 186698972 | 186699188 | 186699080 | 8  | 9  | 5  | 1.955081399 | 0.0892323   | TMEM41A | ENSG00000163900 |
| 3 | 186699340 | 186699629 | 186699481 | 18 | 20 | 11 | 2.052835469 | 0.0201852   | TMEM41A | ENSG00000163900 |
| 3 | 186699676 | 186699894 | 186699785 | 8  | 8  | 9  | 1.055743955 | 0.456865    | TMEM41A | ENSG00000163900 |
| 3 | 186727874 | 186728183 | 186728028 | 13 | 16 | 2  | 6.647276756 | 0.000101928 | LIPH    | ENSG00000163898 |
| 3 | 186786413 | 186787006 | 186786831 | 11 | 25 | 10 | 2.772660893 | 0.00131329  | SENP2   | ENSG00000163904 |
| 3 | 186877670 | 186877849 | 186877768 | 8  | 8  | 2  | 3.519146518 | 0.017558    | C3orf65 | ENSG00000163915 |
| 3 | 186918195 | 186918729 | 186918501 | 51 | 80 | 5  | 15.83615933 | 8.38E-22    | C3orf65 | ENSG00000163915 |
| 3 | 186934482 | 186934661 | 186934571 | 8  | 8  | 4  | 2.111487911 | 0.0804809   | C3orf65 | ENSG00000163915 |
| 3 | 186975952 | 186976193 | 186976085 | 8  | 9  | 2  | 3.910162798 | 0.00955088  | IGF2BP2 | ENSG00000073792 |
| 3 | 187137859 | 187138205 | 187138032 | 8  | 13 | 3  | 4.105670938 | 0.00243034  | SFRS10  | ENSG00000136527 |

|   |           |           |           |     |     |   |             |             |         |                 |
|---|-----------|-----------|-----------|-----|-----|---|-------------|-------------|---------|-----------------|
| 3 | 187276433 | 187276798 | 187276611 | 37  | 42  | 1 | 25.22055005 | 7.76E-14    |         | ENSG00000208376 |
| 3 | 187298413 | 187298634 | 187298523 | 8   | 9   | 5 | 1.955081399 | 0.0892323   | ETV5    | ENSG00000171656 |
| 3 | 187308256 | 187308575 | 187308417 | 14  | 17  | 1 | 10.55743955 | 9.18E-06    | ETV5    | ENSG00000171656 |
| 3 | 187460064 | 187460329 | 187460196 | 11  | 11  | 7 | 1.759573259 | 0.102361    | DGKG    | ENSG00000058866 |
| 3 | 187569273 | 187569496 | 187569413 | 12  | 14  | 0 | 17.59573259 | 8.79E-06    | DGKG    | ENSG00000058866 |
| 3 | 187626857 | 187627080 | 187627000 | 8   | 10  | 3 | 3.225884308 | 0.0139466   | DGKG    | ENSG00000058866 |
| 3 | 187676580 | 187677268 | 187676916 | 30  | 58  | 4 | 13.8419763  | 6.95E-16    | CRYGS   | ENSG00000213139 |
| 3 | 187770720 | 187771057 | 187770888 | 12  | 17  | 8 | 2.346097679 | 0.0144542   | DNAJB11 | ENSG00000090520 |
| 3 | 187815404 | 187815723 | 187815563 | 12  | 16  | 7 | 2.492728784 | 0.0124193   | AHSG    | ENSG00000145192 |
| 3 | 187817458 | 187817697 | 187817570 | 10  | 13  | 7 | 2.052835469 | 0.046392    | AHSG    | ENSG00000145192 |
| 3 | 187840989 | 187841329 | 187841171 | 12  | 16  | 1 | 9.970915134 | 1.89E-05    | FETUB   | ENSG00000090512 |
| 3 | 187845165 | 187845466 | 187845315 | 8   | 9   | 4 | 2.346097679 | 0.050148    | FETUB   | ENSG00000090512 |
| 3 | 187923008 | 187923277 | 187923104 | 8   | 9   | 3 | 2.932622098 | 0.0242899   | KNG1    | ENSG00000113889 |
| 3 | 187960913 | 187961342 | 187961084 | 11  | 17  | 3 | 5.278719777 | 0.000205462 |         | ENSG00000207505 |
| 3 | 187983345 | 187983567 | 187983468 | 9   | 10  | 3 | 3.225884308 | 0.0139466   | EIF4A2  | ENSG00000156976 |
| 3 | 187983607 | 187984016 | 187983758 | 13  | 24  | 8 | 3.258468998 | 0.000499412 | EIF4A2  | ENSG00000156976 |
| 3 | 187984062 | 187984370 | 187984216 | 8   | 13  | 5 | 2.737113958 | 0.0137917   | EIF4A2  | ENSG00000156976 |
| 3 | 188006909 | 188007247 | 188007078 | 12  | 18  | 8 | 2.476436439 | 0.00924552  | RFC4    | ENSG00000163918 |
| 3 | 188042091 | 188042559 | 188042325 | 15  | 25  | 5 | 5.083211637 | 1.58E-05    | ADIPOQ  | ENSG00000181092 |
| 3 | 188123349 | 188123707 | 188123528 | 21  | 27  | 7 | 4.105670938 | 4.08E-05    | ST6GAL1 | ENSG00000073849 |
| 3 | 188177910 | 188178120 | 188178006 | 8   | 8   | 2 | 3.519146518 | 0.017558    |         | ENSG00000203632 |
| 3 | 188180283 | 188180636 | 188180459 | 8   | 13  | 1 | 8.211341875 | 0.000163445 |         | ENSG00000203632 |
| 3 | 188267262 | 188267478 | 188267370 | 8   | 10  | 4 | 2.580707446 | 0.0306059   | ST6GAL1 | ENSG00000073849 |
| 3 | 188313785 | 188314080 | 188313922 | 9   | 13  | 1 | 8.211341875 | 0.000163445 | RPL39L  | ENSG00000163923 |
| 3 | 188340201 | 188340495 | 188340348 | 9   | 11  | 4 | 2.815317214 | 0.0183428   | RPL39L  | ENSG00000163923 |
| 3 | 188365600 | 188365892 | 188365743 | 9   | 11  | 0 | 14.07658607 | 9.02E-05    | RPL39L  | ENSG00000163923 |
| 3 | 188383642 | 188384115 | 188383892 | 132 | 151 | 0 | 178.3034236 | 5.83E-52    | RTP1    | ENSG00000175077 |
| 3 | 188816827 | 188817092 | 188816959 | 11  | 12  | 1 | 7.624817456 | 0.000332769 | SST     | ENSG00000157005 |
| 3 | 188870247 | 188870486 | 188870377 | 10  | 12  | 3 | 3.812408728 | 0.004404    | SST     | ENSG00000157005 |
| 3 | 188880159 | 188880338 | 188880258 | 8   | 8   | 7 | 1.319679944 | 0.283403    | SST     | ENSG00000157005 |
| 3 | 188914934 | 188915137 | 188915035 | 10  | 11  | 7 | 1.759573259 | 0.102361    | RTP2    | ENSG00000198471 |
| 3 | 188942664 | 188943099 | 188942931 | 8   | 16  | 6 | 2.848832895 | 0.00632407  | BCL6    | ENSG00000113916 |
| 3 | 188944329 | 188944508 | 188944418 | 8   | 8   | 0 | 10.55743955 | 0.000925496 | BCL6    | ENSG00000113916 |
| 3 | 188946093 | 188946411 | 188946278 | 11  | 15  | 4 | 3.753756286 | 0.0020497   | BCL6    | ENSG00000113916 |

|   |           |           |           |    |    |    |             |             |         |                 |
|---|-----------|-----------|-----------|----|----|----|-------------|-------------|---------|-----------------|
| 3 | 188948536 | 188948825 | 188948680 | 9  | 11 | 4  | 2.815317214 | 0.0183428   | BCL6    | ENSG00000113916 |
| 3 | 188950368 | 188951186 | 188951053 | 14 | 39 | 7  | 5.865244197 | 3.22E-08    | BCL6    | ENSG00000113916 |
| 3 | 188964875 | 188965165 | 188965020 | 11 | 13 | 3  | 4.105670938 | 0.00243034  | BCL6    | ENSG00000113916 |
| 3 | 189009421 | 189009800 | 189009600 | 10 | 18 | 8  | 2.476436439 | 0.00924552  | BCL6    | ENSG00000113916 |
| 3 | 189114634 | 189114924 | 189114775 | 10 | 12 | 6  | 2.178519273 | 0.0416567   | BCL6    | ENSG00000113916 |
| 3 | 189236985 | 189237450 | 189237297 | 12 | 20 | 3  | 6.158506406 | 2.99E-05    |         | ENSG00000213132 |
| 3 | 189237635 | 189237995 | 189237814 | 12 | 19 | 7  | 2.932622098 | 0.00293566  |         | ENSG00000213132 |
| 3 | 189261569 | 189261912 | 189261740 | 23 | 29 | 12 | 2.707035783 | 0.000762953 |         | ENSG00000213132 |
| 3 | 189483883 | 189484238 | 189483978 | 13 | 17 | 2  | 7.038293036 | 5.19E-05    | LPP     | ENSG00000145012 |
| 3 | 190039784 | 190040112 | 190039942 | 11 | 15 | 8  | 2.085420159 | 0.0338693   |         | ENSG00000207651 |
| 3 | 190148594 | 190148787 | 190148678 | 8  | 9  | 3  | 2.932622098 | 0.0242899   | TPRG1   | ENSG00000188001 |
| 3 | 190176478 | 190176729 | 190176603 | 12 | 13 | 4  | 3.28453675  | 0.00629037  | TPRG1   | ENSG00000188001 |
| 3 | 190176880 | 190177280 | 190177101 | 44 | 53 | 3  | 15.83615933 | 3.03E-15    | TPRG1   | ENSG00000188001 |
| 3 | 190179276 | 190179515 | 190179347 | 9  | 12 | 3  | 3.812408728 | 0.004404    | TPRG1   | ENSG00000188001 |
| 3 | 190242015 | 190242406 | 190242242 | 8  | 13 | 9  | 1.642268375 | 0.111397    | TPRG1   | ENSG00000188001 |
| 3 | 190296732 | 190297048 | 190296890 | 16 | 20 | 5  | 4.105670938 | 0.000308509 | TPRG1   | ENSG00000188001 |
| 3 | 190299513 | 190299867 | 190299691 | 15 | 20 | 4  | 4.926805125 | 0.00010522  | TPRG1   | ENSG00000188001 |
| 3 | 190300088 | 190300377 | 190300224 | 8  | 11 | 4  | 2.815317214 | 0.0183428   | TPRG1   | ENSG00000188001 |
| 3 | 190348474 | 190348654 | 190348632 | 8  | 9  | 7  | 1.466311049 | 0.20706     | TPRG1   | ENSG00000188001 |
| 3 | 190504817 | 190505550 | 190505174 | 12 | 31 | 20 | 1.787502993 | 0.0176346   | TPRG1   | ENSG00000188001 |
| 3 | 190516844 | 190517119 | 190516981 | 16 | 21 | 10 | 2.346097679 | 0.00796926  | TPRG1   | ENSG00000188001 |
| 3 | 190555904 | 190556120 | 190555954 | 9  | 9  | 3  | 2.932622098 | 0.0242899   | TPRG1   | ENSG00000188001 |
| 3 | 190658886 | 190659360 | 190659190 | 19 | 28 | 11 | 2.834868028 | 0.000626961 |         | ENSG00000208357 |
| 3 | 190785168 | 190785377 | 190785342 | 9  | 9  | 3  | 2.932622098 | 0.0242899   |         | ENSG00000208357 |
| 3 | 190842366 | 190842545 | 190842455 | 9  | 9  | 1  | 5.865244197 | 0.00272497  | TP63    | ENSG00000073282 |
| 3 | 190921542 | 190921827 | 190921673 | 8  | 11 | 3  | 3.519146518 | 0.00788869  | TP63    | ENSG00000073282 |
| 3 | 190957054 | 190957322 | 190957200 | 15 | 16 | 7  | 2.492728784 | 0.0124193   | TP63    | ENSG00000073282 |
| 3 | 190966925 | 190967209 | 190967079 | 12 | 16 | 5  | 3.323638378 | 0.00288759  | TP63    | ENSG00000073282 |
| 3 | 191144728 | 191145195 | 191144907 | 12 | 21 | 11 | 2.150589539 | 0.0135908   |         | ENSG00000216058 |
| 3 | 191218304 | 191218513 | 191218428 | 10 | 10 | 6  | 1.843362462 | 0.0964212   | LEPREL1 | ENSG00000090530 |
| 3 | 191238484 | 191238865 | 191238686 | 33 | 40 | 2  | 16.03166747 | 4.15E-12    | LEPREL1 | ENSG00000090530 |
| 3 | 191264737 | 191264985 | 191264837 | 8  | 11 | 1  | 7.038293036 | 0.000674435 | LEPREL1 | ENSG00000090530 |
| 3 | 191317147 | 191317846 | 191317376 | 67 | 97 | 8  | 12.77319847 | 2.16E-24    | LEPREL1 | ENSG00000090530 |
| 3 | 191321219 | 191321640 | 191321531 | 9  | 16 | 4  | 3.988366054 | 0.00115141  | LEPREL1 | ENSG00000090530 |

|   |           |           |           |    |    |    |             |             |         |                 |
|---|-----------|-----------|-----------|----|----|----|-------------|-------------|---------|-----------------|
| 3 | 191430464 | 191430910 | 191430741 | 12 | 18 | 8  | 2.476436439 | 0.00924552  |         | ENSG00000212489 |
| 3 | 191526484 | 191526837 | 191526660 | 22 | 28 | 2  | 11.33947211 | 2.41E-08    | CLDN1   | ENSG00000163347 |
| 3 | 191714574 | 191714861 | 191714718 | 9  | 11 | 1  | 7.038293036 | 0.000674435 | IL1RAP  | ENSG00000196083 |
| 3 | 191787099 | 191787294 | 191787196 | 10 | 11 | 5  | 2.346097679 | 0.0364013   |         | ENSG00000223117 |
| 3 | 192358099 | 192358430 | 192358264 | 27 | 32 | 1  | 19.35530585 | 1.42E-10    | OSTN    | ENSG00000188729 |
| 3 | 192529617 | 192529952 | 192529784 | 12 | 17 | 3  | 5.278719777 | 0.000205462 | CCDC50  | ENSG00000152492 |
| 3 | 192699948 | 192700233 | 192700090 | 10 | 11 | 2  | 4.692195357 | 0.00272444  | PYDC2   | ENSG00000221856 |
| 3 | 193331092 | 193331282 | 193331187 | 10 | 10 | 6  | 1.843362462 | 0.0964212   |         | ENSG00000222583 |
| 3 | 193473943 | 193474452 | 193474187 | 16 | 29 | 7  | 4.398933147 | 1.30E-05    | FGF12   | ENSG00000114279 |
| 3 | 193667818 | 193668185 | 193668009 | 8  | 14 | 9  | 1.759573259 | 0.0786014   | FGF12   | ENSG00000114279 |
| 3 | 193715621 | 193716108 | 193715951 | 13 | 24 | 11 | 2.443851749 | 0.00386428  |         | ENSG00000208337 |
| 3 | 193767274 | 193767584 | 193767412 | 9  | 13 | 6  | 2.346097679 | 0.0266147   |         | ENSG00000208337 |
| 3 | 193771734 | 193772176 | 193771912 | 10 | 19 | 14 | 1.564065119 | 0.0925887   |         | ENSG00000208337 |
| 3 | 193797894 | 193798474 | 193798183 | 28 | 44 | 18 | 2.778273567 | 3.93E-05    |         | ENSG00000208337 |
| 3 | 193927770 | 193928112 | 193927941 | 19 | 23 | 4  | 5.630634429 | 1.63E-05    |         | ENSG00000200184 |
| 3 | 193928147 | 193928427 | 193928262 | 15 | 17 | 3  | 5.278719777 | 0.000205462 |         | ENSG00000200184 |
| 3 | 193999399 | 193999579 | 193999509 | 8  | 8  | 0  | 10.55743955 | 0.000925496 |         | ENSG00000200184 |
| 3 | 194019444 | 194019771 | 194019608 | 19 | 23 | 4  | 5.630634429 | 1.63E-05    |         | ENSG00000200184 |
| 3 | 194052277 | 194053033 | 194052529 | 20 | 50 | 16 | 3.519146518 | 5.06E-07    | C3orf59 | ENSG00000180611 |
| 3 | 194062975 | 194063296 | 194063123 | 9  | 12 | 5  | 2.541605819 | 0.0225912   | C3orf59 | ENSG00000180611 |
| 3 | 194080124 | 194080508 | 194080369 | 11 | 18 | 5  | 3.714654658 | 0.000961539 | C3orf59 | ENSG00000180611 |
| 3 | 194097295 | 194097693 | 194097514 | 10 | 17 | 5  | 3.519146518 | 0.00167472  | C3orf59 | ENSG00000180611 |
| 3 | 194107509 | 194107772 | 194107640 | 9  | 10 | 5  | 2.150589539 | 0.0575848   | C3orf59 | ENSG00000180611 |
| 3 | 194108293 | 194108608 | 194108451 | 19 | 23 | 2  | 9.384390715 | 8.25E-07    | C3orf59 | ENSG00000180611 |
| 3 | 194117377 | 194117724 | 194117545 | 19 | 23 | 7  | 3.519146518 | 0.000369739 | C3orf59 | ENSG00000180611 |
| 3 | 194118055 | 194118295 | 194118168 | 10 | 13 | 0  | 16.42268375 | 1.91E-05    | C3orf59 | ENSG00000180611 |
| 3 | 194118507 | 194118969 | 194118748 | 9  | 20 | 10 | 2.239456875 | 0.0121685   | C3orf59 | ENSG00000180611 |
| 3 | 194241624 | 194241853 | 194241714 | 9  | 10 | 2  | 4.301179077 | 0.00512919  |         | ENSG00000220985 |
| 3 | 194390942 | 194391224 | 194391091 | 9  | 12 | 9  | 1.524963491 | 0.154777    |         | ENSG00000220985 |
| 3 | 194426285 | 194426585 | 194426432 | 14 | 17 | 5  | 3.519146518 | 0.00167472  | HRASLS  | ENSG00000127252 |
| 3 | 194431710 | 194432061 | 194431885 | 17 | 20 | 6  | 3.519146518 | 0.000784044 | HRASLS  | ENSG00000127252 |
| 3 | 194447641 | 194447917 | 194447748 | 23 | 25 | 0  | 30.49926982 | 1.72E-09    | HRASLS  | ENSG00000127252 |
| 3 | 194489598 | 194489838 | 194489718 | 10 | 10 | 3  | 3.225884308 | 0.0139466   | ATP13A5 | ENSG00000187527 |
| 3 | 194489845 | 194490062 | 194489997 | 9  | 12 | 1  | 7.624817456 | 0.000332769 | ATP13A5 | ENSG00000187527 |

|   |           |           |           |    |    |    |             |             |         |                 |
|---|-----------|-----------|-----------|----|----|----|-------------|-------------|---------|-----------------|
| 3 | 194520768 | 194520947 | 194520809 | 8  | 9  | 1  | 5.865244197 | 0.00272497  | ATP13A5 | ENSG00000187527 |
| 3 | 194592528 | 194592853 | 194592690 | 10 | 14 | 7  | 2.199466574 | 0.0303778   | ATP13A5 | ENSG00000187527 |
| 3 | 194662159 | 194662444 | 194662301 | 10 | 14 | 6  | 2.513676084 | 0.016726    | ATP13A5 | ENSG00000187527 |
| 3 | 194700495 | 194700837 | 194700666 | 17 | 23 | 7  | 3.519146518 | 0.000369739 | ATP13A4 | ENSG00000127249 |
| 3 | 194764589 | 194764832 | 194764700 | 8  | 10 | 2  | 4.301179077 | 0.00512919  | ATP13A4 | ENSG00000127249 |
| 3 | 194772926 | 194773286 | 194773107 | 10 | 15 | 7  | 2.346097679 | 0.0195693   |         | ENSG00000221728 |
| 3 | 194793296 | 194793788 | 194793620 | 22 | 33 | 3  | 9.970915134 | 4.56E-09    | OPA1    | ENSG00000198836 |
| 3 | 194794297 | 194794541 | 194794420 | 9  | 11 | 2  | 4.692195357 | 0.00272444  | OPA1    | ENSG00000198836 |
| 3 | 194944472 | 194945010 | 194944651 | 10 | 23 | 9  | 2.815317214 | 0.00172056  |         | ENSG00000208326 |
| 3 | 194981339 | 194981563 | 194981451 | 10 | 12 | 3  | 3.812408728 | 0.004404    |         | ENSG00000208326 |
| 3 | 194982783 | 194983145 | 194982931 | 18 | 23 | 5  | 4.692195357 | 5.29E-05    |         | ENSG00000208326 |
| 3 | 194987675 | 194988047 | 194987854 | 26 | 33 | 4  | 7.976732107 | 2.40E-08    |         | ENSG00000208326 |
| 3 | 194988745 | 194989009 | 194988836 | 10 | 13 | 1  | 8.211341875 | 0.000163445 |         | ENSG00000208326 |
| 3 | 194991961 | 194992562 | 194992188 | 15 | 34 | 15 | 2.566044336 | 0.000523463 |         | ENSG00000208326 |
| 3 | 195005980 | 195006305 | 195006152 | 24 | 29 | 17 | 1.955081399 | 0.0105966   |         | ENSG00000208326 |
| 3 | 195014040 | 195014299 | 195014169 | 9  | 11 | 3  | 3.519146518 | 0.00788869  |         | ENSG00000208326 |
| 3 | 195028994 | 195029414 | 195029204 | 15 | 25 | 10 | 2.772660893 | 0.00131329  |         | ENSG00000208326 |
| 3 | 195030225 | 195030661 | 195030522 | 17 | 27 | 6  | 4.692195357 | 1.46E-05    |         | ENSG00000208326 |
| 3 | 195034987 | 195035500 | 195035203 | 17 | 34 | 11 | 3.421392448 | 3.22E-05    |         | ENSG00000208326 |
| 3 | 195037859 | 195038127 | 195037993 | 11 | 12 | 13 | 1.089259637 | 0.414883    |         | ENSG00000208326 |
| 3 | 195049499 | 195049859 | 195049640 | 11 | 15 | 5  | 3.128130238 | 0.00492422  |         | ENSG00000208326 |
| 3 | 195070715 | 195071285 | 195071033 | 23 | 37 | 15 | 2.785990993 | 0.000136587 |         | ENSG00000208326 |
| 3 | 195071577 | 195071819 | 195071727 | 9  | 11 | 3  | 3.519146518 | 0.00788869  |         | ENSG00000208326 |
| 3 | 195072761 | 195073311 | 195073016 | 34 | 59 | 19 | 3.519146518 | 5.83E-08    |         | ENSG00000214146 |
| 3 | 195078928 | 195079195 | 195079069 | 13 | 15 | 6  | 2.68125449  | 0.0103552   |         | ENSG00000214146 |
| 3 | 195079968 | 195080464 | 195080145 | 19 | 30 | 12 | 2.797270309 | 0.000480593 |         | ENSG00000214146 |
| 3 | 195111386 | 195111860 | 195111681 | 24 | 40 | 12 | 3.69961557  | 3.24E-06    |         | ENSG00000214146 |
| 3 | 195122721 | 195123326 | 195122986 | 27 | 45 | 12 | 4.150788201 | 2.16E-07    |         | ENSG00000214146 |
| 3 | 195152509 | 195152699 | 195152604 | 8  | 9  | 2  | 3.910162798 | 0.00955088  |         | ENSG00000214146 |
| 3 | 195170760 | 195170962 | 195170861 | 8  | 9  | 4  | 2.346097679 | 0.050148    |         | ENSG00000214146 |
| 3 | 195180418 | 195180701 | 195180559 | 10 | 14 | 6  | 2.513676084 | 0.016726    |         | ENSG00000214146 |
| 3 | 195203815 | 195204228 | 195204049 | 14 | 22 | 6  | 3.854303329 | 0.000260696 |         | ENSG00000214146 |
| 3 | 195257253 | 195257478 | 195257401 | 12 | 12 | 5  | 2.541605819 | 0.0225912   |         | ENSG00000214146 |
| 3 | 195287074 | 195287308 | 195287191 | 8  | 8  | 6  | 1.508205651 | 0.203852    | HES1    | ENSG00000114315 |

|   |           |           |           |    |    |    |             |             |         |                 |
|---|-----------|-----------|-----------|----|----|----|-------------|-------------|---------|-----------------|
| 3 | 195291665 | 195291931 | 195291767 | 8  | 10 | 4  | 2.580707446 | 0.0306059   | HES1    | ENSG00000114315 |
| 3 | 195331253 | 195331473 | 195331373 | 9  | 9  | 1  | 5.865244197 | 0.00272497  | HES1    | ENSG00000114315 |
| 3 | 195331593 | 195331984 | 195331818 | 9  | 14 | 7  | 2.199466574 | 0.0303778   | HES1    | ENSG00000114315 |
| 3 | 195332984 | 195333319 | 195333151 | 20 | 25 | 8  | 3.388807758 | 0.000297109 | HES1    | ENSG00000114315 |
| 3 | 195335125 | 195335735 | 195335568 | 16 | 31 | 11 | 3.128130238 | 0.000146711 | HES1    | ENSG00000114315 |
| 3 | 195336285 | 195336846 | 195336578 | 17 | 32 | 15 | 2.419413231 | 0.0012352   | HES1    | ENSG00000114315 |
| 3 | 195339822 | 195340093 | 195339957 | 10 | 13 | 6  | 2.346097679 | 0.0266147   | HES1    | ENSG00000114315 |
| 3 | 195342154 | 195342744 | 195342324 | 18 | 33 | 14 | 2.658910702 | 0.000442466 |         | ENSG00000223332 |
| 3 | 195348819 | 195349260 | 195349105 | 18 | 26 | 11 | 2.639359888 | 0.0015854   |         | ENSG00000208324 |
| 3 | 195351044 | 195351258 | 195351151 | 9  | 11 | 4  | 2.815317214 | 0.0183428   |         | ENSG00000208324 |
| 3 | 195359304 | 195359831 | 195359573 | 19 | 34 | 20 | 1.955081399 | 0.00643758  |         | ENSG00000208323 |
| 3 | 195377721 | 195378060 | 195377890 | 13 | 18 | 9  | 2.228792795 | 0.0164363   |         | ENSG00000208323 |
| 3 | 195401039 | 195401364 | 195401201 | 9  | 12 | 1  | 7.624817456 | 0.000332769 |         | ENSG00000208323 |
| 3 | 195401559 | 195401749 | 195401644 | 8  | 8  | 2  | 3.519146518 | 0.017558    |         | ENSG00000208323 |
| 3 | 195404878 | 195405551 | 195405281 | 59 | 92 | 9  | 10.90935421 | 4.36E-22    |         | ENSG00000208323 |
| 3 | 195413531 | 195413940 | 195413710 | 12 | 21 | 9  | 2.580707446 | 0.00438951  |         | ENSG00000208323 |
| 3 | 195423714 | 195423991 | 195423852 | 9  | 11 | 8  | 1.564065119 | 0.151515    |         | ENSG00000208323 |
| 3 | 195500911 | 195501247 | 195501069 | 9  | 14 | 3  | 4.398933147 | 0.00132748  |         | ENSG00000214145 |
| 3 | 195516065 | 195516592 | 195516233 | 19 | 32 | 5  | 6.451768616 | 1.97E-07    |         | ENSG00000214145 |
| 3 | 195583453 | 195583844 | 195583632 | 8  | 16 | 8  | 2.215758919 | 0.0222902   | LRRC15  | ENSG00000172061 |
| 3 | 195588523 | 195588721 | 195588605 | 8  | 9  | 6  | 1.675784056 | 0.141978    | GP5     | ENSG00000178732 |
| 3 | 195588752 | 195589127 | 195588922 | 12 | 19 | 7  | 2.932622098 | 0.00293566  | GP5     | ENSG00000178732 |
| 3 | 195606739 | 195606920 | 195606821 | 8  | 8  | 5  | 1.759573259 | 0.13508     | GP5     | ENSG00000178732 |
| 3 | 195674363 | 195674609 | 195674486 | 13 | 14 | 6  | 2.513676084 | 0.016726    | ATP13A3 | ENSG00000133657 |
| 3 | 195684647 | 195684851 | 195684784 | 12 | 12 | 0  | 15.24963491 | 4.15E-05    | ATP13A3 | ENSG00000133657 |
| 3 | 195696352 | 195696624 | 195696488 | 9  | 10 | 8  | 1.433726359 | 0.209175    |         | ENSG00000198579 |
| 3 | 195697041 | 195697320 | 195697198 | 14 | 16 | 11 | 1.661819189 | 0.0853913   |         | ENSG00000198579 |
| 3 | 195785880 | 195786204 | 195786042 | 12 | 17 | 6  | 3.016411301 | 0.00381427  | TMEM44  | ENSG00000145014 |
| 3 | 195789301 | 195789625 | 195789465 | 8  | 13 | 2  | 5.474227917 | 0.000747844 | TMEM44  | ENSG00000145014 |
| 3 | 195835792 | 195835980 | 195835876 | 10 | 12 | 2  | 5.083211637 | 0.00143337  | TMEM44  | ENSG00000145014 |
| 3 | 195873395 | 195873821 | 195873574 | 8  | 16 | 5  | 3.323638378 | 0.00288759  | LSG1    | ENSG00000041802 |
| 3 | 195874202 | 195874770 | 195874486 | 20 | 37 | 15 | 2.785990993 | 0.000136587 | LSG1    | ENSG00000041802 |
| 3 | 195884613 | 195885050 | 195884792 | 25 | 32 | 4  | 7.742122339 | 4.68E-08    | FAM43A  | ENSG00000185112 |
| 3 | 195887649 | 195887953 | 195887819 | 18 | 20 | 4  | 4.926805125 | 0.00010522  | FAM43A  | ENSG00000185112 |

|   |           |           |           |     |     |    |             |             |          |                 |
|---|-----------|-----------|-----------|-----|-----|----|-------------|-------------|----------|-----------------|
| 3 | 195888161 | 195888351 | 195888256 | 8   | 8   | 0  | 10.55743955 | 0.000925496 | FAM43A   | ENSG00000185112 |
| 3 | 195888456 | 195888648 | 195888541 | 9   | 10  | 3  | 3.225884308 | 0.0139466   | FAM43A   | ENSG00000185112 |
| 3 | 195932235 | 195932487 | 195932328 | 11  | 14  | 5  | 2.932622098 | 0.00829617  | FAM43A   | ENSG00000185112 |
| 3 | 195952120 | 195952473 | 195952299 | 9   | 11  | 3  | 3.519146518 | 0.00788869  | FAM43A   | ENSG00000185112 |
| 3 | 195976991 | 195977296 | 195977143 | 15  | 19  | 3  | 5.865244197 | 5.72E-05    | FAM43A   | ENSG00000185112 |
| 3 | 196055087 | 196055421 | 196055223 | 10  | 14  | 5  | 2.932622098 | 0.00829617  | FAM43A   | ENSG00000185112 |
| 3 | 196065500 | 196065689 | 196065671 | 8   | 8   | 3  | 2.639359888 | 0.0415794   | FAM43A   | ENSG00000185112 |
| 3 | 196073605 | 196073881 | 196073727 | 13  | 14  | 11 | 1.466311049 | 0.15926     | FAM43A   | ENSG00000185112 |
| 3 | 196074722 | 196074976 | 196074836 | 11  | 12  | 10 | 1.386330446 | 0.21117     | FAM43A   | ENSG00000185112 |
| 3 | 196077953 | 196078212 | 196078094 | 8   | 11  | 3  | 3.519146518 | 0.00788869  | FAM43A   | ENSG00000185112 |
| 3 | 196137061 | 196137375 | 196137218 | 8   | 11  | 0  | 14.07658607 | 9.02E-05    | C3orf21  | ENSG00000173950 |
| 3 | 196159771 | 196159993 | 196159907 | 9   | 10  | 1  | 6.451768616 | 0.00135978  | C3orf21  | ENSG00000173950 |
| 3 | 196232910 | 196233356 | 196233133 | 14  | 23  | 8  | 3.128130238 | 0.000832453 | C3orf21  | ENSG00000173950 |
| 3 | 196304722 | 196305066 | 196304887 | 8   | 12  | 9  | 1.524963491 | 0.154777    | C3orf21  | ENSG00000173950 |
| 3 | 196307335 | 196307686 | 196307511 | 32  | 36  | 16 | 2.553106297 | 0.000397168 | C3orf21  | ENSG00000173950 |
| 3 | 196389500 | 196390380 | 196389807 | 116 | 181 | 5  | 35.58248146 | 3.81E-54    | C3orf21  | ENSG00000173950 |
| 3 | 196473282 | 196473919 | 196473585 | 9   | 26  | 8  | 3.519146518 | 0.000175368 | C3orf21  | ENSG00000173950 |
| 3 | 196643857 | 196644112 | 196643984 | 8   | 10  | 3  | 3.225884308 | 0.0139466   | ACAP2    | ENSG00000114331 |
| 3 | 196645354 | 196645683 | 196645518 | 16  | 22  | 5  | 4.496687217 | 9.59E-05    | ACAP2    | ENSG00000114331 |
| 3 | 196747627 | 196747953 | 196747790 | 13  | 16  | 3  | 4.985457567 | 0.000385643 | PPP1R2P3 | ENSG00000184203 |
| 3 | 196750475 | 196750727 | 196750598 | 8   | 9   | 1  | 5.865244197 | 0.00272497  | PPP1R2P3 | ENSG00000184203 |
| 3 | 196751520 | 196751755 | 196751637 | 14  | 15  | 7  | 2.346097679 | 0.0195693   | PPP1R2P3 | ENSG00000184203 |
| 3 | 196764496 | 196764880 | 196764701 | 15  | 21  | 3  | 6.451768616 | 1.56E-05    | PPP1R2P3 | ENSG00000184203 |
| 3 | 196766740 | 196767020 | 196766851 | 12  | 14  | 4  | 3.519146518 | 0.00361132  | PPP1R2P3 | ENSG00000184203 |
| 3 | 196792172 | 196792710 | 196792463 | 20  | 34  | 3  | 10.26417734 | 2.27E-09    | APOD     | ENSG00000189058 |
| 3 | 196917281 | 196917473 | 196917389 | 11  | 12  | 7  | 1.906204364 | 0.0695918   |          | ENSG00000205814 |
| 3 | 196932417 | 196932771 | 196932610 | 9   | 13  | 1  | 8.211341875 | 0.000163445 | MUC20    | ENSG00000176945 |
| 3 | 197013984 | 197014177 | 197014123 | 8   | 8   | 0  | 10.55743955 | 0.000925496 | MUC4     | ENSG00000145113 |
| 3 | 197062132 | 197062530 | 197062318 | 15  | 23  | 13 | 2.010940867 | 0.0163115   | MUC4     | ENSG00000145113 |
| 3 | 197070658 | 197070844 | 197070778 | 8   | 9   | 6  | 1.675784056 | 0.141978    | TNK2     | ENSG00000061938 |
| 3 | 197074410 | 197074596 | 197074503 | 8   | 9   | 3  | 2.932622098 | 0.0242899   | TNK2     | ENSG00000061938 |
| 3 | 197105955 | 197106224 | 197106089 | 9   | 12  | 7  | 1.906204364 | 0.0695918   | TNK2     | ENSG00000061938 |
| 3 | 197109145 | 197109346 | 197109245 | 9   | 10  | 2  | 4.301179077 | 0.00512919  | TNK2     | ENSG00000061938 |
| 3 | 197119334 | 197119521 | 197119427 | 8   | 8   | 9  | 1.055743955 | 0.456865    | TNK2     | ENSG00000061938 |

|   |           |           |           |    |     |    |             |             |          |                 |
|---|-----------|-----------|-----------|----|-----|----|-------------|-------------|----------|-----------------|
| 3 | 197119638 | 197119935 | 197119786 | 11 | 12  | 5  | 2.541605819 | 0.0225912   | TNK2     | ENSG00000061938 |
| 3 | 197121006 | 197121599 | 197121422 | 11 | 25  | 8  | 3.388807758 | 0.000297109 | TNK2     | ENSG00000061938 |
| 3 | 197126093 | 197126718 | 197126406 | 14 | 29  | 5  | 5.865244197 | 1.33E-06    | TNK2     | ENSG00000061938 |
| 3 | 197292427 | 197292769 | 197292598 | 8  | 12  | 7  | 1.906204364 | 0.0695918   | TFRC     | ENSG00000072274 |
| 3 | 197293174 | 197293838 | 197293412 | 18 | 36  | 4  | 8.680561411 | 3.18E-09    | TFRC     | ENSG00000072274 |
| 3 | 197324667 | 197324988 | 197324819 | 22 | 23  | 1  | 14.07658607 | 1.14E-07    | TFRC     | ENSG00000072274 |
| 3 | 197347194 | 197348087 | 197347854 | 60 | 117 | 15 | 8.65123519  | 4.40E-25    | TFRC     | ENSG00000072274 |
| 3 | 197354420 | 197354729 | 197354573 | 10 | 14  | 5  | 2.932622098 | 0.00829617  |          | ENSG00000208298 |
| 3 | 197407905 | 197408204 | 197408054 | 14 | 16  | 2  | 6.647276756 | 0.000101928 |          | ENSG00000208298 |
| 3 | 197489172 | 197489517 | 197489344 | 17 | 20  | 1  | 12.31701281 | 1.03E-06    | PCYT1A   | ENSG00000161217 |
| 3 | 197498852 | 197499207 | 197499029 | 19 | 25  | 6  | 4.357038546 | 4.72E-05    | PCYT1A   | ENSG00000161217 |
| 3 | 197499220 | 197499420 | 197499320 | 8  | 10  | 3  | 3.225884308 | 0.0139466   | PCYT1A   | ENSG00000161217 |
| 3 | 197529627 | 197529814 | 197529720 | 8  | 8   | 1  | 5.278719777 | 0.00542188  | TCTEX1D2 | ENSG00000213123 |
| 3 | 197531349 | 197531937 | 197531562 | 51 | 67  | 6  | 11.39533158 | 5.94E-17    | TCTEX1D2 | ENSG00000213123 |
| 3 | 197554325 | 197554781 | 197554551 | 15 | 24  | 8  | 3.258468998 | 0.000499412 |          | ENSG00000212146 |
| 3 | 197608495 | 197608693 | 197608607 | 8  | 9   | 4  | 2.346097679 | 0.050148    |          | ENSG00000208295 |
| 3 | 197642620 | 197642989 | 197642810 | 8  | 15  | 5  | 3.128130238 | 0.00492422  | UBXN7    | ENSG00000163960 |
| 3 | 197643444 | 197643661 | 197643544 | 8  | 11  | 5  | 2.346097679 | 0.0364013   | UBXN7    | ENSG00000163960 |
| 3 | 197643773 | 197644289 | 197644044 | 16 | 31  | 14 | 2.502504191 | 0.00106817  | UBXN7    | ENSG00000163960 |
| 3 | 197656011 | 197656198 | 197656121 | 8  | 8   | 5  | 1.759573259 | 0.13508     | UBXN7    | ENSG00000163960 |
| 3 | 197713212 | 197713464 | 197713342 | 9  | 11  | 5  | 2.346097679 | 0.0364013   | RNF168   | ENSG00000163961 |
| 3 | 197714808 | 197715008 | 197714848 | 8  | 10  | 3  | 3.225884308 | 0.0139466   | RNF168   | ENSG00000163961 |
| 3 | 197779646 | 197779970 | 197779819 | 17 | 19  | 10 | 2.132816071 | 0.01835     | WDR53    | ENSG00000185798 |
| 3 | 197843461 | 197843989 | 197843640 | 12 | 22  | 8  | 2.997791478 | 0.00137524  | LRRC33   | ENSG00000174004 |
| 3 | 197862172 | 197862494 | 197862333 | 15 | 19  | 7  | 2.932622098 | 0.00293566  | LRRC33   | ENSG00000174004 |
| 3 | 197871754 | 197872147 | 197871993 | 11 | 19  | 11 | 1.955081399 | 0.0295891   | LRRC33   | ENSG00000174004 |
| 3 | 197889081 | 197889369 | 197889225 | 10 | 13  | 2  | 5.474227917 | 0.000747844 |          | ENSG00000201441 |
| 3 | 197896187 | 197896541 | 197896364 | 12 | 18  | 15 | 1.392995497 | 0.16305     |          | ENSG00000201441 |
| 3 | 197898516 | 197898721 | 197898618 | 9  | 9   | 2  | 3.910162798 | 0.00955088  |          | ENSG00000201441 |
| 3 | 197966005 | 197966257 | 197966131 | 8  | 9   | 7  | 1.466311049 | 0.20706     |          | ENSG00000202181 |
| 3 | 197990028 | 197990252 | 197990140 | 8  | 11  | 3  | 3.519146518 | 0.00788869  |          | ENSG00000206892 |
| 3 | 197998956 | 197999394 | 197999204 | 15 | 23  | 15 | 1.759573259 | 0.0372968   |          | ENSG00000206892 |
| 3 | 198004104 | 198004361 | 198004205 | 16 | 16  | 9  | 1.994183027 | 0.0370915   |          | ENSG00000206892 |
| 3 | 198004471 | 198004837 | 198004621 | 23 | 29  | 15 | 2.199466574 | 0.00420562  |          | ENSG00000206892 |



|   |           |           |           |    |    |    |             |             |          |                 |
|---|-----------|-----------|-----------|----|----|----|-------------|-------------|----------|-----------------|
| 3 | 198018917 | 198019200 | 198019071 | 9  | 12 | 4  | 3.049926982 | 0.0108184   |          | ENSG00000206892 |
| 3 | 198034178 | 198034367 | 198034272 | 8  | 9  | 3  | 2.932622098 | 0.0242899   |          | ENSG00000206892 |
| 3 | 198048972 | 198049339 | 198049235 | 8  | 14 | 5  | 2.932622098 | 0.00829617  | SENP5    | ENSG00000119231 |
| 3 | 198078703 | 198079060 | 198078881 | 9  | 15 | 5  | 3.128130238 | 0.00492422  | SENP5    | ENSG00000119231 |
| 3 | 198153597 | 198154140 | 198153776 | 18 | 38 | 13 | 3.26777891  | 2.05E-05    | NCBP2    | ENSG00000114503 |
| 3 | 198190015 | 198190384 | 198190194 | 9  | 16 | 8  | 2.215758919 | 0.0222902   | PIGZ     | ENSG00000119227 |
| 3 | 198242749 | 198243163 | 198242956 | 14 | 22 | 14 | 1.798674887 | 0.0355729   | MF12     | ENSG00000163975 |
| 3 | 198437383 | 198437588 | 198437476 | 8  | 8  | 4  | 2.111487911 | 0.0804809   | DLG1     | ENSG00000075711 |
| 3 | 198454411 | 198454766 | 198454588 | 16 | 21 | 3  | 6.451768616 | 1.56E-05    | DLG1     | ENSG00000075711 |
| 3 | 198578824 | 198579015 | 198578919 | 8  | 9  | 0  | 11.73048839 | 0.000425898 | DLG1     | ENSG00000075711 |
| 3 | 198638373 | 198638719 | 198638546 | 12 | 16 | 14 | 1.329455351 | 0.210108    | DLG1     | ENSG00000075711 |
| 3 | 198639351 | 198639555 | 198639454 | 8  | 9  | 5  | 1.955081399 | 0.0892323   | BDH1     | ENSG00000161267 |
| 3 | 198642122 | 198642301 | 198642287 | 8  | 8  | 7  | 1.319679944 | 0.283403    | BDH1     | ENSG00000161267 |
| 3 | 198665347 | 198665630 | 198665510 | 9  | 10 | 8  | 1.433726359 | 0.209175    | BDH1     | ENSG00000161267 |
| 3 | 198694644 | 198694916 | 198694799 | 12 | 14 | 6  | 2.513676084 | 0.016726    | BDH1     | ENSG00000161267 |
| 3 | 198699196 | 198699527 | 198699363 | 8  | 13 | 5  | 2.737113958 | 0.0137917   | BDH1     | ENSG00000161267 |
| 3 | 198713615 | 198713912 | 198713751 | 8  | 11 | 4  | 2.815317214 | 0.0183428   | BDH1     | ENSG00000161267 |
| 3 | 198714836 | 198715142 | 198714989 | 9  | 12 | 3  | 3.812408728 | 0.004404    | BDH1     | ENSG00000161267 |
| 3 | 198721343 | 198721823 | 198721660 | 11 | 21 | 2  | 8.602358155 | 3.33E-06    | BDH1     | ENSG00000161267 |
| 3 | 198751047 | 198751360 | 198751203 | 17 | 20 | 7  | 3.079253203 | 0.00177418  | BDH1     | ENSG00000161267 |
| 3 | 198752341 | 198752679 | 198752547 | 11 | 15 | 14 | 1.251252095 | 0.26676     | BDH1     | ENSG00000161267 |
| 3 | 198765785 | 198766288 | 198766066 | 12 | 26 | 9  | 3.167231866 | 0.000393236 | BDH1     | ENSG00000161267 |
| 3 | 198786629 | 198786910 | 198786769 | 14 | 16 | 6  | 2.848832895 | 0.00632407  | BDH1     | ENSG00000161267 |
| 3 | 198810392 | 198810624 | 198810482 | 12 | 13 | 6  | 2.346097679 | 0.0266147   | BDH1     | ENSG00000161267 |
| 3 | 198810700 | 198810997 | 198810850 | 8  | 11 | 5  | 2.346097679 | 0.0364013   | BDH1     | ENSG00000161267 |
| 3 | 198866104 | 198866285 | 198866194 | 8  | 8  | 1  | 5.278719777 | 0.00542188  |          | ENSG00000216042 |
| 3 | 198870515 | 198870836 | 198870675 | 13 | 17 | 12 | 1.62422147  | 0.088135    |          | ENSG00000216042 |
| 3 | 198870896 | 198871219 | 198871057 | 9  | 14 | 5  | 2.932622098 | 0.00829617  |          | ENSG00000216042 |
| 3 | 198948203 | 198948579 | 198948449 | 8  | 16 | 7  | 2.492728784 | 0.0124193   | KIAA0226 | ENSG00000145016 |
| 3 | 198962183 | 198962365 | 198962274 | 8  | 9  | 9  | 1.173048839 | 0.362316    | FYTTD1   | ENSG00000122068 |
| 3 | 198994557 | 198994810 | 198994693 | 8  | 10 | 2  | 4.301179077 | 0.00512919  | LRCH3    | ENSG00000186001 |
| 3 | 198998770 | 198998984 | 198998851 | 8  | 8  | 2  | 3.519146518 | 0.017558    | LRCH3    | ENSG00000186001 |
| 3 | 199002587 | 199002878 | 199002732 | 9  | 12 | 7  | 1.906204364 | 0.0695918   | LRCH3    | ENSG00000186001 |
| 3 | 199035516 | 199035741 | 199035628 | 8  | 8  | 4  | 2.111487911 | 0.0804809   | LRCH3    | ENSG00000186001 |

|   |           |           |           |     |     |    |             |             |         |                 |
|---|-----------|-----------|-----------|-----|-----|----|-------------|-------------|---------|-----------------|
| 3 | 199036078 | 199036287 | 199036192 | 8   | 10  | 1  | 6.451768616 | 0.00135978  | LRCH3   | ENSG00000186001 |
| 3 | 199118305 | 199118506 | 199118348 | 9   | 10  | 6  | 1.843362462 | 0.0964212   |         | ENSG00000199306 |
| 3 | 199138153 | 199138372 | 199138262 | 8   | 11  | 2  | 4.692195357 | 0.00272444  | RPL35A  | ENSG00000182899 |
| 3 | 199161018 | 199161632 | 199161294 | 16  | 36  | 15 | 2.712675441 | 0.000215253 | RPL35A  | ENSG00000182899 |
| 4 | 6222      | 6824      | 6504      | 181 | 208 | 3  | 61.29180185 | 8.90E-66    | ZNF595  | ENSG00000197701 |
| 4 | 41474     | 41677     | 41575     | 9   | 9   | 6  | 1.675784056 | 0.141978    | ZNF595  | ENSG00000197701 |
| 4 | 42829     | 43430     | 43167     | 26  | 52  | 23 | 2.590482853 | 2.50E-05    | ZNF595  | ENSG00000197701 |
| 4 | 321629    | 321808    | 321683    | 8   | 8   | 0  | 10.55743955 | 0.000925496 | ZNF141  | ENSG00000131127 |
| 4 | 594564    | 594833    | 594677    | 9   | 11  | 3  | 3.519146518 | 0.00788869  | PDE6B   | ENSG00000133256 |
| 4 | 651739    | 651927    | 651822    | 8   | 8   | 0  | 10.55743955 | 0.000925496 | ATP5I   | ENSG00000169020 |
| 4 | 766255    | 766456    | 766355    | 8   | 9   | 10 | 1.066408036 | 0.444985    | CPLX1   | ENSG00000168993 |
| 4 | 1526762   | 1527054   | 1526939   | 18  | 22  | 5  | 4.496687217 | 9.59E-05    |         | ENSG00000207009 |
| 4 | 1697872   | 1698107   | 1698037   | 9   | 11  | 4  | 2.815317214 | 0.0183428   | TACC3   | ENSG00000013810 |
| 4 | 1742353   | 1742648   | 1742500   | 15  | 19  | 1  | 11.73048839 | 2.14E-06    | FGFR3   | ENSG00000068078 |
| 4 | 1747540   | 1747774   | 1747704   | 9   | 11  | 9  | 1.407658607 | 0.210479    | FGFR3   | ENSG00000068078 |
| 4 | 1749378   | 1749627   | 1749455   | 11  | 12  | 2  | 5.083211637 | 0.00143337  | FGFR3   | ENSG00000068078 |
| 4 | 1827940   | 1828127   | 1828051   | 8   | 8   | 1  | 5.278719777 | 0.00542188  | LETM1   | ENSG00000168924 |
| 4 | 1879474   | 1879706   | 1879590   | 9   | 9   | 1  | 5.865244197 | 0.00272497  | WHSC1   | ENSG00000109685 |
| 4 | 1911962   | 1912208   | 1912085   | 10  | 10  | 0  | 12.90353723 | 0.000195991 | WHSC1   | ENSG00000109685 |
| 4 | 1981487   | 1981779   | 1981626   | 8   | 10  | 2  | 4.301179077 | 0.00512919  | WHSC2   | ENSG00000185049 |
| 4 | 2233803   | 2234067   | 2233950   | 9   | 10  | 0  | 12.90353723 | 0.000195991 |         | ENSG00000215361 |
| 4 | 2555131   | 2555384   | 2555257   | 11  | 13  | 4  | 3.28453675  | 0.00629037  |         | ENSG00000206738 |
| 4 | 2769309   | 2769592   | 2769433   | 8   | 10  | 1  | 6.451768616 | 0.00135978  | SH3BP2  | ENSG00000087266 |
| 4 | 2879474   | 2879788   | 2879631   | 14  | 18  | 4  | 4.457585589 | 0.000353565 | MFSD10  | ENSG00000109736 |
| 4 | 3008872   | 3009144   | 3009024   | 8   | 11  | 2  | 4.692195357 | 0.00272444  |         | ENSG00000199335 |
| 4 | 3078081   | 3078297   | 3078189   | 8   | 9   | 0  | 11.73048839 | 0.000425898 | HTT     | ENSG00000197386 |
| 4 | 3163661   | 3164002   | 3163775   | 11  | 16  | 3  | 4.985457567 | 0.000385643 | C4orf44 | ENSG00000188981 |
| 4 | 3164008   | 3164187   | 3164067   | 8   | 8   | 2  | 3.519146518 | 0.017558    | C4orf44 | ENSG00000188981 |
| 4 | 3357543   | 3357734   | 3357621   | 8   | 9   | 1  | 5.865244197 | 0.00272497  | RGS12   | ENSG00000159788 |
| 4 | 3358091   | 3358308   | 3358228   | 10  | 11  | 1  | 7.038293036 | 0.000674435 | RGS12   | ENSG00000159788 |
| 4 | 3359521   | 3359753   | 3359645   | 8   | 11  | 2  | 4.692195357 | 0.00272444  | RGS12   | ENSG00000159788 |
| 4 | 3408342   | 3408941   | 3408625   | 134 | 178 | 5  | 34.99595704 | 3.61E-53    | HGFAC   | ENSG00000109758 |
| 4 | 3456170   | 3456471   | 3456314   | 10  | 12  | 0  | 15.24963491 | 4.15E-05    | DOK7    | ENSG00000175920 |
| 4 | 3503190   | 3503428   | 3503309   | 8   | 10  | 3  | 3.225884308 | 0.0139466   | LRPAP1  | ENSG00000163956 |

|   |         |         |         |    |    |   |             |             |          |                 |
|---|---------|---------|---------|----|----|---|-------------|-------------|----------|-----------------|
| 4 | 3751876 | 3752228 | 3752052 | 21 | 26 | 3 | 7.918079665 | 5.55E-07    | ADRA2C   | ENSG00000184160 |
| 4 | 3755898 | 3756382 | 3756207 | 32 | 41 | 2 | 16.42268375 | 2.00E-12    | ADRA2C   | ENSG00000184160 |
| 4 | 3852257 | 3852658 | 3852520 | 8  | 13 | 3 | 4.105670938 | 0.00243034  | ADRA2C   | ENSG00000184160 |
| 4 | 3992653 | 3993120 | 3992832 | 45 | 61 | 0 | 72.72902804 | 1.26E-21    |          | ENSG00000151539 |
| 4 | 4300785 | 4301140 | 4300962 | 16 | 22 | 3 | 6.745030826 | 8.05E-06    | TMEM128  | ENSG00000132406 |
| 4 | 4342743 | 4343066 | 4342904 | 9  | 14 | 3 | 4.398933147 | 0.00132748  | ZNF509   | ENSG00000168826 |
| 4 | 4523559 | 4523738 | 4523624 | 8  | 8  | 0 | 10.55743955 | 0.000925496 | STX18    | ENSG00000168818 |
| 4 | 4594553 | 4594833 | 4594689 | 12 | 14 | 5 | 2.932622098 | 0.00829617  | STX18    | ENSG00000168818 |
| 4 | 5038533 | 5038869 | 5038701 | 31 | 35 | 1 | 21.11487911 | 1.50E-11    | CYTL1    | ENSG00000170891 |
| 4 | 5138723 | 5138916 | 5138819 | 8  | 10 | 3 | 3.225884308 | 0.0139466   | STK32B   | ENSG00000152953 |
| 4 | 5418366 | 5418636 | 5418501 | 11 | 12 | 0 | 15.24963491 | 4.15E-05    |          | ENSG00000201496 |
| 4 | 5825679 | 5826231 | 5825996 | 35 | 56 | 0 | 66.86378384 | 6.12E-20    | EVC      | ENSG00000072840 |
| 4 | 5842994 | 5843173 | 5843103 | 8  | 8  | 6 | 1.508205651 | 0.203852    | EVC      | ENSG00000072840 |
| 4 | 5965274 | 5965848 | 5965493 | 46 | 63 | 6 | 10.72501796 | 9.41E-16    | CRMP1    | ENSG00000072832 |
| 4 | 6009297 | 6009541 | 6009419 | 8  | 10 | 4 | 2.580707446 | 0.0306059   |          | ENSG00000181215 |
| 4 | 6316899 | 6317131 | 6317015 | 14 | 15 | 0 | 18.76878143 | 4.04E-06    | WFS1     | ENSG00000109501 |
| 4 | 6317289 | 6317682 | 6317485 | 28 | 41 | 0 | 49.26805125 | 6.97E-15    | WFS1     | ENSG00000109501 |
| 4 | 6379891 | 6380168 | 6380000 | 8  | 10 | 2 | 4.301179077 | 0.00512919  | PPP2R2C  | ENSG00000074211 |
| 4 | 6455911 | 6456151 | 6456031 | 9  | 10 | 7 | 1.612942154 | 0.147335    | PPP2R2C  | ENSG00000074211 |
| 4 | 6456890 | 6457163 | 6457035 | 12 | 14 | 2 | 5.865244197 | 0.000387308 | PPP2R2C  | ENSG00000074211 |
| 4 | 6685970 | 6686422 | 6686165 | 8  | 16 | 8 | 2.215758919 | 0.0222902   | MRFAP1   | ENSG00000179010 |
| 4 | 6741691 | 6742168 | 6741954 | 11 | 21 | 4 | 5.161414893 | 5.68E-05    | S100P    | ENSG00000163993 |
| 4 | 6748352 | 6748562 | 6748443 | 10 | 11 | 7 | 1.759573259 | 0.102361    | S100P    | ENSG00000163993 |
| 4 | 6762283 | 6762731 | 6762566 | 10 | 18 | 7 | 2.785990993 | 0.00480525  | MRFAP1L1 | ENSG00000178988 |
| 4 | 6834379 | 6834613 | 6834477 | 8  | 10 | 3 | 3.225884308 | 0.0139466   | KIAA0232 | ENSG00000170871 |
| 4 | 6938152 | 6938366 | 6938261 | 12 | 13 | 3 | 4.105670938 | 0.00243034  |          | ENSG00000196377 |
| 4 | 6969160 | 6969493 | 6969318 | 10 | 14 | 2 | 5.865244197 | 0.000387308 | TBC1D14  | ENSG00000132405 |
| 4 | 7008329 | 7008665 | 7008490 | 8  | 12 | 2 | 5.083211637 | 0.00143337  | TBC1D14  | ENSG00000132405 |
| 4 | 7026980 | 7027326 | 7027147 | 12 | 17 | 7 | 2.639359888 | 0.00777415  | TBC1D14  | ENSG00000132405 |
| 4 | 7308224 | 7308561 | 7308392 | 53 | 58 | 0 | 69.20988152 | 1.30E-20    | SORCS2   | ENSG00000184985 |
| 4 | 7754783 | 7755208 | 7754961 | 52 | 62 | 0 | 73.90207688 | 5.82E-22    | AFAP1    | ENSG00000196526 |
| 4 | 7760181 | 7760376 | 7760278 | 9  | 9  | 4 | 2.346097679 | 0.050148    | AFAP1    | ENSG00000196526 |
| 4 | 7896995 | 7897227 | 7897104 | 8  | 9  | 2 | 3.910162798 | 0.00955088  | AFAP1    | ENSG00000196526 |
| 4 | 8116297 | 8116678 | 8116476 | 29 | 36 | 1 | 21.70140353 | 7.08E-12    |          | ENSG00000207807 |

|   |          |          |          |    |     |   |             |             |         |                 |
|---|----------|----------|----------|----|-----|---|-------------|-------------|---------|-----------------|
| 4 | 8160061  | 8160371  | 8160217  | 20 | 22  | 1 | 13.49006165 | 2.37E-07    | ABLIM2  | ENSG00000163995 |
| 4 | 8211615  | 8211929  | 8211775  | 9  | 13  | 3 | 4.105670938 | 0.00243034  | ABLIM2  | ENSG00000163995 |
| 4 | 8313451  | 8313719  | 8313585  | 14 | 15  | 1 | 9.384390715 | 3.90E-05    | HTRA3   | ENSG00000170801 |
| 4 | 8463276  | 8463593  | 8463429  | 15 | 18  | 3 | 5.571981987 | 0.000108726 |         | ENSG00000202054 |
| 4 | 8480990  | 8481267  | 8481125  | 12 | 14  | 1 | 8.797866295 | 8.00E-05    | ACOX3   | ENSG00000087008 |
| 4 | 8586791  | 8587101  | 8586961  | 10 | 12  | 5 | 2.541605819 | 0.0225912   |         | ENSG00000205959 |
| 4 | 9618895  | 9619197  | 9619022  | 11 | 13  | 1 | 8.211341875 | 0.000163445 | SLC2A9  | ENSG00000109667 |
| 4 | 9726611  | 9726970  | 9726789  | 10 | 16  | 1 | 9.970915134 | 1.89E-05    |         | ENSG00000223086 |
| 4 | 9785072  | 9785522  | 9785241  | 15 | 23  | 6 | 4.021881735 | 0.000148535 | WDR1    | ENSG00000071127 |
| 4 | 10141097 | 10141298 | 10141197 | 9  | 10  | 2 | 4.301179077 | 0.00512919  | ZNF518B | ENSG00000178163 |
| 4 | 10267838 | 10268017 | 10267927 | 9  | 9   | 3 | 2.932622098 | 0.0242899   |         | ENSG00000109684 |
| 4 | 10318362 | 10318571 | 10318510 | 8  | 8   | 1 | 5.278719777 | 0.00542188  |         | ENSG00000109684 |
| 4 | 10909856 | 10910128 | 10909988 | 12 | 14  | 2 | 5.865244197 | 0.000387308 |         | ENSG00000207716 |
| 4 | 11039467 | 11039679 | 11039596 | 9  | 9   | 1 | 5.865244197 | 0.00272497  | HS3ST1  | ENSG00000002587 |
| 4 | 13238351 | 13238578 | 13238464 | 9  | 9   | 1 | 5.865244197 | 0.00272497  | FAM44A  | ENSG00000038219 |
| 4 | 13265015 | 13265233 | 13265098 | 9  | 10  | 0 | 12.90353723 | 0.000195991 | FAM44A  | ENSG00000038219 |
| 4 | 13312660 | 13312947 | 13312803 | 8  | 10  | 3 | 3.225884308 | 0.0139466   | FAM44A  | ENSG00000038219 |
| 4 | 14611846 | 14612260 | 14612081 | 44 | 55  | 0 | 65.690735   | 1.33E-19    | CPEB2   | ENSG00000137449 |
| 4 | 14612608 | 14612955 | 14612781 | 9  | 15  | 1 | 9.384390715 | 3.90E-05    | CPEB2   | ENSG00000137449 |
| 4 | 14615791 | 14615993 | 14615845 | 8  | 8   | 2 | 3.519146518 | 0.017558    | CPEB2   | ENSG00000137449 |
| 4 | 15007051 | 15007266 | 15007142 | 10 | 11  | 5 | 2.346097679 | 0.0364013   | C1QTNF7 | ENSG00000163145 |
| 4 | 15260719 | 15261009 | 15260864 | 8  | 11  | 4 | 2.815317214 | 0.0183428   | FBXL5   | ENSG00000118564 |
| 4 | 15291889 | 15292609 | 15292228 | 70 | 100 | 4 | 23.69558655 | 3.79E-29    | BST1    | ENSG00000109743 |
| 4 | 15376050 | 15376310 | 15376212 | 8  | 10  | 2 | 4.301179077 | 0.00512919  | CD38    | ENSG00000004468 |
| 4 | 15493373 | 15493587 | 15493473 | 9  | 9   | 5 | 1.955081399 | 0.0892323   | FGFBP1  | ENSG00000137440 |
| 4 | 15612219 | 15612457 | 15612338 | 9  | 10  | 7 | 1.612942154 | 0.147335    |         | ENSG00000209943 |
| 4 | 15655028 | 15655240 | 15655144 | 11 | 11  | 2 | 4.692195357 | 0.00272444  |         | ENSG00000209943 |
| 4 | 15682422 | 15682714 | 15682555 | 14 | 16  | 3 | 4.985457567 | 0.000385643 | PROM1   | ENSG00000007062 |
| 4 | 16492608 | 16492876 | 16492742 | 9  | 10  | 0 | 12.90353723 | 0.000195991 | LDB2    | ENSG00000169744 |
| 4 | 17101331 | 17101563 | 17101447 | 8  | 12  | 4 | 3.049926982 | 0.0108184   | QDPR    | ENSG00000151552 |
| 4 | 17187739 | 17187949 | 17187871 | 8  | 9   | 0 | 11.73048839 | 0.000425898 | LAP3    | ENSG00000002549 |
| 4 | 17198849 | 17199046 | 17198947 | 8  | 11  | 1 | 7.038293036 | 0.000674435 | LAP3    | ENSG00000002549 |
| 4 | 17992521 | 17992771 | 17992642 | 8  | 8   | 0 | 10.55743955 | 0.000925496 |         | ENSG00000209956 |
| 4 | 18155081 | 18155307 | 18155155 | 9  | 9   | 2 | 3.910162798 | 0.00955088  |         | ENSG00000209956 |

|   |          |          |          |    |    |   |             |             |          |                 |
|---|----------|----------|----------|----|----|---|-------------|-------------|----------|-----------------|
| 4 | 18192596 | 18192790 | 18192690 | 8  | 9  | 1 | 5.865244197 | 0.00272497  |          | ENSG00000209956 |
| 4 | 18239491 | 18239738 | 18239636 | 8  | 8  | 2 | 3.519146518 | 0.017558    |          | ENSG00000209956 |
| 4 | 18297197 | 18297433 | 18297315 | 8  | 9  | 2 | 3.910162798 | 0.00955088  |          | ENSG00000209956 |
| 4 | 18461771 | 18461964 | 18461863 | 9  | 9  | 5 | 1.955081399 | 0.0892323   |          | ENSG00000209956 |
| 4 | 20311015 | 20311252 | 20311133 | 8  | 10 | 1 | 6.451768616 | 0.00135978  | PACRGL   | ENSG00000163138 |
| 4 | 21379665 | 21379901 | 21379783 | 10 | 10 | 0 | 12.90353723 | 0.000195991 | KCNIP4   | ENSG00000185774 |
| 4 | 23487245 | 23487424 | 23487281 | 8  | 8  | 1 | 5.278719777 | 0.00542188  | PPARGC1A | ENSG00000109819 |
| 4 | 23515603 | 23515893 | 23515776 | 10 | 10 | 0 | 12.90353723 | 0.000195991 | PPARGC1A | ENSG00000109819 |
| 4 | 24364241 | 24364518 | 24364379 | 11 | 12 | 9 | 1.524963491 | 0.154777    | SOD3     | ENSG00000109610 |
| 4 | 24374221 | 24375004 | 24374538 | 22 | 51 | 0 | 60.99853964 | 2.97E-18    | SOD3     | ENSG00000109610 |
| 4 | 24474254 | 24474580 | 24474416 | 8  | 9  | 1 | 5.865244197 | 0.00272497  | CCDC149  | ENSG00000181982 |
| 4 | 24479687 | 24479909 | 24479798 | 11 | 11 | 1 | 7.038293036 | 0.000674435 | CCDC149  | ENSG00000181982 |
| 4 | 24599399 | 24599664 | 24599531 | 8  | 9  | 2 | 3.910162798 | 0.00955088  | CCDC149  | ENSG00000181982 |
| 4 | 24771020 | 24771321 | 24771143 | 10 | 14 | 3 | 4.398933147 | 0.00132748  | SEPSECS  | ENSG00000109618 |
| 4 | 24910629 | 24910885 | 24910744 | 9  | 12 | 5 | 2.541605819 | 0.0225912   | ZCCHC4   | ENSG00000168228 |
| 4 | 24910900 | 24911221 | 24911062 | 9  | 12 | 2 | 5.083211637 | 0.00143337  | ZCCHC4   | ENSG00000168228 |
| 4 | 24923150 | 24923333 | 24923278 | 9  | 9  | 2 | 3.910162798 | 0.00955088  | ZCCHC4   | ENSG00000168228 |
| 4 | 24923360 | 24923705 | 24923532 | 12 | 16 | 5 | 3.323638378 | 0.00288759  | ZCCHC4   | ENSG00000168228 |
| 4 | 25052366 | 25052613 | 25052489 | 11 | 12 | 1 | 7.624817456 | 0.000332769 | ANAPC4   | ENSG00000053900 |
| 4 | 25170020 | 25170337 | 25170192 | 11 | 13 | 2 | 5.474227917 | 0.000747844 |          | ENSG00000173025 |
| 4 | 25524889 | 25525196 | 25525042 | 9  | 11 | 0 | 14.07658607 | 9.02E-05    |          | ENSG00000180408 |
| 4 | 25526614 | 25526793 | 25526708 | 9  | 9  | 0 | 11.73048839 | 0.000425898 |          | ENSG00000180408 |
| 4 | 25930230 | 25930505 | 25930363 | 10 | 12 | 2 | 5.083211637 | 0.00143337  | RBPJ     | ENSG00000168214 |
| 4 | 25931332 | 25931577 | 25931439 | 8  | 10 | 2 | 4.301179077 | 0.00512919  | RBPJ     | ENSG00000168214 |
| 4 | 25935929 | 25936152 | 25936098 | 14 | 14 | 2 | 5.865244197 | 0.000387308 | RBPJ     | ENSG00000168214 |
| 4 | 26017411 | 26017782 | 26017555 | 30 | 35 | 3 | 10.55743955 | 1.13E-09    | RBPJ     | ENSG00000168214 |
| 4 | 26194511 | 26195043 | 26194682 | 14 | 24 | 3 | 7.331555246 | 2.13E-06    | TBC1D19  | ENSG00000109680 |
| 4 | 26390516 | 26390767 | 26390607 | 8  | 11 | 2 | 4.692195357 | 0.00272444  |          | ENSG00000200999 |
| 4 | 26398557 | 26398915 | 26398736 | 9  | 15 | 1 | 9.384390715 | 3.90E-05    | STIM2    | ENSG00000109689 |
| 4 | 26677475 | 26677654 | 26677612 | 8  | 8  | 3 | 2.639359888 | 0.0415794   |          | ENSG00000205830 |
| 4 | 27112873 | 27113124 | 27112996 | 13 | 14 | 1 | 8.797866295 | 8.00E-05    |          | ENSG00000221807 |
| 4 | 27303297 | 27303514 | 27303422 | 8  | 10 | 1 | 6.451768616 | 0.00135978  |          | ENSG00000221807 |
| 4 | 27472062 | 27472401 | 27472234 | 15 | 20 | 7 | 3.079253203 | 0.00177418  |          | ENSG00000221807 |
| 4 | 27962486 | 27962953 | 27962717 | 28 | 38 | 3 | 11.43722618 | 1.38E-10    |          | ENSG00000210070 |

|   |          |          |          |     |     |    |             |             |         |                 |
|---|----------|----------|----------|-----|-----|----|-------------|-------------|---------|-----------------|
| 4 | 28297470 | 28297669 | 28297564 | 9   | 10  | 4  | 2.580707446 | 0.0306059   |         | ENSG00000210070 |
| 4 | 29110768 | 29111090 | 29110929 | 8   | 13  | 1  | 8.211341875 | 0.000163445 |         | ENSG00000209052 |
| 4 | 30845245 | 30845540 | 30845383 | 20  | 21  | 0  | 25.80707446 | 3.84E-08    |         | ENSG00000215248 |
| 4 | 33425118 | 33425376 | 33425236 | 17  | 17  | 1  | 10.55743955 | 9.18E-06    |         |                 |
| 4 | 34904837 | 34905127 | 34904970 | 8   | 9   | 5  | 1.955081399 | 0.0892323   |         | ENSG00000210088 |
| 4 | 34925075 | 34925370 | 34925198 | 9   | 12  | 5  | 2.541605819 | 0.0225912   |         | ENSG00000206665 |
| 4 | 35178871 | 35179240 | 35179063 | 27  | 34  | 1  | 20.52835469 | 3.17E-11    |         | ENSG00000206665 |
| 4 | 35197997 | 35198498 | 35198285 | 121 | 148 | 4  | 34.95685541 | 1.14E-44    |         | ENSG00000206665 |
| 4 | 37326145 | 37326472 | 37326305 | 11  | 15  | 2  | 6.256260476 | 0.000199274 | RELL1   | ENSG00000181826 |
| 4 | 37364852 | 37365122 | 37364987 | 9   | 11  | 1  | 7.038293036 | 0.000674435 | RELL1   | ENSG00000181826 |
| 4 | 37480202 | 37480405 | 37480303 | 8   | 10  | 2  | 4.301179077 | 0.00512919  | PGM2    | ENSG00000169299 |
| 4 | 37997945 | 37998162 | 37998053 | 10  | 10  | 2  | 4.301179077 | 0.00512919  |         | ENSG00000210143 |
| 4 | 38006172 | 38006351 | 38006261 | 8   | 8   | 3  | 2.639359888 | 0.0415794   |         | ENSG00000210143 |
| 4 | 38140626 | 38140835 | 38140728 | 8   | 10  | 0  | 12.90353723 | 0.000195991 |         | ENSG00000211560 |
| 4 | 38243211 | 38243803 | 38243390 | 9   | 22  | 4  | 5.396024661 | 3.05E-05    |         | ENSG00000211560 |
| 4 | 38248078 | 38248426 | 38248252 | 25  | 31  | 0  | 37.53756286 | 1.64E-11    |         | ENSG00000211560 |
| 4 | 38281138 | 38281498 | 38281324 | 15  | 21  | 1  | 12.90353723 | 4.95E-07    | KLF3    | ENSG00000109787 |
| 4 | 38351689 | 38351961 | 38351825 | 14  | 15  | 1  | 9.384390715 | 3.90E-05    |         | ENSG00000196680 |
| 4 | 38625268 | 38625447 | 38625378 | 8   | 8   | 0  | 10.55743955 | 0.000925496 |         | ENSG00000207944 |
| 4 | 38844954 | 38845574 | 38845272 | 31  | 58  | 0  | 69.20988152 | 1.30E-20    | WDR19   | ENSG00000157796 |
| 4 | 39044305 | 39044555 | 39044467 | 11  | 12  | 2  | 5.083211637 | 0.00143337  | RFC1    | ENSG00000035928 |
| 4 | 39205508 | 39205690 | 39205535 | 8   | 9   | 2  | 3.910162798 | 0.00955088  | UGDH    | ENSG00000109814 |
| 4 | 39218277 | 39218469 | 39218373 | 8   | 9   | 1  | 5.865244197 | 0.00272497  | UGDH    | ENSG00000109814 |
| 4 | 39317012 | 39317355 | 39317180 | 8   | 13  | 2  | 5.474227917 | 0.000747844 | C4orf34 | ENSG00000163683 |
| 4 | 39734356 | 39734579 | 39734467 | 9   | 11  | 2  | 4.692195357 | 0.00272444  | N4BP2   | ENSG00000078177 |
| 4 | 39735605 | 39736297 | 39735784 | 8   | 26  | 11 | 2.639359888 | 0.0015854   |         | ENSG00000205794 |
| 4 | 39856748 | 39856977 | 39856887 | 8   | 10  | 2  | 4.301179077 | 0.00512919  | RHOH    | ENSG00000168421 |
| 4 | 39869587 | 39869778 | 39869640 | 9   | 9   | 5  | 1.955081399 | 0.0892323   | RHOH    | ENSG00000168421 |
| 4 | 39934301 | 39934671 | 39934492 | 15  | 22  | 4  | 5.396024661 | 3.05E-05    | RHOH    | ENSG00000168421 |
| 4 | 39996829 | 39997061 | 39996967 | 10  | 12  | 2  | 5.083211637 | 0.00143337  | CHRNA9  | ENSG00000174343 |
| 4 | 40005987 | 40006245 | 40006090 | 9   | 12  | 3  | 3.812408728 | 0.004404    | CHRNA9  | ENSG00000174343 |
| 4 | 40060272 | 40060455 | 40060363 | 8   | 9   | 1  | 5.865244197 | 0.00272497  | CHRNA9  | ENSG00000174343 |
| 4 | 40143692 | 40143983 | 40143860 | 19  | 19  | 2  | 7.820325595 | 1.32E-05    |         | ENSG00000221122 |
| 4 | 40155551 | 40155779 | 40155665 | 10  | 10  | 3  | 3.225884308 | 0.0139466   |         | ENSG00000221122 |

|   |          |          |          |    |    |    |             |             |         |                 |
|---|----------|----------|----------|----|----|----|-------------|-------------|---------|-----------------|
| 4 | 40319837 | 40320081 | 40319959 | 10 | 12 | 2  | 5.083211637 | 0.00143337  | RBM47   | ENSG00000163694 |
| 4 | 40375278 | 40375513 | 40375395 | 9  | 12 | 3  | 3.812408728 | 0.004404    | RBM47   | ENSG00000163694 |
| 4 | 40399752 | 40399973 | 40399862 | 10 | 13 | 1  | 8.211341875 | 0.000163445 | NSUN7   | ENSG00000179299 |
| 4 | 40446404 | 40446689 | 40446558 | 9  | 10 | 2  | 4.301179077 | 0.00512919  | NSUN7   | ENSG00000179299 |
| 4 | 40594346 | 40594624 | 40594485 | 8  | 11 | 4  | 2.815317214 | 0.0183428   |         | ENSG00000210261 |
| 4 | 40828984 | 40829376 | 40829228 | 14 | 20 | 4  | 4.926805125 | 0.00010522  |         | ENSG00000207198 |
| 4 | 40841510 | 40842016 | 40841763 | 36 | 60 | 0  | 71.5559792  | 2.75E-21    |         | ENSG00000207198 |
| 4 | 40853852 | 40854066 | 40853959 | 11 | 13 | 0  | 16.42268375 | 1.91E-05    |         | ENSG00000207198 |
| 4 | 40977853 | 40978078 | 40977965 | 10 | 12 | 3  | 3.812408728 | 0.004404    |         | ENSG00000207481 |
| 4 | 41015761 | 41016138 | 41015910 | 12 | 19 | 3  | 5.865244197 | 5.72E-05    |         | ENSG00000207481 |
| 4 | 41389290 | 41389494 | 41389392 | 8  | 11 | 0  | 14.07658607 | 9.02E-05    | PHOX2B  | ENSG00000109132 |
| 4 | 41531248 | 41531530 | 41531396 | 8  | 8  | 2  | 3.519146518 | 0.017558    |         | ENSG00000200338 |
| 4 | 41631867 | 41632091 | 41631979 | 9  | 10 | 4  | 2.580707446 | 0.0306059   | TMEM33  | ENSG00000109133 |
| 4 | 42020652 | 42020985 | 42020818 | 30 | 35 | 2  | 14.07658607 | 1.57E-10    | SHISA3  | ENSG00000178343 |
| 4 | 42352568 | 42352805 | 42352656 | 9  | 12 | 6  | 2.178519273 | 0.0416567   | ATP8A1  | ENSG00000124406 |
| 4 | 42406534 | 42406805 | 42406627 | 8  | 11 | 0  | 14.07658607 | 9.02E-05    | ATP8A1  | ENSG00000124406 |
| 4 | 44375047 | 44375400 | 44375223 | 11 | 15 | 5  | 3.128130238 | 0.00492422  | GUF1    | ENSG00000151806 |
| 4 | 47365769 | 47365948 | 47365891 | 8  | 8  | 2  | 3.519146518 | 0.017558    |         | ENSG00000210377 |
| 4 | 47611342 | 47611597 | 47611484 | 8  | 12 | 2  | 5.083211637 | 0.00143337  | NFXL1   | ENSG00000170448 |
| 4 | 47818048 | 47818237 | 47818142 | 8  | 8  | 2  | 3.519146518 | 0.017558    |         | ENSG00000210391 |
| 4 | 48037806 | 48038107 | 48038013 | 10 | 15 | 4  | 3.753756286 | 0.0020497   | SLAIN2  | ENSG00000109171 |
| 4 | 48317715 | 48317953 | 48317834 | 16 | 17 | 0  | 21.11487911 | 8.57E-07    | FRYL    | ENSG00000075539 |
| 4 | 48476836 | 48477015 | 48476964 | 8  | 8  | 1  | 5.278719777 | 0.00542188  | FRYL    | ENSG00000075539 |
| 4 | 48541578 | 48541895 | 48541737 | 10 | 14 | 0  | 17.59573259 | 8.79E-06    | OCIAD1  | ENSG00000109180 |
| 4 | 48599176 | 48599355 | 48599309 | 8  | 8  | 0  | 10.55743955 | 0.000925496 | OCIAD2  | ENSG00000145247 |
| 4 | 48603412 | 48603649 | 48603572 | 8  | 9  | 1  | 5.865244197 | 0.00272497  | OCIAD2  | ENSG00000145247 |
| 4 | 48846367 | 48846702 | 48846534 | 36 | 36 | 73 | 0.58652442  | 0.996846    |         | ENSG00000222437 |
| 4 | 48850241 | 48850579 | 48850410 | 21 | 22 | 37 | 0.710003245 | 0.907893    |         | ENSG00000222437 |
| 4 | 48851522 | 48851773 | 48851670 | 9  | 10 | 9  | 1.290353723 | 0.279648    |         | ENSG00000222437 |
| 4 | 49191700 | 49192037 | 49191868 | 48 | 48 | 0  | 57.47939313 | 3.05E-17    |         | ENSG00000221256 |
| 4 | 49347370 | 49347700 | 49347535 | 19 | 20 | 24 | 0.985361025 | 0.523192    |         | ENSG00000223099 |
| 4 | 52612636 | 52613187 | 52612896 | 54 | 76 | 2  | 30.10825354 | 1.02E-23    | SPATA18 | ENSG00000163071 |
| 4 | 53158822 | 53159071 | 53158950 | 8  | 10 | 2  | 4.301179077 | 0.00512919  |         | ENSG00000196330 |
| 4 | 53283575 | 53283812 | 53283717 | 8  | 10 | 4  | 2.580707446 | 0.0306059   |         | ENSG00000212588 |

|   |          |          |          |    |     |     |             |             |           |                 |
|---|----------|----------|----------|----|-----|-----|-------------|-------------|-----------|-----------------|
| 4 | 53398710 | 53398928 | 53398854 | 8  | 9   | 0   | 11.73048839 | 0.000425898 | RASL11B   | ENSG00000128045 |
| 4 | 53413674 | 53413917 | 53413825 | 10 | 13  | 1   | 8.211341875 | 0.000163445 | RASL11B   | ENSG00000128045 |
| 4 | 53472723 | 53472959 | 53472841 | 8  | 10  | 1   | 6.451768616 | 0.00135978  | RASL11B   | ENSG00000128045 |
| 4 | 53529154 | 53529455 | 53529298 | 21 | 24  | 1   | 14.66311049 | 5.43E-08    | RASL11B   | ENSG00000128045 |
| 4 | 53926928 | 53927147 | 53927020 | 8  | 10  | 3   | 3.225884308 | 0.0139466   | SCFD2     | ENSG00000184178 |
| 4 | 54162147 | 54162385 | 54162291 | 9  | 10  | 1   | 6.451768616 | 0.00135978  | LNK1      | ENSG00000072201 |
| 4 | 54365744 | 54365943 | 54365847 | 8  | 9   | 0   | 11.73048839 | 0.000425898 |           | ENSG00000215164 |
| 4 | 54469523 | 54469706 | 54469614 | 8  | 8   | 3   | 2.639359888 | 0.0415794   |           | ENSG00000215164 |
| 4 | 54774313 | 54774535 | 54774424 | 10 | 10  | 3   | 3.225884308 | 0.0139466   | PDGFRA    | ENSG00000134853 |
| 4 | 54778796 | 54779054 | 54778881 | 11 | 14  | 4   | 3.519146518 | 0.00361132  | PDGFRA    | ENSG00000134853 |
| 4 | 54789056 | 54789269 | 54789205 | 9  | 9   | 2   | 3.910162798 | 0.00955088  | PDGFRA    | ENSG00000134853 |
| 4 | 54794319 | 54794656 | 54794493 | 9  | 12  | 0   | 15.24963491 | 4.15E-05    | PDGFRA    | ENSG00000134853 |
| 4 | 54924114 | 54924366 | 54924223 | 8  | 10  | 0   | 12.90353723 | 0.000195991 | PDGFRA    | ENSG00000134853 |
| 4 | 54980694 | 54981004 | 54980865 | 24 | 25  | 1   | 15.24963491 | 2.59E-08    | PDGFRA    | ENSG00000134853 |
| 4 | 55403187 | 55403434 | 55403323 | 11 | 13  | 4   | 3.28453675  | 0.00629037  | KIT       | ENSG00000157404 |
| 4 | 55907339 | 55907526 | 55907432 | 8  | 8   | 1   | 5.278719777 | 0.00542188  | SRD5A3    | ENSG00000128039 |
| 4 | 55956838 | 55957064 | 55956951 | 8  | 10  | 1   | 6.451768616 | 0.00135978  | TMEM165   | ENSG00000134851 |
| 4 | 56473076 | 56473355 | 56473215 | 8  | 9   | 1   | 5.865244197 | 0.00272497  |           | ENSG00000222954 |
| 4 | 56509645 | 56509961 | 56509810 | 10 | 14  | 6   | 2.513676084 | 0.016726    | CEP135    | ENSG00000174799 |
| 4 | 56610638 | 56610995 | 56610816 | 15 | 21  | 1   | 12.90353723 | 4.95E-07    |           | ENSG00000200741 |
| 4 | 56971291 | 56971488 | 56971389 | 8  | 8   | 5   | 1.759573259 | 0.13508     | AASDH     | ENSG00000157426 |
| 4 | 57028268 | 57028563 | 57028415 | 12 | 14  | 5   | 2.932622098 | 0.00829617  | SRP72     | ENSG00000174780 |
| 4 | 57105567 | 57105788 | 57105664 | 8  | 9   | 1   | 5.865244197 | 0.00272497  | ARL9      | ENSG00000196503 |
| 4 | 57304529 | 57304838 | 57304695 | 9  | 14  | 9   | 1.759573259 | 0.0786014   |           | ENSG00000145268 |
| 4 | 57313930 | 57314221 | 57314073 | 13 | 15  | 1   | 9.384390715 | 3.90E-05    |           | ENSG00000145268 |
| 4 | 57538252 | 57538439 | 57538313 | 8  | 8   | 3   | 2.639359888 | 0.0415794   | POLR2B    | ENSG00000047315 |
| 4 | 57538517 | 57538789 | 57538657 | 8  | 9   | 5   | 1.955081399 | 0.0892323   | POLR2B    | ENSG00000047315 |
| 4 | 57751904 | 57752109 | 57752020 | 9  | 9   | 1   | 5.865244197 | 0.00272497  | IGFBP7    | ENSG00000163453 |
| 4 | 65906982 | 65907174 | 65907073 | 8  | 8   | 1   | 5.278719777 | 0.00542188  | EPHA5     | ENSG00000145242 |
| 4 | 67946747 | 67947629 | 67946915 | 36 | 79  | 128 | 0.727472148 | 0.988326    |           | ENSG00000206629 |
| 4 | 67947929 | 67948678 | 67948161 | 86 | 163 | 208 | 0.920478515 | 0.78791     |           | ENSG00000206629 |
| 4 | 67948792 | 67949365 | 67949052 | 9  | 20  | 39  | 0.615850641 | 0.968328    |           | ENSG00000206629 |
| 4 | 68476865 | 68477237 | 68477105 | 9  | 15  | 1   | 9.384390715 | 3.90E-05    | TMPRSS11F | ENSG00000187054 |
| 4 | 68678089 | 68678405 | 68678250 | 13 | 17  | 0   | 21.11487911 | 8.57E-07    | TMPRSS11F | ENSG00000198092 |



|   |          |          |          |    |    |   |             |             |           |                 |
|---|----------|----------|----------|----|----|---|-------------|-------------|-----------|-----------------|
| 4 | 68723117 | 68723454 | 68723296 | 14 | 17 | 1 | 10.55743955 | 9.18E-06    | TMPRSS11F | ENSG00000198092 |
| 4 | 69967256 | 69967458 | 69967375 | 9  | 11 | 0 | 14.07658607 | 9.02E-05    | UGT2B7    | ENSG00000171234 |
| 4 | 69969428 | 69969616 | 69969598 | 9  | 10 | 2 | 4.301179077 | 0.00512919  | UGT2B7    | ENSG00000171234 |
| 4 | 70331245 | 70331426 | 70331284 | 10 | 10 | 9 | 1.290353723 | 0.279648    |           | ENSG00000210783 |
| 4 | 70549948 | 70550310 | 70550127 | 19 | 25 | 0 | 30.49926982 | 1.72E-09    | UGT2A1    | ENSG00000173610 |
| 4 | 70608270 | 70608548 | 70608409 | 17 | 17 | 1 | 10.55743955 | 9.18E-06    | SULT1B1   | ENSG00000173597 |
| 4 | 71772724 | 71773156 | 71772899 | 24 | 35 | 7 | 5.278719777 | 3.74E-07    | UTP3      | ENSG00000132467 |
| 4 | 71785902 | 71786222 | 71786055 | 21 | 24 | 4 | 5.865244197 | 8.64E-06    |           | ENSG00000207448 |
| 4 | 72242720 | 72242993 | 72242875 | 9  | 9  | 0 | 11.73048839 | 0.000425898 | SLC4A4    | ENSG00000080493 |
| 4 | 72692891 | 72693101 | 72692981 | 9  | 11 | 3 | 3.519146518 | 0.00788869  |           | ENSG00000210828 |
| 4 | 73023413 | 73023617 | 73023546 | 10 | 10 | 0 | 12.90353723 | 0.000195991 | NPFFR2    | ENSG00000056291 |
| 4 | 74044079 | 74044284 | 74044181 | 8  | 10 | 3 | 3.225884308 | 0.0139466   |           | ENSG00000210833 |
| 4 | 74154310 | 74154542 | 74154426 | 9  | 10 | 4 | 2.580707446 | 0.0306059   | COX18     | ENSG00000163626 |
| 4 | 74255433 | 74255706 | 74255554 | 11 | 12 | 2 | 5.083211637 | 0.00143337  |           | ENSG00000210847 |
| 4 | 74370376 | 74370754 | 74370575 | 15 | 22 | 4 | 5.396024661 | 3.05E-05    |           | ENSG00000221639 |
| 4 | 74738288 | 74738505 | 74738396 | 9  | 9  | 5 | 1.955081399 | 0.0892323   | RASSF6    | ENSG00000169435 |
| 4 | 75368315 | 75368591 | 75368431 | 13 | 15 | 3 | 4.692195357 | 0.000718455 | EPGN      | ENSG00000182585 |
| 4 | 75564984 | 75565175 | 75565079 | 9  | 9  | 8 | 1.303387599 | 0.281715    | AREG      | ENSG00000109321 |
| 4 | 76030719 | 76031192 | 76030930 | 66 | 85 | 1 | 50.44110009 | 4.88E-28    |           | ENSG00000169116 |
| 4 | 76262433 | 76262661 | 76262545 | 12 | 13 | 0 | 16.42268375 | 1.91E-05    |           | ENSG00000179272 |
| 4 | 76658514 | 76658915 | 76658758 | 8  | 14 | 3 | 4.398933147 | 0.00132748  | THAP6     | ENSG00000174796 |
| 4 | 76774695 | 76774929 | 76774797 | 10 | 11 | 0 | 14.07658607 | 9.02E-05    | CDKL2     | ENSG00000138769 |
| 4 | 77131122 | 77131431 | 77131276 | 11 | 13 | 2 | 5.474227917 | 0.000747844 | SDAD1     | ENSG00000198301 |
| 4 | 77135980 | 77136348 | 77136169 | 40 | 47 | 0 | 56.30634429 | 6.62E-17    | SDAD1     | ENSG00000198301 |
| 4 | 77227447 | 77227666 | 77227556 | 9  | 11 | 3 | 3.519146518 | 0.00788869  | ART3      | ENSG00000156219 |
| 4 | 77230544 | 77230852 | 77230703 | 13 | 15 | 4 | 3.753756286 | 0.0020497   | ART3      | ENSG00000156219 |
| 4 | 77288605 | 77288810 | 77288719 | 10 | 11 | 6 | 2.010940867 | 0.0640214   | NUP54     | ENSG00000138750 |
| 4 | 77348625 | 77348846 | 77348709 | 8  | 9  | 0 | 11.73048839 | 0.000425898 | SCARB2    | ENSG00000138760 |
| 4 | 77441671 | 77441890 | 77441780 | 9  | 9  | 1 | 5.865244197 | 0.00272497  | STBD1     | ENSG00000118804 |
| 4 | 77528592 | 77529016 | 77528854 | 27 | 38 | 0 | 45.74890473 | 7.15E-14    |           | ENSG00000210916 |
| 4 | 77719716 | 77719978 | 77719872 | 10 | 11 | 3 | 3.519146518 | 0.00788869  |           | ENSG00000207307 |
| 4 | 77908303 | 77908641 | 77908482 | 15 | 18 | 2 | 7.429309316 | 2.63E-05    | SHROOM3   | ENSG00000138771 |
| 4 | 77921895 | 77922464 | 77922292 | 35 | 57 | 4 | 13.60736654 | 1.42E-15    | SHROOM3   | ENSG00000138771 |
| 4 | 78216114 | 78216522 | 78216343 | 11 | 20 | 7 | 3.079253203 | 0.00177418  | CCNI      | ENSG00000118816 |

|   |          |          |          |     |     |    |             |             |          |                 |
|---|----------|----------|----------|-----|-----|----|-------------|-------------|----------|-----------------|
| 4 | 78292726 | 78292912 | 78292819 | 9   | 9   | 5  | 1.955081399 | 0.0892323   |          | ENSG00000201641 |
| 4 | 78343821 | 78344010 | 78343915 | 8   | 8   | 0  | 10.55743955 | 0.000925496 | CCNG2    | ENSG00000138764 |
| 4 | 78369700 | 78369906 | 78369779 | 10  | 11  | 3  | 3.519146518 | 0.00788869  | CCNG2    | ENSG00000138764 |
| 4 | 78472941 | 78473488 | 78473287 | 46  | 70  | 0  | 83.28646759 | 1.17E-24    | CCNG2    | ENSG00000138764 |
| 4 | 78482585 | 78483003 | 78482817 | 42  | 55  | 0  | 65.690735   | 1.33E-19    | CXCL13   | ENSG00000156234 |
| 4 | 78484158 | 78484627 | 78484352 | 57  | 75  | 5  | 14.85861863 | 3.00E-20    | CXCL13   | ENSG00000156234 |
| 4 | 78958276 | 78958535 | 78958405 | 11  | 13  | 7  | 2.052835469 | 0.046392    | CNOT6L   | ENSG00000138767 |
| 4 | 78961195 | 78961416 | 78961263 | 12  | 13  | 2  | 5.474227917 | 0.000747844 | CNOT6L   | ENSG00000138767 |
| 4 | 79002777 | 79003123 | 79002950 | 18  | 22  | 10 | 2.452738482 | 0.00515848  | MRPL1    | ENSG00000169288 |
| 4 | 79020932 | 79021365 | 79021179 | 54  | 72  | 2  | 28.54418842 | 2.05E-22    | MRPL1    | ENSG00000169288 |
| 4 | 79022139 | 79022433 | 79022286 | 10  | 12  | 2  | 5.083211637 | 0.00143337  | MRPL1    | ENSG00000169288 |
| 4 | 82256909 | 82257107 | 82257008 | 8   | 8   | 0  | 10.55743955 | 0.000925496 | BMP3     | ENSG00000152785 |
| 4 | 83514183 | 83514634 | 83514342 | 15  | 23  | 5  | 4.692195357 | 5.29E-05    | HNRNPD   | ENSG00000138668 |
| 4 | 84027513 | 84027832 | 84027672 | 12  | 16  | 1  | 9.970915134 | 1.89E-05    | SEC31A   | ENSG00000138674 |
| 4 | 84031149 | 84031570 | 84031328 | 8   | 16  | 3  | 4.985457567 | 0.000385643 | SEC31A   | ENSG00000138674 |
| 4 | 84040330 | 84040533 | 84040489 | 8   | 9   | 4  | 2.346097679 | 0.050148    | SEC31A   | ENSG00000138674 |
| 4 | 84153303 | 84153552 | 84153426 | 8   | 10  | 9  | 1.290353723 | 0.279648    | LIN54    | ENSG00000189308 |
| 4 | 84174896 | 84175477 | 84175105 | 15  | 28  | 5  | 5.669736057 | 2.48E-06    | COPS4    | ENSG00000138663 |
| 4 | 84252980 | 84253223 | 84253128 | 8   | 9   | 0  | 11.73048839 | 0.000425898 | PLAC8    | ENSG00000145287 |
| 4 | 84311116 | 84311579 | 84311368 | 109 | 139 | 0  | 164.2268375 | 6.46E-48    | PLAC8    | ENSG00000145287 |
| 4 | 84424511 | 84424765 | 84424650 | 9   | 10  | 2  | 4.301179077 | 0.00512919  | COQ2     | ENSG00000173085 |
| 4 | 84424956 | 84425257 | 84425110 | 12  | 13  | 1  | 8.211341875 | 0.000163445 | COQ2     | ENSG00000173085 |
| 4 | 84596030 | 84596324 | 84596177 | 21  | 24  | 6  | 4.18946014  | 8.40E-05    | MRPS18C  | ENSG00000163319 |
| 4 | 84676337 | 84676516 | 84676404 | 8   | 8   | 0  | 10.55743955 | 0.000925496 | AGPAT9   | ENSG00000138678 |
| 4 | 84688663 | 84688949 | 84688806 | 10  | 11  | 5  | 2.346097679 | 0.0364013   | AGPAT9   | ENSG00000138678 |
| 4 | 84818166 | 84818345 | 84818174 | 8   | 8   | 0  | 10.55743955 | 0.000925496 |          | ENSG00000201633 |
| 4 | 85307856 | 85308038 | 85307969 | 8   | 8   | 1  | 5.278719777 | 0.00542188  |          | ENSG00000200108 |
| 4 | 85722577 | 85722836 | 85722671 | 9   | 12  | 4  | 3.049926982 | 0.0108184   | CDS1     | ENSG00000163624 |
| 4 | 86064687 | 86064915 | 86064806 | 13  | 15  | 2  | 6.256260476 | 0.000199274 |          | ENSG00000211039 |
| 4 | 86413065 | 86413303 | 86413184 | 9   | 13  | 0  | 16.42268375 | 1.91E-05    |          | ENSG00000201901 |
| 4 | 86461327 | 86461593 | 86461460 | 9   | 10  | 1  | 6.451768616 | 0.00135978  | ARHGAP24 | ENSG00000138639 |
| 4 | 86615150 | 86615497 | 86615320 | 11  | 13  | 5  | 2.737113958 | 0.0137917   | ARHGAP24 | ENSG00000138639 |
| 4 | 86967596 | 86967801 | 86967698 | 8   | 8   | 1  | 5.278719777 | 0.00542188  | ARHGAP24 | ENSG00000138639 |
| 4 | 87459594 | 87460082 | 87459765 | 35  | 46  | 5  | 9.188882575 | 1.88E-11    | MAPK10   | ENSG00000109339 |

|   |           |           |           |     |     |    |             |             |          |                 |
|---|-----------|-----------|-----------|-----|-----|----|-------------|-------------|----------|-----------------|
| 4 | 88244067  | 88244259  | 88244125  | 9   | 9   | 2  | 3.910162798 | 0.00955088  | AFF1     | ENSG00000172493 |
| 4 | 88381580  | 88381870  | 88381747  | 12  | 15  | 2  | 6.256260476 | 0.000199274 | KLHL8    | ENSG00000145332 |
| 4 | 88562549  | 88562879  | 88562714  | 12  | 17  | 3  | 5.278719777 | 0.000205462 | NUDT9    | ENSG00000170502 |
| 4 | 89125876  | 89126088  | 89125937  | 8   | 9   | 1  | 5.865244197 | 0.00272497  | SPP1     | ENSG00000118785 |
| 4 | 89285014  | 89285329  | 89285171  | 10  | 14  | 4  | 3.519146518 | 0.00361132  | ABCG2    | ENSG00000118777 |
| 4 | 89459044  | 89459403  | 89459224  | 8   | 15  | 3  | 4.692195357 | 0.000718455 |          | ENSG00000207480 |
| 4 | 89519264  | 89519572  | 89519417  | 8   | 11  | 0  | 14.07658607 | 9.02E-05    | HERC6    | ENSG00000138642 |
| 4 | 89595504  | 89595772  | 89595653  | 18  | 21  | 0  | 25.80707446 | 3.84E-08    | HERC5    | ENSG00000138646 |
| 4 | 90108019  | 90108414  | 90108279  | 10  | 15  | 1  | 9.384390715 | 3.90E-05    | FAM13A1  | ENSG00000138640 |
| 4 | 90262853  | 90263142  | 90262993  | 20  | 21  | 4  | 5.161414893 | 5.68E-05    |          | ENSG00000212226 |
| 4 | 90367202  | 90367640  | 90367381  | 15  | 24  | 13 | 2.09473007  | 0.011141    | GPRIN3   | ENSG00000185477 |
| 4 | 90414689  | 90414916  | 90414804  | 8   | 10  | 0  | 12.90353723 | 0.000195991 | GPRIN3   | ENSG00000185477 |
| 4 | 90821295  | 90821832  | 90821524  | 130 | 179 | 4  | 42.22975822 | 8.50E-55    | SNCA     | ENSG00000145335 |
| 4 | 91056174  | 91056455  | 91056320  | 14  | 15  | 2  | 6.256260476 | 0.000199274 | MMRN1    | ENSG00000138722 |
| 4 | 91980990  | 91981334  | 91981187  | 16  | 21  | 1  | 12.90353723 | 4.95E-07    | TMSL3    | ENSG00000187653 |
| 4 | 95347549  | 95347826  | 95347687  | 10  | 12  | 0  | 15.24963491 | 4.15E-05    | SMARCAD1 | ENSG00000163104 |
| 4 | 95347843  | 95348116  | 95347985  | 8   | 10  | 2  | 4.301179077 | 0.00512919  | SMARCAD1 | ENSG00000163104 |
| 4 | 95569190  | 95569469  | 95569317  | 9   | 11  | 1  | 7.038293036 | 0.000674435 |          | ENSG00000203436 |
| 4 | 96331287  | 96331587  | 96331412  | 8   | 13  | 1  | 8.211341875 | 0.000163445 | BMPR1B   | ENSG00000138696 |
| 4 | 96344831  | 96345010  | 96344970  | 8   | 8   | 2  | 3.519146518 | 0.017558    | BMPR1B   | ENSG00000138696 |
| 4 | 96391010  | 96391307  | 96391152  | 12  | 15  | 4  | 3.753756286 | 0.0020497   | BMPR1B   | ENSG00000138696 |
| 4 | 97412994  | 97413173  | 97413083  | 8   | 8   | 2  | 3.519146518 | 0.017558    |          | ENSG00000201640 |
| 4 | 97776007  | 97776194  | 97776059  | 8   | 8   | 2  | 3.519146518 | 0.017558    |          | ENSG00000201837 |
| 4 | 97839875  | 97840081  | 97839972  | 9   | 10  | 1  | 6.451768616 | 0.00135978  |          | ENSG00000109238 |
| 4 | 97842102  | 97842406  | 97842252  | 12  | 14  | 8  | 1.955081399 | 0.0506438   |          | ENSG00000109238 |
| 4 | 98072010  | 98072314  | 98072170  | 9   | 12  | 5  | 2.541605819 | 0.0225912   |          | ENSG00000109238 |
| 4 | 99333987  | 99334270  | 99334154  | 14  | 16  | 0  | 19.94183027 | 1.86E-06    |          | ENSG00000200658 |
| 4 | 99714076  | 99714407  | 99714241  | 8   | 12  | 6  | 2.178519273 | 0.0416567   |          | ENSG00000203420 |
| 4 | 99801853  | 99802159  | 99802008  | 9   | 12  | 1  | 7.624817456 | 0.000332769 | TSPAN5   | ENSG00000168785 |
| 4 | 100103628 | 100103945 | 100103781 | 24  | 28  | 2  | 11.33947211 | 2.41E-08    | FAM177A2 | ENSG00000214886 |
| 4 | 100135886 | 100136143 | 100135984 | 8   | 9   | 0  | 11.73048839 | 0.000425898 | METAP1   | ENSG00000164024 |
| 4 | 101697633 | 101697823 | 101697728 | 9   | 9   | 1  | 5.865244197 | 0.00272497  | EMCN     | ENSG00000164035 |
| 4 | 101721512 | 101721793 | 101721687 | 14  | 17  | 2  | 7.038293036 | 5.19E-05    | EMCN     | ENSG00000164035 |
| 4 | 101954188 | 101954398 | 101954293 | 10  | 10  | 1  | 6.451768616 | 0.00135978  | EMCN     | ENSG00000164035 |

|   |           |           |           |    |    |    |             |             |         |                 |
|---|-----------|-----------|-----------|----|----|----|-------------|-------------|---------|-----------------|
| 4 | 102485873 | 102486067 | 102485970 | 9  | 10 | 0  | 12.90353723 | 0.000195991 | PPP3CA  | ENSG00000138814 |
| 4 | 103615038 | 103615229 | 103615106 | 10 | 10 | 2  | 4.301179077 | 0.00512919  | NFKB1   | ENSG00000109320 |
| 4 | 103677539 | 103677863 | 103677710 | 13 | 16 | 1  | 9.970915134 | 1.89E-05    | NFKB1   | ENSG00000109320 |
| 4 | 103805719 | 103806027 | 103805873 | 8  | 10 | 0  | 12.90353723 | 0.000195991 |         | ENSG00000213538 |
| 4 | 103950106 | 103950289 | 103950279 | 8  | 9  | 1  | 5.865244197 | 0.00272497  | UBE2D3P | ENSG00000109332 |
| 4 | 103967789 | 103968307 | 103968128 | 9  | 20 | 0  | 24.63402563 | 8.35E-08    | UBE2D3P | ENSG00000109332 |
| 4 | 103968466 | 103968682 | 103968587 | 8  | 9  | 7  | 1.466311049 | 0.20706     | UBE2D3P | ENSG00000109332 |
| 4 | 104159966 | 104160609 | 104160242 | 9  | 25 | 6  | 4.357038546 | 4.72E-05    | NHEDC1  | ENSG00000164037 |
| 4 | 104216778 | 104217027 | 104216890 | 8  | 9  | 2  | 3.910162798 | 0.00955088  | NHEDC2  | ENSG00000164038 |
| 4 | 104433723 | 104433957 | 104433840 | 8  | 9  | 1  | 5.865244197 | 0.00272497  | CENPE   | ENSG00000138778 |
| 4 | 104565480 | 104565683 | 104565581 | 8  | 9  | 7  | 1.466311049 | 0.20706     |         | ENSG00000221522 |
| 4 | 104649955 | 104650364 | 104650134 | 19 | 28 | 0  | 34.01841634 | 1.68E-10    |         | ENSG00000221522 |
| 4 | 106107679 | 106108066 | 106107887 | 17 | 28 | 3  | 8.504604085 | 1.43E-07    |         | ENSG00000211278 |
| 4 | 106112113 | 106112498 | 106112323 | 29 | 36 | 1  | 21.70140353 | 7.08E-12    |         | ENSG00000211278 |
| 4 | 106163649 | 106163882 | 106163723 | 9  | 11 | 3  | 3.519146518 | 0.00788869  |         | ENSG00000211278 |
| 4 | 106163896 | 106164286 | 106164117 | 13 | 20 | 10 | 2.239456875 | 0.0121685   |         | ENSG00000211278 |
| 4 | 106614599 | 106614851 | 106614761 | 8  | 10 | 2  | 4.301179077 | 0.00512919  | PPA2    | ENSG00000138777 |
| 4 | 106693027 | 106693315 | 106693171 | 9  | 12 | 3  | 3.812408728 | 0.004404    |         | ENSG00000138784 |
| 4 | 106773868 | 106774141 | 106774004 | 15 | 18 | 1  | 11.14396397 | 4.44E-06    | INTS12  | ENSG00000138785 |
| 4 | 106849146 | 106849488 | 106849317 | 20 | 26 | 0  | 31.67231866 | 7.93E-10    | INTS12  | ENSG00000138785 |
| 4 | 107034908 | 107035258 | 107035080 | 19 | 24 | 3  | 7.331555246 | 2.13E-06    | NPNT    | ENSG00000168743 |
| 4 | 107073587 | 107073826 | 107073713 | 8  | 11 | 6  | 2.010940867 | 0.0640214   | NPNT    | ENSG00000168743 |
| 4 | 107113246 | 107113444 | 107113345 | 8  | 9  | 7  | 1.466311049 | 0.20706     | NPNT    | ENSG00000168743 |
| 4 | 107116698 | 107116985 | 107116844 | 8  | 11 | 4  | 2.815317214 | 0.0183428   | NPNT    | ENSG00000168743 |
| 4 | 107131486 | 107131926 | 107131750 | 12 | 22 | 12 | 2.0753941   | 0.0149739   | NPNT    | ENSG00000168743 |
| 4 | 107203088 | 107203423 | 107203255 | 9  | 13 | 10 | 1.49297125  | 0.157311    | NPNT    | ENSG00000168743 |
| 4 | 107469702 | 107469904 | 107469824 | 9  | 9  | 1  | 5.865244197 | 0.00272497  |         | ENSG00000145348 |
| 4 | 108177832 | 108178123 | 108177977 | 14 | 16 | 4  | 3.988366054 | 0.00115141  | DKK2    | ENSG00000155011 |
| 4 | 108519840 | 108520454 | 108520195 | 47 | 71 | 1  | 42.22975822 | 2.15E-23    |         | ENSG00000211308 |
| 4 | 108965158 | 108965460 | 108965305 | 14 | 15 | 2  | 6.256260476 | 0.000199274 | SGMS2   | ENSG00000164023 |
| 4 | 109488942 | 109489234 | 109489105 | 10 | 13 | 0  | 16.42268375 | 1.91E-05    | LEF1    | ENSG00000138795 |
| 4 | 109490966 | 109491300 | 109491133 | 10 | 13 | 4  | 3.28453675  | 0.00629037  | LEF1    | ENSG00000138795 |
| 4 | 109607806 | 109608126 | 109607966 | 24 | 28 | 4  | 6.803683268 | 6.55E-07    | RPL34   | ENSG00000109475 |
| 4 | 109761034 | 109761431 | 109761213 | 10 | 18 | 4  | 4.457585589 | 0.000353565 | RPL34   | ENSG00000109475 |

|   |           |           |           |     |     |   |             |             |         |                 |
|---|-----------|-----------|-----------|-----|-----|---|-------------|-------------|---------|-----------------|
| 4 | 111146520 | 111146742 | 111146648 | 10  | 11  | 2 | 4.692195357 | 0.00272444  |         | ENSG00000207260 |
| 4 | 111260007 | 111260249 | 111260128 | 14  | 16  | 2 | 6.647276756 | 0.000101928 | ELOVL6  | ENSG00000170522 |
| 4 | 111336992 | 111337213 | 111337102 | 8   | 10  | 6 | 1.843362462 | 0.0964212   | ELOVL6  | ENSG00000170522 |
| 4 | 111763848 | 111764033 | 111763948 | 8   | 8   | 0 | 10.55743955 | 0.000925496 | PITX2   | ENSG00000164093 |
| 4 | 113100851 | 113101076 | 113100963 | 15  | 15  | 1 | 9.384390715 | 3.90E-05    | C4orf32 | ENSG00000174749 |
| 4 | 113253651 | 113253880 | 113253734 | 10  | 11  | 3 | 3.519146518 | 0.00788869  | C4orf32 | ENSG00000174749 |
| 4 | 113417862 | 113418205 | 113417987 | 8   | 12  | 1 | 7.624817456 | 0.000332769 |         | ENSG00000222306 |
| 4 | 113745213 | 113745429 | 113745332 | 9   | 9   | 4 | 2.346097679 | 0.050148    |         | ENSG00000188014 |
| 4 | 113777940 | 113778249 | 113778094 | 11  | 12  | 0 | 15.24963491 | 4.15E-05    | LARP7   | ENSG00000174720 |
| 4 | 114493593 | 114493971 | 114493746 | 11  | 17  | 3 | 5.278719777 | 0.000205462 |         | ENSG00000209187 |
| 4 | 114494980 | 114495190 | 114495047 | 8   | 10  | 1 | 6.451768616 | 0.00135978  |         | ENSG00000209187 |
| 4 | 114535833 | 114536059 | 114535946 | 8   | 8   | 3 | 2.639359888 | 0.0415794   |         | ENSG00000209187 |
| 4 | 114701752 | 114702109 | 114701930 | 27  | 33  | 2 | 13.29455351 | 6.68E-10    |         | ENSG00000206820 |
| 4 | 115044496 | 115044694 | 115044642 | 8   | 9   | 0 | 11.73048839 | 0.000425898 | ARSJ    | ENSG00000180801 |
| 4 | 116565248 | 116565723 | 116565559 | 15  | 23  | 2 | 9.384390715 | 8.25E-07    | NDST4   | ENSG00000138653 |
| 4 | 117110410 | 117110742 | 117110576 | 14  | 19  | 1 | 11.73048839 | 2.14E-06    |         | ENSG00000209247 |
| 4 | 118204672 | 118204851 | 118204761 | 8   | 8   | 5 | 1.759573259 | 0.13508     | TRAM1L1 | ENSG00000174599 |
| 4 | 119537731 | 119538241 | 119538022 | 27  | 39  | 0 | 46.92195357 | 3.29E-14    | PRSS12  | ENSG00000164099 |
| 4 | 119558043 | 119558303 | 119558173 | 10  | 12  | 3 | 3.812408728 | 0.004404    | PRSS12  | ENSG00000164099 |
| 4 | 119964126 | 119964356 | 119964247 | 8   | 9   | 2 | 3.910162798 | 0.00955088  | SEC24D  | ENSG00000150961 |
| 4 | 120352920 | 120353186 | 120353058 | 8   | 10  | 4 | 2.580707446 | 0.0306059   |         | ENSG00000178636 |
| 4 | 122366952 | 122367307 | 122367132 | 42  | 46  | 1 | 27.56664772 | 3.79E-15    |         | ENSG00000212169 |
| 4 | 123743876 | 123744223 | 123744049 | 26  | 31  | 1 | 18.76878143 | 2.99E-10    | IL21    | ENSG00000138684 |
| 4 | 123917574 | 123917924 | 123917749 | 30  | 35  | 0 | 42.22975822 | 7.34E-13    | BBS12   | ENSG00000181004 |
| 4 | 123938677 | 123939188 | 123938991 | 114 | 143 | 3 | 42.22975822 | 2.41E-44    | FGF2    | ENSG00000138685 |
| 4 | 124062624 | 124062807 | 124062715 | 8   | 9   | 0 | 11.73048839 | 0.000425898 | NUDT6   | ENSG00000170917 |
| 4 | 124537155 | 124537397 | 124537235 | 10  | 12  | 1 | 7.624817456 | 0.000332769 | SPRY1   | ENSG00000164056 |
| 4 | 124705488 | 124705682 | 124705592 | 10  | 10  | 2 | 4.301179077 | 0.00512919  | SPRY1   | ENSG00000164056 |
| 4 | 124728746 | 124729103 | 124728924 | 11  | 16  | 5 | 3.323638378 | 0.00288759  | SPRY1   | ENSG00000164056 |
| 4 | 125772412 | 125772731 | 125772573 | 15  | 18  | 4 | 4.457585589 | 0.000353565 | ANKRD50 | ENSG00000151458 |
| 4 | 125774298 | 125774621 | 125774458 | 10  | 13  | 3 | 4.105670938 | 0.00243034  | ANKRD50 | ENSG00000151458 |
| 4 | 125835057 | 125835288 | 125835172 | 10  | 11  | 4 | 2.815317214 | 0.0183428   | ANKRD50 | ENSG00000151458 |
| 4 | 126053982 | 126054601 | 126054291 | 40  | 69  | 0 | 82.11341875 | 2.54E-24    | ANKRD50 | ENSG00000151458 |
| 4 | 126071697 | 126071957 | 126071835 | 11  | 12  | 3 | 3.812408728 | 0.004404    | ANKRD50 | ENSG00000151458 |

|   |           |           |           |    |    |   |             |             |         |                 |
|---|-----------|-----------|-----------|----|----|---|-------------|-------------|---------|-----------------|
| 4 | 126080578 | 126080827 | 126080707 | 9  | 10 | 5 | 2.150589539 | 0.0575848   | ANKRD50 | ENSG00000151458 |
| 4 | 126118253 | 126118520 | 126118388 | 10 | 11 | 4 | 2.815317214 | 0.0183428   | ANKRD50 | ENSG00000151458 |
| 4 | 128402076 | 128402453 | 128402274 | 54 | 61 | 1 | 36.36451402 | 4.36E-20    |         | ENSG00000199862 |
| 4 | 128923801 | 128924311 | 128924099 | 32 | 50 | 1 | 29.9127454  | 1.84E-16    | HSPA4L  | ENSG00000164070 |
| 4 | 129368759 | 129369109 | 129368934 | 9  | 14 | 5 | 2.932622098 | 0.00829617  | PGRMC2  | ENSG00000164040 |
| 4 | 129428922 | 129429121 | 129429021 | 8  | 9  | 1 | 5.865244197 | 0.00272497  | PGRMC2  | ENSG00000164040 |
| 4 | 129826564 | 129827050 | 129826836 | 53 | 67 | 1 | 39.88366054 | 4.53E-22    |         | ENSG00000209148 |
| 4 | 131437207 | 131437404 | 131437305 | 8  | 10 | 4 | 2.580707446 | 0.0306059   |         | ENSG00000199896 |
| 4 | 132951187 | 132951446 | 132951301 | 28 | 31 | 1 | 18.76878143 | 2.99E-10    |         | ENSG00000209132 |
| 4 | 133199829 | 133200184 | 133200006 | 12 | 16 | 0 | 19.94183027 | 1.86E-06    |         | ENSG00000209132 |
| 4 | 134287607 | 134287791 | 134287671 | 8  | 8  | 1 | 5.278719777 | 0.00542188  | PCDH10  | ENSG00000138650 |
| 4 | 134530777 | 134531216 | 134530956 | 22 | 29 | 0 | 35.19146518 | 7.73E-11    |         | ENSG00000221637 |
| 4 | 135050742 | 135050962 | 135050852 | 8  | 10 | 2 | 4.301179077 | 0.00512919  |         | ENSG00000209005 |
| 4 | 136460248 | 136460535 | 136460390 | 17 | 19 | 2 | 7.820325595 | 1.32E-05    |         | ENSG00000207188 |
| 4 | 140038410 | 140038741 | 140038587 | 12 | 17 | 6 | 3.016411301 | 0.00381427  |         | ENSG00000208970 |
| 4 | 140051462 | 140051780 | 140051625 | 10 | 15 | 2 | 6.256260476 | 0.000199274 |         | ENSG00000208970 |
| 4 | 140119378 | 140119562 | 140119470 | 9  | 9  | 1 | 5.865244197 | 0.00272497  |         | ENSG00000208970 |
| 4 | 140120411 | 140120762 | 140120566 | 13 | 17 | 0 | 21.11487911 | 8.57E-07    |         | ENSG00000208970 |
| 4 | 140156087 | 140156287 | 140156187 | 9  | 9  | 2 | 3.910162798 | 0.00955088  | CCRN4L  | ENSG00000151014 |
| 4 | 140171397 | 140171615 | 140171538 | 9  | 9  | 2 | 3.910162798 | 0.00955088  | CCRN4L  | ENSG00000151014 |
| 4 | 140384086 | 140384358 | 140384205 | 12 | 14 | 0 | 17.59573259 | 8.79E-06    |         | ENSG00000206722 |
| 4 | 140436362 | 140436562 | 140436462 | 9  | 9  | 1 | 5.865244197 | 0.00272497  | NDUFC1  | ENSG00000109390 |
| 4 | 140450006 | 140450268 | 140450137 | 10 | 10 | 1 | 6.451768616 | 0.00135978  | NDUFC1  | ENSG00000109390 |
| 4 | 140655005 | 140655256 | 140655092 | 9  | 10 | 2 | 4.301179077 | 0.00512919  | SETD7   | ENSG00000145391 |
| 4 | 140817588 | 140818037 | 140817830 | 39 | 50 | 1 | 29.9127454  | 1.84E-16    |         | ENSG00000201533 |
| 4 | 141291702 | 141291926 | 141291814 | 9  | 11 | 2 | 4.692195357 | 0.00272444  | SCOC    | ENSG00000153130 |
| 4 | 143599590 | 143599830 | 143599678 | 8  | 10 | 1 | 6.451768616 | 0.00135978  | INPP4B  | ENSG00000109452 |
| 4 | 144325072 | 144325386 | 144325220 | 10 | 12 | 6 | 2.178519273 | 0.0416567   | USP38   | ENSG00000170185 |
| 4 | 144325559 | 144325810 | 144325684 | 10 | 13 | 1 | 8.211341875 | 0.000163445 | USP38   | ENSG00000170185 |
| 4 | 144427858 | 144428103 | 144427980 | 13 | 14 | 4 | 3.519146518 | 0.00361132  |         | ENSG00000200049 |
| 4 | 144441514 | 144441824 | 144441669 | 13 | 18 | 1 | 11.14396397 | 4.44E-06    |         | ENSG00000200049 |
| 4 | 144499663 | 144499872 | 144499767 | 8  | 8  | 7 | 1.319679944 | 0.283403    |         | ENSG00000178972 |
| 4 | 146648431 | 146648720 | 146648586 | 17 | 19 | 0 | 23.46097679 | 1.81E-07    | SMAD1   | ENSG00000170365 |
| 4 | 147195341 | 147195572 | 147195456 | 17 | 18 | 1 | 11.14396397 | 4.44E-06    |         | ENSG00000216055 |

|   |           |           |           |    |     |   |             |             |          |                 |
|---|-----------|-----------|-----------|----|-----|---|-------------|-------------|----------|-----------------|
| 4 | 148961617 | 148961820 | 148961718 | 8  | 9   | 0 | 11.73048839 | 0.000425898 |          | ENSG00000208847 |
| 4 | 148972363 | 148972678 | 148972502 | 8  | 12  | 2 | 5.083211637 | 0.00143337  |          | ENSG00000208847 |
| 4 | 149188049 | 149188387 | 149188246 | 14 | 18  | 2 | 7.429309316 | 2.63E-05    |          | ENSG00000208847 |
| 4 | 149197466 | 149197737 | 149197571 | 12 | 14  | 0 | 17.59573259 | 8.79E-06    |          | ENSG00000208847 |
| 4 | 150881298 | 150881502 | 150881418 | 8  | 8   | 1 | 5.278719777 | 0.00542188  |          | ENSG00000208833 |
| 4 | 152175949 | 152176210 | 152176107 | 12 | 15  | 1 | 9.384390715 | 3.90E-05    | LRBA     | ENSG00000198589 |
| 4 | 152598778 | 152598981 | 152598852 | 8  | 11  | 1 | 7.038293036 | 0.000674435 |          | ENSG00000164142 |
| 4 | 152600059 | 152600322 | 152600160 | 8  | 9   | 3 | 2.932622098 | 0.0242899   |          | ENSG00000164142 |
| 4 | 153204522 | 153204752 | 153204657 | 9  | 11  | 0 | 14.07658607 | 9.02E-05    |          | ENSG00000208790 |
| 4 | 153399503 | 153399982 | 153399763 | 53 | 68  | 0 | 80.94036991 | 5.52E-24    |          | ENSG00000208788 |
| 4 | 153492996 | 153493644 | 153493224 | 32 | 55  | 3 | 16.42268375 | 7.12E-16    | FBXW7    | ENSG00000109670 |
| 4 | 153920458 | 153920737 | 153920613 | 8  | 10  | 4 | 2.580707446 | 0.0306059   | ARFIP1   | ENSG00000164144 |
| 4 | 154348298 | 154348501 | 154348352 | 8  | 9   | 4 | 2.346097679 | 0.050148    | TRIM2    | ENSG00000109654 |
| 4 | 154627007 | 154627203 | 154627085 | 10 | 10  | 2 | 4.301179077 | 0.00512919  | KIAA0922 | ENSG00000121210 |
| 4 | 157911863 | 157912461 | 157912219 | 84 | 112 | 3 | 33.13862971 | 3.32E-34    | PDGFC    | ENSG00000145431 |
| 4 | 159311199 | 159311423 | 159311311 | 8  | 9   | 1 | 5.865244197 | 0.00272497  | C4orf18  | ENSG00000164125 |
| 4 | 159311671 | 159312248 | 159311960 | 91 | 128 | 1 | 75.66165014 | 2.33E-42    | C4orf18  | ENSG00000164125 |
| 4 | 159967461 | 159967710 | 159967572 | 8  | 11  | 4 | 2.815317214 | 0.0183428   |          | ENSG00000206703 |
| 4 | 160596218 | 160596551 | 160596384 | 9  | 12  | 2 | 5.083211637 | 0.00143337  |          | ENSG00000208638 |
| 4 | 160824643 | 160824992 | 160824817 | 13 | 19  | 1 | 11.73048839 | 2.14E-06    |          | ENSG00000208635 |
| 4 | 163478871 | 163479172 | 163479037 | 16 | 18  | 2 | 7.429309316 | 2.63E-05    |          | ENSG00000208630 |
| 4 | 163824817 | 163825031 | 163824895 | 10 | 10  | 1 | 6.451768616 | 0.00135978  |          | ENSG00000208630 |
| 4 | 164472947 | 164473219 | 164473057 | 8  | 11  | 4 | 2.815317214 | 0.0183428   | NPY1R    | ENSG00000164128 |
| 4 | 164526230 | 164526409 | 164526323 | 8  | 9   | 0 | 11.73048839 | 0.000425898 | NPY5R    | ENSG00000164129 |
| 4 | 164589049 | 164589483 | 164589304 | 12 | 20  | 5 | 4.105670938 | 0.000308509 | TKTL2    | ENSG00000151005 |
| 4 | 164634696 | 164635020 | 164634858 | 14 | 18  | 0 | 22.28792795 | 3.94E-07    | C4orf43  | ENSG00000198498 |
| 4 | 164635088 | 164635354 | 164635192 | 10 | 13  | 6 | 2.346097679 | 0.0266147   | C4orf43  | ENSG00000198498 |
| 4 | 165677389 | 165677777 | 165677579 | 45 | 57  | 0 | 68.03683268 | 2.82E-20    |          | ENSG00000223037 |
| 4 | 166097482 | 166097705 | 166097559 | 8  | 10  | 3 | 3.225884308 | 0.0139466   | C4orf39  | ENSG00000221891 |
| 4 | 166969606 | 166969890 | 166969748 | 18 | 19  | 0 | 23.46097679 | 1.81E-07    | TLL1     | ENSG00000038295 |
| 4 | 169054873 | 169055261 | 169055079 | 98 | 111 | 2 | 43.79382333 | 3.37E-35    |          | ENSG00000221576 |
| 4 | 169431678 | 169431871 | 169431756 | 8  | 8   | 3 | 2.639359888 | 0.0415794   |          | ENSG00000208555 |
| 4 | 169746985 | 169747205 | 169747074 | 8  | 8   | 1 | 5.278719777 | 0.00542188  | PALLD    | ENSG00000129116 |
| 4 | 169852327 | 169852521 | 169852424 | 9  | 10  | 1 | 6.451768616 | 0.00135978  |          | ENSG00000206613 |

|   |           |           |           |    |    |   |             |             |          |                 |
|---|-----------|-----------|-----------|----|----|---|-------------|-------------|----------|-----------------|
| 4 | 170191568 | 170191807 | 170191731 | 10 | 12 | 6 | 2.178519273 | 0.0416567   | CBR4     | ENSG00000145439 |
| 4 | 170227766 | 170227957 | 170227861 | 8  | 8  | 3 | 2.639359888 | 0.0415794   | CBR4     | ENSG00000145439 |
| 4 | 170729226 | 170729481 | 170729333 | 15 | 17 | 0 | 21.11487911 | 8.57E-07    | NEK1     | ENSG00000137601 |
| 4 | 170777255 | 170777486 | 170777374 | 9  | 9  | 1 | 5.865244197 | 0.00272497  | CLCN3    | ENSG00000109572 |
| 4 | 171185026 | 171185287 | 171185145 | 14 | 15 | 0 | 18.76878143 | 4.04E-06    | MFAP3L   | ENSG00000198948 |
| 4 | 172361207 | 172361450 | 172361328 | 12 | 12 | 3 | 3.812408728 | 0.004404    |          |                 |
| 4 | 174139899 | 174140422 | 174140169 | 65 | 91 | 3 | 26.9801233  | 2.19E-27    |          | ENSG00000205182 |
| 4 | 174491907 | 174492106 | 174492006 | 8  | 10 | 1 | 6.451768616 | 0.00135978  | HMGB2    | ENSG00000164104 |
| 4 | 174910398 | 174910592 | 174910495 | 8  | 8  | 1 | 5.278719777 | 0.00542188  |          | ENSG00000213370 |
| 4 | 175679746 | 175679925 | 175679842 | 8  | 8  | 0 | 10.55743955 | 0.000925496 | HPGD     | ENSG00000164120 |
| 4 | 176040054 | 176040283 | 176040168 | 12 | 12 | 0 | 15.24963491 | 4.15E-05    | ADAM29   | ENSG00000168594 |
| 4 | 177093323 | 177093515 | 177093419 | 8  | 8  | 2 | 3.519146518 | 0.017558    | GPM6A    | ENSG00000150625 |
| 4 | 177173559 | 177173763 | 177173686 | 8  | 8  | 0 | 10.55743955 | 0.000925496 | GPM6A    | ENSG00000150625 |
| 4 | 178669810 | 178670137 | 178669973 | 47 | 49 | 3 | 14.66311049 | 5.43E-14    |          | ENSG00000221499 |
| 4 | 181856913 | 181857142 | 181857027 | 8  | 8  | 0 | 10.55743955 | 0.000925496 |          | ENSG00000214628 |
| 4 | 187857473 | 187857916 | 187857688 | 30 | 41 | 0 | 49.26805125 | 6.97E-15    | FAT1     | ENSG00000083857 |
| 4 | 188078647 | 188079015 | 188078821 | 35 | 41 | 0 | 49.26805125 | 6.97E-15    | FAT1     | ENSG00000083857 |
| 4 | 188576038 | 188576224 | 188576139 | 9  | 9  | 3 | 2.932622098 | 0.0242899   |          | ENSG00000203364 |
| 4 | 190771905 | 190772093 | 190771994 | 8  | 8  | 4 | 2.111487911 | 0.0804809   |          | ENSG00000202215 |
| 5 | 67619     | 68087     | 67856     | 75 | 87 | 0 | 103.2282979 | 2.18E-30    | PLEKHG4B | ENSG00000153404 |
| 5 | 324655    | 324945    | 324800    | 11 | 14 | 0 | 17.59573259 | 8.79E-06    | AHRR     | ENSG00000063438 |
| 5 | 370319    | 370519    | 370428    | 8  | 9  | 4 | 2.346097679 | 0.050148    | AHRR     | ENSG00000063438 |
| 5 | 439813    | 440024    | 439918    | 8  | 9  | 1 | 5.865244197 | 0.00272497  |          | ENSG00000214278 |
| 5 | 484289    | 484482    | 484352    | 9  | 11 | 1 | 7.038293036 | 0.000674435 |          | ENSG00000221990 |
| 5 | 914546    | 914738    | 914646    | 8  | 8  | 2 | 3.519146518 | 0.017558    | ZDHHC11  | ENSG00000188818 |
| 5 | 1126479   | 1126904   | 1126652   | 27 | 35 | 0 | 42.22975822 | 7.34E-13    | NKD2     | ENSG00000145506 |
| 5 | 1192953   | 1193320   | 1193132   | 14 | 21 | 2 | 8.602358155 | 3.33E-06    | SLC12A7  | ENSG00000113504 |
| 5 | 1221347   | 1221545   | 1221446   | 8  | 8  | 2 | 3.519146518 | 0.017558    | SLC6A19  | ENSG00000174358 |
| 5 | 1369266   | 1369699   | 1369429   | 8  | 17 | 4 | 4.222975822 | 0.000640773 |          | ENSG00000203587 |
| 5 | 1425008   | 1425264   | 1425136   | 8  | 9  | 0 | 11.73048839 | 0.000425898 |          | ENSG00000215245 |
| 5 | 1532763   | 1533006   | 1532884   | 8  | 11 | 9 | 1.407658607 | 0.210479    | SLC6A3   | ENSG00000142319 |
| 5 | 1569370   | 1569590   | 1569480   | 9  | 9  | 1 | 5.865244197 | 0.00272497  | LPCAT1   | ENSG00000153395 |
| 5 | 1861612   | 1861852   | 1861718   | 14 | 15 | 0 | 18.76878143 | 4.04E-06    | NDUFS6   | ENSG00000145494 |
| 5 | 1936269   | 1936491   | 1936316   | 8  | 8  | 0 | 10.55743955 | 0.000925496 | IRX4     | ENSG00000113430 |



|   |          |          |          |    |    |    |             |             |          |                 |
|---|----------|----------|----------|----|----|----|-------------|-------------|----------|-----------------|
| 5 | 2253606  | 2253909  | 2253783  | 10 | 13 | 2  | 5.474227917 | 0.000747844 |          | ENSG00000201026 |
| 5 | 2833511  | 2833859  | 2833685  | 17 | 23 | 0  | 28.15317214 | 8.13E-09    |          | ENSG00000215233 |
| 5 | 4072586  | 4072880  | 4072733  | 9  | 11 | 0  | 14.07658607 | 9.02E-05    |          | ENSG00000221195 |
| 5 | 5475287  | 5475713  | 5475559  | 13 | 18 | 8  | 2.476436439 | 0.00924552  |          | ENSG00000164151 |
| 5 | 5758139  | 5758402  | 5758270  | 13 | 15 | 1  | 9.384390715 | 3.90E-05    |          | ENSG00000164151 |
| 5 | 6729128  | 6729556  | 6729307  | 27 | 34 | 0  | 41.05670938 | 1.59E-12    | POLS     | ENSG00000112941 |
| 5 | 6818703  | 6819123  | 6818956  | 34 | 42 | 9  | 5.044110009 | 5.53E-08    | POLS     | ENSG00000112941 |
| 5 | 10199034 | 10199305 | 10199169 | 13 | 15 | 4  | 3.753756286 | 0.0020497   |          | ENSG00000196193 |
| 5 | 10302944 | 10303202 | 10303088 | 10 | 11 | 3  | 3.519146518 | 0.00788869  | FAM173B  | ENSG00000150756 |
| 5 | 10359659 | 10360000 | 10359780 | 8  | 12 | 2  | 5.083211637 | 0.00143337  | CMBL     | ENSG00000164237 |
| 5 | 10360470 | 10361037 | 10360681 | 28 | 46 | 7  | 6.891661931 | 3.87E-10    | CMBL     | ENSG00000164237 |
| 5 | 10581494 | 10581936 | 10581721 | 58 | 76 | 1  | 45.16238031 | 4.73E-25    |          | ENSG00000214179 |
| 5 | 10649045 | 10649254 | 10649149 | 10 | 10 | 0  | 12.90353723 | 0.000195991 | ANKRD33B | ENSG00000164236 |
| 5 | 10654382 | 10654784 | 10654661 | 14 | 21 | 3  | 6.451768616 | 1.56E-05    | ANKRD33B | ENSG00000164236 |
| 5 | 10680951 | 10681170 | 10681060 | 9  | 12 | 3  | 3.812408728 | 0.004404    | ANKRD33B | ENSG00000164236 |
| 5 | 10748257 | 10748468 | 10748370 | 9  | 10 | 1  | 6.451768616 | 0.00135978  | DAP      | ENSG00000112977 |
| 5 | 11041054 | 11041337 | 11041176 | 9  | 11 | 3  | 3.519146518 | 0.00788869  |          | ENSG00000207312 |
| 5 | 14196301 | 14196515 | 14196408 | 8  | 9  | 2  | 3.910162798 | 0.00955088  | TRIO     | ENSG00000038382 |
| 5 | 14713415 | 14713664 | 14713539 | 10 | 11 | 3  | 3.519146518 | 0.00788869  | FAM105B  | ENSG00000154124 |
| 5 | 14717453 | 14717731 | 14717592 | 10 | 14 | 0  | 17.59573259 | 8.79E-06    | FAM105B  | ENSG00000154124 |
| 5 | 14999856 | 15000275 | 15000085 | 41 | 50 | 4  | 11.96509816 | 2.00E-13    |          | ENSG00000212036 |
| 5 | 15012661 | 15012860 | 15012760 | 9  | 12 | 0  | 15.24963491 | 4.15E-05    |          | ENSG00000212036 |
| 5 | 15056576 | 15056851 | 15056732 | 15 | 19 | 6  | 3.351568112 | 0.00134187  |          | ENSG00000212036 |
| 5 | 15061666 | 15061861 | 15061763 | 8  | 9  | 3  | 2.932622098 | 0.0242899   |          | ENSG00000212036 |
| 5 | 16231880 | 16232187 | 16232033 | 8  | 11 | 6  | 2.010940867 | 0.0640214   | 11-Mar   | ENSG00000183654 |
| 5 | 16721499 | 16721709 | 16721621 | 8  | 8  | 3  | 2.639359888 | 0.0415794   |          | ENSG00000201370 |
| 5 | 16743413 | 16743648 | 16743526 | 9  | 10 | 0  | 12.90353723 | 0.000195991 |          | ENSG00000201370 |
| 5 | 16947517 | 16947861 | 16947689 | 8  | 14 | 1  | 8.797866295 | 8.00E-05    | MYO10    | ENSG00000145555 |
| 5 | 17269208 | 17269474 | 17269355 | 9  | 10 | 4  | 2.580707446 | 0.0306059   |          | ENSG00000215196 |
| 5 | 17302461 | 17302687 | 17302574 | 8  | 9  | 1  | 5.865244197 | 0.00272497  |          | ENSG00000210072 |
| 5 | 17355409 | 17355601 | 17355505 | 9  | 9  | 2  | 3.910162798 | 0.00955088  |          | ENSG00000185296 |
| 5 | 17358912 | 17359663 | 17359532 | 12 | 35 | 13 | 3.016411301 | 8.94E-05    |          | ENSG00000185296 |
| 5 | 17365516 | 17365768 | 17365654 | 9  | 11 | 4  | 2.815317214 | 0.0183428   |          | ENSG00000185296 |
| 5 | 17382737 | 17382955 | 17382846 | 8  | 10 | 2  | 4.301179077 | 0.00512919  |          | ENSG00000201715 |

|   |          |          |          |    |    |   |             |             |         |                 |
|---|----------|----------|----------|----|----|---|-------------|-------------|---------|-----------------|
| 5 | 17383526 | 17383920 | 17383684 | 9  | 15 | 0 | 18.76878143 | 4.04E-06    |         | ENSG00000201715 |
| 5 | 17393954 | 17394322 | 17394072 | 9  | 14 | 6 | 2.513676084 | 0.016726    |         | ENSG00000201715 |
| 5 | 17479698 | 17479934 | 17479772 | 9  | 9  | 1 | 5.865244197 | 0.00272497  |         | ENSG00000185041 |
| 5 | 17987705 | 17987923 | 17987814 | 8  | 9  | 1 | 5.865244197 | 0.00272497  |         | ENSG00000212278 |
| 5 | 18433333 | 18433522 | 18433427 | 8  | 8  | 3 | 2.639359888 | 0.0415794   |         | ENSG00000210087 |
| 5 | 18808449 | 18808641 | 18808525 | 10 | 11 | 4 | 2.815317214 | 0.0183428   |         | ENSG00000210097 |
| 5 | 19266551 | 19266774 | 19266662 | 8  | 8  | 0 | 10.55743955 | 0.000925496 |         | ENSG00000210097 |
| 5 | 19358643 | 19358977 | 19358810 | 25 | 30 | 2 | 12.12150467 | 5.77E-09    |         | ENSG00000210097 |
| 5 | 19417511 | 19417720 | 19417615 | 12 | 12 | 0 | 15.24963491 | 4.15E-05    |         | ENSG00000210097 |
| 5 | 19436885 | 19437269 | 19437064 | 22 | 30 | 4 | 7.272902804 | 1.76E-07    | CDH18   | ENSG00000145526 |
| 5 | 19820099 | 19820408 | 19820257 | 11 | 12 | 2 | 5.083211637 | 0.00143337  | CDH18   | ENSG00000145526 |
| 5 | 19831123 | 19831372 | 19831218 | 9  | 10 | 1 | 6.451768616 | 0.00135978  | CDH18   | ENSG00000145526 |
| 5 | 20141697 | 20141899 | 20141838 | 9  | 10 | 2 | 4.301179077 | 0.00512919  | CDH18   | ENSG00000145526 |
| 5 | 20145199 | 20145541 | 20145358 | 21 | 26 | 3 | 7.918079665 | 5.55E-07    | CDH18   | ENSG00000145526 |
| 5 | 22847321 | 22847500 | 22847410 | 8  | 8  | 0 | 10.55743955 | 0.000925496 | CDH12   | ENSG00000154162 |
| 5 | 27507816 | 27508202 | 27507995 | 20 | 25 | 0 | 30.49926982 | 1.72E-09    |         | ENSG00000207261 |
| 5 | 28891606 | 28891925 | 28891752 | 13 | 16 | 0 | 19.94183027 | 1.86E-06    |         | ENSG00000210223 |
| 5 | 31379903 | 31380159 | 31380020 | 13 | 16 | 3 | 4.985457567 | 0.000385643 | C5orf22 | ENSG00000082213 |
| 5 | 31624632 | 31625160 | 31624981 | 18 | 33 | 1 | 19.94183027 | 6.71E-11    |         | ENSG00000199765 |
| 5 | 31742090 | 31742343 | 31742248 | 14 | 16 | 0 | 19.94183027 | 1.86E-06    | PDZD2   | ENSG00000133401 |
| 5 | 31790788 | 31790982 | 31790885 | 8  | 9  | 0 | 11.73048839 | 0.000425898 | PDZD2   | ENSG00000133401 |
| 5 | 32209958 | 32210182 | 32210066 | 8  | 9  | 0 | 11.73048839 | 0.000425898 | GOLPH3  | ENSG00000113384 |
| 5 | 32229595 | 32229883 | 32229734 | 12 | 14 | 3 | 4.398933147 | 0.00132748  | GOLPH3  | ENSG00000113384 |
| 5 | 32621241 | 32621649 | 32621397 | 11 | 17 | 2 | 7.038293036 | 5.19E-05    | SUB1    | ENSG00000113387 |
| 5 | 33026771 | 33027011 | 33026901 | 8  | 8  | 0 | 10.55743955 | 0.000925496 |         | ENSG00000214091 |
| 5 | 33476319 | 33476740 | 33476561 | 13 | 22 | 4 | 5.396024661 | 3.05E-05    | TARS    | ENSG00000113407 |
| 5 | 33476757 | 33477021 | 33476875 | 13 | 16 | 0 | 19.94183027 | 1.86E-06    | TARS    | ENSG00000113407 |
| 5 | 34043847 | 34044342 | 34044210 | 11 | 19 | 0 | 23.46097679 | 1.81E-07    | C1QTNF3 | ENSG00000082196 |
| 5 | 34545380 | 34545774 | 34545559 | 14 | 22 | 2 | 8.993374435 | 1.66E-06    |         | ENSG00000222261 |
| 5 | 34791754 | 34791947 | 34791850 | 8  | 9  | 0 | 11.73048839 | 0.000425898 | RAI14   | ENSG00000039560 |
| 5 | 34875154 | 34875442 | 34875305 | 8  | 10 | 1 | 6.451768616 | 0.00135978  | TTC23L  | ENSG00000205838 |
| 5 | 34934235 | 34934465 | 34934339 | 9  | 10 | 3 | 3.225884308 | 0.0139466   | RAD1    | ENSG00000113456 |
| 5 | 35223758 | 35224335 | 35224065 | 12 | 27 | 7 | 4.105670938 | 4.08E-05    | PRLR    | ENSG00000113494 |
| 5 | 35234041 | 35234325 | 35234187 | 12 | 15 | 2 | 6.256260476 | 0.000199274 | PRLR    | ENSG00000113494 |

|   |          |          |          |     |     |    |             |             |         |                 |
|---|----------|----------|----------|-----|-----|----|-------------|-------------|---------|-----------------|
| 5 | 35241569 | 35241831 | 35241700 | 11  | 13  | 5  | 2.737113958 | 0.0137917   | PRLR    | ENSG00000113494 |
| 5 | 35249561 | 35249807 | 35249699 | 11  | 12  | 10 | 1.386330446 | 0.21117     | PRLR    | ENSG00000113494 |
| 5 | 35249997 | 35250310 | 35250164 | 9   | 13  | 4  | 3.28453675  | 0.00629037  | PRLR    | ENSG00000113494 |
| 5 | 35265152 | 35265528 | 35265296 | 9   | 13  | 3  | 4.105670938 | 0.00243034  | PRLR    | ENSG00000113494 |
| 5 | 35266140 | 35266334 | 35266237 | 8   | 9   | 5  | 1.955081399 | 0.0892323   | PRLR    | ENSG00000113494 |
| 5 | 35342496 | 35342992 | 35342668 | 11  | 22  | 6  | 3.854303329 | 0.000260696 | PRLR    | ENSG00000113494 |
| 5 | 35653631 | 35653952 | 35653776 | 10  | 13  | 2  | 5.474227917 | 0.000747844 | SPEF2   | ENSG00000152582 |
| 5 | 36053574 | 36053850 | 36053712 | 9   | 11  | 2  | 4.692195357 | 0.00272444  | UGT3A1  | ENSG00000145626 |
| 5 | 36076739 | 36077067 | 36076901 | 11  | 15  | 0  | 18.76878143 | 4.04E-06    | UGT3A2  | ENSG00000168671 |
| 5 | 36077173 | 36077845 | 36077426 | 14  | 35  | 2  | 14.07658607 | 1.57E-10    | UGT3A2  | ENSG00000168671 |
| 5 | 36414390 | 36414874 | 36414634 | 25  | 39  | 4  | 9.384390715 | 4.13E-10    | RANBP3L | ENSG00000164188 |
| 5 | 36434094 | 36434309 | 36434192 | 9   | 10  | 1  | 6.451768616 | 0.00135978  |         | ENSG00000222178 |
| 5 | 36478078 | 36478995 | 36478414 | 260 | 371 | 9  | 43.63741682 | 6.86E-111   |         | ENSG00000222178 |
| 5 | 36543272 | 36543491 | 36543381 | 10  | 10  | 1  | 6.451768616 | 0.00135978  |         | ENSG00000222178 |
| 5 | 36702864 | 36703078 | 36703004 | 8   | 9   | 2  | 3.910162798 | 0.00955088  | SLC1A3  | ENSG00000079215 |
| 5 | 36726238 | 36726537 | 36726376 | 10  | 14  | 3  | 4.398933147 | 0.00132748  | SLC1A3  | ENSG00000079215 |
| 5 | 36775517 | 36775760 | 36775638 | 8   | 11  | 0  | 14.07658607 | 9.02E-05    | SLC1A3  | ENSG00000079215 |
| 5 | 36780393 | 36780733 | 36780563 | 9   | 13  | 0  | 16.42268375 | 1.91E-05    | NIPBL   | ENSG00000164190 |
| 5 | 36781051 | 36781417 | 36781230 | 17  | 24  | 7  | 3.665777623 | 0.000215502 | NIPBL   | ENSG00000164190 |
| 5 | 36912495 | 36912822 | 36912644 | 11  | 14  | 2  | 5.865244197 | 0.000387308 | NIPBL   | ENSG00000164190 |
| 5 | 36998262 | 36998645 | 36998533 | 9   | 15  | 1  | 9.384390715 | 3.90E-05    |         | ENSG00000215149 |
| 5 | 37704382 | 37704641 | 37704530 | 14  | 15  | 3  | 4.692195357 | 0.000718455 |         | ENSG00000206743 |
| 5 | 37883590 | 37884245 | 37883917 | 123 | 176 | 3  | 51.90741114 | 3.33E-55    | GDNF    | ENSG00000168621 |
| 5 | 37902581 | 37902771 | 37902676 | 8   | 9   | 0  | 11.73048839 | 0.000425898 | GDNF    | ENSG00000168621 |
| 5 | 38463001 | 38463455 | 38463241 | 41  | 61  | 2  | 24.24300935 | 7.63E-19    | EGFLAM  | ENSG00000164318 |
| 5 | 38477646 | 38477910 | 38477778 | 12  | 13  | 3  | 4.105670938 | 0.00243034  | EGFLAM  | ENSG00000164318 |
| 5 | 38551505 | 38551739 | 38551622 | 8   | 9   | 0  | 11.73048839 | 0.000425898 | LIFR    | ENSG00000113594 |
| 5 | 38866695 | 38866960 | 38866823 | 12  | 15  | 6  | 2.68125449  | 0.0103552   |         | ENSG00000205783 |
| 5 | 39136782 | 39136981 | 39136943 | 8   | 9   | 5  | 1.955081399 | 0.0892323   |         | ENSG00000164327 |
| 5 | 39460606 | 39460785 | 39460695 | 8   | 8   | 1  | 5.278719777 | 0.00542188  | DAB2    | ENSG00000153071 |
| 5 | 39752271 | 39752735 | 39752611 | 12  | 19  | 4  | 4.692195357 | 0.000193572 | DAB2    | ENSG00000153071 |
| 5 | 40465437 | 40465662 | 40465533 | 8   | 9   | 1  | 5.865244197 | 0.00272497  |         | ENSG00000199361 |
| 5 | 40604421 | 40604785 | 40604545 | 10  | 16  | 1  | 9.970915134 | 1.89E-05    |         | ENSG00000199552 |
| 5 | 40637055 | 40637462 | 40637293 | 24  | 32  | 4  | 7.742122339 | 4.68E-08    |         | ENSG00000199552 |

|   |          |          |          |    |     |    |             |             |         |                 |
|---|----------|----------|----------|----|-----|----|-------------|-------------|---------|-----------------|
| 5 | 40712988 | 40713218 | 40713103 | 8  | 8   | 4  | 2.111487911 | 0.0804809   | PTGER4  | ENSG00000171522 |
| 5 | 40870917 | 40871267 | 40871092 | 13 | 18  | 4  | 4.457585589 | 0.000353565 | RPL37   | ENSG00000145592 |
| 5 | 41158358 | 41158735 | 41158527 | 32 | 39  | 3  | 11.73048839 | 6.80E-11    |         | ENSG00000171495 |
| 5 | 41410704 | 41410941 | 41410822 | 9  | 9   | 0  | 11.73048839 | 0.000425898 | C6      | ENSG00000039537 |
| 5 | 42519669 | 42519986 | 42519827 | 8  | 12  | 0  | 15.24963491 | 4.15E-05    |         | ENSG00000215083 |
| 5 | 42623142 | 42623343 | 42623293 | 8  | 9   | 1  | 5.865244197 | 0.00272497  |         | ENSG00000215083 |
| 5 | 42634112 | 42634671 | 42634369 | 52 | 68  | 3  | 20.23509248 | 5.38E-20    |         | ENSG00000215083 |
| 5 | 42634978 | 42635313 | 42635149 | 16 | 19  | 7  | 2.932622098 | 0.00293566  |         | ENSG00000215083 |
| 5 | 42636421 | 42636649 | 42636496 | 11 | 13  | 2  | 5.474227917 | 0.000747844 |         | ENSG00000215083 |
| 5 | 43043178 | 43043849 | 43043525 | 87 | 132 | 3  | 39.00387391 | 9.72E-41    |         | ENSG00000177738 |
| 5 | 43044013 | 43044241 | 43044096 | 11 | 11  | 2  | 4.692195357 | 0.00272444  |         | ENSG00000177738 |
| 5 | 43053686 | 43054009 | 43053845 | 8  | 10  | 6  | 1.843362462 | 0.0964212   |         | ENSG00000177738 |
| 5 | 43100691 | 43101034 | 43100863 | 11 | 16  | 1  | 9.970915134 | 1.89E-05    | C5orf39 | ENSG00000177721 |
| 5 | 43103114 | 43103347 | 43103188 | 9  | 11  | 4  | 2.815317214 | 0.0183428   | C5orf39 | ENSG00000177721 |
| 5 | 43141566 | 43141920 | 43141743 | 14 | 19  | 6  | 3.351568112 | 0.00134187  | ZNF131  | ENSG00000172262 |
| 5 | 43156970 | 43157352 | 43157173 | 10 | 17  | 2  | 7.038293036 | 5.19E-05    | ZNF131  | ENSG00000172262 |
| 5 | 43244361 | 43244903 | 43244524 | 14 | 31  | 5  | 6.256260476 | 3.74E-07    |         | ENSG00000177453 |
| 5 | 43425577 | 43425886 | 43425731 | 10 | 12  | 1  | 7.624817456 | 0.000332769 | CCL28   | ENSG00000151882 |
| 5 | 43436072 | 43436320 | 43436200 | 9  | 9   | 3  | 2.932622098 | 0.0242899   | CCL28   | ENSG00000151882 |
| 5 | 43465554 | 43465894 | 43465724 | 16 | 21  | 2  | 8.602358155 | 3.33E-06    | CCL28   | ENSG00000151882 |
| 5 | 43505606 | 43506035 | 43505833 | 10 | 19  | 3  | 5.865244197 | 5.72E-05    | C5orf28 | ENSG00000151881 |
| 5 | 43520165 | 43520360 | 43520262 | 8  | 10  | 1  | 6.451768616 | 0.00135978  | C5orf28 | ENSG00000151881 |
| 5 | 43536708 | 43537009 | 43536858 | 9  | 11  | 2  | 4.692195357 | 0.00272444  |         | ENSG00000221700 |
| 5 | 43550836 | 43551039 | 43550977 | 8  | 9   | 4  | 2.346097679 | 0.050148    | C5orf34 | ENSG00000172244 |
| 5 | 44033745 | 44033962 | 44033901 | 9  | 11  | 1  | 7.038293036 | 0.000674435 |         | ENSG00000212561 |
| 5 | 44038559 | 44038780 | 44038642 | 11 | 12  | 3  | 3.812408728 | 0.004404    |         | ENSG00000212561 |
| 5 | 44368333 | 44368524 | 44368428 | 8  | 9   | 4  | 2.346097679 | 0.050148    | FGF10   | ENSG00000070193 |
| 5 | 44574660 | 44574885 | 44574763 | 9  | 10  | 5  | 2.150589539 | 0.0575848   | FGF10   | ENSG00000070193 |
| 5 | 44764166 | 44764434 | 44764300 | 13 | 15  | 0  | 18.76878143 | 4.04E-06    |         | ENSG00000222995 |
| 5 | 49486215 | 49486551 | 49486383 | 31 | 31  | 41 | 0.893751497 | 0.687492    | EMB     | ENSG00000170571 |
| 5 | 49537847 | 49538028 | 49537877 | 11 | 11  | 12 | 1.082814313 | 0.424156    | EMB     | ENSG00000170571 |
| 5 | 49755064 | 49755399 | 49755231 | 19 | 22  | 0  | 26.9801233  | 1.77E-08    | EMB     | ENSG00000170571 |
| 5 | 51929501 | 51929755 | 51929638 | 9  | 11  | 0  | 14.07658607 | 9.02E-05    | PELO    | ENSG00000152684 |
| 5 | 52119434 | 52119629 | 52119531 | 10 | 10  | 2  | 4.301179077 | 0.00512919  | PELO    | ENSG00000152684 |

|   |          |          |          |     |     |   |             |             |         |                 |
|---|----------|----------|----------|-----|-----|---|-------------|-------------|---------|-----------------|
| 5 | 52132388 | 52132733 | 52132560 | 11  | 17  | 3 | 5.278719777 | 0.000205462 | PELO    | ENSG00000152684 |
| 5 | 52202207 | 52202447 | 52202327 | 11  | 11  | 2 | 4.692195357 | 0.00272444  | PELO    | ENSG00000152684 |
| 5 | 52280080 | 52280315 | 52280208 | 10  | 12  | 4 | 3.049926982 | 0.0108184   | ITGA2   | ENSG00000164171 |
| 5 | 52359617 | 52359851 | 52359737 | 9   | 11  | 2 | 4.692195357 | 0.00272444  | ITGA2   | ENSG00000164171 |
| 5 | 52441442 | 52441664 | 52441588 | 8   | 10  | 3 | 3.225884308 | 0.0139466   | MOCS2   | ENSG00000164172 |
| 5 | 52454782 | 52455017 | 52454941 | 9   | 12  | 0 | 15.24963491 | 4.15E-05    | MOCS2   | ENSG00000164172 |
| 5 | 52813599 | 52813814 | 52813706 | 8   | 8   | 3 | 2.639359888 | 0.0415794   | FST     | ENSG00000134363 |
| 5 | 52822249 | 52822704 | 52822474 | 76  | 91  | 5 | 17.98674887 | 3.02E-25    | FST     | ENSG00000134363 |
| 5 | 52892077 | 52892424 | 52892250 | 10  | 13  | 3 | 4.105670938 | 0.00243034  | NDUFS4  | ENSG00000164258 |
| 5 | 53114308 | 53114696 | 53114540 | 9   | 14  | 1 | 8.797866295 | 8.00E-05    |         | ENSG00000222077 |
| 5 | 53736133 | 53736449 | 53736291 | 23  | 25  | 1 | 15.24963491 | 2.59E-08    | HSPB3   | ENSG00000169271 |
| 5 | 53772175 | 53772433 | 53772304 | 10  | 14  | 0 | 17.59573259 | 8.79E-06    | HSPB3   | ENSG00000169271 |
| 5 | 54074294 | 54074502 | 54074398 | 9   | 11  | 2 | 4.692195357 | 0.00272444  |         | ENSG00000221073 |
| 5 | 54156646 | 54156831 | 54156753 | 8   | 8   | 0 | 10.55743955 | 0.000925496 |         | ENSG00000221073 |
| 5 | 54550521 | 54550961 | 54550782 | 10  | 18  | 4 | 4.457585589 | 0.000353565 | CCNO    | ENSG00000152669 |
| 5 | 54924617 | 54925038 | 54924863 | 24  | 33  | 1 | 19.94183027 | 6.71E-11    | PPAP2A  | ENSG00000067113 |
| 5 | 55043935 | 55044289 | 55044114 | 9   | 14  | 1 | 8.797866295 | 8.00E-05    | SLC38A9 | ENSG00000177058 |
| 5 | 55361515 | 55361804 | 55361659 | 10  | 11  | 1 | 7.038293036 | 0.000674435 |         | ENSG00000210662 |
| 5 | 55381813 | 55382007 | 55381970 | 8   | 8   | 2 | 3.519146518 | 0.017558    | IL6ST   | ENSG00000134352 |
| 5 | 55444245 | 55444454 | 55444349 | 8   | 9   | 5 | 1.955081399 | 0.0892323   |         | ENSG00000210667 |
| 5 | 55596044 | 55596268 | 55596156 | 8   | 9   | 2 | 3.910162798 | 0.00955088  |         | ENSG00000212265 |
| 5 | 55682396 | 55682622 | 55682505 | 8   | 10  | 2 | 4.301179077 | 0.00512919  |         | ENSG00000210678 |
| 5 | 55972640 | 55972855 | 55972747 | 10  | 10  | 1 | 6.451768616 | 0.00135978  |         | ENSG00000216408 |
| 5 | 56095764 | 56095970 | 56095867 | 9   | 9   | 3 | 2.932622098 | 0.0242899   | MAP3K1  | ENSG00000095015 |
| 5 | 56152304 | 56152830 | 56152567 | 10  | 19  | 4 | 4.692195357 | 0.000193572 | MAP3K1  | ENSG00000095015 |
| 5 | 56193694 | 56194030 | 56193862 | 18  | 21  | 2 | 8.602358155 | 3.33E-06    | C5orf35 | ENSG00000155542 |
| 5 | 56241568 | 56241820 | 56241694 | 11  | 12  | 5 | 2.541605819 | 0.0225912   | C5orf35 | ENSG00000155542 |
| 5 | 56399115 | 56399520 | 56399302 | 119 | 136 | 0 | 160.707691  | 6.63E-47    |         | ENSG00000218706 |
| 5 | 56826252 | 56826742 | 56826441 | 86  | 116 | 3 | 34.31167855 | 1.65E-35    | ACTBL2  | ENSG00000169067 |
| 5 | 56987370 | 56987563 | 56987436 | 9   | 10  | 0 | 12.90353723 | 0.000195991 | ACTBL2  | ENSG00000169067 |
| 5 | 57019448 | 57019697 | 57019616 | 9   | 12  | 2 | 5.083211637 | 0.00143337  | ACTBL2  | ENSG00000169067 |
| 5 | 57166675 | 57167371 | 57166996 | 184 | 235 | 1 | 138.419763  | 3.63E-78    |         | ENSG00000209041 |
| 5 | 57194086 | 57194430 | 57194258 | 11  | 17  | 5 | 3.519146518 | 0.00167472  |         | ENSG00000209041 |
| 5 | 57285336 | 57285581 | 57285458 | 10  | 12  | 3 | 3.812408728 | 0.004404    |         | ENSG00000209041 |

|   |          |          |          |     |     |    |             |             |           |                 |
|---|----------|----------|----------|-----|-----|----|-------------|-------------|-----------|-----------------|
| 5 | 57401500 | 57401753 | 57401626 | 10  | 12  | 3  | 3.812408728 | 0.004404    |           | ENSG00000209041 |
| 5 | 57412253 | 57412496 | 57412342 | 9   | 12  | 3  | 3.812408728 | 0.004404    |           | ENSG00000209041 |
| 5 | 57513690 | 57513891 | 57513790 | 10  | 10  | 4  | 2.580707446 | 0.0306059   |           | ENSG00000209041 |
| 5 | 57514889 | 57515218 | 57515063 | 10  | 13  | 0  | 16.42268375 | 1.91E-05    |           | ENSG00000209041 |
| 5 | 57515446 | 57515777 | 57515611 | 8   | 12  | 5  | 2.541605819 | 0.0225912   |           | ENSG00000209041 |
| 5 | 57630918 | 57631167 | 57631000 | 8   | 11  | 3  | 3.519146518 | 0.00788869  | PLK2      | ENSG00000145632 |
| 5 | 57785880 | 57786129 | 57785963 | 8   | 12  | 0  | 15.24963491 | 4.15E-05    | PLK2      | ENSG00000145632 |
| 5 | 57791388 | 57791760 | 57791564 | 11  | 17  | 7  | 2.639359888 | 0.00777415  | PLK2      | ENSG00000145632 |
| 5 | 57792550 | 57792742 | 57792659 | 8   | 10  | 1  | 6.451768616 | 0.00135978  | PLK2      | ENSG00000145632 |
| 5 | 57793547 | 57794083 | 57793863 | 129 | 159 | 0  | 187.6878143 | 1.17E-54    | PLK2      | ENSG00000145632 |
| 5 | 58633439 | 58633839 | 58633664 | 15  | 21  | 2  | 8.602358155 | 3.33E-06    | PDE4D     | ENSG00000113448 |
| 5 | 58828480 | 58828681 | 58828556 | 8   | 9   | 4  | 2.346097679 | 0.050148    | PDE4D     | ENSG00000113448 |
| 5 | 58880475 | 58880690 | 58880582 | 12  | 13  | 3  | 4.105670938 | 0.00243034  |           | ENSG00000202601 |
| 5 | 58919144 | 58919323 | 58919233 | 9   | 9   | 1  | 5.865244197 | 0.00272497  |           | ENSG00000202601 |
| 5 | 59105008 | 59105192 | 59105080 | 8   | 9   | 0  | 11.73048839 | 0.000425898 | PDE4D     | ENSG00000113448 |
| 5 | 59225515 | 59225922 | 59225687 | 9   | 16  | 6  | 2.848832895 | 0.00632407  | PDE4D     | ENSG00000113448 |
| 5 | 59785109 | 59785535 | 59785356 | 11  | 17  | 1  | 10.55743955 | 9.18E-06    |           | ENSG00000213896 |
| 5 | 59819182 | 59819372 | 59819277 | 8   | 8   | 0  | 10.55743955 | 0.000925496 |           | ENSG00000152931 |
| 5 | 60031288 | 60031543 | 60031373 | 8   | 11  | 2  | 4.692195357 | 0.00272444  | DEPDC1B   | ENSG00000035499 |
| 5 | 60031610 | 60031987 | 60031808 | 8   | 15  | 5  | 3.128130238 | 0.00492422  | DEPDC1B   | ENSG00000035499 |
| 5 | 60379066 | 60379245 | 60379127 | 9   | 9   | 0  | 11.73048839 | 0.000425898 | NDUFAF2   | ENSG00000164182 |
| 5 | 60740217 | 60740496 | 60740378 | 13  | 16  | 2  | 6.647276756 | 0.000101928 |           | ENSG00000213891 |
| 5 | 60931416 | 60931795 | 60931583 | 8   | 14  | 1  | 8.797866295 | 8.00E-05    |           | ENSG00000223200 |
| 5 | 60952457 | 60952997 | 60952718 | 27  | 48  | 10 | 5.225399375 | 4.82E-09    |           | ENSG00000212215 |
| 5 | 60990142 | 60990378 | 60990228 | 12  | 13  | 2  | 5.474227917 | 0.000747844 |           | ENSG00000212215 |
| 5 | 61076885 | 61077079 | 61076982 | 8   | 8   | 1  | 5.278719777 | 0.00542188  |           | ENSG00000178722 |
| 5 | 61136735 | 61137010 | 61136872 | 19  | 20  | 6  | 3.519146518 | 0.000784044 |           | ENSG00000178722 |
| 5 | 61529430 | 61529667 | 61529544 | 9   | 12  | 2  | 5.083211637 | 0.00143337  | KIF2A     | ENSG00000068796 |
| 5 | 61611544 | 61612220 | 61611898 | 46  | 74  | 1  | 43.98933147 | 2.18E-24    | KIF2A     | ENSG00000068796 |
| 5 | 61890652 | 61890831 | 61890768 | 8   | 8   | 2  | 3.519146518 | 0.017558    | IPO11     | ENSG00000086200 |
| 5 | 63100143 | 63100381 | 63100229 | 9   | 10  | 0  | 12.90353723 | 0.000195991 | HTR1A     | ENSG00000178394 |
| 5 | 64100161 | 64100445 | 64100303 | 9   | 12  | 5  | 2.541605819 | 0.0225912   | SFRS12IP1 | ENSG00000153006 |
| 5 | 64812038 | 64812217 | 64812127 | 8   | 8   | 3  | 2.639359888 | 0.0415794   | ADAMTS6   | ENSG00000049192 |
| 5 | 64894681 | 64894973 | 64894851 | 14  | 15  | 8  | 2.085420159 | 0.0338693   | PPWD1     | ENSG00000113593 |

|   |          |          |          |     |     |     |             |             |         |                 |
|---|----------|----------|----------|-----|-----|-----|-------------|-------------|---------|-----------------|
| 5 | 64956302 | 64956778 | 64956642 | 10  | 18  | 8   | 2.476436439 | 0.00924552  | C5orf44 | ENSG00000113597 |
| 5 | 65928996 | 65929278 | 65929137 | 13  | 15  | 1   | 9.384390715 | 3.90E-05    | MAST4   | ENSG00000069020 |
| 5 | 66139430 | 66139609 | 66139558 | 8   | 8   | 1   | 5.278719777 | 0.00542188  | MAST4   | ENSG00000069020 |
| 5 | 66426379 | 66426859 | 66426573 | 54  | 67  | 0   | 79.76732107 | 1.20E-23    | MAST4   | ENSG00000069020 |
| 5 | 66538522 | 66538784 | 66538662 | 10  | 11  | 1   | 7.038293036 | 0.000674435 | CD180   | ENSG00000134061 |
| 5 | 66799832 | 66800011 | 66799921 | 8   | 8   | 2   | 3.519146518 | 0.017558    |         | ENSG00000222939 |
| 5 | 66864557 | 66864833 | 66864693 | 8   | 8   | 3   | 2.639359888 | 0.0415794   |         | ENSG00000222939 |
| 5 | 67364661 | 67364885 | 67364763 | 9   | 10  | 2   | 4.301179077 | 0.00512919  |         | ENSG00000223149 |
| 5 | 67880733 | 67881142 | 67881016 | 15  | 19  | 3   | 5.865244197 | 5.72E-05    | PIK3R1  | ENSG00000145675 |
| 5 | 68281901 | 68282100 | 68282011 | 10  | 12  | 0   | 15.24963491 | 4.15E-05    |         | ENSG00000222762 |
| 5 | 68375329 | 68375524 | 68375426 | 8   | 8   | 3   | 2.639359888 | 0.0415794   | SLC30A5 | ENSG00000145740 |
| 5 | 68425345 | 68425671 | 68425519 | 12  | 15  | 0   | 18.76878143 | 4.04E-06    | SLC30A5 | ENSG00000145740 |
| 5 | 68498400 | 68498764 | 68498624 | 11  | 16  | 2   | 6.647276756 | 0.000101928 | CCNB1   | ENSG00000134057 |
| 5 | 68520982 | 68521386 | 68521153 | 8   | 13  | 11  | 1.368556979 | 0.211388    | CENPH   | ENSG00000153044 |
| 5 | 71182347 | 71182845 | 71182535 | 131 | 174 | 105 | 1.936637235 | 2.19E-08    |         | ENSG00000210845 |
| 5 | 71204943 | 71205328 | 71205122 | 38  | 47  | 1   | 28.15317214 | 1.78E-15    |         | ENSG00000210845 |
| 5 | 71215058 | 71215348 | 71215207 | 8   | 11  | 0   | 14.07658607 | 9.02E-05    |         | ENSG00000210845 |
| 5 | 71238704 | 71239143 | 71238928 | 37  | 48  | 3   | 14.36984828 | 1.11E-13    |         | ENSG00000210845 |
| 5 | 71349781 | 71350091 | 71349944 | 10  | 10  | 0   | 12.90353723 | 0.000195991 | MAP1B   | ENSG00000131711 |
| 5 | 71697911 | 71698143 | 71698027 | 9   | 10  | 3   | 3.225884308 | 0.0139466   | PTCD2   | ENSG00000049883 |
| 5 | 71942787 | 71943020 | 71942903 | 9   | 12  | 6   | 2.178519273 | 0.0416567   | ZNF366  | ENSG00000178175 |
| 5 | 72179557 | 72179816 | 72179686 | 9   | 9   | 2   | 3.910162798 | 0.00955088  | TNPO1   | ENSG00000083312 |
| 5 | 72286703 | 72287556 | 72286936 | 27  | 63  | 5   | 12.51252095 | 1.47E-16    | FCHO2   | ENSG00000157107 |
| 5 | 72469114 | 72469409 | 72469261 | 9   | 10  | 1   | 6.451768616 | 0.00135978  | TMEM171 | ENSG00000157111 |
| 5 | 72533565 | 72533820 | 72533705 | 9   | 10  | 3   | 3.225884308 | 0.0139466   | TMEM174 | ENSG00000164325 |
| 5 | 72568153 | 72568483 | 72568307 | 19  | 23  | 0   | 28.15317214 | 8.13E-09    | TMEM174 | ENSG00000164325 |
| 5 | 72608070 | 72608266 | 72608141 | 9   | 9   | 4   | 2.346097679 | 0.050148    | TMEM174 | ENSG00000164325 |
| 5 | 72829949 | 72830165 | 72830027 | 10  | 11  | 8   | 1.564065119 | 0.151515    | BTF3    | ENSG00000145741 |
| 5 | 72896815 | 72897388 | 72897049 | 16  | 31  | 2   | 12.51252095 | 2.82E-09    | ANKRA2  | ENSG00000164331 |
| 5 | 73531362 | 73531564 | 73531432 | 8   | 10  | 1   | 6.451768616 | 0.00135978  |         | ENSG00000210914 |
| 5 | 73572516 | 73572760 | 73572638 | 13  | 15  | 10  | 1.706252857 | 0.0822346   |         | ENSG00000222551 |
| 5 | 73649096 | 73649275 | 73649169 | 8   | 8   | 3   | 2.639359888 | 0.0415794   |         | ENSG00000210920 |
| 5 | 73672911 | 73673102 | 73673006 | 8   | 9   | 1   | 5.865244197 | 0.00272497  |         | ENSG00000210920 |
| 5 | 73707089 | 73707268 | 73707176 | 8   | 9   | 0   | 11.73048839 | 0.000425898 |         | ENSG00000210920 |

|   |          |          |          |    |     |   |             |             |         |                 |
|---|----------|----------|----------|----|-----|---|-------------|-------------|---------|-----------------|
| 5 | 73795250 | 73795435 | 73795342 | 8  | 8   | 2 | 3.519146518 | 0.017558    |         | ENSG00000210920 |
| 5 | 73963719 | 73964104 | 73963898 | 17 | 24  | 6 | 4.18946014  | 8.40E-05    | ENC1    | ENSG00000171617 |
| 5 | 73968259 | 73968502 | 73968380 | 9  | 11  | 1 | 7.038293036 | 0.000674435 | ENC1    | ENSG00000171617 |
| 5 | 73978539 | 73979244 | 73978923 | 35 | 62  | 1 | 36.95103844 | 2.04E-20    | ENC1    | ENSG00000171617 |
| 5 | 73980423 | 73980612 | 73980517 | 8  | 8   | 0 | 10.55743955 | 0.000925496 | ENC1    | ENSG00000171617 |
| 5 | 74098635 | 74098858 | 74098737 | 12 | 12  | 1 | 7.624817456 | 0.000332769 | GFM2    | ENSG00000164347 |
| 5 | 74287929 | 74288179 | 74288064 | 13 | 15  | 0 | 18.76878143 | 4.04E-06    |         | ENSG00000182383 |
| 5 | 74368707 | 74369105 | 74368926 | 15 | 22  | 0 | 26.9801233  | 1.77E-08    | GCNT4   | ENSG00000176928 |
| 5 | 74377988 | 74378397 | 74378167 | 28 | 41  | 1 | 24.63402563 | 1.65E-13    | GCNT4   | ENSG00000176928 |
| 5 | 74574771 | 74574956 | 74574896 | 8  | 8   | 0 | 10.55743955 | 0.000925496 | ANKRD31 | ENSG00000145700 |
| 5 | 75669489 | 75669870 | 75669766 | 9  | 15  | 9 | 1.876878143 | 0.0544542   |         | ENSG00000171601 |
| 5 | 75718019 | 75718409 | 75718197 | 11 | 18  | 2 | 7.429309316 | 2.63E-05    |         | ENSG00000171601 |
| 5 | 75719891 | 75720171 | 75720023 | 8  | 10  | 0 | 12.90353723 | 0.000195991 |         | ENSG00000171601 |
| 5 | 76361791 | 76362058 | 76361924 | 10 | 14  | 0 | 17.59573259 | 8.79E-06    | AGGF1   | ENSG00000164252 |
| 5 | 76500434 | 76500709 | 76500571 | 20 | 21  | 6 | 3.686724924 | 0.000453999 |         | ENSG00000222316 |
| 5 | 76504731 | 76504924 | 76504827 | 8  | 8   | 6 | 1.508205651 | 0.203852    |         | ENSG00000222316 |
| 5 | 76562512 | 76562713 | 76562592 | 8  | 8   | 2 | 3.519146518 | 0.017558    | PDE8B   | ENSG00000113231 |
| 5 | 76757624 | 76757873 | 76757752 | 13 | 13  | 2 | 5.474227917 | 0.000747844 | WDR41   | ENSG00000164253 |
| 5 | 77211543 | 77211886 | 77211714 | 13 | 17  | 1 | 10.55743955 | 9.18E-06    |         | ENSG00000213763 |
| 5 | 77230067 | 77230263 | 77230165 | 10 | 10  | 1 | 6.451768616 | 0.00135978  |         | ENSG00000213763 |
| 5 | 77285853 | 77286032 | 77285942 | 8  | 8   | 4 | 2.111487911 | 0.0804809   |         | ENSG00000222085 |
| 5 | 77292535 | 77292745 | 77292640 | 9  | 9   | 1 | 5.865244197 | 0.00272497  |         | ENSG00000222085 |
| 5 | 77626152 | 77626526 | 77626339 | 14 | 22  | 5 | 4.496687217 | 9.59E-05    | AP3B1   | ENSG00000132842 |
| 5 | 77677071 | 77677741 | 77677512 | 72 | 105 | 6 | 17.763311   | 1.16E-28    | SCAMP1  | ENSG00000085365 |
| 5 | 77691415 | 77691676 | 77691545 | 11 | 14  | 5 | 2.932622098 | 0.00829617  | SCAMP1  | ENSG00000085365 |
| 5 | 77926520 | 77927034 | 77926647 | 14 | 22  | 7 | 3.372515413 | 0.000629223 | LHFPL2  | ENSG00000145685 |
| 5 | 77948412 | 77948594 | 77948442 | 8  | 9   | 1 | 5.865244197 | 0.00272497  | LHFPL2  | ENSG00000145685 |
| 5 | 77997781 | 77998054 | 77997920 | 10 | 11  | 3 | 3.519146518 | 0.00788869  | LHFPL2  | ENSG00000145685 |
| 5 | 78244030 | 78244209 | 78244119 | 8  | 8   | 0 | 10.55743955 | 0.000925496 | ARSB    | ENSG00000113273 |
| 5 | 78252309 | 78252608 | 78252442 | 8  | 11  | 0 | 14.07658607 | 9.02E-05    | ARSB    | ENSG00000113273 |
| 5 | 78296511 | 78296882 | 78296664 | 10 | 14  | 4 | 3.519146518 | 0.00361132  | ARSB    | ENSG00000113273 |
| 5 | 78306644 | 78307052 | 78306713 | 10 | 18  | 5 | 3.714654658 | 0.000961539 | ARSB    | ENSG00000113273 |
| 5 | 78457892 | 78458104 | 78458031 | 8  | 9   | 1 | 5.865244197 | 0.00272497  | BHMT    | ENSG00000145692 |
| 5 | 78465185 | 78465446 | 78465320 | 8  | 9   | 6 | 1.675784056 | 0.141978    | BHMT    | ENSG00000145692 |



|   |          |          |          |    |    |   |             |             |         |                 |
|---|----------|----------|----------|----|----|---|-------------|-------------|---------|-----------------|
| 5 | 78488867 | 78489110 | 78489026 | 8  | 9  | 2 | 3.910162798 | 0.00955088  |         | ENSG00000201955 |
| 5 | 78505326 | 78505591 | 78505458 | 11 | 11 | 2 | 4.692195357 | 0.00272444  |         | ENSG00000201955 |
| 5 | 78515315 | 78515519 | 78515375 | 10 | 11 | 2 | 4.692195357 | 0.00272444  |         | ENSG00000201955 |
| 5 | 78525422 | 78525778 | 78525600 | 8  | 14 | 3 | 4.398933147 | 0.00132748  |         | ENSG00000201955 |
| 5 | 78637423 | 78637631 | 78637545 | 9  | 11 | 1 | 7.038293036 | 0.000674435 |         | ENSG00000213757 |
| 5 | 78845919 | 78846379 | 78846098 | 8  | 18 | 3 | 5.571981987 | 0.000108726 | HOMER1  | ENSG00000152413 |
| 5 | 79021685 | 79022062 | 79021885 | 14 | 18 | 3 | 5.571981987 | 0.000108726 | CMYA5   | ENSG00000164309 |
| 5 | 79270071 | 79270516 | 79270304 | 37 | 54 | 1 | 32.25884308 | 8.88E-18    | MTX3    | ENSG00000177034 |
| 5 | 79414347 | 79414626 | 79414479 | 14 | 14 | 1 | 8.797866295 | 8.00E-05    | THBS4   | ENSG00000113296 |
| 5 | 79513283 | 79513532 | 79513390 | 9  | 10 | 4 | 2.580707446 | 0.0306059   | SERINC5 | ENSG00000164300 |
| 5 | 79516148 | 79516521 | 79516295 | 9  | 14 | 1 | 8.797866295 | 8.00E-05    | SERINC5 | ENSG00000164300 |
| 5 | 79586562 | 79586966 | 79586764 | 9  | 17 | 2 | 7.038293036 | 5.19E-05    |         | ENSG00000211056 |
| 5 | 79739104 | 79739567 | 79739328 | 11 | 24 | 0 | 29.32622098 | 3.74E-09    | ZFYVE16 | ENSG00000039319 |
| 5 | 79798542 | 79799152 | 79798979 | 39 | 58 | 4 | 13.8419763  | 6.95E-16    | FAM151B | ENSG00000152380 |
| 5 | 79819905 | 79820245 | 79820072 | 16 | 20 | 4 | 4.926805125 | 0.00010522  | FAM151B | ENSG00000152380 |
| 5 | 80440045 | 80440233 | 80440167 | 8  | 8  | 5 | 1.759573259 | 0.13508     |         | ENSG00000214858 |
| 5 | 80526682 | 80526876 | 80526755 | 8  | 9  | 2 | 3.910162798 | 0.00955088  |         | ENSG00000214858 |
| 5 | 80920447 | 80920718 | 80920555 | 8  | 11 | 1 | 7.038293036 | 0.000674435 | SSBP2   | ENSG00000145687 |
| 5 | 81067627 | 81067946 | 81067678 | 8  | 13 | 1 | 8.211341875 | 0.000163445 | SSBP2   | ENSG00000145687 |
| 5 | 81082755 | 81083212 | 81082930 | 17 | 27 | 2 | 10.94845583 | 4.90E-08    | SSBP2   | ENSG00000145687 |
| 5 | 81086862 | 81087296 | 81087041 | 8  | 15 | 2 | 6.256260476 | 0.000199274 | SSBP2   | ENSG00000145687 |
| 5 | 81174480 | 81174828 | 81174652 | 17 | 21 | 4 | 5.161414893 | 5.68E-05    |         | ENSG00000214857 |
| 5 | 81182994 | 81183220 | 81183102 | 9  | 12 | 5 | 2.541605819 | 0.0225912   |         | ENSG00000214857 |
| 5 | 81183373 | 81183786 | 81183610 | 18 | 26 | 8 | 3.519146518 | 0.000175368 |         | ENSG00000214857 |
| 5 | 81187133 | 81187527 | 81187373 | 27 | 33 | 1 | 19.94183027 | 6.71E-11    |         | ENSG00000214857 |
| 5 | 81515543 | 81515738 | 81515640 | 8  | 8  | 2 | 3.519146518 | 0.017558    | RPS23   | ENSG00000186468 |
| 5 | 81609766 | 81610453 | 81610099 | 10 | 26 | 9 | 3.167231866 | 0.000393236 | RPS23   | ENSG00000186468 |
| 5 | 81790818 | 81791044 | 81790931 | 10 | 12 | 2 | 5.083211637 | 0.00143337  |         | ENSG00000205462 |
| 5 | 82416735 | 82417043 | 82416889 | 17 | 21 | 0 | 25.80707446 | 3.84E-08    | XRCC4   | ENSG00000152422 |
| 5 | 82433151 | 82433441 | 82433296 | 16 | 18 | 0 | 22.28792795 | 3.94E-07    | XRCC4   | ENSG00000152422 |
| 5 | 82596862 | 82597084 | 82596973 | 14 | 14 | 1 | 8.797866295 | 8.00E-05    | XRCC4   | ENSG00000152422 |
| 5 | 82762004 | 82762249 | 82762088 | 9  | 11 | 4 | 2.815317214 | 0.0183428   | VCAN    | ENSG00000038427 |
| 5 | 82805932 | 82806249 | 82806090 | 10 | 14 | 2 | 5.865244197 | 0.000387308 | VCAN    | ENSG00000038427 |
| 5 | 82839113 | 82839444 | 82839228 | 8  | 13 | 7 | 2.052835469 | 0.046392    | VCAN    | ENSG00000038427 |

|   |          |          |          |    |    |    |             |             |          |                 |
|---|----------|----------|----------|----|----|----|-------------|-------------|----------|-----------------|
| 5 | 82841061 | 82841289 | 82841152 | 10 | 11 | 3  | 3.519146518 | 0.00788869  | VCAN     | ENSG00000038427 |
| 5 | 82895251 | 82895490 | 82895370 | 13 | 14 | 3  | 4.398933147 | 0.00132748  | VCAN     | ENSG00000038427 |
| 5 | 83056586 | 83056786 | 83056686 | 8  | 8  | 1  | 5.278719777 | 0.00542188  | HAPLN1   | ENSG00000145681 |
| 5 | 83258782 | 83259101 | 83258945 | 16 | 20 | 7  | 3.079253203 | 0.00177418  |          | ENSG00000216125 |
| 5 | 83319517 | 83319818 | 83319659 | 16 | 16 | 3  | 4.985457567 | 0.000385643 |          | ENSG00000216125 |
| 5 | 83619531 | 83619800 | 83619636 | 8  | 12 | 3  | 3.812408728 | 0.004404    |          | ENSG00000211127 |
| 5 | 83743466 | 83743796 | 83743622 | 11 | 15 | 4  | 3.753756286 | 0.0020497   | EDIL3    | ENSG00000164176 |
| 5 | 84652157 | 84652359 | 84652279 | 9  | 9  | 4  | 2.346097679 | 0.050148    |          | ENSG00000215953 |
| 5 | 85763023 | 85763202 | 85763112 | 8  | 8  | 0  | 10.55743955 | 0.000925496 | NBPF22P  | ENSG00000205449 |
| 5 | 85949367 | 85949555 | 85949461 | 9  | 9  | 3  | 2.932622098 | 0.0242899   | COX7C    | ENSG00000127184 |
| 5 | 86174389 | 86174592 | 86174490 | 8  | 8  | 2  | 3.519146518 | 0.017558    |          | ENSG00000221694 |
| 5 | 86573775 | 86574269 | 86573953 | 13 | 24 | 4  | 5.865244197 | 8.64E-06    |          | ENSG00000196836 |
| 5 | 87600246 | 87600631 | 87600391 | 8  | 14 | 5  | 2.932622098 | 0.00829617  | TMEM161B | ENSG00000164180 |
| 5 | 88138839 | 88139028 | 88139002 | 8  | 9  | 0  | 11.73048839 | 0.000425898 | MEF2C    | ENSG00000081189 |
| 5 | 88296604 | 88296791 | 88296697 | 10 | 10 | 11 | 1.075294769 | 0.434143    | MEF2C    | ENSG00000081189 |
| 5 | 88343951 | 88344270 | 88344116 | 19 | 22 | 0  | 26.9801233  | 1.77E-08    | MEF2C    | ENSG00000081189 |
| 5 | 89741155 | 89741480 | 89741329 | 11 | 16 | 4  | 3.988366054 | 0.00115141  | CETN3    | ENSG00000153140 |
| 5 | 89805871 | 89806393 | 89806233 | 9  | 19 | 5  | 3.910162798 | 0.000546977 |          | ENSG00000176055 |
| 5 | 89859107 | 89859365 | 89859233 | 10 | 11 | 1  | 7.038293036 | 0.000674435 | LYSMD3   | ENSG00000176018 |
| 5 | 89860933 | 89861188 | 89861060 | 10 | 11 | 2  | 4.692195357 | 0.00272444  | LYSMD3   | ENSG00000176018 |
| 5 | 89889869 | 89890153 | 89889996 | 8  | 11 | 9  | 1.407658607 | 0.210479    | GPR98    | ENSG00000164199 |
| 5 | 89890171 | 89890546 | 89890350 | 8  | 15 | 8  | 2.085420159 | 0.0338693   | GPR98    | ENSG00000164199 |
| 5 | 90326338 | 90326684 | 90326511 | 25 | 30 | 2  | 12.12150467 | 5.77E-09    |          | ENSG00000199643 |
| 5 | 90494322 | 90494594 | 90494438 | 9  | 13 | 3  | 4.105670938 | 0.00243034  |          | ENSG00000199643 |
| 5 | 90711902 | 90712200 | 90712037 | 11 | 14 | 4  | 3.519146518 | 0.00361132  | ARRDC3   | ENSG00000113369 |
| 5 | 90712623 | 90712832 | 90712752 | 9  | 11 | 7  | 1.759573259 | 0.102361    | ARRDC3   | ENSG00000113369 |
| 5 | 90714701 | 90714928 | 90714787 | 10 | 10 | 2  | 4.301179077 | 0.00512919  | ARRDC3   | ENSG00000113369 |
| 5 | 90715076 | 90715434 | 90715255 | 11 | 16 | 5  | 3.323638378 | 0.00288759  | ARRDC3   | ENSG00000113369 |
| 5 | 90983398 | 90983577 | 90983493 | 8  | 8  | 2  | 3.519146518 | 0.017558    |          | ENSG00000213731 |
| 5 | 91112696 | 91112989 | 91112857 | 8  | 10 | 2  | 4.301179077 | 0.00512919  |          | ENSG00000213731 |
| 5 | 91457874 | 91458078 | 91457951 | 8  | 8  | 5  | 1.759573259 | 0.13508     |          |                 |
| 5 | 92733806 | 92734018 | 92733918 | 8  | 8  | 5  | 1.759573259 | 0.13508     |          | ENSG00000213730 |
| 5 | 92958667 | 92959109 | 92958912 | 8  | 17 | 3  | 5.278719777 | 0.000205462 |          | ENSG00000205434 |
| 5 | 92982426 | 92982655 | 92982540 | 10 | 10 | 2  | 4.301179077 | 0.00512919  |          | ENSG00000205434 |

|   |          |          |          |    |    |    |             |             |         |                 |
|---|----------|----------|----------|----|----|----|-------------|-------------|---------|-----------------|
| 5 | 93038879 | 93039096 | 93038980 | 9  | 11 | 3  | 3.519146518 | 0.00788869  |         | ENSG00000205434 |
| 5 | 93073460 | 93073685 | 93073572 | 8  | 8  | 1  | 5.278719777 | 0.00542188  |         | ENSG00000205434 |
| 5 | 93162509 | 93162813 | 93162661 | 13 | 15 | 4  | 3.753756286 | 0.0020497   |         | ENSG00000205434 |
| 5 | 93169430 | 93169726 | 93169561 | 9  | 12 | 1  | 7.624817456 | 0.000332769 |         | ENSG00000205434 |
| 5 | 93505096 | 93505440 | 93505268 | 31 | 35 | 2  | 14.07658607 | 1.57E-10    | FAM172A | ENSG00000113391 |
| 5 | 93724381 | 93724641 | 93724484 | 12 | 14 | 2  | 5.865244197 | 0.000387308 |         | ENSG00000218494 |
| 5 | 93728395 | 93728699 | 93728547 | 22 | 23 | 2  | 9.384390715 | 8.25E-07    |         | ENSG00000218494 |
| 5 | 93980044 | 93980285 | 93980147 | 11 | 12 | 4  | 3.049926982 | 0.0108184   | ANKRD32 | ENSG00000133302 |
| 5 | 94215274 | 94215589 | 94215438 | 18 | 21 | 2  | 8.602358155 | 3.33E-06    | MCTP1   | ENSG00000175471 |
| 5 | 94355622 | 94355817 | 94355719 | 8  | 8  | 0  | 10.55743955 | 0.000925496 | MCTP1   | ENSG00000175471 |
| 5 | 94474590 | 94474847 | 94474761 | 8  | 9  | 2  | 3.910162798 | 0.00955088  | MCTP1   | ENSG00000175471 |
| 5 | 94771753 | 94771932 | 94771842 | 8  | 8  | 1  | 5.278719777 | 0.00542188  | FAM81B  | ENSG00000153347 |
| 5 | 94916363 | 94916732 | 94916538 | 15 | 21 | 11 | 2.150589539 | 0.0135908   | ARSK    | ENSG00000164291 |
| 5 | 95005823 | 95006016 | 95005919 | 9  | 9  | 2  | 3.910162798 | 0.00955088  | RFESD   | ENSG00000175449 |
| 5 | 95059693 | 95060189 | 95059872 | 14 | 24 | 7  | 3.665777623 | 0.000215502 | SPATA9  | ENSG00000145757 |
| 5 | 95089401 | 95089800 | 95089555 | 9  | 16 | 8  | 2.215758919 | 0.0222902   | RHOBTB3 | ENSG00000164292 |
| 5 | 95121212 | 95121421 | 95121288 | 9  | 10 | 0  | 12.90353723 | 0.000195991 | RHOBTB3 | ENSG00000164292 |
| 5 | 95208281 | 95208742 | 95208563 | 17 | 31 | 7  | 4.692195357 | 4.07E-06    | GLRX    | ENSG00000173221 |
| 5 | 95220312 | 95220602 | 95220454 | 9  | 11 | 4  | 2.815317214 | 0.0183428   | GLRX    | ENSG00000173221 |
| 5 | 95286261 | 95286449 | 95286353 | 8  | 8  | 0  | 10.55743955 | 0.000925496 | ELL2    | ENSG00000118985 |
| 5 | 95327510 | 95327750 | 95327666 | 9  | 9  | 5  | 1.955081399 | 0.0892323   | ELL2    | ENSG00000118985 |
| 5 | 95336674 | 95336926 | 95336805 | 9  | 10 | 1  | 6.451768616 | 0.00135978  |         | ENSG00000213716 |
| 5 | 95455400 | 95455599 | 95455499 | 8  | 9  | 1  | 5.865244197 | 0.00272497  |         | ENSG00000207578 |
| 5 | 95457878 | 95458090 | 95457975 | 8  | 10 | 1  | 6.451768616 | 0.00135978  |         | ENSG00000207578 |
| 5 | 95511096 | 95511336 | 95511206 | 12 | 15 | 2  | 6.256260476 | 0.000199274 |         | ENSG00000206997 |
| 5 | 95697874 | 95698129 | 95698001 | 10 | 11 | 11 | 1.173048839 | 0.349489    | PCSK1   | ENSG00000175426 |
| 5 | 95845353 | 95845658 | 95845515 | 10 | 12 | 2  | 5.083211637 | 0.00143337  | PCSK1   | ENSG00000175426 |
| 5 | 96023374 | 96023753 | 96023532 | 11 | 16 | 9  | 1.994183027 | 0.0370915   | CAST    | ENSG00000153113 |
| 5 | 96024128 | 96024318 | 96024269 | 8  | 8  | 4  | 2.111487911 | 0.0804809   | CAST    | ENSG00000153113 |
| 5 | 96024492 | 96024785 | 96024622 | 10 | 12 | 7  | 1.906204364 | 0.0695918   | CAST    | ENSG00000153113 |
| 5 | 96095593 | 96095787 | 96095705 | 10 | 10 | 4  | 2.580707446 | 0.0306059   | CAST    | ENSG00000153113 |
| 5 | 96169217 | 96169571 | 96169436 | 8  | 13 | 2  | 5.474227917 | 0.000747844 | ERAP1   | ENSG00000164307 |
| 5 | 96169635 | 96169945 | 96169790 | 15 | 18 | 5  | 3.714654658 | 0.000961539 | ERAP1   | ENSG00000164307 |
| 5 | 96205997 | 96206239 | 96206118 | 8  | 10 | 3  | 3.225884308 | 0.0139466   | ERAP2   | ENSG00000164308 |

|   |           |           |           |    |    |    |             |             |         |                 |
|---|-----------|-----------|-----------|----|----|----|-------------|-------------|---------|-----------------|
| 5 | 96230436  | 96230660  | 96230524  | 9  | 12 | 7  | 1.906204364 | 0.0695918   | ERAP2   | ENSG00000164308 |
| 5 | 96296047  | 96296910  | 96296231  | 20 | 55 | 7  | 8.211341875 | 1.10E-12    | LNPEP   | ENSG00000113441 |
| 5 | 96297059  | 96297616  | 96297437  | 13 | 27 | 7  | 4.105670938 | 4.08E-05    | LNPEP   | ENSG00000113441 |
| 5 | 96452387  | 96452645  | 96452516  | 10 | 13 | 4  | 3.28453675  | 0.00629037  |         | ENSG00000213701 |
| 5 | 96544623  | 96545348  | 96545169  | 9  | 25 | 9  | 3.049926982 | 0.000648806 | RIOK2   | ENSG00000058729 |
| 5 | 97212577  | 97212771  | 97212674  | 8  | 8  | 2  | 3.519146518 | 0.017558    |         | ENSG00000211336 |
| 5 | 97525614  | 97525793  | 97525763  | 8  | 8  | 5  | 1.759573259 | 0.13508     |         | ENSG00000176183 |
| 5 | 98135138  | 98135396  | 98135267  | 8  | 9  | 1  | 5.865244197 | 0.00272497  | RGMB    | ENSG00000174136 |
| 5 | 98203285  | 98203541  | 98203413  | 15 | 16 | 0  | 19.94183027 | 1.86E-06    |         | ENSG00000211353 |
| 5 | 98210145  | 98210527  | 98210348  | 31 | 38 | 1  | 22.87445237 | 1.58E-12    |         | ENSG00000211353 |
| 5 | 98291313  | 98291549  | 98291442  | 8  | 10 | 8  | 1.433726359 | 0.209175    | CHD1    | ENSG00000153922 |
| 5 | 98292785  | 98292987  | 98292917  | 8  | 8  | 1  | 5.278719777 | 0.00542188  | CHD1    | ENSG00000153922 |
| 5 | 98293098  | 98293307  | 98293179  | 8  | 10 | 2  | 4.301179077 | 0.00512919  | CHD1    | ENSG00000153922 |
| 5 | 98621643  | 98621822  | 98621670  | 8  | 9  | 4  | 2.346097679 | 0.050148    |         | ENSG00000200351 |
| 5 | 98684196  | 98684383  | 98684278  | 8  | 8  | 2  | 3.519146518 | 0.017558    |         | ENSG00000200351 |
| 5 | 98813271  | 98813628  | 98813433  | 11 | 16 | 3  | 4.985457567 | 0.000385643 |         |                 |
| 5 | 99545553  | 99545942  | 99545737  | 30 | 40 | 5  | 8.015833735 | 1.06E-09    |         | ENSG00000207077 |
| 5 | 99546000  | 99546264  | 99546131  | 10 | 11 | 0  | 14.07658607 | 9.02E-05    |         | ENSG00000207077 |
| 5 | 100001717 | 100002091 | 100001912 | 17 | 24 | 2  | 9.775406994 | 4.09E-07    |         | ENSG00000207269 |
| 5 | 100011100 | 100011609 | 100011405 | 16 | 26 | 3  | 7.918079665 | 5.55E-07    |         | ENSG00000207269 |
| 5 | 100303639 | 100303818 | 100303776 | 8  | 8  | 4  | 2.111487911 | 0.0804809   | ST8SIA4 | ENSG00000113532 |
| 5 | 100467585 | 100467778 | 100467654 | 9  | 9  | 2  | 3.910162798 | 0.00955088  |         | ENSG00000203447 |
| 5 | 100538695 | 100538932 | 100538813 | 8  | 10 | 3  | 3.225884308 | 0.0139466   |         | ENSG00000203447 |
| 5 | 100838777 | 100838984 | 100838880 | 8  | 8  | 3  | 2.639359888 | 0.0415794   |         | ENSG00000222929 |
| 5 | 100854433 | 100854754 | 100854609 | 19 | 23 | 0  | 28.15317214 | 8.13E-09    |         | ENSG00000222929 |
| 5 | 100881386 | 100881709 | 100881554 | 23 | 26 | 1  | 15.83615933 | 1.23E-08    |         | ENSG00000222929 |
| 5 | 100954064 | 100954311 | 100954187 | 8  | 10 | 5  | 2.150589539 | 0.0575848   |         | ENSG00000222929 |
| 5 | 101027029 | 101027431 | 101027207 | 13 | 19 | 3  | 5.865244197 | 5.72E-05    |         | ENSG00000222929 |
| 5 | 101355130 | 101355365 | 101355279 | 10 | 10 | 0  | 12.90353723 | 0.000195991 |         | ENSG00000199786 |
| 5 | 101659858 | 101660107 | 101659987 | 10 | 12 | 2  | 5.083211637 | 0.00143337  | SLCO4C1 | ENSG00000173930 |
| 5 | 102379777 | 102379979 | 102379912 | 8  | 9  | 2  | 3.910162798 | 0.00955088  |         | ENSG00000175749 |
| 5 | 102483491 | 102483977 | 102483804 | 29 | 44 | 14 | 3.519146518 | 2.15E-06    | HISPPD1 | ENSG00000145725 |
| 5 | 102621965 | 102622391 | 102622144 | 12 | 19 | 4  | 4.692195357 | 0.000193572 | C5orf30 | ENSG00000181751 |
| 5 | 102772977 | 102773271 | 102773018 | 9  | 13 | 6  | 2.346097679 | 0.0266147   | C5orf30 | ENSG00000181751 |

|   |           |           |           |    |    |    |             |             |        |                 |
|---|-----------|-----------|-----------|----|----|----|-------------|-------------|--------|-----------------|
| 5 | 102807932 | 102808350 | 102808171 | 27 | 38 | 9  | 4.574890473 | 5.74E-07    | NUDT12 | ENSG00000112874 |
| 5 | 102809253 | 102809554 | 102809403 | 12 | 16 | 11 | 1.661819189 | 0.0853913   | NUDT12 | ENSG00000112874 |
| 5 | 103680269 | 103680603 | 103680429 | 14 | 18 | 1  | 11.14396397 | 4.44E-06    |        | ENSG00000209151 |
| 5 | 103897161 | 103897462 | 103897313 | 9  | 11 | 5  | 2.346097679 | 0.0364013   |        | ENSG00000209193 |
| 5 | 103904090 | 103904345 | 103904217 | 13 | 16 | 3  | 4.985457567 | 0.000385643 |        | ENSG00000209193 |
| 5 | 104945999 | 104946246 | 104946141 | 8  | 11 | 4  | 2.815317214 | 0.0183428   |        | ENSG00000201790 |
| 5 | 104951945 | 104952199 | 104952072 | 8  | 9  | 0  | 11.73048839 | 0.000425898 |        | ENSG00000201790 |
| 5 | 104980278 | 104980565 | 104980421 | 10 | 11 | 6  | 2.010940867 | 0.0640214   |        | ENSG00000201790 |
| 5 | 105246567 | 105246875 | 105246731 | 15 | 19 | 8  | 2.606775198 | 0.00583935  |        | ENSG00000201790 |
| 5 | 105457766 | 105458081 | 105457922 | 17 | 19 | 6  | 3.351568112 | 0.00134187  |        | ENSG00000201790 |
| 5 | 105553078 | 105553353 | 105553215 | 11 | 13 | 3  | 4.105670938 | 0.00243034  |        | ENSG00000201790 |
| 5 | 105605084 | 105605497 | 105605278 | 25 | 35 | 13 | 3.016411301 | 8.94E-05    |        | ENSG00000209251 |
| 5 | 105965362 | 105965560 | 105965456 | 9  | 10 | 3  | 3.225884308 | 0.0139466   |        | ENSG00000209177 |
| 5 | 106143963 | 106144437 | 106144142 | 23 | 31 | 7  | 4.692195357 | 4.07E-06    |        | ENSG00000209177 |
| 5 | 106906233 | 106906436 | 106906346 | 8  | 9  | 3  | 2.932622098 | 0.0242899   | EFNA5  | ENSG00000184349 |
| 5 | 106921048 | 106921263 | 106921154 | 9  | 10 | 4  | 2.580707446 | 0.0306059   | EFNA5  | ENSG00000184349 |
| 5 | 106931905 | 106932196 | 106932064 | 14 | 16 | 0  | 19.94183027 | 1.86E-06    | EFNA5  | ENSG00000184349 |
| 5 | 106935586 | 106935901 | 106935743 | 11 | 15 | 6  | 2.68125449  | 0.0103552   | EFNA5  | ENSG00000184349 |
| 5 | 107037187 | 107037633 | 107037348 | 13 | 19 | 6  | 3.351568112 | 0.00134187  | EFNA5  | ENSG00000184349 |
| 5 | 107447799 | 107448000 | 107447899 | 10 | 10 | 0  | 12.90353723 | 0.000195991 |        | ENSG00000209157 |
| 5 | 107448720 | 107449032 | 107448890 | 10 | 11 | 0  | 14.07658607 | 9.02E-05    |        | ENSG00000209157 |
| 5 | 107624210 | 107624488 | 107624334 | 13 | 14 | 4  | 3.519146518 | 0.00361132  | FBXL17 | ENSG00000145743 |
| 5 | 107744670 | 107744906 | 107744788 | 8  | 8  | 0  | 10.55743955 | 0.000925496 | FBXL17 | ENSG00000145743 |
| 5 | 107745814 | 107746108 | 107745952 | 8  | 12 | 8  | 1.694403879 | 0.107291    | FBXL17 | ENSG00000145743 |
| 5 | 108091880 | 108092097 | 108091982 | 10 | 11 | 3  | 3.519146518 | 0.00788869  | FER    | ENSG00000151422 |
| 5 | 108773267 | 108773544 | 108773415 | 10 | 11 | 4  | 2.815317214 | 0.0183428   | PJA2   | ENSG00000198961 |
| 5 | 108773670 | 108774128 | 108773955 | 9  | 19 | 9  | 2.346097679 | 0.0107159   | PJA2   | ENSG00000198961 |
| 5 | 108787888 | 108788171 | 108788029 | 12 | 14 | 0  | 17.59573259 | 8.79E-06    | PJA2   | ENSG00000198961 |
| 5 | 108893719 | 108893998 | 108893857 | 17 | 18 | 1  | 11.14396397 | 4.44E-06    |        | ENSG00000214794 |
| 5 | 109031368 | 109031561 | 109031464 | 9  | 9  | 1  | 5.865244197 | 0.00272497  | MAN2A1 | ENSG00000112893 |
| 5 | 109069188 | 109069367 | 109069240 | 8  | 8  | 3  | 2.639359888 | 0.0415794   |        | ENSG00000202512 |
| 5 | 109309701 | 109310231 | 109309880 | 15 | 25 | 10 | 2.772660893 | 0.00131329  |        | ENSG00000202512 |
| 5 | 109421833 | 109422108 | 109421970 | 10 | 11 | 6  | 2.010940867 | 0.0640214   |        | ENSG00000202512 |
| 5 | 109754670 | 109755005 | 109754837 | 10 | 14 | 3  | 4.398933147 | 0.00132748  |        | ENSG00000221436 |

|   |           |           |           |     |     |    |             |             |          |                 |
|---|-----------|-----------|-----------|-----|-----|----|-------------|-------------|----------|-----------------|
| 5 | 109804718 | 109804929 | 109804823 | 9   | 11  | 0  | 14.07658607 | 9.02E-05    |          | ENSG00000221436 |
| 5 | 110455704 | 110456103 | 110455883 | 18  | 25  | 4  | 6.099853964 | 4.56E-06    | WDR36    | ENSG00000134987 |
| 5 | 110835107 | 110835430 | 110835281 | 11  | 14  | 5  | 2.932622098 | 0.00829617  | STARD4   | ENSG00000164211 |
| 5 | 110858052 | 110858594 | 110858378 | 180 | 219 | 2  | 86.02358155 | 5.04E-71    | STARD4   | ENSG00000164211 |
| 5 | 110858722 | 110858938 | 110858838 | 9   | 10  | 5  | 2.150589539 | 0.0575848   | STARD4   | ENSG00000164211 |
| 5 | 110875931 | 110876257 | 110876086 | 14  | 18  | 1  | 11.14396397 | 4.44E-06    | STARD4   | ENSG00000164211 |
| 5 | 110912818 | 110913030 | 110912924 | 8   | 10  | 4  | 2.580707446 | 0.0306059   |          | ENSG00000221310 |
| 5 | 110914171 | 110914483 | 110914327 | 10  | 13  | 0  | 16.42268375 | 1.91E-05    |          | ENSG00000221310 |
| 5 | 111044171 | 111044659 | 111044542 | 13  | 22  | 2  | 8.993374435 | 1.66E-06    |          | ENSG00000209164 |
| 5 | 111332241 | 111332495 | 111332368 | 10  | 10  | 0  | 12.90353723 | 0.000195991 | C5orf13  | ENSG00000134986 |
| 5 | 111524032 | 111524443 | 111524154 | 8   | 15  | 5  | 3.128130238 | 0.00492422  | EPB41L4A | ENSG00000129595 |
| 5 | 111592313 | 111592633 | 111592475 | 13  | 16  | 1  | 9.970915134 | 1.89E-05    | EPB41L4A | ENSG00000129595 |
| 5 | 111843044 | 111843367 | 111843205 | 67  | 72  | 0  | 85.63256527 | 2.48E-25    | EPB41L4A | ENSG00000129595 |
| 5 | 111999993 | 112000265 | 112000150 | 12  | 14  | 1  | 8.797866295 | 8.00E-05    | APC      | ENSG00000134982 |
| 5 | 112187299 | 112187504 | 112187412 | 9   | 10  | 4  | 2.580707446 | 0.0306059   | SRP19    | ENSG00000153037 |
| 5 | 112211874 | 112212229 | 112211988 | 10  | 15  | 7  | 2.346097679 | 0.0195693   | SRP19    | ENSG00000153037 |
| 5 | 112285525 | 112285859 | 112285692 | 9   | 13  | 0  | 16.42268375 | 1.91E-05    | REEP5    | ENSG00000129625 |
| 5 | 112291323 | 112291607 | 112291465 | 12  | 14  | 1  | 8.797866295 | 8.00E-05    | REEP5    | ENSG00000129625 |
| 5 | 112298887 | 112299075 | 112298955 | 8   | 8   | 6  | 1.508205651 | 0.203852    | REEP5    | ENSG00000129625 |
| 5 | 112322086 | 112322363 | 112322229 | 11  | 15  | 6  | 2.68125449  | 0.0103552   | DCP2     | ENSG00000172795 |
| 5 | 112327585 | 112327866 | 112327725 | 9   | 10  | 5  | 2.150589539 | 0.0575848   | DCP2     | ENSG00000172795 |
| 5 | 112340082 | 112340333 | 112340226 | 10  | 12  | 10 | 1.386330446 | 0.21117     | DCP2     | ENSG00000172795 |
| 5 | 112344523 | 112344958 | 112344779 | 25  | 38  | 1  | 22.87445237 | 1.58E-12    | DCP2     | ENSG00000172795 |
| 5 | 112359640 | 112359912 | 112359762 | 10  | 11  | 7  | 1.759573259 | 0.102361    | DCP2     | ENSG00000172795 |
| 5 | 112408435 | 112408671 | 112408526 | 8   | 10  | 4  | 2.580707446 | 0.0306059   | DCP2     | ENSG00000172795 |
| 5 | 112531561 | 112531949 | 112531770 | 38  | 46  | 2  | 18.37776515 | 5.11E-14    | MCC      | ENSG00000171444 |
| 5 | 112742664 | 112742938 | 112742801 | 13  | 15  | 2  | 6.256260476 | 0.000199274 | TSSK1B   | ENSG00000212122 |
| 5 | 112852050 | 112852307 | 112852222 | 9   | 13  | 7  | 2.052835469 | 0.046392    | MCC      | ENSG00000171444 |
| 5 | 113038656 | 113039166 | 113038955 | 41  | 61  | 7  | 9.091128505 | 2.01E-14    | YTHDC2   | ENSG00000047188 |
| 5 | 113178847 | 113179061 | 113178932 | 9   | 9   | 1  | 5.865244197 | 0.00272497  | YTHDC2   | ENSG00000047188 |
| 5 | 113210594 | 113210845 | 113210711 | 11  | 13  | 7  | 2.052835469 | 0.046392    | YTHDC2   | ENSG00000047188 |
| 5 | 113303502 | 113303884 | 113303727 | 23  | 30  | 4  | 7.272902804 | 1.76E-07    |          | ENSG00000222706 |
| 5 | 113316716 | 113316949 | 113316832 | 8   | 10  | 3  | 3.225884308 | 0.0139466   |          | ENSG00000222706 |
| 5 | 113725452 | 113725850 | 113725635 | 14  | 22  | 3  | 6.745030826 | 8.05E-06    | KCNN2    | ENSG00000080709 |

|   |           |           |           |     |     |    |             |             |         |                 |
|---|-----------|-----------|-----------|-----|-----|----|-------------|-------------|---------|-----------------|
| 5 | 114288385 | 114288717 | 114288548 | 14  | 17  | 4  | 4.222975822 | 0.000640773 | TRIM36  | ENSG00000152503 |
| 5 | 114396301 | 114396742 | 114396497 | 35  | 47  | 1  | 28.15317214 | 1.78E-15    | TRIM36  | ENSG00000152503 |
| 5 | 114533372 | 114533730 | 114533567 | 10  | 15  | 2  | 6.256260476 | 0.000199274 | TRIM36  | ENSG00000152503 |
| 5 | 114533876 | 114534087 | 114533981 | 9   | 11  | 5  | 2.346097679 | 0.0364013   | TRIM36  | ENSG00000152503 |
| 5 | 114729897 | 114730436 | 114730072 | 26  | 45  | 5  | 8.993374435 | 3.69E-11    |         | ENSG00000177962 |
| 5 | 114894099 | 114894367 | 114894231 | 11  | 11  | 1  | 7.038293036 | 0.000674435 | FEM1C   | ENSG00000145780 |
| 5 | 114908184 | 114908443 | 114908312 | 10  | 12  | 6  | 2.178519273 | 0.0416567   | FEM1C   | ENSG00000145780 |
| 5 | 115029677 | 115029956 | 115029813 | 15  | 18  | 0  | 22.28792795 | 3.94E-07    | TICAM2  | ENSG00000134970 |
| 5 | 115112670 | 115112989 | 115112829 | 27  | 29  | 0  | 35.19146518 | 7.73E-11    |         | ENSG00000222598 |
| 5 | 115194825 | 115195069 | 115194947 | 8   | 10  | 4  | 2.580707446 | 0.0306059   | ATG12   | ENSG00000145782 |
| 5 | 115221554 | 115221872 | 115221702 | 11  | 13  | 3  | 4.105670938 | 0.00243034  | AP3S1   | ENSG00000177879 |
| 5 | 115882090 | 115882444 | 115882267 | 32  | 37  | 3  | 11.14396397 | 2.78E-10    | SEMA6A  | ENSG00000092421 |
| 5 | 115921399 | 115921580 | 115921489 | 8   | 8   | 3  | 2.639359888 | 0.0415794   | SEMA6A  | ENSG00000092421 |
| 5 | 115938428 | 115938614 | 115938521 | 8   | 8   | 4  | 2.111487911 | 0.0804809   | SEMA6A  | ENSG00000092421 |
| 5 | 115942864 | 115943142 | 115942976 | 9   | 10  | 5  | 2.150589539 | 0.0575848   | SEMA6A  | ENSG00000092421 |
| 5 | 116311386 | 116311810 | 116311639 | 19  | 26  | 7  | 3.959039833 | 7.16E-05    | RPS17P2 | ENSG00000197575 |
| 5 | 116818240 | 116818611 | 116818461 | 12  | 18  | 2  | 7.429309316 | 2.63E-05    |         | ENSG00000182152 |
| 5 | 116850487 | 116851063 | 116850786 | 9   | 22  | 13 | 1.927151665 | 0.0235996   |         | ENSG00000182152 |
| 5 | 117357644 | 117357932 | 117357788 | 25  | 25  | 3  | 7.624817456 | 1.09E-06    |         | ENSG00000182152 |
| 5 | 117373298 | 117373841 | 117373625 | 22  | 35  | 9  | 4.222975822 | 3.17E-06    |         | ENSG00000182152 |
| 5 | 117468630 | 117468825 | 117468727 | 8   | 8   | 6  | 1.508205651 | 0.203852    |         | ENSG00000182152 |
| 5 | 117918574 | 117918845 | 117918730 | 10  | 13  | 4  | 3.28453675  | 0.00629037  |         | ENSG00000197744 |
| 5 | 118163353 | 118163722 | 118163543 | 23  | 30  | 3  | 9.091128505 | 3.63E-08    |         | ENSG00000197744 |
| 5 | 118418869 | 118419205 | 118419043 | 9   | 13  | 2  | 5.474227917 | 0.000747844 |         | ENSG00000209207 |
| 5 | 118434530 | 118435033 | 118434726 | 12  | 24  | 6  | 4.18946014  | 8.40E-05    | DMXL1   | ENSG00000172869 |
| 5 | 118631976 | 118632197 | 118632098 | 10  | 11  | 5  | 2.346097679 | 0.0364013   |         | ENSG00000222450 |
| 5 | 118637996 | 118638266 | 118638141 | 21  | 23  | 2  | 9.384390715 | 8.25E-07    |         | ENSG00000222450 |
| 5 | 118686803 | 118687020 | 118686909 | 8   | 11  | 3  | 3.519146518 | 0.00788869  |         | ENSG00000222450 |
| 5 | 118687022 | 118687869 | 118687441 | 127 | 173 | 6  | 29.15864258 | 2.48E-50    |         | ENSG00000222450 |
| 5 | 118751560 | 118751940 | 118751694 | 21  | 27  | 0  | 32.8453675  | 3.65E-10    | TNFAIP8 | ENSG00000145779 |
| 5 | 118775649 | 118775859 | 118775762 | 8   | 10  | 0  | 12.90353723 | 0.000195991 | TNFAIP8 | ENSG00000145779 |
| 5 | 118901465 | 118901683 | 118901549 | 8   | 8   | 3  | 2.639359888 | 0.0415794   |         | ENSG00000213663 |
| 5 | 119782843 | 119783061 | 119782952 | 8   | 9   | 0  | 11.73048839 | 0.000425898 | PRR16   | ENSG00000184838 |
| 5 | 121325330 | 121325668 | 121325494 | 16  | 20  | 3  | 6.158506406 | 2.99E-05    | SRFBP1  | ENSG00000151304 |

|   |           |           |           |    |    |    |             |             |         |                 |
|---|-----------|-----------|-----------|----|----|----|-------------|-------------|---------|-----------------|
| 5 | 121842731 | 121843083 | 121842907 | 22 | 26 | 9  | 3.167231866 | 0.000393236 |         | ENSG00000197462 |
| 5 | 121864510 | 121864739 | 121864574 | 8  | 10 | 10 | 1.173048839 | 0.355733    |         | ENSG00000197462 |
| 5 | 121879770 | 121880077 | 121879932 | 9  | 12 | 7  | 1.906204364 | 0.0695918   |         | ENSG00000197462 |
| 5 | 122400523 | 122400914 | 122400748 | 9  | 14 | 5  | 2.932622098 | 0.00829617  | PPIC    | ENSG00000168938 |
| 5 | 122514778 | 122515018 | 122514932 | 11 | 13 | 0  | 16.42268375 | 1.91E-05    | PRDM6   | ENSG00000061455 |
| 5 | 122519224 | 122519458 | 122519320 | 12 | 13 | 9  | 1.642268375 | 0.111397    | PRDM6   | ENSG00000061455 |
| 5 | 122786755 | 122787254 | 122787046 | 16 | 31 | 4  | 7.507512572 | 9.10E-08    | CEP120  | ENSG00000168944 |
| 5 | 123377688 | 123377881 | 123377784 | 8  | 9  | 1  | 5.865244197 | 0.00272497  |         | ENSG00000214750 |
| 5 | 123496214 | 123496741 | 123496562 | 39 | 59 | 3  | 17.59573259 | 3.89E-17    |         | ENSG00000214750 |
| 5 | 123605978 | 123606436 | 123606257 | 15 | 26 | 1  | 15.83615933 | 1.23E-08    |         | ENSG00000214750 |
| 5 | 123626828 | 123627018 | 123626872 | 8  | 8  | 5  | 1.759573259 | 0.13508     |         | ENSG00000214750 |
| 5 | 124009962 | 124010565 | 124010249 | 35 | 57 | 4  | 13.60736654 | 1.42E-15    | ZNF608  | ENSG00000168916 |
| 5 | 124019608 | 124019824 | 124019728 | 8  | 10 | 8  | 1.433726359 | 0.209175    | ZNF608  | ENSG00000168916 |
| 5 | 124112693 | 124112961 | 124112841 | 8  | 12 | 7  | 1.906204364 | 0.0695918   | ZNF608  | ENSG00000168916 |
| 5 | 124114789 | 124114968 | 124114878 | 8  | 8  | 4  | 2.111487911 | 0.0804809   | ZNF608  | ENSG00000168916 |
| 5 | 124407407 | 124407644 | 124407525 | 11 | 14 | 2  | 5.865244197 | 0.000387308 |         | ENSG00000214748 |
| 5 | 124407707 | 124407899 | 124407789 | 9  | 10 | 6  | 1.843362462 | 0.0964212   |         | ENSG00000214748 |
| 5 | 124773401 | 124773821 | 124773653 | 8  | 16 | 9  | 1.994183027 | 0.0370915   |         | ENSG00000208973 |
| 5 | 125083254 | 125083676 | 125083507 | 14 | 20 | 4  | 4.926805125 | 0.00010522  |         | ENSG00000208973 |
| 5 | 125598244 | 125598512 | 125598384 | 10 | 11 | 11 | 1.173048839 | 0.349489    | GRAMD3  | ENSG00000155324 |
| 5 | 125729068 | 125729440 | 125729261 | 8  | 15 | 1  | 9.384390715 | 3.90E-05    | GRAMD3  | ENSG00000155324 |
| 5 | 125729873 | 125730085 | 125729934 | 8  | 8  | 0  | 10.55743955 | 0.000925496 | GRAMD3  | ENSG00000155324 |
| 5 | 125732093 | 125732372 | 125732232 | 16 | 17 | 9  | 2.111487911 | 0.0248715   | GRAMD3  | ENSG00000155324 |
| 5 | 125748620 | 125748969 | 125748737 | 8  | 13 | 5  | 2.737113958 | 0.0137917   | GRAMD3  | ENSG00000155324 |
| 5 | 125786831 | 125787046 | 125786958 | 16 | 17 | 6  | 3.016411301 | 0.00381427  | GRAMD3  | ENSG00000155324 |
| 5 | 125879634 | 125880015 | 125879812 | 10 | 16 | 3  | 4.985457567 | 0.000385643 |         | ENSG00000200347 |
| 5 | 125880540 | 125880918 | 125880693 | 15 | 20 | 6  | 3.519146518 | 0.000784044 |         | ENSG00000200347 |
| 5 | 125900013 | 125900372 | 125900202 | 12 | 18 | 2  | 7.429309316 | 2.63E-05    |         | ENSG00000200347 |
| 5 | 125902804 | 125903007 | 125902905 | 8  | 9  | 6  | 1.675784056 | 0.141978    |         | ENSG00000200347 |
| 5 | 125958571 | 125959196 | 125958941 | 20 | 40 | 13 | 3.435357315 | 7.45E-06    | ALDH7A1 | ENSG00000164904 |
| 5 | 126020032 | 126020284 | 126020137 | 9  | 10 | 2  | 4.301179077 | 0.00512919  |         | ENSG00000213630 |
| 5 | 126040813 | 126041145 | 126040998 | 28 | 32 | 8  | 4.301179077 | 6.43E-06    |         | ENSG00000213630 |
| 5 | 126141901 | 126142240 | 126142070 | 9  | 13 | 3  | 4.105670938 | 0.00243034  | LMNB1   | ENSG00000113368 |
| 5 | 126165575 | 126165823 | 126165699 | 8  | 10 | 2  | 4.301179077 | 0.00512919  | LMNB1   | ENSG00000113368 |



|   |           |           |           |     |     |    |             |             |           |                 |
|---|-----------|-----------|-----------|-----|-----|----|-------------|-------------|-----------|-----------------|
| 5 | 126393898 | 126394137 | 126394005 | 11  | 14  | 4  | 3.519146518 | 0.00361132  | 3-Mar     | ENSG00000173926 |
| 5 | 126405797 | 126406265 | 126406014 | 16  | 26  | 4  | 6.334463732 | 2.40E-06    | 3-Mar     | ENSG00000173926 |
| 5 | 126436851 | 126437044 | 126436892 | 8   | 9   | 2  | 3.910162798 | 0.00955088  |           | ENSG00000164241 |
| 5 | 126476020 | 126476250 | 126476135 | 11  | 12  | 2  | 5.083211637 | 0.00143337  |           | ENSG00000214743 |
| 5 | 126592791 | 126593010 | 126592900 | 10  | 12  | 1  | 7.624817456 | 0.000332769 | MEGF10    | ENSG00000145794 |
| 5 | 126988387 | 126988587 | 126988472 | 9   | 9   | 1  | 5.865244197 | 0.00272497  | CTXN3     | ENSG00000205279 |
| 5 | 127239220 | 127239665 | 127239399 | 9   | 17  | 5  | 3.519146518 | 0.00167472  | SLC12A2   | ENSG00000064651 |
| 5 | 127272739 | 127272968 | 127272856 | 9   | 10  | 5  | 2.150589539 | 0.0575848   | SLC12A2   | ENSG00000064651 |
| 5 | 127298408 | 127298841 | 127298587 | 10  | 18  | 7  | 2.785990993 | 0.00480525  | SLC12A2   | ENSG00000064651 |
| 5 | 127351694 | 127351926 | 127351810 | 8   | 9   | 4  | 2.346097679 | 0.050148    | SLC12A2   | ENSG00000064651 |
| 5 | 127446479 | 127446701 | 127446590 | 8   | 10  | 6  | 1.843362462 | 0.0964212   | SLC12A2   | ENSG00000064651 |
| 5 | 127517580 | 127517891 | 127517713 | 16  | 19  | 0  | 23.46097679 | 1.81E-07    | SLC12A2   | ENSG00000064651 |
| 5 | 127564749 | 127564966 | 127564840 | 11  | 11  | 2  | 4.692195357 | 0.00272444  | SLC12A2   | ENSG00000064651 |
| 5 | 128284378 | 128284582 | 128284446 | 9   | 9   | 2  | 3.910162798 | 0.00955088  | SLC27A6   | ENSG00000113396 |
| 5 | 128490074 | 128490527 | 128490242 | 15  | 23  | 9  | 2.815317214 | 0.00172056  | ISOC1     | ENSG00000066583 |
| 5 | 128492788 | 128493158 | 128492951 | 9   | 15  | 7  | 2.346097679 | 0.0195693   | ISOC1     | ENSG00000066583 |
| 5 | 128540932 | 128541727 | 128541329 | 106 | 153 | 13 | 12.90353723 | 3.43E-37    | ISOC1     | ENSG00000066583 |
| 5 | 128605303 | 128605727 | 128605504 | 34  | 46  | 7  | 6.891661931 | 3.87E-10    | ISOC1     | ENSG00000066583 |
| 5 | 128634963 | 128635224 | 128635093 | 9   | 10  | 4  | 2.580707446 | 0.0306059   | ISOC1     | ENSG00000066583 |
| 5 | 128725059 | 128725287 | 128725173 | 8   | 8   | 5  | 1.759573259 | 0.13508     | ADAMTS19  | ENSG00000145808 |
| 5 | 129134994 | 129135237 | 129135115 | 13  | 13  | 4  | 3.28453675  | 0.00629037  | KIAA1024L | ENSG00000186367 |
| 5 | 129890386 | 129890631 | 129890508 | 10  | 12  | 5  | 2.541605819 | 0.0225912   |           | ENSG00000199455 |
| 5 | 130528138 | 130528327 | 130528199 | 8   | 8   | 2  | 3.519146518 | 0.017558    | HINT1     | ENSG00000169567 |
| 5 | 130534377 | 130534668 | 130534522 | 12  | 15  | 5  | 3.128130238 | 0.00492422  | LYRM7     | ENSG00000186687 |
| 5 | 130731051 | 130731273 | 130731162 | 13  | 13  | 1  | 8.211341875 | 0.000163445 | CDC42SE2  | ENSG00000158985 |
| 5 | 130746056 | 130746385 | 130746220 | 8   | 12  | 6  | 2.178519273 | 0.0416567   | CDC42SE2  | ENSG00000158985 |
| 5 | 130998481 | 130999335 | 130999096 | 12  | 33  | 12 | 3.067973887 | 0.000114749 | RAPGEF6   | ENSG00000158987 |
| 5 | 131311312 | 131311520 | 131311416 | 8   | 8   | 1  | 5.278719777 | 0.00542188  | ACSL6     | ENSG00000164398 |
| 5 | 131371595 | 131371916 | 131371755 | 9   | 13  | 1  | 8.211341875 | 0.000163445 | ACSL6     | ENSG00000164398 |
| 5 | 131419931 | 131420237 | 131420079 | 10  | 11  | 3  | 3.519146518 | 0.00788869  | IL3       | ENSG00000164399 |
| 5 | 131457469 | 131457833 | 131457633 | 15  | 19  | 0  | 23.46097679 | 1.81E-07    | CSF2      | ENSG00000164400 |
| 5 | 131632528 | 131632804 | 131632666 | 8   | 8   | 1  | 5.278719777 | 0.00542188  | PDLIM4    | ENSG00000131435 |
| 5 | 131742062 | 131742468 | 131742289 | 12  | 19  | 10 | 2.132816071 | 0.01835     | SLC22A5   | ENSG00000197375 |
| 5 | 131744983 | 131745169 | 131745091 | 11  | 11  | 1  | 7.038293036 | 0.000674435 | SLC22A5   | ENSG00000197375 |

|   |           |           |           |    |    |   |             |             |          |                 |
|---|-----------|-----------|-----------|----|----|---|-------------|-------------|----------|-----------------|
| 5 | 131745183 | 131745466 | 131745324 | 9  | 13 | 3 | 4.105670938 | 0.00243034  | SLC22A5  | ENSG00000197375 |
| 5 | 131783321 | 131783531 | 131783426 | 10 | 10 | 3 | 3.225884308 | 0.0139466   |          | ENSG00000197536 |
| 5 | 131852443 | 131852627 | 131852592 | 9  | 9  | 0 | 11.73048839 | 0.000425898 | IRF1     | ENSG00000125347 |
| 5 | 131859783 | 131860100 | 131859941 | 10 | 16 | 3 | 4.985457567 | 0.000385643 | IRF1     | ENSG00000125347 |
| 5 | 131890181 | 131890445 | 131890313 | 9  | 11 | 3 | 3.519146518 | 0.00788869  | IL5      | ENSG00000113525 |
| 5 | 131920370 | 131920585 | 131920477 | 9  | 9  | 3 | 2.932622098 | 0.0242899   | RAD50    | ENSG00000113522 |
| 5 | 132141380 | 132141565 | 132141472 | 8  | 9  | 7 | 1.466311049 | 0.20706     | 8-Sep    | ENSG00000164402 |
| 5 | 132163109 | 132163349 | 132163250 | 18 | 19 | 5 | 3.910162798 | 0.000546977 | ANKRD43  | ENSG00000198944 |
| 5 | 132208615 | 132208796 | 132208777 | 8  | 8  | 6 | 1.508205651 | 0.203852    |          | ENSG00000201274 |
| 5 | 132229895 | 132230342 | 132230163 | 10 | 18 | 3 | 5.571981987 | 0.000108726 | UQCRQ    | ENSG00000164405 |
| 5 | 132317175 | 132317399 | 132317258 | 8  | 8  | 4 | 2.111487911 | 0.0804809   |          | ENSG00000217123 |
| 5 | 132327273 | 132327597 | 132327435 | 12 | 17 | 5 | 3.519146518 | 0.00167472  | AFF4     | ENSG00000072364 |
| 5 | 132390038 | 132390217 | 132390127 | 8  | 8  | 1 | 5.278719777 | 0.00542188  | ZCCHC10  | ENSG00000155329 |
| 5 | 132404237 | 132404490 | 132404326 | 19 | 21 | 5 | 4.301179077 | 0.000172642 | HSPA4    | ENSG00000170606 |
| 5 | 132404813 | 132405121 | 132404989 | 11 | 16 | 0 | 19.94183027 | 1.86E-06    | HSPA4    | ENSG00000170606 |
| 5 | 132413321 | 132413550 | 132413435 | 13 | 14 | 0 | 17.59573259 | 8.79E-06    | HSPA4    | ENSG00000170606 |
| 5 | 132583592 | 132583797 | 132583656 | 8  | 10 | 2 | 4.301179077 | 0.00512919  | HSPA4    | ENSG00000170606 |
| 5 | 132598235 | 132598415 | 132598325 | 8  | 8  | 4 | 2.111487911 | 0.0804809   | HSPA4    | ENSG00000170606 |
| 5 | 132787285 | 132787629 | 132787457 | 16 | 19 | 3 | 5.865244197 | 5.72E-05    |          | ENSG00000221287 |
| 5 | 132820726 | 132821053 | 132820889 | 11 | 12 | 5 | 2.541605819 | 0.0225912   |          | ENSG00000221287 |
| 5 | 132821525 | 132821972 | 132821704 | 10 | 18 | 4 | 4.457585589 | 0.000353565 |          | ENSG00000221287 |
| 5 | 132916618 | 132916816 | 132916740 | 8  | 10 | 3 | 3.225884308 | 0.0139466   | FSTL4    | ENSG00000053108 |
| 5 | 133208502 | 133208873 | 133208737 | 9  | 14 | 3 | 4.398933147 | 0.00132748  |          | ENSG00000208898 |
| 5 | 133211823 | 133212020 | 133211964 | 8  | 8  | 4 | 2.111487911 | 0.0804809   |          | ENSG00000208898 |
| 5 | 133301879 | 133302131 | 133302025 | 9  | 12 | 2 | 5.083211637 | 0.00143337  | C5orf15  | ENSG00000113583 |
| 5 | 133306736 | 133306937 | 133306836 | 12 | 12 | 6 | 2.178519273 | 0.0416567   | C5orf15  | ENSG00000113583 |
| 5 | 133357263 | 133357519 | 133357394 | 8  | 10 | 4 | 2.580707446 | 0.0306059   | VDAC1    | ENSG00000213585 |
| 5 | 133383737 | 133384089 | 133383913 | 9  | 14 | 8 | 1.955081399 | 0.0506438   | VDAC1    | ENSG00000213585 |
| 5 | 133403120 | 133403321 | 133403220 | 8  | 8  | 4 | 2.111487911 | 0.0804809   | VDAC1    | ENSG00000213585 |
| 5 | 133452437 | 133452891 | 133452693 | 29 | 40 | 3 | 12.0237506  | 3.35E-11    | TCF7     | ENSG00000081059 |
| 5 | 133456658 | 133456892 | 133456788 | 9  | 12 | 4 | 3.049926982 | 0.0108184   | TCF7     | ENSG00000081059 |
| 5 | 133540454 | 133540646 | 133540550 | 8  | 10 | 3 | 3.225884308 | 0.0139466   | SKP1     | ENSG00000113558 |
| 5 | 133734759 | 133734989 | 133734868 | 8  | 8  | 3 | 2.639359888 | 0.0415794   | UBE2B    | ENSG00000119048 |
| 5 | 133775264 | 133775621 | 133775430 | 11 | 16 | 3 | 4.985457567 | 0.000385643 | CDKN2AIP | ENSG00000145835 |

|   |           |           |           |    |     |    |             |             |           |                 |
|---|-----------|-----------|-----------|----|-----|----|-------------|-------------|-----------|-----------------|
| 5 | 133803074 | 133803271 | 133803195 | 8  | 9   | 3  | 2.932622098 | 0.0242899   | CDKN2AIPM | ENSG00000145835 |
| 5 | 133830310 | 133830608 | 133830466 | 10 | 13  | 3  | 4.105670938 | 0.00243034  |           | ENSG00000207222 |
| 5 | 133866625 | 133866808 | 133866770 | 8  | 9   | 0  | 11.73048839 | 0.000425898 |           | ENSG00000207222 |
| 5 | 133887886 | 133888619 | 133888014 | 11 | 25  | 10 | 2.772660893 | 0.00131329  | PHF15     | ENSG00000043143 |
| 5 | 133996305 | 133996592 | 133996448 | 16 | 19  | 3  | 5.865244197 | 5.72E-05    | SAR1B     | ENSG00000152700 |
| 5 | 134000829 | 134001126 | 134000979 | 11 | 13  | 4  | 3.28453675  | 0.00629037  |           | ENSG00000207459 |
| 5 | 134101849 | 134102092 | 134101951 | 9  | 11  | 2  | 4.692195357 | 0.00272444  | CAMLG     | ENSG00000164615 |
| 5 | 134102873 | 134103196 | 134102981 | 8  | 12  | 8  | 1.694403879 | 0.107291    | CAMLG     | ENSG00000164615 |
| 5 | 134122192 | 134122428 | 134122310 | 17 | 18  | 9  | 2.228792795 | 0.0164363   | DDX46     | ENSG00000145833 |
| 5 | 134287999 | 134288347 | 134288173 | 37 | 39  | 54 | 0.853126429 | 0.781167    |           | ENSG00000208861 |
| 5 | 134289365 | 134289544 | 134289513 | 8  | 8   | 6  | 1.508205651 | 0.203852    |           | ENSG00000208856 |
| 5 | 134290491 | 134290921 | 134290663 | 14 | 18  | 22 | 0.969040346 | 0.544098    |           | ENSG00000208849 |
| 5 | 134331734 | 134331996 | 134331837 | 16 | 17  | 6  | 3.016411301 | 0.00381427  | CATSPER3  | ENSG00000152705 |
| 5 | 134398000 | 134398340 | 134398169 | 9  | 13  | 0  | 16.42268375 | 1.91E-05    | PITX1     | ENSG00000069011 |
| 5 | 134490390 | 134490602 | 134490434 | 8  | 10  | 4  | 2.580707446 | 0.0306059   | PITX1     | ENSG00000069011 |
| 5 | 134555022 | 134555281 | 134555144 | 15 | 16  | 3  | 4.985457567 | 0.000385643 | PITX1     | ENSG00000069011 |
| 5 | 134700653 | 134701155 | 134700879 | 69 | 87  | 2  | 34.40943262 | 2.59E-27    | H2AFY     | ENSG00000113648 |
| 5 | 134872404 | 134872621 | 134872465 | 11 | 14  | 4  | 3.519146518 | 0.00361132  | NEUROG1   | ENSG00000181965 |
| 5 | 134924489 | 134924736 | 134924561 | 8  | 10  | 1  | 6.451768616 | 0.00135978  | CXCL14    | ENSG00000145824 |
| 5 | 135193700 | 135193958 | 135193850 | 8  | 11  | 6  | 2.010940867 | 0.0640214   |           | ENSG00000145832 |
| 5 | 135221554 | 135221828 | 135221691 | 17 | 17  | 5  | 3.519146518 | 0.00167472  |           | ENSG00000145832 |
| 5 | 135328543 | 135328740 | 135328601 | 10 | 11  | 2  | 4.692195357 | 0.00272444  | LECT2     | ENSG00000145826 |
| 5 | 135397408 | 135397740 | 135397568 | 18 | 20  | 1  | 12.31701281 | 1.03E-06    | TGFBI     | ENSG00000120708 |
| 5 | 135422066 | 135422300 | 135422212 | 10 | 13  | 2  | 5.474227917 | 0.000747844 | TGFBI     | ENSG00000120708 |
| 5 | 135471659 | 135472304 | 135471990 | 82 | 159 | 5  | 31.28130238 | 5.29E-47    | SMAD5     | ENSG00000113658 |
| 5 | 135496046 | 135496483 | 135496194 | 19 | 28  | 5  | 5.669736057 | 2.48E-06    | SMAD5     | ENSG00000113658 |
| 5 | 135556884 | 135557153 | 135557049 | 9  | 10  | 6  | 1.843362462 | 0.0964212   | SMAD5OS   | ENSG00000164621 |
| 5 | 135613425 | 135613624 | 135613510 | 9  | 9   | 2  | 3.910162798 | 0.00955088  | TRPC7     | ENSG00000069018 |
| 5 | 136087589 | 136087797 | 136087728 | 9  | 10  | 3  | 3.225884308 | 0.0139466   |           | ENSG00000214684 |
| 5 | 136133766 | 136134011 | 136133888 | 11 | 11  | 4  | 2.815317214 | 0.0183428   |           | ENSG00000214684 |
| 5 | 136438840 | 136439087 | 136438963 | 10 | 12  | 1  | 7.624817456 | 0.000332769 |           | ENSG00000222285 |
| 5 | 136715316 | 136715618 | 136715467 | 11 | 13  | 2  | 5.474227917 | 0.000747844 | SPOCK1    | ENSG00000152377 |
| 5 | 136991165 | 136991418 | 136991271 | 10 | 10  | 1  | 6.451768616 | 0.00135978  |           | ENSG00000216009 |
| 5 | 137024037 | 137024230 | 137024122 | 12 | 12  | 4  | 3.049926982 | 0.0108184   |           | ENSG00000216009 |

|   |           |           |           |    |    |    |             |             |         |                 |
|---|-----------|-----------|-----------|----|----|----|-------------|-------------|---------|-----------------|
| 5 | 137117678 | 137118139 | 137117960 | 9  | 19 | 6  | 3.351568112 | 0.00134187  | HNRNPA0 | ENSG00000177733 |
| 5 | 137118167 | 137118414 | 137118271 | 10 | 11 | 0  | 14.07658607 | 9.02E-05    | HNRNPA0 | ENSG00000177733 |
| 5 | 137172408 | 137172691 | 137172549 | 11 | 15 | 5  | 3.128130238 | 0.00492422  | NPY6R   | ENSG00000159279 |
| 5 | 137212737 | 137212929 | 137212833 | 10 | 10 | 2  | 4.301179077 | 0.00512919  | MYOT    | ENSG00000120729 |
| 5 | 137396767 | 137396950 | 137396883 | 8  | 8  | 0  | 10.55743955 | 0.000925496 | FAM13B1 | ENSG00000031003 |
| 5 | 137432525 | 137432779 | 137432652 | 8  | 9  | 1  | 5.865244197 | 0.00272497  |         | ENSG00000222924 |
| 5 | 137586554 | 137586779 | 137586664 | 13 | 14 | 3  | 4.398933147 | 0.00132748  | CDC23   | ENSG00000094880 |
| 5 | 137646858 | 137647041 | 137646949 | 8  | 8  | 2  | 3.519146518 | 0.017558    | GFRA3   | ENSG00000146013 |
| 5 | 137669357 | 137669755 | 137669594 | 61 | 67 | 5  | 13.29455351 | 8.80E-18    | CDC25C  | ENSG00000158402 |
| 5 | 137701630 | 137702058 | 137701809 | 13 | 22 | 2  | 8.993374435 | 1.66E-06    | FAM53C  | ENSG00000120709 |
| 5 | 137715998 | 137716193 | 137716094 | 8  | 8  | 3  | 2.639359888 | 0.0415794   | JMJD1B  | ENSG00000120733 |
| 5 | 137717295 | 137717477 | 137717395 | 8  | 8  | 1  | 5.278719777 | 0.00542188  | JMJD1B  | ENSG00000120733 |
| 5 | 137827536 | 137827933 | 137827711 | 10 | 18 | 6  | 3.183989707 | 0.00227432  | EGR1    | ENSG00000120738 |
| 5 | 137828629 | 137828823 | 137828692 | 8  | 9  | 1  | 5.865244197 | 0.00272497  | EGR1    | ENSG00000120738 |
| 5 | 137907041 | 137907306 | 137907164 | 8  | 10 | 3  | 3.225884308 | 0.0139466   | ETF1    | ENSG00000120705 |
| 5 | 137923567 | 137923770 | 137923668 | 13 | 13 | 5  | 2.737113958 | 0.0137917   |         | ENSG00000206989 |
| 5 | 137939070 | 137939508 | 137939226 | 11 | 17 | 6  | 3.016411301 | 0.00381427  | HSPA9   | ENSG00000113013 |
| 5 | 137969551 | 137969945 | 137969658 | 8  | 12 | 1  | 7.624817456 | 0.000332769 |         | ENSG00000208810 |
| 5 | 137972710 | 137973340 | 137973161 | 17 | 32 | 12 | 2.977739361 | 0.000186314 |         | ENSG00000208810 |
| 5 | 138005433 | 138005798 | 138005607 | 8  | 13 | 2  | 5.474227917 | 0.000747844 |         | ENSG00000208810 |
| 5 | 138068766 | 138069174 | 138069015 | 15 | 22 | 12 | 2.0753941   | 0.0149739   | CTNNA1  | ENSG00000044115 |
| 5 | 138088738 | 138089145 | 138088966 | 28 | 36 | 3  | 10.85070176 | 5.62E-10    | CTNNA1  | ENSG00000044115 |
| 5 | 138089161 | 138089389 | 138089275 | 8  | 9  | 3  | 2.932622098 | 0.0242899   | CTNNA1  | ENSG00000044115 |
| 5 | 138116544 | 138116894 | 138116719 | 12 | 16 | 3  | 4.985457567 | 0.000385643 | CTNNA1  | ENSG00000044115 |
| 5 | 138153337 | 138153541 | 138153370 | 9  | 10 | 3  | 3.225884308 | 0.0139466   | CTNNA1  | ENSG00000044115 |
| 5 | 138234137 | 138234665 | 138234486 | 25 | 39 | 3  | 11.73048839 | 6.80E-11    | LRRTM2  | ENSG00000146006 |
| 5 | 138329286 | 138329495 | 138329390 | 8  | 8  | 1  | 5.278719777 | 0.00542188  |         | ENSG00000201532 |
| 5 | 138386248 | 138386452 | 138386364 | 11 | 11 | 0  | 14.07658607 | 9.02E-05    |         | ENSG00000201532 |
| 5 | 138428238 | 138428525 | 138428393 | 13 | 13 | 8  | 1.824742639 | 0.0744168   |         | ENSG00000201532 |
| 5 | 138442239 | 138442423 | 138442331 | 8  | 9  | 3  | 2.932622098 | 0.0242899   |         | ENSG00000201532 |
| 5 | 138464395 | 138464707 | 138464551 | 14 | 18 | 7  | 2.785990993 | 0.00480525  |         | ENSG00000201532 |
| 5 | 138484430 | 138484609 | 138484535 | 8  | 8  | 3  | 2.639359888 | 0.0415794   | SIL1    | ENSG00000120725 |
| 5 | 138511949 | 138512424 | 138512165 | 25 | 33 | 3  | 9.970915134 | 4.56E-09    | SIL1    | ENSG00000120725 |
| 5 | 138521283 | 138521478 | 138521380 | 8  | 9  | 5  | 1.955081399 | 0.0892323   | SIL1    | ENSG00000120725 |

|   |           |           |           |     |     |    |             |             |         |                 |
|---|-----------|-----------|-----------|-----|-----|----|-------------|-------------|---------|-----------------|
| 5 | 138542678 | 138542901 | 138542755 | 8   | 9   | 0  | 11.73048839 | 0.000425898 | SIL1    | ENSG00000120725 |
| 5 | 138595746 | 138596262 | 138595981 | 213 | 260 | 0  | 306.1657471 | 1.06E-88    |         | ENSG00000208799 |
| 5 | 138597340 | 138597761 | 138597610 | 11  | 16  | 3  | 4.985457567 | 0.000385643 |         | ENSG00000208799 |
| 5 | 138626292 | 138626620 | 138626447 | 12  | 15  | 5  | 3.128130238 | 0.00492422  | MATR3   | ENSG00000015479 |
| 5 | 138637458 | 138637924 | 138637637 | 10  | 18  | 6  | 3.183989707 | 0.00227432  | MATR3   | ENSG00000015479 |
| 5 | 138657088 | 138657356 | 138657222 | 9   | 11  | 8  | 1.564065119 | 0.151515    | MATR3   | ENSG00000015479 |
| 5 | 138657882 | 138658184 | 138658033 | 14  | 19  | 2  | 7.820325595 | 1.32E-05    | MATR3   | ENSG00000015479 |
| 5 | 138704779 | 138705002 | 138704876 | 9   | 11  | 4  | 2.815317214 | 0.0183428   | PAIP2   | ENSG00000120727 |
| 5 | 138705594 | 138705843 | 138705741 | 11  | 14  | 8  | 1.955081399 | 0.0506438   | PAIP2   | ENSG00000120727 |
| 5 | 138767463 | 138767731 | 138767610 | 14  | 17  | 8  | 2.346097679 | 0.0144542   |         | ENSG00000170469 |
| 5 | 138803097 | 138803280 | 138803188 | 8   | 9   | 5  | 1.955081399 | 0.0892323   | DNAJC18 | ENSG00000170464 |
| 5 | 138873276 | 138873737 | 138873523 | 9   | 18  | 5  | 3.714654658 | 0.000961539 | TMEM173 | ENSG00000184584 |
| 5 | 138877694 | 138877957 | 138877825 | 15  | 16  | 7  | 2.492728784 | 0.0124193   | TMEM173 | ENSG00000184584 |
| 5 | 138920503 | 138920694 | 138920553 | 10  | 10  | 2  | 4.301179077 | 0.00512919  | UBE2D2  | ENSG00000131508 |
| 5 | 138993135 | 138993354 | 138993254 | 11  | 11  | 4  | 2.815317214 | 0.0183428   | CXXC5   | ENSG00000171604 |
| 5 | 139020029 | 139020254 | 139020141 | 8   | 10  | 2  | 4.301179077 | 0.00512919  | CXXC5   | ENSG00000171604 |
| 5 | 139068365 | 139068616 | 139068439 | 8   | 9   | 2  | 3.910162798 | 0.00955088  |         | ENSG00000200756 |
| 5 | 139098876 | 139099425 | 139099085 | 21  | 37  | 3  | 11.14396397 | 2.78E-10    |         | ENSG00000200756 |
| 5 | 139135163 | 139135439 | 139135306 | 10  | 12  | 2  | 5.083211637 | 0.00143337  | PSD2    | ENSG00000146005 |
| 5 | 139147732 | 139148220 | 139148041 | 16  | 25  | 7  | 3.812408728 | 0.00012465  | PSD2    | ENSG00000146005 |
| 5 | 139204183 | 139204472 | 139204332 | 16  | 19  | 2  | 7.820325595 | 1.32E-05    | PSD2    | ENSG00000146005 |
| 5 | 139328639 | 139328872 | 139328755 | 10  | 11  | 5  | 2.346097679 | 0.0364013   |         | ENSG00000207317 |
| 5 | 139504042 | 139504261 | 139504151 | 9   | 10  | 4  | 2.580707446 | 0.0306059   |         | ENSG00000182700 |
| 5 | 139516880 | 139517075 | 139516963 | 8   | 10  | 2  | 4.301179077 | 0.00512919  | C5orf32 | ENSG00000120306 |
| 5 | 139525385 | 139525644 | 139525483 | 9   | 9   | 1  | 5.865244197 | 0.00272497  | C5orf32 | ENSG00000120306 |
| 5 | 139662788 | 139663194 | 139663015 | 12  | 20  | 14 | 1.642268375 | 0.06827     | PFDN1   | ENSG00000113068 |
| 5 | 139706484 | 139706671 | 139706625 | 8   | 8   | 2  | 3.519146518 | 0.017558    | HBEGF   | ENSG00000113070 |
| 5 | 139761022 | 139761256 | 139761139 | 8   | 10  | 2  | 4.301179077 | 0.00512919  | ANKHD1  | ENSG00000131503 |
| 5 | 139916926 | 139917526 | 139917307 | 48  | 81  | 4  | 19.23800096 | 4.31E-23    | SRA1    | ENSG00000213523 |
| 5 | 139924465 | 139924692 | 139924631 | 12  | 14  | 2  | 5.865244197 | 0.000387308 | SLC35A4 | ENSG00000176087 |
| 5 | 140007509 | 140007893 | 140007715 | 8   | 13  | 4  | 3.28453675  | 0.00629037  | NDUFA2  | ENSG00000131495 |
| 5 | 140051061 | 140051676 | 140051358 | 9   | 24  | 9  | 2.932622098 | 0.00106136  |         | ENSG00000112855 |
| 5 | 140070854 | 140071254 | 140071075 | 18  | 26  | 6  | 4.524616952 | 2.63E-05    |         | ENSG00000199990 |
| 5 | 140078341 | 140078951 | 140078763 | 22  | 41  | 12 | 3.789850096 | 1.90E-06    |         | ENSG00000202111 |

|   |           |           |           |    |    |    |             |             |          |                 |
|---|-----------|-----------|-----------|----|----|----|-------------|-------------|----------|-----------------|
| 5 | 140085940 | 140086193 | 140086079 | 11 | 13 | 4  | 3.28453675  | 0.00629037  |          | ENSG00000202515 |
| 5 | 140137784 | 140138170 | 140137962 | 15 | 21 | 2  | 8.602358155 | 3.33E-06    | PCDHA1   | ENSG00000204970 |
| 5 | 140201442 | 140201647 | 140201529 | 9  | 9  | 5  | 1.955081399 | 0.0892323   | PCDHA8   | ENSG00000204962 |
| 5 | 140242378 | 140242596 | 140242487 | 9  | 10 | 3  | 3.225884308 | 0.0139466   | PCDHA10  | ENSG00000081842 |
| 5 | 140326171 | 140326409 | 140326289 | 9  | 10 | 1  | 6.451768616 | 0.00135978  | PCDHA10  | ENSG00000081842 |
| 5 | 140363954 | 140364375 | 140364292 | 11 | 20 | 8  | 2.737113958 | 0.0036449   | PCDHA10  | ENSG00000081842 |
| 5 | 140399905 | 140400215 | 140400060 | 14 | 17 | 6  | 3.016411301 | 0.00381427  | PCDHB1   | ENSG00000171815 |
| 5 | 140400869 | 140401159 | 140401018 | 14 | 18 | 13 | 1.591994853 | 0.0905191   | PCDHB1   | ENSG00000171815 |
| 5 | 140444223 | 140444464 | 140444335 | 10 | 12 | 5  | 2.541605819 | 0.0225912   | PCDHB2   | ENSG00000112852 |
| 5 | 140460047 | 140460317 | 140460182 | 17 | 20 | 2  | 8.211341875 | 6.65E-06    | PCDHB3   | ENSG00000113205 |
| 5 | 140509651 | 140509967 | 140509820 | 11 | 15 | 8  | 2.085420159 | 0.0338693   | PCDHB6   | ENSG00000113211 |
| 5 | 140568428 | 140568610 | 140568501 | 8  | 9  | 5  | 1.955081399 | 0.0892323   | PCDHB12  | ENSG00000120328 |
| 5 | 140573530 | 140573771 | 140573635 | 11 | 12 | 0  | 15.24963491 | 4.15E-05    | PCDHB13  | ENSG00000187372 |
| 5 | 140709705 | 140709933 | 140709807 | 9  | 9  | 3  | 2.932622098 | 0.0242899   | PCDHGA3  | ENSG00000214594 |
| 5 | 140838158 | 140838349 | 140838204 | 9  | 9  | 4  | 2.346097679 | 0.050148    |          | ENSG00000208724 |
| 5 | 140874145 | 140874414 | 140874279 | 8  | 12 | 2  | 5.083211637 | 0.00143337  | PCDHGC4  | ENSG00000081853 |
| 5 | 140923980 | 140924252 | 140924159 | 19 | 22 | 1  | 13.49006165 | 2.37E-07    | DIAPH1   | ENSG00000131504 |
| 5 | 140978854 | 140979232 | 140979021 | 13 | 20 | 5  | 4.105670938 | 0.000308509 | DIAPH1   | ENSG00000131504 |
| 5 | 141051958 | 141052226 | 141052092 | 13 | 15 | 4  | 3.753756286 | 0.0020497   | ARAP3    | ENSG00000120318 |
| 5 | 141073777 | 141074070 | 141073905 | 9  | 12 | 4  | 3.049926982 | 0.0108184   | ARAP3    | ENSG00000120318 |
| 5 | 141113854 | 141114173 | 141114022 | 9  | 12 | 2  | 5.083211637 | 0.00143337  | ARAP3    | ENSG00000120318 |
| 5 | 141181405 | 141181667 | 141181536 | 11 | 14 | 3  | 4.398933147 | 0.00132748  | PCDH1    | ENSG00000156453 |
| 5 | 141192931 | 141193144 | 141193051 | 10 | 12 | 2  | 5.083211637 | 0.00143337  | PCDH1    | ENSG00000156453 |
| 5 | 141200594 | 141200835 | 141200733 | 8  | 10 | 3  | 3.225884308 | 0.0139466   | PCDH1    | ENSG00000156453 |
| 5 | 141209473 | 141209840 | 141209612 | 17 | 23 | 5  | 4.692195357 | 5.29E-05    | PCDH1    | ENSG00000156453 |
| 5 | 141225820 | 141226101 | 141225960 | 18 | 20 | 2  | 8.211341875 | 6.65E-06    | PCDH1    | ENSG00000156453 |
| 5 | 141238907 | 141239175 | 141239058 | 12 | 13 | 5  | 2.737113958 | 0.0137917   | PCDH1    | ENSG00000156453 |
| 5 | 141283497 | 141283740 | 141283580 | 11 | 12 | 5  | 2.541605819 | 0.0225912   | KIAA0141 | ENSG00000081791 |
| 5 | 141295255 | 141295681 | 141295545 | 9  | 16 | 0  | 19.94183027 | 1.86E-06    | KIAA0141 | ENSG00000081791 |
| 5 | 141320602 | 141320781 | 141320698 | 8  | 8  | 3  | 2.639359888 | 0.0415794   | PCDH12   | ENSG00000113555 |
| 5 | 141328578 | 141328986 | 141328757 | 8  | 16 | 8  | 2.215758919 | 0.0222902   | RNF14    | ENSG00000013561 |
| 5 | 141363158 | 141363535 | 141363325 | 11 | 17 | 0  | 21.11487911 | 8.57E-07    | GNPDA1   | ENSG00000113552 |
| 5 | 141363574 | 141364164 | 141363985 | 14 | 32 | 6  | 5.530087385 | 7.11E-07    | GNPDA1   | ENSG00000113552 |
| 5 | 141364190 | 141364422 | 141364284 | 11 | 13 | 1  | 8.211341875 | 0.000163445 | GNPDA1   | ENSG00000113552 |

|   |           |           |           |    |     |    |             |             |          |                 |
|---|-----------|-----------|-----------|----|-----|----|-------------|-------------|----------|-----------------|
| 5 | 141372887 | 141373075 | 141372981 | 8  | 8   | 4  | 2.111487911 | 0.0804809   | GNPDA1   | ENSG00000113552 |
| 5 | 141384652 | 141384851 | 141384761 | 8  | 10  | 9  | 1.290353723 | 0.279648    | GNPDA1   | ENSG00000113552 |
| 5 | 141684491 | 141684721 | 141684597 | 11 | 13  | 2  | 5.474227917 | 0.000747844 | SPRY4    | ENSG00000187678 |
| 5 | 141763361 | 141763669 | 141763515 | 14 | 16  | 3  | 4.985457567 | 0.000385643 | SPRY4    | ENSG00000187678 |
| 5 | 141928646 | 141928965 | 141928809 | 12 | 16  | 1  | 9.970915134 | 1.89E-05    |          | ENSG00000219227 |
| 5 | 142073099 | 142073393 | 142073246 | 10 | 13  | 5  | 2.737113958 | 0.0137917   | FGF1     | ENSG00000113578 |
| 5 | 142076808 | 142077070 | 142076933 | 9  | 12  | 5  | 2.541605819 | 0.0225912   | FGF1     | ENSG00000113578 |
| 5 | 142100320 | 142100616 | 142100468 | 13 | 17  | 7  | 2.639359888 | 0.00777415  | ARHGAP26 | ENSG00000145819 |
| 5 | 142234477 | 142234663 | 142234579 | 8  | 8   | 1  | 5.278719777 | 0.00542188  | ARHGAP26 | ENSG00000145819 |
| 5 | 142275654 | 142275874 | 142275743 | 10 | 12  | 2  | 5.083211637 | 0.00143337  | ARHGAP26 | ENSG00000145819 |
| 5 | 142341845 | 142342157 | 142342009 | 12 | 15  | 3  | 4.692195357 | 0.000718455 | ARHGAP26 | ENSG00000145819 |
| 5 | 142434290 | 142434748 | 142434551 | 51 | 76  | 5  | 15.05412677 | 1.47E-20    | ARHGAP26 | ENSG00000145819 |
| 5 | 142446671 | 142447293 | 142447138 | 18 | 32  | 5  | 6.451768616 | 1.97E-07    | ARHGAP26 | ENSG00000145819 |
| 5 | 142502797 | 142503239 | 142502976 | 13 | 25  | 9  | 3.049926982 | 0.000648806 | NR3C1    | ENSG00000113580 |
| 5 | 142542766 | 142543388 | 142543209 | 10 | 24  | 9  | 2.932622098 | 0.00106136  | NR3C1    | ENSG00000113580 |
| 5 | 142560516 | 142560840 | 142560678 | 26 | 29  | 1  | 17.59573259 | 1.33E-09    | NR3C1    | ENSG00000113580 |
| 5 | 142582680 | 142582925 | 142582758 | 14 | 17  | 9  | 2.111487911 | 0.0248715   | NR3C1    | ENSG00000113580 |
| 5 | 142605613 | 142606251 | 142605850 | 11 | 25  | 6  | 4.357038546 | 4.72E-05    | NR3C1    | ENSG00000113580 |
| 5 | 142676696 | 142676882 | 142676785 | 8  | 9   | 5  | 1.955081399 | 0.0892323   | NR3C1    | ENSG00000113580 |
| 5 | 142715598 | 142715817 | 142715707 | 11 | 12  | 5  | 2.541605819 | 0.0225912   | NR3C1    | ENSG00000113580 |
| 5 | 142718885 | 142719101 | 142719006 | 9  | 9   | 3  | 2.932622098 | 0.0242899   | NR3C1    | ENSG00000113580 |
| 5 | 142760195 | 142760383 | 142760302 | 9  | 10  | 4  | 2.580707446 | 0.0306059   | NR3C1    | ENSG00000113580 |
| 5 | 142761690 | 142761953 | 142761810 | 8  | 8   | 3  | 2.639359888 | 0.0415794   | NR3C1    | ENSG00000113580 |
| 5 | 142765121 | 142765337 | 142765240 | 8  | 9   | 3  | 2.932622098 | 0.0242899   | NR3C1    | ENSG00000113580 |
| 5 | 142855662 | 142855879 | 142855752 | 9  | 10  | 6  | 1.843362462 | 0.0964212   | NR3C1    | ENSG00000113580 |
| 5 | 142907266 | 142907549 | 142907379 | 8  | 12  | 4  | 3.049926982 | 0.0108184   | NR3C1    | ENSG00000113580 |
| 5 | 142931016 | 142931225 | 142931120 | 11 | 12  | 7  | 1.906204364 | 0.0695918   | NR3C1    | ENSG00000113580 |
| 5 | 142948938 | 142949301 | 142949125 | 8  | 14  | 11 | 1.466311049 | 0.15926     | NR3C1    | ENSG00000113580 |
| 5 | 142954521 | 142955397 | 142954820 | 62 | 142 | 13 | 11.981856   | 7.01E-34    | NR3C1    | ENSG00000113580 |
| 5 | 142956111 | 142956409 | 142956260 | 21 | 25  | 3  | 7.624817456 | 1.09E-06    | NR3C1    | ENSG00000113580 |
| 5 | 143019478 | 143019695 | 143019584 | 9  | 9   | 6  | 1.675784056 | 0.141978    | HMHB1    | ENSG00000158497 |
| 5 | 143337732 | 143337911 | 143337838 | 8  | 8   | 3  | 2.639359888 | 0.0415794   |          | ENSG00000208708 |
| 5 | 143530129 | 143530496 | 143530308 | 11 | 18  | 4  | 4.457585589 | 0.000353565 | YIPF5    | ENSG00000145817 |
| 5 | 143547511 | 143547793 | 143547681 | 13 | 15  | 7  | 2.346097679 | 0.0195693   | YIPF5    | ENSG00000145817 |

|   |           |           |           |    |    |    |             |             |         |                 |
|---|-----------|-----------|-----------|----|----|----|-------------|-------------|---------|-----------------|
| 5 | 143693288 | 143693656 | 143693467 | 13 | 20 | 0  | 24.63402563 | 8.35E-08    | KCTD16  | ENSG00000183775 |
| 5 | 143941845 | 143942150 | 143941993 | 8  | 10 | 1  | 6.451768616 | 0.00135978  |         | ENSG00000201423 |
| 5 | 144097604 | 144097783 | 144097651 | 8  | 8  | 1  | 5.278719777 | 0.00542188  |         | ENSG00000201423 |
| 5 | 144607201 | 144607600 | 144607421 | 17 | 24 | 1  | 14.66311049 | 5.43E-08    |         | ENSG00000213487 |
| 5 | 144684056 | 144684273 | 144684158 | 9  | 11 | 1  | 7.038293036 | 0.000674435 |         | ENSG00000213487 |
| 5 | 144891184 | 144891430 | 144891307 | 9  | 10 | 3  | 3.225884308 | 0.0139466   |         | ENSG00000213487 |
| 5 | 145041352 | 145041663 | 145041504 | 11 | 12 | 3  | 3.812408728 | 0.004404    | PRELID2 | ENSG00000186314 |
| 5 | 145296286 | 145296583 | 145296408 | 9  | 13 | 1  | 8.211341875 | 0.000163445 | SH3RF2  | ENSG00000156463 |
| 5 | 145341723 | 145342200 | 145342021 | 11 | 19 | 5  | 3.910162798 | 0.000546977 | SH3RF2  | ENSG00000156463 |
| 5 | 145431443 | 145431757 | 145431592 | 18 | 21 | 2  | 8.602358155 | 3.33E-06    | PLAC8L1 | ENSG00000173261 |
| 5 | 145542235 | 145542682 | 145542583 | 14 | 23 | 10 | 2.559379286 | 0.00330263  | LARS    | ENSG00000133706 |
| 5 | 145563177 | 145563508 | 145563314 | 9  | 13 | 11 | 1.368556979 | 0.211388    | RBM27   | ENSG00000091009 |
| 5 | 145652413 | 145652742 | 145652577 | 31 | 33 | 0  | 39.88366054 | 3.46E-12    | POU4F3  | ENSG00000091010 |
| 5 | 145806577 | 145807003 | 145806825 | 11 | 18 | 10 | 2.026175268 | 0.0273052   | TCERG1  | ENSG00000113649 |
| 5 | 147505722 | 147506037 | 147505879 | 15 | 19 | 1  | 11.73048839 | 2.14E-06    |         | ENSG00000196800 |
| 5 | 147507437 | 147507635 | 147507507 | 9  | 9  | 0  | 11.73048839 | 0.000425898 |         | ENSG00000196800 |
| 5 | 147619131 | 147619319 | 147619225 | 8  | 8  | 1  | 5.278719777 | 0.00542188  |         | ENSG00000214510 |
| 5 | 147734558 | 147734751 | 147734654 | 8  | 8  | 1  | 5.278719777 | 0.00542188  | FBXO38  | ENSG00000145868 |
| 5 | 147743285 | 147743508 | 147743386 | 9  | 11 | 3  | 3.519146518 | 0.00788869  | FBXO38  | ENSG00000145868 |
| 5 | 147743512 | 147743789 | 147743626 | 9  | 12 | 2  | 5.083211637 | 0.00143337  | FBXO38  | ENSG00000145868 |
| 5 | 147754308 | 147754551 | 147754429 | 8  | 11 | 4  | 2.815317214 | 0.0183428   | FBXO38  | ENSG00000145868 |
| 5 | 147842759 | 147842956 | 147842864 | 8  | 9  | 3  | 2.932622098 | 0.0242899   | FBXO38  | ENSG00000145868 |
| 5 | 147881915 | 147882298 | 147882107 | 28 | 37 | 0  | 44.57585589 | 1.55E-13    | HTR4    | ENSG00000164270 |
| 5 | 147882952 | 147883182 | 147883041 | 11 | 11 | 3  | 3.519146518 | 0.00788869  | HTR4    | ENSG00000164270 |
| 5 | 148185575 | 148186250 | 148186040 | 26 | 52 | 1  | 31.08579424 | 4.04E-17    | ADRB2   | ENSG00000169252 |
| 5 | 148370610 | 148370993 | 148370801 | 8  | 16 | 2  | 6.647276756 | 0.000101928 |         | ENSG00000207714 |
| 5 | 148454815 | 148455031 | 148454923 | 11 | 12 | 0  | 15.24963491 | 4.15E-05    |         | ENSG00000200161 |
| 5 | 148488866 | 148489167 | 148489023 | 10 | 12 | 4  | 3.049926982 | 0.0108184   | ABLIM3  | ENSG00000173210 |
| 5 | 148489171 | 148489418 | 148489247 | 8  | 9  | 8  | 1.303387599 | 0.281715    | ABLIM3  | ENSG00000173210 |
| 5 | 148588773 | 148589052 | 148588912 | 10 | 11 | 3  | 3.519146518 | 0.00788869  | ABLIM3  | ENSG00000173210 |
| 5 | 148684907 | 148685169 | 148685045 | 10 | 13 | 3  | 4.105670938 | 0.00243034  | GRPEL2  | ENSG00000164284 |
| 5 | 148704955 | 148705317 | 148705134 | 17 | 24 | 10 | 2.666020089 | 0.00209276  | GRPEL2  | ENSG00000164284 |
| 5 | 148727380 | 148727640 | 148727507 | 10 | 12 | 4  | 3.049926982 | 0.0108184   | PCYOX1L | ENSG00000145882 |
| 5 | 148741685 | 148741911 | 148741810 | 15 | 15 | 1  | 9.384390715 | 3.90E-05    | IL17B   | ENSG00000127743 |



|   |           |           |           |    |    |    |             |             |          |                 |
|---|-----------|-----------|-----------|----|----|----|-------------|-------------|----------|-----------------|
| 5 | 148799754 | 148799984 | 148799898 | 10 | 11 | 3  | 3.519146518 | 0.00788869  |          | ENSG00000207700 |
| 5 | 148809139 | 148809318 | 148809252 | 8  | 8  | 1  | 5.278719777 | 0.00542188  |          | ENSG00000207700 |
| 5 | 148842517 | 148842790 | 148842645 | 14 | 17 | 0  | 21.11487911 | 8.57E-07    |          | ENSG00000207700 |
| 5 | 148845552 | 148845904 | 148845728 | 13 | 17 | 3  | 5.278719777 | 0.000205462 |          | ENSG00000207700 |
| 5 | 148853253 | 148853439 | 148853346 | 8  | 8  | 4  | 2.111487911 | 0.0804809   |          | ENSG00000214490 |
| 5 | 148906735 | 148906971 | 148906835 | 14 | 14 | 3  | 4.398933147 | 0.00132748  |          | ENSG00000214490 |
| 5 | 148909187 | 148909513 | 148909350 | 8  | 13 | 6  | 2.346097679 | 0.0266147   | CSNK1A1  | ENSG00000113712 |
| 5 | 148911289 | 148911697 | 148911438 | 14 | 20 | 8  | 2.737113958 | 0.0036449   | CSNK1A1  | ENSG00000113712 |
| 5 | 148924620 | 148924800 | 148924740 | 8  | 8  | 0  | 10.55743955 | 0.000925496 | CSNK1A1  | ENSG00000113712 |
| 5 | 149025308 | 149025642 | 149025480 | 8  | 11 | 6  | 2.010940867 | 0.0640214   |          | ENSG00000221043 |
| 5 | 149091177 | 149091494 | 149091342 | 8  | 12 | 4  | 3.049926982 | 0.0108184   |          | ENSG00000199047 |
| 5 | 149124816 | 149125163 | 149124998 | 23 | 27 | 0  | 32.8453675  | 3.65E-10    | PPARGC1B | ENSG00000155846 |
| 5 | 149230100 | 149230345 | 149230221 | 12 | 14 | 4  | 3.519146518 | 0.00361132  | PPARGC1B | ENSG00000155846 |
| 5 | 149237877 | 149238155 | 149238016 | 13 | 16 | 12 | 1.533986944 | 0.120062    | PPARGC1B | ENSG00000155846 |
| 5 | 149238195 | 149238507 | 149238351 | 11 | 15 | 4  | 3.753756286 | 0.0020497   | PPARGC1B | ENSG00000155846 |
| 5 | 149240860 | 149241236 | 149241057 | 20 | 28 | 0  | 34.01841634 | 1.68E-10    |          | ENSG00000200334 |
| 5 | 149264035 | 149264251 | 149264143 | 9  | 9  | 2  | 3.910162798 | 0.00955088  |          | ENSG00000200334 |
| 5 | 149275509 | 149275693 | 149275566 | 8  | 8  | 3  | 2.639359888 | 0.0415794   |          | ENSG00000200334 |
| 5 | 149320307 | 149320629 | 149320468 | 9  | 15 | 0  | 18.76878143 | 4.04E-06    | SLC26A2  | ENSG00000155850 |
| 5 | 149350556 | 149350860 | 149350708 | 14 | 17 | 7  | 2.639359888 | 0.00777415  | TIGD6    | ENSG00000164296 |
| 5 | 149487827 | 149488545 | 149488201 | 25 | 50 | 5  | 9.970915134 | 1.23E-12    | CSF1R    | ENSG00000182578 |
| 5 | 149489633 | 149489919 | 149489771 | 9  | 12 | 5  | 2.541605819 | 0.0225912   | CSF1R    | ENSG00000182578 |
| 5 | 149703955 | 149704272 | 149704113 | 12 | 15 | 1  | 9.384390715 | 3.90E-05    | TCOF1    | ENSG00000070814 |
| 5 | 149710360 | 149710586 | 149710473 | 9  | 10 | 3  | 3.225884308 | 0.0139466   | TCOF1    | ENSG00000070814 |
| 5 | 149770462 | 149770659 | 149770572 | 8  | 9  | 4  | 2.346097679 | 0.050148    | CD74     | ENSG00000019582 |
| 5 | 149795823 | 149796115 | 149795965 | 11 | 12 | 5  | 2.541605819 | 0.0225912   | RPS14    | ENSG00000164587 |
| 5 | 149809323 | 149809613 | 149809488 | 13 | 14 | 8  | 1.955081399 | 0.0506438   | RPS14    | ENSG00000164587 |
| 5 | 149809624 | 149809948 | 149809786 | 14 | 20 | 8  | 2.737113958 | 0.0036449   | RPS14    | ENSG00000164587 |
| 5 | 149846399 | 149846849 | 149846513 | 11 | 19 | 3  | 5.865244197 | 5.72E-05    | NDST1    | ENSG00000070614 |
| 5 | 149860624 | 149860982 | 149860803 | 8  | 13 | 2  | 5.474227917 | 0.000747844 | NDST1    | ENSG00000070614 |
| 5 | 149973886 | 149974096 | 149974005 | 8  | 8  | 6  | 1.508205651 | 0.203852    | SYNPO    | ENSG00000171992 |
| 5 | 149975642 | 149976066 | 149975854 | 15 | 24 | 9  | 2.932622098 | 0.00106136  | SYNPO    | ENSG00000171992 |
| 5 | 149994685 | 149995052 | 149994874 | 8  | 14 | 3  | 4.398933147 | 0.00132748  | SYNPO    | ENSG00000171992 |
| 5 | 149997454 | 149997649 | 149997551 | 10 | 11 | 5  | 2.346097679 | 0.0364013   | SYNPO    | ENSG00000171992 |

|   |           |           |           |    |    |    |             |             |         |                 |
|---|-----------|-----------|-----------|----|----|----|-------------|-------------|---------|-----------------|
| 5 | 150030412 | 150030681 | 150030546 | 8  | 10 | 1  | 6.451768616 | 0.00135978  | MYOZ3   | ENSG00000164591 |
| 5 | 150060741 | 150061080 | 150060908 | 9  | 13 | 3  | 4.105670938 | 0.00243034  | RBM22   | ENSG00000086589 |
| 5 | 150118055 | 150118267 | 150118161 | 8  | 10 | 3  | 3.225884308 | 0.0139466   | DCTN4   | ENSG00000132912 |
| 5 | 150118589 | 150118945 | 150118767 | 11 | 15 | 6  | 2.68125449  | 0.0103552   | DCTN4   | ENSG00000132912 |
| 5 | 150138717 | 150138962 | 150138842 | 8  | 10 | 6  | 1.843362462 | 0.0964212   |         | ENSG00000181368 |
| 5 | 150160981 | 150161225 | 150161138 | 8  | 9  | 2  | 3.910162798 | 0.00955088  |         | ENSG00000181368 |
| 5 | 150161227 | 150161478 | 150161317 | 9  | 11 | 1  | 7.038293036 | 0.000674435 |         | ENSG00000181368 |
| 5 | 150380462 | 150380690 | 150380534 | 8  | 9  | 5  | 1.955081399 | 0.0892323   | GPX3    | ENSG00000211445 |
| 5 | 150440509 | 150440975 | 150440614 | 8  | 17 | 3  | 5.278719777 | 0.000205462 | TNIP1   | ENSG00000145901 |
| 5 | 150494024 | 150494242 | 150494133 | 8  | 8  | 2  | 3.519146518 | 0.017558    | ANXA6   | ENSG00000197043 |
| 5 | 150524592 | 150524843 | 150524717 | 10 | 11 | 4  | 2.815317214 | 0.0183428   | ANXA6   | ENSG00000197043 |
| 5 | 150562581 | 150562916 | 150562738 | 8  | 12 | 2  | 5.083211637 | 0.00143337  | CCDC69  | ENSG00000198624 |
| 5 | 150634467 | 150634761 | 150634614 | 11 | 14 | 4  | 3.519146518 | 0.00361132  | GM2A    | ENSG00000196743 |
| 5 | 150657946 | 150658136 | 150658037 | 8  | 10 | 2  | 4.301179077 | 0.00512919  | SLC36A3 | ENSG00000186334 |
| 5 | 150714026 | 150714268 | 150714141 | 11 | 12 | 2  | 5.083211637 | 0.00143337  | SLC36A2 | ENSG00000186335 |
| 5 | 150860537 | 150860814 | 150860659 | 12 | 13 | 5  | 2.737113958 | 0.0137917   |         | ENSG00000200227 |
| 5 | 150906766 | 150907040 | 150906869 | 11 | 13 | 1  | 8.211341875 | 0.000163445 | FAT2    | ENSG00000086570 |
| 5 | 150930310 | 150930604 | 150930436 | 19 | 23 | 4  | 5.630634429 | 1.63E-05    | FAT2    | ENSG00000086570 |
| 5 | 150977927 | 150978179 | 150978088 | 8  | 10 | 12 | 0.992579787 | 0.511743    | FAT2    | ENSG00000086570 |
| 5 | 150979496 | 150979759 | 150979633 | 15 | 19 | 6  | 3.351568112 | 0.00134187  | FAT2    | ENSG00000086570 |
| 5 | 151044800 | 151045076 | 151044931 | 12 | 13 | 5  | 2.737113958 | 0.0137917   | SPARC   | ENSG00000113140 |
| 5 | 151052044 | 151052434 | 151052223 | 8  | 15 | 3  | 4.692195357 | 0.000718455 |         | ENSG00000208610 |
| 5 | 151131053 | 151131419 | 151131194 | 10 | 16 | 4  | 3.988366054 | 0.00115141  | G3BP1   | ENSG00000145907 |
| 5 | 151131599 | 151131882 | 151131744 | 8  | 11 | 1  | 7.038293036 | 0.000674435 | G3BP1   | ENSG00000145907 |
| 5 | 151185397 | 151185605 | 151185444 | 8  | 8  | 13 | 0.754102825 | 0.754933    |         | ENSG00000222308 |
| 5 | 151297709 | 151297961 | 151297867 | 9  | 11 | 4  | 2.815317214 | 0.0183428   | GLRA1   | ENSG00000145888 |
| 5 | 151476630 | 151476956 | 151476793 | 11 | 15 | 3  | 4.692195357 | 0.000718455 | GLRA1   | ENSG00000145888 |
| 5 | 151578538 | 151578761 | 151578648 | 12 | 13 | 5  | 2.737113958 | 0.0137917   | NMUR2   | ENSG00000132911 |
| 5 | 151589889 | 151590457 | 151590047 | 17 | 32 | 2  | 12.90353723 | 1.37E-09    | NMUR2   | ENSG00000132911 |
| 5 | 152171701 | 152172249 | 152171907 | 57 | 75 | 6  | 12.73595883 | 2.24E-19    | NMUR2   | ENSG00000132911 |
| 5 | 152636026 | 152636226 | 152636115 | 9  | 9  | 0  | 11.73048839 | 0.000425898 | GRIA1   | ENSG00000155511 |
| 5 | 152712372 | 152712611 | 152712491 | 8  | 9  | 1  | 5.865244197 | 0.00272497  | GRIA1   | ENSG00000155511 |
| 5 | 152809256 | 152809458 | 152809350 | 8  | 8  | 0  | 10.55743955 | 0.000925496 | GRIA1   | ENSG00000155511 |
| 5 | 153191888 | 153192099 | 153191983 | 8  | 9  | 6  | 1.675784056 | 0.141978    |         | ENSG00000208592 |

|   |           |           |           |    |    |    |             |             |          |                 |
|---|-----------|-----------|-----------|----|----|----|-------------|-------------|----------|-----------------|
| 5 | 153398559 | 153398751 | 153398625 | 8  | 8  | 7  | 1.319679944 | 0.283403    | FAM114A2 | ENSG00000055147 |
| 5 | 153656399 | 153656832 | 153656653 | 13 | 21 | 10 | 2.346097679 | 0.00796926  |          | ENSG00000221070 |
| 5 | 153755516 | 153755804 | 153755660 | 9  | 13 | 1  | 8.211341875 | 0.000163445 |          | ENSG00000216873 |
| 5 | 153805379 | 153805766 | 153805541 | 10 | 17 | 6  | 3.016411301 | 0.00381427  | SAP30L   | ENSG00000164576 |
| 5 | 153806752 | 153806983 | 153806867 | 11 | 12 | 4  | 3.049926982 | 0.0108184   | SAP30L   | ENSG00000164576 |
| 5 | 153827498 | 153827787 | 153827670 | 13 | 15 | 2  | 6.256260476 | 0.000199274 | HAND1    | ENSG00000113196 |
| 5 | 153876239 | 153876418 | 153876328 | 8  | 8  | 1  | 5.278719777 | 0.00542188  | HAND1    | ENSG00000113196 |
| 5 | 153941831 | 153942054 | 153941930 | 10 | 10 | 2  | 4.301179077 | 0.00512919  |          | ENSG00000221552 |
| 5 | 153943444 | 153943943 | 153943764 | 13 | 23 | 5  | 4.692195357 | 5.29E-05    |          | ENSG00000221552 |
| 5 | 153970096 | 153970408 | 153970243 | 12 | 15 | 2  | 6.256260476 | 0.000199274 |          | ENSG00000221552 |
| 5 | 154010090 | 154010283 | 154010186 | 10 | 10 | 3  | 3.225884308 | 0.0139466   |          | ENSG00000221552 |
| 5 | 154060774 | 154061158 | 154061028 | 10 | 16 | 5  | 3.323638378 | 0.00288759  |          | ENSG00000208575 |
| 5 | 154071850 | 154072155 | 154072069 | 9  | 13 | 6  | 2.346097679 | 0.0266147   | LARP1    | ENSG00000155506 |
| 5 | 154114171 | 154114718 | 154114350 | 9  | 21 | 5  | 4.301179077 | 0.000172642 | LARP1    | ENSG00000155506 |
| 5 | 154152637 | 154152816 | 154152726 | 8  | 9  | 5  | 1.955081399 | 0.0892323   | LARP1    | ENSG00000155506 |
| 5 | 154169188 | 154169459 | 154169325 | 9  | 11 | 0  | 14.07658607 | 9.02E-05    | C5orf4   | ENSG00000170271 |
| 5 | 154202760 | 154202944 | 154202852 | 8  | 8  | 3  | 2.639359888 | 0.0415794   | C5orf4   | ENSG00000170271 |
| 5 | 154204446 | 154204975 | 154204796 | 16 | 28 | 7  | 4.252302043 | 2.31E-05    | C5orf4   | ENSG00000170271 |
| 5 | 154217670 | 154218192 | 154217838 | 10 | 20 | 5  | 4.105670938 | 0.000308509 | CNOT8    | ENSG00000155508 |
| 5 | 154218261 | 154218585 | 154218423 | 10 | 14 | 4  | 3.519146518 | 0.00361132  | CNOT8    | ENSG00000155508 |
| 5 | 154219071 | 154219357 | 154219214 | 8  | 8  | 5  | 1.759573259 | 0.13508     | CNOT8    | ENSG00000155508 |
| 5 | 154237754 | 154238118 | 154237933 | 35 | 42 | 4  | 10.08822002 | 5.25E-11    | CNOT8    | ENSG00000155508 |
| 5 | 154296983 | 154297214 | 154297110 | 8  | 9  | 5  | 1.955081399 | 0.0892323   | GEMIN5   | ENSG00000082516 |
| 5 | 154297899 | 154298088 | 154298055 | 8  | 9  | 3  | 2.932622098 | 0.0242899   | GEMIN5   | ENSG00000082516 |
| 5 | 154327384 | 154327603 | 154327513 | 10 | 11 | 2  | 4.692195357 | 0.00272444  | MRPL22   | ENSG00000082515 |
| 5 | 154332223 | 154332507 | 154332365 | 9  | 11 | 3  | 3.519146518 | 0.00788869  | MRPL22   | ENSG00000082515 |
| 5 | 154428606 | 154428850 | 154428721 | 9  | 11 | 5  | 2.346097679 | 0.0364013   |          | ENSG00000221131 |
| 5 | 154944370 | 154944667 | 154944518 | 19 | 21 | 0  | 25.80707446 | 3.84E-08    |          | ENSG00000208570 |
| 5 | 155258422 | 155258710 | 155258566 | 13 | 16 | 1  | 9.970915134 | 1.89E-05    |          | ENSG00000200275 |
| 5 | 156508464 | 156508796 | 156508636 | 10 | 15 | 4  | 3.753756286 | 0.0020497   | MED7     | ENSG00000155868 |
| 5 | 156824160 | 156824384 | 156824258 | 8  | 9  | 1  | 5.865244197 | 0.00272497  |          | ENSG00000172548 |
| 5 | 156831355 | 156831534 | 156831474 | 8  | 8  | 4  | 2.111487911 | 0.0804809   |          | ENSG00000172548 |
| 5 | 156971580 | 156972038 | 156971897 | 19 | 25 | 2  | 10.16642327 | 2.02E-07    |          | ENSG00000208540 |
| 5 | 157090624 | 157091262 | 157091030 | 19 | 36 | 7  | 5.425350882 | 2.04E-07    | THG1L    | ENSG00000113272 |

|   |           |           |           |    |     |   |             |             |        |                 |
|---|-----------|-----------|-----------|----|-----|---|-------------|-------------|--------|-----------------|
| 5 | 157103117 | 157103373 | 157103281 | 8  | 10  | 7 | 1.612942154 | 0.147335    | LSM11  | ENSG00000155858 |
| 5 | 157121698 | 157121937 | 157121823 | 9  | 10  | 3 | 3.225884308 | 0.0139466   | LSM11  | ENSG00000155858 |
| 5 | 157272639 | 157272870 | 157272746 | 11 | 13  | 2 | 5.474227917 | 0.000747844 |        | ENSG00000214374 |
| 5 | 157711538 | 157711894 | 157711716 | 13 | 19  | 2 | 7.820325595 | 1.32E-05    |        | ENSG00000213414 |
| 5 | 157954554 | 157954852 | 157954703 | 12 | 14  | 5 | 2.932622098 | 0.00829617  |        | ENSG00000212796 |
| 5 | 158061081 | 158061354 | 158061198 | 8  | 11  | 2 | 4.692195357 | 0.00272444  |        | ENSG00000212796 |
| 5 | 158535224 | 158535473 | 158535348 | 11 | 12  | 5 | 2.541605819 | 0.0225912   | RNF145 | ENSG00000145860 |
| 5 | 158676485 | 158676709 | 158676561 | 12 | 12  | 1 | 7.624817456 | 0.000332769 |        | ENSG00000221601 |
| 5 | 158701447 | 158701766 | 158701624 | 17 | 20  | 1 | 12.31701281 | 1.03E-06    | IL12B  | ENSG00000113302 |
| 5 | 158869987 | 158870259 | 158870136 | 11 | 13  | 6 | 2.346097679 | 0.0266147   | IL12B  | ENSG00000113302 |
| 5 | 158871248 | 158871469 | 158871358 | 8  | 8   | 3 | 2.639359888 | 0.0415794   | IL12B  | ENSG00000113302 |
| 5 | 158878044 | 158878436 | 158878239 | 11 | 19  | 2 | 7.820325595 | 1.32E-05    | IL12B  | ENSG00000113302 |
| 5 | 158892854 | 158893064 | 158892959 | 8  | 8   | 4 | 2.111487911 | 0.0804809   | IL12B  | ENSG00000113302 |
| 5 | 158931405 | 158931824 | 158931603 | 11 | 22  | 9 | 2.69801233  | 0.00276236  | IL12B  | ENSG00000113302 |
| 5 | 159015582 | 159015845 | 159015713 | 9  | 9   | 5 | 1.955081399 | 0.0892323   | ADRA1B | ENSG00000170214 |
| 5 | 159325174 | 159325483 | 159325343 | 9  | 11  | 2 | 4.692195357 | 0.00272444  |        | ENSG00000199398 |
| 5 | 159346899 | 159347210 | 159347089 | 11 | 15  | 6 | 2.68125449  | 0.0103552   |        | ENSG00000199398 |
| 5 | 159368570 | 159369008 | 159368749 | 10 | 19  | 9 | 2.346097679 | 0.0107159   | TTC1   | ENSG00000113312 |
| 5 | 159424886 | 159425151 | 159425037 | 13 | 16  | 0 | 19.94183027 | 1.86E-06    | PWWP2A | ENSG00000170234 |
| 5 | 159440453 | 159440694 | 159440570 | 8  | 10  | 2 | 4.301179077 | 0.00512919  | PWWP2A | ENSG00000170234 |
| 5 | 159479095 | 159479312 | 159479171 | 8  | 9   | 4 | 2.346097679 | 0.050148    | PWWP2A | ENSG00000170234 |
| 5 | 159515008 | 159515221 | 159515114 | 10 | 10  | 8 | 1.433726359 | 0.209175    | FABP6  | ENSG00000170231 |
| 5 | 159564669 | 159565284 | 159564972 | 16 | 31  | 1 | 18.76878143 | 2.99E-10    | FABP6  | ENSG00000170231 |
| 5 | 159759386 | 159759630 | 159759508 | 12 | 14  | 4 | 3.519146518 | 0.00361132  |        | ENSG00000221886 |
| 5 | 159778686 | 159778905 | 159778795 | 9  | 11  | 1 | 7.038293036 | 0.000674435 | SLU7   | ENSG00000164609 |
| 5 | 159868287 | 159868627 | 159868457 | 8  | 13  | 9 | 1.642268375 | 0.111397    |        | ENSG00000207936 |
| 5 | 159993443 | 159993759 | 159993583 | 17 | 20  | 2 | 8.211341875 | 6.65E-06    | ATP10B | ENSG00000118322 |
| 5 | 160283577 | 160283895 | 160283742 | 15 | 17  | 4 | 4.222975822 | 0.000640773 | ATP10B | ENSG00000118322 |
| 5 | 162796907 | 162797782 | 162797499 | 52 | 115 | 4 | 27.21473307 | 5.71E-34    | CCNG1  | ENSG00000113328 |
| 5 | 162819480 | 162819726 | 162819596 | 12 | 13  | 4 | 3.28453675  | 0.00629037  | NUDCD2 | ENSG00000170584 |
| 5 | 162868830 | 162869328 | 162869060 | 22 | 32  | 7 | 4.838826462 | 2.26E-06    | MAT2B  | ENSG00000038274 |
| 5 | 163055918 | 163056127 | 163056025 | 11 | 11  | 5 | 2.346097679 | 0.0364013   |        | ENSG00000208477 |
| 5 | 163311268 | 163311583 | 163311425 | 8  | 11  | 0 | 14.07658607 | 9.02E-05    |        | ENSG00000208477 |
| 5 | 163479269 | 163479903 | 163479610 | 66 | 93  | 2 | 36.7555303  | 2.80E-29    |        | ENSG00000208477 |

|   |           |           |           |    |    |    |             |             |        |                 |
|---|-----------|-----------|-----------|----|----|----|-------------|-------------|--------|-----------------|
| 5 | 167406969 | 167407307 | 167407138 | 8  | 13 | 6  | 2.346097679 | 0.0266147   |        | ENSG00000208456 |
| 5 | 167579411 | 167579622 | 167579461 | 9  | 9  | 7  | 1.466311049 | 0.20706     | WWC1   | ENSG00000113645 |
| 5 | 167628963 | 167629231 | 167629081 | 10 | 11 | 5  | 2.346097679 | 0.0364013   | WWC1   | ENSG00000113645 |
| 5 | 167648018 | 167648233 | 167648096 | 9  | 9  | 4  | 2.346097679 | 0.050148    | WWC1   | ENSG00000113645 |
| 5 | 167674427 | 167674696 | 167674585 | 12 | 13 | 3  | 4.105670938 | 0.00243034  | WWC1   | ENSG00000113645 |
| 5 | 167674918 | 167675097 | 167675007 | 9  | 9  | 3  | 2.932622098 | 0.0242899   | WWC1   | ENSG00000113645 |
| 5 | 167675787 | 167676234 | 167675966 | 19 | 28 | 6  | 4.859773763 | 8.07E-06    | WWC1   | ENSG00000113645 |
| 5 | 167684589 | 167684825 | 167684707 | 9  | 10 | 3  | 3.225884308 | 0.0139466   | WWC1   | ENSG00000113645 |
| 5 | 167712679 | 167713065 | 167712968 | 8  | 13 | 4  | 3.28453675  | 0.00629037  |        | ENSG00000208453 |
| 5 | 167761603 | 167761824 | 167761710 | 9  | 10 | 1  | 6.451768616 | 0.00135978  |        | ENSG00000208453 |
| 5 | 167808801 | 167809091 | 167808958 | 10 | 13 | 3  | 4.105670938 | 0.00243034  | RARS   | ENSG00000113643 |
| 5 | 167845903 | 167846137 | 167846018 | 11 | 12 | 5  | 2.541605819 | 0.0225912   | RARS   | ENSG00000113643 |
| 5 | 167939177 | 167939457 | 167939317 | 8  | 10 | 2  | 4.301179077 | 0.00512919  | PANK3  | ENSG00000120137 |
| 5 | 167939554 | 167939733 | 167939643 | 8  | 8  | 7  | 1.319679944 | 0.283403    | PANK3  | ENSG00000120137 |
| 5 | 167951538 | 167951992 | 167951716 | 24 | 33 | 11 | 3.323638378 | 5.37E-05    | PANK3  | ENSG00000120137 |
| 5 | 167959928 | 167960328 | 167960124 | 18 | 29 | 9  | 3.519146518 | 8.36E-05    | PANK3  | ENSG00000120137 |
| 5 | 168018140 | 168018557 | 168018378 | 19 | 27 | 7  | 4.105670938 | 4.08E-05    | PANK3  | ENSG00000120137 |
| 5 | 168039101 | 168039329 | 168039215 | 10 | 11 | 2  | 4.692195357 | 0.00272444  |        | ENSG00000207739 |
| 5 | 168056988 | 168057210 | 168057103 | 11 | 11 | 10 | 1.279689643 | 0.277323    |        | ENSG00000207739 |
| 5 | 168074172 | 168074371 | 168074336 | 9  | 9  | 1  | 5.865244197 | 0.00272497  |        | ENSG00000207739 |
| 5 | 168248099 | 168248293 | 168248246 | 8  | 9  | 0  | 11.73048839 | 0.000425898 |        | ENSG00000202345 |
| 5 | 168941306 | 168941612 | 168941466 | 9  | 9  | 11 | 0.977540699 | 0.526123    | CCDC99 | ENSG00000040275 |
| 5 | 169000961 | 169001250 | 169001109 | 8  | 11 | 1  | 7.038293036 | 0.000674435 | DOCK2  | ENSG00000134516 |
| 5 | 169191007 | 169191246 | 169191095 | 12 | 14 | 2  | 5.865244197 | 0.000387308 |        | ENSG00000204767 |
| 5 | 169193240 | 169193420 | 169193344 | 8  | 8  | 2  | 3.519146518 | 0.017558    |        | ENSG00000204767 |
| 5 | 169339842 | 169340109 | 169339948 | 9  | 11 | 10 | 1.279689643 | 0.277323    |        | ENSG00000204767 |
| 5 | 169377471 | 169377667 | 169377502 | 8  | 10 | 4  | 2.580707446 | 0.0306059   |        | ENSG00000204767 |
| 5 | 169632707 | 169632916 | 169632854 | 8  | 8  | 1  | 5.278719777 | 0.00542188  |        | ENSG00000198424 |
| 5 | 169633678 | 169633924 | 169633780 | 11 | 12 | 1  | 7.624817456 | 0.000332769 |        | ENSG00000198424 |
| 5 | 169696149 | 169696354 | 169696251 | 8  | 10 | 2  | 4.301179077 | 0.00512919  | KCNIP1 | ENSG00000182132 |
| 5 | 169747564 | 169747799 | 169747681 | 10 | 11 | 2  | 4.692195357 | 0.00272444  | KCNMB1 | ENSG00000145936 |
| 5 | 169788567 | 169789079 | 169788846 | 15 | 25 | 0  | 30.49926982 | 1.72E-09    | KCNMB1 | ENSG00000145936 |
| 5 | 169919927 | 169920106 | 169920016 | 8  | 8  | 2  | 3.519146518 | 0.017558    | KCNIP1 | ENSG00000182132 |
| 5 | 169963583 | 169963799 | 169963675 | 9  | 11 | 5  | 2.346097679 | 0.0364013   | KCNIP1 | ENSG00000182132 |

|   |           |           |           |     |     |    |             |             |          |                 |
|---|-----------|-----------|-----------|-----|-----|----|-------------|-------------|----------|-----------------|
| 5 | 169983273 | 169983458 | 169983357 | 9   | 9   | 2  | 3.910162798 | 0.00955088  | KCNIP1   | ENSG00000182132 |
| 5 | 170104126 | 170104338 | 170104239 | 10  | 10  | 5  | 2.150589539 | 0.0575848   | GABRP    | ENSG00000094755 |
| 5 | 170696132 | 170696355 | 170696230 | 8   | 8   | 5  | 1.759573259 | 0.13508     |          | ENSG00000213393 |
| 5 | 170746964 | 170747596 | 170747146 | 17  | 36  | 13 | 3.100200504 | 5.51E-05    | NPM1     | ENSG00000181163 |
| 5 | 170778340 | 170778585 | 170778429 | 9   | 9   | 2  | 3.910162798 | 0.00955088  | FGF18    | ENSG00000156427 |
| 5 | 170796405 | 170796613 | 170796509 | 9   | 10  | 1  | 6.451768616 | 0.00135978  | FGF18    | ENSG00000156427 |
| 5 | 170881595 | 170881987 | 170881774 | 8   | 14  | 8  | 1.955081399 | 0.0506438   | FGF18    | ENSG00000156427 |
| 5 | 171062135 | 171062372 | 171062253 | 8   | 10  | 0  | 12.90353723 | 0.000195991 | C5orf50  | ENSG00000185662 |
| 5 | 171108470 | 171108676 | 171108573 | 8   | 9   | 2  | 3.910162798 | 0.00955088  | C5orf50  | ENSG00000185662 |
| 5 | 171306160 | 171306408 | 171306256 | 11  | 11  | 1  | 7.038293036 | 0.000674435 | FBXW11   | ENSG00000072803 |
| 5 | 171366486 | 171366845 | 171366665 | 10  | 17  | 9  | 2.111487911 | 0.0248715   | FBXW11   | ENSG00000072803 |
| 5 | 171425261 | 171425533 | 171425397 | 9   | 12  | 5  | 2.541605819 | 0.0225912   | FBXW11   | ENSG00000072803 |
| 5 | 171466432 | 171466674 | 171466595 | 9   | 10  | 4  | 2.580707446 | 0.0306059   | STK10    | ENSG00000072786 |
| 5 | 171471546 | 171471891 | 171471718 | 10  | 15  | 2  | 6.256260476 | 0.000199274 | STK10    | ENSG00000072786 |
| 5 | 171521999 | 171522271 | 171522144 | 11  | 12  | 6  | 2.178519273 | 0.0416567   | STK10    | ENSG00000072786 |
| 5 | 171548178 | 171548488 | 171548333 | 11  | 14  | 0  | 17.59573259 | 8.79E-06    | STK10    | ENSG00000072786 |
| 5 | 171643735 | 171643981 | 171643895 | 9   | 9   | 2  | 3.910162798 | 0.00955088  | UBTD2    | ENSG00000168246 |
| 5 | 171745929 | 171746124 | 171746026 | 8   | 8   | 2  | 3.519146518 | 0.017558    |          | ENSG00000216127 |
| 5 | 171774393 | 171774656 | 171774524 | 8   | 11  | 4  | 2.815317214 | 0.0183428   |          | ENSG00000216127 |
| 5 | 171779533 | 171779732 | 171779632 | 8   | 9   | 3  | 2.932622098 | 0.0242899   |          | ENSG00000216127 |
| 5 | 171780244 | 171780812 | 171780415 | 9   | 21  | 12 | 1.985159574 | 0.021936    |          | ENSG00000216127 |
| 5 | 171838608 | 171838887 | 171838732 | 11  | 12  | 4  | 3.049926982 | 0.0108184   | SH3PXD2B | ENSG00000174705 |
| 5 | 171996416 | 171997369 | 171996792 | 135 | 189 | 12 | 17.14455996 | 4.04E-49    |          | ENSG00000214357 |
| 5 | 172019031 | 172019215 | 172019144 | 8   | 9   | 2  | 3.910162798 | 0.00955088  |          | ENSG00000214357 |
| 5 | 172019410 | 172019767 | 172019659 | 10  | 15  | 4  | 3.753756286 | 0.0020497   |          | ENSG00000214357 |
| 5 | 172048703 | 172048924 | 172048826 | 8   | 11  | 5  | 2.346097679 | 0.0364013   |          | ENSG00000214357 |
| 5 | 172072647 | 172072874 | 172072760 | 11  | 11  | 7  | 1.759573259 | 0.102361    |          | ENSG00000213386 |
| 5 | 172124897 | 172125186 | 172125041 | 9   | 12  | 1  | 7.624817456 | 0.000332769 |          | ENSG00000213386 |
| 5 | 172126055 | 172126240 | 172126147 | 8   | 8   | 6  | 1.508205651 | 0.203852    |          | ENSG00000213386 |
| 5 | 172263441 | 172263774 | 172263590 | 15  | 20  | 6  | 3.519146518 | 0.000784044 | ERGIC1   | ENSG00000113719 |
| 5 | 172264322 | 172264746 | 172264479 | 18  | 28  | 5  | 5.669736057 | 2.48E-06    | ERGIC1   | ENSG00000113719 |
| 5 | 172318188 | 172318421 | 172318335 | 8   | 10  | 4  | 2.580707446 | 0.0306059   |          | ENSG00000204758 |
| 5 | 172318806 | 172319100 | 172318949 | 19  | 20  | 10 | 2.239456875 | 0.0121685   |          | ENSG00000204758 |
| 5 | 172343033 | 172343258 | 172343162 | 8   | 10  | 6  | 1.843362462 | 0.0964212   | ATP6V0E1 | ENSG00000113732 |

|   |           |           |           |    |     |    |             |             |          |                 |
|---|-----------|-----------|-----------|----|-----|----|-------------|-------------|----------|-----------------|
| 5 | 172343347 | 172343645 | 172343496 | 9  | 12  | 4  | 3.049926982 | 0.0108184   | ATP6V0E1 | ENSG00000113732 |
| 5 | 172503910 | 172504232 | 172504071 | 17 | 23  | 11 | 2.346097679 | 0.00594236  | BNIP1    | ENSG00000113734 |
| 5 | 172504524 | 172504777 | 172504650 | 12 | 13  | 6  | 2.346097679 | 0.0266147   | BNIP1    | ENSG00000113734 |
| 5 | 172561666 | 172561893 | 172561786 | 11 | 11  | 2  | 4.692195357 | 0.00272444  |          | ENSG00000208401 |
| 5 | 172641542 | 172641814 | 172641678 | 9  | 10  | 6  | 1.843362462 | 0.0964212   |          | ENSG00000208394 |
| 5 | 172643050 | 172643255 | 172643152 | 8  | 10  | 3  | 3.225884308 | 0.0139466   |          | ENSG00000208394 |
| 5 | 172643419 | 172643711 | 172643565 | 10 | 14  | 8  | 1.955081399 | 0.0506438   |          | ENSG00000208394 |
| 5 | 172651925 | 172652463 | 172652194 | 93 | 122 | 4  | 28.85700145 | 3.13E-36    |          | ENSG00000208394 |
| 5 | 172653597 | 172653961 | 172653776 | 9  | 15  | 3  | 4.692195357 | 0.000718455 |          | ENSG00000208394 |
| 5 | 172662023 | 172662346 | 172662184 | 11 | 15  | 7  | 2.346097679 | 0.0195693   |          | ENSG00000208394 |
| 5 | 172662471 | 172662785 | 172662613 | 10 | 13  | 7  | 2.052835469 | 0.046392    |          | ENSG00000208394 |
| 5 | 172663468 | 172663783 | 172663625 | 11 | 14  | 8  | 1.955081399 | 0.0506438   |          | ENSG00000208394 |
| 5 | 172675764 | 172675960 | 172675808 | 8  | 8   | 3  | 2.639359888 | 0.0415794   | STC2     | ENSG00000113739 |
| 5 | 172687836 | 172688178 | 172688007 | 10 | 15  | 6  | 2.68125449  | 0.0103552   | STC2     | ENSG00000113739 |
| 5 | 172688360 | 172689078 | 172688719 | 10 | 30  | 12 | 2.797270309 | 0.000480593 | STC2     | ENSG00000113739 |
| 5 | 172691630 | 172691934 | 172691789 | 13 | 16  | 3  | 4.985457567 | 0.000385643 | STC2     | ENSG00000113739 |
| 5 | 172734121 | 172734369 | 172734222 | 10 | 12  | 1  | 7.624817456 | 0.000332769 |          | ENSG00000199219 |
| 5 | 172895207 | 172895386 | 172895296 | 8  | 8   | 1  | 5.278719777 | 0.00542188  | FAM44B   | ENSG00000145919 |
| 5 | 172924738 | 172925121 | 172924957 | 14 | 21  | 1  | 12.90353723 | 4.95E-07    | FAM44B   | ENSG00000145919 |
| 5 | 172927199 | 172927413 | 172927307 | 8  | 9   | 4  | 2.346097679 | 0.050148    | FAM44B   | ENSG00000145919 |
| 5 | 172929230 | 172929662 | 172929420 | 31 | 43  | 3  | 12.90353723 | 3.99E-12    | FAM44B   | ENSG00000145919 |
| 5 | 172974834 | 172975119 | 172974966 | 8  | 9   | 9  | 1.173048839 | 0.362316    | FAM44B   | ENSG00000145919 |
| 5 | 172976225 | 172976504 | 172976364 | 16 | 19  | 0  | 23.46097679 | 1.81E-07    | FAM44B   | ENSG00000145919 |
| 5 | 172978784 | 172978995 | 172978884 | 8  | 8   | 10 | 0.959767232 | 0.541959    | FAM44B   | ENSG00000145919 |
| 5 | 173072318 | 173072558 | 173072466 | 8  | 9   | 1  | 5.865244197 | 0.00272497  | FAM44B   | ENSG00000145919 |
| 5 | 173088121 | 173088387 | 173088266 | 16 | 17  | 4  | 4.222975822 | 0.000640773 | FAM44B   | ENSG00000145919 |
| 5 | 173113032 | 173113360 | 173113198 | 12 | 16  | 3  | 4.985457567 | 0.000385643 | CPEB4    | ENSG00000113742 |
| 5 | 173182084 | 173182356 | 173182192 | 13 | 13  | 10 | 1.49297125  | 0.157311    | CPEB4    | ENSG00000113742 |
| 5 | 173183701 | 173184109 | 173183930 | 14 | 21  | 11 | 2.150589539 | 0.0135908   | CPEB4    | ENSG00000113742 |
| 5 | 173227619 | 173228066 | 173227760 | 12 | 21  | 10 | 2.346097679 | 0.00796926  | CPEB4    | ENSG00000113742 |
| 5 | 173228207 | 173228386 | 173228275 | 8  | 8   | 3  | 2.639359888 | 0.0415794   | CPEB4    | ENSG00000113742 |
| 5 | 173231439 | 173231664 | 173231528 | 8  | 8   | 1  | 5.278719777 | 0.00542188  | CPEB4    | ENSG00000113742 |
| 5 | 173243596 | 173244152 | 173243966 | 31 | 43  | 5  | 8.602358155 | 1.42E-10    | CPEB4    | ENSG00000113742 |
| 5 | 173245047 | 173245280 | 173245166 | 9  | 11  | 1  | 7.038293036 | 0.000674435 | CPEB4    | ENSG00000113742 |

|   |           |           |           |     |     |    |             |             |         |                 |
|---|-----------|-----------|-----------|-----|-----|----|-------------|-------------|---------|-----------------|
| 5 | 173247185 | 173247364 | 173247208 | 8   | 8   | 7  | 1.319679944 | 0.283403    | CPEB4   | ENSG00000113742 |
| 5 | 173247433 | 173247897 | 173247569 | 12  | 22  | 3  | 6.745030826 | 8.05E-06    | CPEB4   | ENSG00000113742 |
| 5 | 173277507 | 173277751 | 173277629 | 11  | 13  | 8  | 1.824742639 | 0.0744168   | CPEB4   | ENSG00000113742 |
| 5 | 173332838 | 173333128 | 173332995 | 10  | 13  | 3  | 4.105670938 | 0.00243034  | C5orf47 | ENSG00000185056 |
| 5 | 173404970 | 173405562 | 173405273 | 25  | 41  | 7  | 6.158506406 | 9.25E-09    |         | ENSG00000170091 |
| 5 | 173676991 | 173677254 | 173677119 | 9   | 10  | 0  | 12.90353723 | 0.000195991 |         | ENSG00000213376 |
| 5 | 173683522 | 173683724 | 173683594 | 9   | 10  | 1  | 6.451768616 | 0.00135978  |         | ENSG00000213376 |
| 5 | 173686970 | 173687437 | 173687218 | 22  | 36  | 5  | 7.233801176 | 1.48E-08    |         | ENSG00000213376 |
| 5 | 173687542 | 173687797 | 173687632 | 9   | 12  | 2  | 5.083211637 | 0.00143337  |         | ENSG00000213376 |
| 5 | 173687819 | 173688960 | 173688474 | 458 | 627 | 7  | 92.08433389 | 2.25E-198   |         | ENSG00000213376 |
| 5 | 173689617 | 173689970 | 173689793 | 11  | 15  | 3  | 4.692195357 | 0.000718455 |         | ENSG00000213376 |
| 5 | 173779143 | 173779671 | 173779398 | 14  | 24  | 17 | 1.629234499 | 0.0548227   |         | ENSG00000213376 |
| 5 | 173784878 | 173785315 | 173785139 | 32  | 45  | 1  | 26.9801233  | 8.07E-15    |         | ENSG00000213376 |
| 5 | 173804608 | 173804844 | 173804689 | 9   | 9   | 0  | 11.73048839 | 0.000425898 |         | ENSG00000213376 |
| 5 | 173813402 | 173813588 | 173813495 | 8   | 9   | 0  | 11.73048839 | 0.000425898 |         | ENSG00000213376 |
| 5 | 173821031 | 173821251 | 173821141 | 11  | 11  | 3  | 3.519146518 | 0.00788869  |         | ENSG00000213376 |
| 5 | 173842255 | 173842612 | 173842433 | 9   | 14  | 6  | 2.513676084 | 0.016726    |         | ENSG00000213376 |
| 5 | 173843055 | 173843395 | 173843225 | 10  | 16  | 7  | 2.492728784 | 0.0124193   |         | ENSG00000213376 |
| 5 | 173880136 | 173880446 | 173880290 | 13  | 17  | 4  | 4.222975822 | 0.000640773 |         | ENSG00000213376 |
| 5 | 173883506 | 173883796 | 173883634 | 12  | 15  | 6  | 2.68125449  | 0.0103552   |         | ENSG00000213376 |
| 5 | 173888494 | 173888757 | 173888625 | 17  | 20  | 1  | 12.31701281 | 1.03E-06    |         | ENSG00000213376 |
| 5 | 173892101 | 173892487 | 173892306 | 17  | 25  | 7  | 3.812408728 | 0.00012465  |         | ENSG00000213376 |
| 5 | 173927362 | 173927574 | 173927463 | 8   | 10  | 0  | 12.90353723 | 0.000195991 |         | ENSG00000213376 |
| 5 | 173941084 | 173941427 | 173941255 | 10  | 16  | 1  | 9.970915134 | 1.89E-05    |         | ENSG00000213376 |
| 5 | 174080172 | 174080424 | 174080320 | 9   | 11  | 1  | 7.038293036 | 0.000674435 | MSX2    | ENSG00000120149 |
| 5 | 174082271 | 174082458 | 174082364 | 9   | 10  | 3  | 3.225884308 | 0.0139466   | MSX2    | ENSG00000120149 |
| 5 | 174083952 | 174084420 | 174084262 | 11  | 18  | 4  | 4.457585589 | 0.000353565 | MSX2    | ENSG00000120149 |
| 5 | 174095551 | 174095825 | 174095672 | 12  | 14  | 13 | 1.256838042 | 0.269506    |         | ENSG00000222422 |
| 5 | 174295558 | 174295798 | 174295716 | 9   | 11  | 2  | 4.692195357 | 0.00272444  |         | ENSG00000204754 |
| 5 | 174310879 | 174311082 | 174310980 | 9   | 9   | 1  | 5.865244197 | 0.00272497  |         | ENSG00000204754 |
| 5 | 174331939 | 174332250 | 174332102 | 11  | 14  | 4  | 3.519146518 | 0.00361132  |         | ENSG00000204754 |
| 5 | 174563713 | 174564125 | 174563892 | 19  | 27  | 0  | 32.8453675  | 3.65E-10    |         | ENSG00000204754 |
| 5 | 174644475 | 174644798 | 174644633 | 17  | 20  | 10 | 2.239456875 | 0.0121685   | DRD1    | ENSG00000184845 |
| 5 | 174645821 | 174646000 | 174645946 | 8   | 8   | 1  | 5.278719777 | 0.00542188  | DRD1    | ENSG00000184845 |



|   |           |           |           |    |    |    |             |             |          |                 |
|---|-----------|-----------|-----------|----|----|----|-------------|-------------|----------|-----------------|
| 5 | 174646353 | 174646925 | 174646639 | 13 | 25 | 2  | 10.16642327 | 2.02E-07    | DRD1     | ENSG00000184845 |
| 5 | 174647670 | 174647853 | 174647832 | 9  | 10 | 6  | 1.843362462 | 0.0964212   | DRD1     | ENSG00000184845 |
| 5 | 174738166 | 174738498 | 174738339 | 8  | 10 | 2  | 4.301179077 | 0.00512919  | DRD1     | ENSG00000184845 |
| 5 | 174756234 | 174756460 | 174756349 | 8  | 10 | 1  | 6.451768616 | 0.00135978  | DRD1     | ENSG00000184845 |
| 5 | 174819721 | 174820033 | 174819881 | 13 | 16 | 4  | 3.988366054 | 0.00115141  |          | ENSG00000208388 |
| 5 | 174824173 | 174824440 | 174824298 | 11 | 13 | 9  | 1.642268375 | 0.111397    |          | ENSG00000208388 |
| 5 | 174853849 | 174854192 | 174854020 | 17 | 20 | 9  | 2.463402563 | 0.00689886  | SFXN1    | ENSG00000164466 |
| 5 | 174893733 | 174893947 | 174893840 | 9  | 10 | 9  | 1.290353723 | 0.279648    | SFXN1    | ENSG00000164466 |
| 5 | 175089481 | 175089732 | 175089606 | 16 | 17 | 10 | 1.919534464 | 0.0400548   |          | ENSG00000200648 |
| 5 | 175106575 | 175106754 | 175106664 | 8  | 8  | 2  | 3.519146518 | 0.017558    |          | ENSG00000200648 |
| 5 | 175112431 | 175112724 | 175112577 | 13 | 15 | 4  | 3.753756286 | 0.0020497   | CPLX2    | ENSG00000145920 |
| 5 | 175138490 | 175138811 | 175138650 | 9  | 14 | 6  | 2.513676084 | 0.016726    | CPLX2    | ENSG00000145920 |
| 5 | 175138820 | 175139098 | 175138979 | 11 | 13 | 7  | 2.052835469 | 0.046392    | CPLX2    | ENSG00000145920 |
| 5 | 175156528 | 175156777 | 175156670 | 11 | 14 | 2  | 5.865244197 | 0.000387308 | CPLX2    | ENSG00000145920 |
| 5 | 175169403 | 175169657 | 175169532 | 10 | 11 | 3  | 3.519146518 | 0.00788869  | CPLX2    | ENSG00000145920 |
| 5 | 175189782 | 175190039 | 175189910 | 10 | 13 | 1  | 8.211341875 | 0.000163445 | CPLX2    | ENSG00000145920 |
| 5 | 175227564 | 175227778 | 175227678 | 8  | 9  | 2  | 3.910162798 | 0.00955088  | CPLX2    | ENSG00000145920 |
| 5 | 175711910 | 175712140 | 175712051 | 11 | 13 | 6  | 2.346097679 | 0.0266147   | KIAA1191 | ENSG00000122203 |
| 5 | 175720984 | 175721398 | 175721312 | 9  | 16 | 4  | 3.988366054 | 0.00115141  | KIAA1191 | ENSG00000122203 |
| 5 | 175748470 | 175748802 | 175748636 | 13 | 17 | 2  | 7.038293036 | 5.19E-05    | HIGD2A   | ENSG00000146066 |
| 5 | 175807501 | 175807937 | 175807758 | 11 | 21 | 11 | 2.150589539 | 0.0135908   | FAF2     | ENSG00000113194 |
| 5 | 175807946 | 175808253 | 175808099 | 9  | 14 | 6  | 2.513676084 | 0.016726    | FAF2     | ENSG00000113194 |
| 5 | 175897335 | 175897518 | 175897426 | 10 | 10 | 2  | 4.301179077 | 0.00512919  | RNF44    | ENSG00000146083 |
| 5 | 175903688 | 175903927 | 175903808 | 8  | 10 | 3  | 3.225884308 | 0.0139466   |          | ENSG00000203355 |
| 5 | 175937932 | 175938327 | 175938092 | 13 | 20 | 5  | 4.105670938 | 0.000308509 |          | ENSG00000204738 |
| 5 | 176006602 | 176006781 | 176006652 | 8  | 8  | 2  | 3.519146518 | 0.017558    | TSPAN17  | ENSG00000048140 |
| 5 | 176180731 | 176180958 | 176180844 | 9  | 11 | 2  | 4.692195357 | 0.00272444  | UNC5A    | ENSG00000113763 |
| 5 | 176197210 | 176197539 | 176197379 | 13 | 18 | 6  | 3.183989707 | 0.00227432  | UNC5A    | ENSG00000113763 |
| 5 | 176228591 | 176228891 | 176228741 | 11 | 13 | 3  | 4.105670938 | 0.00243034  | UNC5A    | ENSG00000113763 |
| 5 | 176229660 | 176230027 | 176229809 | 8  | 14 | 3  | 4.398933147 | 0.00132748  | UNC5A    | ENSG00000113763 |
| 5 | 176363520 | 176363796 | 176363625 | 8  | 10 | 3  | 3.225884308 | 0.0139466   | UIMC1    | ENSG00000087206 |
| 5 | 176366316 | 176366601 | 176366494 | 14 | 19 | 3  | 5.865244197 | 5.72E-05    | UIMC1    | ENSG00000087206 |
| 5 | 176472900 | 176473112 | 176473006 | 8  | 9  | 4  | 2.346097679 | 0.050148    | NSD1     | ENSG00000165671 |
| 5 | 176629592 | 176629966 | 176629787 | 14 | 22 | 6  | 3.854303329 | 0.000260696 |          | ENSG00000213350 |

|   |           |           |           |    |    |    |             |             |         |                 |
|---|-----------|-----------|-----------|----|----|----|-------------|-------------|---------|-----------------|
| 5 | 176661230 | 176661885 | 176661639 | 11 | 28 | 12 | 2.616801257 | 0.00120123  | RAB24   | ENSG00000169228 |
| 5 | 176676689 | 176676905 | 176676811 | 9  | 10 | 0  | 12.90353723 | 0.000195991 | MXD3    | ENSG00000213347 |
| 5 | 176677594 | 176677832 | 176677721 | 12 | 12 | 2  | 5.083211637 | 0.00143337  | MXD3    | ENSG00000213347 |
| 5 | 176710929 | 176711830 | 176711371 | 19 | 41 | 19 | 2.463402563 | 0.000265263 | LMAN2   | ENSG00000169223 |
| 5 | 176726342 | 176726561 | 176726435 | 8  | 10 | 2  | 4.301179077 | 0.00512919  | RGS14   | ENSG00000169220 |
| 5 | 176749165 | 176749439 | 176749274 | 9  | 12 | 11 | 1.270802909 | 0.274822    | SLC34A1 | ENSG00000131183 |
| 5 | 176750106 | 176750324 | 176750215 | 8  | 9  | 5  | 1.955081399 | 0.0892323   | SLC34A1 | ENSG00000131183 |
| 5 | 176762177 | 176762559 | 176762396 | 10 | 17 | 15 | 1.319679944 | 0.209239    | PFN3    | ENSG00000196570 |
| 5 | 176785529 | 176785802 | 176785667 | 12 | 15 | 7  | 2.346097679 | 0.0195693   | GRK6    | ENSG00000198055 |
| 5 | 176803590 | 176803784 | 176803687 | 8  | 8  | 2  | 3.519146518 | 0.017558    | PRR7    | ENSG00000131188 |
| 5 | 176805847 | 176806255 | 176805983 | 12 | 19 | 7  | 2.932622098 | 0.00293566  | PRR7    | ENSG00000131188 |
| 5 | 176807299 | 176807488 | 176807412 | 8  | 9  | 3  | 2.932622098 | 0.0242899   | PRR7    | ENSG00000131188 |
| 5 | 176811814 | 176811996 | 176811905 | 9  | 10 | 3  | 3.225884308 | 0.0139466   | PRR7    | ENSG00000131188 |
| 5 | 176813965 | 176814341 | 176814104 | 11 | 17 | 2  | 7.038293036 | 5.19E-05    | PRR7    | ENSG00000131188 |
| 5 | 176815062 | 176815245 | 176815153 | 8  | 8  | 3  | 2.639359888 | 0.0415794   | PRR7    | ENSG00000131188 |
| 5 | 176815292 | 176815554 | 176815423 | 8  | 11 | 5  | 2.346097679 | 0.0364013   | PRR7    | ENSG00000131188 |
| 5 | 176815985 | 176816315 | 176816136 | 8  | 13 | 6  | 2.346097679 | 0.0266147   | PRR7    | ENSG00000131188 |
| 5 | 176857060 | 176857341 | 176857191 | 8  | 13 | 7  | 2.052835469 | 0.046392    | PDLIM7  | ENSG00000196923 |
| 5 | 176857361 | 176857608 | 176857471 | 9  | 9  | 8  | 1.303387599 | 0.281715    | PDLIM7  | ENSG00000196923 |
| 5 | 176860596 | 176860932 | 176860774 | 10 | 13 | 6  | 2.346097679 | 0.0266147   | PDLIM7  | ENSG00000196923 |
| 5 | 176876541 | 176877126 | 176876720 | 16 | 31 | 10 | 3.412505714 | 6.73E-05    | DDX41   | ENSG00000183258 |
| 5 | 176914187 | 176914376 | 176914281 | 9  | 10 | 0  | 12.90353723 | 0.000195991 |         | ENSG00000146067 |
| 5 | 176935731 | 176936153 | 176935942 | 48 | 58 | 2  | 23.06996051 | 7.12E-18    | TMED9   | ENSG00000184840 |
| 5 | 176951831 | 176952043 | 176951965 | 8  | 9  | 3  | 2.932622098 | 0.0242899   | TMED9   | ENSG00000184840 |
| 5 | 176967067 | 176967453 | 176967228 | 9  | 14 | 8  | 1.955081399 | 0.0506438   | B4GALT7 | ENSG0000027847  |
| 5 | 177217306 | 177217487 | 177217462 | 8  | 8  | 1  | 5.278719777 | 0.00542188  |         | ENSG00000170089 |
| 5 | 177421655 | 177422029 | 177421789 | 10 | 15 | 7  | 2.346097679 | 0.0195693   |         | ENSG00000218227 |
| 5 | 177429560 | 177429850 | 177429710 | 9  | 12 | 5  | 2.541605819 | 0.0225912   |         | ENSG00000218227 |
| 5 | 177435557 | 177436080 | 177435732 | 13 | 27 | 18 | 1.728703553 | 0.0306274   |         | ENSG00000218227 |
| 5 | 177437409 | 177437611 | 177437452 | 10 | 11 | 2  | 4.692195357 | 0.00272444  |         | ENSG00000218227 |
| 5 | 177437930 | 177438171 | 177438092 | 8  | 12 | 12 | 1.173048839 | 0.343543    |         | ENSG00000218227 |
| 5 | 177438179 | 177438435 | 177438265 | 9  | 12 | 9  | 1.524963491 | 0.154777    |         | ENSG00000218227 |
| 5 | 177440153 | 177440772 | 177440428 | 13 | 26 | 6  | 4.524616952 | 2.63E-05    |         | ENSG00000218227 |
| 5 | 177444428 | 177444663 | 177444526 | 8  | 10 | 5  | 2.150589539 | 0.0575848   |         | ENSG00000145911 |

|   |           |           |           |    |    |    |             |             |                         |
|---|-----------|-----------|-----------|----|----|----|-------------|-------------|-------------------------|
| 5 | 177445768 | 177446122 | 177445945 | 10 | 15 | 3  | 4.692195357 | 0.000718455 | ENSG00000145911         |
| 5 | 177450468 | 177450698 | 177450633 | 9  | 11 | 8  | 1.564065119 | 0.151515    | ENSG00000145911         |
| 5 | 177467454 | 177467806 | 177467635 | 13 | 18 | 3  | 5.571981987 | 0.000108726 | ENSG00000145911         |
| 5 | 177474133 | 177474463 | 177474298 | 8  | 12 | 11 | 1.270802909 | 0.274822    | ENSG00000145911         |
| 5 | 177483224 | 177484308 | 177484049 | 45 | 99 | 31 | 3.665777623 | 1.46E-12    | RMND5B ENSG00000145916  |
| 5 | 177484379 | 177484701 | 177484540 | 8  | 12 | 7  | 1.906204364 | 0.0695918   | RMND5B ENSG00000145916  |
| 5 | 177505606 | 177506032 | 177505853 | 15 | 23 | 9  | 2.815317214 | 0.00172056  | NHP2 ENSG00000145912    |
| 5 | 177513461 | 177513751 | 177513606 | 20 | 22 | 9  | 2.69801233  | 0.00276236  | NHP2 ENSG00000145912    |
| 5 | 177564052 | 177564336 | 177564192 | 9  | 11 | 1  | 7.038293036 | 0.000674435 | HNRNPAB ENSG00000197451 |
| 5 | 177582651 | 177583177 | 177582998 | 16 | 27 | 3  | 8.211341875 | 2.82E-07    | AGXT2L2 ENSG00000175309 |
| 5 | 177594704 | 177594969 | 177594854 | 10 | 12 | 8  | 1.694403879 | 0.107291    | AGXT2L2 ENSG00000175309 |
| 5 | 177608556 | 177608821 | 177608663 | 8  | 9  | 1  | 5.865244197 | 0.00272497  | AGXT2L2 ENSG00000175309 |
| 5 | 177639505 | 177639856 | 177639684 | 9  | 14 | 6  | 2.513676084 | 0.016726    | AGXT2L2 ENSG00000175309 |
| 5 | 177640419 | 177640613 | 177640516 | 8  | 9  | 0  | 11.73048839 | 0.000425898 | AGXT2L2 ENSG00000175309 |
| 5 | 177648414 | 177648883 | 177648592 | 19 | 28 | 13 | 2.429886881 | 0.00217891  | AGXT2L2 ENSG00000175309 |
| 5 | 177890832 | 177891035 | 177890911 | 11 | 13 | 1  | 8.211341875 | 0.000163445 | COL23A1 ENSG00000050767 |
| 5 | 177994773 | 177995133 | 177994985 | 8  | 12 | 3  | 3.812408728 | 0.004404    | CLK4 ENSG00000113240    |
| 5 | 178001771 | 178002013 | 178001929 | 10 | 12 | 1  | 7.624817456 | 0.000332769 | CLK4 ENSG00000113240    |
| 5 | 178002206 | 178002569 | 178002390 | 16 | 21 | 9  | 2.580707446 | 0.00438951  | CLK4 ENSG00000113240    |
| 5 | 178033526 | 178033710 | 178033611 | 10 | 10 | 1  | 6.451768616 | 0.00135978  | CLK4 ENSG00000113240    |
| 5 | 178035624 | 178035973 | 178035798 | 11 | 16 | 3  | 4.985457567 | 0.000385643 | CLK4 ENSG00000113240    |
| 5 | 178059532 | 178059747 | 178059585 | 9  | 12 | 5  | 2.541605819 | 0.0225912   | ZNF354A ENSG00000169131 |
| 5 | 178065071 | 178065299 | 178065168 | 9  | 9  | 0  | 11.73048839 | 0.000425898 | ZNF354A ENSG00000169131 |
| 5 | 178090329 | 178090591 | 178090457 | 11 | 13 | 2  | 5.474227917 | 0.000747844 | ZNF354A ENSG00000169131 |
| 5 | 178188850 | 178189091 | 178188970 | 9  | 9  | 2  | 3.910162798 | 0.00955088  | ZNF354B ENSG00000178338 |
| 5 | 178198886 | 178199182 | 178199063 | 10 | 12 | 1  | 7.624817456 | 0.000332769 | ZNF354B ENSG00000178338 |
| 5 | 178219343 | 178219746 | 178219619 | 10 | 19 | 7  | 2.932622098 | 0.00293566  | ZNF354B ENSG00000178338 |
| 5 | 178383203 | 178383446 | 178383324 | 12 | 13 | 9  | 1.642268375 | 0.111397    | GRM6 ENSG00000113262    |
| 5 | 178383822 | 178384001 | 178383837 | 8  | 8  | 2  | 3.519146518 | 0.017558    | GRM6 ENSG00000113262    |
| 5 | 178843942 | 178844140 | 178844041 | 8  | 9  | 4  | 2.346097679 | 0.050148    | ENSG00000202120         |
| 5 | 178918992 | 178919353 | 178919174 | 12 | 20 | 7  | 3.079253203 | 0.00177418  | RUFY1 ENSG00000176783   |
| 5 | 178969982 | 178970244 | 178970113 | 9  | 12 | 4  | 3.049926982 | 0.0108184   | HNRNPH1 ENSG00000169045 |
| 5 | 178981241 | 178981513 | 178981393 | 8  | 9  | 6  | 1.675784056 | 0.141978    | HNRNPH1 ENSG00000169045 |
| 5 | 178982683 | 178983421 | 178983177 | 20 | 39 | 3  | 11.73048839 | 6.80E-11    | HNRNPH1 ENSG00000169045 |

|   |           |           |           |    |    |    |             |             |          |                 |
|---|-----------|-----------|-----------|----|----|----|-------------|-------------|----------|-----------------|
| 5 | 178983489 | 178984064 | 178983682 | 18 | 31 | 2  | 12.51252095 | 2.82E-09    | HNRNPH1  | ENSG00000169045 |
| 5 | 179037896 | 179038427 | 179038128 | 12 | 23 | 11 | 2.346097679 | 0.00594236  | CBY3     | ENSG00000204659 |
| 5 | 179057831 | 179058556 | 179058169 | 8  | 24 | 8  | 3.258468998 | 0.000499412 | CANX     | ENSG00000127022 |
| 5 | 179091963 | 179092150 | 179092100 | 8  | 8  | 8  | 1.173048839 | 0.36929     | MAML1    | ENSG00000161021 |
| 5 | 179154755 | 179155144 | 179154966 | 8  | 14 | 6  | 2.513676084 | 0.016726    | LTC4S    | ENSG00000213316 |
| 5 | 179155975 | 179156190 | 179156149 | 9  | 10 | 2  | 4.301179077 | 0.00512919  |          | ENSG00000221394 |
| 5 | 179178576 | 179178871 | 179178723 | 9  | 11 | 5  | 2.346097679 | 0.0364013   | SQSTM1   | ENSG00000161011 |
| 5 | 179180232 | 179180425 | 179180328 | 8  | 8  | 7  | 1.319679944 | 0.283403    | SQSTM1   | ENSG00000161011 |
| 5 | 179218004 | 179218213 | 179218117 | 8  | 12 | 4  | 3.049926982 | 0.0108184   | C5orf45  | ENSG00000161010 |
| 5 | 179218359 | 179218790 | 179218538 | 17 | 29 | 8  | 3.910162798 | 3.45E-05    | C5orf45  | ENSG00000161010 |
| 5 | 179226359 | 179226573 | 179226466 | 11 | 11 | 0  | 14.07658607 | 9.02E-05    | C5orf45  | ENSG00000161010 |
| 5 | 179428385 | 179428590 | 179428489 | 10 | 10 | 5  | 2.150589539 | 0.0575848   | RNF130   | ENSG00000113269 |
| 5 | 179444833 | 179445099 | 179444966 | 9  | 13 | 2  | 5.474227917 | 0.000747844 |          | ENSG00000213306 |
| 5 | 179450898 | 179451140 | 179451019 | 8  | 10 | 7  | 1.612942154 | 0.147335    |          | ENSG00000213306 |
| 5 | 179476698 | 179476993 | 179476845 | 9  | 12 | 5  | 2.541605819 | 0.0225912   | RASGEF1C | ENSG00000146090 |
| 5 | 179493123 | 179493426 | 179493274 | 13 | 17 | 3  | 5.278719777 | 0.000205462 | RASGEF1C | ENSG00000146090 |
| 5 | 179560885 | 179561120 | 179560990 | 10 | 10 | 4  | 2.580707446 | 0.0306059   | RASGEF1C | ENSG00000146090 |
| 5 | 179617355 | 179617706 | 179617530 | 14 | 20 | 5  | 4.105670938 | 0.000308509 | MAPK9    | ENSG00000050748 |
| 5 | 179649142 | 179649419 | 179649258 | 12 | 15 | 6  | 2.68125449  | 0.0103552   | MAPK9    | ENSG00000050748 |
| 5 | 179673238 | 179673644 | 179673406 | 11 | 19 | 4  | 4.692195357 | 0.000193572 | MAPK9    | ENSG00000050748 |
| 5 | 179734944 | 179735280 | 179735117 | 8  | 10 | 3  | 3.225884308 | 0.0139466   | GFPT2    | ENSG00000131459 |
| 5 | 179853640 | 179853935 | 179853771 | 10 | 13 | 7  | 2.052835469 | 0.046392    | CNOT6    | ENSG00000113300 |
| 5 | 179855661 | 179856001 | 179855833 | 15 | 16 | 1  | 9.970915134 | 1.89E-05    | CNOT6    | ENSG00000113300 |
| 5 | 179965620 | 179965854 | 179965727 | 9  | 11 | 4  | 2.815317214 | 0.0183428   | SCGB3A1  | ENSG00000161055 |
| 5 | 180030262 | 180030455 | 180030358 | 8  | 10 | 6  | 1.843362462 | 0.0964212   | FLT4     | ENSG00000037280 |
| 5 | 180078291 | 180078544 | 180078464 | 15 | 17 | 0  | 21.11487911 | 8.57E-07    |          | ENSG00000199892 |
| 5 | 180158800 | 180159093 | 180158971 | 13 | 15 | 5  | 3.128130238 | 0.00492422  | MGAT1    | ENSG00000131446 |
| 5 | 180169202 | 180169474 | 180169338 | 13 | 16 | 5  | 3.323638378 | 0.00288759  | MGAT1    | ENSG00000131446 |
| 5 | 180220145 | 180220558 | 180220382 | 10 | 17 | 8  | 2.346097679 | 0.0144542   |          | ENSG00000214302 |
| 5 | 180220993 | 180221325 | 180221159 | 14 | 20 | 7  | 3.079253203 | 0.00177418  |          | ENSG00000214302 |
| 5 | 180228698 | 180228916 | 180228807 | 11 | 12 | 11 | 1.270802909 | 0.274822    |          | ENSG00000214302 |
| 5 | 180258098 | 180258460 | 180258274 | 18 | 25 | 5  | 5.083211637 | 1.58E-05    | BTNL8    | ENSG00000113303 |
| 5 | 180274864 | 180275108 | 180274969 | 10 | 11 | 5  | 2.346097679 | 0.0364013   |          | ENSG00000208346 |
| 5 | 180471472 | 180471685 | 180471537 | 8  | 9  | 2  | 3.910162798 | 0.00955088  |          | ENSG00000214293 |

|   |           |           |           |    |    |    |             |             |          |                 |
|---|-----------|-----------|-----------|----|----|----|-------------|-------------|----------|-----------------|
| 5 | 180474711 | 180474904 | 180474829 | 8  | 9  | 5  | 1.955081399 | 0.0892323   |          | ENSG00000214293 |
| 5 | 180518961 | 180519192 | 180519076 | 10 | 10 | 6  | 1.843362462 | 0.0964212   | OR2V2    | ENSG00000182613 |
| 5 | 180519270 | 180519530 | 180519385 | 9  | 11 | 7  | 1.759573259 | 0.102361    | OR2V2    | ENSG00000182613 |
| 5 | 180541594 | 180541812 | 180541703 | 9  | 11 | 6  | 2.010940867 | 0.0640214   |          | ENSG00000208343 |
| 5 | 180543572 | 180544116 | 180543937 | 9  | 23 | 6  | 4.021881735 | 0.000148535 | TRIM7    | ENSG00000146054 |
| 5 | 180547947 | 180548216 | 180548096 | 14 | 15 | 1  | 9.384390715 | 3.90E-05    | TRIM7    | ENSG00000146054 |
| 5 | 180551073 | 180551593 | 180551277 | 17 | 28 | 7  | 4.252302043 | 2.31E-05    | TRIM7    | ENSG00000146054 |
| 5 | 180566333 | 180566673 | 180566426 | 14 | 19 | 8  | 2.606775198 | 0.00583935  | TRIM7    | ENSG00000146054 |
| 5 | 180567081 | 180567741 | 180567311 | 16 | 34 | 21 | 1.866214063 | 0.00963588  | TRIM7    | ENSG00000146054 |
| 5 | 180575996 | 180576278 | 180576137 | 8  | 10 | 8  | 1.433726359 | 0.209175    | TRIM41   | ENSG00000146063 |
| 5 | 180577538 | 180578188 | 180577981 | 23 | 44 | 18 | 2.778273567 | 3.93E-05    | TRIM41   | ENSG00000146063 |
| 5 | 180581234 | 180582135 | 180581962 | 12 | 38 | 23 | 1.906204364 | 0.00553742  | TRIM41   | ENSG00000146063 |
| 5 | 180582647 | 180583000 | 180582862 | 13 | 18 | 10 | 2.026175268 | 0.0273052   | TRIM41   | ENSG00000146063 |
| 5 | 180583073 | 180583370 | 180583221 | 15 | 18 | 3  | 5.571981987 | 0.000108726 | TRIM41   | ENSG00000146063 |
| 5 | 180603481 | 180603775 | 180603628 | 8  | 10 | 10 | 1.173048839 | 0.355733    | GNB2L1   | ENSG00000204628 |
| 5 | 180604075 | 180604254 | 180604091 | 8  | 8  | 0  | 10.55743955 | 0.000925496 | GNB2L1   | ENSG00000204628 |
| 5 | 180606124 | 180606353 | 180606238 | 9  | 9  | 4  | 2.346097679 | 0.050148    | GNB2L1   | ENSG00000204628 |
| 5 | 180620646 | 180620872 | 180620759 | 8  | 9  | 4  | 2.346097679 | 0.050148    | TRIM52   | ENSG00000183718 |
| 6 | 528156    | 528467    | 528299    | 18 | 21 | 2  | 8.602358155 | 3.33E-06    | HUS1B    | ENSG00000188996 |
| 6 | 562483    | 562854    | 562662    | 15 | 22 | 7  | 3.372515413 | 0.000629223 | HUS1B    | ENSG00000188996 |
| 6 | 625435    | 626184    | 625841    | 27 | 54 | 2  | 21.50589539 | 1.39E-16    |          | ENSG00000219712 |
| 6 | 1270905   | 1271124   | 1271014   | 8  | 9  | 3  | 2.932622098 | 0.0242899   | FOXQ1    | ENSG00000164379 |
| 6 | 1586361   | 1586909   | 1586752   | 21 | 34 | 6  | 5.865244197 | 2.06E-07    |          | ENSG00000203569 |
| 6 | 1712791   | 1713042   | 1712930   | 12 | 12 | 1  | 7.624817456 | 0.000332769 |          | ENSG00000203569 |
| 6 | 2452312   | 2452684   | 2452485   | 19 | 25 | 0  | 30.49926982 | 1.72E-09    |          | ENSG00000203564 |
| 6 | 2476660   | 2476877   | 2476768   | 8  | 9  | 2  | 3.910162798 | 0.00955088  |          | ENSG00000203564 |
| 6 | 2579798   | 2580028   | 2579957   | 10 | 12 | 1  | 7.624817456 | 0.000332769 | C6orf195 | ENSG00000164385 |
| 6 | 2683732   | 2683931   | 2683831   | 10 | 11 | 1  | 7.038293036 | 0.000674435 | MYLK4    | ENSG00000145949 |
| 6 | 2853550   | 2853874   | 2853712   | 8  | 10 | 1  | 6.451768616 | 0.00135978  | SERPINB9 | ENSG00000170542 |
| 6 | 2946992   | 2947430   | 2947111   | 11 | 17 | 4  | 4.222975822 | 0.000640773 | NQO2     | ENSG00000124588 |
| 6 | 3014216   | 3014449   | 3014332   | 8  | 8  | 2  | 3.519146518 | 0.017558    | RIPK1    | ENSG00000137275 |
| 6 | 3196718   | 3197018   | 3196858   | 14 | 16 | 2  | 6.647276756 | 0.000101928 |          | ENSG00000180822 |
| 6 | 3204137   | 3204330   | 3204233   | 8  | 9  | 2  | 3.910162798 | 0.00955088  |          | ENSG00000180822 |
| 6 | 3415392   | 3415772   | 3415593   | 33 | 44 | 5  | 8.797866295 | 7.25E-11    | SLC22A23 | ENSG00000137266 |

|   |         |         |         |    |    |    |             |             |          |                 |
|---|---------|---------|---------|----|----|----|-------------|-------------|----------|-----------------|
| 6 | 3456774 | 3457026 | 3456933 | 9  | 12 | 4  | 3.049926982 | 0.0108184   | SLC22A23 | ENSG00000137266 |
| 6 | 3660630 | 3660853 | 3660769 | 11 | 12 | 3  | 3.812408728 | 0.004404    | C6orf145 | ENSG00000168994 |
| 6 | 3686445 | 3686624 | 3686534 | 8  | 8  | 0  | 10.55743955 | 0.000925496 | C6orf145 | ENSG00000168994 |
| 6 | 3936153 | 3936721 | 3936562 | 9  | 20 | 10 | 2.239456875 | 0.0121685   | C6orf50  | ENSG00000145965 |
| 6 | 3963865 | 3964133 | 3964033 | 10 | 13 | 4  | 3.28453675  | 0.00629037  |          | ENSG00000215066 |
| 6 | 3966361 | 3966726 | 3966517 | 8  | 14 | 11 | 1.466311049 | 0.15926     | PRPF4B   | ENSG00000112739 |
| 6 | 4199156 | 4199456 | 4199287 | 9  | 11 | 12 | 1.082814313 | 0.424156    |          | ENSG00000216307 |
| 6 | 4303699 | 4304258 | 4304090 | 15 | 27 | 6  | 4.692195357 | 1.46E-05    |          | ENSG00000201185 |
| 6 | 4329037 | 4329567 | 4329235 | 42 | 61 | 2  | 24.24300935 | 7.63E-19    |          | ENSG00000201185 |
| 6 | 4434809 | 4435425 | 4434988 | 22 | 38 | 11 | 3.812408728 | 3.92E-06    |          | ENSG00000201185 |
| 6 | 4441629 | 4441872 | 4441750 | 13 | 16 | 3  | 4.985457567 | 0.000385643 |          | ENSG00000201185 |
| 6 | 4524911 | 4525145 | 4525006 | 9  | 10 | 1  | 6.451768616 | 0.00135978  |          | ENSG00000205444 |
| 6 | 4979958 | 4980291 | 4980124 | 12 | 16 | 5  | 3.323638378 | 0.00288759  |          | ENSG00000209924 |
| 6 | 5085594 | 5085773 | 5085683 | 8  | 8  | 0  | 10.55743955 | 0.000925496 |          | ENSG00000182404 |
| 6 | 5262319 | 5262498 | 5262408 | 9  | 9  | 5  | 1.955081399 | 0.0892323   |          | ENSG00000220446 |
| 6 | 5677990 | 5678172 | 5678131 | 8  | 8  | 1  | 5.278719777 | 0.00542188  |          | ENSG00000217239 |
| 6 | 5851339 | 5851695 | 5851517 | 17 | 22 | 0  | 26.9801233  | 1.77E-08    |          | ENSG00000222735 |
| 6 | 6510411 | 6510702 | 6510556 | 13 | 14 | 5  | 2.932622098 | 0.00829617  | LY86     | ENSG00000112799 |
| 6 | 6544677 | 6544879 | 6544778 | 8  | 10 | 6  | 1.843362462 | 0.0964212   | LY86     | ENSG00000112799 |
| 6 | 6669021 | 6669223 | 6669150 | 8  | 8  | 1  | 5.278719777 | 0.00542188  |          | ENSG00000219986 |
| 6 | 6704237 | 6704571 | 6704404 | 9  | 15 | 3  | 4.692195357 | 0.000718455 |          | ENSG00000219986 |
| 6 | 6826834 | 6827049 | 6826965 | 8  | 8  | 0  | 10.55743955 | 0.000925496 |          | ENSG00000222702 |
| 6 | 6953688 | 6954094 | 6953951 | 16 | 21 | 1  | 12.90353723 | 4.95E-07    |          | ENSG00000222702 |
| 6 | 7086670 | 7086862 | 7086696 | 8  | 10 | 2  | 4.301179077 | 0.00512919  | RREB1    | ENSG00000124782 |
| 6 | 7146366 | 7146760 | 7146591 | 21 | 28 | 1  | 17.00920817 | 2.80E-09    | RREB1    | ENSG00000124782 |
| 6 | 7184065 | 7184267 | 7184166 | 8  | 9  | 1  | 5.865244197 | 0.00272497  | RREB1    | ENSG00000124782 |
| 6 | 7206417 | 7206658 | 7206526 | 9  | 11 | 0  | 14.07658607 | 9.02E-05    | RREB1    | ENSG00000124782 |
| 6 | 7207407 | 7207820 | 7207553 | 16 | 22 | 3  | 6.745030826 | 8.05E-06    | RREB1    | ENSG00000124782 |
| 6 | 7212804 | 7213072 | 7212944 | 16 | 16 | 3  | 4.985457567 | 0.000385643 | RREB1    | ENSG00000124782 |
| 6 | 7268390 | 7268749 | 7268574 | 28 | 33 | 2  | 13.29455351 | 6.68E-10    | ATP5GP1  | ENSG00000219375 |
| 6 | 7334873 | 7335076 | 7334945 | 9  | 9  | 2  | 3.910162798 | 0.00955088  | CAGE1    | ENSG00000164304 |
| 6 | 7363472 | 7363822 | 7363647 | 30 | 35 | 6  | 6.032822602 | 1.10E-07    | RIOK1    | ENSG00000124784 |
| 6 | 7408963 | 7409368 | 7409161 | 69 | 79 | 2  | 31.28130238 | 1.07E-24    |          | ENSG00000215042 |
| 6 | 7425053 | 7425380 | 7425216 | 14 | 19 | 3  | 5.865244197 | 5.72E-05    |          | ENSG00000215042 |

|   |          |          |          |    |    |   |             |             |          |                 |
|---|----------|----------|----------|----|----|---|-------------|-------------|----------|-----------------|
| 6 | 7450652  | 7450961  | 7450806  | 16 | 19 | 2 | 7.820325595 | 1.32E-05    |          | ENSG00000219993 |
| 6 | 7471767  | 7471971  | 7471869  | 8  | 9  | 0 | 11.73048839 | 0.000425898 |          | ENSG00000168929 |
| 6 | 7477513  | 7477785  | 7477658  | 18 | 20 | 0 | 24.63402563 | 8.35E-08    | DSP      | ENSG00000096696 |
| 6 | 7488456  | 7488714  | 7488601  | 11 | 13 | 0 | 16.42268375 | 1.91E-05    | DSP      | ENSG00000096696 |
| 6 | 7495613  | 7495955  | 7495788  | 12 | 17 | 0 | 21.11487911 | 8.57E-07    | DSP      | ENSG00000096696 |
| 6 | 7920307  | 7920695  | 7920483  | 12 | 19 | 8 | 2.606775198 | 0.00583935  |          | ENSG00000219294 |
| 6 | 8009650  | 8009873  | 8009761  | 8  | 10 | 1 | 6.451768616 | 0.00135978  | MUTED    | ENSG00000188428 |
| 6 | 8047509  | 8047947  | 8047688  | 13 | 23 | 4 | 5.630634429 | 1.63E-05    | EEF1E1   | ENSG00000124802 |
| 6 | 9516653  | 9516915  | 9516784  | 8  | 9  | 2 | 3.910162798 | 0.00955088  |          | ENSG00000222597 |
| 6 | 9619467  | 9619673  | 9619570  | 9  | 9  | 2 | 3.910162798 | 0.00955088  |          | ENSG00000222597 |
| 6 | 9640903  | 9641093  | 9640998  | 8  | 9  | 2 | 3.910162798 | 0.00955088  |          | ENSG00000222597 |
| 6 | 9723034  | 9723314  | 9723155  | 13 | 14 | 7 | 2.199466574 | 0.0303778   | OFCC1    | ENSG00000181355 |
| 6 | 9983870  | 9984132  | 9983986  | 13 | 15 | 3 | 4.692195357 | 0.000718455 | OFCC1    | ENSG00000181355 |
| 6 | 10235530 | 10235914 | 10235705 | 10 | 16 | 5 | 3.323638378 | 0.00288759  |          | ENSG00000216368 |
| 6 | 10271468 | 10272264 | 10271616 | 40 | 64 | 4 | 15.24963491 | 9.53E-18    |          | ENSG00000216368 |
| 6 | 10288507 | 10288750 | 10288661 | 8  | 9  | 2 | 3.910162798 | 0.00955088  |          | ENSG00000214067 |
| 6 | 10298539 | 10298734 | 10298631 | 10 | 11 | 0 | 14.07658607 | 9.02E-05    |          | ENSG00000214067 |
| 6 | 10422432 | 10423002 | 10422611 | 8  | 20 | 8 | 2.737113958 | 0.0036449   |          | ENSG00000216781 |
| 6 | 10424596 | 10424961 | 10424775 | 20 | 26 | 4 | 6.334463732 | 2.40E-06    |          | ENSG00000216781 |
| 6 | 10456036 | 10456289 | 10456177 | 9  | 11 | 0 | 14.07658607 | 9.02E-05    |          | ENSG00000216781 |
| 6 | 10511895 | 10512268 | 10512079 | 14 | 22 | 8 | 2.997791478 | 0.00137524  | TFAP2A   | ENSG00000137203 |
| 6 | 10523365 | 10523566 | 10523455 | 8  | 10 | 1 | 6.451768616 | 0.00135978  | TFAP2A   | ENSG00000137203 |
| 6 | 10531536 | 10531952 | 10531715 | 10 | 18 | 2 | 7.429309316 | 2.63E-05    | TFAP2A   | ENSG00000137203 |
| 6 | 10539597 | 10539996 | 10539773 | 34 | 43 | 0 | 51.61414893 | 1.48E-15    | C6orf218 | ENSG00000183674 |
| 6 | 10629228 | 10629449 | 10629316 | 8  | 10 | 1 | 6.451768616 | 0.00135978  | GCNT2    | ENSG00000111846 |
| 6 | 10802884 | 10803241 | 10803062 | 13 | 18 | 5 | 3.714654658 | 0.000961539 | PAK1IP1  | ENSG00000111845 |
| 6 | 10826876 | 10827225 | 10827050 | 37 | 43 | 3 | 12.90353723 | 3.99E-12    | TMEM14C  | ENSG00000111843 |
| 6 | 10827227 | 10827415 | 10827271 | 9  | 10 | 0 | 12.90353723 | 0.000195991 | TMEM14C  | ENSG00000111843 |
| 6 | 10855706 | 10856010 | 10855835 | 9  | 12 | 4 | 3.049926982 | 0.0108184   | TMEM14B  | ENSG00000137210 |
| 6 | 10909544 | 10909724 | 10909634 | 8  | 9  | 3 | 2.932622098 | 0.0242899   | MAK      | ENSG00000111837 |
| 6 | 11161557 | 11161736 | 11161648 | 8  | 8  | 1 | 5.278719777 | 0.00542188  | ELOVL2   | ENSG00000197977 |
| 6 | 11337919 | 11338178 | 11338083 | 11 | 13 | 3 | 4.105670938 | 0.00243034  | NEDD9    | ENSG00000111859 |
| 6 | 11452635 | 11452817 | 11452725 | 8  | 8  | 6 | 1.508205651 | 0.203852    | NEDD9    | ENSG00000111859 |
| 6 | 11542927 | 11543250 | 11543097 | 13 | 18 | 3 | 5.571981987 | 0.000108726 |          | ENSG00000202313 |

|   |          |          |          |    |    |   |             |             |          |                 |
|---|----------|----------|----------|----|----|---|-------------|-------------|----------|-----------------|
| 6 | 11826613 | 11826859 | 11826778 | 8  | 9  | 1 | 5.865244197 | 0.00272497  |          | ENSG00000207419 |
| 6 | 11867179 | 11867378 | 11867278 | 8  | 9  | 1 | 5.865244197 | 0.00272497  | C6orf105 | ENSG00000111863 |
| 6 | 12116629 | 12116833 | 12116733 | 11 | 12 | 5 | 2.541605819 | 0.0225912   | HIVEP1   | ENSG00000095951 |
| 6 | 12122342 | 12122559 | 12122450 | 9  | 9  | 5 | 1.955081399 | 0.0892323   | HIVEP1   | ENSG00000095951 |
| 6 | 12336814 | 12337027 | 12336946 | 9  | 9  | 3 | 2.932622098 | 0.0242899   | EDN1     | ENSG00000078401 |
| 6 | 12396428 | 12396828 | 12396688 | 10 | 17 | 1 | 10.55743955 | 9.18E-06    | EDN1     | ENSG00000078401 |
| 6 | 12432372 | 12432645 | 12432508 | 8  | 11 | 2 | 4.692195357 | 0.00272444  |          | ENSG00000218893 |
| 6 | 12440182 | 12440497 | 12440340 | 10 | 14 | 6 | 2.513676084 | 0.016726    |          | ENSG00000218893 |
| 6 | 12600635 | 12600907 | 12600767 | 8  | 12 | 1 | 7.624817456 | 0.000332769 | RPL15P3  | ENSG00000212802 |
| 6 | 12611162 | 12611367 | 12611231 | 10 | 10 | 2 | 4.301179077 | 0.00512919  | RPL15P3  | ENSG00000212802 |
| 6 | 12614273 | 12614452 | 12614427 | 8  | 8  | 1 | 5.278719777 | 0.00542188  | RPL15P3  | ENSG00000212802 |
| 6 | 12614458 | 12614785 | 12614634 | 29 | 32 | 2 | 12.90353723 | 1.37E-09    | RPL15P3  | ENSG00000212802 |
| 6 | 12675980 | 12676185 | 12676082 | 10 | 10 | 4 | 2.580707446 | 0.0306059   | RPL15P3  | ENSG00000212802 |
| 6 | 12710654 | 12710940 | 12710797 | 12 | 14 | 7 | 2.199466574 | 0.0303778   | RPL15P3  | ENSG00000212802 |
| 6 | 12924525 | 12924802 | 12924637 | 21 | 21 | 3 | 6.451768616 | 1.56E-05    |          | ENSG00000223291 |
| 6 | 12953856 | 12954048 | 12953912 | 8  | 8  | 0 | 10.55743955 | 0.000925496 |          | ENSG00000223291 |
| 6 | 12981924 | 12982232 | 12982078 | 10 | 13 | 2 | 5.474227917 | 0.000747844 |          | ENSG00000223291 |
| 6 | 13356204 | 13356640 | 13356465 | 65 | 74 | 0 | 87.97866295 | 5.25E-26    | PHACTR1  | ENSG00000112137 |
| 6 | 13683387 | 13683639 | 13683552 | 12 | 14 | 8 | 1.955081399 | 0.0506438   | SIRT5    | ENSG00000124523 |
| 6 | 13723145 | 13723575 | 13723239 | 9  | 16 | 1 | 9.970915134 | 1.89E-05    | NOL7     | ENSG00000137420 |
| 6 | 13982202 | 13982389 | 13982291 | 9  | 9  | 1 | 5.865244197 | 0.00272497  | RNF182   | ENSG00000180537 |
| 6 | 14213714 | 14214057 | 14213885 | 18 | 22 | 3 | 6.745030826 | 8.05E-06    | CD83     | ENSG00000112149 |
| 6 | 14237712 | 14237984 | 14237885 | 9  | 10 | 6 | 1.843362462 | 0.0964212   | CD83     | ENSG00000112149 |
| 6 | 14599957 | 14600195 | 14600113 | 12 | 14 | 1 | 8.797866295 | 8.00E-05    |          | ENSG00000206960 |
| 6 | 14649864 | 14650043 | 14649953 | 8  | 8  | 1 | 5.278719777 | 0.00542188  |          | ENSG00000206960 |
| 6 | 15378006 | 15378185 | 15378070 | 8  | 8  | 0 | 10.55743955 | 0.000925496 | JARID2   | ENSG00000008083 |
| 6 | 15473616 | 15473877 | 15473721 | 12 | 15 | 1 | 9.384390715 | 3.90E-05    | JARID2   | ENSG00000008083 |
| 6 | 15564031 | 15564263 | 15564147 | 10 | 10 | 2 | 4.301179077 | 0.00512919  | JARID2   | ENSG00000008083 |
| 6 | 16016355 | 16016618 | 16016497 | 9  | 11 | 6 | 2.010940867 | 0.0640214   |          | ENSG00000214027 |
| 6 | 16057659 | 16057853 | 16057742 | 8  | 9  | 1 | 5.865244197 | 0.00272497  |          | ENSG00000214027 |
| 6 | 16236984 | 16237247 | 16237115 | 9  | 12 | 1 | 7.624817456 | 0.000332769 | MYLIP    | ENSG00000007944 |
| 6 | 16276372 | 16276575 | 16276465 | 8  | 9  | 5 | 1.955081399 | 0.0892323   |          | ENSG00000216364 |
| 6 | 16314824 | 16315003 | 16314913 | 8  | 8  | 3 | 2.639359888 | 0.0415794   |          | ENSG00000210092 |
| 6 | 16359928 | 16360244 | 16360095 | 20 | 23 | 2 | 9.384390715 | 8.25E-07    | GMPR     | ENSG00000137198 |



|   |          |          |          |    |    |   |             |             |         |                 |
|---|----------|----------|----------|----|----|---|-------------|-------------|---------|-----------------|
| 6 | 16513734 | 16513913 | 16513906 | 9  | 9  | 0 | 11.73048839 | 0.000425898 | ATXN1   | ENSG00000124788 |
| 6 | 16847513 | 16847814 | 16847663 | 10 | 12 | 2 | 5.083211637 | 0.00143337  | ATXN1   | ENSG00000124788 |
| 6 | 17120672 | 17121063 | 17120890 | 13 | 18 | 7 | 2.785990993 | 0.00480525  |         | ENSG00000209103 |
| 6 | 17424898 | 17425181 | 17425039 | 10 | 12 | 0 | 15.24963491 | 4.15E-05    | RBM24   | ENSG00000112183 |
| 6 | 17497549 | 17497956 | 17497766 | 15 | 26 | 0 | 31.67231866 | 7.93E-10    | CAP2    | ENSG00000112186 |
| 6 | 17502355 | 17502610 | 17502482 | 9  | 10 | 3 | 3.225884308 | 0.0139466   | CAP2    | ENSG00000112186 |
| 6 | 17661069 | 17661262 | 17661165 | 8  | 10 | 4 | 2.580707446 | 0.0306059   |         | ENSG00000184612 |
| 6 | 17815091 | 17815366 | 17815228 | 13 | 16 | 1 | 9.970915134 | 1.89E-05    | NUP153  | ENSG00000124789 |
| 6 | 17830418 | 17830629 | 17830552 | 9  | 10 | 1 | 6.451768616 | 0.00135978  |         | ENSG00000201415 |
| 6 | 17912480 | 17912683 | 17912581 | 11 | 11 | 2 | 4.692195357 | 0.00272444  |         | ENSG00000201442 |
| 6 | 18136503 | 18136869 | 18136682 | 26 | 33 | 0 | 39.88366054 | 3.46E-12    |         | ENSG00000210163 |
| 6 | 18159824 | 18160142 | 18159975 | 9  | 12 | 7 | 1.906204364 | 0.0695918   |         | ENSG00000210163 |
| 6 | 18161756 | 18162137 | 18161980 | 12 | 17 | 6 | 3.016411301 | 0.00381427  |         | ENSG00000210163 |
| 6 | 18164306 | 18164494 | 18164364 | 9  | 9  | 1 | 5.865244197 | 0.00272497  |         | ENSG00000210163 |
| 6 | 18171026 | 18171369 | 18171197 | 16 | 21 | 4 | 5.161414893 | 5.68E-05    |         | ENSG00000210163 |
| 6 | 18198510 | 18198967 | 18198776 | 38 | 55 | 1 | 32.8453675  | 4.16E-18    | NHLRC1  | ENSG00000187566 |
| 6 | 18230825 | 18231035 | 18230930 | 8  | 9  | 3 | 2.932622098 | 0.0242899   | NHLRC1  | ENSG00000187566 |
| 6 | 18434294 | 18434652 | 18434473 | 23 | 29 | 2 | 11.73048839 | 1.18E-08    |         | ENSG00000200681 |
| 6 | 18477026 | 18477238 | 18477132 | 9  | 11 | 3 | 3.519146518 | 0.00788869  |         | ENSG00000218976 |
| 6 | 18495211 | 18495869 | 18495540 | 20 | 39 | 5 | 7.820325595 | 2.05E-09    | RNF144B | ENSG00000137393 |
| 6 | 18601836 | 18602122 | 18601979 | 8  | 13 | 6 | 2.346097679 | 0.0266147   |         | ENSG00000207775 |
| 6 | 18953926 | 18954439 | 18954248 | 43 | 63 | 0 | 75.07512572 | 2.68E-22    |         | ENSG00000207775 |
| 6 | 19133099 | 19133278 | 19133221 | 8  | 8  | 3 | 2.639359888 | 0.0415794   |         | ENSG00000217379 |
| 6 | 19376313 | 19376572 | 19376445 | 8  | 10 | 4 | 2.580707446 | 0.0306059   |         | ENSG00000218643 |
| 6 | 19406274 | 19406584 | 19406429 | 10 | 11 | 0 | 14.07658607 | 9.02E-05    |         | ENSG00000218643 |
| 6 | 19960097 | 19960280 | 19960188 | 8  | 8  | 1 | 5.278719777 | 0.00542188  | ID4     | ENSG00000172201 |
| 6 | 20096784 | 20097176 | 20096963 | 26 | 33 | 2 | 13.29455351 | 6.68E-10    |         | ENSG00000177246 |
| 6 | 20109695 | 20109888 | 20109769 | 10 | 10 | 0 | 12.90353723 | 0.000195991 |         | ENSG00000177246 |
| 6 | 20291328 | 20291662 | 20291495 | 10 | 13 | 2 | 5.474227917 | 0.000747844 | MBOAT1  | ENSG00000172197 |
| 6 | 20296969 | 20297231 | 20297082 | 14 | 15 | 0 | 18.76878143 | 4.04E-06    | MBOAT1  | ENSG00000172197 |
| 6 | 20319652 | 20319843 | 20319710 | 8  | 8  | 1 | 5.278719777 | 0.00542188  | MBOAT1  | ENSG00000172197 |
| 6 | 20479035 | 20479332 | 20479183 | 14 | 16 | 3 | 4.985457567 | 0.000385643 | E2F3    | ENSG00000112242 |
| 6 | 20512875 | 20513146 | 20513028 | 8  | 9  | 4 | 2.346097679 | 0.050148    | E2F3    | ENSG00000112242 |
| 6 | 20642538 | 20642853 | 20642695 | 8  | 13 | 3 | 4.105670938 | 0.00243034  | CDKAL1  | ENSG00000145996 |

|   |          |          |          |     |     |    |             |             |          |                 |
|---|----------|----------|----------|-----|-----|----|-------------|-------------|----------|-----------------|
| 6 | 20943562 | 20943850 | 20943706 | 28  | 30  | 0  | 36.36451402 | 3.56E-11    |          | ENSG00000216591 |
| 6 | 20974893 | 20975333 | 20975100 | 44  | 57  | 7  | 8.504604085 | 2.91E-13    |          | ENSG00000216591 |
| 6 | 21296718 | 21297126 | 21296922 | 46  | 59  | 1  | 35.19146518 | 1.99E-19    | CXorf29  | ENSG00000205147 |
| 6 | 21696953 | 21697309 | 21697131 | 8   | 14  | 8  | 1.955081399 | 0.0506438   | SOX4     | ENSG00000124766 |
| 6 | 21701760 | 21702123 | 21701991 | 8   | 13  | 9  | 1.642268375 | 0.111397    | SOX4     | ENSG00000124766 |
| 6 | 21847128 | 21847398 | 21847263 | 10  | 13  | 1  | 8.211341875 | 0.000163445 |          | ENSG00000220771 |
| 6 | 22471546 | 22471813 | 22471674 | 8   | 12  | 3  | 3.812408728 | 0.004404    | PRL      | ENSG00000172179 |
| 6 | 22551042 | 22551597 | 22551289 | 111 | 150 | 0  | 177.1303747 | 1.27E-51    | HDGFL1   | ENSG00000112273 |
| 6 | 23408724 | 23408976 | 23408849 | 9   | 12  | 0  | 15.24963491 | 4.15E-05    |          | ENSG00000207394 |
| 6 | 24391311 | 24391560 | 24391459 | 8   | 9   | 3  | 2.932622098 | 0.0242899   | KAAG1    | ENSG00000146049 |
| 6 | 24467908 | 24468121 | 24468029 | 9   | 11  | 2  | 4.692195357 | 0.00272444  | DCDC2    | ENSG00000146038 |
| 6 | 24829021 | 24829659 | 24829494 | 17  | 31  | 3  | 9.384390715 | 1.82E-08    | C6orf62  | ENSG00000112308 |
| 6 | 24871865 | 24872095 | 24871987 | 9   | 11  | 0  | 14.07658607 | 9.02E-05    | GMNN     | ENSG00000112312 |
| 6 | 24935331 | 24935982 | 24935595 | 158 | 199 | 4  | 46.92195357 | 2.33E-61    | FAM65B   | ENSG00000111913 |
| 6 | 24936235 | 24936507 | 24936371 | 11  | 13  | 3  | 4.105670938 | 0.00243034  | FAM65B   | ENSG00000111913 |
| 6 | 25093591 | 25093964 | 25093768 | 18  | 25  | 5  | 5.083211637 | 1.58E-05    |          | ENSG00000214975 |
| 6 | 25557391 | 25557739 | 25557569 | 33  | 37  | 2  | 14.85861863 | 3.69E-11    |          | ENSG00000210368 |
| 6 | 25598355 | 25598579 | 25598476 | 8   | 10  | 5  | 2.150589539 | 0.0575848   |          | ENSG00000210368 |
| 6 | 26066873 | 26067197 | 26067026 | 14  | 18  | 1  | 11.14396397 | 4.44E-06    | TRIM38   | ENSG00000112343 |
| 6 | 26128608 | 26129071 | 26128756 | 11  | 17  | 1  | 10.55743955 | 9.18E-06    | HIST1H3A | ENSG00000198366 |
| 6 | 26134547 | 26134764 | 26134655 | 8   | 10  | 4  | 2.580707446 | 0.0306059   | HIST1H4B | ENSG00000124529 |
| 6 | 26140472 | 26140754 | 26140613 | 8   | 12  | 5  | 2.541605819 | 0.0225912   | HIST1H3B | ENSG00000124693 |
| 6 | 26164163 | 26164363 | 26164297 | 8   | 10  | 2  | 4.301179077 | 0.00512919  | HIST1H1C | ENSG00000187837 |
| 6 | 26164519 | 26164828 | 26164673 | 12  | 17  | 3  | 5.278719777 | 0.000205462 | HIST1H1C | ENSG00000187837 |
| 6 | 26211786 | 26212237 | 26212058 | 10  | 19  | 13 | 1.675784056 | 0.0660887   | HIST1H4C | ENSG00000197061 |
| 6 | 26264516 | 26264805 | 26264660 | 9   | 14  | 4  | 3.519146518 | 0.00361132  | HIST1H1E | ENSG00000168298 |
| 6 | 26267978 | 26268299 | 26268139 | 8   | 10  | 1  | 6.451768616 | 0.00135978  | HIST1H2B | ENSG00000158373 |
| 6 | 26297051 | 26297416 | 26297308 | 8   | 13  | 11 | 1.368556979 | 0.211388    | HIST1H4D | ENSG00000188987 |
| 6 | 26312613 | 26312876 | 26312744 | 13  | 15  | 10 | 1.706252857 | 0.0822346   | HIST1H4E | ENSG00000198518 |
| 6 | 26324607 | 26325055 | 26324715 | 8   | 16  | 6  | 2.848832895 | 0.00632407  | HIST1H2B | ENSG00000187990 |
| 6 | 26342632 | 26342889 | 26342733 | 8   | 10  | 4  | 2.580707446 | 0.0306059   | HIST1H1D | ENSG00000124575 |
| 6 | 26348420 | 26348599 | 26348509 | 8   | 8   | 1  | 5.278719777 | 0.00542188  | HIST1H4F | ENSG00000198327 |
| 6 | 26358186 | 26358536 | 26358361 | 11  | 14  | 6  | 2.513676084 | 0.016726    | HIST1H3F | ENSG00000112727 |
| 6 | 26359824 | 26360008 | 26359877 | 9   | 9   | 3  | 2.932622098 | 0.0242899   | HIST1H2B | ENSG00000197459 |

|   |          |          |          |    |    |    |             |             |           |                 |
|---|----------|----------|----------|----|----|----|-------------|-------------|-----------|-----------------|
| 6 | 26380621 | 26381333 | 26381109 | 14 | 35 | 4  | 8.445951643 | 6.26E-09    | HIST1H2BI | ENSG00000168242 |
| 6 | 26393591 | 26394102 | 26393770 | 14 | 25 | 9  | 3.049926982 | 0.000648806 | HIST1H4H  | ENSG00000158406 |
| 6 | 26419588 | 26419781 | 26419684 | 8  | 11 | 2  | 4.692195357 | 0.00272444  | H3F3AP1   | ENSG00000220875 |
| 6 | 26419874 | 26420172 | 26420034 | 8  | 11 | 6  | 2.010940867 | 0.0640214   | H3F3AP1   | ENSG00000220875 |
| 6 | 26421368 | 26421612 | 26421454 | 10 | 10 | 9  | 1.290353723 | 0.279648    | H3F3AP1   | ENSG00000220875 |
| 6 | 26438424 | 26438618 | 26438497 | 8  | 9  | 5  | 1.955081399 | 0.0892323   | H3F3AP1   | ENSG00000220875 |
| 6 | 26449814 | 26450092 | 26449954 | 14 | 17 | 7  | 2.639359888 | 0.00777415  |           | ENSG00000210378 |
| 6 | 26456608 | 26456807 | 26456688 | 9  | 9  | 2  | 3.910162798 | 0.00955088  |           | ENSG00000210378 |
| 6 | 26640971 | 26641289 | 26641133 | 12 | 16 | 7  | 2.492728784 | 0.0124193   | HMGN4     | ENSG00000182952 |
| 6 | 26645613 | 26645877 | 26645745 | 14 | 16 | 7  | 2.492728784 | 0.0124193   | HMGN4     | ENSG00000182952 |
| 6 | 26646025 | 26646524 | 26646365 | 10 | 19 | 12 | 1.804690522 | 0.0452624   | HMGN4     | ENSG00000182952 |
| 6 | 26662241 | 26662487 | 26662379 | 10 | 12 | 4  | 3.049926982 | 0.0108184   |           | ENSG00000210390 |
| 6 | 26680029 | 26680244 | 26680123 | 10 | 12 | 2  | 5.083211637 | 0.00143337  |           | ENSG00000210392 |
| 6 | 26703899 | 26704195 | 26704070 | 9  | 13 | 1  | 8.211341875 | 0.000163445 | ABT1      | ENSG00000146109 |
| 6 | 26704848 | 26705253 | 26705090 | 11 | 16 | 4  | 3.988366054 | 0.00115141  | ABT1      | ENSG00000146109 |
| 6 | 26795043 | 26795466 | 26795256 | 29 | 42 | 0  | 50.44110009 | 3.21E-15    |           | ENSG00000210409 |
| 6 | 26813257 | 26813482 | 26813327 | 24 | 25 | 2  | 10.16642327 | 2.02E-07    |           | ENSG00000210409 |
| 6 | 26866434 | 26866618 | 26866516 | 8  | 8  | 3  | 2.639359888 | 0.0415794   |           | ENSG00000210418 |
| 6 | 27126017 | 27126236 | 27126126 | 8  | 10 | 0  | 12.90353723 | 0.000195991 |           | ENSG00000216762 |
| 6 | 27202925 | 27203250 | 27203072 | 10 | 15 | 4  | 3.753756286 | 0.0020497   | HIST1H2BJ | ENSG00000124635 |
| 6 | 27207595 | 27207911 | 27207756 | 24 | 28 | 3  | 8.504604085 | 1.43E-07    | HIST1H2BJ | ENSG00000124635 |
| 6 | 27208647 | 27208849 | 27208748 | 8  | 11 | 2  | 4.692195357 | 0.00272444  | HIST1H2AC | ENSG00000196787 |
| 6 | 27221819 | 27222009 | 27221914 | 9  | 10 | 4  | 2.580707446 | 0.0306059   | HIST1H2BK | ENSG00000197903 |
| 6 | 27233340 | 27233543 | 27233441 | 10 | 11 | 2  | 4.692195357 | 0.00272444  | HIST1H2AF | ENSG00000184825 |
| 6 | 27237972 | 27238278 | 27238125 | 10 | 13 | 7  | 2.052835469 | 0.046392    | HIST1H2AF | ENSG00000184825 |
| 6 | 27327681 | 27327861 | 27327771 | 8  | 8  | 6  | 1.508205651 | 0.203852    | PRSS16    | ENSG00000112812 |
| 6 | 27350870 | 27351113 | 27350991 | 10 | 10 | 2  | 4.301179077 | 0.00512919  |           | ENSG00000210450 |
| 6 | 27372277 | 27372513 | 27372406 | 9  | 12 | 1  | 7.624817456 | 0.000332769 |           | ENSG00000210452 |
| 6 | 27388493 | 27388732 | 27388612 | 9  | 10 | 1  | 6.451768616 | 0.00135978  | POM121L2  | ENSG00000158553 |
| 6 | 27464548 | 27464890 | 27464719 | 16 | 21 | 2  | 8.602358155 | 3.33E-06    | ZNF391    | ENSG00000124613 |
| 6 | 27548797 | 27549141 | 27548965 | 11 | 15 | 2  | 6.256260476 | 0.000199274 | ZNF184    | ENSG00000096654 |
| 6 | 27581337 | 27581632 | 27581502 | 13 | 15 | 12 | 1.443752418 | 0.160732    |           | ENSG00000218347 |
| 6 | 27632211 | 27632410 | 27632332 | 10 | 12 | 2  | 5.083211637 | 0.00143337  |           | ENSG00000219738 |
| 6 | 27668326 | 27668661 | 27668493 | 11 | 16 | 8  | 2.215758919 | 0.0222902   |           | ENSG00000206671 |

|   |          |          |          |    |    |    |             |             |           |                 |
|---|----------|----------|----------|----|----|----|-------------|-------------|-----------|-----------------|
| 6 | 27744183 | 27744538 | 27744360 | 12 | 18 | 6  | 3.183989707 | 0.00227432  |           | ENSG00000216676 |
| 6 | 27769546 | 27769905 | 27769722 | 8  | 14 | 3  | 4.398933147 | 0.00132748  |           | ENSG00000216676 |
| 6 | 27914015 | 27914219 | 27914117 | 9  | 10 | 1  | 6.451768616 | 0.00135978  | HIST1H2AK | ENSG00000184348 |
| 6 | 27940942 | 27941191 | 27941017 | 8  | 9  | 2  | 3.910162798 | 0.00955088  | HIST1H2AL | ENSG00000198374 |
| 6 | 27947959 | 27948252 | 27948105 | 10 | 12 | 6  | 2.178519273 | 0.0416567   | HIST1H3I  | ENSG00000182572 |
| 6 | 27978652 | 27978835 | 27978743 | 10 | 10 | 8  | 1.433726359 | 0.209175    | OR2B2     | ENSG00000168131 |
| 6 | 28156574 | 28156871 | 28156705 | 13 | 17 | 3  | 5.278719777 | 0.000205462 | ZNF165    | ENSG00000197279 |
| 6 | 28180377 | 28180721 | 28180548 | 14 | 19 | 5  | 3.910162798 | 0.000546977 |           | ENSG00000217751 |
| 6 | 28288138 | 28288402 | 28288270 | 9  | 12 | 2  | 5.083211637 | 0.00143337  |           | ENSG00000176933 |
| 6 | 28300793 | 28301222 | 28301058 | 11 | 18 | 4  | 4.457585589 | 0.000353565 | ZNF193    | ENSG00000137185 |
| 6 | 28550283 | 28550475 | 28550385 | 8  | 10 | 4  | 2.580707446 | 0.0306059   |           | ENSG00000210498 |
| 6 | 28565628 | 28565836 | 28565733 | 8  | 10 | 6  | 1.843362462 | 0.0964212   |           | ENSG00000210498 |
| 6 | 33494407 | 33494625 | 33494474 | 8  | 9  | 4  | 2.346097679 | 0.050148    | CUTA      | ENSG00000112514 |
| 6 | 33647335 | 33647528 | 33647409 | 8  | 8  | 6  | 1.508205651 | 0.203852    | BCL2L7P1  | ENSG0000030110  |
| 6 | 33665548 | 33665792 | 33665670 | 10 | 11 | 3  | 3.519146518 | 0.00788869  |           | ENSG00000197251 |
| 6 | 33675139 | 33675651 | 33675592 | 9  | 19 | 7  | 2.932622098 | 0.00293566  |           | ENSG00000197251 |
| 6 | 33695989 | 33696168 | 33696078 | 8  | 8  | 4  | 2.111487911 | 0.0804809   | ITPR3     | ENSG00000096433 |
| 6 | 33697459 | 33697781 | 33697618 | 9  | 12 | 0  | 15.24963491 | 4.15E-05    | ITPR3     | ENSG00000096433 |
| 6 | 33716934 | 33717131 | 33717034 | 10 | 11 | 0  | 14.07658607 | 9.02E-05    | ITPR3     | ENSG00000096433 |
| 6 | 33776161 | 33776482 | 33776331 | 12 | 15 | 6  | 2.68125449  | 0.0103552   | C6orf125  | ENSG00000137288 |
| 6 | 33787282 | 33787467 | 33787374 | 8  | 8  | 4  | 2.111487911 | 0.0804809   | C6orf125  | ENSG00000137288 |
| 6 | 33807711 | 33807986 | 33807864 | 11 | 13 | 4  | 3.28453675  | 0.00629037  | IHPK3     | ENSG00000161896 |
| 6 | 33820189 | 33820630 | 33820431 | 28 | 39 | 0  | 46.92195357 | 3.29E-14    | IHPK3     | ENSG00000161896 |
| 6 | 33828016 | 33828369 | 33828193 | 14 | 19 | 4  | 4.692195357 | 0.000193572 | IHPK3     | ENSG00000161896 |
| 6 | 33838039 | 33838245 | 33838142 | 8  | 9  | 6  | 1.675784056 | 0.141978    | IHPK3     | ENSG00000161896 |
| 6 | 34041853 | 34042126 | 34041981 | 9  | 11 | 0  | 14.07658607 | 9.02E-05    |           | ENSG00000221697 |
| 6 | 34063400 | 34063801 | 34063579 | 11 | 18 | 1  | 11.14396397 | 4.44E-06    |           | ENSG00000221697 |
| 6 | 34064055 | 34064347 | 34064204 | 8  | 12 | 1  | 7.624817456 | 0.000332769 |           | ENSG00000221697 |
| 6 | 34255776 | 34255990 | 34255937 | 8  | 9  | 2  | 3.910162798 | 0.00955088  | GRM4      | ENSG00000124493 |
| 6 | 34535764 | 34535958 | 34535861 | 8  | 8  | 3  | 2.639359888 | 0.0415794   | PACSIN1   | ENSG00000124507 |
| 6 | 34612242 | 34612755 | 34612497 | 14 | 27 | 11 | 2.737113958 | 0.00100133  | SPDEF     | ENSG00000124664 |
| 6 | 34620745 | 34621063 | 34620904 | 9  | 13 | 5  | 2.737113958 | 0.0137917   | SPDEF     | ENSG00000124664 |
| 6 | 34833026 | 34833283 | 34833162 | 12 | 13 | 5  | 2.737113958 | 0.0137917   | SNRPC     | ENSG00000124562 |
| 6 | 34963646 | 34964034 | 34963797 | 9  | 14 | 9  | 1.759573259 | 0.0786014   | TAF11     | ENSG00000064995 |

|   |          |          |          |     |     |    |             |             |          |                 |
|---|----------|----------|----------|-----|-----|----|-------------|-------------|----------|-----------------|
| 6 | 35335294 | 35335514 | 35335404 | 17  | 18  | 1  | 11.14396397 | 4.44E-06    | ZNF76    | ENSG00000065029 |
| 6 | 35336647 | 35336846 | 35336746 | 10  | 10  | 1  | 6.451768616 | 0.00135978  | ZNF76    | ENSG00000065029 |
| 6 | 35373385 | 35373701 | 35373543 | 19  | 22  | 5  | 4.496687217 | 9.59E-05    | DEF6     | ENSG00000023892 |
| 6 | 35394010 | 35394244 | 35394113 | 8   | 10  | 0  | 12.90353723 | 0.000195991 | DEF6     | ENSG00000023892 |
| 6 | 35417714 | 35418253 | 35417992 | 22  | 35  | 7  | 5.278719777 | 3.74E-07    | PPARD    | ENSG00000112033 |
| 6 | 35537113 | 35537310 | 35537211 | 10  | 10  | 3  | 3.225884308 | 0.0139466   | RPL10A   | ENSG00000198755 |
| 6 | 35543905 | 35544213 | 35544057 | 11  | 15  | 7  | 2.346097679 | 0.0195693   | RPL10A   | ENSG00000198755 |
| 6 | 35562018 | 35562259 | 35562166 | 17  | 19  | 1  | 11.73048839 | 2.14E-06    | TEAD3    | ENSG00000007866 |
| 6 | 35802264 | 35802555 | 35802392 | 9   | 12  | 2  | 5.083211637 | 0.00143337  | FKBP5    | ENSG00000096060 |
| 6 | 35807995 | 35808306 | 35808150 | 10  | 14  | 0  | 17.59573259 | 8.79E-06    | FKBP5    | ENSG00000096060 |
| 6 | 35858237 | 35858493 | 35858365 | 9   | 11  | 1  | 7.038293036 | 0.000674435 | C6orf127 | ENSG00000204140 |
| 6 | 36103197 | 36103441 | 36103319 | 10  | 11  | 0  | 14.07658607 | 9.02E-05    | MAPK14   | ENSG00000112062 |
| 6 | 36199673 | 36199870 | 36199771 | 9   | 9   | 6  | 1.675784056 | 0.141978    | MAPK13   | ENSG00000156711 |
| 6 | 36230096 | 36230543 | 36230275 | 14  | 21  | 2  | 8.602358155 | 3.33E-06    |          | ENSG00000221743 |
| 6 | 36438563 | 36438883 | 36438723 | 9   | 9   | 1  | 5.865244197 | 0.00272497  | ETV7     | ENSG00000010030 |
| 6 | 36449466 | 36449770 | 36449598 | 9   | 11  | 3  | 3.519146518 | 0.00788869  | ETV7     | ENSG00000010030 |
| 6 | 36669264 | 36669494 | 36669383 | 9   | 9   | 2  | 3.910162798 | 0.00955088  | SFRS3    | ENSG00000112081 |
| 6 | 36670090 | 36670309 | 36670164 | 11  | 13  | 2  | 5.474227917 | 0.000747844 | SFRS3    | ENSG00000112081 |
| 6 | 36683768 | 36684064 | 36683906 | 16  | 17  | 1  | 10.55743955 | 9.18E-06    | SFRS3    | ENSG00000112081 |
| 6 | 36692728 | 36693146 | 36692905 | 14  | 21  | 2  | 8.602358155 | 3.33E-06    | SFRS3    | ENSG00000112081 |
| 6 | 36699206 | 36699502 | 36699354 | 16  | 17  | 3  | 5.278719777 | 0.000205462 | SFRS3    | ENSG00000112081 |
| 6 | 36742584 | 36743273 | 36743001 | 184 | 227 | 4  | 53.49102707 | 1.43E-70    |          | ENSG00000213500 |
| 6 | 36751718 | 36752623 | 36752211 | 414 | 588 | 10 | 62.81143331 | 9.47E-181   | CDKN1A   | ENSG00000124762 |
| 6 | 36752718 | 36753353 | 36753120 | 165 | 232 | 7  | 34.16504745 | 3.31E-68    | CDKN1A   | ENSG00000124762 |
| 6 | 36753364 | 36753907 | 36753728 | 10  | 22  | 10 | 2.452738482 | 0.00515848  | CDKN1A   | ENSG00000124762 |
| 6 | 36754039 | 36754835 | 36754237 | 29  | 57  | 10 | 6.185166607 | 2.01E-11    | CDKN1A   | ENSG00000124762 |
| 6 | 36754926 | 36755405 | 36755096 | 8   | 15  | 4  | 3.753756286 | 0.0020497   | CDKN1A   | ENSG00000124762 |
| 6 | 36756214 | 36756627 | 36756393 | 15  | 22  | 1  | 13.49006165 | 2.37E-07    | CDKN1A   | ENSG00000124762 |
| 6 | 36758203 | 36758619 | 36758379 | 42  | 55  | 2  | 21.89691167 | 6.60E-17    | CDKN1A   | ENSG00000124762 |
| 6 | 36764448 | 36764775 | 36764611 | 9   | 12  | 0  | 15.24963491 | 4.15E-05    |          | ENSG00000196624 |
| 6 | 36834954 | 36835155 | 36835008 | 9   | 11  | 2  | 4.692195357 | 0.00272444  |          | ENSG00000214771 |
| 6 | 36938085 | 36938348 | 36938229 | 15  | 17  | 1  | 10.55743955 | 9.18E-06    | C6orf89  | ENSG00000198663 |
| 6 | 36988539 | 36988759 | 36988604 | 9   | 11  | 1  | 7.038293036 | 0.000674435 | C6orf89  | ENSG00000198663 |
| 6 | 37046814 | 37047008 | 37046921 | 8   | 10  | 1  | 6.451768616 | 0.00135978  |          | ENSG00000216412 |

|   |          |          |          |    |    |   |             |             |          |                 |
|---|----------|----------|----------|----|----|---|-------------|-------------|----------|-----------------|
| 6 | 37093868 | 37094230 | 37094022 | 10 | 14 | 1 | 8.797866295 | 8.00E-05    |          | ENSG00000146192 |
| 6 | 37147481 | 37147731 | 37147609 | 8  | 9  | 3 | 2.932622098 | 0.0242899   |          | ENSG00000146192 |
| 6 | 37320417 | 37320925 | 37320767 | 27 | 36 | 2 | 14.46760235 | 7.62E-11    |          | ENSG00000210733 |
| 6 | 37457412 | 37457599 | 37457504 | 8  | 9  | 2 | 3.910162798 | 0.00955088  |          | ENSG00000223195 |
| 6 | 37549175 | 37549557 | 37549354 | 20 | 28 | 6 | 4.859773763 | 8.07E-06    | C6orf129 | ENSG00000198937 |
| 6 | 37591804 | 37592093 | 37591971 | 11 | 15 | 8 | 2.085420159 | 0.0338693   |          | ENSG00000204110 |
| 6 | 37676446 | 37676645 | 37676544 | 8  | 9  | 0 | 11.73048839 | 0.000425898 |          | ENSG00000204110 |
| 6 | 37828554 | 37828907 | 37828730 | 10 | 16 | 1 | 9.970915134 | 1.89E-05    | MDGA1    | ENSG00000112139 |
| 6 | 37867204 | 37867454 | 37867329 | 10 | 12 | 3 | 3.812408728 | 0.004404    | ZFAND3   | ENSG00000156639 |
| 6 | 37884012 | 37884250 | 37884117 | 18 | 19 | 6 | 3.351568112 | 0.00134187  | ZFAND3   | ENSG00000156639 |
| 6 | 37965319 | 37965866 | 37965526 | 12 | 24 | 1 | 14.66311049 | 5.43E-08    |          | ENSG00000200597 |
| 6 | 38180898 | 38181118 | 38181008 | 11 | 13 | 1 | 8.211341875 | 0.000163445 |          | ENSG00000218521 |
| 6 | 38470113 | 38470356 | 38470233 | 11 | 12 | 0 | 15.24963491 | 4.15E-05    | BTBD9    | ENSG00000183826 |
| 6 | 39082603 | 39082835 | 39082754 | 8  | 10 | 4 | 2.580707446 | 0.0306059   |          | ENSG00000220556 |
| 6 | 39169064 | 39169385 | 39169208 | 14 | 17 | 4 | 4.222975822 | 0.000640773 | C6orf64  | ENSG00000112167 |
| 6 | 39213081 | 39213260 | 39213170 | 8  | 8  | 1 | 5.278719777 | 0.00542188  | C6orf64  | ENSG00000112167 |
| 6 | 39468046 | 39468281 | 39468163 | 8  | 8  | 1 | 5.278719777 | 0.00542188  |          | ENSG00000218986 |
| 6 | 39999059 | 39999396 | 39999227 | 10 | 14 | 3 | 4.398933147 | 0.00132748  | MOCS1    | ENSG00000124615 |
| 6 | 40259794 | 40260121 | 40259957 | 23 | 26 | 3 | 7.918079665 | 5.55E-07    |          | ENSG00000204092 |
| 6 | 40404411 | 40404596 | 40404503 | 9  | 9  | 2 | 3.910162798 | 0.00955088  |          | ENSG00000204092 |
| 6 | 40472209 | 40472853 | 40472621 | 55 | 84 | 9 | 9.970915134 | 1.01E-19    |          | ENSG00000210787 |
| 6 | 40495236 | 40495415 | 40495281 | 8  | 8  | 2 | 3.519146518 | 0.017558    |          | ENSG00000210787 |
| 6 | 40599193 | 40599764 | 40599412 | 28 | 50 | 1 | 29.9127454  | 1.84E-16    | LRFN2    | ENSG00000156564 |
| 6 | 40705719 | 40705898 | 40705808 | 8  | 8  | 0 | 10.55743955 | 0.000925496 | LRFN2    | ENSG00000156564 |
| 6 | 40790612 | 40790839 | 40790719 | 11 | 13 | 3 | 4.105670938 | 0.00243034  | LRFN2    | ENSG00000156564 |
| 6 | 40983049 | 40983498 | 40983319 | 20 | 29 | 4 | 7.038293036 | 3.41E-07    | UNC5CL   | ENSG00000124602 |
| 6 | 40988121 | 40988377 | 40988237 | 9  | 11 | 3 | 3.519146518 | 0.00788869  | UNC5CL   | ENSG00000124602 |
| 6 | 41147506 | 41147766 | 41147616 | 9  | 12 | 3 | 3.812408728 | 0.004404    | C6orf130 | ENSG00000124596 |
| 6 | 41186872 | 41187248 | 41187012 | 10 | 16 | 4 | 3.988366054 | 0.00115141  |          | ENSG00000217602 |
| 6 | 41265436 | 41265935 | 41265756 | 27 | 40 | 2 | 16.03166747 | 4.15E-12    | TREML2   | ENSG00000112195 |
| 6 | 41356110 | 41356358 | 41356234 | 9  | 9  | 3 | 2.932622098 | 0.0242899   | TREM1    | ENSG00000124731 |
| 6 | 41394669 | 41394962 | 41394834 | 8  | 11 | 2 | 4.692195357 | 0.00272444  |          | ENSG00000213461 |
| 6 | 41420033 | 41420217 | 41420177 | 8  | 9  | 0 | 11.73048839 | 0.000425898 | NCR2     | ENSG00000096264 |
| 6 | 41443577 | 41443839 | 41443683 | 10 | 12 | 4 | 3.049926982 | 0.0108184   | NCR2     | ENSG00000096264 |

|   |          |          |          |    |     |   |             |             |          |                 |
|---|----------|----------|----------|----|-----|---|-------------|-------------|----------|-----------------|
| 6 | 41612631 | 41612900 | 41612738 | 21 | 24  | 1 | 14.66311049 | 5.43E-08    | FOXP4    | ENSG00000137166 |
| 6 | 41660471 | 41660656 | 41660560 | 9  | 11  | 3 | 3.519146518 | 0.00788869  | FOXP4    | ENSG00000137166 |
| 6 | 41689299 | 41689546 | 41689375 | 11 | 13  | 2 | 5.474227917 | 0.000747844 |          | ENSG00000214738 |
| 6 | 41728849 | 41729265 | 41729028 | 13 | 21  | 4 | 5.161414893 | 5.68E-05    |          | ENSG00000220573 |
| 6 | 41757977 | 41758171 | 41758074 | 10 | 12  | 3 | 3.812408728 | 0.004404    | TFEB     | ENSG00000112561 |
| 6 | 41811319 | 41811500 | 41811403 | 9  | 9   | 0 | 11.73048839 | 0.000425898 | TFEB     | ENSG00000112561 |
| 6 | 41844404 | 41844821 | 41844612 | 28 | 38  | 0 | 45.74890473 | 7.15E-14    | FRS3     | ENSG00000137218 |
| 6 | 41851679 | 41851894 | 41851781 | 8  | 8   | 5 | 1.759573259 | 0.13508     | FRS3     | ENSG00000137218 |
| 6 | 41855614 | 41855882 | 41855749 | 10 | 10  | 3 | 3.225884308 | 0.0139466   | FRS3     | ENSG00000137218 |
| 6 | 41863236 | 41863574 | 41863408 | 16 | 20  | 8 | 2.737113958 | 0.0036449   | TOMM6    | ENSG00000214736 |
| 6 | 41877165 | 41877405 | 41877299 | 8  | 9   | 3 | 2.932622098 | 0.0242899   | TOMM6    | ENSG00000214736 |
| 6 | 41922076 | 41922821 | 41922501 | 87 | 147 | 4 | 34.72224564 | 2.41E-44    |          | ENSG00000206977 |
| 6 | 42121487 | 42121681 | 42121560 | 8  | 9   | 0 | 11.73048839 | 0.000425898 | CCND3    | ENSG00000112576 |
| 6 | 42151213 | 42151482 | 42151347 | 16 | 17  | 2 | 7.038293036 | 5.19E-05    | TAF8     | ENSG00000137413 |
| 6 | 42293498 | 42293777 | 42293628 | 12 | 13  | 3 | 4.105670938 | 0.00243034  | MRPS10   | ENSG00000048544 |
| 6 | 42401993 | 42402236 | 42402095 | 10 | 11  | 5 | 2.346097679 | 0.0364013   |          | ENSG00000210840 |
| 6 | 42789672 | 42789886 | 42789829 | 8  | 9   | 0 | 11.73048839 | 0.000425898 | PRPH2    | ENSG00000112619 |
| 6 | 42821656 | 42821872 | 42821770 | 9  | 9   | 4 | 2.346097679 | 0.050148    | TBCC     | ENSG00000124659 |
| 6 | 42822660 | 42823135 | 42822989 | 9  | 20  | 4 | 4.926805125 | 0.00010522  | KIAA0240 | ENSG00000112624 |
| 6 | 42858493 | 42858697 | 42858595 | 9  | 10  | 4 | 2.580707446 | 0.0306059   | KIAA0240 | ENSG00000112624 |
| 6 | 42955250 | 42955517 | 42955383 | 10 | 10  | 1 | 6.451768616 | 0.00135978  | RPL7L1   | ENSG00000146223 |
| 6 | 42955601 | 42955902 | 42955746 | 10 | 12  | 7 | 1.906204364 | 0.0695918   | RPL7L1   | ENSG00000146223 |
| 6 | 42966347 | 42966749 | 42966575 | 17 | 26  | 4 | 6.334463732 | 2.40E-06    |          | ENSG00000221821 |
| 6 | 43129595 | 43129891 | 43129765 | 9  | 12  | 7 | 1.906204364 | 0.0695918   | CUL7     | ENSG00000044090 |
| 6 | 43172031 | 43172676 | 43172460 | 93 | 132 | 3 | 39.00387391 | 9.72E-41    |          | ENSG00000223079 |
| 6 | 43246489 | 43246726 | 43246594 | 8  | 9   | 2 | 3.910162798 | 0.00955088  | SRF      | ENSG00000112658 |
| 6 | 43500115 | 43500339 | 43500199 | 10 | 10  | 0 | 12.90353723 | 0.000195991 | ABCC10   | ENSG00000124574 |
| 6 | 43502919 | 43503393 | 43503159 | 8  | 18  | 4 | 4.457585589 | 0.000353565 | ABCC10   | ENSG00000124574 |
| 6 | 43616426 | 43616680 | 43616552 | 11 | 12  | 3 | 3.812408728 | 0.004404    |          | ENSG00000219470 |
| 6 | 43651797 | 43652218 | 43651986 | 48 | 60  | 1 | 35.7779896  | 9.32E-20    | POLH     | ENSG00000170734 |
| 6 | 43705678 | 43705891 | 43705793 | 8  | 9   | 6 | 1.675784056 | 0.141978    | GTPBP2   | ENSG00000172432 |
| 6 | 43743965 | 43744582 | 43744265 | 16 | 34  | 2 | 13.68556979 | 3.24E-10    |          | ENSG00000210930 |
| 6 | 43849051 | 43849280 | 43849130 | 9  | 10  | 1 | 6.451768616 | 0.00135978  | VEGFA    | ENSG00000112715 |
| 6 | 43882096 | 43882313 | 43882204 | 9  | 10  | 1 | 6.451768616 | 0.00135978  | VEGFA    | ENSG00000112715 |

|   |          |          |          |    |     |   |             |             |          |                 |
|---|----------|----------|----------|----|-----|---|-------------|-------------|----------|-----------------|
| 6 | 43883185 | 43883447 | 43883316 | 15 | 16  | 5 | 3.323638378 | 0.00288759  | VEGFA    | ENSG00000112715 |
| 6 | 43931866 | 43932111 | 43931988 | 8  | 9   | 4 | 2.346097679 | 0.050148    | VEGFA    | ENSG00000112715 |
| 6 | 44042142 | 44042464 | 44042303 | 12 | 16  | 2 | 6.647276756 | 0.000101928 | C6orf223 | ENSG00000181577 |
| 6 | 44150363 | 44150565 | 44150466 | 8  | 10  | 0 | 12.90353723 | 0.000195991 |          | ENSG00000183239 |
| 6 | 44160371 | 44160621 | 44160536 | 9  | 11  | 2 | 4.692195357 | 0.00272444  |          | ENSG00000183239 |
| 6 | 44204318 | 44204667 | 44204492 | 15 | 19  | 3 | 5.865244197 | 5.72E-05    | TMEM63B  | ENSG00000137216 |
| 6 | 44322656 | 44322897 | 44322726 | 11 | 13  | 2 | 5.474227917 | 0.000747844 | HSP90AB1 | ENSG00000096384 |
| 6 | 44552216 | 44552396 | 44552306 | 8  | 8   | 1 | 5.278719777 | 0.00542188  | CDC5L    | ENSG00000096401 |
| 6 | 44760900 | 44761332 | 44761115 | 85 | 104 | 2 | 41.05670938 | 6.81E-33    | SUPT3H   | ENSG00000196284 |
| 6 | 44860878 | 44861164 | 44861030 | 18 | 19  | 1 | 11.73048839 | 2.14E-06    | SUPT3H   | ENSG00000196284 |
| 6 | 45495214 | 45495596 | 45495393 | 13 | 21  | 5 | 4.301179077 | 0.000172642 | RUNX2    | ENSG00000124813 |
| 6 | 45564534 | 45564713 | 45564639 | 8  | 8   | 0 | 10.55743955 | 0.000925496 | RUNX2    | ENSG00000124813 |
| 6 | 45631656 | 45631887 | 45631800 | 8  | 11  | 4 | 2.815317214 | 0.0183428   |          | ENSG00000210937 |
| 6 | 45644867 | 45645046 | 45644978 | 8  | 8   | 2 | 3.519146518 | 0.017558    |          | ENSG00000210937 |
| 6 | 45684567 | 45684786 | 45684639 | 8  | 8   | 2 | 3.519146518 | 0.017558    |          | ENSG00000210937 |
| 6 | 45786377 | 45786639 | 45786508 | 13 | 13  | 1 | 8.211341875 | 0.000163445 |          | ENSG00000210937 |
| 6 | 46111167 | 46111346 | 46111256 | 8  | 8   | 1 | 5.278719777 | 0.00542188  |          | ENSG00000220020 |
| 6 | 46728226 | 46728423 | 46728328 | 8  | 8   | 0 | 10.55743955 | 0.000925496 | CYP39A1  | ENSG00000146233 |
| 6 | 46897231 | 46897722 | 46897523 | 27 | 37  | 1 | 22.28792795 | 3.34E-12    | MEP1A    | ENSG00000112818 |
| 6 | 47243983 | 47244237 | 47244085 | 9  | 12  | 0 | 15.24963491 | 4.15E-05    | GPR110   | ENSG00000153292 |
| 6 | 47245676 | 47245971 | 47245809 | 10 | 12  | 1 | 7.624817456 | 0.000332769 | GPR110   | ENSG00000153292 |
| 6 | 47557584 | 47557866 | 47557725 | 28 | 31  | 4 | 7.507512572 | 9.10E-08    | CD2AP    | ENSG00000198087 |
| 6 | 47745740 | 47746014 | 47745873 | 8  | 12  | 3 | 3.812408728 | 0.004404    | GPR111   | ENSG00000164393 |
| 6 | 47766088 | 47766275 | 47766164 | 8  | 8   | 0 | 10.55743955 | 0.000925496 | GPR115   | ENSG00000153294 |
| 6 | 47774071 | 47774276 | 47774187 | 10 | 11  | 0 | 14.07658607 | 9.02E-05    | GPR115   | ENSG00000153294 |
| 6 | 48186700 | 48187127 | 48186950 | 38 | 54  | 1 | 32.25884308 | 8.88E-18    |          | ENSG00000214653 |
| 6 | 49340589 | 49340844 | 49340718 | 9  | 11  | 0 | 14.07658607 | 9.02E-05    |          | ENSG00000217631 |
| 6 | 49626305 | 49626565 | 49626409 | 10 | 12  | 1 | 7.624817456 | 0.000332769 | C6orf141 | ENSG00000197261 |
| 6 | 49966763 | 49966998 | 49966880 | 10 | 11  | 5 | 2.346097679 | 0.0364013   | CRISP1   | ENSG00000124812 |
| 6 | 51027794 | 51028013 | 51027903 | 8  | 10  | 3 | 3.225884308 | 0.0139466   |          | ENSG00000213362 |
| 6 | 51445899 | 51446273 | 51446078 | 16 | 22  | 7 | 3.372515413 | 0.000629223 |          | ENSG00000212532 |
| 6 | 51576569 | 51576816 | 51576679 | 8  | 10  | 4 | 2.580707446 | 0.0306059   |          | ENSG00000214641 |
| 6 | 51932671 | 51932870 | 51932810 | 8  | 8   | 6 | 1.508205651 | 0.203852    |          | ENSG00000211003 |
| 6 | 52036466 | 52036685 | 52036573 | 8  | 8   | 2 | 3.519146518 | 0.017558    | PKHD1    | ENSG00000170927 |



|   |          |          |          |    |    |    |             |             |          |                 |
|---|----------|----------|----------|----|----|----|-------------|-------------|----------|-----------------|
| 6 | 52259617 | 52259810 | 52259713 | 8  | 8  | 1  | 5.278719777 | 0.00542188  | MCM3     | ENSG00000112118 |
| 6 | 52472388 | 52472628 | 52472508 | 12 | 12 | 1  | 7.624817456 | 0.000332769 | TRAM2    | ENSG00000065308 |
| 6 | 52524171 | 52524478 | 52524333 | 15 | 17 | 9  | 2.111487911 | 0.0248715   | TRAM2    | ENSG00000065308 |
| 6 | 52561909 | 52562163 | 52562036 | 13 | 14 | 6  | 2.513676084 | 0.016726    | TRAM2    | ENSG00000065308 |
| 6 | 52697290 | 52697502 | 52697396 | 8  | 10 | 2  | 4.301179077 | 0.00512919  |          | ENSG00000218929 |
| 6 | 52788320 | 52788537 | 52788449 | 8  | 10 | 5  | 2.150589539 | 0.0575848   |          | ENSG00000218222 |
| 6 | 52849131 | 52849596 | 52849417 | 12 | 22 | 1  | 13.49006165 | 2.37E-07    |          | ENSG00000216211 |
| 6 | 52969472 | 52969666 | 52969569 | 8  | 9  | 7  | 1.466311049 | 0.20706     |          | ENSG00000202198 |
| 6 | 52984811 | 52985241 | 52984990 | 8  | 15 | 10 | 1.706252857 | 0.0822346   |          | ENSG00000202198 |
| 6 | 53034400 | 53034738 | 53034569 | 14 | 18 | 3  | 5.571981987 | 0.000108726 | ICK      | ENSG00000112144 |
| 6 | 53037489 | 53037893 | 53037604 | 12 | 18 | 7  | 2.785990993 | 0.00480525  | FBXO9    | ENSG00000112146 |
| 6 | 53299405 | 53299761 | 53299583 | 8  | 14 | 6  | 2.513676084 | 0.016726    |          | ENSG00000217527 |
| 6 | 53437359 | 53437550 | 53437452 | 9  | 9  | 1  | 5.865244197 | 0.00272497  |          | ENSG00000212065 |
| 6 | 53437740 | 53438136 | 53437919 | 13 | 21 | 3  | 6.451768616 | 1.56E-05    |          | ENSG00000212065 |
| 6 | 53438494 | 53438858 | 53438681 | 14 | 20 | 7  | 3.079253203 | 0.00177418  |          | ENSG00000212065 |
| 6 | 53445750 | 53446123 | 53445929 | 19 | 26 | 1  | 15.83615933 | 1.23E-08    |          | ENSG00000212065 |
| 6 | 53517727 | 53518025 | 53517861 | 12 | 15 | 1  | 9.384390715 | 3.90E-05    | GCLC     | ENSG00000001084 |
| 6 | 53520626 | 53521189 | 53520791 | 11 | 24 | 2  | 9.775406994 | 4.09E-07    | GCLC     | ENSG00000001084 |
| 6 | 53691789 | 53692008 | 53691898 | 8  | 8  | 8  | 1.173048839 | 0.36929     | KLHL31   | ENSG00000124743 |
| 6 | 53717131 | 53717507 | 53717307 | 12 | 18 | 6  | 3.183989707 | 0.00227432  | LRRC1    | ENSG00000137269 |
| 6 | 53766993 | 53767328 | 53767090 | 8  | 13 | 5  | 2.737113958 | 0.0137917   | LRRC1    | ENSG00000137269 |
| 6 | 53767383 | 53767658 | 53767546 | 8  | 9  | 12 | 0.902345261 | 0.602772    | LRRC1    | ENSG00000137269 |
| 6 | 53783964 | 53784361 | 53784099 | 18 | 24 | 1  | 14.66311049 | 5.43E-08    | LRRC1    | ENSG00000137269 |
| 6 | 53842828 | 53843162 | 53842996 | 21 | 25 | 5  | 5.083211637 | 1.58E-05    | LRRC1    | ENSG00000137269 |
| 6 | 53900031 | 53900233 | 53900097 | 9  | 9  | 2  | 3.910162798 | 0.00955088  |          | ENSG00000218143 |
| 6 | 53935534 | 53935721 | 53935583 | 8  | 9  | 2  | 3.910162798 | 0.00955088  |          | ENSG00000218143 |
| 6 | 54088755 | 54089150 | 54088972 | 45 | 55 | 3  | 16.42268375 | 7.12E-16    | C6orf142 | ENSG00000146147 |
| 6 | 54334574 | 54334755 | 54334675 | 8  | 8  | 1  | 5.278719777 | 0.00542188  | TINAG    | ENSG00000137251 |
| 6 | 54683323 | 54683516 | 54683419 | 8  | 9  | 0  | 11.73048839 | 0.000425898 |          | ENSG00000220635 |
| 6 | 54688663 | 54689007 | 54688835 | 8  | 9  | 2  | 3.910162798 | 0.00955088  |          | ENSG00000220635 |
| 6 | 54690632 | 54690876 | 54690754 | 9  | 10 | 1  | 6.451768616 | 0.00135978  |          | ENSG00000220635 |
| 6 | 54819146 | 54819684 | 54819381 | 10 | 21 | 7  | 3.225884308 | 0.00106152  | FAM83B   | ENSG00000168143 |
| 6 | 55184899 | 55185223 | 55185051 | 12 | 15 | 0  | 18.76878143 | 4.04E-06    | HCRTR2   | ENSG00000137252 |
| 6 | 55609146 | 55609408 | 55609277 | 9  | 12 | 1  | 7.624817456 | 0.000332769 |          | ENSG00000220725 |

|   |          |          |          |     |      |      |             |             |          |                 |
|---|----------|----------|----------|-----|------|------|-------------|-------------|----------|-----------------|
| 6 | 55868849 | 55869073 | 55868961 | 9   | 10   | 3    | 3.225884308 | 0.0139466   | BMP5     | ENSG00000112175 |
| 6 | 55970326 | 55970622 | 55970471 | 8   | 10   | 4    | 2.580707446 | 0.0306059   |          | ENSG00000214604 |
| 6 | 56342914 | 56343336 | 56343090 | 10  | 15   | 4    | 3.753756286 | 0.0020497   | COL21A1  | ENSG00000124749 |
| 6 | 56515134 | 56515326 | 56515230 | 8   | 9    | 4    | 2.346097679 | 0.050148    | DST      | ENSG00000151914 |
| 6 | 56815849 | 56816052 | 56815941 | 8   | 9    | 3    | 2.932622098 | 0.0242899   | DST      | ENSG00000151914 |
| 6 | 56928007 | 56928254 | 56928130 | 11  | 11   | 4    | 2.815317214 | 0.0183428   | BEND6    | ENSG00000151917 |
| 6 | 56971984 | 56972265 | 56972149 | 9   | 12   | 5    | 2.541605819 | 0.0225912   |          | ENSG00000218980 |
| 6 | 57002551 | 57002852 | 57002691 | 14  | 16   | 2    | 6.647276756 | 0.000101928 | KIAA1586 | ENSG00000168116 |
| 6 | 57062791 | 57063026 | 57062908 | 8   | 9    | 1    | 5.865244197 | 0.00272497  | ZNF451   | ENSG00000112200 |
| 6 | 57194191 | 57194455 | 57194296 | 9   | 10   | 1    | 6.451768616 | 0.00135978  | RAB23    | ENSG00000112210 |
| 6 | 57255893 | 57256250 | 57256078 | 9   | 14   | 1    | 8.797866295 | 8.00E-05    | PRIM2    | ENSG00000146143 |
| 6 | 57290131 | 57290492 | 57290307 | 10  | 15   | 2    | 6.256260476 | 0.000199274 | PRIM2    | ENSG00000146143 |
| 6 | 57464665 | 57464982 | 57464823 | 9   | 11   | 1    | 7.038293036 | 0.000674435 | PRIM2    | ENSG00000146143 |
| 6 | 57562416 | 57562609 | 57562485 | 9   | 9    | 6    | 1.675784056 | 0.141978    |          | ENSG00000214566 |
| 6 | 57573542 | 57574184 | 57573924 | 32  | 51   | 3    | 15.24963491 | 1.29E-14    |          | ENSG00000214566 |
| 6 | 58881683 | 58882029 | 58881859 | 30  | 30   | 39   | 0.90911285  | 0.658237    |          | ENSG00000214561 |
| 6 | 58882341 | 58882680 | 58882510 | 33  | 35   | 44   | 0.938439071 | 0.614808    |          | ENSG00000214561 |
| 6 | 58882794 | 58883128 | 58882955 | 22  | 24   | 19   | 1.466311049 | 0.0993901   |          | ENSG00000214561 |
| 6 | 58884052 | 58887381 | 58886885 | 209 | 1586 | 2303 | 0.807998484 | 1           |          | ENSG00000214561 |
| 6 | 58887625 | 58887957 | 58887791 | 21  | 21   | 22   | 1.122046716 | 0.351409    |          | ENSG00000214561 |
| 6 | 61958641 | 61958973 | 61958807 | 37  | 37   | 44   | 0.990574575 | 0.519566    |          | ENSG00000220030 |
| 6 | 61959518 | 61959848 | 61959683 | 17  | 17   | 12   | 1.62422147  | 0.088135    |          | ENSG00000220030 |
| 6 | 61967747 | 61967929 | 61967773 | 9   | 9    | 15   | 0.733155525 | 0.788527    |          | ENSG00000220030 |
| 6 | 61971328 | 61971656 | 61971492 | 9   | 9    | 6    | 1.675784056 | 0.141978    |          | ENSG00000220030 |
| 6 | 63767261 | 63767511 | 63767386 | 13  | 14   | 0    | 17.59573259 | 8.79E-06    |          | ENSG00000217477 |
| 6 | 64333437 | 64333707 | 64333572 | 9   | 12   | 5    | 2.541605819 | 0.0225912   | PTP4A1   | ENSG00000112245 |
| 6 | 64341387 | 64342014 | 64341583 | 157 | 206  | 4    | 48.56422195 | 1.17E-63    | PTP4A1   | ENSG00000112245 |
| 6 | 64342239 | 64342478 | 64342351 | 12  | 13   | 2    | 5.474227917 | 0.000747844 | PTP4A1   | ENSG00000112245 |
| 6 | 64366582 | 64366772 | 64366666 | 11  | 12   | 8    | 1.694403879 | 0.107291    |          | ENSG00000213309 |
| 6 | 65517460 | 65517885 | 65517656 | 13  | 24   | 0    | 29.32622098 | 3.74E-09    |          | ENSG00000219332 |
| 6 | 69006047 | 69006369 | 69006208 | 22  | 24   | 0    | 29.32622098 | 3.74E-09    |          | ENSG00000218834 |
| 6 | 72132356 | 72132807 | 72132516 | 12  | 22   | 0    | 26.9801233  | 1.77E-08    |          | ENSG00000199094 |
| 6 | 72134080 | 72134760 | 72134351 | 202 | 250  | 4    | 58.88705173 | 3.68E-78    |          | ENSG00000199094 |
| 6 | 72134876 | 72135073 | 72135015 | 8   | 10   | 5    | 2.150589539 | 0.0575848   |          | ENSG00000199094 |

|   |           |           |           |    |    |   |             |             |         |                 |
|---|-----------|-----------|-----------|----|----|---|-------------|-------------|---------|-----------------|
| 6 | 72982757  | 72982965  | 72982861  | 9  | 11 | 1 | 7.038293036 | 0.000674435 |         | ENSG00000218732 |
| 6 | 73554059  | 73554280  | 73554169  | 8  | 9  | 2 | 3.910162798 | 0.00955088  | KCNQ5   | ENSG00000185760 |
| 6 | 73794855  | 73795109  | 73794982  | 9  | 12 | 1 | 7.624817456 | 0.000332769 | KCNQ5   | ENSG00000185760 |
| 6 | 73798212  | 73798652  | 73798462  | 11 | 21 | 3 | 6.451768616 | 1.56E-05    |         | ENSG00000198191 |
| 6 | 74287245  | 74287751  | 74287422  | 12 | 23 | 5 | 4.692195357 | 5.29E-05    | EEF1AL3 | ENSG00000156508 |
| 6 | 75997068  | 75997279  | 75997173  | 8  | 8  | 1 | 5.278719777 | 0.00542188  | COX7A2  | ENSG00000112695 |
| 6 | 76038591  | 76038955  | 76038770  | 15 | 22 | 1 | 13.49006165 | 2.37E-07    | TMEM30A | ENSG00000112697 |
| 6 | 76513928  | 76514130  | 76513986  | 8  | 8  | 1 | 5.278719777 | 0.00542188  | MYO6    | ENSG00000196586 |
| 6 | 79019493  | 79019748  | 79019613  | 15 | 16 | 0 | 19.94183027 | 1.86E-06    |         |                 |
| 6 | 79901251  | 79901599  | 79901413  | 9  | 13 | 0 | 16.42268375 | 1.91E-05    | PHIP    | ENSG00000146247 |
| 6 | 80219944  | 80220442  | 80220180  | 33 | 51 | 0 | 60.99853964 | 2.97E-18    |         | ENSG00000218748 |
| 6 | 80715681  | 80715870  | 80715788  | 8  | 8  | 3 | 2.639359888 | 0.0415794   | ELOVL4  | ENSG00000118402 |
| 6 | 80770704  | 80771018  | 80770865  | 9  | 13 | 1 | 8.211341875 | 0.000163445 | TTK     | ENSG00000112742 |
| 6 | 80995275  | 80995526  | 80995401  | 11 | 13 | 0 | 16.42268375 | 1.91E-05    | BCKDHB  | ENSG00000083123 |
| 6 | 81302646  | 81303047  | 81302860  | 40 | 54 | 1 | 32.25884308 | 8.88E-18    |         | ENSG00000216352 |
| 6 | 82526323  | 82526674  | 82526498  | 30 | 35 | 0 | 42.22975822 | 7.34E-13    |         | ENSG00000206886 |
| 6 | 83026818  | 83026999  | 83026908  | 8  | 8  | 1 | 5.278719777 | 0.00542188  |         | ENSG00000220537 |
| 6 | 83130541  | 83130729  | 83130635  | 9  | 9  | 2 | 3.910162798 | 0.00955088  | TPBG    | ENSG00000146242 |
| 6 | 83336577  | 83336888  | 83336732  | 9  | 14 | 3 | 4.398933147 | 0.00132748  | TPBG    | ENSG00000146242 |
| 6 | 84198237  | 84198430  | 84198285  | 9  | 9  | 3 | 2.932622098 | 0.0242899   | ME1     | ENSG00000065833 |
| 6 | 85602685  | 85603023  | 85602854  | 20 | 24 | 2 | 9.775406994 | 4.09E-07    | TBX18   | ENSG00000112837 |
| 6 | 88188103  | 88188354  | 88188237  | 8  | 11 | 4 | 2.815317214 | 0.0183428   |         | ENSG00000216324 |
| 6 | 88498381  | 88498575  | 88498478  | 10 | 11 | 3 | 3.519146518 | 0.00788869  |         | ENSG00000211421 |
| 6 | 88615063  | 88615274  | 88615180  | 9  | 9  | 3 | 2.932622098 | 0.0242899   |         | ENSG00000211983 |
| 6 | 89848265  | 89848467  | 89848365  | 8  | 9  | 1 | 5.865244197 | 0.00272497  | PNRC1   | ENSG00000146278 |
| 6 | 90009058  | 90009298  | 90009178  | 10 | 10 | 0 | 12.90353723 | 0.000195991 | GABRR1  | ENSG00000146276 |
| 6 | 90202625  | 90202886  | 90202755  | 8  | 9  | 1 | 5.865244197 | 0.00272497  | ANKRD6  | ENSG00000135299 |
| 6 | 92096722  | 92096946  | 92096841  | 10 | 11 | 0 | 14.07658607 | 9.02E-05    |         | ENSG00000209145 |
| 6 | 92475108  | 92475293  | 92475246  | 8  | 10 | 3 | 3.225884308 | 0.0139466   |         | ENSG00000209145 |
| 6 | 92510971  | 92511281  | 92511111  | 10 | 13 | 2 | 5.474227917 | 0.000747844 |         | ENSG00000209300 |
| 6 | 94911263  | 94911701  | 94911468  | 44 | 57 | 3 | 17.00920817 | 1.67E-16    |         | ENSG00000220370 |
| 6 | 96278408  | 96278587  | 96278544  | 8  | 8  | 1 | 5.278719777 | 0.00542188  |         | ENSG00000219549 |
| 6 | 96710929  | 96711448  | 96711269  | 30 | 42 | 4 | 10.08822002 | 5.25E-11    |         | ENSG00000223167 |
| 6 | 100391080 | 100391411 | 100391245 | 28 | 28 | 2 | 11.33947211 | 2.41E-08    | MCHR2   | ENSG00000152034 |

|   |           |           |           |     |     |   |             |             |        |                 |
|---|-----------|-----------|-----------|-----|-----|---|-------------|-------------|--------|-----------------|
| 6 | 100551733 | 100552033 | 100551871 | 10  | 14  | 1 | 8.797866295 | 8.00E-05    | MCHR2  | ENSG00000152034 |
| 6 | 101047751 | 101048000 | 101047875 | 13  | 14  | 2 | 5.865244197 | 0.000387308 | SIM1   | ENSG00000112246 |
| 6 | 101435333 | 101435684 | 101435508 | 17  | 21  | 7 | 3.225884308 | 0.00106152  | ASCC3  | ENSG00000112249 |
| 6 | 102953480 | 102953960 | 102953760 | 32  | 44  | 0 | 52.78719777 | 6.79E-16    |        | ENSG00000219757 |
| 6 | 104125145 | 104125331 | 104125217 | 8   | 8   | 0 | 10.55743955 | 0.000925496 |        | ENSG00000202283 |
| 6 | 106546135 | 106546397 | 106546267 | 16  | 17  | 0 | 21.11487911 | 8.57E-07    |        | ENSG00000200198 |
| 6 | 106652740 | 106653507 | 106653166 | 31  | 51  | 3 | 15.24963491 | 1.29E-14    | PRDM1  | ENSG00000057657 |
| 6 | 106880212 | 106880438 | 106880312 | 9   | 10  | 4 | 2.580707446 | 0.0306059   | ATG5   | ENSG00000057663 |
| 6 | 106914738 | 106915073 | 106914980 | 9   | 13  | 2 | 5.474227917 | 0.000747844 | ATG5   | ENSG00000057663 |
| 6 | 106999549 | 106999811 | 106999680 | 10  | 12  | 0 | 15.24963491 | 4.15E-05    |        | ENSG00000202386 |
| 6 | 107328165 | 107328533 | 107328289 | 9   | 14  | 2 | 5.865244197 | 0.000387308 |        | ENSG00000207577 |
| 6 | 107352899 | 107353107 | 107353021 | 11  | 12  | 0 | 15.24963491 | 4.15E-05    |        | ENSG00000207577 |
| 6 | 107613599 | 107613779 | 107613663 | 8   | 8   | 1 | 5.278719777 | 0.00542188  |        | ENSG00000214985 |
| 6 | 107630720 | 107630936 | 107630805 | 8   | 9   | 1 | 5.865244197 | 0.00272497  |        | ENSG00000214985 |
| 6 | 107656759 | 107656946 | 107656852 | 9   | 9   | 0 | 11.73048839 | 0.000425898 |        | ENSG00000203285 |
| 6 | 107658288 | 107658813 | 107658562 | 64  | 79  | 5 | 15.64065119 | 1.72E-21    |        | ENSG00000220237 |
| 6 | 108049030 | 108049300 | 108049167 | 10  | 10  | 1 | 6.451768616 | 0.00135978  | SOBP   | ENSG00000112320 |
| 6 | 108086857 | 108087042 | 108086955 | 8   | 9   | 0 | 11.73048839 | 0.000425898 | SOBP   | ENSG00000112320 |
| 6 | 108555829 | 108556010 | 108555919 | 8   | 8   | 3 | 2.639359888 | 0.0415794   | NR2E1  | ENSG00000112333 |
| 6 | 108986320 | 108986705 | 108986573 | 9   | 14  | 1 | 8.797866295 | 8.00E-05    | FOXO3  | ENSG00000118689 |
| 6 | 109167465 | 109167816 | 109167640 | 9   | 15  | 5 | 3.128130238 | 0.00492422  |        | ENSG00000203801 |
| 6 | 109325254 | 109325716 | 109325473 | 143 | 186 | 1 | 109.6800665 | 9.47E-62    |        | ENSG00000185796 |
| 6 | 109344241 | 109344474 | 109344347 | 9   | 9   | 3 | 2.932622098 | 0.0242899   |        | ENSG00000185796 |
| 6 | 109375444 | 109375728 | 109375598 | 19  | 23  | 3 | 7.038293036 | 4.15E-06    |        | ENSG00000185796 |
| 6 | 109436630 | 109437343 | 109436898 | 40  | 78  | 6 | 13.23869404 | 2.72E-20    | SESN1  | ENSG00000080546 |
| 6 | 109437470 | 109437796 | 109437633 | 11  | 13  | 0 | 16.42268375 | 1.91E-05    | SESN1  | ENSG00000080546 |
| 6 | 109810781 | 109810969 | 109810838 | 10  | 10  | 1 | 6.451768616 | 0.00135978  | CD164  | ENSG00000135535 |
| 6 | 109811042 | 109811227 | 109811178 | 8   | 8   | 3 | 2.639359888 | 0.0415794   | CD164  | ENSG00000135535 |
| 6 | 110148220 | 110148434 | 110148349 | 8   | 8   | 0 | 10.55743955 | 0.000925496 | FIG4   | ENSG00000112367 |
| 6 | 110310014 | 110310418 | 110310216 | 27  | 37  | 1 | 22.28792795 | 3.34E-12    | GPR6   | ENSG00000146360 |
| 6 | 110493351 | 110493625 | 110493485 | 10  | 13  | 0 | 16.42268375 | 1.91E-05    | GPR6   | ENSG00000146360 |
| 6 | 111387952 | 111388164 | 111388044 | 8   | 8   | 0 | 10.55743955 | 0.000925496 | GTF3C6 | ENSG00000155115 |
| 6 | 111534944 | 111535371 | 111535141 | 63  | 77  | 0 | 91.49780947 | 5.11E-27    |        | ENSG00000200926 |
| 6 | 111906715 | 111906960 | 111906860 | 12  | 13  | 7 | 2.052835469 | 0.046392    | REV3L  | ENSG00000009413 |

|   |           |           |           |     |     |     |             |             |          |                 |
|---|-----------|-----------|-----------|-----|-----|-----|-------------|-------------|----------|-----------------|
| 6 | 111911028 | 111911225 | 111911126 | 9   | 10  | 0   | 12.90353723 | 0.000195991 | REV3L    | ENSG00000009413 |
| 6 | 111911720 | 111912320 | 111912012 | 182 | 258 | 2   | 101.2732165 | 4.98E-84    | REV3L    | ENSG00000009413 |
| 6 | 112020665 | 112020892 | 112020764 | 8   | 10  | 1   | 6.451768616 | 0.00135978  | TRAF3IP2 | ENSG00000056972 |
| 6 | 112070465 | 112070680 | 112070608 | 8   | 9   | 1   | 5.865244197 | 0.00272497  |          | ENSG00000208826 |
| 6 | 112415211 | 112415568 | 112415389 | 37  | 43  | 1   | 25.80707446 | 3.65E-14    | WISP3    | ENSG00000112761 |
| 6 | 114070948 | 114071249 | 114071096 | 11  | 13  | 2   | 5.474227917 | 0.000747844 |          | ENSG00000221559 |
| 6 | 114422740 | 114422924 | 114422832 | 8   | 8   | 1   | 5.278719777 | 0.00542188  | HDAC2    | ENSG00000196591 |
| 6 | 115498628 | 115499218 | 115498932 | 33  | 47  | 1   | 28.15317214 | 1.78E-15    |          | ENSG00000208800 |
| 6 | 116780503 | 116780744 | 116780623 | 9   | 10  | 1   | 6.451768616 | 0.00135978  | DSE      | ENSG00000111817 |
| 6 | 116985745 | 116986146 | 116985889 | 9   | 14  | 3   | 4.398933147 | 0.00132748  | FAM26D   | ENSG00000164451 |
| 6 | 119001777 | 119002215 | 119002022 | 49  | 59  | 1   | 35.19146518 | 1.99E-19    |          | ENSG00000217330 |
| 6 | 119600137 | 119600550 | 119600372 | 138 | 175 | 167 | 1.228908308 | 0.028047    |          | ENSG00000216316 |
| 6 | 119847579 | 119847838 | 119847740 | 9   | 9   | 2   | 3.910162798 | 0.00955088  | MAN1A1   | ENSG00000111885 |
| 6 | 120127829 | 120128124 | 120127989 | 13  | 13  | 0   | 16.42268375 | 1.91E-05    | MAN1A1   | ENSG00000111885 |
| 6 | 121956147 | 121956371 | 121956259 | 10  | 12  | 6   | 2.178519273 | 0.0416567   |          | ENSG00000222659 |
| 6 | 122212488 | 122212667 | 122212577 | 8   | 8   | 2   | 3.519146518 | 0.017558    |          | ENSG00000220184 |
| 6 | 123003203 | 123003521 | 123003366 | 19  | 21  | 0   | 25.80707446 | 3.84E-08    | PKIB     | ENSG00000135549 |
| 6 | 123059943 | 123060169 | 123060056 | 8   | 10  | 2   | 4.301179077 | 0.00512919  | PKIB     | ENSG00000135549 |
| 6 | 125408900 | 125409229 | 125409064 | 25  | 28  | 1   | 17.00920817 | 2.80E-09    | RNF217   | ENSG00000146373 |
| 6 | 125516447 | 125516660 | 125516557 | 8   | 10  | 0   | 12.90353723 | 0.000195991 | TPD52L1  | ENSG00000111907 |
| 6 | 125517688 | 125518053 | 125517862 | 10  | 16  | 5   | 3.323638378 | 0.00288759  | TPD52L1  | ENSG00000111907 |
| 6 | 125560804 | 125560998 | 125560900 | 8   | 9   | 2   | 3.910162798 | 0.00955088  | TPD52L1  | ENSG00000111907 |
| 6 | 125565164 | 125565450 | 125565322 | 19  | 21  | 5   | 4.301179077 | 0.000172642 | TPD52L1  | ENSG00000111907 |
| 6 | 125567960 | 125568246 | 125568110 | 8   | 11  | 1   | 7.038293036 | 0.000674435 | TPD52L1  | ENSG00000111907 |
| 6 | 125947392 | 125947733 | 125947562 | 17  | 22  | 2   | 8.993374435 | 1.66E-06    | HEY2     | ENSG00000135547 |
| 6 | 126143045 | 126143232 | 126143168 | 8   | 9   | 0   | 11.73048839 | 0.000425898 | NCOA7    | ENSG00000111912 |
| 6 | 126358810 | 126359115 | 126358962 | 8   | 11  | 2   | 4.692195357 | 0.00272444  | TRMT11   | ENSG00000066651 |
| 6 | 127949173 | 127949623 | 127949349 | 29  | 38  | 0   | 45.74890473 | 7.15E-14    | C6orf58  | ENSG00000184530 |
| 6 | 128857326 | 128857518 | 128857445 | 8   | 9   | 3   | 2.932622098 | 0.0242899   | PTPRK    | ENSG00000152894 |
| 6 | 129509686 | 129510053 | 129509879 | 20  | 26  | 0   | 31.67231866 | 7.93E-10    |          | ENSG00000219642 |
| 6 | 131220391 | 131220667 | 131220521 | 14  | 15  | 0   | 18.76878143 | 4.04E-06    | EPB41L2  | ENSG00000079819 |
| 6 | 131562591 | 131562890 | 131562726 | 10  | 13  | 1   | 8.211341875 | 0.000163445 |          | ENSG00000218857 |
| 6 | 131990863 | 131991301 | 131991089 | 14  | 22  | 4   | 5.396024661 | 3.05E-05    | MED23    | ENSG00000112282 |
| 6 | 133176970 | 133177200 | 133177070 | 11  | 13  | 3   | 4.105670938 | 0.00243034  | RPS12    | ENSG00000112306 |

|   |           |           |           |     |     |    |             |             |                         |
|---|-----------|-----------|-----------|-----|-----|----|-------------|-------------|-------------------------|
| 6 | 133635621 | 133635956 | 133635788 | 24  | 26  | 22 | 1.377057333 | 0.128834    | ENSG00000208647         |
| 6 | 133702411 | 133702691 | 133702573 | 10  | 13  | 0  | 16.42268375 | 1.91E-05    | ENSG00000208647         |
| 6 | 134108672 | 134108924 | 134108798 | 12  | 13  | 2  | 5.474227917 | 0.000747844 | ENSG00000218213         |
| 6 | 134315690 | 134316089 | 134315925 | 10  | 16  | 6  | 2.848832895 | 0.00632407  | TBPL1 ENSG00000028839   |
| 6 | 134420271 | 134420760 | 134420582 | 11  | 19  | 0  | 23.46097679 | 1.81E-07    | SLC2A12 ENSG00000146411 |
| 6 | 135548329 | 135548677 | 135548503 | 11  | 14  | 2  | 5.865244197 | 0.000387308 | MYB ENSG00000118513     |
| 6 | 135603639 | 135603867 | 135603699 | 16  | 16  | 1  | 9.970915134 | 1.89E-05    | ENSG00000207689         |
| 6 | 135614420 | 135614622 | 135614512 | 8   | 8   | 6  | 1.508205651 | 0.203852    | ENSG00000207689         |
| 6 | 136295552 | 136295848 | 136295712 | 11  | 13  | 4  | 3.28453675  | 0.00629037  | ENSG00000222121         |
| 6 | 137007099 | 137007278 | 137007204 | 8   | 8   | 3  | 2.639359888 | 0.0415794   | ENSG00000212242         |
| 6 | 137082131 | 137082406 | 137082281 | 13  | 14  | 3  | 4.398933147 | 0.00132748  | MAP3K5 ENSG00000197442  |
| 6 | 137154175 | 137154354 | 137154260 | 8   | 8   | 0  | 10.55743955 | 0.000925496 | MAP3K5 ENSG00000197442  |
| 6 | 137155733 | 137156039 | 137155907 | 10  | 13  | 4  | 3.28453675  | 0.00629037  | MAP3K5 ENSG00000197442  |
| 6 | 137520482 | 137520860 | 137520661 | 15  | 23  | 2  | 9.384390715 | 8.25E-07    | IL22RA2 ENSG00000164485 |
| 6 | 137839441 | 137839725 | 137839583 | 9   | 13  | 3  | 4.105670938 | 0.00243034  | OLIG3 ENSG00000177468   |
| 6 | 138229936 | 138230138 | 138230049 | 8   | 9   | 1  | 5.865244197 | 0.00272497  | TNFAIP3 ENSG00000118503 |
| 6 | 138397788 | 138398249 | 138398025 | 112 | 136 | 3  | 40.17692275 | 4.76E-42    | ENSG00000219463         |
| 6 | 138449397 | 138449626 | 138449507 | 8   | 10  | 1  | 6.451768616 | 0.00135978  | PERP ENSG00000112378    |
| 6 | 138451115 | 138451377 | 138451246 | 9   | 11  | 1  | 7.038293036 | 0.000674435 | PERP ENSG00000112378    |
| 6 | 138591989 | 138592204 | 138592124 | 10  | 11  | 0  | 14.07658607 | 9.02E-05    | PBOV1 ENSG00000217912   |
| 6 | 138766850 | 138767035 | 138766927 | 8   | 8   | 3  | 2.639359888 | 0.0415794   | HEBP2 ENSG00000051620   |
| 6 | 139118882 | 139119085 | 139118983 | 9   | 9   | 0  | 11.73048839 | 0.000425898 | CCDC28A ENSG00000024862 |
| 6 | 139177029 | 139177302 | 139177165 | 11  | 14  | 3  | 4.398933147 | 0.00132748  | C6orf91 ENSG00000203734 |
| 6 | 139180737 | 139181097 | 139180920 | 28  | 34  | 3  | 10.26417734 | 2.27E-09    | ENSG00000218003         |
| 6 | 139738271 | 139738615 | 139738445 | 16  | 21  | 4  | 5.161414893 | 5.68E-05    | CITED2 ENSG00000164442  |
| 6 | 139794112 | 139794402 | 139794255 | 16  | 17  | 4  | 4.222975822 | 0.000640773 | CITED2 ENSG00000164442  |
| 6 | 139799509 | 139799757 | 139799633 | 10  | 11  | 2  | 4.692195357 | 0.00272444  | CITED2 ENSG00000164442  |
| 6 | 139815471 | 139815717 | 139815594 | 10  | 10  | 0  | 12.90353723 | 0.000195991 | CITED2 ENSG00000164442  |
| 6 | 140116397 | 140116576 | 140116486 | 8   | 8   | 2  | 3.519146518 | 0.017558    | ENSG00000205695         |
| 6 | 140825642 | 140825889 | 140825765 | 14  | 14  | 0  | 17.59573259 | 8.79E-06    | ENSG00000221336         |
| 6 | 142509804 | 142510142 | 142509974 | 11  | 14  | 2  | 5.865244197 | 0.000387308 | VTA1 ENSG00000009844    |
| 6 | 142665286 | 142665519 | 142665347 | 10  | 14  | 1  | 8.797866295 | 8.00E-05    | GPR126 ENSG00000112414  |
| 6 | 142741145 | 142741334 | 142741165 | 8   | 8   | 1  | 5.278719777 | 0.00542188  | GPR126 ENSG00000112414  |
| 6 | 143208873 | 143209052 | 143208962 | 8   | 8   | 1  | 5.278719777 | 0.00542188  | HIVEP2 ENSG00000010818  |

|   |           |           |           |    |     |   |             |             |           |                 |
|---|-----------|-----------|-----------|----|-----|---|-------------|-------------|-----------|-----------------|
| 6 | 143649050 | 143649301 | 143649175 | 11 | 12  | 1 | 7.624817456 | 0.000332769 |           | ENSG00000217495 |
| 6 | 143691803 | 143692103 | 143691949 | 11 | 12  | 2 | 5.083211637 | 0.00143337  |           | ENSG00000216642 |
| 6 | 143813489 | 143813742 | 143813628 | 16 | 18  | 1 | 11.14396397 | 4.44E-06    | PEX3      | ENSG00000034693 |
| 6 | 143814122 | 143814304 | 143814213 | 8  | 8   | 3 | 2.639359888 | 0.0415794   | PEX3      | ENSG00000034693 |
| 6 | 144514061 | 144514277 | 144514144 | 8  | 8   | 3 | 2.639359888 | 0.0415794   | STX11     | ENSG00000135604 |
| 6 | 144579251 | 144579590 | 144579428 | 9  | 14  | 4 | 3.519146518 | 0.00361132  |           | ENSG00000217027 |
| 6 | 145020569 | 145020819 | 145020659 | 10 | 11  | 1 | 7.038293036 | 0.000674435 | UTRN      | ENSG00000152818 |
| 6 | 147220245 | 147220531 | 147220393 | 10 | 11  | 4 | 2.815317214 | 0.0183428   |           | ENSG00000203728 |
| 6 | 147268314 | 147268540 | 147268478 | 8  | 11  | 0 | 14.07658607 | 9.02E-05    |           | ENSG00000216063 |
| 6 | 147407092 | 147407423 | 147407257 | 31 | 34  | 0 | 41.05670938 | 1.59E-12    |           | ENSG00000216063 |
| 6 | 148538727 | 148538936 | 148538831 | 10 | 10  | 2 | 4.301179077 | 0.00512919  | SASH1     | ENSG00000111961 |
| 6 | 148736891 | 148737182 | 148737036 | 10 | 13  | 2 | 5.474227917 | 0.000747844 | SASH1     | ENSG00000111961 |
| 6 | 149219219 | 149219599 | 149219420 | 9  | 17  | 3 | 5.278719777 | 0.000205462 |           | ENSG00000203725 |
| 6 | 149248820 | 149249223 | 149248999 | 25 | 34  | 4 | 8.211341875 | 1.23E-08    |           | ENSG00000203725 |
| 6 | 149394915 | 149395140 | 149395027 | 8  | 9   | 4 | 2.346097679 | 0.050148    |           | ENSG00000219487 |
| 6 | 149442429 | 149442625 | 149442527 | 8  | 8   | 4 | 2.111487911 | 0.0804809   |           | ENSG00000219487 |
| 6 | 149442631 | 149443073 | 149442844 | 38 | 51  | 6 | 8.714077092 | 3.28E-12    |           | ENSG00000219487 |
| 6 | 149445122 | 149445333 | 149445201 | 8  | 9   | 3 | 2.932622098 | 0.0242899   |           | ENSG00000219487 |
| 6 | 149699381 | 149699826 | 149699640 | 85 | 100 | 2 | 39.49264426 | 1.41E-31    | MAP3K7IP2 | ENSG00000055208 |
| 6 | 149741847 | 149742169 | 149741999 | 13 | 16  | 1 | 9.970915134 | 1.89E-05    | SUMO4     | ENSG00000177688 |
| 6 | 149841533 | 149841845 | 149841712 | 18 | 22  | 0 | 26.9801233  | 1.77E-08    | ZC3H12D   | ENSG00000178199 |
| 6 | 150072288 | 150072467 | 150072377 | 8  | 8   | 2 | 3.519146518 | 0.017558    | LATS1     | ENSG00000131023 |
| 6 | 150613782 | 150614117 | 150613949 | 13 | 19  | 1 | 11.73048839 | 2.14E-06    |           | ENSG00000201628 |
| 6 | 150963760 | 150963986 | 150963857 | 11 | 12  | 9 | 1.524963491 | 0.154777    | PLEKHG1   | ENSG00000120278 |
| 6 | 151220000 | 151220554 | 151220199 | 43 | 58  | 0 | 69.20988152 | 1.30E-20    | MTHFD1L   | ENSG00000120254 |
| 6 | 151430830 | 151431069 | 151430949 | 11 | 11  | 1 | 7.038293036 | 0.000674435 |           | ENSG00000221469 |
| 6 | 151762645 | 151762826 | 151762752 | 8  | 9   | 2 | 3.910162798 | 0.00955088  | ZBTB2     | ENSG00000181472 |
| 6 | 151815030 | 151815376 | 151815203 | 11 | 17  | 4 | 4.222975822 | 0.000640773 | C6orf211  | ENSG00000146476 |
| 6 | 151886748 | 151887272 | 151887093 | 31 | 42  | 0 | 50.44110009 | 3.21E-15    | C6orf97   | ENSG00000120262 |
| 6 | 151920853 | 151921163 | 151921023 | 11 | 15  | 0 | 18.76878143 | 4.04E-06    |           | ENSG00000207422 |
| 6 | 152020815 | 152021152 | 152020983 | 21 | 27  | 6 | 4.692195357 | 1.46E-05    | ESR1      | ENSG00000091831 |
| 6 | 152021582 | 152021831 | 152021706 | 8  | 10  | 3 | 3.225884308 | 0.0139466   | ESR1      | ENSG00000091831 |
| 6 | 152027964 | 152028164 | 152028064 | 10 | 11  | 1 | 7.038293036 | 0.000674435 | ESR1      | ENSG00000091831 |
| 6 | 152038657 | 152038861 | 152038799 | 9  | 9   | 6 | 1.675784056 | 0.141978    | ESR1      | ENSG00000091831 |

|   |           |           |           |    |    |   |             |             |         |                 |
|---|-----------|-----------|-----------|----|----|---|-------------|-------------|---------|-----------------|
| 6 | 152046193 | 152046440 | 152046316 | 8  | 12 | 0 | 15.24963491 | 4.15E-05    | ESR1    | ENSG00000091831 |
| 6 | 152128331 | 152128711 | 152128506 | 63 | 68 | 2 | 26.9801233  | 4.10E-21    | ESR1    | ENSG00000091831 |
| 6 | 152537016 | 152537200 | 152537095 | 9  | 9  | 3 | 2.932622098 | 0.0242899   | SYNE1   | ENSG00000131018 |
| 6 | 152584590 | 152585073 | 152584831 | 50 | 72 | 0 | 85.63256527 | 2.48E-25    | SYNE1   | ENSG00000131018 |
| 6 | 152676826 | 152677225 | 152677005 | 33 | 44 | 0 | 52.78719777 | 6.79E-16    | SYNE1   | ENSG00000131018 |
| 6 | 152938692 | 152939053 | 152938841 | 14 | 20 | 0 | 24.63402563 | 8.35E-08    | SYNE1   | ENSG00000131018 |
| 6 | 154090911 | 154091091 | 154091040 | 8  | 8  | 1 | 5.278719777 | 0.00542188  |         | ENSG00000199246 |
| 6 | 154518998 | 154519227 | 154519112 | 9  | 10 | 4 | 2.580707446 | 0.0306059   |         | ENSG00000218017 |
| 6 | 154655839 | 154656165 | 154656015 | 10 | 14 | 4 | 3.519146518 | 0.00361132  |         | ENSG00000074706 |
| 6 | 154829083 | 154829296 | 154829189 | 9  | 10 | 3 | 3.225884308 | 0.0139466   | CNKSR3  | ENSG00000153721 |
| 6 | 154978409 | 154978695 | 154978553 | 8  | 12 | 5 | 2.541605819 | 0.0225912   |         | ENSG00000219146 |
| 6 | 155038504 | 155038686 | 155038595 | 8  | 8  | 3 | 2.639359888 | 0.0415794   |         | ENSG00000205625 |
| 6 | 155096738 | 155097067 | 155096902 | 8  | 14 | 3 | 4.398933147 | 0.00132748  | RBM16   | ENSG00000213079 |
| 6 | 156736795 | 156737105 | 156736950 | 8  | 11 | 0 | 14.07658607 | 9.02E-05    |         | ENSG00000212295 |
| 6 | 157082669 | 157082920 | 157082766 | 8  | 9  | 2 | 3.910162798 | 0.00955088  |         | ENSG00000220347 |
| 6 | 157190210 | 157190547 | 157190380 | 11 | 15 | 1 | 9.384390715 | 3.90E-05    | ARID1B  | ENSG00000049618 |
| 6 | 157343489 | 157343746 | 157343617 | 13 | 15 | 2 | 6.256260476 | 0.000199274 |         | ENSG00000218596 |
| 6 | 157664377 | 157664705 | 157664540 | 9  | 12 | 2 | 5.083211637 | 0.00143337  | C6orf35 | ENSG00000122339 |
| 6 | 157897728 | 157897987 | 157897866 | 8  | 10 | 0 | 12.90353723 | 0.000195991 |         | ENSG00000219448 |
| 6 | 157989518 | 157989946 | 157989720 | 27 | 40 | 0 | 48.09500241 | 1.51E-14    | ZDHHC14 | ENSG00000175048 |
| 6 | 158104295 | 158104715 | 158104474 | 13 | 20 | 2 | 8.211341875 | 6.65E-06    |         | ENSG00000208440 |
| 6 | 158105585 | 158105908 | 158105735 | 8  | 12 | 4 | 3.049926982 | 0.0108184   |         | ENSG00000208440 |
| 6 | 158330849 | 158331159 | 158331014 | 15 | 18 | 7 | 2.785990993 | 0.00480525  | SYNJ2   | ENSG00000078269 |
| 6 | 158349279 | 158349563 | 158349431 | 11 | 12 | 1 | 7.624817456 | 0.000332769 | SYNJ2   | ENSG00000078269 |
| 6 | 158381365 | 158381664 | 158381514 | 29 | 32 | 3 | 9.677652924 | 9.12E-09    | SYNJ2   | ENSG00000078269 |
| 6 | 158390471 | 158391141 | 158390672 | 22 | 47 | 7 | 7.038293036 | 2.04E-10    | SYNJ2   | ENSG00000078269 |
| 6 | 158401442 | 158401684 | 158401563 | 8  | 9  | 0 | 11.73048839 | 0.000425898 | SYNJ2   | ENSG00000078269 |
| 6 | 158463210 | 158463480 | 158463345 | 19 | 21 | 2 | 8.602358155 | 3.33E-06    | SYNJ2   | ENSG00000078269 |
| 6 | 158718980 | 158719230 | 158719100 | 12 | 13 | 3 | 4.105670938 | 0.00243034  |         | ENSG00000208435 |
| 6 | 159004663 | 159004903 | 159004812 | 8  | 10 | 1 | 6.451768616 | 0.00135978  | SYTL3   | ENSG00000164674 |
| 6 | 159007762 | 159008012 | 159007887 | 9  | 10 | 1 | 6.451768616 | 0.00135978  | SYTL3   | ENSG00000164674 |
| 6 | 159190819 | 159191116 | 159190967 | 11 | 12 | 2 | 5.083211637 | 0.00143337  |         | ENSG00000213077 |
| 6 | 159238307 | 159238666 | 159238486 | 19 | 26 | 0 | 31.67231866 | 7.93E-10    |         | ENSG00000213076 |
| 6 | 159251447 | 159251673 | 159251572 | 11 | 12 | 1 | 7.624817456 | 0.000332769 |         | ENSG00000213076 |



|   |           |           |           |     |     |    |             |             |          |                 |
|---|-----------|-----------|-----------|-----|-----|----|-------------|-------------|----------|-----------------|
| 6 | 159341042 | 159341232 | 159341174 | 8   | 9   | 5  | 1.955081399 | 0.0892323   | RSPH3    | ENSG00000130363 |
| 6 | 159593942 | 159594259 | 159594098 | 39  | 42  | 2  | 16.81370003 | 9.62E-13    | FNDC1    | ENSG00000164694 |
| 6 | 159802404 | 159802606 | 159802505 | 8   | 9   | 0  | 11.73048839 | 0.000425898 |          | ENSG00000216480 |
| 6 | 159950075 | 159950286 | 159950183 | 8   | 9   | 1  | 5.865244197 | 0.00272497  |          | ENSG00000216480 |
| 6 | 160131499 | 160131751 | 160131610 | 10  | 12  | 0  | 15.24963491 | 4.15E-05    | MRPL18   | ENSG00000112110 |
| 6 | 160187377 | 160187586 | 160187481 | 10  | 10  | 0  | 12.90353723 | 0.000195991 | PNLDC1   | ENSG00000146453 |
| 6 | 163728396 | 163728738 | 163728567 | 36  | 42  | 0  | 50.44110009 | 3.21E-15    |          | ENSG00000217514 |
| 6 | 163975425 | 163976098 | 163975848 | 132 | 184 | 1  | 108.5070176 | 4.42E-61    |          | ENSG00000222470 |
| 6 | 165714307 | 165714549 | 165714426 | 9   | 10  | 0  | 12.90353723 | 0.000195991 |          | ENSG00000199523 |
| 6 | 165760489 | 165760670 | 165760585 | 8   | 9   | 1  | 5.865244197 | 0.00272497  |          | ENSG00000199523 |
| 6 | 165965802 | 165966060 | 165965931 | 9   | 9   | 2  | 3.910162798 | 0.00955088  | PDE10A   | ENSG00000112541 |
| 6 | 166168063 | 166168468 | 166168242 | 10  | 17  | 2  | 7.038293036 | 5.19E-05    |          | ENSG00000222214 |
| 6 | 166681452 | 166681654 | 166681506 | 9   | 10  | 2  | 4.301179077 | 0.00512919  | SFT2D1   | ENSG00000198818 |
| 6 | 167959143 | 167959472 | 167959301 | 12  | 15  | 2  | 6.256260476 | 0.000199274 | C6orf124 | ENSG00000198221 |
| 6 | 168204018 | 168204264 | 168204142 | 12  | 14  | 1  | 8.797866295 | 8.00E-05    | FRMD1    | ENSG00000153303 |
| 6 | 168759564 | 168759761 | 168759662 | 13  | 13  | 0  | 16.42268375 | 1.91E-05    | SMOC2    | ENSG00000112562 |
| 6 | 169037133 | 169037480 | 169037306 | 13  | 19  | 0  | 23.46097679 | 1.81E-07    | SMOC2    | ENSG00000112562 |
| 6 | 170183701 | 170183948 | 170183822 | 8   | 10  | 3  | 3.225884308 | 0.0139466   |          | ENSG00000218716 |
| 6 | 170383481 | 170383873 | 170383677 | 29  | 38  | 0  | 45.74890473 | 7.15E-14    |          | ENSG00000218716 |
| 6 | 170495801 | 170496147 | 170495974 | 10  | 15  | 1  | 9.384390715 | 3.90E-05    | FAM120B  | ENSG00000112584 |
| 6 | 170704212 | 170704510 | 170704361 | 10  | 13  | 2  | 5.474227917 | 0.000747844 | PSMB1    | ENSG00000008018 |
| 6 | 170705212 | 170705482 | 170705371 | 9   | 12  | 3  | 3.812408728 | 0.004404    | TBP      | ENSG00000112592 |
| 7 | 525183    | 525494    | 525349    | 9   | 13  | 4  | 3.28453675  | 0.00629037  | PDGFA    | ENSG00000197461 |
| 7 | 528531    | 528831    | 528699    | 12  | 12  | 4  | 3.049926982 | 0.0108184   | PDGFA    | ENSG00000197461 |
| 7 | 545945    | 546556    | 546206    | 87  | 125 | 5  | 24.63402563 | 4.77E-36    | PDGFA    | ENSG00000197461 |
| 7 | 711585    | 711953    | 711663    | 11  | 17  | 3  | 5.278719777 | 0.000205462 | PRKAR1B  | ENSG00000188191 |
| 7 | 784755    | 784946    | 784863    | 8   | 8   | 1  | 5.278719777 | 0.00542188  |          | ENSG00000206016 |
| 7 | 819296    | 819864    | 819594    | 10  | 22  | 11 | 2.248343609 | 0.0090389   | UNC84A   | ENSG00000164828 |
| 7 | 873436    | 873739    | 873587    | 9   | 14  | 2  | 5.865244197 | 0.000387308 | C7orf20  | ENSG00000105972 |
| 7 | 879486    | 879795    | 879639    | 9   | 12  | 3  | 3.812408728 | 0.004404    | C7orf20  | ENSG00000105972 |
| 7 | 887554    | 887930    | 887733    | 10  | 16  | 8  | 2.215758919 | 0.0222902   | C7orf20  | ENSG00000105972 |
| 7 | 999223    | 999693    | 999524    | 12  | 20  | 5  | 4.105670938 | 0.000308509 | CYP2W1   | ENSG00000073067 |
| 7 | 1035085   | 1035285   | 1035185   | 11  | 11  | 5  | 2.346097679 | 0.0364013   |          | ENSG00000199023 |
| 7 | 1050424   | 1050657   | 1050533   | 8   | 9   | 5  | 1.955081399 | 0.0892323   |          | ENSG00000212776 |

|   |         |         |         |     |     |    |             |             |          |                 |
|---|---------|---------|---------|-----|-----|----|-------------|-------------|----------|-----------------|
| 7 | 1053021 | 1053459 | 1053280 | 10  | 20  | 11 | 2.052835469 | 0.0201852   |          | ENSG00000212776 |
| 7 | 1093212 | 1093441 | 1093326 | 10  | 12  | 2  | 5.083211637 | 0.00143337  | GPER     | ENSG00000164850 |
| 7 | 1143497 | 1143676 | 1143565 | 9   | 9   | 3  | 2.932622098 | 0.0242899   | C7orf50  | ENSG00000146540 |
| 7 | 1176112 | 1176341 | 1176226 | 12  | 13  | 8  | 1.824742639 | 0.0744168   | ZFAND2A  | ENSG00000178381 |
| 7 | 1182052 | 1182579 | 1182381 | 10  | 21  | 4  | 5.161414893 | 5.68E-05    | ZFAND2A  | ENSG00000178381 |
| 7 | 1275228 | 1275547 | 1275403 | 8   | 11  | 0  | 14.07658607 | 9.02E-05    | UNCX     | ENSG00000164853 |
| 7 | 1308784 | 1309406 | 1309149 | 40  | 64  | 1  | 38.12408728 | 4.44E-21    | UNCX     | ENSG00000164853 |
| 7 | 1438669 | 1439061 | 1438890 | 8   | 12  | 2  | 5.083211637 | 0.00143337  | MICALL2  | ENSG00000164877 |
| 7 | 1512980 | 1513382 | 1513225 | 18  | 25  | 5  | 5.083211637 | 1.58E-05    | INTS1    | ENSG00000164880 |
| 7 | 1519455 | 1519699 | 1519524 | 9   | 12  | 2  | 5.083211637 | 0.00143337  | INTS1    | ENSG00000164880 |
| 7 | 1538819 | 1539273 | 1539094 | 13  | 22  | 6  | 3.854303329 | 0.000260696 | MAFK     | ENSG00000198517 |
| 7 | 1543094 | 1543696 | 1543469 | 12  | 26  | 3  | 7.918079665 | 5.55E-07    | MAFK     | ENSG00000198517 |
| 7 | 1562366 | 1562748 | 1562572 | 13  | 19  | 6  | 3.351568112 | 0.00134187  | TMEM184A | ENSG00000215155 |
| 7 | 1576158 | 1576378 | 1576281 | 8   | 9   | 3  | 2.932622098 | 0.0242899   | PSMG3    | ENSG00000157778 |
| 7 | 1731826 | 1732055 | 1731925 | 9   | 9   | 0  | 11.73048839 | 0.000425898 |          | ENSG00000205971 |
| 7 | 1764743 | 1765076 | 1764909 | 9   | 12  | 1  | 7.624817456 | 0.000332769 |          | ENSG00000205971 |
| 7 | 1818256 | 1818536 | 1818396 | 10  | 13  | 3  | 4.105670938 | 0.00243034  |          | ENSG00000176349 |
| 7 | 1857773 | 1858313 | 1857984 | 9   | 22  | 5  | 4.496687217 | 9.59E-05    |          | ENSG00000215135 |
| 7 | 1898324 | 1898703 | 1898528 | 11  | 17  | 5  | 3.519146518 | 0.00167472  |          | ENSG00000215135 |
| 7 | 1902571 | 1902908 | 1902739 | 14  | 20  | 0  | 24.63402563 | 8.35E-08    |          | ENSG00000215135 |
| 7 | 1944596 | 1944802 | 1944646 | 13  | 14  | 3  | 4.398933147 | 0.00132748  |          | ENSG00000215135 |
| 7 | 1986159 | 1986587 | 1986374 | 20  | 30  | 2  | 12.12150467 | 5.77E-09    |          | ENSG00000215135 |
| 7 | 2174739 | 2174933 | 2174796 | 10  | 10  | 4  | 2.580707446 | 0.0306059   | MAD1L1   | ENSG00000002822 |
| 7 | 2176071 | 2176842 | 2176323 | 246 | 328 | 6  | 55.13329545 | 5.99E-101   | MAD1L1   | ENSG00000002822 |
| 7 | 2178980 | 2179341 | 2179162 | 14  | 21  | 5  | 4.301179077 | 0.000172642 | MAD1L1   | ENSG00000002822 |
| 7 | 2243484 | 2243685 | 2243584 | 9   | 9   | 3  | 2.932622098 | 0.0242899   | FTSJ2    | ENSG00000122687 |
| 7 | 2267079 | 2267258 | 2267201 | 8   | 8   | 2  | 3.519146518 | 0.017558    | CHST12   | ENSG00000136213 |
| 7 | 2354245 | 2354497 | 2354331 | 9   | 12  | 4  | 3.049926982 | 0.0108184   | EIF3B    | ENSG00000106263 |
| 7 | 2477485 | 2477835 | 2477676 | 13  | 18  | 2  | 7.429309316 | 2.63E-05    |          | ENSG00000175873 |
| 7 | 2533967 | 2534194 | 2534100 | 9   | 10  | 3  | 3.225884308 | 0.0139466   | LFNG     | ENSG00000106003 |
| 7 | 2561690 | 2561918 | 2561804 | 9   | 10  | 5  | 2.150589539 | 0.0575848   | C7orf27  | ENSG00000106009 |
| 7 | 2639536 | 2639984 | 2639752 | 9   | 19  | 1  | 11.73048839 | 2.14E-06    | TTYH3    | ENSG00000136295 |
| 7 | 2677117 | 2677346 | 2677231 | 12  | 13  | 3  | 4.105670938 | 0.00243034  | AMZ1     | ENSG00000174945 |
| 7 | 2727092 | 2727388 | 2727240 | 9   | 12  | 0  | 15.24963491 | 4.15E-05    | AMZ1     | ENSG00000174945 |

|   |         |         |         |    |    |    |             |             |          |                 |
|---|---------|---------|---------|----|----|----|-------------|-------------|----------|-----------------|
| 7 | 2808690 | 2808909 | 2808791 | 8  | 11 | 2  | 4.692195357 | 0.00272444  | GNA12    | ENSG00000146535 |
| 7 | 3004491 | 3004712 | 3004570 | 12 | 13 | 0  | 16.42268375 | 1.91E-05    |          | ENSG00000201794 |
| 7 | 3221990 | 3222397 | 3222234 | 12 | 18 | 9  | 2.228792795 | 0.0164363   |          | ENSG00000217455 |
| 7 | 3222650 | 3222859 | 3222802 | 8  | 9  | 5  | 1.955081399 | 0.0892323   |          | ENSG00000217455 |
| 7 | 3410677 | 3410912 | 3410794 | 14 | 14 | 1  | 8.797866295 | 8.00E-05    |          | ENSG00000211544 |
| 7 | 3488738 | 3488920 | 3488830 | 9  | 10 | 4  | 2.580707446 | 0.0306059   |          | ENSG00000211544 |
| 7 | 3634951 | 3635171 | 3635069 | 8  | 9  | 1  | 5.865244197 | 0.00272497  |          | ENSG00000211544 |
| 7 | 3716865 | 3717045 | 3716955 | 8  | 8  | 1  | 5.278719777 | 0.00542188  |          | ENSG00000211544 |
| 7 | 4013190 | 4013370 | 4013280 | 8  | 8  | 7  | 1.319679944 | 0.283403    | SDK1     | ENSG00000146555 |
| 7 | 4073129 | 4073395 | 4073247 | 9  | 9  | 0  | 11.73048839 | 0.000425898 | SDK1     | ENSG00000146555 |
| 7 | 4286867 | 4287124 | 4286996 | 11 | 13 | 0  | 16.42268375 | 1.91E-05    | SDK1     | ENSG00000146555 |
| 7 | 4617034 | 4617293 | 4617122 | 11 | 15 | 1  | 9.384390715 | 3.90E-05    | FOXK1    | ENSG00000164916 |
| 7 | 4637787 | 4638133 | 4637929 | 10 | 14 | 8  | 1.955081399 | 0.0506438   | FOXK1    | ENSG00000164916 |
| 7 | 4647977 | 4648209 | 4648093 | 10 | 10 | 3  | 3.225884308 | 0.0139466   | FOXK1    | ENSG00000164916 |
| 7 | 4781499 | 4781727 | 4781606 | 10 | 12 | 6  | 2.178519273 | 0.0416567   | KIAA0415 | ENSG00000164917 |
| 7 | 4838155 | 4838620 | 4838459 | 12 | 20 | 12 | 1.894925048 | 0.0317253   |          | ENSG00000206895 |
| 7 | 4855461 | 4855928 | 4855749 | 14 | 23 | 2  | 9.384390715 | 8.25E-07    | PAPOLB   | ENSG00000218823 |
| 7 | 5094727 | 5094935 | 5094831 | 10 | 10 | 2  | 4.301179077 | 0.00512919  | RBAK     | ENSG00000146587 |
| 7 | 5095110 | 5095485 | 5095289 | 16 | 21 | 6  | 3.686724924 | 0.000453999 | RBAK     | ENSG00000146587 |
| 7 | 5403262 | 5403806 | 5403560 | 25 | 40 | 5  | 8.015833735 | 1.06E-09    |          | ENSG00000182095 |
| 7 | 5423860 | 5424174 | 5424018 | 13 | 16 | 1  | 9.970915134 | 1.89E-05    |          | ENSG00000188365 |
| 7 | 5430323 | 5430670 | 5430496 | 8  | 14 | 7  | 2.199466574 | 0.0303778   |          | ENSG00000182095 |
| 7 | 5431733 | 5431949 | 5431783 | 13 | 14 | 3  | 4.398933147 | 0.00132748  |          | ENSG00000182095 |
| 7 | 5493025 | 5493283 | 5493149 | 9  | 12 | 3  | 3.812408728 | 0.004404    |          | ENSG00000210024 |
| 7 | 5500734 | 5501078 | 5500904 | 8  | 13 | 2  | 5.474227917 | 0.000747844 |          | ENSG00000207973 |
| 7 | 5519761 | 5520224 | 5519928 | 13 | 21 | 6  | 3.686724924 | 0.000453999 | FBXL18   | ENSG00000155034 |
| 7 | 5532024 | 5532793 | 5532356 | 37 | 68 | 2  | 26.9801233  | 4.10E-21    | ACTB     | ENSG00000075624 |
| 7 | 5535802 | 5536069 | 5535937 | 12 | 13 | 3  | 4.105670938 | 0.00243034  | ACTB     | ENSG00000075624 |
| 7 | 5536727 | 5536973 | 5536850 | 9  | 9  | 1  | 5.865244197 | 0.00272497  | ACTB     | ENSG00000075624 |
| 7 | 5568858 | 5569116 | 5568956 | 9  | 11 | 2  | 4.692195357 | 0.00272444  |          | ENSG00000169549 |
| 7 | 5569719 | 5570068 | 5569893 | 8  | 14 | 3  | 4.398933147 | 0.00132748  |          | ENSG00000169549 |
| 7 | 5576833 | 5577023 | 5576891 | 8  | 8  | 1  | 5.278719777 | 0.00542188  |          | ENSG00000169549 |
| 7 | 5601469 | 5601648 | 5601558 | 8  | 8  | 0  | 10.55743955 | 0.000925496 | FSCN1    | ENSG00000075618 |
| 7 | 5653036 | 5653408 | 5653186 | 46 | 52 | 1  | 31.08579424 | 4.04E-17    |          | ENSG00000215059 |

|   |         |         |         |    |    |    |             |             |         |                 |
|---|---------|---------|---------|----|----|----|-------------|-------------|---------|-----------------|
| 7 | 5671563 | 5671788 | 5671665 | 9  | 10 | 3  | 3.225884308 | 0.0139466   |         | ENSG00000215059 |
| 7 | 5787675 | 5788089 | 5787910 | 9  | 18 | 3  | 5.571981987 | 0.000108726 | RNF216  | ENSG00000011275 |
| 7 | 5862653 | 5862853 | 5862753 | 8  | 9  | 3  | 2.932622098 | 0.0242899   |         | ENSG00000222897 |
| 7 | 6001701 | 6002263 | 6001908 | 23 | 36 | 10 | 3.945709732 | 4.69E-06    |         | ENSG00000201990 |
| 7 | 6065501 | 6065722 | 6065611 | 12 | 15 | 3  | 4.692195357 | 0.000718455 | EIF2AK1 | ENSG00000086232 |
| 7 | 6110573 | 6110860 | 6110704 | 11 | 12 | 2  | 5.083211637 | 0.00143337  | USP42   | ENSG00000106346 |
| 7 | 6355187 | 6355424 | 6355303 | 9  | 11 | 3  | 3.519146518 | 0.00788869  |         | ENSG00000178397 |
| 7 | 6380347 | 6380529 | 6380438 | 8  | 8  | 3  | 2.639359888 | 0.0415794   | RAC1    | ENSG00000136238 |
| 7 | 6410063 | 6410379 | 6410221 | 11 | 13 | 0  | 16.42268375 | 1.91E-05    | RAC1    | ENSG00000136238 |
| 7 | 6453558 | 6453788 | 6453728 | 8  | 9  | 2  | 3.910162798 | 0.00955088  | DAGLB   | ENSG00000164535 |
| 7 | 6454108 | 6454308 | 6454200 | 8  | 10 | 7  | 1.612942154 | 0.147335    | DAGLB   | ENSG00000164535 |
| 7 | 6463682 | 6463873 | 6463806 | 9  | 10 | 1  | 6.451768616 | 0.00135978  | DAGLB   | ENSG00000164535 |
| 7 | 6509925 | 6510110 | 6510008 | 9  | 9  | 7  | 1.466311049 | 0.20706     | KDELR2  | ENSG00000136240 |
| 7 | 6510348 | 6510535 | 6510465 | 8  | 8  | 2  | 3.519146518 | 0.017558    | KDELR2  | ENSG00000136240 |
| 7 | 6510830 | 6511077 | 6510932 | 8  | 9  | 4  | 2.346097679 | 0.050148    | KDELR2  | ENSG00000136240 |
| 7 | 6522581 | 6522826 | 6522703 | 12 | 14 | 1  | 8.797866295 | 8.00E-05    | KDELR2  | ENSG00000136240 |
| 7 | 6583448 | 6583848 | 6583669 | 10 | 16 | 5  | 3.323638378 | 0.00288759  | ZDHHC4  | ENSG00000136247 |
| 7 | 6595828 | 6596067 | 6595945 | 9  | 9  | 2  | 3.910162798 | 0.00955088  | C7orf26 | ENSG00000146576 |
| 7 | 6665768 | 6665977 | 6665872 | 9  | 10 | 1  | 6.451768616 | 0.00135978  |         | ENSG00000198580 |
| 7 | 7105647 | 7106044 | 7105886 | 15 | 21 | 5  | 4.301179077 | 0.000172642 |         | ENSG00000201218 |
| 7 | 7120973 | 7121218 | 7121095 | 9  | 11 | 5  | 2.346097679 | 0.0364013   |         | ENSG00000201218 |
| 7 | 7188331 | 7188675 | 7188503 | 8  | 12 | 6  | 2.178519273 | 0.0416567   | C1GALT1 | ENSG00000106392 |
| 7 | 7327892 | 7328162 | 7328013 | 14 | 14 | 2  | 5.865244197 | 0.000387308 |         | ENSG00000218370 |
| 7 | 7333756 | 7334054 | 7333905 | 9  | 14 | 2  | 5.865244197 | 0.000387308 |         | ENSG00000218370 |
| 7 | 7335519 | 7335833 | 7335676 | 23 | 26 | 2  | 10.55743955 | 9.97E-08    |         | ENSG00000218370 |
| 7 | 7570600 | 7570791 | 7570695 | 9  | 9  | 7  | 1.466311049 | 0.20706     |         | ENSG00000164654 |
| 7 | 7572270 | 7572630 | 7572443 | 9  | 15 | 7  | 2.346097679 | 0.0195693   |         | ENSG00000164654 |
| 7 | 7687660 | 7687890 | 7687736 | 10 | 10 | 2  | 4.301179077 | 0.00512919  | RPA3    | ENSG00000106399 |
| 7 | 7805347 | 7805663 | 7805491 | 16 | 18 | 3  | 5.571981987 | 0.000108726 |         | ENSG00000219545 |
| 7 | 8002761 | 8003042 | 8002872 | 10 | 13 | 2  | 5.474227917 | 0.000747844 |         | ENSG00000217142 |
| 7 | 8042002 | 8042299 | 8042165 | 10 | 11 | 2  | 4.692195357 | 0.00272444  |         | ENSG00000217142 |
| 7 | 8084793 | 8084991 | 8084892 | 8  | 9  | 0  | 11.73048839 | 0.000425898 |         | ENSG00000217142 |
| 7 | 8268617 | 8268979 | 8268819 | 13 | 18 | 3  | 5.571981987 | 0.000108726 | ICA1    | ENSG00000003147 |
| 7 | 8332149 | 8332458 | 8332283 | 19 | 23 | 8  | 3.128130238 | 0.000832453 | ICA1    | ENSG00000003147 |

|   |          |          |          |    |    |    |             |             |          |                 |
|---|----------|----------|----------|----|----|----|-------------|-------------|----------|-----------------|
| 7 | 8603827  | 8604043  | 8603935  | 9  | 11 | 2  | 4.692195357 | 0.00272444  | NXPH1    | ENSG00000122584 |
| 7 | 10714692 | 10714879 | 10714792 | 8  | 9  | 2  | 3.910162798 | 0.00955088  |          | ENSG00000201774 |
| 7 | 10895534 | 10895743 | 10895630 | 8  | 10 | 2  | 4.301179077 | 0.00512919  |          | ENSG00000201774 |
| 7 | 11088818 | 11089323 | 11089098 | 81 | 99 | 0  | 117.3048839 | 1.96E-34    |          | ENSG00000219777 |
| 7 | 11199735 | 11199928 | 11199793 | 9  | 9  | 5  | 1.955081399 | 0.0892323   |          | ENSG00000220166 |
| 7 | 11238726 | 11238987 | 11238827 | 10 | 10 | 3  | 3.225884308 | 0.0139466   |          | ENSG00000220166 |
| 7 | 11267644 | 11267875 | 11267795 | 9  | 12 | 8  | 1.694403879 | 0.107291    |          | ENSG00000220166 |
| 7 | 12217118 | 12217409 | 12217289 | 10 | 13 | 4  | 3.28453675  | 0.00629037  | TMEM106B | ENSG00000106460 |
| 7 | 12563505 | 12563994 | 12563749 | 76 | 96 | 1  | 56.89286871 | 1.08E-31    | SCIN     | ENSG00000006747 |
| 7 | 12691723 | 12691951 | 12691820 | 10 | 11 | 1  | 7.038293036 | 0.000674435 | ARL4A    | ENSG00000122644 |
| 7 | 12808228 | 12808497 | 12808389 | 12 | 13 | 1  | 8.211341875 | 0.000163445 |          | ENSG00000222974 |
| 7 | 12811616 | 12811949 | 12811782 | 12 | 14 | 1  | 8.797866295 | 8.00E-05    |          | ENSG00000222974 |
| 7 | 12815598 | 12815978 | 12815774 | 16 | 23 | 1  | 14.07658607 | 1.14E-07    |          | ENSG00000222974 |
| 7 | 12870326 | 12870529 | 12870422 | 8  | 8  | 0  | 10.55743955 | 0.000925496 |          | ENSG00000222974 |
| 7 | 12947705 | 12948005 | 12947847 | 14 | 14 | 4  | 3.519146518 | 0.00361132  |          | ENSG00000216374 |
| 7 | 12957752 | 12957956 | 12957832 | 10 | 11 | 4  | 2.815317214 | 0.0183428   |          | ENSG00000216374 |
| 7 | 16427771 | 16428316 | 16427950 | 16 | 34 | 2  | 13.68556979 | 3.24E-10    |          | ENSG00000214960 |
| 7 | 16652041 | 16652462 | 16652218 | 13 | 23 | 3  | 7.038293036 | 4.15E-06    | BZW2     | ENSG00000136261 |
| 7 | 16659092 | 16659388 | 16659253 | 22 | 24 | 2  | 9.775406994 | 4.09E-07    | BZW2     | ENSG00000136261 |
| 7 | 16674242 | 16674570 | 16674402 | 16 | 18 | 6  | 3.183989707 | 0.00227432  | BZW2     | ENSG00000136261 |
| 7 | 16701873 | 16702065 | 16701916 | 8  | 9  | 0  | 11.73048839 | 0.000425898 | BZW2     | ENSG00000136261 |
| 7 | 16776843 | 16777094 | 16776968 | 16 | 19 | 4  | 4.692195357 | 0.000193572 | TSPAN13  | ENSG00000106537 |
| 7 | 16996035 | 16996393 | 16996214 | 14 | 20 | 6  | 3.519146518 | 0.000784044 |          | ENSG00000219142 |
| 7 | 17101287 | 17101501 | 17101394 | 8  | 9  | 2  | 3.910162798 | 0.00955088  |          | ENSG00000219142 |
| 7 | 17212544 | 17212780 | 17212615 | 9  | 9  | 1  | 5.865244197 | 0.00272497  |          | ENSG00000209101 |
| 7 | 17213409 | 17213588 | 17213498 | 8  | 9  | 3  | 2.932622098 | 0.0242899   |          | ENSG00000209101 |
| 7 | 17311113 | 17311304 | 17311208 | 8  | 9  | 2  | 3.910162798 | 0.00955088  | AHR      | ENSG00000106546 |
| 7 | 17347642 | 17347833 | 17347786 | 8  | 8  | 0  | 10.55743955 | 0.000925496 |          | ENSG00000199473 |
| 7 | 17496041 | 17496581 | 17496390 | 44 | 60 | 3  | 17.8889948  | 1.88E-17    |          | ENSG00000199473 |
| 7 | 17624610 | 17625098 | 17624846 | 20 | 33 | 15 | 2.492728784 | 0.000807271 |          | ENSG00000199473 |
| 7 | 17687255 | 17687434 | 17687329 | 8  | 8  | 2  | 3.519146518 | 0.017558    | SNX13    | ENSG00000071189 |
| 7 | 17777189 | 17777536 | 17777362 | 13 | 19 | 0  | 23.46097679 | 1.81E-07    | SNX13    | ENSG00000071189 |
| 7 | 17851015 | 17851196 | 17851076 | 8  | 8  | 0  | 10.55743955 | 0.000925496 | SNX13    | ENSG00000071189 |
| 7 | 17948583 | 17948781 | 17948649 | 9  | 9  | 1  | 5.865244197 | 0.00272497  | SNX13    | ENSG00000071189 |

|   |          |          |          |    |    |    |             |             |          |                 |
|---|----------|----------|----------|----|----|----|-------------|-------------|----------|-----------------|
| 7 | 18426878 | 18427290 | 18427115 | 63 | 76 | 2  | 30.10825354 | 1.02E-23    | HDAC9    | ENSG00000048052 |
| 7 | 18437089 | 18437307 | 18437201 | 13 | 14 | 0  | 17.59573259 | 8.79E-06    | HDAC9    | ENSG00000048052 |
| 7 | 19715137 | 19715426 | 19715265 | 8  | 12 | 3  | 3.812408728 | 0.004404    | TWISTNB  | ENSG00000105849 |
| 7 | 21433087 | 21433289 | 21433188 | 8  | 9  | 1  | 5.865244197 | 0.00272497  | SP4      | ENSG00000105866 |
| 7 | 22088960 | 22089225 | 22089108 | 8  | 10 | 4  | 2.580707446 | 0.0306059   | RAPGEF5  | ENSG00000136237 |
| 7 | 22116483 | 22116676 | 22116579 | 10 | 10 | 1  | 6.451768616 | 0.00135978  | RAPGEF5  | ENSG00000136237 |
| 7 | 22240439 | 22240699 | 22240569 | 12 | 15 | 2  | 6.256260476 | 0.000199274 | RAPGEF5  | ENSG00000136237 |
| 7 | 22440086 | 22440265 | 22440183 | 8  | 8  | 3  | 2.639359888 | 0.0415794   |          | ENSG00000105889 |
| 7 | 22679565 | 22679927 | 22679748 | 13 | 19 | 11 | 1.955081399 | 0.0295891   |          | ENSG00000179460 |
| 7 | 22734569 | 22734748 | 22734673 | 8  | 8  | 1  | 5.278719777 | 0.00542188  |          | ENSG00000179428 |
| 7 | 22752721 | 22752997 | 22752855 | 14 | 16 | 0  | 19.94183027 | 1.86E-06    |          | ENSG00000210285 |
| 7 | 23020273 | 23020495 | 23020368 | 10 | 11 | 5  | 2.346097679 | 0.0364013   | FAM126A  | ENSG00000122591 |
| 7 | 23111619 | 23111951 | 23111785 | 11 | 14 | 4  | 3.519146518 | 0.00361132  | KLHL7    | ENSG00000122550 |
| 7 | 23191248 | 23191441 | 23191354 | 9  | 9  | 5  | 1.955081399 | 0.0892323   | NUPL2    | ENSG00000136243 |
| 7 | 23197188 | 23197514 | 23197351 | 10 | 13 | 4  | 3.28453675  | 0.00629037  | NUPL2    | ENSG00000136243 |
| 7 | 23279280 | 23279598 | 23279429 | 10 | 13 | 1  | 8.211341875 | 0.000163445 | C7orf30  | ENSG00000156928 |
| 7 | 23340742 | 23341145 | 23340984 | 12 | 19 | 3  | 5.865244197 | 5.72E-05    | C7orf30  | ENSG00000156928 |
| 7 | 23603211 | 23603595 | 23603424 | 8  | 17 | 1  | 10.55743955 | 9.18E-06    | CCDC126  | ENSG00000169193 |
| 7 | 23741740 | 23741919 | 23741836 | 8  | 8  | 1  | 5.278719777 | 0.00542188  | STK31    | ENSG00000196335 |
| 7 | 24826297 | 24826623 | 24826460 | 8  | 12 | 4  | 3.049926982 | 0.0108184   | DFNA5    | ENSG00000105928 |
| 7 | 24977398 | 24977844 | 24977594 | 31 | 42 | 1  | 25.22055005 | 7.76E-14    | OSBPL3   | ENSG00000070882 |
| 7 | 25100443 | 25100632 | 25100537 | 8  | 9  | 1  | 5.865244197 | 0.00272497  | CYCS     | ENSG00000172115 |
| 7 | 25575149 | 25575362 | 25575255 | 9  | 9  | 1  | 5.865244197 | 0.00272497  |          | ENSG00000222101 |
| 7 | 25810467 | 25810655 | 25810556 | 10 | 10 | 2  | 4.301179077 | 0.00512919  |          | ENSG00000199085 |
| 7 | 25857768 | 25858058 | 25857886 | 8  | 10 | 8  | 1.433726359 | 0.209175    |          | ENSG00000199085 |
| 7 | 25868689 | 25869025 | 25868857 | 8  | 13 | 1  | 8.211341875 | 0.000163445 |          | ENSG00000199085 |
| 7 | 25899176 | 25899509 | 25899340 | 9  | 12 | 1  | 7.624817456 | 0.000332769 |          | ENSG00000199085 |
| 7 | 25970448 | 25970643 | 25970545 | 8  | 8  | 5  | 1.759573259 | 0.13508     |          | ENSG00000199085 |
| 7 | 26067720 | 26067946 | 26067833 | 8  | 9  | 4  | 2.346097679 | 0.050148    | NFE2L3   | ENSG00000050344 |
| 7 | 26068014 | 26068214 | 26068114 | 9  | 10 | 4  | 2.580707446 | 0.0306059   | NFE2L3   | ENSG00000050344 |
| 7 | 26085143 | 26085335 | 26085239 | 10 | 11 | 0  | 14.07658607 | 9.02E-05    | NFE2L3   | ENSG00000050344 |
| 7 | 26089472 | 26089659 | 26089579 | 9  | 11 | 2  | 4.692195357 | 0.00272444  | NFE2L3   | ENSG00000050344 |
| 7 | 26206335 | 26206635 | 26206444 | 9  | 13 | 2  | 5.474227917 | 0.000747844 | HNRNPA2B | ENSG00000122566 |
| 7 | 26291181 | 26291485 | 26291333 | 8  | 13 | 2  | 5.474227917 | 0.000747844 | SNX10    | ENSG00000086300 |

|   |          |          |          |    |    |   |             |             |         |                 |
|---|----------|----------|----------|----|----|---|-------------|-------------|---------|-----------------|
| 7 | 26447953 | 26448146 | 26448049 | 8  | 9  | 4 | 2.346097679 | 0.050148    |         | ENSG00000214870 |
| 7 | 26458257 | 26458505 | 26458382 | 10 | 11 | 2 | 4.692195357 | 0.00272444  |         | ENSG00000214870 |
| 7 | 26600864 | 26601092 | 26600978 | 8  | 8  | 2 | 3.519146518 | 0.017558    |         | ENSG00000222004 |
| 7 | 26673842 | 26674046 | 26673956 | 8  | 9  | 2 | 3.910162798 | 0.00955088  |         | ENSG00000222004 |
| 7 | 26870550 | 26870752 | 26870651 | 8  | 11 | 5 | 2.346097679 | 0.0364013   | SKAP2   | ENSG00000005020 |
| 7 | 26870859 | 26871212 | 26871035 | 13 | 18 | 3 | 5.571981987 | 0.000108726 | SKAP2   | ENSG00000005020 |
| 7 | 27148044 | 27148281 | 27148152 | 8  | 9  | 1 | 5.865244197 | 0.00272497  | HOXA5   | ENSG00000106004 |
| 7 | 27149635 | 27149994 | 27149815 | 11 | 17 | 2 | 7.038293036 | 5.19E-05    | HOXA5   | ENSG00000106004 |
| 7 | 27157230 | 27157518 | 27157374 | 9  | 11 | 4 | 2.815317214 | 0.0183428   | HOXA3   | ENSG00000105997 |
| 7 | 27266396 | 27266682 | 27266534 | 18 | 21 | 5 | 4.301179077 | 0.000172642 |         | ENSG00000213783 |
| 7 | 27309210 | 27309408 | 27309330 | 9  | 10 | 1 | 6.451768616 | 0.00135978  |         | ENSG00000219101 |
| 7 | 27353295 | 27353588 | 27353445 | 8  | 11 | 0 | 14.07658607 | 9.02E-05    |         | ENSG00000219101 |
| 7 | 27378579 | 27378807 | 27378686 | 8  | 8  | 0 | 10.55743955 | 0.000925496 |         | ENSG00000219101 |
| 7 | 28026579 | 28026823 | 28026689 | 9  | 12 | 5 | 2.541605819 | 0.0225912   |         | ENSG00000206623 |
| 7 | 28632437 | 28632636 | 28632536 | 8  | 8  | 1 | 5.278719777 | 0.00542188  |         | ENSG00000205786 |
| 7 | 29334876 | 29335195 | 29335035 | 11 | 15 | 1 | 9.384390715 | 3.90E-05    | CHN2    | ENSG00000106069 |
| 7 | 29456062 | 29456328 | 29456195 | 10 | 14 | 2 | 5.865244197 | 0.000387308 | CHN2    | ENSG00000106069 |
| 7 | 29569809 | 29570027 | 29569897 | 10 | 10 | 2 | 4.301179077 | 0.00512919  | PRR15   | ENSG00000176532 |
| 7 | 29953045 | 29953290 | 29953167 | 10 | 10 | 1 | 6.451768616 | 0.00135978  | SCRN1   | ENSG00000136193 |
| 7 | 30035139 | 30035380 | 30035263 | 9  | 10 | 3 | 3.225884308 | 0.0139466   | PLEKHA8 | ENSG00000106086 |
| 7 | 30172392 | 30172682 | 30172532 | 11 | 15 | 4 | 3.753756286 | 0.0020497   | C7orf41 | ENSG00000180354 |
| 7 | 30179181 | 30179567 | 30179333 | 19 | 26 | 4 | 6.334463732 | 2.40E-06    | C7orf41 | ENSG00000180354 |
| 7 | 30232935 | 30233181 | 30233057 | 8  | 9  | 6 | 1.675784056 | 0.141978    | ZNRF2   | ENSG00000180233 |
| 7 | 30290358 | 30290655 | 30290506 | 9  | 13 | 7 | 2.052835469 | 0.046392    | ZNRF2   | ENSG00000180233 |
| 7 | 30409733 | 30409966 | 30409849 | 13 | 15 | 1 | 9.384390715 | 3.90E-05    | NOD1    | ENSG00000106100 |
| 7 | 30557253 | 30557858 | 30557682 | 37 | 76 | 9 | 9.032476063 | 2.20E-17    |         | ENSG00000196295 |
| 7 | 30600736 | 30601014 | 30600875 | 10 | 11 | 5 | 2.346097679 | 0.0364013   | GARS    | ENSG00000106105 |
| 7 | 30747050 | 30747279 | 30747164 | 10 | 13 | 0 | 16.42268375 | 1.91E-05    | INMT    | ENSG00000011177 |
| 7 | 30994754 | 30995023 | 30994886 | 11 | 12 | 1 | 7.624817456 | 0.000332769 | GHRHR   | ENSG00000106128 |
| 7 | 30998537 | 30998876 | 30998710 | 32 | 37 | 2 | 14.85861863 | 3.69E-11    | GHRHR   | ENSG00000106128 |
| 7 | 31199106 | 31199351 | 31199228 | 10 | 13 | 6 | 2.346097679 | 0.0266147   |         | ENSG00000221751 |
| 7 | 31390054 | 31390355 | 31390204 | 12 | 12 | 2 | 5.083211637 | 0.00143337  | NEUROD6 | ENSG00000164600 |
| 7 | 31742602 | 31742896 | 31742749 | 10 | 13 | 9 | 1.642268375 | 0.111397    | C7orf16 | ENSG00000106341 |
| 7 | 32040226 | 32040463 | 32040344 | 10 | 13 | 1 | 8.211341875 | 0.000163445 | PDE1C   | ENSG00000154678 |

|   |          |          |          |     |     |    |             |             |         |                 |
|---|----------|----------|----------|-----|-----|----|-------------|-------------|---------|-----------------|
| 7 | 32184219 | 32184572 | 32184395 | 8   | 12  | 3  | 3.812408728 | 0.004404    | PDE1C   | ENSG00000154678 |
| 7 | 32210665 | 32210999 | 32210830 | 9   | 11  | 1  | 7.038293036 | 0.000674435 | PDE1C   | ENSG00000154678 |
| 7 | 32496498 | 32496899 | 32496755 | 10  | 16  | 7  | 2.492728784 | 0.0124193   | LSM5    | ENSG00000106355 |
| 7 | 32501479 | 32501896 | 32501618 | 11  | 19  | 2  | 7.820325595 | 1.32E-05    | AVL9    | ENSG00000105778 |
| 7 | 32899050 | 32899229 | 32899139 | 8   | 8   | 6  | 1.508205651 | 0.203852    | KBTBD2  | ENSG00000170852 |
| 7 | 32911705 | 32911884 | 32911840 | 8   | 8   | 3  | 2.639359888 | 0.0415794   | KBTBD2  | ENSG00000170852 |
| 7 | 33069111 | 33069417 | 33069264 | 8   | 12  | 3  | 3.812408728 | 0.004404    | NT5C3   | ENSG00000122643 |
| 7 | 33293901 | 33294621 | 33294166 | 209 | 304 | 4  | 71.5559792  | 5.00E-96    |         | ENSG00000222741 |
| 7 | 33357806 | 33358316 | 33358023 | 40  | 61  | 3  | 18.18225701 | 9.05E-18    |         | ENSG00000222741 |
| 7 | 33793048 | 33793235 | 33793141 | 11  | 11  | 0  | 14.07658607 | 9.02E-05    |         | ENSG00000203495 |
| 7 | 33814074 | 33814441 | 33814275 | 11  | 17  | 6  | 3.016411301 | 0.00381427  |         | ENSG00000203495 |
| 7 | 33831656 | 33831882 | 33831797 | 9   | 10  | 4  | 2.580707446 | 0.0306059   |         | ENSG00000203495 |
| 7 | 33843061 | 33843316 | 33843171 | 10  | 10  | 3  | 3.225884308 | 0.0139466   |         | ENSG00000203495 |
| 7 | 33894133 | 33894350 | 33894256 | 8   | 8   | 2  | 3.519146518 | 0.017558    | BMPER   | ENSG00000164619 |
| 7 | 33917756 | 33917949 | 33917852 | 8   | 8   | 0  | 10.55743955 | 0.000925496 | BMPER   | ENSG00000164619 |
| 7 | 33929480 | 33929676 | 33929578 | 8   | 8   | 0  | 10.55743955 | 0.000925496 | BMPER   | ENSG00000164619 |
| 7 | 33939004 | 33939317 | 33939165 | 11  | 16  | 11 | 1.661819189 | 0.0853913   | BMPER   | ENSG00000164619 |
| 7 | 33939326 | 33939505 | 33939415 | 8   | 9   | 8  | 1.303387599 | 0.281715    | BMPER   | ENSG00000164619 |
| 7 | 34040886 | 34041287 | 34041065 | 18  | 27  | 6  | 4.692195357 | 1.46E-05    | BMPER   | ENSG00000164619 |
| 7 | 34043322 | 34043536 | 34043429 | 8   | 9   | 2  | 3.910162798 | 0.00955088  | BMPER   | ENSG00000164619 |
| 7 | 34066784 | 34066976 | 34066891 | 10  | 10  | 1  | 6.451768616 | 0.00135978  | BMPER   | ENSG00000164619 |
| 7 | 34106823 | 34107193 | 34106981 | 11  | 17  | 5  | 3.519146518 | 0.00167472  | BMPER   | ENSG00000164619 |
| 7 | 34242298 | 34242505 | 34242383 | 10  | 11  | 1  | 7.038293036 | 0.000674435 |         | ENSG00000202431 |
| 7 | 34327391 | 34327774 | 34327570 | 9   | 18  | 5  | 3.714654658 | 0.000961539 |         | ENSG00000202431 |
| 7 | 34569457 | 34569642 | 34569529 | 8   | 8   | 3  | 2.639359888 | 0.0415794   | NPSR1   | ENSG00000187258 |
| 7 | 34651280 | 34651616 | 34651448 | 22  | 28  | 2  | 11.33947211 | 2.41E-08    | NPSR1   | ENSG00000187258 |
| 7 | 34765601 | 34765864 | 34765732 | 14  | 17  | 4  | 4.222975822 | 0.000640773 |         | ENSG00000197085 |
| 7 | 34846413 | 34846656 | 34846516 | 10  | 10  | 5  | 2.150589539 | 0.0575848   | NPSR1   | ENSG00000187258 |
| 7 | 35031594 | 35032116 | 35031937 | 11  | 24  | 12 | 2.255863153 | 0.00673318  | DPY19L1 | ENSG00000173852 |
| 7 | 35042746 | 35043050 | 35042905 | 9   | 12  | 2  | 5.083211637 | 0.00143337  | DPY19L1 | ENSG00000173852 |
| 7 | 35248058 | 35248334 | 35248174 | 12  | 13  | 3  | 4.105670938 | 0.00243034  | TBX20   | ENSG00000164532 |
| 7 | 35543665 | 35543889 | 35543802 | 10  | 11  | 2  | 4.692195357 | 0.00272444  | HERPUD2 | ENSG00000122557 |
| 7 | 35630768 | 35630974 | 35630840 | 8   | 10  | 1  | 6.451768616 | 0.00135978  | HERPUD2 | ENSG00000122557 |
| 7 | 35807201 | 35807417 | 35807309 | 8   | 10  | 5  | 2.150589539 | 0.0575848   | 7-Sep   | ENSG00000122545 |



|   |          |          |          |     |     |    |             |             |         |                 |
|---|----------|----------|----------|-----|-----|----|-------------|-------------|---------|-----------------|
| 7 | 36038796 | 36038975 | 36038834 | 8   | 8   | 6  | 1.508205651 | 0.203852    |         | ENSG00000205745 |
| 7 | 36043320 | 36043913 | 36043616 | 16  | 30  | 6  | 5.194930574 | 2.42E-06    |         | ENSG00000205745 |
| 7 | 36048232 | 36048448 | 36048340 | 8   | 8   | 4  | 2.111487911 | 0.0804809   |         | ENSG00000205745 |
| 7 | 36396454 | 36396672 | 36396500 | 10  | 12  | 3  | 3.812408728 | 0.004404    |         | ENSG00000164542 |
| 7 | 36993305 | 36993504 | 36993404 | 8   | 9   | 1  | 5.865244197 | 0.00272497  | ELMO1   | ENSG00000155849 |
| 7 | 37326448 | 37326680 | 37326564 | 8   | 9   | 2  | 3.910162798 | 0.00955088  |         | ENSG00000222869 |
| 7 | 37494555 | 37494877 | 37494724 | 19  | 23  | 1  | 14.07658607 | 1.14E-07    | ELMO1   | ENSG00000155849 |
| 7 | 37598462 | 37598866 | 37598674 | 23  | 32  | 2  | 12.90353723 | 1.37E-09    |         | ENSG00000178503 |
| 7 | 37700368 | 37700709 | 37700538 | 12  | 17  | 0  | 21.11487911 | 8.57E-07    | GPR141  | ENSG00000187037 |
| 7 | 37859717 | 37859898 | 37859807 | 8   | 8   | 2  | 3.519146518 | 0.017558    | TXNDC3  | ENSG00000086288 |
| 7 | 38279578 | 38280030 | 38279752 | 8   | 15  | 10 | 1.706252857 | 0.0822346   |         | ENSG00000211691 |
| 7 | 38879715 | 38879906 | 38879818 | 9   | 9   | 3  | 2.932622098 | 0.0242899   | VPS41   | ENSG00000006715 |
| 7 | 38938928 | 38939143 | 38939092 | 10  | 11  | 4  | 2.815317214 | 0.0183428   | VPS41   | ENSG00000006715 |
| 7 | 39526033 | 39526252 | 39526126 | 8   | 10  | 1  | 6.451768616 | 0.00135978  | C7orf36 | ENSG00000106540 |
| 7 | 39586541 | 39586816 | 39586678 | 10  | 11  | 6  | 2.010940867 | 0.0640214   | C7orf36 | ENSG00000106540 |
| 7 | 39629563 | 39629915 | 39629740 | 10  | 14  | 1  | 8.797866295 | 8.00E-05    | RALA    | ENSG00000006451 |
| 7 | 39706322 | 39706707 | 39706534 | 15  | 22  | 3  | 6.745030826 | 8.05E-06    |         | ENSG00000221013 |
| 7 | 39767635 | 39767941 | 39767778 | 11  | 14  | 0  | 17.59573259 | 8.79E-06    |         | ENSG00000210544 |
| 7 | 39894350 | 39894557 | 39894429 | 9   | 9   | 3  | 2.932622098 | 0.0242899   |         | ENSG00000222143 |
| 7 | 39955377 | 39955756 | 39955577 | 9   | 16  | 8  | 2.215758919 | 0.0222902   | CDC2L5  | ENSG00000065883 |
| 7 | 40704323 | 40704511 | 40704417 | 9   | 10  | 1  | 6.451768616 | 0.00135978  |         |                 |
| 7 | 40723398 | 40723850 | 40723628 | 218 | 257 | 1  | 151.3233003 | 1.52E-85    |         |                 |
| 7 | 40849148 | 40849344 | 40849250 | 9   | 10  | 0  | 12.90353723 | 0.000195991 |         |                 |
| 7 | 40849705 | 40850171 | 40849962 | 25  | 36  | 1  | 21.70140353 | 7.08E-12    |         |                 |
| 7 | 41051801 | 41051998 | 41051899 | 9   | 9   | 1  | 5.865244197 | 0.00272497  |         |                 |
| 7 | 41113699 | 41114053 | 41113876 | 10  | 15  | 4  | 3.753756286 | 0.0020497   |         |                 |
| 7 | 41230701 | 41230914 | 41230807 | 11  | 11  | 1  | 7.038293036 | 0.000674435 | INHBA   | ENSG00000122641 |
| 7 | 41949194 | 41949475 | 41949356 | 10  | 13  | 5  | 2.737113958 | 0.0137917   |         | ENSG00000213721 |
| 7 | 41962068 | 41962312 | 41962197 | 14  | 14  | 2  | 5.865244197 | 0.000387308 |         | ENSG00000213721 |
| 7 | 42182638 | 42182897 | 42182780 | 9   | 11  | 0  | 14.07658607 | 9.02E-05    | GLI3    | ENSG00000106571 |
| 7 | 42239486 | 42239722 | 42239631 | 8   | 9   | 3  | 2.932622098 | 0.0242899   | GLI3    | ENSG00000106571 |
| 7 | 42603255 | 42603798 | 42603639 | 33  | 43  | 3  | 12.90353723 | 3.99E-12    | C7orf25 | ENSG00000136197 |
| 7 | 42893109 | 42893300 | 42893182 | 8   | 8   | 1  | 5.278719777 | 0.00542188  | C7orf25 | ENSG00000136197 |
| 7 | 43245842 | 43246108 | 43245943 | 13  | 16  | 0  | 19.94183027 | 1.86E-06    |         | ENSG00000223258 |

|   |          |          |          |    |     |   |             |             |         |                 |
|---|----------|----------|----------|----|-----|---|-------------|-------------|---------|-----------------|
| 7 | 43267486 | 43267699 | 43267637 | 10 | 11  | 6 | 2.010940867 | 0.0640214   |         | ENSG00000213717 |
| 7 | 43583571 | 43584021 | 43583780 | 86 | 101 | 4 | 23.93019632 | 1.81E-29    | STK17A  | ENSG00000164543 |
| 7 | 43588793 | 43589035 | 43588936 | 9  | 11  | 3 | 3.519146518 | 0.00788869  | STK17A  | ENSG00000164543 |
| 7 | 43735515 | 43735937 | 43735684 | 9  | 16  | 3 | 4.985457567 | 0.000385643 | C7orf44 | ENSG00000106603 |
| 7 | 43764485 | 43764707 | 43764544 | 8  | 10  | 4 | 2.580707446 | 0.0306059   | BLVRA   | ENSG00000106605 |
| 7 | 43771118 | 43771340 | 43771230 | 11 | 12  | 3 | 3.812408728 | 0.004404    | BLVRA   | ENSG00000106605 |
| 7 | 43805772 | 43806083 | 43805927 | 28 | 29  | 0 | 35.19146518 | 7.73E-11    | BLVRA   | ENSG00000106605 |
| 7 | 43845005 | 43845286 | 43845145 | 13 | 14  | 5 | 2.932622098 | 0.00829617  | MRPS24  | ENSG00000062582 |
| 7 | 44050612 | 44050853 | 44050716 | 11 | 11  | 3 | 3.519146518 | 0.00788869  | DBNL    | ENSG00000136279 |
| 7 | 44206965 | 44207155 | 44207060 | 9  | 9   | 3 | 2.932622098 | 0.0242899   | YKT6    | ENSG00000106636 |
| 7 | 44252451 | 44252825 | 44252630 | 16 | 22  | 1 | 13.49006165 | 2.37E-07    | YKT6    | ENSG00000106636 |
| 7 | 44483436 | 44483803 | 44483615 | 9  | 16  | 3 | 4.985457567 | 0.000385643 |         | ENSG00000146677 |
| 7 | 44496661 | 44496934 | 44496797 | 10 | 14  | 5 | 2.932622098 | 0.00829617  | NUDCD3  | ENSG00000015676 |
| 7 | 44550262 | 44550579 | 44550425 | 36 | 40  | 4 | 9.619000482 | 2.08E-10    | NPC1L1  | ENSG00000015520 |
| 7 | 44580034 | 44580362 | 44580198 | 8  | 12  | 4 | 3.049926982 | 0.0108184   | DDX56   | ENSG00000136271 |
| 7 | 44708121 | 44708629 | 44708295 | 17 | 27  | 1 | 16.42268375 | 5.88E-09    |         | ENSG00000203476 |
| 7 | 44761002 | 44761211 | 44761089 | 9  | 10  | 0 | 12.90353723 | 0.000195991 | ZMIZ2   | ENSG00000122515 |
| 7 | 44802093 | 44802370 | 44802261 | 9  | 11  | 2 | 4.692195357 | 0.00272444  | PPIA    | ENSG00000196262 |
| 7 | 44803217 | 44803462 | 44803319 | 11 | 14  | 0 | 17.59573259 | 8.79E-06    | PPIA    | ENSG00000196262 |
| 7 | 44803529 | 44803807 | 44803696 | 10 | 13  | 2 | 5.474227917 | 0.000747844 | PPIA    | ENSG00000196262 |
| 7 | 44919052 | 44919296 | 44919166 | 15 | 15  | 2 | 6.256260476 | 0.000199274 | PURB    | ENSG00000146676 |
| 7 | 45039993 | 45040371 | 45040182 | 33 | 42  | 1 | 25.22055005 | 7.76E-14    | CCM2    | ENSG00000136280 |
| 7 | 45042082 | 45042325 | 45042206 | 10 | 10  | 3 | 3.225884308 | 0.0139466   | CCM2    | ENSG00000136280 |
| 7 | 45117682 | 45117923 | 45117762 | 10 | 12  | 1 | 7.624817456 | 0.000332769 | TBRG4   | ENSG00000136270 |
| 7 | 45118004 | 45118327 | 45118165 | 9  | 13  | 7 | 2.052835469 | 0.046392    | TBRG4   | ENSG00000136270 |
| 7 | 45266219 | 45266517 | 45266382 | 9  | 11  | 3 | 3.519146518 | 0.00788869  | RAMP3   | ENSG00000122679 |
| 7 | 45353869 | 45354310 | 45354030 | 18 | 26  | 5 | 5.278719777 | 8.57E-06    | RAMP3   | ENSG00000122679 |
| 7 | 45923771 | 45923973 | 45923872 | 9  | 9   | 3 | 2.932622098 | 0.0242899   | IGFBP3  | ENSG00000146674 |
| 7 | 45984259 | 45984813 | 45984438 | 15 | 31  | 5 | 6.256260476 | 3.74E-07    | IGFBP3  | ENSG00000146674 |
| 7 | 46160219 | 46160463 | 46160353 | 8  | 11  | 1 | 7.038293036 | 0.000674435 | IGFBP3  | ENSG00000146674 |
| 7 | 46358596 | 46358903 | 46358751 | 8  | 12  | 0 | 15.24963491 | 4.15E-05    | IGFBP3  | ENSG00000146674 |
| 7 | 47094835 | 47095072 | 47094970 | 8  | 10  | 3 | 3.225884308 | 0.0139466   |         | ENSG00000214754 |
| 7 | 47208308 | 47208648 | 47208487 | 16 | 20  | 3 | 6.158506406 | 2.99E-05    |         | ENSG00000214754 |
| 7 | 47411964 | 47412367 | 47412188 | 10 | 17  | 5 | 3.519146518 | 0.00167472  | TNS3    | ENSG00000136205 |

|   |          |          |          |     |     |     |             |             |        |                 |
|---|----------|----------|----------|-----|-----|-----|-------------|-------------|--------|-----------------|
| 7 | 47481964 | 47482265 | 47482144 | 8   | 12  | 6   | 2.178519273 | 0.0416567   | TNS3   | ENSG00000136205 |
| 7 | 47578019 | 47578469 | 47578305 | 9   | 18  | 4   | 4.457585589 | 0.000353565 | TNS3   | ENSG00000136205 |
| 7 | 47582070 | 47582444 | 47582265 | 10  | 17  | 12  | 1.62422147  | 0.088135    | TNS3   | ENSG00000136205 |
| 7 | 47611123 | 47611326 | 47611204 | 8   | 9   | 2   | 3.910162798 | 0.00955088  | TNS3   | ENSG00000136205 |
| 7 | 47613908 | 47614153 | 47613986 | 8   | 10  | 0   | 12.90353723 | 0.000195991 | TNS3   | ENSG00000136205 |
| 7 | 47641027 | 47641448 | 47641269 | 10  | 18  | 11  | 1.857327329 | 0.0427732   |        | ENSG00000221845 |
| 7 | 47675670 | 47675867 | 47675779 | 9   | 9   | 1   | 5.865244197 | 0.00272497  |        | ENSG00000221845 |
| 7 | 47699559 | 47699738 | 47699648 | 8   | 8   | 2   | 3.519146518 | 0.017558    |        | ENSG00000221845 |
| 7 | 47825521 | 47825703 | 47825612 | 8   | 8   | 2   | 3.519146518 | 0.017558    |        | ENSG00000136275 |
| 7 | 47985546 | 47985846 | 47985709 | 18  | 20  | 7   | 3.079253203 | 0.00177418  |        | ENSG00000136273 |
| 7 | 48094623 | 48094829 | 48094726 | 8   | 9   | 1   | 5.865244197 | 0.00272497  | UPP1   | ENSG00000183696 |
| 7 | 48116330 | 48116670 | 48116497 | 10  | 15  | 10  | 1.706252857 | 0.0822346   | UPP1   | ENSG00000183696 |
| 7 | 48120542 | 48120758 | 48120650 | 9   | 13  | 0   | 16.42268375 | 1.91E-05    | UPP1   | ENSG00000183696 |
| 7 | 48531016 | 48531201 | 48531122 | 8   | 8   | 1   | 5.278719777 | 0.00542188  | ABCA13 | ENSG00000179869 |
| 7 | 48573575 | 48573789 | 48573682 | 10  | 10  | 4   | 2.580707446 | 0.0306059   |        | ENSG00000218305 |
| 7 | 49011823 | 49012075 | 49011924 | 11  | 11  | 5   | 2.346097679 | 0.0364013   |        | ENSG00000218305 |
| 7 | 49025013 | 49025348 | 49025180 | 17  | 22  | 0   | 26.9801233  | 1.77E-08    |        | ENSG00000218305 |
| 7 | 49811796 | 49811994 | 49811916 | 8   | 9   | 0   | 11.73048839 | 0.000425898 | VWC2   | ENSG00000188730 |
| 7 | 51298815 | 51299016 | 51298915 | 9   | 10  | 0   | 12.90353723 | 0.000195991 | COBL   | ENSG00000106078 |
| 7 | 51360323 | 51360714 | 51360516 | 38  | 46  | 1   | 27.56664772 | 3.79E-15    | COBL   | ENSG00000106078 |
| 7 | 52219232 | 52219592 | 52219421 | 13  | 19  | 1   | 11.73048839 | 2.14E-06    |        | ENSG00000210739 |
| 7 | 55609531 | 55609878 | 55609706 | 20  | 25  | 1   | 15.24963491 | 2.59E-08    |        | ENSG00000154978 |
| 7 | 55680507 | 55680686 | 55680593 | 8   | 8   | 3   | 2.639359888 | 0.0415794   |        | ENSG00000210803 |
| 7 | 55809565 | 55809770 | 55809663 | 9   | 9   | 0   | 11.73048839 | 0.000425898 |        | ENSG00000206729 |
| 7 | 55809940 | 55810395 | 55810127 | 14  | 24  | 1   | 14.66311049 | 5.43E-08    |        | ENSG00000206729 |
| 7 | 58046032 | 58046211 | 58046061 | 9   | 10  | 3   | 3.225884308 | 0.0139466   |        |                 |
| 7 | 61255163 | 61255491 | 61255327 | 14  | 14  | 15  | 1.099733287 | 0.398076    |        |                 |
| 7 | 61268292 | 61268624 | 61268458 | 32  | 32  | 29  | 1.290353723 | 0.155959    |        |                 |
| 7 | 61606234 | 61607134 | 61606786 | 133 | 203 | 329 | 0.725157464 | 0.99987     |        |                 |
| 7 | 61607656 | 61607986 | 61607821 | 10  | 10  | 13  | 0.921681231 | 0.585856    |        |                 |
| 7 | 61613095 | 61613344 | 61613245 | 8   | 11  | 5   | 2.346097679 | 0.0364013   |        | ENSG00000207443 |
| 7 | 61632300 | 61632479 | 61632450 | 8   | 8   | 11  | 0.879786629 | 0.621301    |        | ENSG00000207443 |
| 7 | 63405156 | 63405343 | 63405232 | 8   | 8   | 0   | 10.55743955 | 0.000925496 | ZNF679 | ENSG00000197123 |
| 7 | 63737301 | 63737658 | 63737479 | 18  | 24  | 2   | 9.775406994 | 4.09E-07    | ZNF107 | ENSG00000196247 |

|   |          |          |          |    |    |   |             |             |         |                 |
|---|----------|----------|----------|----|----|---|-------------|-------------|---------|-----------------|
| 7 | 64091720 | 64092045 | 64091871 | 9  | 13 | 1 | 8.211341875 | 0.000163445 | ZNF117  | ENSG00000152926 |
| 7 | 65084572 | 65084837 | 65084704 | 10 | 12 | 0 | 15.24963491 | 4.15E-05    | GUSB    | ENSG00000169919 |
| 7 | 65217144 | 65217444 | 65217320 | 9  | 12 | 3 | 3.812408728 | 0.004404    |         | ENSG00000214623 |
| 7 | 65423748 | 65424021 | 65423884 | 8  | 11 | 2 | 4.692195357 | 0.00272444  |         | ENSG00000211191 |
| 7 | 65756591 | 65756955 | 65756770 | 8  | 15 | 0 | 18.76878143 | 4.04E-06    | KCTD7   | ENSG00000218609 |
| 7 | 66447023 | 66447597 | 66447384 | 32 | 47 | 0 | 56.30634429 | 6.62E-17    | STAG3L4 | ENSG00000106610 |
| 7 | 66586812 | 66587025 | 66586918 | 9  | 11 | 0 | 14.07658607 | 9.02E-05    |         | ENSG00000211244 |
| 7 | 66727727 | 66727912 | 66727841 | 9  | 9  | 0 | 11.73048839 | 0.000425898 |         | ENSG00000211244 |
| 7 | 67833932 | 67834276 | 67834103 | 13 | 16 | 2 | 6.647276756 | 0.000101928 |         | ENSG00000211257 |
| 7 | 69035062 | 69035349 | 69035205 | 8  | 11 | 2 | 4.692195357 | 0.00272444  | AUTS2   | ENSG00000158321 |
| 7 | 69939224 | 69939570 | 69939391 | 13 | 16 | 0 | 19.94183027 | 1.86E-06    | WBSCR17 | ENSG00000185274 |
| 7 | 69952482 | 69952892 | 69952661 | 44 | 53 | 2 | 21.11487911 | 2.91E-16    | WBSCR17 | ENSG00000185274 |
| 7 | 70591206 | 70591639 | 70591468 | 34 | 44 | 0 | 52.78719777 | 6.79E-16    |         | ENSG00000199940 |
| 7 | 71429397 | 71429604 | 71429484 | 9  | 9  | 3 | 2.932622098 | 0.0242899   | CALN1   | ENSG00000183166 |
| 7 | 71508329 | 71508558 | 71508434 | 10 | 10 | 0 | 12.90353723 | 0.000195991 | CALN1   | ENSG00000183166 |
| 7 | 72586077 | 72586390 | 72586233 | 10 | 13 | 0 | 16.42268375 | 1.91E-05    | BAZ1B   | ENSG00000009954 |
| 7 | 72665040 | 72665351 | 72665195 | 9  | 13 | 2 | 5.474227917 | 0.000747844 | MLXIPL  | ENSG00000009950 |
| 7 | 72767847 | 72768265 | 72768099 | 12 | 19 | 0 | 23.46097679 | 1.81E-07    | STX1A   | ENSG00000106089 |
| 7 | 72787036 | 72787332 | 72787160 | 8  | 13 | 2 | 5.474227917 | 0.000747844 |         | ENSG00000209048 |
| 7 | 72794595 | 72794838 | 72794724 | 12 | 13 | 1 | 8.211341875 | 0.000163445 | ABHD11  | ENSG00000106077 |
| 7 | 72795454 | 72795772 | 72795598 | 8  | 12 | 2 | 5.083211637 | 0.00143337  | ABHD11  | ENSG00000106077 |
| 7 | 72798684 | 72799129 | 72798897 | 9  | 19 | 3 | 5.865244197 | 5.72E-05    | ABHD11  | ENSG00000106077 |
| 7 | 72874716 | 72875299 | 72875045 | 8  | 20 | 3 | 6.158506406 | 2.99E-05    |         | ENSG00000212838 |
| 7 | 72883125 | 72883366 | 72883245 | 12 | 14 | 7 | 2.199466574 | 0.0303778   | CLDN4   | ENSG00000189143 |
| 7 | 72884344 | 72884837 | 72884578 | 15 | 28 | 8 | 3.779824038 | 5.98E-05    | CLDN4   | ENSG00000189143 |
| 7 | 72890997 | 72891234 | 72891118 | 12 | 13 | 1 | 8.211341875 | 0.000163445 | WBSCR27 | ENSG00000165171 |
| 7 | 72907656 | 72908020 | 72907835 | 18 | 26 | 1 | 15.83615933 | 1.23E-08    | WBSCR28 | ENSG00000175877 |
| 7 | 72968847 | 72969066 | 72968952 | 9  | 9  | 3 | 2.932622098 | 0.0242899   | WBSCR28 | ENSG00000175877 |
| 7 | 73031464 | 73031750 | 73031588 | 11 | 12 | 3 | 3.812408728 | 0.004404    | ELN     | ENSG00000049540 |
| 7 | 73112183 | 73112362 | 73112272 | 8  | 8  | 2 | 3.519146518 | 0.017558    | LIMK1   | ENSG00000106683 |
| 7 | 73120169 | 73120453 | 73120326 | 12 | 15 | 6 | 2.68125449  | 0.0103552   | LIMK1   | ENSG00000106683 |
| 7 | 73227230 | 73227414 | 73227321 | 8  | 9  | 0 | 11.73048839 | 0.000425898 | EIF4H   | ENSG00000106682 |
| 7 | 73416426 | 73416605 | 73416531 | 8  | 8  | 0 | 10.55743955 | 0.000925496 | CLIP2   | ENSG00000106665 |
| 7 | 73634260 | 73634472 | 73634366 | 9  | 11 | 2 | 4.692195357 | 0.00272444  | GTF2I   | ENSG00000077809 |

|   |          |          |          |    |    |    |             |             |          |                 |
|---|----------|----------|----------|----|----|----|-------------|-------------|----------|-----------------|
| 7 | 73658965 | 73659144 | 73659024 | 8  | 9  | 5  | 1.955081399 | 0.0892323   | GTF2I    | ENSG00000077809 |
| 7 | 73664766 | 73665011 | 73664887 | 9  | 11 | 5  | 2.346097679 | 0.0364013   | GTF2I    | ENSG00000077809 |
| 7 | 73685876 | 73686066 | 73685897 | 9  | 11 | 4  | 2.815317214 | 0.0183428   | GTF2I    | ENSG00000077809 |
| 7 | 73687761 | 73688062 | 73687911 | 9  | 12 | 4  | 3.049926982 | 0.0108184   | GTF2I    | ENSG00000077809 |
| 7 | 73709732 | 73710022 | 73709877 | 9  | 13 | 1  | 8.211341875 | 0.000163445 | GTF2I    | ENSG00000077809 |
| 7 | 74995205 | 74995633 | 74995368 | 20 | 26 | 6  | 4.524616952 | 2.63E-05    | PMS2L3   | ENSG00000127957 |
| 7 | 75032508 | 75032801 | 75032635 | 12 | 16 | 4  | 3.988366054 | 0.00115141  | PMS2L3   | ENSG00000127957 |
| 7 | 75195425 | 75195852 | 75195658 | 20 | 29 | 2  | 11.73048839 | 1.18E-08    | HIP1     | ENSG00000127946 |
| 7 | 75196165 | 75196616 | 75196452 | 13 | 21 | 1  | 12.90353723 | 4.95E-07    | HIP1     | ENSG00000127946 |
| 7 | 75346182 | 75346452 | 75346346 | 10 | 11 | 7  | 1.759573259 | 0.102361    | RHBDD2   | ENSG00000005486 |
| 7 | 75487452 | 75487651 | 75487551 | 9  | 9  | 1  | 5.865244197 | 0.00272497  | TMEM120A | ENSG00000189077 |
| 7 | 75515042 | 75515445 | 75515214 | 12 | 19 | 3  | 5.865244197 | 5.72E-05    | STYXL1   | ENSG00000127952 |
| 7 | 75536545 | 75536730 | 75536637 | 8  | 9  | 4  | 2.346097679 | 0.050148    |          | ENSG00000209275 |
| 7 | 75702686 | 75702909 | 75702765 | 8  | 9  | 0  | 11.73048839 | 0.000425898 |          | ENSG00000177679 |
| 7 | 75758843 | 75759058 | 75758978 | 8  | 10 | 14 | 0.860235815 | 0.65444     |          | ENSG00000177679 |
| 7 | 75760690 | 75761195 | 75761080 | 10 | 20 | 3  | 6.158506406 | 2.99E-05    |          | ENSG00000177679 |
| 7 | 75761909 | 75762104 | 75762021 | 11 | 12 | 2  | 5.083211637 | 0.00143337  | HSPB1    | ENSG00000106211 |
| 7 | 75762210 | 75762399 | 75762348 | 12 | 12 | 0  | 15.24963491 | 4.15E-05    | HSPB1    | ENSG00000106211 |
| 7 | 75769503 | 75770062 | 75769757 | 13 | 28 | 6  | 4.859773763 | 8.07E-06    | HSPB1    | ENSG00000106211 |
| 7 | 75772231 | 75772502 | 75772376 | 8  | 11 | 1  | 7.038293036 | 0.000674435 | HSPB1    | ENSG00000106211 |
| 7 | 75785075 | 75785256 | 75785165 | 8  | 8  | 3  | 2.639359888 | 0.0415794   | HSPB1    | ENSG00000106211 |
| 7 | 75785568 | 75785773 | 75785669 | 11 | 12 | 7  | 1.906204364 | 0.0695918   | HSPB1    | ENSG00000106211 |
| 7 | 75826430 | 75826715 | 75826554 | 12 | 15 | 2  | 6.256260476 | 0.000199274 | YWHAG    | ENSG00000170027 |
| 7 | 76589413 | 76589827 | 76589666 | 10 | 16 | 3  | 4.985457567 | 0.000385643 | CCDC146  | ENSG00000135205 |
| 7 | 76799200 | 76799429 | 76799314 | 12 | 12 | 3  | 3.812408728 | 0.004404    | PION     | ENSG00000186088 |
| 7 | 76906917 | 76907123 | 76907043 | 8  | 8  | 3  | 2.639359888 | 0.0415794   |          | ENSG00000209233 |
| 7 | 76966349 | 76966603 | 76966476 | 10 | 10 | 2  | 4.301179077 | 0.00512919  | PTPN12   | ENSG00000127947 |
| 7 | 77005935 | 77006275 | 77006105 | 9  | 12 | 1  | 7.624817456 | 0.000332769 | PTPN12   | ENSG00000127947 |
| 7 | 77125098 | 77125277 | 77125221 | 8  | 8  | 1  | 5.278719777 | 0.00542188  | RSBN1L   | ENSG00000187257 |
| 7 | 77211286 | 77211656 | 77211477 | 17 | 22 | 0  | 26.9801233  | 1.77E-08    | RSBN1L   | ENSG00000187257 |
| 7 | 77552426 | 77552629 | 77552527 | 11 | 13 | 0  | 16.42268375 | 1.91E-05    |          | ENSG00000211483 |
| 7 | 78201791 | 78202102 | 78201924 | 13 | 16 | 1  | 9.970915134 | 1.89E-05    |          | ENSG00000209138 |
| 7 | 78255136 | 78255580 | 78255358 | 51 | 65 | 1  | 38.7106117  | 2.08E-21    |          | ENSG00000209138 |
| 7 | 78523388 | 78523575 | 78523481 | 8  | 9  | 0  | 11.73048839 | 0.000425898 |          | ENSG00000212545 |

|   |          |          |          |    |    |    |             |             |        |                 |
|---|----------|----------|----------|----|----|----|-------------|-------------|--------|-----------------|
| 7 | 78704097 | 78704314 | 78704205 | 9  | 9  | 1  | 5.865244197 | 0.00272497  |        | ENSG00000212482 |
| 7 | 79606525 | 79606746 | 79606652 | 8  | 10 | 2  | 4.301179077 | 0.00512919  | GNAI1  | ENSG00000127955 |
| 7 | 79618173 | 79618596 | 79618417 | 37 | 47 | 3  | 14.07658607 | 2.28E-13    | GNAI1  | ENSG00000127955 |
| 7 | 79707646 | 79707858 | 79707752 | 9  | 9  | 1  | 5.865244197 | 0.00272497  |        | ENSG00000209287 |
| 7 | 79802676 | 79802855 | 79802761 | 8  | 9  | 2  | 3.910162798 | 0.00955088  |        | ENSG00000209130 |
| 7 | 79895802 | 79896034 | 79895937 | 11 | 11 | 2  | 4.692195357 | 0.00272444  | GNAT3  | ENSG00000214415 |
| 7 | 80005150 | 80005767 | 80005526 | 69 | 90 | 5  | 17.79124073 | 6.23E-25    | GNAT3  | ENSG00000214415 |
| 7 | 80009703 | 80010096 | 80009850 | 20 | 26 | 8  | 3.519146518 | 0.000175368 | GNAT3  | ENSG00000214415 |
| 7 | 80018178 | 80018386 | 80018305 | 9  | 10 | 1  | 6.451768616 | 0.00135978  | GNAT3  | ENSG00000214415 |
| 7 | 80031186 | 80031769 | 80031467 | 11 | 26 | 10 | 2.879301697 | 0.000816629 | CD36   | ENSG00000135218 |
| 7 | 80079082 | 80079482 | 80079201 | 11 | 18 | 10 | 2.026175268 | 0.0273052   | CD36   | ENSG00000135218 |
| 7 | 80110230 | 80110450 | 80110340 | 8  | 8  | 0  | 10.55743955 | 0.000925496 | CD36   | ENSG00000135218 |
| 7 | 80132792 | 80133181 | 80132987 | 30 | 38 | 0  | 45.74890473 | 7.15E-14    | CD36   | ENSG00000135218 |
| 7 | 80148651 | 80148837 | 80148744 | 8  | 9  | 7  | 1.466311049 | 0.20706     | CD36   | ENSG00000135218 |
| 7 | 80202800 | 80203055 | 80202932 | 8  | 11 | 1  | 7.038293036 | 0.000674435 | CD36   | ENSG00000135218 |
| 7 | 80241023 | 80241535 | 80241356 | 13 | 22 | 4  | 5.396024661 | 3.05E-05    | CD36   | ENSG00000135218 |
| 7 | 80248869 | 80249093 | 80248977 | 11 | 12 | 5  | 2.541605819 | 0.0225912   | SEMA3C | ENSG00000075223 |
| 7 | 80344250 | 80344441 | 80344333 | 8  | 9  | 4  | 2.346097679 | 0.050148    | SEMA3C | ENSG00000075223 |
| 7 | 80350803 | 80351094 | 80350948 | 15 | 18 | 5  | 3.714654658 | 0.000961539 | SEMA3C | ENSG00000075223 |
| 7 | 80378582 | 80379110 | 80378821 | 32 | 50 | 4  | 11.96509816 | 2.00E-13    | SEMA3C | ENSG00000075223 |
| 7 | 80386129 | 80386310 | 80386156 | 9  | 10 | 8  | 1.433726359 | 0.209175    | SEMA3C | ENSG00000075223 |
| 7 | 80387423 | 80387653 | 80387538 | 9  | 11 | 7  | 1.759573259 | 0.102361    | SEMA3C | ENSG00000075223 |
| 7 | 80388628 | 80388815 | 80388721 | 8  | 9  | 5  | 1.955081399 | 0.0892323   | SEMA3C | ENSG00000075223 |
| 7 | 80389590 | 80389800 | 80389725 | 14 | 15 | 6  | 2.68125449  | 0.0103552   | SEMA3C | ENSG00000075223 |
| 7 | 80407767 | 80408176 | 80407946 | 26 | 34 | 9  | 4.105670938 | 5.54E-06    | SEMA3C | ENSG00000075223 |
| 7 | 80409370 | 80409877 | 80409698 | 24 | 42 | 8  | 5.604566677 | 1.73E-08    | SEMA3C | ENSG00000075223 |
| 7 | 80410210 | 80410431 | 80410320 | 8  | 8  | 8  | 1.173048839 | 0.36929     | SEMA3C | ENSG00000075223 |
| 7 | 80410733 | 80410941 | 80410837 | 8  | 8  | 7  | 1.319679944 | 0.283403    | SEMA3C | ENSG00000075223 |
| 7 | 80540906 | 80541318 | 80541038 | 11 | 18 | 11 | 1.857327329 | 0.0427732   | SEMA3C | ENSG00000075223 |
| 7 | 80582782 | 80583018 | 80582900 | 10 | 12 | 2  | 5.083211637 | 0.00143337  | SEMA3C | ENSG00000075223 |
| 7 | 80600641 | 80600889 | 80600760 | 11 | 13 | 1  | 8.211341875 | 0.000163445 |        | ENSG00000209303 |
| 7 | 80643267 | 80643446 | 80643356 | 8  | 8  | 4  | 2.111487911 | 0.0804809   |        | ENSG00000209303 |
| 7 | 80736357 | 80736540 | 80736448 | 8  | 8  | 2  | 3.519146518 | 0.017558    |        | ENSG00000209303 |
| 7 | 80766526 | 80766785 | 80766677 | 11 | 11 | 5  | 2.346097679 | 0.0364013   |        | ENSG00000209303 |

|   |          |          |          |    |     |    |             |                      |                 |
|---|----------|----------|----------|----|-----|----|-------------|----------------------|-----------------|
| 7 | 80800868 | 80801203 | 80801035 | 15 | 17  | 12 | 1.62422147  | 0.088135             | ENSG00000209220 |
| 7 | 80831861 | 80832055 | 80832011 | 8  | 8   | 2  | 3.519146518 | 0.017558             | ENSG00000209220 |
| 7 | 80937241 | 80937594 | 80937417 | 9  | 15  | 9  | 1.876878143 | 0.0544542            | ENSG00000209220 |
| 7 | 81090456 | 81091034 | 81090737 | 66 | 98  | 3  | 29.03295877 | 1.18E-29 HGF         | ENSG00000019991 |
| 7 | 81157593 | 81157772 | 81157688 | 8  | 8   | 0  | 10.55743955 | 0.000925496 HGF      | ENSG00000019991 |
| 7 | 82167035 | 82167252 | 82167128 | 13 | 15  | 2  | 6.256260476 | 0.000199274          | ENSG00000213530 |
| 7 | 82630027 | 82630495 | 82630316 | 13 | 20  | 7  | 3.079253203 | 0.00177418 PCLO      | ENSG00000186472 |
| 7 | 82730786 | 82731007 | 82730869 | 12 | 13  | 0  | 16.42268375 | 1.91E-05 PCLO        | ENSG00000186472 |
| 7 | 83079825 | 83080093 | 83079931 | 19 | 19  | 2  | 7.820325595 | 1.32E-05 SEMA3E      | ENSG00000170381 |
| 7 | 83106392 | 83106595 | 83106526 | 8  | 9   | 1  | 5.865244197 | 0.00272497 SEMA3E    | ENSG00000170381 |
| 7 | 83116075 | 83116327 | 83116203 | 10 | 12  | 3  | 3.812408728 | 0.004404 SEMA3E      | ENSG00000170381 |
| 7 | 83144479 | 83144706 | 83144581 | 8  | 9   | 1  | 5.865244197 | 0.00272497 SEMA3E    | ENSG00000170381 |
| 7 | 83152320 | 83152505 | 83152399 | 9  | 9   | 4  | 2.346097679 | 0.050148 SEMA3E      | ENSG00000170381 |
| 7 | 83176083 | 83176482 | 83176274 | 24 | 34  | 4  | 8.211341875 | 1.23E-08 SEMA3E      | ENSG00000170381 |
| 7 | 84056284 | 84056610 | 84056447 | 10 | 15  | 2  | 6.256260476 | 0.000199274          | ENSG00000146736 |
| 7 | 84280818 | 84281014 | 84280975 | 9  | 9   | 1  | 5.865244197 | 0.00272497           | ENSG00000146736 |
| 7 | 84417400 | 84417655 | 84417527 | 8  | 9   | 3  | 2.932622098 | 0.0242899            | ENSG00000197029 |
| 7 | 85936997 | 85937247 | 85937137 | 12 | 13  | 4  | 3.28453675  | 0.00629037 GRM3      | ENSG00000198822 |
| 7 | 86314215 | 86314437 | 86314326 | 8  | 10  | 7  | 1.612942154 | 0.147335 KIAA1324L   | ENSG00000164659 |
| 7 | 86448562 | 86448765 | 86448655 | 8  | 9   | 2  | 3.910162798 | 0.00955088 KIAA1324L | ENSG00000164659 |
| 7 | 86558854 | 86559100 | 86559013 | 11 | 11  | 10 | 1.279689643 | 0.277323             | ENSG00000214406 |
| 7 | 86616067 | 86616264 | 86616165 | 9  | 9   | 0  | 11.73048839 | 0.000425898 DMTF1    | ENSG00000135164 |
| 7 | 86619410 | 86619939 | 86619583 | 13 | 27  | 6  | 4.692195357 | 1.46E-05 DMTF1       | ENSG00000135164 |
| 7 | 86620349 | 86620631 | 86620499 | 8  | 11  | 5  | 2.346097679 | 0.0364013 DMTF1      | ENSG00000135164 |
| 7 | 86686410 | 86686707 | 86686556 | 10 | 11  | 9  | 1.407658607 | 0.210479 C7orf23     | ENSG00000135185 |
| 7 | 86686945 | 86687441 | 86687124 | 10 | 18  | 5  | 3.714654658 | 0.000961539 C7orf23  | ENSG00000135185 |
| 7 | 86687842 | 86688063 | 86687952 | 8  | 8   | 8  | 1.173048839 | 0.36929 C7orf23      | ENSG00000135185 |
| 7 | 86779720 | 86779906 | 86779785 | 8  | 8   | 4  | 2.111487911 | 0.0804809 TP53AP1    | ENSG00000182165 |
| 7 | 86784062 | 86784760 | 86784241 | 16 | 33  | 7  | 4.985457567 | 1.25E-06 TP53AP1     | ENSG00000182165 |
| 7 | 86790307 | 86790641 | 86790470 | 19 | 23  | 5  | 4.692195357 | 5.29E-05 TP53AP1     | ENSG00000182165 |
| 7 | 86798182 | 86798649 | 86798397 | 40 | 61  | 0  | 72.72902804 | 1.26E-21 TP53AP1     | ENSG00000182165 |
| 7 | 86811647 | 86813187 | 86811943 | 46 | 122 | 19 | 7.214250362 | 5.95E-24 TP53AP1     | ENSG00000182165 |
| 7 | 86813542 | 86813741 | 86813664 | 8  | 8   | 2  | 3.519146518 | 0.017558 CROT        | ENSG00000005469 |
| 7 | 86842927 | 86843162 | 86843044 | 10 | 10  | 3  | 3.225884308 | 0.0139466 CROT       | ENSG00000005469 |

|   |          |          |          |    |    |    |             |             |         |                  |
|---|----------|----------|----------|----|----|----|-------------|-------------|---------|------------------|
| 7 | 86974844 | 86975023 | 86974950 | 8  | 8  | 3  | 2.639359888 | 0.0415794   | ABCB4   | ENSG00000005471  |
| 7 | 87169593 | 87169868 | 87169762 | 9  | 12 | 6  | 2.178519273 | 0.0416567   | ABCB1   | ENSG000000085563 |
| 7 | 87234894 | 87235360 | 87235127 | 8  | 17 | 8  | 2.346097679 | 0.0144542   | ABCB1   | ENSG000000085563 |
| 7 | 87264965 | 87265423 | 87265210 | 9  | 18 | 3  | 5.571981987 | 0.000108726 | DBF4    | ENSG00000006634  |
| 7 | 87277702 | 87277942 | 87277792 | 9  | 10 | 2  | 4.301179077 | 0.00512919  | DBF4    | ENSG00000006634  |
| 7 | 87343323 | 87343601 | 87343447 | 9  | 11 | 5  | 2.346097679 | 0.0364013   | DBF4    | ENSG00000006634  |
| 7 | 87401188 | 87401412 | 87401276 | 9  | 11 | 5  | 2.346097679 | 0.0364013   |         | ENSG00000008277  |
| 7 | 87694364 | 87694637 | 87694507 | 14 | 15 | 9  | 1.876878143 | 0.0544542   | SRI     | ENSG000000075142 |
| 7 | 89813007 | 89813204 | 89813105 | 8  | 8  | 1  | 5.278719777 | 0.00542188  | GTPBP10 | ENSG00000105793  |
| 7 | 89813865 | 89814093 | 89813973 | 11 | 12 | 5  | 2.541605819 | 0.0225912   | GTPBP10 | ENSG00000105793  |
| 7 | 89870399 | 89870819 | 89870692 | 10 | 18 | 4  | 4.457585589 | 0.000353565 | CLDN12  | ENSG00000157224  |
| 7 | 89870935 | 89871152 | 89871013 | 8  | 10 | 6  | 1.843362462 | 0.0964212   | CLDN12  | ENSG00000157224  |
| 7 | 90092948 | 90093160 | 90093030 | 8  | 8  | 1  | 5.278719777 | 0.00542188  |         | ENSG00000213823  |
| 7 | 90731269 | 90731822 | 90731680 | 20 | 31 | 11 | 3.128130238 | 0.000146711 | FZD1    | ENSG00000157240  |
| 7 | 91024596 | 91024847 | 91024714 | 12 | 14 | 6  | 2.513676084 | 0.016726    | FZD1    | ENSG00000157240  |
| 7 | 91073265 | 91073525 | 91073395 | 11 | 12 | 0  | 15.24963491 | 4.15E-05    | MTERF   | ENSG00000127989  |
| 7 | 91312198 | 91312402 | 91312273 | 8  | 8  | 0  | 10.55743955 | 0.000925496 | MTERF   | ENSG00000127989  |
| 7 | 91347850 | 91348181 | 91348008 | 17 | 19 | 12 | 1.804690522 | 0.0452624   | MTERF   | ENSG00000127989  |
| 7 | 91407382 | 91408190 | 91407561 | 12 | 36 | 7  | 5.425350882 | 2.04E-07    | AKAP9   | ENSG00000127914  |
| 7 | 91515355 | 91515981 | 91515724 | 40 | 81 | 3  | 24.04750121 | 3.67E-24    | AKAP9   | ENSG00000127914  |
| 7 | 91524588 | 91524921 | 91524754 | 16 | 19 | 11 | 1.955081399 | 0.0295891   | AKAP9   | ENSG00000127914  |
| 7 | 91543770 | 91544114 | 91543942 | 13 | 17 | 6  | 3.016411301 | 0.00381427  | AKAP9   | ENSG00000127914  |
| 7 | 91601598 | 91602198 | 91601940 | 17 | 34 | 11 | 3.421392448 | 3.22E-05    | CYP51A1 | ENSG00000001630  |
| 7 | 91644773 | 91644952 | 91644862 | 8  | 8  | 4  | 2.111487911 | 0.0804809   |         | ENSG00000188693  |
| 7 | 91712681 | 91713467 | 91713123 | 12 | 35 | 19 | 2.111487911 | 0.00288271  | KRIT1   | ENSG00000001631  |
| 7 | 91891809 | 91892179 | 91891984 | 11 | 16 | 3  | 4.985457567 | 0.000385643 | GATAD1  | ENSG00000157259  |
| 7 | 91892835 | 91893097 | 91892965 | 14 | 16 | 5  | 3.323638378 | 0.00288759  | GATAD1  | ENSG00000157259  |
| 7 | 91914500 | 91914927 | 91914679 | 12 | 20 | 7  | 3.079253203 | 0.00177418  | GATAD1  | ENSG00000157259  |
| 7 | 91928891 | 91929103 | 91928997 | 8  | 8  | 6  | 1.508205651 | 0.203852    | ERVWE1  | ENSG00000197604  |
| 7 | 91931773 | 91932070 | 91931911 | 16 | 18 | 8  | 2.476436439 | 0.00924552  | ERVWE1  | ENSG00000197604  |
| 7 | 91995864 | 91996268 | 91995967 | 10 | 16 | 6  | 2.848832895 | 0.00632407  | C7orf64 | ENSG00000127993  |
| 7 | 92057603 | 92057821 | 92057712 | 9  | 10 | 6  | 1.843362462 | 0.0964212   | C7orf64 | ENSG00000127993  |
| 7 | 92300253 | 92300496 | 92300374 | 11 | 11 | 3  | 3.519146518 | 0.00788869  | CDK6    | ENSG00000105810  |
| 7 | 92384076 | 92384289 | 92384182 | 8  | 9  | 2  | 3.910162798 | 0.00955088  |         | ENSG00000222576  |



|   |          |          |          |     |     |    |             |             |         |                 |
|---|----------|----------|----------|-----|-----|----|-------------|-------------|---------|-----------------|
| 7 | 92401364 | 92401673 | 92401504 | 22  | 25  | 6  | 4.357038546 | 4.72E-05    |         | ENSG00000222576 |
| 7 | 92496286 | 92496566 | 92496445 | 9   | 10  | 1  | 6.451768616 | 0.00135978  |         | ENSG00000222576 |
| 7 | 92699459 | 92699771 | 92699615 | 16  | 19  | 3  | 5.865244197 | 5.72E-05    | CCDC132 | ENSG00000004766 |
| 7 | 93029395 | 93029764 | 93029542 | 13  | 20  | 2  | 8.211341875 | 6.65E-06    | CALCR   | ENSG00000004948 |
| 7 | 93277896 | 93278113 | 93277996 | 8   | 10  | 3  | 3.225884308 | 0.0139466   |         | ENSG00000213483 |
| 7 | 93471359 | 93471711 | 93471526 | 10  | 15  | 5  | 3.128130238 | 0.00492422  | BET1    | ENSG00000105829 |
| 7 | 93555110 | 93555341 | 93555225 | 8   | 8   | 5  | 1.759573259 | 0.13508     | BET1    | ENSG00000105829 |
| 7 | 93578155 | 93578605 | 93578389 | 38  | 49  | 3  | 14.66311049 | 5.43E-14    | BET1    | ENSG00000105829 |
| 7 | 93756272 | 93756541 | 93756419 | 9   | 10  | 10 | 1.173048839 | 0.355733    | COL1A2  | ENSG00000164692 |
| 7 | 93862714 | 93862980 | 93862847 | 9   | 13  | 4  | 3.28453675  | 0.00629037  | COL1A2  | ENSG00000164692 |
| 7 | 94125101 | 94125355 | 94125228 | 11  | 12  | 15 | 0.953102182 | 0.555895    | PEG10   | ENSG00000217473 |
| 7 | 94125792 | 94126035 | 94125913 | 12  | 14  | 2  | 5.865244197 | 0.000387308 | PEG10   | ENSG00000217473 |
| 7 | 94512916 | 94513127 | 94513051 | 8   | 8   | 2  | 3.519146518 | 0.017558    |         | ENSG00000201607 |
| 7 | 94843086 | 94843503 | 94843259 | 37  | 47  | 3  | 14.07658607 | 2.28E-13    | PON3    | ENSG00000105852 |
| 7 | 94944266 | 94944649 | 94944470 | 8   | 16  | 4  | 3.988366054 | 0.00115141  | ASB4    | ENSG00000005981 |
| 7 | 94946093 | 94946403 | 94946236 | 10  | 10  | 5  | 2.150589539 | 0.0575848   | ASB4    | ENSG00000005981 |
| 7 | 94971008 | 94971254 | 94971132 | 9   | 11  | 4  | 2.815317214 | 0.0183428   | ASB4    | ENSG00000005981 |
| 7 | 95017871 | 95018075 | 95017954 | 9   | 9   | 3  | 2.932622098 | 0.0242899   | PDK4    | ENSG00000004799 |
| 7 | 95076941 | 95077217 | 95077106 | 9   | 11  | 8  | 1.564065119 | 0.151515    | PDK4    | ENSG00000004799 |
| 7 | 95239487 | 95239723 | 95239637 | 9   | 11  | 4  | 2.815317214 | 0.0183428   | DYNC1I1 | ENSG00000158560 |
| 7 | 95602628 | 95602984 | 95602765 | 18  | 22  | 3  | 6.745030826 | 8.05E-06    |         | ENSG00000208025 |
| 7 | 95640598 | 95640837 | 95640717 | 8   | 11  | 2  | 4.692195357 | 0.00272444  |         | ENSG00000208025 |
| 7 | 95770449 | 95770863 | 95770684 | 11  | 20  | 7  | 3.079253203 | 0.00177418  |         | ENSG00000220987 |
| 7 | 95797372 | 95797871 | 95797635 | 154 | 200 | 1  | 117.8914084 | 1.94E-66    |         | ENSG00000207045 |
| 7 | 95882187 | 95882528 | 95882365 | 14  | 19  | 3  | 5.865244197 | 5.72E-05    |         | ENSG00000197851 |
| 7 | 96015902 | 96016284 | 96016105 | 9   | 16  | 9  | 1.994183027 | 0.0370915   |         | ENSG00000197851 |
| 7 | 96268072 | 96268334 | 96268203 | 8   | 11  | 4  | 2.815317214 | 0.0183428   | SHFM1   | ENSG00000127922 |
| 7 | 96417086 | 96417438 | 96417262 | 15  | 21  | 3  | 6.451768616 | 1.56E-05    |         | ENSG00000222415 |
| 7 | 96494976 | 96495217 | 96495091 | 10  | 11  | 8  | 1.564065119 | 0.151515    | DLX5    | ENSG00000105880 |
| 7 | 96571970 | 96572331 | 96572152 | 8   | 14  | 3  | 4.398933147 | 0.00132748  | ACN9    | ENSG00000196636 |
| 7 | 96634985 | 96635372 | 96635193 | 25  | 33  | 4  | 7.976732107 | 2.40E-08    |         | ENSG00000208926 |
| 7 | 96809926 | 96810120 | 96809998 | 8   | 8   | 0  | 10.55743955 | 0.000925496 |         | ENSG00000221192 |
| 7 | 96969771 | 96970046 | 96969886 | 10  | 10  | 0  | 12.90353723 | 0.000195991 |         | ENSG00000199475 |
| 7 | 97339195 | 97340005 | 97339340 | 9   | 27  | 5  | 5.474227917 | 4.62E-06    | ASNS    | ENSG00000070669 |

|   |          |          |          |    |    |    |             |             |          |                 |
|---|----------|----------|----------|----|----|----|-------------|-------------|----------|-----------------|
| 7 | 97518464 | 97518752 | 97518608 | 8  | 12 | 8  | 1.694403879 | 0.107291    |          | ENSG00000208909 |
| 7 | 97561889 | 97562143 | 97562015 | 13 | 14 | 0  | 17.59573259 | 8.79E-06    | LMTK2    | ENSG00000164715 |
| 7 | 97574028 | 97574336 | 97574207 | 9  | 13 | 3  | 4.105670938 | 0.00243034  | LMTK2    | ENSG00000164715 |
| 7 | 97690614 | 97690859 | 97690736 | 8  | 11 | 2  | 4.692195357 | 0.00272444  | BHLHB8   | ENSG00000180535 |
| 7 | 97748266 | 97748464 | 97748384 | 10 | 10 | 3  | 3.225884308 | 0.0139466   | BRI3     | ENSG00000164713 |
| 7 | 97762135 | 97762379 | 97762257 | 8  | 10 | 5  | 2.150589539 | 0.0575848   | BRI3     | ENSG00000164713 |
| 7 | 97780654 | 97780898 | 97780750 | 10 | 11 | 3  | 3.519146518 | 0.00788869  | BRI3     | ENSG00000164713 |
| 7 | 97782913 | 97783298 | 97783087 | 18 | 24 | 4  | 5.865244197 | 8.64E-06    | BRI3     | ENSG00000164713 |
| 7 | 97793830 | 97794103 | 97793990 | 10 | 11 | 3  | 3.519146518 | 0.00788869  | BRI3     | ENSG00000164713 |
| 7 | 97821689 | 97822137 | 97821863 | 20 | 31 | 11 | 3.128130238 | 0.000146711 |          | ENSG00000205871 |
| 7 | 97866659 | 97867008 | 97866833 | 11 | 16 | 4  | 3.988366054 | 0.00115141  | BAIAP2L1 | ENSG00000006453 |
| 7 | 97868415 | 97868649 | 97868532 | 8  | 10 | 0  | 12.90353723 | 0.000195991 | BAIAP2L1 | ENSG00000006453 |
| 7 | 97888281 | 97888707 | 97888435 | 15 | 22 | 7  | 3.372515413 | 0.000629223 | BAIAP2L1 | ENSG00000006453 |
| 7 | 97992915 | 97993252 | 97993057 | 16 | 20 | 4  | 4.926805125 | 0.00010522  |          | ENSG00000213455 |
| 7 | 98213051 | 98213276 | 98213177 | 10 | 11 | 3  | 3.519146518 | 0.00788869  |          | ENSG00000207204 |
| 7 | 98233773 | 98233952 | 98233902 | 8  | 8  | 3  | 2.639359888 | 0.0415794   |          | ENSG00000207204 |
| 7 | 98277394 | 98277645 | 98277471 | 9  | 11 | 3  | 3.519146518 | 0.00788869  | TMEM130  | ENSG00000166448 |
| 7 | 98315264 | 98315479 | 98315376 | 8  | 10 | 6  | 1.843362462 | 0.0964212   | TRRAP    | ENSG00000196367 |
| 7 | 98340413 | 98340612 | 98340519 | 9  | 10 | 1  | 6.451768616 | 0.00135978  |          | ENSG00000208889 |
| 7 | 98534562 | 98534892 | 98534733 | 8  | 11 | 8  | 1.564065119 | 0.151515    | SMURF1   | ENSG00000198742 |
| 7 | 98564257 | 98564472 | 98564364 | 9  | 9  | 7  | 1.466311049 | 0.20706     | SMURF1   | ENSG00000198742 |
| 7 | 98761288 | 98761469 | 98761378 | 8  | 8  | 4  | 2.111487911 | 0.0804809   | ARPC1A   | ENSG00000013455 |
| 7 | 98773680 | 98773936 | 98773808 | 8  | 9  | 3  | 2.932622098 | 0.0242899   | ARPC1A   | ENSG00000013455 |
| 7 | 98811012 | 98811387 | 98811222 | 12 | 17 | 2  | 7.038293036 | 5.19E-05    | ARPC1B   | ENSG00000130429 |
| 7 | 98844153 | 98844677 | 98844375 | 12 | 24 | 6  | 4.18946014  | 8.40E-05    | PDAP1    | ENSG00000106244 |
| 7 | 98874094 | 98874470 | 98874273 | 10 | 16 | 6  | 2.848832895 | 0.00632407  | PTCD1    | ENSG00000106246 |
| 7 | 98874826 | 98875172 | 98874999 | 10 | 12 | 3  | 3.812408728 | 0.004404    | CPSF4    | ENSG00000160917 |
| 7 | 98875873 | 98876198 | 98876020 | 12 | 16 | 1  | 9.970915134 | 1.89E-05    | CPSF4    | ENSG00000160917 |
| 7 | 98901576 | 98902106 | 98901794 | 20 | 30 | 6  | 5.194930574 | 2.42E-06    | ATP5J2   | ENSG00000160916 |
| 7 | 98908184 | 98908541 | 98908362 | 15 | 21 | 4  | 5.161414893 | 5.68E-05    | ZNF789   | ENSG00000198556 |
| 7 | 98935773 | 98935988 | 98935876 | 10 | 12 | 5  | 2.541605819 | 0.0225912   | ZNF394   | ENSG00000160908 |
| 7 | 98940647 | 98941053 | 98940813 | 11 | 18 | 5  | 3.714654658 | 0.000961539 | ZKSCAN5  | ENSG00000196652 |
| 7 | 98961276 | 98961547 | 98961424 | 12 | 13 | 8  | 1.824742639 | 0.0744168   | ZKSCAN5  | ENSG00000196652 |
| 7 | 98976289 | 98976521 | 98976405 | 8  | 8  | 1  | 5.278719777 | 0.00542188  |          | ENSG00000221909 |

|   |          |          |          |     |     |    |             |             |         |                 |
|---|----------|----------|----------|-----|-----|----|-------------|-------------|---------|-----------------|
| 7 | 98987489 | 98987954 | 98987668 | 17  | 27  | 9  | 3.28453675  | 0.000236424 | C7orf38 | ENSG00000185654 |
| 7 | 98996935 | 98997313 | 98997124 | 29  | 38  | 3  | 11.43722618 | 1.38E-10    | ZNF655  | ENSG00000197343 |
| 7 | 99164276 | 99164544 | 99164410 | 11  | 15  | 1  | 9.384390715 | 3.90E-05    | CYP3A7  | ENSG00000160870 |
| 7 | 99172833 | 99173703 | 99173460 | 105 | 148 | 5  | 29.13071284 | 1.91E-43    | CYP3A7  | ENSG00000160870 |
| 7 | 99222273 | 99222641 | 99222462 | 15  | 22  | 2  | 8.993374435 | 1.66E-06    | CYP3A4  | ENSG00000160868 |
| 7 | 99253047 | 99253341 | 99253188 | 11  | 14  | 5  | 2.932622098 | 0.00829617  | CYP3A43 | ENSG00000021461 |
| 7 | 99354740 | 99355412 | 99355109 | 11  | 28  | 12 | 2.616801257 | 0.00120123  | TRIM4   | ENSG00000146833 |
| 7 | 99365099 | 99365320 | 99365159 | 8   | 11  | 1  | 7.038293036 | 0.000674435 | GJC3    | ENSG00000176402 |
| 7 | 99429820 | 99430062 | 99429941 | 15  | 15  | 3  | 4.692195357 | 0.000718455 |         | ENSG00000214313 |
| 7 | 99480290 | 99480506 | 99480398 | 15  | 16  | 1  | 9.970915134 | 1.89E-05    | ZSCAN21 | ENSG00000166529 |
| 7 | 99485304 | 99485632 | 99485454 | 12  | 16  | 8  | 2.215758919 | 0.0222902   | ZSCAN21 | ENSG00000166529 |
| 7 | 99488866 | 99489079 | 99488967 | 9   | 10  | 1  | 6.451768616 | 0.00135978  | ZSCAN21 | ENSG00000166529 |
| 7 | 99517292 | 99517652 | 99517453 | 9   | 15  | 6  | 2.68125449  | 0.0103552   | ZNF3    | ENSG00000166526 |
| 7 | 99524221 | 99524449 | 99524335 | 10  | 12  | 4  | 3.049926982 | 0.0108184   | COPS6   | ENSG00000168090 |
| 7 | 99524569 | 99524748 | 99524658 | 8   | 9   | 2  | 3.910162798 | 0.00955088  | COPS6   | ENSG00000168090 |
| 7 | 99536122 | 99536370 | 99536246 | 13  | 16  | 3  | 4.985457567 | 0.000385643 | MCM7    | ENSG00000166508 |
| 7 | 99537065 | 99537377 | 99537212 | 9   | 12  | 6  | 2.178519273 | 0.0416567   | AP4M1   | ENSG00000221838 |
| 7 | 99554772 | 99554972 | 99554872 | 8   | 10  | 10 | 1.173048839 | 0.355733    | TAF6    | ENSG00000106290 |
| 7 | 99554995 | 99555274 | 99555134 | 11  | 14  | 7  | 2.199466574 | 0.0303778   | CNPY4   | ENSG00000166997 |
| 7 | 99557635 | 99558038 | 99557814 | 9   | 19  | 8  | 2.606775198 | 0.00583935  | CNPY4   | ENSG00000166997 |
| 7 | 99566539 | 99566776 | 99566702 | 10  | 12  | 10 | 1.386330446 | 0.21117     |         | ENSG00000214309 |
| 7 | 99584478 | 99584733 | 99584605 | 8   | 11  | 5  | 2.346097679 | 0.0364013   | C7orf59 | ENSG00000188186 |
| 7 | 99594169 | 99594443 | 99594311 | 14  | 16  | 3  | 4.985457567 | 0.000385643 | C7orf43 | ENSG00000146826 |
| 7 | 99631061 | 99631291 | 99631176 | 8   | 8   | 4  | 2.111487911 | 0.0804809   | STAG3   | ENSG00000066923 |
| 7 | 99707734 | 99708069 | 99707901 | 14  | 16  | 1  | 9.970915134 | 1.89E-05    |         | ENSG00000160844 |
| 7 | 99803082 | 99803404 | 99803228 | 8   | 11  | 2  | 4.692195357 | 0.00272444  | PILRA   | ENSG00000085514 |
| 7 | 99863665 | 99864231 | 99864006 | 10  | 24  | 13 | 2.09473007  | 0.011141    | ZCWPW1  | ENSG00000078487 |
| 7 | 99864342 | 99864729 | 99864513 | 13  | 19  | 12 | 1.804690522 | 0.0452624   | ZCWPW1  | ENSG00000078487 |
| 7 | 99864765 | 99865257 | 99865134 | 12  | 24  | 14 | 1.955081399 | 0.0175993   | MEPCE   | ENSG00000146834 |
| 7 | 99871961 | 99872411 | 99872129 | 9   | 17  | 9  | 2.111487911 | 0.0248715   | C7orf47 | ENSG00000160813 |
| 7 | 99904817 | 99905061 | 99904939 | 8   | 9   | 2  | 3.910162798 | 0.00955088  | C7orf61 | ENSG00000185955 |
| 7 | 99914614 | 99915036 | 99914793 | 18  | 27  | 9  | 3.28453675  | 0.000236424 | TSC22D4 | ENSG00000166925 |
| 7 | 99974200 | 99974547 | 99974373 | 10  | 14  | 7  | 2.199466574 | 0.0303778   | AGFG2   | ENSG00000106351 |
| 7 | 99975713 | 99975892 | 99975802 | 8   | 8   | 7  | 1.319679944 | 0.283403    | AGFG2   | ENSG00000106351 |

|   |           |           |           |    |     |    |             |             |                          |
|---|-----------|-----------|-----------|----|-----|----|-------------|-------------|--------------------------|
| 7 | 99995406  | 99995629  | 99995517  | 11 | 11  | 6  | 2.010940867 | 0.0640214   | ENSG00000184414          |
| 7 | 100021638 | 100021934 | 100021848 | 8  | 12  | 3  | 3.812408728 | 0.004404    | FBXO24 ENSG00000106336   |
| 7 | 100047774 | 100048047 | 100047910 | 9  | 11  | 7  | 1.759573259 | 0.102361    | MOSPD3 ENSG00000106330   |
| 7 | 100092011 | 100092190 | 100092088 | 8  | 8   | 0  | 10.55743955 | 0.000925496 | ACTL6B ENSG00000077080   |
| 7 | 100108833 | 100109320 | 100109143 | 16 | 28  | 8  | 3.779824038 | 5.98E-05    | GNB2 ENSG00000172354     |
| 7 | 100111468 | 100111724 | 100111596 | 10 | 11  | 2  | 4.692195357 | 0.00272444  | GNB2 ENSG00000172354     |
| 7 | 100140831 | 100141033 | 100140947 | 8  | 9   | 1  | 5.865244197 | 0.00272497  | POP7 ENSG00000172336     |
| 7 | 100237193 | 100238216 | 100237539 | 59 | 154 | 15 | 11.36391063 | 6.90E-36    | EPHB4 ENSG00000196411    |
| 7 | 100239079 | 100239436 | 100239257 | 10 | 15  | 5  | 3.128130238 | 0.00492422  | EPHB4 ENSG00000196411    |
| 7 | 100249876 | 100250219 | 100250068 | 15 | 19  | 0  | 23.46097679 | 1.81E-07    | EPHB4 ENSG00000196411    |
| 7 | 100261013 | 100261242 | 100261111 | 8  | 10  | 8  | 1.433726359 | 0.209175    | EPHB4 ENSG00000196411    |
| 7 | 100263264 | 100263644 | 100263443 | 12 | 20  | 3  | 6.158506406 | 2.99E-05    | EPHB4 ENSG00000196411    |
| 7 | 100287497 | 100288145 | 100287813 | 12 | 24  | 6  | 4.18946014  | 8.40E-05    | SLC12A9 ENSG00000146828  |
| 7 | 100302664 | 100303020 | 100302868 | 8  | 13  | 7  | 2.052835469 | 0.046392    | TRIP6 ENSG00000087077    |
| 7 | 100303623 | 100304073 | 100303870 | 13 | 22  | 9  | 2.69801233  | 0.00276236  | TRIP6 ENSG00000087077    |
| 7 | 100310239 | 100310924 | 100310592 | 11 | 28  | 13 | 2.429886881 | 0.00217891  | ENSG00000087087          |
| 7 | 100325319 | 100326122 | 100325901 | 17 | 40  | 7  | 6.011875301 | 1.73E-08    | UFSP1 ENSG00000176125    |
| 7 | 100365181 | 100365690 | 100365299 | 14 | 24  | 4  | 5.865244197 | 8.64E-06    | MUC3B ENSG00000169894    |
| 7 | 100388591 | 100388778 | 100388684 | 8  | 9   | 9  | 1.173048839 | 0.362316    | MUC3B ENSG00000169894    |
| 7 | 100390006 | 100390318 | 100390163 | 8  | 11  | 3  | 3.519146518 | 0.00788869  | MUC3B ENSG00000169894    |
| 7 | 100396780 | 100396966 | 100396914 | 10 | 11  | 3  | 3.519146518 | 0.00788869  | MUC3B ENSG00000169894    |
| 7 | 100448770 | 100449266 | 100448970 | 8  | 17  | 7  | 2.639359888 | 0.00777415  | MUC17 ENSG00000169876    |
| 7 | 100507524 | 100507828 | 100507668 | 10 | 13  | 4  | 3.28453675  | 0.00629037  | TRIM56 ENSG00000169871   |
| 7 | 100515111 | 100515374 | 100515242 | 11 | 14  | 3  | 4.398933147 | 0.00132748  | TRIM56 ENSG00000169871   |
| 7 | 100515400 | 100515670 | 100515579 | 13 | 16  | 2  | 6.647276756 | 0.000101928 | TRIM56 ENSG00000169871   |
| 7 | 100524835 | 100525109 | 100524963 | 10 | 13  | 2  | 5.474227917 | 0.000747844 | TRIM56 ENSG00000169871   |
| 7 | 100530188 | 100530429 | 100530308 | 9  | 11  | 0  | 14.07658607 | 9.02E-05    | TRIM56 ENSG00000169871   |
| 7 | 100556853 | 100557045 | 100556949 | 10 | 10  | 2  | 4.301179077 | 0.00512919  | SERPINE1 ENSG00000106366 |
| 7 | 100568420 | 100568781 | 100568602 | 9  | 15  | 9  | 1.876878143 | 0.0544542   | SERPINE1 ENSG00000106366 |
| 7 | 100574093 | 100574344 | 100574218 | 8  | 11  | 3  | 3.519146518 | 0.00788869  | AP1S1 ENSG00000106367    |
| 7 | 100584313 | 100584574 | 100584443 | 8  | 11  | 5  | 2.346097679 | 0.0364013   | AP1S1 ENSG00000106367    |
| 7 | 100593485 | 100593808 | 100593646 | 8  | 11  | 3  | 3.519146518 | 0.00788869  | VGF ENSG00000128564      |
| 7 | 100595529 | 100595745 | 100595637 | 11 | 12  | 10 | 1.386330446 | 0.21117     | VGF ENSG00000128564      |
| 7 | 100599740 | 100599922 | 100599831 | 8  | 8   | 3  | 2.639359888 | 0.0415794   | VGF ENSG00000128564      |

|   |           |           |           |    |    |    |             |             |         |                 |
|---|-----------|-----------|-----------|----|----|----|-------------|-------------|---------|-----------------|
| 7 | 100612743 | 100612956 | 100612824 | 8  | 10 | 6  | 1.843362462 | 0.0964212   | C7orf52 | ENSG00000167011 |
| 7 | 100622540 | 100622795 | 100622654 | 9  | 12 | 6  | 2.178519273 | 0.0416567   | MOGAT3  | ENSG00000106384 |
| 7 | 100662572 | 100662979 | 100662732 | 9  | 16 | 6  | 2.848832895 | 0.00632407  |         | ENSG00000203384 |
| 7 | 100671668 | 100671969 | 100671818 | 8  | 9  | 0  | 11.73048839 | 0.000425898 | CLDN15  | ENSG00000106404 |
| 7 | 100682274 | 100682517 | 100682404 | 12 | 13 | 8  | 1.824742639 | 0.0744168   | FIS1    | ENSG00000214253 |
| 7 | 100793913 | 100794358 | 100794204 | 11 | 19 | 6  | 3.351568112 | 0.00134187  | EMID2   | ENSG00000160963 |
| 7 | 100832198 | 100832456 | 100832327 | 16 | 19 | 6  | 3.351568112 | 0.00134187  | EMID2   | ENSG00000160963 |
| 7 | 100937860 | 100938165 | 100938031 | 12 | 13 | 4  | 3.28453675  | 0.00629037  |         | ENSG00000214248 |
| 7 | 101013393 | 101013757 | 101013572 | 17 | 25 | 2  | 10.16642327 | 2.02E-07    |         | ENSG00000106436 |
| 7 | 101038849 | 101039163 | 101038991 | 18 | 22 | 10 | 2.452738482 | 0.00515848  |         | ENSG00000106436 |
| 7 | 101065599 | 101065845 | 101065722 | 8  | 10 | 1  | 6.451768616 | 0.00135978  |         | ENSG00000214247 |
| 7 | 101132598 | 101132890 | 101132731 | 10 | 12 | 1  | 7.624817456 | 0.000332769 |         | ENSG00000214247 |
| 7 | 101173278 | 101173685 | 101173571 | 13 | 21 | 0  | 25.80707446 | 3.84E-08    | CUX1    | ENSG00000160967 |
| 7 | 101243902 | 101244279 | 101244073 | 11 | 16 | 1  | 9.970915134 | 1.89E-05    | CUX1    | ENSG00000160967 |
| 7 | 101286955 | 101287318 | 101287122 | 19 | 25 | 10 | 2.772660893 | 0.00131329  | CUX1    | ENSG00000160967 |
| 7 | 101312093 | 101312275 | 101312220 | 8  | 9  | 2  | 3.910162798 | 0.00955088  | CUX1    | ENSG00000160967 |
| 7 | 101312886 | 101313119 | 101313002 | 9  | 13 | 8  | 1.824742639 | 0.0744168   | CUX1    | ENSG00000160967 |
| 7 | 101313166 | 101313549 | 101313361 | 17 | 25 | 9  | 3.049926982 | 0.000648806 | CUX1    | ENSG00000160967 |
| 7 | 101333075 | 101333286 | 101333151 | 8  | 9  | 1  | 5.865244197 | 0.00272497  | CUX1    | ENSG00000160967 |
| 7 | 101443839 | 101444203 | 101444018 | 15 | 22 | 6  | 3.854303329 | 0.000260696 |         | ENSG00000203383 |
| 7 | 101666772 | 101667078 | 101666922 | 12 | 14 | 8  | 1.955081399 | 0.0506438   |         | ENSG00000208808 |
| 7 | 101702156 | 101702512 | 101702334 | 13 | 18 | 8  | 2.476436439 | 0.00924552  |         | ENSG00000160999 |
| 7 | 101716099 | 101716297 | 101716198 | 9  | 10 | 6  | 1.843362462 | 0.0964212   |         | ENSG00000160999 |
| 7 | 101716439 | 101716682 | 101716584 | 8  | 9  | 3  | 2.932622098 | 0.0242899   |         | ENSG00000160999 |
| 7 | 101719809 | 101720035 | 101719922 | 8  | 9  | 5  | 1.955081399 | 0.0892323   |         | ENSG00000160999 |
| 7 | 101745915 | 101746190 | 101746052 | 11 | 14 | 5  | 2.932622098 | 0.00829617  |         | ENSG00000208804 |
| 7 | 101818103 | 101818446 | 101818273 | 11 | 16 | 9  | 1.994183027 | 0.0370915   | PRKRIP1 | ENSG00000128563 |
| 7 | 101823195 | 101824246 | 101823508 | 15 | 54 | 17 | 3.584315898 | 1.47E-07    | PRKRIP1 | ENSG00000128563 |
| 7 | 101843705 | 101843932 | 101843780 | 9  | 12 | 2  | 5.083211637 | 0.00143337  |         | ENSG00000221510 |
| 7 | 102176457 | 102176745 | 102176601 | 16 | 20 | 3  | 6.158506406 | 2.99E-05    |         | ENSG00000222011 |
| 7 | 102345063 | 102345475 | 102345304 | 8  | 14 | 2  | 5.865244197 | 0.000387308 | LRR17   | ENSG00000128606 |
| 7 | 102502008 | 102502863 | 102502278 | 13 | 33 | 4  | 7.976732107 | 2.40E-08    | FBXL13  | ENSG00000161040 |
| 7 | 102576656 | 102576900 | 102576778 | 9  | 12 | 7  | 1.906204364 | 0.0695918   | NAPEPLD | ENSG00000161048 |
| 7 | 102577081 | 102577305 | 102577193 | 11 | 11 | 4  | 2.815317214 | 0.0183428   | NAPEPLD | ENSG00000161048 |

|   |           |           |           |     |     |    |             |             |         |                 |
|---|-----------|-----------|-----------|-----|-----|----|-------------|-------------|---------|-----------------|
| 7 | 102724896 | 102725459 | 102725075 | 23  | 43  | 9  | 5.161414893 | 3.05E-08    | PMPCB   | ENSG00000105819 |
| 7 | 102772406 | 102772734 | 102772556 | 19  | 22  | 6  | 3.854303329 | 0.000260696 | DNAJC2  | ENSG00000105821 |
| 7 | 102775383 | 102775672 | 102775542 | 9   | 12  | 7  | 1.906204364 | 0.0695918   | PSMC2   | ENSG00000161057 |
| 7 | 102834609 | 102834960 | 102834784 | 12  | 18  | 10 | 2.026175268 | 0.0273052   | SLC26A5 | ENSG00000170615 |
| 7 | 102875263 | 102875576 | 102875404 | 12  | 14  | 9  | 1.759573259 | 0.0786014   | SLC26A5 | ENSG00000170615 |
| 7 | 103524480 | 103524665 | 103524572 | 11  | 11  | 8  | 1.564065119 | 0.151515    | RELN    | ENSG00000189056 |
| 7 | 103635500 | 103636073 | 103635811 | 13  | 26  | 7  | 3.959039833 | 7.16E-05    | ORC5L   | ENSG00000164815 |
| 7 | 103790551 | 103790782 | 103790666 | 9   | 9   | 2  | 3.910162798 | 0.00955088  | LHFPL3  | ENSG00000187416 |
| 7 | 103997459 | 103997678 | 103997568 | 9   | 9   | 5  | 1.955081399 | 0.0892323   |         | ENSG00000197258 |
| 7 | 104033839 | 104034018 | 104033955 | 8   | 8   | 3  | 2.639359888 | 0.0415794   |         | ENSG00000197258 |
| 7 | 104049235 | 104049476 | 104049355 | 8   | 8   | 3  | 2.639359888 | 0.0415794   |         | ENSG00000197258 |
| 7 | 104276073 | 104276303 | 104276188 | 10  | 11  | 7  | 1.759573259 | 0.102361    |         | ENSG00000208761 |
| 7 | 104311477 | 104311793 | 104311625 | 11  | 15  | 2  | 6.256260476 | 0.000199274 |         | ENSG00000208761 |
| 7 | 104391732 | 104391919 | 104391825 | 8   | 8   | 1  | 5.278719777 | 0.00542188  |         | ENSG00000208754 |
| 7 | 104410156 | 104410381 | 104410268 | 8   | 10  | 6  | 1.843362462 | 0.0964212   |         | ENSG00000208754 |
| 7 | 104410407 | 104410610 | 104410508 | 11  | 12  | 4  | 3.049926982 | 0.0108184   |         | ENSG00000208754 |
| 7 | 104434393 | 104434611 | 104434477 | 13  | 13  | 3  | 4.105670938 | 0.00243034  | MLL5    | ENSG00000005483 |
| 7 | 104440179 | 104440898 | 104440493 | 20  | 47  | 9  | 5.630634429 | 2.74E-09    | MLL5    | ENSG00000005483 |
| 7 | 104440902 | 104441518 | 104441309 | 13  | 29  | 16 | 2.070086187 | 0.00680287  | MLL5    | ENSG00000005483 |
| 7 | 104441616 | 104441795 | 104441705 | 8   | 8   | 4  | 2.111487911 | 0.0804809   | MLL5    | ENSG00000005483 |
| 7 | 104625228 | 104625407 | 104625287 | 8   | 8   | 3  | 2.639359888 | 0.0415794   | SRPK2   | ENSG00000135250 |
| 7 | 104732233 | 104732575 | 104732404 | 9   | 13  | 3  | 4.105670938 | 0.00243034  |         | ENSG00000208751 |
| 7 | 104741609 | 104741803 | 104741731 | 8   | 10  | 3  | 3.225884308 | 0.0139466   |         | ENSG00000208751 |
| 7 | 104915599 | 104915941 | 104915771 | 9   | 12  | 1  | 7.624817456 | 0.000332769 | PUS7    | ENSG00000091127 |
| 7 | 104959699 | 104960048 | 104959873 | 15  | 21  | 7  | 3.225884308 | 0.00106152  | RINT1   | ENSG00000135249 |
| 7 | 105008813 | 105009011 | 105008912 | 8   | 8   | 0  | 10.55743955 | 0.000925496 | EFCAB10 | ENSG00000185055 |
| 7 | 105009045 | 105009573 | 105009289 | 106 | 136 | 7  | 20.08846137 | 2.03E-37    | EFCAB10 | ENSG00000185055 |
| 7 | 105017172 | 105017475 | 105017313 | 12  | 15  | 9  | 1.876878143 | 0.0544542   | EFCAB10 | ENSG00000185055 |
| 7 | 105038405 | 105038677 | 105038576 | 8   | 8   | 4  | 2.111487911 | 0.0804809   | EFCAB10 | ENSG00000185055 |
| 7 | 105069980 | 105070340 | 105070135 | 8   | 14  | 2  | 5.865244197 | 0.000387308 | EFCAB10 | ENSG00000185055 |
| 7 | 105070351 | 105070557 | 105070475 | 8   | 10  | 5  | 2.150589539 | 0.0575848   | EFCAB10 | ENSG00000185055 |
| 7 | 105075517 | 105075770 | 105075663 | 8   | 12  | 2  | 5.083211637 | 0.00143337  | EFCAB10 | ENSG00000185055 |
| 7 | 105076534 | 105076896 | 105076696 | 12  | 17  | 7  | 2.639359888 | 0.00777415  | EFCAB10 | ENSG00000185055 |
| 7 | 105080115 | 105080398 | 105080256 | 11  | 13  | 8  | 1.824742639 | 0.0744168   | EFCAB10 | ENSG00000185055 |

|   |           |           |           |    |    |   |             |             |         |                 |
|---|-----------|-----------|-----------|----|----|---|-------------|-------------|---------|-----------------|
| 7 | 105084581 | 105085076 | 105084902 | 9  | 16 | 3 | 4.985457567 | 0.000385643 | EFCAB10 | ENSG00000185055 |
| 7 | 105092665 | 105093038 | 105092844 | 11 | 19 | 6 | 3.351568112 | 0.00134187  | EFCAB10 | ENSG00000185055 |
| 7 | 105118380 | 105118580 | 105118425 | 8  | 9  | 3 | 2.932622098 | 0.0242899   | EFCAB10 | ENSG00000185055 |
| 7 | 105119382 | 105119750 | 105119561 | 17 | 24 | 3 | 7.331555246 | 2.13E-06    | EFCAB10 | ENSG00000185055 |
| 7 | 105165392 | 105165631 | 105165544 | 8  | 9  | 5 | 1.955081399 | 0.0892323   | ATXN7L1 | ENSG00000146776 |
| 7 | 105188027 | 105188247 | 105188168 | 12 | 13 | 2 | 5.474227917 | 0.000747844 | ATXN7L1 | ENSG00000146776 |
| 7 | 105260026 | 105260371 | 105260189 | 8  | 12 | 0 | 15.24963491 | 4.15E-05    | ATXN7L1 | ENSG00000146776 |
| 7 | 105304047 | 105304288 | 105304194 | 10 | 11 | 6 | 2.010940867 | 0.0640214   | ATXN7L1 | ENSG00000146776 |
| 7 | 105305040 | 105305250 | 105305145 | 9  | 12 | 2 | 5.083211637 | 0.00143337  | ATXN7L1 | ENSG00000146776 |
| 7 | 105362383 | 105362565 | 105362474 | 8  | 8  | 7 | 1.319679944 | 0.283403    |         | ENSG00000128536 |
| 7 | 105427089 | 105427312 | 105427251 | 8  | 11 | 2 | 4.692195357 | 0.00272444  |         | ENSG00000128536 |
| 7 | 105428291 | 105428693 | 105428514 | 9  | 16 | 2 | 6.647276756 | 0.000101928 |         | ENSG00000128536 |
| 7 | 105437094 | 105437460 | 105437283 | 14 | 20 | 5 | 4.105670938 | 0.000308509 |         | ENSG00000128536 |
| 7 | 105454174 | 105454406 | 105454294 | 9  | 11 | 5 | 2.346097679 | 0.0364013   |         | ENSG00000128536 |
| 7 | 105455244 | 105455696 | 105455416 | 12 | 20 | 3 | 6.158506406 | 2.99E-05    |         | ENSG00000128536 |
| 7 | 105468850 | 105469076 | 105468938 | 10 | 10 | 6 | 1.843362462 | 0.0964212   | SYPL1   | ENSG00000008282 |
| 7 | 105484728 | 105485038 | 105484881 | 9  | 13 | 2 | 5.474227917 | 0.000747844 | SYPL1   | ENSG00000008282 |
| 7 | 105486118 | 105486533 | 105486325 | 20 | 30 | 9 | 3.636451402 | 4.92E-05    | SYPL1   | ENSG00000008282 |
| 7 | 105492628 | 105493471 | 105493013 | 16 | 37 | 8 | 4.952872877 | 3.52E-07    | SYPL1   | ENSG00000008282 |
| 7 | 105497612 | 105498217 | 105497900 | 11 | 25 | 8 | 3.388807758 | 0.000297109 | SYPL1   | ENSG00000008282 |
| 7 | 105498325 | 105498673 | 105498499 | 8  | 14 | 3 | 4.398933147 | 0.00132748  | SYPL1   | ENSG00000008282 |
| 7 | 105499024 | 105499357 | 105499190 | 14 | 19 | 8 | 2.606775198 | 0.00583935  | SYPL1   | ENSG00000008282 |
| 7 | 105499726 | 105499961 | 105499843 | 11 | 12 | 7 | 1.906204364 | 0.0695918   | SYPL1   | ENSG00000008282 |
| 7 | 105581603 | 105581785 | 105581703 | 8  | 8  | 6 | 1.508205651 | 0.203852    | SYPL1   | ENSG00000008282 |
| 7 | 105594553 | 105594818 | 105594673 | 8  | 9  | 9 | 1.173048839 | 0.362316    |         | ENSG00000201796 |
| 7 | 105606349 | 105606590 | 105606469 | 9  | 11 | 3 | 3.519146518 | 0.00788869  |         | ENSG00000201796 |
| 7 | 105645034 | 105645307 | 105645170 | 8  | 10 | 2 | 4.301179077 | 0.00512919  |         | ENSG00000201796 |
| 7 | 105661453 | 105661632 | 105661574 | 8  | 8  | 3 | 2.639359888 | 0.0415794   |         | ENSG00000201796 |
| 7 | 105667125 | 105667349 | 105667238 | 11 | 12 | 5 | 2.541605819 | 0.0225912   |         | ENSG00000201796 |
| 7 | 105711701 | 105711909 | 105711798 | 8  | 9  | 4 | 2.346097679 | 0.050148    | NAMPT   | ENSG00000105835 |
| 7 | 105712640 | 105712857 | 105712808 | 8  | 11 | 7 | 1.759573259 | 0.102361    | NAMPT   | ENSG00000105835 |
| 7 | 105713003 | 105713319 | 105713160 | 13 | 16 | 5 | 3.323638378 | 0.00288759  | NAMPT   | ENSG00000105835 |
| 7 | 105713336 | 105713615 | 105713475 | 8  | 11 | 7 | 1.759573259 | 0.102361    | NAMPT   | ENSG00000105835 |
| 7 | 105970297 | 105970498 | 105970410 | 11 | 11 | 3 | 3.519146518 | 0.00788869  |         | ENSG00000177820 |

|   |           |           |           |    |    |    |             |             |                         |
|---|-----------|-----------|-----------|----|----|----|-------------|-------------|-------------------------|
| 7 | 106026541 | 106026746 | 106026643 | 8  | 9  | 4  | 2.346097679 | 0.050148    | ENSG00000177820         |
| 7 | 106087491 | 106087900 | 106087721 | 13 | 22 | 5  | 4.496687217 | 9.59E-05    | ENSG00000177820         |
| 7 | 106088912 | 106089166 | 106089005 | 9  | 10 | 1  | 6.451768616 | 0.00135978  | ENSG00000177820         |
| 7 | 106164282 | 106164514 | 106164360 | 12 | 15 | 6  | 2.68125449  | 0.0103552   | ENSG00000177820         |
| 7 | 106319583 | 106319857 | 106319690 | 8  | 9  | 2  | 3.910162798 | 0.00955088  | PIK3CG ENSG00000105851  |
| 7 | 106375007 | 106375247 | 106375128 | 9  | 11 | 10 | 1.279689643 | 0.277323    | PIK3CG ENSG00000105851  |
| 7 | 106595383 | 106595639 | 106595473 | 8  | 8  | 5  | 1.759573259 | 0.13508     | HBP1 ENSG00000105856    |
| 7 | 106596189 | 106596922 | 106596649 | 19 | 39 | 9  | 4.692195357 | 3.22E-07    | HBP1 ENSG00000105856    |
| 7 | 106597308 | 106597751 | 106597532 | 22 | 36 | 9  | 4.340280705 | 1.80E-06    | HBP1 ENSG00000105856    |
| 7 | 106621652 | 106621851 | 106621763 | 8  | 8  | 0  | 10.55743955 | 0.000925496 | HBP1 ENSG00000105856    |
| 7 | 106776512 | 106776870 | 106776691 | 21 | 27 | 1  | 16.42268375 | 5.88E-09    | ENSG00000208728         |
| 7 | 106934026 | 106934210 | 106934118 | 8  | 8  | 3  | 2.639359888 | 0.0415794   | GPR22 ENSG00000172209   |
| 7 | 106934279 | 106934542 | 106934410 | 15 | 17 | 9  | 2.111487911 | 0.0248715   | GPR22 ENSG00000172209   |
| 7 | 106990938 | 106991144 | 106991019 | 8  | 10 | 4  | 2.580707446 | 0.0306059   | DUS4L ENSG00000105865   |
| 7 | 106991378 | 106991588 | 106991477 | 8  | 10 | 2  | 4.301179077 | 0.00512919  | DUS4L ENSG00000105865   |
| 7 | 106992039 | 106992314 | 106992149 | 12 | 15 | 10 | 1.706252857 | 0.0822346   | COG5 ENSG00000164597    |
| 7 | 107007450 | 107007761 | 107007609 | 8  | 11 | 1  | 7.038293036 | 0.000674435 | BCAP29 ENSG00000075790  |
| 7 | 107008169 | 107008544 | 107008312 | 8  | 13 | 4  | 3.28453675  | 0.00629037  | BCAP29 ENSG00000075790  |
| 7 | 107140800 | 107141086 | 107140921 | 13 | 15 | 4  | 3.753756286 | 0.0020497   | CBLL1 ENSG00000105879   |
| 7 | 107171102 | 107171421 | 107171249 | 17 | 22 | 9  | 2.69801233  | 0.00276236  | CBLL1 ENSG00000105879   |
| 7 | 107171468 | 107171933 | 107171675 | 11 | 22 | 8  | 2.997791478 | 0.00137524  | CBLL1 ENSG00000105879   |
| 7 | 107172198 | 107172410 | 107172290 | 8  | 8  | 7  | 1.319679944 | 0.283403    | CBLL1 ENSG00000105879   |
| 7 | 107264067 | 107264275 | 107264171 | 12 | 13 | 6  | 2.346097679 | 0.0266147   | SLC26A3 ENSG00000091138 |
| 7 | 107302352 | 107302599 | 107302475 | 13 | 15 | 6  | 2.68125449  | 0.0103552   | DLD ENSG00000091140     |
| 7 | 107318457 | 107319158 | 107318807 | 10 | 30 | 13 | 2.597465287 | 0.000910385 | DLD ENSG00000091140     |
| 7 | 107376962 | 107377247 | 107377104 | 12 | 14 | 8  | 1.955081399 | 0.0506438   | ENSG00000208718         |
| 7 | 107378634 | 107378839 | 107378701 | 9  | 10 | 0  | 12.90353723 | 0.000195991 | ENSG00000208718         |
| 7 | 107380094 | 107380613 | 107380349 | 23 | 42 | 15 | 3.152568756 | 1.28E-05    | ENSG00000208718         |
| 7 | 107423197 | 107423449 | 107423310 | 11 | 11 | 3  | 3.519146518 | 0.00788869  | ENSG00000208718         |
| 7 | 107426548 | 107426800 | 107426682 | 10 | 11 | 3  | 3.519146518 | 0.00788869  | ENSG00000208718         |
| 7 | 107442721 | 107443065 | 107442893 | 10 | 16 | 0  | 19.94183027 | 1.86E-06    | LAMB1 ENSG00000091136   |
| 7 | 107474638 | 107474933 | 107474802 | 14 | 16 | 1  | 9.970915134 | 1.89E-05    | ENSG00000216085         |
| 7 | 107519155 | 107519454 | 107519320 | 15 | 19 | 7  | 2.932622098 | 0.00293566  | LAMB4 ENSG00000091128   |
| 7 | 107606215 | 107606423 | 107606275 | 9  | 9  | 4  | 2.346097679 | 0.050148    | NRCAM ENSG00000091129   |



|   |           |           |           |     |     |    |             |             |        |                 |
|---|-----------|-----------|-----------|-----|-----|----|-------------|-------------|--------|-----------------|
| 7 | 107629467 | 107629657 | 107629599 | 8   | 10  | 3  | 3.225884308 | 0.0139466   | NRCAM  | ENSG00000091129 |
| 7 | 107721546 | 107721790 | 107721665 | 9   | 11  | 2  | 4.692195357 | 0.00272444  | NRCAM  | ENSG00000091129 |
| 7 | 107763002 | 107763231 | 107763107 | 11  | 12  | 3  | 3.812408728 | 0.004404    | NRCAM  | ENSG00000091129 |
| 7 | 107786186 | 107786395 | 107786290 | 10  | 12  | 1  | 7.624817456 | 0.000332769 | NRCAM  | ENSG00000091129 |
| 7 | 107882383 | 107882737 | 107882560 | 13  | 19  | 5  | 3.910162798 | 0.000546977 | NRCAM  | ENSG00000091129 |
| 7 | 107953782 | 107954151 | 107953961 | 16  | 23  | 7  | 3.519146518 | 0.000369739 | PNPLA8 | ENSG00000135241 |
| 7 | 107996736 | 107997767 | 107997442 | 17  | 45  | 13 | 3.854303329 | 5.42E-07    | DNAJB9 | ENSG00000128590 |
| 7 | 108038852 | 108039251 | 108039099 | 12  | 17  | 5  | 3.519146518 | 0.00167472  | DNAJB9 | ENSG00000128590 |
| 7 | 108041339 | 108041637 | 108041477 | 10  | 14  | 10 | 1.599612054 | 0.114822    | DNAJB9 | ENSG00000128590 |
| 7 | 108152002 | 108152234 | 108152118 | 8   | 9   | 4  | 2.346097679 | 0.050148    | DNAJB9 | ENSG00000128590 |
| 7 | 108233573 | 108233802 | 108233704 | 10  | 12  | 5  | 2.541605819 | 0.0225912   |        | ENSG00000205174 |
| 7 | 108243486 | 108243963 | 108243665 | 15  | 28  | 6  | 4.859773763 | 8.07E-06    |        | ENSG00000205174 |
| 7 | 108265909 | 108266088 | 108265998 | 8   | 8   | 1  | 5.278719777 | 0.00542188  |        | ENSG00000205174 |
| 7 | 108400422 | 108400651 | 108400536 | 12  | 12  | 0  | 15.24963491 | 4.15E-05    |        | ENSG00000205174 |
| 7 | 109026965 | 109027349 | 109027015 | 9   | 16  | 4  | 3.988366054 | 0.00115141  |        |                 |
| 7 | 109031346 | 109031634 | 109031456 | 9   | 12  | 3  | 3.812408728 | 0.004404    |        |                 |
| 7 | 109271789 | 109271989 | 109271889 | 11  | 11  | 2  | 4.692195357 | 0.00272444  |        |                 |
| 7 | 109434578 | 109435315 | 109434757 | 46  | 67  | 7  | 9.970915134 | 3.48E-16    |        |                 |
| 7 | 109709103 | 109709335 | 109709176 | 10  | 13  | 6  | 2.346097679 | 0.0266147   |        |                 |
| 7 | 109710351 | 109710746 | 109710561 | 18  | 27  | 6  | 4.692195357 | 1.46E-05    |        |                 |
| 7 | 109814236 | 109814415 | 109814325 | 8   | 8   | 0  | 10.55743955 | 0.000925496 |        |                 |
| 7 | 109834672 | 109834947 | 109834798 | 10  | 13  | 0  | 16.42268375 | 1.91E-05    |        |                 |
| 7 | 109950007 | 109950553 | 109950337 | 30  | 46  | 9  | 5.513329545 | 5.02E-09    |        | ENSG00000221279 |
| 7 | 109961405 | 109962475 | 109962035 | 431 | 633 | 25 | 28.60434477 | 5.01E-176   |        | ENSG00000221279 |
| 7 | 110104663 | 110105066 | 110104864 | 22  | 31  | 5  | 6.256260476 | 3.74E-07    |        | ENSG00000221279 |
| 7 | 110161913 | 110162282 | 110162109 | 16  | 22  | 3  | 6.745030826 | 8.05E-06    |        | ENSG00000221279 |
| 7 | 110201430 | 110201676 | 110201560 | 11  | 14  | 4  | 3.519146518 | 0.00361132  |        | ENSG00000221279 |
| 7 | 110591668 | 110591847 | 110591757 | 8   | 8   | 0  | 10.55743955 | 0.000925496 |        | ENSG00000208701 |
| 7 | 110740320 | 110740636 | 110740477 | 9   | 12  | 4  | 3.049926982 | 0.0108184   |        | ENSG00000208701 |
| 7 | 110785049 | 110785530 | 110785228 | 16  | 23  | 4  | 5.630634429 | 1.63E-05    | IMMP2L | ENSG00000184903 |
| 7 | 110926316 | 110926714 | 110926460 | 12  | 18  | 12 | 1.714455996 | 0.0636479   | IMMP2L | ENSG00000184903 |
| 7 | 110989816 | 110990099 | 110989957 | 12  | 13  | 12 | 1.263283365 | 0.272203    | IMMP2L | ENSG00000184903 |
| 7 | 111077960 | 111078354 | 111078209 | 15  | 21  | 10 | 2.346097679 | 0.00796926  | IMMP2L | ENSG00000184903 |
| 7 | 111157389 | 111157597 | 111157437 | 8   | 8   | 3  | 2.639359888 | 0.0415794   | IMMP2L | ENSG00000184903 |

|   |           |           |           |    |    |    |             |             |         |                 |
|---|-----------|-----------|-----------|----|----|----|-------------|-------------|---------|-----------------|
| 7 | 111169027 | 111169322 | 111169174 | 17 | 17 | 6  | 3.016411301 | 0.00381427  | IMMP2L  | ENSG00000184903 |
| 7 | 111177486 | 111177695 | 111177589 | 12 | 12 | 7  | 1.906204364 | 0.0695918   | IMMP2L  | ENSG00000184903 |
| 7 | 111177910 | 111178192 | 111178051 | 8  | 10 | 8  | 1.433726359 | 0.209175    | IMMP2L  | ENSG00000184903 |
| 7 | 111179526 | 111179783 | 111179622 | 13 | 15 | 4  | 3.753756286 | 0.0020497   | IMMP2L  | ENSG00000184903 |
| 7 | 111212229 | 111212628 | 111212449 | 20 | 27 | 7  | 4.105670938 | 4.08E-05    |         | ENSG00000208691 |
| 7 | 111431972 | 111432151 | 111432061 | 8  | 8  | 6  | 1.508205651 | 0.203852    | DOCK4   | ENSG00000128512 |
| 7 | 111587896 | 111588223 | 111588046 | 14 | 16 | 9  | 1.994183027 | 0.0370915   | ZNF277  | ENSG00000198839 |
| 7 | 111633528 | 111634050 | 111633706 | 17 | 32 | 4  | 7.742122339 | 4.68E-08    | ZNF277  | ENSG00000198839 |
| 7 | 111676187 | 111676524 | 111676358 | 15 | 17 | 3  | 5.278719777 | 0.000205462 |         | ENSG00000202406 |
| 7 | 111676623 | 111676834 | 111676711 | 8  | 9  | 2  | 3.910162798 | 0.00955088  |         | ENSG00000202406 |
| 7 | 111810770 | 111811149 | 111810888 | 8  | 13 | 5  | 2.737113958 | 0.0137917   |         | ENSG00000208671 |
| 7 | 111847881 | 111848123 | 111848002 | 11 | 15 | 7  | 2.346097679 | 0.0195693   | IFRD1   | ENSG00000006652 |
| 7 | 111850117 | 111850509 | 111850296 | 11 | 17 | 8  | 2.346097679 | 0.0144542   | IFRD1   | ENSG00000006652 |
| 7 | 111877255 | 111877866 | 111877627 | 9  | 24 | 11 | 2.443851749 | 0.00386428  | IFRD1   | ENSG00000006652 |
| 7 | 111878116 | 111878450 | 111878283 | 12 | 18 | 4  | 4.457585589 | 0.000353565 | IFRD1   | ENSG00000006652 |
| 7 | 111907846 | 111908053 | 111907949 | 8  | 9  | 9  | 1.173048839 | 0.362316    | C7orf53 | ENSG00000181016 |
| 7 | 111909036 | 111909437 | 111909258 | 29 | 37 | 15 | 2.785990993 | 0.000136587 | C7orf53 | ENSG00000181016 |
| 7 | 111923153 | 111923448 | 111923283 | 12 | 15 | 16 | 1.104045966 | 0.390393    | C7orf53 | ENSG00000181016 |
| 7 | 111937394 | 111937616 | 111937475 | 8  | 8  | 4  | 2.111487911 | 0.0804809   |         | ENSG00000182965 |
| 7 | 111999536 | 111999846 | 111999691 | 10 | 13 | 4  | 3.28453675  | 0.00629037  |         | ENSG00000182965 |
| 7 | 112000055 | 112000338 | 112000188 | 17 | 20 | 4  | 4.926805125 | 0.00010522  |         | ENSG00000182965 |
| 7 | 112000926 | 112001394 | 112001101 | 20 | 33 | 8  | 4.431517837 | 3.63E-06    |         | ENSG00000182965 |
| 7 | 112011571 | 112012039 | 112011805 | 75 | 94 | 6  | 15.91994853 | 3.15E-25    |         | ENSG00000182965 |
| 7 | 112135672 | 112135875 | 112135773 | 8  | 8  | 4  | 2.111487911 | 0.0804809   | TMEM168 | ENSG00000146802 |
| 7 | 112142869 | 112143053 | 112142996 | 8  | 8  | 4  | 2.111487911 | 0.0804809   | TMEM168 | ENSG00000146802 |
| 7 | 112171195 | 112171426 | 112171300 | 13 | 14 | 2  | 5.865244197 | 0.000387308 | TMEM168 | ENSG00000146802 |
| 7 | 112195934 | 112196198 | 112196075 | 9  | 10 | 7  | 1.612942154 | 0.147335    | TMEM168 | ENSG00000146802 |
| 7 | 112197261 | 112197755 | 112197555 | 59 | 82 | 10 | 8.851186697 | 1.99E-18    | TMEM168 | ENSG00000146802 |
| 7 | 112209712 | 112210368 | 112209930 | 36 | 61 | 4  | 14.54580561 | 8.17E-17    | TMEM168 | ENSG00000146802 |
| 7 | 112217215 | 112217788 | 112217609 | 15 | 29 | 17 | 1.955081399 | 0.0105966   | TMEM168 | ENSG00000146802 |
| 7 | 112296392 | 112296796 | 112296571 | 12 | 20 | 11 | 2.052835469 | 0.0201852   | C7orf60 | ENSG00000164603 |
| 7 | 112366980 | 112367371 | 112367123 | 13 | 19 | 9  | 2.346097679 | 0.0107159   | C7orf60 | ENSG00000164603 |
| 7 | 112367448 | 112367693 | 112367555 | 8  | 9  | 3  | 2.932622098 | 0.0242899   | C7orf60 | ENSG00000164603 |
| 7 | 112382815 | 112383154 | 112382984 | 13 | 16 | 5  | 3.323638378 | 0.00288759  | C7orf60 | ENSG00000164603 |

|   |           |           |           |    |    |    |             |             |         |                 |
|---|-----------|-----------|-----------|----|----|----|-------------|-------------|---------|-----------------|
| 7 | 112397975 | 112398298 | 112398136 | 9  | 11 | 3  | 3.519146518 | 0.00788869  | C7orf60 | ENSG00000164603 |
| 7 | 112526663 | 112526952 | 112526807 | 13 | 15 | 5  | 3.128130238 | 0.00492422  | GPR85   | ENSG00000164604 |
| 7 | 112545673 | 112546167 | 112545991 | 19 | 33 | 12 | 3.067973887 | 0.000114749 |         | ENSG00000214194 |
| 7 | 112587134 | 112587351 | 112587242 | 8  | 10 | 2  | 4.301179077 | 0.00512919  |         | ENSG00000214194 |
| 7 | 112598877 | 112599056 | 112598966 | 8  | 8  | 2  | 3.519146518 | 0.017558    |         | ENSG00000214194 |
| 7 | 112611373 | 112611559 | 112611486 | 8  | 8  | 4  | 2.111487911 | 0.0804809   |         | ENSG00000214194 |
| 7 | 112640603 | 112640857 | 112640730 | 9  | 11 | 4  | 2.815317214 | 0.0183428   |         | ENSG00000214194 |
| 7 | 112716609 | 112716847 | 112716717 | 12 | 12 | 9  | 1.524963491 | 0.154777    |         | ENSG00000214194 |
| 7 | 112848976 | 112849386 | 112849150 | 13 | 20 | 11 | 2.052835469 | 0.0201852   |         | ENSG00000214194 |
| 7 | 112858747 | 112859046 | 112858876 | 8  | 12 | 10 | 1.386330446 | 0.21117     |         | ENSG00000214194 |
| 7 | 113190581 | 113190959 | 113190766 | 12 | 20 | 17 | 1.368556979 | 0.163361    | PPP1R3A | ENSG00000154415 |
| 7 | 113191784 | 113192014 | 113191869 | 10 | 10 | 6  | 1.843362462 | 0.0964212   | PPP1R3A | ENSG00000154415 |
| 7 | 113202659 | 113202936 | 113202798 | 8  | 11 | 9  | 1.407658607 | 0.210479    | PPP1R3A | ENSG00000154415 |
| 7 | 113231686 | 113232003 | 113231830 | 9  | 13 | 9  | 1.642268375 | 0.111397    | PPP1R3A | ENSG00000154415 |
| 7 | 113279630 | 113279843 | 113279705 | 9  | 9  | 8  | 1.303387599 | 0.281715    | PPP1R3A | ENSG00000154415 |
| 7 | 113301144 | 113301325 | 113301234 | 8  | 10 | 10 | 1.173048839 | 0.355733    | PPP1R3A | ENSG00000154415 |
| 7 | 113448629 | 113449122 | 113448808 | 12 | 23 | 7  | 3.519146518 | 0.000369739 | PPP1R3A | ENSG00000154415 |
| 7 | 113511539 | 113511727 | 113511633 | 8  | 9  | 5  | 1.955081399 | 0.0892323   |         | ENSG00000208668 |
| 7 | 113512842 | 113513288 | 113513109 | 25 | 37 | 11 | 3.714654658 | 6.69E-06    |         | ENSG00000208668 |
| 7 | 113514223 | 113514435 | 113514311 | 8  | 9  | 10 | 1.066408036 | 0.444985    |         | ENSG00000208668 |
| 7 | 113515592 | 113515920 | 113515766 | 10 | 13 | 4  | 3.28453675  | 0.00629037  |         | ENSG00000208668 |
| 7 | 113603262 | 113603632 | 113603455 | 13 | 19 | 2  | 7.820325595 | 1.32E-05    |         | ENSG00000208668 |
| 7 | 113610669 | 113610963 | 113610816 | 24 | 26 | 0  | 31.67231866 | 7.93E-10    |         | ENSG00000208668 |
| 7 | 113815489 | 113815670 | 113815579 | 8  | 8  | 0  | 10.55743955 | 0.000925496 | FOXP2   | ENSG00000128573 |
| 7 | 113842308 | 113842527 | 113842417 | 8  | 10 | 2  | 4.301179077 | 0.00512919  | FOXP2   | ENSG00000128573 |
| 7 | 115489281 | 115489493 | 115489387 | 9  | 10 | 0  | 12.90353723 | 0.000195991 | TFEC    | ENSG00000105967 |
| 7 | 115853878 | 115854086 | 115854005 | 8  | 10 | 3  | 3.225884308 | 0.0139466   | CAV2    | ENSG00000105971 |
| 7 | 115869467 | 115869687 | 115869577 | 11 | 13 | 3  | 4.105670938 | 0.00243034  | CAV2    | ENSG00000105971 |
| 7 | 116157839 | 116158236 | 116158085 | 13 | 19 | 0  | 23.46097679 | 1.81E-07    | MET     | ENSG00000105976 |
| 7 | 116208330 | 116208582 | 116208456 | 13 | 14 | 2  | 5.865244197 | 0.000387308 | CAPZA2  | ENSG00000198898 |
| 7 | 117057742 | 117058455 | 117058062 | 46 | 78 | 1  | 46.33542915 | 1.03E-25    |         | ENSG00000216672 |
| 7 | 117145353 | 117145591 | 117145417 | 14 | 16 | 2  | 6.647276756 | 0.000101928 |         | ENSG00000216672 |
| 7 | 117694487 | 117694715 | 117694601 | 9  | 10 | 2  | 4.301179077 | 0.00512919  | ANKRD7  | ENSG00000106013 |
| 7 | 120378304 | 120378637 | 120378466 | 8  | 13 | 1  | 8.211341875 | 0.000163445 | ING3    | ENSG00000071243 |

|   |           |           |           |    |    |   |             |             |         |                 |
|---|-----------|-----------|-----------|----|----|---|-------------|-------------|---------|-----------------|
| 7 | 120933109 | 120933545 | 120933283 | 52 | 67 | 1 | 39.88366054 | 4.53E-22    |         | ENSG00000221690 |
| 7 | 120938419 | 120938818 | 120938610 | 69 | 82 | 0 | 97.36305366 | 1.05E-28    |         | ENSG00000221690 |
| 7 | 122192308 | 122192544 | 122192426 | 11 | 12 | 1 | 7.624817456 | 0.000332769 | RNF133  | ENSG00000188050 |
| 7 | 122581650 | 122581856 | 122581734 | 9  | 10 | 0 | 12.90353723 | 0.000195991 | SLC13A1 | ENSG00000081800 |
| 7 | 122618632 | 122618847 | 122618739 | 10 | 12 | 3 | 3.812408728 | 0.004404    | SLC13A1 | ENSG00000081800 |
| 7 | 123176613 | 123176985 | 123176838 | 10 | 16 | 3 | 4.985457567 | 0.000385643 | WASL    | ENSG00000106299 |
| 7 | 123673697 | 123674102 | 123673887 | 36 | 48 | 0 | 57.47939313 | 3.05E-17    |         | ENSG00000213296 |
| 7 | 124099356 | 124099554 | 124099455 | 12 | 12 | 2 | 5.083211637 | 0.00143337  |         | ENSG00000207214 |
| 7 | 126819835 | 126820099 | 126819936 | 14 | 14 | 2 | 5.865244197 | 0.000387308 | ZNF800  | ENSG00000048405 |
| 7 | 127220121 | 127220333 | 127220227 | 8  | 8  | 6 | 1.508205651 | 0.203852    | SND1    | ENSG00000197157 |
| 7 | 127637150 | 127637372 | 127637254 | 11 | 12 | 2 | 5.083211637 | 0.00143337  |         | ENSG00000207705 |
| 7 | 127770882 | 127771409 | 127771122 | 13 | 26 | 3 | 7.918079665 | 5.55E-07    | RBM28   | ENSG00000106344 |
| 7 | 127858529 | 127858809 | 127858670 | 9  | 11 | 3 | 3.519146518 | 0.00788869  | IMPDH1  | ENSG00000106348 |
| 7 | 127862569 | 127862900 | 127862731 | 9  | 13 | 4 | 3.28453675  | 0.00629037  |         | ENSG00000135245 |
| 7 | 127884677 | 127884965 | 127884821 | 8  | 11 | 1 | 7.038293036 | 0.000674435 |         | ENSG00000214175 |
| 7 | 128828543 | 128828801 | 128828677 | 13 | 13 | 7 | 2.052835469 | 0.046392    |         | ENSG00000165111 |
| 7 | 129168880 | 129169124 | 129169002 | 11 | 11 | 1 | 7.038293036 | 0.000674435 |         | ENSG00000212238 |
| 7 | 129251962 | 129252153 | 129252057 | 9  | 9  | 3 | 2.932622098 | 0.0242899   |         | ENSG00000207691 |
| 7 | 129252757 | 129253007 | 129252879 | 8  | 10 | 3 | 3.225884308 | 0.0139466   |         | ENSG00000207691 |
| 7 | 129375919 | 129376551 | 129376235 | 17 | 34 | 6 | 5.865244197 | 2.06E-07    | UBE2H   | ENSG00000186591 |
| 7 | 129396907 | 129397253 | 129397084 | 12 | 14 | 6 | 2.513676084 | 0.016726    |         | ENSG00000207184 |
| 7 | 129420418 | 129420639 | 129420528 | 8  | 9  | 3 | 2.932622098 | 0.0242899   |         | ENSG00000207184 |
| 7 | 129437984 | 129438174 | 129438124 | 11 | 11 | 5 | 2.346097679 | 0.0364013   |         | ENSG00000201109 |
| 7 | 129496445 | 129496638 | 129496584 | 8  | 8  | 5 | 1.759573259 | 0.13508     | KLHDC10 | ENSG00000128607 |
| 7 | 129497255 | 129497632 | 129497470 | 10 | 14 | 7 | 2.199466574 | 0.0303778   | KLHDC10 | ENSG00000128607 |
| 7 | 129632251 | 129632459 | 129632357 | 10 | 10 | 1 | 6.451768616 | 0.00135978  | TMEM209 | ENSG00000146842 |
| 7 | 129699513 | 129699729 | 129699622 | 13 | 13 | 0 | 16.42268375 | 1.91E-05    | CPA2    | ENSG00000158516 |
| 7 | 129786399 | 129786598 | 129786498 | 8  | 8  | 1 | 5.278719777 | 0.00542188  | CPA5    | ENSG00000158525 |
| 7 | 129801019 | 129801322 | 129801166 | 13 | 16 | 5 | 3.323638378 | 0.00288759  | CPA1    | ENSG00000091704 |
| 7 | 130210688 | 130210892 | 130210774 | 10 | 10 | 3 | 3.225884308 | 0.0139466   |         | ENSG00000198981 |
| 7 | 130221529 | 130221713 | 130221572 | 8  | 8  | 0 | 10.55743955 | 0.000925496 |         | ENSG00000207748 |
| 7 | 130306076 | 130306276 | 130306128 | 8  | 8  | 2 | 3.519146518 | 0.017558    |         | ENSG00000199627 |
| 7 | 130551065 | 130551269 | 130551167 | 8  | 9  | 0 | 11.73048839 | 0.000425898 | MKLN1   | ENSG00000128585 |
| 7 | 130682521 | 130682814 | 130682640 | 13 | 14 | 0 | 17.59573259 | 8.79E-06    | MKLN1   | ENSG00000128585 |

|   |           |           |           |     |     |    |             |             |         |                 |
|---|-----------|-----------|-----------|-----|-----|----|-------------|-------------|---------|-----------------|
| 7 | 131109970 | 131110432 | 131110213 | 80  | 99  | 0  | 117.3048839 | 1.96E-34    |         | ENSG00000172400 |
| 7 | 131280675 | 131280989 | 131280832 | 10  | 13  | 2  | 5.474227917 | 0.000747844 |         | ENSG00000205067 |
| 7 | 131363812 | 131364062 | 131363937 | 9   | 11  | 6  | 2.010940867 | 0.0640214   |         | ENSG00000205067 |
| 7 | 131441864 | 131442081 | 131441972 | 10  | 11  | 4  | 2.815317214 | 0.0183428   |         | ENSG00000205067 |
| 7 | 131455559 | 131455790 | 131455656 | 9   | 9   | 1  | 5.865244197 | 0.00272497  |         | ENSG00000205067 |
| 7 | 131549823 | 131550298 | 131549997 | 16  | 25  | 7  | 3.812408728 | 0.00012465  | PLXNA4  | ENSG00000221866 |
| 7 | 131560626 | 131560826 | 131560738 | 10  | 12  | 2  | 5.083211637 | 0.00143337  | PLXNA4  | ENSG00000221866 |
| 7 | 131574897 | 131575383 | 131575248 | 16  | 25  | 0  | 30.49926982 | 1.72E-09    | PLXNA4  | ENSG00000221866 |
| 7 | 131586586 | 131586951 | 131586783 | 10  | 16  | 4  | 3.988366054 | 0.00115141  | PLXNA4  | ENSG00000221866 |
| 7 | 131587217 | 131587406 | 131587311 | 10  | 11  | 6  | 2.010940867 | 0.0640214   | PLXNA4  | ENSG00000221866 |
| 7 | 131591245 | 131591501 | 131591362 | 15  | 17  | 1  | 10.55743955 | 9.18E-06    | PLXNA4  | ENSG00000221866 |
| 7 | 131654142 | 131654403 | 131654272 | 9   | 12  | 5  | 2.541605819 | 0.0225912   | PLXNA4  | ENSG00000221866 |
| 7 | 132417403 | 132417700 | 132417535 | 15  | 17  | 12 | 1.62422147  | 0.088135    | CHCHD3  | ENSG00000106554 |
| 7 | 132518511 | 132518696 | 132518603 | 8   | 9   | 2  | 3.910162798 | 0.00955088  | EXOC4   | ENSG00000131558 |
| 7 | 132925287 | 132925553 | 132925420 | 11  | 12  | 1  | 7.624817456 | 0.000332769 |         | ENSG00000208439 |
| 7 | 133106157 | 133106422 | 133106246 | 8   | 11  | 1  | 7.038293036 | 0.000674435 |         | ENSG00000208439 |
| 7 | 133319253 | 133319639 | 133319314 | 8   | 14  | 0  | 17.59573259 | 8.79E-06    | LRGUK   | ENSG00000155530 |
| 7 | 133867513 | 133867796 | 133867654 | 11  | 13  | 0  | 16.42268375 | 1.91E-05    | AKR1B10 | ENSG00000198074 |
| 7 | 133881375 | 133881746 | 133881554 | 23  | 31  | 0  | 37.53756286 | 1.64E-11    | AKR1B10 | ENSG00000198074 |
| 7 | 133882165 | 133882492 | 133882328 | 10  | 15  | 6  | 2.68125449  | 0.0103552   | AKR1B10 | ENSG00000198074 |
| 7 | 133882711 | 133882927 | 133882849 | 9   | 9   | 3  | 2.932622098 | 0.0242899   | AKR1B10 | ENSG00000198074 |
| 7 | 133958542 | 133958858 | 133958700 | 11  | 13  | 0  | 16.42268375 | 1.91E-05    | BPGM    | ENSG00000172331 |
| 7 | 134180556 | 134181251 | 134180902 | 143 | 173 | 6  | 29.15864258 | 2.48E-50    | CALD1   | ENSG00000122786 |
| 7 | 134506016 | 134506308 | 134506182 | 11  | 14  | 2  | 5.865244197 | 0.000387308 | C7orf49 | ENSG00000122783 |
| 7 | 134624859 | 134625213 | 134625018 | 9   | 13  | 1  | 8.211341875 | 0.000163445 | STRA8   | ENSG00000146857 |
| 7 | 134671008 | 134671277 | 134671141 | 9   | 11  | 3  | 3.519146518 | 0.00788869  | STRA8   | ENSG00000146857 |
| 7 | 134777171 | 134777397 | 134777272 | 8   | 8   | 0  | 10.55743955 | 0.000925496 | CNOT4   | ENSG00000080802 |
| 7 | 134845600 | 134845797 | 134845626 | 11  | 13  | 2  | 5.474227917 | 0.000747844 | CNOT4   | ENSG00000080802 |
| 7 | 134856052 | 134856297 | 134856188 | 15  | 17  | 3  | 5.278719777 | 0.000205462 | CNOT4   | ENSG00000080802 |
| 7 | 134892959 | 134893299 | 134893129 | 12  | 18  | 13 | 1.591994853 | 0.0905191   | NUP205  | ENSG00000155561 |
| 7 | 134997515 | 134997788 | 134997651 | 10  | 13  | 7  | 2.052835469 | 0.046392    |         | ENSG00000212303 |
| 7 | 134999298 | 134999477 | 134999387 | 8   | 9   | 4  | 2.346097679 | 0.050148    |         | ENSG00000212303 |
| 7 | 135042148 | 135042362 | 135042229 | 11  | 12  | 1  | 7.624817456 | 0.000332769 | SLC13A4 | ENSG00000164707 |
| 7 | 137234499 | 137234693 | 137234596 | 10  | 10  | 0  | 12.90353723 | 0.000195991 | DGKI    | ENSG00000157680 |

|   |           |           |           |    |    |    |             |             |                          |
|---|-----------|-----------|-----------|----|----|----|-------------|-------------|--------------------------|
| 7 | 137499979 | 137500497 | 137500265 | 64 | 87 | 2  | 34.40943262 | 2.59E-27    | ENSG00000222912          |
| 7 | 137523728 | 137524089 | 137523944 | 12 | 17 | 0  | 21.11487911 | 8.57E-07    | ENSG00000201465          |
| 7 | 137766770 | 137767222 | 137766955 | 42 | 61 | 1  | 36.36451402 | 4.36E-20    | ENSG00000202072          |
| 7 | 137899707 | 137899921 | 137899814 | 9  | 10 | 1  | 6.451768616 | 0.00135978  | ENSG00000208395          |
| 7 | 137998895 | 137999168 | 137999019 | 10 | 11 | 2  | 4.692195357 | 0.00272444  | SVOPL ENSG00000157703    |
| 7 | 138074096 | 138074416 | 138074269 | 27 | 29 | 3  | 8.797866295 | 7.21E-08    | ATP6V0A4 ENSG00000105929 |
| 7 | 138088015 | 138088297 | 138088123 | 9  | 13 | 3  | 4.105670938 | 0.00243034  | ATP6V0A4 ENSG00000105929 |
| 7 | 138352430 | 138352617 | 138352523 | 9  | 10 | 2  | 4.301179077 | 0.00512919  | ZC3HAV1L ENSG00000146858 |
| 7 | 138643761 | 138644048 | 138643918 | 12 | 15 | 0  | 18.76878143 | 4.04E-06    | ENSG00000206843          |
| 7 | 138675455 | 138675711 | 138675586 | 10 | 12 | 5  | 2.541605819 | 0.0225912   | FMC1 ENSG00000164898     |
| 7 | 138675767 | 138676165 | 138676061 | 10 | 15 | 16 | 1.104045966 | 0.390393    | FMC1 ENSG00000164898     |
| 7 | 138676285 | 138676530 | 138676452 | 8  | 8  | 5  | 1.759573259 | 0.13508     | FMC1 ENSG00000164898     |
| 7 | 138694773 | 138695175 | 138694970 | 11 | 19 | 6  | 3.351568112 | 0.00134187  | LUC7L2 ENSG00000146963   |
| 7 | 138696081 | 138696318 | 138696195 | 8  | 11 | 1  | 7.038293036 | 0.000674435 | LUC7L2 ENSG00000146963   |
| 7 | 138766278 | 138766618 | 138766479 | 11 | 15 | 12 | 1.443752418 | 0.160732    | ENSG00000214117          |
| 7 | 138774223 | 138774517 | 138774370 | 12 | 13 | 0  | 16.42268375 | 1.91E-05    | KLRG2 ENSG00000188883    |
| 7 | 138819194 | 138819377 | 138819314 | 8  | 8  | 1  | 5.278719777 | 0.00542188  | KLRG2 ENSG00000188883    |
| 7 | 138981223 | 138981491 | 138981357 | 11 | 11 | 0  | 14.07658607 | 9.02E-05    | HIPK2 ENSG00000064393    |
| 7 | 139672519 | 139672787 | 139672653 | 11 | 12 | 4  | 3.049926982 | 0.0108184   | ENSG00000213232          |
| 7 | 139750220 | 139750400 | 139750310 | 8  | 9  | 2  | 3.910162798 | 0.00955088  | RAB19 ENSG00000146955    |
| 7 | 139853118 | 139853492 | 139853275 | 19 | 27 | 5  | 5.474227917 | 4.62E-06    | MKRN5 ENSG00000133606    |
| 7 | 139864254 | 139864463 | 139864358 | 11 | 12 | 4  | 3.049926982 | 0.0108184   | MKRN5 ENSG00000133606    |
| 7 | 140157348 | 140157572 | 140157460 | 10 | 11 | 3  | 3.519146518 | 0.00788869  | ENSG00000207040          |
| 7 | 140214057 | 140214478 | 140214307 | 18 | 25 | 1  | 15.24963491 | 2.59E-08    | ENSG00000207040          |
| 7 | 140319341 | 140319683 | 140319520 | 10 | 14 | 5  | 2.932622098 | 0.00829617  | MRPS33 ENSG00000090263   |
| 7 | 140338618 | 140339148 | 140338910 | 10 | 21 | 8  | 2.867452718 | 0.00225035  | MRPS33 ENSG00000090263   |
| 7 | 140361043 | 140361429 | 140361310 | 11 | 15 | 6  | 2.68125449  | 0.0103552   | MRPS33 ENSG00000090263   |
| 7 | 140686031 | 140686245 | 140686138 | 10 | 11 | 3  | 3.519146518 | 0.00788869  | ENSG00000204990          |
| 7 | 140996227 | 140996480 | 140996351 | 14 | 16 | 5  | 3.323638378 | 0.00288759  | ENSG00000219583          |
| 7 | 141009438 | 141009850 | 141009604 | 16 | 23 | 10 | 2.559379286 | 0.00330263  | ENSG00000219583          |
| 7 | 141018005 | 141018275 | 141018140 | 8  | 9  | 0  | 11.73048839 | 0.000425898 | ENSG00000219583          |
| 7 | 141084284 | 141084827 | 141084487 | 35 | 50 | 7  | 7.478186351 | 2.92E-11    | SSBP1 ENSG00000106028    |
| 7 | 141322592 | 141322908 | 141322761 | 9  | 12 | 8  | 1.694403879 | 0.107291    | TAS2R38 ENSG00000183609  |
| 7 | 141515298 | 141515477 | 141515351 | 8  | 8  | 0  | 10.55743955 | 0.000925496 | ENSG00000204987          |

|   |           |           |           |    |    |    |             |             |         |                 |
|---|-----------|-----------|-----------|----|----|----|-------------|-------------|---------|-----------------|
| 7 | 141806809 | 141806994 | 141806901 | 8  | 8  | 1  | 5.278719777 | 0.00542188  |         | ENSG00000211720 |
| 7 | 142191196 | 142191464 | 142191330 | 10 | 10 | 5  | 2.150589539 | 0.0575848   |         | ENSG00000211755 |
| 7 | 142294746 | 142295220 | 142294925 | 13 | 21 | 2  | 8.602358155 | 3.33E-06    | TRPV6   | ENSG00000165125 |
| 7 | 142308874 | 142309094 | 142309001 | 8  | 9  | 4  | 2.346097679 | 0.050148    | TRPV6   | ENSG00000165125 |
| 7 | 142351097 | 142351473 | 142351294 | 19 | 27 | 3  | 8.211341875 | 2.82E-07    | C7orf34 | ENSG00000165131 |
| 7 | 142622383 | 142622592 | 142622487 | 9  | 11 | 6  | 2.010940867 | 0.0640214   | TAS2R40 | ENSG00000221937 |
| 7 | 142670540 | 142670855 | 142670699 | 10 | 14 | 3  | 4.398933147 | 0.00132748  | GSTK1   | ENSG00000197448 |
| 7 | 142712770 | 142712955 | 142712862 | 9  | 9  | 0  | 11.73048839 | 0.000425898 |         | ENSG00000208319 |
| 7 | 143230010 | 143230516 | 143230235 | 9  | 21 | 3  | 6.451768616 | 1.56E-05    | FAM115A | ENSG00000198420 |
| 7 | 143999450 | 143999888 | 143999646 | 65 | 86 | 2  | 34.01841634 | 5.50E-27    |         | ENSG00000214036 |
| 7 | 144105540 | 144105770 | 144105655 | 8  | 9  | 1  | 5.865244197 | 0.00272497  | TPK1    | ENSG00000196511 |
| 7 | 145590054 | 145590266 | 145590160 | 8  | 8  | 3  | 2.639359888 | 0.0415794   | CNTNAP2 | ENSG00000174469 |
| 7 | 147412142 | 147412347 | 147412244 | 8  | 8  | 7  | 1.319679944 | 0.283403    |         | ENSG00000208301 |
| 7 | 147470722 | 147470925 | 147470802 | 10 | 11 | 9  | 1.407658607 | 0.210479    |         | ENSG00000208301 |
| 7 | 147570415 | 147570660 | 147570505 | 10 | 13 | 5  | 2.737113958 | 0.0137917   |         | ENSG00000199370 |
| 7 | 147614256 | 147614484 | 147614370 | 13 | 13 | 1  | 8.211341875 | 0.000163445 |         | ENSG00000199370 |
| 7 | 147667307 | 147667510 | 147667408 | 9  | 10 | 2  | 4.301179077 | 0.00512919  |         | ENSG00000199370 |
| 7 | 147730113 | 147730567 | 147730388 | 52 | 65 | 0  | 77.42122339 | 5.67E-23    |         | ENSG00000199370 |
| 7 | 147855669 | 147855968 | 147855816 | 14 | 14 | 0  | 17.59573259 | 8.79E-06    |         | ENSG00000213210 |
| 7 | 147999914 | 148000461 | 148000282 | 20 | 30 | 0  | 36.36451402 | 3.56E-11    | CUL1    | ENSG00000055130 |
| 7 | 148028814 | 148028999 | 148028885 | 11 | 13 | 1  | 8.211341875 | 0.000163445 | CUL1    | ENSG00000055130 |
| 7 | 148229403 | 148229704 | 148229553 | 20 | 21 | 0  | 25.80707446 | 3.84E-08    |         | ENSG00000208292 |
| 7 | 148268993 | 148269314 | 148269153 | 9  | 14 | 3  | 4.398933147 | 0.00132748  |         | ENSG00000208290 |
| 7 | 148269439 | 148269745 | 148269592 | 8  | 12 | 9  | 1.524963491 | 0.154777    |         | ENSG00000208290 |
| 7 | 148291325 | 148291591 | 148291450 | 11 | 11 | 6  | 2.010940867 | 0.0640214   |         | ENSG00000202442 |
| 7 | 148294778 | 148295007 | 148294889 | 10 | 11 | 4  | 2.815317214 | 0.0183428   |         | ENSG00000202442 |
| 7 | 148356372 | 148356699 | 148356522 | 10 | 13 | 1  | 8.211341875 | 0.000163445 | PDIA4   | ENSG00000155660 |
| 7 | 148356999 | 148357232 | 148357171 | 10 | 12 | 4  | 3.049926982 | 0.0108184   | PDIA4   | ENSG00000155660 |
| 7 | 148393384 | 148393565 | 148393524 | 8  | 9  | 1  | 5.865244197 | 0.00272497  |         | ENSG00000216832 |
| 7 | 148393732 | 148394151 | 148394007 | 14 | 20 | 8  | 2.737113958 | 0.0036449   |         | ENSG00000216832 |
| 7 | 148453958 | 148454596 | 148454233 | 11 | 27 | 10 | 2.9859425   | 0.000503424 | ZNF425  | ENSG00000204947 |
| 7 | 148472992 | 148473347 | 148473169 | 15 | 21 | 6  | 3.686724924 | 0.000453999 | ZNF398  | ENSG00000197024 |
| 7 | 148475109 | 148475382 | 148475245 | 17 | 18 | 6  | 3.183989707 | 0.00227432  | ZNF398  | ENSG00000197024 |
| 7 | 148482115 | 148482425 | 148482270 | 12 | 15 | 3  | 4.692195357 | 0.000718455 | ZNF398  | ENSG00000197024 |

|   |           |           |           |    |    |    |             |             |        |                 |
|---|-----------|-----------|-----------|----|----|----|-------------|-------------|--------|-----------------|
| 7 | 148494982 | 148495361 | 148495182 | 8  | 14 | 5  | 2.932622098 | 0.00829617  | ZNF398 | ENSG00000197024 |
| 7 | 148523367 | 148523707 | 148523537 | 21 | 27 | 11 | 2.737113958 | 0.00100133  | ZNF282 | ENSG00000170265 |
| 7 | 148534199 | 148534426 | 148534328 | 11 | 13 | 4  | 3.28453675  | 0.00629037  | ZNF282 | ENSG00000170265 |
| 7 | 148567454 | 148567835 | 148567608 | 18 | 22 | 6  | 3.854303329 | 0.000260696 | ZNF212 | ENSG00000170260 |
| 7 | 148590109 | 148590365 | 148590231 | 14 | 14 | 0  | 17.59573259 | 8.79E-06    | ZNF783 | ENSG00000204946 |
| 7 | 148612965 | 148613329 | 148613133 | 10 | 16 | 10 | 1.812893661 | 0.0578656   | ZNF783 | ENSG00000204946 |
| 7 | 148638152 | 148638504 | 148638326 | 9  | 12 | 5  | 2.541605819 | 0.0225912   |        | ENSG00000219420 |
| 7 | 148697713 | 148697910 | 148697811 | 8  | 8  | 2  | 3.519146518 | 0.017558    |        | ENSG00000208278 |
| 7 | 148709369 | 148709589 | 148709479 | 8  | 8  | 1  | 5.278719777 | 0.00542188  |        | ENSG00000208277 |
| 7 | 148722188 | 148722651 | 148722419 | 35 | 50 | 1  | 29.9127454  | 1.84E-16    |        | ENSG00000208277 |
| 7 | 148788571 | 148788753 | 148788684 | 10 | 10 | 0  | 12.90353723 | 0.000195991 | ZNF777 | ENSG00000196453 |
| 7 | 148863291 | 148863542 | 148863395 | 9  | 11 | 0  | 14.07658607 | 9.02E-05    | ZNF746 | ENSG00000181220 |
| 7 | 148951808 | 148952251 | 148951980 | 13 | 20 | 4  | 4.926805125 | 0.00010522  | ZNF767 | ENSG00000133624 |
| 7 | 148952762 | 148952941 | 148952891 | 8  | 9  | 5  | 1.955081399 | 0.0892323   | ZNF767 | ENSG00000133624 |
| 7 | 149018844 | 149019529 | 149019006 | 12 | 29 | 8  | 3.910162798 | 3.45E-05    | KRBA1  | ENSG00000133619 |
| 7 | 149070360 | 149070552 | 149070410 | 8  | 8  | 3  | 2.639359888 | 0.0415794   | ZNF467 | ENSG00000181444 |
| 7 | 149089777 | 149089956 | 149089809 | 8  | 8  | 1  | 5.278719777 | 0.00542188  | ZNF467 | ENSG00000181444 |
| 7 | 149099926 | 149100130 | 149100028 | 9  | 9  | 1  | 5.865244197 | 0.00272497  | ZNF467 | ENSG00000181444 |
| 7 | 149121915 | 149122289 | 149122066 | 17 | 25 | 4  | 6.099853964 | 4.56E-06    |        | ENSG00000197558 |
| 7 | 149148982 | 149149168 | 149149075 | 8  | 9  | 2  | 3.910162798 | 0.00955088  | SSPO   | ENSG00000127388 |
| 7 | 149166277 | 149166658 | 149166447 | 9  | 15 | 4  | 3.753756286 | 0.0020497   | ZNF862 | ENSG00000106479 |
| 7 | 149182688 | 149182942 | 149182816 | 12 | 13 | 5  | 2.737113958 | 0.0137917   | ZNF862 | ENSG00000106479 |
| 7 | 149211509 | 149211718 | 149211650 | 8  | 8  | 3  | 2.639359888 | 0.0415794   |        | ENSG00000204934 |
| 7 | 149344871 | 149345052 | 149344961 | 9  | 10 | 0  | 12.90353723 | 0.000195991 |        | ENSG00000204934 |
| 7 | 149696015 | 149696291 | 149696147 | 11 | 15 | 8  | 2.085420159 | 0.0338693   | REPIN1 | ENSG00000214022 |
| 7 | 149726744 | 149727025 | 149726902 | 15 | 18 | 4  | 4.457585589 | 0.000353565 | ZNF775 | ENSG00000196456 |
| 7 | 149728552 | 149728790 | 149728671 | 8  | 10 | 3  | 3.225884308 | 0.0139466   | ZNF775 | ENSG00000196456 |
| 7 | 149749120 | 149749555 | 149749386 | 14 | 23 | 3  | 7.038293036 | 4.15E-06    | GIMAP8 | ENSG00000171115 |
| 7 | 150205103 | 150205297 | 150205195 | 8  | 8  | 2  | 3.519146518 | 0.017558    | ABP1   | ENSG00000002726 |
| 7 | 150272077 | 150272398 | 150272229 | 16 | 18 | 1  | 11.14396397 | 4.44E-06    | KCNH2  | ENSG00000055118 |
| 7 | 150292810 | 150293083 | 150292925 | 9  | 12 | 2  | 5.083211637 | 0.00143337  | KCNH2  | ENSG00000055118 |
| 7 | 150328743 | 150329022 | 150328863 | 11 | 13 | 0  | 16.42268375 | 1.91E-05    | NOS3   | ENSG00000164867 |
| 7 | 150367379 | 150367572 | 150367504 | 8  | 11 | 0  | 14.07658607 | 9.02E-05    | ACCN3  | ENSG00000213199 |
| 7 | 150374878 | 150375324 | 150375057 | 8  | 15 | 11 | 1.564065119 | 0.11768     | ACCN3  | ENSG00000213199 |



|   |           |           |           |    |     |    |             |             |         |                 |
|---|-----------|-----------|-----------|----|-----|----|-------------|-------------|---------|-----------------|
| 7 | 150385821 | 150386109 | 150385950 | 9  | 12  | 4  | 3.049926982 | 0.0108184   | CDK5    | ENSG00000164885 |
| 7 | 150439147 | 150439422 | 150439284 | 11 | 14  | 4  | 3.519146518 | 0.00361132  | AGAP3   | ENSG00000133612 |
| 7 | 150451841 | 150452259 | 150452080 | 11 | 18  | 11 | 1.857327329 | 0.0427732   | AGAP3   | ENSG00000133612 |
| 7 | 150500602 | 150500872 | 150500737 | 17 | 19  | 3  | 5.865244197 | 5.72E-05    | GBX1    | ENSG00000164900 |
| 7 | 150555157 | 150555653 | 150555459 | 8  | 20  | 10 | 2.239456875 | 0.0121685   | ABCF2   | ENSG00000033050 |
| 7 | 150560121 | 150560511 | 150560300 | 10 | 16  | 13 | 1.424416448 | 0.161813    |         | ENSG00000033100 |
| 7 | 150696189 | 150696449 | 150696308 | 10 | 10  | 5  | 2.150589539 | 0.0575848   | NUB1    | ENSG00000013374 |
| 7 | 150712089 | 150712492 | 150712267 | 15 | 24  | 2  | 9.775406994 | 4.09E-07    | WDR86   | ENSG00000187260 |
| 7 | 150848250 | 150848491 | 150848344 | 9  | 11  | 4  | 2.815317214 | 0.0183428   | RHEB    | ENSG00000106615 |
| 7 | 150880447 | 150880758 | 150880606 | 25 | 27  | 4  | 6.5690735   | 1.26E-06    | RHEB    | ENSG00000106615 |
| 7 | 151016109 | 151016594 | 151016295 | 46 | 61  | 1  | 36.36451402 | 4.36E-20    | PRKAG2  | ENSG00000106617 |
| 7 | 151082193 | 151082480 | 151082306 | 16 | 18  | 1  | 11.14396397 | 4.44E-06    | PRKAG2  | ENSG00000106617 |
| 7 | 151147213 | 151147534 | 151147373 | 18 | 23  | 11 | 2.346097679 | 0.00594236  | PRKAG2  | ENSG00000106617 |
| 7 | 151203539 | 151203718 | 151203628 | 8  | 9   | 1  | 5.865244197 | 0.00272497  | PRKAG2  | ENSG00000106617 |
| 7 | 151261309 | 151261542 | 151261444 | 10 | 13  | 2  | 5.474227917 | 0.000747844 |         | ENSG00000222941 |
| 7 | 151320427 | 151320653 | 151320531 | 11 | 12  | 3  | 3.812408728 | 0.004404    |         | ENSG00000208257 |
| 7 | 151400040 | 151400371 | 151400209 | 9  | 11  | 0  | 14.07658607 | 9.02E-05    |         | ENSG00000208254 |
| 7 | 151400434 | 151400977 | 151400636 | 83 | 114 | 2  | 44.96687217 | 3.46E-36    |         | ENSG00000208254 |
| 7 | 151404271 | 151404848 | 151404450 | 11 | 26  | 6  | 4.524616952 | 2.63E-05    | GALNT11 | ENSG00000178234 |
| 7 | 151405254 | 151405509 | 151405353 | 8  | 11  | 4  | 2.815317214 | 0.0183428   | GALNT11 | ENSG00000178234 |
| 7 | 151409262 | 151409796 | 151409440 | 17 | 27  | 7  | 4.105670938 | 4.08E-05    | GALNT11 | ENSG00000178234 |
| 7 | 151410526 | 151410800 | 151410687 | 9  | 11  | 0  | 14.07658607 | 9.02E-05    | GALNT11 | ENSG00000178234 |
| 7 | 151465613 | 151465970 | 151465791 | 9  | 11  | 4  | 2.815317214 | 0.0183428   |         | ENSG00000213188 |
| 7 | 151739477 | 151739691 | 151739581 | 9  | 9   | 2  | 3.910162798 | 0.00955088  | MLL3    | ENSG00000055609 |
| 7 | 151791105 | 151791709 | 151791575 | 10 | 22  | 5  | 4.496687217 | 9.59E-05    | CCT8L1  | ENSG00000020219 |
| 7 | 151792780 | 151793001 | 151792876 | 9  | 10  | 0  | 12.90353723 | 0.000195991 | CCT8L1  | ENSG00000020219 |
| 7 | 151822792 | 151822971 | 151822830 | 8  | 8   | 0  | 10.55743955 | 0.000925496 | CCT8L1  | ENSG00000020219 |
| 7 | 152003970 | 152004453 | 152004314 | 11 | 22  | 7  | 3.372515413 | 0.000629223 | XRCC2   | ENSG00000196584 |
| 7 | 152027690 | 152027900 | 152027795 | 8  | 9   | 2  | 3.910162798 | 0.00955088  | XRCC2   | ENSG00000196584 |
| 7 | 152061595 | 152061938 | 152061766 | 38 | 43  | 1  | 25.80707446 | 3.65E-14    |         | ENSG00000214003 |
| 7 | 152317756 | 152318246 | 152318001 | 62 | 91  | 6  | 15.41721332 | 2.69E-24    |         | ENSG00000217267 |
| 7 | 152318256 | 152318531 | 152318393 | 8  | 11  | 1  | 7.038293036 | 0.000674435 |         | ENSG00000217267 |
| 7 | 154041008 | 154041265 | 154041125 | 11 | 11  | 0  | 14.07658607 | 9.02E-05    |         | ENSG00000221099 |
| 7 | 154212177 | 154212365 | 154212273 | 8  | 8   | 4  | 2.111487911 | 0.0804809   | DPP6    | ENSG00000130226 |

|   |           |           |           |    |    |    |             |             |        |                 |
|---|-----------|-----------|-----------|----|----|----|-------------|-------------|--------|-----------------|
| 7 | 154264490 | 154264752 | 154264621 | 8  | 10 | 15 | 0.806471077 | 0.716145    | DPP6   | ENSG00000130226 |
| 7 | 154426583 | 154426882 | 154426732 | 9  | 13 | 3  | 4.105670938 | 0.00243034  | PAXIP1 | ENSG00000157212 |
| 7 | 154638347 | 154638526 | 154638373 | 8  | 8  | 1  | 5.278719777 | 0.00542188  |        | ENSG00000217825 |
| 7 | 154642536 | 154642780 | 154642658 | 9  | 9  | 2  | 3.910162798 | 0.00955088  |        | ENSG00000217825 |
| 7 | 154646911 | 154647105 | 154646984 | 10 | 10 | 3  | 3.225884308 | 0.0139466   |        | ENSG00000217825 |
| 7 | 154647204 | 154647561 | 154647382 | 19 | 24 | 1  | 14.66311049 | 5.43E-08    |        | ENSG00000217825 |
| 7 | 154721583 | 154721794 | 154721688 | 9  | 9  | 3  | 2.932622098 | 0.0242899   | INSIG1 | ENSG00000186480 |
| 7 | 154834978 | 154835338 | 154835151 | 8  | 12 | 3  | 3.812408728 | 0.004404    | BLACE  | ENSG00000204960 |
| 7 | 154898081 | 154898333 | 154898240 | 8  | 9  | 3  | 2.932622098 | 0.0242899   |        | ENSG00000218672 |
| 7 | 154942123 | 154942488 | 154942424 | 8  | 15 | 5  | 3.128130238 | 0.00492422  | EN2    | ENSG00000164778 |
| 7 | 154967626 | 154968254 | 154968039 | 15 | 34 | 0  | 41.05670938 | 1.59E-12    | EN2    | ENSG00000164778 |
| 7 | 155017326 | 155017547 | 155017436 | 11 | 11 | 5  | 2.346097679 | 0.0364013   | CNPY1  | ENSG00000146910 |
| 7 | 155144143 | 155144350 | 155144212 | 8  | 9  | 3  | 2.932622098 | 0.0242899   | RBM33  | ENSG00000184863 |
| 7 | 155337258 | 155337659 | 155337437 | 13 | 20 | 1  | 12.31701281 | 1.03E-06    |        | ENSG00000221113 |
| 7 | 155346270 | 155346890 | 155346442 | 16 | 39 | 15 | 2.932622098 | 5.39E-05    |        | ENSG00000221113 |
| 7 | 155351535 | 155351932 | 155351753 | 14 | 22 | 7  | 3.372515413 | 0.000629223 |        | ENSG00000221113 |
| 7 | 155352717 | 155353181 | 155352973 | 19 | 29 | 10 | 3.199224107 | 0.000186763 |        | ENSG00000221113 |
| 7 | 155407483 | 155407810 | 155407640 | 14 | 16 | 5  | 3.323638378 | 0.00288759  |        | ENSG00000204876 |
| 7 | 155637986 | 155638225 | 155638145 | 8  | 8  | 2  | 3.519146518 | 0.017558    |        | ENSG00000221368 |
| 7 | 155832675 | 155832869 | 155832803 | 9  | 9  | 1  | 5.865244197 | 0.00272497  |        | ENSG00000207061 |
| 7 | 155885707 | 155885978 | 155885828 | 8  | 9  | 6  | 1.675784056 | 0.141978    |        | ENSG00000207061 |
| 7 | 155886803 | 155887025 | 155886897 | 10 | 10 | 4  | 2.580707446 | 0.0306059   |        | ENSG00000207061 |
| 7 | 156233226 | 156233442 | 156233322 | 9  | 10 | 2  | 4.301179077 | 0.00512919  | RNF32  | ENSG00000105982 |
| 7 | 156440264 | 156440601 | 156440432 | 13 | 19 | 1  | 11.73048839 | 2.14E-06    | NOM1   | ENSG00000146909 |
| 7 | 156473950 | 156474136 | 156474043 | 8  | 8  | 2  | 3.519146518 | 0.017558    | MNX1   | ENSG00000130675 |
| 7 | 156486125 | 156486304 | 156486214 | 8  | 9  | 0  | 11.73048839 | 0.000425898 | MNX1   | ENSG00000130675 |
| 7 | 156494814 | 156495022 | 156494936 | 8  | 10 | 9  | 1.290353723 | 0.279648    | MNX1   | ENSG00000130675 |
| 7 | 156504650 | 156505030 | 156504829 | 11 | 18 | 0  | 22.28792795 | 3.94E-07    |        | ENSG00000213992 |
| 7 | 156714453 | 156714666 | 156714530 | 8  | 8  | 2  | 3.519146518 | 0.017558    |        | ENSG00000213990 |
| 7 | 156740828 | 156741185 | 156740992 | 9  | 13 | 5  | 2.737113958 | 0.0137917   |        | ENSG00000213990 |
| 7 | 156759106 | 156759328 | 156759271 | 9  | 11 | 0  | 14.07658607 | 9.02E-05    |        | ENSG00000213990 |
| 7 | 156774833 | 156775339 | 156775012 | 15 | 26 | 4  | 6.334463732 | 2.40E-06    |        | ENSG00000208243 |
| 7 | 156822145 | 156822342 | 156822196 | 8  | 9  | 4  | 2.346097679 | 0.050148    | DNAJB6 | ENSG00000105993 |
| 7 | 156841284 | 156842045 | 156841463 | 16 | 33 | 8  | 4.431517837 | 3.63E-06    | DNAJB6 | ENSG00000105993 |

|   |           |           |           |    |     |    |             |             |        |                 |
|---|-----------|-----------|-----------|----|-----|----|-------------|-------------|--------|-----------------|
| 7 | 156872652 | 156873002 | 156872827 | 10 | 15  | 2  | 6.256260476 | 0.000199274 | DNAJB6 | ENSG00000105993 |
| 7 | 156883432 | 156883738 | 156883585 | 8  | 13  | 6  | 2.346097679 | 0.0266147   | DNAJB6 | ENSG00000105993 |
| 7 | 156890529 | 156890872 | 156890700 | 13 | 16  | 2  | 6.647276756 | 0.000101928 | DNAJB6 | ENSG00000105993 |
| 7 | 156918429 | 156918718 | 156918573 | 9  | 11  | 8  | 1.564065119 | 0.151515    |        | ENSG00000178158 |
| 7 | 156978482 | 156978739 | 156978631 | 20 | 21  | 1  | 12.90353723 | 4.95E-07    |        | ENSG00000178158 |
| 7 | 157487093 | 157487353 | 157487191 | 10 | 11  | 2  | 4.692195357 | 0.00272444  |        | ENSG00000222012 |
| 7 | 157839540 | 157839737 | 157839677 | 8  | 8   | 2  | 3.519146518 | 0.017558    |        | ENSG00000208234 |
| 7 | 157882962 | 157883291 | 157883126 | 17 | 20  | 0  | 24.63402563 | 8.35E-08    |        | ENSG00000208234 |
| 7 | 157888655 | 157889039 | 157888834 | 21 | 28  | 1  | 17.00920817 | 2.80E-09    |        | ENSG00000208234 |
| 7 | 158080542 | 158080783 | 158080705 | 20 | 20  | 14 | 1.642268375 | 0.06827     | PTPRN2 | ENSG00000155093 |
| 7 | 158132713 | 158133015 | 158132845 | 17 | 19  | 8  | 2.606775198 | 0.00583935  |        | ENSG00000186921 |
| 7 | 158190344 | 158190567 | 158190455 | 9  | 12  | 7  | 1.906204364 | 0.0695918   | NCAPG2 | ENSG00000146918 |
| 7 | 158288811 | 158289030 | 158288920 | 8  | 11  | 4  | 2.815317214 | 0.0183428   | FAM62B | ENSG00000117868 |
| 7 | 158301796 | 158302108 | 158301952 | 10 | 12  | 7  | 1.906204364 | 0.0695918   | FAM62B | ENSG00000117868 |
| 7 | 158303962 | 158304610 | 158304333 | 16 | 41  | 5  | 8.211341875 | 5.42E-10    | FAM62B | ENSG00000117868 |
| 7 | 158341706 | 158342179 | 158341876 | 15 | 25  | 2  | 10.16642327 | 2.02E-07    | WDR60  | ENSG00000126870 |
| 7 | 158462608 | 158462787 | 158462757 | 8  | 8   | 1  | 5.278719777 | 0.00542188  | WDR60  | ENSG00000126870 |
| 7 | 158500971 | 158501181 | 158501078 | 9  | 11  | 10 | 1.279689643 | 0.277323    | VIPR2  | ENSG00000106018 |
| 7 | 158516176 | 158516501 | 158516338 | 8  | 12  | 7  | 1.906204364 | 0.0695918   | VIPR2  | ENSG00000106018 |
| 7 | 158703816 | 158704098 | 158703957 | 16 | 18  | 4  | 4.457585589 | 0.000353565 |        | ENSG00000220691 |
| 7 | 158796232 | 158796638 | 158796419 | 48 | 61  | 0  | 72.72902804 | 1.26E-21    |        | ENSG00000220691 |
| 8 | 154441    | 154818    | 154687    | 48 | 53  | 1  | 31.67231866 | 1.89E-17    | ZNF596 | ENSG00000172748 |
| 8 | 201249    | 201514    | 201364    | 13 | 15  | 0  | 18.76878143 | 4.04E-06    | ZNF596 | ENSG00000172748 |
| 8 | 634353    | 634557    | 634476    | 9  | 10  | 0  | 12.90353723 | 0.000195991 |        | ENSG00000206100 |
| 8 | 2339781   | 2339999   | 2339870   | 8  | 9   | 0  | 11.73048839 | 0.000425898 | MYOM2  | ENSG00000036448 |
| 8 | 2374561   | 2374800   | 2374688   | 9  | 9   | 2  | 3.910162798 | 0.00955088  | MYOM2  | ENSG00000036448 |
| 8 | 3014668   | 3014854   | 3014761   | 8  | 8   | 0  | 10.55743955 | 0.000925496 | CSMD1  | ENSG00000183117 |
| 8 | 5166404   | 5166758   | 5166581   | 14 | 20  | 1  | 12.31701281 | 1.03E-06    |        | ENSG00000209245 |
| 8 | 6183943   | 6184254   | 6184098   | 31 | 32  | 0  | 38.7106117  | 7.53E-12    | MCPH1  | ENSG00000147316 |
| 8 | 6419873   | 6420116   | 6419975   | 9  | 10  | 3  | 3.225884308 | 0.0139466   | ANGPT2 | ENSG00000091879 |
| 8 | 8257428   | 8258097   | 8257838   | 96 | 125 | 2  | 49.26805125 | 8.12E-40    |        | ENSG00000182319 |
| 8 | 8302177   | 8302735   | 8302376   | 57 | 76  | 4  | 18.06495213 | 1.64E-21    |        | ENSG00000182319 |
| 8 | 8349603   | 8349832   | 8349752   | 9  | 11  | 4  | 2.815317214 | 0.0183428   |        | ENSG00000182319 |
| 8 | 8506386   | 8506694   | 8506522   | 10 | 12  | 1  | 7.624817456 | 0.000332769 |        | ENSG00000222487 |

|   |          |          |          |     |     |   |             |             |           |                 |
|---|----------|----------|----------|-----|-----|---|-------------|-------------|-----------|-----------------|
| 8 | 8960760  | 8961046  | 8960927  | 8   | 11  | 6 | 2.010940867 | 0.0640214   |           | ENSG00000210052 |
| 8 | 9021352  | 9021681  | 9021516  | 12  | 16  | 0 | 19.94183027 | 1.86E-06    | PPP1R3B   | ENSG00000173281 |
| 8 | 9302292  | 9302502  | 9302425  | 9   | 9   | 0 | 11.73048839 | 0.000425898 |           | ENSG00000201815 |
| 8 | 9450674  | 9450861  | 9450767  | 9   | 10  | 0 | 12.90353723 | 0.000195991 | TNKS      | ENSG00000173273 |
| 8 | 11459579 | 11459775 | 11459684 | 8   | 9   | 0 | 11.73048839 | 0.000425898 | C8orf14   | ENSG00000170983 |
| 8 | 14610378 | 14610608 | 14610484 | 9   | 10  | 2 | 4.301179077 | 0.00512919  |           | ENSG00000199127 |
| 8 | 17704481 | 17704838 | 17704659 | 8   | 13  | 1 | 8.211341875 | 0.000163445 | MTUS1     | ENSG00000129422 |
| 8 | 17824336 | 17824559 | 17824467 | 10  | 10  | 1 | 6.451768616 | 0.00135978  | PCM1      | ENSG00000078674 |
| 8 | 18943256 | 18943730 | 18943510 | 151 | 175 | 5 | 34.40943262 | 3.41E-52    | PSD3      | ENSG00000156011 |
| 8 | 18943887 | 18944087 | 18943987 | 8   | 9   | 0 | 11.73048839 | 0.000425898 | PSD3      | ENSG00000156011 |
| 8 | 19193302 | 19193591 | 19193414 | 15  | 18  | 2 | 7.429309316 | 2.63E-05    | SH2D4A    | ENSG00000104611 |
| 8 | 19323484 | 19323804 | 19323649 | 13  | 17  | 1 | 10.55743955 | 9.18E-06    | CSGALNAC  | ENSG00000147408 |
| 8 | 19360169 | 19360370 | 19360261 | 8   | 8   | 5 | 1.759573259 | 0.13508     | CSGALNAC  | ENSG00000147408 |
| 8 | 19442560 | 19442773 | 19442612 | 10  | 10  | 2 | 4.301179077 | 0.00512919  |           | ENSG00000181508 |
| 8 | 19718934 | 19719178 | 19719057 | 10  | 10  | 1 | 6.451768616 | 0.00135978  | INTS10    | ENSG00000104613 |
| 8 | 20061482 | 20061781 | 20061631 | 13  | 16  | 3 | 4.985457567 | 0.000385643 | SLC18A1   | ENSG00000036565 |
| 8 | 20219585 | 20219899 | 20219742 | 9   | 11  | 2 | 4.692195357 | 0.00272444  | LZTS1     | ENSG00000061337 |
| 8 | 20329855 | 20330208 | 20330033 | 29  | 34  | 0 | 41.05670938 | 1.59E-12    |           | ENSG00000210340 |
| 8 | 21506008 | 21506187 | 21506097 | 8   | 8   | 0 | 10.55743955 | 0.000925496 |           | ENSG00000210349 |
| 8 | 21965560 | 21965900 | 21965736 | 12  | 15  | 0 | 18.76878143 | 4.04E-06    | EPB49     | ENSG00000158856 |
| 8 | 22266141 | 22266323 | 22266276 | 8   | 9   | 0 | 11.73048839 | 0.000425898 | SLC39A14  | ENSG00000104635 |
| 8 | 22314627 | 22314905 | 22314766 | 10  | 13  | 2 | 5.474227917 | 0.000747844 |           | ENSG00000201761 |
| 8 | 22517964 | 22518180 | 22518072 | 10  | 11  | 4 | 2.815317214 | 0.0183428   | KIAA1967  | ENSG00000158941 |
| 8 | 22900444 | 22900746 | 22900595 | 15  | 17  | 1 | 10.55743955 | 9.18E-06    |           | ENSG00000210402 |
| 8 | 22927906 | 22928207 | 22928056 | 8   | 13  | 2 | 5.474227917 | 0.000747844 | RHOBTB2   | ENSG00000008853 |
| 8 | 22955534 | 22955762 | 22955639 | 11  | 11  | 1 | 7.038293036 | 0.000674435 | TNFRSF10B | ENSG00000120889 |
| 8 | 22981900 | 22982651 | 22982076 | 26  | 61  | 1 | 36.36451402 | 4.36E-20    | TNFRSF10B | ENSG00000120889 |
| 8 | 23137995 | 23138281 | 23138140 | 15  | 19  | 0 | 23.46097679 | 1.81E-07    | TNFRSF10A | ENSG00000104689 |
| 8 | 23767547 | 23767789 | 23767622 | 10  | 12  | 4 | 3.049926982 | 0.0108184   | STC1      | ENSG00000159167 |
| 8 | 24913412 | 24913620 | 24913505 | 10  | 10  | 2 | 4.301179077 | 0.00512919  | NEFL      | ENSG00000104725 |
| 8 | 25232749 | 25233097 | 25232923 | 11  | 16  | 2 | 6.647276756 | 0.000101928 |           | ENSG00000215293 |
| 8 | 25372415 | 25372673 | 25372544 | 9   | 12  | 0 | 15.24963491 | 4.15E-05    | CDCA2     | ENSG00000184661 |
| 8 | 26056696 | 26056946 | 26056821 | 11  | 14  | 3 | 4.398933147 | 0.00132748  |           | ENSG00000199620 |
| 8 | 26179412 | 26179667 | 26179530 | 10  | 13  | 0 | 16.42268375 | 1.91E-05    | PPP2R2A   | ENSG00000221914 |

|   |          |          |          |     |     |   |             |             |         |                 |
|---|----------|----------|----------|-----|-----|---|-------------|-------------|---------|-----------------|
| 8 | 26231148 | 26231489 | 26231317 | 10  | 13  | 1 | 8.211341875 | 0.000163445 | PPP2R2A | ENSG00000221914 |
| 8 | 26706860 | 26707078 | 26707006 | 8   | 10  | 0 | 12.90353723 | 0.000195991 | ADRA1A  | ENSG00000120907 |
| 8 | 27224960 | 27225160 | 27225128 | 12  | 13  | 2 | 5.474227917 | 0.000747844 | PTK2B   | ENSG00000120899 |
| 8 | 27516631 | 27516969 | 27516800 | 13  | 17  | 7 | 2.639359888 | 0.00777415  | CLU     | ENSG00000120885 |
| 8 | 27528058 | 27528322 | 27528190 | 9   | 11  | 1 | 7.038293036 | 0.000674435 | CLU     | ENSG00000120885 |
| 8 | 27751199 | 27751507 | 27751353 | 12  | 15  | 2 | 6.256260476 | 0.000199274 | PBK     | ENSG00000168078 |
| 8 | 28205386 | 28205704 | 28205558 | 8   | 11  | 3 | 3.519146518 | 0.00788869  | PNOC    | ENSG00000168081 |
| 8 | 28608371 | 28608650 | 28608527 | 14  | 15  | 0 | 18.76878143 | 4.04E-06    | EXTL3   | ENSG00000012232 |
| 8 | 29050727 | 29050946 | 29050786 | 10  | 10  | 2 | 4.301179077 | 0.00512919  |         | ENSG00000200719 |
| 8 | 29139154 | 29139378 | 29139292 | 10  | 11  | 0 | 14.07658607 | 9.02E-05    | KIF13B  | ENSG00000197892 |
| 8 | 29154182 | 29154391 | 29154286 | 9   | 9   | 2 | 3.910162798 | 0.00955088  | KIF13B  | ENSG00000197892 |
| 8 | 29200267 | 29200732 | 29200426 | 23  | 33  | 2 | 13.29455351 | 6.68E-10    |         | ENSG00000212034 |
| 8 | 29253696 | 29253946 | 29253821 | 15  | 15  | 5 | 3.128130238 | 0.00492422  | DUSP4   | ENSG00000120875 |
| 8 | 29468843 | 29469091 | 29468961 | 8   | 10  | 1 | 6.451768616 | 0.00135978  | DUSP4   | ENSG00000120875 |
| 8 | 29650801 | 29651159 | 29650971 | 11  | 15  | 1 | 9.384390715 | 3.90E-05    |         | ENSG00000221003 |
| 8 | 29651932 | 29652288 | 29652119 | 16  | 20  | 4 | 4.926805125 | 0.00010522  |         | ENSG00000221003 |
| 8 | 29665737 | 29666047 | 29665892 | 16  | 20  | 4 | 4.926805125 | 0.00010522  |         | ENSG00000221003 |
| 8 | 29670182 | 29670405 | 29670314 | 10  | 10  | 1 | 6.451768616 | 0.00135978  |         | ENSG00000221003 |
| 8 | 29683816 | 29684301 | 29684073 | 281 | 321 | 3 | 94.43043156 | 2.61E-103   |         | ENSG00000221003 |
| 8 | 29687706 | 29687885 | 29687804 | 8   | 8   | 1 | 5.278719777 | 0.00542188  |         | ENSG00000221003 |
| 8 | 29697937 | 29698146 | 29698036 | 8   | 9   | 4 | 2.346097679 | 0.050148    |         | ENSG00000221003 |
| 8 | 29698273 | 29698475 | 29698309 | 8   | 8   | 0 | 10.55743955 | 0.000925496 |         | ENSG00000221003 |
| 8 | 30316595 | 30316955 | 30316774 | 13  | 20  | 8 | 2.737113958 | 0.0036449   |         | ENSG00000210525 |
| 8 | 30372850 | 30373058 | 30372966 | 9   | 10  | 3 | 3.225884308 | 0.0139466   | RBPM5   | ENSG00000157110 |
| 8 | 30531325 | 30531565 | 30531445 | 9   | 10  | 2 | 4.301179077 | 0.00512919  |         | ENSG00000200319 |
| 8 | 30699979 | 30700338 | 30700159 | 12  | 17  | 2 | 7.038293036 | 5.19E-05    | GSR     | ENSG00000104687 |
| 8 | 30780442 | 30780783 | 30780612 | 22  | 25  | 3 | 7.624817456 | 1.09E-06    | PPP2CB  | ENSG00000104695 |
| 8 | 31149552 | 31149804 | 31149711 | 25  | 25  | 0 | 30.49926982 | 1.72E-09    | PURG    | ENSG00000172733 |
| 8 | 32762219 | 32762531 | 32762367 | 34  | 35  | 2 | 14.07658607 | 1.57E-10    |         | ENSG00000210559 |
| 8 | 33081922 | 33082156 | 33082039 | 11  | 13  | 0 | 16.42268375 | 1.91E-05    |         | ENSG00000210596 |
| 8 | 33106614 | 33106890 | 33106752 | 20  | 23  | 1 | 14.07658607 | 1.14E-07    |         | ENSG00000210596 |
| 8 | 33159532 | 33159886 | 33159709 | 9   | 15  | 1 | 9.384390715 | 3.90E-05    |         | ENSG00000210599 |
| 8 | 36900426 | 36900757 | 36900591 | 9   | 13  | 0 | 16.42268375 | 1.91E-05    |         | ENSG00000219491 |
| 8 | 37121480 | 37121710 | 37121591 | 11  | 13  | 3 | 4.105670938 | 0.00243034  |         | ENSG00000219491 |

|   |          |          |          |     |     |     |             |             |           |                 |
|---|----------|----------|----------|-----|-----|-----|-------------|-------------|-----------|-----------------|
| 8 | 37571575 | 37571985 | 37571816 | 41  | 49  | 4   | 11.73048839 | 4.03E-13    |           | ENSG00000223215 |
| 8 | 37575283 | 37575502 | 37575423 | 9   | 9   | 1   | 5.865244197 | 0.00272497  |           | ENSG00000223215 |
| 8 | 37876508 | 37876707 | 37876596 | 10  | 11  | 0   | 14.07658607 | 9.02E-05    | RAB11FIP1 | ENSG00000156675 |
| 8 | 38066658 | 38066886 | 38066772 | 9   | 11  | 1   | 7.038293036 | 0.000674435 | ASH2L     | ENSG00000129691 |
| 8 | 38711320 | 38711505 | 38711466 | 8   | 9   | 1   | 5.865244197 | 0.00272497  |           | ENSG00000207258 |
| 8 | 38769704 | 38770077 | 38769883 | 9   | 16  | 8   | 2.215758919 | 0.0222902   | TACC1     | ENSG00000147526 |
| 8 | 38785519 | 38785745 | 38785628 | 8   | 10  | 0   | 12.90353723 | 0.000195991 | TACC1     | ENSG00000147526 |
| 8 | 39927520 | 39927797 | 39927658 | 12  | 17  | 0   | 21.11487911 | 8.57E-07    | INDOL1    | ENSG00000188676 |
| 8 | 40185071 | 40185268 | 40185145 | 8   | 9   | 2   | 3.910162798 | 0.00955088  | C8orf4    | ENSG00000176907 |
| 8 | 40441279 | 40441473 | 40441437 | 8   | 9   | 0   | 11.73048839 | 0.000425898 | C8orf4    | ENSG00000176907 |
| 8 | 41132954 | 41133287 | 41133094 | 19  | 23  | 1   | 14.07658607 | 1.14E-07    |           | ENSG00000206867 |
| 8 | 41424329 | 41424547 | 41424467 | 9   | 10  | 6   | 1.843362462 | 0.0964212   | GOLGA7    | ENSG00000147533 |
| 8 | 41466973 | 41467219 | 41467096 | 8   | 10  | 0   | 12.90353723 | 0.000195991 | GOLGA7    | ENSG00000147533 |
| 8 | 41519424 | 41519728 | 41519576 | 12  | 15  | 1   | 9.384390715 | 3.90E-05    | GIN5      | ENSG00000147536 |
| 8 | 41536198 | 41536390 | 41536294 | 8   | 8   | 2   | 3.519146518 | 0.017558    | AGPAT6    | ENSG00000158669 |
| 8 | 41747209 | 41747679 | 41747500 | 14  | 25  | 1   | 15.24963491 | 2.59E-08    | ANK1      | ENSG0000029534  |
| 8 | 41795353 | 41795985 | 41795617 | 135 | 169 | 1   | 99.70915134 | 4.63E-56    |           | ENSG00000207101 |
| 8 | 41804711 | 41804954 | 41804832 | 9   | 9   | 2   | 3.910162798 | 0.00955088  |           | ENSG00000223084 |
| 8 | 41805054 | 41805271 | 41805162 | 8   | 9   | 4   | 2.346097679 | 0.050148    |           | ENSG00000223084 |
| 8 | 42129285 | 42129529 | 42129407 | 10  | 11  | 0   | 14.07658607 | 9.02E-05    | AP3M2     | ENSG00000070718 |
| 8 | 42434799 | 42434986 | 42434931 | 9   | 9   | 1   | 5.865244197 | 0.00272497  | VDAC3     | ENSG00000078668 |
| 8 | 42492657 | 42492849 | 42492753 | 9   | 10  | 0   | 12.90353723 | 0.000195991 | C8orf40   | ENSG00000176209 |
| 8 | 42548264 | 42548531 | 42548397 | 20  | 22  | 0   | 26.9801233  | 1.77E-08    | SLC20A2   | ENSG00000168575 |
| 8 | 42726203 | 42726573 | 42726380 | 26  | 32  | 0   | 38.7106117  | 7.53E-12    | CHRNA6    | ENSG00000147434 |
| 8 | 43211912 | 43212603 | 43212076 | 67  | 97  | 156 | 0.732221568 | 0.992918    | A26A1     | ENSG00000188877 |
| 8 | 43214078 | 43214427 | 43214252 | 22  | 28  | 27  | 1.214943441 | 0.231769    | A26A1     | ENSG00000188877 |
| 8 | 43214899 | 43215283 | 43215104 | 41  | 50  | 103 | 0.575245104 | 0.999571    | A26A1     | ENSG00000188877 |
| 8 | 43215443 | 43215911 | 43215601 | 19  | 23  | 55  | 0.502735217 | 0.998409    | A26A1     | ENSG00000188877 |
| 8 | 43880939 | 43881268 | 43881103 | 22  | 22  | 28  | 0.930349079 | 0.605811    |           | ENSG00000221295 |
| 8 | 43887391 | 43887720 | 43887555 | 20  | 20  | 32  | 0.746485625 | 0.858311    |           | ENSG00000221295 |
| 8 | 43939558 | 43939883 | 43939720 | 10  | 10  | 18  | 0.679133539 | 0.855647    |           | ENSG00000221295 |
| 8 | 43943403 | 43943733 | 43943568 | 9   | 9   | 14  | 0.78203256  | 0.734892    |           | ENSG00000221295 |
| 8 | 46964425 | 46964767 | 46964596 | 30  | 30  | 48  | 0.742132939 | 0.907395    |           | ENSG00000210854 |
| 8 | 46971495 | 46971823 | 46971659 | 10  | 10  | 25  | 0.496289894 | 0.980252    |           | ENSG00000210854 |

|   |          |          |          |    |     |    |             |             |         |                 |
|---|----------|----------|----------|----|-----|----|-------------|-------------|---------|-----------------|
| 8 | 47323505 | 47323684 | 47323534 | 8  | 8   | 3  | 2.639359888 | 0.0415794   |         | ENSG00000210854 |
| 8 | 48456693 | 48456935 | 48456814 | 8  | 8   | 0  | 10.55743955 | 0.000925496 |         | ENSG00000215175 |
| 8 | 48617411 | 48617683 | 48617547 | 12 | 13  | 1  | 8.211341875 | 0.000163445 |         | ENSG00000207369 |
| 8 | 48814246 | 48814434 | 48814302 | 9  | 9   | 1  | 5.865244197 | 0.00272497  | CEBPD   | ENSG00000221869 |
| 8 | 49017189 | 49017692 | 49017360 | 10 | 18  | 6  | 3.183989707 | 0.00227432  | PRKDC   | ENSG00000121031 |
| 8 | 49329239 | 49329606 | 49329427 | 15 | 22  | 7  | 3.372515413 | 0.000629223 |         | ENSG00000210964 |
| 8 | 49337333 | 49337515 | 49337417 | 8  | 8   | 1  | 5.278719777 | 0.00542188  |         | ENSG00000210964 |
| 8 | 49359134 | 49359313 | 49359240 | 8  | 8   | 0  | 10.55743955 | 0.000925496 |         | ENSG00000210964 |
| 8 | 49393973 | 49394206 | 49394054 | 8  | 9   | 14 | 0.78203256  | 0.734892    |         | ENSG00000210964 |
| 8 | 49589256 | 49589464 | 49589360 | 8  | 9   | 2  | 3.910162798 | 0.00955088  |         | ENSG00000210974 |
| 8 | 50185495 | 50185884 | 50185676 | 37 | 48  | 2  | 19.15979771 | 1.17E-14    | C8orf22 | ENSG00000168333 |
| 8 | 50453892 | 50454092 | 50454009 | 9  | 10  | 0  | 12.90353723 | 0.000195991 |         | ENSG00000199640 |
| 8 | 53000029 | 53000225 | 53000127 | 8  | 10  | 1  | 6.451768616 | 0.00135978  | PCMTD1  | ENSG00000168300 |
| 8 | 53000233 | 53000712 | 53000454 | 87 | 107 | 0  | 126.6892746 | 3.95E-37    | PCMTD1  | ENSG00000168300 |
| 8 | 53542177 | 53542443 | 53542282 | 15 | 17  | 9  | 2.111487911 | 0.0248715   | ST18    | ENSG00000147488 |
| 8 | 53571331 | 53571643 | 53571481 | 13 | 14  | 0  | 17.59573259 | 8.79E-06    | FAM150A | ENSG00000196711 |
| 8 | 53621259 | 53621763 | 53621603 | 24 | 32  | 0  | 38.7106117  | 7.53E-12    | FAM150A | ENSG00000196711 |
| 8 | 53673909 | 53674088 | 53674005 | 8  | 8   | 0  | 10.55743955 | 0.000925496 | FAM150A | ENSG00000196711 |
| 8 | 53704484 | 53704895 | 53704663 | 69 | 84  | 3  | 24.92728784 | 3.97E-25    | FAM150A | ENSG00000196711 |
| 8 | 54348022 | 54348456 | 54348239 | 32 | 44  | 2  | 17.59573259 | 2.22E-13    | OPRK1   | ENSG00000082556 |
| 8 | 55020143 | 55020367 | 55020223 | 9  | 9   | 1  | 5.865244197 | 0.00272497  | RGS20   | ENSG00000147509 |
| 8 | 55811545 | 55811748 | 55811623 | 8  | 9   | 1  | 5.865244197 | 0.00272497  | RP1     | ENSG00000104237 |
| 8 | 56285893 | 56286274 | 56286057 | 9  | 14  | 0  | 17.59573259 | 8.79E-06    | XKR4    | ENSG00000206579 |
| 8 | 56290240 | 56290431 | 56290356 | 11 | 11  | 3  | 3.519146518 | 0.00788869  | XKR4    | ENSG00000206579 |
| 8 | 56847323 | 56847678 | 56847500 | 27 | 33  | 0  | 39.88366054 | 3.46E-12    | TGS1    | ENSG00000137574 |
| 8 | 56848233 | 56848657 | 56848376 | 9  | 15  | 6  | 2.68125449  | 0.0103552   | TMEM68  | ENSG00000167904 |
| 8 | 56917592 | 56918019 | 56917770 | 32 | 40  | 16 | 2.829117789 | 6.64E-05    |         | ENSG00000211045 |
| 8 | 56961677 | 56961861 | 56961781 | 8  | 8   | 2  | 3.519146518 | 0.017558    | LYN     | ENSG00000147507 |
| 8 | 57064037 | 57064307 | 57064172 | 10 | 13  | 1  | 8.211341875 | 0.000163445 |         | ENSG00000222746 |
| 8 | 57085714 | 57086034 | 57085874 | 18 | 20  | 1  | 12.31701281 | 1.03E-06    |         | ENSG00000211063 |
| 8 | 57149612 | 57149887 | 57149758 | 11 | 13  | 7  | 2.052835469 | 0.046392    | RPS20   | ENSG00000008988 |
| 8 | 57168882 | 57169067 | 57168949 | 9  | 9   | 1  | 5.865244197 | 0.00272497  | RPS20   | ENSG00000008988 |
| 8 | 57264181 | 57264360 | 57264270 | 8  | 8   | 2  | 3.519146518 | 0.017558    | PLAG1   | ENSG00000181690 |
| 8 | 57329901 | 57330156 | 57330028 | 10 | 11  | 0  | 14.07658607 | 9.02E-05    | CHCHD7  | ENSG00000170791 |

|   |          |          |          |     |     |    |             |             |         |                 |
|---|----------|----------|----------|-----|-----|----|-------------|-------------|---------|-----------------|
| 8 | 57676162 | 57676452 | 57676340 | 8   | 12  | 1  | 7.624817456 | 0.000332769 | PENK    | ENSG00000181195 |
| 8 | 57981108 | 57981436 | 57981272 | 31  | 32  | 0  | 38.7106117  | 7.53E-12    |         | ENSG00000206975 |
| 8 | 58027528 | 58027836 | 58027664 | 15  | 16  | 1  | 9.970915134 | 1.89E-05    |         | ENSG00000197334 |
| 8 | 58662429 | 58662682 | 58662555 | 9   | 11  | 8  | 1.564065119 | 0.151515    |         | ENSG00000202265 |
| 8 | 59072176 | 59072409 | 59072297 | 8   | 10  | 2  | 4.301179077 | 0.00512919  | FAM110B | ENSG00000169122 |
| 8 | 59074822 | 59075130 | 59074992 | 11  | 14  | 1  | 8.797866295 | 8.00E-05    | FAM110B | ENSG00000169122 |
| 8 | 59105738 | 59105941 | 59105864 | 9   | 9   | 0  | 11.73048839 | 0.000425898 | FAM110B | ENSG00000169122 |
| 8 | 59212969 | 59213186 | 59213122 | 10  | 10  | 2  | 4.301179077 | 0.00512919  | FAM110B | ENSG00000169122 |
| 8 | 59331544 | 59331767 | 59331625 | 11  | 12  | 0  | 15.24963491 | 4.15E-05    | UBXN2B  | ENSG00000215114 |
| 8 | 59796030 | 59796375 | 59796202 | 15  | 19  | 4  | 4.692195357 | 0.000193572 |         | ENSG00000211109 |
| 8 | 60011066 | 60011364 | 60011215 | 13  | 16  | 0  | 19.94183027 | 1.86E-06    |         | ENSG00000201231 |
| 8 | 60028682 | 60028908 | 60028778 | 10  | 12  | 1  | 7.624817456 | 0.000332769 |         | ENSG00000201231 |
| 8 | 61413856 | 61414101 | 61413978 | 9   | 12  | 2  | 5.083211637 | 0.00143337  | CA8     | ENSG00000178538 |
| 8 | 62129617 | 62129977 | 62129796 | 12  | 19  | 7  | 2.932622098 | 0.00293566  |         | ENSG00000213881 |
| 8 | 62454271 | 62454450 | 62454340 | 8   | 8   | 0  | 10.55743955 | 0.000925496 | RLBP1L1 | ENSG00000177182 |
| 8 | 62543907 | 62544155 | 62544028 | 13  | 13  | 2  | 5.474227917 | 0.000747844 |         | ENSG00000222898 |
| 8 | 64243305 | 64243514 | 64243384 | 8   | 10  | 2  | 4.301179077 | 0.00512919  | YTHDF3  | ENSG00000185728 |
| 8 | 64243665 | 64243942 | 64243778 | 8   | 10  | 2  | 4.301179077 | 0.00512919  | YTHDF3  | ENSG00000185728 |
| 8 | 66116550 | 66116762 | 66116656 | 8   | 9   | 2  | 3.910162798 | 0.00955088  | CYP7B1  | ENSG00000172817 |
| 8 | 66709086 | 66709301 | 66709224 | 9   | 10  | 5  | 2.150589539 | 0.0575848   | ARMC1   | ENSG00000104442 |
| 8 | 66909411 | 66909784 | 66909628 | 9   | 13  | 7  | 2.052835469 | 0.046392    | PDE7A   | ENSG00000205268 |
| 8 | 67023324 | 67023595 | 67023486 | 22  | 25  | 5  | 5.083211637 | 1.58E-05    | DNAJC5B | ENSG00000147570 |
| 8 | 67095723 | 67096293 | 67095834 | 13  | 23  | 10 | 2.559379286 | 0.00330263  | DNAJC5B | ENSG00000147570 |
| 8 | 67097139 | 67097391 | 67097218 | 8   | 10  | 0  | 12.90353723 | 0.000195991 | DNAJC5B | ENSG00000147570 |
| 8 | 67101269 | 67101709 | 67101448 | 22  | 33  | 10 | 3.625787322 | 2.36E-05    | DNAJC5B | ENSG00000147570 |
| 8 | 67139770 | 67140113 | 67139941 | 13  | 16  | 3  | 4.985457567 | 0.000385643 | DNAJC5B | ENSG00000147570 |
| 8 | 67187815 | 67189301 | 67188436 | 152 | 300 | 13 | 25.22055005 | 4.30E-83    |         | ENSG00000209078 |
| 8 | 67198826 | 67199440 | 67199272 | 46  | 69  | 2  | 27.37113958 | 1.94E-21    | TRIM55  | ENSG00000147573 |
| 8 | 67251684 | 67251882 | 67251783 | 8   | 9   | 5  | 1.955081399 | 0.0892323   | CRH     | ENSG00000147571 |
| 8 | 67252250 | 67252478 | 67252348 | 8   | 8   | 3  | 2.639359888 | 0.0415794   | CRH     | ENSG00000147571 |
| 8 | 67503420 | 67503915 | 67503736 | 17  | 24  | 5  | 4.887703497 | 2.90E-05    | RRS1    | ENSG00000179041 |
| 8 | 67513672 | 67514141 | 67513962 | 9   | 18  | 12 | 1.714455996 | 0.0636479   | ADHFE1  | ENSG00000147576 |
| 8 | 67597114 | 67597735 | 67597456 | 16  | 33  | 7  | 4.985457567 | 1.25E-06    |         | ENSG00000206949 |
| 8 | 67665034 | 67665375 | 67665204 | 16  | 22  | 1  | 13.49006165 | 2.37E-07    |         | ENSG00000219180 |



|   |          |          |          |    |    |   |             |             |          |                 |
|---|----------|----------|----------|----|----|---|-------------|-------------|----------|-----------------|
| 8 | 68066116 | 68066302 | 68066191 | 8  | 8  | 1 | 5.278719777 | 0.00542188  | TCF24    | ENSG00000187728 |
| 8 | 68138859 | 68139361 | 68139017 | 11 | 23 | 5 | 4.692195357 | 5.29E-05    | CSPP1    | ENSG00000104218 |
| 8 | 68275208 | 68275471 | 68275362 | 11 | 11 | 1 | 7.038293036 | 0.000674435 |          | ENSG00000211220 |
| 8 | 68455804 | 68456064 | 68455934 | 9  | 13 | 3 | 4.105670938 | 0.00243034  | ARFGEF1  | ENSG00000066777 |
| 8 | 69705543 | 69705787 | 69705710 | 22 | 23 | 0 | 28.15317214 | 8.13E-09    | C8orf34  | ENSG00000165084 |
| 8 | 70236575 | 70236818 | 70236696 | 9  | 11 | 0 | 14.07658607 | 9.02E-05    |          | ENSG00000211297 |
| 8 | 70600502 | 70600730 | 70600616 | 8  | 9  | 3 | 2.932622098 | 0.0242899   |          | ENSG00000218599 |
| 8 | 71477080 | 71477282 | 71477181 | 8  | 8  | 2 | 3.519146518 | 0.017558    | NCOA2    | ENSG00000140396 |
| 8 | 71493098 | 71493277 | 71493172 | 8  | 8  | 0 | 10.55743955 | 0.000925496 | NCOA2    | ENSG00000140396 |
| 8 | 71568021 | 71568272 | 71568146 | 10 | 12 | 2 | 5.083211637 | 0.00143337  |          | ENSG00000222928 |
| 8 | 71607662 | 71607841 | 71607760 | 8  | 9  | 6 | 1.675784056 | 0.141978    |          | ENSG00000213002 |
| 8 | 71609359 | 71609559 | 71609427 | 9  | 10 | 2 | 4.301179077 | 0.00512919  |          | ENSG00000213002 |
| 8 | 71914590 | 71914802 | 71914682 | 9  | 11 | 4 | 2.815317214 | 0.0183428   |          | ENSG00000223220 |
| 8 | 72133949 | 72134175 | 72134083 | 9  | 10 | 3 | 3.225884308 | 0.0139466   | EYA1     | ENSG00000104313 |
| 8 | 72293066 | 72293306 | 72293186 | 9  | 10 | 0 | 12.90353723 | 0.000195991 | EYA1     | ENSG00000104313 |
| 8 | 72402395 | 72402614 | 72402504 | 8  | 8  | 3 | 2.639359888 | 0.0415794   | EYA1     | ENSG00000104313 |
| 8 | 74249189 | 74249618 | 74249368 | 14 | 23 | 2 | 9.384390715 | 8.25E-07    |          | ENSG00000164764 |
| 8 | 74250203 | 74250758 | 74250426 | 18 | 34 | 2 | 13.68556979 | 3.24E-10    |          | ENSG00000164764 |
| 8 | 74299130 | 74299342 | 74299217 | 8  | 9  | 1 | 5.865244197 | 0.00272497  | RPL7     | ENSG00000147604 |
| 8 | 74370765 | 74370965 | 74370832 | 11 | 11 | 6 | 2.010940867 | 0.0640214   | RPL7     | ENSG00000147604 |
| 8 | 74431213 | 74431498 | 74431361 | 11 | 12 | 6 | 2.178519273 | 0.0416567   | RPL7     | ENSG00000147604 |
| 8 | 74953701 | 74954041 | 74953873 | 8  | 12 | 3 | 3.812408728 | 0.004404    | UBE2W    | ENSG00000104343 |
| 8 | 75162987 | 75163190 | 75163085 | 8  | 9  | 2 | 3.910162798 | 0.00955088  |          | ENSG00000212485 |
| 8 | 75379155 | 75379431 | 75379293 | 18 | 20 | 1 | 12.31701281 | 1.03E-06    | JPH1     | ENSG00000104369 |
| 8 | 75651197 | 75651604 | 75651459 | 8  | 15 | 2 | 6.256260476 | 0.000199274 |          | ENSG00000207417 |
| 8 | 75710221 | 75710553 | 75710387 | 12 | 16 | 7 | 2.492728784 | 0.0124193   | PI15     | ENSG00000137558 |
| 8 | 75833815 | 75834023 | 75833919 | 8  | 8  | 0 | 10.55743955 | 0.000925496 | PI15     | ENSG00000137558 |
| 8 | 76198453 | 76198659 | 76198556 | 8  | 8  | 0 | 10.55743955 | 0.000925496 | CRISPLD1 | ENSG00000121005 |
| 8 | 76300652 | 76301012 | 76300810 | 18 | 23 | 2 | 9.384390715 | 8.25E-07    | HNF4G    | ENSG00000164749 |
| 8 | 76558263 | 76558460 | 76558361 | 9  | 9  | 3 | 2.932622098 | 0.0242899   | HNF4G    | ENSG00000164749 |
| 8 | 77442690 | 77442886 | 77442788 | 10 | 11 | 5 | 2.346097679 | 0.0364013   |          | ENSG00000222231 |
| 8 | 78074710 | 78075015 | 78074862 | 8  | 12 | 7 | 1.906204364 | 0.0695918   | PXMP3    | ENSG00000164751 |
| 8 | 78625396 | 78625754 | 78625587 | 25 | 29 | 4 | 7.038293036 | 3.41E-07    |          |                 |
| 8 | 80194678 | 80194963 | 80194844 | 11 | 14 | 0 | 17.59573259 | 8.79E-06    | IL7      | ENSG00000104432 |

|   |          |          |          |     |     |    |             |             |         |                 |
|---|----------|----------|----------|-----|-----|----|-------------|-------------|---------|-----------------|
| 8 | 80199098 | 80199346 | 80199200 | 10  | 12  | 0  | 15.24963491 | 4.15E-05    | IL7     | ENSG00000104432 |
| 8 | 80874367 | 80874608 | 80874487 | 9   | 11  | 2  | 4.692195357 | 0.00272444  | HEY1    | ENSG00000164683 |
| 8 | 80948185 | 80948377 | 80948260 | 9   | 9   | 0  | 11.73048839 | 0.000425898 | HEY1    | ENSG00000164683 |
| 8 | 81007475 | 81007654 | 81007628 | 8   | 8   | 1  | 5.278719777 | 0.00542188  | MRPS28  | ENSG00000147586 |
| 8 | 81127352 | 81127571 | 81127426 | 9   | 10  | 1  | 6.451768616 | 0.00135978  | TPD52   | ENSG00000076554 |
| 8 | 81143049 | 81143841 | 81143453 | 100 | 145 | 2  | 57.08837685 | 1.97E-46    | TPD52   | ENSG00000076554 |
| 8 | 81155361 | 81155713 | 81155537 | 15  | 20  | 13 | 1.759573259 | 0.0475388   | TPD52   | ENSG00000076554 |
| 8 | 81155907 | 81156132 | 81156018 | 8   | 8   | 9  | 1.055743955 | 0.456865    | TPD52   | ENSG00000076554 |
| 8 | 81159109 | 81159423 | 81159263 | 10  | 13  | 4  | 3.28453675  | 0.00629037  | TPD52   | ENSG00000076554 |
| 8 | 81159895 | 81160090 | 81159986 | 8   | 8   | 7  | 1.319679944 | 0.283403    | TPD52   | ENSG00000076554 |
| 8 | 81166472 | 81166702 | 81166587 | 11  | 12  | 6  | 2.178519273 | 0.0416567   | TPD52   | ENSG00000076554 |
| 8 | 81220766 | 81220996 | 81220910 | 9   | 9   | 1  | 5.865244197 | 0.00272497  |         | ENSG00000209175 |
| 8 | 81305617 | 81305880 | 81305748 | 15  | 17  | 2  | 7.038293036 | 5.19E-05    |         | ENSG00000209175 |
| 8 | 81315312 | 81315649 | 81315443 | 9   | 14  | 6  | 2.513676084 | 0.016726    |         | ENSG00000209175 |
| 8 | 81441679 | 81442075 | 81441858 | 28  | 36  | 14 | 2.89352047  | 0.000111563 |         | ENSG00000206649 |
| 8 | 81560940 | 81561253 | 81561096 | 13  | 14  | 2  | 5.865244197 | 0.000387308 | ZBTB10  | ENSG00000205189 |
| 8 | 81576018 | 81576448 | 81576255 | 20  | 31  | 2  | 12.51252095 | 2.82E-09    | ZBTB10  | ENSG00000205189 |
| 8 | 81579048 | 81579295 | 81579174 | 8   | 9   | 4  | 2.346097679 | 0.050148    | ZBTB10  | ENSG00000205189 |
| 8 | 81643257 | 81643535 | 81643396 | 11  | 13  | 3  | 4.105670938 | 0.00243034  |         | ENSG00000188856 |
| 8 | 81653297 | 81653483 | 81653390 | 8   | 8   | 6  | 1.508205651 | 0.203852    |         | ENSG00000223327 |
| 8 | 81656351 | 81656773 | 81656554 | 40  | 50  | 4  | 11.96509816 | 2.00E-13    |         | ENSG00000223327 |
| 8 | 81761969 | 81762413 | 81762239 | 16  | 22  | 6  | 3.854303329 | 0.000260696 |         | ENSG00000212429 |
| 8 | 81827730 | 81828404 | 81828246 | 21  | 41  | 5  | 8.211341875 | 5.42E-10    |         | ENSG00000212429 |
| 8 | 81842717 | 81843018 | 81842866 | 22  | 23  | 6  | 4.021881735 | 0.000148535 |         | ENSG00000209154 |
| 8 | 81882658 | 81882865 | 81882758 | 9   | 9   | 3  | 2.932622098 | 0.0242899   |         | ENSG00000209154 |
| 8 | 81939637 | 81939879 | 81939751 | 10  | 12  | 6  | 2.178519273 | 0.0416567   | ZNF704  | ENSG00000164684 |
| 8 | 82125389 | 82125845 | 82125568 | 9   | 18  | 4  | 4.457585589 | 0.000353565 | PAG1    | ENSG00000076641 |
| 8 | 82179135 | 82179400 | 82179267 | 18  | 20  | 3  | 6.158506406 | 2.99E-05    | PAG1    | ENSG00000076641 |
| 8 | 82185970 | 82186260 | 82186134 | 9   | 11  | 6  | 2.010940867 | 0.0640214   | PAG1    | ENSG00000076641 |
| 8 | 82310140 | 82310335 | 82310237 | 9   | 10  | 5  | 2.150589539 | 0.0575848   | FABP5L3 | ENSG00000164687 |
| 8 | 82328176 | 82328404 | 82328290 | 10  | 10  | 3  | 3.225884308 | 0.0139466   | FABP5L3 | ENSG00000164687 |
| 8 | 82377402 | 82377603 | 82377502 | 12  | 12  | 6  | 2.178519273 | 0.0416567   | FABP5L3 | ENSG00000164687 |
| 8 | 82806955 | 82807292 | 82807123 | 10  | 13  | 0  | 16.42268375 | 1.91E-05    | CHMP4C  | ENSG00000164695 |
| 8 | 82807382 | 82807663 | 82807512 | 8   | 11  | 2  | 4.692195357 | 0.00272444  | CHMP4C  | ENSG00000164695 |

|   |          |          |          |    |    |    |             |             |          |                 |
|---|----------|----------|----------|----|----|----|-------------|-------------|----------|-----------------|
| 8 | 82917164 | 82917500 | 82917332 | 21 | 23 | 26 | 1.042710079 | 0.443237    | SNX16    | ENSG00000104497 |
| 8 | 83237277 | 83237545 | 83237411 | 13 | 16 | 2  | 6.647276756 | 0.000101928 | HNRNPA1P | ENSG00000206228 |
| 8 | 86276333 | 86276599 | 86276483 | 10 | 12 | 3  | 3.812408728 | 0.004404    | E2F5     | ENSG00000133740 |
| 8 | 86320126 | 86320478 | 86320300 | 14 | 19 | 2  | 7.820325595 | 1.32E-05    |          | ENSG00000176731 |
| 8 | 86378569 | 86378772 | 86378673 | 8  | 8  | 0  | 10.55743955 | 0.000925496 | CA13     | ENSG00000185015 |
| 8 | 86451129 | 86451365 | 86451247 | 11 | 12 | 2  | 5.083211637 | 0.00143337  | CA1      | ENSG00000133742 |
| 8 | 86545443 | 86545846 | 86545622 | 9  | 16 | 3  | 4.985457567 | 0.000385643 | CA3      | ENSG00000164879 |
| 8 | 86551121 | 86551338 | 86551240 | 9  | 9  | 4  | 2.346097679 | 0.050148    | CA2      | ENSG00000104267 |
| 8 | 86562672 | 86562925 | 86562798 | 11 | 13 | 5  | 2.737113958 | 0.0137917   | CA2      | ENSG00000104267 |
| 8 | 86739779 | 86740108 | 86739943 | 11 | 15 | 0  | 18.76878143 | 4.04E-06    |          | ENSG00000205178 |
| 8 | 87015972 | 87016167 | 87016075 | 8  | 8  | 3  | 2.639359888 | 0.0415794   |          | ENSG00000205162 |
| 8 | 87134297 | 87134521 | 87134409 | 8  | 9  | 5  | 1.955081399 | 0.0892323   | PSKH2    | ENSG00000147613 |
| 8 | 87189916 | 87190228 | 87190072 | 9  | 11 | 6  | 2.010940867 | 0.0640214   | ATP6V0D2 | ENSG00000147614 |
| 8 | 87206545 | 87206766 | 87206655 | 12 | 14 | 2  | 5.865244197 | 0.000387308 | ATP6V0D2 | ENSG00000147614 |
| 8 | 87218060 | 87218317 | 87218207 | 8  | 9  | 4  | 2.346097679 | 0.050148    | ATP6V0D2 | ENSG00000147614 |
| 8 | 87236769 | 87236949 | 87236859 | 8  | 8  | 2  | 3.519146518 | 0.017558    | ATP6V0D2 | ENSG00000147614 |
| 8 | 87281152 | 87281539 | 87281360 | 10 | 16 | 10 | 1.812893661 | 0.0578656   | SLC7A13  | ENSG00000164893 |
| 8 | 87338948 | 87339166 | 87339057 | 9  | 10 | 5  | 2.150589539 | 0.0575848   | SLC7A13  | ENSG00000164893 |
| 8 | 87339949 | 87340463 | 87340128 | 13 | 24 | 17 | 1.629234499 | 0.0548227   | SLC7A13  | ENSG00000164893 |
| 8 | 87402746 | 87402990 | 87402879 | 11 | 12 | 8  | 1.694403879 | 0.107291    | WWP1     | ENSG00000123124 |
| 8 | 87416671 | 87416850 | 87416760 | 8  | 8  | 2  | 3.519146518 | 0.017558    | WWP1     | ENSG00000123124 |
| 8 | 87423370 | 87423944 | 87423787 | 17 | 35 | 17 | 2.346097679 | 0.00106246  | WWP1     | ENSG00000123124 |
| 8 | 87425632 | 87426085 | 87425815 | 10 | 21 | 12 | 1.985159574 | 0.021936    | WWP1     | ENSG00000123124 |
| 8 | 87494631 | 87494845 | 87494738 | 8  | 8  | 7  | 1.319679944 | 0.283403    | WWP1     | ENSG00000123124 |
| 8 | 87511406 | 87512124 | 87511807 | 40 | 62 | 3  | 18.47551922 | 4.36E-18    |          | ENSG00000214965 |
| 8 | 87525486 | 87525709 | 87525628 | 9  | 10 | 5  | 2.150589539 | 0.0575848   |          | ENSG00000214965 |
| 8 | 87551649 | 87551873 | 87551804 | 8  | 10 | 3  | 3.225884308 | 0.0139466   |          | ENSG00000214965 |
| 8 | 87586217 | 87586396 | 87586306 | 8  | 8  | 2  | 3.519146518 | 0.017558    |          | ENSG00000214963 |
| 8 | 87589782 | 87590452 | 87590118 | 20 | 42 | 14 | 3.362740006 | 5.97E-06    | FAM82B   | ENSG00000176623 |
| 8 | 87595501 | 87595741 | 87595621 | 14 | 15 | 1  | 9.384390715 | 3.90E-05    |          | ENSG00000209264 |
| 8 | 87595794 | 87596096 | 87595945 | 17 | 20 | 8  | 2.737113958 | 0.0036449   |          | ENSG00000209264 |
| 8 | 87635338 | 87635582 | 87635502 | 8  | 9  | 2  | 3.910162798 | 0.00955088  |          | ENSG00000209264 |
| 8 | 87639528 | 87639772 | 87639595 | 10 | 12 | 3  | 3.812408728 | 0.004404    |          | ENSG00000209264 |
| 8 | 87700123 | 87700660 | 87700410 | 13 | 24 | 6  | 4.18946014  | 8.40E-05    |          | ENSG00000221137 |

|   |          |          |          |    |    |    |             |             |        |                 |
|---|----------|----------|----------|----|----|----|-------------|-------------|--------|-----------------|
| 8 | 87740000 | 87740225 | 87740112 | 8  | 10 | 3  | 3.225884308 | 0.0139466   |        | ENSG00000221137 |
| 8 | 87784770 | 87785018 | 87784901 | 14 | 15 | 8  | 2.085420159 | 0.0338693   | CNGB3  | ENSG00000170289 |
| 8 | 88092515 | 88092823 | 88092669 | 9  | 13 | 5  | 2.737113958 | 0.0137917   | CNBD1  | ENSG00000176571 |
| 8 | 88242496 | 88242675 | 88242594 | 8  | 8  | 1  | 5.278719777 | 0.00542188  | CNBD1  | ENSG00000176571 |
| 8 | 88247760 | 88248019 | 88247933 | 12 | 15 | 3  | 4.692195357 | 0.000718455 | CNBD1  | ENSG00000176571 |
| 8 | 88662236 | 88662471 | 88662368 | 8  | 9  | 7  | 1.466311049 | 0.20706     | WDR21C | ENSG00000176566 |
| 8 | 88663412 | 88663637 | 88663546 | 9  | 10 | 7  | 1.612942154 | 0.147335    | WDR21C | ENSG00000176566 |
| 8 | 88743994 | 88744306 | 88744156 | 15 | 18 | 2  | 7.429309316 | 2.63E-05    | WDR21C | ENSG00000176566 |
| 8 | 89325140 | 89325370 | 89325206 | 8  | 9  | 5  | 1.955081399 | 0.0892323   | MMP16  | ENSG00000156103 |
| 8 | 89325402 | 89325636 | 89325514 | 11 | 11 | 7  | 1.759573259 | 0.102361    | MMP16  | ENSG00000156103 |
| 8 | 89409015 | 89409194 | 89409137 | 8  | 8  | 4  | 2.111487911 | 0.0804809   | MMP16  | ENSG00000156103 |
| 8 | 89409209 | 89409590 | 89409458 | 10 | 17 | 8  | 2.346097679 | 0.0144542   | MMP16  | ENSG00000156103 |
| 8 | 89409936 | 89410516 | 89410087 | 19 | 39 | 14 | 3.128130238 | 2.65E-05    | MMP16  | ENSG00000156103 |
| 8 | 89496741 | 89497156 | 89496947 | 21 | 31 | 20 | 1.787502993 | 0.0176346   |        | ENSG00000209292 |
| 8 | 89503987 | 89504230 | 89504068 | 8  | 10 | 6  | 1.843362462 | 0.0964212   |        | ENSG00000209292 |
| 8 | 89518754 | 89518954 | 89518807 | 8  | 9  | 3  | 2.932622098 | 0.0242899   |        | ENSG00000209292 |
| 8 | 89611726 | 89611943 | 89611822 | 9  | 10 | 6  | 1.843362462 | 0.0964212   |        | ENSG00000209292 |
| 8 | 89635961 | 89636296 | 89636118 | 11 | 14 | 7  | 2.199466574 | 0.0303778   |        | ENSG00000209292 |
| 8 | 89679920 | 89680273 | 89680094 | 17 | 21 | 6  | 3.686724924 | 0.000453999 |        | ENSG00000209292 |
| 8 | 89833182 | 89833641 | 89833361 | 27 | 38 | 10 | 4.158991339 | 1.56E-06    |        | ENSG00000209292 |
| 8 | 90064578 | 90064775 | 90064698 | 8  | 8  | 5  | 1.759573259 | 0.13508     |        | ENSG00000213771 |
| 8 | 90334732 | 90334912 | 90334822 | 8  | 9  | 7  | 1.466311049 | 0.20706     |        | ENSG00000213771 |
| 8 | 90528261 | 90528561 | 90528386 | 9  | 11 | 3  | 3.519146518 | 0.00788869  |        | ENSG00000213771 |
| 8 | 90698459 | 90698745 | 90698598 | 8  | 11 | 2  | 4.692195357 | 0.00272444  | RIPK2  | ENSG00000104312 |
| 8 | 90807235 | 90807482 | 90807365 | 12 | 14 | 8  | 1.955081399 | 0.0506438   | RIPK2  | ENSG00000104312 |
| 8 | 90839058 | 90839417 | 90839195 | 8  | 13 | 6  | 2.346097679 | 0.0266147   | RIPK2  | ENSG00000104312 |
| 8 | 90840717 | 90841062 | 90840889 | 12 | 17 | 20 | 1.005470434 | 0.496566    | RIPK2  | ENSG00000104312 |
| 8 | 90938127 | 90938433 | 90938280 | 8  | 13 | 16 | 0.966040221 | 0.542489    |        | ENSG00000207359 |
| 8 | 90963949 | 90964352 | 90964168 | 27 | 35 | 12 | 3.24844294  | 4.27E-05    |        | ENSG00000207359 |
| 8 | 90983298 | 90983560 | 90983422 | 14 | 16 | 15 | 1.246364392 | 0.263987    | OSGIN2 | ENSG00000164823 |
| 8 | 90983642 | 90983838 | 90983671 | 8  | 9  | 3  | 2.932622098 | 0.0242899   | OSGIN2 | ENSG00000164823 |
| 8 | 91065421 | 91066259 | 91065745 | 24 | 68 | 22 | 3.519146518 | 6.77E-09    | NBN    | ENSG00000104320 |
| 8 | 91076927 | 91077411 | 91077097 | 9  | 17 | 5  | 3.519146518 | 0.00167472  | DECR1  | ENSG00000104325 |
| 8 | 91082226 | 91082731 | 91082561 | 11 | 24 | 4  | 5.865244197 | 8.64E-06    | DECR1  | ENSG00000104325 |

|   |          |          |          |    |     |    |             |             |         |                 |
|---|----------|----------|----------|----|-----|----|-------------|-------------|---------|-----------------|
| 8 | 91164098 | 91164309 | 91164203 | 8  | 11  | 7  | 1.759573259 | 0.102361    | CALB1   | ENSG00000104327 |
| 8 | 91618951 | 91619169 | 91619061 | 9  | 11  | 4  | 2.815317214 | 0.0183428   |         | ENSG00000199354 |
| 8 | 91652477 | 91652754 | 91652615 | 12 | 12  | 3  | 3.812408728 | 0.004404    |         | ENSG00000209319 |
| 8 | 91657247 | 91657493 | 91657382 | 10 | 11  | 1  | 7.038293036 | 0.000674435 |         | ENSG00000209319 |
| 8 | 91675056 | 91675382 | 91675219 | 13 | 19  | 8  | 2.606775198 | 0.00583935  |         | ENSG00000209319 |
| 8 | 91726087 | 91726604 | 91726355 | 25 | 38  | 6  | 6.535557819 | 1.65E-08    | TMEM64  | ENSG00000180694 |
| 8 | 91757696 | 91757937 | 91757816 | 9  | 11  | 8  | 1.564065119 | 0.151515    | TMEM64  | ENSG00000180694 |
| 8 | 92122034 | 92122384 | 92122214 | 9  | 14  | 5  | 2.932622098 | 0.00829617  | TMEM55A | ENSG00000155099 |
| 8 | 92150847 | 92151069 | 92150958 | 9  | 10  | 3  | 3.225884308 | 0.0139466   | OTUD6B  | ENSG00000155100 |
| 8 | 92151570 | 92151924 | 92151747 | 12 | 15  | 3  | 4.692195357 | 0.000718455 | OTUD6B  | ENSG00000155100 |
| 8 | 92917571 | 92917773 | 92917698 | 8  | 9   | 2  | 3.910162798 | 0.00955088  | RUNX1T1 | ENSG00000079102 |
| 8 | 93548238 | 93548448 | 93548331 | 8  | 9   | 0  | 11.73048839 | 0.000425898 |         | ENSG00000221172 |
| 8 | 93616747 | 93617059 | 93616903 | 20 | 22  | 2  | 8.993374435 | 1.66E-06    |         | ENSG00000221172 |
| 8 | 94046249 | 94046596 | 94046422 | 10 | 16  | 10 | 1.812893661 | 0.0578656   | C8orf83 | ENSG00000205133 |
| 8 | 94046755 | 94047099 | 94046927 | 8  | 13  | 7  | 2.052835469 | 0.046392    | C8orf83 | ENSG00000205133 |
| 8 | 94149727 | 94150123 | 94149954 | 16 | 21  | 12 | 1.985159574 | 0.021936    | C8orf83 | ENSG00000205133 |
| 8 | 94241752 | 94241941 | 94241846 | 10 | 10  | 11 | 1.075294769 | 0.434143    |         | ENSG00000214950 |
| 8 | 94479420 | 94479643 | 94479531 | 12 | 12  | 6  | 2.178519273 | 0.0416567   |         | ENSG00000209199 |
| 8 | 94525006 | 94525214 | 94525110 | 10 | 10  | 2  | 4.301179077 | 0.00512919  |         | ENSG00000209199 |
| 8 | 94600364 | 94601028 | 94600836 | 35 | 55  | 4  | 13.138147   | 5.86E-15    |         | ENSG00000209199 |
| 8 | 94646883 | 94647083 | 94646983 | 10 | 12  | 5  | 2.541605819 | 0.0225912   |         | ENSG00000209199 |
| 8 | 94783093 | 94783283 | 94783146 | 8  | 8   | 1  | 5.278719777 | 0.00542188  |         | ENSG00000188343 |
| 8 | 94816495 | 94816718 | 94816625 | 9  | 11  | 0  | 14.07658607 | 9.02E-05    | RBM12B  | ENSG00000183808 |
| 8 | 94822112 | 94822407 | 94822284 | 11 | 15  | 9  | 1.876878143 | 0.0544542   | RBM12B  | ENSG00000183808 |
| 8 | 94822442 | 94822779 | 94822607 | 15 | 20  | 9  | 2.463402563 | 0.00689886  | RBM12B  | ENSG00000183808 |
| 8 | 94832476 | 94832837 | 94832655 | 24 | 31  | 2  | 12.51252095 | 2.82E-09    | TMEM67  | ENSG00000164953 |
| 8 | 94836146 | 94836351 | 94836257 | 10 | 10  | 5  | 2.150589539 | 0.0575848   | TMEM67  | ENSG00000164953 |
| 8 | 94836792 | 94836980 | 94836886 | 10 | 10  | 3  | 3.225884308 | 0.0139466   | TMEM67  | ENSG00000164953 |
| 8 | 94871787 | 94872048 | 94871888 | 9  | 10  | 1  | 6.451768616 | 0.00135978  | TMEM67  | ENSG00000164953 |
| 8 | 94903745 | 94903939 | 94903910 | 9  | 9   | 4  | 2.346097679 | 0.050148    | TMEM67  | ENSG00000164953 |
| 8 | 94999053 | 94999368 | 94999210 | 8  | 12  | 10 | 1.386330446 | 0.21117     | PPM2C   | ENSG00000164951 |
| 8 | 95042448 | 95042634 | 95042522 | 10 | 10  | 7  | 1.612942154 | 0.147335    | PPM2C   | ENSG00000164951 |
| 8 | 95056636 | 95056913 | 95056774 | 10 | 13  | 19 | 0.821134188 | 0.720637    | PPM2C   | ENSG00000164951 |
| 8 | 95072125 | 95073157 | 95072413 | 69 | 142 | 12 | 12.90353723 | 1.08E-34    | PPM2C   | ENSG00000164951 |

|   |          |          |          |     |     |    |             |             |          |                 |
|---|----------|----------|----------|-----|-----|----|-------------|-------------|----------|-----------------|
| 8 | 95140864 | 95141070 | 95141013 | 8   | 9   | 2  | 3.910162798 | 0.00955088  | PPM2C    | ENSG00000164951 |
| 8 | 95161277 | 95161477 | 95161345 | 9   | 11  | 2  | 4.692195357 | 0.00272444  | CDH17    | ENSG00000079112 |
| 8 | 95248502 | 95248882 | 95248692 | 26  | 34  | 1  | 20.52835469 | 3.17E-11    | CDH17    | ENSG00000079112 |
| 8 | 95260970 | 95261149 | 95261059 | 9   | 10  | 1  | 6.451768616 | 0.00135978  | CDH17    | ENSG00000079112 |
| 8 | 95343725 | 95343965 | 95343814 | 8   | 10  | 2  | 4.301179077 | 0.00512919  | GEM      | ENSG00000164949 |
| 8 | 95359074 | 95359317 | 95359178 | 8   | 9   | 7  | 1.466311049 | 0.20706     | GEM      | ENSG00000164949 |
| 8 | 95439159 | 95439368 | 95439263 | 9   | 11  | 3  | 3.519146518 | 0.00788869  |          | ENSG00000197065 |
| 8 | 95486772 | 95487047 | 95486946 | 14  | 18  | 3  | 5.571981987 | 0.000108726 |          | ENSG00000197065 |
| 8 | 95528718 | 95528958 | 95528836 | 8   | 8   | 4  | 2.111487911 | 0.0804809   |          | ENSG00000197065 |
| 8 | 95556243 | 95556640 | 95556461 | 10  | 18  | 7  | 2.785990993 | 0.00480525  |          | ENSG00000197065 |
| 8 | 95610136 | 95610461 | 95610298 | 18  | 22  | 5  | 4.496687217 | 9.59E-05    |          | ENSG00000212997 |
| 8 | 95634726 | 95635216 | 95635015 | 14  | 23  | 10 | 2.559379286 | 0.00330263  | KIAA1429 | ENSG00000164944 |
| 8 | 95635399 | 95635746 | 95635572 | 9   | 13  | 4  | 3.28453675  | 0.00629037  | KIAA1429 | ENSG00000164944 |
| 8 | 95694363 | 95694670 | 95694516 | 11  | 16  | 2  | 6.647276756 | 0.000101928 | RBM35A   | ENSG00000104413 |
| 8 | 95720380 | 95720871 | 95720692 | 16  | 30  | 8  | 4.040501558 | 1.98E-05    | RBM35A   | ENSG00000104413 |
| 8 | 95721966 | 95722629 | 95722450 | 18  | 35  | 21 | 1.919534464 | 0.00687348  | RBM35A   | ENSG00000104413 |
| 8 | 95722919 | 95723168 | 95723044 | 10  | 12  | 4  | 3.049926982 | 0.0108184   | RBM35A   | ENSG00000104413 |
| 8 | 95723754 | 95724189 | 95723919 | 11  | 20  | 6  | 3.519146518 | 0.000784044 | RBM35A   | ENSG00000104413 |
| 8 | 95738479 | 95739379 | 95739016 | 133 | 204 | 16 | 14.14558894 | 3.93E-50    |          | ENSG00000209267 |
| 8 | 95800717 | 95801338 | 95801021 | 14  | 31  | 6  | 5.36250898  | 1.31E-06    | DPY19L4  | ENSG00000156162 |
| 8 | 95904082 | 95904376 | 95904229 | 8   | 12  | 7  | 1.906204364 | 0.0695918   | INTS8    | ENSG00000164941 |
| 8 | 95904971 | 95905259 | 95905092 | 9   | 12  | 0  | 15.24963491 | 4.15E-05    | INTS8    | ENSG00000164941 |
| 8 | 95976892 | 95977154 | 95977039 | 8   | 10  | 3  | 3.225884308 | 0.0139466   | C8orf38  | ENSG00000156170 |
| 8 | 96028568 | 96028792 | 96028717 | 8   | 10  | 2  | 4.301179077 | 0.00512919  | TP53INP1 | ENSG00000164938 |
| 8 | 96030700 | 96031500 | 96031003 | 104 | 132 | 2  | 52.00516521 | 3.95E-42    | TP53INP1 | ENSG00000164938 |
| 8 | 96032625 | 96033168 | 96032989 | 13  | 27  | 7  | 4.105670938 | 4.08E-05    | TP53INP1 | ENSG00000164938 |
| 8 | 96071969 | 96072255 | 96072105 | 8   | 12  | 4  | 3.049926982 | 0.0108184   | C8orf38  | ENSG00000156170 |
| 8 | 96072402 | 96072916 | 96072711 | 17  | 30  | 11 | 3.030376168 | 0.000239888 | C8orf38  | ENSG00000156170 |
| 8 | 96106072 | 96106369 | 96106220 | 11  | 13  | 4  | 3.28453675  | 0.00629037  | C8orf38  | ENSG00000156170 |
| 8 | 96109283 | 96109502 | 96109354 | 10  | 10  | 5  | 2.150589539 | 0.0575848   | C8orf38  | ENSG00000156170 |
| 8 | 96148816 | 96149003 | 96148952 | 8   | 9   | 4  | 2.346097679 | 0.050148    |          | ENSG00000200525 |
| 8 | 96167083 | 96167485 | 96167250 | 25  | 33  | 7  | 4.985457567 | 1.25E-06    |          | ENSG00000200525 |
| 8 | 96177694 | 96177918 | 96177778 | 10  | 11  | 2  | 4.692195357 | 0.00272444  | PLEKHF2  | ENSG00000175895 |
| 8 | 96178088 | 96178330 | 96178194 | 11  | 11  | 2  | 4.692195357 | 0.00272444  | PLEKHF2  | ENSG00000175895 |

|   |          |          |          |    |     |    |             |             |         |                 |
|---|----------|----------|----------|----|-----|----|-------------|-------------|---------|-----------------|
| 8 | 96181702 | 96181902 | 96181817 | 8  | 8   | 11 | 0.879786629 | 0.621301    | PLEKHF2 | ENSG00000175895 |
| 8 | 96182554 | 96182753 | 96182653 | 8  | 9   | 4  | 2.346097679 | 0.050148    | PLEKHF2 | ENSG00000175895 |
| 8 | 96184112 | 96184377 | 96184244 | 9  | 10  | 9  | 1.290353723 | 0.279648    | PLEKHF2 | ENSG00000175895 |
| 8 | 96193971 | 96195073 | 96194269 | 30 | 70  | 28 | 2.871947158 | 1.98E-07    | PLEKHF2 | ENSG00000175895 |
| 8 | 96214810 | 96215046 | 96214981 | 10 | 14  | 4  | 3.519146518 | 0.00361132  | PLEKHF2 | ENSG00000175895 |
| 8 | 96215938 | 96216142 | 96215998 | 8  | 10  | 7  | 1.612942154 | 0.147335    | PLEKHF2 | ENSG00000175895 |
| 8 | 96219053 | 96219347 | 96219206 | 8  | 13  | 8  | 1.824742639 | 0.0744168   | PLEKHF2 | ENSG00000175895 |
| 8 | 96232231 | 96232424 | 96232327 | 10 | 11  | 3  | 3.519146518 | 0.00788869  | PLEKHF2 | ENSG00000175895 |
| 8 | 96253632 | 96253879 | 96253731 | 9  | 11  | 6  | 2.010940867 | 0.0640214   | PLEKHF2 | ENSG00000175895 |
| 8 | 96272930 | 96273172 | 96273047 | 9  | 12  | 6  | 2.178519273 | 0.0416567   | PLEKHF2 | ENSG00000175895 |
| 8 | 96274380 | 96274717 | 96274538 | 22 | 27  | 21 | 1.49297125  | 0.078146    | PLEKHF2 | ENSG00000175895 |
| 8 | 96304943 | 96305223 | 96305054 | 12 | 15  | 6  | 2.68125449  | 0.0103552   | C8orf37 | ENSG00000156172 |
| 8 | 96305372 | 96305707 | 96305539 | 16 | 19  | 7  | 2.932622098 | 0.00293566  | C8orf37 | ENSG00000156172 |
| 8 | 96306760 | 96307396 | 96307080 | 53 | 106 | 9  | 12.55162258 | 2.74E-26    | C8orf37 | ENSG00000156172 |
| 8 | 96350498 | 96351364 | 96351191 | 21 | 52  | 18 | 3.272188868 | 8.89E-07    | C8orf37 | ENSG00000156172 |
| 8 | 96367845 | 96368057 | 96367951 | 9  | 9   | 1  | 5.865244197 | 0.00272497  | C8orf37 | ENSG00000156172 |
| 8 | 96549489 | 96549668 | 96549578 | 8  | 8   | 1  | 5.278719777 | 0.00542188  |         | ENSG00000202112 |
| 8 | 96840041 | 96840325 | 96840212 | 9  | 10  | 4  | 2.580707446 | 0.0306059   |         | ENSG00000223297 |
| 8 | 96854467 | 96854910 | 96854641 | 49 | 58  | 11 | 5.767490127 | 3.76E-11    |         | ENSG00000223297 |
| 8 | 96972003 | 96972211 | 96972099 | 8  | 8   | 1  | 5.278719777 | 0.00542188  |         | ENSG00000183663 |
| 8 | 97342722 | 97342951 | 97342836 | 10 | 10  | 3  | 3.225884308 | 0.0139466   | MTERFD1 | ENSG00000156469 |
| 8 | 97343064 | 97343468 | 97343243 | 13 | 20  | 0  | 24.63402563 | 8.35E-08    | PTDSS1  | ENSG00000156471 |
| 8 | 97414587 | 97414929 | 97414758 | 12 | 17  | 4  | 4.222975822 | 0.000640773 |         | ENSG00000199732 |
| 8 | 97434706 | 97434906 | 97434806 | 9  | 9   | 1  | 5.865244197 | 0.00272497  |         | ENSG00000199732 |
| 8 | 97446865 | 97447099 | 97446992 | 12 | 12  | 0  | 15.24963491 | 4.15E-05    |         | ENSG00000199732 |
| 8 | 97548528 | 97548834 | 97548684 | 9  | 10  | 4  | 2.580707446 | 0.0306059   | SDC2    | ENSG00000169439 |
| 8 | 97574723 | 97575350 | 97575042 | 9  | 22  | 13 | 1.927151665 | 0.0235996   | SDC2    | ENSG00000169439 |
| 8 | 98009857 | 98010239 | 98010015 | 9  | 14  | 6  | 2.513676084 | 0.016726    |         | ENSG00000104324 |
| 8 | 98027187 | 98027541 | 98027362 | 9  | 13  | 4  | 3.28453675  | 0.00629037  |         | ENSG00000104324 |
| 8 | 98347735 | 98347948 | 98347841 | 10 | 12  | 3  | 3.812408728 | 0.004404    | TSPYL5  | ENSG00000180543 |
| 8 | 98359282 | 98359657 | 98359541 | 13 | 20  | 3  | 6.158506406 | 2.99E-05    | TSPYL5  | ENSG00000180543 |
| 8 | 98406787 | 98406997 | 98406935 | 9  | 9   | 0  | 11.73048839 | 0.000425898 |         | ENSG00000207215 |
| 8 | 98505455 | 98505778 | 98505619 | 16 | 20  | 4  | 4.926805125 | 0.00010522  |         | ENSG00000207215 |
| 8 | 98634918 | 98635128 | 98635036 | 8  | 11  | 5  | 2.346097679 | 0.0364013   |         | ENSG00000208981 |

|   |           |           |           |    |    |    |             |             |         |                 |
|---|-----------|-----------|-----------|----|----|----|-------------|-------------|---------|-----------------|
| 8 | 98641430  | 98641701  | 98641565  | 10 | 13 | 8  | 1.824742639 | 0.0744168   |         | ENSG00000208981 |
| 8 | 98663956  | 98664181  | 98664024  | 10 | 10 | 4  | 2.580707446 | 0.0306059   |         | ENSG00000208981 |
| 8 | 98724819  | 98725163  | 98724990  | 10 | 13 | 8  | 1.824742639 | 0.0744168   | MTDH    | ENSG00000147649 |
| 8 | 98856901  | 98857205  | 98857061  | 10 | 13 | 6  | 2.346097679 | 0.0266147   | LAPTM4B | ENSG00000104341 |
| 8 | 98859348  | 98859543  | 98859389  | 8  | 8  | 1  | 5.278719777 | 0.00542188  | LAPTM4B | ENSG00000104341 |
| 8 | 98912922  | 98913201  | 98913080  | 21 | 23 | 4  | 5.630634429 | 1.63E-05    | MATN2   | ENSG00000132561 |
| 8 | 99126724  | 99127120  | 99126903  | 11 | 19 | 7  | 2.932622098 | 0.00293566  | RPL30   | ENSG00000156482 |
| 8 | 99167020  | 99167249  | 99167125  | 9  | 12 | 7  | 1.906204364 | 0.0695918   | C8orf47 | ENSG00000177459 |
| 8 | 99198384  | 99198825  | 99198543  | 10 | 21 | 6  | 3.686724924 | 0.000453999 | HRSP12  | ENSG00000132541 |
| 8 | 99246083  | 99246306  | 99246187  | 9  | 11 | 6  | 2.010940867 | 0.0640214   |         | ENSG00000208954 |
| 8 | 99251485  | 99251687  | 99251586  | 8  | 10 | 5  | 2.150589539 | 0.0575848   |         | ENSG00000208954 |
| 8 | 99321486  | 99321903  | 99321649  | 14 | 20 | 1  | 12.31701281 | 1.03E-06    | NPAL2   | ENSG00000104361 |
| 8 | 99340880  | 99341313  | 99341114  | 14 | 25 | 6  | 4.357038546 | 4.72E-05    | NPAL2   | ENSG00000104361 |
| 8 | 99387499  | 99387807  | 99387653  | 9  | 12 | 1  | 7.624817456 | 0.000332769 | NPAL2   | ENSG00000104361 |
| 8 | 99898878  | 99899095  | 99898992  | 10 | 12 | 9  | 1.524963491 | 0.154777    | STK3    | ENSG00000104375 |
| 8 | 99907496  | 99907743  | 99907619  | 11 | 12 | 6  | 2.178519273 | 0.0416567   | STK3    | ENSG00000104375 |
| 8 | 99922347  | 99922526  | 99922436  | 9  | 9  | 2  | 3.910162798 | 0.00955088  | STK3    | ENSG00000104375 |
| 8 | 100025803 | 100026119 | 100025957 | 10 | 15 | 2  | 6.256260476 | 0.000199274 | OSR2    | ENSG00000164920 |
| 8 | 100047895 | 100048325 | 100048129 | 15 | 26 | 8  | 3.519146518 | 0.000175368 | OSR2    | ENSG00000164920 |
| 8 | 100064595 | 100064775 | 100064625 | 8  | 8  | 2  | 3.519146518 | 0.017558    | VPS13B  | ENSG00000132549 |
| 8 | 100094070 | 100094876 | 100094544 | 19 | 37 | 14 | 2.971723726 | 6.95E-05    | VPS13B  | ENSG00000132549 |
| 8 | 100577137 | 100577471 | 100577304 | 15 | 15 | 23 | 0.78203256  | 0.783431    |         | ENSG00000206699 |
| 8 | 100787275 | 100787577 | 100787426 | 15 | 20 | 10 | 2.239456875 | 0.0121685   |         | ENSG00000220387 |
| 8 | 100880640 | 100880953 | 100880796 | 11 | 14 | 6  | 2.513676084 | 0.016726    | COX6C   | ENSG00000164919 |
| 8 | 100885618 | 100885967 | 100885792 | 10 | 15 | 10 | 1.706252857 | 0.0822346   | COX6C   | ENSG00000164919 |
| 8 | 100941357 | 100941559 | 100941437 | 8  | 11 | 11 | 1.173048839 | 0.349489    | COX6C   | ENSG00000164919 |
| 8 | 100973868 | 100974047 | 100973957 | 8  | 8  | 4  | 2.111487911 | 0.0804809   | COX6C   | ENSG00000164919 |
| 8 | 100974836 | 100975265 | 100975053 | 8  | 16 | 5  | 3.323638378 | 0.00288759  | COX6C   | ENSG00000164919 |
| 8 | 100986426 | 100986721 | 100986573 | 14 | 15 | 1  | 9.384390715 | 3.90E-05    | COX6C   | ENSG00000164919 |
| 8 | 101063862 | 101064104 | 101063976 | 9  | 12 | 5  | 2.541605819 | 0.0225912   |         | ENSG00000212414 |
| 8 | 101088583 | 101089019 | 101088842 | 16 | 24 | 3  | 7.331555246 | 2.13E-06    |         | ENSG00000212414 |
| 8 | 101100687 | 101100874 | 101100780 | 8  | 8  | 1  | 5.278719777 | 0.00542188  |         | ENSG00000221753 |
| 8 | 101205192 | 101205502 | 101205347 | 19 | 22 | 10 | 2.452738482 | 0.00515848  | RGS22   | ENSG00000132554 |
| 8 | 101231263 | 101231458 | 101231401 | 9  | 10 | 5  | 2.150589539 | 0.0575848   | POLR2K  | ENSG00000147669 |



|   |           |           |           |    |    |    |             |             |         |                 |
|---|-----------|-----------|-----------|----|----|----|-------------|-------------|---------|-----------------|
| 8 | 101231913 | 101232186 | 101232045 | 11 | 14 | 13 | 1.256838042 | 0.269506    | POLR2K  | ENSG00000147669 |
| 8 | 101239831 | 101240092 | 101239971 | 11 | 12 | 3  | 3.812408728 | 0.004404    | SPAG1   | ENSG00000104450 |
| 8 | 101294385 | 101294586 | 101294485 | 9  | 11 | 1  | 7.038293036 | 0.000674435 |         | ENSG00000199667 |
| 8 | 101294963 | 101295219 | 101295091 | 13 | 14 | 2  | 5.865244197 | 0.000387308 |         | ENSG00000199667 |
| 8 | 101391728 | 101392023 | 101391860 | 8  | 11 | 10 | 1.279689643 | 0.277323    | RNF19A  | ENSG00000034677 |
| 8 | 101462537 | 101462726 | 101462631 | 9  | 9  | 0  | 11.73048839 | 0.000425898 | RNF19A  | ENSG00000034677 |
| 8 | 101477374 | 101477788 | 101477466 | 9  | 15 | 3  | 4.692195357 | 0.000718455 | RNF19A  | ENSG00000034677 |
| 8 | 101498566 | 101498877 | 101498702 | 8  | 12 | 2  | 5.083211637 | 0.00143337  | RNF19A  | ENSG00000034677 |
| 8 | 101526096 | 101526551 | 101526265 | 22 | 32 | 3  | 9.677652924 | 9.12E-09    | ANKRD46 | ENSG00000186106 |
| 8 | 101538997 | 101539194 | 101539095 | 10 | 11 | 3  | 3.519146518 | 0.00788869  | ANKRD46 | ENSG00000186106 |
| 8 | 101553508 | 101553841 | 101553674 | 11 | 16 | 5  | 3.323638378 | 0.00288759  | ANKRD46 | ENSG00000186106 |
| 8 | 101569286 | 101569675 | 101569465 | 28 | 34 | 7  | 5.132088672 | 6.85E-07    | ANKRD46 | ENSG00000186106 |
| 8 | 101573721 | 101574068 | 101573894 | 8  | 13 | 10 | 1.49297125  | 0.157311    | ANKRD46 | ENSG00000186106 |
| 8 | 101591632 | 101591912 | 101591772 | 11 | 13 | 3  | 4.105670938 | 0.00243034  | ANKRD46 | ENSG00000186106 |
| 8 | 101608389 | 101608607 | 101608498 | 10 | 13 | 4  | 3.28453675  | 0.00629037  | ANKRD46 | ENSG00000186106 |
| 8 | 101622275 | 101622516 | 101622395 | 9  | 12 | 2  | 5.083211637 | 0.00143337  | ANKRD46 | ENSG00000186106 |
| 8 | 101640981 | 101641358 | 101641180 | 14 | 19 | 5  | 3.910162798 | 0.000546977 | ANKRD46 | ENSG00000186106 |
| 8 | 101645499 | 101645685 | 101645592 | 11 | 12 | 1  | 7.624817456 | 0.000332769 | ANKRD46 | ENSG00000186106 |
| 8 | 101688215 | 101688394 | 101688374 | 8  | 8  | 2  | 3.519146518 | 0.017558    | SNX31   | ENSG00000174226 |
| 8 | 101723801 | 101723980 | 101723890 | 8  | 9  | 7  | 1.466311049 | 0.20706     | SNX31   | ENSG00000174226 |
| 8 | 101748994 | 101749222 | 101749143 | 8  | 9  | 2  | 3.910162798 | 0.00955088  |         | ENSG00000208885 |
| 8 | 101754923 | 101755329 | 101755100 | 29 | 35 | 2  | 14.07658607 | 1.57E-10    |         | ENSG00000208885 |
| 8 | 101762291 | 101762640 | 101762465 | 9  | 15 | 2  | 6.256260476 | 0.000199274 |         | ENSG00000208885 |
| 8 | 101762725 | 101763057 | 101762892 | 18 | 23 | 8  | 3.128130238 | 0.000832453 |         | ENSG00000208885 |
| 8 | 101802078 | 101802304 | 101802196 | 9  | 11 | 8  | 1.564065119 | 0.151515    | PABPC1  | ENSG00000070756 |
| 8 | 101803416 | 101803674 | 101803581 | 8  | 11 | 3  | 3.519146518 | 0.00788869  | PABPC1  | ENSG00000070756 |
| 8 | 101804362 | 101804743 | 101804564 | 10 | 16 | 6  | 2.848832895 | 0.00632407  | PABPC1  | ENSG00000070756 |
| 8 | 101827615 | 101828039 | 101827873 | 25 | 37 | 9  | 4.457585589 | 1.02E-06    |         | ENSG00000208882 |
| 8 | 101829473 | 101829907 | 101829698 | 21 | 29 | 11 | 2.932622098 | 0.000389335 |         | ENSG00000202001 |
| 8 | 101906049 | 101906261 | 101906155 | 9  | 12 | 1  | 7.624817456 | 0.000332769 |         | ENSG00000222795 |
| 8 | 101908351 | 101908656 | 101908499 | 10 | 13 | 4  | 3.28453675  | 0.00629037  |         | ENSG00000222795 |
| 8 | 101916983 | 101917273 | 101917128 | 10 | 13 | 8  | 1.824742639 | 0.0744168   |         | ENSG00000222795 |
| 8 | 101939860 | 101940090 | 101940015 | 8  | 10 | 6  | 1.843362462 | 0.0964212   |         | ENSG00000222795 |
| 8 | 101963452 | 101963681 | 101963526 | 10 | 11 | 1  | 7.038293036 | 0.000674435 | RPS26P6 | ENSG00000212994 |

|   |           |           |           |    |    |    |             |             |         |                 |
|---|-----------|-----------|-----------|----|----|----|-------------|-------------|---------|-----------------|
| 8 | 101969933 | 101970189 | 101970080 | 14 | 15 | 3  | 4.692195357 | 0.000718455 | RPS26P6 | ENSG00000212994 |
| 8 | 101981842 | 101982153 | 101981997 | 17 | 19 | 1  | 11.73048839 | 2.14E-06    | RPS26P6 | ENSG00000212994 |
| 8 | 101990047 | 101990304 | 101990175 | 8  | 11 | 1  | 7.038293036 | 0.000674435 | RPS26P6 | ENSG00000212994 |
| 8 | 102031652 | 102031972 | 102031812 | 11 | 15 | 9  | 1.876878143 | 0.0544542   | YWHAZ   | ENSG00000164924 |
| 8 | 102033304 | 102033628 | 102033466 | 14 | 19 | 4  | 4.692195357 | 0.000193572 | YWHAZ   | ENSG00000164924 |
| 8 | 102034600 | 102034954 | 102034777 | 12 | 18 | 8  | 2.476436439 | 0.00924552  | YWHAZ   | ENSG00000164924 |
| 8 | 102085046 | 102085304 | 102085175 | 8  | 10 | 4  | 2.580707446 | 0.0306059   |         | ENSG00000207080 |
| 8 | 102132695 | 102133526 | 102133042 | 13 | 34 | 26 | 1.520618866 | 0.0495232   |         | ENSG00000202360 |
| 8 | 102135049 | 102135707 | 102135468 | 30 | 51 | 4  | 12.19970793 | 9.88E-14    |         | ENSG00000202360 |
| 8 | 102147329 | 102147659 | 102147502 | 9  | 12 | 0  | 15.24963491 | 4.15E-05    |         | ENSG00000202360 |
| 8 | 102159396 | 102159654 | 102159501 | 8  | 11 | 5  | 2.346097679 | 0.0364013   |         | ENSG00000202360 |
| 8 | 102160553 | 102160857 | 102160705 | 16 | 19 | 3  | 5.865244197 | 5.72E-05    |         | ENSG00000202360 |
| 8 | 102204751 | 102204951 | 102204832 | 8  | 9  | 6  | 1.675784056 | 0.141978    |         | ENSG00000202360 |
| 8 | 102205174 | 102205380 | 102205232 | 8  | 10 | 2  | 4.301179077 | 0.00512919  |         | ENSG00000202360 |
| 8 | 102207606 | 102207865 | 102207748 | 11 | 13 | 7  | 2.052835469 | 0.046392    |         | ENSG00000202360 |
| 8 | 102251779 | 102251987 | 102251883 | 9  | 10 | 3  | 3.225884308 | 0.0139466   |         | ENSG00000202360 |
| 8 | 102287129 | 102287712 | 102287308 | 12 | 25 | 5  | 5.083211637 | 1.58E-05    | ZNF706  | ENSG00000120963 |
| 8 | 102315371 | 102315715 | 102315543 | 10 | 15 | 3  | 4.692195357 | 0.000718455 | ZNF706  | ENSG00000120963 |
| 8 | 102326790 | 102327039 | 102326940 | 12 | 14 | 5  | 2.932622098 | 0.00829617  | ZNF706  | ENSG00000120963 |
| 8 | 102408409 | 102408662 | 102408535 | 13 | 14 | 8  | 1.955081399 | 0.0506438   |         | ENSG00000180230 |
| 8 | 102414363 | 102414684 | 102414523 | 11 | 15 | 6  | 2.68125449  | 0.0103552   |         | ENSG00000180230 |
| 8 | 102442100 | 102442869 | 102442457 | 17 | 43 | 20 | 2.457816616 | 0.000201157 |         | ENSG00000180230 |
| 8 | 102450197 | 102450435 | 102450359 | 10 | 11 | 3  | 3.519146518 | 0.00788869  |         | ENSG00000180230 |
| 8 | 102457264 | 102457810 | 102457631 | 11 | 23 | 12 | 2.165628626 | 0.0100985   |         | ENSG00000180230 |
| 8 | 102491238 | 102491813 | 102491528 | 19 | 38 | 15 | 2.859306546 | 8.61E-05    |         | ENSG00000222841 |
| 8 | 102518203 | 102518865 | 102518638 | 35 | 70 | 15 | 5.205404224 | 2.97E-12    |         | ENSG00000222841 |
| 8 | 102519445 | 102520339 | 102520014 | 29 | 60 | 20 | 3.407427581 | 7.78E-08    |         | ENSG00000222841 |
| 8 | 102533020 | 102533591 | 102533305 | 15 | 28 | 14 | 2.267894423 | 0.00376222  | GRHL2   | ENSG00000083307 |
| 8 | 102540602 | 102540855 | 102540779 | 8  | 11 | 2  | 4.692195357 | 0.00272444  | GRHL2   | ENSG00000083307 |
| 8 | 102540858 | 102541113 | 102540976 | 8  | 9  | 8  | 1.303387599 | 0.281715    | GRHL2   | ENSG00000083307 |
| 8 | 102542157 | 102542492 | 102542324 | 14 | 19 | 16 | 1.380057458 | 0.163303    | GRHL2   | ENSG00000083307 |
| 8 | 102548055 | 102548409 | 102548285 | 14 | 18 | 3  | 5.571981987 | 0.000108726 | GRHL2   | ENSG00000083307 |
| 8 | 102548476 | 102548770 | 102548623 | 13 | 14 | 8  | 1.955081399 | 0.0506438   | GRHL2   | ENSG00000083307 |
| 8 | 102551334 | 102551612 | 102551473 | 11 | 14 | 10 | 1.599612054 | 0.114822    | GRHL2   | ENSG00000083307 |

|   |           |           |           |     |     |    |             |             |       |                 |
|---|-----------|-----------|-----------|-----|-----|----|-------------|-------------|-------|-----------------|
| 8 | 102555549 | 102556119 | 102555726 | 22  | 44  | 5  | 8.797866295 | 7.25E-11    | GRHL2 | ENSG00000083307 |
| 8 | 102570084 | 102570389 | 102570235 | 11  | 16  | 7  | 2.492728784 | 0.0124193   | GRHL2 | ENSG00000083307 |
| 8 | 102573042 | 102573822 | 102573221 | 11  | 34  | 13 | 2.932622098 | 0.000144323 | GRHL2 | ENSG00000083307 |
| 8 | 102573881 | 102574295 | 102574101 | 54  | 66  | 14 | 5.239618149 | 1.03E-11    | GRHL2 | ENSG00000083307 |
| 8 | 102574524 | 102574757 | 102574640 | 8   | 9   | 4  | 2.346097679 | 0.050148    | GRHL2 | ENSG00000083307 |
| 8 | 102575277 | 102575643 | 102575464 | 12  | 19  | 6  | 3.351568112 | 0.00134187  | GRHL2 | ENSG00000083307 |
| 8 | 102585889 | 102586562 | 102586225 | 8   | 25  | 8  | 3.388807758 | 0.000297109 | GRHL2 | ENSG00000083307 |
| 8 | 102587112 | 102587483 | 102587291 | 12  | 20  | 10 | 2.239456875 | 0.0121685   | GRHL2 | ENSG00000083307 |
| 8 | 102596929 | 102597325 | 102597088 | 8   | 15  | 7  | 2.346097679 | 0.0195693   |       | ENSG00000208823 |
| 8 | 102660316 | 102660528 | 102660422 | 9   | 9   | 3  | 2.932622098 | 0.0242899   | GRHL2 | ENSG00000083307 |
| 8 | 102684872 | 102685325 | 102685122 | 24  | 33  | 11 | 3.323638378 | 5.37E-05    |       | ENSG00000222247 |
| 8 | 102687787 | 102687967 | 102687846 | 9   | 10  | 6  | 1.843362462 | 0.0964212   |       | ENSG00000222247 |
| 8 | 102689623 | 102690043 | 102689864 | 8   | 16  | 10 | 1.812893661 | 0.0578656   |       | ENSG00000222247 |
| 8 | 102700123 | 102700350 | 102700236 | 9   | 10  | 5  | 2.150589539 | 0.0575848   |       | ENSG00000222247 |
| 8 | 102713672 | 102713881 | 102713762 | 9   | 9   | 3  | 2.932622098 | 0.0242899   |       | ENSG00000222247 |
| 8 | 102717136 | 102717395 | 102717271 | 15  | 18  | 5  | 3.714654658 | 0.000961539 |       | ENSG00000222247 |
| 8 | 102772229 | 102772495 | 102772362 | 10  | 11  | 4  | 2.815317214 | 0.0183428   |       | ENSG00000222247 |
| 8 | 102914238 | 102914445 | 102914359 | 12  | 14  | 3  | 4.398933147 | 0.00132748  |       | ENSG00000208818 |
| 8 | 102983832 | 102984025 | 102983928 | 10  | 11  | 2  | 4.692195357 | 0.00272444  |       | ENSG00000208818 |
| 8 | 103049163 | 103049357 | 103049278 | 8   | 8   | 4  | 2.111487911 | 0.0804809   |       | ENSG00000208818 |
| 8 | 103132635 | 103132825 | 103132730 | 9   | 10  | 0  | 12.90353723 | 0.000195991 | NCALD | ENSG00000104490 |
| 8 | 103175879 | 103176065 | 103175936 | 9   | 9   | 0  | 11.73048839 | 0.000425898 | NCALD | ENSG00000104490 |
| 8 | 103195561 | 103195935 | 103195739 | 8   | 15  | 3  | 4.692195357 | 0.000718455 | NCALD | ENSG00000104490 |
| 8 | 103278665 | 103278848 | 103278745 | 9   | 9   | 6  | 1.675784056 | 0.141978    | RRM2B | ENSG00000048392 |
| 8 | 103312710 | 103313040 | 103312880 | 12  | 16  | 5  | 3.323638378 | 0.00288759  | RRM2B | ENSG00000048392 |
| 8 | 103317817 | 103318767 | 103318275 | 291 | 388 | 11 | 38.02633321 | 8.06E-114   | RRM2B | ENSG00000048392 |
| 8 | 103318924 | 103319120 | 103319022 | 8   | 9   | 1  | 5.865244197 | 0.00272497  | RRM2B | ENSG00000048392 |
| 8 | 103319870 | 103321048 | 103320260 | 20  | 78  | 17 | 5.148381017 | 2.50E-13    | RRM2B | ENSG00000048392 |
| 8 | 103369496 | 103369675 | 103369585 | 8   | 8   | 3  | 2.639359888 | 0.0415794   | RRM2B | ENSG00000048392 |
| 8 | 103481767 | 103482114 | 103481945 | 10  | 14  | 5  | 2.932622098 | 0.00829617  | UBR5  | ENSG00000104517 |
| 8 | 103492671 | 103492855 | 103492784 | 8   | 8   | 1  | 5.278719777 | 0.00542188  | UBR5  | ENSG00000104517 |
| 8 | 103494049 | 103494562 | 103494224 | 10  | 20  | 15 | 1.539626602 | 0.0943825   | UBR5  | ENSG00000104517 |
| 8 | 103508382 | 103508652 | 103508517 | 17  | 21  | 1  | 12.90353723 | 4.95E-07    |       | ENSG00000221387 |
| 8 | 103593119 | 103593370 | 103593246 | 10  | 13  | 8  | 1.824742639 | 0.0744168   |       | ENSG00000208806 |

|   |           |           |           |    |    |    |             |             |          |                 |
|---|-----------|-----------|-----------|----|----|----|-------------|-------------|----------|-----------------|
| 8 | 103625082 | 103625265 | 103625140 | 8  | 8  | 5  | 1.759573259 | 0.13508     | ODF1     | ENSG00000155087 |
| 8 | 103658247 | 103658573 | 103658410 | 16 | 19 | 9  | 2.346097679 | 0.0107159   | ODF1     | ENSG00000155087 |
| 8 | 103666696 | 103667003 | 103666854 | 9  | 13 | 0  | 16.42268375 | 1.91E-05    | ODF1     | ENSG00000155087 |
| 8 | 103682353 | 103682886 | 103682656 | 12 | 28 | 11 | 2.834868028 | 0.000626961 | ODF1     | ENSG00000155087 |
| 8 | 103698256 | 103698657 | 103698486 | 9  | 16 | 8  | 2.215758919 | 0.0222902   | KLF10    | ENSG00000155090 |
| 8 | 103728917 | 103729313 | 103729134 | 11 | 17 | 4  | 4.222975822 | 0.000640773 | KLF10    | ENSG00000155090 |
| 8 | 103735087 | 103735353 | 103735251 | 11 | 13 | 5  | 2.737113958 | 0.0137917   | KLF10    | ENSG00000155090 |
| 8 | 103738667 | 103738860 | 103738763 | 8  | 10 | 0  | 12.90353723 | 0.000195991 | KLF10    | ENSG00000155090 |
| 8 | 103767409 | 103767600 | 103767505 | 8  | 8  | 6  | 1.508205651 | 0.203852    | KLF10    | ENSG00000155090 |
| 8 | 103802991 | 103803351 | 103803157 | 11 | 17 | 8  | 2.346097679 | 0.0144542   | KLF10    | ENSG00000155090 |
| 8 | 103863802 | 103864065 | 103863906 | 9  | 11 | 1  | 7.038293036 | 0.000674435 |          | ENSG00000217620 |
| 8 | 103887713 | 103888131 | 103888017 | 11 | 18 | 9  | 2.228792795 | 0.0164363   |          | ENSG00000217620 |
| 8 | 103888309 | 103888527 | 103888447 | 9  | 10 | 1  | 6.451768616 | 0.00135978  |          | ENSG00000217620 |
| 8 | 103888681 | 103889298 | 103889076 | 22 | 38 | 10 | 4.158991339 | 1.56E-06    |          | ENSG00000217620 |
| 8 | 103890529 | 103890904 | 103890736 | 23 | 30 | 4  | 7.272902804 | 1.76E-07    |          | ENSG00000217620 |
| 8 | 103895984 | 103896335 | 103896160 | 15 | 19 | 8  | 2.606775198 | 0.00583935  |          | ENSG00000217620 |
| 8 | 103944209 | 103944756 | 103944594 | 9  | 19 | 5  | 3.910162798 | 0.000546977 | AZIN1    | ENSG00000155096 |
| 8 | 103945427 | 103945739 | 103945583 | 13 | 16 | 7  | 2.492728784 | 0.0124193   | AZIN1    | ENSG00000155096 |
| 8 | 103987747 | 103988025 | 103987887 | 11 | 14 | 5  | 2.932622098 | 0.00829617  | AZIN1    | ENSG00000155096 |
| 8 | 103995818 | 103996057 | 103995946 | 9  | 9  | 8  | 1.303387599 | 0.281715    |          | ENSG00000201216 |
| 8 | 104008986 | 104009209 | 104009118 | 8  | 9  | 2  | 3.910162798 | 0.00955088  |          | ENSG00000201216 |
| 8 | 104042819 | 104043095 | 104042976 | 12 | 15 | 6  | 2.68125449  | 0.0103552   |          | ENSG00000201216 |
| 8 | 104091930 | 104092144 | 104092037 | 9  | 12 | 9  | 1.524963491 | 0.154777    | ATP6V1C1 | ENSG00000155097 |
| 8 | 104102194 | 104102500 | 104102335 | 8  | 13 | 7  | 2.052835469 | 0.046392    | ATP6V1C1 | ENSG00000155097 |
| 8 | 104155318 | 104155521 | 104155455 | 8  | 10 | 3  | 3.225884308 | 0.0139466   |          | ENSG00000208794 |
| 8 | 104155535 | 104155714 | 104155624 | 8  | 8  | 1  | 5.278719777 | 0.00542188  |          | ENSG00000208794 |
| 8 | 104192931 | 104193155 | 104193043 | 13 | 15 | 7  | 2.346097679 | 0.0195693   |          | ENSG00000208768 |
| 8 | 104201778 | 104202049 | 104201913 | 9  | 13 | 4  | 3.28453675  | 0.00629037  | BAALC    | ENSG00000164929 |
| 8 | 104217472 | 104217913 | 104217639 | 22 | 27 | 16 | 1.932080441 | 0.0141162   | BAALC    | ENSG00000164929 |
| 8 | 104256966 | 104257146 | 104257056 | 8  | 8  | 3  | 2.639359888 | 0.0415794   | BAALC    | ENSG00000164929 |
| 8 | 104291421 | 104291615 | 104291518 | 8  | 9  | 0  | 11.73048839 | 0.000425898 | BAALC    | ENSG00000164929 |
| 8 | 104291751 | 104292160 | 104291990 | 22 | 30 | 4  | 7.272902804 | 1.76E-07    | BAALC    | ENSG00000164929 |
| 8 | 104327554 | 104327785 | 104327669 | 8  | 10 | 2  | 4.301179077 | 0.00512919  |          | ENSG00000205066 |
| 8 | 104454665 | 104454985 | 104454839 | 23 | 26 | 5  | 5.278719777 | 8.57E-06    | CTHRC1   | ENSG00000164932 |

|   |           |           |           |    |     |    |             |             |        |                 |
|---|-----------|-----------|-----------|----|-----|----|-------------|-------------|--------|-----------------|
| 8 | 104496527 | 104496852 | 104496689 | 14 | 19  | 10 | 2.132816071 | 0.01835     | WDSOF1 | ENSG00000164934 |
| 8 | 104579915 | 104580201 | 104580058 | 10 | 15  | 2  | 6.256260476 | 0.000199274 | RIMS2  | ENSG00000176406 |
| 8 | 104580206 | 104580426 | 104580316 | 11 | 12  | 0  | 15.24963491 | 4.15E-05    | RIMS2  | ENSG00000176406 |
| 8 | 104593511 | 104593750 | 104593632 | 9  | 12  | 2  | 5.083211637 | 0.00143337  | RIMS2  | ENSG00000176406 |
| 8 | 104788790 | 104789115 | 104788952 | 10 | 15  | 3  | 4.692195357 | 0.000718455 |        | ENSG00000208758 |
| 8 | 104831429 | 104831654 | 104831541 | 8  | 8   | 3  | 2.639359888 | 0.0415794   | RIMS2  | ENSG00000176406 |
| 8 | 104877013 | 104877336 | 104877174 | 16 | 21  | 7  | 3.225884308 | 0.00106152  | RIMS2  | ENSG00000176406 |
| 8 | 105154089 | 105154464 | 105154298 | 17 | 21  | 2  | 8.602358155 | 3.33E-06    | RIMS2  | ENSG00000176406 |
| 8 | 105354971 | 105355183 | 105355035 | 8  | 9   | 4  | 2.346097679 | 0.050148    | RIMS2  | ENSG00000176406 |
| 8 | 105407017 | 105407204 | 105407092 | 8  | 8   | 3  | 2.639359888 | 0.0415794   | TM7SF4 | ENSG00000164935 |
| 8 | 105407479 | 105407855 | 105407620 | 8  | 15  | 5  | 3.128130238 | 0.00492422  | TM7SF4 | ENSG00000164935 |
| 8 | 105462406 | 105462657 | 105462551 | 8  | 10  | 7  | 1.612942154 | 0.147335    |        | ENSG00000220279 |
| 8 | 105499358 | 105499766 | 105499537 | 8  | 16  | 13 | 1.424416448 | 0.161813    |        | ENSG00000179577 |
| 8 | 105670644 | 105670906 | 105670775 | 20 | 20  | 1  | 12.31701281 | 1.03E-06    | LRP12  | ENSG00000147650 |
| 8 | 105787491 | 105787802 | 105787646 | 21 | 22  | 1  | 13.49006165 | 2.37E-07    | LRP12  | ENSG00000147650 |
| 8 | 105976450 | 105976866 | 105976650 | 26 | 38  | 5  | 7.624817456 | 3.97E-09    | LRP12  | ENSG00000147650 |
| 8 | 106036985 | 106037192 | 106037088 | 8  | 9   | 3  | 2.932622098 | 0.0242899   | ZFPM2  | ENSG00000169946 |
| 8 | 107162488 | 107162709 | 107162602 | 12 | 13  | 6  | 2.346097679 | 0.0266147   |        | ENSG00000213708 |
| 8 | 107411157 | 107411379 | 107411266 | 8  | 8   | 2  | 3.519146518 | 0.017558    |        | ENSG00000213708 |
| 8 | 107659103 | 107659438 | 107659276 | 9  | 12  | 8  | 1.694403879 | 0.107291    | OXR1   | ENSG00000164830 |
| 8 | 107670316 | 107670542 | 107670401 | 8  | 8   | 3  | 2.639359888 | 0.0415794   | OXR1   | ENSG00000164830 |
| 8 | 107673228 | 107673553 | 107673390 | 11 | 15  | 6  | 2.68125449  | 0.0103552   | OXR1   | ENSG00000164830 |
| 8 | 107688418 | 107688798 | 107688619 | 8  | 14  | 1  | 8.797866295 | 8.00E-05    | OXR1   | ENSG00000164830 |
| 8 | 107689717 | 107690309 | 107690122 | 99 | 117 | 9  | 13.8419763  | 1.24E-29    | OXR1   | ENSG00000164830 |
| 8 | 107738709 | 107739234 | 107739058 | 17 | 32  | 13 | 2.765043693 | 0.00036798  | OXR1   | ENSG00000164830 |
| 8 | 107739737 | 107739936 | 107739873 | 9  | 10  | 6  | 1.843362462 | 0.0964212   | OXR1   | ENSG00000164830 |
| 8 | 107938030 | 107938209 | 107938119 | 8  | 8   | 5  | 1.759573259 | 0.13508     | ABRA   | ENSG00000174429 |
| 8 | 107971751 | 107972181 | 107971912 | 8  | 16  | 6  | 2.848832895 | 0.00632407  | ABRA   | ENSG00000174429 |
| 8 | 107972191 | 107972475 | 107972336 | 10 | 13  | 2  | 5.474227917 | 0.000747844 | ABRA   | ENSG00000174429 |
| 8 | 108007216 | 108007449 | 108007332 | 8  | 8   | 1  | 5.278719777 | 0.00542188  | ABRA   | ENSG00000174429 |
| 8 | 108274749 | 108274956 | 108274852 | 8  | 9   | 0  | 11.73048839 | 0.000425898 |        | ENSG00000213707 |
| 8 | 108704174 | 108704431 | 108704299 | 8  | 10  | 3  | 3.225884308 | 0.0139466   | ANGPT1 | ENSG00000154188 |
| 8 | 108861317 | 108861514 | 108861364 | 8  | 9   | 5  | 1.955081399 | 0.0892323   |        | ENSG00000200806 |
| 8 | 109154586 | 109154878 | 109154707 | 11 | 13  | 3  | 4.105670938 | 0.00243034  | RSPO2  | ENSG00000147655 |

|   |           |           |           |    |    |    |             |             |         |                 |
|---|-----------|-----------|-----------|----|----|----|-------------|-------------|---------|-----------------|
| 8 | 109329984 | 109330309 | 109330146 | 21 | 25 | 9  | 3.049926982 | 0.000648806 | EIF3E   | ENSG00000104408 |
| 8 | 109330328 | 109330588 | 109330463 | 9  | 12 | 5  | 2.541605819 | 0.0225912   | EIF3E   | ENSG00000104408 |
| 8 | 109347909 | 109348096 | 109347951 | 8  | 10 | 0  | 12.90353723 | 0.000195991 | EIF3E   | ENSG00000104408 |
| 8 | 109653993 | 109654329 | 109654139 | 12 | 16 | 5  | 3.323638378 | 0.00288759  | TTC35   | ENSG00000104412 |
| 8 | 109785148 | 109785456 | 109785283 | 12 | 14 | 5  | 2.932622098 | 0.00829617  | TMEM74  | ENSG00000164841 |
| 8 | 110198240 | 110198469 | 110198354 | 10 | 12 | 4  | 3.049926982 | 0.0108184   | TRHR    | ENSG00000174417 |
| 8 | 110415425 | 110416257 | 110416080 | 16 | 44 | 20 | 2.513676084 | 0.000132163 | ENY2    | ENSG00000120533 |
| 8 | 110428365 | 110428580 | 110428472 | 10 | 10 | 13 | 0.921681231 | 0.585856    | ENY2    | ENSG00000120533 |
| 8 | 110477419 | 110477673 | 110477516 | 10 | 13 | 4  | 3.28453675  | 0.00629037  | PKHD1L1 | ENSG00000205038 |
| 8 | 110532360 | 110532542 | 110532496 | 8  | 9  | 8  | 1.303387599 | 0.281715    | EBAG9   | ENSG00000147654 |
| 8 | 110621353 | 110621688 | 110621515 | 31 | 35 | 8  | 4.692195357 | 1.14E-06    | EBAG9   | ENSG00000147654 |
| 8 | 110622850 | 110623064 | 110622957 | 9  | 10 | 3  | 3.225884308 | 0.0139466   | EBAG9   | ENSG00000147654 |
| 8 | 110641954 | 110642179 | 110642066 | 9  | 9  | 0  | 11.73048839 | 0.000425898 | EBAG9   | ENSG00000147654 |
| 8 | 110674695 | 110674906 | 110674811 | 9  | 10 | 6  | 1.843362462 | 0.0964212   |         | ENSG00000147642 |
| 8 | 110692059 | 110692272 | 110692165 | 8  | 8  | 1  | 5.278719777 | 0.00542188  |         | ENSG00000147642 |
| 8 | 110772945 | 110773335 | 110773179 | 12 | 19 | 3  | 5.865244197 | 5.72E-05    |         | ENSG00000147642 |
| 8 | 110795223 | 110795402 | 110795288 | 8  | 8  | 0  | 10.55743955 | 0.000925496 |         | ENSG00000147642 |
| 8 | 111141850 | 111142053 | 111141957 | 8  | 9  | 1  | 5.865244197 | 0.00272497  | KCNV1   | ENSG00000164794 |
| 8 | 111575085 | 111575344 | 111575200 | 11 | 13 | 2  | 5.474227917 | 0.000747844 |         | ENSG00000208705 |
| 8 | 112195811 | 112196014 | 112195923 | 8  | 9  | 1  | 5.865244197 | 0.00272497  |         | ENSG00000208693 |
| 8 | 112221717 | 112221997 | 112221857 | 8  | 9  | 9  | 1.173048839 | 0.362316    |         | ENSG00000208693 |
| 8 | 112334521 | 112334852 | 112334685 | 14 | 16 | 1  | 9.970915134 | 1.89E-05    |         | ENSG00000208693 |
| 8 | 113831915 | 113832180 | 113832047 | 14 | 17 | 0  | 21.11487911 | 8.57E-07    |         | ENSG00000208686 |
| 8 | 114519075 | 114519333 | 114519211 | 10 | 10 | 7  | 1.612942154 | 0.147335    | CSMD3   | ENSG00000164796 |
| 8 | 115216752 | 115216931 | 115216841 | 8  | 8  | 1  | 5.278719777 | 0.00542188  |         | ENSG00000206719 |
| 8 | 116192846 | 116193199 | 116193022 | 23 | 29 | 1  | 17.59573259 | 1.33E-09    |         |                 |
| 8 | 116209334 | 116209556 | 116209419 | 10 | 11 | 5  | 2.346097679 | 0.0364013   |         |                 |
| 8 | 116415567 | 116415807 | 116415687 | 10 | 13 | 3  | 4.105670938 | 0.00243034  | TRPS1   | ENSG00000104447 |
| 8 | 116462228 | 116462442 | 116462343 | 9  | 11 | 1  | 7.038293036 | 0.000674435 | TRPS1   | ENSG00000104447 |
| 8 | 116919632 | 116920168 | 116919866 | 17 | 34 | 7  | 5.132088672 | 6.85E-07    | TRPS1   | ENSG00000104447 |
| 8 | 116948409 | 116949239 | 116949084 | 19 | 50 | 6  | 8.546498686 | 6.41E-12    |         | ENSG00000199450 |
| 8 | 117016236 | 117016535 | 117016413 | 10 | 14 | 0  | 17.59573259 | 8.79E-06    |         | ENSG00000199450 |
| 8 | 117020245 | 117020690 | 117020547 | 16 | 22 | 16 | 1.587066077 | 0.071956    |         | ENSG00000199450 |
| 8 | 117043416 | 117043610 | 117043455 | 8  | 9  | 2  | 3.910162798 | 0.00955088  |         | ENSG00000199450 |

|   |           |           |           |    |    |    |             |             |                           |
|---|-----------|-----------|-----------|----|----|----|-------------|-------------|---------------------------|
| 8 | 117059684 | 117059991 | 117059857 | 10 | 14 | 7  | 2.199466574 | 0.0303778   | ENSG00000199450           |
| 8 | 117069088 | 117069798 | 117069370 | 21 | 40 | 16 | 2.829117789 | 6.64E-05    | ENSG00000199450           |
| 8 | 117079714 | 117079958 | 117079836 | 9  | 9  | 11 | 0.977540699 | 0.526123    | ENSG00000199450           |
| 8 | 117406208 | 117406458 | 117406333 | 9  | 10 | 2  | 4.301179077 | 0.00512919  | ENSG00000221793           |
| 8 | 117435700 | 117436206 | 117436016 | 12 | 24 | 6  | 4.18946014  | 8.40E-05    | ENSG00000221793           |
| 8 | 117554785 | 117555073 | 117554929 | 9  | 12 | 7  | 1.906204364 | 0.0695918   | EIF3H ENSG00000147677     |
| 8 | 117837040 | 117837303 | 117837185 | 8  | 9  | 8  | 1.303387599 | 0.281715    | EIF3H ENSG00000147677     |
| 8 | 117847514 | 117848059 | 117847786 | 13 | 24 | 9  | 2.932622098 | 0.00106136  | UTP23 ENSG00000147679     |
| 8 | 117866218 | 117866664 | 117866485 | 20 | 28 | 1  | 17.00920817 | 2.80E-09    | UTP23 ENSG00000147679     |
| 8 | 117881863 | 117882176 | 117882019 | 10 | 14 | 5  | 2.932622098 | 0.00829617  | UTP23 ENSG00000147679     |
| 8 | 117884369 | 117884743 | 117884548 | 14 | 21 | 11 | 2.150589539 | 0.0135908   | UTP23 ENSG00000147679     |
| 8 | 117932729 | 117932962 | 117932845 | 9  | 10 | 1  | 6.451768616 | 0.00135978  | RAD21 ENSG00000164754     |
| 8 | 118106113 | 118106319 | 118106213 | 8  | 9  | 7  | 1.466311049 | 0.20706     | ENSG00000208665           |
| 8 | 118136286 | 118136564 | 118136416 | 8  | 10 | 2  | 4.301179077 | 0.00512919  | ENSG00000208665           |
| 8 | 118307460 | 118307639 | 118307579 | 8  | 8  | 2  | 3.519146518 | 0.017558    | ENSG00000208663           |
| 8 | 118313391 | 118313784 | 118313570 | 12 | 19 | 6  | 3.351568112 | 0.00134187  | ENSG00000208663           |
| 8 | 118747337 | 118747516 | 118747422 | 8  | 8  | 0  | 10.55743955 | 0.000925496 | MED30 ENSG00000164758     |
| 8 | 118929120 | 118929337 | 118929213 | 8  | 9  | 4  | 2.346097679 | 0.050148    | EXT1 ENSG00000182197      |
| 8 | 119073515 | 119073724 | 119073618 | 9  | 10 | 1  | 6.451768616 | 0.00135978  | EXT1 ENSG00000182197      |
| 8 | 119081850 | 119082164 | 119082019 | 18 | 22 | 6  | 3.854303329 | 0.000260696 | EXT1 ENSG00000182197      |
| 8 | 119170075 | 119170301 | 119170186 | 10 | 11 | 5  | 2.346097679 | 0.0364013   | EXT1 ENSG00000182197      |
| 8 | 119500585 | 119500779 | 119500652 | 9  | 10 | 1  | 6.451768616 | 0.00135978  | SAMD12 ENSG00000177570    |
| 8 | 119931335 | 119931849 | 119931599 | 38 | 54 | 5  | 10.75294769 | 7.83E-14    | TNFRSF11B ENSG00000164761 |
| 8 | 119959838 | 119960183 | 119960010 | 8  | 13 | 6  | 2.346097679 | 0.0266147   | TNFRSF11B ENSG00000164761 |
| 8 | 120282222 | 120282445 | 120282322 | 8  | 11 | 2  | 4.692195357 | 0.00272444  | MAL2 ENSG00000147676      |
| 8 | 120520613 | 120520863 | 120520718 | 9  | 9  | 0  | 11.73048839 | 0.000425898 | NOV ENSG00000136999       |
| 8 | 120616831 | 120617049 | 120616940 | 9  | 10 | 2  | 4.301179077 | 0.00512919  | ENSG00000213690           |
| 8 | 120702208 | 120702632 | 120702403 | 29 | 43 | 2  | 17.20471631 | 4.62E-13    | ENPP2 ENSG00000136960     |
| 8 | 120874241 | 120874500 | 120874370 | 9  | 9  | 0  | 11.73048839 | 0.000425898 | TAF2 ENSG00000064313      |
| 8 | 120914457 | 120914689 | 120914511 | 10 | 13 | 2  | 5.474227917 | 0.000747844 | TAF2 ENSG00000064313      |
| 8 | 120937218 | 120937516 | 120937339 | 8  | 11 | 3  | 3.519146518 | 0.00788869  | DSCC1 ENSG00000136982     |
| 8 | 120948637 | 120948870 | 120948776 | 9  | 10 | 6  | 1.843362462 | 0.0964212   | ENSG00000208631           |
| 8 | 120955012 | 120955253 | 120955129 | 10 | 11 | 5  | 2.346097679 | 0.0364013   | DEPDC6 ENSG00000155792    |
| 8 | 120955904 | 120956135 | 120956019 | 12 | 14 | 4  | 3.519146518 | 0.00361132  | DEPDC6 ENSG00000155792    |

|   |           |           |           |    |    |    |             |             |        |                 |
|---|-----------|-----------|-----------|----|----|----|-------------|-------------|--------|-----------------|
| 8 | 121064080 | 121064571 | 121064464 | 10 | 21 | 5  | 4.301179077 | 0.000172642 |        | ENSG00000202356 |
| 8 | 121519353 | 121519783 | 121519568 | 13 | 21 | 2  | 8.602358155 | 3.33E-06    | MRPL13 | ENSG00000172172 |
| 8 | 121526553 | 121526792 | 121526669 | 9  | 11 | 5  | 2.346097679 | 0.0364013   | MRPL13 | ENSG00000172172 |
| 8 | 121687178 | 121687493 | 121687335 | 9  | 13 | 9  | 1.642268375 | 0.111397    | MTBP   | ENSG00000172167 |
| 8 | 121782106 | 121782323 | 121782247 | 9  | 10 | 4  | 2.580707446 | 0.0306059   | SNTB1  | ENSG00000172164 |
| 8 | 121867682 | 121867861 | 121867754 | 8  | 8  | 7  | 1.319679944 | 0.283403    | SNTB1  | ENSG00000172164 |
| 8 | 121889975 | 121890429 | 121890148 | 11 | 19 | 15 | 1.466311049 | 0.125014    | SNTB1  | ENSG00000172164 |
| 8 | 121973392 | 121973572 | 121973482 | 8  | 9  | 1  | 5.865244197 | 0.00272497  | SNTB1  | ENSG00000172164 |
| 8 | 122017977 | 122018543 | 122018324 | 52 | 73 | 7  | 10.85070176 | 5.75E-18    | SNTB1  | ENSG00000172164 |
| 8 | 122070726 | 122070917 | 122070821 | 8  | 8  | 4  | 2.111487911 | 0.0804809   | SNTB1  | ENSG00000172164 |
| 8 | 122077898 | 122078077 | 122078022 | 8  | 8  | 3  | 2.639359888 | 0.0415794   | SNTB1  | ENSG00000172164 |
| 8 | 122213966 | 122214158 | 122214062 | 8  | 9  | 3  | 2.932622098 | 0.0242899   |        | ENSG00000221644 |
| 8 | 122226927 | 122227433 | 122227237 | 19 | 37 | 7  | 5.571981987 | 1.11E-07    |        | ENSG00000221644 |
| 8 | 122232358 | 122232712 | 122232535 | 30 | 36 | 13 | 3.100200504 | 5.51E-05    |        | ENSG00000221644 |
| 8 | 122234287 | 122234583 | 122234455 | 11 | 14 | 5  | 2.932622098 | 0.00829617  |        | ENSG00000221644 |
| 8 | 122235874 | 122236305 | 122236126 | 10 | 19 | 7  | 2.932622098 | 0.00293566  |        | ENSG00000221644 |
| 8 | 122236838 | 122237058 | 122236948 | 8  | 10 | 2  | 4.301179077 | 0.00512919  |        | ENSG00000221644 |
| 8 | 122246630 | 122247122 | 122246803 | 27 | 39 | 12 | 3.609381044 | 5.48E-06    |        | ENSG00000221644 |
| 8 | 122257177 | 122257381 | 122257279 | 9  | 9  | 2  | 3.910162798 | 0.00955088  |        | ENSG00000221644 |
| 8 | 122330120 | 122330487 | 122330299 | 10 | 17 | 8  | 2.346097679 | 0.0144542   |        | ENSG00000221644 |
| 8 | 122338098 | 122338294 | 122338181 | 9  | 9  | 7  | 1.466311049 | 0.20706     |        | ENSG00000221644 |
| 8 | 122408587 | 122408819 | 122408669 | 10 | 10 | 1  | 6.451768616 | 0.00135978  |        | ENSG00000222786 |
| 8 | 122507180 | 122507413 | 122507296 | 10 | 11 | 3  | 3.519146518 | 0.00788869  |        | ENSG00000222786 |
| 8 | 122508197 | 122508504 | 122508344 | 14 | 18 | 4  | 4.457585589 | 0.000353565 |        | ENSG00000222786 |
| 8 | 122511739 | 122511977 | 122511887 | 8  | 10 | 6  | 1.843362462 | 0.0964212   |        | ENSG00000222786 |
| 8 | 122536031 | 122536270 | 122536150 | 10 | 11 | 6  | 2.010940867 | 0.0640214   |        | ENSG00000222786 |
| 8 | 122587982 | 122588193 | 122588087 | 8  | 9  | 6  | 1.675784056 | 0.141978    |        | ENSG00000222786 |
| 8 | 122615832 | 122616069 | 122615957 | 12 | 14 | 2  | 5.865244197 | 0.000387308 |        | ENSG00000222786 |
| 8 | 122642255 | 122642661 | 122642421 | 10 | 15 | 8  | 2.085420159 | 0.0338693   | HAS2   | ENSG00000170961 |
| 8 | 122723630 | 122723983 | 122723807 | 19 | 22 | 8  | 2.997791478 | 0.00137524  | HAS2   | ENSG00000170961 |
| 8 | 122818859 | 122819038 | 122818931 | 8  | 8  | 8  | 1.173048839 | 0.36929     | HAS2   | ENSG00000170961 |
| 8 | 122857681 | 122858147 | 122857911 | 18 | 29 | 11 | 2.932622098 | 0.000389335 | HAS2   | ENSG00000170961 |
| 8 | 122884912 | 122885172 | 122885066 | 9  | 10 | 2  | 4.301179077 | 0.00512919  | HAS2   | ENSG00000170961 |
| 8 | 122899080 | 122899341 | 122899210 | 10 | 11 | 1  | 7.038293036 | 0.000674435 | HAS2   | ENSG00000170961 |



|   |           |           |           |    |    |    |             |             |       |                 |
|---|-----------|-----------|-----------|----|----|----|-------------|-------------|-------|-----------------|
| 8 | 122911536 | 122911878 | 122911707 | 14 | 19 | 12 | 1.804690522 | 0.0452624   | HAS2  | ENSG00000170961 |
| 8 | 123080956 | 123081136 | 123081046 | 8  | 8  | 2  | 3.519146518 | 0.017558    | HAS2  | ENSG00000170961 |
| 8 | 123089911 | 123090104 | 123090013 | 10 | 10 | 3  | 3.225884308 | 0.0139466   | HAS2  | ENSG00000170961 |
| 8 | 123098990 | 123099169 | 123099096 | 8  | 8  | 1  | 5.278719777 | 0.00542188  | HAS2  | ENSG00000170961 |
| 8 | 123337952 | 123338175 | 123338066 | 8  | 8  | 4  | 2.111487911 | 0.0804809   |       | ENSG00000208620 |
| 8 | 123420556 | 123420973 | 123420794 | 11 | 17 | 2  | 7.038293036 | 5.19E-05    |       | ENSG00000208620 |
| 8 | 123548581 | 123548893 | 123548763 | 11 | 15 | 8  | 2.085420159 | 0.0338693   |       | ENSG00000208620 |
| 8 | 123648701 | 123648891 | 123648742 | 9  | 10 | 9  | 1.290353723 | 0.279648    |       | ENSG00000208620 |
| 8 | 123650015 | 123650407 | 123650194 | 13 | 21 | 6  | 3.686724924 | 0.000453999 |       | ENSG00000208620 |
| 8 | 123653729 | 123654104 | 123653941 | 13 | 19 | 6  | 3.351568112 | 0.00134187  |       | ENSG00000208620 |
| 8 | 123720312 | 123720509 | 123720410 | 8  | 9  | 8  | 1.303387599 | 0.281715    |       | ENSG00000208620 |
| 8 | 123725132 | 123725326 | 123725229 | 9  | 10 | 8  | 1.433726359 | 0.209175    |       | ENSG00000208620 |
| 8 | 123754972 | 123755182 | 123755077 | 8  | 8  | 8  | 1.173048839 | 0.36929     |       | ENSG00000208620 |
| 8 | 123814968 | 123815344 | 123815120 | 9  | 15 | 16 | 1.104045966 | 0.390393    |       | ENSG00000217845 |
| 8 | 123859484 | 123859739 | 123859611 | 8  | 9  | 4  | 2.346097679 | 0.050148    | ZHX2  | ENSG00000178764 |
| 8 | 123861571 | 123861912 | 123861741 | 25 | 29 | 10 | 3.199224107 | 0.000186763 | ZHX2  | ENSG00000178764 |
| 8 | 123861929 | 123862358 | 123862108 | 12 | 21 | 9  | 2.580707446 | 0.00438951  | ZHX2  | ENSG00000178764 |
| 8 | 123862531 | 123863034 | 123862855 | 9  | 20 | 11 | 2.052835469 | 0.0201852   | ZHX2  | ENSG00000178764 |
| 8 | 123863044 | 123863223 | 123863106 | 8  | 9  | 7  | 1.466311049 | 0.20706     | ZHX2  | ENSG00000178764 |
| 8 | 123863766 | 123863953 | 123863914 | 8  | 8  | 4  | 2.111487911 | 0.0804809   | ZHX2  | ENSG00000178764 |
| 8 | 123867087 | 123868039 | 123867412 | 34 | 80 | 25 | 3.654498307 | 1.73E-10    | ZHX2  | ENSG00000178764 |
| 8 | 123876444 | 123876808 | 123876623 | 19 | 27 | 11 | 2.737113958 | 0.00100133  | ZHX2  | ENSG00000178764 |
| 8 | 123946158 | 123946485 | 123946321 | 14 | 18 | 3  | 5.571981987 | 0.000108726 |       | ENSG00000221542 |
| 8 | 123966529 | 123966858 | 123966617 | 9  | 14 | 6  | 2.513676084 | 0.016726    |       | ENSG00000221542 |
| 8 | 123990992 | 123991272 | 123991097 | 10 | 14 | 1  | 8.797866295 | 8.00E-05    |       | ENSG00000221542 |
| 8 | 123999077 | 123999275 | 123999154 | 8  | 9  | 7  | 1.466311049 | 0.20706     |       | ENSG00000221542 |
| 8 | 124001890 | 124002069 | 124001993 | 8  | 8  | 2  | 3.519146518 | 0.017558    |       | ENSG00000221542 |
| 8 | 124100279 | 124100494 | 124100372 | 9  | 10 | 1  | 6.451768616 | 0.00135978  |       | ENSG00000220455 |
| 8 | 124146913 | 124147359 | 124147181 | 10 | 17 | 14 | 1.407658607 | 0.162567    | WDR67 | ENSG00000156787 |
| 8 | 124153521 | 124154308 | 124154129 | 11 | 33 | 13 | 2.848832895 | 0.000231281 | WDR67 | ENSG00000156787 |
| 8 | 124177936 | 124178146 | 124177995 | 8  | 10 | 3  | 3.225884308 | 0.0139466   | WDR67 | ENSG00000156787 |
| 8 | 124220831 | 124221217 | 124221010 | 18 | 26 | 4  | 6.334463732 | 2.40E-06    |       | ENSG00000214821 |
| 8 | 124233658 | 124233891 | 124233774 | 8  | 8  | 3  | 2.639359888 | 0.0415794   |       | ENSG00000208612 |
| 8 | 124238459 | 124239015 | 124238737 | 18 | 32 | 21 | 1.759573259 | 0.0184275   |       | ENSG00000208612 |

|   |           |           |           |     |     |    |             |             |         |                 |
|---|-----------|-----------|-----------|-----|-----|----|-------------|-------------|---------|-----------------|
| 8 | 124241910 | 124242216 | 124242074 | 12  | 15  | 5  | 3.128130238 | 0.00492422  |         | ENSG00000208612 |
| 8 | 124248676 | 124249219 | 124248947 | 14  | 24  | 9  | 2.932622098 | 0.00106136  |         | ENSG00000208612 |
| 8 | 124260308 | 124260554 | 124260431 | 8   | 10  | 6  | 1.843362462 | 0.0964212   |         | ENSG00000208612 |
| 8 | 124263417 | 124263671 | 124263531 | 9   | 10  | 3  | 3.225884308 | 0.0139466   | FAM83A  | ENSG00000147689 |
| 8 | 124263750 | 124264157 | 124263922 | 26  | 32  | 12 | 2.977739361 | 0.000186314 | FAM83A  | ENSG00000147689 |
| 8 | 124278083 | 124278315 | 124278199 | 10  | 10  | 8  | 1.433726359 | 0.209175    |         | ENSG00000204949 |
| 8 | 124322546 | 124322890 | 124322718 | 8   | 13  | 5  | 2.737113958 | 0.0137917   | C8orf76 | ENSG00000189376 |
| 8 | 124355514 | 124355816 | 124355665 | 8   | 11  | 5  | 2.346097679 | 0.0364013   | ZHX1    | ENSG00000165156 |
| 8 | 124356081 | 124356529 | 124356303 | 17  | 29  | 6  | 5.027352168 | 4.43E-06    | ZHX1    | ENSG00000165156 |
| 8 | 124356539 | 124356910 | 124356699 | 12  | 18  | 8  | 2.476436439 | 0.00924552  | ZHX1    | ENSG00000165156 |
| 8 | 124455996 | 124456297 | 124456125 | 12  | 15  | 12 | 1.443752418 | 0.160732    | ATAD2   | ENSG00000156802 |
| 8 | 124463102 | 124463281 | 124463132 | 8   | 8   | 5  | 1.759573259 | 0.13508     | ATAD2   | ENSG00000156802 |
| 8 | 124476960 | 124477219 | 124477089 | 11  | 12  | 11 | 1.270802909 | 0.274822    | ATAD2   | ENSG00000156802 |
| 8 | 124477756 | 124478304 | 124477995 | 24  | 39  | 18 | 2.469576504 | 0.000350008 | ATAD2   | ENSG00000156802 |
| 8 | 124497639 | 124498064 | 124497818 | 12  | 20  | 8  | 2.737113958 | 0.0036449   | WDYHV1  | ENSG00000156795 |
| 8 | 124498204 | 124498573 | 124498307 | 8   | 13  | 15 | 1.026417734 | 0.475096    | WDYHV1  | ENSG00000156795 |
| 8 | 124537759 | 124538076 | 124537820 | 9   | 13  | 2  | 5.474227917 | 0.000747844 |         | ENSG00000222694 |
| 8 | 124609531 | 124609928 | 124609773 | 13  | 20  | 5  | 4.105670938 | 0.000308509 | FBXO32  | ENSG00000156804 |
| 8 | 124622648 | 124622891 | 124622766 | 10  | 10  | 1  | 6.451768616 | 0.00135978  | FBXO32  | ENSG00000156804 |
| 8 | 124629755 | 124629955 | 124629855 | 8   | 8   | 2  | 3.519146518 | 0.017558    | FBXO32  | ENSG00000156804 |
| 8 | 124645177 | 124645856 | 124645557 | 18  | 41  | 24 | 1.97072205  | 0.00298351  |         | ENSG00000208595 |
| 8 | 124664949 | 124665218 | 124665112 | 8   | 8   | 5  | 1.759573259 | 0.13508     |         | ENSG00000208595 |
| 8 | 124678040 | 124678322 | 124678166 | 8   | 10  | 6  | 1.843362462 | 0.0964212   |         | ENSG00000208595 |
| 8 | 124693667 | 124694702 | 124693975 | 213 | 305 | 5  | 59.82549081 | 7.85E-95    |         | ENSG00000208595 |
| 8 | 124713956 | 124714236 | 124714100 | 16  | 19  | 5  | 3.910162798 | 0.000546977 | KLHL38  | ENSG00000175946 |
| 8 | 124773916 | 124774212 | 124774095 | 8   | 11  | 4  | 2.815317214 | 0.0183428   | ANXA13  | ENSG00000104537 |
| 8 | 124775201 | 124775394 | 124775299 | 8   | 11  | 4  | 2.815317214 | 0.0183428   | ANXA13  | ENSG00000104537 |
| 8 | 124782961 | 124783168 | 124783110 | 9   | 9   | 3  | 2.932622098 | 0.0242899   | ANXA13  | ENSG00000104537 |
| 8 | 124797021 | 124797302 | 124797138 | 12  | 14  | 7  | 2.199466574 | 0.0303778   | ANXA13  | ENSG00000104537 |
| 8 | 124801213 | 124801925 | 124801579 | 29  | 60  | 7  | 8.9444974   | 3.93E-14    | ANXA13  | ENSG00000104537 |
| 8 | 124844804 | 124845079 | 124844976 | 14  | 17  | 4  | 4.222975822 | 0.000640773 | FAM91A1 | ENSG00000176853 |
| 8 | 124847750 | 124848048 | 124847890 | 13  | 14  | 13 | 1.256838042 | 0.269506    | FAM91A1 | ENSG00000176853 |
| 8 | 124849149 | 124849597 | 124849323 | 9   | 17  | 14 | 1.407658607 | 0.162567    | FAM91A1 | ENSG00000176853 |
| 8 | 124925723 | 124926822 | 124926412 | 414 | 530 | 4  | 124.5777867 | 2.99E-171   | FAM91A1 | ENSG00000176853 |

|   |           |           |           |    |    |    |             |             |         |                 |
|---|-----------|-----------|-----------|----|----|----|-------------|-------------|---------|-----------------|
| 8 | 124992981 | 124993217 | 124993099 | 9  | 11 | 5  | 2.346097679 | 0.0364013   | FER1L6  | ENSG00000214814 |
| 8 | 125003621 | 125004140 | 125003797 | 11 | 21 | 15 | 1.612942154 | 0.070218    | FER1L6  | ENSG00000214814 |
| 8 | 125033684 | 125033863 | 125033711 | 8  | 8  | 2  | 3.519146518 | 0.017558    | FER1L6  | ENSG00000214814 |
| 8 | 125046566 | 125046790 | 125046661 | 8  | 9  | 1  | 5.865244197 | 0.00272497  | FER1L6  | ENSG00000214814 |
| 8 | 125119257 | 125119516 | 125119349 | 11 | 14 | 7  | 2.199466574 | 0.0303778   | C8orf54 | ENSG00000181171 |
| 8 | 125219403 | 125220219 | 125219836 | 24 | 48 | 21 | 2.612699688 | 4.28E-05    | C8orf54 | ENSG00000181171 |
| 8 | 125227015 | 125227248 | 125227131 | 8  | 11 | 7  | 1.759573259 | 0.102361    |         | ENSG00000214803 |
| 8 | 125228402 | 125228783 | 125228604 | 13 | 19 | 4  | 4.692195357 | 0.000193572 |         | ENSG00000214803 |
| 8 | 125229021 | 125229321 | 125229163 | 11 | 13 | 3  | 4.105670938 | 0.00243034  |         | ENSG00000214803 |
| 8 | 125247003 | 125247208 | 125247105 | 9  | 10 | 3  | 3.225884308 | 0.0139466   |         | ENSG00000214803 |
| 8 | 125261837 | 125262133 | 125261985 | 22 | 23 | 6  | 4.021881735 | 0.000148535 |         | ENSG00000214803 |
| 8 | 125280938 | 125281293 | 125281096 | 9  | 13 | 4  | 3.28453675  | 0.00629037  |         | ENSG00000214803 |
| 8 | 125281301 | 125281530 | 125281390 | 10 | 12 | 3  | 3.812408728 | 0.004404    |         | ENSG00000214803 |
| 8 | 125281580 | 125282326 | 125281752 | 27 | 47 | 18 | 2.963491805 | 9.86E-06    |         | ENSG00000214803 |
| 8 | 125307445 | 125307673 | 125307525 | 8  | 9  | 6  | 1.675784056 | 0.141978    |         | ENSG00000214803 |
| 8 | 125314103 | 125314327 | 125314215 | 8  | 8  | 4  | 2.111487911 | 0.0804809   |         | ENSG00000214803 |
| 8 | 125318341 | 125318649 | 125318495 | 8  | 9  | 1  | 5.865244197 | 0.00272497  |         | ENSG00000214803 |
| 8 | 125343267 | 125343460 | 125343327 | 8  | 9  | 4  | 2.346097679 | 0.050148    |         | ENSG00000206724 |
| 8 | 125362413 | 125362837 | 125362663 | 12 | 20 | 0  | 24.63402563 | 8.35E-08    |         | ENSG00000206724 |
| 8 | 125452819 | 125453066 | 125452942 | 11 | 13 | 2  | 5.474227917 | 0.000747844 | TMEM65  | ENSG00000164983 |
| 8 | 125453884 | 125454502 | 125454276 | 19 | 40 | 9  | 4.809500241 | 1.80E-07    | TMEM65  | ENSG00000164983 |
| 8 | 125480975 | 125481196 | 125481103 | 9  | 9  | 2  | 3.910162798 | 0.00955088  | TMEM65  | ENSG00000164983 |
| 8 | 125506717 | 125506953 | 125506835 | 10 | 10 | 6  | 1.843362462 | 0.0964212   | TRMT12  | ENSG00000183665 |
| 8 | 125507437 | 125507738 | 125507593 | 18 | 21 | 7  | 3.225884308 | 0.00106152  | TRMT12  | ENSG00000183665 |
| 8 | 125512084 | 125512282 | 125512229 | 8  | 8  | 0  | 10.55743955 | 0.000925496 | TRMT12  | ENSG00000183665 |
| 8 | 125532074 | 125532407 | 125532241 | 18 | 22 | 15 | 1.686257707 | 0.051516    | TRMT12  | ENSG00000183665 |
| 8 | 125532482 | 125532857 | 125532612 | 8  | 15 | 5  | 3.128130238 | 0.00492422  | TRMT12  | ENSG00000183665 |
| 8 | 125555531 | 125555839 | 125555665 | 8  | 12 | 9  | 1.524963491 | 0.154777    | RNF139  | ENSG00000170881 |
| 8 | 125555951 | 125556383 | 125556130 | 19 | 28 | 12 | 2.616801257 | 0.00120123  | RNF139  | ENSG00000170881 |
| 8 | 125556773 | 125557088 | 125556929 | 9  | 11 | 7  | 1.759573259 | 0.102361    | RNF139  | ENSG00000170881 |
| 8 | 125557689 | 125557873 | 125557769 | 8  | 10 | 9  | 1.290353723 | 0.279648    | RNF139  | ENSG00000170881 |
| 8 | 125572546 | 125573087 | 125572819 | 21 | 36 | 25 | 1.669338733 | 0.0212579   | RNF139  | ENSG00000170881 |
| 8 | 125620307 | 125620824 | 125620671 | 17 | 31 | 11 | 3.128130238 | 0.000146711 | NDUFB9  | ENSG00000147684 |
| 8 | 125669459 | 125669638 | 125669484 | 8  | 8  | 5  | 1.759573259 | 0.13508     | MTSS1   | ENSG00000170873 |

|   |           |           |           |    |    |    |             |             |          |                 |
|---|-----------|-----------|-----------|----|----|----|-------------|-------------|----------|-----------------|
| 8 | 125674417 | 125674681 | 125674525 | 19 | 20 | 6  | 3.519146518 | 0.000784044 | MTSS1    | ENSG00000170873 |
| 8 | 125701898 | 125702083 | 125702009 | 8  | 9  | 2  | 3.910162798 | 0.00955088  | MTSS1    | ENSG00000170873 |
| 8 | 125760793 | 125761153 | 125760972 | 19 | 27 | 8  | 3.649485278 | 0.000102745 | MTSS1    | ENSG00000170873 |
| 8 | 125833017 | 125833256 | 125833136 | 10 | 10 | 5  | 2.150589539 | 0.0575848   | MTSS1    | ENSG00000170873 |
| 8 | 125861882 | 125862061 | 125861921 | 8  | 8  | 5  | 1.759573259 | 0.13508     | MTSS1    | ENSG00000170873 |
| 8 | 125938074 | 125938510 | 125938331 | 30 | 37 | 3  | 11.14396397 | 2.78E-10    | ZNF572   | ENSG00000180938 |
| 8 | 125947234 | 125947453 | 125947343 | 8  | 8  | 2  | 3.519146518 | 0.017558    | ZNF572   | ENSG00000180938 |
| 8 | 125953649 | 125953854 | 125953744 | 9  | 9  | 1  | 5.865244197 | 0.00272497  | ZNF572   | ENSG00000180938 |
| 8 | 125970105 | 125970482 | 125970303 | 16 | 24 | 13 | 2.09473007  | 0.011141    | ZNF572   | ENSG00000180938 |
| 8 | 126035177 | 126035460 | 126035300 | 11 | 13 | 12 | 1.263283365 | 0.272203    | ZNF572   | ENSG00000180938 |
| 8 | 126053818 | 126054011 | 126053914 | 8  | 8  | 4  | 2.111487911 | 0.0804809   | ZNF572   | ENSG00000180938 |
| 8 | 126054494 | 126055264 | 126054668 | 24 | 46 | 18 | 2.901752392 | 1.57E-05    | ZNF572   | ENSG00000180938 |
| 8 | 126055347 | 126055560 | 126055514 | 9  | 10 | 6  | 1.843362462 | 0.0964212   | ZNF572   | ENSG00000180938 |
| 8 | 126079418 | 126079687 | 126079552 | 8  | 11 | 5  | 2.346097679 | 0.0364013   | SQLE     | ENSG00000104549 |
| 8 | 126151040 | 126151253 | 126151119 | 8  | 10 | 3  | 3.225884308 | 0.0139466   | KIAA0196 | ENSG00000164961 |
| 8 | 126173071 | 126173362 | 126173216 | 16 | 19 | 6  | 3.351568112 | 0.00134187  | KIAA0196 | ENSG00000164961 |
| 8 | 126192323 | 126192558 | 126192495 | 9  | 10 | 7  | 1.612942154 | 0.147335    | NSMCE2   | ENSG00000156831 |
| 8 | 126199984 | 126200193 | 126200088 | 8  | 8  | 5  | 1.759573259 | 0.13508     | NSMCE2   | ENSG00000156831 |
| 8 | 126224897 | 126225223 | 126225052 | 10 | 15 | 4  | 3.753756286 | 0.0020497   | NSMCE2   | ENSG00000156831 |
| 8 | 126270685 | 126271079 | 126270879 | 55 | 72 | 3  | 21.40814132 | 2.84E-21    |          | ENSG00000222813 |
| 8 | 126289333 | 126289522 | 126289357 | 8  | 8  | 5  | 1.759573259 | 0.13508     |          | ENSG00000222813 |
| 8 | 126300685 | 126300883 | 126300795 | 8  | 8  | 2  | 3.519146518 | 0.017558    |          | ENSG00000222813 |
| 8 | 126312192 | 126312381 | 126312283 | 8  | 9  | 3  | 2.932622098 | 0.0242899   |          | ENSG00000222813 |
| 8 | 126365653 | 126365832 | 126365781 | 8  | 8  | 6  | 1.508205651 | 0.203852    |          | ENSG00000222813 |
| 8 | 126379745 | 126379977 | 126379861 | 8  | 9  | 0  | 11.73048839 | 0.000425898 |          | ENSG00000222813 |
| 8 | 126481295 | 126481474 | 126481384 | 8  | 9  | 4  | 2.346097679 | 0.050148    | TRIB1    | ENSG00000173334 |
| 8 | 126488350 | 126488558 | 126488475 | 9  | 9  | 7  | 1.466311049 | 0.20706     | TRIB1    | ENSG00000173334 |
| 8 | 126511033 | 126511349 | 126511190 | 9  | 13 | 10 | 1.49297125  | 0.157311    | TRIB1    | ENSG00000173334 |
| 8 | 126511486 | 126512013 | 126511686 | 31 | 53 | 9  | 6.334463732 | 6.71E-11    | TRIB1    | ENSG00000173334 |
| 8 | 126512919 | 126513201 | 126513086 | 11 | 13 | 3  | 4.105670938 | 0.00243034  | TRIB1    | ENSG00000173334 |
| 8 | 126513243 | 126513671 | 126513509 | 15 | 25 | 6  | 4.357038546 | 4.72E-05    | TRIB1    | ENSG00000173334 |
| 8 | 126516045 | 126516465 | 126516176 | 10 | 17 | 11 | 1.759573259 | 0.0609179   | TRIB1    | ENSG00000173334 |
| 8 | 126533511 | 126533759 | 126533635 | 15 | 17 | 8  | 2.346097679 | 0.0144542   | TRIB1    | ENSG00000173334 |
| 8 | 126545632 | 126545811 | 126545705 | 8  | 8  | 1  | 5.278719777 | 0.00542188  | TRIB1    | ENSG00000173334 |

|   |           |           |           |     |     |    |             |             |        |                 |
|---|-----------|-----------|-----------|-----|-----|----|-------------|-------------|--------|-----------------|
| 8 | 126594528 | 126594909 | 126594730 | 9   | 14  | 5  | 2.932622098 | 0.00829617  | TRIB1  | ENSG00000173334 |
| 8 | 126610176 | 126610405 | 126610290 | 12  | 14  | 6  | 2.513676084 | 0.016726    | TRIB1  | ENSG00000173334 |
| 8 | 126628443 | 126628733 | 126628588 | 10  | 11  | 5  | 2.346097679 | 0.0364013   | TRIB1  | ENSG00000173334 |
| 8 | 126671599 | 126671811 | 126671689 | 9   | 9   | 11 | 0.977540699 | 0.526123    | TRIB1  | ENSG00000173334 |
| 8 | 126674105 | 126674407 | 126674256 | 8   | 13  | 10 | 1.49297125  | 0.157311    | TRIB1  | ENSG00000173334 |
| 8 | 126675404 | 126675760 | 126675578 | 13  | 17  | 7  | 2.639359888 | 0.00777415  | TRIB1  | ENSG00000173334 |
| 8 | 126725833 | 126726415 | 126726112 | 24  | 41  | 20 | 2.346097679 | 0.000457114 | TRIB1  | ENSG00000173334 |
| 8 | 126734988 | 126735268 | 126735128 | 8   | 11  | 3  | 3.519146518 | 0.00788869  | TRIB1  | ENSG00000173334 |
| 8 | 126745653 | 126746164 | 126745973 | 17  | 28  | 9  | 3.401841634 | 0.000141067 | TRIB1  | ENSG00000173334 |
| 8 | 126758834 | 126759108 | 126758957 | 8   | 9   | 5  | 1.955081399 | 0.0892323   |        | ENSG00000206695 |
| 8 | 126778224 | 126778491 | 126778357 | 9   | 11  | 1  | 7.038293036 | 0.000674435 |        | ENSG00000206695 |
| 8 | 126868783 | 126869083 | 126868913 | 8   | 11  | 8  | 1.564065119 | 0.151515    |        | ENSG00000206695 |
| 8 | 126910226 | 126910563 | 126910400 | 15  | 19  | 5  | 3.910162798 | 0.000546977 |        | ENSG00000206695 |
| 8 | 127013083 | 127013468 | 127013261 | 11  | 16  | 2  | 6.647276756 | 0.000101928 |        | ENSG00000206695 |
| 8 | 127039162 | 127039355 | 127039317 | 8   | 9   | 2  | 3.910162798 | 0.00955088  |        | ENSG00000206695 |
| 8 | 127148390 | 127148610 | 127148525 | 8   | 10  | 5  | 2.150589539 | 0.0575848   |        | ENSG00000221706 |
| 8 | 127165093 | 127165558 | 127165261 | 9   | 17  | 12 | 1.62422147  | 0.088135    |        | ENSG00000221706 |
| 8 | 127382377 | 127382642 | 127382508 | 11  | 13  | 8  | 1.824742639 | 0.0744168   |        | ENSG00000221706 |
| 8 | 127414431 | 127414738 | 127414592 | 14  | 17  | 3  | 5.278719777 | 0.000205462 |        | ENSG00000207138 |
| 8 | 127465244 | 127465452 | 127465337 | 10  | 11  | 9  | 1.407658607 | 0.210479    |        | ENSG00000207138 |
| 8 | 127533440 | 127533878 | 127533661 | 20  | 36  | 8  | 4.822534117 | 6.35E-07    |        | ENSG00000207138 |
| 8 | 127581339 | 127581575 | 127581431 | 8   | 8   | 3  | 2.639359888 | 0.0415794   |        | ENSG00000207138 |
| 8 | 127591739 | 127592133 | 127591914 | 17  | 25  | 8  | 3.388807758 | 0.000297109 |        | ENSG00000207138 |
| 8 | 127637651 | 127638190 | 127637933 | 10  | 21  | 5  | 4.301179077 | 0.000172642 | FAM84B | ENSG00000168672 |
| 8 | 127639084 | 127640384 | 127639746 | 27  | 108 | 34 | 3.653209242 | 1.75E-13    | FAM84B | ENSG00000168672 |
| 8 | 127645461 | 127646182 | 127645954 | 21  | 40  | 16 | 2.829117789 | 6.64E-05    | FAM84B | ENSG00000168672 |
| 8 | 127646206 | 127646473 | 127646339 | 9   | 11  | 10 | 1.279689643 | 0.277323    | FAM84B | ENSG00000168672 |
| 8 | 127651780 | 127652346 | 127652176 | 15  | 29  | 7  | 4.398933147 | 1.30E-05    | FAM84B | ENSG00000168672 |
| 8 | 127652771 | 127653603 | 127653137 | 17  | 47  | 16 | 3.312137899 | 2.30E-06    | FAM84B | ENSG00000168672 |
| 8 | 127660193 | 127660374 | 127660256 | 8   | 8   | 6  | 1.508205651 | 0.203852    | FAM84B | ENSG00000168672 |
| 8 | 127661056 | 127662074 | 127661600 | 392 | 532 | 13 | 44.6596451  | 3.95E-158   | FAM84B | ENSG00000168672 |
| 8 | 127667117 | 127667371 | 127667244 | 12  | 14  | 9  | 1.759573259 | 0.0786014   | FAM84B | ENSG00000168672 |
| 8 | 127690793 | 127691345 | 127691189 | 17  | 31  | 12 | 2.887504835 | 0.000300358 | FAM84B | ENSG00000168672 |
| 8 | 127731474 | 127731681 | 127731583 | 8   | 9   | 0  | 11.73048839 | 0.000425898 |        | ENSG00000212451 |

|   |           |           |           |    |    |    |             |             |          |                 |
|---|-----------|-----------|-----------|----|----|----|-------------|-------------|----------|-----------------|
| 8 | 127780344 | 127780727 | 127780576 | 14 | 20 | 4  | 4.926805125 | 0.00010522  |          | ENSG00000212451 |
| 8 | 127958066 | 127958542 | 127958286 | 44 | 65 | 3  | 19.35530585 | 4.85E-19    |          | ENSG00000212451 |
| 8 | 128277772 | 128277986 | 128277875 | 10 | 11 | 6  | 2.010940867 | 0.0640214   | POU5F1P1 | ENSG00000212993 |
| 8 | 128286816 | 128287120 | 128286968 | 10 | 14 | 3  | 4.398933147 | 0.00132748  | POU5F1P1 | ENSG00000212993 |
| 8 | 128288597 | 128288928 | 128288762 | 10 | 16 | 5  | 3.323638378 | 0.00288759  | POU5F1P1 | ENSG00000212993 |
| 8 | 128296344 | 128296683 | 128296505 | 13 | 16 | 10 | 1.812893661 | 0.0578656   | POU5F1P1 | ENSG00000212993 |
| 8 | 128296706 | 128296973 | 128296839 | 13 | 16 | 8  | 2.215758919 | 0.0222902   | POU5F1P1 | ENSG00000212993 |
| 8 | 128323905 | 128324134 | 128324064 | 8  | 8  | 2  | 3.519146518 | 0.017558    | POU5F1P1 | ENSG00000212993 |
| 8 | 128339239 | 128339422 | 128339330 | 9  | 9  | 0  | 11.73048839 | 0.000425898 | POU5F1P1 | ENSG00000212993 |
| 8 | 128350141 | 128350562 | 128350383 | 28 | 37 | 2  | 14.85861863 | 3.69E-11    | POU5F1P1 | ENSG00000212993 |
| 8 | 128352379 | 128352667 | 128352526 | 12 | 14 | 8  | 1.955081399 | 0.0506438   | POU5F1P1 | ENSG00000212993 |
| 8 | 128417642 | 128417870 | 128417789 | 8  | 9  | 7  | 1.466311049 | 0.20706     | POU5F1P1 | ENSG00000212993 |
| 8 | 128423592 | 128424261 | 128423723 | 16 | 31 | 8  | 4.170840318 | 1.13E-05    | POU5F1P1 | ENSG00000212993 |
| 8 | 128449221 | 128449528 | 128449374 | 8  | 11 | 6  | 2.010940867 | 0.0640214   | POU5F1P1 | ENSG00000212993 |
| 8 | 128451789 | 128451986 | 128451833 | 9  | 9  | 2  | 3.910162798 | 0.00955088  | POU5F1P1 | ENSG00000212993 |
| 8 | 128479481 | 128479740 | 128479598 | 9  | 13 | 4  | 3.28453675  | 0.00629037  | POU5F1P1 | ENSG00000212993 |
| 8 | 128479759 | 128480059 | 128479886 | 9  | 13 | 6  | 2.346097679 | 0.0266147   | POU5F1P1 | ENSG00000212993 |
| 8 | 128482134 | 128482571 | 128482313 | 13 | 22 | 6  | 3.854303329 | 0.000260696 | POU5F1P1 | ENSG00000212993 |
| 8 | 128547451 | 128547737 | 128547584 | 10 | 11 | 7  | 1.759573259 | 0.102361    | POU5F1P1 | ENSG00000212993 |
| 8 | 128577797 | 128578153 | 128577975 | 11 | 16 | 2  | 6.647276756 | 0.000101928 | POU5F1P1 | ENSG00000212993 |
| 8 | 128654827 | 128655108 | 128654937 | 9  | 13 | 7  | 2.052835469 | 0.046392    | POU5F1P1 | ENSG00000212993 |
| 8 | 128678697 | 128678899 | 128678805 | 8  | 8  | 2  | 3.519146518 | 0.017558    | MYC      | ENSG00000136997 |
| 8 | 128749683 | 128750028 | 128749855 | 10 | 16 | 10 | 1.812893661 | 0.0578656   | MYC      | ENSG00000136997 |
| 8 | 128750036 | 128750630 | 128750215 | 21 | 40 | 22 | 2.091087061 | 0.00178999  | MYC      | ENSG00000136997 |
| 8 | 128781339 | 128781567 | 128781453 | 8  | 9  | 2  | 3.910162798 | 0.00955088  | MYC      | ENSG00000136997 |
| 8 | 128787737 | 128787991 | 128787864 | 8  | 9  | 4  | 2.346097679 | 0.050148    | MYC      | ENSG00000136997 |
| 8 | 128807184 | 128807529 | 128807351 | 8  | 12 | 10 | 1.386330446 | 0.21117     | MYC      | ENSG00000136997 |
| 8 | 128811314 | 128811493 | 128811467 | 8  | 8  | 4  | 2.111487911 | 0.0804809   | MYC      | ENSG00000136997 |
| 8 | 128815212 | 128815812 | 128815586 | 19 | 34 | 20 | 1.955081399 | 0.00643758  | MYC      | ENSG00000136997 |
| 8 | 128816316 | 128816715 | 128816549 | 13 | 20 | 9  | 2.463402563 | 0.00689886  | MYC      | ENSG00000136997 |
| 8 | 128816854 | 128817347 | 128817168 | 10 | 21 | 12 | 1.985159574 | 0.021936    |          | ENSG00000212988 |
| 8 | 128817497 | 128817840 | 128817665 | 9  | 14 | 13 | 1.256838042 | 0.269506    | MYC      | ENSG00000136997 |
| 8 | 128817883 | 128818098 | 128817953 | 11 | 13 | 13 | 1.173048839 | 0.337862    | MYC      | ENSG00000136997 |
| 8 | 128818333 | 128818592 | 128818464 | 10 | 12 | 4  | 3.049926982 | 0.0108184   | MYC      | ENSG00000136997 |

|   |           |           |           |     |     |    |             |             |        |                 |
|---|-----------|-----------|-----------|-----|-----|----|-------------|-------------|--------|-----------------|
| 8 | 128819112 | 128819481 | 128819334 | 14  | 18  | 5  | 3.714654658 | 0.000961539 | MYC    | ENSG00000136997 |
| 8 | 128819635 | 128819849 | 128819778 | 9   | 10  | 2  | 4.301179077 | 0.00512919  | MYC    | ENSG00000136997 |
| 8 | 128819965 | 128820270 | 128820117 | 12  | 16  | 11 | 1.661819189 | 0.0853913   | MYC    | ENSG00000136997 |
| 8 | 128823162 | 128823364 | 128823263 | 9   | 10  | 2  | 4.301179077 | 0.00512919  | MYC    | ENSG00000136997 |
| 8 | 128823658 | 128823881 | 128823769 | 8   | 10  | 4  | 2.580707446 | 0.0306059   | MYC    | ENSG00000136997 |
| 8 | 128863827 | 128864060 | 128863907 | 9   | 12  | 7  | 1.906204364 | 0.0695918   |        | ENSG00000214789 |
| 8 | 128870036 | 128870592 | 128870314 | 8   | 21  | 9  | 2.580707446 | 0.00438951  |        | ENSG00000214789 |
| 8 | 128876044 | 128878242 | 128877217 | 446 | 746 | 36 | 23.68290495 | 6.89E-200   |        | ENSG00000221315 |
| 8 | 128882069 | 128882456 | 128882248 | 14  | 21  | 14 | 1.720471631 | 0.0496182   |        | ENSG00000221315 |
| 8 | 128882983 | 128883169 | 128883076 | 8   | 9   | 6  | 1.675784056 | 0.141978    |        | ENSG00000221315 |
| 8 | 128891089 | 128891453 | 128891268 | 11  | 17  | 8  | 2.346097679 | 0.0144542   |        | ENSG00000221315 |
| 8 | 128891773 | 128892046 | 128891893 | 8   | 10  | 3  | 3.225884308 | 0.0139466   |        | ENSG00000221315 |
| 8 | 128899723 | 128899992 | 128899868 | 8   | 9   | 14 | 0.78203256  | 0.734892    |        | ENSG00000221315 |
| 8 | 128900913 | 128901127 | 128900965 | 10  | 13  | 7  | 2.052835469 | 0.046392    |        | ENSG00000221315 |
| 8 | 128901486 | 128901666 | 128901576 | 8   | 9   | 6  | 1.675784056 | 0.141978    |        | ENSG00000221315 |
| 8 | 128901748 | 128902120 | 128901906 | 11  | 17  | 6  | 3.016411301 | 0.00381427  |        | ENSG00000221315 |
| 8 | 128904138 | 128904479 | 128904308 | 8   | 11  | 7  | 1.759573259 | 0.102361    |        | ENSG00000221315 |
| 8 | 128930776 | 128931093 | 128930934 | 17  | 21  | 16 | 1.518063204 | 0.0959332   |        | ENSG00000221315 |
| 8 | 128933373 | 128933718 | 128933551 | 8   | 13  | 11 | 1.368556979 | 0.211388    |        | ENSG00000221315 |
| 8 | 128934000 | 128934508 | 128934330 | 12  | 23  | 9  | 2.815317214 | 0.00172056  |        | ENSG00000221315 |
| 8 | 128936017 | 128936255 | 128936150 | 8   | 11  | 6  | 2.010940867 | 0.0640214   |        | ENSG00000221315 |
| 8 | 128940879 | 128941715 | 128941322 | 33  | 61  | 19 | 3.636451402 | 2.09E-08    |        | ENSG00000221315 |
| 8 | 128945520 | 128945847 | 128945683 | 8   | 13  | 9  | 1.642268375 | 0.111397    |        | ENSG00000221315 |
| 8 | 128947161 | 128947624 | 128947400 | 18  | 29  | 12 | 2.707035783 | 0.000762953 |        | ENSG00000221315 |
| 8 | 128948427 | 128948838 | 128948663 | 20  | 29  | 8  | 3.910162798 | 3.45E-05    |        | ENSG00000221315 |
| 8 | 128951822 | 128952486 | 128952307 | 17  | 37  | 17 | 2.476436439 | 0.000462122 |        | ENSG00000221315 |
| 8 | 128970108 | 128970332 | 128970220 | 13  | 14  | 6  | 2.513676084 | 0.016726    | TMEM75 | ENSG00000184090 |
| 8 | 128975999 | 128976345 | 128976172 | 11  | 16  | 2  | 6.647276756 | 0.000101928 | TMEM75 | ENSG00000184090 |
| 8 | 128980270 | 128980821 | 128980636 | 14  | 30  | 5  | 6.060752336 | 7.05E-07    | TMEM75 | ENSG00000184090 |
| 8 | 128980836 | 128981203 | 128981026 | 8   | 14  | 4  | 3.519146518 | 0.00361132  | TMEM75 | ENSG00000184090 |
| 8 | 128981959 | 128982237 | 128982061 | 16  | 20  | 6  | 3.519146518 | 0.000784044 | TMEM75 | ENSG00000184090 |
| 8 | 128983470 | 128983795 | 128983626 | 8   | 12  | 9  | 1.524963491 | 0.154777    | TMEM75 | ENSG00000184090 |
| 8 | 128990027 | 128990270 | 128990148 | 9   | 9   | 1  | 5.865244197 | 0.00272497  | TMEM75 | ENSG00000184090 |
| 8 | 128999501 | 128999740 | 128999652 | 8   | 8   | 5  | 1.759573259 | 0.13508     | TMEM75 | ENSG00000184090 |

|   |           |           |           |    |    |    |             |             |        |                 |
|---|-----------|-----------|-----------|----|----|----|-------------|-------------|--------|-----------------|
| 8 | 129005378 | 129005576 | 129005458 | 9  | 10 | 2  | 4.301179077 | 0.00512919  | TMEM75 | ENSG00000184090 |
| 8 | 129031962 | 129032231 | 129032117 | 9  | 11 | 9  | 1.407658607 | 0.210479    | TMEM75 | ENSG00000184090 |
| 8 | 129033524 | 129034072 | 129033712 | 19 | 32 | 12 | 2.977739361 | 0.000186314 | TMEM75 | ENSG00000184090 |
| 8 | 129035240 | 129035667 | 129035538 | 9  | 15 | 11 | 1.564065119 | 0.11768     | TMEM75 | ENSG00000184090 |
| 8 | 129052246 | 129052589 | 129052417 | 8  | 11 | 5  | 2.346097679 | 0.0364013   |        | ENSG00000221771 |
| 8 | 129054719 | 129054996 | 129054857 | 12 | 12 | 3  | 3.812408728 | 0.004404    |        | ENSG00000221771 |
| 8 | 129069592 | 129069771 | 129069653 | 8  | 8  | 1  | 5.278719777 | 0.00542188  |        | ENSG00000207110 |
| 8 | 129071441 | 129071668 | 129071540 | 8  | 10 | 2  | 4.301179077 | 0.00512919  |        | ENSG00000207110 |
| 8 | 129073170 | 129073356 | 129073259 | 9  | 9  | 2  | 3.910162798 | 0.00955088  |        | ENSG00000207110 |
| 8 | 129102465 | 129102644 | 129102535 | 8  | 8  | 5  | 1.759573259 | 0.13508     |        | ENSG00000222501 |
| 8 | 129103899 | 129104130 | 129104014 | 8  | 10 | 5  | 2.150589539 | 0.0575848   |        | ENSG00000222501 |
| 8 | 129107125 | 129107350 | 129107237 | 8  | 10 | 3  | 3.225884308 | 0.0139466   |        | ENSG00000222501 |
| 8 | 129108422 | 129108683 | 129108556 | 8  | 10 | 4  | 2.580707446 | 0.0306059   |        | ENSG00000222501 |
| 8 | 129109394 | 129109658 | 129109526 | 8  | 8  | 4  | 2.111487911 | 0.0804809   |        | ENSG00000222501 |
| 8 | 129114290 | 129114512 | 129114401 | 8  | 8  | 2  | 3.519146518 | 0.017558    |        | ENSG00000221176 |
| 8 | 129127174 | 129127373 | 129127273 | 8  | 10 | 12 | 0.992579787 | 0.511743    |        | ENSG00000221176 |
| 8 | 129149393 | 129149580 | 129149516 | 8  | 9  | 4  | 2.346097679 | 0.050148    |        | ENSG00000221176 |
| 8 | 129149666 | 129149852 | 129149759 | 8  | 9  | 4  | 2.346097679 | 0.050148    |        | ENSG00000221176 |
| 8 | 129156106 | 129156301 | 129156197 | 9  | 9  | 0  | 11.73048839 | 0.000425898 |        | ENSG00000221176 |
| 8 | 129170034 | 129170332 | 129170183 | 19 | 21 | 16 | 1.518063204 | 0.0959332   |        | ENSG00000221176 |
| 8 | 129170399 | 129170613 | 129170516 | 9  | 10 | 7  | 1.612942154 | 0.147335    |        | ENSG00000221176 |
| 8 | 129172473 | 129172783 | 129172628 | 9  | 14 | 10 | 1.599612054 | 0.114822    |        | ENSG00000221176 |
| 8 | 129184032 | 129184401 | 129184211 | 10 | 17 | 10 | 1.919534464 | 0.0400548   |        | ENSG00000221261 |
| 8 | 129185260 | 129185516 | 129185388 | 8  | 10 | 4  | 2.580707446 | 0.0306059   |        | ENSG00000221261 |
| 8 | 129186756 | 129187031 | 129186876 | 9  | 12 | 7  | 1.906204364 | 0.0695918   |        | ENSG00000221261 |
| 8 | 129187068 | 129187283 | 129187158 | 9  | 10 | 10 | 1.173048839 | 0.355733    |        | ENSG00000221261 |
| 8 | 129189585 | 129189797 | 129189691 | 8  | 8  | 1  | 5.278719777 | 0.00542188  |        | ENSG00000221261 |
| 8 | 129193946 | 129194145 | 129194033 | 8  | 10 | 6  | 1.843362462 | 0.0964212   |        | ENSG00000221261 |
| 8 | 129195632 | 129195821 | 129195795 | 9  | 10 | 6  | 1.843362462 | 0.0964212   |        | ENSG00000221261 |
| 8 | 129208328 | 129208507 | 129208402 | 8  | 9  | 5  | 1.955081399 | 0.0892323   |        | ENSG00000221261 |
| 8 | 129208621 | 129208964 | 129208814 | 19 | 23 | 16 | 1.65606895  | 0.0532464   |        | ENSG00000221261 |
| 8 | 129212256 | 129212470 | 129212408 | 9  | 10 | 9  | 1.290353723 | 0.279648    |        | ENSG00000221261 |
| 8 | 129217994 | 129218561 | 129218401 | 8  | 21 | 20 | 1.228908308 | 0.250141    |        | ENSG00000221261 |
| 8 | 129220695 | 129220883 | 129220824 | 10 | 12 | 4  | 3.049926982 | 0.0108184   |        | ENSG00000221261 |



|   |           |           |           |     |     |    |             |             |                 |
|---|-----------|-----------|-----------|-----|-----|----|-------------|-------------|-----------------|
| 8 | 129220985 | 129221906 | 129221539 | 30  | 71  | 37 | 2.222618853 | 1.97E-05    | ENSG00000221261 |
| 8 | 129222763 | 129222961 | 129222817 | 8   | 10  | 5  | 2.150589539 | 0.0575848   | ENSG00000221261 |
| 8 | 129223119 | 129224306 | 129223514 | 117 | 228 | 47 | 5.596420504 | 6.51E-37    | ENSG00000221261 |
| 8 | 129226329 | 129227038 | 129226508 | 15  | 35  | 17 | 2.346097679 | 0.00106246  | ENSG00000221261 |
| 8 | 129227492 | 129227690 | 129227591 | 9   | 9   | 6  | 1.675784056 | 0.141978    | ENSG00000221261 |
| 8 | 129228546 | 129228794 | 129228703 | 10  | 12  | 7  | 1.906204364 | 0.0695918   | ENSG00000221261 |
| 8 | 129233493 | 129233704 | 129233598 | 8   | 9   | 8  | 1.303387599 | 0.281715    | ENSG00000221261 |
| 8 | 129233708 | 129233987 | 129233823 | 9   | 11  | 8  | 1.564065119 | 0.151515    | ENSG00000221261 |
| 8 | 129234126 | 129234962 | 129234592 | 50  | 79  | 30 | 3.027222811 | 1.22E-08    | ENSG00000221261 |
| 8 | 129235666 | 129235851 | 129235758 | 8   | 9   | 11 | 0.977540699 | 0.526123    | ENSG00000221261 |
| 8 | 129238721 | 129238993 | 129238824 | 12  | 15  | 13 | 1.340627245 | 0.210788    | ENSG00000221261 |
| 8 | 129247900 | 129248105 | 129248011 | 8   | 10  | 4  | 2.580707446 | 0.0306059   | ENSG00000221261 |
| 8 | 129248898 | 129249341 | 129249034 | 13  | 21  | 13 | 1.843362462 | 0.0337179   | ENSG00000221261 |
| 8 | 129249568 | 129250128 | 129249925 | 18  | 36  | 38 | 1.112892489 | 0.321968    | ENSG00000221261 |
| 8 | 129250385 | 129250765 | 129250521 | 8   | 14  | 11 | 1.466311049 | 0.15926     | ENSG00000221261 |
| 8 | 129250915 | 129251240 | 129251077 | 10  | 13  | 12 | 1.263283365 | 0.272203    | ENSG00000221261 |
| 8 | 129251936 | 129252331 | 129252075 | 9   | 17  | 10 | 1.919534464 | 0.0400548   | ENSG00000221261 |
| 8 | 129257841 | 129258780 | 129258601 | 24  | 68  | 29 | 2.69801233  | 9.02E-07    | ENSG00000221261 |
| 8 | 129266056 | 129266304 | 129266134 | 9   | 11  | 6  | 2.010940867 | 0.0640214   | ENSG00000221261 |
| 8 | 129269048 | 129269478 | 129269299 | 12  | 19  | 8  | 2.606775198 | 0.00583935  | ENSG00000201782 |
| 8 | 129272298 | 129272636 | 129272467 | 9   | 11  | 9  | 1.407658607 | 0.210479    | ENSG00000201782 |
| 8 | 129274349 | 129274762 | 129274603 | 9   | 17  | 12 | 1.62422147  | 0.088135    | ENSG00000201782 |
| 8 | 129274838 | 129275154 | 129274996 | 9   | 12  | 7  | 1.906204364 | 0.0695918   | ENSG00000201782 |
| 8 | 129277468 | 129277972 | 129277647 | 12  | 21  | 16 | 1.518063204 | 0.0959332   | ENSG00000201782 |
| 8 | 129278450 | 129279026 | 129278605 | 12  | 27  | 18 | 1.728703553 | 0.0306274   | ENSG00000201782 |
| 8 | 129279078 | 129279370 | 129279197 | 27  | 30  | 19 | 1.818225701 | 0.0168067   | ENSG00000201782 |
| 8 | 129283323 | 129283580 | 129283424 | 8   | 10  | 5  | 2.150589539 | 0.0575848   | ENSG00000201782 |
| 8 | 129285577 | 129285890 | 129285733 | 13  | 16  | 2  | 6.647276756 | 0.000101928 | ENSG00000201782 |
| 8 | 129285949 | 129286170 | 129286084 | 9   | 9   | 5  | 1.955081399 | 0.0892323   | ENSG00000201782 |
| 8 | 129289356 | 129289633 | 129289494 | 8   | 10  | 6  | 1.843362462 | 0.0964212   | ENSG00000201782 |
| 8 | 129291249 | 129291545 | 129291420 | 9   | 12  | 15 | 0.953102182 | 0.555895    | ENSG00000201782 |
| 8 | 129292321 | 129292644 | 129292554 | 8   | 12  | 8  | 1.694403879 | 0.107291    | ENSG00000201782 |
| 8 | 129305850 | 129306257 | 129306096 | 11  | 17  | 10 | 1.919534464 | 0.0400548   | ENSG00000201782 |
| 8 | 129308176 | 129308366 | 129308266 | 8   | 8   | 3  | 2.639359888 | 0.0415794   | ENSG00000201782 |

|   |           |           |           |    |    |    |             |             |                        |
|---|-----------|-----------|-----------|----|----|----|-------------|-------------|------------------------|
| 8 | 129333472 | 129333700 | 129333586 | 8  | 10 | 14 | 0.860235815 | 0.65444     | ENSG00000201782        |
| 8 | 129340984 | 129341240 | 129341112 | 8  | 12 | 8  | 1.694403879 | 0.107291    | ENSG00000201782        |
| 8 | 129350996 | 129351260 | 129351128 | 11 | 15 | 12 | 1.443752418 | 0.160732    | ENSG00000201782        |
| 8 | 129352946 | 129353285 | 129353115 | 11 | 16 | 10 | 1.812893661 | 0.0578656   | ENSG00000201782        |
| 8 | 129353354 | 129353633 | 129353526 | 9  | 11 | 12 | 1.082814313 | 0.424156    | ENSG00000201782        |
| 8 | 129354498 | 129354827 | 129354651 | 9  | 11 | 4  | 2.815317214 | 0.0183428   | ENSG00000201782        |
| 8 | 129379647 | 129379942 | 129379794 | 8  | 10 | 5  | 2.150589539 | 0.0575848   | ENSG00000201782        |
| 8 | 129394565 | 129394878 | 129394721 | 10 | 14 | 2  | 5.865244197 | 0.000387308 | ENSG00000201782        |
| 8 | 129404160 | 129404433 | 129404267 | 12 | 15 | 9  | 1.876878143 | 0.0544542   | ENSG00000201782        |
| 8 | 129408376 | 129408635 | 129408505 | 12 | 12 | 8  | 1.694403879 | 0.107291    | ENSG00000201782        |
| 8 | 129424229 | 129424530 | 129424391 | 12 | 15 | 9  | 1.876878143 | 0.0544542   | ENSG00000201782        |
| 8 | 129443400 | 129443674 | 129443530 | 9  | 11 | 3  | 3.519146518 | 0.00788869  | ENSG00000201782        |
| 8 | 129509221 | 129509651 | 129509472 | 8  | 17 | 7  | 2.639359888 | 0.00777415  | ENSG00000201782        |
| 8 | 129509665 | 129510049 | 129509797 | 9  | 15 | 5  | 3.128130238 | 0.00492422  | ENSG00000201782        |
| 8 | 129541517 | 129541696 | 129541576 | 8  | 9  | 5  | 1.955081399 | 0.0892323   | ENSG00000201782        |
| 8 | 129734787 | 129735063 | 129734925 | 9  | 12 | 11 | 1.270802909 | 0.274822    | ENSG00000221351        |
| 8 | 129931808 | 129932053 | 129931930 | 10 | 10 | 3  | 3.225884308 | 0.0139466   | ENSG00000221351        |
| 8 | 129940547 | 129940831 | 129940689 | 13 | 16 | 3  | 4.985457567 | 0.000385643 | ENSG00000221351        |
| 8 | 129953097 | 129953282 | 129953144 | 8  | 8  | 4  | 2.111487911 | 0.0804809   | ENSG00000221351        |
| 8 | 130086597 | 130086813 | 130086744 | 8  | 9  | 1  | 5.865244197 | 0.00272497  | ENSG00000221351        |
| 8 | 130513298 | 130513538 | 130513408 | 11 | 12 | 0  | 15.24963491 | 4.15E-05    | ENSG00000208525        |
| 8 | 130617134 | 130617436 | 130617285 | 9  | 12 | 5  | 2.541605819 | 0.0225912   | ENSG00000208525        |
| 8 | 130632697 | 130633014 | 130632855 | 12 | 15 | 6  | 2.68125449  | 0.0103552   | GSDMC ENSG00000147697  |
| 8 | 130789160 | 130789370 | 130789307 | 8  | 8  | 0  | 10.55743955 | 0.000925496 | GSDMC ENSG00000147697  |
| 8 | 130812678 | 130812857 | 130812767 | 8  | 8  | 2  | 3.519146518 | 0.017558    | GSDMC ENSG00000147697  |
| 8 | 130907779 | 130907962 | 130907860 | 8  | 8  | 2  | 3.519146518 | 0.017558    | ENSG00000198683        |
| 8 | 131065666 | 131065881 | 131065753 | 8  | 10 | 5  | 2.150589539 | 0.0575848   | FAM49B ENSG00000153310 |
| 8 | 131078092 | 131078436 | 131078264 | 12 | 17 | 14 | 1.407658607 | 0.162567    | FAM49B ENSG00000153310 |
| 8 | 131096646 | 131097000 | 131096838 | 14 | 19 | 7  | 2.932622098 | 0.00293566  | FAM49B ENSG00000153310 |
| 8 | 131114262 | 131114488 | 131114375 | 10 | 11 | 5  | 2.346097679 | 0.0364013   | FAM49B ENSG00000153310 |
| 8 | 131116358 | 131116577 | 131116467 | 10 | 11 | 8  | 1.564065119 | 0.151515    | FAM49B ENSG00000153310 |
| 8 | 131123580 | 131124046 | 131123956 | 16 | 28 | 11 | 2.834868028 | 0.000626961 | FAM49B ENSG00000153310 |
| 8 | 131125831 | 131126119 | 131125964 | 8  | 9  | 0  | 11.73048839 | 0.000425898 | ENSG00000200304        |
| 8 | 131148275 | 131148503 | 131148389 | 10 | 11 | 4  | 2.815317214 | 0.0183428   | ENSG00000200304        |

|   |           |           |           |    |    |   |             |                   |                 |
|---|-----------|-----------|-----------|----|----|---|-------------|-------------------|-----------------|
| 8 | 131151755 | 131152083 | 131151920 | 9  | 14 | 1 | 8.797866295 | 8.00E-05          | ENSG00000200304 |
| 8 | 131350227 | 131350416 | 131350329 | 9  | 9  | 4 | 2.346097679 | 0.050148          | ENSG00000212342 |
| 8 | 131384027 | 131384346 | 131384175 | 11 | 14 | 3 | 4.398933147 | 0.00132748 ASAP1  | ENSG00000153317 |
| 8 | 131387211 | 131387656 | 131387433 | 9  | 18 | 2 | 7.429309316 | 2.63E-05 ASAP1    | ENSG00000153317 |
| 8 | 131405505 | 131405690 | 131405597 | 8  | 8  | 2 | 3.519146518 | 0.017558 ASAP1    | ENSG00000153317 |
| 8 | 131438479 | 131438658 | 131438527 | 8  | 8  | 0 | 10.55743955 | 0.000925496 ASAP1 | ENSG00000153317 |
| 8 | 131564759 | 131565018 | 131564888 | 12 | 15 | 3 | 4.692195357 | 0.000718455 ASAP1 | ENSG00000153317 |
| 8 | 131580977 | 131581292 | 131581134 | 11 | 16 | 2 | 6.647276756 | 0.000101928 ASAP1 | ENSG00000153317 |
| 8 | 131766957 | 131767264 | 131767134 | 24 | 28 | 0 | 34.01841634 | 1.68E-10          | ENSG00000208512 |
| 8 | 131797266 | 131797490 | 131797336 | 9  | 12 | 0 | 15.24963491 | 4.15E-05          | ENSG00000208512 |
| 8 | 131831183 | 131831375 | 131831279 | 9  | 11 | 3 | 3.519146518 | 0.00788869        | ENSG00000208512 |
| 8 | 131870574 | 131870857 | 131870715 | 16 | 18 | 1 | 11.14396397 | 4.44E-06          | ENSG00000208512 |
| 8 | 132696859 | 132697065 | 132696962 | 8  | 8  | 1 | 5.278719777 | 0.00542188 EFR3A  | ENSG00000132294 |
| 8 | 133106635 | 133107030 | 133106844 | 33 | 41 | 0 | 49.26805125 | 6.97E-15 OC90     | ENSG00000132297 |
| 8 | 133128275 | 133128487 | 133128381 | 10 | 10 | 2 | 4.301179077 | 0.00512919 OC90   | ENSG00000132297 |
| 8 | 133359732 | 133359928 | 133359830 | 8  | 8  | 2 | 3.519146518 | 0.017558 OC90     | ENSG00000132297 |
| 8 | 133485289 | 133485671 | 133485492 | 21 | 28 | 2 | 11.33947211 | 2.41E-08 KCNQ3    | ENSG00000184156 |
| 8 | 133732896 | 133733171 | 133733035 | 12 | 13 | 1 | 8.211341875 | 0.000163445 LRRC6 | ENSG00000129295 |
| 8 | 133980343 | 133980894 | 133980552 | 25 | 43 | 3 | 12.90353723 | 3.99E-12 TG       | ENSG00000042832 |
| 8 | 134114838 | 134115144 | 134114968 | 10 | 12 | 4 | 3.049926982 | 0.0108184 SLA     | ENSG00000155926 |
| 8 | 134284383 | 134284628 | 134284523 | 11 | 12 | 3 | 3.812408728 | 0.004404 WISP1    | ENSG00000104415 |
| 8 | 134286272 | 134286750 | 134286500 | 27 | 39 | 2 | 15.64065119 | 8.61E-12 WISP1    | ENSG00000104415 |
| 8 | 134293638 | 134293850 | 134293744 | 9  | 9  | 0 | 11.73048839 | 0.000425898 WISP1 | ENSG00000104415 |
| 8 | 134316142 | 134316398 | 134316247 | 12 | 14 | 3 | 4.398933147 | 0.00132748 WISP1  | ENSG00000104415 |
| 8 | 134331224 | 134331486 | 134331394 | 13 | 17 | 3 | 5.278719777 | 0.000205462 NDRG1 | ENSG00000104419 |
| 8 | 134355576 | 134355779 | 134355677 | 11 | 11 | 1 | 7.038293036 | 0.000674435 NDRG1 | ENSG00000104419 |
| 8 | 134378975 | 134379298 | 134379149 | 10 | 15 | 8 | 2.085420159 | 0.0338693 NDRG1   | ENSG00000104419 |
| 8 | 134441550 | 134442035 | 134441729 | 8  | 17 | 7 | 2.639359888 | 0.00777415        | ENSG00000213627 |
| 8 | 134472448 | 134472806 | 134472627 | 20 | 26 | 4 | 6.334463732 | 2.40E-06          | ENSG00000213627 |
| 8 | 134534722 | 134534931 | 134534862 | 9  | 9  | 2 | 3.910162798 | 0.00955088        | ENSG00000213627 |
| 8 | 134569877 | 134570084 | 134569961 | 10 | 11 | 3 | 3.519146518 | 0.00788869        | ENSG00000212992 |
| 8 | 134651190 | 134651437 | 134651329 | 8  | 9  | 3 | 2.932622098 | 0.0242899 ST3GAL1 | ENSG00000008513 |
| 8 | 134703505 | 134703708 | 134703569 | 9  | 10 | 2 | 4.301179077 | 0.00512919        | ENSG00000212273 |
| 8 | 134806642 | 134806934 | 134806800 | 11 | 14 | 0 | 17.59573259 | 8.79E-06          | ENSG00000208504 |

|   |           |           |           |    |    |    |             |             |         |                 |
|---|-----------|-----------|-----------|----|----|----|-------------|-------------|---------|-----------------|
| 8 | 134850437 | 134850719 | 134850563 | 15 | 18 | 10 | 2.026175268 | 0.0273052   |         | ENSG00000208501 |
| 8 | 134967602 | 134967809 | 134967720 | 8  | 11 | 2  | 4.692195357 | 0.00272444  |         | ENSG00000208501 |
| 8 | 135035952 | 135036183 | 135036062 | 8  | 9  | 7  | 1.466311049 | 0.20706     |         | ENSG00000208501 |
| 8 | 135261233 | 135261429 | 135261278 | 8  | 9  | 0  | 11.73048839 | 0.000425898 |         | ENSG00000208501 |
| 8 | 135772691 | 135773041 | 135772863 | 20 | 25 | 5  | 5.083211637 | 1.58E-05    | ZFAT    | ENSG00000066827 |
| 8 | 135793749 | 135794178 | 135794011 | 12 | 18 | 4  | 4.457585589 | 0.000353565 | ZFAT    | ENSG00000066827 |
| 8 | 135794309 | 135794503 | 135794406 | 8  | 10 | 4  | 2.580707446 | 0.0306059   | ZFAT    | ENSG00000066827 |
| 8 | 135831889 | 135832235 | 135832062 | 16 | 20 | 0  | 24.63402563 | 8.35E-08    | ZFAT    | ENSG00000066827 |
| 8 | 135913678 | 135914388 | 135913988 | 14 | 32 | 3  | 9.677652924 | 9.12E-09    |         | ENSG00000199153 |
| 8 | 135968022 | 135968230 | 135968126 | 8  | 8  | 3  | 2.639359888 | 0.0415794   |         | ENSG00000199153 |
| 8 | 135987626 | 135987830 | 135987710 | 13 | 14 | 1  | 8.797866295 | 8.00E-05    |         | ENSG00000213624 |
| 8 | 136090218 | 136090417 | 136090317 | 9  | 9  | 1  | 5.865244197 | 0.00272497  |         | ENSG00000213624 |
| 8 | 136434967 | 136435312 | 136435139 | 8  | 13 | 1  | 8.211341875 | 0.000163445 | KHDRBS3 | ENSG00000131773 |
| 8 | 137612685 | 137612888 | 137612807 | 9  | 10 | 1  | 6.451768616 | 0.00135978  |         |                 |
| 8 | 139228377 | 139228682 | 139228503 | 12 | 14 | 0  | 17.59573259 | 8.79E-06    | FAM135B | ENSG00000147724 |
| 8 | 139781842 | 139782067 | 139781943 | 8  | 8  | 1  | 5.278719777 | 0.00542188  | COL22A1 | ENSG00000169436 |
| 8 | 139808787 | 139809112 | 139808954 | 15 | 18 | 6  | 3.183989707 | 0.00227432  | COL22A1 | ENSG00000169436 |
| 8 | 139932969 | 139933155 | 139933062 | 8  | 8  | 2  | 3.519146518 | 0.017558    |         | ENSG00000208469 |
| 8 | 140026597 | 140026870 | 140026743 | 10 | 14 | 4  | 3.519146518 | 0.00361132  | COL22A1 | ENSG00000169436 |
| 8 | 140046488 | 140046793 | 140046654 | 9  | 12 | 3  | 3.812408728 | 0.004404    | COL22A1 | ENSG00000169436 |
| 8 | 140422430 | 140422681 | 140422548 | 8  | 8  | 5  | 1.759573259 | 0.13508     | KCNK9   | ENSG00000169427 |
| 8 | 140706265 | 140706467 | 140706305 | 9  | 9  | 3  | 2.932622098 | 0.0242899   | KCNK9   | ENSG00000169427 |
| 8 | 140801747 | 140802043 | 140801885 | 10 | 14 | 1  | 8.797866295 | 8.00E-05    | KCNK9   | ENSG00000169427 |
| 8 | 140976170 | 140976496 | 140976333 | 31 | 34 | 2  | 13.68556979 | 3.24E-10    | C8orf17 | ENSG00000211505 |
| 8 | 141176098 | 141176369 | 141176261 | 13 | 16 | 3  | 4.985457567 | 0.000385643 | C8orf17 | ENSG00000211505 |
| 8 | 141228378 | 141228579 | 141228463 | 8  | 9  | 4  | 2.346097679 | 0.050148    | C8orf17 | ENSG00000211505 |
| 8 | 141228943 | 141229189 | 141229048 | 10 | 11 | 1  | 7.038293036 | 0.000674435 | C8orf17 | ENSG00000211505 |
| 8 | 141473157 | 141473420 | 141473288 | 9  | 12 | 3  | 3.812408728 | 0.004404    | TRAPPC9 | ENSG00000167632 |
| 8 | 141535927 | 141536176 | 141536051 | 8  | 10 | 2  | 4.301179077 | 0.00512919  | TRAPPC9 | ENSG00000167632 |
| 8 | 141537034 | 141537331 | 141537174 | 13 | 15 | 5  | 3.128130238 | 0.00492422  | TRAPPC9 | ENSG00000167632 |
| 8 | 141543515 | 141543974 | 141543731 | 10 | 20 | 2  | 8.211341875 | 6.65E-06    | TRAPPC9 | ENSG00000167632 |
| 8 | 141591121 | 141591536 | 141591432 | 9  | 16 | 4  | 3.988366054 | 0.00115141  | CHRA1   | ENSG00000104472 |
| 8 | 141732808 | 141733063 | 141732928 | 10 | 11 | 6  | 2.010940867 | 0.0640214   | EIF2C2  | ENSG00000123908 |
| 8 | 141910465 | 141910644 | 141910554 | 8  | 8  | 5  | 1.759573259 | 0.13508     | PTK2    | ENSG00000169398 |

|   |           |           |           |    |    |    |             |             |         |                 |
|---|-----------|-----------|-----------|----|----|----|-------------|-------------|---------|-----------------|
| 8 | 141977498 | 141977713 | 141977639 | 8  | 8  | 1  | 5.278719777 | 0.00542188  | PTK2    | ENSG00000169398 |
| 8 | 142105904 | 142106131 | 142105979 | 10 | 11 | 0  | 14.07658607 | 9.02E-05    | PTK2    | ENSG00000169398 |
| 8 | 142120751 | 142121153 | 142121000 | 12 | 20 | 6  | 3.519146518 | 0.000784044 | PTK2    | ENSG00000169398 |
| 8 | 142137238 | 142137530 | 142137384 | 10 | 13 | 4  | 3.28453675  | 0.00629037  | PTK2    | ENSG00000169398 |
| 8 | 142163485 | 142163891 | 142163714 | 10 | 17 | 2  | 7.038293036 | 5.19E-05    | DENND3  | ENSG00000105339 |
| 8 | 142240248 | 142240436 | 142240334 | 8  | 8  | 2  | 3.519146518 | 0.017558    |         | ENSG00000214762 |
| 8 | 142252590 | 142252783 | 142252686 | 9  | 9  | 4  | 2.346097679 | 0.050148    |         | ENSG00000214762 |
| 8 | 142262809 | 142263147 | 142262978 | 10 | 14 | 4  | 3.519146518 | 0.00361132  |         | ENSG00000214762 |
| 8 | 142317115 | 142317363 | 142317210 | 8  | 10 | 1  | 6.451768616 | 0.00135978  | SLC45A4 | ENSG0000022567  |
| 8 | 142453587 | 142454332 | 142453908 | 12 | 32 | 4  | 7.742122339 | 4.68E-08    | GPR20   | ENSG00000204882 |
| 8 | 142617874 | 142618118 | 142617996 | 9  | 9  | 4  | 2.346097679 | 0.050148    |         | ENSG00000214761 |
| 8 | 142633941 | 142634138 | 142633967 | 8  | 11 | 0  | 14.07658607 | 9.02E-05    |         | ENSG00000214761 |
| 8 | 142723819 | 142723998 | 142723908 | 8  | 8  | 1  | 5.278719777 | 0.00542188  |         | ENSG00000214761 |
| 8 | 142795331 | 142795525 | 142795460 | 8  | 9  | 3  | 2.932622098 | 0.0242899   |         | ENSG00000221123 |
| 8 | 143000459 | 143000722 | 143000590 | 9  | 10 | 2  | 4.301179077 | 0.00512919  |         | ENSG00000221123 |
| 8 | 143015079 | 143015323 | 143015209 | 9  | 11 | 0  | 14.07658607 | 9.02E-05    |         | ENSG00000221123 |
| 8 | 143021452 | 143021732 | 143021592 | 12 | 14 | 2  | 5.865244197 | 0.000387308 |         | ENSG00000221123 |
| 8 | 143068122 | 143068347 | 143068203 | 10 | 10 | 0  | 12.90353723 | 0.000195991 |         | ENSG00000221123 |
| 8 | 143085996 | 143086231 | 143086067 | 10 | 11 | 3  | 3.519146518 | 0.00788869  |         | ENSG00000221123 |
| 8 | 143086644 | 143086993 | 143086875 | 10 | 14 | 3  | 4.398933147 | 0.00132748  |         | ENSG00000221123 |
| 8 | 143209670 | 143210106 | 143209826 | 19 | 29 | 0  | 35.19146518 | 7.73E-11    |         | ENSG00000222423 |
| 8 | 143284587 | 143284938 | 143284762 | 20 | 26 | 0  | 31.67231866 | 7.93E-10    |         | ENSG00000222423 |
| 8 | 143421448 | 143421973 | 143421710 | 12 | 24 | 1  | 14.66311049 | 5.43E-08    | TSNARE1 | ENSG00000171045 |
| 8 | 143489739 | 143490012 | 143489879 | 10 | 12 | 0  | 15.24963491 | 4.15E-05    | TSNARE1 | ENSG00000171045 |
| 8 | 143525769 | 143526127 | 143525944 | 14 | 19 | 3  | 5.865244197 | 5.72E-05    | BAI1    | ENSG00000181790 |
| 8 | 143550242 | 143550579 | 143550403 | 8  | 12 | 2  | 5.083211637 | 0.00143337  | BAI1    | ENSG00000181790 |
| 8 | 143559698 | 143560012 | 143559865 | 18 | 21 | 3  | 6.451768616 | 1.56E-05    | BAI1    | ENSG00000181790 |
| 8 | 143588325 | 143588775 | 143588639 | 13 | 21 | 10 | 2.346097679 | 0.00796926  | BAI1    | ENSG00000181790 |
| 8 | 143702482 | 143702662 | 143702591 | 8  | 8  | 5  | 1.759573259 | 0.13508     | ARC     | ENSG00000198576 |
| 8 | 143749000 | 143749202 | 143749128 | 8  | 8  | 0  | 10.55743955 | 0.000925496 | PSCA    | ENSG00000167653 |
| 8 | 143754410 | 143754871 | 143754588 | 23 | 34 | 7  | 5.132088672 | 6.85E-07    | PSCA    | ENSG00000167653 |
| 8 | 143755772 | 143756023 | 143755947 | 11 | 12 | 2  | 5.083211637 | 0.00143337  | PSCA    | ENSG00000167653 |
| 8 | 143783598 | 143783908 | 143783753 | 12 | 15 | 1  | 9.384390715 | 3.90E-05    | LY6K    | ENSG00000160886 |
| 8 | 143804841 | 143805055 | 143804937 | 8  | 9  | 2  | 3.910162798 | 0.00955088  | C8orf55 | ENSG00000130193 |

|   |           |           |           |     |     |    |             |             |        |                 |
|---|-----------|-----------|-----------|-----|-----|----|-------------|-------------|--------|-----------------|
| 8 | 143817019 | 143817334 | 143817176 | 9   | 13  | 1  | 8.211341875 | 0.000163445 | SLURP1 | ENSG00000126233 |
| 8 | 143860855 | 143861275 | 143860991 | 8   | 14  | 3  | 4.398933147 | 0.00132748  | LY6D   | ENSG00000167656 |
| 8 | 143866776 | 143867146 | 143866955 | 18  | 27  | 5  | 5.474227917 | 4.62E-06    | LY6D   | ENSG00000167656 |
| 8 | 143867414 | 143867625 | 143867571 | 8   | 11  | 1  | 7.038293036 | 0.000674435 | LY6D   | ENSG00000167656 |
| 8 | 143867672 | 143867917 | 143867814 | 10  | 12  | 0  | 15.24963491 | 4.15E-05    | LY6D   | ENSG00000167656 |
| 8 | 143893622 | 143895059 | 143894282 | 527 | 769 | 9  | 90.32476063 | 3.13E-242   | GML    | ENSG00000104499 |
| 8 | 144141011 | 144141279 | 144141134 | 9   | 11  | 4  | 2.815317214 | 0.0183428   | LY6E   | ENSG00000160932 |
| 8 | 144223806 | 144224028 | 144223917 | 10  | 13  | 4  | 3.28453675  | 0.00629037  |        | ENSG00000203366 |
| 8 | 144260795 | 144261173 | 144260994 | 13  | 20  | 0  | 24.63402563 | 8.35E-08    |        | ENSG00000203366 |
| 8 | 144269745 | 144270848 | 144270198 | 205 | 316 | 15 | 23.24103013 | 5.15E-86    |        | ENSG00000203366 |
| 8 | 144327937 | 144328132 | 144328067 | 9   | 11  | 0  | 14.07658607 | 9.02E-05    | LY6H   | ENSG00000176956 |
| 8 | 144435135 | 144435479 | 144435307 | 9   | 13  | 6  | 2.346097679 | 0.0266147   | GLI4   | ENSG00000221850 |
| 8 | 144521804 | 144522257 | 144522011 | 13  | 22  | 12 | 2.0753941   | 0.0149739   | RHPN1  | ENSG00000158106 |
| 8 | 144536865 | 144537132 | 144536998 | 12  | 14  | 1  | 8.797866295 | 8.00E-05    | RHPN1  | ENSG00000158106 |
| 8 | 144694525 | 144694898 | 144694667 | 9   | 13  | 2  | 5.474227917 | 0.000747844 | ZC3H3  | ENSG0000014164  |
| 8 | 144749499 | 144749762 | 144749630 | 11  | 15  | 3  | 4.692195357 | 0.000718455 | EEF1D  | ENSG00000104529 |
| 8 | 144890641 | 144890954 | 144890796 | 13  | 17  | 4  | 4.222975822 | 0.000640773 | FAM83H | ENSG00000180921 |
| 8 | 144892674 | 144893029 | 144892851 | 18  | 24  | 2  | 9.775406994 | 4.09E-07    | FAM83H | ENSG00000180921 |
| 8 | 144893209 | 144893911 | 144893542 | 18  | 36  | 7  | 5.425350882 | 2.04E-07    | FAM83H | ENSG00000180921 |
| 8 | 144967384 | 144967694 | 144967544 | 11  | 15  | 5  | 3.128130238 | 0.00492422  |        | ENSG00000216090 |
| 8 | 144968772 | 144969471 | 144969318 | 23  | 40  | 9  | 4.809500241 | 1.80E-07    | SCRIB  | ENSG00000180900 |
| 8 | 144969920 | 144970269 | 144970094 | 12  | 15  | 3  | 4.692195357 | 0.000718455 | SCRIB  | ENSG00000180900 |
| 8 | 144983445 | 144983684 | 144983621 | 9   | 11  | 6  | 2.010940867 | 0.0640214   | PUF60  | ENSG00000179950 |
| 8 | 144990654 | 144990860 | 144990744 | 11  | 11  | 0  | 14.07658607 | 9.02E-05    | NRBP2  | ENSG00000185189 |
| 8 | 145000948 | 145001133 | 145001040 | 10  | 12  | 0  | 15.24963491 | 4.15E-05    | NRBP2  | ENSG00000185189 |
| 8 | 145022433 | 145022766 | 145022599 | 10  | 13  | 1  | 8.211341875 | 0.000163445 | NRBP2  | ENSG00000185189 |
| 8 | 145052186 | 145052495 | 145052324 | 14  | 19  | 3  | 5.865244197 | 5.72E-05    | PLEC1  | ENSG00000178209 |
| 8 | 145088813 | 145089007 | 145088911 | 9   | 10  | 1  | 6.451768616 | 0.00135978  | PLEC1  | ENSG00000178209 |
| 8 | 145089378 | 145089647 | 145089502 | 10  | 11  | 2  | 4.692195357 | 0.00272444  | PLEC1  | ENSG00000178209 |
| 8 | 145098197 | 145098655 | 145098354 | 12  | 21  | 12 | 1.985159574 | 0.021936    | PLEC1  | ENSG00000178209 |
| 8 | 145098874 | 145099127 | 145099003 | 17  | 19  | 9  | 2.346097679 | 0.0107159   | PLEC1  | ENSG00000178209 |
| 8 | 145102616 | 145102981 | 145102717 | 16  | 20  | 5  | 4.105670938 | 0.000308509 | PLEC1  | ENSG00000178209 |
| 8 | 145102989 | 145103333 | 145103161 | 12  | 18  | 4  | 4.457585589 | 0.000353565 | PLEC1  | ENSG00000178209 |
| 8 | 145121056 | 145121533 | 145121283 | 11  | 21  | 8  | 2.867452718 | 0.00225035  | PLEC1  | ENSG00000178209 |

|   |           |           |           |     |     |    |             |             |          |                 |
|---|-----------|-----------|-----------|-----|-----|----|-------------|-------------|----------|-----------------|
| 8 | 145123216 | 145123490 | 145123353 | 13  | 15  | 3  | 4.692195357 | 0.000718455 | PLEC1    | ENSG00000178209 |
| 8 | 145141955 | 145142371 | 145142222 | 13  | 20  | 8  | 2.737113958 | 0.0036449   | GRINA    | ENSG00000178719 |
| 8 | 145149571 | 145149915 | 145149743 | 35  | 40  | 12 | 3.69961557  | 3.24E-06    | SPATC1   | ENSG00000186583 |
| 8 | 145151282 | 145151953 | 145151527 | 107 | 144 | 9  | 17.00920817 | 5.79E-38    | SPATC1   | ENSG00000186583 |
| 8 | 145160858 | 145161082 | 145160967 | 8   | 9   | 1  | 5.865244197 | 0.00272497  | SPATC1   | ENSG00000186583 |
| 8 | 145205367 | 145205727 | 145205546 | 8   | 15  | 6  | 2.68125449  | 0.0103552   | EXOSC4   | ENSG00000178896 |
| 8 | 145222952 | 145223183 | 145223067 | 9   | 10  | 5  | 2.150589539 | 0.0575848   | CYC1     | ENSG00000179091 |
| 8 | 145253455 | 145253768 | 145253633 | 10  | 13  | 5  | 2.737113958 | 0.0137917   | C8orf30A | ENSG00000179801 |
| 8 | 145360496 | 145360703 | 145360599 | 8   | 8   | 3  | 2.639359888 | 0.0415794   |          | ENSG00000204775 |
| 8 | 145506808 | 145507143 | 145506975 | 9   | 14  | 2  | 5.865244197 | 0.000387308 | DGAT1    | ENSG00000185000 |
| 8 | 145521191 | 145521516 | 145521353 | 12  | 17  | 7  | 2.639359888 | 0.00777415  | DGAT1    | ENSG00000185000 |
| 8 | 145567778 | 145568022 | 145567900 | 9   | 12  | 3  | 3.812408728 | 0.004404    | ADCK5    | ENSG00000173137 |
| 8 | 145587115 | 145587342 | 145587227 | 8   | 10  | 1  | 6.451768616 | 0.00135978  |          | ENSG00000216133 |
| 8 | 145594667 | 145594998 | 145594842 | 8   | 9   | 0  | 11.73048839 | 0.000425898 |          | ENSG00000221802 |
| 8 | 145605441 | 145605656 | 145605548 | 10  | 10  | 0  | 12.90353723 | 0.000195991 | CPSF1    | ENSG00000071894 |
| 8 | 145640384 | 145640615 | 145640499 | 8   | 10  | 0  | 12.90353723 | 0.000195991 | NFKBIL2  | ENSG00000160949 |
| 8 | 145644447 | 145644809 | 145644607 | 17  | 21  | 3  | 6.451768616 | 1.56E-05    | NFKBIL2  | ENSG00000160949 |
| 8 | 145651473 | 145651730 | 145651601 | 16  | 17  | 0  | 21.11487911 | 8.57E-07    |          | ENSG00000204763 |
| 8 | 145660150 | 145660428 | 145660289 | 15  | 17  | 1  | 10.55743955 | 9.18E-06    | CYHR1    | ENSG00000187954 |
| 8 | 145661145 | 145661419 | 145661282 | 9   | 11  | 1  | 7.038293036 | 0.000674435 | CYHR1    | ENSG00000187954 |
| 8 | 145661566 | 145661863 | 145661697 | 11  | 12  | 1  | 7.624817456 | 0.000332769 | CYHR1    | ENSG00000187954 |
| 8 | 145663967 | 145664208 | 145664082 | 9   | 9   | 5  | 1.955081399 | 0.0892323   | KIFC2    | ENSG00000167702 |
| 8 | 145880410 | 145880760 | 145880684 | 9   | 14  | 8  | 1.955081399 | 0.0506438   |          | ENSG00000204756 |
| 8 | 145897831 | 145898387 | 145898208 | 62  | 79  | 5  | 15.64065119 | 1.72E-21    |          | ENSG00000204756 |
| 8 | 145951587 | 145952065 | 145951786 | 15  | 24  | 0  | 29.32622098 | 3.74E-09    | ZNF251   | ENSG00000198169 |
| 8 | 145994664 | 145995033 | 145994843 | 8   | 14  | 4  | 3.519146518 | 0.00361132  | ZNF517   | ENSG00000197363 |
| 8 | 146097594 | 146097901 | 146097732 | 8   | 11  | 5  | 2.346097679 | 0.0364013   | ZNF250   | ENSG00000196150 |
| 8 | 146098138 | 146098515 | 146098317 | 8   | 14  | 6  | 2.513676084 | 0.016726    | ZNF250   | ENSG00000196150 |
| 8 | 146146944 | 146147149 | 146147040 | 8   | 9   | 0  | 11.73048839 | 0.000425898 | ZNF16    | ENSG00000170631 |
| 8 | 146197121 | 146197391 | 146197223 | 8   | 10  | 3  | 3.225884308 | 0.0139466   |          | ENSG00000188653 |
| 8 | 146222923 | 146223102 | 146223012 | 9   | 9   | 11 | 0.977540699 | 0.526123    | C8orf33  | ENSG00000182307 |
| 8 | 146248561 | 146248976 | 146248720 | 10  | 15  | 4  | 3.753756286 | 0.0020497   | C8orf33  | ENSG00000182307 |
| 9 | 204833    | 205147    | 204978    | 10  | 14  | 1  | 8.797866295 | 8.00E-05    | C9orf66  | ENSG00000183784 |
| 9 | 326040    | 326233    | 326136    | 11  | 11  | 3  | 3.519146518 | 0.00788869  | DOCK8    | ENSG00000107099 |

|   |          |          |          |    |     |   |             |             |          |                 |
|---|----------|----------|----------|----|-----|---|-------------|-------------|----------|-----------------|
| 9 | 603818   | 604101   | 603959   | 9  | 12  | 1 | 7.624817456 | 0.000332769 |          | ENSG00000220409 |
| 9 | 754076   | 754326   | 754223   | 8  | 10  | 2 | 4.301179077 | 0.00512919  | KANK1    | ENSG00000107104 |
| 9 | 796593   | 796864   | 796726   | 10 | 11  | 4 | 2.815317214 | 0.0183428   | DMRT1    | ENSG00000137090 |
| 9 | 883920   | 884116   | 884018   | 8  | 10  | 2 | 4.301179077 | 0.00512919  | DMRT1    | ENSG00000137090 |
| 9 | 925440   | 925712   | 925576   | 12 | 12  | 5 | 2.541605819 | 0.0225912   | DMRT3    | ENSG00000064218 |
| 9 | 985858   | 986122   | 985979   | 8  | 10  | 1 | 6.451768616 | 0.00135978  |          | ENSG00000210012 |
| 9 | 999130   | 999854   | 999506   | 97 | 175 | 6 | 29.49379939 | 5.61E-51    |          | ENSG00000216922 |
| 9 | 1040038  | 1040454  | 1040217  | 8  | 16  | 7 | 2.492728784 | 0.0124193   | DMRT2    | ENSG00000173253 |
| 9 | 1090963  | 1091245  | 1091114  | 16 | 18  | 2 | 7.429309316 | 2.63E-05    | DMRT2    | ENSG00000173253 |
| 9 | 1697313  | 1697685  | 1697481  | 36 | 42  | 3 | 12.61027502 | 8.12E-12    |          | ENSG00000218148 |
| 9 | 1967104  | 1967384  | 1967266  | 12 | 16  | 0 | 19.94183027 | 1.86E-06    |          | ENSG00000218148 |
| 9 | 2019817  | 2020004  | 2019910  | 8  | 8   | 5 | 1.759573259 | 0.13508     | SMARCA2  | ENSG00000080503 |
| 9 | 2834127  | 2834329  | 2834228  | 8  | 9   | 0 | 11.73048839 | 0.000425898 | KIAA0020 | ENSG00000080608 |
| 9 | 3499056  | 3499409  | 3499234  | 35 | 40  | 1 | 24.04750121 | 3.50E-13    | RFX3     | ENSG00000080298 |
| 9 | 4733217  | 4733549  | 4733373  | 22 | 26  | 1 | 15.83615933 | 1.23E-08    | AK3      | ENSG00000147853 |
| 9 | 4773242  | 4773550  | 4773386  | 12 | 16  | 0 | 19.94183027 | 1.86E-06    |          | ENSG00000219232 |
| 9 | 4778803  | 4779074  | 4778920  | 11 | 14  | 0 | 17.59573259 | 8.79E-06    | RCL1     | ENSG00000120158 |
| 9 | 4852203  | 4852438  | 4852286  | 8  | 12  | 5 | 2.541605819 | 0.0225912   |          | ENSG00000199065 |
| 9 | 5507393  | 5507572  | 5507492  | 8  | 8   | 0 | 10.55743955 | 0.000925496 | PDCD1LG2 | ENSG00000197646 |
| 9 | 5787000  | 5787383  | 5787217  | 14 | 20  | 1 | 12.31701281 | 1.03E-06    | ERMP1    | ENSG00000099219 |
| 9 | 5823001  | 5823198  | 5823054  | 9  | 9   | 2 | 3.910162798 | 0.00955088  | ERMP1    | ENSG00000099219 |
| 9 | 6077402  | 6077687  | 6077544  | 25 | 29  | 0 | 35.19146518 | 7.73E-11    | RANBP6   | ENSG00000137040 |
| 9 | 6187343  | 6187608  | 6187493  | 8  | 8   | 1 | 5.278719777 | 0.00542188  |          | ENSG00000218509 |
| 9 | 6229242  | 6229458  | 6229350  | 9  | 9   | 0 | 11.73048839 | 0.000425898 | IL33     | ENSG00000137033 |
| 9 | 6854435  | 6854713  | 6854586  | 10 | 12  | 2 | 5.083211637 | 0.00143337  |          | ENSG00000220077 |
| 9 | 7424052  | 7424276  | 7424170  | 11 | 12  | 3 | 3.812408728 | 0.004404    |          | ENSG00000216892 |
| 9 | 12766303 | 12766626 | 12766464 | 10 | 14  | 3 | 4.398933147 | 0.00132748  | C9orf150 | ENSG00000153714 |
| 9 | 12775409 | 12775736 | 12775580 | 9  | 14  | 5 | 2.932622098 | 0.00829617  | C9orf150 | ENSG00000153714 |
| 9 | 13043516 | 13043865 | 13043709 | 16 | 21  | 1 | 12.90353723 | 4.95E-07    |          | ENSG00000216614 |
| 9 | 13171668 | 13171999 | 13171849 | 8  | 13  | 1 | 8.211341875 | 0.000163445 | MPDZ     | ENSG00000107186 |
| 9 | 14241335 | 14241607 | 14241450 | 12 | 12  | 3 | 3.812408728 | 0.004404    |          | ENSG00000218212 |
| 9 | 14455612 | 14455845 | 14455740 | 11 | 11  | 1 | 7.038293036 | 0.000674435 |          | ENSG00000217828 |
| 9 | 14525136 | 14525315 | 14525188 | 8  | 8   | 1 | 5.278719777 | 0.00542188  |          | ENSG00000217828 |
| 9 | 15501001 | 15501190 | 15501098 | 8  | 8   | 0 | 10.55743955 | 0.000925496 | PSIP1    | ENSG00000164985 |



|   |          |          |          |     |     |   |             |             |          |                 |
|---|----------|----------|----------|-----|-----|---|-------------|-------------|----------|-----------------|
| 9 | 16164110 | 16164289 | 16164224 | 9   | 9   | 0 | 11.73048839 | 0.000425898 | C9orf92  | ENSG00000205549 |
| 9 | 16425983 | 16426320 | 16426150 | 12  | 14  | 0 | 17.59573259 | 8.79E-06    | C9orf92  | ENSG00000205549 |
| 9 | 16627243 | 16627484 | 16627367 | 11  | 12  | 0 | 15.24963491 | 4.15E-05    |          | ENSG00000218275 |
| 9 | 19038933 | 19039127 | 19039004 | 8   | 9   | 3 | 2.932622098 | 0.0242899   | RRAGA    | ENSG00000155876 |
| 9 | 19198734 | 19198977 | 19198888 | 12  | 15  | 4 | 3.753756286 | 0.0020497   |          | ENSG00000218778 |
| 9 | 19370164 | 19370521 | 19370355 | 8   | 13  | 4 | 3.28453675  | 0.00629037  | RPS6     | ENSG00000137154 |
| 9 | 19399386 | 19399782 | 19399558 | 21  | 29  | 5 | 5.865244197 | 1.33E-06    | ASAH3L   | ENSG00000177076 |
| 9 | 19894754 | 19895012 | 19894883 | 11  | 13  | 3 | 4.105670938 | 0.00243034  | SLC24A2  | ENSG00000155886 |
| 9 | 22094109 | 22094381 | 22094230 | 9   | 14  | 1 | 8.797866295 | 8.00E-05    |          | ENSG00000215221 |
| 9 | 22124431 | 22124794 | 22124610 | 29  | 36  | 0 | 43.40280705 | 3.38E-13    |          | ENSG00000215221 |
| 9 | 26937441 | 26937631 | 26937536 | 8   | 8   | 3 | 2.639359888 | 0.0415794   | PLAA     | ENSG00000137055 |
| 9 | 26946156 | 26946524 | 26946372 | 9   | 15  | 2 | 6.256260476 | 0.000199274 | IFT74    | ENSG00000096872 |
| 9 | 26966432 | 26966820 | 26966641 | 14  | 20  | 1 | 12.31701281 | 1.03E-06    | IFT74    | ENSG00000096872 |
| 9 | 27352532 | 27352725 | 27352639 | 9   | 9   | 0 | 11.73048839 | 0.000425898 | C9orf11  | ENSG00000120160 |
| 9 | 27443868 | 27444168 | 27444014 | 8   | 11  | 3 | 3.519146518 | 0.00788869  | IFNK     | ENSG00000147896 |
| 9 | 27673380 | 27673629 | 27673497 | 8   | 9   | 0 | 11.73048839 | 0.000425898 |          | ENSG00000217362 |
| 9 | 30915612 | 30915892 | 30915752 | 17  | 18  | 1 | 11.14396397 | 4.44E-06    |          | ENSG00000214020 |
| 9 | 32563055 | 32563371 | 32563215 | 14  | 16  | 5 | 3.323638378 | 0.00288759  | NDUFB6   | ENSG00000165264 |
| 9 | 33066621 | 33066857 | 33066739 | 11  | 13  | 3 | 4.105670938 | 0.00243034  | SMU1     | ENSG00000122692 |
| 9 | 33151588 | 33151805 | 33151723 | 8   | 9   | 1 | 5.865244197 | 0.00272497  | B4GALT1  | ENSG00000086062 |
| 9 | 33151808 | 33152059 | 33151942 | 8   | 11  | 2 | 4.692195357 | 0.00272444  | B4GALT1  | ENSG00000086062 |
| 9 | 33219371 | 33219780 | 33219608 | 15  | 23  | 6 | 4.021881735 | 0.000148535 | SPINK4   | ENSG00000122711 |
| 9 | 33223910 | 33224400 | 33224150 | 11  | 22  | 4 | 5.396024661 | 3.05E-05    | SPINK4   | ENSG00000122711 |
| 9 | 33254616 | 33254824 | 33254680 | 8   | 10  | 0 | 12.90353723 | 0.000195991 | BAG1     | ENSG00000107262 |
| 9 | 33280252 | 33280521 | 33280386 | 8   | 12  | 3 | 3.812408728 | 0.004404    | NFX1     | ENSG00000086102 |
| 9 | 33364898 | 33365222 | 33365070 | 8   | 12  | 1 | 7.624817456 | 0.000332769 | AQP7     | ENSG00000165269 |
| 9 | 33405423 | 33406044 | 33405744 | 11  | 26  | 5 | 5.278719777 | 8.57E-06    | AQP7     | ENSG00000165269 |
| 9 | 33408152 | 33408468 | 33408300 | 13  | 17  | 0 | 21.11487911 | 8.57E-07    | AQP7     | ENSG00000165269 |
| 9 | 33448568 | 33448850 | 33448739 | 12  | 15  | 6 | 2.68125449  | 0.0103552   | NOL6     | ENSG00000165271 |
| 9 | 33550338 | 33550541 | 33550439 | 8   | 8   | 0 | 10.55743955 | 0.000925496 |          | ENSG00000219282 |
| 9 | 33728193 | 33728379 | 33728297 | 8   | 8   | 2 | 3.519146518 | 0.017558    | PRSS3    | ENSG00000010438 |
| 9 | 34062361 | 34062837 | 34062596 | 217 | 241 | 5 | 47.31296985 | 9.22E-74    |          | ENSG00000210706 |
| 9 | 34366902 | 34367094 | 34366998 | 9   | 9   | 4 | 2.346097679 | 0.050148    | KIAA1161 | ENSG00000164976 |
| 9 | 34448430 | 34448664 | 34448545 | 11  | 11  | 1 | 7.038293036 | 0.000674435 | C9orf25  | ENSG00000164970 |

|   |          |          |          |    |    |    |             |             |          |                 |
|---|----------|----------|----------|----|----|----|-------------|-------------|----------|-----------------|
| 9 | 34636351 | 34636530 | 34636483 | 8  | 8  | 2  | 3.519146518 | 0.017558    | GALT     | ENSG00000213930 |
| 9 | 34979466 | 34979673 | 34979545 | 10 | 11 | 0  | 14.07658607 | 9.02E-05    | DNAJB5   | ENSG00000137094 |
| 9 | 35093043 | 35093351 | 35093215 | 12 | 15 | 5  | 3.128130238 | 0.00492422  | STOML2   | ENSG00000165283 |
| 9 | 35647756 | 35648006 | 35647901 | 10 | 10 | 5  | 2.150589539 | 0.0575848   |          | ENSG00000199916 |
| 9 | 35722189 | 35722596 | 35722368 | 8  | 15 | 2  | 6.256260476 | 0.000199274 | TLN1     | ENSG00000137076 |
| 9 | 35802157 | 35802516 | 35802292 | 10 | 14 | 3  | 4.398933147 | 0.00132748  | SPAG8    | ENSG00000137098 |
| 9 | 35816083 | 35816456 | 35816247 | 13 | 20 | 2  | 8.211341875 | 6.65E-06    | C9orf128 | ENSG00000204930 |
| 9 | 35895978 | 35896283 | 35896130 | 10 | 13 | 1  | 8.211341875 | 0.000163445 | HRCT1    | ENSG00000196196 |
| 9 | 35935719 | 35935941 | 35935783 | 9  | 11 | 2  | 4.692195357 | 0.00272444  |          | ENSG00000216898 |
| 9 | 36013504 | 36013732 | 36013618 | 10 | 10 | 2  | 4.301179077 | 0.00512919  |          | ENSG00000217675 |
| 9 | 36064913 | 36065235 | 36065092 | 25 | 28 | 0  | 34.01841634 | 1.68E-10    | RECK     | ENSG00000122707 |
| 9 | 36180488 | 36180699 | 36180616 | 9  | 10 | 0  | 12.90353723 | 0.000195991 | CLTA     | ENSG00000122705 |
| 9 | 36214203 | 36214422 | 36214312 | 8  | 10 | 0  | 12.90353723 | 0.000195991 | GNE      | ENSG00000159921 |
| 9 | 36391365 | 36391545 | 36391455 | 8  | 8  | 6  | 1.508205651 | 0.203852    | RNF38    | ENSG00000137075 |
| 9 | 36876311 | 36876713 | 36876534 | 26 | 32 | 1  | 19.35530585 | 1.42E-10    | PAX5     | ENSG00000196092 |
| 9 | 37790593 | 37790871 | 37790768 | 9  | 12 | 1  | 7.624817456 | 0.000332769 | WDR32    | ENSG00000122741 |
| 9 | 37894259 | 37894760 | 37894536 | 8  | 18 | 2  | 7.429309316 | 2.63E-05    | MCART1   | ENSG00000122696 |
| 9 | 38059619 | 38059907 | 38059785 | 9  | 11 | 2  | 4.692195357 | 0.00272444  | SHB      | ENSG00000107338 |
| 9 | 66561705 | 66562034 | 66561869 | 16 | 18 | 26 | 0.825478813 | 0.744556    | ANKRD36  | ENSG00000158185 |
| 9 | 66575293 | 66575488 | 66575446 | 8  | 9  | 8  | 1.303387599 | 0.281715    | ANKRD36  | ENSG00000158185 |
| 9 | 66583651 | 66583831 | 66583680 | 10 | 10 | 5  | 2.150589539 | 0.0575848   | ANKRD36  | ENSG00000158185 |
| 9 | 67902819 | 67903230 | 67902998 | 12 | 21 | 8  | 2.867452718 | 0.00225035  |          | ENSG00000219132 |
| 9 | 67903335 | 67903656 | 67903494 | 9  | 14 | 4  | 3.519146518 | 0.00361132  |          | ENSG00000217091 |
| 9 | 67903666 | 67904187 | 67903845 | 22 | 36 | 15 | 2.712675441 | 0.000215253 |          | ENSG00000217091 |
| 9 | 67906799 | 67907102 | 67906947 | 11 | 13 | 22 | 0.714029728 | 0.84749     |          | ENSG00000217091 |
| 9 | 67908004 | 67908479 | 67908275 | 9  | 19 | 27 | 0.837892028 | 0.732314    |          | ENSG00000217091 |
| 9 | 67908492 | 67908892 | 67908734 | 8  | 15 | 21 | 0.853126429 | 0.691243    |          | ENSG00000217091 |
| 9 | 67908981 | 67909240 | 67909128 | 9  | 11 | 13 | 1.005470434 | 0.498567    |          | ENSG00000217091 |
| 9 | 67909271 | 67909563 | 67909417 | 8  | 12 | 16 | 0.897037348 | 0.621544    |          | ENSG00000217091 |
| 9 | 67911893 | 67912152 | 67912028 | 8  | 11 | 14 | 0.938439071 | 0.570297    |          | ENSG00000217091 |
| 9 | 67915419 | 67915641 | 67915530 | 8  | 9  | 23 | 0.48877035  | 0.978114    |          | ENSG00000217091 |
| 9 | 70260057 | 70260523 | 70260344 | 15 | 22 | 1  | 13.49006165 | 2.37E-07    | C9orf71  | ENSG00000181778 |
| 9 | 70305480 | 70305696 | 70305588 | 8  | 8  | 4  | 2.111487911 | 0.0804809   | C9orf71  | ENSG00000181778 |
| 9 | 70649807 | 70650024 | 70649951 | 9  | 9  | 0  | 11.73048839 | 0.000425898 | PIP5K1B  | ENSG00000107242 |

|   |          |          |          |    |    |    |             |             |          |                 |
|---|----------|----------|----------|----|----|----|-------------|-------------|----------|-----------------|
| 9 | 70754227 | 70754539 | 70754383 | 14 | 16 | 0  | 19.94183027 | 1.86E-06    |          | ENSG00000207000 |
| 9 | 70927609 | 70927810 | 70927709 | 8  | 10 | 0  | 12.90353723 | 0.000195991 | TJP2     | ENSG00000119139 |
| 9 | 71781016 | 71781364 | 71781190 | 24 | 29 | 1  | 17.59573259 | 1.33E-09    | MAMDC2   | ENSG00000165072 |
| 9 | 71915817 | 71916010 | 71915913 | 8  | 9  | 3  | 2.932622098 | 0.0242899   |          | ENSG00000204706 |
| 9 | 72297243 | 72297435 | 72297289 | 8  | 10 | 1  | 6.451768616 | 0.00135978  | KLF9     | ENSG00000119138 |
| 9 | 73563092 | 73563288 | 73563190 | 8  | 11 | 2  | 4.692195357 | 0.00272444  | TMEM2    | ENSG00000135048 |
| 9 | 73587887 | 73588266 | 73588131 | 11 | 16 | 8  | 2.215758919 | 0.0222902   | TMEM2    | ENSG00000135048 |
| 9 | 73611645 | 73611830 | 73611737 | 8  | 8  | 3  | 2.639359888 | 0.0415794   | TMEM2    | ENSG00000135048 |
| 9 | 74076721 | 74076900 | 74076810 | 8  | 8  | 0  | 10.55743955 | 0.000925496 |          | ENSG00000217295 |
| 9 | 74236283 | 74236569 | 74236404 | 18 | 19 | 3  | 5.865244197 | 5.72E-05    |          | ENSG00000217630 |
| 9 | 74249237 | 74249450 | 74249343 | 11 | 11 | 2  | 4.692195357 | 0.00272444  |          | ENSG00000217630 |
| 9 | 74382038 | 74382533 | 74382385 | 17 | 27 | 3  | 8.211341875 | 2.82E-07    | TMC1     | ENSG00000165091 |
| 9 | 74961323 | 74961631 | 74961476 | 11 | 12 | 3  | 3.812408728 | 0.004404    | ANXA1    | ENSG00000135046 |
| 9 | 75320016 | 75320240 | 75320140 | 8  | 8  | 4  | 2.111487911 | 0.0804809   |          | ENSG00000220817 |
| 9 | 75488850 | 75489818 | 75489205 | 52 | 92 | 5  | 18.18225701 | 1.46E-25    |          | ENSG00000219821 |
| 9 | 76457799 | 76458137 | 76457975 | 12 | 15 | 1  | 9.384390715 | 3.90E-05    |          | ENSG00000202217 |
| 9 | 76691623 | 76691949 | 76691786 | 10 | 14 | 3  | 4.398933147 | 0.00132748  | TRPM6    | ENSG00000119121 |
| 9 | 78019917 | 78020120 | 78020015 | 8  | 9  | 0  | 11.73048839 | 0.000425898 |          | ENSG00000220662 |
| 9 | 78208056 | 78208376 | 78208218 | 8  | 12 | 3  | 3.812408728 | 0.004404    |          | ENSG00000220538 |
| 9 | 78376328 | 78376547 | 78376437 | 31 | 34 | 18 | 2.160879441 | 0.0026233   |          | ENSG00000211139 |
| 9 | 78376554 | 78376802 | 78376696 | 11 | 11 | 5  | 2.346097679 | 0.0364013   |          | ENSG00000211139 |
| 9 | 78561114 | 78561313 | 78561233 | 8  | 8  | 2  | 3.519146518 | 0.017558    | KIAA0367 | ENSG00000106772 |
| 9 | 78630233 | 78630412 | 78630322 | 8  | 8  | 0  | 10.55743955 | 0.000925496 | PRUNE2   | ENSG00000156035 |
| 9 | 78890233 | 78890446 | 78890339 | 10 | 11 | 0  | 14.07658607 | 9.02E-05    |          | ENSG00000220112 |
| 9 | 79096480 | 79096685 | 79096582 | 8  | 8  | 5  | 1.759573259 | 0.13508     | VPS13A   | ENSG00000197969 |
| 9 | 79111868 | 79112231 | 79112081 | 16 | 20 | 2  | 8.211341875 | 6.65E-06    | VPS13A   | ENSG00000197969 |
| 9 | 79301091 | 79301278 | 79301184 | 8  | 9  | 0  | 11.73048839 | 0.000425898 |          | ENSG00000218284 |
| 9 | 79385105 | 79385526 | 79385419 | 19 | 27 | 1  | 16.42268375 | 5.88E-09    |          | ENSG00000218284 |
| 9 | 79393830 | 79394105 | 79393926 | 9  | 10 | 1  | 6.451768616 | 0.00135978  |          | ENSG00000218284 |
| 9 | 79394215 | 79394518 | 79394354 | 12 | 14 | 5  | 2.932622098 | 0.00829617  |          | ENSG00000218284 |
| 9 | 79468604 | 79468971 | 79468841 | 8  | 14 | 4  | 3.519146518 | 0.00361132  | GNA14    | ENSG00000156049 |
| 9 | 79654795 | 79655014 | 79654904 | 8  | 9  | 0  | 11.73048839 | 0.000425898 | GNAQ     | ENSG00000156052 |
| 9 | 79786063 | 79786354 | 79786208 | 23 | 25 | 2  | 10.16642327 | 2.02E-07    | GNAQ     | ENSG00000156052 |
| 9 | 79850910 | 79851123 | 79851016 | 9  | 9  | 2  | 3.910162798 | 0.00955088  | GNAQ     | ENSG00000156052 |

|   |          |          |          |    |     |   |             |             |         |                 |
|---|----------|----------|----------|----|-----|---|-------------|-------------|---------|-----------------|
| 9 | 79870278 | 79870586 | 79870432 | 15 | 17  | 1 | 10.55743955 | 9.18E-06    | GNAQ    | ENSG00000156052 |
| 9 | 79934865 | 79935070 | 79934967 | 9  | 11  | 1 | 7.038293036 | 0.000674435 |         | ENSG00000220456 |
| 9 | 80093196 | 80093601 | 80093407 | 32 | 42  | 4 | 10.08822002 | 5.25E-11    | PSAT1   | ENSG00000135069 |
| 9 | 80830919 | 80831621 | 80831277 | 66 | 105 | 5 | 20.72386283 | 1.14E-29    |         | ENSG00000220535 |
| 9 | 81114499 | 81114702 | 81114600 | 8  | 8   | 1 | 5.278719777 | 0.00542188  | CHCHD9  | ENSG00000186940 |
| 9 | 81294341 | 81294649 | 81294485 | 16 | 19  | 3 | 5.865244197 | 5.72E-05    | TLE4    | ENSG00000106829 |
| 9 | 81379447 | 81379766 | 81379605 | 10 | 11  | 1 | 7.038293036 | 0.000674435 | TLE4    | ENSG00000106829 |
| 9 | 82286997 | 82287283 | 82287140 | 17 | 18  | 2 | 7.429309316 | 2.63E-05    |         | ENSG00000218149 |
| 9 | 83125750 | 83126188 | 83126043 | 13 | 21  | 3 | 6.451768616 | 1.56E-05    |         | ENSG00000218379 |
| 9 | 83396961 | 83397395 | 83397134 | 21 | 33  | 1 | 19.94183027 | 6.71E-11    | TLE1    | ENSG00000196781 |
| 9 | 83495244 | 83495620 | 83495423 | 9  | 16  | 3 | 4.985457567 | 0.000385643 | TLE1    | ENSG00000196781 |
| 9 | 83825940 | 83826468 | 83826152 | 97 | 124 | 1 | 73.31555246 | 5.03E-41    |         | ENSG00000214929 |
| 9 | 84739778 | 84740026 | 84739902 | 10 | 11  | 2 | 4.692195357 | 0.00272444  | RASEF   | ENSG00000165105 |
| 9 | 84766202 | 84766555 | 84766378 | 13 | 18  | 3 | 5.571981987 | 0.000108726 | RASEF   | ENSG00000165105 |
| 9 | 84867648 | 84867882 | 84867746 | 10 | 13  | 3 | 4.105670938 | 0.00243034  | RASEF   | ENSG00000165105 |
| 9 | 85024361 | 85024756 | 85024577 | 10 | 17  | 9 | 2.111487911 | 0.0248715   | FRMD3   | ENSG00000172159 |
| 9 | 85236461 | 85236805 | 85236616 | 12 | 16  | 2 | 6.647276756 | 0.000101928 |         | ENSG00000211262 |
| 9 | 85343441 | 85343638 | 85343539 | 8  | 10  | 5 | 2.150589539 | 0.0575848   | FRMD3   | ENSG00000172159 |
| 9 | 85512584 | 85512878 | 85512731 | 10 | 15  | 0 | 18.76878143 | 4.04E-06    | UBQLN1  | ENSG00000135018 |
| 9 | 85726262 | 85726460 | 85726380 | 8  | 8   | 5 | 1.759573259 | 0.13508     | KIF27   | ENSG00000165115 |
| 9 | 85740072 | 85740271 | 85740171 | 8  | 8   | 3 | 2.639359888 | 0.0415794   | KIF27   | ENSG00000165115 |
| 9 | 85785333 | 85785598 | 85785455 | 9  | 12  | 5 | 2.541605819 | 0.0225912   | RMI1    | ENSG00000178966 |
| 9 | 86043296 | 86043934 | 86043632 | 95 | 136 | 2 | 53.56923033 | 1.88E-43    |         | ENSG00000221282 |
| 9 | 86157491 | 86157714 | 86157602 | 9  | 9   | 0 | 11.73048839 | 0.000425898 | SLC28A3 | ENSG00000197506 |
| 9 | 86201994 | 86202207 | 86202083 | 8  | 8   | 6 | 1.508205651 | 0.203852    | SLC28A3 | ENSG00000197506 |
| 9 | 86317232 | 86317807 | 86317509 | 26 | 46  | 2 | 18.37776515 | 5.11E-14    |         | ENSG00000217944 |
| 9 | 86656604 | 86657035 | 86656821 | 90 | 108 | 1 | 63.93116174 | 1.09E-35    | NTRK2   | ENSG00000148053 |
| 9 | 86660906 | 86661256 | 86661085 | 8  | 13  | 0 | 16.42268375 | 1.91E-05    | NTRK2   | ENSG00000148053 |
| 9 | 87213304 | 87213622 | 87213463 | 16 | 20  | 4 | 4.926805125 | 0.00010522  |         | ENSG00000203398 |
| 9 | 87414895 | 87415133 | 87415020 | 8  | 9   | 1 | 5.865244197 | 0.00272497  | AGTPBP1 | ENSG00000135049 |
| 9 | 87545719 | 87545923 | 87545851 | 8  | 10  | 2 | 4.301179077 | 0.00512919  | AGTPBP1 | ENSG00000135049 |
| 9 | 88007078 | 88007330 | 88007204 | 8  | 10  | 3 | 3.225884308 | 0.0139466   |         | ENSG00000198447 |
| 9 | 88295972 | 88296507 | 88296203 | 19 | 33  | 2 | 13.29455351 | 6.68E-10    |         | ENSG00000222293 |
| 9 | 88526185 | 88526371 | 88526278 | 9  | 9   | 0 | 11.73048839 | 0.000425898 | GAS1    | ENSG00000180447 |

|   |          |          |          |     |     |   |             |             |          |                 |
|---|----------|----------|----------|-----|-----|---|-------------|-------------|----------|-----------------|
| 9 | 88911734 | 88912053 | 88911901 | 8   | 12  | 0 | 15.24963491 | 4.15E-05    |          | ENSG00000218250 |
| 9 | 88924097 | 88924382 | 88924222 | 16  | 18  | 8 | 2.476436439 | 0.00924552  |          | ENSG00000204446 |
| 9 | 89504829 | 89505247 | 89505068 | 20  | 30  | 2 | 12.12150467 | 5.77E-09    | CTSL1    | ENSG00000135047 |
| 9 | 89571561 | 89571875 | 89571707 | 10  | 14  | 6 | 2.513676084 | 0.016726    | CTSL3    | ENSG00000188029 |
| 9 | 89879362 | 89879685 | 89879523 | 11  | 15  | 1 | 9.384390715 | 3.90E-05    |          | ENSG00000218944 |
| 9 | 89978182 | 89978410 | 89978307 | 10  | 12  | 1 | 7.624817456 | 0.000332769 |          | ENSG00000204429 |
| 9 | 90324585 | 90324976 | 90324793 | 34  | 44  | 2 | 17.59573259 | 2.22E-13    | NXNL2    | ENSG00000130045 |
| 9 | 90737664 | 90737853 | 90737760 | 8   | 8   | 1 | 5.278719777 | 0.00542188  |          | ENSG00000219160 |
| 9 | 90805721 | 90806054 | 90805882 | 12  | 16  | 6 | 2.848832895 | 0.00632407  | S1PR3    | ENSG00000213694 |
| 9 | 90877315 | 90877608 | 90877461 | 14  | 18  | 0 | 22.28792795 | 3.94E-07    | SHC3     | ENSG00000148082 |
| 9 | 90974309 | 90974518 | 90974409 | 9   | 9   | 0 | 11.73048839 | 0.000425898 | SHC3     | ENSG00000148082 |
| 9 | 91122956 | 91123223 | 91123094 | 8   | 10  | 3 | 3.225884308 | 0.0139466   | SECISBP2 | ENSG00000187742 |
| 9 | 91251740 | 91252053 | 91251896 | 11  | 15  | 1 | 9.384390715 | 3.90E-05    |          | ENSG00000219641 |
| 9 | 91469669 | 91469967 | 91469818 | 12  | 15  | 7 | 2.346097679 | 0.0195693   | GADD45G  | ENSG00000130222 |
| 9 | 91472570 | 91472814 | 91472695 | 8   | 11  | 1 | 7.038293036 | 0.000674435 | GADD45G  | ENSG00000130222 |
| 9 | 91490751 | 91491474 | 91491112 | 191 | 264 | 7 | 38.8572428  | 1.31E-78    | GADD45G  | ENSG00000130222 |
| 9 | 91593389 | 91593653 | 91593515 | 10  | 11  | 6 | 2.010940867 | 0.0640214   | GADD45G  | ENSG00000130222 |
| 9 | 91600742 | 91601157 | 91601072 | 12  | 20  | 8 | 2.737113958 | 0.0036449   | GADD45G  | ENSG00000130222 |
| 9 | 91608339 | 91608620 | 91608483 | 16  | 19  | 1 | 11.73048839 | 2.14E-06    | GADD45G  | ENSG00000130222 |
| 9 | 91608890 | 91609428 | 91609107 | 34  | 47  | 0 | 56.30634429 | 6.62E-17    | GADD45G  | ENSG00000130222 |
| 9 | 91904620 | 91904835 | 91904738 | 9   | 11  | 3 | 3.519146518 | 0.00788869  |          | ENSG00000219080 |
| 9 | 92221723 | 92221964 | 92221844 | 12  | 14  | 5 | 2.932622098 | 0.00829617  |          | ENSG00000105061 |
| 9 | 92235554 | 92236005 | 92235701 | 16  | 26  | 8 | 3.519146518 | 0.000175368 |          | ENSG00000105061 |
| 9 | 92387015 | 92387197 | 92387107 | 8   | 8   | 0 | 10.55743955 | 0.000925496 | DIRAS2   | ENSG00000165023 |
| 9 | 92402070 | 92402272 | 92402187 | 10  | 11  | 1 | 7.038293036 | 0.000674435 | DIRAS2   | ENSG00000165023 |
| 9 | 92575853 | 92576038 | 92575964 | 8   | 8   | 4 | 2.111487911 | 0.0804809   |          | ENSG00000220612 |
| 9 | 92749165 | 92749441 | 92749303 | 16  | 19  | 5 | 3.910162798 | 0.000546977 | SYK      | ENSG00000165025 |
| 9 | 92750251 | 92750554 | 92750423 | 10  | 13  | 1 | 8.211341875 | 0.000163445 | SYK      | ENSG00000165025 |
| 9 | 92766373 | 92766553 | 92766492 | 8   | 8   | 0 | 10.55743955 | 0.000925496 | SYK      | ENSG00000165025 |
| 9 | 92839360 | 92839658 | 92839509 | 11  | 14  | 5 | 2.932622098 | 0.00829617  |          | ENSG00000219788 |
| 9 | 92862647 | 92862842 | 92862744 | 8   | 8   | 2 | 3.519146518 | 0.017558    |          | ENSG00000219788 |
| 9 | 93115148 | 93115365 | 93115256 | 8   | 10  | 3 | 3.225884308 | 0.0139466   | AUH      | ENSG00000148090 |
| 9 | 93577611 | 93577809 | 93577710 | 8   | 8   | 3 | 2.639359888 | 0.0415794   |          | ENSG00000217636 |
| 9 | 93750938 | 93751129 | 93751033 | 8   | 9   | 0 | 11.73048839 | 0.000425898 | ROR2     | ENSG00000169071 |

|   |          |          |          |     |     |   |             |             |          |                 |
|---|----------|----------|----------|-----|-----|---|-------------|-------------|----------|-----------------|
| 9 | 93765959 | 93766330 | 93766089 | 19  | 25  | 0 | 30.49926982 | 1.72E-09    | ROR2     | ENSG00000169071 |
| 9 | 93942460 | 93942761 | 93942610 | 10  | 13  | 4 | 3.28453675  | 0.00629037  |          | ENSG00000209034 |
| 9 | 93949238 | 93949871 | 93949580 | 252 | 309 | 2 | 121.2150467 | 4.58E-101   |          | ENSG00000209034 |
| 9 | 93954099 | 93954545 | 93954314 | 21  | 35  | 3 | 10.55743955 | 1.13E-09    |          | ENSG00000209034 |
| 9 | 94095843 | 94096084 | 94096003 | 15  | 17  | 3 | 5.278719777 | 0.000205462 | IARS     | ENSG00000196305 |
| 9 | 94115005 | 94115354 | 94115165 | 33  | 37  | 3 | 11.14396397 | 2.78E-10    | NOL8     | ENSG00000198000 |
| 9 | 94127287 | 94127663 | 94127484 | 13  | 21  | 9 | 2.580707446 | 0.00438951  | NOL8     | ENSG00000198000 |
| 9 | 94129502 | 94129977 | 94129798 | 21  | 31  | 4 | 7.507512572 | 9.10E-08    | CENPP    | ENSG00000188312 |
| 9 | 94472235 | 94472555 | 94472404 | 16  | 20  | 2 | 8.211341875 | 6.65E-06    | IPPK     | ENSG00000127080 |
| 9 | 94508392 | 94508827 | 94508655 | 9   | 16  | 4 | 3.988366054 | 0.00115141  |          | ENSG00000213669 |
| 9 | 94567450 | 94567682 | 94567564 | 9   | 11  | 2 | 4.692195357 | 0.00272444  | BICD2    | ENSG00000185963 |
| 9 | 94592996 | 94593350 | 94593175 | 8   | 12  | 1 | 7.624817456 | 0.000332769 | ANKRD19  | ENSG00000218940 |
| 9 | 94602396 | 94602820 | 94602565 | 65  | 75  | 4 | 17.83034236 | 3.39E-21    | ANKRD19  | ENSG00000218940 |
| 9 | 94740247 | 94740426 | 94740336 | 8   | 8   | 5 | 1.759573259 | 0.13508     | FGD3     | ENSG00000127084 |
| 9 | 94790041 | 94790993 | 94790482 | 122 | 195 | 4 | 45.9835145  | 4.81E-60    | FGD3     | ENSG00000127084 |
| 9 | 94855372 | 94855611 | 94855517 | 9   | 9   | 6 | 1.675784056 | 0.141978    | SUSD3    | ENSG00000157303 |
| 9 | 94911426 | 94911615 | 94911491 | 8   | 8   | 5 | 1.759573259 | 0.13508     | C9orf89  | ENSG00000165233 |
| 9 | 94934721 | 94935238 | 94934973 | 49  | 71  | 1 | 42.22975822 | 2.15E-23    | NINJ1    | ENSG00000131669 |
| 9 | 94935271 | 94935607 | 94935439 | 14  | 18  | 1 | 11.14396397 | 4.44E-06    | NINJ1    | ENSG00000131669 |
| 9 | 95115131 | 95115406 | 95115268 | 15  | 18  | 2 | 7.429309316 | 2.63E-05    | WNK2     | ENSG00000165238 |
| 9 | 95379800 | 95380065 | 95379932 | 9   | 10  | 7 | 1.612942154 | 0.147335    | PHF2     | ENSG00000197724 |
| 9 | 95968814 | 95969051 | 95968932 | 8   | 8   | 2 | 3.519146518 | 0.017558    |          | ENSG00000199165 |
| 9 | 96015709 | 96015937 | 96015823 | 8   | 8   | 2 | 3.519146518 | 0.017558    |          | ENSG00000209298 |
| 9 | 96356423 | 96356671 | 96356572 | 9   | 9   | 2 | 3.910162798 | 0.00955088  | FBP2     | ENSG00000130957 |
| 9 | 96432972 | 96433310 | 96433141 | 22  | 26  | 5 | 5.278719777 | 8.57E-06    | FBP1     | ENSG00000165140 |
| 9 | 96471042 | 96471254 | 96471196 | 9   | 9   | 1 | 5.865244197 | 0.00272497  | C9orf118 | ENSG00000204343 |
| 9 | 96483693 | 96483974 | 96483833 | 9   | 11  | 7 | 1.759573259 | 0.102361    | C9orf118 | ENSG00000204343 |
| 9 | 96585220 | 96585610 | 96585456 | 16  | 23  | 4 | 5.630634429 | 1.63E-05    | C9orf3   | ENSG00000148120 |
| 9 | 96716375 | 96716687 | 96716513 | 20  | 24  | 6 | 4.18946014  | 8.40E-05    | C9orf3   | ENSG00000148120 |
| 9 | 96719014 | 96719230 | 96719122 | 13  | 13  | 2 | 5.474227917 | 0.000747844 | C9orf3   | ENSG00000148120 |
| 9 | 96926806 | 96927061 | 96926956 | 10  | 11  | 3 | 3.519146518 | 0.00788869  |          | ENSG00000216320 |
| 9 | 96937801 | 96938142 | 96937971 | 16  | 18  | 2 | 7.429309316 | 2.63E-05    |          | ENSG00000216320 |
| 9 | 96999679 | 97000303 | 96999942 | 75  | 100 | 3 | 29.61948319 | 2.65E-30    |          | ENSG00000209183 |
| 9 | 97566999 | 97567287 | 97567143 | 12  | 13  | 0 | 16.42268375 | 1.91E-05    |          | ENSG00000175611 |

|   |           |           |           |    |    |    |             |             |          |                 |
|---|-----------|-----------|-----------|----|----|----|-------------|-------------|----------|-----------------|
| 9 | 97677924  | 97678428  | 97678094  | 9  | 20 | 5  | 4.105670938 | 0.000308509 | C9orf130 | ENSG00000214847 |
| 9 | 97739298  | 97739591  | 97739444  | 19 | 22 | 1  | 13.49006165 | 2.37E-07    |          | ENSG00000217452 |
| 9 | 97833581  | 97833807  | 97833714  | 13 | 13 | 2  | 5.474227917 | 0.000747844 |          | ENSG00000204330 |
| 9 | 98068946  | 98069310  | 98069135  | 35 | 41 | 0  | 49.26805125 | 6.97E-15    |          | ENSG00000207276 |
| 9 | 98222518  | 98222794  | 98222687  | 9  | 12 | 5  | 2.541605819 | 0.0225912   | ZNF367   | ENSG00000165244 |
| 9 | 98255992  | 98256190  | 98256091  | 8  | 9  | 3  | 2.932622098 | 0.0242899   | HABP4    | ENSG00000130956 |
| 9 | 98848457  | 98848719  | 98848588  | 12 | 15 | 4  | 3.753756286 | 0.0020497   | CTSL2    | ENSG00000136943 |
| 9 | 98970291  | 98970623  | 98970457  | 24 | 25 | 2  | 10.16642327 | 2.02E-07    |          | ENSG00000209181 |
| 9 | 99166952  | 99167148  | 99167047  | 8  | 9  | 0  | 11.73048839 | 0.000425898 |          | ENSG00000221269 |
| 9 | 99189177  | 99189420  | 99189298  | 8  | 12 | 1  | 7.624817456 | 0.000332769 |          | ENSG00000181799 |
| 9 | 99263615  | 99263794  | 99263704  | 8  | 8  | 0  | 10.55743955 | 0.000925496 | TMOD1    | ENSG00000136842 |
| 9 | 99303334  | 99303520  | 99303427  | 8  | 8  | 3  | 2.639359888 | 0.0415794   | TMOD1    | ENSG00000136842 |
| 9 | 99554514  | 99554693  | 99554603  | 8  | 8  | 0  | 10.55743955 | 0.000925496 |          | ENSG00000213601 |
| 9 | 99724271  | 99724831  | 99724438  | 10 | 22 | 14 | 1.798674887 | 0.0355729   | C9orf156 | ENSG00000136932 |
| 9 | 99786345  | 99786530  | 99786437  | 9  | 9  | 0  | 11.73048839 | 0.000425898 | ANP32B   | ENSG00000136938 |
| 9 | 99858454  | 99858683  | 99858568  | 10 | 11 | 8  | 1.564065119 | 0.151515    | NANS     | ENSG00000095380 |
| 9 | 99876456  | 99876715  | 99876585  | 9  | 9  | 7  | 1.466311049 | 0.20706     | NANS     | ENSG00000095380 |
| 9 | 99948470  | 99948906  | 99948685  | 8  | 16 | 2  | 6.647276756 | 0.000101928 | CORO2A   | ENSG00000106789 |
| 9 | 99970757  | 99970936  | 99970814  | 8  | 9  | 0  | 11.73048839 | 0.000425898 | CORO2A   | ENSG00000106789 |
| 9 | 99974807  | 99975026  | 99974916  | 8  | 10 | 5  | 2.150589539 | 0.0575848   | CORO2A   | ENSG00000106789 |
| 9 | 100021045 | 100021411 | 100021218 | 11 | 17 | 7  | 2.639359888 | 0.00777415  | TBC1D2   | ENSG00000095383 |
| 9 | 100057988 | 100058445 | 100058124 | 11 | 19 | 2  | 7.820325595 | 1.32E-05    | TBC1D2   | ENSG00000095383 |
| 9 | 100065953 | 100066159 | 100066056 | 8  | 9  | 2  | 3.910162798 | 0.00955088  | TBC1D2   | ENSG00000095383 |
| 9 | 100108640 | 100108849 | 100108744 | 10 | 12 | 3  | 3.812408728 | 0.004404    | TBC1D2   | ENSG00000095383 |
| 9 | 100202434 | 100202691 | 100202562 | 15 | 16 | 0  | 19.94183027 | 1.86E-06    | TBC1D2   | ENSG00000095383 |
| 9 | 100257428 | 100257717 | 100257572 | 22 | 23 | 0  | 28.15317214 | 8.13E-09    |          | ENSG00000217589 |
| 9 | 100257857 | 100258061 | 100257944 | 10 | 10 | 3  | 3.225884308 | 0.0139466   |          | ENSG00000217589 |
| 9 | 100340837 | 100341057 | 100340978 | 8  | 10 | 0  | 12.90353723 | 0.000195991 |          | ENSG00000217589 |
| 9 | 100567410 | 100567802 | 100567586 | 23 | 30 | 0  | 36.36451402 | 3.56E-11    | ANKS6    | ENSG00000165138 |
| 9 | 100777122 | 100777341 | 100777231 | 11 | 11 | 3  | 3.519146518 | 0.00788869  | COL15A1  | ENSG00000204291 |
| 9 | 100802659 | 100802883 | 100802771 | 8  | 10 | 1  | 6.451768616 | 0.00135978  | COL15A1  | ENSG00000204291 |
| 9 | 101024077 | 101024339 | 101024208 | 9  | 12 | 4  | 3.049926982 | 0.0108184   | ALG2     | ENSG00000119523 |
| 9 | 101068696 | 101069038 | 101068869 | 8  | 12 | 5  | 2.541605819 | 0.0225912   |          | ENSG00000222337 |
| 9 | 101215714 | 101216036 | 101215875 | 11 | 14 | 2  | 5.865244197 | 0.000387308 |          | ENSG00000222026 |

|   |           |           |           |     |     |    |             |             |         |                 |
|---|-----------|-----------|-----------|-----|-----|----|-------------|-------------|---------|-----------------|
| 9 | 101240192 | 101240510 | 101240351 | 11  | 14  | 2  | 5.865244197 | 0.000387308 |         | ENSG00000222026 |
| 9 | 101609424 | 101609675 | 101609549 | 8   | 9   | 8  | 1.303387599 | 0.281715    | NR4A3   | ENSG00000119508 |
| 9 | 102175137 | 102175507 | 102175312 | 20  | 25  | 0  | 30.49926982 | 1.72E-09    | TEX10   | ENSG00000136891 |
| 9 | 102177670 | 102178307 | 102178003 | 32  | 51  | 1  | 30.49926982 | 8.63E-17    | TEX10   | ENSG00000136891 |
| 9 | 102228739 | 102228978 | 102228842 | 9   | 10  | 2  | 4.301179077 | 0.00512919  | C9orf30 | ENSG00000066697 |
| 9 | 102307726 | 102307935 | 102307830 | 8   | 9   | 1  | 5.865244197 | 0.00272497  | C9orf30 | ENSG00000066697 |
| 9 | 102504906 | 102505106 | 102505006 | 8   | 9   | 0  | 11.73048839 | 0.000425898 |         | ENSG00000219293 |
| 9 | 102802306 | 102802602 | 102802463 | 11  | 12  | 1  | 7.624817456 | 0.000332769 |         | ENSG00000217715 |
| 9 | 102920357 | 102920570 | 102920447 | 9   | 9   | 1  | 5.865244197 | 0.00272497  |         | ENSG00000217321 |
| 9 | 105896200 | 105896509 | 105896354 | 8   | 13  | 8  | 1.824742639 | 0.0744168   | SMC2    | ENSG00000136824 |
| 9 | 106671153 | 106671396 | 106671248 | 10  | 12  | 1  | 7.624817456 | 0.000332769 | ABCA1   | ENSG00000165029 |
| 9 | 106770632 | 106770934 | 106770786 | 10  | 11  | 2  | 4.692195357 | 0.00272444  | ABCA1   | ENSG00000165029 |
| 9 | 107046311 | 107046622 | 107046465 | 15  | 17  | 1  | 10.55743955 | 9.18E-06    | SLC44A1 | ENSG00000070214 |
| 9 | 107217300 | 107217560 | 107217433 | 8   | 11  | 7  | 1.759573259 | 0.102361    | FSD1L   | ENSG00000106701 |
| 9 | 107464475 | 107464737 | 107464606 | 11  | 15  | 2  | 6.256260476 | 0.000199274 | TAL2    | ENSG00000186051 |
| 9 | 107666513 | 107666911 | 107666692 | 13  | 21  | 1  | 12.90353723 | 4.95E-07    |         | ENSG00000218063 |
| 9 | 107703623 | 107704063 | 107703794 | 10  | 17  | 6  | 3.016411301 | 0.00381427  |         | ENSG00000218063 |
| 9 | 107714834 | 107715267 | 107715103 | 10  | 17  | 11 | 1.759573259 | 0.0609179   |         | ENSG00000218063 |
| 9 | 108135678 | 108135943 | 108135810 | 13  | 16  | 5  | 3.323638378 | 0.00288759  |         | ENSG00000200131 |
| 9 | 108472563 | 108472762 | 108472662 | 9   | 9   | 1  | 5.865244197 | 0.00272497  |         | ENSG00000200131 |
| 9 | 108536021 | 108536220 | 108536157 | 8   | 8   | 1  | 5.278719777 | 0.00542188  |         | ENSG00000219000 |
| 9 | 108596332 | 108596635 | 108596508 | 13  | 16  | 2  | 6.647276756 | 0.000101928 |         | ENSG00000212276 |
| 9 | 108933170 | 108933388 | 108933279 | 11  | 11  | 0  | 14.07658607 | 9.02E-05    |         | ENSG00000219668 |
| 9 | 108974360 | 108974563 | 108974453 | 9   | 9   | 7  | 1.466311049 | 0.20706     |         | ENSG00000214180 |
| 9 | 109045879 | 109046327 | 109046157 | 26  | 35  | 12 | 3.24844294  | 4.27E-05    | RAD23B  | ENSG00000119318 |
| 9 | 109047741 | 109048014 | 109047889 | 16  | 16  | 4  | 3.988366054 | 0.00115141  | RAD23B  | ENSG00000119318 |
| 9 | 109051044 | 109051688 | 109051464 | 90  | 124 | 7  | 18.32888811 | 1.21E-33    | RAD23B  | ENSG00000119318 |
| 9 | 109082641 | 109083023 | 109082767 | 18  | 23  | 7  | 3.519146518 | 0.000369739 | RAD23B  | ENSG00000119318 |
| 9 | 109143267 | 109143662 | 109143434 | 14  | 20  | 5  | 4.105670938 | 0.000308509 | RAD23B  | ENSG00000119318 |
| 9 | 109224346 | 109224579 | 109224462 | 10  | 11  | 7  | 1.759573259 | 0.102361    |         | ENSG00000213558 |
| 9 | 109240859 | 109241072 | 109240965 | 10  | 11  | 1  | 7.038293036 | 0.000674435 |         | ENSG00000213558 |
| 9 | 109306930 | 109307282 | 109307120 | 9   | 14  | 5  | 2.932622098 | 0.00829617  | KLF4    | ENSG00000136826 |
| 9 | 109447198 | 109447377 | 109447293 | 9   | 9   | 4  | 2.346097679 | 0.050148    |         | ENSG00000202308 |
| 9 | 109539706 | 109540677 | 109540337 | 127 | 191 | 6  | 32.17505388 | 3.78E-56    |         | ENSG00000208975 |



|   |           |           |           |    |    |    |             |             |          |                 |
|---|-----------|-----------|-----------|----|----|----|-------------|-------------|----------|-----------------|
| 9 | 109541902 | 109542173 | 109542072 | 13 | 15 | 0  | 18.76878143 | 4.04E-06    |          | ENSG00000208975 |
| 9 | 109557347 | 109557690 | 109557512 | 22 | 26 | 4  | 6.334463732 | 2.40E-06    |          | ENSG00000208975 |
| 9 | 109933075 | 109933286 | 109933180 | 9  | 10 | 5  | 2.150589539 | 0.0575848   |          | ENSG00000216749 |
| 9 | 110169833 | 110170085 | 110169959 | 10 | 10 | 0  | 12.90353723 | 0.000195991 |          | ENSG00000222512 |
| 9 | 110291712 | 110292057 | 110291884 | 27 | 32 | 2  | 12.90353723 | 1.37E-09    |          | ENSG00000222512 |
| 9 | 110353479 | 110353702 | 110353590 | 8  | 10 | 3  | 3.225884308 | 0.0139466   |          | ENSG00000169253 |
| 9 | 110369872 | 110370545 | 110370366 | 16 | 41 | 5  | 8.211341875 | 5.42E-10    |          | ENSG00000169253 |
| 9 | 110405419 | 110405607 | 110405513 | 9  | 9  | 2  | 3.910162798 | 0.00955088  |          | ENSG00000169253 |
| 9 | 110662033 | 110662213 | 110662123 | 9  | 9  | 2  | 3.910162798 | 0.00955088  | ACTL7A   | ENSG00000187003 |
| 9 | 110814421 | 110814602 | 110814511 | 8  | 8  | 1  | 5.278719777 | 0.00542188  | CTNNAL1  | ENSG00000119326 |
| 9 | 110922039 | 110922241 | 110922140 | 10 | 11 | 6  | 2.010940867 | 0.0640214   | C9orf5   | ENSG00000106771 |
| 9 | 111056125 | 111056338 | 111056264 | 8  | 9  | 2  | 3.910162798 | 0.00955088  |          | ENSG00000216251 |
| 9 | 111118287 | 111118527 | 111118396 | 8  | 9  | 2  | 3.910162798 | 0.00955088  | EPB41L4B | ENSG00000095203 |
| 9 | 111133488 | 111133801 | 111133625 | 11 | 15 | 1  | 9.384390715 | 3.90E-05    |          | ENSG00000207329 |
| 9 | 111147610 | 111148024 | 111147789 | 8  | 16 | 3  | 4.985457567 | 0.000385643 |          | ENSG00000207329 |
| 9 | 111242949 | 111243172 | 111243060 | 9  | 10 | 1  | 6.451768616 | 0.00135978  | PTPN3    | ENSG00000070159 |
| 9 | 111271893 | 111272072 | 111271998 | 8  | 8  | 2  | 3.519146518 | 0.017558    | PTPN3    | ENSG00000070159 |
| 9 | 111771368 | 111771550 | 111771497 | 9  | 10 | 2  | 4.301179077 | 0.00512919  |          | ENSG00000218911 |
| 9 | 111860433 | 111860727 | 111860600 | 12 | 14 | 2  | 5.865244197 | 0.000387308 | AKAP2    | ENSG00000157654 |
| 9 | 111933527 | 111933848 | 111933687 | 9  | 14 | 3  | 4.398933147 | 0.00132748  | C9orf152 | ENSG00000188959 |
| 9 | 112377358 | 112377584 | 112377452 | 8  | 9  | 1  | 5.865244197 | 0.00272497  | SVEP1    | ENSG00000165124 |
| 9 | 112644260 | 112644501 | 112644402 | 8  | 9  | 3  | 2.932622098 | 0.0242899   |          | ENSG00000206923 |
| 9 | 113433116 | 113433527 | 113433244 | 9  | 15 | 6  | 2.68125449  | 0.0103552   | C9orf29  | ENSG00000204173 |
| 9 | 113641664 | 113641949 | 113641806 | 14 | 16 | 4  | 3.988366054 | 0.00115141  |          | ENSG00000206907 |
| 9 | 113698528 | 113698708 | 113698637 | 9  | 9  | 3  | 2.932622098 | 0.0242899   | UGCG     | ENSG00000148154 |
| 9 | 113814027 | 113814683 | 113814382 | 24 | 41 | 10 | 4.47891375  | 2.87E-07    |          | ENSG00000208841 |
| 9 | 113864164 | 113864510 | 113864337 | 9  | 15 | 1  | 9.384390715 | 3.90E-05    |          | ENSG00000208841 |
| 9 | 113867815 | 113868275 | 113867994 | 12 | 22 | 9  | 2.69801233  | 0.00276236  |          | ENSG00000208841 |
| 9 | 113946784 | 113947259 | 113947080 | 61 | 81 | 1  | 48.09500241 | 1.04E-26    |          | ENSG00000208835 |
| 9 | 114101688 | 114101939 | 114101795 | 13 | 15 | 1  | 9.384390715 | 3.90E-05    | ROD1     | ENSG00000119314 |
| 9 | 114181533 | 114181851 | 114181681 | 10 | 13 | 2  | 5.474227917 | 0.000747844 | HSDL2    | ENSG00000119471 |
| 9 | 114446603 | 114446979 | 114446819 | 13 | 18 | 0  | 22.28792795 | 3.94E-07    |          | ENSG00000218158 |
| 9 | 114467491 | 114467711 | 114467601 | 9  | 9  | 4  | 2.346097679 | 0.050148    | C9orf80  | ENSG00000148153 |
| 9 | 115023341 | 115023788 | 115023598 | 9  | 18 | 6  | 3.183989707 | 0.00227432  | SLC31A1  | ENSG00000136868 |

|   |           |           |           |     |     |    |             |             |          |                 |
|---|-----------|-----------|-----------|-----|-----|----|-------------|-------------|----------|-----------------|
| 9 | 115043367 | 115043561 | 115043435 | 9   | 9   | 4  | 2.346097679 | 0.050148    |          | ENSG00000208805 |
| 9 | 115142324 | 115142572 | 115142448 | 12  | 14  | 7  | 2.199466574 | 0.0303778   | WDR31    | ENSG00000148225 |
| 9 | 115203872 | 115204076 | 115203974 | 8   | 8   | 0  | 10.55743955 | 0.000925496 | ALAD     | ENSG00000148218 |
| 9 | 115209128 | 115209391 | 115209224 | 8   | 9   | 0  | 11.73048839 | 0.000425898 | POLE3    | ENSG00000148229 |
| 9 | 115212524 | 115212750 | 115212637 | 9   | 11  | 2  | 4.692195357 | 0.00272444  | POLE3    | ENSG00000148229 |
| 9 | 115267506 | 115267936 | 115267775 | 20  | 25  | 6  | 4.357038546 | 4.72E-05    | RGS3     | ENSG00000138835 |
| 9 | 115382551 | 115383027 | 115382821 | 18  | 32  | 6  | 5.530087385 | 7.11E-07    | RGS3     | ENSG00000138835 |
| 9 | 115460092 | 115460299 | 115460195 | 8   | 9   | 2  | 3.910162798 | 0.00955088  | RGS3     | ENSG00000138835 |
| 9 | 115678589 | 115678771 | 115678680 | 8   | 8   | 2  | 3.519146518 | 0.017558    | ZNF618   | ENSG00000157657 |
| 9 | 115678830 | 115679137 | 115678970 | 9   | 11  | 4  | 2.815317214 | 0.0183428   | ZNF618   | ENSG00000157657 |
| 9 | 115883093 | 115883308 | 115883189 | 8   | 9   | 3  | 2.932622098 | 0.0242899   | AMBP     | ENSG00000106927 |
| 9 | 116014960 | 116015185 | 116015070 | 8   | 9   | 0  | 11.73048839 | 0.000425898 |          | ENSG00000207726 |
| 9 | 116078775 | 116079225 | 116078951 | 13  | 23  | 0  | 28.15317214 | 8.13E-09    | ORM1     | ENSG00000187681 |
| 9 | 116206643 | 116206991 | 116206816 | 20  | 25  | 3  | 7.624817456 | 1.09E-06    | AKNA     | ENSG00000106948 |
| 9 | 116207774 | 116207980 | 116207877 | 9   | 11  | 1  | 7.038293036 | 0.000674435 | AKNA     | ENSG00000106948 |
| 9 | 116289736 | 116289968 | 116289852 | 10  | 13  | 1  | 8.211341875 | 0.000163445 | DFNB31   | ENSG00000095397 |
| 9 | 116353943 | 116354503 | 116354223 | 14  | 24  | 1  | 14.66311049 | 5.43E-08    |          | ENSG00000208798 |
| 9 | 116360529 | 116360723 | 116360608 | 11  | 11  | 3  | 3.519146518 | 0.00788869  |          | ENSG00000208798 |
| 9 | 116389742 | 116390084 | 116389913 | 11  | 16  | 1  | 9.970915134 | 1.89E-05    | ATP6V1G1 | ENSG00000136888 |
| 9 | 116455504 | 116455917 | 116455762 | 11  | 17  | 9  | 2.111487911 | 0.0248715   |          | ENSG00000201749 |
| 9 | 116464112 | 116464358 | 116464235 | 10  | 13  | 4  | 3.28453675  | 0.00629037  |          | ENSG00000217734 |
| 9 | 116606757 | 116606980 | 116606868 | 10  | 11  | 2  | 4.692195357 | 0.00272444  | TNFSF15  | ENSG00000181634 |
| 9 | 116708514 | 116708777 | 116708626 | 13  | 13  | 0  | 16.42268375 | 1.91E-05    | TNFSF8   | ENSG00000106952 |
| 9 | 116709002 | 116709238 | 116709115 | 10  | 12  | 1  | 7.624817456 | 0.000332769 | TNFSF8   | ENSG00000106952 |
| 9 | 116710078 | 116711288 | 116710655 | 221 | 349 | 17 | 22.80928299 | 2.38E-94    | TNFSF8   | ENSG00000106952 |
| 9 | 116713372 | 116713574 | 116713473 | 8   | 8   | 2  | 3.519146518 | 0.017558    | TNFSF8   | ENSG00000106952 |
| 9 | 116827270 | 116827468 | 116827369 | 10  | 11  | 4  | 2.815317214 | 0.0183428   | TNC      | ENSG00000041982 |
| 9 | 117746077 | 117746883 | 117746417 | 151 | 205 | 3  | 60.41201522 | 8.75E-65    | C9orf27  | ENSG00000204148 |
| 9 | 118489055 | 118489492 | 118489335 | 29  | 38  | 1  | 22.87445237 | 1.58E-12    | ASTN2    | ENSG00000148219 |
| 9 | 118607068 | 118607247 | 118607157 | 8   | 8   | 5  | 1.759573259 | 0.13508     | TRIM32   | ENSG00000119401 |
| 9 | 119846856 | 119847208 | 119847007 | 9   | 13  | 0  | 16.42268375 | 1.91E-05    |          | ENSG00000184353 |
| 9 | 121100587 | 121100822 | 121100685 | 8   | 8   | 0  | 10.55743955 | 0.000925496 | DBC1     | ENSG00000078725 |
| 9 | 121214609 | 121214929 | 121214769 | 9   | 13  | 10 | 1.49297125  | 0.157311    | DBC1     | ENSG00000078725 |
| 9 | 121255567 | 121255883 | 121255723 | 10  | 15  | 1  | 9.384390715 | 3.90E-05    | DBC1     | ENSG00000078725 |

|   |           |           |           |     |     |    |             |             |                        |
|---|-----------|-----------|-----------|-----|-----|----|-------------|-------------|------------------------|
| 9 | 121771254 | 121771471 | 121771372 | 11  | 12  | 7  | 1.906204364 | 0.0695918   | ENSG00000222745        |
| 9 | 122152942 | 122153121 | 122152971 | 8   | 8   | 2  | 3.519146518 | 0.017558    | ENSG00000208742        |
| 9 | 122186072 | 122186278 | 122186209 | 8   | 8   | 1  | 5.278719777 | 0.00542188  | ENSG00000208742        |
| 9 | 122496668 | 122496887 | 122496756 | 9   | 9   | 0  | 11.73048839 | 0.000425898 | MEGF9 ENSG00000106780  |
| 9 | 122510699 | 122510968 | 122510831 | 11  | 12  | 2  | 5.083211637 | 0.00143337  | MEGF9 ENSG00000106780  |
| 9 | 122595391 | 122595717 | 122595563 | 9   | 13  | 3  | 4.105670938 | 0.00243034  | FBXW2 ENSG00000119402  |
| 9 | 122644854 | 122645499 | 122645178 | 8   | 22  | 5  | 4.496687217 | 9.59E-05    | PSMD5 ENSG00000095261  |
| 9 | 122737574 | 122737779 | 122737670 | 9   | 12  | 3  | 3.812408728 | 0.004404    | TRAF1 ENSG00000056558  |
| 9 | 122738629 | 122738862 | 122738714 | 9   | 9   | 0  | 11.73048839 | 0.000425898 | TRAF1 ENSG00000056558  |
| 9 | 122787905 | 122788161 | 122788028 | 10  | 10  | 1  | 6.451768616 | 0.00135978  | TRAF1 ENSG00000056558  |
| 9 | 122996958 | 122997253 | 122997108 | 19  | 20  | 3  | 6.158506406 | 2.99E-05    | RAB14 ENSG00000119396  |
| 9 | 123003810 | 123004637 | 123004058 | 11  | 35  | 10 | 3.839068929 | 8.08E-06    | RAB14 ENSG00000119396  |
| 9 | 123015258 | 123015754 | 123015555 | 11  | 22  | 4  | 5.396024661 | 3.05E-05    | GSN ENSG00000148180    |
| 9 | 123069908 | 123070164 | 123070036 | 14  | 16  | 4  | 3.988366054 | 0.00115141  | GSN ENSG00000148180    |
| 9 | 123083908 | 123084326 | 123084147 | 9   | 17  | 3  | 5.278719777 | 0.000205462 | GSN ENSG00000148180    |
| 9 | 123122270 | 123122462 | 123122393 | 8   | 10  | 2  | 4.301179077 | 0.00512919  | GSN ENSG00000148180    |
| 9 | 123124338 | 123124904 | 123124644 | 240 | 287 | 8  | 37.53756286 | 8.24E-85    | GSN ENSG00000148180    |
| 9 | 123137317 | 123137675 | 123137521 | 15  | 19  | 4  | 4.692195357 | 0.000193572 | GSN ENSG00000148180    |
| 9 | 123320894 | 123321538 | 123321381 | 54  | 69  | 2  | 27.37113958 | 1.94E-21    | ENSG00000213467        |
| 9 | 123348130 | 123348385 | 123348256 | 10  | 12  | 2  | 5.083211637 | 0.00143337  | DAB2IP ENSG00000136848 |
| 9 | 123400061 | 123400334 | 123400239 | 9   | 12  | 5  | 2.541605819 | 0.0225912   | DAB2IP ENSG00000136848 |
| 9 | 123546406 | 123546690 | 123546548 | 10  | 12  | 2  | 5.083211637 | 0.00143337  | DAB2IP ENSG00000136848 |
| 9 | 123901975 | 123902181 | 123902078 | 8   | 8   | 2  | 3.519146518 | 0.017558    | TTLL11 ENSG00000175764 |
| 9 | 123924569 | 123924885 | 123924725 | 8   | 11  | 6  | 2.010940867 | 0.0640214   | TTLL11 ENSG00000175764 |
| 9 | 123992703 | 123993002 | 123992852 | 16  | 17  | 0  | 21.11487911 | 8.57E-07    | MORN5 ENSG00000185681  |
| 9 | 124019711 | 124020053 | 124019882 | 8   | 13  | 2  | 5.474227917 | 0.000747844 | LHX6 ENSG00000106852   |
| 9 | 124063608 | 124063829 | 124063672 | 10  | 11  | 6  | 2.010940867 | 0.0640214   | MRRF ENSG00000148187   |
| 9 | 124192345 | 124192564 | 124192476 | 8   | 9   | 7  | 1.466311049 | 0.20706     | PTGS1 ENSG00000095303  |
| 9 | 124301287 | 124301903 | 124301699 | 25  | 49  | 0  | 58.65244197 | 1.40E-17    | OR1J2 ENSG00000197233  |
| 9 | 124339964 | 124340252 | 124340108 | 8   | 10  | 0  | 12.90353723 | 0.000195991 | OR1N1 ENSG00000171505  |
| 9 | 124353432 | 124353875 | 124353653 | 41  | 54  | 1  | 32.25884308 | 8.88E-18    | OR1N2 ENSG00000171501  |
| 9 | 124629297 | 124629490 | 124629384 | 8   | 8   | 3  | 2.639359888 | 0.0415794   | PDCL ENSG00000136940   |
| 9 | 124630666 | 124630927 | 124630796 | 9   | 10  | 7  | 1.612942154 | 0.147335    | PDCL ENSG00000136940   |
| 9 | 124707473 | 124707765 | 124707614 | 9   | 13  | 8  | 1.824742639 | 0.0744168   | RC3H2 ENSG00000056586  |

|   |           |           |           |    |    |   |             |             |         |                 |
|---|-----------|-----------|-----------|----|----|---|-------------|-------------|---------|-----------------|
| 9 | 124715349 | 124715581 | 124715469 | 12 | 12 | 2 | 5.083211637 | 0.00143337  | ZBTB6   | ENSG00000186130 |
| 9 | 125129886 | 125130289 | 125129992 | 11 | 18 | 6 | 3.183989707 | 0.00227432  | CRB2    | ENSG00000148204 |
| 9 | 125876970 | 125877165 | 125877067 | 9  | 9  | 5 | 1.955081399 | 0.0892323   |         | ENSG00000208719 |
| 9 | 125881350 | 125881610 | 125881433 | 9  | 10 | 1 | 6.451768616 | 0.00135978  |         | ENSG00000208719 |
| 9 | 125928993 | 125929178 | 125929085 | 8  | 8  | 0 | 10.55743955 | 0.000925496 |         | ENSG00000208719 |
| 9 | 126061682 | 126061914 | 126061798 | 10 | 10 | 8 | 1.433726359 | 0.209175    | NEK6    | ENSG00000119408 |
| 9 | 126217491 | 126217807 | 126217672 | 10 | 15 | 6 | 2.68125449  | 0.0103552   | PSMB7   | ENSG00000136930 |
| 9 | 126238452 | 126238788 | 126238627 | 17 | 21 | 0 | 25.80707446 | 3.84E-08    | GPR144  | ENSG00000180264 |
| 9 | 126404261 | 126404649 | 126404470 | 23 | 31 | 5 | 6.256260476 | 3.74E-07    |         | ENSG00000217017 |
| 9 | 126405834 | 126406617 | 126406416 | 31 | 74 | 7 | 10.99733287 | 2.89E-18    |         | ENSG00000223143 |
| 9 | 126460298 | 126460634 | 126460459 | 8  | 13 | 1 | 8.211341875 | 0.000163445 |         | ENSG00000207595 |
| 9 | 126573486 | 126573712 | 126573600 | 8  | 9  | 4 | 2.346097679 | 0.050148    | NR6A1   | ENSG00000148200 |
| 9 | 126576478 | 126576730 | 126576595 | 8  | 10 | 4 | 2.580707446 | 0.0306059   | OLFML2A | ENSG00000185585 |
| 9 | 126620215 | 126620549 | 126620368 | 8  | 12 | 0 | 15.24963491 | 4.15E-05    | OLFML2A | ENSG00000185585 |
| 9 | 126663838 | 126664230 | 126664017 | 8  | 13 | 3 | 4.105670938 | 0.00243034  | RPL35   | ENSG00000136942 |
| 9 | 126743119 | 126743345 | 126743270 | 8  | 11 | 5 | 2.346097679 | 0.0364013   | GOLGA1  | ENSG00000136935 |
| 9 | 127001550 | 127001823 | 127001676 | 8  | 12 | 0 | 15.24963491 | 4.15E-05    | RABEPK  | ENSG00000136933 |
| 9 | 127002339 | 127002587 | 127002463 | 8  | 9  | 4 | 2.346097679 | 0.050148    | RABEPK  | ENSG00000136933 |
| 9 | 127074887 | 127075172 | 127075046 | 8  | 9  | 6 | 1.675784056 | 0.141978    |         | ENSG00000176534 |
| 9 | 127099121 | 127099403 | 127099281 | 8  | 13 | 5 | 2.737113958 | 0.0137917   | GAPVD1  | ENSG00000165219 |
| 9 | 127303035 | 127303338 | 127303183 | 12 | 15 | 3 | 4.692195357 | 0.000718455 |         | ENSG00000208649 |
| 9 | 127312428 | 127312739 | 127312583 | 16 | 18 | 2 | 7.429309316 | 2.63E-05    |         | ENSG00000208649 |
| 9 | 127313869 | 127314193 | 127314031 | 14 | 18 | 3 | 5.571981987 | 0.000108726 |         | ENSG00000208649 |
| 9 | 127338282 | 127338599 | 127338441 | 18 | 21 | 5 | 4.301179077 | 0.000172642 |         | ENSG00000222288 |
| 9 | 127340290 | 127340617 | 127340448 | 19 | 22 | 3 | 6.745030826 | 8.05E-06    |         | ENSG00000222288 |
| 9 | 127351690 | 127352062 | 127351826 | 10 | 16 | 4 | 3.988366054 | 0.00115141  |         | ENSG00000222288 |
| 9 | 127509440 | 127509737 | 127509582 | 10 | 13 | 4 | 3.28453675  | 0.00629037  | MAPKAP1 | ENSG00000119487 |
| 9 | 127548030 | 127548342 | 127548205 | 12 | 15 | 4 | 3.753756286 | 0.0020497   | PBX3    | ENSG00000167081 |
| 9 | 127768633 | 127768886 | 127768759 | 11 | 12 | 1 | 7.624817456 | 0.000332769 | PBX3    | ENSG00000167081 |
| 9 | 128013585 | 128014027 | 128013753 | 26 | 36 | 0 | 43.40280705 | 3.38E-13    | FAM125B | ENSG00000196814 |
| 9 | 128031040 | 128031251 | 128031119 | 9  | 11 | 5 | 2.346097679 | 0.0364013   | FAM125B | ENSG00000196814 |
| 9 | 128445025 | 128445365 | 128445192 | 18 | 21 | 9 | 2.580707446 | 0.00438951  | LMX1B   | ENSG00000136944 |
| 9 | 128463807 | 128463993 | 128463839 | 9  | 10 | 1 | 6.451768616 | 0.00135978  | LMX1B   | ENSG00000136944 |
| 9 | 128464293 | 128464794 | 128464570 | 12 | 22 | 5 | 4.496687217 | 9.59E-05    | LMX1B   | ENSG00000136944 |

|   |           |           |           |    |    |    |             |             |          |                 |
|---|-----------|-----------|-----------|----|----|----|-------------|-------------|----------|-----------------|
| 9 | 128596034 | 128596334 | 128596184 | 8  | 11 | 1  | 7.038293036 | 0.000674435 | ZBTB43   | ENSG00000169155 |
| 9 | 128604710 | 128605083 | 128604889 | 8  | 15 | 2  | 6.256260476 | 0.000199274 | ZBTB43   | ENSG00000169155 |
| 9 | 128742768 | 128743030 | 128742899 | 14 | 17 | 1  | 10.55743955 | 9.18E-06    | RALGPS1  | ENSG00000136828 |
| 9 | 129031946 | 129032142 | 129032044 | 8  | 9  | 4  | 2.346097679 | 0.050148    | GARNL3   | ENSG00000136895 |
| 9 | 129096953 | 129097811 | 129097317 | 33 | 62 | 4  | 14.78041538 | 4.00E-17    |          | ENSG00000220303 |
| 9 | 129138829 | 129139232 | 129139057 | 20 | 26 | 2  | 10.55743955 | 9.97E-08    |          | ENSG00000220303 |
| 9 | 129186274 | 129186573 | 129186413 | 9  | 13 | 6  | 2.346097679 | 0.0266147   | SLC2A8   | ENSG00000136856 |
| 9 | 129219321 | 129219527 | 129219445 | 11 | 11 | 0  | 14.07658607 | 9.02E-05    | ZNF79    | ENSG00000196152 |
| 9 | 129226343 | 129226843 | 129226610 | 27 | 39 | 9  | 4.692195357 | 3.22E-07    | ZNF79    | ENSG00000196152 |
| 9 | 129306128 | 129306430 | 129306279 | 18 | 20 | 2  | 8.211341875 | 6.65E-06    |          | ENSG00000200788 |
| 9 | 129358419 | 129358624 | 129358457 | 9  | 9  | 3  | 2.932622098 | 0.0242899   | FAM129B  | ENSG00000136830 |
| 9 | 129363709 | 129364416 | 129363892 | 24 | 55 | 3  | 16.42268375 | 7.12E-16    | FAM129B  | ENSG00000136830 |
| 9 | 129376570 | 129377236 | 129376850 | 21 | 43 | 10 | 4.692195357 | 9.10E-08    | FAM129B  | ENSG00000136830 |
| 9 | 129386400 | 129386725 | 129386553 | 19 | 21 | 0  | 25.80707446 | 3.84E-08    | FAM129B  | ENSG00000136830 |
| 9 | 129515293 | 129515512 | 129515402 | 8  | 8  | 1  | 5.278719777 | 0.00542188  | PTRH1    | ENSG00000187024 |
| 9 | 129744877 | 129745159 | 129745035 | 12 | 14 | 4  | 3.519146518 | 0.00361132  | DPM2     | ENSG00000136908 |
| 9 | 129757588 | 129757845 | 129757709 | 11 | 13 | 4  | 3.28453675  | 0.00629037  | FAM102A  | ENSG00000167106 |
| 9 | 129770186 | 129770390 | 129770282 | 10 | 10 | 5  | 2.150589539 | 0.0575848   | FAM102A  | ENSG00000167106 |
| 9 | 129771730 | 129771974 | 129771854 | 9  | 11 | 9  | 1.407658607 | 0.210479    | FAM102A  | ENSG00000167106 |
| 9 | 129837341 | 129837545 | 129837443 | 11 | 11 | 6  | 2.010940867 | 0.0640214   |          | ENSG00000208622 |
| 9 | 129900184 | 129900694 | 129900515 | 9  | 18 | 7  | 2.785990993 | 0.00480525  | SLC25A25 | ENSG00000148339 |
| 9 | 129919736 | 129920012 | 129919860 | 11 | 13 | 10 | 1.49297125  | 0.157311    | PTGES2   | ENSG00000148334 |
| 9 | 129930196 | 129930538 | 129930367 | 10 | 14 | 3  | 4.398933147 | 0.00132748  | PTGES2   | ENSG00000148334 |
| 9 | 130097412 | 130097619 | 130097515 | 8  | 9  | 1  | 5.865244197 | 0.00272497  | C9orf119 | ENSG00000175854 |
| 9 | 130100961 | 130101195 | 130101078 | 10 | 11 | 5  | 2.346097679 | 0.0364013   | C9orf119 | ENSG00000175854 |
| 9 | 130124308 | 130124743 | 130124564 | 12 | 22 | 7  | 3.372515413 | 0.000629223 | TRUB2    | ENSG00000167112 |
| 9 | 130130984 | 130131460 | 130131256 | 55 | 72 | 1  | 42.81628264 | 1.00E-23    | COQ4     | ENSG00000167113 |
| 9 | 130142269 | 130142521 | 130142374 | 11 | 12 | 4  | 3.049926982 | 0.0108184   | SLC27A4  | ENSG00000167114 |
| 9 | 130164154 | 130164440 | 130164297 | 8  | 11 | 6  | 2.010940867 | 0.0640214   | URM1     | ENSG00000167118 |
| 9 | 130172896 | 130173318 | 130173213 | 9  | 19 | 4  | 4.692195357 | 0.000193572 | URM1     | ENSG00000167118 |
| 9 | 130374681 | 130374880 | 130374771 | 8  | 9  | 1  | 5.865244197 | 0.00272497  | SPTAN1   | ENSG00000197694 |
| 9 | 130437362 | 130437625 | 130437493 | 10 | 13 | 3  | 4.105670938 | 0.00243034  |          | ENSG00000217628 |
| 9 | 130486512 | 130486790 | 130486651 | 9  | 11 | 1  | 7.038293036 | 0.000674435 | SET      | ENSG00000119335 |
| 9 | 130526607 | 130526844 | 130526730 | 8  | 9  | 3  | 2.932622098 | 0.0242899   | ZDHHC12  | ENSG00000160446 |

|   |           |           |           |    |    |    |             |             |          |                 |
|---|-----------|-----------|-----------|----|----|----|-------------|-------------|----------|-----------------|
| 9 | 130574012 | 130574221 | 130574102 | 8  | 9  | 2  | 3.910162798 | 0.00955088  | ZER1     | ENSG00000160445 |
| 9 | 130620515 | 130620709 | 130620612 | 10 | 10 | 6  | 1.843362462 | 0.0964212   | ENDOG    | ENSG00000167136 |
| 9 | 130665803 | 130666028 | 130665864 | 9  | 10 | 2  | 4.301179077 | 0.00512919  | CCBL1    | ENSG00000171097 |
| 9 | 130683979 | 130684189 | 130684084 | 8  | 8  | 1  | 5.278719777 | 0.00542188  | CCBL1    | ENSG00000171097 |
| 9 | 130750187 | 130750383 | 130750306 | 8  | 9  | 4  | 2.346097679 | 0.050148    | NUP188   | ENSG00000095319 |
| 9 | 130809012 | 130809215 | 130809126 | 10 | 11 | 7  | 1.759573259 | 0.102361    | SH3GLB2  | ENSG00000148341 |
| 9 | 130828713 | 130828941 | 130828827 | 11 | 12 | 5  | 2.541605819 | 0.0225912   | SH3GLB2  | ENSG00000148341 |
| 9 | 130933936 | 130934166 | 130934051 | 8  | 10 | 1  | 6.451768616 | 0.00135978  | PPP2R4   | ENSG00000119383 |
| 9 | 130941367 | 130941644 | 130941505 | 12 | 13 | 6  | 2.346097679 | 0.0266147   | PPP2R4   | ENSG00000119383 |
| 9 | 130942038 | 130942505 | 130942329 | 13 | 23 | 5  | 4.692195357 | 5.29E-05    | PPP2R4   | ENSG00000119383 |
| 9 | 130945245 | 130945446 | 130945397 | 11 | 13 | 3  | 4.105670938 | 0.00243034  | PPP2R4   | ENSG00000119383 |
| 9 | 130969047 | 130969488 | 130969226 | 11 | 21 | 6  | 3.686724924 | 0.000453999 |          | ENSG00000204055 |
| 9 | 130976191 | 130976409 | 130976300 | 12 | 12 | 2  | 5.083211637 | 0.00143337  |          | ENSG00000204055 |
| 9 | 131080597 | 131080951 | 131080774 | 8  | 13 | 10 | 1.49297125  | 0.157311    | C9orf106 | ENSG00000179082 |
| 9 | 131119658 | 131119884 | 131119813 | 11 | 12 | 0  | 15.24963491 | 4.15E-05    | C9orf106 | ENSG00000179082 |
| 9 | 131136025 | 131136230 | 131136127 | 9  | 10 | 6  | 1.843362462 | 0.0964212   | C9orf106 | ENSG00000179082 |
| 9 | 131136355 | 131136609 | 131136521 | 10 | 12 | 4  | 3.049926982 | 0.0108184   | C9orf106 | ENSG00000179082 |
| 9 | 131164362 | 131164712 | 131164537 | 15 | 21 | 2  | 8.602358155 | 3.33E-06    |          | ENSG00000223137 |
| 9 | 131185092 | 131185468 | 131185317 | 12 | 18 | 6  | 3.183989707 | 0.00227432  |          | ENSG00000219220 |
| 9 | 131208547 | 131208819 | 131208683 | 8  | 9  | 4  | 2.346097679 | 0.050148    |          | ENSG00000219220 |
| 9 | 131290688 | 131291004 | 131290827 | 12 | 15 | 5  | 3.128130238 | 0.00492422  |          | ENSG00000204054 |
| 9 | 131300343 | 131300530 | 131300436 | 8  | 8  | 2  | 3.519146518 | 0.017558    |          | ENSG00000204054 |
| 9 | 131419414 | 131419727 | 131419570 | 11 | 11 | 3  | 3.519146518 | 0.00788869  | C9orf50  | ENSG00000179058 |
| 9 | 131444185 | 131444530 | 131444357 | 14 | 19 | 3  | 5.865244197 | 5.72E-05    | ASB6     | ENSG00000148331 |
| 9 | 131528947 | 131529149 | 131529029 | 10 | 11 | 3  | 3.519146518 | 0.00788869  | PTGES    | ENSG00000148344 |
| 9 | 131555082 | 131555394 | 131555234 | 9  | 11 | 2  | 4.692195357 | 0.00272444  | PTGES    | ENSG00000148344 |
| 9 | 131592561 | 131592757 | 131592659 | 8  | 9  | 4  | 2.346097679 | 0.050148    |          | ENSG00000217808 |
| 9 | 131637127 | 131637306 | 131637222 | 8  | 8  | 4  | 2.111487911 | 0.0804809   | C9orf78  | ENSG00000136819 |
| 9 | 131687939 | 131688159 | 131688022 | 12 | 13 | 1  | 8.211341875 | 0.000163445 |          | ENSG00000216693 |
| 9 | 132426289 | 132426582 | 132426440 | 13 | 14 | 2  | 5.865244197 | 0.000387308 | FUBP3    | ENSG00000107164 |
| 9 | 132555772 | 132556032 | 132555877 | 9  | 10 | 2  | 4.301179077 | 0.00512919  | EXOSC2   | ENSG00000130713 |
| 9 | 132558633 | 132558870 | 132558746 | 8  | 12 | 4  | 3.049926982 | 0.0108184   | EXOSC2   | ENSG00000130713 |
| 9 | 132566397 | 132566599 | 132566498 | 8  | 9  | 1  | 5.865244197 | 0.00272497  | EXOSC2   | ENSG00000130713 |
| 9 | 132572621 | 132572830 | 132572704 | 8  | 9  | 2  | 3.910162798 | 0.00955088  | ABL1     | ENSG00000097007 |

|   |           |           |           |    |    |   |             |             |         |                 |
|---|-----------|-----------|-----------|----|----|---|-------------|-------------|---------|-----------------|
| 9 | 132680598 | 132680833 | 132680707 | 8  | 11 | 2 | 4.692195357 | 0.00272444  | ABL1    | ENSG00000097007 |
| 9 | 132731691 | 132731995 | 132731843 | 13 | 15 | 4 | 3.753756286 | 0.0020497   | QRFP    | ENSG00000188710 |
| 9 | 132751266 | 132751502 | 132751394 | 13 | 14 | 0 | 17.59573259 | 8.79E-06    | QRFP    | ENSG00000188710 |
| 9 | 132857592 | 132858072 | 132857849 | 45 | 61 | 9 | 7.272902804 | 4.16E-13    | LAMC3   | ENSG00000050555 |
| 9 | 132990663 | 132991003 | 132990823 | 11 | 16 | 2 | 6.647276756 | 0.000101928 | NUP214  | ENSG00000126883 |
| 9 | 133260443 | 133260863 | 133260684 | 8  | 16 | 1 | 9.970915134 | 1.89E-05    | BAT2L   | ENSG00000130723 |
| 9 | 133261050 | 133261324 | 133261194 | 23 | 25 | 7 | 3.812408728 | 0.00012465  | BAT2L   | ENSG00000130723 |
| 9 | 133262498 | 133262709 | 133262603 | 8  | 11 | 0 | 14.07658607 | 9.02E-05    | BAT2L   | ENSG00000130723 |
| 9 | 133273812 | 133273993 | 133273904 | 8  | 8  | 1 | 5.278719777 | 0.00542188  | BAT2L   | ENSG00000130723 |
| 9 | 133347945 | 133348124 | 133348034 | 8  | 8  | 2 | 3.519146518 | 0.017558    |         | ENSG00000206872 |
| 9 | 133456426 | 133456748 | 133456587 | 13 | 17 | 2 | 7.038293036 | 5.19E-05    | UCK1    | ENSG00000130717 |
| 9 | 133471305 | 133471530 | 133471466 | 8  | 10 | 1 | 6.451768616 | 0.00135978  | UCK1    | ENSG00000130717 |
| 9 | 133475660 | 133475848 | 133475715 | 8  | 8  | 5 | 1.759573259 | 0.13508     | UCK1    | ENSG00000130717 |
| 9 | 133598709 | 133599056 | 133598882 | 12 | 17 | 5 | 3.519146518 | 0.00167472  | RAPGEF1 | ENSG00000107263 |
| 9 | 133599528 | 133599766 | 133599594 | 9  | 9  | 2 | 3.910162798 | 0.00955088  | RAPGEF1 | ENSG00000107263 |
| 9 | 133610184 | 133610385 | 133610283 | 8  | 9  | 1 | 5.865244197 | 0.00272497  | RAPGEF1 | ENSG00000107263 |
| 9 | 133612616 | 133612804 | 133612710 | 9  | 10 | 0 | 12.90353723 | 0.000195991 | RAPGEF1 | ENSG00000107263 |
| 9 | 134124445 | 134124645 | 134124545 | 8  | 8  | 2 | 3.519146518 | 0.017558    |         | ENSG00000221105 |
| 9 | 134470822 | 134471076 | 134470937 | 12 | 13 | 1 | 8.211341875 | 0.000163445 | BARHL1  | ENSG00000125492 |
| 9 | 134516382 | 134516604 | 134516493 | 11 | 13 | 2 | 5.474227917 | 0.000747844 | GTF3C4  | ENSG00000125484 |
| 9 | 134665370 | 134665634 | 134665502 | 8  | 12 | 3 | 3.812408728 | 0.004404    |         | ENSG00000208514 |
| 9 | 134809724 | 134810062 | 134809936 | 13 | 17 | 7 | 2.639359888 | 0.00777415  | TSC1    | ENSG00000165699 |
| 9 | 134858648 | 134859115 | 134858951 | 10 | 19 | 1 | 11.73048839 | 2.14E-06    | GFI1B   | ENSG00000165702 |
| 9 | 134867344 | 134867635 | 134867489 | 12 | 14 | 1 | 8.797866295 | 8.00E-05    | GFI1B   | ENSG00000165702 |
| 9 | 134887488 | 134887852 | 134887637 | 8  | 13 | 5 | 2.737113958 | 0.0137917   | GTF3C5  | ENSG00000148308 |
| 9 | 134895998 | 134896235 | 134896088 | 10 | 12 | 1 | 7.624817456 | 0.000332769 | GTF3C5  | ENSG00000148308 |
| 9 | 134924798 | 134925006 | 134924934 | 9  | 9  | 2 | 3.910162798 | 0.00955088  | CEL     | ENSG00000170835 |
| 9 | 134926322 | 134926827 | 134926496 | 23 | 37 | 0 | 44.57585589 | 1.55E-13    | CEL     | ENSG00000170835 |
| 9 | 134998867 | 134999185 | 134999028 | 20 | 21 | 3 | 6.451768616 | 1.56E-05    | RALGDS  | ENSG00000160271 |
| 9 | 135104345 | 135104584 | 135104464 | 9  | 11 | 1 | 7.038293036 | 0.000674435 | LCN1L1  | ENSG00000119440 |
| 9 | 135243118 | 135243326 | 135243271 | 9  | 10 | 3 | 3.225884308 | 0.0139466   | C9orf96 | ENSG00000198870 |
| 9 | 135243462 | 135243801 | 135243638 | 9  | 12 | 3 | 3.812408728 | 0.004404    | C9orf96 | ENSG00000198870 |
| 9 | 135258778 | 135259163 | 135258957 | 12 | 18 | 4 | 4.457585589 | 0.000353565 | REXO4   | ENSG00000148300 |
| 9 | 135318030 | 135318375 | 135318198 | 9  | 12 | 3 | 3.812408728 | 0.004404    | C9orf7  | ENSG00000160325 |

|   |           |           |           |     |     |   |             |             |          |                 |
|---|-----------|-----------|-----------|-----|-----|---|-------------|-------------|----------|-----------------|
| 9 | 135546294 | 135546473 | 135546383 | 8   | 8   | 1 | 5.278719777 | 0.00542188  | SARDH    | ENSG00000123453 |
| 9 | 135718159 | 135718479 | 135718317 | 10  | 13  | 2 | 5.474227917 | 0.000747844 | SARDH    | ENSG00000123453 |
| 9 | 135728891 | 135729433 | 135729182 | 38  | 54  | 3 | 16.12942154 | 1.47E-15    | VAV2     | ENSG00000160293 |
| 9 | 135735793 | 135736669 | 135736263 | 369 | 457 | 6 | 76.75090977 | 1.41E-143   | VAV2     | ENSG00000160293 |
| 9 | 135736919 | 135737277 | 135737098 | 10  | 16  | 2 | 6.647276756 | 0.000101928 | VAV2     | ENSG00000160293 |
| 9 | 135743250 | 135743654 | 135743435 | 36  | 48  | 2 | 19.15979771 | 1.17E-14    | VAV2     | ENSG00000160293 |
| 9 | 135990725 | 135990991 | 135990858 | 13  | 14  | 3 | 4.398933147 | 0.00132748  | WDR5     | ENSG00000196363 |
| 9 | 136019399 | 136019647 | 136019510 | 9   | 10  | 3 | 3.225884308 | 0.0139466   |          | ENSG00000221676 |
| 9 | 136019667 | 136019924 | 136019794 | 10  | 12  | 6 | 2.178519273 | 0.0416567   |          | ENSG00000221676 |
| 9 | 136388719 | 136389101 | 136388932 | 20  | 26  | 1 | 15.83615933 | 1.23E-08    | RXRA     | ENSG00000186350 |
| 9 | 136389378 | 136389563 | 136389427 | 8   | 8   | 1 | 5.278719777 | 0.00542188  | RXRA     | ENSG00000186350 |
| 9 | 136392664 | 136392894 | 136392779 | 12  | 12  | 5 | 2.541605819 | 0.0225912   | RXRA     | ENSG00000186350 |
| 9 | 136397608 | 136397833 | 136397713 | 8   | 9   | 2 | 3.910162798 | 0.00955088  | RXRA     | ENSG00000186350 |
| 9 | 136399331 | 136399863 | 136399605 | 15  | 26  | 6 | 4.524616952 | 2.63E-05    | RXRA     | ENSG00000186350 |
| 9 | 136444059 | 136444302 | 136444204 | 12  | 12  | 2 | 5.083211637 | 0.00143337  |          | ENSG00000214473 |
| 9 | 136466672 | 136466996 | 136466834 | 8   | 11  | 2 | 4.692195357 | 0.00272444  |          | ENSG00000214473 |
| 9 | 136474387 | 136474602 | 136474558 | 10  | 11  | 2 | 4.692195357 | 0.00272444  |          | ENSG00000214473 |
| 9 | 136721367 | 136721550 | 136721497 | 8   | 8   | 1 | 5.278719777 | 0.00542188  | COL5A1   | ENSG00000130635 |
| 9 | 136734722 | 136734936 | 136734829 | 8   | 10  | 3 | 3.225884308 | 0.0139466   | COL5A1   | ENSG00000130635 |
| 9 | 136738767 | 136739059 | 136738917 | 11  | 14  | 3 | 4.398933147 | 0.00132748  | COL5A1   | ENSG00000130635 |
| 9 | 136810784 | 136811233 | 136810906 | 9   | 20  | 7 | 3.079253203 | 0.00177418  | COL5A1   | ENSG00000130635 |
| 9 | 136927455 | 136927771 | 136927613 | 12  | 15  | 2 | 6.256260476 | 0.000199274 | FCN2     | ENSG00000160339 |
| 9 | 137106907 | 137107113 | 137107025 | 8   | 9   | 1 | 5.865244197 | 0.00272497  | OLFM1    | ENSG00000130558 |
| 9 | 137117885 | 137118100 | 137117992 | 9   | 9   | 4 | 2.346097679 | 0.050148    | OLFM1    | ENSG00000130558 |
| 9 | 137191161 | 137191345 | 137191253 | 8   | 8   | 0 | 10.55743955 | 0.000925496 |          | ENSG00000189363 |
| 9 | 137206966 | 137207221 | 137207093 | 8   | 9   | 2 | 3.910162798 | 0.00955088  |          | ENSG00000189363 |
| 9 | 137313566 | 137314018 | 137313740 | 9   | 17  | 6 | 3.016411301 | 0.00381427  | C9orf62  | ENSG00000178243 |
| 9 | 137326735 | 137326929 | 137326836 | 8   | 8   | 3 | 2.639359888 | 0.0415794   | C9orf62  | ENSG00000178243 |
| 9 | 137375686 | 137375881 | 137375785 | 10  | 10  | 4 | 2.580707446 | 0.0306059   | C9orf62  | ENSG00000178243 |
| 9 | 137402440 | 137402988 | 137402627 | 31  | 43  | 2 | 17.20471631 | 4.62E-13    | C9orf62  | ENSG00000178243 |
| 9 | 137425286 | 137425510 | 137425421 | 11  | 11  | 5 | 2.346097679 | 0.0364013   | C9orf62  | ENSG00000178243 |
| 9 | 137425513 | 137425701 | 137425600 | 8   | 10  | 2 | 4.301179077 | 0.00512919  | C9orf62  | ENSG00000178243 |
| 9 | 137536391 | 137536644 | 137536523 | 8   | 9   | 2 | 3.910162798 | 0.00955088  | C9orf116 | ENSG00000160345 |
| 9 | 137635616 | 137635838 | 137635692 | 8   | 11  | 4 | 2.815317214 | 0.0183428   |          | ENSG00000218234 |



|   |           |           |           |     |     |   |             |             |          |                 |
|---|-----------|-----------|-----------|-----|-----|---|-------------|-------------|----------|-----------------|
| 9 | 137676444 | 137676637 | 137676600 | 9   | 10  | 3 | 3.225884308 | 0.0139466   | GLT6D1   | ENSG00000204007 |
| 9 | 137757274 | 137757605 | 137757439 | 11  | 17  | 0 | 21.11487911 | 8.57E-07    | KCNT1    | ENSG00000107147 |
| 9 | 137829357 | 137829536 | 137829464 | 8   | 8   | 4 | 2.111487911 | 0.0804809   | CAMSAP1  | ENSG00000130559 |
| 9 | 137920438 | 137920928 | 137920648 | 18  | 26  | 4 | 6.334463732 | 2.40E-06    | CAMSAP1  | ENSG00000130559 |
| 9 | 137921981 | 137922165 | 137922107 | 8   | 8   | 4 | 2.111487911 | 0.0804809   | CAMSAP1  | ENSG00000130559 |
| 9 | 138093698 | 138093946 | 138093792 | 17  | 19  | 0 | 23.46097679 | 1.81E-07    | NACC2    | ENSG00000148411 |
| 9 | 138112907 | 138113303 | 138113086 | 11  | 18  | 6 | 3.183989707 | 0.00227432  | NACC2    | ENSG00000148411 |
| 9 | 138139971 | 138140503 | 138140232 | 54  | 75  | 6 | 12.73595883 | 2.24E-19    | NACC2    | ENSG00000148411 |
| 9 | 138140913 | 138141784 | 138141530 | 164 | 207 | 7 | 30.49926982 | 4.07E-60    | NACC2    | ENSG00000148411 |
| 9 | 138149458 | 138149759 | 138149608 | 8   | 9   | 0 | 11.73048839 | 0.000425898 | NACC2    | ENSG00000148411 |
| 9 | 138499342 | 138499567 | 138499434 | 8   | 10  | 4 | 2.580707446 | 0.0306059   | C9orf163 | ENSG00000196366 |
| 9 | 138559035 | 138559276 | 138559155 | 8   | 9   | 2 | 3.910162798 | 0.00955088  | NOTCH1   | ENSG00000148400 |
| 9 | 138564427 | 138565369 | 138564886 | 191 | 257 | 3 | 75.66165014 | 5.06E-82    | NOTCH1   | ENSG00000148400 |
| 9 | 138565600 | 138565959 | 138565772 | 18  | 23  | 4 | 5.630634429 | 1.63E-05    | NOTCH1   | ENSG00000148400 |
| 9 | 138615913 | 138616269 | 138616091 | 16  | 21  | 2 | 8.602358155 | 3.33E-06    |          | ENSG00000203275 |
| 9 | 138636819 | 138637286 | 138637078 | 39  | 55  | 3 | 16.42268375 | 7.12E-16    |          | ENSG00000203275 |
| 9 | 138637368 | 138637694 | 138637531 | 25  | 30  | 3 | 9.091128505 | 3.63E-08    |          | ENSG00000203275 |
| 9 | 138638056 | 138638454 | 138638275 | 20  | 29  | 3 | 8.797866295 | 7.21E-08    |          | ENSG00000203275 |
| 9 | 138645755 | 138645986 | 138645870 | 11  | 11  | 3 | 3.519146518 | 0.00788869  |          | ENSG00000203275 |
| 9 | 138688519 | 138688714 | 138688616 | 8   | 9   | 1 | 5.865244197 | 0.00272497  |          | ENSG00000199161 |
| 9 | 138693780 | 138694197 | 138694018 | 14  | 21  | 1 | 12.90353723 | 4.95E-07    | AGPAT2   | ENSG00000169692 |
| 9 | 138709706 | 138710068 | 138709967 | 10  | 15  | 2 | 6.256260476 | 0.000199274 |          | ENSG00000221693 |
| 9 | 138741086 | 138741331 | 138741208 | 9   | 11  | 1 | 7.038293036 | 0.000674435 |          | ENSG00000212487 |
| 9 | 138775189 | 138775468 | 138775365 | 11  | 12  | 2 | 5.083211637 | 0.00143337  | LCN8     | ENSG00000204001 |
| 9 | 138805845 | 138806082 | 138805980 | 10  | 12  | 1 | 7.624817456 | 0.000332769 | TMEM141  | ENSG00000221865 |
| 9 | 138863335 | 138863956 | 138863777 | 75  | 96  | 3 | 28.44643435 | 5.26E-29    | PHPT1    | ENSG00000054148 |
| 9 | 139082083 | 139082285 | 139082226 | 9   | 9   | 3 | 2.932622098 | 0.0242899   | C9orf140 | ENSG00000186193 |
| 9 | 139215073 | 139215317 | 139215195 | 9   | 10  | 0 | 12.90353723 | 0.000195991 | C9orf75  | ENSG00000176058 |
| 9 | 139240198 | 139240722 | 139240435 | 19  | 31  | 3 | 9.384390715 | 1.82E-08    | C9orf169 | ENSG00000197191 |
| 9 | 139241805 | 139242029 | 139241917 | 8   | 10  | 1 | 6.451768616 | 0.00135978  |          | ENSG00000189110 |
| 9 | 139437391 | 139437616 | 139437516 | 10  | 10  | 3 | 3.225884308 | 0.0139466   |          | ENSG00000187609 |
| 9 | 139496308 | 139496556 | 139496453 | 8   | 10  | 2 | 4.301179077 | 0.00512919  | NELF     | ENSG00000165802 |
| 9 | 139549116 | 139549658 | 139549532 | 9   | 20  | 7 | 3.079253203 | 0.00177418  | PNPLA7   | ENSG00000130653 |
| 9 | 139564616 | 139564826 | 139564731 | 12  | 12  | 3 | 3.812408728 | 0.004404    | PNPLA7   | ENSG00000130653 |

|    |           |           |           |     |      |       |             |             |         |                 |
|----|-----------|-----------|-----------|-----|------|-------|-------------|-------------|---------|-----------------|
| 9  | 139568413 | 139568673 | 139568499 | 8   | 11   | 3     | 3.519146518 | 0.00788869  | MRPL41  | ENSG00000182154 |
| 9  | 139626256 | 139626465 | 139626325 | 8   | 9    | 5     | 1.955081399 | 0.0892323   | ARRDC1  | ENSG00000197070 |
| 9  | 139626560 | 139626864 | 139626712 | 14  | 16   | 2     | 6.647276756 | 0.000101928 | C9orf37 | ENSG00000203993 |
| 9  | 139734986 | 139735273 | 139735147 | 9   | 11   | 1     | 7.038293036 | 0.000674435 | EHMT1   | ENSG00000181090 |
| 9  | 139996598 | 139996844 | 139996742 | 12  | 14   | 7     | 2.199466574 | 0.0303778   | CACNA1B | ENSG00000148408 |
| MT | 1         | 7326      | 280       | 385 | 4529 | 8248  | 0.644188537 |             | 1       | ENSG00000223073 |
| MT | 7344      | 16711     | 16168     | 622 | 8536 | 15727 | 0.636719096 |             | 1       | ENSG00000210196 |
| X  | 3304285   | 3304485   | 3304366   | 15  | 15   | 0     | 18.76878143 | 4.04E-06    |         | ENSG00000215325 |
| X  | 3398403   | 3398582   | 3398492   | 8   | 8    | 2     | 3.519146518 | 0.017558    |         | ENSG00000212214 |
| X  | 4638589   | 4639043   | 4638817   | 148 | 173  | 0     | 204.110498  | 2.24E-59    |         | ENSG00000222834 |
| X  | 6657684   | 6657944   | 6657814   | 12  | 12   | 1     | 7.624817456 | 0.000332769 | VCX3A   | ENSG00000169059 |
| X  | 7060457   | 7060679   | 7060550   | 10  | 11   | 6     | 2.010940867 | 0.0640214   | HDHD1A  | ENSG00000130021 |
| X  | 7529476   | 7529790   | 7529633   | 10  | 11   | 1     | 7.038293036 | 0.000674435 | VCX     | ENSG00000182583 |
| X  | 7625007   | 7625333   | 7625179   | 18  | 21   | 0     | 25.80707446 | 3.84E-08    | VCX     | ENSG00000182583 |
| X  | 7639271   | 7639555   | 7639403   | 9   | 9    | 2     | 3.910162798 | 0.00955088  | VCX     | ENSG00000182583 |
| X  | 9390922   | 9391359   | 9391231   | 11  | 20   | 0     | 24.63402563 | 8.35E-08    | TBL1X   | ENSG00000101849 |
| X  | 9979945   | 9980214   | 9980057   | 12  | 12   | 1     | 7.624817456 | 0.000332769 |         | ENSG00000202469 |
| X  | 10195859  | 10196102  | 10195980  | 10  | 11   | 0     | 14.07658607 | 9.02E-05    |         | ENSG00000222133 |
| X  | 10689579  | 10689861  | 10689740  | 15  | 18   | 0     | 22.28792795 | 3.94E-07    | MID1    | ENSG00000101871 |
| X  | 11678293  | 11678497  | 11678361  | 9   | 10   | 0     | 12.90353723 | 0.000195991 | MSL3    | ENSG00000005302 |
| X  | 12630583  | 12630969  | 12630836  | 8   | 12   | 0     | 15.24963491 | 4.15E-05    | PRPS2   | ENSG00000101911 |
| X  | 13597268  | 13597493  | 13597391  | 9   | 9    | 0     | 11.73048839 | 0.000425898 |         | ENSG00000176896 |
| X  | 15380131  | 15380380  | 15380231  | 9   | 12   | 0     | 15.24963491 | 4.15E-05    | BMX     | ENSG00000102010 |
| X  | 15493262  | 15493514  | 15493361  | 9   | 11   | 4     | 2.815317214 | 0.0183428   | ACE2    | ENSG00000130234 |
| X  | 15718468  | 15718731  | 15718608  | 9   | 10   | 1     | 6.451768616 | 0.00135978  | ZRSR2   | ENSG00000169249 |
| X  | 16532997  | 16533330  | 16533163  | 17  | 20   | 1     | 12.31701281 | 1.03E-06    |         | ENSG00000222290 |
| X  | 16548977  | 16549298  | 16549146  | 8   | 10   | 0     | 12.90353723 | 0.000195991 |         | ENSG00000222290 |
| X  | 16590459  | 16590853  | 16590606  | 10  | 18   | 7     | 2.785990993 | 0.00480525  | S100G   | ENSG00000169906 |
| X  | 16699713  | 16700191  | 16700026  | 11  | 19   | 6     | 3.351568112 | 0.00134187  | CXorf15 | ENSG00000086712 |
| X  | 17475740  | 17476182  | 17475918  | 27  | 39   | 5     | 7.820325595 | 2.05E-09    |         | ENSG00000221408 |
| X  | 17542249  | 17542461  | 17542407  | 8   | 9    | 1     | 5.865244197 | 0.00272497  | NHS     | ENSG00000188158 |
| X  | 17635779  | 17636015  | 17635897  | 11  | 14   | 4     | 3.519146518 | 0.00361132  |         | ENSG00000217991 |
| X  | 17716517  | 17716904  | 17716729  | 9   | 13   | 3     | 4.105670938 | 0.00243034  |         | ENSG00000217287 |
| X  | 17938277  | 17938542  | 17938397  | 8   | 10   | 0     | 12.90353723 | 0.000195991 |         | ENSG00000218530 |

|   |          |          |          |    |     |   |             |             |           |                 |
|---|----------|----------|----------|----|-----|---|-------------|-------------|-----------|-----------------|
| X | 18721743 | 18722073 | 18721913 | 32 | 35  | 0 | 42.22975822 | 7.34E-13    |           | ENSG00000203503 |
| X | 19545690 | 19545869 | 19545779 | 9  | 9   | 0 | 11.73048839 | 0.000425898 | SH3KBP1   | ENSG00000147010 |
| X | 19835948 | 19836254 | 19836090 | 13 | 14  | 1 | 8.797866295 | 8.00E-05    | SH3KBP1   | ENSG00000147010 |
| X | 21767488 | 21767706 | 21767612 | 9  | 11  | 5 | 2.346097679 | 0.0364013   | MBTPS2    | ENSG00000012174 |
| X | 21902074 | 21902317 | 21902195 | 12 | 13  | 5 | 2.737113958 | 0.0137917   | SMS       | ENSG00000102172 |
| X | 22046201 | 22046393 | 22046297 | 8  | 8   | 1 | 5.278719777 | 0.00542188  | PHEX      | ENSG00000102174 |
| X | 22603157 | 22603406 | 22603281 | 8  | 9   | 0 | 11.73048839 | 0.000425898 |           | ENSG00000216582 |
| X | 23432266 | 23432500 | 23432387 | 10 | 11  | 2 | 4.692195357 | 0.00272444  |           | ENSG00000210537 |
| X | 23725486 | 23725715 | 23725603 | 9  | 10  | 1 | 6.451768616 | 0.00135978  | SAT1      | ENSG00000130066 |
| X | 24419830 | 24420082 | 24419956 | 9  | 9   | 1 | 5.865244197 | 0.00272497  |           | ENSG00000214124 |
| X | 24621523 | 24621755 | 24621625 | 8  | 10  | 3 | 3.225884308 | 0.0139466   | POLA1     | ENSG00000101868 |
| X | 24692508 | 24692742 | 24692625 | 8  | 9   | 1 | 5.865244197 | 0.00272497  |           | ENSG00000212474 |
| X | 27114746 | 27115016 | 27114841 | 9  | 11  | 0 | 14.07658607 | 9.02E-05    |           | ENSG00000219551 |
| X | 27362164 | 27362379 | 27362278 | 8  | 8   | 2 | 3.519146518 | 0.017558    |           | ENSG00000219351 |
| X | 30717243 | 30717521 | 30717405 | 8  | 9   | 0 | 11.73048839 | 0.000425898 | MAP3K7IP3 | ENSG00000157625 |
| X | 30719479 | 30720056 | 30719780 | 25 | 54  | 2 | 21.50589539 | 1.39E-16    | MAP3K7IP3 | ENSG00000157625 |
| X | 30720343 | 30720711 | 30720535 | 11 | 17  | 0 | 21.11487911 | 8.57E-07    | MAP3K7IP3 | ENSG00000157625 |
| X | 30721689 | 30721878 | 30721760 | 10 | 10  | 0 | 12.90353723 | 0.000195991 | MAP3K7IP3 | ENSG00000157625 |
| X | 30723686 | 30724047 | 30723820 | 11 | 17  | 1 | 10.55743955 | 9.18E-06    | MAP3K7IP3 | ENSG00000157625 |
| X | 30724067 | 30724627 | 30724306 | 19 | 33  | 2 | 13.29455351 | 6.68E-10    | MAP3K7IP3 | ENSG00000157625 |
| X | 30725347 | 30725557 | 30725452 | 8  | 8   | 1 | 5.278719777 | 0.00542188  | MAP3K7IP3 | ENSG00000157625 |
| X | 30726736 | 30727211 | 30727011 | 42 | 55  | 1 | 32.8453675  | 4.16E-18    | MAP3K7IP3 | ENSG00000157625 |
| X | 30727333 | 30727842 | 30727679 | 26 | 38  | 0 | 45.74890473 | 7.15E-14    | MAP3K7IP3 | ENSG00000157625 |
| X | 30728301 | 30729677 | 30729092 | 41 | 105 | 1 | 62.17158848 | 1.09E-34    | MAP3K7IP3 | ENSG00000157625 |
| X | 30730390 | 30730591 | 30730521 | 8  | 8   | 0 | 10.55743955 | 0.000925496 | MAP3K7IP3 | ENSG00000157625 |
| X | 30731448 | 30731777 | 30731620 | 10 | 15  | 0 | 18.76878143 | 4.04E-06    | MAP3K7IP3 | ENSG00000157625 |
| X | 30734147 | 30734552 | 30734286 | 10 | 14  | 2 | 5.865244197 | 0.000387308 | MAP3K7IP3 | ENSG00000157625 |
| X | 30817570 | 30817832 | 30817701 | 9  | 10  | 1 | 6.451768616 | 0.00135978  | MAP3K7IP3 | ENSG00000157625 |
| X | 30823317 | 30823564 | 30823393 | 8  | 11  | 3 | 3.519146518 | 0.00788869  | MAP3K7IP3 | ENSG00000157625 |
| X | 30832670 | 30833072 | 30832875 | 14 | 24  | 2 | 9.775406994 | 4.09E-07    | MAP3K7IP3 | ENSG00000157625 |
| X | 33088379 | 33088736 | 33088455 | 14 | 19  | 0 | 23.46097679 | 1.81E-07    | DMD       | ENSG00000198947 |
| X | 33884426 | 33884762 | 33884594 | 20 | 26  | 2 | 10.55743955 | 9.97E-08    | FAM47A    | ENSG00000185448 |
| X | 34487528 | 34487768 | 34487648 | 9  | 12  | 0 | 15.24963491 | 4.15E-05    |           | ENSG00000222668 |
| X | 38545166 | 38545502 | 38545328 | 8  | 11  | 4 | 2.815317214 | 0.0183428   | MID1IP1   | ENSG00000165175 |

|   |          |          |          |    |     |    |             |             |         |                 |
|---|----------|----------|----------|----|-----|----|-------------|-------------|---------|-----------------|
| X | 39699574 | 39699759 | 39699710 | 8  | 8   | 1  | 5.278719777 | 0.00542188  |         | ENSG00000214047 |
| X | 40158623 | 40158841 | 40158732 | 10 | 11  | 2  | 4.692195357 | 0.00272444  |         | ENSG00000214045 |
| X | 40262384 | 40262591 | 40262528 | 11 | 11  | 2  | 4.692195357 | 0.00272444  |         | ENSG00000216880 |
| X | 40937126 | 40937425 | 40937305 | 14 | 17  | 4  | 4.222975822 | 0.000640773 |         | ENSG00000199564 |
| X | 41704340 | 41704607 | 41704473 | 11 | 11  | 1  | 7.038293036 | 0.000674435 | CASK    | ENSG00000147044 |
| X | 42664867 | 42665165 | 42665016 | 14 | 14  | 0  | 17.59573259 | 8.79E-06    |         | ENSG00000102055 |
| X | 42720921 | 42721472 | 42721124 | 31 | 45  | 1  | 26.9801233  | 8.07E-15    |         | ENSG00000102055 |
| X | 42920869 | 42921165 | 42921005 | 9  | 13  | 0  | 16.42268375 | 1.91E-05    |         | ENSG00000220898 |
| X | 44159959 | 44160154 | 44160046 | 8  | 8   | 0  | 10.55743955 | 0.000925496 |         | ENSG00000200702 |
| X | 44419621 | 44419863 | 44419746 | 12 | 13  | 1  | 8.211341875 | 0.000163445 |         | ENSG00000214017 |
| X | 44719893 | 44720143 | 44720018 | 18 | 21  | 0  | 25.80707446 | 3.84E-08    |         | ENSG00000203505 |
| X | 46419226 | 46419557 | 46419386 | 19 | 22  | 0  | 26.9801233  | 1.77E-08    |         | ENSG00000219718 |
| X | 46703132 | 46703506 | 46703298 | 27 | 32  | 0  | 38.7106117  | 7.53E-12    | PHF16   | ENSG00000102221 |
| X | 47560169 | 47560612 | 47560435 | 47 | 62  | 0  | 73.90207688 | 5.82E-22    | WASF4   | ENSG00000188459 |
| X | 47563207 | 47563721 | 47563478 | 14 | 24  | 0  | 29.32622098 | 3.74E-09    | ZNF81   | ENSG00000197779 |
| X | 48374768 | 48375087 | 48374927 | 10 | 12  | 0  | 15.24963491 | 4.15E-05    |         | ENSG00000216287 |
| X | 48659444 | 48659744 | 48659605 | 14 | 14  | 1  | 8.797866295 | 8.00E-05    | PIM2    | ENSG00000102096 |
| X | 50297708 | 50297888 | 50297798 | 8  | 9   | 1  | 5.865244197 | 0.00272497  | DGKK    | ENSG00000204466 |
| X | 53427135 | 53427597 | 53427397 | 27 | 39  | 2  | 15.64065119 | 8.61E-12    | SMC1A   | ENSG00000072501 |
| X | 55952100 | 55952308 | 55952200 | 8  | 9   | 0  | 11.73048839 | 0.000425898 |         | ENSG00000220365 |
| X | 56009115 | 56009523 | 56009293 | 9  | 15  | 3  | 4.692195357 | 0.000718455 |         | ENSG00000220365 |
| X | 58507445 | 58507774 | 58507609 | 14 | 14  | 7  | 2.199466574 | 0.0303778   |         | ENSG00000219753 |
| X | 58568337 | 58568665 | 58568501 | 13 | 13  | 10 | 1.49297125  | 0.157311    |         |                 |
| X | 58577958 | 58578289 | 58578131 | 23 | 23  | 34 | 0.804376347 | 0.799304    |         |                 |
| X | 61676849 | 61677183 | 61677016 | 34 | 34  | 39 | 1.026417734 | 0.457358    |         | ENSG00000216395 |
| X | 61755870 | 61756199 | 61756034 | 24 | 24  | 43 | 0.666505022 | 0.951744    |         | ENSG00000216395 |
| X | 62540942 | 62541228 | 62541055 | 21 | 23  | 1  | 14.07658607 | 1.14E-07    | SPIN4   | ENSG00000186767 |
| X | 63342434 | 63342676 | 63342505 | 8  | 9   | 5  | 1.955081399 | 0.0892323   | FAM123B | ENSG00000184675 |
| X | 65774949 | 65775589 | 65775263 | 92 | 141 | 2  | 55.52431173 | 4.15E-45    | EDA2R   | ENSG00000131080 |
| X | 67258821 | 67259021 | 67258966 | 8  | 9   | 0  | 11.73048839 | 0.000425898 |         | ENSG00000216699 |
| X | 69247753 | 69248079 | 69247903 | 21 | 23  | 0  | 28.15317214 | 8.13E-09    |         | ENSG00000219613 |
| X | 70669401 | 70669695 | 70669548 | 11 | 14  | 3  | 4.398933147 | 0.00132748  | OGT     | ENSG00000147162 |
| X | 71263237 | 71263639 | 71263401 | 13 | 21  | 0  | 25.80707446 | 3.84E-08    | NHSL2   | ENSG00000204131 |
| X | 71413739 | 71413963 | 71413851 | 9  | 10  | 0  | 12.90353723 | 0.000195991 | RPS4X   | ENSG00000198034 |

|   |           |           |           |    |     |   |             |             |          |                 |
|---|-----------|-----------|-----------|----|-----|---|-------------|-------------|----------|-----------------|
| X | 72508198  | 72508547  | 72508420  | 11 | 15  | 0 | 18.76878143 | 4.04E-06    |          | ENSG00000207486 |
| X | 77234500  | 77234778  | 77234639  | 10 | 11  | 0 | 14.07658607 | 9.02E-05    | PGK1     | ENSG00000102144 |
| X | 82035144  | 82035478  | 82035307  | 9  | 11  | 0 | 14.07658607 | 9.02E-05    |          | ENSG00000217962 |
| X | 83876685  | 83877013  | 83876856  | 30 | 34  | 0 | 41.05670938 | 1.59E-12    |          | ENSG00000219196 |
| X | 84145403  | 84145617  | 84145486  | 8  | 9   | 3 | 2.932622098 | 0.0242899   | APOOL    | ENSG00000155008 |
| X | 86407187  | 86407531  | 86407360  | 17 | 22  | 0 | 26.9801233  | 1.77E-08    |          | ENSG00000200422 |
| X | 93502504  | 93502967  | 93502781  | 28 | 41  | 1 | 24.63402563 | 1.65E-13    |          | ENSG00000209165 |
| X | 93542179  | 93542630  | 93542356  | 46 | 63  | 1 | 37.53756286 | 9.51E-21    |          | ENSG00000209165 |
| X | 93995992  | 93996171  | 93996081  | 8  | 8   | 3 | 2.639359888 | 0.0415794   |          | ENSG00000221665 |
| X | 94433194  | 94433552  | 94433373  | 32 | 38  | 1 | 22.87445237 | 1.58E-12    |          | ENSG00000212098 |
| X | 95323133  | 95323327  | 95323230  | 8  | 8   | 0 | 10.55743955 | 0.000925496 |          | ENSG00000218262 |
| X | 95548767  | 95549058  | 95548906  | 12 | 13  | 2 | 5.474227917 | 0.000747844 |          | ENSG00000209276 |
| X | 96664656  | 96664843  | 96664749  | 8  | 8   | 0 | 10.55743955 | 0.000925496 |          | ENSG00000209212 |
| X | 97506901  | 97507089  | 97506995  | 9  | 9   | 0 | 11.73048839 | 0.000425898 |          | ENSG00000217946 |
| X | 99756666  | 99757244  | 99756954  | 94 | 113 | 5 | 22.28792795 | 3.26E-32    | TSPAN6   | ENSG00000000003 |
| X | 99961729  | 99962198  | 99962059  | 11 | 18  | 2 | 7.429309316 | 2.63E-05    | CSTF2    | ENSG00000101811 |
| X | 100138237 | 100138491 | 100138358 | 11 | 11  | 1 | 7.038293036 | 0.000674435 | ARL13A   | ENSG00000174225 |
| X | 100532469 | 100532956 | 100532777 | 9  | 19  | 3 | 5.865244197 | 5.72E-05    | HNRNPH2  | ENSG00000126945 |
| X | 102583526 | 102583861 | 102583697 | 13 | 17  | 0 | 21.11487911 | 8.57E-07    | RAB40A   | ENSG00000172476 |
| X | 102771146 | 102771440 | 102771293 | 8  | 9   | 0 | 11.73048839 | 0.000425898 | TCEAL1   | ENSG00000172465 |
| X | 102840905 | 102841167 | 102841036 | 8  | 10  | 2 | 4.301179077 | 0.00512919  | MORF4L2  | ENSG00000123562 |
| X | 102986719 | 102986951 | 102986835 | 9  | 10  | 6 | 1.843362462 | 0.0964212   |          | ENSG00000208948 |
| X | 103288094 | 103288279 | 103288140 | 8  | 8   | 1 | 5.278719777 | 0.00542188  | MCART6   | ENSG00000176274 |
| X | 103563731 | 103564091 | 103563912 | 9  | 15  | 6 | 2.68125449  | 0.0103552   | IL1RAPL2 | ENSG00000189108 |
| X | 104053510 | 104053856 | 104053683 | 8  | 14  | 1 | 8.797866295 | 8.00E-05    |          | ENSG00000219091 |
| X | 104149014 | 104149351 | 104149176 | 16 | 21  | 0 | 25.80707446 | 3.84E-08    | TEX13A   | ENSG00000133149 |
| X | 104268288 | 104268480 | 104268384 | 10 | 10  | 1 | 6.451768616 | 0.00135978  | TEX13A   | ENSG00000133149 |
| X | 106419659 | 106419848 | 106419706 | 8  | 9   | 0 | 11.73048839 | 0.000425898 | MYCL2    | ENSG00000204053 |
| X | 106490788 | 106491188 | 106491009 | 8  | 14  | 2 | 5.865244197 | 0.000387308 |          | ENSG00000215007 |
| X | 106502466 | 106502647 | 106502518 | 9  | 9   | 1 | 5.865244197 | 0.00272497  |          | ENSG00000215007 |
| X | 106569405 | 106569617 | 106569511 | 12 | 12  | 1 | 7.624817456 | 0.000332769 |          | ENSG00000207846 |
| X | 106623159 | 106623384 | 106623254 | 9  | 11  | 0 | 14.07658607 | 9.02E-05    | FRMPD3   | ENSG00000147234 |
| X | 106855725 | 106856146 | 106856013 | 8  | 14  | 4 | 3.519146518 | 0.00361132  | TSC22D3  | ENSG00000157514 |
| X | 107130682 | 107131168 | 107130957 | 51 | 68  | 0 | 80.94036991 | 5.52E-24    | TEX13B   | ENSG00000170925 |

|   |           |           |           |    |    |    |             |             |          |                 |
|---|-----------|-----------|-----------|----|----|----|-------------|-------------|----------|-----------------|
| X | 107131243 | 107131564 | 107131401 | 11 | 15 | 3  | 4.692195357 | 0.000718455 | TEX13B   | ENSG00000170925 |
| X | 107252453 | 107252708 | 107252580 | 9  | 10 | 1  | 6.451768616 | 0.00135978  | ATG4A    | ENSG00000101844 |
| X | 107252720 | 107253120 | 107252920 | 64 | 76 | 1  | 45.16238031 | 4.73E-25    | ATG4A    | ENSG00000101844 |
| X | 107400087 | 107400560 | 107400342 | 48 | 60 | 1  | 35.7779896  | 9.32E-20    |          | ENSG00000189372 |
| X | 107442843 | 107443241 | 107443062 | 41 | 49 | 1  | 29.32622098 | 3.92E-16    |          | ENSG00000189372 |
| X | 107646049 | 107646553 | 107646387 | 25 | 35 | 0  | 42.22975822 | 7.34E-13    | COL4A5   | ENSG00000188153 |
| X | 108183913 | 108184249 | 108184081 | 21 | 24 | 23 | 1.221925874 | 0.24208     |          | ENSG00000208893 |
| X | 108184256 | 108184641 | 108184463 | 29 | 33 | 35 | 1.107879459 | 0.335679    |          | ENSG00000219692 |
| X | 108666624 | 108666917 | 108666749 | 12 | 15 | 1  | 9.384390715 | 3.90E-05    | NXT2     | ENSG00000101888 |
| X | 108893553 | 108894223 | 108893888 | 13 | 28 | 1  | 17.00920817 | 2.80E-09    | ACSL4    | ENSG00000068366 |
| X | 109135066 | 109135285 | 109135189 | 9  | 11 | 1  | 7.038293036 | 0.000674435 | TMEM164  | ENSG00000157600 |
| X | 109142774 | 109142959 | 109142866 | 8  | 8  | 3  | 2.639359888 | 0.0415794   | TMEM164  | ENSG00000157600 |
| X | 109303198 | 109303533 | 109303365 | 14 | 20 | 1  | 12.31701281 | 1.03E-06    |          | ENSG00000212738 |
| X | 109543099 | 109543315 | 109543181 | 8  | 8  | 5  | 1.759573259 | 0.13508     | RGAG1    | ENSG00000181110 |
| X | 109552724 | 109552956 | 109552815 | 11 | 13 | 1  | 8.211341875 | 0.000163445 | RGAG1    | ENSG00000181110 |
| X | 113058620 | 113058832 | 113058726 | 8  | 8  | 0  | 10.55743955 | 0.000925496 |          | ENSG00000201674 |
| X | 113200927 | 113201270 | 113201099 | 18 | 23 | 0  | 28.15317214 | 8.13E-09    |          | ENSG00000212611 |
| X | 113401295 | 113401588 | 113401469 | 9  | 13 | 0  | 16.42268375 | 1.91E-05    |          | ENSG00000219648 |
| X | 113485528 | 113485763 | 113485618 | 8  | 8  | 0  | 10.55743955 | 0.000925496 |          | ENSG00000219648 |
| X | 114115880 | 114116079 | 114115979 | 8  | 8  | 3  | 2.639359888 | 0.0415794   | IL13RA2  | ENSG00000123496 |
| X | 114820122 | 114820362 | 114820281 | 11 | 12 | 1  | 7.624817456 | 0.000332769 | ASSP5    | ENSG00000218981 |
| X | 114923369 | 114923717 | 114923543 | 8  | 14 | 2  | 5.865244197 | 0.000387308 |          | ENSG00000188612 |
| X | 115768033 | 115768410 | 115768199 | 49 | 55 | 1  | 32.8453675  | 4.16E-18    |          | ENSG00000217238 |
| X | 117608844 | 117609074 | 117608959 | 9  | 9  | 2  | 3.910162798 | 0.00955088  |          | ENSG00000206862 |
| X | 118033520 | 118033744 | 118033640 | 8  | 11 | 3  | 3.519146518 | 0.00788869  | LONRF3   | ENSG00000175556 |
| X | 118112286 | 118112664 | 118112490 | 10 | 16 | 2  | 6.647276756 | 0.000101928 | KIAA1210 | ENSG00000175553 |
| X | 118419524 | 118419725 | 118419672 | 8  | 10 | 1  | 6.451768616 | 0.00135978  | SLC25A43 | ENSG00000077713 |
| X | 118477682 | 118478022 | 118477845 | 25 | 29 | 2  | 11.73048839 | 1.18E-08    | SLC25A5  | ENSG00000005022 |
| X | 118961574 | 118961931 | 118961828 | 15 | 20 | 4  | 4.926805125 | 0.00010522  | NKAP     | ENSG00000101882 |
| X | 119263067 | 119263274 | 119263173 | 14 | 14 | 1  | 8.797866295 | 8.00E-05    | ZBTB33   | ENSG00000177485 |
| X | 119808045 | 119808233 | 119808167 | 9  | 9  | 3  | 2.932622098 | 0.0242899   |          | ENSG00000181511 |
| X | 119975057 | 119975482 | 119975269 | 38 | 50 | 1  | 29.9127454  | 1.84E-16    |          | ENSG00000215359 |
| X | 119975498 | 119975856 | 119975677 | 14 | 20 | 3  | 6.158506406 | 2.99E-05    |          | ENSG00000215359 |
| X | 120784955 | 120785362 | 120785165 | 30 | 39 | 0  | 46.92195357 | 3.29E-14    |          | ENSG00000213498 |

|   |           |           |           |     |     |   |             |             |           |                 |
|---|-----------|-----------|-----------|-----|-----|---|-------------|-------------|-----------|-----------------|
| X | 121200386 | 121200592 | 121200489 | 9   | 9   | 0 | 11.73048839 | 0.000425898 |           | ENSG00000219462 |
| X | 121527598 | 121527779 | 121527688 | 8   | 9   | 2 | 3.910162798 | 0.00955088  |           | ENSG00000217270 |
| X | 122393916 | 122394100 | 122394012 | 8   | 8   | 2 | 3.519146518 | 0.017558    |           | ENSG00000179101 |
| X | 122438379 | 122438615 | 122438491 | 9   | 10  | 0 | 12.90353723 | 0.000195991 |           | ENSG00000179101 |
| X | 122531606 | 122531846 | 122531724 | 13  | 14  | 1 | 8.797866295 | 8.00E-05    |           | ENSG00000207655 |
| X | 122694746 | 122694925 | 122694784 | 8   | 8   | 4 | 2.111487911 | 0.0804809   | THOC2     | ENSG00000125676 |
| X | 122764918 | 122765304 | 122765093 | 12  | 18  | 9 | 2.228792795 | 0.0164363   |           | ENSG00000213737 |
| X | 122780018 | 122780229 | 122780084 | 8   | 8   | 2 | 3.519146518 | 0.017558    |           | ENSG00000213737 |
| X | 122794990 | 122795178 | 122795084 | 10  | 10  | 4 | 2.580707446 | 0.0306059   |           | ENSG00000199705 |
| X | 128450093 | 128450272 | 128450182 | 9   | 9   | 1 | 5.865244197 | 0.00272497  | SMARCA1   | ENSG00000102038 |
| X | 128468405 | 128468715 | 128468561 | 30  | 30  | 0 | 36.36451402 | 3.56E-11    | SMARCA1   | ENSG00000102038 |
| X | 128568656 | 128568927 | 128568788 | 9   | 10  | 1 | 6.451768616 | 0.00135978  | APLN      | ENSG00000171388 |
| X | 128933756 | 128934024 | 128933876 | 11  | 12  | 1 | 7.624817456 | 0.000332769 | BCORL1    | ENSG00000085185 |
| X | 128943758 | 128944369 | 128943914 | 9   | 21  | 5 | 4.301179077 | 0.000172642 | BCORL1    | ENSG00000085185 |
| X | 129127672 | 129127970 | 129127828 | 8   | 9   | 3 | 2.932622098 | 0.0242899   | AIFM1     | ENSG00000156709 |
| X | 130527653 | 130527903 | 130527778 | 12  | 15  | 0 | 18.76878143 | 4.04E-06    |           | ENSG00000219078 |
| X | 130569539 | 130570036 | 130569742 | 38  | 49  | 1 | 29.32622098 | 3.92E-16    |           | ENSG00000219221 |
| X | 131143080 | 131143298 | 131143200 | 8   | 8   | 1 | 5.278719777 | 0.00542188  | RAP2C     | ENSG00000123728 |
| X | 131150038 | 131150373 | 131150211 | 22  | 26  | 0 | 31.67231866 | 7.93E-10    | RAP2C     | ENSG00000123728 |
| X | 131168165 | 131168345 | 131168237 | 9   | 9   | 1 | 5.865244197 | 0.00272497  | RAP2C     | ENSG00000123728 |
| X | 131181049 | 131181255 | 131181178 | 8   | 8   | 4 | 2.111487911 | 0.0804809   | RAP2C     | ENSG00000123728 |
| X | 131232975 | 131233236 | 131233076 | 11  | 12  | 2 | 5.083211637 | 0.00143337  | RAP2C     | ENSG00000123728 |
| X | 131574770 | 131575025 | 131574884 | 9   | 10  | 1 | 6.451768616 | 0.00135978  |           | ENSG00000206900 |
| X | 131839875 | 131840329 | 131840117 | 110 | 130 | 0 | 153.669398  | 6.98E-45    |           | ENSG00000218958 |
| X | 131916153 | 131916393 | 131916273 | 12  | 13  | 2 | 5.474227917 | 0.000747844 | HS6ST2    | ENSG00000171004 |
| X | 132238688 | 132238950 | 132238793 | 10  | 13  | 1 | 8.211341875 | 0.000163445 |           | ENSG00000202199 |
| X | 132747955 | 132748480 | 132748301 | 32  | 43  | 0 | 51.61414893 | 1.48E-15    |           | ENSG00000219153 |
| X | 132754220 | 132754509 | 132754359 | 13  | 16  | 2 | 6.647276756 | 0.000101928 |           | ENSG00000219153 |
| X | 133510132 | 133510329 | 133510260 | 8   | 8   | 4 | 2.111487911 | 0.0804809   |           | ENSG00000199097 |
| X | 133680005 | 133680225 | 133680104 | 8   | 10  | 0 | 12.90353723 | 0.000195991 |           | ENSG00000211558 |
| X | 134385144 | 134385469 | 134385306 | 13  | 16  | 0 | 19.94183027 | 1.86E-06    | NCRNA0008 | ENSG00000178947 |
| X | 134493424 | 134493603 | 134493518 | 8   | 8   | 0 | 10.55743955 | 0.000925496 | DDX26B    | ENSG00000165359 |
| X | 135790596 | 135790873 | 135790719 | 9   | 11  | 5 | 2.346097679 | 0.0364013   | RBMX      | ENSG00000147274 |
| X | 136211933 | 136212259 | 136212098 | 11  | 16  | 1 | 9.970915134 | 1.89E-05    |           | ENSG00000217721 |

|   |           |           |           |    |    |    |             |             |                             |
|---|-----------|-----------|-----------|----|----|----|-------------|-------------|-----------------------------|
| X | 136347948 | 136348265 | 136348108 | 23 | 24 | 38 | 0.751954384 | 0.872183    | ENSG00000134598             |
| X | 136411468 | 136411694 | 136411578 | 11 | 11 | 0  | 14.07658607 | 9.02E-05    | ENSG00000134598             |
| X | 136994961 | 136995286 | 136995131 | 16 | 19 | 0  | 23.46097679 | 1.81E-07    | ENSG00000208536             |
| X | 137680511 | 137680866 | 137680688 | 24 | 29 | 1  | 17.59573259 | 1.33E-09    | FGF13<br>ENSG00000129682    |
| X | 138590203 | 138590587 | 138590417 | 26 | 33 | 2  | 13.29455351 | 6.68E-10    | MCF2<br>ENSG00000101977     |
| X | 138735706 | 138735885 | 138735752 | 8  | 8  | 0  | 10.55743955 | 0.000925496 | ATP11C<br>ENSG00000101974   |
| X | 139402092 | 139402402 | 139402249 | 14 | 17 | 5  | 3.519146518 | 0.00167472  | SOX3<br>ENSG00000134595     |
| X | 139828290 | 139828533 | 139828362 | 8  | 9  | 0  | 11.73048839 | 0.000425898 | ENSG00000221081             |
| X | 141129679 | 141129882 | 141129778 | 9  | 9  | 1  | 5.865244197 | 0.00272497  | MAGEC2<br>ENSG00000046774   |
| X | 148517871 | 148518060 | 148517965 | 8  | 8  | 0  | 10.55743955 | 0.000925496 | TMEM185A<br>ENSG00000155984 |
| X | 148859254 | 148859472 | 148859369 | 8  | 9  | 2  | 3.910162798 | 0.00955088  | CXorf40B<br>ENSG00000197021 |
| X | 150010064 | 150010332 | 150010155 | 9  | 10 | 2  | 4.301179077 | 0.00512919  | ENSG00000212595             |
| X | 150462860 | 150463247 | 150463072 | 41 | 49 | 0  | 58.65244197 | 1.40E-17    | PASD1<br>ENSG00000166049    |
| X | 150895136 | 150895503 | 150895333 | 11 | 18 | 0  | 22.28792795 | 3.94E-07    | GABRE<br>ENSG00000102287    |
| X | 151814732 | 151815276 | 151814944 | 10 | 26 | 1  | 15.83615933 | 1.23E-08    | ZNF185<br>ENSG00000147394   |
| X | 152359924 | 152360423 | 152360157 | 72 | 94 | 4  | 22.28792795 | 3.15E-27    | TREX2<br>ENSG00000183479    |
| X | 152430498 | 152430737 | 152430617 | 10 | 10 | 0  | 12.90353723 | 0.000195991 | ATP2B3<br>ENSG00000067842   |
| X | 152586606 | 152586834 | 152586698 | 9  | 9  | 1  | 5.865244197 | 0.00272497  | ENSG00000208378             |
| X | 152682641 | 152682844 | 152682742 | 8  | 8  | 4  | 2.111487911 | 0.0804809   | PLXNB3<br>ENSG00000198753   |
| X | 152697415 | 152697735 | 152697582 | 22 | 26 | 1  | 15.83615933 | 1.23E-08    | SRPK3<br>ENSG00000184343    |
| X | 152845959 | 152846166 | 152846062 | 8  | 9  | 0  | 11.73048839 | 0.000425898 | ARHGAP4<br>ENSG00000089820  |
| X | 152957370 | 152957549 | 152957411 | 8  | 8  | 0  | 10.55743955 | 0.000925496 | MECP2<br>ENSG00000169057    |
| X | 153255133 | 153255391 | 153255252 | 15 | 15 | 3  | 4.692195357 | 0.000718455 | FLNA<br>ENSG00000196924     |
| X | 153407107 | 153407383 | 153407239 | 9  | 13 | 0  | 16.42268375 | 1.91E-05    | FAM3A<br>ENSG00000071889    |
| X | 153408203 | 153408803 | 153408618 | 28 | 55 | 7  | 8.211341875 | 1.10E-12    | FAM3A<br>ENSG00000071889    |
| X | 153423441 | 153423683 | 153423528 | 9  | 11 | 4  | 2.815317214 | 0.0183428   | IKBK<br>ENSG00000073009     |
| X | 154097762 | 154098111 | 154098000 | 8  | 12 | 1  | 7.624817456 | 0.000332769 | VBP1<br>ENSG00000155959     |
| X | 154703036 | 154703393 | 154703214 | 20 | 26 | 1  | 15.83615933 | 1.23E-08    | ENSG00000219128             |
| X | 154850789 | 154851432 | 154851245 | 28 | 48 | 0  | 57.47939313 | 3.05E-17    | ENSG00000220501             |
| Y | 10629205  | 10629716  | 10629538  | 32 | 50 | 57 | 1.031473979 | 0.437666    | ENSG00000219584             |
| Y | 10630430  | 10630819  | 10630642  | 18 | 25 | 27 | 1.089259637 | 0.378702    | ENSG00000219584             |
| Y | 10631179  | 10631451  | 10631315  | 9  | 9  | 11 | 0.977540699 | 0.526123    | ENSG00000218597             |
| Y | 10632298  | 10632642  | 10632470  | 39 | 42 | 32 | 1.528518185 | 0.0323191   | ENSG00000218597             |
| Y | 10633213  | 10633536  | 10633372  | 13 | 13 | 21 | 0.746485625 | 0.811212    | ENSG00000218597             |



|   |          |          |          |    |    |    |             |             |                 |
|---|----------|----------|----------|----|----|----|-------------|-------------|-----------------|
| Y | 10635033 | 10635411 | 10635233 | 19 | 24 | 32 | 0.888673363 | 0.675985    | ENSG00000218597 |
| Y | 10636559 | 10636756 | 10636657 | 10 | 12 | 12 | 1.173048839 | 0.343543    | ENSG00000218597 |
| Y | 10637386 | 10637716 | 10637551 | 14 | 15 | 21 | 0.853126429 | 0.691243    | ENSG00000218597 |
| Y | 10639374 | 10639831 | 10639654 | 41 | 53 | 53 | 1.173048839 | 0.204123    | ENSG00000218597 |
| Y | 10641281 | 10641805 | 10641560 | 10 | 20 | 22 | 1.071044592 | 0.412397    | ENSG00000218597 |
| Y | 10641810 | 10642158 | 10641985 | 14 | 18 | 11 | 1.857327329 | 0.0427732   | ENSG00000221022 |
| Y | 10643367 | 10643714 | 10643539 | 30 | 30 | 17 | 2.020250779 | 0.0073882   | ENSG00000221022 |
| Y | 10644897 | 10645245 | 10645066 | 32 | 37 | 32 | 1.350783512 | 0.102597    | ENSG00000223068 |
| Y | 10645298 | 10645635 | 10645466 | 24 | 27 | 17 | 1.824742639 | 0.0211436   | ENSG00000223068 |
| Y | 10645748 | 10646275 | 10646007 | 18 | 29 | 32 | 1.066408036 | 0.401409    | ENSG00000219313 |
| Y | 10646305 | 10646725 | 10646484 | 17 | 23 | 8  | 3.128130238 | 0.000832453 | ENSG00000219313 |
| Y | 10647615 | 10648027 | 10647848 | 65 | 82 | 55 | 1.738625958 | 0.000594936 | ENSG00000222088 |
| Y | 11243326 | 11243654 | 11243490 | 15 | 15 | 9  | 1.876878143 | 0.0544542   |                 |
| Y | 11247681 | 11248011 | 11247846 | 17 | 17 | 23 | 0.879786629 | 0.664328    |                 |
| Y | 11654845 | 11655123 | 11655012 | 9  | 10 | 3  | 3.225884308 | 0.0139466   | ENSG00000221738 |
| Y | 11911064 | 11911276 | 11911170 | 8  | 10 | 8  | 1.433726359 | 0.209175    | ENSG00000206163 |
| Y | 11918275 | 11918466 | 11918437 | 12 | 13 | 16 | 0.966040221 | 0.542489    | ENSG00000206163 |
| Y | 11920826 | 11921235 | 11921005 | 20 | 29 | 46 | 0.748754578 | 0.896605    | ENSG00000206161 |
| Y | 11925824 | 11926074 | 11925913 | 8  | 10 | 6  | 1.843362462 | 0.0964212   | ENSG00000206161 |
| Y | 11926668 | 11927003 | 11926832 | 12 | 13 | 4  | 3.28453675  | 0.00629037  | ENSG00000206161 |
| Y | 11927668 | 11928274 | 11927847 | 25 | 38 | 42 | 1.063928017 | 0.391421    | ENSG00000206161 |
| Y | 11928310 | 11928511 | 11928362 | 9  | 10 | 8  | 1.433726359 | 0.209175    | ENSG00000206161 |
| Y | 11941765 | 11942160 | 11942023 | 12 | 20 | 31 | 0.769813301 | 0.829881    | ENSG00000217642 |
| Y | 11944400 | 11944925 | 11944747 | 15 | 26 | 27 | 1.131154238 | 0.325317    | ENSG00000217642 |
| Y | 11945270 | 11945626 | 11945448 | 38 | 43 | 47 | 1.075294769 | 0.365563    | ENSG00000217642 |
| Y | 11948702 | 11949050 | 11948879 | 9  | 13 | 7  | 2.052835469 | 0.046392    | ENSG00000217642 |
| Y | 12128537 | 12128861 | 12128699 | 14 | 14 | 14 | 1.173048839 | 0.332418    | ENSG00000183704 |
| Y | 12312271 | 12312451 | 12312301 | 10 | 10 | 14 | 0.860235815 | 0.65444     | ENSG00000220799 |
| Y | 12323530 | 12323858 | 12323694 | 8  | 11 | 22 | 0.612025481 | 0.924393    | ENSG00000220799 |
| Y | 12327789 | 12328117 | 12327953 | 14 | 14 | 13 | 1.256838042 | 0.269506    | ENSG00000220799 |
| Y | 12334099 | 12334427 | 12334263 | 11 | 12 | 23 | 0.635401455 | 0.914098    | ENSG00000220799 |
| Y | 12361512 | 12361839 | 12361675 | 10 | 10 | 18 | 0.679133539 | 0.855647    | ENSG00000220799 |
| Y | 12372450 | 12372774 | 12372612 | 10 | 10 | 23 | 0.537647385 | 0.963335    | ENSG00000220799 |
| Y | 12372958 | 12373297 | 12373127 | 25 | 26 | 34 | 0.90492339  | 0.655516    | ENSG00000220799 |

|      |          |          |          |    |    |    |             |          |                 |
|------|----------|----------|----------|----|----|----|-------------|----------|-----------------|
| Y    | 57381664 | 57381994 | 57381829 | 22 | 23 | 31 | 0.879786629 | 0.686638 | ENSG00000217042 |
| Y    | 57395011 | 57395190 | 57395040 | 8  | 8  | 12 | 0.812110735 | 0.692685 | ENSG00000217042 |
| Y    | 57406313 | 57406493 | 57406460 | 8  | 8  | 7  | 1.319679944 | 0.283403 | ENSG00000217042 |
| c6_Q | 31429415 | 31429659 | 31429537 | 20 | 20 | 1  | 12.31701281 | 1.03E-06 | ENSG00000219118 |
| c6_Q | 31437989 | 31438176 | 31438082 | 11 | 11 | 0  | 14.07658607 | 9.02E-05 | ENSG00000206450 |
