# Supplementary material for: Insights into p53 transcriptional function via genome-wide chromatin occupancy and gene expression analysis
Source: PubMed Central journal article supplement — Cell Death Differ. 2012 Jul 13;19(12):1992–2002. doi: 10.1038/cdd.2012.89 (PMC3504713; doi:10.1038/cdd.2012.89), 2012-07-13
Supplement: cdd201289x7.pdf [file cdd201289x7.pdf]

| chr | start    | end      | maximum  | p53<br>Height | p53<br>Area | IgG | Ratio p53/IgG | P-Value     | Gene<br>Symbol | Ensemble<br>name |
|-----|----------|----------|----------|---------------|-------------|-----|---------------|-------------|----------------|------------------|
| 1   | 557268   | 557605   | 557436   | 16            | 16          | 29  | 0.588939038   | 0.963731    |                | ENSG00000209350  |
| 1   | 559612   | 559960   | 559786   | 37            | 37          | 55  | 0.705242125   | 0.954002    |                | ENSG00000212678  |
| 1   | 1176146  | 1176417  | 1176300  | 9             | 11          | 2   | 4.157216737   | 0.0052913   | FAM132A        | ENSG00000184163  |
| 1   | 1780686  | 1780956  | 1780821  | 10            | 10          | 2   | 3.810782009   | 0.00936112  | GNB1           | ENSG00000078369  |
| 1   | 1828844  | 1829117  | 1828998  | 11            | 12          | 0   | 13.5109544    | 9.48E-05    | CALML6         | ENSG00000169885  |
| 1   | 3166769  | 3166950  | 3166859  | 9             | 9           | 0   | 10.39304184   | 0.000803859 | PRDM16         | ENSG00000142611  |
| 1   | 3703040  | 3703226  | 3703131  | 8             | 8           | 2   | 3.117912553   | 0.0283184   | LRRC47         | ENSG00000130764  |
| 1   | 3763599  | 3763859  | 3763729  | 8             | 11          | 3   | 3.117912553   | 0.0146045   | DFFB           | ENSG00000169598  |
| 1   | 5043750  | 5044032  | 5043891  | 9             | 11          | 0   | 12.47165021   | 0.000193293 | AJAP1          | ENSG00000196581  |
| 1   | 6056905  | 6057212  | 6057063  | 11            | 13          | 1   | 7.27512929    | 0.000378098 | KCNAB2         | ENSG00000069424  |
| 1   | 6202976  | 6203155  | 6203053  | 8             | 8           | 2   | 3.117912553   | 0.0283184   | RNF207         | ENSG00000158286  |
| 1   | 6397081  | 6397521  | 6397334  | 34            | 48          | 0   | 50.92590503   | 6.85E-16    | HES2           | ENSG00000069812  |
| 1   | 8684905  | 8685120  | 8685017  | 13            | 14          | 1   | 7.794781382   | 0.000197021 |                | ENSG00000218821  |
| 1   | 8894217  | 8894454  | 8894330  | 11            | 11          | 2   | 4.157216737   | 0.0052913   |                | ENSG00000218059  |
| 1   | 9163992  | 9164415  | 9164146  | 9             | 14          | 4   | 3.117912553   | 0.00766354  |                | ENSG00000207865  |
| 1   | 9164532  | 9165093  | 9164833  | 78            | 117         | 1   | 61.31894687   | 1.85E-35    |                | ENSG00000207865  |
| 1   | 9826195  | 9826383  | 9826280  | 9             | 9           | 2   | 3.464347281   | 0.0163838   | CLSTN1         | ENSG00000171603  |
| 1   | 9873836  | 9874100  | 9873972  | 8             | 11          | 2   | 4.157216737   | 0.0052913   | CTNNBIP1       | ENSG00000178585  |
| 1   | 9933110  | 9933425  | 9933286  | 10            | 12          | 1   | 6.755477198   | 0.000722752 |                | ENSG00000202415  |
| 1   | 11020396 | 11020588 | 11020492 | 8             | 10          | 2   | 3.810782009   | 0.00936112  | MASP2          | ENSG00000009724  |
| 1   | 11062972 | 11063185 | 11063078 | 12            | 12          | 3   | 3.377738599   | 0.00867157  | EXOSC10        | ENSG00000171824  |
| 1   | 11541978 | 11542236 | 11542107 | 11            | 12          | 0   | 13.5109544    | 9.48E-05    | PTCHD2         | ENSG00000204624  |
| 1   | 11890623 | 11890935 | 11890759 | 17            | 20          | 8   | 2.425043097   | 0.00917565  |                | ENSG00000199347  |
| 1   | 11890963 | 11891320 | 11891141 | 8             | 14          | 8   | 1.73217364    | 0.0890835   |                | ENSG00000199347  |
| 1   | 11892277 | 11892494 | 11892398 | 10            | 10          | 4   | 2.286469205   | 0.0509017   |                | ENSG00000201801  |
| 1   | 12189743 | 12190123 | 12189944 | 30            | 37          | 0   | 39.493559     | 1.74E-12    |                | ENSG00000219226  |
| 1   | 12511042 | 12511311 | 12511199 | 10            | 13          | 0   | 14.55025858   | 4.65E-05    |                | ENSG00000209463  |
| 1   | 12600928 | 12601325 | 12601116 | 24            | 33          | 1   | 17.66817113   | 5.50E-10    | DHRS3          | ENSG00000162496  |
| 1   | 12623171 | 12623460 | 12623314 | 18            | 21          | 0   | 22.86469205   | 1.55E-07    | AADA4L4        | ENSG00000204518  |
| 1   | 14932262 | 14932498 | 14932380 | 8             | 12          | 1   | 6.755477198   | 0.000722752 |                | ENSG00000203390  |
| 1   | 15106515 | 15106882 | 15106713 | 8             | 13          | 0   | 14.55025858   | 4.65E-05    |                | ENSG00000189337  |
| 1   | 15245629 | 15245936 | 15245782 | 9             | 13          | 0   | 14.55025858   | 4.65E-05    |                | ENSG00000189337  |

|   |          |          |          |    |    |    |             |             |           |                 |
|---|----------|----------|----------|----|----|----|-------------|-------------|-----------|-----------------|
| 1 | 15999322 | 15999509 | 15999455 | 8  | 10 | 0  | 11.43234603 | 0.000394183 |           | ENSG00000197883 |
| 1 | 15999561 | 15999785 | 15999721 | 8  | 11 | 1  | 6.235825105 | 0.0013754   |           | ENSG00000197883 |
| 1 | 16353766 | 16353960 | 16353920 | 9  | 9  | 0  | 10.39304184 | 0.000803859 | EPHA2     | ENSG00000142627 |
| 1 | 16383752 | 16384080 | 16383914 | 28 | 29 | 1  | 15.58956276 | 8.46E-09    | ARHGEF19  | ENSG00000142632 |
| 1 | 16566135 | 16566348 | 16566290 | 10 | 13 | 3  | 3.637564645 | 0.0050909   | C1orf144  | ENSG00000055070 |
| 1 | 16712957 | 16713336 | 16713157 | 20 | 30 | 14 | 2.147895314 | 0.00561491  |           | ENSG00000206652 |
| 1 | 16758802 | 16759152 | 16758977 | 27 | 32 | 0  | 34.29703808 | 6.12E-11    |           | ENSG00000209524 |
| 1 | 16811565 | 16811799 | 16811699 | 8  | 8  | 6  | 1.336248237 | 0.277651    | NBPF1     | ENSG00000179571 |
| 1 | 16820139 | 16820484 | 16820311 | 8  | 13 | 6  | 2.078608368 | 0.0483393   | NBPF1     | ENSG00000179571 |
| 1 | 16926395 | 16926650 | 16926522 | 14 | 17 | 5  | 3.117912553 | 0.00407023  |           | ENSG00000209530 |
| 1 | 17104405 | 17104609 | 17104529 | 9  | 11 | 8  | 1.385738912 | 0.224757    |           | ENSG00000207005 |
| 1 | 17444363 | 17444651 | 17444499 | 8  | 11 | 1  | 6.235825105 | 0.0013754   | PADI3     | ENSG00000142619 |
| 1 | 17486583 | 17486825 | 17486704 | 9  | 10 | 1  | 5.716173013 | 0.00260397  | PADI4     | ENSG00000159339 |
| 1 | 17508787 | 17509220 | 17508966 | 17 | 24 | 2  | 8.660868202 | 1.80E-06    | PADI4     | ENSG00000159339 |
| 1 | 17611228 | 17611535 | 17611358 | 11 | 13 | 2  | 4.850086193 | 0.00164564  | RCC2      | ENSG00000179051 |
| 1 | 17719341 | 17719573 | 17719477 | 9  | 10 | 1  | 5.716173013 | 0.00260397  | ARHGEF10L | ENSG00000074964 |
| 1 | 18065669 | 18065848 | 18065758 | 8  | 8  | 0  | 9.353737658 | 0.00163931  | ACTL8     | ENSG00000117148 |
| 1 | 18392167 | 18392377 | 18392260 | 9  | 9  | 0  | 10.39304184 | 0.000803859 | IGSF21    | ENSG00000117154 |
| 1 | 18865763 | 18866041 | 18865902 | 9  | 13 | 1  | 7.27512929  | 0.000378098 | PAX7      | ENSG00000009709 |
| 1 | 18867897 | 18868151 | 18868021 | 9  | 12 | 3  | 3.377738599 | 0.00867157  | PAX7      | ENSG00000009709 |
| 1 | 19102150 | 19102459 | 19102304 | 9  | 12 | 8  | 1.501217155 | 0.168286    | ALDH4A1   | ENSG00000159423 |
| 1 | 19197288 | 19197721 | 19197527 | 33 | 43 | 1  | 22.86469205 | 5.66E-13    | IFFO2     | ENSG00000169991 |
| 1 | 20174045 | 20174281 | 20174130 | 10 | 10 | 0  | 11.43234603 | 0.000394183 |           | ENSG00000209591 |
| 1 | 20332765 | 20333075 | 20332931 | 10 | 14 | 0  | 15.58956276 | 2.28E-05    | PLA2G2F   | ENSG00000158786 |
| 1 | 20693059 | 20693238 | 20693092 | 8  | 8  | 1  | 4.676868829 | 0.0091584   | CAMK2N1   | ENSG00000162545 |
| 1 | 21082977 | 21083221 | 21083082 | 12 | 13 | 0  | 14.55025858 | 4.65E-05    | EIF4G3    | ENSG00000075151 |
| 1 | 21595728 | 21596042 | 21595885 | 9  | 11 | 0  | 12.47165021 | 0.000193293 |           | ENSG00000182068 |
| 1 | 21847040 | 21847262 | 21847151 | 8  | 8  | 2  | 3.117912553 | 0.0283184   | RAP1GAP   | ENSG00000076864 |
| 1 | 22154922 | 22155320 | 22155141 | 12 | 18 | 0  | 19.7467795  | 1.32E-06    | HSPG2     | ENSG00000142798 |
| 1 | 22242318 | 22242620 | 22242469 | 22 | 25 | 5  | 4.503651465 | 6.33E-05    | CDC42     | ENSG00000070831 |
| 1 | 22671738 | 22671990 | 22671834 | 8  | 8  | 3  | 2.338434415 | 0.0641221   | ZBTB40    | ENSG00000184677 |
| 1 | 23016537 | 23016897 | 23016719 | 17 | 22 | 1  | 11.95199812 | 9.69E-07    | EPHB2     | ENSG00000133216 |
| 1 | 23175541 | 23175742 | 23175649 | 8  | 8  | 3  | 2.338434415 | 0.0641221   |           | ENSG00000215906 |
| 1 | 23576432 | 23576892 | 23576611 | 21 | 32 | 4  | 6.859407616 | 3.06E-07    |           | ENSG00000201405 |

|   |          |          |          |    |    |   |             |             |         |                 |
|---|----------|----------|----------|----|----|---|-------------|-------------|---------|-----------------|
| 1 | 23606530 | 23606755 | 23606620 | 8  | 9  | 1 | 5.196520921 | 0.00490062  |         | ENSG00000220249 |
| 1 | 23651124 | 23651386 | 23651275 | 11 | 13 | 3 | 3.637564645 | 0.0050909   | TCEA3   | ENSG00000204219 |
| 1 | 23758370 | 23758590 | 23758440 | 8  | 9  | 3 | 2.598260461 | 0.0397929   | ID3     | ENSG00000117318 |
| 1 | 23758651 | 23758972 | 23758811 | 8  | 11 | 3 | 3.117912553 | 0.0146045   | ID3     | ENSG00000117318 |
| 1 | 23784724 | 23784915 | 23784819 | 9  | 9  | 1 | 5.196520921 | 0.00490062  | ID3     | ENSG00000117318 |
| 1 | 23791364 | 23791614 | 23791489 | 8  | 10 | 3 | 2.858086507 | 0.0242838   | ID3     | ENSG00000117318 |
| 1 | 23791645 | 23792137 | 23791837 | 84 | 99 | 2 | 34.64347281 | 1.54E-28    | ID3     | ENSG00000117318 |
| 1 | 23792472 | 23792709 | 23792590 | 10 | 12 | 1 | 6.755477198 | 0.000722752 | MDS2    | ENSG00000197880 |
| 1 | 23890470 | 23890700 | 23890585 | 10 | 12 | 0 | 13.5109544  | 9.48E-05    | RPL11   | ENSG00000142676 |
| 1 | 24023995 | 24024178 | 24024100 | 8  | 8  | 2 | 3.117912553 | 0.0283184   | HMGCL   | ENSG00000117305 |
| 1 | 24841825 | 24842195 | 24842019 | 8  | 13 | 9 | 1.455025858 | 0.177172    | SRRM1   | ENSG00000133226 |
| 1 | 25171197 | 25171729 | 25171550 | 41 | 53 | 2 | 18.70747532 | 8.04E-15    | RUNX3   | ENSG00000020633 |
| 1 | 25681479 | 25681672 | 25681575 | 9  | 10 | 0 | 11.43234603 | 0.000394183 | TMEM57  | ENSG00000204178 |
| 1 | 26127661 | 26127883 | 26127772 | 8  | 8  | 1 | 4.676868829 | 0.0091584   | STMN1   | ENSG00000117632 |
| 1 | 26892043 | 26892311 | 26892177 | 9  | 11 | 5 | 2.078608368 | 0.0614303   | ARID1A  | ENSG00000117713 |
| 1 | 26894584 | 26894803 | 26894711 | 9  | 10 | 1 | 5.716173013 | 0.00260397  | ARID1A  | ENSG00000117713 |
| 1 | 27060280 | 27060688 | 27060481 | 16 | 24 | 1 | 12.9913023  | 2.52E-07    | SFN     | ENSG00000175793 |
| 1 | 27063994 | 27064248 | 27064122 | 9  | 11 | 1 | 6.235825105 | 0.0013754   | SFN     | ENSG00000175793 |
| 1 | 27340759 | 27340938 | 27340848 | 8  | 8  | 0 | 9.353737658 | 0.00163931  | SLC9A1  | ENSG00000090020 |
| 1 | 28384291 | 28384470 | 28384394 | 8  | 8  | 0 | 9.353737658 | 0.00163931  | PTAFR   | ENSG00000169403 |
| 1 | 28441016 | 28441292 | 28441154 | 11 | 12 | 0 | 13.5109544  | 9.48E-05    | ATPIF1  | ENSG00000130770 |
| 1 | 28459198 | 28459568 | 28459403 | 16 | 21 | 3 | 5.716173013 | 5.37E-05    | SESN2   | ENSG00000130766 |
| 1 | 28551409 | 28551722 | 28551565 | 29 | 32 | 0 | 34.29703808 | 6.12E-11    | PHACTR4 | ENSG00000204138 |
| 1 | 28637061 | 28637279 | 28637158 | 8  | 10 | 2 | 3.810782009 | 0.00936112  | PHACTR4 | ENSG00000204138 |
| 1 | 29003213 | 29003499 | 29003368 | 9  | 10 | 2 | 3.810782009 | 0.00936112  | OPRD1   | ENSG00000116329 |
| 1 | 29438384 | 29438648 | 29438516 | 21 | 25 | 0 | 27.02190879 | 8.98E-09    | PTPRU   | ENSG00000060656 |
| 1 | 29955332 | 29955659 | 29955495 | 8  | 12 | 3 | 3.377738599 | 0.00867157  |         | ENSG00000221126 |
| 1 | 30666131 | 30666372 | 30666274 | 13 | 14 | 0 | 15.58956276 | 2.28E-05    |         | ENSG00000217351 |
| 1 | 30993566 | 30993918 | 30993742 | 25 | 29 | 2 | 10.39304184 | 7.12E-08    | LAPTM5  | ENSG00000162511 |
| 1 | 31099596 | 31099875 | 31099735 | 11 | 12 | 0 | 13.5109544  | 9.48E-05    |         | ENSG00000222784 |
| 1 | 31983709 | 31983917 | 31983775 | 8  | 9  | 2 | 3.464347281 | 0.0163838   | BAI2    | ENSG00000121753 |
| 1 | 32465302 | 32465499 | 32465411 | 8  | 8  | 1 | 4.676868829 | 0.0091584   | EIF3I   | ENSG00000084623 |
| 1 | 33201913 | 33202168 | 33202053 | 13 | 15 | 0 | 16.62886695 | 1.12E-05    | RNF19B  | ENSG00000116514 |
| 1 | 34830568 | 34830797 | 34830691 | 8  | 8  | 0 | 9.353737658 | 0.00163931  |         | ENSG00000207941 |

|   |          |          |          |    |    |   |             |             |         |                 |
|---|----------|----------|----------|----|----|---|-------------|-------------|---------|-----------------|
| 1 | 35795820 | 35796010 | 35795860 | 8  | 9  | 2 | 3.464347281 | 0.0163838   | NCDN    | ENSG00000020129 |
| 1 | 37338635 | 37338985 | 37338812 | 29 | 33 | 0 | 35.33634226 | 3.00E-11    | GRIK3   | ENSG00000163873 |
| 1 | 37716176 | 37716375 | 37716323 | 8  | 10 | 2 | 3.810782009 | 0.00936112  | ZC3H12A | ENSG00000163874 |
| 1 | 38072983 | 38073261 | 38073122 | 20 | 22 | 1 | 11.95199812 | 9.69E-07    |         | ENSG00000217771 |
| 1 | 38185224 | 38185562 | 38185393 | 29 | 31 | 0 | 33.2577339  | 1.25E-10    | INPP5B  | ENSG00000204084 |
| 1 | 38228228 | 38228547 | 38228376 | 20 | 23 | 2 | 8.314433474 | 3.41E-06    | SF3A3   | ENSG00000183431 |
| 1 | 38525514 | 38525812 | 38525686 | 9  | 12 | 4 | 2.702190879 | 0.0203088   |         | ENSG00000200796 |
| 1 | 38741135 | 38741449 | 38741292 | 8  | 11 | 0 | 12.47165021 | 0.000193293 |         | ENSG00000200796 |
| 1 | 39585138 | 39585480 | 39585309 | 26 | 30 | 0 | 32.21842971 | 2.55E-10    | MACF1   | ENSG00000127603 |
| 1 | 39787266 | 39787534 | 39787391 | 8  | 10 | 1 | 5.716173013 | 0.00260397  |         | ENSG00000220027 |
| 1 | 40215162 | 40215492 | 40215328 | 21 | 23 | 2 | 8.314433474 | 3.41E-06    |         | ENSG00000217900 |
| 1 | 40345698 | 40345977 | 40345806 | 8  | 11 | 2 | 4.157216737 | 0.0052913   | PPT1    | ENSG00000131238 |
| 1 | 40382222 | 40382580 | 40382364 | 9  | 14 | 7 | 1.948695345 | 0.0559175   |         | ENSG00000216766 |
| 1 | 40949783 | 40950117 | 40949946 | 15 | 19 | 1 | 10.39304184 | 7.23E-06    | NFYC    | ENSG00000066136 |
| 1 | 41137890 | 41138116 | 41137950 | 9  | 11 | 2 | 4.157216737 | 0.0052913   | CITED4  | ENSG00000179862 |
| 1 | 41592057 | 41592249 | 41592149 | 8  | 8  | 1 | 4.676868829 | 0.0091584   | FOXO6   | ENSG00000204060 |
| 1 | 41649599 | 41649791 | 41649756 | 8  | 8  | 0 | 9.353737658 | 0.00163931  | FOXO6   | ENSG00000204060 |
| 1 | 41720493 | 41720965 | 41720694 | 43 | 62 | 7 | 8.184520451 | 3.80E-13    | EDN2    | ENSG00000127129 |
| 1 | 42028040 | 42028461 | 42028219 | 11 | 19 | 7 | 2.598260461 | 0.00730518  | HIVEP3  | ENSG00000127124 |
| 1 | 42098597 | 42098800 | 42098698 | 9  | 9  | 3 | 2.598260461 | 0.0397929   | HIVEP3  | ENSG00000127124 |
| 1 | 42120415 | 42120623 | 42120526 | 10 | 10 | 8 | 1.27026067  | 0.293854    | HIVEP3  | ENSG00000127124 |
| 1 | 42158382 | 42158622 | 42158502 | 8  | 10 | 1 | 5.716173013 | 0.00260397  | HIVEP3  | ENSG00000127124 |
| 1 | 42404128 | 42404409 | 42404270 | 11 | 14 | 2 | 5.196520921 | 0.000907371 | GUCA2A  | ENSG00000197273 |
| 1 | 42412266 | 42412560 | 42412440 | 21 | 24 | 3 | 6.495651151 | 8.89E-06    | GUCA2A  | ENSG00000197273 |
| 1 | 42573604 | 42573799 | 42573702 | 8  | 8  | 3 | 2.338434415 | 0.0641221   | FOXJ3   | ENSG00000198815 |
| 1 | 42771472 | 42771821 | 42771646 | 13 | 19 | 3 | 5.196520921 | 0.000174201 |         | ENSG00000186409 |
| 1 | 43181614 | 43182009 | 43181881 | 8  | 14 | 5 | 2.598260461 | 0.0167748   | SLC2A1  | ENSG00000117394 |
| 1 | 43230671 | 43230936 | 43230801 | 10 | 11 | 4 | 2.494330042 | 0.0324033   |         | ENSG00000207256 |
| 1 | 43233065 | 43233248 | 43233210 | 9  | 9  | 0 | 10.39304184 | 0.000803859 |         | ENSG00000207256 |
| 1 | 43391060 | 43391453 | 43391277 | 19 | 26 | 0 | 28.06121297 | 4.41E-09    | FAM183A | ENSG00000186973 |
| 1 | 43774776 | 43775069 | 43774923 | 18 | 21 | 1 | 11.43234603 | 1.90E-06    | PTPRF   | ENSG00000142949 |
| 1 | 43788528 | 43788805 | 43788636 | 9  | 11 | 0 | 12.47165021 | 0.000193293 | PTPRF   | ENSG00000142949 |
| 1 | 43888388 | 43888569 | 43888478 | 8  | 8  | 1 | 4.676868829 | 0.0091584   | JMJD2A  | ENSG00000066135 |
| 1 | 44968996 | 44969205 | 44969100 | 10 | 10 | 6 | 1.63319229  | 0.146906    |         | ENSG00000200169 |

|   |          |          |          |    |     |   |             |             |          |                 |
|---|----------|----------|----------|----|-----|---|-------------|-------------|----------|-----------------|
| 1 | 44969417 | 44969630 | 44969478 | 10 | 11  | 3 | 3.117912553 | 0.0146045   |          | ENSG00000200169 |
| 1 | 45013681 | 45013930 | 45013764 | 9  | 11  | 5 | 2.078608368 | 0.0614303   | RPS8     | ENSG00000142937 |
| 1 | 45037988 | 45038588 | 45038260 | 58 | 101 | 2 | 35.33634226 | 3.84E-29    | PLK3     | ENSG00000173846 |
| 1 | 45053316 | 45053522 | 45053409 | 9  | 10  | 1 | 5.716173013 | 0.00260397  |          | ENSG00000202444 |
| 1 | 45057746 | 45058079 | 45057918 | 13 | 16  | 2 | 5.889390377 | 0.000270741 |          | ENSG00000202444 |
| 1 | 45760161 | 45760489 | 45760325 | 8  | 13  | 6 | 2.078608368 | 0.0483393   | PRDX1    | ENSG00000117450 |
| 1 | 45806587 | 45806924 | 45806755 | 9  | 13  | 0 | 14.55025858 | 4.65E-05    | NASP     | ENSG00000132780 |
| 1 | 45822225 | 45822503 | 45822343 | 11 | 12  | 3 | 3.377738599 | 0.00867157  | NASP     | ENSG00000132780 |
| 1 | 45851530 | 45851869 | 45851699 | 10 | 15  | 1 | 8.314433474 | 0.000102308 | CCDC17   | ENSG00000159588 |
| 1 | 45926415 | 45926740 | 45926567 | 8  | 12  | 3 | 3.377738599 | 0.00867157  | TMEM69   | ENSG00000159596 |
| 1 | 46195749 | 46196014 | 46195913 | 11 | 14  | 0 | 15.58956276 | 2.28E-05    | MAST2    | ENSG00000086015 |
| 1 | 46259144 | 46259323 | 46259265 | 8  | 8   | 2 | 3.117912553 | 0.0283184   |          | ENSG00000216741 |
| 1 | 46410193 | 46410490 | 46410341 | 10 | 11  | 0 | 12.47165021 | 0.000193293 | TSPAN1   | ENSG00000117472 |
| 1 | 46417863 | 46418067 | 46417965 | 9  | 11  | 3 | 3.117912553 | 0.0146045   | TSPAN1   | ENSG00000117472 |
| 1 | 46421792 | 46421981 | 46421886 | 8  | 9   | 0 | 10.39304184 | 0.000803859 | TSPAN1   | ENSG00000117472 |
| 1 | 46579039 | 46579228 | 46579073 | 8  | 9   | 2 | 3.464347281 | 0.0163838   | NSUN4    | ENSG00000117481 |
| 1 | 46608665 | 46608891 | 46608778 | 11 | 11  | 1 | 6.235825105 | 0.0013754   |          | ENSG00000119916 |
| 1 | 46685182 | 46685409 | 46685310 | 12 | 12  | 2 | 4.503651465 | 0.002963    |          | ENSG00000213777 |
| 1 | 46842378 | 46842609 | 46842478 | 10 | 10  | 4 | 2.286469205 | 0.0509017   | MKNK1    | ENSG00000079277 |
| 1 | 47036314 | 47036531 | 47036429 | 12 | 13  | 0 | 14.55025858 | 4.65E-05    | CYP4B1   | ENSG00000142973 |
| 1 | 47417397 | 47417679 | 47417535 | 11 | 12  | 2 | 4.503651465 | 0.002963    | PDZK1IP1 | ENSG00000162366 |
| 1 | 50377556 | 50377813 | 50377676 | 10 | 12  | 0 | 13.5109544  | 9.48E-05    | ELAVL4   | ENSG00000162374 |
| 1 | 51571974 | 51572200 | 51572087 | 8  | 8   | 0 | 9.353737658 | 0.00163931  | TTC39A   | ENSG00000085831 |
| 1 | 51805989 | 51806287 | 51806126 | 13 | 16  | 3 | 4.417042783 | 0.00097367  | OSBPL9   | ENSG00000117859 |
| 1 | 51808138 | 51808386 | 51808262 | 8  | 11  | 9 | 1.247165021 | 0.300052    | OSBPL9   | ENSG00000117859 |
| 1 | 51831002 | 51831259 | 51831139 | 11 | 12  | 0 | 13.5109544  | 9.48E-05    |          | ENSG00000218025 |
| 1 | 51930577 | 51930801 | 51930679 | 8  | 8   | 0 | 9.353737658 | 0.00163931  |          | ENSG00000219625 |
| 1 | 53476695 | 53476945 | 53476820 | 9  | 11  | 1 | 6.235825105 | 0.0013754   | MAGOH    | ENSG00000162385 |
| 1 | 55189118 | 55189350 | 55189242 | 9  | 9   | 0 | 10.39304184 | 0.000803859 | TMEM61   | ENSG00000143001 |
| 1 | 55298364 | 55298581 | 55298517 | 11 | 11  | 0 | 12.47165021 | 0.000193293 | PCSK9    | ENSG00000169174 |
| 1 | 56303808 | 56303987 | 56303897 | 8  | 8   | 1 | 4.676868829 | 0.0091584   |          | ENSG00000217577 |
| 1 | 56653084 | 56653288 | 56653200 | 9  | 11  | 1 | 6.235825105 | 0.0013754   |          | ENSG00000216893 |
| 1 | 56677970 | 56678157 | 56678066 | 8  | 8   | 0 | 9.353737658 | 0.00163931  |          | ENSG00000216893 |
| 1 | 56811605 | 56811969 | 56811739 | 10 | 15  | 0 | 16.62886695 | 1.12E-05    | PPAP2B   | ENSG00000162407 |

|   |          |          |          |    |     |   |             |             |           |                 |
|---|----------|----------|----------|----|-----|---|-------------|-------------|-----------|-----------------|
| 1 | 57057379 | 57057565 | 57057485 | 9  | 9   | 4 | 2.078608368 | 0.0785659   | C1orf168  | ENSG00000187889 |
| 1 | 58421652 | 58421831 | 58421738 | 8  | 8   | 5 | 1.558956276 | 0.191397    |           | ENSG00000216719 |
| 1 | 58445156 | 58445349 | 58445252 | 11 | 11  | 0 | 12.47165021 | 0.000193293 |           | ENSG00000216719 |
| 1 | 60069781 | 60069967 | 60069874 | 8  | 9   | 3 | 2.598260461 | 0.0397929   | HOOK1     | ENSG00000134709 |
| 1 | 61318335 | 61318536 | 61318431 | 8  | 8   | 5 | 1.558956276 | 0.191397    | NFIA      | ENSG00000162599 |
| 1 | 61377784 | 61377983 | 61377921 | 10 | 12  | 2 | 4.503651465 | 0.002963    | NFIA      | ENSG00000162599 |
| 1 | 61691650 | 61691917 | 61691752 | 8  | 9   | 4 | 2.078608368 | 0.0785659   |           | ENSG00000218038 |
| 1 | 63761403 | 63761705 | 63761554 | 15 | 19  | 4 | 4.157216737 | 0.000560204 | EFCAB7    | ENSG00000203965 |
| 1 | 64216891 | 64217153 | 64217012 | 9  | 11  | 2 | 4.157216737 | 0.0052913   |           | ENSG00000207190 |
| 1 | 65233666 | 65233863 | 65233755 | 8  | 8   | 1 | 4.676868829 | 0.0091584   |           | ENSG00000185031 |
| 1 | 66420844 | 66421074 | 66420959 | 9  | 10  | 4 | 2.286469205 | 0.0509017   | PDE4B     | ENSG00000184588 |
| 1 | 66509522 | 66509832 | 66509660 | 16 | 19  | 2 | 6.928694562 | 4.25E-05    | PDE4B     | ENSG00000184588 |
| 1 | 66638917 | 66639215 | 66639066 | 18 | 21  | 0 | 22.86469205 | 1.55E-07    | PDE4B     | ENSG00000184588 |
| 1 | 67384876 | 67385234 | 67385055 | 9  | 15  | 0 | 16.62886695 | 1.12E-05    | C1orf141  | ENSG00000203963 |
| 1 | 67614708 | 67615033 | 67614885 | 13 | 17  | 7 | 2.338434415 | 0.0171287   |           | ENSG00000223263 |
| 1 | 67924852 | 67925241 | 67925046 | 87 | 100 | 5 | 17.49495377 | 2.02E-25    | GADD45A   | ENSG00000116717 |
| 1 | 67976870 | 67977055 | 67976980 | 8  | 8   | 0 | 9.353737658 | 0.00163931  | GADD45A   | ENSG00000116717 |
| 1 | 68759726 | 68759909 | 68759857 | 8  | 8   | 4 | 1.870747532 | 0.118863    |           | ENSG00000218491 |
| 1 | 69293363 | 69294040 | 69293684 | 24 | 43  | 1 | 22.86469205 | 5.66E-13    |           |                 |
| 1 | 70649060 | 70649239 | 70649124 | 8  | 9   | 0 | 10.39304184 | 0.000803859 | CTH       | ENSG00000116761 |
| 1 | 72239002 | 72239481 | 72239241 | 74 | 106 | 1 | 55.60277386 | 4.27E-32    | NEGR1     | ENSG00000172260 |
| 1 | 75330403 | 75330690 | 75330546 | 20 | 22  | 2 | 7.967998746 | 6.43E-06    | LHX8      | ENSG00000162624 |
| 1 | 76429350 | 76429611 | 76429485 | 8  | 11  | 4 | 2.494330042 | 0.0324033   | ST6GALNA( | ENSG00000184005 |
| 1 | 76925622 | 76925844 | 76925733 | 8  | 9   | 5 | 1.73217364  | 0.133894    |           | ENSG00000220402 |
| 1 | 77157551 | 77157891 | 77157719 | 18 | 21  | 0 | 22.86469205 | 1.55E-07    | ST6GALNA( | ENSG00000117069 |
| 1 | 77969130 | 77969356 | 77969243 | 9  | 10  | 2 | 3.810782009 | 0.00936112  | USP33     | ENSG00000077254 |
| 1 | 78202440 | 78202619 | 78202529 | 8  | 8   | 0 | 9.353737658 | 0.00163931  | FUBP1     | ENSG00000162613 |
| 1 | 78352581 | 78352835 | 78352708 | 10 | 12  | 3 | 3.377738599 | 0.00867157  |           | ENSG00000202263 |
| 1 | 82112770 | 82113052 | 82112900 | 20 | 22  | 0 | 23.90399624 | 7.62E-08    | LPHN2     | ENSG00000117114 |
| 1 | 82184169 | 82184348 | 82184258 | 8  | 8   | 0 | 9.353737658 | 0.00163931  | LPHN2     | ENSG00000117114 |
| 1 | 82464475 | 82464720 | 82464597 | 12 | 14  | 0 | 15.58956276 | 2.28E-05    | LPHN2     | ENSG00000117114 |
| 1 | 83249555 | 83250056 | 83249794 | 28 | 40  | 2 | 14.20382385 | 5.03E-11    |           |                 |
| 1 | 83304707 | 83304897 | 83304863 | 8  | 8   | 1 | 4.676868829 | 0.0091584   |           |                 |
| 1 | 83348594 | 83348779 | 83348686 | 9  | 9   | 2 | 3.464347281 | 0.0163838   |           |                 |

|   |           |           |           |     |     |     |             |             |         |                 |
|---|-----------|-----------|-----------|-----|-----|-----|-------------|-------------|---------|-----------------|
| 1 | 85463412  | 85463702  | 85463528  | 10  | 14  | 2   | 5.196520921 | 0.000907371 | SYDE2   | ENSG00000097096 |
| 1 | 85478592  | 85478809  | 85478717  | 8   | 9   | 0   | 10.39304184 | 0.000803859 | C1orf52 | ENSG00000162642 |
| 1 | 85546445  | 85546749  | 85546601  | 8   | 10  | 0   | 11.43234603 | 0.000394183 | BCL10   | ENSG00000142867 |
| 1 | 85762827  | 85763050  | 85762958  | 9   | 11  | 2   | 4.157216737 | 0.0052913   | CYR61   | ENSG00000142871 |
| 1 | 85946562  | 85946775  | 85946666  | 8   | 10  | 1   | 5.716173013 | 0.00260397  | ZNHIT6  | ENSG00000117174 |
| 1 | 86662169  | 86662446  | 86662307  | 18  | 19  | 1   | 10.39304184 | 7.23E-06    | CLCA2   | ENSG00000137975 |
| 1 | 87152126  | 87152333  | 87152232  | 8   | 9   | 3   | 2.598260461 | 0.0397929   |         | ENSG00000183291 |
| 1 | 87331660  | 87331856  | 87331738  | 8   | 8   | 0   | 9.353737658 | 0.00163931  | HS2ST1  | ENSG00000153936 |
| 1 | 87413001  | 87413335  | 87413168  | 26  | 32  | 1   | 17.14851904 | 1.09E-09    |         | ENSG00000221222 |
| 1 | 87676142  | 87676321  | 87676185  | 8   | 8   | 0   | 9.353737658 | 0.00163931  |         | ENSG00000199318 |
| 1 | 87716503  | 87716872  | 87716702  | 8   | 13  | 4   | 2.910051716 | 0.0125532   |         | ENSG00000199318 |
| 1 | 89040158  | 89040531  | 89040255  | 19  | 25  | 0   | 27.02190879 | 8.98E-09    |         | ENSG00000207234 |
| 1 | 89854026  | 89854287  | 89854189  | 9   | 10  | 0   | 11.43234603 | 0.000394183 | LRRRC8C | ENSG00000171488 |
| 1 | 91625225  | 91625842  | 91625520  | 287 | 468 | 309 | 1.572366653 | 1.97E-10    |         | ENSG00000211233 |
| 1 | 91768072  | 91768406  | 91768245  | 51  | 55  | 1   | 29.10051716 | 1.38E-16    |         | ENSG00000185636 |
| 1 | 91843173  | 91843363  | 91843258  | 8   | 8   | 0   | 9.353737658 | 0.00163931  |         | ENSG00000218593 |
| 1 | 93070074  | 93070253  | 93070163  | 8   | 8   | 5   | 1.558956276 | 0.191397    | RPL5    | ENSG00000122406 |
| 1 | 93461537  | 93461833  | 93461685  | 9   | 13  | 0   | 14.55025858 | 4.65E-05    |         | ENSG00000220257 |
| 1 | 93832344  | 93832569  | 93832409  | 9   | 10  | 2   | 3.810782009 | 0.00936112  | BCAR3   | ENSG00000137936 |
| 1 | 93867562  | 93867866  | 93867714  | 14  | 16  | 0   | 17.66817113 | 5.48E-06    | BCAR3   | ENSG00000137936 |
| 1 | 93911569  | 93911818  | 93911659  | 9   | 9   | 0   | 10.39304184 | 0.000803859 | BCAR3   | ENSG00000137936 |
| 1 | 94199007  | 94199370  | 94199205  | 8   | 13  | 1   | 7.27512929  | 0.000378098 |         | ENSG00000216267 |
| 1 | 94574121  | 94574326  | 94574223  | 8   | 8   | 1   | 4.676868829 | 0.0091584   |         | ENSG00000178596 |
| 1 | 95075029  | 95075391  | 95075230  | 14  | 19  | 2   | 6.928694562 | 4.25E-05    | SLC44A3 | ENSG00000143036 |
| 1 | 99923962  | 99924157  | 99924059  | 8   | 8   | 1   | 4.676868829 | 0.0091584   |         | ENSG00000220411 |
| 1 | 100668432 | 100668981 | 100668643 | 58  | 78  | 4   | 16.42100611 | 4.63E-20    |         | ENSG00000216398 |
| 1 | 101765009 | 101765331 | 101765154 | 25  | 29  | 0   | 31.17912553 | 5.19E-10    |         | ENSG00000173810 |
| 1 | 106546371 | 106546636 | 106546518 | 10  | 13  | 10  | 1.32275078  | 0.240023    |         | ENSG00000217439 |
| 1 | 106577801 | 106578097 | 106577949 | 8   | 11  | 8   | 1.385738912 | 0.224757    |         | ENSG00000217439 |
| 1 | 106580415 | 106580674 | 106580544 | 11  | 13  | 3   | 3.637564645 | 0.0050909   |         | ENSG00000217439 |
| 1 | 106612292 | 106612716 | 106612471 | 10  | 19  | 13  | 1.484720263 | 0.123861    |         | ENSG00000217439 |
| 1 | 106622928 | 106623267 | 106623097 | 9   | 13  | 5   | 2.425043097 | 0.0262442   |         | ENSG00000217439 |
| 1 | 106636216 | 106636610 | 106636395 | 9   | 16  | 3   | 4.417042783 | 0.00097367  |         | ENSG00000217439 |
| 1 | 106638916 | 106639195 | 106639095 | 8   | 11  | 7   | 1.558956276 | 0.158273    |         | ENSG00000217439 |

|   |           |           |           |    |    |    |             |             |                 |
|---|-----------|-----------|-----------|----|----|----|-------------|-------------|-----------------|
| 1 | 106639474 | 106639674 | 106639574 | 9  | 9  | 9  | 1.039304184 | 0.466079    | ENSG00000217439 |
| 1 | 106641236 | 106641479 | 106641357 | 13 | 13 | 6  | 2.078608368 | 0.0483393   | ENSG00000217439 |
| 1 | 106650812 | 106651011 | 106650859 | 9  | 9  | 4  | 2.078608368 | 0.0785659   | ENSG00000217439 |
| 1 | 106651456 | 106651674 | 106651516 | 8  | 10 | 2  | 3.810782009 | 0.00936112  | ENSG00000217439 |
| 1 | 106689572 | 106689893 | 106689732 | 9  | 11 | 3  | 3.117912553 | 0.0146045   | ENSG00000217439 |
| 1 | 106699051 | 106699243 | 106699132 | 9  | 9  | 5  | 1.73217364  | 0.133894    | ENSG00000217439 |
| 1 | 106700171 | 106700396 | 106700325 | 9  | 10 | 0  | 11.43234603 | 0.000394183 | ENSG00000217439 |
| 1 | 106738963 | 106739159 | 106739061 | 9  | 9  | 4  | 2.078608368 | 0.0785659   | ENSG00000217439 |
| 1 | 106758275 | 106758486 | 106758380 | 10 | 10 | 1  | 5.716173013 | 0.00260397  | ENSG00000217439 |
| 1 | 106760872 | 106761054 | 106760933 | 8  | 8  | 4  | 1.870747532 | 0.118863    | ENSG00000217439 |
| 1 | 106762495 | 106762719 | 106762607 | 8  | 10 | 5  | 1.905391004 | 0.0915982   | ENSG00000217439 |
| 1 | 106763515 | 106763833 | 106763675 | 9  | 12 | 3  | 3.377738599 | 0.00867157  | ENSG00000217439 |
| 1 | 106783576 | 106783770 | 106783673 | 8  | 8  | 4  | 1.870747532 | 0.118863    | ENSG00000217439 |
| 1 | 106787490 | 106787704 | 106787656 | 8  | 9  | 5  | 1.73217364  | 0.133894    | ENSG00000220633 |
| 1 | 106809835 | 106810219 | 106810040 | 8  | 15 | 7  | 2.078608368 | 0.038229    | ENSG00000220633 |
| 1 | 106823985 | 106824283 | 106824134 | 8  | 9  | 3  | 2.598260461 | 0.0397929   | ENSG00000220633 |
| 1 | 106830953 | 106831281 | 106831128 | 8  | 12 | 1  | 6.755477198 | 0.000722752 | ENSG00000220633 |
| 1 | 106833163 | 106833645 | 106833467 | 23 | 31 | 14 | 2.21718226  | 0.00388768  | ENSG00000220633 |
| 1 | 106834412 | 106834717 | 106834570 | 8  | 12 | 4  | 2.702190879 | 0.0203088   | ENSG00000220633 |
| 1 | 106835586 | 106835808 | 106835685 | 10 | 11 | 12 | 0.959357709 | 0.543005    | ENSG00000220633 |
| 1 | 106837232 | 106837492 | 106837357 | 8  | 12 | 4  | 2.702190879 | 0.0203088   | ENSG00000220633 |
| 1 | 106845564 | 106845811 | 106845709 | 9  | 10 | 9  | 1.143234603 | 0.378307    | ENSG00000220633 |
| 1 | 106847181 | 106847392 | 106847286 | 8  | 9  | 7  | 1.29913023  | 0.286504    | ENSG00000220633 |
| 1 | 106852742 | 106853046 | 106852917 | 8  | 11 | 12 | 0.959357709 | 0.543005    | ENSG00000220633 |
| 1 | 106854809 | 106855163 | 106854987 | 8  | 11 | 3  | 3.117912553 | 0.0146045   | ENSG00000220633 |
| 1 | 106877020 | 106877199 | 106877100 | 9  | 9  | 4  | 2.078608368 | 0.0785659   | ENSG00000220633 |
| 1 | 106881478 | 106881727 | 106881575 | 8  | 10 | 18 | 0.601702422 | 0.917232    | ENSG00000220633 |
| 1 | 106893113 | 106893309 | 106893264 | 9  | 10 | 4  | 2.286469205 | 0.0509017   | ENSG00000220633 |
| 1 | 106893926 | 106894189 | 106894057 | 9  | 10 | 6  | 1.63319229  | 0.146906    | ENSG00000220633 |
| 1 | 106899734 | 106900078 | 106899906 | 15 | 21 | 11 | 1.905391004 | 0.031399    | ENSG00000220633 |
| 1 | 106913885 | 106914132 | 106913976 | 9  | 11 | 9  | 1.247165021 | 0.300052    | ENSG00000220633 |
| 1 | 106915347 | 106915907 | 106915682 | 10 | 22 | 12 | 1.838768941 | 0.0349935   | ENSG00000220633 |
| 1 | 106917774 | 106917970 | 106917872 | 9  | 9  | 8  | 1.154782427 | 0.375434    | ENSG00000220633 |
| 1 | 106920473 | 106920736 | 106920566 | 8  | 11 | 9  | 1.247165021 | 0.300052    | ENSG00000220633 |



|   |           |           |           |    |    |    |             |             |                 |
|---|-----------|-----------|-----------|----|----|----|-------------|-------------|-----------------|
| 1 | 106929014 | 106929212 | 106929171 | 10 | 11 | 9  | 1.247165021 | 0.300052    | ENSG00000220633 |
| 1 | 106938573 | 106938752 | 106938662 | 8  | 8  | 8  | 1.039304184 | 0.46786     | ENSG00000220633 |
| 1 | 106945472 | 106945661 | 106945566 | 8  | 9  | 8  | 1.154782427 | 0.375434    | ENSG00000220633 |
| 1 | 106948064 | 106948433 | 106948243 | 10 | 17 | 15 | 1.169217207 | 0.323156    | ENSG00000220633 |
| 1 | 106953847 | 106954137 | 106953991 | 10 | 13 | 15 | 0.909391161 | 0.604792    | ENSG00000220633 |
| 1 | 106954832 | 106955024 | 106954946 | 8  | 9  | 3  | 2.598260461 | 0.0397929   | ENSG00000220633 |
| 1 | 106958168 | 106958435 | 106958318 | 13 | 18 | 16 | 1.161575265 | 0.325582    | ENSG00000220633 |
| 1 | 106959611 | 106959948 | 106959779 | 13 | 19 | 3  | 5.196520921 | 0.000174201 | ENSG00000220633 |
| 1 | 106960919 | 106961214 | 106961066 | 8  | 13 | 12 | 1.11925066  | 0.384109    | ENSG00000220633 |
| 1 | 106962271 | 106962599 | 106962433 | 11 | 13 | 8  | 1.616695398 | 0.123553    | ENSG00000220633 |
| 1 | 106974112 | 106974399 | 106974255 | 9  | 11 | 2  | 4.157216737 | 0.0052913   | ENSG00000220633 |
| 1 | 106982172 | 106982351 | 106982261 | 8  | 8  | 5  | 1.558956276 | 0.191397    | ENSG00000220633 |
| 1 | 106983963 | 106984156 | 106984072 | 8  | 8  | 3  | 2.338434415 | 0.0641221   | ENSG00000220633 |
| 1 | 106996503 | 106996829 | 106996666 | 9  | 12 | 0  | 13.5109544  | 9.48E-05    | ENSG00000220633 |
| 1 | 107003808 | 107004288 | 107004109 | 9  | 18 | 15 | 1.234173719 | 0.265435    | ENSG00000220633 |
| 1 | 107019152 | 107019433 | 107019267 | 10 | 13 | 9  | 1.455025858 | 0.177172    | ENSG00000220633 |
| 1 | 107026490 | 107026757 | 107026634 | 9  | 10 | 7  | 1.429043253 | 0.21536     | ENSG00000220633 |
| 1 | 107030913 | 107031102 | 107031006 | 8  | 8  | 7  | 1.169217207 | 0.371848    | ENSG00000220633 |
| 1 | 107033482 | 107033677 | 107033579 | 10 | 10 | 10 | 1.039304184 | 0.464387    | ENSG00000220633 |
| 1 | 107034920 | 107035105 | 107034944 | 8  | 10 | 0  | 11.43234603 | 0.000394183 | ENSG00000220633 |
| 1 | 107036106 | 107036359 | 107036227 | 11 | 11 | 6  | 1.781664316 | 0.103344    | ENSG00000220633 |
| 1 | 107038112 | 107038380 | 107038260 | 10 | 12 | 1  | 6.755477198 | 0.000722752 | ENSG00000220633 |
| 1 | 107046275 | 107046509 | 107046392 | 8  | 11 | 9  | 1.247165021 | 0.300052    | ENSG00000220633 |
| 1 | 107050932 | 107051156 | 107051067 | 8  | 9  | 4  | 2.078608368 | 0.0785659   | ENSG00000220633 |
| 1 | 107054474 | 107054653 | 107054563 | 8  | 8  | 4  | 1.870747532 | 0.118863    | ENSG00000220633 |
| 1 | 107062397 | 107062759 | 107062603 | 8  | 13 | 3  | 3.637564645 | 0.0050909   | ENSG00000220633 |
| 1 | 107063711 | 107063891 | 107063807 | 8  | 9  | 5  | 1.73217364  | 0.133894    | ENSG00000220633 |
| 1 | 107066180 | 107066382 | 107066281 | 8  | 9  | 2  | 3.464347281 | 0.0163838   | ENSG00000220633 |
| 1 | 107069452 | 107069734 | 107069590 | 8  | 11 | 9  | 1.247165021 | 0.300052    | ENSG00000220633 |
| 1 | 107080819 | 107081134 | 107080968 | 9  | 13 | 7  | 1.818782322 | 0.0805123   | ENSG00000220633 |
| 1 | 107081367 | 107081575 | 107081471 | 8  | 10 | 6  | 1.63319229  | 0.146906    | ENSG00000220633 |
| 1 | 107088916 | 107089100 | 107089008 | 8  | 9  | 2  | 3.464347281 | 0.0163838   | ENSG00000220633 |
| 1 | 107094070 | 107094375 | 107094222 | 21 | 23 | 8  | 2.771477825 | 0.00251818  | ENSG00000220633 |
| 1 | 107097009 | 107097379 | 107097234 | 9  | 15 | 9  | 1.662886695 | 0.0970566   | ENSG00000220633 |

|   |           |           |           |    |    |    |             |            |       |                 |
|---|-----------|-----------|-----------|----|----|----|-------------|------------|-------|-----------------|
| 1 | 107104820 | 107105090 | 107104952 | 8  | 10 | 10 | 1.039304184 | 0.464387   |       | ENSG00000220633 |
| 1 | 107116528 | 107116788 | 107116658 | 8  | 11 | 7  | 1.558956276 | 0.158273   |       | ENSG00000220633 |
| 1 | 107117051 | 107117301 | 107117183 | 8  | 10 | 6  | 1.63319229  | 0.146906   |       | ENSG00000220633 |
| 1 | 107128491 | 107128715 | 107128641 | 8  | 9  | 7  | 1.29913023  | 0.286504   |       | ENSG00000220633 |
| 1 | 107129465 | 107129689 | 107129575 | 9  | 10 | 6  | 1.63319229  | 0.146906   |       | ENSG00000220633 |
| 1 | 107129944 | 107130258 | 107130101 | 9  | 12 | 7  | 1.688869299 | 0.11395    |       | ENSG00000220633 |
| 1 | 107130883 | 107131118 | 107131000 | 10 | 11 | 8  | 1.385738912 | 0.224757   |       | ENSG00000220633 |
| 1 | 107131726 | 107131927 | 107131792 | 10 | 10 | 8  | 1.27026067  | 0.293854   |       | ENSG00000220633 |
| 1 | 107134144 | 107134335 | 107134252 | 9  | 9  | 5  | 1.73217364  | 0.133894   |       | ENSG00000220633 |
| 1 | 107136581 | 107136902 | 107136741 | 8  | 10 | 10 | 1.039304184 | 0.464387   |       | ENSG00000220633 |
| 1 | 107137857 | 107138132 | 107138022 | 12 | 15 | 11 | 1.385738912 | 0.19225    |       | ENSG00000220633 |
| 1 | 107144516 | 107144773 | 107144644 | 8  | 10 | 11 | 0.952695502 | 0.548138   |       | ENSG00000220633 |
| 1 | 107152688 | 107152873 | 107152780 | 9  | 9  | 3  | 2.598260461 | 0.0397929  |       | ENSG00000216572 |
| 1 | 107183680 | 107184106 | 107183822 | 11 | 17 | 14 | 1.247165021 | 0.261378   |       | ENSG00000216572 |
| 1 | 107185065 | 107185306 | 107185163 | 10 | 12 | 10 | 1.228268581 | 0.305344   |       | ENSG00000216572 |
| 1 | 107214288 | 107214670 | 107214463 | 25 | 32 | 1  | 17.14851904 | 1.09E-09   |       | ENSG00000216572 |
| 1 | 107220510 | 107220798 | 107220627 | 8  | 11 | 7  | 1.558956276 | 0.158273   |       | ENSG00000216572 |
| 1 | 107231884 | 107232136 | 107232010 | 9  | 9  | 3  | 2.598260461 | 0.0397929  |       | ENSG00000216572 |
| 1 | 107232503 | 107232718 | 107232631 | 9  | 9  | 6  | 1.484720263 | 0.204387   |       | ENSG00000216572 |
| 1 | 107242626 | 107242822 | 107242732 | 8  | 8  | 2  | 3.117912553 | 0.0283184  |       | ENSG00000216572 |
| 1 | 107252901 | 107253102 | 107252991 | 11 | 13 | 3  | 3.637564645 | 0.0050909  |       | ENSG00000216572 |
| 1 | 107270866 | 107271247 | 107271188 | 10 | 16 | 8  | 1.963130126 | 0.0441028  |       | ENSG00000216572 |
| 1 | 107288873 | 107289186 | 107289009 | 8  | 11 | 5  | 2.078608368 | 0.0614303  | PRMT6 | ENSG00000198890 |
| 1 | 107298831 | 107299040 | 107298943 | 8  | 10 | 3  | 2.858086507 | 0.0242838  | PRMT6 | ENSG00000198890 |
| 1 | 107309626 | 107309934 | 107309780 | 8  | 14 | 10 | 1.417232979 | 0.185113   | PRMT6 | ENSG00000198890 |
| 1 | 107320057 | 107320331 | 107320194 | 10 | 12 | 7  | 1.688869299 | 0.11395    | PRMT6 | ENSG00000198890 |
| 1 | 107356214 | 107356411 | 107356301 | 10 | 10 | 3  | 2.858086507 | 0.0242838  | PRMT6 | ENSG00000198890 |
| 1 | 107386644 | 107386853 | 107386741 | 8  | 8  | 3  | 2.338434415 | 0.0641221  | PRMT6 | ENSG00000198890 |
| 1 | 107391579 | 107391942 | 107391763 | 15 | 22 | 4  | 4.780799247 | 0.00010647 | PRMT6 | ENSG00000198890 |
| 1 | 107400531 | 107400969 | 107400744 | 12 | 23 | 16 | 1.467252966 | 0.109416   | PRMT6 | ENSG00000198890 |
| 1 | 107401493 | 107401933 | 107401754 | 9  | 16 | 8  | 1.963130126 | 0.0441028  | PRMT6 | ENSG00000198890 |
| 1 | 107414108 | 107414400 | 107414254 | 8  | 10 | 10 | 1.039304184 | 0.464387   | PRMT6 | ENSG00000198890 |
| 1 | 107417829 | 107418112 | 107417970 | 8  | 11 | 9  | 1.247165021 | 0.300052   | PRMT6 | ENSG00000198890 |
| 1 | 107421036 | 107421287 | 107421173 | 8  | 10 | 10 | 1.039304184 | 0.464387   | PRMT6 | ENSG00000198890 |

|   |           |           |           |    |    |    |             |            |       |                 |
|---|-----------|-----------|-----------|----|----|----|-------------|------------|-------|-----------------|
| 1 | 107421882 | 107422142 | 107422012 | 11 | 11 | 5  | 2.078608368 | 0.0614303  | PRMT6 | ENSG00000198890 |
| 1 | 107446802 | 107446989 | 107446873 | 9  | 9  | 6  | 1.484720263 | 0.204387   | NTNG1 | ENSG00000162631 |
| 1 | 107448318 | 107448512 | 107448417 | 10 | 10 | 7  | 1.429043253 | 0.21536    | NTNG1 | ENSG00000162631 |
| 1 | 107451339 | 107451738 | 107451499 | 10 | 17 | 14 | 1.247165021 | 0.261378   | NTNG1 | ENSG00000162631 |
| 1 | 107461630 | 107461878 | 107461749 | 9  | 10 | 7  | 1.429043253 | 0.21536    | NTNG1 | ENSG00000162631 |
| 1 | 107462120 | 107462327 | 107462241 | 9  | 9  | 6  | 1.484720263 | 0.204387   | NTNG1 | ENSG00000162631 |
| 1 | 107465995 | 107466257 | 107466126 | 12 | 15 | 11 | 1.385738912 | 0.19225    | NTNG1 | ENSG00000162631 |
| 1 | 107479548 | 107479951 | 107479772 | 11 | 18 | 13 | 1.41048425  | 0.160361   | NTNG1 | ENSG00000162631 |
| 1 | 107482627 | 107482848 | 107482746 | 8  | 9  | 14 | 0.692869456 | 0.822654   | NTNG1 | ENSG00000162631 |
| 1 | 107484857 | 107485365 | 107485198 | 10 | 20 | 12 | 1.67887599  | 0.0659142  | NTNG1 | ENSG00000162631 |
| 1 | 107485786 | 107485977 | 107485884 | 8  | 8  | 8  | 1.039304184 | 0.46786    | NTNG1 | ENSG00000162631 |
| 1 | 107486073 | 107486335 | 107486218 | 11 | 14 | 26 | 0.577391213 | 0.96085    | NTNG1 | ENSG00000162631 |
| 1 | 107486343 | 107486691 | 107486517 | 16 | 19 | 22 | 0.903742769 | 0.631776   | NTNG1 | ENSG00000162631 |
| 1 | 107487012 | 107487254 | 107487093 | 8  | 11 | 13 | 0.890832158 | 0.618492   | NTNG1 | ENSG00000162631 |
| 1 | 107491808 | 107492123 | 107491950 | 9  | 13 | 7  | 1.818782322 | 0.0805123  | NTNG1 | ENSG00000162631 |
| 1 | 107492245 | 107492475 | 107492314 | 8  | 8  | 4  | 1.870747532 | 0.118863   | NTNG1 | ENSG00000162631 |
| 1 | 107492948 | 107493318 | 107493189 | 9  | 14 | 8  | 1.73217364  | 0.0890835  | NTNG1 | ENSG00000162631 |
| 1 | 107496533 | 107496779 | 107496696 | 10 | 12 | 12 | 1.039304184 | 0.461227   | NTNG1 | ENSG00000162631 |
| 1 | 107513555 | 107513799 | 107513677 | 9  | 11 | 4  | 2.494330042 | 0.0324033  | NTNG1 | ENSG00000162631 |
| 1 | 107522885 | 107523301 | 107523042 | 10 | 18 | 7  | 2.468347438 | 0.0112499  | NTNG1 | ENSG00000162631 |
| 1 | 107539428 | 107539981 | 107539824 | 10 | 21 | 8  | 2.540521339 | 0.00602138 | NTNG1 | ENSG00000162631 |
| 1 | 107541196 | 107541501 | 107541359 | 11 | 14 | 7  | 1.948695345 | 0.0559175  | NTNG1 | ENSG00000162631 |
| 1 | 107545567 | 107545773 | 107545630 | 9  | 9  | 8  | 1.154782427 | 0.375434   | NTNG1 | ENSG00000162631 |
| 1 | 107550574 | 107550824 | 107550718 | 8  | 9  | 8  | 1.154782427 | 0.375434   | NTNG1 | ENSG00000162631 |
| 1 | 107551381 | 107551602 | 107551479 | 8  | 10 | 11 | 0.952695502 | 0.548138   | NTNG1 | ENSG00000162631 |
| 1 | 107551919 | 107552229 | 107552074 | 8  | 11 | 11 | 1.039304184 | 0.462773   | NTNG1 | ENSG00000162631 |
| 1 | 107570562 | 107570876 | 107570705 | 10 | 13 | 11 | 1.212521548 | 0.309909   | NTNG1 | ENSG00000162631 |
| 1 | 107592010 | 107592205 | 107592037 | 9  | 10 | 12 | 0.879411233 | 0.62639    | NTNG1 | ENSG00000162631 |
| 1 | 107592375 | 107592591 | 107592415 | 8  | 10 | 9  | 1.143234603 | 0.378307   | NTNG1 | ENSG00000162631 |
| 1 | 107595522 | 107595778 | 107595660 | 9  | 9  | 9  | 1.039304184 | 0.466079   | NTNG1 | ENSG00000162631 |
| 1 | 107596450 | 107596756 | 107596603 | 11 | 14 | 13 | 1.113540197 | 0.385405   | NTNG1 | ENSG00000162631 |
| 1 | 107598178 | 107598374 | 107598245 | 8  | 8  | 9  | 0.935373766 | 0.560286   | NTNG1 | ENSG00000162631 |
| 1 | 107598634 | 107598818 | 107598712 | 8  | 8  | 6  | 1.336248237 | 0.277651   | NTNG1 | ENSG00000162631 |
| 1 | 107604392 | 107604683 | 107604506 | 8  | 11 | 12 | 0.959357709 | 0.543005   | NTNG1 | ENSG00000162631 |

|   |           |           |           |    |    |    |             |             |       |                 |
|---|-----------|-----------|-----------|----|----|----|-------------|-------------|-------|-----------------|
| 1 | 107604719 | 107604898 | 107604775 | 8  | 8  | 4  | 1.870747532 | 0.118863    | NTNG1 | ENSG00000162631 |
| 1 | 107606349 | 107606720 | 107606550 | 8  | 14 | 8  | 1.73217364  | 0.0890835   | NTNG1 | ENSG00000162631 |
| 1 | 107617739 | 107617977 | 107617839 | 9  | 11 | 5  | 2.078608368 | 0.0614303   | NTNG1 | ENSG00000162631 |
| 1 | 107619970 | 107620389 | 107620289 | 8  | 15 | 4  | 3.32577339  | 0.00462646  | NTNG1 | ENSG00000162631 |
| 1 | 107621232 | 107621506 | 107621333 | 10 | 13 | 22 | 0.632619938 | 0.917511    | NTNG1 | ENSG00000162631 |
| 1 | 107633374 | 107633588 | 107633496 | 8  | 8  | 8  | 1.039304184 | 0.46786     | NTNG1 | ENSG00000162631 |
| 1 | 107644342 | 107644550 | 107644418 | 8  | 9  | 10 | 0.944821986 | 0.553851    | NTNG1 | ENSG00000162631 |
| 1 | 107667937 | 107668266 | 107668101 | 9  | 13 | 8  | 1.616695398 | 0.123553    | NTNG1 | ENSG00000162631 |
| 1 | 107671178 | 107671366 | 107671267 | 8  | 8  | 9  | 0.935373766 | 0.560286    | NTNG1 | ENSG00000162631 |
| 1 | 107671638 | 107672050 | 107671817 | 21 | 33 | 4  | 7.067268453 | 1.67E-07    | NTNG1 | ENSG00000162631 |
| 1 | 107673899 | 107674124 | 107674038 | 9  | 11 | 5  | 2.078608368 | 0.0614303   | NTNG1 | ENSG00000162631 |
| 1 | 107683999 | 107684210 | 107684104 | 8  | 11 | 6  | 1.781664316 | 0.103344    | NTNG1 | ENSG00000162631 |
| 1 | 107689591 | 107689796 | 107689693 | 8  | 9  | 3  | 2.598260461 | 0.0397929   | NTNG1 | ENSG00000162631 |
| 1 | 107692514 | 107692928 | 107692687 | 8  | 13 | 8  | 1.616695398 | 0.123553    | NTNG1 | ENSG00000162631 |
| 1 | 107702598 | 107702808 | 107702703 | 10 | 12 | 10 | 1.228268581 | 0.305344    | NTNG1 | ENSG00000162631 |
| 1 | 107702812 | 107703104 | 107702952 | 8  | 12 | 14 | 0.900730293 | 0.611333    | NTNG1 | ENSG00000162631 |
| 1 | 107703963 | 107704254 | 107704077 | 11 | 14 | 5  | 2.598260461 | 0.0167748   | NTNG1 | ENSG00000162631 |
| 1 | 107712762 | 107712973 | 107712851 | 11 | 11 | 5  | 2.078608368 | 0.0614303   | NTNG1 | ENSG00000162631 |
| 1 | 107715147 | 107715363 | 107715255 | 8  | 10 | 4  | 2.286469205 | 0.0509017   | NTNG1 | ENSG00000162631 |
| 1 | 107721057 | 107721283 | 107721198 | 10 | 11 | 5  | 2.078608368 | 0.0614303   | NTNG1 | ENSG00000162631 |
| 1 | 107721608 | 107721931 | 107721776 | 9  | 14 | 15 | 0.974347673 | 0.530138    | NTNG1 | ENSG00000162631 |
| 1 | 107723544 | 107723792 | 107723679 | 9  | 13 | 14 | 0.970017239 | 0.534076    | NTNG1 | ENSG00000162631 |
| 1 | 107914470 | 107914805 | 107914637 | 14 | 16 | 12 | 1.359090087 | 0.198699    |       | ENSG00000211552 |
| 1 | 107914887 | 107915118 | 107915064 | 10 | 12 | 6  | 1.930136342 | 0.071303    |       | ENSG00000211552 |
| 1 | 107970647 | 107971027 | 107970853 | 9  | 16 | 10 | 1.606197376 | 0.104477    |       | ENSG00000211552 |
| 1 | 108014175 | 108014493 | 108014330 | 8  | 12 | 3  | 3.377738599 | 0.00867157  |       | ENSG00000211552 |
| 1 | 108021859 | 108022195 | 108022033 | 16 | 19 | 6  | 2.969440526 | 0.0035096   |       | ENSG00000211552 |
| 1 | 108027349 | 108027676 | 108027512 | 14 | 18 | 5  | 3.291129917 | 0.00248584  | VAV3  | ENSG00000134215 |
| 1 | 108035739 | 108035938 | 108035838 | 8  | 9  | 8  | 1.154782427 | 0.375434    | VAV3  | ENSG00000134215 |
| 1 | 108047529 | 108047791 | 108047673 | 8  | 11 | 3  | 3.117912553 | 0.0146045   | VAV3  | ENSG00000134215 |
| 1 | 108072095 | 108072391 | 108072243 | 9  | 12 | 5  | 2.251825733 | 0.0404733   | VAV3  | ENSG00000134215 |
| 1 | 108280725 | 108281083 | 108280848 | 8  | 13 | 5  | 2.425043097 | 0.0262442   | VAV3  | ENSG00000134215 |
| 1 | 108356648 | 108357181 | 108356872 | 9  | 18 | 4  | 3.9493559   | 0.000961379 | VAV3  | ENSG00000134215 |
| 1 | 108378570 | 108378884 | 108378713 | 15 | 18 | 5  | 3.291129917 | 0.00248584  | VAV3  | ENSG00000134215 |

|   |           |           |           |    |    |    |             |             |          |                 |
|---|-----------|-----------|-----------|----|----|----|-------------|-------------|----------|-----------------|
| 1 | 108393860 | 108394071 | 108393953 | 9  | 9  | 1  | 5.196520921 | 0.00490062  | VAV3     | ENSG00000134215 |
| 1 | 108458677 | 108458880 | 108458778 | 8  | 10 | 2  | 3.810782009 | 0.00936112  | SLC25A24 | ENSG00000085491 |
| 1 | 108462194 | 108462526 | 108462360 | 12 | 18 | 5  | 3.291129917 | 0.00248584  | SLC25A24 | ENSG00000085491 |
| 1 | 108466877 | 108467063 | 108466978 | 8  | 8  | 2  | 3.117912553 | 0.0283184   | SLC25A24 | ENSG00000085491 |
| 1 | 108469723 | 108469967 | 108469845 | 8  | 12 | 11 | 1.125912866 | 0.382541    | SLC25A24 | ENSG00000085491 |
| 1 | 108543366 | 108543655 | 108543504 | 8  | 11 | 5  | 2.078608368 | 0.0614303   | SLC25A24 | ENSG00000085491 |
| 1 | 108898128 | 108898480 | 108898304 | 16 | 22 | 3  | 5.975999059 | 2.96E-05    | FAM102B  | ENSG00000162636 |
| 1 | 108903792 | 108904143 | 108903942 | 10 | 14 | 5  | 2.598260461 | 0.0167748   | FAM102B  | ENSG00000162636 |
| 1 | 108914312 | 108914550 | 108914472 | 9  | 10 | 3  | 2.858086507 | 0.0242838   | FAM102B  | ENSG00000162636 |
| 1 | 108968266 | 108968572 | 108968393 | 8  | 10 | 5  | 1.905391004 | 0.0915982   | C1orf59  | ENSG00000162639 |
| 1 | 109030898 | 109031079 | 109030988 | 8  | 8  | 0  | 9.353737658 | 0.00163931  | PRPF38B  | ENSG00000134186 |
| 1 | 109036345 | 109036527 | 109036468 | 8  | 8  | 5  | 1.558956276 | 0.191397    | PRPF38B  | ENSG00000134186 |
| 1 | 109174725 | 109174968 | 109174863 | 13 | 16 | 8  | 1.963130126 | 0.0441028   | C1orf62  | ENSG00000162641 |
| 1 | 109190027 | 109190620 | 109190272 | 39 | 66 | 0  | 69.63338034 | 1.84E-21    | C1orf62  | ENSG00000162641 |
| 1 | 109386096 | 109386311 | 109386209 | 8  | 9  | 3  | 2.598260461 | 0.0397929   | WDR47    | ENSG00000085433 |
| 1 | 109420148 | 109420412 | 109420280 | 8  | 10 | 5  | 1.905391004 | 0.0915982   | TAF13    | ENSG00000197780 |
| 1 | 109433360 | 109433646 | 109433501 | 9  | 13 | 5  | 2.425043097 | 0.0262442   | TMEM167B | ENSG00000162647 |
| 1 | 109434703 | 109435067 | 109434888 | 15 | 21 | 8  | 2.540521339 | 0.00602138  | TMEM167B | ENSG00000162647 |
| 1 | 109444087 | 109444446 | 109444266 | 15 | 22 | 7  | 2.98799953  | 0.00188278  |          | ENSG00000219444 |
| 1 | 109456872 | 109457060 | 109456929 | 8  | 8  | 1  | 4.676868829 | 0.0091584   | C1orf194 | ENSG00000179902 |
| 1 | 109496381 | 109496639 | 109496537 | 10 | 14 | 8  | 1.73217364  | 0.0890835   | KIAA1324 | ENSG00000116299 |
| 1 | 109542165 | 109542685 | 109542295 | 21 | 32 | 4  | 6.859407616 | 3.06E-07    | KIAA1324 | ENSG00000116299 |
| 1 | 109558493 | 109558748 | 109558620 | 14 | 14 | 5  | 2.598260461 | 0.0167748   | SARS     | ENSG00000031698 |
| 1 | 109607290 | 109607652 | 109607469 | 12 | 18 | 0  | 19.7467795  | 1.32E-06    | CELSR2   | ENSG00000143126 |
| 1 | 109618910 | 109619334 | 109619156 | 13 | 24 | 1  | 12.9913023  | 2.52E-07    | PSRC1    | ENSG00000134222 |
| 1 | 109770783 | 109770995 | 109770889 | 8  | 9  | 5  | 1.73217364  | 0.133894    | PSMA5    | ENSG00000143106 |
| 1 | 109838121 | 109838415 | 109838268 | 8  | 13 | 2  | 4.850086193 | 0.00164564  | CYB561D1 | ENSG00000174151 |
| 1 | 109910433 | 109910612 | 109910522 | 9  | 9  | 1  | 5.196520921 | 0.00490062  | GNAI3    | ENSG00000065135 |
| 1 | 109999962 | 110000205 | 110000054 | 8  | 10 | 7  | 1.429043253 | 0.21536     | GSTM4    | ENSG00000168765 |
| 1 | 110164663 | 110164925 | 110164788 | 18 | 20 | 0  | 21.82538787 | 3.17E-07    |          | ENSG00000219071 |
| 1 | 110292544 | 110292769 | 110292650 | 9  | 9  | 0  | 10.39304184 | 0.000803859 | AHCYL1   | ENSG00000168710 |
| 1 | 110324802 | 110325090 | 110324926 | 8  | 11 | 4  | 2.494330042 | 0.0324033   | AHCYL1   | ENSG00000168710 |
| 1 | 110326710 | 110326889 | 110326836 | 8  | 8  | 4  | 1.870747532 | 0.118863    | AHCYL1   | ENSG00000168710 |
| 1 | 110461060 | 110461302 | 110461165 | 8  | 8  | 3  | 2.338434415 | 0.0641221   | UBL4B    | ENSG00000186150 |

|   |           |           |           |    |     |    |             |             |          |                 |
|---|-----------|-----------|-----------|----|-----|----|-------------|-------------|----------|-----------------|
| 1 | 110558675 | 110558923 | 110558799 | 9  | 11  | 4  | 2.494330042 | 0.0324033   | KCNC4    | ENSG00000116396 |
| 1 | 110656732 | 110657021 | 110656876 | 8  | 11  | 3  | 3.117912553 | 0.0146045   | RBM15    | ENSG00000162775 |
| 1 | 110682365 | 110682569 | 110682453 | 8  | 8   | 6  | 1.336248237 | 0.277651    | RBM15    | ENSG00000162775 |
| 1 | 110751770 | 110752078 | 110751924 | 12 | 14  | 7  | 1.948695345 | 0.0559175   | HBXIP    | ENSG00000134248 |
| 1 | 111173690 | 111173869 | 111173779 | 8  | 8   | 0  | 9.353737658 | 0.00163931  |          | ENSG00000219348 |
| 1 | 111558606 | 111559096 | 111558808 | 86 | 114 | 1  | 59.75999059 | 1.53E-34    | DENND2D  | ENSG00000162777 |
| 1 | 111649175 | 111649367 | 111649271 | 8  | 8   | 0  | 9.353737658 | 0.00163931  | CHIA     | ENSG00000134216 |
| 1 | 111708880 | 111709458 | 111709133 | 80 | 102 | 4  | 21.4096662  | 4.80E-27    |          | ENSG00000217967 |
| 1 | 111857593 | 111857772 | 111857702 | 8  | 8   | 1  | 4.676868829 | 0.0091584   | ADORA3   | ENSG00000121933 |
| 1 | 111920564 | 111921001 | 111920855 | 11 | 19  | 10 | 1.889643971 | 0.0394833   | ADORA3   | ENSG00000121933 |
| 1 | 112082610 | 112082854 | 112082732 | 17 | 19  | 0  | 20.78608368 | 6.46E-07    | C1orf183 | ENSG00000197852 |
| 1 | 112099808 | 112100067 | 112099937 | 19 | 20  | 5  | 3.637564645 | 0.000902929 | DDX20    | ENSG00000064703 |
| 1 | 112156497 | 112156700 | 112156608 | 8  | 8   | 1  | 4.676868829 | 0.0091584   | DDX20    | ENSG00000064703 |
| 1 | 112172194 | 112172425 | 112172248 | 8  | 10  | 2  | 3.810782009 | 0.00936112  | DDX20    | ENSG00000064703 |
| 1 | 112172564 | 112172778 | 112172671 | 8  | 9   | 4  | 2.078608368 | 0.0785659   | DDX20    | ENSG00000064703 |
| 1 | 112177715 | 112177982 | 112177838 | 10 | 12  | 4  | 2.702190879 | 0.0203088   | DDX20    | ENSG00000064703 |
| 1 | 112178591 | 112178819 | 112178705 | 8  | 10  | 8  | 1.27026067  | 0.293854    | DDX20    | ENSG00000064703 |
| 1 | 112184439 | 112184642 | 112184540 | 8  | 9   | 3  | 2.598260461 | 0.0397929   | DDX20    | ENSG00000064703 |
| 1 | 112188655 | 112188869 | 112188751 | 9  | 11  | 3  | 3.117912553 | 0.0146045   | DDX20    | ENSG00000064703 |
| 1 | 112192342 | 112192534 | 112192432 | 8  | 9   | 8  | 1.154782427 | 0.375434    | DDX20    | ENSG00000064703 |
| 1 | 112195735 | 112195977 | 112195850 | 8  | 10  | 4  | 2.286469205 | 0.0509017   | DDX20    | ENSG00000064703 |
| 1 | 112208757 | 112208964 | 112208830 | 9  | 10  | 4  | 2.286469205 | 0.0509017   | DDX20    | ENSG00000064703 |
| 1 | 112209495 | 112209767 | 112209659 | 13 | 13  | 5  | 2.425043097 | 0.0262442   | DDX20    | ENSG00000064703 |
| 1 | 112228735 | 112229157 | 112228914 | 8  | 16  | 14 | 1.177878075 | 0.320433    | KCND3    | ENSG00000171385 |
| 1 | 112239953 | 112240657 | 112240179 | 13 | 34  | 18 | 1.914507708 | 0.00935224  | KCND3    | ENSG00000171385 |
| 1 | 112240779 | 112241068 | 112240952 | 8  | 11  | 12 | 0.959357709 | 0.543005    | KCND3    | ENSG00000171385 |
| 1 | 112242231 | 112242605 | 112242431 | 8  | 13  | 11 | 1.212521548 | 0.309909    | KCND3    | ENSG00000171385 |
| 1 | 112252087 | 112252339 | 112252213 | 10 | 10  | 6  | 1.63319229  | 0.146906    | KCND3    | ENSG00000171385 |
| 1 | 112298636 | 112298934 | 112298762 | 13 | 16  | 3  | 4.417042783 | 0.00097367  | KCND3    | ENSG00000171385 |
| 1 | 112319593 | 112319776 | 112319684 | 9  | 9   | 3  | 2.598260461 | 0.0397929   | KCND3    | ENSG00000171385 |
| 1 | 112320989 | 112321354 | 112321168 | 13 | 20  | 15 | 1.364086742 | 0.171319    | KCND3    | ENSG00000171385 |
| 1 | 112332200 | 112332437 | 112332315 | 8  | 9   | 8  | 1.154782427 | 0.375434    | KCND3    | ENSG00000171385 |
| 1 | 112335617 | 112335933 | 112335756 | 11 | 15  | 13 | 1.187776211 | 0.317363    | KCND3    | ENSG00000171385 |
| 1 | 112345848 | 112346049 | 112345921 | 8  | 8   | 3  | 2.338434415 | 0.0641221   | KCND3    | ENSG00000171385 |

|   |           |           |           |    |     |    |             |             |           |                 |
|---|-----------|-----------|-----------|----|-----|----|-------------|-------------|-----------|-----------------|
| 1 | 112735023 | 112735234 | 112735118 | 8  | 8   | 3  | 2.338434415 | 0.0641221   | CTTNBP2NL | ENSG00000143079 |
| 1 | 113031510 | 113032018 | 113031712 | 71 | 90  | 0  | 94.57668077 | 6.87E-29    | MOV10     | ENSG00000155363 |
| 1 | 113047941 | 113048191 | 113048066 | 10 | 11  | 1  | 6.235825105 | 0.0013754   | RHOC      | ENSG00000155366 |
| 1 | 113106811 | 113107628 | 113107370 | 57 | 93  | 0  | 97.69459332 | 8.10E-30    |           | ENSG00000198789 |
| 1 | 113416921 | 113417281 | 113417100 | 10 | 17  | 5  | 3.117912553 | 0.00407023  | LRIG2     | ENSG00000198799 |
| 1 | 113733204 | 113733392 | 113733298 | 8  | 9   | 2  | 3.464347281 | 0.0163838   | MAGI3     | ENSG00000081026 |
| 1 | 113735489 | 113735744 | 113735616 | 8  | 9   | 7  | 1.29913023  | 0.286504    | MAGI3     | ENSG00000081026 |
| 1 | 113877394 | 113877626 | 113877509 | 8  | 10  | 0  | 11.43234603 | 0.000394183 |           | ENSG00000217056 |
| 1 | 113898472 | 113898651 | 113898586 | 8  | 9   | 3  | 2.598260461 | 0.0397929   |           | ENSG00000217056 |
| 1 | 113939327 | 113939542 | 113939394 | 8  | 8   | 0  | 9.353737658 | 0.00163931  |           | ENSG00000217056 |
| 1 | 114018780 | 114019102 | 114018954 | 8  | 11  | 6  | 1.781664316 | 0.103344    |           | ENSG00000217298 |
| 1 | 114051984 | 114052291 | 114052143 | 8  | 10  | 5  | 1.905391004 | 0.0915982   |           | ENSG00000217298 |
| 1 | 114102796 | 114103065 | 114102891 | 12 | 15  | 9  | 1.662886695 | 0.0970566   | PHTF1     | ENSG00000116793 |
| 1 | 114103543 | 114103909 | 114103721 | 9  | 15  | 9  | 1.662886695 | 0.0970566   | PHTF1     | ENSG00000116793 |
| 1 | 114149013 | 114149197 | 114149112 | 8  | 8   | 3  | 2.338434415 | 0.0641221   | RSBN1     | ENSG00000081019 |
| 1 | 114154033 | 114154390 | 114154290 | 10 | 14  | 11 | 1.29913023  | 0.246308    | RSBN1     | ENSG00000081019 |
| 1 | 114155620 | 114155878 | 114155749 | 8  | 9   | 16 | 0.611355402 | 0.899375    | RSBN1     | ENSG00000081019 |
| 1 | 114156351 | 114157192 | 114156590 | 27 | 64  | 26 | 2.502028592 | 1.20E-05    | RSBN1     | ENSG00000081019 |
| 1 | 114167296 | 114167503 | 114167451 | 9  | 10  | 1  | 5.716173013 | 0.00260397  | RSBN1     | ENSG00000081019 |
| 1 | 114179872 | 114180105 | 114179988 | 8  | 10  | 3  | 2.858086507 | 0.0242838   | HIPK1     | ENSG00000163349 |
| 1 | 114204811 | 114205045 | 114204874 | 8  | 11  | 9  | 1.247165021 | 0.300052    | HIPK1     | ENSG00000163349 |
| 1 | 114212487 | 114212803 | 114212645 | 8  | 9   | 12 | 0.799464757 | 0.707717    | PTPN22    | ENSG00000134242 |
| 1 | 114216729 | 114216934 | 114216802 | 8  | 8   | 11 | 0.779478138 | 0.719708    | PTPN22    | ENSG00000134242 |
| 1 | 114218592 | 114219001 | 114218768 | 12 | 19  | 14 | 1.385738912 | 0.166049    | PTPN22    | ENSG00000134242 |
| 1 | 114229350 | 114229566 | 114229458 | 9  | 10  | 5  | 1.905391004 | 0.0915982   | C1orf178  | ENSG00000188761 |
| 1 | 114234754 | 114234973 | 114234863 | 10 | 12  | 2  | 4.503651465 | 0.002963    | C1orf178  | ENSG00000188761 |
| 1 | 114239403 | 114239667 | 114239498 | 8  | 11  | 14 | 0.831443347 | 0.68719     | C1orf178  | ENSG00000188761 |
| 1 | 114247934 | 114248252 | 114248093 | 8  | 14  | 19 | 0.779478138 | 0.771518    | AP4B1     | ENSG00000134262 |
| 1 | 114248438 | 114249653 | 114249373 | 38 | 104 | 36 | 2.949376739 | 6.43E-10    | AP4B1     | ENSG00000134262 |
| 1 | 114255396 | 114255614 | 114255567 | 10 | 11  | 5  | 2.078608368 | 0.0614303   | DCLRE1B   | ENSG00000118655 |
| 1 | 114256888 | 114257106 | 114257010 | 8  | 8   | 10 | 0.850339787 | 0.645072    | DCLRE1B   | ENSG00000118655 |
| 1 | 114260369 | 114260763 | 114260654 | 12 | 18  | 4  | 3.9493559   | 0.000961379 | DCLRE1B   | ENSG00000118655 |
| 1 | 114261269 | 114261805 | 114261448 | 21 | 35  | 14 | 2.494330042 | 0.000827091 | DCLRE1B   | ENSG00000118655 |
| 1 | 114262465 | 114262646 | 114262555 | 8  | 8   | 6  | 1.336248237 | 0.277651    | HIPK1     | ENSG00000163349 |

|   |           |           |           |    |    |    |             |            |        |                 |
|---|-----------|-----------|-----------|----|----|----|-------------|------------|--------|-----------------|
| 1 | 114269074 | 114269300 | 114269154 | 9  | 11 | 6  | 1.781664316 | 0.103344   | HIPK1  | ENSG00000163349 |
| 1 | 114272680 | 114272987 | 114272833 | 10 | 13 | 18 | 0.765803083 | 0.780427   | HIPK1  | ENSG00000163349 |
| 1 | 114273017 | 114273275 | 114273144 | 10 | 10 | 17 | 0.635130335 | 0.889407   | HIPK1  | ENSG00000163349 |
| 1 | 114273402 | 114273787 | 114273640 | 23 | 31 | 15 | 2.078608368 | 0.00648505 | HIPK1  | ENSG00000163349 |
| 1 | 114274267 | 114274575 | 114274430 | 14 | 18 | 13 | 1.41048425  | 0.160361   | HIPK1  | ENSG00000163349 |
| 1 | 114274645 | 114274824 | 114274734 | 8  | 8  | 5  | 1.558956276 | 0.191397   | HIPK1  | ENSG00000163349 |
| 1 | 114274912 | 114275274 | 114275095 | 11 | 17 | 9  | 1.870747532 | 0.0498299  | HIPK1  | ENSG00000163349 |
| 1 | 114275846 | 114276366 | 114276187 | 10 | 22 | 9  | 2.390399624 | 0.00747467 | HIPK1  | ENSG00000163349 |
| 1 | 114276953 | 114277132 | 114277045 | 8  | 8  | 0  | 9.353737658 | 0.00163931 | HIPK1  | ENSG00000163349 |
| 1 | 114279954 | 114280198 | 114280076 | 10 | 11 | 3  | 3.117912553 | 0.0146045  | HIPK1  | ENSG00000163349 |
| 1 | 114282003 | 114282259 | 114282150 | 10 | 12 | 6  | 1.930136342 | 0.071303   | HIPK1  | ENSG00000163349 |
| 1 | 114283583 | 114284003 | 114283797 | 8  | 16 | 7  | 2.208521392 | 0.0257604  | HIPK1  | ENSG00000163349 |
| 1 | 114291851 | 114292094 | 114291966 | 11 | 12 | 2  | 4.503651465 | 0.002963   | HIPK1  | ENSG00000163349 |
| 1 | 114311708 | 114311892 | 114311863 | 8  | 8  | 0  | 9.353737658 | 0.00163931 | OLFML3 | ENSG00000116774 |
| 1 | 114313225 | 114313450 | 114313365 | 8  | 8  | 4  | 1.870747532 | 0.118863   | OLFML3 | ENSG00000116774 |
| 1 | 114317905 | 114318098 | 114318001 | 10 | 10 | 6  | 1.63319229  | 0.146906   | OLFML3 | ENSG00000116774 |
| 1 | 114319469 | 114319655 | 114319541 | 8  | 9  | 3  | 2.598260461 | 0.0397929  | OLFML3 | ENSG00000116774 |
| 1 | 114320763 | 114321445 | 114320958 | 15 | 33 | 35 | 0.981565063 | 0.531809   | OLFML3 | ENSG00000116774 |
| 1 | 114322053 | 114322298 | 114322175 | 14 | 16 | 6  | 2.524024447 | 0.0137633  | OLFML3 | ENSG00000116774 |
| 1 | 114322920 | 114323338 | 114323066 | 16 | 23 | 16 | 1.467252966 | 0.109416   | OLFML3 | ENSG00000116774 |
| 1 | 114328192 | 114328482 | 114328319 | 9  | 12 | 6  | 1.930136342 | 0.071303   | OLFML3 | ENSG00000116774 |
| 1 | 114329471 | 114329683 | 114329604 | 8  | 9  | 3  | 2.598260461 | 0.0397929  | OLFML3 | ENSG00000116774 |
| 1 | 114337758 | 114337937 | 114337847 | 8  | 8  | 1  | 4.676868829 | 0.0091584  |        | ENSG00000216343 |
| 1 | 114343894 | 114344252 | 114344073 | 8  | 13 | 14 | 0.970017239 | 0.534076   |        | ENSG00000216343 |
| 1 | 114359411 | 114359590 | 114359500 | 8  | 8  | 12 | 0.719518281 | 0.783103   |        | ENSG00000216343 |
| 1 | 114368388 | 114368567 | 114368457 | 8  | 8  | 1  | 4.676868829 | 0.0091584  |        | ENSG00000216343 |
| 1 | 114377168 | 114377418 | 114377293 | 8  | 12 | 11 | 1.125912866 | 0.382541   |        | ENSG00000216343 |
| 1 | 114377577 | 114377849 | 114377693 | 10 | 12 | 8  | 1.501217155 | 0.168286   |        | ENSG00000216343 |
| 1 | 114380728 | 114380919 | 114380783 | 8  | 9  | 1  | 5.196520921 | 0.00490062 |        | ENSG00000216343 |
| 1 | 114386823 | 114387099 | 114386961 | 9  | 11 | 6  | 1.781664316 | 0.103344   |        | ENSG00000216343 |
| 1 | 114394713 | 114394965 | 114394839 | 9  | 12 | 3  | 3.377738599 | 0.00867157 |        | ENSG00000216343 |
| 1 | 114397460 | 114397769 | 114397614 | 8  | 13 | 4  | 2.910051716 | 0.0125532  |        | ENSG00000216343 |
| 1 | 114407778 | 114408071 | 114407924 | 8  | 13 | 6  | 2.078608368 | 0.0483393  |        | ENSG00000216343 |
| 1 | 114419080 | 114419293 | 114419186 | 8  | 9  | 8  | 1.154782427 | 0.375434   |        | ENSG00000216343 |



|   |           |           |           |    |    |    |             |           |      |                 |
|---|-----------|-----------|-----------|----|----|----|-------------|-----------|------|-----------------|
| 1 | 114428076 | 114428402 | 114428225 | 9  | 13 | 3  | 3.637564645 | 0.0050909 | SYT6 | ENSG00000134207 |
| 1 | 114431017 | 114431196 | 114431082 | 8  | 8  | 1  | 4.676868829 | 0.0091584 | SYT6 | ENSG00000134207 |
| 1 | 114433959 | 114434224 | 114434091 | 8  | 11 | 17 | 0.692869456 | 0.843876  | SYT6 | ENSG00000134207 |
| 1 | 114434277 | 114434528 | 114434434 | 10 | 11 | 5  | 2.078608368 | 0.0614303 | SYT6 | ENSG00000134207 |
| 1 | 114435268 | 114435473 | 114435373 | 11 | 11 | 8  | 1.385738912 | 0.224757  | SYT6 | ENSG00000134207 |
| 1 | 114439469 | 114439779 | 114439624 | 8  | 11 | 4  | 2.494330042 | 0.0324033 | SYT6 | ENSG00000134207 |
| 1 | 114442002 | 114442233 | 114442117 | 8  | 9  | 4  | 2.078608368 | 0.0785659 | SYT6 | ENSG00000134207 |
| 1 | 114451912 | 114452129 | 114452070 | 9  | 9  | 9  | 1.039304184 | 0.466079  | SYT6 | ENSG00000134207 |
| 1 | 114472942 | 114473165 | 114472994 | 8  | 10 | 11 | 0.952695502 | 0.548138  | SYT6 | ENSG00000134207 |
| 1 | 114494544 | 114494754 | 114494678 | 9  | 10 | 5  | 1.905391004 | 0.0915982 | SYT6 | ENSG00000134207 |
| 1 | 114498224 | 114498457 | 114498375 | 12 | 13 | 6  | 2.078608368 | 0.0483393 | SYT6 | ENSG00000134207 |
| 1 | 114498955 | 114499567 | 114499423 | 9  | 19 | 11 | 1.73217364  | 0.0607469 | SYT6 | ENSG00000134207 |
| 1 | 114504616 | 114504823 | 114504701 | 9  | 11 | 5  | 2.078608368 | 0.0614303 | SYT6 | ENSG00000134207 |
| 1 | 114514688 | 114514967 | 114514845 | 8  | 10 | 5  | 1.905391004 | 0.0915982 | SYT6 | ENSG00000134207 |
| 1 | 114517139 | 114517354 | 114517246 | 11 | 11 | 6  | 1.781664316 | 0.103344  | SYT6 | ENSG00000134207 |
| 1 | 114517595 | 114518075 | 114517683 | 10 | 19 | 15 | 1.29913023  | 0.214784  | SYT6 | ENSG00000134207 |
| 1 | 114518291 | 114518660 | 114518481 | 9  | 16 | 14 | 1.177878075 | 0.320433  | SYT6 | ENSG00000134207 |
| 1 | 114521437 | 114521616 | 114521526 | 8  | 8  | 8  | 1.039304184 | 0.46786   | SYT6 | ENSG00000134207 |
| 1 | 114534213 | 114534442 | 114534327 | 8  | 10 | 8  | 1.27026067  | 0.293854  | SYT6 | ENSG00000134207 |
| 1 | 114534951 | 114535219 | 114535080 | 8  | 8  | 5  | 1.558956276 | 0.191397  | SYT6 | ENSG00000134207 |
| 1 | 114536278 | 114536504 | 114536379 | 9  | 10 | 5  | 1.905391004 | 0.0915982 | SYT6 | ENSG00000134207 |
| 1 | 114536605 | 114536797 | 114536686 | 8  | 8  | 4  | 1.870747532 | 0.118863  | SYT6 | ENSG00000134207 |
| 1 | 114557800 | 114557996 | 114557898 | 9  | 9  | 7  | 1.29913023  | 0.286504  | SYT6 | ENSG00000134207 |
| 1 | 114559418 | 114559703 | 114559550 | 10 | 11 | 8  | 1.385738912 | 0.224757  | SYT6 | ENSG00000134207 |
| 1 | 114563029 | 114563338 | 114563183 | 8  | 12 | 4  | 2.702190879 | 0.0203088 | SYT6 | ENSG00000134207 |
| 1 | 114563406 | 114563846 | 114563541 | 10 | 17 | 18 | 0.984603964 | 0.519872  | SYT6 | ENSG00000134207 |
| 1 | 114564226 | 114564405 | 114564288 | 8  | 9  | 2  | 3.464347281 | 0.0163838 | SYT6 | ENSG00000134207 |
| 1 | 114566944 | 114567224 | 114567052 | 9  | 10 | 4  | 2.286469205 | 0.0509017 | SYT6 | ENSG00000134207 |
| 1 | 114567729 | 114567964 | 114567846 | 8  | 9  | 6  | 1.484720263 | 0.204387  | SYT6 | ENSG00000134207 |
| 1 | 114568258 | 114568571 | 114568414 | 12 | 15 | 11 | 1.385738912 | 0.19225   | SYT6 | ENSG00000134207 |
| 1 | 114580319 | 114580506 | 114580396 | 8  | 8  | 12 | 0.719518281 | 0.783103  | SYT6 | ENSG00000134207 |
| 1 | 114593138 | 114593374 | 114593258 | 9  | 12 | 10 | 1.228268581 | 0.305344  | SYT6 | ENSG00000134207 |
| 1 | 114600485 | 114600826 | 114600655 | 10 | 16 | 10 | 1.606197376 | 0.104477  | SYT6 | ENSG00000134207 |
| 1 | 114601652 | 114601990 | 114601821 | 8  | 13 | 8  | 1.616695398 | 0.123553  | SYT6 | ENSG00000134207 |

|   |           |           |           |    |    |    |             |            |        |                 |
|---|-----------|-----------|-----------|----|----|----|-------------|------------|--------|-----------------|
| 1 | 114603800 | 114604226 | 114604102 | 8  | 16 | 16 | 1.039304184 | 0.455583   | SYT6   | ENSG00000134207 |
| 1 | 114606004 | 114606315 | 114606159 | 10 | 14 | 7  | 1.948695345 | 0.0559175  | SYT6   | ENSG00000134207 |
| 1 | 114613661 | 114613883 | 114613722 | 8  | 8  | 6  | 1.336248237 | 0.277651   | SYT6   | ENSG00000134207 |
| 1 | 114626997 | 114627252 | 114627101 | 16 | 16 | 15 | 1.104260696 | 0.387363   | SYT6   | ENSG00000134207 |
| 1 | 114636437 | 114636774 | 114636605 | 13 | 18 | 15 | 1.234173719 | 0.265435   | SYT6   | ENSG00000134207 |
| 1 | 114638166 | 114638418 | 114638278 | 8  | 9  | 5  | 1.73217364  | 0.133894   | SYT6   | ENSG00000134207 |
| 1 | 114644323 | 114644910 | 114644496 | 8  | 19 | 15 | 1.29913023  | 0.214784   | SYT6   | ENSG00000134207 |
| 1 | 114654910 | 114655116 | 114654988 | 8  | 9  | 10 | 0.944821986 | 0.553851   |        | ENSG00000216325 |
| 1 | 114659936 | 114660139 | 114660037 | 8  | 9  | 5  | 1.73217364  | 0.133894   |        | ENSG00000216325 |
| 1 | 114680446 | 114680870 | 114680657 | 57 | 74 | 14 | 5.196520921 | 4.53E-12   |        | ENSG00000216325 |
| 1 | 114684102 | 114684334 | 114684189 | 8  | 11 | 10 | 1.133786383 | 0.380636   |        | ENSG00000216325 |
| 1 | 114690528 | 114691323 | 114690855 | 28 | 57 | 23 | 2.511651779 | 3.11E-05   |        | ENSG00000216325 |
| 1 | 114691522 | 114691707 | 114691681 | 9  | 10 | 5  | 1.905391004 | 0.0915982  |        | ENSG00000216325 |
| 1 | 114702324 | 114702642 | 114702483 | 8  | 11 | 5  | 2.078608368 | 0.0614303  |        | ENSG00000216325 |
| 1 | 114729149 | 114729371 | 114729271 | 8  | 9  | 5  | 1.73217364  | 0.133894   |        | ENSG00000216325 |
| 1 | 114734839 | 114735046 | 114734909 | 10 | 10 | 2  | 3.810782009 | 0.00936112 |        | ENSG00000216325 |
| 1 | 114751427 | 114751646 | 114751533 | 13 | 13 | 0  | 14.55025858 | 4.65E-05   |        | ENSG00000216325 |
| 1 | 114752134 | 114752473 | 114752303 | 11 | 15 | 4  | 3.32577339  | 0.00462646 |        | ENSG00000216325 |
| 1 | 114754994 | 114755184 | 114755089 | 8  | 8  | 5  | 1.558956276 | 0.191397   |        | ENSG00000216325 |
| 1 | 114765582 | 114765773 | 114765654 | 8  | 8  | 5  | 1.558956276 | 0.191397   |        | ENSG00000216325 |
| 1 | 114778843 | 114779561 | 114779008 | 24 | 43 | 5  | 7.621564018 | 1.77E-09   |        | ENSG00000216325 |
| 1 | 114780845 | 114781061 | 114780914 | 8  | 9  | 4  | 2.078608368 | 0.0785659  |        | ENSG00000216325 |
| 1 | 114787877 | 114788175 | 114788055 | 9  | 11 | 4  | 2.494330042 | 0.0324033  |        | ENSG00000216325 |
| 1 | 114791064 | 114791292 | 114791178 | 8  | 9  | 7  | 1.29913023  | 0.286504   |        | ENSG00000216325 |
| 1 | 114795090 | 114795308 | 114795199 | 8  | 8  | 2  | 3.117912553 | 0.0283184  |        | ENSG00000216325 |
| 1 | 114797565 | 114797884 | 114797724 | 8  | 13 | 19 | 0.727512929 | 0.824686   |        | ENSG00000216325 |
| 1 | 114798815 | 114799109 | 114798962 | 8  | 10 | 6  | 1.63319229  | 0.146906   |        | ENSG00000216325 |
| 1 | 114805459 | 114805660 | 114805597 | 9  | 10 | 4  | 2.286469205 | 0.0509017  |        | ENSG00000216325 |
| 1 | 114806544 | 114806733 | 114806657 | 8  | 8  | 9  | 0.935373766 | 0.560286   |        | ENSG00000216325 |
| 1 | 114807280 | 114807473 | 114807376 | 8  | 8  | 4  | 1.870747532 | 0.118863   |        | ENSG00000216325 |
| 1 | 114832940 | 114833157 | 114833080 | 8  | 8  | 1  | 4.676868829 | 0.0091584  |        | ENSG00000201114 |
| 1 | 114835974 | 114836243 | 114836108 | 8  | 10 | 5  | 1.905391004 | 0.0915982  |        | ENSG00000201114 |
| 1 | 114841005 | 114841337 | 114841180 | 8  | 12 | 7  | 1.688869299 | 0.11395    |        | ENSG00000201114 |
| 1 | 114849409 | 114849697 | 114849553 | 16 | 19 | 9  | 2.078608368 | 0.0241848  | TRIM33 | ENSG00000197323 |

|   |           |           |           |    |    |    |             |            |         |                 |
|---|-----------|-----------|-----------|----|----|----|-------------|------------|---------|-----------------|
| 1 | 114853286 | 114853525 | 114853395 | 10 | 13 | 8  | 1.616695398 | 0.123553   | TRIM33  | ENSG00000197323 |
| 1 | 114853781 | 114854409 | 114854126 | 14 | 29 | 18 | 1.641006607 | 0.042208   | TRIM33  | ENSG00000197323 |
| 1 | 114855444 | 114856045 | 114855589 | 15 | 33 | 33 | 1.039304184 | 0.437085   | TRIM33  | ENSG00000197323 |
| 1 | 114856479 | 114856832 | 114856655 | 14 | 19 | 6  | 2.969440526 | 0.0035096  | TRIM33  | ENSG00000197323 |
| 1 | 114856837 | 114857313 | 114857134 | 10 | 20 | 12 | 1.67887599  | 0.0659142  | TRIM33  | ENSG00000197323 |
| 1 | 114858447 | 114858704 | 114858619 | 8  | 11 | 4  | 2.494330042 | 0.0324033  | TRIM33  | ENSG00000197323 |
| 1 | 114861580 | 114861844 | 114861704 | 15 | 18 | 9  | 1.97467795  | 0.0349428  | TRIM33  | ENSG00000197323 |
| 1 | 114866261 | 114866654 | 114866427 | 9  | 14 | 10 | 1.417232979 | 0.185113   | TRIM33  | ENSG00000197323 |
| 1 | 114873212 | 114873526 | 114873292 | 9  | 14 | 4  | 3.117912553 | 0.00766354 |         | ENSG00000216823 |
| 1 | 114879250 | 114879456 | 114879353 | 8  | 9  | 3  | 2.598260461 | 0.0397929  |         | ENSG00000216823 |
| 1 | 114879772 | 114879952 | 114879862 | 10 | 11 | 5  | 2.078608368 | 0.0614303  |         | ENSG00000216823 |
| 1 | 114890354 | 114890588 | 114890461 | 11 | 11 | 6  | 1.781664316 | 0.103344   |         | ENSG00000216823 |
| 1 | 114908191 | 114908498 | 114908344 | 10 | 14 | 7  | 1.948695345 | 0.0559175  | BCAS2   | ENSG00000116752 |
| 1 | 114908500 | 114908695 | 114908564 | 9  | 10 | 3  | 2.858086507 | 0.0242838  | BCAS2   | ENSG00000116752 |
| 1 | 114921822 | 114922018 | 114921920 | 8  | 9  | 1  | 5.196520921 | 0.00490062 | BCAS2   | ENSG00000116752 |
| 1 | 114922435 | 114922614 | 114922557 | 8  | 8  | 4  | 1.870747532 | 0.118863   | BCAS2   | ENSG00000116752 |
| 1 | 114925110 | 114925434 | 114925256 | 8  | 11 | 19 | 0.623582511 | 0.908792   | BCAS2   | ENSG00000116752 |
| 1 | 114925578 | 114926547 | 114925897 | 19 | 60 | 27 | 2.264198401 | 9.31E-05   | BCAS2   | ENSG00000116752 |
| 1 | 114926640 | 114926943 | 114926781 | 9  | 11 | 7  | 1.558956276 | 0.158273   | BCAS2   | ENSG00000116752 |
| 1 | 114929413 | 114929600 | 114929515 | 9  | 10 | 2  | 3.810782009 | 0.00936112 | BCAS2   | ENSG00000116752 |
| 1 | 114931752 | 114931960 | 114931828 | 9  | 12 | 9  | 1.35109544  | 0.232899   | BCAS2   | ENSG00000116752 |
| 1 | 114938515 | 114938698 | 114938530 | 8  | 9  | 7  | 1.29913023  | 0.286504   | BCAS2   | ENSG00000116752 |
| 1 | 114942648 | 114942887 | 114942827 | 8  | 11 | 4  | 2.494330042 | 0.0324033  | BCAS2   | ENSG00000116752 |
| 1 | 114943350 | 114943643 | 114943496 | 8  | 10 | 2  | 3.810782009 | 0.00936112 | BCAS2   | ENSG00000116752 |
| 1 | 114945297 | 114945817 | 114945561 | 8  | 19 | 14 | 1.385738912 | 0.166049   | BCAS2   | ENSG00000116752 |
| 1 | 114949192 | 114949389 | 114949329 | 8  | 8  | 7  | 1.169217207 | 0.371848   | BCAS2   | ENSG00000116752 |
| 1 | 114953718 | 114954190 | 114954011 | 8  | 17 | 17 | 1.039304184 | 0.454282   | BCAS2   | ENSG00000116752 |
| 1 | 114954808 | 114955170 | 114954987 | 12 | 18 | 7  | 2.468347438 | 0.0112499  | BCAS2   | ENSG00000116752 |
| 1 | 114958514 | 114958693 | 114958667 | 8  | 8  | 2  | 3.117912553 | 0.0283184  | BCAS2   | ENSG00000116752 |
| 1 | 114964589 | 114964889 | 114964731 | 8  | 12 | 8  | 1.501217155 | 0.168286   | BCAS2   | ENSG00000116752 |
| 1 | 114965502 | 114965718 | 114965610 | 9  | 10 | 3  | 2.858086507 | 0.0242838  | BCAS2   | ENSG00000116752 |
| 1 | 114965754 | 114966080 | 114965917 | 9  | 11 | 9  | 1.247165021 | 0.300052   | BCAS2   | ENSG00000116752 |
| 1 | 114969826 | 114970024 | 114969905 | 8  | 8  | 8  | 1.039304184 | 0.46786    | BCAS2   | ENSG00000116752 |
| 1 | 114974618 | 114974915 | 114974766 | 9  | 12 | 18 | 0.711102863 | 0.834017   | DENND2C | ENSG00000175984 |

|   |           |           |           |    |    |    |             |            |         |                 |
|---|-----------|-----------|-----------|----|----|----|-------------|------------|---------|-----------------|
| 1 | 114979486 | 114979696 | 114979629 | 8  | 9  | 1  | 5.196520921 | 0.00490062 | DENND2C | ENSG00000175984 |
| 1 | 115011102 | 115011315 | 115011204 | 8  | 9  | 3  | 2.598260461 | 0.0397929  | DENND2C | ENSG00000175984 |
| 1 | 115013484 | 115013915 | 115013609 | 9  | 16 | 11 | 1.472347594 | 0.147517   | DENND2C | ENSG00000175984 |
| 1 | 115014045 | 115014235 | 115014150 | 8  | 9  | 7  | 1.29913023  | 0.286504   | DENND2C | ENSG00000175984 |
| 1 | 115014242 | 115014865 | 115014696 | 12 | 28 | 20 | 1.435229588 | 0.100491   | DENND2C | ENSG00000175984 |
| 1 | 115015603 | 115015820 | 115015719 | 8  | 9  | 5  | 1.73217364  | 0.133894   | DENND2C | ENSG00000175984 |
| 1 | 115018895 | 115019140 | 115018971 | 9  | 12 | 11 | 1.125912866 | 0.382541   | DENND2C | ENSG00000175984 |
| 1 | 115021382 | 115021666 | 115021497 | 9  | 12 | 7  | 1.688869299 | 0.11395    | DENND2C | ENSG00000175984 |
| 1 | 115031832 | 115032071 | 115031960 | 10 | 11 | 7  | 1.558956276 | 0.158273   | AMPD1   | ENSG00000116748 |
| 1 | 115060047 | 115060282 | 115060164 | 9  | 9  | 6  | 1.484720263 | 0.204387   | NRAS    | ENSG00000213281 |
| 1 | 115060347 | 115061392 | 115061131 | 24 | 64 | 38 | 1.73217364  | 0.00281343 | NRAS    | ENSG00000213281 |
| 1 | 115063833 | 115064015 | 115063909 | 9  | 9  | 13 | 0.742360132 | 0.770276   | NRAS    | ENSG00000213281 |
| 1 | 115069070 | 115069354 | 115069209 | 9  | 14 | 6  | 2.227080395 | 0.0322529  |         | ENSG00000201900 |
| 1 | 115071157 | 115071357 | 115071301 | 8  | 8  | 4  | 1.870747532 | 0.118863   |         | ENSG00000201900 |
| 1 | 115071363 | 115071647 | 115071505 | 8  | 11 | 6  | 1.781664316 | 0.103344   |         | ENSG00000201900 |
| 1 | 115074480 | 115074723 | 115074593 | 9  | 10 | 10 | 1.039304184 | 0.464387   |         | ENSG00000201900 |
| 1 | 115081413 | 115081772 | 115081592 | 9  | 16 | 5  | 2.944695189 | 0.00659886 | CSDE1   | ENSG00000009307 |
| 1 | 115082185 | 115082478 | 115082320 | 9  | 10 | 8  | 1.27026067  | 0.293854   | CSDE1   | ENSG00000009307 |
| 1 | 115085001 | 115085231 | 115085112 | 8  | 9  | 6  | 1.484720263 | 0.204387   | CSDE1   | ENSG00000009307 |
| 1 | 115086085 | 115086537 | 115086388 | 9  | 16 | 5  | 2.944695189 | 0.00659886 | CSDE1   | ENSG00000009307 |
| 1 | 115093021 | 115093218 | 115093146 | 8  | 10 | 4  | 2.286469205 | 0.0509017  | CSDE1   | ENSG00000009307 |
| 1 | 115094937 | 115095123 | 115095028 | 8  | 8  | 4  | 1.870747532 | 0.118863   | CSDE1   | ENSG00000009307 |
| 1 | 115097221 | 115097477 | 115097343 | 9  | 13 | 11 | 1.212521548 | 0.309909   | CSDE1   | ENSG00000009307 |
| 1 | 115099680 | 115100050 | 115099859 | 10 | 17 | 8  | 2.078608368 | 0.0303558  | CSDE1   | ENSG00000009307 |
| 1 | 115100116 | 115100313 | 115100241 | 8  | 9  | 9  | 1.039304184 | 0.466079   | CSDE1   | ENSG00000009307 |
| 1 | 115100872 | 115101258 | 115101051 | 8  | 15 | 10 | 1.511715177 | 0.140236   | CSDE1   | ENSG00000009307 |
| 1 | 115101266 | 115101559 | 115101430 | 10 | 12 | 6  | 1.930136342 | 0.071303   | CSDE1   | ENSG00000009307 |
| 1 | 115101571 | 115102555 | 115102376 | 16 | 61 | 42 | 1.498531614 | 0.0195387  | CSDE1   | ENSG00000009307 |
| 1 | 115112654 | 115112904 | 115112779 | 11 | 13 | 9  | 1.455025858 | 0.177172   | CSDE1   | ENSG00000009307 |
| 1 | 115115133 | 115115312 | 115115258 | 8  | 8  | 6  | 1.336248237 | 0.277651   |         | ENSG00000052723 |
| 1 | 115121523 | 115121757 | 115121640 | 8  | 9  | 1  | 5.196520921 | 0.00490062 |         | ENSG00000052723 |
| 1 | 115124104 | 115124286 | 115124148 | 8  | 9  | 7  | 1.29913023  | 0.286504   |         | ENSG00000052723 |
| 1 | 115124376 | 115125081 | 115124744 | 13 | 31 | 18 | 1.750407047 | 0.0237314  |         | ENSG00000052723 |
| 1 | 115143006 | 115143278 | 115143135 | 8  | 11 | 3  | 3.117912553 | 0.0146045  |         | ENSG00000052723 |

|   |           |           |           |    |     |    |             |             |          |                 |
|---|-----------|-----------|-----------|----|-----|----|-------------|-------------|----------|-----------------|
| 1 | 115300802 | 115301042 | 115300887 | 13 | 17  | 6  | 2.672496474 | 0.00882337  | TSHB     | ENSG00000134200 |
| 1 | 115323506 | 115323731 | 115323602 | 8  | 9   | 11 | 0.86608682  | 0.635181    | TSHB     | ENSG00000134200 |
| 1 | 115381261 | 115381551 | 115381406 | 11 | 15  | 9  | 1.662886695 | 0.0970566   | TSHB     | ENSG00000134200 |
| 1 | 115385871 | 115386235 | 115386063 | 8  | 14  | 9  | 1.558956276 | 0.132279    | TSHB     | ENSG00000134200 |
| 1 | 115396641 | 115396878 | 115396759 | 12 | 13  | 5  | 2.425043097 | 0.0262442   | TSHB     | ENSG00000134200 |
| 1 | 115457009 | 115457240 | 115457184 | 8  | 10  | 7  | 1.429043253 | 0.21536     | TSPAN2   | ENSG00000134198 |
| 1 | 115554598 | 115554933 | 115554765 | 11 | 14  | 1  | 7.794781382 | 0.000197021 | TSPAN2   | ENSG00000134198 |
| 1 | 115803044 | 115803269 | 115803185 | 9  | 11  | 4  | 2.494330042 | 0.0324033   |          | ENSG00000216304 |
| 1 | 115887630 | 115887809 | 115887685 | 9  | 9   | 0  | 10.39304184 | 0.000803859 |          | ENSG00000219215 |
| 1 | 115969087 | 115969299 | 115969166 | 8  | 11  | 2  | 4.157216737 | 0.0052913   |          | ENSG00000207502 |
| 1 | 116026786 | 116027113 | 116026965 | 8  | 12  | 6  | 1.930136342 | 0.071303    | VANGL1   | ENSG00000173218 |
| 1 | 116055447 | 116055686 | 116055566 | 8  | 10  | 7  | 1.429043253 | 0.21536     | CASQ2    | ENSG00000118729 |
| 1 | 116057417 | 116057716 | 116057562 | 8  | 12  | 14 | 0.900730293 | 0.611333    | CASQ2    | ENSG00000118729 |
| 1 | 116058983 | 116059318 | 116059161 | 8  | 13  | 9  | 1.455025858 | 0.177172    | CASQ2    | ENSG00000118729 |
| 1 | 116115950 | 116116280 | 116116118 | 22 | 23  | 1  | 12.47165021 | 4.94E-07    | CASQ2    | ENSG00000118729 |
| 1 | 116155324 | 116155689 | 116155503 | 14 | 21  | 3  | 5.716173013 | 5.37E-05    | NHLH2    | ENSG00000177551 |
| 1 | 116183039 | 116183930 | 116183575 | 68 | 116 | 5  | 20.26643159 | 4.59E-30    | NHLH2    | ENSG00000177551 |
| 1 | 116184013 | 116184211 | 116184112 | 9  | 13  | 2  | 4.850086193 | 0.00164564  | NHLH2    | ENSG00000177551 |
| 1 | 116184835 | 116185020 | 116184927 | 8  | 8   | 3  | 2.338434415 | 0.0641221   | NHLH2    | ENSG00000177551 |
| 1 | 116221652 | 116221944 | 116221798 | 16 | 20  | 1  | 10.91269393 | 3.71E-06    |          | ENSG00000219640 |
| 1 | 116320121 | 116320343 | 116320232 | 8  | 8   | 4  | 1.870747532 | 0.118863    | SLC22A15 | ENSG00000163393 |
| 1 | 116325504 | 116325686 | 116325595 | 8  | 9   | 5  | 1.73217364  | 0.133894    | SLC22A15 | ENSG00000163393 |
| 1 | 116483196 | 116483677 | 116483344 | 17 | 26  | 6  | 4.008744711 | 0.000106454 | C1orf161 | ENSG00000173212 |
| 1 | 116497024 | 116497225 | 116497122 | 9  | 9   | 0  | 10.39304184 | 0.000803859 | C1orf161 | ENSG00000173212 |
| 1 | 116564489 | 116564735 | 116564623 | 9  | 9   | 2  | 3.464347281 | 0.0163838   |          | ENSG00000209230 |
| 1 | 116611545 | 116611818 | 116611669 | 9  | 11  | 3  | 3.117912553 | 0.0146045   |          | ENSG00000209170 |
| 1 | 116656171 | 116656531 | 116656316 | 17 | 23  | 12 | 1.918715417 | 0.0250463   |          | ENSG00000209170 |
| 1 | 116688677 | 116688912 | 116688794 | 8  | 9   | 0  | 10.39304184 | 0.000803859 | ATP1A1   | ENSG00000163399 |
| 1 | 116720209 | 116720729 | 116720487 | 9  | 21  | 7  | 2.858086507 | 0.0029864   | ATP1A1   | ENSG00000163399 |
| 1 | 116724040 | 116724224 | 116724120 | 8  | 8   | 6  | 1.336248237 | 0.277651    | ATP1A1   | ENSG00000163399 |
| 1 | 116738887 | 116739108 | 116738965 | 8  | 9   | 5  | 1.73217364  | 0.133894    | ATP1A1   | ENSG00000163399 |
| 1 | 116773254 | 116773552 | 116773384 | 9  | 10  | 3  | 2.858086507 | 0.0242838   |          | ENSG00000203865 |
| 1 | 116777030 | 116777315 | 116777186 | 8  | 10  | 4  | 2.286469205 | 0.0509017   |          | ENSG00000203865 |
| 1 | 116793146 | 116793405 | 116793267 | 8  | 12  | 4  | 2.702190879 | 0.0203088   |          | ENSG00000200547 |

|   |           |           |           |     |     |    |             |             |        |                 |
|---|-----------|-----------|-----------|-----|-----|----|-------------|-------------|--------|-----------------|
| 1 | 116795877 | 116796066 | 116796032 | 9   | 9   | 1  | 5.196520921 | 0.00490062  |        | ENSG00000200547 |
| 1 | 116796124 | 116796557 | 116796378 | 11  | 20  | 10 | 1.98412617  | 0.0277883   |        | ENSG00000200547 |
| 1 | 116797661 | 116798085 | 116797840 | 12  | 20  | 16 | 1.283846345 | 0.219275    |        | ENSG00000200547 |
| 1 | 116816400 | 116816639 | 116816520 | 10  | 11  | 1  | 6.235825105 | 0.0013754   |        | ENSG00000200547 |
| 1 | 116829480 | 116829839 | 116829563 | 9   | 13  | 5  | 2.425043097 | 0.0262442   |        | ENSG00000200547 |
| 1 | 116853426 | 116853680 | 116853537 | 10  | 14  | 5  | 2.598260461 | 0.0167748   |        | ENSG00000177173 |
| 1 | 116918718 | 116919191 | 116918878 | 11  | 19  | 9  | 2.078608368 | 0.0241848   | CD58   | ENSG00000116815 |
| 1 | 117018910 | 117019220 | 117019057 | 14  | 19  | 7  | 2.598260461 | 0.00730518  |        | ENSG00000211543 |
| 1 | 117222067 | 117222485 | 117222306 | 18  | 25  | 5  | 4.503651465 | 6.33E-05    |        | ENSG00000221425 |
| 1 | 117222804 | 117223723 | 117223448 | 139 | 207 | 13 | 15.44109074 | 2.37E-48    |        | ENSG00000221425 |
| 1 | 117223848 | 117224211 | 117223971 | 8   | 13  | 2  | 4.850086193 | 0.00164564  |        | ENSG00000221425 |
| 1 | 117225183 | 117225410 | 117225285 | 8   | 8   | 2  | 3.117912553 | 0.0283184   |        | ENSG00000221425 |
| 1 | 117272031 | 117272267 | 117272142 | 8   | 8   | 3  | 2.338434415 | 0.0641221   | PTGFRN | ENSG00000134247 |
| 1 | 117357408 | 117357851 | 117357629 | 13  | 21  | 8  | 2.540521339 | 0.00602138  | IGSF2  | ENSG00000134256 |
| 1 | 117390847 | 117391026 | 117390930 | 8   | 8   | 2  | 3.117912553 | 0.0283184   | TTF2   | ENSG00000116830 |
| 1 | 117613103 | 117613405 | 117613254 | 15  | 18  | 12 | 1.518983039 | 0.117837    |        | ENSG00000223204 |
| 1 | 117675368 | 117675607 | 117675496 | 9   | 11  | 2  | 4.157216737 | 0.0052913   | MAN1A2 | ENSG00000198162 |
| 1 | 117710227 | 117710475 | 117710351 | 10  | 11  | 7  | 1.558956276 | 0.158273    | MAN1A2 | ENSG00000198162 |
| 1 | 117749216 | 117749506 | 117749361 | 9   | 12  | 2  | 4.503651465 | 0.002963    | MAN1A2 | ENSG00000198162 |
| 1 | 117879220 | 117879629 | 117879386 | 9   | 15  | 5  | 2.771477825 | 0.0105836   |        | ENSG00000217774 |
| 1 | 117934620 | 117934879 | 117934783 | 11  | 14  | 2  | 5.196520921 | 0.000907371 | FAM46C | ENSG00000183508 |
| 1 | 117935563 | 117935900 | 117935729 | 20  | 23  | 4  | 4.988660084 | 6.05E-05    | FAM46C | ENSG00000183508 |
| 1 | 117968739 | 117968961 | 117968842 | 8   | 8   | 3  | 2.338434415 | 0.0641221   |        | ENSG00000213262 |
| 1 | 117971924 | 117972241 | 117972094 | 20  | 22  | 5  | 3.983999373 | 0.000317941 |        | ENSG00000213262 |
| 1 | 118001365 | 118001597 | 118001459 | 9   | 9   | 4  | 2.078608368 | 0.0785659   |        | ENSG00000213262 |
| 1 | 118016247 | 118016452 | 118016408 | 9   | 9   | 1  | 5.196520921 | 0.00490062  |        | ENSG00000212266 |
| 1 | 118029780 | 118030066 | 118029902 | 9   | 11  | 0  | 12.47165021 | 0.000193293 |        | ENSG00000212266 |
| 1 | 118191200 | 118191382 | 118191282 | 8   | 10  | 7  | 1.429043253 | 0.21536     |        | ENSG00000218616 |
| 1 | 118600047 | 118600226 | 118600078 | 8   | 8   | 1  | 4.676868829 | 0.0091584   |        | ENSG00000209185 |
| 1 | 118769474 | 118769709 | 118769606 | 8   | 8   | 1  | 4.676868829 | 0.0091584   |        | ENSG00000209180 |
| 1 | 119677251 | 119677430 | 119677340 | 8   | 8   | 0  | 9.353737658 | 0.00163931  |        | ENSG00000194297 |
| 1 | 119702888 | 119703206 | 119703047 | 10  | 13  | 4  | 2.910051716 | 0.0125532   | HAO2   | ENSG00000116882 |
| 1 | 119718582 | 119718809 | 119718663 | 10  | 11  | 3  | 3.117912553 | 0.0146045   | HAO2   | ENSG00000116882 |
| 1 | 119971805 | 119971984 | 119971828 | 8   | 8   | 3  | 2.338434415 | 0.0641221   | ZNF697 | ENSG00000143067 |

|   |           |           |           |     |      |      |             |             |         |                 |
|---|-----------|-----------|-----------|-----|------|------|-------------|-------------|---------|-----------------|
| 1 | 120019660 | 120019921 | 120019790 | 8   | 10   | 1    | 5.716173013 | 0.00260397  | PHGDH   | ENSG00000092621 |
| 1 | 120030966 | 120031161 | 120031063 | 8   | 8    | 7    | 1.169217207 | 0.371848    | PHGDH   | ENSG00000092621 |
| 1 | 120110872 | 120111098 | 120111005 | 8   | 8    | 3    | 2.338434415 | 0.0641221   | HMGCS2  | ENSG00000134240 |
| 1 | 120123936 | 120124481 | 120124181 | 10  | 21   | 13   | 1.63319229  | 0.0708832   | HMGCS2  | ENSG00000134240 |
| 1 | 120230383 | 120230562 | 120230425 | 8   | 8    | 5    | 1.558956276 | 0.191397    |         | ENSG00000219683 |
| 1 | 120292780 | 120293027 | 120292955 | 8   | 11   | 2    | 4.157216737 | 0.0052913   | ADAM30  | ENSG00000134249 |
| 1 | 120312884 | 120313223 | 120313053 | 8   | 13   | 0    | 14.55025858 | 4.65E-05    |         | ENSG00000209009 |
| 1 | 121053728 | 121053907 | 121053757 | 9   | 9    | 3    | 2.598260461 | 0.0397929   |         | ENSG00000216725 |
| 1 | 121185539 | 121187107 | 121186578 | 551 | 2524 | 2759 | 0.950812705 | 0.96656     |         | ENSG00000216725 |
| 1 | 142310768 | 142311011 | 142310854 | 10  | 11   | 1    | 6.235825105 | 0.0013754   |         | ENSG00000222289 |
| 1 | 142720879 | 142721142 | 142720973 | 10  | 13   | 9    | 1.455025858 | 0.177172    |         | ENSG00000196369 |
| 1 | 142721216 | 142722996 | 142722206 | 334 | 462  | 51   | 9.253804564 | 6.06E-88    |         | ENSG00000196369 |
| 1 | 142724520 | 142724766 | 142724643 | 11  | 14   | 15   | 0.974347673 | 0.530138    |         | ENSG00000196369 |
| 1 | 143245306 | 143245855 | 143245485 | 19  | 41   | 24   | 1.74603103  | 0.0119716   |         | ENSG00000201699 |
| 1 | 143259989 | 143260234 | 143260111 | 11  | 13   | 3    | 3.637564645 | 0.0050909   |         | ENSG00000201699 |
| 1 | 143642489 | 143644830 | 143644024 | 24  | 143  | 64   | 2.3024585   | 2.94E-09    | PDE4DIP | ENSG00000178104 |
| 1 | 143658038 | 143658224 | 143658049 | 10  | 10   | 1    | 5.716173013 | 0.00260397  |         | ENSG00000222788 |
| 1 | 143698013 | 143698396 | 143698233 | 8   | 13   | 9    | 1.455025858 | 0.177172    | PDE4DIP | ENSG00000178104 |
| 1 | 143698474 | 143698679 | 143698593 | 9   | 9    | 6    | 1.484720263 | 0.204387    | PDE4DIP | ENSG00000178104 |
| 1 | 143699548 | 143699908 | 143699706 | 9   | 14   | 12   | 1.199197136 | 0.313881    | PDE4DIP | ENSG00000178104 |
| 1 | 143700347 | 143701346 | 143700884 | 13  | 39   | 34   | 1.187776211 | 0.227496    | PDE4DIP | ENSG00000178104 |
| 1 | 143703321 | 143703585 | 143703453 | 14  | 16   | 6    | 2.524024447 | 0.0137633   | PDE4DIP | ENSG00000178104 |
| 1 | 143703877 | 143704242 | 143704089 | 16  | 23   | 16   | 1.467252966 | 0.109416    | PDE4DIP | ENSG00000178104 |
| 1 | 143704329 | 143704893 | 143704470 | 10  | 22   | 23   | 0.995999843 | 0.506279    | PDE4DIP | ENSG00000178104 |
| 1 | 143709348 | 143709789 | 143709527 | 8   | 16   | 2    | 5.889390377 | 0.000270741 | PDE4DIP | ENSG00000178104 |
| 1 | 143713908 | 143714249 | 143714078 | 10  | 13   | 15   | 0.909391161 | 0.604792    | PDE4DIP | ENSG00000178104 |
| 1 | 143715731 | 143716151 | 143715972 | 11  | 21   | 16   | 1.344981885 | 0.176214    | PDE4DIP | ENSG00000178104 |
| 1 | 143716679 | 143716862 | 143716809 | 8   | 8    | 5    | 1.558956276 | 0.191397    | PDE4DIP | ENSG00000178104 |
| 1 | 143723402 | 143723646 | 143723524 | 10  | 11   | 8    | 1.385738912 | 0.224757    | PDE4DIP | ENSG00000178104 |
| 1 | 143723775 | 143724175 | 143724015 | 8   | 15   | 14   | 1.10859113  | 0.386477    | PDE4DIP | ENSG00000178104 |
| 1 | 143725981 | 143726646 | 143726356 | 10  | 25   | 21   | 1.228268581 | 0.23714     | PDE4DIP | ENSG00000178104 |
| 1 | 143729452 | 143729789 | 143729620 | 10  | 15   | 12   | 1.279143611 | 0.251893    | PDE4DIP | ENSG00000178104 |
| 1 | 143732693 | 143732965 | 143732857 | 9   | 12   | 9    | 1.35109544  | 0.232899    | PDE4DIP | ENSG00000178104 |
| 1 | 143735599 | 143736063 | 143735771 | 9   | 18   | 7    | 2.468347438 | 0.0112499   | PDE4DIP | ENSG00000178104 |

|   |           |           |           |    |    |    |             |             |          |                 |
|---|-----------|-----------|-----------|----|----|----|-------------|-------------|----------|-----------------|
| 1 | 143739686 | 143740370 | 143740191 | 11 | 29 | 17 | 1.73217364  | 0.029443    | PDE4DIP  | ENSG00000178104 |
| 1 | 143740675 | 143740972 | 143740823 | 10 | 16 | 6  | 2.524024447 | 0.0137633   | PDE4DIP  | ENSG00000178104 |
| 1 | 143741255 | 143741843 | 143741506 | 12 | 29 | 29 | 1.039304184 | 0.440902    | PDE4DIP  | ENSG00000178104 |
| 1 | 143745341 | 143745542 | 143745365 | 9  | 12 | 8  | 1.501217155 | 0.168286    | PDE4DIP  | ENSG00000178104 |
| 1 | 143745548 | 143745735 | 143745599 | 8  | 10 | 12 | 0.879411233 | 0.62639     | PDE4DIP  | ENSG00000178104 |
| 1 | 143749682 | 143750106 | 143749843 | 11 | 19 | 12 | 1.598929514 | 0.0887417   | PDE4DIP  | ENSG00000178104 |
| 1 | 143750296 | 143750828 | 143750542 | 9  | 21 | 20 | 1.08879486  | 0.389871    | PDE4DIP  | ENSG00000178104 |
| 1 | 143750893 | 143751751 | 143751187 | 20 | 50 | 43 | 1.204648032 | 0.181677    | PDE4DIP  | ENSG00000178104 |
| 1 | 143752121 | 143752780 | 143752575 | 11 | 26 | 17 | 1.558956276 | 0.0684939   | PDE4DIP  | ENSG00000178104 |
| 1 | 143756143 | 143756384 | 143756227 | 11 | 13 | 13 | 1.039304184 | 0.45974     | PDE4DIP  | ENSG00000178104 |
| 1 | 143757237 | 143757530 | 143757383 | 10 | 13 | 7  | 1.818782322 | 0.0805123   | PDE4DIP  | ENSG00000178104 |
| 1 | 143758398 | 143758662 | 143758499 | 8  | 10 | 10 | 1.039304184 | 0.464387    | PDE4DIP  | ENSG00000178104 |
| 1 | 143769378 | 143769705 | 143769541 | 10 | 15 | 14 | 1.10859113  | 0.386477    | PDE4DIP  | ENSG00000178104 |
| 1 | 143769871 | 143770808 | 143770477 | 20 | 57 | 39 | 1.506991067 | 0.0216314   | PDE4DIP  | ENSG00000178104 |
| 1 | 143772505 | 143772765 | 143772635 | 8  | 10 | 13 | 0.816596145 | 0.696946    | PDE4DIP  | ENSG00000178104 |
| 1 | 143773073 | 143773768 | 143773210 | 9  | 25 | 27 | 0.965068171 | 0.55304     | PDE4DIP  | ENSG00000178104 |
| 1 | 143774038 | 143774652 | 143774378 | 13 | 25 | 11 | 2.251825733 | 0.00731045  | PDE4DIP  | ENSG00000178104 |
| 1 | 143780891 | 143781185 | 143781021 | 9  | 13 | 9  | 1.455025858 | 0.177172    | PDE4DIP  | ENSG00000178104 |
| 1 | 143785012 | 143785267 | 143785138 | 12 | 13 | 11 | 1.212521548 | 0.309909    | PDE4DIP  | ENSG00000178104 |
| 1 | 143787680 | 143788051 | 143787878 | 8  | 13 | 9  | 1.455025858 | 0.177172    | PDE4DIP  | ENSG00000178104 |
| 1 | 143807538 | 143807869 | 143807703 | 18 | 22 | 17 | 1.327999791 | 0.180771    |          | ENSG00000218759 |
| 1 | 143809406 | 143809696 | 143809551 | 9  | 12 | 6  | 1.930136342 | 0.071303    |          | ENSG00000218759 |
| 1 | 143811028 | 143811223 | 143811133 | 9  | 10 | 10 | 1.039304184 | 0.464387    |          | ENSG00000218759 |
| 1 | 143812736 | 143812941 | 143812824 | 8  | 9  | 10 | 0.944821986 | 0.553851    |          | ENSG00000218759 |
| 1 | 143821909 | 143822432 | 143822308 | 10 | 22 | 17 | 1.327999791 | 0.180771    |          | ENSG00000218759 |
| 1 | 143824271 | 143824453 | 143824362 | 8  | 8  | 7  | 1.169217207 | 0.371848    |          | ENSG00000218759 |
| 1 | 143825754 | 143826087 | 143825920 | 16 | 20 | 8  | 2.425043097 | 0.00917565  |          | ENSG00000218759 |
| 1 | 143826739 | 143826999 | 143826869 | 8  | 11 | 12 | 0.959357709 | 0.543005    |          | ENSG00000218759 |
| 1 | 143827554 | 143827733 | 143827643 | 8  | 8  | 16 | 0.550219862 | 0.934723    |          | ENSG00000218759 |
| 1 | 143829435 | 143829684 | 143829543 | 11 | 11 | 7  | 1.558956276 | 0.158273    |          | ENSG00000177144 |
| 1 | 143920296 | 143920489 | 143920463 | 9  | 9  | 0  | 10.39304184 | 0.000803859 | NOTCH2NL | ENSG00000213240 |
| 1 | 143988689 | 143988987 | 143988837 | 8  | 8  | 9  | 0.935373766 | 0.560286    |          | ENSG00000208961 |
| 1 | 144093562 | 144093818 | 144093698 | 12 | 12 | 3  | 3.377738599 | 0.00867157  |          | ENSG00000201558 |
| 1 | 144094092 | 144094598 | 144094276 | 26 | 41 | 17 | 2.425043097 | 0.000462592 |          | ENSG00000201558 |



|   |           |           |           |    |    |    |             |             |                         |
|---|-----------|-----------|-----------|----|----|----|-------------|-------------|-------------------------|
| 1 | 144106723 | 144107418 | 144106976 | 20 | 41 | 24 | 1.74603103  | 0.0119716   | ENSG00000201558         |
| 1 | 144107994 | 144108396 | 144108217 | 20 | 28 | 17 | 1.674434519 | 0.0394126   | ENSG00000201558         |
| 1 | 144108568 | 144108788 | 144108678 | 9  | 10 | 10 | 1.039304184 | 0.464387    | ENSG00000201558         |
| 1 | 144108863 | 144109394 | 144109215 | 15 | 28 | 16 | 1.772930667 | 0.02708     | ENSG00000201558         |
| 1 | 144110389 | 144111104 | 144110662 | 16 | 36 | 34 | 1.098692995 | 0.344552    | HFE2 ENSG00000168509    |
| 1 | 144113445 | 144113660 | 144113541 | 8  | 10 | 12 | 0.879411233 | 0.62639     | HFE2 ENSG00000168509    |
| 1 | 144127750 | 144127958 | 144127850 | 9  | 9  | 6  | 1.484720263 | 0.204387    | HFE2 ENSG00000168509    |
| 1 | 144133079 | 144133557 | 144133228 | 9  | 15 | 10 | 1.511715177 | 0.140236    | HFE2 ENSG00000168509    |
| 1 | 144144851 | 144145063 | 144144957 | 9  | 9  | 1  | 5.196520921 | 0.00490062  | TXNIP ENSG00000117289   |
| 1 | 144149460 | 144150071 | 144149757 | 13 | 29 | 14 | 2.078608368 | 0.00804141  | TXNIP ENSG00000117289   |
| 1 | 144150515 | 144150810 | 144150635 | 8  | 11 | 7  | 1.558956276 | 0.158273    | TXNIP ENSG00000117289   |
| 1 | 144151005 | 144151198 | 144151080 | 10 | 10 | 2  | 3.810782009 | 0.00936112  | TXNIP ENSG00000117289   |
| 1 | 144151255 | 144151511 | 144151388 | 11 | 12 | 5  | 2.251825733 | 0.0404733   | TXNIP ENSG00000117289   |
| 1 | 144151648 | 144152086 | 144151907 | 8  | 17 | 8  | 2.078608368 | 0.0303558   | TXNIP ENSG00000117289   |
| 1 | 144166551 | 144167171 | 144166972 | 15 | 32 | 37 | 0.902553634 | 0.668358    | POLR3GL ENSG00000121851 |
| 1 | 144168576 | 144169012 | 144168808 | 17 | 25 | 15 | 1.688869299 | 0.0455215   | POLR3GL ENSG00000121851 |
| 1 | 144181469 | 144182228 | 144181648 | 16 | 43 | 19 | 2.286469205 | 0.000663983 | POLR3GL ENSG00000121851 |
| 1 | 144187873 | 144188104 | 144187988 | 8  | 9  | 5  | 1.73217364  | 0.133894    | LIX1L ENSG00000152022   |
| 1 | 144218623 | 144219400 | 144218803 | 15 | 45 | 24 | 1.912319699 | 0.00360474  | RBM8A ENSG00000131795   |
| 1 | 144226458 | 144226815 | 144226636 | 15 | 21 | 14 | 1.524312804 | 0.0996258   | GNRHR2 ENSG00000211451  |
| 1 | 144227011 | 144227812 | 144227606 | 12 | 35 | 30 | 1.206933891 | 0.220031    | PEX11B ENSG00000131779  |
| 1 | 144235324 | 144235541 | 144235421 | 8  | 8  | 5  | 1.558956276 | 0.191397    | ITGA10 ENSG00000143127  |
| 1 | 144236095 | 144236353 | 144236182 | 9  | 11 | 5  | 2.078608368 | 0.0614303   | ITGA10 ENSG00000143127  |
| 1 | 144246206 | 144246416 | 144246318 | 8  | 8  | 4  | 1.870747532 | 0.118863    | ITGA10 ENSG00000143127  |
| 1 | 144249220 | 144249427 | 144249323 | 9  | 9  | 3  | 2.598260461 | 0.0397929   | ANKRD35 ENSG00000198483 |
| 1 | 144253464 | 144253740 | 144253569 | 9  | 12 | 5  | 2.251825733 | 0.0404733   | ANKRD35 ENSG00000198483 |
| 1 | 144253879 | 144255223 | 144254715 | 16 | 62 | 38 | 1.67887599  | 0.00478657  | ANKRD35 ENSG00000198483 |
| 1 | 144259259 | 144259443 | 144259368 | 8  | 8  | 4  | 1.870747532 | 0.118863    | ANKRD35 ENSG00000198483 |
| 1 | 144272087 | 144272324 | 144272244 | 8  | 10 | 6  | 1.63319229  | 0.146906    | ANKRD35 ENSG00000198483 |
| 1 | 144300717 | 144300930 | 144300823 | 9  | 10 | 11 | 0.952695502 | 0.548138    | NUDT17 ENSG00000186364  |
| 1 | 144321627 | 144321866 | 144321746 | 8  | 9  | 7  | 1.29913023  | 0.286504    | POLR3C ENSG00000186141  |
| 1 | 144322127 | 144322452 | 144322283 | 16 | 20 | 5  | 3.637564645 | 0.000902929 | POLR3C ENSG00000186141  |
| 1 | 144380498 | 144380722 | 144380610 | 11 | 12 | 2  | 4.503651465 | 0.002963    | CD160 ENSG00000117281   |
| 1 | 144388719 | 144388911 | 144388861 | 8  | 8  | 4  | 1.870747532 | 0.118863    | CD160 ENSG00000117281   |

|   |           |           |           |    |    |    |             |            |        |                 |
|---|-----------|-----------|-----------|----|----|----|-------------|------------|--------|-----------------|
| 1 | 144395434 | 144395657 | 144395545 | 8  | 9  | 4  | 2.078608368 | 0.0785659  | CD160  | ENSG00000117281 |
| 1 | 144405744 | 144406045 | 144405910 | 10 | 11 | 11 | 1.039304184 | 0.462773   | CD160  | ENSG00000117281 |
| 1 | 144425597 | 144425898 | 144425752 | 10 | 15 | 3  | 4.157216737 | 0.00170423 | CD160  | ENSG00000117281 |
| 1 | 145022615 | 145022960 | 145022788 | 14 | 18 | 9  | 1.97467795  | 0.0349428  |        | ENSG00000200838 |
| 1 | 145091616 | 145091822 | 145091719 | 8  | 8  | 5  | 1.558956276 | 0.191397   | PRKAB2 | ENSG00000131791 |
| 1 | 145108974 | 145109229 | 145109101 | 10 | 12 | 6  | 1.930136342 | 0.071303   | PRKAB2 | ENSG00000131791 |
| 1 | 145110453 | 145110778 | 145110619 | 12 | 15 | 6  | 2.375552421 | 0.0212094  | PRKAB2 | ENSG00000131791 |
| 1 | 145163404 | 145163671 | 145163516 | 9  | 11 | 8  | 1.385738912 | 0.224757   | FMO5   | ENSG00000131781 |
| 1 | 145175904 | 145176164 | 145176009 | 10 | 11 | 3  | 3.117912553 | 0.0146045  | CHD1L  | ENSG00000131778 |
| 1 | 145180723 | 145180932 | 145180827 | 9  | 10 | 8  | 1.27026067  | 0.293854   | CHD1L  | ENSG00000131778 |
| 1 | 145181342 | 145181611 | 145181451 | 9  | 11 | 6  | 1.781664316 | 0.103344   | CHD1L  | ENSG00000131778 |
| 1 | 145212060 | 145212314 | 145212187 | 11 | 12 | 4  | 2.702190879 | 0.0203088  | CHD1L  | ENSG00000131778 |
| 1 | 145309304 | 145309532 | 145309473 | 8  | 9  | 2  | 3.464347281 | 0.0163838  |        | ENSG00000207209 |
| 1 | 145328323 | 145328568 | 145328445 | 9  | 11 | 5  | 2.078608368 | 0.0614303  |        | ENSG00000207209 |
| 1 | 145417021 | 145417253 | 145417137 | 9  | 11 | 1  | 6.235825105 | 0.0013754  |        | ENSG00000221166 |
| 1 | 145476810 | 145477120 | 145476969 | 13 | 14 | 4  | 3.117912553 | 0.00766354 | BCL9   | ENSG00000116128 |
| 1 | 145506208 | 145506442 | 145506359 | 8  | 10 | 3  | 2.858086507 | 0.0242838  | BCL9   | ENSG00000116128 |
| 1 | 145516131 | 145516317 | 145516233 | 8  | 10 | 2  | 3.810782009 | 0.00936112 | BCL9   | ENSG00000116128 |
| 1 | 145518665 | 145518966 | 145518808 | 10 | 13 | 3  | 3.637564645 | 0.0050909  | BCL9   | ENSG00000116128 |
| 1 | 145532588 | 145532791 | 145532657 | 9  | 9  | 4  | 2.078608368 | 0.0785659  | BCL9   | ENSG00000116128 |
| 1 | 145549797 | 145549991 | 145549868 | 8  | 8  | 2  | 3.117912553 | 0.0283184  | ACP6   | ENSG00000162836 |
| 1 | 145550835 | 145551149 | 145550992 | 11 | 17 | 5  | 3.117912553 | 0.00407023 | ACP6   | ENSG00000162836 |
| 1 | 145563875 | 145564073 | 145564022 | 9  | 9  | 4  | 2.078608368 | 0.0785659  | ACP6   | ENSG00000162836 |
| 1 | 145580452 | 145580764 | 145580628 | 10 | 13 | 8  | 1.616695398 | 0.123553   | ACP6   | ENSG00000162836 |
| 1 | 145608250 | 145608493 | 145608377 | 8  | 10 | 4  | 2.286469205 | 0.0509017  | ACP6   | ENSG00000162836 |
| 1 | 145608990 | 145609224 | 145609149 | 12 | 13 | 6  | 2.078608368 | 0.0483393  | ACP6   | ENSG00000162836 |
| 1 | 145609229 | 145609477 | 145609353 | 8  | 10 | 11 | 0.952695502 | 0.548138   | ACP6   | ENSG00000162836 |
| 1 | 145655748 | 145656066 | 145655907 | 10 | 12 | 17 | 0.750608578 | 0.78992    |        | ENSG00000208881 |
| 1 | 145680378 | 145680603 | 145680538 | 8  | 8  | 2  | 3.117912553 | 0.0283184  | GJA5   | ENSG00000143140 |
| 1 | 145698294 | 145698483 | 145698388 | 8  | 8  | 2  | 3.117912553 | 0.0283184  | GJA5   | ENSG00000143140 |
| 1 | 145829005 | 145829419 | 145829174 | 9  | 15 | 6  | 2.375552421 | 0.0212094  | GJA8   | ENSG00000121634 |
| 1 | 146193972 | 146194257 | 146194114 | 12 | 15 | 11 | 1.385738912 | 0.19225    |        | ENSG00000199879 |
| 1 | 146196852 | 146197031 | 146197023 | 8  | 8  | 1  | 4.676868829 | 0.0091584  |        | ENSG00000199879 |
| 1 | 146202196 | 146202785 | 146202541 | 20 | 41 | 14 | 2.910051716 | 6.65E-05   |        | ENSG00000199879 |

|   |           |           |           |    |    |    |             |             |           |                 |
|---|-----------|-----------|-----------|----|----|----|-------------|-------------|-----------|-----------------|
| 1 | 146273164 | 146273612 | 146273290 | 12 | 21 | 11 | 1.905391004 | 0.031399    |           | ENSG00000202408 |
| 1 | 146608132 | 146608375 | 146608248 | 11 | 12 | 6  | 1.930136342 | 0.071303    |           | ENSG00000207501 |
| 1 | 147489859 | 147490076 | 147489913 | 10 | 12 | 7  | 1.688869299 | 0.11395     |           | ENSG00000206737 |
| 1 | 147490163 | 147490789 | 147490495 | 32 | 58 | 43 | 1.393612429 | 0.0463307   |           | ENSG00000206737 |
| 1 | 147491132 | 147491466 | 147491299 | 16 | 20 | 12 | 1.67887599  | 0.0659142   |           | ENSG00000206737 |
| 1 | 147978403 | 147978629 | 147978516 | 10 | 10 | 4  | 2.286469205 | 0.0509017   |           | ENSG00000212053 |
| 1 | 148087939 | 148088197 | 148088090 | 9  | 12 | 8  | 1.501217155 | 0.168286    | HIST2H2BC | ENSG00000218157 |
| 1 | 148123872 | 148124374 | 148124016 | 12 | 23 | 15 | 1.558956276 | 0.0802366   | HIST2H2BE | ENSG00000184678 |
| 1 | 148124713 | 148125296 | 148124952 | 12 | 26 | 11 | 2.338434415 | 0.00495238  | HIST2H2BE | ENSG00000184678 |
| 1 | 148125950 | 148126214 | 148126070 | 10 | 11 | 7  | 1.558956276 | 0.158273    | HIST2H2AB | ENSG00000184270 |
| 1 | 148126643 | 148126971 | 148126807 | 15 | 20 | 15 | 1.364086742 | 0.171319    | HIST2H2AB | ENSG00000184270 |
| 1 | 148137640 | 148138049 | 148137870 | 13 | 23 | 14 | 1.662886695 | 0.0567474   | BOLA1     | ENSG00000178096 |
| 1 | 148166262 | 148166609 | 148166435 | 14 | 20 | 9  | 2.182538787 | 0.0165356   | SF3B4     | ENSG00000143368 |
| 1 | 148174766 | 148175067 | 148174916 | 9  | 12 | 11 | 1.125912866 | 0.382541    | MTMR11    | ENSG00000014914 |
| 1 | 148175343 | 148175653 | 148175487 | 10 | 14 | 9  | 1.558956276 | 0.132279    | MTMR11    | ENSG00000014914 |
| 1 | 148175763 | 148176408 | 148176117 | 21 | 34 | 11 | 3.031303871 | 0.000164745 | MTMR11    | ENSG00000014914 |
| 1 | 148177473 | 148178084 | 148177673 | 12 | 31 | 10 | 3.023430354 | 0.000301033 | MTMR11    | ENSG00000014914 |
| 1 | 148200654 | 148200950 | 148200771 | 9  | 12 | 7  | 1.688869299 | 0.11395     | MTMR11    | ENSG00000014914 |
| 1 | 148223405 | 148223598 | 148223501 | 8  | 8  | 4  | 1.870747532 | 0.118863    | OTUD7B    | ENSG00000163113 |
| 1 | 148234641 | 148234926 | 148234783 | 8  | 12 | 5  | 2.251825733 | 0.0404733   | OTUD7B    | ENSG00000163113 |
| 1 | 148247369 | 148247598 | 148247483 | 8  | 10 | 1  | 5.716173013 | 0.00260397  | OTUD7B    | ENSG00000163113 |
| 1 | 148249111 | 148249697 | 148249316 | 13 | 28 | 4  | 6.027964269 | 3.34E-06    | OTUD7B    | ENSG00000163113 |
| 1 | 148259782 | 148259978 | 148259880 | 12 | 12 | 4  | 2.702190879 | 0.0203088   | OTUD7B    | ENSG00000163113 |
| 1 | 148261157 | 148261563 | 148261334 | 8  | 13 | 6  | 2.078608368 | 0.0483393   | OTUD7B    | ENSG00000163113 |
| 1 | 148266781 | 148266963 | 148266823 | 8  | 8  | 3  | 2.338434415 | 0.0641221   | OTUD7B    | ENSG00000163113 |
| 1 | 148306107 | 148306883 | 148306339 | 13 | 37 | 14 | 2.632903933 | 0.000365839 | VPS45     | ENSG00000136631 |
| 1 | 148377046 | 148377324 | 148377217 | 8  | 11 | 4  | 2.494330042 | 0.0324033   | PLEKHO1   | ENSG00000023902 |
| 1 | 148398259 | 148398476 | 148398351 | 10 | 12 | 7  | 1.688869299 | 0.11395     | PLEKHO1   | ENSG00000023902 |
| 1 | 148407925 | 148408129 | 148408019 | 8  | 9  | 5  | 1.73217364  | 0.133894    | PLEKHO1   | ENSG00000023902 |
| 1 | 148452399 | 148452964 | 148452745 | 14 | 27 | 17 | 1.616695398 | 0.0522299   |           | ENSG00000222828 |
| 1 | 148472722 | 148473131 | 148472960 | 9  | 15 | 12 | 1.279143611 | 0.251893    | ANP32E    | ENSG00000143401 |
| 1 | 148473538 | 148474070 | 148473827 | 15 | 29 | 5  | 5.196520921 | 6.82E-06    | ANP32E    | ENSG00000143401 |
| 1 | 148474749 | 148475457 | 148475213 | 10 | 26 | 22 | 1.220052738 | 0.239999    | ANP32E    | ENSG00000143401 |
| 1 | 148478721 | 148478940 | 148478830 | 9  | 10 | 4  | 2.286469205 | 0.0509017   |           | ENSG00000222222 |

|   |           |           |           |    |    |    |             |             |          |                 |
|---|-----------|-----------|-----------|----|----|----|-------------|-------------|----------|-----------------|
| 1 | 148495013 | 148495249 | 148495130 | 12 | 14 | 12 | 1.199197136 | 0.313881    | CA14     | ENSG00000118298 |
| 1 | 148507425 | 148508260 | 148508081 | 10 | 36 | 17 | 2.13634749  | 0.00297834  | APH1A    | ENSG00000117362 |
| 1 | 148511824 | 148512038 | 148511931 | 8  | 9  | 3  | 2.598260461 | 0.0397929   | C1orf54  | ENSG00000118292 |
| 1 | 148520323 | 148520609 | 148520466 | 11 | 16 | 6  | 2.524024447 | 0.0137633   | C1orf51  | ENSG00000159208 |
| 1 | 148520837 | 148521206 | 148520977 | 8  | 13 | 8  | 1.616695398 | 0.123553    | C1orf51  | ENSG00000159208 |
| 1 | 148521229 | 148521479 | 148521391 | 12 | 15 | 14 | 1.10859113  | 0.386477    | C1orf51  | ENSG00000159208 |
| 1 | 148521602 | 148522016 | 148521837 | 9  | 16 | 9  | 1.766817113 | 0.0700694   | C1orf51  | ENSG00000159208 |
| 1 | 148602440 | 148603472 | 148602693 | 12 | 43 | 27 | 1.63319229  | 0.019363    | RPRD2    | ENSG00000163125 |
| 1 | 148603833 | 148604026 | 148603958 | 8  | 8  | 10 | 0.850339787 | 0.645072    | RPRD2    | ENSG00000163125 |
| 1 | 148605098 | 148605277 | 148605140 | 8  | 9  | 5  | 1.73217364  | 0.133894    | RPRD2    | ENSG00000163125 |
| 1 | 148660024 | 148660207 | 148660101 | 9  | 9  | 3  | 2.598260461 | 0.0397929   | RPRD2    | ENSG00000163125 |
| 1 | 148669006 | 148669266 | 148669132 | 14 | 15 | 6  | 2.375552421 | 0.0212094   | TARS2    | ENSG00000143374 |
| 1 | 148691307 | 148691527 | 148691417 | 8  | 8  | 1  | 4.676868829 | 0.0091584   | TARS2    | ENSG00000143374 |
| 1 | 148723880 | 148724111 | 148723995 | 8  | 10 | 1  | 5.716173013 | 0.00260397  | TARS2    | ENSG00000143374 |
| 1 | 148726127 | 148726666 | 148726355 | 19 | 35 | 14 | 2.494330042 | 0.000827091 | TARS2    | ENSG00000143374 |
| 1 | 148754427 | 148754836 | 148754657 | 9  | 16 | 17 | 0.981565063 | 0.523072    | ECM1     | ENSG00000143369 |
| 1 | 148776730 | 148776909 | 148776819 | 8  | 8  | 5  | 1.558956276 | 0.191397    | ADAMTSL4 | ENSG00000143382 |
| 1 | 148800064 | 148800599 | 148800420 | 12 | 26 | 12 | 2.158554844 | 0.00861404  | C1orf138 | ENSG00000203804 |
| 1 | 148803048 | 148803262 | 148803113 | 9  | 10 | 6  | 1.63319229  | 0.146906    | C1orf138 | ENSG00000203804 |
| 1 | 148807205 | 148807914 | 148807735 | 12 | 31 | 21 | 1.511715177 | 0.0647459   |          | ENSG00000223014 |
| 1 | 148843562 | 148844117 | 148843938 | 11 | 24 | 19 | 1.29913023  | 0.189       |          | ENSG00000208652 |
| 1 | 148852673 | 148852998 | 148852839 | 9  | 11 | 9  | 1.247165021 | 0.300052    |          | ENSG00000208652 |
| 1 | 148858838 | 148859101 | 148858969 | 8  | 10 | 6  | 1.63319229  | 0.146906    | ENSA     | ENSG00000143420 |
| 1 | 148859230 | 148859423 | 148859326 | 9  | 9  | 9  | 1.039304184 | 0.466079    | ENSA     | ENSG00000143420 |
| 1 | 148863161 | 148863804 | 148863535 | 25 | 44 | 6  | 6.681241184 | 4.26E-09    | ENSA     | ENSG00000143420 |
| 1 | 148866116 | 148866342 | 148866229 | 9  | 12 | 3  | 3.377738599 | 0.00867157  | ENSA     | ENSG00000143420 |
| 1 | 148868798 | 148869113 | 148868952 | 10 | 12 | 8  | 1.501217155 | 0.168286    | ENSA     | ENSG00000143420 |
| 1 | 148936033 | 148936380 | 148936206 | 8  | 13 | 9  | 1.455025858 | 0.177172    | GOLPH3L  | ENSG00000143457 |
| 1 | 148936400 | 148936709 | 148936554 | 13 | 16 | 4  | 3.533634226 | 0.00276486  | GOLPH3L  | ENSG00000143457 |
| 1 | 148986967 | 148987250 | 148987108 | 11 | 13 | 1  | 7.27512929  | 0.000378098 | CTSS     | ENSG00000163131 |
| 1 | 149052160 | 149052572 | 149052335 | 13 | 21 | 10 | 2.078608368 | 0.0193227   |          | ENSG00000200175 |
| 1 | 149115086 | 149115317 | 149115165 | 10 | 12 | 2  | 4.503651465 | 0.002963    | ARNT     | ENSG00000143437 |
| 1 | 149145520 | 149145732 | 149145626 | 10 | 12 | 6  | 1.930136342 | 0.071303    |          | ENSG00000198962 |
| 1 | 149161610 | 149161859 | 149161762 | 11 | 12 | 10 | 1.228268581 | 0.305344    | SETDB1   | ENSG00000143379 |

|   |           |           |           |    |     |    |             |             |          |                 |
|---|-----------|-----------|-----------|----|-----|----|-------------|-------------|----------|-----------------|
| 1 | 149165305 | 149165702 | 149165503 | 14 | 24  | 20 | 1.237266886 | 0.234075    | SETDB1   | ENSG00000143379 |
| 1 | 149165830 | 149166068 | 149165949 | 8  | 10  | 4  | 2.286469205 | 0.0509017   | SETDB1   | ENSG00000143379 |
| 1 | 149215204 | 149215383 | 149215303 | 8  | 8   | 4  | 1.870747532 | 0.118863    | LASS2    | ENSG00000143418 |
| 1 | 149218563 | 149218851 | 149218686 | 13 | 14  | 6  | 2.227080395 | 0.0322529   | ANXA9    | ENSG00000143412 |
| 1 | 149220169 | 149220500 | 149220334 | 11 | 15  | 9  | 1.662886695 | 0.0970566   | ANXA9    | ENSG00000143412 |
| 1 | 149220785 | 149220993 | 149220855 | 8  | 11  | 3  | 3.117912553 | 0.0146045   | ANXA9    | ENSG00000143412 |
| 1 | 149234804 | 149235121 | 149234943 | 10 | 13  | 4  | 2.910051716 | 0.0125532   | FAM63A   | ENSG00000143409 |
| 1 | 149245832 | 149246079 | 149245975 | 8  | 10  | 7  | 1.429043253 | 0.21536     | FAM63A   | ENSG00000143409 |
| 1 | 149247192 | 149247800 | 149247624 | 17 | 29  | 13 | 2.227080395 | 0.00479511  | PRUNE    | ENSG00000143363 |
| 1 | 149252657 | 149252856 | 149252756 | 8  | 9   | 2  | 3.464347281 | 0.0163838   | PRUNE    | ENSG00000143363 |
| 1 | 149263610 | 149263964 | 149263787 | 9  | 14  | 8  | 1.73217364  | 0.0890835   | PRUNE    | ENSG00000143363 |
| 1 | 149275493 | 149275720 | 149275672 | 9  | 12  | 5  | 2.251825733 | 0.0404733   | BNIPL    | ENSG00000163141 |
| 1 | 149281942 | 149282168 | 149282055 | 8  | 9   | 3  | 2.598260461 | 0.0397929   | C1orf56  | ENSG00000143443 |
| 1 | 149285681 | 149286026 | 149285858 | 9  | 10  | 5  | 1.905391004 | 0.0915982   | C1orf56  | ENSG00000143443 |
| 1 | 149286614 | 149287118 | 149286988 | 10 | 19  | 10 | 1.889643971 | 0.0394833   | C1orf56  | ENSG00000143443 |
| 1 | 149287618 | 149287856 | 149287737 | 10 | 12  | 9  | 1.35109544  | 0.232899    | C1orf56  | ENSG00000143443 |
| 1 | 149295661 | 149295857 | 149295774 | 9  | 9   | 9  | 1.039304184 | 0.466079    | MLLT11   | ENSG00000213190 |
| 1 | 149297732 | 149298307 | 149297964 | 78 | 101 | 18 | 5.579422463 | 1.90E-16    | MLLT11   | ENSG00000213190 |
| 1 | 149300037 | 149300221 | 149300129 | 8  | 8   | 3  | 2.338434415 | 0.0641221   | CDC42SE1 | ENSG00000197622 |
| 1 | 149309516 | 149310444 | 149309738 | 26 | 55  | 21 | 2.64550156  | 2.02E-05    |          | ENSG00000143458 |
| 1 | 149357089 | 149357337 | 149357213 | 8  | 9   | 5  | 1.73217364  | 0.133894    |          | ENSG00000216764 |
| 1 | 149368702 | 149368909 | 149368863 | 8  | 9   | 1  | 5.196520921 | 0.00490062  | SEMA6C   | ENSG00000143434 |
| 1 | 149385826 | 149386034 | 149385940 | 9  | 10  | 6  | 1.63319229  | 0.146906    | SEMA6C   | ENSG00000143434 |
| 1 | 149404936 | 149405593 | 149405167 | 14 | 33  | 13 | 2.524024447 | 0.0010017   | SCNM1    | ENSG00000163156 |
| 1 | 149429196 | 149429598 | 149429375 | 15 | 24  | 11 | 2.16521705  | 0.0106896   | VPS72    | ENSG00000163159 |
| 1 | 149434285 | 149434729 | 149434506 | 16 | 27  | 9  | 2.910051716 | 0.000869703 | PIP5K1A  | ENSG00000143398 |
| 1 | 149435283 | 149435776 | 149435462 | 13 | 25  | 9  | 2.702190879 | 0.00210968  | PIP5K1A  | ENSG00000143398 |
| 1 | 149437331 | 149437818 | 149437598 | 11 | 24  | 11 | 2.16521705  | 0.0106896   | PIP5K1A  | ENSG00000143398 |
| 1 | 149490894 | 149491083 | 149490988 | 10 | 10  | 2  | 3.810782009 | 0.00936112  | PSMD4    | ENSG00000159352 |
| 1 | 149493716 | 149493907 | 149493811 | 8  | 10  | 1  | 5.716173013 | 0.00260397  | PSMD4    | ENSG00000159352 |
| 1 | 149494372 | 149494559 | 149494465 | 8  | 8   | 9  | 0.935373766 | 0.560286    | PSMD4    | ENSG00000159352 |
| 1 | 149520262 | 149521124 | 149520716 | 14 | 42  | 15 | 2.793129995 | 8.70E-05    | ZNF687   | ENSG00000143373 |
| 1 | 149521134 | 149521588 | 149521313 | 10 | 19  | 7  | 2.598260461 | 0.00730518  | ZNF687   | ENSG00000143373 |
| 1 | 149529013 | 149529275 | 149529206 | 8  | 12  | 2  | 4.503651465 | 0.002963    | ZNF687   | ENSG00000143373 |

|   |           |           |           |    |    |    |             |             |          |                 |
|---|-----------|-----------|-----------|----|----|----|-------------|-------------|----------|-----------------|
| 1 | 149530309 | 149530606 | 149530432 | 8  | 11 | 2  | 4.157216737 | 0.0052913   | ZNF687   | ENSG00000143373 |
| 1 | 149540023 | 149540297 | 149540160 | 15 | 16 | 5  | 2.944695189 | 0.00659886  |          | ENSG00000222803 |
| 1 | 149550668 | 149550891 | 149550779 | 8  | 10 | 8  | 1.27026067  | 0.293854    |          | ENSG00000222803 |
| 1 | 149553543 | 149553908 | 149553757 | 9  | 14 | 3  | 3.897390691 | 0.00295882  | PI4KB    | ENSG00000143393 |
| 1 | 149565504 | 149566250 | 149566124 | 8  | 25 | 14 | 1.801460586 | 0.0308364   | PI4KB    | ENSG00000143393 |
| 1 | 149566446 | 149566999 | 149566614 | 15 | 32 | 15 | 2.14356488  | 0.00454085  | PI4KB    | ENSG00000143393 |
| 1 | 149576546 | 149576832 | 149576677 | 14 | 17 | 2  | 6.235825105 | 0.000146695 | RFX5     | ENSG00000143390 |
| 1 | 149580022 | 149580224 | 149580123 | 8  | 11 | 12 | 0.959357709 | 0.543005    | RFX5     | ENSG00000143390 |
| 1 | 149580244 | 149580551 | 149580361 | 8  | 12 | 12 | 1.039304184 | 0.461227    | RFX5     | ENSG00000143390 |
| 1 | 149586292 | 149586905 | 149586744 | 10 | 27 | 7  | 3.637564645 | 0.000166657 | RFX5     | ENSG00000143390 |
| 1 | 149587066 | 149587271 | 149587130 | 9  | 9  | 6  | 1.484720263 | 0.204387    | RFX5     | ENSG00000143390 |
| 1 | 149611599 | 149611993 | 149611875 | 12 | 18 | 18 | 1.039304184 | 0.453018    | SELENBP1 | ENSG00000143416 |
| 1 | 149631455 | 149631636 | 149631545 | 9  | 10 | 1  | 5.716173013 | 0.00260397  | PSMB4    | ENSG00000159377 |
| 1 | 149638382 | 149638787 | 149638608 | 15 | 23 | 9  | 2.494330042 | 0.00494866  | PSMB4    | ENSG00000159377 |
| 1 | 149663359 | 149663610 | 149663505 | 8  | 10 | 3  | 2.858086507 | 0.0242838   | POGZ     | ENSG00000143442 |
| 1 | 149682975 | 149683260 | 149683117 | 8  | 10 | 5  | 1.905391004 | 0.0915982   | POGZ     | ENSG00000143442 |
| 1 | 149751386 | 149751702 | 149751544 | 13 | 16 | 10 | 1.606197376 | 0.104477    | CGN      | ENSG00000143375 |
| 1 | 149752227 | 149752571 | 149752399 | 17 | 21 | 7  | 2.858086507 | 0.0029864   | CGN      | ENSG00000143375 |
| 1 | 149752597 | 149752889 | 149752756 | 12 | 14 | 2  | 5.196520921 | 0.000907371 | CGN      | ENSG00000143375 |
| 1 | 149753558 | 149753781 | 149753661 | 11 | 11 | 0  | 12.47165021 | 0.000193293 | CGN      | ENSG00000143375 |
| 1 | 149755327 | 149755506 | 149755419 | 8  | 8  | 9  | 0.935373766 | 0.560286    | CGN      | ENSG00000143375 |
| 1 | 149773784 | 149774142 | 149773943 | 9  | 14 | 7  | 1.948695345 | 0.0559175   | TUFT1    | ENSG00000143367 |
| 1 | 149778862 | 149779174 | 149779034 | 10 | 13 | 9  | 1.455025858 | 0.177172    | TUFT1    | ENSG00000143367 |
| 1 | 149779275 | 149779625 | 149779450 | 19 | 25 | 7  | 3.377738599 | 0.000449165 | TUFT1    | ENSG00000143367 |
| 1 | 149787785 | 149788203 | 149788024 | 16 | 23 | 14 | 1.662886695 | 0.0567474   |          | ENSG00000207606 |
| 1 | 149807921 | 149808121 | 149808074 | 9  | 9  | 6  | 1.484720263 | 0.204387    |          | ENSG00000219893 |
| 1 | 149818157 | 149818448 | 149818299 | 9  | 10 | 3  | 2.858086507 | 0.0242838   |          | ENSG00000219893 |
| 1 | 149821043 | 149821277 | 149821158 | 10 | 11 | 4  | 2.494330042 | 0.0324033   |          | ENSG00000219893 |
| 1 | 149823154 | 149823486 | 149823320 | 10 | 16 | 5  | 2.944695189 | 0.00659886  |          | ENSG00000219893 |
| 1 | 149833400 | 149833807 | 149833579 | 10 | 18 | 12 | 1.518983039 | 0.117837    | SNX27    | ENSG00000143376 |
| 1 | 149835622 | 149836117 | 149835801 | 13 | 28 | 4  | 6.027964269 | 3.34E-06    | SNX27    | ENSG00000143376 |
| 1 | 149842261 | 149842440 | 149842367 | 8  | 8  | 2  | 3.117912553 | 0.0283184   | SNX27    | ENSG00000143376 |
| 1 | 149845554 | 149845813 | 149845684 | 9  | 9  | 9  | 1.039304184 | 0.466079    | SNX27    | ENSG00000143376 |
| 1 | 149854958 | 149855261 | 149855116 | 11 | 14 | 4  | 3.117912553 | 0.00766354  | SNX27    | ENSG00000143376 |

|   |           |           |           |    |    |    |             |             |         |                 |
|---|-----------|-----------|-----------|----|----|----|-------------|-------------|---------|-----------------|
| 1 | 149859181 | 149859364 | 149859258 | 8  | 8  | 0  | 9.353737658 | 0.00163931  | SNX27   | ENSG00000143376 |
| 1 | 149863990 | 149864175 | 149864109 | 8  | 9  | 10 | 0.944821986 | 0.553851    |         | ENSG00000206635 |
| 1 | 149931931 | 149932171 | 149932051 | 9  | 9  | 5  | 1.73217364  | 0.133894    |         | ENSG00000178796 |
| 1 | 149943788 | 149943967 | 149943847 | 8  | 8  | 2  | 3.117912553 | 0.0283184   |         | ENSG00000178796 |
| 1 | 149953072 | 149953304 | 149953151 | 12 | 13 | 4  | 2.910051716 | 0.0125532   | TNRC4   | ENSG00000159409 |
| 1 | 149955990 | 149956430 | 149956103 | 11 | 19 | 4  | 4.157216737 | 0.000560204 | TNRC4   | ENSG00000159409 |
| 1 | 149962847 | 149963159 | 149963003 | 19 | 21 | 2  | 7.621564018 | 1.21E-05    | TNRC4   | ENSG00000159409 |
| 1 | 149974201 | 149974434 | 149974317 | 9  | 12 | 4  | 2.702190879 | 0.0203088   |         | ENSG00000206980 |
| 1 | 149978948 | 149979471 | 149979240 | 19 | 29 | 11 | 2.598260461 | 0.00146165  |         | ENSG00000206980 |
| 1 | 150022420 | 150022823 | 150022599 | 9  | 16 | 10 | 1.606197376 | 0.104477    | TDRKH   | ENSG00000182134 |
| 1 | 150027853 | 150028042 | 150027938 | 8  | 8  | 6  | 1.336248237 | 0.277651    | TDRKH   | ENSG00000182134 |
| 1 | 150029319 | 150029548 | 150029433 | 10 | 11 | 2  | 4.157216737 | 0.0052913   | TDRKH   | ENSG00000182134 |
| 1 | 150029686 | 150030169 | 150030042 | 13 | 24 | 18 | 1.367505506 | 0.148798    | TDRKH   | ENSG00000182134 |
| 1 | 150075595 | 150075862 | 150075728 | 10 | 14 | 10 | 1.417232979 | 0.185113    | RORC    | ENSG00000143365 |
| 1 | 150075867 | 150076337 | 150076046 | 15 | 29 | 13 | 2.227080395 | 0.00479511  |         | ENSG00000201134 |
| 1 | 150097437 | 150097745 | 150097591 | 8  | 12 | 5  | 2.251825733 | 0.0404733   | THEM5   | ENSG00000196407 |
| 1 | 150110452 | 150110844 | 150110631 | 12 | 19 | 14 | 1.385738912 | 0.166049    | THEM5   | ENSG00000196407 |
| 1 | 150128212 | 150128415 | 150128344 | 9  | 10 | 1  | 5.716173013 | 0.00260397  | THEM4   | ENSG00000159445 |
| 1 | 150148666 | 150149161 | 150148982 | 12 | 26 | 16 | 1.650659587 | 0.048911    | THEM4   | ENSG00000159445 |
| 1 | 150157990 | 150158308 | 150158141 | 9  | 13 | 5  | 2.425043097 | 0.0262442   | THEM4   | ENSG00000159445 |
| 1 | 150163953 | 150164239 | 150164068 | 10 | 13 | 8  | 1.616695398 | 0.123553    | THEM4   | ENSG00000159445 |
| 1 | 150184393 | 150184643 | 150184547 | 8  | 11 | 7  | 1.558956276 | 0.158273    |         | ENSG00000215843 |
| 1 | 150184798 | 150185111 | 150184945 | 13 | 17 | 6  | 2.672496474 | 0.00882337  |         | ENSG00000215843 |
| 1 | 150185186 | 150185365 | 150185323 | 8  | 8  | 7  | 1.169217207 | 0.371848    |         | ENSG00000215843 |
| 1 | 150186062 | 150186254 | 150186179 | 9  | 9  | 2  | 3.464347281 | 0.0163838   |         | ENSG00000215843 |
| 1 | 150202035 | 150202227 | 150202168 | 8  | 9  | 2  | 3.464347281 | 0.0163838   |         | ENSG00000215843 |
| 1 | 150202330 | 150202679 | 150202509 | 10 | 13 | 5  | 2.425043097 | 0.0262442   |         | ENSG00000215843 |
| 1 | 150207098 | 150207317 | 150207207 | 8  | 11 | 12 | 0.959357709 | 0.543005    |         | ENSG00000215843 |
| 1 | 150210368 | 150210580 | 150210470 | 8  | 9  | 4  | 2.078608368 | 0.0785659   |         | ENSG00000215843 |
| 1 | 150211640 | 150211948 | 150211784 | 13 | 15 | 13 | 1.187776211 | 0.317363    | S100A10 | ENSG00000197747 |
| 1 | 150212131 | 150212338 | 150212288 | 8  | 8  | 7  | 1.169217207 | 0.371848    | S100A10 | ENSG00000197747 |
| 1 | 150223882 | 150224079 | 150223980 | 8  | 8  | 5  | 1.558956276 | 0.191397    | S100A10 | ENSG00000197747 |
| 1 | 150224806 | 150225156 | 150224980 | 10 | 14 | 10 | 1.417232979 | 0.185113    | S100A10 | ENSG00000197747 |
| 1 | 150228664 | 150228875 | 150228743 | 8  | 10 | 5  | 1.905391004 | 0.0915982   | S100A10 | ENSG00000197747 |

|   |           |           |           |    |     |    |             |             |         |                 |
|---|-----------|-----------|-----------|----|-----|----|-------------|-------------|---------|-----------------|
| 1 | 150229157 | 150230368 | 150229597 | 26 | 85  | 29 | 2.979338661 | 1.56E-08    | S100A10 | ENSG00000197747 |
| 1 | 150231136 | 150232094 | 150231647 | 20 | 57  | 28 | 2.078608368 | 0.000430316 | S100A10 | ENSG00000197747 |
| 1 | 150233093 | 150233599 | 150233250 | 20 | 31  | 10 | 3.023430354 | 0.000301033 | S100A10 | ENSG00000197747 |
| 1 | 150240751 | 150241198 | 150240893 | 10 | 19  | 14 | 1.385738912 | 0.166049    | S100A10 | ENSG00000197747 |
| 1 | 150249299 | 150249529 | 150249391 | 10 | 10  | 1  | 5.716173013 | 0.00260397  |         | ENSG00000216988 |
| 1 | 150257742 | 150258085 | 150257913 | 11 | 15  | 5  | 2.771477825 | 0.0105836   |         | ENSG00000216988 |
| 1 | 150264133 | 150264545 | 150264436 | 9  | 15  | 10 | 1.511715177 | 0.140236    |         | ENSG00000216988 |
| 1 | 150268603 | 150268824 | 150268713 | 10 | 10  | 1  | 5.716173013 | 0.00260397  | S100A11 | ENSG00000163191 |
| 1 | 150270465 | 150270666 | 150270565 | 8  | 8   | 2  | 3.117912553 | 0.0283184   | S100A11 | ENSG00000163191 |
| 1 | 150273016 | 150273216 | 150273161 | 8  | 11  | 5  | 2.078608368 | 0.0614303   | S100A11 | ENSG00000163191 |
| 1 | 150273454 | 150274553 | 150274303 | 60 | 106 | 37 | 2.926461782 | 5.51E-10    | S100A11 | ENSG00000163191 |
| 1 | 150274906 | 150275494 | 150275147 | 10 | 25  | 17 | 1.501217155 | 0.0888464   | S100A11 | ENSG00000163191 |
| 1 | 150275629 | 150276394 | 150275973 | 11 | 29  | 12 | 2.398394271 | 0.00272121  | S100A11 | ENSG00000163191 |
| 1 | 150279428 | 150279728 | 150279578 | 10 | 14  | 2  | 5.196520921 | 0.000907371 | S100A11 | ENSG00000163191 |
| 1 | 150285046 | 150285361 | 150285184 | 9  | 13  | 7  | 1.818782322 | 0.0805123   | S100A11 | ENSG00000163191 |
| 1 | 150286466 | 150287234 | 150286966 | 34 | 65  | 21 | 3.117912553 | 2.87E-07    | S100A11 | ENSG00000163191 |
| 1 | 150287239 | 150287826 | 150287418 | 16 | 34  | 19 | 1.818782322 | 0.0141578   | S100A11 | ENSG00000163191 |
| 1 | 150291733 | 150292091 | 150291912 | 17 | 22  | 16 | 1.406117426 | 0.139742    | S100A11 | ENSG00000163191 |
| 1 | 150299828 | 150300075 | 150299909 | 10 | 14  | 11 | 1.29913023  | 0.246308    |         | ENSG00000219550 |
| 1 | 150301414 | 150301636 | 150301522 | 10 | 11  | 1  | 6.235825105 | 0.0013754   |         | ENSG00000219550 |
| 1 | 150367011 | 150367262 | 150367136 | 11 | 12  | 4  | 2.702190879 | 0.0203088   |         | ENSG00000219179 |
| 1 | 150381156 | 150381417 | 150381286 | 8  | 11  | 13 | 0.890832158 | 0.618492    | RPTN    | ENSG00000215853 |
| 1 | 150406931 | 150407354 | 150407093 | 10 | 16  | 4  | 3.533634226 | 0.00276486  | RPTN    | ENSG00000215853 |
| 1 | 150424780 | 150425030 | 150424879 | 12 | 14  | 2  | 5.196520921 | 0.000907371 | RPTN    | ENSG00000215853 |
| 1 | 150446350 | 150446588 | 150446519 | 9  | 10  | 2  | 3.810782009 | 0.00936112  | HRNR    | ENSG00000197915 |
| 1 | 150570167 | 150570372 | 150570264 | 8  | 9   | 5  | 1.73217364  | 0.133894    | FLG     | ENSG00000143631 |
| 1 | 150603276 | 150603466 | 150603364 | 8  | 8   | 6  | 1.336248237 | 0.277651    | FLG2    | ENSG00000143520 |
| 1 | 150631762 | 150632244 | 150631999 | 14 | 25  | 9  | 2.702190879 | 0.00210968  |         | ENSG00000183586 |
| 1 | 150632315 | 150632528 | 150632421 | 9  | 10  | 3  | 2.858086507 | 0.0242838   |         | ENSG00000183586 |
| 1 | 150638332 | 150638589 | 150638448 | 13 | 13  | 5  | 2.425043097 | 0.0262442   |         | ENSG00000183586 |
| 1 | 150667011 | 150667345 | 150667174 | 9  | 11  | 1  | 6.235825105 | 0.0013754   | CRNN    | ENSG00000143536 |
| 1 | 150677062 | 150677304 | 150677219 | 10 | 12  | 7  | 1.688869299 | 0.11395     | CRNN    | ENSG00000143536 |
| 1 | 150681577 | 150681795 | 150681627 | 8  | 9   | 1  | 5.196520921 | 0.00490062  | CRNN    | ENSG00000143536 |
| 1 | 150699345 | 150699570 | 150699457 | 9  | 12  | 6  | 1.930136342 | 0.071303    | CRNN    | ENSG00000143536 |



|   |           |           |           |    |    |    |             |             |         |                 |
|---|-----------|-----------|-----------|----|----|----|-------------|-------------|---------|-----------------|
| 1 | 150700601 | 150700906 | 150700753 | 14 | 17 | 4  | 3.741495063 | 0.00163722  | CRNN    | ENSG00000143536 |
| 1 | 150716728 | 150716958 | 150716843 | 13 | 13 | 0  | 14.55025858 | 4.65E-05    | LCE5A   | ENSG00000186207 |
| 1 | 150893237 | 150893416 | 150893376 | 9  | 10 | 1  | 5.716173013 | 0.00260397  | C1orf46 | ENSG00000176075 |
| 1 | 151025110 | 151025368 | 151025239 | 8  | 11 | 1  | 6.235825105 | 0.0013754   | LCE1E   | ENSG00000186226 |
| 1 | 151204343 | 151204564 | 151204453 | 11 | 11 | 0  | 12.47165021 | 0.000193293 | SPRR4   | ENSG00000184148 |
| 1 | 151362048 | 151362227 | 151362127 | 8  | 8  | 1  | 4.676868829 | 0.0091584   | SPRR2F  | ENSG00000213163 |
| 1 | 151579096 | 151579403 | 151579274 | 10 | 13 | 1  | 7.27512929  | 0.000378098 |         | ENSG00000207321 |
| 1 | 151594675 | 151594872 | 151594773 | 8  | 9  | 8  | 1.154782427 | 0.375434    | S100A9  | ENSG00000163220 |
| 1 | 151603323 | 151603587 | 151603423 | 9  | 11 | 2  | 4.157216737 | 0.0052913   | S100A9  | ENSG00000163220 |
| 1 | 151604618 | 151604853 | 151604735 | 11 | 12 | 6  | 1.930136342 | 0.071303    | S100A9  | ENSG00000163220 |
| 1 | 151805695 | 151805971 | 151805843 | 10 | 13 | 2  | 4.850086193 | 0.00164564  | S100A2  | ENSG00000196754 |
| 1 | 151806627 | 151807055 | 151806780 | 20 | 27 | 1  | 14.55025858 | 3.30E-08    | S100A2  | ENSG00000196754 |
| 1 | 151807642 | 151807945 | 151807793 | 12 | 17 | 11 | 1.558956276 | 0.111389    | S100A2  | ENSG00000196754 |
| 1 | 151811736 | 151811922 | 151811866 | 10 | 10 | 5  | 1.905391004 | 0.0915982   | S100A2  | ENSG00000196754 |
| 1 | 151826588 | 151826798 | 151826691 | 9  | 9  | 0  | 10.39304184 | 0.000803859 | S100A2  | ENSG00000196754 |
| 1 | 151847342 | 151847636 | 151847459 | 10 | 11 | 10 | 1.133786383 | 0.380636    | S100A16 | ENSG00000188643 |
| 1 | 151865407 | 151865761 | 151865584 | 8  | 13 | 3  | 3.637564645 | 0.0050909   | S100A13 | ENSG00000189171 |
| 1 | 151866453 | 151866681 | 151866572 | 10 | 12 | 2  | 4.503651465 | 0.002963    | S100A13 | ENSG00000189171 |
| 1 | 151873175 | 151873587 | 151873379 | 12 | 20 | 13 | 1.558956276 | 0.0943292   | S100A13 | ENSG00000189171 |
| 1 | 151967150 | 151967403 | 151967276 | 8  | 9  | 2  | 3.464347281 | 0.0163838   | INTS3   | ENSG00000143624 |
| 1 | 152013856 | 152014219 | 152014075 | 14 | 19 | 1  | 10.39304184 | 7.23E-06    |         | ENSG00000216243 |
| 1 | 152014327 | 152014580 | 152014453 | 11 | 13 | 5  | 2.425043097 | 0.0262442   | SLC27A3 | ENSG00000143554 |
| 1 | 152035739 | 152035918 | 152035851 | 8  | 8  | 1  | 4.676868829 | 0.0091584   |         | ENSG00000219979 |
| 1 | 152036392 | 152036609 | 152036502 | 8  | 9  | 0  | 10.39304184 | 0.000803859 |         | ENSG00000219979 |
| 1 | 152162138 | 152162367 | 152162252 | 8  | 8  | 9  | 0.935373766 | 0.560286    | GATAD2B | ENSG00000143614 |
| 1 | 152162848 | 152163243 | 152163064 | 8  | 15 | 5  | 2.771477825 | 0.0105836   | GATAD2B | ENSG00000143614 |
| 1 | 152203100 | 152203589 | 152203344 | 9  | 19 | 6  | 2.969440526 | 0.0035096   | SLC39A1 | ENSG00000143570 |
| 1 | 152216689 | 152216924 | 152216767 | 11 | 12 | 5  | 2.251825733 | 0.0404733   | JTB     | ENSG00000143543 |
| 1 | 152225905 | 152226270 | 152226091 | 11 | 17 | 3  | 4.676868829 | 0.000552213 | RAB13   | ENSG00000143545 |
| 1 | 152229586 | 152230019 | 152229833 | 12 | 20 | 10 | 1.98412617  | 0.0277883   | RPS27   | ENSG00000177954 |
| 1 | 152231910 | 152232108 | 152231997 | 8  | 9  | 5  | 1.73217364  | 0.133894    | RPS27   | ENSG00000177954 |
| 1 | 152422288 | 152422513 | 152422400 | 11 | 14 | 5  | 2.598260461 | 0.0167748   | TPM3    | ENSG00000143549 |
| 1 | 152459489 | 152459791 | 152459640 | 8  | 12 | 7  | 1.688869299 | 0.11395     | C1orf43 | ENSG00000143612 |
| 1 | 152511546 | 152512016 | 152511725 | 10 | 20 | 8  | 2.425043097 | 0.00917565  | HAX1    | ENSG00000143575 |

|   |           |           |           |    |    |    |             |             |         |                 |
|---|-----------|-----------|-----------|----|----|----|-------------|-------------|---------|-----------------|
| 1 | 152592840 | 152593125 | 152592988 | 8  | 9  | 3  | 2.598260461 | 0.0397929   | ATP8B2  | ENSG00000143515 |
| 1 | 152657315 | 152657657 | 152657486 | 8  | 12 | 1  | 6.755477198 | 0.000722752 |         | ENSG00000219049 |
| 1 | 152717717 | 152717978 | 152717834 | 10 | 10 | 8  | 1.27026067  | 0.293854    | SHE     | ENSG00000169291 |
| 1 | 152718889 | 152719186 | 152719038 | 12 | 15 | 1  | 8.314433474 | 0.000102308 | SHE     | ENSG00000169291 |
| 1 | 152773441 | 152773637 | 152773590 | 9  | 9  | 2  | 3.464347281 | 0.0163838   | TDRD10  | ENSG00000163239 |
| 1 | 152847242 | 152847434 | 152847338 | 9  | 9  | 2  | 3.464347281 | 0.0163838   | ADAR    | ENSG00000160710 |
| 1 | 152867154 | 152867336 | 152867227 | 10 | 10 | 6  | 1.63319229  | 0.146906    | ADAR    | ENSG00000160710 |
| 1 | 152908850 | 152909102 | 152909005 | 9  | 11 | 7  | 1.558956276 | 0.158273    | ADAR    | ENSG00000160710 |
| 1 | 153052492 | 153053061 | 153052776 | 36 | 55 | 7  | 7.27512929  | 2.61E-11    | KCNN3   | ENSG00000143603 |
| 1 | 153099075 | 153099289 | 153099146 | 9  | 10 | 0  | 11.43234603 | 0.000394183 | KCNN3   | ENSG00000143603 |
| 1 | 153175629 | 153175853 | 153175741 | 8  | 10 | 6  | 1.63319229  | 0.146906    | PMVK    | ENSG00000163344 |
| 1 | 153176456 | 153176880 | 153176788 | 11 | 18 | 6  | 2.8209685   | 0.00559354  | PMVK    | ENSG00000163344 |
| 1 | 153211714 | 153212107 | 153211873 | 15 | 20 | 3  | 5.456346967 | 9.70E-05    | SHC1    | ENSG00000160691 |
| 1 | 153212818 | 153213184 | 153213005 | 10 | 17 | 2  | 6.235825105 | 0.000146695 | SHC1    | ENSG00000160691 |
| 1 | 153214085 | 153214420 | 153214245 | 10 | 13 | 5  | 2.425043097 | 0.0262442   | CKS1B   | ENSG00000173207 |
| 1 | 153222021 | 153222332 | 153222168 | 12 | 15 | 4  | 3.32577339  | 0.00462646  | FLAD1   | ENSG00000160688 |
| 1 | 153239792 | 153240037 | 153239914 | 10 | 12 | 8  | 1.501217155 | 0.168286    | ZBTB7B  | ENSG00000160685 |
| 1 | 153240039 | 153240839 | 153240354 | 17 | 45 | 13 | 3.414856605 | 4.95E-06    | ZBTB7B  | ENSG00000160685 |
| 1 | 153241182 | 153241434 | 153241339 | 9  | 11 | 8  | 1.385738912 | 0.224757    | ZBTB7B  | ENSG00000160685 |
| 1 | 153256555 | 153256941 | 153256734 | 10 | 17 | 1  | 9.353737658 | 2.73E-05    | ZBTB7B  | ENSG00000160685 |
| 1 | 153284132 | 153284410 | 153284271 | 10 | 12 | 2  | 4.503651465 | 0.002963    | ADAM15  | ENSG00000143537 |
| 1 | 153330543 | 153330794 | 153330649 | 8  | 10 | 5  | 1.905391004 | 0.0915982   | EFNA3   | ENSG00000143590 |
| 1 | 153356796 | 153357030 | 153356914 | 10 | 11 | 7  | 1.558956276 | 0.158273    |         | ENSG00000202027 |
| 1 | 153363656 | 153363861 | 153363760 | 8  | 8  | 3  | 2.338434415 | 0.0641221   | EFNA1   | ENSG00000169242 |
| 1 | 153368802 | 153369096 | 153368949 | 8  | 11 | 5  | 2.078608368 | 0.0614303   | EFNA1   | ENSG00000169242 |
| 1 | 153370529 | 153370708 | 153370618 | 8  | 8  | 1  | 4.676868829 | 0.0091584   | RAG1AP1 | ENSG00000169241 |
| 1 | 153374245 | 153374440 | 153374342 | 8  | 8  | 4  | 1.870747532 | 0.118863    | RAG1AP1 | ENSG00000169241 |
| 1 | 153374570 | 153374900 | 153374691 | 11 | 15 | 3  | 4.157216737 | 0.00170423  | RAG1AP1 | ENSG00000169241 |
| 1 | 153379624 | 153379810 | 153379717 | 8  | 9  | 3  | 2.598260461 | 0.0397929   | DPM3    | ENSG00000179085 |
| 1 | 153412289 | 153412577 | 153412433 | 12 | 17 | 9  | 1.870747532 | 0.0498299   | KRTCAP2 | ENSG00000163463 |
| 1 | 153416346 | 153416614 | 153416480 | 9  | 13 | 9  | 1.455025858 | 0.177172    | TRIM46  | ENSG00000163462 |
| 1 | 153429800 | 153430155 | 153429977 | 8  | 14 | 3  | 3.897390691 | 0.00295882  | MUC1    | ENSG00000185499 |
| 1 | 153477603 | 153477786 | 153477760 | 8  | 9  | 5  | 1.73217364  | 0.133894    | GBA     | ENSG00000177628 |
| 1 | 153487192 | 153487428 | 153487310 | 8  | 11 | 3  | 3.117912553 | 0.0146045   | C1orf2  | ENSG00000160767 |

|   |           |           |           |    |     |     |             |             |          |                 |
|---|-----------|-----------|-----------|----|-----|-----|-------------|-------------|----------|-----------------|
| 1 | 153498855 | 153499044 | 153498968 | 8  | 9   | 4   | 2.078608368 | 0.0785659   | SCAMP3   | ENSG00000116521 |
| 1 | 153514884 | 153515120 | 153515023 | 10 | 12  | 6   | 1.930136342 | 0.071303    | HCN3     | ENSG00000143630 |
| 1 | 153545237 | 153545425 | 153545331 | 8  | 8   | 3   | 2.338434415 | 0.0641221   | FDPS     | ENSG00000160752 |
| 1 | 153799312 | 153799614 | 153799461 | 11 | 14  | 5   | 2.598260461 | 0.0167748   | ASH1L    | ENSG00000116539 |
| 1 | 153819574 | 153819753 | 153819650 | 8  | 8   | 0   | 9.353737658 | 0.00163931  |          | ENSG00000218745 |
| 1 | 153887909 | 153888194 | 153888051 | 8  | 11  | 3   | 3.117912553 | 0.0146045   | ERVK5    | ENSG00000198358 |
| 1 | 154094837 | 154095020 | 154094913 | 8  | 8   | 4   | 1.870747532 | 0.118863    | SYT11    | ENSG00000132718 |
| 1 | 154257467 | 154257730 | 154257597 | 8  | 9   | 5   | 1.73217364  | 0.133894    | SSR2     | ENSG00000163479 |
| 1 | 154290952 | 154291202 | 154291077 | 8  | 10  | 7   | 1.429043253 | 0.21536     | ROBLD3   | ENSG00000116586 |
| 1 | 154308873 | 154309052 | 154308962 | 8  | 8   | 0   | 9.353737658 | 0.00163931  |          | ENSG00000222611 |
| 1 | 154333017 | 154333396 | 154333217 | 9  | 16  | 3   | 4.417042783 | 0.00097367  | LMNA     | ENSG00000160789 |
| 1 | 154340326 | 154340542 | 154340403 | 8  | 11  | 1   | 6.235825105 | 0.0013754   | LMNA     | ENSG00000160789 |
| 1 | 154354374 | 154354602 | 154354517 | 10 | 12  | 2   | 4.503651465 | 0.002963    | LMNA     | ENSG00000160789 |
| 1 | 154359634 | 154360608 | 154360299 | 77 | 117 | 11  | 10.21982448 | 5.32E-25    |          | ENSG00000203263 |
| 1 | 154366700 | 154366889 | 154366794 | 10 | 11  | 3   | 3.117912553 | 0.0146045   | LMNA     | ENSG00000160789 |
| 1 | 154382537 | 154382762 | 154382631 | 9  | 10  | 7   | 1.429043253 | 0.21536     | SEMA4A   | ENSG00000196189 |
| 1 | 154389854 | 154390063 | 154389958 | 9  | 10  | 3   | 2.858086507 | 0.0242838   | SEMA4A   | ENSG00000196189 |
| 1 | 154430312 | 154430614 | 154430466 | 9  | 11  | 4   | 2.494330042 | 0.0324033   | SLC25A44 | ENSG00000160785 |
| 1 | 154449505 | 154449922 | 154449610 | 9  | 16  | 4   | 3.533634226 | 0.00276486  | PMF1     | ENSG00000160783 |
| 1 | 154452709 | 154453428 | 154452885 | 68 | 132 | 154 | 0.891790042 | 0.834537    |          | ENSG00000203262 |
| 1 | 154461915 | 154462097 | 154461997 | 9  | 11  | 3   | 3.117912553 | 0.0146045   |          | ENSG00000203262 |
| 1 | 154519233 | 154519521 | 154519367 | 13 | 15  | 5   | 2.771477825 | 0.0105836   | TMEM79   | ENSG00000163472 |
| 1 | 154596341 | 154596564 | 154596452 | 8  | 8   | 2   | 3.117912553 | 0.0283184   | CCT3     | ENSG00000163468 |
| 1 | 154604675 | 154604935 | 154604805 | 8  | 9   | 5   | 1.73217364  | 0.133894    | CCT3     | ENSG00000163468 |
| 1 | 154692890 | 154693503 | 154693021 | 13 | 30  | 8   | 3.579825523 | 9.27E-05    | C1orf61  | ENSG00000125462 |
| 1 | 154693520 | 154693804 | 154693652 | 13 | 16  | 7   | 2.208521392 | 0.0257604   |          | ENSG00000206651 |
| 1 | 154708100 | 154708431 | 154708255 | 11 | 15  | 12  | 1.279143611 | 0.251893    |          | ENSG00000206651 |
| 1 | 154708504 | 154708850 | 154708677 | 8  | 13  | 4   | 2.910051716 | 0.0125532   |          | ENSG00000206651 |
| 1 | 154737629 | 154737860 | 154737775 | 12 | 12  | 6   | 1.930136342 | 0.071303    | MEF2D    | ENSG00000116604 |
| 1 | 154809172 | 154809355 | 154809277 | 8  | 8   | 3   | 2.338434415 | 0.0641221   | IQGAP3   | ENSG00000183856 |
| 1 | 154852955 | 154853196 | 154853075 | 11 | 12  | 7   | 1.688869299 | 0.11395     | HAPLN2   | ENSG00000132702 |
| 1 | 154896433 | 154896723 | 154896580 | 12 | 14  | 8   | 1.73217364  | 0.0890835   | NES      | ENSG00000132688 |
| 1 | 154942434 | 154942665 | 154942517 | 10 | 11  | 0   | 12.47165021 | 0.000193293 | CRABP2   | ENSG00000143320 |
| 1 | 154962267 | 154962587 | 154962387 | 8  | 12  | 4   | 2.702190879 | 0.0203088   | ISG20L2  | ENSG00000143319 |

|   |           |           |           |    |    |    |             |             |         |                 |
|---|-----------|-----------|-----------|----|----|----|-------------|-------------|---------|-----------------|
| 1 | 154977358 | 154977721 | 154977490 | 8  | 13 | 20 | 0.692869456 | 0.861903    | MRPL24  | ENSG00000143314 |
| 1 | 155003427 | 155003683 | 155003561 | 10 | 13 | 7  | 1.818782322 | 0.0805123   | PRCC    | ENSG00000143294 |
| 1 | 155042540 | 155042768 | 155042642 | 8  | 8  | 5  | 1.558956276 | 0.191397    | NTRK1   | ENSG00000198400 |
| 1 | 155927830 | 155928063 | 155927924 | 8  | 10 | 3  | 2.858086507 | 0.0242838   | FCRL3   | ENSG00000160856 |
| 1 | 156361503 | 156361688 | 156361595 | 9  | 9  | 7  | 1.29913023  | 0.286504    |         | ENSG00000212882 |
| 1 | 158035312 | 158035558 | 158035443 | 8  | 12 | 2  | 4.503651465 | 0.002963    | FCRL6   | ENSG00000181036 |
| 1 | 158136952 | 158137139 | 158137021 | 10 | 11 | 4  | 2.494330042 | 0.0324033   | CCDC19  | ENSG00000213085 |
| 1 | 158182342 | 158182649 | 158182492 | 12 | 15 | 4  | 3.32577339  | 0.00462646  | IGSF9   | ENSG00000085552 |
| 1 | 158297978 | 158298206 | 158298102 | 8  | 8  | 4  | 1.870747532 | 0.118863    | KCNJ10  | ENSG00000177807 |
| 1 | 158345423 | 158345711 | 158345567 | 9  | 11 | 1  | 6.235825105 | 0.0013754   | ATP1A2  | ENSG00000018625 |
| 1 | 158488452 | 158488684 | 158488555 | 8  | 10 | 3  | 2.858086507 | 0.0242838   | WDR42A  | ENSG00000132716 |
| 1 | 158651315 | 158651635 | 158651470 | 11 | 13 | 1  | 7.27512929  | 0.000378098 | VANGL2  | ENSG00000162738 |
| 1 | 159179306 | 159179490 | 159179413 | 9  | 9  | 1  | 5.196520921 | 0.00490062  |         | ENSG00000219416 |
| 1 | 159233854 | 159234192 | 159234013 | 10 | 14 | 4  | 3.117912553 | 0.00766354  | F11R    | ENSG00000158769 |
| 1 | 159320009 | 159320299 | 159320134 | 10 | 13 | 3  | 3.637564645 | 0.0050909   | PVRL4   | ENSG00000143217 |
| 1 | 159325909 | 159326108 | 159325934 | 9  | 10 | 1  | 5.716173013 | 0.00260397  | PVRL4   | ENSG00000143217 |
| 1 | 159369265 | 159369601 | 159369433 | 9  | 13 | 0  | 14.55025858 | 4.65E-05    | DEDD    | ENSG00000158796 |
| 1 | 159396102 | 159396347 | 159396214 | 9  | 9  | 6  | 1.484720263 | 0.204387    | USP21   | ENSG00000143258 |
| 1 | 159402055 | 159402392 | 159402216 | 8  | 12 | 5  | 2.251825733 | 0.0404733   | PPOX    | ENSG00000143224 |
| 1 | 159402599 | 159402784 | 159402737 | 8  | 9  | 5  | 1.73217364  | 0.133894    | PPOX    | ENSG00000143224 |
| 1 | 159435028 | 159435245 | 159435081 | 9  | 10 | 2  | 3.810782009 | 0.00936112  | ADAMTS4 | ENSG00000158859 |
| 1 | 159438587 | 159438794 | 159438690 | 8  | 9  | 7  | 1.29913023  | 0.286504    | NDUFS2  | ENSG00000158864 |
| 1 | 159495076 | 159495255 | 159495165 | 8  | 8  | 4  | 1.870747532 | 0.118863    | PCP4L1  | ENSG00000173126 |
| 1 | 159618651 | 159618848 | 159618774 | 9  | 9  | 2  | 3.464347281 | 0.0163838   |         | ENSG00000217421 |
| 1 | 159664465 | 159664754 | 159664560 | 9  | 13 | 10 | 1.32275078  | 0.240023    |         | ENSG00000208455 |
| 1 | 159960265 | 159960495 | 159960380 | 8  | 11 | 1  | 6.235825105 | 0.0013754   | FCRLB   | ENSG00000162746 |
| 1 | 160330866 | 160331174 | 160331019 | 16 | 19 | 5  | 3.464347281 | 0.00150447  | NOS1AP  | ENSG00000198929 |
| 1 | 160428694 | 160428900 | 160428777 | 9  | 9  | 0  | 10.39304184 | 0.000803859 | NOS1AP  | ENSG00000198929 |
| 1 | 160466582 | 160466792 | 160466687 | 9  | 10 | 1  | 5.716173013 | 0.00260397  |         | ENSG00000207729 |
| 1 | 160566364 | 160566576 | 160566510 | 11 | 11 | 2  | 4.157216737 | 0.0052913   |         | ENSG00000207729 |
| 1 | 160781843 | 160782079 | 160781976 | 10 | 11 | 2  | 4.157216737 | 0.0052913   |         | ENSG00000219168 |
| 1 | 161558029 | 161558365 | 161558197 | 12 | 17 | 7  | 2.338434415 | 0.0171287   | NUF2    | ENSG00000143228 |
| 1 | 161646567 | 161646858 | 161646684 | 8  | 11 | 1  | 6.235825105 | 0.0013754   |         | ENSG00000218131 |
| 1 | 162834575 | 162834983 | 162834744 | 10 | 18 | 7  | 2.468347438 | 0.0112499   |         | ENSG00000215839 |

|   |           |           |           |    |    |    |             |             |          |                 |
|---|-----------|-----------|-----------|----|----|----|-------------|-------------|----------|-----------------|
| 1 | 162984159 | 162984470 | 162984314 | 8  | 10 | 5  | 1.905391004 | 0.0915982   |          | ENSG00000208426 |
| 1 | 163008608 | 163008955 | 163008823 | 10 | 14 | 5  | 2.598260461 | 0.0167748   |          | ENSG00000208426 |
| 1 | 163398509 | 163398690 | 163398586 | 12 | 12 | 3  | 3.377738599 | 0.00867157  | LMX1A    | ENSG00000162761 |
| 1 | 163846838 | 163847095 | 163846959 | 13 | 15 | 4  | 3.32577339  | 0.00462646  |          | ENSG00000208402 |
| 1 | 163866661 | 163866982 | 163866803 | 8  | 12 | 11 | 1.125912866 | 0.382541    | MGST3    | ENSG00000143198 |
| 1 | 164004697 | 164004931 | 164004814 | 11 | 11 | 4  | 2.494330042 | 0.0324033   | TMCO1    | ENSG00000143183 |
| 1 | 164094265 | 164094493 | 164094438 | 11 | 13 | 1  | 7.27512929  | 0.000378098 | UCK2     | ENSG00000143179 |
| 1 | 164123914 | 164124110 | 164124050 | 8  | 8  | 2  | 3.117912553 | 0.0283184   | UCK2     | ENSG00000143179 |
| 1 | 165001546 | 165001755 | 165001650 | 8  | 8  | 2  | 3.117912553 | 0.0283184   |          | ENSG00000217857 |
| 1 | 165112279 | 165112473 | 165112407 | 9  | 9  | 2  | 3.464347281 | 0.0163838   | TADA1L   | ENSG00000152382 |
| 1 | 165195480 | 165195659 | 165195549 | 8  | 8  | 3  | 2.338434415 | 0.0641221   | C1orf32  | ENSG00000143195 |
| 1 | 165293052 | 165293335 | 165293204 | 8  | 11 | 1  | 6.235825105 | 0.0013754   |          | ENSG00000208384 |
| 1 | 165458290 | 165458537 | 165458413 | 9  | 9  | 3  | 2.598260461 | 0.0397929   | POU2F1   | ENSG00000143190 |
| 1 | 165808932 | 165809190 | 165809079 | 10 | 12 | 0  | 13.5109544  | 9.48E-05    |          | ENSG00000217876 |
| 1 | 166039164 | 166039432 | 166039311 | 9  | 11 | 6  | 1.781664316 | 0.103344    |          | ENSG00000216870 |
| 1 | 166675145 | 166675339 | 166675230 | 8  | 8  | 1  | 4.676868829 | 0.0091584   |          | ENSG00000215833 |
| 1 | 166859175 | 166859360 | 166859272 | 8  | 10 | 2  | 3.810782009 | 0.00936112  |          | ENSG00000216686 |
| 1 | 166945868 | 166946157 | 166946010 | 13 | 15 | 1  | 8.314433474 | 0.000102308 | DPT      | ENSG00000143196 |
| 1 | 167097636 | 167097911 | 167097773 | 8  | 10 | 2  | 3.810782009 | 0.00936112  |          | ENSG00000220043 |
| 1 | 167142890 | 167143283 | 167143104 | 12 | 18 | 9  | 1.97467795  | 0.0349428   |          | ENSG00000220043 |
| 1 | 167175378 | 167175696 | 167175537 | 9  | 12 | 3  | 3.377738599 | 0.00867157  |          | ENSG00000213063 |
| 1 | 167227550 | 167227957 | 167227790 | 40 | 48 | 7  | 6.365738128 | 1.63E-09    |          | ENSG00000213063 |
| 1 | 167240069 | 167240368 | 167240226 | 11 | 13 | 0  | 14.55025858 | 4.65E-05    |          | ENSG00000213063 |
| 1 | 167267562 | 167267746 | 167267654 | 9  | 9  | 4  | 2.078608368 | 0.0785659   | ATP1B1   | ENSG00000143153 |
| 1 | 167438788 | 167439143 | 167438965 | 33 | 38 | 0  | 40.53286319 | 8.52E-13    | ATP1B1   | ENSG00000143153 |
| 1 | 167603907 | 167604150 | 167604028 | 10 | 10 | 3  | 2.858086507 | 0.0242838   | BLZF1    | ENSG00000117475 |
| 1 | 167721989 | 167722168 | 167722033 | 8  | 8  | 2  | 3.117912553 | 0.0283184   |          | ENSG00000213062 |
| 1 | 167753520 | 167753715 | 167753635 | 8  | 9  | 1  | 5.196520921 | 0.00490062  |          | ENSG00000213062 |
| 1 | 167764836 | 167765639 | 167765416 | 21 | 47 | 19 | 2.494330042 | 0.000144216 |          | ENSG00000213062 |
| 1 | 167820404 | 167820920 | 167820583 | 23 | 37 | 5  | 6.582259834 | 6.53E-08    | F5       | ENSG00000198734 |
| 1 | 168017109 | 168017444 | 168017314 | 13 | 18 | 7  | 2.468347438 | 0.0112499   | C1orf156 | ENSG00000171806 |
| 1 | 168030643 | 168030893 | 168030772 | 11 | 15 | 3  | 4.157216737 | 0.00170423  | C1orf156 | ENSG00000171806 |
| 1 | 168085267 | 168085446 | 168085356 | 8  | 8  | 3  | 2.338434415 | 0.0641221   |          | ENSG00000222641 |
| 1 | 168104847 | 168105158 | 168105002 | 10 | 11 | 7  | 1.558956276 | 0.158273    |          | ENSG00000208383 |

|   |           |           |           |    |    |    |             |            |           |                 |
|---|-----------|-----------|-----------|----|----|----|-------------|------------|-----------|-----------------|
| 1 | 168127125 | 168127377 | 168127303 | 10 | 12 | 8  | 1.501217155 | 0.168286   | SCYL3     | ENSG00000000457 |
| 1 | 168129695 | 168130012 | 168129853 | 10 | 15 | 10 | 1.511715177 | 0.140236   | SCYL3     | ENSG00000000457 |
| 1 | 168130104 | 168130442 | 168130273 | 8  | 13 | 4  | 2.910051716 | 0.0125532  | SCYL3     | ENSG00000000457 |
| 1 | 168371808 | 168372172 | 168371987 | 11 | 18 | 5  | 3.291129917 | 0.00248584 | METTLL11B | ENSG00000203740 |
| 1 | 168432604 | 168432800 | 168432727 | 8  | 8  | 4  | 1.870747532 | 0.118863   |           | ENSG00000217910 |
| 1 | 168534487 | 168534670 | 168534580 | 8  | 8  | 1  | 4.676868829 | 0.0091584  |           | ENSG00000217933 |
| 1 | 168542819 | 168543005 | 168542912 | 8  | 9  | 1  | 5.196520921 | 0.00490062 |           | ENSG00000217933 |
| 1 | 168767636 | 168767993 | 168767815 | 9  | 14 | 10 | 1.417232979 | 0.185113   | SCYL1BP1  | ENSG00000120370 |
| 1 | 168798705 | 168798902 | 168798829 | 8  | 9  | 2  | 3.464347281 | 0.0163838  | SCYL1BP1  | ENSG00000120370 |
| 1 | 169117792 | 169118016 | 169117904 | 9  | 9  | 2  | 3.464347281 | 0.0163838  | C1orf129  | ENSG00000117501 |
| 1 | 169638955 | 169639308 | 169639131 | 10 | 16 | 3  | 4.417042783 | 0.00097367 |           | ENSG00000202082 |
| 1 | 169901704 | 169901932 | 169901776 | 9  | 9  | 5  | 1.73217364  | 0.133894   |           | ENSG00000213061 |
| 1 | 169990174 | 169990546 | 169990343 | 9  | 16 | 1  | 8.834085566 | 5.30E-05   |           | ENSG00000218993 |
| 1 | 170016904 | 170017214 | 170017059 | 10 | 12 | 10 | 1.228268581 | 0.305344   | KIAA0859  | ENSG00000010165 |
| 1 | 170146586 | 170146863 | 170146746 | 8  | 9  | 1  | 5.196520921 | 0.00490062 | DNM3      | ENSG00000197959 |
| 1 | 170442801 | 170442983 | 170442849 | 9  | 9  | 3  | 2.598260461 | 0.0397929  |           | ENSG00000208024 |
| 1 | 170659138 | 170659465 | 170659306 | 21 | 24 | 1  | 12.9913023  | 2.52E-07   | C1orf105  | ENSG00000180999 |
| 1 | 170679657 | 170680016 | 170679824 | 9  | 15 | 0  | 16.62886695 | 1.12E-05   |           | ENSG00000212919 |
| 1 | 170711984 | 170712371 | 170712177 | 12 | 20 | 1  | 10.91269393 | 3.71E-06   | C1orf105  | ENSG00000180999 |
| 1 | 170768165 | 170768482 | 170768323 | 10 | 14 | 13 | 1.113540197 | 0.385405   | C1orf9    | ENSG00000094975 |
| 1 | 170834049 | 170834228 | 170834179 | 8  | 8  | 0  | 9.353737658 | 0.00163931 | FASLG     | ENSG00000117560 |
| 1 | 170978433 | 170978737 | 170978585 | 9  | 13 | 5  | 2.425043097 | 0.0262442  |           | ENSG00000219740 |
| 1 | 171878231 | 171878545 | 171878396 | 11 | 11 | 1  | 6.235825105 | 0.0013754  |           | ENSG00000208338 |
| 1 | 171950511 | 171950753 | 171950598 | 9  | 10 | 4  | 2.286469205 | 0.0509017  | KLHL20    | ENSG00000076321 |
| 1 | 172060019 | 172060508 | 172060329 | 9  | 19 | 1  | 10.39304184 | 7.23E-06   | CENPL     | ENSG00000120334 |
| 1 | 172103851 | 172104190 | 172104020 | 10 | 15 | 9  | 1.662886695 | 0.0970566  | ZBTB37    | ENSG00000185278 |
| 1 | 172130004 | 172130236 | 172130120 | 10 | 12 | 0  | 13.5109544  | 9.48E-05   | SERPINC1  | ENSG00000117601 |
| 1 | 172375385 | 172375597 | 172375440 | 8  | 8  | 0  | 9.353737658 | 0.00163931 | RABGAP1L  | ENSG00000152061 |
| 1 | 173235157 | 173235422 | 173235273 | 10 | 13 | 5  | 2.425043097 | 0.0262442  | CACYBP    | ENSG00000116161 |
| 1 | 173259102 | 173259365 | 173259233 | 11 | 13 | 5  | 2.425043097 | 0.0262442  | MRPS14    | ENSG00000120333 |
| 1 | 173265528 | 173265735 | 173265631 | 8  | 9  | 1  | 5.196520921 | 0.00490062 | MRPS14    | ENSG00000120333 |
| 1 | 173555141 | 173555360 | 173555250 | 8  | 9  | 5  | 1.73217364  | 0.133894   |           | ENSG00000219660 |
| 1 | 173770827 | 173771058 | 173770942 | 9  | 11 | 1  | 6.235825105 | 0.0013754  | TNR       | ENSG00000116147 |
| 1 | 174030437 | 174030696 | 174030573 | 16 | 17 | 1  | 9.353737658 | 2.73E-05   | TNR       | ENSG00000116147 |

|   |           |           |           |    |    |    |             |             |          |                 |
|---|-----------|-----------|-----------|----|----|----|-------------|-------------|----------|-----------------|
| 1 | 174443450 | 174443690 | 174443570 | 10 | 10 | 5  | 1.905391004 | 0.0915982   | RFWD2    | ENSG00000143207 |
| 1 | 174717133 | 174717312 | 174717222 | 8  | 8  | 3  | 2.338434415 | 0.0641221   | PAPPA2   | ENSG00000116183 |
| 1 | 174795798 | 174796047 | 174795935 | 8  | 11 | 5  | 2.078608368 | 0.0614303   |          | ENSG00000172760 |
| 1 | 174926568 | 174926765 | 174926601 | 8  | 9  | 3  | 2.598260461 | 0.0397929   |          | ENSG00000172760 |
| 1 | 175128603 | 175128813 | 175128697 | 8  | 9  | 1  | 5.196520921 | 0.00490062  |          | ENSG00000202609 |
| 1 | 175184828 | 175185137 | 175184982 | 12 | 17 | 7  | 2.338434415 | 0.0171287   |          | ENSG00000202609 |
| 1 | 175252049 | 175252295 | 175252172 | 10 | 11 | 2  | 4.157216737 | 0.0052913   |          | ENSG00000202609 |
| 1 | 175368155 | 175368341 | 175368248 | 8  | 9  | 2  | 3.464347281 | 0.0163838   | ASTN1    | ENSG00000152092 |
| 1 | 175417539 | 175417795 | 175417667 | 14 | 14 | 8  | 1.73217364  | 0.0890835   |          | ENSG00000222749 |
| 1 | 175492198 | 175492409 | 175492303 | 8  | 8  | 3  | 2.338434415 | 0.0641221   |          | ENSG00000222749 |
| 1 | 175676696 | 175676941 | 175676818 | 11 | 11 | 3  | 3.117912553 | 0.0146045   |          | ENSG00000222749 |
| 1 | 175678231 | 175678514 | 175678372 | 11 | 12 | 11 | 1.125912866 | 0.382541    |          | ENSG00000222749 |
| 1 | 175684433 | 175684896 | 175684664 | 18 | 29 | 12 | 2.398394271 | 0.00272121  |          | ENSG00000222749 |
| 1 | 175686806 | 175687070 | 175686963 | 8  | 11 | 3  | 3.117912553 | 0.0146045   |          | ENSG00000222749 |
| 1 | 175821275 | 175821796 | 175821547 | 13 | 25 | 18 | 1.422205726 | 0.118245    | SEC16B   | ENSG00000120341 |
| 1 | 175846828 | 175847168 | 175846998 | 9  | 15 | 6  | 2.375552421 | 0.0212094   | SEC16B   | ENSG00000120341 |
| 1 | 175855942 | 175856198 | 175856071 | 8  | 8  | 7  | 1.169217207 | 0.371848    | SEC16B   | ENSG00000120341 |
| 1 | 176048980 | 176049350 | 176049171 | 18 | 25 | 1  | 13.5109544  | 1.28E-07    | SEC16B   | ENSG00000120341 |
| 1 | 176050827 | 176051037 | 176050948 | 8  | 8  | 2  | 3.117912553 | 0.0283184   | SEC16B   | ENSG00000120341 |
| 1 | 176177565 | 176177813 | 176177689 | 8  | 9  | 2  | 3.464347281 | 0.0163838   | SEC16B   | ENSG00000120341 |
| 1 | 176181738 | 176181998 | 176181862 | 12 | 15 | 4  | 3.32577339  | 0.00462646  | SEC16B   | ENSG00000120341 |
| 1 | 176290792 | 176291177 | 176291002 | 11 | 18 | 7  | 2.468347438 | 0.0112499   |          | ENSG00000215831 |
| 1 | 176513916 | 176514228 | 176514077 | 14 | 16 | 1  | 8.834085566 | 5.30E-05    | RASAL2   | ENSG00000075391 |
| 1 | 176705869 | 176706048 | 176705958 | 8  | 8  | 0  | 9.353737658 | 0.00163931  | RASAL2   | ENSG00000075391 |
| 1 | 176768126 | 176768314 | 176768261 | 10 | 10 | 3  | 2.858086507 | 0.0242838   |          | ENSG00000135820 |
| 1 | 176891572 | 176891953 | 176891740 | 15 | 21 | 6  | 3.266384579 | 0.0013436   | RALGPS2  | ENSG00000116191 |
| 1 | 177261363 | 177261547 | 177261455 | 8  | 9  | 3  | 2.598260461 | 0.0397929   | FAM20B   | ENSG00000116199 |
| 1 | 177274567 | 177275195 | 177274964 | 31 | 51 | 5  | 9.00730293  | 1.28E-11    |          | ENSG00000217530 |
| 1 | 177374022 | 177374201 | 177374180 | 8  | 9  | 3  | 2.598260461 | 0.0397929   |          | ENSG00000218381 |
| 1 | 177529187 | 177529462 | 177529366 | 18 | 19 | 4  | 4.157216737 | 0.000560204 | SOAT1    | ENSG00000057252 |
| 1 | 177601473 | 177601798 | 177601635 | 10 | 15 | 10 | 1.511715177 | 0.140236    | C1orf125 | ENSG00000162779 |
| 1 | 177997306 | 177997503 | 177997325 | 9  | 11 | 1  | 6.235825105 | 0.0013754   | FAM163A  | ENSG00000143340 |
| 1 | 178041366 | 178041545 | 178041468 | 8  | 8  | 2  | 3.117912553 | 0.0283184   | FAM163A  | ENSG00000143340 |
| 1 | 178113528 | 178113795 | 178113666 | 8  | 9  | 7  | 1.29913023  | 0.286504    | TOR1AIP2 | ENSG00000169905 |

|   |           |           |           |    |     |    |              |             |          |                 |
|---|-----------|-----------|-----------|----|-----|----|--------------|-------------|----------|-----------------|
| 1 | 178118331 | 178118732 | 178118571 | 13 | 21  | 6  | 3.266384579  | 0.0013436   | TOR1AIP1 | ENSG00000143337 |
| 1 | 178189638 | 178189924 | 178189781 | 8  | 10  | 10 | 1.039304184  | 0.464387    | CEP350   | ENSG00000135837 |
| 1 | 178190107 | 178190596 | 178190393 | 15 | 24  | 14 | 1.73217364   | 0.0420666   | CEP350   | ENSG00000135837 |
| 1 | 178393557 | 178393781 | 178393672 | 8  | 9   | 4  | 2.078608368  | 0.0785659   | QSOX1    | ENSG00000116260 |
| 1 | 178403729 | 178403990 | 178403859 | 15 | 17  | 12 | 1.439036563  | 0.154203    | QSOX1    | ENSG00000116260 |
| 1 | 178467136 | 178467376 | 178467256 | 9  | 11  | 0  | 12.47165021  | 0.000193293 | LHX4     | ENSG00000121454 |
| 1 | 178492743 | 178493033 | 178492888 | 11 | 12  | 2  | 4.503651465  | 0.002963    | LHX4     | ENSG00000121454 |
| 1 | 178547319 | 178547530 | 178547440 | 9  | 12  | 6  | 1.930136342  | 0.071303    | LHX4     | ENSG00000121454 |
| 1 | 178600836 | 178601114 | 178600962 | 8  | 10  | 7  | 1.429043253  | 0.21536     |          | ENSG00000217496 |
| 1 | 178735592 | 178735936 | 178735763 | 13 | 17  | 4  | 3.741495063  | 0.00163722  | ACBD6    | ENSG00000135847 |
| 1 | 178738491 | 178738913 | 178738734 | 12 | 19  | 4  | 4.157216737  | 0.000560204 | ACBD6    | ENSG00000135847 |
| 1 | 178751380 | 178752230 | 178751993 | 54 | 124 | 13 | 9.279501645  | 2.11E-25    |          | ENSG00000206905 |
| 1 | 178757775 | 178758306 | 178757902 | 23 | 39  | 2  | 13.85738912  | 9.79E-11    |          | ENSG00000206905 |
| 1 | 178769349 | 178769571 | 178769415 | 12 | 14  | 6  | 2.227080395  | 0.0322529   |          | ENSG00000206905 |
| 1 | 178791230 | 178791468 | 178791347 | 19 | 20  | 7  | 2.728173484  | 0.00469378  |          | ENSG00000206905 |
| 1 | 178798354 | 178798561 | 178798524 | 8  | 9   | 5  | 1.73217364   | 0.133894    |          | ENSG00000206905 |
| 1 | 178821262 | 178821621 | 178821451 | 39 | 45  | 6  | 6.829713211  | 2.35E-09    | XPR1     | ENSG00000143324 |
| 1 | 178822665 | 178822916 | 178822753 | 8  | 9   | 1  | 5.196520921  | 0.00490062  | XPR1     | ENSG00000143324 |
| 1 | 178845473 | 178845743 | 178845642 | 10 | 10  | 5  | 1.905391004  | 0.0915982   | XPR1     | ENSG00000143324 |
| 1 | 178953306 | 178953501 | 178953422 | 9  | 9   | 3  | 2.598260461  | 0.0397929   |          | ENSG00000206753 |
| 1 | 179048846 | 179049033 | 179048930 | 8  | 9   | 2  | 3.464347281  | 0.0163838   |          | ENSG00000206753 |
| 1 | 179193003 | 179193182 | 179193092 | 8  | 8   | 2  | 3.117912553  | 0.0283184   |          | ENSG00000220772 |
| 1 | 179257482 | 179258005 | 179257830 | 9  | 19  | 14 | 1.385738912  | 0.166049    | STX6     | ENSG00000135823 |
| 1 | 179269134 | 179269511 | 179269313 | 8  | 14  | 8  | 1.73217364   | 0.0890835   | MR1      | ENSG00000153029 |
| 1 | 179320065 | 179320359 | 179320218 | 20 | 21  | 8  | 2.540521339  | 0.00602138  | IER5     | ENSG00000162783 |
| 1 | 179323748 | 179324696 | 179323927 | 15 | 46  | 17 | 2.713738703  | 6.17E-05    | IER5     | ENSG00000162783 |
| 1 | 179325428 | 179325658 | 179325602 | 8  | 12  | 1  | 6.755477198  | 0.000722752 | IER5     | ENSG00000162783 |
| 1 | 179325840 | 179326266 | 179325985 | 14 | 22  | 9  | 2.390399624  | 0.00747467  | IER5     | ENSG00000162783 |
| 1 | 179328762 | 179329183 | 179329018 | 12 | 20  | 6  | 3.117912553  | 0.00218114  | IER5     | ENSG00000162783 |
| 1 | 179335034 | 179335213 | 179335123 | 8  | 9   | 3  | 2.598260461  | 0.0397929   | IER5     | ENSG00000162783 |
| 1 | 179335267 | 179336273 | 179335578 | 59 | 114 | 11 | 9.959998432  | 3.45E-24    | IER5     | ENSG00000162783 |
| 1 | 179340771 | 179341038 | 179340904 | 8  | 9   | 5  | 1.73217364   | 0.133894    | IER5     | ENSG00000162783 |
| 1 | 179353380 | 179353862 | 179353584 | 16 | 27  | 8  | 3.233390795  | 0.000398033 | IER5     | ENSG00000162783 |
| 1 | 179354955 | 179355558 | 179355297 | 37 | 58  | 10 | 5.5744449715 | 2.62E-10    | IER5     | ENSG00000162783 |



|   |           |           |           |     |      |    |             |             |         |                 |
|---|-----------|-----------|-----------|-----|------|----|-------------|-------------|---------|-----------------|
| 1 | 179362813 | 179363296 | 179363067 | 21  | 34   | 16 | 2.139743909 | 0.00367586  | IER5    | ENSG00000162783 |
| 1 | 179370254 | 179371468 | 179370910 | 981 | 1270 | 26 | 48.92428215 | 0           | IER5    | ENSG00000162783 |
| 1 | 179371517 | 179371744 | 179371637 | 8   | 11   | 5  | 2.078608368 | 0.0614303   | IER5    | ENSG00000162783 |
| 1 | 179371762 | 179372218 | 179371939 | 12  | 23   | 6  | 3.563328632 | 0.000497701 | IER5    | ENSG00000162783 |
| 1 | 179378293 | 179378508 | 179378386 | 11  | 11   | 7  | 1.558956276 | 0.158273    | IER5    | ENSG00000162783 |
| 1 | 179427351 | 179427588 | 179427469 | 9   | 9    | 4  | 2.078608368 | 0.0785659   |         | ENSG00000179452 |
| 1 | 179543951 | 179544163 | 179544059 | 8   | 9    | 6  | 1.484720263 | 0.204387    |         | ENSG00000179452 |
| 1 | 179548383 | 179548598 | 179548427 | 8   | 10   | 3  | 2.858086507 | 0.0242838   |         | ENSG00000179452 |
| 1 | 179660673 | 179660949 | 179660811 | 15  | 19   | 7  | 2.598260461 | 0.00730518  |         | ENSG00000208272 |
| 1 | 179661399 | 179661685 | 179661574 | 8   | 9    | 5  | 1.73217364  | 0.133894    |         | ENSG00000208272 |
| 1 | 179712033 | 179712233 | 179712118 | 9   | 9    | 1  | 5.196520921 | 0.00490062  | CACNA1E | ENSG00000198216 |
| 1 | 179715119 | 179715317 | 179715215 | 8   | 9    | 8  | 1.154782427 | 0.375434    | CACNA1E | ENSG00000198216 |
| 1 | 179740830 | 179741030 | 179740932 | 8   | 8    | 1  | 4.676868829 | 0.0091584   | CACNA1E | ENSG00000198216 |
| 1 | 179757455 | 179758154 | 179757735 | 87  | 124  | 13 | 9.279501645 | 2.11E-25    | CACNA1E | ENSG00000198216 |
| 1 | 179819540 | 179819740 | 179819657 | 9   | 10   | 1  | 5.716173013 | 0.00260397  | CACNA1E | ENSG00000198216 |
| 1 | 180382078 | 180382464 | 180382285 | 24  | 31   | 4  | 6.651546779 | 5.59E-07    |         | ENSG00000217074 |
| 1 | 180480333 | 180480558 | 180480445 | 9   | 10   | 2  | 3.810782009 | 0.00936112  |         | ENSG00000217074 |
| 1 | 180837166 | 180837477 | 180837321 | 9   | 11   | 4  | 2.494330042 | 0.0324033   | RGS16   | ENSG00000143333 |
| 1 | 180869369 | 180869774 | 180869615 | 17  | 22   | 8  | 2.655999582 | 0.0039122   | RGS16   | ENSG00000143333 |
| 1 | 180879242 | 180879907 | 180879645 | 131 | 192  | 6  | 28.65510108 | 2.69E-51    | RGS8    | ENSG00000135824 |
| 1 | 180882568 | 180882751 | 180882659 | 8   | 8    | 1  | 4.676868829 | 0.0091584   | RGS8    | ENSG00000135824 |
| 1 | 180932766 | 180932947 | 180932815 | 8   | 8    | 1  | 4.676868829 | 0.0091584   | RGS8    | ENSG00000135824 |
| 1 | 180996942 | 180997644 | 180997292 | 164 | 228  | 0  | 238.0006582 | 1.34E-71    | NPL     | ENSG00000135838 |
| 1 | 181018460 | 181018655 | 181018558 | 8   | 8    | 0  | 9.353737658 | 0.00163931  | NPL     | ENSG00000135838 |
| 1 | 181098054 | 181098245 | 181098149 | 9   | 9    | 1  | 5.196520921 | 0.00490062  | DHX9    | ENSG00000135829 |
| 1 | 181126745 | 181126945 | 181126813 | 9   | 9    | 6  | 1.484720263 | 0.204387    |         | ENSG00000220174 |
| 1 | 181198296 | 181198679 | 181198475 | 17  | 23   | 5  | 4.157216737 | 0.000186738 |         | ENSG00000176855 |
| 1 | 181395798 | 181396102 | 181395929 | 23  | 26   | 9  | 2.806121297 | 0.00135991  | LAMC2   | ENSG00000058085 |
| 1 | 181550043 | 181550333 | 181550188 | 9   | 12   | 3  | 3.377738599 | 0.00867157  | NMNAT2  | ENSG00000157064 |
| 1 | 181585123 | 181585545 | 181585272 | 14  | 21   | 6  | 3.266384579 | 0.0013436   | NMNAT2  | ENSG00000157064 |
| 1 | 181706301 | 181706482 | 181706391 | 8   | 8    | 4  | 1.870747532 | 0.118863    | SMG7    | ENSG00000116698 |
| 1 | 181706960 | 181707140 | 181707057 | 8   | 10   | 3  | 2.858086507 | 0.0242838   | SMG7    | ENSG00000116698 |
| 1 | 181707270 | 181708152 | 181707711 | 12  | 38   | 23 | 1.688869299 | 0.019531    | SMG7    | ENSG00000116698 |
| 1 | 181933728 | 181934001 | 181933864 | 10  | 10   | 3  | 2.858086507 | 0.0242838   | APOBEC4 | ENSG00000173627 |

|   |           |           |           |    |    |    |             |             |          |                 |
|---|-----------|-----------|-----------|----|----|----|-------------|-------------|----------|-----------------|
| 1 | 181955197 | 181955409 | 181955303 | 8  | 11 | 1  | 6.235825105 | 0.0013754   | APOBEC4  | ENSG00000173627 |
| 1 | 182040520 | 182040859 | 182040689 | 9  | 13 | 5  | 2.425043097 | 0.0262442   | RGL1     | ENSG00000143344 |
| 1 | 182151722 | 182152004 | 182151836 | 12 | 14 | 7  | 1.948695345 | 0.0559175   | GLT25D2  | ENSG00000198756 |
| 1 | 182261061 | 182261378 | 182261219 | 11 | 15 | 4  | 3.32577339  | 0.00462646  | GLT25D2  | ENSG00000198756 |
| 1 | 182261717 | 182261912 | 182261825 | 9  | 9  | 3  | 2.598260461 | 0.0397929   | GLT25D2  | ENSG00000198756 |
| 1 | 182392335 | 182392613 | 182392474 | 10 | 14 | 2  | 5.196520921 | 0.000907371 |          | ENSG00000199840 |
| 1 | 182430380 | 182430607 | 182430493 | 8  | 9  | 1  | 5.196520921 | 0.00490062  |          | ENSG00000199840 |
| 1 | 182570238 | 182570443 | 182570327 | 8  | 8  | 4  | 1.870747532 | 0.118863    |          | ENSG00000222967 |
| 1 | 182644211 | 182644679 | 182644480 | 14 | 24 | 19 | 1.29913023  | 0.189       |          | ENSG00000221414 |
| 1 | 182654288 | 182654601 | 182654444 | 11 | 14 | 4  | 3.117912553 | 0.00766354  |          | ENSG00000221414 |
| 1 | 182659942 | 182660172 | 182660063 | 11 | 12 | 2  | 4.503651465 | 0.002963    |          | ENSG00000221414 |
| 1 | 182680781 | 182680960 | 182680822 | 8  | 8  | 6  | 1.336248237 | 0.277651    |          | ENSG00000221414 |
| 1 | 182693417 | 182693596 | 182693471 | 8  | 8  | 4  | 1.870747532 | 0.118863    |          | ENSG00000221414 |
| 1 | 182703842 | 182704037 | 182703937 | 8  | 8  | 5  | 1.558956276 | 0.191397    |          | ENSG00000221414 |
| 1 | 182777624 | 182777923 | 182777773 | 11 | 11 | 6  | 1.781664316 | 0.103344    |          | ENSG00000217919 |
| 1 | 182781336 | 182781607 | 182781476 | 11 | 12 | 6  | 1.930136342 | 0.071303    |          | ENSG00000217919 |
| 1 | 182807256 | 182807470 | 182807363 | 8  | 8  | 4  | 1.870747532 | 0.118863    | C1orf21  | ENSG00000116667 |
| 1 | 182826236 | 182826419 | 182826308 | 8  | 9  | 3  | 2.598260461 | 0.0397929   | C1orf21  | ENSG00000116667 |
| 1 | 182833427 | 182833606 | 182833516 | 8  | 8  | 7  | 1.169217207 | 0.371848    | C1orf21  | ENSG00000116667 |
| 1 | 183141079 | 183141758 | 183141339 | 12 | 29 | 11 | 2.598260461 | 0.00146165  | FAM129A  | ENSG00000135842 |
| 1 | 183165742 | 183165971 | 183165856 | 11 | 12 | 5  | 2.251825733 | 0.0404733   | FAM129A  | ENSG00000135842 |
| 1 | 183217858 | 183218248 | 183218125 | 9  | 15 | 4  | 3.32577339  | 0.00462646  | FAM129A  | ENSG00000135842 |
| 1 | 183237085 | 183237346 | 183237215 | 9  | 10 | 3  | 2.858086507 | 0.0242838   |          | ENSG00000201312 |
| 1 | 183255086 | 183255276 | 183255181 | 8  | 9  | 1  | 5.196520921 | 0.00490062  |          | ENSG00000201312 |
| 1 | 183353723 | 183353902 | 183353812 | 8  | 8  | 2  | 3.117912553 | 0.0283184   | C1orf25  | ENSG00000121486 |
| 1 | 183392707 | 183392992 | 183392853 | 10 | 13 | 7  | 1.818782322 | 0.0805123   | C1orf26  | ENSG00000116668 |
| 1 | 183553204 | 183553589 | 183553396 | 15 | 23 | 10 | 2.267572766 | 0.00903625  | IVNS1ABP | ENSG00000116679 |
| 1 | 183659631 | 183659900 | 183659786 | 10 | 12 | 2  | 4.503651465 | 0.002963    | IVNS1ABP | ENSG00000116679 |
| 1 | 183807801 | 183808010 | 183807856 | 9  | 9  | 3  | 2.598260461 | 0.0397929   |          | ENSG00000207108 |
| 1 | 183872962 | 183873193 | 183873087 | 14 | 15 | 3  | 4.157216737 | 0.00170423  |          | ENSG00000201596 |
| 1 | 183882021 | 183882376 | 183882198 | 13 | 18 | 4  | 3.9493559   | 0.000961379 |          | ENSG00000201596 |
| 1 | 183888820 | 183888999 | 183888855 | 8  | 8  | 2  | 3.117912553 | 0.0283184   |          | ENSG00000201596 |
| 1 | 183932594 | 183932774 | 183932653 | 8  | 8  | 2  | 3.117912553 | 0.0283184   | HMCN1    | ENSG00000143341 |
| 1 | 183956004 | 183956190 | 183956029 | 9  | 9  | 0  | 10.39304184 | 0.000803859 | HMCN1    | ENSG00000143341 |

|   |           |           |           |    |    |    |             |             |         |                 |
|---|-----------|-----------|-----------|----|----|----|-------------|-------------|---------|-----------------|
| 1 | 184318025 | 184318241 | 184318133 | 10 | 11 | 8  | 1.385738912 | 0.224757    | PRG4    | ENSG00000116690 |
| 1 | 184388287 | 184388980 | 184388582 | 22 | 49 | 12 | 3.997323786 | 2.85E-07    | PRG4    | ENSG00000116690 |
| 1 | 184448412 | 184448699 | 184448550 | 9  | 12 | 4  | 2.702190879 | 0.0203088   | PRG4    | ENSG00000116690 |
| 1 | 184553645 | 184553824 | 184553734 | 8  | 8  | 1  | 4.676868829 | 0.0091584   |         | ENSG00000202025 |
| 1 | 184559440 | 184559619 | 184559513 | 8  | 8  | 3  | 2.338434415 | 0.0641221   |         | ENSG00000202025 |
| 1 | 184610947 | 184611426 | 184611320 | 8  | 18 | 10 | 1.795161773 | 0.055383    | TPR     | ENSG00000047410 |
| 1 | 184611433 | 184611827 | 184611630 | 9  | 18 | 12 | 1.518983039 | 0.117837    | C1orf27 | ENSG00000157181 |
| 1 | 185163702 | 185163913 | 185163807 | 9  | 9  | 6  | 1.484720263 | 0.204387    | PLA2G4A | ENSG00000116711 |
| 1 | 185643887 | 185644317 | 185644126 | 25 | 36 | 2  | 12.81808494 | 7.17E-10    |         | ENSG00000203918 |
| 1 | 185644322 | 185644557 | 185644439 | 9  | 11 | 0  | 12.47165021 | 0.000193293 |         | ENSG00000203918 |
| 1 | 185866390 | 185866923 | 185866630 | 19 | 35 | 0  | 37.41495063 | 7.22E-12    |         | ENSG00000217211 |
| 1 | 185874442 | 185874880 | 185874667 | 52 | 66 | 1  | 34.81669017 | 6.47E-20    |         | ENSG00000217712 |
| 1 | 186297639 | 186297927 | 186297783 | 12 | 13 | 1  | 7.27512929  | 0.000378098 |         | ENSG00000150732 |
| 1 | 186725050 | 186725428 | 186725253 | 13 | 19 | 27 | 0.742360132 | 0.849695    |         | ENSG00000217509 |
| 1 | 186735574 | 186735832 | 186735691 | 10 | 12 | 0  | 13.5109544  | 9.48E-05    |         | ENSG00000217509 |
| 1 | 186892655 | 186892852 | 186892747 | 8  | 8  | 4  | 1.870747532 | 0.118863    |         | ENSG00000217509 |
| 1 | 187005792 | 187005996 | 187005898 | 10 | 11 | 2  | 4.157216737 | 0.0052913   |         | ENSG00000218573 |
| 1 | 187105661 | 187105873 | 187105743 | 8  | 8  | 1  | 4.676868829 | 0.0091584   |         | ENSG00000218573 |
| 1 | 187387253 | 187387472 | 187387346 | 9  | 9  | 3  | 2.598260461 | 0.0397929   |         | ENSG00000219973 |
| 1 | 187413580 | 187413791 | 187413708 | 8  | 9  | 1  | 5.196520921 | 0.00490062  |         | ENSG00000219973 |
| 1 | 188445006 | 188445260 | 188445171 | 8  | 9  | 1  | 5.196520921 | 0.00490062  |         | ENSG00000217253 |
| 1 | 188609532 | 188609717 | 188609624 | 9  | 9  | 2  | 3.464347281 | 0.0163838   | FAM5C   | ENSG00000162670 |
| 1 | 188688609 | 188688789 | 188688694 | 8  | 8  | 1  | 4.676868829 | 0.0091584   | FAM5C   | ENSG00000162670 |
| 1 | 188713825 | 188714013 | 188713928 | 8  | 8  | 3  | 2.338434415 | 0.0641221   | FAM5C   | ENSG00000162670 |
| 1 | 188714157 | 188714383 | 188714270 | 8  | 8  | 2  | 3.117912553 | 0.0283184   | FAM5C   | ENSG00000162670 |
| 1 | 188905554 | 188905740 | 188905647 | 10 | 10 | 4  | 2.286469205 | 0.0509017   |         | ENSG00000218693 |
| 1 | 189301566 | 189301877 | 189301721 | 8  | 8  | 4  | 1.870747532 | 0.118863    |         | ENSG00000217637 |
| 1 | 189378245 | 189378511 | 189378385 | 11 | 14 | 5  | 2.598260461 | 0.0167748   |         | ENSG00000217637 |
| 1 | 189944894 | 189945247 | 189945070 | 13 | 18 | 1  | 9.87338975  | 1.41E-05    | RGS18   | ENSG00000150681 |
| 1 | 190137364 | 190137808 | 190137586 | 21 | 31 | 2  | 11.0859113  | 1.93E-08    | RGS18   | ENSG00000150681 |
| 1 | 191137295 | 191137647 | 191137468 | 19 | 23 | 2  | 8.314433474 | 3.41E-06    |         | ENSG00000223075 |
| 1 | 191295110 | 191295667 | 191295421 | 13 | 29 | 12 | 2.398394271 | 0.00272121  | TROVE2  | ENSG00000116747 |
| 1 | 191357557 | 191357741 | 191357660 | 10 | 10 | 2  | 3.810782009 | 0.00936112  | CDC73   | ENSG00000134371 |
| 1 | 192771063 | 192771486 | 192771285 | 58 | 69 | 2  | 24.25043097 | 1.48E-19    |         | ENSG00000208230 |

|   |           |           |           |     |     |    |             |             |          |                 |
|---|-----------|-----------|-----------|-----|-----|----|-------------|-------------|----------|-----------------|
| 1 | 193554339 | 193554692 | 193554515 | 9   | 14  | 0  | 15.58956276 | 2.28E-05    |          |                 |
| 1 | 194025170 | 194025359 | 194025218 | 8   | 10  | 1  | 5.716173013 | 0.00260397  |          |                 |
| 1 | 194598134 | 194598335 | 194598240 | 8   | 8   | 2  | 3.117912553 | 0.0283184   | KCNT2    | ENSG00000162687 |
| 1 | 195366583 | 195366805 | 195366664 | 10  | 10  | 3  | 2.858086507 | 0.0242838   | ASPM     | ENSG00000066279 |
| 1 | 195437203 | 195437547 | 195437375 | 8   | 14  | 8  | 1.73217364  | 0.0890835   | ZBTB41   | ENSG00000177888 |
| 1 | 195458006 | 195458194 | 195458147 | 8   | 9   | 3  | 2.598260461 | 0.0397929   |          | ENSG00000216992 |
| 1 | 195671569 | 195671751 | 195671627 | 10  | 10  | 2  | 3.810782009 | 0.00936112  | CRB1     | ENSG00000134376 |
| 1 | 195721419 | 195721906 | 195721727 | 14  | 23  | 8  | 2.771477825 | 0.00251818  | CRB1     | ENSG00000134376 |
| 1 | 196391943 | 196392153 | 196392051 | 12  | 14  | 8  | 1.73217364  | 0.0890835   | NEK7     | ENSG00000151414 |
| 1 | 196581994 | 196582209 | 196582163 | 8   | 8   | 5  | 1.558956276 | 0.191397    | NEK7     | ENSG00000151414 |
| 1 | 196632466 | 196632671 | 196632525 | 8   | 9   | 1  | 5.196520921 | 0.00490062  | ATP6V1G3 | ENSG00000151418 |
| 1 | 196641723 | 196641917 | 196641820 | 8   | 9   | 2  | 3.464347281 | 0.0163838   | ATP6V1G3 | ENSG00000151418 |
| 1 | 196651745 | 196651963 | 196651838 | 8   | 8   | 2  | 3.117912553 | 0.0283184   | ATP6V1G3 | ENSG00000151418 |
| 1 | 196659451 | 196659673 | 196659562 | 8   | 10  | 2  | 3.810782009 | 0.00936112  | ATP6V1G3 | ENSG00000151418 |
| 1 | 196770055 | 196770296 | 196770175 | 11  | 12  | 4  | 2.702190879 | 0.0203088   | ATP6V1G3 | ENSG00000151418 |
| 1 | 196908029 | 196908276 | 196908152 | 8   | 11  | 0  | 12.47165021 | 0.000193293 |          | ENSG00000219393 |
| 1 | 196935102 | 196935573 | 196935235 | 10  | 18  | 8  | 2.194086611 | 0.0206188   |          | ENSG00000219393 |
| 1 | 196986493 | 196986772 | 196986645 | 9   | 10  | 12 | 0.879411233 | 0.62639     |          | ENSG00000219393 |
| 1 | 197007448 | 197007667 | 197007565 | 11  | 12  | 6  | 1.930136342 | 0.071303    |          | ENSG00000207975 |
| 1 | 197045457 | 197045663 | 197045493 | 9   | 9   | 1  | 5.196520921 | 0.00490062  |          | ENSG00000207975 |
| 1 | 197126463 | 197126667 | 197126565 | 8   | 8   | 5  | 1.558956276 | 0.191397    |          | ENSG00000207759 |
| 1 | 197168237 | 197168471 | 197168355 | 8   | 10  | 11 | 0.952695502 | 0.548138    |          | ENSG00000177287 |
| 1 | 197168569 | 197168823 | 197168694 | 14  | 16  | 6  | 2.524024447 | 0.0137633   |          | ENSG00000177287 |
| 1 | 197171183 | 197171514 | 197171348 | 12  | 16  | 7  | 2.208521392 | 0.0257604   |          | ENSG00000177287 |
| 1 | 197172983 | 197173329 | 197173097 | 10  | 14  | 8  | 1.73217364  | 0.0890835   |          | ENSG00000177287 |
| 1 | 197175109 | 197175353 | 197175231 | 9   | 12  | 5  | 2.251825733 | 0.0404733   |          | ENSG00000177287 |
| 1 | 197764703 | 197764936 | 197764811 | 8   | 9   | 4  | 2.078608368 | 0.0785659   |          | ENSG00000208226 |
| 1 | 197766913 | 197767204 | 197767050 | 10  | 12  | 4  | 2.702190879 | 0.0203088   |          | ENSG00000208226 |
| 1 | 198024373 | 198024559 | 198024456 | 8   | 8   | 0  | 9.353737658 | 0.00163931  |          | ENSG00000218096 |
| 1 | 198144673 | 198145227 | 198145048 | 23  | 37  | 5  | 6.582259834 | 6.53E-08    |          | ENSG00000216458 |
| 1 | 198184707 | 198185162 | 198184920 | 131 | 169 | 5  | 29.44695189 | 1.12E-45    |          | ENSG00000216458 |
| 1 | 198275347 | 198275594 | 198275470 | 10  | 13  | 2  | 4.850086193 | 0.00164564  | NR5A2    | ENSG00000116833 |
| 1 | 198330886 | 198331115 | 198331046 | 9   | 10  | 5  | 1.905391004 | 0.0915982   |          | ENSG00000208220 |
| 1 | 198342806 | 198343254 | 198342968 | 10  | 19  | 5  | 3.464347281 | 0.00150447  |          | ENSG00000221403 |

|   |           |           |           |    |    |    |             |             |           |                 |
|---|-----------|-----------|-----------|----|----|----|-------------|-------------|-----------|-----------------|
| 1 | 198375481 | 198375782 | 198375639 | 8  | 11 | 3  | 3.117912553 | 0.0146045   |           | ENSG00000221403 |
| 1 | 198397666 | 198397876 | 198397771 | 9  | 9  | 7  | 1.29913023  | 0.286504    |           | ENSG00000220390 |
| 1 | 198419977 | 198420219 | 198420098 | 9  | 12 | 6  | 1.930136342 | 0.071303    |           | ENSG00000217193 |
| 1 | 198434976 | 198435174 | 198435099 | 8  | 11 | 5  | 2.078608368 | 0.0614303   |           | ENSG00000217193 |
| 1 | 198500693 | 198500943 | 198500818 | 9  | 9  | 6  | 1.484720263 | 0.204387    |           | ENSG00000217193 |
| 1 | 198511985 | 198512164 | 198512061 | 8  | 8  | 0  | 9.353737658 | 0.00163931  |           | ENSG00000213045 |
| 1 | 198515444 | 198515816 | 198515683 | 10 | 16 | 3  | 4.417042783 | 0.00097367  |           | ENSG00000213045 |
| 1 | 198531839 | 198532043 | 198531967 | 11 | 11 | 1  | 6.235825105 | 0.0013754   |           | ENSG00000213045 |
| 1 | 198552400 | 198552632 | 198552516 | 10 | 11 | 5  | 2.078608368 | 0.0614303   |           | ENSG00000213045 |
| 1 | 198555724 | 198556006 | 198555876 | 10 | 13 | 1  | 7.27512929  | 0.000378098 |           | ENSG00000213045 |
| 1 | 198607882 | 198608182 | 198608023 | 9  | 9  | 5  | 1.73217364  | 0.133894    | C1orf98   | ENSG00000203721 |
| 1 | 198612741 | 198612985 | 198612863 | 8  | 10 | 5  | 1.905391004 | 0.0915982   | C1orf98   | ENSG00000203721 |
| 1 | 198646263 | 198646662 | 198646538 | 12 | 19 | 9  | 2.078608368 | 0.0241848   | ZNF281    | ENSG00000162702 |
| 1 | 198713418 | 198713669 | 198713543 | 9  | 11 | 13 | 0.890832158 | 0.618492    | ZNF281    | ENSG00000162702 |
| 1 | 198724501 | 198724713 | 198724603 | 11 | 11 | 6  | 1.781664316 | 0.103344    | ZNF281    | ENSG00000162702 |
| 1 | 198745962 | 198746187 | 198746074 | 11 | 13 | 6  | 2.078608368 | 0.0483393   | ZNF281    | ENSG00000162702 |
| 1 | 198890222 | 198890425 | 198890320 | 9  | 10 | 2  | 3.810782009 | 0.00936112  | DDX59     | ENSG00000118197 |
| 1 | 198905031 | 198905238 | 198905137 | 8  | 10 | 4  | 2.286469205 | 0.0509017   | DDX59     | ENSG00000118197 |
| 1 | 198905892 | 198906281 | 198906052 | 8  | 15 | 2  | 5.542955649 | 0.000497081 | DDX59     | ENSG00000118197 |
| 1 | 198993547 | 198993726 | 198993636 | 8  | 8  | 9  | 0.935373766 | 0.560286    | CAMSAP1L1 | ENSG00000118200 |
| 1 | 199038679 | 199038953 | 199038793 | 12 | 14 | 11 | 1.29913023  | 0.246308    | RPL34P1   | ENSG00000218506 |
| 1 | 199215383 | 199215616 | 199215488 | 9  | 9  | 2  | 3.464347281 | 0.0163838   | KIF21B    | ENSG00000116852 |
| 1 | 199278686 | 199279045 | 199278865 | 11 | 18 | 8  | 2.194086611 | 0.0206188   | KIF21B    | ENSG00000116852 |
| 1 | 199285691 | 199285872 | 199285742 | 8  | 8  | 1  | 4.676868829 | 0.0091584   | KIF21B    | ENSG00000116852 |
| 1 | 199349940 | 199350505 | 199350294 | 12 | 29 | 3  | 7.794781382 | 4.12E-07    |           | ENSG00000217218 |
| 1 | 199384921 | 199385157 | 199385039 | 8  | 9  | 1  | 5.196520921 | 0.00490062  | TMEM9     | ENSG00000116857 |
| 1 | 199385407 | 199385601 | 199385521 | 10 | 11 | 4  | 2.494330042 | 0.0324033   | TMEM9     | ENSG00000116857 |
| 1 | 199390197 | 199390547 | 199390439 | 9  | 14 | 11 | 1.29913023  | 0.246308    | TMEM9     | ENSG00000116857 |
| 1 | 199406218 | 199406504 | 199406370 | 11 | 14 | 2  | 5.196520921 | 0.000907371 | TMEM9     | ENSG00000116857 |
| 1 | 199406634 | 199407033 | 199406765 | 15 | 20 | 2  | 7.27512929  | 2.27E-05    | TMEM9     | ENSG00000116857 |
| 1 | 199409506 | 199409824 | 199409684 | 8  | 11 | 6  | 1.781664316 | 0.103344    | TMEM9     | ENSG00000116857 |
| 1 | 199420761 | 199420957 | 199420912 | 8  | 9  | 3  | 2.598260461 | 0.0397929   | TMEM9     | ENSG00000116857 |
| 1 | 199517759 | 199517948 | 199517853 | 9  | 10 | 5  | 1.905391004 | 0.0915982   | PKP1      | ENSG00000081277 |
| 1 | 199518085 | 199518366 | 199518215 | 10 | 11 | 4  | 2.494330042 | 0.0324033   | PKP1      | ENSG00000081277 |

|   |           |           |           |    |     |    |             |             |        |                 |
|---|-----------|-----------|-----------|----|-----|----|-------------|-------------|--------|-----------------|
| 1 | 199524519 | 199524713 | 199524616 | 10 | 10  | 1  | 5.716173013 | 0.00260397  | PKP1   | ENSG00000081277 |
| 1 | 199545182 | 199545460 | 199545326 | 12 | 14  | 9  | 1.558956276 | 0.132279    | PKP1   | ENSG00000081277 |
| 1 | 199610784 | 199611222 | 199611068 | 8  | 14  | 2  | 5.196520921 | 0.000907371 | TNNT2  | ENSG00000118194 |
| 1 | 199611907 | 199612106 | 199612006 | 8  | 8   | 5  | 1.558956276 | 0.191397    | TNNT2  | ENSG00000118194 |
| 1 | 199616859 | 199617062 | 199616926 | 10 | 12  | 7  | 1.688869299 | 0.11395     | TNNT2  | ENSG00000118194 |
| 1 | 199635964 | 199636213 | 199636048 | 11 | 11  | 4  | 2.494330042 | 0.0324033   | LAD1   | ENSG00000159166 |
| 1 | 199671506 | 199671751 | 199671628 | 8  | 9   | 3  | 2.598260461 | 0.0397929   | TNNI1  | ENSG00000159173 |
| 1 | 199696891 | 199697424 | 199697031 | 14 | 24  | 6  | 3.711800658 | 0.000299603 | PHLDA3 | ENSG00000174307 |
| 1 | 199702151 | 199702333 | 199702242 | 8  | 9   | 4  | 2.078608368 | 0.0785659   | PHLDA3 | ENSG00000174307 |
| 1 | 199704700 | 199705163 | 199704879 | 92 | 102 | 6  | 15.29261871 | 4.99E-25    | PHLDA3 | ENSG00000174307 |
| 1 | 199705170 | 199705455 | 199705339 | 11 | 14  | 3  | 3.897390691 | 0.00295882  | PHLDA3 | ENSG00000174307 |
| 1 | 199715999 | 199716279 | 199716147 | 9  | 12  | 6  | 1.930136342 | 0.071303    | PHLDA3 | ENSG00000174307 |
| 1 | 199716281 | 199716635 | 199716458 | 16 | 22  | 5  | 3.983999373 | 0.000317941 | PHLDA3 | ENSG00000174307 |
| 1 | 199717878 | 199718342 | 199718206 | 9  | 17  | 7  | 2.338434415 | 0.0171287   | PHLDA3 | ENSG00000174307 |
| 1 | 199748636 | 199748969 | 199748803 | 18 | 22  | 11 | 1.991999686 | 0.0221672   | CSRP1  | ENSG00000159176 |
| 1 | 199758924 | 199759271 | 199759101 | 10 | 15  | 3  | 4.157216737 | 0.00170423  |        | ENSG00000218820 |
| 1 | 199766420 | 199766795 | 199766635 | 13 | 18  | 4  | 3.9493559   | 0.000961379 |        | ENSG00000218820 |
| 1 | 199774121 | 199774329 | 199774189 | 8  | 8   | 2  | 3.117912553 | 0.0283184   |        | ENSG00000218820 |
| 1 | 199776521 | 199777053 | 199776742 | 12 | 27  | 10 | 2.64550156  | 0.00175911  |        | ENSG00000218820 |
| 1 | 199786412 | 199786608 | 199786508 | 9  | 9   | 4  | 2.078608368 | 0.0785659   |        | ENSG00000218820 |
| 1 | 199792648 | 199792921 | 199792787 | 8  | 10  | 2  | 3.810782009 | 0.00936112  |        | ENSG00000218820 |
| 1 | 199795529 | 199795898 | 199795724 | 10 | 14  | 11 | 1.29913023  | 0.246308    |        | ENSG00000218820 |
| 1 | 199809867 | 199810076 | 199809976 | 8  | 9   | 1  | 5.196520921 | 0.00490062  | NAV1   | ENSG00000134369 |
| 1 | 199830278 | 199830724 | 199830550 | 8  | 17  | 6  | 2.672496474 | 0.00882337  | NAV1   | ENSG00000134369 |
| 1 | 199875647 | 199875834 | 199875716 | 8  | 9   | 3  | 2.598260461 | 0.0397929   | NAV1   | ENSG00000134369 |
| 1 | 199886262 | 199886540 | 199886422 | 10 | 13  | 2  | 4.850086193 | 0.00164564  | NAV1   | ENSG00000134369 |
| 1 | 199945455 | 199945634 | 199945544 | 8  | 8   | 2  | 3.117912553 | 0.0283184   |        | ENSG00000184965 |
| 1 | 199975268 | 199975587 | 199975434 | 10 | 14  | 8  | 1.73217364  | 0.0890835   | NAV1   | ENSG00000134369 |
| 1 | 199977450 | 199977696 | 199977590 | 8  | 9   | 8  | 1.154782427 | 0.375434    | NAV1   | ENSG00000134369 |
| 1 | 200254268 | 200254832 | 200254653 | 20 | 41  | 16 | 2.56769269  | 0.000253248 | ELF3   | ENSG00000163435 |
| 1 | 200254840 | 200255090 | 200254954 | 8  | 10  | 6  | 1.63319229  | 0.146906    | ELF3   | ENSG00000163435 |
| 1 | 200258778 | 200259020 | 200258899 | 9  | 12  | 4  | 2.702190879 | 0.0203088   |        | ENSG00000220486 |
| 1 | 200270576 | 200270844 | 200270674 | 8  | 13  | 9  | 1.455025858 | 0.177172    |        | ENSG00000217849 |
| 1 | 200281968 | 200282650 | 200282147 | 31 | 58  | 29 | 2.043964896 | 0.000488218 |        | ENSG00000217849 |

|   |           |           |           |    |     |    |             |             |          |                 |
|---|-----------|-----------|-----------|----|-----|----|-------------|-------------|----------|-----------------|
| 1 | 200292316 | 200293220 | 200292517 | 66 | 134 | 22 | 6.10026369  | 2.76E-22    |          | ENSG00000217849 |
| 1 | 200293938 | 200294244 | 200294091 | 8  | 12  | 3  | 3.377738599 | 0.00867157  |          | ENSG00000217849 |
| 1 | 200294464 | 200294674 | 200294548 | 9  | 10  | 5  | 1.905391004 | 0.0915982   |          | ENSG00000217849 |
| 1 | 200322710 | 200322925 | 200322792 | 14 | 16  | 5  | 2.944695189 | 0.00659886  |          | ENSG00000216268 |
| 1 | 200337051 | 200337230 | 200337140 | 8  | 8   | 8  | 1.039304184 | 0.46786     |          | ENSG00000216268 |
| 1 | 200341662 | 200342080 | 200341915 | 9  | 17  | 6  | 2.672496474 | 0.00882337  |          | ENSG00000216268 |
| 1 | 200342145 | 200342429 | 200342287 | 10 | 14  | 5  | 2.598260461 | 0.0167748   |          | ENSG00000216268 |
| 1 | 200342853 | 200343489 | 200343310 | 13 | 32  | 10 | 3.117912553 | 0.000190324 |          | ENSG00000216268 |
| 1 | 200343855 | 200344281 | 200344121 | 8  | 16  | 4  | 3.533634226 | 0.00276486  |          | ENSG00000216268 |
| 1 | 200350837 | 200351042 | 200350939 | 10 | 10  | 3  | 2.858086507 | 0.0242838   | GPR37L1  | ENSG00000170075 |
| 1 | 200354729 | 200355013 | 200354857 | 17 | 20  | 6  | 3.117912553 | 0.00218114  | GPR37L1  | ENSG00000170075 |
| 1 | 200368278 | 200368753 | 200368603 | 10 | 18  | 5  | 3.291129917 | 0.00248584  | GPR37L1  | ENSG00000170075 |
| 1 | 200392631 | 200392868 | 200392716 | 8  | 9   | 3  | 2.598260461 | 0.0397929   | PTPN7    | ENSG00000143851 |
| 1 | 200435997 | 200436475 | 200436249 | 11 | 21  | 4  | 4.572938411 | 0.000186332 |          | ENSG00000208212 |
| 1 | 200472862 | 200473455 | 200473085 | 78 | 98  | 8  | 11.43234603 | 3.69E-22    |          | ENSG00000208209 |
| 1 | 200503848 | 200504182 | 200504015 | 10 | 14  | 8  | 1.73217364  | 0.0890835   |          | ENSG00000208209 |
| 1 | 200510393 | 200510603 | 200510478 | 8  | 8   | 8  | 1.039304184 | 0.46786     |          | ENSG00000208209 |
| 1 | 200551463 | 200551665 | 200551585 | 8  | 8   | 9  | 0.935373766 | 0.560286    | UBE2T    | ENSG00000077152 |
| 1 | 200584185 | 200584695 | 200584347 | 10 | 19  | 12 | 1.598929514 | 0.0887417   | PPP1R12B | ENSG00000077157 |
| 1 | 200589962 | 200590274 | 200590111 | 12 | 16  | 5  | 2.944695189 | 0.00659886  | PPP1R12B | ENSG00000077157 |
| 1 | 200811981 | 200812333 | 200812154 | 9  | 14  | 6  | 2.227080395 | 0.0322529   |          | ENSG00000212880 |
| 1 | 200907195 | 200907431 | 200907342 | 9  | 11  | 5  | 2.078608368 | 0.0614303   | SYT2     | ENSG00000143858 |
| 1 | 200921475 | 200921697 | 200921586 | 9  | 10  | 2  | 3.810782009 | 0.00936112  | SYT2     | ENSG00000143858 |
| 1 | 200955473 | 200955670 | 200955571 | 9  | 9   | 3  | 2.598260461 | 0.0397929   | SYT2     | ENSG00000143858 |
| 1 | 201030093 | 201030302 | 201030235 | 11 | 11  | 2  | 4.157216737 | 0.0052913   |          | ENSG00000216668 |
| 1 | 201044095 | 201044452 | 201044273 | 12 | 18  | 8  | 2.194086611 | 0.0206188   | JARID1B  | ENSG00000117139 |
| 1 | 201072073 | 201072704 | 201072388 | 10 | 28  | 20 | 1.435229588 | 0.100491    |          | ENSG00000184774 |
| 1 | 201073792 | 201073975 | 201073883 | 8  | 9   | 0  | 10.39304184 | 0.000803859 |          | ENSG00000184774 |
| 1 | 201080027 | 201080313 | 201080146 | 13 | 13  | 1  | 7.27512929  | 0.000378098 |          | ENSG00000220471 |
| 1 | 201088082 | 201088360 | 201088221 | 16 | 18  | 4  | 3.9493559   | 0.000961379 |          | ENSG00000220471 |
| 1 | 201096503 | 201096682 | 201096540 | 8  | 8   | 5  | 1.558956276 | 0.191397    |          | ENSG00000220471 |
| 1 | 201107216 | 201107408 | 201107314 | 8  | 8   | 3  | 2.338434415 | 0.0641221   |          | ENSG00000217627 |
| 1 | 201124710 | 201124970 | 201124840 | 10 | 13  | 10 | 1.32275078  | 0.240023    | RABIF    | ENSG00000183155 |
| 1 | 201162585 | 201163319 | 201162742 | 19 | 45  | 12 | 3.677537883 | 2.09E-06    | KLHL12   | ENSG00000117153 |

|   |           |           |           |    |    |    |             |             |          |                 |
|---|-----------|-----------|-----------|----|----|----|-------------|-------------|----------|-----------------|
| 1 | 201180532 | 201180965 | 201180812 | 9  | 16 | 8  | 1.963130126 | 0.0441028   | ADIPOR1  | ENSG00000159346 |
| 1 | 201192713 | 201192912 | 201192871 | 8  | 8  | 5  | 1.558956276 | 0.191397    | ADIPOR1  | ENSG00000159346 |
| 1 | 201194963 | 201195238 | 201195091 | 15 | 16 | 5  | 2.944695189 | 0.00659886  | ADIPOR1  | ENSG00000159346 |
| 1 | 201196891 | 201197099 | 201197012 | 9  | 9  | 2  | 3.464347281 | 0.0163838   | ADIPOR1  | ENSG00000159346 |
| 1 | 201201133 | 201201339 | 201201268 | 8  | 8  | 2  | 3.117912553 | 0.0283184   | CYB5R1   | ENSG00000159348 |
| 1 | 201238158 | 201238804 | 201238434 | 53 | 81 | 5  | 14.20382385 | 5.65E-20    |          | ENSG00000218804 |
| 1 | 201242862 | 201243155 | 201243008 | 13 | 16 | 11 | 1.472347594 | 0.147517    | TMEM183B | ENSG00000163444 |
| 1 | 201261565 | 201261754 | 201261615 | 8  | 9  | 4  | 2.078608368 | 0.0785659   | PPFIA4   | ENSG00000143847 |
| 1 | 201261902 | 201262128 | 201262015 | 8  | 9  | 5  | 1.73217364  | 0.133894    | PPFIA4   | ENSG00000143847 |
| 1 | 201262561 | 201262746 | 201262653 | 9  | 9  | 2  | 3.464347281 | 0.0163838   | PPFIA4   | ENSG00000143847 |
| 1 | 201275252 | 201275460 | 201275361 | 10 | 10 | 5  | 1.905391004 | 0.0915982   | PPFIA4   | ENSG00000143847 |
| 1 | 201290326 | 201290531 | 201290428 | 9  | 10 | 5  | 1.905391004 | 0.0915982   | PPFIA4   | ENSG00000143847 |
| 1 | 201313397 | 201313672 | 201313534 | 9  | 12 | 1  | 6.755477198 | 0.000722752 | MYOG     | ENSG00000122180 |
| 1 | 201357616 | 201357895 | 201357755 | 8  | 11 | 7  | 1.558956276 | 0.158273    | ADORA1   | ENSG00000163485 |
| 1 | 201399179 | 201399373 | 201399239 | 8  | 8  | 3  | 2.338434415 | 0.0641221   | MYBPH    | ENSG00000133055 |
| 1 | 201402325 | 201402566 | 201402445 | 13 | 13 | 5  | 2.425043097 | 0.0262442   | MYBPH    | ENSG00000133055 |
| 1 | 201452040 | 201452288 | 201452211 | 10 | 12 | 14 | 0.900730293 | 0.611333    | CHIT1    | ENSG00000133063 |
| 1 | 201453034 | 201453335 | 201453175 | 8  | 13 | 4  | 2.910051716 | 0.0125532   | CHIT1    | ENSG00000133063 |
| 1 | 201462002 | 201462274 | 201462124 | 13 | 15 | 7  | 2.078608368 | 0.038229    | CHIT1    | ENSG00000133063 |
| 1 | 201464646 | 201464833 | 201464765 | 8  | 9  | 1  | 5.196520921 | 0.00490062  | CHIT1    | ENSG00000133063 |
| 1 | 201488577 | 201488853 | 201488726 | 14 | 18 | 0  | 19.7467795  | 1.32E-06    | NECAP1   | ENSG00000219801 |
| 1 | 201502983 | 201503344 | 201503162 | 11 | 17 | 14 | 1.247165021 | 0.261378    | NECAP1   | ENSG00000219801 |
| 1 | 201504880 | 201505107 | 201504993 | 8  | 10 | 7  | 1.429043253 | 0.21536     | NECAP1   | ENSG00000219801 |
| 1 | 201509030 | 201509217 | 201509078 | 8  | 8  | 5  | 1.558956276 | 0.191397    | NECAP1   | ENSG00000219801 |
| 1 | 201516990 | 201517256 | 201517105 | 10 | 12 | 5  | 2.251825733 | 0.0404733   | BTG2     | ENSG00000159388 |
| 1 | 201518043 | 201518250 | 201518174 | 8  | 8  | 4  | 1.870747532 | 0.118863    | BTG2     | ENSG00000159388 |
| 1 | 201525067 | 201525292 | 201525179 | 10 | 11 | 1  | 6.235825105 | 0.0013754   | BTG2     | ENSG00000159388 |
| 1 | 201539331 | 201539540 | 201539396 | 10 | 11 | 4  | 2.494330042 | 0.0324033   | BTG2     | ENSG00000159388 |
| 1 | 201541090 | 201541484 | 201541306 | 32 | 41 | 6  | 6.235825105 | 2.48E-08    | BTG2     | ENSG00000159388 |
| 1 | 201542076 | 201542721 | 201542428 | 48 | 81 | 7  | 10.65286789 | 2.80E-18    | BTG2     | ENSG00000159388 |
| 1 | 201552437 | 201553033 | 201552616 | 19 | 34 | 8  | 4.041738494 | 1.22E-05    |          | ENSG00000202300 |
| 1 | 201562964 | 201563157 | 201563000 | 9  | 10 | 6  | 1.63319229  | 0.146906    |          | ENSG00000202300 |
| 1 | 201563224 | 201563446 | 201563381 | 9  | 9  | 5  | 1.73217364  | 0.133894    |          | ENSG00000202300 |
| 1 | 201563623 | 201563979 | 201563754 | 8  | 12 | 3  | 3.377738599 | 0.00867157  |          | ENSG00000202300 |



|   |           |           |           |    |    |    |             |             |         |                 |
|---|-----------|-----------|-----------|----|----|----|-------------|-------------|---------|-----------------|
| 1 | 201575878 | 201576190 | 201576012 | 12 | 14 | 13 | 1.113540197 | 0.385405    | FMOD    | ENSG00000122176 |
| 1 | 201578325 | 201578615 | 201578495 | 9  | 11 | 4  | 2.494330042 | 0.0324033   | FMOD    | ENSG00000122176 |
| 1 | 201646280 | 201646491 | 201646383 | 8  | 9  | 1  | 5.196520921 | 0.00490062  |         | ENSG00000219588 |
| 1 | 201660616 | 201660874 | 201660745 | 8  | 11 | 4  | 2.494330042 | 0.0324033   | PRELP   | ENSG00000188783 |
| 1 | 201723084 | 201723956 | 201723497 | 11 | 34 | 16 | 2.139743909 | 0.00367586  | OPTC    | ENSG00000188770 |
| 1 | 201762579 | 201762769 | 201762731 | 8  | 8  | 1  | 4.676868829 | 0.0091584   | OPTC    | ENSG00000188770 |
| 1 | 201808468 | 201808732 | 201808560 | 10 | 13 | 1  | 7.27512929  | 0.000378098 | ATP2B4  | ENSG00000058668 |
| 1 | 201829389 | 201829797 | 201829618 | 11 | 18 | 13 | 1.41048425  | 0.160361    | ATP2B4  | ENSG00000058668 |
| 1 | 201861479 | 201861674 | 201861584 | 10 | 10 | 6  | 1.63319229  | 0.146906    | ATP2B4  | ENSG00000058668 |
| 1 | 201861939 | 201862147 | 201862024 | 9  | 10 | 4  | 2.286469205 | 0.0509017   | ATP2B4  | ENSG00000058668 |
| 1 | 201924460 | 201924704 | 201924598 | 8  | 11 | 1  | 6.235825105 | 0.0013754   | ATP2B4  | ENSG00000058668 |
| 1 | 201968929 | 201969144 | 201969036 | 8  | 9  | 7  | 1.29913023  | 0.286504    |         | ENSG00000221643 |
| 1 | 202031811 | 202032013 | 202031912 | 10 | 11 | 2  | 4.157216737 | 0.0052913   | ZC3H11A | ENSG00000058673 |
| 1 | 202074787 | 202075252 | 202074966 | 13 | 24 | 8  | 2.886956067 | 0.00160675  |         | ENSG00000216908 |
| 1 | 202096761 | 202096940 | 202096810 | 8  | 8  | 2  | 3.117912553 | 0.0283184   | SNRPEL1 | ENSG00000182004 |
| 1 | 202097097 | 202097506 | 202097294 | 12 | 21 | 5  | 3.810782009 | 0.000537724 | SNRPEL1 | ENSG00000182004 |
| 1 | 202106613 | 202106872 | 202106742 | 9  | 12 | 7  | 1.688869299 | 0.11395     |         | ENSG00000216997 |
| 1 | 202165579 | 202165920 | 202165703 | 11 | 15 | 10 | 1.511715177 | 0.140236    |         | ENSG00000218299 |
| 1 | 202169966 | 202170145 | 202170055 | 8  | 9  | 4  | 2.078608368 | 0.0785659   |         | ENSG00000218299 |
| 1 | 202231950 | 202232185 | 202232067 | 11 | 13 | 4  | 2.910051716 | 0.0125532   |         | ENSG00000211554 |
| 1 | 202235901 | 202236134 | 202235987 | 9  | 10 | 1  | 5.716173013 | 0.00260397  |         | ENSG00000211554 |
| 1 | 202239346 | 202239572 | 202239447 | 9  | 10 | 2  | 3.810782009 | 0.00936112  |         | ENSG00000211554 |
| 1 | 202254161 | 202254385 | 202254301 | 10 | 12 | 6  | 1.930136342 | 0.071303    |         | ENSG00000211554 |
| 1 | 202316033 | 202316476 | 202316280 | 9  | 19 | 4  | 4.157216737 | 0.000560204 | SOX13   | ENSG00000143842 |
| 1 | 202320056 | 202320602 | 202320230 | 12 | 25 | 8  | 3.00243431  | 0.0010168   | SOX13   | ENSG00000143842 |
| 1 | 202320761 | 202321156 | 202320933 | 9  | 16 | 9  | 1.766817113 | 0.0700694   | SOX13   | ENSG00000143842 |
| 1 | 202338751 | 202338954 | 202338802 | 9  | 10 | 4  | 2.286469205 | 0.0509017   | SOX13   | ENSG00000143842 |
| 1 | 202363433 | 202363828 | 202363531 | 13 | 19 | 9  | 2.078608368 | 0.0241848   | ETNK2   | ENSG00000143845 |
| 1 | 202364548 | 202364740 | 202364644 | 8  | 9  | 1  | 5.196520921 | 0.00490062  | ETNK2   | ENSG00000143845 |
| 1 | 202376969 | 202377334 | 202377145 | 14 | 18 | 7  | 2.468347438 | 0.0112499   | ETNK2   | ENSG00000143845 |
| 1 | 202384813 | 202385339 | 202384996 | 14 | 25 | 8  | 3.00243431  | 0.0010168   | ETNK2   | ENSG00000143845 |
| 1 | 202386475 | 202386840 | 202386628 | 9  | 16 | 9  | 1.766817113 | 0.0700694   | ETNK2   | ENSG00000143845 |
| 1 | 202398174 | 202398427 | 202398300 | 11 | 13 | 8  | 1.616695398 | 0.123553    | REN     | ENSG00000143839 |
| 1 | 202419761 | 202419988 | 202419901 | 8  | 9  | 0  | 10.39304184 | 0.000803859 |         | ENSG00000218951 |

|   |           |           |           |    |    |    |             |             |          |                 |
|---|-----------|-----------|-----------|----|----|----|-------------|-------------|----------|-----------------|
| 1 | 202424444 | 202424637 | 202424540 | 8  | 9  | 1  | 5.196520921 | 0.00490062  |          | ENSG00000218951 |
| 1 | 202442847 | 202443155 | 202442998 | 12 | 14 | 4  | 3.117912553 | 0.00766354  | GOLT1A   | ENSG00000174567 |
| 1 | 202449822 | 202450187 | 202450016 | 10 | 16 | 9  | 1.766817113 | 0.0700694   | GOLT1A   | ENSG00000174567 |
| 1 | 202462012 | 202462410 | 202462239 | 9  | 15 | 7  | 2.078608368 | 0.038229    | GOLT1A   | ENSG00000174567 |
| 1 | 202492242 | 202492448 | 202492345 | 10 | 10 | 4  | 2.286469205 | 0.0509017   | GOLT1A   | ENSG00000174567 |
| 1 | 202522291 | 202522637 | 202522516 | 9  | 14 | 6  | 2.227080395 | 0.0322529   |          | ENSG00000219133 |
| 1 | 202522647 | 202523291 | 202522982 | 16 | 30 | 16 | 1.895201748 | 0.0144147   |          | ENSG00000219133 |
| 1 | 202524149 | 202524365 | 202524234 | 11 | 12 | 6  | 1.930136342 | 0.071303    |          | ENSG00000219133 |
| 1 | 202549818 | 202550072 | 202549945 | 10 | 11 | 0  | 12.47165021 | 0.000193293 |          | ENSG00000219133 |
| 1 | 202550245 | 202550643 | 202550473 | 9  | 15 | 9  | 1.662886695 | 0.0970566   |          | ENSG00000219133 |
| 1 | 202554351 | 202554530 | 202554483 | 8  | 8  | 3  | 2.338434415 | 0.0641221   |          | ENSG00000219133 |
| 1 | 202555259 | 202555812 | 202555438 | 18 | 33 | 11 | 2.944695189 | 0.000258336 |          | ENSG00000219133 |
| 1 | 202556293 | 202556624 | 202556458 | 8  | 13 | 3  | 3.637564645 | 0.0050909   |          | ENSG00000219133 |
| 1 | 202566111 | 202566291 | 202566200 | 9  | 9  | 0  | 10.39304184 | 0.000803859 |          | ENSG00000219133 |
| 1 | 202572726 | 202572944 | 202572847 | 8  | 8  | 2  | 3.117912553 | 0.0283184   |          | ENSG00000219133 |
| 1 | 202599431 | 202599691 | 202599561 | 10 | 13 | 5  | 2.425043097 | 0.0262442   | PLEKHA6  | ENSG00000143850 |
| 1 | 202601705 | 202602024 | 202601878 | 8  | 12 | 5  | 2.251825733 | 0.0404733   | PLEKHA6  | ENSG00000143850 |
| 1 | 202613910 | 202614180 | 202614045 | 9  | 13 | 8  | 1.616695398 | 0.123553    |          | ENSG00000220782 |
| 1 | 202616193 | 202616632 | 202616384 | 17 | 26 | 7  | 3.507651622 | 0.000274507 |          | ENSG00000220782 |
| 1 | 202619274 | 202619549 | 202619411 | 8  | 10 | 1  | 5.716173013 | 0.00260397  |          | ENSG00000220782 |
| 1 | 202634141 | 202634666 | 202634440 | 18 | 31 | 10 | 3.023430354 | 0.000301033 |          | ENSG00000220782 |
| 1 | 202646579 | 202646810 | 202646683 | 9  | 10 | 4  | 2.286469205 | 0.0509017   | PPP1R15B | ENSG00000158615 |
| 1 | 202647181 | 202647599 | 202647436 | 13 | 18 | 10 | 1.795161773 | 0.055383    | PPP1R15B | ENSG00000158615 |
| 1 | 202652867 | 202653283 | 202653021 | 15 | 22 | 12 | 1.838768941 | 0.0349935   | PPP1R15B | ENSG00000158615 |
| 1 | 202653308 | 202653673 | 202653474 | 14 | 20 | 9  | 2.182538787 | 0.0165356   | PPP1R15B | ENSG00000158615 |
| 1 | 202654535 | 202654841 | 202654688 | 8  | 12 | 1  | 6.755477198 | 0.000722752 | PPP1R15B | ENSG00000158615 |
| 1 | 202667074 | 202667450 | 202667316 | 8  | 13 | 9  | 1.455025858 | 0.177172    | PIK3C2B  | ENSG00000133056 |
| 1 | 202678831 | 202679316 | 202679010 | 10 | 20 | 8  | 2.425043097 | 0.00917565  | PIK3C2B  | ENSG00000133056 |
| 1 | 202714185 | 202714371 | 202714233 | 8  | 9  | 2  | 3.464347281 | 0.0163838   | PIK3C2B  | ENSG00000133056 |
| 1 | 202715415 | 202715822 | 202715594 | 14 | 22 | 16 | 1.406117426 | 0.139742    | PIK3C2B  | ENSG00000133056 |
| 1 | 202730705 | 202731085 | 202730908 | 11 | 16 | 12 | 1.359090087 | 0.198699    | PIK3C2B  | ENSG00000133056 |
| 1 | 202736164 | 202736455 | 202736311 | 10 | 10 | 6  | 1.63319229  | 0.146906    | PIK3C2B  | ENSG00000133056 |
| 1 | 202738994 | 202739251 | 202739143 | 8  | 9  | 3  | 2.598260461 | 0.0397929   | MDM4     | ENSG00000198625 |
| 1 | 202742214 | 202742545 | 202742379 | 16 | 21 | 26 | 0.846840446 | 0.721382    | MDM4     | ENSG00000198625 |

|   |           |           |           |     |     |    |             |             |         |                 |
|---|-----------|-----------|-----------|-----|-----|----|-------------|-------------|---------|-----------------|
| 1 | 202742755 | 202743053 | 202742894 | 14  | 16  | 17 | 0.981565063 | 0.523072    | MDM4    | ENSG00000198625 |
| 1 | 202745143 | 202745548 | 202745305 | 33  | 42  | 0  | 44.69007992 | 4.92E-14    | MDM4    | ENSG00000198625 |
| 1 | 202751806 | 202752421 | 202752242 | 21  | 38  | 11 | 3.377738599 | 2.57E-05    | MDM4    | ENSG00000198625 |
| 1 | 202760583 | 202761212 | 202760818 | 189 | 240 | 13 | 17.89087917 | 9.23E-58    | MDM4    | ENSG00000198625 |
| 1 | 202797310 | 202797564 | 202797435 | 11  | 14  | 4  | 3.117912553 | 0.00766354  |         | ENSG00000200408 |
| 1 | 202797658 | 202797891 | 202797820 | 8   | 11  | 7  | 1.558956276 | 0.158273    |         | ENSG00000200408 |
| 1 | 202801375 | 202801783 | 202801707 | 8   | 16  | 8  | 1.963130126 | 0.0441028   |         | ENSG00000200408 |
| 1 | 202856886 | 202857119 | 202857002 | 8   | 9   | 0  | 10.39304184 | 0.000803859 | LRRN2   | ENSG00000170382 |
| 1 | 202883367 | 202883588 | 202883477 | 8   | 9   | 7  | 1.29913023  | 0.286504    | LRRN2   | ENSG00000170382 |
| 1 | 202944529 | 202944736 | 202944597 | 9   | 10  | 5  | 1.905391004 | 0.0915982   |         | ENSG00000208201 |
| 1 | 202967048 | 202967261 | 202967165 | 8   | 9   | 7  | 1.29913023  | 0.286504    |         | ENSG00000221071 |
| 1 | 203140259 | 203140545 | 203140402 | 8   | 8   | 3  | 2.338434415 | 0.0641221   | NFASC   | ENSG00000163531 |
| 1 | 203160319 | 203160626 | 203160482 | 13  | 17  | 10 | 1.700679574 | 0.0766266   | NFASC   | ENSG00000163531 |
| 1 | 203211384 | 203211836 | 203211676 | 9   | 16  | 9  | 1.766817113 | 0.0700694   | NFASC   | ENSG00000163531 |
| 1 | 203224983 | 203225323 | 203225177 | 9   | 13  | 14 | 0.970017239 | 0.534076    | NFASC   | ENSG00000163531 |
| 1 | 203235178 | 203235416 | 203235333 | 8   | 9   | 1  | 5.196520921 | 0.00490062  | CNTN2   | ENSG00000184144 |
| 1 | 203239262 | 203239483 | 203239372 | 11  | 11  | 8  | 1.385738912 | 0.224757    | CNTN2   | ENSG00000184144 |
| 1 | 203249621 | 203250216 | 203250037 | 50  | 68  | 7  | 8.963998589 | 9.54E-15    | CNTN2   | ENSG00000184144 |
| 1 | 203297348 | 203297593 | 203297470 | 12  | 15  | 11 | 1.385738912 | 0.19225     | CNTN2   | ENSG00000184144 |
| 1 | 203326609 | 203326825 | 203326755 | 8   | 10  | 5  | 1.905391004 | 0.0915982   | TMEM81  | ENSG00000174529 |
| 1 | 203357674 | 203358250 | 203358071 | 22  | 37  | 12 | 3.037966077 | 9.04E-05    | RBBP5   | ENSG00000117222 |
| 1 | 203373849 | 203374085 | 203373967 | 11  | 11  | 1  | 6.235825105 | 0.0013754   |         | ENSG00000217567 |
| 1 | 203447272 | 203447659 | 203447445 | 37  | 44  | 7  | 5.846086036 | 1.65E-08    | RIPK5   | ENSG00000133059 |
| 1 | 203542911 | 203543090 | 203543000 | 8   | 8   | 1  | 4.676868829 | 0.0091584   | NUAK2   | ENSG00000163545 |
| 1 | 203557501 | 203557806 | 203557660 | 8   | 9   | 5  | 1.73217364  | 0.133894    | NUAK2   | ENSG00000163545 |
| 1 | 203570500 | 203570706 | 203570585 | 9   | 9   | 3  | 2.598260461 | 0.0397929   | NUAK2   | ENSG00000163545 |
| 1 | 203571399 | 203571779 | 203571600 | 10  | 17  | 13 | 1.336248237 | 0.204556    | NUAK2   | ENSG00000163545 |
| 1 | 203601732 | 203602036 | 203601893 | 8   | 12  | 7  | 1.688869299 | 0.11395     | KLHDC8A | ENSG00000162873 |
| 1 | 203651587 | 203651791 | 203651713 | 9   | 9   | 3  | 2.598260461 | 0.0397929   | LEMD1   | ENSG00000186007 |
| 1 | 203666587 | 203666789 | 203666688 | 8   | 9   | 3  | 2.598260461 | 0.0397929   | LEMD1   | ENSG00000186007 |
| 1 | 203689276 | 203689586 | 203689431 | 9   | 9   | 0  | 10.39304184 | 0.000803859 | LEMD1   | ENSG00000186007 |
| 1 | 203705372 | 203705596 | 203705549 | 8   | 9   | 2  | 3.464347281 | 0.0163838   | LEMD1   | ENSG00000186007 |
| 1 | 203713772 | 203714262 | 203713978 | 8   | 18  | 3  | 4.936694875 | 0.000311102 | PCTK3   | ENSG00000117266 |
| 1 | 203779013 | 203779666 | 203779192 | 12  | 28  | 18 | 1.586306386 | 0.0554746   | MFSD4   | ENSG00000174514 |

|   |           |           |           |    |    |    |             |             |         |                 |
|---|-----------|-----------|-----------|----|----|----|-------------|-------------|---------|-----------------|
| 1 | 203799683 | 203799869 | 203799748 | 8  | 9  | 6  | 1.484720263 | 0.204387    | MFSD4   | ENSG00000174514 |
| 1 | 203801168 | 203801453 | 203801277 | 9  | 12 | 1  | 6.755477198 | 0.000722752 | MFSD4   | ENSG00000174514 |
| 1 | 203801594 | 203801783 | 203801688 | 9  | 10 | 6  | 1.63319229  | 0.146906    | MFSD4   | ENSG00000174514 |
| 1 | 203813834 | 203814067 | 203813936 | 9  | 9  | 4  | 2.078608368 | 0.0785659   | MFSD4   | ENSG00000174514 |
| 1 | 203827691 | 203828022 | 203827849 | 15 | 18 | 9  | 1.97467795  | 0.0349428   |         | ENSG00000206762 |
| 1 | 203866672 | 203867228 | 203866832 | 12 | 24 | 6  | 3.711800658 | 0.000299603 | ELK4    | ENSG00000158711 |
| 1 | 203867693 | 203868086 | 203867814 | 19 | 25 | 4  | 5.404381758 | 1.92E-05    | ELK4    | ENSG00000158711 |
| 1 | 203869389 | 203869568 | 203869478 | 8  | 8  | 1  | 4.676868829 | 0.0091584   | ELK4    | ENSG00000158711 |
| 1 | 203871570 | 203871828 | 203871699 | 12 | 14 | 2  | 5.196520921 | 0.000907371 | ELK4    | ENSG00000158711 |
| 1 | 203907721 | 203908254 | 203908075 | 10 | 22 | 7  | 2.98799953  | 0.00188278  | SLC45A3 | ENSG00000158715 |
| 1 | 203917264 | 203917503 | 203917383 | 9  | 11 | 4  | 2.494330042 | 0.0324033   | SLC45A3 | ENSG00000158715 |
| 1 | 203946898 | 203947137 | 203946989 | 10 | 11 | 5  | 2.078608368 | 0.0614303   |         | ENSG00000201944 |
| 1 | 203984650 | 203985045 | 203984866 | 10 | 17 | 13 | 1.336248237 | 0.204556    | NUCKS1  | ENSG00000069275 |
| 1 | 203985053 | 203985259 | 203985166 | 8  | 9  | 5  | 1.73217364  | 0.133894    | NUCKS1  | ENSG00000069275 |
| 1 | 203985266 | 203985525 | 203985407 | 13 | 17 | 6  | 2.672496474 | 0.00882337  | NUCKS1  | ENSG00000069275 |
| 1 | 203985536 | 203986531 | 203986343 | 15 | 51 | 9  | 5.404381758 | 3.86E-09    | NUCKS1  | ENSG00000069275 |
| 1 | 204005682 | 204005887 | 204005784 | 8  | 10 | 2  | 3.810782009 | 0.00936112  | RAB7L1  | ENSG00000117280 |
| 1 | 204006437 | 204006650 | 204006543 | 11 | 12 | 11 | 1.125912866 | 0.382541    | RAB7L1  | ENSG00000117280 |
| 1 | 204011001 | 204011506 | 204011349 | 9  | 18 | 1  | 9.87338975  | 1.41E-05    | RAB7L1  | ENSG00000117280 |
| 1 | 204027392 | 204027682 | 204027537 | 10 | 12 | 4  | 2.702190879 | 0.0203088   | RAB7L1  | ENSG00000117280 |
| 1 | 204034363 | 204034615 | 204034489 | 9  | 12 | 9  | 1.35109544  | 0.232899    | SLC41A1 | ENSG00000133065 |
| 1 | 204036811 | 204037117 | 204036964 | 8  | 10 | 3  | 2.858086507 | 0.0242838   | SLC41A1 | ENSG00000133065 |
| 1 | 204047537 | 204047718 | 204047615 | 8  | 9  | 2  | 3.464347281 | 0.0163838   | SLC41A1 | ENSG00000133065 |
| 1 | 204154998 | 204155211 | 204155156 | 9  | 10 | 4  | 2.286469205 | 0.0509017   | SLC26A9 | ENSG00000174502 |
| 1 | 204159887 | 204160066 | 204159976 | 8  | 8  | 1  | 4.676868829 | 0.0091584   | SLC26A9 | ENSG00000174502 |
| 1 | 204175494 | 204175826 | 204175656 | 8  | 12 | 5  | 2.251825733 | 0.0404733   | SLC26A9 | ENSG00000174502 |
| 1 | 204182807 | 204183083 | 204182945 | 19 | 19 | 4  | 4.157216737 | 0.000560204 | SLC26A9 | ENSG00000174502 |
| 1 | 204184425 | 204184858 | 204184679 | 8  | 18 | 3  | 4.936694875 | 0.000311102 | SLC26A9 | ENSG00000174502 |
| 1 | 204366009 | 204366334 | 204366183 | 9  | 13 | 3  | 3.637564645 | 0.0050909   |         | ENSG00000219978 |
| 1 | 204394683 | 204394864 | 204394799 | 8  | 8  | 6  | 1.336248237 | 0.277651    | AVPR1B  | ENSG00000198049 |
| 1 | 204477051 | 204477252 | 204477151 | 8  | 10 | 4  | 2.286469205 | 0.0509017   | CTSE    | ENSG00000196188 |
| 1 | 204655785 | 204656004 | 204655922 | 8  | 8  | 4  | 1.870747532 | 0.118863    | IKBKE   | ENSG00000143466 |
| 1 | 204664901 | 204665180 | 204665040 | 10 | 12 | 4  | 2.702190879 | 0.0203088   | IKBKE   | ENSG00000143466 |
| 1 | 204685642 | 204685844 | 204685743 | 8  | 9  | 0  | 10.39304184 | 0.000803859 | IKBKE   | ENSG00000143466 |

|   |           |           |           |    |    |    |             |             |          |                 |
|---|-----------|-----------|-----------|----|----|----|-------------|-------------|----------|-----------------|
| 1 | 204689656 | 204690044 | 204689835 | 8  | 15 | 10 | 1.511715177 | 0.140236    | IKBKE    | ENSG00000143466 |
| 1 | 204704450 | 204704637 | 204704543 | 8  | 8  | 3  | 2.338434415 | 0.0641221   | IKBKE    | ENSG00000143466 |
| 1 | 204730108 | 204730332 | 204730211 | 10 | 12 | 4  | 2.702190879 | 0.0203088   | C1orf147 | ENSG00000162888 |
| 1 | 204750215 | 204750438 | 204750326 | 8  | 8  | 1  | 4.676868829 | 0.0091584   | RASSF5   | ENSG00000136653 |
| 1 | 204761164 | 204761407 | 204761271 | 9  | 11 | 8  | 1.385738912 | 0.224757    |          | ENSG00000218386 |
| 1 | 204823586 | 204823789 | 204823687 | 8  | 8  | 5  | 1.558956276 | 0.191397    | RASSF5   | ENSG00000136653 |
| 1 | 204826667 | 204827134 | 204826883 | 20 | 32 | 13 | 2.449788434 | 0.00149869  | LGTN     | ENSG00000143486 |
| 1 | 204830749 | 204830960 | 204830814 | 9  | 9  | 0  | 10.39304184 | 0.000803859 | LGTN     | ENSG00000143486 |
| 1 | 204847968 | 204848157 | 204848062 | 8  | 9  | 7  | 1.29913023  | 0.286504    | LGTN     | ENSG00000143486 |
| 1 | 204852082 | 204852915 | 204852458 | 15 | 37 | 16 | 2.323150529 | 0.00121592  | LGTN     | ENSG00000143486 |
| 1 | 204874758 | 204875063 | 204874910 | 9  | 9  | 6  | 1.484720263 | 0.204387    | DYRK3    | ENSG00000143479 |
| 1 | 204887013 | 204887439 | 204887230 | 11 | 19 | 1  | 10.39304184 | 7.23E-06    | DYRK3    | ENSG00000143479 |
| 1 | 204903730 | 204903999 | 204903864 | 11 | 14 | 2  | 5.196520921 | 0.000907371 | MAPKAPK2 | ENSG00000162889 |
| 1 | 204940535 | 204940743 | 204940639 | 9  | 11 | 3  | 3.117912553 | 0.0146045   |          | ENSG00000216783 |
| 1 | 204942173 | 204942392 | 204942336 | 10 | 11 | 5  | 2.078608368 | 0.0614303   |          | ENSG00000216783 |
| 1 | 204954732 | 204954996 | 204954859 | 10 | 14 | 4  | 3.117912553 | 0.00766354  |          | ENSG00000216783 |
| 1 | 204978533 | 204978879 | 204978706 | 9  | 14 | 5  | 2.598260461 | 0.0167748   |          | ENSG00000199349 |
| 1 | 204979028 | 204979424 | 204979191 | 16 | 20 | 7  | 2.728173484 | 0.00469378  |          | ENSG00000199349 |
| 1 | 205001499 | 205001749 | 205001624 | 9  | 10 | 5  | 1.905391004 | 0.0915982   | IL10     | ENSG00000136634 |
| 1 | 205010592 | 205010803 | 205010697 | 8  | 8  | 0  | 9.353737658 | 0.00163931  | IL10     | ENSG00000136634 |
| 1 | 205050076 | 205050294 | 205050161 | 8  | 8  | 4  | 1.870747532 | 0.118863    | IL19     | ENSG00000142224 |
| 1 | 205065372 | 205065683 | 205065527 | 11 | 14 | 1  | 7.794781382 | 0.000197021 | IL19     | ENSG00000142224 |
| 1 | 205066430 | 205066930 | 205066668 | 28 | 45 | 4  | 9.561598495 | 9.80E-11    | IL19     | ENSG00000142224 |
| 1 | 205087877 | 205088229 | 205088053 | 17 | 23 | 6  | 3.563328632 | 0.000497701 | IL20     | ENSG00000162891 |
| 1 | 205096425 | 205096747 | 205096586 | 15 | 19 | 2  | 6.928694562 | 4.25E-05    | IL20     | ENSG00000162891 |
| 1 | 205096868 | 205097066 | 205096965 | 11 | 11 | 5  | 2.078608368 | 0.0614303   | IL20     | ENSG00000162891 |
| 1 | 205104018 | 205104286 | 205104149 | 10 | 12 | 7  | 1.688869299 | 0.11395     | IL20     | ENSG00000162891 |
| 1 | 205104870 | 205105626 | 205105164 | 25 | 62 | 34 | 1.870747532 | 0.00114471  | IL20     | ENSG00000162891 |
| 1 | 205113636 | 205114157 | 205113911 | 14 | 25 | 7  | 3.377738599 | 0.000449165 | IL20     | ENSG00000162891 |
| 1 | 205116336 | 205116600 | 205116465 | 11 | 13 | 2  | 4.850086193 | 0.00164564  | IL20     | ENSG00000162891 |
| 1 | 205124672 | 205124906 | 205124809 | 10 | 10 | 7  | 1.429043253 | 0.21536     | IL24     | ENSG00000162892 |
| 1 | 205135251 | 205136131 | 205135567 | 15 | 48 | 21 | 2.314813865 | 0.000307138 | IL24     | ENSG00000162892 |
| 1 | 205136323 | 205136561 | 205136421 | 9  | 11 | 7  | 1.558956276 | 0.158273    | IL24     | ENSG00000162892 |
| 1 | 205136564 | 205136748 | 205136594 | 9  | 10 | 5  | 1.905391004 | 0.0915982   | IL24     | ENSG00000162892 |

|   |           |           |           |    |    |    |             |             |          |                 |
|---|-----------|-----------|-----------|----|----|----|-------------|-------------|----------|-----------------|
| 1 | 205138692 | 205139037 | 205138869 | 8  | 12 | 2  | 4.503651465 | 0.002963    | IL24     | ENSG00000162892 |
| 1 | 205139554 | 205139800 | 205139677 | 8  | 11 | 5  | 2.078608368 | 0.0614303   | IL24     | ENSG00000162892 |
| 1 | 205141500 | 205141748 | 205141631 | 8  | 9  | 6  | 1.484720263 | 0.204387    | IL24     | ENSG00000162892 |
| 1 | 205143399 | 205144090 | 205143793 | 34 | 61 | 36 | 1.741536741 | 0.00319059  |          | ENSG00000217798 |
| 1 | 205148605 | 205148912 | 205148736 | 11 | 15 | 7  | 2.078608368 | 0.038229    |          | ENSG00000217798 |
| 1 | 205148991 | 205149382 | 205149203 | 10 | 18 | 7  | 2.468347438 | 0.0112499   |          | ENSG00000217798 |
| 1 | 205157990 | 205158188 | 205158113 | 10 | 10 | 7  | 1.429043253 | 0.21536     | FAIM3    | ENSG00000162894 |
| 1 | 205158344 | 205158523 | 205158430 | 8  | 8  | 4  | 1.870747532 | 0.118863    | FAIM3    | ENSG00000162894 |
| 1 | 205173298 | 205173487 | 205173404 | 9  | 9  | 5  | 1.73217364  | 0.133894    | FAIM3    | ENSG00000162894 |
| 1 | 205175113 | 205175363 | 205175238 | 9  | 11 | 3  | 3.117912553 | 0.0146045   | PIGR     | ENSG00000162896 |
| 1 | 205201654 | 205202055 | 205201854 | 39 | 51 | 5  | 9.00730293  | 1.28E-11    | FCAMR    | ENSG00000162897 |
| 1 | 205219415 | 205219644 | 205219506 | 8  | 9  | 3  | 2.598260461 | 0.0397929   | FCAMR    | ENSG00000162897 |
| 1 | 205222094 | 205222374 | 205222234 | 11 | 12 | 4  | 2.702190879 | 0.0203088   | FCAMR    | ENSG00000162897 |
| 1 | 205268318 | 205268616 | 205268463 | 11 | 13 | 2  | 4.850086193 | 0.00164564  | C1orf116 | ENSG00000182795 |
| 1 | 205272758 | 205273171 | 205272930 | 14 | 19 | 6  | 2.969440526 | 0.0035096   | C1orf116 | ENSG00000182795 |
| 1 | 205291621 | 205291826 | 205291711 | 9  | 9  | 0  | 10.39304184 | 0.000803859 | YOD1     | ENSG00000180667 |
| 1 | 205394917 | 205395242 | 205395079 | 8  | 13 | 2  | 4.850086193 | 0.00164564  |          | ENSG00000217797 |
| 1 | 205480696 | 205480997 | 205480832 | 17 | 21 | 3  | 5.716173013 | 5.37E-05    |          | ENSG00000218808 |
| 1 | 205481662 | 205481880 | 205481771 | 8  | 8  | 4  | 1.870747532 | 0.118863    |          | ENSG00000218808 |
| 1 | 205488814 | 205488993 | 205488903 | 8  | 8  | 0  | 9.353737658 | 0.00163931  |          | ENSG00000218808 |
| 1 | 205491123 | 205491337 | 205491230 | 9  | 10 | 5  | 1.905391004 | 0.0915982   |          | ENSG00000218808 |
| 1 | 205556233 | 205556882 | 205556703 | 14 | 30 | 14 | 2.147895314 | 0.00561491  | CD55     | ENSG00000196352 |
| 1 | 205561024 | 205561732 | 205561458 | 18 | 40 | 5  | 7.101911926 | 1.09E-08    | CD55     | ENSG00000196352 |
| 1 | 206037358 | 206037619 | 206037488 | 9  | 10 | 1  | 5.716173013 | 0.00260397  |          | ENSG00000207966 |
| 1 | 206453803 | 206454030 | 206453916 | 10 | 11 | 0  | 12.47165021 | 0.000193293 | PLXNA2   | ENSG00000076356 |
| 1 | 207623887 | 207624382 | 207624066 | 52 | 62 | 1  | 32.7380818  | 1.05E-18    |          | ENSG00000207623 |
| 1 | 207638706 | 207638913 | 207638809 | 9  | 11 | 0  | 12.47165021 | 0.000193293 |          | ENSG00000207623 |
| 1 | 208056424 | 208056666 | 208056533 | 10 | 10 | 0  | 11.43234603 | 0.000394183 | IRF6     | ENSG00000117595 |
| 1 | 208561472 | 208561883 | 208561628 | 44 | 55 | 2  | 19.40034477 | 2.07E-15    | HHAT     | ENSG00000054392 |
| 1 | 208569060 | 208569339 | 208569199 | 11 | 14 | 3  | 3.897390691 | 0.00295882  | HHAT     | ENSG00000054392 |
| 1 | 208859458 | 208859637 | 208859547 | 8  | 8  | 2  | 3.117912553 | 0.0283184   | HHAT     | ENSG00000054392 |
| 1 | 209817263 | 209817751 | 209817479 | 24 | 42 | 1  | 22.34503996 | 1.13E-12    | SLC30A1  | ENSG00000170385 |
| 1 | 210836158 | 210836705 | 210836526 | 54 | 68 | 4  | 14.34239774 | 3.43E-17    | ATF3     | ENSG00000162772 |
| 1 | 212456847 | 212457048 | 212456974 | 11 | 11 | 3  | 3.117912553 | 0.0146045   | SMYD2    | ENSG00000143499 |

|   |           |           |           |     |     |    |             |             |       |                 |
|---|-----------|-----------|-----------|-----|-----|----|-------------|-------------|-------|-----------------|
| 1 | 212679379 | 212679885 | 212679611 | 238 | 282 | 2  | 98.04102805 | 2.76E-84    |       | ENSG00000213036 |
| 1 | 212879905 | 212880085 | 212879946 | 9   | 9   | 4  | 2.078608368 | 0.0785659   | CENPF | ENSG00000117724 |
| 1 | 212954213 | 212954459 | 212954361 | 8   | 10  | 0  | 11.43234603 | 0.000394183 | CENPF | ENSG00000117724 |
| 1 | 213017629 | 213017808 | 213017765 | 9   | 9   | 1  | 5.196520921 | 0.00490062  |       | ENSG00000185221 |
| 1 | 213044910 | 213045173 | 213045060 | 9   | 10  | 1  | 5.716173013 | 0.00260397  |       | ENSG00000185221 |
| 1 | 213048969 | 213049272 | 213049120 | 8   | 11  | 1  | 6.235825105 | 0.0013754   |       | ENSG00000185221 |
| 1 | 213103095 | 213103307 | 213103178 | 10  | 10  | 5  | 1.905391004 | 0.0915982   |       | ENSG00000185221 |
| 1 | 213241571 | 213242023 | 213241847 | 28  | 41  | 4  | 8.730155148 | 1.21E-09    | KCNK2 | ENSG00000082482 |
| 1 | 213243774 | 213244056 | 213243927 | 9   | 12  | 6  | 1.930136342 | 0.071303    | KCNK2 | ENSG00000082482 |
| 1 | 213354005 | 213354425 | 213354153 | 10  | 17  | 6  | 2.672496474 | 0.00882337  | KCNK2 | ENSG00000082482 |
| 1 | 213433319 | 213433596 | 213433457 | 9   | 9   | 1  | 5.196520921 | 0.00490062  | KCNK2 | ENSG00000082482 |
| 1 | 213456658 | 213456872 | 213456765 | 8   | 8   | 1  | 4.676868829 | 0.0091584   | KCNK2 | ENSG00000082482 |
| 1 | 213507658 | 213507914 | 213507803 | 9   | 12  | 3  | 3.377738599 | 0.00867157  |       | ENSG00000217162 |
| 1 | 213722102 | 213722434 | 213722263 | 10  | 13  | 8  | 1.616695398 | 0.123553    | KCTD3 | ENSG00000136636 |
| 1 | 213763564 | 213763772 | 213763668 | 8   | 9   | 4  | 2.078608368 | 0.0785659   | KCTD3 | ENSG00000136636 |
| 1 | 213771887 | 213772101 | 213771994 | 9   | 10  | 4  | 2.286469205 | 0.0509017   | KCTD3 | ENSG00000136636 |
| 1 | 213807011 | 213807385 | 213807198 | 8   | 16  | 7  | 2.208521392 | 0.0257604   | KCTD3 | ENSG00000136636 |
| 1 | 213807986 | 213808338 | 213808162 | 8   | 13  | 8  | 1.616695398 | 0.123553    | KCTD3 | ENSG00000136636 |
| 1 | 213810327 | 213810589 | 213810458 | 8   | 11  | 1  | 6.235825105 | 0.0013754   | KCTD3 | ENSG00000136636 |
| 1 | 213886980 | 213887229 | 213887104 | 8   | 9   | 3  | 2.598260461 | 0.0397929   |       | ENSG00000202498 |
| 1 | 213931371 | 213931568 | 213931449 | 8   | 9   | 4  | 2.078608368 | 0.0785659   |       | ENSG00000202498 |
| 1 | 214007278 | 214007535 | 214007406 | 8   | 10  | 4  | 2.286469205 | 0.0509017   |       | ENSG00000202498 |
| 1 | 214153069 | 214153249 | 214153159 | 8   | 9   | 2  | 3.464347281 | 0.0163838   |       | ENSG00000202498 |
| 1 | 214327885 | 214328087 | 214328008 | 8   | 9   | 5  | 1.73217364  | 0.133894    |       | ENSG00000216335 |
| 1 | 214778125 | 214778396 | 214778266 | 8   | 9   | 1  | 5.196520921 | 0.00490062  | USH2A | ENSG00000042781 |
| 1 | 214862042 | 214862258 | 214862150 | 9   | 11  | 2  | 4.157216737 | 0.0052913   | ESRRG | ENSG00000196482 |
| 1 | 214946455 | 214946697 | 214946562 | 11  | 11  | 3  | 3.117912553 | 0.0146045   | ESRRG | ENSG00000196482 |
| 1 | 215074586 | 215074773 | 215074679 | 9   | 9   | 2  | 3.464347281 | 0.0163838   | ESRRG | ENSG00000196482 |
| 1 | 215124614 | 215124942 | 215124790 | 8   | 12  | 6  | 1.930136342 | 0.071303    | ESRRG | ENSG00000196482 |
| 1 | 215137616 | 215137804 | 215137761 | 8   | 8   | 3  | 2.338434415 | 0.0641221   | ESRRG | ENSG00000196482 |
| 1 | 215318226 | 215318662 | 215318396 | 18  | 26  | 5  | 4.676868829 | 3.65E-05    | ESRRG | ENSG00000196482 |
| 1 | 215359653 | 215359875 | 215359764 | 9   | 10  | 10 | 1.039304184 | 0.464387    | ESRRG | ENSG00000196482 |
| 1 | 215366290 | 215366588 | 215366459 | 8   | 10  | 4  | 2.286469205 | 0.0509017   | ESRRG | ENSG00000196482 |
| 1 | 215413713 | 215413956 | 215413789 | 8   | 10  | 2  | 3.810782009 | 0.00936112  | ESRRG | ENSG00000196482 |

|   |           |           |           |     |     |    |             |             |         |                 |
|---|-----------|-----------|-----------|-----|-----|----|-------------|-------------|---------|-----------------|
| 1 | 215516237 | 215516465 | 215516351 | 8   | 8   | 2  | 3.117912553 | 0.0283184   |         | ENSG00000201753 |
| 1 | 215531337 | 215531530 | 215531433 | 8   | 9   | 1  | 5.196520921 | 0.00490062  |         | ENSG00000201753 |
| 1 | 215551092 | 215551380 | 215551243 | 9   | 10  | 3  | 2.858086507 | 0.0242838   |         | ENSG00000201753 |
| 1 | 215612149 | 215612459 | 215612273 | 9   | 13  | 12 | 1.11925066  | 0.384109    |         | ENSG00000201753 |
| 1 | 215664833 | 215665154 | 215665007 | 11  | 15  | 3  | 4.157216737 | 0.00170423  |         | ENSG00000201753 |
| 1 | 215733361 | 215733587 | 215733468 | 8   | 9   | 5  | 1.73217364  | 0.133894    | GPATCH2 | ENSG00000092978 |
| 1 | 215739210 | 215739504 | 215739366 | 9   | 12  | 5  | 2.251825733 | 0.0404733   | GPATCH2 | ENSG00000092978 |
| 1 | 215814622 | 215814945 | 215814783 | 18  | 21  | 8  | 2.540521339 | 0.00602138  | GPATCH2 | ENSG00000092978 |
| 1 | 215914964 | 215915143 | 215915059 | 8   | 8   | 2  | 3.117912553 | 0.0283184   | SPATA17 | ENSG00000162814 |
| 1 | 216193312 | 216193717 | 216193569 | 13  | 21  | 16 | 1.344981885 | 0.176214    | UBBP2   | ENSG00000220297 |
| 1 | 216194028 | 216194231 | 216194129 | 8   | 9   | 9  | 1.039304184 | 0.466079    | UBBP2   | ENSG00000220297 |
| 1 | 216417919 | 216418211 | 216418050 | 9   | 10  | 0  | 11.43234603 | 0.000394183 |         | ENSG00000201493 |
| 1 | 216440793 | 216440982 | 216440881 | 10  | 11  | 1  | 6.235825105 | 0.0013754   |         | ENSG00000201493 |
| 1 | 216457804 | 216458024 | 216457934 | 8   | 10  | 0  | 11.43234603 | 0.000394183 | RRP15   | ENSG00000067533 |
| 1 | 216478616 | 216478795 | 216478733 | 8   | 8   | 2  | 3.117912553 | 0.0283184   | RRP15   | ENSG00000067533 |
| 1 | 216498250 | 216498582 | 216498427 | 8   | 9   | 3  | 2.598260461 | 0.0397929   | RRP15   | ENSG00000067533 |
| 1 | 216524669 | 216525459 | 216525272 | 15  | 38  | 15 | 2.533303949 | 0.00045729  | RRP15   | ENSG00000067533 |
| 1 | 216601946 | 216602183 | 216602031 | 8   | 9   | 6  | 1.484720263 | 0.204387    | TGFB2   | ENSG00000092969 |
| 1 | 216606731 | 216606952 | 216606906 | 10  | 10  | 3  | 2.858086507 | 0.0242838   | TGFB2   | ENSG00000092969 |
| 1 | 216620409 | 216621054 | 216620588 | 19  | 35  | 12 | 2.878073126 | 0.000220273 | TGFB2   | ENSG00000092969 |
| 1 | 216621491 | 216621876 | 216621697 | 9   | 15  | 8  | 1.847651883 | 0.0631662   | TGFB2   | ENSG00000092969 |
| 1 | 216649775 | 216650159 | 216649845 | 9   | 16  | 9  | 1.766817113 | 0.0700694   | TGFB2   | ENSG00000092969 |
| 1 | 216681038 | 216681240 | 216681140 | 8   | 8   | 2  | 3.117912553 | 0.0283184   |         | ENSG00000222824 |
| 1 | 216699729 | 216700335 | 216700083 | 8   | 22  | 11 | 1.991999686 | 0.0221672   |         | ENSG00000222824 |
| 1 | 216733125 | 216733369 | 216733242 | 8   | 8   | 1  | 4.676868829 | 0.0091584   |         | ENSG00000222824 |
| 1 | 216761642 | 216761858 | 216761750 | 8   | 8   | 11 | 0.779478138 | 0.719708    |         | ENSG00000222824 |
| 1 | 216814134 | 216814333 | 216814233 | 8   | 8   | 6  | 1.336248237 | 0.277651    |         | ENSG00000212610 |
| 1 | 216840792 | 216841443 | 216841173 | 172 | 217 | 6  | 32.36690174 | 1.01E-58    |         | ENSG00000212610 |
| 1 | 216859016 | 216859312 | 216859157 | 11  | 12  | 4  | 2.702190879 | 0.0203088   |         | ENSG00000212610 |
| 1 | 216874210 | 216874405 | 216874282 | 8   | 9   | 0  | 10.39304184 | 0.000803859 |         | ENSG00000212610 |
| 1 | 216916820 | 216917002 | 216916911 | 8   | 8   | 4  | 1.870747532 | 0.118863    |         | ENSG00000212610 |
| 1 | 216949800 | 216949979 | 216949889 | 8   | 8   | 2  | 3.117912553 | 0.0283184   |         | ENSG00000212610 |
| 1 | 217051720 | 217052044 | 217051872 | 8   | 12  | 6  | 1.930136342 | 0.071303    |         | ENSG00000218763 |
| 1 | 217056993 | 217057182 | 217057064 | 8   | 8   | 2  | 3.117912553 | 0.0283184   |         | ENSG00000218763 |



|   |           |           |           |    |    |    |             |             |         |                 |
|---|-----------|-----------|-----------|----|----|----|-------------|-------------|---------|-----------------|
| 1 | 217307264 | 217307453 | 217307358 | 8  | 8  | 0  | 9.353737658 | 0.00163931  | LYPLAL1 | ENSG00000143353 |
| 1 | 217361916 | 217362111 | 217362012 | 8  | 9  | 0  | 10.39304184 | 0.000803859 | LYPLAL1 | ENSG00000143353 |
| 1 | 217414580 | 217414782 | 217414704 | 8  | 9  | 2  | 3.464347281 | 0.0163838   | LYPLAL1 | ENSG00000143353 |
| 1 | 217467013 | 217467228 | 217467120 | 8  | 10 | 2  | 3.810782009 | 0.00936112  |         | ENSG00000220015 |
| 1 | 217519352 | 217519547 | 217519522 | 9  | 10 | 5  | 1.905391004 | 0.0915982   |         | ENSG00000220015 |
| 1 | 217618459 | 217618681 | 217618514 | 8  | 10 | 3  | 2.858086507 | 0.0242838   |         | ENSG00000222634 |
| 1 | 217656563 | 217656786 | 217656674 | 9  | 10 | 4  | 2.286469205 | 0.0509017   |         | ENSG00000222634 |
| 1 | 217670467 | 217670661 | 217670564 | 8  | 8  | 2  | 3.117912553 | 0.0283184   |         | ENSG00000222634 |
| 1 | 217753331 | 217753530 | 217753381 | 8  | 8  | 5  | 1.558956276 | 0.191397    | ZC3H11B | ENSG00000215817 |
| 1 | 217759183 | 217759500 | 217759341 | 8  | 11 | 3  | 3.117912553 | 0.0146045   | ZC3H11B | ENSG00000215817 |
| 1 | 217770801 | 217770983 | 217770925 | 8  | 9  | 6  | 1.484720263 | 0.204387    | ZC3H11B | ENSG00000215817 |
| 1 | 217770997 | 217771337 | 217771167 | 10 | 16 | 11 | 1.472347594 | 0.147517    | ZC3H11B | ENSG00000215817 |
| 1 | 217777321 | 217777539 | 217777440 | 9  | 10 | 3  | 2.858086507 | 0.0242838   | ZC3H11B | ENSG00000215817 |
| 1 | 217784076 | 217784276 | 217784205 | 8  | 10 | 2  | 3.810782009 | 0.00936112  | ZC3H11B | ENSG00000215817 |
| 1 | 217825750 | 217826255 | 217825992 | 28 | 44 | 7  | 5.846086036 | 1.65E-08    | ZC3H11B | ENSG00000215817 |
| 1 | 218576349 | 218576616 | 218576491 | 17 | 18 | 1  | 9.87338975  | 1.41E-05    |         | ENSG00000218105 |
| 1 | 220127134 | 220127331 | 220127232 | 8  | 9  | 0  | 10.39304184 | 0.000803859 |         | ENSG00000200033 |
| 1 | 221045849 | 221046161 | 221046019 | 14 | 16 | 0  | 17.66817113 | 5.48E-06    | DISP1   | ENSG00000154309 |
| 1 | 221661759 | 221661977 | 221661868 | 10 | 10 | 0  | 11.43234603 | 0.000394183 | C1orf65 | ENSG00000178395 |
| 1 | 221730956 | 221731135 | 221731015 | 8  | 8  | 1  | 4.676868829 | 0.0091584   |         | ENSG00000218790 |
| 1 | 221962389 | 221962758 | 221962585 | 20 | 25 | 1  | 13.5109544  | 1.28E-07    | CAPN2   | ENSG00000162909 |
| 1 | 222584699 | 222584881 | 222584836 | 8  | 8  | 6  | 1.336248237 | 0.277651    | NVL     | ENSG00000143748 |
| 1 | 224075133 | 224075514 | 224075310 | 27 | 34 | 2  | 12.12521548 | 2.69E-09    | EPHX1   | ENSG00000143819 |
| 1 | 224080750 | 224080936 | 224080857 | 8  | 9  | 1  | 5.196520921 | 0.00490062  | EPHX1   | ENSG00000143819 |
| 1 | 224733966 | 224734145 | 224734021 | 8  | 8  | 2  | 3.117912553 | 0.0283184   |         | ENSG00000177770 |
| 1 | 226042007 | 226042333 | 226042170 | 8  | 10 | 1  | 5.716173013 | 0.00260397  |         | ENSG00000185888 |
| 1 | 226200809 | 226201055 | 226200949 | 8  | 10 | 1  | 5.716173013 | 0.00260397  | WNT9A   | ENSG00000143816 |
| 1 | 226923809 | 226923989 | 226923893 | 8  | 8  | 4  | 1.870747532 | 0.118863    | RHOA    | ENSG00000116574 |
| 1 | 227240538 | 227240724 | 227240631 | 9  | 9  | 3  | 2.598260461 | 0.0397929   |         | ENSG00000181413 |
| 1 | 227826278 | 227826490 | 227826384 | 9  | 9  | 0  | 10.39304184 | 0.000803859 | TAF5L   | ENSG00000135801 |
| 1 | 228439440 | 228439619 | 228439529 | 8  | 8  | 0  | 9.353737658 | 0.00163931  |         | ENSG00000203257 |
| 1 | 228830198 | 228830491 | 228830344 | 21 | 23 | 1  | 12.47165021 | 4.94E-07    | COG2    | ENSG00000135775 |
| 1 | 229374005 | 229374296 | 229374150 | 19 | 21 | 3  | 5.716173013 | 5.37E-05    | TRIM67  | ENSG00000119283 |
| 1 | 229980491 | 229980678 | 229980536 | 8  | 8  | 3  | 2.338434415 | 0.0641221   | DISC1   | ENSG00000162946 |

|    |           |           |           |     |     |    |             |             |           |                 |
|----|-----------|-----------|-----------|-----|-----|----|-------------|-------------|-----------|-----------------|
| 1  | 230580590 | 230580804 | 230580711 | 8   | 8   | 3  | 2.338434415 | 0.0641221   | SIPA1L2   | ENSG00000116991 |
| 1  | 231155173 | 231155653 | 231155433 | 54  | 69  | 1  | 36.37564645 | 7.95E-21    | C1orf57   | ENSG00000135778 |
| 1  | 232595592 | 232595898 | 232595745 | 16  | 19  | 7  | 2.598260461 | 0.00730518  | C1orf31   | ENSG00000168275 |
| 1  | 232820753 | 232821252 | 232820957 | 100 | 122 | 0  | 127.8344147 | 8.58E-39    | IRF2BP2   | ENSG00000168264 |
| 1  | 233899938 | 233900207 | 233900041 | 11  | 12  | 3  | 3.377738599 | 0.00867157  | GNG4      | ENSG00000168243 |
| 1  | 233904987 | 233905349 | 233905166 | 36  | 43  | 0  | 45.72938411 | 2.41E-14    | GNG4      | ENSG00000168243 |
| 1  | 235024823 | 235025091 | 235024950 | 8   | 11  | 4  | 2.494330042 | 0.0324033   | MTR       | ENSG00000116984 |
| 1  | 239338266 | 239338445 | 239338312 | 8   | 9   | 2  | 3.464347281 | 0.0163838   | RGS7      | ENSG00000182901 |
| 1  | 241663006 | 241663268 | 241663177 | 8   | 10  | 1  | 5.716173013 | 0.00260397  |           | ENSG00000217361 |
| 1  | 242469357 | 242469706 | 242469531 | 37  | 42  | 1  | 22.34503996 | 1.13E-12    | C1orf100  | ENSG00000173728 |
| 1  | 242957694 | 242957883 | 242957851 | 8   | 8   | 3  | 2.338434415 | 0.0641221   |           | ENSG00000218614 |
| 1  | 242965256 | 242965797 | 242965530 | 97  | 124 | 0  | 129.913023  | 2.06E-39    |           | ENSG00000218614 |
| 1  | 243199654 | 243199833 | 243199743 | 8   | 8   | 3  | 2.338434415 | 0.0641221   | EFCAB2    | ENSG00000203666 |
| 1  | 243719765 | 243720063 | 243719894 | 14  | 17  | 2  | 6.235825105 | 0.000146695 | KIF26B    | ENSG00000162849 |
| 1  | 244231087 | 244231422 | 244231254 | 12  | 17  | 0  | 18.70747532 | 2.69E-06    | SMYD3     | ENSG00000185420 |
| 1  | 244242265 | 244242444 | 244242354 | 8   | 8   | 0  | 9.353737658 | 0.00163931  | SMYD3     | ENSG00000185420 |
| 1  | 245620120 | 245620321 | 245620220 | 8   | 9   | 3  | 2.598260461 | 0.0397929   | NLRP3     | ENSG00000162711 |
| 1  | 247087141 | 247087333 | 247087240 | 8   | 10  | 1  | 5.716173013 | 0.00260397  | SH3BP5L   | ENSG00000175137 |
| 1  | 247134654 | 247135105 | 247134833 | 12  | 19  | 7  | 2.598260461 | 0.00730518  | ZNF692    | ENSG00000171163 |
| 10 | 234937    | 235121    | 235029    | 8   | 8   | 10 | 0.850339787 | 0.645072    | ZMYND11   | ENSG00000015171 |
| 10 | 270710    | 270943    | 270833    | 11  | 14  | 3  | 3.897390691 | 0.00295882  |           | ENSG00000201861 |
| 10 | 271298    | 271603    | 271450    | 9   | 12  | 2  | 4.503651465 | 0.002963    |           | ENSG00000201861 |
| 10 | 406434    | 406713    | 406573    | 9   | 12  | 4  | 2.702190879 | 0.0203088   | DIP2C     | ENSG00000151240 |
| 10 | 409427    | 409840    | 409601    | 12  | 21  | 2  | 7.621564018 | 1.21E-05    | DIP2C     | ENSG00000151240 |
| 10 | 471208    | 471431    | 471372    | 8   | 9   | 1  | 5.196520921 | 0.00490062  |           | ENSG00000209361 |
| 10 | 472227    | 472439    | 472333    | 8   | 8   | 4  | 1.870747532 | 0.118863    |           | ENSG00000209361 |
| 10 | 556389    | 556672    | 556540    | 17  | 20  | 5  | 3.637564645 | 0.000902929 | DIP2C     | ENSG00000151240 |
| 10 | 582844    | 583123    | 582975    | 20  | 20  | 6  | 3.117912553 | 0.00218114  | DIP2C     | ENSG00000151240 |
| 10 | 609027    | 609208    | 609117    | 8   | 8   | 5  | 1.558956276 | 0.191397    | C10orf108 | ENSG00000180525 |
| 10 | 648434    | 648718    | 648576    | 8   | 10  | 6  | 1.63319229  | 0.146906    | C10orf108 | ENSG00000180525 |
| 10 | 649342    | 649655    | 649498    | 9   | 13  | 11 | 1.212521548 | 0.309909    | C10orf108 | ENSG00000180525 |
| 10 | 1024162   | 1024488   | 1024327   | 10  | 15  | 0  | 16.62886695 | 1.12E-05    | GTPBP4    | ENSG00000107937 |
| 10 | 1757152   | 1757554   | 1757352   | 39  | 51  | 3  | 13.5109544  | 2.96E-13    | ADARB2    | ENSG00000185736 |
| 10 | 3127575   | 3127780   | 3127717   | 8   | 9   | 1  | 5.196520921 | 0.00490062  | PFKP      | ENSG00000067057 |

|    |         |         |         |    |    |    |             |             |         |                 |
|----|---------|---------|---------|----|----|----|-------------|-------------|---------|-----------------|
| 10 | 3159268 | 3159551 | 3159387 | 9  | 12 | 0  | 13.5109544  | 9.48E-05    | PFKP    | ENSG00000067057 |
| 10 | 3272633 | 3272820 | 3272726 | 8  | 8  | 4  | 1.870747532 | 0.118863    | PITRM1  | ENSG00000107959 |
| 10 | 3499615 | 3499821 | 3499727 | 8  | 8  | 0  | 9.353737658 | 0.00163931  | PITRM1  | ENSG00000107959 |
| 10 | 4554669 | 4554918 | 4554793 | 8  | 8  | 3  | 2.338434415 | 0.0641221   |         | ENSG00000207124 |
| 10 | 4639761 | 4639985 | 4639873 | 8  | 8  | 0  | 9.353737658 | 0.00163931  |         | ENSG00000207124 |
| 10 | 4681065 | 4681245 | 4681155 | 9  | 9  | 1  | 5.196520921 | 0.00490062  |         | ENSG00000207124 |
| 10 | 4943362 | 4943544 | 4943495 | 10 | 10 | 0  | 11.43234603 | 0.000394183 |         | ENSG00000151631 |
| 10 | 5122015 | 5122332 | 5122183 | 9  | 12 | 2  | 4.503651465 | 0.002963    |         | ENSG00000209373 |
| 10 | 5361195 | 5361465 | 5361330 | 11 | 13 | 5  | 2.425043097 | 0.0262442   |         | ENSG00000216680 |
| 10 | 5525568 | 5526039 | 5525841 | 16 | 28 | 15 | 1.883738834 | 0.0179382   | CALML5  | ENSG00000178372 |
| 10 | 5532692 | 5532893 | 5532792 | 8  | 8  | 0  | 9.353737658 | 0.00163931  | CALML5  | ENSG00000178372 |
| 10 | 5535462 | 5535718 | 5535583 | 20 | 22 | 2  | 7.967998746 | 6.43E-06    | CALML5  | ENSG00000178372 |
| 10 | 5895258 | 5895462 | 5895360 | 9  | 10 | 4  | 2.286469205 | 0.0509017   | GDI2    | ENSG00000057608 |
| 10 | 5895872 | 5896067 | 5895969 | 8  | 8  | 0  | 9.353737658 | 0.00163931  | GDI2    | ENSG00000057608 |
| 10 | 5955518 | 5955777 | 5955624 | 10 | 11 | 5  | 2.078608368 | 0.0614303   | ANKRD16 | ENSG00000134461 |
| 10 | 6060224 | 6060510 | 6060355 | 11 | 12 | 0  | 13.5109544  | 9.48E-05    | IL15RA  | ENSG00000134470 |
| 10 | 6655431 | 6655804 | 6655636 | 10 | 16 | 0  | 17.66817113 | 5.48E-06    | PRKCQ   | ENSG00000065675 |
| 10 | 6783248 | 6783511 | 6783379 | 8  | 9  | 0  | 10.39304184 | 0.000803859 | PRKCQ   | ENSG00000065675 |
| 10 | 7314149 | 7314337 | 7314264 | 8  | 9  | 0  | 10.39304184 | 0.000803859 |         | ENSG00000220641 |
| 10 | 7315300 | 7315865 | 7315582 | 12 | 24 | 4  | 5.196520921 | 3.42E-05    |         | ENSG00000220641 |
| 10 | 7493136 | 7493375 | 7493255 | 9  | 10 | 4  | 2.286469205 | 0.0509017   | SFMBT2  | ENSG00000198879 |
| 10 | 7900103 | 7900498 | 7900412 | 9  | 14 | 9  | 1.558956276 | 0.132279    | TAF3    | ENSG00000165632 |
| 10 | 8132637 | 8132816 | 8132727 | 8  | 9  | 3  | 2.598260461 | 0.0397929   |         | ENSG00000197308 |
| 10 | 8135948 | 8136150 | 8136049 | 8  | 9  | 7  | 1.29913023  | 0.286504    |         | ENSG00000197308 |
| 10 | 8136513 | 8136715 | 8136680 | 8  | 8  | 5  | 1.558956276 | 0.191397    | GATA3   | ENSG00000107485 |
| 10 | 8142305 | 8142504 | 8142433 | 9  | 9  | 3  | 2.598260461 | 0.0397929   | GATA3   | ENSG00000107485 |
| 10 | 8166765 | 8167008 | 8166878 | 9  | 9  | 3  | 2.598260461 | 0.0397929   | GATA3   | ENSG00000107485 |
| 10 | 8382962 | 8383162 | 8383045 | 8  | 9  | 5  | 1.73217364  | 0.133894    |         | ENSG00000217532 |
| 10 | 8489505 | 8489810 | 8489647 | 9  | 12 | 1  | 6.755477198 | 0.000722752 |         | ENSG00000220584 |
| 10 | 8590487 | 8590682 | 8590566 | 9  | 10 | 3  | 2.858086507 | 0.0242838   |         | ENSG00000220584 |
| 10 | 8710290 | 8710721 | 8710469 | 11 | 22 | 8  | 2.655999582 | 0.0039122   |         | ENSG00000219750 |
| 10 | 8760863 | 8761101 | 8760982 | 10 | 10 | 1  | 5.716173013 | 0.00260397  |         | ENSG00000212505 |
| 10 | 8808039 | 8808330 | 8808180 | 12 | 15 | 4  | 3.32577339  | 0.00462646  |         | ENSG00000212505 |
| 10 | 8845476 | 8845704 | 8845586 | 11 | 11 | 1  | 6.235825105 | 0.0013754   |         | ENSG00000212505 |

|    |          |          |          |    |    |    |             |             |          |                 |
|----|----------|----------|----------|----|----|----|-------------|-------------|----------|-----------------|
| 10 | 8846137  | 8846503  | 8846306  | 52 | 58 | 2  | 20.43964896 | 2.70E-16    |          | ENSG00000212505 |
| 10 | 8943598  | 8943908  | 8943753  | 16 | 18 | 7  | 2.468347438 | 0.0112499   |          | ENSG00000212505 |
| 10 | 8972707  | 8972975  | 8972812  | 10 | 12 | 4  | 2.702190879 | 0.0203088   |          | ENSG00000212505 |
| 10 | 9053462  | 9053766  | 9053614  | 19 | 22 | 7  | 2.98799953  | 0.00188278  |          | ENSG00000212505 |
| 10 | 9057601  | 9057916  | 9057758  | 12 | 15 | 6  | 2.375552421 | 0.0212094   |          | ENSG00000212505 |
| 10 | 9074862  | 9075041  | 9074951  | 8  | 8  | 1  | 4.676868829 | 0.0091584   |          | ENSG00000212505 |
| 10 | 9120202  | 9120395  | 9120290  | 8  | 10 | 3  | 2.858086507 | 0.0242838   |          | ENSG00000212505 |
| 10 | 9144188  | 9144403  | 9144280  | 8  | 9  | 1  | 5.196520921 | 0.00490062  |          | ENSG00000212505 |
| 10 | 9151165  | 9151451  | 9151308  | 9  | 11 | 4  | 2.494330042 | 0.0324033   |          | ENSG00000212505 |
| 10 | 9231242  | 9231706  | 9231340  | 11 | 20 | 7  | 2.728173484 | 0.00469378  |          | ENSG00000212505 |
| 10 | 9269986  | 9270266  | 9270126  | 11 | 13 | 2  | 4.850086193 | 0.00164564  |          |                 |
| 10 | 9270289  | 9270944  | 9270691  | 53 | 76 | 17 | 4.445912344 | 4.14E-11    |          |                 |
| 10 | 9291092  | 9291352  | 9291222  | 11 | 11 | 10 | 1.133786383 | 0.380636    |          |                 |
| 10 | 9397251  | 9397541  | 9397396  | 8  | 8  | 0  | 9.353737658 | 0.00163931  |          | ENSG00000203336 |
| 10 | 10039597 | 10039777 | 10039749 | 8  | 8  | 5  | 1.558956276 | 0.191397    |          | ENSG00000218997 |
| 10 | 11153550 | 11154089 | 11153910 | 18 | 29 | 6  | 4.45416079  | 2.16E-05    | CUGBP2   | ENSG00000048740 |
| 10 | 11670129 | 11670414 | 11670271 | 9  | 11 | 1  | 6.235825105 | 0.0013754   |          | ENSG00000181437 |
| 10 | 11769358 | 11769646 | 11769502 | 14 | 16 | 3  | 4.417042783 | 0.00097367  | ECHDC3   | ENSG00000134463 |
| 10 | 11793844 | 11794105 | 11793974 | 9  | 10 | 1  | 5.716173013 | 0.00260397  | ECHDC3   | ENSG00000134463 |
| 10 | 11956514 | 11956936 | 11956788 | 11 | 19 | 6  | 2.969440526 | 0.0035096   | C10orf47 | ENSG00000148426 |
| 10 | 12124916 | 12125102 | 12125011 | 9  | 9  | 2  | 3.464347281 | 0.0163838   | UPF2     | ENSG00000151461 |
| 10 | 12277956 | 12278189 | 12278108 | 8  | 11 | 5  | 2.078608368 | 0.0614303   | NUDT5    | ENSG00000165609 |
| 10 | 12687800 | 12688003 | 12687901 | 12 | 12 | 4  | 2.702190879 | 0.0203088   |          | ENSG00000221331 |
| 10 | 12747810 | 12748119 | 12747974 | 10 | 11 | 4  | 2.494330042 | 0.0324033   |          | ENSG00000221331 |
| 10 | 12802694 | 12802897 | 12802794 | 8  | 8  | 4  | 1.870747532 | 0.118863    |          | ENSG00000221331 |
| 10 | 12955158 | 12955400 | 12955281 | 9  | 10 | 8  | 1.27026067  | 0.293854    |          | ENSG00000212499 |
| 10 | 12957223 | 12957419 | 12957324 | 8  | 8  | 4  | 1.870747532 | 0.118863    |          | ENSG00000212499 |
| 10 | 12963867 | 12964198 | 12964032 | 10 | 13 | 6  | 2.078608368 | 0.0483393   |          | ENSG00000212499 |
| 10 | 13243065 | 13243449 | 13243286 | 11 | 18 | 1  | 9.87338975  | 1.41E-05    | MCM10    | ENSG00000065328 |
| 10 | 13353476 | 13353699 | 13353594 | 8  | 9  | 2  | 3.464347281 | 0.0163838   | PHYH     | ENSG00000107537 |
| 10 | 13431138 | 13431318 | 13431159 | 8  | 8  | 3  | 2.338434415 | 0.0641221   | SEPHS1   | ENSG00000086475 |
| 10 | 13573720 | 13573959 | 13573842 | 13 | 15 | 8  | 1.847651883 | 0.0631662   | BEND7    | ENSG00000165626 |
| 10 | 13594134 | 13594315 | 13594218 | 8  | 8  | 4  | 1.870747532 | 0.118863    |          | ENSG00000202508 |
| 10 | 13611694 | 13611915 | 13611845 | 11 | 12 | 1  | 6.755477198 | 0.000722752 | BEND7    | ENSG00000165626 |

|    |          |          |          |    |    |    |             |             |           |                 |
|----|----------|----------|----------|----|----|----|-------------|-------------|-----------|-----------------|
| 10 | 13668667 | 13669068 | 13668813 | 14 | 20 | 11 | 1.818782322 | 0.04395     | PRPF18    | ENSG00000165630 |
| 10 | 13742486 | 13742720 | 13742626 | 9  | 12 | 2  | 4.503651465 | 0.002963    |           | ENSG00000222235 |
| 10 | 13840330 | 13840742 | 13840540 | 64 | 81 | 3  | 21.30573578 | 5.68E-22    |           | ENSG00000199407 |
| 10 | 13841103 | 13841369 | 13841238 | 10 | 11 | 0  | 12.47165021 | 0.000193293 |           | ENSG00000199407 |
| 10 | 13953031 | 13953254 | 13953159 | 10 | 11 | 3  | 3.117912553 | 0.0146045   |           | ENSG00000215227 |
| 10 | 14156478 | 14156670 | 14156574 | 8  | 8  | 3  | 2.338434415 | 0.0641221   | FRMD4A    | ENSG00000151474 |
| 10 | 14734052 | 14734293 | 14734174 | 10 | 10 | 6  | 1.63319229  | 0.146906    |           | ENSG00000201766 |
| 10 | 14735253 | 14735481 | 14735327 | 11 | 11 | 3  | 3.117912553 | 0.0146045   |           | ENSG00000201766 |
| 10 | 14735919 | 14736278 | 14736099 | 15 | 21 | 4  | 4.572938411 | 0.000186332 |           | ENSG00000201766 |
| 10 | 15041715 | 15041947 | 15041818 | 8  | 9  | 1  | 5.196520921 | 0.00490062  | MEIG1     | ENSG00000197889 |
| 10 | 15166253 | 15166442 | 15166362 | 9  | 9  | 1  | 5.196520921 | 0.00490062  | ACBD7     | ENSG00000176244 |
| 10 | 15205777 | 15206336 | 15206082 | 55 | 69 | 0  | 72.7512929  | 2.17E-22    | RPP38     | ENSG00000152464 |
| 10 | 16278876 | 16279254 | 16279052 | 12 | 17 | 1  | 9.353737658 | 2.73E-05    |           | ENSG00000201260 |
| 10 | 16519057 | 16519267 | 16519136 | 8  | 10 | 0  | 11.43234603 | 0.000394183 | PTER      | ENSG00000165983 |
| 10 | 16872175 | 16872354 | 16872264 | 8  | 8  | 1  | 4.676868829 | 0.0091584   | RSU1      | ENSG00000148484 |
| 10 | 17329321 | 17329649 | 17329480 | 36 | 40 | 1  | 21.30573578 | 4.48E-12    | VIM       | ENSG0000026025  |
| 10 | 17430573 | 17430794 | 17430683 | 8  | 9  | 1  | 5.196520921 | 0.00490062  |           | ENSG00000204832 |
| 10 | 17470157 | 17470589 | 17470333 | 15 | 24 | 4  | 5.196520921 | 3.42E-05    |           | ENSG00000204832 |
| 10 | 17536613 | 17536851 | 17536732 | 8  | 10 | 1  | 5.716173013 | 0.00260397  | ST8SIA6   | ENSG00000148488 |
| 10 | 19538232 | 19538483 | 19538357 | 9  | 10 | 10 | 1.039304184 | 0.464387    |           | ENSG00000204741 |
| 10 | 19561365 | 19561649 | 19561498 | 10 | 11 | 2  | 4.157216737 | 0.0052913   |           | ENSG00000204741 |
| 10 | 19575281 | 19575663 | 19575459 | 16 | 22 | 12 | 1.838768941 | 0.0349935   |           | ENSG00000204741 |
| 10 | 20202934 | 20203164 | 20203049 | 8  | 9  | 0  | 10.39304184 | 0.000803859 | PLXDC2    | ENSG00000120594 |
| 10 | 20381686 | 20381865 | 20381734 | 8  | 8  | 2  | 3.117912553 | 0.0283184   | PLXDC2    | ENSG00000120594 |
| 10 | 21513214 | 21513512 | 21513343 | 11 | 14 | 2  | 5.196520921 | 0.000907371 | NEBL      | ENSG00000078114 |
| 10 | 21638381 | 21638560 | 21638470 | 8  | 8  | 1  | 4.676868829 | 0.0091584   |           | ENSG00000207264 |
| 10 | 21663989 | 21664224 | 21664082 | 10 | 12 | 1  | 6.755477198 | 0.000722752 |           | ENSG00000207264 |
| 10 | 21679525 | 21679707 | 21679681 | 8  | 8  | 1  | 4.676868829 | 0.0091584   |           | ENSG00000207264 |
| 10 | 21693383 | 21693763 | 21693507 | 13 | 19 | 3  | 5.196520921 | 0.000174201 |           | ENSG00000216589 |
| 10 | 21756679 | 21757124 | 21756880 | 36 | 47 | 1  | 24.94330042 | 3.55E-14    |           | ENSG00000216589 |
| 10 | 21826202 | 21826381 | 21826304 | 9  | 9  | 2  | 3.464347281 | 0.0163838   | C10orf114 | ENSG00000204682 |
| 10 | 21862666 | 21862854 | 21862784 | 9  | 10 | 2  | 3.810782009 | 0.00936112  | MLLT10    | ENSG00000078403 |
| 10 | 22558357 | 22558763 | 22558522 | 11 | 19 | 5  | 3.464347281 | 0.00150447  |           | ENSG00000218957 |
| 10 | 22961956 | 22962375 | 22962196 | 11 | 19 | 11 | 1.73217364  | 0.0607469   | PIP4K2A   | ENSG00000150867 |

|    |          |          |          |     |     |   |             |             |          |                 |
|----|----------|----------|----------|-----|-----|---|-------------|-------------|----------|-----------------|
| 10 | 22962769 | 22962983 | 22962896 | 8   | 10  | 0 | 11.43234603 | 0.000394183 | PIP4K2A  | ENSG00000150867 |
| 10 | 23010686 | 23010878 | 23010804 | 8   | 8   | 2 | 3.117912553 | 0.0283184   | PIP4K2A  | ENSG00000150867 |
| 10 | 23012370 | 23012590 | 23012499 | 9   | 10  | 5 | 1.905391004 | 0.0915982   | PIP4K2A  | ENSG00000150867 |
| 10 | 23507396 | 23507577 | 23507531 | 8   | 8   | 0 | 9.353737658 | 0.00163931  |          | ENSG00000209517 |
| 10 | 24567468 | 24567708 | 24567622 | 10  | 12  | 3 | 3.377738599 | 0.00867157  | KIAA1217 | ENSG00000120549 |
| 10 | 24584871 | 24585357 | 24585144 | 110 | 138 | 8 | 16.05147573 | 2.06E-33    |          | ENSG00000207930 |
| 10 | 24591949 | 24592145 | 24592021 | 9   | 9   | 1 | 5.196520921 | 0.00490062  |          | ENSG00000207930 |
| 10 | 24617667 | 24618137 | 24617918 | 23  | 36  | 4 | 7.690850963 | 2.68E-08    |          | ENSG00000207930 |
| 10 | 24744658 | 24744839 | 24744748 | 9   | 11  | 1 | 6.235825105 | 0.0013754   | KIAA1217 | ENSG00000120549 |
| 10 | 24867072 | 24867251 | 24867161 | 9   | 10  | 2 | 3.810782009 | 0.00936112  | KIAA1217 | ENSG00000120549 |
| 10 | 25085221 | 25085596 | 25085391 | 21  | 26  | 1 | 14.03060649 | 6.50E-08    | ARHGAP21 | ENSG00000107863 |
| 10 | 25345178 | 25345548 | 25345340 | 13  | 18  | 2 | 6.582259834 | 7.91E-05    | THNSL1   | ENSG00000185875 |
| 10 | 25509832 | 25510022 | 25509969 | 8   | 8   | 1 | 4.676868829 | 0.0091584   | GPR158   | ENSG00000151025 |
| 10 | 25713664 | 25713843 | 25713805 | 8   | 8   | 3 | 2.338434415 | 0.0641221   |          | ENSG00000209533 |
| 10 | 25832529 | 25832770 | 25832662 | 8   | 8   | 1 | 4.676868829 | 0.0091584   |          | ENSG00000222543 |
| 10 | 25837138 | 25837339 | 25837214 | 11  | 12  | 1 | 6.755477198 | 0.000722752 |          | ENSG00000222543 |
| 10 | 26562039 | 26562239 | 26562169 | 8   | 8   | 1 | 4.676868829 | 0.0091584   | GAD2     | ENSG00000136750 |
| 10 | 27152394 | 27152573 | 27152483 | 8   | 8   | 4 | 1.870747532 | 0.118863    |          | ENSG00000206605 |
| 10 | 27189945 | 27190238 | 27190091 | 9   | 12  | 6 | 1.930136342 | 0.071303    | ABI1     | ENSG00000136754 |
| 10 | 27429483 | 27429662 | 27429570 | 8   | 8   | 5 | 1.558956276 | 0.191397    | ANKRD26  | ENSG00000107890 |
| 10 | 27571009 | 27571250 | 27571076 | 9   | 12  | 0 | 13.5109544  | 9.48E-05    | ACBD5    | ENSG00000107897 |
| 10 | 28194168 | 28194484 | 28194323 | 28  | 31  | 5 | 5.542955649 | 2.18E-06    |          | ENSG00000219432 |
| 10 | 28474883 | 28475075 | 28474979 | 8   | 8   | 0 | 9.353737658 | 0.00163931  | MPP7     | ENSG00000150054 |
| 10 | 28613104 | 28613296 | 28613259 | 10  | 10  | 3 | 2.858086507 | 0.0242838   | MPP7     | ENSG00000150054 |
| 10 | 28704534 | 28704880 | 28704743 | 9   | 14  | 5 | 2.598260461 | 0.0167748   |          | ENSG00000209609 |
| 10 | 28739526 | 28739712 | 28739593 | 8   | 8   | 2 | 3.117912553 | 0.0283184   |          | ENSG00000209609 |
| 10 | 28740718 | 28740967 | 28740852 | 9   | 9   | 0 | 10.39304184 | 0.000803859 |          | ENSG00000209609 |
| 10 | 28992897 | 28993211 | 28993054 | 10  | 14  | 4 | 3.117912553 | 0.00766354  |          | ENSG00000207483 |
| 10 | 29007595 | 29007850 | 29007669 | 8   | 12  | 5 | 2.251825733 | 0.0404733   | BAMBI    | ENSG00000095739 |
| 10 | 29043397 | 29043597 | 29043467 | 8   | 8   | 2 | 3.117912553 | 0.0283184   | BAMBI    | ENSG00000095739 |
| 10 | 29126952 | 29127140 | 29127040 | 8   | 8   | 0 | 9.353737658 | 0.00163931  |          | ENSG00000201001 |
| 10 | 29232081 | 29232383 | 29232230 | 8   | 10  | 4 | 2.286469205 | 0.0509017   |          | ENSG00000216946 |
| 10 | 29298837 | 29299057 | 29298943 | 8   | 10  | 1 | 5.716173013 | 0.00260397  |          | ENSG00000216946 |
| 10 | 29320812 | 29321012 | 29320966 | 9   | 10  | 9 | 1.143234603 | 0.378307    |          | ENSG00000216946 |

|    |          |          |          |    |    |   |             |             |          |                 |
|----|----------|----------|----------|----|----|---|-------------|-------------|----------|-----------------|
| 10 | 29421017 | 29421611 | 29421270 | 24 | 36 | 2 | 12.81808494 | 7.17E-10    |          | ENSG00000216946 |
| 10 | 29435250 | 29435601 | 29435425 | 10 | 14 | 3 | 3.897390691 | 0.00295882  | LYZL1    | ENSG00000120563 |
| 10 | 29453781 | 29454231 | 29454013 | 10 | 19 | 7 | 2.598260461 | 0.00730518  | LYZL1    | ENSG00000120563 |
| 10 | 29459156 | 29459440 | 29459298 | 10 | 11 | 0 | 12.47165021 | 0.000193293 | LYZL1    | ENSG00000120563 |
| 10 | 29461531 | 29461859 | 29461703 | 9  | 14 | 5 | 2.598260461 | 0.0167748   | LYZL1    | ENSG00000120563 |
| 10 | 29470141 | 29470321 | 29470231 | 8  | 8  | 5 | 1.558956276 | 0.191397    | LYZL1    | ENSG00000120563 |
| 10 | 29470737 | 29471073 | 29470905 | 8  | 13 | 4 | 2.910051716 | 0.0125532   | LYZL1    | ENSG00000120563 |
| 10 | 29475622 | 29475926 | 29475774 | 8  | 12 | 2 | 4.503651465 | 0.002963    | LYZL1    | ENSG00000120563 |
| 10 | 29959666 | 29959875 | 29959710 | 8  | 10 | 3 | 2.858086507 | 0.0242838   | SVIL     | ENSG00000197321 |
| 10 | 29963158 | 29963380 | 29963269 | 13 | 13 | 0 | 14.55025858 | 4.65E-05    | SVIL     | ENSG00000197321 |
| 10 | 30133158 | 30133380 | 30133269 | 10 | 12 | 0 | 13.5109544  | 9.48E-05    | SVIL     | ENSG00000197321 |
| 10 | 30141160 | 30141371 | 30141265 | 8  | 9  | 5 | 1.73217364  | 0.133894    | SVIL     | ENSG00000197321 |
| 10 | 30280763 | 30280995 | 30280830 | 11 | 12 | 0 | 13.5109544  | 9.48E-05    |          | ENSG00000220159 |
| 10 | 30559129 | 30559464 | 30559296 | 29 | 29 | 1 | 15.58956276 | 8.46E-09    |          | ENSG00000200887 |
| 10 | 30968990 | 30969204 | 30969074 | 10 | 11 | 3 | 3.117912553 | 0.0146045   | LYZL2    | ENSG00000151033 |
| 10 | 31412744 | 31412944 | 31412827 | 8  | 9  | 2 | 3.464347281 | 0.0163838   | ZNF438   | ENSG00000183621 |
| 10 | 32088949 | 32089129 | 32088999 | 8  | 8  | 5 | 1.558956276 | 0.191397    |          | ENSG00000222412 |
| 10 | 32271950 | 32272133 | 32272041 | 8  | 8  | 1 | 4.676868829 | 0.0091584   | ARHGAP12 | ENSG00000165322 |
| 10 | 32399639 | 32399898 | 32399737 | 9  | 10 | 2 | 3.810782009 | 0.00936112  |          | ENSG00000206660 |
| 10 | 32500130 | 32500454 | 32500292 | 14 | 19 | 3 | 5.196520921 | 0.000174201 |          | ENSG00000217094 |
| 10 | 32747707 | 32747886 | 32747752 | 8  | 8  | 0 | 9.353737658 | 0.00163931  |          | ENSG00000209712 |
| 10 | 32775442 | 32775636 | 32775531 | 8  | 8  | 2 | 3.117912553 | 0.0283184   | CCDC7    | ENSG00000216937 |
| 10 | 33116485 | 33116664 | 33116574 | 8  | 8  | 3 | 2.338434415 | 0.0641221   | C10orf68 | ENSG00000150076 |
| 10 | 33361682 | 33361864 | 33361841 | 8  | 9  | 3 | 2.598260461 | 0.0397929   |          | ENSG00000216573 |
| 10 | 33602294 | 33602595 | 33602444 | 10 | 13 | 0 | 14.55025858 | 4.65E-05    |          | ENSG00000209716 |
| 10 | 33620227 | 33620507 | 33620376 | 15 | 17 | 2 | 6.235825105 | 0.000146695 |          | ENSG00000209716 |
| 10 | 33659521 | 33659704 | 33659612 | 8  | 9  | 2 | 3.464347281 | 0.0163838   | NRP1     | ENSG00000099250 |
| 10 | 33838148 | 33838415 | 33838281 | 11 | 14 | 6 | 2.227080395 | 0.0322529   | NRP1     | ENSG00000099250 |
| 10 | 34033425 | 34033815 | 34033601 | 13 | 19 | 2 | 6.928694562 | 4.25E-05    |          | ENSG00000219446 |
| 10 | 35048327 | 35048699 | 35048520 | 11 | 17 | 7 | 2.338434415 | 0.0171287   |          | ENSG00000215184 |
| 10 | 35061044 | 35061223 | 35061133 | 8  | 8  | 4 | 1.870747532 | 0.118863    |          | ENSG00000215184 |
| 10 | 35234928 | 35235289 | 35235110 | 8  | 15 | 4 | 3.32577339  | 0.00462646  |          | ENSG00000223047 |
| 10 | 35283103 | 35283350 | 35283226 | 9  | 12 | 7 | 1.688869299 | 0.11395     |          | ENSG00000213724 |
| 10 | 35635855 | 35636072 | 35635964 | 9  | 12 | 3 | 3.377738599 | 0.00867157  | CCNY     | ENSG00000108100 |

|    |          |          |          |     |     |     |             |             |                          |
|----|----------|----------|----------|-----|-----|-----|-------------|-------------|--------------------------|
| 10 | 36150202 | 36150410 | 36150308 | 10  | 11  | 5   | 2.078608368 | 0.0614303   | ENSG00000218744          |
| 10 | 36384792 | 36385109 | 36384950 | 10  | 14  | 2   | 5.196520921 | 0.000907371 | ENSG00000218744          |
| 10 | 36402839 | 36403059 | 36402949 | 9   | 9   | 0   | 10.39304184 | 0.000803859 | ENSG00000218688          |
| 10 | 38305530 | 38305852 | 38305691 | 12  | 15  | 4   | 3.32577339  | 0.00462646  | ZNF25<br>ENSG00000175395 |
| 10 | 38844156 | 38844487 | 38844321 | 11  | 14  | 3   | 3.897390691 | 0.00295882  | ENSG00000219057          |
| 10 | 38912033 | 38912328 | 38912179 | 10  | 12  | 5   | 2.251825733 | 0.0404733   | ENSG00000215151          |
| 10 | 39118679 | 39119008 | 39118843 | 10  | 13  | 5   | 2.425043097 | 0.0262442   | ENSG00000217685          |
| 10 | 39122206 | 39122534 | 39122370 | 17  | 17  | 26  | 0.692869456 | 0.890806    | ENSG00000217685          |
| 10 | 39134174 | 39134646 | 39134352 | 26  | 34  | 27  | 1.29913023  | 0.148943    | ENSG00000217685          |
| 10 | 39160360 | 39160689 | 39160524 | 12  | 15  | 11  | 1.385738912 | 0.19225     | ENSG00000217685          |
| 10 | 39163576 | 39163760 | 39163606 | 12  | 13  | 17  | 0.808347699 | 0.728863    | ENSG00000217685          |
| 10 | 41675742 | 41675924 | 41675805 | 8   | 8   | 5   | 1.558956276 | 0.191397    | ENSG00000220883          |
| 10 | 41684605 | 41684944 | 41684774 | 15  | 18  | 15  | 1.234173719 | 0.265435    | ENSG00000220883          |
| 10 | 41699742 | 41700090 | 41699916 | 170 | 172 | 209 | 0.856188685 | 0.935434    | ENSG00000220883          |
| 10 | 41700103 | 41700438 | 41700270 | 15  | 16  | 26  | 0.654376709 | 0.9196      | ENSG00000220883          |
| 10 | 41701019 | 41701209 | 41701194 | 8   | 11  | 3   | 3.117912553 | 0.0146045   | ENSG00000220883          |
| 10 | 41704506 | 41704760 | 41704633 | 9   | 13  | 7   | 1.818782322 | 0.0805123   | ENSG00000220883          |
| 10 | 41705018 | 41705372 | 41705195 | 88  | 91  | 80  | 1.180444259 | 0.137479    | ENSG00000220883          |
| 10 | 41707048 | 41707240 | 41707149 | 9   | 10  | 10  | 1.039304184 | 0.464387    | ENSG00000220883          |
| 10 | 41712575 | 41712763 | 41712722 | 9   | 9   | 6   | 1.484720263 | 0.204387    | ENSG00000220883          |
| 10 | 41714317 | 41714574 | 41714430 | 9   | 10  | 6   | 1.63319229  | 0.146906    | ENSG00000220883          |
| 10 | 41715972 | 41716625 | 41716447 | 18  | 34  | 32  | 1.102292317 | 0.343693    | ENSG00000220883          |
| 10 | 41716715 | 41717064 | 41716889 | 78  | 79  | 105 | 0.784380516 | 0.950715    | ENSG00000220883          |
| 10 | 41718211 | 41718883 | 41718704 | 35  | 56  | 58  | 1.004073534 | 0.491713    | ENSG00000220883          |
| 10 | 41719204 | 41719537 | 41719370 | 45  | 48  | 38  | 1.305792437 | 0.105214    | ENSG00000220883          |
| 10 | 41719547 | 41719965 | 41719722 | 23  | 30  | 32  | 0.976316052 | 0.539065    | ENSG00000220883          |
| 10 | 41721689 | 41722024 | 41721863 | 23  | 25  | 23  | 1.125912866 | 0.336929    | ENSG00000220883          |
| 10 | 41722111 | 41722290 | 41722191 | 8   | 8   | 11  | 0.779478138 | 0.719708    | ENSG00000220883          |
| 10 | 41722971 | 41723306 | 41723138 | 28  | 29  | 25  | 1.199197136 | 0.247521    | ENSG00000220883          |
| 10 | 41727266 | 41727761 | 41727443 | 22  | 29  | 27  | 1.113540197 | 0.340649    | ENSG00000220883          |
| 10 | 41847287 | 41847466 | 41847315 | 8   | 9   | 10  | 0.944821986 | 0.553851    | ENSG00000220883          |
| 10 | 41849144 | 41850098 | 41849612 | 59  | 99  | 124 | 0.831443347 | 0.916674    | ENSG00000220883          |
| 10 | 41850477 | 41850827 | 41850652 | 19  | 21  | 36  | 0.61796465  | 0.966476    | ENSG00000220883          |
| 10 | 41850908 | 41851247 | 41851077 | 27  | 27  | 30  | 0.93872636  | 0.597175    | ENSG00000220883          |



|    |          |          |          |     |     |    |             |             |           |                 |
|----|----------|----------|----------|-----|-----|----|-------------|-------------|-----------|-----------------|
| 10 | 41851776 | 41852125 | 41851950 | 96  | 98  | 64 | 1.582940219 | 0.0017662   |           | ENSG00000220883 |
| 10 | 41852436 | 41852926 | 41852615 | 19  | 26  | 19 | 1.403060649 | 0.122336    |           | ENSG00000220883 |
| 10 | 41854731 | 41854910 | 41854759 | 8   | 8   | 6  | 1.336248237 | 0.277651    |           | ENSG00000220883 |
| 10 | 42117147 | 42117478 | 42117312 | 23  | 25  | 27 | 0.965068171 | 0.55304     |           | ENSG00000219859 |
| 10 | 42119844 | 42120024 | 42119993 | 8   | 8   | 10 | 0.850339787 | 0.645072    |           | ENSG00000219859 |
| 10 | 42137065 | 42137396 | 42137230 | 27  | 29  | 12 | 2.398394271 | 0.00272121  |           | ENSG00000215146 |
| 10 | 42137410 | 42137733 | 42137578 | 15  | 15  | 15 | 1.039304184 | 0.456923    |           | ENSG00000215146 |
| 10 | 42456344 | 42456632 | 42456506 | 25  | 26  | 1  | 14.03060649 | 6.50E-08    | ZNF33B    | ENSG00000196693 |
| 10 | 42598087 | 42598293 | 42598188 | 8   | 9   | 6  | 1.484720263 | 0.204387    | BMS1      | ENSG00000165733 |
| 10 | 42841645 | 42842117 | 42841780 | 15  | 26  | 4  | 5.612242595 | 1.08E-05    | RET       | ENSG00000165731 |
| 10 | 43165436 | 43165891 | 43165715 | 19  | 27  | 4  | 5.820103432 | 6.01E-06    |           | ENSG00000209850 |
| 10 | 43389899 | 43390189 | 43390044 | 10  | 10  | 1  | 5.716173013 | 0.00260397  | ZNF239    | ENSG00000196793 |
| 10 | 43669526 | 43669817 | 43669672 | 13  | 16  | 1  | 8.834085566 | 5.30E-05    | C10orf136 | ENSG00000204187 |
| 10 | 43728139 | 43728580 | 43728359 | 19  | 29  | 4  | 6.235825105 | 1.85E-06    | C10orf136 | ENSG00000204187 |
| 10 | 43989078 | 43989299 | 43989134 | 8   | 10  | 0  | 11.43234603 | 0.000394183 | CXCL12    | ENSG00000107562 |
| 10 | 44154645 | 44155079 | 44154938 | 12  | 18  | 10 | 1.795161773 | 0.055383    | CXCL12    | ENSG00000107562 |
| 10 | 45253673 | 45254407 | 45254028 | 188 | 248 | 0  | 258.7867419 | 8.69E-78    | 8-Mar     | ENSG00000165406 |
| 10 | 45286162 | 45286428 | 45286302 | 14  | 14  | 8  | 1.73217364  | 0.0890835   | 8-Mar     | ENSG00000165406 |
| 10 | 45350697 | 45350957 | 45350828 | 9   | 9   | 3  | 2.598260461 | 0.0397929   | 8-Mar     | ENSG00000165406 |
| 10 | 46410720 | 46411200 | 46410946 | 10  | 19  | 10 | 1.889643971 | 0.0394833   | GPRIN2    | ENSG00000204175 |
| 10 | 46477357 | 46477536 | 46477453 | 9   | 9   | 3  | 2.598260461 | 0.0397929   | PPYR1     | ENSG00000204174 |
| 10 | 47952184 | 47952450 | 47952333 | 14  | 15  | 4  | 3.32577339  | 0.00462646  | ZNF488    | ENSG00000165388 |
| 10 | 47952804 | 47953068 | 47952936 | 10  | 10  | 1  | 5.716173013 | 0.00260397  | ZNF488    | ENSG00000165388 |
| 10 | 47962630 | 47963160 | 47962904 | 93  | 119 | 3  | 31.17912553 | 2.99E-33    | ZNF488    | ENSG00000165388 |
| 10 | 49129553 | 49129996 | 49129791 | 45  | 59  | 7  | 7.794781382 | 2.35E-12    | FRMPD2    | ENSG00000170324 |
| 10 | 49295349 | 49296015 | 49295606 | 84  | 108 | 6  | 16.18345087 | 9.60E-27    | MAPK8     | ENSG00000107643 |
| 10 | 49354457 | 49354695 | 49354579 | 8   | 9   | 1  | 5.196520921 | 0.00490062  | ARHGAP22  | ENSG00000128805 |
| 10 | 49467472 | 49467831 | 49467651 | 14  | 21  | 1  | 11.43234603 | 1.90E-06    | ARHGAP22  | ENSG00000128805 |
| 10 | 49826774 | 49826996 | 49826943 | 10  | 11  | 1  | 6.235825105 | 0.0013754   | LRRRC18   | ENSG00000165383 |
| 10 | 50297159 | 50297425 | 50297287 | 14  | 14  | 3  | 3.897390691 | 0.00295882  | DRGX      | ENSG00000165606 |
| 10 | 50661784 | 50661989 | 50661886 | 9   | 9   | 3  | 2.598260461 | 0.0397929   |           | ENSG00000218816 |
| 10 | 51235051 | 51235256 | 51235140 | 8   | 8   | 4  | 1.870747532 | 0.118863    | NCOA4     | ENSG00000138293 |
| 10 | 51740545 | 51740815 | 51740665 | 8   | 11  | 1  | 6.235825105 | 0.0013754   |           | ENSG00000217121 |
| 10 | 52009811 | 52010157 | 52009969 | 8   | 13  | 2  | 4.850086193 | 0.00164564  |           | ENSG00000209947 |

|    |          |          |          |     |     |   |             |             |         |                 |
|----|----------|----------|----------|-----|-----|---|-------------|-------------|---------|-----------------|
| 10 | 53129333 | 53129563 | 53129450 | 10  | 11  | 1 | 6.235825105 | 0.0013754   | CSTF2T  | ENSG00000177613 |
| 10 | 53744154 | 53744480 | 53744318 | 13  | 17  | 4 | 3.741495063 | 0.00163722  | DKK1    | ENSG00000107984 |
| 10 | 53749011 | 53749247 | 53749131 | 9   | 10  | 1 | 5.716173013 | 0.00260397  | DKK1    | ENSG00000107984 |
| 10 | 53873176 | 53873849 | 53873440 | 55  | 77  | 6 | 11.58081805 | 5.57E-18    |         | ENSG00000216209 |
| 10 | 53881778 | 53881968 | 53881873 | 8   | 8   | 1 | 4.676868829 | 0.0091584   |         | ENSG00000216209 |
| 10 | 55049321 | 55049882 | 55049658 | 56  | 76  | 3 | 20.00660555 | 1.67E-20    |         | ENSG00000217935 |
| 10 | 58013125 | 58013470 | 58013297 | 10  | 12  | 0 | 13.5109544  | 9.48E-05    | ZWINT   | ENSG00000122952 |
| 10 | 58175254 | 58175511 | 58175417 | 8   | 11  | 1 | 6.235825105 | 0.0013754   | ZWINT   | ENSG00000122952 |
| 10 | 59053822 | 59054163 | 59053992 | 25  | 27  | 0 | 29.10051716 | 2.16E-09    |         | ENSG00000218583 |
| 10 | 59619187 | 59619417 | 59619271 | 10  | 10  | 1 | 5.716173013 | 0.00260397  |         | ENSG00000180221 |
| 10 | 59669507 | 59669703 | 59669591 | 8   | 9   | 4 | 2.078608368 | 0.0785659   |         | ENSG00000210008 |
| 10 | 60766910 | 60767407 | 60767165 | 34  | 49  | 3 | 12.9913023  | 1.10E-12    | FAM13C1 | ENSG00000148541 |
| 10 | 61295062 | 61295282 | 61295194 | 8   | 9   | 8 | 1.154782427 | 0.375434    | CCDC6   | ENSG00000108091 |
| 10 | 61395127 | 61395611 | 61395359 | 53  | 69  | 6 | 10.39304184 | 9.03E-16    | CCDC6   | ENSG00000108091 |
| 10 | 61858412 | 61858803 | 61858553 | 11  | 16  | 2 | 5.889390377 | 0.000270741 | ANK3    | ENSG00000151150 |
| 10 | 61917905 | 61918246 | 61918072 | 35  | 39  | 0 | 41.57216737 | 4.18E-13    | ANK3    | ENSG00000151150 |
| 10 | 61924674 | 61924935 | 61924801 | 9   | 10  | 0 | 11.43234603 | 0.000394183 | ANK3    | ENSG00000151150 |
| 10 | 62187110 | 62187496 | 62187282 | 8   | 13  | 1 | 7.27512929  | 0.000378098 | CDC2    | ENSG00000170312 |
| 10 | 62190415 | 62190874 | 62190665 | 165 | 189 | 3 | 49.36694875 | 2.50E-54    | CDC2    | ENSG00000170312 |
| 10 | 62394032 | 62394228 | 62394148 | 10  | 11  | 4 | 2.494330042 | 0.0324033   | RHOBTB1 | ENSG00000072422 |
| 10 | 62497542 | 62497721 | 62497592 | 8   | 8   | 6 | 1.336248237 | 0.277651    | RHOBTB1 | ENSG00000072422 |
| 10 | 62701363 | 62701556 | 62701435 | 8   | 8   | 2 | 3.117912553 | 0.0283184   | TMEM26  | ENSG00000196932 |
| 10 | 62977275 | 62977506 | 62977390 | 9   | 11  | 0 | 12.47165021 | 0.000193293 | TMEM26  | ENSG00000196932 |
| 10 | 63264410 | 63264607 | 63264447 | 8   | 10  | 5 | 1.905391004 | 0.0915982   | ARID5B  | ENSG00000150347 |
| 10 | 63330882 | 63331126 | 63330981 | 8   | 9   | 1 | 5.196520921 | 0.00490062  | ARID5B  | ENSG00000150347 |
| 10 | 63332255 | 63332509 | 63332382 | 10  | 12  | 3 | 3.377738599 | 0.00867157  | ARID5B  | ENSG00000150347 |
| 10 | 63542078 | 63542333 | 63542219 | 11  | 11  | 9 | 1.247165021 | 0.300052    |         | ENSG00000221094 |
| 10 | 63766217 | 63766413 | 63766351 | 11  | 11  | 0 | 12.47165021 | 0.000193293 |         | ENSG00000223151 |
| 10 | 65002822 | 65003023 | 65002922 | 8   | 8   | 0 | 9.353737658 | 0.00163931  | REEP3   | ENSG00000165476 |
| 10 | 65059191 | 65059463 | 65059327 | 8   | 12  | 4 | 2.702190879 | 0.0203088   |         | ENSG00000220039 |
| 10 | 65137096 | 65137290 | 65137235 | 9   | 9   | 1 | 5.196520921 | 0.00490062  |         | ENSG00000220039 |
| 10 | 65141995 | 65142188 | 65142089 | 8   | 10  | 1 | 5.716173013 | 0.00260397  |         | ENSG00000220039 |
| 10 | 65352907 | 65353086 | 65352996 | 8   | 8   | 1 | 4.676868829 | 0.0091584   |         | ENSG00000213609 |
| 10 | 66849098 | 66849407 | 66849246 | 32  | 34  | 0 | 36.37564645 | 1.47E-11    |         | ENSG00000219519 |

|    |          |          |          |    |     |   |             |             |           |                 |
|----|----------|----------|----------|----|-----|---|-------------|-------------|-----------|-----------------|
| 10 | 67045093 | 67045466 | 67045270 | 9  | 15  | 2 | 5.542955649 | 0.000497081 |           | ENSG00000219519 |
| 10 | 68057056 | 68057235 | 68057145 | 8  | 8   | 3 | 2.338434415 | 0.0641221   |           | ENSG00000210060 |
| 10 | 69194146 | 69194431 | 69194317 | 12 | 13  | 4 | 2.910051716 | 0.0125532   |           | ENSG00000213606 |
| 10 | 69583416 | 69583847 | 69583595 | 13 | 21  | 8 | 2.540521339 | 0.00602138  |           | ENSG00000222371 |
| 10 | 69762909 | 69763108 | 69762998 | 8  | 9   | 2 | 3.464347281 | 0.0163838   | PBLD      | ENSG00000108187 |
| 10 | 70030068 | 70030518 | 70030213 | 10 | 17  | 5 | 3.117912553 | 0.00407023  |           | ENSG00000216826 |
| 10 | 70330934 | 70331180 | 70331079 | 8  | 10  | 2 | 3.810782009 | 0.00936112  | DDX50     | ENSG00000107625 |
| 10 | 70418477 | 70418777 | 70418612 | 8  | 11  | 2 | 4.157216737 | 0.0052913   | KIAA1279  | ENSG00000198954 |
| 10 | 70643446 | 70643703 | 70643574 | 13 | 14  | 2 | 5.196520921 | 0.000907371 | HKDC1     | ENSG00000156510 |
| 10 | 70815941 | 70816151 | 70816037 | 8  | 9   | 3 | 2.598260461 | 0.0397929   |           | ENSG00000221774 |
| 10 | 70855670 | 70855921 | 70855779 | 8  | 10  | 2 | 3.810782009 | 0.00936112  |           | ENSG00000217700 |
| 10 | 70888572 | 70888842 | 70888707 | 9  | 11  | 1 | 6.235825105 | 0.0013754   | TSPAN15   | ENSG00000099282 |
| 10 | 71694980 | 71695255 | 71695117 | 10 | 12  | 2 | 4.503651465 | 0.002963    | NPFFR1    | ENSG00000148734 |
| 10 | 72296722 | 72297056 | 72296889 | 17 | 20  | 1 | 10.91269393 | 3.71E-06    | PCBD1     | ENSG00000166228 |
| 10 | 72506845 | 72507058 | 72506916 | 8  | 10  | 3 | 2.858086507 | 0.0242838   | UNC5B     | ENSG00000107731 |
| 10 | 72705282 | 72705497 | 72705399 | 9  | 10  | 0 | 11.43234603 | 0.000394183 | SLC29A3   | ENSG00000198246 |
| 10 | 72942514 | 72943030 | 72942745 | 22 | 33  | 2 | 11.77878075 | 5.19E-09    | CDH23     | ENSG00000107736 |
| 10 | 73360465 | 73360690 | 73360537 | 8  | 11  | 0 | 12.47165021 | 0.000193293 | CHST3     | ENSG00000122863 |
| 10 | 73478334 | 73478513 | 73478423 | 8  | 8   | 5 | 1.558956276 | 0.191397    | SPOCK2    | ENSG00000107742 |
| 10 | 73645760 | 73645955 | 73645862 | 8  | 8   | 0 | 9.353737658 | 0.00163931  | C10orf104 | ENSG00000166295 |
| 10 | 73700455 | 73700668 | 73700564 | 8  | 10  | 3 | 2.858086507 | 0.0242838   | DDIT4     | ENSG00000168209 |
| 10 | 73702834 | 73703025 | 73702955 | 8  | 9   | 3 | 2.598260461 | 0.0397929   | DDIT4     | ENSG00000168209 |
| 10 | 73703205 | 73703449 | 73703316 | 11 | 12  | 1 | 6.755477198 | 0.000722752 | DDIT4     | ENSG00000168209 |
| 10 | 73727860 | 73728642 | 73728123 | 82 | 114 | 4 | 23.90399624 | 1.42E-30    | DDIT4     | ENSG00000168209 |
| 10 | 73761259 | 73761958 | 73761807 | 12 | 29  | 2 | 10.39304184 | 7.12E-08    | DNAJB12   | ENSG00000148719 |
| 10 | 73784409 | 73784683 | 73784546 | 10 | 11  | 5 | 2.078608368 | 0.0614303   | DNAJB12   | ENSG00000148719 |
| 10 | 74336429 | 74336614 | 74336521 | 9  | 10  | 0 | 11.43234603 | 0.000394183 |           | ENSG00000217814 |
| 10 | 74540111 | 74540325 | 74540222 | 10 | 11  | 3 | 3.117912553 | 0.0146045   | NUDT13    | ENSG00000166321 |
| 10 | 74676924 | 74677241 | 74677133 | 8  | 12  | 6 | 1.930136342 | 0.071303    | DNAJC9    | ENSG00000213551 |
| 10 | 74682429 | 74682622 | 74682525 | 8  | 8   | 1 | 4.676868829 | 0.0091584   | MRPS16    | ENSG00000182180 |
| 10 | 74789097 | 74789342 | 74789219 | 8  | 9   | 2 | 3.464347281 | 0.0163838   | TTC18     | ENSG00000156042 |
| 10 | 75031451 | 75031666 | 75031561 | 8  | 10  | 2 | 3.810782009 | 0.00936112  | USP54     | ENSG00000166348 |
| 10 | 75268671 | 75268997 | 75268836 | 8  | 9   | 0 | 10.39304184 | 0.000803859 |           | ENSG00000214633 |
| 10 | 75304521 | 75304701 | 75304611 | 9  | 9   | 2 | 3.464347281 | 0.0163838   | CAMK2G    | ENSG00000148660 |

|    |          |          |          |    |    |   |             |             |          |                 |
|----|----------|----------|----------|----|----|---|-------------|-------------|----------|-----------------|
| 10 | 75305869 | 75306174 | 75306004 | 16 | 18 | 1 | 9.87338975  | 1.41E-05    | CAMK2G   | ENSG00000148660 |
| 10 | 75317239 | 75317944 | 75317663 | 48 | 72 | 7 | 9.483650681 | 7.97E-16    | CAMK2G   | ENSG00000148660 |
| 10 | 75318143 | 75319199 | 75318899 | 14 | 46 | 9 | 4.884729666 | 6.07E-08    | CAMK2G   | ENSG00000148660 |
| 10 | 75336590 | 75336810 | 75336691 | 9  | 9  | 1 | 5.196520921 | 0.00490062  | PLAU     | ENSG00000122861 |
| 10 | 75580701 | 75580914 | 75580830 | 8  | 9  | 4 | 2.078608368 | 0.0785659   | AP3M1    | ENSG00000185009 |
| 10 | 76509617 | 76509875 | 76509741 | 8  | 12 | 0 | 13.5109544  | 9.48E-05    |          | ENSG00000217937 |
| 10 | 76595846 | 76596122 | 76596003 | 9  | 11 | 3 | 3.117912553 | 0.0146045   |          | ENSG00000218910 |
| 10 | 78968996 | 78969253 | 78969106 | 11 | 13 | 1 | 7.27512929  | 0.000378098 |          | ENSG00000199592 |
| 10 | 79012445 | 79012773 | 79012572 | 10 | 14 | 3 | 3.897390691 | 0.00295882  |          | ENSG00000199592 |
| 10 | 79036662 | 79036893 | 79036758 | 8  | 10 | 6 | 1.63319229  | 0.146906    |          | ENSG00000199592 |
| 10 | 79089013 | 79089461 | 79089192 | 10 | 18 | 1 | 9.87338975  | 1.41E-05    | KCNMA1   | ENSG00000156113 |
| 10 | 79276632 | 79276858 | 79276698 | 8  | 9  | 1 | 5.196520921 | 0.00490062  |          | ENSG00000204049 |
| 10 | 79459319 | 79459654 | 79459478 | 8  | 11 | 4 | 2.494330042 | 0.0324033   | POLR3A   | ENSG00000148606 |
| 10 | 79836703 | 79837013 | 79836853 | 8  | 10 | 3 | 2.858086507 | 0.0242838   |          | ENSG00000201393 |
| 10 | 80063822 | 80064001 | 80063911 | 8  | 8  | 1 | 4.676868829 | 0.0091584   |          | ENSG00000223243 |
| 10 | 80245792 | 80246001 | 80245901 | 8  | 8  | 1 | 4.676868829 | 0.0091584   |          | ENSG00000223243 |
| 10 | 80349847 | 80350099 | 80349954 | 15 | 15 | 3 | 4.157216737 | 0.00170423  | ZMIZ1    | ENSG00000108175 |
| 10 | 80377617 | 80377834 | 80377736 | 8  | 9  | 1 | 5.196520921 | 0.00490062  | ZMIZ1    | ENSG00000108175 |
| 10 | 80394436 | 80394676 | 80394556 | 10 | 10 | 0 | 11.43234603 | 0.000394183 | ZMIZ1    | ENSG00000108175 |
| 10 | 80516680 | 80516867 | 80516773 | 8  | 8  | 3 | 2.338434415 | 0.0641221   | ZMIZ1    | ENSG00000108175 |
| 10 | 80529663 | 80530109 | 80529877 | 17 | 28 | 0 | 30.13982134 | 1.06E-09    | ZMIZ1    | ENSG00000108175 |
| 10 | 80667501 | 80667717 | 80667649 | 10 | 11 | 5 | 2.078608368 | 0.0614303   | ZMIZ1    | ENSG00000108175 |
| 10 | 80668448 | 80668638 | 80668537 | 9  | 9  | 3 | 2.598260461 | 0.0397929   | ZMIZ1    | ENSG00000108175 |
| 10 | 80669967 | 80670210 | 80670107 | 11 | 11 | 5 | 2.078608368 | 0.0614303   | ZMIZ1    | ENSG00000108175 |
| 10 | 80690669 | 80690894 | 80690787 | 13 | 15 | 1 | 8.314433474 | 0.000102308 | ZMIZ1    | ENSG00000108175 |
| 10 | 80694601 | 80694973 | 80694780 | 12 | 18 | 6 | 2.8209685   | 0.00559354  | ZMIZ1    | ENSG00000108175 |
| 10 | 80778242 | 80778456 | 80778343 | 9  | 9  | 2 | 3.464347281 | 0.0163838   | PPIF     | ENSG00000108179 |
| 10 | 80804478 | 80804664 | 80804571 | 8  | 8  | 2 | 3.117912553 | 0.0283184   | PPIF     | ENSG00000108179 |
| 10 | 82161556 | 82161800 | 82161678 | 14 | 14 | 2 | 5.196520921 | 0.000907371 | C10orf57 | ENSG00000122378 |
| 10 | 82179513 | 82179761 | 82179610 | 14 | 14 | 0 | 15.58956276 | 2.28E-05    | C10orf57 | ENSG00000122378 |
| 10 | 82210432 | 82210817 | 82210682 | 15 | 21 | 5 | 3.810782009 | 0.000537724 | TSPAN14  | ENSG00000108219 |
| 10 | 82220854 | 82221167 | 82221010 | 15 | 19 | 2 | 6.928694562 | 4.25E-05    | TSPAN14  | ENSG00000108219 |
| 10 | 82368860 | 82369087 | 82368970 | 10 | 11 | 0 | 12.47165021 | 0.000193293 | SH2D4B   | ENSG00000178217 |
| 10 | 82449344 | 82449688 | 82449509 | 11 | 15 | 5 | 2.771477825 | 0.0105836   |          | ENSG00000220228 |

|    |          |          |          |     |     |   |             |             |           |                 |
|----|----------|----------|----------|-----|-----|---|-------------|-------------|-----------|-----------------|
| 10 | 82497236 | 82497519 | 82497386 | 14  | 16  | 1 | 8.834085566 | 5.30E-05    |           | ENSG00000217745 |
| 10 | 82555139 | 82555332 | 82555235 | 8   | 8   | 0 | 9.353737658 | 0.00163931  |           | ENSG00000218551 |
| 10 | 82645421 | 82645600 | 82645503 | 8   | 9   | 2 | 3.464347281 | 0.0163838   |           | ENSG00000220859 |
| 10 | 82646338 | 82646529 | 82646433 | 9   | 9   | 4 | 2.078608368 | 0.0785659   |           | ENSG00000220859 |
| 10 | 82695046 | 82695345 | 82695190 | 8   | 10  | 4 | 2.286469205 | 0.0509017   |           | ENSG00000220859 |
| 10 | 82798336 | 82798565 | 82798450 | 8   | 10  | 2 | 3.810782009 | 0.00936112  |           | ENSG00000219745 |
| 10 | 82866169 | 82866495 | 82866332 | 14  | 19  | 1 | 10.39304184 | 7.23E-06    |           | ENSG00000219745 |
| 10 | 82927737 | 82928073 | 82927905 | 23  | 27  | 0 | 29.10051716 | 2.16E-09    |           | ENSG00000219745 |
| 10 | 83081073 | 83081252 | 83081162 | 8   | 8   | 1 | 4.676868829 | 0.0091584   |           | ENSG00000219745 |
| 10 | 83161491 | 83161680 | 83161558 | 8   | 9   | 1 | 5.196520921 | 0.00490062  |           | ENSG00000219745 |
| 10 | 83933036 | 83933242 | 83933139 | 10  | 10  | 6 | 1.63319229  | 0.146906    |           | ENSG00000221378 |
| 10 | 84442292 | 84442496 | 84442389 | 9   | 11  | 0 | 12.47165021 | 0.000193293 |           | ENSG00000207275 |
| 10 | 84638561 | 84638771 | 84638666 | 8   | 8   | 1 | 4.676868829 | 0.0091584   |           | ENSG00000200774 |
| 10 | 85356055 | 85356274 | 85356207 | 11  | 12  | 3 | 3.377738599 | 0.00867157  |           | ENSG00000211570 |
| 10 | 85733379 | 85733748 | 85733569 | 25  | 32  | 1 | 17.14851904 | 1.09E-09    |           | ENSG00000200789 |
| 10 | 86041189 | 86041524 | 86041356 | 9   | 12  | 2 | 4.503651465 | 0.002963    | KIAA1128  | ENSG00000107771 |
| 10 | 86274662 | 86275172 | 86274993 | 63  | 75  | 3 | 19.7467795  | 3.28E-20    |           | ENSG00000178429 |
| 10 | 86277241 | 86277475 | 86277328 | 9   | 9   | 1 | 5.196520921 | 0.00490062  |           | ENSG00000178429 |
| 10 | 86861769 | 86861948 | 86861858 | 8   | 8   | 2 | 3.117912553 | 0.0283184   |           | ENSG00000223064 |
| 10 | 87297880 | 87298181 | 87298030 | 23  | 26  | 2 | 9.353737658 | 4.98E-07    |           | ENSG00000210526 |
| 10 | 87392189 | 87392485 | 87392337 | 10  | 12  | 3 | 3.377738599 | 0.00867157  |           | ENSG00000210532 |
| 10 | 87970184 | 87970505 | 87970334 | 12  | 15  | 0 | 16.62886695 | 1.12E-05    |           | ENSG00000199104 |
| 10 | 88257241 | 88257470 | 88257394 | 8   | 9   | 4 | 2.078608368 | 0.0785659   | WAPAL     | ENSG00000062650 |
| 10 | 88306302 | 88306696 | 88306473 | 13  | 19  | 1 | 10.39304184 | 7.23E-06    | WAPAL     | ENSG00000062650 |
| 10 | 88718055 | 88718422 | 88718270 | 35  | 41  | 7 | 5.456346967 | 9.08E-08    | C10orf116 | ENSG00000148671 |
| 10 | 89254427 | 89254615 | 89254521 | 8   | 8   | 1 | 4.676868829 | 0.0091584   | MINPP1    | ENSG00000107789 |
| 10 | 89403967 | 89404152 | 89404089 | 10  | 10  | 1 | 5.716173013 | 0.00260397  | PAPSS2    | ENSG00000198682 |
| 10 | 89592010 | 89592375 | 89592221 | 19  | 24  | 2 | 8.660868202 | 1.80E-06    |           | ENSG00000213478 |
| 10 | 89592734 | 89593296 | 89593016 | 129 | 158 | 5 | 27.54156088 | 2.04E-42    |           | ENSG00000213478 |
| 10 | 89612046 | 89612287 | 89612166 | 11  | 14  | 5 | 2.598260461 | 0.0167748   | PTENP1    | ENSG00000171862 |
| 10 | 89612923 | 89613177 | 89613051 | 11  | 12  | 2 | 4.503651465 | 0.002963    | PTENP1    | ENSG00000171862 |
| 10 | 89881662 | 89881947 | 89881821 | 10  | 14  | 2 | 5.196520921 | 0.000907371 |           | ENSG00000216533 |
| 10 | 90010492 | 90010740 | 90010638 | 11  | 12  | 2 | 4.503651465 | 0.002963    |           | ENSG00000216533 |
| 10 | 90601361 | 90601763 | 90601665 | 9   | 13  | 5 | 2.425043097 | 0.0262442   | ANKRD22   | ENSG00000152766 |

|    |          |          |          |    |    |    |             |             |         |                 |
|----|----------|----------|----------|----|----|----|-------------|-------------|---------|-----------------|
| 10 | 90714503 | 90714682 | 90714592 | 8  | 8  | 2  | 3.117912553 | 0.0283184   | ACTA2   | ENSG00000107796 |
| 10 | 90740368 | 90740770 | 90740547 | 15 | 22 | 4  | 4.780799247 | 0.00010647  | FAS     | ENSG00000026103 |
| 10 | 90740845 | 90741259 | 90741023 | 42 | 52 | 1  | 27.54156088 | 1.11E-15    | FAS     | ENSG00000026103 |
| 10 | 91012142 | 91012336 | 91012220 | 8  | 9  | 5  | 1.73217364  | 0.133894    | LIPA    | ENSG00000107798 |
| 10 | 91028017 | 91028248 | 91028086 | 8  | 11 | 2  | 4.157216737 | 0.0052913   | IFIT2   | ENSG00000119922 |
| 10 | 91394960 | 91395229 | 91395094 | 13 | 15 | 2  | 5.542955649 | 0.000497081 | PANK1   | ENSG00000152782 |
| 10 | 91801302 | 91801654 | 91801469 | 8  | 12 | 1  | 6.755477198 | 0.000722752 |         | ENSG00000148667 |
| 10 | 92662139 | 92662337 | 92662262 | 8  | 8  | 1  | 4.676868829 | 0.0091584   | ANKRD1  | ENSG00000148677 |
| 10 | 92727102 | 92727376 | 92727237 | 13 | 16 | 1  | 8.834085566 | 5.30E-05    |         | ENSG00000201604 |
| 10 | 92756098 | 92756489 | 92756269 | 8  | 14 | 5  | 2.598260461 | 0.0167748   |         | ENSG00000186773 |
| 10 | 92988086 | 92988337 | 92988211 | 11 | 13 | 0  | 14.55025858 | 4.65E-05    | PCGF5   | ENSG00000180628 |
| 10 | 93016626 | 93016808 | 93016721 | 8  | 8  | 2  | 3.117912553 | 0.0283184   | PCGF5   | ENSG00000180628 |
| 10 | 93421318 | 93421598 | 93421458 | 9  | 13 | 2  | 4.850086193 | 0.00164564  |         | ENSG00000213449 |
| 10 | 93872920 | 93873205 | 93873089 | 9  | 12 | 5  | 2.251825733 | 0.0404733   |         | ENSG00000214549 |
| 10 | 93923937 | 93924140 | 93924038 | 8  | 8  | 1  | 4.676868829 | 0.0091584   |         | ENSG00000221042 |
| 10 | 94342626 | 94342933 | 94342779 | 9  | 13 | 4  | 2.910051716 | 0.0125532   | KIF11   | ENSG00000138160 |
| 10 | 94642142 | 94642411 | 94642282 | 12 | 15 | 6  | 2.375552421 | 0.0212094   |         | ENSG00000219151 |
| 10 | 94887882 | 94888215 | 94888048 | 38 | 42 | 2  | 14.89669331 | 1.32E-11    |         | ENSG00000218488 |
| 10 | 95165692 | 95165876 | 95165784 | 8  | 9  | 3  | 2.598260461 | 0.0397929   | FER1L3  | ENSG00000138119 |
| 10 | 95184800 | 95185229 | 95184970 | 15 | 25 | 5  | 4.503651465 | 6.33E-05    | FER1L3  | ENSG00000138119 |
| 10 | 95195266 | 95195815 | 95195398 | 11 | 24 | 13 | 1.855900329 | 0.0279411   | FER1L3  | ENSG00000138119 |
| 10 | 95214400 | 95214628 | 95214489 | 9  | 9  | 1  | 5.196520921 | 0.00490062  | FER1L3  | ENSG00000138119 |
| 10 | 95215620 | 95215976 | 95215798 | 10 | 16 | 4  | 3.533634226 | 0.00276486  | FER1L3  | ENSG00000138119 |
| 10 | 95218211 | 95218522 | 95218370 | 12 | 16 | 4  | 3.533634226 | 0.00276486  | FER1L3  | ENSG00000138119 |
| 10 | 95219526 | 95219823 | 95219650 | 9  | 10 | 3  | 2.858086507 | 0.0242838   | FER1L3  | ENSG00000138119 |
| 10 | 95225394 | 95225642 | 95225561 | 9  | 9  | 5  | 1.73217364  | 0.133894    | FER1L3  | ENSG00000138119 |
| 10 | 95232045 | 95232249 | 95232143 | 9  | 10 | 0  | 11.43234603 | 0.000394183 | FER1L3  | ENSG00000138119 |
| 10 | 95452247 | 95452617 | 95452426 | 24 | 32 | 6  | 4.899576869 | 4.19E-06    | C10orf4 | ENSG00000148690 |
| 10 | 96294937 | 96295201 | 96295075 | 9  | 12 | 2  | 4.503651465 | 0.002963    | HELLS   | ENSG00000119969 |
| 10 | 96484397 | 96484712 | 96484554 | 18 | 21 | 2  | 7.621564018 | 1.21E-05    | CYP2C19 | ENSG00000165841 |
| 10 | 96737869 | 96738223 | 96738045 | 11 | 16 | 1  | 8.834085566 | 5.30E-05    |         | ENSG00000218402 |
| 10 | 97044833 | 97045145 | 97044989 | 21 | 25 | 2  | 9.00730293  | 9.47E-07    | PDLIM1  | ENSG00000107438 |
| 10 | 97262085 | 97262366 | 97262219 | 11 | 12 | 1  | 6.755477198 | 0.000722752 | SORBS1  | ENSG00000095637 |
| 10 | 97979909 | 97980099 | 97980025 | 8  | 8  | 1  | 4.676868829 | 0.0091584   |         | ENSG00000216429 |

|    |           |           |           |    |    |    |             |             |          |                 |
|----|-----------|-----------|-----------|----|----|----|-------------|-------------|----------|-----------------|
| 10 | 97988689  | 97988948  | 97988828  | 15 | 16 | 7  | 2.208521392 | 0.0257604   | BLNK     | ENSG00000095585 |
| 10 | 98013561  | 98013740  | 98013653  | 8  | 8  | 0  | 9.353737658 | 0.00163931  | BLNK     | ENSG00000095585 |
| 10 | 98551357  | 98551672  | 98551514  | 10 | 13 | 11 | 1.212521548 | 0.309909    |          | ENSG00000207976 |
| 10 | 98785690  | 98785942  | 98785768  | 9  | 10 | 0  | 11.43234603 | 0.000394183 | C10orf12 | ENSG00000155640 |
| 10 | 99077586  | 99077927  | 99077756  | 15 | 20 | 5  | 3.637564645 | 0.000902929 | FRAT2    | ENSG00000181274 |
| 10 | 99086786  | 99087111  | 99086948  | 8  | 13 | 6  | 2.078608368 | 0.0483393   | FRAT2    | ENSG00000181274 |
| 10 | 99087134  | 99087458  | 99087296  | 13 | 17 | 5  | 3.117912553 | 0.00407023  | FRAT2    | ENSG00000181274 |
| 10 | 99195533  | 99195750  | 99195641  | 9  | 11 | 2  | 4.157216737 | 0.0052913   | EXOSC1   | ENSG00000171311 |
| 10 | 99299678  | 99300236  | 99299946  | 56 | 78 | 4  | 16.42100611 | 4.63E-20    | ANKRD2   | ENSG00000165887 |
| 10 | 99316256  | 99316465  | 99316348  | 8  | 10 | 4  | 2.286469205 | 0.0509017   | ANKRD2   | ENSG00000165887 |
| 10 | 99321367  | 99321596  | 99321481  | 8  | 8  | 3  | 2.338434415 | 0.0641221   | ANKRD2   | ENSG00000165887 |
| 10 | 99324607  | 99324830  | 99324710  | 10 | 12 | 4  | 2.702190879 | 0.0203088   | ANKRD2   | ENSG00000165887 |
| 10 | 99344969  | 99345157  | 99345063  | 8  | 9  | 1  | 5.196520921 | 0.00490062  | C10orf65 | ENSG00000155252 |
| 10 | 99401444  | 99401881  | 99401695  | 68 | 86 | 2  | 30.13982134 | 1.24E-24    | PI4K2A   | ENSG00000043822 |
| 10 | 99451248  | 99451427  | 99451337  | 8  | 8  | 1  | 4.676868829 | 0.0091584   | MARVELD1 | ENSG00000155254 |
| 10 | 99619239  | 99619472  | 99619355  | 8  | 9  | 4  | 2.078608368 | 0.0785659   | GOLGA7B  | ENSG00000155265 |
| 10 | 100758832 | 100759145 | 100758969 | 26 | 28 | 2  | 10.04660711 | 1.36E-07    |          | ENSG00000217480 |
| 10 | 101200754 | 101201084 | 101200921 | 9  | 12 | 3  | 3.377738599 | 0.00867157  | GOT1     | ENSG00000120053 |
| 10 | 101361953 | 101362217 | 101362085 | 8  | 9  | 1  | 5.196520921 | 0.00490062  | SLC25A28 | ENSG00000155287 |
| 10 | 101481969 | 101482345 | 101482145 | 11 | 17 | 10 | 1.700679574 | 0.0766266   | CUTC     | ENSG00000119929 |
| 10 | 101595693 | 101595897 | 101595795 | 10 | 10 | 1  | 5.716173013 | 0.00260397  |          | ENSG00000218314 |
| 10 | 101717433 | 101717630 | 101717499 | 8  | 8  | 0  | 9.353737658 | 0.00163931  | DNMBP    | ENSG00000107554 |
| 10 | 101793186 | 101793536 | 101793359 | 22 | 26 | 1  | 14.03060649 | 6.50E-08    |          | ENSG00000210842 |
| 10 | 102017320 | 102017605 | 102017449 | 8  | 12 | 8  | 1.501217155 | 0.168286    | CWF19L1  | ENSG00000095485 |
| 10 | 102035693 | 102036220 | 102035956 | 31 | 53 | 3  | 14.03060649 | 7.92E-14    | BLOC1S2  | ENSG00000196072 |
| 10 | 102268456 | 102268713 | 102268604 | 8  | 12 | 3  | 3.377738599 | 0.00867157  | SEC31B   | ENSG00000075826 |
| 10 | 102406197 | 102406392 | 102406294 | 8  | 9  | 1  | 5.196520921 | 0.00490062  | PAX2     | ENSG00000075891 |
| 10 | 102420596 | 102420828 | 102420742 | 8  | 8  | 1  | 4.676868829 | 0.0091584   | PAX2     | ENSG00000075891 |
| 10 | 102737089 | 102737365 | 102737203 | 8  | 10 | 3  | 2.858086507 | 0.0242838   | MRPL43   | ENSG00000055950 |
| 10 | 102816496 | 102816703 | 102816599 | 8  | 9  | 0  | 10.39304184 | 0.000803859 | KAZALD1  | ENSG00000107821 |
| 10 | 102817578 | 102817798 | 102817699 | 9  | 10 | 1  | 5.716173013 | 0.00260397  | KAZALD1  | ENSG00000107821 |
| 10 | 102971333 | 102971667 | 102971499 | 15 | 20 | 6  | 3.117912553 | 0.00218114  | LBX1     | ENSG00000138136 |
| 10 | 103352585 | 103352771 | 103352721 | 8  | 8  | 5  | 1.558956276 | 0.191397    |          | ENSG00000166171 |
| 10 | 103568223 | 103568421 | 103568307 | 8  | 8  | 2  | 3.117912553 | 0.0283184   | MGEA5    | ENSG00000198408 |

|    |           |           |           |    |    |    |             |             |           |                 |
|----|-----------|-----------|-----------|----|----|----|-------------|-------------|-----------|-----------------|
| 10 | 103580403 | 103580684 | 103580543 | 9  | 12 | 7  | 1.688869299 | 0.11395     | KCNIP2    | ENSG00000120049 |
| 10 | 103640026 | 103640222 | 103640166 | 9  | 9  | 1  | 5.196520921 | 0.00490062  | KCNIP2    | ENSG00000120049 |
| 10 | 103643575 | 103643984 | 103643747 | 11 | 17 | 7  | 2.338434415 | 0.0171287   | KCNIP2    | ENSG00000120049 |
| 10 | 103804243 | 103804460 | 103804351 | 8  | 8  | 0  | 9.353737658 | 0.00163931  | C10orf76  | ENSG00000120029 |
| 10 | 103882618 | 103882821 | 103882715 | 8  | 9  | 8  | 1.154782427 | 0.375434    | PPRC1     | ENSG00000148840 |
| 10 | 103979626 | 103979850 | 103979762 | 10 | 10 | 2  | 3.810782009 | 0.00936112  | ELOVL3    | ENSG00000119915 |
| 10 | 104514657 | 104514966 | 104514824 | 8  | 11 | 1  | 6.235825105 | 0.0013754   | C10orf26  | ENSG00000166272 |
| 10 | 104568930 | 104569202 | 104569063 | 11 | 14 | 5  | 2.598260461 | 0.0167748   |           | ENSG00000203886 |
| 10 | 104792079 | 104792354 | 104792208 | 15 | 18 | 1  | 9.87338975  | 1.41E-05    |           | ENSG00000210987 |
| 10 | 105117518 | 105117775 | 105117646 | 8  | 11 | 5  | 2.078608368 | 0.0614303   | TAF5      | ENSG00000148835 |
| 10 | 105292448 | 105292627 | 105292537 | 8  | 8  | 1  | 4.676868829 | 0.0091584   | NEURL     | ENSG00000107954 |
| 10 | 105573969 | 105574296 | 105574143 | 10 | 14 | 2  | 5.196520921 | 0.000907371 | SH3PXD2A  | ENSG00000107957 |
| 10 | 105639938 | 105640260 | 105640099 | 9  | 14 | 8  | 1.73217364  | 0.0890835   | OBFC1     | ENSG00000107960 |
| 10 | 105681476 | 105681735 | 105681605 | 11 | 11 | 5  | 2.078608368 | 0.0614303   | OBFC1     | ENSG00000107960 |
| 10 | 105698354 | 105698570 | 105698462 | 8  | 9  | 0  | 10.39304184 | 0.000803859 | SLK       | ENSG00000065613 |
| 10 | 105733099 | 105733293 | 105733196 | 8  | 9  | 2  | 3.464347281 | 0.0163838   | SLK       | ENSG00000065613 |
| 10 | 106248742 | 106248925 | 106248821 | 8  | 10 | 0  | 11.43234603 | 0.000394183 | CCDC147   | ENSG00000120051 |
| 10 | 107701924 | 107702250 | 107702102 | 15 | 18 | 3  | 4.936694875 | 0.000311102 |           | ENSG00000213260 |
| 10 | 109789599 | 109789961 | 109789782 | 25 | 33 | 2  | 11.77878075 | 5.19E-09    |           | ENSG00000217870 |
| 10 | 111634024 | 111634268 | 111634146 | 11 | 11 | 5  | 2.078608368 | 0.0614303   | XPNPEP1   | ENSG00000108039 |
| 10 | 111640847 | 111641170 | 111641008 | 15 | 18 | 1  | 9.87338975  | 1.41E-05    | XPNPEP1   | ENSG00000108039 |
| 10 | 111881902 | 111882140 | 111882023 | 8  | 9  | 0  | 10.39304184 | 0.000803859 |           | ENSG00000216242 |
| 10 | 111925153 | 111925489 | 111925321 | 14 | 16 | 0  | 17.66817113 | 5.48E-06    | MXI1      | ENSG00000119950 |
| 10 | 111966973 | 111967331 | 111967163 | 18 | 23 | 6  | 3.563328632 | 0.000497701 | MXI1      | ENSG00000119950 |
| 10 | 112379624 | 112379843 | 112379733 | 8  | 8  | 1  | 4.676868829 | 0.0091584   |           | ENSG00000223302 |
| 10 | 112544111 | 112544344 | 112544227 | 8  | 8  | 3  | 2.338434415 | 0.0641221   | RBM20     | ENSG00000203867 |
| 10 | 112572572 | 112573003 | 112572702 | 9  | 18 | 14 | 1.316451967 | 0.209896    | RBM20     | ENSG00000203867 |
| 10 | 112668924 | 112669131 | 112669029 | 9  | 10 | 0  | 11.43234603 | 0.000394183 | NCRNA0008 | ENSG00000214413 |
| 10 | 113110079 | 113110326 | 113110202 | 9  | 10 | 0  | 11.43234603 | 0.000394183 |           | ENSG00000219328 |
| 10 | 114112203 | 114112504 | 114112350 | 11 | 15 | 3  | 4.157216737 | 0.00170423  |           | ENSG00000219383 |
| 10 | 114465901 | 114466193 | 114466048 | 15 | 16 | 1  | 8.834085566 | 5.30E-05    |           | ENSG00000203854 |
| 10 | 114474238 | 114474576 | 114474404 | 9  | 13 | 7  | 1.818782322 | 0.0805123   |           | ENSG00000203854 |
| 10 | 114561665 | 114561956 | 114561790 | 13 | 17 | 3  | 4.676868829 | 0.000552213 |           | ENSG00000203854 |
| 10 | 114736531 | 114736760 | 114736645 | 10 | 10 | 3  | 2.858086507 | 0.0242838   |           | ENSG00000219783 |



|    |           |           |           |    |    |    |             |             |           |                 |
|----|-----------|-----------|-----------|----|----|----|-------------|-------------|-----------|-----------------|
| 10 | 115456822 | 115457003 | 115456914 | 8  | 8  | 2  | 3.117912553 | 0.0283184   |           | ENSG00000211077 |
| 10 | 115924394 | 115924731 | 115924562 | 9  | 15 | 5  | 2.771477825 | 0.0105836   | C10orf118 | ENSG00000165813 |
| 10 | 116016180 | 116016587 | 116016349 | 13 | 21 | 5  | 3.810782009 | 0.000537724 |           | ENSG00000219906 |
| 10 | 116099262 | 116099848 | 116099524 | 8  | 20 | 11 | 1.818782322 | 0.04395     | AFAP1L2   | ENSG00000169129 |
| 10 | 116239711 | 116239943 | 116239827 | 8  | 8  | 1  | 4.676868829 | 0.0091584   | ABLIM1    | ENSG00000099204 |
| 10 | 116529533 | 116529790 | 116529646 | 12 | 15 | 2  | 5.542955649 | 0.000497081 |           | ENSG00000220318 |
| 10 | 116569215 | 116569412 | 116569323 | 9  | 9  | 0  | 10.39304184 | 0.000803859 | FAM160B1  | ENSG00000151553 |
| 10 | 116687793 | 116688164 | 116687870 | 10 | 15 | 4  | 3.32577339  | 0.00462646  | TRUB1     | ENSG00000165832 |
| 10 | 117423280 | 117423483 | 117423381 | 10 | 10 | 1  | 5.716173013 | 0.00260397  |           | ENSG00000203279 |
| 10 | 117794053 | 117794307 | 117794153 | 10 | 11 | 4  | 2.494330042 | 0.0324033   |           | ENSG00000222696 |
| 10 | 118384095 | 118384301 | 118384202 | 11 | 13 | 4  | 2.910051716 | 0.0125532   | PNLIPRP2  | ENSG00000165862 |
| 10 | 118410058 | 118410244 | 118410151 | 9  | 9  | 3  | 2.598260461 | 0.0397929   | C10orf82  | ENSG00000165863 |
| 10 | 118739848 | 118740135 | 118739984 | 20 | 24 | 0  | 25.98260461 | 1.83E-08    | KIAA1598  | ENSG00000187164 |
| 10 | 118754900 | 118755153 | 118755026 | 8  | 9  | 2  | 3.464347281 | 0.0163838   | KIAA1598  | ENSG00000187164 |
| 10 | 118966338 | 118966697 | 118966517 | 25 | 32 | 2  | 11.43234603 | 1.00E-08    | KCNK18    | ENSG00000186795 |
| 10 | 119803977 | 119804186 | 119804081 | 9  | 10 | 2  | 3.810782009 | 0.00936112  | CASC2     | ENSG00000177640 |
| 10 | 120159603 | 120159782 | 120159694 | 8  | 8  | 0  | 9.353737658 | 0.00163931  | C10orf84  | ENSG00000165669 |
| 10 | 120272384 | 120272596 | 120272505 | 11 | 11 | 4  | 2.494330042 | 0.0324033   |           | ENSG00000203278 |
| 10 | 120616551 | 120616736 | 120616643 | 8  | 8  | 1  | 4.676868829 | 0.0091584   |           | ENSG00000217638 |
| 10 | 120753152 | 120753567 | 120753361 | 23 | 33 | 1  | 17.66817113 | 5.50E-10    |           | ENSG00000215925 |
| 10 | 120756367 | 120756722 | 120756517 | 11 | 16 | 3  | 4.417042783 | 0.00097367  |           | ENSG00000215925 |
| 10 | 120775928 | 120776168 | 120776034 | 8  | 10 | 0  | 11.43234603 | 0.000394183 | NANOS1    | ENSG00000188613 |
| 10 | 121074675 | 121075005 | 121074836 | 18 | 22 | 5  | 3.983999373 | 0.000317941 |           | ENSG00000211177 |
| 10 | 121096575 | 121096790 | 121096682 | 8  | 8  | 3  | 2.338434415 | 0.0641221   |           | ENSG00000211177 |
| 10 | 121346353 | 121346571 | 121346464 | 8  | 9  | 0  | 10.39304184 | 0.000803859 | TIAL1     | ENSG00000151923 |
| 10 | 121346576 | 121346967 | 121346788 | 10 | 18 | 2  | 6.582259834 | 7.91E-05    | TIAL1     | ENSG00000151923 |
| 10 | 121403888 | 121404099 | 121403987 | 11 | 12 | 2  | 4.503651465 | 0.002963    | BAG3      | ENSG00000151929 |
| 10 | 121413458 | 121413936 | 121413757 | 9  | 19 | 22 | 0.903742769 | 0.631776    | BAG3      | ENSG00000151929 |
| 10 | 121535791 | 121535970 | 121535861 | 8  | 8  | 2  | 3.117912553 | 0.0283184   | INPP5F    | ENSG00000198825 |
| 10 | 121621445 | 121621646 | 121621579 | 8  | 8  | 4  | 1.870747532 | 0.118863    | C10orf119 | ENSG00000197771 |
| 10 | 121894826 | 121895005 | 121894910 | 8  | 9  | 0  | 10.39304184 | 0.000803859 |           | ENSG00000221402 |
| 10 | 121971340 | 121971561 | 121971439 | 9  | 10 | 0  | 11.43234603 | 0.000394183 |           | ENSG00000221402 |
| 10 | 123074430 | 123074613 | 123074521 | 9  | 9  | 0  | 10.39304184 | 0.000803859 |           | ENSG00000222979 |
| 10 | 123261681 | 123261882 | 123261761 | 8  | 8  | 1  | 4.676868829 | 0.0091584   | FGFR2     | ENSG00000066468 |

|    |           |           |           |    |    |    |             |             |        |                 |
|----|-----------|-----------|-----------|----|----|----|-------------|-------------|--------|-----------------|
| 10 | 123360466 | 123360841 | 123360645 | 24 | 34 | 0  | 36.37564645 | 1.47E-11    | FGFR2  | ENSG00000066468 |
| 10 | 123744145 | 123744403 | 123744298 | 8  | 10 | 3  | 2.858086507 | 0.0242838   | TACC2  | ENSG00000138162 |
| 10 | 123744608 | 123744832 | 123744706 | 8  | 8  | 3  | 2.338434415 | 0.0641221   | TACC2  | ENSG00000138162 |
| 10 | 124225846 | 124226108 | 124225968 | 9  | 9  | 0  | 10.39304184 | 0.000803859 | HTRA1  | ENSG00000166033 |
| 10 | 124792995 | 124793174 | 124793083 | 8  | 8  | 5  | 1.558956276 | 0.191397    | ACADSB | ENSG00000196177 |
| 10 | 125288279 | 125288741 | 125288570 | 29 | 40 | 4  | 8.522294311 | 2.26E-09    | GPR26  | ENSG00000154478 |
| 10 | 125333510 | 125333689 | 125333547 | 8  | 8  | 0  | 9.353737658 | 0.00163931  | GPR26  | ENSG00000154478 |
| 10 | 125837622 | 125837941 | 125837781 | 10 | 13 | 3  | 3.637564645 | 0.0050909   |        | ENSG00000182022 |
| 10 | 125931563 | 125931837 | 125931700 | 9  | 10 | 0  | 11.43234603 | 0.000394183 |        | ENSG00000182022 |
| 10 | 126208774 | 126208970 | 126208875 | 8  | 8  | 3  | 2.338434415 | 0.0641221   |        | ENSG00000203273 |
| 10 | 126369527 | 126369775 | 126369651 | 9  | 10 | 7  | 1.429043253 | 0.21536     | FAM53B | ENSG00000189319 |
| 10 | 126372031 | 126372259 | 126372135 | 11 | 11 | 3  | 3.117912553 | 0.0146045   | FAM53B | ENSG00000189319 |
| 10 | 126406027 | 126406344 | 126406185 | 10 | 14 | 3  | 3.897390691 | 0.00295882  | FAM53B | ENSG00000189319 |
| 10 | 126743291 | 126743635 | 126743460 | 17 | 21 | 5  | 3.810782009 | 0.000537724 | CTBP2  | ENSG00000175029 |
| 10 | 126743742 | 126744013 | 126743877 | 9  | 12 | 0  | 13.5109544  | 9.48E-05    | CTBP2  | ENSG00000175029 |
| 10 | 126975175 | 126975410 | 126975297 | 9  | 10 | 2  | 3.810782009 | 0.00936112  |        | ENSG00000212946 |
| 10 | 127127128 | 127127361 | 127127277 | 8  | 9  | 3  | 2.598260461 | 0.0397929   |        | ENSG00000220396 |
| 10 | 127134404 | 127134754 | 127134579 | 9  | 15 | 3  | 4.157216737 | 0.00170423  |        | ENSG00000220396 |
| 10 | 127193686 | 127194028 | 127193857 | 8  | 13 | 5  | 2.425043097 | 0.0262442   |        | ENSG00000220396 |
| 10 | 127217555 | 127217762 | 127217660 | 12 | 13 | 0  | 14.55025858 | 4.65E-05    |        | ENSG00000220396 |
| 10 | 127270504 | 127270754 | 127270648 | 9  | 11 | 6  | 1.781664316 | 0.103344    |        | ENSG00000214297 |
| 10 | 127303406 | 127303682 | 127303544 | 12 | 13 | 10 | 1.32275078  | 0.240023    |        | ENSG00000214297 |
| 10 | 127312182 | 127312361 | 127312326 | 10 | 10 | 5  | 1.905391004 | 0.0915982   |        | ENSG00000214297 |
| 10 | 127515309 | 127515498 | 127515372 | 8  | 9  | 2  | 3.464347281 | 0.0163838   |        | ENSG00000215972 |
| 10 | 127571404 | 127571717 | 127571560 | 8  | 11 | 7  | 1.558956276 | 0.158273    |        | ENSG00000222629 |
| 10 | 127607361 | 127607658 | 127607533 | 8  | 9  | 4  | 2.078608368 | 0.0785659   |        | ENSG00000220675 |
| 10 | 127646137 | 127646534 | 127646320 | 32 | 43 | 2  | 15.24312804 | 6.77E-12    | FANK1  | ENSG00000203780 |
| 10 | 128072597 | 128072790 | 128072693 | 8  | 8  | 0  | 9.353737658 | 0.00163931  | ADAM12 | ENSG00000148848 |
| 10 | 129263019 | 129263378 | 129263200 | 15 | 21 | 1  | 11.43234603 | 1.90E-06    | NPS    | ENSG00000214285 |
| 10 | 129551364 | 129551966 | 129551628 | 63 | 81 | 0  | 85.22294311 | 4.19E-26    | CLRN3  | ENSG00000180745 |
| 10 | 129627997 | 129628410 | 129628158 | 19 | 32 | 1  | 17.14851904 | 1.09E-09    | PTPRE  | ENSG00000132334 |
| 10 | 129900205 | 129900482 | 129900343 | 12 | 12 | 4  | 2.702190879 | 0.0203088   | MKI67  | ENSG00000148773 |
| 10 | 130080316 | 130080518 | 130080392 | 9  | 9  | 3  | 2.598260461 | 0.0397929   | MKI67  | ENSG00000148773 |
| 10 | 131377935 | 131378315 | 131378127 | 9  | 17 | 7  | 2.338434415 | 0.0171287   | MGMT   | ENSG00000170430 |

|    |           |           |           |     |     |   |             |             |           |                 |
|----|-----------|-----------|-----------|-----|-----|---|-------------|-------------|-----------|-----------------|
| 10 | 132078200 | 132078467 | 132078333 | 18  | 20  | 0 | 21.82538787 | 3.17E-07    |           | ENSG00000222997 |
| 10 | 132478674 | 132478853 | 132478823 | 8   | 8   | 5 | 1.558956276 | 0.191397    |           | ENSG00000211268 |
| 10 | 132782792 | 132783349 | 132783118 | 124 | 148 | 2 | 51.61877448 | 2.30E-43    | TCERG1L   | ENSG00000176769 |
| 10 | 132817853 | 132818153 | 132818032 | 11  | 15  | 7 | 2.078608368 | 0.038229    | TCERG1L   | ENSG00000176769 |
| 10 | 133459668 | 133460185 | 133459983 | 27  | 41  | 2 | 14.55025858 | 2.58E-11    |           | ENSG00000189275 |
| 10 | 134045072 | 134045509 | 134045307 | 22  | 32  | 1 | 17.14851904 | 1.09E-09    | PWWP2B    | ENSG00000171813 |
| 10 | 134254822 | 134255001 | 134254892 | 8   | 8   | 2 | 3.117912553 | 0.0283184   | INPP5A    | ENSG00000068383 |
| 10 | 134526887 | 134527213 | 134527050 | 15  | 19  | 2 | 6.928694562 | 4.25E-05    | C10orf92  | ENSG00000108046 |
| 10 | 134567775 | 134567985 | 134567901 | 9   | 9   | 1 | 5.196520921 | 0.00490062  |           | ENSG00000203775 |
| 10 | 134908460 | 134908864 | 134908704 | 11  | 17  | 0 | 18.70747532 | 2.69E-06    |           | ENSG00000199089 |
| 10 | 134921126 | 134921357 | 134921241 | 8   | 9   | 0 | 10.39304184 | 0.000803859 |           | ENSG00000199089 |
| 10 | 134982186 | 134982413 | 134982297 | 8   | 9   | 3 | 2.598260461 | 0.0397929   |           | ENSG00000198050 |
| 10 | 135023649 | 135023887 | 135023805 | 9   | 11  | 7 | 1.558956276 | 0.158273    | C10orf125 | ENSG00000148803 |
| 10 | 135349106 | 135349435 | 135349270 | 10  | 11  | 9 | 1.247165021 | 0.300052    |           | ENSG00000203766 |
| 10 | 135374099 | 135374330 | 135374214 | 8   | 9   | 3 | 2.598260461 | 0.0397929   |           | ENSG00000213147 |
| 11 | 696822    | 697132    | 696977    | 17  | 21  | 2 | 7.621564018 | 1.21E-05    | EPS8L2    | ENSG00000177106 |
| 11 | 794249    | 794645    | 794399    | 21  | 28  | 4 | 6.027964269 | 3.34E-06    | LRDD      | ENSG00000177595 |
| 11 | 1098705   | 1099062   | 1098883   | 11  | 14  | 1 | 7.794781382 | 0.000197021 | MUC2      | ENSG00000198788 |
| 11 | 1633111   | 1633426   | 1633268   | 19  | 23  | 0 | 24.94330042 | 3.74E-08    | FAM99A    | ENSG00000205866 |
| 11 | 1774347   | 1774705   | 1774526   | 17  | 23  | 5 | 4.157216737 | 0.000186738 |           | ENSG00000216482 |
| 11 | 1805081   | 1805288   | 1805174   | 8   | 8   | 0 | 9.353737658 | 0.00163931  | SYT8      | ENSG00000149043 |
| 11 | 1808470   | 1808891   | 1808665   | 43  | 55  | 1 | 29.10051716 | 1.38E-16    | SYT8      | ENSG00000149043 |
| 11 | 2978309   | 2978507   | 2978421   | 8   | 8   | 2 | 3.117912553 | 0.0283184   | NAP1L4    | ENSG00000205531 |
| 11 | 3593859   | 3594155   | 3594007   | 19  | 22  | 1 | 11.95199812 | 9.69E-07    | TRPC2     | ENSG00000215103 |
| 11 | 4072350   | 4072546   | 4072422   | 8   | 9   | 0 | 10.39304184 | 0.000803859 | RRM1      | ENSG00000167325 |
| 11 | 4441928   | 4442434   | 4442221   | 78  | 94  | 5 | 16.45564958 | 1.08E-23    | OR52K3P   | ENSG00000205512 |
| 11 | 4487129   | 4487308   | 4487211   | 8   | 8   | 0 | 9.353737658 | 0.00163931  | OR52K1    | ENSG00000196778 |
| 11 | 5598332   | 5598589   | 5598460   | 10  | 11  | 1 | 6.235825105 | 0.0013754   | TRIM34    | ENSG00000121236 |
| 11 | 5668123   | 5668569   | 5668379   | 21  | 36  | 0 | 38.45425482 | 3.54E-12    | TRIM22    | ENSG00000132274 |
| 11 | 5785458   | 5785774   | 5785632   | 24  | 28  | 3 | 7.534955336 | 7.67E-07    | OR52N2    | ENSG00000180988 |
| 11 | 5786415   | 5786629   | 5786515   | 9   | 9   | 1 | 5.196520921 | 0.00490062  | OR52N2    | ENSG00000180988 |
| 11 | 7549590   | 7549789   | 7549670   | 8   | 8   | 3 | 2.338434415 | 0.0641221   | PPFIBP2   | ENSG00000166387 |
| 11 | 7551446   | 7551655   | 7551488   | 8   | 10  | 8 | 1.27026067  | 0.293854    | PPFIBP2   | ENSG00000166387 |
| 11 | 7575538   | 7575857   | 7575710   | 18  | 20  | 5 | 3.637564645 | 0.000902929 | CYB5R2    | ENSG00000166394 |

|    |          |          |          |    |    |    |             |             |         |                 |
|----|----------|----------|----------|----|----|----|-------------|-------------|---------|-----------------|
| 11 | 7578098  | 7578526  | 7578273  | 15 | 25 | 6  | 3.860272684 | 0.00017915  | CYB5R2  | ENSG00000166394 |
| 11 | 7589911  | 7590133  | 7590054  | 11 | 11 | 5  | 2.078608368 | 0.0614303   | CYB5R2  | ENSG00000166394 |
| 11 | 7965245  | 7965424  | 7965334  | 9  | 9  | 3  | 2.598260461 | 0.0397929   | EIF3F   | ENSG00000175390 |
| 11 | 8306944  | 8307199  | 8307071  | 9  | 10 | 1  | 5.716173013 | 0.00260397  | LMO1    | ENSG00000166407 |
| 11 | 9054484  | 9054673  | 9054568  | 8  | 9  | 4  | 2.078608368 | 0.0785659   | SCUBE2  | ENSG00000175356 |
| 11 | 9054822  | 9055047  | 9054931  | 9  | 11 | 6  | 1.781664316 | 0.103344    | SCUBE2  | ENSG00000175356 |
| 11 | 9117110  | 9117323  | 9117216  | 12 | 14 | 2  | 5.196520921 | 0.000907371 |         | ENSG00000212788 |
| 11 | 9587945  | 9588461  | 9588220  | 18 | 35 | 1  | 18.70747532 | 1.40E-10    |         | ENSG00000209446 |
| 11 | 9780451  | 9780751  | 9780622  | 16 | 17 | 1  | 9.353737658 | 2.73E-05    |         | ENSG00000201564 |
| 11 | 9802784  | 9802963  | 9802877  | 8  | 8  | 2  | 3.117912553 | 0.0283184   |         | ENSG00000215043 |
| 11 | 10022703 | 10023061 | 10022882 | 38 | 44 | 0  | 46.76868829 | 1.18E-14    |         | ENSG00000215043 |
| 11 | 10366393 | 10366582 | 10366420 | 8  | 8  | 5  | 1.558956276 | 0.191397    |         | ENSG00000209450 |
| 11 | 10372977 | 10373283 | 10373135 | 10 | 12 | 4  | 2.702190879 | 0.0203088   |         | ENSG00000209450 |
| 11 | 10878139 | 10878318 | 10878228 | 8  | 8  | 1  | 4.676868829 | 0.0091584   |         | ENSG00000222048 |
| 11 | 11823306 | 11823561 | 11823439 | 8  | 9  | 2  | 3.464347281 | 0.0163838   | USP47   | ENSG00000170242 |
| 11 | 12226658 | 12226904 | 12226782 | 13 | 15 | 4  | 3.32577339  | 0.00462646  | MICALCL | ENSG00000133808 |
| 11 | 12552037 | 12552216 | 12552093 | 8  | 8  | 1  | 4.676868829 | 0.0091584   | TEAD1   | ENSG00000187079 |
| 11 | 12701915 | 12702109 | 12702060 | 8  | 10 | 3  | 2.858086507 | 0.0242838   | TEAD1   | ENSG00000187079 |
| 11 | 13322483 | 13322693 | 13322579 | 10 | 10 | 3  | 2.858086507 | 0.0242838   |         | ENSG00000222162 |
| 11 | 16934849 | 16935172 | 16935016 | 15 | 17 | 10 | 1.700679574 | 0.0766266   |         | ENSG00000209522 |
| 11 | 16964968 | 16965202 | 16965082 | 8  | 10 | 1  | 5.716173013 | 0.00260397  |         | ENSG00000209522 |
| 11 | 16977770 | 16977969 | 16977905 | 8  | 8  | 1  | 4.676868829 | 0.0091584   | PLEKHA7 | ENSG00000166689 |
| 11 | 17055716 | 17055997 | 17055856 | 8  | 11 | 4  | 2.494330042 | 0.0324033   | RPS13   | ENSG00000110700 |
| 11 | 17090899 | 17091131 | 17091015 | 17 | 18 | 0  | 19.7467795  | 1.32E-06    |         | ENSG00000201586 |
| 11 | 17216657 | 17216856 | 17216756 | 9  | 9  | 2  | 3.464347281 | 0.0163838   |         | ENSG00000197149 |
| 11 | 17347966 | 17348276 | 17348133 | 14 | 18 | 0  | 19.7467795  | 1.32E-06    | KCNJ11  | ENSG00000187486 |
| 11 | 17356858 | 17357139 | 17356979 | 23 | 25 | 2  | 9.00730293  | 9.47E-07    | KCNJ11  | ENSG00000187486 |
| 11 | 17449669 | 17449886 | 17449777 | 9  | 9  | 0  | 10.39304184 | 0.000803859 | ABCC8   | ENSG00000006071 |
| 11 | 17789508 | 17789732 | 17789622 | 8  | 10 | 2  | 3.810782009 | 0.00936112  |         | ENSG00000205289 |
| 11 | 18372304 | 18372502 | 18372403 | 9  | 11 | 0  | 12.47165021 | 0.000193293 | LDHA    | ENSG00000134333 |
| 11 | 18374055 | 18374334 | 18374208 | 9  | 10 | 4  | 2.286469205 | 0.0509017   | LDHA    | ENSG00000134333 |
| 11 | 19289574 | 19289861 | 19289702 | 9  | 12 | 4  | 2.702190879 | 0.0203088   | E2F8    | ENSG00000129173 |
| 11 | 19781847 | 19782027 | 19781923 | 8  | 9  | 2  | 3.464347281 | 0.0163838   | NAV2    | ENSG00000166833 |
| 11 | 20462115 | 20462407 | 20462262 | 14 | 14 | 1  | 7.794781382 | 0.000197021 | PRMT3   | ENSG00000185238 |

|    |          |          |          |    |    |   |             |             |          |                 |
|----|----------|----------|----------|----|----|---|-------------|-------------|----------|-----------------|
| 11 | 28118029 | 28118213 | 28118121 | 11 | 12 | 0 | 13.5109544  | 9.48E-05    | METT5D1  | ENSG00000169519 |
| 11 | 28118831 | 28119142 | 28118980 | 16 | 18 | 1 | 9.87338975  | 1.41E-05    | METT5D1  | ENSG00000169519 |
| 11 | 28499235 | 28499587 | 28499411 | 58 | 63 | 2 | 22.1718226  | 8.95E-18    |          | ENSG00000216849 |
| 11 | 30176022 | 30176303 | 30176171 | 11 | 11 | 1 | 6.235825105 | 0.0013754   | FSHB     | ENSG00000131808 |
| 11 | 30499889 | 30500106 | 30499997 | 8  | 9  | 3 | 2.598260461 | 0.0397929   | MPPED2   | ENSG00000066382 |
| 11 | 31232724 | 31232912 | 31232807 | 9  | 9  | 1 | 5.196520921 | 0.00490062  |          | ENSG00000188512 |
| 11 | 33039577 | 33039879 | 33039728 | 17 | 19 | 0 | 20.78608368 | 6.46E-07    |          | ENSG00000213713 |
| 11 | 33807759 | 33807938 | 33807848 | 8  | 8  | 1 | 4.676868829 | 0.0091584   | LMO2     | ENSG00000135363 |
| 11 | 33949246 | 33949439 | 33949342 | 8  | 9  | 3 | 2.598260461 | 0.0397929   | LMO2     | ENSG00000135363 |
| 11 | 34241602 | 34241831 | 34241716 | 14 | 16 | 6 | 2.524024447 | 0.0137633   |          | ENSG00000201867 |
| 11 | 34247629 | 34247846 | 34247737 | 8  | 10 | 1 | 5.716173013 | 0.00260397  |          | ENSG00000201867 |
| 11 | 34491121 | 34491310 | 34491215 | 8  | 8  | 3 | 2.338434415 | 0.0641221   | ELF5     | ENSG00000135374 |
| 11 | 34491656 | 34492099 | 34491830 | 8  | 16 | 6 | 2.524024447 | 0.0137633   | ELF5     | ENSG00000135374 |
| 11 | 34548768 | 34549023 | 34548919 | 8  | 11 | 7 | 1.558956276 | 0.158273    | EHF      | ENSG00000135373 |
| 11 | 34552003 | 34552203 | 34552103 | 8  | 10 | 6 | 1.63319229  | 0.146906    | EHF      | ENSG00000135373 |
| 11 | 34610093 | 34610468 | 34610298 | 14 | 19 | 7 | 2.598260461 | 0.00730518  | EHF      | ENSG00000135373 |
| 11 | 34643682 | 34643896 | 34643749 | 8  | 8  | 3 | 2.338434415 | 0.0641221   | EHF      | ENSG00000135373 |
| 11 | 34646273 | 34646666 | 34646487 | 9  | 17 | 1 | 9.353737658 | 2.73E-05    | EHF      | ENSG00000135373 |
| 11 | 34663519 | 34663884 | 34663698 | 32 | 39 | 2 | 13.85738912 | 9.79E-11    | EHF      | ENSG00000135373 |
| 11 | 35284088 | 35284487 | 35284308 | 9  | 14 | 4 | 3.117912553 | 0.00766354  |          | ENSG00000198603 |
| 11 | 36572475 | 36572773 | 36572624 | 13 | 15 | 2 | 5.542955649 | 0.000497081 | C11orf74 | ENSG00000166352 |
| 11 | 37966195 | 37966402 | 37966298 | 8  | 8  | 2 | 3.117912553 | 0.0283184   |          |                 |
| 11 | 42750033 | 42750257 | 42750116 | 10 | 10 | 0 | 11.43234603 | 0.000394183 |          |                 |
| 11 | 43717136 | 43717344 | 43717259 | 8  | 8  | 0 | 9.353737658 | 0.00163931  | HSD17B12 | ENSG00000149084 |
| 11 | 44957054 | 44957352 | 44957203 | 10 | 14 | 1 | 7.794781382 | 0.000197021 | TP53I11  | ENSG00000175274 |
| 11 | 45318353 | 45318600 | 45318476 | 8  | 9  | 6 | 1.484720263 | 0.204387    | SYT13    | ENSG00000019505 |
| 11 | 45784988 | 45785178 | 45785083 | 9  | 9  | 1 | 5.196520921 | 0.00490062  | SLC35C1  | ENSG00000181830 |
| 11 | 46214234 | 46214499 | 46214383 | 9  | 12 | 5 | 2.251825733 | 0.0404733   |          | ENSG00000206837 |
| 11 | 46221360 | 46221712 | 46221536 | 8  | 14 | 5 | 2.598260461 | 0.0167748   |          | ENSG00000206837 |
| 11 | 46286715 | 46286899 | 46286766 | 8  | 8  | 1 | 4.676868829 | 0.0091584   | DGKZ     | ENSG00000149091 |
| 11 | 46316853 | 46317049 | 46316967 | 9  | 9  | 6 | 1.484720263 | 0.204387    | DGKZ     | ENSG00000149091 |
| 11 | 46317556 | 46317757 | 46317606 | 8  | 8  | 3 | 2.338434415 | 0.0641221   | DGKZ     | ENSG00000149091 |
| 11 | 46323311 | 46323506 | 46323360 | 8  | 8  | 0 | 9.353737658 | 0.00163931  | DGKZ     | ENSG00000149091 |
| 11 | 46441397 | 46441628 | 46441509 | 8  | 8  | 0 | 9.353737658 | 0.00163931  |          | ENSG00000222006 |

|    |          |          |          |     |     |    |             |             |          |                 |
|----|----------|----------|----------|-----|-----|----|-------------|-------------|----------|-----------------|
| 11 | 46528254 | 46528506 | 46528380 | 9   | 9   | 0  | 10.39304184 | 0.000803859 | AMBRA1   | ENSG00000110497 |
| 11 | 46572094 | 46572400 | 46572247 | 9   | 12  | 6  | 1.930136342 | 0.071303    | AMBRA1   | ENSG00000110497 |
| 11 | 46635601 | 46635814 | 46635661 | 8   | 10  | 3  | 2.858086507 | 0.0242838   | KIAA0652 | ENSG00000175224 |
| 11 | 46635913 | 46636173 | 46636032 | 10  | 12  | 5  | 2.251825733 | 0.0404733   | KIAA0652 | ENSG00000175224 |
| 11 | 46678460 | 46678809 | 46678634 | 10  | 16  | 11 | 1.472347594 | 0.147517    | ARHGAP1  | ENSG00000175220 |
| 11 | 46678967 | 46679219 | 46679071 | 9   | 11  | 8  | 1.385738912 | 0.224757    | ZNF408   | ENSG00000175213 |
| 11 | 46719890 | 46720072 | 46719981 | 8   | 8   | 5  | 1.558956276 | 0.191397    |          | ENSG00000212135 |
| 11 | 46914637 | 46914858 | 46914747 | 8   | 10  | 3  | 2.858086507 | 0.0242838   | C11orf49 | ENSG00000149179 |
| 11 | 46965447 | 46965674 | 46965588 | 8   | 9   | 2  | 3.464347281 | 0.0163838   | C11orf49 | ENSG00000149179 |
| 11 | 47141350 | 47141604 | 47141477 | 9   | 10  | 4  | 2.286469205 | 0.0509017   | ARFGAP2  | ENSG00000149182 |
| 11 | 47154930 | 47155130 | 47154978 | 9   | 10  | 4  | 2.286469205 | 0.0509017   | ARFGAP2  | ENSG00000149182 |
| 11 | 47155205 | 47155673 | 47155384 | 11  | 18  | 3  | 4.936694875 | 0.000311102 | ARFGAP2  | ENSG00000149182 |
| 11 | 47167822 | 47168013 | 47167992 | 9   | 11  | 0  | 12.47165021 | 0.000193293 | PACSIN3  | ENSG00000165912 |
| 11 | 47192196 | 47193826 | 47193125 | 325 | 426 | 14 | 29.58552578 | 5.73E-111   | DDB2     | ENSG00000134574 |
| 11 | 47226818 | 47227257 | 47227037 | 13  | 22  | 10 | 2.173090567 | 0.0132845   | NR1H3    | ENSG0000025434  |
| 11 | 47332879 | 47333209 | 47333044 | 10  | 12  | 3  | 3.377738599 | 0.00867157  |          | ENSG00000203453 |
| 11 | 47333443 | 47333707 | 47333609 | 11  | 13  | 5  | 2.425043097 | 0.0262442   |          | ENSG00000203453 |
| 11 | 47378713 | 47378913 | 47378852 | 8   | 9   | 3  | 2.598260461 | 0.0397929   | SLC39A13 | ENSG00000165915 |
| 11 | 47387904 | 47388178 | 47388041 | 8   | 11  | 2  | 4.157216737 | 0.0052913   | SLC39A13 | ENSG00000165915 |
| 11 | 47501741 | 47501988 | 47501864 | 8   | 11  | 2  | 4.157216737 | 0.0052913   | CUGBP1   | ENSG00000149187 |
| 11 | 47556992 | 47557320 | 47557152 | 18  | 22  | 10 | 2.173090567 | 0.0132845   | NDUFS3   | ENSG00000213619 |
| 11 | 48028185 | 48028367 | 48028276 | 9   | 9   | 1  | 5.196520921 | 0.00490062  | PTPRJ    | ENSG00000149177 |
| 11 | 48087473 | 48087656 | 48087564 | 8   | 9   | 7  | 1.29913023  | 0.286504    | OR4B1    | ENSG00000175619 |
| 11 | 48772885 | 48773067 | 48772918 | 9   | 9   | 14 | 0.692869456 | 0.822654    |          | ENSG00000214907 |
| 11 | 48791572 | 48791751 | 48791725 | 12  | 12  | 3  | 3.377738599 | 0.00867157  |          | ENSG00000214907 |
| 11 | 48815934 | 48816113 | 48815963 | 8   | 8   | 19 | 0.467686883 | 0.977188    |          | ENSG00000214907 |
| 11 | 48820165 | 48820499 | 48820332 | 50  | 52  | 46 | 1.171981314 | 0.213329    |          | ENSG00000214907 |
| 11 | 48838307 | 48838634 | 48838470 | 8   | 8   | 7  | 1.169217207 | 0.371848    |          | ENSG00000214907 |
| 11 | 48896243 | 48896422 | 48896272 | 8   | 8   | 10 | 0.850339787 | 0.645072    |          | ENSG00000214907 |
| 11 | 48914373 | 48914705 | 48914539 | 34  | 34  | 18 | 1.914507708 | 0.00935224  |          | ENSG00000214907 |
| 11 | 50651572 | 50651893 | 50651739 | 8   | 8   | 0  | 9.353737658 | 0.00163931  |          | ENSG00000214883 |
| 11 | 50726273 | 50726602 | 50726437 | 17  | 18  | 6  | 2.8209685   | 0.00559354  |          | ENSG00000214883 |
| 11 | 50737885 | 50738213 | 50738044 | 14  | 14  | 12 | 1.199197136 | 0.313881    |          | ENSG00000214883 |
| 11 | 51428561 | 51428890 | 51428725 | 8   | 8   | 8  | 1.039304184 | 0.46786     | OR4C46   | ENSG00000185926 |

|    |          |          |          |    |    |    |             |             |          |                 |
|----|----------|----------|----------|----|----|----|-------------|-------------|----------|-----------------|
| 11 | 51429781 | 51429961 | 51429934 | 9  | 9  | 8  | 1.154782427 | 0.375434    | OR4C46   | ENSG00000185926 |
| 11 | 51435326 | 51435657 | 51435491 | 13 | 13 | 8  | 1.616695398 | 0.123553    | OR4C46   | ENSG00000185926 |
| 11 | 51435885 | 51436217 | 51436051 | 27 | 30 | 23 | 1.342434571 | 0.13686     | OR4C46   | ENSG00000185926 |
| 11 | 51437367 | 51437546 | 51437517 | 9  | 10 | 3  | 2.858086507 | 0.0242838   | OR4C46   | ENSG00000185926 |
| 11 | 51447736 | 51448074 | 51447905 | 12 | 12 | 12 | 1.039304184 | 0.461227    | OR4C46   | ENSG00000185926 |
| 11 | 57181257 | 57181497 | 57181344 | 10 | 10 | 4  | 2.286469205 | 0.0509017   | CLP1     | ENSG00000172409 |
| 11 | 57265266 | 57265535 | 57265385 | 11 | 14 | 2  | 5.196520921 | 0.000907371 | C11orf31 | ENSG00000211450 |
| 11 | 58102049 | 58102374 | 58102215 | 10 | 14 | 6  | 2.227080395 | 0.0322529   | CNTF     | ENSG00000186660 |
| 11 | 59080293 | 59080719 | 59080540 | 8  | 13 | 4  | 2.910051716 | 0.0125532   | OR4D9    | ENSG00000172742 |
| 11 | 59097595 | 59097844 | 59097718 | 9  | 9  | 0  | 10.39304184 | 0.000803859 | OSBP     | ENSG00000110048 |
| 11 | 59894803 | 59895053 | 59894928 | 9  | 10 | 2  | 3.810782009 | 0.00936112  | MS4A7    | ENSG00000166927 |
| 11 | 60087592 | 60088117 | 60087879 | 26 | 43 | 2  | 15.24312804 | 6.77E-12    | MS4A13   | ENSG00000204979 |
| 11 | 60396198 | 60396447 | 60396322 | 8  | 10 | 1  | 5.716173013 | 0.00260397  | ZP1      | ENSG00000149506 |
| 11 | 60466352 | 60466543 | 60466447 | 8  | 8  | 3  | 2.338434415 | 0.0641221   | SLC15A3  | ENSG00000110446 |
| 11 | 60682713 | 60682960 | 60682836 | 15 | 17 | 6  | 2.672496474 | 0.00882337  | VPS37C   | ENSG00000167987 |
| 11 | 60824752 | 60824982 | 60824827 | 11 | 11 | 1  | 6.235825105 | 0.0013754   | VWCE     | ENSG00000167992 |
| 11 | 60886156 | 60886448 | 60886302 | 8  | 11 | 5  | 2.078608368 | 0.0614303   | CYBASC3  | ENSG00000162144 |
| 11 | 60970325 | 60970556 | 60970424 | 10 | 13 | 3  | 3.637564645 | 0.0050909   |          | ENSG00000209851 |
| 11 | 61005419 | 61005616 | 61005520 | 9  | 9  | 2  | 3.464347281 | 0.0163838   | C11orf66 | ENSG00000162148 |
| 11 | 61105487 | 61105700 | 61105601 | 9  | 9  | 4  | 2.078608368 | 0.0785659   |          | ENSG00000011347 |
| 11 | 61150805 | 61151161 | 61150982 | 13 | 18 | 9  | 1.97467795  | 0.0349428   |          | ENSG00000213553 |
| 11 | 61199737 | 61199938 | 61199837 | 8  | 9  | 0  | 10.39304184 | 0.000803859 | DAGLA    | ENSG00000134780 |
| 11 | 61304974 | 61305153 | 61305063 | 8  | 9  | 1  | 5.196520921 | 0.00490062  | C11orf9  | ENSG00000124920 |
| 11 | 61316125 | 61316343 | 61316182 | 8  | 10 | 5  | 1.905391004 | 0.0915982   |          | ENSG00000207601 |
| 11 | 61340406 | 61340592 | 61340499 | 12 | 12 | 6  | 1.930136342 | 0.071303    | FADS2    | ENSG00000134824 |
| 11 | 61344192 | 61344531 | 61344361 | 27 | 32 | 3  | 8.57425952  | 6.31E-08    | FADS1    | ENSG00000149485 |
| 11 | 61495825 | 61496105 | 61495965 | 8  | 10 | 6  | 1.63319229  | 0.146906    | FTH1     | ENSG00000167996 |
| 11 | 61523071 | 61523544 | 61523224 | 24 | 34 | 5  | 6.062607741 | 3.83E-07    | FTH1     | ENSG00000167996 |
| 11 | 61620317 | 61620535 | 61620426 | 9  | 10 | 0  | 11.43234603 | 0.000394183 | INCENP   | ENSG00000149503 |
| 11 | 61746942 | 61747252 | 61747097 | 25 | 27 | 0  | 29.10051716 | 2.16E-09    | SCGB2A1  | ENSG00000124939 |
| 11 | 62032735 | 62032934 | 62032794 | 11 | 13 | 2  | 4.850086193 | 0.00164564  | AHNAK    | ENSG00000124942 |
| 11 | 62097408 | 62097587 | 62097497 | 8  | 8  | 2  | 3.117912553 | 0.0283184   | EEF1G    | ENSG00000186676 |
| 11 | 62123923 | 62124318 | 62124120 | 17 | 25 | 3  | 6.755477198 | 4.84E-06    | MTA2     | ENSG00000149480 |
| 11 | 62189226 | 62189610 | 62189405 | 13 | 20 | 4  | 4.365077574 | 0.000324139 |          | ENSG00000214756 |

|    |          |          |          |     |     |    |             |             |          |                 |
|----|----------|----------|----------|-----|-----|----|-------------|-------------|----------|-----------------|
| 11 | 62195574 | 62195835 | 62195693 | 14  | 14  | 1  | 7.794781382 | 0.000197021 | C11orf83 | ENSG00000204922 |
| 11 | 62245871 | 62246081 | 62245971 | 10  | 10  | 4  | 2.286469205 | 0.0509017   | HNRNPUL2 | ENSG00000214753 |
| 11 | 62285634 | 62285829 | 62285734 | 9   | 10  | 3  | 2.858086507 | 0.0242838   | POLR2G   | ENSG00000168002 |
| 11 | 62355842 | 62356049 | 62355922 | 8   | 9   | 6  | 1.484720263 | 0.204387    | STX5     | ENSG00000162236 |
| 11 | 62365307 | 62366093 | 62365555 | 26  | 65  | 40 | 1.673026248 | 0.00419693  |          | ENSG00000222328 |
| 11 | 62433230 | 62433474 | 62433352 | 9   | 12  | 4  | 2.702190879 | 0.0203088   | CHRM1    | ENSG00000168539 |
| 11 | 62433528 | 62433745 | 62433636 | 8   | 9   | 2  | 3.464347281 | 0.0163838   | CHRM1    | ENSG00000168539 |
| 11 | 62559743 | 62560101 | 62559921 | 9   | 13  | 4  | 2.910051716 | 0.0125532   | SLC22A8  | ENSG00000149452 |
| 11 | 63069913 | 63070112 | 63070029 | 9   | 9   | 1  | 5.196520921 | 0.00490062  | RARRES3  | ENSG00000133321 |
| 11 | 63166213 | 63166393 | 63166256 | 8   | 9   | 3  | 2.598260461 | 0.0397929   |          | ENSG00000196566 |
| 11 | 63315530 | 63315864 | 63315697 | 10  | 16  | 1  | 8.834085566 | 5.30E-05    | C11orf84 | ENSG00000168005 |
| 11 | 63328413 | 63328668 | 63328548 | 9   | 12  | 7  | 1.688869299 | 0.11395     | C11orf84 | ENSG00000168005 |
| 11 | 63371414 | 63371793 | 63371593 | 12  | 19  | 4  | 4.157216737 | 0.000560204 | MARK2    | ENSG00000072518 |
| 11 | 63485961 | 63486252 | 63486103 | 10  | 11  | 7  | 1.558956276 | 0.158273    |          | ENSG00000207200 |
| 11 | 63510218 | 63510484 | 63510365 | 8   | 11  | 3  | 3.117912553 | 0.0146045   | OTUB1    | ENSG00000167770 |
| 11 | 63547597 | 63547776 | 63547744 | 8   | 8   | 0  | 9.353737658 | 0.00163931  | OTUB1    | ENSG00000167770 |
| 11 | 63690557 | 63690828 | 63690688 | 11  | 12  | 2  | 4.503651465 | 0.002963    | MACROD1  | ENSG00000133315 |
| 11 | 63728635 | 63728875 | 63728758 | 14  | 17  | 2  | 6.235825105 | 0.000146695 | FERMT3   | ENSG00000149781 |
| 11 | 63825065 | 63825288 | 63825132 | 8   | 11  | 1  | 6.235825105 | 0.0013754   |          | ENSG00000219435 |
| 11 | 64327484 | 64327698 | 64327615 | 8   | 9   | 4  | 2.078608368 | 0.0785659   | MAP4K2   | ENSG00000168067 |
| 11 | 64366797 | 64367356 | 64367215 | 19  | 38  | 1  | 20.26643159 | 1.78E-11    | CDC42BPG | ENSG00000171219 |
| 11 | 64400945 | 64401156 | 64401050 | 8   | 8   | 2  | 3.117912553 | 0.0283184   | EHD1     | ENSG00000110047 |
| 11 | 64565090 | 64565490 | 64565360 | 14  | 22  | 3  | 5.975999059 | 2.96E-05    | SAC3D1   | ENSG00000168061 |
| 11 | 64608022 | 64608220 | 64608152 | 8   | 9   | 7  | 1.29913023  | 0.286504    | CDCA5    | ENSG00000146670 |
| 11 | 64620028 | 64620296 | 64620171 | 10  | 13  | 13 | 1.039304184 | 0.45974     | C11orf2  | ENSG00000149823 |
| 11 | 64646226 | 64646507 | 64646296 | 9   | 13  | 2  | 4.850086193 | 0.00164564  | MRPL49   | ENSG00000149792 |
| 11 | 64906803 | 64907042 | 64906922 | 9   | 11  | 10 | 1.133786383 | 0.380636    | SLC25A45 | ENSG00000162241 |
| 11 | 64942772 | 64943222 | 64943043 | 8   | 18  | 11 | 1.645564958 | 0.0828462   |          | ENSG00000207727 |
| 11 | 64944036 | 64944497 | 64944215 | 22  | 34  | 3  | 9.093911612 | 1.78E-08    |          | ENSG00000207727 |
| 11 | 64944882 | 64945812 | 64945375 | 273 | 334 | 17 | 19.34260565 | 8.67E-81    |          | ENSG00000207727 |
| 11 | 64946197 | 64946524 | 64946360 | 10  | 15  | 1  | 8.314433474 | 0.000102308 |          | ENSG00000207727 |
| 11 | 64946561 | 64946954 | 64946820 | 17  | 23  | 4  | 4.988660084 | 6.05E-05    |          | ENSG00000207727 |
| 11 | 64950952 | 64951450 | 64951131 | 8   | 15  | 3  | 4.157216737 | 0.00170423  |          | ENSG00000207727 |
| 11 | 64952607 | 64952861 | 64952734 | 8   | 10  | 0  | 11.43234603 | 0.000394183 |          | ENSG00000207727 |



|    |          |          |          |    |    |    |             |             |         |                 |
|----|----------|----------|----------|----|----|----|-------------|-------------|---------|-----------------|
| 11 | 64953310 | 64953580 | 64953426 | 8  | 13 | 3  | 3.637564645 | 0.0050909   |         | ENSG00000207727 |
| 11 | 64954080 | 64954323 | 64954201 | 11 | 11 | 7  | 1.558956276 | 0.158273    |         | ENSG00000207727 |
| 11 | 64978919 | 64979213 | 64979050 | 9  | 14 | 6  | 2.227080395 | 0.0322529   |         | ENSG00000173727 |
| 11 | 64992914 | 64993105 | 64993042 | 11 | 11 | 1  | 6.235825105 | 0.0013754   |         | ENSG00000173727 |
| 11 | 64996136 | 64996480 | 64996307 | 16 | 21 | 5  | 3.810782009 | 0.000537724 |         | ENSG00000173727 |
| 11 | 65011555 | 65011972 | 65011642 | 12 | 21 | 5  | 3.810782009 | 0.000537724 |         | ENSG00000173727 |
| 11 | 65013535 | 65013818 | 65013682 | 9  | 10 | 8  | 1.27026067  | 0.293854    |         | ENSG00000173727 |
| 11 | 65021129 | 65021361 | 65021245 | 9  | 10 | 7  | 1.429043253 | 0.21536     | SCYL1   | ENSG00000142186 |
| 11 | 65021442 | 65021822 | 65021635 | 11 | 20 | 3  | 5.456346967 | 9.70E-05    | SCYL1   | ENSG00000142186 |
| 11 | 65022889 | 65023238 | 65023063 | 15 | 20 | 10 | 1.98412617  | 0.0277883   | SCYL1   | ENSG00000142186 |
| 11 | 65023436 | 65023632 | 65023509 | 8  | 9  | 3  | 2.598260461 | 0.0397929   | SCYL1   | ENSG00000142186 |
| 11 | 65023950 | 65024195 | 65024055 | 10 | 12 | 5  | 2.251825733 | 0.0404733   | SCYL1   | ENSG00000142186 |
| 11 | 65024839 | 65025124 | 65024983 | 9  | 12 | 1  | 6.755477198 | 0.000722752 | SCYL1   | ENSG00000142186 |
| 11 | 65026540 | 65026876 | 65026711 | 11 | 12 | 3  | 3.377738599 | 0.00867157  | SCYL1   | ENSG00000142186 |
| 11 | 65028274 | 65028566 | 65028420 | 10 | 12 | 5  | 2.251825733 | 0.0404733   | SCYL1   | ENSG00000142186 |
| 11 | 65031627 | 65031948 | 65031787 | 12 | 14 | 8  | 1.73217364  | 0.0890835   | SCYL1   | ENSG00000142186 |
| 11 | 65034759 | 65035075 | 65034917 | 9  | 14 | 3  | 3.897390691 | 0.00295882  | SCYL1   | ENSG00000142186 |
| 11 | 65064487 | 65064775 | 65064656 | 10 | 13 | 3  | 3.637564645 | 0.0050909   | SCYL1   | ENSG00000142186 |
| 11 | 65073183 | 65073465 | 65073354 | 8  | 11 | 1  | 6.235825105 | 0.0013754   | LTBP3   | ENSG00000168056 |
| 11 | 65076986 | 65077165 | 65077077 | 8  | 8  | 4  | 1.870747532 | 0.118863    | LTBP3   | ENSG00000168056 |
| 11 | 65094286 | 65094720 | 65094465 | 9  | 16 | 2  | 5.889390377 | 0.000270741 | SSSCA1  | ENSG00000173465 |
| 11 | 65098366 | 65098545 | 65098455 | 9  | 9  | 7  | 1.29913023  | 0.286504    | EHBP1L1 | ENSG00000173442 |
| 11 | 65099338 | 65099610 | 65099452 | 8  | 11 | 8  | 1.385738912 | 0.224757    | EHBP1L1 | ENSG00000173442 |
| 11 | 65138274 | 65138462 | 65138368 | 9  | 9  | 1  | 5.196520921 | 0.00490062  | MAP3K11 | ENSG00000173327 |
| 11 | 65139295 | 65139506 | 65139400 | 8  | 9  | 7  | 1.29913023  | 0.286504    | PCNXL3  | ENSG00000197136 |
| 11 | 65169487 | 65169670 | 65169585 | 8  | 9  | 0  | 10.39304184 | 0.000803859 | SIPA1   | ENSG00000213445 |
| 11 | 65235829 | 65236254 | 65236083 | 10 | 17 | 3  | 4.676868829 | 0.000552213 | KAT5    | ENSG00000172977 |
| 11 | 65266613 | 65266795 | 65266704 | 8  | 8  | 1  | 4.676868829 | 0.0091584   |         | ENSG00000214659 |
| 11 | 65308065 | 65308340 | 65308202 | 9  | 11 | 2  | 4.157216737 | 0.0052913   | OVOL1   | ENSG00000172818 |
| 11 | 65313013 | 65313218 | 65313170 | 8  | 8  | 1  | 4.676868829 | 0.0091584   | OVOL1   | ENSG00000172818 |
| 11 | 65317267 | 65317549 | 65317408 | 20 | 22 | 1  | 11.95199812 | 9.69E-07    | OVOL1   | ENSG00000172818 |
| 11 | 65383649 | 65383901 | 65383765 | 8  | 10 | 5  | 1.905391004 | 0.0915982   | MUS81   | ENSG00000172732 |
| 11 | 65384339 | 65384584 | 65384433 | 10 | 12 | 4  | 2.702190879 | 0.0203088   | MUS81   | ENSG00000172732 |
| 11 | 65423084 | 65423393 | 65423262 | 20 | 23 | 2  | 8.314433474 | 3.41E-06    | FOSL1   | ENSG00000175592 |

|    |          |          |          |    |    |    |             |             |         |                 |
|----|----------|----------|----------|----|----|----|-------------|-------------|---------|-----------------|
| 11 | 65494108 | 65494287 | 65494193 | 8  | 8  | 3  | 2.338434415 | 0.0641221   | SART1   | ENSG00000175467 |
| 11 | 65513123 | 65513426 | 65513271 | 11 | 15 | 8  | 1.847651883 | 0.0631662   | BANF1   | ENSG00000175334 |
| 11 | 65526073 | 65526437 | 65526252 | 15 | 22 | 6  | 3.414856605 | 0.000820885 | EIF1AD  | ENSG00000175376 |
| 11 | 65569237 | 65569451 | 65569344 | 10 | 10 | 6  | 1.63319229  | 0.146906    | GAL3ST3 | ENSG00000175229 |
| 11 | 65569985 | 65570168 | 65570079 | 9  | 9  | 0  | 10.39304184 | 0.000803859 | GAL3ST3 | ENSG00000175229 |
| 11 | 65575879 | 65576480 | 65576107 | 8  | 22 | 12 | 1.838768941 | 0.0349935   | SF3B2   | ENSG00000087365 |
| 11 | 65584298 | 65584477 | 65584387 | 8  | 8  | 1  | 4.676868829 | 0.0091584   |         | ENSG00000210095 |
| 11 | 65637256 | 65637512 | 65637384 | 10 | 13 | 2  | 4.850086193 | 0.00164564  |         | ENSG00000210102 |
| 11 | 65806613 | 65806852 | 65806690 | 8  | 9  | 8  | 1.154782427 | 0.375434    | CNIH2   | ENSG00000174871 |
| 11 | 65868972 | 65869282 | 65869147 | 14 | 18 | 1  | 9.87338975  | 1.41E-05    | BRMS1   | ENSG00000174744 |
| 11 | 65872083 | 65872288 | 65872216 | 8  | 10 | 7  | 1.429043253 | 0.21536     |         | ENSG00000174684 |
| 11 | 65896388 | 65896584 | 65896414 | 9  | 12 | 4  | 2.702190879 | 0.0203088   | SLC29A2 | ENSG00000174669 |
| 11 | 65913041 | 65913246 | 65913173 | 9  | 9  | 4  | 2.078608368 | 0.0785659   |         | ENSG00000202317 |
| 11 | 65945683 | 65946010 | 65945821 | 15 | 20 | 6  | 3.117912553 | 0.00218114  | NPAS4   | ENSG00000174576 |
| 11 | 65982699 | 65982878 | 65982788 | 8  | 8  | 2  | 3.117912553 | 0.0283184   | PELI3   | ENSG00000174516 |
| 11 | 66035021 | 66035250 | 66035142 | 8  | 10 | 2  | 3.810782009 | 0.00936112  | BBS1    | ENSG00000174483 |
| 11 | 66140230 | 66140934 | 66140499 | 11 | 33 | 12 | 2.718180174 | 0.000523509 | RBM4    | ENSG00000173933 |
| 11 | 66142973 | 66143673 | 66143445 | 47 | 69 | 4  | 14.55025858 | 1.78E-17    | RBM4    | ENSG00000173933 |
| 11 | 66160694 | 66160928 | 66160811 | 9  | 10 | 6  | 1.63319229  | 0.146906    | RBM4    | ENSG00000173933 |
| 11 | 66162450 | 66162964 | 66162710 | 11 | 22 | 17 | 1.327999791 | 0.180771    | RBM4    | ENSG00000173933 |
| 11 | 66202130 | 66202815 | 66202636 | 9  | 26 | 12 | 2.158554844 | 0.00861404  | RBM4B   | ENSG00000173914 |
| 11 | 66218738 | 66219109 | 66218941 | 21 | 27 | 6  | 4.157216737 | 6.29E-05    | RBM4B   | ENSG00000173914 |
| 11 | 66242736 | 66243073 | 66242904 | 10 | 16 | 12 | 1.359090087 | 0.198699    | SPTBN2  | ENSG00000173898 |
| 11 | 66244146 | 66244894 | 66244661 | 18 | 44 | 14 | 3.117912553 | 1.75E-05    | SPTBN2  | ENSG00000173898 |
| 11 | 66273087 | 66273455 | 66273265 | 11 | 17 | 8  | 2.078608368 | 0.0303558   |         | ENSG00000213410 |
| 11 | 66292120 | 66292329 | 66292224 | 8  | 8  | 4  | 1.870747532 | 0.118863    |         | ENSG00000213409 |
| 11 | 66312087 | 66312295 | 66312191 | 9  | 9  | 3  | 2.598260461 | 0.0397929   |         | ENSG00000213409 |
| 11 | 66313815 | 66314137 | 66313976 | 8  | 11 | 3  | 3.117912553 | 0.0146045   |         | ENSG00000213409 |
| 11 | 66367728 | 66367924 | 66367858 | 9  | 9  | 3  | 2.598260461 | 0.0397929   | RCE1    | ENSG00000173653 |
| 11 | 66380097 | 66380310 | 66380203 | 8  | 10 | 3  | 2.858086507 | 0.0242838   | LRFN4   | ENSG00000173621 |
| 11 | 66380496 | 66380779 | 66380651 | 14 | 15 | 0  | 16.62886695 | 1.12E-05    | LRFN4   | ENSG00000173621 |
| 11 | 66386701 | 66386880 | 66386790 | 10 | 10 | 2  | 3.810782009 | 0.00936112  | LRFN4   | ENSG00000173621 |
| 11 | 66404910 | 66405141 | 66405025 | 8  | 10 | 7  | 1.429043253 | 0.21536     | PC      | ENSG00000173599 |
| 11 | 66474019 | 66474278 | 66474144 | 10 | 13 | 7  | 1.818782322 | 0.0805123   | PC      | ENSG00000173599 |

|    |          |          |          |    |    |    |             |             |          |                 |
|----|----------|----------|----------|----|----|----|-------------|-------------|----------|-----------------|
| 11 | 66551794 | 66552163 | 66551969 | 15 | 22 | 14 | 1.593599749 | 0.0756559   | SYT12    | ENSG00000173227 |
| 11 | 66555106 | 66555494 | 66555280 | 14 | 23 | 8  | 2.771477825 | 0.00251818  | SYT12    | ENSG00000173227 |
| 11 | 66578310 | 66578499 | 66578404 | 8  | 9  | 2  | 3.464347281 | 0.0163838   | RHOD     | ENSG00000173156 |
| 11 | 66578986 | 66579691 | 66579165 | 15 | 35 | 13 | 2.672496474 | 0.00043826  | RHOD     | ENSG00000173156 |
| 11 | 66581248 | 66581484 | 66581419 | 8  | 9  | 4  | 2.078608368 | 0.0785659   | RHOD     | ENSG00000173156 |
| 11 | 66581560 | 66582074 | 66581895 | 23 | 41 | 5  | 7.27512929  | 5.94E-09    | RHOD     | ENSG00000173156 |
| 11 | 66595834 | 66596075 | 66595986 | 9  | 11 | 1  | 6.235825105 | 0.0013754   | RHOD     | ENSG00000173156 |
| 11 | 66605557 | 66605930 | 66605770 | 14 | 24 | 7  | 3.247825576 | 0.000729793 | RHOD     | ENSG00000173156 |
| 11 | 66644931 | 66645160 | 66645045 | 9  | 10 | 3  | 2.858086507 | 0.0242838   | FBXL11   | ENSG00000173120 |
| 11 | 66763979 | 66764267 | 66764123 | 11 | 14 | 6  | 2.227080395 | 0.0322529   | ADRBK1   | ENSG00000173020 |
| 11 | 66776796 | 66777060 | 66776950 | 12 | 14 | 5  | 2.598260461 | 0.0167748   | ADRBK1   | ENSG00000173020 |
| 11 | 66786664 | 66786884 | 66786785 | 9  | 10 | 0  | 11.43234603 | 0.000394183 | ADRBK1   | ENSG00000173020 |
| 11 | 66836815 | 66836994 | 66836904 | 8  | 9  | 6  | 1.484720263 | 0.204387    | SSH3     | ENSG00000172830 |
| 11 | 66837002 | 66837193 | 66837049 | 9  | 9  | 4  | 2.078608368 | 0.0785659   | SSH3     | ENSG00000172830 |
| 11 | 66841674 | 66842024 | 66841897 | 9  | 13 | 5  | 2.425043097 | 0.0262442   | SSH3     | ENSG00000172830 |
| 11 | 66870028 | 66870267 | 66870147 | 10 | 10 | 3  | 2.858086507 | 0.0242838   | POLD4    | ENSG00000175482 |
| 11 | 66875341 | 66875622 | 66875477 | 8  | 12 | 2  | 4.503651465 | 0.002963    | POLD4    | ENSG00000175482 |
| 11 | 66902759 | 66902938 | 66902848 | 8  | 8  | 2  | 3.117912553 | 0.0283184   | CLCF1    | ENSG00000175505 |
| 11 | 66926139 | 66926350 | 66926287 | 8  | 9  | 3  | 2.598260461 | 0.0397929   | PPP1CA   | ENSG00000172531 |
| 11 | 66952177 | 66952576 | 66952356 | 8  | 15 | 10 | 1.511715177 | 0.140236    | RPS6KB2  | ENSG00000175634 |
| 11 | 66988041 | 66988485 | 66988206 | 18 | 27 | 9  | 2.910051716 | 0.000869703 | TMEM134  | ENSG00000172663 |
| 11 | 66988512 | 66988723 | 66988574 | 8  | 10 | 4  | 2.286469205 | 0.0509017   | TMEM134  | ENSG00000172663 |
| 11 | 66988918 | 66989129 | 66989010 | 8  | 9  | 2  | 3.464347281 | 0.0163838   | TMEM134  | ENSG00000172663 |
| 11 | 67060169 | 67060360 | 67060306 | 8  | 8  | 0  | 9.353737658 | 0.00163931  | CABP2    | ENSG00000167791 |
| 11 | 67106608 | 67106896 | 67106757 | 10 | 15 | 5  | 2.771477825 | 0.0105836   | GSTP1    | ENSG00000084207 |
| 11 | 67180448 | 67180725 | 67180584 | 13 | 13 | 1  | 7.27512929  | 0.000378098 | ACY3     | ENSG00000132744 |
| 11 | 67198705 | 67199171 | 67198868 | 14 | 25 | 12 | 2.078608368 | 0.0124196   | ALDH3B2  | ENSG00000132746 |
| 11 | 67652276 | 67652556 | 67652416 | 10 | 11 | 2  | 4.157216737 | 0.0052913   | CHKA     | ENSG00000110721 |
| 11 | 67687916 | 67688098 | 67687961 | 9  | 9  | 1  | 5.196520921 | 0.00490062  | CHKA     | ENSG00000110721 |
| 11 | 67722373 | 67722696 | 67722534 | 17 | 20 | 0  | 21.82538787 | 3.17E-07    | SUV420H1 | ENSG00000110066 |
| 11 | 67795229 | 67795408 | 67795313 | 8  | 8  | 0  | 9.353737658 | 0.00163931  | C11orf24 | ENSG00000171067 |
| 11 | 67806244 | 67806480 | 67806362 | 11 | 13 | 5  | 2.425043097 | 0.0262442   | C11orf24 | ENSG00000171067 |
| 11 | 67861319 | 67861757 | 67861538 | 19 | 28 | 4  | 6.027964269 | 3.34E-06    | LRP5     | ENSG00000162337 |
| 11 | 67983948 | 67984406 | 67984227 | 10 | 18 | 14 | 1.316451967 | 0.209896    |          | ENSG00000210241 |

|    |          |          |          |    |    |   |             |             |          |                 |
|----|----------|----------|----------|----|----|---|-------------|-------------|----------|-----------------|
| 11 | 68069892 | 68070194 | 68070043 | 8  | 11 | 2 | 4.157216737 | 0.0052913   |          | ENSG00000212093 |
| 11 | 68156957 | 68157154 | 68157055 | 9  | 9  | 2 | 3.464347281 | 0.0163838   | GAL      | ENSG00000069482 |
| 11 | 68287198 | 68287597 | 68287422 | 14 | 22 | 6 | 3.414856605 | 0.000820885 | MTL5     | ENSG00000132749 |
| 11 | 68427759 | 68427948 | 68427835 | 8  | 9  | 7 | 1.29913023  | 0.286504    | MRPL21   | ENSG00000197345 |
| 11 | 68646781 | 68647105 | 68646937 | 13 | 17 | 7 | 2.338434415 | 0.0171287   | TPCN2    | ENSG00000162341 |
| 11 | 68655677 | 68656022 | 68655849 | 9  | 14 | 4 | 3.117912553 | 0.00766354  | TPCN2    | ENSG00000162341 |
| 11 | 68673736 | 68674029 | 68673882 | 15 | 17 | 0 | 18.70747532 | 2.69E-06    | TPCN2    | ENSG00000162341 |
| 11 | 68775388 | 68775729 | 68775558 | 9  | 11 | 0 | 12.47165021 | 0.000193293 | MYEOV    | ENSG00000172927 |
| 11 | 68978608 | 68978787 | 68978732 | 8  | 8  | 2 | 3.117912553 | 0.0283184   | MYEOV    | ENSG00000172927 |
| 11 | 69017747 | 69017999 | 69017847 | 8  | 8  | 5 | 1.558956276 | 0.191397    | CCND1    | ENSG00000110092 |
| 11 | 69025563 | 69025865 | 69025717 | 12 | 14 | 0 | 15.58956276 | 2.28E-05    | CCND1    | ENSG00000110092 |
| 11 | 69034528 | 69034838 | 69034663 | 14 | 18 | 1 | 9.87338975  | 1.41E-05    | CCND1    | ENSG00000110092 |
| 11 | 69039298 | 69039504 | 69039401 | 8  | 8  | 2 | 3.117912553 | 0.0283184   | CCND1    | ENSG00000110092 |
| 11 | 69162361 | 69162673 | 69162528 | 8  | 12 | 3 | 3.377738599 | 0.00867157  | CCND1    | ENSG00000110092 |
| 11 | 69176284 | 69176593 | 69176438 | 9  | 11 | 2 | 4.157216737 | 0.0052913   |          | ENSG00000204579 |
| 11 | 69178161 | 69178564 | 69178412 | 10 | 18 | 4 | 3.9493559   | 0.000961379 |          | ENSG00000204579 |
| 11 | 69418273 | 69418543 | 69418390 | 9  | 10 | 9 | 1.143234603 | 0.378307    | FGF3     | ENSG00000186895 |
| 11 | 69572545 | 69572790 | 69572667 | 14 | 15 | 4 | 3.32577339  | 0.00462646  |          | ENSG00000202070 |
| 11 | 69587371 | 69587661 | 69587516 | 14 | 16 | 2 | 5.889390377 | 0.000270741 |          | ENSG00000202070 |
| 11 | 69707325 | 69707536 | 69707446 | 9  | 11 | 3 | 3.117912553 | 0.0146045   | FADD     | ENSG00000168040 |
| 11 | 69757304 | 69757587 | 69757450 | 10 | 13 | 4 | 2.910051716 | 0.0125532   | FADD     | ENSG00000168040 |
| 11 | 69895129 | 69895317 | 69895236 | 8  | 9  | 5 | 1.73217364  | 0.133894    | CTTN     | ENSG00000085733 |
| 11 | 70048846 | 70049180 | 70049013 | 18 | 22 | 1 | 11.95199812 | 9.69E-07    | CTTN     | ENSG00000085733 |
| 11 | 70167660 | 70168083 | 70167839 | 22 | 31 | 3 | 8.314433474 | 1.18E-07    | SHANK2   | ENSG00000162105 |
| 11 | 70216125 | 70216328 | 70216226 | 8  | 9  | 0 | 10.39304184 | 0.000803859 |          | ENSG00000207196 |
| 11 | 70293292 | 70293611 | 70293451 | 14 | 18 | 1 | 9.87338975  | 1.41E-05    |          | ENSG00000207196 |
| 11 | 70329620 | 70329921 | 70329795 | 14 | 16 | 5 | 2.944695189 | 0.00659886  | C11orf76 | ENSG00000171671 |
| 11 | 70501928 | 70502107 | 70502017 | 8  | 8  | 4 | 1.870747532 | 0.118863    | SHANK2   | ENSG00000162105 |
| 11 | 70568776 | 70568965 | 70568870 | 13 | 13 | 6 | 2.078608368 | 0.0483393   | SHANK2   | ENSG00000162105 |
| 11 | 70672608 | 70672964 | 70672785 | 15 | 19 | 6 | 2.969440526 | 0.0035096   | SHANK2   | ENSG00000162105 |
| 11 | 70687921 | 70688214 | 70688067 | 8  | 12 | 3 | 3.377738599 | 0.00867157  |          | ENSG00000172900 |
| 11 | 70809131 | 70809356 | 70809243 | 8  | 11 | 7 | 1.558956276 | 0.158273    |          | ENSG00000172900 |
| 11 | 70836109 | 70836313 | 70836177 | 8  | 9  | 4 | 2.078608368 | 0.0785659   | DHCR7    | ENSG00000172893 |
| 11 | 70841296 | 70841578 | 70841434 | 9  | 12 | 5 | 2.251825733 | 0.0404733   | NADSYN1  | ENSG00000172890 |

|    |          |          |          |    |    |    |             |             |          |                 |
|----|----------|----------|----------|----|----|----|-------------|-------------|----------|-----------------|
| 11 | 70870030 | 70870421 | 70870178 | 9  | 16 | 6  | 2.524024447 | 0.0137633   | NADSYN1  | ENSG00000172890 |
| 11 | 71413862 | 71414126 | 71413959 | 12 | 12 | 1  | 6.755477198 | 0.000722752 |          | ENSG00000206783 |
| 11 | 71441510 | 71441750 | 71441632 | 8  | 11 | 3  | 3.117912553 | 0.0146045   |          | ENSG00000206783 |
| 11 | 71469354 | 71469615 | 71469436 | 8  | 11 | 6  | 1.781664316 | 0.103344    | LRR51    | ENSG00000184154 |
| 11 | 71470452 | 71470872 | 71470707 | 13 | 23 | 8  | 2.771477825 | 0.00251818  | LRR51    | ENSG00000184154 |
| 11 | 71501245 | 71501639 | 71501498 | 8  | 14 | 5  | 2.598260461 | 0.0167748   | C11orf51 | ENSG00000110200 |
| 11 | 71594722 | 71594903 | 71594780 | 8  | 8  | 5  | 1.558956276 | 0.191397    | FOLR2    | ENSG00000165457 |
| 11 | 71609216 | 71609463 | 71609359 | 9  | 9  | 0  | 10.39304184 | 0.000803859 | FOLR2    | ENSG00000165457 |
| 11 | 71807061 | 71807241 | 71807159 | 8  | 8  | 2  | 3.117912553 | 0.0283184   | CLPB     | ENSG00000162129 |
| 11 | 71823273 | 71823504 | 71823381 | 9  | 10 | 8  | 1.27026067  | 0.293854    | CLPB     | ENSG00000162129 |
| 11 | 71880476 | 71880673 | 71880548 | 8  | 8  | 3  | 2.338434415 | 0.0641221   | CLPB     | ENSG00000162129 |
| 11 | 72141314 | 72141494 | 72141404 | 8  | 9  | 4  | 2.078608368 | 0.0785659   | ARAP1    | ENSG00000186635 |
| 11 | 72169258 | 72169601 | 72169429 | 9  | 13 | 11 | 1.212521548 | 0.309909    | STARD10  | ENSG00000214530 |
| 11 | 72174961 | 72175375 | 72175203 | 9  | 16 | 4  | 3.533634226 | 0.00276486  | STARD10  | ENSG00000214530 |
| 11 | 72181954 | 72182199 | 72182105 | 14 | 17 | 2  | 6.235825105 | 0.000146695 | STARD10  | ENSG00000214530 |
| 11 | 72201741 | 72201960 | 72201850 | 9  | 10 | 4  | 2.286469205 | 0.0509017   | ATG16L2  | ENSG00000168010 |
| 11 | 72220267 | 72220482 | 72220411 | 9  | 11 | 5  | 2.078608368 | 0.0614303   | FCHSD2   | ENSG00000137478 |
| 11 | 72574097 | 72574331 | 72574214 | 9  | 10 | 9  | 1.143234603 | 0.378307    | P2RY2    | ENSG00000175591 |
| 11 | 72574768 | 72575339 | 72575215 | 12 | 23 | 7  | 3.117912553 | 0.00117689  | P2RY2    | ENSG00000175591 |
| 11 | 72576530 | 72577016 | 72576773 | 31 | 45 | 4  | 9.561598495 | 9.80E-11    | P2RY2    | ENSG00000175591 |
| 11 | 72580989 | 72581321 | 72581155 | 9  | 11 | 10 | 1.133786383 | 0.380636    | P2RY2    | ENSG00000175591 |
| 11 | 72582580 | 72582987 | 72582808 | 22 | 30 | 15 | 2.013651857 | 0.00918451  | P2RY2    | ENSG00000175591 |
| 11 | 72583223 | 72583641 | 72583462 | 13 | 23 | 3  | 6.235825105 | 1.63E-05    | P2RY2    | ENSG00000175591 |
| 11 | 72584070 | 72584515 | 72584249 | 12 | 24 | 6  | 3.711800658 | 0.000299603 | P2RY2    | ENSG00000175591 |
| 11 | 72616558 | 72616884 | 72616712 | 19 | 22 | 4  | 4.780799247 | 0.00010647  | P2RY2    | ENSG00000175591 |
| 11 | 72631394 | 72631814 | 72631567 | 13 | 19 | 2  | 6.928694562 | 4.25E-05    | P2RY6    | ENSG00000171631 |
| 11 | 72638312 | 72638636 | 72638474 | 8  | 13 | 3  | 3.637564645 | 0.0050909   | P2RY6    | ENSG00000171631 |
| 11 | 72644559 | 72644817 | 72644709 | 8  | 9  | 1  | 5.196520921 | 0.00490062  | P2RY6    | ENSG00000171631 |
| 11 | 72660624 | 72661030 | 72660851 | 17 | 25 | 6  | 3.860272684 | 0.00017915  | P2RY6    | ENSG00000171631 |
| 11 | 72664032 | 72664419 | 72664274 | 11 | 16 | 8  | 1.963130126 | 0.0441028   | P2RY6    | ENSG00000171631 |
| 11 | 72696074 | 72696280 | 72696172 | 9  | 11 | 4  | 2.494330042 | 0.0324033   | ARHGEF17 | ENSG00000110237 |
| 11 | 72696576 | 72696821 | 72696678 | 10 | 12 | 4  | 2.702190879 | 0.0203088   | ARHGEF17 | ENSG00000110237 |
| 11 | 72706434 | 72706638 | 72706536 | 8  | 9  | 3  | 2.598260461 | 0.0397929   | ARHGEF17 | ENSG00000110237 |
| 11 | 72801960 | 72802140 | 72802050 | 8  | 8  | 1  | 4.676868829 | 0.0091584   | RELT     | ENSG00000054967 |

|    |          |          |          |    |    |    |             |             |          |                 |
|----|----------|----------|----------|----|----|----|-------------|-------------|----------|-----------------|
| 11 | 73049713 | 73049997 | 73049879 | 9  | 11 | 4  | 2.494330042 | 0.0324033   | PLEKHB1  | ENSG00000021300 |
| 11 | 73176431 | 73176918 | 73176610 | 8  | 17 | 10 | 1.700679574 | 0.0766266   | MRPL48   | ENSG00000175581 |
| 11 | 73377988 | 73378192 | 73378134 | 8  | 8  | 3  | 2.338434415 | 0.0641221   | UCP2     | ENSG00000175567 |
| 11 | 73425342 | 73425618 | 73425449 | 9  | 11 | 8  | 1.385738912 | 0.224757    |          | ENSG00000204552 |
| 11 | 73457700 | 73458393 | 73457967 | 16 | 34 | 9  | 3.637564645 | 3.15E-05    |          | ENSG00000204552 |
| 11 | 73458532 | 73458738 | 73458649 | 8  | 10 | 2  | 3.810782009 | 0.00936112  |          | ENSG00000204552 |
| 11 | 73479340 | 73479605 | 73479472 | 9  | 9  | 4  | 2.078608368 | 0.0785659   |          | ENSG00000204552 |
| 11 | 73523975 | 73524251 | 73524113 | 15 | 17 | 4  | 3.741495063 | 0.00163722  | C2CD3    | ENSG00000168014 |
| 11 | 73527263 | 73527581 | 73527410 | 12 | 17 | 3  | 4.676868829 | 0.000552213 | C2CD3    | ENSG00000168014 |
| 11 | 73559618 | 73560063 | 73559925 | 11 | 19 | 13 | 1.484720263 | 0.123861    |          | ENSG00000214517 |
| 11 | 73760391 | 73760643 | 73760555 | 9  | 11 | 4  | 2.494330042 | 0.0324033   | PGM2L1   | ENSG00000165434 |
| 11 | 73806018 | 73806331 | 73806174 | 13 | 15 | 5  | 2.771477825 | 0.0105836   | PGM2L1   | ENSG00000165434 |
| 11 | 73921234 | 73921489 | 73921410 | 10 | 13 | 4  | 2.910051716 | 0.0125532   |          | ENSG00000210380 |
| 11 | 74482183 | 74482396 | 74482309 | 8  | 10 | 2  | 3.810782009 | 0.00936112  | OR2AT4   | ENSG00000171561 |
| 11 | 74587306 | 74587585 | 74587445 | 18 | 20 | 2  | 7.27512929  | 2.27E-05    | SLCO2B1  | ENSG00000137491 |
| 11 | 74603082 | 74603388 | 74603228 | 10 | 13 | 4  | 2.910051716 | 0.0125532   | SLCO2B1  | ENSG00000137491 |
| 11 | 74646283 | 74646485 | 74646384 | 9  | 9  | 5  | 1.73217364  | 0.133894    |          | ENSG00000199090 |
| 11 | 74714828 | 74715013 | 74714902 | 8  | 9  | 3  | 2.598260461 | 0.0397929   |          | ENSG00000199090 |
| 11 | 74717500 | 74717727 | 74717613 | 9  | 10 | 0  | 11.43234603 | 0.000394183 |          | ENSG00000199090 |
| 11 | 74723358 | 74723548 | 74723427 | 8  | 9  | 6  | 1.484720263 | 0.204387    |          | ENSG00000199090 |
| 11 | 74731697 | 74732002 | 74731849 | 15 | 21 | 5  | 3.810782009 | 0.000537724 |          | ENSG00000199090 |
| 11 | 74732187 | 74732605 | 74732426 | 10 | 17 | 9  | 1.870747532 | 0.0498299   | ARRB1    | ENSG00000137486 |
| 11 | 74739895 | 74740105 | 74740026 | 8  | 8  | 0  | 9.353737658 | 0.00163931  | ARRB1    | ENSG00000137486 |
| 11 | 74745075 | 74745254 | 74745202 | 8  | 8  | 0  | 9.353737658 | 0.00163931  | ARRB1    | ENSG00000137486 |
| 11 | 74761089 | 74761331 | 74761210 | 10 | 12 | 13 | 0.965068171 | 0.538344    | ARRB1    | ENSG00000137486 |
| 11 | 74788013 | 74788449 | 74788137 | 11 | 20 | 9  | 2.182538787 | 0.0165356   | RPS3     | ENSG00000149273 |
| 11 | 74889477 | 74889753 | 74889617 | 25 | 26 | 2  | 9.353737658 | 4.98E-07    | GDPD5    | ENSG00000158555 |
| 11 | 74896970 | 74897250 | 74897142 | 9  | 12 | 7  | 1.688869299 | 0.11395     | GDPD5    | ENSG00000158555 |
| 11 | 74964628 | 74964807 | 74964717 | 8  | 8  | 0  | 9.353737658 | 0.00163931  | SERPINH1 | ENSG00000149257 |
| 11 | 75336306 | 75336486 | 75336396 | 8  | 8  | 0  | 9.353737658 | 0.00163931  |          | ENSG00000210489 |
| 11 | 75372114 | 75372340 | 75372259 | 9  | 9  | 1  | 5.196520921 | 0.00490062  |          | ENSG00000210489 |
| 11 | 75484686 | 75484968 | 75484845 | 9  | 11 | 4  | 2.494330042 | 0.0324033   | WNT11    | ENSG00000085741 |
| 11 | 75540968 | 75541156 | 75541062 | 9  | 9  | 3  | 2.598260461 | 0.0397929   | WNT11    | ENSG00000085741 |
| 11 | 75624176 | 75624725 | 75624500 | 17 | 29 | 19 | 1.558956276 | 0.0586429   | WNT11    | ENSG00000085741 |

|    |          |          |          |    |    |    |             |             |          |                 |
|----|----------|----------|----------|----|----|----|-------------|-------------|----------|-----------------|
| 11 | 75833153 | 75833591 | 75833322 | 9  | 17 | 5  | 3.117912553 | 0.00407023  | C11orf30 | ENSG00000158636 |
| 11 | 75834247 | 75834448 | 75834297 | 8  | 9  | 2  | 3.464347281 | 0.0163838   | C11orf30 | ENSG00000158636 |
| 11 | 76154866 | 76155178 | 76155022 | 8  | 9  | 1  | 5.196520921 | 0.00490062  | TSKU     | ENSG00000182704 |
| 11 | 76160716 | 76160920 | 76160818 | 8  | 9  | 7  | 1.29913023  | 0.286504    | TSKU     | ENSG00000182704 |
| 11 | 76161311 | 76161567 | 76161442 | 17 | 19 | 8  | 2.309564854 | 0.0138337   | TSKU     | ENSG00000182704 |
| 11 | 76162611 | 76162799 | 76162705 | 8  | 9  | 1  | 5.196520921 | 0.00490062  | TSKU     | ENSG00000182704 |
| 11 | 76171704 | 76171905 | 76171785 | 8  | 8  | 2  | 3.117912553 | 0.0283184   | TSKU     | ENSG00000182704 |
| 11 | 76173365 | 76173576 | 76173441 | 9  | 10 | 1  | 5.716173013 | 0.00260397  | TSKU     | ENSG00000182704 |
| 11 | 76177256 | 76177496 | 76177377 | 8  | 10 | 6  | 1.63319229  | 0.146906    | TSKU     | ENSG00000182704 |
| 11 | 76489942 | 76490166 | 76490054 | 10 | 10 | 2  | 3.810782009 | 0.00936112  | MYO7A    | ENSG00000137474 |
| 11 | 76502338 | 76502535 | 76502384 | 10 | 10 | 4  | 2.286469205 | 0.0509017   | MYO7A    | ENSG00000137474 |
| 11 | 76860549 | 76860829 | 76860689 | 9  | 13 | 4  | 2.910051716 | 0.0125532   | PAK1     | ENSG00000149269 |
| 11 | 77026381 | 77026763 | 77026513 | 12 | 20 | 7  | 2.728173484 | 0.00469378  | CLNS1A   | ENSG00000074201 |
| 11 | 77209353 | 77209705 | 77209531 | 8  | 13 | 6  | 2.078608368 | 0.0483393   | RSF1     | ENSG00000048649 |
| 11 | 77383318 | 77383739 | 77383560 | 10 | 20 | 13 | 1.558956276 | 0.0943292   | INTS4    | ENSG00000149262 |
| 11 | 77434897 | 77435254 | 77435075 | 9  | 15 | 5  | 2.771477825 | 0.0105836   | THRSP    | ENSG00000151365 |
| 11 | 77450787 | 77450966 | 77450839 | 8  | 8  | 1  | 4.676868829 | 0.0091584   | THRSP    | ENSG00000151365 |
| 11 | 77468520 | 77468756 | 77468638 | 9  | 10 | 9  | 1.143234603 | 0.378307    | NDUFC2   | ENSG00000151366 |
| 11 | 77545183 | 77545487 | 77545354 | 9  | 11 | 8  | 1.385738912 | 0.224757    | ALG8     | ENSG00000159063 |
| 11 | 77617204 | 77617459 | 77617290 | 9  | 11 | 0  | 12.47165021 | 0.000193293 | USP35    | ENSG00000118369 |
| 11 | 77648589 | 77649075 | 77648873 | 12 | 23 | 12 | 1.918715417 | 0.0250463   | USP35    | ENSG00000118369 |
| 11 | 77963252 | 77963731 | 77963509 | 11 | 24 | 16 | 1.528388506 | 0.0846311   | NARS2    | ENSG00000137513 |
| 11 | 78096211 | 78096424 | 78096343 | 9  | 9  | 1  | 5.196520921 | 0.00490062  |          | ENSG00000210533 |
| 11 | 78104324 | 78104508 | 78104416 | 9  | 9  | 5  | 1.73217364  | 0.133894    |          | ENSG00000210533 |
| 11 | 78189893 | 78190097 | 78189995 | 8  | 9  | 5  | 1.73217364  | 0.133894    |          | ENSG00000210533 |
| 11 | 78296264 | 78296719 | 78296409 | 12 | 23 | 3  | 6.235825105 | 1.63E-05    | ODZ4     | ENSG00000149256 |
| 11 | 78448624 | 78449243 | 78448933 | 18 | 34 | 15 | 2.273477903 | 0.00217414  | ODZ4     | ENSG00000149256 |
| 11 | 78465218 | 78465516 | 78465368 | 8  | 9  | 2  | 3.464347281 | 0.0163838   | ODZ4     | ENSG00000149256 |
| 11 | 78544722 | 78545008 | 78544854 | 17 | 19 | 3  | 5.196520921 | 0.000174201 |          | ENSG00000212701 |
| 11 | 78549608 | 78549789 | 78549700 | 8  | 9  | 1  | 5.196520921 | 0.00490062  |          | ENSG00000212701 |
| 11 | 78557426 | 78557731 | 78557578 | 15 | 18 | 3  | 4.936694875 | 0.000311102 |          | ENSG00000212701 |
| 11 | 78698091 | 78698288 | 78698185 | 8  | 8  | 3  | 2.338434415 | 0.0641221   |          | ENSG00000211997 |
| 11 | 78882372 | 78882714 | 78882543 | 9  | 13 | 2  | 4.850086193 | 0.00164564  |          | ENSG00000211997 |
| 11 | 79328753 | 79329110 | 79328931 | 12 | 18 | 6  | 2.8209685   | 0.00559354  |          | ENSG00000221551 |

|    |          |          |          |     |     |     |             |             |          |                 |
|----|----------|----------|----------|-----|-----|-----|-------------|-------------|----------|-----------------|
| 11 | 79389145 | 79389349 | 79389247 | 9   | 9   | 2   | 3.464347281 | 0.0163838   |          | ENSG00000221551 |
| 11 | 79670002 | 79670247 | 79670120 | 8   | 9   | 2   | 3.464347281 | 0.0163838   |          | ENSG00000200146 |
| 11 | 80109130 | 80109339 | 80109234 | 9   | 10  | 3   | 2.858086507 | 0.0242838   |          | ENSG00000200146 |
| 11 | 80304903 | 80305148 | 80305065 | 12  | 13  | 2   | 4.850086193 | 0.00164564  |          | ENSG00000200146 |
| 11 | 80307283 | 80307484 | 80307425 | 8   | 8   | 2   | 3.117912553 | 0.0283184   |          | ENSG00000200146 |
| 11 | 80460384 | 80460582 | 80460483 | 9   | 9   | 6   | 1.484720263 | 0.204387    |          | ENSG00000210551 |
| 11 | 81997357 | 81997552 | 81997483 | 8   | 8   | 1   | 4.676868829 | 0.0091584   | FAM181B  | ENSG00000182103 |
| 11 | 82180630 | 82180855 | 82180742 | 8   | 10  | 5   | 1.905391004 | 0.0915982   |          | ENSG00000212700 |
| 11 | 82320399 | 82320620 | 82320509 | 10  | 10  | 1   | 5.716173013 | 0.00260397  | C11orf82 | ENSG00000165490 |
| 11 | 82460593 | 82460916 | 82460754 | 11  | 13  | 1   | 7.27512929  | 0.000378098 | RAB30    | ENSG00000137502 |
| 11 | 82481504 | 82481866 | 82481687 | 14  | 21  | 13  | 1.63319229  | 0.0708832   | RAB30    | ENSG00000137502 |
| 11 | 82549183 | 82549505 | 82549344 | 19  | 23  | 5   | 4.157216737 | 0.000186738 | PCF11    | ENSG00000165494 |
| 11 | 82583979 | 82584212 | 82584095 | 12  | 14  | 3   | 3.897390691 | 0.00295882  | ANKRD42  | ENSG00000137494 |
| 11 | 82674270 | 82674651 | 82674525 | 16  | 21  | 6   | 3.266384579 | 0.0013436   | CCDC90B  | ENSG00000137500 |
| 11 | 83050367 | 83050790 | 83050546 | 27  | 39  | 1   | 20.78608368 | 8.93E-12    | DLG2     | ENSG00000150672 |
| 11 | 83050866 | 83051045 | 83050909 | 8   | 8   | 0   | 9.353737658 | 0.00163931  | DLG2     | ENSG00000150672 |
| 11 | 83564735 | 83564975 | 83564855 | 10  | 11  | 0   | 12.47165021 | 0.000193293 | DLG2     | ENSG00000150672 |
| 11 | 83786808 | 83786987 | 83786943 | 8   | 8   | 2   | 3.117912553 | 0.0283184   | DLG2     | ENSG00000150672 |
| 11 | 84073186 | 84073501 | 84073343 | 8   | 11  | 1   | 6.235825105 | 0.0013754   | DLG2     | ENSG00000150672 |
| 11 | 84657823 | 84658169 | 84657996 | 11  | 14  | 1   | 7.794781382 | 0.000197021 | DLG2     | ENSG00000150672 |
| 11 | 84673075 | 84673456 | 84673245 | 18  | 25  | 3   | 6.755477198 | 4.84E-06    | DLG2     | ENSG00000150672 |
| 11 | 84872516 | 84872944 | 84872755 | 200 | 245 | 203 | 1.253278575 | 0.00838743  |          | ENSG00000210598 |
| 11 | 85016237 | 85016485 | 85016364 | 9   | 9   | 1   | 5.196520921 | 0.00490062  | DLG2     | ENSG00000150672 |
| 11 | 85017329 | 85017663 | 85017496 | 8   | 12  | 8   | 1.501217155 | 0.168286    | TMEM126B | ENSG00000171204 |
| 11 | 85124946 | 85125129 | 85125022 | 8   | 8   | 4   | 1.870747532 | 0.118863    | SYTL2    | ENSG00000137501 |
| 11 | 85189407 | 85189586 | 85189565 | 8   | 8   | 3   | 2.338434415 | 0.0641221   | SYTL2    | ENSG00000137501 |
| 11 | 85195439 | 85196014 | 85195793 | 31  | 53  | 6   | 8.017489421 | 1.90E-11    | CCDC83   | ENSG00000150676 |
| 11 | 85198796 | 85199015 | 85198905 | 10  | 10  | 3   | 2.858086507 | 0.0242838   | CCDC83   | ENSG00000150676 |
| 11 | 85202912 | 85203238 | 85203075 | 8   | 11  | 3   | 3.117912553 | 0.0146045   | CCDC83   | ENSG00000150676 |
| 11 | 85216019 | 85216293 | 85216156 | 10  | 11  | 6   | 1.781664316 | 0.103344    | CCDC83   | ENSG00000150676 |
| 11 | 85216362 | 85217056 | 85216807 | 16  | 36  | 13  | 2.746732487 | 0.000287048 | CCDC83   | ENSG00000150676 |
| 11 | 85217061 | 85217366 | 85217225 | 12  | 17  | 10  | 1.700679574 | 0.0766266   | CCDC83   | ENSG00000150676 |
| 11 | 85219199 | 85219476 | 85219337 | 8   | 12  | 8   | 1.501217155 | 0.168286    | CCDC83   | ENSG00000150676 |
| 11 | 85219899 | 85220253 | 85220088 | 16  | 21  | 3   | 5.716173013 | 5.37E-05    | CCDC83   | ENSG00000150676 |



|    |           |           |           |    |     |    |             |             |          |                 |
|----|-----------|-----------|-----------|----|-----|----|-------------|-------------|----------|-----------------|
| 11 | 85430659  | 85430847  | 85430786  | 8  | 8   | 5  | 1.558956276 | 0.191397    | PICALM   | ENSG00000073921 |
| 11 | 85536631  | 85536848  | 85536696  | 9  | 9   | 0  | 10.39304184 | 0.000803859 |          | ENSG00000200877 |
| 11 | 85690850  | 85691046  | 85690950  | 11 | 11  | 3  | 3.117912553 | 0.0146045   | C11orf73 | ENSG00000149196 |
| 11 | 85703446  | 85703627  | 85703528  | 8  | 9   | 2  | 3.464347281 | 0.0163838   |          | ENSG00000210623 |
| 11 | 85723852  | 85724564  | 85724289  | 93 | 162 | 11 | 14.11721517 | 1.85E-37    |          | ENSG00000222550 |
| 11 | 85912837  | 85913142  | 85913005  | 13 | 18  | 5  | 3.291129917 | 0.00248584  | ME3      | ENSG00000151376 |
| 11 | 86094726  | 86095024  | 86094875  | 8  | 12  | 4  | 2.702190879 | 0.0203088   | ME3      | ENSG00000151376 |
| 11 | 86095097  | 86095438  | 86095276  | 20 | 25  | 7  | 3.377738599 | 0.000449165 | ME3      | ENSG00000151376 |
| 11 | 86153812  | 86153994  | 86153903  | 9  | 9   | 1  | 5.196520921 | 0.00490062  | PRSS23   | ENSG00000150687 |
| 11 | 86393960  | 86394251  | 86394105  | 14 | 15  | 2  | 5.542955649 | 0.000497081 | TMEM135  | ENSG00000166575 |
| 11 | 86992922  | 86993203  | 86993069  | 14 | 14  | 2  | 5.196520921 | 0.000907371 |          | ENSG00000223015 |
| 11 | 87791486  | 87791672  | 87791512  | 8  | 10  | 6  | 1.63319229  | 0.146906    | CTSC     | ENSG00000109861 |
| 11 | 93678070  | 93678345  | 93678225  | 10 | 10  | 2  | 3.810782009 | 0.00936112  |          | ENSG00000183560 |
| 11 | 94408206  | 94408510  | 94408341  | 10 | 11  | 2  | 4.157216737 | 0.0052913   |          | ENSG00000180771 |
| 11 | 94438226  | 94438547  | 94438398  | 14 | 18  | 0  | 19.7467795  | 1.32E-06    |          | ENSG00000180771 |
| 11 | 95209323  | 95209585  | 95209440  | 8  | 9   | 0  | 10.39304184 | 0.000803859 |          | ENSG00000210880 |
| 11 | 95518124  | 95518334  | 95518200  | 8  | 9   | 2  | 3.464347281 | 0.0163838   | MAML2    | ENSG00000184384 |
| 11 | 100410051 | 100410437 | 100410225 | 24 | 30  | 7  | 4.027303714 | 3.60E-05    | TMEM133  | ENSG00000170647 |
| 11 | 100712308 | 100712510 | 100712361 | 8  | 9   | 3  | 2.598260461 | 0.0397929   | PGR      | ENSG00000082175 |
| 11 | 101632200 | 101632589 | 101632396 | 42 | 54  | 0  | 57.16173013 | 9.52E-18    |          | ENSG00000212466 |
| 11 | 102485034 | 102485287 | 102485160 | 12 | 14  | 1  | 7.794781382 | 0.000197021 | DYNC2H1  | ENSG00000187240 |
| 11 | 103234658 | 103234837 | 103234683 | 8  | 9   | 3  | 2.598260461 | 0.0397929   | DDI1     | ENSG00000170967 |
| 11 | 105463866 | 105464045 | 105463921 | 8  | 8   | 0  | 9.353737658 | 0.00163931  | AASDHPPT | ENSG00000149313 |
| 11 | 105606073 | 105606258 | 105606165 | 8  | 9   | 1  | 5.196520921 | 0.00490062  | AASDHPPT | ENSG00000149313 |
| 11 | 106534909 | 106535509 | 106535209 | 59 | 92  | 6  | 13.80789845 | 3.45E-22    | GUCY1A2  | ENSG00000152402 |
| 11 | 107711243 | 107711480 | 107711361 | 12 | 14  | 0  | 15.58956276 | 2.28E-05    | ATM      | ENSG00000149311 |
| 11 | 107873484 | 107873780 | 107873632 | 8  | 12  | 4  | 2.702190879 | 0.0203088   | KDELC2   | ENSG00000178202 |
| 11 | 108324215 | 108324519 | 108324367 | 14 | 14  | 0  | 15.58956276 | 2.28E-05    |          | ENSG00000203334 |
| 11 | 108718342 | 108718521 | 108718366 | 8  | 8   | 0  | 9.353737658 | 0.00163931  | C11orf87 | ENSG00000185742 |
| 11 | 109398513 | 109398763 | 109398648 | 16 | 17  | 0  | 18.70747532 | 2.69E-06    | ZC3H12C  | ENSG00000149289 |
| 11 | 110710720 | 110710935 | 110710826 | 8  | 9   | 3  | 2.598260461 | 0.0397929   | POU2AF1  | ENSG00000110777 |
| 11 | 110802630 | 110802892 | 110802756 | 11 | 14  | 0  | 15.58956276 | 2.28E-05    | POU2AF1  | ENSG00000110777 |
| 11 | 110886288 | 110886684 | 110886462 | 49 | 56  | 2  | 19.7467795  | 1.05E-15    | BTG4     | ENSG00000137707 |
| 11 | 111254500 | 111254739 | 111254668 | 8  | 10  | 7  | 1.429043253 | 0.21536     | FDXACB1  | ENSG00000137702 |

|    |           |           |           |    |    |    |             |             |          |                 |
|----|-----------|-----------|-----------|----|----|----|-------------|-------------|----------|-----------------|
| 11 | 112720281 | 112720594 | 112720438 | 8  | 12 | 0  | 13.5109544  | 9.48E-05    | TTC12    | ENSG00000149292 |
| 11 | 112760546 | 112760893 | 112760719 | 16 | 20 | 2  | 7.27512929  | 2.27E-05    | ANKK1    | ENSG00000170209 |
| 11 | 112822815 | 112823266 | 112822994 | 21 | 32 | 3  | 8.57425952  | 6.31E-08    | DRD2     | ENSG00000149295 |
| 11 | 113351033 | 113351312 | 113351172 | 8  | 8  | 1  | 4.676868829 | 0.0091584   | HTR3A    | ENSG00000166736 |
| 11 | 114864952 | 114865175 | 114865055 | 9  | 9  | 0  | 10.39304184 | 0.000803859 | CADM1    | ENSG00000182985 |
| 11 | 116447281 | 116447465 | 116447373 | 9  | 9  | 5  | 1.73217364  | 0.133894    |          | ENSG00000160584 |
| 11 | 116559863 | 116560145 | 116559993 | 9  | 12 | 3  | 3.377738599 | 0.00867157  | SIDT2    | ENSG00000149577 |
| 11 | 117132347 | 117132526 | 117132436 | 8  | 8  | 2  | 3.117912553 | 0.0283184   | DSCAML1  | ENSG00000177103 |
| 11 | 117283543 | 117283771 | 117283615 | 8  | 10 | 2  | 3.810782009 | 0.00936112  | TMPRSS13 | ENSG00000137747 |
| 11 | 117305232 | 117305540 | 117305378 | 10 | 14 | 3  | 3.897390691 | 0.00295882  | TMPRSS13 | ENSG00000137747 |
| 11 | 117433778 | 117434141 | 117433962 | 17 | 24 | 9  | 2.598260461 | 0.0032455   |          | ENSG00000222925 |
| 11 | 117450902 | 117451102 | 117451004 | 9  | 10 | 0  | 11.43234603 | 0.000394183 | TMPRSS4  | ENSG00000137648 |
| 11 | 117452707 | 117453091 | 117452912 | 10 | 18 | 12 | 1.518983039 | 0.117837    | TMPRSS4  | ENSG00000137648 |
| 11 | 117468918 | 117469178 | 117469048 | 11 | 12 | 4  | 2.702190879 | 0.0203088   | TMPRSS4  | ENSG00000137648 |
| 11 | 117574160 | 117574502 | 117574324 | 11 | 16 | 4  | 3.533634226 | 0.00276486  | AMICA1   | ENSG00000160593 |
| 11 | 117617595 | 117617918 | 117617747 | 9  | 13 | 7  | 1.818782322 | 0.0805123   | MPZL3    | ENSG00000160588 |
| 11 | 117735314 | 117735622 | 117735489 | 9  | 11 | 9  | 1.247165021 | 0.300052    | UBE4A    | ENSG00000110344 |
| 11 | 117777110 | 117777502 | 117777376 | 9  | 15 | 6  | 2.375552421 | 0.0212094   | ATP5L    | ENSG00000167283 |
| 11 | 117791718 | 117791950 | 117791823 | 9  | 11 | 1  | 6.235825105 | 0.0013754   | ATP5L    | ENSG00000167283 |
| 11 | 117811339 | 117811564 | 117811437 | 9  | 10 | 3  | 2.858086507 | 0.0242838   |          | ENSG00000175913 |
| 11 | 117997067 | 117997353 | 117997210 | 11 | 12 | 2  | 4.503651465 | 0.002963    | PHLDB1   | ENSG00000019144 |
| 11 | 117999233 | 117999596 | 117999449 | 13 | 18 | 3  | 4.936694875 | 0.000311102 | PHLDB1   | ENSG00000019144 |
| 11 | 118038919 | 118039149 | 118039052 | 8  | 8  | 7  | 1.169217207 | 0.371848    | TREH     | ENSG00000118094 |
| 11 | 118066251 | 118066550 | 118066424 | 11 | 15 | 1  | 8.314433474 | 0.000102308 | TREH     | ENSG00000118094 |
| 11 | 118246136 | 118246379 | 118246291 | 8  | 10 | 1  | 5.716173013 | 0.00260397  | CXCR5    | ENSG00000160683 |
| 11 | 118283365 | 118283559 | 118283462 | 9  | 10 | 3  | 2.858086507 | 0.0242838   | BCL9L    | ENSG00000186174 |
| 11 | 118285178 | 118285539 | 118285336 | 9  | 14 | 3  | 3.897390691 | 0.00295882  | BCL9L    | ENSG00000186174 |
| 11 | 118287928 | 118288591 | 118288412 | 12 | 29 | 19 | 1.558956276 | 0.0586429   | BCL9L    | ENSG00000186174 |
| 11 | 118293483 | 118293720 | 118293601 | 8  | 11 | 9  | 1.247165021 | 0.300052    | BCL9L    | ENSG00000186174 |
| 11 | 118301813 | 118302005 | 118301920 | 9  | 9  | 1  | 5.196520921 | 0.00490062  |          | ENSG00000223272 |
| 11 | 118304413 | 118304624 | 118304534 | 8  | 9  | 5  | 1.73217364  | 0.133894    |          | ENSG00000223272 |
| 11 | 118305517 | 118305737 | 118305683 | 8  | 10 | 5  | 1.905391004 | 0.0915982   |          | ENSG00000223272 |
| 11 | 118306085 | 118306391 | 118306238 | 8  | 13 | 2  | 4.850086193 | 0.00164564  |          | ENSG00000223272 |
| 11 | 118364132 | 118364447 | 118364284 | 11 | 12 | 1  | 6.755477198 | 0.000722752 |          | ENSG00000200242 |

|    |           |           |           |     |     |    |             |             |          |                 |
|----|-----------|-----------|-----------|-----|-----|----|-------------|-------------|----------|-----------------|
| 11 | 118394329 | 118394656 | 118394491 | 11  | 16  | 7  | 2.208521392 | 0.0257604   | TRAPPC4  | ENSG00000196655 |
| 11 | 118407522 | 118407715 | 118407618 | 8   | 9   | 0  | 10.39304184 | 0.000803859 | SLC37A4  | ENSG00000137700 |
| 11 | 118471539 | 118471742 | 118471671 | 8   | 11  | 4  | 2.494330042 | 0.0324033   | H2AFX    | ENSG00000188486 |
| 11 | 118477896 | 118478332 | 118478075 | 9   | 18  | 13 | 1.41048425  | 0.160361    | DPAGT1   | ENSG00000172269 |
| 11 | 118482977 | 118483217 | 118483097 | 9   | 10  | 9  | 1.143234603 | 0.378307    | C2CD2L   | ENSG00000172375 |
| 11 | 118532213 | 118532392 | 118532292 | 8   | 8   | 3  | 2.338434415 | 0.0641221   | ABCG4    | ENSG00000172350 |
| 11 | 118988828 | 118989071 | 118988962 | 9   | 10  | 1  | 5.716173013 | 0.00260397  |          | ENSG00000199217 |
| 11 | 119072268 | 119072727 | 119072447 | 91  | 115 | 1  | 60.27964269 | 7.57E-35    | PVRL1    | ENSG00000110400 |
| 11 | 119221634 | 119222008 | 119221829 | 45  | 55  | 2  | 19.40034477 | 2.07E-15    | PVRL1    | ENSG00000110400 |
| 11 | 119400700 | 119401296 | 119401045 | 33  | 54  | 7  | 7.145216267 | 4.74E-11    | TRIM29   | ENSG00000137699 |
| 11 | 119612582 | 119612793 | 119612687 | 10  | 13  | 3  | 3.637564645 | 0.0050909   | POU2F3   | ENSG00000137709 |
| 11 | 120633899 | 120634096 | 120633997 | 9   | 9   | 3  | 2.598260461 | 0.0397929   | SC5DL    | ENSG00000109929 |
| 11 | 120858544 | 120858747 | 120858645 | 10  | 10  | 0  | 11.43234603 | 0.000394183 | SORL1    | ENSG00000137642 |
| 11 | 120864623 | 120864883 | 120864753 | 10  | 11  | 3  | 3.117912553 | 0.0146045   | SORL1    | ENSG00000137642 |
| 11 | 124499409 | 124499718 | 124499545 | 8   | 11  | 2  | 4.157216737 | 0.0052913   |          | ENSG00000187686 |
| 11 | 124676012 | 124676358 | 124676185 | 8   | 13  | 1  | 7.27512929  | 0.000378098 |          | ENSG00000222844 |
| 11 | 128699659 | 128699922 | 128699795 | 9   | 11  | 5  | 2.078608368 | 0.0614303   |          | ENSG00000166080 |
| 11 | 129001020 | 129001402 | 129001223 | 17  | 23  | 1  | 12.47165021 | 4.94E-07    | TMEM45B  | ENSG00000151715 |
| 11 | 129017160 | 129017346 | 129017253 | 8   | 8   | 0  | 9.353737658 | 0.00163931  | TMEM45B  | ENSG00000151715 |
| 11 | 129221600 | 129221863 | 129221738 | 8   | 11  | 2  | 4.157216737 | 0.0052913   | TMEM45B  | ENSG00000151715 |
| 12 | 490206    | 490385    | 490273    | 8   | 8   | 2  | 3.117912553 | 0.0283184   | B4GALNT3 | ENSG00000139044 |
| 12 | 503584    | 504305    | 504024    | 72  | 112 | 10 | 10.67648844 | 2.07E-24    | B4GALNT3 | ENSG00000139044 |
| 12 | 577752    | 577979    | 577857    | 9   | 10  | 0  | 11.43234603 | 0.000394183 | NINJ2    | ENSG00000171840 |
| 12 | 730879    | 731096    | 730960    | 9   | 9   | 3  | 2.598260461 | 0.0397929   | WNK1     | ENSG00000060237 |
| 12 | 827312    | 827561    | 827436    | 14  | 14  | 1  | 7.794781382 | 0.000197021 | WNK1     | ENSG00000060237 |
| 12 | 929080    | 929426    | 929258    | 12  | 16  | 2  | 5.889390377 | 0.000270741 | RAD52    | ENSG00000002016 |
| 12 | 1512990   | 1513169   | 1513011   | 8   | 8   | 1  | 4.676868829 | 0.0091584   | FBXL14   | ENSG00000171823 |
| 12 | 1545900   | 1546180   | 1546038   | 9   | 9   | 2  | 3.464347281 | 0.0163838   | FBXL14   | ENSG00000171823 |
| 12 | 1584695   | 1584971   | 1584853   | 8   | 10  | 1  | 5.716173013 | 0.00260397  | FBXL14   | ENSG00000171823 |
| 12 | 1983782   | 1984329   | 1984108   | 154 | 205 | 2  | 71.36555398 | 9.96E-61    | DCP1B    | ENSG00000151065 |
| 12 | 2676607   | 2676867   | 2676737   | 17  | 18  | 1  | 9.87338975  | 1.41E-05    |          | ENSG00000216217 |
| 12 | 3279417   | 3279647   | 3279553   | 11  | 11  | 0  | 12.47165021 | 0.000193293 | TSPAN9   | ENSG00000011105 |
| 12 | 3294634   | 3295075   | 3294812   | 13  | 20  | 3  | 5.456346967 | 9.70E-05    | TSPAN9   | ENSG00000011105 |
| 12 | 3295081   | 3295260   | 3295106   | 8   | 8   | 1  | 4.676868829 | 0.0091584   | TSPAN9   | ENSG00000011105 |

|    |          |          |          |    |    |    |             |             |          |                 |
|----|----------|----------|----------|----|----|----|-------------|-------------|----------|-----------------|
| 12 | 3788683  | 3788957  | 3788820  | 9  | 11 | 4  | 2.494330042 | 0.0324033   |          | ENSG00000118976 |
| 12 | 4092377  | 4092715  | 4092546  | 16 | 21 | 2  | 7.621564018 | 1.21E-05    | CCND2    | ENSG00000118971 |
| 12 | 4300635  | 4301327  | 4300814  | 22 | 46 | 2  | 16.28243222 | 9.05E-13    | C12orf5  | ENSG00000078237 |
| 12 | 4362692  | 4363004  | 4362848  | 10 | 11 | 0  | 12.47165021 | 0.000193293 | FGF23    | ENSG00000118972 |
| 12 | 4462361  | 4462694  | 4462515  | 15 | 18 | 0  | 19.7467795  | 1.32E-06    | FGF6     | ENSG00000111241 |
| 12 | 4517776  | 4518060  | 4517908  | 8  | 11 | 2  | 4.157216737 | 0.0052913   |          | ENSG00000047621 |
| 12 | 5257478  | 5257736  | 5257607  | 13 | 14 | 4  | 3.117912553 | 0.00766354  |          | ENSG00000212729 |
| 12 | 6214930  | 6215269  | 6215031  | 16 | 21 | 3  | 5.716173013 | 5.37E-05    |          | ENSG00000202318 |
| 12 | 6301279  | 6301646  | 6301445  | 9  | 14 | 5  | 2.598260461 | 0.0167748   | PLEKHG6  | ENSG00000008323 |
| 12 | 6316075  | 6316269  | 6316172  | 8  | 9  | 4  | 2.078608368 | 0.0785659   | TNFRSF1A | ENSG00000067182 |
| 12 | 6487106  | 6487378  | 6487242  | 17 | 20 | 0  | 21.82538787 | 3.17E-07    | NCAPD2   | ENSG00000010292 |
| 12 | 6593353  | 6593565  | 6593416  | 8  | 11 | 1  | 6.235825105 | 0.0013754   | CHD4     | ENSG00000111642 |
| 12 | 6732983  | 6733311  | 6733161  | 9  | 12 | 4  | 2.702190879 | 0.0203088   | MLF2     | ENSG00000089693 |
| 12 | 6743910  | 6744165  | 6744037  | 8  | 9  | 3  | 2.598260461 | 0.0397929   | PTMS     | ENSG00000159335 |
| 12 | 6923203  | 6923569  | 6923382  | 11 | 18 | 13 | 1.41048425  | 0.160361    | C12orf57 | ENSG00000111678 |
| 12 | 6942390  | 6942650  | 6942512  | 8  | 10 | 2  | 3.810782009 | 0.00936112  |          | ENSG00000207713 |
| 12 | 7016990  | 7017291  | 7017116  | 8  | 11 | 0  | 12.47165021 | 0.000193293 | LPCAT3   | ENSG00000111684 |
| 12 | 7020348  | 7020584  | 7020515  | 8  | 8  | 5  | 1.558956276 | 0.191397    | C1S      | ENSG00000182326 |
| 12 | 8993956  | 8994144  | 8994060  | 9  | 10 | 4  | 2.286469205 | 0.0509017   | M6PR     | ENSG00000003056 |
| 12 | 9175970  | 9176341  | 9176180  | 11 | 16 | 1  | 8.834085566 | 5.30E-05    |          | ENSG00000211542 |
| 12 | 9416024  | 9416232  | 9416128  | 9  | 9  | 1  | 5.196520921 | 0.00490062  |          | ENSG00000186611 |
| 12 | 9692381  | 9692629  | 9692466  | 8  | 9  | 2  | 3.464347281 | 0.0163838   |          | ENSG00000214774 |
| 12 | 9954925  | 9955369  | 9955132  | 17 | 28 | 2  | 10.04660711 | 1.36E-07    | CLEC2A   | ENSG00000188393 |
| 12 | 10962786 | 10962999 | 10962903 | 10 | 10 | 0  | 11.43234603 | 0.000394183 | TAS2R13  | ENSG00000212128 |
| 12 | 11243722 | 11243905 | 11243854 | 8  | 8  | 3  | 2.338434415 | 0.0641221   | TAS2R42  | ENSG00000186136 |
| 12 | 11679696 | 11679925 | 11679833 | 9  | 10 | 0  | 11.43234603 | 0.000394183 | ETV6     | ENSG00000139083 |
| 12 | 12091339 | 12091559 | 12091449 | 12 | 12 | 0  | 13.5109544  | 9.48E-05    | BCL2L14  | ENSG00000121380 |
| 12 | 12143409 | 12143588 | 12143498 | 8  | 8  | 1  | 4.676868829 | 0.0091584   |          | ENSG00000198134 |
| 12 | 12513639 | 12513977 | 12513813 | 14 | 16 | 0  | 17.66817113 | 5.48E-06    | DUSP16   | ENSG00000111266 |
| 12 | 12769535 | 12769855 | 12769710 | 8  | 10 | 3  | 2.858086507 | 0.0242838   | APOLD1   | ENSG00000178878 |
| 12 | 12916543 | 12916859 | 12916702 | 9  | 13 | 0  | 14.55025858 | 4.65E-05    | GPRC5A   | ENSG00000013588 |
| 12 | 12927625 | 12927984 | 12927809 | 13 | 19 | 4  | 4.157216737 | 0.000560204 | GPRC5A   | ENSG00000013588 |
| 12 | 12935012 | 12935231 | 12935121 | 8  | 8  | 2  | 3.117912553 | 0.0283184   | GPRC5A   | ENSG00000013588 |
| 12 | 12960495 | 12960706 | 12960651 | 9  | 11 | 0  | 12.47165021 | 0.000193293 |          | ENSG00000207817 |

|    |          |          |          |     |     |     |             |             |          |                 |
|----|----------|----------|----------|-----|-----|-----|-------------|-------------|----------|-----------------|
| 12 | 13106108 | 13106296 | 13106269 | 8   | 8   | 10  | 0.850339787 | 0.645072    |          | ENSG00000199690 |
| 12 | 14252130 | 14252324 | 14252227 | 8   | 8   | 2   | 3.117912553 | 0.0283184   |          | ENSG00000209525 |
| 12 | 14361465 | 14361913 | 14361644 | 13  | 23  | 0   | 24.94330042 | 3.74E-08    | ATF7IP   | ENSG00000171681 |
| 12 | 14815267 | 14815451 | 14815326 | 8   | 8   | 9   | 0.935373766 | 0.560286    | HIST4H4  | ENSG00000197837 |
| 12 | 15265052 | 15265464 | 15265231 | 8   | 15  | 5   | 2.771477825 | 0.0105836   | RERG     | ENSG00000134533 |
| 12 | 15579548 | 15579918 | 15579727 | 17  | 24  | 0   | 25.98260461 | 1.83E-08    |          | ENSG00000200105 |
| 12 | 15980924 | 15981336 | 15981099 | 66  | 78  | 3   | 20.52625764 | 4.32E-21    | DERA     | ENSG00000023697 |
| 12 | 18305529 | 18305797 | 18305663 | 8   | 8   | 3   | 2.338434415 | 0.0641221   | PIK3C2G  | ENSG00000139144 |
| 12 | 18393950 | 18394170 | 18394060 | 8   | 9   | 0   | 10.39304184 | 0.000803859 |          | ENSG00000209542 |
| 12 | 18947516 | 18947725 | 18947640 | 8   | 8   | 1   | 4.676868829 | 0.0091584   | CAPZA3   | ENSG00000177938 |
| 12 | 19125620 | 19125810 | 19125738 | 9   | 9   | 0   | 10.39304184 | 0.000803859 | PLEKHA5  | ENSG00000052126 |
| 12 | 19475974 | 19476413 | 19476234 | 97  | 113 | 0   | 118.480677  | 5.24E-36    | AEBP2    | ENSG00000139154 |
| 12 | 20595492 | 20595898 | 20595674 | 102 | 152 | 129 | 1.223181078 | 0.0451499   |          | ENSG00000209580 |
| 12 | 21863062 | 21863270 | 21863140 | 10  | 11  | 0   | 12.47165021 | 0.000193293 | KCNJ8    | ENSG00000121361 |
| 12 | 22320358 | 22320537 | 22320447 | 8   | 9   | 3   | 2.598260461 | 0.0397929   | ST8SIA1  | ENSG00000111728 |
| 12 | 22875197 | 22875610 | 22875432 | 47  | 58  | 2   | 20.43964896 | 2.70E-16    | ETNK1    | ENSG00000139163 |
| 12 | 25098363 | 25098622 | 25098482 | 9   | 9   | 1   | 5.196520921 | 0.00490062  |          | ENSG00000212652 |
| 12 | 25173022 | 25173362 | 25173189 | 11  | 14  | 3   | 3.897390691 | 0.00295882  | CASC1    | ENSG00000118307 |
| 12 | 25179647 | 25180265 | 25180086 | 23  | 43  | 5   | 7.621564018 | 1.77E-09    | CASC1    | ENSG00000118307 |
| 12 | 25700087 | 25700308 | 25700197 | 9   | 11  | 3   | 3.117912553 | 0.0146045   |          | ENSG00000209624 |
| 12 | 25755486 | 25755804 | 25755645 | 9   | 10  | 1   | 5.716173013 | 0.00260397  |          | ENSG00000222950 |
| 12 | 26088321 | 26088505 | 26088414 | 9   | 9   | 0   | 10.39304184 | 0.000803859 | BHLHB3   | ENSG00000123095 |
| 12 | 26876282 | 26876461 | 26876377 | 8   | 8   | 0   | 9.353737658 | 0.00163931  | ITPR2    | ENSG00000123104 |
| 12 | 27057094 | 27057555 | 27057262 | 26  | 36  | 1   | 19.22712741 | 7.03E-11    | TM7SF3   | ENSG00000064115 |
| 12 | 27428206 | 27428480 | 27428329 | 9   | 10  | 1   | 5.716173013 | 0.00260397  | ARNTL2   | ENSG00000029153 |
| 12 | 27568094 | 27568397 | 27568245 | 12  | 18  | 1   | 9.87338975  | 1.41E-05    | PPFIBP1  | ENSG00000110841 |
| 12 | 28728536 | 28728715 | 28728624 | 8   | 8   | 0   | 9.353737658 | 0.00163931  |          | ENSG00000202187 |
| 12 | 29007916 | 29008095 | 29008005 | 8   | 8   | 2   | 3.117912553 | 0.0283184   |          | ENSG00000222481 |
| 12 | 29177870 | 29178077 | 29177969 | 11  | 12  | 1   | 6.755477198 | 0.000722752 |          | ENSG00000222481 |
| 12 | 31504288 | 31504467 | 31504411 | 8   | 8   | 2   | 3.117912553 | 0.0283184   |          | ENSG00000209704 |
| 12 | 31777148 | 31777515 | 31777323 | 14  | 19  | 2   | 6.928694562 | 4.25E-05    | AMN1     | ENSG00000151743 |
| 12 | 31793500 | 31793860 | 31793679 | 14  | 21  | 3   | 5.716173013 | 5.37E-05    | AMN1     | ENSG00000151743 |
| 12 | 32003284 | 32003529 | 32003447 | 13  | 15  | 3   | 4.157216737 | 0.00170423  | C12orf35 | ENSG00000174718 |
| 12 | 32293076 | 32293359 | 32293219 | 11  | 14  | 2   | 5.196520921 | 0.000907371 | BICD1    | ENSG00000151746 |

|    |          |          |          |    |    |    |             |             |          |                 |
|----|----------|----------|----------|----|----|----|-------------|-------------|----------|-----------------|
| 12 | 32937244 | 32937623 | 32937423 | 12 | 20 | 7  | 2.728173484 | 0.00469378  | PKP2     | ENSG00000057294 |
| 12 | 32938934 | 32939134 | 32939066 | 8  | 8  | 0  | 9.353737658 | 0.00163931  | PKP2     | ENSG00000057294 |
| 12 | 32941252 | 32941541 | 32941372 | 9  | 11 | 1  | 6.235825105 | 0.0013754   | PKP2     | ENSG00000057294 |
| 12 | 33065469 | 33065805 | 33065642 | 12 | 14 | 2  | 5.196520921 | 0.000907371 | PKP2     | ENSG00000057294 |
| 12 | 33471475 | 33471724 | 33471579 | 9  | 11 | 4  | 2.494330042 | 0.0324033   | SYT10    | ENSG00000110975 |
| 12 | 34066542 | 34066722 | 34066632 | 8  | 8  | 2  | 3.117912553 | 0.0283184   | ALG10    | ENSG00000139133 |
| 12 | 34263742 | 34264085 | 34263913 | 36 | 36 | 47 | 0.801130309 | 0.847038    |          | ENSG00000209793 |
| 12 | 34724577 | 34724909 | 34724743 | 13 | 13 | 16 | 0.855897563 | 0.670115    |          | ENSG00000209793 |
| 12 | 34730068 | 34730248 | 34730219 | 11 | 11 | 8  | 1.385738912 | 0.224757    |          | ENSG00000209793 |
| 12 | 34737558 | 34737894 | 34737726 | 18 | 18 | 20 | 0.940322833 | 0.578675    |          | ENSG00000209793 |
| 12 | 36411022 | 36411203 | 36411112 | 12 | 12 | 19 | 0.67554772  | 0.870684    |          | ENSG00000209796 |
| 12 | 36730910 | 36731098 | 36731060 | 13 | 13 | 5  | 2.425043097 | 0.0262442   |          | ENSG00000209796 |
| 12 | 36818870 | 36819064 | 36818997 | 8  | 10 | 5  | 1.905391004 | 0.0915982   |          | ENSG00000209796 |
| 12 | 36829769 | 36830249 | 36830074 | 13 | 18 | 13 | 1.41048425  | 0.160361    |          | ENSG00000199843 |
| 12 | 38699032 | 38699245 | 38699161 | 9  | 9  | 8  | 1.154782427 | 0.375434    |          | ENSG00000219786 |
| 12 | 38708489 | 38708737 | 38708580 | 9  | 9  | 2  | 3.464347281 | 0.0163838   |          | ENSG00000219786 |
| 12 | 38787514 | 38787786 | 38787677 | 9  | 10 | 3  | 2.858086507 | 0.0242838   | SLC2A13  | ENSG00000151229 |
| 12 | 39089503 | 39089873 | 39089684 | 14 | 22 | 0  | 23.90399624 | 7.62E-08    |          | ENSG00000214639 |
| 12 | 39154692 | 39155145 | 39154938 | 58 | 78 | 7  | 10.26312882 | 1.86E-17    |          | ENSG00000214639 |
| 12 | 40259312 | 40259560 | 40259433 | 9  | 9  | 5  | 1.73217364  | 0.133894    |          | ENSG00000209871 |
| 12 | 40693891 | 40694113 | 40693968 | 8  | 11 | 2  | 4.157216737 | 0.0052913   |          | ENSG00000222884 |
| 12 | 40824150 | 40824365 | 40824257 | 8  | 8  | 6  | 1.336248237 | 0.277651    | GLT8D3   | ENSG00000151233 |
| 12 | 41016469 | 41016659 | 41016564 | 8  | 8  | 0  | 9.353737658 | 0.00163931  | PPHLN1   | ENSG00000134283 |
| 12 | 41061530 | 41061740 | 41061635 | 8  | 8  | 0  | 9.353737658 | 0.00163931  |          | ENSG00000199886 |
| 12 | 41300088 | 41300333 | 41300210 | 8  | 9  | 2  | 3.464347281 | 0.0163838   |          | ENSG00000213677 |
| 12 | 42212230 | 42212409 | 42212319 | 8  | 8  | 1  | 4.676868829 | 0.0091584   | ADAMTS20 | ENSG00000173157 |
| 12 | 42266717 | 42267196 | 42266896 | 49 | 61 | 0  | 64.43685942 | 6.49E-20    |          | ENSG00000214615 |
| 12 | 42438761 | 42439110 | 42438911 | 9  | 13 | 6  | 2.078608368 | 0.0483393   | PUS7L    | ENSG00000129317 |
| 12 | 42439547 | 42439726 | 42439596 | 8  | 8  | 1  | 4.676868829 | 0.0091584   | IRAK4    | ENSG00000198001 |
| 12 | 43176718 | 43177043 | 43176870 | 8  | 11 | 4  | 2.494330042 | 0.0324033   | NELL2    | ENSG00000184613 |
| 12 | 43628780 | 43629114 | 43628947 | 17 | 21 | 11 | 1.905391004 | 0.031399    |          | ENSG00000201788 |
| 12 | 43895436 | 43895817 | 43895609 | 11 | 17 | 5  | 3.117912553 | 0.00407023  | PLEKHA9  | ENSG00000134297 |
| 12 | 43956376 | 43956678 | 43956527 | 9  | 11 | 10 | 1.133786383 | 0.380636    | ANO6     | ENSG00000177119 |
| 12 | 43979235 | 43979440 | 43979287 | 8  | 10 | 0  | 11.43234603 | 0.000394183 | ANO6     | ENSG00000177119 |

|    |          |          |          |    |    |    |             |             |         |                 |
|----|----------|----------|----------|----|----|----|-------------|-------------|---------|-----------------|
| 12 | 44325123 | 44325345 | 44325235 | 16 | 17 | 1  | 9.353737658 | 2.73E-05    | ARID2   | ENSG00000189079 |
| 12 | 44407519 | 44407698 | 44407608 | 8  | 8  | 0  | 9.353737658 | 0.00163931  | ARID2   | ENSG00000189079 |
| 12 | 44558778 | 44559036 | 44558911 | 10 | 10 | 3  | 2.858086507 | 0.0242838   |         | ENSG00000209242 |
| 12 | 44670604 | 44670823 | 44670687 | 8  | 9  | 3  | 2.598260461 | 0.0397929   | SFRS2IP | ENSG00000139218 |
| 12 | 44670835 | 44671033 | 44670964 | 9  | 10 | 9  | 1.143234603 | 0.378307    | SFRS2IP | ENSG00000139218 |
| 12 | 44672008 | 44672288 | 44672148 | 8  | 10 | 6  | 1.63319229  | 0.146906    | SFRS2IP | ENSG00000139218 |
| 12 | 44751366 | 44751705 | 44751536 | 41 | 44 | 2  | 15.58956276 | 3.47E-12    | SFRS2IP | ENSG00000139218 |
| 12 | 44751741 | 44751920 | 44751872 | 8  | 8  | 3  | 2.338434415 | 0.0641221   | SFRS2IP | ENSG00000139218 |
| 12 | 44752093 | 44752442 | 44752361 | 8  | 13 | 13 | 1.039304184 | 0.45974     | SFRS2IP | ENSG00000139218 |
| 12 | 44787664 | 44788076 | 44787859 | 38 | 51 | 1  | 27.02190879 | 2.22E-15    | SFRS2IP | ENSG00000139218 |
| 12 | 44834164 | 44834555 | 44834378 | 8  | 15 | 6  | 2.375552421 | 0.0212094   | SLC38A1 | ENSG00000111371 |
| 12 | 44840780 | 44841083 | 44840930 | 13 | 17 | 5  | 3.117912553 | 0.00407023  | SLC38A1 | ENSG00000111371 |
| 12 | 44844074 | 44844559 | 44844380 | 17 | 26 | 4  | 5.612242595 | 1.08E-05    | SLC38A1 | ENSG00000111371 |
| 12 | 44881452 | 44881697 | 44881541 | 12 | 13 | 7  | 1.818782322 | 0.0805123   | SLC38A1 | ENSG00000111371 |
| 12 | 44890013 | 44890390 | 44890211 | 16 | 23 | 3  | 6.235825105 | 1.63E-05    | SLC38A1 | ENSG00000111371 |
| 12 | 44939143 | 44939457 | 44939300 | 15 | 19 | 5  | 3.464347281 | 0.00150447  | SLC38A1 | ENSG00000111371 |
| 12 | 44940652 | 44940853 | 44940709 | 8  | 9  | 11 | 0.86608682  | 0.635181    | SLC38A1 | ENSG00000111371 |
| 12 | 44941163 | 44941464 | 44941313 | 10 | 14 | 7  | 1.948695345 | 0.0559175   | SLC38A1 | ENSG00000111371 |
| 12 | 45021768 | 45021950 | 45021891 | 8  | 8  | 0  | 9.353737658 | 0.00163931  | SLC38A2 | ENSG00000134294 |
| 12 | 45045459 | 45045638 | 45045548 | 8  | 8  | 0  | 9.353737658 | 0.00163931  | SLC38A2 | ENSG00000134294 |
| 12 | 45052536 | 45052740 | 45052660 | 8  | 8  | 2  | 3.117912553 | 0.0283184   | SLC38A2 | ENSG00000134294 |
| 12 | 45063485 | 45063718 | 45063601 | 10 | 12 | 1  | 6.755477198 | 0.000722752 | SLC38A2 | ENSG00000134294 |
| 12 | 45065493 | 45065679 | 45065586 | 10 | 10 | 4  | 2.286469205 | 0.0509017   | SLC38A2 | ENSG00000134294 |
| 12 | 45135837 | 45136115 | 45135976 | 22 | 26 | 5  | 4.676868829 | 3.65E-05    | SLC38A2 | ENSG00000134294 |
| 12 | 45142396 | 45143127 | 45142498 | 10 | 29 | 13 | 2.227080395 | 0.00479511  | SLC38A2 | ENSG00000134294 |
| 12 | 45153858 | 45154060 | 45153983 | 9  | 10 | 7  | 1.429043253 | 0.21536     | SLC38A2 | ENSG00000134294 |
| 12 | 45173687 | 45174206 | 45173860 | 11 | 23 | 4  | 4.988660084 | 6.05E-05    | SLC38A2 | ENSG00000134294 |
| 12 | 45257559 | 45257826 | 45257730 | 14 | 16 | 4  | 3.533634226 | 0.00276486  | SLC38A2 | ENSG00000134294 |
| 12 | 45358071 | 45358250 | 45358160 | 8  | 8  | 2  | 3.117912553 | 0.0283184   | SLC38A4 | ENSG00000139209 |
| 12 | 45450614 | 45450811 | 45450739 | 8  | 10 | 6  | 1.63319229  | 0.146906    | SLC38A4 | ENSG00000139209 |
| 12 | 45464855 | 45465219 | 45465019 | 9  | 13 | 1  | 7.27512929  | 0.000378098 | SLC38A4 | ENSG00000139209 |
| 12 | 45748533 | 45748713 | 45748623 | 9  | 9  | 0  | 10.39304184 | 0.000803859 | FAM113B | ENSG00000179715 |
| 12 | 45760802 | 45760981 | 45760891 | 8  | 8  | 2  | 3.117912553 | 0.0283184   | AMIGO2  | ENSG00000139211 |
| 12 | 45768520 | 45768766 | 45768694 | 9  | 10 | 1  | 5.716173013 | 0.00260397  | AMIGO2  | ENSG00000139211 |

|    |          |          |          |    |    |    |             |             |          |                 |
|----|----------|----------|----------|----|----|----|-------------|-------------|----------|-----------------|
| 12 | 45927509 | 45927723 | 45927599 | 12 | 13 | 0  | 14.55025858 | 4.65E-05    | FAM113B  | ENSG00000179715 |
| 12 | 46029269 | 46029458 | 46029363 | 9  | 9  | 1  | 5.196520921 | 0.00490062  |          | ENSG00000199566 |
| 12 | 46050571 | 46051020 | 46050750 | 16 | 27 | 10 | 2.64550156  | 0.00175911  |          | ENSG00000199566 |
| 12 | 46236336 | 46236733 | 46236511 | 59 | 65 | 3  | 17.14851904 | 2.72E-17    | RPAP3    | ENSG00000005175 |
| 12 | 46296265 | 46296468 | 46296360 | 8  | 9  | 4  | 2.078608368 | 0.0785659   | RPAP3    | ENSG00000005175 |
| 12 | 46432704 | 46432901 | 46432802 | 11 | 11 | 2  | 4.157216737 | 0.0052913   | RAPGEF3  | ENSG00000079337 |
| 12 | 46434269 | 46434491 | 46434380 | 10 | 12 | 2  | 4.503651465 | 0.002963    | RAPGEF3  | ENSG00000079337 |
| 12 | 46448455 | 46448796 | 46448625 | 34 | 36 | 4  | 7.690850963 | 2.68E-08    | SLC48A1  | ENSG00000211584 |
| 12 | 46516094 | 46516318 | 46516206 | 9  | 10 | 2  | 3.810782009 | 0.00936112  | HDAC7    | ENSG00000061273 |
| 12 | 46584747 | 46585071 | 46584900 | 11 | 12 | 3  | 3.377738599 | 0.00867157  | VDR      | ENSG00000111424 |
| 12 | 46629626 | 46629815 | 46629728 | 9  | 9  | 3  | 2.598260461 | 0.0397929   | TMEM106C | ENSG00000134291 |
| 12 | 46701804 | 46702348 | 46702087 | 11 | 25 | 10 | 2.456537163 | 0.00405907  | COL2A1   | ENSG00000139219 |
| 12 | 46703108 | 46703411 | 46703259 | 8  | 12 | 5  | 2.251825733 | 0.0404733   | COL2A1   | ENSG00000139219 |
| 12 | 46704035 | 46704264 | 46704104 | 8  | 8  | 0  | 9.353737658 | 0.00163931  | COL2A1   | ENSG00000139219 |
| 12 | 46785950 | 46786481 | 46786374 | 8  | 18 | 6  | 2.8209685   | 0.00559354  | SENP1    | ENSG00000079387 |
| 12 | 47282192 | 47282633 | 47282425 | 31 | 40 | 5  | 7.101911926 | 1.09E-08    | LALBA    | ENSG00000167531 |
| 12 | 47474970 | 47475223 | 47475096 | 10 | 11 | 6  | 1.781664316 | 0.103344    | ADCY6    | ENSG00000174233 |
| 12 | 47498205 | 47498452 | 47498352 | 10 | 13 | 2  | 4.850086193 | 0.00164564  | CACNB3   | ENSG00000167535 |
| 12 | 47532442 | 47532674 | 47532556 | 8  | 10 | 3  | 2.858086507 | 0.0242838   | DDX23    | ENSG00000174243 |
| 12 | 47533297 | 47533764 | 47533679 | 10 | 19 | 5  | 3.464347281 | 0.00150447  | DDX23    | ENSG00000174243 |
| 12 | 47675489 | 47675750 | 47675614 | 10 | 11 | 6  | 1.781664316 | 0.103344    | DDN      | ENSG00000181418 |
| 12 | 47740452 | 47741123 | 47740954 | 11 | 26 | 4  | 5.612242595 | 1.08E-05    | MLL2     | ENSG00000167548 |
| 12 | 47810145 | 47810466 | 47810290 | 10 | 13 | 9  | 1.455025858 | 0.177172    | TUBA1B   | ENSG00000123416 |
| 12 | 47944776 | 47944985 | 47944864 | 8  | 9  | 1  | 5.196520921 | 0.00490062  | TUBA1C   | ENSG00000167553 |
| 12 | 47969127 | 47969374 | 47969250 | 11 | 11 | 4  | 2.494330042 | 0.0324033   | PRPH     | ENSG00000135406 |
| 12 | 48003342 | 48003527 | 48003448 | 8  | 9  | 1  | 5.196520921 | 0.00490062  | TROAP    | ENSG00000135451 |
| 12 | 48083956 | 48084242 | 48084089 | 14 | 18 | 8  | 2.194086611 | 0.0206188   | SPATS2   | ENSG00000123352 |
| 12 | 48084253 | 48084561 | 48084342 | 9  | 13 | 2  | 4.850086193 | 0.00164564  | SPATS2   | ENSG00000123352 |
| 12 | 48248083 | 48248481 | 48248262 | 8  | 15 | 5  | 2.771477825 | 0.0105836   | MCRS1    | ENSG00000187778 |
| 12 | 48325387 | 48325571 | 48325479 | 8  | 8  | 0  | 9.353737658 | 0.00163931  | PRPF40B  | ENSG00000110844 |
| 12 | 48421104 | 48421445 | 48421281 | 8  | 13 | 6  | 2.078608368 | 0.0483393   | TMBIM6   | ENSG00000139644 |
| 12 | 48443169 | 48443348 | 48443245 | 8  | 9  | 0  | 10.39304184 | 0.000803859 | TMBIM6   | ENSG00000139644 |
| 12 | 48508634 | 48508844 | 48508792 | 9  | 11 | 1  | 6.235825105 | 0.0013754   | KIAA1602 | ENSG00000167566 |
| 12 | 48549210 | 48549472 | 48549370 | 9  | 12 | 5  | 2.251825733 | 0.0404733   |          | ENSG00000214531 |



|    |          |          |          |     |     |    |             |             |          |                 |
|----|----------|----------|----------|-----|-----|----|-------------|-------------|----------|-----------------|
| 12 | 48705550 | 48705739 | 48705701 | 8   | 8   | 12 | 0.719518281 | 0.783103    | RACGAP1  | ENSG00000161800 |
| 12 | 48764973 | 48765296 | 48765141 | 8   | 12  | 11 | 1.125912866 | 0.382541    | SMARCD1  | ENSG00000066117 |
| 12 | 48791689 | 48791904 | 48791787 | 11  | 14  | 5  | 2.598260461 | 0.0167748   | C12orf62 | ENSG00000178449 |
| 12 | 48847666 | 48847898 | 48847743 | 10  | 11  | 5  | 2.078608368 | 0.0614303   | LASS5    | ENSG00000139624 |
| 12 | 48850420 | 48850776 | 48850598 | 106 | 109 | 1  | 57.16173013 | 5.17E-33    | LASS5    | ENSG00000139624 |
| 12 | 48882221 | 48882575 | 48882398 | 12  | 18  | 4  | 3.9493559   | 0.000961379 |          | ENSG00000221604 |
| 12 | 48904410 | 48904701 | 48904552 | 10  | 12  | 7  | 1.688869299 | 0.11395     |          | ENSG00000221604 |
| 12 | 48962701 | 48962955 | 48962813 | 10  | 10  | 1  | 5.716173013 | 0.00260397  | LIMA1    | ENSG00000050405 |
| 12 | 49098469 | 49098697 | 49098543 | 10  | 11  | 2  | 4.157216737 | 0.0052913   | LARP4    | ENSG00000161813 |
| 12 | 49184804 | 49185013 | 49184908 | 8   | 8   | 4  | 1.870747532 | 0.118863    | DIP2B    | ENSG00000066084 |
| 12 | 49212564 | 49212856 | 49212721 | 9   | 10  | 1  | 5.716173013 | 0.00260397  | DIP2B    | ENSG00000066084 |
| 12 | 49259912 | 49260092 | 49260002 | 8   | 8   | 5  | 1.558956276 | 0.191397    |          | ENSG00000207136 |
| 12 | 49300488 | 49300667 | 49300577 | 8   | 8   | 0  | 9.353737658 | 0.00163931  |          | ENSG00000207136 |
| 12 | 49385440 | 49385648 | 49385544 | 8   | 9   | 1  | 5.196520921 | 0.00490062  |          | ENSG00000200428 |
| 12 | 49608411 | 49608747 | 49608575 | 21  | 25  | 1  | 13.5109544  | 1.28E-07    | METTL7A  | ENSG00000185432 |
| 12 | 49666949 | 49667213 | 49667057 | 8   | 11  | 2  | 4.157216737 | 0.0052913   |          | ENSG00000206830 |
| 12 | 49708119 | 49708359 | 49708255 | 10  | 11  | 6  | 1.781664316 | 0.103344    | SLC11A2  | ENSG00000110911 |
| 12 | 49728176 | 49728554 | 49728354 | 10  | 16  | 1  | 8.834085566 | 5.30E-05    | LETMD1   | ENSG00000050426 |
| 12 | 49728686 | 49728935 | 49728811 | 8   | 9   | 2  | 3.464347281 | 0.0163838   | LETMD1   | ENSG00000050426 |
| 12 | 50068226 | 50068471 | 50068348 | 13  | 13  | 3  | 3.637564645 | 0.0050909   | SLC4A8   | ENSG00000050438 |
| 12 | 50072672 | 50073006 | 50072827 | 9   | 14  | 1  | 7.794781382 | 0.000197021 | GALNT6   | ENSG00000139629 |
| 12 | 50110337 | 50110533 | 50110441 | 8   | 8   | 4  | 1.870747532 | 0.118863    | SLC4A8   | ENSG00000050438 |
| 12 | 50211994 | 50212241 | 50212122 | 8   | 10  | 4  | 2.286469205 | 0.0509017   | SLC4A8   | ENSG00000050438 |
| 12 | 50705644 | 50705872 | 50705754 | 8   | 10  | 2  | 3.810782009 | 0.00936112  | NR4A1    | ENSG00000123358 |
| 12 | 50731507 | 50731686 | 50731651 | 8   | 9   | 0  | 10.39304184 | 0.000803859 | NR4A1    | ENSG00000123358 |
| 12 | 50749644 | 50750019 | 50749861 | 14  | 19  | 11 | 1.73217364  | 0.0607469   | C12orf44 | ENSG00000123395 |
| 12 | 50836944 | 50837123 | 50837046 | 8   | 8   | 3  | 2.338434415 | 0.0641221   | KRT80    | ENSG00000167767 |
| 12 | 50844003 | 50844302 | 50844141 | 13  | 16  | 2  | 5.889390377 | 0.000270741 | KRT80    | ENSG00000167767 |
| 12 | 50856070 | 50856587 | 50856248 | 51  | 63  | 3  | 16.62886695 | 1.03E-16    | KRT80    | ENSG00000167767 |
| 12 | 50872169 | 50872511 | 50872336 | 9   | 14  | 9  | 1.558956276 | 0.132279    | KRT80    | ENSG00000167767 |
| 12 | 50895648 | 50896099 | 50895852 | 12  | 24  | 9  | 2.598260461 | 0.0032455   | KRT7     | ENSG00000135480 |
| 12 | 50897347 | 50897792 | 50897569 | 15  | 24  | 14 | 1.73217364  | 0.0420666   | KRT7     | ENSG00000135480 |
| 12 | 50908521 | 50908923 | 50908651 | 13  | 21  | 3  | 5.716173013 | 5.37E-05    | KRT7     | ENSG00000135480 |
| 12 | 50915875 | 50916406 | 50916054 | 9   | 21  | 4  | 4.572938411 | 0.000186332 | KRT7     | ENSG00000135480 |

|    |          |          |          |    |    |    |             |             |                 |                 |
|----|----------|----------|----------|----|----|----|-------------|-------------|-----------------|-----------------|
| 12 | 50927182 | 50927368 | 50927258 | 8  | 9  | 3  | 2.598260461 | 0.0397929   | ENSG00000135477 |                 |
| 12 | 50927591 | 50927846 | 50927737 | 8  | 9  | 4  | 2.078608368 | 0.0785659   | ENSG00000135477 |                 |
| 12 | 51007640 | 51007990 | 51007815 | 11 | 15 | 6  | 2.375552421 | 0.0212094   | KRT83           | ENSG00000170523 |
| 12 | 51014235 | 51014429 | 51014332 | 9  | 9  | 2  | 3.464347281 | 0.0163838   | KRT83           | ENSG00000170523 |
| 12 | 51018379 | 51018558 | 51018539 | 8  | 8  | 5  | 1.558956276 | 0.191397    | KRT83           | ENSG00000170523 |
| 12 | 51018636 | 51019018 | 51018839 | 20 | 27 | 4  | 5.820103432 | 6.01E-06    | KRT83           | ENSG00000170523 |
| 12 | 51024560 | 51025042 | 51024739 | 14 | 23 | 5  | 4.157216737 | 0.000186738 | KRT85           | ENSG00000135443 |
| 12 | 51263013 | 51263292 | 51263151 | 13 | 15 | 5  | 2.771477825 | 0.0105836   | KRT74           | ENSG00000170484 |
| 12 | 51335749 | 51336126 | 51335948 | 8  | 14 | 3  | 3.897390691 | 0.00295882  | KRT2            | ENSG00000172867 |
| 12 | 51368829 | 51369008 | 51368918 | 8  | 8  | 0  | 9.353737658 | 0.00163931  | KRT1            | ENSG00000167768 |
| 12 | 51421485 | 51421788 | 51421636 | 11 | 14 | 7  | 1.948695345 | 0.0559175   | ENSG00000214466 |                 |
| 12 | 51461691 | 51461870 | 51461737 | 8  | 8  | 2  | 3.117912553 | 0.0283184   | KRT76           | ENSG00000185069 |
| 12 | 51480887 | 51481218 | 51481052 | 18 | 24 | 7  | 3.247825576 | 0.000729793 | KRT3            | ENSG00000186442 |
| 12 | 51540117 | 51540678 | 51540292 | 18 | 39 | 8  | 4.619129708 | 8.77E-07    | KRT78           | ENSG00000170423 |
| 12 | 51551520 | 51551818 | 51551649 | 11 | 14 | 5  | 2.598260461 | 0.0167748   | KRT78           | ENSG00000170423 |
| 12 | 51554563 | 51554792 | 51554649 | 8  | 10 | 4  | 2.286469205 | 0.0509017   | KRT78           | ENSG00000170423 |
| 12 | 51559556 | 51559848 | 51559702 | 9  | 14 | 6  | 2.227080395 | 0.0322529   | KRT8            | ENSG00000170421 |
| 12 | 51560079 | 51560319 | 51560177 | 9  | 12 | 4  | 2.702190879 | 0.0203088   | KRT8            | ENSG00000170421 |
| 12 | 51575241 | 51576085 | 51575537 | 23 | 54 | 18 | 3.008512112 | 4.02E-06    | KRT8            | ENSG00000170421 |
| 12 | 51578283 | 51578496 | 51578389 | 9  | 9  | 4  | 2.078608368 | 0.0785659   | KRT8            | ENSG00000170421 |
| 12 | 51581609 | 51581794 | 51581757 | 8  | 9  | 3  | 2.598260461 | 0.0397929   | KRT8            | ENSG00000170421 |
| 12 | 51583437 | 51583670 | 51583553 | 8  | 8  | 7  | 1.169217207 | 0.371848    | KRT8            | ENSG00000170421 |
| 12 | 51584037 | 51584246 | 51584172 | 8  | 9  | 4  | 2.078608368 | 0.0785659   | KRT8            | ENSG00000170421 |
| 12 | 51584280 | 51584529 | 51584427 | 12 | 13 | 4  | 2.910051716 | 0.0125532   | KRT8            | ENSG00000170421 |
| 12 | 51585134 | 51585516 | 51585337 | 15 | 22 | 5  | 3.983999373 | 0.000317941 | KRT8            | ENSG00000170421 |
| 12 | 51587242 | 51587678 | 51587365 | 13 | 19 | 12 | 1.598929514 | 0.0887417   | KRT8            | ENSG00000170421 |
| 12 | 51596588 | 51596891 | 51596739 | 15 | 16 | 5  | 2.944695189 | 0.00659886  | KRT8            | ENSG00000170421 |
| 12 | 51625482 | 51625727 | 51625604 | 11 | 12 | 8  | 1.501217155 | 0.168286    | KRT18           | ENSG00000111057 |
| 12 | 51626061 | 51626483 | 51626218 | 12 | 21 | 13 | 1.63319229  | 0.0708832   | KRT18           | ENSG00000111057 |
| 12 | 51627103 | 51627295 | 51627186 | 9  | 11 | 6  | 1.781664316 | 0.103344    | KRT18           | ENSG00000111057 |
| 12 | 51628755 | 51628999 | 51628858 | 12 | 12 | 2  | 4.503651465 | 0.002963    | KRT18           | ENSG00000111057 |
| 12 | 51633302 | 51633542 | 51633422 | 9  | 12 | 9  | 1.35109544  | 0.232899    | KRT18           | ENSG00000111057 |
| 12 | 51649876 | 51650652 | 51650473 | 20 | 50 | 24 | 2.120180536 | 0.000696689 | KRT18           | ENSG00000111057 |
| 12 | 51651771 | 51652377 | 51652198 | 24 | 57 | 12 | 4.636895591 | 4.53E-09    | KRT18           | ENSG00000111057 |

|    |          |          |          |    |    |    |             |             |          |                 |
|----|----------|----------|----------|----|----|----|-------------|-------------|----------|-----------------|
| 12 | 51656152 | 51656501 | 51656330 | 15 | 20 | 5  | 3.637564645 | 0.000902929 | KRT18    | ENSG00000111057 |
| 12 | 51656712 | 51657008 | 51656860 | 15 | 16 | 4  | 3.533634226 | 0.00276486  | KRT18    | ENSG00000111057 |
| 12 | 51660949 | 51661290 | 51661172 | 10 | 15 | 11 | 1.385738912 | 0.19225     | EIF4B    | ENSG00000063046 |
| 12 | 51686287 | 51686720 | 51686496 | 8  | 17 | 7  | 2.338434415 | 0.0171287   | EIF4B    | ENSG00000063046 |
| 12 | 51733610 | 51734047 | 51733770 | 11 | 18 | 5  | 3.291129917 | 0.00248584  | TENC1    | ENSG00000111077 |
| 12 | 51741492 | 51741786 | 51741625 | 9  | 12 | 6  | 1.930136342 | 0.071303    | TENC1    | ENSG00000111077 |
| 12 | 51746404 | 51746603 | 51746486 | 8  | 10 | 8  | 1.27026067  | 0.293854    | SPRYD3   | ENSG00000167778 |
| 12 | 51759460 | 51759639 | 51759519 | 8  | 8  | 4  | 1.870747532 | 0.118863    | SPRYD3   | ENSG00000167778 |
| 12 | 51797863 | 51798114 | 51797988 | 8  | 8  | 2  | 3.117912553 | 0.0283184   | SOAT2    | ENSG00000167780 |
| 12 | 51861802 | 51862021 | 51861918 | 8  | 9  | 2  | 3.464347281 | 0.0163838   | CSAD     | ENSG00000139631 |
| 12 | 51887259 | 51887438 | 51887348 | 8  | 8  | 3  | 2.338434415 | 0.0641221   | ITGB7    | ENSG00000139626 |
| 12 | 51931603 | 51931823 | 51931721 | 9  | 11 | 2  | 4.157216737 | 0.0052913   | MFSD5    | ENSG00000182544 |
| 12 | 51948530 | 51948828 | 51948679 | 11 | 14 | 4  | 3.117912553 | 0.00766354  | ESPL1    | ENSG00000135476 |
| 12 | 51960157 | 51960388 | 51960254 | 8  | 8  | 4  | 1.870747532 | 0.118863    | ESPL1    | ENSG00000135476 |
| 12 | 52001435 | 52001844 | 52001639 | 11 | 20 | 9  | 2.182538787 | 0.0165356   | AAAS     | ENSG00000094914 |
| 12 | 52004813 | 52004996 | 52004926 | 8  | 9  | 2  | 3.464347281 | 0.0163838   | AAAS     | ENSG00000094914 |
| 12 | 52032697 | 52032963 | 52032792 | 12 | 13 | 4  | 2.910051716 | 0.0125532   | SP7      | ENSG00000170374 |
| 12 | 52050856 | 52051154 | 52050992 | 12 | 14 | 5  | 2.598260461 | 0.0167748   | SP1      | ENSG00000185591 |
| 12 | 52051170 | 52051467 | 52051302 | 9  | 13 | 7  | 1.818782322 | 0.0805123   | SP1      | ENSG00000185591 |
| 12 | 52059282 | 52059509 | 52059443 | 8  | 11 | 4  | 2.494330042 | 0.0324033   | SP1      | ENSG00000185591 |
| 12 | 52101480 | 52101911 | 52101746 | 16 | 24 | 9  | 2.598260461 | 0.0032455   | AMHR2    | ENSG00000135409 |
| 12 | 52121105 | 52121569 | 52121344 | 9  | 20 | 6  | 3.117912553 | 0.00218114  | PRR13    | ENSG00000205352 |
| 12 | 52131851 | 52132097 | 52131967 | 11 | 13 | 7  | 1.818782322 | 0.0805123   | PCBP2    | ENSG00000197111 |
| 12 | 52179917 | 52180214 | 52180063 | 8  | 12 | 1  | 6.755477198 | 0.000722752 | MAP3K12  | ENSG00000139625 |
| 12 | 52205719 | 52205898 | 52205808 | 8  | 8  | 3  | 2.338434415 | 0.0641221   | NPFF     | ENSG00000139574 |
| 12 | 52223694 | 52223935 | 52223766 | 9  | 10 | 8  | 1.27026067  | 0.293854    | NPFF     | ENSG00000139574 |
| 12 | 52306556 | 52306904 | 52306747 | 8  | 12 | 8  | 1.501217155 | 0.168286    | ATF7     | ENSG00000170653 |
| 12 | 52356021 | 52356344 | 52356182 | 9  | 14 | 6  | 2.227080395 | 0.0322529   | ATP5G2   | ENSG00000135390 |
| 12 | 52407540 | 52407806 | 52407642 | 8  | 11 | 11 | 1.039304184 | 0.462773    | CALCOCO1 | ENSG00000012822 |
| 12 | 52484525 | 52484888 | 52484804 | 10 | 15 | 8  | 1.847651883 | 0.0631662   |          | ENSG00000223213 |
| 12 | 52500722 | 52500901 | 52500796 | 8  | 8  | 2  | 3.117912553 | 0.0283184   |          | ENSG00000223213 |
| 12 | 52505199 | 52505696 | 52505466 | 15 | 27 | 13 | 2.078608368 | 0.00998554  |          | ENSG00000223213 |
| 12 | 52516271 | 52516682 | 52516503 | 9  | 18 | 8  | 2.194086611 | 0.0206188   |          | ENSG00000223213 |
| 12 | 52547659 | 52547966 | 52547825 | 13 | 16 | 8  | 1.963130126 | 0.0441028   | HOXC13   | ENSG00000123364 |

|    |          |          |          |    |    |    |             |             |          |                 |
|----|----------|----------|----------|----|----|----|-------------|-------------|----------|-----------------|
| 12 | 52720834 | 52721073 | 52720953 | 8  | 8  | 3  | 2.338434415 | 0.0641221   |          | ENSG00000207571 |
| 12 | 52902048 | 52902314 | 52902153 | 8  | 8  | 0  | 9.353737658 | 0.00163931  | SMUG1    | ENSG00000123415 |
| 12 | 52961572 | 52961776 | 52961620 | 9  | 10 | 1  | 5.716173013 | 0.00260397  | HNRNPA1  | ENSG00000135486 |
| 12 | 53534061 | 53534318 | 53534205 | 10 | 12 | 7  | 1.688869299 | 0.11395     | MUCL1    | ENSG00000172551 |
| 12 | 53572267 | 53572478 | 53572427 | 13 | 14 | 4  | 3.117912553 | 0.00766354  | MUCL1    | ENSG00000172551 |
| 12 | 53615313 | 53615559 | 53615462 | 11 | 12 | 4  | 2.702190879 | 0.0203088   | KIAA0748 | ENSG00000135426 |
| 12 | 53852767 | 53853005 | 53852929 | 10 | 11 | 0  | 12.47165021 | 0.000193293 | OR9K2    | ENSG00000170605 |
| 12 | 54361587 | 54361887 | 54361738 | 8  | 9  | 2  | 3.464347281 | 0.0163838   | METTTL7B | ENSG00000170439 |
| 12 | 54416440 | 54416665 | 54416596 | 8  | 10 | 0  | 11.43234603 | 0.000394183 | GDF11    | ENSG00000135414 |
| 12 | 54608076 | 54608335 | 54608205 | 9  | 12 | 4  | 2.702190879 | 0.0203088   | WIBG     | ENSG00000170473 |
| 12 | 54613405 | 54613642 | 54613523 | 10 | 11 | 3  | 3.117912553 | 0.0146045   | DGKA     | ENSG00000065357 |
| 12 | 54636221 | 54636500 | 54636360 | 9  | 13 | 7  | 1.818782322 | 0.0805123   | SILV     | ENSG00000185664 |
| 12 | 54646485 | 54646713 | 54646639 | 10 | 13 | 5  | 2.425043097 | 0.0262442   | SILV     | ENSG00000185664 |
| 12 | 54709168 | 54709504 | 54709336 | 11 | 16 | 1  | 8.834085566 | 5.30E-05    | IKZF4    | ENSG00000123411 |
| 12 | 54721782 | 54722439 | 54722110 | 9  | 26 | 11 | 2.338434415 | 0.00495238  | RPS26    | ENSG00000197728 |
| 12 | 54784106 | 54784537 | 54784285 | 13 | 23 | 5  | 4.157216737 | 0.000186738 | PA2G4    | ENSG00000170515 |
| 12 | 54806171 | 54806594 | 54806429 | 12 | 22 | 6  | 3.414856605 | 0.000820885 | FAM62A   | ENSG00000139641 |
| 12 | 55148431 | 55148635 | 55148574 | 9  | 10 | 2  | 3.810782009 | 0.00936112  | SPRYD4   | ENSG00000176422 |
| 12 | 55274152 | 55274354 | 55274253 | 9  | 10 | 1  | 5.716173013 | 0.00260397  |          | ENSG00000201579 |
| 12 | 55316976 | 55317474 | 55317225 | 10 | 21 | 13 | 1.63319229  | 0.0708832   | BAZ2A    | ENSG00000076108 |
| 12 | 55667676 | 55668010 | 55667843 | 8  | 12 | 1  | 6.755477198 | 0.000722752 | GPR182   | ENSG00000166856 |
| 12 | 55711471 | 55711850 | 55711650 | 62 | 71 | 0  | 74.82990127 | 5.22E-23    | TAC3     | ENSG00000166863 |
| 12 | 55776066 | 55776528 | 55776297 | 49 | 62 | 4  | 13.09523272 | 1.75E-15    | NAB2     | ENSG00000166886 |
| 12 | 55792181 | 55792413 | 55792336 | 8  | 10 | 1  | 5.716173013 | 0.00260397  | STAT6    | ENSG00000166888 |
| 12 | 55807592 | 55808101 | 55807855 | 22 | 33 | 0  | 35.33634226 | 3.00E-11    | LRP1     | ENSG00000123384 |
| 12 | 55893388 | 55893671 | 55893560 | 11 | 13 | 0  | 14.55025858 | 4.65E-05    | NXPH4    | ENSG00000182379 |
| 12 | 56139208 | 56139429 | 56139313 | 9  | 9  | 6  | 1.484720263 | 0.204387    | GLI1     | ENSG00000111087 |
| 12 | 56142507 | 56142947 | 56142748 | 13 | 22 | 8  | 2.655999582 | 0.0039122   | GLI1     | ENSG00000111087 |
| 12 | 56202195 | 56202653 | 56202374 | 9  | 17 | 2  | 6.235825105 | 0.000146695 | MBD6     | ENSG00000166987 |
| 12 | 56422011 | 56422215 | 56422105 | 9  | 9  | 8  | 1.154782427 | 0.375434    | AGAP2    | ENSG00000135439 |
| 12 | 56434323 | 56434508 | 56434415 | 8  | 8  | 5  | 1.558956276 | 0.191397    | 9-Mar    | ENSG00000139266 |
| 12 | 56451985 | 56452261 | 56452123 | 9  | 11 | 1  | 6.235825105 | 0.0013754   | METTTL1  | ENSG00000037897 |
| 12 | 56462605 | 56463049 | 56462809 | 8  | 17 | 12 | 1.439036563 | 0.154203    | TSFM     | ENSG00000123297 |
| 12 | 56499723 | 56499915 | 56499789 | 9  | 10 | 0  | 11.43234603 | 0.000394183 | AVIL     | ENSG00000135407 |

|    |          |          |          |    |    |    |             |             |          |                 |
|----|----------|----------|----------|----|----|----|-------------|-------------|----------|-----------------|
| 12 | 56586988 | 56587306 | 56587145 | 12 | 14 | 0  | 15.58956276 | 2.28E-05    | XRCC6BP1 | ENSG00000166896 |
| 12 | 56621161 | 56621473 | 56621335 | 8  | 11 | 2  | 4.157216737 | 0.0052913   | XRCC6BP1 | ENSG00000166896 |
| 12 | 56621562 | 56621748 | 56621655 | 11 | 11 | 2  | 4.157216737 | 0.0052913   | XRCC6BP1 | ENSG00000166896 |
| 12 | 56706537 | 56706724 | 56706630 | 8  | 8  | 4  | 1.870747532 | 0.118863    |          | ENSG00000213368 |
| 12 | 56747735 | 56748017 | 56747912 | 8  | 11 | 0  | 12.47165021 | 0.000193293 |          | ENSG00000213368 |
| 12 | 56856444 | 56856623 | 56856547 | 9  | 9  | 1  | 5.196520921 | 0.00490062  |          | ENSG00000213368 |
| 12 | 56971520 | 56971699 | 56971609 | 8  | 8  | 1  | 4.676868829 | 0.0091584   |          | ENSG00000213368 |
| 12 | 57021860 | 57022055 | 57021978 | 9  | 10 | 2  | 3.810782009 | 0.00936112  |          | ENSG00000213368 |
| 12 | 57568210 | 57568425 | 57568317 | 11 | 12 | 1  | 6.755477198 | 0.000722752 | LRIG3    | ENSG00000139263 |
| 12 | 57587010 | 57587289 | 57587149 | 15 | 17 | 4  | 3.741495063 | 0.00163722  | LRIG3    | ENSG00000139263 |
| 12 | 57642127 | 57642412 | 57642270 | 8  | 8  | 1  | 4.676868829 | 0.0091584   | LRIG3    | ENSG00000139263 |
| 12 | 58037829 | 58038246 | 58038044 | 33 | 46 | 1  | 24.42364833 | 7.10E-14    |          | ENSG00000212599 |
| 12 | 59601247 | 59601465 | 59601356 | 15 | 16 | 0  | 17.66817113 | 5.48E-06    |          |                 |
| 12 | 59724026 | 59724268 | 59724119 | 8  | 9  | 1  | 5.196520921 | 0.00490062  |          |                 |
| 12 | 60673825 | 60674004 | 60673914 | 8  | 8  | 1  | 4.676868829 | 0.0091584   |          | ENSG00000213363 |
| 12 | 60782781 | 60782960 | 60782870 | 8  | 8  | 2  | 3.117912553 | 0.0283184   | FAM19A2  | ENSG00000198673 |
| 12 | 60872781 | 60873299 | 60873052 | 31 | 59 | 7  | 7.794781382 | 2.35E-12    | USP15    | ENSG00000135655 |
| 12 | 60939980 | 60940303 | 60940145 | 10 | 13 | 6  | 2.078608368 | 0.0483393   | USP15    | ENSG00000135655 |
| 12 | 61104184 | 61104366 | 61104276 | 8  | 8  | 0  | 9.353737658 | 0.00163931  | MON2     | ENSG00000061987 |
| 12 | 61282401 | 61282585 | 61282475 | 9  | 10 | 3  | 2.858086507 | 0.0242838   | C12orf61 | ENSG00000221949 |
| 12 | 61405086 | 61405297 | 61405182 | 9  | 9  | 2  | 3.464347281 | 0.0163838   |          | ENSG00000213352 |
| 12 | 61405369 | 61405633 | 61405498 | 9  | 11 | 4  | 2.494330042 | 0.0324033   |          | ENSG00000213352 |
| 12 | 61482384 | 61482643 | 61482513 | 10 | 12 | 1  | 6.755477198 | 0.000722752 |          | ENSG00000213352 |
| 12 | 61493354 | 61493538 | 61493451 | 8  | 9  | 4  | 2.078608368 | 0.0785659   |          | ENSG00000200296 |
| 12 | 61571817 | 61571996 | 61571850 | 8  | 8  | 2  | 3.117912553 | 0.0283184   |          | ENSG00000200296 |
| 12 | 61956784 | 61957007 | 61956895 | 8  | 9  | 2  | 3.464347281 | 0.0163838   | AVPR1A   | ENSG00000166148 |
| 12 | 62135465 | 62135679 | 62135572 | 9  | 9  | 2  | 3.464347281 | 0.0163838   |          | ENSG00000210536 |
| 12 | 62486116 | 62486415 | 62486283 | 11 | 11 | 5  | 2.078608368 | 0.0614303   | TMEM5    | ENSG00000118600 |
| 12 | 62598266 | 62598480 | 62598344 | 8  | 8  | 2  | 3.117912553 | 0.0283184   | SRGAP1   | ENSG00000196935 |
| 12 | 62614792 | 62615069 | 62614953 | 10 | 12 | 3  | 3.377738599 | 0.00867157  | SRGAP1   | ENSG00000196935 |
| 12 | 62705345 | 62705588 | 62705456 | 10 | 12 | 2  | 4.503651465 | 0.002963    |          | ENSG00000212298 |
| 12 | 62760611 | 62760913 | 62760769 | 11 | 14 | 10 | 1.417232979 | 0.185113    |          | ENSG00000212298 |
| 12 | 62824058 | 62824250 | 62824154 | 9  | 9  | 3  | 2.598260461 | 0.0397929   |          | ENSG00000212298 |
| 12 | 62850146 | 62850350 | 62850248 | 8  | 10 | 1  | 5.716173013 | 0.00260397  |          | ENSG00000212298 |

|    |          |          |          |    |    |    |             |             |         |                 |
|----|----------|----------|----------|----|----|----|-------------|-------------|---------|-----------------|
| 12 | 63084138 | 63084364 | 63084250 | 8  | 11 | 3  | 3.117912553 | 0.0146045   | XPOT    | ENSG00000184575 |
| 12 | 63133026 | 63133227 | 63133127 | 11 | 12 | 2  | 4.503651465 | 0.002963    | TBK1    | ENSG00000183735 |
| 12 | 63202274 | 63202631 | 63202452 | 22 | 28 | 5  | 5.023303557 | 1.20E-05    |         | ENSG00000223294 |
| 12 | 63280209 | 63280548 | 63280328 | 9  | 13 | 3  | 3.637564645 | 0.0050909   | RASSF3  | ENSG00000153179 |
| 12 | 63289030 | 63289229 | 63289129 | 8  | 9  | 8  | 1.154782427 | 0.375434    | RASSF3  | ENSG00000153179 |
| 12 | 63289827 | 63290042 | 63289978 | 9  | 11 | 3  | 3.117912553 | 0.0146045   | RASSF3  | ENSG00000153179 |
| 12 | 63305431 | 63305808 | 63305610 | 9  | 18 | 4  | 3.9493559   | 0.000961379 |         | ENSG00000207546 |
| 12 | 63314010 | 63314543 | 63314189 | 9  | 23 | 7  | 3.117912553 | 0.00117689  |         | ENSG00000207546 |
| 12 | 63314576 | 63315215 | 63314910 | 41 | 63 | 6  | 9.502209684 | 3.93E-14    |         | ENSG00000207546 |
| 12 | 63315404 | 63315707 | 63315555 | 10 | 11 | 2  | 4.157216737 | 0.0052913   |         | ENSG00000207546 |
| 12 | 63336606 | 63336810 | 63336669 | 9  | 10 | 1  | 5.716173013 | 0.00260397  |         | ENSG00000207546 |
| 12 | 63349360 | 63349570 | 63349465 | 8  | 8  | 2  | 3.117912553 | 0.0283184   |         | ENSG00000207546 |
| 12 | 63352986 | 63353241 | 63353113 | 9  | 9  | 3  | 2.598260461 | 0.0397929   |         | ENSG00000207546 |
| 12 | 63376390 | 63376571 | 63376480 | 8  | 9  | 2  | 3.464347281 | 0.0163838   | GNS     | ENSG00000135677 |
| 12 | 63378150 | 63378452 | 63378301 | 11 | 13 | 7  | 1.818782322 | 0.0805123   | GNS     | ENSG00000135677 |
| 12 | 63387404 | 63387744 | 63387574 | 24 | 26 | 1  | 14.03060649 | 6.50E-08    | GNS     | ENSG00000135677 |
| 12 | 63388744 | 63388923 | 63388833 | 8  | 8  | 3  | 2.338434415 | 0.0641221   | GNS     | ENSG00000135677 |
| 12 | 63460203 | 63460410 | 63460321 | 8  | 9  | 7  | 1.29913023  | 0.286504    | TBC1D30 | ENSG00000111490 |
| 12 | 63461655 | 63462005 | 63461830 | 10 | 16 | 8  | 1.963130126 | 0.0441028   | TBC1D30 | ENSG00000111490 |
| 12 | 63476270 | 63476513 | 63476381 | 10 | 11 | 5  | 2.078608368 | 0.0614303   | TBC1D30 | ENSG00000111490 |
| 12 | 63569963 | 63570348 | 63570142 | 18 | 25 | 6  | 3.860272684 | 0.00017915  |         | ENSG00000210581 |
| 12 | 63663830 | 63664260 | 63664009 | 14 | 25 | 6  | 3.860272684 | 0.00017915  |         | ENSG00000210581 |
| 12 | 63729861 | 63730040 | 63729950 | 8  | 8  | 0  | 9.353737658 | 0.00163931  |         | ENSG00000207099 |
| 12 | 63849429 | 63849832 | 63849608 | 8  | 14 | 4  | 3.117912553 | 0.00766354  | LEMD3   | ENSG00000174106 |
| 12 | 63850339 | 63850542 | 63850400 | 8  | 8  | 1  | 4.676868829 | 0.0091584   | LEMD3   | ENSG00000174106 |
| 12 | 63850969 | 63851187 | 63851078 | 8  | 9  | 2  | 3.464347281 | 0.0163838   | LEMD3   | ENSG00000174106 |
| 12 | 64287479 | 64287909 | 64287738 | 16 | 22 | 11 | 1.991999686 | 0.0221672   |         | ENSG00000213344 |
| 12 | 64294650 | 64294945 | 64294797 | 8  | 9  | 4  | 2.078608368 | 0.0785659   |         | ENSG00000213344 |
| 12 | 64311751 | 64311971 | 64311911 | 9  | 9  | 3  | 2.598260461 | 0.0397929   |         | ENSG00000213344 |
| 12 | 64319728 | 64320006 | 64319866 | 15 | 17 | 1  | 9.353737658 | 2.73E-05    |         | ENSG00000213344 |
| 12 | 64400983 | 64401240 | 64401111 | 9  | 9  | 3  | 2.598260461 | 0.0397929   |         | ENSG00000213344 |
| 12 | 64673431 | 64673610 | 64673512 | 8  | 8  | 2  | 3.117912553 | 0.0283184   |         | ENSG00000213343 |
| 12 | 64810801 | 64811167 | 64810980 | 8  | 15 | 8  | 1.847651883 | 0.0631662   | LLPH    | ENSG00000139233 |
| 12 | 64818260 | 64818536 | 64818398 | 10 | 13 | 1  | 7.27512929  | 0.000378098 |         | ENSG00000214287 |

|    |          |          |          |    |    |    |             |             |         |                 |
|----|----------|----------|----------|----|----|----|-------------|-------------|---------|-----------------|
| 12 | 64825128 | 64825469 | 64825298 | 9  | 13 | 5  | 2.425043097 | 0.0262442   |         | ENSG00000214287 |
| 12 | 64849795 | 64850184 | 64849937 | 8  | 16 | 4  | 3.533634226 | 0.00276486  | TMBIM4  | ENSG00000155957 |
| 12 | 65016160 | 65016347 | 65016278 | 8  | 9  | 2  | 3.464347281 | 0.0163838   |         | ENSG00000210604 |
| 12 | 65089516 | 65089809 | 65089692 | 10 | 11 | 5  | 2.078608368 | 0.0614303   |         | ENSG00000210604 |
| 12 | 65136715 | 65136912 | 65136845 | 8  | 8  | 0  | 9.353737658 | 0.00163931  |         | ENSG00000210604 |
| 12 | 65229056 | 65229257 | 65229131 | 10 | 11 | 0  | 12.47165021 | 0.000193293 | GRIP1   | ENSG00000155974 |
| 12 | 65314713 | 65314897 | 65314832 | 9  | 11 | 1  | 6.235825105 | 0.0013754   | GRIP1   | ENSG00000155974 |
| 12 | 65368991 | 65369224 | 65369046 | 8  | 12 | 5  | 2.251825733 | 0.0404733   | GRIP1   | ENSG00000155974 |
| 12 | 65596363 | 65596542 | 65596481 | 10 | 10 | 1  | 5.716173013 | 0.00260397  | GRIP1   | ENSG00000155974 |
| 12 | 65635200 | 65635383 | 65635277 | 9  | 10 | 2  | 3.810782009 | 0.00936112  | GRIP1   | ENSG00000155974 |
| 12 | 65754131 | 65754609 | 65754432 | 11 | 21 | 11 | 1.905391004 | 0.031399    | CAND1   | ENSG00000111530 |
| 12 | 65949101 | 65949494 | 65949315 | 9  | 16 | 10 | 1.606197376 | 0.104477    | CAND1   | ENSG00000111530 |
| 12 | 66035921 | 66036146 | 66036030 | 8  | 10 | 3  | 2.858086507 | 0.0242838   |         | ENSG00000210608 |
| 12 | 66057138 | 66057897 | 66057758 | 15 | 38 | 10 | 3.684805744 | 1.08E-05    |         | ENSG00000210608 |
| 12 | 66163374 | 66163645 | 66163552 | 9  | 11 | 3  | 3.117912553 | 0.0146045   |         | ENSG00000210608 |
| 12 | 66163870 | 66164306 | 66164047 | 12 | 24 | 5  | 4.330434101 | 0.000108998 |         | ENSG00000210608 |
| 12 | 66164492 | 66164750 | 66164598 | 11 | 11 | 0  | 12.47165021 | 0.000193293 |         | ENSG00000210608 |
| 12 | 66199933 | 66200118 | 66200029 | 8  | 9  | 4  | 2.078608368 | 0.0785659   | DYRK2   | ENSG00000127334 |
| 12 | 66211309 | 66211491 | 66211373 | 8  | 9  | 0  | 10.39304184 | 0.000803859 | DYRK2   | ENSG00000127334 |
| 12 | 66273191 | 66273469 | 66273339 | 16 | 19 | 3  | 5.196520921 | 0.000174201 | DYRK2   | ENSG00000127334 |
| 12 | 66275482 | 66275713 | 66275553 | 12 | 13 | 4  | 2.910051716 | 0.0125532   | DYRK2   | ENSG00000127334 |
| 12 | 66371049 | 66371238 | 66371093 | 8  | 8  | 0  | 9.353737658 | 0.00163931  | DYRK2   | ENSG00000127334 |
| 12 | 66459279 | 66459480 | 66459379 | 8  | 8  | 4  | 1.870747532 | 0.118863    | DYRK2   | ENSG00000127334 |
| 12 | 66605659 | 66605987 | 66605828 | 11 | 15 | 3  | 4.157216737 | 0.00170423  | IFNG    | ENSG00000111537 |
| 12 | 66722147 | 66722715 | 66722352 | 33 | 52 | 4  | 11.01662435 | 1.13E-12    | IFNG    | ENSG00000111537 |
| 12 | 67012442 | 67012826 | 67012647 | 10 | 17 | 5  | 3.117912553 | 0.00407023  | MDM1    | ENSG00000111554 |
| 12 | 67017086 | 67017302 | 67017194 | 8  | 11 | 5  | 2.078608368 | 0.0614303   | MDM1    | ENSG00000111554 |
| 12 | 67039008 | 67039317 | 67039168 | 9  | 13 | 10 | 1.32275078  | 0.240023    | MDM1    | ENSG00000111554 |
| 12 | 67264916 | 67265240 | 67265078 | 8  | 12 | 9  | 1.35109544  | 0.232899    | RAP1B   | ENSG00000127314 |
| 12 | 67366727 | 67367202 | 67366906 | 22 | 40 | 15 | 2.663216972 | 0.00020177  | NUP107  | ENSG00000111581 |
| 12 | 67426905 | 67427249 | 67427080 | 11 | 16 | 2  | 5.889390377 | 0.000270741 | SLC35E3 | ENSG00000175782 |
| 12 | 67461424 | 67461651 | 67461536 | 14 | 15 | 3  | 4.157216737 | 0.00170423  | MDM2    | ENSG00000135679 |
| 12 | 67467542 | 67467937 | 67467742 | 37 | 47 | 5  | 8.314433474 | 1.52E-10    | MDM2    | ENSG00000135679 |
| 12 | 67479990 | 67480609 | 67480454 | 20 | 42 | 4  | 8.938015984 | 6.48E-10    | MDM2    | ENSG00000135679 |

|    |          |          |          |     |     |    |             |             |          |                 |
|----|----------|----------|----------|-----|-----|----|-------------|-------------|----------|-----------------|
| 12 | 67484373 | 67484660 | 67484538 | 9   | 12  | 6  | 1.930136342 | 0.071303    | MDM2     | ENSG00000135679 |
| 12 | 67484889 | 67485101 | 67484987 | 9   | 9   | 6  | 1.484720263 | 0.204387    | MDM2     | ENSG00000135679 |
| 12 | 67487613 | 67488034 | 67487855 | 12  | 21  | 5  | 3.810782009 | 0.000537724 | MDM2     | ENSG00000135679 |
| 12 | 67488136 | 67488457 | 67488296 | 8   | 11  | 7  | 1.558956276 | 0.158273    | MDM2     | ENSG00000135679 |
| 12 | 67488690 | 67489439 | 67489016 | 592 | 713 | 6  | 106.0090268 | 3.59E-209   | MDM2     | ENSG00000135679 |
| 12 | 67548202 | 67548582 | 67548415 | 9   | 15  | 3  | 4.157216737 | 0.00170423  | MDM2     | ENSG00000135679 |
| 12 | 67835150 | 67835363 | 67835266 | 8   | 8   | 4  | 1.870747532 | 0.118863    |          | ENSG00000221422 |
| 12 | 67837207 | 67837413 | 67837282 | 13  | 14  | 9  | 1.558956276 | 0.132279    |          | ENSG00000221422 |
| 12 | 67971190 | 67971395 | 67971292 | 8   | 8   | 6  | 1.336248237 | 0.277651    | CPSF6    | ENSG00000111605 |
| 12 | 68041719 | 68042003 | 68041859 | 9   | 11  | 1  | 6.235825105 | 0.0013754   | YEATS4   | ENSG00000127337 |
| 12 | 68084965 | 68085179 | 68085115 | 8   | 9   | 3  | 2.598260461 | 0.0397929   |          | ENSG00000223320 |
| 12 | 68096298 | 68096716 | 68096425 | 9   | 15  | 9  | 1.662886695 | 0.0970566   |          | ENSG00000223320 |
| 12 | 68106863 | 68107082 | 68106972 | 8   | 8   | 3  | 2.338434415 | 0.0641221   |          | ENSG00000223320 |
| 12 | 68120110 | 68120407 | 68120258 | 10  | 12  | 4  | 2.702190879 | 0.0203088   | FRS2     | ENSG00000166225 |
| 12 | 68120450 | 68120692 | 68120587 | 9   | 10  | 8  | 1.27026067  | 0.293854    | FRS2     | ENSG00000166225 |
| 12 | 68147376 | 68147628 | 68147487 | 9   | 10  | 5  | 1.905391004 | 0.0915982   | FRS2     | ENSG00000166225 |
| 12 | 68150030 | 68150547 | 68150368 | 12  | 20  | 14 | 1.455025858 | 0.129498    | FRS2     | ENSG00000166225 |
| 12 | 68246721 | 68246913 | 68246817 | 10  | 11  | 0  | 12.47165021 | 0.000193293 | CCT2     | ENSG00000166226 |
| 12 | 68266118 | 68266326 | 68266213 | 10  | 10  | 3  | 2.858086507 | 0.0242838   | CCT2     | ENSG00000166226 |
| 12 | 68445615 | 68445878 | 68445746 | 8   | 10  | 0  | 11.43234603 | 0.000394183 | RAB3IP   | ENSG00000127328 |
| 12 | 68467470 | 68467666 | 68467602 | 8   | 9   | 0  | 10.39304184 | 0.000803859 | RAB3IP   | ENSG00000127328 |
| 12 | 68615462 | 68615710 | 68615613 | 9   | 9   | 9  | 1.039304184 | 0.466079    | C12orf28 | ENSG00000166268 |
| 12 | 68771060 | 68771496 | 68771292 | 46  | 60  | 1  | 31.69877762 | 4.25E-18    | CNOT2    | ENSG00000111596 |
| 12 | 68923253 | 68923439 | 68923377 | 8   | 8   | 4  | 1.870747532 | 0.118863    | CNOT2    | ENSG00000111596 |
| 12 | 69200867 | 69201172 | 69201018 | 12  | 16  | 3  | 4.417042783 | 0.00097367  |          | ENSG00000218665 |
| 12 | 69211885 | 69212064 | 69212016 | 8   | 8   | 2  | 3.117912553 | 0.0283184   | PTPRB    | ENSG00000127329 |
| 12 | 69325936 | 69326197 | 69326105 | 9   | 10  | 2  | 3.810782009 | 0.00936112  | PTPRB    | ENSG00000127329 |
| 12 | 69413537 | 69413732 | 69413634 | 8   | 8   | 3  | 2.338434415 | 0.0641221   | PTPRR    | ENSG00000153233 |
| 12 | 69472721 | 69472955 | 69472838 | 8   | 10  | 0  | 11.43234603 | 0.000394183 | PTPRR    | ENSG00000153233 |
| 12 | 69897121 | 69897428 | 69897274 | 14  | 15  | 9  | 1.662886695 | 0.0970566   | TSPAN8   | ENSG00000127324 |
| 12 | 70135327 | 70135757 | 70135503 | 11  | 17  | 6  | 2.672496474 | 0.00882337  | TSPAN8   | ENSG00000127324 |
| 12 | 70138688 | 70138982 | 70138835 | 12  | 12  | 1  | 6.755477198 | 0.000722752 | TSPAN8   | ENSG00000127324 |
| 12 | 70316808 | 70317191 | 70317018 | 12  | 20  | 8  | 2.425043097 | 0.00917565  |          | ENSG00000212461 |
| 12 | 70343806 | 70344034 | 70343882 | 10  | 11  | 7  | 1.558956276 | 0.158273    | ZFC3H1   | ENSG00000133858 |



|    |          |          |          |    |    |    |             |             |          |                 |
|----|----------|----------|----------|----|----|----|-------------|-------------|----------|-----------------|
| 12 | 70344149 | 70344356 | 70344252 | 8  | 9  | 6  | 1.484720263 | 0.204387    | THAP2    | ENSG00000173451 |
| 12 | 70344385 | 70344579 | 70344521 | 10 | 12 | 3  | 3.377738599 | 0.00867157  | THAP2    | ENSG00000173451 |
| 12 | 70366015 | 70366210 | 70366080 | 8  | 9  | 7  | 1.29913023  | 0.286504    | TMEM19   | ENSG00000139291 |
| 12 | 70405810 | 70406070 | 70405940 | 17 | 17 | 3  | 4.676868829 | 0.000552213 | RAB21    | ENSG00000080371 |
| 12 | 70434613 | 70434947 | 70434779 | 8  | 12 | 8  | 1.501217155 | 0.168286    | RAB21    | ENSG00000080371 |
| 12 | 70661300 | 70661487 | 70661393 | 8  | 9  | 0  | 10.39304184 | 0.000803859 | TPH2     | ENSG00000139287 |
| 12 | 70748115 | 70748308 | 70748211 | 8  | 8  | 3  | 2.338434415 | 0.0641221   | TPH2     | ENSG00000139287 |
| 12 | 70813355 | 70813560 | 70813427 | 8  | 8  | 1  | 4.676868829 | 0.0091584   | TRHDE    | ENSG00000072657 |
| 12 | 71250820 | 71251103 | 71250997 | 13 | 16 | 5  | 2.944695189 | 0.00659886  |          | ENSG00000216084 |
| 12 | 71298823 | 71299059 | 71298964 | 8  | 10 | 1  | 5.716173013 | 0.00260397  |          | ENSG00000216084 |
| 12 | 71450355 | 71450558 | 71450496 | 9  | 9  | 2  | 3.464347281 | 0.0163838   |          | ENSG00000216084 |
| 12 | 71655087 | 71655519 | 71655354 | 22 | 29 | 1  | 15.58956276 | 8.46E-09    |          | ENSG00000216084 |
| 12 | 71870833 | 71871056 | 71870944 | 11 | 12 | 1  | 6.755477198 | 0.000722752 |          | ENSG00000216084 |
| 12 | 72063805 | 72064222 | 72064063 | 19 | 27 | 6  | 4.157216737 | 6.29E-05    |          | ENSG00000210684 |
| 12 | 72371608 | 72371798 | 72371703 | 8  | 9  | 0  | 10.39304184 | 0.000803859 |          | ENSG00000210684 |
| 12 | 72441097 | 72441314 | 72441202 | 11 | 11 | 3  | 3.117912553 | 0.0146045   |          | ENSG00000201809 |
| 12 | 72585117 | 72585325 | 72585260 | 10 | 10 | 0  | 11.43234603 | 0.000394183 |          | ENSG00000215944 |
| 12 | 72702085 | 72702298 | 72702127 | 8  | 10 | 3  | 2.858086507 | 0.0242838   |          | ENSG00000215944 |
| 12 | 72791795 | 72792018 | 72791880 | 12 | 12 | 5  | 2.251825733 | 0.0404733   |          | ENSG00000215944 |
| 12 | 73388514 | 73388792 | 73388635 | 8  | 8  | 1  | 4.676868829 | 0.0091584   |          | ENSG00000188646 |
| 12 | 73473185 | 73473421 | 73473303 | 12 | 13 | 5  | 2.425043097 | 0.0262442   |          | ENSG00000188646 |
| 12 | 73551943 | 73552374 | 73552095 | 12 | 20 | 11 | 1.818782322 | 0.04395     |          | ENSG00000210718 |
| 12 | 73577542 | 73577765 | 73577653 | 8  | 8  | 0  | 9.353737658 | 0.00163931  |          | ENSG00000210718 |
| 12 | 73738681 | 73738888 | 73738784 | 10 | 10 | 3  | 2.858086507 | 0.0242838   |          | ENSG00000210718 |
| 12 | 73857975 | 73858354 | 73858176 | 43 | 51 | 0  | 54.04381758 | 8.07E-17    | KCNC2    | ENSG00000166006 |
| 12 | 74014365 | 74014614 | 74014459 | 9  | 11 | 6  | 1.781664316 | 0.103344    | GLIPR1L1 | ENSG00000173401 |
| 12 | 74071062 | 74071387 | 74071229 | 10 | 13 | 12 | 1.11925066  | 0.384109    | GLIPR1L2 | ENSG00000180481 |
| 12 | 74191472 | 74191908 | 74191729 | 16 | 23 | 6  | 3.563328632 | 0.000497701 | KRR1     | ENSG00000111615 |
| 12 | 74264330 | 74264529 | 74264429 | 8  | 8  | 3  | 2.338434415 | 0.0641221   | KRR1     | ENSG00000111615 |
| 12 | 74400906 | 74401312 | 74401109 | 18 | 26 | 12 | 2.158554844 | 0.00861404  | KRR1     | ENSG00000111615 |
| 12 | 74446877 | 74447104 | 74446968 | 8  | 10 | 5  | 1.905391004 | 0.0915982   |          | ENSG00000210725 |
| 12 | 74464798 | 74465028 | 74464913 | 8  | 10 | 10 | 1.039304184 | 0.464387    |          | ENSG00000210725 |
| 12 | 74497112 | 74497340 | 74497226 | 11 | 13 | 1  | 7.27512929  | 0.000378098 |          | ENSG00000210725 |
| 12 | 74588996 | 74589423 | 74589299 | 10 | 17 | 6  | 2.672496474 | 0.00882337  |          | ENSG00000210725 |

|    |          |          |          |    |     |   |             |             |        |                 |
|----|----------|----------|----------|----|-----|---|-------------|-------------|--------|-----------------|
| 12 | 74624005 | 74624272 | 74624142 | 8  | 9   | 2 | 3.464347281 | 0.0163838   |        | ENSG00000210725 |
| 12 | 74657920 | 74658170 | 74658084 | 11 | 12  | 5 | 2.251825733 | 0.0404733   |        | ENSG00000198923 |
| 12 | 74677207 | 74677400 | 74677303 | 8  | 8   | 1 | 4.676868829 | 0.0091584   |        | ENSG00000198923 |
| 12 | 74695265 | 74695533 | 74695399 | 12 | 12  | 0 | 13.5109544  | 9.48E-05    | PHLDA1 | ENSG00000139289 |
| 12 | 74716127 | 74716306 | 74716216 | 8  | 8   | 0 | 9.353737658 | 0.00163931  | PHLDA1 | ENSG00000139289 |
| 12 | 74765015 | 74765346 | 74765180 | 9  | 14  | 7 | 1.948695345 | 0.0559175   | NAP1L1 | ENSG00000187109 |
| 12 | 74782121 | 74782311 | 74782220 | 8  | 8   | 0 | 9.353737658 | 0.00163931  | NAP1L1 | ENSG00000187109 |
| 12 | 75153952 | 75154159 | 75154045 | 8  | 9   | 4 | 2.078608368 | 0.0785659   |        | ENSG00000223273 |
| 12 | 75266140 | 75266657 | 75266368 | 13 | 24  | 2 | 8.660868202 | 1.80E-06    | BBS10  | ENSG00000179941 |
| 12 | 75341039 | 75341318 | 75341177 | 13 | 15  | 1 | 8.314433474 | 0.000102308 | OSBPL8 | ENSG00000091039 |
| 12 | 75373695 | 75373874 | 75373784 | 8  | 8   | 2 | 3.117912553 | 0.0283184   | OSBPL8 | ENSG00000091039 |
| 12 | 75462604 | 75462872 | 75462703 | 10 | 13  | 0 | 14.55025858 | 4.65E-05    | OSBPL8 | ENSG00000091039 |
| 12 | 75539552 | 75539786 | 75539705 | 9  | 9   | 2 | 3.464347281 | 0.0163838   |        | ENSG00000213272 |
| 12 | 75542406 | 75542589 | 75542497 | 8  | 9   | 4 | 2.078608368 | 0.0785659   |        | ENSG00000213272 |
| 12 | 75768269 | 75768479 | 75768374 | 8  | 10  | 2 | 3.810782009 | 0.00936112  | CSRP2  | ENSG00000175183 |
| 12 | 75845133 | 75845353 | 75845230 | 8  | 9   | 2 | 3.464347281 | 0.0163838   | CSRP2  | ENSG00000175183 |
| 12 | 75870944 | 75871196 | 75871033 | 9  | 10  | 1 | 5.716173013 | 0.00260397  | CSRP2  | ENSG00000175183 |
| 12 | 75983782 | 75984224 | 75983988 | 74 | 95  | 6 | 14.25331453 | 4.89E-23    | E2F7   | ENSG00000165891 |
| 12 | 76082451 | 76082674 | 76082553 | 13 | 15  | 2 | 5.542955649 | 0.000497081 |        | ENSG00000210743 |
| 12 | 76246262 | 76246576 | 76246419 | 13 | 15  | 0 | 16.62886695 | 1.12E-05    |        | ENSG00000210743 |
| 12 | 76329645 | 76329837 | 76329694 | 8  | 9   | 1 | 5.196520921 | 0.00490062  |        | ENSG00000210743 |
| 12 | 76548338 | 76548640 | 76548509 | 14 | 17  | 3 | 4.676868829 | 0.000552213 | NAV3   | ENSG00000067798 |
| 12 | 76604737 | 76604988 | 76604862 | 9  | 13  | 1 | 7.27512929  | 0.000378098 | NAV3   | ENSG00000067798 |
| 12 | 77037257 | 77037565 | 77037411 | 8  | 13  | 3 | 3.637564645 | 0.0050909   | NAV3   | ENSG00000067798 |
| 12 | 77075120 | 77075705 | 77075340 | 61 | 87  | 1 | 45.72938411 | 2.67E-26    | NAV3   | ENSG00000067798 |
| 12 | 77559776 | 77559970 | 77559875 | 8  | 8   | 2 | 3.117912553 | 0.0283184   |        | ENSG00000213271 |
| 12 | 77644964 | 77645230 | 77645097 | 8  | 11  | 3 | 3.117912553 | 0.0146045   |        | ENSG00000213271 |
| 12 | 77663931 | 77664409 | 77664171 | 75 | 101 | 4 | 21.20180536 | 9.43E-27    |        | ENSG00000213271 |
| 12 | 77940735 | 77940971 | 77940850 | 8  | 10  | 5 | 1.905391004 | 0.0915982   | SYT1   | ENSG00000067715 |
| 12 | 77976229 | 77976580 | 77976382 | 10 | 15  | 3 | 4.157216737 | 0.00170423  | SYT1   | ENSG00000067715 |
| 12 | 78030142 | 78030367 | 78030254 | 9  | 10  | 5 | 1.905391004 | 0.0915982   |        | ENSG00000221776 |
| 12 | 78247082 | 78247310 | 78247172 | 9  | 9   | 0 | 10.39304184 | 0.000803859 |        | ENSG00000221776 |
| 12 | 78325981 | 78326172 | 78326102 | 8  | 11  | 6 | 1.781664316 | 0.103344    |        | ENSG00000221788 |
| 12 | 78333979 | 78334273 | 78334126 | 8  | 9   | 4 | 2.078608368 | 0.0785659   |        | ENSG00000221788 |

|    |          |          |          |     |     |    |             |             |          |                 |
|----|----------|----------|----------|-----|-----|----|-------------|-------------|----------|-----------------|
| 12 | 78338180 | 78338434 | 78338307 | 8   | 12  | 9  | 1.35109544  | 0.232899    |          | ENSG00000221788 |
| 12 | 78450838 | 78451122 | 78451014 | 10  | 14  | 5  | 2.598260461 | 0.0167748   |          | ENSG00000210752 |
| 12 | 78465473 | 78465736 | 78465649 | 9   | 12  | 1  | 6.755477198 | 0.000722752 |          | ENSG00000210752 |
| 12 | 78467490 | 78467705 | 78467619 | 8   | 9   | 2  | 3.464347281 | 0.0163838   |          | ENSG00000210752 |
| 12 | 78478321 | 78478611 | 78478466 | 9   | 12  | 2  | 4.503651465 | 0.002963    |          | ENSG00000210752 |
| 12 | 78537017 | 78537206 | 78537176 | 8   | 9   | 2  | 3.464347281 | 0.0163838   | PAWR     | ENSG00000177425 |
| 12 | 78656147 | 78656405 | 78656276 | 8   | 9   | 2  | 3.464347281 | 0.0163838   | PAWR     | ENSG00000177425 |
| 12 | 78851634 | 78851856 | 78851725 | 8   | 10  | 6  | 1.63319229  | 0.146906    | PPP1R12A | ENSG00000058272 |
| 12 | 78853301 | 78853573 | 78853401 | 8   | 10  | 5  | 1.905391004 | 0.0915982   | PPP1R12A | ENSG00000058272 |
| 12 | 79048055 | 79048290 | 79048211 | 9   | 12  | 7  | 1.688869299 | 0.11395     | C12orf64 | ENSG00000165899 |
| 12 | 79360833 | 79361048 | 79360940 | 12  | 12  | 2  | 4.503651465 | 0.002963    |          | ENSG00000222880 |
| 12 | 79390815 | 79391063 | 79390946 | 9   | 12  | 4  | 2.702190879 | 0.0203088   |          | ENSG00000222880 |
| 12 | 79422396 | 79422617 | 79422484 | 10  | 11  | 4  | 2.494330042 | 0.0324033   |          | ENSG00000222880 |
| 12 | 79695946 | 79696392 | 79696168 | 102 | 124 | 10 | 11.81027482 | 1.04E-27    |          | ENSG00000207763 |
| 12 | 79755243 | 79755501 | 79755373 | 8   | 10  | 10 | 1.039304184 | 0.464387    |          | ENSG00000207763 |
| 12 | 79843175 | 79843547 | 79843382 | 11  | 16  | 6  | 2.524024447 | 0.0137633   |          | ENSG00000208022 |
| 12 | 79993623 | 79993802 | 79993706 | 8   | 8   | 1  | 4.676868829 | 0.0091584   | ACSS3    | ENSG00000111058 |
| 12 | 79995843 | 79996101 | 79995952 | 10  | 13  | 4  | 2.910051716 | 0.0125532   | ACSS3    | ENSG00000111058 |
| 12 | 80015421 | 80015604 | 80015512 | 8   | 8   | 1  | 4.676868829 | 0.0091584   | ACSS3    | ENSG00000111058 |
| 12 | 80018759 | 80018988 | 80018886 | 10  | 10  | 4  | 2.286469205 | 0.0509017   | ACSS3    | ENSG00000111058 |
| 12 | 80247615 | 80247815 | 80247715 | 9   | 10  | 3  | 2.858086507 | 0.0242838   | ACSS3    | ENSG00000111058 |
| 12 | 80309646 | 80309850 | 80309752 | 9   | 10  | 1  | 5.716173013 | 0.00260397  | ACSS3    | ENSG00000111058 |
| 12 | 80716645 | 80716825 | 80716748 | 8   | 8   | 3  | 2.338434415 | 0.0641221   | PPFIA2   | ENSG00000139220 |
| 12 | 80756897 | 80757098 | 80756951 | 8   | 8   | 0  | 9.353737658 | 0.00163931  | PPFIA2   | ENSG00000139220 |
| 12 | 81078355 | 81078534 | 81078444 | 8   | 8   | 3  | 2.338434415 | 0.0641221   |          | ENSG00000221121 |
| 12 | 81276245 | 81276657 | 81276405 | 12  | 18  | 5  | 3.291129917 | 0.00248584  | C12orf26 | ENSG00000127720 |
| 12 | 81545913 | 81546142 | 81546044 | 9   | 9   | 4  | 2.078608368 | 0.0785659   | TMTC2    | ENSG00000179104 |
| 12 | 81568729 | 81568910 | 81568819 | 8   | 8   | 1  | 4.676868829 | 0.0091584   | TMTC2    | ENSG00000179104 |
| 12 | 81591094 | 81591300 | 81591195 | 9   | 9   | 1  | 5.196520921 | 0.00490062  | TMTC2    | ENSG00000179104 |
| 12 | 81600815 | 81601031 | 81600938 | 12  | 12  | 6  | 1.930136342 | 0.071303    | TMTC2    | ENSG00000179104 |
| 12 | 81603685 | 81603943 | 81603814 | 8   | 8   | 5  | 1.558956276 | 0.191397    | TMTC2    | ENSG00000179104 |
| 12 | 81604070 | 81604392 | 81604213 | 9   | 13  | 7  | 1.818782322 | 0.0805123   | TMTC2    | ENSG00000179104 |
| 12 | 81604449 | 81604666 | 81604557 | 11  | 12  | 4  | 2.702190879 | 0.0203088   | TMTC2    | ENSG00000179104 |
| 12 | 81814943 | 81815273 | 81815108 | 11  | 16  | 2  | 5.889390377 | 0.000270741 |          | ENSG00000212029 |

|    |          |          |          |     |     |   |             |             |        |                 |
|----|----------|----------|----------|-----|-----|---|-------------|-------------|--------|-----------------|
| 12 | 81827021 | 81827249 | 81827135 | 8   | 10  | 5 | 1.905391004 | 0.0915982   |        | ENSG00000212029 |
| 12 | 81882400 | 81882650 | 81882525 | 8   | 12  | 3 | 3.377738599 | 0.00867157  |        | ENSG00000212029 |
| 12 | 81913644 | 81913832 | 81913738 | 11  | 11  | 3 | 3.117912553 | 0.0146045   |        | ENSG00000212029 |
| 12 | 82741621 | 82741912 | 82741741 | 8   | 10  | 8 | 1.27026067  | 0.293854    |        | ENSG00000221148 |
| 12 | 83994645 | 83994898 | 83994783 | 8   | 9   | 2 | 3.464347281 | 0.0163838   | LRRIQ1 | ENSG00000133640 |
| 12 | 84047631 | 84047812 | 84047721 | 8   | 10  | 3 | 2.858086507 | 0.0242838   | LRRIQ1 | ENSG00000133640 |
| 12 | 84366048 | 84366349 | 84366198 | 8   | 9   | 5 | 1.73217364  | 0.133894    |        | ENSG00000213268 |
| 12 | 84665315 | 84665503 | 84665386 | 8   | 10  | 0 | 11.43234603 | 0.000394183 | RASSF9 | ENSG00000198774 |
| 12 | 86037705 | 86037929 | 86037841 | 9   | 10  | 6 | 1.63319229  | 0.146906    |        |                 |
| 12 | 86149745 | 86150112 | 86149924 | 28  | 35  | 1 | 18.70747532 | 1.40E-10    |        |                 |
| 12 | 86357992 | 86358346 | 86358169 | 13  | 19  | 6 | 2.969440526 | 0.0035096   |        | ENSG00000205071 |
| 12 | 86362013 | 86362192 | 86362132 | 8   | 9   | 2 | 3.464347281 | 0.0163838   |        | ENSG00000205071 |
| 12 | 86511938 | 86512133 | 86511987 | 9   | 9   | 2 | 3.464347281 | 0.0163838   |        | ENSG00000205071 |
| 12 | 86970676 | 86970949 | 86970812 | 9   | 9   | 7 | 1.29913023  | 0.286504    |        | ENSG00000210797 |
| 12 | 87060084 | 87060290 | 87060187 | 9   | 10  | 1 | 5.716173013 | 0.00260397  | TMTC3  | ENSG00000139324 |
| 12 | 87060442 | 87060645 | 87060543 | 9   | 9   | 3 | 2.598260461 | 0.0397929   | TMTC3  | ENSG00000139324 |
| 12 | 87062720 | 87063036 | 87062878 | 16  | 17  | 1 | 9.353737658 | 2.73E-05    | TMTC3  | ENSG00000139324 |
| 12 | 87343066 | 87343305 | 87343151 | 9   | 9   | 3 | 2.598260461 | 0.0397929   |        | ENSG00000199245 |
| 12 | 87408545 | 87408749 | 87408643 | 8   | 8   | 2 | 3.117912553 | 0.0283184   |        | ENSG00000205065 |
| 12 | 87463211 | 87463457 | 87463334 | 9   | 12  | 6 | 1.930136342 | 0.071303    | KITLG  | ENSG00000049130 |
| 12 | 87476240 | 87476528 | 87476384 | 10  | 14  | 2 | 5.196520921 | 0.000907371 | KITLG  | ENSG00000049130 |
| 12 | 87477362 | 87478169 | 87477803 | 555 | 672 | 6 | 99.92167371 | 1.23E-196   | KITLG  | ENSG00000049130 |
| 12 | 87681531 | 87681771 | 87681661 | 11  | 12  | 2 | 4.503651465 | 0.002963    |        | ENSG00000210830 |
| 12 | 87699860 | 87700277 | 87700098 | 43  | 53  | 3 | 14.03060649 | 7.92E-14    |        | ENSG00000210830 |
| 12 | 87783594 | 87783802 | 87783698 | 9   | 9   | 2 | 3.464347281 | 0.0163838   |        | ENSG00000210830 |
| 12 | 87802048 | 87802241 | 87802105 | 9   | 9   | 1 | 5.196520921 | 0.00490062  |        | ENSG00000210830 |
| 12 | 87844037 | 87844268 | 87844098 | 10  | 11  | 3 | 3.117912553 | 0.0146045   |        | ENSG00000210830 |
| 12 | 88018449 | 88018785 | 88018608 | 9   | 11  | 2 | 4.157216737 | 0.0052913   |        | ENSG00000210830 |
| 12 | 88035388 | 88035921 | 88035633 | 12  | 24  | 6 | 3.711800658 | 0.000299603 | DUSP6  | ENSG00000139318 |
| 12 | 88143760 | 88144064 | 88143912 | 14  | 19  | 7 | 2.598260461 | 0.00730518  | DUSP6  | ENSG00000139318 |
| 12 | 88237004 | 88237360 | 88237150 | 12  | 17  | 5 | 3.117912553 | 0.00407023  | DUSP6  | ENSG00000139318 |
| 12 | 88410608 | 88410831 | 88410719 | 8   | 9   | 2 | 3.464347281 | 0.0163838   | WDR51B | ENSG00000139323 |
| 12 | 88485739 | 88486107 | 88485931 | 10  | 15  | 2 | 5.542955649 | 0.000497081 | WDR51B | ENSG00000139323 |
| 12 | 88532313 | 88532526 | 88532419 | 8   | 8   | 0 | 9.353737658 | 0.00163931  | ATP2B1 | ENSG00000070961 |

|    |          |          |          |     |     |    |             |             |         |                 |
|----|----------|----------|----------|-----|-----|----|-------------|-------------|---------|-----------------|
| 12 | 88680497 | 88680980 | 88680801 | 8   | 17  | 6  | 2.672496474 | 0.00882337  |         | ENSG00000210846 |
| 12 | 88687188 | 88687454 | 88687305 | 8   | 12  | 3  | 3.377738599 | 0.00867157  |         | ENSG00000210846 |
| 12 | 88836574 | 88836840 | 88836717 | 10  | 11  | 5  | 2.078608368 | 0.0614303   |         | ENSG00000210846 |
| 12 | 88869272 | 88869476 | 88869374 | 11  | 11  | 7  | 1.558956276 | 0.158273    |         | ENSG00000210846 |
| 12 | 88942131 | 88942650 | 88942471 | 15  | 28  | 5  | 5.023303557 | 1.20E-05    |         | ENSG00000210846 |
| 12 | 88943566 | 88943751 | 88943658 | 8   | 8   | 0  | 9.353737658 | 0.00163931  |         | ENSG00000210846 |
| 12 | 89008931 | 89009110 | 89009078 | 8   | 9   | 1  | 5.196520921 | 0.00490062  |         | ENSG00000210846 |
| 12 | 89021008 | 89021224 | 89021085 | 9   | 9   | 2  | 3.464347281 | 0.0163838   |         | ENSG00000210846 |
| 12 | 89152331 | 89152779 | 89152603 | 62  | 73  | 1  | 38.45425482 | 4.86E-22    |         |                 |
| 12 | 90306694 | 90306906 | 90306800 | 10  | 10  | 3  | 2.858086507 | 0.0242838   | DCN     | ENSG00000011465 |
| 12 | 90340769 | 90341090 | 90340925 | 13  | 15  | 3  | 4.157216737 | 0.00170423  | DCN     | ENSG00000011465 |
| 12 | 90341454 | 90342017 | 90341809 | 13  | 28  | 9  | 3.013982134 | 0.000552057 | DCN     | ENSG00000011465 |
| 12 | 90343049 | 90343300 | 90343130 | 8   | 10  | 1  | 5.716173013 | 0.00260397  | DCN     | ENSG00000011465 |
| 12 | 90343975 | 90344176 | 90344075 | 8   | 8   | 4  | 1.870747532 | 0.118863    | DCN     | ENSG00000011465 |
| 12 | 90534431 | 90534684 | 90534543 | 8   | 10  | 1  | 5.716173013 | 0.00260397  | DCN     | ENSG00000011465 |
| 12 | 90536369 | 90536622 | 90536469 | 9   | 9   | 2  | 3.464347281 | 0.0163838   | DCN     | ENSG00000011465 |
| 12 | 90820854 | 90821217 | 90821026 | 15  | 20  | 1  | 10.91269393 | 3.71E-06    | BTG1    | ENSG00000133639 |
| 12 | 90952665 | 90953213 | 90952975 | 115 | 145 | 7  | 18.96730136 | 2.07E-36    | BTG1    | ENSG00000133639 |
| 12 | 91063522 | 91063859 | 91063690 | 11  | 16  | 3  | 4.417042783 | 0.00097367  | BTG1    | ENSG00000133639 |
| 12 | 91107051 | 91107249 | 91107180 | 8   | 9   | 0  | 10.39304184 | 0.000803859 |         | ENSG00000223333 |
| 12 | 91278268 | 91278447 | 91278338 | 8   | 8   | 1  | 4.676868829 | 0.0091584   | CLLU1   | ENSG00000205056 |
| 12 | 91439324 | 91439551 | 91439463 | 8   | 9   | 0  | 10.39304184 | 0.000803859 | CLLU1OS | ENSG00000205057 |
| 12 | 91452283 | 91452575 | 91452406 | 14  | 14  | 1  | 7.794781382 | 0.000197021 | CLLU1OS | ENSG00000205057 |
| 12 | 91461356 | 91461581 | 91461462 | 12  | 13  | 4  | 2.910051716 | 0.0125532   | CLLU1OS | ENSG00000205057 |
| 12 | 91492421 | 91492627 | 91492555 | 9   | 11  | 4  | 2.494330042 | 0.0324033   |         | ENSG00000214215 |
| 12 | 91510206 | 91510630 | 91510385 | 22  | 32  | 3  | 8.57425952  | 6.31E-08    |         | ENSG00000214215 |
| 12 | 91539264 | 91539542 | 91539403 | 13  | 14  | 1  | 7.794781382 | 0.000197021 |         | ENSG00000214215 |
| 12 | 91702364 | 91702964 | 91702559 | 45  | 65  | 5  | 11.43234603 | 1.81E-15    | PLEKHG7 | ENSG00000187510 |
| 12 | 91703054 | 91703382 | 91703218 | 8   | 12  | 3  | 3.377738599 | 0.00867157  | PLEKHG7 | ENSG00000187510 |
| 12 | 91787704 | 91787936 | 91787809 | 10  | 10  | 4  | 2.286469205 | 0.0509017   | EEA1    | ENSG00000102189 |
| 12 | 91891544 | 91891925 | 91891729 | 48  | 59  | 0  | 62.35825105 | 2.70E-19    |         | ENSG00000202534 |
| 12 | 91946776 | 91946973 | 91946874 | 8   | 8   | 7  | 1.169217207 | 0.371848    |         | ENSG00000207365 |
| 12 | 92062986 | 92063510 | 92063162 | 12  | 25  | 14 | 1.801460586 | 0.0308364   |         | ENSG00000221617 |
| 12 | 92295280 | 92295482 | 92295418 | 9   | 10  | 2  | 3.810782009 | 0.00936112  | NUDT4   | ENSG00000173598 |

|    |          |          |          |    |    |    |             |             |         |                 |
|----|----------|----------|----------|----|----|----|-------------|-------------|---------|-----------------|
| 12 | 92385457 | 92385646 | 92385507 | 8  | 10 | 3  | 2.858086507 | 0.0242838   | MRPL42  | ENSG00000198015 |
| 12 | 92442731 | 92442924 | 92442827 | 8  | 8  | 2  | 3.117912553 | 0.0283184   |         | ENSG00000214214 |
| 12 | 92459710 | 92459992 | 92459829 | 12 | 16 | 6  | 2.524024447 | 0.0137633   |         | ENSG00000214214 |
| 12 | 92542995 | 92543371 | 92543199 | 21 | 29 | 4  | 6.235825105 | 1.85E-06    |         | ENSG00000220515 |
| 12 | 92595050 | 92595507 | 92595328 | 12 | 23 | 5  | 4.157216737 | 0.000186738 | CRADD   | ENSG00000169372 |
| 12 | 92660015 | 92660209 | 92660175 | 8  | 8  | 4  | 1.870747532 | 0.118863    | CRADD   | ENSG00000169372 |
| 12 | 92975685 | 92975995 | 92975856 | 16 | 19 | 6  | 2.969440526 | 0.0035096   |         | ENSG00000210951 |
| 12 | 93037845 | 93038115 | 93038008 | 8  | 10 | 2  | 3.810782009 | 0.00936112  | PLXNC1  | ENSG00000136040 |
| 12 | 93391197 | 93391573 | 93391394 | 11 | 18 | 2  | 6.582259834 | 7.91E-05    | CCDC41  | ENSG00000173588 |
| 12 | 93508287 | 93508495 | 93508391 | 8  | 9  | 0  | 10.39304184 | 0.000803859 |         | ENSG00000187738 |
| 12 | 93629023 | 93629263 | 93629143 | 9  | 11 | 5  | 2.078608368 | 0.0614303   | TMCC3   | ENSG00000057704 |
| 12 | 93921442 | 93921735 | 93921584 | 8  | 11 | 9  | 1.247165021 | 0.300052    | NDUFA12 | ENSG00000184752 |
| 12 | 93991356 | 93991793 | 93991535 | 9  | 16 | 6  | 2.524024447 | 0.0137633   | NR2C1   | ENSG00000120798 |
| 12 | 94035159 | 94035339 | 94035249 | 8  | 8  | 2  | 3.117912553 | 0.0283184   |         | ENSG00000213243 |
| 12 | 94136144 | 94136324 | 94136255 | 8  | 8  | 2  | 3.117912553 | 0.0283184   | VEZT    | ENSG00000028203 |
| 12 | 94236232 | 94236451 | 94236341 | 8  | 11 | 5  | 2.078608368 | 0.0614303   |         | ENSG00000199172 |
| 12 | 94391841 | 94392083 | 94391990 | 8  | 10 | 5  | 1.905391004 | 0.0915982   | METAP2  | ENSG00000111142 |
| 12 | 94588432 | 94588611 | 94588586 | 8  | 8  | 0  | 9.353737658 | 0.00163931  |         | ENSG00000216285 |
| 12 | 94635960 | 94636179 | 94636066 | 10 | 11 | 6  | 1.781664316 | 0.103344    |         | ENSG00000216285 |
| 12 | 94639243 | 94639601 | 94639410 | 28 | 33 | 6  | 5.048048895 | 2.40E-06    |         | ENSG00000216285 |
| 12 | 94663670 | 94663936 | 94663803 | 9  | 10 | 0  | 11.43234603 | 0.000394183 | NTN4    | ENSG00000074527 |
| 12 | 94860763 | 94861115 | 94861004 | 8  | 13 | 4  | 2.910051716 | 0.0125532   | AMDHD1  | ENSG00000139344 |
| 12 | 94948320 | 94948621 | 94948456 | 8  | 10 | 5  | 1.905391004 | 0.0915982   | LTA4H   | ENSG00000111144 |
| 12 | 94953751 | 94954089 | 94953920 | 11 | 16 | 13 | 1.262012224 | 0.256887    | LTA4H   | ENSG00000111144 |
| 12 | 94965473 | 94965753 | 94965613 | 11 | 13 | 3  | 3.637564645 | 0.0050909   | LTA4H   | ENSG00000111144 |
| 12 | 95090355 | 95090536 | 95090465 | 8  | 8  | 1  | 4.676868829 | 0.0091584   | ELK3    | ENSG00000111145 |
| 12 | 96405378 | 96405651 | 96405508 | 11 | 12 | 0  | 13.5109544  | 9.48E-05    |         | ENSG00000221479 |
| 12 | 96486493 | 96486972 | 96486824 | 18 | 25 | 10 | 2.456537163 | 0.00405907  |         | ENSG00000207586 |
| 12 | 96512672 | 96512904 | 96512788 | 9  | 9  | 1  | 5.196520921 | 0.00490062  |         | ENSG00000207586 |
| 12 | 96639350 | 96639530 | 96639390 | 8  | 8  | 1  | 4.676868829 | 0.0091584   |         | ENSG00000206899 |
| 12 | 96793156 | 96793431 | 96793319 | 10 | 13 | 0  | 14.55025858 | 4.65E-05    |         | ENSG00000206899 |
| 12 | 96920919 | 96921272 | 96921050 | 8  | 12 | 2  | 4.503651465 | 0.002963    |         | ENSG00000206899 |
| 12 | 97263275 | 97263706 | 97263472 | 28 | 40 | 4  | 8.522294311 | 2.26E-09    |         | ENSG00000201296 |
| 12 | 97408848 | 97409160 | 97408990 | 11 | 14 | 6  | 2.227080395 | 0.0322529   | TMPO    | ENSG00000120802 |

|    |           |           |           |     |     |    |             |             |           |                 |
|----|-----------|-----------|-----------|-----|-----|----|-------------|-------------|-----------|-----------------|
| 12 | 97433522  | 97433874  | 97433698  | 9   | 14  | 2  | 5.196520921 | 0.000907371 | TMPO      | ENSG00000120802 |
| 12 | 97434334  | 97434579  | 97434511  | 8   | 12  | 7  | 1.688869299 | 0.11395     | TMPO      | ENSG00000120802 |
| 12 | 97511532  | 97511749  | 97511640  | 9   | 9   | 4  | 2.078608368 | 0.0785659   | SLC25A3   | ENSG00000075415 |
| 12 | 97661369  | 97661633  | 97661521  | 8   | 11  | 4  | 2.494330042 | 0.0324033   | APAF1     | ENSG00000120868 |
| 12 | 98308525  | 98308735  | 98308608  | 11  | 11  | 1  | 6.235825105 | 0.0013754   | ANKS1B    | ENSG00000185046 |
| 12 | 98415156  | 98415393  | 98415291  | 9   | 12  | 0  | 13.5109544  | 9.48E-05    | ANKS1B    | ENSG00000185046 |
| 12 | 98471581  | 98471780  | 98471671  | 9   | 9   | 3  | 2.598260461 | 0.0397929   | ANKS1B    | ENSG00000185046 |
| 12 | 98824808  | 98825078  | 98824943  | 8   | 11  | 4  | 2.494330042 | 0.0324033   | ANKS1B    | ENSG00000185046 |
| 12 | 98877485  | 98877746  | 98877615  | 8   | 12  | 3  | 3.377738599 | 0.00867157  | ANKS1B    | ENSG00000185046 |
| 12 | 98878151  | 98878452  | 98878301  | 10  | 14  | 4  | 3.117912553 | 0.00766354  | ANKS1B    | ENSG00000185046 |
| 12 | 99046504  | 99046748  | 99046633  | 8   | 10  | 1  | 5.716173013 | 0.00260397  | UHRF1BP1L | ENSG00000111647 |
| 12 | 99066772  | 99067028  | 99066919  | 9   | 11  | 0  | 12.47165021 | 0.000193293 | UHRF1BP1L | ENSG00000111647 |
| 12 | 99067062  | 99067320  | 99067210  | 15  | 17  | 1  | 9.353737658 | 2.73E-05    | UHRF1BP1L | ENSG00000111647 |
| 12 | 99118552  | 99118770  | 99118677  | 13  | 14  | 4  | 3.117912553 | 0.00766354  | ACTR6     | ENSG00000075089 |
| 12 | 99147097  | 99147419  | 99147267  | 14  | 17  | 8  | 2.078608368 | 0.0303558   |           | ENSG00000206790 |
| 12 | 99147833  | 99148157  | 99147991  | 16  | 21  | 8  | 2.540521339 | 0.00602138  |           | ENSG00000206790 |
| 12 | 99184407  | 99184680  | 99184543  | 10  | 11  | 5  | 2.078608368 | 0.0614303   | DEPDC4    | ENSG00000166153 |
| 12 | 99184863  | 99185084  | 99184973  | 8   | 12  | 10 | 1.228268581 | 0.305344    | DEPDC4    | ENSG00000166153 |
| 12 | 99185714  | 99185920  | 99185817  | 9   | 10  | 3  | 2.858086507 | 0.0242838   | SCYL2     | ENSG00000136021 |
| 12 | 99536251  | 99536443  | 99536347  | 8   | 8   | 0  | 9.353737658 | 0.00163931  | GAS2L3    | ENSG00000139354 |
| 12 | 99844643  | 99844829  | 99844736  | 9   | 9   | 4  | 2.078608368 | 0.0785659   | ANO4      | ENSG00000151572 |
| 12 | 99870502  | 99870702  | 99870602  | 10  | 10  | 2  | 3.810782009 | 0.00936112  | ANO4      | ENSG00000151572 |
| 12 | 100139303 | 100139503 | 100139403 | 8   | 10  | 4  | 2.286469205 | 0.0509017   | SLC5A8    | ENSG00000139357 |
| 12 | 100198033 | 100198235 | 100198134 | 8   | 11  | 3  | 3.117912553 | 0.0146045   | UTP20     | ENSG00000120800 |
| 12 | 100334669 | 100334877 | 100334775 | 8   | 8   | 0  | 9.353737658 | 0.00163931  |           | ENSG00000222890 |
| 12 | 100773073 | 100773823 | 100773442 | 101 | 147 | 0  | 153.8170193 | 1.57E-46    |           | ENSG00000211206 |
| 12 | 100795148 | 100795565 | 100795415 | 11  | 17  | 3  | 4.676868829 | 0.000552213 |           | ENSG00000136048 |
| 12 | 100812601 | 100813021 | 100812846 | 14  | 20  | 5  | 3.637564645 | 0.000902929 |           | ENSG00000211214 |
| 12 | 100857785 | 100857990 | 100857892 | 9   | 9   | 8  | 1.154782427 | 0.375434    |           | ENSG00000211222 |
| 12 | 100872720 | 100872916 | 100872818 | 8   | 8   | 2  | 3.117912553 | 0.0283184   |           | ENSG00000211222 |
| 12 | 100979737 | 100980135 | 100979956 | 9   | 18  | 6  | 2.8209685   | 0.00559354  | CCDC53    | ENSG00000120860 |
| 12 | 101399700 | 101400028 | 101399873 | 13  | 14  | 4  | 3.117912553 | 0.00766354  | IGF1      | ENSG00000017427 |
| 12 | 101465961 | 101466182 | 101466071 | 9   | 9   | 6  | 1.484720263 | 0.204387    | IGF1      | ENSG00000017427 |
| 12 | 101794907 | 101795114 | 101794989 | 8   | 10  | 1  | 5.716173013 | 0.00260397  | PAH       | ENSG00000171759 |

|    |           |           |           |    |     |    |             |             |          |                 |
|----|-----------|-----------|-----------|----|-----|----|-------------|-------------|----------|-----------------|
| 12 | 102441646 | 102442489 | 102441877 | 93 | 121 | 10 | 11.52682823 | 7.00E-27    | C12orf42 | ENSG00000179088 |
| 12 | 102442536 | 102442720 | 102442607 | 8  | 9   | 0  | 10.39304184 | 0.000803859 | C12orf42 | ENSG00000179088 |
| 12 | 102673915 | 102674128 | 102674021 | 8  | 8   | 1  | 4.676868829 | 0.0091584   |          | ENSG00000211247 |
| 12 | 102795945 | 102796147 | 102796056 | 9  | 11  | 3  | 3.117912553 | 0.0146045   |          | ENSG00000187809 |
| 12 | 102847339 | 102847572 | 102847452 | 9  | 10  | 14 | 0.762156402 | 0.758589    |          | ENSG00000214198 |
| 12 | 102874905 | 102875301 | 102875191 | 9  | 15  | 5  | 2.771477825 | 0.0105836   | C12orf73 | ENSG00000204954 |
| 12 | 103095577 | 103096136 | 103096046 | 11 | 22  | 11 | 1.991999686 | 0.0221672   |          | ENSG00000222492 |
| 12 | 103119108 | 103119412 | 103119249 | 11 | 11  | 12 | 0.959357709 | 0.543005    |          | ENSG00000222492 |
| 12 | 103125867 | 103126046 | 103125915 | 8  | 8   | 0  | 9.353737658 | 0.00163931  | RPL18AP3 | ENSG00000218754 |
| 12 | 103137539 | 103137718 | 103137571 | 8  | 8   | 5  | 1.558956276 | 0.191397    | RPL18AP3 | ENSG00000218754 |
| 12 | 103137804 | 103138254 | 103138091 | 14 | 21  | 13 | 1.63319229  | 0.0708832   | RPL18AP3 | ENSG00000218754 |
| 12 | 103204836 | 103205095 | 103204965 | 9  | 10  | 1  | 5.716173013 | 0.00260397  | TXNRD1   | ENSG00000198431 |
| 12 | 103299851 | 103300061 | 103299956 | 8  | 10  | 7  | 1.429043253 | 0.21536     | TXNRD1   | ENSG00000198431 |
| 12 | 103313110 | 103313289 | 103313140 | 8  | 9   | 3  | 2.598260461 | 0.0397929   | CHST11   | ENSG00000171310 |
| 12 | 103375333 | 103375572 | 103375418 | 10 | 12  | 5  | 2.251825733 | 0.0404733   | CHST11   | ENSG00000171310 |
| 12 | 103396834 | 103397026 | 103396965 | 9  | 10  | 1  | 5.716173013 | 0.00260397  | CHST11   | ENSG00000171310 |
| 12 | 103714918 | 103715166 | 103715042 | 8  | 10  | 3  | 2.858086507 | 0.0242838   |          | ENSG00000211260 |
| 12 | 104149614 | 104149834 | 104149771 | 10 | 10  | 2  | 3.810782009 | 0.00936112  | APPL2    | ENSG00000136044 |
| 12 | 104798686 | 104798865 | 104798799 | 8  | 8   | 0  | 9.353737658 | 0.00163931  | NUAK1    | ENSG00000074590 |
| 12 | 104873304 | 104873675 | 104873497 | 21 | 27  | 2  | 9.700172386 | 2.61E-07    | NUAK1    | ENSG00000074590 |
| 12 | 104950111 | 104950336 | 104950223 | 9  | 11  | 3  | 3.117912553 | 0.0146045   | NUAK1    | ENSG00000074590 |
| 12 | 105055128 | 105055342 | 105055245 | 8  | 8   | 0  | 9.353737658 | 0.00163931  | NUAK1    | ENSG00000074590 |
| 12 | 105067021 | 105067313 | 105067167 | 9  | 13  | 3  | 3.637564645 | 0.0050909   | NUAK1    | ENSG00000074590 |
| 12 | 105263783 | 105263986 | 105263896 | 8  | 9   | 4  | 2.078608368 | 0.0785659   | POLR3B   | ENSG00000013503 |
| 12 | 105275475 | 105275773 | 105275624 | 12 | 15  | 7  | 2.078608368 | 0.038229    | POLR3B   | ENSG00000013503 |
| 12 | 105296722 | 105296901 | 105296887 | 8  | 8   | 2  | 3.117912553 | 0.0283184   | POLR3B   | ENSG00000013503 |
| 12 | 105641268 | 105641447 | 105641357 | 8  | 8   | 0  | 9.353737658 | 0.00163931  | RFX4     | ENSG00000111783 |
| 12 | 106010153 | 106010348 | 106010288 | 11 | 11  | 2  | 4.157216737 | 0.0052913   | CRY1     | ENSG00000008405 |
| 12 | 106011937 | 106012217 | 106012103 | 9  | 9   | 6  | 1.484720263 | 0.204387    | CRY1     | ENSG00000008405 |
| 12 | 106090488 | 106090690 | 106090589 | 9  | 10  | 3  | 2.858086507 | 0.0242838   | CRY1     | ENSG00000008405 |
| 12 | 106177939 | 106178118 | 106178008 | 8  | 8   | 5  | 1.558956276 | 0.191397    |          | ENSG00000211275 |
| 12 | 106437021 | 106437229 | 106437125 | 11 | 11  | 3  | 3.117912553 | 0.0146045   |          | ENSG00000211282 |
| 12 | 106438108 | 106438287 | 106438197 | 8  | 8   | 2  | 3.117912553 | 0.0283184   |          | ENSG00000211282 |
| 12 | 106603674 | 106603859 | 106603766 | 8  | 8   | 10 | 0.850339787 | 0.645072    | PWP1     | ENSG00000136045 |



|    |           |           |           |    |    |    |             |             |         |                 |
|----|-----------|-----------|-----------|----|----|----|-------------|-------------|---------|-----------------|
| 12 | 106679494 | 106679788 | 106679641 | 9  | 11 | 3  | 3.117912553 | 0.0146045   | PRDM4   | ENSG00000110851 |
| 12 | 106691495 | 106691924 | 106691659 | 48 | 60 | 2  | 21.13251841 | 6.92E-17    | ASCL4   | ENSG00000187855 |
| 12 | 107150619 | 107150816 | 107150694 | 8  | 8  | 3  | 2.338434415 | 0.0641221   |         | ENSG00000214163 |
| 12 | 107155261 | 107155496 | 107155357 | 9  | 9  | 2  | 3.464347281 | 0.0163838   |         | ENSG00000214163 |
| 12 | 107370111 | 107370369 | 107370214 | 10 | 10 | 1  | 5.716173013 | 0.00260397  | FICD    | ENSG00000198855 |
| 12 | 107479182 | 107479487 | 107479358 | 12 | 16 | 4  | 3.533634226 | 0.00276486  | SART3   | ENSG00000075856 |
| 12 | 107480542 | 107481078 | 107480915 | 10 | 21 | 7  | 2.858086507 | 0.0029864   | ISCU    | ENSG00000136003 |
| 12 | 107535911 | 107536090 | 107536084 | 8  | 8  | 3  | 2.338434415 | 0.0641221   | SELPLG  | ENSG00000110876 |
| 12 | 107536110 | 107536312 | 107536183 | 10 | 10 | 4  | 2.286469205 | 0.0509017   | SELPLG  | ENSG00000110876 |
| 12 | 107716402 | 107716614 | 107716501 | 11 | 12 | 1  | 6.755477198 | 0.000722752 | SSH1    | ENSG00000084112 |
| 12 | 107829829 | 107830163 | 107830018 | 9  | 14 | 7  | 1.948695345 | 0.0559175   |         | ENSG00000201324 |
| 12 | 108038523 | 108038790 | 108038656 | 16 | 17 | 11 | 1.558956276 | 0.111389    | UNG     | ENSG00000076248 |
| 12 | 108065148 | 108065330 | 108065239 | 8  | 8  | 0  | 9.353737658 | 0.00163931  | ACACB   | ENSG00000076555 |
| 12 | 108225006 | 108225340 | 108225173 | 8  | 12 | 7  | 1.688869299 | 0.11395     | FOXN4   | ENSG00000139445 |
| 12 | 108234123 | 108234329 | 108234226 | 8  | 10 | 11 | 0.952695502 | 0.548138    | FOXN4   | ENSG00000139445 |
| 12 | 108399557 | 108399851 | 108399704 | 8  | 11 | 7  | 1.558956276 | 0.158273    | UBE3B   | ENSG00000151148 |
| 12 | 108439175 | 108439473 | 108439333 | 8  | 8  | 0  | 9.353737658 | 0.00163931  | UBE3B   | ENSG00000151148 |
| 12 | 108697586 | 108697836 | 108697727 | 8  | 11 | 10 | 1.133786383 | 0.380636    |         | ENSG00000211357 |
| 12 | 108699819 | 108700000 | 108699909 | 8  | 8  | 2  | 3.117912553 | 0.0283184   |         | ENSG00000211357 |
| 12 | 108706144 | 108706375 | 108706276 | 11 | 11 | 3  | 3.117912553 | 0.0146045   |         | ENSG00000211357 |
| 12 | 108739830 | 108740055 | 108739942 | 8  | 9  | 2  | 3.464347281 | 0.0163838   | TRPV4   | ENSG00000111199 |
| 12 | 108743118 | 108743504 | 108743297 | 34 | 43 | 1  | 22.86469205 | 5.66E-13    | TRPV4   | ENSG00000111199 |
| 12 | 108767443 | 108767694 | 108767568 | 10 | 13 | 4  | 2.910051716 | 0.0125532   | TRPV4   | ENSG00000111199 |
| 12 | 108787195 | 108787494 | 108787345 | 13 | 18 | 3  | 4.936694875 | 0.000311102 |         | ENSG00000211363 |
| 12 | 108822265 | 108822545 | 108822408 | 9  | 12 | 1  | 6.755477198 | 0.000722752 | TCHP    | ENSG00000139437 |
| 12 | 108970709 | 108971057 | 108970941 | 13 | 18 | 5  | 3.291129917 | 0.00248584  |         | ENSG00000174456 |
| 12 | 109263018 | 109263409 | 109263197 | 12 | 20 | 2  | 7.27512929  | 2.27E-05    |         | ENSG00000223337 |
| 12 | 109277358 | 109277582 | 109277417 | 8  | 10 | 1  | 5.716173013 | 0.00260397  |         | ENSG00000223337 |
| 12 | 109390278 | 109390647 | 109390430 | 8  | 14 | 4  | 3.117912553 | 0.00766354  | GPN3    | ENSG00000111231 |
| 12 | 109424324 | 109424532 | 109424440 | 8  | 9  | 5  | 1.73217364  | 0.133894    | RAD9B   | ENSG00000151164 |
| 12 | 110056918 | 110057312 | 110057008 | 10 | 15 | 6  | 2.375552421 | 0.0212094   | CUX2    | ENSG00000111249 |
| 12 | 110675339 | 110675518 | 110675443 | 8  | 8  | 1  | 4.676868829 | 0.0091584   | ALDH2   | ENSG00000111275 |
| 12 | 110680390 | 110680924 | 110680670 | 25 | 46 | 3  | 12.21182416 | 7.85E-12    | ALDH2   | ENSG00000111275 |
| 12 | 110933042 | 110933248 | 110933145 | 8  | 8  | 1  | 4.676868829 | 0.0091584   | TMEM116 | ENSG00000198270 |

|    |           |           |           |    |    |    |             |             |           |                 |
|----|-----------|-----------|-----------|----|----|----|-------------|-------------|-----------|-----------------|
| 12 | 110935137 | 110935399 | 110935268 | 9  | 11 | 10 | 1.133786383 | 0.380636    | TMEM116   | ENSG00000198270 |
| 12 | 111309701 | 111309880 | 111309776 | 8  | 9  | 2  | 3.464347281 | 0.0163838   | RPL6      | ENSG00000089009 |
| 12 | 111854752 | 111854974 | 111854852 | 12 | 13 | 6  | 2.078608368 | 0.0483393   | OAS3      | ENSG00000111331 |
| 12 | 112038520 | 112038921 | 112038706 | 79 | 91 | 0  | 95.61598495 | 3.37E-29    | RASAL1    | ENSG00000111344 |
| 12 | 112082268 | 112082565 | 112082413 | 10 | 13 | 2  | 4.850086193 | 0.00164564  |           | ENSG00000199899 |
| 12 | 112107274 | 112107459 | 112107316 | 8  | 10 | 2  | 3.810782009 | 0.00936112  | DDX54     | ENSG00000123064 |
| 12 | 112137080 | 112137309 | 112137135 | 8  | 10 | 0  | 11.43234603 | 0.000394183 | IQCD      | ENSG00000166578 |
| 12 | 112168172 | 112168499 | 112168338 | 10 | 13 | 4  | 2.910051716 | 0.0125532   |           | ENSG00000186815 |
| 12 | 112257410 | 112257609 | 112257479 | 9  | 9  | 2  | 3.464347281 | 0.0163838   | SLC24A6   | ENSG00000089060 |
| 12 | 112344384 | 112344591 | 112344492 | 8  | 10 | 3  | 2.858086507 | 0.0242838   | SDSL      | ENSG00000139410 |
| 12 | 112762489 | 112762846 | 112762649 | 12 | 17 | 0  | 18.70747532 | 2.69E-06    |           | ENSG00000211425 |
| 12 | 112888290 | 112888668 | 112888517 | 9  | 15 | 4  | 3.32577339  | 0.00462646  | RBM19     | ENSG00000122965 |
| 12 | 113191358 | 113191706 | 113191535 | 31 | 35 | 2  | 12.47165021 | 1.39E-09    | TBX5      | ENSG00000089225 |
| 12 | 113231136 | 113231315 | 113231225 | 8  | 8  | 2  | 3.117912553 | 0.0283184   | TBX5      | ENSG00000089225 |
| 12 | 113558206 | 113558462 | 113558334 | 13 | 17 | 4  | 3.741495063 | 0.00163722  |           | ENSG00000199220 |
| 12 | 113703093 | 113703422 | 113703265 | 17 | 19 | 2  | 6.928694562 | 4.25E-05    |           | ENSG00000209253 |
| 12 | 113735415 | 113735672 | 113735543 | 13 | 15 | 6  | 2.375552421 | 0.0212094   |           | ENSG00000209253 |
| 12 | 114217063 | 114217242 | 114217152 | 9  | 10 | 1  | 5.716173013 | 0.00260397  |           | ENSG00000222458 |
| 12 | 114397312 | 114397528 | 114397479 | 8  | 8  | 1  | 4.676868829 | 0.0091584   |           | ENSG00000222458 |
| 12 | 114574649 | 114574833 | 114574741 | 8  | 8  | 1  | 4.676868829 | 0.0091584   |           | ENSG00000222458 |
| 12 | 114795161 | 114795436 | 114795298 | 8  | 10 | 4  | 2.286469205 | 0.0509017   |           | ENSG00000200112 |
| 12 | 115159376 | 115159566 | 115159506 | 8  | 8  | 3  | 2.338434415 | 0.0641221   | MED13L    | ENSG00000123066 |
| 12 | 115179485 | 115179685 | 115179585 | 8  | 8  | 1  | 4.676868829 | 0.0091584   | MED13L    | ENSG00000123066 |
| 12 | 115312229 | 115312511 | 115312341 | 8  | 10 | 4  | 2.286469205 | 0.0509017   | MED13L    | ENSG00000123066 |
| 12 | 115312707 | 115313102 | 115312884 | 17 | 24 | 4  | 5.196520921 | 3.42E-05    | MED13L    | ENSG00000123066 |
| 12 | 115328863 | 115329143 | 115329008 | 11 | 14 | 4  | 3.117912553 | 0.00766354  |           | ENSG00000196668 |
| 12 | 115348603 | 115348892 | 115348747 | 11 | 14 | 3  | 3.897390691 | 0.00295882  |           | ENSG00000196668 |
| 12 | 115349469 | 115349682 | 115349597 | 8  | 10 | 3  | 2.858086507 | 0.0242838   |           | ENSG00000196668 |
| 12 | 115356466 | 115356686 | 115356557 | 11 | 12 | 3  | 3.377738599 | 0.00867157  |           | ENSG00000196668 |
| 12 | 115417576 | 115417785 | 115417680 | 8  | 8  | 4  | 1.870747532 | 0.118863    |           | ENSG00000196668 |
| 12 | 115528727 | 115528928 | 115528827 | 9  | 9  | 3  | 2.598260461 | 0.0397929   | MAP1LC3B2 | ENSG00000171471 |
| 12 | 116227003 | 116227220 | 116227081 | 11 | 11 | 0  | 12.47165021 | 0.000193293 | NOS1      | ENSG00000089250 |
| 12 | 116380530 | 116380711 | 116380620 | 8  | 8  | 2  | 3.117912553 | 0.0283184   | NOS1      | ENSG00000089250 |
| 12 | 116598654 | 116598892 | 116598773 | 8  | 8  | 0  | 9.353737658 | 0.00163931  | KSR2      | ENSG00000171435 |

|    |           |           |           |     |     |    |             |             |          |                 |
|----|-----------|-----------|-----------|-----|-----|----|-------------|-------------|----------|-----------------|
| 12 | 116779169 | 116779570 | 116779342 | 11  | 18  | 4  | 3.9493559   | 0.000961379 | KSR2     | ENSG00000171435 |
| 12 | 116891678 | 116891932 | 116891803 | 8   | 8   | 3  | 2.338434415 | 0.0641221   | RFC5     | ENSG00000111445 |
| 12 | 116957061 | 116957264 | 116957162 | 9   | 9   | 3  | 2.598260461 | 0.0397929   | RFC5     | ENSG00000111445 |
| 12 | 116977443 | 116977626 | 116977502 | 8   | 9   | 5  | 1.73217364  | 0.133894    | WSB2     | ENSG00000176871 |
| 12 | 117194057 | 117194236 | 117194164 | 8   | 9   | 2  | 3.464347281 | 0.0163838   | TAOK3    | ENSG00000135090 |
| 12 | 117298392 | 117298652 | 117298522 | 9   | 9   | 5  | 1.73217364  | 0.133894    | SUDS3    | ENSG00000111707 |
| 12 | 117465550 | 117465930 | 117465729 | 15  | 22  | 1  | 11.95199812 | 9.69E-07    | SUDS3    | ENSG00000111707 |
| 12 | 118037457 | 118037818 | 118037619 | 9   | 13  | 4  | 2.910051716 | 0.0125532   | HSPB8    | ENSG00000152137 |
| 12 | 118093412 | 118093708 | 118093590 | 10  | 13  | 2  | 4.850086193 | 0.00164564  | HSPB8    | ENSG00000152137 |
| 12 | 118292106 | 118292466 | 118292275 | 25  | 29  | 1  | 15.58956276 | 8.46E-09    | CCDC60   | ENSG00000183273 |
| 12 | 118310196 | 118310566 | 118310387 | 28  | 35  | 3  | 9.353737658 | 9.45E-09    | CCDC60   | ENSG00000183273 |
| 12 | 118401513 | 118401789 | 118401626 | 14  | 17  | 3  | 4.676868829 | 0.000552213 |          | ENSG00000222647 |
| 12 | 118590083 | 118590344 | 118590213 | 12  | 12  | 1  | 6.755477198 | 0.000722752 | PRKAB1   | ENSG00000111725 |
| 12 | 118896654 | 118896838 | 118896686 | 9   | 9   | 4  | 2.078608368 | 0.0785659   | CCDC64   | ENSG00000135127 |
| 12 | 119123406 | 119123729 | 119123567 | 14  | 18  | 7  | 2.468347438 | 0.0112499   | RPLP0    | ENSG00000089157 |
| 12 | 119154028 | 119154221 | 119154188 | 12  | 12  | 5  | 2.251825733 | 0.0404733   | PXN      | ENSG00000089159 |
| 12 | 119188083 | 119188272 | 119188177 | 11  | 11  | 2  | 4.157216737 | 0.0052913   | PXN      | ENSG00000089159 |
| 12 | 119213419 | 119214158 | 119213841 | 36  | 76  | 35 | 2.222956172 | 1.90E-05    | RNU4-1B  | ENSG00000202538 |
| 12 | 119214639 | 119215642 | 119215307 | 24  | 77  | 27 | 2.895204513 | 1.17E-07    |          | ENSG00000200795 |
| 12 | 119268735 | 119268957 | 119268802 | 11  | 11  | 3  | 3.117912553 | 0.0146045   | PLA2G1B  | ENSG00000170890 |
| 12 | 119316924 | 119317153 | 119317038 | 8   | 9   | 8  | 1.154782427 | 0.375434    | MSI1     | ENSG00000135097 |
| 12 | 119368116 | 119368780 | 119368523 | 118 | 160 | 4  | 33.46559473 | 3.07E-44    | TRIAP1   | ENSG00000170855 |
| 12 | 119396762 | 119397121 | 119396941 | 13  | 20  | 7  | 2.728173484 | 0.00469378  | DYNLL1   | ENSG00000088986 |
| 12 | 119847995 | 119848455 | 119848181 | 27  | 39  | 3  | 10.39304184 | 7.32E-10    |          | ENSG00000174074 |
| 12 | 119948403 | 119948639 | 119948495 | 8   | 10  | 2  | 3.810782009 | 0.00936112  | C12orf43 | ENSG00000157895 |
| 12 | 120155373 | 120155711 | 120155544 | 10  | 13  | 2  | 4.850086193 | 0.00164564  | P2RX4    | ENSG00000135124 |
| 12 | 120274675 | 120274854 | 120274764 | 8   | 8   | 3  | 2.338434415 | 0.0641221   | ANAPC5   | ENSG00000089053 |
| 12 | 120321824 | 120322030 | 120321893 | 8   | 10  | 4  | 2.286469205 | 0.0509017   | RNF34    | ENSG00000170633 |
| 12 | 120695548 | 120695836 | 120695692 | 8   | 13  | 4  | 2.910051716 | 0.0125532   |          | ENSG00000184314 |
| 12 | 120923733 | 120924064 | 120923899 | 19  | 24  | 2  | 8.660868202 | 1.80E-06    | BCL7A    | ENSG00000110987 |
| 12 | 120986560 | 120986783 | 120986671 | 8   | 8   | 2  | 3.117912553 | 0.0283184   | MLXIP    | ENSG00000175727 |
| 12 | 121450912 | 121451091 | 121450971 | 8   | 9   | 2  | 3.464347281 | 0.0163838   | CLIP1    | ENSG00000130779 |
| 12 | 121471732 | 121471969 | 121471807 | 8   | 10  | 5  | 1.905391004 | 0.0915982   | CLIP1    | ENSG00000130779 |
| 12 | 121577250 | 121577444 | 121577293 | 9   | 10  | 7  | 1.429043253 | 0.21536     | RSRC2    | ENSG00000111011 |

|    |           |           |           |     |     |    |             |             |          |                 |
|----|-----------|-----------|-----------|-----|-----|----|-------------|-------------|----------|-----------------|
| 12 | 121634826 | 121635005 | 121634915 | 8   | 8   | 0  | 9.353737658 | 0.00163931  | KNTC1    | ENSG00000184445 |
| 12 | 121776499 | 121776793 | 121776663 | 8   | 12  | 5  | 2.251825733 | 0.0404733   | GPR81    | ENSG00000196917 |
| 12 | 121803097 | 121803495 | 121803221 | 11  | 17  | 3  | 4.676868829 | 0.000552213 | DENR     | ENSG00000139726 |
| 12 | 121886755 | 121887046 | 121886915 | 9   | 11  | 4  | 2.494330042 | 0.0324033   | HIP1R    | ENSG00000130787 |
| 12 | 121997313 | 121997670 | 121997491 | 9   | 15  | 2  | 5.542955649 | 0.000497081 | ABCB9    | ENSG00000150967 |
| 12 | 122145585 | 122145862 | 122145709 | 8   | 11  | 2  | 4.157216737 | 0.0052913   | PITPNM2  | ENSG00000090975 |
| 12 | 122415703 | 122416303 | 122416127 | 12  | 25  | 8  | 3.00243431  | 0.0010168   | SBNO1    | ENSG00000139697 |
| 12 | 122496453 | 122496752 | 122496602 | 8   | 13  | 10 | 1.32275078  | 0.240023    | RILPL2   | ENSG00000150977 |
| 12 | 122508548 | 122508767 | 122508647 | 9   | 10  | 7  | 1.429043253 | 0.21536     |          | ENSG00000184209 |
| 12 | 122652485 | 122652672 | 122652578 | 9   | 9   | 2  | 3.464347281 | 0.0163838   | DDX55    | ENSG00000111364 |
| 12 | 122840486 | 122840689 | 122840587 | 9   | 9   | 2  | 3.464347281 | 0.0163838   | DNAH10   | ENSG00000197653 |
| 12 | 123304610 | 123304817 | 123304745 | 8   | 8   | 1  | 4.676868829 | 0.0091584   | FAM101A  | ENSG00000178882 |
| 12 | 123323987 | 123324494 | 123324315 | 54  | 65  | 0  | 68.59407616 | 3.75E-21    | FAM101A  | ENSG00000178882 |
| 12 | 123569531 | 123569809 | 123569672 | 11  | 14  | 3  | 3.897390691 | 0.00295882  | NCOR2    | ENSG00000196498 |
| 12 | 123610014 | 123610302 | 123610109 | 8   | 13  | 6  | 2.078608368 | 0.0483393   | NCOR2    | ENSG00000196498 |
| 12 | 123622627 | 123622879 | 123622758 | 8   | 11  | 2  | 4.157216737 | 0.0052913   | NCOR2    | ENSG00000196498 |
| 12 | 123659620 | 123659942 | 123659772 | 11  | 16  | 3  | 4.417042783 | 0.00097367  | NCOR2    | ENSG00000196498 |
| 12 | 123733649 | 123733912 | 123733817 | 9   | 12  | 5  | 2.251825733 | 0.0404733   | SCARB1   | ENSG00000073060 |
| 12 | 123888938 | 123889128 | 123889033 | 8   | 9   | 2  | 3.464347281 | 0.0163838   | SCARB1   | ENSG00000073060 |
| 12 | 123957303 | 123957522 | 123957412 | 9   | 11  | 1  | 6.235825105 | 0.0013754   |          | ENSG00000209201 |
| 12 | 123964612 | 123964792 | 123964725 | 8   | 8   | 1  | 4.676868829 | 0.0091584   | UBC      | ENSG00000150991 |
| 12 | 123965096 | 123965423 | 123965303 | 9   | 13  | 8  | 1.616695398 | 0.123553    | UBC      | ENSG00000150991 |
| 12 | 123967514 | 123968017 | 123967768 | 14  | 25  | 10 | 2.456537163 | 0.00405907  | UBC      | ENSG00000150991 |
| 12 | 123988430 | 123988722 | 123988576 | 8   | 9   | 1  | 5.196520921 | 0.00490062  | UBC      | ENSG00000150991 |
| 12 | 123988987 | 123990292 | 123989267 | 166 | 236 | 15 | 15.39469323 | 1.02E-54    | UBC      | ENSG00000150991 |
| 12 | 123990398 | 123990960 | 123990781 | 12  | 26  | 18 | 1.476905946 | 0.0928898   | UBC      | ENSG00000150991 |
| 12 | 123991173 | 123991480 | 123991313 | 14  | 18  | 7  | 2.468347438 | 0.0112499   | UBC      | ENSG00000150991 |
| 12 | 124043872 | 124044061 | 124043951 | 8   | 8   | 1  | 4.676868829 | 0.0091584   | BRI3BP   | ENSG00000184992 |
| 12 | 124099888 | 124100071 | 124099979 | 9   | 9   | 7  | 1.29913023  | 0.286504    | AACS     | ENSG00000081760 |
| 12 | 124245620 | 124245841 | 124245675 | 8   | 9   | 3  | 2.598260461 | 0.0397929   |          | ENSG00000222916 |
| 12 | 124279034 | 124279279 | 124279153 | 12  | 13  | 0  | 14.55025858 | 4.65E-05    |          | ENSG00000222916 |
| 12 | 124832746 | 124832936 | 124832841 | 8   | 8   | 0  | 9.353737658 | 0.00163931  | TMEM132B | ENSG00000139364 |
| 12 | 125946626 | 125946829 | 125946727 | 8   | 9   | 2  | 3.464347281 | 0.0163838   |          | ENSG00000189238 |
| 12 | 126216412 | 126216608 | 126216561 | 9   | 9   | 14 | 0.692869456 | 0.822654    |          | ENSG00000208959 |

|    |           |           |           |    |    |    |             |             |        |                 |
|----|-----------|-----------|-----------|----|----|----|-------------|-------------|--------|-----------------|
| 12 | 126216756 | 126217061 | 126216908 | 30 | 35 | 36 | 1.011214882 | 0.481494    |        | ENSG00000208959 |
| 12 | 127773896 | 127774151 | 127774023 | 8  | 9  | 0  | 10.39304184 | 0.000803859 |        | ENSG00000221749 |
| 12 | 129148554 | 129148765 | 129148693 | 8  | 8  | 4  | 1.870747532 | 0.118863    |        | ENSG00000214039 |
| 12 | 129198970 | 129199175 | 129199109 | 8  | 9  | 0  | 10.39304184 | 0.000803859 | FZD10  | ENSG00000111432 |
| 12 | 129869089 | 129869429 | 129869265 | 10 | 12 | 3  | 3.377738599 | 0.00867157  |        | ENSG00000208928 |
| 12 | 130333426 | 130333624 | 130333582 | 8  | 9  | 0  | 10.39304184 | 0.000803859 |        | ENSG00000212251 |
| 12 | 130696819 | 130697015 | 130696925 | 9  | 9  | 0  | 10.39304184 | 0.000803859 |        | ENSG00000212154 |
| 12 | 130734334 | 130734619 | 130734477 | 9  | 12 | 0  | 13.5109544  | 9.48E-05    |        | ENSG00000212154 |
| 12 | 130771375 | 130771724 | 130771549 | 12 | 17 | 0  | 18.70747532 | 2.69E-06    | SFRS8  | ENSG00000061936 |
| 12 | 130834561 | 130834862 | 130834715 | 9  | 12 | 7  | 1.688869299 | 0.11395     |        | ENSG00000200516 |
| 12 | 130922742 | 130923065 | 130922874 | 9  | 13 | 8  | 1.616695398 | 0.123553    | ULK1   | ENSG00000177169 |
| 12 | 131209444 | 131209710 | 131209556 | 14 | 16 | 0  | 17.66817113 | 5.48E-06    | NOC4L  | ENSG00000184967 |
| 12 | 131610533 | 131610774 | 131610653 | 12 | 13 | 6  | 2.078608368 | 0.0483393   |        | ENSG00000204586 |
| 12 | 131701690 | 131701896 | 131701793 | 10 | 10 | 7  | 1.429043253 | 0.21536     | P2RX2  | ENSG00000187848 |
| 12 | 131710078 | 131710291 | 131710184 | 8  | 9  | 1  | 5.196520921 | 0.00490062  | P2RX2  | ENSG00000187848 |
| 12 | 131848983 | 131849236 | 131849109 | 8  | 10 | 1  | 5.716173013 | 0.00260397  | ANKLE2 | ENSG00000176915 |
| 13 | 18821171  | 18821419  | 18821295  | 11 | 11 | 1  | 6.235825105 | 0.0013754   |        | ENSG00000219123 |
| 13 | 19266780  | 19267060  | 19266935  | 15 | 19 | 6  | 2.969440526 | 0.0035096   | PSPC1  | ENSG00000121390 |
| 13 | 19335656  | 19335861  | 19335751  | 8  | 10 | 0  | 11.43234603 | 0.000394183 | ZMYM5  | ENSG00000132950 |
| 13 | 19429541  | 19429769  | 19429648  | 9  | 10 | 4  | 2.286469205 | 0.0509017   | ZMYM2  | ENSG00000121741 |
| 13 | 19475114  | 19475297  | 19475187  | 8  | 8  | 1  | 4.676868829 | 0.0091584   | ZMYM2  | ENSG00000121741 |
| 13 | 19494214  | 19494582  | 19494419  | 9  | 14 | 7  | 1.948695345 | 0.0559175   | ZMYM2  | ENSG00000121741 |
| 13 | 19593356  | 19593632  | 19593494  | 9  | 12 | 7  | 1.688869299 | 0.11395     | GJA3   | ENSG00000121743 |
| 13 | 19599960  | 19600140  | 19600107  | 8  | 9  | 3  | 2.598260461 | 0.0397929   | GJA3   | ENSG00000121743 |
| 13 | 19834752  | 19835196  | 19834970  | 20 | 31 | 4  | 6.651546779 | 5.59E-07    | GJB6   | ENSG00000121742 |
| 13 | 19880396  | 19880727  | 19880564  | 14 | 16 | 0  | 17.66817113 | 5.48E-06    | CRYL1  | ENSG00000165475 |
| 13 | 20486817  | 20487084  | 20486933  | 8  | 10 | 2  | 3.810782009 | 0.00936112  |        | ENSG00000201821 |
| 13 | 20596985  | 20597209  | 20597125  | 9  | 10 | 6  | 1.63319229  | 0.146906    | SAP18  | ENSG00000150459 |
| 13 | 20705282  | 20705647  | 20705468  | 30 | 36 | 5  | 6.409042469 | 1.18E-07    |        | ENSG00000215572 |
| 13 | 21023127  | 21023357  | 21023223  | 10 | 11 | 2  | 4.157216737 | 0.0052913   |        | ENSG00000207518 |
| 13 | 21110876  | 21111176  | 21111030  | 9  | 12 | 1  | 6.755477198 | 0.000722752 |        | ENSG00000218366 |
| 13 | 21231799  | 21231978  | 21231888  | 8  | 8  | 4  | 1.870747532 | 0.118863    |        | ENSG00000222286 |
| 13 | 21394361  | 21394568  | 21394519  | 10 | 10 | 1  | 5.716173013 | 0.00260397  |        | ENSG00000209405 |
| 13 | 21406525  | 21406728  | 21406641  | 10 | 11 | 7  | 1.558956276 | 0.158273    |        | ENSG00000209405 |

|    |          |          |          |    |    |    |             |             |          |                 |
|----|----------|----------|----------|----|----|----|-------------|-------------|----------|-----------------|
| 13 | 22451030 | 22451560 | 22451296 | 13 | 26 | 12 | 2.158554844 | 0.00861404  |          | ENSG00000223116 |
| 13 | 22684856 | 22685156 | 22685009 | 11 | 14 | 3  | 3.897390691 | 0.00295882  |          | ENSG00000219054 |
| 13 | 22871404 | 22871830 | 22871623 | 25 | 34 | 0  | 36.37564645 | 1.47E-11    | SACS     | ENSG00000151835 |
| 13 | 23101720 | 23101908 | 23101814 | 8  | 9  | 4  | 2.078608368 | 0.0785659   | TNFRSF19 | ENSG00000127863 |
| 13 | 23167159 | 23167354 | 23167296 | 8  | 8  | 2  | 3.117912553 | 0.0283184   | MIPEP    | ENSG00000027001 |
| 13 | 23220844 | 23221092 | 23220968 | 15 | 15 | 2  | 5.542955649 | 0.000497081 | MIPEP    | ENSG00000027001 |
| 13 | 23224016 | 23224286 | 23224151 | 8  | 9  | 2  | 3.464347281 | 0.0163838   | MIPEP    | ENSG00000027001 |
| 13 | 23260956 | 23261165 | 23261101 | 8  | 9  | 2  | 3.464347281 | 0.0163838   |          | ENSG00000217247 |
| 13 | 23387551 | 23387790 | 23387706 | 10 | 12 | 4  | 2.702190879 | 0.0203088   |          | ENSG00000205863 |
| 13 | 23599218 | 23599710 | 23599464 | 9  | 20 | 4  | 4.365077574 | 0.000324139 |          | ENSG00000218467 |
| 13 | 24121654 | 24122120 | 24121887 | 31 | 46 | 2  | 16.28243222 | 9.05E-13    | ATP12A   | ENSG00000075673 |
| 13 | 24515552 | 24515746 | 24515629 | 8  | 8  | 1  | 4.676868829 | 0.0091584   | PABPC3   | ENSG00000151846 |
| 13 | 24535145 | 24535324 | 24535234 | 8  | 9  | 1  | 5.196520921 | 0.00490062  | PABPC3   | ENSG00000151846 |
| 13 | 25058536 | 25058715 | 25058672 | 8  | 8  | 4  | 1.870747532 | 0.118863    |          | ENSG00000199767 |
| 13 | 25121240 | 25121449 | 25121318 | 10 | 11 | 6  | 1.781664316 | 0.103344    |          | ENSG00000199767 |
| 13 | 25131228 | 25131597 | 25131407 | 21 | 28 | 4  | 6.027964269 | 3.34E-06    |          | ENSG00000199767 |
| 13 | 25271377 | 25271556 | 25271487 | 9  | 9  | 3  | 2.598260461 | 0.0397929   |          | ENSG00000180803 |
| 13 | 25275658 | 25275869 | 25275781 | 8  | 8  | 0  | 9.353737658 | 0.00163931  |          | ENSG00000180803 |
| 13 | 25460975 | 25461221 | 25461069 | 9  | 10 | 1  | 5.716173013 | 0.00260397  |          | ENSG00000223158 |
| 13 | 25694333 | 25694551 | 25694442 | 8  | 9  | 4  | 2.078608368 | 0.0785659   | RNF6     | ENSG00000127870 |
| 13 | 26073756 | 26073938 | 26073807 | 8  | 10 | 2  | 3.810782009 | 0.00936112  |          | ENSG00000217615 |
| 13 | 26144960 | 26145139 | 26145049 | 8  | 8  | 1  | 4.676868829 | 0.0091584   | GPR12    | ENSG00000132975 |
| 13 | 26386863 | 26387411 | 26387052 | 21 | 36 | 4  | 7.690850963 | 2.68E-08    |          | ENSG00000218019 |
| 13 | 26395668 | 26395981 | 26395820 | 10 | 14 | 2  | 5.196520921 | 0.000907371 |          | ENSG00000218019 |
| 13 | 26444325 | 26444563 | 26444444 | 9  | 11 | 3  | 3.117912553 | 0.0146045   |          | ENSG00000218572 |
| 13 | 26465314 | 26465589 | 26465451 | 10 | 11 | 1  | 6.235825105 | 0.0013754   |          | ENSG00000218572 |
| 13 | 26494943 | 26495146 | 26495052 | 10 | 10 | 7  | 1.429043253 | 0.21536     |          | ENSG00000220716 |
| 13 | 26545216 | 26545441 | 26545353 | 8  | 8  | 3  | 2.338434415 | 0.0641221   | USP12    | ENSG00000152484 |
| 13 | 26644337 | 26644572 | 26644448 | 8  | 10 | 4  | 2.286469205 | 0.0509017   | USP12    | ENSG00000152484 |
| 13 | 26714982 | 26715215 | 26715150 | 8  | 10 | 2  | 3.810782009 | 0.00936112  | RPL21    | ENSG00000122026 |
| 13 | 26723223 | 26723715 | 26723610 | 12 | 21 | 11 | 1.905391004 | 0.031399    | RPL21    | ENSG00000122026 |
| 13 | 26724247 | 26724426 | 26724398 | 9  | 9  | 5  | 1.73217364  | 0.133894    | RPL21    | ENSG00000122026 |
| 13 | 26754478 | 26754670 | 26754574 | 8  | 8  | 0  | 9.353737658 | 0.00163931  | RASL11A  | ENSG00000122035 |
| 13 | 26807587 | 26808086 | 26807715 | 18 | 27 | 2  | 9.700172386 | 2.61E-07    |          | ENSG00000209438 |

|    |          |          |          |    |    |    |             |             |         |                 |
|----|----------|----------|----------|----|----|----|-------------|-------------|---------|-----------------|
| 13 | 26846775 | 26846965 | 26846870 | 9  | 10 | 3  | 2.858086507 | 0.0242838   |         | ENSG00000201242 |
| 13 | 26847968 | 26848269 | 26848118 | 11 | 13 | 2  | 4.850086193 | 0.00164564  |         | ENSG00000201242 |
| 13 | 26855401 | 26855580 | 26855490 | 8  | 8  | 2  | 3.117912553 | 0.0283184   |         | ENSG00000201242 |
| 13 | 26878619 | 26878798 | 26878647 | 8  | 8  | 1  | 4.676868829 | 0.0091584   |         | ENSG00000201242 |
| 13 | 26896407 | 26896606 | 26896582 | 8  | 9  | 6  | 1.484720263 | 0.204387    | GTF3A   | ENSG00000122034 |
| 13 | 26898082 | 26898736 | 26898582 | 10 | 26 | 12 | 2.158554844 | 0.00861404  | GTF3A   | ENSG00000122034 |
| 13 | 26922674 | 26922889 | 26922827 | 10 | 10 | 0  | 11.43234603 | 0.000394183 | MTIF3   | ENSG00000122033 |
| 13 | 26931571 | 26932008 | 26931743 | 23 | 39 | 46 | 0.884514199 | 0.717474    | MTIF3   | ENSG00000122033 |
| 13 | 27243090 | 27243442 | 27243266 | 22 | 28 | 2  | 10.04660711 | 1.36E-07    | GSX1    | ENSG00000169840 |
| 13 | 27298578 | 27298811 | 27298699 | 8  | 10 | 3  | 2.858086507 | 0.0242838   |         | ENSG00000207330 |
| 13 | 27796305 | 27796553 | 27796429 | 10 | 12 | 3  | 3.377738599 | 0.00867157  |         | ENSG00000200840 |
| 13 | 28037298 | 28037502 | 28037444 | 10 | 10 | 5  | 1.905391004 | 0.0915982   |         | ENSG00000216743 |
| 13 | 28100344 | 28100523 | 28100471 | 8  | 8  | 2  | 3.117912553 | 0.0283184   |         | ENSG00000216743 |
| 13 | 28322204 | 28322541 | 28322372 | 8  | 12 | 4  | 2.702190879 | 0.0203088   |         | ENSG00000220482 |
| 13 | 28597404 | 28597583 | 28597470 | 8  | 8  | 0  | 9.353737658 | 0.00163931  |         | ENSG00000221670 |
| 13 | 29313742 | 29314039 | 29313911 | 10 | 14 | 6  | 2.227080395 | 0.0322529   | UBL3    | ENSG00000122042 |
| 13 | 29322498 | 29322752 | 29322625 | 8  | 9  | 4  | 2.078608368 | 0.0785659   | UBL3    | ENSG00000122042 |
| 13 | 29381409 | 29381601 | 29381423 | 8  | 8  | 1  | 4.676868829 | 0.0091584   |         | ENSG00000122043 |
| 13 | 29381869 | 29382059 | 29381979 | 8  | 9  | 3  | 2.598260461 | 0.0397929   |         | ENSG00000122043 |
| 13 | 29383873 | 29384152 | 29384014 | 10 | 11 | 1  | 6.235825105 | 0.0013754   |         | ENSG00000122043 |
| 13 | 29390874 | 29391192 | 29391033 | 15 | 21 | 9  | 2.286469205 | 0.0111772   |         | ENSG00000122043 |
| 13 | 29393318 | 29393559 | 29393450 | 8  | 10 | 4  | 2.286469205 | 0.0509017   |         | ENSG00000122043 |
| 13 | 29393621 | 29393904 | 29393762 | 11 | 16 | 2  | 5.889390377 | 0.000270741 |         | ENSG00000122043 |
| 13 | 29397524 | 29397751 | 29397637 | 10 | 12 | 5  | 2.251825733 | 0.0404733   |         | ENSG00000122043 |
| 13 | 29544696 | 29545005 | 29544834 | 12 | 16 | 6  | 2.524024447 | 0.0137633   |         | ENSG00000122043 |
| 13 | 29587243 | 29587476 | 29587370 | 8  | 8  | 2  | 3.117912553 | 0.0283184   |         | ENSG00000209486 |
| 13 | 29604722 | 29604993 | 29604850 | 9  | 10 | 0  | 11.43234603 | 0.000394183 |         | ENSG00000209486 |
| 13 | 29703324 | 29703662 | 29703494 | 10 | 12 | 2  | 4.503651465 | 0.002963    |         | ENSG00000209486 |
| 13 | 29807267 | 29807486 | 29807376 | 8  | 8  | 2  | 3.117912553 | 0.0283184   | KATNAL1 | ENSG00000102781 |
| 13 | 29814315 | 29814508 | 29814401 | 8  | 8  | 7  | 1.169217207 | 0.371848    | KATNAL1 | ENSG00000102781 |
| 13 | 29867662 | 29867866 | 29867824 | 9  | 10 | 10 | 1.039304184 | 0.464387    |         | ENSG00000169697 |
| 13 | 29893427 | 29893635 | 29893526 | 8  | 9  | 9  | 1.039304184 | 0.466079    |         | ENSG00000169697 |
| 13 | 29894596 | 29895042 | 29894863 | 9  | 18 | 1  | 9.87338975  | 1.41E-05    |         | ENSG00000169697 |
| 13 | 29903312 | 29903687 | 29903491 | 8  | 13 | 4  | 2.910051716 | 0.0125532   |         | ENSG00000169697 |

|    |          |          |          |    |    |    |             |             |          |                 |
|----|----------|----------|----------|----|----|----|-------------|-------------|----------|-----------------|
| 13 | 29952629 | 29952858 | 29952765 | 8  | 10 | 3  | 2.858086507 | 0.0242838   | HMGB1    | ENSG00000189403 |
| 13 | 29958611 | 29958934 | 29958763 | 14 | 16 | 9  | 1.766817113 | 0.0700694   | HMGB1    | ENSG00000189403 |
| 13 | 30035069 | 30035248 | 30035110 | 8  | 8  | 1  | 4.676868829 | 0.0091584   |          | ENSG00000220290 |
| 13 | 30089010 | 30089233 | 30089121 | 12 | 12 | 6  | 1.930136342 | 0.071303    | HMGB1    | ENSG00000189403 |
| 13 | 30089844 | 30090273 | 30090030 | 16 | 28 | 10 | 2.739983758 | 0.00114395  | USPL1    | ENSG00000132952 |
| 13 | 30162721 | 30163001 | 30162861 | 8  | 11 | 3  | 3.117912553 | 0.0146045   | ALOX5AP  | ENSG00000132965 |
| 13 | 30175174 | 30175364 | 30175269 | 8  | 8  | 1  | 4.676868829 | 0.0091584   | ALOX5AP  | ENSG00000132965 |
| 13 | 30211043 | 30211231 | 30211137 | 8  | 8  | 1  | 4.676868829 | 0.0091584   | ALOX5AP  | ENSG00000132965 |
| 13 | 30215731 | 30216097 | 30215891 | 8  | 14 | 2  | 5.196520921 | 0.000907371 | ALOX5AP  | ENSG00000132965 |
| 13 | 30274956 | 30275284 | 30275116 | 10 | 13 | 1  | 7.27512929  | 0.000378098 | ALOX5AP  | ENSG00000132965 |
| 13 | 30337519 | 30337730 | 30337580 | 8  | 10 | 6  | 1.63319229  | 0.146906    | C13orf33 | ENSG00000102802 |
| 13 | 30388313 | 30388586 | 30388449 | 9  | 10 | 1  | 5.716173013 | 0.00260397  | C13orf33 | ENSG00000102802 |
| 13 | 30504619 | 30505010 | 30504798 | 9  | 16 | 7  | 2.208521392 | 0.0257604   |          | ENSG00000218269 |
| 13 | 30547055 | 30547394 | 30547224 | 8  | 10 | 0  | 11.43234603 | 0.000394183 |          | ENSG00000218269 |
| 13 | 30566914 | 30567150 | 30566997 | 10 | 11 | 3  | 3.117912553 | 0.0146045   |          | ENSG00000218269 |
| 13 | 30896368 | 30896566 | 30896467 | 10 | 10 | 2  | 3.810782009 | 0.00936112  |          | ENSG00000219235 |
| 13 | 31214314 | 31214525 | 31214419 | 8  | 9  | 6  | 1.484720263 | 0.204387    | RXFP2    | ENSG00000133105 |
| 13 | 31637866 | 31638178 | 31638022 | 19 | 23 | 0  | 24.94330042 | 3.74E-08    | FRY      | ENSG00000073910 |
| 13 | 31757330 | 31757859 | 31757610 | 13 | 24 | 3  | 6.495651151 | 8.89E-06    | FRY      | ENSG00000073910 |
| 13 | 31761701 | 31761899 | 31761800 | 8  | 9  | 0  | 10.39304184 | 0.000803859 | FRY      | ENSG00000073910 |
| 13 | 31853780 | 31853987 | 31853862 | 12 | 12 | 1  | 6.755477198 | 0.000722752 |          | ENSG00000215515 |
| 13 | 32010727 | 32010931 | 32010829 | 8  | 9  | 8  | 1.154782427 | 0.375434    | N4BP2L2  | ENSG00000139617 |
| 13 | 32405455 | 32405777 | 32405616 | 8  | 11 | 6  | 1.781664316 | 0.103344    |          | ENSG00000218413 |
| 13 | 32457046 | 32457345 | 32457195 | 13 | 14 | 9  | 1.558956276 | 0.132279    |          | ENSG00000218413 |
| 13 | 32588615 | 32588831 | 32588730 | 8  | 9  | 4  | 2.078608368 | 0.0785659   | STARD13  | ENSG00000133121 |
| 13 | 32592088 | 32592603 | 32592424 | 19 | 32 | 9  | 3.429703808 | 8.38E-05    | STARD13  | ENSG00000133121 |
| 13 | 32700593 | 32700796 | 32700710 | 8  | 8  | 4  | 1.870747532 | 0.118863    | STARD13  | ENSG00000133121 |
| 13 | 32757760 | 32758013 | 32757888 | 8  | 11 | 6  | 1.781664316 | 0.103344    | STARD13  | ENSG00000133121 |
| 13 | 32817765 | 32818146 | 32817944 | 17 | 22 | 9  | 2.390399624 | 0.00747467  | STARD13  | ENSG00000133121 |
| 13 | 32862364 | 32862582 | 32862531 | 8  | 9  | 1  | 5.196520921 | 0.00490062  | STARD13  | ENSG00000133121 |
| 13 | 33014928 | 33015190 | 33015056 | 10 | 13 | 4  | 2.910051716 | 0.0125532   | STARD13  | ENSG00000133121 |
| 13 | 33114919 | 33115146 | 33115073 | 8  | 11 | 3  | 3.117912553 | 0.0146045   | RFC3     | ENSG00000133119 |
| 13 | 33121329 | 33121532 | 33121437 | 10 | 10 | 2  | 3.810782009 | 0.00936112  | RFC3     | ENSG00000133119 |
| 13 | 33290012 | 33290270 | 33290165 | 10 | 12 | 3  | 3.377738599 | 0.00867157  | RFC3     | ENSG00000133119 |



|    |          |          |          |    |    |    |             |                   |                 |
|----|----------|----------|----------|----|----|----|-------------|-------------------|-----------------|
| 13 | 33413016 | 33413469 | 33413201 | 37 | 50 | 2  | 17.66817113 | 6.11E-14          | ENSG00000222132 |
| 13 | 33923657 | 33923897 | 33923777 | 8  | 8  | 0  | 9.353737658 | 0.00163931        | ENSG00000220002 |
| 13 | 34172904 | 34173105 | 34173004 | 8  | 8  | 2  | 3.117912553 | 0.0283184         | ENSG00000220002 |
| 13 | 35037117 | 35037333 | 35037197 | 8  | 8  | 2  | 3.117912553 | 0.0283184 NBEA    | ENSG00000172915 |
| 13 | 35071532 | 35071771 | 35071651 | 8  | 10 | 3  | 2.858086507 | 0.0242838 NBEA    | ENSG00000172915 |
| 13 | 35102781 | 35103051 | 35102933 | 8  | 10 | 2  | 3.810782009 | 0.00936112 NBEA   | ENSG00000172915 |
| 13 | 35478593 | 35478776 | 35478709 | 9  | 10 | 1  | 5.716173013 | 0.00260397        | ENSG00000209518 |
| 13 | 35573209 | 35573388 | 35573352 | 8  | 8  | 3  | 2.338434415 | 0.0641221 DCLK1   | ENSG00000133083 |
| 13 | 35573410 | 35573736 | 35573576 | 8  | 13 | 2  | 4.850086193 | 0.00164564 DCLK1  | ENSG00000133083 |
| 13 | 35587502 | 35587745 | 35587631 | 12 | 12 | 3  | 3.377738599 | 0.00867157 DCLK1  | ENSG00000133083 |
| 13 | 36193483 | 36193669 | 36193590 | 8  | 8  | 0  | 9.353737658 | 0.00163931        | ENSG00000222602 |
| 13 | 36472644 | 36472896 | 36472770 | 9  | 12 | 4  | 2.702190879 | 0.0203088 EXOSC8  | ENSG00000120699 |
| 13 | 37387127 | 37387567 | 37387305 | 21 | 32 | 4  | 6.859407616 | 3.06E-07 TRPC4    | ENSG00000133107 |
| 13 | 37818897 | 37819166 | 37819031 | 13 | 16 | 0  | 17.66817113 | 5.48E-06 UFM1     | ENSG00000120686 |
| 13 | 37821413 | 37821726 | 37821565 | 9  | 11 | 2  | 4.157216737 | 0.0052913 UFM1    | ENSG00000120686 |
| 13 | 38109001 | 38109271 | 38109136 | 11 | 13 | 8  | 1.616695398 | 0.123553          | ENSG00000216558 |
| 13 | 38141322 | 38141570 | 38141404 | 8  | 10 | 3  | 2.858086507 | 0.0242838 FREM2   | ENSG00000150893 |
| 13 | 38142776 | 38142955 | 38142867 | 8  | 8  | 1  | 4.676868829 | 0.0091584 FREM2   | ENSG00000150893 |
| 13 | 38153774 | 38153962 | 38153808 | 8  | 10 | 6  | 1.63319229  | 0.146906 FREM2    | ENSG00000150893 |
| 13 | 38156991 | 38157206 | 38157098 | 9  | 10 | 6  | 1.63319229  | 0.146906 FREM2    | ENSG00000150893 |
| 13 | 38158197 | 38158511 | 38158354 | 11 | 15 | 12 | 1.279143611 | 0.251893 FREM2    | ENSG00000150893 |
| 13 | 38183274 | 38183542 | 38183408 | 8  | 9  | 1  | 5.196520921 | 0.00490062 FREM2  | ENSG00000150893 |
| 13 | 38393270 | 38393551 | 38393391 | 15 | 18 | 2  | 6.582259834 | 7.91E-05          | ENSG00000217780 |
| 13 | 38564561 | 38564805 | 38564685 | 8  | 9  | 1  | 5.196520921 | 0.00490062 NHLRC3 | ENSG00000188811 |
| 13 | 39308385 | 39308564 | 39308401 | 8  | 8  | 2  | 3.117912553 | 0.0283184         | ENSG00000216930 |
| 13 | 39755849 | 39756123 | 39755962 | 9  | 12 | 7  | 1.688869299 | 0.11395           | ENSG00000207458 |
| 13 | 39805385 | 39805722 | 39805553 | 14 | 18 | 0  | 19.7467795  | 1.32E-06          | ENSG00000207458 |
| 13 | 39857562 | 39858121 | 39857864 | 15 | 29 | 2  | 10.39304184 | 7.12E-08          | ENSG00000215483 |
| 13 | 40243237 | 40243466 | 40243351 | 10 | 11 | 7  | 1.558956276 | 0.158273 MRPS31   | ENSG00000102738 |
| 13 | 40247717 | 40247963 | 40247865 | 8  | 8  | 4  | 1.870747532 | 0.118863 MRPS31   | ENSG00000102738 |
| 13 | 40278491 | 40278729 | 40278624 | 8  | 9  | 1  | 5.196520921 | 0.00490062        | ENSG00000207652 |
| 13 | 40466050 | 40466414 | 40466235 | 15 | 22 | 8  | 2.655999582 | 0.0039122         | ENSG00000220844 |
| 13 | 40491298 | 40491477 | 40491370 | 8  | 8  | 5  | 1.558956276 | 0.191397 ELF1     | ENSG00000120690 |
| 13 | 40533400 | 40533840 | 40533620 | 19 | 29 | 8  | 3.464347281 | 0.000151572 WBP4  | ENSG00000120688 |

|    |          |          |          |    |    |    |             |             |          |                 |
|----|----------|----------|----------|----|----|----|-------------|-------------|----------|-----------------|
| 13 | 40534165 | 40534465 | 40534291 | 8  | 11 | 4  | 2.494330042 | 0.0324033   | WBP4     | ENSG00000120688 |
| 13 | 40617635 | 40617986 | 40617810 | 24 | 29 | 3  | 7.794781382 | 4.12E-07    | KBTBD6   | ENSG00000165572 |
| 13 | 40859477 | 40859656 | 40859640 | 8  | 8  | 3  | 2.338434415 | 0.0641221   |          | ENSG00000218901 |
| 13 | 40874687 | 40875015 | 40874850 | 20 | 24 | 2  | 8.660868202 | 1.80E-06    |          | ENSG00000218901 |
| 13 | 41030033 | 41030212 | 41030095 | 8  | 8  | 1  | 4.676868829 | 0.0091584   |          | ENSG00000221194 |
| 13 | 41275201 | 41275512 | 41275360 | 18 | 19 | 1  | 10.39304184 | 7.23E-06    |          | ENSG00000223066 |
| 13 | 41432476 | 41432655 | 41432554 | 8  | 8  | 0  | 9.353737658 | 0.00163931  | KIAA0564 | ENSG00000102763 |
| 13 | 41511122 | 41511427 | 41511292 | 10 | 11 | 0  | 12.47165021 | 0.000193293 | DGKH     | ENSG00000102780 |
| 13 | 41576622 | 41576806 | 41576767 | 8  | 9  | 2  | 3.464347281 | 0.0163838   |          | ENSG00000220384 |
| 13 | 42475449 | 42475767 | 42475608 | 9  | 13 | 2  | 4.850086193 | 0.00164564  | EPSTI1   | ENSG00000133106 |
| 13 | 43593175 | 43593354 | 43593264 | 8  | 8  | 0  | 9.353737658 | 0.00163931  |          | ENSG00000139656 |
| 13 | 43783209 | 43783503 | 43783331 | 9  | 13 | 0  | 14.55025858 | 4.65E-05    | SERP2    | ENSG00000151778 |
| 13 | 43875641 | 43876007 | 43875804 | 10 | 17 | 12 | 1.439036563 | 0.154203    | SERP2    | ENSG00000151778 |
| 13 | 43907468 | 43907986 | 43907788 | 8  | 19 | 6  | 2.969440526 | 0.0035096   | TSC22D1  | ENSG00000102804 |
| 13 | 43908718 | 43909052 | 43908885 | 10 | 16 | 7  | 2.208521392 | 0.0257604   | TSC22D1  | ENSG00000102804 |
| 13 | 43909269 | 43909606 | 43909438 | 11 | 16 | 4  | 3.533634226 | 0.00276486  | TSC22D1  | ENSG00000102804 |
| 13 | 44049612 | 44049841 | 44049761 | 8  | 9  | 1  | 5.196520921 | 0.00490062  | TSC22D1  | ENSG00000102804 |
| 13 | 44231220 | 44231538 | 44231379 | 8  | 11 | 2  | 4.157216737 | 0.0052913   |          | ENSG00000209569 |
| 13 | 44233634 | 44233813 | 44233723 | 8  | 8  | 3  | 2.338434415 | 0.0641221   |          | ENSG00000209569 |
| 13 | 44282200 | 44282478 | 44282331 | 9  | 11 | 12 | 0.959357709 | 0.543005    | NUFIP1   | ENSG00000083635 |
| 13 | 44389789 | 44390319 | 44390142 | 12 | 26 | 21 | 1.275509681 | 0.196223    | NUFIP1   | ENSG00000083635 |
| 13 | 44390488 | 44390854 | 44390577 | 9  | 13 | 8  | 1.616695398 | 0.123553    | NUFIP1   | ENSG00000083635 |
| 13 | 44592385 | 44592826 | 44592526 | 14 | 19 | 2  | 6.928694562 | 4.25E-05    | GTF2F2   | ENSG00000188342 |
| 13 | 44690795 | 44690975 | 44690910 | 8  | 8  | 0  | 9.353737658 | 0.00163931  | KCTD4    | ENSG00000180332 |
| 13 | 44783217 | 44783527 | 44783377 | 11 | 13 | 5  | 2.425043097 | 0.0262442   |          | ENSG00000221163 |
| 13 | 44806516 | 44806703 | 44806609 | 8  | 9  | 4  | 2.078608368 | 0.0785659   |          | ENSG00000209605 |
| 13 | 44993479 | 44993791 | 44993612 | 9  | 11 | 1  | 6.235825105 | 0.0013754   |          | ENSG00000200709 |
| 13 | 44997026 | 44997330 | 44997172 | 8  | 10 | 6  | 1.63319229  | 0.146906    |          | ENSG00000200709 |
| 13 | 44999984 | 45000178 | 45000051 | 9  | 9  | 4  | 2.078608368 | 0.0785659   |          | ENSG00000200709 |
| 13 | 45245453 | 45245720 | 45245563 | 9  | 13 | 1  | 7.27512929  | 0.000378098 |          | ENSG00000209627 |
| 13 | 45329661 | 45329873 | 45329767 | 8  | 8  | 1  | 4.676868829 | 0.0091584   |          | ENSG00000215475 |
| 13 | 45524614 | 45524927 | 45524758 | 11 | 15 | 15 | 1.039304184 | 0.456923    | ZC3H13   | ENSG00000123200 |
| 13 | 45573369 | 45573593 | 45573447 | 8  | 10 | 3  | 2.858086507 | 0.0242838   | CPB2     | ENSG00000080618 |
| 13 | 45575448 | 45575627 | 45575520 | 8  | 8  | 4  | 1.870747532 | 0.118863    | CPB2     | ENSG00000080618 |

|    |          |          |          |    |    |    |             |             |       |                 |
|----|----------|----------|----------|----|----|----|-------------|-------------|-------|-----------------|
| 13 | 45592211 | 45592638 | 45592390 | 15 | 26 | 15 | 1.753825811 | 0.0337197   | CPB2  | ENSG00000080618 |
| 13 | 45593810 | 45594195 | 45593979 | 10 | 15 | 11 | 1.385738912 | 0.19225     | CPB2  | ENSG00000080618 |
| 13 | 45607314 | 45607696 | 45607488 | 15 | 22 | 12 | 1.838768941 | 0.0349935   | CPB2  | ENSG00000080618 |
| 13 | 45619083 | 45619262 | 45619172 | 8  | 8  | 4  | 1.870747532 | 0.118863    |       | ENSG00000209631 |
| 13 | 45647802 | 45648162 | 45647944 | 8  | 12 | 1  | 6.755477198 | 0.000722752 |       | ENSG00000222074 |
| 13 | 45654317 | 45654592 | 45654431 | 9  | 10 | 6  | 1.63319229  | 0.146906    | LCP1  | ENSG00000136167 |
| 13 | 45698751 | 45698966 | 45698858 | 8  | 10 | 2  | 3.810782009 | 0.00936112  |       | ENSG00000209633 |
| 13 | 45708545 | 45708729 | 45708599 | 8  | 8  | 2  | 3.117912553 | 0.0283184   |       | ENSG00000209633 |
| 13 | 45728259 | 45728456 | 45728357 | 8  | 9  | 0  | 10.39304184 | 0.000803859 |       | ENSG00000214554 |
| 13 | 45998927 | 45999112 | 45999019 | 9  | 10 | 4  | 2.286469205 | 0.0509017   |       | ENSG00000217737 |
| 13 | 46013684 | 46013866 | 46013811 | 8  | 9  | 2  | 3.464347281 | 0.0163838   | LRCH1 | ENSG00000136141 |
| 13 | 46018598 | 46018806 | 46018702 | 9  | 9  | 10 | 0.944821986 | 0.553851    | LRCH1 | ENSG00000136141 |
| 13 | 46023627 | 46024073 | 46023786 | 15 | 23 | 14 | 1.662886695 | 0.0567474   | LRCH1 | ENSG00000136141 |
| 13 | 46024504 | 46024705 | 46024604 | 8  | 8  | 0  | 9.353737658 | 0.00163931  | LRCH1 | ENSG00000136141 |
| 13 | 46026536 | 46026783 | 46026659 | 8  | 9  | 8  | 1.154782427 | 0.375434    | LRCH1 | ENSG00000136141 |
| 13 | 46028310 | 46028657 | 46028483 | 9  | 13 | 12 | 1.11925066  | 0.384109    | LRCH1 | ENSG00000136141 |
| 13 | 46031753 | 46031999 | 46031904 | 8  | 10 | 6  | 1.63319229  | 0.146906    | LRCH1 | ENSG00000136141 |
| 13 | 46035935 | 46036237 | 46036095 | 8  | 11 | 2  | 4.157216737 | 0.0052913   | LRCH1 | ENSG00000136141 |
| 13 | 46041663 | 46041842 | 46041698 | 8  | 8  | 4  | 1.870747532 | 0.118863    | LRCH1 | ENSG00000136141 |
| 13 | 46055386 | 46055731 | 46055558 | 10 | 16 | 3  | 4.417042783 | 0.00097367  | LRCH1 | ENSG00000136141 |
| 13 | 46063770 | 46064052 | 46063886 | 9  | 11 | 4  | 2.494330042 | 0.0324033   | LRCH1 | ENSG00000136141 |
| 13 | 46072434 | 46072634 | 46072567 | 8  | 9  | 6  | 1.484720263 | 0.204387    | LRCH1 | ENSG00000136141 |
| 13 | 46087653 | 46088314 | 46087926 | 34 | 58 | 8  | 6.813216319 | 1.87E-11    | LRCH1 | ENSG00000136141 |
| 13 | 46089591 | 46089943 | 46089767 | 10 | 16 | 10 | 1.606197376 | 0.104477    | LRCH1 | ENSG00000136141 |
| 13 | 46095065 | 46095281 | 46095186 | 9  | 10 | 1  | 5.716173013 | 0.00260397  | LRCH1 | ENSG00000136141 |
| 13 | 46102819 | 46103038 | 46102928 | 8  | 8  | 3  | 2.338434415 | 0.0641221   | LRCH1 | ENSG00000136141 |
| 13 | 46120406 | 46120713 | 46120559 | 12 | 15 | 6  | 2.375552421 | 0.0212094   | LRCH1 | ENSG00000136141 |
| 13 | 46127774 | 46128038 | 46127906 | 8  | 10 | 7  | 1.429043253 | 0.21536     | LRCH1 | ENSG00000136141 |
| 13 | 46131551 | 46132242 | 46132063 | 11 | 31 | 16 | 1.956337288 | 0.0103735   | LRCH1 | ENSG00000136141 |
| 13 | 46137812 | 46138079 | 46137916 | 9  | 11 | 5  | 2.078608368 | 0.0614303   | LRCH1 | ENSG00000136141 |
| 13 | 46144671 | 46144879 | 46144820 | 8  | 8  | 1  | 4.676868829 | 0.0091584   | LRCH1 | ENSG00000136141 |
| 13 | 46156739 | 46156927 | 46156877 | 8  | 8  | 8  | 1.039304184 | 0.46786     | ESD   | ENSG00000139684 |
| 13 | 46157151 | 46157506 | 46157330 | 11 | 15 | 7  | 2.078608368 | 0.038229    | ESD   | ENSG00000139684 |
| 13 | 46183114 | 46183377 | 46183257 | 10 | 10 | 6  | 1.63319229  | 0.146906    | ESD   | ENSG00000139684 |

|    |          |          |          |    |    |    |             |             |        |                 |
|----|----------|----------|----------|----|----|----|-------------|-------------|--------|-----------------|
| 13 | 46224106 | 46224285 | 46224157 | 8  | 10 | 6  | 1.63319229  | 0.146906    | ESD    | ENSG00000139684 |
| 13 | 46271844 | 46272027 | 46271928 | 9  | 9  | 4  | 2.078608368 | 0.0785659   | ESD    | ENSG00000139684 |
| 13 | 46273777 | 46273999 | 46273851 | 8  | 10 | 2  | 3.810782009 | 0.00936112  | ESD    | ENSG00000139684 |
| 13 | 46377441 | 46377900 | 46377743 | 9  | 18 | 12 | 1.518983039 | 0.117837    | HTR2A  | ENSG00000102468 |
| 13 | 46384483 | 46384677 | 46384580 | 8  | 8  | 4  | 1.870747532 | 0.118863    | HTR2A  | ENSG00000102468 |
| 13 | 46502593 | 46502806 | 46502729 | 8  | 9  | 1  | 5.196520921 | 0.00490062  |        | ENSG00000209653 |
| 13 | 46522160 | 46522402 | 46522255 | 9  | 9  | 7  | 1.29913023  | 0.286504    |        | ENSG00000209653 |
| 13 | 46684599 | 46684792 | 46684695 | 8  | 8  | 1  | 4.676868829 | 0.0091584   |        | ENSG00000220245 |
| 13 | 46700993 | 46701172 | 46701081 | 8  | 8  | 0  | 9.353737658 | 0.00163931  |        | ENSG00000220245 |
| 13 | 46702324 | 46702504 | 46702357 | 8  | 9  | 4  | 2.078608368 | 0.0785659   |        | ENSG00000220245 |
| 13 | 46709517 | 46709768 | 46709637 | 9  | 11 | 2  | 4.157216737 | 0.0052913   |        | ENSG00000220245 |
| 13 | 46730809 | 46731081 | 46730941 | 8  | 8  | 7  | 1.169217207 | 0.371848    |        | ENSG00000220245 |
| 13 | 46871847 | 46872026 | 46871936 | 8  | 8  | 9  | 0.935373766 | 0.560286    |        | ENSG00000209657 |
| 13 | 47103757 | 47104140 | 47104015 | 12 | 17 | 1  | 9.353737658 | 2.73E-05    |        | ENSG00000218471 |
| 13 | 47538659 | 47539086 | 47538877 | 52 | 72 | 0  | 75.86920545 | 2.56E-23    | MED4   | ENSG00000136146 |
| 13 | 47544457 | 47544791 | 47544626 | 38 | 42 | 0  | 44.69007992 | 4.92E-14    | MED4   | ENSG00000136146 |
| 13 | 47567233 | 47567426 | 47567342 | 9  | 9  | 3  | 2.598260461 | 0.0397929   | MED4   | ENSG00000136146 |
| 13 | 49685710 | 49686123 | 49685944 | 15 | 23 | 3  | 6.235825105 | 1.63E-05    |        | ENSG00000220558 |
| 13 | 49829698 | 49830048 | 49829956 | 8  | 12 | 3  | 3.377738599 | 0.00867157  |        | ENSG00000217189 |
| 13 | 50001389 | 50001871 | 50001699 | 61 | 87 | 2  | 30.48625607 | 6.20E-25    |        | ENSG00000221198 |
| 13 | 50203546 | 50203884 | 50203713 | 17 | 21 | 1  | 11.43234603 | 1.90E-06    |        | ENSG00000200711 |
| 13 | 51289798 | 51290099 | 51289920 | 8  | 9  | 0  | 10.39304184 | 0.000803859 | DHRS12 | ENSG00000102796 |
| 13 | 51298822 | 51299057 | 51298927 | 13 | 14 | 3  | 3.897390691 | 0.00295882  |        | ENSG00000180358 |
| 13 | 51329219 | 51329426 | 51329322 | 8  | 9  | 1  | 5.196520921 | 0.00490062  | CCDC70 | ENSG00000123171 |
| 13 | 51331236 | 51331442 | 51331347 | 8  | 8  | 3  | 2.338434415 | 0.0641221   | CCDC70 | ENSG00000123171 |
| 13 | 51683524 | 51683831 | 51683677 | 23 | 25 | 1  | 13.5109544  | 1.28E-07    |        | ENSG00000220040 |
| 13 | 59403847 | 59404034 | 59403938 | 9  | 9  | 1  | 5.196520921 | 0.00490062  | DIAPH3 | ENSG00000139734 |
| 13 | 61106697 | 61106895 | 61106751 | 8  | 8  | 0  | 9.353737658 | 0.00163931  |        | ENSG00000209865 |
| 13 | 63068048 | 63068259 | 63068158 | 10 | 11 | 0  | 12.47165021 | 0.000193293 |        | ENSG00000215432 |
| 13 | 68416465 | 68416849 | 68416680 | 9  | 14 | 1  | 7.794781382 | 0.000197021 |        | ENSG00000219035 |
| 13 | 71569713 | 71570107 | 71569897 | 26 | 34 | 1  | 18.18782322 | 2.77E-10    |        | ENSG00000200037 |
| 13 | 72253987 | 72254216 | 72254066 | 9  | 11 | 3  | 3.117912553 | 0.0146045   | DIS3   | ENSG00000083520 |
| 13 | 72432769 | 72432987 | 72432878 | 8  | 9  | 5  | 1.73217364  | 0.133894    | PIBF1  | ENSG00000083535 |
| 13 | 72574743 | 72574928 | 72574857 | 8  | 8  | 1  | 4.676868829 | 0.0091584   |        | ENSG00000118928 |

|    |           |           |           |    |    |    |             |             |          |                 |
|----|-----------|-----------|-----------|----|----|----|-------------|-------------|----------|-----------------|
| 13 | 72871541  | 72871779  | 72871635  | 8  | 10 | 1  | 5.716173013 | 0.00260397  |          | ENSG00000218304 |
| 13 | 72985949  | 72986215  | 72986082  | 21 | 21 | 0  | 22.86469205 | 1.55E-07    |          | ENSG00000218304 |
| 13 | 73075883  | 73076135  | 73076009  | 16 | 16 | 0  | 17.66817113 | 5.48E-06    |          | ENSG00000218304 |
| 13 | 74654183  | 74654362  | 74654272  | 8  | 8  | 4  | 1.870747532 | 0.118863    |          | ENSG00000219076 |
| 13 | 75994230  | 75994527  | 75994378  | 18 | 20 | 4  | 4.365077574 | 0.000324139 | KCTD12   | ENSG00000178695 |
| 13 | 76527379  | 76527567  | 76527473  | 8  | 8  | 0  | 9.353737658 | 0.00163931  | FBXL3    | ENSG00000005812 |
| 13 | 76799275  | 76799615  | 76799445  | 11 | 15 | 1  | 8.314433474 | 0.000102308 | MYCBP2   | ENSG00000005810 |
| 13 | 78866032  | 78866328  | 78866188  | 9  | 11 | 0  | 12.47165021 | 0.000193293 |          | ENSG00000209123 |
| 13 | 79103509  | 79103696  | 79103602  | 8  | 8  | 4  | 1.870747532 | 0.118863    | NDFIP2   | ENSG00000102471 |
| 13 | 80614884  | 80615118  | 80615023  | 8  | 8  | 2  | 3.117912553 | 0.0283184   |          | ENSG00000222486 |
| 13 | 83413785  | 83414216  | 83414002  | 40 | 50 | 3  | 13.25112835 | 5.72E-13    |          | ENSG00000220449 |
| 13 | 84580560  | 84580878  | 84580719  | 22 | 25 | 0  | 27.02190879 | 8.98E-09    |          | ENSG00000207012 |
| 13 | 85214044  | 85214223  | 85214119  | 8  | 8  | 0  | 9.353737658 | 0.00163931  | SLITRK6  | ENSG00000184564 |
| 13 | 87856006  | 87856251  | 87856148  | 12 | 15 | 0  | 16.62886695 | 1.12E-05    |          | ENSG00000218326 |
| 13 | 88688807  | 88689065  | 88688936  | 11 | 12 | 2  | 4.503651465 | 0.002963    |          | ENSG00000216336 |
| 13 | 90042225  | 90042571  | 90042400  | 21 | 25 | 0  | 27.02190879 | 8.98E-09    |          | ENSG00000209120 |
| 13 | 93795633  | 93795910  | 93795782  | 23 | 25 | 2  | 9.00730293  | 9.47E-07    |          | ENSG00000212057 |
| 13 | 96591894  | 96592098  | 96592008  | 9  | 9  | 10 | 0.944821986 | 0.553851    | MBNL2    | ENSG00000139793 |
| 13 | 96670769  | 96671024  | 96670913  | 8  | 10 | 2  | 3.810782009 | 0.00936112  | MBNL2    | ENSG00000139793 |
| 13 | 97866772  | 97866996  | 97866884  | 10 | 13 | 5  | 2.425043097 | 0.0262442   | STK24    | ENSG00000102572 |
| 13 | 98109767  | 98110215  | 98110062  | 18 | 27 | 2  | 9.700172386 | 2.61E-07    |          | ENSG00000223127 |
| 13 | 98173737  | 98173917  | 98173827  | 9  | 10 | 0  | 11.43234603 | 0.000394183 | SLC15A1  | ENSG00000088386 |
| 13 | 99060997  | 99061183  | 99061090  | 8  | 9  | 2  | 3.464347281 | 0.0163838   | CLYBL    | ENSG00000125246 |
| 13 | 99500737  | 99501000  | 99500868  | 12 | 15 | 2  | 5.542955649 | 0.000497081 |          | ENSG00000220223 |
| 13 | 102137926 | 102138166 | 102138040 | 15 | 15 | 1  | 8.314433474 | 0.000102308 | C13orf39 | ENSG00000139780 |
| 13 | 102296091 | 102296283 | 102296187 | 8  | 8  | 5  | 1.558956276 | 0.191397    | ERCC5    | ENSG00000134899 |
| 13 | 103333695 | 103333874 | 103333724 | 8  | 8  | 1  | 4.676868829 | 0.0091584   |          | ENSG00000219505 |
| 13 | 106358455 | 106358670 | 106358536 | 8  | 8  | 0  | 9.353737658 | 0.00163931  |          | ENSG00000196777 |
| 13 | 106655747 | 106655955 | 106655825 | 8  | 9  | 3  | 2.598260461 | 0.0397929   |          | ENSG00000221316 |
| 13 | 108093994 | 108094195 | 108094105 | 8  | 9  | 0  | 10.39304184 | 0.000803859 | MYO16    | ENSG00000041515 |
| 13 | 108369495 | 108370227 | 108369870 | 11 | 31 | 17 | 1.847651883 | 0.0159688   | MYO16    | ENSG00000041515 |
| 13 | 109450689 | 109450923 | 109450806 | 8  | 11 | 0  | 12.47165021 | 0.000193293 |          | ENSG00000201161 |
| 13 | 109573249 | 109573633 | 109573428 | 17 | 24 | 1  | 12.9913023  | 2.52E-07    |          | ENSG00000222584 |
| 13 | 111916639 | 111916842 | 111916740 | 8  | 8  | 1  | 4.676868829 | 0.0091584   | SOX1     | ENSG00000182968 |

|    |           |           |           |     |     |    |             |             |           |                 |
|----|-----------|-----------|-----------|-----|-----|----|-------------|-------------|-----------|-----------------|
| 13 | 112212411 | 112212759 | 112212583 | 11  | 14  | 8  | 1.73217364  | 0.0890835   | TUBGCP3   | ENSG00000126216 |
| 13 | 113573219 | 113573980 | 113573537 | 122 | 166 | 0  | 173.5637988 | 2.07E-52    | GAS6      | ENSG00000183087 |
| 13 | 113925195 | 113925388 | 113925336 | 8   | 8   | 1  | 4.676868829 | 0.0091584   | RASA3     | ENSG00000185989 |
| 13 | 114127669 | 114127923 | 114127796 | 19  | 20  | 0  | 21.82538787 | 3.17E-07    | ZNF828    | ENSG00000198824 |
| 14 | 18076308  | 18076629  | 18076468  | 14  | 14  | 16 | 0.917033104 | 0.598778    |           | ENSG00000215398 |
| 14 | 18086404  | 18086583  | 18086433  | 8   | 8   | 4  | 1.870747532 | 0.118863    |           | ENSG00000215398 |
| 14 | 20151292  | 20151496  | 20151394  | 8   | 10  | 5  | 1.905391004 | 0.0915982   | RNASE12   | ENSG00000206171 |
| 14 | 20289941  | 20290318  | 20290110  | 34  | 41  | 0  | 43.65077574 | 1.00E-13    | FAM12A    | ENSG00000181562 |
| 14 | 20358267  | 20358733  | 20358500  | 18  | 33  | 0  | 35.33634226 | 3.00E-11    | RNASE1    | ENSG00000129538 |
| 14 | 20635051  | 20635563  | 20635384  | 24  | 36  | 5  | 6.409042469 | 1.18E-07    | ZNF219    | ENSG00000165804 |
| 14 | 20636755  | 20636934  | 20636813  | 8   | 8   | 4  | 1.870747532 | 0.118863    | ZNF219    | ENSG00000165804 |
| 14 | 21014985  | 21015249  | 21015117  | 9   | 11  | 6  | 1.781664316 | 0.103344    | TOX4      | ENSG00000092203 |
| 14 | 21095529  | 21095765  | 21095664  | 11  | 11  | 4  | 2.494330042 | 0.0324033   |           | ENSG00000215307 |
| 14 | 21922330  | 21922563  | 21922446  | 8   | 8   | 1  | 4.676868829 | 0.0091584   |           | ENSG00000211821 |
| 14 | 22011878  | 22012076  | 22011971  | 9   | 9   | 1  | 5.196520921 | 0.00490062  |           | ENSG00000211831 |
| 14 | 22075814  | 22076068  | 22075916  | 18  | 18  | 4  | 3.9493559   | 0.000961379 |           | ENSG00000211882 |
| 14 | 22437476  | 22437685  | 22437572  | 8   | 8   | 0  | 9.353737658 | 0.00163931  | REM2      | ENSG00000139890 |
| 14 | 22468671  | 22468969  | 22468827  | 9   | 12  | 10 | 1.228268581 | 0.305344    | PRMT5     | ENSG00000100462 |
| 14 | 22525893  | 22526108  | 22526023  | 8   | 10  | 4  | 2.286469205 | 0.0509017   | JUB       | ENSG00000129474 |
| 14 | 22610400  | 22610858  | 22610579  | 8   | 17  | 4  | 3.741495063 | 0.00163722  | ACIN1     | ENSG00000100813 |
| 14 | 23170893  | 23171277  | 23171065  | 34  | 41  | 2  | 14.55025858 | 2.58E-11    | DHRS2     | ENSG00000100867 |
| 14 | 23209542  | 23209957  | 23209743  | 26  | 36  | 1  | 19.22712741 | 7.03E-11    | DHRS2     | ENSG00000100867 |
| 14 | 23727945  | 23728171  | 23728056  | 8   | 11  | 3  | 3.117912553 | 0.0146045   | IPO4      | ENSG00000196497 |
| 14 | 23810146  | 23810335  | 23810224  | 8   | 8   | 1  | 4.676868829 | 0.0091584   | RABGGTA   | ENSG00000100949 |
| 14 | 23871316  | 23871511  | 23871413  | 8   | 8   | 0  | 9.353737658 | 0.00163931  | ADCY4     | ENSG00000129467 |
| 14 | 23935376  | 23935738  | 23935559  | 16  | 23  | 3  | 6.235825105 | 1.63E-05    | KIAA1305  | ENSG00000205978 |
| 14 | 23982021  | 23982249  | 23982190  | 8   | 9   | 2  | 3.464347281 | 0.0163838   | C14orf124 | ENSG00000100445 |
| 14 | 24939741  | 24939974  | 24939853  | 8   | 9   | 0  | 10.39304184 | 0.000803859 |           | ENSG00000179020 |
| 14 | 25416062  | 25416241  | 25416197  | 8   | 8   | 0  | 9.353737658 | 0.00163931  |           | ENSG00000212270 |
| 14 | 28290494  | 28290727  | 28290640  | 12  | 12  | 2  | 4.503651465 | 0.002963    | FOXG1     | ENSG00000176165 |
| 14 | 29792015  | 29792266  | 29792140  | 18  | 20  | 0  | 21.82538787 | 3.17E-07    | KIAA1333  | ENSG00000092140 |
| 14 | 29809112  | 29809349  | 29809216  | 8   | 9   | 2  | 3.464347281 | 0.0163838   | KIAA1333  | ENSG00000092140 |
| 14 | 29834919  | 29835236  | 29835077  | 11  | 15  | 2  | 5.542955649 | 0.000497081 | KIAA1333  | ENSG00000092140 |
| 14 | 29912194  | 29912442  | 29912364  | 9   | 11  | 3  | 3.117912553 | 0.0146045   | KIAA1333  | ENSG00000092140 |

|    |          |          |          |     |     |   |             |             |           |                 |
|----|----------|----------|----------|-----|-----|---|-------------|-------------|-----------|-----------------|
| 14 | 30149711 | 30149905 | 30149788 | 8   | 9   | 3 | 2.598260461 | 0.0397929   | SCFD1     | ENSG00000092108 |
| 14 | 30768752 | 30768996 | 30768860 | 8   | 10  | 7 | 1.429043253 | 0.21536     |           | ENSG00000202402 |
| 14 | 30980387 | 30980682 | 30980534 | 9   | 11  | 1 | 6.235825105 | 0.0013754   | C14orf126 | ENSG00000129480 |
| 14 | 30988966 | 30989167 | 30989066 | 10  | 10  | 1 | 5.716173013 | 0.00260397  | C14orf126 | ENSG00000129480 |
| 14 | 31559833 | 31560470 | 31560012 | 17  | 30  | 2 | 10.73947657 | 3.71E-08    | C14orf128 | ENSG00000176127 |
| 14 | 31745037 | 31745272 | 31745180 | 9   | 9   | 3 | 2.598260461 | 0.0397929   |           | ENSG00000202337 |
| 14 | 31791152 | 31791374 | 31791329 | 8   | 8   | 1 | 4.676868829 | 0.0091584   |           | ENSG00000202337 |
| 14 | 31847068 | 31847443 | 31847247 | 11  | 17  | 2 | 6.235825105 | 0.000146695 | AKAP6     | ENSG00000151320 |
| 14 | 31884126 | 31884793 | 31884458 | 87  | 127 | 7 | 16.62886695 | 3.17E-31    | AKAP6     | ENSG00000151320 |
| 14 | 31908218 | 31908397 | 31908307 | 8   | 8   | 0 | 9.353737658 | 0.00163931  | AKAP6     | ENSG00000151320 |
| 14 | 32099174 | 32099526 | 32099357 | 10  | 15  | 4 | 3.32577339  | 0.00462646  |           | ENSG00000209554 |
| 14 | 32247701 | 32247896 | 32247777 | 9   | 9   | 5 | 1.73217364  | 0.133894    |           | ENSG00000209554 |
| 14 | 32284099 | 32284284 | 32284256 | 8   | 8   | 5 | 1.558956276 | 0.191397    | NPAS3     | ENSG00000151322 |
| 14 | 32284589 | 32284773 | 32284627 | 8   | 9   | 1 | 5.196520921 | 0.00490062  | NPAS3     | ENSG00000151322 |
| 14 | 32342612 | 32342865 | 32342729 | 8   | 9   | 0 | 10.39304184 | 0.000803859 | NPAS3     | ENSG00000151322 |
| 14 | 32532847 | 32533150 | 32533025 | 9   | 13  | 1 | 7.27512929  | 0.000378098 | NPAS3     | ENSG00000151322 |
| 14 | 33014583 | 33014830 | 33014748 | 9   | 10  | 6 | 1.63319229  | 0.146906    | NPAS3     | ENSG00000151322 |
| 14 | 33059043 | 33059341 | 33059192 | 8   | 10  | 1 | 5.716173013 | 0.00260397  | NPAS3     | ENSG00000151322 |
| 14 | 33215045 | 33215224 | 33215134 | 8   | 8   | 5 | 1.558956276 | 0.191397    | EGLN3     | ENSG00000129521 |
| 14 | 33219539 | 33219752 | 33219688 | 8   | 8   | 2 | 3.117912553 | 0.0283184   | EGLN3     | ENSG00000129521 |
| 14 | 33236148 | 33236403 | 33236275 | 8   | 11  | 2 | 4.157216737 | 0.0052913   | EGLN3     | ENSG00000129521 |
| 14 | 33277671 | 33277895 | 33277795 | 9   | 9   | 1 | 5.196520921 | 0.00490062  | EGLN3     | ENSG00000129521 |
| 14 | 33314647 | 33314872 | 33314777 | 8   | 8   | 2 | 3.117912553 | 0.0283184   | EGLN3     | ENSG00000129521 |
| 14 | 33320258 | 33320579 | 33320418 | 14  | 17  | 4 | 3.741495063 | 0.00163722  | EGLN3     | ENSG00000129521 |
| 14 | 33331760 | 33331984 | 33331874 | 9   | 11  | 6 | 1.781664316 | 0.103344    | EGLN3     | ENSG00000129521 |
| 14 | 33378939 | 33379158 | 33379043 | 12  | 13  | 3 | 3.637564645 | 0.0050909   | EGLN3     | ENSG00000129521 |
| 14 | 33718605 | 33718967 | 33718802 | 9   | 14  | 8 | 1.73217364  | 0.0890835   | EGLN3     | ENSG00000129521 |
| 14 | 33766875 | 33767058 | 33766948 | 9   | 9   | 5 | 1.73217364  | 0.133894    | C14orf147 | ENSG00000165389 |
| 14 | 33795045 | 33795256 | 33795132 | 9   | 10  | 0 | 11.43234603 | 0.000394183 | C14orf147 | ENSG00000165389 |
| 14 | 33836459 | 33837439 | 33836915 | 157 | 215 | 5 | 37.41495063 | 2.09E-59    | C14orf147 | ENSG00000165389 |
| 14 | 33870684 | 33870914 | 33870780 | 11  | 13  | 5 | 2.425043097 | 0.0262442   | C14orf147 | ENSG00000165389 |
| 14 | 33900313 | 33900575 | 33900437 | 11  | 13  | 4 | 2.910051716 | 0.0125532   | C14orf147 | ENSG00000165389 |
| 14 | 33907234 | 33907474 | 33907354 | 14  | 16  | 2 | 5.889390377 | 0.000270741 | C14orf147 | ENSG00000165389 |
| 14 | 33907592 | 33907885 | 33907738 | 11  | 14  | 9 | 1.558956276 | 0.132279    | C14orf147 | ENSG00000165389 |

|    |          |          |          |    |    |    |             |             |        |                 |
|----|----------|----------|----------|----|----|----|-------------|-------------|--------|-----------------|
| 14 | 34078462 | 34078721 | 34078628 | 9  | 11 | 0  | 12.47165021 | 0.000193293 | EAPP   | ENSG00000129518 |
| 14 | 34239160 | 34239357 | 34239262 | 13 | 14 | 3  | 3.897390691 | 0.00295882  | CFL2   | ENSG00000165410 |
| 14 | 34262049 | 34262286 | 34262140 | 9  | 10 | 1  | 5.716173013 | 0.00260397  | CFL2   | ENSG00000165410 |
| 14 | 34381953 | 34382207 | 34382080 | 9  | 10 | 2  | 3.810782009 | 0.00936112  | BAZ1A  | ENSG00000198604 |
| 14 | 34521726 | 34521935 | 34521855 | 9  | 10 | 5  | 1.905391004 | 0.0915982   | SRP54  | ENSG00000100883 |
| 14 | 34753374 | 34753637 | 34753505 | 11 | 13 | 0  | 14.55025858 | 4.65E-05    |        | ENSG00000203598 |
| 14 | 34831159 | 34831407 | 34831283 | 11 | 14 | 2  | 5.196520921 | 0.000907371 | PSMA6  | ENSG00000100902 |
| 14 | 34875741 | 34876087 | 34875911 | 22 | 27 | 11 | 2.425043097 | 0.00332497  | PSMA6  | ENSG00000100902 |
| 14 | 34876105 | 34876389 | 34876247 | 8  | 12 | 13 | 0.965068171 | 0.538344    | PSMA6  | ENSG00000100902 |
| 14 | 34880546 | 34881006 | 34880683 | 10 | 18 | 5  | 3.291129917 | 0.00248584  | PSMA6  | ENSG00000100902 |
| 14 | 34942681 | 34942918 | 34942769 | 9  | 10 | 2  | 3.810782009 | 0.00936112  | NFKBIA | ENSG00000100906 |
| 14 | 34943688 | 34944022 | 34943855 | 9  | 14 | 5  | 2.598260461 | 0.0167748   | NFKBIA | ENSG00000100906 |
| 14 | 35208903 | 35209125 | 35209014 | 10 | 11 | 6  | 1.781664316 | 0.103344    |        | ENSG00000209579 |
| 14 | 35747772 | 35748030 | 35747903 | 8  | 11 | 5  | 2.078608368 | 0.0614303   |        | ENSG00000212071 |
| 14 | 35859775 | 35860126 | 35859964 | 8  | 12 | 4  | 2.702190879 | 0.0203088   | MBIP   | ENSG00000151332 |
| 14 | 35943535 | 35943802 | 35943643 | 8  | 9  | 1  | 5.196520921 | 0.00490062  |        | ENSG00000188831 |
| 14 | 36187264 | 36187490 | 36187396 | 8  | 9  | 1  | 5.196520921 | 0.00490062  |        | ENSG00000212929 |
| 14 | 36222096 | 36222392 | 36222244 | 11 | 11 | 3  | 3.117912553 | 0.0146045   | PAX9   | ENSG00000198807 |
| 14 | 36359889 | 36360285 | 36360088 | 46 | 59 | 3  | 15.58956276 | 1.49E-15    | PAX9   | ENSG00000198807 |
| 14 | 36438760 | 36439073 | 36438916 | 8  | 10 | 2  | 3.810782009 | 0.00936112  | PAX9   | ENSG00000198807 |
| 14 | 36736455 | 36736751 | 36736623 | 14 | 15 | 3  | 4.157216737 | 0.00170423  | MIPOL1 | ENSG00000151338 |
| 14 | 36975538 | 36975747 | 36975642 | 11 | 11 | 4  | 2.494330042 | 0.0324033   |        | ENSG00000207046 |
| 14 | 37085859 | 37086107 | 37086011 | 11 | 12 | 8  | 1.501217155 | 0.168286    | FOXA1  | ENSG00000129514 |
| 14 | 37105748 | 37106188 | 37106029 | 9  | 15 | 7  | 2.078608368 | 0.038229    | FOXA1  | ENSG00000129514 |
| 14 | 37123992 | 37124199 | 37124095 | 12 | 12 | 3  | 3.377738599 | 0.00867157  | FOXA1  | ENSG00000129514 |
| 14 | 37129378 | 37129616 | 37129497 | 10 | 11 | 5  | 2.078608368 | 0.0614303   | FOXA1  | ENSG00000129514 |
| 14 | 37131942 | 37132214 | 37132065 | 10 | 12 | 3  | 3.377738599 | 0.00867157  | FOXA1  | ENSG00000129514 |
| 14 | 37133075 | 37133527 | 37133348 | 18 | 30 | 16 | 1.895201748 | 0.0144147   | FOXA1  | ENSG00000129514 |
| 14 | 37134335 | 37134591 | 37134471 | 8  | 10 | 10 | 1.039304184 | 0.464387    | FOXA1  | ENSG00000129514 |
| 14 | 37134676 | 37135344 | 37134963 | 19 | 47 | 34 | 1.425331453 | 0.0534913   | FOXA1  | ENSG00000129514 |
| 14 | 37135378 | 37135575 | 37135448 | 8  | 9  | 15 | 0.649565115 | 0.865365    | FOXA1  | ENSG00000129514 |
| 14 | 37136088 | 37136277 | 37136198 | 9  | 9  | 6  | 1.484720263 | 0.204387    | FOXA1  | ENSG00000129514 |
| 14 | 37138987 | 37139263 | 37139128 | 9  | 12 | 5  | 2.251825733 | 0.0404733   | FOXA1  | ENSG00000129514 |
| 14 | 37140274 | 37140667 | 37140442 | 10 | 16 | 4  | 3.533634226 | 0.00276486  | FOXA1  | ENSG00000129514 |



|    |          |          |          |    |    |    |             |             |          |                 |
|----|----------|----------|----------|----|----|----|-------------|-------------|----------|-----------------|
| 14 | 37150597 | 37150783 | 37150689 | 8  | 9  | 2  | 3.464347281 | 0.0163838   | FOXA1    | ENSG00000129514 |
| 14 | 37155800 | 37156240 | 37155973 | 28 | 42 | 5  | 7.448346654 | 3.24E-09    | FOXA1    | ENSG00000129514 |
| 14 | 37180059 | 37180499 | 37180238 | 25 | 38 | 28 | 1.397684937 | 0.083712    | FOXA1    | ENSG00000129514 |
| 14 | 37185876 | 37186095 | 37185985 | 8  | 8  | 2  | 3.117912553 | 0.0283184   | FOXA1    | ENSG00000129514 |
| 14 | 37189182 | 37190007 | 37189550 | 15 | 43 | 35 | 1.27026067  | 0.141946    | FOXA1    | ENSG00000129514 |
| 14 | 37194946 | 37195138 | 37194987 | 8  | 9  | 4  | 2.078608368 | 0.0785659   | FOXA1    | ENSG00000129514 |
| 14 | 37245213 | 37245401 | 37245256 | 8  | 10 | 6  | 1.63319229  | 0.146906    |          | ENSG00000200385 |
| 14 | 37358681 | 37358877 | 37358773 | 11 | 11 | 1  | 6.235825105 | 0.0013754   |          | ENSG00000201431 |
| 14 | 37413668 | 37413939 | 37413843 | 17 | 19 | 3  | 5.196520921 | 0.000174201 |          | ENSG00000201431 |
| 14 | 37442563 | 37442843 | 37442703 | 11 | 15 | 7  | 2.078608368 | 0.038229    |          | ENSG00000201431 |
| 14 | 37476065 | 37476339 | 37476197 | 11 | 12 | 6  | 1.930136342 | 0.071303    |          | ENSG00000201431 |
| 14 | 37584925 | 37585151 | 37585002 | 10 | 11 | 0  | 12.47165021 | 0.000193293 | SSTR1    | ENSG00000139874 |
| 14 | 37724529 | 37724795 | 37724625 | 8  | 8  | 2  | 3.117912553 | 0.0283184   | SSTR1    | ENSG00000139874 |
| 14 | 38562571 | 38563288 | 38562905 | 49 | 73 | 1  | 38.45425482 | 4.86E-22    |          | ENSG00000199285 |
| 14 | 38709062 | 38709480 | 38709301 | 12 | 21 | 4  | 4.572938411 | 0.000186332 | TRAPPC6B | ENSG00000182400 |
| 14 | 38726926 | 38727422 | 38727140 | 10 | 21 | 2  | 7.621564018 | 1.21E-05    | PNN      | ENSG00000100941 |
| 14 | 38805514 | 38805703 | 38805608 | 8  | 9  | 3  | 2.598260461 | 0.0397929   | CTAGE5   | ENSG00000150527 |
| 14 | 39207271 | 39207533 | 39207422 | 11 | 12 | 1  | 6.755477198 | 0.000722752 | FBXO33   | ENSG00000165355 |
| 14 | 39760381 | 39760651 | 39760512 | 9  | 10 | 4  | 2.286469205 | 0.0509017   |          |                 |
| 14 | 39932414 | 39932680 | 39932551 | 10 | 12 | 1  | 6.755477198 | 0.000722752 |          |                 |
| 14 | 39986099 | 39986381 | 39986210 | 11 | 13 | 1  | 7.27512929  | 0.000378098 |          |                 |
| 14 | 40988019 | 40988350 | 40988184 | 13 | 14 | 3  | 3.897390691 | 0.00295882  |          | ENSG00000221695 |
| 14 | 41732007 | 41732554 | 41732240 | 11 | 21 | 3  | 5.716173013 | 5.37E-05    |          | ENSG00000222084 |
| 14 | 43160199 | 43160537 | 43160368 | 12 | 17 | 0  | 18.70747532 | 2.69E-06    |          | ENSG00000205898 |
| 14 | 43647482 | 43647839 | 43647678 | 24 | 28 | 1  | 15.06991067 | 1.67E-08    |          | ENSG00000205898 |
| 14 | 43973201 | 43973442 | 43973291 | 8  | 8  | 2  | 3.117912553 | 0.0283184   | FSCB     | ENSG00000189139 |
| 14 | 44305982 | 44306184 | 44306029 | 9  | 10 | 7  | 1.429043253 | 0.21536     | C14orf28 | ENSG00000179476 |
| 14 | 44323369 | 44323555 | 44323462 | 9  | 9  | 0  | 10.39304184 | 0.000803859 | C14orf28 | ENSG00000179476 |
| 14 | 44342133 | 44342318 | 44342223 | 8  | 9  | 1  | 5.196520921 | 0.00490062  | C14orf28 | ENSG00000179476 |
| 14 | 44499141 | 44499320 | 44499251 | 8  | 8  | 3  | 2.338434415 | 0.0641221   | KLHL28   | ENSG00000179454 |
| 14 | 44500650 | 44501271 | 44501054 | 13 | 27 | 13 | 2.078608368 | 0.00998554  | FAM179B  | ENSG00000198718 |
| 14 | 44623086 | 44623317 | 44623201 | 10 | 11 | 7  | 1.558956276 | 0.158273    | PRPF39   | ENSG00000185246 |
| 14 | 44651853 | 44652154 | 44652019 | 9  | 12 | 3  | 3.377738599 | 0.00867157  |          | ENSG00000214921 |
| 14 | 44652311 | 44652600 | 44652455 | 10 | 11 | 4  | 2.494330042 | 0.0324033   |          | ENSG00000214921 |

|    |          |          |          |     |     |   |             |             |         |                 |
|----|----------|----------|----------|-----|-----|---|-------------|-------------|---------|-----------------|
| 14 | 44673294 | 44673506 | 44673410 | 8   | 9   | 3 | 2.598260461 | 0.0397929   | FKBP3   | ENSG00000100442 |
| 14 | 44674412 | 44674906 | 44674727 | 10  | 17  | 7 | 2.338434415 | 0.0171287   | FANCM   | ENSG00000187790 |
| 14 | 45066317 | 45066533 | 45066463 | 10  | 12  | 7 | 1.688869299 | 0.11395     |         | ENSG00000199739 |
| 14 | 45254343 | 45254557 | 45254450 | 10  | 10  | 0 | 11.43234603 | 0.000394183 |         | ENSG00000199739 |
| 14 | 45324222 | 45324699 | 45324518 | 128 | 167 | 2 | 58.20103432 | 3.84E-49    |         |                 |
| 14 | 45332037 | 45332468 | 45332216 | 57  | 72  | 1 | 37.93460272 | 9.77E-22    |         |                 |
| 14 | 45587076 | 45587353 | 45587205 | 8   | 11  | 2 | 4.157216737 | 0.0052913   |         |                 |
| 14 | 46604426 | 46604605 | 46604505 | 8   | 8   | 0 | 9.353737658 | 0.00163931  | MDGA2   | ENSG00000139915 |
| 14 | 48593086 | 48593274 | 48593192 | 8   | 8   | 4 | 1.870747532 | 0.118863    |         | ENSG00000209067 |
| 14 | 49008392 | 49008571 | 49008482 | 8   | 8   | 0 | 9.353737658 | 0.00163931  |         | ENSG00000209067 |
| 14 | 49156353 | 49156677 | 49156528 | 10  | 13  | 1 | 7.27512929  | 0.000378098 | RPL36AL | ENSG00000165502 |
| 14 | 49224651 | 49224872 | 49224784 | 8   | 9   | 2 | 3.464347281 | 0.0163838   | POLE2   | ENSG00000100479 |
| 14 | 49398551 | 49398944 | 49398695 | 11  | 17  | 4 | 3.741495063 | 0.00163722  |         | ENSG00000222619 |
| 14 | 49399349 | 49399665 | 49399507 | 10  | 14  | 4 | 3.117912553 | 0.00766354  |         | ENSG00000222619 |
| 14 | 49416242 | 49416499 | 49416370 | 8   | 10  | 2 | 3.810782009 | 0.00936112  | ARF6    | ENSG00000165527 |
| 14 | 49487256 | 49487714 | 49487468 | 26  | 37  | 2 | 13.16451967 | 3.70E-10    |         | ENSG00000175860 |
| 14 | 49509263 | 49509507 | 49509371 | 8   | 9   | 1 | 5.196520921 | 0.00490062  |         | ENSG00000175860 |
| 14 | 49535818 | 49536012 | 49535915 | 10  | 11  | 2 | 4.157216737 | 0.0052913   |         | ENSG00000175860 |
| 14 | 49537554 | 49537749 | 49537650 | 8   | 8   | 4 | 1.870747532 | 0.118863    |         | ENSG00000175860 |
| 14 | 49537949 | 49538430 | 49538242 | 9   | 18  | 8 | 2.194086611 | 0.0206188   |         | ENSG00000175860 |
| 14 | 49618446 | 49618642 | 49618590 | 8   | 9   | 1 | 5.196520921 | 0.00490062  |         | ENSG00000168260 |
| 14 | 49857600 | 49857862 | 49857754 | 13  | 13  | 6 | 2.078608368 | 0.0483393   | ATP5S   | ENSG00000125375 |
| 14 | 50136459 | 50137091 | 50136835 | 172 | 244 | 7 | 31.82869064 | 1.62E-65    |         | ENSG00000223050 |
| 14 | 50137264 | 50137467 | 50137365 | 8   | 9   | 0 | 10.39304184 | 0.000803859 |         | ENSG00000223050 |
| 14 | 50300256 | 50300435 | 50300359 | 8   | 9   | 1 | 5.196520921 | 0.00490062  | NIN     | ENSG00000100503 |
| 14 | 50487357 | 50487544 | 50487450 | 9   | 9   | 2 | 3.464347281 | 0.0163838   | PYGL    | ENSG00000100504 |
| 14 | 50491784 | 50492107 | 50491938 | 12  | 14  | 4 | 3.117912553 | 0.00766354  | PYGL    | ENSG00000100504 |
| 14 | 50492257 | 50492499 | 50492383 | 10  | 12  | 5 | 2.251825733 | 0.0404733   | PYGL    | ENSG00000100504 |
| 14 | 50501280 | 50501459 | 50501375 | 8   | 8   | 3 | 2.338434415 | 0.0641221   | PYGL    | ENSG00000100504 |
| 14 | 50631614 | 50631800 | 50631707 | 10  | 10  | 3 | 2.858086507 | 0.0242838   | TRIM9   | ENSG00000100505 |
| 14 | 50659942 | 50660278 | 50660110 | 25  | 29  | 1 | 15.58956276 | 8.46E-09    | TRIM9   | ENSG00000100505 |
| 14 | 50873908 | 50874153 | 50874030 | 14  | 16  | 1 | 8.834085566 | 5.30E-05    |         | ENSG00000201820 |
| 14 | 50931774 | 50932215 | 50931915 | 15  | 22  | 2 | 7.967998746 | 6.43E-06    | FRMD6   | ENSG00000139926 |
| 14 | 51069800 | 51070030 | 51069915 | 9   | 10  | 4 | 2.286469205 | 0.0509017   | FRMD6   | ENSG00000139926 |

|    |          |          |          |    |    |    |             |             |           |                 |
|----|----------|----------|----------|----|----|----|-------------|-------------|-----------|-----------------|
| 14 | 51071183 | 51071465 | 51071324 | 11 | 13 | 4  | 2.910051716 | 0.0125532   | FRMD6     | ENSG00000139926 |
| 14 | 51101079 | 51101265 | 51101235 | 9  | 10 | 2  | 3.810782009 | 0.00936112  |           | ENSG00000223144 |
| 14 | 51101537 | 51101814 | 51101677 | 11 | 12 | 3  | 3.377738599 | 0.00867157  |           | ENSG00000223144 |
| 14 | 51167704 | 51168005 | 51167854 | 8  | 11 | 0  | 12.47165021 | 0.000193293 | FRMD6     | ENSG00000139926 |
| 14 | 52319790 | 52319969 | 52319912 | 8  | 8  | 0  | 9.353737658 | 0.00163931  | GNPNAT1   | ENSG00000100522 |
| 14 | 52437165 | 52437434 | 52437316 | 14 | 15 | 7  | 2.078608368 | 0.038229    |           | ENSG00000214855 |
| 14 | 52460037 | 52460228 | 52460117 | 8  | 8  | 1  | 4.676868829 | 0.0091584   |           | ENSG00000214855 |
| 14 | 52479849 | 52480029 | 52479939 | 8  | 9  | 3  | 2.598260461 | 0.0397929   |           | ENSG00000214855 |
| 14 | 52486545 | 52486744 | 52486644 | 8  | 9  | 4  | 2.078608368 | 0.0785659   | FERMT2    | ENSG00000073712 |
| 14 | 52497603 | 52497839 | 52497699 | 12 | 13 | 7  | 1.818782322 | 0.0805123   | FERMT2    | ENSG00000073712 |
| 14 | 52616138 | 52616398 | 52616285 | 8  | 8  | 5  | 1.558956276 | 0.191397    | DDHD1     | ENSG00000100523 |
| 14 | 52688105 | 52688327 | 52688198 | 10 | 13 | 4  | 2.910051716 | 0.0125532   | DDHD1     | ENSG00000100523 |
| 14 | 52924793 | 52925090 | 52924952 | 9  | 10 | 4  | 2.286469205 | 0.0509017   |           | ENSG00000219652 |
| 14 | 52926588 | 52926791 | 52926658 | 8  | 8  | 2  | 3.117912553 | 0.0283184   |           | ENSG00000219652 |
| 14 | 53061780 | 53061981 | 53061826 | 8  | 9  | 3  | 2.598260461 | 0.0397929   |           | ENSG00000219652 |
| 14 | 53091120 | 53091435 | 53091277 | 11 | 15 | 6  | 2.375552421 | 0.0212094   |           | ENSG00000219652 |
| 14 | 53135698 | 53135894 | 53135796 | 8  | 8  | 0  | 9.353737658 | 0.00163931  |           | ENSG00000219652 |
| 14 | 53175576 | 53175773 | 53175718 | 8  | 8  | 5  | 1.558956276 | 0.191397    |           | ENSG00000219652 |
| 14 | 53188647 | 53188880 | 53188736 | 8  | 8  | 3  | 2.338434415 | 0.0641221   |           | ENSG00000219652 |
| 14 | 53191931 | 53192205 | 53192068 | 8  | 8  | 4  | 1.870747532 | 0.118863    |           | ENSG00000219652 |
| 14 | 53475064 | 53475310 | 53475186 | 9  | 11 | 3  | 3.117912553 | 0.0146045   | BMP4      | ENSG00000125378 |
| 14 | 53500207 | 53500416 | 53500292 | 10 | 10 | 5  | 1.905391004 | 0.0915982   | BMP4      | ENSG00000125378 |
| 14 | 53877007 | 53877199 | 53877106 | 8  | 8  | 5  | 1.558956276 | 0.191397    | CDKN3     | ENSG00000100526 |
| 14 | 54046195 | 54046464 | 54046336 | 9  | 12 | 5  | 2.251825733 | 0.0404733   | CGRRF1    | ENSG00000100532 |
| 14 | 54046787 | 54046991 | 54046835 | 10 | 10 | 5  | 1.905391004 | 0.0915982   | CGRRF1    | ENSG00000100532 |
| 14 | 54309537 | 54309945 | 54309784 | 11 | 17 | 8  | 2.078608368 | 0.0303558   | SAMD4A    | ENSG00000020577 |
| 14 | 54310099 | 54310279 | 54310155 | 8  | 8  | 5  | 1.558956276 | 0.191397    | SAMD4A    | ENSG00000020577 |
| 14 | 54310507 | 54310796 | 54310679 | 9  | 11 | 8  | 1.385738912 | 0.224757    | SAMD4A    | ENSG00000020577 |
| 14 | 54438709 | 54438905 | 54438824 | 8  | 9  | 1  | 5.196520921 | 0.00490062  | GCH1      | ENSG00000131979 |
| 14 | 54563529 | 54563760 | 54563644 | 8  | 10 | 10 | 1.039304184 | 0.464387    | SOCS4     | ENSG00000180008 |
| 14 | 54587680 | 54587947 | 54587844 | 8  | 11 | 4  | 2.494330042 | 0.0324033   | MAPK1IP1L | ENSG00000168175 |
| 14 | 54588749 | 54588928 | 54588838 | 8  | 8  | 5  | 1.558956276 | 0.191397    | MAPK1IP1L | ENSG00000168175 |
| 14 | 54658768 | 54659066 | 54658891 | 14 | 16 | 4  | 3.533634226 | 0.00276486  | LGALS3    | ENSG00000131981 |
| 14 | 54727578 | 54727776 | 54727616 | 8  | 10 | 11 | 0.952695502 | 0.548138    | DLGAP5    | ENSG00000126787 |

|    |          |          |          |    |     |    |             |             |           |                 |
|----|----------|----------|----------|----|-----|----|-------------|-------------|-----------|-----------------|
| 14 | 54749285 | 54749528 | 54749364 | 8  | 10  | 1  | 5.716173013 | 0.00260397  | UBE2L7P   | ENSG00000131982 |
| 14 | 54807624 | 54807901 | 54807747 | 9  | 10  | 2  | 3.810782009 | 0.00936112  | FBXO34    | ENSG00000178974 |
| 14 | 54853246 | 54853449 | 54853347 | 9  | 11  | 4  | 2.494330042 | 0.0324033   |           | ENSG00000209119 |
| 14 | 54891237 | 54891425 | 54891346 | 9  | 10  | 6  | 1.63319229  | 0.146906    | KIAA0831  | ENSG00000126775 |
| 14 | 54948165 | 54948460 | 54948325 | 11 | 15  | 6  | 2.375552421 | 0.0212094   | KIAA0831  | ENSG00000126775 |
| 14 | 54984858 | 54985104 | 54984944 | 9  | 10  | 4  | 2.286469205 | 0.0509017   | TBPL2     | ENSG00000182521 |
| 14 | 55113844 | 55114034 | 55113935 | 8  | 9   | 3  | 2.598260461 | 0.0397929   | C14orf33  | ENSG00000186615 |
| 14 | 55226440 | 55226707 | 55226574 | 8  | 9   | 2  | 3.464347281 | 0.0163838   |           | ENSG00000200742 |
| 14 | 55242373 | 55242955 | 55242776 | 13 | 32  | 12 | 2.638233698 | 0.000799104 |           | ENSG00000200742 |
| 14 | 55268741 | 55268953 | 55268810 | 8  | 8   | 1  | 4.676868829 | 0.0091584   |           | ENSG00000177350 |
| 14 | 55277044 | 55277232 | 55277144 | 9  | 9   | 3  | 2.598260461 | 0.0397929   |           | ENSG00000177350 |
| 14 | 55299246 | 55299439 | 55299342 | 8  | 8   | 3  | 2.338434415 | 0.0641221   |           | ENSG00000177350 |
| 14 | 55325973 | 55326222 | 55326097 | 9  | 11  | 5  | 2.078608368 | 0.0614303   |           | ENSG00000177350 |
| 14 | 55478794 | 55479111 | 55478950 | 11 | 13  | 3  | 3.637564645 | 0.0050909   |           | ENSG00000213622 |
| 14 | 55585016 | 55585195 | 55585086 | 8  | 8   | 3  | 2.338434415 | 0.0641221   |           | ENSG00000212522 |
| 14 | 55956278 | 55956554 | 55956416 | 8  | 8   | 1  | 4.676868829 | 0.0091584   | C14orf101 | ENSG00000070269 |
| 14 | 56037872 | 56038051 | 56037961 | 8  | 8   | 2  | 3.117912553 | 0.0283184   | C14orf101 | ENSG00000070269 |
| 14 | 56061837 | 56062074 | 56061963 | 9  | 9   | 0  | 10.39304184 | 0.000803859 | C14orf101 | ENSG00000070269 |
| 14 | 56092521 | 56092700 | 56092610 | 8  | 8   | 3  | 2.338434415 | 0.0641221   | C14orf101 | ENSG00000070269 |
| 14 | 56115864 | 56116198 | 56116031 | 11 | 17  | 4  | 3.741495063 | 0.00163722  | C14orf101 | ENSG00000070269 |
| 14 | 56122237 | 56122500 | 56122368 | 8  | 10  | 3  | 2.858086507 | 0.0242838   | C14orf101 | ENSG00000070269 |
| 14 | 56202568 | 56203483 | 56202930 | 77 | 121 | 3  | 31.69877762 | 7.54E-34    | C14orf101 | ENSG00000070269 |
| 14 | 56203510 | 56203747 | 56203668 | 8  | 11  | 3  | 3.117912553 | 0.0146045   | C14orf101 | ENSG00000070269 |
| 14 | 56261718 | 56261897 | 56261751 | 8  | 9   | 3  | 2.598260461 | 0.0397929   | OTX2      | ENSG00000165588 |
| 14 | 56383905 | 56384335 | 56384184 | 11 | 19  | 7  | 2.598260461 | 0.00730518  |           | ENSG00000200818 |
| 14 | 56533274 | 56533538 | 56533378 | 10 | 13  | 3  | 3.637564645 | 0.0050909   |           | ENSG00000213618 |
| 14 | 56545979 | 56546233 | 56546106 | 8  | 9   | 3  | 2.598260461 | 0.0397929   |           | ENSG00000213618 |
| 14 | 56603432 | 56603622 | 56603540 | 8  | 8   | 1  | 4.676868829 | 0.0091584   |           | ENSG00000213618 |
| 14 | 56609946 | 56610125 | 56610035 | 8  | 8   | 4  | 1.870747532 | 0.118863    |           | ENSG00000213618 |
| 14 | 56805306 | 56805777 | 56805521 | 11 | 20  | 11 | 1.818782322 | 0.04395     | C14orf108 | ENSG00000053770 |
| 14 | 57010585 | 57010820 | 57010744 | 8  | 10  | 1  | 5.716173013 | 0.00260397  | C14orf105 | ENSG00000100557 |
| 14 | 57014741 | 57014940 | 57014840 | 9  | 9   | 5  | 1.73217364  | 0.133894    | C14orf105 | ENSG00000100557 |
| 14 | 57037541 | 57037958 | 57037720 | 10 | 20  | 3  | 5.456346967 | 9.70E-05    | C14orf105 | ENSG00000100557 |
| 14 | 57073765 | 57074019 | 57073892 | 9  | 13  | 2  | 4.850086193 | 0.00164564  | C14orf105 | ENSG00000100557 |

|    |          |          |          |    |    |    |             |            |           |                 |
|----|----------|----------|----------|----|----|----|-------------|------------|-----------|-----------------|
| 14 | 57219916 | 57220103 | 57220063 | 9  | 9  | 2  | 3.464347281 | 0.0163838  | SLC35F4   | ENSG00000151812 |
| 14 | 57251162 | 57251368 | 57251265 | 8  | 10 | 3  | 2.858086507 | 0.0242838  | SLC35F4   | ENSG00000151812 |
| 14 | 57408028 | 57408247 | 57408133 | 8  | 10 | 4  | 2.286469205 | 0.0509017  |           | ENSG00000209817 |
| 14 | 57409213 | 57409394 | 57409327 | 8  | 8  | 0  | 9.353737658 | 0.00163931 |           | ENSG00000209817 |
| 14 | 57602640 | 57602930 | 57602769 | 11 | 14 | 0  | 15.58956276 | 2.28E-05   | C14orf37  | ENSG00000139971 |
| 14 | 57707718 | 57707953 | 57707835 | 11 | 13 | 9  | 1.455025858 | 0.177172   |           | ENSG00000223002 |
| 14 | 57745294 | 57745550 | 57745429 | 11 | 13 | 2  | 4.850086193 | 0.00164564 | ACTR10    | ENSG00000131966 |
| 14 | 57776288 | 57776475 | 57776381 | 8  | 9  | 11 | 0.86608682  | 0.635181   | PSMA3     | ENSG00000100567 |
| 14 | 57834276 | 57834571 | 57834419 | 10 | 12 | 3  | 3.377738599 | 0.00867157 | ARID4A    | ENSG00000032219 |
| 14 | 57835012 | 57835213 | 57835085 | 9  | 11 | 4  | 2.494330042 | 0.0324033  | ARID4A    | ENSG00000032219 |
| 14 | 57955098 | 57955350 | 57955246 | 8  | 9  | 2  | 3.464347281 | 0.0163838  | KIAA0586  | ENSG00000100578 |
| 14 | 57963463 | 57963698 | 57963526 | 8  | 11 | 2  | 4.157216737 | 0.0052913  | TIMM9     | ENSG00000100575 |
| 14 | 57963764 | 57964167 | 57963988 | 16 | 24 | 23 | 1.082608525 | 0.390382   | TIMM9     | ENSG00000100575 |
| 14 | 58037801 | 58038016 | 58037908 | 8  | 10 | 3  | 2.858086507 | 0.0242838  | KIAA0586  | ENSG00000100578 |
| 14 | 58102835 | 58103040 | 58102937 | 9  | 9  | 1  | 5.196520921 | 0.00490062 | DACT1     | ENSG00000165617 |
| 14 | 58204448 | 58204666 | 58204557 | 8  | 11 | 7  | 1.558956276 | 0.158273   | DACT1     | ENSG00000165617 |
| 14 | 58276698 | 58276906 | 58276802 | 8  | 9  | 1  | 5.196520921 | 0.00490062 |           | ENSG00000221427 |
| 14 | 58629165 | 58629392 | 58629278 | 9  | 9  | 3  | 2.598260461 | 0.0397929  |           | ENSG00000214813 |
| 14 | 58724659 | 58724898 | 58724757 | 8  | 8  | 1  | 4.676868829 | 0.0091584  | DAAM1     | ENSG00000100592 |
| 14 | 58725177 | 58725470 | 58725323 | 9  | 14 | 3  | 3.897390691 | 0.00295882 | DAAM1     | ENSG00000100592 |
| 14 | 58776853 | 58777044 | 58776948 | 8  | 8  | 5  | 1.558956276 | 0.191397   | DAAM1     | ENSG00000100592 |
| 14 | 58781050 | 58781345 | 58781211 | 14 | 16 | 1  | 8.834085566 | 5.30E-05   | DAAM1     | ENSG00000100592 |
| 14 | 58790962 | 58791217 | 58791058 | 14 | 16 | 6  | 2.524024447 | 0.0137633  | DAAM1     | ENSG00000100592 |
| 14 | 58848157 | 58848386 | 58848271 | 8  | 11 | 2  | 4.157216737 | 0.0052913  | DAAM1     | ENSG00000100592 |
| 14 | 58886253 | 58886432 | 58886304 | 8  | 8  | 4  | 1.870747532 | 0.118863   | DAAM1     | ENSG00000100592 |
| 14 | 58916871 | 58917057 | 58916964 | 8  | 8  | 4  | 1.870747532 | 0.118863   | GPR135    | ENSG00000181619 |
| 14 | 58987398 | 58987674 | 58987510 | 9  | 12 | 6  | 1.930136342 | 0.071303   | GPR135    | ENSG00000181619 |
| 14 | 59043674 | 59043920 | 59043797 | 8  | 11 | 9  | 1.247165021 | 0.300052   | C14orf100 | ENSG00000050130 |
| 14 | 59472043 | 59472502 | 59472208 | 14 | 21 | 1  | 11.43234603 | 1.90E-06   | LRR9      | ENSG00000131951 |
| 14 | 59627608 | 59627907 | 59627763 | 8  | 10 | 1  | 5.716173013 | 0.00260397 | C14orf135 | ENSG00000126773 |
| 14 | 59628079 | 59628348 | 59628213 | 11 | 13 | 9  | 1.455025858 | 0.177172   | C14orf135 | ENSG00000126773 |
| 14 | 59628450 | 59628681 | 59628565 | 8  | 9  | 3  | 2.598260461 | 0.0397929  | C14orf135 | ENSG00000126773 |
| 14 | 59697940 | 59698220 | 59698053 | 9  | 10 | 1  | 5.716173013 | 0.00260397 | DHRS7     | ENSG00000100612 |
| 14 | 59701293 | 59701597 | 59701445 | 8  | 12 | 9  | 1.35109544  | 0.232899   | DHRS7     | ENSG00000100612 |

|    |          |          |          |    |    |    |             |             |         |                 |
|----|----------|----------|----------|----|----|----|-------------|-------------|---------|-----------------|
| 14 | 59759113 | 59759647 | 59759392 | 11 | 21 | 17 | 1.27026067  | 0.223413    | PPM1A   | ENSG00000100614 |
| 14 | 59769879 | 59770083 | 59769971 | 9  | 11 | 3  | 3.117912553 | 0.0146045   | PPM1A   | ENSG00000100614 |
| 14 | 59772615 | 59772794 | 59772724 | 8  | 8  | 3  | 2.338434415 | 0.0641221   | PPM1A   | ENSG00000100614 |
| 14 | 59784645 | 59785079 | 59784770 | 11 | 21 | 8  | 2.540521339 | 0.00602138  | PPM1A   | ENSG00000100614 |
| 14 | 59885051 | 59885288 | 59885185 | 8  | 8  | 2  | 3.117912553 | 0.0283184   | PPM1A   | ENSG00000100614 |
| 14 | 59886396 | 59886696 | 59886517 | 9  | 13 | 6  | 2.078608368 | 0.0483393   | PPM1A   | ENSG00000100614 |
| 14 | 60098645 | 60098890 | 60098717 | 14 | 16 | 4  | 3.533634226 | 0.00276486  |         | ENSG00000209837 |
| 14 | 60153098 | 60153497 | 60153277 | 30 | 38 | 14 | 2.702190879 | 0.00024101  | SIX1    | ENSG00000126778 |
| 14 | 60186981 | 60187193 | 60187087 | 9  | 10 | 9  | 1.143234603 | 0.378307    | SIX1    | ENSG00000126778 |
| 14 | 60193272 | 60193498 | 60193385 | 9  | 11 | 2  | 4.157216737 | 0.0052913   | SIX1    | ENSG00000126778 |
| 14 | 60194061 | 60194327 | 60194181 | 11 | 12 | 6  | 1.930136342 | 0.071303    | SIX1    | ENSG00000126778 |
| 14 | 60223557 | 60223736 | 60223646 | 8  | 8  | 0  | 9.353737658 | 0.00163931  | SIX4    | ENSG00000100625 |
| 14 | 60261224 | 60261467 | 60261345 | 9  | 10 | 6  | 1.63319229  | 0.146906    | SIX4    | ENSG00000100625 |
| 14 | 60270958 | 60271290 | 60271123 | 16 | 21 | 4  | 4.572938411 | 0.000186332 | MNAT1   | ENSG0000020426  |
| 14 | 60398849 | 60399203 | 60399026 | 23 | 26 | 2  | 9.353737658 | 4.98E-07    |         | ENSG00000214775 |
| 14 | 60399348 | 60399572 | 60399460 | 9  | 9  | 6  | 1.484720263 | 0.204387    |         | ENSG00000214775 |
| 14 | 60415636 | 60415928 | 60415788 | 16 | 19 | 5  | 3.464347281 | 0.00150447  |         | ENSG00000214775 |
| 14 | 60436837 | 60437256 | 60437015 | 8  | 14 | 1  | 7.794781382 | 0.000197021 |         | ENSG00000214775 |
| 14 | 60517512 | 60517691 | 60517610 | 8  | 8  | 2  | 3.117912553 | 0.0283184   | SLC38A6 | ENSG00000139974 |
| 14 | 60662093 | 60662604 | 60662391 | 23 | 38 | 3  | 10.1332158  | 1.39E-09    | SLC38A6 | ENSG00000139974 |
| 14 | 60732609 | 60732789 | 60732699 | 9  | 9  | 2  | 3.464347281 | 0.0163838   | TMEM30B | ENSG00000182107 |
| 14 | 60789300 | 60789538 | 60789419 | 10 | 11 | 4  | 2.494330042 | 0.0324033   | TMEM30B | ENSG00000182107 |
| 14 | 60806053 | 60806282 | 60806115 | 9  | 11 | 10 | 1.133786383 | 0.380636    | TMEM30B | ENSG00000182107 |
| 14 | 60892302 | 60892823 | 60892481 | 21 | 30 | 8  | 3.579825523 | 9.27E-05    | PRKCH   | ENSG0000027075  |
| 14 | 60956004 | 60956216 | 60956075 | 13 | 13 | 1  | 7.27512929  | 0.000378098 | PRKCH   | ENSG0000027075  |
| 14 | 60975230 | 60975716 | 60975537 | 12 | 25 | 10 | 2.456537163 | 0.00405907  | PRKCH   | ENSG0000027075  |
| 14 | 60993198 | 60993398 | 60993298 | 8  | 9  | 4  | 2.078608368 | 0.0785659   | PRKCH   | ENSG0000027075  |
| 14 | 61008760 | 61009034 | 61008935 | 8  | 10 | 2  | 3.810782009 | 0.00936112  | PRKCH   | ENSG0000027075  |
| 14 | 61019152 | 61019373 | 61019264 | 8  | 9  | 1  | 5.196520921 | 0.00490062  | PRKCH   | ENSG0000027075  |
| 14 | 61021673 | 61022013 | 61021844 | 13 | 16 | 2  | 5.889390377 | 0.000270741 | PRKCH   | ENSG0000027075  |
| 14 | 61061846 | 61062057 | 61061951 | 11 | 13 | 0  | 14.55025858 | 4.65E-05    | HIF1A   | ENSG00000100644 |
| 14 | 61062981 | 61063235 | 61063137 | 9  | 9  | 4  | 2.078608368 | 0.0785659   | HIF1A   | ENSG00000100644 |
| 14 | 61095992 | 61096246 | 61096094 | 8  | 12 | 3  | 3.377738599 | 0.00867157  | HIF1A   | ENSG00000100644 |
| 14 | 61123629 | 61123966 | 61123797 | 12 | 18 | 1  | 9.87338975  | 1.41E-05    | HIF1A   | ENSG00000100644 |

|    |          |          |          |    |     |    |             |             |         |                 |
|----|----------|----------|----------|----|-----|----|-------------|-------------|---------|-----------------|
| 14 | 61176827 | 61177070 | 61176912 | 8  | 9   | 5  | 1.73217364  | 0.133894    | HIF1A   | ENSG00000100644 |
| 14 | 61357457 | 61357636 | 61357508 | 8  | 9   | 0  | 10.39304184 | 0.000803859 |         | ENSG00000213572 |
| 14 | 61450304 | 61450523 | 61450403 | 8  | 9   | 1  | 5.196520921 | 0.00490062  |         | ENSG00000213572 |
| 14 | 61606277 | 61606456 | 61606326 | 8  | 8   | 0  | 9.353737658 | 0.00163931  |         | ENSG00000186369 |
| 14 | 61610109 | 61610358 | 61610233 | 8  | 8   | 4  | 1.870747532 | 0.118863    |         | ENSG00000186369 |
| 14 | 61616493 | 61616676 | 61616592 | 8  | 9   | 2  | 3.464347281 | 0.0163838   |         | ENSG00000186369 |
| 14 | 62228717 | 62228964 | 62228805 | 12 | 13  | 0  | 14.55025858 | 4.65E-05    | KCNH5   | ENSG00000140015 |
| 14 | 62271389 | 62271682 | 62271521 | 10 | 13  | 1  | 7.27512929  | 0.000378098 | KCNH5   | ENSG00000140015 |
| 14 | 62282252 | 62282449 | 62282333 | 8  | 9   | 0  | 10.39304184 | 0.000803859 | KCNH5   | ENSG00000140015 |
| 14 | 62539350 | 62539551 | 62539475 | 8  | 9   | 1  | 5.196520921 | 0.00490062  | KCNH5   | ENSG00000140015 |
| 14 | 62979748 | 62980089 | 62979914 | 8  | 11  | 5  | 2.078608368 | 0.0614303   |         | ENSG00000221675 |
| 14 | 63041125 | 63041342 | 63041233 | 9  | 10  | 3  | 2.858086507 | 0.0242838   |         | ENSG00000221675 |
| 14 | 63078743 | 63078939 | 63078807 | 10 | 10  | 3  | 2.858086507 | 0.0242838   | PPP2R5E | ENSG00000154001 |
| 14 | 63079656 | 63080048 | 63079835 | 9  | 17  | 6  | 2.672496474 | 0.00882337  | PPP2R5E | ENSG00000154001 |
| 14 | 63100116 | 63100427 | 63100271 | 12 | 16  | 5  | 2.944695189 | 0.00659886  |         | ENSG00000205767 |
| 14 | 63101879 | 63102250 | 63102082 | 38 | 44  | 0  | 46.76868829 | 1.18E-14    |         | ENSG00000205767 |
| 14 | 63177782 | 63178502 | 63177953 | 13 | 32  | 12 | 2.638233698 | 0.000799104 | WDR89   | ENSG00000140006 |
| 14 | 63178993 | 63179191 | 63179092 | 8  | 8   | 5  | 1.558956276 | 0.191397    | WDR89   | ENSG00000140006 |
| 14 | 63192699 | 63192920 | 63192809 | 9  | 11  | 5  | 2.078608368 | 0.0614303   |         | ENSG00000209942 |
| 14 | 63214391 | 63214805 | 63214532 | 21 | 30  | 13 | 2.301316408 | 0.00328017  |         | ENSG00000209942 |
| 14 | 63226261 | 63226470 | 63226416 | 8  | 8   | 5  | 1.558956276 | 0.191397    |         | ENSG00000209942 |
| 14 | 63264705 | 63265002 | 63264853 | 11 | 14  | 2  | 5.196520921 | 0.000907371 | SGPP1   | ENSG00000126821 |
| 14 | 63285217 | 63285463 | 63285360 | 8  | 8   | 5  | 1.558956276 | 0.191397    | SGPP1   | ENSG00000126821 |
| 14 | 63309871 | 63310533 | 63310197 | 97 | 118 | 5  | 20.61286632 | 1.20E-30    | SGPP1   | ENSG00000126821 |
| 14 | 63390523 | 63390782 | 63390639 | 9  | 11  | 6  | 1.781664316 | 0.103344    | SYNE2   | ENSG00000054654 |
| 14 | 63596993 | 63597332 | 63597153 | 21 | 24  | 5  | 4.330434101 | 0.000108998 | SYNE2   | ENSG00000054654 |
| 14 | 63750339 | 63750579 | 63750459 | 8  | 10  | 6  | 1.63319229  | 0.146906    | ESR2    | ENSG00000140009 |
| 14 | 63771431 | 63771650 | 63771523 | 10 | 11  | 4  | 2.494330042 | 0.0324033   | ESR2    | ENSG00000140009 |
| 14 | 63875252 | 63875618 | 63875405 | 13 | 18  | 7  | 2.468347438 | 0.0112499   |         | ENSG00000214770 |
| 14 | 63880685 | 63880962 | 63880823 | 11 | 13  | 3  | 3.637564645 | 0.0050909   |         | ENSG00000214770 |
| 14 | 63924448 | 63925048 | 63924627 | 11 | 25  | 16 | 1.589524046 | 0.0646994   | MTHFD1  | ENSG00000100714 |
| 14 | 63966569 | 63966756 | 63966662 | 9  | 9   | 2  | 3.464347281 | 0.0163838   | AKAP5   | ENSG00000179841 |
| 14 | 64031966 | 64032146 | 64032045 | 8  | 8   | 5  | 1.558956276 | 0.191397    | ZBTB25  | ENSG00000089775 |
| 14 | 64038336 | 64038583 | 64038480 | 8  | 9   | 4  | 2.078608368 | 0.0785659   | ZBTB25  | ENSG00000089775 |

|    |          |          |          |     |     |    |             |             |          |                 |
|----|----------|----------|----------|-----|-----|----|-------------|-------------|----------|-----------------|
| 14 | 64040843 | 64041065 | 64040938 | 9   | 9   | 4  | 2.078608368 | 0.0785659   | ZBTB25   | ENSG00000089775 |
| 14 | 64041666 | 64042045 | 64041893 | 16  | 22  | 10 | 2.173090567 | 0.0132845   | ZBTB1    | ENSG00000126804 |
| 14 | 64075562 | 64075987 | 64075690 | 8   | 14  | 17 | 0.86608682  | 0.662567    | HSPA2    | ENSG00000126803 |
| 14 | 64076688 | 64076929 | 64076784 | 8   | 9   | 12 | 0.799464757 | 0.707717    | HSPA2    | ENSG00000126803 |
| 14 | 64147673 | 64148016 | 64147847 | 9   | 13  | 7  | 1.818782322 | 0.0805123   | C14orf50 | ENSG00000165807 |
| 14 | 64233892 | 64234166 | 64234029 | 9   | 11  | 1  | 6.235825105 | 0.0013754   | PLEKHG3  | ENSG00000126822 |
| 14 | 64298609 | 64298826 | 64298717 | 9   | 9   | 2  | 3.464347281 | 0.0163838   | SPTB     | ENSG00000070182 |
| 14 | 64358723 | 64358914 | 64358818 | 8   | 8   | 4  | 1.870747532 | 0.118863    | SPTB     | ENSG00000070182 |
| 14 | 64389304 | 64389654 | 64389479 | 9   | 12  | 2  | 4.503651465 | 0.002963    | SPTB     | ENSG00000070182 |
| 14 | 64400183 | 64400382 | 64400341 | 8   | 8   | 1  | 4.676868829 | 0.0091584   | SPTB     | ENSG00000070182 |
| 14 | 64475092 | 64475360 | 64475238 | 12  | 14  | 5  | 2.598260461 | 0.0167748   | GPX2     | ENSG00000176153 |
| 14 | 64497480 | 64497691 | 64497583 | 8   | 8   | 3  | 2.338434415 | 0.0641221   | RAB15    | ENSG00000139998 |
| 14 | 64503454 | 64503778 | 64503616 | 18  | 20  | 8  | 2.425043097 | 0.00917565  | RAB15    | ENSG00000139998 |
| 14 | 64523013 | 64523601 | 64523192 | 12  | 24  | 10 | 2.362054964 | 0.00608507  | FNTB     | ENSG00000125954 |
| 14 | 64541998 | 64542256 | 64542127 | 26  | 27  | 1  | 14.55025858 | 3.30E-08    | FNTB     | ENSG00000125954 |
| 14 | 64639246 | 64639731 | 64639407 | 15  | 22  | 8  | 2.655999582 | 0.0039122   | MAX      | ENSG00000125952 |
| 14 | 64763294 | 64763820 | 64763429 | 20  | 32  | 15 | 2.14356488  | 0.00454085  |          | ENSG00000214760 |
| 14 | 64773491 | 64773670 | 64773545 | 8   | 8   | 1  | 4.676868829 | 0.0091584   |          | ENSG00000214760 |
| 14 | 64791507 | 64792301 | 64791902 | 17  | 47  | 13 | 3.563328632 | 1.91E-06    |          | ENSG00000214760 |
| 14 | 64871381 | 64871661 | 64871521 | 13  | 15  | 7  | 2.078608368 | 0.038229    |          | ENSG00000213511 |
| 14 | 64948988 | 64949185 | 64949086 | 9   | 9   | 3  | 2.598260461 | 0.0397929   | FUT8     | ENSG00000033170 |
| 14 | 65135991 | 65136201 | 65136074 | 8   | 9   | 2  | 3.464347281 | 0.0163838   | FUT8     | ENSG00000033170 |
| 14 | 65495714 | 65495959 | 65495850 | 11  | 13  | 1  | 7.27512929  | 0.000378098 |          | ENSG00000197907 |
| 14 | 65550649 | 65550954 | 65550813 | 11  | 14  | 2  | 5.196520921 | 0.000907371 |          | ENSG00000197907 |
| 14 | 65640983 | 65641226 | 65641120 | 13  | 14  | 2  | 5.196520921 | 0.000907371 |          | ENSG00000200860 |
| 14 | 65654105 | 65654463 | 65654306 | 9   | 13  | 5  | 2.425043097 | 0.0262442   |          | ENSG00000200860 |
| 14 | 65955498 | 65955677 | 65955593 | 10  | 10  | 1  | 5.716173013 | 0.00260397  | C14orf53 | ENSG00000196553 |
| 14 | 66039945 | 66040343 | 66040177 | 33  | 40  | 1  | 21.30573578 | 4.48E-12    | GPHN     | ENSG00000171723 |
| 14 | 66044400 | 66044657 | 66044528 | 10  | 11  | 7  | 1.558956276 | 0.158273    | GPHN     | ENSG00000171723 |
| 14 | 66098340 | 66098544 | 66098442 | 9   | 10  | 1  | 5.716173013 | 0.00260397  | GPHN     | ENSG00000171723 |
| 14 | 66191315 | 66191502 | 66191408 | 8   | 8   | 0  | 9.353737658 | 0.00163931  | GPHN     | ENSG00000171723 |
| 14 | 66468578 | 66469760 | 66469269 | 281 | 367 | 6  | 54.63770569 | 8.38E-104   | FAM71D   | ENSG00000172717 |
| 14 | 66796684 | 66796890 | 66796811 | 9   | 9   | 3  | 2.598260461 | 0.0397929   |          | ENSG00000199386 |
| 14 | 66896353 | 66896848 | 66896597 | 9   | 18  | 8  | 2.194086611 | 0.0206188   | EIF2S1   | ENSG00000134001 |



|    |          |          |          |     |     |    |             |             |           |                 |
|----|----------|----------|----------|-----|-----|----|-------------|-------------|-----------|-----------------|
| 14 | 66948670 | 66948912 | 66948757 | 9   | 10  | 1  | 5.716173013 | 0.00260397  | PLEK2     | ENSG00000100558 |
| 14 | 66972814 | 66973111 | 66972962 | 8   | 11  | 4  | 2.494330042 | 0.0324033   | PLEK2     | ENSG00000100558 |
| 14 | 66976637 | 66976893 | 66976774 | 10  | 12  | 1  | 6.755477198 | 0.000722752 | PLEK2     | ENSG00000100558 |
| 14 | 66977156 | 66977384 | 66977270 | 13  | 16  | 4  | 3.533634226 | 0.00276486  | PLEK2     | ENSG00000100558 |
| 14 | 67014364 | 67015395 | 67014664 | 102 | 167 | 20 | 8.314433474 | 7.02E-32    | C14orf83  | ENSG00000198133 |
| 14 | 67016411 | 67016902 | 67016728 | 32  | 45  | 16 | 2.812234851 | 4.80E-05    | C14orf83  | ENSG00000198133 |
| 14 | 67065434 | 67065647 | 67065540 | 10  | 10  | 3  | 2.858086507 | 0.0242838   | PLEKHH1   | ENSG00000054690 |
| 14 | 67083733 | 67083953 | 67083819 | 9   | 10  | 3  | 2.858086507 | 0.0242838   | PLEKHH1   | ENSG00000054690 |
| 14 | 67107871 | 67108054 | 67107981 | 8   | 9   | 5  | 1.73217364  | 0.133894    | PIGH      | ENSG00000100564 |
| 14 | 67155178 | 67155435 | 67155319 | 8   | 11  | 1  | 6.235825105 | 0.0013754   | ARG2      | ENSG00000081181 |
| 14 | 67232018 | 67232329 | 67232168 | 9   | 11  | 2  | 4.157216737 | 0.0052913   | RDH11     | ENSG00000072042 |
| 14 | 67264873 | 67265336 | 67265052 | 8   | 17  | 6  | 2.672496474 | 0.00882337  | RDH12     | ENSG00000139988 |
| 14 | 67280500 | 67280822 | 67280657 | 8   | 11  | 7  | 1.558956276 | 0.158273    |           | ENSG00000210035 |
| 14 | 67356017 | 67356226 | 67356122 | 11  | 12  | 2  | 4.503651465 | 0.002963    | RAD51L1   | ENSG00000182185 |
| 14 | 67429012 | 67429330 | 67429173 | 10  | 12  | 5  | 2.251825733 | 0.0404733   | RAD51L1   | ENSG00000182185 |
| 14 | 67478296 | 67478542 | 67478425 | 10  | 12  | 8  | 1.501217155 | 0.168286    | RAD51L1   | ENSG00000182185 |
| 14 | 67513838 | 67514584 | 67514252 | 10  | 27  | 5  | 4.850086193 | 2.10E-05    | RAD51L1   | ENSG00000182185 |
| 14 | 67674267 | 67674601 | 67674433 | 17  | 21  | 7  | 2.858086507 | 0.0029864   |           | ENSG00000210045 |
| 14 | 67676831 | 67677148 | 67676991 | 14  | 15  | 8  | 1.847651883 | 0.0631662   |           | ENSG00000210045 |
| 14 | 67831946 | 67832150 | 67832046 | 9   | 10  | 1  | 5.716173013 | 0.00260397  |           | ENSG00000219350 |
| 14 | 67934169 | 67934566 | 67934348 | 10  | 17  | 4  | 3.741495063 | 0.00163722  |           | ENSG00000213482 |
| 14 | 67995344 | 67995917 | 67995522 | 9   | 21  | 12 | 1.758822466 | 0.048324    |           | ENSG00000213482 |
| 14 | 68005176 | 68005477 | 68005308 | 10  | 13  | 7  | 1.818782322 | 0.0805123   |           | ENSG00000213482 |
| 14 | 68063789 | 68063968 | 68063890 | 9   | 10  | 3  | 2.858086507 | 0.0242838   |           | ENSG00000213482 |
| 14 | 68205508 | 68206027 | 68205680 | 9   | 19  | 7  | 2.598260461 | 0.00730518  |           | ENSG00000207089 |
| 14 | 68311278 | 68311675 | 68311476 | 16  | 25  | 6  | 3.860272684 | 0.00017915  | ZFP36L1   | ENSG00000185650 |
| 14 | 68328274 | 68328492 | 68328391 | 10  | 11  | 3  | 3.117912553 | 0.0146045   | ZFP36L1   | ENSG00000185650 |
| 14 | 68329316 | 68330139 | 68329841 | 16  | 41  | 11 | 3.637564645 | 6.05E-06    | ZFP36L1   | ENSG00000185650 |
| 14 | 68331997 | 68332352 | 68332260 | 8   | 12  | 8  | 1.501217155 | 0.168286    | C14orf181 | ENSG00000221899 |
| 14 | 68361274 | 68361655 | 68361443 | 16  | 22  | 12 | 1.838768941 | 0.0349935   | C14orf181 | ENSG00000221899 |
| 14 | 68376921 | 68377104 | 68377012 | 8   | 8   | 3  | 2.338434415 | 0.0641221   |           | ENSG00000214730 |
| 14 | 68390147 | 68390527 | 68390349 | 10  | 16  | 0  | 17.66817113 | 5.48E-06    |           | ENSG00000214730 |
| 14 | 68399687 | 68399946 | 68399816 | 9   | 10  | 4  | 2.286469205 | 0.0509017   |           | ENSG00000214730 |
| 14 | 68463198 | 68463449 | 68463320 | 8   | 11  | 7  | 1.558956276 | 0.158273    | ACTN1     | ENSG00000072110 |

|    |          |          |          |    |    |    |             |             |          |                 |
|----|----------|----------|----------|----|----|----|-------------|-------------|----------|-----------------|
| 14 | 68480916 | 68481120 | 68480983 | 8  | 8  | 1  | 4.676868829 | 0.0091584   | ACTN1    | ENSG00000072110 |
| 14 | 68524756 | 68525204 | 68524934 | 22 | 34 | 0  | 36.37564645 | 1.47E-11    | ACTN1    | ENSG00000072110 |
| 14 | 68550461 | 68550640 | 68550608 | 8  | 9  | 0  | 10.39304184 | 0.000803859 | ACTN1    | ENSG00000072110 |
| 14 | 68592786 | 68593085 | 68592958 | 10 | 12 | 0  | 13.5109544  | 9.48E-05    | ACTN1    | ENSG00000072110 |
| 14 | 68727771 | 68728180 | 68727950 | 14 | 22 | 8  | 2.655999582 | 0.0039122   | EXDL2    | ENSG00000081177 |
| 14 | 68750898 | 68751149 | 68751058 | 11 | 12 | 1  | 6.755477198 | 0.000722752 | EXDL2    | ENSG00000081177 |
| 14 | 68871951 | 68872293 | 68872122 | 8  | 13 | 8  | 1.616695398 | 0.123553    | ERH      | ENSG00000100632 |
| 14 | 68887620 | 68888204 | 68888085 | 9  | 21 | 1  | 11.43234603 | 1.90E-06    | ERH      | ENSG00000100632 |
| 14 | 68893623 | 68893826 | 68893702 | 9  | 11 | 8  | 1.385738912 | 0.224757    | ERH      | ENSG00000100632 |
| 14 | 68893870 | 68894415 | 68894170 | 20 | 34 | 16 | 2.139743909 | 0.00367586  | ERH      | ENSG00000100632 |
| 14 | 68934709 | 68934916 | 68934806 | 9  | 10 | 7  | 1.429043253 | 0.21536     | ERH      | ENSG00000100632 |
| 14 | 68935214 | 68935538 | 68935368 | 9  | 13 | 4  | 2.910051716 | 0.0125532   | SLC39A9  | ENSG00000029364 |
| 14 | 68946928 | 68947157 | 68947075 | 10 | 10 | 5  | 1.905391004 | 0.0915982   | SLC39A9  | ENSG00000029364 |
| 14 | 68964215 | 68964449 | 68964391 | 12 | 15 | 3  | 4.157216737 | 0.00170423  | SLC39A9  | ENSG00000029364 |
| 14 | 69038078 | 69038327 | 69038202 | 8  | 9  | 3  | 2.598260461 | 0.0397929   |          | ENSG00000175985 |
| 14 | 69068152 | 69068445 | 69068298 | 9  | 12 | 9  | 1.35109544  | 0.232899    |          | ENSG00000214724 |
| 14 | 69071813 | 69072120 | 69071971 | 9  | 10 | 5  | 1.905391004 | 0.0915982   |          | ENSG00000214724 |
| 14 | 69076635 | 69076908 | 69076774 | 13 | 15 | 1  | 8.314433474 | 0.000102308 |          | ENSG00000214724 |
| 14 | 69140154 | 69140376 | 69140265 | 9  | 10 | 2  | 3.810782009 | 0.00936112  | KIAA0247 | ENSG00000100647 |
| 14 | 69149273 | 69149669 | 69149491 | 15 | 22 | 6  | 3.414856605 | 0.000820885 | KIAA0247 | ENSG00000100647 |
| 14 | 69156505 | 69156796 | 69156650 | 9  | 13 | 12 | 1.11925066  | 0.384109    | KIAA0247 | ENSG00000100647 |
| 14 | 69179873 | 69180261 | 69180197 | 9  | 14 | 0  | 15.58956276 | 2.28E-05    | KIAA0247 | ENSG00000100647 |
| 14 | 69194600 | 69194862 | 69194731 | 8  | 9  | 5  | 1.73217364  | 0.133894    | KIAA0247 | ENSG00000100647 |
| 14 | 69199716 | 69200054 | 69199877 | 16 | 19 | 7  | 2.598260461 | 0.00730518  | KIAA0247 | ENSG00000100647 |
| 14 | 69245379 | 69245593 | 69245497 | 8  | 9  | 0  | 10.39304184 | 0.000803859 | SFRS5    | ENSG00000100650 |
| 14 | 69249178 | 69249474 | 69249326 | 13 | 15 | 3  | 4.157216737 | 0.00170423  | SFRS5    | ENSG00000100650 |
| 14 | 69249592 | 69250134 | 69249801 | 36 | 52 | 10 | 5.007556524 | 7.24E-09    | SFRS5    | ENSG00000100650 |
| 14 | 69276032 | 69276267 | 69276095 | 8  | 11 | 1  | 6.235825105 | 0.0013754   | SFRS5    | ENSG00000100650 |
| 14 | 69303390 | 69303734 | 69303601 | 15 | 20 | 13 | 1.558956276 | 0.0943292   | SFRS5    | ENSG00000100650 |
| 14 | 69322646 | 69322859 | 69322767 | 10 | 10 | 1  | 5.716173013 | 0.00260397  | SLC10A1  | ENSG00000100652 |
| 14 | 69334352 | 69334533 | 69334471 | 10 | 11 | 3  | 3.117912553 | 0.0146045   | SLC10A1  | ENSG00000100652 |
| 14 | 69355226 | 69355422 | 69355324 | 8  | 10 | 6  | 1.63319229  | 0.146906    |          | ENSG00000221060 |
| 14 | 69535110 | 69535319 | 69535182 | 9  | 10 | 4  | 2.286469205 | 0.0509017   |          | ENSG00000210090 |
| 14 | 69535496 | 69536273 | 69535991 | 27 | 55 | 7  | 7.27512929  | 2.61E-11    |          | ENSG00000210090 |

|    |          |          |          |    |     |    |             |             |         |                 |
|----|----------|----------|----------|----|-----|----|-------------|-------------|---------|-----------------|
| 14 | 69547519 | 69547959 | 69547763 | 58 | 74  | 2  | 25.98260461 | 4.79E-21    |         | ENSG00000210090 |
| 14 | 69896060 | 69896371 | 69896215 | 16 | 21  | 11 | 1.905391004 | 0.031399    | COX16   | ENSG00000133983 |
| 14 | 69931190 | 69931384 | 69931278 | 8  | 8   | 4  | 1.870747532 | 0.118863    | SYNJ2BP | ENSG00000213463 |
| 14 | 69962502 | 69962681 | 69962628 | 8  | 8   | 1  | 4.676868829 | 0.0091584   | SYNJ2BP | ENSG00000213463 |
| 14 | 69983554 | 69984055 | 69983876 | 21 | 33  | 1  | 17.66817113 | 5.50E-10    |         | ENSG00000213462 |
| 14 | 70201355 | 70201573 | 70201492 | 9  | 10  | 5  | 1.905391004 | 0.0915982   | TTC9    | ENSG00000133985 |
| 14 | 70201939 | 70202280 | 70202109 | 16 | 19  | 7  | 2.598260461 | 0.00730518  | TTC9    | ENSG00000133985 |
| 14 | 70202294 | 70202646 | 70202470 | 11 | 16  | 12 | 1.359090087 | 0.198699    | TTC9    | ENSG00000133985 |
| 14 | 70316086 | 70316337 | 70316211 | 10 | 11  | 2  | 4.157216737 | 0.0052913   | MAP3K9  | ENSG00000006432 |
| 14 | 70354136 | 70354547 | 70354315 | 18 | 26  | 8  | 3.117912553 | 0.000638503 | MAP3K9  | ENSG00000006432 |
| 14 | 70401505 | 70401871 | 70401692 | 37 | 44  | 1  | 23.38434415 | 2.83E-13    | PCNX    | ENSG00000100731 |
| 14 | 70508926 | 70509135 | 70509030 | 8  | 9   | 11 | 0.86608682  | 0.635181    | PCNX    | ENSG00000100731 |
| 14 | 70612904 | 70613380 | 70613144 | 50 | 66  | 4  | 13.92667607 | 1.28E-16    | PCNX    | ENSG00000100731 |
| 14 | 70703040 | 70703290 | 70703165 | 13 | 14  | 6  | 2.227080395 | 0.0322529   |         | ENSG00000207444 |
| 14 | 70856556 | 70856875 | 70856699 | 10 | 13  | 3  | 3.637564645 | 0.0050909   |         | ENSG00000207444 |
| 14 | 70924901 | 70925096 | 70925030 | 8  | 11  | 5  | 2.078608368 | 0.0614303   |         | ENSG00000207444 |
| 14 | 70947262 | 70947485 | 70947408 | 10 | 10  | 1  | 5.716173013 | 0.00260397  |         | ENSG00000207444 |
| 14 | 71008055 | 71008385 | 71008220 | 10 | 15  | 11 | 1.385738912 | 0.19225     |         | ENSG00000210153 |
| 14 | 71008461 | 71008718 | 71008625 | 8  | 11  | 4  | 2.494330042 | 0.0324033   |         | ENSG00000210153 |
| 14 | 71130358 | 71130569 | 71130509 | 9  | 10  | 0  | 11.43234603 | 0.000394183 | SIPA1L1 | ENSG00000197555 |
| 14 | 71175132 | 71175359 | 71175220 | 9  | 12  | 1  | 6.755477198 | 0.000722752 | SIPA1L1 | ENSG00000197555 |
| 14 | 71183608 | 71183807 | 71183707 | 8  | 9   | 10 | 0.944821986 | 0.553851    | SIPA1L1 | ENSG00000197555 |
| 14 | 71276051 | 71276245 | 71276151 | 9  | 9   | 3  | 2.598260461 | 0.0397929   | SIPA1L1 | ENSG00000197555 |
| 14 | 71289472 | 71290033 | 71289778 | 16 | 28  | 10 | 2.739983758 | 0.00114395  | RGS6    | ENSG00000182732 |
| 14 | 71291048 | 71291281 | 71291164 | 9  | 9   | 3  | 2.598260461 | 0.0397929   | RGS6    | ENSG00000182732 |
| 14 | 71310183 | 71310881 | 71310660 | 87 | 131 | 3  | 34.29703808 | 7.63E-37    | RGS6    | ENSG00000182732 |
| 14 | 71322661 | 71322964 | 71322812 | 10 | 14  | 1  | 7.794781382 | 0.000197021 | RGS6    | ENSG00000182732 |
| 14 | 71335378 | 71335664 | 71335546 | 13 | 17  | 5  | 3.117912553 | 0.00407023  | RGS6    | ENSG00000182732 |
| 14 | 71340022 | 71340550 | 71340391 | 10 | 20  | 9  | 2.182538787 | 0.0165356   | RGS6    | ENSG00000182732 |
| 14 | 71855122 | 71855301 | 71855199 | 9  | 9   | 2  | 3.464347281 | 0.0163838   |         | ENSG00000200298 |
| 14 | 71902402 | 71902581 | 71902451 | 8  | 8   | 2  | 3.117912553 | 0.0283184   |         | ENSG00000200298 |
| 14 | 71940598 | 71941028 | 71940849 | 17 | 26  | 4  | 5.612242595 | 1.08E-05    | DPF3    | ENSG00000205683 |
| 14 | 71953435 | 71953730 | 71953582 | 11 | 14  | 3  | 3.897390691 | 0.00295882  | DPF3    | ENSG00000205683 |
| 14 | 71990120 | 71990338 | 71990280 | 9  | 9   | 1  | 5.196520921 | 0.00490062  | DPF3    | ENSG00000205683 |

|    |          |          |          |    |    |    |             |             |          |                 |
|----|----------|----------|----------|----|----|----|-------------|-------------|----------|-----------------|
| 14 | 72009324 | 72009513 | 72009434 | 8  | 8  | 1  | 4.676868829 | 0.0091584   | DPF3     | ENSG00000205683 |
| 14 | 72032214 | 72032477 | 72032393 | 9  | 12 | 3  | 3.377738599 | 0.00867157  | DPF3     | ENSG00000205683 |
| 14 | 72036921 | 72037245 | 72037083 | 14 | 18 | 7  | 2.468347438 | 0.0112499   | DPF3     | ENSG00000205683 |
| 14 | 72048196 | 72048423 | 72048298 | 8  | 9  | 0  | 10.39304184 | 0.000803859 | DPF3     | ENSG00000205683 |
| 14 | 72199007 | 72199246 | 72199126 | 9  | 9  | 5  | 1.73217364  | 0.133894    | DPF3     | ENSG00000205683 |
| 14 | 72203092 | 72203312 | 72203167 | 8  | 10 | 4  | 2.286469205 | 0.0509017   | DPF3     | ENSG00000205683 |
| 14 | 72391393 | 72391736 | 72391564 | 8  | 12 | 2  | 4.503651465 | 0.002963    |          | ENSG00000206751 |
| 14 | 72445571 | 72445919 | 72445745 | 9  | 14 | 2  | 5.196520921 | 0.000907371 | DPF3     | ENSG00000205683 |
| 14 | 72460632 | 72461135 | 72460904 | 23 | 38 | 3  | 10.1332158  | 1.39E-09    | WDR21A   | ENSG00000119599 |
| 14 | 72462889 | 72463080 | 72462967 | 8  | 8  | 6  | 1.336248237 | 0.277651    | WDR21A   | ENSG00000119599 |
| 14 | 72538638 | 72538867 | 72538752 | 8  | 8  | 5  | 1.558956276 | 0.191397    | ZFYVE1   | ENSG00000165861 |
| 14 | 72563424 | 72563635 | 72563549 | 9  | 9  | 0  | 10.39304184 | 0.000803859 | ZFYVE1   | ENSG00000165861 |
| 14 | 72591421 | 72591606 | 72591513 | 8  | 8  | 2  | 3.117912553 | 0.0283184   | RBM25    | ENSG00000119707 |
| 14 | 72594727 | 72594961 | 72594863 | 10 | 12 | 7  | 1.688869299 | 0.11395     | RBM25    | ENSG00000119707 |
| 14 | 72616210 | 72616393 | 72616301 | 8  | 8  | 1  | 4.676868829 | 0.0091584   |          | ENSG00000209100 |
| 14 | 72673510 | 72673804 | 72673657 | 9  | 11 | 4  | 2.494330042 | 0.0324033   | PSEN1    | ENSG00000080815 |
| 14 | 72685855 | 72686122 | 72686026 | 9  | 11 | 3  | 3.117912553 | 0.0146045   | PSEN1    | ENSG00000080815 |
| 14 | 72995177 | 72995403 | 72995290 | 14 | 14 | 9  | 1.558956276 | 0.132279    |          | ENSG00000221236 |
| 14 | 73096235 | 73096446 | 73096340 | 8  | 9  | 0  | 10.39304184 | 0.000803859 | HEATR4   | ENSG00000187105 |
| 14 | 73198773 | 73199278 | 73199012 | 11 | 21 | 10 | 2.078608368 | 0.0193227   | DNAL1    | ENSG00000119661 |
| 14 | 73277366 | 73277551 | 73277471 | 8  | 8  | 3  | 2.338434415 | 0.0641221   | C14orf43 | ENSG00000156030 |
| 14 | 73288823 | 73289446 | 73289211 | 14 | 30 | 10 | 2.928948156 | 0.00047305  | C14orf43 | ENSG00000156030 |
| 14 | 73293046 | 73293332 | 73293194 | 16 | 18 | 13 | 1.41048425  | 0.160361    | C14orf43 | ENSG00000156030 |
| 14 | 73296462 | 73296692 | 73296577 | 13 | 14 | 5  | 2.598260461 | 0.0167748   | C14orf43 | ENSG00000156030 |
| 14 | 73300042 | 73300271 | 73300156 | 8  | 10 | 6  | 1.63319229  | 0.146906    | C14orf43 | ENSG00000156030 |
| 14 | 73313858 | 73314404 | 73314141 | 26 | 41 | 8  | 4.850086193 | 2.97E-07    | C14orf43 | ENSG00000156030 |
| 14 | 73321951 | 73322188 | 73322102 | 8  | 10 | 1  | 5.716173013 | 0.00260397  | C14orf43 | ENSG00000156030 |
| 14 | 73362106 | 73362312 | 73362200 | 9  | 12 | 7  | 1.688869299 | 0.11395     | PTGR2    | ENSG00000140043 |
| 14 | 73387912 | 73388254 | 73388079 | 15 | 19 | 4  | 4.157216737 | 0.000560204 | PTGR2    | ENSG00000140043 |
| 14 | 73486320 | 73486679 | 73486416 | 8  | 14 | 6  | 2.227080395 | 0.0322529   | COQ6     | ENSG00000119723 |
| 14 | 73608150 | 73608388 | 73608269 | 8  | 9  | 1  | 5.196520921 | 0.00490062  |          | ENSG00000198671 |
| 14 | 73620547 | 73620765 | 73620662 | 8  | 8  | 5  | 1.558956276 | 0.191397    | ALDH6A1  | ENSG00000119711 |
| 14 | 73621182 | 73621409 | 73621294 | 9  | 9  | 9  | 1.039304184 | 0.466079    | LIN52    | ENSG00000205659 |
| 14 | 73744542 | 73744749 | 73744682 | 8  | 9  | 4  | 2.078608368 | 0.0785659   | VSX2     | ENSG00000119614 |

|    |          |          |          |    |    |    |             |             |         |                 |
|----|----------|----------|----------|----|----|----|-------------|-------------|---------|-----------------|
| 14 | 73754113 | 73754481 | 73754271 | 8  | 13 | 6  | 2.078608368 | 0.0483393   | VSX2    | ENSG00000119614 |
| 14 | 73788041 | 73788269 | 73788144 | 12 | 12 | 7  | 1.688869299 | 0.11395     | VSX2    | ENSG00000119614 |
| 14 | 73839361 | 73839618 | 73839489 | 9  | 12 | 10 | 1.228268581 | 0.305344    | ABCD4   | ENSG00000119688 |
| 14 | 73950678 | 73950884 | 73950744 | 8  | 9  | 0  | 10.39304184 | 0.000803859 | TMEM90A | ENSG00000183379 |
| 14 | 74167713 | 74168064 | 74167888 | 9  | 11 | 5  | 2.078608368 | 0.0614303   | LTBP2   | ENSG00000119681 |
| 14 | 74193132 | 74193330 | 74193231 | 9  | 9  | 0  | 10.39304184 | 0.000803859 | LTBP2   | ENSG00000119681 |
| 14 | 74199354 | 74199533 | 74199460 | 8  | 8  | 5  | 1.558956276 | 0.191397    |         | ENSG00000222604 |
| 14 | 74249525 | 74249862 | 74249693 | 10 | 15 | 12 | 1.279143611 | 0.251893    | FCF1    | ENSG00000119616 |
| 14 | 74299497 | 74299739 | 74299622 | 10 | 11 | 3  | 3.117912553 | 0.0146045   | YLPM1   | ENSG00000119596 |
| 14 | 74330327 | 74330622 | 74330464 | 13 | 15 | 2  | 5.542955649 | 0.000497081 | YLPM1   | ENSG00000119596 |
| 14 | 74340775 | 74340955 | 74340884 | 8  | 9  | 10 | 0.944821986 | 0.553851    | YLPM1   | ENSG00000119596 |
| 14 | 74418182 | 74418399 | 74418268 | 11 | 11 | 3  | 3.117912553 | 0.0146045   | DLSTP   | ENSG00000119689 |
| 14 | 74442196 | 74442406 | 74442360 | 9  | 10 | 4  | 2.286469205 | 0.0509017   | RPS6KL1 | ENSG00000198208 |
| 14 | 74481786 | 74482002 | 74481869 | 8  | 10 | 5  | 1.905391004 | 0.0915982   | PGF     | ENSG00000119630 |
| 14 | 74483229 | 74483531 | 74483380 | 10 | 12 | 5  | 2.251825733 | 0.0404733   | PGF     | ENSG00000119630 |
| 14 | 74489454 | 74489878 | 74489648 | 28 | 40 | 2  | 14.20382385 | 5.03E-11    | PGF     | ENSG00000119630 |
| 14 | 74538825 | 74539134 | 74538979 | 9  | 13 | 1  | 7.27512929  | 0.000378098 | EIF2B2  | ENSG00000119718 |
| 14 | 74696457 | 74696674 | 74696550 | 8  | 10 | 4  | 2.286469205 | 0.0509017   | TMED10  | ENSG00000170348 |
| 14 | 74713025 | 74713299 | 74713162 | 11 | 12 | 9  | 1.35109544  | 0.232899    | TMED10  | ENSG00000170348 |
| 14 | 74736999 | 74737321 | 74737160 | 17 | 21 | 16 | 1.344981885 | 0.176214    |         | ENSG00000210276 |
| 14 | 74742581 | 74742793 | 74742687 | 8  | 8  | 1  | 4.676868829 | 0.0091584   |         | ENSG00000210276 |
| 14 | 74749476 | 74749726 | 74749648 | 9  | 10 | 0  | 11.43234603 | 0.000394183 |         | ENSG00000210276 |
| 14 | 74788734 | 74788946 | 74788840 | 8  | 8  | 1  | 4.676868829 | 0.0091584   | FOS     | ENSG00000170345 |
| 14 | 74791479 | 74791888 | 74791658 | 39 | 46 | 16 | 2.873370392 | 3.13E-05    | FOS     | ENSG00000170345 |
| 14 | 74792125 | 74792310 | 74792195 | 8  | 8  | 1  | 4.676868829 | 0.0091584   | FOS     | ENSG00000170345 |
| 14 | 74792611 | 74792811 | 74792711 | 10 | 10 | 1  | 5.716173013 | 0.00260397  | FOS     | ENSG00000170345 |
| 14 | 74795023 | 74795874 | 74795670 | 13 | 43 | 14 | 3.048625607 | 2.75E-05    | FOS     | ENSG00000170345 |
| 14 | 74796440 | 74797050 | 74796648 | 26 | 48 | 10 | 4.62962773  | 6.26E-08    | FOS     | ENSG00000170345 |
| 14 | 74800361 | 74800824 | 74800598 | 19 | 30 | 12 | 2.478340747 | 0.00182253  | FOS     | ENSG00000170345 |
| 14 | 74803947 | 74804134 | 74804051 | 8  | 9  | 5  | 1.73217364  | 0.133894    | FOS     | ENSG00000170345 |
| 14 | 74809925 | 74810234 | 74810079 | 8  | 12 | 4  | 2.702190879 | 0.0203088   | FOS     | ENSG00000170345 |
| 14 | 74832654 | 74833030 | 74832833 | 9  | 16 | 6  | 2.524024447 | 0.0137633   |         | ENSG00000119660 |
| 14 | 74839945 | 74840130 | 74840037 | 9  | 10 | 7  | 1.429043253 | 0.21536     |         | ENSG00000119660 |
| 14 | 74844318 | 74844526 | 74844381 | 12 | 12 | 5  | 2.251825733 | 0.0404733   |         | ENSG00000119660 |

|    |          |          |          |    |    |    |             |             |           |                 |
|----|----------|----------|----------|----|----|----|-------------|-------------|-----------|-----------------|
| 14 | 74885016 | 74885264 | 74885157 | 8  | 9  | 1  | 5.196520921 | 0.00490062  |           | ENSG00000119660 |
| 14 | 74892299 | 74892478 | 74892317 | 8  | 8  | 4  | 1.870747532 | 0.118863    |           | ENSG00000119660 |
| 14 | 75054746 | 75055110 | 75054931 | 11 | 17 | 8  | 2.078608368 | 0.0303558   | BATF      | ENSG00000156127 |
| 14 | 75057385 | 75057837 | 75057666 | 20 | 28 | 11 | 2.511651779 | 0.00221344  | BATF      | ENSG00000156127 |
| 14 | 75058667 | 75058876 | 75058822 | 8  | 9  | 7  | 1.29913023  | 0.286504    | BATF      | ENSG00000156127 |
| 14 | 75090862 | 75091070 | 75090932 | 8  | 9  | 2  | 3.464347281 | 0.0163838   | FLVCR2    | ENSG00000119686 |
| 14 | 75097124 | 75097349 | 75097236 | 8  | 8  | 4  | 1.870747532 | 0.118863    | FLVCR2    | ENSG00000119686 |
| 14 | 75108300 | 75108536 | 75108418 | 8  | 9  | 4  | 2.078608368 | 0.0785659   | FLVCR2    | ENSG00000119686 |
| 14 | 75113818 | 75114171 | 75113994 | 11 | 16 | 5  | 2.944695189 | 0.00659886  | FLVCR2    | ENSG00000119686 |
| 14 | 75170864 | 75171221 | 75170987 | 9  | 14 | 4  | 3.117912553 | 0.00766354  | C14orf1   | ENSG00000133935 |
| 14 | 75196896 | 75197335 | 75197156 | 13 | 23 | 3  | 6.235825105 | 1.63E-05    | TLL5      | ENSG00000119685 |
| 14 | 75252706 | 75252962 | 75252834 | 8  | 8  | 4  | 1.870747532 | 0.118863    | TLL5      | ENSG00000119685 |
| 14 | 75331183 | 75331373 | 75331278 | 8  | 8  | 1  | 4.676868829 | 0.0091584   | TLL5      | ENSG00000119685 |
| 14 | 75514693 | 75514903 | 75514791 | 8  | 9  | 3  | 2.598260461 | 0.0397929   | TGFB3     | ENSG00000119699 |
| 14 | 75608605 | 75608795 | 75608700 | 8  | 10 | 2  | 3.810782009 | 0.00936112  | C14orf118 | ENSG00000089916 |
| 14 | 75705583 | 75705786 | 75705659 | 8  | 8  | 2  | 3.117912553 | 0.0283184   | C14orf118 | ENSG00000089916 |
| 14 | 75912158 | 75912337 | 75912286 | 8  | 8  | 5  | 1.558956276 | 0.191397    | ESRRB     | ENSG00000119715 |
| 14 | 75930411 | 75930590 | 75930500 | 8  | 10 | 0  | 11.43234603 | 0.000394183 | ESRRB     | ENSG00000119715 |
| 14 | 76183761 | 76183985 | 76183873 | 12 | 12 | 6  | 1.930136342 | 0.071303    | VASH1     | ENSG00000071246 |
| 14 | 76187678 | 76188026 | 76187852 | 13 | 19 | 10 | 1.889643971 | 0.0394833   | VASH1     | ENSG00000071246 |
| 14 | 76190015 | 76190434 | 76190194 | 11 | 20 | 3  | 5.456346967 | 9.70E-05    | VASH1     | ENSG00000071246 |
| 14 | 76241387 | 76241632 | 76241509 | 9  | 10 | 3  | 2.858086507 | 0.0242838   | VASH1     | ENSG00000071246 |
| 14 | 76312686 | 76312896 | 76312783 | 8  | 10 | 3  | 2.858086507 | 0.0242838   | VASH1     | ENSG00000071246 |
| 14 | 76320914 | 76321183 | 76321056 | 14 | 17 | 5  | 3.117912553 | 0.00407023  | VASH1     | ENSG00000071246 |
| 14 | 76348947 | 76349183 | 76349078 | 8  | 9  | 9  | 1.039304184 | 0.466079    | ANGEL1    | ENSG00000013523 |
| 14 | 76402629 | 76402889 | 76402759 | 8  | 11 | 4  | 2.494330042 | 0.0324033   |           | ENSG00000213379 |
| 14 | 76412195 | 76412403 | 76412328 | 11 | 12 | 7  | 1.688869299 | 0.11395     |           | ENSG00000213379 |
| 14 | 76441119 | 76441349 | 76441232 | 8  | 9  | 2  | 3.464347281 | 0.0163838   |           | ENSG00000210304 |
| 14 | 76449491 | 76449744 | 76449617 | 11 | 14 | 6  | 2.227080395 | 0.0322529   |           | ENSG00000210304 |
| 14 | 76450806 | 76451238 | 76450982 | 14 | 22 | 6  | 3.414856605 | 0.000820885 |           | ENSG00000210304 |
| 14 | 76492759 | 76493009 | 76492908 | 11 | 12 | 3  | 3.377738599 | 0.00867157  |           | ENSG00000214657 |
| 14 | 76495385 | 76495702 | 76495547 | 25 | 27 | 3  | 7.27512929  | 1.42E-06    |           | ENSG00000214657 |
| 14 | 76497934 | 76498245 | 76498112 | 10 | 13 | 9  | 1.455025858 | 0.177172    |           | ENSG00000214657 |
| 14 | 76543930 | 76544288 | 76544109 | 18 | 24 | 8  | 2.886956067 | 0.00160675  | C14orf4   | ENSG00000119669 |

|    |          |          |          |    |    |    |             |             |           |                 |
|----|----------|----------|----------|----|----|----|-------------|-------------|-----------|-----------------|
| 14 | 76545227 | 76545492 | 76545359 | 9  | 12 | 1  | 6.755477198 | 0.000722752 | C14orf4   | ENSG00000119669 |
| 14 | 76563986 | 76564238 | 76564098 | 9  | 12 | 12 | 1.039304184 | 0.461227    | C14orf4   | ENSG00000119669 |
| 14 | 76564891 | 76565228 | 76565053 | 17 | 21 | 12 | 1.758822466 | 0.048324    | C14orf4   | ENSG00000119669 |
| 14 | 76565290 | 76565651 | 76565531 | 12 | 18 | 1  | 9.87338975  | 1.41E-05    | C14orf4   | ENSG00000119669 |
| 14 | 76569324 | 76569646 | 76569495 | 22 | 26 | 14 | 1.870747532 | 0.0223642   | C14orf4   | ENSG00000119669 |
| 14 | 76570329 | 76570638 | 76570489 | 10 | 13 | 11 | 1.212521548 | 0.309909    | C14orf4   | ENSG00000119669 |
| 14 | 76576408 | 76576927 | 76576543 | 14 | 25 | 11 | 2.251825733 | 0.00731045  | C14orf4   | ENSG00000119669 |
| 14 | 76582874 | 76583274 | 76583036 | 9  | 15 | 8  | 1.847651883 | 0.0631662   | C14orf4   | ENSG00000119669 |
| 14 | 76604143 | 76604616 | 76604468 | 15 | 23 | 4  | 4.988660084 | 6.05E-05    | KIAA1737  | ENSG00000198894 |
| 14 | 76606645 | 76606851 | 76606806 | 9  | 9  | 4  | 2.078608368 | 0.0785659   | KIAA1737  | ENSG00000198894 |
| 14 | 76612565 | 76612756 | 76612626 | 9  | 9  | 6  | 1.484720263 | 0.204387    | KIAA1737  | ENSG00000198894 |
| 14 | 76622513 | 76622775 | 76622644 | 9  | 9  | 9  | 1.039304184 | 0.466079    | KIAA1737  | ENSG00000198894 |
| 14 | 76624311 | 76624918 | 76624556 | 23 | 40 | 17 | 2.367303975 | 0.000680164 | KIAA1737  | ENSG00000198894 |
| 14 | 76625316 | 76625495 | 76625370 | 8  | 8  | 6  | 1.336248237 | 0.277651    | KIAA1737  | ENSG00000198894 |
| 14 | 76633985 | 76634359 | 76634161 | 12 | 18 | 10 | 1.795161773 | 0.055383    | KIAA1737  | ENSG00000198894 |
| 14 | 76634830 | 76635140 | 76635001 | 8  | 10 | 4  | 2.286469205 | 0.0509017   | KIAA1737  | ENSG00000198894 |
| 14 | 76669861 | 76670251 | 76670017 | 11 | 15 | 3  | 4.157216737 | 0.00170423  | ZDHHC22   | ENSG00000177108 |
| 14 | 76740624 | 76740999 | 76740877 | 9  | 15 | 5  | 2.771477825 | 0.0105836   |           | ENSG00000201384 |
| 14 | 76744881 | 76745079 | 76745000 | 11 | 12 | 8  | 1.501217155 | 0.168286    |           | ENSG00000201384 |
| 14 | 76910517 | 76910772 | 76910668 | 11 | 12 | 1  | 6.755477198 | 0.000722752 | TMED8     | ENSG00000100580 |
| 14 | 76913736 | 76913916 | 76913826 | 8  | 8  | 1  | 4.676868829 | 0.0091584   | C14orf174 | ENSG00000100583 |
| 14 | 76936366 | 76936629 | 76936498 | 8  | 9  | 3  | 2.598260461 | 0.0397929   |           | ENSG00000200854 |
| 14 | 76993503 | 76994211 | 76993909 | 11 | 31 | 7  | 4.157216737 | 2.13E-05    | AHSA1     | ENSG00000100591 |
| 14 | 77174636 | 77174815 | 77174742 | 8  | 8  | 2  | 3.117912553 | 0.0283184   | SPTLC2    | ENSG00000100596 |
| 14 | 77204510 | 77204729 | 77204619 | 9  | 11 | 6  | 1.781664316 | 0.103344    | ALKBH1    | ENSG00000100601 |
| 14 | 77243614 | 77243932 | 77243773 | 9  | 14 | 4  | 3.117912553 | 0.00766354  | ALKBH1    | ENSG00000100601 |
| 14 | 77297007 | 77297204 | 77297105 | 8  | 10 | 0  | 11.43234603 | 0.000394183 | SNW1      | ENSG00000100603 |
| 14 | 77334204 | 77334407 | 77334305 | 9  | 9  | 1  | 5.196520921 | 0.00490062  | ADCK1     | ENSG00000063761 |
| 14 | 77671524 | 77671760 | 77671642 | 9  | 11 | 1  | 6.235825105 | 0.0013754   |           | ENSG00000199454 |
| 14 | 78010706 | 78010885 | 78010793 | 8  | 8  | 5  | 1.558956276 | 0.191397    |           | ENSG00000205585 |
| 14 | 78576869 | 78577199 | 78577034 | 20 | 23 | 3  | 6.235825105 | 1.63E-05    | NRXN3     | ENSG00000021645 |
| 14 | 78613233 | 78613467 | 78613350 | 8  | 10 | 6  | 1.63319229  | 0.146906    | NRXN3     | ENSG00000021645 |
| 14 | 78620886 | 78621065 | 78620966 | 8  | 8  | 2  | 3.117912553 | 0.0283184   | NRXN3     | ENSG00000021645 |
| 14 | 78643352 | 78643531 | 78643441 | 9  | 9  | 3  | 2.598260461 | 0.0397929   | NRXN3     | ENSG00000021645 |

|    |          |          |          |    |     |    |             |             |           |                 |
|----|----------|----------|----------|----|-----|----|-------------|-------------|-----------|-----------------|
| 14 | 78695806 | 78696230 | 78695985 | 21 | 31  | 2  | 11.0859113  | 1.93E-08    | NRXN3     | ENSG00000021645 |
| 14 | 78747151 | 78747369 | 78747236 | 10 | 10  | 0  | 11.43234603 | 0.000394183 | NRXN3     | ENSG00000021645 |
| 14 | 78861265 | 78861476 | 78861370 | 10 | 11  | 12 | 0.959357709 | 0.543005    | NRXN3     | ENSG00000021645 |
| 14 | 78879173 | 78879367 | 78879270 | 10 | 10  | 4  | 2.286469205 | 0.0509017   | NRXN3     | ENSG00000021645 |
| 14 | 78892286 | 78892623 | 78892473 | 11 | 16  | 6  | 2.524024447 | 0.0137633   | NRXN3     | ENSG00000021645 |
| 14 | 78949478 | 78949807 | 78949642 | 15 | 19  | 11 | 1.73217364  | 0.0607469   | NRXN3     | ENSG00000021645 |
| 14 | 78974238 | 78974417 | 78974310 | 8  | 8   | 3  | 2.338434415 | 0.0641221   | NRXN3     | ENSG00000021645 |
| 14 | 79068030 | 79068227 | 79068079 | 8  | 8   | 2  | 3.117912553 | 0.0283184   | NRXN3     | ENSG00000021645 |
| 14 | 79080149 | 79080428 | 79080288 | 10 | 14  | 5  | 2.598260461 | 0.0167748   | NRXN3     | ENSG00000021645 |
| 14 | 79200178 | 79200405 | 79200307 | 9  | 12  | 1  | 6.755477198 | 0.000722752 | NRXN3     | ENSG00000021645 |
| 14 | 79365999 | 79366228 | 79366147 | 8  | 10  | 11 | 0.952695502 | 0.548138    | DIO2      | ENSG00000211448 |
| 14 | 79534044 | 79534354 | 79534214 | 12 | 15  | 8  | 1.847651883 | 0.0631662   | DIO2      | ENSG00000211448 |
| 14 | 79539150 | 79539584 | 79539405 | 11 | 20  | 9  | 2.182538787 | 0.0165356   | DIO2      | ENSG00000211448 |
| 14 | 80029488 | 80029743 | 80029621 | 8  | 9   | 3  | 2.598260461 | 0.0397929   | DIO2      | ENSG00000211448 |
| 14 | 80119570 | 80119779 | 80119687 | 10 | 10  | 4  | 2.286469205 | 0.0509017   | C14orf145 | ENSG00000100629 |
| 14 | 80478095 | 80478306 | 80478253 | 9  | 9   | 10 | 0.944821986 | 0.553851    | C14orf145 | ENSG00000100629 |
| 14 | 80506480 | 80506679 | 80506579 | 8  | 9   | 0  | 10.39304184 | 0.000803859 | TSHR      | ENSG00000165409 |
| 14 | 80706407 | 80706811 | 80706586 | 11 | 18  | 10 | 1.795161773 | 0.055383    |           | ENSG00000210351 |
| 14 | 80756753 | 80756932 | 80756842 | 8  | 8   | 7  | 1.169217207 | 0.371848    | GTF2A1    | ENSG00000165417 |
| 14 | 80835188 | 80835430 | 80835309 | 9  | 11  | 1  | 6.235825105 | 0.0013754   |           | ENSG00000205579 |
| 14 | 80856830 | 80857051 | 80856940 | 9  | 10  | 5  | 1.905391004 | 0.0915982   |           | ENSG00000205579 |
| 14 | 80907941 | 80908231 | 80908094 | 17 | 18  | 7  | 2.468347438 | 0.0112499   | STON2     | ENSG00000140022 |
| 14 | 80919229 | 80919542 | 80919385 | 11 | 15  | 5  | 2.771477825 | 0.0105836   | STON2     | ENSG00000140022 |
| 14 | 80937033 | 80937212 | 80937122 | 8  | 8   | 0  | 9.353737658 | 0.00163931  | STON2     | ENSG00000140022 |
| 14 | 81341980 | 81342159 | 81342085 | 8  | 8   | 2  | 3.117912553 | 0.0283184   |           | ENSG00000222877 |
| 14 | 81345880 | 81346147 | 81346029 | 9  | 10  | 2  | 3.810782009 | 0.00936112  |           | ENSG00000222877 |
| 14 | 81350632 | 81350829 | 81350739 | 8  | 8   | 0  | 9.353737658 | 0.00163931  |           | ENSG00000222877 |
| 14 | 84080327 | 84080527 | 84080427 | 8  | 8   | 0  | 9.353737658 | 0.00163931  |           | ENSG00000210433 |
| 14 | 84733928 | 84734158 | 84734024 | 10 | 10  | 0  | 11.43234603 | 0.000394183 |           | ENSG00000222836 |
| 14 | 86750568 | 86750820 | 86750673 | 11 | 14  | 2  | 5.196520921 | 0.000907371 |           |                 |
| 14 | 86769547 | 86769824 | 86769685 | 13 | 16  | 0  | 17.66817113 | 5.48E-06    |           |                 |
| 14 | 87307212 | 87307711 | 87307397 | 81 | 110 | 94 | 1.214344889 | 0.0816878   | GALC      | ENSG00000054983 |
| 14 | 87435461 | 87435691 | 87435597 | 8  | 10  | 2  | 3.810782009 | 0.00936112  | GALC      | ENSG00000054983 |
| 14 | 87676846 | 87677146 | 87676998 | 8  | 9   | 3  | 2.598260461 | 0.0397929   | KCNK10    | ENSG00000100433 |



|    |          |          |          |    |    |   |             |             |           |                 |
|----|----------|----------|----------|----|----|---|-------------|-------------|-----------|-----------------|
| 14 | 87921454 | 87921796 | 87921625 | 11 | 16 | 6 | 2.524024447 | 0.0137633   | SPATA7    | ENSG00000042317 |
| 14 | 87999311 | 87999611 | 87999461 | 8  | 12 | 7 | 1.688869299 | 0.11395     |           | ENSG00000222990 |
| 14 | 88023981 | 88024533 | 88024321 | 45 | 58 | 6 | 8.759849553 | 8.79E-13    |           | ENSG00000222990 |
| 14 | 88028350 | 88028610 | 88028480 | 10 | 12 | 2 | 4.503651465 | 0.002963    |           | ENSG00000222990 |
| 14 | 88096013 | 88096383 | 88096230 | 12 | 17 | 7 | 2.338434415 | 0.0171287   | ZC3H14    | ENSG00000100722 |
| 14 | 88203641 | 88203854 | 88203768 | 10 | 12 | 3 | 3.377738599 | 0.00867157  | ZC3H14    | ENSG00000100722 |
| 14 | 88360100 | 88360289 | 88360194 | 9  | 9  | 4 | 2.078608368 | 0.0785659   | TTC8      | ENSG00000165533 |
| 14 | 88548081 | 88548275 | 88548180 | 8  | 8  | 3 | 2.338434415 | 0.0641221   | TTC8      | ENSG00000165533 |
| 14 | 88597694 | 88597873 | 88597783 | 8  | 8  | 5 | 1.558956276 | 0.191397    | TTC8      | ENSG00000165533 |
| 14 | 88750407 | 88750960 | 88750567 | 15 | 27 | 6 | 4.157216737 | 6.29E-05    |           | ENSG00000214598 |
| 14 | 88952291 | 88952828 | 88952497 | 8  | 20 | 6 | 3.117912553 | 0.00218114  | FOXN3     | ENSG00000053254 |
| 14 | 88960942 | 88961148 | 88961045 | 8  | 9  | 3 | 2.598260461 | 0.0397929   | FOXN3     | ENSG00000053254 |
| 14 | 88964818 | 88965338 | 88965068 | 50 | 69 | 0 | 72.7512929  | 2.17E-22    | FOXN3     | ENSG00000053254 |
| 14 | 89190375 | 89190593 | 89190522 | 8  | 10 | 2 | 3.810782009 | 0.00936112  |           | ENSG00000201027 |
| 14 | 89443793 | 89443972 | 89443882 | 8  | 8  | 1 | 4.676868829 | 0.0091584   |           | ENSG00000210535 |
| 14 | 89490581 | 89491092 | 89490836 | 15 | 26 | 3 | 7.015303244 | 2.63E-06    | C14orf143 | ENSG00000140025 |
| 14 | 89640224 | 89640463 | 89640361 | 8  | 9  | 5 | 1.73217364  | 0.133894    | KCNK13    | ENSG00000152315 |
| 14 | 89792480 | 89792776 | 89792617 | 19 | 22 | 6 | 3.414856605 | 0.000820885 | PSMC1     | ENSG00000100764 |
| 14 | 89794534 | 89794736 | 89794635 | 10 | 10 | 1 | 5.716173013 | 0.00260397  | PSMC1     | ENSG00000100764 |
| 14 | 89824633 | 89824868 | 89824750 | 9  | 10 | 0 | 11.43234603 | 0.000394183 |           | ENSG00000205533 |
| 14 | 89867920 | 89868274 | 89868097 | 8  | 12 | 2 | 4.503651465 | 0.002963    | C14orf102 | ENSG00000119720 |
| 14 | 89919435 | 89919676 | 89919605 | 10 | 13 | 7 | 1.818782322 | 0.0805123   | CALM1     | ENSG00000198668 |
| 14 | 89933285 | 89933466 | 89933375 | 8  | 8  | 3 | 2.338434415 | 0.0641221   | CALM1     | ENSG00000198668 |
| 14 | 89935685 | 89935978 | 89935847 | 13 | 18 | 8 | 2.194086611 | 0.0206188   | CALM1     | ENSG00000198668 |
| 14 | 89990240 | 89990455 | 89990395 | 10 | 12 | 4 | 2.702190879 | 0.0203088   | CALM1     | ENSG00000198668 |
| 14 | 90044995 | 90045381 | 90045202 | 18 | 25 | 8 | 3.00243431  | 0.0010168   | CALM1     | ENSG00000198668 |
| 14 | 90111258 | 90111437 | 90111347 | 8  | 8  | 1 | 4.676868829 | 0.0091584   | CALM1     | ENSG00000198668 |
| 14 | 90136117 | 90136326 | 90136221 | 8  | 10 | 3 | 2.858086507 | 0.0242838   |           | ENSG00000213315 |
| 14 | 90252221 | 90252467 | 90252352 | 14 | 16 | 4 | 3.533634226 | 0.00276486  |           | ENSG00000213315 |
| 14 | 90252599 | 90252810 | 90252682 | 8  | 10 | 3 | 2.858086507 | 0.0242838   |           | ENSG00000213315 |
| 14 | 90333695 | 90334046 | 90333854 | 10 | 15 | 1 | 8.314433474 | 0.000102308 | TTC7B     | ENSG00000165914 |
| 14 | 90364084 | 90364285 | 90364231 | 8  | 10 | 9 | 1.143234603 | 0.378307    | TTC7B     | ENSG00000165914 |
| 14 | 90419829 | 90420195 | 90420000 | 18 | 24 | 2 | 8.660868202 | 1.80E-06    | TTC7B     | ENSG00000165914 |
| 14 | 90652080 | 90652538 | 90652215 | 13 | 21 | 5 | 3.810782009 | 0.000537724 | C14orf159 | ENSG00000133943 |

|    |          |          |          |    |    |    |             |             |         |                 |
|----|----------|----------|----------|----|----|----|-------------|-------------|---------|-----------------|
| 14 | 90663498 | 90664056 | 90663777 | 12 | 23 | 9  | 2.494330042 | 0.00494866  |         | ENSG00000221102 |
| 14 | 90676812 | 90677095 | 90676951 | 11 | 12 | 2  | 4.503651465 | 0.002963    |         | ENSG00000221102 |
| 14 | 90694103 | 90694820 | 90694420 | 27 | 46 | 7  | 6.105912082 | 5.22E-09    |         | ENSG00000221102 |
| 14 | 90709293 | 90709483 | 90709388 | 9  | 9  | 3  | 2.598260461 | 0.0397929   |         | ENSG00000221102 |
| 14 | 90812407 | 90812835 | 90812625 | 21 | 31 | 11 | 2.771477825 | 0.000623099 | CCDC88C | ENSG00000015133 |
| 14 | 90813789 | 90813973 | 90813898 | 9  | 9  | 3  | 2.598260461 | 0.0397929   | CCDC88C | ENSG00000015133 |
| 14 | 90822563 | 90822810 | 90822686 | 13 | 14 | 11 | 1.29913023  | 0.246308    | CCDC88C | ENSG00000015133 |
| 14 | 90862011 | 90862252 | 90862121 | 10 | 13 | 7  | 1.818782322 | 0.0805123   | CCDC88C | ENSG00000015133 |
| 14 | 90932152 | 90932699 | 90932315 | 22 | 37 | 7  | 4.936694875 | 8.45E-07    | CCDC88C | ENSG00000015133 |
| 14 | 91044852 | 91045829 | 91045663 | 48 | 81 | 12 | 6.555611008 | 7.12E-15    | SMEK1   | ENSG00000100796 |
| 14 | 91046475 | 91046717 | 91046596 | 8  | 11 | 3  | 3.117912553 | 0.0146045   | SMEK1   | ENSG00000100796 |
| 14 | 91365686 | 91365881 | 91365836 | 8  | 9  | 3  | 2.598260461 | 0.0397929   | TC2N    | ENSG00000165929 |
| 14 | 91372951 | 91373206 | 91373048 | 10 | 13 | 4  | 2.910051716 | 0.0125532   | TC2N    | ENSG00000165929 |
| 14 | 91394753 | 91395105 | 91394929 | 10 | 14 | 3  | 3.897390691 | 0.00295882  | TC2N    | ENSG00000165929 |
| 14 | 91408776 | 91408992 | 91408908 | 8  | 9  | 4  | 2.078608368 | 0.0785659   | TC2N    | ENSG00000165929 |
| 14 | 91444457 | 91444662 | 91444530 | 8  | 8  | 0  | 9.353737658 | 0.00163931  | FBLN5   | ENSG00000140092 |
| 14 | 91447724 | 91447953 | 91447832 | 9  | 10 | 8  | 1.27026067  | 0.293854    | FBLN5   | ENSG00000140092 |
| 14 | 91639461 | 91639947 | 91639699 | 40 | 53 | 2  | 18.70747532 | 8.04E-15    | ATXN3   | ENSG00000066427 |
| 14 | 91657762 | 91658124 | 91657945 | 13 | 19 | 6  | 2.969440526 | 0.0035096   | NDUFB1  | ENSG00000183648 |
| 14 | 91789380 | 91789731 | 91789555 | 9  | 11 | 5  | 2.078608368 | 0.0614303   |         | ENSG00000201097 |
| 14 | 91799943 | 91800142 | 91800042 | 9  | 11 | 0  | 12.47165021 | 0.000193293 |         | ENSG00000201097 |
| 14 | 91884170 | 91884520 | 91884323 | 14 | 19 | 7  | 2.598260461 | 0.00730518  | SLC24A4 | ENSG00000140090 |
| 14 | 92134645 | 92134944 | 92134794 | 32 | 34 | 3  | 9.093911612 | 1.78E-08    | RIN3    | ENSG00000100599 |
| 14 | 92149226 | 92149418 | 92149326 | 8  | 8  | 2  | 3.117912553 | 0.0283184   | RIN3    | ENSG00000100599 |
| 14 | 92217206 | 92217617 | 92217357 | 8  | 16 | 11 | 1.472347594 | 0.147517    | LGMN    | ENSG00000100600 |
| 14 | 92329010 | 92329194 | 92329102 | 8  | 8  | 2  | 3.117912553 | 0.0283184   | GOLGA5  | ENSG00000066455 |
| 14 | 92416939 | 92417315 | 92417146 | 8  | 14 | 7  | 1.948695345 | 0.0559175   | CHGA    | ENSG00000100604 |
| 14 | 92451892 | 92452211 | 92452062 | 9  | 13 | 0  | 14.55025858 | 4.65E-05    | CHGA    | ENSG00000100604 |
| 14 | 92453061 | 92453325 | 92453208 | 10 | 10 | 7  | 1.429043253 | 0.21536     | CHGA    | ENSG00000100604 |
| 14 | 92462043 | 92462300 | 92462171 | 8  | 8  | 5  | 1.558956276 | 0.191397    | CHGA    | ENSG00000100604 |
| 14 | 92509703 | 92509914 | 92509752 | 9  | 11 | 6  | 1.781664316 | 0.103344    | CHGA    | ENSG00000100604 |
| 14 | 92510319 | 92510588 | 92510424 | 10 | 12 | 7  | 1.688869299 | 0.11395     | CHGA    | ENSG00000100604 |
| 14 | 92547720 | 92548158 | 92547979 | 21 | 37 | 4  | 7.8987118   | 1.45E-08    | CHGA    | ENSG00000100604 |
| 14 | 92552905 | 92553106 | 92553013 | 8  | 9  | 3  | 2.598260461 | 0.0397929   | CHGA    | ENSG00000100604 |

|    |          |          |          |    |    |    |             |             |           |                 |
|----|----------|----------|----------|----|----|----|-------------|-------------|-----------|-----------------|
| 14 | 92553347 | 92553738 | 92553572 | 14 | 19 | 6  | 2.969440526 | 0.0035096   | CHGA      | ENSG00000100604 |
| 14 | 92554481 | 92554709 | 92554619 | 9  | 12 | 4  | 2.702190879 | 0.0203088   | CHGA      | ENSG00000100604 |
| 14 | 92569193 | 92569488 | 92569340 | 9  | 15 | 2  | 5.542955649 | 0.000497081 | ITPK1     | ENSG00000100605 |
| 14 | 92569518 | 92569734 | 92569626 | 9  | 9  | 4  | 2.078608368 | 0.0785659   | ITPK1     | ENSG00000100605 |
| 14 | 92579613 | 92579862 | 92579747 | 8  | 10 | 9  | 1.143234603 | 0.378307    | ITPK1     | ENSG00000100605 |
| 14 | 92585492 | 92585699 | 92585614 | 10 | 11 | 3  | 3.117912553 | 0.0146045   | ITPK1     | ENSG00000100605 |
| 14 | 92635449 | 92635644 | 92635567 | 9  | 9  | 3  | 2.598260461 | 0.0397929   | ITPK1     | ENSG00000100605 |
| 14 | 92648854 | 92649256 | 92649005 | 16 | 21 | 13 | 1.63319229  | 0.0708832   | ITPK1     | ENSG00000100605 |
| 14 | 92649490 | 92649744 | 92649609 | 11 | 13 | 11 | 1.212521548 | 0.309909    | ITPK1     | ENSG00000100605 |
| 14 | 92668633 | 92668863 | 92668748 | 11 | 14 | 4  | 3.117912553 | 0.00766354  | ITPK1     | ENSG00000100605 |
| 14 | 92671509 | 92671908 | 92671729 | 8  | 16 | 11 | 1.472347594 | 0.147517    | ITPK1     | ENSG00000100605 |
| 14 | 92671931 | 92672386 | 92672110 | 10 | 18 | 8  | 2.194086611 | 0.0206188   | ITPK1     | ENSG00000100605 |
| 14 | 92675233 | 92675646 | 92675474 | 12 | 19 | 10 | 1.889643971 | 0.0394833   | ITPK1     | ENSG00000100605 |
| 14 | 92692889 | 92693082 | 92692985 | 8  | 8  | 5  | 1.558956276 | 0.191397    | MOAP1     | ENSG00000165943 |
| 14 | 92710892 | 92711100 | 92710996 | 8  | 9  | 4  | 2.078608368 | 0.0785659   | MOAP1     | ENSG00000165943 |
| 14 | 92755253 | 92755537 | 92755398 | 9  | 13 | 1  | 7.27512929  | 0.000378098 |           | ENSG00000213263 |
| 14 | 92771906 | 92772103 | 92772019 | 8  | 8  | 2  | 3.117912553 | 0.0283184   |           | ENSG00000213263 |
| 14 | 92798629 | 92798869 | 92798750 | 9  | 10 | 8  | 1.27026067  | 0.293854    | BTBD7     | ENSG00000011114 |
| 14 | 92869327 | 92869756 | 92869593 | 8  | 13 | 7  | 1.818782322 | 0.0805123   | KIAA1409  | ENSG00000133958 |
| 14 | 93535660 | 93535879 | 93535701 | 9  | 11 | 7  | 1.558956276 | 0.158273    | C14orf48  | ENSG00000175699 |
| 14 | 93537875 | 93538169 | 93538022 | 8  | 9  | 4  | 2.078608368 | 0.0785659   | C14orf48  | ENSG00000175699 |
| 14 | 93631906 | 93632104 | 93631970 | 8  | 9  | 1  | 5.196520921 | 0.00490062  | IFI27L1   | ENSG00000165948 |
| 14 | 93672797 | 93673076 | 93672936 | 10 | 13 | 7  | 1.818782322 | 0.0805123   | IFI27L2   | ENSG00000119632 |
| 14 | 93709781 | 93709960 | 93709870 | 8  | 8  | 0  | 9.353737658 | 0.00163931  | PPP4R4    | ENSG00000119698 |
| 14 | 93822636 | 93822818 | 93822765 | 8  | 8  | 2  | 3.117912553 | 0.0283184   | SERPINA10 | ENSG00000140093 |
| 14 | 93856383 | 93856569 | 93856476 | 8  | 8  | 2  | 3.117912553 | 0.0283184   | SERPINA6  | ENSG00000170099 |
| 14 | 93870915 | 93871295 | 93871157 | 11 | 18 | 1  | 9.87338975  | 1.41E-05    | SERPINA6  | ENSG00000170099 |
| 14 | 94001801 | 94002002 | 94001901 | 9  | 9  | 1  | 5.196520921 | 0.00490062  | SERPINA9  | ENSG00000170054 |
| 14 | 94161290 | 94161479 | 94161384 | 9  | 9  | 1  | 5.196520921 | 0.00490062  | SERPINA3  | ENSG00000196136 |
| 14 | 94217542 | 94217762 | 94217652 | 8  | 10 | 4  | 2.286469205 | 0.0509017   | SERPINA13 | ENSG00000187483 |
| 14 | 94592433 | 94592781 | 94592607 | 10 | 15 | 4  | 3.32577339  | 0.00462646  | DICER1    | ENSG00000100697 |
| 14 | 94595044 | 94595223 | 94595105 | 8  | 8  | 3  | 2.338434415 | 0.0641221   | DICER1    | ENSG00000100697 |
| 14 | 94694199 | 94694410 | 94694301 | 10 | 13 | 6  | 2.078608368 | 0.0483393   | DICER1    | ENSG00000100697 |
| 14 | 94732413 | 94732644 | 94732479 | 9  | 11 | 7  | 1.558956276 | 0.158273    |           | ENSG00000198411 |

|    |          |          |          |    |    |    |             |             |          |                 |
|----|----------|----------|----------|----|----|----|-------------|-------------|----------|-----------------|
| 14 | 94733765 | 94733984 | 94733925 | 8  | 11 | 1  | 6.235825105 | 0.0013754   |          | ENSG00000198411 |
| 14 | 94748666 | 94748903 | 94748784 | 9  | 11 | 7  | 1.558956276 | 0.158273    |          | ENSG00000198411 |
| 14 | 94777325 | 94777993 | 94777845 | 8  | 23 | 11 | 2.078608368 | 0.0154752   |          | ENSG00000198411 |
| 14 | 94801617 | 94801945 | 94801788 | 18 | 22 | 6  | 3.414856605 | 0.000820885 | CLMN     | ENSG00000165959 |
| 14 | 94808991 | 94809362 | 94809130 | 9  | 15 | 6  | 2.375552421 | 0.0212094   | CLMN     | ENSG00000165959 |
| 14 | 94843548 | 94843766 | 94843625 | 9  | 12 | 5  | 2.251825733 | 0.0404733   | CLMN     | ENSG00000165959 |
| 14 | 94876314 | 94876542 | 94876482 | 8  | 9  | 8  | 1.154782427 | 0.375434    | CLMN     | ENSG00000165959 |
| 14 | 94968389 | 94968694 | 94968537 | 10 | 11 | 2  | 4.157216737 | 0.0052913   | C14orf49 | ENSG00000176438 |
| 14 | 95097133 | 95097389 | 95097219 | 9  | 12 | 6  | 1.930136342 | 0.071303    | GLRX5    | ENSG00000182512 |
| 14 | 95141291 | 95141480 | 95141332 | 9  | 9  | 3  | 2.598260461 | 0.0397929   | TCL6     | ENSG00000187621 |
| 14 | 95277139 | 95277560 | 95277355 | 16 | 24 | 9  | 2.598260461 | 0.0032455   | TCL1A    | ENSG00000100721 |
| 14 | 95310384 | 95310582 | 95310483 | 10 | 10 | 5  | 1.905391004 | 0.0915982   | TCL1A    | ENSG00000100721 |
| 14 | 95536028 | 95536237 | 95536132 | 8  | 9  | 1  | 5.196520921 | 0.00490062  | BDKRB2   | ENSG00000168398 |
| 14 | 95560694 | 95560890 | 95560867 | 8  | 9  | 2  | 3.464347281 | 0.0163838   | BDKRB2   | ENSG00000168398 |
| 14 | 95601671 | 95602389 | 95602001 | 27 | 58 | 14 | 4.087929791 | 2.08E-08    | BDKRB2   | ENSG00000168398 |
| 14 | 95619716 | 95620328 | 95619895 | 15 | 29 | 8  | 3.464347281 | 0.000151572 | BDKRB2   | ENSG00000168398 |
| 14 | 95631907 | 95632385 | 95632206 | 23 | 40 | 8  | 4.73460795  | 5.11E-07    | BDKRB2   | ENSG00000168398 |
| 14 | 95653274 | 95653541 | 95653385 | 11 | 14 | 8  | 1.73217364  | 0.0890835   | BDKRB2   | ENSG00000168398 |
| 14 | 95752150 | 95752430 | 95752310 | 10 | 11 | 3  | 3.117912553 | 0.0146045   | BDKRB2   | ENSG00000168398 |
| 14 | 95799947 | 95800201 | 95800069 | 8  | 12 | 8  | 1.501217155 | 0.168286    | BDKRB1   | ENSG00000100739 |
| 14 | 95898038 | 95898360 | 95898208 | 9  | 11 | 8  | 1.385738912 | 0.224757    | ATG2B    | ENSG00000066739 |
| 14 | 96016476 | 96016775 | 96016601 | 23 | 26 | 3  | 7.015303244 | 2.63E-06    | PAPOLA   | ENSG00000090060 |
| 14 | 96038164 | 96038399 | 96038281 | 12 | 14 | 7  | 1.948695345 | 0.0559175   | PAPOLA   | ENSG00000090060 |
| 14 | 96110827 | 96111265 | 96111125 | 21 | 27 | 7  | 3.637564645 | 0.000166657 | PAPOLA   | ENSG00000090060 |
| 14 | 96120357 | 96120568 | 96120462 | 9  | 11 | 2  | 4.157216737 | 0.0052913   |          | ENSG00000223299 |
| 14 | 96243175 | 96243354 | 96243238 | 8  | 9  | 3  | 2.598260461 | 0.0397929   |          | ENSG00000223299 |
| 14 | 96332995 | 96333325 | 96333160 | 8  | 12 | 7  | 1.688869299 | 0.11395     | VRK1     | ENSG00000100749 |
| 14 | 96416277 | 96416471 | 96416374 | 9  | 9  | 3  | 2.598260461 | 0.0397929   | VRK1     | ENSG00000100749 |
| 14 | 96490626 | 96490805 | 96490763 | 9  | 9  | 1  | 5.196520921 | 0.00490062  | VRK1     | ENSG00000100749 |
| 14 | 96594431 | 96594718 | 96594574 | 10 | 10 | 2  | 3.810782009 | 0.00936112  | VRK1     | ENSG00000100749 |
| 14 | 96632883 | 96633062 | 96632982 | 8  | 8  | 2  | 3.117912553 | 0.0283184   | VRK1     | ENSG00000100749 |
| 14 | 96815843 | 96816070 | 96815956 | 11 | 11 | 1  | 6.235825105 | 0.0013754   |          | ENSG00000210655 |
| 14 | 96868178 | 96868516 | 96868347 | 9  | 15 | 6  | 2.375552421 | 0.0212094   |          | ENSG00000210655 |
| 14 | 97034787 | 97034999 | 97034893 | 8  | 8  | 4  | 1.870747532 | 0.118863    |          | ENSG00000210655 |

|    |          |          |          |    |    |    |             |             |           |                 |
|----|----------|----------|----------|----|----|----|-------------|-------------|-----------|-----------------|
| 14 | 97036190 | 97036574 | 97036373 | 12 | 21 | 10 | 2.078608368 | 0.0193227   |           | ENSG00000210655 |
| 14 | 97117129 | 97117381 | 97117271 | 11 | 12 | 2  | 4.503651465 | 0.002963    |           | ENSG00000222491 |
| 14 | 97226160 | 97226440 | 97226295 | 11 | 12 | 1  | 6.755477198 | 0.000722752 |           | ENSG00000197176 |
| 14 | 97513540 | 97513719 | 97513598 | 8  | 8  | 5  | 1.558956276 | 0.191397    |           | ENSG00000205477 |
| 14 | 97514446 | 97514776 | 97514616 | 13 | 18 | 8  | 2.194086611 | 0.0206188   |           | ENSG00000205477 |
| 14 | 97613266 | 97613730 | 97613498 | 24 | 38 | 5  | 6.755477198 | 3.60E-08    |           | ENSG00000222066 |
| 14 | 97769802 | 97770275 | 97770038 | 19 | 30 | 0  | 32.21842971 | 2.55E-10    |           | ENSG00000222066 |
| 14 | 97811161 | 97811378 | 97811244 | 11 | 12 | 3  | 3.377738599 | 0.00867157  |           | ENSG00000222066 |
| 14 | 97948368 | 97948594 | 97948481 | 8  | 8  | 0  | 9.353737658 | 0.00163931  |           | ENSG00000210657 |
| 14 | 98085944 | 98086290 | 98086117 | 9  | 13 | 1  | 7.27512929  | 0.000378098 | C14orf177 | ENSG00000176605 |
| 14 | 98150823 | 98151032 | 98150881 | 9  | 9  | 2  | 3.464347281 | 0.0163838   | C14orf177 | ENSG00000176605 |
| 14 | 98326936 | 98327134 | 98327011 | 8  | 8  | 1  | 4.676868829 | 0.0091584   | C14orf177 | ENSG00000176605 |
| 14 | 98344619 | 98344922 | 98344770 | 13 | 14 | 3  | 3.897390691 | 0.00295882  | C14orf177 | ENSG00000176605 |
| 14 | 98355550 | 98355798 | 98355656 | 8  | 10 | 8  | 1.27026067  | 0.293854    | C14orf177 | ENSG00000176605 |
| 14 | 98439522 | 98439829 | 98439658 | 8  | 10 | 3  | 2.858086507 | 0.0242838   |           | ENSG00000218496 |
| 14 | 98442537 | 98442716 | 98442676 | 8  | 8  | 4  | 1.870747532 | 0.118863    |           | ENSG00000218496 |
| 14 | 98449833 | 98450199 | 98450012 | 8  | 15 | 1  | 8.314433474 | 0.000102308 |           | ENSG00000218496 |
| 14 | 98540334 | 98540567 | 98540450 | 11 | 11 | 2  | 4.157216737 | 0.0052913   |           | ENSG00000220591 |
| 14 | 98768791 | 98769046 | 98768928 | 10 | 12 | 3  | 3.377738599 | 0.00867157  | BCL11B    | ENSG00000127152 |
| 14 | 98802658 | 98802956 | 98802835 | 9  | 13 | 4  | 2.910051716 | 0.0125532   | BCL11B    | ENSG00000127152 |
| 14 | 98810793 | 98811045 | 98810919 | 12 | 14 | 3  | 3.897390691 | 0.00295882  | BCL11B    | ENSG00000127152 |
| 14 | 98929196 | 98929531 | 98929377 | 10 | 15 | 4  | 3.32577339  | 0.00462646  |           | ENSG00000216173 |
| 14 | 98951879 | 98952083 | 98951981 | 9  | 10 | 1  | 5.716173013 | 0.00260397  |           | ENSG00000199789 |
| 14 | 98977860 | 98978043 | 98977955 | 8  | 8  | 0  | 9.353737658 | 0.00163931  |           | ENSG00000199789 |
| 14 | 99009530 | 99009725 | 99009627 | 8  | 9  | 2  | 3.464347281 | 0.0163838   | SETD3     | ENSG00000183576 |
| 14 | 99077848 | 99078168 | 99078008 | 9  | 11 | 6  | 1.781664316 | 0.103344    |           | ENSG00000200506 |
| 14 | 99099330 | 99099586 | 99099458 | 9  | 9  | 4  | 2.078608368 | 0.0785659   |           | ENSG00000200506 |
| 14 | 99102214 | 99102453 | 99102333 | 11 | 11 | 4  | 2.494330042 | 0.0324033   |           | ENSG00000200506 |
| 14 | 99110139 | 99110586 | 99110318 | 8  | 16 | 9  | 1.766817113 | 0.0700694   |           | ENSG00000200506 |
| 14 | 99115286 | 99115701 | 99115381 | 11 | 18 | 4  | 3.9493559   | 0.000961379 |           | ENSG00000200506 |
| 14 | 99131023 | 99131226 | 99131128 | 8  | 10 | 5  | 1.905391004 | 0.0915982   |           | ENSG00000205476 |
| 14 | 99158097 | 99158388 | 99158222 | 16 | 19 | 5  | 3.464347281 | 0.00150447  |           | ENSG00000205476 |
| 14 | 99190761 | 99191055 | 99190922 | 20 | 23 | 16 | 1.467252966 | 0.109416    | HHIPL1    | ENSG00000182218 |
| 14 | 99478423 | 99478765 | 99478594 | 8  | 13 | 2  | 4.850086193 | 0.00164564  |           | ENSG00000199836 |

|    |           |           |           |    |    |    |             |             |          |                 |
|----|-----------|-----------|-----------|----|----|----|-------------|-------------|----------|-----------------|
| 14 | 99498155  | 99498708  | 99498530  | 11 | 24 | 7  | 3.247825576 | 0.000729793 |          | ENSG00000213220 |
| 14 | 99518650  | 99518868  | 99518759  | 10 | 10 | 7  | 1.429043253 | 0.21536     | EVL      | ENSG00000196405 |
| 14 | 99547943  | 99548201  | 99548070  | 9  | 9  | 2  | 3.464347281 | 0.0163838   | EVL      | ENSG00000196405 |
| 14 | 99561194  | 99561592  | 99561397  | 11 | 20 | 6  | 3.117912553 | 0.00218114  | EVL      | ENSG00000196405 |
| 14 | 99567705  | 99567989  | 99567810  | 10 | 15 | 1  | 8.314433474 | 0.000102308 | EVL      | ENSG00000196405 |
| 14 | 99595567  | 99595878  | 99595732  | 22 | 26 | 7  | 3.507651622 | 0.000274507 | EVL      | ENSG00000196405 |
| 14 | 99632650  | 99633026  | 99632847  | 25 | 32 | 9  | 3.429703808 | 8.38E-05    |          | ENSG00000199082 |
| 14 | 99635434  | 99635746  | 99635590  | 11 | 16 | 2  | 5.889390377 | 0.000270741 |          | ENSG00000199082 |
| 14 | 99644360  | 99644781  | 99644602  | 8  | 15 | 3  | 4.157216737 | 0.00170423  |          | ENSG00000199082 |
| 14 | 99686073  | 99686266  | 99686169  | 10 | 10 | 3  | 2.858086507 | 0.0242838   | DEGS2    | ENSG00000168350 |
| 14 | 99692227  | 99692529  | 99692352  | 11 | 14 | 13 | 1.113540197 | 0.385405    | DEGS2    | ENSG00000168350 |
| 14 | 99728979  | 99729189  | 99729064  | 9  | 10 | 6  | 1.63319229  | 0.146906    | DEGS2    | ENSG00000168350 |
| 14 | 99782895  | 99783190  | 99783042  | 12 | 15 | 9  | 1.662886695 | 0.0970566   | YY1      | ENSG00000100811 |
| 14 | 99807386  | 99807722  | 99807554  | 10 | 15 | 5  | 2.771477825 | 0.0105836   | YY1      | ENSG00000100811 |
| 14 | 99830467  | 99830663  | 99830568  | 8  | 10 | 2  | 3.810782009 | 0.00936112  | SLC25A29 | ENSG00000197119 |
| 14 | 99841093  | 99841305  | 99841199  | 8  | 11 | 3  | 3.117912553 | 0.0146045   | SLC25A29 | ENSG00000197119 |
| 14 | 99856381  | 99856912  | 99856750  | 21 | 32 | 7  | 4.28712976  | 1.26E-05    |          | ENSG00000223312 |
| 14 | 99913991  | 99914254  | 99914122  | 8  | 10 | 5  | 1.905391004 | 0.0915982   | WDR25    | ENSG00000176473 |
| 14 | 99934227  | 99934467  | 99934337  | 11 | 11 | 0  | 12.47165021 | 0.000193293 | WDR25    | ENSG00000176473 |
| 14 | 100022548 | 100022784 | 100022647 | 9  | 11 | 1  | 6.235825105 | 0.0013754   | BEGAIN   | ENSG00000183092 |
| 14 | 100084104 | 100084506 | 100084342 | 15 | 22 | 6  | 3.414856605 | 0.000820885 | BEGAIN   | ENSG00000183092 |
| 14 | 100191096 | 100191275 | 100191201 | 9  | 9  | 1  | 5.196520921 | 0.00490062  | C14orf70 | ENSG00000196273 |
| 14 | 100239976 | 100240342 | 100240103 | 14 | 18 | 3  | 4.936694875 | 0.000311102 | DLK1     | ENSG00000185559 |
| 14 | 100248522 | 100248875 | 100248698 | 13 | 19 | 0  | 20.78608368 | 6.46E-07    | DLK1     | ENSG00000185559 |
| 14 | 100252066 | 100252252 | 100252159 | 9  | 10 | 2  | 3.810782009 | 0.00936112  | DLK1     | ENSG00000185559 |
| 14 | 100353646 | 100353855 | 100353766 | 8  | 8  | 3  | 2.338434415 | 0.0641221   |          | ENSG00000214548 |
| 14 | 100584775 | 100584969 | 100584868 | 8  | 8  | 0  | 9.353737658 | 0.00163931  |          | ENSG00000207587 |
| 14 | 100884352 | 100884531 | 100884441 | 8  | 8  | 0  | 9.353737658 | 0.00163931  |          | ENSG00000206761 |
| 14 | 101162810 | 101162989 | 101162899 | 8  | 8  | 3  | 2.338434415 | 0.0641221   | DIO3     | ENSG00000197406 |
| 14 | 101201750 | 101201999 | 101201861 | 9  | 10 | 4  | 2.286469205 | 0.0509017   | PPP2R5C  | ENSG00000078304 |
| 14 | 101246152 | 101246555 | 101246397 | 8  | 13 | 8  | 1.616695398 | 0.123553    | PPP2R5C  | ENSG00000078304 |
| 14 | 101309058 | 101309240 | 101309149 | 8  | 8  | 2  | 3.117912553 | 0.0283184   | PPP2R5C  | ENSG00000078304 |
| 14 | 101345847 | 101346086 | 101345977 | 9  | 10 | 2  | 3.810782009 | 0.00936112  | PPP2R5C  | ENSG00000078304 |
| 14 | 101346209 | 101346739 | 101346404 | 16 | 28 | 13 | 2.152844382 | 0.00695052  | PPP2R5C  | ENSG00000078304 |

|    |           |           |           |    |    |    |             |             |           |                 |
|----|-----------|-----------|-----------|----|----|----|-------------|-------------|-----------|-----------------|
| 14 | 101516105 | 101516622 | 101516264 | 10 | 19 | 5  | 3.464347281 | 0.00150447  | DYNC1H1   | ENSG00000197102 |
| 14 | 101562982 | 101563215 | 101563151 | 8  | 11 | 4  | 2.494330042 | 0.0324033   |           | ENSG00000211198 |
| 14 | 101571668 | 101571992 | 101571837 | 8  | 12 | 1  | 6.755477198 | 0.000722752 |           | ENSG00000211198 |
| 14 | 101622932 | 101623137 | 101623035 | 8  | 8  | 2  | 3.117912553 | 0.0283184   | HSP90AA2  | ENSG00000080824 |
| 14 | 101633553 | 101633872 | 101633699 | 19 | 23 | 9  | 2.494330042 | 0.00494866  | HSP90AA2  | ENSG00000080824 |
| 14 | 101768046 | 101768225 | 101768135 | 8  | 8  | 1  | 4.676868829 | 0.0091584   | RAGE      | ENSG00000080823 |
| 14 | 101815608 | 101815984 | 101815854 | 10 | 14 | 6  | 2.227080395 | 0.0322529   | RAGE      | ENSG00000080823 |
| 14 | 101853087 | 101853324 | 101853206 | 8  | 11 | 9  | 1.247165021 | 0.300052    | ZNF839    | ENSG00000022976 |
| 14 | 102017950 | 102018233 | 102018091 | 14 | 15 | 2  | 5.542955649 | 0.000497081 |           | ENSG00000212330 |
| 14 | 102060657 | 102060948 | 102060802 | 10 | 14 | 11 | 1.29913023  | 0.246308    | ANKRD9    | ENSG00000156381 |
| 14 | 102068513 | 102068732 | 102068622 | 8  | 9  | 2  | 3.464347281 | 0.0163838   | ANKRD9    | ENSG00000156381 |
| 14 | 102240041 | 102240226 | 102240133 | 8  | 8  | 2  | 3.117912553 | 0.0283184   |           | ENSG00000202459 |
| 14 | 102262399 | 102262746 | 102262572 | 17 | 22 | 8  | 2.655999582 | 0.0039122   |           | ENSG00000202459 |
| 14 | 102399717 | 102399910 | 102399791 | 8  | 10 | 2  | 3.810782009 | 0.00936112  |           | ENSG00000206969 |
| 14 | 102479772 | 102480028 | 102479913 | 8  | 8  | 3  | 2.338434415 | 0.0641221   | AMN       | ENSG00000166126 |
| 14 | 102523285 | 102523728 | 102523553 | 38 | 50 | 2  | 17.66817113 | 6.11E-14    |           | ENSG00000213176 |
| 14 | 102524177 | 102524424 | 102524300 | 8  | 9  | 2  | 3.464347281 | 0.0163838   |           | ENSG00000213176 |
| 14 | 102639719 | 102639939 | 102639804 | 9  | 10 | 3  | 2.858086507 | 0.0242838   | C14orf73  | ENSG00000205436 |
| 14 | 102722907 | 102723086 | 102722996 | 8  | 8  | 3  | 2.338434415 | 0.0641221   | TNFAIP2   | ENSG00000185215 |
| 14 | 102780085 | 102780543 | 102780345 | 62 | 75 | 0  | 78.987118   | 3.02E-24    |           | ENSG00000199528 |
| 14 | 102828985 | 102829256 | 102829104 | 9  | 12 | 3  | 3.377738599 | 0.00867157  |           | ENSG00000199528 |
| 14 | 102869792 | 102870249 | 102870126 | 12 | 21 | 6  | 3.266384579 | 0.0013436   | EIF5      | ENSG00000100664 |
| 14 | 102893961 | 102894304 | 102894116 | 19 | 24 | 1  | 12.9913023  | 2.52E-07    |           | ENSG00000213173 |
| 14 | 102927234 | 102927450 | 102927314 | 10 | 10 | 4  | 2.286469205 | 0.0509017   | MARK3     | ENSG00000075413 |
| 14 | 103036284 | 103036627 | 103036453 | 8  | 12 | 4  | 2.702190879 | 0.0203088   | CKB       | ENSG00000166165 |
| 14 | 103064959 | 103065201 | 103065080 | 8  | 10 | 8  | 1.27026067  | 0.293854    | C14orf172 | ENSG00000166166 |
| 14 | 103097905 | 103098084 | 103098023 | 8  | 9  | 2  | 3.464347281 | 0.0163838   | BAG5      | ENSG00000166170 |
| 14 | 103163257 | 103163499 | 103163378 | 14 | 14 | 5  | 2.598260461 | 0.0167748   | KLC1      | ENSG00000126214 |
| 14 | 103166172 | 103166351 | 103166261 | 8  | 8  | 3  | 2.338434415 | 0.0641221   | KLC1      | ENSG00000126214 |
| 14 | 103166900 | 103167090 | 103167010 | 9  | 9  | 0  | 10.39304184 | 0.000803859 | KLC1      | ENSG00000126214 |
| 14 | 103170983 | 103171215 | 103171083 | 9  | 9  | 5  | 1.73217364  | 0.133894    | KLC1      | ENSG00000126214 |
| 14 | 103229670 | 103230001 | 103229835 | 9  | 11 | 2  | 4.157216737 | 0.0052913   | XRCC3     | ENSG00000126215 |
| 14 | 103296453 | 103296689 | 103296571 | 9  | 10 | 7  | 1.429043253 | 0.21536     | ZFYVE21   | ENSG00000100711 |
| 14 | 103380766 | 103380953 | 103380859 | 8  | 9  | 1  | 5.196520921 | 0.00490062  | PPP1R13B  | ENSG00000088808 |

|    |           |           |           |    |    |    |             |             |          |                 |
|----|-----------|-----------|-----------|----|----|----|-------------|-------------|----------|-----------------|
| 14 | 103391609 | 103391844 | 103391723 | 8  | 10 | 7  | 1.429043253 | 0.21536     | PPP1R13B | ENSG00000088808 |
| 14 | 103457331 | 103457618 | 103457507 | 9  | 13 | 4  | 2.910051716 | 0.0125532   | C14orf2  | ENSG00000156411 |
| 14 | 103614167 | 103614449 | 103614308 | 11 | 14 | 12 | 1.199197136 | 0.313881    |          | ENSG00000166183 |
| 14 | 103972338 | 103972567 | 103972454 | 8  | 9  | 1  | 5.196520921 | 0.00490062  |          | ENSG00000213159 |
| 14 | 104218966 | 104219155 | 104219095 | 8  | 9  | 2  | 3.464347281 | 0.0163838   | INF2     | ENSG00000203485 |
| 14 | 104225322 | 104225633 | 104225470 | 8  | 12 | 3  | 3.377738599 | 0.00867157  | INF2     | ENSG00000203485 |
| 14 | 104311810 | 104312285 | 104312106 | 8  | 16 | 4  | 3.533634226 | 0.00276486  | AKT1     | ENSG00000142208 |
| 14 | 104342421 | 104342727 | 104342564 | 8  | 10 | 1  | 5.716173013 | 0.00260397  |          | ENSG00000179627 |
| 14 | 104520133 | 104520393 | 104520263 | 16 | 18 | 2  | 6.582259834 | 7.91E-05    | C14orf79 | ENSG00000140104 |
| 14 | 104558752 | 104559021 | 104558886 | 10 | 12 | 3  | 3.377738599 | 0.00867157  | CDCA4    | ENSG00000170779 |
| 14 | 104702592 | 104702824 | 104702743 | 11 | 11 | 6  | 1.781664316 | 0.103344    | JAG2     | ENSG00000184916 |
| 14 | 104731865 | 104732097 | 104731976 | 8  | 11 | 2  | 4.157216737 | 0.0052913   | NUDT14   | ENSG00000183828 |
| 14 | 104785612 | 104785799 | 104785705 | 8  | 9  | 1  | 5.196520921 | 0.00490062  | BTBD6    | ENSG00000184887 |
| 14 | 104791109 | 104791288 | 104791231 | 8  | 9  | 1  | 5.196520921 | 0.00490062  | BTBD6    | ENSG00000184887 |
| 14 | 104810309 | 104810641 | 104810475 | 12 | 16 | 4  | 3.533634226 | 0.00276486  | BTBD6    | ENSG00000184887 |
| 14 | 104846678 | 104846961 | 104846800 | 10 | 13 | 7  | 1.818782322 | 0.0805123   | PACS2    | ENSG00000179364 |
| 14 | 104891718 | 104891910 | 104891800 | 8  | 9  | 7  | 1.29913023  | 0.286504    | PACS2    | ENSG00000179364 |
| 14 | 104908219 | 104908508 | 104908334 | 13 | 15 | 8  | 1.847651883 | 0.0631662   | MTA1     | ENSG00000182979 |
| 14 | 104960107 | 104960377 | 104960242 | 9  | 12 | 11 | 1.125912866 | 0.382541    | MTA1     | ENSG00000182979 |
| 14 | 104986081 | 104986289 | 104986221 | 8  | 9  | 8  | 1.154782427 | 0.375434    | CRIP2    | ENSG00000182809 |
| 14 | 105004604 | 105004892 | 105004740 | 12 | 15 | 0  | 16.62886695 | 1.12E-05    | CRIP2    | ENSG00000182809 |
| 14 | 105011170 | 105011601 | 105011422 | 9  | 18 | 6  | 2.8209685   | 0.00559354  | CRIP2    | ENSG00000182809 |
| 14 | 105017351 | 105017586 | 105017468 | 8  | 10 | 3  | 2.858086507 | 0.0242838   | CRIP2    | ENSG00000182809 |
| 14 | 105027050 | 105027671 | 105027357 | 13 | 26 | 7  | 3.507651622 | 0.000274507 | C14orf80 | ENSG00000185347 |
| 14 | 105105544 | 105105874 | 105105709 | 11 | 15 | 0  | 16.62886695 | 1.12E-05    |          | ENSG00000219311 |
| 14 | 105119999 | 105120274 | 105120136 | 14 | 15 | 6  | 2.375552421 | 0.0212094   | IGHA2    | ENSG00000211890 |
| 14 | 105225176 | 105225395 | 105225306 | 8  | 9  | 2  | 3.464347281 | 0.0163838   |          | ENSG00000183545 |
| 14 | 105580855 | 105581034 | 105580953 | 8  | 8  | 2  | 3.117912553 | 0.0283184   | IGHV3-6  | ENSG00000218874 |
| 14 | 105738164 | 105738500 | 105738325 | 16 | 18 | 3  | 4.936694875 | 0.000311102 |          | ENSG00000211946 |
| 14 | 106078382 | 106078661 | 106078537 | 8  | 9  | 2  | 3.464347281 | 0.0163838   |          | ENSG00000211965 |
| 14 | 106138913 | 106139540 | 106139196 | 27 | 43 | 6  | 6.532769158 | 7.68E-09    | IGHV7-56 | ENSG00000218845 |
| 14 | 106323185 | 106323595 | 106323364 | 9  | 17 | 4  | 3.741495063 | 0.00163722  |          | ENSG00000211978 |
| 15 | 19180726  | 19180995  | 19180862  | 8  | 10 | 2  | 3.810782009 | 0.00936112  |          | ENSG00000187646 |
| 15 | 19988190  | 19988418  | 19988340  | 11 | 11 | 6  | 1.781664316 | 0.103344    | VSIG6    | ENSG00000189039 |



|    |          |          |          |    |    |    |             |             |          |                 |
|----|----------|----------|----------|----|----|----|-------------|-------------|----------|-----------------|
| 15 | 23878430 | 23878718 | 23878573 | 9  | 10 | 2  | 3.810782009 | 0.00936112  |          | ENSG00000212604 |
| 15 | 24635127 | 24635407 | 24635267 | 10 | 10 | 1  | 5.716173013 | 0.00260397  | GABRA5   | ENSG00000186297 |
| 15 | 25329666 | 25329943 | 25329837 | 9  | 13 | 0  | 14.55025858 | 4.65E-05    |          | ENSG00000200326 |
| 15 | 25613407 | 25613679 | 25613529 | 15 | 16 | 0  | 17.66817113 | 5.48E-06    |          | ENSG00000210015 |
| 15 | 27825872 | 27826152 | 27826012 | 16 | 17 | 0  | 18.70747532 | 2.69E-06    |          | ENSG00000212769 |
| 15 | 29230206 | 29230592 | 29230385 | 50 | 57 | 0  | 60.27964269 | 1.12E-18    | TRPM1    | ENSG00000134160 |
| 15 | 29477497 | 29477750 | 29477623 | 8  | 10 | 0  | 11.43234603 | 0.000394183 | KLF13    | ENSG00000169926 |
| 15 | 29478196 | 29478449 | 29478307 | 8  | 10 | 0  | 11.43234603 | 0.000394183 | KLF13    | ENSG00000169926 |
| 15 | 31225038 | 31225479 | 31225219 | 56 | 70 | 1  | 36.89529854 | 3.95E-21    |          | ENSG00000206125 |
| 15 | 32043569 | 32043825 | 32043697 | 8  | 9  | 4  | 2.078608368 | 0.0785659   | CHRM5    | ENSG00000184984 |
| 15 | 32811878 | 32812402 | 32812080 | 32 | 43 | 3  | 11.43234603 | 5.53E-11    | GJD2     | ENSG00000159248 |
| 15 | 34085328 | 34085647 | 34085487 | 8  | 13 | 1  | 7.27512929  | 0.000378098 | ATPBD4   | ENSG00000134146 |
| 15 | 34960113 | 34960378 | 34960245 | 8  | 9  | 0  | 10.39304184 | 0.000803859 |          | ENSG00000212511 |
| 15 | 36494051 | 36494239 | 36494145 | 9  | 9  | 1  | 5.196520921 | 0.00490062  | FAM98B   | ENSG00000171262 |
| 15 | 37353545 | 37353877 | 37353711 | 11 | 15 | 0  | 16.62886695 | 1.12E-05    | C15orf54 | ENSG00000175746 |
| 15 | 38081964 | 38082223 | 38082093 | 10 | 12 | 2  | 4.503651465 | 0.002963    | SRP14    | ENSG00000140319 |
| 15 | 38184321 | 38184657 | 38184487 | 8  | 12 | 5  | 2.251825733 | 0.0404733   | BMF      | ENSG00000104081 |
| 15 | 38500412 | 38500592 | 38500502 | 8  | 8  | 3  | 2.338434415 | 0.0641221   | IVD      | ENSG00000128928 |
| 15 | 38758672 | 38758917 | 38758740 | 8  | 9  | 1  | 5.196520921 | 0.00490062  | RAD51    | ENSG00000051180 |
| 15 | 39097945 | 39098234 | 39098076 | 13 | 17 | 2  | 6.235825105 | 0.000146695 | CHAC1    | ENSG00000128965 |
| 15 | 39853918 | 39854202 | 39854077 | 10 | 12 | 3  | 3.377738599 | 0.00867157  | MAPKBP1  | ENSG00000137802 |
| 15 | 40110765 | 40111057 | 40110911 | 10 | 12 | 0  | 13.5109544  | 9.48E-05    | PLA2G4E  | ENSG00000188089 |
| 15 | 40136552 | 40136731 | 40136641 | 8  | 8  | 0  | 9.353737658 | 0.00163931  | PLA2G4E  | ENSG00000188089 |
| 15 | 40570563 | 40570794 | 40570660 | 9  | 11 | 1  | 6.235825105 | 0.0013754   | SNAP23   | ENSG00000092531 |
| 15 | 40750933 | 40751300 | 40751082 | 23 | 30 | 0  | 32.21842971 | 2.55E-10    | STARD9   | ENSG00000166917 |
| 15 | 41298801 | 41299095 | 41298948 | 8  | 11 | 1  | 6.235825105 | 0.0013754   | EPB42    | ENSG00000166947 |
| 15 | 41856924 | 41857137 | 41857002 | 9  | 10 | 3  | 2.858086507 | 0.0242838   | ELL3     | ENSG00000128886 |
| 15 | 42001402 | 42001687 | 42001544 | 9  | 11 | 3  | 3.117912553 | 0.0146045   |          | ENSG00000218054 |
| 15 | 42506562 | 42506831 | 42506692 | 8  | 9  | 13 | 0.742360132 | 0.770276    | CTDSPL2  | ENSG00000137770 |
| 15 | 43162828 | 43163051 | 43162939 | 13 | 14 | 1  | 7.794781382 | 0.000197021 | DUOX2    | ENSG00000140279 |
| 15 | 43279823 | 43280162 | 43279993 | 8  | 12 | 7  | 1.688869299 | 0.11395     | SHF      | ENSG00000138606 |
| 15 | 43739956 | 43740196 | 43740065 | 10 | 10 | 2  | 3.810782009 | 0.00936112  | SQRDL    | ENSG00000137767 |
| 15 | 46947529 | 46947779 | 46947635 | 15 | 16 | 0  | 17.66817113 | 5.48E-06    | SHC4     | ENSG00000185634 |
| 15 | 47235043 | 47235305 | 47235174 | 11 | 13 | 1  | 7.27512929  | 0.000378098 | GALK2    | ENSG00000156958 |

|    |          |          |          |     |     |    |             |            |          |                 |
|----|----------|----------|----------|-----|-----|----|-------------|------------|----------|-----------------|
| 15 | 47345485 | 47345847 | 47345663 | 29  | 35  | 0  | 37.41495063 | 7.22E-12   |          | ENSG00000210823 |
| 15 | 47533022 | 47533222 | 47533123 | 8   | 9   | 1  | 5.196520921 | 0.00490062 | FGF7P2   | ENSG00000140285 |
| 15 | 47534552 | 47534780 | 47534660 | 9   | 10  | 3  | 2.858086507 | 0.0242838  | FGF7P2   | ENSG00000140285 |
| 15 | 47540176 | 47540365 | 47540270 | 9   | 9   | 1  | 5.196520921 | 0.00490062 | FGF7P2   | ENSG00000140285 |
| 15 | 47547335 | 47547534 | 47547434 | 10  | 12  | 5  | 2.251825733 | 0.0404733  | FGF7P2   | ENSG00000140285 |
| 15 | 47548045 | 47548376 | 47548210 | 9   | 13  | 14 | 0.970017239 | 0.534076   | FGF7P2   | ENSG00000140285 |
| 15 | 47573478 | 47573812 | 47573644 | 10  | 14  | 9  | 1.558956276 | 0.132279   | FGF7P2   | ENSG00000140285 |
| 15 | 47573814 | 47574026 | 47573944 | 8   | 9   | 10 | 0.944821986 | 0.553851   | FGF7P2   | ENSG00000140285 |
| 15 | 47585898 | 47586152 | 47586025 | 12  | 14  | 6  | 2.227080395 | 0.0322529  | FGF7P2   | ENSG00000140285 |
| 15 | 47601366 | 47601605 | 47601491 | 8   | 10  | 13 | 0.816596145 | 0.696946   | FGF7P2   | ENSG00000140285 |
| 15 | 47635312 | 47635504 | 47635408 | 11  | 11  | 5  | 2.078608368 | 0.0614303  | C15orf33 | ENSG00000166262 |
| 15 | 47686753 | 47686984 | 47686878 | 8   | 11  | 5  | 2.078608368 | 0.0614303  | C15orf33 | ENSG00000166262 |
| 15 | 47700109 | 47700755 | 47700524 | 56  | 79  | 35 | 2.309564854 | 6.58E-06   | DTWD1    | ENSG00000104047 |
| 15 | 47700767 | 47701018 | 47700882 | 9   | 12  | 4  | 2.702190879 | 0.0203088  | DTWD1    | ENSG00000104047 |
| 15 | 47701132 | 47701391 | 47701260 | 9   | 12  | 9  | 1.35109544  | 0.232899   | DTWD1    | ENSG00000104047 |
| 15 | 47701453 | 47701742 | 47701597 | 10  | 12  | 13 | 0.965068171 | 0.538344   | DTWD1    | ENSG00000104047 |
| 15 | 47702080 | 47702469 | 47702179 | 9   | 15  | 17 | 0.923825942 | 0.593214   | DTWD1    | ENSG00000104047 |
| 15 | 47704950 | 47705708 | 47705347 | 292 | 357 | 11 | 31.00590816 | 3.71E-94   | DTWD1    | ENSG00000104047 |
| 15 | 47710625 | 47710892 | 47710753 | 11  | 12  | 5  | 2.251825733 | 0.0404733  | DTWD1    | ENSG00000104047 |
| 15 | 47717374 | 47717562 | 47717419 | 9   | 10  | 3  | 2.858086507 | 0.0242838  | DTWD1    | ENSG00000104047 |
| 15 | 47723467 | 47723814 | 47723640 | 8   | 11  | 4  | 2.494330042 | 0.0324033  | DTWD1    | ENSG00000104047 |
| 15 | 47731411 | 47731667 | 47731539 | 8   | 10  | 11 | 0.952695502 | 0.548138   | DTWD1    | ENSG00000104047 |
| 15 | 47734592 | 47734774 | 47734698 | 8   | 8   | 8  | 1.039304184 | 0.46786    | DTWD1    | ENSG00000104047 |
| 15 | 47742775 | 47742955 | 47742845 | 8   | 9   | 3  | 2.598260461 | 0.0397929  | DTWD1    | ENSG00000104047 |
| 15 | 47747089 | 47747316 | 47747239 | 8   | 9   | 6  | 1.484720263 | 0.204387   | DTWD1    | ENSG00000104047 |
| 15 | 47750239 | 47750427 | 47750333 | 8   | 10  | 1  | 5.716173013 | 0.00260397 | DTWD1    | ENSG00000104047 |
| 15 | 47754560 | 47754933 | 47754727 | 11  | 17  | 15 | 1.169217207 | 0.323156   | DTWD1    | ENSG00000104047 |
| 15 | 47757230 | 47757444 | 47757337 | 9   | 11  | 8  | 1.385738912 | 0.224757   | DTWD1    | ENSG00000104047 |
| 15 | 47767369 | 47767554 | 47767490 | 8   | 9   | 3  | 2.598260461 | 0.0397929  | DTWD1    | ENSG00000104047 |
| 15 | 47768880 | 47769310 | 47769099 | 20  | 30  | 15 | 2.013651857 | 0.00918451 | DTWD1    | ENSG00000104047 |
| 15 | 47786460 | 47786816 | 47786638 | 10  | 15  | 5  | 2.771477825 | 0.0105836  | DTWD1    | ENSG00000104047 |
| 15 | 47792175 | 47792368 | 47792271 | 9   | 10  | 7  | 1.429043253 | 0.21536    |          | ENSG00000214966 |
| 15 | 47795855 | 47796195 | 47796025 | 8   | 13  | 18 | 0.765803083 | 0.780427   |          | ENSG00000214966 |
| 15 | 47796269 | 47796480 | 47796390 | 8   | 9   | 8  | 1.154782427 | 0.375434   |          | ENSG00000214966 |

|    |          |          |          |    |    |    |             |            |                 |
|----|----------|----------|----------|----|----|----|-------------|------------|-----------------|
| 15 | 47804004 | 47804203 | 47804148 | 9  | 9  | 2  | 3.464347281 | 0.0163838  | ENSG00000214966 |
| 15 | 47810057 | 47810273 | 47810165 | 9  | 9  | 8  | 1.154782427 | 0.375434   | ENSG00000214966 |
| 15 | 47828550 | 47828744 | 47828647 | 8  | 8  | 2  | 3.117912553 | 0.0283184  | ENSG00000214966 |
| 15 | 47856976 | 47857284 | 47857128 | 9  | 12 | 14 | 0.900730293 | 0.611333   | ENSG00000214966 |
| 15 | 47880091 | 47880366 | 47880228 | 8  | 9  | 15 | 0.649565115 | 0.865365   | ENSG00000214966 |
| 15 | 47880665 | 47881010 | 47880844 | 9  | 14 | 5  | 2.598260461 | 0.0167748  | ENSG00000214966 |
| 15 | 47881789 | 47882068 | 47881928 | 13 | 16 | 3  | 4.417042783 | 0.00097367 | ENSG00000214966 |
| 15 | 47887906 | 47888181 | 47888043 | 8  | 9  | 2  | 3.464347281 | 0.0163838  | ENSG00000214966 |
| 15 | 47889731 | 47890001 | 47889866 | 11 | 15 | 7  | 2.078608368 | 0.038229   | ENSG00000214966 |
| 15 | 47892415 | 47892676 | 47892545 | 8  | 12 | 3  | 3.377738599 | 0.00867157 | ENSG00000214966 |
| 15 | 47894731 | 47894927 | 47894829 | 9  | 10 | 4  | 2.286469205 | 0.0509017  | ENSG00000214966 |
| 15 | 47896228 | 47896587 | 47896502 | 10 | 15 | 13 | 1.187776211 | 0.317363   | ENSG00000214966 |
| 15 | 47904770 | 47905019 | 47904894 | 9  | 11 | 6  | 1.781664316 | 0.103344   | ENSG00000214966 |
| 15 | 47909308 | 47909747 | 47909568 | 10 | 18 | 12 | 1.518983039 | 0.117837   | ENSG00000214966 |
| 15 | 47912126 | 47912438 | 47912276 | 19 | 22 | 9  | 2.390399624 | 0.00747467 | ENSG00000214966 |
| 15 | 47931830 | 47932054 | 47931942 | 10 | 12 | 6  | 1.930136342 | 0.071303   | ATP8B4          |
| 15 | 47938870 | 47939177 | 47939023 | 13 | 16 | 10 | 1.606197376 | 0.104477   | ATP8B4          |
| 15 | 47941537 | 47941824 | 47941680 | 9  | 12 | 5  | 2.251825733 | 0.0404733  | ATP8B4          |
| 15 | 47945740 | 47946079 | 47945909 | 16 | 22 | 9  | 2.390399624 | 0.00747467 | ATP8B4          |
| 15 | 47946964 | 47947228 | 47947096 | 10 | 13 | 4  | 2.910051716 | 0.0125532  | ATP8B4          |
| 15 | 47954651 | 47954855 | 47954725 | 8  | 8  | 6  | 1.336248237 | 0.277651   | ATP8B4          |
| 15 | 47955098 | 47955419 | 47955258 | 10 | 14 | 10 | 1.417232979 | 0.185113   | ATP8B4          |
| 15 | 47956199 | 47956575 | 47956430 | 13 | 18 | 23 | 0.822782479 | 0.740651   | ATP8B4          |
| 15 | 47957881 | 47958074 | 47957977 | 8  | 10 | 4  | 2.286469205 | 0.0509017  | ATP8B4          |
| 15 | 47974621 | 47974960 | 47974790 | 12 | 16 | 9  | 1.766817113 | 0.0700694  | ATP8B4          |
| 15 | 47981932 | 47982246 | 47982089 | 9  | 15 | 9  | 1.662886695 | 0.0970566  | ATP8B4          |
| 15 | 47982467 | 47982708 | 47982577 | 8  | 9  | 13 | 0.742360132 | 0.770276   | ATP8B4          |
| 15 | 47985937 | 47986134 | 47986043 | 10 | 10 | 5  | 1.905391004 | 0.0915982  | ATP8B4          |
| 15 | 47996821 | 47997110 | 47996964 | 8  | 10 | 14 | 0.762156402 | 0.758589   | ATP8B4          |
| 15 | 48005999 | 48006224 | 48006098 | 9  | 10 | 11 | 0.952695502 | 0.548138   | ATP8B4          |
| 15 | 48006308 | 48006508 | 48006408 | 13 | 14 | 6  | 2.227080395 | 0.0322529  | ATP8B4          |
| 15 | 48007070 | 48007387 | 48007225 | 8  | 13 | 11 | 1.212521548 | 0.309909   | ATP8B4          |
| 15 | 48007572 | 48007912 | 48007742 | 8  | 13 | 5  | 2.425043097 | 0.0262442  | ATP8B4          |
| 15 | 48014717 | 48014896 | 48014806 | 8  | 8  | 5  | 1.558956276 | 0.191397   | ATP8B4          |

|    |          |          |          |    |    |    |             |            |                        |
|----|----------|----------|----------|----|----|----|-------------|------------|------------------------|
| 15 | 48022881 | 48023281 | 48023020 | 9  | 15 | 13 | 1.187776211 | 0.317363   | ENSG00000201086        |
| 15 | 48057945 | 48058233 | 48058077 | 8  | 11 | 13 | 0.890832158 | 0.618492   | ENSG00000201086        |
| 15 | 48062811 | 48063018 | 48062893 | 8  | 10 | 6  | 1.63319229  | 0.146906   | ENSG00000201086        |
| 15 | 48063910 | 48064295 | 48064116 | 20 | 26 | 17 | 1.558956276 | 0.0684939  | ENSG00000201086        |
| 15 | 48065751 | 48065995 | 48065884 | 9  | 11 | 4  | 2.494330042 | 0.0324033  | ENSG00000201086        |
| 15 | 48066723 | 48067098 | 48066899 | 9  | 14 | 9  | 1.558956276 | 0.132279   | ENSG00000201086        |
| 15 | 48071618 | 48071878 | 48071740 | 8  | 10 | 5  | 1.905391004 | 0.0915982  | ENSG00000201086        |
| 15 | 48076299 | 48076529 | 48076417 | 9  | 11 | 10 | 1.133786383 | 0.380636   | ENSG00000201086        |
| 15 | 48083015 | 48083625 | 48083349 | 26 | 50 | 25 | 2.038635131 | 0.00111243 | ENSG00000201086        |
| 15 | 48089238 | 48089437 | 48089337 | 8  | 9  | 4  | 2.078608368 | 0.0785659  | ENSG00000201086        |
| 15 | 48091248 | 48091462 | 48091362 | 11 | 11 | 4  | 2.494330042 | 0.0324033  | ENSG00000201086        |
| 15 | 48091754 | 48091942 | 48091784 | 8  | 9  | 5  | 1.73217364  | 0.133894   | ENSG00000201086        |
| 15 | 48093305 | 48093525 | 48093374 | 8  | 10 | 4  | 2.286469205 | 0.0509017  | ENSG00000201086        |
| 15 | 48093534 | 48093739 | 48093636 | 8  | 8  | 2  | 3.117912553 | 0.0283184  | ENSG00000201086        |
| 15 | 48095031 | 48095243 | 48095093 | 8  | 9  | 3  | 2.598260461 | 0.0397929  | ENSG00000201086        |
| 15 | 48095830 | 48096096 | 48095963 | 8  | 9  | 10 | 0.944821986 | 0.553851   | ENSG00000201086        |
| 15 | 48098620 | 48098886 | 48098744 | 8  | 10 | 4  | 2.286469205 | 0.0509017  | ENSG00000201086        |
| 15 | 48104773 | 48105088 | 48104932 | 8  | 12 | 11 | 1.125912866 | 0.382541   | ENSG00000201086        |
| 15 | 48112763 | 48112949 | 48112843 | 8  | 8  | 1  | 4.676868829 | 0.0091584  | ENSG00000201086        |
| 15 | 48114050 | 48114262 | 48114156 | 8  | 8  | 8  | 1.039304184 | 0.46786    | ENSG00000201086        |
| 15 | 48119953 | 48120178 | 48120065 | 8  | 8  | 7  | 1.169217207 | 0.371848   | ENSG00000201086        |
| 15 | 48126403 | 48126735 | 48126576 | 9  | 14 | 5  | 2.598260461 | 0.0167748  | ENSG00000201086        |
| 15 | 48127273 | 48127516 | 48127386 | 8  | 8  | 8  | 1.039304184 | 0.46786    | ATP8B4 ENSG00000104043 |
| 15 | 48131391 | 48131736 | 48131568 | 14 | 19 | 13 | 1.484720263 | 0.123861   | ATP8B4 ENSG00000104043 |
| 15 | 48135874 | 48136159 | 48136016 | 10 | 11 | 5  | 2.078608368 | 0.0614303  | ATP8B4 ENSG00000104043 |
| 15 | 48137578 | 48137912 | 48137781 | 9  | 13 | 7  | 1.818782322 | 0.0805123  | ATP8B4 ENSG00000104043 |
| 15 | 48138061 | 48138329 | 48138199 | 11 | 12 | 3  | 3.377738599 | 0.00867157 | ATP8B4 ENSG00000104043 |
| 15 | 48139137 | 48139720 | 48139556 | 10 | 22 | 10 | 2.173090567 | 0.0132845  | ATP8B4 ENSG00000104043 |
| 15 | 48148542 | 48148938 | 48148780 | 8  | 14 | 5  | 2.598260461 | 0.0167748  | ATP8B4 ENSG00000104043 |
| 15 | 48154269 | 48154450 | 48154359 | 8  | 8  | 7  | 1.169217207 | 0.371848   | ATP8B4 ENSG00000104043 |
| 15 | 48157550 | 48157729 | 48157638 | 8  | 8  | 2  | 3.117912553 | 0.0283184  | ATP8B4 ENSG00000104043 |
| 15 | 48163625 | 48163880 | 48163752 | 9  | 10 | 13 | 0.816596145 | 0.696946   | ATP8B4 ENSG00000104043 |
| 15 | 48178412 | 48178639 | 48178531 | 8  | 9  | 8  | 1.154782427 | 0.375434   | ATP8B4 ENSG00000104043 |
| 15 | 48179949 | 48180279 | 48180071 | 9  | 13 | 12 | 1.11925066  | 0.384109   | ATP8B4 ENSG00000104043 |

|    |          |          |          |    |    |    |             |             |         |                 |
|----|----------|----------|----------|----|----|----|-------------|-------------|---------|-----------------|
| 15 | 48188140 | 48188503 | 48188269 | 9  | 15 | 7  | 2.078608368 | 0.038229    | ATP8B4  | ENSG00000104043 |
| 15 | 48188994 | 48189215 | 48189104 | 12 | 13 | 14 | 0.970017239 | 0.534076    | ATP8B4  | ENSG00000104043 |
| 15 | 48192010 | 48192251 | 48192130 | 9  | 12 | 11 | 1.125912866 | 0.382541    | ATP8B4  | ENSG00000104043 |
| 15 | 48192315 | 48192509 | 48192417 | 10 | 11 | 12 | 0.959357709 | 0.543005    | ATP8B4  | ENSG00000104043 |
| 15 | 48194890 | 48195126 | 48194984 | 9  | 10 | 8  | 1.27026067  | 0.293854    | ATP8B4  | ENSG00000104043 |
| 15 | 48196108 | 48196332 | 48196249 | 8  | 10 | 12 | 0.879411233 | 0.62639     | ATP8B4  | ENSG00000104043 |
| 15 | 48206820 | 48207194 | 48207015 | 10 | 15 | 11 | 1.385738912 | 0.19225     | ATP8B4  | ENSG00000104043 |
| 15 | 48214089 | 48214482 | 48214374 | 8  | 15 | 6  | 2.375552421 | 0.0212094   | ATP8B4  | ENSG00000104043 |
| 15 | 48224941 | 48225373 | 48225119 | 13 | 22 | 12 | 1.838768941 | 0.0349935   | ATP8B4  | ENSG00000104043 |
| 15 | 48226938 | 48227342 | 48227117 | 10 | 18 | 10 | 1.795161773 | 0.055383    | ATP8B4  | ENSG00000104043 |
| 15 | 48228635 | 48229069 | 48228908 | 14 | 23 | 13 | 1.781664316 | 0.0385539   | ATP8B4  | ENSG00000104043 |
| 15 | 48246070 | 48246267 | 48246203 | 9  | 10 | 7  | 1.429043253 | 0.21536     | SLC27A2 | ENSG00000140284 |
| 15 | 48259528 | 48259770 | 48259649 | 10 | 11 | 6  | 1.781664316 | 0.103344    | SLC27A2 | ENSG00000140284 |
| 15 | 48260224 | 48260569 | 48260396 | 10 | 15 | 10 | 1.511715177 | 0.140236    | SLC27A2 | ENSG00000140284 |
| 15 | 48261314 | 48261568 | 48261469 | 10 | 13 | 11 | 1.212521548 | 0.309909    | SLC27A2 | ENSG00000140284 |
| 15 | 48261903 | 48262213 | 48262058 | 10 | 14 | 5  | 2.598260461 | 0.0167748   | SLC27A2 | ENSG00000140284 |
| 15 | 48262217 | 48262431 | 48262358 | 9  | 9  | 5  | 1.73217364  | 0.133894    | SLC27A2 | ENSG00000140284 |
| 15 | 48262949 | 48263208 | 48263078 | 9  | 13 | 20 | 0.692869456 | 0.861903    | SLC27A2 | ENSG00000140284 |
| 15 | 48267162 | 48267506 | 48267334 | 10 | 16 | 7  | 2.208521392 | 0.0257604   | SLC27A2 | ENSG00000140284 |
| 15 | 48271073 | 48271263 | 48271168 | 9  | 10 | 7  | 1.429043253 | 0.21536     | SLC27A2 | ENSG00000140284 |
| 15 | 48272354 | 48273043 | 48272655 | 28 | 58 | 30 | 1.978030544 | 0.000758522 | SLC27A2 | ENSG00000140284 |
| 15 | 48283333 | 48283533 | 48283433 | 8  | 8  | 3  | 2.338434415 | 0.0641221   |         | ENSG00000200605 |
| 15 | 48285177 | 48285631 | 48285356 | 14 | 25 | 14 | 1.801460586 | 0.0308364   |         | ENSG00000200605 |
| 15 | 48286116 | 48286411 | 48286269 | 12 | 16 | 9  | 1.766817113 | 0.0700694   |         | ENSG00000200605 |
| 15 | 48287672 | 48287860 | 48287766 | 8  | 8  | 5  | 1.558956276 | 0.191397    |         | ENSG00000200605 |
| 15 | 48298288 | 48298474 | 48298381 | 10 | 10 | 5  | 1.905391004 | 0.0915982   |         | ENSG00000200605 |
| 15 | 48306499 | 48306812 | 48306655 | 12 | 18 | 11 | 1.645564958 | 0.0828462   |         | ENSG00000200605 |
| 15 | 48307019 | 48307246 | 48307128 | 8  | 9  | 4  | 2.078608368 | 0.0785659   |         | ENSG00000200605 |
| 15 | 48308201 | 48308920 | 48308552 | 20 | 41 | 37 | 1.148704625 | 0.267139    |         | ENSG00000200605 |
| 15 | 48310122 | 48310343 | 48310232 | 8  | 10 | 6  | 1.63319229  | 0.146906    |         | ENSG00000200605 |
| 15 | 48310990 | 48311280 | 48311151 | 8  | 11 | 5  | 2.078608368 | 0.0614303   |         | ENSG00000200605 |
| 15 | 48314282 | 48314478 | 48314380 | 8  | 8  | 13 | 0.668124118 | 0.835294    |         | ENSG00000210855 |
| 15 | 48314776 | 48314984 | 48314880 | 11 | 13 | 8  | 1.616695398 | 0.123553    |         | ENSG00000210855 |
| 15 | 48321677 | 48321881 | 48321828 | 8  | 9  | 12 | 0.799464757 | 0.707717    |         | ENSG00000210855 |

|    |          |          |          |    |    |    |             |             |        |                 |
|----|----------|----------|----------|----|----|----|-------------|-------------|--------|-----------------|
| 15 | 48325493 | 48325732 | 48325612 | 9  | 12 | 8  | 1.501217155 | 0.168286    |        | ENSG00000210855 |
| 15 | 48325869 | 48326092 | 48325980 | 10 | 10 | 7  | 1.429043253 | 0.21536     |        | ENSG00000210855 |
| 15 | 48326375 | 48326577 | 48326511 | 8  | 11 | 8  | 1.385738912 | 0.224757    |        | ENSG00000210855 |
| 15 | 48327255 | 48327717 | 48327486 | 20 | 30 | 15 | 2.013651857 | 0.00918451  |        | ENSG00000210855 |
| 15 | 48330800 | 48330984 | 48330916 | 9  | 9  | 9  | 1.039304184 | 0.466079    |        | ENSG00000210855 |
| 15 | 48334380 | 48334631 | 48334454 | 9  | 12 | 9  | 1.35109544  | 0.232899    |        | ENSG00000210855 |
| 15 | 48335572 | 48335963 | 48335686 | 14 | 21 | 21 | 1.039304184 | 0.449418    | HDC    | ENSG00000140287 |
| 15 | 48337468 | 48337769 | 48337607 | 10 | 12 | 16 | 0.794762023 | 0.738004    | HDC    | ENSG00000140287 |
| 15 | 48342031 | 48342292 | 48342136 | 9  | 10 | 3  | 2.858086507 | 0.0242838   | HDC    | ENSG00000140287 |
| 15 | 48347972 | 48348151 | 48348061 | 9  | 9  | 1  | 5.196520921 | 0.00490062  | HDC    | ENSG00000140287 |
| 15 | 48350832 | 48351017 | 48350924 | 8  | 8  | 11 | 0.779478138 | 0.719708    | HDC    | ENSG00000140287 |
| 15 | 48372653 | 48372834 | 48372753 | 8  | 8  | 6  | 1.336248237 | 0.277651    | HDC    | ENSG00000140287 |
| 15 | 48384892 | 48385082 | 48384918 | 8  | 9  | 5  | 1.73217364  | 0.133894    | HDC    | ENSG00000140287 |
| 15 | 48393937 | 48394126 | 48394001 | 8  | 9  | 12 | 0.799464757 | 0.707717    |        | ENSG00000207498 |
| 15 | 48395612 | 48395890 | 48395721 | 11 | 13 | 3  | 3.637564645 | 0.0050909   |        | ENSG00000207498 |
| 15 | 48400167 | 48400400 | 48400247 | 9  | 12 | 8  | 1.501217155 | 0.168286    |        | ENSG00000207498 |
| 15 | 48404635 | 48404859 | 48404749 | 9  | 10 | 2  | 3.810782009 | 0.00936112  |        | ENSG00000207498 |
| 15 | 48424544 | 48424812 | 48424675 | 11 | 14 | 1  | 7.794781382 | 0.000197021 |        | ENSG00000207498 |
| 15 | 48433461 | 48433717 | 48433561 | 9  | 10 | 15 | 0.714521627 | 0.810948    | GABPB1 | ENSG00000104064 |
| 15 | 48434308 | 48435398 | 48435067 | 17 | 62 | 30 | 2.11213431  | 0.0002047   | GABPB1 | ENSG00000104064 |
| 15 | 48438277 | 48438723 | 48438456 | 17 | 26 | 13 | 2.004372355 | 0.0142124   | GABPB1 | ENSG00000104064 |
| 15 | 48448778 | 48449009 | 48448893 | 8  | 11 | 11 | 1.039304184 | 0.462773    | GABPB1 | ENSG00000104064 |
| 15 | 48470176 | 48470815 | 48470518 | 10 | 26 | 17 | 1.558956276 | 0.0684939   | USP8   | ENSG00000138592 |
| 15 | 48470817 | 48470996 | 48470906 | 8  | 8  | 3  | 2.338434415 | 0.0641221   | USP8   | ENSG00000138592 |
| 15 | 48484449 | 48484776 | 48484614 | 9  | 14 | 3  | 3.897390691 | 0.00295882  | USP8   | ENSG00000138592 |
| 15 | 48488847 | 48489072 | 48488959 | 8  | 10 | 3  | 2.858086507 | 0.0242838   | USP8   | ENSG00000138592 |
| 15 | 48503406 | 48504159 | 48503585 | 18 | 46 | 28 | 1.68438954  | 0.0121295   | USP8   | ENSG00000138592 |
| 15 | 48549661 | 48549883 | 48549778 | 9  | 9  | 15 | 0.649565115 | 0.865365    | USP8   | ENSG00000138592 |
| 15 | 48560155 | 48560464 | 48560346 | 11 | 15 | 3  | 4.157216737 | 0.00170423  | USP8   | ENSG00000138592 |
| 15 | 48563848 | 48564086 | 48564018 | 8  | 11 | 7  | 1.558956276 | 0.158273    | USP8   | ENSG00000138592 |
| 15 | 48582885 | 48583152 | 48583020 | 11 | 15 | 7  | 2.078608368 | 0.038229    | USP8   | ENSG00000138592 |
| 15 | 48620396 | 48620725 | 48620569 | 8  | 11 | 3  | 3.117912553 | 0.0146045   | USP50  | ENSG00000170236 |
| 15 | 48621313 | 48621539 | 48621426 | 8  | 8  | 4  | 1.870747532 | 0.118863    | USP50  | ENSG00000170236 |
| 15 | 48642186 | 48642492 | 48642339 | 8  | 13 | 5  | 2.425043097 | 0.0262442   | USP50  | ENSG00000170236 |

|    |          |          |          |     |     |    |             |             |       |                 |
|----|----------|----------|----------|-----|-----|----|-------------|-------------|-------|-----------------|
| 15 | 48646289 | 48646474 | 48646454 | 8   | 8   | 6  | 1.336248237 | 0.277651    | USP50 | ENSG00000170236 |
| 15 | 48658519 | 48658757 | 48658645 | 10  | 11  | 3  | 3.117912553 | 0.0146045   | USP50 | ENSG00000170236 |
| 15 | 48666636 | 48666964 | 48666800 | 8   | 9   | 5  | 1.73217364  | 0.133894    | USP50 | ENSG00000170236 |
| 15 | 48677486 | 48677703 | 48677609 | 14  | 14  | 3  | 3.897390691 | 0.00295882  | USP50 | ENSG00000170236 |
| 15 | 48754964 | 48755300 | 48755132 | 9   | 14  | 11 | 1.29913023  | 0.246308    | TRPM7 | ENSG00000092439 |
| 15 | 48765065 | 48765336 | 48765200 | 12  | 12  | 6  | 1.930136342 | 0.071303    | TRPM7 | ENSG00000092439 |
| 15 | 48765917 | 48766253 | 48766095 | 18  | 22  | 14 | 1.593599749 | 0.0756559   | TRPM7 | ENSG00000092439 |
| 15 | 48766390 | 48766821 | 48766549 | 12  | 21  | 15 | 1.429043253 | 0.134782    | TRPM7 | ENSG00000092439 |
| 15 | 48766831 | 48767088 | 48766937 | 13  | 14  | 10 | 1.417232979 | 0.185113    | TRPM7 | ENSG00000092439 |
| 15 | 48795940 | 48796178 | 48796059 | 8   | 10  | 3  | 2.858086507 | 0.0242838   |       | ENSG00000222751 |
| 15 | 48797196 | 48797424 | 48797335 | 10  | 10  | 3  | 2.858086507 | 0.0242838   |       | ENSG00000222751 |
| 15 | 48832238 | 48832497 | 48832367 | 12  | 13  | 2  | 4.850086193 | 0.00164564  |       | ENSG00000138600 |
| 15 | 48832664 | 48832957 | 48832816 | 10  | 13  | 8  | 1.616695398 | 0.123553    |       | ENSG00000138600 |
| 15 | 48844305 | 48845034 | 48844673 | 21  | 46  | 21 | 2.220331666 | 0.000637679 |       | ENSG00000138600 |
| 15 | 48845116 | 48845723 | 48845444 | 12  | 25  | 9  | 2.702190879 | 0.00210968  |       | ENSG00000138600 |
| 15 | 48857591 | 48857963 | 48857806 | 19  | 26  | 13 | 2.004372355 | 0.0142124   |       | ENSG00000138600 |
| 15 | 48861607 | 48861892 | 48861749 | 8   | 10  | 7  | 1.429043253 | 0.21536     |       | ENSG00000138600 |
| 15 | 48870431 | 48870642 | 48870536 | 10  | 11  | 4  | 2.494330042 | 0.0324033   |       | ENSG00000138600 |
| 15 | 48877328 | 48878335 | 48877594 | 192 | 254 | 24 | 10.60090268 | 3.60E-52    |       | ENSG00000138600 |
| 15 | 48879143 | 48879345 | 48879249 | 10  | 10  | 5  | 1.905391004 | 0.0915982   |       | ENSG00000138600 |
| 15 | 48889421 | 48889612 | 48889518 | 10  | 12  | 3  | 3.377738599 | 0.00867157  |       | ENSG00000138600 |
| 15 | 48895456 | 48896229 | 48895859 | 34  | 66  | 38 | 1.785471291 | 0.00162115  |       | ENSG00000138600 |
| 15 | 48897099 | 48897280 | 48897161 | 8   | 9   | 6  | 1.484720263 | 0.204387    |       | ENSG00000138600 |
| 15 | 48897489 | 48897709 | 48897599 | 9   | 10  | 6  | 1.63319229  | 0.146906    |       | ENSG00000138600 |
| 15 | 48900378 | 48900561 | 48900469 | 9   | 10  | 5  | 1.905391004 | 0.0915982   |       | ENSG00000138600 |
| 15 | 48905818 | 48906066 | 48905942 | 8   | 11  | 7  | 1.558956276 | 0.158273    |       | ENSG00000138600 |
| 15 | 48934015 | 48934862 | 48934314 | 27  | 55  | 28 | 2.006932218 | 0.000830536 | AP4E1 | ENSG00000081014 |
| 15 | 48936075 | 48936759 | 48936590 | 11  | 27  | 13 | 2.078608368 | 0.00998554  | AP4E1 | ENSG00000081014 |
| 15 | 48937002 | 48937712 | 48937214 | 13  | 32  | 4  | 6.859407616 | 3.06E-07    | AP4E1 | ENSG00000081014 |
| 15 | 48942615 | 48942902 | 48942770 | 11  | 15  | 8  | 1.847651883 | 0.0631662   | AP4E1 | ENSG00000081014 |
| 15 | 48949598 | 48949838 | 48949718 | 8   | 9   | 6  | 1.484720263 | 0.204387    | AP4E1 | ENSG00000081014 |
| 15 | 48956416 | 48956881 | 48956643 | 16  | 26  | 31 | 0.876912905 | 0.694502    | AP4E1 | ENSG00000081014 |
| 15 | 48965378 | 48965746 | 48965549 | 22  | 27  | 9  | 2.910051716 | 0.000869703 | AP4E1 | ENSG00000081014 |
| 15 | 48970323 | 48970565 | 48970482 | 10  | 11  | 4  | 2.494330042 | 0.0324033   | AP4E1 | ENSG00000081014 |

|    |          |          |          |    |    |    |             |             |           |                 |
|----|----------|----------|----------|----|----|----|-------------|-------------|-----------|-----------------|
| 15 | 48977647 | 48977864 | 48977755 | 9  | 9  | 0  | 10.39304184 | 0.000803859 | AP4E1     | ENSG00000081014 |
| 15 | 48981368 | 48981654 | 48981511 | 12 | 13 | 2  | 4.850086193 | 0.00164564  | AP4E1     | ENSG00000081014 |
| 15 | 48982049 | 48982228 | 48982138 | 8  | 8  | 4  | 1.870747532 | 0.118863    | AP4E1     | ENSG00000081014 |
| 15 | 48987215 | 48987546 | 48987380 | 18 | 23 | 12 | 1.918715417 | 0.0250463   | AP4E1     | ENSG00000081014 |
| 15 | 48987849 | 48988234 | 48988063 | 31 | 40 | 18 | 2.242709029 | 0.00117575  | AP4E1     | ENSG00000081014 |
| 15 | 49030076 | 49030341 | 49030214 | 9  | 10 | 2  | 3.810782009 | 0.00936112  | AP4E1     | ENSG00000081014 |
| 15 | 49035013 | 49035426 | 49035247 | 8  | 15 | 10 | 1.511715177 | 0.140236    | AP4E1     | ENSG00000081014 |
| 15 | 49036637 | 49036823 | 49036734 | 9  | 9  | 1  | 5.196520921 | 0.00490062  | AP4E1     | ENSG00000081014 |
| 15 | 49059785 | 49060091 | 49059938 | 9  | 12 | 1  | 6.755477198 | 0.000722752 | AP4E1     | ENSG00000081014 |
| 15 | 49073155 | 49073335 | 49073173 | 8  | 9  | 5  | 1.73217364  | 0.133894    | AP4E1     | ENSG00000081014 |
| 15 | 49117082 | 49117371 | 49117226 | 19 | 19 | 0  | 20.78608368 | 6.46E-07    | TNFAIP8L3 | ENSG00000183578 |
| 15 | 49123431 | 49123661 | 49123589 | 11 | 11 | 10 | 1.133786383 | 0.380636    | TNFAIP8L3 | ENSG00000183578 |
| 15 | 49125505 | 49125727 | 49125616 | 10 | 11 | 4  | 2.494330042 | 0.0324033   | TNFAIP8L3 | ENSG00000183578 |
| 15 | 49128822 | 49129027 | 49128856 | 8  | 8  | 7  | 1.169217207 | 0.371848    | TNFAIP8L3 | ENSG00000183578 |
| 15 | 49131817 | 49132060 | 49131952 | 9  | 11 | 7  | 1.558956276 | 0.158273    | TNFAIP8L3 | ENSG00000183578 |
| 15 | 49135046 | 49135229 | 49135128 | 9  | 9  | 3  | 2.598260461 | 0.0397929   | TNFAIP8L3 | ENSG00000183578 |
| 15 | 49153113 | 49153309 | 49153156 | 9  | 9  | 4  | 2.078608368 | 0.0785659   | TNFAIP8L3 | ENSG00000183578 |
| 15 | 49158800 | 49159005 | 49158912 | 12 | 13 | 5  | 2.425043097 | 0.0262442   | TNFAIP8L3 | ENSG00000183578 |
| 15 | 49159795 | 49160248 | 49160004 | 17 | 27 | 7  | 3.637564645 | 0.000166657 | TNFAIP8L3 | ENSG00000183578 |
| 15 | 49170769 | 49170948 | 49170841 | 8  | 9  | 4  | 2.078608368 | 0.0785659   | TNFAIP8L3 | ENSG00000183578 |
| 15 | 49172161 | 49172445 | 49172294 | 8  | 11 | 2  | 4.157216737 | 0.0052913   | TNFAIP8L3 | ENSG00000183578 |
| 15 | 49174903 | 49175121 | 49175028 | 8  | 9  | 2  | 3.464347281 | 0.0163838   | TNFAIP8L3 | ENSG00000183578 |
| 15 | 49197088 | 49197269 | 49197219 | 8  | 8  | 1  | 4.676868829 | 0.0091584   | TNFAIP8L3 | ENSG00000183578 |
| 15 | 49205425 | 49205719 | 49205557 | 8  | 11 | 5  | 2.078608368 | 0.0614303   | TNFAIP8L3 | ENSG00000183578 |
| 15 | 49212444 | 49212748 | 49212596 | 16 | 18 | 4  | 3.9493559   | 0.000961379 | TNFAIP8L3 | ENSG00000183578 |
| 15 | 49224398 | 49224671 | 49224534 | 10 | 11 | 8  | 1.385738912 | 0.224757    | TNFAIP8L3 | ENSG00000183578 |
| 15 | 49240587 | 49240769 | 49240687 | 8  | 8  | 2  | 3.117912553 | 0.0283184   | TNFAIP8L3 | ENSG00000183578 |
| 15 | 49242396 | 49242733 | 49242558 | 12 | 17 | 12 | 1.439036563 | 0.154203    | TNFAIP8L3 | ENSG00000183578 |
| 15 | 49246068 | 49246333 | 49246200 | 10 | 13 | 9  | 1.455025858 | 0.177172    | TNFAIP8L3 | ENSG00000183578 |
| 15 | 49263223 | 49263506 | 49263377 | 9  | 10 | 7  | 1.429043253 | 0.21536     | CYP19A1   | ENSG00000137869 |
| 15 | 49269006 | 49269278 | 49269102 | 13 | 16 | 6  | 2.524024447 | 0.0137633   | CYP19A1   | ENSG00000137869 |
| 15 | 49270498 | 49270714 | 49270623 | 9  | 10 | 4  | 2.286469205 | 0.0509017   | CYP19A1   | ENSG00000137869 |
| 15 | 49272105 | 49272507 | 49272337 | 15 | 22 | 22 | 1.039304184 | 0.448275    | CYP19A1   | ENSG00000137869 |
| 15 | 49279349 | 49279567 | 49279469 | 9  | 9  | 6  | 1.484720263 | 0.204387    | CYP19A1   | ENSG00000137869 |



|    |          |          |          |    |    |    |             |            |         |                 |
|----|----------|----------|----------|----|----|----|-------------|------------|---------|-----------------|
| 15 | 49281361 | 49281573 | 49281467 | 8  | 9  | 3  | 2.598260461 | 0.0397929  | CYP19A1 | ENSG00000137869 |
| 15 | 49286248 | 49286484 | 49286366 | 8  | 10 | 7  | 1.429043253 | 0.21536    | CYP19A1 | ENSG00000137869 |
| 15 | 49299141 | 49299486 | 49299313 | 11 | 16 | 5  | 2.944695189 | 0.00659886 | CYP19A1 | ENSG00000137869 |
| 15 | 49307327 | 49307598 | 49307474 | 9  | 10 | 5  | 1.905391004 | 0.0915982  | CYP19A1 | ENSG00000137869 |
| 15 | 49309328 | 49309628 | 49309478 | 10 | 12 | 9  | 1.35109544  | 0.232899   | CYP19A1 | ENSG00000137869 |
| 15 | 49319725 | 49320117 | 49319952 | 9  | 15 | 3  | 4.157216737 | 0.00170423 | CYP19A1 | ENSG00000137869 |
| 15 | 49323259 | 49323552 | 49323387 | 8  | 11 | 9  | 1.247165021 | 0.300052   | CYP19A1 | ENSG00000137869 |
| 15 | 49358116 | 49358296 | 49358195 | 8  | 8  | 3  | 2.338434415 | 0.0641221  | CYP19A1 | ENSG00000137869 |
| 15 | 49360941 | 49361220 | 49361080 | 12 | 14 | 9  | 1.558956276 | 0.132279   | CYP19A1 | ENSG00000137869 |
| 15 | 49365748 | 49366196 | 49365972 | 10 | 19 | 16 | 1.222710805 | 0.269115   | CYP19A1 | ENSG00000137869 |
| 15 | 49381584 | 49381784 | 49381684 | 8  | 9  | 2  | 3.464347281 | 0.0163838  | CYP19A1 | ENSG00000137869 |
| 15 | 49387763 | 49387986 | 49387874 | 9  | 12 | 6  | 1.930136342 | 0.071303   | CYP19A1 | ENSG00000137869 |
| 15 | 49389888 | 49390098 | 49389993 | 8  | 8  | 3  | 2.338434415 | 0.0641221  | CYP19A1 | ENSG00000137869 |
| 15 | 49399363 | 49399543 | 49399453 | 8  | 8  | 2  | 3.117912553 | 0.0283184  | CYP19A1 | ENSG00000137869 |
| 15 | 49400873 | 49401119 | 49400996 | 14 | 14 | 7  | 1.948695345 | 0.0559175  | CYP19A1 | ENSG00000137869 |
| 15 | 49418971 | 49419172 | 49419130 | 9  | 11 | 7  | 1.558956276 | 0.158273   | CYP19A1 | ENSG00000137869 |
| 15 | 49419746 | 49420031 | 49419888 | 9  | 12 | 8  | 1.501217155 | 0.168286   | GLDN    | ENSG00000186417 |
| 15 | 49421833 | 49422048 | 49421942 | 8  | 9  | 2  | 3.464347281 | 0.0163838  | GLDN    | ENSG00000186417 |
| 15 | 49428722 | 49428936 | 49428803 | 9  | 11 | 10 | 1.133786383 | 0.380636   | GLDN    | ENSG00000186417 |
| 15 | 49433502 | 49433681 | 49433546 | 8  | 8  | 4  | 1.870747532 | 0.118863   | GLDN    | ENSG00000186417 |
| 15 | 49445045 | 49445247 | 49445104 | 11 | 12 | 11 | 1.125912866 | 0.382541   | GLDN    | ENSG00000186417 |
| 15 | 49452903 | 49453234 | 49453062 | 8  | 12 | 7  | 1.688869299 | 0.11395    | GLDN    | ENSG00000186417 |
| 15 | 49455105 | 49455290 | 49455197 | 10 | 10 | 7  | 1.429043253 | 0.21536    | GLDN    | ENSG00000186417 |
| 15 | 49458473 | 49458708 | 49458590 | 8  | 10 | 1  | 5.716173013 | 0.00260397 | GLDN    | ENSG00000186417 |
| 15 | 49460668 | 49461045 | 49460847 | 18 | 26 | 20 | 1.336248237 | 0.156853   | GLDN    | ENSG00000186417 |
| 15 | 49461554 | 49461771 | 49461687 | 11 | 11 | 7  | 1.558956276 | 0.158273   | GLDN    | ENSG00000186417 |
| 15 | 49462356 | 49462695 | 49462568 | 8  | 12 | 10 | 1.228268581 | 0.305344   | GLDN    | ENSG00000186417 |
| 15 | 49463838 | 49464087 | 49463938 | 8  | 10 | 3  | 2.858086507 | 0.0242838  | GLDN    | ENSG00000186417 |
| 15 | 49481700 | 49481958 | 49481801 | 9  | 10 | 7  | 1.429043253 | 0.21536    | GLDN    | ENSG00000186417 |
| 15 | 49482832 | 49483025 | 49482928 | 9  | 10 | 6  | 1.63319229  | 0.146906   | GLDN    | ENSG00000186417 |
| 15 | 49485688 | 49485963 | 49485805 | 8  | 11 | 7  | 1.558956276 | 0.158273   | GLDN    | ENSG00000186417 |
| 15 | 49486482 | 49486689 | 49486585 | 8  | 9  | 3  | 2.598260461 | 0.0397929  | GLDN    | ENSG00000186417 |
| 15 | 49486885 | 49487071 | 49487028 | 8  | 8  | 1  | 4.676868829 | 0.0091584  | GLDN    | ENSG00000186417 |
| 15 | 49491888 | 49492104 | 49492030 | 8  | 10 | 6  | 1.63319229  | 0.146906   | GLDN    | ENSG00000186417 |

|    |          |          |          |    |    |    |             |             |        |                 |
|----|----------|----------|----------|----|----|----|-------------|-------------|--------|-----------------|
| 15 | 49505205 | 49505666 | 49505361 | 11 | 20 | 8  | 2.425043097 | 0.00917565  | GLDN   | ENSG00000186417 |
| 15 | 49539839 | 49540018 | 49539918 | 9  | 9  | 8  | 1.154782427 | 0.375434    | GLDN   | ENSG00000186417 |
| 15 | 49552199 | 49552453 | 49552298 | 8  | 11 | 6  | 1.781664316 | 0.103344    | GLDN   | ENSG00000186417 |
| 15 | 49560528 | 49560881 | 49560704 | 9  | 14 | 12 | 1.199197136 | 0.313881    | GLDN   | ENSG00000186417 |
| 15 | 49564023 | 49564260 | 49564116 | 9  | 10 | 2  | 3.810782009 | 0.00936112  | GLDN   | ENSG00000186417 |
| 15 | 49568302 | 49568527 | 49568414 | 8  | 8  | 5  | 1.558956276 | 0.191397    | GLDN   | ENSG00000186417 |
| 15 | 49578991 | 49579407 | 49579142 | 13 | 19 | 16 | 1.222710805 | 0.269115    | GLDN   | ENSG00000186417 |
| 15 | 49579434 | 49579641 | 49579528 | 8  | 11 | 4  | 2.494330042 | 0.0324033   | DMXL2  | ENSG00000104093 |
| 15 | 49616442 | 49616645 | 49616543 | 8  | 9  | 6  | 1.484720263 | 0.204387    | DMXL2  | ENSG00000104093 |
| 15 | 49637385 | 49637635 | 49637508 | 9  | 10 | 9  | 1.143234603 | 0.378307    | DMXL2  | ENSG00000104093 |
| 15 | 49639130 | 49639321 | 49639230 | 9  | 10 | 5  | 1.905391004 | 0.0915982   | DMXL2  | ENSG00000104093 |
| 15 | 49656098 | 49656333 | 49656237 | 8  | 10 | 7  | 1.429043253 | 0.21536     | DMXL2  | ENSG00000104093 |
| 15 | 49656500 | 49656876 | 49656679 | 11 | 18 | 11 | 1.645564958 | 0.0828462   | DMXL2  | ENSG00000104093 |
| 15 | 49701376 | 49702281 | 49701660 | 13 | 40 | 21 | 1.936885071 | 0.00493425  | DMXL2  | ENSG00000104093 |
| 15 | 49707764 | 49708020 | 49707892 | 8  | 9  | 1  | 5.196520921 | 0.00490062  | DMXL2  | ENSG00000104093 |
| 15 | 49717680 | 49717907 | 49717766 | 8  | 10 | 0  | 11.43234603 | 0.000394183 | DMXL2  | ENSG00000104093 |
| 15 | 49722345 | 49722553 | 49722399 | 8  | 9  | 6  | 1.484720263 | 0.204387    | DMXL2  | ENSG00000104093 |
| 15 | 49724103 | 49724418 | 49724260 | 11 | 15 | 4  | 3.32577339  | 0.00462646  | DMXL2  | ENSG00000104093 |
| 15 | 49725628 | 49725825 | 49725712 | 9  | 11 | 5  | 2.078608368 | 0.0614303   | DMXL2  | ENSG00000104093 |
| 15 | 49729351 | 49729663 | 49729516 | 9  | 14 | 11 | 1.29913023  | 0.246308    | DMXL2  | ENSG00000104093 |
| 15 | 49743005 | 49743191 | 49743098 | 8  | 8  | 5  | 1.558956276 | 0.191397    | SCG3   | ENSG00000104112 |
| 15 | 49752630 | 49752853 | 49752751 | 8  | 10 | 5  | 1.905391004 | 0.0915982   | SCG3   | ENSG00000104112 |
| 15 | 49757296 | 49757501 | 49757398 | 8  | 9  | 7  | 1.29913023  | 0.286504    | SCG3   | ENSG00000104112 |
| 15 | 49765790 | 49766064 | 49765927 | 8  | 10 | 2  | 3.810782009 | 0.00936112  | SCG3   | ENSG00000104112 |
| 15 | 49785607 | 49785811 | 49785709 | 11 | 11 | 3  | 3.117912553 | 0.0146045   | SCG3   | ENSG00000104112 |
| 15 | 49787497 | 49787930 | 49787676 | 9  | 16 | 12 | 1.359090087 | 0.198699    | SCG3   | ENSG00000104112 |
| 15 | 49798598 | 49798914 | 49798712 | 8  | 12 | 7  | 1.688869299 | 0.11395     | LYSMD2 | ENSG00000140280 |
| 15 | 49799669 | 49800058 | 49799929 | 9  | 13 | 11 | 1.212521548 | 0.309909    | LYSMD2 | ENSG00000140280 |
| 15 | 49805728 | 49806290 | 49806039 | 21 | 37 | 21 | 1.795161773 | 0.0125164   | LYSMD2 | ENSG00000140280 |
| 15 | 49808560 | 49808831 | 49808731 | 8  | 10 | 13 | 0.816596145 | 0.696946    | LYSMD2 | ENSG00000140280 |
| 15 | 49809969 | 49810295 | 49810137 | 12 | 15 | 7  | 2.078608368 | 0.038229    | LYSMD2 | ENSG00000140280 |
| 15 | 49810392 | 49810653 | 49810490 | 11 | 12 | 6  | 1.930136342 | 0.071303    | LYSMD2 | ENSG00000140280 |
| 15 | 49810736 | 49810974 | 49810869 | 9  | 11 | 2  | 4.157216737 | 0.0052913   | LYSMD2 | ENSG00000140280 |
| 15 | 49816232 | 49816524 | 49816376 | 12 | 17 | 12 | 1.439036563 | 0.154203    | LYSMD2 | ENSG00000140280 |

|    |          |          |          |    |    |    |             |             |        |                 |
|----|----------|----------|----------|----|----|----|-------------|-------------|--------|-----------------|
| 15 | 49818084 | 49818278 | 49818128 | 8  | 9  | 7  | 1.29913023  | 0.286504    | LYSMD2 | ENSG00000140280 |
| 15 | 49818579 | 49818792 | 49818685 | 14 | 14 | 10 | 1.417232979 | 0.185113    | LYSMD2 | ENSG00000140280 |
| 15 | 49830749 | 49830952 | 49830850 | 13 | 13 | 12 | 1.11925066  | 0.384109    | TMOD2  | ENSG00000128872 |
| 15 | 49831477 | 49831732 | 49831604 | 10 | 10 | 13 | 0.816596145 | 0.696946    | TMOD2  | ENSG00000128872 |
| 15 | 49831961 | 49832239 | 49832099 | 11 | 11 | 12 | 0.959357709 | 0.543005    | TMOD2  | ENSG00000128872 |
| 15 | 49840689 | 49840946 | 49840817 | 9  | 9  | 2  | 3.464347281 | 0.0163838   | TMOD2  | ENSG00000128872 |
| 15 | 49855333 | 49856065 | 49855782 | 16 | 33 | 25 | 1.359090087 | 0.117005    | TMOD2  | ENSG00000128872 |
| 15 | 49856382 | 49856843 | 49856644 | 12 | 23 | 9  | 2.494330042 | 0.00494866  | TMOD2  | ENSG00000128872 |
| 15 | 49860573 | 49860874 | 49860723 | 13 | 17 | 3  | 4.676868829 | 0.000552213 | TMOD2  | ENSG00000128872 |
| 15 | 49863625 | 49863861 | 49863746 | 13 | 15 | 5  | 2.771477825 | 0.0105836   | TMOD2  | ENSG00000128872 |
| 15 | 49881044 | 49881249 | 49881116 | 11 | 11 | 10 | 1.133786383 | 0.380636    | TMOD3  | ENSG00000138594 |
| 15 | 49887763 | 49887950 | 49887867 | 9  | 10 | 0  | 11.43234603 | 0.000394183 | TMOD3  | ENSG00000138594 |
| 15 | 49904884 | 49905075 | 49905002 | 9  | 9  | 2  | 3.464347281 | 0.0163838   | TMOD3  | ENSG00000138594 |
| 15 | 49908662 | 49909275 | 49908825 | 12 | 30 | 19 | 1.610921486 | 0.0449624   | TMOD3  | ENSG00000138594 |
| 15 | 49909860 | 49910460 | 49909998 | 10 | 21 | 19 | 1.143234603 | 0.33145     | TMOD3  | ENSG00000138594 |
| 15 | 49933629 | 49933813 | 49933721 | 8  | 8  | 4  | 1.870747532 | 0.118863    | TMOD3  | ENSG00000138594 |
| 15 | 49943837 | 49944465 | 49944173 | 46 | 71 | 14 | 4.988660084 | 2.30E-11    |        | ENSG00000207484 |
| 15 | 49952962 | 49953296 | 49953132 | 8  | 12 | 7  | 1.688869299 | 0.11395     |        | ENSG00000207484 |
| 15 | 49963677 | 49963856 | 49963766 | 8  | 8  | 3  | 2.338434415 | 0.0641221   |        | ENSG00000207484 |
| 15 | 49967459 | 49967646 | 49967553 | 8  | 9  | 5  | 1.73217364  | 0.133894    |        | ENSG00000207484 |
| 15 | 49983234 | 49983422 | 49983413 | 8  | 9  | 6  | 1.484720263 | 0.204387    |        | ENSG00000202323 |
| 15 | 49997003 | 49997476 | 49997239 | 11 | 21 | 4  | 4.572938411 | 0.000186332 |        | ENSG00000202323 |
| 15 | 50003976 | 50004279 | 50004127 | 12 | 15 | 8  | 1.847651883 | 0.0631662   |        | ENSG00000202323 |
| 15 | 50005005 | 50005283 | 50005167 | 12 | 14 | 9  | 1.558956276 | 0.132279    |        | ENSG00000202323 |
| 15 | 50013708 | 50013905 | 50013806 | 8  | 9  | 5  | 1.73217364  | 0.133894    |        | ENSG00000202323 |
| 15 | 50028267 | 50028457 | 50028327 | 11 | 11 | 7  | 1.558956276 | 0.158273    | LEO1   | ENSG00000166477 |
| 15 | 50030582 | 50030777 | 50030679 | 9  | 10 | 7  | 1.429043253 | 0.21536     | LEO1   | ENSG00000166477 |
| 15 | 50045234 | 50045478 | 50045372 | 9  | 11 | 12 | 0.959357709 | 0.543005    | LEO1   | ENSG00000166477 |
| 15 | 50050658 | 50051532 | 50051231 | 20 | 54 | 29 | 1.905391004 | 0.0017409   | LEO1   | ENSG00000166477 |
| 15 | 50061606 | 50061990 | 50061767 | 10 | 16 | 12 | 1.359090087 | 0.198699    | LEO1   | ENSG00000166477 |
| 15 | 50069385 | 50069579 | 50069445 | 8  | 8  | 4  | 1.870747532 | 0.118863    | LEO1   | ENSG00000166477 |
| 15 | 50074074 | 50074336 | 50074205 | 10 | 11 | 6  | 1.781664316 | 0.103344    | LEO1   | ENSG00000166477 |
| 15 | 50084360 | 50084652 | 50084509 | 15 | 17 | 10 | 1.700679574 | 0.0766266   | MAPK6  | ENSG00000069956 |
| 15 | 50085942 | 50086169 | 50086100 | 10 | 11 | 4  | 2.494330042 | 0.0324033   | MAPK6  | ENSG00000069956 |

|    |          |          |          |    |    |    |             |            |         |                 |
|----|----------|----------|----------|----|----|----|-------------|------------|---------|-----------------|
| 15 | 50088661 | 50088997 | 50088829 | 11 | 15 | 12 | 1.279143611 | 0.251893   | MAPK6   | ENSG00000069956 |
| 15 | 50098086 | 50098630 | 50098455 | 11 | 21 | 17 | 1.27026067  | 0.223413   | MAPK6   | ENSG00000069956 |
| 15 | 50099755 | 50099985 | 50099843 | 10 | 12 | 11 | 1.125912866 | 0.382541   | MAPK6   | ENSG00000069956 |
| 15 | 50100199 | 50100411 | 50100273 | 8  | 10 | 9  | 1.143234603 | 0.378307   | MAPK6   | ENSG00000069956 |
| 15 | 50100587 | 50100846 | 50100716 | 10 | 14 | 5  | 2.598260461 | 0.0167748  | MAPK6   | ENSG00000069956 |
| 15 | 50100903 | 50101220 | 50101079 | 10 | 14 | 6  | 2.227080395 | 0.0322529  | MAPK6   | ENSG00000069956 |
| 15 | 50117838 | 50118055 | 50117972 | 11 | 11 | 11 | 1.039304184 | 0.462773   | MAPK6   | ENSG00000069956 |
| 15 | 50133907 | 50134086 | 50134024 | 8  | 8  | 0  | 9.353737658 | 0.00163931 | MAPK6   | ENSG00000069956 |
| 15 | 50136896 | 50137077 | 50136986 | 9  | 9  | 4  | 2.078608368 | 0.0785659  | MAPK6   | ENSG00000069956 |
| 15 | 50138615 | 50138853 | 50138723 | 8  | 8  | 10 | 0.850339787 | 0.645072   | MAPK6   | ENSG00000069956 |
| 15 | 50140843 | 50141030 | 50140903 | 8  | 8  | 2  | 3.117912553 | 0.0283184  | MAPK6   | ENSG00000069956 |
| 15 | 50146991 | 50147341 | 50147166 | 10 | 15 | 4  | 3.32577339  | 0.00462646 | MAPK6   | ENSG00000069956 |
| 15 | 50147523 | 50147828 | 50147673 | 9  | 14 | 8  | 1.73217364  | 0.0890835  | MAPK6   | ENSG00000069956 |
| 15 | 50151099 | 50151278 | 50151188 | 8  | 9  | 6  | 1.484720263 | 0.204387   | MAPK6   | ENSG00000069956 |
| 15 | 50158426 | 50158719 | 50158567 | 16 | 18 | 15 | 1.234173719 | 0.265435   | MAPK6   | ENSG00000069956 |
| 15 | 50159071 | 50159324 | 50159197 | 11 | 12 | 7  | 1.688869299 | 0.11395    | MAPK6   | ENSG00000069956 |
| 15 | 50159557 | 50159840 | 50159728 | 8  | 10 | 6  | 1.63319229  | 0.146906   | MAPK6   | ENSG00000069956 |
| 15 | 50164789 | 50164998 | 50164855 | 8  | 9  | 8  | 1.154782427 | 0.375434   | MAPK6   | ENSG00000069956 |
| 15 | 50182728 | 50182907 | 50182817 | 8  | 8  | 4  | 1.870747532 | 0.118863   | BCL2L10 | ENSG00000137875 |
| 15 | 50185108 | 50185459 | 50185286 | 8  | 13 | 13 | 1.039304184 | 0.45974    | BCL2L10 | ENSG00000137875 |
| 15 | 50202394 | 50202612 | 50202491 | 8  | 10 | 7  | 1.429043253 | 0.21536    | BCL2L10 | ENSG00000137875 |
| 15 | 50217004 | 50217271 | 50217135 | 8  | 10 | 7  | 1.429043253 | 0.21536    | BCL2L10 | ENSG00000137875 |
| 15 | 50219382 | 50219678 | 50219530 | 22 | 25 | 10 | 2.456537163 | 0.00405907 |         | ENSG00000206995 |
| 15 | 50222060 | 50222301 | 50222202 | 9  | 10 | 3  | 2.858086507 | 0.0242838  |         | ENSG00000206995 |
| 15 | 50232604 | 50232783 | 50232693 | 8  | 8  | 2  | 3.117912553 | 0.0283184  |         | ENSG00000206995 |
| 15 | 50233878 | 50234064 | 50233971 | 8  | 8  | 5  | 1.558956276 | 0.191397   |         | ENSG00000206995 |
| 15 | 50250884 | 50251169 | 50251019 | 10 | 13 | 10 | 1.32275078  | 0.240023   | GNB5    | ENSG00000069966 |
| 15 | 50254124 | 50254381 | 50254267 | 9  | 9  | 4  | 2.078608368 | 0.0785659  | GNB5    | ENSG00000069966 |
| 15 | 50256045 | 50256304 | 50256156 | 8  | 11 | 8  | 1.385738912 | 0.224757   | GNB5    | ENSG00000069966 |
| 15 | 50257379 | 50257845 | 50257558 | 14 | 23 | 14 | 1.662886695 | 0.0567474  | GNB5    | ENSG00000069966 |
| 15 | 50259968 | 50260314 | 50260141 | 9  | 13 | 12 | 1.11925066  | 0.384109   | GNB5    | ENSG00000069966 |
| 15 | 50263141 | 50263618 | 50263306 | 12 | 21 | 21 | 1.039304184 | 0.449418   | GNB5    | ENSG00000069966 |
| 15 | 50264775 | 50265092 | 50264933 | 10 | 12 | 7  | 1.688869299 | 0.11395    | GNB5    | ENSG00000069966 |
| 15 | 50287833 | 50288057 | 50287945 | 9  | 10 | 11 | 0.952695502 | 0.548138   | GNB5    | ENSG00000069966 |

|    |          |          |          |    |    |    |             |             |       |                 |
|----|----------|----------|----------|----|----|----|-------------|-------------|-------|-----------------|
| 15 | 50292801 | 50293008 | 50292875 | 10 | 11 | 3  | 3.117912553 | 0.0146045   | GNB5  | ENSG00000069966 |
| 15 | 50293390 | 50293627 | 50293465 | 9  | 11 | 7  | 1.558956276 | 0.158273    | GNB5  | ENSG00000069966 |
| 15 | 50296064 | 50296263 | 50296161 | 8  | 8  | 4  | 1.870747532 | 0.118863    | GNB5  | ENSG00000069966 |
| 15 | 50296646 | 50296988 | 50296820 | 8  | 13 | 12 | 1.11925066  | 0.384109    | GNB5  | ENSG00000069966 |
| 15 | 50303166 | 50303381 | 50303277 | 9  | 10 | 3  | 2.858086507 | 0.0242838   | GNB5  | ENSG00000069966 |
| 15 | 50304970 | 50305232 | 50305132 | 9  | 11 | 5  | 2.078608368 | 0.0614303   | GNB5  | ENSG00000069966 |
| 15 | 50308468 | 50308688 | 50308613 | 11 | 12 | 7  | 1.688869299 | 0.11395     | GNB5  | ENSG00000069966 |
| 15 | 50315491 | 50315670 | 50315596 | 10 | 10 | 0  | 11.43234603 | 0.000394183 |       | ENSG00000221052 |
| 15 | 50333921 | 50334147 | 50334030 | 8  | 9  | 15 | 0.649565115 | 0.865365    |       | ENSG00000221052 |
| 15 | 50335895 | 50336176 | 50336035 | 10 | 13 | 9  | 1.455025858 | 0.177172    |       | ENSG00000221052 |
| 15 | 50345600 | 50345808 | 50345712 | 8  | 8  | 5  | 1.558956276 | 0.191397    |       | ENSG00000221052 |
| 15 | 50355704 | 50355885 | 50355839 | 8  | 9  | 8  | 1.154782427 | 0.375434    |       | ENSG00000221052 |
| 15 | 50366600 | 50366869 | 50366734 | 12 | 12 | 5  | 2.251825733 | 0.0404733   | MYO5C | ENSG00000128833 |
| 15 | 50367442 | 50367621 | 50367548 | 9  | 9  | 5  | 1.73217364  | 0.133894    | MYO5C | ENSG00000128833 |
| 15 | 50367680 | 50368175 | 50367978 | 16 | 30 | 17 | 1.789912762 | 0.021784    | MYO5C | ENSG00000128833 |
| 15 | 50371861 | 50372068 | 50372017 | 8  | 8  | 5  | 1.558956276 | 0.191397    | MYO5C | ENSG00000128833 |
| 15 | 50375942 | 50376195 | 50376058 | 8  | 11 | 6  | 1.781664316 | 0.103344    | MYO5C | ENSG00000128833 |
| 15 | 50380820 | 50381004 | 50380961 | 8  | 8  | 2  | 3.117912553 | 0.0283184   | MYO5C | ENSG00000128833 |
| 15 | 50382236 | 50382481 | 50382358 | 11 | 11 | 4  | 2.494330042 | 0.0324033   | MYO5C | ENSG00000128833 |
| 15 | 50392907 | 50393098 | 50392945 | 8  | 10 | 3  | 2.858086507 | 0.0242838   | MYO5C | ENSG00000128833 |
| 15 | 50393722 | 50394047 | 50393899 | 9  | 13 | 6  | 2.078608368 | 0.0483393   | MYO5C | ENSG00000128833 |
| 15 | 50410910 | 50411415 | 50411070 | 17 | 31 | 12 | 2.558287223 | 0.00121125  | MYO5A | ENSG00000197535 |
| 15 | 50415971 | 50416260 | 50416094 | 11 | 12 | 6  | 1.930136342 | 0.071303    | MYO5A | ENSG00000197535 |
| 15 | 50416999 | 50417274 | 50417135 | 10 | 12 | 2  | 4.503651465 | 0.002963    | MYO5A | ENSG00000197535 |
| 15 | 50419779 | 50420484 | 50420305 | 38 | 60 | 10 | 5.763414113 | 8.52E-11    | MYO5A | ENSG00000197535 |
| 15 | 50429885 | 50430139 | 50430002 | 10 | 14 | 1  | 7.794781382 | 0.000197021 | MYO5A | ENSG00000197535 |
| 15 | 50439403 | 50439993 | 50439689 | 8  | 21 | 16 | 1.344981885 | 0.176214    | MYO5A | ENSG00000197535 |
| 15 | 50441195 | 50441487 | 50441341 | 9  | 12 | 11 | 1.125912866 | 0.382541    | MYO5A | ENSG00000197535 |
| 15 | 50441545 | 50441733 | 50441633 | 8  | 8  | 9  | 0.935373766 | 0.560286    | MYO5A | ENSG00000197535 |
| 15 | 50447045 | 50447235 | 50447170 | 8  | 8  | 5  | 1.558956276 | 0.191397    | MYO5A | ENSG00000197535 |
| 15 | 50447756 | 50448127 | 50447948 | 8  | 15 | 10 | 1.511715177 | 0.140236    | MYO5A | ENSG00000197535 |
| 15 | 50458907 | 50459107 | 50458963 | 8  | 9  | 6  | 1.484720263 | 0.204387    | MYO5A | ENSG00000197535 |
| 15 | 50471766 | 50471975 | 50471836 | 8  | 10 | 10 | 1.039304184 | 0.464387    | MYO5A | ENSG00000197535 |
| 15 | 50492869 | 50493222 | 50493045 | 9  | 15 | 3  | 4.157216737 | 0.00170423  | MYO5A | ENSG00000197535 |

|    |          |          |          |    |     |    |             |             |          |                 |
|----|----------|----------|----------|----|-----|----|-------------|-------------|----------|-----------------|
| 15 | 50509670 | 50509929 | 50509801 | 9  | 10  | 2  | 3.810782009 | 0.00936112  | MYO5A    | ENSG00000197535 |
| 15 | 50560248 | 50560635 | 50560456 | 9  | 16  | 8  | 1.963130126 | 0.0441028   |          | ENSG00000174057 |
| 15 | 50561837 | 50562022 | 50561888 | 8  | 8   | 7  | 1.169217207 | 0.371848    |          | ENSG00000174057 |
| 15 | 50578953 | 50579136 | 50579064 | 8  | 8   | 3  | 2.338434415 | 0.0641221   |          | ENSG00000174057 |
| 15 | 50590443 | 50590648 | 50590543 | 8  | 9   | 8  | 1.154782427 | 0.375434    |          | ENSG00000174057 |
| 15 | 50599795 | 50599995 | 50599880 | 8  | 9   | 4  | 2.078608368 | 0.0785659   | MYO5A    | ENSG00000197535 |
| 15 | 50605209 | 50605430 | 50605326 | 9  | 10  | 4  | 2.286469205 | 0.0509017   | MYO5A    | ENSG00000197535 |
| 15 | 50607125 | 50607324 | 50607222 | 8  | 8   | 2  | 3.117912553 | 0.0283184   | MYO5A    | ENSG00000197535 |
| 15 | 50607476 | 50607812 | 50607633 | 10 | 13  | 7  | 1.818782322 | 0.0805123   | MYO5A    | ENSG00000197535 |
| 15 | 50609223 | 50609411 | 50609282 | 8  | 9   | 8  | 1.154782427 | 0.375434    | MYO5A    | ENSG00000197535 |
| 15 | 50627994 | 50628232 | 50628113 | 10 | 11  | 3  | 3.117912553 | 0.0146045   | MYO5A    | ENSG00000197535 |
| 15 | 50632959 | 50633293 | 50633132 | 13 | 18  | 6  | 2.8209685   | 0.00559354  |          | ENSG00000128989 |
| 15 | 50637623 | 50638015 | 50637786 | 26 | 32  | 12 | 2.638233698 | 0.000799104 |          | ENSG00000128989 |
| 15 | 50639833 | 50640137 | 50640004 | 11 | 14  | 6  | 2.227080395 | 0.0322529   |          | ENSG00000128989 |
| 15 | 50644474 | 50644779 | 50644622 | 10 | 13  | 3  | 3.637564645 | 0.0050909   |          | ENSG00000128989 |
| 15 | 50644843 | 50645136 | 50644968 | 13 | 15  | 10 | 1.511715177 | 0.140236    |          | ENSG00000128989 |
| 15 | 50647515 | 50647822 | 50647665 | 14 | 17  | 14 | 1.247165021 | 0.261378    |          | ENSG00000128989 |
| 15 | 50647892 | 50648226 | 50648059 | 9  | 13  | 20 | 0.692869456 | 0.861903    |          | ENSG00000128989 |
| 15 | 50648556 | 50648833 | 50648690 | 9  | 12  | 8  | 1.501217155 | 0.168286    |          | ENSG00000128989 |
| 15 | 50662294 | 50662524 | 50662404 | 8  | 8   | 2  | 3.117912553 | 0.0283184   |          | ENSG00000128989 |
| 15 | 50672656 | 50672892 | 50672762 | 8  | 9   | 5  | 1.73217364  | 0.133894    | KIAA1370 | ENSG00000047346 |
| 15 | 50709173 | 50709392 | 50709326 | 8  | 8   | 1  | 4.676868829 | 0.0091584   | KIAA1370 | ENSG00000047346 |
| 15 | 50712671 | 50712862 | 50712700 | 9  | 9   | 4  | 2.078608368 | 0.0785659   | KIAA1370 | ENSG00000047346 |
| 15 | 50732827 | 50733445 | 50733248 | 10 | 26  | 23 | 1.169217207 | 0.28753     | KIAA1370 | ENSG00000047346 |
| 15 | 50733791 | 50734103 | 50733954 | 14 | 17  | 12 | 1.439036563 | 0.154203    | KIAA1370 | ENSG00000047346 |
| 15 | 50739175 | 50739372 | 50739282 | 8  | 10  | 3  | 2.858086507 | 0.0242838   | KIAA1370 | ENSG00000047346 |
| 15 | 50741152 | 50741331 | 50741239 | 8  | 8   | 6  | 1.336248237 | 0.277651    | KIAA1370 | ENSG00000047346 |
| 15 | 50742646 | 50742832 | 50742746 | 8  | 9   | 4  | 2.078608368 | 0.0785659   | KIAA1370 | ENSG00000047346 |
| 15 | 50743020 | 50743927 | 50743281 | 88 | 139 | 10 | 13.2275078  | 6.98E-32    | KIAA1370 | ENSG00000047346 |
| 15 | 50743979 | 50744200 | 50744079 | 9  | 11  | 6  | 1.781664316 | 0.103344    | KIAA1370 | ENSG00000047346 |
| 15 | 50746318 | 50746506 | 50746458 | 8  | 8   | 1  | 4.676868829 | 0.0091584   | KIAA1370 | ENSG00000047346 |
| 15 | 50749380 | 50749647 | 50749488 | 11 | 14  | 5  | 2.598260461 | 0.0167748   | KIAA1370 | ENSG00000047346 |
| 15 | 50757420 | 50758476 | 50758127 | 18 | 54  | 33 | 1.681227357 | 0.00759532  | KIAA1370 | ENSG00000047346 |
| 15 | 50758806 | 50759174 | 50758949 | 11 | 17  | 13 | 1.336248237 | 0.204556    | KIAA1370 | ENSG00000047346 |

|    |          |          |          |    |    |    |             |            |          |                 |
|----|----------|----------|----------|----|----|----|-------------|------------|----------|-----------------|
| 15 | 50759587 | 50759778 | 50759693 | 8  | 8  | 3  | 2.338434415 | 0.0641221  | KIAA1370 | ENSG00000047346 |
| 15 | 50774672 | 50775166 | 50774851 | 13 | 23 | 25 | 0.959357709 | 0.559486   | KIAA1370 | ENSG00000047346 |
| 15 | 50788376 | 50788781 | 50788479 | 9  | 17 | 6  | 2.672496474 | 0.00882337 | KIAA1370 | ENSG00000047346 |
| 15 | 50789268 | 50789770 | 50789591 | 10 | 22 | 13 | 1.707428303 | 0.0525925  | ONECUT1  | ENSG00000169856 |
| 15 | 50789866 | 50790112 | 50789989 | 11 | 12 | 6  | 1.930136342 | 0.071303   | ONECUT1  | ENSG00000169856 |
| 15 | 50790673 | 50790959 | 50790816 | 9  | 13 | 8  | 1.616695398 | 0.123553   | ONECUT1  | ENSG00000169856 |
| 15 | 50794946 | 50795126 | 50795055 | 8  | 9  | 4  | 2.078608368 | 0.0785659  | ONECUT1  | ENSG00000169856 |
| 15 | 50795149 | 50795452 | 50795316 | 8  | 10 | 2  | 3.810782009 | 0.00936112 | ONECUT1  | ENSG00000169856 |
| 15 | 50797056 | 50797324 | 50797190 | 9  | 10 | 10 | 1.039304184 | 0.464387   | ONECUT1  | ENSG00000169856 |
| 15 | 50800708 | 50801231 | 50800969 | 8  | 19 | 8  | 2.309564854 | 0.0138337  | ONECUT1  | ENSG00000169856 |
| 15 | 50806734 | 50807035 | 50806884 | 11 | 15 | 9  | 1.662886695 | 0.0970566  | ONECUT1  | ENSG00000169856 |
| 15 | 50809713 | 50810211 | 50809874 | 13 | 24 | 13 | 1.855900329 | 0.0279411  | ONECUT1  | ENSG00000169856 |
| 15 | 50813680 | 50813995 | 50813837 | 9  | 12 | 7  | 1.688869299 | 0.11395    | ONECUT1  | ENSG00000169856 |
| 15 | 50814976 | 50815304 | 50815148 | 14 | 17 | 13 | 1.336248237 | 0.204556   | ONECUT1  | ENSG00000169856 |
| 15 | 50841047 | 50841273 | 50841160 | 8  | 8  | 3  | 2.338434415 | 0.0641221  | ONECUT1  | ENSG00000169856 |
| 15 | 50843953 | 50844164 | 50844041 | 8  | 9  | 6  | 1.484720263 | 0.204387   | ONECUT1  | ENSG00000169856 |
| 15 | 50848340 | 50848526 | 50848428 | 8  | 8  | 7  | 1.169217207 | 0.371848   | ONECUT1  | ENSG00000169856 |
| 15 | 50859932 | 50860433 | 50860248 | 11 | 22 | 20 | 1.138285535 | 0.33303    | ONECUT1  | ENSG00000169856 |
| 15 | 50865841 | 50866026 | 50865888 | 8  | 8  | 2  | 3.117912553 | 0.0283184  | ONECUT1  | ENSG00000169856 |
| 15 | 50866629 | 50867024 | 50866846 | 12 | 19 | 7  | 2.598260461 | 0.00730518 | ONECUT1  | ENSG00000169856 |
| 15 | 50869324 | 50869770 | 50869503 | 9  | 18 | 6  | 2.8209685   | 0.00559354 | ONECUT1  | ENSG00000169856 |
| 15 | 50882578 | 50882946 | 50882767 | 8  | 15 | 8  | 1.847651883 | 0.0631662  | ONECUT1  | ENSG00000169856 |
| 15 | 50883784 | 50884486 | 50884190 | 9  | 24 | 13 | 1.855900329 | 0.0279411  | ONECUT1  | ENSG00000169856 |
| 15 | 50888752 | 50889146 | 50888967 | 8  | 16 | 9  | 1.766817113 | 0.0700694  | ONECUT1  | ENSG00000169856 |
| 15 | 50901373 | 50901983 | 50901767 | 8  | 21 | 0  | 22.86469205 | 1.55E-07   | ONECUT1  | ENSG00000169856 |
| 15 | 50915108 | 50915408 | 50915257 | 8  | 11 | 2  | 4.157216737 | 0.0052913  | ONECUT1  | ENSG00000169856 |
| 15 | 50916418 | 50916731 | 50916589 | 8  | 11 | 3  | 3.117912553 | 0.0146045  | ONECUT1  | ENSG00000169856 |
| 15 | 50926494 | 50926675 | 50926584 | 9  | 9  | 6  | 1.484720263 | 0.204387   |          | ENSG00000214896 |
| 15 | 50937208 | 50937426 | 50937256 | 8  | 10 | 5  | 1.905391004 | 0.0915982  |          | ENSG00000214896 |
| 15 | 50946346 | 50946559 | 50946433 | 9  | 11 | 4  | 2.494330042 | 0.0324033  |          | ENSG00000214896 |
| 15 | 50956249 | 50956537 | 50956387 | 9  | 13 | 6  | 2.078608368 | 0.0483393  |          | ENSG00000214896 |
| 15 | 50969255 | 50969536 | 50969434 | 10 | 13 | 2  | 4.850086193 | 0.00164564 |          | ENSG00000214896 |
| 15 | 50995768 | 50995999 | 50995891 | 12 | 12 | 7  | 1.688869299 | 0.11395    |          | ENSG00000221274 |
| 15 | 51002851 | 51003184 | 51003006 | 9  | 12 | 9  | 1.35109544  | 0.232899   |          | ENSG00000221274 |

|    |          |          |          |    |    |    |             |             |                 |
|----|----------|----------|----------|----|----|----|-------------|-------------|-----------------|
| 15 | 51003327 | 51003526 | 51003426 | 8  | 9  | 9  | 1.039304184 | 0.466079    | ENSG00000221274 |
| 15 | 51011519 | 51011910 | 51011646 | 8  | 14 | 12 | 1.199197136 | 0.313881    | ENSG00000221274 |
| 15 | 51014214 | 51014428 | 51014321 | 10 | 10 | 7  | 1.429043253 | 0.21536     | ENSG00000221274 |
| 15 | 51020605 | 51020870 | 51020737 | 9  | 10 | 1  | 5.716173013 | 0.00260397  | ENSG00000221274 |
| 15 | 51027255 | 51027434 | 51027344 | 8  | 8  | 14 | 0.623582511 | 0.877092    | ENSG00000221274 |
| 15 | 51038896 | 51039084 | 51038990 | 8  | 8  | 13 | 0.668124118 | 0.835294    | ENSG00000221274 |
| 15 | 51039784 | 51040179 | 51040005 | 10 | 18 | 13 | 1.41048425  | 0.160361    | ENSG00000221274 |
| 15 | 51040472 | 51040676 | 51040639 | 9  | 10 | 6  | 1.63319229  | 0.146906    | ENSG00000221274 |
| 15 | 51054113 | 51054345 | 51054227 | 8  | 10 | 9  | 1.143234603 | 0.378307    | ENSG00000221274 |
| 15 | 51058658 | 51058883 | 51058770 | 8  | 10 | 5  | 1.905391004 | 0.0915982   | ENSG00000221274 |
| 15 | 51100567 | 51100746 | 51100656 | 8  | 8  | 3  | 2.338434415 | 0.0641221   | ENSG00000221274 |
| 15 | 51119526 | 51119736 | 51119573 | 10 | 10 | 4  | 2.286469205 | 0.0509017   | ENSG00000221274 |
| 15 | 51147573 | 51147849 | 51147711 | 8  | 11 | 8  | 1.385738912 | 0.224757    | ENSG00000221274 |
| 15 | 51151269 | 51152180 | 51151836 | 36 | 99 | 34 | 2.969440526 | 1.33E-09    | ENSG00000221274 |
| 15 | 51158871 | 51159192 | 51159031 | 13 | 17 | 11 | 1.558956276 | 0.111389    | ENSG00000221274 |
| 15 | 51160041 | 51160232 | 51160136 | 8  | 11 | 5  | 2.078608368 | 0.0614303   | ENSG00000221274 |
| 15 | 51160361 | 51160568 | 51160438 | 9  | 11 | 2  | 4.157216737 | 0.0052913   | ENSG00000221274 |
| 15 | 51163388 | 51163705 | 51163544 | 8  | 11 | 4  | 2.494330042 | 0.0324033   | ENSG00000221274 |
| 15 | 51192323 | 51192518 | 51192420 | 8  | 9  | 5  | 1.73217364  | 0.133894    | ENSG00000221274 |
| 15 | 51193159 | 51193482 | 51193332 | 10 | 13 | 2  | 4.850086193 | 0.00164564  | ENSG00000221274 |
| 15 | 51207516 | 51207761 | 51207638 | 8  | 10 | 7  | 1.429043253 | 0.21536     | ENSG00000221274 |
| 15 | 51212212 | 51212464 | 51212348 | 9  | 10 | 5  | 1.905391004 | 0.0915982   | ENSG00000221274 |
| 15 | 51213611 | 51213830 | 51213770 | 8  | 9  | 5  | 1.73217364  | 0.133894    | ENSG00000221274 |
| 15 | 51213875 | 51214294 | 51214019 | 9  | 16 | 6  | 2.524024447 | 0.0137633   | ENSG00000221274 |
| 15 | 51244562 | 51244774 | 51244668 | 8  | 8  | 8  | 1.039304184 | 0.46786     | ENSG00000221274 |
| 15 | 51245221 | 51245733 | 51245502 | 8  | 18 | 4  | 3.9493559   | 0.000961379 | ENSG00000221274 |
| 15 | 51272716 | 51273010 | 51272839 | 12 | 15 | 12 | 1.279143611 | 0.251893    | ENSG00000221274 |
| 15 | 51276497 | 51276742 | 51276601 | 12 | 13 | 5  | 2.425043097 | 0.0262442   | ENSG00000221274 |
| 15 | 51276798 | 51277221 | 51277042 | 16 | 25 | 12 | 2.078608368 | 0.0124196   | ENSG00000221274 |
| 15 | 51316544 | 51316822 | 51316683 | 8  | 9  | 4  | 2.078608368 | 0.0785659   | ENSG00000221274 |
| 15 | 51326629 | 51326861 | 51326747 | 10 | 10 | 2  | 3.810782009 | 0.00936112  | ENSG00000221274 |
| 15 | 51346273 | 51346452 | 51346319 | 8  | 8  | 9  | 0.935373766 | 0.560286    | ENSG00000221274 |
| 15 | 51367312 | 51367491 | 51367396 | 8  | 8  | 7  | 1.169217207 | 0.371848    | ENSG00000221274 |
| 15 | 51403830 | 51404114 | 51403987 | 10 | 13 | 3  | 3.637564645 | 0.0050909   | ENSG00000210932 |



|    |          |          |          |    |    |    |             |             |        |                 |
|----|----------|----------|----------|----|----|----|-------------|-------------|--------|-----------------|
| 15 | 51410469 | 51410686 | 51410607 | 8  | 10 | 4  | 2.286469205 | 0.0509017   |        | ENSG00000210932 |
| 15 | 51427889 | 51428211 | 51428050 | 9  | 14 | 1  | 7.794781382 | 0.000197021 |        | ENSG00000210932 |
| 15 | 51435160 | 51435378 | 51435211 | 8  | 10 | 6  | 1.63319229  | 0.146906    |        | ENSG00000210932 |
| 15 | 51444991 | 51445398 | 51445237 | 11 | 17 | 10 | 1.700679574 | 0.0766266   |        | ENSG00000210932 |
| 15 | 51456040 | 51456248 | 51456151 | 8  | 9  | 11 | 0.86608682  | 0.635181    |        | ENSG00000210932 |
| 15 | 51464092 | 51464310 | 51464161 | 9  | 9  | 9  | 1.039304184 | 0.466079    |        | ENSG00000210932 |
| 15 | 51470202 | 51470408 | 51470305 | 8  | 8  | 3  | 2.338434415 | 0.0641221   |        | ENSG00000210932 |
| 15 | 51477496 | 51477746 | 51477592 | 12 | 14 | 6  | 2.227080395 | 0.0322529   |        | ENSG00000210932 |
| 15 | 51521256 | 51521758 | 51521560 | 10 | 20 | 5  | 3.637564645 | 0.000902929 |        | ENSG00000210932 |
| 15 | 51523828 | 51524129 | 51523978 | 9  | 13 | 9  | 1.455025858 | 0.177172    |        | ENSG00000210932 |
| 15 | 51527717 | 51527965 | 51527826 | 9  | 11 | 10 | 1.133786383 | 0.380636    |        | ENSG00000210932 |
| 15 | 51543693 | 51544072 | 51543871 | 16 | 22 | 6  | 3.414856605 | 0.000820885 |        | ENSG00000210932 |
| 15 | 51564808 | 51565009 | 51564908 | 9  | 9  | 4  | 2.078608368 | 0.0785659   |        | ENSG00000210932 |
| 15 | 51590838 | 51591094 | 51590989 | 9  | 13 | 8  | 1.616695398 | 0.123553    |        | ENSG00000210932 |
| 15 | 51592788 | 51592989 | 51592888 | 13 | 14 | 1  | 7.794781382 | 0.000197021 |        | ENSG00000210932 |
| 15 | 51601388 | 51601808 | 51601536 | 9  | 15 | 6  | 2.375552421 | 0.0212094   |        | ENSG00000210932 |
| 15 | 51666353 | 51666598 | 51666475 | 12 | 13 | 2  | 4.850086193 | 0.00164564  |        | ENSG00000210932 |
| 15 | 51716300 | 51716557 | 51716388 | 8  | 11 | 1  | 6.235825105 | 0.0013754   |        | ENSG00000210932 |
| 15 | 51724558 | 51724819 | 51724677 | 10 | 12 | 10 | 1.228268581 | 0.305344    |        | ENSG00000210932 |
| 15 | 51755341 | 51755791 | 51755498 | 17 | 25 | 3  | 6.755477198 | 4.84E-06    |        | ENSG00000210932 |
| 15 | 51796378 | 51796698 | 51796497 | 8  | 12 | 12 | 1.039304184 | 0.461227    | WDR72  | ENSG00000166415 |
| 15 | 51841939 | 51842171 | 51842042 | 10 | 11 | 7  | 1.558956276 | 0.158273    | WDR72  | ENSG00000166415 |
| 15 | 51847450 | 51847662 | 51847556 | 8  | 9  | 7  | 1.29913023  | 0.286504    |        | ENSG00000206641 |
| 15 | 51866027 | 51866244 | 51866134 | 8  | 8  | 4  | 1.870747532 | 0.118863    |        | ENSG00000206641 |
| 15 | 51891109 | 51891498 | 51891330 | 8  | 13 | 10 | 1.32275078  | 0.240023    |        | ENSG00000206641 |
| 15 | 51916733 | 51917019 | 51916876 | 18 | 21 | 7  | 2.858086507 | 0.0029864   |        | ENSG00000206641 |
| 15 | 51920788 | 51920967 | 51920877 | 8  | 8  | 2  | 3.117912553 | 0.0283184   |        | ENSG00000206641 |
| 15 | 51989570 | 51989977 | 51989796 | 82 | 99 | 4  | 20.78608368 | 3.63E-26    |        | ENSG00000206641 |
| 15 | 52057892 | 52058100 | 52057985 | 8  | 9  | 3  | 2.598260461 | 0.0397929   |        | ENSG00000206641 |
| 15 | 52107218 | 52107413 | 52107364 | 8  | 8  | 1  | 4.676868829 | 0.0091584   | UNC13C | ENSG00000137766 |
| 15 | 52116270 | 52116486 | 52116363 | 8  | 8  | 4  | 1.870747532 | 0.118863    | UNC13C | ENSG00000137766 |
| 15 | 52140707 | 52140984 | 52140835 | 9  | 12 | 2  | 4.503651465 | 0.002963    | UNC13C | ENSG00000137766 |
| 15 | 52162411 | 52162674 | 52162542 | 14 | 15 | 5  | 2.771477825 | 0.0105836   | UNC13C | ENSG00000137766 |
| 15 | 52163625 | 52163824 | 52163663 | 8  | 9  | 2  | 3.464347281 | 0.0163838   | UNC13C | ENSG00000137766 |

|    |          |          |          |     |     |    |             |             |          |                 |
|----|----------|----------|----------|-----|-----|----|-------------|-------------|----------|-----------------|
| 15 | 52227161 | 52227435 | 52227279 | 9   | 10  | 8  | 1.27026067  | 0.293854    | UNC13C   | ENSG00000137766 |
| 15 | 53187672 | 53187851 | 53187774 | 8   | 8   | 1  | 4.676868829 | 0.0091584   | C15orf15 | ENSG00000137876 |
| 15 | 53728011 | 53728209 | 53728103 | 8   | 8   | 2  | 3.117912553 | 0.0283184   | PYGO1    | ENSG00000171016 |
| 15 | 53816867 | 53817137 | 53817002 | 8   | 10  | 6  | 1.63319229  | 0.146906    | PRTG     | ENSG00000166450 |
| 15 | 53854817 | 53855328 | 53854996 | 8   | 17  | 3  | 4.676868829 | 0.000552213 |          | ENSG00000221218 |
| 15 | 54072974 | 54073184 | 54073084 | 9   | 9   | 0  | 10.39304184 | 0.000803859 | NEDD4    | ENSG00000069869 |
| 15 | 54284594 | 54285134 | 54284822 | 37  | 52  | 1  | 27.54156088 | 1.11E-15    | RFX7     | ENSG00000181827 |
| 15 | 54319865 | 54320253 | 54320103 | 31  | 38  | 2  | 13.5109544  | 1.90E-10    | RFX7     | ENSG00000181827 |
| 15 | 54325608 | 54325803 | 54325705 | 8   | 8   | 6  | 1.336248237 | 0.277651    | RFX7     | ENSG00000181827 |
| 15 | 54329375 | 54329562 | 54329425 | 8   | 8   | 0  | 9.353737658 | 0.00163931  | RFX7     | ENSG00000181827 |
| 15 | 54448821 | 54449074 | 54448939 | 8   | 10  | 3  | 2.858086507 | 0.0242838   | TEX9     | ENSG00000151575 |
| 15 | 55585386 | 55585692 | 55585539 | 11  | 14  | 0  | 15.58956276 | 2.28E-05    | GRINL1A  | ENSG00000137878 |
| 15 | 57245146 | 57245595 | 57245393 | 72  | 87  | 1  | 45.72938411 | 2.67E-26    |          | ENSG00000221096 |
| 15 | 57245600 | 57245812 | 57245706 | 8   | 10  | 0  | 11.43234603 | 0.000394183 |          | ENSG00000221096 |
| 15 | 57335987 | 57336243 | 57336115 | 8   | 9   | 2  | 3.464347281 | 0.0163838   |          | ENSG00000215983 |
| 15 | 57608480 | 57608664 | 57608572 | 10  | 10  | 2  | 3.810782009 | 0.00936112  |          | ENSG00000201704 |
| 15 | 58138633 | 58139053 | 58138887 | 19  | 26  | 1  | 14.03060649 | 6.50E-08    | FOXB1    | ENSG00000171956 |
| 15 | 58396419 | 58396772 | 58396623 | 42  | 46  | 1  | 24.42364833 | 7.10E-14    | ANXA2P2  | ENSG00000182718 |
| 15 | 58988476 | 58988784 | 58988606 | 8   | 13  | 0  | 14.55025858 | 4.65E-05    |          | ENSG00000212625 |
| 15 | 59488622 | 59488810 | 59488716 | 9   | 9   | 2  | 3.464347281 | 0.0163838   | RORA     | ENSG00000069667 |
| 15 | 60341892 | 60342490 | 60342219 | 48  | 74  | 0  | 77.94781382 | 6.15E-24    |          | ENSG00000166104 |
| 15 | 60377414 | 60377593 | 60377503 | 8   | 8   | 1  | 4.676868829 | 0.0091584   |          | ENSG00000166104 |
| 15 | 60546117 | 60546340 | 60546228 | 8   | 8   | 0  | 9.353737658 | 0.00163931  |          | ENSG00000182015 |
| 15 | 60960487 | 60960671 | 60960511 | 9   | 9   | 0  | 10.39304184 | 0.000803859 |          | ENSG00000211137 |
| 15 | 60975483 | 60975663 | 60975633 | 10  | 10  | 1  | 5.716173013 | 0.00260397  |          | ENSG00000213712 |
| 15 | 60976230 | 60976884 | 60976506 | 10  | 25  | 5  | 4.503651465 | 6.33E-05    |          | ENSG00000213712 |
| 15 | 61079695 | 61079895 | 61079805 | 9   | 9   | 1  | 5.196520921 | 0.00490062  | TPM1     | ENSG00000140416 |
| 15 | 61236158 | 61236963 | 61236556 | 318 | 479 | 5  | 83.14433474 | 2.14E-139   | RPS27L   | ENSG00000185088 |
| 15 | 61268277 | 61268573 | 61268450 | 8   | 12  | 4  | 2.702190879 | 0.0203088   | RAB8B    | ENSG00000166128 |
| 15 | 61458772 | 61459193 | 61458950 | 16  | 24  | 12 | 1.998661893 | 0.0177296   | CA12     | ENSG00000074410 |
| 15 | 61465138 | 61465371 | 61465303 | 10  | 12  | 0  | 13.5109544  | 9.48E-05    | CA12     | ENSG00000074410 |
| 15 | 61467003 | 61467292 | 61467147 | 14  | 17  | 4  | 3.741495063 | 0.00163722  | CA12     | ENSG00000074410 |
| 15 | 61468679 | 61468896 | 61468831 | 8   | 8   | 8  | 1.039304184 | 0.46786     | CA12     | ENSG00000074410 |
| 15 | 61493000 | 61493179 | 61493089 | 8   | 8   | 2  | 3.117912553 | 0.0283184   | CA12     | ENSG00000074410 |

|    |          |          |          |    |    |    |             |             |          |                 |
|----|----------|----------|----------|----|----|----|-------------|-------------|----------|-----------------|
| 15 | 61507674 | 61507919 | 61507796 | 11 | 12 | 0  | 13.5109544  | 9.48E-05    | CA12     | ENSG00000074410 |
| 15 | 61539884 | 61540198 | 61540041 | 8  | 12 | 4  | 2.702190879 | 0.0203088   | USP3     | ENSG00000140455 |
| 15 | 61585160 | 61585365 | 61585262 | 8  | 8  | 3  | 2.338434415 | 0.0641221   | USP3     | ENSG00000140455 |
| 15 | 61936795 | 61936981 | 61936883 | 8  | 8  | 4  | 1.870747532 | 0.118863    |          | ENSG00000199156 |
| 15 | 62175128 | 62175352 | 62175225 | 8  | 9  | 2  | 3.464347281 | 0.0163838   | SNX1     | ENSG00000028528 |
| 15 | 62232960 | 62233214 | 62233066 | 8  | 9  | 11 | 0.86608682  | 0.635181    | SNX22    | ENSG00000157734 |
| 15 | 62434001 | 62434790 | 62434356 | 20 | 39 | 8  | 4.619129708 | 8.77E-07    | CSNK1G1  | ENSG00000169118 |
| 15 | 62435193 | 62435769 | 62435486 | 11 | 26 | 8  | 3.117912553 | 0.000638503 | CSNK1G1  | ENSG00000169118 |
| 15 | 62466767 | 62467234 | 62466982 | 18 | 28 | 6  | 4.305688763 | 3.69E-05    | TRIP4    | ENSG00000103671 |
| 15 | 62539585 | 62539853 | 62539725 | 11 | 13 | 4  | 2.910051716 | 0.0125532   |          | ENSG00000206781 |
| 15 | 62594342 | 62594797 | 62594621 | 14 | 19 | 2  | 6.928694562 | 4.25E-05    | ZNF609   | ENSG00000180357 |
| 15 | 62648616 | 62648795 | 62648639 | 8  | 8  | 0  | 9.353737658 | 0.00163931  | ZNF609   | ENSG00000180357 |
| 15 | 62651133 | 62651559 | 62651359 | 17 | 28 | 6  | 4.305688763 | 3.69E-05    | ZNF609   | ENSG00000180357 |
| 15 | 62846343 | 62846648 | 62846495 | 21 | 22 | 3  | 5.975999059 | 2.96E-05    |          | ENSG00000221033 |
| 15 | 62915092 | 62915310 | 62915214 | 8  | 9  | 2  | 3.464347281 | 0.0163838   | PLEKHO2  | ENSG00000169094 |
| 15 | 63265031 | 63265240 | 63265132 | 9  | 10 | 10 | 1.039304184 | 0.464387    | CLPX     | ENSG00000166855 |
| 15 | 63375396 | 63375994 | 63375763 | 17 | 37 | 21 | 1.795161773 | 0.0125164   |          | ENSG00000199568 |
| 15 | 63383222 | 63383753 | 63383390 | 19 | 30 | 9  | 3.221842971 | 0.000217846 | RNU5B-1  | ENSG00000200156 |
| 15 | 63383996 | 63384415 | 63384175 | 23 | 33 | 24 | 1.413453691 | 0.0918299   | RNU5B-1  | ENSG00000200156 |
| 15 | 63384479 | 63384800 | 63384639 | 16 | 20 | 8  | 2.425043097 | 0.00917565  | RNU5B-1  | ENSG00000200156 |
| 15 | 63444634 | 63444952 | 63444795 | 9  | 13 | 8  | 1.616695398 | 0.123553    | PUNC     | ENSG00000174498 |
| 15 | 63612871 | 63613074 | 63613012 | 11 | 11 | 2  | 4.157216737 | 0.0052913   | PTPLAD1  | ENSG00000074696 |
| 15 | 63638493 | 63638714 | 63638567 | 8  | 10 | 3  | 2.858086507 | 0.0242838   |          | ENSG00000207449 |
| 15 | 63670738 | 63670917 | 63670893 | 8  | 8  | 1  | 4.676868829 | 0.0091584   | C15orf44 | ENSG00000138614 |
| 15 | 63690458 | 63690950 | 63690603 | 19 | 28 | 8  | 3.348869038 | 0.000246424 | C15orf44 | ENSG00000138614 |
| 15 | 63871615 | 63872070 | 63871909 | 9  | 15 | 7  | 2.078608368 | 0.038229    | DENND4A  | ENSG00000174485 |
| 15 | 63911918 | 63912343 | 63912164 | 11 | 21 | 8  | 2.540521339 | 0.00602138  | RAB11A   | ENSG00000103769 |
| 15 | 63912354 | 63912584 | 63912420 | 8  | 10 | 13 | 0.816596145 | 0.696946    | RAB11A   | ENSG00000103769 |
| 15 | 63916229 | 63916496 | 63916382 | 10 | 11 | 6  | 1.781664316 | 0.103344    | RAB11A   | ENSG00000103769 |
| 15 | 63948368 | 63948586 | 63948460 | 8  | 10 | 7  | 1.429043253 | 0.21536     | RAB11A   | ENSG00000103769 |
| 15 | 63948846 | 63949044 | 63948910 | 8  | 9  | 4  | 2.078608368 | 0.0785659   | RAB11A   | ENSG00000103769 |
| 15 | 63950040 | 63950241 | 63950081 | 8  | 9  | 3  | 2.598260461 | 0.0397929   | RAB11A   | ENSG00000103769 |
| 15 | 64031973 | 64032169 | 64032111 | 9  | 10 | 8  | 1.27026067  | 0.293854    | RAB11A   | ENSG00000103769 |
| 15 | 64372637 | 64372816 | 64372674 | 8  | 8  | 2  | 3.117912553 | 0.0283184   | DIS3L    | ENSG00000166938 |

|    |          |          |          |    |    |    |             |             |        |                 |
|----|----------|----------|----------|----|----|----|-------------|-------------|--------|-----------------|
| 15 | 64735335 | 64735731 | 64735607 | 12 | 18 | 9  | 1.97467795  | 0.0349428   | SMAD6  | ENSG00000137834 |
| 15 | 64853677 | 64854125 | 64853980 | 9  | 17 | 8  | 2.078608368 | 0.0303558   | SMAD6  | ENSG00000137834 |
| 15 | 65011161 | 65011410 | 65011285 | 11 | 13 | 4  | 2.910051716 | 0.0125532   |        | ENSG00000213670 |
| 15 | 65011473 | 65011665 | 65011569 | 8  | 9  | 3  | 2.598260461 | 0.0397929   |        | ENSG00000213670 |
| 15 | 65026143 | 65026473 | 65026308 | 8  | 11 | 6  | 1.781664316 | 0.103344    |        | ENSG00000213670 |
| 15 | 65103049 | 65103458 | 65103310 | 18 | 24 | 3  | 6.495651151 | 8.89E-06    |        | ENSG00000205438 |
| 15 | 65103756 | 65104141 | 65103956 | 15 | 24 | 3  | 6.495651151 | 8.89E-06    |        | ENSG00000205438 |
| 15 | 65116755 | 65116981 | 65116868 | 9  | 9  | 3  | 2.598260461 | 0.0397929   |        | ENSG00000205438 |
| 15 | 65127852 | 65128404 | 65128225 | 19 | 31 | 3  | 8.314433474 | 1.18E-07    |        | ENSG00000205438 |
| 15 | 65161803 | 65162002 | 65161859 | 8  | 9  | 1  | 5.196520921 | 0.00490062  | SMAD3  | ENSG00000166949 |
| 15 | 65205381 | 65205717 | 65205547 | 10 | 13 | 5  | 2.425043097 | 0.0262442   | SMAD3  | ENSG00000166949 |
| 15 | 65226470 | 65226684 | 65226592 | 10 | 10 | 3  | 2.858086507 | 0.0242838   | SMAD3  | ENSG00000166949 |
| 15 | 65919599 | 65919914 | 65919761 | 8  | 11 | 12 | 0.959357709 | 0.543005    |        | ENSG00000206625 |
| 15 | 65994785 | 65995265 | 65994925 | 8  | 18 | 10 | 1.795161773 | 0.055383    |        | ENSG00000206625 |
| 15 | 66003510 | 66003699 | 66003663 | 8  | 8  | 1  | 4.676868829 | 0.0091584   |        | ENSG00000206625 |
| 15 | 66016588 | 66016892 | 66016745 | 9  | 11 | 7  | 1.558956276 | 0.158273    |        | ENSG00000206625 |
| 15 | 66122097 | 66122343 | 66122220 | 13 | 15 | 6  | 2.375552421 | 0.0212094   | PIAS1  | ENSG00000033800 |
| 15 | 66332273 | 66332553 | 66332413 | 8  | 9  | 1  | 5.196520921 | 0.00490062  |        | ENSG00000213656 |
| 15 | 66351345 | 66351593 | 66351469 | 11 | 13 | 1  | 7.27512929  | 0.000378098 | FEM1B  | ENSG00000169018 |
| 15 | 66356971 | 66357230 | 66357100 | 9  | 13 | 6  | 2.078608368 | 0.0483393   | FEM1B  | ENSG00000169018 |
| 15 | 66771125 | 66771429 | 66771292 | 14 | 18 | 4  | 3.9493559   | 0.000961379 |        | ENSG00000214746 |
| 15 | 66849038 | 66849217 | 66849127 | 8  | 8  | 3  | 2.338434415 | 0.0641221   |        | ENSG00000214746 |
| 15 | 66901371 | 66901698 | 66901536 | 9  | 11 | 4  | 2.494330042 | 0.0324033   | ANP32A | ENSG00000140350 |
| 15 | 66955277 | 66955533 | 66955369 | 9  | 11 | 1  | 6.235825105 | 0.0013754   | NOX5   | ENSG00000137808 |
| 15 | 67138564 | 67138765 | 67138664 | 9  | 9  | 5  | 1.73217364  | 0.133894    | TMEM84 | ENSG00000212766 |
| 15 | 67239649 | 67239859 | 67239754 | 8  | 11 | 3  | 3.117912553 | 0.0146045   | GLCE   | ENSG00000138604 |
| 15 | 67467557 | 67467864 | 67467685 | 12 | 15 | 3  | 4.157216737 | 0.00170423  |        | ENSG00000207395 |
| 15 | 67470555 | 67470760 | 67470657 | 8  | 9  | 0  | 10.39304184 | 0.000803859 |        | ENSG00000207395 |
| 15 | 67487181 | 67487411 | 67487296 | 9  | 9  | 8  | 1.154782427 | 0.375434    |        | ENSG00000207395 |
| 15 | 67501350 | 67501572 | 67501461 | 11 | 11 | 5  | 2.078608368 | 0.0614303   | KIF23  | ENSG00000137807 |
| 15 | 67537070 | 67537272 | 67537183 | 9  | 10 | 11 | 0.952695502 | 0.548138    |        | ENSG00000207119 |
| 15 | 67539171 | 67539411 | 67539291 | 9  | 9  | 4  | 2.078608368 | 0.0785659   |        | ENSG00000207119 |
| 15 | 67547120 | 67547517 | 67547338 | 11 | 20 | 11 | 1.818782322 | 0.04395     |        | ENSG00000207119 |
| 15 | 67562063 | 67562450 | 67562238 | 17 | 23 | 13 | 1.781664316 | 0.0385539   |        | ENSG00000207119 |

|    |          |          |          |    |    |    |             |             |      |                 |
|----|----------|----------|----------|----|----|----|-------------|-------------|------|-----------------|
| 15 | 67602865 | 67603277 | 67602953 | 10 | 17 | 9  | 1.870747532 | 0.0498299   |      | ENSG00000207119 |
| 15 | 67648375 | 67648604 | 67648489 | 11 | 12 | 4  | 2.702190879 | 0.0203088   |      | ENSG00000207119 |
| 15 | 67655534 | 67655730 | 67655581 | 8  | 9  | 4  | 2.078608368 | 0.0785659   |      | ENSG00000207119 |
| 15 | 67655837 | 67656016 | 67655931 | 8  | 8  | 2  | 3.117912553 | 0.0283184   |      | ENSG00000207119 |
| 15 | 67673793 | 67674089 | 67673969 | 8  | 10 | 3  | 2.858086507 | 0.0242838   |      | ENSG00000207119 |
| 15 | 67683337 | 67683686 | 67683507 | 13 | 17 | 13 | 1.336248237 | 0.204556    |      | ENSG00000207119 |
| 15 | 67927937 | 67928209 | 67928073 | 12 | 14 | 3  | 3.897390691 | 0.00295882  |      | ENSG00000215958 |
| 15 | 67996313 | 67996492 | 67996454 | 8  | 8  | 1  | 4.676868829 | 0.0091584   |      | ENSG00000215958 |
| 15 | 68030977 | 68031210 | 68031093 | 11 | 11 | 2  | 4.157216737 | 0.0052913   |      | ENSG00000207965 |
| 15 | 68067005 | 68067509 | 68067330 | 12 | 22 | 7  | 2.98799953  | 0.00188278  |      | ENSG00000207965 |
| 15 | 68088062 | 68088250 | 68088159 | 11 | 11 | 3  | 3.117912553 | 0.0146045   |      | ENSG00000207965 |
| 15 | 68088376 | 68088678 | 68088506 | 10 | 13 | 1  | 7.27512929  | 0.000378098 |      | ENSG00000207965 |
| 15 | 68171288 | 68171638 | 68171463 | 16 | 21 | 8  | 2.540521339 | 0.00602138  | TLE3 | ENSG00000140332 |
| 15 | 68172876 | 68173325 | 68173147 | 16 | 28 | 9  | 3.013982134 | 0.000552057 | TLE3 | ENSG00000140332 |
| 15 | 68177412 | 68177695 | 68177553 | 8  | 12 | 4  | 2.702190879 | 0.0203088   | TLE3 | ENSG00000140332 |
| 15 | 68180884 | 68181132 | 68180992 | 8  | 12 | 4  | 2.702190879 | 0.0203088   | TLE3 | ENSG00000140332 |
| 15 | 68275890 | 68276369 | 68276069 | 22 | 31 | 7  | 4.157216737 | 2.13E-05    |      | ENSG00000200216 |
| 15 | 68289772 | 68290013 | 68289845 | 9  | 10 | 1  | 5.716173013 | 0.00260397  |      | ENSG00000200216 |
| 15 | 68368700 | 68368898 | 68368805 | 8  | 10 | 4  | 2.286469205 | 0.0509017   |      | ENSG00000200216 |
| 15 | 68368938 | 68369363 | 68369117 | 10 | 19 | 11 | 1.73217364  | 0.0607469   |      | ENSG00000200216 |
| 15 | 68370866 | 68371266 | 68371087 | 9  | 16 | 4  | 3.533634226 | 0.00276486  |      | ENSG00000200216 |
| 15 | 68387875 | 68388064 | 68387981 | 8  | 8  | 2  | 3.117912553 | 0.0283184   |      | ENSG00000200216 |
| 15 | 68403484 | 68403887 | 68403670 | 16 | 25 | 15 | 1.688869299 | 0.0455215   |      | ENSG00000200216 |
| 15 | 68454634 | 68454902 | 68454768 | 10 | 12 | 1  | 6.755477198 | 0.000722752 |      | ENSG00000200216 |
| 15 | 68457606 | 68457841 | 68457723 | 11 | 13 | 5  | 2.425043097 | 0.0262442   |      | ENSG00000200216 |
| 15 | 68498272 | 68498594 | 68498433 | 9  | 13 | 0  | 14.55025858 | 4.65E-05    |      | ENSG00000200216 |
| 15 | 68500488 | 68500777 | 68500632 | 10 | 13 | 1  | 7.27512929  | 0.000378098 |      | ENSG00000200216 |
| 15 | 68506578 | 68506758 | 68506684 | 8  | 8  | 0  | 9.353737658 | 0.00163931  |      | ENSG00000200216 |
| 15 | 68514755 | 68515087 | 68514917 | 11 | 12 | 3  | 3.377738599 | 0.00867157  |      | ENSG00000200216 |
| 15 | 68517217 | 68517612 | 68517414 | 9  | 17 | 6  | 2.672496474 | 0.00882337  |      | ENSG00000200216 |
| 15 | 68542269 | 68542756 | 68542444 | 14 | 23 | 5  | 4.157216737 | 0.000186738 | UACA | ENSG00000137831 |
| 15 | 68575024 | 68575238 | 68575147 | 9  | 9  | 2  | 3.464347281 | 0.0163838   | UACA | ENSG00000137831 |
| 15 | 68587287 | 68587486 | 68587386 | 8  | 8  | 3  | 2.338434415 | 0.0641221   | UACA | ENSG00000137831 |
| 15 | 68605905 | 68606425 | 68606044 | 10 | 20 | 5  | 3.637564645 | 0.000902929 | UACA | ENSG00000137831 |

|    |          |          |          |     |     |    |             |             |          |                 |
|----|----------|----------|----------|-----|-----|----|-------------|-------------|----------|-----------------|
| 15 | 68843101 | 68843415 | 68843261 | 10  | 13  | 5  | 2.425043097 | 0.0262442   | UACA     | ENSG00000137831 |
| 15 | 68904586 | 68904929 | 68904753 | 11  | 14  | 1  | 7.794781382 | 0.000197021 |          | ENSG00000156577 |
| 15 | 68971618 | 68972101 | 68971922 | 14  | 23  | 12 | 1.918715417 | 0.0250463   | THAP10   | ENSG00000129028 |
| 15 | 69175915 | 69176395 | 69176114 | 19  | 32  | 16 | 2.017472828 | 0.00740095  | THSD4    | ENSG00000187720 |
| 15 | 69182428 | 69182825 | 69182601 | 22  | 30  | 3  | 8.054607428 | 2.21E-07    | THSD4    | ENSG00000187720 |
| 15 | 69194576 | 69194762 | 69194682 | 9   | 9   | 4  | 2.078608368 | 0.0785659   | THSD4    | ENSG00000187720 |
| 15 | 69416760 | 69417063 | 69416932 | 26  | 29  | 8  | 3.464347281 | 0.000151572 |          | ENSG00000175333 |
| 15 | 69443415 | 69443874 | 69443650 | 31  | 43  | 6  | 6.532769158 | 7.68E-09    |          | ENSG00000175333 |
| 15 | 69591606 | 69591808 | 69591669 | 8   | 8   | 5  | 1.558956276 | 0.191397    | THSD4    | ENSG00000187720 |
| 15 | 69689270 | 69689599 | 69689439 | 12  | 17  | 1  | 9.353737658 | 2.73E-05    |          | ENSG00000203497 |
| 15 | 70054950 | 70055175 | 70055071 | 10  | 11  | 6  | 1.781664316 | 0.103344    |          | ENSG00000214713 |
| 15 | 70197576 | 70198038 | 70197725 | 11  | 19  | 5  | 3.464347281 | 0.00150447  | SENP8    | ENSG00000166192 |
| 15 | 70234647 | 70235260 | 70234965 | 11  | 24  | 4  | 5.196520921 | 3.42E-05    | SENP8    | ENSG00000166192 |
| 15 | 70301854 | 70302093 | 70302010 | 10  | 14  | 4  | 3.117912553 | 0.00766354  | PKM2     | ENSG00000067225 |
| 15 | 70310408 | 70310635 | 70310538 | 10  | 10  | 3  | 2.858086507 | 0.0242838   | PKM2     | ENSG00000067225 |
| 15 | 70310677 | 70310970 | 70310823 | 8   | 11  | 2  | 4.157216737 | 0.0052913   | PKM2     | ENSG00000067225 |
| 15 | 70455214 | 70455494 | 70455370 | 11  | 13  | 5  | 2.425043097 | 0.0262442   | HEXA     | ENSG00000213614 |
| 15 | 70455506 | 70455699 | 70455624 | 8   | 11  | 4  | 2.494330042 | 0.0324033   | HEXA     | ENSG00000213614 |
| 15 | 70765337 | 70765531 | 70765454 | 10  | 10  | 8  | 1.27026067  | 0.293854    | HIGD2BP  | ENSG00000175202 |
| 15 | 70765850 | 70766096 | 70765978 | 9   | 12  | 2  | 4.503651465 | 0.002963    | BBS4     | ENSG00000140463 |
| 15 | 70801641 | 70801901 | 70801778 | 8   | 12  | 5  | 2.251825733 | 0.0404733   | BBS4     | ENSG00000140463 |
| 15 | 71245116 | 71245631 | 71245330 | 111 | 142 | 0  | 148.6204983 | 5.55E-45    | NEO1     | ENSG00000067141 |
| 15 | 71284966 | 71285186 | 71285076 | 8   | 8   | 6  | 1.336248237 | 0.277651    | NEO1     | ENSG00000067141 |
| 15 | 71345063 | 71345285 | 71345174 | 8   | 10  | 7  | 1.429043253 | 0.21536     | HCN4     | ENSG00000138622 |
| 15 | 71411996 | 71412227 | 71412112 | 9   | 11  | 3  | 3.117912553 | 0.0146045   | HCN4     | ENSG00000138622 |
| 15 | 71715853 | 71716332 | 71716031 | 19  | 28  | 4  | 6.027964269 | 3.34E-06    | NPTN     | ENSG00000156642 |
| 15 | 71726742 | 71727246 | 71727067 | 9   | 19  | 0  | 20.78608368 | 6.46E-07    | NPTN     | ENSG00000156642 |
| 15 | 71789463 | 71789990 | 71789728 | 25  | 36  | 11 | 3.204521235 | 6.58E-05    | CD276    | ENSG00000103855 |
| 15 | 71828689 | 71828939 | 71828826 | 9   | 10  | 2  | 3.810782009 | 0.00936112  | C15orf59 | ENSG00000205363 |
| 15 | 72074431 | 72074701 | 72074551 | 9   | 12  | 3  | 3.377738599 | 0.00867157  | PML      | ENSG00000140464 |
| 15 | 72223862 | 72224072 | 72223967 | 8   | 9   | 0  | 10.39304184 | 0.000803859 | ISLR2    | ENSG00000167178 |
| 15 | 72224908 | 72225280 | 72225087 | 13  | 20  | 0  | 21.82538787 | 3.17E-07    | ISLR2    | ENSG00000167178 |
| 15 | 72269482 | 72269696 | 72269589 | 8   | 10  | 2  | 3.810782009 | 0.00936112  | STRA6    | ENSG00000137868 |
| 15 | 72281347 | 72281542 | 72281395 | 9   | 9   | 4  | 2.078608368 | 0.0785659   | STRA6    | ENSG00000137868 |

|    |          |          |          |    |    |    |             |             |          |                 |
|----|----------|----------|----------|----|----|----|-------------|-------------|----------|-----------------|
| 15 | 72319374 | 72319775 | 72319516 | 13 | 19 | 12 | 1.598929514 | 0.0887417   | CCDC33   | ENSG00000140481 |
| 15 | 72376753 | 72377017 | 72376856 | 15 | 19 | 3  | 5.196520921 | 0.000174201 | CCDC33   | ENSG00000140481 |
| 15 | 72382187 | 72382378 | 72382282 | 8  | 8  | 2  | 3.117912553 | 0.0283184   | CCDC33   | ENSG00000140481 |
| 15 | 72540538 | 72540822 | 72540680 | 8  | 12 | 7  | 1.688869299 | 0.11395     | UBL7     | ENSG00000138629 |
| 15 | 72620092 | 72620432 | 72620217 | 9  | 14 | 3  | 3.897390691 | 0.00295882  | ARID3B   | ENSG00000179361 |
| 15 | 72622989 | 72623186 | 72623087 | 8  | 8  | 0  | 9.353737658 | 0.00163931  | ARID3B   | ENSG00000179361 |
| 15 | 72625614 | 72626017 | 72625774 | 8  | 15 | 5  | 2.771477825 | 0.0105836   | ARID3B   | ENSG00000179361 |
| 15 | 72721677 | 72722156 | 72721916 | 15 | 26 | 8  | 3.117912553 | 0.000638503 |          | ENSG00000214697 |
| 15 | 72775318 | 72775552 | 72775435 | 8  | 10 | 3  | 2.858086507 | 0.0242838   | EDC3     | ENSG00000179151 |
| 15 | 72850494 | 72850701 | 72850597 | 8  | 9  | 7  | 1.29913023  | 0.286504    | CSK      | ENSG00000103653 |
| 15 | 72868618 | 72868959 | 72868788 | 14 | 19 | 1  | 10.39304184 | 7.23E-06    | CSK      | ENSG00000103653 |
| 15 | 72879073 | 72879527 | 72879311 | 31 | 45 | 2  | 15.93599749 | 1.77E-12    | LMAN1L   | ENSG00000140506 |
| 15 | 72895034 | 72895348 | 72895208 | 8  | 12 | 5  | 2.251825733 | 0.0404733   | CPLX3    | ENSG00000213578 |
| 15 | 72896878 | 72897104 | 72896991 | 12 | 12 | 1  | 6.755477198 | 0.000722752 | CPLX3    | ENSG00000213578 |
| 15 | 72908409 | 72908622 | 72908570 | 11 | 12 | 12 | 1.039304184 | 0.461227    | CPLX3    | ENSG00000213578 |
| 15 | 73052304 | 73052496 | 73052376 | 8  | 8  | 0  | 9.353737658 | 0.00163931  |          | ENSG00000199580 |
| 15 | 73102809 | 73102992 | 73102916 | 8  | 8  | 4  | 1.870747532 | 0.118863    | PPCDC    | ENSG00000138621 |
| 15 | 73115648 | 73115911 | 73115790 | 9  | 13 | 4  | 2.910051716 | 0.0125532   | PPCDC    | ENSG00000138621 |
| 15 | 73393013 | 73393192 | 73393071 | 8  | 8  | 0  | 9.353737658 | 0.00163931  |          | ENSG00000217988 |
| 15 | 73447090 | 73447309 | 73447256 | 8  | 10 | 3  | 2.858086507 | 0.0242838   | MAN2C1   | ENSG00000140400 |
| 15 | 73447896 | 73448203 | 73448034 | 13 | 15 | 8  | 1.847651883 | 0.0631662   | MAN2C1   | ENSG00000140400 |
| 15 | 73489586 | 73489792 | 73489641 | 8  | 8  | 1  | 4.676868829 | 0.0091584   | SIN3A    | ENSG00000169375 |
| 15 | 73717732 | 73718015 | 73717873 | 8  | 9  | 1  | 5.196520921 | 0.00490062  | IMP3     | ENSG00000177971 |
| 15 | 73726162 | 73726427 | 73726310 | 8  | 11 | 4  | 2.494330042 | 0.0324033   | IMP3     | ENSG00000177971 |
| 15 | 73773880 | 73774220 | 73774050 | 8  | 12 | 5  | 2.251825733 | 0.0404733   |          | ENSG00000198165 |
| 15 | 73800531 | 73800750 | 73800631 | 10 | 10 | 4  | 2.286469205 | 0.0509017   | ODF3L1   | ENSG00000182950 |
| 15 | 73983085 | 73983775 | 73983524 | 35 | 64 | 6  | 9.650681711 | 2.10E-14    | FBXO22   | ENSG00000167196 |
| 15 | 74230320 | 74230541 | 74230413 | 8  | 11 | 2  | 4.157216737 | 0.0052913   | C15orf27 | ENSG00000169758 |
| 15 | 74390593 | 74390834 | 74390713 | 9  | 10 | 2  | 3.810782009 | 0.00936112  | ETFA     | ENSG00000140374 |
| 15 | 74390851 | 74391186 | 74391028 | 15 | 17 | 3  | 4.676868829 | 0.000552213 | ETFA     | ENSG00000140374 |
| 15 | 74392161 | 74392535 | 74392396 | 10 | 14 | 2  | 5.196520921 | 0.000907371 | ETFA     | ENSG00000140374 |
| 15 | 75010621 | 75010855 | 75010748 | 8  | 10 | 5  | 1.905391004 | 0.0915982   | RCN2     | ENSG00000117906 |
| 15 | 75205203 | 75205417 | 75205250 | 9  | 9  | 1  | 5.196520921 | 0.00490062  | TSPAN3   | ENSG00000140391 |
| 15 | 75392039 | 75392322 | 75392180 | 11 | 13 | 3  | 3.637564645 | 0.0050909   |          | ENSG00000186690 |

|    |          |          |          |    |    |   |             |             |          |                 |
|----|----------|----------|----------|----|----|---|-------------|-------------|----------|-----------------|
| 15 | 75576295 | 75576630 | 75576457 | 8  | 13 | 8 | 1.616695398 | 0.123553    | HMG20A   | ENSG00000140382 |
| 15 | 75582659 | 75582931 | 75582817 | 10 | 13 | 6 | 2.078608368 | 0.0483393   | HMG20A   | ENSG00000140382 |
| 15 | 75583574 | 75583753 | 75583735 | 8  | 9  | 0 | 10.39304184 | 0.000803859 | HMG20A   | ENSG00000140382 |
| 15 | 75584985 | 75585314 | 75585149 | 27 | 32 | 5 | 5.716173013 | 1.22E-06    | HMG20A   | ENSG00000140382 |
| 15 | 75909749 | 75909928 | 75909838 | 8  | 8  | 1 | 4.676868829 | 0.0091584   |          | ENSG00000209296 |
| 15 | 75982256 | 75982502 | 75982344 | 8  | 10 | 1 | 5.716173013 | 0.00260397  |          | ENSG00000209296 |
| 15 | 76086407 | 76086594 | 76086487 | 8  | 10 | 2 | 3.810782009 | 0.00936112  |          | ENSG00000221476 |
| 15 | 76132906 | 76133085 | 76132944 | 8  | 8  | 0 | 9.353737658 | 0.00163931  |          | ENSG00000221476 |
| 15 | 76146883 | 76147062 | 76146972 | 8  | 9  | 3 | 2.598260461 | 0.0397929   | TBC1D2B  | ENSG00000167202 |
| 15 | 76189423 | 76189612 | 76189517 | 8  | 8  | 0 | 9.353737658 | 0.00163931  | SH2D7    | ENSG00000183476 |
| 15 | 76211132 | 76211444 | 76211278 | 8  | 11 | 5 | 2.078608368 | 0.0614303   | CIB2     | ENSG00000136425 |
| 15 | 76289298 | 76289482 | 76289417 | 8  | 10 | 1 | 5.716173013 | 0.00260397  | ACSBG1   | ENSG00000103740 |
| 15 | 76296197 | 76296606 | 76296335 | 12 | 20 | 4 | 4.365077574 | 0.000324139 | ACSBG1   | ENSG00000103740 |
| 15 | 76320345 | 76320535 | 76320440 | 8  | 9  | 7 | 1.29913023  | 0.286504    | ACSBG1   | ENSG00000103740 |
| 15 | 76449704 | 76449894 | 76449718 | 9  | 10 | 2 | 3.810782009 | 0.00936112  | CRABP1   | ENSG00000166426 |
| 15 | 76536558 | 76536806 | 76536632 | 12 | 15 | 7 | 2.078608368 | 0.038229    | IREB2    | ENSG00000136381 |
| 15 | 76561806 | 76562012 | 76561905 | 8  | 9  | 7 | 1.29913023  | 0.286504    |          | ENSG00000188266 |
| 15 | 77031354 | 77031645 | 77031499 | 12 | 14 | 2 | 5.196520921 | 0.000907371 | CTSH     | ENSG00000103811 |
| 15 | 77050813 | 77051061 | 77050961 | 11 | 12 | 3 | 3.377738599 | 0.00867157  |          | ENSG00000177699 |
| 15 | 77216515 | 77216694 | 77216604 | 8  | 8  | 1 | 4.676868829 | 0.0091584   | RASGRF1  | ENSG00000058335 |
| 15 | 77400383 | 77400562 | 77400427 | 8  | 8  | 2 | 3.117912553 | 0.0283184   | TMED3    | ENSG00000166557 |
| 15 | 77654507 | 77654765 | 77654636 | 9  | 9  | 1 | 5.196520921 | 0.00490062  | KIAA1024 | ENSG00000169330 |
| 15 | 77675435 | 77675693 | 77675578 | 10 | 12 | 3 | 3.377738599 | 0.00867157  |          | ENSG00000213527 |
| 15 | 77932935 | 77933166 | 77933060 | 13 | 14 | 4 | 3.117912553 | 0.00766354  |          | ENSG00000209163 |
| 15 | 77944800 | 77945008 | 77944904 | 8  | 8  | 0 | 9.353737658 | 0.00163931  | MTHFS    | ENSG00000136371 |
| 15 | 78002950 | 78003444 | 78003274 | 10 | 19 | 4 | 4.157216737 | 0.000560204 | ST20     | ENSG00000180953 |
| 15 | 78073199 | 78073383 | 78073312 | 10 | 10 | 2 | 3.810782009 | 0.00936112  |          | ENSG00000180725 |
| 15 | 78074207 | 78074393 | 78074296 | 8  | 9  | 0 | 10.39304184 | 0.000803859 |          | ENSG00000180725 |
| 15 | 78082544 | 78082989 | 78082759 | 81 | 97 | 0 | 101.8518101 | 4.69E-31    |          | ENSG00000180725 |
| 15 | 78247768 | 78248103 | 78247947 | 14 | 18 | 4 | 3.9493559   | 0.000961379 | FAH      | ENSG00000103876 |
| 15 | 78282087 | 78282331 | 78282209 | 8  | 8  | 0 | 9.353737658 | 0.00163931  | FAH      | ENSG00000103876 |
| 15 | 78564724 | 78565185 | 78565007 | 38 | 54 | 2 | 19.05391004 | 4.08E-15    | ARNT2    | ENSG00000172379 |
| 15 | 78616705 | 78616884 | 78616794 | 8  | 8  | 2 | 3.117912553 | 0.0283184   |          | ENSG00000222139 |
| 15 | 78716112 | 78716308 | 78716210 | 8  | 9  | 4 | 2.078608368 | 0.0785659   |          | ENSG00000222139 |



|    |          |          |          |    |     |    |             |             |          |                 |
|----|----------|----------|----------|----|-----|----|-------------|-------------|----------|-----------------|
| 15 | 78775737 | 78775952 | 78775841 | 9  | 11  | 1  | 6.235825105 | 0.0013754   | FAM108C1 | ENSG00000136379 |
| 15 | 78780300 | 78780525 | 78780370 | 8  | 9   | 0  | 10.39304184 | 0.000803859 | FAM108C1 | ENSG00000136379 |
| 15 | 78822579 | 78822873 | 78822723 | 10 | 12  | 10 | 1.228268581 | 0.305344    | KIAA1199 | ENSG00000103888 |
| 15 | 78828950 | 78829497 | 78829322 | 16 | 31  | 15 | 2.078608368 | 0.00648505  | KIAA1199 | ENSG00000103888 |
| 15 | 78855914 | 78856121 | 78856009 | 8  | 8   | 7  | 1.169217207 | 0.371848    | KIAA1199 | ENSG00000103888 |
| 15 | 78884447 | 78884790 | 78884618 | 15 | 21  | 4  | 4.572938411 | 0.000186332 | KIAA1199 | ENSG00000103888 |
| 15 | 78904214 | 78904456 | 78904334 | 8  | 9   | 2  | 3.464347281 | 0.0163838   |          | ENSG00000208003 |
| 15 | 78985894 | 78986184 | 78986039 | 10 | 14  | 4  | 3.117912553 | 0.00766354  |          | ENSG00000208003 |
| 15 | 79022643 | 79022882 | 79022781 | 8  | 9   | 4  | 2.078608368 | 0.0785659   | MESDC2   | ENSG00000117899 |
| 15 | 79067793 | 79067981 | 79067840 | 8  | 8   | 4  | 1.870747532 | 0.118863    | MESDC2   | ENSG00000117899 |
| 15 | 79361345 | 79361746 | 79361567 | 11 | 17  | 5  | 3.117912553 | 0.00407023  | IL16     | ENSG00000172349 |
| 15 | 79383479 | 79383760 | 79383619 | 10 | 11  | 4  | 2.494330042 | 0.0324033   | IL16     | ENSG00000172349 |
| 15 | 79512470 | 79512718 | 79512594 | 11 | 13  | 3  | 3.637564645 | 0.0050909   | TMC3     | ENSG00000188869 |
| 15 | 79560122 | 79560311 | 79560173 | 8  | 9   | 4  | 2.078608368 | 0.0785659   | TMC3     | ENSG00000188869 |
| 15 | 79627300 | 79627524 | 79627364 | 8  | 10  | 0  | 11.43234603 | 0.000394183 | TMC3     | ENSG00000188869 |
| 15 | 80098169 | 80098348 | 80098258 | 8  | 9   | 1  | 5.196520921 | 0.00490062  |          | ENSG00000222521 |
| 15 | 80101146 | 80101838 | 80101607 | 94 | 135 | 1  | 70.67268453 | 5.72E-41    |          | ENSG00000222521 |
| 15 | 80102314 | 80102524 | 80102412 | 9  | 9   | 2  | 3.464347281 | 0.0163838   |          | ENSG00000222521 |
| 15 | 80166895 | 80167093 | 80166994 | 9  | 9   | 1  | 5.196520921 | 0.00490062  | MEX3B    | ENSG00000183496 |
| 15 | 80170393 | 80170674 | 80170533 | 8  | 10  | 1  | 5.716173013 | 0.00260397  | MEX3B    | ENSG00000183496 |
| 15 | 81207849 | 81208396 | 81208081 | 28 | 45  | 2  | 15.93599749 | 1.77E-12    |          | ENSG00000222483 |
| 15 | 81402443 | 81402708 | 81402575 | 10 | 10  | 3  | 2.858086507 | 0.0242838   | HOMER2   | ENSG00000103942 |
| 15 | 81471157 | 81471594 | 81471372 | 10 | 21  | 8  | 2.540521339 | 0.00602138  | C15orf40 | ENSG00000169609 |
| 15 | 81670314 | 81670708 | 81670563 | 12 | 18  | 5  | 3.291129917 | 0.00248584  |          | ENSG00000166503 |
| 15 | 81812620 | 81812880 | 81812708 | 8  | 10  | 0  | 11.43234603 | 0.000394183 | BNC1     | ENSG00000169594 |
| 15 | 81840298 | 81840653 | 81840519 | 17 | 21  | 2  | 7.621564018 | 1.21E-05    | SH3GL3   | ENSG00000140600 |
| 15 | 82147246 | 82147425 | 82147354 | 8  | 8   | 2  | 3.117912553 | 0.0283184   |          | ENSG00000212374 |
| 15 | 82223588 | 82223767 | 82223677 | 8  | 8   | 1  | 4.676868829 | 0.0091584   |          | ENSG00000212374 |
| 15 | 82328420 | 82328599 | 82328509 | 8  | 8   | 3  | 2.338434415 | 0.0641221   |          | ENSG00000200444 |
| 15 | 82480935 | 82481151 | 82481017 | 9  | 10  | 1  | 5.716173013 | 0.00260397  |          | ENSG00000221484 |
| 15 | 82932117 | 82932575 | 82932416 | 13 | 21  | 0  | 22.86469205 | 1.55E-07    | ZSCAN2   | ENSG00000176371 |
| 15 | 82953157 | 82953402 | 82953276 | 8  | 10  | 0  | 11.43234603 | 0.000394183 | ZSCAN2   | ENSG00000176371 |
| 15 | 82998380 | 82998690 | 82998485 | 8  | 13  | 17 | 0.808347699 | 0.728863    | WDR73    | ENSG00000177082 |
| 15 | 83002506 | 83002863 | 83002684 | 8  | 14  | 2  | 5.196520921 | 0.000907371 | NMB      | ENSG00000197696 |

|    |          |          |          |    |    |    |             |             |         |                 |
|----|----------|----------|----------|----|----|----|-------------|-------------|---------|-----------------|
| 15 | 83060302 | 83060667 | 83060629 | 8  | 15 | 11 | 1.385738912 | 0.19225     | SEC11A  | ENSG00000140612 |
| 15 | 83079739 | 83080058 | 83079882 | 11 | 14 | 3  | 3.897390691 | 0.00295882  | SEC11A  | ENSG00000140612 |
| 15 | 83092224 | 83092404 | 83092314 | 8  | 8  | 6  | 1.336248237 | 0.277651    | SEC11A  | ENSG00000140612 |
| 15 | 83170710 | 83171033 | 83170871 | 9  | 13 | 12 | 1.11925066  | 0.384109    | ALPK3   | ENSG00000136383 |
| 15 | 83189619 | 83189898 | 83189758 | 8  | 11 | 3  | 3.117912553 | 0.0146045   |         | ENSG00000200991 |
| 15 | 83203404 | 83203710 | 83203557 | 8  | 14 | 5  | 2.598260461 | 0.0167748   |         | ENSG00000200991 |
| 15 | 83215359 | 83215637 | 83215498 | 10 | 12 | 1  | 6.755477198 | 0.000722752 | SLC28A1 | ENSG00000156222 |
| 15 | 83234337 | 83234736 | 83234557 | 21 | 30 | 4  | 6.443685942 | 1.02E-06    | SLC28A1 | ENSG00000156222 |
| 15 | 83259101 | 83259584 | 83259421 | 10 | 18 | 7  | 2.468347438 | 0.0112499   |         | ENSG00000207037 |
| 15 | 83271081 | 83271264 | 83271211 | 8  | 8  | 1  | 4.676868829 | 0.0091584   |         | ENSG00000207037 |
| 15 | 83272449 | 83272736 | 83272592 | 13 | 14 | 6  | 2.227080395 | 0.0322529   |         | ENSG00000207037 |
| 15 | 83324472 | 83324823 | 83324644 | 14 | 18 | 12 | 1.518983039 | 0.117837    | PDE8A   | ENSG00000073417 |
| 15 | 83325331 | 83325510 | 83325437 | 8  | 8  | 2  | 3.117912553 | 0.0283184   | PDE8A   | ENSG00000073417 |
| 15 | 83407605 | 83407825 | 83407715 | 8  | 9  | 1  | 5.196520921 | 0.00490062  | PDE8A   | ENSG00000073417 |
| 15 | 83675363 | 83675671 | 83675524 | 11 | 14 | 5  | 2.598260461 | 0.0167748   | AKAP13  | ENSG00000170776 |
| 15 | 83746607 | 83746799 | 83746703 | 9  | 10 | 2  | 3.810782009 | 0.00936112  | AKAP13  | ENSG00000170776 |
| 15 | 84133418 | 84133625 | 84133577 | 8  | 10 | 3  | 2.858086507 | 0.0242838   | KLHL25  | ENSG00000183655 |
| 15 | 84169946 | 84170143 | 84170002 | 8  | 8  | 6  | 1.336248237 | 0.277651    | KLHL25  | ENSG00000183655 |
| 15 | 84184964 | 84185199 | 84185081 | 9  | 10 | 5  | 1.905391004 | 0.0915982   | KLHL25  | ENSG00000183655 |
| 15 | 85203419 | 85203680 | 85203549 | 8  | 10 | 3  | 2.858086507 | 0.0242838   |         |                 |
| 15 | 85208794 | 85208991 | 85208895 | 8  | 9  | 3  | 2.598260461 | 0.0397929   |         |                 |
| 15 | 85211101 | 85211350 | 85211225 | 8  | 10 | 2  | 3.810782009 | 0.00936112  |         |                 |
| 15 | 85260400 | 85260592 | 85260464 | 8  | 8  | 8  | 1.039304184 | 0.46786     |         |                 |
| 15 | 85316437 | 85316623 | 85316543 | 8  | 8  | 3  | 2.338434415 | 0.0641221   |         |                 |
| 15 | 85390011 | 85390348 | 85390179 | 9  | 14 | 4  | 3.117912553 | 0.00766354  |         | ENSG00000207150 |
| 15 | 85466793 | 85466989 | 85466891 | 9  | 10 | 5  | 1.905391004 | 0.0915982   |         | ENSG00000207150 |
| 15 | 85534544 | 85534772 | 85534632 | 8  | 10 | 6  | 1.63319229  | 0.146906    |         | ENSG00000207150 |
| 15 | 85710267 | 85710588 | 85710436 | 11 | 14 | 2  | 5.196520921 | 0.000907371 |         | ENSG00000207150 |
| 15 | 85822233 | 85822449 | 85822367 | 8  | 8  | 2  | 3.117912553 | 0.0283184   |         | ENSG00000207150 |
| 15 | 85864987 | 85865261 | 85865111 | 11 | 14 | 7  | 1.948695345 | 0.0559175   |         | ENSG00000207150 |
| 15 | 85867101 | 85867345 | 85867223 | 10 | 11 | 9  | 1.247165021 | 0.300052    |         | ENSG00000207150 |
| 15 | 85867406 | 85867621 | 85867513 | 9  | 10 | 5  | 1.905391004 | 0.0915982   |         | ENSG00000207150 |
| 15 | 85871608 | 85871892 | 85871750 | 8  | 11 | 8  | 1.385738912 | 0.224757    | TMEM83  | ENSG00000219654 |
| 15 | 85900880 | 85901138 | 85901022 | 10 | 11 | 5  | 2.078608368 | 0.0614303   | TMEM83  | ENSG00000219654 |

|    |          |          |          |     |     |    |             |            |          |                 |
|----|----------|----------|----------|-----|-----|----|-------------|------------|----------|-----------------|
| 15 | 86036984 | 86037163 | 86037073 | 8   | 8   | 2  | 3.117912553 | 0.0283184  | TMEM83   | ENSG00000219654 |
| 15 | 86075902 | 86076123 | 86076012 | 8   | 9   | 6  | 1.484720263 | 0.204387   | TMEM83   | ENSG00000219654 |
| 15 | 86138883 | 86139075 | 86138979 | 8   | 8   | 3  | 2.338434415 | 0.0641221  | TMEM83   | ENSG00000219654 |
| 15 | 86149366 | 86149621 | 86149493 | 9   | 11  | 8  | 1.385738912 | 0.224757   | TMEM83   | ENSG00000219654 |
| 15 | 86224970 | 86225149 | 86225098 | 8   | 8   | 0  | 9.353737658 | 0.00163931 | TMEM83   | ENSG00000219654 |
| 15 | 86840099 | 86840309 | 86840173 | 8   | 8   | 3  | 2.338434415 | 0.0641221  |          | ENSG00000198469 |
| 15 | 86965026 | 86965770 | 86965543 | 125 | 163 | 5  | 28.4076477  | 6.74E-44   | AEN      | ENSG00000181026 |
| 15 | 87001758 | 87001985 | 87001827 | 8   | 9   | 7  | 1.29913023  | 0.286504   | ISG20    | ENSG00000172183 |
| 15 | 87048534 | 87048762 | 87048651 | 8   | 10  | 1  | 5.716173013 | 0.00260397 | ISG20    | ENSG00000172183 |
| 15 | 87257858 | 87258164 | 87258011 | 10  | 13  | 0  | 14.55025858 | 4.65E-05   | MFGE8    | ENSG00000140545 |
| 15 | 87361835 | 87362095 | 87361953 | 9   | 11  | 6  | 1.781664316 | 0.103344   |          | ENSG00000214448 |
| 15 | 87411525 | 87411808 | 87411694 | 14  | 17  | 4  | 3.741495063 | 0.00163722 | ABHD2    | ENSG00000140526 |
| 15 | 87465754 | 87466034 | 87465894 | 13  | 16  | 5  | 2.944695189 | 0.00659886 | ABHD2    | ENSG00000140526 |
| 15 | 87505207 | 87505387 | 87505260 | 8   | 10  | 2  | 3.810782009 | 0.00936112 |          | ENSG00000213485 |
| 15 | 87515796 | 87516015 | 87515907 | 13  | 13  | 4  | 2.910051716 | 0.0125532  |          | ENSG00000213485 |
| 15 | 87539814 | 87539994 | 87539913 | 8   | 8   | 1  | 4.676868829 | 0.0091584  |          | ENSG00000213485 |
| 15 | 87551035 | 87551459 | 87551310 | 11  | 18  | 5  | 3.291129917 | 0.00248584 |          | ENSG00000213485 |
| 15 | 87644782 | 87644972 | 87644877 | 8   | 9   | 4  | 2.078608368 | 0.0785659  | POLG     | ENSG00000140521 |
| 15 | 87679050 | 87679588 | 87679322 | 15  | 28  | 22 | 1.310427015 | 0.164056   | POLG     | ENSG00000140521 |
| 15 | 87722673 | 87722955 | 87722814 | 9   | 11  | 3  | 3.117912553 | 0.0146045  |          | ENSG00000207819 |
| 15 | 87723705 | 87723985 | 87723841 | 8   | 11  | 2  | 4.157216737 | 0.0052913  |          | ENSG00000207819 |
| 15 | 87724139 | 87724361 | 87724241 | 14  | 15  | 4  | 3.32577339  | 0.00462646 |          | ENSG00000207819 |
| 15 | 87745503 | 87745759 | 87745657 | 9   | 9   | 5  | 1.73217364  | 0.133894   |          | ENSG00000207819 |
| 15 | 87755717 | 87756178 | 87755889 | 27  | 40  | 6  | 6.087353079 | 4.45E-08   |          | ENSG00000207819 |
| 15 | 87760436 | 87760791 | 87760613 | 11  | 17  | 4  | 3.741495063 | 0.00163722 |          | ENSG00000207819 |
| 15 | 87785579 | 87785840 | 87785674 | 14  | 16  | 3  | 4.417042783 | 0.00097367 | RHCG     | ENSG00000140519 |
| 15 | 87919583 | 87919845 | 87919714 | 11  | 12  | 3  | 3.377738599 | 0.00867157 | C15orf42 | ENSG00000140534 |
| 15 | 88024105 | 88024381 | 88024245 | 10  | 10  | 2  | 3.810782009 | 0.00936112 | PLIN     | ENSG00000166819 |
| 15 | 88034798 | 88035078 | 88034931 | 8   | 10  | 2  | 3.810782009 | 0.00936112 | PEX11A   | ENSG00000166821 |
| 15 | 88166233 | 88166412 | 88166383 | 8   | 8   | 1  | 4.676868829 | 0.0091584  | ANPEP    | ENSG00000166825 |
| 15 | 88250313 | 88250822 | 88250467 | 19  | 30  | 10 | 2.928948156 | 0.00047305 |          | ENSG00000214445 |
| 15 | 88253982 | 88254214 | 88254098 | 8   | 11  | 4  | 2.494330042 | 0.0324033  |          | ENSG00000214445 |
| 15 | 88261095 | 88261288 | 88261191 | 9   | 12  | 2  | 4.503651465 | 0.002963   | C15orf38 | ENSG00000214446 |
| 15 | 88302283 | 88302768 | 88302514 | 23  | 36  | 6  | 5.493464974 | 4.44E-07   | ZNF710   | ENSG00000140548 |

|    |          |          |          |    |    |    |             |             |          |                 |
|----|----------|----------|----------|----|----|----|-------------|-------------|----------|-----------------|
| 15 | 88415579 | 88415814 | 88415754 | 11 | 11 | 4  | 2.494330042 | 0.0324033   | IDH2     | ENSG00000182054 |
| 15 | 88442405 | 88442701 | 88442537 | 10 | 13 | 3  | 3.637564645 | 0.0050909   | IDH2     | ENSG00000182054 |
| 15 | 88448970 | 88449191 | 88449043 | 11 | 13 | 5  | 2.425043097 | 0.0262442   | IDH2     | ENSG00000182054 |
| 15 | 88498761 | 88498993 | 88498864 | 8  | 11 | 0  | 12.47165021 | 0.000193293 |          | ENSG00000208939 |
| 15 | 88609406 | 88609585 | 88609517 | 8  | 9  | 4  | 2.078608368 | 0.0785659   | NGRN     | ENSG00000182768 |
| 15 | 88664286 | 88664510 | 88664414 | 11 | 11 | 9  | 1.247165021 | 0.300052    |          | ENSG00000221309 |
| 15 | 88678573 | 88678874 | 88678723 | 19 | 24 | 2  | 8.660868202 | 1.80E-06    |          | ENSG00000173683 |
| 15 | 88757023 | 88757222 | 88757122 | 9  | 10 | 2  | 3.810782009 | 0.00936112  | IQGAP1   | ENSG00000140575 |
| 15 | 88795716 | 88795922 | 88795819 | 9  | 10 | 2  | 3.810782009 | 0.00936112  | IQGAP1   | ENSG00000140575 |
| 15 | 88823910 | 88824453 | 88824083 | 11 | 21 | 9  | 2.286469205 | 0.0111772   | CRTC3    | ENSG00000140577 |
| 15 | 88833723 | 88834281 | 88833945 | 27 | 39 | 14 | 2.771477825 | 0.000157826 | CRTC3    | ENSG00000140577 |
| 15 | 89251879 | 89252059 | 89251982 | 8  | 8  | 1  | 4.676868829 | 0.0091584   | MAN2A2   | ENSG00000196547 |
| 15 | 89274123 | 89274438 | 89274284 | 8  | 10 | 3  | 2.858086507 | 0.0242838   | UNC45A   | ENSG00000140553 |
| 15 | 89278562 | 89278813 | 89278687 | 11 | 12 | 4  | 2.702190879 | 0.0203088   | UNC45A   | ENSG00000140553 |
| 15 | 89484137 | 89484316 | 89484269 | 8  | 8  | 3  | 2.338434415 | 0.0641221   | SV2B     | ENSG00000185518 |
| 15 | 89775215 | 89775945 | 89775766 | 15 | 40 | 9  | 4.261147155 | 1.49E-06    | SV2B     | ENSG00000185518 |
| 15 | 89835393 | 89835727 | 89835560 | 14 | 17 | 2  | 6.235825105 | 0.000146695 | SV2B     | ENSG00000185518 |
| 15 | 89875256 | 89875454 | 89875385 | 10 | 10 | 4  | 2.286469205 | 0.0509017   | SV2B     | ENSG00000185518 |
| 15 | 89916335 | 89916629 | 89916513 | 10 | 13 | 4  | 2.910051716 | 0.0125532   | SLCO3A1  | ENSG00000176463 |
| 15 | 90426524 | 90426730 | 90426627 | 8  | 8  | 7  | 1.169217207 | 0.371848    |          | ENSG00000221154 |
| 15 | 90532456 | 90532733 | 90532594 | 11 | 15 | 6  | 2.375552421 | 0.0212094   |          | ENSG00000213443 |
| 15 | 90671974 | 90672192 | 90672083 | 8  | 8  | 0  | 9.353737658 | 0.00163931  |          | ENSG00000213443 |
| 15 | 90813989 | 90814300 | 90814155 | 8  | 11 | 0  | 12.47165021 | 0.000193293 | C15orf32 | ENSG00000183643 |
| 15 | 90967694 | 90967910 | 90967831 | 9  | 9  | 2  | 3.464347281 | 0.0163838   | FAM174B  | ENSG00000185442 |
| 15 | 90989233 | 90989461 | 90989347 | 10 | 11 | 4  | 2.494330042 | 0.0324033   | FAM174B  | ENSG00000185442 |
| 15 | 90989698 | 90989937 | 90989817 | 9  | 11 | 6  | 1.781664316 | 0.103344    | FAM174B  | ENSG00000185442 |
| 15 | 90998460 | 90998709 | 90998554 | 9  | 10 | 7  | 1.429043253 | 0.21536     | FAM174B  | ENSG00000185442 |
| 15 | 91038326 | 91038552 | 91038439 | 12 | 12 | 7  | 1.688869299 | 0.11395     |          | ENSG00000157576 |
| 15 | 91146503 | 91146818 | 91146677 | 17 | 20 | 0  | 21.82538787 | 3.17E-07    |          | ENSG00000213440 |
| 15 | 91153982 | 91154163 | 91154019 | 8  | 8  | 5  | 1.558956276 | 0.191397    |          | ENSG00000213440 |
| 15 | 91155009 | 91155227 | 91155118 | 9  | 10 | 3  | 2.858086507 | 0.0242838   |          | ENSG00000213440 |
| 15 | 91164777 | 91165020 | 91164876 | 11 | 14 | 5  | 2.598260461 | 0.0167748   | CHD2     | ENSG00000173575 |
| 15 | 91213565 | 91213841 | 91213703 | 13 | 15 | 5  | 2.771477825 | 0.0105836   | CHD2     | ENSG00000173575 |
| 15 | 91214525 | 91214752 | 91214663 | 9  | 10 | 2  | 3.810782009 | 0.00936112  | CHD2     | ENSG00000173575 |

|    |          |          |          |     |     |    |             |             |          |                 |
|----|----------|----------|----------|-----|-----|----|-------------|-------------|----------|-----------------|
| 15 | 91226375 | 91226574 | 91226419 | 10  | 11  | 9  | 1.247165021 | 0.300052    | CHD2     | ENSG00000173575 |
| 15 | 91262121 | 91262460 | 91262290 | 12  | 16  | 1  | 8.834085566 | 5.30E-05    | CHD2     | ENSG00000173575 |
| 15 | 91277533 | 91277808 | 91277648 | 8   | 12  | 1  | 6.755477198 | 0.000722752 | CHD2     | ENSG00000173575 |
| 15 | 91286984 | 91287172 | 91287078 | 8   | 9   | 0  | 10.39304184 | 0.000803859 | CHD2     | ENSG00000173575 |
| 15 | 91293920 | 91294530 | 91294339 | 104 | 123 | 3  | 32.21842971 | 1.90E-34    | CHD2     | ENSG00000173575 |
| 15 | 92373707 | 92373925 | 92373785 | 8   | 10  | 0  | 11.43234603 | 0.000394183 |          | ENSG00000212022 |
| 15 | 92972186 | 92972365 | 92972275 | 9   | 9   | 0  | 10.39304184 | 0.000803859 |          | ENSG00000176070 |
| 15 | 93136697 | 93136880 | 93136747 | 8   | 8   | 6  | 1.336248237 | 0.277651    |          | ENSG00000176070 |
| 15 | 93591403 | 93591680 | 93591541 | 22  | 23  | 5  | 4.157216737 | 0.000186738 |          | ENSG00000176070 |
| 15 | 93603758 | 93603961 | 93603859 | 9   | 11  | 3  | 3.117912553 | 0.0146045   |          | ENSG00000176070 |
| 15 | 94239773 | 94240041 | 94239916 | 8   | 12  | 8  | 1.501217155 | 0.168286    |          | ENSG00000208900 |
| 15 | 94255934 | 94256268 | 94256101 | 9   | 12  | 10 | 1.228268581 | 0.305344    |          | ENSG00000208900 |
| 15 | 94368804 | 94368983 | 94368928 | 8   | 8   | 0  | 9.353737658 | 0.00163931  |          | ENSG00000208900 |
| 15 | 94544914 | 94545094 | 94545016 | 8   | 8   | 5  | 1.558956276 | 0.191397    |          | ENSG00000205148 |
| 15 | 94670346 | 94670572 | 94670459 | 9   | 11  | 7  | 1.558956276 | 0.158273    | NR2F2    | ENSG00000185551 |
| 15 | 96553173 | 96553352 | 96553236 | 8   | 8   | 0  | 9.353737658 | 0.00163931  |          | ENSG00000222361 |
| 15 | 96789553 | 96789783 | 96789642 | 8   | 11  | 2  | 4.157216737 | 0.0052913   | FAM169B  | ENSG00000185087 |
| 15 | 97110014 | 97110227 | 97110120 | 9   | 9   | 0  | 10.39304184 | 0.000803859 | IGF1R    | ENSG00000140443 |
| 15 | 97110363 | 97110555 | 97110459 | 8   | 8   | 1  | 4.676868829 | 0.0091584   | IGF1R    | ENSG00000140443 |
| 15 | 97140346 | 97140658 | 97140502 | 12  | 15  | 5  | 2.771477825 | 0.0105836   | IGF1R    | ENSG00000140443 |
| 15 | 97183267 | 97183457 | 97183353 | 9   | 9   | 3  | 2.598260461 | 0.0397929   | IGF1R    | ENSG00000140443 |
| 15 | 97214007 | 97214215 | 97214111 | 8   | 10  | 2  | 3.810782009 | 0.00936112  |          | ENSG00000183571 |
| 15 | 97221132 | 97221471 | 97221239 | 9   | 14  | 5  | 2.598260461 | 0.0167748   |          | ENSG00000183571 |
| 15 | 97234331 | 97234699 | 97234378 | 9   | 15  | 5  | 2.771477825 | 0.0105836   |          | ENSG00000183571 |
| 15 | 97458345 | 97458529 | 97458398 | 8   | 8   | 4  | 1.870747532 | 0.118863    | SYNM     | ENSG00000182253 |
| 15 | 97481484 | 97481664 | 97481574 | 8   | 8   | 1  | 4.676868829 | 0.0091584   | SYNM     | ENSG00000182253 |
| 15 | 97516733 | 97516912 | 97516822 | 8   | 8   | 1  | 4.676868829 | 0.0091584   | SYNM     | ENSG00000182253 |
| 15 | 97621995 | 97622288 | 97622141 | 11  | 12  | 4  | 2.702190879 | 0.0203088   | HSP90B2P | ENSG00000205141 |
| 15 | 97923310 | 97923668 | 97923489 | 10  | 13  | 4  | 2.910051716 | 0.0125532   | MEF2A    | ENSG00000068305 |
| 15 | 98325592 | 98325877 | 98325713 | 14  | 16  | 2  | 5.889390377 | 0.000270741 |          | ENSG00000208876 |
| 15 | 98529562 | 98529741 | 98529714 | 8   | 9   | 0  | 10.39304184 | 0.000803859 |          | ENSG00000208876 |
| 15 | 98566969 | 98567148 | 98567040 | 8   | 8   | 0  | 9.353737658 | 0.00163931  | ADAMTS17 | ENSG00000140470 |
| 15 | 98599543 | 98599874 | 98599695 | 9   | 13  | 1  | 7.27512929  | 0.000378098 | ADAMTS17 | ENSG00000140470 |
| 15 | 98604954 | 98605197 | 98605075 | 9   | 12  | 5  | 2.251825733 | 0.0404733   | ADAMTS17 | ENSG00000140470 |

|    |          |          |          |    |    |    |             |             |          |                 |
|----|----------|----------|----------|----|----|----|-------------|-------------|----------|-----------------|
| 15 | 98683543 | 98683742 | 98683642 | 9  | 10 | 0  | 11.43234603 | 0.000394183 | ADAMTS17 | ENSG00000140470 |
| 15 | 98707923 | 98708169 | 98708011 | 10 | 12 | 2  | 4.503651465 | 0.002963    |          | ENSG00000189419 |
| 15 | 98708230 | 98708440 | 98708321 | 10 | 11 | 4  | 2.494330042 | 0.0324033   |          | ENSG00000189419 |
| 15 | 98821333 | 98821702 | 98821427 | 9  | 13 | 6  | 2.078608368 | 0.0483393   | LASS3    | ENSG00000154227 |
| 15 | 98959855 | 98960191 | 98960023 | 10 | 13 | 11 | 1.212521548 | 0.309909    | LINS1    | ENSG00000140471 |
| 15 | 99235203 | 99235546 | 99235381 | 35 | 39 | 2  | 13.85738912 | 9.79E-11    | ALDH1A3  | ENSG00000184254 |
| 15 | 99397216 | 99397462 | 99397310 | 8  | 11 | 3  | 3.117912553 | 0.0146045   | LRRK1    | ENSG00000154237 |
| 15 | 99610648 | 99610860 | 99610771 | 8  | 8  | 3  | 2.338434415 | 0.0641221   | CHSY1    | ENSG00000131873 |
| 15 | 99821097 | 99821339 | 99821176 | 9  | 11 | 0  | 12.47165021 | 0.000193293 | PCSK6    | ENSG00000140479 |
| 16 | 67129    | 67329    | 67267    | 8  | 8  | 5  | 1.558956276 | 0.191397    | MPG      | ENSG00000103152 |
| 16 | 317154   | 317409   | 317317   | 9  | 9  | 2  | 3.464347281 | 0.0163838   | AXIN1    | ENSG00000103126 |
| 16 | 583543   | 583811   | 583681   | 11 | 12 | 0  | 13.5109544  | 9.48E-05    | RAB40C   | ENSG00000197562 |
| 16 | 626645   | 626875   | 626707   | 8  | 10 | 6  | 1.63319229  | 0.146906    | C16orf13 | ENSG00000130731 |
| 16 | 663268   | 663499   | 663421   | 11 | 12 | 0  | 13.5109544  | 9.48E-05    | RHBDL1   | ENSG00000103269 |
| 16 | 680316   | 680574   | 680445   | 10 | 11 | 5  | 2.078608368 | 0.0614303   | WDR24    | ENSG00000127580 |
| 16 | 702686   | 703058   | 702848   | 8  | 13 | 2  | 4.850086193 | 0.00164564  | METRNL   | ENSG00000103260 |
| 16 | 1068647  | 1068853  | 1068750  | 8  | 8  | 2  | 3.117912553 | 0.0283184   | SSTR5    | ENSG00000162009 |
| 16 | 1073075  | 1073396  | 1073244  | 11 | 13 | 0  | 14.55025858 | 4.65E-05    | SSTR5    | ENSG00000162009 |
| 16 | 1287047  | 1287275  | 1287154  | 9  | 9  | 1  | 5.196520921 | 0.00490062  | UBE2I    | ENSG00000103275 |
| 16 | 1299174  | 1299353  | 1299196  | 8  | 8  | 2  | 3.117912553 | 0.0283184   | UBE2I    | ENSG00000103275 |
| 16 | 1410532  | 1410967  | 1410793  | 8  | 16 | 5  | 2.944695189 | 0.00659886  | UNKL     | ENSG00000059145 |
| 16 | 1691452  | 1691783  | 1691581  | 12 | 16 | 9  | 1.766817113 | 0.0700694   | MAPK8IP3 | ENSG00000138834 |
| 16 | 1826406  | 1826585  | 1826500  | 9  | 9  | 2  | 3.464347281 | 0.0163838   | FAHD1    | ENSG00000180185 |
| 16 | 1903375  | 1903603  | 1903489  | 9  | 11 | 1  | 6.235825105 | 0.0013754   | HS3ST6   | ENSG00000162040 |
| 16 | 2188449  | 2188760  | 2188589  | 11 | 14 | 3  | 3.897390691 | 0.00295882  | CASKIN1  | ENSG00000167971 |
| 16 | 2241556  | 2241778  | 2241667  | 8  | 9  | 3  | 2.598260461 | 0.0397929   | DCI      | ENSG00000167969 |
| 16 | 2511335  | 2511560  | 2511447  | 8  | 10 | 3  | 2.858086507 | 0.0242838   | AMDHD2   | ENSG00000162066 |
| 16 | 2523307  | 2523548  | 2523427  | 8  | 11 | 0  | 12.47165021 | 0.000193293 | CEMP1    | ENSG00000205923 |
| 16 | 2593268  | 2593481  | 2593374  | 8  | 10 | 1  | 5.716173013 | 0.00260397  |          | ENSG00000215154 |
| 16 | 2730054  | 2730487  | 2730336  | 21 | 29 | 1  | 15.58956276 | 8.46E-09    |          | ENSG00000205913 |
| 16 | 2857979  | 2858624  | 2858318  | 9  | 23 | 5  | 4.157216737 | 0.000186738 | PRSS22   | ENSG00000005001 |
| 16 | 2894015  | 2894394  | 2894281  | 9  | 16 | 2  | 5.889390377 | 0.000270741 | FLYWCH1  | ENSG00000059122 |
| 16 | 2901770  | 2901959  | 2901834  | 8  | 8  | 1  | 4.676868829 | 0.0091584   | FLYWCH1  | ENSG00000059122 |
| 16 | 2906037  | 2906265  | 2906151  | 10 | 11 | 1  | 6.235825105 | 0.0013754   | FLYWCH1  | ENSG00000059122 |

|    |          |          |          |     |     |    |             |             |          |                 |
|----|----------|----------|----------|-----|-----|----|-------------|-------------|----------|-----------------|
| 16 | 2958604  | 2958845  | 2958704  | 8   | 9   | 5  | 1.73217364  | 0.133894    | PAQR4    | ENSG00000162073 |
| 16 | 2999858  | 3000131  | 3000037  | 13  | 17  | 8  | 2.078608368 | 0.0303558   | CLDN9    | ENSG00000213937 |
| 16 | 3090264  | 3090507  | 3090385  | 11  | 12  | 0  | 13.5109544  | 9.48E-05    | ZSCAN10  | ENSG00000130182 |
| 16 | 3102285  | 3102627  | 3102460  | 16  | 20  | 3  | 5.456346967 | 9.70E-05    | ZNF205   | ENSG00000122386 |
| 16 | 3116132  | 3116312  | 3116222  | 8   | 9   | 1  | 5.196520921 | 0.00490062  | ZNF213   | ENSG00000085644 |
| 16 | 3119641  | 3119830  | 3119771  | 12  | 12  | 5  | 2.251825733 | 0.0404733   | ZNF213   | ENSG00000085644 |
| 16 | 3165600  | 3165800  | 3165648  | 8   | 9   | 8  | 1.154782427 | 0.375434    |          | ENSG00000209496 |
| 16 | 3173465  | 3173644  | 3173562  | 9   | 9   | 1  | 5.196520921 | 0.00490062  |          | ENSG00000209496 |
| 16 | 3179520  | 3179883  | 3179704  | 11  | 16  | 3  | 4.417042783 | 0.00097367  |          | ENSG00000209499 |
| 16 | 3213382  | 3213608  | 3213507  | 8   | 8   | 1  | 4.676868829 | 0.0091584   |          | ENSG00000203581 |
| 16 | 3504014  | 3504265  | 3504139  | 11  | 13  | 3  | 3.637564645 | 0.0050909   | CLUAP1   | ENSG00000103351 |
| 16 | 3543262  | 3543441  | 3543389  | 8   | 8   | 2  | 3.117912553 | 0.0283184   | NLRC3    | ENSG00000167984 |
| 16 | 3636080  | 3636259  | 3636169  | 8   | 9   | 1  | 5.196520921 | 0.00490062  | DNASE1   | ENSG00000213918 |
| 16 | 3636403  | 3636793  | 3636641  | 14  | 21  | 5  | 3.810782009 | 0.000537724 | DNASE1   | ENSG00000213918 |
| 16 | 4130605  | 4131129  | 4130869  | 241 | 275 | 1  | 143.4239774 | 5.42E-84    | ADCY9    | ENSG00000162104 |
| 16 | 4132553  | 4132760  | 4132685  | 9   | 10  | 3  | 2.858086507 | 0.0242838   | ADCY9    | ENSG00000162104 |
| 16 | 4142155  | 4142679  | 4142466  | 26  | 40  | 3  | 10.65286789 | 3.85E-10    | ADCY9    | ENSG00000162104 |
| 16 | 4167201  | 4167380  | 4167290  | 9   | 9   | 10 | 0.944821986 | 0.553851    | ADCY9    | ENSG00000162104 |
| 16 | 4243998  | 4244310  | 4244162  | 10  | 13  | 7  | 1.818782322 | 0.0805123   | SRL      | ENSG00000185739 |
| 16 | 4615896  | 4616202  | 4616055  | 18  | 21  | 1  | 11.43234603 | 1.90E-06    | MGRN1    | ENSG00000102858 |
| 16 | 4813255  | 4813434  | 4813350  | 8   | 8   | 3  | 2.338434415 | 0.0641221   | ROGDI    | ENSG00000067836 |
| 16 | 4887374  | 4887670  | 4887516  | 12  | 13  | 2  | 4.850086193 | 0.00164564  | PPL      | ENSG00000118898 |
| 16 | 4935867  | 4936129  | 4935997  | 9   | 10  | 3  | 2.858086507 | 0.0242838   |          | ENSG00000200980 |
| 16 | 4946130  | 4946439  | 4946284  | 9   | 12  | 1  | 6.755477198 | 0.000722752 | SEC14L5  | ENSG00000103184 |
| 16 | 5321384  | 5321708  | 5321538  | 13  | 16  | 1  | 8.834085566 | 5.30E-05    |          | ENSG00000215086 |
| 16 | 5395741  | 5396165  | 5395953  | 34  | 45  | 1  | 23.90399624 | 1.42E-13    |          | ENSG00000215086 |
| 16 | 5622294  | 5622479  | 5622346  | 8   | 8   | 0  | 9.353737658 | 0.00163931  |          | ENSG00000221257 |
| 16 | 8470398  | 8470604  | 8470458  | 8   | 9   | 3  | 2.598260461 | 0.0397929   | C16orf68 | ENSG00000067365 |
| 16 | 8672309  | 8672489  | 8672394  | 8   | 8   | 0  | 9.353737658 | 0.00163931  | ABAT     | ENSG00000183044 |
| 16 | 8913280  | 8913497  | 8913381  | 14  | 14  | 0  | 15.58956276 | 2.28E-05    | USP7     | ENSG00000187555 |
| 16 | 9054637  | 9054857  | 9054698  | 9   | 9   | 2  | 3.464347281 | 0.0163838   |          | ENSG00000209566 |
| 16 | 10042801 | 10043008 | 10042904 | 9   | 9   | 2  | 3.464347281 | 0.0163838   |          | ENSG00000213855 |
| 16 | 10370382 | 10370741 | 10370595 | 22  | 27  | 4  | 5.820103432 | 6.01E-06    | ATF7IP2  | ENSG00000166669 |
| 16 | 10595818 | 10596348 | 10596151 | 33  | 47  | 7  | 6.235825105 | 2.92E-09    | EMP2     | ENSG00000213853 |

|    |          |          |          |    |    |    |             |             |          |                 |
|----|----------|----------|----------|----|----|----|-------------|-------------|----------|-----------------|
| 16 | 10629449 | 10629780 | 10629601 | 8  | 13 | 1  | 7.27512929  | 0.000378098 | EMP2     | ENSG00000213853 |
| 16 | 10825974 | 10826170 | 10826045 | 8  | 8  | 3  | 2.338434415 | 0.0641221   | FAM18A   | ENSG00000166676 |
| 16 | 10837858 | 10838037 | 10837922 | 8  | 8  | 1  | 4.676868829 | 0.0091584   | FAM18A   | ENSG00000166676 |
| 16 | 10959476 | 10959715 | 10959595 | 9  | 11 | 2  | 4.157216737 | 0.0052913   | CLEC16A  | ENSG00000038532 |
| 16 | 11270784 | 11271016 | 11270900 | 11 | 11 | 0  | 12.47165021 | 0.000193293 | TNP2     | ENSG00000178279 |
| 16 | 11298292 | 11298518 | 11298405 | 9  | 10 | 3  | 2.858086507 | 0.0242838   |          | ENSG00000209625 |
| 16 | 11358684 | 11358865 | 11358774 | 10 | 10 | 3  | 2.858086507 | 0.0242838   | C16orf75 | ENSG00000175643 |
| 16 | 11397664 | 11397852 | 11397758 | 10 | 10 | 3  | 2.858086507 | 0.0242838   | C16orf75 | ENSG00000175643 |
| 16 | 11498729 | 11499078 | 11498903 | 23 | 29 | 7  | 3.897390691 | 6.03E-05    |          | ENSG00000188897 |
| 16 | 11508638 | 11508978 | 11508808 | 9  | 13 | 1  | 7.27512929  | 0.000378098 |          | ENSG00000188897 |
| 16 | 11563904 | 11564266 | 11564049 | 9  | 14 | 2  | 5.196520921 | 0.000907371 |          | ENSG00000209636 |
| 16 | 11578003 | 11578225 | 11578100 | 8  | 10 | 3  | 2.858086507 | 0.0242838   | LITAF    | ENSG00000189067 |
| 16 | 11585530 | 11585776 | 11585667 | 12 | 13 | 2  | 4.850086193 | 0.00164564  | LITAF    | ENSG00000189067 |
| 16 | 11783114 | 11783293 | 11783207 | 8  | 8  | 0  | 9.353737658 | 0.00163931  | ZC3H7A   | ENSG00000122299 |
| 16 | 11881510 | 11881712 | 11881611 | 9  | 9  | 0  | 10.39304184 | 0.000803859 |          | ENSG00000203550 |
| 16 | 12216696 | 12216904 | 12216799 | 8  | 9  | 0  | 10.39304184 | 0.000803859 |          | ENSG00000205782 |
| 16 | 12290712 | 12290940 | 12290821 | 9  | 10 | 6  | 1.63319229  | 0.146906    |          | ENSG00000205782 |
| 16 | 12322252 | 12322431 | 12322307 | 9  | 9  | 2  | 3.464347281 | 0.0163838   |          | ENSG00000205782 |
| 16 | 12352249 | 12352447 | 12352324 | 8  | 10 | 3  | 2.858086507 | 0.0242838   |          | ENSG00000205782 |
| 16 | 12539943 | 12540239 | 12540121 | 17 | 21 | 0  | 22.86469205 | 1.55E-07    | SNX29    | ENSG00000048471 |
| 16 | 12804879 | 12805079 | 12804962 | 8  | 8  | 2  | 3.117912553 | 0.0283184   |          | ENSG00000103381 |
| 16 | 12900775 | 12901254 | 12900953 | 9  | 18 | 7  | 2.468347438 | 0.0112499   |          | ENSG00000199474 |
| 16 | 12941366 | 12941560 | 12941493 | 10 | 11 | 2  | 4.157216737 | 0.0052913   |          | ENSG00000199474 |
| 16 | 12941633 | 12941864 | 12941748 | 12 | 14 | 0  | 15.58956276 | 2.28E-05    |          | ENSG00000199474 |
| 16 | 13454694 | 13455118 | 13454901 | 49 | 61 | 0  | 64.43685942 | 6.49E-20    | ERCC4    | ENSG00000175595 |
| 16 | 13455335 | 13455612 | 13455480 | 11 | 12 | 4  | 2.702190879 | 0.0203088   | ERCC4    | ENSG00000175595 |
| 16 | 13849374 | 13849580 | 13849477 | 8  | 8  | 2  | 3.117912553 | 0.0283184   | ERCC4    | ENSG00000175595 |
| 16 | 13959247 | 13959495 | 13959380 | 10 | 11 | 5  | 2.078608368 | 0.0614303   | ERCC4    | ENSG00000175595 |
| 16 | 14076530 | 14076741 | 14076634 | 9  | 9  | 2  | 3.464347281 | 0.0163838   | MKL2     | ENSG00000186260 |
| 16 | 14098554 | 14098877 | 14098715 | 13 | 18 | 6  | 2.8209685   | 0.00559354  | MKL2     | ENSG00000186260 |
| 16 | 14310921 | 14311185 | 14311053 | 16 | 17 | 1  | 9.353737658 | 2.73E-05    |          | ENSG00000199130 |
| 16 | 14379641 | 14379859 | 14379714 | 8  | 10 | 1  | 5.716173013 | 0.00260397  |          | ENSG00000199130 |
| 16 | 14488056 | 14488629 | 14488342 | 36 | 50 | 50 | 1.039304184 | 0.423013    |          | ENSG00000212739 |
| 16 | 14631778 | 14631992 | 14631910 | 8  | 8  | 1  | 4.676868829 | 0.0091584   | BFAR     | ENSG00000103429 |



|    |          |          |          |    |     |    |             |             |          |                 |
|----|----------|----------|----------|----|-----|----|-------------|-------------|----------|-----------------|
| 16 | 15428940 | 15429224 | 15429082 | 11 | 12  | 0  | 13.5109544  | 9.48E-05    | C16orf45 | ENSG00000166780 |
| 16 | 15435417 | 15435617 | 15435517 | 8  | 9   | 1  | 5.196520921 | 0.00490062  | C16orf45 | ENSG00000166780 |
| 16 | 16012850 | 16013099 | 16012990 | 9  | 9   | 0  | 10.39304184 | 0.000803859 | ABCC1    | ENSG00000103222 |
| 16 | 16150120 | 16150345 | 16150232 | 13 | 13  | 2  | 4.850086193 | 0.00164564  | ABCC6    | ENSG00000091262 |
| 16 | 16196338 | 16196517 | 16196427 | 8  | 8   | 1  | 4.676868829 | 0.0091584   | ABCC6    | ENSG00000091262 |
| 16 | 16828404 | 16828739 | 16828571 | 8  | 11  | 1  | 6.235825105 | 0.0013754   |          | ENSG00000205748 |
| 16 | 16829562 | 16829744 | 16829672 | 8  | 8   | 1  | 4.676868829 | 0.0091584   |          | ENSG00000205748 |
| 16 | 16862896 | 16863383 | 16863186 | 51 | 66  | 4  | 13.92667607 | 1.28E-16    |          | ENSG00000205748 |
| 16 | 16969730 | 16969920 | 16969825 | 8  | 8   | 3  | 2.338434415 | 0.0641221   |          | ENSG00000205748 |
| 16 | 17155853 | 17156065 | 17155983 | 9  | 10  | 2  | 3.810782009 | 0.00936112  |          | ENSG00000205748 |
| 16 | 17317043 | 17317241 | 17317142 | 9  | 9   | 1  | 5.196520921 | 0.00490062  | XYLT1    | ENSG00000103489 |
| 16 | 17516811 | 17517076 | 17516914 | 8  | 10  | 3  | 2.858086507 | 0.0242838   | XYLT1    | ENSG00000103489 |
| 16 | 17634510 | 17634816 | 17634663 | 15 | 20  | 5  | 3.637564645 | 0.000902929 | XYLT1    | ENSG00000103489 |
| 16 | 18010953 | 18011213 | 18011091 | 11 | 13  | 4  | 2.910051716 | 0.0125532   |          | ENSG00000221687 |
| 16 | 18720560 | 18720845 | 18720702 | 13 | 14  | 3  | 3.897390691 | 0.00295882  | ARL6IP1  | ENSG00000170540 |
| 16 | 18902589 | 18902813 | 18902690 | 9  | 10  | 1  | 5.716173013 | 0.00260397  | TMC7     | ENSG00000170537 |
| 16 | 18917544 | 18917754 | 18917649 | 8  | 8   | 2  | 3.117912553 | 0.0283184   |          | ENSG00000207167 |
| 16 | 19005197 | 19005533 | 19005365 | 9  | 15  | 5  | 2.771477825 | 0.0105836   | COQ7     | ENSG00000167186 |
| 16 | 19029711 | 19030214 | 19029942 | 13 | 21  | 3  | 5.716173013 | 5.37E-05    | ITPRIPL2 | ENSG00000205730 |
| 16 | 19635154 | 19635394 | 19635300 | 8  | 12  | 9  | 1.35109544  | 0.232899    | IQCK     | ENSG00000174628 |
| 16 | 19805119 | 19805319 | 19805220 | 10 | 10  | 3  | 2.858086507 | 0.0242838   | GPRC5B   | ENSG00000167191 |
| 16 | 20003523 | 20003761 | 20003642 | 8  | 10  | 1  | 5.716173013 | 0.00260397  | GPR139   | ENSG00000180269 |
| 16 | 20068683 | 20068881 | 20068752 | 9  | 11  | 4  | 2.494330042 | 0.0324033   | GPR139   | ENSG00000180269 |
| 16 | 20102746 | 20103010 | 20102878 | 10 | 10  | 2  | 3.810782009 | 0.00936112  | GPR139   | ENSG00000180269 |
| 16 | 20660436 | 20660756 | 20660596 | 9  | 14  | 6  | 2.227080395 | 0.0322529   | THUMPD1  | ENSG00000066654 |
| 16 | 20725314 | 20725625 | 20725469 | 11 | 15  | 2  | 5.542955649 | 0.000497081 |          | ENSG00000005189 |
| 16 | 20784404 | 20785055 | 20784759 | 84 | 118 | 1  | 61.83859896 | 9.15E-36    | DCUN1D3  | ENSG00000188215 |
| 16 | 20787979 | 20788165 | 20788072 | 9  | 9   | 1  | 5.196520921 | 0.00490062  | DCUN1D3  | ENSG00000188215 |
| 16 | 20820288 | 20820624 | 20820456 | 11 | 14  | 6  | 2.227080395 | 0.0322529   | LYRM1    | ENSG00000102897 |
| 16 | 20832941 | 20833200 | 20833070 | 8  | 9   | 1  | 5.196520921 | 0.00490062  | LYRM1    | ENSG00000102897 |
| 16 | 20920069 | 20920249 | 20920159 | 8  | 9   | 0  | 10.39304184 | 0.000803859 | LYRM1    | ENSG00000102897 |
| 16 | 21078428 | 21078757 | 21078601 | 8  | 12  | 11 | 1.125912866 | 0.382541    | DNAH3    | ENSG00000158486 |
| 16 | 21498113 | 21498439 | 21498276 | 8  | 12  | 3  | 3.377738599 | 0.00867157  |          | ENSG00000209776 |
| 16 | 21871591 | 21872313 | 21872134 | 11 | 32  | 12 | 2.638233698 | 0.000799104 | UQCRC2   | ENSG00000140740 |

|    |          |          |          |    |     |    |             |             |                          |
|----|----------|----------|----------|----|-----|----|-------------|-------------|--------------------------|
| 16 | 21955664 | 21955852 | 21955758 | 8  | 8   | 0  | 9.353737658 | 0.00163931  | ENSG00000185716          |
| 16 | 21996770 | 21996968 | 21996868 | 8  | 9   | 3  | 2.598260461 | 0.0397929   | VWA3A ENSG00000175267    |
| 16 | 22107312 | 22107644 | 22107478 | 9  | 12  | 3  | 3.377738599 | 0.00867157  | EEF2K ENSG00000103319    |
| 16 | 22114555 | 22114998 | 22114892 | 12 | 19  | 10 | 1.889643971 | 0.0394833   | EEF2K ENSG00000103319    |
| 16 | 22129737 | 22129928 | 22129848 | 11 | 11  | 0  | 12.47165021 | 0.000193293 | EEF2K ENSG00000103319    |
| 16 | 22151665 | 22151925 | 22151795 | 10 | 12  | 2  | 4.503651465 | 0.002963    | EEF2K ENSG00000103319    |
| 16 | 22215774 | 22216140 | 22215949 | 10 | 17  | 7  | 2.338434415 | 0.0171287   | POLR3E ENSG00000058600   |
| 16 | 22216995 | 22217212 | 22217144 | 8  | 9   | 5  | 1.73217364  | 0.133894    | POLR3E ENSG00000058600   |
| 16 | 22217283 | 22217501 | 22217402 | 11 | 14  | 6  | 2.227080395 | 0.0322529   | POLR3E ENSG00000058600   |
| 16 | 22287385 | 22287718 | 22287560 | 8  | 12  | 2  | 4.503651465 | 0.002963    | CDR2 ENSG00000140743     |
| 16 | 22559863 | 22560086 | 22559964 | 8  | 11  | 2  | 4.157216737 | 0.0052913   | ENSG00000198064          |
| 16 | 22592703 | 22592887 | 22592734 | 8  | 8   | 1  | 4.676868829 | 0.0091584   | ENSG00000198064          |
| 16 | 22599580 | 22599874 | 22599727 | 9  | 12  | 10 | 1.228268581 | 0.305344    | HS3ST2 ENSG00000122254   |
| 16 | 22604231 | 22604480 | 22604369 | 10 | 10  | 1  | 5.716173013 | 0.00260397  | HS3ST2 ENSG00000122254   |
| 16 | 22817777 | 22818080 | 22817928 | 9  | 12  | 8  | 1.501217155 | 0.168286    | HS3ST2 ENSG00000122254   |
| 16 | 22945690 | 22945894 | 22945810 | 9  | 9   | 2  | 3.464347281 | 0.0163838   | USP31 ENSG00000103404    |
| 16 | 23001107 | 23001415 | 23001270 | 16 | 16  | 5  | 2.944695189 | 0.00659886  | USP31 ENSG00000103404    |
| 16 | 23203444 | 23203809 | 23203623 | 10 | 17  | 7  | 2.338434415 | 0.0171287   | SCNN1B ENSG00000168447   |
| 16 | 23343295 | 23343591 | 23343453 | 9  | 10  | 6  | 1.63319229  | 0.146906    | ENSG00000209795          |
| 16 | 23371685 | 23372119 | 23371906 | 9  | 17  | 4  | 3.741495063 | 0.00163722  | COG7 ENSG00000168434     |
| 16 | 23405398 | 23405628 | 23405480 | 9  | 10  | 3  | 2.858086507 | 0.0242838   | GGA2 ENSG00000103365     |
| 16 | 23476208 | 23476500 | 23476364 | 10 | 11  | 4  | 2.494330042 | 0.0324033   | EARS2 ENSG00000103356    |
| 16 | 23560106 | 23560383 | 23560242 | 10 | 12  | 2  | 4.503651465 | 0.002963    | PALB2 ENSG00000083093    |
| 16 | 23712427 | 23712630 | 23712528 | 10 | 10  | 3  | 2.858086507 | 0.0242838   | ENSG00000166869          |
| 16 | 23915574 | 23915818 | 23915694 | 8  | 11  | 2  | 4.157216737 | 0.0052913   | PRKCB ENSG00000166501    |
| 16 | 24300538 | 24300993 | 24300789 | 31 | 42  | 5  | 7.448346654 | 3.24E-09    | ENSG00000201541          |
| 16 | 24457938 | 24458203 | 24458075 | 10 | 11  | 8  | 1.385738912 | 0.224757    | RBBP6 ENSG00000122257    |
| 16 | 24772527 | 24772727 | 24772627 | 8  | 9   | 0  | 10.39304184 | 0.000803859 | SLC5A11 ENSG00000158865  |
| 16 | 24883361 | 24883554 | 24883457 | 10 | 10  | 0  | 11.43234603 | 0.000394183 | ARHGAP17 ENSG00000140750 |
| 16 | 25183469 | 25183669 | 25183599 | 8  | 8   | 5  | 1.558956276 | 0.191397    | ZKSCAN2 ENSG00000155592  |
| 16 | 25332912 | 25333107 | 25332963 | 8  | 9   | 5  | 1.73217364  | 0.133894    | ZKSCAN2 ENSG00000155592  |
| 16 | 25472390 | 25473018 | 25472806 | 76 | 104 | 4  | 21.82538787 | 1.24E-27    | HS3ST4 ENSG00000182601   |
| 16 | 25487785 | 25488266 | 25487963 | 15 | 24  | 2  | 8.660868202 | 1.80E-06    | HS3ST4 ENSG00000182601   |
| 16 | 25633393 | 25633720 | 25633553 | 8  | 11  | 2  | 4.157216737 | 0.0052913   | HS3ST4 ENSG00000182601   |

|    |          |          |          |    |    |    |             |             |          |                 |
|----|----------|----------|----------|----|----|----|-------------|-------------|----------|-----------------|
| 16 | 26941902 | 26942196 | 26942064 | 18 | 21 | 0  | 22.86469205 | 1.55E-07    |          | ENSG00000213704 |
| 16 | 27028793 | 27028999 | 27028915 | 8  | 8  | 4  | 1.870747532 | 0.118863    |          | ENSG00000213704 |
| 16 | 27122202 | 27122410 | 27122272 | 9  | 9  | 4  | 2.078608368 | 0.0785659   | JMJD5    | ENSG00000155666 |
| 16 | 27327638 | 27327954 | 27327780 | 15 | 18 | 2  | 6.582259834 | 7.91E-05    | IL21R    | ENSG00000103522 |
| 16 | 27394843 | 27395087 | 27394962 | 8  | 8  | 2  | 3.117912553 | 0.0283184   | IL21R    | ENSG00000103522 |
| 16 | 27498586 | 27498765 | 27498675 | 8  | 8  | 2  | 3.117912553 | 0.0283184   | KIAA0556 | ENSG00000047578 |
| 16 | 27561716 | 27561945 | 27561823 | 9  | 11 | 4  | 2.494330042 | 0.0324033   |          | ENSG00000221528 |
| 16 | 27594400 | 27594579 | 27594489 | 8  | 8  | 0  | 9.353737658 | 0.00163931  |          | ENSG00000221528 |
| 16 | 27642742 | 27643367 | 27642957 | 42 | 72 | 3  | 18.96730136 | 2.48E-19    |          | ENSG00000201371 |
| 16 | 27715516 | 27715912 | 27715761 | 10 | 16 | 3  | 4.417042783 | 0.00097367  |          | ENSG00000212382 |
| 16 | 27816828 | 27817114 | 27816971 | 19 | 21 | 4  | 4.572938411 | 0.000186332 | GSG1L    | ENSG00000169181 |
| 16 | 27839191 | 27839758 | 27839542 | 13 | 28 | 8  | 3.348869038 | 0.000246424 | GSG1L    | ENSG00000169181 |
| 16 | 27841388 | 27841583 | 27841494 | 9  | 9  | 3  | 2.598260461 | 0.0397929   | GSG1L    | ENSG00000169181 |
| 16 | 27912375 | 27912791 | 27912554 | 24 | 32 | 4  | 6.859407616 | 3.06E-07    |          | ENSG00000207266 |
| 16 | 27989203 | 27989413 | 27989350 | 10 | 10 | 4  | 2.286469205 | 0.0509017   | GSG1L    | ENSG00000169181 |
| 16 | 28105648 | 28105835 | 28105670 | 8  | 8  | 4  | 1.870747532 | 0.118863    |          | ENSG00000200138 |
| 16 | 28455985 | 28456237 | 28456096 | 18 | 19 | 4  | 4.157216737 | 0.000560204 |          | ENSG00000176046 |
| 16 | 28782170 | 28782537 | 28782325 | 12 | 17 | 3  | 4.676868829 | 0.000552213 | SH2B1    | ENSG00000178188 |
| 16 | 28818826 | 28819354 | 28818993 | 13 | 25 | 1  | 13.5109544  | 1.28E-07    | ATP2A1   | ENSG00000196296 |
| 16 | 28843478 | 28843737 | 28843591 | 11 | 12 | 5  | 2.251825733 | 0.0404733   | RABEP2   | ENSG00000177548 |
| 16 | 28844190 | 28844401 | 28844295 | 8  | 9  | 2  | 3.464347281 | 0.0163838   | RABEP2   | ENSG00000177548 |
| 16 | 28864394 | 28864627 | 28864516 | 10 | 11 | 9  | 1.247165021 | 0.300052    | NFATC2IP | ENSG00000176953 |
| 16 | 28869364 | 28869588 | 28869476 | 9  | 10 | 5  | 1.905391004 | 0.0915982   | NFATC2IP | ENSG00000176953 |
| 16 | 29637884 | 29638117 | 29637986 | 10 | 12 | 0  | 13.5109544  | 9.48E-05    |          | ENSG00000222375 |
| 16 | 29648295 | 29648490 | 29648392 | 8  | 9  | 1  | 5.196520921 | 0.00490062  |          | ENSG00000222375 |
| 16 | 29657464 | 29657690 | 29657577 | 14 | 14 | 6  | 2.227080395 | 0.0322529   | C16orf54 | ENSG00000185905 |
| 16 | 29709079 | 29709308 | 29709199 | 10 | 10 | 8  | 1.27026067  | 0.293854    | KIF22    | ENSG00000079616 |
| 16 | 29734703 | 29735035 | 29734858 | 10 | 14 | 5  | 2.598260461 | 0.0167748   | C16orf53 | ENSG00000185928 |
| 16 | 29782080 | 29782554 | 29782335 | 8  | 18 | 14 | 1.316451967 | 0.209896    | CDIPT    | ENSG00000103502 |
| 16 | 29844097 | 29844300 | 29844226 | 8  | 9  | 1  | 5.196520921 | 0.00490062  | KCTD13   | ENSG00000174943 |
| 16 | 29914804 | 29915278 | 29915137 | 9  | 18 | 8  | 2.194086611 | 0.0206188   | INO80E   | ENSG00000169592 |
| 16 | 29971704 | 29971966 | 29971845 | 8  | 12 | 7  | 1.688869299 | 0.11395     | ALDOA    | ENSG00000149925 |
| 16 | 29983658 | 29984049 | 29983794 | 8  | 14 | 9  | 1.558956276 | 0.132279    | ALDOA    | ENSG00000149925 |
| 16 | 30008787 | 30009111 | 30008945 | 9  | 13 | 5  | 2.425043097 | 0.0262442   | TBX6     | ENSG00000149922 |

|    |          |          |          |    |    |    |             |             |          |                 |
|----|----------|----------|----------|----|----|----|-------------|-------------|----------|-----------------|
| 16 | 30023361 | 30023673 | 30023517 | 10 | 12 | 5  | 2.251825733 | 0.0404733   | YPEL3    | ENSG00000090238 |
| 16 | 30043193 | 30043382 | 30043287 | 8  | 10 | 2  | 3.810782009 | 0.00936112  | MAPK3    | ENSG00000102882 |
| 16 | 30101553 | 30101800 | 30101685 | 10 | 12 | 5  | 2.251825733 | 0.0404733   | CORO1A   | ENSG00000102879 |
| 16 | 30274036 | 30274535 | 30274221 | 11 | 22 | 14 | 1.593599749 | 0.0756559   | CD2BP2   | ENSG00000169217 |
| 16 | 30289724 | 30290222 | 30289905 | 8  | 18 | 10 | 1.795161773 | 0.055383    | TBC1D10B | ENSG00000169221 |
| 16 | 30325962 | 30326198 | 30326137 | 8  | 9  | 6  | 1.484720263 | 0.204387    | ZNF771   | ENSG00000179965 |
| 16 | 30348916 | 30349342 | 30349091 | 18 | 25 | 13 | 1.930136342 | 0.0200308   |          | ENSG00000179958 |
| 16 | 30363246 | 30363632 | 30363351 | 8  | 13 | 4  | 2.910051716 | 0.0125532   | SEPHS2   | ENSG00000179918 |
| 16 | 30446050 | 30446231 | 30446140 | 8  | 8  | 4  | 1.870747532 | 0.118863    | ZNF768   | ENSG00000169957 |
| 16 | 30446242 | 30446499 | 30446370 | 9  | 14 | 4  | 3.117912553 | 0.00766354  | ZNF768   | ENSG00000169957 |
| 16 | 30446552 | 30447039 | 30446860 | 16 | 26 | 4  | 5.612242595 | 1.08E-05    | ZNF768   | ENSG00000169957 |
| 16 | 30490636 | 30490822 | 30490699 | 8  | 10 | 7  | 1.429043253 | 0.21536     | ZNF785   | ENSG00000197162 |
| 16 | 30504447 | 30504712 | 30504579 | 8  | 10 | 6  | 1.63319229  | 0.146906    | ZNF785   | ENSG00000197162 |
| 16 | 30528909 | 30529400 | 30529224 | 14 | 26 | 2  | 9.353737658 | 4.98E-07    | ZNF689   | ENSG00000156853 |
| 16 | 30547680 | 30547904 | 30547777 | 10 | 10 | 6  | 1.63319229  | 0.146906    | ZNF689   | ENSG00000156853 |
| 16 | 30577175 | 30577496 | 30577343 | 12 | 16 | 14 | 1.177878075 | 0.320433    | FBRS     | ENSG00000156860 |
| 16 | 30612814 | 30613035 | 30612973 | 8  | 9  | 5  | 1.73217364  | 0.133894    | SRCAP    | ENSG00000080603 |
| 16 | 30616708 | 30616974 | 30616840 | 8  | 11 | 4  | 2.494330042 | 0.0324033   | SRCAP    | ENSG00000080603 |
| 16 | 30706234 | 30706568 | 30706334 | 10 | 14 | 4  | 3.117912553 | 0.00766354  | ZNF629   | ENSG00000102870 |
| 16 | 30724218 | 30724582 | 30724376 | 11 | 17 | 11 | 1.558956276 | 0.111389    |          | ENSG00000183355 |
| 16 | 30811188 | 30811391 | 30811289 | 9  | 10 | 1  | 5.716173013 | 0.00260397  | CTF1     | ENSG00000150281 |
| 16 | 30815935 | 30816123 | 30816007 | 8  | 10 | 5  | 1.905391004 | 0.0915982   | CTF1     | ENSG00000150281 |
| 16 | 30841330 | 30841822 | 30841506 | 12 | 22 | 10 | 2.173090567 | 0.0132845   |          | ENSG00000212972 |
| 16 | 30841926 | 30842281 | 30842144 | 8  | 13 | 3  | 3.637564645 | 0.0050909   |          | ENSG00000212972 |
| 16 | 30856534 | 30856743 | 30856644 | 9  | 9  | 1  | 5.196520921 | 0.00490062  | ORAI3    | ENSG00000175938 |
| 16 | 30868925 | 30869361 | 30869104 | 18 | 28 | 10 | 2.739983758 | 0.00114395  | ORAI3    | ENSG00000175938 |
| 16 | 30875738 | 30876399 | 30876235 | 8  | 24 | 4  | 5.196520921 | 3.42E-05    | SETD1A   | ENSG00000099381 |
| 16 | 30921241 | 30921475 | 30921353 | 8  | 8  | 4  | 1.870747532 | 0.118863    | STX1B    | ENSG00000099365 |
| 16 | 30993067 | 30993453 | 30993274 | 11 | 19 | 18 | 1.094004404 | 0.389177    | ZNF646   | ENSG00000167395 |
| 16 | 31008155 | 31008392 | 31008273 | 9  | 10 | 0  | 11.43234603 | 0.000394183 |          | ENSG00000151006 |
| 16 | 31013576 | 31013838 | 31013698 | 11 | 11 | 5  | 2.078608368 | 0.0614303   | VKORC1   | ENSG00000167397 |
| 16 | 31098759 | 31099069 | 31098914 | 9  | 13 | 5  | 2.425043097 | 0.0262442   | FUS      | ENSG00000089280 |
| 16 | 31192394 | 31192981 | 31192721 | 45 | 65 | 1  | 34.29703808 | 1.30E-19    | ITGAM    | ENSG00000169896 |
| 16 | 31349602 | 31350044 | 31349922 | 8  | 15 | 5  | 2.771477825 | 0.0105836   | COX6A2   | ENSG00000156885 |

|    |          |          |          |     |     |     |             |             |          |                 |
|----|----------|----------|----------|-----|-----|-----|-------------|-------------|----------|-----------------|
| 16 | 31370588 | 31370887 | 31370715 | 9   | 11  | 4   | 2.494330042 | 0.0324033   | ARMC5    | ENSG00000140691 |
| 16 | 31378120 | 31378345 | 31378178 | 8   | 10  | 3   | 2.858086507 | 0.0242838   | ARMC5    | ENSG00000140691 |
| 16 | 31427202 | 31427386 | 31427303 | 8   | 9   | 0   | 10.39304184 | 0.000803859 | C16orf58 | ENSG00000140688 |
| 16 | 31792498 | 31792802 | 31792641 | 11  | 14  | 5   | 2.598260461 | 0.0167748   | ZNF267   | ENSG00000185947 |
| 16 | 33526534 | 33526784 | 33526659 | 9   | 11  | 3   | 3.117912553 | 0.0146045   |          | ENSG00000185520 |
| 16 | 33796733 | 33797066 | 33796899 | 46  | 46  | 49  | 0.976945933 | 0.546418    |          | ENSG00000207986 |
| 16 | 33830002 | 33830186 | 33830165 | 8   | 10  | 2   | 3.810782009 | 0.00936112  |          | ENSG00000207986 |
| 16 | 33842759 | 33842943 | 33842795 | 8   | 8   | 2   | 3.117912553 | 0.0283184   |          | ENSG00000207986 |
| 16 | 33857518 | 33858015 | 33857840 | 36  | 46  | 36  | 1.320197207 | 0.101366    |          | ENSG00000207986 |
| 16 | 33858418 | 33858763 | 33858590 | 23  | 27  | 15  | 1.818782322 | 0.0247174   |          | ENSG00000207986 |
| 16 | 33858777 | 33859156 | 33858854 | 12  | 17  | 14  | 1.247165021 | 0.261378    |          | ENSG00000207986 |
| 16 | 33860100 | 33860425 | 33860262 | 11  | 12  | 16  | 0.794762023 | 0.738004    |          | ENSG00000207986 |
| 16 | 33860534 | 33861262 | 33860713 | 44  | 65  | 69  | 0.979915374 | 0.547652    |          | ENSG00000207986 |
| 16 | 33861266 | 33861446 | 33861278 | 10  | 10  | 7   | 1.429043253 | 0.21536     |          | ENSG00000207986 |
| 16 | 33863157 | 33863500 | 33863332 | 15  | 18  | 17  | 1.097043306 | 0.388692    |          | ENSG00000207986 |
| 16 | 33863820 | 33864216 | 33863978 | 21  | 32  | 15  | 2.14356488  | 0.00454085  |          | ENSG00000207986 |
| 16 | 33864459 | 33865161 | 33864787 | 46  | 88  | 91  | 1.00541383  | 0.485864    |          | ENSG00000207986 |
| 16 | 33865946 | 33866152 | 33865997 | 9   | 10  | 16  | 0.672490943 | 0.854309    |          | ENSG00000207986 |
| 16 | 33866510 | 33867090 | 33866800 | 22  | 42  | 55  | 0.798037141 | 0.869285    |          | ENSG00000207986 |
| 16 | 33868476 | 33868826 | 33868651 | 31  | 34  | 20  | 1.73217364  | 0.0207704   |          | ENSG00000207986 |
| 16 | 33869921 | 33871753 | 33870864 | 146 | 579 | 431 | 1.395362099 | 6.65E-08    |          | ENSG00000200002 |
| 16 | 33872367 | 33872622 | 33872454 | 13  | 15  | 21  | 0.755857589 | 0.807439    |          | ENSG00000200434 |
| 16 | 33872805 | 33873142 | 33872973 | 29  | 35  | 23  | 1.558956276 | 0.0432947   |          | ENSG00000200434 |
| 16 | 33878598 | 33878826 | 33878703 | 8   | 9   | 4   | 2.078608368 | 0.0785659   |          | ENSG00000200434 |
| 16 | 33881683 | 33881872 | 33881843 | 12  | 14  | 14  | 1.039304184 | 0.458308    |          | ENSG00000200434 |
| 16 | 33881988 | 33882323 | 33882157 | 9   | 14  | 17  | 0.86608682  | 0.662567    |          | ENSG00000200434 |
| 16 | 33883341 | 33883525 | 33883366 | 9   | 11  | 7   | 1.558956276 | 0.158273    |          | ENSG00000200434 |
| 16 | 33930057 | 33930517 | 33930236 | 55  | 61  | 61  | 1.039304184 | 0.415193    |          | ENSG00000200434 |
| 16 | 34400489 | 34400936 | 34400668 | 13  | 21  | 1   | 11.43234603 | 1.90E-06    |          | ENSG00000221532 |
| 16 | 44944292 | 44944475 | 44944314 | 8   | 8   | 11  | 0.779478138 | 0.719708    |          | ENSG00000199448 |
| 16 | 44946431 | 44946763 | 44946608 | 11  | 14  | 14  | 1.039304184 | 0.458308    |          | ENSG00000199448 |
| 16 | 44949109 | 44949446 | 44949277 | 21  | 24  | 19  | 1.29913023  | 0.189       |          | ENSG00000199448 |
| 16 | 44949510 | 44949761 | 44949635 | 13  | 18  | 19  | 0.987338975 | 0.516858    |          | ENSG00000199448 |
| 16 | 44951696 | 44952109 | 44951955 | 17  | 25  | 26  | 1.000811437 | 0.499519    |          | ENSG00000199448 |

|    |          |          |          |    |    |    |             |             |         |                 |
|----|----------|----------|----------|----|----|----|-------------|-------------|---------|-----------------|
| 16 | 44961162 | 44961341 | 44961336 | 8  | 8  | 6  | 1.336248237 | 0.277651    |         | ENSG00000199448 |
| 16 | 44962319 | 44962498 | 44962470 | 8  | 8  | 1  | 4.676868829 | 0.0091584   |         | ENSG00000199448 |
| 16 | 44974399 | 44974923 | 44974750 | 15 | 28 | 40 | 0.735117594 | 0.900826    |         | ENSG00000199448 |
| 16 | 44984450 | 44984707 | 44984550 | 11 | 11 | 11 | 1.039304184 | 0.462773    |         | ENSG00000199448 |
| 16 | 44984875 | 44985381 | 44985104 | 16 | 30 | 26 | 1.193275174 | 0.249725    |         | ENSG00000199448 |
| 16 | 46096077 | 46096416 | 46096246 | 22 | 27 | 17 | 1.616695398 | 0.0522299   |         | ENSG00000210173 |
| 16 | 49595280 | 49595498 | 49595389 | 9  | 9  | 0  | 10.39304184 | 0.000803859 |         | ENSG00000199771 |
| 16 | 51633134 | 51633391 | 51633262 | 9  | 12 | 3  | 3.377738599 | 0.00867157  | CHD9    | ENSG00000177200 |
| 16 | 51643876 | 51644365 | 51644053 | 25 | 34 | 0  | 36.37564645 | 1.47E-11    | CHD9    | ENSG00000177200 |
| 16 | 51969551 | 51969878 | 51969730 | 14 | 17 | 0  | 18.70747532 | 2.69E-06    |         | ENSG00000202193 |
| 16 | 52041221 | 52041611 | 52041432 | 48 | 59 | 0  | 62.35825105 | 2.70E-19    | RBL2    | ENSG00000103479 |
| 16 | 52323934 | 52324467 | 52324113 | 9  | 19 | 6  | 2.969440526 | 0.0035096   | FTO     | ENSG00000140718 |
| 16 | 52346528 | 52346714 | 52346578 | 8  | 8  | 2  | 3.117912553 | 0.0283184   | FTO     | ENSG00000140718 |
| 16 | 52672147 | 52672419 | 52672283 | 8  | 9  | 1  | 5.196520921 | 0.00490062  | FTO     | ENSG00000140718 |
| 16 | 52686297 | 52686551 | 52686424 | 8  | 9  | 7  | 1.29913023  | 0.286504    | FTO     | ENSG00000140718 |
| 16 | 52758005 | 52758216 | 52758119 | 9  | 10 | 3  | 2.858086507 | 0.0242838   | FTO     | ENSG00000140718 |
| 16 | 52763401 | 52763604 | 52763502 | 9  | 10 | 6  | 1.63319229  | 0.146906    | FTO     | ENSG00000140718 |
| 16 | 52770270 | 52770539 | 52770404 | 9  | 10 | 0  | 11.43234603 | 0.000394183 | FTO     | ENSG00000140718 |
| 16 | 52771605 | 52771864 | 52771709 | 9  | 10 | 3  | 2.858086507 | 0.0242838   | FTO     | ENSG00000140718 |
| 16 | 52785198 | 52785405 | 52785271 | 8  | 8  | 0  | 9.353737658 | 0.00163931  | FTO     | ENSG00000140718 |
| 16 | 52785539 | 52785789 | 52785644 | 8  | 8  | 0  | 9.353737658 | 0.00163931  | FTO     | ENSG00000140718 |
| 16 | 52930637 | 52930903 | 52930792 | 15 | 16 | 2  | 5.889390377 | 0.000270741 | IRX3    | ENSG00000177508 |
| 16 | 54962270 | 54962662 | 54962418 | 11 | 18 | 4  | 3.9493559   | 0.000961379 | AMFR    | ENSG00000159461 |
| 16 | 54964473 | 54964759 | 54964616 | 8  | 11 | 1  | 6.235825105 | 0.0013754   | AMFR    | ENSG00000159461 |
| 16 | 55042658 | 55042941 | 55042773 | 9  | 11 | 1  | 6.235825105 | 0.0013754   | NUDT21  | ENSG00000167005 |
| 16 | 64360454 | 64360872 | 64360625 | 60 | 69 | 0  | 72.7512929  | 2.17E-22    |         |                 |
| 16 | 64480919 | 64481114 | 64481016 | 9  | 9  | 2  | 3.464347281 | 0.0163838   |         | ENSG00000201999 |
| 16 | 64683717 | 64684050 | 64683873 | 9  | 12 | 1  | 6.755477198 | 0.000722752 |         | ENSG00000201999 |
| 16 | 64867473 | 64867653 | 64867550 | 8  | 9  | 1  | 5.196520921 | 0.00490062  |         | ENSG00000201999 |
| 16 | 65519305 | 65519740 | 65519484 | 21 | 31 | 2  | 11.0859113  | 1.93E-08    | RRAD    | ENSG00000166592 |
| 16 | 65764621 | 65764806 | 65764714 | 8  | 9  | 2  | 3.464347281 | 0.0163838   | NOL3    | ENSG00000140939 |
| 16 | 65815447 | 65815641 | 65815544 | 8  | 8  | 1  | 4.676868829 | 0.0091584   | LRRC29  | ENSG00000125122 |
| 16 | 65818284 | 65818679 | 65818569 | 9  | 15 | 5  | 2.771477825 | 0.0105836   | TMEM208 | ENSG00000168701 |
| 16 | 66019561 | 66019750 | 66019655 | 8  | 8  | 3  | 2.338434415 | 0.0641221   | HSD11B2 | ENSG00000176387 |

|    |          |          |          |    |    |    |             |             |          |                 |
|----|----------|----------|----------|----|----|----|-------------|-------------|----------|-----------------|
| 16 | 66135888 | 66136187 | 66136037 | 17 | 18 | 0  | 19.7467795  | 1.32E-06    | FAM65A   | ENSG00000039523 |
| 16 | 66259875 | 66260056 | 66259897 | 8  | 8  | 1  | 4.676868829 | 0.0091584   | C16orf86 | ENSG00000159761 |
| 16 | 66268005 | 66268263 | 66268136 | 14 | 14 | 0  | 15.58956276 | 2.28E-05    | C16orf86 | ENSG00000159761 |
| 16 | 66408032 | 66408229 | 66408180 | 8  | 10 | 4  | 2.286469205 | 0.0509017   | TSNAXIP1 | ENSG00000102904 |
| 16 | 66437974 | 66438298 | 66438129 | 8  | 11 | 1  | 6.235825105 | 0.0013754   | NUTF2    | ENSG00000102898 |
| 16 | 66462064 | 66462319 | 66462179 | 8  | 8  | 0  | 9.353737658 | 0.00163931  | EDC4     | ENSG00000038358 |
| 16 | 66553027 | 66553534 | 66553206 | 9  | 20 | 3  | 5.456346967 | 9.70E-05    | SLC12A4  | ENSG00000124067 |
| 16 | 66557501 | 66558298 | 66557752 | 47 | 85 | 3  | 22.34503996 | 3.77E-23    | SLC12A4  | ENSG00000124067 |
| 16 | 66683017 | 66683474 | 66683245 | 31 | 44 | 6  | 6.681241184 | 4.26E-09    |          | ENSG00000201850 |
| 16 | 66829204 | 66829438 | 66829341 | 11 | 12 | 5  | 2.251825733 | 0.0404733   | RBM35B   | ENSG00000103067 |
| 16 | 66867125 | 66867449 | 66867287 | 17 | 20 | 2  | 7.27512929  | 2.27E-05    |          | ENSG00000210531 |
| 16 | 66969223 | 66969502 | 66969362 | 8  | 11 | 5  | 2.078608368 | 0.0614303   |          | ENSG00000214388 |
| 16 | 67039930 | 67040113 | 67040028 | 8  | 8  | 2  | 3.117912553 | 0.0283184   | SMPD3    | ENSG00000103056 |
| 16 | 67236390 | 67236589 | 67236489 | 9  | 10 | 0  | 11.43234603 | 0.000394183 | CDH3     | ENSG00000062038 |
| 16 | 67250078 | 67250355 | 67250248 | 11 | 15 | 4  | 3.32577339  | 0.00462646  | CDH3     | ENSG00000062038 |
| 16 | 67336204 | 67336549 | 67336376 | 33 | 37 | 9  | 3.9493559   | 6.99E-06    |          | ENSG00000200558 |
| 16 | 67346822 | 67347106 | 67346954 | 10 | 13 | 1  | 7.27512929  | 0.000378098 |          | ENSG00000200558 |
| 16 | 67521877 | 67522083 | 67521980 | 8  | 9  | 0  | 10.39304184 | 0.000803859 |          | ENSG00000203389 |
| 16 | 67528130 | 67528646 | 67528354 | 43 | 68 | 4  | 14.34239774 | 3.43E-17    |          | ENSG00000203389 |
| 16 | 67852322 | 67852575 | 67852436 | 10 | 10 | 2  | 3.810782009 | 0.00936112  | VPS4A    | ENSG00000132612 |
| 16 | 67930952 | 67931162 | 67931058 | 9  | 9  | 4  | 2.078608368 | 0.0785659   | NIP7     | ENSG00000132603 |
| 16 | 68317725 | 68318157 | 68317989 | 11 | 20 | 5  | 3.637564645 | 0.000902929 | NQO1     | ENSG00000181019 |
| 16 | 68843333 | 68843525 | 68843429 | 12 | 12 | 2  | 4.503651465 | 0.002963    | EXOSC6   | ENSG00000157344 |
| 16 | 69186034 | 69186303 | 69186149 | 9  | 12 | 5  | 2.251825733 | 0.0404733   | IL34     | ENSG00000157368 |
| 16 | 69276417 | 69276597 | 69276486 | 8  | 8  | 4  | 1.870747532 | 0.118863    |          | ENSG00000132613 |
| 16 | 69298603 | 69298979 | 69298755 | 13 | 18 | 5  | 3.291129917 | 0.00248584  |          | ENSG00000177242 |
| 16 | 69306640 | 69306864 | 69306699 | 10 | 11 | 2  | 4.157216737 | 0.0052913   |          | ENSG00000177242 |
| 16 | 69370457 | 69370750 | 69370597 | 8  | 11 | 11 | 1.039304184 | 0.462773    | VAC14    | ENSG00000103043 |
| 16 | 69439142 | 69439454 | 69439298 | 9  | 14 | 7  | 1.948695345 | 0.0559175   |          | ENSG00000221725 |
| 16 | 69509526 | 69509705 | 69509615 | 8  | 8  | 4  | 1.870747532 | 0.118863    | HYDIN2   | ENSG00000157423 |
| 16 | 69524993 | 69525249 | 69525121 | 8  | 8  | 3  | 2.338434415 | 0.0641221   | HYDIN2   | ENSG00000157423 |
| 16 | 69530839 | 69531294 | 69530970 | 13 | 21 | 9  | 2.286469205 | 0.0111772   | HYDIN2   | ENSG00000157423 |
| 16 | 69531310 | 69531510 | 69531410 | 9  | 11 | 2  | 4.157216737 | 0.0052913   | HYDIN2   | ENSG00000157423 |
| 16 | 69531628 | 69531808 | 69531718 | 8  | 9  | 7  | 1.29913023  | 0.286504    | HYDIN2   | ENSG00000157423 |

|    |          |          |          |    |    |    |             |             |          |                 |
|----|----------|----------|----------|----|----|----|-------------|-------------|----------|-----------------|
| 16 | 69541057 | 69541490 | 69541205 | 8  | 15 | 7  | 2.078608368 | 0.038229    | HYDIN2   | ENSG00000157423 |
| 16 | 69557686 | 69557901 | 69557829 | 11 | 12 | 5  | 2.251825733 | 0.0404733   | HYDIN2   | ENSG00000157423 |
| 16 | 69565781 | 69566095 | 69565946 | 8  | 10 | 4  | 2.286469205 | 0.0509017   | HYDIN2   | ENSG00000157423 |
| 16 | 69566269 | 69566491 | 69566380 | 9  | 9  | 5  | 1.73217364  | 0.133894    | HYDIN2   | ENSG00000157423 |
| 16 | 69568447 | 69568643 | 69568545 | 9  | 10 | 2  | 3.810782009 | 0.00936112  | HYDIN2   | ENSG00000157423 |
| 16 | 69569015 | 69569325 | 69569151 | 8  | 13 | 3  | 3.637564645 | 0.0050909   | HYDIN2   | ENSG00000157423 |
| 16 | 69576344 | 69576593 | 69576504 | 8  | 11 | 3  | 3.117912553 | 0.0146045   | HYDIN2   | ENSG00000157423 |
| 16 | 69578560 | 69579059 | 69578716 | 12 | 22 | 21 | 1.086545284 | 0.390103    | HYDIN2   | ENSG00000157423 |
| 16 | 69583784 | 69584055 | 69583888 | 9  | 10 | 3  | 2.858086507 | 0.0242838   | HYDIN2   | ENSG00000157423 |
| 16 | 69591014 | 69591580 | 69591193 | 12 | 23 | 33 | 0.733626483 | 0.881043    | HYDIN2   | ENSG00000157423 |
| 16 | 69610516 | 69610872 | 69610638 | 10 | 15 | 20 | 0.791850807 | 0.763134    | HYDIN2   | ENSG00000157423 |
| 16 | 69616800 | 69616997 | 69616860 | 8  | 9  | 1  | 5.196520921 | 0.00490062  | HYDIN2   | ENSG00000157423 |
| 16 | 69625716 | 69625904 | 69625800 | 8  | 9  | 3  | 2.598260461 | 0.0397929   | HYDIN2   | ENSG00000157423 |
| 16 | 69629064 | 69629348 | 69629221 | 9  | 12 | 6  | 1.930136342 | 0.071303    | HYDIN2   | ENSG00000157423 |
| 16 | 69629514 | 69629911 | 69629693 | 10 | 17 | 12 | 1.439036563 | 0.154203    | HYDIN2   | ENSG00000157423 |
| 16 | 69660518 | 69660717 | 69660617 | 8  | 9  | 13 | 0.742360132 | 0.770276    | HYDIN2   | ENSG00000157423 |
| 16 | 69683251 | 69683510 | 69683380 | 8  | 9  | 1  | 5.196520921 | 0.00490062  | HYDIN2   | ENSG00000157423 |
| 16 | 69725848 | 69726331 | 69726119 | 18 | 28 | 17 | 1.674434519 | 0.0394126   | HYDIN2   | ENSG00000157423 |
| 16 | 69757757 | 69758004 | 69757880 | 8  | 10 | 4  | 2.286469205 | 0.0509017   | HYDIN2   | ENSG00000157423 |
| 16 | 69881082 | 69881284 | 69881183 | 11 | 11 | 3  | 3.117912553 | 0.0146045   | FTSJD1   | ENSG00000180917 |
| 16 | 70059235 | 70059427 | 70059331 | 9  | 9  | 2  | 3.464347281 | 0.0163838   | ZNF23    | ENSG00000167377 |
| 16 | 70202423 | 70202788 | 70202599 | 16 | 22 | 3  | 5.975999059 | 2.96E-05    | MARVELD3 | ENSG00000140832 |
| 16 | 70222221 | 70222463 | 70222342 | 9  | 11 | 3  | 3.117912553 | 0.0146045   | MARVELD3 | ENSG00000140832 |
| 16 | 70400153 | 70400601 | 70400347 | 11 | 20 | 17 | 1.212521548 | 0.272468    | AP1G1    | ENSG00000166747 |
| 16 | 70400670 | 70400943 | 70400811 | 14 | 15 | 5  | 2.771477825 | 0.0105836   | AP1G1    | ENSG00000166747 |
| 16 | 70437055 | 70437401 | 70437254 | 12 | 16 | 5  | 2.944695189 | 0.00659886  | AP1G1    | ENSG00000166747 |
| 16 | 70486778 | 70487098 | 70486942 | 16 | 20 | 5  | 3.637564645 | 0.000902929 | KIAA0174 | ENSG00000182149 |
| 16 | 70552880 | 70553177 | 70553010 | 9  | 11 | 7  | 1.558956276 | 0.158273    | PKD1L3   | ENSG00000187008 |
| 16 | 70641563 | 70641742 | 70641587 | 8  | 8  | 2  | 3.117912553 | 0.0283184   | HP       | ENSG00000197711 |
| 16 | 70685072 | 70685397 | 70685218 | 11 | 15 | 7  | 2.078608368 | 0.038229    | DHX38    | ENSG00000140829 |
| 16 | 71071989 | 71072198 | 71072116 | 9  | 9  | 1  | 5.196520921 | 0.00490062  |          | ENSG00000221286 |
| 16 | 71256423 | 71256806 | 71256696 | 10 | 14 | 7  | 1.948695345 | 0.0559175   |          | ENSG00000221286 |
| 16 | 71408631 | 71408859 | 71408745 | 8  | 9  | 3  | 2.598260461 | 0.0397929   |          | ENSG00000221799 |
| 16 | 71428320 | 71428520 | 71428428 | 8  | 9  | 6  | 1.484720263 | 0.204387    |          | ENSG00000221799 |



|    |          |          |          |    |    |    |             |             |       |                 |
|----|----------|----------|----------|----|----|----|-------------|-------------|-------|-----------------|
| 16 | 71519078 | 71519260 | 71519174 | 9  | 10 | 1  | 5.716173013 | 0.00260397  |       | ENSG00000221799 |
| 16 | 71544343 | 71544563 | 71544435 | 9  | 10 | 5  | 1.905391004 | 0.0915982   |       | ENSG00000221799 |
| 16 | 71575337 | 71575668 | 71575502 | 18 | 21 | 4  | 4.572938411 | 0.000186332 |       | ENSG00000221799 |
| 16 | 71578842 | 71579400 | 71579227 | 11 | 21 | 4  | 4.572938411 | 0.000186332 |       | ENSG00000221799 |
| 16 | 71584628 | 71584868 | 71584748 | 10 | 11 | 5  | 2.078608368 | 0.0614303   |       | ENSG00000221799 |
| 16 | 71587851 | 71588312 | 71588145 | 15 | 25 | 12 | 2.078608368 | 0.0124196   |       | ENSG00000221799 |
| 16 | 71588452 | 71589097 | 71588671 | 14 | 31 | 15 | 2.078608368 | 0.00648505  |       | ENSG00000221799 |
| 16 | 71591048 | 71591346 | 71591175 | 8  | 11 | 5  | 2.078608368 | 0.0614303   |       | ENSG00000221799 |
| 16 | 71606949 | 71607390 | 71607128 | 13 | 21 | 10 | 2.078608368 | 0.0193227   |       | ENSG00000221799 |
| 16 | 71625066 | 71625245 | 71625155 | 8  | 8  | 1  | 4.676868829 | 0.0091584   | ZFH3  | ENSG00000140836 |
| 16 | 71638820 | 71639205 | 71639026 | 12 | 19 | 6  | 2.969440526 | 0.0035096   | ZFH3  | ENSG00000140836 |
| 16 | 71642294 | 71642493 | 71642379 | 9  | 9  | 6  | 1.484720263 | 0.204387    | ZFH3  | ENSG00000140836 |
| 16 | 71646353 | 71646749 | 71646570 | 11 | 18 | 2  | 6.582259834 | 7.91E-05    | ZFH3  | ENSG00000140836 |
| 16 | 71652583 | 71652801 | 71652692 | 8  | 10 | 2  | 3.810782009 | 0.00936112  | ZFH3  | ENSG00000140836 |
| 16 | 71661823 | 71662211 | 71661978 | 8  | 14 | 4  | 3.117912553 | 0.00766354  | ZFH3  | ENSG00000140836 |
| 16 | 72156098 | 72156278 | 72156120 | 9  | 9  | 2  | 3.464347281 | 0.0163838   |       | ENSG00000184543 |
| 16 | 72156845 | 72157034 | 72156939 | 8  | 8  | 4  | 1.870747532 | 0.118863    |       | ENSG00000184543 |
| 16 | 72559481 | 72559660 | 72559570 | 8  | 8  | 0  | 9.353737658 | 0.00163931  |       | ENSG00000184543 |
| 16 | 72582398 | 72582598 | 72582466 | 8  | 10 | 0  | 11.43234603 | 0.000394183 |       | ENSG00000184543 |
| 16 | 72699389 | 72699646 | 72699483 | 9  | 11 | 2  | 4.157216737 | 0.0052913   |       | ENSG00000222127 |
| 16 | 72887659 | 72887838 | 72887748 | 8  | 8  | 3  | 2.338434415 | 0.0641221   | PSMD7 | ENSG00000103035 |
| 16 | 72889647 | 72889826 | 72889736 | 8  | 9  | 2  | 3.464347281 | 0.0163838   | PSMD7 | ENSG00000103035 |
| 16 | 72895816 | 72896182 | 72896037 | 10 | 14 | 3  | 3.897390691 | 0.00295882  | PSMD7 | ENSG00000103035 |
| 16 | 72901249 | 72901553 | 72901401 | 9  | 11 | 2  | 4.157216737 | 0.0052913   | PSMD7 | ENSG00000103035 |
| 16 | 73022699 | 73023268 | 73022931 | 48 | 62 | 5  | 10.91269393 | 1.23E-14    |       | ENSG00000140839 |
| 16 | 73067732 | 73068036 | 73067888 | 8  | 9  | 1  | 5.196520921 | 0.00490062  |       | ENSG00000207525 |
| 16 | 73070857 | 73071095 | 73070976 | 8  | 9  | 1  | 5.196520921 | 0.00490062  |       | ENSG00000207525 |
| 16 | 73071401 | 73071580 | 73071519 | 8  | 8  | 7  | 1.169217207 | 0.371848    |       | ENSG00000207525 |
| 16 | 73077366 | 73077666 | 73077516 | 10 | 14 | 1  | 7.794781382 | 0.000197021 |       | ENSG00000207525 |
| 16 | 73249848 | 73250041 | 73249958 | 10 | 12 | 0  | 13.5109544  | 9.48E-05    | RFWD3 | ENSG00000168411 |
| 16 | 73258340 | 73258622 | 73258504 | 10 | 14 | 5  | 2.598260461 | 0.0167748   | RFWD3 | ENSG00000168411 |
| 16 | 73321371 | 73322021 | 73321516 | 28 | 56 | 5  | 9.87338975  | 5.54E-13    | MLKL  | ENSG00000168404 |
| 16 | 73330969 | 73331245 | 73331107 | 10 | 13 | 0  | 14.55025858 | 4.65E-05    | FA2H  | ENSG00000103089 |
| 16 | 73335281 | 73335597 | 73335438 | 8  | 11 | 4  | 2.494330042 | 0.0324033   | FA2H  | ENSG00000103089 |

|    |          |          |          |    |    |    |             |             |           |                 |
|----|----------|----------|----------|----|----|----|-------------|-------------|-----------|-----------------|
| 16 | 73404568 | 73404958 | 73404714 | 15 | 21 | 14 | 1.524312804 | 0.0996258   | FA2H      | ENSG00000103089 |
| 16 | 73428486 | 73428739 | 73428613 | 13 | 15 | 5  | 2.771477825 | 0.0105836   | FA2H      | ENSG00000103089 |
| 16 | 73439224 | 73439435 | 73439329 | 8  | 9  | 0  | 10.39304184 | 0.000803859 | FA2H      | ENSG00000103089 |
| 16 | 73459144 | 73459561 | 73459316 | 13 | 20 | 3  | 5.456346967 | 9.70E-05    | FA2H      | ENSG00000103089 |
| 16 | 73488690 | 73488896 | 73488794 | 8  | 9  | 2  | 3.464347281 | 0.0163838   | WDR59     | ENSG00000103091 |
| 16 | 73576352 | 73576743 | 73576564 | 9  | 17 | 2  | 6.235825105 | 0.000146695 | WDR59     | ENSG00000103091 |
| 16 | 73589878 | 73590119 | 73589998 | 8  | 9  | 4  | 2.078608368 | 0.0785659   | ZNRF1     | ENSG00000186187 |
| 16 | 73594962 | 73595199 | 73595080 | 8  | 10 | 5  | 1.905391004 | 0.0915982   | ZNRF1     | ENSG00000186187 |
| 16 | 73621289 | 73621534 | 73621414 | 10 | 12 | 4  | 2.702190879 | 0.0203088   | ZNRF1     | ENSG00000186187 |
| 16 | 73636220 | 73636785 | 73636606 | 24 | 37 | 17 | 2.194086611 | 0.00208015  | ZNRF1     | ENSG00000186187 |
| 16 | 73644116 | 73644324 | 73644194 | 8  | 11 | 5  | 2.078608368 | 0.0614303   | ZNRF1     | ENSG00000186187 |
| 16 | 73678613 | 73679041 | 73678792 | 27 | 38 | 3  | 10.1332158  | 1.39E-09    | LDHD      | ENSG00000166816 |
| 16 | 73688149 | 73688397 | 73688266 | 10 | 11 | 11 | 1.039304184 | 0.462773    | LDHD      | ENSG00000166816 |
| 16 | 73700418 | 73700665 | 73700543 | 10 | 13 | 1  | 7.27512929  | 0.000378098 | LDHD      | ENSG00000166816 |
| 16 | 73701930 | 73702179 | 73702092 | 8  | 11 | 6  | 1.781664316 | 0.103344    | LDHD      | ENSG00000166816 |
| 16 | 73739652 | 73739966 | 73739809 | 9  | 11 | 9  | 1.247165021 | 0.300052    | ZFP1      | ENSG00000184517 |
| 16 | 73775905 | 73776163 | 73776064 | 8  | 8  | 2  | 3.117912553 | 0.0283184   |           | ENSG00000213318 |
| 16 | 73780301 | 73780861 | 73780597 | 10 | 23 | 3  | 6.235825105 | 1.63E-05    |           | ENSG00000213318 |
| 16 | 73790835 | 73791094 | 73790957 | 11 | 13 | 8  | 1.616695398 | 0.123553    |           | ENSG00000213318 |
| 16 | 73843220 | 73843454 | 73843337 | 8  | 8  | 11 | 0.779478138 | 0.719708    | BCAR1     | ENSG00000050820 |
| 16 | 73896657 | 73897456 | 73896864 | 30 | 58 | 20 | 2.919949851 | 2.96E-06    | BCAR1     | ENSG00000050820 |
| 16 | 74024973 | 74025744 | 74025542 | 10 | 29 | 16 | 1.834066207 | 0.0198505   | CFDP1     | ENSG00000153774 |
| 16 | 74056161 | 74056455 | 74056331 | 18 | 22 | 9  | 2.390399624 | 0.00747467  | TMEM170A  | ENSG00000166822 |
| 16 | 74076239 | 74076538 | 74076371 | 8  | 11 | 6  | 1.781664316 | 0.103344    | CHST6     | ENSG00000183196 |
| 16 | 74077392 | 74077840 | 74077523 | 25 | 36 | 2  | 12.81808494 | 7.17E-10    | CHST6     | ENSG00000183196 |
| 16 | 74083302 | 74083718 | 74083547 | 10 | 16 | 11 | 1.472347594 | 0.147517    | CHST6     | ENSG00000183196 |
| 16 | 74108662 | 74108990 | 74108837 | 10 | 13 | 11 | 1.212521548 | 0.309909    | CHST5     | ENSG00000135702 |
| 16 | 74111332 | 74111707 | 74111505 | 9  | 13 | 2  | 4.850086193 | 0.00164564  | CHST5     | ENSG00000135702 |
| 16 | 74112802 | 74113042 | 74112922 | 9  | 10 | 9  | 1.143234603 | 0.378307    | CHST5     | ENSG00000135702 |
| 16 | 74146632 | 74147053 | 74146926 | 10 | 18 | 12 | 1.518983039 | 0.117837    |           | ENSG00000205084 |
| 16 | 74156439 | 74156641 | 74156540 | 9  | 10 | 2  | 3.810782009 | 0.00936112  | GABARAPL2 | ENSG00000034713 |
| 16 | 74157351 | 74157552 | 74157501 | 9  | 9  | 6  | 1.484720263 | 0.204387    | GABARAPL2 | ENSG00000034713 |
| 16 | 74214672 | 74214924 | 74214833 | 8  | 11 | 0  | 12.47165021 | 0.000193293 | ADAT1     | ENSG00000065457 |
| 16 | 74239047 | 74239357 | 74239225 | 8  | 12 | 9  | 1.35109544  | 0.232899    | TERF2IP   | ENSG00000166848 |

|    |          |          |          |     |     |    |             |             |         |                 |
|----|----------|----------|----------|-----|-----|----|-------------|-------------|---------|-----------------|
| 16 | 74239859 | 74240072 | 74239965 | 12  | 12  | 4  | 2.702190879 | 0.0203088   | TERF2IP | ENSG00000166848 |
| 16 | 74240966 | 74241145 | 74241066 | 9   | 9   | 3  | 2.598260461 | 0.0397929   | TERF2IP | ENSG00000166848 |
| 16 | 74259912 | 74260115 | 74260013 | 10  | 10  | 2  | 3.810782009 | 0.00936112  | TERF2IP | ENSG00000166848 |
| 16 | 74361315 | 74361560 | 74361493 | 8   | 11  | 3  | 3.117912553 | 0.0146045   |         | ENSG00000213308 |
| 16 | 74537536 | 74537720 | 74537628 | 8   | 8   | 5  | 1.558956276 | 0.191397    |         | ENSG00000199299 |
| 16 | 74748093 | 74748272 | 74748182 | 8   | 8   | 3  | 2.338434415 | 0.0641221   |         | ENSG00000213307 |
| 16 | 74752366 | 74752547 | 74752456 | 8   | 8   | 0  | 9.353737658 | 0.00163931  |         | ENSG00000213307 |
| 16 | 76313830 | 76314243 | 76313997 | 9   | 14  | 6  | 2.227080395 | 0.0322529   | NUDT7   | ENSG00000140876 |
| 16 | 76382964 | 76383163 | 76383109 | 8   | 9   | 5  | 1.73217364  | 0.133894    | VAT1L   | ENSG00000171724 |
| 16 | 76428898 | 76429094 | 76429040 | 8   | 9   | 1  | 5.196520921 | 0.00490062  | VAT1L   | ENSG00000171724 |
| 16 | 76488044 | 76488528 | 76488349 | 8   | 17  | 10 | 1.700679574 | 0.0766266   | VAT1L   | ENSG00000171724 |
| 16 | 76496686 | 76496952 | 76496829 | 14  | 14  | 5  | 2.598260461 | 0.0167748   | VAT1L   | ENSG00000171724 |
| 16 | 76497023 | 76497366 | 76497200 | 8   | 12  | 2  | 4.503651465 | 0.002963    | CLEC3A  | ENSG00000166509 |
| 16 | 76510097 | 76510484 | 76510359 | 10  | 16  | 8  | 1.963130126 | 0.0441028   | CLEC3A  | ENSG00000166509 |
| 16 | 76551084 | 76551266 | 76551228 | 8   | 8   | 5  | 1.558956276 | 0.191397    | CLEC3A  | ENSG00000166509 |
| 16 | 76566401 | 76566650 | 76566561 | 9   | 11  | 8  | 1.385738912 | 0.224757    | CLEC3A  | ENSG00000166509 |
| 16 | 76583016 | 76583593 | 76583240 | 110 | 141 | 4  | 29.51623883 | 1.42E-38    | CLEC3A  | ENSG00000166509 |
| 16 | 76587107 | 76587820 | 76587407 | 81  | 114 | 10 | 10.86545284 | 5.87E-25    | CLEC3A  | ENSG00000166509 |
| 16 | 76634993 | 76635194 | 76635093 | 11  | 11  | 2  | 4.157216737 | 0.0052913   | CLEC3A  | ENSG00000166509 |
| 16 | 76642036 | 76642601 | 76642334 | 8   | 18  | 9  | 1.97467795  | 0.0349428   | CLEC3A  | ENSG00000166509 |
| 16 | 76690479 | 76691239 | 76690952 | 10  | 30  | 9  | 3.221842971 | 0.000217846 | WVWX    | ENSG00000186153 |
| 16 | 76789463 | 76789809 | 76789636 | 8   | 12  | 2  | 4.503651465 | 0.002963    | WVWX    | ENSG00000186153 |
| 16 | 77107981 | 77108162 | 77108084 | 8   | 8   | 2  | 3.117912553 | 0.0283184   | WVWX    | ENSG00000186153 |
| 16 | 77266778 | 77266958 | 77266868 | 10  | 11  | 2  | 4.157216737 | 0.0052913   | WVWX    | ENSG00000186153 |
| 16 | 77283826 | 77284131 | 77283975 | 8   | 8   | 3  | 2.338434415 | 0.0641221   | WVWX    | ENSG00000186153 |
| 16 | 77339936 | 77340115 | 77340025 | 8   | 9   | 2  | 3.464347281 | 0.0163838   | WVWX    | ENSG00000186153 |
| 16 | 77516482 | 77516892 | 77516713 | 12  | 19  | 2  | 6.928694562 | 4.25E-05    |         | ENSG00000222244 |
| 16 | 77579785 | 77579964 | 77579854 | 8   | 8   | 0  | 9.353737658 | 0.00163931  |         | ENSG00000222244 |
| 16 | 77629247 | 77629447 | 77629400 | 10  | 11  | 4  | 2.494330042 | 0.0324033   |         | ENSG00000222244 |
| 16 | 77882263 | 77882517 | 77882393 | 9   | 10  | 3  | 2.858086507 | 0.0242838   |         | ENSG00000222244 |
| 16 | 78054767 | 78054968 | 78054908 | 8   | 8   | 2  | 3.117912553 | 0.0283184   | MAF     | ENSG00000178573 |
| 16 | 78359042 | 78359332 | 78359183 | 10  | 12  | 0  | 13.5109544  | 9.48E-05    |         | ENSG00000221330 |
| 16 | 78615318 | 78615735 | 78615497 | 9   | 18  | 3  | 4.936694875 | 0.000311102 |         | ENSG00000221330 |
| 16 | 78618368 | 78618777 | 78618586 | 16  | 24  | 4  | 5.196520921 | 3.42E-05    |         | ENSG00000221330 |

|    |          |          |          |    |    |    |             |             |          |                 |
|----|----------|----------|----------|----|----|----|-------------|-------------|----------|-----------------|
| 16 | 78696675 | 78696904 | 78696771 | 9  | 11 | 2  | 4.157216737 | 0.0052913   | DYNLRB2  | ENSG00000168589 |
| 16 | 78994490 | 78994709 | 78994543 | 9  | 11 | 2  | 4.157216737 | 0.0052913   | DYNLRB2  | ENSG00000168589 |
| 16 | 79132056 | 79132423 | 79132213 | 9  | 15 | 11 | 1.385738912 | 0.19225     | DYNLRB2  | ENSG00000168589 |
| 16 | 79134425 | 79134721 | 79134566 | 8  | 9  | 1  | 5.196520921 | 0.00490062  | DYNLRB2  | ENSG00000168589 |
| 16 | 79161633 | 79161883 | 79161758 | 9  | 10 | 0  | 11.43234603 | 0.000394183 | DYNLRB2  | ENSG00000168589 |
| 16 | 79199056 | 79199256 | 79199219 | 9  | 11 | 3  | 3.117912553 | 0.0146045   | DYNLRB2  | ENSG00000168589 |
| 16 | 79205275 | 79205701 | 79205522 | 24 | 35 | 12 | 2.878073126 | 0.000220273 | DYNLRB2  | ENSG00000168589 |
| 16 | 79206378 | 79206671 | 79206534 | 8  | 10 | 6  | 1.63319229  | 0.146906    | DYNLRB2  | ENSG00000168589 |
| 16 | 79207172 | 79207595 | 79207315 | 18 | 26 | 14 | 1.870747532 | 0.0223642   | DYNLRB2  | ENSG00000168589 |
| 16 | 79211280 | 79211670 | 79211459 | 11 | 18 | 10 | 1.795161773 | 0.055383    | DYNLRB2  | ENSG00000168589 |
| 16 | 79292409 | 79292588 | 79292498 | 8  | 8  | 4  | 1.870747532 | 0.118863    | CDYL2    | ENSG00000166446 |
| 16 | 79309826 | 79310176 | 79310001 | 17 | 23 | 5  | 4.157216737 | 0.000186738 | CDYL2    | ENSG00000166446 |
| 16 | 79342530 | 79342726 | 79342628 | 9  | 10 | 6  | 1.63319229  | 0.146906    | CDYL2    | ENSG00000166446 |
| 16 | 79342750 | 79342958 | 79342806 | 8  | 9  | 3  | 2.598260461 | 0.0397929   | CDYL2    | ENSG00000166446 |
| 16 | 79345813 | 79346124 | 79345964 | 8  | 10 | 3  | 2.858086507 | 0.0242838   | CDYL2    | ENSG00000166446 |
| 16 | 79429127 | 79429427 | 79429301 | 9  | 12 | 7  | 1.688869299 | 0.11395     | CDYL2    | ENSG00000166446 |
| 16 | 79443863 | 79444067 | 79443965 | 9  | 10 | 4  | 2.286469205 | 0.0509017   | CDYL2    | ENSG00000166446 |
| 16 | 79598036 | 79598312 | 79598174 | 10 | 14 | 7  | 1.948695345 | 0.0559175   | CENPN    | ENSG00000166451 |
| 16 | 79668131 | 79668421 | 79668290 | 10 | 12 | 5  | 2.251825733 | 0.0404733   | C16orf46 | ENSG00000166455 |
| 16 | 79687574 | 79687909 | 79687748 | 8  | 12 | 6  | 1.930136342 | 0.071303    | GCSH     | ENSG00000140905 |
| 16 | 79766485 | 79766898 | 79766648 | 9  | 15 | 5  | 2.771477825 | 0.0105836   | PKD1L2   | ENSG00000166473 |
| 16 | 79851967 | 79852182 | 79852096 | 8  | 10 | 5  | 1.905391004 | 0.0915982   | BCMO1    | ENSG00000135697 |
| 16 | 79868830 | 79869127 | 79868978 | 11 | 14 | 6  | 2.227080395 | 0.0322529   | GAN      | ENSG00000127688 |
| 16 | 79905585 | 79906028 | 79905872 | 10 | 18 | 6  | 2.8209685   | 0.00559354  | GAN      | ENSG00000127688 |
| 16 | 79911626 | 79911810 | 79911673 | 8  | 8  | 3  | 2.338434415 | 0.0641221   | GAN      | ENSG00000127688 |
| 16 | 79919871 | 79920086 | 79920030 | 8  | 8  | 0  | 9.353737658 | 0.00163931  | GAN      | ENSG00000127688 |
| 16 | 79972348 | 79972545 | 79972405 | 9  | 9  | 0  | 10.39304184 | 0.000803859 |          | ENSG00000153815 |
| 16 | 79996772 | 79997068 | 79996925 | 12 | 16 | 4  | 3.533634226 | 0.00276486  |          | ENSG00000153815 |
| 16 | 80090761 | 80091208 | 80091022 | 34 | 46 | 6  | 6.978185237 | 1.30E-09    |          | ENSG00000213288 |
| 16 | 80099296 | 80099489 | 80099392 | 8  | 9  | 0  | 10.39304184 | 0.000803859 |          | ENSG00000213288 |
| 16 | 80192856 | 80193156 | 80193006 | 9  | 13 | 3  | 3.637564645 | 0.0050909   |          | ENSG00000153815 |
| 16 | 80329149 | 80329449 | 80329299 | 12 | 12 | 3  | 3.377738599 | 0.00867157  | PLCG2    | ENSG00000197943 |
| 16 | 80402168 | 80402440 | 80402286 | 11 | 14 | 2  | 5.196520921 | 0.000907371 | PLCG2    | ENSG00000197943 |
| 16 | 80419739 | 80419932 | 80419881 | 8  | 9  | 2  | 3.464347281 | 0.0163838   | PLCG2    | ENSG00000197943 |

|    |          |          |          |    |    |   |             |             |          |                 |
|----|----------|----------|----------|----|----|---|-------------|-------------|----------|-----------------|
| 16 | 80729665 | 80729900 | 80729817 | 14 | 15 | 8 | 1.847651883 | 0.0631662   |          | ENSG00000210850 |
| 16 | 80741603 | 80741972 | 80741793 | 8  | 15 | 2 | 5.542955649 | 0.000497081 | MPHOSPH6 | ENSG00000135698 |
| 16 | 80743791 | 80744075 | 80743968 | 9  | 12 | 2 | 4.503651465 | 0.002963    | MPHOSPH6 | ENSG00000135698 |
| 16 | 80761723 | 80761925 | 80761807 | 8  | 9  | 4 | 2.078608368 | 0.0785659   | MPHOSPH6 | ENSG00000135698 |
| 16 | 80787913 | 80788092 | 80788051 | 8  | 8  | 4 | 1.870747532 | 0.118863    | MPHOSPH6 | ENSG00000135698 |
| 16 | 80920998 | 80921298 | 80921165 | 8  | 10 | 5 | 1.905391004 | 0.0915982   |          | ENSG00000210858 |
| 16 | 80959172 | 80959362 | 80959267 | 10 | 10 | 2 | 3.810782009 | 0.00936112  |          | ENSG00000210858 |
| 16 | 81078529 | 81078715 | 81078649 | 8  | 8  | 0 | 9.353737658 | 0.00163931  |          | ENSG00000210858 |
| 16 | 81200223 | 81200491 | 81200357 | 8  | 8  | 1 | 4.676868829 | 0.0091584   |          | ENSG00000210858 |
| 16 | 81666170 | 81666349 | 81666259 | 8  | 8  | 3 | 2.338434415 | 0.0641221   |          | ENSG00000210864 |
| 16 | 81993367 | 81993701 | 81993546 | 8  | 11 | 2 | 4.157216737 | 0.0052913   |          | ENSG00000222299 |
| 16 | 82223152 | 82223341 | 82223281 | 8  | 9  | 2 | 3.464347281 | 0.0163838   | HSBP1    | ENSG00000166530 |
| 16 | 82227781 | 82228375 | 82228212 | 40 | 54 | 1 | 28.58086507 | 2.76E-16    | HSBP1    | ENSG00000166530 |
| 16 | 82291127 | 82291467 | 82291297 | 9  | 12 | 3 | 3.377738599 | 0.00867157  | HSBP1    | ENSG00000166530 |
| 16 | 82393278 | 82393517 | 82393341 | 8  | 10 | 3 | 2.858086507 | 0.0242838   | HSBP1    | ENSG00000166530 |
| 16 | 82417328 | 82417644 | 82417501 | 8  | 12 | 5 | 2.251825733 | 0.0404733   | HSBP1    | ENSG00000166530 |
| 16 | 82438630 | 82439162 | 82438946 | 41 | 59 | 8 | 6.928694562 | 1.04E-11    | HSBP1    | ENSG00000166530 |
| 16 | 82470024 | 82470262 | 82470133 | 11 | 12 | 4 | 2.702190879 | 0.0203088   | MLYCD    | ENSG00000103150 |
| 16 | 82477680 | 82477928 | 82477804 | 9  | 10 | 0 | 11.43234603 | 0.000394183 | MLYCD    | ENSG00000103150 |
| 16 | 82478344 | 82478588 | 82478444 | 8  | 9  | 6 | 1.484720263 | 0.204387    | MLYCD    | ENSG00000103150 |
| 16 | 82548117 | 82548438 | 82548275 | 11 | 14 | 8 | 1.73217364  | 0.0890835   | OSGIN1   | ENSG00000140961 |
| 16 | 82604946 | 82605143 | 82605044 | 8  | 8  | 4 | 1.870747532 | 0.118863    |          | ENSG00000199350 |
| 16 | 82605456 | 82605668 | 82605560 | 8  | 8  | 3 | 2.338434415 | 0.0641221   |          | ENSG00000199350 |
| 16 | 82687769 | 82688070 | 82687934 | 14 | 17 | 4 | 3.741495063 | 0.00163722  | MBTPS1   | ENSG00000140943 |
| 16 | 82694755 | 82694974 | 82694858 | 8  | 9  | 2 | 3.464347281 | 0.0163838   | MBTPS1   | ENSG00000140943 |
| 16 | 82694978 | 82695181 | 82695079 | 9  | 11 | 3 | 3.117912553 | 0.0146045   | MBTPS1   | ENSG00000140943 |
| 16 | 82707941 | 82708143 | 82708042 | 8  | 9  | 4 | 2.078608368 | 0.0785659   | MBTPS1   | ENSG00000140943 |
| 16 | 82947326 | 82947505 | 82947415 | 9  | 9  | 2 | 3.464347281 | 0.0163838   | ATP2C2   | ENSG00000064270 |
| 16 | 82971000 | 82971195 | 82971054 | 8  | 9  | 1 | 5.196520921 | 0.00490062  | ATP2C2   | ENSG00000064270 |
| 16 | 83102555 | 83102833 | 83102694 | 11 | 12 | 3 | 3.377738599 | 0.00867157  | KIAA1609 | ENSG00000140950 |
| 16 | 83307273 | 83307491 | 83307382 | 9  | 9  | 6 | 1.484720263 | 0.204387    | USP10    | ENSG00000103194 |
| 16 | 83317044 | 83317486 | 83317307 | 9  | 19 | 6 | 2.969440526 | 0.0035096   | USP10    | ENSG00000103194 |
| 16 | 83321650 | 83321910 | 83321780 | 10 | 11 | 4 | 2.494330042 | 0.0324033   | USP10    | ENSG00000103194 |
| 16 | 83327336 | 83327686 | 83327511 | 12 | 18 | 3 | 4.936694875 | 0.000311102 | USP10    | ENSG00000103194 |

|    |          |          |          |    |    |    |             |             |          |                 |
|----|----------|----------|----------|----|----|----|-------------|-------------|----------|-----------------|
| 16 | 83345477 | 83345700 | 83345588 | 9  | 9  | 7  | 1.29913023  | 0.286504    | USP10    | ENSG00000103194 |
| 16 | 83347042 | 83347221 | 83347170 | 8  | 8  | 2  | 3.117912553 | 0.0283184   | USP10    | ENSG00000103194 |
| 16 | 83378502 | 83378719 | 83378610 | 8  | 8  | 5  | 1.558956276 | 0.191397    | CRISPLD2 | ENSG00000103196 |
| 16 | 83432866 | 83433174 | 83433014 | 9  | 12 | 4  | 2.702190879 | 0.0203088   | CRISPLD2 | ENSG00000103196 |
| 16 | 83433716 | 83434038 | 83433949 | 13 | 18 | 2  | 6.582259834 | 7.91E-05    | CRISPLD2 | ENSG00000103196 |
| 16 | 83442560 | 83442854 | 83442707 | 8  | 14 | 2  | 5.196520921 | 0.000907371 | CRISPLD2 | ENSG00000103196 |
| 16 | 83443311 | 83443492 | 83443441 | 8  | 9  | 0  | 10.39304184 | 0.000803859 | CRISPLD2 | ENSG00000103196 |
| 16 | 83476136 | 83476336 | 83476194 | 8  | 8  | 1  | 4.676868829 | 0.0091584   |          | ENSG00000213275 |
| 16 | 83543450 | 83543691 | 83543539 | 9  | 11 | 7  | 1.558956276 | 0.158273    |          | ENSG00000213275 |
| 16 | 83590252 | 83590460 | 83590384 | 9  | 10 | 9  | 1.143234603 | 0.378307    | ZDHHC7   | ENSG00000153786 |
| 16 | 83591681 | 83592322 | 83592144 | 8  | 20 | 12 | 1.67887599  | 0.0659142   | ZDHHC7   | ENSG00000153786 |
| 16 | 83607012 | 83607262 | 83607135 | 9  | 9  | 2  | 3.464347281 | 0.0163838   | ZDHHC7   | ENSG00000153786 |
| 16 | 83620549 | 83621052 | 83620728 | 12 | 24 | 3  | 6.495651151 | 8.89E-06    | KIAA0513 | ENSG00000135709 |
| 16 | 83725132 | 83725322 | 83725227 | 8  | 8  | 0  | 9.353737658 | 0.00163931  | FAM92B   | ENSG00000153789 |
| 16 | 83735205 | 83735577 | 83735406 | 9  | 16 | 7  | 2.208521392 | 0.0257604   | FAM92B   | ENSG00000153789 |
| 16 | 83738534 | 83738805 | 83738684 | 11 | 14 | 7  | 1.948695345 | 0.0559175   | FAM92B   | ENSG00000153789 |
| 16 | 83742829 | 83743011 | 83742968 | 8  | 8  | 3  | 2.338434415 | 0.0641221   | FAM92B   | ENSG00000153789 |
| 16 | 83811721 | 83811944 | 83811774 | 8  | 10 | 5  | 1.905391004 | 0.0915982   | TMEM148  | ENSG00000179219 |
| 16 | 83824743 | 83824928 | 83824835 | 9  | 10 | 1  | 5.716173013 | 0.00260397  | TMEM148  | ENSG00000179219 |
| 16 | 83836920 | 83837138 | 83837029 | 8  | 9  | 3  | 2.598260461 | 0.0397929   | TMEM148  | ENSG00000179219 |
| 16 | 83868044 | 83868327 | 83868164 | 8  | 9  | 3  | 2.598260461 | 0.0397929   | TMEM148  | ENSG00000179219 |
| 16 | 83897265 | 83897480 | 83897372 | 9  | 9  | 5  | 1.73217364  | 0.133894    |          | ENSG00000220991 |
| 16 | 83907504 | 83907858 | 83907636 | 8  | 12 | 5  | 2.251825733 | 0.0404733   |          | ENSG00000220991 |
| 16 | 83921956 | 83922250 | 83922086 | 15 | 17 | 13 | 1.336248237 | 0.204556    |          | ENSG00000220991 |
| 16 | 83940554 | 83940850 | 83940702 | 9  | 14 | 5  | 2.598260461 | 0.0167748   |          | ENSG00000220991 |
| 16 | 83942110 | 83942500 | 83942289 | 13 | 20 | 14 | 1.455025858 | 0.129498    |          | ENSG00000220991 |
| 16 | 83944908 | 83945353 | 83945087 | 13 | 21 | 10 | 2.078608368 | 0.0193227   |          | ENSG00000220991 |
| 16 | 83956380 | 83956795 | 83956593 | 20 | 31 | 5  | 5.542955649 | 2.18E-06    |          | ENSG00000220991 |
| 16 | 83975893 | 83976363 | 83976184 | 25 | 40 | 3  | 10.65286789 | 3.85E-10    |          | ENSG00000220991 |
| 16 | 84007648 | 84007898 | 84007750 | 8  | 9  | 9  | 1.039304184 | 0.466079    |          | ENSG00000220991 |
| 16 | 84027270 | 84027623 | 84027504 | 8  | 13 | 6  | 2.078608368 | 0.0483393   |          | ENSG00000220991 |
| 16 | 84049997 | 84050430 | 84050205 | 16 | 26 | 10 | 2.551019361 | 0.00268348  |          | ENSG00000220991 |
| 16 | 84057313 | 84057566 | 84057485 | 8  | 11 | 6  | 1.781664316 | 0.103344    | KIAA0182 | ENSG00000131149 |
| 16 | 84083132 | 84083458 | 84083293 | 14 | 16 | 7  | 2.208521392 | 0.0257604   | KIAA0182 | ENSG00000131149 |

|    |          |          |          |    |    |    |             |             |          |                 |
|----|----------|----------|----------|----|----|----|-------------|-------------|----------|-----------------|
| 16 | 84106248 | 84106633 | 84106376 | 11 | 15 | 5  | 2.771477825 | 0.0105836   | KIAA0182 | ENSG00000131149 |
| 16 | 84114860 | 84115041 | 84114990 | 8  | 9  | 6  | 1.484720263 | 0.204387    | KIAA0182 | ENSG00000131149 |
| 16 | 84136391 | 84136577 | 84136467 | 9  | 10 | 5  | 1.905391004 | 0.0915982   | KIAA0182 | ENSG00000131149 |
| 16 | 84145338 | 84145616 | 84145440 | 9  | 13 | 9  | 1.455025858 | 0.177172    | KIAA0182 | ENSG00000131149 |
| 16 | 84148775 | 84149014 | 84148894 | 10 | 11 | 6  | 1.781664316 | 0.103344    | KIAA0182 | ENSG00000131149 |
| 16 | 84149423 | 84149641 | 84149532 | 11 | 12 | 1  | 6.755477198 | 0.000722752 | KIAA0182 | ENSG00000131149 |
| 16 | 84155572 | 84155920 | 84155746 | 9  | 12 | 7  | 1.688869299 | 0.11395     | KIAA0182 | ENSG00000131149 |
| 16 | 84161552 | 84161836 | 84161694 | 9  | 14 | 4  | 3.117912553 | 0.00766354  | KIAA0182 | ENSG00000131149 |
| 16 | 84202970 | 84203341 | 84203183 | 12 | 17 | 3  | 4.676868829 | 0.000552213 | KIAA0182 | ENSG00000131149 |
| 16 | 84204372 | 84204551 | 84204461 | 8  | 8  | 4  | 1.870747532 | 0.118863    | KIAA0182 | ENSG00000131149 |
| 16 | 84213137 | 84213388 | 84213262 | 9  | 9  | 4  | 2.078608368 | 0.0785659   | KIAA0182 | ENSG00000131149 |
| 16 | 84299043 | 84299305 | 84299132 | 8  | 12 | 6  | 1.930136342 | 0.071303    | GINS2    | ENSG00000131153 |
| 16 | 84337423 | 84337707 | 84337565 | 9  | 13 | 7  | 1.818782322 | 0.0805123   | C16orf74 | ENSG00000154102 |
| 16 | 84344387 | 84344612 | 84344499 | 10 | 12 | 4  | 2.702190879 | 0.0203088   | C16orf74 | ENSG00000154102 |
| 16 | 84369068 | 84369272 | 84369161 | 9  | 10 | 3  | 2.858086507 | 0.0242838   | COX4NB   | ENSG00000131148 |
| 16 | 84370880 | 84371162 | 84371014 | 8  | 11 | 3  | 3.117912553 | 0.0146045   | COX4NB   | ENSG00000131148 |
| 16 | 84412407 | 84412640 | 84412523 | 8  | 10 | 6  | 1.63319229  | 0.146906    |          | ENSG00000214259 |
| 16 | 84482533 | 84482933 | 84482695 | 15 | 22 | 4  | 4.780799247 | 0.00010647  | IRF8     | ENSG00000140968 |
| 16 | 84485485 | 84485704 | 84485573 | 10 | 11 | 13 | 0.890832158 | 0.618492    | IRF8     | ENSG00000140968 |
| 16 | 84501019 | 84501222 | 84501084 | 8  | 8  | 1  | 4.676868829 | 0.0091584   | IRF8     | ENSG00000140968 |
| 16 | 84551292 | 84551562 | 84551427 | 11 | 11 | 5  | 2.078608368 | 0.0614303   | IRF8     | ENSG00000140968 |
| 16 | 84716547 | 84716760 | 84716654 | 9  | 10 | 0  | 11.43234603 | 0.000394183 |          | ENSG00000199949 |
| 16 | 84726421 | 84726632 | 84726526 | 9  | 9  | 1  | 5.196520921 | 0.00490062  |          | ENSG00000199949 |
| 16 | 84778901 | 84779122 | 84779050 | 8  | 8  | 0  | 9.353737658 | 0.00163931  |          | ENSG00000199949 |
| 16 | 85093448 | 85093914 | 85093691 | 25 | 40 | 9  | 4.261147155 | 1.49E-06    | FOXF1    | ENSG00000103241 |
| 16 | 85100032 | 85100272 | 85100210 | 8  | 10 | 0  | 11.43234603 | 0.000394183 | FOXF1    | ENSG00000103241 |
| 16 | 85136787 | 85136966 | 85136906 | 8  | 8  | 0  | 9.353737658 | 0.00163931  | MTHFSD   | ENSG00000103248 |
| 16 | 85154946 | 85155157 | 85155050 | 10 | 13 | 7  | 1.818782322 | 0.0805123   | MTHFSD   | ENSG00000103248 |
| 16 | 85216382 | 85216582 | 85216438 | 9  | 9  | 2  | 3.464347281 | 0.0163838   | FOXL1    | ENSG00000176678 |
| 16 | 85225422 | 85225606 | 85225549 | 8  | 9  | 2  | 3.464347281 | 0.0163838   | FOXL1    | ENSG00000176678 |
| 16 | 85267349 | 85267534 | 85267442 | 10 | 10 | 1  | 5.716173013 | 0.00260397  | FOXL1    | ENSG00000176678 |
| 16 | 85353240 | 85353424 | 85353332 | 9  | 9  | 6  | 1.484720263 | 0.204387    | FOXL1    | ENSG00000176678 |
| 16 | 85435874 | 85436155 | 85436023 | 20 | 21 | 6  | 3.266384579 | 0.0013436   | FOXL1    | ENSG00000176678 |
| 16 | 85468555 | 85468841 | 85468694 | 8  | 9  | 3  | 2.598260461 | 0.0397929   | FOXL1    | ENSG00000176678 |

|    |          |          |          |    |    |    |             |             |          |                 |
|----|----------|----------|----------|----|----|----|-------------|-------------|----------|-----------------|
| 16 | 85661230 | 85661409 | 85661249 | 8  | 8  | 0  | 9.353737658 | 0.00163931  |          | ENSG00000210934 |
| 16 | 85798049 | 85798279 | 85798164 | 10 | 11 | 4  | 2.494330042 | 0.0324033   |          | ENSG00000210934 |
| 16 | 85831892 | 85832262 | 85832085 | 10 | 16 | 10 | 1.606197376 | 0.104477    |          | ENSG00000210934 |
| 16 | 85869730 | 85870033 | 85869880 | 15 | 17 | 4  | 3.741495063 | 0.00163722  |          | ENSG00000210934 |
| 16 | 85888745 | 85888974 | 85888856 | 9  | 9  | 1  | 5.196520921 | 0.00490062  |          | ENSG00000210934 |
| 16 | 85954536 | 85954799 | 85954667 | 10 | 12 | 3  | 3.377738599 | 0.00867157  | FBXO31   | ENSG00000103264 |
| 16 | 85975064 | 85975280 | 85975186 | 9  | 10 | 10 | 1.039304184 | 0.464387    | FBXO31   | ENSG00000103264 |
| 16 | 86007954 | 86008136 | 86008063 | 8  | 8  | 6  | 1.336248237 | 0.277651    |          | ENSG00000218256 |
| 16 | 86207749 | 86207940 | 86207844 | 9  | 9  | 2  | 3.464347281 | 0.0163838   | JPH3     | ENSG00000154118 |
| 16 | 86252774 | 86253098 | 86252936 | 8  | 13 | 0  | 14.55025858 | 4.65E-05    |          | ENSG00000205047 |
| 16 | 86297675 | 86297961 | 86297803 | 13 | 17 | 3  | 4.676868829 | 0.000552213 |          | ENSG00000205047 |
| 16 | 86325710 | 86325903 | 86325806 | 8  | 8  | 2  | 3.117912553 | 0.0283184   | KLHDC4   | ENSG00000104731 |
| 16 | 86349207 | 86349447 | 86349347 | 9  | 12 | 3  | 3.377738599 | 0.00867157  | KLHDC4   | ENSG00000104731 |
| 16 | 86356482 | 86356711 | 86356596 | 10 | 12 | 1  | 6.755477198 | 0.000722752 | KLHDC4   | ENSG00000104731 |
| 16 | 86359842 | 86360094 | 86359954 | 8  | 8  | 7  | 1.169217207 | 0.371848    | KLHDC4   | ENSG00000104731 |
| 16 | 86368817 | 86369301 | 86369030 | 15 | 26 | 12 | 2.158554844 | 0.00861404  | KLHDC4   | ENSG00000104731 |
| 16 | 86370162 | 86370381 | 86370286 | 8  | 9  | 1  | 5.196520921 | 0.00490062  | KLHDC4   | ENSG00000104731 |
| 16 | 86380650 | 86381648 | 86380846 | 27 | 80 | 14 | 5.612242595 | 1.66E-13    | KLHDC4   | ENSG00000104731 |
| 16 | 86381658 | 86381918 | 86381788 | 14 | 16 | 6  | 2.524024447 | 0.0137633   | KLHDC4   | ENSG00000104731 |
| 16 | 86395802 | 86395981 | 86395900 | 8  | 8  | 1  | 4.676868829 | 0.0091584   | KLHDC4   | ENSG00000104731 |
| 16 | 86397848 | 86398237 | 86398021 | 15 | 20 | 10 | 1.98412617  | 0.0277883   | KLHDC4   | ENSG00000104731 |
| 16 | 86399898 | 86400137 | 86400017 | 8  | 10 | 3  | 2.858086507 | 0.0242838   | KLHDC4   | ENSG00000104731 |
| 16 | 86444054 | 86444348 | 86444182 | 12 | 15 | 6  | 2.375552421 | 0.0212094   | SLC7A5   | ENSG00000103257 |
| 16 | 86444547 | 86445082 | 86444805 | 17 | 34 | 13 | 2.598260461 | 0.000664816 | SLC7A5   | ENSG00000103257 |
| 16 | 86445420 | 86445648 | 86445534 | 8  | 10 | 5  | 1.905391004 | 0.0915982   | SLC7A5   | ENSG00000103257 |
| 16 | 86536593 | 86536785 | 86536683 | 9  | 9  | 4  | 2.078608368 | 0.0785659   | BANP     | ENSG00000172530 |
| 16 | 86536917 | 86537183 | 86537044 | 13 | 15 | 2  | 5.542955649 | 0.000497081 | BANP     | ENSG00000172530 |
| 16 | 86541893 | 86542190 | 86542028 | 13 | 16 | 12 | 1.359090087 | 0.198699    | BANP     | ENSG00000172530 |
| 16 | 87104338 | 87104725 | 87104460 | 16 | 22 | 3  | 5.975999059 | 2.96E-05    | ZFPM1    | ENSG00000179588 |
| 16 | 87119202 | 87119381 | 87119310 | 8  | 8  | 1  | 4.676868829 | 0.0091584   | C16orf85 | ENSG00000205036 |
| 16 | 87244217 | 87244488 | 87244336 | 11 | 12 | 2  | 4.503651465 | 0.002963    | CYBA     | ENSG00000051523 |
| 16 | 87282008 | 87282264 | 87282143 | 9  | 10 | 3  | 2.858086507 | 0.0242838   | SNAI3    | ENSG00000185669 |
| 16 | 87341573 | 87341833 | 87341703 | 8  | 9  | 1  | 5.196520921 | 0.00490062  |          | ENSG00000182376 |
| 16 | 87358965 | 87359179 | 87359061 | 10 | 11 | 5  | 2.078608368 | 0.0614303   |          | ENSG00000182376 |



|    |          |          |          |     |     |   |             |             |          |                 |
|----|----------|----------|----------|-----|-----|---|-------------|-------------|----------|-----------------|
| 16 | 87364740 | 87365317 | 87365028 | 16  | 32  | 6 | 4.899576869 | 4.19E-06    |          | ENSG00000182376 |
| 16 | 87405841 | 87406134 | 87405975 | 8   | 11  | 3 | 3.117912553 | 0.0146045   | APRT     | ENSG00000198931 |
| 16 | 87511493 | 87511703 | 87511598 | 8   | 8   | 1 | 4.676868829 | 0.0091584   |          | ENSG00000205018 |
| 16 | 87520964 | 87521464 | 87521212 | 9   | 21  | 6 | 3.266384579 | 0.0013436   |          | ENSG00000205018 |
| 16 | 87522424 | 87522630 | 87522527 | 8   | 8   | 6 | 1.336248237 | 0.277651    |          | ENSG00000205018 |
| 16 | 87692098 | 87692310 | 87692265 | 8   | 8   | 5 | 1.558956276 | 0.191397    | ACSF3    | ENSG00000176715 |
| 16 | 87716189 | 87716569 | 87716308 | 17  | 23  | 4 | 4.988660084 | 6.05E-05    | ACSF3    | ENSG00000176715 |
| 16 | 87744095 | 87744324 | 87744238 | 11  | 13  | 2 | 4.850086193 | 0.00164564  | C16orf81 | ENSG00000180422 |
| 16 | 87747895 | 87748187 | 87748033 | 13  | 16  | 3 | 4.417042783 | 0.00097367  | C16orf81 | ENSG00000180422 |
| 16 | 87764057 | 87764337 | 87764196 | 8   | 8   | 3 | 2.338434415 | 0.0641221   | CDH15    | ENSG00000129910 |
| 16 | 87810249 | 87810466 | 87810310 | 10  | 13  | 6 | 2.078608368 | 0.0483393   | ZNF778   | ENSG00000170100 |
| 16 | 87883380 | 87883639 | 87883503 | 11  | 12  | 8 | 1.501217155 | 0.168286    | ANKRD11  | ENSG00000167522 |
| 16 | 87998533 | 87998732 | 87998632 | 8   | 10  | 1 | 5.716173013 | 0.00260397  |          | ENSG00000210946 |
| 16 | 88035826 | 88036424 | 88036146 | 45  | 65  | 6 | 9.799153737 | 1.12E-14    | ANKRD11  | ENSG00000167522 |
| 16 | 88052327 | 88052837 | 88052571 | 158 | 181 | 0 | 189.1533615 | 4.72E-57    | ANKRD11  | ENSG00000167522 |
| 16 | 88070320 | 88070672 | 88070611 | 8   | 13  | 6 | 2.078608368 | 0.0483393   | ANKRD11  | ENSG00000167522 |
| 16 | 88124490 | 88124754 | 88124622 | 8   | 9   | 1 | 5.196520921 | 0.00490062  | SPG7     | ENSG00000197912 |
| 16 | 88154442 | 88154783 | 88154613 | 13  | 17  | 3 | 4.676868829 | 0.000552213 | RPL13    | ENSG00000167526 |
| 16 | 88194509 | 88194705 | 88194607 | 8   | 9   | 6 | 1.484720263 | 0.204387    | DPEP1    | ENSG00000015413 |
| 16 | 88238289 | 88238471 | 88238390 | 8   | 8   | 0 | 9.353737658 | 0.00163931  | CHMP1A   | ENSG00000131165 |
| 16 | 88261647 | 88261838 | 88261742 | 10  | 11  | 0 | 12.47165021 | 0.000193293 | C16orf55 | ENSG00000167523 |
| 16 | 88299901 | 88300204 | 88300052 | 11  | 13  | 2 | 4.850086193 | 0.00164564  | SPATA2L  | ENSG00000158792 |
| 16 | 88511775 | 88512018 | 88511896 | 11  | 11  | 6 | 1.781664316 | 0.103344    | MC1R     | ENSG00000198211 |
| 16 | 88594315 | 88594501 | 88594383 | 10  | 10  | 2 | 3.810782009 | 0.00936112  | DBNDD1   | ENSG00000003249 |
| 16 | 88616228 | 88616595 | 88616424 | 8   | 14  | 8 | 1.73217364  | 0.0890835   | GAS8     | ENSG00000141013 |
| 16 | 88675929 | 88676153 | 88676019 | 10  | 12  | 4 | 2.702190879 | 0.0203088   | PRDM7    | ENSG00000126856 |
| 17 | 198928   | 199184   | 199056   | 9   | 11  | 3 | 3.117912553 | 0.0146045   | RPH3AL   | ENSG00000181031 |
| 17 | 276317   | 276587   | 276437   | 9   | 9   | 4 | 2.078608368 | 0.0785659   | C17orf97 | ENSG00000187624 |
| 17 | 482094   | 482276   | 482100   | 8   | 9   | 0 | 10.39304184 | 0.000803859 | VPS53    | ENSG00000141252 |
| 17 | 692268   | 692490   | 692319   | 8   | 10  | 2 | 3.810782009 | 0.00936112  | NXN      | ENSG00000167693 |
| 17 | 733400   | 733598   | 733499   | 8   | 8   | 5 | 1.558956276 | 0.191397    | NXN      | ENSG00000167693 |
| 17 | 846950   | 847323   | 847108   | 11  | 15  | 4 | 3.32577339  | 0.00462646  | TIMM22   | ENSG00000177370 |
| 17 | 1563943  | 1564223  | 1564060  | 12  | 15  | 0 | 16.62886695 | 1.12E-05    |          | ENSG00000199060 |
| 17 | 1620235  | 1620548  | 1620391  | 18  | 21  | 3 | 5.716173013 | 5.37E-05    | SERPINF1 | ENSG00000132386 |

|    |         |         |         |    |    |    |             |             |        |                 |
|----|---------|---------|---------|----|----|----|-------------|-------------|--------|-----------------|
| 17 | 1758879 | 1759074 | 1758960 | 10 | 12 | 0  | 13.5109544  | 9.48E-05    |        | ENSG00000212735 |
| 17 | 1847297 | 1847786 | 1847560 | 49 | 63 | 2  | 22.1718226  | 8.95E-18    | DPH1   | ENSG00000108963 |
| 17 | 1861548 | 1861865 | 1861689 | 12 | 15 | 6  | 2.375552421 | 0.0212094   | DPH1   | ENSG00000108963 |
| 17 | 1862031 | 1862303 | 1862167 | 9  | 11 | 5  | 2.078608368 | 0.0614303   | DPH1   | ENSG00000108963 |
| 17 | 1951475 | 1951809 | 1951648 | 19 | 21 | 7  | 2.858086507 | 0.0029864   | SMG6   | ENSG00000070366 |
| 17 | 1988887 | 1989070 | 1988978 | 9  | 9  | 5  | 1.73217364  | 0.133894    | SMG6   | ENSG00000070366 |
| 17 | 2020254 | 2020549 | 2020401 | 8  | 11 | 2  | 4.157216737 | 0.0052913   | SMG6   | ENSG00000070366 |
| 17 | 2028360 | 2028668 | 2028505 | 8  | 9  | 4  | 2.078608368 | 0.0785659   | SMG6   | ENSG00000070366 |
| 17 | 2081871 | 2082058 | 2081956 | 9  | 9  | 1  | 5.196520921 | 0.00490062  | SMG6   | ENSG00000070366 |
| 17 | 2196540 | 2196801 | 2196670 | 14 | 16 | 4  | 3.533634226 | 0.00276486  | SGSM2  | ENSG00000141258 |
| 17 | 2197761 | 2198161 | 2197909 | 10 | 15 | 7  | 2.078608368 | 0.038229    | SGSM2  | ENSG00000141258 |
| 17 | 2203143 | 2203392 | 2203260 | 10 | 12 | 1  | 6.755477198 | 0.000722752 | SGSM2  | ENSG00000141258 |
| 17 | 2266170 | 2266370 | 2266276 | 9  | 9  | 3  | 2.598260461 | 0.0397929   |        | ENSG00000205821 |
| 17 | 2486174 | 2486363 | 2486266 | 8  | 8  | 4  | 1.870747532 | 0.118863    |        | ENSG00000209044 |
| 17 | 2776057 | 2776376 | 2776227 | 12 | 14 | 0  | 15.58956276 | 2.28E-05    |        | ENSG00000203592 |
| 17 | 2825490 | 2825692 | 2825585 | 8  | 9  | 3  | 2.598260461 | 0.0397929   |        | ENSG00000203592 |
| 17 | 2854525 | 2854858 | 2854691 | 8  | 13 | 3  | 3.637564645 | 0.0050909   |        | ENSG00000203592 |
| 17 | 3413319 | 3413511 | 3413415 | 8  | 8  | 2  | 3.117912553 | 0.0283184   | TRPV3  | ENSG00000167723 |
| 17 | 3839377 | 3839592 | 3839512 | 11 | 11 | 1  | 6.235825105 | 0.0013754   | ATP2A3 | ENSG00000074370 |
| 17 | 3854589 | 3854803 | 3854758 | 9  | 10 | 2  | 3.810782009 | 0.00936112  | ATP2A3 | ENSG00000074370 |
| 17 | 4011401 | 4011847 | 4011668 | 13 | 23 | 1  | 12.47165021 | 4.94E-07    | CYB5D2 | ENSG00000167740 |
| 17 | 4065485 | 4065671 | 4065578 | 8  | 8  | 0  | 9.353737658 | 0.00163931  |        | ENSG00000207390 |
| 17 | 4069315 | 4069675 | 4069494 | 33 | 40 | 1  | 21.30573578 | 4.48E-12    |        | ENSG00000207390 |
| 17 | 4257355 | 4257577 | 4257405 | 8  | 10 | 1  | 5.716173013 | 0.00260397  | SPNS3  | ENSG00000182557 |
| 17 | 4263214 | 4263527 | 4263361 | 8  | 11 | 7  | 1.558956276 | 0.158273    | SPNS3  | ENSG00000182557 |
| 17 | 4365773 | 4366050 | 4365911 | 12 | 13 | 0  | 14.55025858 | 4.65E-05    | SPNS2  | ENSG00000183018 |
| 17 | 4410500 | 4410872 | 4410703 | 11 | 17 | 0  | 18.70747532 | 2.69E-06    | GGT6   | ENSG00000167741 |
| 17 | 4429796 | 4430033 | 4429914 | 12 | 13 | 2  | 4.850086193 | 0.00164564  | SMTNL2 | ENSG00000188176 |
| 17 | 4581297 | 4581544 | 4581417 | 10 | 14 | 12 | 1.199197136 | 0.313881    | MED11  | ENSG00000161920 |
| 17 | 4581555 | 4581907 | 4581731 | 11 | 17 | 9  | 1.870747532 | 0.0498299   | MED11  | ENSG00000161920 |
| 17 | 4640482 | 4640825 | 4640661 | 12 | 17 | 3  | 4.676868829 | 0.000552213 | GLTPD2 | ENSG00000182327 |
| 17 | 4646277 | 4646468 | 4646370 | 8  | 9  | 3  | 2.598260461 | 0.0397929   | PSMB6  | ENSG00000142507 |
| 17 | 4703854 | 4704205 | 4704029 | 19 | 23 | 0  | 24.94330042 | 3.74E-08    |        | ENSG00000216765 |
| 17 | 4781135 | 4781361 | 4781248 | 8  | 10 | 0  | 11.43234603 | 0.000394183 | RNF167 | ENSG00000108523 |

|    |         |         |         |    |    |    |             |             |          |                 |
|----|---------|---------|---------|----|----|----|-------------|-------------|----------|-----------------|
| 17 | 4811067 | 4811302 | 4811170 | 10 | 10 | 0  | 11.43234603 | 0.000394183 | SPAG7    | ENSG00000091640 |
| 17 | 5728126 | 5728361 | 5728243 | 8  | 9  | 6  | 1.484720263 | 0.204387    | WSCD1    | ENSG00000179314 |
| 17 | 6037053 | 6037319 | 6037197 | 12 | 15 | 2  | 5.542955649 | 0.000497081 |          | ENSG00000206618 |
| 17 | 6056075 | 6056254 | 6056178 | 8  | 8  | 1  | 4.676868829 | 0.0091584   |          | ENSG00000206618 |
| 17 | 6396100 | 6396450 | 6396275 | 11 | 15 | 3  | 4.157216737 | 0.00170423  | PITPNM3  | ENSG00000091622 |
| 17 | 6396477 | 6396717 | 6396597 | 11 | 11 | 0  | 12.47165021 | 0.000193293 | PITPNM3  | ENSG00000091622 |
| 17 | 7035619 | 7035841 | 7035708 | 8  | 8  | 4  | 1.870747532 | 0.118863    | ASGR1    | ENSG00000141505 |
| 17 | 7078597 | 7078827 | 7078667 | 8  | 9  | 1  | 5.196520921 | 0.00490062  | DVL2     | ENSG00000004975 |
| 17 | 7106621 | 7106813 | 7106717 | 8  | 9  | 3  | 2.598260461 | 0.0397929   | CLDN7    | ENSG00000181885 |
| 17 | 7151168 | 7151390 | 7151241 | 11 | 12 | 4  | 2.702190879 | 0.0203088   | EIF5AL1  | ENSG00000132507 |
| 17 | 7159513 | 7159704 | 7159608 | 9  | 11 | 4  | 2.494330042 | 0.0324033   | GPS2     | ENSG00000132522 |
| 17 | 7198456 | 7198674 | 7198565 | 9  | 10 | 1  | 5.716173013 | 0.00260397  | TMEM95   | ENSG00000182896 |
| 17 | 7200013 | 7200302 | 7200157 | 9  | 12 | 3  | 3.377738599 | 0.00867157  | TMEM95   | ENSG00000182896 |
| 17 | 7327622 | 7327875 | 7327784 | 8  | 8  | 3  | 2.338434415 | 0.0641221   | ZBTB4    | ENSG00000174282 |
| 17 | 7328077 | 7328656 | 7328394 | 14 | 27 | 11 | 2.425043097 | 0.00332497  | POLR2A   | ENSG00000181222 |
| 17 | 7404983 | 7405255 | 7405128 | 9  | 10 | 3  | 2.858086507 | 0.0242838   | SENP3    | ENSG00000161956 |
| 17 | 7417695 | 7417936 | 7417805 | 8  | 10 | 0  | 11.43234603 | 0.000394183 | EIF4A1   | ENSG00000161960 |
| 17 | 7427603 | 7428246 | 7428067 | 12 | 27 | 5  | 4.850086193 | 2.10E-05    | MPDU1    | ENSG00000129255 |
| 17 | 7458968 | 7459147 | 7459057 | 8  | 8  | 1  | 4.676868829 | 0.0091584   | FXR2     | ENSG00000129245 |
| 17 | 7680871 | 7681127 | 7680999 | 10 | 12 | 10 | 1.228268581 | 0.305344    | JMJD3    | ENSG00000132510 |
| 17 | 7683360 | 7683601 | 7683513 | 11 | 11 | 6  | 1.781664316 | 0.103344    | JMJD3    | ENSG00000132510 |
| 17 | 7731768 | 7732066 | 7731913 | 8  | 12 | 9  | 1.35109544  | 0.232899    | CHD3     | ENSG00000170004 |
| 17 | 7795976 | 7796225 | 7796101 | 12 | 14 | 1  | 7.794781382 | 0.000197021 | CNTROB   | ENSG00000170037 |
| 17 | 7832844 | 7833027 | 7832935 | 8  | 9  | 0  | 10.39304184 | 0.000803859 | GUCY2D   | ENSG00000132518 |
| 17 | 7963746 | 7963928 | 7963862 | 8  | 9  | 4  | 2.078608368 | 0.0785659   | ALOXE3   | ENSG00000179148 |
| 17 | 7982721 | 7983097 | 7982918 | 11 | 18 | 6  | 2.8209685   | 0.00559354  | PER1     | ENSG00000179094 |
| 17 | 7983427 | 7983647 | 7983537 | 8  | 9  | 3  | 2.598260461 | 0.0397929   | PER1     | ENSG00000179094 |
| 17 | 8017235 | 8017842 | 8017603 | 22 | 38 | 16 | 2.38428607  | 0.000829296 |          | ENSG00000200463 |
| 17 | 8020695 | 8021028 | 8020864 | 9  | 14 | 1  | 7.794781382 | 0.000197021 | TMEM107  | ENSG00000179029 |
| 17 | 8029767 | 8030041 | 8029904 | 9  | 10 | 7  | 1.429043253 | 0.21536     | C17orf59 | ENSG00000196544 |
| 17 | 8030269 | 8030509 | 8030389 | 9  | 11 | 5  | 2.078608368 | 0.0614303   | C17orf59 | ENSG00000196544 |
| 17 | 8030817 | 8031082 | 8030929 | 10 | 13 | 9  | 1.455025858 | 0.177172    | C17orf59 | ENSG00000196544 |
| 17 | 8031594 | 8031869 | 8031731 | 11 | 15 | 7  | 2.078608368 | 0.038229    | C17orf59 | ENSG00000196544 |
| 17 | 8052762 | 8052954 | 8052894 | 8  | 9  | 1  | 5.196520921 | 0.00490062  | AURKB    | ENSG00000178999 |

|    |          |          |          |    |    |    |             |             |          |                 |
|----|----------|----------|----------|----|----|----|-------------|-------------|----------|-----------------|
| 17 | 8065411  | 8065764  | 8065585  | 8  | 13 | 4  | 2.910051716 | 0.0125532   | C17orf44 | ENSG00000178977 |
| 17 | 8070103  | 8070326  | 8070251  | 8  | 9  | 10 | 0.944821986 | 0.553851    | C17orf44 | ENSG00000178977 |
| 17 | 8070731  | 8070910  | 8070786  | 8  | 8  | 6  | 1.336248237 | 0.277651    | C17orf44 | ENSG00000178977 |
| 17 | 8093050  | 8093245  | 8093220  | 8  | 10 | 6  | 1.63319229  | 0.146906    | PFAS     | ENSG00000178921 |
| 17 | 9143777  | 9143994  | 9143885  | 8  | 9  | 2  | 3.464347281 | 0.0163838   | STX8     | ENSG00000170310 |
| 17 | 9963864  | 9964129  | 9964026  | 11 | 12 | 4  | 2.702190879 | 0.0203088   |          | ENSG00000221486 |
| 17 | 10049700 | 10050097 | 10049873 | 23 | 33 | 0  | 35.33634226 | 3.00E-11    | GAS7     | ENSG00000007237 |
| 17 | 10141256 | 10141501 | 10141384 | 13 | 15 | 0  | 16.62886695 | 1.12E-05    | MYH13    | ENSG00000006788 |
| 17 | 10195746 | 10196063 | 10195897 | 11 | 13 | 0  | 14.55025858 | 4.65E-05    | MYH13    | ENSG00000006788 |
| 17 | 10581168 | 10581347 | 10581257 | 8  | 9  | 5  | 1.73217364  | 0.133894    | TMEM220  | ENSG00000187824 |
| 17 | 10720180 | 10720359 | 10720269 | 8  | 8  | 0  | 9.353737658 | 0.00163931  |          | ENSG00000199374 |
| 17 | 11986442 | 11987024 | 11986852 | 11 | 23 | 0  | 24.94330042 | 3.74E-08    |          | ENSG00000211589 |
| 17 | 12393518 | 12393727 | 12393622 | 8  | 8  | 1  | 4.676868829 | 0.0091584   |          | ENSG00000179136 |
| 17 | 12862265 | 12862544 | 12862404 | 14 | 16 | 1  | 8.834085566 | 5.30E-05    | ELAC2    | ENSG00000006744 |
| 17 | 13019322 | 13019546 | 13019448 | 10 | 11 | 1  | 6.235825105 | 0.0013754   | ELAC2    | ENSG00000006744 |
| 17 | 13331602 | 13331790 | 13331696 | 9  | 9  | 3  | 2.598260461 | 0.0397929   |          | ENSG00000221698 |
| 17 | 15807727 | 15808200 | 15807966 | 30 | 41 | 3  | 10.91269393 | 2.02E-10    | ADORA2B  | ENSG00000170425 |
| 17 | 16061041 | 16061287 | 16061164 | 12 | 15 | 5  | 2.771477825 | 0.0105836   | PIGL     | ENSG00000108474 |
| 17 | 16282861 | 16283072 | 16282993 | 9  | 10 | 5  | 1.905391004 | 0.0915982   | C17orf45 | ENSG00000175061 |
| 17 | 16307861 | 16308145 | 16307998 | 8  | 9  | 2  | 3.464347281 | 0.0163838   |          | ENSG00000212381 |
| 17 | 16354417 | 16354605 | 16354511 | 8  | 8  | 0  | 9.353737658 | 0.00163931  | C17orf76 | ENSG00000181350 |
| 17 | 16380936 | 16381205 | 16381050 | 8  | 8  | 6  | 1.336248237 | 0.277651    | ZNF287   | ENSG00000141040 |
| 17 | 17033568 | 17033935 | 17033779 | 20 | 26 | 1  | 14.03060649 | 6.50E-08    |          | ENSG00000209051 |
| 17 | 17382698 | 17382885 | 17382765 | 10 | 11 | 1  | 6.235825105 | 0.0013754   | PEMT     | ENSG00000133027 |
| 17 | 17541363 | 17541707 | 17541535 | 9  | 14 | 3  | 3.897390691 | 0.00295882  | RAI1     | ENSG00000108557 |
| 17 | 17554903 | 17555232 | 17555067 | 13 | 15 | 3  | 4.157216737 | 0.00170423  | RAI1     | ENSG00000108557 |
| 17 | 17655806 | 17656219 | 17655939 | 11 | 17 | 1  | 9.353737658 | 2.73E-05    |          | ENSG00000207839 |
| 17 | 17684413 | 17684610 | 17684548 | 9  | 10 | 0  | 11.43234603 | 0.000394183 | SREBF1   | ENSG00000072310 |
| 17 | 17851024 | 17851243 | 17851133 | 8  | 8  | 2  | 3.117912553 | 0.0283184   |          | ENSG00000220352 |
| 17 | 17882573 | 17882808 | 17882743 | 9  | 12 | 5  | 2.251825733 | 0.0404733   | ATPAF2   | ENSG00000171953 |
| 17 | 17931745 | 17932155 | 17931924 | 12 | 21 | 6  | 3.266384579 | 0.0013436   | DRG2     | ENSG00000108591 |
| 17 | 18027437 | 18027661 | 18027549 | 8  | 9  | 7  | 1.29913023  | 0.286504    | ALKBH5   | ENSG00000091542 |
| 17 | 19597045 | 19597424 | 19597234 | 45 | 55 | 4  | 11.64020686 | 1.64E-13    |          | ENSG00000219014 |
| 17 | 19597714 | 19598057 | 19597885 | 11 | 17 | 0  | 18.70747532 | 2.69E-06    |          | ENSG00000219014 |

|    |          |          |          |     |     |    |             |             |          |                 |
|----|----------|----------|----------|-----|-----|----|-------------|-------------|----------|-----------------|
| 17 | 19802017 | 19802298 | 19802149 | 14  | 16  | 4  | 3.533634226 | 0.00276486  | AKAP10   | ENSG00000108599 |
| 17 | 19830756 | 19831172 | 19830935 | 21  | 29  | 0  | 31.17912553 | 5.19E-10    | AKAP10   | ENSG00000108599 |
| 17 | 20067785 | 20068030 | 20067907 | 8   | 11  | 0  | 12.47165021 | 0.000193293 | SPECC1   | ENSG00000128487 |
| 17 | 20752630 | 20752843 | 20752736 | 9   | 10  | 2  | 3.810782009 | 0.00936112  |          | ENSG00000205212 |
| 17 | 20942752 | 20942933 | 20942887 | 8   | 8   | 3  | 2.338434415 | 0.0641221   | DHRS7B   | ENSG00000109016 |
| 17 | 20963536 | 20963790 | 20963663 | 8   | 11  | 1  | 6.235825105 | 0.0013754   | DHRS7B   | ENSG00000109016 |
| 17 | 20970581 | 20971025 | 20970740 | 9   | 15  | 3  | 4.157216737 | 0.00170423  | DHRS7B   | ENSG00000109016 |
| 17 | 21149953 | 21150132 | 21150042 | 8   | 8   | 2  | 3.117912553 | 0.0283184   | MAP2K3   | ENSG00000034152 |
| 17 | 21164420 | 21164705 | 21164562 | 8   | 12  | 3  | 3.377738599 | 0.00867157  | MAP2K3   | ENSG00000034152 |
| 17 | 21180373 | 21180586 | 21180499 | 12  | 13  | 2  | 4.850086193 | 0.00164564  | MAP2K3   | ENSG00000034152 |
| 17 | 21240052 | 21240561 | 21240298 | 17  | 33  | 6  | 5.048048895 | 2.40E-06    | KCNJ12   | ENSG00000184185 |
| 17 | 21944681 | 21945026 | 21944853 | 54  | 54  | 85 | 0.664671281 | 0.991843    |          | ENSG00000209244 |
| 17 | 22289016 | 22289421 | 22289195 | 12  | 19  | 12 | 1.598929514 | 0.0887417   |          | ENSG00000210006 |
| 17 | 22592876 | 22593090 | 22592983 | 9   | 11  | 6  | 1.781664316 | 0.103344    |          | ENSG00000213664 |
| 17 | 22682361 | 22682718 | 22682539 | 41  | 46  | 0  | 48.84729666 | 2.85E-15    | WSB1     | ENSG00000109046 |
| 17 | 22683628 | 22683918 | 22683733 | 12  | 17  | 0  | 18.70747532 | 2.69E-06    | WSB1     | ENSG00000109046 |
| 17 | 23225102 | 23225308 | 23225205 | 9   | 10  | 2  | 3.810782009 | 0.00936112  |          | ENSG00000205191 |
| 17 | 23633796 | 23634150 | 23633973 | 22  | 26  | 1  | 14.03060649 | 6.50E-08    |          | ENSG00000203478 |
| 17 | 23686576 | 23686765 | 23686670 | 8   | 9   | 4  | 2.078608368 | 0.0785659   | IFT20    | ENSG00000109083 |
| 17 | 23849146 | 23849371 | 23849260 | 12  | 12  | 1  | 6.755477198 | 0.000722752 |          | ENSG00000203466 |
| 17 | 23876548 | 23876732 | 23876640 | 9   | 9   | 3  | 2.598260461 | 0.0397929   | FOXN1    | ENSG00000109101 |
| 17 | 24076618 | 24076901 | 24076743 | 12  | 15  | 4  | 3.32577339  | 0.00462646  | TLCD1    | ENSG00000160606 |
| 17 | 24080067 | 24080361 | 24080206 | 8   | 12  | 5  | 2.251825733 | 0.0404733   | NEK8     | ENSG00000160602 |
| 17 | 24094120 | 24094759 | 24094334 | 117 | 155 | 4  | 32.42629055 | 9.56E-43    | TRAF4    | ENSG00000076604 |
| 17 | 24205751 | 24205988 | 24205869 | 9   | 11  | 6  | 1.781664316 | 0.103344    | ERAL1    | ENSG00000132591 |
| 17 | 24230262 | 24230441 | 24230351 | 8   | 8   | 4  | 1.870747532 | 0.118863    |          | ENSG00000207618 |
| 17 | 24253537 | 24253743 | 24253598 | 9   | 9   | 2  | 3.464347281 | 0.0163838   | DHRS13   | ENSG00000167536 |
| 17 | 24300073 | 24300377 | 24300239 | 9   | 12  | 3  | 3.377738599 | 0.00867157  | PHF12    | ENSG00000109118 |
| 17 | 24300425 | 24300646 | 24300535 | 8   | 11  | 3  | 3.117912553 | 0.0146045   | PHF12    | ENSG00000109118 |
| 17 | 24302884 | 24303173 | 24303051 | 9   | 11  | 6  | 1.781664316 | 0.103344    | PHF12    | ENSG00000109118 |
| 17 | 24303538 | 24303814 | 24303664 | 11  | 13  | 13 | 1.039304184 | 0.45974     | PHF12    | ENSG00000109118 |
| 17 | 24467389 | 24467568 | 24467483 | 8   | 8   | 3  | 2.338434415 | 0.0641221   | TIAF1    | ENSG00000221995 |
| 17 | 24502779 | 24502988 | 24502865 | 8   | 8   | 6  | 1.336248237 | 0.277651    | MYO18A   | ENSG00000196535 |
| 17 | 24943079 | 24943391 | 24943235 | 10  | 12  | 2  | 4.503651465 | 0.002963    | ANKRD13B | ENSG00000198720 |

|    |          |          |          |     |     |    |             |             |          |                 |
|----|----------|----------|----------|-----|-----|----|-------------|-------------|----------|-----------------|
| 17 | 25355177 | 25355418 | 25355311 | 11  | 12  | 3  | 3.377738599 | 0.00867157  |          | ENSG00000207011 |
| 17 | 25391823 | 25392168 | 25391995 | 8   | 14  | 0  | 15.58956276 | 2.28E-05    |          | ENSG00000207011 |
| 17 | 25588028 | 25588208 | 25588101 | 8   | 9   | 1  | 5.196520921 | 0.00490062  | SLC6A4   | ENSG00000108576 |
| 17 | 25823706 | 25823913 | 25823782 | 9   | 9   | 0  | 10.39304184 | 0.000803859 | GOSR1    | ENSG00000108587 |
| 17 | 26423307 | 26423665 | 26423486 | 37  | 42  | 2  | 14.89669331 | 1.32E-11    | NF1      | ENSG00000196712 |
| 17 | 26625452 | 26625745 | 26625603 | 8   | 11  | 2  | 4.157216737 | 0.0052913   |          | ENSG00000210267 |
| 17 | 26917766 | 26918055 | 26917925 | 9   | 11  | 4  | 2.494330042 | 0.0324033   |          | ENSG00000221038 |
| 17 | 27508317 | 27508675 | 27508496 | 11  | 15  | 10 | 1.511715177 | 0.140236    |          | ENSG00000214708 |
| 17 | 28173777 | 28174129 | 28173956 | 19  | 23  | 19 | 1.247165021 | 0.230782    |          | ENSG00000201178 |
| 17 | 28934580 | 28934979 | 28934854 | 17  | 23  | 0  | 24.94330042 | 3.74E-08    | ACCN1    | ENSG00000108684 |
| 17 | 29557798 | 29558194 | 29558015 | 20  | 29  | 1  | 15.58956276 | 8.46E-09    | CCL2     | ENSG00000108691 |
| 17 | 30502096 | 30502618 | 30502297 | 78  | 115 | 99 | 1.205592854 | 0.0847006   | UNC45B   | ENSG00000141161 |
| 17 | 30510765 | 30511028 | 30510896 | 9   | 12  | 0  | 13.5109544  | 9.48E-05    | UNC45B   | ENSG00000141161 |
| 17 | 32351222 | 32351475 | 32351392 | 11  | 12  | 2  | 4.503651465 | 0.002963    | LHX1     | ENSG00000132130 |
| 17 | 32357575 | 32357852 | 32357713 | 8   | 9   | 0  | 10.39304184 | 0.000803859 | LHX1     | ENSG00000132130 |
| 17 | 32925537 | 32925716 | 32925626 | 8   | 8   | 0  | 9.353737658 | 0.00163931  | DUSP14   | ENSG00000161326 |
| 17 | 33729882 | 33730176 | 33730029 | 11  | 16  | 3  | 4.417042783 | 0.00097367  | GPR179   | ENSG00000188888 |
| 17 | 34027735 | 34027914 | 34027761 | 8   | 8   | 0  | 9.353737658 | 0.00163931  |          | ENSG00000017373 |
| 17 | 34103627 | 34103806 | 34103752 | 8   | 9   | 0  | 10.39304184 | 0.000803859 | MLLT6    | ENSG00000108292 |
| 17 | 34162351 | 34162595 | 34162526 | 10  | 13  | 4  | 2.910051716 | 0.0125532   | PSMB3    | ENSG00000108294 |
| 17 | 34281288 | 34281498 | 34281395 | 8   | 9   | 1  | 5.196520921 | 0.00490062  | LASP1    | ENSG00000002834 |
| 17 | 34456399 | 34456999 | 34456655 | 244 | 295 | 5  | 51.27233976 | 1.72E-83    |          | ENSG00000214553 |
| 17 | 34562747 | 34563042 | 34562894 | 9   | 13  | 5  | 2.425043097 | 0.0262442   | PLXDC1   | ENSG00000161381 |
| 17 | 35031809 | 35032015 | 35031905 | 9   | 11  | 1  | 6.235825105 | 0.0013754   |          | ENSG00000214546 |
| 17 | 35073096 | 35073298 | 35073197 | 9   | 9   | 0  | 10.39304184 | 0.000803859 | TCAP     | ENSG00000173991 |
| 17 | 35113234 | 35113541 | 35113382 | 9   | 12  | 4  | 2.702190879 | 0.0203088   | ERBB2    | ENSG00000141736 |
| 17 | 35159820 | 35160259 | 35159993 | 18  | 25  | 0  | 27.02190879 | 8.98E-09    | GRB7     | ENSG00000141738 |
| 17 | 35222237 | 35222565 | 35222401 | 11  | 13  | 3  | 3.637564645 | 0.0050909   |          | ENSG00000218970 |
| 17 | 35282601 | 35282858 | 35282729 | 10  | 10  | 5  | 1.905391004 | 0.0915982   | ZBPB2    | ENSG00000186075 |
| 17 | 35390456 | 35390635 | 35390509 | 8   | 8   | 3  | 2.338434415 | 0.0641221   | PSMD3    | ENSG00000108344 |
| 17 | 35485390 | 35485594 | 35485529 | 8   | 8   | 1  | 4.676868829 | 0.0091584   |          | ENSG00000210504 |
| 17 | 35604130 | 35604323 | 35604237 | 9   | 9   | 0  | 10.39304184 | 0.000803859 | RAPGEFL1 | ENSG00000108352 |
| 17 | 35721436 | 35721660 | 35721539 | 10  | 12  | 3  | 3.377738599 | 0.00867157  | RARA     | ENSG00000131759 |
| 17 | 35724330 | 35724756 | 35724490 | 11  | 19  | 1  | 10.39304184 | 7.23E-06    | RARA     | ENSG00000131759 |

|    |          |          |          |    |    |    |             |             |          |                 |
|----|----------|----------|----------|----|----|----|-------------|-------------|----------|-----------------|
| 17 | 35732248 | 35732469 | 35732366 | 9  | 11 | 6  | 1.781664316 | 0.103344    | RARA     | ENSG00000131759 |
| 17 | 35881104 | 35881399 | 35881281 | 9  | 12 | 1  | 6.755477198 | 0.000722752 | TNS4     | ENSG00000131746 |
| 17 | 35911207 | 35911398 | 35911285 | 8  | 9  | 0  | 10.39304184 | 0.000803859 | TNS4     | ENSG00000131746 |
| 17 | 35943186 | 35943396 | 35943283 | 8  | 11 | 4  | 2.494330042 | 0.0324033   | TNS4     | ENSG00000131746 |
| 17 | 35947778 | 35948135 | 35947956 | 20 | 26 | 2  | 9.353737658 | 4.98E-07    | CCR7     | ENSG00000126353 |
| 17 | 35957336 | 35957606 | 35957476 | 14 | 15 | 2  | 5.542955649 | 0.000497081 | CCR7     | ENSG00000126353 |
| 17 | 35992022 | 35992440 | 35992261 | 23 | 31 | 2  | 11.0859113  | 1.93E-08    | CCR7     | ENSG00000126353 |
| 17 | 36025428 | 36025738 | 36025583 | 10 | 15 | 5  | 2.771477825 | 0.0105836   |          | ENSG00000198587 |
| 17 | 36027693 | 36027933 | 36027829 | 9  | 10 | 8  | 1.27026067  | 0.293854    |          | ENSG00000198587 |
| 17 | 36104473 | 36104687 | 36104580 | 10 | 10 | 6  | 1.63319229  | 0.146906    |          | ENSG00000220264 |
| 17 | 36106479 | 36106658 | 36106568 | 8  | 8  | 3  | 2.338434415 | 0.0641221   | KRT24    | ENSG00000167916 |
| 17 | 36129683 | 36129877 | 36129780 | 8  | 8  | 0  | 9.353737658 | 0.00163931  | KRT24    | ENSG00000167916 |
| 17 | 36320275 | 36320474 | 36320355 | 9  | 9  | 9  | 1.039304184 | 0.466079    | KRT20    | ENSG00000171431 |
| 17 | 36419180 | 36419402 | 36419291 | 8  | 10 | 5  | 1.905391004 | 0.0915982   | KRTAP3-1 | ENSG00000213418 |
| 17 | 36732693 | 36732872 | 36732729 | 8  | 8  | 1  | 4.676868829 | 0.0091584   |          | ENSG00000212732 |
| 17 | 36929330 | 36929730 | 36929502 | 12 | 20 | 7  | 2.728173484 | 0.00469378  | KRT15    | ENSG00000171346 |
| 17 | 36932617 | 36932806 | 36932711 | 10 | 10 | 2  | 3.810782009 | 0.00936112  | KRT15    | ENSG00000171346 |
| 17 | 36940062 | 36940299 | 36940202 | 9  | 10 | 4  | 2.286469205 | 0.0509017   | KRT19    | ENSG00000171345 |
| 17 | 36945785 | 36946141 | 36945963 | 23 | 29 | 3  | 7.794781382 | 4.12E-07    | KRT19    | ENSG00000171345 |
| 17 | 36949126 | 36949355 | 36949260 | 9  | 10 | 4  | 2.286469205 | 0.0509017   | KRT19    | ENSG00000171345 |
| 17 | 36950194 | 36950373 | 36950283 | 8  | 8  | 2  | 3.117912553 | 0.0283184   | KRT19    | ENSG00000171345 |
| 17 | 36958949 | 36959325 | 36959118 | 12 | 18 | 2  | 6.582259834 | 7.91E-05    | KRT19    | ENSG00000171345 |
| 17 | 37055563 | 37055777 | 37055670 | 9  | 10 | 6  | 1.63319229  | 0.146906    | KRT42P   | ENSG00000214514 |
| 17 | 37181997 | 37182396 | 37182176 | 12 | 19 | 5  | 3.464347281 | 0.00150447  | JUP      | ENSG00000173801 |
| 17 | 37187358 | 37187618 | 37187510 | 10 | 12 | 11 | 1.125912866 | 0.382541    | JUP      | ENSG00000173801 |
| 17 | 37202990 | 37203217 | 37203126 | 11 | 12 | 7  | 1.688869299 | 0.11395     | JUP      | ENSG00000173801 |
| 17 | 37211377 | 37211566 | 37211501 | 8  | 9  | 8  | 1.154782427 | 0.375434    |          | ENSG00000141696 |
| 17 | 37425352 | 37425608 | 37425473 | 8  | 10 | 2  | 3.810782009 | 0.00936112  | NKIRAS2  | ENSG00000168256 |
| 17 | 37457033 | 37457215 | 37457124 | 8  | 9  | 1  | 5.196520921 | 0.00490062  | ZNF385C  | ENSG00000187595 |
| 17 | 37728317 | 37728655 | 37728486 | 9  | 15 | 4  | 3.32577339  | 0.00462646  | STAT5A   | ENSG00000126561 |
| 17 | 37792898 | 37793098 | 37793003 | 8  | 9  | 1  | 5.196520921 | 0.00490062  | STAT3    | ENSG00000168610 |
| 17 | 37813108 | 37813300 | 37813204 | 8  | 9  | 2  | 3.464347281 | 0.0163838   |          | ENSG00000221020 |
| 17 | 38014666 | 38014896 | 38014809 | 9  | 11 | 3  | 3.117912553 | 0.0146045   | FAM134C  | ENSG00000141699 |
| 17 | 38073028 | 38073389 | 38073207 | 10 | 17 | 3  | 4.676868829 | 0.000552213 | TUBG2    | ENSG00000037042 |

|    |          |          |          |    |    |    |             |             |          |                 |
|----|----------|----------|----------|----|----|----|-------------|-------------|----------|-----------------|
| 17 | 38178801 | 38179116 | 38178937 | 11 | 15 | 7  | 2.078608368 | 0.038229    | VPS25    | ENSG00000131475 |
| 17 | 38247111 | 38247338 | 38247224 | 9  | 9  | 2  | 3.464347281 | 0.0163838   | AOC2     | ENSG00000131480 |
| 17 | 38369981 | 38370213 | 38370100 | 10 | 11 | 5  | 2.078608368 | 0.0614303   | AARSD1   | ENSG00000108825 |
| 17 | 38403657 | 38403890 | 38403773 | 9  | 11 | 4  | 2.494330042 | 0.0324033   | RPL27    | ENSG00000131469 |
| 17 | 38737151 | 38737990 | 38737351 | 17 | 54 | 45 | 1.242646307 | 0.137202    | TMEM106A | ENSG00000184988 |
| 17 | 38748695 | 38748973 | 38748834 | 10 | 13 | 23 | 0.606260774 | 0.937372    | TMEM106A | ENSG00000184988 |
| 17 | 38755556 | 38756835 | 38756004 | 22 | 78 | 90 | 0.902253083 | 0.749269    | TMEM106A | ENSG00000184988 |
| 17 | 38793847 | 38794310 | 38794177 | 21 | 30 | 13 | 2.301316408 | 0.00328017  |          | ENSG00000210609 |
| 17 | 38800580 | 38801101 | 38800759 | 10 | 22 | 12 | 1.838768941 | 0.0349935   |          | ENSG00000210609 |
| 17 | 38819021 | 38819393 | 38819185 | 12 | 16 | 5  | 2.944695189 | 0.00659886  |          | ENSG00000222944 |
| 17 | 38821431 | 38822104 | 38821610 | 15 | 35 | 30 | 1.206933891 | 0.220031    |          | ENSG00000204733 |
| 17 | 38953554 | 38953790 | 38953673 | 8  | 9  | 2  | 3.464347281 | 0.0163838   | ETV4     | ENSG00000175832 |
| 17 | 38980977 | 38981190 | 38981042 | 8  | 8  | 0  | 9.353737658 | 0.00163931  | ETV4     | ENSG00000175832 |
| 17 | 39193377 | 39193568 | 39193472 | 8  | 9  | 4  | 2.078608368 | 0.0785659   | SOST     | ENSG00000167941 |
| 17 | 39255597 | 39255776 | 39255650 | 8  | 8  | 1  | 4.676868829 | 0.0091584   | MPP3     | ENSG00000161647 |
| 17 | 39272674 | 39273103 | 39272936 | 14 | 22 | 4  | 4.780799247 | 0.00010647  | MPP3     | ENSG00000161647 |
| 17 | 39305127 | 39305586 | 39305373 | 62 | 80 | 1  | 42.09181946 | 3.61E-24    | CD300LG  | ENSG00000161649 |
| 17 | 39447744 | 39448056 | 39447900 | 11 | 17 | 4  | 3.741495063 | 0.00163722  | TMEM101  | ENSG00000091947 |
| 17 | 39503264 | 39503706 | 39503443 | 9  | 17 | 5  | 3.117912553 | 0.00407023  | G6PC3    | ENSG00000141349 |
| 17 | 39585622 | 39586141 | 39585963 | 41 | 54 | 0  | 57.16173013 | 9.52E-18    | C17orf53 | ENSG00000125319 |
| 17 | 39626495 | 39626772 | 39626633 | 9  | 10 | 5  | 1.905391004 | 0.0915982   | ATXN7L3  | ENSG00000087152 |
| 17 | 39655559 | 39655917 | 39655764 | 11 | 16 | 9  | 1.766817113 | 0.0700694   | UBTF     | ENSG00000108312 |
| 17 | 39818089 | 39818334 | 39818238 | 10 | 12 | 3  | 3.377738599 | 0.00867157  | ITGA2B   | ENSG00000005961 |
| 17 | 40362535 | 40362726 | 40362630 | 8  | 9  | 2  | 3.464347281 | 0.0163838   | KIF18B   | ENSG00000186185 |
| 17 | 40480162 | 40480428 | 40480262 | 17 | 20 | 2  | 7.27512929  | 2.27E-05    | DCAKD    | ENSG00000172992 |
| 17 | 40483433 | 40483688 | 40483549 | 8  | 10 | 4  | 2.286469205 | 0.0509017   | DCAKD    | ENSG00000172992 |
| 17 | 40493644 | 40493855 | 40493766 | 10 | 12 | 1  | 6.755477198 | 0.000722752 | DCAKD    | ENSG00000172992 |
| 17 | 40560384 | 40560769 | 40560607 | 16 | 21 | 1  | 11.43234603 | 1.90E-06    | PLCD3    | ENSG00000161714 |
| 17 | 40565560 | 40565829 | 40565694 | 9  | 11 | 1  | 6.235825105 | 0.0013754   | PLCD3    | ENSG00000161714 |
| 17 | 40568211 | 40568496 | 40568353 | 10 | 13 | 5  | 2.425043097 | 0.0262442   | ACBD4    | ENSG00000181513 |
| 17 | 40580910 | 40581169 | 40581061 | 11 | 12 | 5  | 2.251825733 | 0.0404733   | HEXIM1   | ENSG00000186834 |
| 17 | 40581174 | 40581356 | 40581240 | 8  | 10 | 0  | 11.43234603 | 0.000394183 | HEXIM1   | ENSG00000186834 |
| 17 | 40581511 | 40581819 | 40581665 | 10 | 14 | 4  | 3.117912553 | 0.00766354  | HEXIM1   | ENSG00000186834 |
| 17 | 40717326 | 40717570 | 40717454 | 9  | 10 | 3  | 2.858086507 | 0.0242838   | MAP3K14  | ENSG00000006062 |



|    |          |          |          |    |    |    |             |             |          |                 |
|----|----------|----------|----------|----|----|----|-------------|-------------|----------|-----------------|
| 17 | 40752533 | 40752807 | 40752701 | 8  | 9  | 4  | 2.078608368 | 0.0785659   | MAP3K14  | ENSG00000006062 |
| 17 | 41081891 | 41082109 | 41082021 | 9  | 11 | 2  | 4.157216737 | 0.0052913   | C17orf69 | ENSG00000167159 |
| 17 | 41646053 | 41646369 | 41646211 | 8  | 12 | 3  | 3.377738599 | 0.00867157  |          | ENSG00000207064 |
| 17 | 42349856 | 42350076 | 42350015 | 9  | 9  | 2  | 3.464347281 | 0.0163838   |          | ENSG00000210709 |
| 17 | 42355275 | 42355456 | 42355361 | 8  | 10 | 7  | 1.429043253 | 0.21536     | GOSR2    | ENSG00000108433 |
| 17 | 42532568 | 42532831 | 42532699 | 10 | 11 | 1  | 6.235825105 | 0.0013754   |          | ENSG00000221016 |
| 17 | 42567778 | 42568310 | 42568141 | 20 | 41 | 32 | 1.32275078  | 0.112657    |          | ENSG00000221016 |
| 17 | 42568486 | 42569316 | 42568934 | 38 | 73 | 88 | 0.864140558 | 0.824653    |          | ENSG00000221016 |
| 17 | 42569389 | 42569865 | 42569568 | 40 | 50 | 67 | 0.779478138 | 0.912636    |          | ENSG00000221016 |
| 17 | 42571094 | 42571305 | 42571188 | 13 | 14 | 6  | 2.227080395 | 0.0322529   |          | ENSG00000221016 |
| 17 | 42574093 | 42574429 | 42574261 | 22 | 22 | 27 | 0.853714151 | 0.715539    |          | ENSG00000221016 |
| 17 | 42576116 | 42576442 | 42576279 | 13 | 13 | 14 | 0.970017239 | 0.534076    |          | ENSG00000221016 |
| 17 | 42590429 | 42590811 | 42590605 | 18 | 22 | 24 | 0.956159849 | 0.562938    | CDC27    | ENSG00000004897 |
| 17 | 42604172 | 42604497 | 42604334 | 15 | 15 | 27 | 0.593888105 | 0.956572    | CDC27    | ENSG00000004897 |
| 17 | 42613787 | 42613983 | 42613958 | 11 | 11 | 25 | 0.479678854 | 0.986393    | CDC27    | ENSG00000004897 |
| 17 | 42621378 | 42621612 | 42621495 | 14 | 16 | 11 | 1.472347594 | 0.147517    | CDC27    | ENSG00000004897 |
| 17 | 43153328 | 43153515 | 43153421 | 8  | 9  | 3  | 2.598260461 | 0.0397929   | TBX21    | ENSG00000073861 |
| 17 | 43243208 | 43243412 | 43243347 | 8  | 9  | 3  | 2.598260461 | 0.0397929   | OSBPL7   | ENSG00000006025 |
| 17 | 43379280 | 43379669 | 43379459 | 8  | 14 | 6  | 2.227080395 | 0.0322529   | PNPO     | ENSG00000108439 |
| 17 | 43450602 | 43450793 | 43450697 | 10 | 11 | 2  | 4.157216737 | 0.0052913   |          | ENSG00000207947 |
| 17 | 43480218 | 43480449 | 43480327 | 10 | 11 | 4  | 2.494330042 | 0.0324033   | NFE2L1   | ENSG00000082641 |
| 17 | 43991485 | 43991672 | 43991591 | 8  | 8  | 1  | 4.676868829 | 0.0091584   | HOXB2    | ENSG00000173917 |
| 17 | 44110934 | 44111372 | 44111108 | 22 | 30 | 2  | 10.73947657 | 3.71E-08    | C17orf92 | ENSG00000159182 |
| 17 | 44340439 | 44340705 | 44340560 | 8  | 10 | 4  | 2.286469205 | 0.0509017   | UBE2Z    | ENSG00000159202 |
| 17 | 44533727 | 44534096 | 44533917 | 9  | 16 | 1  | 8.834085566 | 5.30E-05    | B4GALNT2 | ENSG00000167080 |
| 17 | 44624861 | 44625114 | 44625020 | 9  | 11 | 7  | 1.558956276 | 0.158273    | GNGT2    | ENSG00000167083 |
| 17 | 44658255 | 44658486 | 44658394 | 8  | 10 | 0  | 11.43234603 | 0.000394183 | PHOSPHO1 | ENSG00000173868 |
| 17 | 44940703 | 44940982 | 44940839 | 9  | 11 | 10 | 1.133786383 | 0.380636    | NGFR     | ENSG00000064300 |
| 17 | 45140650 | 45140917 | 45140783 | 15 | 15 | 4  | 3.32577339  | 0.00462646  | SLC35B1  | ENSG00000121073 |
| 17 | 45220796 | 45221015 | 45220850 | 8  | 10 | 3  | 2.858086507 | 0.0242838   | MYST2    | ENSG00000136504 |
| 17 | 45319554 | 45319953 | 45319733 | 16 | 24 | 2  | 8.660868202 | 1.80E-06    | TAC4     | ENSG00000176358 |
| 17 | 45494762 | 45495387 | 45495023 | 29 | 45 | 6  | 6.829713211 | 2.35E-09    | ITGA3    | ENSG00000005884 |
| 17 | 45564012 | 45564278 | 45564109 | 8  | 10 | 2  | 3.810782009 | 0.00936112  | SAMD14   | ENSG00000167100 |
| 17 | 45584453 | 45584714 | 45584572 | 9  | 10 | 4  | 2.286469205 | 0.0509017   | PPP1R9B  | ENSG00000108819 |

|    |          |          |          |     |     |    |             |             |          |                 |
|----|----------|----------|----------|-----|-----|----|-------------|-------------|----------|-----------------|
| 17 | 45610818 | 45611125 | 45610960 | 9   | 13  | 4  | 2.910051716 | 0.0125532   | HILS1    | ENSG00000188662 |
| 17 | 45713678 | 45713857 | 45713767 | 8   | 8   | 1  | 4.676868829 | 0.0091584   | TMEM92   | ENSG00000167105 |
| 17 | 45803906 | 45804463 | 45804143 | 52  | 69  | 8  | 8.083476989 | 2.59E-14    | MRPL27   | ENSG00000108826 |
| 17 | 45805353 | 45805586 | 45805506 | 11  | 11  | 5  | 2.078608368 | 0.0614303   | MRPL27   | ENSG00000108826 |
| 17 | 45914967 | 45915183 | 45915086 | 8   | 10  | 2  | 3.810782009 | 0.00936112  | RSAD1    | ENSG00000136444 |
| 17 | 45966726 | 45966990 | 45966858 | 11  | 13  | 1  | 7.27512929  | 0.000378098 | EPN3     | ENSG00000049283 |
| 17 | 46140352 | 46140604 | 46140471 | 10  | 13  | 8  | 1.616695398 | 0.123553    | ANKRD40  | ENSG00000154945 |
| 17 | 46215643 | 46215822 | 46215732 | 8   | 8   | 1  | 4.676868829 | 0.0091584   | C17orf73 | ENSG00000167117 |
| 17 | 46219406 | 46219803 | 46219624 | 18  | 29  | 2  | 10.39304184 | 7.12E-08    | C17orf73 | ENSG00000167117 |
| 17 | 46238142 | 46238510 | 46238321 | 12  | 18  | 0  | 19.7467795  | 1.32E-06    | WFIKKN2  | ENSG00000173714 |
| 17 | 46300178 | 46300536 | 46300357 | 10  | 14  | 4  | 3.117912553 | 0.00766354  | TOB1     | ENSG00000141232 |
| 17 | 46336861 | 46337294 | 46337022 | 13  | 19  | 8  | 2.309564854 | 0.0138337   | TOB1     | ENSG00000141232 |
| 17 | 46381377 | 46381629 | 46381503 | 8   | 10  | 0  | 11.43234603 | 0.000394183 | TOB1     | ENSG00000141232 |
| 17 | 46381865 | 46382269 | 46382067 | 33  | 44  | 5  | 7.794781382 | 9.60E-10    | TOB1     | ENSG00000141232 |
| 17 | 46386408 | 46387159 | 46386795 | 106 | 140 | 4  | 29.308378   | 2.83E-38    | TOB1     | ENSG00000141232 |
| 17 | 46585547 | 46586354 | 46586011 | 12  | 38  | 14 | 2.702190879 | 0.00024101  | NME2     | ENSG0000011052  |
| 17 | 47040664 | 47040890 | 47040802 | 9   | 11  | 0  | 12.47165021 | 0.000193293 |          | ENSG00000187504 |
| 17 | 47046339 | 47046625 | 47046477 | 17  | 19  | 1  | 10.39304184 | 7.23E-06    |          | ENSG00000187504 |
| 17 | 47139575 | 47139786 | 47139731 | 11  | 12  | 3  | 3.377738599 | 0.00867157  |          | ENSG00000187504 |
| 17 | 49742019 | 49742350 | 49742184 | 11  | 12  | 5  | 2.251825733 | 0.0404733   | KIF2B    | ENSG00000141200 |
| 17 | 50401050 | 50401240 | 50401145 | 10  | 11  | 3  | 3.117912553 | 0.0146045   | STXBP4   | ENSG00000166263 |
| 17 | 50741256 | 50741660 | 50741311 | 8   | 16  | 1  | 8.834085566 | 5.30E-05    |          | ENSG00000204772 |
| 17 | 50865605 | 50865899 | 50865750 | 8   | 11  | 6  | 1.781664316 | 0.103344    | MMD      | ENSG00000108960 |
| 17 | 51604996 | 51605251 | 51605123 | 8   | 10  | 4  | 2.286469205 | 0.0509017   | ANKFN1   | ENSG00000153930 |
| 17 | 51655197 | 51655421 | 51655309 | 8   | 9   | 1  | 5.196520921 | 0.00490062  | ANKFN1   | ENSG00000153930 |
| 17 | 51791951 | 51792140 | 51792033 | 9   | 10  | 2  | 3.810782009 | 0.00936112  | ANKFN1   | ENSG00000153930 |
| 17 | 51911296 | 51911482 | 51911465 | 9   | 10  | 4  | 2.286469205 | 0.0509017   | NOG      | ENSG00000183691 |
| 17 | 52109254 | 52109444 | 52109426 | 8   | 10  | 5  | 1.905391004 | 0.0915982   | NOG      | ENSG00000183691 |
| 17 | 52149823 | 52150278 | 52150059 | 43  | 55  | 4  | 11.64020686 | 1.64E-13    | C17orf67 | ENSG00000214226 |
| 17 | 52319021 | 52319200 | 52319171 | 8   | 9   | 3  | 2.598260461 | 0.0397929   |          | ENSG00000212469 |
| 17 | 52519365 | 52519660 | 52519495 | 8   | 9   | 4  | 2.078608368 | 0.0785659   | AKAP1    | ENSG00000121057 |
| 17 | 52546412 | 52546687 | 52546549 | 8   | 10  | 5  | 1.905391004 | 0.0915982   | AKAP1    | ENSG00000121057 |
| 17 | 52599042 | 52599321 | 52599174 | 13  | 16  | 6  | 2.524024447 | 0.0137633   |          | ENSG00000210853 |
| 17 | 52628583 | 52628893 | 52628738 | 10  | 14  | 1  | 7.794781382 | 0.000197021 |          | ENSG00000210853 |

|    |          |          |          |     |     |    |             |             |         |                 |
|----|----------|----------|----------|-----|-----|----|-------------|-------------|---------|-----------------|
| 17 | 52685473 | 52685689 | 52685581 | 9   | 11  | 1  | 6.235825105 | 0.0013754   | MSI2    | ENSG00000153944 |
| 17 | 52685738 | 52685981 | 52685836 | 8   | 10  | 3  | 2.858086507 | 0.0242838   | MSI2    | ENSG00000153944 |
| 17 | 52767869 | 52768060 | 52767964 | 8   | 8   | 6  | 1.336248237 | 0.277651    |         | ENSG00000197862 |
| 17 | 52775341 | 52775610 | 52775475 | 8   | 12  | 6  | 1.930136342 | 0.071303    |         | ENSG00000197862 |
| 17 | 52788691 | 52788966 | 52788793 | 8   | 10  | 4  | 2.286469205 | 0.0509017   |         | ENSG00000197862 |
| 17 | 52789979 | 52790238 | 52790108 | 12  | 16  | 7  | 2.208521392 | 0.0257604   |         | ENSG00000197862 |
| 17 | 52790455 | 52790765 | 52790601 | 18  | 22  | 9  | 2.390399624 | 0.00747467  |         | ENSG00000197862 |
| 17 | 52802361 | 52802747 | 52802534 | 10  | 17  | 3  | 4.676868829 | 0.000552213 |         | ENSG00000197862 |
| 17 | 52804582 | 52804811 | 52804696 | 9   | 11  | 7  | 1.558956276 | 0.158273    |         | ENSG00000197862 |
| 17 | 52808077 | 52808871 | 52808372 | 13  | 36  | 10 | 3.495841347 | 2.87E-05    |         | ENSG00000197862 |
| 17 | 52816584 | 52816845 | 52816732 | 11  | 11  | 5  | 2.078608368 | 0.0614303   |         | ENSG00000197862 |
| 17 | 52829171 | 52829404 | 52829299 | 11  | 12  | 5  | 2.251825733 | 0.0404733   |         | ENSG00000197862 |
| 17 | 52840301 | 52840515 | 52840462 | 10  | 11  | 2  | 4.157216737 | 0.0052913   |         | ENSG00000197862 |
| 17 | 52840603 | 52840878 | 52840748 | 8   | 10  | 3  | 2.858086507 | 0.0242838   |         | ENSG00000197862 |
| 17 | 52877389 | 52877810 | 52877655 | 8   | 14  | 1  | 7.794781382 | 0.000197021 |         | ENSG00000197862 |
| 17 | 52890940 | 52891200 | 52891092 | 11  | 12  | 0  | 13.5109544  | 9.48E-05    |         | ENSG00000210857 |
| 17 | 52956016 | 52956249 | 52956132 | 8   | 8   | 2  | 3.117912553 | 0.0283184   |         | ENSG00000210857 |
| 17 | 52956300 | 52957044 | 52956517 | 155 | 210 | 4  | 43.85863657 | 2.98E-59    |         | ENSG00000210857 |
| 17 | 53015354 | 53015627 | 53015479 | 13  | 14  | 4  | 3.117912553 | 0.00766354  |         | ENSG00000210857 |
| 17 | 53163848 | 53164027 | 53163932 | 8   | 8   | 0  | 9.353737658 | 0.00163931  |         | ENSG00000166329 |
| 17 | 53282303 | 53282874 | 53282576 | 16  | 33  | 15 | 2.208521392 | 0.00315413  | MRPS23  | ENSG00000181610 |
| 17 | 53290307 | 53290554 | 53290464 | 9   | 11  | 3  | 3.117912553 | 0.0146045   | MRPS23  | ENSG00000181610 |
| 17 | 53332141 | 53332528 | 53332349 | 9   | 16  | 10 | 1.606197376 | 0.104477    | CUEDC1  | ENSG00000180891 |
| 17 | 53333551 | 53334283 | 53333967 | 62  | 95  | 8  | 11.0859113  | 2.48E-21    | CUEDC1  | ENSG00000180891 |
| 17 | 53390234 | 53390425 | 53390330 | 9   | 11  | 1  | 6.235825105 | 0.0013754   | CUEDC1  | ENSG00000180891 |
| 17 | 53420967 | 53421205 | 53421066 | 8   | 9   | 12 | 0.799464757 | 0.707717    | VEZF1   | ENSG00000136451 |
| 17 | 53439752 | 53440044 | 53439924 | 10  | 15  | 3  | 4.157216737 | 0.00170423  | SFRS1   | ENSG00000136450 |
| 17 | 53455351 | 53455666 | 53455502 | 11  | 15  | 10 | 1.511715177 | 0.140236    | SFRS1   | ENSG00000136450 |
| 17 | 53525403 | 53525706 | 53525549 | 16  | 20  | 3  | 5.456346967 | 9.70E-05    | DYNLL2  | ENSG00000121083 |
| 17 | 53545451 | 53545736 | 53545586 | 9   | 12  | 8  | 1.501217155 | 0.168286    | DYNLL2  | ENSG00000121083 |
| 17 | 53651095 | 53651329 | 53651221 | 8   | 11  | 7  | 1.558956276 | 0.158273    | MKS1    | ENSG00000011143 |
| 17 | 53651549 | 53651809 | 53651684 | 8   | 10  | 3  | 2.858086507 | 0.0242838   | MKS1    | ENSG00000011143 |
| 17 | 53784283 | 53784666 | 53784524 | 10  | 16  | 7  | 2.208521392 | 0.0257604   | SUPT4H1 | ENSG00000213246 |
| 17 | 53820116 | 53820694 | 53820295 | 31  | 45  | 13 | 3.414856605 | 4.95E-06    | RNF43   | ENSG00000108375 |

|    |          |          |          |    |    |    |             |            |          |                 |
|----|----------|----------|----------|----|----|----|-------------|------------|----------|-----------------|
| 17 | 53821037 | 53821379 | 53821208 | 8  | 12 | 9  | 1.35109544  | 0.232899   | RNF43    | ENSG00000108375 |
| 17 | 53823762 | 53824175 | 53824008 | 18 | 24 | 10 | 2.362054964 | 0.00608507 | RNF43    | ENSG00000108375 |
| 17 | 53825116 | 53825348 | 53825271 | 8  | 9  | 2  | 3.464347281 | 0.0163838  | RNF43    | ENSG00000108375 |
| 17 | 53849741 | 53850262 | 53850013 | 15 | 28 | 16 | 1.772930667 | 0.02708    | RNF43    | ENSG00000108375 |
| 17 | 53946424 | 53946742 | 53946583 | 9  | 12 | 8  | 1.501217155 | 0.168286   | MTMR4    | ENSG00000108389 |
| 17 | 53949946 | 53950206 | 53950076 | 9  | 11 | 4  | 2.494330042 | 0.0324033  | MTMR4    | ENSG00000108389 |
| 17 | 53950550 | 53950896 | 53950778 | 9  | 13 | 10 | 1.32275078  | 0.240023   | MTMR4    | ENSG00000108389 |
| 17 | 53951064 | 53951316 | 53951190 | 10 | 11 | 7  | 1.558956276 | 0.158273   | MTMR4    | ENSG00000108389 |
| 17 | 53951393 | 53951645 | 53951519 | 8  | 10 | 2  | 3.810782009 | 0.00936112 | MTMR4    | ENSG00000108389 |
| 17 | 53976767 | 53976988 | 53976860 | 8  | 8  | 1  | 4.676868829 | 0.0091584  | C17orf47 | ENSG00000181013 |
| 17 | 53992652 | 53992888 | 53992762 | 8  | 10 | 5  | 1.905391004 | 0.0915982  | C17orf47 | ENSG00000181013 |
| 17 | 53993004 | 53993258 | 53993108 | 8  | 10 | 4  | 2.286469205 | 0.0509017  | C17orf47 | ENSG00000181013 |
| 17 | 53993661 | 53993865 | 53993815 | 10 | 12 | 6  | 1.930136342 | 0.071303   | C17orf47 | ENSG00000181013 |
| 17 | 53997451 | 53997762 | 53997606 | 9  | 13 | 9  | 1.455025858 | 0.177172   | C17orf47 | ENSG00000181013 |
| 17 | 53998455 | 53998868 | 53998582 | 12 | 17 | 9  | 1.870747532 | 0.0498299  | C17orf47 | ENSG00000181013 |
| 17 | 54000884 | 54001250 | 54000960 | 8  | 14 | 13 | 1.113540197 | 0.385405   | C17orf47 | ENSG00000181013 |
| 17 | 54001521 | 54001824 | 54001659 | 11 | 15 | 10 | 1.511715177 | 0.140236   | C17orf47 | ENSG00000181013 |
| 17 | 54003777 | 54003967 | 54003899 | 8  | 9  | 5  | 1.73217364  | 0.133894   | C17orf47 | ENSG00000181013 |
| 17 | 54007104 | 54007479 | 54007283 | 8  | 15 | 13 | 1.187776211 | 0.317363   | C17orf47 | ENSG00000181013 |
| 17 | 54007916 | 54008279 | 54008058 | 8  | 14 | 20 | 0.742360132 | 0.815839   | C17orf47 | ENSG00000181013 |
| 17 | 54009394 | 54009573 | 54009466 | 8  | 8  | 8  | 1.039304184 | 0.46786    | C17orf47 | ENSG00000181013 |
| 17 | 54009977 | 54010335 | 54010156 | 20 | 23 | 9  | 2.494330042 | 0.00494866 | C17orf47 | ENSG00000181013 |
| 17 | 54010411 | 54010681 | 54010546 | 9  | 11 | 16 | 0.733626483 | 0.800067   | C17orf47 | ENSG00000181013 |
| 17 | 54011044 | 54011252 | 54011115 | 8  | 9  | 5  | 1.73217364  | 0.133894   | C17orf47 | ENSG00000181013 |
| 17 | 54012232 | 54012451 | 54012318 | 8  | 9  | 11 | 0.86608682  | 0.635181   | C17orf47 | ENSG00000181013 |
| 17 | 54014142 | 54014547 | 54014253 | 8  | 14 | 16 | 0.917033104 | 0.598778   | C17orf47 | ENSG00000181013 |
| 17 | 54019139 | 54019351 | 54019245 | 9  | 12 | 5  | 2.251825733 | 0.0404733  | C17orf47 | ENSG00000181013 |
| 17 | 54019908 | 54020442 | 54020200 | 15 | 31 | 21 | 1.511715177 | 0.0647459  | C17orf47 | ENSG00000181013 |
| 17 | 54025502 | 54025709 | 54025605 | 8  | 9  | 10 | 0.944821986 | 0.553851   |          | ENSG00000212195 |
| 17 | 54027656 | 54028173 | 54027929 | 10 | 23 | 21 | 1.133786383 | 0.33446    |          | ENSG00000212195 |
| 17 | 54030053 | 54030278 | 54030167 | 9  | 10 | 9  | 1.143234603 | 0.378307   |          | ENSG00000212195 |
| 17 | 54031248 | 54031585 | 54031416 | 8  | 14 | 9  | 1.558956276 | 0.132279   |          | ENSG00000212195 |
| 17 | 54038571 | 54038824 | 54038747 | 9  | 12 | 11 | 1.125912866 | 0.382541   |          | ENSG00000212195 |
| 17 | 54039512 | 54039865 | 54039686 | 8  | 13 | 8  | 1.616695398 | 0.123553   |          | ENSG00000212195 |

|    |          |          |          |     |     |     |             |           |                 |
|----|----------|----------|----------|-----|-----|-----|-------------|-----------|-----------------|
| 17 | 54041077 | 54041348 | 54041230 | 12  | 13  | 17  | 0.808347699 | 0.728863  | ENSG00000212195 |
| 17 | 54044226 | 54044449 | 54044365 | 8   | 9   | 19  | 0.519652092 | 0.96137   | ENSG00000212195 |
| 17 | 54048293 | 54048592 | 54048464 | 8   | 11  | 10  | 1.133786383 | 0.380636  | ENSG00000212195 |
| 17 | 54049743 | 54050057 | 54049900 | 8   | 13  | 7   | 1.818782322 | 0.0805123 | ENSG00000212195 |
| 17 | 54053725 | 54053959 | 54053842 | 8   | 10  | 8   | 1.27026067  | 0.293854  | ENSG00000212195 |
| 17 | 54059320 | 54059663 | 54059489 | 11  | 16  | 21  | 0.803098688 | 0.755224  | ENSG00000212195 |
| 17 | 54060416 | 54060789 | 54060649 | 14  | 19  | 11  | 1.73217364  | 0.0607469 | ENSG00000212195 |
| 17 | 54061297 | 54061500 | 54061419 | 13  | 14  | 11  | 1.29913023  | 0.246308  | ENSG00000212195 |
| 17 | 54062593 | 54063271 | 54062901 | 11  | 31  | 24  | 1.330309356 | 0.140086  | ENSG00000212195 |
| 17 | 54063312 | 54064912 | 54064068 | 118 | 311 | 193 | 1.671458276 | 5.78E-09  | ENSG00000212195 |
| 17 | 54064942 | 54065123 | 54065032 | 8   | 8   | 13  | 0.668124118 | 0.835294  | ENSG00000212195 |
| 17 | 54065284 | 54066028 | 54065749 | 15  | 39  | 37  | 1.094004404 | 0.345548  | ENSG00000212195 |
| 17 | 54066742 | 54067122 | 54066943 | 15  | 21  | 26  | 0.846840446 | 0.721382  | ENSG00000212195 |
| 17 | 54068495 | 54069020 | 54068841 | 11  | 21  | 16  | 1.344981885 | 0.176214  | ENSG00000212195 |
| 17 | 54069596 | 54070077 | 54069770 | 14  | 24  | 20  | 1.237266886 | 0.234075  | ENSG00000212195 |
| 17 | 54070535 | 54070775 | 54070655 | 10  | 11  | 9   | 1.247165021 | 0.300052  | ENSG00000212195 |
| 17 | 54071910 | 54072529 | 54072220 | 60  | 85  | 44  | 1.986225774 | 6.08E-05  | ENSG00000212195 |
| 17 | 54072562 | 54073504 | 54072741 | 20  | 66  | 49  | 1.392667607 | 0.036902  | ENSG00000212195 |
| 17 | 54074186 | 54074463 | 54074331 | 10  | 13  | 20  | 0.692869456 | 0.861903  | ENSG00000212195 |
| 17 | 54074537 | 54074894 | 54074715 | 11  | 17  | 22  | 0.813368492 | 0.747743  | ENSG00000212195 |
| 17 | 54075100 | 54075935 | 54075668 | 18  | 47  | 33  | 1.467252966 | 0.0416852 | ENSG00000212195 |
| 17 | 54076604 | 54076816 | 54076737 | 10  | 11  | 9   | 1.247165021 | 0.300052  | ENSG00000212195 |
| 17 | 54078544 | 54078997 | 54078723 | 16  | 28  | 23  | 1.255825889 | 0.202607  | ENSG00000202077 |
| 17 | 54079080 | 54079279 | 54079201 | 10  | 11  | 12  | 0.959357709 | 0.543005  | ENSG00000202077 |
| 17 | 54080633 | 54080887 | 54080771 | 9   | 10  | 15  | 0.714521627 | 0.810948  | ENSG00000202077 |
| 17 | 54080960 | 54081161 | 54081060 | 9   | 10  | 16  | 0.672490943 | 0.854309  | ENSG00000202077 |
| 17 | 54081692 | 54081938 | 54081801 | 10  | 12  | 15  | 0.84443465  | 0.678289  | ENSG00000202077 |
| 17 | 54083220 | 54083399 | 54083309 | 8   | 8   | 16  | 0.550219862 | 0.934723  | ENSG00000202077 |
| 17 | 54083566 | 54084527 | 54083816 | 15  | 45  | 35  | 1.327999791 | 0.0993631 | ENSG00000202077 |
| 17 | 54085985 | 54086264 | 54086097 | 8   | 12  | 12  | 1.039304184 | 0.461227  | ENSG00000202077 |
| 17 | 54090976 | 54092517 | 54091590 | 127 | 340 | 156 | 2.257342209 | 8.44E-19  | ENSG00000202077 |
| 17 | 54092827 | 54093104 | 54092964 | 11  | 16  | 15  | 1.104260696 | 0.387363  | ENSG00000202077 |
| 17 | 54093576 | 54093781 | 54093738 | 9   | 11  | 8   | 1.385738912 | 0.224757  | ENSG00000202077 |
| 17 | 54093802 | 54094169 | 54093981 | 12  | 19  | 12  | 1.598929514 | 0.0887417 | ENSG00000202077 |

|    |          |          |          |     |     |     |             |           |                        |
|----|----------|----------|----------|-----|-----|-----|-------------|-----------|------------------------|
| 17 | 54094176 | 54094543 | 54094355 | 8   | 15  | 11  | 1.385738912 | 0.19225   | ENSG00000202077        |
| 17 | 54094753 | 54095127 | 54094912 | 10  | 16  | 12  | 1.359090087 | 0.198699  | ENSG00000202077        |
| 17 | 54096329 | 54098122 | 54097447 | 15  | 83  | 68  | 1.265239876 | 0.0728551 | ENSG00000199426        |
| 17 | 54099458 | 54099890 | 54099713 | 14  | 21  | 18  | 1.203404845 | 0.275531  | ENSG00000199426        |
| 17 | 54100166 | 54101445 | 54100458 | 22  | 73  | 31  | 2.403390926 | 6.85E-06  | ENSG00000199426        |
| 17 | 54102220 | 54102443 | 54102272 | 10  | 13  | 11  | 1.212521548 | 0.309909  | ENSG00000199426        |
| 17 | 54102580 | 54102888 | 54102734 | 8   | 11  | 24  | 0.498866008 | 0.980815  | ENSG00000199426        |
| 17 | 54103633 | 54104297 | 54103889 | 15  | 39  | 22  | 1.807485538 | 0.0101335 | ENSG00000199426        |
| 17 | 54105353 | 54105601 | 54105491 | 8   | 9   | 8   | 1.154782427 | 0.375434  | ENSG00000206917        |
| 17 | 54109502 | 54109904 | 54109646 | 10  | 20  | 22  | 0.948929907 | 0.57038   | ENSG00000206917        |
| 17 | 54110014 | 54110225 | 54110093 | 9   | 10  | 22  | 0.497058523 | 0.977096  | ENSG00000206917        |
| 17 | 54110395 | 54110625 | 54110510 | 8   | 9   | 7   | 1.29913023  | 0.286504  | ENSG00000206917        |
| 17 | 54111442 | 54112411 | 54111970 | 36  | 88  | 83  | 1.101167529 | 0.262962  | ENSG00000200997        |
| 17 | 54112472 | 54112787 | 54112638 | 11  | 15  | 23  | 0.692869456 | 0.877389  | ENSG00000200997        |
| 17 | 54114090 | 54114375 | 54114222 | 8   | 11  | 6   | 1.781664316 | 0.103344  | ENSG00000200997        |
| 17 | 54114902 | 54115277 | 54115048 | 13  | 20  | 16  | 1.283846345 | 0.219275  | ENSG00000200997        |
| 17 | 54118526 | 54119641 | 54119112 | 17  | 63  | 59  | 1.10859113  | 0.282764  | TEX14 ENSG00000121101  |
| 17 | 54119669 | 54120322 | 54119947 | 14  | 34  | 23  | 1.515651935 | 0.0555079 | TEX14 ENSG00000121101  |
| 17 | 54120658 | 54121067 | 54120790 | 11  | 19  | 22  | 0.903742769 | 0.631776  | TEX14 ENSG00000121101  |
| 17 | 54121955 | 54122251 | 54122121 | 13  | 15  | 17  | 0.923825942 | 0.593214  | TEX14 ENSG00000121101  |
| 17 | 54124126 | 54124478 | 54124302 | 10  | 16  | 16  | 1.039304184 | 0.455583  | TEX14 ENSG00000121101  |
| 17 | 54124516 | 54126517 | 54125806 | 128 | 377 | 149 | 2.619046544 | 3.06E-26  | RAD51C ENSG00000108384 |
| 17 | 54126714 | 54126960 | 54126837 | 8   | 12  | 9   | 1.35109544  | 0.232899  | RAD51C ENSG00000108384 |
| 17 | 54127130 | 54127651 | 54127337 | 11  | 26  | 27  | 1.002186178 | 0.497439  | RAD51C ENSG00000108384 |
| 17 | 54128736 | 54129609 | 54129430 | 16  | 37  | 43  | 0.897580886 | 0.688768  | RAD51C ENSG00000108384 |
| 17 | 54129797 | 54130045 | 54129937 | 9   | 11  | 10  | 1.133786383 | 0.380636  | RAD51C ENSG00000108384 |
| 17 | 54131637 | 54132106 | 54131927 | 9   | 19  | 13  | 1.484720263 | 0.123861  | RAD51C ENSG00000108384 |
| 17 | 54132483 | 54132704 | 54132629 | 8   | 9   | 7   | 1.29913023  | 0.286504  | RAD51C ENSG00000108384 |
| 17 | 54134331 | 54134781 | 54134510 | 10  | 18  | 18  | 1.039304184 | 0.453018  | RAD51C ENSG00000108384 |
| 17 | 54135515 | 54135889 | 54135694 | 11  | 18  | 12  | 1.518983039 | 0.117837  | RAD51C ENSG00000108384 |
| 17 | 54138835 | 54139161 | 54139013 | 13  | 18  | 9   | 1.97467795  | 0.0349428 | RAD51C ENSG00000108384 |
| 17 | 54139251 | 54139662 | 54139409 | 10  | 16  | 15  | 1.104260696 | 0.387363  | RAD51C ENSG00000108384 |
| 17 | 54141159 | 54141375 | 54141267 | 8   | 9   | 13  | 0.742360132 | 0.770276  | RAD51C ENSG00000108384 |
| 17 | 54142519 | 54142719 | 54142571 | 8   | 9   | 5   | 1.73217364  | 0.133894  | RAD51C ENSG00000108384 |

|    |          |          |          |    |    |    |             |             |        |                 |
|----|----------|----------|----------|----|----|----|-------------|-------------|--------|-----------------|
| 17 | 54142912 | 54143192 | 54143085 | 11 | 13 | 17 | 0.808347699 | 0.728863    | RAD51C | ENSG00000108384 |
| 17 | 54143410 | 54143682 | 54143570 | 14 | 17 | 16 | 1.100439724 | 0.388093    | RAD51C | ENSG00000108384 |
| 17 | 54147271 | 54147615 | 54147443 | 9  | 14 | 9  | 1.558956276 | 0.132279    | RAD51C | ENSG00000108384 |
| 17 | 54147752 | 54147951 | 54147868 | 8  | 8  | 8  | 1.039304184 | 0.46786     | RAD51C | ENSG00000108384 |
| 17 | 54150110 | 54150328 | 54150266 | 9  | 11 | 15 | 0.779478138 | 0.747877    | RAD51C | ENSG00000108384 |
| 17 | 54150723 | 54151233 | 54150967 | 11 | 20 | 16 | 1.283846345 | 0.219275    | RAD51C | ENSG00000108384 |
| 17 | 54152980 | 54153372 | 54153112 | 11 | 18 | 11 | 1.645564958 | 0.0828462   | RAD51C | ENSG00000108384 |
| 17 | 54156299 | 54156782 | 54156540 | 9  | 19 | 22 | 0.903742769 | 0.631776    | RAD51C | ENSG00000108384 |
| 17 | 54156821 | 54157274 | 54157095 | 11 | 20 | 13 | 1.558956276 | 0.0943292   | PPM1E  | ENSG00000175175 |
| 17 | 54157482 | 54157999 | 54157661 | 11 | 21 | 21 | 1.039304184 | 0.449418    | PPM1E  | ENSG00000175175 |
| 17 | 54158236 | 54158415 | 54158329 | 8  | 8  | 4  | 1.870747532 | 0.118863    | PPM1E  | ENSG00000175175 |
| 17 | 54162236 | 54162486 | 54162347 | 8  | 11 | 13 | 0.890832158 | 0.618492    | PPM1E  | ENSG00000175175 |
| 17 | 54162765 | 54163125 | 54162963 | 13 | 19 | 5  | 3.464347281 | 0.00150447  | PPM1E  | ENSG00000175175 |
| 17 | 54170898 | 54171122 | 54171017 | 8  | 10 | 4  | 2.286469205 | 0.0509017   | PPM1E  | ENSG00000175175 |
| 17 | 54171845 | 54172094 | 54172003 | 8  | 9  | 0  | 10.39304184 | 0.000803859 | PPM1E  | ENSG00000175175 |
| 17 | 54173407 | 54174052 | 54173560 | 13 | 27 | 28 | 1.003466109 | 0.495433    | PPM1E  | ENSG00000175175 |
| 17 | 54180127 | 54180466 | 54180296 | 11 | 16 | 13 | 1.262012224 | 0.256887    | PPM1E  | ENSG00000175175 |
| 17 | 54183583 | 54183826 | 54183749 | 12 | 14 | 13 | 1.113540197 | 0.385405    | PPM1E  | ENSG00000175175 |
| 17 | 54185151 | 54185940 | 54185299 | 15 | 35 | 21 | 1.700679574 | 0.0223996   | PPM1E  | ENSG00000175175 |
| 17 | 54187284 | 54187524 | 54187404 | 8  | 10 | 3  | 2.858086507 | 0.0242838   | PPM1E  | ENSG00000175175 |
| 17 | 54187754 | 54188148 | 54187933 | 11 | 20 | 17 | 1.212521548 | 0.272468    | PPM1E  | ENSG00000175175 |
| 17 | 54188235 | 54188658 | 54188387 | 14 | 21 | 13 | 1.63319229  | 0.0708832   | PPM1E  | ENSG00000175175 |
| 17 | 54189047 | 54189792 | 54189370 | 19 | 45 | 34 | 1.365942642 | 0.0802807   | PPM1E  | ENSG00000175175 |
| 17 | 54189935 | 54190174 | 54190097 | 10 | 12 | 12 | 1.039304184 | 0.461227    | PPM1E  | ENSG00000175175 |
| 17 | 54192347 | 54192757 | 54192526 | 13 | 21 | 19 | 1.143234603 | 0.33145     | PPM1E  | ENSG00000175175 |
| 17 | 54192880 | 54193168 | 54193030 | 8  | 13 | 23 | 0.606260774 | 0.937372    | PPM1E  | ENSG00000175175 |
| 17 | 54193326 | 54193727 | 54193548 | 9  | 16 | 14 | 1.177878075 | 0.320433    | PPM1E  | ENSG00000175175 |
| 17 | 54195439 | 54196188 | 54195972 | 20 | 46 | 33 | 1.436685196 | 0.0517913   | PPM1E  | ENSG00000175175 |
| 17 | 54199718 | 54199957 | 54199837 | 9  | 9  | 6  | 1.484720263 | 0.204387    | PPM1E  | ENSG00000175175 |
| 17 | 54204893 | 54205189 | 54205039 | 8  | 10 | 7  | 1.429043253 | 0.21536     | PPM1E  | ENSG00000175175 |
| 17 | 54207355 | 54207567 | 54207438 | 8  | 9  | 3  | 2.598260461 | 0.0397929   | PPM1E  | ENSG00000175175 |
| 17 | 54209486 | 54209776 | 54209543 | 9  | 13 | 9  | 1.455025858 | 0.177172    | PPM1E  | ENSG00000175175 |
| 17 | 54215772 | 54216039 | 54215901 | 14 | 16 | 9  | 1.766817113 | 0.0700694   | PPM1E  | ENSG00000175175 |
| 17 | 54221851 | 54222087 | 54221969 | 9  | 12 | 14 | 0.900730293 | 0.611333    | PPM1E  | ENSG00000175175 |

|    |          |          |          |    |    |    |             |           |       |                 |
|----|----------|----------|----------|----|----|----|-------------|-----------|-------|-----------------|
| 17 | 54222287 | 54222540 | 54222413 | 8  | 10 | 14 | 0.762156402 | 0.758589  | PPM1E | ENSG00000175175 |
| 17 | 54222803 | 54223099 | 54222922 | 8  | 11 | 11 | 1.039304184 | 0.462773  | PPM1E | ENSG00000175175 |
| 17 | 54237300 | 54237487 | 54237376 | 9  | 9  | 6  | 1.484720263 | 0.204387  |       | ENSG00000210940 |
| 17 | 54242848 | 54243027 | 54242937 | 8  | 8  | 10 | 0.850339787 | 0.645072  |       | ENSG00000210940 |
| 17 | 54246120 | 54246433 | 54246276 | 9  | 12 | 11 | 1.125912866 | 0.382541  |       | ENSG00000210940 |
| 17 | 54254812 | 54255327 | 54254991 | 10 | 20 | 15 | 1.364086742 | 0.171319  |       | ENSG00000210940 |
| 17 | 54255610 | 54255789 | 54255699 | 8  | 8  | 7  | 1.169217207 | 0.371848  |       | ENSG00000210940 |
| 17 | 54263855 | 54264116 | 54263985 | 9  | 10 | 9  | 1.143234603 | 0.378307  |       | ENSG00000210940 |
| 17 | 54265484 | 54265785 | 54265615 | 10 | 13 | 9  | 1.455025858 | 0.177172  |       | ENSG00000210940 |
| 17 | 54287092 | 54287290 | 54287191 | 8  | 9  | 11 | 0.86608682  | 0.635181  |       | ENSG00000210940 |
| 17 | 54292209 | 54292492 | 54292350 | 8  | 10 | 10 | 1.039304184 | 0.464387  |       | ENSG00000210940 |
| 17 | 54297961 | 54298194 | 54298077 | 12 | 12 | 10 | 1.228268581 | 0.305344  |       | ENSG00000210940 |
| 17 | 54298697 | 54299097 | 54298876 | 16 | 23 | 18 | 1.312805285 | 0.185024  |       | ENSG00000210940 |
| 17 | 54301763 | 54302032 | 54301871 | 8  | 10 | 8  | 1.27026067  | 0.293854  |       | ENSG00000210940 |
| 17 | 54302310 | 54302503 | 54302359 | 8  | 9  | 5  | 1.73217364  | 0.133894  |       | ENSG00000210940 |
| 17 | 54302960 | 54303320 | 54303154 | 14 | 19 | 17 | 1.154782427 | 0.327751  |       | ENSG00000210940 |
| 17 | 54304491 | 54304718 | 54304581 | 9  | 11 | 8  | 1.385738912 | 0.224757  |       | ENSG00000210940 |
| 17 | 54304896 | 54305166 | 54305005 | 9  | 12 | 8  | 1.501217155 | 0.168286  |       | ENSG00000210940 |
| 17 | 54306077 | 54306472 | 54306217 | 8  | 15 | 13 | 1.187776211 | 0.317363  |       | ENSG00000210940 |
| 17 | 54310057 | 54310301 | 54310207 | 10 | 10 | 9  | 1.143234603 | 0.378307  |       | ENSG00000210940 |
| 17 | 54316340 | 54316704 | 54316519 | 11 | 17 | 21 | 0.850339787 | 0.697991  |       | ENSG00000210940 |
| 17 | 54317640 | 54318279 | 54317977 | 11 | 30 | 22 | 1.400801292 | 0.107495  |       | ENSG00000210940 |
| 17 | 54318991 | 54319179 | 54319085 | 8  | 8  | 11 | 0.779478138 | 0.719708  |       | ENSG00000210940 |
| 17 | 54319695 | 54319950 | 54319822 | 8  | 11 | 9  | 1.247165021 | 0.300052  |       | ENSG00000210940 |
| 17 | 54320045 | 54320315 | 54320174 | 14 | 15 | 13 | 1.187776211 | 0.317363  |       | ENSG00000210940 |
| 17 | 54326439 | 54326719 | 54326579 | 9  | 12 | 4  | 2.702190879 | 0.0203088 |       | ENSG00000210952 |
| 17 | 54333063 | 54333312 | 54333219 | 8  | 9  | 7  | 1.29913023  | 0.286504  |       | ENSG00000210952 |
| 17 | 54334392 | 54334821 | 54334642 | 9  | 17 | 12 | 1.439036563 | 0.154203  |       | ENSG00000210952 |
| 17 | 54335453 | 54335646 | 54335521 | 11 | 12 | 17 | 0.750608578 | 0.78992   |       | ENSG00000210952 |
| 17 | 54341640 | 54341857 | 54341717 | 10 | 11 | 7  | 1.558956276 | 0.158273  |       | ENSG00000210952 |
| 17 | 54342694 | 54343021 | 54342857 | 8  | 12 | 13 | 0.965068171 | 0.538344  |       | ENSG00000210952 |
| 17 | 54343147 | 54343474 | 54343317 | 10 | 13 | 12 | 1.11925066  | 0.384109  |       | ENSG00000210952 |
| 17 | 54343888 | 54344561 | 54344379 | 25 | 44 | 16 | 2.751099311 | 7.34E-05  |       | ENSG00000210952 |
| 17 | 54344879 | 54345065 | 54344907 | 10 | 11 | 11 | 1.039304184 | 0.462773  |       | ENSG00000210952 |



|    |          |          |          |    |    |    |             |           |                 |
|----|----------|----------|----------|----|----|----|-------------|-----------|-----------------|
| 17 | 54345529 | 54345956 | 54345777 | 15 | 27 | 16 | 1.711795127 | 0.0365811 | ENSG00000210952 |
| 17 | 54346432 | 54346611 | 54346541 | 8  | 8  | 18 | 0.492301982 | 0.967211  | ENSG00000210952 |
| 17 | 54346633 | 54346877 | 54346694 | 9  | 13 | 14 | 0.970017239 | 0.534076  | ENSG00000210952 |
| 17 | 54353100 | 54353326 | 54353213 | 10 | 10 | 11 | 0.952695502 | 0.548138  | ENSG00000210952 |
| 17 | 54357888 | 54358232 | 54358060 | 8  | 13 | 5  | 2.425043097 | 0.0262442 | ENSG00000210952 |
| 17 | 54362649 | 54362879 | 54362746 | 8  | 8  | 4  | 1.870747532 | 0.118863  | ENSG00000210952 |
| 17 | 54372166 | 54372366 | 54372266 | 8  | 10 | 3  | 2.858086507 | 0.0242838 | ENSG00000210952 |
| 17 | 54380059 | 54380603 | 54380238 | 10 | 25 | 18 | 1.422205726 | 0.118245  | ENSG00000210961 |
| 17 | 54387442 | 54387621 | 54387531 | 8  | 8  | 1  | 4.676868829 | 0.0091584 | ENSG00000210961 |
| 17 | 54392074 | 54392651 | 54392472 | 44 | 68 | 32 | 2.173090567 | 6.92E-05  | ENSG00000210961 |
| 17 | 54393362 | 54393541 | 54393451 | 8  | 8  | 6  | 1.336248237 | 0.277651  | ENSG00000210961 |
| 17 | 54396389 | 54396745 | 54396567 | 12 | 16 | 20 | 0.841341482 | 0.704984  | ENSG00000210961 |
| 17 | 54397366 | 54397977 | 54397813 | 15 | 30 | 33 | 0.947600874 | 0.586988  | ENSG00000210961 |
| 17 | 54398868 | 54399208 | 54399038 | 11 | 17 | 12 | 1.439036563 | 0.154203  | ENSG00000210961 |
| 17 | 54399240 | 54399508 | 54399380 | 8  | 9  | 12 | 0.799464757 | 0.707717  | ENSG00000210961 |
| 17 | 54400241 | 54400537 | 54400384 | 9  | 14 | 13 | 1.113540197 | 0.385405  | ENSG00000210961 |
| 17 | 54400807 | 54401159 | 54400983 | 13 | 19 | 10 | 1.889643971 | 0.0394833 | ENSG00000210961 |
| 17 | 54401252 | 54401999 | 54401542 | 15 | 38 | 31 | 1.266651975 | 0.159121  | ENSG00000210961 |
| 17 | 54402034 | 54402469 | 54402294 | 13 | 22 | 28 | 0.824275732 | 0.75853   | ENSG00000216168 |
| 17 | 54403119 | 54403417 | 54403268 | 12 | 18 | 18 | 1.039304184 | 0.453018  | ENSG00000216168 |
| 17 | 54404860 | 54405210 | 54405035 | 11 | 16 | 20 | 0.841341482 | 0.704984  | ENSG00000216168 |
| 17 | 54406518 | 54406740 | 54406633 | 9  | 10 | 10 | 1.039304184 | 0.464387  | ENSG00000216168 |
| 17 | 54407115 | 54407813 | 54407268 | 11 | 30 | 34 | 0.920526563 | 0.632962  | ENSG00000216168 |
| 17 | 54408185 | 54409078 | 54408443 | 11 | 36 | 51 | 0.7395049   | 0.922273  | ENSG00000216168 |
| 17 | 54410007 | 54410450 | 54410290 | 9  | 17 | 11 | 1.558956276 | 0.111389  | ENSG00000216168 |
| 17 | 54411102 | 54411546 | 54411277 | 12 | 23 | 22 | 1.084491323 | 0.39027   | ENSG00000216168 |
| 17 | 54411740 | 54412000 | 54411898 | 8  | 11 | 19 | 0.623582511 | 0.908792  | ENSG00000216168 |
| 17 | 54412421 | 54412783 | 54412567 | 12 | 19 | 14 | 1.385738912 | 0.166049  | ENSG00000216168 |
| 17 | 54414050 | 54414481 | 54414318 | 8  | 16 | 28 | 0.60924728  | 0.952249  | ENSG00000216168 |
| 17 | 54414774 | 54415267 | 54414953 | 14 | 26 | 15 | 1.753825811 | 0.0337197 | ENSG00000216168 |
| 17 | 54415552 | 54415775 | 54415663 | 12 | 14 | 11 | 1.29913023  | 0.246308  | ENSG00000216168 |
| 17 | 54416352 | 54416596 | 54416474 | 8  | 10 | 8  | 1.27026067  | 0.293854  | ENSG00000216168 |
| 17 | 54416606 | 54417093 | 54416785 | 8  | 18 | 15 | 1.234173719 | 0.265435  | ENSG00000216168 |
| 17 | 54417404 | 54417821 | 54417567 | 11 | 18 | 35 | 0.548521653 | 0.985681  | ENSG00000216168 |

|    |          |          |          |    |    |    |             |           |                 |
|----|----------|----------|----------|----|----|----|-------------|-----------|-----------------|
| 17 | 54418995 | 54419786 | 54419119 | 13 | 37 | 28 | 1.361846862 | 0.102919  | ENSG00000216168 |
| 17 | 54420023 | 54420551 | 54420268 | 14 | 27 | 22 | 1.265239876 | 0.199511  | ENSG00000216168 |
| 17 | 54420716 | 54421082 | 54420903 | 11 | 18 | 12 | 1.518983039 | 0.117837  | ENSG00000216168 |
| 17 | 54423885 | 54424405 | 54424242 | 12 | 26 | 19 | 1.403060649 | 0.122336  | ENSG00000216168 |
| 17 | 54424685 | 54425126 | 54424947 | 14 | 20 | 14 | 1.455025858 | 0.129498  | ENSG00000216168 |
| 17 | 54425386 | 54425997 | 54425771 | 14 | 28 | 27 | 1.076422191 | 0.390384  | ENSG00000216168 |
| 17 | 54426132 | 54426384 | 54426287 | 10 | 12 | 12 | 1.039304184 | 0.461227  | ENSG00000216168 |
| 17 | 54427446 | 54427669 | 54427557 | 9  | 10 | 12 | 0.879411233 | 0.62639   | ENSG00000216168 |
| 17 | 54429171 | 54430301 | 54429858 | 10 | 46 | 61 | 0.787859624 | 0.893281  | ENSG00000216168 |
| 17 | 54430780 | 54431054 | 54430908 | 10 | 13 | 19 | 0.727512929 | 0.824686  | ENSG00000216168 |
| 17 | 54431363 | 54431771 | 54431539 | 13 | 20 | 16 | 1.283846345 | 0.219275  | ENSG00000216168 |
| 17 | 54431817 | 54432300 | 54432058 | 12 | 21 | 17 | 1.27026067  | 0.223413  | ENSG00000216168 |
| 17 | 54432876 | 54433150 | 54432996 | 10 | 12 | 8  | 1.501217155 | 0.168286  | ENSG00000216168 |
| 17 | 54433505 | 54433941 | 54433794 | 10 | 17 | 19 | 0.935373766 | 0.583208  | ENSG00000216168 |
| 17 | 54434277 | 54434524 | 54434400 | 9  | 11 | 9  | 1.247165021 | 0.300052  | ENSG00000216168 |
| 17 | 54434539 | 54435143 | 54434912 | 12 | 29 | 31 | 0.974347673 | 0.541653  | ENSG00000216168 |
| 17 | 54435644 | 54435945 | 54435767 | 8  | 11 | 16 | 0.733626483 | 0.800067  | ENSG00000216168 |
| 17 | 54436830 | 54437416 | 54437208 | 26 | 46 | 52 | 0.921647107 | 0.65928   | ENSG00000216168 |
| 17 | 54437627 | 54437873 | 54437760 | 12 | 15 | 7  | 2.078608368 | 0.038229  | ENSG00000216168 |
| 17 | 54438196 | 54438474 | 54438349 | 10 | 11 | 13 | 0.890832158 | 0.618492  | ENSG00000216168 |
| 17 | 54439566 | 54439750 | 54439720 | 8  | 10 | 16 | 0.672490943 | 0.854309  | ENSG00000216168 |
| 17 | 54439823 | 54440115 | 54439969 | 9  | 13 | 13 | 1.039304184 | 0.45974   | ENSG00000216168 |
| 17 | 54440125 | 54440368 | 54440286 | 8  | 10 | 16 | 0.672490943 | 0.854309  | ENSG00000216168 |
| 17 | 54442164 | 54442517 | 54442340 | 9  | 15 | 21 | 0.755857589 | 0.807439  | ENSG00000216168 |
| 17 | 54443399 | 54443964 | 54443751 | 11 | 23 | 30 | 0.804622594 | 0.791126  | ENSG00000216168 |
| 17 | 54444418 | 54444691 | 54444554 | 10 | 14 | 14 | 1.039304184 | 0.458308  | ENSG00000216168 |
| 17 | 54445843 | 54446183 | 54446013 | 15 | 19 | 16 | 1.222710805 | 0.269115  | ENSG00000216168 |
| 17 | 54446731 | 54447013 | 54446878 | 12 | 13 | 10 | 1.32275078  | 0.240023  | ENSG00000216168 |
| 17 | 54447118 | 54447304 | 54447247 | 9  | 10 | 10 | 1.039304184 | 0.464387  | ENSG00000216168 |
| 17 | 54447719 | 54448028 | 54447873 | 10 | 14 | 15 | 0.974347673 | 0.530138  | ENSG00000216168 |
| 17 | 54448790 | 54449112 | 54448943 | 12 | 15 | 10 | 1.511715177 | 0.140236  | ENSG00000216168 |
| 17 | 54450062 | 54450513 | 54450334 | 8  | 17 | 8  | 2.078608368 | 0.0303558 | ENSG00000216168 |
| 17 | 54452278 | 54452613 | 54452445 | 12 | 16 | 12 | 1.359090087 | 0.198699  | ENSG00000216168 |
| 17 | 54454405 | 54454704 | 54454578 | 9  | 12 | 11 | 1.125912866 | 0.382541  | ENSG00000216168 |

|    |          |          |          |    |    |    |             |           |                        |
|----|----------|----------|----------|----|----|----|-------------|-----------|------------------------|
| 17 | 54457643 | 54457948 | 54457782 | 10 | 12 | 13 | 0.965068171 | 0.538344  | ENSG00000216168        |
| 17 | 54458829 | 54459026 | 54458947 | 8  | 9  | 15 | 0.649565115 | 0.865365  | ENSG00000216168        |
| 17 | 54459109 | 54459724 | 54459242 | 10 | 25 | 28 | 0.931789958 | 0.604671  | ENSG00000216168        |
| 17 | 54459826 | 54460481 | 54460133 | 13 | 32 | 24 | 1.371881523 | 0.113959  | ENSG00000216168        |
| 17 | 54460566 | 54460910 | 54460738 | 11 | 17 | 20 | 0.890832158 | 0.642922  | ENSG00000216168        |
| 17 | 54461209 | 54461699 | 54461383 | 9  | 17 | 19 | 0.935373766 | 0.583208  | ENSG00000216168        |
| 17 | 54461813 | 54462004 | 54461957 | 8  | 10 | 9  | 1.143234603 | 0.378307  | ENSG00000216168        |
| 17 | 54463027 | 54463226 | 54463126 | 8  | 9  | 12 | 0.799464757 | 0.707717  | ENSG00000216168        |
| 17 | 54463979 | 54464282 | 54464130 | 8  | 12 | 6  | 1.930136342 | 0.071303  | ENSG00000216168        |
| 17 | 54465128 | 54465309 | 54465218 | 8  | 8  | 10 | 0.850339787 | 0.645072  | ENSG00000216168        |
| 17 | 54465399 | 54465662 | 54465530 | 10 | 11 | 9  | 1.247165021 | 0.300052  | ENSG00000216168        |
| 17 | 54471062 | 54471428 | 54471231 | 11 | 17 | 11 | 1.558956276 | 0.111389  | ENSG00000216168        |
| 17 | 54472402 | 54472814 | 54472534 | 13 | 18 | 21 | 0.897580886 | 0.637183  | ENSG00000216168        |
| 17 | 54473637 | 54474241 | 54474070 | 12 | 26 | 31 | 0.876912905 | 0.694502  | ENSG00000216168        |
| 17 | 54475448 | 54475691 | 54475527 | 8  | 10 | 19 | 0.571617301 | 0.938875  | ENSG00000216168        |
| 17 | 54475713 | 54476030 | 54475871 | 9  | 13 | 20 | 0.692869456 | 0.861903  | ENSG00000216168        |
| 17 | 54476045 | 54476226 | 54476101 | 9  | 10 | 10 | 1.039304184 | 0.464387  | ENSG00000216168        |
| 17 | 54476957 | 54477162 | 54477026 | 9  | 9  | 11 | 0.86608682  | 0.635181  | ENSG00000216168        |
| 17 | 54478497 | 54478688 | 54478600 | 10 | 10 | 9  | 1.143234603 | 0.378307  | ENSG00000216168        |
| 17 | 54479644 | 54480173 | 54479916 | 10 | 20 | 25 | 0.839437995 | 0.727499  | TRIM37 ENSG00000108395 |
| 17 | 54480176 | 54480680 | 54480501 | 11 | 20 | 21 | 0.992063085 | 0.511305  | TRIM37 ENSG00000108395 |
| 17 | 54481675 | 54482545 | 54482042 | 11 | 38 | 29 | 1.35109544  | 0.105472  | TRIM37 ENSG00000108395 |
| 17 | 54483272 | 54483629 | 54483485 | 13 | 18 | 13 | 1.41048425  | 0.160361  | TRIM37 ENSG00000108395 |
| 17 | 54484060 | 54484451 | 54484211 | 10 | 18 | 21 | 0.897580886 | 0.637183  | TRIM37 ENSG00000108395 |
| 17 | 54486283 | 54486524 | 54486425 | 8  | 11 | 9  | 1.247165021 | 0.300052  | TRIM37 ENSG00000108395 |
| 17 | 54488955 | 54489301 | 54489124 | 8  | 12 | 13 | 0.965068171 | 0.538344  | TRIM37 ENSG00000108395 |
| 17 | 54489306 | 54489495 | 54489354 | 8  | 9  | 4  | 2.078608368 | 0.0785659 | TRIM37 ENSG00000108395 |
| 17 | 54491787 | 54492887 | 54492252 | 13 | 52 | 47 | 1.147565037 | 0.244189  | TRIM37 ENSG00000108395 |
| 17 | 54493138 | 54493617 | 54493317 | 8  | 18 | 9  | 1.97467795  | 0.0349428 | TRIM37 ENSG00000108395 |
| 17 | 54494434 | 54494620 | 54494579 | 8  | 9  | 12 | 0.799464757 | 0.707717  | TRIM37 ENSG00000108395 |
| 17 | 54494626 | 54494993 | 54494829 | 15 | 20 | 22 | 0.948929907 | 0.57038   | TRIM37 ENSG00000108395 |
| 17 | 54498049 | 54498724 | 54498449 | 10 | 27 | 42 | 0.676756213 | 0.949127  | TRIM37 ENSG00000108395 |
| 17 | 54498731 | 54498955 | 54498858 | 8  | 10 | 15 | 0.714521627 | 0.810948  | TRIM37 ENSG00000108395 |
| 17 | 54499309 | 54499639 | 54499470 | 13 | 18 | 21 | 0.897580886 | 0.637183  | TRIM37 ENSG00000108395 |

|    |          |          |          |    |     |     |             |           |        |                 |
|----|----------|----------|----------|----|-----|-----|-------------|-----------|--------|-----------------|
| 17 | 54500266 | 54500482 | 54500374 | 8  | 11  | 10  | 1.133786383 | 0.380636  | TRIM37 | ENSG00000108395 |
| 17 | 54500819 | 54501320 | 54501184 | 12 | 23  | 16  | 1.467252966 | 0.109416  | TRIM37 | ENSG00000108395 |
| 17 | 54503696 | 54504035 | 54503826 | 13 | 18  | 8   | 2.194086611 | 0.0206188 | TRIM37 | ENSG00000108395 |
| 17 | 54506227 | 54506803 | 54506512 | 8  | 21  | 19  | 1.143234603 | 0.33145   | TRIM37 | ENSG00000108395 |
| 17 | 54507033 | 54507374 | 54507203 | 9  | 15  | 10  | 1.511715177 | 0.140236  | TRIM37 | ENSG00000108395 |
| 17 | 54511663 | 54512038 | 54511859 | 9  | 16  | 18  | 0.929903744 | 0.58804   | TRIM37 | ENSG00000108395 |
| 17 | 54513221 | 54513444 | 54513274 | 10 | 12  | 7   | 1.688869299 | 0.11395   | TRIM37 | ENSG00000108395 |
| 17 | 54513473 | 54513678 | 54513575 | 9  | 10  | 6   | 1.63319229  | 0.146906  | TRIM37 | ENSG00000108395 |
| 17 | 54515475 | 54515743 | 54515649 | 10 | 12  | 5   | 2.251825733 | 0.0404733 | TRIM37 | ENSG00000108395 |
| 17 | 54516034 | 54516413 | 54516195 | 10 | 16  | 8   | 1.963130126 | 0.0441028 | TRIM37 | ENSG00000108395 |
| 17 | 54516698 | 54517087 | 54516877 | 12 | 21  | 17  | 1.27026067  | 0.223413  | TRIM37 | ENSG00000108395 |
| 17 | 54518821 | 54519356 | 54518977 | 10 | 20  | 14  | 1.455025858 | 0.129498  | TRIM37 | ENSG00000108395 |
| 17 | 54519572 | 54519943 | 54519723 | 8  | 13  | 21  | 0.66137539  | 0.892612  | TRIM37 | ENSG00000108395 |
| 17 | 54520380 | 54520670 | 54520526 | 12 | 15  | 15  | 1.039304184 | 0.456923  | TRIM37 | ENSG00000108395 |
| 17 | 54522043 | 54522305 | 54522174 | 10 | 13  | 23  | 0.606260774 | 0.937372  | TRIM37 | ENSG00000108395 |
| 17 | 54522523 | 54522830 | 54522674 | 9  | 11  | 5   | 2.078608368 | 0.0614303 | TRIM37 | ENSG00000108395 |
| 17 | 54523101 | 54523541 | 54523230 | 12 | 19  | 15  | 1.29913023  | 0.214784  | TRIM37 | ENSG00000108395 |
| 17 | 54523810 | 54524053 | 54523931 | 8  | 10  | 7   | 1.429043253 | 0.21536   | TRIM37 | ENSG00000108395 |
| 17 | 54525177 | 54526160 | 54525347 | 19 | 61  | 47  | 1.342434571 | 0.0613871 | TRIM37 | ENSG00000108395 |
| 17 | 54526477 | 54527333 | 54526873 | 14 | 42  | 40  | 1.090001949 | 0.346256  | TRIM37 | ENSG00000108395 |
| 17 | 54527438 | 54528045 | 54527608 | 15 | 36  | 25  | 1.479009801 | 0.0604746 | TRIM37 | ENSG00000108395 |
| 17 | 54528336 | 54528515 | 54528410 | 8  | 8   | 2   | 3.117912553 | 0.0283184 | TRIM37 | ENSG00000108395 |
| 17 | 54529204 | 54529451 | 54529363 | 8  | 10  | 10  | 1.039304184 | 0.464387  | TRIM37 | ENSG00000108395 |
| 17 | 54531222 | 54531547 | 54531357 | 8  | 12  | 4   | 2.702190879 | 0.0203088 | TRIM37 | ENSG00000108395 |
| 17 | 54531688 | 54532113 | 54531934 | 8  | 16  | 10  | 1.606197376 | 0.104477  | TRIM37 | ENSG00000108395 |
| 17 | 54532185 | 54532380 | 54532300 | 8  | 10  | 14  | 0.762156402 | 0.758589  | TRIM37 | ENSG00000108395 |
| 17 | 54532657 | 54532868 | 54532739 | 12 | 15  | 15  | 1.039304184 | 0.456923  | TRIM37 | ENSG00000108395 |
| 17 | 54533451 | 54533748 | 54533600 | 9  | 12  | 9   | 1.35109544  | 0.232899  | TRIM37 | ENSG00000108395 |
| 17 | 54534147 | 54534592 | 54534316 | 9  | 16  | 26  | 0.654376709 | 0.9196    | TRIM37 | ENSG00000108395 |
| 17 | 54534612 | 54535042 | 54534863 | 10 | 19  | 18  | 1.094004404 | 0.389177  | TRIM37 | ENSG00000108395 |
| 17 | 54535998 | 54536466 | 54536172 | 15 | 26  | 34  | 0.801748942 | 0.808783  | TRIM37 | ENSG00000108395 |
| 17 | 54536470 | 54536761 | 54536615 | 9  | 13  | 21  | 0.66137539  | 0.892612  | TRIM37 | ENSG00000108395 |
| 17 | 54537310 | 54537708 | 54537509 | 11 | 20  | 30  | 0.70404477  | 0.896995  | TRIM37 | ENSG00000108395 |
| 17 | 54537997 | 54539936 | 54539254 | 42 | 223 | 142 | 1.62800096  | 1.94E-06  | TRIM37 | ENSG00000108395 |

|    |          |          |          |    |    |    |             |             |          |                 |
|----|----------|----------|----------|----|----|----|-------------|-------------|----------|-----------------|
| 17 | 54540417 | 54541021 | 54540719 | 19 | 36 | 19 | 1.922712741 | 0.00754839  | TRIM37   | ENSG00000108395 |
| 17 | 54541805 | 54542099 | 54541953 | 12 | 13 | 10 | 1.32275078  | 0.240023    | TRIM37   | ENSG00000108395 |
| 17 | 54543254 | 54543543 | 54543398 | 11 | 13 | 14 | 0.970017239 | 0.534076    | TRIM37   | ENSG00000108395 |
| 17 | 54543630 | 54543974 | 54543802 | 10 | 15 | 14 | 1.10859113  | 0.386477    | TRIM37   | ENSG00000108395 |
| 17 | 54544157 | 54544469 | 54544319 | 14 | 14 | 6  | 2.227080395 | 0.0322529   | TRIM37   | ENSG00000108395 |
| 17 | 54545027 | 54545235 | 54545142 | 8  | 9  | 7  | 1.29913023  | 0.286504    | TRIM37   | ENSG00000108395 |
| 17 | 54546036 | 54546356 | 54546212 | 15 | 19 | 23 | 0.86608682  | 0.685164    | TRIM37   | ENSG00000108395 |
| 17 | 54546726 | 54546993 | 54546875 | 14 | 17 | 19 | 0.935373766 | 0.583208    | TRIM37   | ENSG00000108395 |
| 17 | 54549509 | 54550055 | 54549688 | 11 | 26 | 22 | 1.220052738 | 0.239999    | TRIM37   | ENSG00000108395 |
| 17 | 54550600 | 54550849 | 54550724 | 9  | 11 | 12 | 0.959357709 | 0.543005    | TRIM37   | ENSG00000108395 |
| 17 | 54551310 | 54551701 | 54551489 | 11 | 19 | 8  | 2.309564854 | 0.0138337   | TRIM37   | ENSG00000108395 |
| 17 | 54553317 | 54553613 | 54553481 | 10 | 13 | 7  | 1.818782322 | 0.0805123   | TRIM37   | ENSG00000108395 |
| 17 | 54554035 | 54554388 | 54554211 | 14 | 20 | 15 | 1.364086742 | 0.171319    | TRIM37   | ENSG00000108395 |
| 17 | 54572047 | 54572246 | 54572121 | 9  | 9  | 3  | 2.598260461 | 0.0397929   |          | ENSG00000211514 |
| 17 | 54586870 | 54587562 | 54587311 | 14 | 36 | 19 | 1.922712741 | 0.00754839  | FAM33A   | ENSG00000182628 |
| 17 | 54587912 | 54588168 | 54588048 | 8  | 10 | 9  | 1.143234603 | 0.378307    | PRR11    | ENSG00000068489 |
| 17 | 54641943 | 54642280 | 54642104 | 18 | 22 | 9  | 2.390399624 | 0.00747467  | C17orf71 | ENSG00000167447 |
| 17 | 54652757 | 54653010 | 54652883 | 10 | 11 | 8  | 1.385738912 | 0.224757    | GDPD1    | ENSG00000153982 |
| 17 | 54729048 | 54729238 | 54729184 | 8  | 8  | 6  | 1.336248237 | 0.277651    | YPEL2    | ENSG00000175155 |
| 17 | 54759558 | 54759795 | 54759676 | 8  | 10 | 1  | 5.716173013 | 0.00260397  | YPEL2    | ENSG00000175155 |
| 17 | 54761430 | 54761675 | 54761557 | 8  | 9  | 7  | 1.29913023  | 0.286504    | YPEL2    | ENSG00000175155 |
| 17 | 54763393 | 54763682 | 54763525 | 8  | 11 | 4  | 2.494330042 | 0.0324033   | YPEL2    | ENSG00000175155 |
| 17 | 54801366 | 54801574 | 54801486 | 8  | 10 | 1  | 5.716173013 | 0.00260397  | YPEL2    | ENSG00000175155 |
| 17 | 54839082 | 54839469 | 54839230 | 15 | 22 | 10 | 2.173090567 | 0.0132845   | YPEL2    | ENSG00000175155 |
| 17 | 54850897 | 54851354 | 54851099 | 16 | 24 | 9  | 2.598260461 | 0.0032455   | YPEL2    | ENSG00000175155 |
| 17 | 54855270 | 54855487 | 54855378 | 8  | 9  | 4  | 2.078608368 | 0.0785659   | YPEL2    | ENSG00000175155 |
| 17 | 54946389 | 54946671 | 54946536 | 8  | 11 | 6  | 1.781664316 | 0.103344    |          | ENSG00000200889 |
| 17 | 54997437 | 54997907 | 54997728 | 9  | 17 | 5  | 3.117912553 | 0.00407023  | DHX40    | ENSG00000108406 |
| 17 | 55051224 | 55051441 | 55051389 | 8  | 10 | 3  | 2.858086507 | 0.0242838   | CLTC     | ENSG00000141367 |
| 17 | 55051460 | 55051692 | 55051560 | 8  | 11 | 4  | 2.494330042 | 0.0324033   | CLTC     | ENSG00000141367 |
| 17 | 55051708 | 55052004 | 55051843 | 8  | 11 | 8  | 1.385738912 | 0.224757    | CLTC     | ENSG00000141367 |
| 17 | 55113656 | 55113870 | 55113741 | 8  | 9  | 0  | 10.39304184 | 0.000803859 | PTRH2    | ENSG00000141378 |
| 17 | 55139162 | 55139548 | 55139336 | 9  | 15 | 11 | 1.385738912 | 0.19225     |          | ENSG00000214225 |
| 17 | 55218532 | 55218713 | 55218622 | 8  | 10 | 3  | 2.858086507 | 0.0242838   |          | ENSG00000199004 |

|    |          |          |          |     |     |     |             |             |                 |
|----|----------|----------|----------|-----|-----|-----|-------------|-------------|-----------------|
| 17 | 55261666 | 55262309 | 55262034 | 13  | 29  | 30  | 1.005778243 | 0.491622    | ENSG00000199004 |
| 17 | 55262329 | 55262518 | 55262388 | 8   | 10  | 12  | 0.879411233 | 0.62639     | ENSG00000199004 |
| 17 | 55262532 | 55263219 | 55262711 | 13  | 34  | 26  | 1.347246165 | 0.119935    | ENSG00000199004 |
| 17 | 55263226 | 55263421 | 55263291 | 8   | 9   | 18  | 0.547002202 | 0.94615     | ENSG00000199004 |
| 17 | 55264482 | 55264837 | 55264734 | 8   | 13  | 9   | 1.455025858 | 0.177172    | ENSG00000199004 |
| 17 | 55264962 | 55265574 | 55265104 | 21  | 38  | 28  | 1.397684937 | 0.083712    | ENSG00000199004 |
| 17 | 55266038 | 55266247 | 55266142 | 9   | 10  | 5   | 1.905391004 | 0.0915982   | ENSG00000199004 |
| 17 | 55268087 | 55268359 | 55268185 | 12  | 14  | 18  | 0.820503303 | 0.720361    | ENSG00000199004 |
| 17 | 55268722 | 55269118 | 55268901 | 8   | 15  | 13  | 1.187776211 | 0.317363    | ENSG00000199004 |
| 17 | 55269207 | 55270794 | 55269619 | 108 | 326 | 140 | 2.410301193 | 3.19E-20    | ENSG00000199004 |
| 17 | 55270872 | 55271186 | 55271007 | 12  | 16  | 14  | 1.177878075 | 0.320433    | ENSG00000199004 |
| 17 | 55271315 | 55272591 | 55271582 | 19  | 72  | 77  | 0.972682121 | 0.568134    | ENSG00000199004 |
| 17 | 55272599 | 55273122 | 55272943 | 10  | 23  | 33  | 0.733626483 | 0.881043    | ENSG00000199004 |
| 17 | 55273171 | 55273443 | 55273287 | 10  | 13  | 15  | 0.909391161 | 0.604792    | ENSG00000199004 |
| 17 | 55274283 | 55274662 | 55274487 | 13  | 19  | 10  | 1.889643971 | 0.0394833   | ENSG00000199004 |
| 17 | 55274917 | 55275096 | 55274979 | 8   | 8   | 6   | 1.336248237 | 0.277651    | ENSG00000199004 |
| 17 | 55275145 | 55275915 | 55275492 | 34  | 67  | 33  | 2.078608368 | 0.000155503 | ENSG00000199004 |
| 17 | 55276097 | 55276482 | 55276291 | 17  | 25  | 8   | 3.00243431  | 0.0010168   | ENSG00000199004 |
| 17 | 55276719 | 55279400 | 55277968 | 72  | 370 | 208 | 1.844889246 | 2.28E-13    | ENSG00000201524 |
| 17 | 55279584 | 55280378 | 55279981 | 43  | 80  | 58  | 1.426841338 | 0.0180389   | ENSG00000201524 |
| 17 | 55280698 | 55280957 | 55280830 | 11  | 13  | 21  | 0.66137539  | 0.892612    | ENSG00000201524 |
| 17 | 55281620 | 55282225 | 55281922 | 16  | 28  | 28  | 1.039304184 | 0.441896    | ENSG00000201524 |
| 17 | 55283513 | 55284600 | 55284049 | 12  | 50  | 75  | 0.697427808 | 0.978156    | ENSG00000201524 |
| 17 | 55285119 | 55285964 | 55285506 | 54  | 97  | 33  | 2.995641472 | 1.55E-09    | ENSG00000201524 |
| 17 | 55286044 | 55286337 | 55286207 | 8   | 9   | 0   | 10.39304184 | 0.000803859 | ENSG00000201524 |
| 17 | 55286939 | 55287118 | 55286999 | 8   | 8   | 10  | 0.850339787 | 0.645072    | ENSG00000201524 |
| 17 | 55287554 | 55288199 | 55287817 | 17  | 34  | 16  | 2.139743909 | 0.00367586  | ENSG00000201524 |
| 17 | 55288318 | 55288638 | 55288478 | 10  | 12  | 9   | 1.35109544  | 0.232899    | ENSG00000201524 |
| 17 | 55288772 | 55289979 | 55289598 | 35  | 104 | 96  | 1.125019993 | 0.201097    | ENSG00000201524 |
| 17 | 55290110 | 55290827 | 55290369 | 15  | 33  | 37  | 0.929903744 | 0.622229    | ENSG00000201524 |
| 17 | 55290836 | 55291105 | 55291004 | 8   | 11  | 22  | 0.542245661 | 0.962988    | ENSG00000201524 |
| 17 | 55291240 | 55292785 | 55291816 | 28  | 88  | 65  | 1.401485945 | 0.0180835   | ENSG00000201524 |
| 17 | 55293603 | 55293808 | 55293756 | 8   | 9   | 6   | 1.484720263 | 0.204387    | ENSG00000201524 |
| 17 | 55294372 | 55294784 | 55294613 | 11  | 16  | 6   | 2.524024447 | 0.0137633   | ENSG00000201524 |

|    |          |          |          |    |     |     |             |            |                         |
|----|----------|----------|----------|----|-----|-----|-------------|------------|-------------------------|
| 17 | 55295765 | 55296089 | 55295974 | 10 | 15  | 11  | 1.385738912 | 0.19225    | ENSG00000201524         |
| 17 | 55297197 | 55297526 | 55297375 | 12 | 15  | 10  | 1.511715177 | 0.140236   | ENSG00000201524         |
| 17 | 55298389 | 55298942 | 55298771 | 8  | 19  | 25  | 0.799464757 | 0.777638   | ENSG00000201524         |
| 17 | 55299698 | 55300056 | 55299877 | 14 | 20  | 15  | 1.364086742 | 0.171319   | ENSG00000201524         |
| 17 | 55301584 | 55301886 | 55301708 | 22 | 25  | 16  | 1.589524046 | 0.0646994  | ENSG00000201524         |
| 17 | 55301900 | 55302357 | 55302079 | 15 | 26  | 13  | 2.004372355 | 0.0142124  | ENSG00000201524         |
| 17 | 55302451 | 55303292 | 55302911 | 15 | 49  | 38  | 1.332441262 | 0.0878461  | TUBD1 ENSG00000108423   |
| 17 | 55303551 | 55304109 | 55303730 | 12 | 25  | 22  | 1.1748656   | 0.285497   | TUBD1 ENSG00000108423   |
| 17 | 55306406 | 55306914 | 55306735 | 10 | 25  | 23  | 1.125912866 | 0.336929   | TUBD1 ENSG00000108423   |
| 17 | 55308144 | 55308512 | 55308323 | 10 | 17  | 18  | 0.984603964 | 0.519872   | TUBD1 ENSG00000108423   |
| 17 | 55309300 | 55309644 | 55309472 | 8  | 13  | 14  | 0.970017239 | 0.534076   | TUBD1 ENSG00000108423   |
| 17 | 55309979 | 55310711 | 55310441 | 18 | 35  | 33  | 1.100439724 | 0.344144   | TUBD1 ENSG00000108423   |
| 17 | 55311339 | 55311657 | 55311498 | 14 | 17  | 6   | 2.672496474 | 0.00882337 | TUBD1 ENSG00000108423   |
| 17 | 55313025 | 55313258 | 55313141 | 12 | 13  | 16  | 0.855897563 | 0.670115   | TUBD1 ENSG00000108423   |
| 17 | 55316043 | 55316223 | 55316133 | 9  | 9   | 6   | 1.484720263 | 0.204387   | TUBD1 ENSG00000108423   |
| 17 | 55317426 | 55317714 | 55317580 | 8  | 11  | 12  | 0.959357709 | 0.543005   | TUBD1 ENSG00000108423   |
| 17 | 55317835 | 55318172 | 55318001 | 13 | 18  | 26  | 0.731362204 | 0.856292   | TUBD1 ENSG00000108423   |
| 17 | 55318175 | 55318604 | 55318447 | 17 | 27  | 32  | 0.881833853 | 0.689746   | TUBD1 ENSG00000108423   |
| 17 | 55319634 | 55319929 | 55319793 | 8  | 12  | 22  | 0.5874328   | 0.943388   | TUBD1 ENSG00000108423   |
| 17 | 55320546 | 55320808 | 55320688 | 10 | 12  | 15  | 0.84443465  | 0.678289   | TUBD1 ENSG00000108423   |
| 17 | 55322832 | 55323319 | 55323128 | 11 | 24  | 22  | 1.129678461 | 0.335754   | TUBD1 ENSG00000108423   |
| 17 | 55323707 | 55324073 | 55323910 | 11 | 16  | 12  | 1.359090087 | 0.198699   | TUBD1 ENSG00000108423   |
| 17 | 55324195 | 55326702 | 55325147 | 36 | 195 | 193 | 1.05001866  | 0.314976   | TUBD1 ENSG00000108423   |
| 17 | 55330119 | 55330372 | 55330245 | 10 | 13  | 12  | 1.11925066  | 0.384109   | RPS6KB1 ENSG00000108443 |
| 17 | 55331360 | 55331755 | 55331617 | 10 | 18  | 26  | 0.731362204 | 0.856292   | RPS6KB1 ENSG00000108443 |
| 17 | 55331995 | 55332316 | 55332151 | 8  | 12  | 12  | 1.039304184 | 0.461227   | RPS6KB1 ENSG00000108443 |
| 17 | 55334979 | 55335181 | 55335045 | 9  | 10  | 5   | 1.905391004 | 0.0915982  | RPS6KB1 ENSG00000108443 |
| 17 | 55336027 | 55336214 | 55336120 | 8  | 8   | 5   | 1.558956276 | 0.191397   | RPS6KB1 ENSG00000108443 |
| 17 | 55337108 | 55337328 | 55337173 | 9  | 9   | 5   | 1.73217364  | 0.133894   | RPS6KB1 ENSG00000108443 |
| 17 | 55337430 | 55337741 | 55337585 | 9  | 12  | 15  | 0.84443465  | 0.678289   | RPS6KB1 ENSG00000108443 |
| 17 | 55337854 | 55338214 | 55338120 | 9  | 14  | 10  | 1.417232979 | 0.185113   | RPS6KB1 ENSG00000108443 |
| 17 | 55339748 | 55339937 | 55339842 | 8  | 9   | 14  | 0.692869456 | 0.822654   | RPS6KB1 ENSG00000108443 |
| 17 | 55342575 | 55342827 | 55342701 | 11 | 13  | 17  | 0.808347699 | 0.728863   | RPS6KB1 ENSG00000108443 |
| 17 | 55343243 | 55343433 | 55343413 | 9  | 11  | 6   | 1.781664316 | 0.103344   | RPS6KB1 ENSG00000108443 |

|    |          |          |          |    |     |    |             |             |         |                 |
|----|----------|----------|----------|----|-----|----|-------------|-------------|---------|-----------------|
| 17 | 55344217 | 55344481 | 55344349 | 9  | 13  | 9  | 1.455025858 | 0.177172    | RPS6KB1 | ENSG00000108443 |
| 17 | 55344750 | 55345461 | 55344918 | 16 | 37  | 27 | 1.41048425  | 0.0812201   | RPS6KB1 | ENSG00000108443 |
| 17 | 55346566 | 55346890 | 55346717 | 11 | 15  | 22 | 0.722994215 | 0.845414    | RPS6KB1 | ENSG00000108443 |
| 17 | 55347475 | 55347654 | 55347578 | 8  | 8   | 7  | 1.169217207 | 0.371848    | RPS6KB1 | ENSG00000108443 |
| 17 | 55348575 | 55349020 | 55348842 | 9  | 17  | 25 | 0.719518281 | 0.863101    | RPS6KB1 | ENSG00000108443 |
| 17 | 55351659 | 55352481 | 55351853 | 10 | 29  | 23 | 1.29913023  | 0.167378    | RPS6KB1 | ENSG00000108443 |
| 17 | 55352602 | 55352982 | 55352806 | 8  | 14  | 7  | 1.948695345 | 0.0559175   | RPS6KB1 | ENSG00000108443 |
| 17 | 55353086 | 55353365 | 55353226 | 9  | 12  | 6  | 1.930136342 | 0.071303    | RPS6KB1 | ENSG00000108443 |
| 17 | 55353462 | 55353748 | 55353605 | 9  | 13  | 23 | 0.606260774 | 0.937372    | RPS6KB1 | ENSG00000108443 |
| 17 | 55355837 | 55356030 | 55355933 | 8  | 8   | 3  | 2.338434415 | 0.0641221   | RPS6KB1 | ENSG00000108443 |
| 17 | 55373092 | 55373360 | 55373227 | 9  | 11  | 2  | 4.157216737 | 0.0052913   | RNFT1   | ENSG00000189050 |
| 17 | 55376465 | 55376779 | 55376640 | 12 | 13  | 14 | 0.970017239 | 0.534076    | RNFT1   | ENSG00000189050 |
| 17 | 55377517 | 55377711 | 55377574 | 8  | 9   | 14 | 0.692869456 | 0.822654    | RNFT1   | ENSG00000189050 |
| 17 | 55378021 | 55378269 | 55378147 | 8  | 11  | 13 | 0.890832158 | 0.618492    | RNFT1   | ENSG00000189050 |
| 17 | 55378658 | 55379226 | 55378834 | 12 | 24  | 23 | 1.082608525 | 0.390382    | RNFT1   | ENSG00000189050 |
| 17 | 55379807 | 55380103 | 55379964 | 8  | 12  | 6  | 1.930136342 | 0.071303    | RNFT1   | ENSG00000189050 |
| 17 | 55380447 | 55380644 | 55380555 | 9  | 10  | 12 | 0.879411233 | 0.62639     | RNFT1   | ENSG00000189050 |
| 17 | 55383710 | 55384241 | 55384023 | 10 | 24  | 24 | 1.039304184 | 0.446062    | RNFT1   | ENSG00000189050 |
| 17 | 55385996 | 55386283 | 55386148 | 8  | 11  | 10 | 1.133786383 | 0.380636    | RNFT1   | ENSG00000189050 |
| 17 | 55389321 | 55389750 | 55389497 | 10 | 17  | 22 | 0.813368492 | 0.747743    | RNFT1   | ENSG00000189050 |
| 17 | 55390976 | 55391349 | 55391192 | 11 | 16  | 10 | 1.606197376 | 0.104477    | RNFT1   | ENSG00000189050 |
| 17 | 55394918 | 55395611 | 55395097 | 10 | 30  | 34 | 0.920526563 | 0.632962    | RNFT1   | ENSG00000189050 |
| 17 | 55395634 | 55395907 | 55395732 | 10 | 14  | 16 | 0.917033104 | 0.598778    | RNFT1   | ENSG00000189050 |
| 17 | 55395936 | 55396907 | 55396621 | 37 | 111 | 70 | 1.639465755 | 0.000466198 | RNFT1   | ENSG00000189050 |
| 17 | 55396916 | 55397583 | 55397142 | 33 | 68  | 23 | 2.98799953  | 3.33E-07    | RNFT1   | ENSG00000189050 |
| 17 | 55400603 | 55401063 | 55400899 | 14 | 21  | 13 | 1.63319229  | 0.0708832   | RNFT1   | ENSG00000189050 |
| 17 | 55404247 | 55404554 | 55404406 | 8  | 11  | 8  | 1.385738912 | 0.224757    | RNFT1   | ENSG00000189050 |
| 17 | 55404912 | 55405162 | 55405034 | 9  | 10  | 20 | 0.54439743  | 0.955421    | RNFT1   | ENSG00000189050 |
| 17 | 55406179 | 55406435 | 55406297 | 9  | 11  | 9  | 1.247165021 | 0.300052    | RNFT1   | ENSG00000189050 |
| 17 | 55466774 | 55466956 | 55466865 | 8  | 8   | 4  | 1.870747532 | 0.118863    |         | ENSG00000204471 |
| 17 | 55468281 | 55468639 | 55468452 | 9  | 14  | 9  | 1.558956276 | 0.132279    |         | ENSG00000204471 |
| 17 | 55468709 | 55469834 | 55469424 | 57 | 112 | 61 | 1.894215691 | 1.69E-05    |         | ENSG00000204471 |
| 17 | 55469838 | 55470235 | 55470056 | 11 | 19  | 23 | 0.86608682  | 0.685164    |         | ENSG00000204471 |
| 17 | 55470240 | 55470711 | 55470477 | 12 | 25  | 19 | 1.35109544  | 0.152941    |         | ENSG00000204471 |



|    |          |          |          |    |    |    |             |           |                        |
|----|----------|----------|----------|----|----|----|-------------|-----------|------------------------|
| 17 | 55471177 | 55471710 | 55471356 | 15 | 28 | 22 | 1.310427015 | 0.164056  | ENSG00000204471        |
| 17 | 55471975 | 55472763 | 55472245 | 14 | 38 | 52 | 0.764771003 | 0.900635  | ENSG00000204471        |
| 17 | 55473019 | 55473409 | 55473180 | 12 | 20 | 23 | 0.909391161 | 0.626666  | ENSG00000204471        |
| 17 | 55473603 | 55473805 | 55473775 | 10 | 12 | 19 | 0.67554772  | 0.870684  | ENSG00000204471        |
| 17 | 55473870 | 55474086 | 55473954 | 9  | 9  | 14 | 0.692869456 | 0.822654  | ENSG00000204471        |
| 17 | 55475934 | 55476168 | 55476040 | 12 | 14 | 12 | 1.199197136 | 0.313881  | ENSG00000204471        |
| 17 | 55476469 | 55476700 | 55476584 | 8  | 11 | 16 | 0.733626483 | 0.800067  | ENSG00000204471        |
| 17 | 55476994 | 55477304 | 55477145 | 10 | 14 | 15 | 0.974347673 | 0.530138  | ENSG00000204471        |
| 17 | 55478546 | 55478868 | 55478694 | 9  | 13 | 8  | 1.616695398 | 0.123553  | ENSG00000204471        |
| 17 | 55478914 | 55479237 | 55479075 | 8  | 12 | 8  | 1.501217155 | 0.168286  | ENSG00000204471        |
| 17 | 55479867 | 55480322 | 55480046 | 10 | 20 | 13 | 1.558956276 | 0.0943292 | ENSG00000204471        |
| 17 | 55481566 | 55481792 | 55481614 | 9  | 12 | 10 | 1.228268581 | 0.305344  | HEATR6 ENSG00000068097 |
| 17 | 55482060 | 55482261 | 55482164 | 8  | 9  | 18 | 0.547002202 | 0.94615   | HEATR6 ENSG00000068097 |
| 17 | 55482671 | 55482862 | 55482753 | 8  | 8  | 8  | 1.039304184 | 0.46786   | HEATR6 ENSG00000068097 |
| 17 | 55483817 | 55484069 | 55483960 | 11 | 14 | 13 | 1.113540197 | 0.385405  | HEATR6 ENSG00000068097 |
| 17 | 55484307 | 55484635 | 55484440 | 9  | 14 | 12 | 1.199197136 | 0.313881  | HEATR6 ENSG00000068097 |
| 17 | 55485779 | 55485970 | 55485810 | 8  | 9  | 6  | 1.484720263 | 0.204387  | HEATR6 ENSG00000068097 |
| 17 | 55486627 | 55487010 | 55486863 | 8  | 16 | 9  | 1.766817113 | 0.0700694 | HEATR6 ENSG00000068097 |
| 17 | 55487376 | 55487557 | 55487492 | 8  | 8  | 11 | 0.779478138 | 0.719708  | HEATR6 ENSG00000068097 |
| 17 | 55487756 | 55488044 | 55487913 | 9  | 11 | 6  | 1.781664316 | 0.103344  | HEATR6 ENSG00000068097 |
| 17 | 55489111 | 55489599 | 55489420 | 13 | 24 | 29 | 0.86608682  | 0.704588  | HEATR6 ENSG00000068097 |
| 17 | 55490409 | 55490761 | 55490582 | 8  | 13 | 23 | 0.606260774 | 0.937372  | HEATR6 ENSG00000068097 |
| 17 | 55490825 | 55491138 | 55490983 | 11 | 14 | 22 | 0.677807077 | 0.884881  | HEATR6 ENSG00000068097 |
| 17 | 55491174 | 55491569 | 55491333 | 12 | 21 | 16 | 1.344981885 | 0.176214  | HEATR6 ENSG00000068097 |
| 17 | 55492020 | 55492289 | 55492152 | 12 | 15 | 19 | 0.831443347 | 0.712423  | HEATR6 ENSG00000068097 |
| 17 | 55493277 | 55493883 | 55493720 | 12 | 26 | 29 | 0.935373766 | 0.600845  | HEATR6 ENSG00000068097 |
| 17 | 55495098 | 55495576 | 55495277 | 8  | 15 | 18 | 0.875203524 | 0.655562  | HEATR6 ENSG00000068097 |
| 17 | 55495652 | 55495979 | 55495815 | 8  | 14 | 19 | 0.779478138 | 0.771518  | HEATR6 ENSG00000068097 |
| 17 | 55496988 | 55497176 | 55497082 | 8  | 8  | 10 | 0.850339787 | 0.645072  | HEATR6 ENSG00000068097 |
| 17 | 55498012 | 55498272 | 55498142 | 9  | 12 | 17 | 0.750608578 | 0.78992   | HEATR6 ENSG00000068097 |
| 17 | 55498702 | 55499030 | 55498903 | 11 | 16 | 15 | 1.104260696 | 0.387363  | HEATR6 ENSG00000068097 |
| 17 | 55499477 | 55499889 | 55499650 | 12 | 19 | 18 | 1.094004404 | 0.389177  | HEATR6 ENSG00000068097 |
| 17 | 55500972 | 55501261 | 55501116 | 9  | 11 | 17 | 0.692869456 | 0.843876  | HEATR6 ENSG00000068097 |
| 17 | 55501533 | 55501902 | 55501712 | 9  | 17 | 13 | 1.336248237 | 0.204556  | HEATR6 ENSG00000068097 |

|    |          |          |          |    |     |     |             |             |        |                 |
|----|----------|----------|----------|----|-----|-----|-------------|-------------|--------|-----------------|
| 17 | 55503303 | 55503901 | 55503696 | 12 | 26  | 20  | 1.336248237 | 0.156853    | HEATR6 | ENSG00000068097 |
| 17 | 55503908 | 55504120 | 55504014 | 8  | 10  | 12  | 0.879411233 | 0.62639     | HEATR6 | ENSG00000068097 |
| 17 | 55504722 | 55505364 | 55505185 | 12 | 27  | 30  | 0.93872636  | 0.597175    | HEATR6 | ENSG00000068097 |
| 17 | 55505471 | 55506175 | 55505697 | 13 | 33  | 46  | 0.751837069 | 0.900185    | HEATR6 | ENSG00000068097 |
| 17 | 55506276 | 55506501 | 55506386 | 8  | 10  | 20  | 0.54439743  | 0.955421    | HEATR6 | ENSG00000068097 |
| 17 | 55506554 | 55507023 | 55506729 | 12 | 21  | 24  | 0.914587682 | 0.621823    | HEATR6 | ENSG00000068097 |
| 17 | 55507090 | 55507280 | 55507194 | 8  | 9   | 12  | 0.799464757 | 0.707717    | HEATR6 | ENSG00000068097 |
| 17 | 55508180 | 55508706 | 55508543 | 9  | 20  | 20  | 1.039304184 | 0.450588    | HEATR6 | ENSG00000068097 |
| 17 | 55508782 | 55511311 | 55510911 | 34 | 170 | 116 | 1.518983039 | 0.000214104 | HEATR6 | ENSG00000068097 |
| 17 | 55511446 | 55512386 | 55511613 | 22 | 55  | 61  | 0.93872636  | 0.635158    | HEATR6 | ENSG00000068097 |
| 17 | 55513199 | 55513430 | 55513315 | 8  | 9   | 11  | 0.86608682  | 0.635181    | HEATR6 | ENSG00000068097 |
| 17 | 55513810 | 55513989 | 55513899 | 8  | 8   | 14  | 0.623582511 | 0.877092    | HEATR6 | ENSG00000068097 |
| 17 | 55514144 | 55514529 | 55514312 | 13 | 19  | 22  | 0.903742769 | 0.631776    | HEATR6 | ENSG00000068097 |
| 17 | 55514627 | 55514967 | 55514821 | 16 | 20  | 8   | 2.425043097 | 0.00917565  | HEATR6 | ENSG00000068097 |
| 17 | 55515438 | 55515983 | 55515714 | 13 | 25  | 26  | 1.000811437 | 0.499519    | HEATR6 | ENSG00000068097 |
| 17 | 55517470 | 55518062 | 55517883 | 11 | 26  | 37  | 0.738452973 | 0.889183    | HEATR6 | ENSG00000068097 |
| 17 | 55518143 | 55518676 | 55518322 | 12 | 22  | 30  | 0.771096653 | 0.831099    | HEATR6 | ENSG00000068097 |
| 17 | 55519707 | 55520175 | 55519886 | 11 | 23  | 16  | 1.467252966 | 0.109416    | HEATR6 | ENSG00000068097 |
| 17 | 55520223 | 55520849 | 55520599 | 12 | 30  | 26  | 1.193275174 | 0.249725    | HEATR6 | ENSG00000068097 |
| 17 | 55520911 | 55521204 | 55521057 | 8  | 10  | 12  | 0.879411233 | 0.62639     | HEATR6 | ENSG00000068097 |
| 17 | 55521517 | 55521780 | 55521609 | 11 | 14  | 20  | 0.742360132 | 0.815839    | HEATR6 | ENSG00000068097 |
| 17 | 55521802 | 55522017 | 55521904 | 8  | 9   | 28  | 0.358380753 | 0.998772    | HEATR6 | ENSG00000068097 |
| 17 | 55522661 | 55522889 | 55522775 | 8  | 12  | 17  | 0.750608578 | 0.78992     | HEATR6 | ENSG00000068097 |
| 17 | 55523115 | 55523490 | 55523311 | 10 | 19  | 24  | 0.831443347 | 0.733913    | HEATR6 | ENSG00000068097 |
| 17 | 55523511 | 55524835 | 55524662 | 15 | 69  | 59  | 1.212521548 | 0.135757    | HEATR6 | ENSG00000068097 |
| 17 | 55526984 | 55527578 | 55527317 | 11 | 24  | 22  | 1.129678461 | 0.335754    | HEATR6 | ENSG00000068097 |
| 17 | 55527600 | 55527812 | 55527689 | 9  | 11  | 21  | 0.566893191 | 0.949414    | HEATR6 | ENSG00000068097 |
| 17 | 55538296 | 55538702 | 55538523 | 11 | 19  | 12  | 1.598929514 | 0.0887417   | HEATR6 | ENSG00000068097 |
| 17 | 55538757 | 55539016 | 55538863 | 8  | 11  | 18  | 0.656402643 | 0.879847    | HEATR6 | ENSG00000068097 |
| 17 | 55539799 | 55540053 | 55539912 | 9  | 11  | 4   | 2.494330042 | 0.0324033   | HEATR6 | ENSG00000068097 |
| 17 | 55541372 | 55541639 | 55541493 | 11 | 13  | 8   | 1.616695398 | 0.123553    | HEATR6 | ENSG00000068097 |
| 17 | 55559712 | 55559938 | 55559856 | 8  | 10  | 10  | 1.039304184 | 0.464387    | CA4    | ENSG00000167434 |
| 17 | 55560950 | 55561683 | 55561117 | 11 | 30  | 20  | 1.534210939 | 0.0617334   | CA4    | ENSG00000167434 |
| 17 | 55564025 | 55564240 | 55564144 | 10 | 11  | 22  | 0.542245661 | 0.962988    | CA4    | ENSG00000167434 |

|    |          |          |          |    |     |    |             |            |     |                 |
|----|----------|----------|----------|----|-----|----|-------------|------------|-----|-----------------|
| 17 | 55564460 | 55564666 | 55564496 | 9  | 12  | 13 | 0.965068171 | 0.538344   | CA4 | ENSG00000167434 |
| 17 | 55564678 | 55564951 | 55564814 | 8  | 11  | 19 | 0.623582511 | 0.908792   | CA4 | ENSG00000167434 |
| 17 | 55565420 | 55565834 | 55565680 | 12 | 19  | 15 | 1.29913023  | 0.214784   | CA4 | ENSG00000167434 |
| 17 | 55566482 | 55566891 | 55566729 | 10 | 16  | 16 | 1.039304184 | 0.455583   | CA4 | ENSG00000167434 |
| 17 | 55567007 | 55568529 | 55567912 | 23 | 88  | 92 | 0.994602929 | 0.51497    | CA4 | ENSG00000167434 |
| 17 | 55569122 | 55569417 | 55569269 | 8  | 10  | 26 | 0.423420223 | 0.994643   | CA4 | ENSG00000167434 |
| 17 | 55570994 | 55571193 | 55571086 | 8  | 10  | 6  | 1.63319229  | 0.146906   | CA4 | ENSG00000167434 |
| 17 | 55571412 | 55571885 | 55571587 | 13 | 24  | 15 | 1.623912788 | 0.0607838  | CA4 | ENSG00000167434 |
| 17 | 55571911 | 55572687 | 55572186 | 29 | 71  | 45 | 1.626736984 | 0.00439438 | CA4 | ENSG00000167434 |
| 17 | 55573771 | 55574020 | 55573851 | 10 | 14  | 10 | 1.417232979 | 0.185113   | CA4 | ENSG00000167434 |
| 17 | 55574438 | 55575583 | 55575175 | 36 | 110 | 90 | 1.267722686 | 0.0460233  | CA4 | ENSG00000167434 |
| 17 | 55575632 | 55575935 | 55575777 | 13 | 16  | 22 | 0.768181354 | 0.79945    | CA4 | ENSG00000167434 |
| 17 | 55577130 | 55577552 | 55577395 | 13 | 22  | 21 | 1.086545284 | 0.390103   | CA4 | ENSG00000167434 |
| 17 | 55578158 | 55578539 | 55578303 | 8  | 14  | 16 | 0.917033104 | 0.598778   | CA4 | ENSG00000167434 |
| 17 | 55579077 | 55579363 | 55579207 | 11 | 14  | 14 | 1.039304184 | 0.458308   | CA4 | ENSG00000167434 |
| 17 | 55579506 | 55580076 | 55579791 | 14 | 29  | 47 | 0.649565115 | 0.9706     | CA4 | ENSG00000167434 |
| 17 | 55580514 | 55581629 | 55581169 | 12 | 46  | 56 | 0.856970117 | 0.785056   | CA4 | ENSG00000167434 |
| 17 | 55582809 | 55584036 | 55583523 | 14 | 72  | 72 | 1.039304184 | 0.408073   | CA4 | ENSG00000167434 |
| 17 | 55584178 | 55584636 | 55584442 | 9  | 19  | 17 | 1.154782427 | 0.327751   | CA4 | ENSG00000167434 |
| 17 | 55586091 | 55586273 | 55586182 | 9  | 9   | 10 | 0.944821986 | 0.553851   | CA4 | ENSG00000167434 |
| 17 | 55586709 | 55587732 | 55587103 | 12 | 43  | 53 | 0.846840446 | 0.79538    | CA4 | ENSG00000167434 |
| 17 | 55587795 | 55587974 | 55587937 | 8  | 8   | 13 | 0.668124118 | 0.835294   | CA4 | ENSG00000167434 |
| 17 | 55588027 | 55588211 | 55588116 | 9  | 11  | 13 | 0.890832158 | 0.618492   | CA4 | ENSG00000167434 |
| 17 | 55588282 | 55588528 | 55588405 | 14 | 16  | 9  | 1.766817113 | 0.0700694  | CA4 | ENSG00000167434 |
| 17 | 55589157 | 55589536 | 55589357 | 13 | 20  | 10 | 1.98412617  | 0.0277883  |     | ENSG00000221779 |
| 17 | 55590486 | 55590819 | 55590660 | 16 | 21  | 10 | 2.078608368 | 0.0193227  |     | ENSG00000221779 |
| 17 | 55590878 | 55591664 | 55591057 | 10 | 30  | 18 | 1.695706827 | 0.0317992  |     | ENSG00000221779 |
| 17 | 55591733 | 55592002 | 55591880 | 17 | 18  | 11 | 1.645564958 | 0.0828462  |     | ENSG00000221779 |
| 17 | 55592824 | 55593310 | 55592990 | 9  | 18  | 17 | 1.097043306 | 0.388692   |     | ENSG00000221779 |
| 17 | 55593360 | 55593765 | 55593586 | 15 | 22  | 18 | 1.258105065 | 0.227238   |     | ENSG00000221779 |
| 17 | 55593794 | 55594633 | 55594205 | 10 | 34  | 33 | 1.069871954 | 0.389489   |     | ENSG00000221779 |
| 17 | 55595752 | 55596122 | 55595931 | 8  | 15  | 20 | 0.791850807 | 0.763134   |     | ENSG00000221779 |
| 17 | 55596799 | 55597031 | 55596905 | 10 | 14  | 19 | 0.779478138 | 0.771518   |     | ENSG00000221779 |
| 17 | 55597252 | 55597492 | 55597344 | 9  | 10  | 11 | 0.952695502 | 0.548138   |     | ENSG00000221779 |

|    |          |          |          |    |    |    |             |             |                 |
|----|----------|----------|----------|----|----|----|-------------|-------------|-----------------|
| 17 | 55597696 | 55598244 | 55597875 | 9  | 22 | 27 | 0.853714151 | 0.715539    | ENSG00000221779 |
| 17 | 55598248 | 55598536 | 55598421 | 9  | 14 | 14 | 1.039304184 | 0.458308    | ENSG00000221779 |
| 17 | 55599444 | 55600323 | 55599884 | 16 | 48 | 33 | 1.497820736 | 0.0333225   | ENSG00000221779 |
| 17 | 55602376 | 55602876 | 55602647 | 9  | 23 | 23 | 1.039304184 | 0.447157    | ENSG00000221779 |
| 17 | 55602974 | 55603851 | 55603623 | 14 | 45 | 45 | 1.039304184 | 0.426858    | ENSG00000221779 |
| 17 | 55606700 | 55607125 | 55606946 | 15 | 23 | 11 | 2.078608368 | 0.0154752   | ENSG00000221779 |
| 17 | 55608573 | 55608831 | 55608704 | 8  | 9  | 5  | 1.73217364  | 0.133894    | ENSG00000221779 |
| 17 | 55621898 | 55622152 | 55622076 | 9  | 11 | 16 | 0.733626483 | 0.800067    | ENSG00000221779 |
| 17 | 55624022 | 55624241 | 55624122 | 9  | 9  | 6  | 1.484720263 | 0.204387    | ENSG00000221779 |
| 17 | 55650924 | 55651148 | 55651038 | 8  | 9  | 0  | 10.39304184 | 0.000803859 | ENSG00000222433 |
| 17 | 55653308 | 55653597 | 55653458 | 9  | 12 | 11 | 1.125912866 | 0.382541    | ENSG00000222433 |
| 17 | 55656970 | 55657317 | 55657139 | 8  | 13 | 8  | 1.616695398 | 0.123553    | ENSG00000222433 |
| 17 | 55661288 | 55661905 | 55661726 | 16 | 35 | 33 | 1.100439724 | 0.344144    | ENSG00000211027 |
| 17 | 55662518 | 55662906 | 55662806 | 13 | 19 | 16 | 1.222710805 | 0.269115    | ENSG00000221009 |
| 17 | 55663283 | 55663872 | 55663577 | 16 | 34 | 46 | 0.773949924 | 0.877125    | ENSG00000221009 |
| 17 | 55665186 | 55665422 | 55665303 | 8  | 11 | 4  | 2.494330042 | 0.0324033   | ENSG00000221009 |
| 17 | 55667859 | 55668234 | 55668025 | 9  | 15 | 15 | 1.039304184 | 0.456923    | ENSG00000221009 |
| 17 | 55668695 | 55668986 | 55668840 | 10 | 13 | 8  | 1.616695398 | 0.123553    | ENSG00000221009 |
| 17 | 55669682 | 55669929 | 55669788 | 8  | 9  | 9  | 1.039304184 | 0.466079    | ENSG00000221009 |
| 17 | 55671069 | 55671553 | 55671248 | 11 | 20 | 13 | 1.558956276 | 0.0943292   | ENSG00000221009 |
| 17 | 55672775 | 55672982 | 55672846 | 8  | 11 | 11 | 1.039304184 | 0.462773    | ENSG00000221009 |
| 17 | 55673852 | 55674248 | 55673983 | 9  | 16 | 15 | 1.104260696 | 0.387363    | ENSG00000221009 |
| 17 | 55675078 | 55675290 | 55675184 | 8  | 11 | 10 | 1.133786383 | 0.380636    | ENSG00000221009 |
| 17 | 55676616 | 55676876 | 55676746 | 8  | 10 | 9  | 1.143234603 | 0.378307    | ENSG00000221009 |
| 17 | 55676943 | 55677162 | 55677094 | 8  | 9  | 6  | 1.484720263 | 0.204387    | ENSG00000221009 |
| 17 | 55679175 | 55679354 | 55679299 | 9  | 9  | 3  | 2.598260461 | 0.0397929   | ENSG00000221009 |
| 17 | 55681013 | 55681411 | 55681266 | 11 | 18 | 29 | 0.658225983 | 0.927623    | ENSG00000221009 |
| 17 | 55681859 | 55682057 | 55681958 | 9  | 9  | 9  | 1.039304184 | 0.466079    | ENSG00000221009 |
| 17 | 55682766 | 55683004 | 55682908 | 11 | 14 | 12 | 1.199197136 | 0.313881    | ENSG00000221009 |
| 17 | 55684651 | 55684959 | 55684805 | 8  | 11 | 8  | 1.385738912 | 0.224757    | ENSG00000221009 |
| 17 | 55686425 | 55686636 | 55686511 | 10 | 11 | 10 | 1.133786383 | 0.380636    | ENSG00000221009 |
| 17 | 55687900 | 55688298 | 55688098 | 9  | 17 | 14 | 1.247165021 | 0.261378    | ENSG00000212648 |
| 17 | 55688401 | 55688657 | 55688529 | 9  | 10 | 15 | 0.714521627 | 0.810948    | ENSG00000212648 |
| 17 | 55689006 | 55689475 | 55689296 | 11 | 22 | 19 | 1.195199812 | 0.27834     | ENSG00000212648 |

|    |          |          |          |    |    |    |             |           |                 |
|----|----------|----------|----------|----|----|----|-------------|-----------|-----------------|
| 17 | 55689641 | 55689979 | 55689810 | 15 | 19 | 20 | 0.989813509 | 0.514009  | ENSG00000212648 |
| 17 | 55690030 | 55690279 | 55690140 | 9  | 11 | 25 | 0.479678854 | 0.986393  | ENSG00000212648 |
| 17 | 55690403 | 55690788 | 55690570 | 11 | 17 | 19 | 0.935373766 | 0.583208  | ENSG00000212648 |
| 17 | 55691158 | 55691461 | 55691328 | 10 | 12 | 9  | 1.35109544  | 0.232899  | ENSG00000212648 |
| 17 | 55692142 | 55692432 | 55692281 | 8  | 12 | 10 | 1.228268581 | 0.305344  | ENSG00000212648 |
| 17 | 55693022 | 55693281 | 55693180 | 11 | 13 | 16 | 0.855897563 | 0.670115  | ENSG00000212648 |
| 17 | 55700340 | 55700592 | 55700463 | 8  | 10 | 8  | 1.27026067  | 0.293854  | ENSG00000212648 |
| 17 | 55701516 | 55701810 | 55701663 | 13 | 16 | 17 | 0.981565063 | 0.523072  | ENSG00000212648 |
| 17 | 55702073 | 55702742 | 55702424 | 11 | 27 | 19 | 1.455025858 | 0.0967688 | ENSG00000212648 |
| 17 | 55703423 | 55703832 | 55703602 | 9  | 15 | 13 | 1.187776211 | 0.317363  | ENSG00000212648 |
| 17 | 55704715 | 55705210 | 55705051 | 10 | 20 | 12 | 1.67887599  | 0.0659142 | ENSG00000212648 |
| 17 | 55705281 | 55705863 | 55705460 | 17 | 30 | 16 | 1.895201748 | 0.0144147 | ENSG00000212648 |
| 17 | 55706537 | 55706837 | 55706696 | 8  | 12 | 9  | 1.35109544  | 0.232899  | ENSG00000212648 |
| 17 | 55706970 | 55707346 | 55707125 | 12 | 19 | 14 | 1.385738912 | 0.166049  | ENSG00000212648 |
| 17 | 55708480 | 55709010 | 55708855 | 9  | 19 | 14 | 1.385738912 | 0.166049  | ENSG00000212648 |
| 17 | 55709186 | 55709580 | 55709401 | 16 | 24 | 13 | 1.855900329 | 0.0279411 | ENSG00000212648 |
| 17 | 55710432 | 55710634 | 55710533 | 8  | 9  | 8  | 1.154782427 | 0.375434  | ENSG00000212648 |
| 17 | 55712975 | 55713218 | 55713144 | 8  | 12 | 8  | 1.501217155 | 0.168286  | ENSG00000212648 |
| 17 | 55713695 | 55714339 | 55713906 | 12 | 30 | 22 | 1.400801292 | 0.107495  | ENSG00000212648 |
| 17 | 55715118 | 55715559 | 55715443 | 11 | 20 | 22 | 0.948929907 | 0.57038   | ENSG00000212648 |
| 17 | 55715566 | 55715822 | 55715694 | 9  | 10 | 10 | 1.039304184 | 0.464387  | ENSG00000212648 |
| 17 | 55715877 | 55716146 | 55716011 | 11 | 12 | 13 | 0.965068171 | 0.538344  | ENSG00000212648 |
| 17 | 55716931 | 55717342 | 55717093 | 8  | 16 | 27 | 0.631006112 | 0.93773   | ENSG00000212648 |
| 17 | 55718243 | 55718578 | 55718410 | 10 | 15 | 10 | 1.511715177 | 0.140236  | ENSG00000212648 |
| 17 | 55719516 | 55719848 | 55719682 | 15 | 19 | 24 | 0.831443347 | 0.733913  | ENSG00000212648 |
| 17 | 55720649 | 55720995 | 55720859 | 8  | 12 | 16 | 0.794762023 | 0.738004  | ENSG00000212648 |
| 17 | 55721535 | 55722181 | 55721820 | 10 | 28 | 19 | 1.506991067 | 0.0757238 | ENSG00000212648 |
| 17 | 55722219 | 55722625 | 55722529 | 8  | 15 | 15 | 1.039304184 | 0.456923  | ENSG00000212648 |
| 17 | 55722792 | 55723211 | 55723032 | 8  | 18 | 23 | 0.822782479 | 0.740651  | ENSG00000212648 |
| 17 | 55723301 | 55723524 | 55723370 | 9  | 12 | 11 | 1.125912866 | 0.382541  | ENSG00000212648 |
| 17 | 55724137 | 55724845 | 55724361 | 14 | 35 | 37 | 0.984603964 | 0.527342  | ENSG00000212648 |
| 17 | 55724991 | 55725187 | 55725071 | 10 | 10 | 10 | 1.039304184 | 0.464387  | ENSG00000212648 |
| 17 | 55725666 | 55726094 | 55725868 | 16 | 28 | 34 | 0.861137753 | 0.726418  | ENSG00000212648 |
| 17 | 55726454 | 55726639 | 55726528 | 8  | 8  | 13 | 0.668124118 | 0.835294  | ENSG00000212648 |

|    |          |          |          |    |    |    |             |            |                       |
|----|----------|----------|----------|----|----|----|-------------|------------|-----------------------|
| 17 | 55727199 | 55727455 | 55727327 | 12 | 14 | 11 | 1.29913023  | 0.246308   | ENSG00000212648       |
| 17 | 55728520 | 55728727 | 55728564 | 14 | 16 | 11 | 1.472347594 | 0.147517   | ENSG00000212648       |
| 17 | 55728958 | 55729254 | 55729106 | 10 | 13 | 13 | 1.039304184 | 0.45974    | ENSG00000212648       |
| 17 | 55731377 | 55731868 | 55731689 | 9  | 20 | 21 | 0.992063085 | 0.511305   | ENSG00000212648       |
| 17 | 55732077 | 55732590 | 55732256 | 9  | 22 | 13 | 1.707428303 | 0.0525925  | ENSG00000212648       |
| 17 | 55732927 | 55733159 | 55733037 | 8  | 11 | 11 | 1.039304184 | 0.462773   | ENSG00000212648       |
| 17 | 55733298 | 55733529 | 55733420 | 8  | 10 | 6  | 1.63319229  | 0.146906   | ENSG00000212648       |
| 17 | 55734672 | 55734988 | 55734833 | 15 | 19 | 15 | 1.29913023  | 0.214784   | ENSG00000212648       |
| 17 | 55735224 | 55735600 | 55735421 | 11 | 18 | 22 | 0.85855563  | 0.691398   | ENSG00000212648       |
| 17 | 55735781 | 55736173 | 55736017 | 14 | 20 | 12 | 1.67887599  | 0.0659142  | ENSG00000212648       |
| 17 | 55736312 | 55736566 | 55736430 | 11 | 13 | 12 | 1.11925066  | 0.384109   | ENSG00000212648       |
| 17 | 55739628 | 55739989 | 55739820 | 8  | 13 | 2  | 4.850086193 | 0.00164564 | ENSG00000212648       |
| 17 | 55740227 | 55740497 | 55740375 | 10 | 13 | 10 | 1.32275078  | 0.240023   | ENSG00000212648       |
| 17 | 55740980 | 55741253 | 55741100 | 10 | 10 | 10 | 1.039304184 | 0.464387   | ENSG00000212648       |
| 17 | 55741353 | 55741640 | 55741492 | 10 | 13 | 7  | 1.818782322 | 0.0805123  | ENSG00000212648       |
| 17 | 55744053 | 55744339 | 55744193 | 8  | 11 | 18 | 0.656402643 | 0.879847   | ENSG00000212648       |
| 17 | 55746649 | 55746892 | 55746770 | 9  | 9  | 5  | 1.73217364  | 0.133894   | ENSG00000212648       |
| 17 | 55747817 | 55748280 | 55748000 | 19 | 32 | 25 | 1.319116849 | 0.143169   | ENSG00000212648       |
| 17 | 55748424 | 55748718 | 55748595 | 9  | 12 | 13 | 0.965068171 | 0.538344   | ENSG00000212648       |
| 17 | 55750138 | 55750387 | 55750275 | 10 | 13 | 10 | 1.32275078  | 0.240023   | ENSG00000212648       |
| 17 | 55752490 | 55752779 | 55752609 | 12 | 16 | 10 | 1.606197376 | 0.104477   | ENSG00000212648       |
| 17 | 55752924 | 55753317 | 55753138 | 10 | 18 | 25 | 0.759491519 | 0.823082   | ENSG00000212648       |
| 17 | 55753377 | 55754198 | 55754019 | 12 | 34 | 36 | 0.98312558  | 0.529542   | ENSG00000212648       |
| 17 | 55754262 | 55754450 | 55754357 | 8  | 10 | 9  | 1.143234603 | 0.378307   | ENSG00000212648       |
| 17 | 55756115 | 55756348 | 55756200 | 9  | 9  | 6  | 1.484720263 | 0.204387   | ENSG00000212648       |
| 17 | 55757146 | 55757450 | 55757309 | 11 | 13 | 7  | 1.818782322 | 0.0805123  | ENSG00000212648       |
| 17 | 55758862 | 55759187 | 55759024 | 9  | 11 | 8  | 1.385738912 | 0.224757   | ENSG00000212648       |
| 17 | 55759769 | 55760122 | 55759996 | 8  | 12 | 9  | 1.35109544  | 0.232899   | ENSG00000212648       |
| 17 | 55761832 | 55762025 | 55761927 | 8  | 9  | 8  | 1.154782427 | 0.375434   | ENSG00000212648       |
| 17 | 55762106 | 55762384 | 55762245 | 8  | 12 | 15 | 0.84443465  | 0.678289   | ENSG00000212648       |
| 17 | 55765268 | 55765609 | 55765433 | 9  | 11 | 13 | 0.890832158 | 0.618492   | ENSG00000212648       |
| 17 | 55765816 | 55766395 | 55766095 | 9  | 22 | 16 | 1.406117426 | 0.139742   | ENSG00000212648       |
| 17 | 55767615 | 55767982 | 55767794 | 8  | 16 | 14 | 1.177878075 | 0.320433   | USP32 ENSG00000170832 |
| 17 | 55776869 | 55777194 | 55777031 | 15 | 18 | 18 | 1.039304184 | 0.453018   | USP32 ENSG00000170832 |

|    |          |          |          |    |     |    |             |             |       |                 |
|----|----------|----------|----------|----|-----|----|-------------|-------------|-------|-----------------|
| 17 | 55777339 | 55777858 | 55777598 | 28 | 51  | 24 | 2.161752703 | 0.000492894 | USP32 | ENSG00000170832 |
| 17 | 55778074 | 55778418 | 55778243 | 11 | 14  | 13 | 1.113540197 | 0.385405    | USP32 | ENSG00000170832 |
| 17 | 55778748 | 55779409 | 55779067 | 17 | 34  | 22 | 1.581549846 | 0.0410466   | USP32 | ENSG00000170832 |
| 17 | 55780171 | 55780429 | 55780300 | 8  | 10  | 7  | 1.429043253 | 0.21536     | USP32 | ENSG00000170832 |
| 17 | 55782992 | 55783589 | 55783118 | 14 | 28  | 28 | 1.039304184 | 0.441896    | USP32 | ENSG00000170832 |
| 17 | 55784239 | 55784533 | 55784386 | 9  | 13  | 18 | 0.765803083 | 0.780427    | USP32 | ENSG00000170832 |
| 17 | 55784646 | 55785094 | 55784921 | 28 | 38  | 30 | 1.307511716 | 0.130608    | USP32 | ENSG00000170832 |
| 17 | 55785242 | 55785425 | 55785315 | 8  | 9   | 23 | 0.43304341  | 0.990856    | USP32 | ENSG00000170832 |
| 17 | 55785974 | 55786199 | 55786100 | 8  | 9   | 10 | 0.944821986 | 0.553851    | USP32 | ENSG00000170832 |
| 17 | 55786343 | 55786968 | 55786522 | 10 | 26  | 23 | 1.169217207 | 0.28753     | USP32 | ENSG00000170832 |
| 17 | 55787206 | 55787747 | 55787574 | 13 | 28  | 24 | 1.205592854 | 0.245174    | USP32 | ENSG00000170832 |
| 17 | 55787932 | 55789321 | 55788363 | 35 | 132 | 87 | 1.570766551 | 0.000436137 | USP32 | ENSG00000170832 |
| 17 | 55789470 | 55790051 | 55789878 | 13 | 25  | 16 | 1.589524046 | 0.0646994   | USP32 | ENSG00000170832 |
| 17 | 55790324 | 55790588 | 55790474 | 9  | 11  | 1  | 6.235825105 | 0.0013754   | USP32 | ENSG00000170832 |
| 17 | 55790732 | 55791388 | 55791098 | 12 | 30  | 39 | 0.805460743 | 0.819719    | USP32 | ENSG00000170832 |
| 17 | 55791422 | 55791698 | 55791560 | 10 | 12  | 11 | 1.125912866 | 0.382541    | USP32 | ENSG00000170832 |
| 17 | 55794166 | 55794447 | 55794343 | 8  | 12  | 8  | 1.501217155 | 0.168286    | USP32 | ENSG00000170832 |
| 17 | 55795004 | 55795345 | 55795174 | 18 | 23  | 3  | 6.235825105 | 1.63E-05    | USP32 | ENSG00000170832 |
| 17 | 55795995 | 55796277 | 55796151 | 9  | 12  | 10 | 1.228268581 | 0.305344    | USP32 | ENSG00000170832 |
| 17 | 55796315 | 55796597 | 55796465 | 8  | 9   | 11 | 0.86608682  | 0.635181    | USP32 | ENSG00000170832 |
| 17 | 55797065 | 55797395 | 55797221 | 8  | 10  | 10 | 1.039304184 | 0.464387    | USP32 | ENSG00000170832 |
| 17 | 55797542 | 55797743 | 55797624 | 8  | 9   | 4  | 2.078608368 | 0.0785659   | USP32 | ENSG00000170832 |
| 17 | 55800203 | 55800434 | 55800360 | 9  | 10  | 7  | 1.429043253 | 0.21536     | USP32 | ENSG00000170832 |
| 17 | 55801718 | 55801903 | 55801810 | 8  | 8   | 8  | 1.039304184 | 0.46786     | USP32 | ENSG00000170832 |
| 17 | 55802873 | 55803168 | 55803001 | 11 | 14  | 3  | 3.897390691 | 0.00295882  | USP32 | ENSG00000170832 |
| 17 | 55803768 | 55804286 | 55803937 | 10 | 24  | 35 | 0.721739017 | 0.898423    | USP32 | ENSG00000170832 |
| 17 | 55804288 | 55804548 | 55804446 | 15 | 17  | 19 | 0.935373766 | 0.583208    | USP32 | ENSG00000170832 |
| 17 | 55804845 | 55805149 | 55804997 | 12 | 17  | 10 | 1.700679574 | 0.0766266   | USP32 | ENSG00000170832 |
| 17 | 55807265 | 55807534 | 55807399 | 9  | 11  | 1  | 6.235825105 | 0.0013754   | USP32 | ENSG00000170832 |
| 17 | 55814165 | 55814908 | 55814315 | 20 | 45  | 32 | 1.448727045 | 0.0500654   | USP32 | ENSG00000170832 |
| 17 | 55815557 | 55815933 | 55815727 | 12 | 19  | 17 | 1.154782427 | 0.327751    | USP32 | ENSG00000170832 |
| 17 | 55816117 | 55816628 | 55816379 | 9  | 20  | 28 | 0.752599582 | 0.843303    | USP32 | ENSG00000170832 |
| 17 | 55818025 | 55818728 | 55818351 | 13 | 33  | 23 | 1.472347594 | 0.0705377   | USP32 | ENSG00000170832 |
| 17 | 55820862 | 55821361 | 55821048 | 11 | 26  | 23 | 1.169217207 | 0.28753     | USP32 | ENSG00000170832 |

|    |          |          |          |    |     |     |             |           |          |                 |
|----|----------|----------|----------|----|-----|-----|-------------|-----------|----------|-----------------|
| 17 | 55822413 | 55822668 | 55822534 | 8  | 9   | 12  | 0.799464757 | 0.707717  | USP32    | ENSG00000170832 |
| 17 | 55822709 | 55825174 | 55824699 | 45 | 245 | 165 | 1.540173671 | 6.88E-06  | USP32    | ENSG00000170832 |
| 17 | 55825225 | 55825646 | 55825402 | 19 | 29  | 44  | 0.692869456 | 0.943176  | USP32    | ENSG00000170832 |
| 17 | 55826260 | 55826783 | 55826613 | 19 | 33  | 24  | 1.413453691 | 0.0918299 | USP32    | ENSG00000170832 |
| 17 | 55827799 | 55828009 | 55827957 | 9  | 12  | 15  | 0.84443465  | 0.678289  | USP32    | ENSG00000170832 |
| 17 | 55828588 | 55828887 | 55828736 | 9  | 14  | 13  | 1.113540197 | 0.385405  | USP32    | ENSG00000170832 |
| 17 | 55829344 | 55829538 | 55829441 | 11 | 12  | 8   | 1.501217155 | 0.168286  | USP32    | ENSG00000170832 |
| 17 | 55830476 | 55830665 | 55830610 | 9  | 10  | 11  | 0.952695502 | 0.548138  | USP32    | ENSG00000170832 |
| 17 | 55831142 | 55831441 | 55831286 | 8  | 12  | 6   | 1.930136342 | 0.071303  | USP32    | ENSG00000170832 |
| 17 | 55831881 | 55832079 | 55831980 | 9  | 10  | 19  | 0.571617301 | 0.938875  | USP32    | ENSG00000170832 |
| 17 | 55832714 | 55832936 | 55832828 | 8  | 10  | 10  | 1.039304184 | 0.464387  | USP32    | ENSG00000170832 |
| 17 | 55834124 | 55834398 | 55834246 | 10 | 12  | 16  | 0.794762023 | 0.738004  | USP32    | ENSG00000170832 |
| 17 | 55834722 | 55835087 | 55834901 | 17 | 24  | 20  | 1.237266886 | 0.234075  | USP32    | ENSG00000170832 |
| 17 | 55839040 | 55839474 | 55839352 | 14 | 22  | 23  | 0.995999843 | 0.506279  | USP32    | ENSG00000170832 |
| 17 | 55839522 | 55839845 | 55839674 | 10 | 14  | 12  | 1.199197136 | 0.313881  | C17orf64 | ENSG00000141371 |
| 17 | 55840991 | 55841193 | 55841092 | 8  | 9   | 16  | 0.611355402 | 0.899375  | C17orf64 | ENSG00000141371 |
| 17 | 55841691 | 55841884 | 55841798 | 8  | 9   | 7   | 1.29913023  | 0.286504  | C17orf64 | ENSG00000141371 |
| 17 | 55842190 | 55842554 | 55842361 | 10 | 16  | 10  | 1.606197376 | 0.104477  | C17orf64 | ENSG00000141371 |
| 17 | 55844733 | 55845148 | 55845053 | 15 | 23  | 17  | 1.385738912 | 0.144406  | C17orf64 | ENSG00000141371 |
| 17 | 55847143 | 55848005 | 55847574 | 11 | 36  | 33  | 1.131007495 | 0.301525  | C17orf64 | ENSG00000141371 |
| 17 | 55848211 | 55849120 | 55848704 | 11 | 38  | 31  | 1.266651975 | 0.159121  | C17orf64 | ENSG00000141371 |
| 17 | 55853186 | 55853427 | 55853339 | 12 | 14  | 12  | 1.199197136 | 0.313881  | C17orf64 | ENSG00000141371 |
| 17 | 55854101 | 55854377 | 55854207 | 10 | 13  | 5   | 2.425043097 | 0.0262442 | C17orf64 | ENSG00000141371 |
| 17 | 55854385 | 55854617 | 55854501 | 8  | 11  | 9   | 1.247165021 | 0.300052  | C17orf64 | ENSG00000141371 |
| 17 | 55854955 | 55855348 | 55855169 | 10 | 18  | 22  | 0.85855563  | 0.691398  | C17orf64 | ENSG00000141371 |
| 17 | 55856324 | 55856512 | 55856418 | 8  | 8   | 10  | 0.850339787 | 0.645072  | C17orf64 | ENSG00000141371 |
| 17 | 55857827 | 55858083 | 55857952 | 8  | 10  | 15  | 0.714521627 | 0.810948  | C17orf64 | ENSG00000141371 |
| 17 | 55858386 | 55858626 | 55858468 | 8  | 12  | 17  | 0.750608578 | 0.78992   | C17orf64 | ENSG00000141371 |
| 17 | 55858800 | 55859209 | 55859030 | 9  | 15  | 15  | 1.039304184 | 0.456923  | C17orf64 | ENSG00000141371 |
| 17 | 55860238 | 55860648 | 55860387 | 10 | 16  | 17  | 0.981565063 | 0.523072  | C17orf64 | ENSG00000141371 |
| 17 | 55861140 | 55861556 | 55861426 | 11 | 19  | 18  | 1.094004404 | 0.389177  |          | ENSG00000213228 |
| 17 | 55863312 | 55864110 | 55863708 | 11 | 33  | 36  | 0.955036277 | 0.577843  |          | ENSG00000213228 |
| 17 | 55866221 | 55866402 | 55866305 | 8  | 8   | 2   | 3.117912553 | 0.0283184 |          | ENSG00000213228 |
| 17 | 55866713 | 55867020 | 55866875 | 8  | 11  | 10  | 1.133786383 | 0.380636  |          | ENSG00000213228 |



|    |          |          |          |    |    |    |             |             |                        |
|----|----------|----------|----------|----|----|----|-------------|-------------|------------------------|
| 17 | 55867536 | 55868513 | 55868245 | 40 | 87 | 60 | 1.499324069 | 0.00697308  | ENSG00000213228        |
| 17 | 55868851 | 55869044 | 55868944 | 8  | 10 | 16 | 0.672490943 | 0.854309    | ENSG00000213228        |
| 17 | 55869505 | 55869799 | 55869663 | 9  | 12 | 9  | 1.35109544  | 0.232899    | ENSG00000213228        |
| 17 | 55871424 | 55871767 | 55871595 | 18 | 24 | 5  | 4.330434101 | 0.000108998 | ENSG00000213228        |
| 17 | 55874062 | 55874801 | 55874497 | 15 | 34 | 42 | 0.845945266 | 0.770954    | ENSG00000213228        |
| 17 | 55875969 | 55877098 | 55876351 | 13 | 49 | 42 | 1.208493237 | 0.180149    | ENSG00000213228        |
| 17 | 55877759 | 55878057 | 55877930 | 14 | 18 | 13 | 1.41048425  | 0.160361    | ENSG00000213228        |
| 17 | 55879474 | 55879707 | 55879633 | 9  | 10 | 11 | 0.952695502 | 0.548138    | ENSG00000213228        |
| 17 | 55881174 | 55881426 | 55881300 | 8  | 10 | 16 | 0.672490943 | 0.854309    | ENSG00000213228        |
| 17 | 55883816 | 55884185 | 55884028 | 9  | 13 | 15 | 0.909391161 | 0.604792    | ENSG00000213228        |
| 17 | 55886802 | 55887104 | 55886969 | 10 | 13 | 11 | 1.212521548 | 0.309909    | ENSG00000213228        |
| 17 | 55887634 | 55887902 | 55887754 | 13 | 16 | 7  | 2.208521392 | 0.0257604   | ENSG00000213228        |
| 17 | 55889274 | 55889681 | 55889452 | 17 | 24 | 16 | 1.528388506 | 0.0846311   | ENSG00000213228        |
| 17 | 55891171 | 55891747 | 55891350 | 11 | 23 | 10 | 2.267572766 | 0.00903625  | ENSG00000213228        |
| 17 | 55891820 | 55892216 | 55891986 | 14 | 19 | 15 | 1.29913023  | 0.214784    | ENSG00000213228        |
| 17 | 55896627 | 55897119 | 55896870 | 18 | 27 | 18 | 1.531606166 | 0.072168    | ENSG00000213228        |
| 17 | 55897342 | 55897526 | 55897474 | 8  | 11 | 7  | 1.558956276 | 0.158273    | ENSG00000213228        |
| 17 | 55897895 | 55898290 | 55898065 | 10 | 15 | 15 | 1.039304184 | 0.456923    | ENSG00000213228        |
| 17 | 55898356 | 55898838 | 55898528 | 11 | 22 | 21 | 1.086545284 | 0.390103    | ENSG00000213228        |
| 17 | 55899677 | 55899933 | 55899805 | 9  | 13 | 16 | 0.855897563 | 0.670115    | ENSG00000213228        |
| 17 | 55900141 | 55900531 | 55900352 | 11 | 18 | 18 | 1.039304184 | 0.453018    | ENSG00000213228        |
| 17 | 55900672 | 55900979 | 55900820 | 13 | 14 | 16 | 0.917033104 | 0.598778    | ENSG00000213228        |
| 17 | 55901890 | 55902259 | 55902080 | 20 | 27 | 21 | 1.32275078  | 0.160553    | ENSG00000213228        |
| 17 | 55903405 | 55903671 | 55903538 | 8  | 10 | 6  | 1.63319229  | 0.146906    | ENSG00000213228        |
| 17 | 55903721 | 55904056 | 55903888 | 8  | 12 | 5  | 2.251825733 | 0.0404733   | ENSG00000213228        |
| 17 | 55904628 | 55904851 | 55904739 | 12 | 12 | 16 | 0.794762023 | 0.738004    | ENSG00000213228        |
| 17 | 55905141 | 55905398 | 55905257 | 9  | 11 | 12 | 0.959357709 | 0.543005    | ENSG00000213228        |
| 17 | 55905860 | 55906357 | 55906039 | 12 | 22 | 13 | 1.707428303 | 0.0525925   | ENSG00000213228        |
| 17 | 55907906 | 55908306 | 55908223 | 10 | 16 | 22 | 0.768181354 | 0.79945     | ENSG00000213228        |
| 17 | 55908934 | 55909430 | 55909135 | 10 | 21 | 25 | 0.879411233 | 0.673643    | ENSG00000213228        |
| 17 | 55909949 | 55910140 | 55910044 | 8  | 8  | 11 | 0.779478138 | 0.719708    | ENSG00000213228        |
| 17 | 55911973 | 55912191 | 55912082 | 9  | 9  | 5  | 1.73217364  | 0.133894    | ENSG00000213228        |
| 17 | 55912745 | 55913181 | 55913032 | 14 | 20 | 33 | 0.641923173 | 0.948808    | APPBP2 ENSG00000062725 |
| 17 | 55913263 | 55913569 | 55913416 | 9  | 13 | 27 | 0.519652092 | 0.981283    | APPBP2 ENSG00000062725 |

|    |          |          |          |     |     |     |             |            |        |                 |
|----|----------|----------|----------|-----|-----|-----|-------------|------------|--------|-----------------|
| 17 | 55913670 | 55913985 | 55913827 | 9   | 12  | 14  | 0.900730293 | 0.611333   | APPBP2 | ENSG00000062725 |
| 17 | 55920705 | 55920980 | 55920842 | 9   | 14  | 14  | 1.039304184 | 0.458308   | APPBP2 | ENSG00000062725 |
| 17 | 55926138 | 55926444 | 55926291 | 12  | 14  | 16  | 0.917033104 | 0.598778   | APPBP2 | ENSG00000062725 |
| 17 | 55926492 | 55926855 | 55926687 | 15  | 21  | 22  | 0.994117046 | 0.508733   | APPBP2 | ENSG00000062725 |
| 17 | 55927635 | 55927931 | 55927783 | 11  | 14  | 5   | 2.598260461 | 0.0167748  | APPBP2 | ENSG00000062725 |
| 17 | 55929240 | 55929529 | 55929384 | 8   | 13  | 14  | 0.970017239 | 0.534076   | APPBP2 | ENSG00000062725 |
| 17 | 55931965 | 55932156 | 55932035 | 9   | 10  | 12  | 0.879411233 | 0.62639    | APPBP2 | ENSG00000062725 |
| 17 | 55932445 | 55932724 | 55932571 | 8   | 12  | 6   | 1.930136342 | 0.071303   | APPBP2 | ENSG00000062725 |
| 17 | 55933288 | 55933467 | 55933316 | 8   | 8   | 7   | 1.169217207 | 0.371848   | APPBP2 | ENSG00000062725 |
| 17 | 55933812 | 55934350 | 55933991 | 16  | 28  | 25  | 1.159223898 | 0.291166   | APPBP2 | ENSG00000062725 |
| 17 | 55934856 | 55935116 | 55935003 | 9   | 11  | 7   | 1.558956276 | 0.158273   | APPBP2 | ENSG00000062725 |
| 17 | 55937016 | 55937206 | 55937095 | 9   | 9   | 11  | 0.86608682  | 0.635181   | APPBP2 | ENSG00000062725 |
| 17 | 55938290 | 55938843 | 55938604 | 8   | 20  | 18  | 1.148704625 | 0.329698   | APPBP2 | ENSG00000062725 |
| 17 | 55939190 | 55939479 | 55939334 | 9   | 9   | 6   | 1.484720263 | 0.204387   | APPBP2 | ENSG00000062725 |
| 17 | 55939817 | 55940014 | 55939915 | 8   | 9   | 11  | 0.86608682  | 0.635181   | APPBP2 | ENSG00000062725 |
| 17 | 55940743 | 55941356 | 55941049 | 8   | 21  | 21  | 1.039304184 | 0.449418   | APPBP2 | ENSG00000062725 |
| 17 | 55941912 | 55942125 | 55942036 | 9   | 11  | 8   | 1.385738912 | 0.224757   | APPBP2 | ENSG00000062725 |
| 17 | 55945254 | 55945772 | 55945433 | 12  | 27  | 16  | 1.711795127 | 0.0365811  | APPBP2 | ENSG00000062725 |
| 17 | 55949343 | 55949551 | 55949459 | 8   | 10  | 7   | 1.429043253 | 0.21536    | APPBP2 | ENSG00000062725 |
| 17 | 55950921 | 55951130 | 55951025 | 8   | 8   | 17  | 0.519652092 | 0.953436   | APPBP2 | ENSG00000062725 |
| 17 | 55951889 | 55952360 | 55952053 | 9   | 19  | 14  | 1.385738912 | 0.166049   | APPBP2 | ENSG00000062725 |
| 17 | 55953063 | 55953399 | 55953231 | 9   | 14  | 14  | 1.039304184 | 0.458308   | APPBP2 | ENSG00000062725 |
| 17 | 55954270 | 55954702 | 55954523 | 9   | 15  | 13  | 1.187776211 | 0.317363   | APPBP2 | ENSG00000062725 |
| 17 | 55956326 | 55959357 | 55958442 | 44  | 241 | 164 | 1.524312804 | 1.22E-05   | APPBP2 | ENSG00000062725 |
| 17 | 55959736 | 55960118 | 55959915 | 10  | 15  | 16  | 0.978168644 | 0.526483   | APPBP2 | ENSG00000062725 |
| 17 | 55961145 | 55961665 | 55961324 | 15  | 28  | 14  | 2.009321423 | 0.0114153  | APPBP2 | ENSG00000062725 |
| 17 | 55961718 | 55962609 | 55962187 | 334 | 416 | 17  | 24.0772136  | 1.37E-104  | APPBP2 | ENSG00000062725 |
| 17 | 55965832 | 55966288 | 55966011 | 12  | 21  | 23  | 0.952695502 | 0.566563   | APPBP2 | ENSG00000062725 |
| 17 | 55966514 | 55966949 | 55966770 | 8   | 17  | 14  | 1.247165021 | 0.261378   | APPBP2 | ENSG00000062725 |
| 17 | 55967838 | 55968135 | 55967986 | 14  | 16  | 13  | 1.262012224 | 0.256887   | APPBP2 | ENSG00000062725 |
| 17 | 55968193 | 55968480 | 55968338 | 10  | 14  | 16  | 0.917033104 | 0.598778   | APPBP2 | ENSG00000062725 |
| 17 | 55975854 | 55976461 | 55976137 | 10  | 22  | 7   | 2.98799953  | 0.00188278 | APPBP2 | ENSG00000062725 |
| 17 | 55976774 | 55977444 | 55977117 | 13  | 30  | 22  | 1.400801292 | 0.107495   | APPBP2 | ENSG00000062725 |
| 17 | 55978178 | 55978973 | 55978656 | 12  | 33  | 27  | 1.262012224 | 0.179092   | APPBP2 | ENSG00000062725 |

|    |          |          |          |    |    |    |             |             |        |                 |
|----|----------|----------|----------|----|----|----|-------------|-------------|--------|-----------------|
| 17 | 55985064 | 55985563 | 55985243 | 10 | 19 | 24 | 0.831443347 | 0.733913    | APPBP2 | ENSG00000062725 |
| 17 | 55986550 | 55986772 | 55986645 | 8  | 8  | 11 | 0.779478138 | 0.719708    | APPBP2 | ENSG00000062725 |
| 17 | 55987244 | 55987489 | 55987383 | 9  | 12 | 12 | 1.039304184 | 0.461227    | APPBP2 | ENSG00000062725 |
| 17 | 55989425 | 55990435 | 55990106 | 15 | 48 | 46 | 1.083529894 | 0.347017    | APPBP2 | ENSG00000062725 |
| 17 | 55993231 | 55993458 | 55993344 | 8  | 10 | 12 | 0.879411233 | 0.62639     | APPBP2 | ENSG00000062725 |
| 17 | 55993823 | 55994305 | 55994025 | 13 | 26 | 18 | 1.476905946 | 0.0928898   | APPBP2 | ENSG00000062725 |
| 17 | 55994739 | 55994954 | 55994879 | 10 | 12 | 11 | 1.125912866 | 0.382541    | APPBP2 | ENSG00000062725 |
| 17 | 55995019 | 55995220 | 55995119 | 8  | 10 | 15 | 0.714521627 | 0.810948    | APPBP2 | ENSG00000062725 |
| 17 | 55995419 | 55995852 | 55995681 | 10 | 18 | 16 | 1.161575265 | 0.325582    | PPM1D  | ENSG00000170836 |
| 17 | 55995924 | 55996131 | 55996030 | 8  | 11 | 12 | 0.959357709 | 0.543005    | PPM1D  | ENSG00000170836 |
| 17 | 55996686 | 55997048 | 55996891 | 10 | 15 | 14 | 1.10859113  | 0.386477    | PPM1D  | ENSG00000170836 |
| 17 | 55997446 | 55997849 | 55997670 | 12 | 18 | 7  | 2.468347438 | 0.0112499   | PPM1D  | ENSG00000170836 |
| 17 | 55998654 | 55998951 | 55998802 | 8  | 10 | 27 | 0.408298072 | 0.996356    | PPM1D  | ENSG00000170836 |
| 17 | 55999062 | 55999241 | 55999174 | 8  | 8  | 19 | 0.467686883 | 0.977188    | PPM1D  | ENSG00000170836 |
| 17 | 56000009 | 56000555 | 56000260 | 15 | 30 | 25 | 1.239170374 | 0.208284    | PPM1D  | ENSG00000170836 |
| 17 | 56001646 | 56002281 | 56002045 | 27 | 54 | 35 | 1.587825837 | 0.0142195   | PPM1D  | ENSG00000170836 |
| 17 | 56003383 | 56003747 | 56003556 | 8  | 13 | 24 | 0.582010343 | 0.952977    | PPM1D  | ENSG00000170836 |
| 17 | 56003812 | 56004163 | 56003941 | 10 | 14 | 21 | 0.708616489 | 0.853486    | PPM1D  | ENSG00000170836 |
| 17 | 56005129 | 56005361 | 56005276 | 8  | 11 | 7  | 1.558956276 | 0.158273    | PPM1D  | ENSG00000170836 |
| 17 | 56005363 | 56005690 | 56005526 | 13 | 19 | 17 | 1.154782427 | 0.327751    | PPM1D  | ENSG00000170836 |
| 17 | 56005697 | 56006133 | 56005876 | 11 | 20 | 12 | 1.67887599  | 0.0659142   | PPM1D  | ENSG00000170836 |
| 17 | 56007160 | 56007380 | 56007270 | 8  | 9  | 12 | 0.799464757 | 0.707717    | PPM1D  | ENSG00000170836 |
| 17 | 56007981 | 56008286 | 56008136 | 9  | 12 | 8  | 1.501217155 | 0.168286    | PPM1D  | ENSG00000170836 |
| 17 | 56008862 | 56009174 | 56009018 | 9  | 12 | 14 | 0.900730293 | 0.611333    | PPM1D  | ENSG00000170836 |
| 17 | 56009193 | 56009382 | 56009287 | 9  | 11 | 19 | 0.623582511 | 0.908792    | PPM1D  | ENSG00000170836 |
| 17 | 56009447 | 56010175 | 56009612 | 14 | 37 | 42 | 0.91845486  | 0.650155    | PPM1D  | ENSG00000170836 |
| 17 | 56011407 | 56011613 | 56011523 | 9  | 11 | 9  | 1.247165021 | 0.300052    | PPM1D  | ENSG00000170836 |
| 17 | 56012924 | 56013253 | 56013095 | 8  | 12 | 11 | 1.125912866 | 0.382541    | PPM1D  | ENSG00000170836 |
| 17 | 56013734 | 56014042 | 56013888 | 9  | 14 | 12 | 1.199197136 | 0.313881    | PPM1D  | ENSG00000170836 |
| 17 | 56014423 | 56014603 | 56014512 | 9  | 9  | 4  | 2.078608368 | 0.0785659   | PPM1D  | ENSG00000170836 |
| 17 | 56015329 | 56016104 | 56015479 | 15 | 44 | 29 | 1.558956276 | 0.0278352   | PPM1D  | ENSG00000170836 |
| 17 | 56018149 | 56019110 | 56018853 | 21 | 69 | 37 | 1.914507708 | 0.000460978 | PPM1D  | ENSG00000170836 |
| 17 | 56019829 | 56020244 | 56020073 | 11 | 18 | 25 | 0.759491519 | 0.823082    | PPM1D  | ENSG00000170836 |
| 17 | 56022518 | 56022899 | 56022763 | 9  | 15 | 25 | 0.639571806 | 0.925462    | PPM1D  | ENSG00000170836 |

|    |          |          |          |     |     |     |             |            |       |                 |
|----|----------|----------|----------|-----|-----|-----|-------------|------------|-------|-----------------|
| 17 | 56022956 | 56024511 | 56023405 | 12  | 66  | 56  | 1.221638252 | 0.132283   | PPM1D | ENSG00000170836 |
| 17 | 56025149 | 56025392 | 56025270 | 11  | 12  | 6   | 1.930136342 | 0.071303   | PPM1D | ENSG00000170836 |
| 17 | 56026827 | 56027313 | 56027032 | 9   | 18  | 30  | 0.636992887 | 0.94353    | PPM1D | ENSG00000170836 |
| 17 | 56027951 | 56028363 | 56028216 | 11  | 18  | 18  | 1.039304184 | 0.453018   | PPM1D | ENSG00000170836 |
| 17 | 56028809 | 56029327 | 56029201 | 8   | 18  | 23  | 0.822782479 | 0.740651   | PPM1D | ENSG00000170836 |
| 17 | 56029986 | 56030195 | 56030040 | 9   | 11  | 14  | 0.831443347 | 0.68719    | PPM1D | ENSG00000170836 |
| 17 | 56030402 | 56030811 | 56030581 | 19  | 26  | 22  | 1.220052738 | 0.239999   | PPM1D | ENSG00000170836 |
| 17 | 56030892 | 56032746 | 56032427 | 334 | 621 | 141 | 4.552445089 | 3.10E-77   | PPM1D | ENSG00000170836 |
| 17 | 56032836 | 56033822 | 56033462 | 39  | 109 | 73  | 1.544911625 | 0.00170023 | PPM1D | ENSG00000170836 |
| 17 | 56033913 | 56035308 | 56034235 | 37  | 104 | 91  | 1.186162384 | 0.115334   | PPM1D | ENSG00000170836 |
| 17 | 56035506 | 56035734 | 56035662 | 8   | 10  | 7   | 1.429043253 | 0.21536    | PPM1D | ENSG00000170836 |
| 17 | 56035811 | 56036148 | 56035979 | 8   | 12  | 11  | 1.125912866 | 0.382541   | PPM1D | ENSG00000170836 |
| 17 | 56036308 | 56036631 | 56036469 | 12  | 15  | 26  | 0.615883961 | 0.942815   | PPM1D | ENSG00000170836 |
| 17 | 56037283 | 56037662 | 56037477 | 15  | 23  | 25  | 0.959357709 | 0.559486   | PPM1D | ENSG00000170836 |
| 17 | 56038377 | 56038559 | 56038543 | 8   | 9   | 12  | 0.799464757 | 0.707717   | PPM1D | ENSG00000170836 |
| 17 | 56039726 | 56040224 | 56040055 | 12  | 21  | 23  | 0.952695502 | 0.566563   | PPM1D | ENSG00000170836 |
| 17 | 56041573 | 56041882 | 56041728 | 10  | 15  | 6   | 2.375552421 | 0.0212094  | PPM1D | ENSG00000170836 |
| 17 | 56042413 | 56043066 | 56042904 | 12  | 30  | 36  | 0.870768371 | 0.717131   | PPM1D | ENSG00000170836 |
| 17 | 56043812 | 56044048 | 56043891 | 8   | 9   | 5   | 1.73217364  | 0.133894   | PPM1D | ENSG00000170836 |
| 17 | 56045001 | 56045286 | 56045123 | 13  | 16  | 11  | 1.472347594 | 0.147517   | PPM1D | ENSG00000170836 |
| 17 | 56045362 | 56045624 | 56045445 | 9   | 12  | 7   | 1.688869299 | 0.11395    | PPM1D | ENSG00000170836 |
| 17 | 56049375 | 56049695 | 56049535 | 8   | 12  | 13  | 0.965068171 | 0.538344   | PPM1D | ENSG00000170836 |
| 17 | 56049708 | 56050155 | 56049849 | 11  | 22  | 24  | 0.956159849 | 0.562938   | PPM1D | ENSG00000170836 |
| 17 | 56050297 | 56050488 | 56050369 | 8   | 8   | 12  | 0.719518281 | 0.783103   | PPM1D | ENSG00000170836 |
| 17 | 56051025 | 56051460 | 56051259 | 11  | 20  | 9   | 2.182538787 | 0.0165356  | PPM1D | ENSG00000170836 |
| 17 | 56051497 | 56052025 | 56051846 | 14  | 26  | 18  | 1.476905946 | 0.0928898  | PPM1D | ENSG00000170836 |
| 17 | 56055542 | 56055937 | 56055763 | 10  | 16  | 16  | 1.039304184 | 0.455583   | PPM1D | ENSG00000170836 |
| 17 | 56057286 | 56057554 | 56057417 | 8   | 10  | 8   | 1.27026067  | 0.293854   | PPM1D | ENSG00000170836 |
| 17 | 56058020 | 56058230 | 56058120 | 8   | 9   | 20  | 0.494906754 | 0.972617   | PPM1D | ENSG00000170836 |
| 17 | 56059203 | 56059575 | 56059402 | 9   | 14  | 15  | 0.974347673 | 0.530138   | PPM1D | ENSG00000170836 |
| 17 | 56059792 | 56060401 | 56059971 | 11  | 27  | 12  | 2.23850132  | 0.00591854 | PPM1D | ENSG00000170836 |
| 17 | 56060418 | 56060846 | 56060570 | 11  | 19  | 12  | 1.598929514 | 0.0887417  | PPM1D | ENSG00000170836 |
| 17 | 56065437 | 56065764 | 56065600 | 11  | 15  | 9   | 1.662886695 | 0.0970566  |       | ENSG00000200013 |
| 17 | 56065937 | 56066293 | 56066115 | 19  | 25  | 17  | 1.501217155 | 0.0888464  |       | ENSG00000200013 |

|    |          |          |          |    |     |     |             |             |                       |
|----|----------|----------|----------|----|-----|-----|-------------|-------------|-----------------------|
| 17 | 56068105 | 56068528 | 56068291 | 15 | 25  | 27  | 0.965068171 | 0.55304     | ENSG00000200013       |
| 17 | 56068700 | 56068946 | 56068823 | 8  | 11  | 9   | 1.247165021 | 0.300052    | ENSG00000200013       |
| 17 | 56069533 | 56070254 | 56070038 | 13 | 39  | 28  | 1.433523013 | 0.0675318   | ENSG00000200013       |
| 17 | 56070644 | 56071583 | 56070982 | 29 | 56  | 41  | 1.41048425  | 0.04383     | ENSG00000200013       |
| 17 | 56072453 | 56072741 | 56072602 | 11 | 14  | 7   | 1.948695345 | 0.0559175   | ENSG00000200013       |
| 17 | 56072768 | 56073037 | 56072946 | 14 | 18  | 12  | 1.518983039 | 0.117837    | ENSG00000200013       |
| 17 | 56073746 | 56074405 | 56074064 | 38 | 68  | 33  | 2.109176139 | 0.000111522 | ENSG00000200013       |
| 17 | 56075727 | 56075994 | 56075860 | 9  | 12  | 19  | 0.67554772  | 0.870684    | ENSG00000200013       |
| 17 | 56076458 | 56077004 | 56076603 | 8  | 19  | 23  | 0.86608682  | 0.685164    | ENSG00000200013       |
| 17 | 56078183 | 56078618 | 56078362 | 16 | 24  | 30  | 0.838148536 | 0.747023    | ENSG00000200013       |
| 17 | 56078764 | 56079072 | 56078918 | 9  | 13  | 18  | 0.765803083 | 0.780427    | ENSG00000200013       |
| 17 | 56079824 | 56080429 | 56080003 | 11 | 27  | 23  | 1.212521548 | 0.242672    | ENSG00000200013       |
| 17 | 56082949 | 56083511 | 56083332 | 14 | 28  | 19  | 1.506991067 | 0.0757238   | ENSG00000200013       |
| 17 | 56083732 | 56083913 | 56083822 | 9  | 9   | 9   | 1.039304184 | 0.466079    | ENSG00000200013       |
| 17 | 56083953 | 56084218 | 56084085 | 9  | 11  | 11  | 1.039304184 | 0.462773    | ENSG00000200013       |
| 17 | 56085042 | 56085472 | 56085199 | 18 | 27  | 20  | 1.385738912 | 0.126232    | ENSG00000200013       |
| 17 | 56088575 | 56088890 | 56088724 | 9  | 12  | 17  | 0.750608578 | 0.78992     | ENSG00000200013       |
| 17 | 56090184 | 56090555 | 56090349 | 11 | 16  | 10  | 1.606197376 | 0.104477    | ENSG00000200013       |
| 17 | 56093680 | 56093939 | 56093783 | 9  | 11  | 12  | 0.959357709 | 0.543005    | ENSG00000200013       |
| 17 | 56095022 | 56096113 | 56095155 | 11 | 47  | 35  | 1.385738912 | 0.0675879   | ENSG00000200013       |
| 17 | 56101912 | 56102584 | 56102138 | 11 | 29  | 20  | 1.484720263 | 0.0791637   | ENSG00000200013       |
| 17 | 56103444 | 56103730 | 56103563 | 9  | 12  | 14  | 0.900730293 | 0.611333    | BCAS3 ENSG00000141376 |
| 17 | 56103759 | 56104078 | 56103931 | 13 | 18  | 16  | 1.161575265 | 0.325582    | BCAS3 ENSG00000141376 |
| 17 | 56109088 | 56110796 | 56109512 | 49 | 178 | 124 | 1.488283592 | 0.000285889 | BCAS3 ENSG00000141376 |
| 17 | 56113158 | 56113372 | 56113265 | 11 | 11  | 2   | 4.157216737 | 0.0052913   | BCAS3 ENSG00000141376 |
| 17 | 56114173 | 56114498 | 56114335 | 10 | 15  | 15  | 1.039304184 | 0.456923    | BCAS3 ENSG00000141376 |
| 17 | 56115218 | 56115644 | 56115363 | 11 | 20  | 12  | 1.67887599  | 0.0659142   | BCAS3 ENSG00000141376 |
| 17 | 56115981 | 56116625 | 56116236 | 10 | 24  | 17  | 1.443478034 | 0.113942    | BCAS3 ENSG00000141376 |
| 17 | 56116963 | 56117203 | 56117085 | 9  | 11  | 17  | 0.692869456 | 0.843876    | BCAS3 ENSG00000141376 |
| 17 | 56118260 | 56119098 | 56118679 | 17 | 49  | 26  | 1.924637378 | 0.00237545  | BCAS3 ENSG00000141376 |
| 17 | 56119209 | 56119409 | 56119330 | 8  | 10  | 5   | 1.905391004 | 0.0915982   | BCAS3 ENSG00000141376 |
| 17 | 56119828 | 56120011 | 56120006 | 9  | 11  | 16  | 0.733626483 | 0.800067    | BCAS3 ENSG00000141376 |
| 17 | 56120044 | 56120298 | 56120171 | 12 | 13  | 14  | 0.970017239 | 0.534076    | ENSG00000211041       |
| 17 | 56121597 | 56121801 | 56121698 | 8  | 9   | 4   | 2.078608368 | 0.0785659   | ENSG00000211041       |

|    |          |          |          |    |    |    |             |           |                 |
|----|----------|----------|----------|----|----|----|-------------|-----------|-----------------|
| 17 | 56123311 | 56123740 | 56123563 | 9  | 15 | 12 | 1.279143611 | 0.251893  | ENSG00000211041 |
| 17 | 56124032 | 56124283 | 56124157 | 10 | 13 | 5  | 2.425043097 | 0.0262442 | ENSG00000211041 |
| 17 | 56125209 | 56125491 | 56125376 | 9  | 12 | 14 | 0.900730293 | 0.611333  | ENSG00000211041 |
| 17 | 56127779 | 56128114 | 56127946 | 9  | 12 | 14 | 0.900730293 | 0.611333  | ENSG00000211041 |
| 17 | 56128686 | 56129070 | 56128901 | 11 | 15 | 14 | 1.10859113  | 0.386477  | ENSG00000211041 |
| 17 | 56129778 | 56130073 | 56129928 | 12 | 15 | 12 | 1.279143611 | 0.251893  | ENSG00000211041 |
| 17 | 56132329 | 56132581 | 56132439 | 10 | 12 | 19 | 0.67554772  | 0.870684  | ENSG00000211041 |
| 17 | 56136298 | 56136625 | 56136458 | 9  | 14 | 13 | 1.113540197 | 0.385405  | ENSG00000211041 |
| 17 | 56137132 | 56137368 | 56137250 | 8  | 10 | 13 | 0.816596145 | 0.696946  | ENSG00000211041 |
| 17 | 56137718 | 56137921 | 56137821 | 8  | 8  | 8  | 1.039304184 | 0.46786   | ENSG00000211041 |
| 17 | 56139542 | 56139899 | 56139720 | 8  | 14 | 13 | 1.113540197 | 0.385405  | ENSG00000211041 |
| 17 | 56140475 | 56140673 | 56140510 | 9  | 11 | 9  | 1.247165021 | 0.300052  | ENSG00000211041 |
| 17 | 56142053 | 56142412 | 56142345 | 8  | 13 | 13 | 1.039304184 | 0.45974   | ENSG00000211041 |
| 17 | 56143297 | 56143735 | 56143556 | 10 | 19 | 15 | 1.29913023  | 0.214784  | ENSG00000211041 |
| 17 | 56144886 | 56145111 | 56144998 | 10 | 12 | 16 | 0.794762023 | 0.738004  | ENSG00000175090 |
| 17 | 56145128 | 56145336 | 56145246 | 10 | 11 | 17 | 0.692869456 | 0.843876  | ENSG00000175090 |
| 17 | 56145520 | 56145712 | 56145593 | 8  | 8  | 13 | 0.668124118 | 0.835294  | ENSG00000175090 |
| 17 | 56146751 | 56147227 | 56147068 | 13 | 21 | 22 | 0.994117046 | 0.508733  | ENSG00000175090 |
| 17 | 56149747 | 56149939 | 56149843 | 8  | 8  | 5  | 1.558956276 | 0.191397  | ENSG00000175090 |
| 17 | 56150243 | 56150504 | 56150383 | 8  | 10 | 10 | 1.039304184 | 0.464387  | ENSG00000175090 |
| 17 | 56150600 | 56150792 | 56150696 | 8  | 8  | 11 | 0.779478138 | 0.719708  | ENSG00000175090 |
| 17 | 56151172 | 56151374 | 56151273 | 8  | 9  | 11 | 0.86608682  | 0.635181  | ENSG00000175090 |
| 17 | 56151694 | 56152137 | 56151971 | 13 | 22 | 17 | 1.327999791 | 0.180771  | ENSG00000175090 |
| 17 | 56152525 | 56152737 | 56152621 | 9  | 9  | 7  | 1.29913023  | 0.286504  | ENSG00000175090 |
| 17 | 56152803 | 56153727 | 56153178 | 35 | 67 | 56 | 1.239871658 | 0.114533  | ENSG00000175090 |
| 17 | 56154425 | 56154630 | 56154507 | 9  | 9  | 10 | 0.944821986 | 0.553851  | ENSG00000175090 |
| 17 | 56157395 | 56157763 | 56157584 | 15 | 22 | 20 | 1.138285535 | 0.33303   | ENSG00000175090 |
| 17 | 56157769 | 56157970 | 56157869 | 9  | 9  | 14 | 0.692869456 | 0.822654  | ENSG00000175090 |
| 17 | 56159498 | 56159847 | 56159693 | 11 | 16 | 8  | 1.963130126 | 0.0441028 | ENSG00000175090 |
| 17 | 56161396 | 56161849 | 56161575 | 10 | 19 | 11 | 1.73217364  | 0.0607469 | ENSG00000175090 |
| 17 | 56162088 | 56162772 | 56162426 | 10 | 28 | 42 | 0.700926078 | 0.933521  | ENSG00000175090 |
| 17 | 56162977 | 56163178 | 56163077 | 8  | 9  | 12 | 0.799464757 | 0.707717  | ENSG00000175090 |
| 17 | 56169783 | 56170029 | 56169906 | 9  | 10 | 5  | 1.905391004 | 0.0915982 | ENSG00000175090 |
| 17 | 56170304 | 56171058 | 56170453 | 11 | 28 | 30 | 0.972252301 | 0.544336  | ENSG00000201988 |

|    |          |          |          |    |    |    |             |           |                 |
|----|----------|----------|----------|----|----|----|-------------|-----------|-----------------|
| 17 | 56171964 | 56172358 | 56172143 | 11 | 20 | 32 | 0.66137539  | 0.934793  | ENSG00000201988 |
| 17 | 56172981 | 56173617 | 56173373 | 17 | 37 | 26 | 1.462724407 | 0.0628793 | ENSG00000201988 |
| 17 | 56173775 | 56173988 | 56173881 | 8  | 8  | 15 | 0.584608604 | 0.909754  | ENSG00000201988 |
| 17 | 56174093 | 56174570 | 56174407 | 8  | 15 | 15 | 1.039304184 | 0.456923  | ENSG00000201988 |
| 17 | 56175278 | 56175547 | 56175412 | 9  | 12 | 11 | 1.125912866 | 0.382541  | ENSG00000201988 |
| 17 | 56175703 | 56176497 | 56176124 | 18 | 42 | 42 | 1.039304184 | 0.429271  | ENSG00000201988 |
| 17 | 56176500 | 56177305 | 56176925 | 10 | 35 | 34 | 1.06899859  | 0.389269  | ENSG00000201988 |
| 17 | 56177685 | 56178075 | 56177896 | 19 | 27 | 26 | 1.077796932 | 0.39044   | ENSG00000201988 |
| 17 | 56178243 | 56178761 | 56178345 | 12 | 22 | 24 | 0.956159849 | 0.562938  | ENSG00000201988 |
| 17 | 56179186 | 56180259 | 56179623 | 16 | 62 | 61 | 1.056067155 | 0.380253  | ENSG00000201988 |
| 17 | 56180312 | 56180835 | 56180555 | 15 | 33 | 30 | 1.139882009 | 0.298279  | ENSG00000201988 |
| 17 | 56180943 | 56181333 | 56181084 | 11 | 18 | 26 | 0.731362204 | 0.856292  | ENSG00000201988 |
| 17 | 56181379 | 56181558 | 56181429 | 8  | 9  | 17 | 0.577391213 | 0.925885  | ENSG00000201988 |
| 17 | 56182622 | 56183142 | 56182866 | 11 | 25 | 31 | 0.84443465  | 0.741591  | ENSG00000201988 |
| 17 | 56184905 | 56185147 | 56184990 | 8  | 10 | 9  | 1.143234603 | 0.378307  | ENSG00000201988 |
| 17 | 56185742 | 56186017 | 56185879 | 12 | 13 | 12 | 1.11925066  | 0.384109  | ENSG00000201988 |
| 17 | 56186762 | 56187421 | 56187076 | 12 | 28 | 35 | 0.83721726  | 0.764263  | ENSG00000201988 |
| 17 | 56191159 | 56191517 | 56191268 | 10 | 15 | 10 | 1.511715177 | 0.140236  | ENSG00000201988 |
| 17 | 56191925 | 56192257 | 56192104 | 10 | 14 | 17 | 0.86608682  | 0.662567  | ENSG00000201988 |
| 17 | 56192705 | 56193047 | 56192840 | 11 | 16 | 26 | 0.654376709 | 0.9196    | ENSG00000201988 |
| 17 | 56200150 | 56200445 | 56200278 | 8  | 12 | 16 | 0.794762023 | 0.738004  | ENSG00000211058 |
| 17 | 56200855 | 56201476 | 56201189 | 9  | 22 | 32 | 0.724363522 | 0.886261  | ENSG00000211058 |
| 17 | 56203222 | 56203404 | 56203368 | 9  | 9  | 16 | 0.611355402 | 0.899375  | ENSG00000211058 |
| 17 | 56203413 | 56203807 | 56203628 | 13 | 22 | 13 | 1.707428303 | 0.0525925 | ENSG00000211058 |
| 17 | 56205104 | 56205553 | 56205376 | 10 | 16 | 26 | 0.654376709 | 0.9196    | ENSG00000211058 |
| 17 | 56206033 | 56207117 | 56206486 | 16 | 46 | 40 | 1.191397479 | 0.205212  | ENSG00000211058 |
| 17 | 56207850 | 56208153 | 56208001 | 10 | 14 | 16 | 0.917033104 | 0.598778  | ENSG00000211058 |
| 17 | 56208167 | 56208378 | 56208252 | 8  | 9  | 9  | 1.039304184 | 0.466079  | ENSG00000211058 |
| 17 | 56209232 | 56209532 | 56209382 | 8  | 11 | 6  | 1.781664316 | 0.103344  | ENSG00000211058 |
| 17 | 56209812 | 56210140 | 56209976 | 11 | 16 | 6  | 2.524024447 | 0.0137633 | ENSG00000211058 |
| 17 | 56213415 | 56214187 | 56213636 | 26 | 51 | 8  | 6.00486862  | 1.10E-09  | ENSG00000211058 |
| 17 | 56218163 | 56218647 | 56218342 | 10 | 21 | 7  | 2.858086507 | 0.0029864 | ENSG00000211058 |
| 17 | 56218827 | 56219058 | 56218947 | 8  | 9  | 6  | 1.484720263 | 0.204387  | ENSG00000211058 |
| 17 | 56219711 | 56220017 | 56219842 | 8  | 12 | 27 | 0.482534086 | 0.988534  | ENSG00000211058 |

|    |          |          |          |    |     |     |             |             |                 |
|----|----------|----------|----------|----|-----|-----|-------------|-------------|-----------------|
| 17 | 56221421 | 56221755 | 56221588 | 17 | 20  | 13  | 1.558956276 | 0.0943292   | ENSG00000211058 |
| 17 | 56224651 | 56225065 | 56224751 | 9  | 16  | 17  | 0.981565063 | 0.523072    | ENSG00000211058 |
| 17 | 56230145 | 56230324 | 56230234 | 8  | 8   | 9   | 0.935373766 | 0.560286    | ENSG00000211058 |
| 17 | 56230662 | 56231074 | 56230895 | 14 | 21  | 18  | 1.203404845 | 0.275531    | ENSG00000214207 |
| 17 | 56232450 | 56232808 | 56232606 | 9  | 14  | 13  | 1.113540197 | 0.385405    | ENSG00000214207 |
| 17 | 56233535 | 56233857 | 56233697 | 12 | 17  | 9   | 1.870747532 | 0.0498299   | ENSG00000214207 |
| 17 | 56277318 | 56277802 | 56277623 | 16 | 25  | 1   | 13.5109544  | 1.28E-07    | ENSG00000211515 |
| 17 | 56582595 | 56582782 | 56582700 | 8  | 8   | 6   | 1.336248237 | 0.277651    | ENSG00000213227 |
| 17 | 56633340 | 56633935 | 56633519 | 13 | 28  | 6   | 4.305688763 | 3.69E-05    | ENSG00000213227 |
| 17 | 56642457 | 56642895 | 56642676 | 16 | 27  | 32  | 0.881833853 | 0.689746    | ENSG00000213227 |
| 17 | 56642904 | 56644540 | 56643788 | 19 | 91  | 88  | 1.07433691  | 0.314736    | ENSG00000213227 |
| 17 | 56644746 | 56645138 | 56644925 | 13 | 20  | 27  | 0.779478138 | 0.809588    | ENSG00000213227 |
| 17 | 56645831 | 56646257 | 56646048 | 14 | 23  | 26  | 0.923825942 | 0.612844    | ENSG00000213227 |
| 17 | 56646858 | 56647122 | 56647012 | 10 | 12  | 17  | 0.750608578 | 0.78992     | ENSG00000213227 |
| 17 | 56647202 | 56648180 | 56647468 | 15 | 48  | 37  | 1.340155395 | 0.0860201   | ENSG00000213227 |
| 17 | 56648241 | 56648798 | 56648425 | 18 | 32  | 23  | 1.429043253 | 0.0888203   | ENSG00000213227 |
| 17 | 56649335 | 56652163 | 56651688 | 70 | 270 | 197 | 1.42248199  | 7.32E-05    | ENSG00000213227 |
| 17 | 56652474 | 56653014 | 56652727 | 17 | 29  | 30  | 1.005778243 | 0.491622    | ENSG00000213227 |
| 17 | 56653354 | 56654091 | 56653766 | 18 | 47  | 51  | 0.959357709 | 0.582969    | ENSG00000213227 |
| 17 | 56654116 | 56654618 | 56654295 | 11 | 23  | 25  | 0.959357709 | 0.559486    | ENSG00000213227 |
| 17 | 56654717 | 56655180 | 56654955 | 8  | 19  | 33  | 0.611355402 | 0.963374    | ENSG00000213227 |
| 17 | 56655554 | 56655855 | 56655699 | 12 | 16  | 13  | 1.262012224 | 0.256887    | ENSG00000213227 |
| 17 | 56655870 | 56656268 | 56656089 | 21 | 29  | 24  | 1.247165021 | 0.205527    | ENSG00000213227 |
| 17 | 56656351 | 56656894 | 56656715 | 20 | 32  | 30  | 1.106356067 | 0.342646    | ENSG00000213227 |
| 17 | 56656903 | 56658104 | 56657345 | 26 | 75  | 67  | 1.161575265 | 0.184157    | ENSG00000213227 |
| 17 | 56658421 | 56658979 | 56658692 | 14 | 29  | 41  | 0.742360132 | 0.896757    | ENSG00000213227 |
| 17 | 56659022 | 56660117 | 56659179 | 19 | 67  | 76  | 0.917827072 | 0.697841    | ENSG00000213227 |
| 17 | 56660131 | 56660620 | 56660310 | 14 | 28  | 36  | 0.814589766 | 0.798552    | ENSG00000213227 |
| 17 | 56660623 | 56661644 | 56661076 | 16 | 56  | 48  | 1.2089865   | 0.163943    | ENSG00000213227 |
| 17 | 56661650 | 56662140 | 56661877 | 10 | 22  | 22  | 1.039304184 | 0.448275    | ENSG00000213227 |
| 17 | 56662188 | 56662742 | 56662475 | 13 | 25  | 32  | 0.818845721 | 0.77985     | ENSG00000213227 |
| 17 | 56662870 | 56664029 | 56663616 | 43 | 125 | 83  | 1.558956276 | 0.000706264 | ENSG00000213227 |
| 17 | 56664488 | 56666171 | 56665232 | 20 | 113 | 123 | 0.955489331 | 0.63775     | ENSG00000213227 |
| 17 | 56666254 | 56667046 | 56666523 | 20 | 58  | 61  | 0.989015272 | 0.524764    | ENSG00000213227 |



|    |          |          |          |     |     |     |             |                |                 |
|----|----------|----------|----------|-----|-----|-----|-------------|----------------|-----------------|
| 17 | 56667260 | 56668603 | 56668138 | 142 | 332 | 158 | 2.176655933 | 3.13E-17       | ENSG00000213227 |
| 17 | 56668755 | 56669280 | 56669046 | 12  | 26  | 36  | 0.758411161 | 0.865982       | ENSG00000213227 |
| 17 | 56669627 | 56670116 | 56669937 | 18  | 31  | 36  | 0.898857673 | 0.67235        | ENSG00000213227 |
| 17 | 56670525 | 56672000 | 56670983 | 15  | 69  | 95  | 0.757825968 | 0.962453       | ENSG00000213227 |
| 17 | 56672016 | 56672647 | 56672380 | 13  | 28  | 43  | 0.68499594  | 0.946157       | ENSG00000213227 |
| 17 | 56672967 | 56673647 | 56673470 | 11  | 28  | 31  | 0.941869417 | 0.59365        | ENSG00000213227 |
| 17 | 56674360 | 56674740 | 56674539 | 8   | 16  | 28  | 0.60924728  | 0.952249       | ENSG00000213227 |
| 17 | 56674773 | 56675034 | 56674877 | 10  | 13  | 22  | 0.632619938 | 0.917511       | ENSG00000213227 |
| 17 | 56675314 | 56676258 | 56675764 | 13  | 44  | 39  | 1.169217207 | 0.235053       | ENSG00000213227 |
| 17 | 56676324 | 56676805 | 56676493 | 9   | 18  | 15  | 1.234173719 | 0.265435       | ENSG00000213227 |
| 17 | 56677528 | 56678201 | 56677996 | 12  | 31  | 34  | 0.950220968 | 0.583835       | ENSG00000213227 |
| 17 | 56678608 | 56679120 | 56678917 | 11  | 20  | 22  | 0.948929907 | 0.57038        | ENSG00000213227 |
| 17 | 56679578 | 56680927 | 56680093 | 19  | 72  | 101 | 0.74381574  | 0.974328       | ENSG00000213227 |
| 17 | 56680931 | 56681191 | 56681061 | 10  | 13  | 10  | 1.32275078  | 0.240023       | ENSG00000213227 |
| 17 | 56681493 | 56681900 | 56681726 | 9   | 17  | 39  | 0.467686883 | 0.997472       | ENSG00000213227 |
| 17 | 56682074 | 56683148 | 56682712 | 14  | 55  | 62  | 0.923825942 | 0.667996       | ENSG00000213227 |
| 17 | 56683177 | 56683443 | 56683324 | 9   | 12  | 8   | 1.501217155 | 0.168286       | ENSG00000213227 |
| 17 | 56683769 | 56684361 | 56684097 | 12  | 28  | 45  | 0.655213507 | 0.965407       | ENSG00000213227 |
| 17 | 56684372 | 56684701 | 56684536 | 9   | 15  | 27  | 0.593888105 | 0.956572       | ENSG00000213227 |
| 17 | 56684708 | 56684935 | 56684821 | 8   | 10  | 13  | 0.816596145 | 0.696946       | ENSG00000213227 |
| 17 | 56685595 | 56685877 | 56685736 | 8   | 12  | 22  | 0.5874328   | 0.943388       | ENSG00000213227 |
| 17 | 56685921 | 56686725 | 56686499 | 26  | 57  | 60  | 0.988190864 | 0.526384       | ENSG00000213227 |
| 17 | 56686854 | 56687490 | 56687255 | 15  | 37  | 42  | 0.91845486  | 0.650155       | ENSG00000213227 |
| 17 | 56687538 | 56688260 | 56687812 | 19  | 47  | 48  | 1.018093895 | 0.465188       | ENSG00000213227 |
| 17 | 56688777 | 56689289 | 56688990 | 10  | 20  | 32  | 0.66137539  | 0.934793       | ENSG00000213227 |
| 17 | 56690032 | 56690647 | 56690197 | 11  | 27  | 44  | 0.646678159 | 0.967646       | ENSG00000213227 |
| 17 | 56690858 | 56691543 | 56691035 | 21  | 53  | 49  | 1.122448519 | 0.277615       | ENSG00000213227 |
| 17 | 56691567 | 56691967 | 56691767 | 13  | 21  | 30  | 0.737570711 | 0.866474       | ENSG00000213227 |
| 17 | 56692130 | 56692428 | 56692271 | 13  | 15  | 10  | 1.511715177 | 0.140236       | ENSG00000213227 |
| 17 | 56692449 | 56692981 | 56692802 | 13  | 26  | 39  | 0.701530324 | 0.926013       | ENSG00000213227 |
| 17 | 56693234 | 56694169 | 56693758 | 15  | 45  | 37  | 1.258105065 | 0.145959       | ENSG00000213227 |
| 17 | 56695200 | 56695843 | 56695630 | 18  | 38  | 40  | 0.988606419 | 0.52111        | ENSG00000213227 |
| 17 | 56696963 | 56697153 | 56697058 | 9   | 11  | 7   | 1.558956276 | 0.158273       | ENSG00000213227 |
| 17 | 56697611 | 56698827 | 56698576 | 16  | 64  | 60  | 1.107455278 | 0.283158 BCAS3 | ENSG00000141376 |

|    |          |          |          |     |     |     |             |           |       |                 |
|----|----------|----------|----------|-----|-----|-----|-------------|-----------|-------|-----------------|
| 17 | 56698829 | 56699202 | 56699023 | 11  | 18  | 17  | 1.097043306 | 0.388692  | BCAS3 | ENSG00000141376 |
| 17 | 56699861 | 56700396 | 56700124 | 12  | 26  | 33  | 0.825329793 | 0.774487  | BCAS3 | ENSG00000141376 |
| 17 | 56702545 | 56702825 | 56702685 | 13  | 16  | 13  | 1.262012224 | 0.256887  | BCAS3 | ENSG00000141376 |
| 17 | 56704141 | 56704369 | 56704255 | 8   | 10  | 10  | 1.039304184 | 0.464387  | BCAS3 | ENSG00000141376 |
| 17 | 56704402 | 56704604 | 56704503 | 9   | 11  | 12  | 0.959357709 | 0.543005  | BCAS3 | ENSG00000141376 |
| 17 | 56704826 | 56705406 | 56705116 | 12  | 28  | 30  | 0.972252301 | 0.544336  | BCAS3 | ENSG00000141376 |
| 17 | 56705508 | 56705933 | 56705669 | 9   | 15  | 21  | 0.755857589 | 0.807439  | BCAS3 | ENSG00000141376 |
| 17 | 56706691 | 56706937 | 56706814 | 9   | 10  | 11  | 0.952695502 | 0.548138  | BCAS3 | ENSG00000141376 |
| 17 | 56706940 | 56707321 | 56707130 | 12  | 22  | 27  | 0.853714151 | 0.715539  | BCAS3 | ENSG00000141376 |
| 17 | 56707428 | 56707812 | 56707637 | 11  | 19  | 26  | 0.769854951 | 0.816207  | BCAS3 | ENSG00000141376 |
| 17 | 56708549 | 56708948 | 56708707 | 8   | 16  | 13  | 1.262012224 | 0.256887  | BCAS3 | ENSG00000141376 |
| 17 | 56709069 | 56709262 | 56709165 | 8   | 9   | 14  | 0.692869456 | 0.822654  | BCAS3 | ENSG00000141376 |
| 17 | 56709787 | 56710100 | 56709943 | 9   | 14  | 12  | 1.199197136 | 0.313881  | BCAS3 | ENSG00000141376 |
| 17 | 56710561 | 56711026 | 56710853 | 11  | 18  | 28  | 0.680923431 | 0.908117  | BCAS3 | ENSG00000141376 |
| 17 | 56711322 | 56712733 | 56712137 | 17  | 74  | 79  | 0.974347673 | 0.564809  | BCAS3 | ENSG00000141376 |
| 17 | 56712758 | 56713418 | 56713196 | 19  | 38  | 27  | 1.447602257 | 0.0652315 | BCAS3 | ENSG00000141376 |
| 17 | 56714330 | 56715022 | 56714800 | 16  | 41  | 34  | 1.247165021 | 0.165744  | BCAS3 | ENSG00000141376 |
| 17 | 56715130 | 56715392 | 56715225 | 8   | 11  | 13  | 0.890832158 | 0.618492  | BCAS3 | ENSG00000141376 |
| 17 | 56715436 | 56715640 | 56715499 | 8   | 10  | 7   | 1.429043253 | 0.21536   | BCAS3 | ENSG00000141376 |
| 17 | 56716493 | 56718294 | 56717002 | 307 | 504 | 105 | 4.95140201  | 2.32E-67  | BCAS3 | ENSG00000141376 |
| 17 | 56718404 | 56719157 | 56718777 | 14  | 37  | 40  | 0.963257537 | 0.566947  | BCAS3 | ENSG00000141376 |
| 17 | 56719286 | 56719607 | 56719512 | 8   | 12  | 9   | 1.35109544  | 0.232899  | BCAS3 | ENSG00000141376 |
| 17 | 56720051 | 56720799 | 56720423 | 14  | 37  | 54  | 0.718064709 | 0.944199  | BCAS3 | ENSG00000141376 |
| 17 | 56720939 | 56722435 | 56722132 | 31  | 99  | 98  | 1.049802206 | 0.365947  | BCAS3 | ENSG00000141376 |
| 17 | 56723158 | 56724429 | 56723554 | 19  | 71  | 78  | 0.94721394  | 0.63116   | BCAS3 | ENSG00000141376 |
| 17 | 56724827 | 56725262 | 56724993 | 9   | 17  | 22  | 0.813368492 | 0.747743  | BCAS3 | ENSG00000141376 |
| 17 | 56725307 | 56725915 | 56725599 | 8   | 23  | 45  | 0.542245661 | 0.99395   | BCAS3 | ENSG00000141376 |
| 17 | 56726460 | 56727845 | 56727271 | 16  | 64  | 60  | 1.107455278 | 0.283158  | BCAS3 | ENSG00000141376 |
| 17 | 56728129 | 56729423 | 56728280 | 15  | 66  | 54  | 1.266061461 | 0.0962244 | BCAS3 | ENSG00000141376 |
| 17 | 56729503 | 56730932 | 56730556 | 17  | 80  | 69  | 1.202623413 | 0.128307  | BCAS3 | ENSG00000141376 |
| 17 | 56732072 | 56732517 | 56732251 | 14  | 25  | 34  | 0.772054537 | 0.844426  | BCAS3 | ENSG00000141376 |
| 17 | 56732637 | 56732826 | 56732731 | 12  | 13  | 19  | 0.727512929 | 0.824686  | BCAS3 | ENSG00000141376 |
| 17 | 56732912 | 56733626 | 56733091 | 13  | 34  | 27  | 1.29913023  | 0.148943  | BCAS3 | ENSG00000141376 |
| 17 | 56733846 | 56734083 | 56733964 | 8   | 12  | 18  | 0.711102863 | 0.834017  | BCAS3 | ENSG00000141376 |

|    |          |          |          |     |     |     |             |             |       |                 |
|----|----------|----------|----------|-----|-----|-----|-------------|-------------|-------|-----------------|
| 17 | 56734118 | 56734514 | 56734335 | 10  | 17  | 20  | 0.890832158 | 0.642922    | BCAS3 | ENSG00000141376 |
| 17 | 56734805 | 56735484 | 56735305 | 17  | 37  | 32  | 1.196774515 | 0.223945    | BCAS3 | ENSG00000141376 |
| 17 | 56735502 | 56736166 | 56735992 | 14  | 34  | 37  | 0.957253854 | 0.574992    | BCAS3 | ENSG00000141376 |
| 17 | 56736271 | 56736556 | 56736429 | 10  | 13  | 26  | 0.538898466 | 0.974306    | BCAS3 | ENSG00000141376 |
| 17 | 56736641 | 56736963 | 56736815 | 14  | 17  | 11  | 1.558956276 | 0.111389    | BCAS3 | ENSG00000141376 |
| 17 | 56737238 | 56737568 | 56737403 | 11  | 17  | 20  | 0.890832158 | 0.642922    | BCAS3 | ENSG00000141376 |
| 17 | 56737572 | 56737817 | 56737695 | 8   | 11  | 15  | 0.779478138 | 0.747877    | BCAS3 | ENSG00000141376 |
| 17 | 56739016 | 56739500 | 56739343 | 13  | 22  | 26  | 0.885333194 | 0.668299    | BCAS3 | ENSG00000141376 |
| 17 | 56739552 | 56740227 | 56740048 | 10  | 27  | 28  | 1.003466109 | 0.495433    | BCAS3 | ENSG00000141376 |
| 17 | 56740250 | 56740889 | 56740710 | 16  | 36  | 29  | 1.281808494 | 0.154243    | BCAS3 | ENSG00000141376 |
| 17 | 56740978 | 56742307 | 56741731 | 28  | 78  | 68  | 1.189927979 | 0.144876    | BCAS3 | ENSG00000141376 |
| 17 | 56742710 | 56743231 | 56742896 | 19  | 37  | 31  | 1.234173719 | 0.188755    | BCAS3 | ENSG00000141376 |
| 17 | 56743975 | 56747348 | 56746760 | 289 | 679 | 269 | 2.617506834 | 1.54E-45    | BCAS3 | ENSG00000141376 |
| 17 | 56747443 | 56747932 | 56747725 | 11  | 22  | 19  | 1.195199812 | 0.27834     | BCAS3 | ENSG00000141376 |
| 17 | 56748361 | 56750429 | 56749657 | 14  | 92  | 79  | 1.208191114 | 0.106695    | BCAS3 | ENSG00000141376 |
| 17 | 56750541 | 56750841 | 56750691 | 10  | 13  | 27  | 0.519652092 | 0.981283    | BCAS3 | ENSG00000141376 |
| 17 | 56750951 | 56751631 | 56751291 | 10  | 31  | 20  | 1.583701614 | 0.047672    | BCAS3 | ENSG00000141376 |
| 17 | 56752841 | 56753144 | 56752992 | 10  | 14  | 13  | 1.113540197 | 0.385405    | BCAS3 | ENSG00000141376 |
| 17 | 56753228 | 56754016 | 56753634 | 15  | 39  | 30  | 1.341037657 | 0.107943    | BCAS3 | ENSG00000141376 |
| 17 | 56754553 | 56755001 | 56754772 | 12  | 21  | 29  | 0.762156402 | 0.837107    | BCAS3 | ENSG00000141376 |
| 17 | 56755161 | 56756293 | 56755679 | 15  | 54  | 88  | 0.642266631 | 0.995674    | BCAS3 | ENSG00000141376 |
| 17 | 56756541 | 56756854 | 56756701 | 12  | 16  | 21  | 0.803098688 | 0.755224    | BCAS3 | ENSG00000141376 |
| 17 | 56757002 | 56757206 | 56757148 | 8   | 9   | 22  | 0.451871384 | 0.986686    | BCAS3 | ENSG00000141376 |
| 17 | 56757211 | 56758340 | 56757922 | 14  | 57  | 71  | 0.83721726  | 0.844695    | BCAS3 | ENSG00000141376 |
| 17 | 56758472 | 56759041 | 56758752 | 21  | 40  | 36  | 1.151661393 | 0.26595     | BCAS3 | ENSG00000141376 |
| 17 | 56761843 | 56762289 | 56762150 | 12  | 19  | 23  | 0.86608682  | 0.685164    | BCAS3 | ENSG00000141376 |
| 17 | 56763025 | 56764718 | 56763520 | 14  | 74  | 95  | 0.811956394 | 0.913175    | BCAS3 | ENSG00000141376 |
| 17 | 56765116 | 56765533 | 56765354 | 13  | 21  | 21  | 1.039304184 | 0.449418    | BCAS3 | ENSG00000141376 |
| 17 | 56766126 | 56766457 | 56766298 | 17  | 21  | 22  | 0.994117046 | 0.508733    | BCAS3 | ENSG00000141376 |
| 17 | 56766892 | 56769030 | 56768312 | 41  | 172 | 115 | 1.549996758 | 0.000109808 | BCAS3 | ENSG00000141376 |
| 17 | 56769446 | 56770215 | 56769749 | 11  | 32  | 49  | 0.685940762 | 0.956165    | BCAS3 | ENSG00000141376 |
| 17 | 56770269 | 56770661 | 56770605 | 10  | 17  | 34  | 0.534499295 | 0.987357    | BCAS3 | ENSG00000141376 |
| 17 | 56770896 | 56771714 | 56771144 | 23  | 54  | 37  | 1.504256056 | 0.0249545   | BCAS3 | ENSG00000141376 |
| 17 | 56771891 | 56772585 | 56772449 | 13  | 31  | 34  | 0.950220968 | 0.583835    | BCAS3 | ENSG00000141376 |

|    |          |          |          |    |     |     |             |           |       |                 |
|----|----------|----------|----------|----|-----|-----|-------------|-----------|-------|-----------------|
| 17 | 56772692 | 56773343 | 56773020 | 14 | 29  | 45  | 0.677807077 | 0.954077  | BCAS3 | ENSG00000141376 |
| 17 | 56773381 | 56773878 | 56773699 | 11 | 21  | 24  | 0.914587682 | 0.621823  | BCAS3 | ENSG00000141376 |
| 17 | 56775304 | 56776842 | 56776065 | 13 | 69  | 72  | 0.996593053 | 0.508591  | BCAS3 | ENSG00000141376 |
| 17 | 56776878 | 56777102 | 56777048 | 8  | 10  | 19  | 0.571617301 | 0.938875  | BCAS3 | ENSG00000141376 |
| 17 | 56777842 | 56779035 | 56778017 | 11 | 51  | 65  | 0.818845721 | 0.86132   | BCAS3 | ENSG00000141376 |
| 17 | 56779610 | 56780214 | 56779863 | 15 | 29  | 31  | 0.974347673 | 0.541653  | BCAS3 | ENSG00000141376 |
| 17 | 56780265 | 56780790 | 56780433 | 11 | 23  | 30  | 0.804622594 | 0.791126  | BCAS3 | ENSG00000141376 |
| 17 | 56781055 | 56782148 | 56781735 | 22 | 69  | 66  | 1.085840192 | 0.314798  | BCAS3 | ENSG00000141376 |
| 17 | 56782158 | 56782361 | 56782259 | 12 | 13  | 11  | 1.212521548 | 0.309909  | BCAS3 | ENSG00000141376 |
| 17 | 56783174 | 56786325 | 56784525 | 37 | 221 | 183 | 1.253943092 | 0.0113886 | BCAS3 | ENSG00000141376 |
| 17 | 56786425 | 56788249 | 56787682 | 17 | 91  | 98  | 0.96581803  | 0.595483  | BCAS3 | ENSG00000141376 |
| 17 | 56788462 | 56789372 | 56788979 | 85 | 160 | 94  | 1.761347091 | 4.06E-06  | BCAS3 | ENSG00000141376 |
| 17 | 56790328 | 56790762 | 56790492 | 11 | 17  | 16  | 1.100439724 | 0.388093  | BCAS3 | ENSG00000141376 |
| 17 | 56791000 | 56791590 | 56791140 | 16 | 35  | 36  | 1.011214882 | 0.481494  | BCAS3 | ENSG00000141376 |
| 17 | 56791807 | 56792165 | 56791986 | 12 | 17  | 8   | 2.078608368 | 0.0303558 | BCAS3 | ENSG00000141376 |
| 17 | 56792797 | 56793332 | 56793027 | 17 | 30  | 29  | 1.073947657 | 0.390181  | BCAS3 | ENSG00000141376 |
| 17 | 56793626 | 56794407 | 56794228 | 14 | 34  | 33  | 1.069871954 | 0.389489  | BCAS3 | ENSG00000141376 |
| 17 | 56794424 | 56796102 | 56795369 | 17 | 75  | 104 | 0.752258267 | 0.971733  | BCAS3 | ENSG00000141376 |
| 17 | 56796147 | 56796538 | 56796363 | 19 | 24  | 14  | 1.73217364  | 0.0420666 | BCAS3 | ENSG00000141376 |
| 17 | 56797022 | 56797443 | 56797258 | 13 | 23  | 31  | 0.779478138 | 0.82527   | BCAS3 | ENSG00000141376 |
| 17 | 56797789 | 56798002 | 56797852 | 10 | 11  | 7   | 1.558956276 | 0.158273  | BCAS3 | ENSG00000141376 |
| 17 | 56798414 | 56799001 | 56798593 | 12 | 27  | 24  | 1.164020686 | 0.289415  | BCAS3 | ENSG00000141376 |
| 17 | 56799038 | 56799909 | 56799217 | 14 | 39  | 50  | 0.815140537 | 0.835654  | BCAS3 | ENSG00000141376 |
| 17 | 56800069 | 56800685 | 56800378 | 16 | 38  | 24  | 1.621314527 | 0.0273137 | BCAS3 | ENSG00000141376 |
| 17 | 56800801 | 56801332 | 56800908 | 15 | 30  | 26  | 1.193275174 | 0.249725  | BCAS3 | ENSG00000141376 |
| 17 | 56801384 | 56802145 | 56801798 | 16 | 35  | 30  | 1.206933891 | 0.220031  | BCAS3 | ENSG00000141376 |
| 17 | 56802175 | 56802568 | 56802429 | 13 | 21  | 17  | 1.27026067  | 0.223413  | BCAS3 | ENSG00000141376 |
| 17 | 56802883 | 56803563 | 56803294 | 14 | 36  | 44  | 0.854538996 | 0.762645  | BCAS3 | ENSG00000141376 |
| 17 | 56804082 | 56805017 | 56804331 | 15 | 52  | 53  | 1.02005781  | 0.459433  | BCAS3 | ENSG00000141376 |
| 17 | 56805409 | 56806095 | 56805694 | 26 | 45  | 9   | 4.780799247 | 1.04E-07  | BCAS3 | ENSG00000141376 |
| 17 | 56807022 | 56807786 | 56807347 | 10 | 29  | 34  | 0.890832158 | 0.680743  | BCAS3 | ENSG00000141376 |
| 17 | 56807986 | 56808294 | 56808142 | 8  | 12  | 21  | 0.614134291 | 0.924528  | BCAS3 | ENSG00000141376 |
| 17 | 56808311 | 56808629 | 56808470 | 9  | 15  | 29  | 0.554295565 | 0.975664  | BCAS3 | ENSG00000141376 |
| 17 | 56808707 | 56809077 | 56808862 | 18 | 24  | 17  | 1.443478034 | 0.113942  | BCAS3 | ENSG00000141376 |

|    |          |          |          |    |     |     |             |           |          |                 |
|----|----------|----------|----------|----|-----|-----|-------------|-----------|----------|-----------------|
| 17 | 56809427 | 56809735 | 56809576 | 10 | 13  | 11  | 1.212521548 | 0.309909  | BCAS3    | ENSG00000141376 |
| 17 | 56809827 | 56810160 | 56809993 | 18 | 24  | 21  | 1.181027482 | 0.2833    | BCAS3    | ENSG00000141376 |
| 17 | 56810322 | 56811453 | 56810959 | 16 | 57  | 46  | 1.282545589 | 0.101038  | BCAS3    | ENSG00000141376 |
| 17 | 56811586 | 56812708 | 56812155 | 14 | 50  | 50  | 1.039304184 | 0.423013  | BCAS3    | ENSG00000141376 |
| 17 | 56812733 | 56814146 | 56813282 | 20 | 78  | 76  | 1.066299098 | 0.344239  | BCAS3    | ENSG00000141376 |
| 17 | 56814923 | 56815231 | 56815085 | 10 | 14  | 29  | 0.519652092 | 0.984317  | BCAS3    | ENSG00000141376 |
| 17 | 56815567 | 56815762 | 56815692 | 8  | 8   | 18  | 0.492301982 | 0.967211  | BCAS3    | ENSG00000141376 |
| 17 | 56816056 | 56816383 | 56816226 | 8  | 12  | 25  | 0.519652092 | 0.977628  | BCAS3    | ENSG00000141376 |
| 17 | 56816419 | 56816735 | 56816577 | 14 | 17  | 26  | 0.692869456 | 0.890806  | BCAS3    | ENSG00000141376 |
| 17 | 56816961 | 56818945 | 56817687 | 12 | 87  | 88  | 1.027626609 | 0.428289  | BCAS3    | ENSG00000141376 |
| 17 | 56819714 | 56820262 | 56819863 | 13 | 28  | 25  | 1.159223898 | 0.291166  | BCAS3    | ENSG00000141376 |
| 17 | 56820432 | 56821337 | 56821158 | 14 | 43  | 45  | 0.994117046 | 0.511754  | BCAS3    | ENSG00000141376 |
| 17 | 56821629 | 56823161 | 56822315 | 38 | 113 | 91  | 1.287833446 | 0.0348779 | BCAS3    | ENSG00000141376 |
| 17 | 56823269 | 56823813 | 56823554 | 9  | 21  | 32  | 0.692869456 | 0.912769  | TBX2     | ENSG00000121068 |
| 17 | 56824039 | 56824729 | 56824399 | 19 | 37  | 38  | 1.012655359 | 0.478466  | TBX2     | ENSG00000121068 |
| 17 | 56824848 | 56825105 | 56824972 | 9  | 11  | 19  | 0.623582511 | 0.908792  | TBX2     | ENSG00000121068 |
| 17 | 56825286 | 56827808 | 56825887 | 61 | 232 | 163 | 1.476572408 | 5.71E-05  | TBX2     | ENSG00000121068 |
| 17 | 56828057 | 56828375 | 56828236 | 15 | 18  | 21  | 0.897580886 | 0.637183  | TBX2     | ENSG00000121068 |
| 17 | 56829728 | 56830138 | 56829959 | 11 | 18  | 28  | 0.680923431 | 0.908117  | TBX2     | ENSG00000121068 |
| 17 | 56830146 | 56831698 | 56830996 | 28 | 113 | 92  | 1.273985774 | 0.0408764 | TBX2     | ENSG00000121068 |
| 17 | 56831775 | 56832063 | 56831919 | 24 | 27  | 29  | 0.970017239 | 0.547123  | TBX2     | ENSG00000121068 |
| 17 | 56832536 | 56832721 | 56832628 | 8  | 8   | 7   | 1.169217207 | 0.371848  | TBX2     | ENSG00000121068 |
| 17 | 56832761 | 56833567 | 56832926 | 21 | 59  | 51  | 1.199197136 | 0.167887  | TBX2     | ENSG00000121068 |
| 17 | 56833619 | 56834436 | 56834257 | 16 | 42  | 48  | 0.912042447 | 0.671595  | TBX2     | ENSG00000121068 |
| 17 | 56834580 | 56834934 | 56834757 | 15 | 21  | 19  | 1.143234603 | 0.33145   | TBX2     | ENSG00000121068 |
| 17 | 56835182 | 56835404 | 56835293 | 10 | 11  | 8   | 1.385738912 | 0.224757  | TBX2     | ENSG00000121068 |
| 17 | 56835500 | 56836297 | 56835829 | 18 | 48  | 40  | 1.242095245 | 0.1515    | TBX2     | ENSG00000121068 |
| 17 | 56836756 | 56837350 | 56837171 | 11 | 26  | 19  | 1.403060649 | 0.122336  | TBX2     | ENSG00000121068 |
| 17 | 56838089 | 56838823 | 56838546 | 15 | 38  | 37  | 1.066654294 | 0.388522  | C17orf82 | ENSG00000187013 |
| 17 | 56838980 | 56839255 | 56839117 | 11 | 13  | 17  | 0.808347699 | 0.728863  | C17orf82 | ENSG00000187013 |
| 17 | 56839328 | 56839942 | 56839702 | 22 | 43  | 34  | 1.306553832 | 0.117083  | C17orf82 | ENSG00000187013 |
| 17 | 56840011 | 56840228 | 56840119 | 8  | 9   | 15  | 0.649565115 | 0.865365  | C17orf82 | ENSG00000187013 |
| 17 | 56840747 | 56841699 | 56841183 | 17 | 55  | 50  | 1.141196751 | 0.246911  | C17orf82 | ENSG00000187013 |
| 17 | 56841999 | 56843164 | 56842986 | 17 | 72  | 58  | 1.285918736 | 0.0743092 | C17orf82 | ENSG00000187013 |

|    |          |          |          |     |     |     |             |           |          |                 |
|----|----------|----------|----------|-----|-----|-----|-------------|-----------|----------|-----------------|
| 17 | 56843290 | 56846182 | 56844459 | 115 | 434 | 194 | 2.318447796 | 1.37E-24  | C17orf82 | ENSG00000187013 |
| 17 | 56846424 | 56847361 | 56846837 | 17  | 49  | 52  | 0.980475646 | 0.540501  | C17orf82 | ENSG00000187013 |
| 17 | 56847383 | 56849767 | 56849107 | 45  | 184 | 151 | 1.264942593 | 0.0155945 | C17orf82 | ENSG00000187013 |
| 17 | 56849894 | 56850272 | 56850083 | 17  | 26  | 30  | 0.905200419 | 0.649195  | C17orf82 | ENSG00000187013 |
| 17 | 56850565 | 56850797 | 56850701 | 8   | 9   | 9   | 1.039304184 | 0.466079  | C17orf82 | ENSG00000187013 |
| 17 | 56850916 | 56852727 | 56851942 | 15  | 88  | 81  | 1.128025273 | 0.215245  | C17orf82 | ENSG00000187013 |
| 17 | 56852933 | 56854134 | 56853356 | 16  | 68  | 56  | 1.258105065 | 0.0986615 | C17orf82 | ENSG00000187013 |
| 17 | 56854409 | 56854705 | 56854558 | 11  | 13  | 19  | 0.727512929 | 0.824686  | C17orf82 | ENSG00000187013 |
| 17 | 56854836 | 56855299 | 56855120 | 9   | 18  | 26  | 0.731362204 | 0.856292  | C17orf82 | ENSG00000187013 |
| 17 | 56855369 | 56855607 | 56855465 | 11  | 13  | 8   | 1.616695398 | 0.123553  | C17orf82 | ENSG00000187013 |
| 17 | 56855889 | 56856578 | 56856318 | 20  | 38  | 34  | 1.158081805 | 0.263379  | C17orf82 | ENSG00000187013 |
| 17 | 56856697 | 56857067 | 56856889 | 11  | 17  | 25  | 0.719518281 | 0.863101  | C17orf82 | ENSG00000187013 |
| 17 | 56857320 | 56857537 | 56857379 | 8   | 10  | 28  | 0.394218829 | 0.99754   | C17orf82 | ENSG00000187013 |
| 17 | 56857607 | 56858078 | 56857842 | 13  | 24  | 27  | 0.927950164 | 0.608665  | C17orf82 | ENSG00000187013 |
| 17 | 56858083 | 56858609 | 56858309 | 32  | 50  | 38  | 1.359090087 | 0.0728571 | C17orf82 | ENSG00000187013 |
| 17 | 56858955 | 56859400 | 56859221 | 12  | 22  | 20  | 1.138285535 | 0.33303   | C17orf82 | ENSG00000187013 |
| 17 | 56859423 | 56860082 | 56859620 | 16  | 41  | 42  | 1.015134319 | 0.472821  | C17orf82 | ENSG00000187013 |
| 17 | 56860707 | 56861123 | 56860944 | 9   | 17  | 20  | 0.890832158 | 0.642922  | C17orf82 | ENSG00000187013 |
| 17 | 56863666 | 56864628 | 56863845 | 20  | 54  | 56  | 1.002837371 | 0.494483  | C17orf82 | ENSG00000187013 |
| 17 | 56865767 | 56866497 | 56866318 | 11  | 30  | 24  | 1.288737188 | 0.170531  | TBX4     | ENSG00000121075 |
| 17 | 56866973 | 56867203 | 56867071 | 10  | 12  | 10  | 1.228268581 | 0.305344  | TBX4     | ENSG00000121075 |
| 17 | 56868401 | 56868807 | 56868658 | 10  | 15  | 19  | 0.831443347 | 0.712423  | TBX4     | ENSG00000121075 |
| 17 | 56869444 | 56870173 | 56869981 | 12  | 33  | 30  | 1.139882009 | 0.298279  | TBX4     | ENSG00000121075 |
| 17 | 56870490 | 56870797 | 56870644 | 8   | 13  | 25  | 0.55962533  | 0.965065  | TBX4     | ENSG00000121075 |
| 17 | 56871157 | 56871550 | 56871418 | 11  | 17  | 17  | 1.039304184 | 0.454282  | TBX4     | ENSG00000121075 |
| 17 | 56871600 | 56873584 | 56872163 | 17  | 105 | 147 | 0.74436651  | 0.990349  | TBX4     | ENSG00000121075 |
| 17 | 56873604 | 56873889 | 56873746 | 10  | 13  | 22  | 0.632619938 | 0.917511  | TBX4     | ENSG00000121075 |
| 17 | 56874174 | 56874594 | 56874459 | 17  | 24  | 39  | 0.649565115 | 0.957933  | TBX4     | ENSG00000121075 |
| 17 | 56874708 | 56875846 | 56875191 | 12  | 56  | 76  | 0.769355045 | 0.935009  | TBX4     | ENSG00000121075 |
| 17 | 56876094 | 56877498 | 56877032 | 14  | 61  | 91  | 0.700400646 | 0.98588   | TBX4     | ENSG00000121075 |
| 17 | 56878108 | 56879220 | 56878471 | 12  | 46  | 74  | 0.651297289 | 0.990456  | TBX4     | ENSG00000121075 |
| 17 | 56879228 | 56881258 | 56879665 | 16  | 102 | 122 | 0.870311634 | 0.851873  | TBX4     | ENSG00000121075 |
| 17 | 56881646 | 56883735 | 56882595 | 41  | 201 | 179 | 1.166330251 | 0.0663457 | TBX4     | ENSG00000121075 |
| 17 | 56884808 | 56885262 | 56885083 | 20  | 30  | 37  | 0.847853413 | 0.75465   | TBX4     | ENSG00000121075 |

|    |          |          |          |    |     |     |             |           |      |                 |
|----|----------|----------|----------|----|-----|-----|-------------|-----------|------|-----------------|
| 17 | 56885680 | 56885910 | 56885774 | 8  | 10  | 15  | 0.714521627 | 0.810948  | TBX4 | ENSG00000121075 |
| 17 | 56885930 | 56886356 | 56886176 | 9  | 19  | 18  | 1.094004404 | 0.389177  | TBX4 | ENSG00000121075 |
| 17 | 56886389 | 56886627 | 56886476 | 8  | 9   | 11  | 0.86608682  | 0.635181  | TBX4 | ENSG00000121075 |
| 17 | 56887285 | 56887499 | 56887348 | 10 | 12  | 17  | 0.750608578 | 0.78992   | TBX4 | ENSG00000121075 |
| 17 | 56887529 | 56888065 | 56887887 | 11 | 21  | 30  | 0.737570711 | 0.866474  | TBX4 | ENSG00000121075 |
| 17 | 56889016 | 56889990 | 56889633 | 15 | 50  | 47  | 1.104260696 | 0.310616  | TBX4 | ENSG00000121075 |
| 17 | 56890511 | 56891904 | 56891749 | 32 | 106 | 81  | 1.356165216 | 0.0183312 | TBX4 | ENSG00000121075 |
| 17 | 56891984 | 56892249 | 56892116 | 17 | 20  | 20  | 1.039304184 | 0.450588  | TBX4 | ENSG00000121075 |
| 17 | 56892562 | 56894056 | 56892986 | 25 | 97  | 100 | 1.008433763 | 0.476698  | TBX4 | ENSG00000121075 |
| 17 | 56894077 | 56894590 | 56894256 | 16 | 31  | 23  | 1.385738912 | 0.110791  | TBX4 | ENSG00000121075 |
| 17 | 56894883 | 56896185 | 56895904 | 17 | 76  | 76  | 1.039304184 | 0.405626  | TBX4 | ENSG00000121075 |
| 17 | 56896285 | 56898196 | 56897058 | 12 | 75  | 92  | 0.849323849 | 0.855903  | TBX4 | ENSG00000121075 |
| 17 | 56898509 | 56899342 | 56898786 | 20 | 46  | 52  | 0.921647107 | 0.65928   | TBX4 | ENSG00000121075 |
| 17 | 56899452 | 56900535 | 56899873 | 46 | 101 | 97  | 1.081724763 | 0.28921   | TBX4 | ENSG00000121075 |
| 17 | 56900592 | 56902327 | 56901495 | 12 | 64  | 93  | 0.718667787 | 0.980798  | TBX4 | ENSG00000121075 |
| 17 | 56902446 | 56902953 | 56902625 | 17 | 32  | 34  | 0.979915374 | 0.534148  | TBX4 | ENSG00000121075 |
| 17 | 56903034 | 56903996 | 56903498 | 15 | 51  | 47  | 1.125912866 | 0.276262  | TBX4 | ENSG00000121075 |
| 17 | 56904020 | 56904850 | 56904374 | 12 | 35  | 37  | 0.984603964 | 0.527342  | TBX4 | ENSG00000121075 |
| 17 | 56904859 | 56905217 | 56905038 | 16 | 22  | 24  | 0.956159849 | 0.562938  | TBX4 | ENSG00000121075 |
| 17 | 56905246 | 56906096 | 56905431 | 20 | 52  | 53  | 1.02005781  | 0.459433  | TBX4 | ENSG00000121075 |
| 17 | 56906171 | 56907588 | 56907078 | 21 | 86  | 73  | 1.221884649 | 0.101712  | TBX4 | ENSG00000121075 |
| 17 | 56907591 | 56908276 | 56907955 | 10 | 26  | 31  | 0.876912905 | 0.694502  | TBX4 | ENSG00000121075 |
| 17 | 56908592 | 56909111 | 56908771 | 16 | 31  | 43  | 0.755857589 | 0.88876   | TBX4 | ENSG00000121075 |
| 17 | 56909132 | 56909889 | 56909334 | 14 | 36  | 29  | 1.281808494 | 0.154243  | TBX4 | ENSG00000121075 |
| 17 | 56910051 | 56910475 | 56910296 | 12 | 20  | 35  | 0.606260774 | 0.969237  | TBX4 | ENSG00000121075 |
| 17 | 56910776 | 56911350 | 56910955 | 12 | 29  | 31  | 0.974347673 | 0.541653  | TBX4 | ENSG00000121075 |
| 17 | 56911374 | 56912050 | 56911628 | 13 | 34  | 23  | 1.515651935 | 0.0555079 | TBX4 | ENSG00000121075 |
| 17 | 56912459 | 56912679 | 56912510 | 10 | 13  | 17  | 0.808347699 | 0.728863  | TBX4 | ENSG00000121075 |
| 17 | 56912694 | 56912882 | 56912788 | 11 | 11  | 14  | 0.831443347 | 0.68719   | TBX4 | ENSG00000121075 |
| 17 | 56912975 | 56913430 | 56913189 | 23 | 34  | 34  | 1.039304184 | 0.436168  | TBX4 | ENSG00000121075 |
| 17 | 56913469 | 56913955 | 56913737 | 15 | 29  | 21  | 1.417232979 | 0.104064  | TBX4 | ENSG00000121075 |
| 17 | 56914204 | 56914958 | 56914376 | 20 | 48  | 48  | 1.039304184 | 0.424526  | TBX4 | ENSG00000121075 |
| 17 | 56915460 | 56916409 | 56915609 | 20 | 64  | 61  | 1.089593096 | 0.314234  | TBX4 | ENSG00000121075 |
| 17 | 56916431 | 56917034 | 56916675 | 12 | 26  | 32  | 0.850339787 | 0.736354  | TBX4 | ENSG00000121075 |

|    |          |          |          |    |     |    |             |            |      |                 |
|----|----------|----------|----------|----|-----|----|-------------|------------|------|-----------------|
| 17 | 56917183 | 56917691 | 56917355 | 11 | 23  | 30 | 0.804622594 | 0.791126   | TBX4 | ENSG00000121075 |
| 17 | 56917767 | 56918390 | 56918156 | 17 | 37  | 42 | 0.91845486  | 0.650155   | TBX4 | ENSG00000121075 |
| 17 | 56918393 | 56918833 | 56918654 | 11 | 22  | 34 | 0.682971321 | 0.926111   | TBX4 | ENSG00000121075 |
| 17 | 56918843 | 56919545 | 56919110 | 18 | 37  | 40 | 0.963257537 | 0.566947   | TBX4 | ENSG00000121075 |
| 17 | 56919686 | 56921045 | 56920715 | 15 | 67  | 68 | 1.024241805 | 0.444528   | TBX4 | ENSG00000121075 |
| 17 | 56921067 | 56921320 | 56921239 | 8  | 11  | 12 | 0.959357709 | 0.543005   | TBX4 | ENSG00000121075 |
| 17 | 56921484 | 56922446 | 56922267 | 22 | 50  | 58 | 0.898381583 | 0.713768   | TBX4 | ENSG00000121075 |
| 17 | 56922644 | 56923488 | 56923042 | 16 | 51  | 47 | 1.125912866 | 0.276262   | TBX4 | ENSG00000121075 |
| 17 | 56923987 | 56924537 | 56924294 | 19 | 35  | 46 | 0.796062779 | 0.850956   | TBX4 | ENSG00000121075 |
| 17 | 56924801 | 56926059 | 56925591 | 16 | 74  | 83 | 0.927950164 | 0.681977   | TBX4 | ENSG00000121075 |
| 17 | 56926372 | 56928151 | 56927438 | 17 | 108 | 87 | 1.287319955 | 0.0382986  | TBX4 | ENSG00000121075 |
| 17 | 56928271 | 56929381 | 56928828 | 15 | 63  | 64 | 1.023314889 | 0.448218   | TBX4 | ENSG00000121075 |
| 17 | 56929419 | 56929932 | 56929754 | 14 | 23  | 54 | 0.453514553 | 0.999646   | TBX4 | ENSG00000121075 |
| 17 | 56930332 | 56930779 | 56930489 | 15 | 25  | 37 | 0.711102863 | 0.913296   | TBX4 | ENSG00000121075 |
| 17 | 56930813 | 56931603 | 56931386 | 14 | 42  | 35 | 1.241391109 | 0.167785   | TBX4 | ENSG00000121075 |
| 17 | 56931813 | 56932772 | 56932147 | 23 | 68  | 61 | 1.156644979 | 0.202183   | TBX4 | ENSG00000121075 |
| 17 | 56932873 | 56933437 | 56933052 | 11 | 24  | 40 | 0.633722064 | 0.966896   | TBX4 | ENSG00000121075 |
| 17 | 56933611 | 56934461 | 56934155 | 21 | 48  | 62 | 0.808347699 | 0.869992   | TBX4 | ENSG00000121075 |
| 17 | 56934508 | 56934974 | 56934796 | 11 | 19  | 28 | 0.716761506 | 0.878343   | TBX4 | ENSG00000121075 |
| 17 | 56935927 | 56936106 | 56936063 | 8  | 8   | 7  | 1.169217207 | 0.371848   | TBX4 | ENSG00000121075 |
| 17 | 56936621 | 56937552 | 56937066 | 36 | 95  | 64 | 1.534972334 | 0.00345928 | TBX4 | ENSG00000121075 |
| 17 | 56937965 | 56938390 | 56938089 | 13 | 22  | 21 | 1.086545284 | 0.390103   | TBX4 | ENSG00000121075 |
| 17 | 56938703 | 56939431 | 56938854 | 14 | 39  | 39 | 1.039304184 | 0.431772   | TBX4 | ENSG00000121075 |
| 17 | 56939441 | 56940589 | 56939774 | 18 | 65  | 76 | 0.890832158 | 0.755865   | TBX4 | ENSG00000121075 |
| 17 | 56941111 | 56941491 | 56941290 | 28 | 36  | 37 | 1.011954074 | 0.479962   | TBX4 | ENSG00000121075 |
| 17 | 56941697 | 56942955 | 56942422 | 19 | 69  | 84 | 0.855897563 | 0.833895   | TBX4 | ENSG00000121075 |
| 17 | 56943065 | 56944299 | 56943776 | 17 | 69  | 66 | 1.085840192 | 0.314798   | TBX4 | ENSG00000121075 |
| 17 | 56944616 | 56945268 | 56945145 | 11 | 28  | 25 | 1.159223898 | 0.291166   | TBX4 | ENSG00000121075 |
| 17 | 56945796 | 56946265 | 56946106 | 13 | 18  | 13 | 1.41048425  | 0.160361   | TBX4 | ENSG00000121075 |
| 17 | 56946845 | 56947085 | 56946952 | 12 | 14  | 21 | 0.708616489 | 0.853486   | TBX4 | ENSG00000121075 |
| 17 | 56947443 | 56947757 | 56947589 | 11 | 15  | 16 | 0.978168644 | 0.526483   | TBX4 | ENSG00000121075 |
| 17 | 56948308 | 56948787 | 56948647 | 15 | 26  | 23 | 1.169217207 | 0.28753    | TBX4 | ENSG00000121075 |
| 17 | 56949399 | 56950559 | 56950134 | 12 | 55  | 58 | 0.986458209 | 0.529714   | TBX4 | ENSG00000121075 |
| 17 | 56950570 | 56950890 | 56950730 | 12 | 18  | 27 | 0.705242125 | 0.884499   | TBX4 | ENSG00000121075 |



|    |          |          |          |    |    |    |             |           |       |                 |
|----|----------|----------|----------|----|----|----|-------------|-----------|-------|-----------------|
| 17 | 56950892 | 56951648 | 56951071 | 15 | 38 | 57 | 0.698842469 | 0.960388  | TBX4  | ENSG00000121075 |
| 17 | 56952052 | 56952234 | 56952155 | 9  | 9  | 10 | 0.944821986 | 0.553851  | TBX4  | ENSG00000121075 |
| 17 | 56953122 | 56953578 | 56953301 | 15 | 25 | 23 | 1.125912866 | 0.336929  | TBX4  | ENSG00000121075 |
| 17 | 56955137 | 56955424 | 56955261 | 12 | 14 | 22 | 0.677807077 | 0.884881  | TBX4  | ENSG00000121075 |
| 17 | 56955914 | 56956700 | 56956370 | 14 | 38 | 28 | 1.397684937 | 0.083712  | NACA2 | ENSG00000196861 |
| 17 | 56956914 | 56957474 | 56957109 | 15 | 29 | 44 | 0.692869456 | 0.943176  | NACA2 | ENSG00000196861 |
| 17 | 56957501 | 56958750 | 56958027 | 21 | 66 | 76 | 0.904329615 | 0.727513  | NACA2 | ENSG00000196861 |
| 17 | 56959271 | 56959518 | 56959391 | 9  | 11 | 13 | 0.890832158 | 0.618492  | NACA2 | ENSG00000196861 |
| 17 | 56959919 | 56960156 | 56960051 | 8  | 9  | 9  | 1.039304184 | 0.466079  | NACA2 | ENSG00000196861 |
| 17 | 56960327 | 56960588 | 56960457 | 9  | 11 | 10 | 1.133786383 | 0.380636  | NACA2 | ENSG00000196861 |
| 17 | 56961241 | 56961838 | 56961672 | 16 | 34 | 31 | 1.136738952 | 0.299433  | NACA2 | ENSG00000196861 |
| 17 | 56961923 | 56962437 | 56962102 | 12 | 25 | 28 | 0.931789958 | 0.604671  | NACA2 | ENSG00000196861 |
| 17 | 56963404 | 56963692 | 56963577 | 12 | 15 | 11 | 1.385738912 | 0.19225   | NACA2 | ENSG00000196861 |
| 17 | 56964186 | 56964688 | 56964297 | 10 | 22 | 29 | 0.796799875 | 0.797061  | NACA2 | ENSG00000196861 |
| 17 | 56964809 | 56965517 | 56965102 | 13 | 35 | 73 | 0.505607441 | 0.999745  | NACA2 | ENSG00000196861 |
| 17 | 56965836 | 56966487 | 56966015 | 10 | 25 | 28 | 0.931789958 | 0.604671  | NACA2 | ENSG00000196861 |
| 17 | 56966517 | 56966923 | 56966696 | 10 | 17 | 29 | 0.623582511 | 0.947897  | NACA2 | ENSG00000196861 |
| 17 | 56967376 | 56967674 | 56967525 | 12 | 15 | 18 | 0.875203524 | 0.655562  | NACA2 | ENSG00000196861 |
| 17 | 56968492 | 56969024 | 56968671 | 11 | 24 | 22 | 1.129678461 | 0.335754  | NACA2 | ENSG00000196861 |
| 17 | 56969448 | 56970091 | 56969627 | 17 | 31 | 22 | 1.44598843  | 0.0857085 | NACA2 | ENSG00000196861 |
| 17 | 56970552 | 56970964 | 56970702 | 10 | 15 | 19 | 0.831443347 | 0.712423  | NACA2 | ENSG00000196861 |
| 17 | 56971278 | 56971483 | 56971408 | 9  | 9  | 6  | 1.484720263 | 0.204387  | NACA2 | ENSG00000196861 |
| 17 | 56972803 | 56973282 | 56973107 | 9  | 19 | 15 | 1.29913023  | 0.214784  | NACA2 | ENSG00000196861 |
| 17 | 56973758 | 56974236 | 56973937 | 11 | 21 | 18 | 1.203404845 | 0.275531  | NACA2 | ENSG00000196861 |
| 17 | 56974388 | 56974612 | 56974493 | 9  | 10 | 10 | 1.039304184 | 0.464387  | NACA2 | ENSG00000196861 |
| 17 | 56974742 | 56975236 | 56975059 | 9  | 17 | 24 | 0.748299013 | 0.830231  | NACA2 | ENSG00000196861 |
| 17 | 56976383 | 56976808 | 56976633 | 9  | 15 | 16 | 0.978168644 | 0.526483  | NACA2 | ENSG00000196861 |
| 17 | 56977059 | 56977349 | 56977170 | 11 | 14 | 15 | 0.974347673 | 0.530138  | NACA2 | ENSG00000196861 |
| 17 | 56977647 | 56977978 | 56977812 | 9  | 13 | 19 | 0.727512929 | 0.824686  | NACA2 | ENSG00000196861 |
| 17 | 56978770 | 56979190 | 56978949 | 11 | 19 | 13 | 1.484720263 | 0.123861  | NACA2 | ENSG00000196861 |
| 17 | 56979290 | 56979583 | 56979436 | 10 | 12 | 13 | 0.965068171 | 0.538344  | NACA2 | ENSG00000196861 |
| 17 | 56980556 | 56980783 | 56980658 | 8  | 10 | 15 | 0.714521627 | 0.810948  | NACA2 | ENSG00000196861 |
| 17 | 56981415 | 56981885 | 56981578 | 16 | 25 | 17 | 1.501217155 | 0.0888464 | NACA2 | ENSG00000196861 |
| 17 | 56982260 | 56983137 | 56982557 | 16 | 48 | 45 | 1.107084892 | 0.309755  | NACA2 | ENSG00000196861 |

|    |          |          |          |    |     |     |             |             |       |                 |
|----|----------|----------|----------|----|-----|-----|-------------|-------------|-------|-----------------|
| 17 | 56983219 | 56984018 | 56983518 | 46 | 90  | 52  | 1.784465675 | 0.000307823 | NACA2 | ENSG00000196861 |
| 17 | 56984785 | 56985124 | 56984946 | 19 | 21  | 13  | 1.63319229  | 0.0708832   | NACA2 | ENSG00000196861 |
| 17 | 56985189 | 56985817 | 56985674 | 20 | 40  | 40  | 1.039304184 | 0.430928    | NACA2 | ENSG00000196861 |
| 17 | 56986114 | 56986621 | 56986442 | 14 | 25  | 28  | 0.931789958 | 0.604671    | NACA2 | ENSG00000196861 |
| 17 | 56987019 | 56988088 | 56987586 | 28 | 81  | 102 | 0.827407215 | 0.901064    | NACA2 | ENSG00000196861 |
| 17 | 56988176 | 56989336 | 56988583 | 27 | 86  | 78  | 1.144550178 | 0.192002    | NACA2 | ENSG00000196861 |
| 17 | 56989466 | 56989667 | 56989566 | 8  | 9   | 14  | 0.692869456 | 0.822654    | NACA2 | ENSG00000196861 |
| 17 | 56989989 | 56990211 | 56990130 | 11 | 12  | 17  | 0.750608578 | 0.78992     | NACA2 | ENSG00000196861 |
| 17 | 56990354 | 56990776 | 56990477 | 8  | 16  | 32  | 0.535399125 | 0.984936    | NACA2 | ENSG00000196861 |
| 17 | 56991648 | 56992078 | 56991906 | 17 | 24  | 24  | 1.039304184 | 0.446062    | NACA2 | ENSG00000196861 |
| 17 | 56993132 | 56994208 | 56993968 | 19 | 62  | 67  | 0.962884759 | 0.586342    | NACA2 | ENSG00000196861 |
| 17 | 56994381 | 56994780 | 56994560 | 16 | 24  | 20  | 1.237266886 | 0.234075    | NACA2 | ENSG00000196861 |
| 17 | 56994785 | 56995153 | 56995019 | 8  | 14  | 15  | 0.974347673 | 0.530138    | NACA2 | ENSG00000196861 |
| 17 | 56995465 | 56995877 | 56995701 | 9  | 15  | 20  | 0.791850807 | 0.763134    | NACA2 | ENSG00000196861 |
| 17 | 56996930 | 56997416 | 56996996 | 13 | 27  | 33  | 0.855897563 | 0.7313      | NACA2 | ENSG00000196861 |
| 17 | 56999165 | 57000538 | 56999654 | 14 | 70  | 69  | 1.054151387 | 0.377163    | NACA2 | ENSG00000196861 |
| 17 | 57000554 | 57001970 | 57000983 | 57 | 130 | 86  | 1.564929289 | 0.00051993  | NACA2 | ENSG00000196861 |
| 17 | 57002145 | 57002682 | 57002318 | 16 | 31  | 29  | 1.10859113  | 0.342043    | NACA2 | ENSG00000196861 |
| 17 | 57002688 | 57002918 | 57002803 | 10 | 12  | 16  | 0.794762023 | 0.738004    | NACA2 | ENSG00000196861 |
| 17 | 57003160 | 57003573 | 57003394 | 9  | 16  | 23  | 0.736173797 | 0.837668    | NACA2 | ENSG00000196861 |
| 17 | 57003788 | 57004043 | 57003886 | 13 | 14  | 14  | 1.039304184 | 0.458308    | NACA2 | ENSG00000196861 |
| 17 | 57004964 | 57005386 | 57005208 | 9  | 16  | 19  | 0.883408557 | 0.649033    | NACA2 | ENSG00000196861 |
| 17 | 57005613 | 57006552 | 57006118 | 14 | 47  | 56  | 0.875203524 | 0.753475    | NACA2 | ENSG00000196861 |
| 17 | 57006703 | 57007798 | 57007146 | 39 | 97  | 92  | 1.095180753 | 0.264794    | NACA2 | ENSG00000196861 |
| 17 | 57007833 | 57008148 | 57007986 | 11 | 15  | 20  | 0.791850807 | 0.763134    | NACA2 | ENSG00000196861 |
| 17 | 57008208 | 57008579 | 57008387 | 10 | 17  | 31  | 0.584608604 | 0.96966     | NACA2 | ENSG00000196861 |
| 17 | 57009767 | 57011145 | 57010739 | 22 | 66  | 61  | 1.123119038 | 0.254565    | NACA2 | ENSG00000196861 |
| 17 | 57011379 | 57013352 | 57012720 | 23 | 120 | 118 | 1.056771481 | 0.334462    | NACA2 | ENSG00000196861 |
| 17 | 57013431 | 57013924 | 57013667 | 12 | 24  | 39  | 0.649565115 | 0.957933    | NACA2 | ENSG00000196861 |
| 17 | 57013931 | 57014320 | 57014110 | 14 | 23  | 24  | 0.997732017 | 0.503931    | NACA2 | ENSG00000196861 |
| 17 | 57015261 | 57016155 | 57015657 | 29 | 73  | 55  | 1.373366243 | 0.0355059   | NACA2 | ENSG00000196861 |
| 17 | 57016555 | 57016762 | 57016658 | 9  | 11  | 14  | 0.831443347 | 0.68719     | NACA2 | ENSG00000196861 |
| 17 | 57017012 | 57017291 | 57017123 | 10 | 14  | 21  | 0.708616489 | 0.853486    | NACA2 | ENSG00000196861 |
| 17 | 57018580 | 57018862 | 57018721 | 8  | 11  | 7   | 1.558956276 | 0.158273    | NACA2 | ENSG00000196861 |

|    |          |          |          |    |     |     |             |            |       |                 |
|----|----------|----------|----------|----|-----|-----|-------------|------------|-------|-----------------|
| 17 | 57019074 | 57020073 | 57019517 | 15 | 46  | 59  | 0.814121611 | 0.856477   | NACA2 | ENSG00000196861 |
| 17 | 57020098 | 57020772 | 57020249 | 13 | 32  | 42  | 0.797605537 | 0.838401   | NACA2 | ENSG00000196861 |
| 17 | 57020944 | 57021361 | 57021182 | 11 | 20  | 40  | 0.532326533 | 0.992476   | NACA2 | ENSG00000196861 |
| 17 | 57021441 | 57022712 | 57021774 | 22 | 85  | 83  | 1.064049522 | 0.342841   | NACA2 | ENSG00000196861 |
| 17 | 57023046 | 57023627 | 57023376 | 13 | 31  | 33  | 0.978168644 | 0.536565   | NACA2 | ENSG00000196861 |
| 17 | 57024097 | 57024620 | 57024226 | 17 | 31  | 40  | 0.811164241 | 0.815118   | NACA2 | ENSG00000196861 |
| 17 | 57024639 | 57025040 | 57024883 | 13 | 20  | 20  | 1.039304184 | 0.450588   | NACA2 | ENSG00000196861 |
| 17 | 57025370 | 57025870 | 57025660 | 11 | 21  | 36  | 0.61796465  | 0.966476   | NACA2 | ENSG00000196861 |
| 17 | 57026864 | 57027166 | 57027011 | 11 | 15  | 18  | 0.875203524 | 0.655562   | NACA2 | ENSG00000196861 |
| 17 | 57027648 | 57029343 | 57028403 | 19 | 85  | 107 | 0.827594073 | 0.906054   | NACA2 | ENSG00000196861 |
| 17 | 57029588 | 57030746 | 57029985 | 15 | 58  | 55  | 1.094981194 | 0.313117   | NACA2 | ENSG00000196861 |
| 17 | 57030821 | 57031415 | 57031072 | 13 | 27  | 42  | 0.676756213 | 0.949127   | NACA2 | ENSG00000196861 |
| 17 | 57031561 | 57032456 | 57032008 | 13 | 42  | 51  | 0.859424614 | 0.770637   | NACA2 | ENSG00000196861 |
| 17 | 57032780 | 57033247 | 57032959 | 10 | 21  | 42  | 0.531737024 | 0.99366    | NACA2 | ENSG00000196861 |
| 17 | 57033504 | 57033980 | 57033683 | 12 | 25  | 20  | 1.286757561 | 0.192726   | NACA2 | ENSG00000196861 |
| 17 | 57034789 | 57035305 | 57035029 | 12 | 26  | 32  | 0.850339787 | 0.736354   | NACA2 | ENSG00000196861 |
| 17 | 57035363 | 57035696 | 57035529 | 13 | 18  | 28  | 0.680923431 | 0.908117   | NACA2 | ENSG00000196861 |
| 17 | 57036306 | 57036704 | 57036485 | 9  | 18  | 14  | 1.316451967 | 0.209896   | NACA2 | ENSG00000196861 |
| 17 | 57038426 | 57038655 | 57038540 | 10 | 13  | 12  | 1.11925066  | 0.384109   | NACA2 | ENSG00000196861 |
| 17 | 57039076 | 57039363 | 57039214 | 20 | 22  | 18  | 1.258105065 | 0.227238   | NACA2 | ENSG00000196861 |
| 17 | 57042194 | 57042647 | 57042373 | 10 | 19  | 19  | 1.039304184 | 0.451787   | NACA2 | ENSG00000196861 |
| 17 | 57043032 | 57043958 | 57043300 | 24 | 52  | 48  | 1.124145342 | 0.276954   | NACA2 | ENSG00000196861 |
| 17 | 57043960 | 57044991 | 57044362 | 23 | 58  | 56  | 1.075770998 | 0.346967   | NACA2 | ENSG00000196861 |
| 17 | 57045120 | 57045323 | 57045191 | 8  | 10  | 9   | 1.143234603 | 0.378307   | NACA2 | ENSG00000196861 |
| 17 | 57045939 | 57046220 | 57046060 | 12 | 15  | 5   | 2.771477825 | 0.0105836  | NACA2 | ENSG00000196861 |
| 17 | 57048110 | 57048530 | 57048323 | 19 | 28  | 35  | 0.83721726  | 0.764263   | NACA2 | ENSG00000196861 |
| 17 | 57048828 | 57049914 | 57049536 | 11 | 44  | 42  | 1.087643914 | 0.346596   | NACA2 | ENSG00000196861 |
| 17 | 57050126 | 57050403 | 57050263 | 10 | 11  | 11  | 1.039304184 | 0.462773   | NACA2 | ENSG00000196861 |
| 17 | 57050947 | 57051378 | 57051201 | 9  | 16  | 14  | 1.177878075 | 0.320433   | NACA2 | ENSG00000196861 |
| 17 | 57051516 | 57052059 | 57051741 | 15 | 33  | 25  | 1.359090087 | 0.117005   | NACA2 | ENSG00000196861 |
| 17 | 57053461 | 57055329 | 57054678 | 41 | 126 | 91  | 1.434691646 | 0.00391748 | NACA2 | ENSG00000196861 |
| 17 | 57056066 | 57056349 | 57056208 | 8  | 11  | 14  | 0.831443347 | 0.68719    | NACA2 | ENSG00000196861 |
| 17 | 57057800 | 57058073 | 57057951 | 12 | 16  | 8   | 1.963130126 | 0.0441028  | NACA2 | ENSG00000196861 |
| 17 | 57058289 | 57058658 | 57058479 | 10 | 17  | 22  | 0.813368492 | 0.747743   | NACA2 | ENSG00000196861 |

|    |          |          |          |    |    |    |             |           |       |                 |
|----|----------|----------|----------|----|----|----|-------------|-----------|-------|-----------------|
| 17 | 57058846 | 57059031 | 57058938 | 9  | 10 | 10 | 1.039304184 | 0.464387  | NACA2 | ENSG00000196861 |
| 17 | 57059259 | 57059679 | 57059531 | 8  | 14 | 11 | 1.29913023  | 0.246308  | NACA2 | ENSG00000196861 |
| 17 | 57059732 | 57060181 | 57060002 | 16 | 24 | 17 | 1.443478034 | 0.113942  | NACA2 | ENSG00000196861 |
| 17 | 57062228 | 57062609 | 57062407 | 10 | 18 | 28 | 0.680923431 | 0.908117  | NACA2 | ENSG00000196861 |
| 17 | 57062933 | 57063330 | 57063131 | 12 | 20 | 18 | 1.148704625 | 0.329698  | NACA2 | ENSG00000196861 |
| 17 | 57063641 | 57063968 | 57063804 | 8  | 12 | 18 | 0.711102863 | 0.834017  | NACA2 | ENSG00000196861 |
| 17 | 57064473 | 57064974 | 57064795 | 8  | 17 | 20 | 0.890832158 | 0.642922  | NACA2 | ENSG00000196861 |
| 17 | 57065729 | 57065960 | 57065891 | 9  | 10 | 7  | 1.429043253 | 0.21536   | NACA2 | ENSG00000196861 |
| 17 | 57067098 | 57067952 | 57067469 | 13 | 38 | 53 | 0.750608578 | 0.916358  | NACA2 | ENSG00000196861 |
| 17 | 57067955 | 57068748 | 57068302 | 28 | 60 | 67 | 0.932316989 | 0.655436  | NACA2 | ENSG00000196861 |
| 17 | 57068883 | 57069166 | 57069031 | 14 | 17 | 15 | 1.169217207 | 0.323156  | NACA2 | ENSG00000196861 |
| 17 | 57075024 | 57075336 | 57075180 | 10 | 14 | 15 | 0.974347673 | 0.530138  | NACA2 | ENSG00000196861 |
| 17 | 57075563 | 57075938 | 57075750 | 18 | 26 | 24 | 1.122448519 | 0.337995  | NACA2 | ENSG00000196861 |
| 17 | 57076406 | 57076650 | 57076517 | 8  | 11 | 17 | 0.692869456 | 0.843876  | NACA2 | ENSG00000196861 |
| 17 | 57077120 | 57077675 | 57077397 | 19 | 37 | 34 | 1.1283874   | 0.302474  | NACA2 | ENSG00000196861 |
| 17 | 57078547 | 57079426 | 57079093 | 15 | 45 | 45 | 1.039304184 | 0.426858  | NACA2 | ENSG00000196861 |
| 17 | 57081031 | 57081432 | 57081210 | 11 | 19 | 25 | 0.799464757 | 0.777638  | NACA2 | ENSG00000196861 |
| 17 | 57082540 | 57083268 | 57083128 | 23 | 48 | 60 | 0.834850902 | 0.828487  | NACA2 | ENSG00000196861 |
| 17 | 57083525 | 57085338 | 57084428 | 15 | 85 | 93 | 0.950852764 | 0.632915  | NACA2 | ENSG00000196861 |
| 17 | 57085636 | 57086276 | 57085763 | 9  | 24 | 20 | 1.237266886 | 0.234075  | NACA2 | ENSG00000196861 |
| 17 | 57086866 | 57087130 | 57086993 | 17 | 20 | 23 | 0.909391161 | 0.626666  | NACA2 | ENSG00000196861 |
| 17 | 57089555 | 57089773 | 57089664 | 10 | 13 | 11 | 1.212521548 | 0.309909  | NACA2 | ENSG00000196861 |
| 17 | 57090056 | 57090311 | 57090209 | 8  | 11 | 6  | 1.781664316 | 0.103344  | NACA2 | ENSG00000196861 |
| 17 | 57090337 | 57090673 | 57090505 | 11 | 17 | 20 | 0.890832158 | 0.642922  | NACA2 | ENSG00000196861 |
| 17 | 57090957 | 57091730 | 57091136 | 17 | 47 | 42 | 1.160153508 | 0.238845  | NACA2 | ENSG00000196861 |
| 17 | 57091843 | 57092323 | 57092144 | 10 | 19 | 28 | 0.716761506 | 0.878343  | NACA2 | ENSG00000196861 |
| 17 | 57092503 | 57093133 | 57092794 | 11 | 26 | 42 | 0.652586348 | 0.961857  | NACA2 | ENSG00000196861 |
| 17 | 57093406 | 57093903 | 57093564 | 12 | 22 | 36 | 0.646053952 | 0.953597  | NACA2 | ENSG00000196861 |
| 17 | 57093926 | 57095273 | 57094458 | 15 | 63 | 54 | 1.209372142 | 0.149617  | NACA2 | ENSG00000196861 |
| 17 | 57095354 | 57096352 | 57095710 | 11 | 38 | 49 | 0.810657264 | 0.839388  | NACA2 | ENSG00000196861 |
| 17 | 57099001 | 57099230 | 57099121 | 10 | 11 | 10 | 1.133786383 | 0.380636  | NACA2 | ENSG00000196861 |
| 17 | 57099652 | 57100085 | 57099964 | 9  | 16 | 9  | 1.766817113 | 0.0700694 | NACA2 | ENSG00000196861 |
| 17 | 57100132 | 57101687 | 57101020 | 18 | 82 | 76 | 1.120288926 | 0.236054  | NACA2 | ENSG00000196861 |
| 17 | 57101701 | 57102178 | 57101936 | 19 | 31 | 21 | 1.511715177 | 0.0647459 | NACA2 | ENSG00000196861 |

|    |          |          |          |    |    |    |             |          |       |                 |
|----|----------|----------|----------|----|----|----|-------------|----------|-------|-----------------|
| 17 | 57102755 | 57103732 | 57102940 | 16 | 48 | 44 | 1.131686778 | 0.273975 | NACA2 | ENSG00000196861 |
| 17 | 57104725 | 57105271 | 57104930 | 15 | 29 | 27 | 1.113540197 | 0.340649 | NACA2 | ENSG00000196861 |
| 17 | 57110463 | 57110890 | 57110711 | 14 | 22 | 30 | 0.771096653 | 0.831099 | NACA2 | ENSG00000196861 |
| 17 | 57111037 | 57111312 | 57111172 | 9  | 11 | 17 | 0.692869456 | 0.843876 | NACA2 | ENSG00000196861 |
| 17 | 57113440 | 57113726 | 57113583 | 9  | 12 | 20 | 0.643378781 | 0.900583 | NACA2 | ENSG00000196861 |
| 17 | 57114560 | 57115115 | 57114739 | 10 | 25 | 27 | 0.965068171 | 0.55304  | NACA2 | ENSG00000196861 |
| 17 | 57115795 | 57116007 | 57115858 | 10 | 12 | 19 | 0.67554772  | 0.870684 | NACA2 | ENSG00000196861 |
| 17 | 57116024 | 57116314 | 57116174 | 8  | 12 | 29 | 0.450365147 | 0.994327 | NACA2 | ENSG00000196861 |
| 17 | 57116422 | 57116736 | 57116572 | 10 | 13 | 16 | 0.855897563 | 0.670115 | NACA2 | ENSG00000196861 |
| 17 | 57117199 | 57117539 | 57117369 | 19 | 24 | 19 | 1.29913023  | 0.189    | NACA2 | ENSG00000196861 |
| 17 | 57117605 | 57118510 | 57118221 | 12 | 34 | 46 | 0.773949924 | 0.877125 | NACA2 | ENSG00000196861 |
| 17 | 57119127 | 57119683 | 57119481 | 16 | 29 | 32 | 0.944821986 | 0.590257 | NACA2 | ENSG00000196861 |
| 17 | 57119801 | 57120271 | 57120054 | 10 | 20 | 41 | 0.519652092 | 0.994442 | NACA2 | ENSG00000196861 |
| 17 | 57120484 | 57120877 | 57120657 | 8  | 16 | 23 | 0.736173797 | 0.837668 | NACA2 | ENSG00000196861 |
| 17 | 57121381 | 57121897 | 57121625 | 18 | 35 | 29 | 1.247165021 | 0.184147 | NACA2 | ENSG00000196861 |
| 17 | 57122036 | 57122452 | 57122273 | 14 | 23 | 17 | 1.385738912 | 0.144406 | NACA2 | ENSG00000196861 |
| 17 | 57122556 | 57122983 | 57122826 | 13 | 21 | 17 | 1.27026067  | 0.223413 | NACA2 | ENSG00000196861 |
| 17 | 57123955 | 57124589 | 57124144 | 17 | 30 | 27 | 1.150658204 | 0.29431  | NACA2 | ENSG00000196861 |
| 17 | 57124629 | 57125026 | 57124847 | 8  | 16 | 23 | 0.736173797 | 0.837668 | NACA2 | ENSG00000196861 |
| 17 | 57125063 | 57125504 | 57125333 | 9  | 18 | 20 | 0.940322833 | 0.578675 | NACA2 | ENSG00000196861 |
| 17 | 57126148 | 57126615 | 57126432 | 14 | 24 | 21 | 1.181027482 | 0.2833   | NACA2 | ENSG00000196861 |
| 17 | 57126628 | 57126827 | 57126698 | 10 | 11 | 16 | 0.733626483 | 0.800067 | NACA2 | ENSG00000196861 |
| 17 | 57127090 | 57127299 | 57127194 | 8  | 10 | 18 | 0.601702422 | 0.917232 | NACA2 | ENSG00000196861 |
| 17 | 57127397 | 57127734 | 57127565 | 9  | 15 | 17 | 0.923825942 | 0.593214 | NACA2 | ENSG00000196861 |
| 17 | 57128156 | 57128386 | 57128211 | 12 | 14 | 18 | 0.820503303 | 0.720361 | NACA2 | ENSG00000196861 |
| 17 | 57129858 | 57130095 | 57129952 | 9  | 10 | 12 | 0.879411233 | 0.62639  | NACA2 | ENSG00000196861 |
| 17 | 57130462 | 57130696 | 57130606 | 9  | 10 | 13 | 0.816596145 | 0.696946 | NACA2 | ENSG00000196861 |
| 17 | 57131148 | 57131386 | 57131213 | 11 | 12 | 11 | 1.125912866 | 0.382541 | NACA2 | ENSG00000196861 |
| 17 | 57131559 | 57132395 | 57132200 | 21 | 53 | 64 | 0.863421938 | 0.789013 | NACA2 | ENSG00000196861 |
| 17 | 57132546 | 57132876 | 57132711 | 13 | 18 | 28 | 0.680923431 | 0.908117 | NACA2 | ENSG00000196861 |
| 17 | 57133425 | 57134131 | 57133813 | 11 | 31 | 28 | 1.14681841  | 0.295725 | NACA2 | ENSG00000196861 |
| 17 | 57134215 | 57134772 | 57134374 | 11 | 26 | 26 | 1.039304184 | 0.44394  | NACA2 | ENSG00000196861 |
| 17 | 57135881 | 57136063 | 57135972 | 8  | 10 | 8  | 1.27026067  | 0.293854 | NACA2 | ENSG00000196861 |
| 17 | 57136278 | 57136513 | 57136395 | 11 | 12 | 10 | 1.228268581 | 0.305344 | NACA2 | ENSG00000196861 |

|    |          |          |          |    |     |     |             |           |       |                 |
|----|----------|----------|----------|----|-----|-----|-------------|-----------|-------|-----------------|
| 17 | 57136650 | 57137428 | 57137129 | 13 | 33  | 24  | 1.413453691 | 0.0918299 | NACA2 | ENSG00000196861 |
| 17 | 57137624 | 57137951 | 57137787 | 13 | 17  | 10  | 1.700679574 | 0.0766266 | NACA2 | ENSG00000196861 |
| 17 | 57138386 | 57139365 | 57138661 | 9  | 34  | 44  | 0.808347699 | 0.829904  | NACA2 | ENSG00000196861 |
| 17 | 57139425 | 57139636 | 57139574 | 8  | 10  | 14  | 0.762156402 | 0.758589  | NACA2 | ENSG00000196861 |
| 17 | 57140489 | 57141697 | 57141014 | 13 | 62  | 50  | 1.283846345 | 0.0910563 | NACA2 | ENSG00000196861 |
| 17 | 57141733 | 57142104 | 57141912 | 12 | 19  | 15  | 1.29913023  | 0.214784  | NACA2 | ENSG00000196861 |
| 17 | 57142322 | 57142757 | 57142470 | 14 | 24  | 21  | 1.181027482 | 0.2833    | NACA2 | ENSG00000196861 |
| 17 | 57143095 | 57143699 | 57143569 | 17 | 36  | 32  | 1.165280449 | 0.260519  | NACA2 | ENSG00000196861 |
| 17 | 57145162 | 57145425 | 57145284 | 9  | 12  | 9   | 1.35109544  | 0.232899  | NACA2 | ENSG00000196861 |
| 17 | 57145438 | 57145661 | 57145560 | 8  | 9   | 10  | 0.944821986 | 0.553851  | NACA2 | ENSG00000196861 |
| 17 | 57146719 | 57146899 | 57146864 | 8  | 8   | 6   | 1.336248237 | 0.277651  | NACA2 | ENSG00000196861 |
| 17 | 57147484 | 57148277 | 57148100 | 12 | 33  | 35  | 0.981565063 | 0.531809  | NACA2 | ENSG00000196861 |
| 17 | 57148280 | 57148710 | 57148459 | 10 | 19  | 34  | 0.593888105 | 0.971942  | NACA2 | ENSG00000196861 |
| 17 | 57148746 | 57149105 | 57148925 | 9  | 16  | 18  | 0.929903744 | 0.58804   | NACA2 | ENSG00000196861 |
| 17 | 57149559 | 57149871 | 57149711 | 8  | 11  | 13  | 0.890832158 | 0.618492  | NACA2 | ENSG00000196861 |
| 17 | 57150142 | 57150694 | 57150492 | 16 | 31  | 36  | 0.898857673 | 0.67235   | NACA2 | ENSG00000196861 |
| 17 | 57151811 | 57151990 | 57151914 | 8  | 8   | 8   | 1.039304184 | 0.46786   | NACA2 | ENSG00000196861 |
| 17 | 57152618 | 57152963 | 57152790 | 16 | 21  | 19  | 1.143234603 | 0.33145   | NACA2 | ENSG00000196861 |
| 17 | 57154611 | 57154850 | 57154730 | 11 | 11  | 18  | 0.656402643 | 0.879847  | NACA2 | ENSG00000196861 |
| 17 | 57154942 | 57156245 | 57155423 | 46 | 116 | 109 | 1.105441723 | 0.224951  | NACA2 | ENSG00000196861 |
| 17 | 57156615 | 57158806 | 57157069 | 31 | 142 | 122 | 1.208296735 | 0.0614461 | NACA2 | ENSG00000196861 |
| 17 | 57159175 | 57159727 | 57159464 | 8  | 18  | 22  | 0.85855563  | 0.691398  | BRIP1 | ENSG00000136492 |
| 17 | 57160131 | 57161295 | 57160870 | 19 | 65  | 55  | 1.224894217 | 0.13107   | BRIP1 | ENSG00000136492 |
| 17 | 57161636 | 57162544 | 57161951 | 14 | 43  | 59  | 0.762156402 | 0.916632  | BRIP1 | ENSG00000136492 |
| 17 | 57162556 | 57163942 | 57162689 | 16 | 83  | 98  | 0.881833853 | 0.802832  | BRIP1 | ENSG00000136492 |
| 17 | 57164558 | 57164747 | 57164669 | 8  | 10  | 14  | 0.762156402 | 0.758589  | BRIP1 | ENSG00000136492 |
| 17 | 57164985 | 57165306 | 57165145 | 12 | 13  | 12  | 1.11925066  | 0.384109  | BRIP1 | ENSG00000136492 |
| 17 | 57165406 | 57165689 | 57165547 | 10 | 13  | 16  | 0.855897563 | 0.670115  | BRIP1 | ENSG00000136492 |
| 17 | 57166202 | 57167029 | 57166669 | 15 | 41  | 31  | 1.364086742 | 0.0907884 | BRIP1 | ENSG00000136492 |
| 17 | 57167169 | 57167457 | 57167281 | 11 | 14  | 17  | 0.86608682  | 0.662567  | BRIP1 | ENSG00000136492 |
| 17 | 57167468 | 57167736 | 57167624 | 9  | 12  | 21  | 0.614134291 | 0.924528  | BRIP1 | ENSG00000136492 |
| 17 | 57167896 | 57168154 | 57168025 | 9  | 11  | 9   | 1.247165021 | 0.300052  | BRIP1 | ENSG00000136492 |
| 17 | 57169832 | 57170597 | 57170128 | 22 | 55  | 54  | 1.058200624 | 0.382892  | BRIP1 | ENSG00000136492 |
| 17 | 57170600 | 57170823 | 57170734 | 8  | 11  | 31  | 0.389739069 | 0.998552  | BRIP1 | ENSG00000136492 |

|    |          |          |          |    |    |    |             |            |       |                 |
|----|----------|----------|----------|----|----|----|-------------|------------|-------|-----------------|
| 17 | 57171187 | 57171506 | 57171346 | 8  | 13 | 26 | 0.538898466 | 0.974306   | BRIP1 | ENSG00000136492 |
| 17 | 57171806 | 57172194 | 57171983 | 10 | 18 | 16 | 1.161575265 | 0.325582   | BRIP1 | ENSG00000136492 |
| 17 | 57172286 | 57172660 | 57172481 | 15 | 25 | 28 | 0.931789958 | 0.604671   | BRIP1 | ENSG00000136492 |
| 17 | 57172969 | 57173299 | 57173134 | 8  | 14 | 18 | 0.820503303 | 0.720361   | BRIP1 | ENSG00000136492 |
| 17 | 57173413 | 57173837 | 57173544 | 12 | 21 | 21 | 1.039304184 | 0.449418   | BRIP1 | ENSG00000136492 |
| 17 | 57174027 | 57175387 | 57174968 | 11 | 60 | 39 | 1.584938881 | 0.0107629  | BRIP1 | ENSG00000136492 |
| 17 | 57176691 | 57176967 | 57176794 | 11 | 14 | 10 | 1.417232979 | 0.185113   | BRIP1 | ENSG00000136492 |
| 17 | 57177451 | 57177657 | 57177532 | 9  | 11 | 12 | 0.959357709 | 0.543005   | BRIP1 | ENSG00000136492 |
| 17 | 57177676 | 57177953 | 57177862 | 8  | 12 | 17 | 0.750608578 | 0.78992    | BRIP1 | ENSG00000136492 |
| 17 | 57178679 | 57179644 | 57179143 | 12 | 41 | 36 | 1.179750696 | 0.230727   | BRIP1 | ENSG00000136492 |
| 17 | 57179796 | 57180185 | 57180013 | 8  | 14 | 10 | 1.417232979 | 0.185113   | BRIP1 | ENSG00000136492 |
| 17 | 57180395 | 57181046 | 57180877 | 14 | 32 | 13 | 2.449788434 | 0.00149869 | BRIP1 | ENSG00000136492 |
| 17 | 57181539 | 57181994 | 57181717 | 14 | 22 | 15 | 1.493999765 | 0.104649   | BRIP1 | ENSG00000136492 |
| 17 | 57182048 | 57182477 | 57182262 | 12 | 21 | 23 | 0.952695502 | 0.566563   | BRIP1 | ENSG00000136492 |
| 17 | 57182681 | 57183247 | 57182949 | 16 | 32 | 28 | 1.182656486 | 0.253749   | BRIP1 | ENSG00000136492 |
| 17 | 57183277 | 57183632 | 57183454 | 12 | 18 | 16 | 1.161575265 | 0.325582   | BRIP1 | ENSG00000136492 |
| 17 | 57184184 | 57184746 | 57184567 | 11 | 27 | 16 | 1.711795127 | 0.0365811  | BRIP1 | ENSG00000136492 |
| 17 | 57184969 | 57186303 | 57185141 | 16 | 63 | 70 | 0.936837575 | 0.648395   | BRIP1 | ENSG00000136492 |
| 17 | 57186398 | 57186959 | 57186535 | 10 | 21 | 37 | 0.601702422 | 0.974135   | BRIP1 | ENSG00000136492 |
| 17 | 57187785 | 57188140 | 57187962 | 12 | 18 | 29 | 0.658225983 | 0.927623   | BRIP1 | ENSG00000136492 |
| 17 | 57188597 | 57189075 | 57188934 | 15 | 25 | 33 | 0.794762023 | 0.814119   | BRIP1 | ENSG00000136492 |
| 17 | 57189385 | 57189711 | 57189548 | 13 | 16 | 27 | 0.631006112 | 0.93773    | BRIP1 | ENSG00000136492 |
| 17 | 57190050 | 57190247 | 57190185 | 9  | 10 | 16 | 0.672490943 | 0.854309   | BRIP1 | ENSG00000136492 |
| 17 | 57190638 | 57191021 | 57190817 | 10 | 17 | 22 | 0.813368492 | 0.747743   | BRIP1 | ENSG00000136492 |
| 17 | 57192513 | 57192757 | 57192644 | 9  | 9  | 13 | 0.742360132 | 0.770276   | BRIP1 | ENSG00000136492 |
| 17 | 57193047 | 57193226 | 57193090 | 8  | 8  | 12 | 0.719518281 | 0.783103   | BRIP1 | ENSG00000136492 |
| 17 | 57194065 | 57194383 | 57194224 | 13 | 18 | 15 | 1.234173719 | 0.265435   | BRIP1 | ENSG00000136492 |
| 17 | 57194881 | 57195232 | 57195056 | 13 | 19 | 18 | 1.094004404 | 0.389177   | BRIP1 | ENSG00000136492 |
| 17 | 57195374 | 57195730 | 57195552 | 10 | 14 | 18 | 0.820503303 | 0.720361   | BRIP1 | ENSG00000136492 |
| 17 | 57196225 | 57197369 | 57196604 | 16 | 56 | 62 | 0.940322833 | 0.632732   | BRIP1 | ENSG00000136492 |
| 17 | 57198423 | 57198882 | 57198703 | 19 | 32 | 28 | 1.182656486 | 0.253749   | BRIP1 | ENSG00000136492 |
| 17 | 57199946 | 57200157 | 57200043 | 12 | 12 | 16 | 0.794762023 | 0.738004   | BRIP1 | ENSG00000136492 |
| 17 | 57200665 | 57201507 | 57201175 | 14 | 43 | 38 | 1.17254831  | 0.233675   | BRIP1 | ENSG00000136492 |
| 17 | 57201512 | 57202506 | 57202231 | 13 | 39 | 53 | 0.769854951 | 0.897455   | BRIP1 | ENSG00000136492 |

|    |          |          |          |    |    |    |             |           |       |                 |
|----|----------|----------|----------|----|----|----|-------------|-----------|-------|-----------------|
| 17 | 57202707 | 57203115 | 57202940 | 12 | 21 | 21 | 1.039304184 | 0.449418  | BRIP1 | ENSG00000136492 |
| 17 | 57204888 | 57205505 | 57205376 | 10 | 25 | 23 | 1.125912866 | 0.336929  | BRIP1 | ENSG00000136492 |
| 17 | 57208002 | 57208379 | 57208075 | 9  | 18 | 10 | 1.795161773 | 0.055383  | BRIP1 | ENSG00000136492 |
| 17 | 57208394 | 57209393 | 57208968 | 21 | 68 | 47 | 1.493999765 | 0.0153362 | BRIP1 | ENSG00000136492 |
| 17 | 57209398 | 57209947 | 57209577 | 13 | 25 | 26 | 1.000811437 | 0.499519  | BRIP1 | ENSG00000136492 |
| 17 | 57209965 | 57210266 | 57210115 | 9  | 13 | 18 | 0.765803083 | 0.780427  | BRIP1 | ENSG00000136492 |
| 17 | 57210806 | 57211109 | 57210957 | 12 | 16 | 13 | 1.262012224 | 0.256887  | BRIP1 | ENSG00000136492 |
| 17 | 57212294 | 57212580 | 57212418 | 17 | 19 | 20 | 0.989813509 | 0.514009  | BRIP1 | ENSG00000136492 |
| 17 | 57212877 | 57213277 | 57213056 | 13 | 22 | 18 | 1.258105065 | 0.227238  | BRIP1 | ENSG00000136492 |
| 17 | 57213332 | 57213874 | 57213544 | 16 | 29 | 20 | 1.484720263 | 0.0791637 | BRIP1 | ENSG00000136492 |
| 17 | 57214577 | 57214800 | 57214688 | 8  | 10 | 10 | 1.039304184 | 0.464387  | BRIP1 | ENSG00000136492 |
| 17 | 57214920 | 57215140 | 57215067 | 9  | 12 | 15 | 0.84443465  | 0.678289  | BRIP1 | ENSG00000136492 |
| 17 | 57216477 | 57217480 | 57216976 | 18 | 48 | 48 | 1.039304184 | 0.424526  | BRIP1 | ENSG00000136492 |
| 17 | 57217936 | 57218154 | 57218045 | 9  | 11 | 11 | 1.039304184 | 0.462773  | BRIP1 | ENSG00000136492 |
| 17 | 57218180 | 57218587 | 57218410 | 12 | 18 | 25 | 0.759491519 | 0.823082  | BRIP1 | ENSG00000136492 |
| 17 | 57220712 | 57220946 | 57220779 | 10 | 12 | 6  | 1.930136342 | 0.071303  | BRIP1 | ENSG00000136492 |
| 17 | 57221597 | 57222006 | 57221827 | 10 | 18 | 24 | 0.78987118  | 0.784577  | BRIP1 | ENSG00000136492 |
| 17 | 57222157 | 57222348 | 57222252 | 8  | 9  | 26 | 0.384927476 | 0.997192  | BRIP1 | ENSG00000136492 |
| 17 | 57222805 | 57223181 | 57223008 | 15 | 21 | 16 | 1.344981885 | 0.176214  | BRIP1 | ENSG00000136492 |
| 17 | 57223201 | 57224234 | 57223830 | 12 | 43 | 35 | 1.27026067  | 0.141946  | BRIP1 | ENSG00000136492 |
| 17 | 57224361 | 57224551 | 57224456 | 8  | 9  | 4  | 2.078608368 | 0.0785659 | BRIP1 | ENSG00000136492 |
| 17 | 57224685 | 57224896 | 57224801 | 10 | 10 | 14 | 0.762156402 | 0.758589  | BRIP1 | ENSG00000136492 |
| 17 | 57226099 | 57226307 | 57226154 | 9  | 10 | 12 | 0.879411233 | 0.62639   | BRIP1 | ENSG00000136492 |
| 17 | 57226465 | 57226696 | 57226580 | 10 | 11 | 21 | 0.566893191 | 0.949414  | BRIP1 | ENSG00000136492 |
| 17 | 57228651 | 57228867 | 57228754 | 9  | 9  | 13 | 0.742360132 | 0.770276  | BRIP1 | ENSG00000136492 |
| 17 | 57229037 | 57229305 | 57229150 | 8  | 10 | 22 | 0.497058523 | 0.977096  | BRIP1 | ENSG00000136492 |
| 17 | 57229357 | 57229740 | 57229536 | 15 | 23 | 23 | 1.039304184 | 0.447157  | BRIP1 | ENSG00000136492 |
| 17 | 57229746 | 57229978 | 57229905 | 10 | 11 | 16 | 0.733626483 | 0.800067  | BRIP1 | ENSG00000136492 |
| 17 | 57230271 | 57230715 | 57230571 | 10 | 18 | 8  | 2.194086611 | 0.0206188 | BRIP1 | ENSG00000136492 |
| 17 | 57230898 | 57231755 | 57231077 | 11 | 36 | 35 | 1.068173745 | 0.389034  | BRIP1 | ENSG00000136492 |
| 17 | 57231904 | 57232441 | 57232201 | 22 | 41 | 33 | 1.283846345 | 0.137648  | BRIP1 | ENSG00000136492 |
| 17 | 57232533 | 57233210 | 57232986 | 15 | 31 | 42 | 0.773435672 | 0.867273  | BRIP1 | ENSG00000136492 |
| 17 | 57233219 | 57233636 | 57233463 | 19 | 28 | 24 | 1.205592854 | 0.245174  | BRIP1 | ENSG00000136492 |
| 17 | 57233753 | 57234125 | 57233976 | 12 | 18 | 19 | 0.987338975 | 0.516858  | BRIP1 | ENSG00000136492 |



|    |          |          |          |    |    |    |             |           |       |                 |
|----|----------|----------|----------|----|----|----|-------------|-----------|-------|-----------------|
| 17 | 57234481 | 57234669 | 57234559 | 8  | 9  | 18 | 0.547002202 | 0.94615   | BRIP1 | ENSG00000136492 |
| 17 | 57234734 | 57234989 | 57234861 | 9  | 12 | 19 | 0.67554772  | 0.870684  | BRIP1 | ENSG00000136492 |
| 17 | 57235118 | 57235309 | 57235213 | 8  | 9  | 12 | 0.799464757 | 0.707717  | BRIP1 | ENSG00000136492 |
| 17 | 57236279 | 57236458 | 57236368 | 8  | 8  | 8  | 1.039304184 | 0.46786   | BRIP1 | ENSG00000136492 |
| 17 | 57237257 | 57237494 | 57237375 | 9  | 12 | 18 | 0.711102863 | 0.834017  | BRIP1 | ENSG00000136492 |
| 17 | 57237595 | 57237864 | 57237770 | 15 | 17 | 20 | 0.890832158 | 0.642922  | BRIP1 | ENSG00000136492 |
| 17 | 57238075 | 57238586 | 57238254 | 14 | 25 | 29 | 0.900730293 | 0.653667  | BRIP1 | ENSG00000136492 |
| 17 | 57238716 | 57238900 | 57238779 | 8  | 8  | 14 | 0.623582511 | 0.877092  | BRIP1 | ENSG00000136492 |
| 17 | 57239215 | 57239467 | 57239372 | 8  | 12 | 15 | 0.84443465  | 0.678289  | BRIP1 | ENSG00000136492 |
| 17 | 57239484 | 57239829 | 57239677 | 9  | 14 | 10 | 1.417232979 | 0.185113  | BRIP1 | ENSG00000136492 |
| 17 | 57239945 | 57240198 | 57240071 | 10 | 13 | 10 | 1.32275078  | 0.240023  | BRIP1 | ENSG00000136492 |
| 17 | 57240515 | 57241090 | 57240807 | 14 | 28 | 36 | 0.814589766 | 0.798552  | BRIP1 | ENSG00000136492 |
| 17 | 57241597 | 57242405 | 57242030 | 17 | 43 | 54 | 0.831443347 | 0.821295  | BRIP1 | ENSG00000136492 |
| 17 | 57243317 | 57243496 | 57243406 | 8  | 8  | 6  | 1.336248237 | 0.277651  | BRIP1 | ENSG00000136492 |
| 17 | 57243595 | 57243866 | 57243730 | 8  | 11 | 12 | 0.959357709 | 0.543005  | BRIP1 | ENSG00000136492 |
| 17 | 57244049 | 57244331 | 57244186 | 12 | 13 | 15 | 0.909391161 | 0.604792  | BRIP1 | ENSG00000136492 |
| 17 | 57245382 | 57245731 | 57245556 | 16 | 22 | 12 | 1.838768941 | 0.0349935 | BRIP1 | ENSG00000136492 |
| 17 | 57246721 | 57246974 | 57246847 | 11 | 12 | 9  | 1.35109544  | 0.232899  | BRIP1 | ENSG00000136492 |
| 17 | 57247767 | 57248562 | 57248384 | 22 | 48 | 59 | 0.848765084 | 0.804552  | BRIP1 | ENSG00000136492 |
| 17 | 57248585 | 57249275 | 57248901 | 11 | 29 | 40 | 0.760466476 | 0.875833  | BRIP1 | ENSG00000136492 |
| 17 | 57249415 | 57250068 | 57249754 | 12 | 26 | 16 | 1.650659587 | 0.048911  | BRIP1 | ENSG00000136492 |
| 17 | 57250202 | 57250521 | 57250373 | 9  | 13 | 16 | 0.855897563 | 0.670115  | BRIP1 | ENSG00000136492 |
| 17 | 57250640 | 57251026 | 57250848 | 8  | 15 | 10 | 1.511715177 | 0.140236  | BRIP1 | ENSG00000136492 |
| 17 | 57252280 | 57252778 | 57252503 | 16 | 27 | 30 | 0.93872636  | 0.597175  | BRIP1 | ENSG00000136492 |
| 17 | 57253087 | 57253287 | 57253170 | 8  | 8  | 9  | 0.935373766 | 0.560286  | BRIP1 | ENSG00000136492 |
| 17 | 57253616 | 57254111 | 57253898 | 15 | 28 | 33 | 0.886465334 | 0.685163  | BRIP1 | ENSG00000136492 |
| 17 | 57254210 | 57255343 | 57255095 | 22 | 60 | 54 | 1.152682823 | 0.221736  | BRIP1 | ENSG00000136492 |
| 17 | 57255405 | 57256020 | 57255856 | 12 | 25 | 18 | 1.422205726 | 0.118245  | BRIP1 | ENSG00000136492 |
| 17 | 57256669 | 57257068 | 57256904 | 10 | 15 | 10 | 1.511715177 | 0.140236  | BRIP1 | ENSG00000136492 |
| 17 | 57258835 | 57259014 | 57258938 | 8  | 8  | 4  | 1.870747532 | 0.118863  | BRIP1 | ENSG00000136492 |
| 17 | 57259898 | 57260582 | 57260383 | 11 | 31 | 21 | 1.511715177 | 0.0647459 | BRIP1 | ENSG00000136492 |
| 17 | 57260629 | 57260995 | 57260812 | 8  | 16 | 9  | 1.766817113 | 0.0700694 | BRIP1 | ENSG00000136492 |
| 17 | 57261506 | 57261868 | 57261616 | 9  | 14 | 20 | 0.742360132 | 0.815839  | BRIP1 | ENSG00000136492 |
| 17 | 57262363 | 57262603 | 57262496 | 8  | 11 | 4  | 2.494330042 | 0.0324033 | BRIP1 | ENSG00000136492 |

|    |          |          |          |    |    |    |             |           |       |                 |
|----|----------|----------|----------|----|----|----|-------------|-----------|-------|-----------------|
| 17 | 57263114 | 57263488 | 57263278 | 11 | 18 | 15 | 1.234173719 | 0.265435  | BRIP1 | ENSG00000136492 |
| 17 | 57264081 | 57264337 | 57264197 | 15 | 16 | 15 | 1.104260696 | 0.387363  | BRIP1 | ENSG00000136492 |
| 17 | 57264651 | 57265529 | 57264808 | 17 | 47 | 46 | 1.061417039 | 0.385744  | BRIP1 | ENSG00000136492 |
| 17 | 57265702 | 57266411 | 57265934 | 48 | 82 | 40 | 2.103957251 | 2.73E-05  | BRIP1 | ENSG00000136492 |
| 17 | 57266576 | 57267246 | 57267080 | 20 | 46 | 34 | 1.395637047 | 0.0657614 | BRIP1 | ENSG00000136492 |
| 17 | 57267941 | 57268269 | 57268105 | 8  | 14 | 15 | 0.974347673 | 0.530138  | BRIP1 | ENSG00000136492 |
| 17 | 57268654 | 57269771 | 57269526 | 30 | 81 | 75 | 1.121354515 | 0.235596  | BRIP1 | ENSG00000136492 |
| 17 | 57269815 | 57270340 | 57269994 | 12 | 28 | 25 | 1.159223898 | 0.291166  | BRIP1 | ENSG00000136492 |
| 17 | 57271478 | 57271897 | 57271645 | 9  | 15 | 30 | 0.536415063 | 0.982029  | BRIP1 | ENSG00000136492 |
| 17 | 57272006 | 57272325 | 57272150 | 12 | 14 | 18 | 0.820503303 | 0.720361  | BRIP1 | ENSG00000136492 |
| 17 | 57272462 | 57272814 | 57272638 | 12 | 17 | 10 | 1.700679574 | 0.0766266 | BRIP1 | ENSG00000136492 |
| 17 | 57274355 | 57274610 | 57274459 | 9  | 13 | 6  | 2.078608368 | 0.0483393 | BRIP1 | ENSG00000136492 |
| 17 | 57275082 | 57275515 | 57275204 | 10 | 18 | 20 | 0.940322833 | 0.578675  | BRIP1 | ENSG00000136492 |
| 17 | 57275592 | 57276004 | 57275875 | 14 | 20 | 13 | 1.558956276 | 0.0943292 | BRIP1 | ENSG00000136492 |
| 17 | 57276407 | 57276635 | 57276568 | 9  | 11 | 11 | 1.039304184 | 0.462773  | BRIP1 | ENSG00000136492 |
| 17 | 57276790 | 57277121 | 57276955 | 10 | 16 | 30 | 0.569941004 | 0.972704  | BRIP1 | ENSG00000136492 |
| 17 | 57277319 | 57277593 | 57277488 | 9  | 12 | 17 | 0.750608578 | 0.78992   | BRIP1 | ENSG00000136492 |
| 17 | 57277728 | 57278012 | 57277870 | 12 | 17 | 20 | 0.890832158 | 0.642922  | BRIP1 | ENSG00000136492 |
| 17 | 57278425 | 57278622 | 57278519 | 8  | 8  | 7  | 1.169217207 | 0.371848  | BRIP1 | ENSG00000136492 |
| 17 | 57279138 | 57279646 | 57279361 | 17 | 31 | 30 | 1.072830126 | 0.39004   | BRIP1 | ENSG00000136492 |
| 17 | 57279859 | 57280665 | 57280007 | 11 | 31 | 33 | 0.978168644 | 0.536565  | BRIP1 | ENSG00000136492 |
| 17 | 57281550 | 57282247 | 57281898 | 12 | 32 | 24 | 1.371881523 | 0.113959  | BRIP1 | ENSG00000136492 |
| 17 | 57282532 | 57282845 | 57282688 | 10 | 15 | 14 | 1.10859113  | 0.386477  | BRIP1 | ENSG00000136492 |
| 17 | 57283352 | 57283768 | 57283524 | 13 | 20 | 24 | 0.873015515 | 0.679256  | BRIP1 | ENSG00000136492 |
| 17 | 57283849 | 57284128 | 57283987 | 13 | 17 | 30 | 0.603466946 | 0.960061  | BRIP1 | ENSG00000136492 |
| 17 | 57284208 | 57284460 | 57284296 | 12 | 14 | 18 | 0.820503303 | 0.720361  | BRIP1 | ENSG00000136492 |
| 17 | 57284654 | 57285156 | 57284821 | 13 | 26 | 28 | 0.967628034 | 0.550021  | BRIP1 | ENSG00000136492 |
| 17 | 57286249 | 57286546 | 57286397 | 9  | 12 | 27 | 0.482534086 | 0.988534  | BRIP1 | ENSG00000136492 |
| 17 | 57287757 | 57288139 | 57287936 | 10 | 17 | 26 | 0.692869456 | 0.890806  | BRIP1 | ENSG00000136492 |
| 17 | 57288144 | 57288625 | 57288477 | 15 | 31 | 28 | 1.14681841  | 0.295725  | BRIP1 | ENSG00000136492 |
| 17 | 57289155 | 57289479 | 57289317 | 9  | 15 | 14 | 1.10859113  | 0.386477  | BRIP1 | ENSG00000136492 |
| 17 | 57289761 | 57289979 | 57289870 | 9  | 11 | 4  | 2.494330042 | 0.0324033 | BRIP1 | ENSG00000136492 |
| 17 | 57290314 | 57290631 | 57290483 | 12 | 13 | 13 | 1.039304184 | 0.45974   | BRIP1 | ENSG00000136492 |
| 17 | 57291062 | 57291251 | 57291176 | 9  | 10 | 5  | 1.905391004 | 0.0915982 | BRIP1 | ENSG00000136492 |

|    |          |          |          |    |     |     |             |           |       |                 |
|----|----------|----------|----------|----|-----|-----|-------------|-----------|-------|-----------------|
| 17 | 57291439 | 57291688 | 57291561 | 9  | 10  | 20  | 0.54439743  | 0.955421  | BRIP1 | ENSG00000136492 |
| 17 | 57291692 | 57292201 | 57291871 | 13 | 27  | 30  | 0.93872636  | 0.597175  | BRIP1 | ENSG00000136492 |
| 17 | 57293725 | 57294766 | 57294073 | 18 | 69  | 82  | 0.876521601 | 0.792935  | BRIP1 | ENSG00000136492 |
| 17 | 57294820 | 57296785 | 57295906 | 52 | 258 | 173 | 1.547010251 | 3.37E-06  | BRIP1 | ENSG00000136492 |
| 17 | 57297237 | 57297902 | 57297400 | 13 | 27  | 29  | 0.970017239 | 0.547123  | BRIP1 | ENSG00000136492 |
| 17 | 57298022 | 57298218 | 57298105 | 8  | 10  | 16  | 0.672490943 | 0.854309  | BRIP1 | ENSG00000136492 |
| 17 | 57299168 | 57299469 | 57299298 | 15 | 20  | 23  | 0.909391161 | 0.626666  | BRIP1 | ENSG00000136492 |
| 17 | 57299495 | 57299726 | 57299610 | 10 | 13  | 11  | 1.212521548 | 0.309909  | BRIP1 | ENSG00000136492 |
| 17 | 57301780 | 57302168 | 57302016 | 16 | 23  | 27  | 0.890832158 | 0.663202  |       | ENSG00000202361 |
| 17 | 57302457 | 57302795 | 57302626 | 16 | 19  | 26  | 0.769854951 | 0.816207  |       | ENSG00000202361 |
| 17 | 57303437 | 57303850 | 57303583 | 13 | 19  | 11  | 1.73217364  | 0.0607469 |       | ENSG00000202361 |
| 17 | 57305876 | 57306232 | 57306054 | 11 | 17  | 27  | 0.668124118 | 0.913816  |       | ENSG00000202361 |
| 17 | 57306425 | 57306926 | 57306675 | 14 | 27  | 28  | 1.003466109 | 0.495433  |       | ENSG00000202361 |
| 17 | 57307600 | 57307902 | 57307751 | 13 | 15  | 17  | 0.923825942 | 0.593214  |       | ENSG00000202361 |
| 17 | 57308623 | 57308954 | 57308802 | 12 | 17  | 17  | 1.039304184 | 0.454282  |       | ENSG00000202361 |
| 17 | 57309179 | 57310374 | 57309799 | 13 | 55  | 71  | 0.808347699 | 0.885589  |       | ENSG00000202361 |
| 17 | 57311276 | 57311700 | 57311455 | 18 | 26  | 30  | 0.905200419 | 0.649195  |       | ENSG00000202361 |
| 17 | 57313111 | 57313490 | 57313290 | 11 | 18  | 23  | 0.822782479 | 0.740651  |       | ENSG00000202361 |
| 17 | 57313963 | 57314249 | 57314106 | 12 | 15  | 21  | 0.755857589 | 0.807439  |       | ENSG00000202361 |
| 17 | 57315199 | 57315507 | 57315353 | 14 | 19  | 23  | 0.86608682  | 0.685164  |       | ENSG00000202361 |
| 17 | 57315854 | 57316227 | 57316048 | 9  | 16  | 22  | 0.768181354 | 0.79945   |       | ENSG00000202361 |
| 17 | 57316665 | 57317178 | 57316953 | 18 | 32  | 30  | 1.106356067 | 0.342646  |       | ENSG00000202361 |
| 17 | 57317261 | 57317569 | 57317415 | 13 | 18  | 28  | 0.680923431 | 0.908117  |       | ENSG00000202361 |
| 17 | 57318437 | 57318649 | 57318573 | 10 | 10  | 16  | 0.672490943 | 0.854309  |       | ENSG00000202361 |
| 17 | 57318686 | 57318998 | 57318842 | 11 | 15  | 16  | 0.978168644 | 0.526483  |       | ENSG00000202361 |
| 17 | 57319788 | 57320242 | 57319904 | 9  | 14  | 9   | 1.558956276 | 0.132279  |       | ENSG00000202361 |
| 17 | 57321477 | 57321766 | 57321622 | 10 | 13  | 12  | 1.11925066  | 0.384109  |       | ENSG00000202361 |
| 17 | 57321822 | 57322541 | 57321970 | 17 | 40  | 51  | 0.819451376 | 0.831979  |       | ENSG00000202361 |
| 17 | 57323419 | 57323688 | 57323553 | 11 | 13  | 10  | 1.32275078  | 0.240023  |       | ENSG00000202361 |
| 17 | 57323889 | 57324329 | 57324155 | 9  | 18  | 31  | 0.617086859 | 0.956343  |       | ENSG00000202361 |
| 17 | 57324407 | 57324729 | 57324576 | 13 | 17  | 17  | 1.039304184 | 0.454282  |       | ENSG00000202361 |
| 17 | 57325789 | 57326152 | 57325967 | 16 | 22  | 20  | 1.138285535 | 0.33303   |       | ENSG00000202361 |
| 17 | 57327163 | 57327478 | 57327320 | 9  | 10  | 14  | 0.762156402 | 0.758589  |       | ENSG00000202361 |
| 17 | 57327557 | 57327826 | 57327691 | 10 | 11  | 3   | 3.117912553 | 0.0146045 |       | ENSG00000202361 |

|    |          |          |          |    |    |    |             |            |                          |
|----|----------|----------|----------|----|----|----|-------------|------------|--------------------------|
| 17 | 57329547 | 57329733 | 57329702 | 8  | 10 | 20 | 0.54439743  | 0.955421   | ENSG00000202361          |
| 17 | 57329946 | 57330424 | 57330125 | 8  | 18 | 28 | 0.680923431 | 0.908117   | ENSG00000202361          |
| 17 | 57331233 | 57331482 | 57331357 | 15 | 16 | 5  | 2.944695189 | 0.00659886 | ENSG00000202361          |
| 17 | 57331940 | 57332188 | 57332084 | 10 | 11 | 21 | 0.566893191 | 0.949414   | ENSG00000202361          |
| 17 | 57332195 | 57332559 | 57332380 | 14 | 21 | 40 | 0.557675416 | 0.988638   | ENSG00000202361          |
| 17 | 57332567 | 57332813 | 57332693 | 9  | 13 | 22 | 0.632619938 | 0.917511   | INTS2<br>ENSG00000108506 |
| 17 | 57333208 | 57333496 | 57333352 | 10 | 14 | 14 | 1.039304184 | 0.458308   | INTS2<br>ENSG00000108506 |
| 17 | 57334106 | 57334544 | 57334271 | 23 | 30 | 24 | 1.288737188 | 0.170531   | INTS2<br>ENSG00000108506 |
| 17 | 57334608 | 57334888 | 57334754 | 10 | 11 | 17 | 0.692869456 | 0.843876   | INTS2<br>ENSG00000108506 |
| 17 | 57335264 | 57335859 | 57335413 | 12 | 26 | 22 | 1.220052738 | 0.239999   | INTS2<br>ENSG00000108506 |
| 17 | 57336218 | 57336739 | 57336386 | 15 | 26 | 31 | 0.876912905 | 0.694502   | INTS2<br>ENSG00000108506 |
| 17 | 57336804 | 57337207 | 57336974 | 11 | 18 | 25 | 0.759491519 | 0.823082   | INTS2<br>ENSG00000108506 |
| 17 | 57338072 | 57338330 | 57338197 | 10 | 13 | 13 | 1.039304184 | 0.45974    | INTS2<br>ENSG00000108506 |
| 17 | 57338393 | 57338783 | 57338588 | 9  | 18 | 36 | 0.533696743 | 0.989376   | INTS2<br>ENSG00000108506 |
| 17 | 57339103 | 57339984 | 57339615 | 12 | 33 | 35 | 0.981565063 | 0.531809   | INTS2<br>ENSG00000108506 |
| 17 | 57340580 | 57340773 | 57340643 | 8  | 10 | 18 | 0.601702422 | 0.917232   | INTS2<br>ENSG00000108506 |
| 17 | 57359281 | 57359465 | 57359312 | 8  | 8  | 4  | 1.870747532 | 0.118863   | INTS2<br>ENSG00000108506 |
| 17 | 57359964 | 57360143 | 57360092 | 8  | 8  | 8  | 1.039304184 | 0.46786    | INTS2<br>ENSG00000108506 |
| 17 | 57433234 | 57433468 | 57433338 | 8  | 11 | 9  | 1.247165021 | 0.300052   | ENSG00000211085          |
| 17 | 57433474 | 57433873 | 57433717 | 11 | 17 | 15 | 1.169217207 | 0.323156   | ENSG00000211085          |
| 17 | 57434919 | 57435525 | 57435051 | 12 | 22 | 30 | 0.771096653 | 0.831099   | ENSG00000211085          |
| 17 | 57435680 | 57436225 | 57436053 | 8  | 18 | 22 | 0.85855563  | 0.691398   | ENSG00000211085          |
| 17 | 57436483 | 57436940 | 57436761 | 13 | 22 | 33 | 0.703058713 | 0.907926   | ENSG00000211085          |
| 17 | 57449319 | 57449596 | 57449457 | 9  | 11 | 15 | 0.779478138 | 0.747877   | ENSG00000221302          |
| 17 | 57449652 | 57450000 | 57449813 | 14 | 19 | 18 | 1.094004404 | 0.389177   | ENSG00000221302          |
| 17 | 57450024 | 57450238 | 57450140 | 8  | 11 | 9  | 1.247165021 | 0.300052   | ENSG00000221302          |
| 17 | 57498102 | 57498377 | 57498238 | 8  | 10 | 5  | 1.905391004 | 0.0915982  | MED13<br>ENSG00000108510 |
| 17 | 57541654 | 57541923 | 57541788 | 10 | 14 | 8  | 1.73217364  | 0.0890835  | ENSG00000207123          |
| 17 | 57542926 | 57543672 | 57543310 | 17 | 41 | 39 | 1.091269393 | 0.346048   | ENSG00000207123          |
| 17 | 57544073 | 57544288 | 57544238 | 14 | 15 | 23 | 0.692869456 | 0.877389   | ENSG00000207123          |
| 17 | 57544306 | 57544603 | 57544481 | 8  | 12 | 30 | 0.435837239 | 0.996057   | ENSG00000207123          |
| 17 | 57562912 | 57563643 | 57563245 | 14 | 39 | 36 | 1.123572091 | 0.304199   | ENSG00000207123          |
| 17 | 57567782 | 57568112 | 57567947 | 13 | 17 | 12 | 1.439036563 | 0.154203   | ENSG00000207123          |
| 17 | 57568192 | 57568488 | 57568315 | 9  | 12 | 21 | 0.614134291 | 0.924528   | ENSG00000207123          |

|    |          |          |          |    |    |    |             |             |         |                 |
|----|----------|----------|----------|----|----|----|-------------|-------------|---------|-----------------|
| 17 | 57568856 | 57569315 | 57569046 | 12 | 23 | 14 | 1.662886695 | 0.0567474   |         | ENSG00000207123 |
| 17 | 57575780 | 57576010 | 57575872 | 13 | 15 | 1  | 8.314433474 | 0.000102308 |         | ENSG00000207123 |
| 17 | 57576186 | 57576636 | 57576360 | 58 | 70 | 0  | 73.79059708 | 1.06E-22    |         | ENSG00000207123 |
| 17 | 57596073 | 57596451 | 57596230 | 11 | 17 | 7  | 2.338434415 | 0.0171287   |         | ENSG00000207123 |
| 17 | 57621033 | 57621234 | 57621133 | 12 | 13 | 3  | 3.637564645 | 0.0050909   |         | ENSG00000207123 |
| 17 | 57854654 | 57854996 | 57854825 | 13 | 18 | 4  | 3.9493559   | 0.000961379 | METTL2A | ENSG00000087995 |
| 17 | 57993618 | 57994042 | 57993773 | 10 | 15 | 4  | 3.32577339  | 0.00462646  | MRC2    | ENSG00000011028 |
| 17 | 58006298 | 58006595 | 58006427 | 9  | 11 | 0  | 12.47165021 | 0.000193293 | MRC2    | ENSG00000011028 |
| 17 | 58068792 | 58069161 | 58069017 | 9  | 13 | 3  | 3.637564645 | 0.0050909   | MRC2    | ENSG00000011028 |
| 17 | 58137513 | 58137908 | 58137788 | 8  | 14 | 3  | 3.897390691 | 0.00295882  |         | ENSG00000199697 |
| 17 | 58147768 | 58148216 | 58147937 | 48 | 55 | 6  | 8.314433474 | 5.58E-12    |         | ENSG00000199697 |
| 17 | 58149585 | 58149952 | 58149773 | 17 | 23 | 13 | 1.781664316 | 0.0385539   |         | ENSG00000199697 |
| 17 | 58151636 | 58151836 | 58151736 | 8  | 8  | 1  | 4.676868829 | 0.0091584   |         | ENSG00000199697 |
| 17 | 58155783 | 58156079 | 58155931 | 9  | 10 | 4  | 2.286469205 | 0.0509017   |         | ENSG00000199697 |
| 17 | 58163278 | 58163748 | 58163550 | 30 | 43 | 3  | 11.43234603 | 5.53E-11    |         | ENSG00000199697 |
| 17 | 58168848 | 58169078 | 58168965 | 10 | 12 | 2  | 4.503651465 | 0.002963    |         | ENSG00000199697 |
| 17 | 58180000 | 58180182 | 58180091 | 8  | 8  | 1  | 4.676868829 | 0.0091584   | 10-Mar  | ENSG00000173838 |
| 17 | 58211392 | 58211743 | 58211567 | 9  | 14 | 1  | 7.794781382 | 0.000197021 | 10-Mar  | ENSG00000173838 |
| 17 | 58256082 | 58256297 | 58256189 | 8  | 10 | 4  | 2.286469205 | 0.0509017   | 10-Mar  | ENSG00000173838 |
| 17 | 58279404 | 58279615 | 58279451 | 8  | 10 | 5  | 1.905391004 | 0.0915982   | 10-Mar  | ENSG00000173838 |
| 17 | 58287101 | 58287447 | 58287274 | 16 | 20 | 2  | 7.27512929  | 2.27E-05    | 10-Mar  | ENSG00000173838 |
| 17 | 58291984 | 58292358 | 58292179 | 30 | 37 | 19 | 1.97467795  | 0.00544744  | 10-Mar  | ENSG00000173838 |
| 17 | 58292783 | 58292975 | 58292879 | 8  | 10 | 4  | 2.286469205 | 0.0509017   | 10-Mar  | ENSG00000173838 |
| 17 | 58307993 | 58308228 | 58308098 | 10 | 12 | 1  | 6.755477198 | 0.000722752 |         | ENSG00000207552 |
| 17 | 58323282 | 58323475 | 58323388 | 9  | 9  | 3  | 2.598260461 | 0.0397929   |         | ENSG00000207552 |
| 17 | 58329405 | 58329611 | 58329486 | 9  | 10 | 6  | 1.63319229  | 0.146906    |         | ENSG00000207552 |
| 17 | 58381088 | 58381508 | 58381365 | 18 | 27 | 10 | 2.64550156  | 0.00175911  |         | ENSG00000207552 |
| 17 | 58393074 | 58393347 | 58393210 | 12 | 17 | 19 | 0.935373766 | 0.583208    |         | ENSG00000207552 |
| 17 | 58393509 | 58393741 | 58393625 | 8  | 10 | 10 | 1.039304184 | 0.464387    |         | ENSG00000207552 |
| 17 | 58393812 | 58394233 | 58394111 | 20 | 26 | 23 | 1.169217207 | 0.28753     |         | ENSG00000207552 |
| 17 | 58394299 | 58394766 | 58394449 | 15 | 33 | 46 | 0.751837069 | 0.900185    |         | ENSG00000207552 |
| 17 | 58395610 | 58397116 | 58396224 | 20 | 78 | 68 | 1.189927979 | 0.144876    |         | ENSG00000207552 |
| 17 | 58399489 | 58400033 | 58399665 | 20 | 32 | 14 | 2.286469205 | 0.00267017  |         | ENSG00000207552 |
| 17 | 58418614 | 58418834 | 58418715 | 8  | 8  | 2  | 3.117912553 | 0.0283184   | TANC2   | ENSG00000170921 |

|    |          |          |          |    |    |    |             |             |         |                 |
|----|----------|----------|----------|----|----|----|-------------|-------------|---------|-----------------|
| 17 | 58426510 | 58426732 | 58426580 | 9  | 10 | 5  | 1.905391004 | 0.0915982   | TANC2   | ENSG00000170921 |
| 17 | 58433192 | 58433675 | 58433356 | 14 | 22 | 25 | 0.919384471 | 0.617223    | TANC2   | ENSG00000170921 |
| 17 | 58484700 | 58484929 | 58484826 | 8  | 8  | 4  | 1.870747532 | 0.118863    | TANC2   | ENSG00000170921 |
| 17 | 58544358 | 58544582 | 58544493 | 11 | 12 | 2  | 4.503651465 | 0.002963    | TANC2   | ENSG00000170921 |
| 17 | 58558061 | 58558283 | 58558137 | 11 | 11 | 5  | 2.078608368 | 0.0614303   | TANC2   | ENSG00000170921 |
| 17 | 58613065 | 58613476 | 58613290 | 44 | 57 | 2  | 20.09321423 | 5.33E-16    | TANC2   | ENSG00000170921 |
| 17 | 58680586 | 58680765 | 58680672 | 8  | 8  | 0  | 9.353737658 | 0.00163931  | CYB561  | ENSG00000008283 |
| 17 | 58738108 | 58738306 | 58738221 | 8  | 8  | 3  | 2.338434415 | 0.0641221   | CYB561  | ENSG00000008283 |
| 17 | 58836798 | 58837022 | 58836868 | 8  | 9  | 3  | 2.598260461 | 0.0397929   | CYB561  | ENSG00000008283 |
| 17 | 58864356 | 58864561 | 58864452 | 8  | 10 | 2  | 3.810782009 | 0.00936112  | CYB561  | ENSG00000008283 |
| 17 | 58867389 | 58867598 | 58867455 | 9  | 9  | 2  | 3.464347281 | 0.0163838   | CYB561  | ENSG00000008283 |
| 17 | 58868996 | 58869191 | 58869126 | 8  | 9  | 0  | 10.39304184 | 0.000803859 | CYB561  | ENSG00000008283 |
| 17 | 58877935 | 58878173 | 58878054 | 9  | 10 | 1  | 5.716173013 | 0.00260397  | CYB561  | ENSG00000008283 |
| 17 | 58981567 | 58981774 | 58981670 | 8  | 9  | 13 | 0.742360132 | 0.770276    | WDR68   | ENSG00000136485 |
| 17 | 59031729 | 59032086 | 59031937 | 14 | 19 | 13 | 1.484720263 | 0.123861    | CCDC44  | ENSG00000136463 |
| 17 | 59052280 | 59052815 | 59052636 | 9  | 21 | 6  | 3.266384579 | 0.0013436   | MAP3K3  | ENSG00000198909 |
| 17 | 59103490 | 59103669 | 59103579 | 8  | 8  | 2  | 3.117912553 | 0.0283184   | LIMD2   | ENSG00000136490 |
| 17 | 59107010 | 59107444 | 59107189 | 13 | 21 | 10 | 2.078608368 | 0.0193227   | LIMD2   | ENSG00000136490 |
| 17 | 59172528 | 59172938 | 59172774 | 11 | 17 | 4  | 3.741495063 | 0.00163722  | STRADA  | ENSG00000125695 |
| 17 | 59173157 | 59173472 | 59173299 | 8  | 12 | 7  | 1.688869299 | 0.11395     | STRADA  | ENSG00000125695 |
| 17 | 59183716 | 59184081 | 59183895 | 11 | 18 | 6  | 2.8209685   | 0.00559354  | STRADA  | ENSG00000125695 |
| 17 | 59201284 | 59201612 | 59201443 | 14 | 19 | 7  | 2.598260461 | 0.00730518  | CCDC47  | ENSG00000108588 |
| 17 | 59204615 | 59204820 | 59204661 | 9  | 12 | 5  | 2.251825733 | 0.0404733   | CCDC47  | ENSG00000108588 |
| 17 | 59204852 | 59205172 | 59205012 | 22 | 27 | 7  | 3.637564645 | 0.000166657 | DDX42   | ENSG00000198231 |
| 17 | 59211734 | 59212059 | 59211896 | 13 | 17 | 8  | 2.078608368 | 0.0303558   | DDX42   | ENSG00000198231 |
| 17 | 59223496 | 59223778 | 59223637 | 16 | 17 | 5  | 3.117912553 | 0.00407023  | DDX42   | ENSG00000198231 |
| 17 | 59257634 | 59257873 | 59257753 | 9  | 11 | 5  | 2.078608368 | 0.0614303   | FTSJ3   | ENSG00000108592 |
| 17 | 59269732 | 59270064 | 59269906 | 15 | 18 | 7  | 2.468347438 | 0.0112499   | SMARCD2 | ENSG00000108604 |
| 17 | 59273777 | 59274098 | 59273929 | 28 | 32 | 10 | 3.117912553 | 0.000190324 | SMARCD2 | ENSG00000108604 |
| 17 | 59348048 | 59348227 | 59348137 | 8  | 8  | 1  | 4.676868829 | 0.0091584   | GH1     | ENSG00000189162 |
| 17 | 59482900 | 59483101 | 59483012 | 8  | 9  | 1  | 5.196520921 | 0.00490062  | ICAM2   | ENSG00000108622 |
| 17 | 59511612 | 59511806 | 59511674 | 8  | 8  | 4  | 1.870747532 | 0.118863    | ERN1    | ENSG00000178607 |
| 17 | 59576714 | 59577393 | 59577105 | 11 | 29 | 10 | 2.834465957 | 0.000738283 |         | ENSG00000199753 |
| 17 | 59578179 | 59578364 | 59578259 | 13 | 14 | 9  | 1.558956276 | 0.132279    |         | ENSG00000221462 |

|    |          |          |          |    |    |    |             |             |        |                 |
|----|----------|----------|----------|----|----|----|-------------|-------------|--------|-----------------|
| 17 | 59578913 | 59579236 | 59579069 | 9  | 12 | 9  | 1.35109544  | 0.232899    |        | ENSG00000221462 |
| 17 | 59641879 | 59642163 | 59642019 | 9  | 11 | 0  | 12.47165021 | 0.000193293 | TEX2   | ENSG00000136478 |
| 17 | 59694429 | 59694748 | 59694588 | 11 | 15 | 8  | 1.847651883 | 0.0631662   | TEX2   | ENSG00000136478 |
| 17 | 59744713 | 59744936 | 59744811 | 9  | 10 | 23 | 0.476347751 | 0.983843    |        | ENSG00000220588 |
| 17 | 59745010 | 59745381 | 59745188 | 10 | 17 | 19 | 0.935373766 | 0.583208    |        | ENSG00000220588 |
| 17 | 59746243 | 59746670 | 59746389 | 12 | 19 | 19 | 1.039304184 | 0.451787    |        | ENSG00000220588 |
| 17 | 59750319 | 59750613 | 59750466 | 8  | 10 | 11 | 0.952695502 | 0.548138    |        | ENSG00000220588 |
| 17 | 59750739 | 59751085 | 59750912 | 11 | 17 | 12 | 1.439036563 | 0.154203    |        | ENSG00000220588 |
| 17 | 59751631 | 59751839 | 59751747 | 8  | 8  | 12 | 0.719518281 | 0.783103    |        | ENSG00000220588 |
| 17 | 59751910 | 59752731 | 59752262 | 31 | 58 | 49 | 1.226378937 | 0.14309     |        | ENSG00000220588 |
| 17 | 59752783 | 59753077 | 59752930 | 9  | 12 | 6  | 1.930136342 | 0.071303    |        | ENSG00000220588 |
| 17 | 59753432 | 59753826 | 59753567 | 8  | 14 | 6  | 2.227080395 | 0.0322529   |        | ENSG00000220588 |
| 17 | 59754080 | 59754533 | 59754386 | 13 | 19 | 17 | 1.154782427 | 0.327751    |        | ENSG00000220588 |
| 17 | 59754628 | 59755029 | 59754850 | 10 | 17 | 18 | 0.984603964 | 0.519872    |        | ENSG00000220588 |
| 17 | 59756802 | 59757215 | 59756978 | 9  | 13 | 19 | 0.727512929 | 0.824686    |        | ENSG00000220588 |
| 17 | 59758044 | 59758545 | 59758313 | 11 | 23 | 21 | 1.133786383 | 0.33446     |        | ENSG00000220588 |
| 17 | 59758629 | 59759150 | 59758792 | 11 | 23 | 17 | 1.385738912 | 0.144406    |        | ENSG00000220588 |
| 17 | 59759583 | 59760038 | 59759859 | 19 | 27 | 21 | 1.32275078  | 0.160553    |        | ENSG00000220588 |
| 17 | 59760132 | 59760348 | 59760248 | 8  | 9  | 13 | 0.742360132 | 0.770276    |        | ENSG00000220588 |
| 17 | 59761855 | 59762195 | 59761972 | 8  | 12 | 18 | 0.711102863 | 0.834017    |        | ENSG00000220588 |
| 17 | 59763095 | 59763660 | 59763497 | 8  | 20 | 29 | 0.727512929 | 0.872335    |        | ENSG00000220588 |
| 17 | 59766444 | 59766653 | 59766548 | 9  | 9  | 10 | 0.944821986 | 0.553851    |        | ENSG00000220588 |
| 17 | 59768055 | 59768458 | 59768250 | 9  | 18 | 20 | 0.940322833 | 0.578675    | PECAM1 | ENSG00000198802 |
| 17 | 59769955 | 59770222 | 59770107 | 9  | 11 | 16 | 0.733626483 | 0.800067    | PECAM1 | ENSG00000198802 |
| 17 | 59771226 | 59771899 | 59771588 | 14 | 33 | 26 | 1.308753417 | 0.146119    | PECAM1 | ENSG00000198802 |
| 17 | 59772649 | 59772926 | 59772771 | 14 | 16 | 12 | 1.359090087 | 0.198699    | PECAM1 | ENSG00000198802 |
| 17 | 59773234 | 59773622 | 59773413 | 9  | 16 | 12 | 1.359090087 | 0.198699    | PECAM1 | ENSG00000198802 |
| 17 | 59773919 | 59774193 | 59774044 | 17 | 18 | 12 | 1.518983039 | 0.117837    | PECAM1 | ENSG00000198802 |
| 17 | 59775419 | 59775805 | 59775609 | 8  | 18 | 24 | 0.78987118  | 0.784577    | PECAM1 | ENSG00000198802 |
| 17 | 59777734 | 59778193 | 59777917 | 11 | 22 | 26 | 0.885333194 | 0.668299    | PECAM1 | ENSG00000198802 |
| 17 | 59932357 | 59932560 | 59932447 | 8  | 9  | 4  | 2.078608368 | 0.0785659   | CCDC45 | ENSG00000141325 |
| 17 | 59932674 | 59932989 | 59932831 | 9  | 12 | 2  | 4.503651465 | 0.002963    | DDX5   | ENSG00000108654 |
| 17 | 59933362 | 59933640 | 59933477 | 12 | 15 | 9  | 1.662886695 | 0.0970566   | DDX5   | ENSG00000108654 |
| 17 | 60206399 | 60206595 | 60206530 | 9  | 10 | 2  | 3.810782009 | 0.00936112  |        | ENSG00000214176 |

|    |          |          |          |    |     |    |             |             |         |                 |
|----|----------|----------|----------|----|-----|----|-------------|-------------|---------|-----------------|
| 17 | 60401403 | 60402109 | 60401930 | 15 | 38  | 6  | 5.790409026 | 1.41E-07    |         | ENSG00000214174 |
| 17 | 60411800 | 60412015 | 60411923 | 10 | 10  | 2  | 3.810782009 | 0.00936112  |         | ENSG00000214174 |
| 17 | 60485030 | 60485598 | 60485401 | 83 | 111 | 9  | 11.64020686 | 6.17E-25    | GNA13   | ENSG00000120063 |
| 17 | 60488659 | 60488869 | 60488764 | 8  | 9   | 6  | 1.484720263 | 0.204387    | GNA13   | ENSG00000120063 |
| 17 | 60501476 | 60501680 | 60501590 | 10 | 10  | 7  | 1.429043253 | 0.21536     |         | ENSG00000211170 |
| 17 | 60549847 | 60550113 | 60549968 | 12 | 14  | 4  | 3.117912553 | 0.00766354  | RGS9    | ENSG00000108370 |
| 17 | 60625278 | 60625573 | 60625430 | 8  | 10  | 4  | 2.286469205 | 0.0509017   | RGS9    | ENSG00000108370 |
| 17 | 60751742 | 60751939 | 60751879 | 10 | 11  | 2  | 4.157216737 | 0.0052913   | RGS9    | ENSG00000108370 |
| 17 | 60957879 | 60958129 | 60958052 | 8  | 11  | 6  | 1.781664316 | 0.103344    | AXIN2   | ENSG00000168646 |
| 17 | 60958132 | 60958395 | 60958278 | 8  | 11  | 3  | 3.117912553 | 0.0146045   | AXIN2   | ENSG00000168646 |
| 17 | 60969217 | 60969440 | 60969333 | 9  | 9   | 2  | 3.464347281 | 0.0163838   | AXIN2   | ENSG00000168646 |
| 17 | 61014721 | 61014906 | 61014828 | 8  | 8   | 5  | 1.558956276 | 0.191397    | AXIN2   | ENSG00000168646 |
| 17 | 61054854 | 61055209 | 61055031 | 19 | 23  | 5  | 4.157216737 | 0.000186738 | AXIN2   | ENSG00000168646 |
| 17 | 61060604 | 61060817 | 61060710 | 8  | 9   | 4  | 2.078608368 | 0.0785659   | AXIN2   | ENSG00000168646 |
| 17 | 61427155 | 61427500 | 61427333 | 17 | 21  | 5  | 3.810782009 | 0.000537724 | CCDC46  | ENSG00000154240 |
| 17 | 61627302 | 61627589 | 61627445 | 10 | 13  | 5  | 2.425043097 | 0.0262442   | CCDC46  | ENSG00000154240 |
| 17 | 61657951 | 61658182 | 61658127 | 10 | 11  | 2  | 4.157216737 | 0.0052913   | APOH    | ENSG00000091583 |
| 17 | 61722909 | 61723118 | 61722974 | 9  | 10  | 4  | 2.286469205 | 0.0509017   | PRKCA   | ENSG00000154229 |
| 17 | 61786680 | 61786873 | 61786797 | 8  | 8   | 2  | 3.117912553 | 0.0283184   |         | ENSG00000211174 |
| 17 | 61993951 | 61994170 | 61994060 | 9  | 9   | 5  | 1.73217364  | 0.133894    |         | ENSG00000211176 |
| 17 | 62102915 | 62103296 | 62103141 | 11 | 16  | 5  | 2.944695189 | 0.00659886  |         | ENSG00000211176 |
| 17 | 62106959 | 62107148 | 62107060 | 8  | 9   | 6  | 1.484720263 | 0.204387    |         | ENSG00000211176 |
| 17 | 62133521 | 62133804 | 62133673 | 9  | 9   | 2  | 3.464347281 | 0.0163838   |         | ENSG00000211176 |
| 17 | 62157181 | 62157458 | 62157350 | 8  | 11  | 3  | 3.117912553 | 0.0146045   |         | ENSG00000207943 |
| 17 | 62378657 | 62379027 | 62378871 | 12 | 18  | 11 | 1.645564958 | 0.0828462   | CACNG4  | ENSG00000075461 |
| 17 | 62392773 | 62392952 | 62392862 | 8  | 9   | 3  | 2.598260461 | 0.0397929   | CACNG4  | ENSG00000075461 |
| 17 | 62441641 | 62441820 | 62441722 | 8  | 9   | 1  | 5.196520921 | 0.00490062  |         | ENSG00000214167 |
| 17 | 62639744 | 62640050 | 62639897 | 9  | 10  | 1  | 5.716173013 | 0.00260397  |         | ENSG00000213180 |
| 17 | 62671857 | 62672062 | 62672026 | 9  | 10  | 0  | 11.43234603 | 0.000394183 | HELZ    | ENSG00000198265 |
| 17 | 62699271 | 62699512 | 62699359 | 9  | 9   | 3  | 2.598260461 | 0.0397929   |         | ENSG00000207410 |
| 17 | 62801229 | 62801408 | 62801318 | 8  | 8   | 3  | 2.338434415 | 0.0641221   | PITPNC1 | ENSG00000154217 |
| 17 | 62827790 | 62828061 | 62827927 | 12 | 15  | 5  | 2.771477825 | 0.0105836   |         | ENSG00000211193 |
| 17 | 62849109 | 62849288 | 62849124 | 8  | 8   | 0  | 9.353737658 | 0.00163931  |         | ENSG00000201547 |
| 17 | 62894164 | 62894422 | 62894293 | 8  | 10  | 6  | 1.63319229  | 0.146906    |         | ENSG00000207688 |



|    |          |          |          |     |     |    |             |             |          |                 |
|----|----------|----------|----------|-----|-----|----|-------------|-------------|----------|-----------------|
| 17 | 62917548 | 62917753 | 62917650 | 8   | 9   | 3  | 2.598260461 | 0.0397929   |          | ENSG00000207688 |
| 17 | 62982632 | 62982811 | 62982698 | 8   | 8   | 2  | 3.117912553 | 0.0283184   |          | ENSG00000207688 |
| 17 | 63032291 | 63032502 | 63032442 | 8   | 11  | 3  | 3.117912553 | 0.0146045   | NOL11    | ENSG00000130935 |
| 17 | 63064482 | 63065156 | 63064656 | 19  | 38  | 12 | 3.117912553 | 5.75E-05    | NOL11    | ENSG00000130935 |
| 17 | 63144029 | 63144578 | 63144349 | 12  | 24  | 22 | 1.129678461 | 0.335754    | NOL11    | ENSG00000130935 |
| 17 | 63247086 | 63247317 | 63247246 | 9   | 9   | 3  | 2.598260461 | 0.0397929   | BPTF     | ENSG00000171634 |
| 17 | 63421157 | 63421462 | 63421309 | 8   | 11  | 5  | 2.078608368 | 0.0614303   | C17orf58 | ENSG00000186665 |
| 17 | 63446279 | 63446635 | 63446457 | 19  | 25  | 11 | 2.251825733 | 0.00731045  | KPNA2    | ENSG00000182481 |
| 17 | 63708506 | 63708747 | 63708627 | 9   | 9   | 1  | 5.196520921 | 0.00490062  |          | ENSG00000183600 |
| 17 | 63756234 | 63756623 | 63756448 | 10  | 15  | 4  | 3.32577339  | 0.00462646  | AMZ2     | ENSG00000196704 |
| 17 | 63836545 | 63836835 | 63836673 | 11  | 14  | 10 | 1.417232979 | 0.185113    | ARSG     | ENSG00000141337 |
| 17 | 63886297 | 63886642 | 63886463 | 10  | 15  | 4  | 3.32577339  | 0.00462646  |          | ENSG00000207561 |
| 17 | 63954885 | 63955076 | 63954942 | 8   | 8   | 2  | 3.117912553 | 0.0283184   | WIPI1    | ENSG00000070540 |
| 17 | 64205298 | 64205483 | 64205364 | 8   | 9   | 1  | 5.196520921 | 0.00490062  | FAM20A   | ENSG00000108950 |
| 17 | 64205516 | 64205982 | 64205757 | 35  | 50  | 2  | 17.66817113 | 6.11E-14    | FAM20A   | ENSG00000108950 |
| 17 | 64267217 | 64267493 | 64267355 | 8   | 9   | 4  | 2.078608368 | 0.0785659   | FAM20A   | ENSG00000108950 |
| 17 | 64314912 | 64315128 | 64315030 | 9   | 9   | 1  | 5.196520921 | 0.00490062  | ABCA8    | ENSG00000141338 |
| 17 | 64884294 | 64884491 | 64884392 | 8   | 8   | 3  | 2.338434415 | 0.0641221   |          | ENSG00000211230 |
| 17 | 64938223 | 64938587 | 64938402 | 26  | 33  | 3  | 8.834085566 | 3.36E-08    | MAP2K6   | ENSG00000108984 |
| 17 | 65064784 | 65064965 | 65064874 | 9   | 10  | 4  | 2.286469205 | 0.0509017   | MAP2K6   | ENSG00000108984 |
| 17 | 65068818 | 65069094 | 65068956 | 11  | 15  | 0  | 16.62886695 | 1.12E-05    | MAP2K6   | ENSG00000108984 |
| 17 | 65114862 | 65115719 | 65115113 | 489 | 583 | 6  | 86.70766337 | 1.85E-169   | MAP2K6   | ENSG00000108984 |
| 17 | 65354000 | 65354252 | 65354131 | 10  | 11  | 1  | 6.235825105 | 0.0013754   |          | ENSG00000222953 |
| 17 | 65592156 | 65592409 | 65592294 | 8   | 8   | 2  | 3.117912553 | 0.0283184   | KCNJ16   | ENSG00000153822 |
| 17 | 66409570 | 66409749 | 66409671 | 8   | 8   | 1  | 4.676868829 | 0.0091584   |          | ENSG00000211252 |
| 17 | 66966096 | 66966321 | 66966249 | 9   | 10  | 5  | 1.905391004 | 0.0915982   |          | ENSG00000211255 |
| 17 | 67663884 | 67664086 | 67664007 | 8   | 9   | 0  | 10.39304184 | 0.000803859 | SOX9     | ENSG00000125398 |
| 17 | 67777039 | 67777329 | 67777184 | 9   | 10  | 4  | 2.286469205 | 0.0509017   |          | ENSG00000211264 |
| 17 | 67778350 | 67778590 | 67778453 | 9   | 11  | 3  | 3.117912553 | 0.0146045   |          | ENSG00000211264 |
| 17 | 68139989 | 68140233 | 68140111 | 9   | 10  | 2  | 3.810782009 | 0.00936112  |          | ENSG00000200783 |
| 17 | 68191725 | 68192066 | 68191888 | 9   | 13  | 4  | 2.910051716 | 0.0125532   |          | ENSG00000200783 |
| 17 | 68210916 | 68211095 | 68211005 | 8   | 8   | 3  | 2.338434415 | 0.0641221   |          | ENSG00000222545 |
| 17 | 68739786 | 68739977 | 68739881 | 8   | 9   | 1  | 5.196520921 | 0.00490062  | FAM104A  | ENSG00000133193 |
| 17 | 68867946 | 68868141 | 68867983 | 9   | 10  | 1  | 5.716173013 | 0.00260397  | SDK2     | ENSG00000069188 |

|    |          |          |          |    |    |   |             |             |          |                 |
|----|----------|----------|----------|----|----|---|-------------|-------------|----------|-----------------|
| 17 | 69014187 | 69014463 | 69014314 | 18 | 19 | 3 | 5.196520921 | 0.000174201 | SDK2     | ENSG00000069188 |
| 17 | 69021785 | 69022045 | 69021915 | 8  | 9  | 0 | 10.39304184 | 0.000803859 | SDK2     | ENSG00000069188 |
| 17 | 69122033 | 69122320 | 69122176 | 18 | 21 | 2 | 7.621564018 | 1.21E-05    | SDK2     | ENSG00000069188 |
| 17 | 69684534 | 69684772 | 69684709 | 8  | 8  | 2 | 3.117912553 | 0.0283184   | RPL38    | ENSG00000172809 |
| 17 | 69700660 | 69701081 | 69700809 | 23 | 29 | 5 | 5.196520921 | 6.82E-06    | RPL38    | ENSG00000172809 |
| 17 | 69711145 | 69711597 | 69711296 | 12 | 18 | 9 | 1.97467795  | 0.0349428   | RPL38    | ENSG00000172809 |
| 17 | 70266112 | 70266499 | 70266282 | 9  | 15 | 3 | 4.157216737 | 0.00170423  | SLC9A3R1 | ENSG00000109062 |
| 17 | 70445142 | 70445407 | 70445270 | 8  | 10 | 3 | 2.858086507 | 0.0242838   | OTOP3    | ENSG00000182938 |
| 17 | 70479703 | 70479978 | 70479836 | 8  | 9  | 4 | 2.078608368 | 0.0785659   | C17orf28 | ENSG00000167861 |
| 17 | 70527344 | 70527549 | 70527404 | 8  | 8  | 2 | 3.117912553 | 0.0283184   | ICT1     | ENSG00000167862 |
| 17 | 70528056 | 70528368 | 70528212 | 8  | 14 | 1 | 7.794781382 | 0.000197021 | ICT1     | ENSG00000167862 |
| 17 | 70613300 | 70613629 | 70613464 | 8  | 13 | 2 | 4.850086193 | 0.00164564  | ARMC7    | ENSG00000125449 |
| 17 | 70746433 | 70746662 | 70746547 | 8  | 9  | 5 | 1.73217364  | 0.133894    | GGA3     | ENSG00000125447 |
| 17 | 70796897 | 70797099 | 70796998 | 9  | 9  | 1 | 5.196520921 | 0.00490062  | SLC25A19 | ENSG00000125454 |
| 17 | 70901524 | 70901989 | 70901735 | 8  | 17 | 7 | 2.338434415 | 0.0171287   | GRB2     | ENSG00000177885 |
| 17 | 70915487 | 70915708 | 70915534 | 8  | 11 | 5 | 2.078608368 | 0.0614303   |          | ENSG00000223217 |
| 17 | 70920324 | 70920541 | 70920401 | 8  | 10 | 5 | 1.905391004 | 0.0915982   |          | ENSG00000211333 |
| 17 | 70964064 | 70964377 | 70964220 | 8  | 14 | 9 | 1.558956276 | 0.132279    | KIAA0195 | ENSG00000177728 |
| 17 | 71056968 | 71057279 | 71057123 | 11 | 14 | 5 | 2.598260461 | 0.0167748   | LLGL2    | ENSG00000073350 |
| 17 | 71057506 | 71057757 | 71057631 | 9  | 11 | 6 | 1.781664316 | 0.103344    | LLGL2    | ENSG00000073350 |
| 17 | 71065094 | 71065521 | 71065397 | 10 | 18 | 5 | 3.291129917 | 0.00248584  |          | ENSG00000204326 |
| 17 | 71127702 | 71127931 | 71127816 | 8  | 9  | 3 | 2.598260461 | 0.0397929   | MYO15B   | ENSG00000204325 |
| 17 | 71147601 | 71147915 | 71147776 | 8  | 12 | 6 | 1.930136342 | 0.071303    |          | ENSG00000204323 |
| 17 | 71153151 | 71153462 | 71153308 | 10 | 13 | 8 | 1.616695398 | 0.123553    |          | ENSG00000204323 |
| 17 | 71180743 | 71180947 | 71180854 | 9  | 9  | 3 | 2.598260461 | 0.0397929   | SAP30BP  | ENSG00000161526 |
| 17 | 71255449 | 71255830 | 71255595 | 8  | 14 | 2 | 5.196520921 | 0.000907371 | GALK1    | ENSG00000108479 |
| 17 | 71287584 | 71287773 | 71287678 | 8  | 10 | 3 | 2.858086507 | 0.0242838   | H3F3B    | ENSG00000132475 |
| 17 | 71291074 | 71291305 | 71291221 | 8  | 8  | 4 | 1.870747532 | 0.118863    | UNK      | ENSG00000132478 |
| 17 | 71292312 | 71292513 | 71292412 | 10 | 12 | 5 | 2.251825733 | 0.0404733   | UNK      | ENSG00000132478 |
| 17 | 71293090 | 71293323 | 71293206 | 10 | 12 | 4 | 2.702190879 | 0.0203088   | UNK      | ENSG00000132478 |
| 17 | 71353047 | 71353317 | 71353202 | 8  | 10 | 0 | 11.43234603 | 0.000394183 | UNC13D   | ENSG00000092929 |
| 17 | 71487134 | 71487402 | 71487297 | 13 | 14 | 2 | 5.196520921 | 0.000907371 | ACOX1    | ENSG00000161533 |
| 17 | 71573165 | 71573372 | 71573268 | 8  | 8  | 1 | 4.676868829 | 0.0091584   | SRP68    | ENSG00000167881 |
| 17 | 71639948 | 71640668 | 71640112 | 18 | 34 | 2 | 12.12521548 | 2.69E-09    | FOXJ1    | ENSG00000129654 |

|    |          |          |          |    |     |    |             |             |          |                 |
|----|----------|----------|----------|----|-----|----|-------------|-------------|----------|-----------------|
| 17 | 71861553 | 71861947 | 71861699 | 8  | 14  | 5  | 2.598260461 | 0.0167748   | PRPSAP1  | ENSG00000161542 |
| 17 | 71893356 | 71893593 | 71893516 | 8  | 9   | 3  | 2.598260461 | 0.0397929   | SPHK1    | ENSG00000176170 |
| 17 | 72058724 | 72059208 | 72058952 | 19 | 30  | 0  | 32.21842971 | 2.55E-10    |          | ENSG00000204303 |
| 17 | 72227279 | 72227463 | 72227371 | 9  | 9   | 1  | 5.196520921 | 0.00490062  | JMJD6    | ENSG00000070495 |
| 17 | 72245148 | 72245380 | 72245238 | 9  | 11  | 1  | 6.235825105 | 0.0013754   | MFSD11   | ENSG00000092931 |
| 17 | 72297081 | 72297312 | 72297256 | 9  | 12  | 1  | 6.755477198 | 0.000722752 |          | ENSG00000203321 |
| 17 | 72682623 | 72682894 | 72682727 | 14 | 15  | 1  | 8.314433474 | 0.000102308 |          | ENSG00000211400 |
| 17 | 72793719 | 72794786 | 72793966 | 44 | 100 | 10 | 9.542702055 | 3.71E-21    | 9-Sep    | ENSG00000184640 |
| 17 | 72796427 | 72796777 | 72796602 | 8  | 12  | 2  | 4.503651465 | 0.002963    | 9-Sep    | ENSG00000184640 |
| 17 | 72985314 | 72985517 | 72985404 | 11 | 11  | 1  | 6.235825105 | 0.0013754   |          | ENSG00000203307 |
| 17 | 73309336 | 73309577 | 73309456 | 8  | 9   | 1  | 5.196520921 | 0.00490062  |          | ENSG00000204283 |
| 17 | 73424014 | 73424281 | 73424134 | 10 | 10  | 0  | 11.43234603 | 0.000394183 |          | ENSG00000204283 |
| 17 | 73521468 | 73521672 | 73521515 | 8  | 10  | 5  | 1.905391004 | 0.0915982   | TNRC6C   | ENSG00000078687 |
| 17 | 73548686 | 73548927 | 73548806 | 10 | 11  | 3  | 3.117912553 | 0.0146045   | TNRC6C   | ENSG00000078687 |
| 17 | 73677289 | 73677591 | 73677440 | 9  | 13  | 2  | 4.850086193 | 0.00164564  | SYNGR2   | ENSG00000108639 |
| 17 | 73759069 | 73759269 | 73759169 | 8  | 9   | 1  | 5.196520921 | 0.00490062  |          | ENSG00000220038 |
| 17 | 74100015 | 74100300 | 74100157 | 10 | 14  | 3  | 3.897390691 | 0.00295882  | DNAH17   | ENSG00000187775 |
| 17 | 74299777 | 74300103 | 74299926 | 13 | 16  | 1  | 8.834085566 | 5.30E-05    | CYTH1    | ENSG00000108669 |
| 17 | 74513052 | 74513281 | 74513172 | 8  | 9   | 5  | 1.73217364  | 0.133894    | CANT1    | ENSG00000171302 |
| 17 | 74622526 | 74622862 | 74622692 | 10 | 14  | 6  | 2.227080395 | 0.0322529   |          | ENSG00000167280 |
| 17 | 74735788 | 74736342 | 74736067 | 17 | 29  | 1  | 15.58956276 | 8.46E-09    |          | ENSG00000167280 |
| 17 | 75321432 | 75321704 | 75321568 | 8  | 9   | 1  | 5.196520921 | 0.00490062  | ENPP7    | ENSG00000182156 |
| 17 | 75358568 | 75358752 | 75358660 | 8  | 8   | 2  | 3.117912553 | 0.0283184   | CBX2     | ENSG00000173894 |
| 17 | 75388770 | 75389092 | 75388934 | 8  | 12  | 0  | 13.5109544  | 9.48E-05    | CBX8     | ENSG00000141570 |
| 17 | 75399823 | 75400002 | 75399928 | 8  | 8   | 1  | 4.676868829 | 0.0091584   | CBX8     | ENSG00000141570 |
| 17 | 75480888 | 75481150 | 75481019 | 12 | 13  | 4  | 2.910051716 | 0.0125532   |          | ENSG00000184247 |
| 17 | 75619158 | 75619384 | 75619266 | 12 | 14  | 2  | 5.196520921 | 0.000907371 | TBC1D16  | ENSG00000167291 |
| 17 | 76254175 | 76254450 | 76254320 | 8  | 9   | 0  | 10.39304184 | 0.000803859 |          | ENSG00000216958 |
| 17 | 76282442 | 76282864 | 76282697 | 29 | 36  | 1  | 19.22712741 | 7.03E-11    |          | ENSG00000216958 |
| 17 | 76625805 | 76626092 | 76625948 | 12 | 15  | 5  | 2.771477825 | 0.0105836   | BAIAP2   | ENSG00000175866 |
| 17 | 76828091 | 76828424 | 76828253 | 32 | 35  | 2  | 12.47165021 | 1.39E-09    | C17orf56 | ENSG00000167302 |
| 17 | 76894951 | 76895200 | 76895074 | 9  | 10  | 2  | 3.810782009 | 0.00936112  | C17orf55 | ENSG00000185168 |
| 17 | 76917926 | 76918165 | 76918045 | 15 | 17  | 8  | 2.078608368 | 0.0303558   | TMEM105  | ENSG00000185332 |
| 17 | 76982325 | 76982648 | 76982455 | 12 | 16  | 7  | 2.208521392 | 0.0257604   |          | ENSG00000171282 |

|    |          |          |          |    |    |     |             |             |          |                 |
|----|----------|----------|----------|----|----|-----|-------------|-------------|----------|-----------------|
| 17 | 77190369 | 77190570 | 77190469 | 8  | 8  | 2   | 3.117912553 | 0.0283184   | TSPAN10  | ENSG00000182612 |
| 17 | 77301052 | 77301534 | 77301354 | 18 | 27 | 7   | 3.637564645 | 0.000166657 | SLC25A10 | ENSG00000183048 |
| 17 | 77313684 | 77313921 | 77313802 | 9  | 10 | 1   | 5.716173013 | 0.00260397  | SLC25A10 | ENSG00000183048 |
| 17 | 77411795 | 77412060 | 77411930 | 10 | 12 | 0   | 13.5109544  | 9.48E-05    | P4HB     | ENSG00000185624 |
| 17 | 77511294 | 77511520 | 77511407 | 9  | 9  | 0   | 10.39304184 | 0.000803859 | NOTUM    | ENSG00000185269 |
| 17 | 77785915 | 77786127 | 77786054 | 9  | 10 | 5   | 1.905391004 | 0.0915982   | SLC16A3  | ENSG00000141526 |
| 17 | 77849504 | 77849723 | 77849613 | 8  | 9  | 1   | 5.196520921 | 0.00490062  | CD7      | ENSG00000173762 |
| 17 | 77935991 | 77936203 | 77936097 | 8  | 11 | 1   | 6.235825105 | 0.0013754   | UTS2R    | ENSG00000181408 |
| 17 | 78045551 | 78045807 | 78045699 | 10 | 13 | 4   | 2.910051716 | 0.0125532   | FO XK2   | ENSG00000141568 |
| 17 | 78047000 | 78047517 | 78047200 | 46 | 57 | 5   | 10.04660711 | 2.95E-13    | FO XK2   | ENSG00000141568 |
| 17 | 78085778 | 78086073 | 78085934 | 19 | 22 | 1   | 11.95199812 | 9.69E-07    | FO XK2   | ENSG00000141568 |
| 17 | 78326214 | 78326407 | 78326287 | 8  | 9  | 2   | 3.464347281 | 0.0163838   | TBCD     | ENSG00000141556 |
| 17 | 78333026 | 78333216 | 78333121 | 9  | 9  | 0   | 10.39304184 | 0.000803859 | TBCD     | ENSG00000141556 |
| 17 | 78391583 | 78391824 | 78391740 | 8  | 10 | 4   | 2.286469205 | 0.0509017   | ZNF750   | ENSG00000141579 |
| 17 | 78409533 | 78409805 | 78409669 | 10 | 12 | 7   | 1.688869299 | 0.11395     | ZNF750   | ENSG00000141579 |
| 17 | 78440785 | 78441100 | 78440962 | 12 | 14 | 7   | 1.948695345 | 0.0559175   | ZNF750   | ENSG00000141579 |
| 17 | 78620797 | 78620982 | 78620889 | 8  | 8  | 0   | 9.353737658 | 0.00163931  | METRNL   | ENSG00000176845 |
| 17 | 78648008 | 78648364 | 78648151 | 8  | 13 | 2   | 4.850086193 | 0.00164564  | METRNL   | ENSG00000176845 |
| 18 | 98069    | 98621    | 98391    | 43 | 74 | 77  | 0.999330946 | 0.50207     |          | ENSG00000215585 |
| 18 | 98730    | 99547    | 99311    | 41 | 86 | 117 | 0.766266644 | 0.971198    |          | ENSG00000215585 |
| 18 | 262432   | 262655   | 262543   | 9  | 11 | 0   | 12.47165021 | 0.000193293 | THOC1    | ENSG00000079134 |
| 18 | 439493   | 439695   | 439594   | 8  | 9  | 6   | 1.484720263 | 0.204387    | COLEC12  | ENSG00000158270 |
| 18 | 493934   | 494191   | 494046   | 8  | 9  | 6   | 1.484720263 | 0.204387    | COLEC12  | ENSG00000158270 |
| 18 | 558743   | 559031   | 558887   | 11 | 16 | 3   | 4.417042783 | 0.00097367  | CETN1    | ENSG00000177143 |
| 18 | 579356   | 579610   | 579483   | 12 | 13 | 0   | 14.55025858 | 4.65E-05    |          | ENSG00000222174 |
| 18 | 587004   | 587323   | 587156   | 8  | 10 | 3   | 2.858086507 | 0.0242838   | CLUL1    | ENSG00000079101 |
| 18 | 594797   | 595142   | 594969   | 12 | 18 | 4   | 3.9493559   | 0.000961379 | CLUL1    | ENSG00000079101 |
| 18 | 647307   | 647502   | 647404   | 8  | 9  | 3   | 2.598260461 | 0.0397929   | TYMS     | ENSG00000176890 |
| 18 | 648061   | 648544   | 648284   | 40 | 57 | 8   | 6.697738076 | 3.36E-11    | C18orf56 | ENSG00000176912 |
| 18 | 835230   | 835525   | 835377   | 8  | 12 | 0   | 13.5109544  | 9.48E-05    | YES1     | ENSG00000176105 |
| 18 | 854865   | 855060   | 854930   | 10 | 11 | 5   | 2.078608368 | 0.0614303   | ADCYAP1  | ENSG00000141433 |
| 18 | 1401694  | 1401873  | 1401783  | 8  | 8  | 5   | 1.558956276 | 0.191397    |          | ENSG00000215401 |
| 18 | 2470528  | 2470937  | 2470762  | 10 | 16 | 6   | 2.524024447 | 0.0137633   | METTL4   | ENSG00000101574 |
| 18 | 2644361  | 2644577  | 2644469  | 9  | 10 | 5   | 1.905391004 | 0.0915982   |          | ENSG00000180715 |

|    |         |         |         |    |    |    |             |             |          |                 |
|----|---------|---------|---------|----|----|----|-------------|-------------|----------|-----------------|
| 18 | 2867029 | 2867209 | 2867089 | 10 | 10 | 3  | 2.858086507 | 0.0242838   | EMILIN2  | ENSG00000132205 |
| 18 | 2938108 | 2938328 | 2938218 | 8  | 10 | 7  | 1.429043253 | 0.21536     | LPIN2    | ENSG00000101577 |
| 18 | 3034834 | 3035211 | 3035011 | 26 | 34 | 3  | 9.093911612 | 1.78E-08    | LPIN2    | ENSG00000101577 |
| 18 | 3035299 | 3035765 | 3035545 | 23 | 36 | 1  | 19.22712741 | 7.03E-11    | LPIN2    | ENSG00000101577 |
| 18 | 3048437 | 3048797 | 3048603 | 15 | 20 | 6  | 3.117912553 | 0.00218114  | LPIN2    | ENSG00000101577 |
| 18 | 3063611 | 3063876 | 3063743 | 10 | 11 | 2  | 4.157216737 | 0.0052913   | LPIN2    | ENSG00000101577 |
| 18 | 3226361 | 3226841 | 3226602 | 28 | 39 | 13 | 2.969440526 | 7.78E-05    |          | ENSG00000101608 |
| 18 | 3229259 | 3229452 | 3229332 | 8  | 10 | 6  | 1.63319229  | 0.146906    |          | ENSG00000101608 |
| 18 | 3235694 | 3236010 | 3235873 | 8  | 10 | 6  | 1.63319229  | 0.146906    |          | ENSG00000101608 |
| 18 | 3236120 | 3236492 | 3236263 | 9  | 16 | 16 | 1.039304184 | 0.455583    |          | ENSG00000101608 |
| 18 | 3237105 | 3237378 | 3237241 | 12 | 16 | 5  | 2.944695189 | 0.00659886  |          | ENSG00000101608 |
| 18 | 3237423 | 3237893 | 3237647 | 33 | 51 | 13 | 3.860272684 | 2.69E-07    |          | ENSG00000101608 |
| 18 | 3238265 | 3238508 | 3238331 | 14 | 17 | 8  | 2.078608368 | 0.0303558   |          | ENSG00000101608 |
| 18 | 3247477 | 3247819 | 3247649 | 8  | 13 | 3  | 3.637564645 | 0.0050909   |          | ENSG00000118680 |
| 18 | 3249263 | 3249710 | 3249531 | 9  | 19 | 3  | 5.196520921 | 0.000174201 |          | ENSG00000118680 |
| 18 | 3251258 | 3251562 | 3251410 | 13 | 16 | 7  | 2.208521392 | 0.0257604   |          | ENSG00000118680 |
| 18 | 3251590 | 3251840 | 3251715 | 11 | 14 | 3  | 3.897390691 | 0.00295882  |          | ENSG00000118680 |
| 18 | 3259188 | 3259450 | 3259319 | 9  | 12 | 5  | 2.251825733 | 0.0404733   |          | ENSG00000118680 |
| 18 | 3263709 | 3263911 | 3263810 | 10 | 10 | 7  | 1.429043253 | 0.21536     |          | ENSG00000118680 |
| 18 | 3266340 | 3266526 | 3266413 | 9  | 9  | 2  | 3.464347281 | 0.0163838   |          | ENSG00000118680 |
| 18 | 3266864 | 3267122 | 3266992 | 9  | 10 | 2  | 3.810782009 | 0.00936112  |          | ENSG00000118680 |
| 18 | 3287481 | 3287665 | 3287583 | 8  | 8  | 5  | 1.558956276 | 0.191397    |          | ENSG00000118680 |
| 18 | 3320557 | 3320894 | 3320725 | 13 | 19 | 5  | 3.464347281 | 0.00150447  |          | ENSG00000118680 |
| 18 | 3387119 | 3387575 | 3387417 | 9  | 16 | 8  | 1.963130126 | 0.0441028   | TGIF1    | ENSG00000177426 |
| 18 | 3437717 | 3438153 | 3437896 | 10 | 19 | 3  | 5.196520921 | 0.000174201 | TGIF1    | ENSG00000177426 |
| 18 | 3442545 | 3442883 | 3442714 | 9  | 13 | 6  | 2.078608368 | 0.0483393   | TGIF1    | ENSG00000177426 |
| 18 | 3444748 | 3444997 | 3444872 | 8  | 9  | 3  | 2.598260461 | 0.0397929   | TGIF1    | ENSG00000177426 |
| 18 | 3583242 | 3584298 | 3583689 | 22 | 52 | 15 | 3.44269511  | 9.64E-07    |          | ENSG00000177337 |
| 18 | 3592970 | 3593219 | 3593083 | 9  | 9  | 6  | 1.484720263 | 0.204387    |          | ENSG00000177337 |
| 18 | 7025022 | 7025334 | 7025201 | 12 | 15 | 3  | 4.157216737 | 0.00170423  | LAMA1    | ENSG00000101680 |
| 18 | 7718346 | 7718665 | 7718505 | 18 | 19 | 0  | 20.78608368 | 6.46E-07    |          | ENSG00000221631 |
| 18 | 7723712 | 7724028 | 7723880 | 12 | 15 | 1  | 8.314433474 | 0.000102308 |          | ENSG00000221631 |
| 18 | 8675320 | 8675647 | 8675482 | 14 | 17 | 0  | 18.70747532 | 2.69E-06    | KIAA0802 | ENSG00000168502 |
| 18 | 9280150 | 9280511 | 9280285 | 24 | 29 | 1  | 15.58956276 | 8.46E-09    |          | ENSG00000209637 |

|    |          |          |          |    |    |    |             |             |          |                 |
|----|----------|----------|----------|----|----|----|-------------|-------------|----------|-----------------|
| 18 | 9426320  | 9426546  | 9426433  | 9  | 10 | 2  | 3.810782009 | 0.00936112  | RALBP1   | ENSG00000017797 |
| 18 | 9658980  | 9659163  | 9659071  | 8  | 8  | 0  | 9.353737658 | 0.00163931  |          | ENSG00000212572 |
| 18 | 9815654  | 9815984  | 9815810  | 9  | 11 | 3  | 3.117912553 | 0.0146045   |          | ENSG00000223065 |
| 18 | 9923565  | 9923852  | 9923684  | 13 | 15 | 0  | 16.62886695 | 1.12E-05    |          | ENSG00000223138 |
| 18 | 10076522 | 10076780 | 10076651 | 9  | 10 | 3  | 2.858086507 | 0.0242838   |          | ENSG00000223138 |
| 18 | 10112153 | 10112371 | 10112299 | 8  | 9  | 3  | 2.598260461 | 0.0397929   |          | ENSG00000223138 |
| 18 | 10119116 | 10119328 | 10119213 | 9  | 10 | 1  | 5.716173013 | 0.00260397  |          | ENSG00000223138 |
| 18 | 10199327 | 10199721 | 10199539 | 34 | 45 | 0  | 47.80799247 | 5.81E-15    |          | ENSG00000209662 |
| 18 | 10331862 | 10332109 | 10331985 | 8  | 8  | 7  | 1.169217207 | 0.371848    |          | ENSG00000209662 |
| 18 | 10548734 | 10548968 | 10548851 | 8  | 8  | 3  | 2.338434415 | 0.0641221   | NAPG     | ENSG00000134265 |
| 18 | 11499769 | 11499962 | 11499936 | 9  | 10 | 4  | 2.286469205 | 0.0509017   |          | ENSG00000153081 |
| 18 | 11502687 | 11502938 | 11502793 | 10 | 11 | 0  | 12.47165021 | 0.000193293 |          | ENSG00000153081 |
| 18 | 11745754 | 11745964 | 11745859 | 8  | 8  | 1  | 4.676868829 | 0.0091584   | GNAL     | ENSG00000141404 |
| 18 | 11751672 | 11751866 | 11751769 | 9  | 10 | 3  | 2.858086507 | 0.0242838   | GNAL     | ENSG00000141404 |
| 18 | 11840238 | 11840475 | 11840408 | 8  | 11 | 3  | 3.117912553 | 0.0146045   | MPPE1    | ENSG00000154889 |
| 18 | 11970349 | 11970571 | 11970449 | 8  | 8  | 6  | 1.336248237 | 0.277651    | IMPA2    | ENSG00000141401 |
| 18 | 12018804 | 12018987 | 12018895 | 9  | 9  | 2  | 3.464347281 | 0.0163838   |          | ENSG00000212712 |
| 18 | 12082835 | 12083028 | 12082979 | 8  | 10 | 2  | 3.810782009 | 0.00936112  |          | ENSG00000181626 |
| 18 | 12299680 | 12300289 | 12300028 | 22 | 45 | 3  | 11.95199812 | 1.51E-11    | TUBB6    | ENSG00000176014 |
| 18 | 12318059 | 12318276 | 12318182 | 8  | 9  | 0  | 10.39304184 | 0.000803859 |          | ENSG00000221088 |
| 18 | 12381734 | 12381968 | 12381874 | 8  | 10 | 3  | 2.858086507 | 0.0242838   | AFG3L2   | ENSG00000141385 |
| 18 | 12648556 | 12648751 | 12648653 | 10 | 12 | 2  | 4.503651465 | 0.002963    |          | ENSG00000215527 |
| 18 | 12668254 | 12668446 | 12668351 | 8  | 8  | 0  | 9.353737658 | 0.00163931  | PSMG2    | ENSG00000128789 |
| 18 | 12731314 | 12731582 | 12731449 | 14 | 16 | 4  | 3.533634226 | 0.00276486  |          | ENSG00000201466 |
| 18 | 12773230 | 12773637 | 12773409 | 13 | 22 | 1  | 11.95199812 | 9.69E-07    |          | ENSG00000201466 |
| 18 | 13175630 | 13175949 | 13175789 | 9  | 9  | 1  | 5.196520921 | 0.00490062  | C18orf1  | ENSG00000168675 |
| 18 | 13257037 | 13257225 | 13257131 | 10 | 11 | 3  | 3.117912553 | 0.0146045   | C18orf1  | ENSG00000168675 |
| 18 | 13257328 | 13257561 | 13257411 | 8  | 10 | 3  | 2.858086507 | 0.0242838   | C18orf1  | ENSG00000168675 |
| 18 | 13530333 | 13530569 | 13530498 | 8  | 10 | 1  | 5.716173013 | 0.00260397  | C18orf1  | ENSG00000168675 |
| 18 | 13715710 | 13715893 | 13715801 | 8  | 9  | 1  | 5.196520921 | 0.00490062  | C18orf19 | ENSG00000177150 |
| 18 | 13790848 | 13791158 | 13790996 | 8  | 13 | 4  | 2.910051716 | 0.0125532   |          | ENSG00000211528 |
| 18 | 14918571 | 14918754 | 14918662 | 8  | 8  | 4  | 1.870747532 | 0.118863    |          | ENSG00000206323 |
| 18 | 16764927 | 16766074 | 16765684 | 50 | 80 | 92 | 0.905200419 | 0.744893    |          | ENSG00000216205 |
| 18 | 16766110 | 16766573 | 16766402 | 25 | 39 | 46 | 0.884514199 | 0.717474    |          | ENSG00000216205 |

|    |          |          |          |     |     |     |             |             |          |                 |
|----|----------|----------|----------|-----|-----|-----|-------------|-------------|----------|-----------------|
| 18 | 16766842 | 16767780 | 16767048 | 64  | 94  | 128 | 0.76537905  | 0.976862    |          | ENSG00000216205 |
| 18 | 16768113 | 16768355 | 16768207 | 10  | 10  | 13  | 0.816596145 | 0.696946    |          | ENSG00000216205 |
| 18 | 16768555 | 16769105 | 16768881 | 14  | 26  | 26  | 1.039304184 | 0.44394     |          | ENSG00000216205 |
| 18 | 16769651 | 16771311 | 16770178 | 29  | 102 | 153 | 0.695119032 | 0.998071    |          | ENSG00000216205 |
| 18 | 16771569 | 16771749 | 16771640 | 12  | 12  | 16  | 0.794762023 | 0.738004    |          | ENSG00000216205 |
| 18 | 16771777 | 16772447 | 16772134 | 102 | 131 | 134 | 1.016208536 | 0.447979    |          | ENSG00000216205 |
| 18 | 16772461 | 16773141 | 16772907 | 40  | 66  | 67  | 1.024020299 | 0.445434    |          | ENSG00000216205 |
| 18 | 16773682 | 16774022 | 16773852 | 27  | 32  | 27  | 1.224894217 | 0.213361    |          | ENSG00000216205 |
| 18 | 16774029 | 16774447 | 16774273 | 31  | 36  | 64  | 0.59160392  | 0.995463    |          | ENSG00000216205 |
| 18 | 17018407 | 17018675 | 17018541 | 26  | 27  | 13  | 2.078608368 | 0.00998554  | KIAA1772 | ENSG00000141449 |
| 18 | 17038232 | 17038494 | 17038365 | 9   | 11  | 3   | 3.117912553 | 0.0146045   | KIAA1772 | ENSG00000141449 |
| 18 | 17446033 | 17446329 | 17446159 | 12  | 15  | 1   | 8.314433474 | 0.000102308 | SNRPD1   | ENSG00000167088 |
| 18 | 17537429 | 17537624 | 17537529 | 8   | 9   | 1   | 5.196520921 | 0.00490062  | ABHD3    | ENSG00000158201 |
| 18 | 18300536 | 18300931 | 18300702 | 9   | 16  | 3   | 4.417042783 | 0.00097367  |          | ENSG00000181358 |
| 18 | 18377816 | 18378078 | 18377958 | 9   | 12  | 3   | 3.377738599 | 0.00867157  |          | ENSG00000206827 |
| 18 | 18397121 | 18397309 | 18397215 | 10  | 10  | 2   | 3.810782009 | 0.00936112  |          | ENSG00000206827 |
| 18 | 18747817 | 18748065 | 18747941 | 10  | 12  | 4   | 2.702190879 | 0.0203088   | RBBP8    | ENSG00000101773 |
| 18 | 18939231 | 18939410 | 18939271 | 8   | 8   | 1   | 4.676868829 | 0.0091584   | CABLES1  | ENSG00000134508 |
| 18 | 18949689 | 18949965 | 18949856 | 12  | 12  | 1   | 6.755477198 | 0.000722752 | CABLES1  | ENSG00000134508 |
| 18 | 18964863 | 18965163 | 18965007 | 10  | 12  | 3   | 3.377738599 | 0.00867157  | CABLES1  | ENSG00000134508 |
| 18 | 19091832 | 19092018 | 19091925 | 9   | 9   | 4   | 2.078608368 | 0.0785659   | CABLES1  | ENSG00000134508 |
| 18 | 19093851 | 19094083 | 19093978 | 11  | 13  | 2   | 4.850086193 | 0.00164564  | CABLES1  | ENSG00000134508 |
| 18 | 19094746 | 19095030 | 19094840 | 9   | 13  | 4   | 2.910051716 | 0.0125532   | CABLES1  | ENSG00000134508 |
| 18 | 19111390 | 19111727 | 19111556 | 29  | 32  | 0   | 34.29703808 | 6.12E-11    | CABLES1  | ENSG00000134508 |
| 18 | 19115604 | 19115814 | 19115709 | 9   | 11  | 5   | 2.078608368 | 0.0614303   | CABLES1  | ENSG00000134508 |
| 18 | 19147084 | 19147389 | 19147236 | 17  | 22  | 0   | 23.90399624 | 7.62E-08    | C18orf45 | ENSG00000134490 |
| 18 | 19165272 | 19165550 | 19165430 | 16  | 20  | 10  | 1.98412617  | 0.0277883   | C18orf45 | ENSG00000134490 |
| 18 | 19212947 | 19213126 | 19212955 | 8   | 8   | 2   | 3.117912553 | 0.0283184   | C18orf45 | ENSG00000134490 |
| 18 | 19336958 | 19337187 | 19337072 | 8   | 9   | 5   | 1.73217364  | 0.133894    | C18orf8  | ENSG00000141452 |
| 18 | 19349048 | 19349313 | 19349173 | 9   | 10  | 2   | 3.810782009 | 0.00936112  | C18orf8  | ENSG00000141452 |
| 18 | 19374020 | 19374270 | 19374121 | 9   | 10  | 3   | 2.858086507 | 0.0242838   | C18orf8  | ENSG00000141452 |
| 18 | 19522947 | 19523126 | 19523034 | 8   | 8   | 1   | 4.676868829 | 0.0091584   | LAMA3    | ENSG00000053747 |
| 18 | 19537090 | 19537360 | 19537266 | 8   | 11  | 1   | 6.235825105 | 0.0013754   |          | ENSG00000215051 |
| 18 | 19538051 | 19538283 | 19538119 | 8   | 8   | 1   | 4.676868829 | 0.0091584   |          | ENSG00000215051 |

|    |          |          |          |    |    |   |             |             |         |                 |
|----|----------|----------|----------|----|----|---|-------------|-------------|---------|-----------------|
| 18 | 19646675 | 19646913 | 19646821 | 8  | 9  | 5 | 1.73217364  | 0.133894    | LAMA3   | ENSG00000053747 |
| 18 | 19717262 | 19717441 | 19717312 | 8  | 8  | 2 | 3.117912553 | 0.0283184   | LAMA3   | ENSG00000053747 |
| 18 | 19717509 | 19717841 | 19717660 | 18 | 22 | 0 | 23.90399624 | 7.62E-08    |         | ENSG00000221389 |
| 18 | 19850600 | 19850826 | 19850713 | 8  | 8  | 2 | 3.117912553 | 0.0283184   |         | ENSG00000176309 |
| 18 | 19857460 | 19857852 | 19857711 | 8  | 13 | 7 | 1.818782322 | 0.0805123   |         | ENSG00000176309 |
| 18 | 20010683 | 20010918 | 20010819 | 8  | 10 | 3 | 2.858086507 | 0.0242838   |         | ENSG00000209825 |
| 18 | 20169290 | 20169469 | 20169379 | 8  | 8  | 3 | 2.338434415 | 0.0641221   |         | ENSG00000212051 |
| 18 | 20196815 | 20197109 | 20196934 | 9  | 12 | 6 | 1.930136342 | 0.071303    | OSBPL1A | ENSG00000141447 |
| 18 | 20336475 | 20336701 | 20336622 | 8  | 9  | 1 | 5.196520921 | 0.00490062  | HRH4    | ENSG00000134489 |
| 18 | 20515229 | 20515414 | 20515301 | 8  | 8  | 4 | 1.870747532 | 0.118863    | HRH4    | ENSG00000134489 |
| 18 | 21017729 | 21017933 | 21017831 | 8  | 8  | 1 | 4.676868829 | 0.0091584   | ZNF521  | ENSG00000198795 |
| 18 | 21119357 | 21119628 | 21119492 | 9  | 10 | 1 | 5.716173013 | 0.00260397  | ZNF521  | ENSG00000198795 |
| 18 | 21367158 | 21367597 | 21367332 | 41 | 53 | 2 | 18.70747532 | 8.04E-15    | ZNF521  | ENSG00000198795 |
| 18 | 21931488 | 21931714 | 21931590 | 9  | 9  | 3 | 2.598260461 | 0.0397929   | SS18    | ENSG00000141380 |
| 18 | 22294738 | 22295051 | 22294894 | 15 | 18 | 5 | 3.291129917 | 0.00248584  | KCTD1   | ENSG00000134504 |
| 18 | 22382515 | 22382699 | 22382639 | 8  | 8  | 4 | 1.870747532 | 0.118863    | KCTD1   | ENSG00000134504 |
| 18 | 22383615 | 22383889 | 22383762 | 8  | 10 | 3 | 2.858086507 | 0.0242838   | KCTD1   | ENSG00000134504 |
| 18 | 22384310 | 22384526 | 22384410 | 9  | 10 | 2 | 3.810782009 | 0.00936112  | KCTD1   | ENSG00000134504 |
| 18 | 22409067 | 22409255 | 22409134 | 8  | 9  | 3 | 2.598260461 | 0.0397929   |         | ENSG00000214993 |
| 18 | 22568660 | 22568907 | 22568783 | 8  | 10 | 2 | 3.810782009 | 0.00936112  |         | ENSG00000212367 |
| 18 | 22598550 | 22598887 | 22598718 | 8  | 12 | 2 | 4.503651465 | 0.002963    |         | ENSG00000212367 |
| 18 | 22647121 | 22647372 | 22647264 | 8  | 8  | 6 | 1.336248237 | 0.277651    | AQP4    | ENSG00000171885 |
| 18 | 23381151 | 23381333 | 23381223 | 8  | 8  | 0 | 9.353737658 | 0.00163931  |         | ENSG00000215499 |
| 18 | 26262000 | 26262331 | 26262154 | 13 | 17 | 2 | 6.235825105 | 0.000146695 |         |                 |
| 18 | 27025018 | 27025228 | 27025072 | 10 | 11 | 7 | 1.558956276 | 0.158273    | DSC1    | ENSG00000134765 |
| 18 | 27033418 | 27033677 | 27033547 | 8  | 11 | 0 | 12.47165021 | 0.000193293 | DSC1    | ENSG00000134765 |
| 18 | 27075783 | 27076163 | 27075984 | 11 | 19 | 8 | 2.309564854 | 0.0138337   | DSG1    | ENSG00000134760 |
| 18 | 27100543 | 27100759 | 27100675 | 9  | 9  | 2 | 3.464347281 | 0.0163838   | DSG1    | ENSG00000134760 |
| 18 | 27547299 | 27547674 | 27547495 | 29 | 38 | 2 | 13.5109544  | 1.90E-10    |         | ENSG00000200472 |
| 18 | 28001998 | 28002278 | 28002150 | 12 | 16 | 0 | 17.66817113 | 5.48E-06    |         | ENSG00000199373 |
| 18 | 28119049 | 28119282 | 28119165 | 10 | 12 | 0 | 13.5109544  | 9.48E-05    |         | ENSG00000222395 |
| 18 | 28206517 | 28206942 | 28206688 | 12 | 19 | 3 | 5.196520921 | 0.000174201 |         | ENSG00000215492 |
| 18 | 28446665 | 28446858 | 28446761 | 10 | 10 | 3 | 2.858086507 | 0.0242838   |         | ENSG00000221621 |
| 18 | 29394756 | 29394944 | 29394850 | 8  | 8  | 0 | 9.353737658 | 0.00163931  | ASXL3   | ENSG00000141431 |



|    |          |          |          |    |    |    |             |             |          |                 |
|----|----------|----------|----------|----|----|----|-------------|-------------|----------|-----------------|
| 18 | 30207275 | 30207454 | 30207364 | 8  | 8  | 0  | 9.353737658 | 0.00163931  | DTNA     | ENSG00000134769 |
| 18 | 30488067 | 30488246 | 30488135 | 8  | 8  | 1  | 4.676868829 | 0.0091584   | DTNA     | ENSG00000134769 |
| 18 | 30919444 | 30919623 | 30919533 | 8  | 8  | 1  | 4.676868829 | 0.0091584   | MAPRE2   | ENSG00000166974 |
| 18 | 31174398 | 31174587 | 31174492 | 8  | 8  | 3  | 2.338434415 | 0.0641221   |          | ENSG00000215489 |
| 18 | 31242018 | 31242206 | 31242112 | 8  | 8  | 9  | 0.935373766 | 0.560286    | ZNF396   | ENSG00000186496 |
| 18 | 31331856 | 31332188 | 31332016 | 9  | 13 | 8  | 1.616695398 | 0.123553    | INO80C   | ENSG00000153391 |
| 18 | 31341793 | 31342006 | 31341899 | 8  | 8  | 2  | 3.117912553 | 0.0283184   | INO80C   | ENSG00000153391 |
| 18 | 31696068 | 31696269 | 31696193 | 10 | 11 | 0  | 12.47165021 | 0.000193293 |          | ENSG00000207797 |
| 18 | 31901460 | 31901694 | 31901577 | 9  | 11 | 8  | 1.385738912 | 0.224757    | RPRD1A   | ENSG00000141425 |
| 18 | 31963745 | 31963944 | 31963835 | 9  | 9  | 3  | 2.598260461 | 0.0397929   | ELP2     | ENSG00000134759 |
| 18 | 33125740 | 33125932 | 33125820 | 9  | 9  | 0  | 10.39304184 | 0.000803859 | BRUNOL4  | ENSG00000101489 |
| 18 | 33375699 | 33375878 | 33375788 | 9  | 10 | 0  | 11.43234603 | 0.000394183 | BRUNOL4  | ENSG00000101489 |
| 18 | 37291669 | 37291853 | 37291761 | 8  | 8  | 1  | 4.676868829 | 0.0091584   |          | ENSG00000218954 |
| 18 | 37408720 | 37408899 | 37408815 | 8  | 8  | 1  | 4.676868829 | 0.0091584   |          | ENSG00000218954 |
| 18 | 41233815 | 41234131 | 41233977 | 9  | 9  | 0  | 10.39304184 | 0.000803859 | SLC14A2  | ENSG00000132874 |
| 18 | 41454980 | 41455177 | 41455079 | 11 | 11 | 3  | 3.117912553 | 0.0146045   | SLC14A2  | ENSG00000132874 |
| 18 | 41627192 | 41627649 | 41627430 | 11 | 22 | 13 | 1.707428303 | 0.0525925   | SIGLEC15 | ENSG00000197046 |
| 18 | 41636574 | 41637066 | 41636901 | 19 | 31 | 15 | 2.078608368 | 0.00648505  | SIGLEC15 | ENSG00000197046 |
| 18 | 41705722 | 41705912 | 41705830 | 8  | 9  | 1  | 5.196520921 | 0.00490062  | KIAA1632 | ENSG00000152223 |
| 18 | 41711531 | 41711722 | 41711576 | 9  | 10 | 6  | 1.63319229  | 0.146906    | KIAA1632 | ENSG00000152223 |
| 18 | 41827551 | 41827884 | 41827717 | 12 | 14 | 3  | 3.897390691 | 0.00295882  |          | ENSG00000210083 |
| 18 | 41903539 | 41903824 | 41903681 | 29 | 30 | 4  | 6.443685942 | 1.02E-06    | PSTPIP2  | ENSG00000152229 |
| 18 | 41931705 | 41932042 | 41931875 | 11 | 14 | 3  | 3.897390691 | 0.00295882  | ATP5A1   | ENSG00000152234 |
| 18 | 41932205 | 41932516 | 41932360 | 14 | 17 | 6  | 2.672496474 | 0.00882337  | ATP5A1   | ENSG00000152234 |
| 18 | 41938711 | 41938948 | 41938807 | 10 | 11 | 3  | 3.117912553 | 0.0146045   | CCDC5    | ENSG00000152240 |
| 18 | 41947760 | 41948215 | 41947897 | 11 | 21 | 10 | 2.078608368 | 0.0193227   |          | ENSG00000200088 |
| 18 | 41948355 | 41948540 | 41948447 | 8  | 10 | 1  | 5.716173013 | 0.00260397  |          | ENSG00000200088 |
| 18 | 41962479 | 41962728 | 41962603 | 11 | 12 | 1  | 6.755477198 | 0.000722752 |          | ENSG00000200088 |
| 18 | 41986822 | 41987119 | 41986999 | 12 | 17 | 4  | 3.741495063 | 0.00163722  | C18orf25 | ENSG00000152242 |
| 18 | 42007312 | 42007711 | 42007532 | 11 | 18 | 11 | 1.645564958 | 0.0828462   | C18orf25 | ENSG00000152242 |
| 18 | 42007809 | 42008159 | 42007984 | 12 | 17 | 9  | 1.870747532 | 0.0498299   | C18orf25 | ENSG00000152242 |
| 18 | 42084353 | 42084950 | 42084587 | 14 | 29 | 5  | 5.196520921 | 6.82E-06    | C18orf25 | ENSG00000152242 |
| 18 | 42302154 | 42302680 | 42302543 | 10 | 19 | 4  | 4.157216737 | 0.000560204 | LOXHD1   | ENSG00000167210 |
| 18 | 42303393 | 42303953 | 42303774 | 13 | 30 | 20 | 1.534210939 | 0.0617334   | LOXHD1   | ENSG00000167210 |

|    |          |          |          |    |    |    |             |             |          |                 |
|----|----------|----------|----------|----|----|----|-------------|-------------|----------|-----------------|
| 18 | 42348194 | 42348377 | 42348257 | 8  | 9  | 0  | 10.39304184 | 0.000803859 | LOXHD1   | ENSG00000167210 |
| 18 | 42457145 | 42457655 | 42457508 | 18 | 30 | 4  | 6.443685942 | 1.02E-06    | LOXHD1   | ENSG00000167210 |
| 18 | 42569808 | 42569987 | 42569897 | 8  | 8  | 1  | 4.676868829 | 0.0091584   | ST8SIA5  | ENSG00000101638 |
| 18 | 42656574 | 42656856 | 42656721 | 8  | 10 | 3  | 2.858086507 | 0.0242838   | ST8SIA5  | ENSG00000101638 |
| 18 | 42691124 | 42691303 | 42691213 | 8  | 8  | 0  | 9.353737658 | 0.00163931  | PIAS2    | ENSG00000078043 |
| 18 | 42702361 | 42702619 | 42702490 | 17 | 17 | 0  | 18.70747532 | 2.69E-06    | PIAS2    | ENSG00000078043 |
| 18 | 42711341 | 42711730 | 42711520 | 16 | 22 | 2  | 7.967998746 | 6.43E-06    | PIAS2    | ENSG00000078043 |
| 18 | 42751910 | 42752089 | 42751991 | 8  | 8  | 3  | 2.338434415 | 0.0641221   | PIAS2    | ENSG00000078043 |
| 18 | 42780736 | 42780992 | 42780864 | 9  | 12 | 14 | 0.900730293 | 0.611333    | KATNAL2  | ENSG00000167216 |
| 18 | 42880591 | 42880818 | 42880704 | 8  | 9  | 4  | 2.078608368 | 0.0785659   | HDHD2    | ENSG00000167220 |
| 18 | 42930374 | 42930553 | 42930463 | 8  | 8  | 0  | 9.353737658 | 0.00163931  | HDHD2    | ENSG00000167220 |
| 18 | 42955094 | 42955472 | 42955216 | 10 | 16 | 1  | 8.834085566 | 5.30E-05    | IER3IP1  | ENSG00000134049 |
| 18 | 42956550 | 42956852 | 42956701 | 8  | 9  | 2  | 3.464347281 | 0.0163838   | IER3IP1  | ENSG00000134049 |
| 18 | 43803096 | 43803386 | 43803254 | 11 | 14 | 3  | 3.897390691 | 0.00295882  | ZBTB7C   | ENSG00000184828 |
| 18 | 43804132 | 43804397 | 43804289 | 12 | 14 | 6  | 2.227080395 | 0.0322529   | ZBTB7C   | ENSG00000184828 |
| 18 | 43809180 | 43809418 | 43809306 | 16 | 18 | 4  | 3.9493559   | 0.000961379 | ZBTB7C   | ENSG00000184828 |
| 18 | 43818370 | 43818623 | 43818530 | 9  | 11 | 6  | 1.781664316 | 0.103344    | ZBTB7C   | ENSG00000184828 |
| 18 | 43845644 | 43845956 | 43845800 | 19 | 22 | 0  | 23.90399624 | 7.62E-08    | ZBTB7C   | ENSG00000184828 |
| 18 | 43885758 | 43886080 | 43885924 | 8  | 11 | 2  | 4.157216737 | 0.0052913   |          | ENSG00000206944 |
| 18 | 43914235 | 43914488 | 43914396 | 15 | 18 | 13 | 1.41048425  | 0.160361    |          | ENSG00000206944 |
| 18 | 44110405 | 44110746 | 44110575 | 27 | 32 | 0  | 34.29703808 | 6.12E-11    |          | ENSG00000200872 |
| 18 | 44173653 | 44173877 | 44173765 | 10 | 10 | 1  | 5.716173013 | 0.00260397  |          | ENSG00000200872 |
| 18 | 44226991 | 44227247 | 44227119 | 9  | 10 | 4  | 2.286469205 | 0.0509017   |          | ENSG00000200872 |
| 18 | 44233767 | 44234076 | 44233935 | 8  | 11 | 3  | 3.117912553 | 0.0146045   |          | ENSG00000200872 |
| 18 | 44316128 | 44316346 | 44316194 | 8  | 8  | 3  | 2.338434415 | 0.0641221   | KIAA0427 | ENSG00000134030 |
| 18 | 44396455 | 44396726 | 44396570 | 10 | 12 | 3  | 3.377738599 | 0.00867157  | KIAA0427 | ENSG00000134030 |
| 18 | 44513213 | 44513489 | 44513358 | 16 | 16 | 2  | 5.889390377 | 0.000270741 | KIAA0427 | ENSG00000134030 |
| 18 | 44629082 | 44629373 | 44629232 | 12 | 16 | 3  | 4.417042783 | 0.00097367  | SMAD7    | ENSG00000101665 |
| 18 | 44703474 | 44703688 | 44703581 | 9  | 9  | 0  | 10.39304184 | 0.000803859 | SMAD7    | ENSG00000101665 |
| 18 | 44728339 | 44728567 | 44728453 | 9  | 11 | 0  | 12.47165021 | 0.000193293 | SMAD7    | ENSG00000101665 |
| 18 | 44728695 | 44728968 | 44728799 | 9  | 11 | 2  | 4.157216737 | 0.0052913   | SMAD7    | ENSG00000101665 |
| 18 | 44763536 | 44763799 | 44763682 | 11 | 12 | 3  | 3.377738599 | 0.00867157  | SMAD7    | ENSG00000101665 |
| 18 | 44778248 | 44778435 | 44778362 | 9  | 9  | 7  | 1.29913023  | 0.286504    | SMAD7    | ENSG00000101665 |
| 18 | 44801819 | 44802391 | 44801998 | 10 | 22 | 10 | 2.173090567 | 0.0132845   | SMAD7    | ENSG00000101665 |

|    |          |          |          |    |     |   |             |             |          |                 |
|----|----------|----------|----------|----|-----|---|-------------|-------------|----------|-----------------|
| 18 | 45350449 | 45350652 | 45350550 | 10 | 10  | 3 | 2.858086507 | 0.0242838   | LIPG     | ENSG00000101670 |
| 18 | 45409602 | 45409889 | 45409753 | 9  | 10  | 1 | 5.716173013 | 0.00260397  | LIPG     | ENSG00000101670 |
| 18 | 45484699 | 45484878 | 45484788 | 8  | 8   | 3 | 2.338434415 | 0.0641221   | ACAA2    | ENSG00000167315 |
| 18 | 45561658 | 45561848 | 45561752 | 8  | 8   | 2 | 3.117912553 | 0.0283184   | ACAA2    | ENSG00000167315 |
| 18 | 45674139 | 45674355 | 45674247 | 8  | 8   | 0 | 9.353737658 | 0.00163931  |          | ENSG00000201668 |
| 18 | 45939318 | 45939613 | 45939467 | 12 | 16  | 2 | 5.889390377 | 0.000270741 | MYO5B    | ENSG00000167306 |
| 18 | 46144399 | 46144611 | 46144511 | 8  | 8   | 0 | 9.353737658 | 0.00163931  | C18orf24 | ENSG00000154839 |
| 18 | 46391870 | 46392151 | 46392006 | 13 | 15  | 5 | 2.771477825 | 0.0105836   | MAPK4    | ENSG00000141639 |
| 18 | 46392267 | 46392453 | 46392363 | 8  | 9   | 3 | 2.598260461 | 0.0397929   | MAPK4    | ENSG00000141639 |
| 18 | 46392812 | 46392995 | 46392903 | 8  | 10  | 1 | 5.716173013 | 0.00260397  | MAPK4    | ENSG00000141639 |
| 18 | 46409647 | 46410021 | 46409808 | 16 | 23  | 5 | 4.157216737 | 0.000186738 | MAPK4    | ENSG00000141639 |
| 18 | 46412770 | 46413065 | 46412922 | 13 | 15  | 1 | 8.314433474 | 0.000102308 | MAPK4    | ENSG00000141639 |
| 18 | 47394562 | 47394793 | 47394664 | 10 | 11  | 2 | 4.157216737 | 0.0052913   |          | ENSG00000210277 |
| 18 | 50016388 | 50016578 | 50016483 | 9  | 9   | 3 | 2.598260461 | 0.0397929   | MBD2     | ENSG00000134046 |
| 18 | 50585328 | 50585541 | 50585448 | 10 | 12  | 6 | 1.930136342 | 0.071303    | RAB27B   | ENSG00000041353 |
| 18 | 51053100 | 51053293 | 51053149 | 8  | 9   | 3 | 2.598260461 | 0.0397929   | CCDC68   | ENSG00000166510 |
| 18 | 51645747 | 51645928 | 51645855 | 8  | 9   | 0 | 10.39304184 | 0.000803859 | TCF4     | ENSG00000196628 |
| 18 | 52122992 | 52123171 | 52123063 | 8  | 9   | 0 | 10.39304184 | 0.000803859 |          | ENSG00000206129 |
| 18 | 52634247 | 52634473 | 52634360 | 8  | 9   | 1 | 5.196520921 | 0.00490062  |          | ENSG00000206865 |
| 18 | 53448452 | 53448688 | 53448570 | 10 | 11  | 3 | 3.117912553 | 0.0146045   | NARS     | ENSG00000134440 |
| 18 | 53798750 | 53799373 | 53798987 | 92 | 129 | 5 | 22.51825733 | 7.24E-34    |          | ENSG00000172186 |
| 18 | 53835606 | 53835877 | 53835757 | 12 | 12  | 0 | 13.5109544  | 9.48E-05    |          | ENSG00000172186 |
| 18 | 53838901 | 53839238 | 53839069 | 8  | 10  | 5 | 1.905391004 | 0.0915982   |          | ENSG00000172186 |
| 18 | 53925198 | 53925407 | 53925302 | 8  | 9   | 4 | 2.078608368 | 0.0785659   | NEDD4L   | ENSG00000049759 |
| 18 | 54042200 | 54042395 | 54042375 | 8  | 10  | 4 | 2.286469205 | 0.0509017   | NEDD4L   | ENSG00000049759 |
| 18 | 54140332 | 54140551 | 54140407 | 9  | 10  | 0 | 11.43234603 | 0.000394183 | NEDD4L   | ENSG00000049759 |
| 18 | 54293301 | 54293485 | 54293426 | 8  | 8   | 3 | 2.338434415 | 0.0641221   |          | ENSG00000207778 |
| 18 | 54586745 | 54587262 | 54587062 | 14 | 26  | 4 | 5.612242595 | 1.08E-05    |          | ENSG00000223035 |
| 18 | 55007341 | 55007654 | 55007497 | 9  | 12  | 0 | 13.5109544  | 9.48E-05    | GRP      | ENSG00000134443 |
| 18 | 55641851 | 55642071 | 55641925 | 8  | 10  | 5 | 1.905391004 | 0.0915982   |          | ENSG00000221471 |
| 18 | 55717810 | 55718035 | 55717938 | 8  | 11  | 3 | 3.117912553 | 0.0146045   | PMAIP1   | ENSG00000141682 |
| 18 | 57253453 | 57253655 | 57253554 | 9  | 9   | 3 | 2.598260461 | 0.0397929   |          | ENSG00000206769 |
| 18 | 57359889 | 57360244 | 57360031 | 16 | 21  | 0 | 22.86469205 | 1.55E-07    | CDH20    | ENSG00000101542 |
| 18 | 57405889 | 57406068 | 57405983 | 8  | 8   | 2 | 3.117912553 | 0.0283184   | CDH20    | ENSG00000101542 |

|    |          |          |          |    |    |    |             |             |          |                 |
|----|----------|----------|----------|----|----|----|-------------|-------------|----------|-----------------|
| 18 | 57469449 | 57469645 | 57469543 | 8  | 8  | 4  | 1.870747532 | 0.118863    | CDH20    | ENSG00000101542 |
| 18 | 57470149 | 57470386 | 57470290 | 13 | 14 | 2  | 5.196520921 | 0.000907371 | CDH20    | ENSG00000101542 |
| 18 | 57617268 | 57617522 | 57617395 | 9  | 11 | 2  | 4.157216737 | 0.0052913   | RNF152   | ENSG00000176641 |
| 18 | 58006865 | 58007050 | 58006884 | 8  | 8  | 5  | 1.558956276 | 0.191397    | KIAA1468 | ENSG00000134444 |
| 18 | 58303938 | 58304137 | 58304015 | 8  | 10 | 2  | 3.810782009 | 0.00936112  | ZCCHC2   | ENSG00000141664 |
| 18 | 58390729 | 58391005 | 58390857 | 22 | 23 | 3  | 6.235825105 | 1.63E-05    | ZCCHC2   | ENSG00000141664 |
| 18 | 58532743 | 58532930 | 58532851 | 8  | 8  | 6  | 1.336248237 | 0.277651    | PHLPP    | ENSG00000081913 |
| 18 | 58532932 | 58533249 | 58533090 | 9  | 15 | 13 | 1.187776211 | 0.317363    | PHLPP    | ENSG00000081913 |
| 18 | 58535561 | 58535847 | 58535737 | 8  | 11 | 3  | 3.117912553 | 0.0146045   | PHLPP    | ENSG00000081913 |
| 18 | 58613733 | 58613939 | 58613836 | 9  | 10 | 0  | 11.43234603 | 0.000394183 |          | ENSG00000215431 |
| 18 | 58618776 | 58619065 | 58618920 | 11 | 12 | 10 | 1.228268581 | 0.305344    |          | ENSG00000215431 |
| 18 | 58790908 | 58791127 | 58791065 | 8  | 10 | 2  | 3.810782009 | 0.00936112  | PHLPP    | ENSG00000081913 |
| 18 | 58834553 | 58834795 | 58834674 | 9  | 10 | 6  | 1.63319229  | 0.146906    | PHLPP    | ENSG00000081913 |
| 18 | 58864670 | 58865043 | 58864864 | 10 | 17 | 5  | 3.117912553 | 0.00407023  | PHLPP    | ENSG00000081913 |
| 18 | 58893099 | 58893432 | 58893295 | 12 | 16 | 8  | 1.963130126 | 0.0441028   | BCL2     | ENSG00000171791 |
| 18 | 58897377 | 58897670 | 58897491 | 11 | 12 | 2  | 4.503651465 | 0.002963    | BCL2     | ENSG00000171791 |
| 18 | 58949442 | 58949667 | 58949593 | 8  | 10 | 10 | 1.039304184 | 0.464387    | BCL2     | ENSG00000171791 |
| 18 | 58950841 | 58951050 | 58950946 | 8  | 9  | 6  | 1.484720263 | 0.204387    | BCL2     | ENSG00000171791 |
| 18 | 58973864 | 58974137 | 58973995 | 10 | 12 | 5  | 2.251825733 | 0.0404733   | BCL2     | ENSG00000171791 |
| 18 | 59047677 | 59047951 | 59047821 | 9  | 10 | 0  | 11.43234603 | 0.000394183 | BCL2     | ENSG00000171791 |
| 18 | 59059584 | 59059868 | 59059742 | 11 | 14 | 14 | 1.039304184 | 0.458308    | BCL2     | ENSG00000171791 |
| 18 | 59060005 | 59060196 | 59060121 | 8  | 8  | 12 | 0.719518281 | 0.783103    | BCL2     | ENSG00000171791 |
| 18 | 59072911 | 59073199 | 59073055 | 14 | 17 | 16 | 1.100439724 | 0.388093    | BCL2     | ENSG00000171791 |
| 18 | 59075351 | 59075569 | 59075460 | 8  | 10 | 10 | 1.039304184 | 0.464387    | BCL2     | ENSG00000171791 |
| 18 | 59078001 | 59078489 | 59078298 | 12 | 23 | 12 | 1.918715417 | 0.0250463   | BCL2     | ENSG00000171791 |
| 18 | 59136391 | 59136613 | 59136502 | 8  | 9  | 4  | 2.078608368 | 0.0785659   | BCL2     | ENSG00000171791 |
| 18 | 59139565 | 59139786 | 59139673 | 8  | 10 | 5  | 1.905391004 | 0.0915982   | BCL2     | ENSG00000171791 |
| 18 | 59141319 | 59141499 | 59141409 | 8  | 8  | 10 | 0.850339787 | 0.645072    | BCL2     | ENSG00000171791 |
| 18 | 59180073 | 59180470 | 59180252 | 10 | 18 | 4  | 3.9493559   | 0.000961379 | KDSR     | ENSG00000119537 |
| 18 | 59185663 | 59186057 | 59185879 | 14 | 20 | 14 | 1.455025858 | 0.129498    | KDSR     | ENSG00000119537 |
| 18 | 59294690 | 59295377 | 59294977 | 57 | 83 | 3  | 21.82538787 | 1.46E-22    | SERPINB5 | ENSG00000206075 |
| 18 | 59662485 | 59662703 | 59662594 | 9  | 11 | 5  | 2.078608368 | 0.0614303   | SERPINB2 | ENSG00000197632 |
| 18 | 59666467 | 59666661 | 59666564 | 9  | 9  | 3  | 2.598260461 | 0.0397929   | SERPINB2 | ENSG00000197632 |
| 18 | 59781755 | 59782097 | 59781931 | 10 | 12 | 6  | 1.930136342 | 0.071303    | SERPINB8 | ENSG00000166401 |

|    |          |          |          |    |    |   |             |             |           |                 |
|----|----------|----------|----------|----|----|---|-------------|-------------|-----------|-----------------|
| 18 | 59813075 | 59813327 | 59813201 | 10 | 13 | 3 | 3.637564645 | 0.0050909   | SERPINB8  | ENSG00000166401 |
| 18 | 69588421 | 69588600 | 69588493 | 8  | 8  | 0 | 9.353737658 | 0.00163931  |           | ENSG00000210546 |
| 18 | 69589321 | 69589626 | 69589475 | 9  | 11 | 1 | 6.235825105 | 0.0013754   |           | ENSG00000210546 |
| 18 | 69760593 | 69760772 | 69760681 | 8  | 9  | 1 | 5.196520921 | 0.00490062  |           | ENSG00000210546 |
| 18 | 69968050 | 69968447 | 69968289 | 31 | 37 | 4 | 7.8987118   | 1.45E-08    | C18orf55  | ENSG00000075336 |
| 18 | 71640877 | 71641113 | 71641009 | 10 | 10 | 0 | 11.43234603 | 0.000394183 | C18orf62  | ENSG00000206026 |
| 18 | 74403246 | 74403593 | 74403419 | 20 | 26 | 2 | 9.353737658 | 4.98E-07    |           | ENSG00000201723 |
| 18 | 74664758 | 74664961 | 74664859 | 8  | 8  | 1 | 4.676868829 | 0.0091584   | SALL3     | ENSG00000151514 |
| 18 | 75991090 | 75991291 | 75991190 | 9  | 10 | 4 | 2.286469205 | 0.0509017   | ADNP2     | ENSG00000101544 |
| 19 | 228742   | 228921   | 228841   | 8  | 8  | 0 | 9.353737658 | 0.00163931  | PPAP2C    | ENSG00000141934 |
| 19 | 884453   | 884681   | 884567   | 10 | 12 | 0 | 13.5109544  | 9.48E-05    | ARID3A    | ENSG00000116017 |
| 19 | 972565   | 972804   | 972684   | 9  | 10 | 5 | 1.905391004 | 0.0915982   |           | ENSG00000207357 |
| 19 | 1132601  | 1132880  | 1132749  | 8  | 9  | 7 | 1.29913023  | 0.286504    | SBNO2     | ENSG00000064932 |
| 19 | 1161392  | 1161748  | 1161582  | 14 | 19 | 0 | 20.78608368 | 6.46E-07    | STK11     | ENSG00000118046 |
| 19 | 1264596  | 1264795  | 1264695  | 8  | 8  | 1 | 4.676868829 | 0.0091584   | EFNA2     | ENSG00000099617 |
| 19 | 1334701  | 1334977  | 1334874  | 10 | 13 | 2 | 4.850086193 | 0.00164564  | NDUFS7    | ENSG00000115286 |
| 19 | 2009528  | 2009818  | 2009673  | 9  | 11 | 0 | 12.47165021 | 0.000193293 | MKNK2     | ENSG00000099875 |
| 19 | 2414023  | 2414308  | 2414168  | 10 | 11 | 4 | 2.494330042 | 0.0324033   | LMNB2     | ENSG00000176619 |
| 19 | 2426948  | 2427136  | 2427042  | 8  | 8  | 7 | 1.169217207 | 0.371848    | GADD45B   | ENSG00000099860 |
| 19 | 2530350  | 2530913  | 2530627  | 17 | 30 | 6 | 4.602632816 | 1.26E-05    | GNG7      | ENSG00000213611 |
| 19 | 2553507  | 2553742  | 2553624  | 8  | 9  | 1 | 5.196520921 | 0.00490062  | GNG7      | ENSG00000213611 |
| 19 | 2904266  | 2904480  | 2904349  | 8  | 8  | 1 | 4.676868829 | 0.0091584   | ZNF77     | ENSG00000175691 |
| 19 | 3993389  | 3993719  | 3993568  | 9  | 13 | 1 | 7.27512929  | 0.000378098 |           | ENSG00000188205 |
| 19 | 3993758  | 3993951  | 3993885  | 8  | 9  | 0 | 10.39304184 | 0.000803859 |           | ENSG00000188205 |
| 19 | 4133455  | 4133674  | 4133566  | 11 | 11 | 0 | 12.47165021 | 0.000193293 | SIRT6     | ENSG00000077463 |
| 19 | 4135079  | 4135280  | 4135231  | 8  | 9  | 1 | 5.196520921 | 0.00490062  | ANKRD24   | ENSG00000089847 |
| 19 | 4197747  | 4198036  | 4197920  | 16 | 19 | 7 | 2.598260461 | 0.00730518  | CCDC94    | ENSG00000105248 |
| 19 | 4351633  | 4351826  | 4351729  | 12 | 12 | 2 | 4.503651465 | 0.002963    | SH3GL1    | ENSG00000141985 |
| 19 | 4575777  | 4576088  | 4575932  | 30 | 33 | 1 | 17.66817113 | 5.50E-10    | TNFAIP8L1 | ENSG00000185361 |
| 19 | 4742229  | 4742464  | 4742333  | 8  | 9  | 0 | 10.39304184 | 0.000803859 | FEM1A     | ENSG00000141965 |
| 19 | 5421467  | 5421672  | 5421569  | 9  | 9  | 1 | 5.196520921 | 0.00490062  | ZNRF4     | ENSG00000105428 |
| 19 | 5454629  | 5454808  | 5454684  | 8  | 9  | 1 | 5.196520921 | 0.00490062  | ZNRF4     | ENSG00000105428 |
| 19 | 5637614  | 5637854  | 5637754  | 8  | 11 | 7 | 1.558956276 | 0.158273    | RPL36     | ENSG00000130255 |
| 19 | 5671350  | 5671626  | 5671488  | 9  | 12 | 1 | 6.755477198 | 0.000722752 | TMEM146   | ENSG00000174898 |

|    |          |          |          |     |     |    |             |             |          |                 |
|----|----------|----------|----------|-----|-----|----|-------------|-------------|----------|-----------------|
| 19 | 5938393  | 5938679  | 5938536  | 10  | 13  | 1  | 7.27512929  | 0.000378098 | RANBP3   | ENSG00000031823 |
| 19 | 6528320  | 6528826  | 6528624  | 108 | 134 | 1  | 70.15303244 | 1.16E-40    |          | ENSG00000199223 |
| 19 | 6694852  | 6695219  | 6694991  | 22  | 30  | 2  | 10.73947657 | 3.71E-08    | TRIP10   | ENSG00000125733 |
| 19 | 6717091  | 6717313  | 6717202  | 9   | 11  | 3  | 3.117912553 | 0.0146045   | SH2D3A   | ENSG00000125731 |
| 19 | 7089946  | 7090224  | 7090085  | 11  | 11  | 0  | 12.47165021 | 0.000193293 | ZNF557   | ENSG00000130544 |
| 19 | 7392802  | 7393086  | 7392958  | 10  | 13  | 2  | 4.850086193 | 0.00164564  | ARHGEF18 | ENSG00000104880 |
| 19 | 7719641  | 7720061  | 7719882  | 10  | 17  | 7  | 2.338434415 | 0.0171287   | CD209    | ENSG00000090659 |
| 19 | 7778544  | 7778774  | 7778659  | 8   | 9   | 1  | 5.196520921 | 0.00490062  | CLEC4GP1 | ENSG00000205680 |
| 19 | 7899774  | 7899968  | 7899871  | 8   | 9   | 3  | 2.598260461 | 0.0397929   | CTXN1    | ENSG00000178531 |
| 19 | 9011308  | 9011805  | 9011626  | 27  | 40  | 1  | 21.30573578 | 4.48E-12    | OR1M1    | ENSG00000170929 |
| 19 | 9027239  | 9027502  | 9027370  | 8   | 11  | 1  | 6.235825105 | 0.0013754   | OR1M1    | ENSG00000170929 |
| 19 | 9593511  | 9593862  | 9593686  | 21  | 27  | 0  | 29.10051716 | 2.16E-09    | ZNF561   | ENSG00000171469 |
| 19 | 9594274  | 9594481  | 9594418  | 9   | 11  | 0  | 12.47165021 | 0.000193293 | ZNF561   | ENSG00000171469 |
| 19 | 9740286  | 9740522  | 9740404  | 12  | 12  | 3  | 3.377738599 | 0.00867157  | ZNF846   | ENSG00000196605 |
| 19 | 9799416  | 9799639  | 9799505  | 9   | 11  | 7  | 1.558956276 | 0.158273    | UBL5     | ENSG00000198258 |
| 19 | 9981351  | 9981530  | 9981440  | 8   | 8   | 3  | 2.338434415 | 0.0641221   | COL5A3   | ENSG00000080573 |
| 19 | 9999336  | 9999666  | 9999510  | 8   | 12  | 3  | 3.377738599 | 0.00867157  |          | ENSG00000167798 |
| 19 | 10156368 | 10156638 | 10156492 | 15  | 17  | 2  | 6.235825105 | 0.000146695 | DNMT1    | ENSG00000130816 |
| 19 | 10242652 | 10242929 | 10242790 | 10  | 10  | 2  | 3.810782009 | 0.00936112  | ICAM1    | ENSG00000090339 |
| 19 | 10625424 | 10625795 | 10625555 | 9   | 14  | 4  | 3.117912553 | 0.00766354  | ILF3     | ENSG00000129351 |
| 19 | 10689003 | 10689311 | 10689138 | 13  | 15  | 12 | 1.279143611 | 0.251893    | DNM2     | ENSG00000079805 |
| 19 | 10870717 | 10871156 | 10870896 | 8   | 17  | 11 | 1.558956276 | 0.111389    | CARM1    | ENSG00000142453 |
| 19 | 10900311 | 10900530 | 10900421 | 15  | 17  | 5  | 3.117912553 | 0.00407023  | C19orf52 | ENSG00000142444 |
| 19 | 10913781 | 10914030 | 10913905 | 9   | 11  | 2  | 4.157216737 | 0.0052913   | C19orf52 | ENSG00000142444 |
| 19 | 10924506 | 10924790 | 10924652 | 12  | 15  | 6  | 2.375552421 | 0.0212094   | SMARCA4  | ENSG00000127616 |
| 19 | 10931994 | 10932232 | 10932101 | 8   | 11  | 2  | 4.157216737 | 0.0052913   | SMARCA4  | ENSG00000127616 |
| 19 | 11237340 | 11237718 | 11237515 | 8   | 14  | 3  | 3.897390691 | 0.00295882  | DOCK6    | ENSG00000130158 |
| 19 | 11316079 | 11316369 | 11316253 | 13  | 15  | 10 | 1.511715177 | 0.140236    |          | ENSG00000183401 |
| 19 | 11352817 | 11353000 | 11352865 | 8   | 9   | 2  | 3.464347281 | 0.0163838   | EPOR     | ENSG00000187266 |
| 19 | 11407206 | 11407632 | 11407355 | 8   | 15  | 3  | 4.157216737 | 0.00170423  | PRKCSH   | ENSG00000130175 |
| 19 | 11553050 | 11553232 | 11553130 | 9   | 10  | 5  | 1.905391004 | 0.0915982   | ACP5     | ENSG00000102575 |
| 19 | 11569942 | 11570121 | 11570031 | 8   | 8   | 2  | 3.117912553 | 0.0283184   | ZNF627   | ENSG00000198551 |
| 19 | 11668574 | 11668807 | 11668690 | 12  | 13  | 0  | 14.55025858 | 4.65E-05    | ZNF833   | ENSG00000197332 |
| 19 | 11710993 | 11711178 | 11711106 | 8   | 9   | 5  | 1.73217364  | 0.133894    | ZNF823   | ENSG00000197933 |

|    |          |          |          |    |    |    |             |             |          |                 |
|----|----------|----------|----------|----|----|----|-------------|-------------|----------|-----------------|
| 19 | 12606430 | 12606611 | 12606559 | 8  | 9  | 1  | 5.196520921 | 0.00490062  |          | ENSG00000221343 |
| 19 | 12638699 | 12638921 | 12638815 | 9  | 10 | 6  | 1.63319229  | 0.146906    | MAN2B1   | ENSG00000104774 |
| 19 | 12641268 | 12641546 | 12641414 | 13 | 17 | 10 | 1.700679574 | 0.0766266   | C19orf56 | ENSG00000105583 |
| 19 | 12653267 | 12653936 | 12653757 | 14 | 34 | 13 | 2.598260461 | 0.000664816 | DHPS     | ENSG00000095059 |
| 19 | 12668337 | 12668814 | 12668569 | 15 | 25 | 28 | 0.931789958 | 0.604671    | FBXW9    | ENSG00000132004 |
| 19 | 12688857 | 12689047 | 12688952 | 8  | 8  | 3  | 2.338434415 | 0.0641221   | TNPO2    | ENSG00000105576 |
| 19 | 12694359 | 12695035 | 12694722 | 11 | 30 | 11 | 2.684869143 | 0.000957822 | TNPO2    | ENSG00000105576 |
| 19 | 12695171 | 12695769 | 12695338 | 13 | 28 | 7  | 3.767477668 | 0.000100549 | TNPO2    | ENSG00000105576 |
| 19 | 12708481 | 12709419 | 12709240 | 13 | 41 | 22 | 1.897859815 | 0.00548724  | ASNA1    | ENSG00000198356 |
| 19 | 12743807 | 12743997 | 12743902 | 8  | 9  | 8  | 1.154782427 | 0.375434    | HOOK2    | ENSG00000095066 |
| 19 | 12746462 | 12746802 | 12746632 | 9  | 14 | 11 | 1.29913023  | 0.246308    | HOOK2    | ENSG00000095066 |
| 19 | 12747420 | 12747727 | 12747573 | 11 | 14 | 4  | 3.117912553 | 0.00766354  | HOOK2    | ENSG00000095066 |
| 19 | 12754587 | 12754914 | 12754750 | 8  | 11 | 5  | 2.078608368 | 0.0614303   | HOOK2    | ENSG00000095066 |
| 19 | 12755212 | 12755391 | 12755301 | 8  | 8  | 8  | 1.039304184 | 0.46786     | HOOK2    | ENSG00000095066 |
| 19 | 12760340 | 12760553 | 12760450 | 8  | 10 | 7  | 1.429043253 | 0.21536     | JUNB     | ENSG00000171223 |
| 19 | 12761730 | 12761970 | 12761850 | 8  | 9  | 3  | 2.598260461 | 0.0397929   | JUNB     | ENSG00000171223 |
| 19 | 12762053 | 12762396 | 12762213 | 10 | 14 | 12 | 1.199197136 | 0.313881    | JUNB     | ENSG00000171223 |
| 19 | 12763055 | 12763466 | 12763305 | 11 | 19 | 6  | 2.969440526 | 0.0035096   | JUNB     | ENSG00000171223 |
| 19 | 12765008 | 12765343 | 12765180 | 10 | 14 | 12 | 1.199197136 | 0.313881    | JUNB     | ENSG00000171223 |
| 19 | 12765931 | 12766231 | 12766072 | 10 | 11 | 9  | 1.247165021 | 0.300052    | JUNB     | ENSG00000171223 |
| 19 | 12768314 | 12768716 | 12768609 | 11 | 19 | 9  | 2.078608368 | 0.0241848   | PRDX2    | ENSG00000167815 |
| 19 | 12773452 | 12773681 | 12773566 | 10 | 11 | 3  | 3.117912553 | 0.0146045   | PRDX2    | ENSG00000167815 |
| 19 | 12808090 | 12808411 | 12808233 | 11 | 16 | 7  | 2.208521392 | 0.0257604   | RTBDN    | ENSG00000132026 |
| 19 | 12856858 | 12857186 | 12857022 | 8  | 13 | 1  | 7.27512929  | 0.000378098 | KLF1     | ENSG00000105610 |
| 19 | 12862500 | 12862729 | 12862671 | 9  | 10 | 5  | 1.905391004 | 0.0915982   | GCDH     | ENSG00000105607 |
| 19 | 12900089 | 12900312 | 12900200 | 9  | 11 | 2  | 4.157216737 | 0.0052913   | FARSA    | ENSG00000179115 |
| 19 | 12912202 | 12912585 | 12912428 | 11 | 19 | 2  | 6.928694562 | 4.25E-05    | CALR     | ENSG00000179218 |
| 19 | 12936826 | 12937046 | 12936942 | 9  | 10 | 8  | 1.27026067  | 0.293854    | DAND5    | ENSG00000179284 |
| 19 | 12977730 | 12977921 | 12977850 | 8  | 8  | 0  | 9.353737658 | 0.00163931  | NFIX     | ENSG00000008441 |
| 19 | 13123361 | 13123540 | 13123486 | 8  | 9  | 8  | 1.154782427 | 0.375434    | IER2     | ENSG00000160888 |
| 19 | 13126709 | 13126912 | 13126872 | 8  | 10 | 5  | 1.905391004 | 0.0915982   | IER2     | ENSG00000160888 |
| 19 | 13134637 | 13134931 | 13134770 | 11 | 14 | 2  | 5.196520921 | 0.000907371 |          | ENSG00000213253 |
| 19 | 13136464 | 13136727 | 13136595 | 8  | 10 | 4  | 2.286469205 | 0.0509017   |          | ENSG00000213253 |
| 19 | 13241209 | 13241390 | 13241221 | 8  | 8  | 4  | 1.870747532 | 0.118863    |          | ENSG00000213253 |

|    |          |          |          |    |    |    |             |             |          |                 |
|----|----------|----------|----------|----|----|----|-------------|-------------|----------|-----------------|
| 19 | 13625751 | 13626058 | 13625902 | 18 | 19 | 1  | 10.39304184 | 7.23E-06    | CCDC130  | ENSG00000104957 |
| 19 | 13737368 | 13737689 | 13737529 | 17 | 21 | 6  | 3.266384579 | 0.0013436   |          | ENSG00000037757 |
| 19 | 13746019 | 13746247 | 13746137 | 8  | 9  | 3  | 2.598260461 | 0.0397929   | C19orf53 | ENSG00000104979 |
| 19 | 13815489 | 13815831 | 13815660 | 8  | 14 | 1  | 7.794781382 | 0.000197021 |          | ENSG00000205463 |
| 19 | 13819438 | 13819670 | 13819519 | 8  | 8  | 2  | 3.117912553 | 0.0283184   |          | ENSG00000221627 |
| 19 | 13984431 | 13984715 | 13984573 | 10 | 12 | 0  | 13.5109544  | 9.48E-05    | RFX1     | ENSG00000132005 |
| 19 | 14033856 | 14034078 | 14033956 | 9  | 9  | 5  | 1.73217364  | 0.133894    |          | ENSG00000187867 |
| 19 | 14053004 | 14053342 | 14053173 | 8  | 14 | 12 | 1.199197136 | 0.313881    | C19orf67 | ENSG00000188032 |
| 19 | 14091490 | 14091731 | 14091651 | 10 | 11 | 2  | 4.157216737 | 0.0052913   | PRKACA   | ENSG00000072062 |
| 19 | 14528525 | 14528760 | 14528642 | 8  | 8  | 1  | 4.676868829 | 0.0091584   | NDUFB7   | ENSG00000099795 |
| 19 | 14543823 | 14544035 | 14543929 | 8  | 11 | 7  | 1.558956276 | 0.158273    | NDUFB7   | ENSG00000099795 |
| 19 | 14806682 | 14806927 | 14806799 | 11 | 11 | 2  | 4.157216737 | 0.0052913   | OR7A5    | ENSG00000188269 |
| 19 | 15010232 | 15010547 | 15010317 | 10 | 14 | 5  | 2.598260461 | 0.0167748   | CASP14   | ENSG00000105141 |
| 19 | 15076256 | 15076464 | 15076360 | 8  | 8  | 0  | 9.353737658 | 0.00163931  | SYDE1    | ENSG00000105137 |
| 19 | 15095508 | 15095729 | 15095645 | 8  | 9  | 0  | 10.39304184 | 0.000803859 | ILVBL    | ENSG00000105135 |
| 19 | 15167787 | 15168034 | 15167915 | 9  | 11 | 3  | 3.117912553 | 0.0146045   | NOTCH3   | ENSG00000074181 |
| 19 | 15352242 | 15352461 | 15352336 | 8  | 9  | 5  | 1.73217364  | 0.133894    | AKAP8    | ENSG00000105127 |
| 19 | 15460409 | 15460703 | 15460555 | 14 | 15 | 6  | 2.375552421 | 0.0212094   | PGLYRP2  | ENSG00000161031 |
| 19 | 15527649 | 15527886 | 15527785 | 8  | 11 | 3  | 3.117912553 | 0.0146045   | CYP4F22  | ENSG00000171954 |
| 19 | 15528244 | 15528543 | 15528383 | 9  | 13 | 2  | 4.850086193 | 0.00164564  | CYP4F22  | ENSG00000171954 |
| 19 | 15586386 | 15586592 | 15586507 | 13 | 13 | 6  | 2.078608368 | 0.0483393   | CYP4F8   | ENSG00000186526 |
| 19 | 15618432 | 15618765 | 15618594 | 11 | 16 | 2  | 5.889390377 | 0.000270741 | CYP4F3   | ENSG00000186529 |
| 19 | 15633334 | 15633529 | 15633437 | 8  | 9  | 0  | 10.39304184 | 0.000803859 | CYP4F12  | ENSG00000186204 |
| 19 | 15864484 | 15864894 | 15864724 | 12 | 19 | 3  | 5.196520921 | 0.000174201 | CYP4F2   | ENSG00000186115 |
| 19 | 15947704 | 15947949 | 15947818 | 10 | 11 | 13 | 0.890832158 | 0.618492    | HSH2D    | ENSG00000196684 |
| 19 | 16069772 | 16069953 | 16069862 | 9  | 9  | 2  | 3.464347281 | 0.0163838   | RAB8A    | ENSG00000167461 |
| 19 | 16082595 | 16082793 | 16082718 | 8  | 8  | 1  | 4.676868829 | 0.0091584   | RAB8A    | ENSG00000167461 |
| 19 | 16144841 | 16145134 | 16144987 | 9  | 11 | 7  | 1.558956276 | 0.158273    | CIB3     | ENSG00000141977 |
| 19 | 16157006 | 16157347 | 16157176 | 12 | 17 | 5  | 3.117912553 | 0.00407023  | FAM32A   | ENSG00000105058 |
| 19 | 16435596 | 16436261 | 16435951 | 11 | 23 | 8  | 2.771477825 | 0.00251818  | EPS15L1  | ENSG00000127527 |
| 19 | 16441198 | 16441377 | 16441287 | 8  | 8  | 6  | 1.336248237 | 0.277651    | EPS15L1  | ENSG00000127527 |
| 19 | 17047035 | 17047224 | 17047129 | 9  | 9  | 2  | 3.464347281 | 0.0163838   |          | ENSG00000131351 |
| 19 | 17248490 | 17248746 | 17248618 | 8  | 8  | 1  | 4.676868829 | 0.0091584   | ANKLE1   | ENSG00000160117 |
| 19 | 17766829 | 17767017 | 17766895 | 8  | 8  | 3  | 2.338434415 | 0.0641221   | B3GNT3   | ENSG00000179913 |



|    |          |          |          |     |     |    |             |             |          |                 |
|----|----------|----------|----------|-----|-----|----|-------------|-------------|----------|-----------------|
| 19 | 17874523 | 17874820 | 17874668 | 11  | 14  | 0  | 15.58956276 | 2.28E-05    | SLC5A5   | ENSG00000105641 |
| 19 | 18001542 | 18001873 | 18001699 | 10  | 13  | 2  | 4.850086193 | 0.00164564  | ARRDC2   | ENSG00000105643 |
| 19 | 18006807 | 18007180 | 18006985 | 23  | 29  | 2  | 10.39304184 | 7.12E-08    | ARRDC2   | ENSG00000105643 |
| 19 | 18065184 | 18065693 | 18065359 | 19  | 26  | 2  | 9.353737658 | 4.98E-07    | MAST3    | ENSG00000099308 |
| 19 | 18124174 | 18124400 | 18124226 | 10  | 13  | 1  | 7.27512929  | 0.000378098 | PIK3R2   | ENSG00000105647 |
| 19 | 18195711 | 18196094 | 18195917 | 13  | 19  | 1  | 10.39304184 | 7.23E-06    | PDE4C    | ENSG00000105650 |
| 19 | 18196236 | 18196760 | 18196474 | 88  | 108 | 5  | 18.88069268 | 9.74E-28    | PDE4C    | ENSG00000105650 |
| 19 | 18265016 | 18265274 | 18265128 | 8   | 9   | 2  | 3.464347281 | 0.0163838   | JUND     | ENSG00000130522 |
| 19 | 18321466 | 18321645 | 18321546 | 9   | 9   | 1  | 5.196520921 | 0.00490062  | PGPEP1   | ENSG00000130517 |
| 19 | 18336413 | 18337223 | 18336811 | 375 | 499 | 7  | 64.95651151 | 2.69E-142   | GDF15    | ENSG00000130513 |
| 19 | 18345266 | 18346289 | 18345770 | 256 | 357 | 2  | 124.0236327 | 2.71E-107   | GDF15    | ENSG00000130513 |
| 19 | 18351832 | 18352258 | 18352120 | 10  | 17  | 4  | 3.741495063 | 0.00163722  | GDF15    | ENSG00000130513 |
| 19 | 18357778 | 18358244 | 18358043 | 37  | 54  | 3  | 14.29043253 | 4.09E-14    | GDF15    | ENSG00000130513 |
| 19 | 18410571 | 18410857 | 18410714 | 13  | 15  | 1  | 8.314433474 | 0.000102308 | ISYNA1   | ENSG00000105655 |
| 19 | 18523515 | 18523779 | 18523647 | 12  | 14  | 1  | 7.794781382 | 0.000197021 | C19orf50 | ENSG00000105700 |
| 19 | 18728698 | 18729182 | 18728942 | 27  | 38  | 2  | 13.5109544  | 1.90E-10    | COMP     | ENSG00000105664 |
| 19 | 18734423 | 18734700 | 18734561 | 8   | 10  | 0  | 11.43234603 | 0.000394183 | COMP     | ENSG00000105664 |
| 19 | 19237576 | 19237770 | 19237629 | 10  | 10  | 0  | 11.43234603 | 0.000394183 | TM6SF2   | ENSG00000213996 |
| 19 | 19349499 | 19349962 | 19349730 | 11  | 19  | 4  | 4.157216737 | 0.000560204 | GATAD2A  | ENSG00000167491 |
| 19 | 19378851 | 19379056 | 19378953 | 9   | 9   | 0  | 10.39304184 | 0.000803859 | GATAD2A  | ENSG00000167491 |
| 19 | 19460973 | 19461173 | 19461073 | 8   | 8   | 2  | 3.117912553 | 0.0283184   | TSSK6    | ENSG00000178093 |
| 19 | 19462269 | 19462499 | 19462385 | 8   | 10  | 2  | 3.810782009 | 0.00936112  | TSSK6    | ENSG00000178093 |
| 19 | 19748091 | 19748655 | 19748479 | 60  | 81  | 7  | 10.65286789 | 2.80E-18    | ZNF14    | ENSG00000105708 |
| 19 | 20023520 | 20023761 | 20023676 | 13  | 13  | 1  | 7.27512929  | 0.000378098 | ZNF682   | ENSG00000197124 |
| 19 | 20143107 | 20143332 | 20143213 | 10  | 12  | 1  | 6.755477198 | 0.000722752 | ZNF486   | ENSG00000160229 |
| 19 | 21457630 | 21457816 | 21457676 | 8   | 8   | 4  | 1.870747532 | 0.118863    | ZNF429   | ENSG00000197013 |
| 19 | 21502277 | 21502456 | 21502366 | 8   | 8   | 1  | 4.676868829 | 0.0091584   | ZNF429   | ENSG00000197013 |
| 19 | 21987120 | 21987327 | 21987216 | 8   | 9   | 1  | 5.196520921 | 0.00490062  | ZNF208   | ENSG00000160321 |
| 19 | 23262407 | 23262633 | 23262520 | 8   | 9   | 3  | 2.598260461 | 0.0397929   |          | ENSG00000213971 |
| 19 | 23974240 | 23974419 | 23974269 | 8   | 9   | 2  | 3.464347281 | 0.0163838   |          | ENSG00000211551 |
| 19 | 23975365 | 23975711 | 23975538 | 21  | 25  | 12 | 2.078608368 | 0.0124196   |          | ENSG00000211551 |
| 19 | 23975784 | 23976121 | 23975952 | 24  | 26  | 19 | 1.403060649 | 0.122336    |          | ENSG00000211551 |
| 19 | 23976481 | 23976766 | 23976649 | 10  | 14  | 11 | 1.29913023  | 0.246308    |          | ENSG00000211551 |
| 19 | 24317867 | 24318210 | 24318038 | 35  | 35  | 34 | 1.06899859  | 0.389269    | ZNF254   | ENSG00000213096 |

|    |          |          |          |     |     |     |             |             |          |                 |
|----|----------|----------|----------|-----|-----|-----|-------------|-------------|----------|-----------------|
| 19 | 32423691 | 32424786 | 32423868 | 140 | 269 | 264 | 1.058913697 | 0.253996    |          |                 |
| 19 | 32424935 | 32425417 | 32425238 | 50  | 66  | 67  | 1.024020299 | 0.445434    |          |                 |
| 19 | 32425931 | 32426785 | 32426608 | 67  | 118 | 130 | 0.944100748 | 0.675798    |          |                 |
| 19 | 32426888 | 32427929 | 32427065 | 50  | 93  | 86  | 1.12292636  | 0.217543    |          |                 |
| 19 | 32428340 | 32428994 | 32428614 | 93  | 143 | 137 | 1.084491323 | 0.247862    |          |                 |
| 19 | 32429294 | 32429624 | 32429459 | 16  | 19  | 18  | 1.094004404 | 0.389177    |          |                 |
| 19 | 32429700 | 32430500 | 32430323 | 209 | 232 | 243 | 0.992450307 | 0.533232    |          |                 |
| 19 | 32430538 | 32430771 | 32430654 | 8   | 10  | 7   | 1.429043253 | 0.21536     |          |                 |
| 19 | 32430852 | 32431300 | 32431030 | 11  | 16  | 24  | 0.706726845 | 0.870131    |          |                 |
| 19 | 32493932 | 32494260 | 32494096 | 9   | 9   | 20  | 0.494906754 | 0.972617    |          |                 |
| 19 | 32561992 | 32562321 | 32562156 | 11  | 12  | 15  | 0.84443465  | 0.678289    |          |                 |
| 19 | 32571356 | 32571538 | 32571509 | 8   | 9   | 9   | 1.039304184 | 0.466079    |          |                 |
| 19 | 32593470 | 32593684 | 32593622 | 10  | 11  | 9   | 1.247165021 | 0.300052    |          |                 |
| 19 | 32658821 | 32659153 | 32658987 | 21  | 21  | 37  | 0.601702422 | 0.974135    |          |                 |
| 19 | 33664794 | 33665259 | 33665080 | 31  | 41  | 3   | 10.91269393 | 2.02E-10    |          | ENSG00000205243 |
| 19 | 34572199 | 34572702 | 34572493 | 14  | 27  | 8   | 3.233390795 | 0.000398033 | VSTM2B   | ENSG00000187135 |
| 19 | 35028463 | 35028712 | 35028568 | 9   | 11  | 1   | 6.235825105 | 0.0013754   | CCNE1    | ENSG00000105173 |
| 19 | 35967742 | 35967921 | 35967831 | 8   | 8   | 2   | 3.117912553 | 0.0283184   |          | ENSG00000223148 |
| 19 | 36046280 | 36046471 | 36046358 | 8   | 9   | 0   | 10.39304184 | 0.000803859 |          | ENSG00000223148 |
| 19 | 37205783 | 37205994 | 37205888 | 10  | 10  | 5   | 1.905391004 | 0.0915982   |          | ENSG00000221504 |
| 19 | 37545977 | 37546268 | 37546123 | 13  | 14  | 2   | 5.196520921 | 0.000907371 | ZNF507   | ENSG00000168813 |
| 19 | 37556555 | 37556894 | 37556734 | 11  | 15  | 2   | 5.542955649 | 0.000497081 | ZNF507   | ENSG00000168813 |
| 19 | 38263644 | 38264008 | 38263869 | 8   | 14  | 2   | 5.196520921 | 0.000907371 | GPATCH1  | ENSG00000076650 |
| 19 | 38360428 | 38360626 | 38360527 | 8   | 8   | 0   | 9.353737658 | 0.00163931  | LRP3     | ENSG00000130881 |
| 19 | 38387167 | 38387476 | 38387326 | 8   | 8   | 3   | 2.338434415 | 0.0641221   | LRP3     | ENSG00000130881 |
| 19 | 38493431 | 38493806 | 38493627 | 10  | 17  | 3   | 4.676868829 | 0.000552213 |          | ENSG00000178863 |
| 19 | 38786223 | 38786433 | 38786316 | 10  | 11  | 0   | 12.47165021 | 0.000193293 | CHST8    | ENSG00000124302 |
| 19 | 38803618 | 38803881 | 38803749 | 8   | 9   | 4   | 2.078608368 | 0.0785659   | CHST8    | ENSG00000124302 |
| 19 | 38978781 | 38978960 | 38978893 | 8   | 9   | 3   | 2.598260461 | 0.0397929   | KCTD15   | ENSG00000153885 |
| 19 | 39317013 | 39317206 | 39317109 | 11  | 11  | 3   | 3.117912553 | 0.0146045   | LSM14A   | ENSG00000105216 |
| 19 | 39424385 | 39424586 | 39424485 | 10  | 10  | 4   | 2.286469205 | 0.0509017   | KIAA0355 | ENSG00000166398 |
| 19 | 39493363 | 39493668 | 39493509 | 9   | 14  | 2   | 5.196520921 | 0.000907371 |          | ENSG00000174717 |
| 19 | 39519652 | 39519833 | 39519742 | 8   | 8   | 3   | 2.338434415 | 0.0641221   | GPI      | ENSG00000105220 |
| 19 | 40396694 | 40396874 | 40396779 | 8   | 9   | 2   | 3.464347281 | 0.0163838   | FAM187B  | ENSG00000177558 |

|    |          |          |          |    |    |    |             |             |         |                 |
|----|----------|----------|----------|----|----|----|-------------|-------------|---------|-----------------|
| 19 | 40399367 | 40399571 | 40399479 | 8  | 9  | 0  | 10.39304184 | 0.000803859 | FAM187B | ENSG00000177558 |
| 19 | 40603146 | 40603378 | 40603262 | 8  | 8  | 1  | 4.676868829 | 0.0091584   |         | ENSG00000205188 |
| 19 | 40632216 | 40632415 | 40632302 | 8  | 9  | 4  | 2.078608368 | 0.0785659   | FFAR2   | ENSG00000126262 |
| 19 | 40661712 | 40661925 | 40661810 | 9  | 10 | 3  | 2.858086507 | 0.0242838   | KRTDAP  | ENSG00000188508 |
| 19 | 40661966 | 40662156 | 40662061 | 10 | 10 | 2  | 3.810782009 | 0.00936112  | KRTDAP  | ENSG00000188508 |
| 19 | 40758346 | 40758729 | 40758551 | 39 | 44 | 46 | 0.995078474 | 0.510015    |         | ENSG00000209925 |
| 19 | 41002763 | 41003107 | 41002941 | 12 | 16 | 3  | 4.417042783 | 0.00097367  | PRODH2  | ENSG00000221873 |
| 19 | 41177801 | 41178049 | 41177925 | 9  | 9  | 5  | 1.73217364  | 0.133894    |         | ENSG00000205138 |
| 19 | 41310443 | 41310721 | 41310587 | 9  | 11 | 2  | 4.157216737 | 0.0052913   | CAPNS1  | ENSG00000126247 |
| 19 | 41311019 | 41311439 | 41311260 | 13 | 21 | 2  | 7.621564018 | 1.21E-05    | CAPNS1  | ENSG00000126247 |
| 19 | 41319683 | 41320283 | 41319854 | 11 | 25 | 6  | 3.860272684 | 0.00017915  | CAPNS1  | ENSG00000126247 |
| 19 | 41716424 | 41716603 | 41716513 | 8  | 9  | 0  | 10.39304184 | 0.000803859 | ZNF260  | ENSG00000178042 |
| 19 | 42393403 | 42393582 | 42393492 | 8  | 8  | 2  | 3.117912553 | 0.0283184   | ZNF585B | ENSG00000197800 |
| 19 | 43148669 | 43149009 | 43148838 | 19 | 21 | 2  | 7.621564018 | 1.21E-05    | SIPA1L3 | ENSG00000105738 |
| 19 | 43162230 | 43162627 | 43162463 | 9  | 16 | 0  | 17.66817113 | 5.48E-06    | SIPA1L3 | ENSG00000105738 |
| 19 | 43240909 | 43241240 | 43241074 | 8  | 11 | 7  | 1.558956276 | 0.158273    |         | ENSG00000221258 |
| 19 | 43446931 | 43447146 | 43447038 | 8  | 9  | 2  | 3.464347281 | 0.0163838   | SPINT2  | ENSG00000167642 |
| 19 | 43473448 | 43473682 | 43473569 | 11 | 11 | 3  | 3.117912553 | 0.0146045   |         | ENSG00000200209 |
| 19 | 43504078 | 43504382 | 43504239 | 10 | 11 | 9  | 1.247165021 | 0.300052    | KCNK6   | ENSG00000099337 |
| 19 | 43556922 | 43557140 | 43557066 | 9  | 11 | 6  | 1.781664316 | 0.103344    | PSMD8   | ENSG00000099341 |
| 19 | 43600395 | 43600620 | 43600507 | 8  | 8  | 0  | 9.353737658 | 0.00163931  | RASGRP4 | ENSG00000171777 |
| 19 | 43819430 | 43819667 | 43819550 | 8  | 9  | 2  | 3.464347281 | 0.0163838   | ACTN4   | ENSG00000130402 |
| 19 | 43844598 | 43844860 | 43844704 | 16 | 17 | 4  | 3.741495063 | 0.00163722  | ACTN4   | ENSG00000130402 |
| 19 | 43957905 | 43958274 | 43958095 | 28 | 35 | 0  | 37.41495063 | 7.22E-12    | LGALS7  | ENSG00000205076 |
| 19 | 44013723 | 44013976 | 44013836 | 14 | 15 | 6  | 2.375552421 | 0.0212094   | ECH1    | ENSG00000104823 |
| 19 | 44018001 | 44018188 | 44018094 | 8  | 8  | 1  | 4.676868829 | 0.0091584   | ECH1    | ENSG00000104823 |
| 19 | 44019446 | 44019803 | 44019624 | 20 | 26 | 2  | 9.353737658 | 4.98E-07    | ECH1    | ENSG00000104823 |
| 19 | 44020187 | 44020675 | 44020343 | 11 | 22 | 10 | 2.173090567 | 0.0132845   | ECH1    | ENSG00000104823 |
| 19 | 44033187 | 44033463 | 44033316 | 10 | 11 | 5  | 2.078608368 | 0.0614303   | HNRNPL  | ENSG00000104824 |
| 19 | 44082876 | 44083055 | 44082963 | 8  | 8  | 5  | 1.558956276 | 0.191397    | NFKBIB  | ENSG00000104825 |
| 19 | 44215994 | 44216246 | 44216135 | 10 | 11 | 0  | 12.47165021 | 0.000193293 | FBXO27  | ENSG00000161243 |
| 19 | 44312915 | 44313132 | 44313028 | 10 | 12 | 1  | 6.755477198 | 0.000722752 | PAK4    | ENSG00000130669 |
| 19 | 44340381 | 44340623 | 44340488 | 9  | 11 | 2  | 4.157216737 | 0.0052913   | PAK4    | ENSG00000130669 |
| 19 | 44594446 | 44594836 | 44594598 | 8  | 14 | 12 | 1.199197136 | 0.313881    | PLEKHG2 | ENSG00000090924 |

|    |          |          |          |     |     |    |             |             |          |                 |
|----|----------|----------|----------|-----|-----|----|-------------|-------------|----------|-----------------|
| 19 | 44618653 | 44618880 | 44618771 | 9   | 11  | 3  | 3.117912553 | 0.0146045   | RPS16    | ENSG00000105193 |
| 19 | 44627819 | 44628189 | 44628025 | 10  | 15  | 8  | 1.847651883 | 0.0631662   | SUPT5H   | ENSG00000196235 |
| 19 | 44715306 | 44715495 | 44715400 | 8   | 9   | 2  | 3.464347281 | 0.0163838   | EID2B    | ENSG00000176401 |
| 19 | 44722534 | 44722752 | 44722655 | 10  | 10  | 2  | 3.810782009 | 0.00936112  | EID2     | ENSG00000176396 |
| 19 | 44740355 | 44740625 | 44740449 | 9   | 13  | 7  | 1.818782322 | 0.0805123   | EID2     | ENSG00000176396 |
| 19 | 44864846 | 44865040 | 44864916 | 8   | 8   | 0  | 9.353737658 | 0.00163931  | LGALS14  | ENSG00000006659 |
| 19 | 44995126 | 44995340 | 44995233 | 8   | 9   | 3  | 2.598260461 | 0.0397929   | DYRK1B   | ENSG00000105204 |
| 19 | 45016285 | 45016464 | 45016374 | 8   | 9   | 1  | 5.196520921 | 0.00490062  | DYRK1B   | ENSG00000105204 |
| 19 | 45318793 | 45319010 | 45318866 | 9   | 10  | 0  | 11.43234603 | 0.000394183 |          | ENSG00000210014 |
| 19 | 45337727 | 45337929 | 45337805 | 8   | 8   | 5  | 1.558956276 | 0.191397    |          | ENSG00000210014 |
| 19 | 45419765 | 45419996 | 45419887 | 8   | 9   | 1  | 5.196520921 | 0.00490062  | TTC9B    | ENSG00000174521 |
| 19 | 45499957 | 45500621 | 45500111 | 27  | 53  | 1  | 28.06121297 | 5.54E-16    |          | ENSG00000206674 |
| 19 | 45528710 | 45529232 | 45529007 | 44  | 60  | 3  | 15.84938881 | 7.65E-16    |          | ENSG00000207281 |
| 19 | 45590662 | 45590914 | 45590788 | 9   | 11  | 3  | 3.117912553 | 0.0146045   | HIPK4    | ENSG00000160396 |
| 19 | 45623615 | 45624089 | 45623919 | 34  | 43  | 10 | 4.157216737 | 8.62E-07    | SERTAD1  | ENSG00000197019 |
| 19 | 45774407 | 45774617 | 45774502 | 8   | 9   | 2  | 3.464347281 | 0.0163838   | SHKBP1   | ENSG00000160410 |
| 19 | 45913404 | 45913586 | 45913420 | 10  | 11  | 5  | 2.078608368 | 0.0614303   | ADCK4    | ENSG00000123815 |
| 19 | 45916641 | 45916990 | 45916848 | 10  | 15  | 5  | 2.771477825 | 0.0105836   | ITPKC    | ENSG00000086544 |
| 19 | 46119066 | 46119259 | 46119165 | 8   | 9   | 5  | 1.73217364  | 0.133894    | CYP2B7P1 | ENSG00000197573 |
| 19 | 46211312 | 46211560 | 46211436 | 10  | 10  | 1  | 5.716173013 | 0.00260397  | CYP2A7P1 | ENSG00000213908 |
| 19 | 46324526 | 46324716 | 46324621 | 8   | 8   | 2  | 3.117912553 | 0.0283184   | CYP2F1   | ENSG00000197446 |
| 19 | 46459775 | 46460368 | 46460058 | 16  | 33  | 5  | 5.889390377 | 6.86E-07    | HNRNPUL1 | ENSG00000105323 |
| 19 | 46562119 | 46562350 | 46562221 | 8   | 9   | 3  | 2.598260461 | 0.0397929   | B9D2     | ENSG00000123810 |
| 19 | 46637475 | 46637866 | 46637703 | 9   | 16  | 2  | 5.889390377 | 0.000270741 | ATP5SL   | ENSG00000105341 |
| 19 | 46726097 | 46726782 | 46726554 | 159 | 202 | 0  | 210.9787494 | 1.50E-63    | CEACAM21 | ENSG00000007129 |
| 19 | 46902497 | 46902682 | 46902589 | 8   | 8   | 3  | 2.338434415 | 0.0641221   | CEACAM5  | ENSG00000105388 |
| 19 | 46995266 | 46995469 | 46995330 | 8   | 9   | 7  | 1.29913023  | 0.286504    | CEACAM3  | ENSG00000170956 |
| 19 | 47055230 | 47055815 | 47055636 | 12  | 28  | 8  | 3.348869038 | 0.000246424 | RPS19    | ENSG00000105372 |
| 19 | 47055917 | 47056285 | 47056109 | 30  | 35  | 4  | 7.482990127 | 4.95E-08    | RPS19    | ENSG00000105372 |
| 19 | 47056325 | 47056787 | 47056523 | 15  | 26  | 2  | 9.353737658 | 4.98E-07    | RPS19    | ENSG00000105372 |
| 19 | 47069045 | 47069265 | 47069155 | 11  | 14  | 1  | 7.794781382 | 0.000197021 | CD79A    | ENSG00000105369 |
| 19 | 47079661 | 47080037 | 47079840 | 10  | 17  | 4  | 3.741495063 | 0.00163722  | ARHGEF1  | ENSG00000076928 |
| 19 | 47080152 | 47080387 | 47080272 | 9   | 10  | 10 | 1.039304184 | 0.464387    | ARHGEF1  | ENSG00000076928 |
| 19 | 47124757 | 47125011 | 47124898 | 8   | 8   | 1  | 4.676868829 | 0.0091584   | RABAC1   | ENSG00000105404 |

|    |          |          |          |    |    |   |             |             |          |                 |
|----|----------|----------|----------|----|----|---|-------------|-------------|----------|-----------------|
| 19 | 47521908 | 47522087 | 47521959 | 8  | 8  | 0 | 9.353737658 | 0.00163931  | MEGF8    | ENSG00000105429 |
| 19 | 48792430 | 48792803 | 48792555 | 9  | 14 | 8 | 1.73217364  | 0.0890835   | ZNF576   | ENSG00000124444 |
| 19 | 48865124 | 48865330 | 48865218 | 8  | 8  | 3 | 2.338434415 | 0.0641221   | PLAUR    | ENSG00000011422 |
| 19 | 48955414 | 48955736 | 48955575 | 10 | 13 | 5 | 2.425043097 | 0.0262442   | C19orf61 | ENSG00000105771 |
| 19 | 48962649 | 48962836 | 48962742 | 10 | 10 | 1 | 5.716173013 | 0.00260397  | C19orf61 | ENSG00000105771 |
| 19 | 48978700 | 48979191 | 48978955 | 52 | 71 | 2 | 24.94330042 | 3.76E-20    | KCNN4    | ENSG00000104783 |
| 19 | 48981157 | 48981468 | 48981306 | 10 | 11 | 4 | 2.494330042 | 0.0324033   | KCNN4    | ENSG00000104783 |
| 19 | 49308909 | 49309405 | 49309227 | 9  | 16 | 7 | 2.208521392 | 0.0257604   | ZNF225   | ENSG00000159904 |
| 19 | 49455773 | 49455997 | 49455885 | 10 | 11 | 1 | 6.235825105 | 0.0013754   | ZNF233   | ENSG00000159915 |
| 19 | 49919043 | 49919331 | 49919187 | 15 | 18 | 6 | 2.8209685   | 0.00559354  | CEACAM16 | ENSG00000213892 |
| 19 | 49937072 | 49937451 | 49937269 | 17 | 26 | 6 | 4.008744711 | 0.000106454 | BCL3     | ENSG00000069399 |
| 19 | 49942175 | 49942414 | 49942301 | 8  | 9  | 8 | 1.154782427 | 0.375434    | BCL3     | ENSG00000069399 |
| 19 | 49965866 | 49966122 | 49965993 | 11 | 13 | 6 | 2.078608368 | 0.0483393   |          | ENSG00000216919 |
| 19 | 50040761 | 50041064 | 50040912 | 8  | 9  | 0 | 10.39304184 | 0.000803859 | PVRL2    | ENSG00000130202 |
| 19 | 50146797 | 50147019 | 50146906 | 9  | 9  | 2 | 3.464347281 | 0.0163838   | CLPTM1   | ENSG00000104853 |
| 19 | 50228055 | 50228268 | 50228125 | 9  | 10 | 1 | 5.716173013 | 0.00260397  | SFRS16   | ENSG00000104859 |
| 19 | 50318545 | 50318891 | 50318713 | 17 | 21 | 6 | 3.266384579 | 0.0013436   |          | ENSG00000213043 |
| 19 | 50501347 | 50501530 | 50501438 | 8  | 9  | 1 | 5.196520921 | 0.00490062  | CKM      | ENSG00000104879 |
| 19 | 50673505 | 50673852 | 50673678 | 14 | 18 | 6 | 2.8209685   | 0.00559354  |          | ENSG00000213889 |
| 19 | 50688417 | 50688596 | 50688481 | 8  | 8  | 1 | 4.676868829 | 0.0091584   | RTN2     | ENSG00000125744 |
| 19 | 50827524 | 50828040 | 50827703 | 44 | 56 | 6 | 8.4629055   | 3.02E-12    |          | ENSG00000199066 |
| 19 | 50834256 | 50834440 | 50834290 | 9  | 9  | 3 | 2.598260461 | 0.0397929   |          | ENSG00000199066 |
| 19 | 50925927 | 50926240 | 50926081 | 12 | 15 | 3 | 4.157216737 | 0.00170423  |          | ENSG00000177051 |
| 19 | 51012221 | 51012521 | 51012349 | 10 | 14 | 8 | 1.73217364  | 0.0890835   | RSHL1    | ENSG00000104941 |
| 19 | 51080261 | 51080440 | 51080350 | 8  | 9  | 1 | 5.196520921 | 0.00490062  | IRF2BP1  | ENSG00000170604 |
| 19 | 51147694 | 51148034 | 51147856 | 8  | 12 | 2 | 4.503651465 | 0.002963    | NOVA2    | ENSG00000104967 |
| 19 | 51190190 | 51190557 | 51190383 | 9  | 16 | 7 | 2.208521392 | 0.0257604   | CCDC61   | ENSG00000104983 |
| 19 | 51236219 | 51236662 | 51236398 | 11 | 19 | 3 | 5.196520921 | 0.000174201 | IGFL4    | ENSG00000204869 |
| 19 | 51272771 | 51272963 | 51272867 | 8  | 8  | 5 | 1.558956276 | 0.191397    |          | ENSG00000203347 |
| 19 | 51273704 | 51273962 | 51273881 | 8  | 10 | 3 | 2.858086507 | 0.0242838   | IGFL2    | ENSG00000204866 |
| 19 | 51328459 | 51328893 | 51328619 | 58 | 73 | 1 | 38.45425482 | 4.86E-22    | IGFL3    | ENSG00000188624 |
| 19 | 51328983 | 51329267 | 51329130 | 10 | 14 | 0 | 15.58956276 | 2.28E-05    | IGFL3    | ENSG00000188624 |
| 19 | 51354600 | 51354894 | 51354747 | 11 | 13 | 2 | 4.850086193 | 0.00164564  | IGFL3    | ENSG00000188624 |
| 19 | 51401487 | 51401790 | 51401638 | 10 | 11 | 1 | 6.235825105 | 0.0013754   | IGFL1    | ENSG00000188293 |

|    |          |          |          |    |     |    |             |             |         |                 |
|----|----------|----------|----------|----|-----|----|-------------|-------------|---------|-----------------|
| 19 | 51417096 | 51417343 | 51417219 | 9  | 10  | 6  | 1.63319229  | 0.146906    | IGFL1   | ENSG00000188293 |
| 19 | 51796771 | 51796950 | 51796902 | 9  | 9   | 2  | 3.464347281 | 0.0163838   | CALM3   | ENSG00000160014 |
| 19 | 51798296 | 51798486 | 51798460 | 8  | 9   | 2  | 3.464347281 | 0.0163838   | CALM3   | ENSG00000160014 |
| 19 | 51966069 | 51966325 | 51966197 | 16 | 16  | 2  | 5.889390377 | 0.000270741 | SLC1A5  | ENSG00000105281 |
| 19 | 51979901 | 51980199 | 51980034 | 11 | 12  | 3  | 3.377738599 | 0.00867157  | SLC1A5  | ENSG00000105281 |
| 19 | 52021679 | 52021871 | 52021849 | 8  | 8   | 0  | 9.353737658 | 0.00163931  | AP2S1   | ENSG00000042753 |
| 19 | 52045943 | 52046220 | 52046095 | 9  | 11  | 12 | 0.959357709 | 0.543005    | AP2S1   | ENSG00000042753 |
| 19 | 52051316 | 52051566 | 52051387 | 9  | 12  | 8  | 1.501217155 | 0.168286    | AP2S1   | ENSG00000042753 |
| 19 | 52054963 | 52055325 | 52055158 | 11 | 18  | 5  | 3.291129917 | 0.00248584  | AP2S1   | ENSG00000042753 |
| 19 | 52058894 | 52059672 | 52059203 | 11 | 33  | 6  | 5.048048895 | 2.40E-06    | AP2S1   | ENSG00000042753 |
| 19 | 52061915 | 52062202 | 52062058 | 9  | 11  | 13 | 0.890832158 | 0.618492    | AP2S1   | ENSG00000042753 |
| 19 | 52119859 | 52120266 | 52120008 | 9  | 15  | 3  | 4.157216737 | 0.00170423  | GRLF1   | ENSG00000160007 |
| 19 | 52230330 | 52230778 | 52230509 | 9  | 19  | 6  | 2.969440526 | 0.0035096   | TMEM160 | ENSG00000130748 |
| 19 | 52231130 | 52231412 | 52231258 | 9  | 13  | 9  | 1.455025858 | 0.177172    | TMEM160 | ENSG00000130748 |
| 19 | 52251874 | 52252155 | 52251994 | 21 | 22  | 0  | 23.90399624 | 7.62E-08    | TMEM160 | ENSG00000130748 |
| 19 | 52347395 | 52347579 | 52347486 | 9  | 9   | 3  | 2.598260461 | 0.0397929   | SAE1    | ENSG00000142230 |
| 19 | 52347767 | 52348032 | 52347899 | 18 | 21  | 3  | 5.716173013 | 5.37E-05    | SAE1    | ENSG00000142230 |
| 19 | 52422794 | 52423075 | 52422921 | 9  | 12  | 5  | 2.251825733 | 0.0404733   | BBC3    | ENSG00000105327 |
| 19 | 52426342 | 52426925 | 52426536 | 82 | 114 | 2  | 39.83999373 | 4.60E-33    | BBC3    | ENSG00000105327 |
| 19 | 52427483 | 52427955 | 52427733 | 48 | 64  | 1  | 33.77738599 | 2.61E-19    | BBC3    | ENSG00000105327 |
| 19 | 52436212 | 52436695 | 52436403 | 10 | 20  | 4  | 4.365077574 | 0.000324139 | BBC3    | ENSG00000105327 |
| 19 | 52439361 | 52439661 | 52439528 | 15 | 17  | 3  | 4.676868829 | 0.000552213 | BBC3    | ENSG00000105327 |
| 19 | 52442727 | 52442906 | 52442772 | 8  | 8   | 0  | 9.353737658 | 0.00163931  | CCDC9   | ENSG00000105321 |
| 19 | 52452549 | 52452791 | 52452666 | 8  | 8   | 2  | 3.117912553 | 0.0283184   | CCDC9   | ENSG00000105321 |
| 19 | 52468587 | 52468843 | 52468710 | 10 | 13  | 5  | 2.425043097 | 0.0262442   | CCDC9   | ENSG00000105321 |
| 19 | 52484736 | 52484973 | 52484811 | 8  | 11  | 2  | 4.157216737 | 0.0052913   | C5AR1   | ENSG00000197405 |
| 19 | 52544129 | 52544332 | 52544230 | 8  | 9   | 4  | 2.078608368 | 0.0785659   | DHX34   | ENSG00000134815 |
| 19 | 52678900 | 52679281 | 52679044 | 10 | 16  | 3  | 4.417042783 | 0.00097367  | KPTN    | ENSG00000118162 |
| 19 | 52843415 | 52843626 | 52843591 | 8  | 10  | 10 | 1.039304184 | 0.464387    | GLTSCR1 | ENSG00000063169 |
| 19 | 53091974 | 53092285 | 53092129 | 14 | 17  | 0  | 18.70747532 | 2.69E-06    |         | ENSG00000221072 |
| 19 | 53359655 | 53359912 | 53359781 | 10 | 12  | 3  | 3.377738599 | 0.00867157  | LIG1    | ENSG00000105486 |
| 19 | 53465190 | 53465464 | 53465331 | 9  | 9   | 2  | 3.464347281 | 0.0163838   | ZNF114  | ENSG00000178150 |
| 19 | 53517021 | 53517250 | 53517122 | 9  | 11  | 0  | 12.47165021 | 0.000193293 | CCDC114 | ENSG00000105479 |
| 19 | 53622889 | 53623142 | 53623005 | 9  | 10  | 1  | 5.716173013 | 0.00260397  | GRWD1   | ENSG00000105447 |

|    |          |          |          |    |    |    |             |             |          |                 |
|----|----------|----------|----------|----|----|----|-------------|-------------|----------|-----------------|
| 19 | 53708322 | 53708557 | 53708439 | 8  | 9  | 0  | 10.39304184 | 0.000803859 | LMTK3    | ENSG00000142235 |
| 19 | 53708579 | 53708946 | 53708693 | 8  | 14 | 3  | 3.897390691 | 0.00295882  | LMTK3    | ENSG00000142235 |
| 19 | 53747077 | 53747430 | 53747253 | 13 | 18 | 3  | 4.936694875 | 0.000311102 | SULT2B1  | ENSG00000088002 |
| 19 | 53779384 | 53779616 | 53779500 | 10 | 11 | 2  | 4.157216737 | 0.0052913   | SULT2B1  | ENSG00000088002 |
| 19 | 53832465 | 53832713 | 53832632 | 8  | 10 | 0  | 11.43234603 | 0.000394183 | DBP      | ENSG00000105516 |
| 19 | 53833089 | 53833271 | 53833163 | 9  | 9  | 0  | 10.39304184 | 0.000803859 | DBP      | ENSG00000105516 |
| 19 | 54067288 | 54067506 | 54067356 | 8  | 9  | 0  | 10.39304184 | 0.000803859 | PPP1R15A | ENSG00000087074 |
| 19 | 54149535 | 54149881 | 54149708 | 10 | 14 | 1  | 7.794781382 | 0.000197021 | BAX      | ENSG00000087088 |
| 19 | 54150061 | 54150500 | 54150305 | 72 | 92 | 1  | 48.32764457 | 8.00E-28    | BAX      | ENSG00000087088 |
| 19 | 54292754 | 54293140 | 54292976 | 9  | 14 | 9  | 1.558956276 | 0.132279    | SNRNP70  | ENSG00000104852 |
| 19 | 54320332 | 54320647 | 54320489 | 10 | 15 | 1  | 8.314433474 | 0.000102308 | PPFIA3   | ENSG00000177380 |
| 19 | 54466338 | 54466683 | 54466507 | 13 | 16 | 6  | 2.524024447 | 0.0137633   | SLC6A16  | ENSG00000063127 |
| 19 | 54467206 | 54467595 | 54467418 | 39 | 48 | 6  | 7.27512929  | 3.92E-10    | SLC6A16  | ENSG00000063127 |
| 19 | 54646895 | 54647170 | 54647025 | 8  | 11 | 3  | 3.117912553 | 0.0146045   | PIH1D1   | ENSG00000104872 |
| 19 | 54691191 | 54691388 | 54691253 | 8  | 10 | 3  | 2.858086507 | 0.0242838   | RPS11    | ENSG00000142534 |
| 19 | 54691409 | 54691666 | 54691568 | 8  | 11 | 7  | 1.558956276 | 0.158273    | RPS11    | ENSG00000142534 |
| 19 | 54741813 | 54742263 | 54741992 | 12 | 23 | 8  | 2.771477825 | 0.00251818  | RCN3     | ENSG00000142552 |
| 19 | 54775655 | 54775836 | 54775745 | 8  | 8  | 3  | 2.338434415 | 0.0641221   | NOSIP    | ENSG00000142546 |
| 19 | 54872147 | 54872343 | 54872245 | 8  | 8  | 4  | 1.870747532 | 0.118863    | PRMT1    | ENSG00000126457 |
| 19 | 54875840 | 54876023 | 54875959 | 8  | 8  | 3  | 2.338434415 | 0.0641221   | PRMT1    | ENSG00000126457 |
| 19 | 54960628 | 54960877 | 54960752 | 8  | 9  | 2  | 3.464347281 | 0.0163838   |          | ENSG00000206599 |
| 19 | 54961776 | 54962016 | 54961896 | 8  | 8  | 1  | 4.676868829 | 0.0091584   | AP2A1    | ENSG00000196961 |
| 19 | 55061594 | 55061894 | 55061744 | 9  | 12 | 4  | 2.702190879 | 0.0203088   | PNKP     | ENSG00000039650 |
| 19 | 55246202 | 55246490 | 55246334 | 10 | 13 | 2  | 4.850086193 | 0.00164564  |          | ENSG00000204666 |
| 19 | 55246526 | 55246974 | 55246695 | 34 | 45 | 1  | 23.90399624 | 1.42E-13    |          | ENSG00000204666 |
| 19 | 55468389 | 55468604 | 55468496 | 8  | 8  | 0  | 9.353737658 | 0.00163931  | KCNC3    | ENSG00000131398 |
| 19 | 55564165 | 55564655 | 55564504 | 9  | 18 | 11 | 1.645564958 | 0.0828462   | NAPSA    | ENSG00000131400 |
| 19 | 55571321 | 55571562 | 55571456 | 11 | 13 | 9  | 1.455025858 | 0.177172    | NR1H2    | ENSG00000131408 |
| 19 | 56303464 | 56303707 | 56303585 | 8  | 10 | 2  | 3.810782009 | 0.00936112  | ATPBD3   | ENSG00000142544 |
| 19 | 56475441 | 56475683 | 56475562 | 17 | 17 | 0  | 18.70747532 | 2.69E-06    |          | ENSG00000179213 |
| 19 | 56562474 | 56562705 | 56562600 | 9  | 10 | 8  | 1.27026067  | 0.293854    | ETFB     | ENSG00000105379 |
| 19 | 56589465 | 56589662 | 56589563 | 8  | 8  | 0  | 9.353737658 | 0.00163931  | LIM2     | ENSG00000105370 |
| 19 | 56603982 | 56604371 | 56604060 | 11 | 16 | 9  | 1.766817113 | 0.0700694   | SIGLEC10 | ENSG00000142512 |
| 19 | 56803005 | 56803277 | 56803141 | 10 | 12 | 8  | 1.501217155 | 0.168286    |          | ENSG00000213818 |

|    |          |          |          |     |     |   |             |             |          |                 |
|----|----------|----------|----------|-----|-----|---|-------------|-------------|----------|-----------------|
| 19 | 56827270 | 56827449 | 56827415 | 8   | 8   | 7 | 1.169217207 | 0.371848    | SIGLEC5  | ENSG00000105501 |
| 19 | 56889206 | 56889398 | 56889302 | 8   | 8   | 0 | 9.353737658 | 0.00163931  |          | ENSG00000182310 |
| 19 | 57334811 | 57335030 | 57334941 | 8   | 9   | 5 | 1.73217364  | 0.133894    | ZNF616   | ENSG00000204611 |
| 19 | 57385276 | 57385470 | 57385342 | 9   | 10  | 1 | 5.716173013 | 0.00260397  | PPP2R1A  | ENSG00000105568 |
| 19 | 57932934 | 57933261 | 57933093 | 11  | 15  | 2 | 5.542955649 | 0.000497081 |          | ENSG00000175885 |
| 19 | 58490153 | 58490553 | 58490360 | 93  | 107 | 4 | 22.44897038 | 1.64E-28    | BIRC8    | ENSG00000180152 |
| 19 | 58676101 | 58676413 | 58676257 | 19  | 21  | 3 | 5.716173013 | 5.37E-05    | ZNF813   | ENSG00000198346 |
| 19 | 58848025 | 58848204 | 58848112 | 8   | 8   | 0 | 9.353737658 | 0.00163931  |          | ENSG00000200393 |
| 19 | 58987986 | 58988239 | 58988101 | 9   | 10  | 3 | 2.858086507 | 0.0242838   |          | ENSG00000199143 |
| 19 | 59203866 | 59204061 | 59203959 | 10  | 10  | 2 | 3.810782009 | 0.00936112  | CACNG6   | ENSG00000130433 |
| 19 | 59225099 | 59225383 | 59225244 | 8   | 9   | 5 | 1.73217364  | 0.133894    | VSTM1    | ENSG00000189068 |
| 19 | 59396669 | 59396848 | 59396708 | 8   | 8   | 2 | 3.117912553 | 0.0283184   | RPS9     | ENSG00000170889 |
| 19 | 59863733 | 59863990 | 59863861 | 8   | 9   | 0 | 10.39304184 | 0.000803859 | LILRB4   | ENSG00000186818 |
| 19 | 59996426 | 59996684 | 59996555 | 8   | 9   | 3 | 2.598260461 | 0.0397929   | KIR2DL4  | ENSG00000189013 |
| 19 | 60076840 | 60077057 | 60076948 | 12  | 12  | 2 | 4.503651465 | 0.002963    | FCAR     | ENSG00000186431 |
| 19 | 60320836 | 60321054 | 60320945 | 9   | 9   | 4 | 2.078608368 | 0.0785659   | LENG3    | ENSG00000125503 |
| 19 | 60420165 | 60420387 | 60420285 | 11  | 13  | 5 | 2.425043097 | 0.0262442   | PTPRH    | ENSG00000080031 |
| 19 | 60462333 | 60462625 | 60462479 | 12  | 15  | 1 | 8.314433474 | 0.000102308 | SAPS1    | ENSG00000105063 |
| 19 | 60542327 | 60542543 | 60542467 | 8   | 9   | 9 | 1.039304184 | 0.466079    | SUV420H2 | ENSG00000133247 |
| 19 | 60547728 | 60548136 | 60547898 | 33  | 40  | 4 | 8.522294311 | 2.26E-09    | SUV420H2 | ENSG00000133247 |
| 19 | 60640750 | 60640944 | 60640817 | 9   | 10  | 2 | 3.810782009 | 0.00936112  |          | ENSG00000187902 |
| 19 | 60784005 | 60784474 | 60784176 | 9   | 18  | 8 | 2.194086611 | 0.0206188   | ZNF579   | ENSG00000218891 |
| 19 | 60804342 | 60804881 | 60804528 | 40  | 61  | 6 | 9.205265632 | 1.37E-13    | ZNF524   | ENSG00000171443 |
| 19 | 60838035 | 60838363 | 60838199 | 9   | 14  | 2 | 5.196520921 | 0.000907371 | ZNF580   | ENSG00000213015 |
| 19 | 61288143 | 61288336 | 61288282 | 8   | 8   | 2 | 3.117912553 | 0.0283184   |          | ENSG00000223060 |
| 19 | 62138018 | 62138197 | 62138107 | 9   | 9   | 1 | 5.196520921 | 0.00490062  |          | ENSG00000210700 |
| 19 | 63508168 | 63508366 | 63508308 | 8   | 8   | 1 | 4.676868829 | 0.0091584   |          | ENSG00000166718 |
| 19 | 63598520 | 63598862 | 63598686 | 11  | 13  | 2 | 4.850086193 | 0.00164564  | RPS5     | ENSG00000083845 |
| 19 | 63723468 | 63723658 | 63723563 | 8   | 8   | 4 | 1.870747532 | 0.118863    | ZBTB45   | ENSG00000119574 |
| 2  | 25974    | 26216    | 26142    | 8   | 11  | 4 | 2.494330042 | 0.0324033   | FAM110C  | ENSG00000184731 |
| 2  | 557839   | 558054   | 557962   | 9   | 9   | 5 | 1.73217364  | 0.133894    | TMEM18   | ENSG00000151353 |
| 2  | 704308   | 704506   | 704407   | 8   | 9   | 2 | 3.464347281 | 0.0163838   | TMEM18   | ENSG00000151353 |
| 2  | 728578   | 728843   | 728668   | 10  | 12  | 2 | 4.503651465 | 0.002963    | TMEM18   | ENSG00000151353 |
| 2  | 1471572  | 1472351  | 1471910  | 129 | 202 | 3 | 52.74468735 | 2.89E-58    | TPO      | ENSG00000115705 |



|   |          |          |          |    |    |    |             |             |         |                 |
|---|----------|----------|----------|----|----|----|-------------|-------------|---------|-----------------|
| 2 | 1608012  | 1608384  | 1608205  | 15 | 22 | 3  | 5.975999059 | 2.96E-05    | PXDN    | ENSG00000130508 |
| 2 | 1687636  | 1688176  | 1687951  | 54 | 67 | 3  | 17.66817113 | 7.12E-18    | PXDN    | ENSG00000130508 |
| 2 | 1733623  | 1733802  | 1733673  | 8  | 8  | 6  | 1.336248237 | 0.277651    | PXDN    | ENSG00000130508 |
| 2 | 1957192  | 1957394  | 1957273  | 10 | 12 | 0  | 13.5109544  | 9.48E-05    |         | ENSG00000214874 |
| 2 | 2066241  | 2066420  | 2066330  | 8  | 10 | 2  | 3.810782009 | 0.00936112  |         | ENSG00000214874 |
| 2 | 2560171  | 2560372  | 2560248  | 8  | 8  | 5  | 1.558956276 | 0.191397    | MYT1L   | ENSG00000186487 |
| 2 | 2974211  | 2974468  | 2974358  | 15 | 16 | 4  | 3.533634226 | 0.00276486  | TSSC1   | ENSG00000032389 |
| 2 | 3600365  | 3600779  | 3600675  | 18 | 24 | 11 | 2.16521705  | 0.0106896   | RPS7    | ENSG00000171863 |
| 2 | 4574523  | 4574714  | 4574617  | 9  | 9  | 0  | 10.39304184 | 0.000803859 |         | ENSG00000216435 |
| 2 | 5500476  | 5500778  | 5500627  | 13 | 14 | 7  | 1.948695345 | 0.0559175   |         | ENSG00000219497 |
| 2 | 7802883  | 7803140  | 7803007  | 9  | 11 | 3  | 3.117912553 | 0.0146045   |         | ENSG00000220722 |
| 2 | 7805851  | 7806045  | 7805948  | 8  | 8  | 1  | 4.676868829 | 0.0091584   |         | ENSG00000220722 |
| 2 | 8597486  | 8597827  | 8597659  | 15 | 18 | 8  | 2.194086611 | 0.0206188   |         | ENSG00000182367 |
| 2 | 8768647  | 8768860  | 8768766  | 10 | 10 | 0  | 11.43234603 | 0.000394183 | ID2     | ENSG00000115738 |
| 2 | 8930522  | 8930750  | 8930599  | 9  | 9  | 2  | 3.464347281 | 0.0163838   |         | ENSG00000134313 |
| 2 | 9139786  | 9140027  | 9139893  | 11 | 13 | 0  | 14.55025858 | 4.65E-05    | MBOAT2  | ENSG00000143797 |
| 2 | 9236017  | 9236196  | 9236120  | 8  | 8  | 10 | 0.850339787 | 0.645072    | ASAP2   | ENSG00000151693 |
| 2 | 9391302  | 9391531  | 9391373  | 9  | 10 | 1  | 5.716173013 | 0.00260397  |         | ENSG00000213772 |
| 2 | 9688409  | 9688623  | 9688517  | 9  | 9  | 4  | 2.078608368 | 0.0785659   | YWHAQ   | ENSG00000134308 |
| 2 | 9887945  | 9888306  | 9888124  | 16 | 23 | 8  | 2.771477825 | 0.00251818  | TAF1B   | ENSG00000115750 |
| 2 | 10007464 | 10007643 | 10007575 | 8  | 8  | 2  | 3.117912553 | 0.0283184   | GRHL1   | ENSG00000134317 |
| 2 | 10011857 | 10012097 | 10011977 | 9  | 9  | 3  | 2.598260461 | 0.0397929   | GRHL1   | ENSG00000134317 |
| 2 | 10189597 | 10189776 | 10189686 | 9  | 9  | 1  | 5.196520921 | 0.00490062  | C2orf48 | ENSG00000163009 |
| 2 | 10509932 | 10510252 | 10510092 | 8  | 13 | 1  | 7.27512929  | 0.000378098 |         | ENSG00000217258 |
| 2 | 10517877 | 10518126 | 10518026 | 8  | 8  | 2  | 3.117912553 | 0.0283184   |         | ENSG00000217258 |
| 2 | 10747422 | 10747678 | 10747526 | 11 | 14 | 3  | 3.897390691 | 0.00295882  | NOL10   | ENSG00000115761 |
| 2 | 11187631 | 11187852 | 11187727 | 10 | 12 | 3  | 3.377738599 | 0.00867157  |         | ENSG00000145063 |
| 2 | 11190446 | 11190687 | 11190566 | 9  | 10 | 3  | 2.858086507 | 0.0242838   | C2orf50 | ENSG00000150873 |
| 2 | 11403477 | 11403753 | 11403623 | 8  | 10 | 6  | 1.63319229  | 0.146906    | ROCK2   | ENSG00000134318 |
| 2 | 11447257 | 11447563 | 11447414 | 8  | 10 | 2  | 3.810782009 | 0.00936112  |         | ENSG00000197781 |
| 2 | 11523709 | 11524004 | 11523856 | 18 | 20 | 5  | 3.637564645 | 0.000902929 | E2F6    | ENSG00000169016 |
| 2 | 11556226 | 11556461 | 11556343 | 14 | 16 | 2  | 5.889390377 | 0.000270741 |         | ENSG00000201610 |
| 2 | 11588576 | 11588886 | 11588743 | 15 | 17 | 3  | 4.676868829 | 0.000552213 |         | ENSG00000196208 |
| 2 | 11589974 | 11590417 | 11590195 | 24 | 33 | 11 | 2.944695189 | 0.000258336 |         | ENSG00000196208 |

|   |          |          |          |    |    |    |             |             |         |                 |
|---|----------|----------|----------|----|----|----|-------------|-------------|---------|-----------------|
| 2 | 11593650 | 11593848 | 11593697 | 8  | 10 | 4  | 2.286469205 | 0.0509017   |         | ENSG00000196208 |
| 2 | 11597126 | 11597374 | 11597250 | 18 | 20 | 11 | 1.818782322 | 0.04395     |         | ENSG00000196208 |
| 2 | 11689115 | 11689440 | 11689231 | 13 | 17 | 3  | 4.676868829 | 0.000552213 |         | ENSG00000196208 |
| 2 | 11714254 | 11714471 | 11714363 | 9  | 10 | 1  | 5.716173013 | 0.00260397  |         | ENSG00000220847 |
| 2 | 11801756 | 11801978 | 11801909 | 12 | 13 | 2  | 4.850086193 | 0.00164564  | LPIN1   | ENSG00000134324 |
| 2 | 11822082 | 11822461 | 11822261 | 10 | 17 | 4  | 3.741495063 | 0.00163722  | LPIN1   | ENSG00000134324 |
| 2 | 12021613 | 12021792 | 12021684 | 8  | 8  | 2  | 3.117912553 | 0.0283184   | LPIN1   | ENSG00000134324 |
| 2 | 12147225 | 12147416 | 12147328 | 8  | 8  | 1  | 4.676868829 | 0.0091584   | LPIN1   | ENSG00000134324 |
| 2 | 13754321 | 13754655 | 13754488 | 15 | 21 | 0  | 22.86469205 | 1.55E-07    |         |                 |
| 2 | 14345629 | 14346002 | 14345805 | 58 | 65 | 1  | 34.29703808 | 1.30E-19    |         | ENSG00000210748 |
| 2 | 14612701 | 14612880 | 14612790 | 8  | 8  | 1  | 4.676868829 | 0.0091584   | FAM84A  | ENSG00000162981 |
| 2 | 14686537 | 14686884 | 14686710 | 22 | 27 | 3  | 7.27512929  | 1.42E-06    | FAM84A  | ENSG00000162981 |
| 2 | 14838788 | 14838976 | 14838864 | 8  | 8  | 2  | 3.117912553 | 0.0283184   | FAM84A  | ENSG00000162981 |
| 2 | 16662114 | 16662340 | 16662259 | 9  | 9  | 1  | 5.196520921 | 0.00490062  | FAM49A  | ENSG00000197872 |
| 2 | 16697720 | 16697997 | 16697842 | 11 | 14 | 2  | 5.196520921 | 0.000907371 | FAM49A  | ENSG00000197872 |
| 2 | 16726060 | 16726278 | 16726150 | 12 | 12 | 4  | 2.702190879 | 0.0203088   | FAM49A  | ENSG00000197872 |
| 2 | 17860354 | 17860789 | 17860611 | 36 | 50 | 1  | 26.5022567  | 4.44E-15    | MSGN1   | ENSG00000151379 |
| 2 | 17875435 | 17875622 | 17875537 | 8  | 8  | 3  | 2.338434415 | 0.0641221   | MSGN1   | ENSG00000151379 |
| 2 | 19111997 | 19112391 | 19112158 | 9  | 14 | 4  | 3.117912553 | 0.00766354  | OSR1    | ENSG00000143867 |
| 2 | 19136792 | 19137043 | 19136917 | 10 | 11 | 11 | 1.039304184 | 0.462773    | OSR1    | ENSG00000143867 |
| 2 | 19173447 | 19173773 | 19173610 | 9  | 9  | 2  | 3.464347281 | 0.0163838   | OSR1    | ENSG00000143867 |
| 2 | 19201633 | 19201956 | 19201794 | 8  | 13 | 3  | 3.637564645 | 0.0050909   | OSR1    | ENSG00000143867 |
| 2 | 19204100 | 19204649 | 19204323 | 15 | 29 | 7  | 3.897390691 | 6.03E-05    | OSR1    | ENSG00000143867 |
| 2 | 19291872 | 19292570 | 19292180 | 69 | 98 | 5  | 17.14851904 | 7.63E-25    | OSR1    | ENSG00000143867 |
| 2 | 19717899 | 19718211 | 19718055 | 14 | 19 | 0  | 20.78608368 | 6.46E-07    | CISD1B  | ENSG00000143880 |
| 2 | 19965324 | 19965513 | 19965400 | 9  | 10 | 2  | 3.810782009 | 0.00936112  | TTC32   | ENSG00000183891 |
| 2 | 20115113 | 20115339 | 20115229 | 8  | 9  | 6  | 1.484720263 | 0.204387    | LAPTM4A | ENSG00000068697 |
| 2 | 20242200 | 20242385 | 20242292 | 8  | 8  | 1  | 4.676868829 | 0.0091584   |         | ENSG00000200763 |
| 2 | 20271422 | 20271621 | 20271521 | 8  | 9  | 5  | 1.73217364  | 0.133894    | SDC1    | ENSG00000115884 |
| 2 | 20276402 | 20276611 | 20276506 | 8  | 9  | 10 | 0.944821986 | 0.553851    | SDC1    | ENSG00000115884 |
| 2 | 20416988 | 20417254 | 20417121 | 10 | 11 | 1  | 6.235825105 | 0.0013754   | PUM2    | ENSG00000055917 |
| 2 | 20444596 | 20444817 | 20444706 | 10 | 10 | 2  | 3.810782009 | 0.00936112  |         | ENSG00000212171 |
| 2 | 20510164 | 20510343 | 20510254 | 8  | 9  | 4  | 2.078608368 | 0.0785659   | RHOB    | ENSG00000143878 |
| 2 | 20515842 | 20516047 | 20515941 | 9  | 10 | 2  | 3.810782009 | 0.00936112  | RHOB    | ENSG00000143878 |

|   |          |          |          |    |    |    |             |             |         |                 |
|---|----------|----------|----------|----|----|----|-------------|-------------|---------|-----------------|
| 2 | 20520868 | 20521360 | 20521232 | 15 | 28 | 6  | 4.305688763 | 3.69E-05    | RHOB    | ENSG00000143878 |
| 2 | 20529285 | 20529863 | 20529508 | 15 | 31 | 6  | 4.751104842 | 7.27E-06    |         | ENSG00000200829 |
| 2 | 20532094 | 20532295 | 20532215 | 10 | 10 | 7  | 1.429043253 | 0.21536     |         | ENSG00000200829 |
| 2 | 20647808 | 20648075 | 20647982 | 13 | 16 | 8  | 1.963130126 | 0.0441028   |         | ENSG00000219263 |
| 2 | 20724706 | 20724918 | 20724823 | 9  | 10 | 4  | 2.286469205 | 0.0509017   | GDF7    | ENSG00000143869 |
| 2 | 21438621 | 21438821 | 21438710 | 10 | 10 | 0  | 11.43234603 | 0.000394183 |         | ENSG00000218819 |
| 2 | 23731268 | 23731469 | 23731368 | 8  | 8  | 0  | 9.353737658 | 0.00163931  | KBTBD9  | ENSG00000119771 |
| 2 | 24017339 | 24017626 | 24017482 | 8  | 11 | 5  | 2.078608368 | 0.0614303   | UBXN2A  | ENSG00000173960 |
| 2 | 24123680 | 24123972 | 24123826 | 9  | 13 | 3  | 3.637564645 | 0.0050909   | C2orf44 | ENSG00000163026 |
| 2 | 24152653 | 24152867 | 24152752 | 9  | 11 | 3  | 3.117912553 | 0.0146045   |         | ENSG00000115128 |
| 2 | 24160594 | 24160871 | 24160732 | 16 | 18 | 1  | 9.87338975  | 1.41E-05    | TP53I3  | ENSG00000115129 |
| 2 | 24161278 | 24161616 | 24161470 | 11 | 15 | 2  | 5.542955649 | 0.000497081 | TP53I3  | ENSG00000115129 |
| 2 | 24689502 | 24689776 | 24689639 | 8  | 8  | 5  | 1.558956276 | 0.191397    | NCOA1   | ENSG00000084676 |
| 2 | 24869587 | 24869808 | 24869697 | 8  | 10 | 3  | 2.858086507 | 0.0242838   | C2orf79 | ENSG00000184924 |
| 2 | 25048386 | 25048578 | 25048479 | 8  | 9  | 2  | 3.464347281 | 0.0163838   | DNAJC27 | ENSG00000115137 |
| 2 | 25695220 | 25695446 | 25695312 | 8  | 9  | 1  | 5.196520921 | 0.00490062  | DTNB    | ENSG00000138101 |
| 2 | 25737656 | 25737835 | 25737797 | 8  | 8  | 1  | 4.676868829 | 0.0091584   | DTNB    | ENSG00000138101 |
| 2 | 25740904 | 25741165 | 25741044 | 8  | 9  | 1  | 5.196520921 | 0.00490062  | DTNB    | ENSG00000138101 |
| 2 | 25748031 | 25748265 | 25748148 | 10 | 10 | 3  | 2.858086507 | 0.0242838   | DTNB    | ENSG00000138101 |
| 2 | 26027469 | 26027688 | 26027538 | 12 | 13 | 3  | 3.637564645 | 0.0050909   | KIF3C   | ENSG00000084731 |
| 2 | 26027812 | 26027991 | 26027879 | 8  | 9  | 2  | 3.464347281 | 0.0163838   | KIF3C   | ENSG00000084731 |
| 2 | 26085147 | 26085489 | 26085315 | 9  | 13 | 5  | 2.425043097 | 0.0262442   |         | ENSG00000220917 |
| 2 | 26088595 | 26088857 | 26088693 | 10 | 12 | 4  | 2.702190879 | 0.0203088   |         | ENSG00000220917 |
| 2 | 26152725 | 26152935 | 26152880 | 10 | 10 | 10 | 1.039304184 | 0.464387    |         | ENSG00000199872 |
| 2 | 26422864 | 26423046 | 26422955 | 8  | 9  | 2  | 3.464347281 | 0.0163838   | GPR113  | ENSG00000173567 |
| 2 | 26654274 | 26654596 | 26654435 | 8  | 13 | 3  | 3.637564645 | 0.0050909   | C2orf70 | ENSG00000173557 |
| 2 | 26747384 | 26747652 | 26747518 | 9  | 9  | 1  | 5.196520921 | 0.00490062  |         | ENSG00000216626 |
| 2 | 27126907 | 27127247 | 27127018 | 8  | 12 | 6  | 1.930136342 | 0.071303    | AGBL5   | ENSG00000084693 |
| 2 | 27241584 | 27242056 | 27241877 | 23 | 34 | 6  | 5.196520921 | 1.37E-06    |         | ENSG00000216392 |
| 2 | 27286418 | 27286725 | 27286571 | 11 | 14 | 4  | 3.117912553 | 0.00766354  | SLC5A6  | ENSG00000138074 |
| 2 | 27326446 | 27326674 | 27326620 | 8  | 10 | 4  | 2.286469205 | 0.0509017   | SLC30A3 | ENSG00000115194 |
| 2 | 27369484 | 27369732 | 27369608 | 11 | 12 | 2  | 4.503651465 | 0.002963    | TRIM54  | ENSG00000138100 |
| 2 | 27369843 | 27370155 | 27370008 | 8  | 12 | 5  | 2.251825733 | 0.0404733   | TRIM54  | ENSG00000138100 |
| 2 | 27433407 | 27433690 | 27433548 | 9  | 12 | 3  | 3.377738599 | 0.00867157  | GTF3C2  | ENSG00000115207 |

|   |          |          |          |    |    |   |             |             |          |                 |
|---|----------|----------|----------|----|----|---|-------------|-------------|----------|-----------------|
| 2 | 27446775 | 27446997 | 27446886 | 11 | 11 | 2 | 4.157216737 | 0.0052913   | SNX17    | ENSG00000115234 |
| 2 | 27471791 | 27472060 | 27471956 | 8  | 10 | 0 | 11.43234603 | 0.000394183 | FTHL3P   | ENSG00000213453 |
| 2 | 27504669 | 27504898 | 27504783 | 12 | 12 | 2 | 4.503651465 | 0.002963    | NRBP1    | ENSG00000115216 |
| 2 | 27740063 | 27740283 | 27740154 | 16 | 17 | 0 | 18.70747532 | 2.69E-06    | SUPT7L   | ENSG00000119760 |
| 2 | 27782533 | 27782890 | 27782711 | 43 | 49 | 1 | 25.98260461 | 8.89E-15    |          | ENSG00000205334 |
| 2 | 28248662 | 28249086 | 28248899 | 39 | 53 | 2 | 18.70747532 | 8.04E-15    |          | ENSG00000197918 |
| 2 | 28395008 | 28395193 | 28395126 | 8  | 9  | 1 | 5.196520921 | 0.00490062  | FOSL2    | ENSG00000075426 |
| 2 | 28469072 | 28469326 | 28469207 | 14 | 15 | 3 | 4.157216737 | 0.00170423  | FOSL2    | ENSG00000075426 |
| 2 | 28513069 | 28513344 | 28513207 | 10 | 12 | 2 | 4.503651465 | 0.002963    | FOSL2    | ENSG00000075426 |
| 2 | 28971615 | 28971884 | 28971749 | 23 | 23 | 1 | 12.47165021 | 4.94E-07    | WDR43    | ENSG00000163811 |
| 2 | 29251422 | 29251601 | 29251511 | 8  | 8  | 5 | 1.558956276 | 0.191397    | CLIP4    | ENSG00000115295 |
| 2 | 29714903 | 29715207 | 29715034 | 9  | 13 | 2 | 4.850086193 | 0.00164564  |          | ENSG00000222996 |
| 2 | 30042519 | 30043022 | 30042767 | 52 | 70 | 0 | 73.79059708 | 1.06E-22    | ALK      | ENSG00000171094 |
| 2 | 30102793 | 30103080 | 30102928 | 12 | 13 | 1 | 7.27512929  | 0.000378098 |          | ENSG00000221383 |
| 2 | 30192170 | 30192365 | 30192267 | 8  | 10 | 1 | 5.716173013 | 0.00260397  | YPEL5    | ENSG00000119801 |
| 2 | 30294384 | 30294623 | 30294503 | 9  | 10 | 5 | 1.905391004 | 0.0915982   |          | ENSG00000217617 |
| 2 | 30778843 | 30779063 | 30778983 | 8  | 9  | 1 | 5.196520921 | 0.00490062  |          | ENSG00000219426 |
| 2 | 31066186 | 31066374 | 31066280 | 8  | 8  | 4 | 1.870747532 | 0.118863    |          | ENSG00000216093 |
| 2 | 31784830 | 31785019 | 31784890 | 8  | 8  | 0 | 9.353737658 | 0.00163931  |          | ENSG00000222772 |
| 2 | 32089431 | 32089680 | 32089534 | 10 | 11 | 3 | 3.117912553 | 0.0146045   | MEMO1    | ENSG00000162959 |
| 2 | 32706501 | 32706779 | 32706616 | 13 | 15 | 3 | 4.157216737 | 0.00170423  | TTC27    | ENSG0000018699  |
| 2 | 33010688 | 33010875 | 33010774 | 10 | 10 | 4 | 2.286469205 | 0.0509017   |          | ENSG00000206951 |
| 2 | 33016647 | 33016846 | 33016746 | 8  | 8  | 7 | 1.169217207 | 0.371848    |          | ENSG00000206951 |
| 2 | 33092957 | 33093288 | 33093126 | 26 | 30 | 0 | 32.21842971 | 2.55E-10    |          | ENSG00000217182 |
| 2 | 34565667 | 34565863 | 34565765 | 11 | 11 | 2 | 4.157216737 | 0.0052913   |          | ENSG00000212025 |
| 2 | 35377165 | 35377439 | 35377302 | 10 | 11 | 5 | 2.078608368 | 0.0614303   |          | ENSG00000217899 |
| 2 | 36453858 | 36454050 | 36453954 | 8  | 9  | 3 | 2.598260461 | 0.0397929   | CRIM1    | ENSG00000150938 |
| 2 | 36902079 | 36902258 | 36902150 | 8  | 8  | 3 | 2.338434415 | 0.0641221   |          | ENSG00000211150 |
| 2 | 37312055 | 37312294 | 37312174 | 8  | 11 | 8 | 1.385738912 | 0.224757    | CEBPZ    | ENSG00000115816 |
| 2 | 37669125 | 37669367 | 37669189 | 8  | 11 | 4 | 2.494330042 | 0.0324033   | CDC42EP3 | ENSG00000163171 |
| 2 | 37734566 | 37735132 | 37734968 | 36 | 52 | 4 | 11.01662435 | 1.13E-12    | CDC42EP3 | ENSG00000163171 |
| 2 | 37867584 | 37867932 | 37867758 | 49 | 54 | 1 | 28.58086507 | 2.76E-16    |          | ENSG00000213595 |
| 2 | 37883248 | 37883522 | 37883350 | 9  | 11 | 0 | 12.47165021 | 0.000193293 |          | ENSG00000213595 |
| 2 | 38006060 | 38006278 | 38006170 | 10 | 12 | 6 | 1.930136342 | 0.071303    | FAM82A1  | ENSG00000115841 |

|   |          |          |          |    |    |    |             |             |          |                 |
|---|----------|----------|----------|----|----|----|-------------|-------------|----------|-----------------|
| 2 | 38107498 | 38107910 | 38107677 | 18 | 26 | 2  | 9.353737658 | 4.98E-07    | CYP1B1   | ENSG00000138061 |
| 2 | 38176969 | 38177182 | 38177075 | 8  | 10 | 3  | 2.858086507 | 0.0242838   | CYP1B1   | ENSG00000138061 |
| 2 | 38476838 | 38477018 | 38476928 | 9  | 9  | 2  | 3.464347281 | 0.0163838   | ATL2     | ENSG00000119787 |
| 2 | 38697104 | 38697383 | 38697243 | 11 | 11 | 2  | 4.157216737 | 0.0052913   | HNRPLL   | ENSG00000143889 |
| 2 | 38771571 | 38771903 | 38771737 | 10 | 15 | 5  | 2.771477825 | 0.0105836   | GALM     | ENSG00000143891 |
| 2 | 38831725 | 38831971 | 38831845 | 9  | 11 | 2  | 4.157216737 | 0.0052913   | SFRS7    | ENSG00000115875 |
| 2 | 38986409 | 38986664 | 38986558 | 8  | 10 | 4  | 2.286469205 | 0.0509017   |          | ENSG00000214694 |
| 2 | 38986773 | 38987101 | 38986933 | 11 | 15 | 1  | 8.314433474 | 0.000102308 |          | ENSG00000214694 |
| 2 | 39231674 | 39231868 | 39231702 | 11 | 13 | 4  | 2.910051716 | 0.0125532   |          | ENSG00000202309 |
| 2 | 39257790 | 39257979 | 39257877 | 8  | 8  | 6  | 1.336248237 | 0.277651    |          | ENSG00000202309 |
| 2 | 39317529 | 39317742 | 39317635 | 8  | 9  | 2  | 3.464347281 | 0.0163838   | CDKL4    | ENSG00000205111 |
| 2 | 39485998 | 39486248 | 39486123 | 11 | 12 | 1  | 6.755477198 | 0.000722752 | MAP4K3   | ENSG00000011566 |
| 2 | 39547041 | 39547299 | 39547158 | 8  | 10 | 0  | 11.43234603 | 0.000394183 |          | ENSG00000211215 |
| 2 | 41803442 | 41803751 | 41803590 | 20 | 22 | 1  | 11.95199812 | 9.69E-07    |          | ENSG00000213574 |
| 2 | 41854874 | 41855151 | 41855039 | 8  | 10 | 3  | 2.858086507 | 0.0242838   |          | ENSG00000213574 |
| 2 | 42423070 | 42423517 | 42423353 | 8  | 16 | 8  | 1.963130126 | 0.0441028   | COX7A2L  | ENSG00000115944 |
| 2 | 42575538 | 42575944 | 42575706 | 10 | 15 | 18 | 0.875203524 | 0.655562    | MTA3     | ENSG00000057935 |
| 2 | 42649578 | 42649772 | 42649675 | 8  | 8  | 3  | 2.338434415 | 0.0641221   | MTA3     | ENSG00000057935 |
| 2 | 42876589 | 42877024 | 42876817 | 65 | 82 | 0  | 86.26224729 | 2.06E-26    |          | ENSG00000217155 |
| 2 | 42891133 | 42891498 | 42891297 | 10 | 14 | 10 | 1.417232979 | 0.185113    |          | ENSG00000217155 |
| 2 | 42939754 | 42939944 | 42939849 | 8  | 8  | 2  | 3.117912553 | 0.0283184   |          | ENSG00000218916 |
| 2 | 43507028 | 43507346 | 43507170 | 11 | 15 | 12 | 1.279143611 | 0.251893    |          | ENSG00000211259 |
| 2 | 43524063 | 43524389 | 43524218 | 9  | 12 | 5  | 2.251825733 | 0.0404733   |          | ENSG00000211259 |
| 2 | 43543875 | 43544071 | 43543973 | 8  | 8  | 5  | 1.558956276 | 0.191397    |          | ENSG00000211259 |
| 2 | 43549268 | 43549545 | 43549419 | 9  | 11 | 3  | 3.117912553 | 0.0146045   |          | ENSG00000211259 |
| 2 | 43855384 | 43855563 | 43855473 | 8  | 8  | 0  | 9.353737658 | 0.00163931  | DYNC2LI1 | ENSG00000138036 |
| 2 | 43962436 | 43962619 | 43962530 | 8  | 8  | 2  | 3.117912553 | 0.0283184   |          | ENSG00000200924 |
| 2 | 44167654 | 44167833 | 44167747 | 8  | 8  | 1  | 4.676868829 | 0.0091584   |          | ENSG00000219391 |
| 2 | 44167911 | 44168100 | 44168058 | 8  | 9  | 0  | 10.39304184 | 0.000803859 |          | ENSG00000219391 |
| 2 | 45373812 | 45373999 | 45373905 | 8  | 8  | 4  | 1.870747532 | 0.118863    |          | ENSG00000205054 |
| 2 | 45731048 | 45731253 | 45731172 | 8  | 10 | 2  | 3.810782009 | 0.00936112  | PRKCE    | ENSG00000171132 |
| 2 | 45846657 | 45846891 | 45846740 | 8  | 10 | 1  | 5.716173013 | 0.00260397  | PRKCE    | ENSG00000171132 |
| 2 | 45902348 | 45902603 | 45902475 | 9  | 11 | 1  | 6.235825105 | 0.0013754   | PRKCE    | ENSG00000171132 |
| 2 | 45930130 | 45930473 | 45930299 | 37 | 40 | 1  | 21.30573578 | 4.48E-12    | PRKCE    | ENSG00000171132 |

|   |          |          |          |    |    |    |             |             |         |                 |
|---|----------|----------|----------|----|----|----|-------------|-------------|---------|-----------------|
| 2 | 45971927 | 45972116 | 45972021 | 8  | 8  | 2  | 3.117912553 | 0.0283184   | PRKCE   | ENSG00000171132 |
| 2 | 46019417 | 46019848 | 46019669 | 10 | 18 | 9  | 1.97467795  | 0.0349428   | PRKCE   | ENSG00000171132 |
| 2 | 46089097 | 46089414 | 46089255 | 11 | 14 | 0  | 15.58956276 | 2.28E-05    |         | ENSG00000217939 |
| 2 | 46252766 | 46253367 | 46253088 | 48 | 72 | 8  | 8.429911717 | 4.17E-15    | EPAS1   | ENSG00000116016 |
| 2 | 46351184 | 46351371 | 46351237 | 8  | 9  | 3  | 2.598260461 | 0.0397929   | EPAS1   | ENSG00000116016 |
| 2 | 46726393 | 46726597 | 46726494 | 9  | 9  | 2  | 3.464347281 | 0.0163838   |         | ENSG00000203445 |
| 2 | 46727751 | 46728076 | 46727935 | 17 | 21 | 2  | 7.621564018 | 1.21E-05    |         | ENSG00000203445 |
| 2 | 46818284 | 46818552 | 46818418 | 8  | 9  | 0  | 10.39304184 | 0.000803859 | SOCS5   | ENSG00000171150 |
| 2 | 47257250 | 47257605 | 47257427 | 9  | 15 | 6  | 2.375552421 | 0.0212094   | CALM2   | ENSG00000143933 |
| 2 | 47484596 | 47484867 | 47484739 | 8  | 10 | 4  | 2.286469205 | 0.0509017   | MSH2    | ENSG00000095002 |
| 2 | 47830968 | 47831160 | 47831051 | 9  | 10 | 2  | 3.810782009 | 0.00936112  |         | ENSG00000219040 |
| 2 | 48849315 | 48849692 | 48849489 | 19 | 25 | 4  | 5.404381758 | 1.92E-05    | TCEB2   | ENSG00000217429 |
| 2 | 48859739 | 48860182 | 48859899 | 11 | 18 | 6  | 2.8209685   | 0.00559354  | TCEB2   | ENSG00000217429 |
| 2 | 48921744 | 48922191 | 48922005 | 41 | 53 | 2  | 18.70747532 | 8.04E-15    | TCEB2   | ENSG00000217429 |
| 2 | 48939702 | 48939981 | 48939841 | 10 | 10 | 0  | 11.43234603 | 0.000394183 |         | ENSG00000214602 |
| 2 | 50606436 | 50606734 | 50606580 | 8  | 9  | 3  | 2.598260461 | 0.0397929   | NRXN1   | ENSG00000179915 |
| 2 | 51254942 | 51255213 | 51255086 | 9  | 9  | 0  | 10.39304184 | 0.000803859 | NRXN1   | ENSG00000179915 |
| 2 | 54411405 | 54411692 | 54411542 | 11 | 13 | 4  | 2.910051716 | 0.0125532   | C2orf73 | ENSG00000177994 |
| 2 | 54652986 | 54653238 | 54653104 | 11 | 13 | 2  | 4.850086193 | 0.00164564  | SPTBN1  | ENSG00000115306 |
| 2 | 54944834 | 54945020 | 54944944 | 8  | 9  | 6  | 1.484720263 | 0.204387    |         | ENSG00000143940 |
| 2 | 55158861 | 55159128 | 55158994 | 10 | 12 | 1  | 6.755477198 | 0.000722752 | RTN4    | ENSG00000115310 |
| 2 | 55312896 | 55313194 | 55313045 | 9  | 12 | 10 | 1.228268581 | 0.305344    | C2orf63 | ENSG00000162994 |
| 2 | 55313202 | 55313559 | 55313380 | 11 | 17 | 5  | 3.117912553 | 0.00407023  | RPS27A  | ENSG00000143947 |
| 2 | 55362701 | 55362940 | 55362820 | 8  | 9  | 0  | 10.39304184 | 0.000803859 |         | ENSG00000162997 |
| 2 | 55512745 | 55512962 | 55512819 | 8  | 8  | 6  | 1.336248237 | 0.277651    | BTF3L2  | ENSG00000220254 |
| 2 | 55698128 | 55698402 | 55698240 | 11 | 13 | 8  | 1.616695398 | 0.123553    | SMEK2   | ENSG00000138041 |
| 2 | 55860380 | 55860647 | 55860513 | 14 | 16 | 6  | 2.524024447 | 0.0137633   | PNPT1   | ENSG00000138035 |
| 2 | 55919925 | 55920191 | 55920052 | 9  | 12 | 2  | 4.503651465 | 0.002963    | EFEMP1  | ENSG00000115380 |
| 2 | 56037252 | 56037469 | 56037360 | 8  | 9  | 1  | 5.196520921 | 0.00490062  |         | ENSG00000202344 |
| 2 | 56042504 | 56042683 | 56042593 | 8  | 8  | 0  | 9.353737658 | 0.00163931  |         | ENSG00000202344 |
| 2 | 56459715 | 56460049 | 56459882 | 19 | 22 | 4  | 4.780799247 | 0.00010647  |         | ENSG00000199395 |
| 2 | 57796110 | 57796294 | 57796214 | 9  | 9  | 0  | 10.39304184 | 0.000803859 |         | ENSG00000212168 |
| 2 | 58528798 | 58528981 | 58528889 | 9  | 9  | 1  | 5.196520921 | 0.00490062  | IK      | ENSG00000219858 |
| 2 | 60646141 | 60646424 | 60646282 | 9  | 9  | 0  | 10.39304184 | 0.000803859 | BCL11A  | ENSG00000119866 |

|   |          |          |          |    |    |   |             |             |         |                 |
|---|----------|----------|----------|----|----|---|-------------|-------------|---------|-----------------|
| 2 | 60723781 | 60723960 | 60723870 | 8  | 8  | 0 | 9.353737658 | 0.00163931  |         | ENSG00000209290 |
| 2 | 61098096 | 61098299 | 61098197 | 9  | 11 | 3 | 3.117912553 | 0.0146045   | PEX13   | ENSG00000162928 |
| 2 | 61358429 | 61358710 | 61358581 | 12 | 13 | 0 | 14.55025858 | 4.65E-05    | AHSA2   | ENSG00000173209 |
| 2 | 61845028 | 61845319 | 61845163 | 12 | 15 | 7 | 2.078608368 | 0.038229    |         | ENSG00000213486 |
| 2 | 61968383 | 61968661 | 61968534 | 8  | 10 | 3 | 2.858086507 | 0.0242838   | CCT4    | ENSG00000115484 |
| 2 | 61979511 | 61979737 | 61979673 | 9  | 10 | 1 | 5.716173013 | 0.00260397  | COMMD1  | ENSG00000173163 |
| 2 | 61986717 | 61986898 | 61986808 | 8  | 9  | 1 | 5.196520921 | 0.00490062  | COMMD1  | ENSG00000173163 |
| 2 | 62040505 | 62041065 | 62040765 | 62 | 77 | 3 | 20.26643159 | 8.50E-21    |         | ENSG00000209229 |
| 2 | 62041978 | 62042301 | 62042139 | 25 | 27 | 1 | 14.55025858 | 3.30E-08    |         | ENSG00000209229 |
| 2 | 62387566 | 62387828 | 62387697 | 12 | 13 | 7 | 1.818782322 | 0.0805123   |         | ENSG00000209133 |
| 2 | 62694275 | 62694459 | 62694367 | 10 | 10 | 0 | 11.43234603 | 0.000394183 |         | ENSG00000219597 |
| 2 | 64314862 | 64315054 | 64314909 | 11 | 11 | 0 | 12.47165021 | 0.000193293 | PELI1   | ENSG00000197329 |
| 2 | 64597151 | 64597463 | 64597322 | 11 | 14 | 3 | 3.897390691 | 0.00295882  | AFTPH   | ENSG00000119844 |
| 2 | 64655009 | 64655188 | 64655091 | 8  | 8  | 1 | 4.676868829 | 0.0091584   |         | ENSG00000209305 |
| 2 | 64680215 | 64680422 | 64680386 | 8  | 8  | 7 | 1.169217207 | 0.371848    |         | ENSG00000209305 |
| 2 | 64688246 | 64688660 | 64688525 | 8  | 13 | 5 | 2.425043097 | 0.0262442   |         | ENSG00000209305 |
| 2 | 64811373 | 64811578 | 64811475 | 8  | 10 | 1 | 5.716173013 | 0.00260397  | SERTAD2 | ENSG00000179833 |
| 2 | 64912455 | 64912682 | 64912522 | 12 | 14 | 4 | 3.117912553 | 0.00766354  |         | ENSG00000199964 |
| 2 | 64929183 | 64929375 | 64929279 | 8  | 8  | 0 | 9.353737658 | 0.00163931  |         | ENSG00000199964 |
| 2 | 64998309 | 64998519 | 64998414 | 8  | 9  | 5 | 1.73217364  | 0.133894    |         | ENSG00000209016 |
| 2 | 65149419 | 65149743 | 65149582 | 25 | 27 | 0 | 29.10051716 | 2.16E-09    | CEP68   | ENSG00000011523 |
| 2 | 65210585 | 65210792 | 65210688 | 9  | 10 | 4 | 2.286469205 | 0.0509017   | RAB1A   | ENSG00000138069 |
| 2 | 65390275 | 65390713 | 65390550 | 13 | 20 | 7 | 2.728173484 | 0.00469378  | ACTR2   | ENSG00000138071 |
| 2 | 65618765 | 65619141 | 65618967 | 30 | 37 | 1 | 19.7467795  | 3.54E-11    |         | ENSG00000208992 |
| 2 | 65789529 | 65789708 | 65789618 | 8  | 8  | 2 | 3.117912553 | 0.0283184   |         | ENSG00000214533 |
| 2 | 67131398 | 67131578 | 67131545 | 8  | 8  | 1 | 4.676868829 | 0.0091584   | ETAA1   | ENSG00000143971 |
| 2 | 68238175 | 68238391 | 68238283 | 8  | 9  | 3 | 2.598260461 | 0.0397929   | WDR92   | ENSG00000221823 |
| 2 | 69180445 | 69180668 | 69180530 | 9  | 9  | 0 | 10.39304184 | 0.000803859 | ANTXR1  | ENSG00000169604 |
| 2 | 69723338 | 69723601 | 69723480 | 8  | 9  | 2 | 3.464347281 | 0.0163838   | AAK1    | ENSG00000115977 |
| 2 | 69728995 | 69729354 | 69729177 | 9  | 15 | 0 | 16.62886695 | 1.12E-05    |         | ENSG00000220011 |
| 2 | 69822072 | 69822265 | 69822170 | 8  | 8  | 2 | 3.117912553 | 0.0283184   | ANXA4   | ENSG00000196975 |
| 2 | 70221687 | 70222037 | 70221860 | 8  | 12 | 2 | 4.503651465 | 0.002963    | C2orf42 | ENSG00000115998 |
| 2 | 70677437 | 70678015 | 70677726 | 63 | 89 | 4 | 18.70747532 | 3.01E-23    | TGFA    | ENSG00000163235 |
| 2 | 71148948 | 71149181 | 71149006 | 9  | 13 | 3 | 3.637564645 | 0.0050909   | NAGK    | ENSG00000124357 |

|   |          |          |          |    |    |    |             |             |         |                 |
|---|----------|----------|----------|----|----|----|-------------|-------------|---------|-----------------|
| 2 | 71210357 | 71210568 | 71210457 | 8  | 9  | 4  | 2.078608368 | 0.0785659   | MCEE    | ENSG00000124370 |
| 2 | 71210657 | 71210880 | 71210768 | 8  | 10 | 9  | 1.143234603 | 0.378307    | MCEE    | ENSG00000124370 |
| 2 | 71412119 | 71412386 | 71412293 | 10 | 13 | 2  | 4.850086193 | 0.00164564  | ZNF638  | ENSG00000075292 |
| 2 | 71808365 | 71808640 | 71808502 | 12 | 13 | 3  | 3.637564645 | 0.0050909   | DYSF    | ENSG00000135636 |
| 2 | 71825837 | 71826073 | 71825950 | 8  | 9  | 1  | 5.196520921 | 0.00490062  | DYSF    | ENSG00000135636 |
| 2 | 71827660 | 71827867 | 71827802 | 8  | 9  | 4  | 2.078608368 | 0.0785659   | DYSF    | ENSG00000135636 |
| 2 | 71961409 | 71961866 | 71961701 | 11 | 18 | 2  | 6.582259834 | 7.91E-05    | CYP26B1 | ENSG00000003137 |
| 2 | 72974658 | 72975014 | 72974836 | 15 | 21 | 0  | 22.86469205 | 1.55E-07    | SPR     | ENSG00000116096 |
| 2 | 73152735 | 73152928 | 73152846 | 8  | 9  | 0  | 10.39304184 | 0.000803859 | SFXN5   | ENSG00000144040 |
| 2 | 73238486 | 73238665 | 73238575 | 9  | 9  | 0  | 10.39304184 | 0.000803859 | NOTO    | ENSG00000214513 |
| 2 | 73244455 | 73244634 | 73244588 | 8  | 8  | 1  | 4.676868829 | 0.0091584   | NOTO    | ENSG00000214513 |
| 2 | 73293234 | 73293416 | 73293325 | 8  | 8  | 3  | 2.338434415 | 0.0641221   | SMYD5   | ENSG00000135632 |
| 2 | 73314665 | 73315040 | 73314795 | 8  | 15 | 4  | 3.32577339  | 0.00462646  | CCT7    | ENSG00000135624 |
| 2 | 73511766 | 73511966 | 73511847 | 8  | 8  | 8  | 1.039304184 | 0.46786     | ALMS1   | ENSG00000116127 |
| 2 | 74064255 | 74064693 | 74064514 | 17 | 31 | 10 | 3.023430354 | 0.000301033 |         | ENSG00000201876 |
| 2 | 74090858 | 74091302 | 74091094 | 16 | 26 | 5  | 4.676868829 | 3.65E-05    | TET3    | ENSG00000187605 |
| 2 | 74296762 | 74296991 | 74296885 | 9  | 9  | 0  | 10.39304184 | 0.000803859 | MTHFD2  | ENSG00000065911 |
| 2 | 74408485 | 74408683 | 74408621 | 8  | 9  | 1  | 5.196520921 | 0.00490062  | SLC4A5  | ENSG00000188687 |
| 2 | 74535547 | 74535760 | 74535653 | 8  | 11 | 5  | 2.078608368 | 0.0614303   | INO80B  | ENSG00000221956 |
| 2 | 74573960 | 74574204 | 74574082 | 9  | 10 | 0  | 11.43234603 | 0.000394183 | LBX2    | ENSG00000179528 |
| 2 | 74610298 | 74610654 | 74610476 | 10 | 16 | 1  | 8.834085566 | 5.30E-05    | AUP1    | ENSG00000115307 |
| 2 | 74926043 | 74926307 | 74926207 | 12 | 14 | 5  | 2.598260461 | 0.0167748   | HK2     | ENSG00000159399 |
| 2 | 75630192 | 75630512 | 75630368 | 15 | 19 | 4  | 4.157216737 | 0.000560204 | FAM176A | ENSG00000115363 |
| 2 | 75708672 | 75708913 | 75708812 | 8  | 8  | 4  | 1.870747532 | 0.118863    |         | ENSG00000208913 |
| 2 | 77309073 | 77309317 | 77309206 | 10 | 10 | 2  | 3.810782009 | 0.00936112  | LRRTM4  | ENSG00000176204 |
| 2 | 84166327 | 84166536 | 84166431 | 8  | 9  | 3  | 2.598260461 | 0.0397929   |         | ENSG00000182814 |
| 2 | 84496923 | 84497123 | 84497050 | 10 | 10 | 3  | 2.858086507 | 0.0242838   | SUCLG1  | ENSG00000163541 |
| 2 | 84539914 | 84540147 | 84539995 | 8  | 10 | 1  | 5.716173013 | 0.00260397  | SUCLG1  | ENSG00000163541 |
| 2 | 84962679 | 84962987 | 84962840 | 10 | 12 | 5  | 2.251825733 | 0.0404733   |         | ENSG00000186854 |
| 2 | 84974806 | 84975033 | 84974919 | 10 | 13 | 12 | 1.11925066  | 0.384109    | TMSB10  | ENSG00000034510 |
| 2 | 85038761 | 85039022 | 85038888 | 8  | 10 | 6  | 1.63319229  | 0.146906    | KCMF1   | ENSG00000176407 |
| 2 | 85073883 | 85074062 | 85073963 | 8  | 8  | 2  | 3.117912553 | 0.0283184   | KCMF1   | ENSG00000176407 |
| 2 | 85095367 | 85095717 | 85095542 | 48 | 52 | 2  | 18.36104059 | 1.58E-14    | KCMF1   | ENSG00000176407 |
| 2 | 85172584 | 85172829 | 85172706 | 8  | 9  | 0  | 10.39304184 | 0.000803859 | TCF7L1  | ENSG00000152284 |



|   |          |          |          |    |    |    |             |             |          |                 |
|---|----------|----------|----------|----|----|----|-------------|-------------|----------|-----------------|
| 2 | 85273578 | 85273833 | 85273694 | 9  | 10 | 0  | 11.43234603 | 0.000394183 |          | ENSG00000200701 |
| 2 | 85339900 | 85340206 | 85340029 | 12 | 15 | 7  | 2.078608368 | 0.038229    |          | ENSG00000221579 |
| 2 | 85366217 | 85366459 | 85366367 | 8  | 10 | 4  | 2.286469205 | 0.0509017   |          | ENSG00000221579 |
| 2 | 85435113 | 85435557 | 85435442 | 11 | 23 | 10 | 2.267572766 | 0.00903625  | ELMOD3   | ENSG00000115459 |
| 2 | 85477546 | 85478004 | 85477725 | 11 | 22 | 7  | 2.98799953  | 0.00188278  | CAPG     | ENSG00000042493 |
| 2 | 85501287 | 85501584 | 85501418 | 8  | 11 | 1  | 6.235825105 | 0.0013754   | SH2D6    | ENSG00000152292 |
| 2 | 85604929 | 85605242 | 85605085 | 11 | 15 | 4  | 3.32577339  | 0.00462646  | MAT2A    | ENSG00000168906 |
| 2 | 85605344 | 85605545 | 85605451 | 11 | 12 | 3  | 3.377738599 | 0.00867157  | MAT2A    | ENSG00000168906 |
| 2 | 85619364 | 85619685 | 85619525 | 15 | 18 | 7  | 2.468347438 | 0.0112499   | MAT2A    | ENSG00000168906 |
| 2 | 85641991 | 85642300 | 85642145 | 8  | 10 | 4  | 2.286469205 | 0.0509017   | GGCX     | ENSG00000115486 |
| 2 | 85658129 | 85658345 | 85658245 | 8  | 9  | 3  | 2.598260461 | 0.0397929   | VAMP8    | ENSG00000118640 |
| 2 | 85683434 | 85683660 | 85683563 | 10 | 10 | 6  | 1.63319229  | 0.146906    | TMEM150  | ENSG00000168890 |
| 2 | 85759054 | 85759346 | 85759200 | 9  | 9  | 4  | 2.078608368 | 0.0785659   | SFTP8    | ENSG00000168878 |
| 2 | 85852484 | 85852715 | 85852570 | 8  | 8  | 4  | 1.870747532 | 0.118863    | ATOH8    | ENSG00000168874 |
| 2 | 85899067 | 85899366 | 85899198 | 11 | 13 | 1  | 7.27512929  | 0.000378098 |          | ENSG00000208775 |
| 2 | 86035586 | 86036028 | 86035762 | 9  | 14 | 5  | 2.598260461 | 0.0167748   | ST3GAL5  | ENSG00000115525 |
| 2 | 86186261 | 86186454 | 86186350 | 8  | 9  | 4  | 2.078608368 | 0.0785659   | POLR1A   | ENSG00000068654 |
| 2 | 86276319 | 86276517 | 86276418 | 8  | 8  | 5  | 1.558956276 | 0.191397    | IMMT     | ENSG00000132305 |
| 2 | 86506904 | 86507338 | 86507096 | 51 | 60 | 8  | 7.044172804 | 5.73E-12    | JMJD1A   | ENSG00000115548 |
| 2 | 86521503 | 86521803 | 86521681 | 8  | 11 | 5  | 2.078608368 | 0.0614303   | JMJD1A   | ENSG00000115548 |
| 2 | 86549914 | 86550093 | 86549945 | 9  | 10 | 2  | 3.810782009 | 0.00936112  | JMJD1A   | ENSG00000115548 |
| 2 | 86579566 | 86579785 | 86579684 | 10 | 10 | 6  | 1.63319229  | 0.146906    |          | ENSG00000200563 |
| 2 | 86643973 | 86644359 | 86644216 | 22 | 28 | 6  | 4.305688763 | 3.69E-05    | VPS24    | ENSG00000115561 |
| 2 | 86781196 | 86781389 | 86781292 | 8  | 8  | 1  | 4.676868829 | 0.0091584   | RMND5A   | ENSG00000153561 |
| 2 | 86888733 | 86889327 | 86889157 | 10 | 23 | 12 | 1.918715417 | 0.0250463   | CD8A     | ENSG00000153563 |
| 2 | 88096963 | 88097243 | 88097103 | 8  | 10 | 8  | 1.27026067  | 0.293854    |          | ENSG00000222724 |
| 2 | 88272058 | 88272585 | 88272398 | 66 | 81 | 7  | 10.65286789 | 2.80E-18    | THNSL2   | ENSG00000144115 |
| 2 | 88431340 | 88431555 | 88431499 | 9  | 9  | 1  | 5.196520921 | 0.00490062  |          | ENSG00000212133 |
| 2 | 88618806 | 88619320 | 88619121 | 62 | 77 | 1  | 40.53286319 | 2.95E-23    | C2orf51  | ENSG00000172073 |
| 2 | 88708879 | 88709058 | 88708965 | 8  | 8  | 0  | 9.353737658 | 0.00163931  | EIF2AK3  | ENSG00000172071 |
| 2 | 88752495 | 88752877 | 88752644 | 10 | 15 | 10 | 1.511715177 | 0.140236    | RPIA     | ENSG00000153574 |
| 2 | 88961380 | 88961567 | 88961460 | 10 | 11 | 1  | 6.235825105 | 0.0013754   | IGKV4-1  | ENSG00000211598 |
| 2 | 89048574 | 89048891 | 89048713 | 13 | 17 | 4  | 3.741495063 | 0.00163722  |          | ENSG00000211601 |
| 2 | 89388136 | 89388369 | 89388252 | 10 | 10 | 7  | 1.429043253 | 0.21536     | IGKV2-38 | ENSG00000217827 |

|   |          |          |          |     |     |     |             |             |                 |
|---|----------|----------|----------|-----|-----|-----|-------------|-------------|-----------------|
| 2 | 90960471 | 90960732 | 90960601 | 9   | 11  | 14  | 0.831443347 | 0.68719     | ENSG00000219041 |
| 2 | 90961779 | 90961972 | 90961938 | 9   | 10  | 4   | 2.286469205 | 0.0509017   | ENSG00000219041 |
| 2 | 90968501 | 90968844 | 90968708 | 8   | 12  | 16  | 0.794762023 | 0.738004    | ENSG00000219041 |
| 2 | 90970915 | 90971409 | 90971090 | 13  | 21  | 18  | 1.203404845 | 0.275531    | ENSG00000219041 |
| 2 | 90977260 | 90977590 | 90977423 | 8   | 11  | 5   | 2.078608368 | 0.0614303   | ENSG00000219041 |
| 2 | 91056408 | 91056628 | 91056518 | 12  | 15  | 13  | 1.187776211 | 0.317363    | ENSG00000219041 |
| 2 | 91125524 | 91125829 | 91125684 | 10  | 13  | 14  | 0.970017239 | 0.534076    | ENSG00000213356 |
| 2 | 91142356 | 91142538 | 91142416 | 8   | 9   | 3   | 2.598260461 | 0.0397929   | ENSG00000213356 |
| 2 | 91157532 | 91157866 | 91157699 | 11  | 14  | 8   | 1.73217364  | 0.0890835   | ENSG00000212975 |
| 2 | 91163036 | 91163384 | 91163213 | 21  | 25  | 8   | 3.00243431  | 0.0010168   | ENSG00000212975 |
| 2 | 91167286 | 91167498 | 91167465 | 9   | 11  | 7   | 1.558956276 | 0.158273    | ENSG00000212975 |
| 2 | 91176197 | 91176546 | 91176371 | 13  | 17  | 13  | 1.336248237 | 0.204556    | ENSG00000212975 |
| 2 | 91176656 | 91177028 | 91176883 | 10  | 15  | 7   | 2.078608368 | 0.038229    | ENSG00000212975 |
| 2 | 91177344 | 91177666 | 91177505 | 11  | 12  | 2   | 4.503651465 | 0.002963    | ENSG00000212975 |
| 2 | 91178359 | 91179052 | 91178727 | 14  | 37  | 15  | 2.468347438 | 0.000682071 | ENSG00000212975 |
| 2 | 91179093 | 91179538 | 91179272 | 11  | 21  | 8   | 2.540521339 | 0.00602138  | ENSG00000212975 |
| 2 | 91179919 | 91180219 | 91180069 | 11  | 15  | 17  | 0.923825942 | 0.593214    | ENSG00000212975 |
| 2 | 91180289 | 91180994 | 91180483 | 15  | 38  | 33  | 1.192143035 | 0.225763    | ENSG00000212975 |
| 2 | 91181262 | 91181650 | 91181441 | 15  | 22  | 7   | 2.98799953  | 0.00188278  | ENSG00000212975 |
| 2 | 91182292 | 91182519 | 91182467 | 9   | 11  | 7   | 1.558956276 | 0.158273    | ENSG00000212975 |
| 2 | 91636518 | 91636722 | 91636556 | 10  | 12  | 12  | 1.039304184 | 0.461227    | ENSG00000198710 |
| 2 | 91637256 | 91637585 | 91637420 | 11  | 14  | 15  | 0.974347673 | 0.530138    | ENSG00000198710 |
| 2 | 91639514 | 91639846 | 91639680 | 54  | 55  | 63  | 0.909391161 | 0.699342    | ENSG00000198710 |
| 2 | 91639880 | 91640215 | 91640047 | 40  | 40  | 44  | 0.94692159  | 0.600763    | ENSG00000198710 |
| 2 | 91644891 | 91645244 | 91645067 | 87  | 89  | 66  | 1.396080247 | 0.0185533   | ENSG00000198710 |
| 2 | 91647910 | 91648239 | 91648081 | 16  | 16  | 23  | 0.736173797 | 0.837668    | ENSG00000198710 |
| 2 | 91653969 | 91654444 | 91654265 | 113 | 161 | 148 | 1.129981731 | 0.140544    | ENSG00000198710 |
| 2 | 91654856 | 91655186 | 91655021 | 21  | 23  | 32  | 0.755857589 | 0.855178    | ENSG00000198710 |
| 2 | 91660301 | 91660749 | 91660580 | 104 | 112 | 114 | 1.021229329 | 0.437218    | ENSG00000198710 |
| 2 | 91664291 | 91664622 | 91664456 | 13  | 13  | 28  | 0.501733054 | 0.986489    | ENSG00000198710 |
| 2 | 91667643 | 91667823 | 91667733 | 14  | 14  | 19  | 0.779478138 | 0.771518    | ENSG00000198710 |
| 2 | 91669314 | 91669667 | 91669490 | 144 | 148 | 155 | 0.99266874  | 0.525938    | ENSG00000198710 |
| 2 | 91672781 | 91673131 | 91672956 | 17  | 21  | 16  | 1.344981885 | 0.176214    | ENSG00000198710 |
| 2 | 91681307 | 91681651 | 91681479 | 30  | 32  | 56  | 0.601702422 | 0.991254    | ENSG00000198710 |

|   |          |          |          |    |    |    |             |             |          |                 |
|---|----------|----------|----------|----|----|----|-------------|-------------|----------|-----------------|
| 2 | 91686986 | 91687464 | 91687165 | 61 | 70 | 89 | 0.819895523 | 0.896022    |          | ENSG00000198710 |
| 2 | 94903669 | 94903973 | 94903821 | 10 | 14 | 3  | 3.897390691 | 0.00295882  | TEKT4    | ENSG00000163060 |
| 2 | 95050313 | 95050588 | 95050458 | 8  | 11 | 2  | 4.157216737 | 0.0052913   | MAL      | ENSG00000172005 |
| 2 | 95194717 | 95194896 | 95194806 | 8  | 8  | 4  | 1.870747532 | 0.118863    | ZNF2     | ENSG00000163067 |
| 2 | 95195001 | 95195292 | 95195120 | 11 | 14 | 12 | 1.199197136 | 0.313881    | ZNF2     | ENSG00000163067 |
| 2 | 95236703 | 95236991 | 95236829 | 9  | 11 | 5  | 2.078608368 | 0.0614303   | ZNF2     | ENSG00000163067 |
| 2 | 95303621 | 95304026 | 95303932 | 10 | 17 | 4  | 3.741495063 | 0.00163722  | PROM2    | ENSG00000155066 |
| 2 | 95342974 | 95343212 | 95343106 | 9  | 11 | 1  | 6.235825105 | 0.0013754   | KCNIP3   | ENSG00000115041 |
| 2 | 96129768 | 96130226 | 96129947 | 13 | 24 | 3  | 6.495651151 | 8.89E-06    | ADRA2B   | ENSG00000222040 |
| 2 | 96176514 | 96176742 | 96176628 | 12 | 12 | 4  | 2.702190879 | 0.0203088   | DUSP2    | ENSG00000158050 |
| 2 | 96214876 | 96215123 | 96214999 | 14 | 16 | 3  | 4.417042783 | 0.00097367  | STARD7   | ENSG00000084090 |
| 2 | 96327926 | 96328164 | 96328037 | 9  | 9  | 2  | 3.464347281 | 0.0163838   | SNRNP200 | ENSG00000144028 |
| 2 | 96334941 | 96335283 | 96335112 | 9  | 13 | 7  | 1.818782322 | 0.0805123   | SNRNP200 | ENSG00000144028 |
| 2 | 96709464 | 96709841 | 96709662 | 11 | 18 | 12 | 1.518983039 | 0.117837    | FER1L5   | ENSG00000214272 |
| 2 | 96744130 | 96744333 | 96744231 | 9  | 9  | 3  | 2.598260461 | 0.0397929   | FER1L5   | ENSG00000214272 |
| 2 | 96801225 | 96801550 | 96801379 | 13 | 15 | 6  | 2.375552421 | 0.0212094   | CNNM4    | ENSG00000158158 |
| 2 | 96830455 | 96830714 | 96830581 | 10 | 10 | 3  | 2.858086507 | 0.0242838   | CNNM3    | ENSG00000168763 |
| 2 | 96848641 | 96849071 | 96848846 | 17 | 29 | 12 | 2.398394271 | 0.00272121  | CNNM3    | ENSG00000168763 |
| 2 | 96891632 | 96891884 | 96891758 | 8  | 9  | 3  | 2.598260461 | 0.0397929   | ANKRD39  | ENSG00000213337 |
| 2 | 96901977 | 96902169 | 96902039 | 8  | 10 | 5  | 1.905391004 | 0.0915982   | SEMA4C   | ENSG00000168758 |
| 2 | 96902491 | 96902681 | 96902609 | 9  | 11 | 5  | 2.078608368 | 0.0614303   | SEMA4C   | ENSG00000168758 |
| 2 | 96915751 | 96916142 | 96915925 | 11 | 16 | 6  | 2.524024447 | 0.0137633   | FAM178B  | ENSG00000168754 |
| 2 | 96917690 | 96918380 | 96918158 | 19 | 37 | 11 | 3.291129917 | 4.12E-05    | FAM178B  | ENSG00000168754 |
| 2 | 96923062 | 96923333 | 96923215 | 10 | 12 | 2  | 4.503651465 | 0.002963    | FAM178B  | ENSG00000168754 |
| 2 | 96927306 | 96927667 | 96927485 | 11 | 18 | 3  | 4.936694875 | 0.000311102 | FAM178B  | ENSG00000168754 |
| 2 | 96932813 | 96933094 | 96932951 | 9  | 12 | 4  | 2.702190879 | 0.0203088   | FAM178B  | ENSG00000168754 |
| 2 | 96960083 | 96960338 | 96960210 | 9  | 11 | 9  | 1.247165021 | 0.300052    |          | ENSG00000208682 |
| 2 | 96963174 | 96963369 | 96963251 | 8  | 9  | 6  | 1.484720263 | 0.204387    |          | ENSG00000208682 |
| 2 | 96994167 | 96994553 | 96994378 | 14 | 19 | 10 | 1.889643971 | 0.0394833   | FAM178B  | ENSG00000168754 |
| 2 | 96995117 | 96995318 | 96995225 | 9  | 10 | 1  | 5.716173013 | 0.00260397  | FAM178B  | ENSG00000168754 |
| 2 | 97628641 | 97629069 | 97628819 | 10 | 16 | 11 | 1.472347594 | 0.147517    | COX5B    | ENSG00000135940 |
| 2 | 97831353 | 97831686 | 97831529 | 15 | 19 | 1  | 10.39304184 | 7.23E-06    |          | ENSG00000198875 |
| 2 | 98210886 | 98211066 | 98211025 | 8  | 8  | 0  | 9.353737658 | 0.00163931  | VWA3B    | ENSG00000168658 |
| 2 | 98272107 | 98272346 | 98272226 | 15 | 16 | 1  | 8.834085566 | 5.30E-05    |          | ENSG00000216112 |

|   |           |           |           |    |    |    |             |             |         |                 |
|---|-----------|-----------|-----------|----|----|----|-------------|-------------|---------|-----------------|
| 2 | 98339447  | 98339715  | 98339611  | 8  | 11 | 3  | 3.117912553 | 0.0146045   | CNGA3   | ENSG00000144191 |
| 2 | 98367910  | 98368108  | 98368009  | 8  | 10 | 0  | 11.43234603 | 0.000394183 | CNGA3   | ENSG00000144191 |
| 2 | 98418654  | 98418861  | 98418799  | 9  | 9  | 0  | 10.39304184 | 0.000803859 | INPP4A  | ENSG00000040933 |
| 2 | 98427504  | 98427683  | 98427593  | 8  | 8  | 2  | 3.117912553 | 0.0283184   | INPP4A  | ENSG00000040933 |
| 2 | 98499771  | 98499950  | 98499772  | 8  | 8  | 0  | 9.353737658 | 0.00163931  | INPP4A  | ENSG00000040933 |
| 2 | 98580535  | 98580714  | 98580624  | 8  | 8  | 3  | 2.338434415 | 0.0641221   | C2orf64 | ENSG00000183513 |
| 2 | 98591255  | 98591489  | 98591372  | 11 | 12 | 5  | 2.251825733 | 0.0404733   | C2orf64 | ENSG00000183513 |
| 2 | 98776323  | 98776516  | 98776419  | 8  | 8  | 0  | 9.353737658 | 0.00163931  |         | ENSG00000201070 |
| 2 | 98777185  | 98777479  | 98777348  | 13 | 15 | 5  | 2.771477825 | 0.0105836   |         | ENSG00000201070 |
| 2 | 98818786  | 98818965  | 98818856  | 8  | 8  | 5  | 1.558956276 | 0.191397    |         | ENSG00000201070 |
| 2 | 99023660  | 99024120  | 99023816  | 26 | 33 | 0  | 35.33634226 | 3.00E-11    | TSGA10  | ENSG00000135951 |
| 2 | 99137584  | 99137780  | 99137650  | 8  | 10 | 0  | 11.43234603 | 0.000394183 | TSGA10  | ENSG00000135951 |
| 2 | 99138059  | 99138323  | 99138204  | 12 | 15 | 4  | 3.32577339  | 0.00462646  | MRPL30  | ENSG00000185414 |
| 2 | 99163885  | 99164258  | 99164079  | 11 | 18 | 10 | 1.795161773 | 0.055383    | MRPL30  | ENSG00000185414 |
| 2 | 99320140  | 99320325  | 99320232  | 8  | 8  | 7  | 1.169217207 | 0.371848    | EIF5B   | ENSG00000158417 |
| 2 | 99387380  | 99387605  | 99387492  | 8  | 9  | 5  | 1.73217364  | 0.133894    | TXNDC9  | ENSG00000115514 |
| 2 | 99542071  | 99542358  | 99542209  | 12 | 14 | 3  | 3.897390691 | 0.00295882  |         | ENSG00000222274 |
| 2 | 99553128  | 99553336  | 99553275  | 10 | 12 | 1  | 6.755477198 | 0.000722752 |         | ENSG00000222274 |
| 2 | 99619372  | 99619827  | 99619548  | 19 | 28 | 15 | 1.883738834 | 0.0179382   |         | ENSG00000222274 |
| 2 | 99639634  | 99640233  | 99640054  | 11 | 27 | 10 | 2.64550156  | 0.00175911  |         | ENSG00000222274 |
| 2 | 99691278  | 99691590  | 99691422  | 10 | 12 | 3  | 3.377738599 | 0.00867157  |         | ENSG00000222274 |
| 2 | 99692696  | 99692928  | 99692812  | 8  | 9  | 3  | 2.598260461 | 0.0397929   |         | ENSG00000222274 |
| 2 | 99710163  | 99710487  | 99710325  | 11 | 13 | 3  | 3.637564645 | 0.0050909   |         | ENSG00000222274 |
| 2 | 99789716  | 99789905  | 99789810  | 11 | 11 | 5  | 2.078608368 | 0.0614303   |         | ENSG00000222274 |
| 2 | 99960819  | 99961173  | 99960996  | 17 | 23 | 0  | 24.94330042 | 3.74E-08    | AFF3    | ENSG00000144218 |
| 2 | 100050678 | 100051021 | 100050849 | 12 | 16 | 7  | 2.208521392 | 0.0257604   | AFF3    | ENSG00000144218 |
| 2 | 100232014 | 100232400 | 100232192 | 18 | 26 | 2  | 9.353737658 | 4.98E-07    | LONRF2  | ENSG00000170500 |
| 2 | 100250483 | 100250701 | 100250595 | 9  | 11 | 4  | 2.494330042 | 0.0324033   | LONRF2  | ENSG00000170500 |
| 2 | 100264889 | 100265115 | 100265009 | 8  | 8  | 2  | 3.117912553 | 0.0283184   | LONRF2  | ENSG00000170500 |
| 2 | 100273944 | 100274377 | 100274168 | 13 | 22 | 6  | 3.414856605 | 0.000820885 | LONRF2  | ENSG00000170500 |
| 2 | 100274949 | 100275284 | 100275116 | 11 | 17 | 6  | 2.672496474 | 0.00882337  | LONRF2  | ENSG00000170500 |
| 2 | 100364061 | 100364450 | 100364271 | 9  | 16 | 1  | 8.834085566 | 5.30E-05    | CHST10  | ENSG00000115526 |
| 2 | 100746824 | 100747047 | 100746906 | 8  | 9  | 1  | 5.196520921 | 0.00490062  | NPAS2   | ENSG00000170485 |
| 2 | 100942309 | 100942488 | 100942472 | 8  | 8  | 3  | 2.338434415 | 0.0641221   | RPL31   | ENSG00000071082 |

|   |           |           |           |     |     |    |             |             |         |                 |
|---|-----------|-----------|-----------|-----|-----|----|-------------|-------------|---------|-----------------|
| 2 | 100985102 | 100985385 | 100985243 | 10  | 13  | 4  | 2.910051716 | 0.0125532   | RPL31   | ENSG00000071082 |
| 2 | 100995622 | 100995829 | 100995725 | 8   | 8   | 10 | 0.850339787 | 0.645072    | RPL31   | ENSG00000071082 |
| 2 | 101012736 | 101012959 | 101012847 | 8   | 8   | 3  | 2.338434415 | 0.0641221   | RPL31   | ENSG00000071082 |
| 2 | 101096163 | 101096505 | 101096330 | 45  | 48  | 3  | 12.73147626 | 2.12E-12    | TBC1D8  | ENSG00000204634 |
| 2 | 101103357 | 101103662 | 101103497 | 8   | 11  | 5  | 2.078608368 | 0.0614303   | TBC1D8  | ENSG00000204634 |
| 2 | 101118634 | 101118833 | 101118727 | 8   | 9   | 4  | 2.078608368 | 0.0785659   | TBC1D8  | ENSG00000204634 |
| 2 | 101142459 | 101142795 | 101142627 | 15  | 20  | 2  | 7.27512929  | 2.27E-05    | TBC1D8  | ENSG00000204634 |
| 2 | 101167947 | 101168170 | 101168058 | 13  | 14  | 2  | 5.196520921 | 0.000907371 | TBC1D8  | ENSG00000204634 |
| 2 | 101259952 | 101260167 | 101260090 | 9   | 10  | 2  | 3.810782009 | 0.00936112  |         | ENSG00000212283 |
| 2 | 101291678 | 101291965 | 101291812 | 13  | 14  | 4  | 3.117912553 | 0.00766354  | RNF149  | ENSG00000163162 |
| 2 | 101310685 | 101311006 | 101310845 | 34  | 36  | 8  | 4.27269498  | 4.32E-06    | RNF149  | ENSG00000163162 |
| 2 | 101686902 | 101687373 | 101687099 | 145 | 174 | 2  | 60.62607741 | 2.83E-51    | MAP4K4  | ENSG00000071054 |
| 2 | 101818583 | 101818771 | 101818677 | 9   | 9   | 1  | 5.196520921 | 0.00490062  | MAP4K4  | ENSG00000071054 |
| 2 | 102223647 | 102223983 | 102223814 | 9   | 13  | 7  | 1.818782322 | 0.0805123   |         | ENSG00000205716 |
| 2 | 102284971 | 102285204 | 102285031 | 8   | 10  | 2  | 3.810782009 | 0.00936112  | IL1RL1  | ENSG00000115602 |
| 2 | 102455905 | 102456148 | 102456005 | 10  | 13  | 0  | 14.55025858 | 4.65E-05    | SLC9A4  | ENSG00000180251 |
| 2 | 102488365 | 102488594 | 102488479 | 13  | 14  | 1  | 7.794781382 | 0.000197021 | SLC9A4  | ENSG00000180251 |
| 2 | 102835512 | 102835691 | 102835537 | 8   | 10  | 4  | 2.286469205 | 0.0509017   | TMEM182 | ENSG00000170417 |
| 2 | 102966744 | 102967077 | 102966910 | 17  | 20  | 2  | 7.27512929  | 2.27E-05    | TMEM182 | ENSG00000170417 |
| 2 | 102993217 | 102993396 | 102993321 | 8   | 9   | 0  | 10.39304184 | 0.000803859 | TMEM182 | ENSG00000170417 |
| 2 | 103620746 | 103621165 | 103620915 | 23  | 30  | 0  | 32.21842971 | 2.55E-10    |         |                 |
| 2 | 104315833 | 104316087 | 104316005 | 10  | 12  | 8  | 1.501217155 | 0.168286    |         | ENSG00000199727 |
| 2 | 104350944 | 104351193 | 104351068 | 9   | 11  | 0  | 12.47165021 | 0.000193293 |         | ENSG00000199727 |
| 2 | 104464405 | 104464767 | 104464588 | 15  | 21  | 5  | 3.810782009 | 0.000537724 |         | ENSG00000199727 |
| 2 | 104686420 | 104687052 | 104686599 | 35  | 49  | 4  | 10.39304184 | 7.73E-12    |         | ENSG00000207249 |
| 2 | 104856405 | 104856589 | 104856483 | 9   | 9   | 2  | 3.464347281 | 0.0163838   | POU3F3  | ENSG00000198914 |
| 2 | 104988844 | 104989042 | 104988943 | 8   | 8   | 2  | 3.117912553 | 0.0283184   | MRPS9   | ENSG00000135972 |
| 2 | 105731865 | 105732044 | 105731913 | 9   | 10  | 3  | 2.858086507 | 0.0242838   | NCK2    | ENSG00000071051 |
| 2 | 105823998 | 105824197 | 105824072 | 12  | 12  | 2  | 4.503651465 | 0.002963    | NCK2    | ENSG00000071051 |
| 2 | 105838989 | 105839187 | 105839088 | 8   | 9   | 1  | 5.196520921 | 0.00490062  | NCK2    | ENSG00000071051 |
| 2 | 105843296 | 105843484 | 105843443 | 8   | 9   | 0  | 10.39304184 | 0.000803859 | NCK2    | ENSG00000071051 |
| 2 | 106555622 | 106555850 | 106555697 | 8   | 9   | 3  | 2.598260461 | 0.0397929   | CD8BP   | ENSG00000169664 |
| 2 | 106606886 | 106607076 | 106606981 | 8   | 8   | 1  | 4.676868829 | 0.0091584   |         | ENSG00000221149 |
| 2 | 106688955 | 106689176 | 106689070 | 9   | 11  | 3  | 3.117912553 | 0.0146045   |         | ENSG00000214199 |

|   |           |           |           |    |    |    |             |             |         |                 |
|---|-----------|-----------|-----------|----|----|----|-------------|-------------|---------|-----------------|
| 2 | 106689180 | 106689464 | 106689304 | 9  | 13 | 0  | 14.55025858 | 4.65E-05    |         | ENSG00000214199 |
| 2 | 108202544 | 108202723 | 108202649 | 8  | 8  | 1  | 4.676868829 | 0.0091584   | SULT1C3 | ENSG00000196228 |
| 2 | 108318734 | 108319026 | 108318880 | 11 | 12 | 0  | 13.5109544  | 9.48E-05    | SULT1C4 | ENSG00000198075 |
| 2 | 108347633 | 108347854 | 108347743 | 9  | 11 | 2  | 4.157216737 | 0.0052913   | SULT1C4 | ENSG00000198075 |
| 2 | 108347876 | 108348092 | 108347984 | 8  | 10 | 1  | 5.716173013 | 0.00260397  | SULT1C4 | ENSG00000198075 |
| 2 | 108427980 | 108428509 | 108428286 | 32 | 46 | 1  | 24.42364833 | 7.10E-14    | GCC2    | ENSG00000135968 |
| 2 | 108619253 | 108619516 | 108619384 | 9  | 11 | 4  | 2.494330042 | 0.0324033   | LIMS1   | ENSG00000169756 |
| 2 | 108832249 | 108832598 | 108832423 | 8  | 14 | 2  | 5.196520921 | 0.000907371 | CCDC138 | ENSG00000163006 |
| 2 | 108888069 | 108888308 | 108888188 | 8  | 9  | 2  | 3.464347281 | 0.0163838   | EDAR    | ENSG00000135960 |
| 2 | 109132236 | 109132476 | 109132356 | 8  | 10 | 1  | 5.716173013 | 0.00260397  | EDAR    | ENSG00000135960 |
| 2 | 109390718 | 109390996 | 109390857 | 8  | 13 | 6  | 2.078608368 | 0.0483393   |         | ENSG00000172985 |
| 2 | 109453428 | 109453767 | 109453602 | 10 | 15 | 2  | 5.542955649 | 0.000497081 |         | ENSG00000172985 |
| 2 | 109613059 | 109613260 | 109613162 | 8  | 8  | 0  | 9.353737658 | 0.00163931  | 10-Sep  | ENSG00000186522 |
| 2 | 109657469 | 109657658 | 109657563 | 8  | 8  | 0  | 9.353737658 | 0.00163931  | 10-Sep  | ENSG00000186522 |
| 2 | 109759592 | 109759799 | 109759691 | 8  | 10 | 1  | 5.716173013 | 0.00260397  | ANKRD57 | ENSG00000198142 |
| 2 | 109805708 | 109806060 | 109805909 | 22 | 27 | 5  | 4.850086193 | 2.10E-05    |         | ENSG00000183998 |
| 2 | 110186842 | 110187130 | 110186986 | 11 | 14 | 10 | 1.417232979 | 0.185113    | MALL    | ENSG00000144063 |
| 2 | 111362074 | 111362426 | 111362250 | 10 | 15 | 2  | 5.542955649 | 0.000497081 | ACOXL   | ENSG00000153093 |
| 2 | 111502839 | 111503029 | 111502956 | 9  | 10 | 4  | 2.286469205 | 0.0509017   |         | ENSG00000204581 |
| 2 | 111542585 | 111542824 | 111542653 | 11 | 13 | 4  | 2.910051716 | 0.0125532   |         | ENSG00000204581 |
| 2 | 112159579 | 112159758 | 112159658 | 8  | 8  | 6  | 1.336248237 | 0.277651    |         | ENSG00000172965 |
| 2 | 112420837 | 112421074 | 112420955 | 12 | 12 | 2  | 4.503651465 | 0.002963    |         | ENSG00000208643 |
| 2 | 112506026 | 112506416 | 112506196 | 10 | 17 | 5  | 3.117912553 | 0.00407023  | TMEM87B | ENSG00000153214 |
| 2 | 112703387 | 112703762 | 112703615 | 29 | 34 | 1  | 18.18782322 | 2.77E-10    | ZC3H8   | ENSG00000144161 |
| 2 | 112728903 | 112729147 | 112729015 | 13 | 13 | 3  | 3.637564645 | 0.0050909   | ZC3H8   | ENSG00000144161 |
| 2 | 112749276 | 112749744 | 112749565 | 11 | 21 | 8  | 2.540521339 | 0.00602138  | ZC3H6   | ENSG00000188177 |
| 2 | 112796621 | 112796951 | 112796790 | 14 | 14 | 6  | 2.227080395 | 0.0322529   | ZC3H6   | ENSG00000188177 |
| 2 | 113016552 | 113016830 | 113016722 | 9  | 11 | 8  | 1.385738912 | 0.224757    | POLR1B  | ENSG00000125630 |
| 2 | 113058238 | 113058717 | 113058417 | 10 | 20 | 5  | 3.637564645 | 0.000902929 | CHCHD5  | ENSG00000125611 |
| 2 | 113166555 | 113167016 | 113166734 | 18 | 28 | 4  | 6.027964269 | 3.34E-06    |         | ENSG00000223139 |
| 2 | 113223854 | 113224121 | 113223987 | 9  | 11 | 2  | 4.157216737 | 0.0052913   | CKAP2L  | ENSG00000169607 |
| 2 | 113288364 | 113288825 | 113288594 | 37 | 48 | 7  | 6.365738128 | 1.63E-09    | IL1B    | ENSG00000125538 |
| 2 | 113314824 | 113315003 | 113314896 | 9  | 9  | 2  | 3.464347281 | 0.0163838   |         | ENSG00000221541 |
| 2 | 113591727 | 113591927 | 113591845 | 8  | 10 | 0  | 11.43234603 | 0.000394183 | IL1RN   | ENSG00000136689 |

|   |           |           |           |     |     |    |             |             |         |                 |
|---|-----------|-----------|-----------|-----|-----|----|-------------|-------------|---------|-----------------|
| 2 | 113659244 | 113659506 | 113659336 | 10  | 11  | 6  | 1.781664316 | 0.103344    | PSD4    | ENSG00000125637 |
| 2 | 113659707 | 113659901 | 113659804 | 8   | 9   | 4  | 2.078608368 | 0.0785659   | PSD4    | ENSG00000125637 |
| 2 | 114363660 | 114363973 | 114363816 | 12  | 15  | 8  | 1.847651883 | 0.0631662   | ACTR3   | ENSG00000115091 |
| 2 | 115411590 | 115411772 | 115411617 | 8   | 10  | 7  | 1.429043253 | 0.21536     |         | ENSG00000208611 |
| 2 | 118286530 | 118286738 | 118286634 | 8   | 9   | 1  | 5.196520921 | 0.00490062  | DDX18   | ENSG00000088205 |
| 2 | 118288442 | 118288737 | 118288564 | 11  | 15  | 6  | 2.375552421 | 0.0212094   | DDX18   | ENSG00000088205 |
| 2 | 118432349 | 118432534 | 118432441 | 10  | 10  | 1  | 5.716173013 | 0.00260397  |         | ENSG00000218814 |
| 2 | 118589820 | 118590203 | 118590024 | 34  | 42  | 5  | 7.448346654 | 3.24E-09    | INSIG2  | ENSG00000125629 |
| 2 | 119306025 | 119306204 | 119306114 | 8   | 8   | 0  | 9.353737658 | 0.00163931  | EN1     | ENSG00000163064 |
| 2 | 119356735 | 119356921 | 119356814 | 8   | 8   | 2  | 3.117912553 | 0.0283184   | EN1     | ENSG00000163064 |
| 2 | 119497686 | 119497882 | 119497784 | 8   | 8   | 0  | 9.353737658 | 0.00163931  | MARCO   | ENSG00000019169 |
| 2 | 119547908 | 119548264 | 119548086 | 20  | 26  | 4  | 5.612242595 | 1.08E-05    | C1QL2   | ENSG00000144119 |
| 2 | 119648634 | 119648822 | 119648728 | 9   | 9   | 4  | 2.078608368 | 0.0785659   |         | ENSG00000208545 |
| 2 | 119691436 | 119691691 | 119691563 | 12  | 13  | 3  | 3.637564645 | 0.0050909   | STEAP3  | ENSG00000115107 |
| 2 | 119692199 | 119692945 | 119692561 | 194 | 261 | 11 | 22.69147469 | 6.63E-66    | STEAP3  | ENSG00000115107 |
| 2 | 119693673 | 119693852 | 119693762 | 8   | 8   | 0  | 9.353737658 | 0.00163931  | STEAP3  | ENSG00000115107 |
| 2 | 119714492 | 119714992 | 119714762 | 27  | 46  | 3  | 12.21182416 | 7.85E-12    | STEAP3  | ENSG00000115107 |
| 2 | 119840832 | 119841175 | 119840986 | 8   | 12  | 8  | 1.501217155 | 0.168286    | DBI     | ENSG00000155368 |
| 2 | 119889747 | 119890122 | 119889961 | 8   | 15  | 8  | 1.847651883 | 0.0631662   | TMEM37  | ENSG00000171227 |
| 2 | 120152109 | 120152365 | 120152252 | 10  | 11  | 2  | 4.157216737 | 0.0052913   | TMEM177 | ENSG00000144120 |
| 2 | 120177017 | 120177196 | 120177106 | 8   | 8   | 2  | 3.117912553 | 0.0283184   | TMEM177 | ENSG00000144120 |
| 2 | 120218446 | 120218683 | 120218593 | 8   | 10  | 4  | 2.286469205 | 0.0509017   | PTPN4   | ENSG00000088179 |
| 2 | 120233624 | 120234101 | 120233862 | 8   | 18  | 9  | 1.97467795  | 0.0349428   | PTPN4   | ENSG00000088179 |
| 2 | 120312417 | 120312705 | 120312591 | 9   | 13  | 2  | 4.850086193 | 0.00164564  |         | ENSG00000208541 |
| 2 | 120541101 | 120541596 | 120541426 | 11  | 22  | 7  | 2.98799953  | 0.00188278  | EPB41L5 | ENSG00000115109 |
| 2 | 120582124 | 120582419 | 120582271 | 15  | 18  | 3  | 4.936694875 | 0.000311102 |         | ENSG00000202046 |
| 2 | 120765424 | 120765752 | 120765588 | 18  | 19  | 13 | 1.484720263 | 0.123861    | RALB    | ENSG00000144118 |
| 2 | 120787346 | 120787538 | 120787413 | 9   | 10  | 5  | 1.905391004 | 0.0915982   | INHBB   | ENSG00000163083 |
| 2 | 120873412 | 120873648 | 120873504 | 9   | 10  | 2  | 3.810782009 | 0.00936112  | INHBB   | ENSG00000163083 |
| 2 | 120877734 | 120877992 | 120877862 | 8   | 10  | 4  | 2.286469205 | 0.0509017   | INHBB   | ENSG00000163083 |
| 2 | 120917040 | 120917257 | 120917148 | 8   | 10  | 5  | 1.905391004 | 0.0915982   | INHBB   | ENSG00000163083 |
| 2 | 121276434 | 121276613 | 121276507 | 8   | 8   | 2  | 3.117912553 | 0.0283184   | GLI2    | ENSG00000074047 |
| 2 | 121510211 | 121510531 | 121510371 | 9   | 13  | 5  | 2.425043097 | 0.0262442   |         | ENSG00000221321 |
| 2 | 121551035 | 121551242 | 121551124 | 8   | 10  | 4  | 2.286469205 | 0.0509017   |         | ENSG00000201584 |

|   |           |           |           |    |    |    |             |             |         |                 |
|---|-----------|-----------|-----------|----|----|----|-------------|-------------|---------|-----------------|
| 2 | 121573325 | 121573673 | 121573499 | 11 | 15 | 6  | 2.375552421 | 0.0212094   |         | ENSG00000201584 |
| 2 | 121737677 | 121737941 | 121737809 | 10 | 11 | 3  | 3.117912553 | 0.0146045   | TFCP2L1 | ENSG00000115112 |
| 2 | 122005049 | 122005339 | 122005202 | 11 | 15 | 12 | 1.279143611 | 0.251893    |         | ENSG00000208506 |
| 2 | 122043563 | 122043742 | 122043627 | 8  | 8  | 1  | 4.676868829 | 0.0091584   |         | ENSG00000222467 |
| 2 | 122157891 | 122158091 | 122157957 | 8  | 8  | 1  | 4.676868829 | 0.0091584   |         | ENSG00000213239 |
| 2 | 122473444 | 122473817 | 122473623 | 15 | 22 | 3  | 5.975999059 | 2.96E-05    | TSN     | ENSG00000211460 |
| 2 | 122993969 | 122994224 | 122994076 | 10 | 12 | 1  | 6.755477198 | 0.000722752 |         |                 |
| 2 | 124468669 | 124468879 | 124468823 | 8  | 8  | 0  | 9.353737658 | 0.00163931  | CNTNAP5 | ENSG00000155052 |
| 2 | 127700708 | 127701039 | 127700877 | 22 | 24 | 11 | 2.16521705  | 0.0106896   | CYP27C1 | ENSG00000186684 |
| 2 | 127829587 | 127829766 | 127829740 | 9  | 9  | 2  | 3.464347281 | 0.0163838   | MAP3K2  | ENSG00000169967 |
| 2 | 127872283 | 127872738 | 127872462 | 9  | 16 | 11 | 1.472347594 | 0.147517    | MAP3K2  | ENSG00000169967 |
| 2 | 127885285 | 127885531 | 127885428 | 10 | 13 | 8  | 1.616695398 | 0.123553    | PROC    | ENSG00000115718 |
| 2 | 127905819 | 127906028 | 127905908 | 8  | 9  | 5  | 1.73217364  | 0.133894    | PROC    | ENSG00000115718 |
| 2 | 127929936 | 127930217 | 127930069 | 8  | 8  | 2  | 3.117912553 | 0.0283184   |         | ENSG00000202429 |
| 2 | 128001026 | 128001253 | 128001169 | 9  | 11 | 4  | 2.494330042 | 0.0324033   | IWS1    | ENSG00000163166 |
| 2 | 128195762 | 128195941 | 128195851 | 8  | 8  | 0  | 9.353737658 | 0.00163931  | SFT2D3  | ENSG00000173349 |
| 2 | 128333698 | 128334099 | 128333922 | 13 | 19 | 4  | 4.157216737 | 0.000560204 | POLR2D  | ENSG00000144231 |
| 2 | 128496044 | 128496228 | 128496136 | 9  | 9  | 2  | 3.464347281 | 0.0163838   | SAP130  | ENSG00000136715 |
| 2 | 128516964 | 128517288 | 128517126 | 13 | 17 | 0  | 18.70747532 | 2.69E-06    | SAP130  | ENSG00000136715 |
| 2 | 128626529 | 128626711 | 128626682 | 9  | 9  | 0  | 10.39304184 | 0.000803859 | UGCGL1  | ENSG00000136731 |
| 2 | 128779148 | 128779343 | 128779198 | 8  | 11 | 7  | 1.558956276 | 0.158273    | HS6ST1  | ENSG00000136720 |
| 2 | 128780304 | 128780663 | 128780553 | 10 | 15 | 1  | 8.314433474 | 0.000102308 | HS6ST1  | ENSG00000136720 |
| 2 | 129069231 | 129069410 | 129069315 | 8  | 8  | 2  | 3.117912553 | 0.0283184   |         | ENSG00000208433 |
| 2 | 129530318 | 129530611 | 129530471 | 18 | 20 | 3  | 5.456346967 | 9.70E-05    |         | ENSG00000204460 |
| 2 | 129533027 | 129533270 | 129533094 | 10 | 12 | 4  | 2.702190879 | 0.0203088   |         | ENSG00000204460 |
| 2 | 129722708 | 129722904 | 129722846 | 8  | 8  | 3  | 2.338434415 | 0.0641221   |         | ENSG00000204460 |
| 2 | 129800818 | 129801053 | 129800935 | 11 | 12 | 0  | 13.5109544  | 9.48E-05    |         | ENSG00000204460 |
| 2 | 130222834 | 130223062 | 130222918 | 8  | 8  | 3  | 2.338434415 | 0.0641221   |         | ENSG00000204459 |
| 2 | 130287923 | 130288102 | 130288036 | 8  | 8  | 3  | 2.338434415 | 0.0641221   |         | ENSG00000204459 |
| 2 | 130344724 | 130344924 | 130344791 | 8  | 9  | 5  | 1.73217364  | 0.133894    |         | ENSG00000214100 |
| 2 | 130715198 | 130715383 | 130715290 | 10 | 10 | 4  | 2.286469205 | 0.0509017   |         | ENSG00000213225 |
| 2 | 130762901 | 130763083 | 130762992 | 8  | 8  | 4  | 1.870747532 | 0.118863    |         | ENSG00000208390 |
| 2 | 130806640 | 130806901 | 130806792 | 10 | 11 | 8  | 1.385738912 | 0.224757    | CCDC115 | ENSG00000136710 |
| 2 | 130811073 | 130811292 | 130811156 | 10 | 12 | 7  | 1.688869299 | 0.11395     | CCDC115 | ENSG00000136710 |



|   |           |           |           |    |     |     |             |             |         |                 |
|---|-----------|-----------|-----------|----|-----|-----|-------------|-------------|---------|-----------------|
| 2 | 131491280 | 131491749 | 131491570 | 8  | 17  | 2   | 6.235825105 | 0.000146695 | ARHGEF4 | ENSG00000136002 |
| 2 | 131966870 | 131967070 | 131966977 | 9  | 10  | 2   | 3.810782009 | 0.00936112  |         | ENSG00000152117 |
| 2 | 132712633 | 132713276 | 132712954 | 24 | 46  | 41  | 1.163030873 | 0.237635    |         | ENSG00000202174 |
| 2 | 132719636 | 132719967 | 132719804 | 26 | 28  | 32  | 0.913327919 | 0.640772    |         | ENSG00000202174 |
| 2 | 132728316 | 132728777 | 132728556 | 47 | 56  | 32  | 1.795161773 | 0.00308436  |         | ENSG00000202174 |
| 2 | 132728877 | 132730149 | 132729339 | 75 | 225 | 188 | 1.24276585  | 0.0135      |         | ENSG00000200236 |
| 2 | 132731507 | 132731859 | 132731683 | 39 | 44  | 37  | 1.230754955 | 0.171645    |         | ENSG00000221288 |
| 2 | 132733093 | 132733890 | 132733272 | 26 | 64  | 69  | 0.965068171 | 0.582467    |         | ENSG00000221288 |
| 2 | 132735092 | 132735578 | 132735385 | 36 | 49  | 52  | 0.980475646 | 0.540501    |         | ENSG00000221288 |
| 2 | 132735757 | 132736405 | 132736226 | 17 | 31  | 51  | 0.639571806 | 0.978753    |         | ENSG00000221288 |
| 2 | 132736408 | 132736834 | 132736621 | 21 | 36  | 39  | 0.96135637  | 0.569549    |         | ENSG00000221288 |
| 2 | 132737363 | 132737695 | 132737529 | 10 | 15  | 27  | 0.593888105 | 0.956572    |         | ENSG00000221288 |
| 2 | 132738884 | 132739087 | 132739016 | 8  | 10  | 9   | 1.143234603 | 0.378307    |         | ENSG00000221288 |
| 2 | 132739143 | 132739394 | 132739268 | 8  | 9   | 6   | 1.484720263 | 0.204387    |         | ENSG00000221288 |
| 2 | 132739521 | 132740260 | 132739700 | 21 | 49  | 50  | 1.018925671 | 0.462828    |         | ENSG00000221288 |
| 2 | 132741490 | 132742662 | 132741858 | 43 | 118 | 121 | 1.013747524 | 0.458058    |         | ENSG00000221288 |
| 2 | 132742700 | 132742889 | 132742720 | 9  | 11  | 12  | 0.959357709 | 0.543005    |         | ENSG00000221288 |
| 2 | 132743036 | 132743677 | 132743222 | 48 | 95  | 95  | 1.039304184 | 0.394836    |         | ENSG00000211547 |
| 2 | 132743811 | 132744142 | 132743976 | 16 | 18  | 31  | 0.617086859 | 0.956343    |         | ENSG00000211547 |
| 2 | 132744737 | 132745257 | 132744918 | 69 | 81  | 61  | 1.374563599 | 0.028402    |         | ENSG00000211547 |
| 2 | 132745271 | 132746421 | 132746148 | 66 | 146 | 114 | 1.32850187  | 0.010896    |         | ENSG00000211547 |
| 2 | 132746492 | 132747961 | 132747043 | 73 | 190 | 195 | 1.012791322 | 0.450465    |         | ENSG00000211547 |
| 2 | 132748104 | 132748438 | 132748271 | 32 | 38  | 30  | 1.307511716 | 0.130608    |         | ENSG00000211547 |
| 2 | 132748530 | 132748795 | 132748662 | 8  | 12  | 10  | 1.228268581 | 0.305344    |         | ENSG00000211547 |
| 2 | 132748944 | 132750190 | 132749856 | 29 | 81  | 73  | 1.151661393 | 0.1887      |         | ENSG00000211547 |
| 2 | 132750609 | 132751392 | 132751073 | 42 | 82  | 92  | 0.927551046 | 0.691643    |         | ENSG00000211547 |
| 2 | 132751510 | 132751698 | 132751666 | 10 | 10  | 11  | 0.952695502 | 0.548138    |         | ENSG00000211547 |
| 2 | 132751908 | 132752351 | 132752194 | 16 | 25  | 23  | 1.125912866 | 0.336929    |         | ENSG00000211547 |
| 2 | 132753069 | 132753259 | 132753154 | 9  | 9   | 7   | 1.29913023  | 0.286504    |         | ENSG00000211547 |
| 2 | 132754587 | 132754831 | 132754679 | 30 | 30  | 11  | 2.684869143 | 0.000957822 |         | ENSG00000211547 |
| 2 | 132755087 | 132755278 | 132755126 | 10 | 10  | 3   | 2.858086507 | 0.0242838   |         | ENSG00000211547 |
| 2 | 132755381 | 132755594 | 132755487 | 11 | 11  | 16  | 0.733626483 | 0.800067    |         | ENSG00000211547 |
| 2 | 132890527 | 132890812 | 132890669 | 11 | 13  | 6   | 2.078608368 | 0.0483393   | GPR39   | ENSG00000183840 |
| 2 | 133017218 | 133017593 | 133017440 | 35 | 41  | 0   | 43.65077574 | 1.00E-13    |         | ENSG00000221142 |

|   |           |           |           |    |    |    |             |             |          |                 |
|---|-----------|-----------|-----------|----|----|----|-------------|-------------|----------|-----------------|
| 2 | 133018170 | 133018447 | 133018308 | 12 | 13 | 0  | 14.55025858 | 4.65E-05    |          | ENSG00000221142 |
| 2 | 133430615 | 133430876 | 133430745 | 14 | 17 | 0  | 18.70747532 | 2.69E-06    | LYPD1    | ENSG00000150551 |
| 2 | 133518758 | 133518988 | 133518905 | 14 | 15 | 1  | 8.314433474 | 0.000102308 |          | ENSG00000176771 |
| 2 | 133645561 | 133645741 | 133645651 | 8  | 8  | 3  | 2.338434415 | 0.0641221   |          | ENSG00000176771 |
| 2 | 133909431 | 133909656 | 133909605 | 8  | 11 | 7  | 1.558956276 | 0.158273    |          | ENSG00000208316 |
| 2 | 134115573 | 134115957 | 134115696 | 20 | 27 | 8  | 3.233390795 | 0.000398033 |          | ENSG00000200708 |
| 2 | 134273608 | 134273857 | 134273734 | 12 | 13 | 5  | 2.425043097 | 0.0262442   |          | ENSG00000200708 |
| 2 | 134360764 | 134361123 | 134360923 | 12 | 18 | 7  | 2.468347438 | 0.0112499   | MGAT5    | ENSG00000152127 |
| 2 | 134374638 | 134374977 | 134374801 | 11 | 14 | 1  | 7.794781382 | 0.000197021 | MGAT5    | ENSG00000152127 |
| 2 | 134529148 | 134529411 | 134529279 | 8  | 8  | 0  | 9.353737658 | 0.00163931  | MGAT5    | ENSG00000152127 |
| 2 | 135064759 | 135065135 | 135064956 | 27 | 35 | 0  | 37.41495063 | 7.22E-12    | TMEM163  | ENSG00000152128 |
| 2 | 135112294 | 135112558 | 135112426 | 10 | 10 | 4  | 2.286469205 | 0.0509017   | TMEM163  | ENSG00000152128 |
| 2 | 135317236 | 135317488 | 135317338 | 8  | 10 | 11 | 0.952695502 | 0.548138    | ACMSD    | ENSG00000153086 |
| 2 | 135424252 | 135424451 | 135424351 | 9  | 10 | 1  | 5.716173013 | 0.00260397  | CCNT2    | ENSG00000082258 |
| 2 | 135633412 | 135633598 | 135633505 | 8  | 9  | 1  | 5.196520921 | 0.00490062  | RAB3GAP1 | ENSG00000115839 |
| 2 | 136271646 | 136271867 | 136271756 | 9  | 10 | 0  | 11.43234603 | 0.000394183 |          | ENSG00000200664 |
| 2 | 136400754 | 136400983 | 136400868 | 9  | 11 | 2  | 4.157216737 | 0.0052913   |          | ENSG00000214070 |
| 2 | 136460126 | 136460391 | 136460252 | 8  | 8  | 5  | 1.558956276 | 0.191397    | DARS     | ENSG00000115866 |
| 2 | 136566156 | 136566347 | 136566229 | 8  | 9  | 1  | 5.196520921 | 0.00490062  | CXCR4    | ENSG00000121966 |
| 2 | 136648292 | 136648506 | 136648403 | 8  | 8  | 4  | 1.870747532 | 0.118863    | CXCR4    | ENSG00000121966 |
| 2 | 136688882 | 136689108 | 136688995 | 8  | 9  | 6  | 1.484720263 | 0.204387    | CXCR4    | ENSG00000121966 |
| 2 | 136849509 | 136850171 | 136849885 | 46 | 68 | 3  | 17.92799718 | 3.64E-18    |          | ENSG00000216081 |
| 2 | 136980011 | 136980191 | 136980151 | 8  | 9  | 1  | 5.196520921 | 0.00490062  |          | ENSG00000216081 |
| 2 | 137642673 | 137642899 | 137642786 | 13 | 13 | 2  | 4.850086193 | 0.00164564  | THSD7B   | ENSG00000144229 |
| 2 | 138546260 | 138546611 | 138546432 | 9  | 14 | 2  | 5.196520921 | 0.000907371 | HNMT     | ENSG00000150540 |
| 2 | 138579706 | 138579885 | 138579856 | 8  | 8  | 0  | 9.353737658 | 0.00163931  | HNMT     | ENSG00000150540 |
| 2 | 138909830 | 138910069 | 138909949 | 9  | 11 | 6  | 1.781664316 | 0.103344    | SPOPL    | ENSG00000144228 |
| 2 | 138911769 | 138912104 | 138911930 | 17 | 21 | 0  | 22.86469205 | 1.55E-07    | SPOPL    | ENSG00000144228 |
| 2 | 138912115 | 138912303 | 138912210 | 8  | 9  | 0  | 10.39304184 | 0.000803859 | SPOPL    | ENSG00000144228 |
| 2 | 139039283 | 139039582 | 139039409 | 9  | 11 | 1  | 6.235825105 | 0.0013754   | SPOPL    | ENSG00000144228 |
| 2 | 139651119 | 139651365 | 139651242 | 8  | 10 | 1  | 5.716173013 | 0.00260397  |          | ENSG00000222826 |
| 2 | 140251083 | 140251272 | 140251254 | 8  | 8  | 0  | 9.353737658 | 0.00163931  |          | ENSG00000221074 |
| 2 | 142374827 | 142375128 | 142374954 | 10 | 12 | 0  | 13.5109544  | 9.48E-05    | LRP1B    | ENSG00000168702 |
| 2 | 142380814 | 142381022 | 142380918 | 8  | 9  | 1  | 5.196520921 | 0.00490062  | LRP1B    | ENSG00000168702 |

|   |           |           |           |    |    |   |             |             |          |                 |
|---|-----------|-----------|-----------|----|----|---|-------------|-------------|----------|-----------------|
| 2 | 143227683 | 143227868 | 143227733 | 9  | 9  | 1 | 5.196520921 | 0.00490062  | KYNU     | ENSG00000115919 |
| 2 | 143331261 | 143331852 | 143331409 | 12 | 27 | 3 | 7.27512929  | 1.42E-06    | KYNU     | ENSG00000115919 |
| 2 | 143351549 | 143351738 | 143351643 | 8  | 9  | 3 | 2.598260461 | 0.0397929   | KYNU     | ENSG00000115919 |
| 2 | 143448451 | 143448900 | 143448562 | 11 | 18 | 4 | 3.9493559   | 0.000961379 |          | ENSG00000221169 |
| 2 | 143758207 | 143758457 | 143758341 | 8  | 11 | 1 | 6.235825105 | 0.0013754   | ARHGAP15 | ENSG00000075884 |
| 2 | 143810885 | 143811092 | 143811011 | 8  | 8  | 4 | 1.870747532 | 0.118863    | ARHGAP15 | ENSG00000075884 |
| 2 | 143872763 | 143873151 | 143872957 | 34 | 43 | 5 | 7.621564018 | 1.77E-09    | ARHGAP15 | ENSG00000075884 |
| 2 | 143874045 | 143874228 | 143874136 | 8  | 8  | 0 | 9.353737658 | 0.00163931  | ARHGAP15 | ENSG00000075884 |
| 2 | 144576432 | 144576828 | 144576602 | 17 | 22 | 4 | 4.780799247 | 0.00010647  | GTDC1    | ENSG00000121964 |
| 2 | 147171168 | 147171686 | 147171529 | 15 | 29 | 2 | 10.39304184 | 7.12E-08    | PABPCP2  | ENSG00000198526 |
| 2 | 148730062 | 148730271 | 148730166 | 8  | 8  | 0 | 9.353737658 | 0.00163931  |          | ENSG00000212181 |
| 2 | 149068356 | 149068556 | 149068415 | 10 | 12 | 3 | 3.377738599 | 0.00867157  | EPC2     | ENSG00000135999 |
| 2 | 149571919 | 149572274 | 149572096 | 33 | 38 | 6 | 5.790409026 | 1.41E-07    | LYPD6B   | ENSG00000150556 |
| 2 | 149582208 | 149582400 | 149582273 | 8  | 9  | 8 | 1.154782427 | 0.375434    | LYPD6B   | ENSG00000150556 |
| 2 | 149605343 | 149605539 | 149605449 | 9  | 9  | 4 | 2.078608368 | 0.0785659   | LYPD6B   | ENSG00000150556 |
| 2 | 149634126 | 149634461 | 149634293 | 12 | 17 | 1 | 9.353737658 | 2.73E-05    | LYPD6B   | ENSG00000150556 |
| 2 | 149686978 | 149687157 | 149687067 | 8  | 8  | 4 | 1.870747532 | 0.118863    | LYPD6B   | ENSG00000150556 |
| 2 | 149734493 | 149734788 | 149734631 | 9  | 12 | 0 | 13.5109544  | 9.48E-05    | LYPD6B   | ENSG00000150556 |
| 2 | 149953712 | 149953891 | 149953801 | 10 | 10 | 4 | 2.286469205 | 0.0509017   | LYPD6    | ENSG00000187123 |
| 2 | 150175955 | 150176314 | 150176177 | 9  | 15 | 2 | 5.542955649 | 0.000497081 |          | ENSG00000207270 |
| 2 | 150554396 | 150554687 | 150554541 | 8  | 13 | 2 | 4.850086193 | 0.00164564  |          | ENSG00000162947 |
| 2 | 150766113 | 150766313 | 150766220 | 8  | 8  | 1 | 4.676868829 | 0.0091584   |          | ENSG00000208244 |
| 2 | 150858569 | 150858915 | 150858742 | 26 | 30 | 0 | 32.21842971 | 2.55E-10    |          | ENSG00000208244 |
| 2 | 151044154 | 151044384 | 151044269 | 8  | 8  | 0 | 9.353737658 | 0.00163931  | RND3     | ENSG00000115963 |
| 2 | 151117424 | 151117629 | 151117526 | 8  | 8  | 0 | 9.353737658 | 0.00163931  | RND3     | ENSG00000115963 |
| 2 | 151473838 | 151474136 | 151474001 | 20 | 22 | 1 | 11.95199812 | 9.69E-07    |          | ENSG00000222031 |
| 2 | 151974403 | 151974674 | 151974526 | 8  | 10 | 2 | 3.810782009 | 0.00936112  | RIF1     | ENSG00000080345 |
| 2 | 152662436 | 152662659 | 152662547 | 8  | 8  | 1 | 4.676868829 | 0.0091584   | CACNB4   | ENSG00000182389 |
| 2 | 152967792 | 152968041 | 152967956 | 11 | 11 | 2 | 4.157216737 | 0.0052913   |          | ENSG00000213197 |
| 2 | 153265870 | 153266324 | 153266145 | 29 | 43 | 0 | 45.72938411 | 2.41E-14    | PRPF40A  | ENSG00000196504 |
| 2 | 153281936 | 153282171 | 153282079 | 8  | 10 | 3 | 2.858086507 | 0.0242838   | PRPF40A  | ENSG00000196504 |
| 2 | 153624494 | 153624720 | 153624613 | 14 | 15 | 2 | 5.542955649 | 0.000497081 |          | ENSG00000214025 |
| 2 | 153793871 | 153794175 | 153794023 | 11 | 13 | 6 | 2.078608368 | 0.0483393   |          | ENSG00000214025 |
| 2 | 156746927 | 156747250 | 156747088 | 10 | 12 | 8 | 1.501217155 | 0.168286    | NR4A2    | ENSG00000153234 |

|   |           |           |           |    |    |   |             |             |         |                 |
|---|-----------|-----------|-----------|----|----|---|-------------|-------------|---------|-----------------|
| 2 | 156871884 | 156872117 | 156872016 | 8  | 10 | 0 | 11.43234603 | 0.000394183 | NR4A2   | ENSG00000153234 |
| 2 | 157048653 | 157048925 | 157048785 | 10 | 12 | 3 | 3.377738599 | 0.00867157  | GPD2    | ENSG00000115159 |
| 2 | 157143017 | 157143196 | 157143106 | 8  | 8  | 1 | 4.676868829 | 0.0091584   | GPD2    | ENSG00000115159 |
| 2 | 157456987 | 157457624 | 157457377 | 25 | 43 | 6 | 6.532769158 | 7.68E-09    |         | ENSG00000213194 |
| 2 | 157468203 | 157468425 | 157468295 | 11 | 12 | 1 | 6.755477198 | 0.000722752 |         | ENSG00000213194 |
| 2 | 157867375 | 157867778 | 157867622 | 8  | 14 | 1 | 7.794781382 | 0.000197021 |         | ENSG00000222404 |
| 2 | 158390706 | 158390966 | 158390828 | 9  | 11 | 4 | 2.494330042 | 0.0324033   | ACVR1   | ENSG00000115170 |
| 2 | 158678466 | 158678908 | 158678635 | 13 | 21 | 1 | 11.43234603 | 1.90E-06    | UPP2    | ENSG00000007001 |
| 2 | 158886150 | 158886431 | 158886290 | 15 | 18 | 0 | 19.7467795  | 1.32E-06    | CCDC148 | ENSG00000153237 |
| 2 | 159287885 | 159288533 | 159288223 | 18 | 33 | 2 | 11.77878075 | 5.19E-09    |         | ENSG00000204380 |
| 2 | 159288771 | 159289143 | 159289018 | 14 | 19 | 6 | 2.969440526 | 0.0035096   |         | ENSG00000204380 |
| 2 | 159458015 | 159458224 | 159458119 | 9  | 10 | 0 | 11.43234603 | 0.000394183 |         | ENSG00000208221 |
| 2 | 159533520 | 159533871 | 159533695 | 10 | 16 | 1 | 8.834085566 | 5.30E-05    | TANC1   | ENSG00000115183 |
| 2 | 160170539 | 160170753 | 160170646 | 8  | 9  | 0 | 10.39304184 | 0.000803859 | BAZ2B   | ENSG00000123636 |
| 2 | 160280386 | 160280578 | 160280422 | 9  | 9  | 2 | 3.464347281 | 0.0163838   | 7-Mar   | ENSG00000136536 |
| 2 | 160622311 | 160622490 | 160622400 | 8  | 8  | 0 | 9.353737658 | 0.00163931  | PLA2R1  | ENSG00000153246 |
| 2 | 160764512 | 160764720 | 160764616 | 9  | 9  | 2 | 3.464347281 | 0.0163838   | ITGB6   | ENSG00000115221 |
| 2 | 160770382 | 160770607 | 160770494 | 10 | 10 | 1 | 5.716173013 | 0.00260397  | ITGB6   | ENSG00000115221 |
| 2 | 160788878 | 160789273 | 160789117 | 9  | 15 | 2 | 5.542955649 | 0.000497081 | ITGB6   | ENSG00000115221 |
| 2 | 160790578 | 160790854 | 160790741 | 11 | 14 | 1 | 7.794781382 | 0.000197021 | ITGB6   | ENSG00000115221 |
| 2 | 160792121 | 160792310 | 160792204 | 8  | 8  | 5 | 1.558956276 | 0.191397    | ITGB6   | ENSG00000115221 |
| 2 | 160794327 | 160794604 | 160794490 | 9  | 10 | 0 | 11.43234603 | 0.000394183 | ITGB6   | ENSG00000115221 |
| 2 | 160806658 | 160806892 | 160806775 | 8  | 9  | 8 | 1.154782427 | 0.375434    | ITGB6   | ENSG00000115221 |
| 2 | 160843636 | 160843845 | 160843740 | 8  | 9  | 3 | 2.598260461 | 0.0397929   | ITGB6   | ENSG00000115221 |
| 2 | 160917283 | 160917549 | 160917416 | 9  | 10 | 1 | 5.716173013 | 0.00260397  |         | ENSG00000208218 |
| 2 | 160998435 | 160998819 | 160998644 | 16 | 23 | 6 | 3.563328632 | 0.000497701 | RBMS1   | ENSG00000153250 |
| 2 | 161021503 | 161021687 | 161021645 | 10 | 10 | 0 | 11.43234603 | 0.000394183 | RBMS1   | ENSG00000153250 |
| 2 | 161126772 | 161126960 | 161126866 | 8  | 8  | 2 | 3.117912553 | 0.0283184   | RBMS1   | ENSG00000153250 |
| 2 | 161141108 | 161141339 | 161141223 | 8  | 11 | 6 | 1.781664316 | 0.103344    | RBMS1   | ENSG00000153250 |
| 2 | 161628423 | 161628690 | 161628556 | 9  | 11 | 5 | 2.078608368 | 0.0614303   | TANK    | ENSG00000136560 |
| 2 | 161951238 | 161951502 | 161951370 | 9  | 11 | 0 | 12.47165021 | 0.000193293 | PSMD14  | ENSG00000115233 |
| 2 | 162409651 | 162409863 | 162409747 | 10 | 12 | 4 | 2.702190879 | 0.0203088   | SLC4A10 | ENSG00000144290 |
| 2 | 163054814 | 163055152 | 163054983 | 39 | 43 | 0 | 45.72938411 | 2.41E-14    |         | ENSG00000212312 |
| 2 | 163147310 | 163147556 | 163147403 | 17 | 17 | 6 | 2.672496474 | 0.00882337  |         | ENSG00000212312 |

|   |           |           |           |    |     |   |             |             |          |                 |
|---|-----------|-----------|-----------|----|-----|---|-------------|-------------|----------|-----------------|
| 2 | 163275142 | 163275367 | 163275223 | 10 | 12  | 4 | 2.702190879 | 0.0203088   | KCNH7    | ENSG00000184611 |
| 2 | 164518063 | 164518543 | 164518303 | 20 | 33  | 0 | 35.33634226 | 3.00E-11    | FIGN     | ENSG00000182263 |
| 2 | 165079412 | 165079610 | 165079486 | 8  | 9   | 1 | 5.196520921 | 0.00490062  | GRB14    | ENSG00000115290 |
| 2 | 165102937 | 165103133 | 165103035 | 8  | 10  | 5 | 1.905391004 | 0.0915982   | GRB14    | ENSG00000115290 |
| 2 | 165424309 | 165424488 | 165424398 | 8  | 8   | 0 | 9.353737658 | 0.00163931  |          | ENSG00000199508 |
| 2 | 165971089 | 165971289 | 165971190 | 8  | 9   | 5 | 1.73217364  | 0.133894    | FAM130A2 | ENSG00000178662 |
| 2 | 165978039 | 165978254 | 165978137 | 8  | 9   | 5 | 1.73217364  | 0.133894    | FAM130A2 | ENSG00000178662 |
| 2 | 166138656 | 166138951 | 166138788 | 11 | 14  | 1 | 7.794781382 | 0.000197021 | FAM130A2 | ENSG00000178662 |
| 2 | 168108578 | 168108807 | 168108692 | 8  | 8   | 2 | 3.117912553 | 0.0283184   | B3GALT1  | ENSG00000172318 |
| 2 | 169017525 | 169017970 | 169017730 | 62 | 76  | 2 | 26.67547406 | 1.21E-21    |          | ENSG00000208206 |
| 2 | 169148603 | 169148975 | 169148782 | 11 | 18  | 5 | 3.291129917 | 0.00248584  |          | ENSG00000199348 |
| 2 | 169173003 | 169173221 | 169173112 | 9  | 9   | 0 | 10.39304184 | 0.000803859 |          | ENSG00000199348 |
| 2 | 169696300 | 169696560 | 169696389 | 10 | 13  | 0 | 14.55025858 | 4.65E-05    | DHRS9    | ENSG00000073737 |
| 2 | 170518765 | 170519061 | 170518906 | 13 | 14  | 1 | 7.794781382 | 0.000197021 | UBR3     | ENSG00000144357 |
| 2 | 170740469 | 170740661 | 170740543 | 12 | 12  | 3 | 3.377738599 | 0.00867157  | MYO3B    | ENSG00000071909 |
| 2 | 170754692 | 170754881 | 170754796 | 8  | 10  | 2 | 3.810782009 | 0.00936112  | MYO3B    | ENSG00000071909 |
| 2 | 170786339 | 170787267 | 170786614 | 98 | 138 | 5 | 24.0772136  | 1.64E-36    | MYO3B    | ENSG00000071909 |
| 2 | 170803442 | 170803845 | 170803666 | 13 | 20  | 4 | 4.365077574 | 0.000324139 | MYO3B    | ENSG00000071909 |
| 2 | 170886225 | 170886622 | 170886420 | 77 | 90  | 0 | 94.57668077 | 6.87E-29    | MYO3B    | ENSG00000071909 |
| 2 | 170889516 | 170889754 | 170889593 | 12 | 12  | 8 | 1.501217155 | 0.168286    | MYO3B    | ENSG00000071909 |
| 2 | 171493404 | 171493848 | 171493671 | 17 | 24  | 2 | 8.660868202 | 1.80E-06    | GORASP2  | ENSG00000115806 |
| 2 | 171836875 | 171837106 | 171836977 | 9  | 9   | 1 | 5.196520921 | 0.00490062  |          | ENSG00000218900 |
| 2 | 171851936 | 171852466 | 171852154 | 24 | 38  | 8 | 4.503651465 | 1.50E-06    |          | ENSG00000218900 |
| 2 | 171974895 | 171975281 | 171975074 | 15 | 23  | 5 | 4.157216737 | 0.000186738 | METTL8   | ENSG00000123600 |
| 2 | 171995802 | 171996054 | 171995928 | 9  | 10  | 1 | 5.716173013 | 0.00260397  | METTL8   | ENSG00000123600 |
| 2 | 172129328 | 172129566 | 172129447 | 10 | 12  | 5 | 2.251825733 | 0.0404733   | CYBRD1   | ENSG00000071967 |
| 2 | 172272532 | 172272804 | 172272668 | 13 | 14  | 0 | 15.58956276 | 2.28E-05    | DYNC1I2  | ENSG00000077380 |
| 2 | 172821913 | 172822240 | 172822090 | 9  | 13  | 1 | 7.27512929  | 0.000378098 |          | ENSG00000208202 |
| 2 | 172981419 | 172981688 | 172981553 | 14 | 15  | 0 | 16.62886695 | 1.12E-05    | ITGA6    | ENSG00000091409 |
| 2 | 173271252 | 173271431 | 173271341 | 8  | 8   | 1 | 4.676868829 | 0.0091584   |          | ENSG00000208200 |
| 2 | 173864389 | 173864659 | 173864524 | 10 | 11  | 0 | 12.47165021 | 0.000193293 | CDCA7    | ENSG00000144354 |
| 2 | 174144334 | 174144543 | 174144380 | 8  | 11  | 2 | 4.157216737 | 0.0052913   |          | ENSG00000170226 |
| 2 | 174144599 | 174144842 | 174144720 | 9  | 12  | 3 | 3.377738599 | 0.00867157  |          | ENSG00000170226 |
| 2 | 174225843 | 174226130 | 174225982 | 9  | 13  | 2 | 4.850086193 | 0.00164564  |          | ENSG00000170226 |

|   |           |           |           |     |     |    |             |             |         |                 |
|---|-----------|-----------|-----------|-----|-----|----|-------------|-------------|---------|-----------------|
| 2 | 174253916 | 174254095 | 174254017 | 8   | 8   | 1  | 4.676868829 | 0.0091584   |         | ENSG00000170226 |
| 2 | 174255323 | 174255504 | 174255391 | 10  | 11  | 0  | 12.47165021 | 0.000193293 |         | ENSG00000170226 |
| 2 | 174510180 | 174510365 | 174510282 | 8   | 8   | 3  | 2.338434415 | 0.0641221   | SP3     | ENSG00000172845 |
| 2 | 174555947 | 174556397 | 174556205 | 52  | 68  | 0  | 71.71198871 | 4.42E-22    | SP3     | ENSG00000172845 |
| 2 | 174557876 | 174558444 | 174558239 | 11  | 24  | 8  | 2.886956067 | 0.00160675  | SP3     | ENSG00000172845 |
| 2 | 174565196 | 174565386 | 174565291 | 8   | 10  | 6  | 1.63319229  | 0.146906    | SP3     | ENSG00000172845 |
| 2 | 174612827 | 174613206 | 174612976 | 12  | 17  | 5  | 3.117912553 | 0.00407023  | SP3     | ENSG00000172845 |
| 2 | 174620716 | 174620898 | 174620857 | 9   | 9   | 1  | 5.196520921 | 0.00490062  | SP3     | ENSG00000172845 |
| 2 | 174636766 | 174637101 | 174636937 | 17  | 20  | 2  | 7.27512929  | 2.27E-05    | SP3     | ENSG00000172845 |
| 2 | 174821673 | 174821941 | 174821807 | 8   | 9   | 2  | 3.464347281 | 0.0163838   | OLA1    | ENSG00000138430 |
| 2 | 174914522 | 174914800 | 174914682 | 10  | 10  | 7  | 1.429043253 | 0.21536     |         | ENSG00000187876 |
| 2 | 175740902 | 175741152 | 175741027 | 8   | 10  | 4  | 2.286469205 | 0.0509017   | ATF2    | ENSG00000115966 |
| 2 | 176130008 | 176130195 | 176130181 | 8   | 8   | 2  | 3.117912553 | 0.0283184   |         | ENSG00000221347 |
| 2 | 176870092 | 176870300 | 176870196 | 9   | 9   | 1  | 5.196520921 | 0.00490062  |         | ENSG00000223166 |
| 2 | 177387358 | 177387548 | 177387453 | 10  | 10  | 3  | 2.858086507 | 0.0242838   |         | ENSG00000206866 |
| 2 | 177504815 | 177505194 | 177504919 | 10  | 16  | 1  | 8.834085566 | 5.30E-05    |         | ENSG00000206866 |
| 2 | 177742960 | 177743579 | 177743313 | 182 | 226 | 11 | 19.66017082 | 9.71E-56    |         | ENSG00000201102 |
| 2 | 177785146 | 177785424 | 177785269 | 10  | 12  | 5  | 2.251825733 | 0.0404733   | HNRNPA3 | ENSG00000170144 |
| 2 | 177886426 | 177886750 | 177886586 | 18  | 19  | 1  | 10.39304184 | 7.23E-06    |         | ENSG00000208194 |
| 2 | 179223081 | 179223273 | 179223184 | 9   | 9   | 2  | 3.464347281 | 0.0163838   | TTN     | ENSG00000155657 |
| 2 | 179983946 | 179984137 | 179984041 | 8   | 8   | 0  | 9.353737658 | 0.00163931  | SESTD1  | ENSG00000187231 |
| 2 | 180147322 | 180147558 | 180147476 | 10  | 11  | 7  | 1.558956276 | 0.158273    | ZNF385B | ENSG00000144331 |
| 2 | 180190835 | 180191092 | 180190979 | 9   | 9   | 2  | 3.464347281 | 0.0163838   | ZNF385B | ENSG00000144331 |
| 2 | 180219896 | 180220166 | 180220031 | 9   | 9   | 7  | 1.29913023  | 0.286504    | ZNF385B | ENSG00000144331 |
| 2 | 182475893 | 182476119 | 182476018 | 8   | 9   | 0  | 10.39304184 | 0.000803859 | SSFA2   | ENSG00000138434 |
| 2 | 183501118 | 183501467 | 183501295 | 14  | 19  | 3  | 5.196520921 | 0.000174201 |         | ENSG00000207178 |
| 2 | 184565750 | 184566019 | 184565884 | 11  | 13  | 4  | 2.910051716 | 0.0125532   |         | ENSG00000208184 |
| 2 | 186140965 | 186141337 | 186141174 | 24  | 29  | 2  | 10.39304184 | 7.12E-08    |         | ENSG00000212581 |
| 2 | 188559418 | 188559682 | 188559566 | 10  | 12  | 1  | 6.755477198 | 0.000722752 |         | ENSG00000213115 |
| 2 | 189630103 | 189630282 | 189630207 | 8   | 8   | 2  | 3.117912553 | 0.0283184   |         | ENSG00000221502 |
| 2 | 190054103 | 190054380 | 190054241 | 14  | 15  | 3  | 4.157216737 | 0.00170423  | WDR75   | ENSG00000115368 |
| 2 | 190115198 | 190115421 | 190115285 | 11  | 11  | 1  | 6.235825105 | 0.0013754   | SLC40A1 | ENSG00000138449 |
| 2 | 190357783 | 190357979 | 190357876 | 9   | 9   | 1  | 5.196520921 | 0.00490062  | PMS1    | ENSG00000064933 |
| 2 | 191042274 | 191042518 | 191042396 | 9   | 9   | 5  | 1.73217364  | 0.133894    | MFSD6   | ENSG00000151690 |

|   |           |           |           |    |    |    |             |             |         |                 |
|---|-----------|-----------|-----------|----|----|----|-------------|-------------|---------|-----------------|
| 2 | 191190997 | 191191226 | 191191084 | 8  | 11 | 0  | 12.47165021 | 0.000193293 | NAB1    | ENSG00000138386 |
| 2 | 191253247 | 191253426 | 191253295 | 8  | 9  | 2  | 3.464347281 | 0.0163838   | NAB1    | ENSG00000138386 |
| 2 | 191359493 | 191359729 | 191359588 | 10 | 11 | 3  | 3.117912553 | 0.0146045   | GLS     | ENSG00000115419 |
| 2 | 191603596 | 191603819 | 191603684 | 8  | 9  | 4  | 2.078608368 | 0.0785659   | STAT1   | ENSG00000115415 |
| 2 | 191743282 | 191743545 | 191743415 | 10 | 12 | 0  | 13.5109544  | 9.48E-05    | STAT4   | ENSG00000138378 |
| 2 | 191891300 | 191891484 | 191891387 | 9  | 9  | 0  | 10.39304184 | 0.000803859 | MYO1B   | ENSG00000128641 |
| 2 | 191902800 | 191903138 | 191902970 | 22 | 24 | 4  | 5.196520921 | 3.42E-05    |         | ENSG00000208171 |
| 2 | 191931327 | 191931577 | 191931452 | 9  | 12 | 3  | 3.377738599 | 0.00867157  |         | ENSG00000208171 |
| 2 | 192128300 | 192128620 | 192128474 | 9  | 13 | 3  | 3.637564645 | 0.0050909   | OBFC2A  | ENSG00000173559 |
| 2 | 192269369 | 192269561 | 192269445 | 8  | 8  | 0  | 9.353737658 | 0.00163931  | OBFC2A  | ENSG00000173559 |
| 2 | 192417778 | 192418087 | 192417923 | 11 | 14 | 6  | 2.227080395 | 0.0322529   | SDPR    | ENSG00000168497 |
| 2 | 193117516 | 193117991 | 193117814 | 21 | 32 | 0  | 34.29703808 | 6.12E-11    | TMEFF2  | ENSG00000144339 |
| 2 | 194533910 | 194534272 | 194534093 | 11 | 17 | 5  | 3.117912553 | 0.00407023  |         | ENSG00000222759 |
| 2 | 194916138 | 194916411 | 194916262 | 11 | 15 | 1  | 8.314433474 | 0.000102308 |         | ENSG00000208170 |
| 2 | 195122010 | 195122190 | 195122100 | 8  | 8  | 2  | 3.117912553 | 0.0283184   |         | ENSG00000208170 |
| 2 | 197372549 | 197372821 | 197372685 | 12 | 14 | 4  | 3.117912553 | 0.00766354  | GTF3C3  | ENSG00000119041 |
| 2 | 198026167 | 198026362 | 198026270 | 8  | 9  | 2  | 3.464347281 | 0.0163838   | COQ10B  | ENSG00000115520 |
| 2 | 198072893 | 198073115 | 198073004 | 10 | 13 | 9  | 1.455025858 | 0.177172    | HSPE1   | ENSG00000115541 |
| 2 | 198186562 | 198186782 | 198186672 | 11 | 12 | 0  | 13.5109544  | 9.48E-05    | RFTN2   | ENSG00000162944 |
| 2 | 198278313 | 198278511 | 198278412 | 8  | 9  | 2  | 3.464347281 | 0.0163838   | MARS2   | ENSG00000152428 |
| 2 | 198474479 | 198474658 | 198474568 | 8  | 8  | 1  | 4.676868829 | 0.0091584   | BOLL    | ENSG00000152430 |
| 2 | 200265504 | 200265687 | 200265627 | 10 | 11 | 2  | 4.157216737 | 0.0052913   |         | ENSG00000213938 |
| 2 | 200424186 | 200424446 | 200424321 | 8  | 10 | 3  | 2.858086507 | 0.0242838   |         | ENSG00000208157 |
| 2 | 200528280 | 200528671 | 200528427 | 9  | 15 | 4  | 3.32577339  | 0.00462646  | C2orf60 | ENSG00000162971 |
| 2 | 200832047 | 200832234 | 200832115 | 8  | 8  | 0  | 9.353737658 | 0.00163931  |         | ENSG00000196141 |
| 2 | 200832519 | 200832961 | 200832782 | 11 | 20 | 13 | 1.558956276 | 0.0943292   |         | ENSG00000196141 |
| 2 | 200873575 | 200874264 | 200873793 | 32 | 50 | 3  | 13.25112835 | 5.72E-13    |         | ENSG00000196141 |
| 2 | 200979075 | 200979332 | 200979171 | 8  | 8  | 3  | 2.338434415 | 0.0641221   |         | ENSG00000196141 |
| 2 | 201286083 | 201286283 | 201286195 | 9  | 10 | 2  | 3.810782009 | 0.00936112  |         | ENSG00000212691 |
| 2 | 201384500 | 201384795 | 201384647 | 9  | 11 | 1  | 6.235825105 | 0.0013754   | BZW1    | ENSG00000082153 |
| 2 | 201461986 | 201462298 | 201462142 | 13 | 16 | 6  | 2.524024447 | 0.0137633   | PPIL3   | ENSG00000115934 |
| 2 | 201536699 | 201536893 | 201536796 | 8  | 8  | 4  | 1.870747532 | 0.118863    | ORC2L   | ENSG00000115942 |
| 2 | 201644516 | 201645048 | 201644869 | 16 | 26 | 9  | 2.806121297 | 0.00135991  | NDUFB3  | ENSG00000119013 |
| 2 | 201806417 | 201806624 | 201806492 | 8  | 8  | 2  | 3.117912553 | 0.0283184   | CASP8   | ENSG00000064012 |

|   |           |           |           |    |    |   |             |             |         |                 |
|---|-----------|-----------|-----------|----|----|---|-------------|-------------|---------|-----------------|
| 2 | 202253742 | 202253936 | 202253819 | 8  | 9  | 8 | 1.154782427 | 0.375434    | MPP4    | ENSG00000082126 |
| 2 | 202398309 | 202398493 | 202398368 | 9  | 9  | 0 | 10.39304184 | 0.000803859 |         | ENSG00000221374 |
| 2 | 202686591 | 202687132 | 202686953 | 8  | 20 | 1 | 10.91269393 | 3.71E-06    |         | ENSG00000222035 |
| 2 | 202838437 | 202838680 | 202838580 | 9  | 10 | 3 | 2.858086507 | 0.0242838   |         | ENSG00000055044 |
| 2 | 202851490 | 202851704 | 202851599 | 9  | 9  | 2 | 3.464347281 | 0.0163838   |         | ENSG00000212309 |
| 2 | 202912569 | 202912882 | 202912725 | 8  | 11 | 4 | 2.494330042 | 0.0324033   |         | ENSG00000223083 |
| 2 | 202981827 | 202982020 | 202981908 | 8  | 8  | 0 | 9.353737658 | 0.00163931  | BMP2R2  | ENSG00000204217 |
| 2 | 203484693 | 203485097 | 203484832 | 8  | 16 | 3 | 4.417042783 | 0.00097367  | WDR12   | ENSG00000138442 |
| 2 | 204116939 | 204117132 | 204117083 | 10 | 11 | 4 | 2.494330042 | 0.0324033   | RAPH1   | ENSG00000173166 |
| 2 | 204151998 | 204152365 | 204152174 | 8  | 14 | 9 | 1.558956276 | 0.132279    | RAPH1   | ENSG00000173166 |
| 2 | 204221401 | 204221603 | 204221502 | 8  | 9  | 0 | 10.39304184 | 0.000803859 |         | ENSG00000187543 |
| 2 | 204599983 | 204600356 | 204600149 | 13 | 18 | 0 | 19.7467795  | 1.32E-06    | ICOS    | ENSG00000163600 |
| 2 | 204682688 | 204682924 | 204682810 | 15 | 15 | 4 | 3.32577339  | 0.00462646  | ICOS    | ENSG00000163600 |
| 2 | 205021470 | 205021790 | 205021630 | 11 | 14 | 0 | 15.58956276 | 2.28E-05    | PARD3B  | ENSG00000116117 |
| 2 | 205337205 | 205337535 | 205337370 | 19 | 23 | 0 | 24.94330042 | 3.74E-08    | PARD3B  | ENSG00000116117 |
| 2 | 206243432 | 206243615 | 206243500 | 8  | 9  | 1 | 5.196520921 | 0.00490062  | NRP2    | ENSG00000118257 |
| 2 | 206251834 | 206252103 | 206251968 | 8  | 8  | 1 | 4.676868829 | 0.0091584   | NRP2    | ENSG00000118257 |
| 2 | 206458605 | 206458824 | 206458761 | 9  | 11 | 2 | 4.157216737 | 0.0052913   |         | ENSG00000201875 |
| 2 | 206803096 | 206803655 | 206803477 | 39 | 63 | 2 | 22.1718226  | 8.95E-18    |         | ENSG00000222496 |
| 2 | 206835539 | 206835724 | 206835631 | 8  | 8  | 4 | 1.870747532 | 0.118863    |         | ENSG00000208117 |
| 2 | 207596643 | 207596856 | 207596746 | 8  | 8  | 1 | 4.676868829 | 0.0091584   | CPO     | ENSG00000144410 |
| 2 | 207862313 | 207862505 | 207862409 | 9  | 9  | 5 | 1.73217364  | 0.133894    |         | ENSG00000221628 |
| 2 | 208251482 | 208251662 | 208251572 | 8  | 8  | 0 | 9.353737658 | 0.00163931  |         | ENSG00000199251 |
| 2 | 208481743 | 208481926 | 208481877 | 8  | 8  | 1 | 4.676868829 | 0.0091584   |         | ENSG00000220999 |
| 2 | 208685962 | 208686255 | 208686102 | 11 | 15 | 3 | 4.157216737 | 0.00170423  | CRYGD   | ENSG00000118231 |
| 2 | 208748385 | 208748579 | 208748482 | 8  | 9  | 3 | 2.598260461 | 0.0397929   | CRYGA   | ENSG00000168582 |
| 2 | 209219712 | 209219902 | 209219807 | 8  | 8  | 1 | 4.676868829 | 0.0091584   | PTH2R   | ENSG00000144407 |
| 2 | 209440290 | 209440479 | 209440384 | 8  | 9  | 5 | 1.73217364  | 0.133894    |         | ENSG00000202164 |
| 2 | 209556524 | 209556773 | 209556648 | 10 | 11 | 3 | 3.117912553 | 0.0146045   |         | ENSG00000202164 |
| 2 | 210575110 | 210575305 | 210575207 | 8  | 9  | 2 | 3.464347281 | 0.0163838   | RPE     | ENSG00000197713 |
| 2 | 210726800 | 210726979 | 210726882 | 8  | 8  | 5 | 1.558956276 | 0.191397    | C2orf67 | ENSG00000144445 |
| 2 | 210761774 | 210762035 | 210761923 | 8  | 10 | 1 | 5.716173013 | 0.00260397  | C2orf67 | ENSG00000144445 |
| 2 | 210776192 | 210776421 | 210776306 | 8  | 9  | 2 | 3.464347281 | 0.0163838   | ACADL   | ENSG00000115361 |
| 2 | 211821816 | 211822170 | 211821992 | 12 | 16 | 3 | 4.417042783 | 0.00097367  |         | ENSG00000199585 |



|   |           |           |           |     |     |    |             |             |        |                 |
|---|-----------|-----------|-----------|-----|-----|----|-------------|-------------|--------|-----------------|
| 2 | 211986858 | 211987153 | 211987009 | 8   | 9   | 0  | 10.39304184 | 0.000803859 |        | ENSG00000199585 |
| 2 | 212137390 | 212137759 | 212137576 | 21  | 29  | 0  | 31.17912553 | 5.19E-10    |        | ENSG00000199585 |
| 2 | 212474511 | 212474797 | 212474676 | 11  | 14  | 0  | 15.58956276 | 2.28E-05    |        | ENSG00000208089 |
| 2 | 212500481 | 212500716 | 212500562 | 10  | 12  | 1  | 6.755477198 | 0.000722752 |        | ENSG00000208089 |
| 2 | 212530912 | 212531228 | 212531080 | 10  | 12  | 1  | 6.755477198 | 0.000722752 |        | ENSG00000208089 |
| 2 | 212727487 | 212727883 | 212727735 | 8   | 17  | 2  | 6.235825105 | 0.000146695 |        | ENSG00000221782 |
| 2 | 213478840 | 213479140 | 213478993 | 11  | 15  | 10 | 1.511715177 | 0.140236    |        | ENSG00000221388 |
| 2 | 214951720 | 214951997 | 214951869 | 11  | 14  | 4  | 3.117912553 | 0.00766354  |        | ENSG00000174453 |
| 2 | 214983967 | 214984213 | 214984094 | 8   | 8   | 1  | 4.676868829 | 0.0091584   |        | ENSG00000174453 |
| 2 | 215107095 | 215107323 | 215107209 | 8   | 10  | 3  | 2.858086507 | 0.0242838   |        | ENSG00000174453 |
| 2 | 215710711 | 215711167 | 215710922 | 110 | 132 | 8  | 15.35860628 | 1.05E-31    | ABCA12 | ENSG00000144452 |
| 2 | 215711484 | 215711801 | 215711642 | 8   | 13  | 6  | 2.078608368 | 0.0483393   | ABCA12 | ENSG00000144452 |
| 2 | 215744213 | 215744529 | 215744371 | 10  | 10  | 0  | 11.43234603 | 0.000394183 | ABCA12 | ENSG00000144452 |
| 2 | 215789903 | 215790153 | 215790029 | 17  | 20  | 3  | 5.456346967 | 9.70E-05    | ABCA12 | ENSG00000144452 |
| 2 | 215811477 | 215811731 | 215811564 | 8   | 11  | 2  | 4.157216737 | 0.0052913   |        | ENSG00000208081 |
| 2 | 215842834 | 215843028 | 215842931 | 8   | 8   | 2  | 3.117912553 | 0.0283184   |        | ENSG00000208081 |
| 2 | 215884636 | 215885035 | 215884935 | 9   | 15  | 1  | 8.314433474 | 0.000102308 | ATIC   | ENSG00000138363 |
| 2 | 216493371 | 216493566 | 216493468 | 8   | 11  | 6  | 1.781664316 | 0.103344    |        | ENSG00000212055 |
| 2 | 216555452 | 216555924 | 216555745 | 14  | 26  | 7  | 3.507651622 | 0.000274507 | MREG   | ENSG00000118242 |
| 2 | 216682249 | 216682496 | 216682372 | 8   | 9   | 5  | 1.73217364  | 0.133894    | XRCC5  | ENSG00000079246 |
| 2 | 216867072 | 216867310 | 216867145 | 10  | 10  | 2  | 3.810782009 | 0.00936112  |        | ENSG00000207303 |
| 2 | 217092239 | 217092485 | 217092364 | 9   | 12  | 4  | 2.702190879 | 0.0203088   | RPL37A | ENSG00000197756 |
| 2 | 217124262 | 217124581 | 217124428 | 13  | 17  | 2  | 6.235825105 | 0.000146695 | RPL37A | ENSG00000197756 |
| 2 | 217124677 | 217125062 | 217124865 | 40  | 49  | 3  | 12.9913023  | 1.10E-12    | RPL37A | ENSG00000197756 |
| 2 | 217350879 | 217351206 | 217351029 | 8   | 10  | 2  | 3.810782009 | 0.00936112  |        | ENSG00000222832 |
| 2 | 217939243 | 217939454 | 217939385 | 8   | 8   | 1  | 4.676868829 | 0.0091584   |        |                 |
| 2 | 218007162 | 218007375 | 218007268 | 8   | 8   | 2  | 3.117912553 | 0.0283184   | TNS1   | ENSG00000079308 |
| 2 | 218516506 | 218516734 | 218516664 | 9   | 11  | 4  | 2.494330042 | 0.0324033   | TNS1   | ENSG00000079308 |
| 2 | 218560886 | 218561329 | 218561192 | 12  | 18  | 4  | 3.9493559   | 0.000961379 | TNS1   | ENSG00000079308 |
| 2 | 218759323 | 218759566 | 218759449 | 8   | 8   | 2  | 3.117912553 | 0.0283184   |        | ENSG00000208079 |
| 2 | 218791963 | 218792228 | 218792095 | 14  | 14  | 2  | 5.196520921 | 0.000907371 | ARPC2  | ENSG00000163466 |
| 2 | 218896512 | 218896695 | 218896603 | 8   | 10  | 0  | 11.43234603 | 0.000394183 | PNKD   | ENSG00000127838 |
| 2 | 218969302 | 218969665 | 218969539 | 9   | 15  | 2  | 5.542955649 | 0.000497081 | CTDSP1 | ENSG00000144579 |
| 2 | 218979117 | 218979330 | 218979223 | 8   | 8   | 7  | 1.169217207 | 0.371848    |        | ENSG00000199121 |

|   |           |           |           |    |    |   |             |             |         |                 |
|---|-----------|-----------|-----------|----|----|---|-------------|-------------|---------|-----------------|
| 2 | 219017539 | 219017935 | 219017773 | 15 | 22 | 4 | 4.780799247 | 0.00010647  | VIL1    | ENSG00000127831 |
| 2 | 219141102 | 219141307 | 219141212 | 8  | 9  | 2 | 3.464347281 | 0.0163838   | USP37   | ENSG00000135913 |
| 2 | 219481988 | 219482171 | 219482131 | 9  | 9  | 3 | 2.598260461 | 0.0397929   |         | ENSG00000200029 |
| 2 | 219699559 | 219699854 | 219699700 | 11 | 12 | 7 | 1.688869299 | 0.11395     |         | ENSG00000223334 |
| 2 | 219750766 | 219751120 | 219750919 | 9  | 13 | 2 | 4.850086193 | 0.00164564  | C2orf24 | ENSG00000115649 |
| 2 | 219791005 | 219791239 | 219791184 | 8  | 10 | 3 | 2.858086507 | 0.0242838   | ABCB6   | ENSG00000115657 |
| 2 | 219971851 | 219972118 | 219972019 | 12 | 15 | 8 | 1.847651883 | 0.0631662   | DNPEP   | ENSG00000123992 |
| 2 | 219972878 | 219973122 | 219972999 | 8  | 9  | 3 | 2.598260461 | 0.0397929   | DNPEP   | ENSG00000123992 |
| 2 | 219973139 | 219973436 | 219973287 | 10 | 15 | 5 | 2.771477825 | 0.0105836   | DNPEP   | ENSG00000123992 |
| 2 | 220142050 | 220142335 | 220142172 | 10 | 12 | 7 | 1.688869299 | 0.11395     | OBSL1   | ENSG00000124006 |
| 2 | 220144892 | 220145188 | 220145069 | 10 | 13 | 3 | 3.637564645 | 0.0050909   | INHA    | ENSG00000123999 |
| 2 | 220215573 | 220215766 | 220215669 | 11 | 11 | 3 | 3.117912553 | 0.0146045   | SLC4A3  | ENSG00000114923 |
| 2 | 220257342 | 220258271 | 220257735 | 37 | 72 | 5 | 12.64486757 | 1.98E-17    |         | ENSG00000216281 |
| 2 | 220306145 | 220306607 | 220306265 | 21 | 30 | 1 | 16.10921486 | 4.28E-09    |         | ENSG00000216666 |
| 2 | 220541823 | 220542026 | 220541927 | 8  | 9  | 2 | 3.464347281 | 0.0163838   |         | ENSG00000221199 |
| 2 | 220587823 | 220588106 | 220587964 | 8  | 9  | 6 | 1.484720263 | 0.204387    |         | ENSG00000221199 |
| 2 | 220752379 | 220752606 | 220752459 | 12 | 13 | 4 | 2.910051716 | 0.0125532   |         | ENSG00000221199 |
| 2 | 220753343 | 220753589 | 220753466 | 9  | 11 | 1 | 6.235825105 | 0.0013754   |         | ENSG00000221199 |
| 2 | 220771869 | 220772287 | 220772081 | 12 | 21 | 2 | 7.621564018 | 1.21E-05    |         | ENSG00000221199 |
| 2 | 220798193 | 220798381 | 220798288 | 8  | 8  | 4 | 1.870747532 | 0.118863    |         | ENSG00000221199 |
| 2 | 220846098 | 220846334 | 220846244 | 11 | 13 | 5 | 2.425043097 | 0.0262442   |         | ENSG00000221199 |
| 2 | 221192569 | 221192750 | 221192659 | 8  | 10 | 1 | 5.716173013 | 0.00260397  |         | ENSG00000222096 |
| 2 | 221428261 | 221428539 | 221428430 | 14 | 15 | 3 | 4.157216737 | 0.00170423  |         | ENSG00000208071 |
| 2 | 221744781 | 221744972 | 221744920 | 8  | 9  | 2 | 3.464347281 | 0.0163838   |         | ENSG00000208071 |
| 2 | 221876069 | 221876280 | 221876194 | 9  | 9  | 5 | 1.73217364  | 0.133894    |         | ENSG00000221432 |
| 2 | 222103133 | 222103380 | 222103262 | 20 | 20 | 4 | 4.365077574 | 0.000324139 |         | ENSG00000221432 |
| 2 | 222367260 | 222367593 | 222367426 | 9  | 14 | 1 | 7.794781382 | 0.000197021 |         | ENSG00000144440 |
| 2 | 222686806 | 222686997 | 222686909 | 8  | 8  | 2 | 3.117912553 | 0.0283184   |         | ENSG00000208070 |
| 2 | 223229080 | 223229343 | 223229204 | 8  | 11 | 2 | 4.157216737 | 0.0052913   | FARSB   | ENSG00000116120 |
| 2 | 223276858 | 223277037 | 223276947 | 8  | 8  | 0 | 9.353737658 | 0.00163931  |         | ENSG00000208067 |
| 2 | 223406024 | 223406246 | 223406135 | 9  | 9  | 0 | 10.39304184 | 0.000803859 | ACSL3   | ENSG00000123983 |
| 2 | 223455467 | 223455720 | 223455569 | 13 | 13 | 2 | 4.850086193 | 0.00164564  | ACSL3   | ENSG00000123983 |
| 2 | 223471046 | 223471255 | 223471150 | 10 | 10 | 3 | 2.858086507 | 0.0242838   | ACSL3   | ENSG00000123983 |
| 2 | 224177208 | 224177427 | 224177258 | 8  | 8  | 0 | 9.353737658 | 0.00163931  | SCG2    | ENSG00000171951 |

|   |           |           |           |    |     |    |             |             |          |                 |
|---|-----------|-----------|-----------|----|-----|----|-------------|-------------|----------|-----------------|
| 2 | 225094969 | 225095189 | 225095087 | 8  | 10  | 1  | 5.716173013 | 0.00260397  | CUL3     | ENSG00000036257 |
| 2 | 225422481 | 225422660 | 225422533 | 8  | 8   | 1  | 4.676868829 | 0.0091584   |          | ENSG00000208064 |
| 2 | 225814148 | 225814355 | 225814295 | 11 | 11  | 1  | 6.235825105 | 0.0013754   |          | ENSG00000144460 |
| 2 | 226188427 | 226189005 | 226188759 | 64 | 90  | 1  | 47.28834038 | 3.26E-27    |          | ENSG00000144460 |
| 2 | 226189229 | 226189607 | 226189428 | 35 | 42  | 0  | 44.69007992 | 4.92E-14    |          | ENSG00000144460 |
| 2 | 226209693 | 226209906 | 226209763 | 8  | 10  | 1  | 5.716173013 | 0.00260397  |          | ENSG00000144460 |
| 2 | 226687989 | 226688174 | 226688093 | 9  | 9   | 5  | 1.73217364  | 0.133894    |          | ENSG00000208062 |
| 2 | 226691960 | 226692313 | 226692136 | 13 | 19  | 2  | 6.928694562 | 4.25E-05    |          | ENSG00000208062 |
| 2 | 228039259 | 228040034 | 228039898 | 23 | 48  | 4  | 10.18518101 | 1.46E-11    | AGFG1    | ENSG00000173744 |
| 2 | 229396688 | 229396867 | 229396799 | 8  | 9   | 3  | 2.598260461 | 0.0397929   |          | ENSG00000208058 |
| 2 | 229753583 | 229754009 | 229753832 | 86 | 113 | 74 | 1.57974236  | 0.000912842 |          | ENSG00000208058 |
| 2 | 230640188 | 230640405 | 230640266 | 8  | 9   | 2  | 3.464347281 | 0.0163838   | SLC16A14 | ENSG00000163053 |
| 2 | 232037047 | 232037328 | 232037187 | 10 | 11  | 2  | 4.157216737 | 0.0052913   | NCL      | ENSG00000115053 |
| 2 | 232215676 | 232215896 | 232215786 | 11 | 11  | 2  | 4.157216737 | 0.0052913   |          | ENSG00000208049 |
| 2 | 232369079 | 232369258 | 232369115 | 8  | 8   | 2  | 3.117912553 | 0.0283184   | COPS7B   | ENSG00000144524 |
| 2 | 233179088 | 233179300 | 233179159 | 8  | 9   | 3  | 2.598260461 | 0.0397929   | EFHD1    | ENSG00000115468 |
| 2 | 234108592 | 234108788 | 234108649 | 8  | 9   | 3  | 2.598260461 | 0.0397929   | USP40    | ENSG00000085982 |
| 2 | 235037403 | 235037741 | 235037571 | 12 | 16  | 5  | 2.944695189 | 0.00659886  | ARL4C    | ENSG00000188042 |
| 2 | 235208641 | 235208891 | 235208756 | 9  | 9   | 0  | 10.39304184 | 0.000803859 | ARL4C    | ENSG00000188042 |
| 2 | 235400856 | 235401057 | 235400937 | 12 | 12  | 0  | 13.5109544  | 9.48E-05    | SH3BP4   | ENSG00000130147 |
| 2 | 235898649 | 235898839 | 235898744 | 8  | 10  | 0  | 11.43234603 | 0.000394183 |          | ENSG00000216002 |
| 2 | 236125212 | 236125545 | 236125397 | 8  | 12  | 5  | 2.251825733 | 0.0404733   |          | ENSG00000221704 |
| 2 | 237265283 | 237265506 | 237265394 | 9  | 10  | 2  | 3.810782009 | 0.00936112  | CXCR7    | ENSG00000144476 |
| 2 | 237319105 | 237319574 | 237319395 | 10 | 18  | 3  | 4.936694875 | 0.000311102 | CXCR7    | ENSG00000144476 |
| 2 | 237559942 | 237560158 | 237560050 | 9  | 10  | 1  | 5.716173013 | 0.00260397  |          | ENSG00000202341 |
| 2 | 238074546 | 238074735 | 238074640 | 8  | 9   | 0  | 10.39304184 | 0.000803859 | MLPH     | ENSG00000115648 |
| 2 | 238075998 | 238076183 | 238076056 | 8  | 9   | 1  | 5.196520921 | 0.00490062  | MLPH     | ENSG00000115648 |
| 2 | 238132403 | 238132741 | 238132572 | 12 | 16  | 4  | 3.533634226 | 0.00276486  |          | ENSG00000208040 |
| 2 | 238501517 | 238501755 | 238501600 | 10 | 11  | 2  | 4.157216737 | 0.0052913   | UBE2F    | ENSG00000184182 |
| 2 | 238513200 | 238513558 | 238513379 | 45 | 51  | 0  | 54.04381758 | 8.07E-17    | UBE2F    | ENSG00000184182 |
| 2 | 238841557 | 238841739 | 238841579 | 8  | 10  | 1  | 5.716173013 | 0.00260397  | PER2     | ENSG00000132326 |
| 2 | 238963294 | 238964042 | 238963836 | 79 | 114 | 2  | 39.83999373 | 4.60E-33    |          | ENSG00000202099 |
| 2 | 241534246 | 241534455 | 241534380 | 8  | 8   | 0  | 9.353737658 | 0.00163931  | C2orf54  | ENSG00000172478 |
| 2 | 241877853 | 241878083 | 241877968 | 8  | 8   | 0  | 9.353737658 | 0.00163931  | HDLBP    | ENSG00000115677 |

|    |           |           |           |    |    |   |             |             |          |                 |
|----|-----------|-----------|-----------|----|----|---|-------------|-------------|----------|-----------------|
| 2  | 242486553 | 242486748 | 242486653 | 8  | 8  | 1 | 4.676868829 | 0.0091584   |          | ENSG00000216921 |
| 20 | 291208    | 291387    | 291332    | 8  | 8  | 2 | 3.117912553 | 0.0283184   | NRSN2    | ENSG00000125841 |
| 20 | 309256    | 309447    | 309351    | 8  | 9  | 0 | 10.39304184 | 0.000803859 | TRIB3    | ENSG00000101255 |
| 20 | 831621    | 832150    | 831861    | 49 | 64 | 1 | 33.77738599 | 2.61E-19    | ANGPT4   | ENSG00000101280 |
| 20 | 939544    | 939843    | 939687    | 9  | 10 | 0 | 11.43234603 | 0.000394183 | RSPO4    | ENSG00000101282 |
| 20 | 2057207   | 2057429   | 2057343   | 8  | 8  | 2 | 3.117912553 | 0.0283184   | STK35    | ENSG00000125834 |
| 20 | 2399298   | 2399594   | 2399442   | 14 | 17 | 2 | 6.235825105 | 0.000146695 | SNRPB    | ENSG00000125835 |
| 20 | 3246938   | 3247140   | 3247039   | 8  | 8  | 1 | 4.676868829 | 0.0091584   |          | ENSG00000201294 |
| 20 | 3422833   | 3423195   | 3423012   | 20 | 27 | 2 | 9.700172386 | 2.61E-07    | SF3A3P1  | ENSG00000217305 |
| 20 | 3686907   | 3687086   | 3686996   | 8  | 8  | 2 | 3.117912553 | 0.0283184   | C20orf27 | ENSG00000101220 |
| 20 | 3696043   | 3696363   | 3696201   | 8  | 9  | 1 | 5.196520921 | 0.00490062  | C20orf27 | ENSG00000101220 |
| 20 | 3710189   | 3710420   | 3710289   | 8  | 10 | 8 | 1.27026067  | 0.293854    | SPEF1    | ENSG00000101222 |
| 20 | 3735634   | 3735898   | 3735762   | 14 | 16 | 5 | 2.944695189 | 0.00659886  | CDC25B   | ENSG00000101224 |
| 20 | 3783304   | 3783565   | 3783433   | 8  | 11 | 1 | 6.235825105 | 0.0013754   |          | ENSG00000088888 |
| 20 | 3822114   | 3822391   | 3822256   | 26 | 26 | 1 | 14.03060649 | 6.50E-08    | PANK2    | ENSG00000125779 |
| 20 | 4080051   | 4080314   | 4080200   | 9  | 9  | 5 | 1.73217364  | 0.133894    | SMOX     | ENSG00000088826 |
| 20 | 4380200   | 4380504   | 4380353   | 11 | 13 | 1 | 7.27512929  | 0.000378098 | RPL7AL2  | ENSG00000219900 |
| 20 | 4700464   | 4700683   | 4700573   | 8  | 10 | 0 | 11.43234603 | 0.000394183 | RASSF2   | ENSG00000101265 |
| 20 | 4798217   | 4798498   | 4798357   | 10 | 10 | 2 | 3.810782009 | 0.00936112  | RASSF2   | ENSG00000101265 |
| 20 | 5048585   | 5049052   | 5048852   | 51 | 65 | 4 | 13.71881523 | 2.46E-16    | PCNA     | ENSG00000132646 |
| 20 | 5055018   | 5055208   | 5055158   | 9  | 9  | 1 | 5.196520921 | 0.00490062  | PCNA     | ENSG00000132646 |
| 20 | 6029785   | 6029993   | 6029889   | 8  | 9  | 0 | 10.39304184 | 0.000803859 |          | ENSG00000198145 |
| 20 | 6030059   | 6030286   | 6030172   | 11 | 12 | 3 | 3.377738599 | 0.00867157  |          | ENSG00000198145 |
| 20 | 6583534   | 6583784   | 6583656   | 13 | 14 | 0 | 15.58956276 | 2.28E-05    | BMP2     | ENSG00000125845 |
| 20 | 7514030   | 7514209   | 7514134   | 8  | 9  | 0 | 10.39304184 | 0.000803859 |          | ENSG00000209691 |
| 20 | 7701094   | 7701345   | 7701219   | 20 | 21 | 2 | 7.621564018 | 1.21E-05    |          | ENSG00000215586 |
| 20 | 8649855   | 8650044   | 8649955   | 8  | 8  | 1 | 4.676868829 | 0.0091584   | PLCB1    | ENSG00000182621 |
| 20 | 8729463   | 8729672   | 8729569   | 9  | 9  | 0 | 10.39304184 | 0.000803859 |          | ENSG00000201348 |
| 20 | 8785591   | 8785944   | 8785767   | 19 | 23 | 0 | 24.94330042 | 3.74E-08    |          | ENSG00000201348 |
| 20 | 8831353   | 8831720   | 8831532   | 11 | 18 | 1 | 9.87338975  | 1.41E-05    |          | ENSG00000219276 |
| 20 | 9211941   | 9212127   | 9212034   | 8  | 8  | 0 | 9.353737658 | 0.00163931  | PLCB4    | ENSG00000101333 |
| 20 | 9296925   | 9297154   | 9297056   | 8  | 9  | 0 | 10.39304184 | 0.000803859 | PLCB4    | ENSG00000101333 |
| 20 | 10047995  | 10048419  | 10048174  | 45 | 54 | 2 | 19.05391004 | 4.08E-15    | ANKRD5   | ENSG00000132623 |
| 20 | 10060316  | 10060509  | 10060402  | 8  | 8  | 1 | 4.676868829 | 0.0091584   | SNAP25   | ENSG00000132639 |

|    |          |          |          |    |    |    |             |             |           |                 |
|----|----------|----------|----------|----|----|----|-------------|-------------|-----------|-----------------|
| 20 | 10179342 | 10179521 | 10179492 | 8  | 8  | 4  | 1.870747532 | 0.118863    | SNAP25    | ENSG00000132639 |
| 20 | 10317292 | 10317518 | 10317446 | 16 | 17 | 2  | 6.235825105 | 0.000146695 |           | ENSG00000218202 |
| 20 | 10363614 | 10364185 | 10364006 | 11 | 23 | 14 | 1.662886695 | 0.0567474   | C20orf94  | ENSG00000149346 |
| 20 | 10593861 | 10594403 | 10594071 | 27 | 38 | 1  | 20.26643159 | 1.78E-11    | JAG1      | ENSG00000101384 |
| 20 | 10661830 | 10662383 | 10662048 | 28 | 43 | 0  | 45.72938411 | 2.41E-14    | JAG1      | ENSG00000101384 |
| 20 | 10790301 | 10790582 | 10790433 | 8  | 9  | 1  | 5.196520921 | 0.00490062  | FAT1P1    | ENSG00000217809 |
| 20 | 10868902 | 10869081 | 10868948 | 8  | 8  | 1  | 4.676868829 | 0.0091584   | FAT1P1    | ENSG00000217809 |
| 20 | 10932824 | 10933003 | 10932863 | 8  | 8  | 0  | 9.353737658 | 0.00163931  | C20orf187 | ENSG00000125899 |
| 20 | 11167290 | 11167504 | 11167397 | 8  | 9  | 0  | 10.39304184 | 0.000803859 | RPS11P1   | ENSG00000217905 |
| 20 | 11835781 | 11836034 | 11835927 | 9  | 10 | 0  | 11.43234603 | 0.000394183 | BTBD3     | ENSG00000132640 |
| 20 | 13034616 | 13034797 | 13034706 | 8  | 8  | 3  | 2.338434415 | 0.0641221   | SPTLC3    | ENSG00000172296 |
| 20 | 13213436 | 13213981 | 13213793 | 35 | 47 | 1  | 24.94330042 | 3.55E-14    | C20orf82  | ENSG00000101230 |
| 20 | 13215225 | 13215552 | 13215388 | 12 | 18 | 4  | 3.9493559   | 0.000961379 | C20orf82  | ENSG00000101230 |
| 20 | 13713371 | 13713723 | 13713547 | 15 | 19 | 5  | 3.464347281 | 0.00150447  | ESF1      | ENSG00000089048 |
| 20 | 13714922 | 13715102 | 13715067 | 9  | 9  | 0  | 10.39304184 | 0.000803859 | C20orf7   | ENSG00000101247 |
| 20 | 13729373 | 13729816 | 13729589 | 19 | 29 | 3  | 7.794781382 | 4.12E-07    | C20orf7   | ENSG00000101247 |
| 20 | 13737754 | 13737966 | 13737858 | 9  | 10 | 0  | 11.43234603 | 0.000394183 | C20orf7   | ENSG00000101247 |
| 20 | 14520556 | 14520930 | 14520727 | 23 | 29 | 4  | 6.235825105 | 1.85E-06    |           | ENSG00000216947 |
| 20 | 14542042 | 14542221 | 14542157 | 8  | 8  | 0  | 9.353737658 | 0.00163931  |           | ENSG00000216947 |
| 20 | 14548614 | 14548793 | 14548728 | 8  | 8  | 6  | 1.336248237 | 0.277651    |           | ENSG00000216947 |
| 20 | 14642629 | 14642868 | 14642749 | 8  | 9  | 0  | 10.39304184 | 0.000803859 | RPS10P2   | ENSG00000220654 |
| 20 | 14774259 | 14774478 | 14774377 | 11 | 11 | 6  | 1.781664316 | 0.103344    | RPS10P2   | ENSG00000220654 |
| 20 | 15233088 | 15233480 | 15233276 | 30 | 40 | 1  | 21.30573578 | 4.48E-12    |           | ENSG00000222500 |
| 20 | 15264676 | 15264855 | 15264765 | 8  | 8  | 3  | 2.338434415 | 0.0641221   |           | ENSG00000222500 |
| 20 | 15763588 | 15763833 | 15763744 | 8  | 11 | 3  | 3.117912553 | 0.0146045   | MACROD2   | ENSG00000172264 |
| 20 | 16362693 | 16362987 | 16362844 | 9  | 11 | 2  | 4.157216737 | 0.0052913   |           | ENSG00000221448 |
| 20 | 16471189 | 16471436 | 16471312 | 10 | 11 | 0  | 12.47165021 | 0.000193293 | KIF16B    | ENSG00000089177 |
| 20 | 16480340 | 16480522 | 16480465 | 8  | 8  | 4  | 1.870747532 | 0.118863    | KIF16B    | ENSG00000089177 |
| 20 | 16658432 | 16658736 | 16658584 | 11 | 15 | 12 | 1.279143611 | 0.251893    | SNRPB2    | ENSG00000125870 |
| 20 | 17037434 | 17037696 | 17037565 | 8  | 9  | 2  | 3.464347281 | 0.0163838   |           | ENSG00000220540 |
| 20 | 17254296 | 17254641 | 17254474 | 19 | 23 | 1  | 12.47165021 | 4.94E-07    | PCSK2     | ENSG00000125851 |
| 20 | 17360586 | 17360808 | 17360631 | 8  | 9  | 5  | 1.73217364  | 0.133894    | TCTE1P    | ENSG00000216727 |
| 20 | 17486396 | 17486581 | 17486488 | 8  | 8  | 3  | 2.338434415 | 0.0641221   | BFSP1     | ENSG00000125864 |
| 20 | 17497758 | 17497984 | 17497871 | 10 | 12 | 5  | 2.251825733 | 0.0404733   | DSTN      | ENSG00000125868 |

|    |          |          |          |    |    |    |             |             |          |                 |
|----|----------|----------|----------|----|----|----|-------------|-------------|----------|-----------------|
| 20 | 17498285 | 17498614 | 17498449 | 8  | 14 | 2  | 5.196520921 | 0.000907371 | DSTN     | ENSG00000125868 |
| 20 | 17499415 | 17499703 | 17499560 | 9  | 11 | 3  | 3.117912553 | 0.0146045   | DSTN     | ENSG00000125868 |
| 20 | 17500800 | 17501062 | 17500954 | 8  | 9  | 2  | 3.464347281 | 0.0163838   | DSTN     | ENSG00000125868 |
| 20 | 17534009 | 17534395 | 17534188 | 8  | 15 | 5  | 2.771477825 | 0.0105836   |          | ENSG00000219283 |
| 20 | 17778901 | 17779181 | 17779058 | 10 | 14 | 2  | 5.196520921 | 0.000907371 |          | ENSG00000221220 |
| 20 | 17827242 | 17827432 | 17827328 | 9  | 9  | 3  | 2.598260461 | 0.0397929   |          | ENSG00000212555 |
| 20 | 17897340 | 17897864 | 17897721 | 13 | 27 | 9  | 2.910051716 | 0.000869703 | C20orf72 | ENSG00000125871 |
| 20 | 17898127 | 17898631 | 17898390 | 16 | 32 | 3  | 8.57425952  | 6.31E-08    | C20orf72 | ENSG00000125871 |
| 20 | 17986418 | 17986836 | 17986597 | 10 | 16 | 4  | 3.533634226 | 0.00276486  | OVOL2    | ENSG00000125850 |
| 20 | 17987663 | 17987842 | 17987729 | 8  | 8  | 0  | 9.353737658 | 0.00163931  | OVOL2    | ENSG00000125850 |
| 20 | 18216487 | 18216788 | 18216656 | 9  | 12 | 6  | 1.930136342 | 0.071303    | ZNF133   | ENSG00000125846 |
| 20 | 18217312 | 18217557 | 18217389 | 10 | 12 | 8  | 1.501217155 | 0.168286    | ZNF133   | ENSG00000125846 |
| 20 | 18395774 | 18396020 | 18395863 | 10 | 11 | 0  | 12.47165021 | 0.000193293 | C20orf12 | ENSG00000089091 |
| 20 | 18425805 | 18426047 | 18425916 | 12 | 12 | 6  | 1.930136342 | 0.071303    | RBBP9    | ENSG00000089050 |
| 20 | 18436054 | 18436585 | 18436275 | 9  | 21 | 9  | 2.286469205 | 0.0111772   | SEC23B   | ENSG00000101310 |
| 20 | 18495691 | 18496240 | 18495947 | 12 | 23 | 10 | 2.267572766 | 0.00903625  | DTD1     | ENSG00000125821 |
| 20 | 18560863 | 18561232 | 18561031 | 10 | 14 | 2  | 5.196520921 | 0.000907371 |          | ENSG00000217650 |
| 20 | 18780985 | 18781355 | 18781176 | 22 | 29 | 0  | 31.17912553 | 5.19E-10    | C20orf78 | ENSG00000149443 |
| 20 | 18833442 | 18833712 | 18833577 | 11 | 12 | 4  | 2.702190879 | 0.0203088   | C20orf78 | ENSG00000149443 |
| 20 | 19325437 | 19325711 | 19325584 | 15 | 16 | 2  | 5.889390377 | 0.000270741 |          | ENSG00000221748 |
| 20 | 19336517 | 19336848 | 19336670 | 14 | 17 | 3  | 4.676868829 | 0.000552213 |          | ENSG00000221748 |
| 20 | 19557264 | 19557506 | 19557385 | 8  | 9  | 2  | 3.464347281 | 0.0163838   |          | ENSG00000216017 |
| 20 | 19615907 | 19616184 | 19616045 | 8  | 10 | 5  | 1.905391004 | 0.0915982   |          | ENSG00000216017 |
| 20 | 19621316 | 19621521 | 19621432 | 13 | 14 | 1  | 7.794781382 | 0.000197021 |          | ENSG00000216017 |
| 20 | 19713464 | 19713809 | 19713636 | 13 | 19 | 13 | 1.484720263 | 0.123861    |          | ENSG00000125822 |
| 20 | 19922077 | 19922408 | 19922252 | 8  | 12 | 7  | 1.688869299 | 0.11395     | NAT5     | ENSG00000173418 |
| 20 | 19928108 | 19928509 | 19928265 | 8  | 12 | 10 | 1.228268581 | 0.305344    | NAT5     | ENSG00000173418 |
| 20 | 19945817 | 19946014 | 19945907 | 8  | 8  | 9  | 0.935373766 | 0.560286    | NAT5     | ENSG00000173418 |
| 20 | 19981248 | 19981436 | 19981342 | 10 | 12 | 4  | 2.702190879 | 0.0203088   | C20orf26 | ENSG00000089101 |
| 20 | 20094268 | 20094516 | 20094401 | 10 | 10 | 3  | 2.858086507 | 0.0242838   | C20orf26 | ENSG00000089101 |
| 20 | 20289132 | 20289484 | 20289308 | 22 | 28 | 7  | 3.767477668 | 0.000100549 | INSM1    | ENSG00000173404 |
| 20 | 20478456 | 20478684 | 20478570 | 10 | 10 | 3  | 2.858086507 | 0.0242838   |          | ENSG00000204746 |
| 20 | 20532056 | 20532352 | 20532211 | 8  | 9  | 1  | 5.196520921 | 0.00490062  | C20orf74 | ENSG00000188559 |
| 20 | 20788963 | 20789152 | 20789057 | 8  | 8  | 4  | 1.870747532 | 0.118863    | MRPS11P1 | ENSG00000218888 |

|    |          |          |          |    |    |   |             |             |          |                 |
|----|----------|----------|----------|----|----|---|-------------|-------------|----------|-----------------|
| 20 | 20793022 | 20793279 | 20793150 | 9  | 10 | 0 | 11.43234603 | 0.000394183 | MRPS11P1 | ENSG00000218888 |
| 20 | 21425123 | 21425488 | 21425327 | 9  | 14 | 2 | 5.196520921 | 0.000907371 | GSTM3P   | ENSG00000220966 |
| 20 | 21427964 | 21428146 | 21428055 | 8  | 8  | 0 | 9.353737658 | 0.00163931  | GSTM3P   | ENSG00000220966 |
| 20 | 21590168 | 21590387 | 21590326 | 8  | 11 | 5 | 2.078608368 | 0.0614303   | PAX1     | ENSG00000125813 |
| 20 | 21590392 | 21590771 | 21590592 | 8  | 14 | 6 | 2.227080395 | 0.0322529   | PAX1     | ENSG00000125813 |
| 20 | 22035078 | 22035263 | 22035139 | 8  | 9  | 8 | 1.154782427 | 0.375434    | ST13P    | ENSG00000218837 |
| 20 | 22210344 | 22210523 | 22210433 | 8  | 8  | 0 | 9.353737658 | 0.00163931  | ST13P    | ENSG00000218837 |
| 20 | 22308045 | 22308457 | 22308224 | 8  | 15 | 4 | 3.32577339  | 0.00462646  |          | ENSG00000204684 |
| 20 | 22975224 | 22975403 | 22975313 | 8  | 8  | 3 | 2.338434415 | 0.0641221   | THBD     | ENSG00000178726 |
| 20 | 23028943 | 23029443 | 23029245 | 82 | 99 | 4 | 20.78608368 | 3.63E-26    | CD93     | ENSG00000125810 |
| 20 | 23083640 | 23084001 | 23083829 | 17 | 23 | 1 | 12.47165021 | 4.94E-07    |          | ENSG00000201527 |
| 20 | 23446717 | 23446896 | 23446806 | 8  | 8  | 4 | 1.870747532 | 0.118863    |          | ENSG00000204663 |
| 20 | 23517254 | 23517572 | 23517413 | 8  | 11 | 1 | 6.235825105 | 0.0013754   |          | ENSG00000204658 |
| 20 | 23524518 | 23524712 | 23524615 | 8  | 8  | 5 | 1.558956276 | 0.191397    | CST9     | ENSG00000173335 |
| 20 | 23963595 | 23963840 | 23963717 | 10 | 12 | 7 | 1.688869299 | 0.11395     |          | ENSG00000167390 |
| 20 | 23969262 | 23969581 | 23969421 | 9  | 13 | 3 | 3.637564645 | 0.0050909   |          | ENSG00000167390 |
| 20 | 24024358 | 24024671 | 24024516 | 8  | 11 | 0 | 12.47165021 | 0.000193293 |          | ENSG00000167390 |
| 20 | 24029376 | 24029588 | 24029498 | 11 | 12 | 4 | 2.702190879 | 0.0203088   |          | ENSG00000167390 |
| 20 | 24054173 | 24054442 | 24054310 | 11 | 13 | 3 | 3.637564645 | 0.0050909   |          | ENSG00000200231 |
| 20 | 24388373 | 24388670 | 24388521 | 15 | 16 | 1 | 8.834085566 | 5.30E-05    | C20orf39 | ENSG00000101463 |
| 20 | 24516599 | 24516778 | 24516642 | 8  | 8  | 0 | 9.353737658 | 0.00163931  | C20orf39 | ENSG00000101463 |
| 20 | 24558441 | 24558654 | 24558516 | 11 | 11 | 1 | 6.235825105 | 0.0013754   | C20orf39 | ENSG00000101463 |
| 20 | 24655222 | 24655459 | 24655343 | 9  | 9  | 1 | 5.196520921 | 0.00490062  | CST7     | ENSG00000077984 |
| 20 | 24672081 | 24672260 | 24672161 | 9  | 9  | 4 | 2.078608368 | 0.0785659   | CST7     | ENSG00000077984 |
| 20 | 24742437 | 24742731 | 24742557 | 8  | 11 | 0 | 12.47165021 | 0.000193293 | CST7     | ENSG00000077984 |
| 20 | 24859123 | 24859338 | 24859251 | 12 | 13 | 4 | 2.910051716 | 0.0125532   | CST7     | ENSG00000077984 |
| 20 | 24928975 | 24929215 | 24929145 | 10 | 12 | 9 | 1.35109544  | 0.232899    | C20orf3  | ENSG00000101474 |
| 20 | 24946156 | 24946429 | 24946300 | 10 | 10 | 2 | 3.810782009 | 0.00936112  | C20orf3  | ENSG00000101474 |
| 20 | 24951394 | 24951715 | 24951591 | 8  | 12 | 3 | 3.377738599 | 0.00867157  | C20orf3  | ENSG00000101474 |
| 20 | 25107420 | 25107617 | 25107471 | 8  | 10 | 1 | 5.716173013 | 0.00260397  |          | ENSG00000216300 |
| 20 | 25125105 | 25125352 | 25125251 | 10 | 13 | 2 | 4.850086193 | 0.00164564  | ENTPD6   | ENSG00000197586 |
| 20 | 25158896 | 25159076 | 25159019 | 8  | 8  | 4 | 1.870747532 | 0.118863    |          | ENSG00000202414 |
| 20 | 25265254 | 25265441 | 25265410 | 8  | 9  | 3 | 2.598260461 | 0.0397929   | ABHD12   | ENSG00000100997 |
| 20 | 25282742 | 25282928 | 25282844 | 10 | 11 | 7 | 1.558956276 | 0.158273    | ABHD12   | ENSG00000100997 |

|    |          |          |          |     |     |     |             |             |         |                 |
|----|----------|----------|----------|-----|-----|-----|-------------|-------------|---------|-----------------|
| 20 | 25552363 | 25552589 | 25552476 | 8   | 10  | 7   | 1.429043253 | 0.21536     | NANP    | ENSG00000170191 |
| 20 | 25624537 | 25625178 | 25624835 | 17  | 37  | 9   | 3.9493559   | 6.99E-06    | ZNF337  | ENSG00000130684 |
| 20 | 26136866 | 26137613 | 26137342 | 49  | 94  | 89  | 1.097043306 | 0.264259    |         | ENSG00000207985 |
| 20 | 26137644 | 26137829 | 26137793 | 13  | 13  | 19  | 0.727512929 | 0.824686    |         | ENSG00000207985 |
| 20 | 26137838 | 26138632 | 26138017 | 80  | 116 | 104 | 1.158081805 | 0.136994    |         | ENSG00000207985 |
| 20 | 26235622 | 26235947 | 26235784 | 12  | 12  | 6   | 1.930136342 | 0.071303    |         | ENSG00000207985 |
| 20 | 26244214 | 26244393 | 26244364 | 10  | 10  | 8   | 1.27026067  | 0.293854    |         | ENSG00000207985 |
| 20 | 26264993 | 26265173 | 26265145 | 11  | 11  | 21  | 0.566893191 | 0.949414    |         | ENSG00000207985 |
| 20 | 26266313 | 26266644 | 26266478 | 15  | 17  | 23  | 0.779478138 | 0.791839    |         | ENSG00000207985 |
| 20 | 26267261 | 26267599 | 26267430 | 187 | 187 | 174 | 1.116509638 | 0.146825    |         | ENSG00000207985 |
| 20 | 28252025 | 28252207 | 28252152 | 9   | 10  | 13  | 0.816596145 | 0.696946    | MLLT10L | ENSG00000217081 |
| 20 | 28260865 | 28261118 | 28260991 | 9   | 10  | 9   | 1.143234603 | 0.378307    | MLLT10L | ENSG00000217081 |
| 20 | 28261906 | 28262127 | 28262016 | 8   | 9   | 3   | 2.598260461 | 0.0397929   | MLLT10L | ENSG00000217081 |
| 20 | 28265289 | 28265480 | 28265435 | 9   | 10  | 11  | 0.952695502 | 0.548138    | MLLT10L | ENSG00000217081 |
| 20 | 29278743 | 29279071 | 29278907 | 11  | 13  | 15  | 0.909391161 | 0.604792    | DEFB115 | ENSG00000215547 |
| 20 | 29282577 | 29282849 | 29282700 | 8   | 9   | 13  | 0.742360132 | 0.770276    | DEFB115 | ENSG00000215547 |
| 20 | 29284136 | 29284464 | 29284300 | 9   | 10  | 12  | 0.879411233 | 0.62639     | DEFB115 | ENSG00000215547 |
| 20 | 29287457 | 29287785 | 29287621 | 10  | 12  | 14  | 0.900730293 | 0.611333    | DEFB115 | ENSG00000215547 |
| 20 | 29364827 | 29365175 | 29365001 | 11  | 16  | 7   | 2.208521392 | 0.0257604   | RPL31P3 | ENSG00000217200 |
| 20 | 29565554 | 29565752 | 29565696 | 8   | 9   | 5   | 1.73217364  | 0.133894    | HM13    | ENSG00000101294 |
| 20 | 29598670 | 29598989 | 29598825 | 19  | 23  | 4   | 4.988660084 | 6.05E-05    |         | ENSG00000219431 |
| 20 | 29614387 | 29614635 | 29614540 | 12  | 15  | 4   | 3.32577339  | 0.00462646  |         | ENSG00000219431 |
| 20 | 29624280 | 29624542 | 29624407 | 13  | 14  | 2   | 5.196520921 | 0.000907371 |         | ENSG00000201770 |
| 20 | 29644797 | 29645358 | 29644976 | 10  | 24  | 10  | 2.362054964 | 0.00608507  | ID1     | ENSG00000125968 |
| 20 | 29654168 | 29654373 | 29654270 | 9   | 9   | 2   | 3.464347281 | 0.0163838   | ID1     | ENSG00000125968 |
| 20 | 29655681 | 29656030 | 29655855 | 13  | 18  | 6   | 2.8209685   | 0.00559354  | ID1     | ENSG00000125968 |
| 20 | 29656573 | 29656794 | 29656683 | 9   | 12  | 8   | 1.501217155 | 0.168286    | ID1     | ENSG00000125968 |
| 20 | 29657798 | 29658080 | 29657939 | 9   | 12  | 4   | 2.702190879 | 0.0203088   | ID1     | ENSG00000125968 |
| 20 | 29658123 | 29658374 | 29658248 | 9   | 10  | 3   | 2.858086507 | 0.0242838   | ID1     | ENSG00000125968 |
| 20 | 29659938 | 29660200 | 29660069 | 10  | 12  | 1   | 6.755477198 | 0.000722752 | ID1     | ENSG00000125968 |
| 20 | 29712979 | 29713292 | 29713144 | 10  | 11  | 5   | 2.078608368 | 0.0614303   | COX4I2  | ENSG00000131055 |
| 20 | 29729802 | 29730553 | 29730253 | 178 | 218 | 9   | 22.76076163 | 1.58E-55    | COX4I2  | ENSG00000131055 |
| 20 | 29731472 | 29731801 | 29731643 | 15  | 19  | 10  | 1.889643971 | 0.0394833   | BCL2L1  | ENSG00000171552 |
| 20 | 29733133 | 29733381 | 29733256 | 10  | 11  | 0   | 12.47165021 | 0.000193293 | BCL2L1  | ENSG00000171552 |



|    |          |          |          |     |     |    |             |             |           |                 |
|----|----------|----------|----------|-----|-----|----|-------------|-------------|-----------|-----------------|
| 20 | 29762024 | 29762540 | 29762203 | 16  | 28  | 11 | 2.511651779 | 0.00221344  | BCL2L1    | ENSG00000171552 |
| 20 | 29770896 | 29771239 | 29771067 | 12  | 15  | 6  | 2.375552421 | 0.0212094   | BCL2L1    | ENSG00000171552 |
| 20 | 29775226 | 29775713 | 29775534 | 9   | 16  | 6  | 2.524024447 | 0.0137633   | BCL2L1    | ENSG00000171552 |
| 20 | 29790166 | 29790661 | 29790426 | 14  | 28  | 10 | 2.739983758 | 0.00114395  | TPX2      | ENSG00000088325 |
| 20 | 29791814 | 29792037 | 29791925 | 9   | 11  | 2  | 4.157216737 | 0.0052913   | TPX2      | ENSG00000088325 |
| 20 | 29799149 | 29799347 | 29799259 | 10  | 10  | 2  | 3.810782009 | 0.00936112  | TPX2      | ENSG00000088325 |
| 20 | 29874333 | 29874531 | 29874475 | 8   | 9   | 9  | 1.039304184 | 0.466079    | MYLK2     | ENSG00000101306 |
| 20 | 29950166 | 29950345 | 29950255 | 9   | 9   | 0  | 10.39304184 | 0.000803859 |           | ENSG00000199497 |
| 20 | 30066036 | 30066241 | 30066151 | 9   | 9   | 2  | 3.464347281 | 0.0163838   | C20orf160 | ENSG00000101331 |
| 20 | 30160795 | 30161353 | 30160974 | 12  | 25  | 7  | 3.377738599 | 0.000449165 | TM9SF4    | ENSG00000101337 |
| 20 | 30187662 | 30187859 | 30187760 | 9   | 9   | 7  | 1.29913023  | 0.286504    | TM9SF4    | ENSG00000101337 |
| 20 | 30562638 | 30562825 | 30562731 | 9   | 9   | 2  | 3.464347281 | 0.0163838   | C20orf112 | ENSG00000197183 |
| 20 | 30746676 | 30746887 | 30746781 | 12  | 13  | 4  | 2.910051716 | 0.0125532   |           | ENSG00000198179 |
| 20 | 30770546 | 30770742 | 30770654 | 8   | 8   | 2  | 3.117912553 | 0.0283184   | COMMD7    | ENSG00000149600 |
| 20 | 31452875 | 31453165 | 31453020 | 10  | 13  | 7  | 1.818782322 | 0.0805123   | CDK5RAP1  | ENSG00000101391 |
| 20 | 31889607 | 31889819 | 31889713 | 9   | 11  | 3  | 3.117912553 | 0.0146045   | CHMP4B    | ENSG00000101421 |
| 20 | 32044460 | 32044662 | 32044585 | 8   | 9   | 1  | 5.196520921 | 0.00490062  | RALY      | ENSG00000125970 |
| 20 | 32121317 | 32121509 | 32121413 | 8   | 8   | 0  | 9.353737658 | 0.00163931  | RALY      | ENSG00000125970 |
| 20 | 32577321 | 32577501 | 32577434 | 8   | 10  | 3  | 2.858086507 | 0.0242838   |           | ENSG00000206582 |
| 20 | 32577522 | 32577725 | 32577613 | 10  | 12  | 7  | 1.688869299 | 0.11395     |           | ENSG00000206582 |
| 20 | 33259877 | 33260059 | 33259986 | 8   | 8   | 0  | 9.353737658 | 0.00163931  |           | ENSG00000178424 |
| 20 | 33359317 | 33359768 | 33359540 | 29  | 42  | 3  | 11.17251998 | 1.06E-10    | FAM83C    | ENSG00000125998 |
| 20 | 33463083 | 33463502 | 33463323 | 13  | 20  | 8  | 2.425043097 | 0.00917565  | UQCC      | ENSG00000101019 |
| 20 | 33502446 | 33502904 | 33502683 | 190 | 219 | 9  | 22.86469205 | 8.06E-56    |           | ENSG00000221763 |
| 20 | 33505840 | 33506300 | 33505984 | 10  | 20  | 3  | 5.456346967 | 9.70E-05    | GDF5      | ENSG00000125965 |
| 20 | 33515043 | 33515364 | 33515191 | 8   | 9   | 5  | 1.73217364  | 0.133894    | CEP250    | ENSG00000126001 |
| 20 | 33563114 | 33563363 | 33563246 | 12  | 13  | 4  | 2.910051716 | 0.0125532   | C20orf173 | ENSG00000125975 |
| 20 | 33655498 | 33655681 | 33655575 | 8   | 8   | 0  | 9.353737658 | 0.00163931  |           | ENSG00000222008 |
| 20 | 33793463 | 33794107 | 33793785 | 14  | 31  | 16 | 1.956337288 | 0.0103735   | RBM39     | ENSG00000131051 |
| 20 | 33904756 | 33904941 | 33904848 | 8   | 9   | 0  | 10.39304184 | 0.000803859 |           | ENSG00000199676 |
| 20 | 34005603 | 34006044 | 34005849 | 11  | 19  | 4  | 4.157216737 | 0.000560204 | SCAND1    | ENSG00000171222 |
| 20 | 34189967 | 34190249 | 34190075 | 15  | 17  | 5  | 3.117912553 | 0.00407023  | EPB41L1   | ENSG00000088367 |
| 20 | 34618351 | 34618675 | 34618530 | 8   | 13  | 2  | 4.850086193 | 0.00164564  | MYL9      | ENSG00000101335 |
| 20 | 34637256 | 34637444 | 34637321 | 8   | 10  | 8  | 1.27026067  | 0.293854    | TGIF2     | ENSG00000118707 |

|    |          |          |          |    |    |    |             |             |           |                 |
|----|----------|----------|----------|----|----|----|-------------|-------------|-----------|-----------------|
| 20 | 34647233 | 34647570 | 34647358 | 12 | 16 | 7  | 2.208521392 | 0.0257604   | TGIF2     | ENSG00000118707 |
| 20 | 34649137 | 34649368 | 34649252 | 10 | 11 | 2  | 4.157216737 | 0.0052913   | TGIF2     | ENSG00000118707 |
| 20 | 34708524 | 34708852 | 34708688 | 36 | 40 | 3  | 10.65286789 | 3.85E-10    | SLA2      | ENSG00000101082 |
| 20 | 34709555 | 34709841 | 34709697 | 10 | 11 | 1  | 6.235825105 | 0.0013754   | SLA2      | ENSG00000101082 |
| 20 | 34835709 | 34836005 | 34835864 | 11 | 14 | 5  | 2.598260461 | 0.0167748   | DSN1      | ENSG00000149636 |
| 20 | 34896905 | 34897611 | 34897283 | 35 | 61 | 7  | 8.054607428 | 6.98E-13    | C20orf117 | ENSG00000149639 |
| 20 | 35240605 | 35240962 | 35240783 | 11 | 16 | 4  | 3.533634226 | 0.00276486  | RPN2      | ENSG00000118705 |
| 20 | 35456621 | 35457146 | 35456877 | 59 | 75 | 1  | 39.493559   | 1.20E-22    | SRC       | ENSG00000197122 |
| 20 | 36497345 | 36497619 | 36497482 | 14 | 16 | 5  | 2.944695189 | 0.00659886  |           | ENSG00000196756 |
| 20 | 36534450 | 36534735 | 36534592 | 11 | 14 | 5  | 2.598260461 | 0.0167748   | KIAA1219  | ENSG00000170471 |
| 20 | 36661673 | 36661852 | 36661719 | 8  | 8  | 3  | 2.338434415 | 0.0641221   |           | ENSG00000213959 |
| 20 | 36666970 | 36667149 | 36667059 | 8  | 9  | 1  | 5.196520921 | 0.00490062  |           | ENSG00000213959 |
| 20 | 36989953 | 36990334 | 36990167 | 8  | 14 | 2  | 5.196520921 | 0.000907371 | FAM83D    | ENSG00000101447 |
| 20 | 37601719 | 37601898 | 37601745 | 8  | 8  | 0  | 9.353737658 | 0.00163931  |           | ENSG00000210455 |
| 20 | 37874255 | 37874506 | 37874380 | 8  | 10 | 1  | 5.716173013 | 0.00260397  | HSPEP1    | ENSG00000219645 |
| 20 | 38228372 | 38228592 | 38228482 | 8  | 8  | 3  | 2.338434415 | 0.0641221   | HSPEP1    | ENSG00000219645 |
| 20 | 38337253 | 38337471 | 38337351 | 10 | 10 | 5  | 1.905391004 | 0.0915982   | HSPEP1    | ENSG00000219645 |
| 20 | 38349145 | 38349558 | 38349351 | 10 | 19 | 2  | 6.928694562 | 4.25E-05    | HSPEP1    | ENSG00000219645 |
| 20 | 38349964 | 38350464 | 38350141 | 9  | 16 | 4  | 3.533634226 | 0.00276486  | HSPEP1    | ENSG00000219645 |
| 20 | 38421636 | 38421907 | 38421756 | 9  | 9  | 5  | 1.73217364  | 0.133894    | MAFB      | ENSG00000204103 |
| 20 | 38525174 | 38525456 | 38525331 | 10 | 12 | 1  | 6.755477198 | 0.000722752 | MAFB      | ENSG00000204103 |
| 20 | 38525462 | 38525793 | 38525627 | 16 | 19 | 1  | 10.39304184 | 7.23E-06    | MAFB      | ENSG00000204103 |
| 20 | 38726320 | 38726521 | 38726393 | 9  | 9  | 1  | 5.196520921 | 0.00490062  | MAFB      | ENSG00000204103 |
| 20 | 38949016 | 38949196 | 38949106 | 9  | 9  | 1  | 5.196520921 | 0.00490062  |           | ENSG00000222612 |
| 20 | 38954925 | 38955172 | 38955048 | 10 | 10 | 7  | 1.429043253 | 0.21536     |           | ENSG00000222612 |
| 20 | 38965496 | 38965766 | 38965626 | 24 | 27 | 8  | 3.233390795 | 0.000398033 |           | ENSG00000222612 |
| 20 | 39005131 | 39005354 | 39005236 | 9  | 10 | 3  | 2.858086507 | 0.0242838   |           | ENSG00000222612 |
| 20 | 39007941 | 39008337 | 39008110 | 10 | 18 | 11 | 1.645564958 | 0.0828462   |           | ENSG00000222612 |
| 20 | 39010846 | 39011038 | 39010942 | 8  | 9  | 5  | 1.73217364  | 0.133894    |           | ENSG00000222612 |
| 20 | 39016083 | 39016273 | 39016187 | 8  | 8  | 5  | 1.558956276 | 0.191397    |           | ENSG00000222612 |
| 20 | 39020625 | 39021056 | 39020919 | 12 | 18 | 10 | 1.795161773 | 0.055383    |           | ENSG00000222612 |
| 20 | 39040927 | 39041203 | 39041073 | 15 | 16 | 4  | 3.533634226 | 0.00276486  |           | ENSG00000222612 |
| 20 | 39052584 | 39053015 | 39052799 | 19 | 28 | 13 | 2.152844382 | 0.00695052  |           | ENSG00000222612 |
| 20 | 39065204 | 39065433 | 39065318 | 8  | 9  | 5  | 1.73217364  | 0.133894    |           | ENSG00000222612 |

|    |          |          |          |    |    |    |             |             |         |                 |
|----|----------|----------|----------|----|----|----|-------------|-------------|---------|-----------------|
| 20 | 39079414 | 39080130 | 39079923 | 14 | 36 | 18 | 2.023908148 | 0.00482463  |         | ENSG00000222612 |
| 20 | 39081692 | 39081909 | 39081832 | 10 | 10 | 6  | 1.63319229  | 0.146906    |         | ENSG00000222612 |
| 20 | 39090823 | 39091057 | 39090922 | 12 | 13 | 5  | 2.425043097 | 0.0262442   | TOP1    | ENSG00000198900 |
| 20 | 39091763 | 39092031 | 39091897 | 8  | 12 | 5  | 2.251825733 | 0.0404733   | TOP1    | ENSG00000198900 |
| 20 | 39112625 | 39112830 | 39112727 | 8  | 9  | 1  | 5.196520921 | 0.00490062  | TOP1    | ENSG00000198900 |
| 20 | 39140453 | 39140822 | 39140632 | 12 | 19 | 13 | 1.484720263 | 0.123861    | TOP1    | ENSG00000198900 |
| 20 | 39149116 | 39149342 | 39149184 | 10 | 13 | 8  | 1.616695398 | 0.123553    | PLCG1   | ENSG00000124181 |
| 20 | 39187050 | 39187229 | 39187102 | 8  | 8  | 7  | 1.169217207 | 0.371848    | PLCG1   | ENSG00000124181 |
| 20 | 39188813 | 39189010 | 39188916 | 8  | 8  | 5  | 1.558956276 | 0.191397    | PLCG1   | ENSG00000124181 |
| 20 | 39197139 | 39197825 | 39197486 | 8  | 25 | 9  | 2.702190879 | 0.00210968  | PLCG1   | ENSG00000124181 |
| 20 | 39201196 | 39201434 | 39201315 | 8  | 9  | 3  | 2.598260461 | 0.0397929   | PLCG1   | ENSG00000124181 |
| 20 | 39206341 | 39206520 | 39206430 | 8  | 8  | 3  | 2.338434415 | 0.0641221   | PLCG1   | ENSG00000124181 |
| 20 | 39235659 | 39235890 | 39235815 | 9  | 9  | 2  | 3.464347281 | 0.0163838   |         | ENSG00000216278 |
| 20 | 39264811 | 39265001 | 39264906 | 8  | 8  | 2  | 3.117912553 | 0.0283184   | ZHX3    | ENSG00000174306 |
| 20 | 39300736 | 39300978 | 39300857 | 9  | 10 | 0  | 11.43234603 | 0.000394183 | ZHX3    | ENSG00000174306 |
| 20 | 39352806 | 39353114 | 39352960 | 10 | 13 | 18 | 0.765803083 | 0.780427    |         | ENSG00000223210 |
| 20 | 39369206 | 39369424 | 39369316 | 8  | 9  | 4  | 2.078608368 | 0.0785659   | ZHX3    | ENSG00000174306 |
| 20 | 39379929 | 39380380 | 39380149 | 12 | 21 | 15 | 1.429043253 | 0.134782    |         | ENSG00000218353 |
| 20 | 39401891 | 39403008 | 39402258 | 15 | 54 | 23 | 2.381738756 | 9.82E-05    | LPIN3   | ENSG00000132793 |
| 20 | 39403221 | 39403531 | 39403376 | 10 | 12 | 8  | 1.501217155 | 0.168286    | LPIN3   | ENSG00000132793 |
| 20 | 39416291 | 39416528 | 39416353 | 11 | 13 | 2  | 4.850086193 | 0.00164564  | EMILIN3 | ENSG00000183798 |
| 20 | 39416572 | 39416767 | 39416668 | 8  | 8  | 4  | 1.870747532 | 0.118863    | EMILIN3 | ENSG00000183798 |
| 20 | 39446040 | 39446252 | 39446180 | 8  | 10 | 2  | 3.810782009 | 0.00936112  |         | ENSG00000219721 |
| 20 | 39449620 | 39449802 | 39449725 | 8  | 9  | 3  | 2.598260461 | 0.0397929   |         | ENSG00000219721 |
| 20 | 39455412 | 39455779 | 39455603 | 17 | 23 | 8  | 2.771477825 | 0.00251818  |         | ENSG00000219721 |
| 20 | 39461693 | 39461932 | 39461812 | 15 | 16 | 7  | 2.208521392 | 0.0257604   |         | ENSG00000219721 |
| 20 | 39468714 | 39468911 | 39468812 | 8  | 8  | 2  | 3.117912553 | 0.0283184   |         | ENSG00000219721 |
| 20 | 39623818 | 39624019 | 39623954 | 9  | 10 | 7  | 1.429043253 | 0.21536     |         | ENSG00000196775 |
| 20 | 39666558 | 39666838 | 39666698 | 10 | 11 | 3  | 3.117912553 | 0.0146045   | CHD6    | ENSG00000124177 |
| 20 | 39712591 | 39712932 | 39712763 | 37 | 42 | 19 | 2.234503996 | 0.000958521 | CHD6    | ENSG00000124177 |
| 20 | 39726869 | 39727171 | 39727027 | 10 | 14 | 5  | 2.598260461 | 0.0167748   |         | ENSG00000210486 |
| 20 | 39754652 | 39754864 | 39754754 | 9  | 11 | 6  | 1.781664316 | 0.103344    |         | ENSG00000199287 |
| 20 | 39755479 | 39755882 | 39755705 | 16 | 22 | 10 | 2.173090567 | 0.0132845   |         | ENSG00000199287 |
| 20 | 39800756 | 39801067 | 39800905 | 13 | 15 | 11 | 1.385738912 | 0.19225     |         | ENSG00000212224 |

|    |          |          |          |    |    |    |             |             |                        |
|----|----------|----------|----------|----|----|----|-------------|-------------|------------------------|
| 20 | 39801387 | 39801616 | 39801501 | 10 | 12 | 3  | 3.377738599 | 0.00867157  | ENSG00000212224        |
| 20 | 39832674 | 39832864 | 39832769 | 8  | 8  | 3  | 2.338434415 | 0.0641221   | ENSG00000212224        |
| 20 | 39902165 | 39902362 | 39902231 | 8  | 9  | 1  | 5.196520921 | 0.00490062  | ENSG00000212224        |
| 20 | 39925479 | 39925658 | 39925568 | 8  | 8  | 4  | 1.870747532 | 0.118863    | ENSG00000220309        |
| 20 | 39928008 | 39928412 | 39928210 | 31 | 41 | 5  | 7.27512929  | 5.94E-09    | ENSG00000220309        |
| 20 | 40018474 | 40018681 | 40018577 | 8  | 9  | 7  | 1.29913023  | 0.286504    | ENSG00000220309        |
| 20 | 40042090 | 40042276 | 40042132 | 8  | 9  | 2  | 3.464347281 | 0.0163838   | ENSG00000220309        |
| 20 | 40250637 | 40251131 | 40250979 | 10 | 19 | 10 | 1.889643971 | 0.0394833   | ENSG00000220309        |
| 20 | 40252007 | 40252363 | 40252185 | 8  | 14 | 14 | 1.039304184 | 0.458308    | ENSG00000220309        |
| 20 | 40253403 | 40253856 | 40253582 | 13 | 26 | 25 | 1.079277422 | 0.390462    | ENSG00000220309        |
| 20 | 40253896 | 40254278 | 40254103 | 14 | 20 | 13 | 1.558956276 | 0.0943292   | ENSG00000220309        |
| 20 | 40254513 | 40254916 | 40254684 | 11 | 16 | 14 | 1.177878075 | 0.320433    | ENSG00000220309        |
| 20 | 40260836 | 40261260 | 40261015 | 8  | 13 | 10 | 1.32275078  | 0.240023    | ENSG00000220309        |
| 20 | 40261601 | 40261780 | 40261667 | 9  | 9  | 10 | 0.944821986 | 0.553851    | ENSG00000220309        |
| 20 | 40266210 | 40266757 | 40266483 | 15 | 31 | 16 | 1.956337288 | 0.0103735   | ENSG00000220309        |
| 20 | 40268071 | 40268251 | 40268161 | 8  | 9  | 7  | 1.29913023  | 0.286504    | ENSG00000220309        |
| 20 | 40294081 | 40294293 | 40294207 | 10 | 10 | 1  | 5.716173013 | 0.00260397  | ENSG00000220309        |
| 20 | 40439285 | 40439837 | 40439464 | 10 | 22 | 24 | 0.956159849 | 0.562938    | ENSG00000217390        |
| 20 | 40440345 | 40440821 | 40440524 | 14 | 25 | 15 | 1.688869299 | 0.0455215   | ENSG00000217390        |
| 20 | 40442060 | 40442239 | 40442147 | 8  | 9  | 5  | 1.73217364  | 0.133894    | ENSG00000217390        |
| 20 | 40442436 | 40442624 | 40442530 | 8  | 10 | 5  | 1.905391004 | 0.0915982   | ENSG00000217390        |
| 20 | 40443204 | 40443442 | 40443323 | 9  | 9  | 9  | 1.039304184 | 0.466079    | ENSG00000217390        |
| 20 | 40444218 | 40444490 | 40444354 | 11 | 14 | 8  | 1.73217364  | 0.0890835   | ENSG00000217390        |
| 20 | 40446022 | 40446271 | 40446151 | 9  | 11 | 7  | 1.558956276 | 0.158273    | ENSG00000217390        |
| 20 | 40530182 | 40530377 | 40530279 | 8  | 8  | 7  | 1.169217207 | 0.371848    | ENSG00000217390        |
| 20 | 40530910 | 40531169 | 40531031 | 8  | 9  | 2  | 3.464347281 | 0.0163838   | ENSG00000217390        |
| 20 | 40531427 | 40531749 | 40531605 | 12 | 15 | 1  | 8.314433474 | 0.000102308 | ENSG00000217390        |
| 20 | 40545872 | 40546148 | 40546021 | 8  | 11 | 11 | 1.039304184 | 0.462773    | ENSG00000217390        |
| 20 | 40592959 | 40593145 | 40593052 | 8  | 8  | 7  | 1.169217207 | 0.371848    | ENSG00000217390        |
| 20 | 40631220 | 40631462 | 40631341 | 9  | 9  | 0  | 10.39304184 | 0.000803859 | ENSG00000217390        |
| 20 | 40634574 | 40634770 | 40634672 | 8  | 8  | 6  | 1.336248237 | 0.277651    | ENSG00000217390        |
| 20 | 40675272 | 40675460 | 40675366 | 8  | 8  | 0  | 9.353737658 | 0.00163931  | ENSG00000217390        |
| 20 | 41575813 | 41576061 | 41575937 | 8  | 9  | 1  | 5.196520921 | 0.00490062  | L3MBTL ENSG00000185513 |
| 20 | 41591514 | 41591841 | 41591654 | 8  | 12 | 0  | 13.5109544  | 9.48E-05    | L3MBTL ENSG00000185513 |

|    |          |          |          |    |    |    |             |             |           |                 |
|----|----------|----------|----------|----|----|----|-------------|-------------|-----------|-----------------|
| 20 | 41960418 | 41960624 | 41960521 | 9  | 9  | 3  | 2.598260461 | 0.0397929   | TOX2      | ENSG00000124191 |
| 20 | 42118241 | 42118440 | 42118339 | 8  | 8  | 3  | 2.338434415 | 0.0641221   |           | ENSG00000222893 |
| 20 | 42155059 | 42155238 | 42155134 | 8  | 8  | 6  | 1.336248237 | 0.277651    |           | ENSG00000222893 |
| 20 | 42290281 | 42290777 | 42290529 | 11 | 20 | 8  | 2.425043097 | 0.00917565  | C20orf111 | ENSG00000132823 |
| 20 | 42372378 | 42372557 | 42372520 | 8  | 8  | 2  | 3.117912553 | 0.0283184   | C20orf142 | ENSG00000197296 |
| 20 | 42373424 | 42373630 | 42373527 | 8  | 9  | 2  | 3.464347281 | 0.0163838   | C20orf142 | ENSG00000197296 |
| 20 | 42392904 | 42393143 | 42392989 | 11 | 11 | 1  | 6.235825105 | 0.0013754   | R3HDML    | ENSG00000101074 |
| 20 | 42538807 | 42538998 | 42538902 | 8  | 9  | 3  | 2.598260461 | 0.0397929   | TTPAL     | ENSG00000124120 |
| 20 | 42615465 | 42615653 | 42615562 | 8  | 9  | 2  | 3.464347281 | 0.0163838   | PKIG      | ENSG00000168734 |
| 20 | 42634988 | 42635187 | 42635081 | 9  | 10 | 4  | 2.286469205 | 0.0509017   | PKIG      | ENSG00000168734 |
| 20 | 42703404 | 42703671 | 42703551 | 11 | 13 | 4  | 2.910051716 | 0.0125532   | ADA       | ENSG00000196839 |
| 20 | 42714185 | 42714411 | 42714326 | 8  | 9  | 3  | 2.598260461 | 0.0397929   | ADA       | ENSG00000196839 |
| 20 | 42740254 | 42740742 | 42740518 | 49 | 69 | 3  | 18.18782322 | 1.86E-18    |           | ENSG00000132832 |
| 20 | 42790799 | 42791257 | 42791096 | 15 | 24 | 9  | 2.598260461 | 0.0032455   | WISP2     | ENSG00000064205 |
| 20 | 42795456 | 42795670 | 42795520 | 8  | 10 | 3  | 2.858086507 | 0.0242838   | WISP2     | ENSG00000064205 |
| 20 | 42800987 | 42801171 | 42801046 | 8  | 10 | 1  | 5.716173013 | 0.00260397  | KCNK15    | ENSG00000124249 |
| 20 | 42809250 | 42809456 | 42809306 | 9  | 10 | 3  | 2.858086507 | 0.0242838   | KCNK15    | ENSG00000124249 |
| 20 | 42809623 | 42809883 | 42809714 | 10 | 13 | 5  | 2.425043097 | 0.0262442   | KCNK15    | ENSG00000124249 |
| 20 | 42949451 | 42949758 | 42949616 | 8  | 11 | 1  | 6.235825105 | 0.0013754   | YWHAB     | ENSG00000166913 |
| 20 | 43061985 | 43062327 | 43062160 | 13 | 17 | 0  | 18.70747532 | 2.69E-06    | STK4      | ENSG00000101109 |
| 20 | 43407617 | 43408019 | 43407796 | 9  | 15 | 7  | 2.078608368 | 0.038229    | SDC4      | ENSG00000124145 |
| 20 | 43425172 | 43425374 | 43425213 | 8  | 9  | 2  | 3.464347281 | 0.0163838   | SYS1      | ENSG00000198641 |
| 20 | 43853631 | 43853850 | 43853713 | 8  | 9  | 6  | 1.484720263 | 0.204387    | WFDC3     | ENSG00000124116 |
| 20 | 43943340 | 43943519 | 43943415 | 8  | 8  | 0  | 9.353737658 | 0.00163931  | ZSWIM1    | ENSG00000168612 |
| 20 | 43961265 | 43961484 | 43961416 | 8  | 8  | 0  | 9.353737658 | 0.00163931  | CTSA      | ENSG00000064601 |
| 20 | 44021293 | 44021530 | 44021450 | 8  | 9  | 1  | 5.196520921 | 0.00490062  | ZNF335    | ENSG00000198026 |
| 20 | 44033727 | 44034190 | 44033875 | 11 | 18 | 13 | 1.41048425  | 0.160361    | ZNF335    | ENSG00000198026 |
| 20 | 44034201 | 44034505 | 44034369 | 10 | 14 | 6  | 2.227080395 | 0.0322529   | ZNF335    | ENSG00000198026 |
| 20 | 44055503 | 44055821 | 44055658 | 14 | 18 | 5  | 3.291129917 | 0.00248584  | MMP9      | ENSG00000100985 |
| 20 | 44057663 | 44057984 | 44057823 | 17 | 21 | 6  | 3.266384579 | 0.0013436   | MMP9      | ENSG00000100985 |
| 20 | 44075874 | 44076134 | 44076005 | 8  | 12 | 6  | 1.930136342 | 0.071303    |           | ENSG00000203346 |
| 20 | 44317627 | 44317825 | 44317726 | 9  | 9  | 1  | 5.196520921 | 0.00490062  | CDH22     | ENSG00000149654 |
| 20 | 44468694 | 44469003 | 44468850 | 11 | 14 | 2  | 5.196520921 | 0.000907371 | ELMO2     | ENSG00000062598 |
| 20 | 44624615 | 44624923 | 44624753 | 8  | 11 | 5  | 2.078608368 | 0.0614303   | C20orf123 | ENSG00000149635 |

|    |          |          |          |    |     |    |             |            |      |                 |
|----|----------|----------|----------|----|-----|----|-------------|------------|------|-----------------|
| 20 | 45011087 | 45011294 | 45011207 | 9  | 9   | 2  | 3.464347281 | 0.0163838  | EYA2 | ENSG00000064655 |
| 20 | 45203515 | 45203744 | 45203652 | 15 | 17  | 16 | 1.100439724 | 0.388093   |      | ENSG00000215450 |
| 20 | 45203878 | 45204128 | 45204003 | 11 | 13  | 12 | 1.11925066  | 0.384109   |      | ENSG00000215450 |
| 20 | 45204446 | 45205205 | 45205026 | 14 | 40  | 37 | 1.121354515 | 0.304982   |      | ENSG00000215450 |
| 20 | 45211922 | 45212201 | 45212035 | 11 | 14  | 17 | 0.86608682  | 0.662567   |      | ENSG00000215450 |
| 20 | 45212217 | 45212501 | 45212342 | 11 | 15  | 18 | 0.875203524 | 0.655562   |      | ENSG00000215450 |
| 20 | 45219694 | 45220268 | 45219981 | 9  | 24  | 34 | 0.742360132 | 0.875925   |      | ENSG00000215450 |
| 20 | 45220600 | 45220999 | 45220758 | 10 | 15  | 23 | 0.692869456 | 0.877389   |      | ENSG00000215450 |
| 20 | 45221043 | 45221638 | 45221459 | 18 | 35  | 22 | 1.626736984 | 0.0315434  |      | ENSG00000215450 |
| 20 | 45229931 | 45230254 | 45230092 | 18 | 23  | 16 | 1.467252966 | 0.109416   |      | ENSG00000215450 |
| 20 | 45230427 | 45230789 | 45230606 | 13 | 20  | 18 | 1.148704625 | 0.329698   |      | ENSG00000215450 |
| 20 | 45230842 | 45232084 | 45231241 | 22 | 74  | 50 | 1.528388506 | 0.00896207 |      | ENSG00000215450 |
| 20 | 45232627 | 45233528 | 45233143 | 20 | 50  | 65 | 0.803098688 | 0.882176   |      | ENSG00000215450 |
| 20 | 45234361 | 45235200 | 45234704 | 10 | 38  | 35 | 1.125912866 | 0.303364   |      | ENSG00000215450 |
| 20 | 45235676 | 45237312 | 45236296 | 23 | 108 | 96 | 1.167877898 | 0.132581   |      | ENSG00000215450 |
| 20 | 45237349 | 45238034 | 45237632 | 14 | 38  | 41 | 0.965068171 | 0.564419   |      | ENSG00000215450 |
| 20 | 45239404 | 45239814 | 45239635 | 9  | 17  | 24 | 0.748299013 | 0.830231   |      | ENSG00000215450 |
| 20 | 45241578 | 45241771 | 45241674 | 8  | 9   | 17 | 0.577391213 | 0.925885   |      | ENSG00000215450 |
| 20 | 45241872 | 45242092 | 45241977 | 10 | 13  | 23 | 0.606260774 | 0.937372   |      | ENSG00000215450 |
| 20 | 45242310 | 45243065 | 45242967 | 10 | 29  | 41 | 0.742360132 | 0.896757   |      | ENSG00000215450 |
| 20 | 45243083 | 45243850 | 45243492 | 29 | 64  | 69 | 0.965068171 | 0.582467   |      | ENSG00000215450 |
| 20 | 45244903 | 45245590 | 45245067 | 13 | 31  | 27 | 1.187776211 | 0.251797   |      | ENSG00000215450 |
| 20 | 45245678 | 45245869 | 45245817 | 8  | 9   | 18 | 0.547002202 | 0.94615    |      | ENSG00000215450 |
| 20 | 45245951 | 45246358 | 45246179 | 14 | 22  | 33 | 0.703058713 | 0.907926   |      | ENSG00000215450 |
| 20 | 45246405 | 45247280 | 45246955 | 10 | 31  | 41 | 0.791850807 | 0.842775   |      | ENSG00000215450 |
| 20 | 45247574 | 45248445 | 45248013 | 21 | 52  | 28 | 1.899417992 | 0.00213992 |      | ENSG00000215450 |
| 20 | 45248708 | 45249144 | 45248979 | 14 | 22  | 11 | 1.991999686 | 0.0221672  |      | ENSG00000215450 |
| 20 | 45249636 | 45249996 | 45249802 | 10 | 16  | 16 | 1.039304184 | 0.455583   |      | ENSG00000215450 |
| 20 | 45250111 | 45250597 | 45250348 | 9  | 20  | 34 | 0.623582511 | 0.960152   |      | ENSG00000215450 |
| 20 | 45250604 | 45251220 | 45250956 | 15 | 32  | 44 | 0.762156402 | 0.884833   |      | ENSG00000215450 |
| 20 | 45251371 | 45251851 | 45251603 | 17 | 28  | 19 | 1.506991067 | 0.0757238  |      | ENSG00000215450 |
| 20 | 45252003 | 45252764 | 45252600 | 12 | 31  | 32 | 1.007810118 | 0.488049   |      | ENSG00000215450 |
| 20 | 45252768 | 45253628 | 45253274 | 8  | 31  | 50 | 0.652112429 | 0.97328    |      | ENSG00000215450 |
| 20 | 45253736 | 45254240 | 45254066 | 12 | 25  | 26 | 1.000811437 | 0.499519   |      | ENSG00000215450 |

|    |          |          |          |    |     |    |             |            |                 |
|----|----------|----------|----------|----|-----|----|-------------|------------|-----------------|
| 20 | 45255038 | 45255254 | 45255146 | 13 | 15  | 8  | 1.847651883 | 0.0631662  | ENSG00000215450 |
| 20 | 45256166 | 45256785 | 45256312 | 15 | 28  | 13 | 2.152844382 | 0.00695052 | ENSG00000215450 |
| 20 | 45256999 | 45258028 | 45257828 | 15 | 52  | 62 | 0.874335266 | 0.765901   | ENSG00000215450 |
| 20 | 45258032 | 45259062 | 45258611 | 50 | 107 | 76 | 1.457725349 | 0.00537031 | ENSG00000215450 |
| 20 | 45260181 | 45261081 | 45260539 | 17 | 48  | 53 | 0.943072315 | 0.617786   | ENSG00000215450 |
| 20 | 45261155 | 45261462 | 45261294 | 9  | 12  | 11 | 1.125912866 | 0.382541   | ENSG00000215450 |
| 20 | 45262686 | 45262919 | 45262802 | 12 | 13  | 16 | 0.855897563 | 0.670115   | ENSG00000215450 |
| 20 | 45263188 | 45263598 | 45263395 | 18 | 29  | 23 | 1.29913023  | 0.167378   | ENSG00000215450 |
| 20 | 45263617 | 45264001 | 45263673 | 9  | 15  | 20 | 0.791850807 | 0.763134   | ENSG00000215450 |
| 20 | 45264529 | 45264781 | 45264631 | 13 | 14  | 13 | 1.113540197 | 0.385405   | ENSG00000215450 |
| 20 | 45264857 | 45265513 | 45265036 | 16 | 39  | 28 | 1.433523013 | 0.0675318  | ENSG00000215450 |
| 20 | 45266213 | 45267061 | 45266642 | 47 | 97  | 52 | 1.921732265 | 4.15E-05   | ENSG00000215450 |
| 20 | 45267504 | 45268232 | 45267835 | 38 | 87  | 57 | 1.576875314 | 0.00316024 | ENSG00000215450 |
| 20 | 45268815 | 45269407 | 45268981 | 10 | 26  | 32 | 0.850339787 | 0.736354   | ENSG00000215450 |
| 20 | 45269447 | 45269670 | 45269591 | 9  | 9   | 21 | 0.472410993 | 0.980806   | ENSG00000215450 |
| 20 | 45271441 | 45272163 | 45271661 | 13 | 40  | 50 | 0.83551905  | 0.806262   | ENSG00000215450 |
| 20 | 45272208 | 45273648 | 45273469 | 16 | 62  | 84 | 0.770307807 | 0.943323   | ENSG00000215450 |
| 20 | 45273686 | 45274075 | 45273906 | 13 | 21  | 28 | 0.788437657 | 0.803211   | ENSG00000215450 |
| 20 | 45274143 | 45274787 | 45274303 | 10 | 26  | 26 | 1.039304184 | 0.44394    | ENSG00000215450 |
| 20 | 45274972 | 45275228 | 45275097 | 10 | 12  | 13 | 0.965068171 | 0.538344   | ENSG00000215450 |
| 20 | 45275449 | 45276518 | 45276341 | 14 | 58  | 58 | 1.039304184 | 0.417248   | ENSG00000215450 |
| 20 | 45276788 | 45277117 | 45276954 | 10 | 13  | 9  | 1.455025858 | 0.177172   | ENSG00000215450 |
| 20 | 45277628 | 45277880 | 45277754 | 10 | 13  | 11 | 1.212521548 | 0.309909   | ENSG00000215450 |
| 20 | 45279000 | 45279506 | 45279412 | 9  | 20  | 44 | 0.485008619 | 0.997843   | ENSG00000215450 |
| 20 | 45279611 | 45279925 | 45279795 | 8  | 13  | 11 | 1.212521548 | 0.309909   | ENSG00000215450 |
| 20 | 45280182 | 45281014 | 45280870 | 12 | 34  | 37 | 0.957253854 | 0.574992   | ENSG00000215450 |
| 20 | 45281452 | 45283035 | 45281866 | 17 | 88  | 80 | 1.141951511 | 0.193214   | ENSG00000215450 |
| 20 | 45283366 | 45283655 | 45283510 | 12 | 15  | 20 | 0.791850807 | 0.763134   | ENSG00000215450 |
| 20 | 45284660 | 45284921 | 45284755 | 9  | 12  | 21 | 0.614134291 | 0.924528   | ENSG00000215450 |
| 20 | 45286515 | 45286897 | 45286706 | 9  | 17  | 16 | 1.100439724 | 0.388093   | ENSG00000215450 |
| 20 | 45286914 | 45287281 | 45287093 | 11 | 18  | 17 | 1.097043306 | 0.388692   | ENSG00000215450 |
| 20 | 45287801 | 45288044 | 45287963 | 8  | 10  | 6  | 1.63319229  | 0.146906   | ENSG00000215450 |
| 20 | 45288421 | 45288600 | 45288499 | 8  | 8   | 15 | 0.584608604 | 0.909754   | ENSG00000215450 |
| 20 | 45289158 | 45289879 | 45289479 | 11 | 30  | 37 | 0.847853413 | 0.75465    | ENSG00000215450 |

|    |          |          |          |    |     |    |             |            |                        |
|----|----------|----------|----------|----|-----|----|-------------|------------|------------------------|
| 20 | 45290345 | 45290568 | 45290456 | 8  | 10  | 20 | 0.54439743  | 0.955421   | ENSG00000215450        |
| 20 | 45290720 | 45291199 | 45291056 | 8  | 17  | 26 | 0.692869456 | 0.890806   | ENSG00000215450        |
| 20 | 45291377 | 45291908 | 45291646 | 12 | 23  | 32 | 0.755857589 | 0.855178   | ENSG00000215450        |
| 20 | 45291922 | 45292477 | 45292306 | 20 | 36  | 16 | 2.262014989 | 0.00177076 | ENSG00000215450        |
| 20 | 45292867 | 45293169 | 45293024 | 12 | 16  | 22 | 0.768181354 | 0.79945    | ENSG00000215450        |
| 20 | 45293336 | 45294196 | 45294035 | 11 | 34  | 38 | 0.932708883 | 0.61888    | ENSG00000215450        |
| 20 | 45294582 | 45295059 | 45294868 | 14 | 26  | 19 | 1.403060649 | 0.122336   | ENSG00000215450        |
| 20 | 45295580 | 45296298 | 45295926 | 14 | 30  | 28 | 1.110980335 | 0.341379   | ENSG00000215450        |
| 20 | 45297317 | 45297555 | 45297436 | 12 | 13  | 8  | 1.616695398 | 0.123553   | ENSG00000215450        |
| 20 | 45297840 | 45300306 | 45299452 | 31 | 167 | 89 | 1.940034477 | 9.46E-08   | ENSG00000215450        |
| 20 | 45300703 | 45301122 | 45301003 | 12 | 22  | 25 | 0.919384471 | 0.617223   | ENSG00000215450        |
| 20 | 45301272 | 45301558 | 45301411 | 8  | 12  | 8  | 1.501217155 | 0.168286   | ENSG00000215450        |
| 20 | 45301574 | 45302077 | 45301825 | 10 | 24  | 33 | 0.764194253 | 0.849736   | ENSG00000215450        |
| 20 | 45303524 | 45303976 | 45303677 | 12 | 23  | 34 | 0.712665726 | 0.903143   | ZMYND8 ENSG00000101040 |
| 20 | 45304175 | 45305234 | 45304756 | 26 | 76  | 58 | 1.356380037 | 0.0379803  | ZMYND8 ENSG00000101040 |
| 20 | 45305303 | 45305804 | 45305468 | 8  | 19  | 27 | 0.742360132 | 0.849695   | ZMYND8 ENSG00000101040 |
| 20 | 45305838 | 45306397 | 45306218 | 13 | 26  | 19 | 1.403060649 | 0.122336   | ZMYND8 ENSG00000101040 |
| 20 | 45306406 | 45306909 | 45306804 | 11 | 24  | 22 | 1.129678461 | 0.335754   | ZMYND8 ENSG00000101040 |
| 20 | 45307909 | 45308251 | 45308080 | 18 | 22  | 20 | 1.138285535 | 0.33303    | ZMYND8 ENSG00000101040 |
| 20 | 45308343 | 45309234 | 45308863 | 18 | 52  | 47 | 1.147565037 | 0.244189   | ZMYND8 ENSG00000101040 |
| 20 | 45309264 | 45310409 | 45310230 | 12 | 52  | 49 | 1.101662435 | 0.311373   | ZMYND8 ENSG00000101040 |
| 20 | 45310608 | 45311422 | 45311123 | 16 | 40  | 38 | 1.092601835 | 0.345813   | ZMYND8 ENSG00000101040 |
| 20 | 45311584 | 45312309 | 45311997 | 15 | 43  | 27 | 1.63319229  | 0.019363   | ZMYND8 ENSG00000101040 |
| 20 | 45312340 | 45313416 | 45312510 | 13 | 50  | 40 | 1.29279301  | 0.108864   | ZMYND8 ENSG00000101040 |
| 20 | 45313591 | 45313780 | 45313760 | 10 | 12  | 5  | 2.251825733 | 0.0404733  | ZMYND8 ENSG00000101040 |
| 20 | 45314956 | 45315408 | 45315135 | 8  | 18  | 16 | 1.161575265 | 0.325582   | ZMYND8 ENSG00000101040 |
| 20 | 45315720 | 45315986 | 45315853 | 10 | 12  | 20 | 0.643378781 | 0.900583   | ZMYND8 ENSG00000101040 |
| 20 | 45315996 | 45316385 | 45316175 | 14 | 24  | 29 | 0.86608682  | 0.704588   | ZMYND8 ENSG00000101040 |
| 20 | 45316533 | 45316993 | 45316712 | 9  | 18  | 20 | 0.940322833 | 0.578675   | ZMYND8 ENSG00000101040 |
| 20 | 45317376 | 45317605 | 45317530 | 9  | 11  | 21 | 0.566893191 | 0.949414   | ZMYND8 ENSG00000101040 |
| 20 | 45318787 | 45319371 | 45318965 | 23 | 43  | 41 | 1.08879486  | 0.346438   | ZMYND8 ENSG00000101040 |
| 20 | 45320186 | 45321188 | 45320687 | 13 | 47  | 43 | 1.133786383 | 0.273137   | ZMYND8 ENSG00000101040 |
| 20 | 45321650 | 45322184 | 45322005 | 15 | 27  | 31 | 0.909391161 | 0.644901   | ZMYND8 ENSG00000101040 |
| 20 | 45322522 | 45322835 | 45322678 | 10 | 16  | 20 | 0.841341482 | 0.704984   | ZMYND8 ENSG00000101040 |



|    |          |          |          |    |    |    |             |           |        |                 |
|----|----------|----------|----------|----|----|----|-------------|-----------|--------|-----------------|
| 20 | 45324244 | 45324523 | 45324369 | 13 | 15 | 27 | 0.593888105 | 0.956572  | ZMYND8 | ENSG00000101040 |
| 20 | 45324827 | 45325035 | 45324924 | 10 | 12 | 17 | 0.750608578 | 0.78992   | ZMYND8 | ENSG00000101040 |
| 20 | 45325175 | 45325707 | 45325433 | 20 | 33 | 27 | 1.262012224 | 0.179092  | ZMYND8 | ENSG00000101040 |
| 20 | 45326628 | 45326961 | 45326783 | 9  | 14 | 9  | 1.558956276 | 0.132279  | ZMYND8 | ENSG00000101040 |
| 20 | 45327249 | 45327590 | 45327413 | 14 | 19 | 15 | 1.29913023  | 0.214784  | ZMYND8 | ENSG00000101040 |
| 20 | 45328011 | 45328305 | 45328141 | 10 | 12 | 18 | 0.711102863 | 0.834017  | ZMYND8 | ENSG00000101040 |
| 20 | 45328788 | 45329026 | 45328928 | 11 | 12 | 22 | 0.5874328   | 0.943388  | ZMYND8 | ENSG00000101040 |
| 20 | 45329142 | 45329578 | 45329264 | 9  | 18 | 23 | 0.822782479 | 0.740651  | ZMYND8 | ENSG00000101040 |
| 20 | 45329646 | 45329866 | 45329707 | 11 | 14 | 11 | 1.29913023  | 0.246308  | ZMYND8 | ENSG00000101040 |
| 20 | 45329892 | 45330264 | 45330071 | 12 | 19 | 15 | 1.29913023  | 0.214784  | ZMYND8 | ENSG00000101040 |
| 20 | 45331489 | 45332140 | 45331666 | 14 | 34 | 34 | 1.039304184 | 0.436168  | ZMYND8 | ENSG00000101040 |
| 20 | 45333200 | 45333860 | 45333369 | 19 | 39 | 31 | 1.29913023  | 0.133039  | ZMYND8 | ENSG00000101040 |
| 20 | 45334526 | 45334886 | 45334705 | 15 | 22 | 30 | 0.771096653 | 0.831099  | ZMYND8 | ENSG00000101040 |
| 20 | 45334934 | 45335464 | 45335222 | 34 | 56 | 49 | 1.18480677  | 0.189844  | ZMYND8 | ENSG00000101040 |
| 20 | 45336482 | 45337293 | 45337013 | 16 | 48 | 59 | 0.848765084 | 0.804552  | ZMYND8 | ENSG00000101040 |
| 20 | 45338028 | 45338790 | 45338447 | 14 | 37 | 30 | 1.273985774 | 0.156732  | ZMYND8 | ENSG00000101040 |
| 20 | 45338799 | 45339806 | 45339447 | 22 | 65 | 48 | 1.399879105 | 0.0359377 | ZMYND8 | ENSG00000101040 |
| 20 | 45340511 | 45341290 | 45340841 | 15 | 43 | 46 | 0.972965619 | 0.552752  | ZMYND8 | ENSG00000101040 |
| 20 | 45341576 | 45341900 | 45341738 | 12 | 15 | 18 | 0.875203524 | 0.655562  | ZMYND8 | ENSG00000101040 |
| 20 | 45342293 | 45342946 | 45342472 | 11 | 27 | 34 | 0.831443347 | 0.769295  | ZMYND8 | ENSG00000101040 |
| 20 | 45343090 | 45343442 | 45343266 | 17 | 21 | 15 | 1.429043253 | 0.134782  | ZMYND8 | ENSG00000101040 |
| 20 | 45343573 | 45344561 | 45344346 | 12 | 45 | 56 | 0.83873671  | 0.814444  | ZMYND8 | ENSG00000101040 |
| 20 | 45345412 | 45346136 | 45345775 | 18 | 42 | 39 | 1.117251998 | 0.306409  | ZMYND8 | ENSG00000101040 |
| 20 | 45346296 | 45347136 | 45346582 | 14 | 36 | 41 | 0.915577496 | 0.653583  | ZMYND8 | ENSG00000101040 |
| 20 | 45347154 | 45347835 | 45347525 | 13 | 33 | 34 | 1.009609779 | 0.484681  | ZMYND8 | ENSG00000101040 |
| 20 | 45348054 | 45348270 | 45348162 | 8  | 8  | 12 | 0.719518281 | 0.783103  | ZMYND8 | ENSG00000101040 |
| 20 | 45348865 | 45349999 | 45349040 | 15 | 58 | 75 | 0.806828248 | 0.893697  | ZMYND8 | ENSG00000101040 |
| 20 | 45350126 | 45350480 | 45350303 | 10 | 15 | 30 | 0.536415063 | 0.982029  | ZMYND8 | ENSG00000101040 |
| 20 | 45351294 | 45352701 | 45351894 | 14 | 68 | 61 | 1.156644979 | 0.202183  | ZMYND8 | ENSG00000101040 |
| 20 | 45352991 | 45353743 | 45353553 | 10 | 29 | 28 | 1.07514226  | 0.390297  | ZMYND8 | ENSG00000101040 |
| 20 | 45353892 | 45354177 | 45354049 | 10 | 13 | 35 | 0.404173849 | 0.998897  | ZMYND8 | ENSG00000101040 |
| 20 | 45355502 | 45355899 | 45355808 | 12 | 19 | 22 | 0.903742769 | 0.631776  | ZMYND8 | ENSG00000101040 |
| 20 | 45356746 | 45357074 | 45356910 | 10 | 14 | 22 | 0.677807077 | 0.884881  | ZMYND8 | ENSG00000101040 |
| 20 | 45357087 | 45357288 | 45357174 | 9  | 11 | 13 | 0.890832158 | 0.618492  | ZMYND8 | ENSG00000101040 |

|    |          |          |          |    |     |     |             |           |        |                 |
|----|----------|----------|----------|----|-----|-----|-------------|-----------|--------|-----------------|
| 20 | 45357561 | 45358159 | 45357986 | 14 | 32  | 25  | 1.319116849 | 0.143169  | ZMYND8 | ENSG00000101040 |
| 20 | 45358441 | 45358823 | 45358648 | 13 | 19  | 27  | 0.742360132 | 0.849695  | ZMYND8 | ENSG00000101040 |
| 20 | 45359028 | 45359771 | 45359315 | 15 | 41  | 30  | 1.40808954  | 0.0719787 | ZMYND8 | ENSG00000101040 |
| 20 | 45360168 | 45361205 | 45360663 | 12 | 50  | 42  | 1.232663102 | 0.154907  | ZMYND8 | ENSG00000101040 |
| 20 | 45361336 | 45361555 | 45361390 | 8  | 11  | 11  | 1.039304184 | 0.462773  | ZMYND8 | ENSG00000101040 |
| 20 | 45362054 | 45362322 | 45362188 | 16 | 17  | 14  | 1.247165021 | 0.261378  | ZMYND8 | ENSG00000101040 |
| 20 | 45362415 | 45362753 | 45362584 | 14 | 18  | 24  | 0.78987118  | 0.784577  | ZMYND8 | ENSG00000101040 |
| 20 | 45363681 | 45364210 | 45364032 | 10 | 23  | 11  | 2.078608368 | 0.0154752 | ZMYND8 | ENSG00000101040 |
| 20 | 45364577 | 45365444 | 45365161 | 13 | 36  | 57  | 0.663004393 | 0.97652   | ZMYND8 | ENSG00000101040 |
| 20 | 45365952 | 45367160 | 45366740 | 12 | 56  | 80  | 0.731362204 | 0.966309  | ZMYND8 | ENSG00000101040 |
| 20 | 45367854 | 45368302 | 45368033 | 14 | 25  | 16  | 1.589524046 | 0.0646994 | ZMYND8 | ENSG00000101040 |
| 20 | 45368662 | 45369250 | 45369071 | 15 | 36  | 34  | 1.098692995 | 0.344552  | ZMYND8 | ENSG00000101040 |
| 20 | 45370759 | 45371411 | 45371048 | 14 | 31  | 37  | 0.875203524 | 0.712707  | ZMYND8 | ENSG00000101040 |
| 20 | 45371754 | 45372018 | 45371856 | 10 | 12  | 10  | 1.228268581 | 0.305344  | ZMYND8 | ENSG00000101040 |
| 20 | 45372146 | 45372403 | 45372274 | 9  | 10  | 16  | 0.672490943 | 0.854309  | ZMYND8 | ENSG00000101040 |
| 20 | 45372470 | 45372940 | 45372705 | 8  | 17  | 17  | 1.039304184 | 0.454282  | ZMYND8 | ENSG00000101040 |
| 20 | 45373103 | 45373610 | 45373431 | 10 | 22  | 34  | 0.682971321 | 0.926111  | ZMYND8 | ENSG00000101040 |
| 20 | 45374032 | 45374731 | 45374443 | 12 | 35  | 39  | 0.935373766 | 0.615635  | ZMYND8 | ENSG00000101040 |
| 20 | 45374984 | 45375460 | 45375311 | 13 | 26  | 16  | 1.650659587 | 0.048911  | ZMYND8 | ENSG00000101040 |
| 20 | 45376557 | 45377409 | 45376981 | 20 | 54  | 52  | 1.07852321  | 0.347141  | ZMYND8 | ENSG00000101040 |
| 20 | 45377663 | 45378148 | 45378005 | 16 | 28  | 39  | 0.753495534 | 0.880214  | ZMYND8 | ENSG00000101040 |
| 20 | 45378886 | 45379624 | 45379341 | 17 | 40  | 44  | 0.94692159  | 0.600763  | ZMYND8 | ENSG00000101040 |
| 20 | 45379630 | 45382670 | 45382152 | 73 | 259 | 225 | 1.195659681 | 0.0244874 | ZMYND8 | ENSG00000101040 |
| 20 | 45382851 | 45384103 | 45383783 | 28 | 85  | 73  | 1.207839998 | 0.116052  | ZMYND8 | ENSG00000101040 |
| 20 | 45384310 | 45384590 | 45384466 | 14 | 17  | 7   | 2.338434415 | 0.0171287 | ZMYND8 | ENSG00000101040 |
| 20 | 45384895 | 45385696 | 45385181 | 11 | 33  | 38  | 0.906060058 | 0.664493  | ZMYND8 | ENSG00000101040 |
| 20 | 45386613 | 45387159 | 45386893 | 12 | 22  | 27  | 0.853714151 | 0.715539  | ZMYND8 | ENSG00000101040 |
| 20 | 45387276 | 45387915 | 45387534 | 17 | 37  | 40  | 0.963257537 | 0.566947  | ZMYND8 | ENSG00000101040 |
| 20 | 45388628 | 45389321 | 45389096 | 24 | 53  | 39  | 1.403060649 | 0.0505812 | ZMYND8 | ENSG00000101040 |
| 20 | 45389778 | 45390225 | 45389987 | 9  | 17  | 21  | 0.850339787 | 0.697991  | ZMYND8 | ENSG00000101040 |
| 20 | 45390256 | 45390506 | 45390431 | 11 | 15  | 25  | 0.639571806 | 0.925462  | ZMYND8 | ENSG00000101040 |
| 20 | 45390809 | 45391600 | 45391296 | 16 | 42  | 44  | 0.993112887 | 0.513535  | ZMYND8 | ENSG00000101040 |
| 20 | 45391793 | 45392248 | 45392069 | 13 | 22  | 25  | 0.919384471 | 0.617223  | ZMYND8 | ENSG00000101040 |
| 20 | 45392335 | 45392571 | 45392420 | 8  | 11  | 11  | 1.039304184 | 0.462773  | ZMYND8 | ENSG00000101040 |

|    |          |          |          |    |     |     |             |           |        |                 |
|----|----------|----------|----------|----|-----|-----|-------------|-----------|--------|-----------------|
| 20 | 45392629 | 45394240 | 45393745 | 18 | 88  | 70  | 1.302789752 | 0.0473131 | ZMYND8 | ENSG00000101040 |
| 20 | 45396264 | 45396701 | 45396584 | 13 | 21  | 22  | 0.994117046 | 0.508733  | ZMYND8 | ENSG00000101040 |
| 20 | 45397466 | 45397944 | 45397614 | 12 | 21  | 14  | 1.524312804 | 0.0996258 | ZMYND8 | ENSG00000101040 |
| 20 | 45398281 | 45399100 | 45398460 | 15 | 44  | 34  | 1.336248237 | 0.097306  | ZMYND8 | ENSG00000101040 |
| 20 | 45399793 | 45400067 | 45399930 | 15 | 18  | 17  | 1.097043306 | 0.388692  | ZMYND8 | ENSG00000101040 |
| 20 | 45400196 | 45400799 | 45400614 | 14 | 30  | 33  | 0.947600874 | 0.586988  | ZMYND8 | ENSG00000101040 |
| 20 | 45400811 | 45401134 | 45400972 | 13 | 19  | 11  | 1.73217364  | 0.0607469 | ZMYND8 | ENSG00000101040 |
| 20 | 45403054 | 45403388 | 45403221 | 18 | 24  | 30  | 0.838148536 | 0.747023  | ZMYND8 | ENSG00000101040 |
| 20 | 45404876 | 45405165 | 45405081 | 11 | 15  | 11  | 1.385738912 | 0.19225   | ZMYND8 | ENSG00000101040 |
| 20 | 45405352 | 45405594 | 45405470 | 12 | 15  | 9   | 1.662886695 | 0.0970566 | ZMYND8 | ENSG00000101040 |
| 20 | 45405908 | 45406139 | 45406015 | 8  | 10  | 14  | 0.762156402 | 0.758589  | ZMYND8 | ENSG00000101040 |
| 20 | 45406387 | 45406708 | 45406547 | 10 | 15  | 26  | 0.615883961 | 0.942815  | ZMYND8 | ENSG00000101040 |
| 20 | 45407240 | 45407736 | 45407348 | 11 | 20  | 18  | 1.148704625 | 0.329698  | ZMYND8 | ENSG00000101040 |
| 20 | 45408108 | 45408403 | 45408255 | 12 | 15  | 11  | 1.385738912 | 0.19225   | ZMYND8 | ENSG00000101040 |
| 20 | 45408406 | 45408699 | 45408531 | 10 | 15  | 19  | 0.831443347 | 0.712423  | ZMYND8 | ENSG00000101040 |
| 20 | 45408925 | 45409306 | 45409127 | 9  | 16  | 8   | 1.963130126 | 0.0441028 | ZMYND8 | ENSG00000101040 |
| 20 | 45409419 | 45410333 | 45409743 | 15 | 43  | 63  | 0.714521627 | 0.958932  | ZMYND8 | ENSG00000101040 |
| 20 | 45410593 | 45410858 | 45410770 | 17 | 20  | 21  | 0.992063085 | 0.511305  | ZMYND8 | ENSG00000101040 |
| 20 | 45410898 | 45412425 | 45411924 | 18 | 87  | 82  | 1.10191287  | 0.262714  | ZMYND8 | ENSG00000101040 |
| 20 | 45412572 | 45413366 | 45412955 | 19 | 44  | 51  | 0.899397852 | 0.700166  | ZMYND8 | ENSG00000101040 |
| 20 | 45413722 | 45416063 | 45414966 | 18 | 143 | 142 | 1.046572046 | 0.349981  | ZMYND8 | ENSG00000101040 |
| 20 | 45416214 | 45417507 | 45416815 | 16 | 68  | 70  | 1.01002801  | 0.47683   | ZMYND8 | ENSG00000101040 |
| 20 | 45417649 | 45418427 | 45418226 | 24 | 48  | 49  | 1.018518101 | 0.463998  | ZMYND8 | ENSG00000101040 |
| 20 | 45418609 | 45423484 | 45422519 | 52 | 540 | 378 | 1.483545023 | 1.42E-09  | ZMYND8 | ENSG00000101040 |
| 20 | 45423514 | 45424030 | 45423704 | 17 | 34  | 31  | 1.136738952 | 0.299433  | ZMYND8 | ENSG00000101040 |
| 20 | 45424605 | 45425381 | 45424948 | 12 | 38  | 46  | 0.862401344 | 0.754722  | ZMYND8 | ENSG00000101040 |
| 20 | 45427286 | 45427748 | 45427482 | 10 | 23  | 16  | 1.467252966 | 0.109416  | ZMYND8 | ENSG00000101040 |
| 20 | 45429060 | 45429359 | 45429209 | 13 | 17  | 20  | 0.890832158 | 0.642922  | ZMYND8 | ENSG00000101040 |
| 20 | 45430422 | 45430652 | 45430510 | 8  | 11  | 11  | 1.039304184 | 0.462773  | ZMYND8 | ENSG00000101040 |
| 20 | 45430864 | 45431660 | 45431506 | 19 | 49  | 54  | 0.944821986 | 0.615238  | ZMYND8 | ENSG00000101040 |
| 20 | 45432917 | 45433610 | 45433449 | 12 | 34  | 31  | 1.136738952 | 0.299433  | ZMYND8 | ENSG00000101040 |
| 20 | 45434273 | 45434470 | 45434313 | 8  | 9   | 12  | 0.799464757 | 0.707717  | ZMYND8 | ENSG00000101040 |
| 20 | 45434715 | 45435682 | 45435316 | 33 | 72  | 66  | 1.132376201 | 0.230767  | ZMYND8 | ENSG00000101040 |
| 20 | 45437200 | 45437507 | 45437347 | 16 | 18  | 15  | 1.234173719 | 0.265435  | ZMYND8 | ENSG00000101040 |

|    |          |          |          |     |     |    |             |             |        |                 |
|----|----------|----------|----------|-----|-----|----|-------------|-------------|--------|-----------------|
| 20 | 45438515 | 45439090 | 45438692 | 13  | 29  | 11 | 2.598260461 | 0.00146165  | ZMYND8 | ENSG00000101040 |
| 20 | 45439190 | 45439962 | 45439448 | 625 | 781 | 23 | 33.86399467 | 3.53E-205   | ZMYND8 | ENSG00000101040 |
| 20 | 45440140 | 45440697 | 45440372 | 10  | 22  | 29 | 0.796799875 | 0.797061    | ZMYND8 | ENSG00000101040 |
| 20 | 45440801 | 45441550 | 45441227 | 13  | 35  | 35 | 1.039304184 | 0.435264    | ZMYND8 | ENSG00000101040 |
| 20 | 45441701 | 45441943 | 45441782 | 8   | 10  | 11 | 0.952695502 | 0.548138    | ZMYND8 | ENSG00000101040 |
| 20 | 45441945 | 45442380 | 45442134 | 8   | 16  | 26 | 0.654376709 | 0.9196      | ZMYND8 | ENSG00000101040 |
| 20 | 45442587 | 45443205 | 45442763 | 13  | 27  | 23 | 1.212521548 | 0.242672    | ZMYND8 | ENSG00000101040 |
| 20 | 45444753 | 45445025 | 45444900 | 13  | 13  | 25 | 0.55962533  | 0.965065    | ZMYND8 | ENSG00000101040 |
| 20 | 45445126 | 45445467 | 45445289 | 12  | 16  | 27 | 0.631006112 | 0.93773     | ZMYND8 | ENSG00000101040 |
| 20 | 45445884 | 45446780 | 45446318 | 62  | 120 | 80 | 1.552540818 | 0.000959698 | ZMYND8 | ENSG00000101040 |
| 20 | 45446856 | 45447372 | 45447035 | 10  | 21  | 29 | 0.762156402 | 0.837107    | ZMYND8 | ENSG00000101040 |
| 20 | 45450250 | 45450626 | 45450452 | 13  | 19  | 27 | 0.742360132 | 0.849695    | ZMYND8 | ENSG00000101040 |
| 20 | 45451942 | 45452584 | 45452370 | 36  | 72  | 38 | 1.945364242 | 0.000277444 | ZMYND8 | ENSG00000101040 |
| 20 | 45453488 | 45453850 | 45453715 | 11  | 17  | 16 | 1.100439724 | 0.388093    | ZMYND8 | ENSG00000101040 |
| 20 | 45453914 | 45455429 | 45454169 | 17  | 88  | 77 | 1.185872723 | 0.135166    | ZMYND8 | ENSG00000101040 |
| 20 | 45455608 | 45456178 | 45455956 | 16  | 31  | 12 | 2.558287223 | 0.00121125  | ZMYND8 | ENSG00000101040 |
| 20 | 45458331 | 45458595 | 45458463 | 9   | 13  | 10 | 1.32275078  | 0.240023    | ZMYND8 | ENSG00000101040 |
| 20 | 45459898 | 45460298 | 45460077 | 10  | 17  | 20 | 0.890832158 | 0.642922    | ZMYND8 | ENSG00000101040 |
| 20 | 45461086 | 45461424 | 45461297 | 10  | 14  | 19 | 0.779478138 | 0.771518    | ZMYND8 | ENSG00000101040 |
| 20 | 45461766 | 45462180 | 45462015 | 17  | 25  | 10 | 2.456537163 | 0.00405907  | ZMYND8 | ENSG00000101040 |
| 20 | 45462602 | 45462925 | 45462763 | 8   | 12  | 29 | 0.450365147 | 0.994327    | ZMYND8 | ENSG00000101040 |
| 20 | 45462935 | 45463129 | 45463009 | 9   | 9   | 27 | 0.371180066 | 0.998136    | ZMYND8 | ENSG00000101040 |
| 20 | 45463777 | 45464093 | 45463935 | 9   | 13  | 9  | 1.455025858 | 0.177172    | ZMYND8 | ENSG00000101040 |
| 20 | 45465682 | 45466198 | 45466051 | 13  | 25  | 32 | 0.818845721 | 0.77985     | ZMYND8 | ENSG00000101040 |
| 20 | 45466798 | 45467512 | 45467135 | 18  | 36  | 35 | 1.068173745 | 0.389034    | ZMYND8 | ENSG00000101040 |
| 20 | 45468198 | 45468564 | 45468335 | 10  | 16  | 17 | 0.981565063 | 0.523072    | ZMYND8 | ENSG00000101040 |
| 20 | 45470092 | 45470508 | 45470262 | 10  | 17  | 11 | 1.558956276 | 0.111389    | ZMYND8 | ENSG00000101040 |
| 20 | 45470582 | 45471054 | 45470699 | 11  | 19  | 15 | 1.29913023  | 0.214784    | ZMYND8 | ENSG00000101040 |
| 20 | 45472699 | 45472964 | 45472754 | 14  | 18  | 20 | 0.940322833 | 0.578675    | ZMYND8 | ENSG00000101040 |
| 20 | 45473354 | 45473826 | 45473550 | 13  | 24  | 23 | 1.082608525 | 0.390382    | ZMYND8 | ENSG00000101040 |
| 20 | 45474034 | 45474337 | 45474162 | 8   | 10  | 19 | 0.571617301 | 0.938875    | ZMYND8 | ENSG00000101040 |
| 20 | 45474701 | 45474979 | 45474811 | 9   | 11  | 11 | 1.039304184 | 0.462773    | ZMYND8 | ENSG00000101040 |
| 20 | 45474993 | 45476001 | 45475617 | 22  | 62  | 44 | 1.455025858 | 0.0260492   | ZMYND8 | ENSG00000101040 |
| 20 | 45477185 | 45477818 | 45477501 | 13  | 34  | 46 | 0.773949924 | 0.877125    | ZMYND8 | ENSG00000101040 |

|    |          |          |          |    |    |    |             |             |         |                 |
|----|----------|----------|----------|----|----|----|-------------|-------------|---------|-----------------|
| 20 | 45478174 | 45478656 | 45478427 | 13 | 25 | 7  | 3.377738599 | 0.000449165 | ZMYND8  | ENSG00000101040 |
| 20 | 45478776 | 45479272 | 45479012 | 16 | 27 | 29 | 0.970017239 | 0.547123    | ZMYND8  | ENSG00000101040 |
| 20 | 45479369 | 45479817 | 45479539 | 11 | 17 | 26 | 0.692869456 | 0.890806    | ZMYND8  | ENSG00000101040 |
| 20 | 45480054 | 45480890 | 45480343 | 17 | 43 | 49 | 0.914587682 | 0.668408    | RPL35AP | ENSG00000217854 |
| 20 | 45482059 | 45482686 | 45482520 | 14 | 29 | 18 | 1.641006607 | 0.042208    | RPL35AP | ENSG00000217854 |
| 20 | 45484643 | 45485207 | 45484974 | 13 | 27 | 42 | 0.676756213 | 0.949127    | RPL35AP | ENSG00000217854 |
| 20 | 45485222 | 45485542 | 45485366 | 9  | 13 | 29 | 0.485008619 | 0.990332    | RPL35AP | ENSG00000217854 |
| 20 | 45485568 | 45486167 | 45485747 | 19 | 34 | 34 | 1.039304184 | 0.436168    | RPL35AP | ENSG00000217854 |
| 20 | 45489124 | 45489649 | 45489324 | 20 | 33 | 22 | 1.536362707 | 0.0529465   | RPL35AP | ENSG00000217854 |
| 20 | 45489668 | 45490324 | 45490006 | 15 | 36 | 26 | 1.42423166  | 0.0786584   | RPL35AP | ENSG00000217854 |
| 20 | 45490402 | 45490642 | 45490522 | 10 | 11 | 21 | 0.566893191 | 0.949414    | RPL35AP | ENSG00000217854 |
| 20 | 45490930 | 45491500 | 45491086 | 13 | 25 | 22 | 1.1748656   | 0.285497    | RPL35AP | ENSG00000217854 |
| 20 | 45491517 | 45492081 | 45491799 | 10 | 22 | 23 | 0.995999843 | 0.506279    | RPL35AP | ENSG00000217854 |
| 20 | 45492281 | 45492498 | 45492351 | 8  | 9  | 8  | 1.154782427 | 0.375434    | RPL35AP | ENSG00000217854 |
| 20 | 45493036 | 45493284 | 45493160 | 10 | 13 | 11 | 1.212521548 | 0.309909    | RPL35AP | ENSG00000217854 |
| 20 | 45493463 | 45493687 | 45493575 | 8  | 9  | 8  | 1.154782427 | 0.375434    | RPL35AP | ENSG00000217854 |
| 20 | 45494739 | 45495229 | 45495050 | 13 | 21 | 27 | 0.816596145 | 0.764635    | RPL35AP | ENSG00000217854 |
| 20 | 45495548 | 45496656 | 45496406 | 21 | 76 | 60 | 1.31190856  | 0.0555243   | RPL35AP | ENSG00000217854 |
| 20 | 45496669 | 45497572 | 45497069 | 15 | 42 | 41 | 1.064049522 | 0.387367    | RPL35AP | ENSG00000217854 |
| 20 | 45498133 | 45498361 | 45498226 | 9  | 10 | 17 | 0.635130335 | 0.889407    | RPL35AP | ENSG00000217854 |
| 20 | 45500114 | 45500370 | 45500242 | 10 | 10 | 6  | 1.63319229  | 0.146906    | RPL35AP | ENSG00000217854 |
| 20 | 45500804 | 45501718 | 45500980 | 25 | 73 | 69 | 1.098692995 | 0.285963    | RPL35AP | ENSG00000217854 |
| 20 | 45502283 | 45502548 | 45502415 | 12 | 15 | 14 | 1.10859113  | 0.386477    | RPL35AP | ENSG00000217854 |
| 20 | 45503186 | 45504127 | 45503708 | 12 | 43 | 36 | 1.2359293   | 0.169751    | RPL35AP | ENSG00000217854 |
| 20 | 45504565 | 45504801 | 45504734 | 8  | 10 | 12 | 0.879411233 | 0.62639     | RPL35AP | ENSG00000217854 |
| 20 | 45505123 | 45505361 | 45505242 | 11 | 11 | 9  | 1.247165021 | 0.300052    | RPL35AP | ENSG00000217854 |
| 20 | 45507408 | 45507843 | 45507683 | 12 | 18 | 15 | 1.234173719 | 0.265435    | RPL35AP | ENSG00000217854 |
| 20 | 45510464 | 45511138 | 45510630 | 10 | 27 | 33 | 0.855897563 | 0.7313      | RPL35AP | ENSG00000217854 |
| 20 | 45511728 | 45512192 | 45511907 | 12 | 21 | 8  | 2.540521339 | 0.00602138  | RPL35AP | ENSG00000217854 |
| 20 | 45512752 | 45513037 | 45512905 | 10 | 13 | 9  | 1.455025858 | 0.177172    | RPL35AP | ENSG00000217854 |
| 20 | 45513187 | 45514053 | 45513652 | 15 | 47 | 30 | 1.609245188 | 0.0178352   | RPL35AP | ENSG00000217854 |
| 20 | 45514146 | 45514360 | 45514253 | 9  | 10 | 6  | 1.63319229  | 0.146906    | RPL35AP | ENSG00000217854 |
| 20 | 45514585 | 45514770 | 45514659 | 8  | 9  | 8  | 1.154782427 | 0.375434    | RPL35AP | ENSG00000217854 |
| 20 | 45514935 | 45515446 | 45515114 | 13 | 24 | 24 | 1.039304184 | 0.446062    | RPL35AP | ENSG00000217854 |

|    |          |          |          |     |     |     |             |             |         |                 |
|----|----------|----------|----------|-----|-----|-----|-------------|-------------|---------|-----------------|
| 20 | 45515510 | 45515905 | 45515689 | 18  | 30  | 28  | 1.110980335 | 0.341379    | RPL35AP | ENSG00000217854 |
| 20 | 45516049 | 45516443 | 45516228 | 12  | 18  | 18  | 1.039304184 | 0.453018    | RPL35AP | ENSG00000217854 |
| 20 | 45517028 | 45517914 | 45517471 | 56  | 132 | 66  | 2.063096366 | 3.00E-07    | RPL35AP | ENSG00000217854 |
| 20 | 45518455 | 45519023 | 45518883 | 17  | 28  | 32  | 0.913327919 | 0.640772    | RPL35AP | ENSG00000217854 |
| 20 | 45519227 | 45520105 | 45519802 | 17  | 50  | 41  | 1.262012224 | 0.13062     | RPL35AP | ENSG00000217854 |
| 20 | 45520293 | 45520684 | 45520505 | 9   | 17  | 14  | 1.247165021 | 0.261378    | RPL35AP | ENSG00000217854 |
| 20 | 45521071 | 45521299 | 45521212 | 10  | 10  | 9   | 1.143234603 | 0.378307    | RPL35AP | ENSG00000217854 |
| 20 | 45521310 | 45522050 | 45521678 | 18  | 44  | 43  | 1.062924734 | 0.386738    | RPL35AP | ENSG00000217854 |
| 20 | 45522971 | 45523255 | 45523106 | 9   | 11  | 13  | 0.890832158 | 0.618492    | RPL35AP | ENSG00000217854 |
| 20 | 45523350 | 45523708 | 45523529 | 10  | 16  | 25  | 0.679545044 | 0.897263    | RPL35AP | ENSG00000217854 |
| 20 | 45523787 | 45524232 | 45524098 | 13  | 22  | 17  | 1.327999791 | 0.180771    | RPL35AP | ENSG00000217854 |
| 20 | 45524420 | 45525199 | 45525020 | 18  | 43  | 22  | 1.988234092 | 0.00288957  | RPL35AP | ENSG00000217854 |
| 20 | 45525679 | 45526061 | 45525895 | 15  | 22  | 16  | 1.406117426 | 0.139742    | RPL35AP | ENSG00000217854 |
| 20 | 45526127 | 45527471 | 45526745 | 103 | 238 | 129 | 1.910720769 | 5.61E-10    | RPL35AP | ENSG00000217854 |
| 20 | 45527620 | 45529732 | 45528440 | 28  | 123 | 75  | 1.695706827 | 0.000112549 | RPL35AP | ENSG00000217854 |
| 20 | 45530239 | 45531395 | 45530808 | 63  | 169 | 46  | 3.759185347 | 2.82E-19    | RPL35AP | ENSG00000217854 |
| 20 | 45531757 | 45532127 | 45531936 | 15  | 22  | 21  | 1.086545284 | 0.390103    | RPL35AP | ENSG00000217854 |
| 20 | 45532669 | 45532974 | 45532821 | 8   | 11  | 4   | 2.494330042 | 0.0324033   | RPL35AP | ENSG00000217854 |
| 20 | 45533503 | 45534029 | 45533653 | 12  | 25  | 24  | 1.080876352 | 0.390444    | RPL35AP | ENSG00000217854 |
| 20 | 45534040 | 45534495 | 45534316 | 12  | 22  | 19  | 1.195199812 | 0.27834     | RPL35AP | ENSG00000217854 |
| 20 | 45534708 | 45535103 | 45534971 | 9   | 15  | 19  | 0.831443347 | 0.712423    | RPL35AP | ENSG00000217854 |
| 20 | 45535109 | 45535381 | 45535279 | 10  | 13  | 21  | 0.66137539  | 0.892612    | RPL35AP | ENSG00000217854 |
| 20 | 45535591 | 45535947 | 45535754 | 9   | 13  | 12  | 1.11925066  | 0.384109    | RPL35AP | ENSG00000217854 |
| 20 | 45538335 | 45538692 | 45538513 | 11  | 17  | 19  | 0.935373766 | 0.583208    | RPL35AP | ENSG00000217854 |
| 20 | 45538956 | 45539187 | 45539047 | 15  | 15  | 11  | 1.385738912 | 0.19225     | RPL35AP | ENSG00000217854 |
| 20 | 45540368 | 45540820 | 45540641 | 11  | 20  | 13  | 1.558956276 | 0.0943292   | RPL35AP | ENSG00000217854 |
| 20 | 45541049 | 45541756 | 45541455 | 15  | 38  | 28  | 1.397684937 | 0.083712    | RPL35AP | ENSG00000217854 |
| 20 | 45541800 | 45542080 | 45541940 | 10  | 15  | 26  | 0.615883961 | 0.942815    | RPL35AP | ENSG00000217854 |
| 20 | 45542640 | 45543005 | 45542826 | 8   | 15  | 16  | 0.978168644 | 0.526483    | RPL35AP | ENSG00000217854 |
| 20 | 45543649 | 45544493 | 45544139 | 36  | 78  | 40  | 2.002561721 | 9.94E-05    |         | ENSG00000202186 |
| 20 | 45544977 | 45545342 | 45545163 | 14  | 21  | 14  | 1.524312804 | 0.0996258   |         | ENSG00000202186 |
| 20 | 45546477 | 45547061 | 45546752 | 10  | 25  | 32  | 0.818845721 | 0.77985     |         | ENSG00000202186 |
| 20 | 45547959 | 45548340 | 45548161 | 15  | 22  | 26  | 0.885333194 | 0.668299    |         | ENSG00000202186 |
| 20 | 45549076 | 45550168 | 45549910 | 31  | 78  | 62  | 1.303254453 | 0.0573782   |         | ENSG00000202186 |

|    |          |          |          |    |     |     |             |            |       |                 |
|----|----------|----------|----------|----|-----|-----|-------------|------------|-------|-----------------|
| 20 | 45550309 | 45550649 | 45550468 | 12 | 16  | 6   | 2.524024447 | 0.0137633  |       | ENSG00000202186 |
| 20 | 45551207 | 45551423 | 45551277 | 10 | 13  | 3   | 3.637564645 | 0.0050909  |       | ENSG00000201742 |
| 20 | 45552836 | 45553257 | 45553177 | 13 | 19  | 15  | 1.29913023  | 0.214784   |       | ENSG00000201742 |
| 20 | 45553264 | 45553447 | 45553312 | 8  | 8   | 7   | 1.169217207 | 0.371848   |       | ENSG00000201742 |
| 20 | 45553752 | 45553949 | 45553843 | 8  | 10  | 12  | 0.879411233 | 0.62639    |       | ENSG00000201742 |
| 20 | 45554309 | 45554744 | 45554462 | 8  | 15  | 24  | 0.665154678 | 0.903869   |       | ENSG00000201742 |
| 20 | 45555111 | 45556436 | 45555538 | 46 | 211 | 109 | 2.00302261  | 5.86E-10   |       | ENSG00000201742 |
| 20 | 45557514 | 45557904 | 45557650 | 15 | 21  | 20  | 1.08879486  | 0.389871   |       | ENSG00000201742 |
| 20 | 45558217 | 45558813 | 45558465 | 17 | 34  | 24  | 1.455025858 | 0.0733189  |       | ENSG00000201742 |
| 20 | 45559696 | 45559994 | 45559816 | 9  | 12  | 19  | 0.67554772  | 0.870684   | NCOA3 | ENSG00000124151 |
| 20 | 45560412 | 45561063 | 45560696 | 11 | 25  | 26  | 1.000811437 | 0.499519   | NCOA3 | ENSG00000124151 |
| 20 | 45562530 | 45566359 | 45563773 | 50 | 338 | 276 | 1.271928225 | 0.00144247 | NCOA3 | ENSG00000124151 |
| 20 | 45567404 | 45567952 | 45567642 | 18 | 30  | 29  | 1.073947657 | 0.390181   | NCOA3 | ENSG00000124151 |
| 20 | 45568177 | 45569731 | 45568754 | 81 | 182 | 134 | 1.408834561 | 0.00116997 | NCOA3 | ENSG00000124151 |
| 20 | 45570318 | 45570790 | 45570484 | 13 | 23  | 17  | 1.385738912 | 0.144406   | NCOA3 | ENSG00000124151 |
| 20 | 45571085 | 45571357 | 45571225 | 8  | 12  | 5   | 2.251825733 | 0.0404733  | NCOA3 | ENSG00000124151 |
| 20 | 45571758 | 45572213 | 45572034 | 10 | 20  | 16  | 1.283846345 | 0.219275   | NCOA3 | ENSG00000124151 |
| 20 | 45572498 | 45572761 | 45572629 | 10 | 10  | 10  | 1.039304184 | 0.464387   | NCOA3 | ENSG00000124151 |
| 20 | 45573821 | 45574148 | 45573978 | 9  | 13  | 9   | 1.455025858 | 0.177172   | NCOA3 | ENSG00000124151 |
| 20 | 45574299 | 45574485 | 45574392 | 8  | 8   | 3   | 2.338434415 | 0.0641221  | NCOA3 | ENSG00000124151 |
| 20 | 45574745 | 45575032 | 45574880 | 15 | 17  | 9   | 1.870747532 | 0.0498299  | NCOA3 | ENSG00000124151 |
| 20 | 45575270 | 45575551 | 45575410 | 8  | 11  | 11  | 1.039304184 | 0.462773   | NCOA3 | ENSG00000124151 |
| 20 | 45575824 | 45576172 | 45575998 | 14 | 20  | 17  | 1.212521548 | 0.272468   | NCOA3 | ENSG00000124151 |
| 20 | 45579267 | 45579625 | 45579446 | 9  | 14  | 11  | 1.29913023  | 0.246308   | NCOA3 | ENSG00000124151 |
| 20 | 45579948 | 45580206 | 45580095 | 9  | 12  | 14  | 0.900730293 | 0.611333   | NCOA3 | ENSG00000124151 |
| 20 | 45581539 | 45581812 | 45581654 | 8  | 10  | 13  | 0.816596145 | 0.696946   | NCOA3 | ENSG00000124151 |
| 20 | 45582756 | 45583125 | 45582946 | 9  | 16  | 21  | 0.803098688 | 0.755224   | NCOA3 | ENSG00000124151 |
| 20 | 45583149 | 45583692 | 45583551 | 9  | 22  | 16  | 1.406117426 | 0.139742   | NCOA3 | ENSG00000124151 |
| 20 | 45586199 | 45586633 | 45586378 | 11 | 21  | 17  | 1.27026067  | 0.223413   | NCOA3 | ENSG00000124151 |
| 20 | 45589641 | 45590063 | 45589719 | 9  | 16  | 24  | 0.706726845 | 0.870131   | NCOA3 | ENSG00000124151 |
| 20 | 45590128 | 45590347 | 45590246 | 8  | 9   | 10  | 0.944821986 | 0.553851   | NCOA3 | ENSG00000124151 |
| 20 | 45593599 | 45594246 | 45593946 | 9  | 27  | 28  | 1.003466109 | 0.495433   | NCOA3 | ENSG00000124151 |
| 20 | 45594715 | 45594975 | 45594894 | 8  | 11  | 13  | 0.890832158 | 0.618492   | NCOA3 | ENSG00000124151 |
| 20 | 45596085 | 45597631 | 45596556 | 13 | 68  | 46  | 1.525786994 | 0.0118205  | NCOA3 | ENSG00000124151 |

|    |          |          |          |    |    |    |             |           |       |                 |
|----|----------|----------|----------|----|----|----|-------------|-----------|-------|-----------------|
| 20 | 45598388 | 45598710 | 45598564 | 9  | 14 | 18 | 0.820503303 | 0.720361  | NCOA3 | ENSG00000124151 |
| 20 | 45599174 | 45599587 | 45599332 | 13 | 19 | 14 | 1.385738912 | 0.166049  |       | ENSG00000221294 |
| 20 | 45600298 | 45600650 | 45600543 | 9  | 14 | 13 | 1.113540197 | 0.385405  |       | ENSG00000221294 |
| 20 | 45600961 | 45601542 | 45601140 | 13 | 27 | 35 | 0.808347699 | 0.803596  |       | ENSG00000221294 |
| 20 | 45601627 | 45601820 | 45601725 | 8  | 10 | 17 | 0.635130335 | 0.889407  |       | ENSG00000221294 |
| 20 | 45601855 | 45602579 | 45602234 | 18 | 36 | 26 | 1.42423166  | 0.0786584 |       | ENSG00000221294 |
| 20 | 45602590 | 45603439 | 45602769 | 14 | 43 | 33 | 1.344981885 | 0.0951923 |       | ENSG00000221294 |
| 20 | 45603943 | 45604263 | 45604106 | 11 | 16 | 17 | 0.981565063 | 0.523072  |       | ENSG00000221294 |
| 20 | 45605084 | 45605552 | 45605320 | 26 | 38 | 27 | 1.447602257 | 0.0652315 |       | ENSG00000221294 |
| 20 | 45606134 | 45606782 | 45606620 | 18 | 36 | 25 | 1.479009801 | 0.0604746 |       | ENSG00000221294 |
| 20 | 45606857 | 45607331 | 45607179 | 10 | 18 | 17 | 1.097043306 | 0.388692  |       | ENSG00000221294 |
| 20 | 45608165 | 45608767 | 45608576 | 35 | 54 | 21 | 2.598260461 | 3.03E-05  |       | ENSG00000221294 |
| 20 | 45608857 | 45609532 | 45609142 | 14 | 34 | 26 | 1.347246165 | 0.119935  |       | ENSG00000221294 |
| 20 | 45610024 | 45610219 | 45610157 | 8  | 9  | 10 | 0.944821986 | 0.553851  |       | ENSG00000221294 |
| 20 | 45610736 | 45611123 | 45610915 | 14 | 20 | 12 | 1.67887599  | 0.0659142 |       | ENSG00000221294 |
| 20 | 45611379 | 45611612 | 45611517 | 8  | 10 | 8  | 1.27026067  | 0.293854  |       | ENSG00000221294 |
| 20 | 45612613 | 45613077 | 45612962 | 9  | 19 | 18 | 1.094004404 | 0.389177  |       | ENSG00000221294 |
| 20 | 45613303 | 45613752 | 45613474 | 15 | 26 | 28 | 0.967628034 | 0.550021  |       | ENSG00000221294 |
| 20 | 45613957 | 45614224 | 45614125 | 9  | 12 | 14 | 0.900730293 | 0.611333  |       | ENSG00000221294 |
| 20 | 45614363 | 45615133 | 45614671 | 12 | 32 | 34 | 0.979915374 | 0.534148  |       | ENSG00000221294 |
| 20 | 45615270 | 45615519 | 45615402 | 9  | 10 | 11 | 0.952695502 | 0.548138  |       | ENSG00000221294 |
| 20 | 45619351 | 45619668 | 45619502 | 14 | 18 | 16 | 1.161575265 | 0.325582  |       | ENSG00000221294 |
| 20 | 45620986 | 45621207 | 45621112 | 9  | 12 | 16 | 0.794762023 | 0.738004  |       | ENSG00000221294 |
| 20 | 45622949 | 45623207 | 45623077 | 9  | 11 | 6  | 1.781664316 | 0.103344  |       | ENSG00000221294 |
| 20 | 45623232 | 45623524 | 45623378 | 9  | 15 | 9  | 1.662886695 | 0.0970566 |       | ENSG00000221294 |
| 20 | 45624060 | 45624384 | 45624208 | 9  | 14 | 16 | 0.917033104 | 0.598778  |       | ENSG00000221294 |
| 20 | 45624389 | 45624662 | 45624525 | 9  | 13 | 20 | 0.692869456 | 0.861903  |       | ENSG00000221294 |
| 20 | 45624665 | 45625158 | 45624844 | 8  | 19 | 24 | 0.831443347 | 0.733913  |       | ENSG00000221294 |
| 20 | 45626128 | 45626312 | 45626252 | 8  | 8  | 8  | 1.039304184 | 0.46786   |       | ENSG00000221294 |
| 20 | 45626462 | 45626726 | 45626588 | 8  | 11 | 7  | 1.558956276 | 0.158273  |       | ENSG00000221294 |
| 20 | 45627440 | 45627737 | 45627588 | 11 | 14 | 8  | 1.73217364  | 0.0890835 |       | ENSG00000221294 |
| 20 | 45630122 | 45630751 | 45630381 | 17 | 36 | 35 | 1.068173745 | 0.389034  |       | ENSG00000221294 |
| 20 | 45632521 | 45632805 | 45632663 | 13 | 16 | 16 | 1.039304184 | 0.455583  |       | ENSG00000221294 |
| 20 | 45634432 | 45634654 | 45634549 | 9  | 9  | 15 | 0.649565115 | 0.865365  |       | ENSG00000221294 |



|    |          |          |          |    |    |    |             |             |                 |
|----|----------|----------|----------|----|----|----|-------------|-------------|-----------------|
| 20 | 45636759 | 45637442 | 45636934 | 19 | 45 | 23 | 1.991999686 | 0.00234329  | ENSG00000221294 |
| 20 | 45638686 | 45639312 | 45638965 | 47 | 96 | 54 | 1.832954652 | 0.000119185 | ENSG00000221294 |
| 20 | 45639424 | 45640001 | 45639645 | 18 | 35 | 28 | 1.290170711 | 0.151649    | ENSG00000221294 |
| 20 | 45640635 | 45641104 | 45640925 | 11 | 22 | 21 | 1.086545284 | 0.390103    | ENSG00000221294 |
| 20 | 45641150 | 45641388 | 45641269 | 10 | 12 | 18 | 0.711102863 | 0.834017    | ENSG00000221294 |
| 20 | 45641877 | 45642333 | 45642117 | 20 | 33 | 36 | 0.955036277 | 0.577843    | ENSG00000221294 |
| 20 | 45643333 | 45643679 | 45643503 | 9  | 12 | 17 | 0.750608578 | 0.78992     | ENSG00000221294 |
| 20 | 45643718 | 45644010 | 45643864 | 11 | 16 | 17 | 0.981565063 | 0.523072    | ENSG00000221294 |
| 20 | 45644021 | 45644259 | 45644140 | 8  | 9  | 16 | 0.611355402 | 0.899375    | ENSG00000221294 |
| 20 | 45645080 | 45645478 | 45645251 | 13 | 19 | 23 | 0.86608682  | 0.685164    | ENSG00000221294 |
| 20 | 45646178 | 45646382 | 45646317 | 8  | 8  | 12 | 0.719518281 | 0.783103    | ENSG00000221294 |
| 20 | 45646789 | 45647074 | 45646911 | 13 | 14 | 8  | 1.73217364  | 0.0890835   | ENSG00000221294 |
| 20 | 45647589 | 45647845 | 45647717 | 10 | 13 | 22 | 0.632619938 | 0.917511    | ENSG00000221294 |
| 20 | 45648580 | 45648939 | 45648759 | 8  | 15 | 7  | 2.078608368 | 0.038229    | ENSG00000221294 |
| 20 | 45648983 | 45649180 | 45649073 | 8  | 9  | 13 | 0.742360132 | 0.770276    | ENSG00000221294 |
| 20 | 45649369 | 45649792 | 45649548 | 10 | 19 | 13 | 1.484720263 | 0.123861    | ENSG00000221294 |
| 20 | 45650140 | 45650339 | 45650239 | 10 | 11 | 7  | 1.558956276 | 0.158273    | ENSG00000221294 |
| 20 | 45651303 | 45651598 | 45651480 | 11 | 13 | 11 | 1.212521548 | 0.309909    | ENSG00000221294 |
| 20 | 45651905 | 45652166 | 45652036 | 9  | 13 | 16 | 0.855897563 | 0.670115    | ENSG00000221294 |
| 20 | 45653740 | 45654273 | 45654132 | 9  | 20 | 20 | 1.039304184 | 0.450588    | ENSG00000221294 |
| 20 | 45654490 | 45654953 | 45654669 | 14 | 23 | 22 | 1.084491323 | 0.39027     | ENSG00000221294 |
| 20 | 45657868 | 45658240 | 45657965 | 11 | 17 | 19 | 0.935373766 | 0.583208    | ENSG00000221294 |
| 20 | 45658459 | 45658838 | 45658735 | 8  | 15 | 9  | 1.662886695 | 0.0970566   | ENSG00000221294 |
| 20 | 45659201 | 45659584 | 45659380 | 11 | 18 | 19 | 0.987338975 | 0.516858    | ENSG00000221294 |
| 20 | 45661236 | 45661677 | 45661500 | 12 | 19 | 21 | 0.944821986 | 0.574409    | ENSG00000221294 |
| 20 | 45661935 | 45662139 | 45662037 | 11 | 11 | 5  | 2.078608368 | 0.0614303   | ENSG00000221294 |
| 20 | 45663050 | 45663752 | 45663598 | 10 | 28 | 33 | 0.886465334 | 0.685163    | ENSG00000218714 |
| 20 | 45664588 | 45664844 | 45664744 | 9  | 12 | 20 | 0.643378781 | 0.900583    | ENSG00000218714 |
| 20 | 45664876 | 45665472 | 45665068 | 11 | 25 | 23 | 1.125912866 | 0.336929    | ENSG00000218714 |
| 20 | 45665476 | 45665704 | 45665545 | 8  | 11 | 8  | 1.385738912 | 0.224757    | ENSG00000218714 |
| 20 | 45666286 | 45666944 | 45666450 | 11 | 28 | 27 | 1.076422191 | 0.390384    | ENSG00000218714 |
| 20 | 45668399 | 45668912 | 45668733 | 15 | 28 | 27 | 1.076422191 | 0.390384    | ENSG00000218714 |
| 20 | 45669063 | 45669676 | 45669301 | 8  | 21 | 28 | 0.788437657 | 0.803211    | ENSG00000218714 |
| 20 | 45670564 | 45670863 | 45670718 | 11 | 11 | 15 | 0.779478138 | 0.747877    | ENSG00000218714 |

|    |          |          |          |    |    |    |             |           |                 |
|----|----------|----------|----------|----|----|----|-------------|-----------|-----------------|
| 20 | 45671292 | 45671551 | 45671398 | 10 | 11 | 15 | 0.779478138 | 0.747877  | ENSG00000218714 |
| 20 | 45672627 | 45673071 | 45672806 | 12 | 21 | 19 | 1.143234603 | 0.33145   | ENSG00000218714 |
| 20 | 45673081 | 45673367 | 45673206 | 15 | 16 | 17 | 0.981565063 | 0.523072  | ENSG00000218714 |
| 20 | 45674546 | 45674731 | 45674595 | 9  | 10 | 10 | 1.039304184 | 0.464387  | ENSG00000218714 |
| 20 | 45674799 | 45675071 | 45674935 | 10 | 12 | 11 | 1.125912866 | 0.382541  | ENSG00000218714 |
| 20 | 45675447 | 45675724 | 45675554 | 12 | 14 | 19 | 0.779478138 | 0.771518  | ENSG00000218714 |
| 20 | 45676002 | 45676303 | 45676134 | 14 | 16 | 14 | 1.177878075 | 0.320433  | ENSG00000218714 |
| 20 | 45676473 | 45676741 | 45676573 | 11 | 14 | 12 | 1.199197136 | 0.313881  | ENSG00000218714 |
| 20 | 45678552 | 45678817 | 45678659 | 9  | 11 | 8  | 1.385738912 | 0.224757  | ENSG00000218714 |
| 20 | 45678853 | 45679134 | 45678977 | 13 | 16 | 18 | 0.929903744 | 0.58804   | ENSG00000218714 |
| 20 | 45680683 | 45681019 | 45680858 | 11 | 14 | 9  | 1.558956276 | 0.132279  | ENSG00000218714 |
| 20 | 45682416 | 45682800 | 45682566 | 11 | 17 | 11 | 1.558956276 | 0.111389  | ENSG00000218714 |
| 20 | 45682921 | 45683298 | 45683070 | 15 | 21 | 24 | 0.914587682 | 0.621823  | ENSG00000218714 |
| 20 | 45683327 | 45683885 | 45683506 | 20 | 33 | 24 | 1.413453691 | 0.0918299 | ENSG00000218714 |
| 20 | 45684026 | 45684417 | 45684165 | 8  | 13 | 23 | 0.606260774 | 0.937372  | ENSG00000218714 |
| 20 | 45684500 | 45684959 | 45684631 | 11 | 20 | 10 | 1.98412617  | 0.0277883 | ENSG00000218714 |
| 20 | 45686794 | 45687066 | 45686930 | 9  | 11 | 6  | 1.781664316 | 0.103344  | ENSG00000218714 |
| 20 | 45687231 | 45687442 | 45687336 | 9  | 11 | 15 | 0.779478138 | 0.747877  | ENSG00000218714 |
| 20 | 45687830 | 45688254 | 45688075 | 10 | 18 | 20 | 0.940322833 | 0.578675  | ENSG00000218714 |
| 20 | 45688328 | 45688587 | 45688476 | 8  | 11 | 23 | 0.519652092 | 0.973215  | ENSG00000218714 |
| 20 | 45688685 | 45689044 | 45688864 | 12 | 19 | 23 | 0.86608682  | 0.685164  | ENSG00000218714 |
| 20 | 45689082 | 45689286 | 45689111 | 9  | 12 | 17 | 0.750608578 | 0.78992   | ENSG00000218714 |
| 20 | 45689733 | 45690071 | 45689902 | 10 | 14 | 25 | 0.599598568 | 0.947903  | ENSG00000218714 |
| 20 | 45692033 | 45692503 | 45692260 | 20 | 32 | 28 | 1.182656486 | 0.253749  | ENSG00000218714 |
| 20 | 45692841 | 45693539 | 45693360 | 16 | 34 | 30 | 1.17340795  | 0.257326  | ENSG00000218714 |
| 20 | 45694109 | 45694521 | 45694354 | 13 | 20 | 26 | 0.808347699 | 0.770998  | ENSG00000218714 |
| 20 | 45695152 | 45695616 | 45695296 | 10 | 19 | 10 | 1.889643971 | 0.0394833 | ENSG00000218714 |
| 20 | 45695765 | 45696123 | 45695862 | 11 | 16 | 16 | 1.039304184 | 0.455583  | ENSG00000218714 |
| 20 | 45696516 | 45696902 | 45696769 | 14 | 21 | 16 | 1.344981885 | 0.176214  | ENSG00000218714 |
| 20 | 45697396 | 45697927 | 45697784 | 11 | 22 | 24 | 0.956159849 | 0.562938  | ENSG00000218714 |
| 20 | 45697936 | 45698858 | 45698311 | 13 | 41 | 44 | 0.970017239 | 0.557238  | ENSG00000218714 |
| 20 | 45699129 | 45699445 | 45699287 | 8  | 13 | 8  | 1.616695398 | 0.123553  | ENSG00000218714 |
| 20 | 45700247 | 45700627 | 45700426 | 8  | 14 | 12 | 1.199197136 | 0.313881  | ENSG00000218714 |
| 20 | 45701152 | 45701472 | 45701312 | 9  | 13 | 17 | 0.808347699 | 0.728863  | ENSG00000218714 |

|    |          |          |          |     |     |     |             |            |                       |
|----|----------|----------|----------|-----|-----|-----|-------------|------------|-----------------------|
| 20 | 45701495 | 45701756 | 45701625 | 11  | 12  | 23  | 0.562956433 | 0.958014   | ENSG00000218714       |
| 20 | 45702077 | 45702705 | 45702343 | 9   | 25  | 28  | 0.931789958 | 0.604671   | ENSG00000218714       |
| 20 | 45703078 | 45703525 | 45703374 | 10  | 17  | 15  | 1.169217207 | 0.323156   | ENSG00000218714       |
| 20 | 45704404 | 45704872 | 45704583 | 12  | 24  | 29  | 0.86608682  | 0.704588   | ENSG00000218714       |
| 20 | 45705255 | 45705858 | 45705408 | 10  | 26  | 29  | 0.935373766 | 0.600845   | ENSG00000218714       |
| 20 | 45705934 | 45706336 | 45706113 | 8   | 15  | 9   | 1.662886695 | 0.0970566  | ENSG00000218714       |
| 20 | 45706587 | 45706884 | 45706735 | 12  | 15  | 12  | 1.279143611 | 0.251893   | ENSG00000218714       |
| 20 | 45707314 | 45707669 | 45707491 | 13  | 19  | 20  | 0.989813509 | 0.514009   | ENSG00000218714       |
| 20 | 45707778 | 45708315 | 45708017 | 11  | 22  | 21  | 1.086545284 | 0.390103   | ENSG00000218714       |
| 20 | 45708385 | 45708706 | 45708545 | 10  | 14  | 20  | 0.742360132 | 0.815839   | ENSG00000218714       |
| 20 | 45708794 | 45709186 | 45708951 | 11  | 17  | 27  | 0.668124118 | 0.913816   | ENSG00000218714       |
| 20 | 45709205 | 45709533 | 45709370 | 15  | 18  | 20  | 0.940322833 | 0.578675   | ENSG00000218714       |
| 20 | 45710841 | 45711560 | 45711243 | 15  | 36  | 21  | 1.747920673 | 0.0168117  | SULF2 ENSG00000196562 |
| 20 | 45711907 | 45712490 | 45712073 | 10  | 22  | 23  | 0.995999843 | 0.506279   | SULF2 ENSG00000196562 |
| 20 | 45713193 | 45713771 | 45713596 | 16  | 26  | 28  | 0.967628034 | 0.550021   | SULF2 ENSG00000196562 |
| 20 | 45714020 | 45715614 | 45715308 | 13  | 74  | 45  | 1.694517692 | 0.00205736 | SULF2 ENSG00000196562 |
| 20 | 45715720 | 45716218 | 45715982 | 14  | 26  | 31  | 0.876912905 | 0.694502   | SULF2 ENSG00000196562 |
| 20 | 45716583 | 45716822 | 45716691 | 13  | 14  | 12  | 1.199197136 | 0.313881   | SULF2 ENSG00000196562 |
| 20 | 45716942 | 45717249 | 45717082 | 8   | 12  | 27  | 0.482534086 | 0.988534   | SULF2 ENSG00000196562 |
| 20 | 45717269 | 45717488 | 45717378 | 13  | 15  | 18  | 0.875203524 | 0.655562   | SULF2 ENSG00000196562 |
| 20 | 45717630 | 45718545 | 45717809 | 13  | 42  | 29  | 1.489669331 | 0.0447371  | SULF2 ENSG00000196562 |
| 20 | 45718551 | 45718803 | 45718664 | 11  | 14  | 14  | 1.039304184 | 0.458308   | SULF2 ENSG00000196562 |
| 20 | 45718943 | 45719308 | 45719129 | 10  | 17  | 20  | 0.890832158 | 0.642922   | SULF2 ENSG00000196562 |
| 20 | 45719538 | 45719960 | 45719804 | 11  | 19  | 23  | 0.86608682  | 0.685164   | SULF2 ENSG00000196562 |
| 20 | 45720055 | 45720550 | 45720207 | 12  | 24  | 24  | 1.039304184 | 0.446062   | SULF2 ENSG00000196562 |
| 20 | 45720593 | 45721010 | 45720771 | 12  | 20  | 29  | 0.727512929 | 0.872335   | SULF2 ENSG00000196562 |
| 20 | 45721072 | 45721280 | 45721186 | 10  | 10  | 11  | 0.952695502 | 0.548138   | SULF2 ENSG00000196562 |
| 20 | 45721400 | 45722307 | 45721687 | 14  | 43  | 40  | 1.115350832 | 0.307057   | SULF2 ENSG00000196562 |
| 20 | 45722424 | 45722839 | 45722631 | 8   | 16  | 30  | 0.569941004 | 0.972704   | SULF2 ENSG00000196562 |
| 20 | 45722853 | 45723258 | 45723032 | 10  | 19  | 28  | 0.716761506 | 0.878343   | SULF2 ENSG00000196562 |
| 20 | 45723331 | 45723569 | 45723476 | 16  | 17  | 20  | 0.890832158 | 0.642922   | SULF2 ENSG00000196562 |
| 20 | 45723669 | 45724073 | 45723939 | 8   | 16  | 12  | 1.359090087 | 0.198699   | SULF2 ENSG00000196562 |
| 20 | 45724411 | 45724802 | 45724590 | 8   | 16  | 26  | 0.654376709 | 0.9196     | SULF2 ENSG00000196562 |
| 20 | 45724938 | 45728127 | 45727571 | 247 | 530 | 148 | 3.703829006 | 4.56E-55   | SULF2 ENSG00000196562 |

|    |          |          |          |    |    |    |             |           |       |                 |
|----|----------|----------|----------|----|----|----|-------------|-----------|-------|-----------------|
| 20 | 45728733 | 45729317 | 45729170 | 11 | 23 | 36 | 0.674143255 | 0.937395  | SULF2 | ENSG00000196562 |
| 20 | 45729808 | 45730235 | 45730021 | 11 | 22 | 31 | 0.746999882 | 0.860756  | SULF2 | ENSG00000196562 |
| 20 | 45730285 | 45730692 | 45730372 | 11 | 18 | 26 | 0.731362204 | 0.856292  | SULF2 | ENSG00000196562 |
| 20 | 45733002 | 45733423 | 45733181 | 10 | 19 | 25 | 0.799464757 | 0.777638  | SULF2 | ENSG00000196562 |
| 20 | 45734136 | 45735027 | 45734811 | 17 | 43 | 39 | 1.143234603 | 0.269341  | SULF2 | ENSG00000196562 |
| 20 | 45735034 | 45735504 | 45735348 | 11 | 20 | 30 | 0.70404477  | 0.896995  | SULF2 | ENSG00000196562 |
| 20 | 45736028 | 45736306 | 45736151 | 9  | 12 | 10 | 1.228268581 | 0.305344  | SULF2 | ENSG00000196562 |
| 20 | 45737177 | 45737908 | 45737340 | 11 | 30 | 39 | 0.805460743 | 0.819719  | SULF2 | ENSG00000196562 |
| 20 | 45738654 | 45739438 | 45738946 | 9  | 30 | 40 | 0.785815359 | 0.847235  | SULF2 | ENSG00000196562 |
| 20 | 45739690 | 45740577 | 45740205 | 28 | 65 | 83 | 0.816596145 | 0.892556  | SULF2 | ENSG00000196562 |
| 20 | 45740845 | 45741109 | 45740966 | 8  | 11 | 13 | 0.890832158 | 0.618492  | SULF2 | ENSG00000196562 |
| 20 | 45741312 | 45741933 | 45741754 | 12 | 29 | 25 | 1.199197136 | 0.247521  | SULF2 | ENSG00000196562 |
| 20 | 45743121 | 45743823 | 45743441 | 10 | 26 | 18 | 1.476905946 | 0.0928898 | SULF2 | ENSG00000196562 |
| 20 | 45744158 | 45744527 | 45744337 | 10 | 17 | 22 | 0.813368492 | 0.747743  | SULF2 | ENSG00000196562 |
| 20 | 45744807 | 45745203 | 45745070 | 10 | 15 | 20 | 0.791850807 | 0.763134  | SULF2 | ENSG00000196562 |
| 20 | 45745844 | 45746076 | 45745960 | 9  | 11 | 18 | 0.656402643 | 0.879847  | SULF2 | ENSG00000196562 |
| 20 | 45746143 | 45746562 | 45746458 | 9  | 17 | 25 | 0.719518281 | 0.863101  | SULF2 | ENSG00000196562 |
| 20 | 45748363 | 45748653 | 45748521 | 10 | 13 | 15 | 0.909391161 | 0.604792  | SULF2 | ENSG00000196562 |
| 20 | 45750115 | 45750482 | 45750294 | 9  | 17 | 16 | 1.100439724 | 0.388093  | SULF2 | ENSG00000196562 |
| 20 | 45751743 | 45752261 | 45751905 | 13 | 26 | 23 | 1.169217207 | 0.28753   | SULF2 | ENSG00000196562 |
| 20 | 45753060 | 45753364 | 45753222 | 10 | 14 | 14 | 1.039304184 | 0.458308  | SULF2 | ENSG00000196562 |
| 20 | 45753394 | 45754025 | 45753811 | 10 | 27 | 37 | 0.765803083 | 0.861155  | SULF2 | ENSG00000196562 |
| 20 | 45754091 | 45754419 | 45754241 | 9  | 13 | 15 | 0.909391161 | 0.604792  | SULF2 | ENSG00000196562 |
| 20 | 45755282 | 45755720 | 45755541 | 12 | 21 | 13 | 1.63319229  | 0.0708832 | SULF2 | ENSG00000196562 |
| 20 | 45755765 | 45755988 | 45755876 | 10 | 13 | 16 | 0.855897563 | 0.670115  | SULF2 | ENSG00000196562 |
| 20 | 45756088 | 45756361 | 45756224 | 11 | 14 | 14 | 1.039304184 | 0.458308  | SULF2 | ENSG00000196562 |
| 20 | 45757019 | 45757332 | 45757172 | 10 | 13 | 19 | 0.727512929 | 0.824686  | SULF2 | ENSG00000196562 |
| 20 | 45757441 | 45757649 | 45757595 | 9  | 9  | 17 | 0.577391213 | 0.925885  | SULF2 | ENSG00000196562 |
| 20 | 45759375 | 45759617 | 45759464 | 12 | 12 | 8  | 1.501217155 | 0.168286  | SULF2 | ENSG00000196562 |
| 20 | 45759703 | 45760169 | 45759936 | 9  | 18 | 20 | 0.940322833 | 0.578675  | SULF2 | ENSG00000196562 |
| 20 | 45760369 | 45760606 | 45760487 | 9  | 11 | 13 | 0.890832158 | 0.618492  | SULF2 | ENSG00000196562 |
| 20 | 45761496 | 45761747 | 45761664 | 14 | 16 | 17 | 0.981565063 | 0.523072  | SULF2 | ENSG00000196562 |
| 20 | 45761823 | 45762777 | 45762248 | 9  | 36 | 45 | 0.835962061 | 0.793602  | SULF2 | ENSG00000196562 |
| 20 | 45763992 | 45764348 | 45764170 | 13 | 18 | 18 | 1.039304184 | 0.453018  | SULF2 | ENSG00000196562 |

|    |          |          |          |    |    |    |             |           |       |                 |
|----|----------|----------|----------|----|----|----|-------------|-----------|-------|-----------------|
| 20 | 45764555 | 45764757 | 45764656 | 8  | 10 | 13 | 0.816596145 | 0.696946  | SULF2 | ENSG00000196562 |
| 20 | 45764782 | 45765045 | 45764913 | 9  | 11 | 11 | 1.039304184 | 0.462773  | SULF2 | ENSG00000196562 |
| 20 | 45765478 | 45765737 | 45765599 | 11 | 15 | 16 | 0.978168644 | 0.526483  | SULF2 | ENSG00000196562 |
| 20 | 45766020 | 45766587 | 45766199 | 12 | 25 | 18 | 1.422205726 | 0.118245  | SULF2 | ENSG00000196562 |
| 20 | 45766850 | 45767513 | 45767323 | 11 | 29 | 25 | 1.199197136 | 0.247521  | SULF2 | ENSG00000196562 |
| 20 | 45768396 | 45768590 | 45768493 | 8  | 10 | 9  | 1.143234603 | 0.378307  | SULF2 | ENSG00000196562 |
| 20 | 45768609 | 45769139 | 45768892 | 10 | 25 | 21 | 1.228268581 | 0.23714   | SULF2 | ENSG00000196562 |
| 20 | 45769438 | 45769960 | 45769693 | 10 | 21 | 11 | 1.905391004 | 0.031399  | SULF2 | ENSG00000196562 |
| 20 | 45770037 | 45770824 | 45770425 | 13 | 34 | 31 | 1.136738952 | 0.299433  | SULF2 | ENSG00000196562 |
| 20 | 45770889 | 45771541 | 45771213 | 10 | 26 | 36 | 0.758411161 | 0.865982  | SULF2 | ENSG00000196562 |
| 20 | 45772471 | 45772993 | 45772650 | 15 | 25 | 26 | 1.000811437 | 0.499519  | SULF2 | ENSG00000196562 |
| 20 | 45773412 | 45774020 | 45773758 | 17 | 32 | 27 | 1.224894217 | 0.213361  | SULF2 | ENSG00000196562 |
| 20 | 45774220 | 45774523 | 45774346 | 14 | 17 | 25 | 0.719518281 | 0.863101  | SULF2 | ENSG00000196562 |
| 20 | 45774545 | 45774897 | 45774723 | 13 | 18 | 29 | 0.658225983 | 0.927623  | SULF2 | ENSG00000196562 |
| 20 | 45775077 | 45775305 | 45775219 | 8  | 11 | 5  | 2.078608368 | 0.0614303 | SULF2 | ENSG00000196562 |
| 20 | 45776440 | 45776784 | 45776612 | 9  | 15 | 26 | 0.615883961 | 0.942815  | SULF2 | ENSG00000196562 |
| 20 | 45777480 | 45777691 | 45777585 | 11 | 12 | 14 | 0.900730293 | 0.611333  | SULF2 | ENSG00000196562 |
| 20 | 45778018 | 45778230 | 45778124 | 10 | 11 | 11 | 1.039304184 | 0.462773  | SULF2 | ENSG00000196562 |
| 20 | 45778406 | 45778595 | 45778468 | 8  | 8  | 4  | 1.870747532 | 0.118863  | SULF2 | ENSG00000196562 |
| 20 | 45779467 | 45779716 | 45779591 | 8  | 12 | 26 | 0.500405718 | 0.98391   | SULF2 | ENSG00000196562 |
| 20 | 45780544 | 45781140 | 45780842 | 10 | 25 | 34 | 0.772054537 | 0.844426  | SULF2 | ENSG00000196562 |
| 20 | 45781222 | 45781771 | 45781371 | 8  | 20 | 32 | 0.66137539  | 0.934793  | SULF2 | ENSG00000196562 |
| 20 | 45781790 | 45782088 | 45781939 | 16 | 19 | 15 | 1.29913023  | 0.214784  | SULF2 | ENSG00000196562 |
| 20 | 45782867 | 45783432 | 45783033 | 15 | 30 | 33 | 0.947600874 | 0.586988  | SULF2 | ENSG00000196562 |
| 20 | 45783886 | 45784277 | 45784130 | 14 | 21 | 15 | 1.429043253 | 0.134782  | SULF2 | ENSG00000196562 |
| 20 | 45786159 | 45786521 | 45786347 | 9  | 15 | 29 | 0.554295565 | 0.975664  | SULF2 | ENSG00000196562 |
| 20 | 45786630 | 45787991 | 45787664 | 34 | 95 | 88 | 1.12104721  | 0.218381  | SULF2 | ENSG00000196562 |
| 20 | 45789008 | 45789420 | 45789241 | 10 | 18 | 11 | 1.645564958 | 0.0828462 | SULF2 | ENSG00000196562 |
| 20 | 45790100 | 45790437 | 45790268 | 14 | 18 | 22 | 0.85855563  | 0.691398  | SULF2 | ENSG00000196562 |
| 20 | 45790477 | 45790787 | 45790632 | 10 | 13 | 16 | 0.855897563 | 0.670115  | SULF2 | ENSG00000196562 |
| 20 | 45791190 | 45791429 | 45791318 | 10 | 12 | 10 | 1.228268581 | 0.305344  | SULF2 | ENSG00000196562 |
| 20 | 45791573 | 45792255 | 45791919 | 13 | 34 | 30 | 1.17340795  | 0.257326  | SULF2 | ENSG00000196562 |
| 20 | 45792322 | 45792584 | 45792443 | 12 | 13 | 13 | 1.039304184 | 0.45974   | SULF2 | ENSG00000196562 |
| 20 | 45792978 | 45793334 | 45793201 | 12 | 17 | 22 | 0.813368492 | 0.747743  | SULF2 | ENSG00000196562 |

|    |          |          |          |    |    |    |             |             |       |                 |
|----|----------|----------|----------|----|----|----|-------------|-------------|-------|-----------------|
| 20 | 45794001 | 45794220 | 45794054 | 8  | 9  | 15 | 0.649565115 | 0.865365    | SULF2 | ENSG00000196562 |
| 20 | 45794496 | 45794785 | 45794624 | 10 | 14 | 23 | 0.649565115 | 0.910621    | SULF2 | ENSG00000196562 |
| 20 | 45795030 | 45795342 | 45795186 | 15 | 19 | 17 | 1.154782427 | 0.327751    | SULF2 | ENSG00000196562 |
| 20 | 45796049 | 45797062 | 45796398 | 14 | 45 | 63 | 0.746999882 | 0.936434    | SULF2 | ENSG00000196562 |
| 20 | 45797091 | 45797470 | 45797270 | 11 | 17 | 26 | 0.692869456 | 0.890806    | SULF2 | ENSG00000196562 |
| 20 | 45797536 | 45798291 | 45798120 | 12 | 34 | 22 | 1.581549846 | 0.0410466   | SULF2 | ENSG00000196562 |
| 20 | 45798294 | 45798779 | 45798600 | 14 | 24 | 21 | 1.181027482 | 0.2833      | SULF2 | ENSG00000196562 |
| 20 | 45798895 | 45799580 | 45799074 | 10 | 28 | 18 | 1.586306386 | 0.0554746   | SULF2 | ENSG00000196562 |
| 20 | 45799788 | 45800001 | 45799894 | 9  | 10 | 7  | 1.429043253 | 0.21536     | SULF2 | ENSG00000196562 |
| 20 | 45800067 | 45800698 | 45800209 | 20 | 35 | 14 | 2.494330042 | 0.000827091 | SULF2 | ENSG00000196562 |
| 20 | 45801082 | 45802070 | 45801865 | 13 | 46 | 40 | 1.191397479 | 0.205212    | SULF2 | ENSG00000196562 |
| 20 | 45802473 | 45802912 | 45802735 | 10 | 16 | 36 | 0.477518139 | 0.995828    | SULF2 | ENSG00000196562 |
| 20 | 45803180 | 45804214 | 45803515 | 11 | 44 | 49 | 0.935373766 | 0.628563    | SULF2 | ENSG00000196562 |
| 20 | 45804230 | 45804802 | 45804572 | 10 | 22 | 23 | 0.995999843 | 0.506279    | SULF2 | ENSG00000196562 |
| 20 | 45804821 | 45805083 | 45804952 | 8  | 10 | 11 | 0.952695502 | 0.548138    | SULF2 | ENSG00000196562 |
| 20 | 45805171 | 45805451 | 45805304 | 10 | 12 | 11 | 1.125912866 | 0.382541    | SULF2 | ENSG00000196562 |
| 20 | 45805797 | 45806232 | 45806081 | 8  | 16 | 17 | 0.981565063 | 0.523072    | SULF2 | ENSG00000196562 |
| 20 | 45806548 | 45807297 | 45806859 | 8  | 27 | 40 | 0.709768711 | 0.922248    | SULF2 | ENSG00000196562 |
| 20 | 45808037 | 45808496 | 45808187 | 10 | 20 | 16 | 1.283846345 | 0.219275    | SULF2 | ENSG00000196562 |
| 20 | 45809194 | 45810217 | 45809814 | 14 | 49 | 34 | 1.484720263 | 0.0346749   | SULF2 | ENSG00000196562 |
| 20 | 45810288 | 45810564 | 45810426 | 9  | 12 | 18 | 0.711102863 | 0.834017    | SULF2 | ENSG00000196562 |
| 20 | 45810845 | 45811258 | 45811049 | 11 | 20 | 30 | 0.70404477  | 0.896995    | SULF2 | ENSG00000196562 |
| 20 | 45811463 | 45811723 | 45811593 | 10 | 13 | 29 | 0.485008619 | 0.990332    | SULF2 | ENSG00000196562 |
| 20 | 45811825 | 45812062 | 45811943 | 9  | 9  | 12 | 0.799464757 | 0.707717    | SULF2 | ENSG00000196562 |
| 20 | 45812522 | 45812757 | 45812623 | 9  | 10 | 6  | 1.63319229  | 0.146906    | SULF2 | ENSG00000196562 |
| 20 | 45813588 | 45814008 | 45813705 | 8  | 15 | 12 | 1.279143611 | 0.251893    | SULF2 | ENSG00000196562 |
| 20 | 45816604 | 45816903 | 45816753 | 10 | 15 | 12 | 1.279143611 | 0.251893    | SULF2 | ENSG00000196562 |
| 20 | 45817723 | 45818107 | 45817983 | 10 | 15 | 9  | 1.662886695 | 0.0970566   | SULF2 | ENSG00000196562 |
| 20 | 45818564 | 45818823 | 45818720 | 8  | 11 | 10 | 1.133786383 | 0.380636    | SULF2 | ENSG00000196562 |
| 20 | 45820862 | 45821255 | 45821029 | 9  | 14 | 11 | 1.29913023  | 0.246308    | SULF2 | ENSG00000196562 |
| 20 | 45821939 | 45822428 | 45822118 | 8  | 17 | 7  | 2.338434415 | 0.0171287   | SULF2 | ENSG00000196562 |
| 20 | 45823266 | 45823558 | 45823412 | 9  | 13 | 5  | 2.425043097 | 0.0262442   | SULF2 | ENSG00000196562 |
| 20 | 45824512 | 45824691 | 45824527 | 8  | 9  | 2  | 3.464347281 | 0.0163838   | SULF2 | ENSG00000196562 |
| 20 | 45824795 | 45825055 | 45824913 | 9  | 10 | 5  | 1.905391004 | 0.0915982   | SULF2 | ENSG00000196562 |

|    |          |          |          |    |     |    |             |            |       |                 |
|----|----------|----------|----------|----|-----|----|-------------|------------|-------|-----------------|
| 20 | 45825335 | 45825523 | 45825468 | 8  | 9   | 9  | 1.039304184 | 0.466079   | SULF2 | ENSG00000196562 |
| 20 | 45825932 | 45826151 | 45826079 | 10 | 12  | 7  | 1.688869299 | 0.11395    | SULF2 | ENSG00000196562 |
| 20 | 45826396 | 45826863 | 45826555 | 15 | 25  | 16 | 1.589524046 | 0.0646994  | SULF2 | ENSG00000196562 |
| 20 | 45828423 | 45828801 | 45828602 | 15 | 22  | 8  | 2.655999582 | 0.0039122  | SULF2 | ENSG00000196562 |
| 20 | 45828896 | 45829293 | 45829147 | 8  | 15  | 7  | 2.078608368 | 0.038229   | SULF2 | ENSG00000196562 |
| 20 | 45830404 | 45830671 | 45830511 | 8  | 10  | 13 | 0.816596145 | 0.696946   | SULF2 | ENSG00000196562 |
| 20 | 45832520 | 45832796 | 45832625 | 8  | 12  | 6  | 1.930136342 | 0.071303   | SULF2 | ENSG00000196562 |
| 20 | 45845052 | 45846209 | 45845630 | 11 | 48  | 36 | 1.376375812 | 0.0693789  | SULF2 | ENSG00000196562 |
| 20 | 45846233 | 45847246 | 45847046 | 77 | 135 | 34 | 4.038439116 | 7.97E-17   | SULF2 | ENSG00000196562 |
| 20 | 45848091 | 45849610 | 45848753 | 27 | 117 | 78 | 1.552378402 | 0.00109485 | SULF2 | ENSG00000196562 |
| 20 | 45850090 | 45850769 | 45850596 | 12 | 30  | 24 | 1.288737188 | 0.170531   | SULF2 | ENSG00000196562 |
| 20 | 45851181 | 45852088 | 45851877 | 10 | 38  | 37 | 1.066654294 | 0.388522   | SULF2 | ENSG00000196562 |
| 20 | 45852413 | 45852677 | 45852545 | 13 | 16  | 16 | 1.039304184 | 0.455583   | SULF2 | ENSG00000196562 |
| 20 | 45852955 | 45853153 | 45853029 | 9  | 12  | 12 | 1.039304184 | 0.461227   | SULF2 | ENSG00000196562 |
| 20 | 45858281 | 45858470 | 45858375 | 9  | 9   | 7  | 1.29913023  | 0.286504   | SULF2 | ENSG00000196562 |
| 20 | 45858862 | 45859142 | 45858998 | 14 | 14  | 4  | 3.117912553 | 0.00766354 | SULF2 | ENSG00000196562 |
| 20 | 45863297 | 45863596 | 45863444 | 13 | 16  | 5  | 2.944695189 | 0.00659886 | SULF2 | ENSG00000196562 |
| 20 | 45863981 | 45864162 | 45864021 | 10 | 10  | 5  | 1.905391004 | 0.0915982  | SULF2 | ENSG00000196562 |
| 20 | 45867764 | 45867976 | 45867943 | 9  | 12  | 11 | 1.125912866 | 0.382541   | SULF2 | ENSG00000196562 |
| 20 | 45868965 | 45869374 | 45869210 | 13 | 20  | 14 | 1.455025858 | 0.129498   | SULF2 | ENSG00000196562 |
| 20 | 45869527 | 45869726 | 45869608 | 13 | 14  | 10 | 1.417232979 | 0.185113   | SULF2 | ENSG00000196562 |
| 20 | 45871263 | 45872104 | 45871692 | 10 | 33  | 19 | 1.766817113 | 0.0191523  | SULF2 | ENSG00000196562 |
| 20 | 45872110 | 45872364 | 45872235 | 10 | 13  | 9  | 1.455025858 | 0.177172   | SULF2 | ENSG00000196562 |
| 20 | 45873527 | 45873938 | 45873789 | 10 | 17  | 17 | 1.039304184 | 0.454282   | SULF2 | ENSG00000196562 |
| 20 | 45874174 | 45874479 | 45874318 | 9  | 12  | 11 | 1.125912866 | 0.382541   | SULF2 | ENSG00000196562 |
| 20 | 45876118 | 45876322 | 45876232 | 8  | 10  | 5  | 1.905391004 | 0.0915982  | SULF2 | ENSG00000196562 |
| 20 | 45876585 | 45877089 | 45876915 | 16 | 26  | 16 | 1.650659587 | 0.048911   | SULF2 | ENSG00000196562 |
| 20 | 45878621 | 45879133 | 45878782 | 9  | 18  | 21 | 0.897580886 | 0.637183   | SULF2 | ENSG00000196562 |
| 20 | 45879297 | 45880429 | 45879871 | 10 | 46  | 31 | 1.526478021 | 0.0305922  | SULF2 | ENSG00000196562 |
| 20 | 45880579 | 45880883 | 45880731 | 9  | 13  | 15 | 0.909391161 | 0.604792   | SULF2 | ENSG00000196562 |
| 20 | 45881705 | 45882156 | 45881864 | 12 | 19  | 11 | 1.73217364  | 0.0607469  | SULF2 | ENSG00000196562 |
| 20 | 45886731 | 45887029 | 45886910 | 8  | 12  | 3  | 3.377738599 | 0.00867157 |       | ENSG00000215448 |
| 20 | 45910565 | 45910887 | 45910737 | 8  | 10  | 8  | 1.27026067  | 0.293854   |       | ENSG00000215448 |
| 20 | 45912498 | 45912742 | 45912603 | 9  | 9   | 12 | 0.799464757 | 0.707717   |       | ENSG00000215448 |

|    |          |          |          |    |    |    |             |            |                 |
|----|----------|----------|----------|----|----|----|-------------|------------|-----------------|
| 20 | 45915018 | 45915223 | 45915120 | 12 | 13 | 7  | 1.818782322 | 0.0805123  | ENSG00000215448 |
| 20 | 45915985 | 45916414 | 45916123 | 9  | 16 | 11 | 1.472347594 | 0.147517   | ENSG00000215448 |
| 20 | 45916880 | 45917270 | 45917125 | 12 | 20 | 26 | 0.808347699 | 0.770998   | ENSG00000215448 |
| 20 | 45917320 | 45917507 | 45917402 | 10 | 11 | 5  | 2.078608368 | 0.0614303  | ENSG00000215448 |
| 20 | 45917913 | 45918439 | 45918215 | 13 | 26 | 11 | 2.338434415 | 0.00495238 | ENSG00000215448 |
| 20 | 45919518 | 45919769 | 45919601 | 10 | 10 | 7  | 1.429043253 | 0.21536    | ENSG00000215448 |
| 20 | 45920205 | 45920520 | 45920369 | 12 | 16 | 14 | 1.177878075 | 0.320433   | ENSG00000215448 |
| 20 | 45920619 | 45921031 | 45920798 | 12 | 19 | 12 | 1.598929514 | 0.0887417  | ENSG00000215448 |
| 20 | 45923178 | 45923376 | 45923225 | 8  | 8  | 7  | 1.169217207 | 0.371848   | ENSG00000215448 |
| 20 | 45923833 | 45924167 | 45924004 | 8  | 13 | 16 | 0.855897563 | 0.670115   | ENSG00000215448 |
| 20 | 45924572 | 45924813 | 45924683 | 10 | 12 | 10 | 1.228268581 | 0.305344   | ENSG00000215448 |
| 20 | 45926058 | 45926251 | 45926190 | 9  | 10 | 8  | 1.27026067  | 0.293854   | ENSG00000215448 |
| 20 | 45928041 | 45928517 | 45928338 | 12 | 24 | 18 | 1.367505506 | 0.148798   | ENSG00000215448 |
| 20 | 45931154 | 45931467 | 45931306 | 10 | 14 | 12 | 1.199197136 | 0.313881   | ENSG00000215448 |
| 20 | 45931483 | 45931673 | 45931522 | 8  | 10 | 11 | 0.952695502 | 0.548138   | ENSG00000215448 |
| 20 | 45932907 | 45933098 | 45932987 | 9  | 10 | 6  | 1.63319229  | 0.146906   | ENSG00000215448 |
| 20 | 45935052 | 45935357 | 45935202 | 14 | 15 | 17 | 0.923825942 | 0.593214   | ENSG00000215448 |
| 20 | 45939508 | 45940136 | 45939957 | 10 | 25 | 18 | 1.422205726 | 0.118245   | ENSG00000215448 |
| 20 | 45944765 | 45945309 | 45944980 | 8  | 20 | 21 | 0.992063085 | 0.511305   | ENSG00000215448 |
| 20 | 45946416 | 45946624 | 45946575 | 10 | 10 | 13 | 0.816596145 | 0.696946   | ENSG00000215448 |
| 20 | 45947106 | 45947617 | 45947325 | 8  | 18 | 11 | 1.645564958 | 0.0828462  | ENSG00000215448 |
| 20 | 45948803 | 45949031 | 45948877 | 10 | 11 | 2  | 4.157216737 | 0.0052913  | ENSG00000215448 |
| 20 | 45949205 | 45949431 | 45949256 | 9  | 11 | 11 | 1.039304184 | 0.462773   | ENSG00000215448 |
| 20 | 45956770 | 45957097 | 45956919 | 8  | 11 | 23 | 0.519652092 | 0.973215   | ENSG00000215448 |
| 20 | 45957115 | 45957315 | 45957215 | 8  | 9  | 14 | 0.692869456 | 0.822654   | ENSG00000215448 |
| 20 | 45957917 | 45958161 | 45957993 | 14 | 17 | 8  | 2.078608368 | 0.0303558  | ENSG00000215448 |
| 20 | 45984351 | 45984536 | 45984477 | 8  | 8  | 6  | 1.336248237 | 0.277651   | ENSG00000215448 |
| 20 | 45986227 | 45986575 | 45986410 | 9  | 14 | 12 | 1.199197136 | 0.313881   | ENSG00000215448 |
| 20 | 45987678 | 45987873 | 45987775 | 9  | 11 | 9  | 1.247165021 | 0.300052   | ENSG00000215448 |
| 20 | 45988546 | 45989040 | 45988873 | 11 | 21 | 12 | 1.758822466 | 0.048324   | ENSG00000215448 |
| 20 | 45989244 | 45989462 | 45989291 | 10 | 10 | 16 | 0.672490943 | 0.854309   | ENSG00000215448 |
| 20 | 45989735 | 45990342 | 45989819 | 11 | 27 | 29 | 0.970017239 | 0.547123   | ENSG00000215448 |
| 20 | 45990467 | 45990748 | 45990625 | 13 | 14 | 15 | 0.974347673 | 0.530138   | ENSG00000215448 |
| 20 | 45997907 | 45998139 | 45998023 | 8  | 9  | 13 | 0.742360132 | 0.770276   | ENSG00000215448 |



|    |          |          |          |     |     |    |             |            |                 |
|----|----------|----------|----------|-----|-----|----|-------------|------------|-----------------|
| 20 | 45999571 | 45999768 | 45999669 | 8   | 9   | 8  | 1.154782427 | 0.375434   | ENSG00000215448 |
| 20 | 46001719 | 46002084 | 46001890 | 9   | 13  | 10 | 1.32275078  | 0.240023   | ENSG00000215448 |
| 20 | 46003121 | 46003583 | 46003300 | 8   | 17  | 10 | 1.700679574 | 0.0766266  | ENSG00000215448 |
| 20 | 46004971 | 46005306 | 46005138 | 8   | 10  | 13 | 0.816596145 | 0.696946   | ENSG00000215448 |
| 20 | 46006270 | 46006842 | 46006514 | 10  | 24  | 34 | 0.742360132 | 0.875925   | ENSG00000215448 |
| 20 | 46007194 | 46007560 | 46007382 | 9   | 15  | 13 | 1.187776211 | 0.317363   | ENSG00000215448 |
| 20 | 46007624 | 46007940 | 46007783 | 11  | 15  | 16 | 0.978168644 | 0.526483   | ENSG00000215448 |
| 20 | 46009756 | 46009987 | 46009918 | 9   | 12  | 12 | 1.039304184 | 0.461227   | ENSG00000215448 |
| 20 | 46010714 | 46010965 | 46010839 | 11  | 13  | 11 | 1.212521548 | 0.309909   | ENSG00000215448 |
| 20 | 46012091 | 46012502 | 46012270 | 13  | 20  | 18 | 1.148704625 | 0.329698   | ENSG00000215448 |
| 20 | 46015778 | 46016056 | 46015917 | 8   | 12  | 6  | 1.930136342 | 0.071303   | ENSG00000215448 |
| 20 | 46016519 | 46016729 | 46016654 | 8   | 9   | 6  | 1.484720263 | 0.204387   | ENSG00000215448 |
| 20 | 46021704 | 46022030 | 46021867 | 9   | 14  | 15 | 0.974347673 | 0.530138   | ENSG00000215448 |
| 20 | 46023345 | 46023647 | 46023468 | 15  | 19  | 15 | 1.29913023  | 0.214784   | ENSG00000215448 |
| 20 | 46027762 | 46028185 | 46027905 | 9   | 17  | 9  | 1.870747532 | 0.0498299  | ENSG00000215448 |
| 20 | 46032121 | 46032434 | 46032215 | 14  | 18  | 16 | 1.161575265 | 0.325582   | ENSG00000215448 |
| 20 | 46034143 | 46034841 | 46034492 | 11  | 27  | 15 | 1.818782322 | 0.0247174  | ENSG00000215448 |
| 20 | 46037110 | 46037328 | 46037216 | 10  | 10  | 4  | 2.286469205 | 0.0509017  | ENSG00000215448 |
| 20 | 46041070 | 46041431 | 46041249 | 11  | 18  | 8  | 2.194086611 | 0.0206188  | ENSG00000215448 |
| 20 | 46041788 | 46042140 | 46041967 | 8   | 13  | 13 | 1.039304184 | 0.45974    | ENSG00000215448 |
| 20 | 46043035 | 46043231 | 46043181 | 8   | 10  | 12 | 0.879411233 | 0.62639    | ENSG00000215448 |
| 20 | 46043727 | 46043942 | 46043892 | 9   | 10  | 7  | 1.429043253 | 0.21536    | ENSG00000215448 |
| 20 | 46044310 | 46044510 | 46044410 | 8   | 9   | 7  | 1.29913023  | 0.286504   | ENSG00000215448 |
| 20 | 46045554 | 46045828 | 46045691 | 12  | 16  | 11 | 1.472347594 | 0.147517   | ENSG00000215448 |
| 20 | 46046462 | 46046882 | 46046706 | 11  | 18  | 16 | 1.161575265 | 0.325582   | ENSG00000215448 |
| 20 | 46046901 | 46047639 | 46047431 | 16  | 35  | 23 | 1.558956276 | 0.0432947  | ENSG00000215448 |
| 20 | 46047747 | 46047962 | 46047854 | 9   | 10  | 7  | 1.429043253 | 0.21536    | ENSG00000215448 |
| 20 | 46050743 | 46051068 | 46050917 | 12  | 15  | 12 | 1.279143611 | 0.251893   | ENSG00000215448 |
| 20 | 46052005 | 46052716 | 46052349 | 21  | 53  | 30 | 1.810400837 | 0.00347549 | ENSG00000215448 |
| 20 | 46053411 | 46055864 | 46055408 | 354 | 631 | 89 | 7.298224938 | 1.24E-106  | ENSG00000215448 |
| 20 | 46055909 | 46056209 | 46056059 | 12  | 15  | 10 | 1.511715177 | 0.140236   | ENSG00000215448 |
| 20 | 46056359 | 46056640 | 46056499 | 13  | 17  | 6  | 2.672496474 | 0.00882337 | ENSG00000215448 |
| 20 | 46057526 | 46057734 | 46057651 | 9   | 10  | 10 | 1.039304184 | 0.464387   | ENSG00000215448 |
| 20 | 46058478 | 46058722 | 46058600 | 8   | 10  | 9  | 1.143234603 | 0.378307   | ENSG00000215448 |

|    |          |          |          |    |    |    |             |            |                 |
|----|----------|----------|----------|----|----|----|-------------|------------|-----------------|
| 20 | 46060581 | 46060839 | 46060710 | 8  | 10 | 13 | 0.816596145 | 0.696946   | ENSG00000215448 |
| 20 | 46060932 | 46061535 | 46061233 | 8  | 23 | 16 | 1.467252966 | 0.109416   | ENSG00000215448 |
| 20 | 46067972 | 46068515 | 46068151 | 11 | 25 | 9  | 2.702190879 | 0.00210968 | ENSG00000215448 |
| 20 | 46068759 | 46069025 | 46068859 | 8  | 9  | 9  | 1.039304184 | 0.466079   | ENSG00000215448 |
| 20 | 46069062 | 46069311 | 46069151 | 8  | 11 | 5  | 2.078608368 | 0.0614303  | ENSG00000215448 |
| 20 | 46069433 | 46069769 | 46069601 | 9  | 15 | 9  | 1.662886695 | 0.0970566  | ENSG00000215448 |
| 20 | 46069975 | 46070194 | 46070154 | 8  | 11 | 10 | 1.133786383 | 0.380636   | ENSG00000215448 |
| 20 | 46071103 | 46071560 | 46071239 | 10 | 18 | 13 | 1.41048425  | 0.160361   | ENSG00000215448 |
| 20 | 46074184 | 46074428 | 46074318 | 10 | 11 | 17 | 0.692869456 | 0.843876   | ENSG00000215448 |
| 20 | 46074431 | 46075375 | 46074944 | 33 | 81 | 25 | 3.277805504 | 4.68E-09   | ENSG00000215448 |
| 20 | 46076184 | 46076529 | 46076356 | 8  | 11 | 10 | 1.133786383 | 0.380636   | ENSG00000215448 |
| 20 | 46076772 | 46077088 | 46076915 | 11 | 14 | 14 | 1.039304184 | 0.458308   | ENSG00000215448 |
| 20 | 46078199 | 46078642 | 46078378 | 10 | 19 | 18 | 1.094004404 | 0.389177   | ENSG00000215448 |
| 20 | 46078681 | 46078964 | 46078762 | 8  | 13 | 9  | 1.455025858 | 0.177172   | ENSG00000215448 |
| 20 | 46079733 | 46079968 | 46079885 | 8  | 10 | 6  | 1.63319229  | 0.146906   | ENSG00000215448 |
| 20 | 46082889 | 46083215 | 46083052 | 9  | 13 | 7  | 1.818782322 | 0.0805123  | ENSG00000215448 |
| 20 | 46084338 | 46084954 | 46084548 | 13 | 29 | 24 | 1.247165021 | 0.205527   | ENSG00000215448 |
| 20 | 46086337 | 46086537 | 46086457 | 11 | 11 | 7  | 1.558956276 | 0.158273   | ENSG00000215448 |
| 20 | 46087454 | 46087735 | 46087619 | 9  | 12 | 12 | 1.039304184 | 0.461227   | ENSG00000215448 |
| 20 | 46090682 | 46091044 | 46090812 | 10 | 15 | 10 | 1.511715177 | 0.140236   | ENSG00000215448 |
| 20 | 46092041 | 46092226 | 46092154 | 8  | 9  | 7  | 1.29913023  | 0.286504   | ENSG00000215448 |
| 20 | 46092679 | 46092968 | 46092823 | 8  | 11 | 19 | 0.623582511 | 0.908792   | ENSG00000215448 |
| 20 | 46093285 | 46093472 | 46093439 | 9  | 10 | 10 | 1.039304184 | 0.464387   | ENSG00000215448 |
| 20 | 46093643 | 46093876 | 46093819 | 10 | 11 | 19 | 0.623582511 | 0.908792   | ENSG00000215448 |
| 20 | 46094323 | 46094566 | 46094420 | 8  | 10 | 18 | 0.601702422 | 0.917232   | ENSG00000215448 |
| 20 | 46095959 | 46096355 | 46096099 | 13 | 18 | 10 | 1.795161773 | 0.055383   | ENSG00000215448 |
| 20 | 46096948 | 46097138 | 46097045 | 8  | 9  | 8  | 1.154782427 | 0.375434   | ENSG00000215448 |
| 20 | 46097639 | 46098188 | 46097915 | 8  | 22 | 15 | 1.493999765 | 0.104649   | ENSG00000215448 |
| 20 | 46098372 | 46098574 | 46098462 | 9  | 10 | 15 | 0.714521627 | 0.810948   | ENSG00000215448 |
| 20 | 46099119 | 46099706 | 46099233 | 11 | 26 | 18 | 1.476905946 | 0.0928898  | ENSG00000215448 |
| 20 | 46099872 | 46100298 | 46100119 | 11 | 19 | 8  | 2.309564854 | 0.0138337  | ENSG00000215448 |
| 20 | 46101831 | 46102057 | 46101944 | 14 | 17 | 9  | 1.870747532 | 0.0498299  | ENSG00000215448 |
| 20 | 46102199 | 46102650 | 46102389 | 8  | 17 | 21 | 0.850339787 | 0.697991   | ENSG00000215448 |
| 20 | 46103103 | 46103524 | 46103250 | 11 | 19 | 14 | 1.385738912 | 0.166049   | ENSG00000215448 |

|    |          |          |          |    |    |    |             |           |                 |
|----|----------|----------|----------|----|----|----|-------------|-----------|-----------------|
| 20 | 46103767 | 46104039 | 46103903 | 9  | 13 | 13 | 1.039304184 | 0.45974   | ENSG00000215448 |
| 20 | 46104253 | 46104451 | 46104402 | 8  | 9  | 9  | 1.039304184 | 0.466079  | ENSG00000215448 |
| 20 | 46104484 | 46104685 | 46104581 | 8  | 8  | 13 | 0.668124118 | 0.835294  | ENSG00000215448 |
| 20 | 46104991 | 46105307 | 46105128 | 10 | 15 | 16 | 0.978168644 | 0.526483  | ENSG00000215448 |
| 20 | 46105407 | 46105722 | 46105564 | 12 | 16 | 12 | 1.359090087 | 0.198699  | ENSG00000215448 |
| 20 | 46106364 | 46106650 | 46106507 | 9  | 14 | 11 | 1.29913023  | 0.246308  | ENSG00000215448 |
| 20 | 46107587 | 46107767 | 46107664 | 9  | 9  | 11 | 0.86608682  | 0.635181  | ENSG00000215448 |
| 20 | 46108035 | 46108237 | 46108107 | 9  | 11 | 12 | 0.959357709 | 0.543005  | ENSG00000215448 |
| 20 | 46108387 | 46108877 | 46108566 | 13 | 26 | 21 | 1.275509681 | 0.196223  | ENSG00000215448 |
| 20 | 46108972 | 46109310 | 46109146 | 12 | 17 | 11 | 1.558956276 | 0.111389  | ENSG00000215448 |
| 20 | 46109384 | 46109624 | 46109504 | 14 | 16 | 16 | 1.039304184 | 0.455583  | ENSG00000215448 |
| 20 | 46109839 | 46110196 | 46110017 | 10 | 16 | 11 | 1.472347594 | 0.147517  | ENSG00000215448 |
| 20 | 46111359 | 46111575 | 46111469 | 12 | 13 | 13 | 1.039304184 | 0.45974   | ENSG00000215448 |
| 20 | 46112785 | 46113198 | 46112963 | 11 | 17 | 7  | 2.338434415 | 0.0171287 | ENSG00000215448 |
| 20 | 46113216 | 46113578 | 46113428 | 13 | 20 | 15 | 1.364086742 | 0.171319  | ENSG00000215448 |
| 20 | 46113588 | 46113860 | 46113718 | 10 | 15 | 24 | 0.665154678 | 0.903869  | ENSG00000215448 |
| 20 | 46113866 | 46114566 | 46114284 | 15 | 37 | 48 | 0.805991    | 0.843182  | ENSG00000215448 |
| 20 | 46114573 | 46115033 | 46114854 | 10 | 21 | 32 | 0.692869456 | 0.912769  | ENSG00000215448 |
| 20 | 46115788 | 46116335 | 46116042 | 10 | 24 | 37 | 0.683752753 | 0.93359   | ENSG00000215448 |
| 20 | 46116589 | 46116919 | 46116746 | 12 | 17 | 12 | 1.439036563 | 0.154203  | ENSG00000215448 |
| 20 | 46117394 | 46118057 | 46117708 | 16 | 34 | 21 | 1.653438475 | 0.0295967 | ENSG00000215448 |
| 20 | 46118061 | 46118856 | 46118513 | 12 | 33 | 39 | 0.883408557 | 0.704258  | ENSG00000215448 |
| 20 | 46118915 | 46119199 | 46119045 | 16 | 19 | 8  | 2.309564854 | 0.0138337 | ENSG00000215448 |
| 20 | 46119264 | 46120021 | 46119667 | 11 | 36 | 29 | 1.281808494 | 0.154243  | ENSG00000215448 |
| 20 | 46120354 | 46120595 | 46120500 | 9  | 12 | 7  | 1.688869299 | 0.11395   | ENSG00000215448 |
| 20 | 46123344 | 46123574 | 46123459 | 8  | 11 | 10 | 1.133786383 | 0.380636  | ENSG00000215448 |
| 20 | 46124595 | 46124923 | 46124759 | 8  | 13 | 18 | 0.765803083 | 0.780427  | ENSG00000215448 |
| 20 | 46125743 | 46127108 | 46126425 | 19 | 71 | 57 | 1.290170711 | 0.0732216 | ENSG00000215448 |
| 20 | 46127118 | 46127433 | 46127275 | 14 | 16 | 19 | 0.883408557 | 0.649033  | ENSG00000215448 |
| 20 | 46128449 | 46128657 | 46128552 | 9  | 10 | 8  | 1.27026067  | 0.293854  | ENSG00000215448 |
| 20 | 46130599 | 46130831 | 46130715 | 10 | 12 | 10 | 1.228268581 | 0.305344  | ENSG00000215448 |
| 20 | 46134291 | 46134697 | 46134518 | 9  | 16 | 14 | 1.177878075 | 0.320433  | ENSG00000215448 |
| 20 | 46135731 | 46135967 | 46135849 | 9  | 11 | 8  | 1.385738912 | 0.224757  | ENSG00000215448 |
| 20 | 46136092 | 46136374 | 46136233 | 11 | 13 | 13 | 1.039304184 | 0.45974   | ENSG00000215448 |

|    |          |          |          |    |    |    |             |            |                 |
|----|----------|----------|----------|----|----|----|-------------|------------|-----------------|
| 20 | 46137671 | 46137859 | 46137820 | 8  | 8  | 11 | 0.779478138 | 0.719708   | ENSG00000215448 |
| 20 | 46137867 | 46138351 | 46138109 | 12 | 24 | 24 | 1.039304184 | 0.446062   | ENSG00000215448 |
| 20 | 46138363 | 46138603 | 46138428 | 9  | 12 | 12 | 1.039304184 | 0.461227   | ENSG00000215448 |
| 20 | 46140163 | 46140739 | 46140451 | 9  | 23 | 19 | 1.247165021 | 0.230782   | ENSG00000215448 |
| 20 | 46140742 | 46141149 | 46141041 | 9  | 16 | 16 | 1.039304184 | 0.455583   | ENSG00000215448 |
| 20 | 46141940 | 46142164 | 46142071 | 8  | 9  | 8  | 1.154782427 | 0.375434   | ENSG00000215448 |
| 20 | 46142980 | 46143259 | 46143158 | 8  | 11 | 16 | 0.733626483 | 0.800067   | ENSG00000215448 |
| 20 | 46143394 | 46143634 | 46143508 | 9  | 11 | 7  | 1.558956276 | 0.158273   | ENSG00000215448 |
| 20 | 46144424 | 46144609 | 46144516 | 8  | 8  | 12 | 0.719518281 | 0.783103   | ENSG00000215448 |
| 20 | 46146190 | 46146499 | 46146336 | 9  | 11 | 12 | 0.959357709 | 0.543005   | ENSG00000215448 |
| 20 | 46148180 | 46148519 | 46148349 | 8  | 13 | 8  | 1.616695398 | 0.123553   | ENSG00000215448 |
| 20 | 46151130 | 46151458 | 46151300 | 10 | 14 | 8  | 1.73217364  | 0.0890835  | ENSG00000215448 |
| 20 | 46152400 | 46152644 | 46152515 | 9  | 10 | 6  | 1.63319229  | 0.146906   | ENSG00000215448 |
| 20 | 46152716 | 46153049 | 46152916 | 11 | 15 | 9  | 1.662886695 | 0.0970566  | ENSG00000215448 |
| 20 | 46156678 | 46156997 | 46156832 | 13 | 15 | 14 | 1.10859113  | 0.386477   | ENSG00000215448 |
| 20 | 46157038 | 46157239 | 46157099 | 9  | 9  | 9  | 1.039304184 | 0.466079   | ENSG00000215448 |
| 20 | 46158487 | 46158915 | 46158809 | 10 | 19 | 12 | 1.598929514 | 0.0887417  | ENSG00000215448 |
| 20 | 46160209 | 46160590 | 46160365 | 12 | 20 | 22 | 0.948929907 | 0.57038    | ENSG00000215448 |
| 20 | 46160663 | 46160960 | 46160824 | 8  | 12 | 12 | 1.039304184 | 0.461227   | ENSG00000215448 |
| 20 | 46161645 | 46161829 | 46161737 | 9  | 10 | 7  | 1.429043253 | 0.21536    | ENSG00000215448 |
| 20 | 46162189 | 46162549 | 46162420 | 8  | 13 | 11 | 1.212521548 | 0.309909   | ENSG00000215448 |
| 20 | 46162589 | 46162946 | 46162767 | 16 | 21 | 8  | 2.540521339 | 0.00602138 | ENSG00000215448 |
| 20 | 46163260 | 46163534 | 46163428 | 8  | 11 | 14 | 0.831443347 | 0.68719    | ENSG00000215448 |
| 20 | 46164293 | 46164665 | 46164495 | 9  | 16 | 6  | 2.524024447 | 0.0137633  | ENSG00000215448 |
| 20 | 46164844 | 46165033 | 46164938 | 9  | 9  | 7  | 1.29913023  | 0.286504   | ENSG00000215448 |
| 20 | 46165664 | 46165978 | 46165833 | 17 | 20 | 23 | 0.909391161 | 0.626666   | ENSG00000215448 |
| 20 | 46166106 | 46166475 | 46166246 | 14 | 19 | 15 | 1.29913023  | 0.214784   | ENSG00000215448 |
| 20 | 46166587 | 46166960 | 46166757 | 12 | 18 | 10 | 1.795161773 | 0.055383   | ENSG00000215448 |
| 20 | 46167341 | 46167885 | 46167506 | 15 | 26 | 5  | 4.676868829 | 3.65E-05   | ENSG00000215448 |
| 20 | 46168367 | 46168916 | 46168737 | 25 | 43 | 22 | 1.988234092 | 0.00288957 | ENSG00000215448 |
| 20 | 46170986 | 46171235 | 46171105 | 8  | 12 | 14 | 0.900730293 | 0.611333   | ENSG00000215448 |
| 20 | 46171566 | 46171752 | 46171694 | 8  | 9  | 11 | 0.86608682  | 0.635181   | ENSG00000215448 |
| 20 | 46175321 | 46175641 | 46175483 | 9  | 14 | 10 | 1.417232979 | 0.185113   | ENSG00000215448 |
| 20 | 46175871 | 46176050 | 46175960 | 8  | 8  | 10 | 0.850339787 | 0.645072   | ENSG00000215448 |

|    |          |          |          |    |    |    |             |             |                 |
|----|----------|----------|----------|----|----|----|-------------|-------------|-----------------|
| 20 | 46177694 | 46177971 | 46177831 | 9  | 13 | 5  | 2.425043097 | 0.0262442   | ENSG00000215448 |
| 20 | 46178792 | 46179111 | 46178951 | 12 | 17 | 12 | 1.439036563 | 0.154203    | ENSG00000215448 |
| 20 | 46179274 | 46179453 | 46179394 | 8  | 8  | 0  | 9.353737658 | 0.00163931  | ENSG00000215448 |
| 20 | 46190474 | 46190791 | 46190623 | 8  | 10 | 5  | 1.905391004 | 0.0915982   | ENSG00000215448 |
| 20 | 46191518 | 46191758 | 46191638 | 9  | 10 | 6  | 1.63319229  | 0.146906    | ENSG00000215448 |
| 20 | 46192624 | 46192940 | 46192787 | 11 | 14 | 6  | 2.227080395 | 0.0322529   | ENSG00000215448 |
| 20 | 46199933 | 46200187 | 46200071 | 8  | 9  | 9  | 1.039304184 | 0.466079    | ENSG00000215448 |
| 20 | 46204406 | 46204783 | 46204585 | 10 | 17 | 6  | 2.672496474 | 0.00882337  | ENSG00000215448 |
| 20 | 46206366 | 46206730 | 46206590 | 8  | 12 | 6  | 1.930136342 | 0.071303    | ENSG00000215448 |
| 20 | 46207946 | 46208192 | 46208049 | 9  | 11 | 5  | 2.078608368 | 0.0614303   | ENSG00000215448 |
| 20 | 46208517 | 46208847 | 46208726 | 10 | 15 | 5  | 2.771477825 | 0.0105836   | ENSG00000215448 |
| 20 | 46209390 | 46209576 | 46209471 | 8  | 8  | 1  | 4.676868829 | 0.0091584   | ENSG00000215448 |
| 20 | 46210822 | 46211323 | 46210997 | 10 | 20 | 13 | 1.558956276 | 0.0943292   | ENSG00000215448 |
| 20 | 46211959 | 46212202 | 46212080 | 8  | 11 | 9  | 1.247165021 | 0.300052    | ENSG00000215448 |
| 20 | 46228394 | 46228802 | 46228565 | 11 | 18 | 11 | 1.645564958 | 0.0828462   | ENSG00000215448 |
| 20 | 46235879 | 46236207 | 46236052 | 11 | 12 | 10 | 1.228268581 | 0.305344    | ENSG00000215448 |
| 20 | 46238386 | 46238579 | 46238481 | 9  | 9  | 4  | 2.078608368 | 0.0785659   | ENSG00000215448 |
| 20 | 46240712 | 46240923 | 46240802 | 8  | 11 | 0  | 12.47165021 | 0.000193293 | ENSG00000215448 |
| 20 | 46249364 | 46249589 | 46249437 | 8  | 10 | 4  | 2.286469205 | 0.0509017   | ENSG00000215448 |
| 20 | 46251359 | 46251769 | 46251538 | 19 | 27 | 13 | 2.078608368 | 0.00998554  | ENSG00000215448 |
| 20 | 46259738 | 46259967 | 46259873 | 8  | 11 | 6  | 1.781664316 | 0.103344    | ENSG00000215448 |
| 20 | 46280012 | 46280205 | 46280108 | 11 | 11 | 2  | 4.157216737 | 0.0052913   | ENSG00000215448 |
| 20 | 46282323 | 46282533 | 46282446 | 10 | 11 | 5  | 2.078608368 | 0.0614303   | ENSG00000215448 |
| 20 | 46283220 | 46283519 | 46283387 | 10 | 13 | 5  | 2.425043097 | 0.0262442   | ENSG00000215448 |
| 20 | 46286541 | 46286875 | 46286708 | 9  | 11 | 13 | 0.890832158 | 0.618492    | ENSG00000215448 |
| 20 | 46292128 | 46292529 | 46292304 | 9  | 16 | 12 | 1.359090087 | 0.198699    | ENSG00000215448 |
| 20 | 46296736 | 46296971 | 46296854 | 8  | 9  | 10 | 0.944821986 | 0.553851    | ENSG00000215448 |
| 20 | 46301211 | 46301864 | 46301390 | 11 | 27 | 12 | 2.23850132  | 0.00591854  | ENSG00000215448 |
| 20 | 46305156 | 46305335 | 46305232 | 8  | 9  | 3  | 2.598260461 | 0.0397929   | ENSG00000215448 |
| 20 | 46307250 | 46307704 | 46307347 | 11 | 19 | 6  | 2.969440526 | 0.0035096   | ENSG00000215448 |
| 20 | 46308850 | 46309184 | 46309017 | 11 | 15 | 7  | 2.078608368 | 0.038229    | ENSG00000215448 |
| 20 | 46311685 | 46312024 | 46311926 | 8  | 12 | 5  | 2.251825733 | 0.0404733   | ENSG00000215448 |
| 20 | 46314548 | 46314785 | 46314715 | 8  | 11 | 6  | 1.781664316 | 0.103344    | ENSG00000215448 |
| 20 | 46315723 | 46315999 | 46315853 | 10 | 11 | 5  | 2.078608368 | 0.0614303   | ENSG00000215448 |

|    |          |          |          |    |    |    |             |             |       |                 |
|----|----------|----------|----------|----|----|----|-------------|-------------|-------|-----------------|
| 20 | 46325264 | 46325589 | 46325426 | 10 | 15 | 6  | 2.375552421 | 0.0212094   | PREX1 | ENSG00000124126 |
| 20 | 46327494 | 46327775 | 46327628 | 8  | 11 | 12 | 0.959357709 | 0.543005    | PREX1 | ENSG00000124126 |
| 20 | 46332751 | 46332975 | 46332863 | 8  | 9  | 0  | 10.39304184 | 0.000803859 | PREX1 | ENSG00000124126 |
| 20 | 46337618 | 46337848 | 46337733 | 10 | 10 | 8  | 1.27026067  | 0.293854    | PREX1 | ENSG00000124126 |
| 20 | 46340357 | 46340641 | 46340499 | 8  | 12 | 6  | 1.930136342 | 0.071303    | PREX1 | ENSG00000124126 |
| 20 | 46343412 | 46343596 | 46343472 | 8  | 9  | 9  | 1.039304184 | 0.466079    | PREX1 | ENSG00000124126 |
| 20 | 46352108 | 46352293 | 46352200 | 8  | 8  | 5  | 1.558956276 | 0.191397    | PREX1 | ENSG00000124126 |
| 20 | 46355005 | 46355301 | 46355158 | 9  | 13 | 6  | 2.078608368 | 0.0483393   | PREX1 | ENSG00000124126 |
| 20 | 46357681 | 46358029 | 46357855 | 10 | 16 | 12 | 1.359090087 | 0.198699    | PREX1 | ENSG00000124126 |
| 20 | 46360884 | 46361932 | 46361408 | 16 | 54 | 36 | 1.544911625 | 0.0189833   | PREX1 | ENSG00000124126 |
| 20 | 46363412 | 46363666 | 46363541 | 9  | 12 | 4  | 2.702190879 | 0.0203088   | PREX1 | ENSG00000124126 |
| 20 | 46367169 | 46367394 | 46367281 | 8  | 10 | 4  | 2.286469205 | 0.0509017   | PREX1 | ENSG00000124126 |
| 20 | 46376683 | 46376879 | 46376781 | 8  | 9  | 1  | 5.196520921 | 0.00490062  | PREX1 | ENSG00000124126 |
| 20 | 46378993 | 46379322 | 46379221 | 8  | 12 | 3  | 3.377738599 | 0.00867157  | PREX1 | ENSG00000124126 |
| 20 | 46381187 | 46381551 | 46381407 | 10 | 15 | 18 | 0.875203524 | 0.655562    | PREX1 | ENSG00000124126 |
| 20 | 46391042 | 46391309 | 46391174 | 9  | 11 | 8  | 1.385738912 | 0.224757    | PREX1 | ENSG00000124126 |
| 20 | 46391624 | 46391843 | 46391728 | 8  | 9  | 5  | 1.73217364  | 0.133894    | PREX1 | ENSG00000124126 |
| 20 | 46394300 | 46395134 | 46394860 | 13 | 42 | 36 | 1.207839998 | 0.19865     | PREX1 | ENSG00000124126 |
| 20 | 46396158 | 46396451 | 46396304 | 10 | 12 | 3  | 3.377738599 | 0.00867157  | PREX1 | ENSG00000124126 |
| 20 | 46397905 | 46398120 | 46398000 | 9  | 10 | 3  | 2.858086507 | 0.0242838   | PREX1 | ENSG00000124126 |
| 20 | 46402717 | 46403003 | 46402824 | 8  | 11 | 4  | 2.494330042 | 0.0324033   | PREX1 | ENSG00000124126 |
| 20 | 46406824 | 46407058 | 46406971 | 9  | 11 | 3  | 3.117912553 | 0.0146045   | PREX1 | ENSG00000124126 |
| 20 | 46416590 | 46417130 | 46416951 | 10 | 21 | 14 | 1.524312804 | 0.0996258   | PREX1 | ENSG00000124126 |
| 20 | 46420663 | 46420956 | 46420809 | 8  | 13 | 9  | 1.455025858 | 0.177172    | PREX1 | ENSG00000124126 |
| 20 | 46432852 | 46433099 | 46432967 | 12 | 14 | 10 | 1.417232979 | 0.185113    | PREX1 | ENSG00000124126 |
| 20 | 46436384 | 46436642 | 46436468 | 9  | 10 | 4  | 2.286469205 | 0.0509017   | PREX1 | ENSG00000124126 |
| 20 | 46439079 | 46439344 | 46439250 | 9  | 10 | 7  | 1.429043253 | 0.21536     | PREX1 | ENSG00000124126 |
| 20 | 46446024 | 46446368 | 46446196 | 8  | 14 | 11 | 1.29913023  | 0.246308    | PREX1 | ENSG00000124126 |
| 20 | 46452178 | 46452499 | 46452338 | 9  | 13 | 4  | 2.910051716 | 0.0125532   | PREX1 | ENSG00000124126 |
| 20 | 46457498 | 46457813 | 46457640 | 8  | 12 | 5  | 2.251825733 | 0.0404733   | PREX1 | ENSG00000124126 |
| 20 | 46458376 | 46458735 | 46458555 | 10 | 17 | 4  | 3.741495063 | 0.00163722  | PREX1 | ENSG00000124126 |
| 20 | 46461952 | 46462146 | 46461974 | 8  | 9  | 2  | 3.464347281 | 0.0163838   | PREX1 | ENSG00000124126 |
| 20 | 46467484 | 46467729 | 46467606 | 8  | 10 | 6  | 1.63319229  | 0.146906    | PREX1 | ENSG00000124126 |
| 20 | 46474249 | 46474428 | 46474352 | 9  | 9  | 3  | 2.598260461 | 0.0397929   | PREX1 | ENSG00000124126 |

|    |          |          |          |    |    |    |             |            |       |                 |
|----|----------|----------|----------|----|----|----|-------------|------------|-------|-----------------|
| 20 | 46483741 | 46484039 | 46483888 | 14 | 18 | 19 | 0.987338975 | 0.516858   | PREX1 | ENSG00000124126 |
| 20 | 46484119 | 46484339 | 46484239 | 8  | 9  | 10 | 0.944821986 | 0.553851   | PREX1 | ENSG00000124126 |
| 20 | 46495106 | 46495392 | 46495249 | 14 | 17 | 8  | 2.078608368 | 0.0303558  | PREX1 | ENSG00000124126 |
| 20 | 46516923 | 46517155 | 46517039 | 8  | 9  | 6  | 1.484720263 | 0.204387   | PREX1 | ENSG00000124126 |
| 20 | 46520019 | 46520330 | 46520154 | 11 | 14 | 10 | 1.417232979 | 0.185113   | PREX1 | ENSG00000124126 |
| 20 | 46521047 | 46521462 | 46521178 | 8  | 15 | 3  | 4.157216737 | 0.00170423 | PREX1 | ENSG00000124126 |
| 20 | 46522324 | 46522824 | 46522574 | 14 | 29 | 30 | 1.005778243 | 0.491622   | PREX1 | ENSG00000124126 |
| 20 | 46523194 | 46523668 | 46523493 | 9  | 17 | 13 | 1.336248237 | 0.204556   | PREX1 | ENSG00000124126 |
| 20 | 46524562 | 46525211 | 46524892 | 11 | 24 | 17 | 1.443478034 | 0.113942   | PREX1 | ENSG00000124126 |
| 20 | 46529289 | 46529550 | 46529411 | 9  | 10 | 20 | 0.54439743  | 0.955421   | PREX1 | ENSG00000124126 |
| 20 | 46541176 | 46541364 | 46541283 | 8  | 9  | 6  | 1.484720263 | 0.204387   | PREX1 | ENSG00000124126 |
| 20 | 46541992 | 46542203 | 46542097 | 10 | 11 | 10 | 1.133786383 | 0.380636   | PREX1 | ENSG00000124126 |
| 20 | 46544577 | 46544815 | 46544709 | 8  | 8  | 5  | 1.558956276 | 0.191397   | PREX1 | ENSG00000124126 |
| 20 | 46565010 | 46565735 | 46565483 | 18 | 47 | 43 | 1.133786383 | 0.273137   | PREX1 | ENSG00000124126 |
| 20 | 46572816 | 46573014 | 46572894 | 8  | 9  | 3  | 2.598260461 | 0.0397929  | PREX1 | ENSG00000124126 |
| 20 | 46573073 | 46573480 | 46573308 | 20 | 27 | 16 | 1.711795127 | 0.0365811  | PREX1 | ENSG00000124126 |
| 20 | 46574810 | 46575042 | 46574955 | 8  | 10 | 7  | 1.429043253 | 0.21536    | PREX1 | ENSG00000124126 |
| 20 | 46577395 | 46577696 | 46577535 | 10 | 11 | 7  | 1.558956276 | 0.158273   | PREX1 | ENSG00000124126 |
| 20 | 46585724 | 46586459 | 46586072 | 10 | 30 | 25 | 1.239170374 | 0.208284   | PREX1 | ENSG00000124126 |
| 20 | 46586576 | 46587013 | 46586755 | 9  | 18 | 9  | 1.97467795  | 0.0349428  | PREX1 | ENSG00000124126 |
| 20 | 46588482 | 46588805 | 46588652 | 22 | 24 | 18 | 1.367505506 | 0.148798   | PREX1 | ENSG00000124126 |
| 20 | 46593953 | 46594144 | 46594074 | 9  | 10 | 6  | 1.63319229  | 0.146906   | PREX1 | ENSG00000124126 |
| 20 | 46594324 | 46594635 | 46594485 | 12 | 15 | 7  | 2.078608368 | 0.038229   | PREX1 | ENSG00000124126 |
| 20 | 46594999 | 46595192 | 46595103 | 8  | 9  | 5  | 1.73217364  | 0.133894   | PREX1 | ENSG00000124126 |
| 20 | 46604307 | 46604600 | 46604453 | 10 | 13 | 7  | 1.818782322 | 0.0805123  | PREX1 | ENSG00000124126 |
| 20 | 46605333 | 46605566 | 46605449 | 12 | 12 | 13 | 0.965068171 | 0.538344   | PREX1 | ENSG00000124126 |
| 20 | 46608234 | 46608419 | 46608329 | 8  | 10 | 7  | 1.429043253 | 0.21536    | PREX1 | ENSG00000124126 |
| 20 | 46609834 | 46610089 | 46609993 | 9  | 11 | 3  | 3.117912553 | 0.0146045  | PREX1 | ENSG00000124126 |
| 20 | 46611488 | 46611677 | 46611582 | 8  | 9  | 6  | 1.484720263 | 0.204387   | PREX1 | ENSG00000124126 |
| 20 | 46617673 | 46618432 | 46618052 | 30 | 60 | 16 | 3.729267955 | 4.94E-08   | PREX1 | ENSG00000124126 |
| 20 | 46621994 | 46622489 | 46622324 | 18 | 30 | 14 | 2.147895314 | 0.00561491 | PREX1 | ENSG00000124126 |
| 20 | 46631003 | 46631363 | 46631151 | 9  | 14 | 3  | 3.897390691 | 0.00295882 | PREX1 | ENSG00000124126 |
| 20 | 46658204 | 46658607 | 46658358 | 8  | 15 | 3  | 4.157216737 | 0.00170423 | PREX1 | ENSG00000124126 |
| 20 | 46658784 | 46658973 | 46658900 | 8  | 9  | 9  | 1.039304184 | 0.466079   | PREX1 | ENSG00000124126 |

|    |          |          |          |    |    |    |             |             |       |                 |
|----|----------|----------|----------|----|----|----|-------------|-------------|-------|-----------------|
| 20 | 46659268 | 46659718 | 46659419 | 10 | 18 | 12 | 1.518983039 | 0.117837    | PREX1 | ENSG00000124126 |
| 20 | 46663948 | 46664133 | 46664070 | 8  | 8  | 11 | 0.779478138 | 0.719708    | PREX1 | ENSG00000124126 |
| 20 | 46669614 | 46669882 | 46669747 | 13 | 16 | 10 | 1.606197376 | 0.104477    | PREX1 | ENSG00000124126 |
| 20 | 46670348 | 46671872 | 46671112 | 19 | 75 | 31 | 2.468347438 | 3.22E-06    | PREX1 | ENSG00000124126 |
| 20 | 46672403 | 46672906 | 46672733 | 11 | 23 | 13 | 1.781664316 | 0.0385539   | PREX1 | ENSG00000124126 |
| 20 | 46685619 | 46686028 | 46685862 | 12 | 20 | 13 | 1.558956276 | 0.0943292   | PREX1 | ENSG00000124126 |
| 20 | 46692466 | 46692711 | 46692588 | 8  | 11 | 8  | 1.385738912 | 0.224757    | PREX1 | ENSG00000124126 |
| 20 | 46707592 | 46708089 | 46707910 | 20 | 36 | 17 | 2.13634749  | 0.00297834  | PREX1 | ENSG00000124126 |
| 20 | 46708640 | 46708918 | 46708779 | 8  | 12 | 4  | 2.702190879 | 0.0203088   | PREX1 | ENSG00000124126 |
| 20 | 46711603 | 46712270 | 46711782 | 11 | 27 | 14 | 1.940034477 | 0.0160556   | PREX1 | ENSG00000124126 |
| 20 | 46713642 | 46713962 | 46713802 | 8  | 14 | 11 | 1.29913023  | 0.246308    | PREX1 | ENSG00000124126 |
| 20 | 46730890 | 46731069 | 46730979 | 10 | 11 | 8  | 1.385738912 | 0.224757    | PREX1 | ENSG00000124126 |
| 20 | 46732025 | 46732432 | 46732204 | 8  | 16 | 13 | 1.262012224 | 0.256887    | PREX1 | ENSG00000124126 |
| 20 | 46735950 | 46736851 | 46736189 | 12 | 40 | 17 | 2.367303975 | 0.000680164 | PREX1 | ENSG00000124126 |
| 20 | 46737734 | 46737913 | 46737823 | 8  | 9  | 4  | 2.078608368 | 0.0785659   |       | ENSG00000212716 |
| 20 | 46747705 | 46748385 | 46747939 | 21 | 40 | 34 | 1.217470616 | 0.194943    |       | ENSG00000212716 |
| 20 | 46748611 | 46749321 | 46749099 | 12 | 32 | 28 | 1.182656486 | 0.253749    |       | ENSG00000212716 |
| 20 | 46750572 | 46750827 | 46750699 | 8  | 10 | 5  | 1.905391004 | 0.0915982   |       | ENSG00000212716 |
| 20 | 46754824 | 46755569 | 46755342 | 13 | 34 | 26 | 1.347246165 | 0.119935    |       | ENSG00000212716 |
| 20 | 46755719 | 46755906 | 46755850 | 8  | 9  | 15 | 0.649565115 | 0.865365    |       | ENSG00000212716 |
| 20 | 46755933 | 46756220 | 46756076 | 9  | 12 | 12 | 1.039304184 | 0.461227    |       | ENSG00000212716 |
| 20 | 46756857 | 46757215 | 46757094 | 9  | 14 | 6  | 2.227080395 | 0.0322529   |       | ENSG00000212716 |
| 20 | 46758392 | 46758580 | 46758507 | 8  | 9  | 9  | 1.039304184 | 0.466079    |       | ENSG00000212716 |
| 20 | 46760317 | 46760587 | 46760357 | 8  | 12 | 8  | 1.501217155 | 0.168286    |       | ENSG00000212716 |
| 20 | 46760733 | 46761117 | 46760973 | 11 | 18 | 10 | 1.795161773 | 0.055383    |       | ENSG00000212716 |
| 20 | 46769291 | 46769480 | 46769385 | 8  | 8  | 6  | 1.336248237 | 0.277651    |       | ENSG00000212716 |
| 20 | 46770197 | 46770522 | 46770357 | 8  | 12 | 6  | 1.930136342 | 0.071303    |       | ENSG00000212716 |
| 20 | 46770615 | 46770913 | 46770764 | 9  | 13 | 7  | 1.818782322 | 0.0805123   |       | ENSG00000212716 |
| 20 | 46771563 | 46771830 | 46771694 | 9  | 12 | 7  | 1.688869299 | 0.11395     |       | ENSG00000212716 |
| 20 | 46776864 | 46777065 | 46776964 | 9  | 9  | 3  | 2.598260461 | 0.0397929   |       | ENSG00000212716 |
| 20 | 46791838 | 46792131 | 46791996 | 13 | 16 | 8  | 1.963130126 | 0.0441028   |       | ENSG00000212716 |
| 20 | 46797211 | 46797455 | 46797341 | 8  | 9  | 3  | 2.598260461 | 0.0397929   |       | ENSG00000212716 |
| 20 | 46800365 | 46800713 | 46800538 | 11 | 15 | 7  | 2.078608368 | 0.038229    |       | ENSG00000212716 |
| 20 | 46807888 | 46808073 | 46807980 | 9  | 9  | 8  | 1.154782427 | 0.375434    |       | ENSG00000212716 |



|    |          |          |          |    |    |    |             |            |       |                 |
|----|----------|----------|----------|----|----|----|-------------|------------|-------|-----------------|
| 20 | 46813081 | 46813412 | 46813246 | 8  | 10 | 7  | 1.429043253 | 0.21536    |       | ENSG00000212716 |
| 20 | 46815338 | 46815517 | 46815427 | 8  | 8  | 8  | 1.039304184 | 0.46786    | PREX1 | ENSG00000124126 |
| 20 | 46820113 | 46820292 | 46820202 | 8  | 8  | 5  | 1.558956276 | 0.191397   | PREX1 | ENSG00000124126 |
| 20 | 46822693 | 46822905 | 46822799 | 8  | 9  | 10 | 0.944821986 | 0.553851   | PREX1 | ENSG00000124126 |
| 20 | 46824172 | 46824538 | 46824348 | 10 | 16 | 7  | 2.208521392 | 0.0257604  | PREX1 | ENSG00000124126 |
| 20 | 46824828 | 46825008 | 46824903 | 8  | 10 | 5  | 1.905391004 | 0.0915982  | PREX1 | ENSG00000124126 |
| 20 | 46828676 | 46828858 | 46828792 | 8  | 8  | 4  | 1.870747532 | 0.118863   | PREX1 | ENSG00000124126 |
| 20 | 46834502 | 46834696 | 46834530 | 8  | 9  | 5  | 1.73217364  | 0.133894   | PREX1 | ENSG00000124126 |
| 20 | 46839310 | 46839649 | 46839479 | 8  | 13 | 8  | 1.616695398 | 0.123553   | PREX1 | ENSG00000124126 |
| 20 | 46843072 | 46843309 | 46843192 | 8  | 8  | 3  | 2.338434415 | 0.0641221  | PREX1 | ENSG00000124126 |
| 20 | 46844480 | 46844659 | 46844588 | 9  | 9  | 4  | 2.078608368 | 0.0785659  | PREX1 | ENSG00000124126 |
| 20 | 46845708 | 46846307 | 46845962 | 12 | 24 | 22 | 1.129678461 | 0.335754   | PREX1 | ENSG00000124126 |
| 20 | 46849945 | 46850145 | 46850035 | 8  | 8  | 2  | 3.117912553 | 0.0283184  | PREX1 | ENSG00000124126 |
| 20 | 46851525 | 46851726 | 46851625 | 8  | 9  | 6  | 1.484720263 | 0.204387   | PREX1 | ENSG00000124126 |
| 20 | 46853076 | 46853269 | 46853170 | 9  | 9  | 5  | 1.73217364  | 0.133894   | PREX1 | ENSG00000124126 |
| 20 | 46858301 | 46858720 | 46858479 | 14 | 20 | 13 | 1.558956276 | 0.0943292  | PREX1 | ENSG00000124126 |
| 20 | 46858923 | 46859311 | 46859102 | 9  | 15 | 8  | 1.847651883 | 0.0631662  | PREX1 | ENSG00000124126 |
| 20 | 46859755 | 46860033 | 46859898 | 12 | 15 | 4  | 3.32577339  | 0.00462646 | PREX1 | ENSG00000124126 |
| 20 | 46862579 | 46862841 | 46862758 | 9  | 12 | 10 | 1.228268581 | 0.305344   | PREX1 | ENSG00000124126 |
| 20 | 46862973 | 46863397 | 46863107 | 10 | 16 | 8  | 1.963130126 | 0.0441028  | PREX1 | ENSG00000124126 |
| 20 | 46865474 | 46865668 | 46865571 | 9  | 10 | 4  | 2.286469205 | 0.0509017  | PREX1 | ENSG00000124126 |
| 20 | 46869176 | 46869570 | 46869404 | 8  | 15 | 7  | 2.078608368 | 0.038229   | PREX1 | ENSG00000124126 |
| 20 | 46869728 | 46869977 | 46869818 | 9  | 12 | 10 | 1.228268581 | 0.305344   | PREX1 | ENSG00000124126 |
| 20 | 46872723 | 46872930 | 46872843 | 8  | 9  | 5  | 1.73217364  | 0.133894   | PREX1 | ENSG00000124126 |
| 20 | 46874828 | 46875138 | 46874983 | 9  | 12 | 17 | 0.750608578 | 0.78992    | PREX1 | ENSG00000124126 |
| 20 | 46876132 | 46876451 | 46876291 | 8  | 11 | 10 | 1.133786383 | 0.380636   | PREX1 | ENSG00000124126 |
| 20 | 46877106 | 46877453 | 46877248 | 9  | 14 | 7  | 1.948695345 | 0.0559175  | PREX1 | ENSG00000124126 |
| 20 | 46878484 | 46878888 | 46878709 | 10 | 20 | 10 | 1.98412617  | 0.0277883  | PREX1 | ENSG00000124126 |
| 20 | 46879279 | 46879470 | 46879351 | 8  | 9  | 7  | 1.29913023  | 0.286504   | PREX1 | ENSG00000124126 |
| 20 | 46882363 | 46882602 | 46882450 | 11 | 13 | 10 | 1.32275078  | 0.240023   | PREX1 | ENSG00000124126 |
| 20 | 46886028 | 46886560 | 46886448 | 8  | 18 | 15 | 1.234173719 | 0.265435   | PREX1 | ENSG00000124126 |
| 20 | 46892441 | 46892621 | 46892543 | 8  | 8  | 1  | 4.676868829 | 0.0091584  | PREX1 | ENSG00000124126 |
| 20 | 46901881 | 46902081 | 46901976 | 8  | 9  | 2  | 3.464347281 | 0.0163838  | PREX1 | ENSG00000124126 |
| 20 | 46903731 | 46903977 | 46903898 | 8  | 11 | 4  | 2.494330042 | 0.0324033  | PREX1 | ENSG00000124126 |

|    |          |          |          |    |    |    |             |             |           |                 |
|----|----------|----------|----------|----|----|----|-------------|-------------|-----------|-----------------|
| 20 | 46912279 | 46912612 | 46912445 | 10 | 16 | 12 | 1.359090087 | 0.198699    | PREX1     | ENSG00000124126 |
| 20 | 46914039 | 46914592 | 46914288 | 12 | 23 | 20 | 1.187776211 | 0.280921    | PREX1     | ENSG00000124126 |
| 20 | 46914732 | 46915285 | 46914931 | 18 | 34 | 28 | 1.254332636 | 0.181679    | PREX1     | ENSG00000124126 |
| 20 | 46919822 | 46920005 | 46919971 | 8  | 8  | 1  | 4.676868829 | 0.0091584   | PREX1     | ENSG00000124126 |
| 20 | 46928691 | 46929027 | 46928859 | 8  | 12 | 5  | 2.251825733 | 0.0404733   | ARFGEF2   | ENSG00000124198 |
| 20 | 46929262 | 46929521 | 46929391 | 9  | 10 | 8  | 1.27026067  | 0.293854    | ARFGEF2   | ENSG00000124198 |
| 20 | 46950027 | 46950472 | 46950295 | 9  | 17 | 14 | 1.247165021 | 0.261378    | ARFGEF2   | ENSG00000124198 |
| 20 | 46951275 | 46951565 | 46951420 | 10 | 15 | 10 | 1.511715177 | 0.140236    | ARFGEF2   | ENSG00000124198 |
| 20 | 46954794 | 46955380 | 46955083 | 18 | 31 | 25 | 1.279143611 | 0.173528    | ARFGEF2   | ENSG00000124198 |
| 20 | 46956243 | 46956585 | 46956414 | 11 | 14 | 8  | 1.73217364  | 0.0890835   | ARFGEF2   | ENSG00000124198 |
| 20 | 46959588 | 46959781 | 46959692 | 8  | 9  | 5  | 1.73217364  | 0.133894    | ARFGEF2   | ENSG00000124198 |
| 20 | 46966633 | 46966943 | 46966788 | 10 | 12 | 13 | 0.965068171 | 0.538344    | ARFGEF2   | ENSG00000124198 |
| 20 | 46970412 | 46970704 | 46970547 | 10 | 14 | 6  | 2.227080395 | 0.0322529   | ARFGEF2   | ENSG00000124198 |
| 20 | 46971301 | 46971728 | 46971470 | 15 | 24 | 21 | 1.181027482 | 0.2833      | ARFGEF2   | ENSG00000124198 |
| 20 | 46972095 | 46972513 | 46972336 | 12 | 23 | 16 | 1.467252966 | 0.109416    | ARFGEF2   | ENSG00000124198 |
| 20 | 46972985 | 46973239 | 46973095 | 9  | 11 | 14 | 0.831443347 | 0.68719     | ARFGEF2   | ENSG00000124198 |
| 20 | 46973341 | 46973520 | 46973430 | 8  | 9  | 17 | 0.577391213 | 0.925885    | ARFGEF2   | ENSG00000124198 |
| 20 | 46973528 | 46973711 | 46973566 | 8  | 8  | 10 | 0.850339787 | 0.645072    | ARFGEF2   | ENSG00000124198 |
| 20 | 47328317 | 47328710 | 47328581 | 8  | 13 | 6  | 2.078608368 | 0.0483393   | C20orf199 | ENSG00000177410 |
| 20 | 47422103 | 47422540 | 47422279 | 9  | 15 | 2  | 5.542955649 | 0.000497081 |           | ENSG00000212304 |
| 20 | 47534182 | 47534459 | 47534305 | 9  | 12 | 3  | 3.377738599 | 0.00867157  | KCNB1     | ENSG00000158445 |
| 20 | 47584305 | 47584524 | 47584428 | 10 | 10 | 3  | 2.858086507 | 0.0242838   | PTGIS     | ENSG00000124212 |
| 20 | 47612602 | 47612784 | 47612689 | 8  | 10 | 0  | 11.43234603 | 0.000394183 | PTGIS     | ENSG00000124212 |
| 20 | 47644108 | 47644409 | 47644281 | 12 | 13 | 2  | 4.850086193 | 0.00164564  | PTGIS     | ENSG00000124212 |
| 20 | 47820039 | 47820432 | 47820270 | 18 | 25 | 1  | 13.5109544  | 1.28E-07    | SNRPPF1   | ENSG00000217373 |
| 20 | 47861157 | 47861336 | 47861246 | 8  | 8  | 0  | 9.353737658 | 0.00163931  | SLC9A8    | ENSG00000197818 |
| 20 | 47885025 | 47885364 | 47885192 | 21 | 25 | 1  | 13.5109544  | 1.28E-07    |           | ENSG00000220552 |
| 20 | 47909826 | 47910037 | 47909931 | 10 | 12 | 10 | 1.228268581 | 0.305344    |           | ENSG00000220552 |
| 20 | 47949575 | 47949783 | 47949704 | 8  | 10 | 0  | 11.43234603 | 0.000394183 | SPATA2    | ENSG00000158480 |
| 20 | 48069505 | 48069772 | 48069645 | 17 | 20 | 1  | 10.91269393 | 3.71E-06    | SNAI1     | ENSG00000124216 |
| 20 | 48083796 | 48084020 | 48083910 | 8  | 9  | 2  | 3.464347281 | 0.0163838   | TMEM189   | ENSG00000124208 |
| 20 | 48087668 | 48087902 | 48087772 | 9  | 10 | 4  | 2.286469205 | 0.0509017   | TMEM189   | ENSG00000124208 |
| 20 | 48092876 | 48093119 | 48092960 | 8  | 11 | 4  | 2.494330042 | 0.0324033   | TMEM189   | ENSG00000124208 |
| 20 | 48176708 | 48176923 | 48176815 | 8  | 10 | 4  | 2.286469205 | 0.0509017   | TMEM189   | ENSG00000124208 |

|    |          |          |          |    |     |     |             |             |         |                 |
|----|----------|----------|----------|----|-----|-----|-------------|-------------|---------|-----------------|
| 20 | 48212778 | 48212964 | 48212871 | 9  | 9   | 1   | 5.196520921 | 0.00490062  | TMEM189 | ENSG00000124208 |
| 20 | 48215887 | 48216238 | 48216033 | 18 | 22  | 5   | 3.983999373 | 0.000317941 | TMEM189 | ENSG00000124208 |
| 20 | 48296948 | 48297134 | 48297041 | 8  | 8   | 5   | 1.558956276 | 0.191397    |         | ENSG00000203999 |
| 20 | 48333968 | 48334193 | 48334059 | 8  | 9   | 0   | 10.39304184 | 0.000803859 |         | ENSG00000203999 |
| 20 | 48334718 | 48334933 | 48334825 | 9  | 10  | 6   | 1.63319229  | 0.146906    |         | ENSG00000203999 |
| 20 | 48421982 | 48422370 | 48422176 | 25 | 33  | 3   | 8.834085566 | 3.36E-08    |         | ENSG00000210745 |
| 20 | 48477857 | 48478206 | 48478027 | 15 | 19  | 3   | 5.196520921 | 0.000174201 |         | ENSG00000210745 |
| 20 | 48518140 | 48518319 | 48518229 | 8  | 9   | 2   | 3.464347281 | 0.0163838   | COX6CP2 | ENSG00000217066 |
| 20 | 48719978 | 48721722 | 48720685 | 72 | 186 | 76  | 2.524024447 | 3.13E-13    | FAM65C  | ENSG00000042062 |
| 20 | 48721804 | 48722158 | 48721981 | 9  | 15  | 10  | 1.511715177 | 0.140236    | FAM65C  | ENSG00000042062 |
| 20 | 48722379 | 48724585 | 48723599 | 15 | 106 | 87  | 1.263699406 | 0.0512063   | FAM65C  | ENSG00000042062 |
| 20 | 48724855 | 48725399 | 48725114 | 9  | 24  | 21  | 1.181027482 | 0.2833      | FAM65C  | ENSG00000042062 |
| 20 | 48725422 | 48725682 | 48725534 | 9  | 12  | 21  | 0.614134291 | 0.924528    | FAM65C  | ENSG00000042062 |
| 20 | 48725796 | 48726384 | 48726127 | 10 | 22  | 23  | 0.995999843 | 0.506279    | FAM65C  | ENSG00000042062 |
| 20 | 48726495 | 48726677 | 48726606 | 8  | 8   | 3   | 2.338434415 | 0.0641221   | FAM65C  | ENSG00000042062 |
| 20 | 48726815 | 48727355 | 48727198 | 13 | 25  | 24  | 1.080876352 | 0.390444    | FAM65C  | ENSG00000042062 |
| 20 | 48727844 | 48728892 | 48728478 | 27 | 70  | 51  | 1.419049944 | 0.0264676   | FAM65C  | ENSG00000042062 |
| 20 | 48729234 | 48729422 | 48729300 | 8  | 8   | 9   | 0.935373766 | 0.560286    | FAM65C  | ENSG00000042062 |
| 20 | 48729748 | 48730908 | 48730095 | 18 | 68  | 79  | 0.896399859 | 0.748362    | FAM65C  | ENSG00000042062 |
| 20 | 48731274 | 48732347 | 48731795 | 18 | 54  | 63  | 0.893152033 | 0.731919    | FAM65C  | ENSG00000042062 |
| 20 | 48733013 | 48733385 | 48733206 | 13 | 20  | 20  | 1.039304184 | 0.450588    | FAM65C  | ENSG00000042062 |
| 20 | 48733986 | 48734669 | 48734218 | 18 | 36  | 37  | 1.011954074 | 0.479962    | FAM65C  | ENSG00000042062 |
| 20 | 48735759 | 48736008 | 48735883 | 9  | 13  | 20  | 0.692869456 | 0.861903    | FAM65C  | ENSG00000042062 |
| 20 | 48736946 | 48737553 | 48737282 | 16 | 40  | 31  | 1.331608486 | 0.110337    | FAM65C  | ENSG00000042062 |
| 20 | 48738340 | 48738766 | 48738488 | 9  | 17  | 24  | 0.748299013 | 0.830231    | FAM65C  | ENSG00000042062 |
| 20 | 48739408 | 48741438 | 48739964 | 29 | 137 | 112 | 1.269238738 | 0.0295939   | FAM65C  | ENSG00000042062 |
| 20 | 48741817 | 48742205 | 48742026 | 11 | 18  | 20  | 0.940322833 | 0.578675    | FAM65C  | ENSG00000042062 |
| 20 | 48742209 | 48742455 | 48742323 | 9  | 10  | 13  | 0.816596145 | 0.696946    | FAM65C  | ENSG00000042062 |
| 20 | 48742624 | 48742833 | 48742728 | 9  | 11  | 10  | 1.133786383 | 0.380636    | FAM65C  | ENSG00000042062 |
| 20 | 48742918 | 48743338 | 48743159 | 17 | 27  | 15  | 1.818782322 | 0.0247174   | FAM65C  | ENSG00000042062 |
| 20 | 48743759 | 48743966 | 48743917 | 8  | 10  | 11  | 0.952695502 | 0.548138    | FAM65C  | ENSG00000042062 |
| 20 | 48744431 | 48745897 | 48745722 | 16 | 72  | 72  | 1.039304184 | 0.408073    | FAM65C  | ENSG00000042062 |
| 20 | 48746199 | 48747074 | 48746760 | 12 | 43  | 28  | 1.576875314 | 0.02645     | FAM65C  | ENSG00000042062 |
| 20 | 48749212 | 48749852 | 48749666 | 10 | 29  | 32  | 0.944821986 | 0.590257    | FAM65C  | ENSG00000042062 |

|    |          |          |          |     |     |     |             |            |        |                 |
|----|----------|----------|----------|-----|-----|-----|-------------|------------|--------|-----------------|
| 20 | 48750214 | 48751946 | 48750914 | 17  | 96  | 89  | 1.120138954 | 0.218783   | FAM65C | ENSG00000042062 |
| 20 | 48752161 | 48752990 | 48752570 | 14  | 39  | 25  | 1.598929514 | 0.0289496  | FAM65C | ENSG00000042062 |
| 20 | 48753484 | 48753878 | 48753560 | 12  | 19  | 24  | 0.831443347 | 0.733913   | FAM65C | ENSG00000042062 |
| 20 | 48753929 | 48754160 | 48754022 | 9   | 11  | 12  | 0.959357709 | 0.543005   | FAM65C | ENSG00000042062 |
| 20 | 48754403 | 48755211 | 48754807 | 17  | 45  | 40  | 1.166048597 | 0.236372   | FAM65C | ENSG00000042062 |
| 20 | 48757509 | 48758104 | 48757724 | 13  | 32  | 30  | 1.106356067 | 0.342646   | FAM65C | ENSG00000042062 |
| 20 | 48758848 | 48759325 | 48759020 | 17  | 29  | 17  | 1.73217364  | 0.029443   | FAM65C | ENSG00000042062 |
| 20 | 48759383 | 48759851 | 48759672 | 11  | 22  | 23  | 0.995999843 | 0.506279   | FAM65C | ENSG00000042062 |
| 20 | 48760447 | 48760709 | 48760578 | 10  | 13  | 11  | 1.212521548 | 0.309909   | FAM65C | ENSG00000042062 |
| 20 | 48760894 | 48761528 | 48761349 | 45  | 76  | 51  | 1.538969657 | 0.00748235 | FAM65C | ENSG00000042062 |
| 20 | 48762051 | 48762354 | 48762199 | 8   | 12  | 26  | 0.500405718 | 0.98391    | PARD6B | ENSG00000124171 |
| 20 | 48762467 | 48763193 | 48762881 | 15  | 31  | 29  | 1.10859113  | 0.342043   | PARD6B | ENSG00000124171 |
| 20 | 48763305 | 48764238 | 48763864 | 23  | 64  | 51  | 1.29913023  | 0.0784939  | PARD6B | ENSG00000124171 |
| 20 | 48764719 | 48765022 | 48764863 | 8   | 13  | 9   | 1.455025858 | 0.177172   | PARD6B | ENSG00000124171 |
| 20 | 48765062 | 48765308 | 48765215 | 11  | 15  | 19  | 0.831443347 | 0.712423   | PARD6B | ENSG00000124171 |
| 20 | 48765345 | 48765595 | 48765497 | 8   | 11  | 14  | 0.831443347 | 0.68719    | PARD6B | ENSG00000124171 |
| 20 | 48765709 | 48766170 | 48765855 | 21  | 31  | 22  | 1.44598843  | 0.0857085  | PARD6B | ENSG00000124171 |
| 20 | 48766343 | 48766818 | 48766484 | 19  | 40  | 31  | 1.331608486 | 0.110337   | PARD6B | ENSG00000124171 |
| 20 | 48767885 | 48769358 | 48768570 | 24  | 84  | 77  | 1.132575073 | 0.213172   | PARD6B | ENSG00000124171 |
| 20 | 48769423 | 48769613 | 48769519 | 9   | 9   | 3   | 2.598260461 | 0.0397929  | PARD6B | ENSG00000124171 |
| 20 | 48769715 | 48770159 | 48769989 | 13  | 18  | 26  | 0.731362204 | 0.856292   | PARD6B | ENSG00000124171 |
| 20 | 48770638 | 48770922 | 48770786 | 11  | 14  | 18  | 0.820503303 | 0.720361   | PARD6B | ENSG00000124171 |
| 20 | 48771872 | 48772147 | 48772009 | 8   | 11  | 10  | 1.133786383 | 0.380636   | PARD6B | ENSG00000124171 |
| 20 | 48772304 | 48773409 | 48772976 | 12  | 51  | 59  | 0.900730293 | 0.710777   | PARD6B | ENSG00000124171 |
| 20 | 48773773 | 48774109 | 48773941 | 15  | 19  | 15  | 1.29913023  | 0.214784   | PARD6B | ENSG00000124171 |
| 20 | 48774304 | 48775514 | 48775007 | 30  | 94  | 80  | 1.218937006 | 0.0944896  | PARD6B | ENSG00000124171 |
| 20 | 48776285 | 48776906 | 48776595 | 12  | 32  | 29  | 1.143234603 | 0.297045   | PARD6B | ENSG00000124171 |
| 20 | 48776956 | 48781623 | 48779668 | 178 | 678 | 371 | 1.897009519 | 1.44E-24   | PARD6B | ENSG00000124171 |
| 20 | 48781798 | 48783141 | 48782531 | 30  | 106 | 79  | 1.390069346 | 0.0123786  | PARD6B | ENSG00000124171 |
| 20 | 48783267 | 48784096 | 48783519 | 26  | 65  | 49  | 1.371881523 | 0.044547   | PARD6B | ENSG00000124171 |
| 20 | 48784986 | 48785187 | 48785086 | 8   | 9   | 6   | 1.484720263 | 0.204387   | PARD6B | ENSG00000124171 |
| 20 | 48785268 | 48785595 | 48785431 | 18  | 24  | 27  | 0.927950164 | 0.608665   | PARD6B | ENSG00000124171 |
| 20 | 48785675 | 48786709 | 48785878 | 20  | 73  | 73  | 1.039304184 | 0.407455   | PARD6B | ENSG00000124171 |
| 20 | 48786846 | 48787867 | 48787024 | 13  | 46  | 51  | 0.93937109  | 0.623052   | PARD6B | ENSG00000124171 |

|    |          |          |          |     |     |     |             |            |        |                 |
|----|----------|----------|----------|-----|-----|-----|-------------|------------|--------|-----------------|
| 20 | 48788298 | 48788676 | 48788406 | 8   | 14  | 17  | 0.86608682  | 0.662567   | PARD6B | ENSG00000124171 |
| 20 | 48788738 | 48789181 | 48788917 | 15  | 23  | 21  | 1.133786383 | 0.33446    | PARD6B | ENSG00000124171 |
| 20 | 48789438 | 48790028 | 48789849 | 12  | 31  | 42  | 0.773435672 | 0.867273   | PARD6B | ENSG00000124171 |
| 20 | 48790187 | 48790508 | 48790359 | 10  | 14  | 16  | 0.917033104 | 0.598778   | PARD6B | ENSG00000124171 |
| 20 | 48790695 | 48790992 | 48790843 | 11  | 15  | 15  | 1.039304184 | 0.456923   | PARD6B | ENSG00000124171 |
| 20 | 48791076 | 48791407 | 48791247 | 10  | 13  | 23  | 0.606260774 | 0.937372   | PARD6B | ENSG00000124171 |
| 20 | 48791740 | 48792136 | 48791935 | 12  | 21  | 11  | 1.905391004 | 0.031399   | PARD6B | ENSG00000124171 |
| 20 | 48792563 | 48793592 | 48793290 | 22  | 63  | 57  | 1.14681841  | 0.224338   | PARD6B | ENSG00000124171 |
| 20 | 48793769 | 48794050 | 48793902 | 11  | 14  | 5   | 2.598260461 | 0.0167748  | PARD6B | ENSG00000124171 |
| 20 | 48794245 | 48795208 | 48794504 | 62  | 121 | 66  | 1.892464335 | 8.47E-06   | PARD6B | ENSG00000124171 |
| 20 | 48795297 | 48796899 | 48796560 | 16  | 83  | 89  | 0.970017239 | 0.580098   | PARD6B | ENSG00000124171 |
| 20 | 48796975 | 48797569 | 48797312 | 20  | 41  | 29  | 1.455025858 | 0.0560877  | PARD6B | ENSG00000124171 |
| 20 | 48797631 | 48797920 | 48797783 | 21  | 23  | 24  | 0.997732017 | 0.503931   | PARD6B | ENSG00000124171 |
| 20 | 48798295 | 48798739 | 48798474 | 12  | 22  | 28  | 0.824275732 | 0.75853    | PARD6B | ENSG00000124171 |
| 20 | 48798809 | 48799022 | 48798924 | 8   | 9   | 13  | 0.742360132 | 0.770276   | PARD6B | ENSG00000124171 |
| 20 | 48799192 | 48800595 | 48799744 | 19  | 82  | 55  | 1.540397273 | 0.00569343 | PARD6B | ENSG00000124171 |
| 20 | 48800613 | 48800943 | 48800766 | 14  | 19  | 8   | 2.309564854 | 0.0138337  | PARD6B | ENSG00000124171 |
| 20 | 48800996 | 48801399 | 48801175 | 8   | 15  | 9   | 1.662886695 | 0.0970566  | PARD6B | ENSG00000124171 |
| 20 | 48801759 | 48802177 | 48801918 | 10  | 16  | 12  | 1.359090087 | 0.198699   | PARD6B | ENSG00000124171 |
| 20 | 48803736 | 48803947 | 48803870 | 12  | 13  | 5   | 2.425043097 | 0.0262442  | PARD6B | ENSG00000124171 |
| 20 | 48804386 | 48804794 | 48804587 | 14  | 23  | 26  | 0.923825942 | 0.612844   | PARD6B | ENSG00000124171 |
| 20 | 48804926 | 48805657 | 48805285 | 12  | 36  | 34  | 1.098692995 | 0.344552   | PARD6B | ENSG00000124171 |
| 20 | 48806307 | 48806627 | 48806473 | 15  | 19  | 31  | 0.649565115 | 0.939158   | PARD6B | ENSG00000124171 |
| 20 | 48806697 | 48806970 | 48806833 | 10  | 13  | 21  | 0.66137539  | 0.892612   | PARD6B | ENSG00000124171 |
| 20 | 48806991 | 48807618 | 48807170 | 14  | 28  | 13  | 2.152844382 | 0.00695052 | PARD6B | ENSG00000124171 |
| 20 | 48808021 | 48808236 | 48808099 | 10  | 11  | 9   | 1.247165021 | 0.300052   | PARD6B | ENSG00000124171 |
| 20 | 48808504 | 48808952 | 48808773 | 14  | 23  | 34  | 0.712665726 | 0.903143   | PARD6B | ENSG00000124171 |
| 20 | 48808959 | 48809364 | 48809258 | 10  | 18  | 18  | 1.039304184 | 0.453018   | PARD6B | ENSG00000124171 |
| 20 | 48809470 | 48809721 | 48809547 | 8   | 11  | 6   | 1.781664316 | 0.103344   | PARD6B | ENSG00000124171 |
| 20 | 48809756 | 48810266 | 48810011 | 9   | 19  | 21  | 0.944821986 | 0.574409   | PARD6B | ENSG00000124171 |
| 20 | 48810477 | 48810701 | 48810589 | 8   | 11  | 23  | 0.519652092 | 0.973215   | PARD6B | ENSG00000124171 |
| 20 | 48811201 | 48812480 | 48811784 | 132 | 299 | 148 | 2.09255876  | 1.40E-14   | PARD6B | ENSG00000124171 |
| 20 | 48812512 | 48813350 | 48812956 | 26  | 73  | 47  | 1.602260617 | 0.00489821 | PARD6B | ENSG00000124171 |
| 20 | 48813992 | 48814564 | 48814265 | 107 | 154 | 62  | 2.557018231 | 1.76E-11   | BCAS4  | ENSG00000124243 |

|    |          |          |          |    |     |     |             |            |       |                 |
|----|----------|----------|----------|----|-----|-----|-------------|------------|-------|-----------------|
| 20 | 48814568 | 48814796 | 48814682 | 20 | 23  | 24  | 0.997732017 | 0.503931   | BCAS4 | ENSG00000124243 |
| 20 | 48815333 | 48815658 | 48815495 | 8  | 13  | 11  | 1.212521548 | 0.309909   | BCAS4 | ENSG00000124243 |
| 20 | 48815731 | 48815991 | 48815899 | 10 | 13  | 15  | 0.909391161 | 0.604792   | BCAS4 | ENSG00000124243 |
| 20 | 48816423 | 48816712 | 48816573 | 13 | 16  | 16  | 1.039304184 | 0.455583   | BCAS4 | ENSG00000124243 |
| 20 | 48816782 | 48817429 | 48817176 | 11 | 30  | 23  | 1.342434571 | 0.13686    | BCAS4 | ENSG00000124243 |
| 20 | 48818039 | 48818253 | 48818146 | 8  | 8   | 12  | 0.719518281 | 0.783103   | BCAS4 | ENSG00000124243 |
| 20 | 48820872 | 48821152 | 48821012 | 12 | 13  | 6   | 2.078608368 | 0.0483393  | BCAS4 | ENSG00000124243 |
| 20 | 48822661 | 48823004 | 48822832 | 11 | 16  | 10  | 1.606197376 | 0.104477   | BCAS4 | ENSG00000124243 |
| 20 | 48823166 | 48823356 | 48823219 | 11 | 12  | 3   | 3.377738599 | 0.00867157 | BCAS4 | ENSG00000124243 |
| 20 | 48824526 | 48824778 | 48824644 | 12 | 14  | 8   | 1.73217364  | 0.0890835  | BCAS4 | ENSG00000124243 |
| 20 | 48826238 | 48826885 | 48826417 | 13 | 31  | 32  | 1.007810118 | 0.488049   | BCAS4 | ENSG00000124243 |
| 20 | 48827404 | 48827757 | 48827580 | 12 | 18  | 16  | 1.161575265 | 0.325582   | BCAS4 | ENSG00000124243 |
| 20 | 48829599 | 48829902 | 48829750 | 8  | 13  | 14  | 0.970017239 | 0.534076   | BCAS4 | ENSG00000124243 |
| 20 | 48830010 | 48830253 | 48830127 | 8  | 10  | 23  | 0.476347751 | 0.983843   | BCAS4 | ENSG00000124243 |
| 20 | 48831748 | 48832117 | 48831992 | 10 | 16  | 26  | 0.654376709 | 0.9196     | BCAS4 | ENSG00000124243 |
| 20 | 48832584 | 48832885 | 48832734 | 10 | 15  | 13  | 1.187776211 | 0.317363   | BCAS4 | ENSG00000124243 |
| 20 | 48833165 | 48833638 | 48833464 | 12 | 20  | 19  | 1.091269393 | 0.389566   | BCAS4 | ENSG00000124243 |
| 20 | 48833784 | 48834068 | 48833911 | 9  | 11  | 20  | 0.593888105 | 0.931657   | BCAS4 | ENSG00000124243 |
| 20 | 48834106 | 48834380 | 48834243 | 11 | 15  | 29  | 0.554295565 | 0.975664   | BCAS4 | ENSG00000124243 |
| 20 | 48834495 | 48834685 | 48834590 | 8  | 9   | 7   | 1.29913023  | 0.286504   | BCAS4 | ENSG00000124243 |
| 20 | 48835521 | 48835717 | 48835679 | 8  | 11  | 14  | 0.831443347 | 0.68719    | BCAS4 | ENSG00000124243 |
| 20 | 48836025 | 48836361 | 48836193 | 14 | 20  | 20  | 1.039304184 | 0.450588   | BCAS4 | ENSG00000124243 |
| 20 | 48836599 | 48836802 | 48836744 | 8  | 10  | 9   | 1.143234603 | 0.378307   | BCAS4 | ENSG00000124243 |
| 20 | 48837178 | 48837418 | 48837297 | 9  | 11  | 7   | 1.558956276 | 0.158273   | BCAS4 | ENSG00000124243 |
| 20 | 48837807 | 48838889 | 48838155 | 71 | 125 | 87  | 1.488094627 | 0.00192229 | BCAS4 | ENSG00000124243 |
| 20 | 48839940 | 48841614 | 48840814 | 64 | 180 | 144 | 1.297338327 | 0.00949019 | BCAS4 | ENSG00000124243 |
| 20 | 48842696 | 48844913 | 48844151 | 25 | 149 | 132 | 1.172147576 | 0.0907344  | BCAS4 | ENSG00000124243 |
| 20 | 48844933 | 48846102 | 48845186 | 26 | 91  | 70  | 1.346704013 | 0.0289273  | BCAS4 | ENSG00000124243 |
| 20 | 48847020 | 48847582 | 48847193 | 16 | 32  | 38  | 0.879411233 | 0.708418   | BCAS4 | ENSG00000124243 |
| 20 | 48848156 | 48848730 | 48848493 | 14 | 25  | 25  | 1.039304184 | 0.44499    | BCAS4 | ENSG00000124243 |
| 20 | 48848885 | 48849219 | 48849052 | 15 | 21  | 21  | 1.039304184 | 0.449418   | BCAS4 | ENSG00000124243 |
| 20 | 48849228 | 48849677 | 48849504 | 15 | 27  | 27  | 1.039304184 | 0.442908   | BCAS4 | ENSG00000124243 |
| 20 | 48849682 | 48850504 | 48850316 | 15 | 45  | 44  | 1.062399833 | 0.386413   | BCAS4 | ENSG00000124243 |
| 20 | 48851495 | 48851710 | 48851577 | 8  | 9   | 13  | 0.742360132 | 0.770276   | BCAS4 | ENSG00000124243 |

|    |          |          |          |    |    |    |             |             |        |                 |
|----|----------|----------|----------|----|----|----|-------------|-------------|--------|-----------------|
| 20 | 48851716 | 48852318 | 48851895 | 23 | 41 | 17 | 2.425043097 | 0.000462592 | BCAS4  | ENSG00000124243 |
| 20 | 48853201 | 48853531 | 48853366 | 10 | 13 | 22 | 0.632619938 | 0.917511    | BCAS4  | ENSG00000124243 |
| 20 | 48853801 | 48854058 | 48853929 | 8  | 11 | 11 | 1.039304184 | 0.462773    | BCAS4  | ENSG00000124243 |
| 20 | 48854203 | 48855149 | 48854895 | 18 | 47 | 35 | 1.385738912 | 0.0675879   | BCAS4  | ENSG00000124243 |
| 20 | 48855188 | 48855794 | 48855491 | 12 | 27 | 29 | 0.970017239 | 0.547123    | BCAS4  | ENSG00000124243 |
| 20 | 48855950 | 48856494 | 48856040 | 13 | 26 | 27 | 1.002186178 | 0.497439    | BCAS4  | ENSG00000124243 |
| 20 | 48859985 | 48860616 | 48860337 | 27 | 51 | 27 | 1.930136342 | 0.0019303   | BCAS4  | ENSG00000124243 |
| 20 | 48860744 | 48861245 | 48861014 | 13 | 22 | 11 | 1.991999686 | 0.0221672   | BCAS4  | ENSG00000124243 |
| 20 | 48862944 | 48863521 | 48863298 | 10 | 24 | 40 | 0.633722064 | 0.966896    | BCAS4  | ENSG00000124243 |
| 20 | 48863666 | 48863877 | 48863821 | 8  | 11 | 19 | 0.623582511 | 0.908792    | BCAS4  | ENSG00000124243 |
| 20 | 48889106 | 48889322 | 48889214 | 13 | 14 | 1  | 7.794781382 | 0.000197021 | TMSL6  | ENSG00000189262 |
| 20 | 48906154 | 48906336 | 48906262 | 8  | 8  | 4  | 1.870747532 | 0.118863    | TMSL6  | ENSG00000189262 |
| 20 | 49042374 | 49042688 | 49042531 | 12 | 15 | 2  | 5.542955649 | 0.000497081 | KCNG1  | ENSG00000026559 |
| 20 | 49150478 | 49150663 | 49150570 | 8  | 8  | 0  | 9.353737658 | 0.00163931  |        | ENSG00000219218 |
| 20 | 49172661 | 49172884 | 49172774 | 8  | 9  | 4  | 2.078608368 | 0.0785659   |        | ENSG00000219218 |
| 20 | 49176357 | 49176545 | 49176479 | 8  | 8  | 3  | 2.338434415 | 0.0641221   |        | ENSG00000219218 |
| 20 | 49249267 | 49249461 | 49249370 | 8  | 10 | 0  | 11.43234603 | 0.000394183 |        | ENSG00000219218 |
| 20 | 49273247 | 49273460 | 49273353 | 10 | 10 | 4  | 2.286469205 | 0.0509017   |        | ENSG00000219218 |
| 20 | 49435997 | 49436272 | 49436116 | 8  | 11 | 6  | 1.781664316 | 0.103344    | NFATC2 | ENSG00000101096 |
| 20 | 49502871 | 49503137 | 49502975 | 9  | 11 | 0  | 12.47165021 | 0.000193293 | NFATC2 | ENSG00000101096 |
| 20 | 49504369 | 49504599 | 49504473 | 11 | 11 | 7  | 1.558956276 | 0.158273    | NFATC2 | ENSG00000101096 |
| 20 | 49506642 | 49507060 | 49506767 | 9  | 17 | 4  | 3.741495063 | 0.00163722  | NFATC2 | ENSG00000101096 |
| 20 | 49746294 | 49746508 | 49746401 | 9  | 11 | 10 | 1.133786383 | 0.380636    |        | ENSG00000215444 |
| 20 | 49750746 | 49750949 | 49750847 | 12 | 12 | 2  | 4.503651465 | 0.002963    |        | ENSG00000215444 |
| 20 | 49765700 | 49765999 | 49765849 | 11 | 16 | 8  | 1.963130126 | 0.0441028   |        | ENSG00000215444 |
| 20 | 49766470 | 49766743 | 49766606 | 8  | 8  | 3  | 2.338434415 | 0.0641221   |        | ENSG00000215444 |
| 20 | 49800037 | 49800544 | 49800391 | 10 | 19 | 16 | 1.222710805 | 0.269115    |        | ENSG00000215444 |
| 20 | 49816938 | 49817123 | 49817052 | 8  | 9  | 4  | 2.078608368 | 0.0785659   | ATP9A  | ENSG00000054793 |
| 20 | 49817491 | 49817901 | 49817722 | 9  | 15 | 5  | 2.771477825 | 0.0105836   | ATP9A  | ENSG00000054793 |
| 20 | 49818987 | 49819250 | 49819118 | 8  | 11 | 7  | 1.558956276 | 0.158273    | ATP9A  | ENSG00000054793 |
| 20 | 49847443 | 49847753 | 49847605 | 11 | 14 | 8  | 1.73217364  | 0.0890835   | SALL4  | ENSG00000101115 |
| 20 | 49850087 | 49850397 | 49850264 | 10 | 12 | 2  | 4.503651465 | 0.002963    | SALL4  | ENSG00000101115 |
| 20 | 49850948 | 49851145 | 49851043 | 8  | 8  | 13 | 0.668124118 | 0.835294    | SALL4  | ENSG00000101115 |
| 20 | 49851283 | 49851758 | 49851520 | 12 | 21 | 11 | 1.905391004 | 0.031399    | SALL4  | ENSG00000101115 |

|    |          |          |          |    |    |    |             |             |        |                 |
|----|----------|----------|----------|----|----|----|-------------|-------------|--------|-----------------|
| 20 | 49851779 | 49851979 | 49851842 | 8  | 9  | 5  | 1.73217364  | 0.133894    | SALL4  | ENSG00000101115 |
| 20 | 49852560 | 49852805 | 49852707 | 9  | 11 | 10 | 1.133786383 | 0.380636    | SALL4  | ENSG00000101115 |
| 20 | 49853080 | 49853431 | 49853255 | 10 | 16 | 11 | 1.472347594 | 0.147517    | SALL4  | ENSG00000101115 |
| 20 | 49865313 | 49865515 | 49865410 | 9  | 9  | 4  | 2.078608368 | 0.0785659   | SALL4  | ENSG00000101115 |
| 20 | 49883270 | 49883552 | 49883411 | 10 | 14 | 10 | 1.417232979 | 0.185113    | SALL4  | ENSG00000101115 |
| 20 | 49906754 | 49906960 | 49906858 | 9  | 9  | 1  | 5.196520921 | 0.00490062  |        | ENSG00000210764 |
| 20 | 49939822 | 49940225 | 49939921 | 11 | 18 | 6  | 2.8209685   | 0.00559354  |        | ENSG00000210764 |
| 20 | 49960417 | 49960704 | 49960555 | 10 | 12 | 7  | 1.688869299 | 0.11395     |        | ENSG00000210768 |
| 20 | 49968024 | 49968319 | 49968171 | 14 | 18 | 4  | 3.9493559   | 0.000961379 |        | ENSG00000210768 |
| 20 | 49968362 | 49968825 | 49968658 | 11 | 20 | 8  | 2.425043097 | 0.00917565  |        | ENSG00000210768 |
| 20 | 49973677 | 49973916 | 49973796 | 10 | 11 | 4  | 2.494330042 | 0.0324033   |        | ENSG00000210768 |
| 20 | 49984547 | 49984815 | 49984654 | 11 | 13 | 12 | 1.11925066  | 0.384109    |        | ENSG00000210768 |
| 20 | 50012314 | 50012571 | 50012439 | 9  | 12 | 14 | 0.900730293 | 0.611333    |        | ENSG00000210768 |
| 20 | 50012650 | 50012850 | 50012699 | 8  | 9  | 7  | 1.29913023  | 0.286504    |        | ENSG00000210768 |
| 20 | 50016239 | 50016689 | 50016533 | 10 | 20 | 8  | 2.425043097 | 0.00917565  |        | ENSG00000210768 |
| 20 | 50016877 | 50017113 | 50017009 | 8  | 9  | 7  | 1.29913023  | 0.286504    |        | ENSG00000210768 |
| 20 | 50020962 | 50021273 | 50021117 | 12 | 15 | 1  | 8.314433474 | 0.000102308 |        | ENSG00000210768 |
| 20 | 50027947 | 50028453 | 50028278 | 48 | 64 | 0  | 67.55477198 | 7.65E-21    |        | ENSG00000210768 |
| 20 | 50035021 | 50035311 | 50035166 | 9  | 13 | 5  | 2.425043097 | 0.0262442   |        | ENSG00000210768 |
| 20 | 50089813 | 50090031 | 50089922 | 9  | 11 | 5  | 2.078608368 | 0.0614303   | ZFP64  | ENSG00000020256 |
| 20 | 50144722 | 50144985 | 50144859 | 12 | 13 | 2  | 4.850086193 | 0.00164564  | ZFP64  | ENSG00000020256 |
| 20 | 50423147 | 50423342 | 50423244 | 8  | 9  | 0  | 10.39304184 | 0.000803859 |        | ENSG00000221024 |
| 20 | 51267104 | 51267387 | 51267240 | 9  | 9  | 3  | 2.598260461 | 0.0397929   |        | ENSG00000199218 |
| 20 | 51584253 | 51584471 | 51584337 | 9  | 10 | 4  | 2.286469205 | 0.0509017   |        | ENSG00000206959 |
| 20 | 51597781 | 51597969 | 51597944 | 8  | 11 | 6  | 1.781664316 | 0.103344    |        | ENSG00000206959 |
| 20 | 51615156 | 51615387 | 51615271 | 13 | 16 | 24 | 0.706726845 | 0.870131    |        | ENSG00000197670 |
| 20 | 51615629 | 51616180 | 51616001 | 22 | 41 | 22 | 1.897859815 | 0.00548724  |        | ENSG00000197670 |
| 20 | 51616772 | 51616980 | 51616924 | 10 | 10 | 17 | 0.635130335 | 0.889407    |        | ENSG00000197670 |
| 20 | 51617236 | 51618145 | 51617437 | 18 | 63 | 71 | 0.923825942 | 0.678682    |        | ENSG00000197670 |
| 20 | 51618286 | 51619354 | 51619150 | 16 | 58 | 71 | 0.85165204  | 0.821322    | ZNF217 | ENSG00000171940 |
| 20 | 51619625 | 51620146 | 51619790 | 11 | 25 | 37 | 0.711102863 | 0.913296    | ZNF217 | ENSG00000171940 |
| 20 | 51620154 | 51620837 | 51620764 | 17 | 42 | 46 | 0.950852764 | 0.595361    | ZNF217 | ENSG00000171940 |
| 20 | 51620862 | 51621244 | 51621072 | 19 | 27 | 32 | 0.881833853 | 0.689746    | ZNF217 | ENSG00000171940 |
| 20 | 51621580 | 51622236 | 51621744 | 13 | 31 | 39 | 0.831443347 | 0.784215    | ZNF217 | ENSG00000171940 |



|    |          |          |          |     |     |     |             |            |        |                 |
|----|----------|----------|----------|-----|-----|-----|-------------|------------|--------|-----------------|
| 20 | 51622392 | 51623227 | 51622904 | 19  | 48  | 71  | 0.707304236 | 0.970871   | ZNF217 | ENSG00000171940 |
| 20 | 51623989 | 51624579 | 51624352 | 20  | 38  | 33  | 1.192143035 | 0.225763   | ZNF217 | ENSG00000171940 |
| 20 | 51624667 | 51627263 | 51624846 | 21  | 163 | 137 | 1.235115117 | 0.0333523  | ZNF217 | ENSG00000171940 |
| 20 | 51627383 | 51627899 | 51627693 | 10  | 22  | 25  | 0.919384471 | 0.617223   | ZNF217 | ENSG00000171940 |
| 20 | 51627910 | 51633281 | 51628942 | 53  | 406 | 406 | 1.039304184 | 0.291241   | ZNF217 | ENSG00000171940 |
| 20 | 51635284 | 51635502 | 51635351 | 10  | 11  | 8   | 1.385738912 | 0.224757   | ZNF217 | ENSG00000171940 |
| 20 | 51635669 | 51635998 | 51635833 | 10  | 11  | 12  | 0.959357709 | 0.543005   | ZNF217 | ENSG00000171940 |
| 20 | 51636672 | 51637088 | 51636820 | 15  | 22  | 25  | 0.919384471 | 0.617223   | ZNF217 | ENSG00000171940 |
| 20 | 51638531 | 51638814 | 51638656 | 9   | 12  | 14  | 0.900730293 | 0.611333   | ZNF217 | ENSG00000171940 |
| 20 | 51639246 | 51639658 | 51639419 | 11  | 19  | 13  | 1.484720263 | 0.123861   | ZNF217 | ENSG00000171940 |
| 20 | 51639777 | 51640054 | 51639908 | 9   | 12  | 13  | 0.965068171 | 0.538344   | ZNF217 | ENSG00000171940 |
| 20 | 51640070 | 51640281 | 51640175 | 9   | 9   | 9   | 1.039304184 | 0.466079   | ZNF217 | ENSG00000171940 |
| 20 | 51640553 | 51640770 | 51640661 | 8   | 10  | 15  | 0.714521627 | 0.810948   | ZNF217 | ENSG00000171940 |
| 20 | 51640976 | 51641229 | 51641087 | 9   | 12  | 7   | 1.688869299 | 0.11395    | ZNF217 | ENSG00000171940 |
| 20 | 51641261 | 51641701 | 51641440 | 10  | 18  | 17  | 1.097043306 | 0.388692   | ZNF217 | ENSG00000171940 |
| 20 | 51642190 | 51643569 | 51642944 | 18  | 77  | 51  | 1.558956276 | 0.00596516 | ZNF217 | ENSG00000171940 |
| 20 | 51644624 | 51645325 | 51644792 | 27  | 63  | 54  | 1.209372142 | 0.149617   | ZNF217 | ENSG00000171940 |
| 20 | 51645758 | 51645996 | 51645877 | 9   | 12  | 7   | 1.688869299 | 0.11395    | ZNF217 | ENSG00000171940 |
| 20 | 51646042 | 51650177 | 51647299 | 127 | 472 | 356 | 1.377005264 | 2.22E-06   | ZNF217 | ENSG00000171940 |
| 20 | 51650403 | 51650797 | 51650618 | 14  | 22  | 14  | 1.593599749 | 0.0756559  | ZNF217 | ENSG00000171940 |
| 20 | 51650806 | 51651452 | 51651138 | 25  | 49  | 37  | 1.367505506 | 0.0711352  | ZNF217 | ENSG00000171940 |
| 20 | 51652268 | 51653168 | 51652848 | 14  | 41  | 37  | 1.148704625 | 0.267139   | ZNF217 | ENSG00000171940 |
| 20 | 51653915 | 51654103 | 51654009 | 8   | 9   | 13  | 0.742360132 | 0.770276   | ZNF217 | ENSG00000171940 |
| 20 | 51654581 | 51655107 | 51654756 | 11  | 22  | 13  | 1.707428303 | 0.0525925  | ZNF217 | ENSG00000171940 |
| 20 | 51655707 | 51656044 | 51655875 | 12  | 17  | 8   | 2.078608368 | 0.0303558  | ZNF217 | ENSG00000171940 |
| 20 | 51656194 | 51656942 | 51656507 | 20  | 48  | 62  | 0.808347699 | 0.869992   | ZNF217 | ENSG00000171940 |
| 20 | 51657680 | 51657923 | 51657806 | 10  | 12  | 15  | 0.84443465  | 0.678289   | ZNF217 | ENSG00000171940 |
| 20 | 51657963 | 51660406 | 51659704 | 25  | 178 | 185 | 1.000190586 | 0.499542   | ZNF217 | ENSG00000171940 |
| 20 | 51660522 | 51660738 | 51660630 | 9   | 11  | 8   | 1.385738912 | 0.224757   | ZNF217 | ENSG00000171940 |
| 20 | 51660934 | 51661226 | 51661047 | 10  | 13  | 8   | 1.616695398 | 0.123553   | ZNF217 | ENSG00000171940 |
| 20 | 51661266 | 51662139 | 51661563 | 21  | 49  | 63  | 0.811956394 | 0.867074   | ZNF217 | ENSG00000171940 |
| 20 | 51662257 | 51662883 | 51662577 | 26  | 49  | 52  | 0.980475646 | 0.540501   | ZNF217 | ENSG00000171940 |
| 20 | 51663025 | 51664217 | 51663448 | 23  | 80  | 87  | 0.95663226  | 0.613983   | ZNF217 | ENSG00000171940 |
| 20 | 51665334 | 51666202 | 51665696 | 12  | 36  | 27  | 1.373366243 | 0.100282   | ZNF217 | ENSG00000171940 |

|    |          |          |          |    |     |     |             |             |        |                 |
|----|----------|----------|----------|----|-----|-----|-------------|-------------|--------|-----------------|
| 20 | 51666706 | 51666937 | 51666798 | 8  | 12  | 12  | 1.039304184 | 0.461227    | ZNF217 | ENSG00000171940 |
| 20 | 51667180 | 51667462 | 51667321 | 14 | 17  | 18  | 0.984603964 | 0.519872    | ZNF217 | ENSG00000171940 |
| 20 | 51667713 | 51668447 | 51668009 | 22 | 50  | 29  | 1.766817113 | 0.00568405  | ZNF217 | ENSG00000171940 |
| 20 | 51668581 | 51668872 | 51668726 | 9  | 12  | 9   | 1.35109544  | 0.232899    | ZNF217 | ENSG00000171940 |
| 20 | 51669279 | 51670005 | 51669807 | 17 | 36  | 43  | 0.873960337 | 0.728899    | ZNF217 | ENSG00000171940 |
| 20 | 51671205 | 51674596 | 51671801 | 70 | 564 | 448 | 1.307810388 | 1.02E-05    | ZNF217 | ENSG00000171940 |
| 20 | 51674976 | 51675525 | 51675406 | 9  | 21  | 26  | 0.846840446 | 0.721382    | ZNF217 | ENSG00000171940 |
| 20 | 51675795 | 51676233 | 51676045 | 13 | 24  | 20  | 1.237266886 | 0.234075    | ZNF217 | ENSG00000171940 |
| 20 | 51676391 | 51676855 | 51676567 | 19 | 27  | 29  | 0.970017239 | 0.547123    | ZNF217 | ENSG00000171940 |
| 20 | 51677705 | 51678330 | 51678151 | 13 | 27  | 32  | 0.881833853 | 0.689746    | ZNF217 | ENSG00000171940 |
| 20 | 51678829 | 51679290 | 51679059 | 20 | 28  | 20  | 1.435229588 | 0.100491    | ZNF217 | ENSG00000171940 |
| 20 | 51679488 | 51679733 | 51679610 | 13 | 15  | 15  | 1.039304184 | 0.456923    | ZNF217 | ENSG00000171940 |
| 20 | 51679746 | 51680294 | 51680042 | 10 | 19  | 27  | 0.742360132 | 0.849695    | ZNF217 | ENSG00000171940 |
| 20 | 51681127 | 51681395 | 51681274 | 9  | 12  | 4   | 2.702190879 | 0.0203088   | ZNF217 | ENSG00000171940 |
| 20 | 51681471 | 51682409 | 51681823 | 21 | 62  | 60  | 1.073379731 | 0.346635    | ZNF217 | ENSG00000171940 |
| 20 | 51683001 | 51683354 | 51683169 | 11 | 15  | 2   | 5.542955649 | 0.000497081 | ZNF217 | ENSG00000171940 |
| 20 | 51683473 | 51683965 | 51683786 | 9  | 18  | 21  | 0.897580886 | 0.637183    | ZNF217 | ENSG00000171940 |
| 20 | 51684097 | 51684542 | 51684422 | 21 | 33  | 70  | 0.497694961 | 0.99974     | ZNF217 | ENSG00000171940 |
| 20 | 51684827 | 51685764 | 51685396 | 24 | 72  | 70  | 1.068580358 | 0.345295    | ZNF217 | ENSG00000171940 |
| 20 | 51685951 | 51686685 | 51686431 | 23 | 48  | 35  | 1.414608473 | 0.0551653   | ZNF217 | ENSG00000171940 |
| 20 | 51686773 | 51687288 | 51686952 | 17 | 33  | 31  | 1.104260696 | 0.343195    | ZNF217 | ENSG00000171940 |
| 20 | 51687297 | 51687625 | 51687448 | 12 | 16  | 18  | 0.929903744 | 0.58804     | ZNF217 | ENSG00000171940 |
| 20 | 51687833 | 51688232 | 51688012 | 21 | 29  | 22  | 1.355614153 | 0.133482    | ZNF217 | ENSG00000171940 |
| 20 | 51688343 | 51688522 | 51688469 | 8  | 8   | 9   | 0.935373766 | 0.560286    | ZNF217 | ENSG00000171940 |
| 20 | 51688714 | 51690419 | 51689396 | 23 | 129 | 143 | 0.938260722 | 0.701449    | ZNF217 | ENSG00000171940 |
| 20 | 51691175 | 51691375 | 51691286 | 11 | 12  | 7   | 1.688869299 | 0.11395     | ZNF217 | ENSG00000171940 |
| 20 | 51691410 | 51691668 | 51691503 | 12 | 15  | 11  | 1.385738912 | 0.19225     | ZNF217 | ENSG00000171940 |
| 20 | 51691845 | 51692358 | 51692023 | 22 | 34  | 27  | 1.29913023  | 0.148943    | ZNF217 | ENSG00000171940 |
| 20 | 51692374 | 51693602 | 51693311 | 27 | 111 | 84  | 1.369436102 | 0.0138808   | ZNF217 | ENSG00000171940 |
| 20 | 51693654 | 51694110 | 51693831 | 13 | 25  | 16  | 1.589524046 | 0.0646994   | ZNF217 | ENSG00000171940 |
| 20 | 51694139 | 51694691 | 51694415 | 12 | 25  | 20  | 1.286757561 | 0.192726    | ZNF217 | ENSG00000171940 |
| 20 | 51694743 | 51694954 | 51694851 | 9  | 10  | 9   | 1.143234603 | 0.378307    | ZNF217 | ENSG00000171940 |
| 20 | 51695209 | 51696216 | 51695550 | 21 | 54  | 60  | 0.937077543 | 0.63763     | ZNF217 | ENSG00000171940 |
| 20 | 51696359 | 51696906 | 51696598 | 14 | 25  | 32  | 0.818845721 | 0.77985     | ZNF217 | ENSG00000171940 |

|    |          |          |          |    |     |     |             |           |        |                 |
|----|----------|----------|----------|----|-----|-----|-------------|-----------|--------|-----------------|
| 20 | 51697211 | 51698099 | 51697722 | 14 | 40  | 52  | 0.803990029 | 0.855167  | ZNF217 | ENSG00000171940 |
| 20 | 51699217 | 51699542 | 51699386 | 10 | 13  | 11  | 1.212521548 | 0.309909  | ZNF217 | ENSG00000171940 |
| 20 | 51700260 | 51700545 | 51700402 | 8  | 12  | 16  | 0.794762023 | 0.738004  | ZNF217 | ENSG00000171940 |
| 20 | 51700878 | 51701073 | 51700975 | 8  | 8   | 6   | 1.336248237 | 0.277651  | ZNF217 | ENSG00000171940 |
| 20 | 51701647 | 51703588 | 51703182 | 33 | 149 | 147 | 1.053348835 | 0.326902  | ZNF217 | ENSG00000171940 |
| 20 | 51703727 | 51704086 | 51703906 | 9  | 16  | 15  | 1.104260696 | 0.387363  | ZNF217 | ENSG00000171940 |
| 20 | 51704451 | 51704758 | 51704615 | 17 | 19  | 23  | 0.86608682  | 0.685164  | ZNF217 | ENSG00000171940 |
| 20 | 51704762 | 51705663 | 51705061 | 48 | 126 | 92  | 1.419264854 | 0.00485   | ZNF217 | ENSG00000171940 |
| 20 | 51705802 | 51709204 | 51706538 | 42 | 295 | 297 | 1.032328988 | 0.349209  | ZNF217 | ENSG00000171940 |
| 20 | 51709271 | 51709537 | 51709404 | 9  | 13  | 17  | 0.808347699 | 0.728863  | ZNF217 | ENSG00000171940 |
| 20 | 51709596 | 51710113 | 51709890 | 17 | 28  | 31  | 0.941869417 | 0.59365   | ZNF217 | ENSG00000171940 |
| 20 | 51710290 | 51712055 | 51711719 | 29 | 146 | 171 | 0.88824253  | 0.855089  | ZNF217 | ENSG00000171940 |
| 20 | 51712368 | 51712921 | 51712651 | 21 | 36  | 30  | 1.240459833 | 0.186503  | ZNF217 | ENSG00000171940 |
| 20 | 51713017 | 51713409 | 51713244 | 11 | 17  | 23  | 0.779478138 | 0.791839  | ZNF217 | ENSG00000171940 |
| 20 | 51714016 | 51714851 | 51714397 | 23 | 70  | 62  | 1.171279319 | 0.179801  | ZNF217 | ENSG00000171940 |
| 20 | 51714964 | 51715574 | 51715405 | 12 | 31  | 22  | 1.44598843  | 0.0857085 | ZNF217 | ENSG00000171940 |
| 20 | 51715995 | 51716780 | 51716174 | 18 | 39  | 38  | 1.065953009 | 0.388248  | ZNF217 | ENSG00000171940 |
| 20 | 51716911 | 51717421 | 51717178 | 15 | 27  | 33  | 0.855897563 | 0.7313    | ZNF217 | ENSG00000171940 |
| 20 | 51717527 | 51717899 | 51717730 | 12 | 18  | 14  | 1.316451967 | 0.209896  | ZNF217 | ENSG00000171940 |
| 20 | 51718043 | 51718320 | 51718187 | 17 | 19  | 36  | 0.561786046 | 0.983925  | ZNF217 | ENSG00000171940 |
| 20 | 51719056 | 51719747 | 51719568 | 24 | 60  | 52  | 1.196180288 | 0.169128  | ZNF217 | ENSG00000171940 |
| 20 | 51721165 | 51721822 | 51721319 | 17 | 36  | 43  | 0.873960337 | 0.728899  | ZNF217 | ENSG00000171940 |
| 20 | 51722105 | 51722376 | 51722240 | 10 | 14  | 13  | 1.113540197 | 0.385405  | ZNF217 | ENSG00000171940 |
| 20 | 51722397 | 51722932 | 51722745 | 22 | 40  | 40  | 1.039304184 | 0.430928  | ZNF217 | ENSG00000171940 |
| 20 | 51723197 | 51724412 | 51723588 | 17 | 58  | 45  | 1.333020584 | 0.0704822 | ZNF217 | ENSG00000171940 |
| 20 | 51725240 | 51725734 | 51725487 | 15 | 27  | 30  | 0.93872636  | 0.597175  | ZNF217 | ENSG00000171940 |
| 20 | 51726452 | 51730381 | 51729891 | 46 | 339 | 365 | 0.965473832 | 0.679868  | ZNF217 | ENSG00000171940 |
| 20 | 51730490 | 51731093 | 51730665 | 16 | 37  | 40  | 0.963257537 | 0.566947  | ZNF217 | ENSG00000171940 |
| 20 | 51731273 | 51731681 | 51731477 | 19 | 27  | 24  | 1.164020686 | 0.289415  | ZNF217 | ENSG00000171940 |
| 20 | 51731697 | 51732363 | 51731940 | 16 | 34  | 31  | 1.136738952 | 0.299433  | ZNF217 | ENSG00000171940 |
| 20 | 51732559 | 51733015 | 51732806 | 18 | 31  | 33  | 0.978168644 | 0.536565  | ZNF217 | ENSG00000171940 |
| 20 | 51733317 | 51733981 | 51733855 | 21 | 37  | 52  | 0.745161491 | 0.91931   | ZNF217 | ENSG00000171940 |
| 20 | 51734779 | 51736428 | 51736096 | 35 | 161 | 121 | 1.380059654 | 0.0034141 | ZNF217 | ENSG00000171940 |
| 20 | 51737138 | 51737764 | 51737431 | 11 | 29  | 37  | 0.820503303 | 0.793644  | ZNF217 | ENSG00000171940 |

|    |          |          |          |    |     |     |             |            |        |                 |
|----|----------|----------|----------|----|-----|-----|-------------|------------|--------|-----------------|
| 20 | 51737875 | 51738423 | 51738149 | 18 | 38  | 38  | 1.039304184 | 0.432628   | ZNF217 | ENSG00000171940 |
| 20 | 51738621 | 51739256 | 51739089 | 14 | 26  | 29  | 0.935373766 | 0.600845   | ZNF217 | ENSG00000171940 |
| 20 | 51740239 | 51740839 | 51740493 | 18 | 34  | 30  | 1.17340795  | 0.257326   | ZNF217 | ENSG00000171940 |
| 20 | 51740904 | 51742269 | 51741712 | 64 | 181 | 155 | 1.212521548 | 0.0383105  | ZNF217 | ENSG00000171940 |
| 20 | 51742440 | 51743603 | 51742619 | 18 | 68  | 81  | 0.874536448 | 0.79538    | ZNF217 | ENSG00000171940 |
| 20 | 51744463 | 51745003 | 51744630 | 10 | 22  | 26  | 0.885333194 | 0.668299   | ZNF217 | ENSG00000171940 |
| 20 | 51745046 | 51746604 | 51745863 | 22 | 88  | 82  | 1.114434607 | 0.238522   | ZNF217 | ENSG00000171940 |
| 20 | 51747911 | 51748385 | 51748090 | 14 | 24  | 25  | 0.999330946 | 0.501681   | ZNF217 | ENSG00000171940 |
| 20 | 51748568 | 51748946 | 51748771 | 13 | 20  | 23  | 0.909391161 | 0.626666   | ZNF217 | ENSG00000171940 |
| 20 | 51749002 | 51749243 | 51749167 | 10 | 12  | 5   | 2.251825733 | 0.0404733  | ZNF217 | ENSG00000171940 |
| 20 | 51749248 | 51749995 | 51749781 | 27 | 73  | 79  | 0.96135637  | 0.597198   | ZNF217 | ENSG00000171940 |
| 20 | 51750755 | 51751390 | 51751025 | 13 | 28  | 34  | 0.861137753 | 0.726418   | ZNF217 | ENSG00000171940 |
| 20 | 51751515 | 51751857 | 51751686 | 14 | 19  | 21  | 0.944821986 | 0.574409   | ZNF217 | ENSG00000171940 |
| 20 | 51752366 | 51752650 | 51752508 | 9  | 12  | 12  | 1.039304184 | 0.461227   | ZNF217 | ENSG00000171940 |
| 20 | 51752861 | 51753072 | 51752966 | 8  | 11  | 10  | 1.133786383 | 0.380636   | ZNF217 | ENSG00000171940 |
| 20 | 51753243 | 51753564 | 51753402 | 8  | 11  | 13  | 0.890832158 | 0.618492   | ZNF217 | ENSG00000171940 |
| 20 | 51754006 | 51754222 | 51754070 | 9  | 9   | 9   | 1.039304184 | 0.466079   | ZNF217 | ENSG00000171940 |
| 20 | 51754741 | 51755255 | 51755071 | 12 | 21  | 31  | 0.714521627 | 0.891579   | ZNF217 | ENSG00000171940 |
| 20 | 51755959 | 51758654 | 51756579 | 34 | 266 | 254 | 1.088212616 | 0.167062   | ZNF217 | ENSG00000171940 |
| 20 | 51758711 | 51759054 | 51758883 | 14 | 19  | 16  | 1.222710805 | 0.269115   | ZNF217 | ENSG00000171940 |
| 20 | 51759628 | 51760007 | 51759766 | 11 | 16  | 18  | 0.929903744 | 0.58804    | ZNF217 | ENSG00000171940 |
| 20 | 51760403 | 51760649 | 51760484 | 10 | 10  | 2   | 3.810782009 | 0.00936112 | ZNF217 | ENSG00000171940 |
| 20 | 51760735 | 51764248 | 51761920 | 26 | 250 | 217 | 1.196630047 | 0.0260161  | ZNF217 | ENSG00000171940 |
| 20 | 51764290 | 51764997 | 51764491 | 28 | 61  | 67  | 0.947600874 | 0.621236   | ZNF217 | ENSG00000171940 |
| 20 | 51765154 | 51765836 | 51765389 | 16 | 38  | 44  | 0.900730293 | 0.685154   | ZNF217 | ENSG00000171940 |
| 20 | 51766092 | 51766906 | 51766509 | 14 | 35  | 41  | 0.890832158 | 0.696295   | ZNF217 | ENSG00000171940 |
| 20 | 51767187 | 51767505 | 51767344 | 10 | 13  | 17  | 0.808347699 | 0.728863   | ZNF217 | ENSG00000171940 |
| 20 | 51767706 | 51768637 | 51768066 | 18 | 62  | 87  | 0.744047314 | 0.964775   | ZNF217 | ENSG00000171940 |
| 20 | 51769048 | 51769327 | 51769187 | 8  | 10  | 16  | 0.672490943 | 0.854309   | ZNF217 | ENSG00000171940 |
| 20 | 51769402 | 51769832 | 51769563 | 18 | 26  | 30  | 0.905200419 | 0.649195   | ZNF217 | ENSG00000171940 |
| 20 | 51770312 | 51770679 | 51770533 | 8  | 14  | 15  | 0.974347673 | 0.530138   | ZNF217 | ENSG00000171940 |
| 20 | 51770804 | 51771345 | 51771058 | 16 | 36  | 32  | 1.165280449 | 0.260519   | ZNF217 | ENSG00000171940 |
| 20 | 51771457 | 51771931 | 51771646 | 18 | 29  | 14  | 2.078608368 | 0.00804141 | ZNF217 | ENSG00000171940 |
| 20 | 51771982 | 51772445 | 51772293 | 18 | 27  | 34  | 0.831443347 | 0.769295   | ZNF217 | ENSG00000171940 |

|    |          |          |          |    |     |     |             |           |        |                 |
|----|----------|----------|----------|----|-----|-----|-------------|-----------|--------|-----------------|
| 20 | 51772519 | 51773248 | 51773069 | 21 | 43  | 61  | 0.737570711 | 0.940868  | ZNF217 | ENSG00000171940 |
| 20 | 51773279 | 51773520 | 51773403 | 12 | 15  | 21  | 0.755857589 | 0.807439  | ZNF217 | ENSG00000171940 |
| 20 | 51773529 | 51774047 | 51773868 | 14 | 25  | 45  | 0.5874328   | 0.986959  | ZNF217 | ENSG00000171940 |
| 20 | 51774188 | 51774562 | 51774390 | 10 | 14  | 15  | 0.974347673 | 0.530138  | ZNF217 | ENSG00000171940 |
| 20 | 51774965 | 51775493 | 51775269 | 22 | 40  | 41  | 1.014558847 | 0.474186  | ZNF217 | ENSG00000171940 |
| 20 | 51775695 | 51776404 | 51775821 | 17 | 42  | 47  | 0.931043332 | 0.634344  | ZNF217 | ENSG00000171940 |
| 20 | 51776552 | 51777093 | 51776750 | 20 | 40  | 23  | 1.775477981 | 0.0110428 | ZNF217 | ENSG00000171940 |
| 20 | 51777376 | 51778810 | 51778222 | 23 | 87  | 79  | 1.143234603 | 0.192615  | ZNF217 | ENSG00000171940 |
| 20 | 51779467 | 51780157 | 51779712 | 14 | 30  | 47  | 0.671217286 | 0.960835  | ZNF217 | ENSG00000171940 |
| 20 | 51780415 | 51780670 | 51780542 | 10 | 11  | 28  | 0.430056904 | 0.9954    | ZNF217 | ENSG00000171940 |
| 20 | 51781315 | 51782147 | 51781804 | 17 | 48  | 53  | 0.943072315 | 0.617786  | ZNF217 | ENSG00000171940 |
| 20 | 51782390 | 51782702 | 51782546 | 9  | 14  | 18  | 0.820503303 | 0.720361  | ZNF217 | ENSG00000171940 |
| 20 | 51782768 | 51783600 | 51783304 | 15 | 43  | 72  | 0.626429919 | 0.993757  | ZNF217 | ENSG00000171940 |
| 20 | 51783924 | 51784717 | 51784417 | 29 | 71  | 65  | 1.133786383 | 0.230141  | ZNF217 | ENSG00000171940 |
| 20 | 51784887 | 51785211 | 51785035 | 12 | 16  | 18  | 0.929903744 | 0.58804   |        | ENSG00000149617 |
| 20 | 51785328 | 51786465 | 51785957 | 30 | 120 | 100 | 1.245106993 | 0.0512902 |        | ENSG00000149617 |
| 20 | 51786550 | 51793121 | 51788201 | 37 | 595 | 561 | 1.102180238 | 0.0489287 |        | ENSG00000149617 |
| 20 | 51793395 | 51793988 | 51793617 | 27 | 51  | 58  | 0.915996908 | 0.678893  |        | ENSG00000149617 |
| 20 | 51794084 | 51794994 | 51794434 | 11 | 38  | 57  | 0.698842469 | 0.960388  |        | ENSG00000149617 |
| 20 | 51795853 | 51796647 | 51796250 | 18 | 51  | 48  | 1.102935053 | 0.311007  |        | ENSG00000149617 |
| 20 | 51796738 | 51797460 | 51796980 | 18 | 34  | 23  | 1.515651935 | 0.0555079 |        | ENSG00000149617 |
| 20 | 51797681 | 51797996 | 51797838 | 9  | 11  | 12  | 0.959357709 | 0.543005  |        | ENSG00000149617 |
| 20 | 51798054 | 51800150 | 51799215 | 26 | 173 | 182 | 0.988190864 | 0.544988  |        | ENSG00000149617 |
| 20 | 51800460 | 51805318 | 51800897 | 68 | 546 | 437 | 1.29794381  | 2.23E-05  |        | ENSG00000149617 |
| 20 | 51805637 | 51806038 | 51805865 | 12 | 19  | 25  | 0.799464757 | 0.777638  |        | ENSG00000149617 |
| 20 | 51806070 | 51806997 | 51806252 | 47 | 105 | 80  | 1.360077081 | 0.0179558 |        | ENSG00000149617 |
| 20 | 51807412 | 51808199 | 51807834 | 21 | 46  | 43  | 1.110165833 | 0.308777  |        | ENSG00000149617 |
| 20 | 51808483 | 51809180 | 51808698 | 18 | 43  | 55  | 0.816596145 | 0.844828  |        | ENSG00000149617 |
| 20 | 51809548 | 51809875 | 51809711 | 9  | 12  | 11  | 1.125912866 | 0.382541  |        | ENSG00000149617 |
| 20 | 51809889 | 51810660 | 51810098 | 17 | 52  | 57  | 0.949708996 | 0.607911  |        | ENSG00000149617 |
| 20 | 51810724 | 51810921 | 51810879 | 8  | 10  | 16  | 0.672490943 | 0.854309  |        | ENSG00000149617 |
| 20 | 51810934 | 51811152 | 51811037 | 10 | 10  | 19  | 0.571617301 | 0.938875  |        | ENSG00000149617 |
| 20 | 51811234 | 51811682 | 51811590 | 11 | 20  | 29  | 0.727512929 | 0.872335  |        | ENSG00000149617 |
| 20 | 51811773 | 51812291 | 51812016 | 18 | 31  | 38  | 0.852762408 | 0.750053  |        | ENSG00000149617 |

|    |          |          |          |     |     |     |             |            |                 |
|----|----------|----------|----------|-----|-----|-----|-------------|------------|-----------------|
| 20 | 51812551 | 51812883 | 51812718 | 11  | 13  | 19  | 0.727512929 | 0.824686   | ENSG00000149617 |
| 20 | 51813084 | 51814974 | 51814098 | 29  | 168 | 181 | 0.965068171 | 0.630808   | ENSG00000149617 |
| 20 | 51815939 | 51816830 | 51816512 | 32  | 64  | 38  | 1.73217364  | 0.00281343 | ENSG00000149617 |
| 20 | 51816985 | 51818010 | 51817256 | 26  | 94  | 84  | 1.161575265 | 0.157333   | ENSG00000149617 |
| 20 | 51818056 | 51819622 | 51818398 | 33  | 147 | 126 | 1.211157632 | 0.0561291  | ENSG00000149617 |
| 20 | 51820270 | 51820605 | 51820437 | 10  | 15  | 29  | 0.554295565 | 0.975664   | ENSG00000149617 |
| 20 | 51820816 | 51821328 | 51821149 | 13  | 27  | 24  | 1.164020686 | 0.289415   | ENSG00000149617 |
| 20 | 51821364 | 51822044 | 51821881 | 20  | 41  | 45  | 0.948929907 | 0.598027   | ENSG00000149617 |
| 20 | 51822169 | 51822867 | 51822530 | 14  | 35  | 35  | 1.039304184 | 0.435264   | ENSG00000149617 |
| 20 | 51823053 | 51825407 | 51823868 | 47  | 269 | 228 | 1.225380479 | 0.0116598  | ENSG00000149617 |
| 20 | 51825481 | 51826202 | 51825814 | 20  | 50  | 54  | 0.963718425 | 0.576186   | ENSG00000149617 |
| 20 | 51826204 | 51826574 | 51826470 | 21  | 26  | 29  | 0.935373766 | 0.600845   | ENSG00000149617 |
| 20 | 51827262 | 51828629 | 51828300 | 29  | 117 | 96  | 1.264308183 | 0.0428764  | ENSG00000149617 |
| 20 | 51829217 | 51830364 | 51829557 | 22  | 63  | 57  | 1.14681841  | 0.224338   | ENSG00000149617 |
| 20 | 51831558 | 51831933 | 51831758 | 10  | 17  | 20  | 0.890832158 | 0.642922   | ENSG00000149617 |
| 20 | 51832272 | 51833331 | 51832617 | 16  | 60  | 62  | 1.006310401 | 0.486446   | ENSG00000149617 |
| 20 | 51833709 | 51834507 | 51834328 | 15  | 36  | 43  | 0.873960337 | 0.728899   | ENSG00000149617 |
| 20 | 51835095 | 51839003 | 51836189 | 163 | 542 | 353 | 1.594186927 | 2.38E-12   | ENSG00000149617 |
| 20 | 51839099 | 51840253 | 51839767 | 28  | 97  | 84  | 1.198256589 | 0.110495   | ENSG00000149617 |
| 20 | 51840402 | 51841483 | 51840989 | 66  | 212 | 146 | 1.505930553 | 5.74E-05   | ENSG00000149617 |
| 20 | 51841488 | 51841902 | 51841723 | 10  | 17  | 16  | 1.100439724 | 0.388093   | ENSG00000149617 |
| 20 | 51842036 | 51845065 | 51843928 | 307 | 623 | 231 | 2.795369875 | 3.80E-46   | ENSG00000149617 |
| 20 | 51845233 | 51845585 | 51845409 | 18  | 24  | 16  | 1.528388506 | 0.0846311  | ENSG00000149617 |
| 20 | 51845881 | 51846376 | 51846060 | 11  | 20  | 18  | 1.148704625 | 0.329698   | ENSG00000149617 |
| 20 | 51846648 | 51847462 | 51847106 | 20  | 44  | 58  | 0.792689632 | 0.881934   | ENSG00000149617 |
| 20 | 51847644 | 51848148 | 51847812 | 16  | 27  | 25  | 1.11925066  | 0.338965   | ENSG00000149617 |
| 20 | 51848150 | 51849467 | 51848930 | 17  | 80  | 74  | 1.122448519 | 0.235124   | ENSG00000149617 |
| 20 | 51849523 | 51851649 | 51850694 | 27  | 166 | 179 | 0.964243326 | 0.633096   | ENSG00000149617 |
| 20 | 51851855 | 51852439 | 51852260 | 25  | 51  | 36  | 1.460643718 | 0.0373494  | ENSG00000149617 |
| 20 | 51852654 | 51853261 | 51852975 | 22  | 39  | 51  | 0.799464757 | 0.858707   | ENSG00000149617 |
| 20 | 51853716 | 51854343 | 51854028 | 20  | 46  | 36  | 1.320197207 | 0.101366   | ENSG00000149617 |
| 20 | 51854572 | 51856405 | 51855968 | 108 | 350 | 197 | 1.842402872 | 1.05E-12   | ENSG00000149617 |
| 20 | 51856529 | 51857374 | 51856951 | 31  | 71  | 67  | 1.100439724 | 0.285443   | ENSG00000149617 |
| 20 | 51857807 | 51858215 | 51857985 | 12  | 18  | 21  | 0.897580886 | 0.637183   | ENSG00000149617 |

|    |          |          |          |    |     |     |             |           |                 |
|----|----------|----------|----------|----|-----|-----|-------------|-----------|-----------------|
| 20 | 51858223 | 51858526 | 51858396 | 10 | 13  | 20  | 0.692869456 | 0.861903  | ENSG00000149617 |
| 20 | 51858714 | 51859846 | 51859521 | 19 | 85  | 115 | 0.770518619 | 0.967559  | ENSG00000149617 |
| 20 | 51859906 | 51860369 | 51860190 | 10 | 17  | 28  | 0.645085356 | 0.932662  | ENSG00000149617 |
| 20 | 51860526 | 51861074 | 51860806 | 16 | 34  | 50  | 0.71324797  | 0.940766  | ENSG00000149617 |
| 20 | 51861090 | 51861270 | 51861146 | 8  | 9   | 13  | 0.742360132 | 0.770276  | ENSG00000149617 |
| 20 | 51861273 | 51862314 | 51861605 | 21 | 59  | 46  | 1.326771299 | 0.0718759 | ENSG00000149617 |
| 20 | 51862587 | 51863031 | 51862819 | 16 | 26  | 21  | 1.275509681 | 0.196223  | ENSG00000149617 |
| 20 | 51863074 | 51864383 | 51863931 | 30 | 110 | 99  | 1.153627645 | 0.149505  | ENSG00000149617 |
| 20 | 51864494 | 51865408 | 51864797 | 15 | 49  | 60  | 0.851888676 | 0.801352  | ENSG00000149617 |
| 20 | 51865411 | 51865613 | 51865491 | 8  | 11  | 17  | 0.692869456 | 0.843876  | ENSG00000149617 |
| 20 | 51865820 | 51866329 | 51866150 | 22 | 34  | 26  | 1.347246165 | 0.119935  | ENSG00000149617 |
| 20 | 51867621 | 51867987 | 51867771 | 10 | 14  | 14  | 1.039304184 | 0.458308  | ENSG00000149617 |
| 20 | 51868007 | 51868215 | 51868043 | 8  | 11  | 12  | 0.959357709 | 0.543005  | ENSG00000149617 |
| 20 | 51868239 | 51868643 | 51868533 | 11 | 18  | 20  | 0.940322833 | 0.578675  | ENSG00000149617 |
| 20 | 51869072 | 51869307 | 51869160 | 13 | 15  | 12  | 1.279143611 | 0.251893  | ENSG00000149617 |
| 20 | 51869424 | 51870892 | 51869716 | 38 | 125 | 65  | 1.98412617  | 1.73E-06  | ENSG00000149617 |
| 20 | 51871514 | 51872001 | 51871693 | 16 | 30  | 30  | 1.039304184 | 0.439924  | ENSG00000149617 |
| 20 | 51872566 | 51875070 | 51873667 | 18 | 138 | 146 | 0.982743412 | 0.558876  | ENSG00000149617 |
| 20 | 51875199 | 51875600 | 51875362 | 16 | 24  | 30  | 0.838148536 | 0.747023  | ENSG00000149617 |
| 20 | 51875620 | 51876316 | 51875836 | 16 | 40  | 78  | 0.539385716 | 0.999522  | ENSG00000149617 |
| 20 | 51876361 | 51877607 | 51877110 | 26 | 77  | 101 | 0.794762023 | 0.937964  | ENSG00000149617 |
| 20 | 51877628 | 51880274 | 51878762 | 40 | 297 | 273 | 1.130338127 | 0.0714434 | ENSG00000149617 |
| 20 | 51880277 | 51880859 | 51880456 | 25 | 41  | 32  | 1.32275078  | 0.112657  | ENSG00000149617 |
| 20 | 51880868 | 51881419 | 51881047 | 9  | 20  | 14  | 1.455025858 | 0.129498  | ENSG00000149617 |
| 20 | 51881662 | 51882863 | 51882430 | 22 | 80  | 80  | 1.039304184 | 0.403246  | ENSG00000149617 |
| 20 | 51882951 | 51884633 | 51883262 | 30 | 127 | 114 | 1.156790744 | 0.128042  | ENSG00000149617 |
| 20 | 51884693 | 51885039 | 51884879 | 17 | 22  | 15  | 1.493999765 | 0.104649  | ENSG00000149617 |
| 20 | 51885200 | 51886164 | 51885606 | 17 | 59  | 46  | 1.326771299 | 0.0718759 | ENSG00000149617 |
| 20 | 51886434 | 51886854 | 51886675 | 15 | 23  | 16  | 1.467252966 | 0.109416  | ENSG00000149617 |
| 20 | 51886898 | 51887581 | 51887229 | 16 | 37  | 59  | 0.658225983 | 0.979921  | ENSG00000149617 |
| 20 | 51888258 | 51888825 | 51888563 | 19 | 36  | 30  | 1.240459833 | 0.186503  | ENSG00000149617 |
| 20 | 51889320 | 51890325 | 51889932 | 23 | 94  | 68  | 1.430926051 | 0.0111335 | ENSG00000149617 |
| 20 | 51890330 | 51890987 | 51890651 | 22 | 43  | 41  | 1.08879486  | 0.346438  | ENSG00000149617 |
| 20 | 51891023 | 51891424 | 51891186 | 11 | 18  | 24  | 0.78987118  | 0.784577  | ENSG00000149617 |

|    |          |          |          |     |      |     |             |           |                 |
|----|----------|----------|----------|-----|------|-----|-------------|-----------|-----------------|
| 20 | 51891966 | 51892235 | 51892057 | 11  | 14   | 16  | 0.917033104 | 0.598778  | ENSG00000149617 |
| 20 | 51892248 | 51892874 | 51892573 | 15  | 30   | 49  | 0.644368594 | 0.975009  | ENSG00000149617 |
| 20 | 51892914 | 51893139 | 51893049 | 9   | 10   | 21  | 0.519652092 | 0.967869  | ENSG00000149617 |
| 20 | 51893493 | 51893731 | 51893620 | 13  | 14   | 17  | 0.86608682  | 0.662567  | ENSG00000149617 |
| 20 | 51893778 | 51894045 | 51893937 | 9   | 10   | 17  | 0.635130335 | 0.889407  | ENSG00000149617 |
| 20 | 51894110 | 51894601 | 51894282 | 15  | 26   | 30  | 0.905200419 | 0.649195  | ENSG00000149617 |
| 20 | 51894747 | 51895349 | 51895034 | 15  | 32   | 19  | 1.714851904 | 0.0256863 | ENSG00000149617 |
| 20 | 51895565 | 51895814 | 51895728 | 8   | 10   | 21  | 0.519652092 | 0.967869  | ENSG00000149617 |
| 20 | 51895862 | 51896580 | 51896154 | 22  | 51   | 33  | 1.589524046 | 0.0163624 | ENSG00000149617 |
| 20 | 51896590 | 51898784 | 51897687 | 25  | 185  | 188 | 1.022807292 | 0.413748  | ENSG00000149617 |
| 20 | 51899319 | 51899935 | 51899736 | 24  | 45   | 50  | 0.937411617 | 0.625775  | ENSG00000149617 |
| 20 | 51900026 | 51900902 | 51900485 | 20  | 52   | 43  | 1.251889131 | 0.134004  | ENSG00000149617 |
| 20 | 51901495 | 51902464 | 51902230 | 32  | 84   | 93  | 0.939796337 | 0.661645  | ENSG00000149617 |
| 20 | 51902687 | 51903461 | 51903178 | 19  | 57   | 68  | 0.87361801  | 0.777358  | ENSG00000149617 |
| 20 | 51905730 | 51907234 | 51906693 | 23  | 104  | 148 | 0.732395566 | 0.993175  | ENSG00000149617 |
| 20 | 51907584 | 51908323 | 51907801 | 14  | 43   | 82  | 0.550956435 | 0.999492  | ENSG00000149617 |
| 20 | 51909088 | 51909403 | 51909245 | 12  | 17   | 11  | 1.558956276 | 0.111389  | ENSG00000149617 |
| 20 | 51909405 | 51912362 | 51911280 | 23  | 196  | 181 | 1.124961122 | 0.12581   | ENSG00000149617 |
| 20 | 51912490 | 51918365 | 51916339 | 161 | 1138 | 759 | 1.557588771 | 5.57E-22  | ENSG00000149617 |
| 20 | 51919229 | 51921239 | 51919931 | 103 | 312  | 182 | 1.777607703 | 1.46E-10  | ENSG00000149617 |
| 20 | 51921431 | 51922846 | 51921755 | 27  | 103  | 113 | 0.948137151 | 0.653396  | ENSG00000149617 |
| 20 | 51922925 | 51923624 | 51923274 | 22  | 51   | 53  | 1.000811437 | 0.498827  | ENSG00000149617 |
| 20 | 51923631 | 51923873 | 51923742 | 10  | 11   | 17  | 0.692869456 | 0.843876  | ENSG00000149617 |
| 20 | 51924122 | 51924954 | 51924322 | 20  | 49   | 50  | 1.018925671 | 0.462828  | ENSG00000149617 |
| 20 | 51925213 | 51926279 | 51925525 | 20  | 68   | 64  | 1.103261365 | 0.284558  | ENSG00000149617 |
| 20 | 51926333 | 51928223 | 51927457 | 19  | 97   | 104 | 0.970017239 | 0.58633   | ENSG00000149617 |
| 20 | 51928280 | 51928544 | 51928451 | 12  | 14   | 41  | 0.371180066 | 0.999798  | ENSG00000149617 |
| 20 | 51928588 | 51929429 | 51928891 | 28  | 57   | 61  | 0.972252301 | 0.561895  | ENSG00000149617 |
| 20 | 51929657 | 51930277 | 51930100 | 18  | 35   | 39  | 0.935373766 | 0.615635  | ENSG00000149617 |
| 20 | 51930289 | 51930728 | 51930459 | 15  | 24   | 25  | 0.999330946 | 0.501681  | ENSG00000149617 |
| 20 | 51931268 | 51931735 | 51931556 | 20  | 33   | 23  | 1.472347594 | 0.0705377 | ENSG00000149617 |
| 20 | 51931748 | 51931983 | 51931865 | 9   | 11   | 14  | 0.831443347 | 0.68719   | ENSG00000149617 |
| 20 | 51933024 | 51933962 | 51933218 | 14  | 41   | 34  | 1.247165021 | 0.165744  | ENSG00000149617 |
| 20 | 51934043 | 51935590 | 51935072 | 26  | 127  | 121 | 1.090417505 | 0.246803  | ENSG00000149617 |



|    |          |          |          |    |     |     |             |             |                 |
|----|----------|----------|----------|----|-----|-----|-------------|-------------|-----------------|
| 20 | 51935897 | 51936432 | 51936076 | 20 | 39  | 30  | 1.341037657 | 0.107943    | ENSG00000149617 |
| 20 | 51936872 | 51937317 | 51937131 | 11 | 20  | 27  | 0.779478138 | 0.809588    | ENSG00000149617 |
| 20 | 51937663 | 51937862 | 51937792 | 8  | 9   | 10  | 0.944821986 | 0.553851    | ENSG00000149617 |
| 20 | 51937864 | 51938110 | 51937971 | 8  | 11  | 9   | 1.247165021 | 0.300052    | ENSG00000149617 |
| 20 | 51938343 | 51939313 | 51938994 | 23 | 73  | 61  | 1.240459833 | 0.104361    | ENSG00000149617 |
| 20 | 51939342 | 51939698 | 51939520 | 13 | 19  | 38  | 0.532976505 | 0.991064    | ENSG00000149617 |
| 20 | 51939720 | 51939974 | 51939847 | 12 | 14  | 17  | 0.86608682  | 0.662567    | ENSG00000149617 |
| 20 | 51940411 | 51942407 | 51941303 | 26 | 146 | 127 | 1.193575899 | 0.0711608   | ENSG00000149617 |
| 20 | 51942872 | 51943604 | 51943134 | 16 | 43  | 42  | 1.063474049 | 0.387056    | ENSG00000149617 |
| 20 | 51944323 | 51944675 | 51944499 | 11 | 16  | 15  | 1.104260696 | 0.387363    | ENSG00000149617 |
| 20 | 51944834 | 51946239 | 51945477 | 20 | 84  | 85  | 1.027219252 | 0.43053     | ENSG00000149617 |
| 20 | 51946294 | 51946564 | 51946445 | 10 | 12  | 24  | 0.540438176 | 0.969195    | ENSG00000149617 |
| 20 | 51946640 | 51947007 | 51946819 | 21 | 29  | 37  | 0.820503303 | 0.793644    | ENSG00000149617 |
| 20 | 51947287 | 51947560 | 51947429 | 8  | 12  | 18  | 0.711102863 | 0.834017    | ENSG00000149617 |
| 20 | 51947745 | 51950171 | 51948331 | 73 | 234 | 205 | 1.185613997 | 0.0369523   | ENSG00000149617 |
| 20 | 51950209 | 51952117 | 51951609 | 23 | 114 | 147 | 0.80756744  | 0.958094    | ENSG00000149617 |
| 20 | 51952180 | 51952822 | 51952305 | 16 | 34  | 30  | 1.17340795  | 0.257326    | ENSG00000149617 |
| 20 | 51953020 | 51954210 | 51953248 | 16 | 59  | 81  | 0.760466476 | 0.948094    | ENSG00000149617 |
| 20 | 51954467 | 51954697 | 51954582 | 12 | 14  | 16  | 0.917033104 | 0.598778    | ENSG00000149617 |
| 20 | 51954913 | 51956529 | 51956164 | 20 | 107 | 96  | 1.157163422 | 0.147868    | ENSG00000149617 |
| 20 | 51956842 | 51957454 | 51957021 | 14 | 34  | 44  | 0.808347699 | 0.829904    | ENSG00000149617 |
| 20 | 51957552 | 51958410 | 51957981 | 14 | 42  | 57  | 0.770518619 | 0.904688    | ENSG00000149617 |
| 20 | 51959071 | 51959448 | 51959250 | 19 | 25  | 42  | 0.628416483 | 0.972016    | ENSG00000149617 |
| 20 | 51960223 | 51961155 | 51960635 | 11 | 44  | 49  | 0.935373766 | 0.628563    | ENSG00000149617 |
| 20 | 51961222 | 51961827 | 51961648 | 18 | 41  | 52  | 0.823599542 | 0.828362    | ENSG00000149617 |
| 20 | 51961858 | 51962124 | 51961995 | 14 | 18  | 31  | 0.617086859 | 0.956343    | ENSG00000149617 |
| 20 | 51962171 | 51962695 | 51962488 | 14 | 30  | 37  | 0.847853413 | 0.75465     | ENSG00000149617 |
| 20 | 51963388 | 51963628 | 51963508 | 8  | 11  | 22  | 0.542245661 | 0.962988    | ENSG00000149617 |
| 20 | 51964023 | 51966423 | 51965839 | 73 | 322 | 246 | 1.359090087 | 0.000131232 | ENSG00000149617 |
| 20 | 51966638 | 51967802 | 51967555 | 25 | 82  | 77  | 1.105926247 | 0.261315    | ENSG00000149617 |
| 20 | 51967807 | 51968626 | 51967986 | 15 | 44  | 49  | 0.935373766 | 0.628563    | ENSG00000149617 |
| 20 | 51968778 | 51969226 | 51969017 | 22 | 36  | 37  | 1.011954074 | 0.479962    | ENSG00000149617 |
| 20 | 51969765 | 51970462 | 51970044 | 16 | 43  | 57  | 0.788437657 | 0.884986    | ENSG00000149617 |
| 20 | 51970843 | 51971989 | 51971636 | 29 | 108 | 91  | 1.231349523 | 0.0700919   | ENSG00000149617 |

|    |          |          |          |    |     |     |             |           |                 |
|----|----------|----------|----------|----|-----|-----|-------------|-----------|-----------------|
| 20 | 51972257 | 51972570 | 51972413 | 12 | 17  | 14  | 1.247165021 | 0.261378  | ENSG00000149617 |
| 20 | 51972794 | 51973357 | 51972917 | 15 | 29  | 35  | 0.86608682  | 0.721698  | ENSG00000149617 |
| 20 | 51973803 | 51974055 | 51973891 | 8  | 11  | 39  | 0.311791255 | 0.99995   | ENSG00000149617 |
| 20 | 51974073 | 51974545 | 51974309 | 14 | 24  | 52  | 0.490237823 | 0.99888   | ENSG00000149617 |
| 20 | 51975174 | 51975535 | 51975349 | 14 | 21  | 27  | 0.816596145 | 0.764635  | ENSG00000149617 |
| 20 | 51975613 | 51976619 | 51976111 | 20 | 61  | 76  | 0.83684233  | 0.853322  | ENSG00000149617 |
| 20 | 51976622 | 51977220 | 51977056 | 24 | 47  | 56  | 0.875203524 | 0.753475  | ENSG00000149617 |
| 20 | 51977466 | 51978116 | 51977751 | 13 | 31  | 48  | 0.678729263 | 0.958511  | ENSG00000149617 |
| 20 | 51978946 | 51982090 | 51981711 | 19 | 183 | 204 | 0.932838878 | 0.753754  | ENSG00000149617 |
| 20 | 51983208 | 51985577 | 51984945 | 21 | 144 | 174 | 0.861137753 | 0.909266  | ENSG00000149617 |
| 20 | 51985641 | 51986199 | 51985832 | 21 | 38  | 23  | 1.688869299 | 0.019531  | ENSG00000149617 |
| 20 | 51986570 | 51987839 | 51986959 | 15 | 69  | 70  | 1.024666097 | 0.442748  | ENSG00000149617 |
| 20 | 51987887 | 51992924 | 51989982 | 86 | 442 | 427 | 1.075728396 | 0.140693  | ENSG00000149617 |
| 20 | 51992933 | 51994396 | 51993933 | 49 | 164 | 137 | 1.242646307 | 0.0294225 | ENSG00000149617 |
| 20 | 51994490 | 51995201 | 51994735 | 19 | 41  | 61  | 0.70404477  | 0.962453  | ENSG00000149617 |
| 20 | 51995490 | 51995971 | 51995792 | 9  | 21  | 31  | 0.714521627 | 0.891579  | ENSG00000149617 |
| 20 | 51996031 | 51996452 | 51996206 | 18 | 29  | 32  | 0.944821986 | 0.590257  | ENSG00000149617 |
| 20 | 51996955 | 51997250 | 51997102 | 12 | 16  | 12  | 1.359090087 | 0.198699  | ENSG00000149617 |
| 20 | 51997269 | 52000974 | 51999206 | 22 | 215 | 229 | 0.97604219  | 0.601337  | ENSG00000149617 |
| 20 | 52001464 | 52003690 | 52003020 | 27 | 141 | 156 | 0.940007606 | 0.704001  | ENSG00000149617 |
| 20 | 52003825 | 52004149 | 52003987 | 19 | 22  | 30  | 0.771096653 | 0.831099  | ENSG00000149617 |
| 20 | 52004224 | 52004456 | 52004373 | 8  | 10  | 20  | 0.54439743  | 0.955421  | ENSG00000149617 |
| 20 | 52004461 | 52005077 | 52004701 | 15 | 38  | 55  | 0.723801128 | 0.941775  | ENSG00000149617 |
| 20 | 52005136 | 52005702 | 52005497 | 25 | 39  | 58  | 0.704613006 | 0.958459  | ENSG00000149617 |
| 20 | 52006085 | 52008643 | 52008230 | 24 | 160 | 177 | 0.940044796 | 0.715701  | ENSG00000149617 |
| 20 | 52008649 | 52009214 | 52008807 | 13 | 28  | 30  | 0.972252301 | 0.544336  | ENSG00000149617 |
| 20 | 52009553 | 52012146 | 52010311 | 21 | 165 | 155 | 1.105926247 | 0.183092  | ENSG00000149617 |
| 20 | 52012497 | 52012809 | 52012648 | 12 | 16  | 19  | 0.883408557 | 0.649033  | ENSG00000149617 |
| 20 | 52013314 | 52015172 | 52013679 | 22 | 114 | 123 | 0.963870816 | 0.612418  | ENSG00000149617 |
| 20 | 52015196 | 52015510 | 52015357 | 9  | 14  | 21  | 0.708616489 | 0.853486  | ENSG00000149617 |
| 20 | 52015642 | 52016091 | 52015933 | 10 | 17  | 20  | 0.890832158 | 0.642922  | ENSG00000149617 |
| 20 | 52016226 | 52016505 | 52016364 | 10 | 11  | 15  | 0.779478138 | 0.747877  | ENSG00000149617 |
| 20 | 52016557 | 52018219 | 52017176 | 18 | 109 | 97  | 1.166565921 | 0.133164  | ENSG00000149617 |
| 20 | 52018277 | 52019316 | 52019079 | 15 | 54  | 98  | 0.577391213 | 0.999586  | ENSG00000149617 |

|    |          |          |          |    |     |     |             |           |                       |
|----|----------|----------|----------|----|-----|-----|-------------|-----------|-----------------------|
| 20 | 52019409 | 52020905 | 52019572 | 17 | 87  | 86  | 1.051250209 | 0.37055   | ENSG00000149617       |
| 20 | 52020959 | 52021740 | 52021561 | 15 | 44  | 62  | 0.742360132 | 0.938653  | ENSG00000149617       |
| 20 | 52021967 | 52022992 | 52022296 | 18 | 59  | 53  | 1.154782427 | 0.220809  | ENSG00000149617       |
| 20 | 52023405 | 52023830 | 52023584 | 21 | 33  | 33  | 1.039304184 | 0.437085  | BCAS1 ENSG00000064787 |
| 20 | 52024214 | 52025582 | 52024893 | 16 | 75  | 72  | 1.082015315 | 0.315132  | BCAS1 ENSG00000064787 |
| 20 | 52025657 | 52026729 | 52026030 | 20 | 63  | 58  | 1.12738081  | 0.252785  | BCAS1 ENSG00000064787 |
| 20 | 52027129 | 52027708 | 52027463 | 21 | 36  | 34  | 1.098692995 | 0.344552  | BCAS1 ENSG00000064787 |
| 20 | 52028290 | 52028586 | 52028438 | 8  | 11  | 12  | 0.959357709 | 0.543005  | BCAS1 ENSG00000064787 |
| 20 | 52028589 | 52029729 | 52028959 | 22 | 75  | 84  | 0.929260212 | 0.679828  | BCAS1 ENSG00000064787 |
| 20 | 52029773 | 52030496 | 52030307 | 18 | 38  | 53  | 0.750608578 | 0.916358  | BCAS1 ENSG00000064787 |
| 20 | 52030525 | 52030941 | 52030780 | 16 | 24  | 33  | 0.764194253 | 0.849736  | BCAS1 ENSG00000064787 |
| 20 | 52030953 | 52031849 | 52031181 | 27 | 59  | 69  | 0.890832158 | 0.745728  | BCAS1 ENSG00000064787 |
| 20 | 52031908 | 52032327 | 52032087 | 14 | 23  | 23  | 1.039304184 | 0.447157  | BCAS1 ENSG00000064787 |
| 20 | 52032652 | 52032936 | 52032794 | 10 | 13  | 16  | 0.855897563 | 0.670115  | BCAS1 ENSG00000064787 |
| 20 | 52032940 | 52034027 | 52033848 | 21 | 72  | 66  | 1.132376201 | 0.230767  | BCAS1 ENSG00000064787 |
| 20 | 52034305 | 52035584 | 52035069 | 22 | 79  | 77  | 1.065953009 | 0.344049  | BCAS1 ENSG00000064787 |
| 20 | 52035822 | 52036610 | 52036206 | 17 | 48  | 56  | 0.89343693  | 0.719921  | BCAS1 ENSG00000064787 |
| 20 | 52036818 | 52037194 | 52037021 | 16 | 22  | 41  | 0.569142768 | 0.987331  | BCAS1 ENSG00000064787 |
| 20 | 52037331 | 52038588 | 52037967 | 18 | 69  | 111 | 0.649565115 | 0.997988  | BCAS1 ENSG00000064787 |
| 20 | 52038717 | 52039782 | 52039502 | 15 | 56  | 68  | 0.85855563  | 0.804465  | BCAS1 ENSG00000064787 |
| 20 | 52040050 | 52041776 | 52040252 | 23 | 93  | 109 | 0.888132667 | 0.801867  | BCAS1 ENSG00000064787 |
| 20 | 52042011 | 52044650 | 52044285 | 25 | 177 | 149 | 1.233307632 | 0.0288737 | BCAS1 ENSG00000064787 |
| 20 | 52044845 | 52045122 | 52045018 | 12 | 16  | 17  | 0.981565063 | 0.523072  | BCAS1 ENSG00000064787 |
| 20 | 52045225 | 52047365 | 52047160 | 21 | 130 | 129 | 1.047298832 | 0.354537  | BCAS1 ENSG00000064787 |
| 20 | 52047509 | 52048140 | 52047858 | 10 | 25  | 30  | 0.871674477 | 0.699445  | BCAS1 ENSG00000064787 |
| 20 | 52049227 | 52049731 | 52049552 | 13 | 26  | 30  | 0.905200419 | 0.649195  | BCAS1 ENSG00000064787 |
| 20 | 52049914 | 52050551 | 52050193 | 10 | 27  | 29  | 0.970017239 | 0.547123  | BCAS1 ENSG00000064787 |
| 20 | 52050717 | 52051069 | 52050907 | 12 | 17  | 23  | 0.779478138 | 0.791839  | BCAS1 ENSG00000064787 |
| 20 | 52051325 | 52053801 | 52053368 | 18 | 124 | 160 | 0.806913187 | 0.964813  | BCAS1 ENSG00000064787 |
| 20 | 52053894 | 52054155 | 52054009 | 11 | 13  | 25  | 0.55962533  | 0.965065  | BCAS1 ENSG00000064787 |
| 20 | 52055523 | 52055861 | 52055686 | 15 | 20  | 17  | 1.212521548 | 0.272468  | BCAS1 ENSG00000064787 |
| 20 | 52056680 | 52056975 | 52056849 | 11 | 15  | 22  | 0.722994215 | 0.845414  | BCAS1 ENSG00000064787 |
| 20 | 52057164 | 52057458 | 52057311 | 12 | 15  | 18  | 0.875203524 | 0.655562  | BCAS1 ENSG00000064787 |
| 20 | 52057530 | 52058574 | 52057897 | 25 | 63  | 56  | 1.166938031 | 0.197582  | BCAS1 ENSG00000064787 |

|    |          |          |          |    |    |    |             |           |       |                 |
|----|----------|----------|----------|----|----|----|-------------|-----------|-------|-----------------|
| 20 | 52058586 | 52058881 | 52058725 | 11 | 12 | 17 | 0.750608578 | 0.78992   | BCAS1 | ENSG00000064787 |
| 20 | 52058929 | 52059243 | 52059074 | 9  | 12 | 2  | 4.503651465 | 0.002963  | BCAS1 | ENSG00000064787 |
| 20 | 52059894 | 52060416 | 52060229 | 9  | 21 | 24 | 0.914587682 | 0.621823  | BCAS1 | ENSG00000064787 |
| 20 | 52061267 | 52062221 | 52061700 | 15 | 46 | 43 | 1.110165833 | 0.308777  | BCAS1 | ENSG00000064787 |
| 20 | 52062287 | 52062475 | 52062418 | 8  | 9  | 14 | 0.692869456 | 0.822654  | BCAS1 | ENSG00000064787 |
| 20 | 52062492 | 52062905 | 52062726 | 12 | 22 | 26 | 0.885333194 | 0.668299  | BCAS1 | ENSG00000064787 |
| 20 | 52062948 | 52063420 | 52063170 | 9  | 20 | 22 | 0.948929907 | 0.57038   | BCAS1 | ENSG00000064787 |
| 20 | 52063524 | 52063828 | 52063676 | 12 | 17 | 25 | 0.719518281 | 0.863101  | BCAS1 | ENSG00000064787 |
| 20 | 52064404 | 52064907 | 52064583 | 20 | 31 | 45 | 0.722994215 | 0.923491  | BCAS1 | ENSG00000064787 |
| 20 | 52065102 | 52065819 | 52065281 | 44 | 72 | 24 | 3.034768218 | 1.20E-07  | BCAS1 | ENSG00000064787 |
| 20 | 52065835 | 52066222 | 52066014 | 9  | 16 | 19 | 0.883408557 | 0.649033  | BCAS1 | ENSG00000064787 |
| 20 | 52066466 | 52067238 | 52066823 | 16 | 46 | 52 | 0.921647107 | 0.65928   | BCAS1 | ENSG00000064787 |
| 20 | 52067659 | 52068264 | 52068111 | 14 | 29 | 29 | 1.039304184 | 0.440902  | BCAS1 | ENSG00000064787 |
| 20 | 52068502 | 52068940 | 52068770 | 13 | 21 | 25 | 0.879411233 | 0.673643  | BCAS1 | ENSG00000064787 |
| 20 | 52069077 | 52069427 | 52069250 | 12 | 15 | 26 | 0.615883961 | 0.942815  | BCAS1 | ENSG00000064787 |
| 20 | 52070036 | 52070785 | 52070224 | 13 | 36 | 45 | 0.835962061 | 0.793602  | BCAS1 | ENSG00000064787 |
| 20 | 52070790 | 52071264 | 52071027 | 21 | 32 | 26 | 1.27026067  | 0.176378  | BCAS1 | ENSG00000064787 |
| 20 | 52072060 | 52072983 | 52072827 | 11 | 36 | 37 | 1.011954074 | 0.479962  | BCAS1 | ENSG00000064787 |
| 20 | 52073010 | 52073434 | 52073164 | 15 | 25 | 29 | 0.900730293 | 0.653667  | BCAS1 | ENSG00000064787 |
| 20 | 52073441 | 52073766 | 52073603 | 15 | 20 | 26 | 0.808347699 | 0.770998  | BCAS1 | ENSG00000064787 |
| 20 | 52073971 | 52074519 | 52074125 | 19 | 36 | 39 | 0.96135637  | 0.569549  | BCAS1 | ENSG00000064787 |
| 20 | 52074593 | 52074824 | 52074708 | 12 | 14 | 15 | 0.974347673 | 0.530138  | BCAS1 | ENSG00000064787 |
| 20 | 52075209 | 52075878 | 52075504 | 15 | 36 | 24 | 1.538170193 | 0.0455121 | BCAS1 | ENSG00000064787 |
| 20 | 52075899 | 52076119 | 52076053 | 8  | 11 | 6  | 1.781664316 | 0.103344  | BCAS1 | ENSG00000064787 |
| 20 | 52076189 | 52076599 | 52076317 | 11 | 20 | 18 | 1.148704625 | 0.329698  | BCAS1 | ENSG00000064787 |
| 20 | 52076879 | 52077125 | 52077002 | 11 | 14 | 15 | 0.974347673 | 0.530138  | BCAS1 | ENSG00000064787 |
| 20 | 52077165 | 52077505 | 52077335 | 9  | 15 | 22 | 0.722994215 | 0.845414  | BCAS1 | ENSG00000064787 |
| 20 | 52077701 | 52078237 | 52078058 | 15 | 26 | 26 | 1.039304184 | 0.44394   | BCAS1 | ENSG00000064787 |
| 20 | 52078646 | 52079251 | 52079017 | 15 | 37 | 25 | 1.518983039 | 0.0476968 | BCAS1 | ENSG00000064787 |
| 20 | 52079384 | 52079725 | 52079554 | 12 | 18 | 17 | 1.097043306 | 0.388692  | BCAS1 | ENSG00000064787 |
| 20 | 52079784 | 52080190 | 52079892 | 14 | 20 | 23 | 0.909391161 | 0.626666  | BCAS1 | ENSG00000064787 |
| 20 | 52080854 | 52081929 | 52081750 | 15 | 56 | 61 | 0.955489331 | 0.598802  | BCAS1 | ENSG00000064787 |
| 20 | 52082713 | 52082950 | 52082804 | 8  | 9  | 7  | 1.29913023  | 0.286504  | BCAS1 | ENSG00000064787 |
| 20 | 52084414 | 52084624 | 52084548 | 9  | 9  | 10 | 0.944821986 | 0.553851  | BCAS1 | ENSG00000064787 |

|    |          |          |          |    |     |     |             |           |       |                 |
|----|----------|----------|----------|----|-----|-----|-------------|-----------|-------|-----------------|
| 20 | 52086358 | 52086654 | 52086528 | 10 | 13  | 21  | 0.66137539  | 0.892612  | BCAS1 | ENSG00000064787 |
| 20 | 52087467 | 52087820 | 52087707 | 12 | 16  | 31  | 0.552130348 | 0.979636  | BCAS1 | ENSG00000064787 |
| 20 | 52087945 | 52088911 | 52088795 | 14 | 44  | 54  | 0.850339787 | 0.791879  | BCAS1 | ENSG00000064787 |
| 20 | 52088919 | 52089616 | 52089400 | 11 | 31  | 42  | 0.773435672 | 0.867273  | BCAS1 | ENSG00000064787 |
| 20 | 52089647 | 52090071 | 52089826 | 9  | 18  | 20  | 0.940322833 | 0.578675  | BCAS1 | ENSG00000064787 |
| 20 | 52090080 | 52090745 | 52090272 | 15 | 35  | 24  | 1.496598025 | 0.0580175 | BCAS1 | ENSG00000064787 |
| 20 | 52090987 | 52091250 | 52091127 | 10 | 12  | 11  | 1.125912866 | 0.382541  | BCAS1 | ENSG00000064787 |
| 20 | 52091412 | 52091617 | 52091514 | 9  | 9   | 16  | 0.611355402 | 0.899375  | BCAS1 | ENSG00000064787 |
| 20 | 52092052 | 52093115 | 52092489 | 10 | 43  | 55  | 0.816596145 | 0.844828  | BCAS1 | ENSG00000064787 |
| 20 | 52093190 | 52093935 | 52093813 | 12 | 35  | 31  | 1.169217207 | 0.258967  | BCAS1 | ENSG00000064787 |
| 20 | 52093972 | 52094540 | 52094267 | 18 | 31  | 26  | 1.231767922 | 0.210892  | BCAS1 | ENSG00000064787 |
| 20 | 52094691 | 52094891 | 52094799 | 9  | 10  | 3   | 2.858086507 | 0.0242838 | BCAS1 | ENSG00000064787 |
| 20 | 52095511 | 52096014 | 52095772 | 12 | 23  | 24  | 0.997732017 | 0.503931  | BCAS1 | ENSG00000064787 |
| 20 | 52096943 | 52097489 | 52097310 | 14 | 27  | 26  | 1.077796932 | 0.39044   | BCAS1 | ENSG00000064787 |
| 20 | 52097991 | 52098469 | 52098321 | 10 | 22  | 34  | 0.682971321 | 0.926111  | BCAS1 | ENSG00000064787 |
| 20 | 52098614 | 52099215 | 52099020 | 20 | 41  | 27  | 1.558956276 | 0.0322026 | BCAS1 | ENSG00000064787 |
| 20 | 52099283 | 52099699 | 52099510 | 10 | 20  | 20  | 1.039304184 | 0.450588  | BCAS1 | ENSG00000064787 |
| 20 | 52099903 | 52100288 | 52100109 | 8  | 16  | 32  | 0.535399125 | 0.984936  | BCAS1 | ENSG00000064787 |
| 20 | 52100291 | 52100624 | 52100468 | 11 | 15  | 23  | 0.692869456 | 0.877389  | BCAS1 | ENSG00000064787 |
| 20 | 52101195 | 52101432 | 52101292 | 9  | 11  | 23  | 0.519652092 | 0.973215  | BCAS1 | ENSG00000064787 |
| 20 | 52101998 | 52102238 | 52102164 | 9  | 11  | 17  | 0.692869456 | 0.843876  | BCAS1 | ENSG00000064787 |
| 20 | 52102389 | 52102680 | 52102534 | 11 | 16  | 11  | 1.472347594 | 0.147517  | BCAS1 | ENSG00000064787 |
| 20 | 52102818 | 52103518 | 52103339 | 10 | 30  | 28  | 1.110980335 | 0.341379  | BCAS1 | ENSG00000064787 |
| 20 | 52103634 | 52103861 | 52103747 | 8  | 11  | 12  | 0.959357709 | 0.543005  | BCAS1 | ENSG00000064787 |
| 20 | 52104405 | 52104858 | 52104557 | 11 | 19  | 35  | 0.577391213 | 0.978679  | BCAS1 | ENSG00000064787 |
| 20 | 52105548 | 52105759 | 52105647 | 9  | 9   | 7   | 1.29913023  | 0.286504  | BCAS1 | ENSG00000064787 |
| 20 | 52106959 | 52107302 | 52107130 | 14 | 20  | 38  | 0.55962533  | 0.986493  | BCAS1 | ENSG00000064787 |
| 20 | 52107597 | 52108766 | 52107721 | 12 | 50  | 53  | 0.981565063 | 0.538612  | BCAS1 | ENSG00000064787 |
| 20 | 52108996 | 52109206 | 52109101 | 9  | 11  | 8   | 1.385738912 | 0.224757  | BCAS1 | ENSG00000064787 |
| 20 | 52109785 | 52110210 | 52109964 | 16 | 27  | 33  | 0.855897563 | 0.7313    | BCAS1 | ENSG00000064787 |
| 20 | 52110708 | 52111202 | 52110910 | 13 | 25  | 33  | 0.794762023 | 0.814119  | BCAS1 | ENSG00000064787 |
| 20 | 52111258 | 52111576 | 52111428 | 17 | 19  | 38  | 0.532976505 | 0.991064  | BCAS1 | ENSG00000064787 |
| 20 | 52112517 | 52113768 | 52112853 | 36 | 102 | 107 | 0.99118825  | 0.526024  | BCAS1 | ENSG00000064787 |
| 20 | 52113777 | 52114269 | 52113992 | 14 | 25  | 36  | 0.730321859 | 0.89377   | BCAS1 | ENSG00000064787 |

|    |          |          |          |    |     |     |             |             |       |                 |
|----|----------|----------|----------|----|-----|-----|-------------|-------------|-------|-----------------|
| 20 | 52114596 | 52114995 | 52114765 | 9  | 16  | 19  | 0.883408557 | 0.649033    | BCAS1 | ENSG00000064787 |
| 20 | 52115260 | 52116065 | 52115663 | 11 | 32  | 46  | 0.729724214 | 0.920171    | BCAS1 | ENSG00000064787 |
| 20 | 52116271 | 52117110 | 52116738 | 13 | 42  | 42  | 1.039304184 | 0.429271    | BCAS1 | ENSG00000064787 |
| 20 | 52117296 | 52118433 | 52117770 | 63 | 142 | 91  | 1.615440199 | 0.000136169 | BCAS1 | ENSG00000064787 |
| 20 | 52118452 | 52121418 | 52120755 | 38 | 226 | 175 | 1.340466192 | 0.00167953  | BCAS1 | ENSG00000064787 |
| 20 | 52121430 | 52122104 | 52121707 | 20 | 41  | 42  | 1.015134319 | 0.472821    | BCAS1 | ENSG00000064787 |
| 20 | 52122371 | 52122688 | 52122531 | 11 | 15  | 15  | 1.039304184 | 0.456923    | BCAS1 | ENSG00000064787 |
| 20 | 52123225 | 52124366 | 52124000 | 12 | 50  | 67  | 0.779478138 | 0.912636    | BCAS1 | ENSG00000064787 |
| 20 | 52124555 | 52125008 | 52124729 | 11 | 20  | 20  | 1.039304184 | 0.450588    | BCAS1 | ENSG00000064787 |
| 20 | 52125076 | 52125333 | 52125210 | 11 | 13  | 15  | 0.909391161 | 0.604792    | BCAS1 | ENSG00000064787 |
| 20 | 52125346 | 52125786 | 52125607 | 16 | 27  | 35  | 0.808347699 | 0.803596    | BCAS1 | ENSG00000064787 |
| 20 | 52125912 | 52126624 | 52126407 | 34 | 64  | 59  | 1.125912866 | 0.253401    | BCAS1 | ENSG00000064787 |
| 20 | 52126764 | 52127017 | 52126890 | 12 | 15  | 17  | 0.923825942 | 0.593214    | BCAS1 | ENSG00000064787 |
| 20 | 52127078 | 52128095 | 52127390 | 16 | 50  | 53  | 0.981565063 | 0.538612    | BCAS1 | ENSG00000064787 |
| 20 | 52128219 | 52128423 | 52128341 | 11 | 13  | 21  | 0.66137539  | 0.892612    | BCAS1 | ENSG00000064787 |
| 20 | 52128469 | 52129415 | 52128648 | 18 | 58  | 45  | 1.333020584 | 0.0704822   | BCAS1 | ENSG00000064787 |
| 20 | 52129743 | 52130097 | 52129961 | 13 | 17  | 16  | 1.100439724 | 0.388093    | BCAS1 | ENSG00000064787 |
| 20 | 52130178 | 52131148 | 52130472 | 15 | 50  | 39  | 1.325112835 | 0.0896303   | BCAS1 | ENSG00000064787 |
| 20 | 52132088 | 52132944 | 52132327 | 19 | 42  | 33  | 1.314414115 | 0.114904    | BCAS1 | ENSG00000064787 |
| 20 | 52133001 | 52133348 | 52133174 | 15 | 21  | 5   | 3.810782009 | 0.000537724 | BCAS1 | ENSG00000064787 |
| 20 | 52133381 | 52134278 | 52134058 | 14 | 46  | 50  | 0.957790131 | 0.585332    | BCAS1 | ENSG00000064787 |
| 20 | 52134297 | 52135760 | 52135138 | 52 | 156 | 89  | 1.81300841  | 2.13E-06    | BCAS1 | ENSG00000064787 |
| 20 | 52135834 | 52136215 | 52136013 | 12 | 20  | 37  | 0.574352312 | 0.982094    | BCAS1 | ENSG00000064787 |
| 20 | 52136255 | 52137535 | 52136785 | 17 | 72  | 61  | 1.223696862 | 0.12027     | BCAS1 | ENSG00000064787 |
| 20 | 52137658 | 52137920 | 52137789 | 14 | 17  | 14  | 1.247165021 | 0.261378    | BCAS1 | ENSG00000064787 |
| 20 | 52137929 | 52138357 | 52138143 | 18 | 27  | 28  | 1.003466109 | 0.495433    | BCAS1 | ENSG00000064787 |
| 20 | 52138473 | 52139259 | 52138927 | 18 | 45  | 34  | 1.365942642 | 0.0802807   | BCAS1 | ENSG00000064787 |
| 20 | 52139761 | 52140908 | 52140491 | 20 | 60  | 75  | 0.834178358 | 0.855841    | BCAS1 | ENSG00000064787 |
| 20 | 52141242 | 52141518 | 52141348 | 10 | 13  | 6   | 2.078608368 | 0.0483393   | BCAS1 | ENSG00000064787 |
| 20 | 52141529 | 52141818 | 52141664 | 8  | 12  | 16  | 0.794762023 | 0.738004    | BCAS1 | ENSG00000064787 |
| 20 | 52141959 | 52142682 | 52142431 | 14 | 35  | 38  | 0.959357709 | 0.572229    | BCAS1 | ENSG00000064787 |
| 20 | 52143304 | 52144654 | 52143649 | 16 | 71  | 76  | 0.9718169   | 0.569833    | BCAS1 | ENSG00000064787 |
| 20 | 52144682 | 52144977 | 52144844 | 12 | 15  | 9   | 1.662886695 | 0.0970566   | BCAS1 | ENSG00000064787 |
| 20 | 52145757 | 52146214 | 52145932 | 12 | 19  | 40  | 0.506977651 | 0.995171    | BCAS1 | ENSG00000064787 |

|    |          |          |          |    |     |     |             |             |         |                 |
|----|----------|----------|----------|----|-----|-----|-------------|-------------|---------|-----------------|
| 20 | 52146413 | 52147676 | 52146720 | 35 | 127 | 79  | 1.662886695 | 0.000143585 | BCAS1   | ENSG00000064787 |
| 20 | 52147851 | 52150319 | 52149366 | 25 | 137 | 113 | 1.258105065 | 0.0343026   | BCAS1   | ENSG00000064787 |
| 20 | 52150507 | 52150761 | 52150641 | 8  | 9   | 8   | 1.154782427 | 0.375434    | BCAS1   | ENSG00000064787 |
| 20 | 52150975 | 52151247 | 52151111 | 10 | 12  | 19  | 0.67554772  | 0.870684    | BCAS1   | ENSG00000064787 |
| 20 | 52151330 | 52151550 | 52151480 | 10 | 11  | 15  | 0.779478138 | 0.747877    | BCAS1   | ENSG00000064787 |
| 20 | 52151804 | 52152570 | 52152395 | 12 | 34  | 49  | 0.727512929 | 0.928226    | BCAS1   | ENSG00000064787 |
| 20 | 52152754 | 52154139 | 52153489 | 37 | 99  | 104 | 0.989813509 | 0.529625    | BCAS1   | ENSG00000064787 |
| 20 | 52154217 | 52155546 | 52154878 | 15 | 63  | 64  | 1.023314889 | 0.448218    | BCAS1   | ENSG00000064787 |
| 20 | 52155690 | 52156088 | 52155904 | 15 | 23  | 29  | 0.831443347 | 0.752665    | BCAS1   | ENSG00000064787 |
| 20 | 52156120 | 52156392 | 52156256 | 12 | 14  | 15  | 0.974347673 | 0.530138    | BCAS1   | ENSG00000064787 |
| 20 | 52156618 | 52158761 | 52157240 | 33 | 124 | 114 | 1.129678461 | 0.172332    | BCAS1   | ENSG00000064787 |
| 20 | 52159159 | 52159426 | 52159314 | 12 | 13  | 25  | 0.55962533  | 0.965065    | BCAS1   | ENSG00000064787 |
| 20 | 52159858 | 52160953 | 52160141 | 39 | 125 | 61  | 2.11213431  | 3.06E-07    | BCAS1   | ENSG00000064787 |
| 20 | 52161619 | 52162709 | 52162369 | 17 | 63  | 75  | 0.875203524 | 0.78534     | BCAS1   | ENSG00000064787 |
| 20 | 52163346 | 52164270 | 52164048 | 14 | 44  | 52  | 0.882428081 | 0.732974    | BCAS1   | ENSG00000064787 |
| 20 | 52164499 | 52164843 | 52164671 | 12 | 17  | 24  | 0.748299013 | 0.830231    | BCAS1   | ENSG00000064787 |
| 20 | 52164845 | 52165472 | 52165024 | 14 | 34  | 42  | 0.845945266 | 0.770954    | BCAS1   | ENSG00000064787 |
| 20 | 52165538 | 52166266 | 52165896 | 11 | 31  | 42  | 0.773435672 | 0.867273    | BCAS1   | ENSG00000064787 |
| 20 | 52166596 | 52167016 | 52166837 | 13 | 22  | 31  | 0.746999882 | 0.860756    | BCAS1   | ENSG00000064787 |
| 20 | 52167282 | 52167886 | 52167717 | 12 | 25  | 39  | 0.67554772  | 0.943593    | BCAS1   | ENSG00000064787 |
| 20 | 52168116 | 52168523 | 52168374 | 16 | 25  | 24  | 1.080876352 | 0.390444    | BCAS1   | ENSG00000064787 |
| 20 | 52168605 | 52168845 | 52168718 | 10 | 12  | 19  | 0.67554772  | 0.870684    | BCAS1   | ENSG00000064787 |
| 20 | 52168955 | 52169694 | 52169132 | 16 | 45  | 43  | 1.086545284 | 0.346732    | BCAS1   | ENSG00000064787 |
| 20 | 52169718 | 52170280 | 52169999 | 10 | 24  | 37  | 0.683752753 | 0.93359     | BCAS1   | ENSG00000064787 |
| 20 | 52170302 | 52171048 | 52170710 | 13 | 35  | 49  | 0.748299013 | 0.910311    | BCAS1   | ENSG00000064787 |
| 20 | 52171501 | 52172599 | 52171807 | 21 | 65  | 60  | 1.124493052 | 0.253994    | CYP24A1 | ENSG00000019186 |
| 20 | 52172665 | 52174526 | 52173846 | 92 | 283 | 162 | 1.810812198 | 3.43E-10    | CYP24A1 | ENSG00000019186 |
| 20 | 52174714 | 52175179 | 52174831 | 13 | 23  | 25  | 0.959357709 | 0.559486    | CYP24A1 | ENSG00000019186 |
| 20 | 52175455 | 52175874 | 52175634 | 17 | 25  | 21  | 1.228268581 | 0.23714     | CYP24A1 | ENSG00000019186 |
| 20 | 52176591 | 52179024 | 52177062 | 23 | 135 | 123 | 1.139882009 | 0.145483    | CYP24A1 | ENSG00000019186 |
| 20 | 52179243 | 52180324 | 52179936 | 11 | 48  | 54  | 0.925925546 | 0.653526    | CYP24A1 | ENSG00000019186 |
| 20 | 52180424 | 52180900 | 52180603 | 15 | 26  | 36  | 0.758411161 | 0.865982    | CYP24A1 | ENSG00000019186 |
| 20 | 52181521 | 52182346 | 52181758 | 18 | 47  | 45  | 1.084491323 | 0.346941    | CYP24A1 | ENSG00000019186 |
| 20 | 52182357 | 52184231 | 52183188 | 26 | 122 | 112 | 1.131278006 | 0.171573    | CYP24A1 | ENSG00000019186 |

|    |          |          |          |    |     |     |             |           |         |                 |
|----|----------|----------|----------|----|-----|-----|-------------|-----------|---------|-----------------|
| 20 | 52184830 | 52185413 | 52185049 | 14 | 28  | 30  | 0.972252301 | 0.544336  | CYP24A1 | ENSG00000019186 |
| 20 | 52185690 | 52186944 | 52186555 | 17 | 76  | 65  | 1.212521548 | 0.124451  | CYP24A1 | ENSG00000019186 |
| 20 | 52186973 | 52187223 | 52187113 | 8  | 10  | 18  | 0.601702422 | 0.917232  | CYP24A1 | ENSG00000019186 |
| 20 | 52187812 | 52188232 | 52187977 | 11 | 17  | 10  | 1.700679574 | 0.0766266 | CYP24A1 | ENSG00000019186 |
| 20 | 52188343 | 52188635 | 52188489 | 13 | 16  | 13  | 1.262012224 | 0.256887  | CYP24A1 | ENSG00000019186 |
| 20 | 52188834 | 52189267 | 52189026 | 13 | 24  | 23  | 1.082608525 | 0.390382  | CYP24A1 | ENSG00000019186 |
| 20 | 52189276 | 52189989 | 52189626 | 10 | 30  | 48  | 0.657518974 | 0.968616  | CYP24A1 | ENSG00000019186 |
| 20 | 52190075 | 52191044 | 52190814 | 15 | 44  | 52  | 0.882428081 | 0.732974  | CYP24A1 | ENSG00000019186 |
| 20 | 52191068 | 52191634 | 52191243 | 14 | 29  | 39  | 0.779478138 | 0.851784  | CYP24A1 | ENSG00000019186 |
| 20 | 52191640 | 52191975 | 52191807 | 10 | 16  | 26  | 0.654376709 | 0.9196    | CYP24A1 | ENSG00000019186 |
| 20 | 52191997 | 52192386 | 52192319 | 15 | 22  | 32  | 0.724363522 | 0.886261  | CYP24A1 | ENSG00000019186 |
| 20 | 52192522 | 52192728 | 52192625 | 8  | 9   | 21  | 0.472410993 | 0.980806  | CYP24A1 | ENSG00000019186 |
| 20 | 52192853 | 52193110 | 52192945 | 18 | 21  | 13  | 1.63319229  | 0.0708832 | CYP24A1 | ENSG00000019186 |
| 20 | 52193125 | 52193536 | 52193289 | 12 | 20  | 17  | 1.212521548 | 0.272468  | CYP24A1 | ENSG00000019186 |
| 20 | 52193964 | 52194577 | 52194254 | 10 | 24  | 20  | 1.237266886 | 0.234075  | CYP24A1 | ENSG00000019186 |
| 20 | 52195638 | 52196076 | 52195913 | 9  | 16  | 30  | 0.569941004 | 0.972704  | CYP24A1 | ENSG00000019186 |
| 20 | 52196097 | 52196378 | 52196237 | 10 | 12  | 25  | 0.519652092 | 0.977628  | CYP24A1 | ENSG00000019186 |
| 20 | 52196503 | 52196765 | 52196645 | 13 | 14  | 25  | 0.599598568 | 0.947903  | CYP24A1 | ENSG00000019186 |
| 20 | 52196878 | 52197650 | 52197116 | 12 | 34  | 39  | 0.909391161 | 0.660746  | CYP24A1 | ENSG00000019186 |
| 20 | 52198086 | 52199962 | 52199205 | 69 | 241 | 167 | 1.497092932 | 2.48E-05  | CYP24A1 | ENSG00000019186 |
| 20 | 52199967 | 52200419 | 52200280 | 13 | 21  | 20  | 1.08879486  | 0.389871  | CYP24A1 | ENSG00000019186 |
| 20 | 52200557 | 52200935 | 52200664 | 12 | 19  | 25  | 0.799464757 | 0.777638  | CYP24A1 | ENSG00000019186 |
| 20 | 52201930 | 52203213 | 52202657 | 21 | 68  | 78  | 0.907746693 | 0.722623  | CYP24A1 | ENSG00000019186 |
| 20 | 52203795 | 52204024 | 52203853 | 11 | 13  | 13  | 1.039304184 | 0.45974   | CYP24A1 | ENSG00000019186 |
| 20 | 52204418 | 52205477 | 52204675 | 19 | 60  | 86  | 0.728707531 | 0.972282  | CYP24A1 | ENSG00000019186 |
| 20 | 52206211 | 52207718 | 52207237 | 14 | 69  | 76  | 0.944821986 | 0.635277  | CYP24A1 | ENSG00000019186 |
| 20 | 52207888 | 52208483 | 52208304 | 13 | 29  | 34  | 0.890832158 | 0.680743  | CYP24A1 | ENSG00000019186 |
| 20 | 52208490 | 52209069 | 52208913 | 13 | 29  | 28  | 1.07514226  | 0.390297  | CYP24A1 | ENSG00000019186 |
| 20 | 52209897 | 52210247 | 52210072 | 15 | 20  | 17  | 1.212521548 | 0.272468  | CYP24A1 | ENSG00000019186 |
| 20 | 52210286 | 52210537 | 52210432 | 10 | 13  | 28  | 0.501733054 | 0.986489  | CYP24A1 | ENSG00000019186 |
| 20 | 52210591 | 52211324 | 52210779 | 15 | 42  | 45  | 0.971523477 | 0.554967  | CYP24A1 | ENSG00000019186 |
| 20 | 52211571 | 52212257 | 52211754 | 17 | 41  | 46  | 0.928739909 | 0.637343  | CYP24A1 | ENSG00000019186 |
| 20 | 52212330 | 52213060 | 52212607 | 16 | 36  | 36  | 1.039304184 | 0.434373  | CYP24A1 | ENSG00000019186 |
| 20 | 52213116 | 52213986 | 52213641 | 11 | 37  | 47  | 0.822782479 | 0.817752  | CYP24A1 | ENSG00000019186 |



|    |          |          |          |    |     |     |             |             |         |                 |
|----|----------|----------|----------|----|-----|-----|-------------|-------------|---------|-----------------|
| 20 | 52214111 | 52215036 | 52214361 | 16 | 41  | 46  | 0.928739909 | 0.637343    | CYP24A1 | ENSG00000019186 |
| 20 | 52215625 | 52215872 | 52215742 | 8  | 11  | 28  | 0.430056904 | 0.9954      | CYP24A1 | ENSG00000019186 |
| 20 | 52216414 | 52216663 | 52216504 | 10 | 13  | 17  | 0.808347699 | 0.728863    | CYP24A1 | ENSG00000019186 |
| 20 | 52216974 | 52217372 | 52217153 | 9  | 16  | 25  | 0.679545044 | 0.897263    | CYP24A1 | ENSG00000019186 |
| 20 | 52217691 | 52218535 | 52217924 | 18 | 54  | 35  | 1.587825837 | 0.0142195   | CYP24A1 | ENSG00000019186 |
| 20 | 52219032 | 52220481 | 52219902 | 16 | 84  | 77  | 1.132575073 | 0.213172    | CYP24A1 | ENSG00000019186 |
| 20 | 52220648 | 52221465 | 52221148 | 14 | 45  | 53  | 0.885333194 | 0.729612    | CYP24A1 | ENSG00000019186 |
| 20 | 52221500 | 52225258 | 52222579 | 23 | 266 | 201 | 1.373733748 | 0.000306746 | CYP24A1 | ENSG00000019186 |
| 20 | 52225407 | 52225889 | 52225720 | 10 | 22  | 33  | 0.703058713 | 0.907926    | CYP24A1 | ENSG00000019186 |
| 20 | 52226405 | 52226787 | 52226608 | 12 | 20  | 24  | 0.873015515 | 0.679256    | CYP24A1 | ENSG00000019186 |
| 20 | 52226791 | 52227158 | 52226979 | 11 | 17  | 21  | 0.850339787 | 0.697991    | CYP24A1 | ENSG00000019186 |
| 20 | 52227325 | 52227636 | 52227480 | 16 | 20  | 31  | 0.682043371 | 0.91767     | CYP24A1 | ENSG00000019186 |
| 20 | 52228374 | 52228754 | 52228564 | 14 | 22  | 28  | 0.824275732 | 0.75853     | CYP24A1 | ENSG00000019186 |
| 20 | 52229339 | 52229612 | 52229487 | 10 | 13  | 14  | 0.970017239 | 0.534076    | CYP24A1 | ENSG00000019186 |
| 20 | 52229771 | 52230884 | 52230550 | 15 | 53  | 58  | 0.951227558 | 0.605566    | CYP24A1 | ENSG00000019186 |
| 20 | 52231159 | 52231943 | 52231626 | 16 | 40  | 63  | 0.665804243 | 0.980618    | CYP24A1 | ENSG00000019186 |
| 20 | 52231956 | 52232249 | 52232112 | 8  | 13  | 19  | 0.727512929 | 0.824686    | CYP24A1 | ENSG00000019186 |
| 20 | 52232339 | 52232822 | 52232643 | 10 | 22  | 29  | 0.796799875 | 0.797061    | CYP24A1 | ENSG00000019186 |
| 20 | 52232830 | 52233258 | 52233009 | 20 | 29  | 23  | 1.29913023  | 0.167378    | CYP24A1 | ENSG00000019186 |
| 20 | 52233307 | 52237000 | 52234809 | 25 | 190 | 182 | 1.084738247 | 0.215741    | CYP24A1 | ENSG00000019186 |
| 20 | 52238000 | 52238425 | 52238246 | 19 | 29  | 30  | 1.005778243 | 0.491622    | CYP24A1 | ENSG00000019186 |
| 20 | 52238772 | 52239047 | 52238920 | 9  | 12  | 29  | 0.450365147 | 0.994327    | CYP24A1 | ENSG00000019186 |
| 20 | 52240035 | 52240674 | 52240344 | 14 | 33  | 36  | 0.955036277 | 0.577843    | CYP24A1 | ENSG00000019186 |
| 20 | 52241097 | 52241645 | 52241476 | 9  | 19  | 25  | 0.799464757 | 0.777638    | PFDN4   | ENSG00000101132 |
| 20 | 52242004 | 52242243 | 52242123 | 8  | 12  | 13  | 0.965068171 | 0.538344    | PFDN4   | ENSG00000101132 |
| 20 | 52242354 | 52242697 | 52242525 | 11 | 17  | 11  | 1.558956276 | 0.111389    | PFDN4   | ENSG00000101132 |
| 20 | 52242701 | 52243021 | 52242843 | 17 | 20  | 23  | 0.909391161 | 0.626666    | PFDN4   | ENSG00000101132 |
| 20 | 52243110 | 52243574 | 52243320 | 12 | 23  | 34  | 0.712665726 | 0.903143    | PFDN4   | ENSG00000101132 |
| 20 | 52243980 | 52244292 | 52244127 | 10 | 14  | 15  | 0.974347673 | 0.530138    | PFDN4   | ENSG00000101132 |
| 20 | 52244604 | 52246553 | 52245733 | 25 | 119 | 124 | 0.997732017 | 0.507427    | PFDN4   | ENSG00000101132 |
| 20 | 52246941 | 52247445 | 52247175 | 20 | 33  | 39  | 0.883408557 | 0.704258    | PFDN4   | ENSG00000101132 |
| 20 | 52247563 | 52248751 | 52248154 | 21 | 67  | 55  | 1.262012224 | 0.0974547   | PFDN4   | ENSG00000101132 |
| 20 | 52249209 | 52251443 | 52249777 | 54 | 248 | 182 | 1.414135202 | 0.000168888 | PFDN4   | ENSG00000101132 |
| 20 | 52252301 | 52252546 | 52252412 | 9  | 11  | 7   | 1.558956276 | 0.158273    | PFDN4   | ENSG00000101132 |

|    |          |          |          |    |     |    |             |             |       |                 |
|----|----------|----------|----------|----|-----|----|-------------|-------------|-------|-----------------|
| 20 | 52253953 | 52254910 | 52254519 | 12 | 45  | 27 | 1.707428303 | 0.0113146   | PFDN4 | ENSG00000101132 |
| 20 | 52255735 | 52255914 | 52255803 | 8  | 8   | 7  | 1.169217207 | 0.371848    | PFDN4 | ENSG00000101132 |
| 20 | 52255922 | 52256174 | 52256048 | 11 | 13  | 10 | 1.32275078  | 0.240023    | PFDN4 | ENSG00000101132 |
| 20 | 52256295 | 52256573 | 52256434 | 11 | 13  | 15 | 0.909391161 | 0.604792    | PFDN4 | ENSG00000101132 |
| 20 | 52257241 | 52258112 | 52257844 | 54 | 102 | 54 | 1.94633329  | 2.07E-05    | PFDN4 | ENSG00000101132 |
| 20 | 52258240 | 52259677 | 52258790 | 26 | 113 | 92 | 1.273985774 | 0.0408764   | PFDN4 | ENSG00000101132 |
| 20 | 52259681 | 52260824 | 52259837 | 13 | 55  | 57 | 1.003466109 | 0.493086    | PFDN4 | ENSG00000101132 |
| 20 | 52261088 | 52261647 | 52261468 | 13 | 29  | 21 | 1.417232979 | 0.104064    | PFDN4 | ENSG00000101132 |
| 20 | 52262149 | 52262345 | 52262320 | 8  | 9   | 24 | 0.415721674 | 0.993777    | PFDN4 | ENSG00000101132 |
| 20 | 52262478 | 52262871 | 52262657 | 12 | 21  | 17 | 1.27026067  | 0.223413    | PFDN4 | ENSG00000101132 |
| 20 | 52263205 | 52263683 | 52263359 | 11 | 19  | 17 | 1.154782427 | 0.327751    | PFDN4 | ENSG00000101132 |
| 20 | 52264349 | 52264769 | 52264590 | 10 | 19  | 11 | 1.73217364  | 0.0607469   | PFDN4 | ENSG00000101132 |
| 20 | 52264990 | 52265655 | 52265169 | 8  | 21  | 28 | 0.788437657 | 0.803211    | PFDN4 | ENSG00000101132 |
| 20 | 52267772 | 52268106 | 52267939 | 9  | 13  | 17 | 0.808347699 | 0.728863    | PFDN4 | ENSG00000101132 |
| 20 | 52268304 | 52268838 | 52268608 | 15 | 29  | 30 | 1.005778243 | 0.491622    | PFDN4 | ENSG00000101132 |
| 20 | 52268936 | 52269162 | 52269049 | 12 | 13  | 10 | 1.32275078  | 0.240023    | PFDN4 | ENSG00000101132 |
| 20 | 52269250 | 52269530 | 52269388 | 8  | 8   | 9  | 0.935373766 | 0.560286    | PFDN4 | ENSG00000101132 |
| 20 | 52269604 | 52270268 | 52269936 | 13 | 33  | 32 | 1.07079825  | 0.389692    | PFDN4 | ENSG00000101132 |
| 20 | 52270503 | 52271825 | 52271381 | 18 | 62  | 63 | 1.023065056 | 0.449169    | PFDN4 | ENSG00000101132 |
| 20 | 52271829 | 52272977 | 52272392 | 12 | 52  | 50 | 1.080061211 | 0.347157    | PFDN4 | ENSG00000101132 |
| 20 | 52273247 | 52274428 | 52273485 | 14 | 63  | 32 | 2.015620236 | 0.000365865 | PFDN4 | ENSG00000101132 |
| 20 | 52275624 | 52276547 | 52275765 | 9  | 36  | 32 | 1.165280449 | 0.260519    | PFDN4 | ENSG00000101132 |
| 20 | 52277175 | 52277828 | 52277535 | 12 | 29  | 35 | 0.86608682  | 0.721698    | PFDN4 | ENSG00000101132 |
| 20 | 52278665 | 52279774 | 52279002 | 11 | 43  | 47 | 0.952695502 | 0.592762    | PFDN4 | ENSG00000101132 |
| 20 | 52279790 | 52280419 | 52279969 | 12 | 30  | 28 | 1.110980335 | 0.341379    | PFDN4 | ENSG00000101132 |
| 20 | 52280952 | 52281317 | 52281138 | 8  | 15  | 21 | 0.755857589 | 0.807439    | PFDN4 | ENSG00000101132 |
| 20 | 52281380 | 52281601 | 52281455 | 8  | 8   | 10 | 0.850339787 | 0.645072    | PFDN4 | ENSG00000101132 |
| 20 | 52281686 | 52282415 | 52282050 | 10 | 31  | 37 | 0.875203524 | 0.712707    | PFDN4 | ENSG00000101132 |
| 20 | 52282480 | 52283065 | 52282983 | 8  | 20  | 21 | 0.992063085 | 0.511305    | PFDN4 | ENSG00000101132 |
| 20 | 52284772 | 52285677 | 52285508 | 12 | 38  | 32 | 1.228268581 | 0.190908    | PFDN4 | ENSG00000101132 |
| 20 | 52285877 | 52286672 | 52286540 | 9  | 30  | 31 | 1.006825928 | 0.489808    | PFDN4 | ENSG00000101132 |
| 20 | 52287876 | 52288072 | 52287903 | 8  | 9   | 16 | 0.611355402 | 0.899375    | PFDN4 | ENSG00000101132 |
| 20 | 52288095 | 52288337 | 52288240 | 10 | 12  | 13 | 0.965068171 | 0.538344    | PFDN4 | ENSG00000101132 |
| 20 | 52288970 | 52289243 | 52289106 | 8  | 11  | 10 | 1.133786383 | 0.380636    | PFDN4 | ENSG00000101132 |

|    |          |          |          |    |     |     |             |            |       |                 |
|----|----------|----------|----------|----|-----|-----|-------------|------------|-------|-----------------|
| 20 | 52289282 | 52289519 | 52289446 | 8  | 11  | 10  | 1.133786383 | 0.380636   | PFDN4 | ENSG00000101132 |
| 20 | 52294652 | 52294904 | 52294778 | 11 | 12  | 13  | 0.965068171 | 0.538344   | PFDN4 | ENSG00000101132 |
| 20 | 52296371 | 52296569 | 52296489 | 8  | 9   | 12  | 0.799464757 | 0.707717   | PFDN4 | ENSG00000101132 |
| 20 | 52296628 | 52296842 | 52296764 | 9  | 12  | 11  | 1.125912866 | 0.382541   | PFDN4 | ENSG00000101132 |
| 20 | 52296989 | 52297305 | 52297147 | 12 | 13  | 6   | 2.078608368 | 0.0483393  | PFDN4 | ENSG00000101132 |
| 20 | 52298098 | 52298529 | 52298277 | 12 | 21  | 26  | 0.846840446 | 0.721382   | PFDN4 | ENSG00000101132 |
| 20 | 52299167 | 52299402 | 52299259 | 8  | 10  | 13  | 0.816596145 | 0.696946   | PFDN4 | ENSG00000101132 |
| 20 | 52299476 | 52299687 | 52299581 | 9  | 11  | 7   | 1.558956276 | 0.158273   | PFDN4 | ENSG00000101132 |
| 20 | 52300751 | 52301635 | 52300981 | 19 | 49  | 45  | 1.129678461 | 0.274774   | PFDN4 | ENSG00000101132 |
| 20 | 52301759 | 52302097 | 52301918 | 18 | 22  | 18  | 1.258105065 | 0.227238   | PFDN4 | ENSG00000101132 |
| 20 | 52302301 | 52303148 | 52302724 | 17 | 39  | 46  | 0.884514199 | 0.717474   | PFDN4 | ENSG00000101132 |
| 20 | 52303733 | 52304147 | 52303858 | 11 | 17  | 28  | 0.645085356 | 0.932662   | PFDN4 | ENSG00000101132 |
| 20 | 52305125 | 52305410 | 52305274 | 9  | 13  | 15  | 0.909391161 | 0.604792   | PFDN4 | ENSG00000101132 |
| 20 | 52305689 | 52306599 | 52306201 | 12 | 41  | 31  | 1.364086742 | 0.0907884  | PFDN4 | ENSG00000101132 |
| 20 | 52307067 | 52307335 | 52307218 | 11 | 14  | 20  | 0.742360132 | 0.815839   | PFDN4 | ENSG00000101132 |
| 20 | 52307483 | 52307851 | 52307651 | 11 | 16  | 16  | 1.039304184 | 0.455583   | PFDN4 | ENSG00000101132 |
| 20 | 52308152 | 52308468 | 52308310 | 11 | 16  | 12  | 1.359090087 | 0.198699   | PFDN4 | ENSG00000101132 |
| 20 | 52308571 | 52308770 | 52308670 | 9  | 10  | 10  | 1.039304184 | 0.464387   | PFDN4 | ENSG00000101132 |
| 20 | 52308913 | 52309270 | 52309091 | 10 | 16  | 8   | 1.963130126 | 0.0441028  | PFDN4 | ENSG00000101132 |
| 20 | 52310675 | 52311186 | 52311072 | 11 | 22  | 15  | 1.493999765 | 0.104649   | PFDN4 | ENSG00000101132 |
| 20 | 52311347 | 52311685 | 52311516 | 9  | 13  | 21  | 0.66137539  | 0.892612   | PFDN4 | ENSG00000101132 |
| 20 | 52314669 | 52315147 | 52314968 | 13 | 25  | 23  | 1.125912866 | 0.336929   | PFDN4 | ENSG00000101132 |
| 20 | 52315158 | 52315549 | 52315380 | 11 | 17  | 19  | 0.935373766 | 0.583208   | PFDN4 | ENSG00000101132 |
| 20 | 52316923 | 52318687 | 52317869 | 50 | 182 | 116 | 1.625578339 | 1.56E-05   | PFDN4 | ENSG00000101132 |
| 20 | 52318702 | 52319354 | 52319128 | 20 | 46  | 24  | 1.953891866 | 0.00262644 | PFDN4 | ENSG00000101132 |
| 20 | 52319768 | 52319947 | 52319857 | 8  | 8   | 12  | 0.719518281 | 0.783103   | PFDN4 | ENSG00000101132 |
| 20 | 52321501 | 52322133 | 52321813 | 11 | 23  | 29  | 0.831443347 | 0.752665   | PFDN4 | ENSG00000101132 |
| 20 | 52322645 | 52323067 | 52322824 | 13 | 23  | 22  | 1.084491323 | 0.39027    | PFDN4 | ENSG00000101132 |
| 20 | 52323109 | 52323619 | 52323410 | 13 | 24  | 28  | 0.895951883 | 0.65833    | PFDN4 | ENSG00000101132 |
| 20 | 52325347 | 52325968 | 52325811 | 12 | 30  | 27  | 1.150658204 | 0.29431    | PFDN4 | ENSG00000101132 |
| 20 | 52326551 | 52327158 | 52326979 | 12 | 28  | 18  | 1.586306386 | 0.0554746  | PFDN4 | ENSG00000101132 |
| 20 | 52328078 | 52328463 | 52328307 | 11 | 16  | 17  | 0.981565063 | 0.523072   | PFDN4 | ENSG00000101132 |
| 20 | 52329215 | 52329916 | 52329616 | 11 | 31  | 34  | 0.950220968 | 0.583835   | PFDN4 | ENSG00000101132 |
| 20 | 52331067 | 52331478 | 52331246 | 11 | 18  | 41  | 0.470161417 | 0.997851   | PFDN4 | ENSG00000101132 |

|    |          |          |          |    |    |    |             |            |       |                 |
|----|----------|----------|----------|----|----|----|-------------|------------|-------|-----------------|
| 20 | 52332406 | 52333332 | 52333153 | 16 | 44 | 41 | 1.113540197 | 0.307667   | PFDN4 | ENSG00000101132 |
| 20 | 52333357 | 52333584 | 52333500 | 8  | 9  | 14 | 0.692869456 | 0.822654   | PFDN4 | ENSG00000101132 |
| 20 | 52333672 | 52334186 | 52334007 | 12 | 24 | 17 | 1.443478034 | 0.113942   | PFDN4 | ENSG00000101132 |
| 20 | 52334849 | 52336214 | 52335338 | 14 | 66 | 67 | 1.024020299 | 0.445434   | PFDN4 | ENSG00000101132 |
| 20 | 52337702 | 52337947 | 52337824 | 8  | 11 | 15 | 0.779478138 | 0.747877   | PFDN4 | ENSG00000101132 |
| 20 | 52338927 | 52339200 | 52339042 | 12 | 14 | 9  | 1.558956276 | 0.132279   | PFDN4 | ENSG00000101132 |
| 20 | 52339493 | 52340212 | 52339809 | 10 | 28 | 37 | 0.793153193 | 0.82925    | PFDN4 | ENSG00000101132 |
| 20 | 52341485 | 52341760 | 52341619 | 8  | 12 | 14 | 0.900730293 | 0.611333   | PFDN4 | ENSG00000101132 |
| 20 | 52342079 | 52343193 | 52342981 | 12 | 45 | 51 | 0.919384471 | 0.662254   | PFDN4 | ENSG00000101132 |
| 20 | 52343239 | 52343616 | 52343562 | 11 | 19 | 17 | 1.154782427 | 0.327751   | PFDN4 | ENSG00000101132 |
| 20 | 52343995 | 52344462 | 52344106 | 11 | 21 | 16 | 1.344981885 | 0.176214   | PFDN4 | ENSG00000101132 |
| 20 | 52345723 | 52346184 | 52346032 | 16 | 23 | 26 | 0.923825942 | 0.612844   | PFDN4 | ENSG00000101132 |
| 20 | 52346361 | 52346893 | 52346515 | 11 | 19 | 14 | 1.385738912 | 0.166049   | PFDN4 | ENSG00000101132 |
| 20 | 52346997 | 52347442 | 52347270 | 11 | 19 | 22 | 0.903742769 | 0.631776   | PFDN4 | ENSG00000101132 |
| 20 | 52348560 | 52348817 | 52348688 | 10 | 12 | 19 | 0.67554772  | 0.870684   | PFDN4 | ENSG00000101132 |
| 20 | 52349906 | 52350656 | 52350280 | 14 | 39 | 29 | 1.385738912 | 0.0861361  | PFDN4 | ENSG00000101132 |
| 20 | 52352280 | 52352638 | 52352511 | 13 | 18 | 17 | 1.097043306 | 0.388692   | PFDN4 | ENSG00000101132 |
| 20 | 52353281 | 52353528 | 52353387 | 13 | 14 | 15 | 0.974347673 | 0.530138   | PFDN4 | ENSG00000101132 |
| 20 | 52353770 | 52354003 | 52353878 | 10 | 11 | 10 | 1.133786383 | 0.380636   | PFDN4 | ENSG00000101132 |
| 20 | 52354917 | 52355105 | 52355001 | 8  | 9  | 8  | 1.154782427 | 0.375434   | PFDN4 | ENSG00000101132 |
| 20 | 52355758 | 52355974 | 52355900 | 9  | 12 | 13 | 0.965068171 | 0.538344   | PFDN4 | ENSG00000101132 |
| 20 | 52357141 | 52357442 | 52357318 | 10 | 14 | 13 | 1.113540197 | 0.385405   | PFDN4 | ENSG00000101132 |
| 20 | 52357872 | 52358120 | 52357996 | 8  | 9  | 8  | 1.154782427 | 0.375434   | PFDN4 | ENSG00000101132 |
| 20 | 52358152 | 52358668 | 52358468 | 11 | 23 | 16 | 1.467252966 | 0.109416   | PFDN4 | ENSG00000101132 |
| 20 | 52358683 | 52359112 | 52358862 | 8  | 16 | 25 | 0.679545044 | 0.897263   | PFDN4 | ENSG00000101132 |
| 20 | 52360001 | 52360189 | 52360110 | 9  | 10 | 11 | 0.952695502 | 0.548138   | PFDN4 | ENSG00000101132 |
| 20 | 52360461 | 52360825 | 52360680 | 8  | 14 | 10 | 1.417232979 | 0.185113   | PFDN4 | ENSG00000101132 |
| 20 | 52360965 | 52361206 | 52361085 | 8  | 10 | 2  | 3.810782009 | 0.00936112 | PFDN4 | ENSG00000101132 |
| 20 | 52362377 | 52362684 | 52362530 | 8  | 13 | 9  | 1.455025858 | 0.177172   | PFDN4 | ENSG00000101132 |
| 20 | 52363694 | 52364256 | 52363942 | 8  | 21 | 24 | 0.914587682 | 0.621823   | PFDN4 | ENSG00000101132 |
| 20 | 52364652 | 52365295 | 52365097 | 12 | 27 | 31 | 0.909391161 | 0.644901   | PFDN4 | ENSG00000101132 |
| 20 | 52365823 | 52366662 | 52366256 | 11 | 36 | 24 | 1.538170193 | 0.0455121  | PFDN4 | ENSG00000101132 |
| 20 | 52366671 | 52366862 | 52366766 | 8  | 10 | 14 | 0.762156402 | 0.758589   | PFDN4 | ENSG00000101132 |
| 20 | 52367363 | 52368027 | 52367684 | 17 | 38 | 38 | 1.039304184 | 0.432628   | PFDN4 | ENSG00000101132 |

|    |          |          |          |    |    |    |             |           |       |                 |
|----|----------|----------|----------|----|----|----|-------------|-----------|-------|-----------------|
| 20 | 52368838 | 52369212 | 52369033 | 8  | 15 | 15 | 1.039304184 | 0.456923  | PFDN4 | ENSG00000101132 |
| 20 | 52369714 | 52370521 | 52370021 | 17 | 43 | 40 | 1.115350832 | 0.307057  | PFDN4 | ENSG00000101132 |
| 20 | 52370828 | 52371152 | 52370990 | 10 | 16 | 20 | 0.841341482 | 0.704984  | PFDN4 | ENSG00000101132 |
| 20 | 52371600 | 52372043 | 52371777 | 16 | 24 | 27 | 0.927950164 | 0.608665  | PFDN4 | ENSG00000101132 |
| 20 | 52373283 | 52373733 | 52373593 | 8  | 18 | 22 | 0.85855563  | 0.691398  | PFDN4 | ENSG00000101132 |
| 20 | 52374058 | 52374629 | 52374237 | 8  | 20 | 12 | 1.67887599  | 0.0659142 | PFDN4 | ENSG00000101132 |
| 20 | 52374654 | 52375188 | 52374833 | 8  | 20 | 22 | 0.948929907 | 0.57038   | PFDN4 | ENSG00000101132 |
| 20 | 52375766 | 52376388 | 52376147 | 19 | 34 | 26 | 1.347246165 | 0.119935  | PFDN4 | ENSG00000101132 |
| 20 | 52376652 | 52377160 | 52377004 | 10 | 19 | 27 | 0.742360132 | 0.849695  | PFDN4 | ENSG00000101132 |
| 20 | 52377594 | 52378047 | 52377723 | 14 | 22 | 22 | 1.039304184 | 0.448275  | PFDN4 | ENSG00000101132 |
| 20 | 52378594 | 52379103 | 52378924 | 17 | 29 | 21 | 1.417232979 | 0.104064  | PFDN4 | ENSG00000101132 |
| 20 | 52379332 | 52379586 | 52379459 | 8  | 13 | 14 | 0.970017239 | 0.534076  | PFDN4 | ENSG00000101132 |
| 20 | 52380325 | 52380504 | 52380466 | 9  | 9  | 3  | 2.598260461 | 0.0397929 | PFDN4 | ENSG00000101132 |
| 20 | 52381026 | 52381432 | 52381205 | 14 | 21 | 14 | 1.524312804 | 0.0996258 | PFDN4 | ENSG00000101132 |
| 20 | 52381705 | 52381885 | 52381835 | 8  | 9  | 12 | 0.799464757 | 0.707717  | PFDN4 | ENSG00000101132 |
| 20 | 52381887 | 52382181 | 52382008 | 8  | 10 | 22 | 0.497058523 | 0.977096  | PFDN4 | ENSG00000101132 |
| 20 | 52382966 | 52383329 | 52383145 | 11 | 18 | 14 | 1.316451967 | 0.209896  | PFDN4 | ENSG00000101132 |
| 20 | 52383363 | 52383942 | 52383576 | 10 | 22 | 19 | 1.195199812 | 0.27834   | PFDN4 | ENSG00000101132 |
| 20 | 52384472 | 52385169 | 52385012 | 11 | 29 | 36 | 0.842679068 | 0.759384  | PFDN4 | ENSG00000101132 |
| 20 | 52385778 | 52385995 | 52385886 | 11 | 12 | 13 | 0.965068171 | 0.538344  | PFDN4 | ENSG00000101132 |
| 20 | 52388411 | 52389381 | 52389140 | 11 | 40 | 36 | 1.151661393 | 0.26595   | PFDN4 | ENSG00000101132 |
| 20 | 52389434 | 52391330 | 52390644 | 22 | 91 | 91 | 1.039304184 | 0.397006  | PFDN4 | ENSG00000101132 |
| 20 | 52391665 | 52392035 | 52391823 | 13 | 17 | 13 | 1.336248237 | 0.204556  | DOK5  | ENSG00000101134 |
| 20 | 52392230 | 52392463 | 52392285 | 8  | 12 | 18 | 0.711102863 | 0.834017  | DOK5  | ENSG00000101134 |
| 20 | 52392487 | 52392787 | 52392618 | 13 | 16 | 21 | 0.803098688 | 0.755224  | DOK5  | ENSG00000101134 |
| 20 | 52393307 | 52393524 | 52393415 | 10 | 11 | 14 | 0.831443347 | 0.68719   | DOK5  | ENSG00000101134 |
| 20 | 52393630 | 52394147 | 52393968 | 9  | 19 | 28 | 0.716761506 | 0.878343  | DOK5  | ENSG00000101134 |
| 20 | 52394787 | 52395082 | 52394952 | 12 | 15 | 15 | 1.039304184 | 0.456923  | DOK5  | ENSG00000101134 |
| 20 | 52395146 | 52395698 | 52395322 | 25 | 42 | 31 | 1.396564998 | 0.0741268 | DOK5  | ENSG00000101134 |
| 20 | 52395737 | 52396519 | 52396017 | 18 | 42 | 31 | 1.396564998 | 0.0741268 | DOK5  | ENSG00000101134 |
| 20 | 52396690 | 52397319 | 52396951 | 10 | 25 | 27 | 0.965068171 | 0.55304   | DOK5  | ENSG00000101134 |
| 20 | 52399261 | 52399764 | 52399585 | 13 | 23 | 26 | 0.923825942 | 0.612844  | DOK5  | ENSG00000101134 |
| 20 | 52399961 | 52400245 | 52400103 | 9  | 12 | 13 | 0.965068171 | 0.538344  | DOK5  | ENSG00000101134 |
| 20 | 52400510 | 52400859 | 52400684 | 9  | 15 | 16 | 0.978168644 | 0.526483  | DOK5  | ENSG00000101134 |

|    |          |          |          |    |    |    |             |           |      |                 |
|----|----------|----------|----------|----|----|----|-------------|-----------|------|-----------------|
| 20 | 52401484 | 52401836 | 52401660 | 15 | 20 | 14 | 1.455025858 | 0.129498  | DOK5 | ENSG00000101134 |
| 20 | 52401862 | 52402121 | 52401992 | 8  | 11 | 13 | 0.890832158 | 0.618492  | DOK5 | ENSG00000101134 |
| 20 | 52404014 | 52404609 | 52404383 | 12 | 27 | 33 | 0.855897563 | 0.7313    | DOK5 | ENSG00000101134 |
| 20 | 52405632 | 52406016 | 52405811 | 12 | 20 | 26 | 0.808347699 | 0.770998  | DOK5 | ENSG00000101134 |
| 20 | 52406711 | 52407155 | 52406900 | 9  | 19 | 17 | 1.154782427 | 0.327751  | DOK5 | ENSG00000101134 |
| 20 | 52407871 | 52408855 | 52408283 | 15 | 50 | 43 | 1.204648032 | 0.181677  | DOK5 | ENSG00000101134 |
| 20 | 52409775 | 52410017 | 52409896 | 8  | 9  | 19 | 0.519652092 | 0.96137   | DOK5 | ENSG00000101134 |
| 20 | 52411432 | 52411816 | 52411611 | 10 | 17 | 26 | 0.692869456 | 0.890806  | DOK5 | ENSG00000101134 |
| 20 | 52412270 | 52412766 | 52412469 | 10 | 20 | 22 | 0.948929907 | 0.57038   | DOK5 | ENSG00000101134 |
| 20 | 52412862 | 52413064 | 52413034 | 8  | 10 | 9  | 1.143234603 | 0.378307  | DOK5 | ENSG00000101134 |
| 20 | 52414245 | 52414804 | 52414537 | 11 | 25 | 20 | 1.286757561 | 0.192726  | DOK5 | ENSG00000101134 |
| 20 | 52415346 | 52416086 | 52415907 | 12 | 32 | 27 | 1.224894217 | 0.213361  | DOK5 | ENSG00000101134 |
| 20 | 52416480 | 52416764 | 52416622 | 10 | 14 | 17 | 0.86608682  | 0.662567  | DOK5 | ENSG00000101134 |
| 20 | 52416799 | 52417093 | 52416946 | 9  | 14 | 23 | 0.649565115 | 0.910621  | DOK5 | ENSG00000101134 |
| 20 | 52417854 | 52418035 | 52417963 | 8  | 10 | 17 | 0.635130335 | 0.889407  | DOK5 | ENSG00000101134 |
| 20 | 52418218 | 52419049 | 52418870 | 16 | 42 | 61 | 0.720807741 | 0.952579  | DOK5 | ENSG00000101134 |
| 20 | 52419288 | 52419530 | 52419425 | 14 | 17 | 18 | 0.984603964 | 0.519872  | DOK5 | ENSG00000101134 |
| 20 | 52420798 | 52421127 | 52420948 | 10 | 13 | 12 | 1.11925066  | 0.384109  | DOK5 | ENSG00000101134 |
| 20 | 52422312 | 52422692 | 52422429 | 8  | 14 | 17 | 0.86608682  | 0.662567  | DOK5 | ENSG00000101134 |
| 20 | 52422791 | 52423239 | 52422953 | 13 | 23 | 15 | 1.558956276 | 0.0802366 | DOK5 | ENSG00000101134 |
| 20 | 52423620 | 52423868 | 52423754 | 8  | 10 | 10 | 1.039304184 | 0.464387  | DOK5 | ENSG00000101134 |
| 20 | 52423939 | 52424254 | 52424086 | 11 | 15 | 18 | 0.875203524 | 0.655562  | DOK5 | ENSG00000101134 |
| 20 | 52427914 | 52428128 | 52428063 | 8  | 10 | 13 | 0.816596145 | 0.696946  | DOK5 | ENSG00000101134 |
| 20 | 52428148 | 52428443 | 52428311 | 12 | 15 | 17 | 0.923825942 | 0.593214  | DOK5 | ENSG00000101134 |
| 20 | 52430009 | 52430513 | 52430151 | 10 | 21 | 33 | 0.672490943 | 0.930441  | DOK5 | ENSG00000101134 |
| 20 | 52430638 | 52431063 | 52430771 | 11 | 19 | 16 | 1.222710805 | 0.269115  | DOK5 | ENSG00000101134 |
| 20 | 52431331 | 52432036 | 52431498 | 16 | 34 | 31 | 1.136738952 | 0.299433  | DOK5 | ENSG00000101134 |
| 20 | 52432163 | 52433221 | 52432644 | 35 | 85 | 58 | 1.514917963 | 0.0064514 | DOK5 | ENSG00000101134 |
| 20 | 52433265 | 52434001 | 52433619 | 13 | 32 | 27 | 1.224894217 | 0.213361  | DOK5 | ENSG00000101134 |
| 20 | 52434360 | 52435475 | 52435296 | 16 | 55 | 57 | 1.003466109 | 0.493086  | DOK5 | ENSG00000101134 |
| 20 | 52435544 | 52436036 | 52435857 | 10 | 21 | 31 | 0.714521627 | 0.891579  | DOK5 | ENSG00000101134 |
| 20 | 52436043 | 52436275 | 52436159 | 12 | 13 | 10 | 1.32275078  | 0.240023  | DOK5 | ENSG00000101134 |
| 20 | 52437651 | 52438117 | 52437776 | 12 | 21 | 32 | 0.692869456 | 0.912769  | DOK5 | ENSG00000101134 |
| 20 | 52438121 | 52438386 | 52438224 | 10 | 12 | 29 | 0.450365147 | 0.994327  | DOK5 | ENSG00000101134 |

|    |          |          |          |    |    |    |             |            |      |                 |
|----|----------|----------|----------|----|----|----|-------------|------------|------|-----------------|
| 20 | 52438875 | 52439128 | 52439007 | 8  | 9  | 9  | 1.039304184 | 0.466079   | DOK5 | ENSG00000101134 |
| 20 | 52439142 | 52439395 | 52439238 | 11 | 15 | 14 | 1.10859113  | 0.386477   | DOK5 | ENSG00000101134 |
| 20 | 52439568 | 52439802 | 52439736 | 9  | 12 | 25 | 0.519652092 | 0.977628   | DOK5 | ENSG00000101134 |
| 20 | 52439823 | 52440829 | 52440581 | 17 | 57 | 55 | 1.076422191 | 0.347027   | DOK5 | ENSG00000101134 |
| 20 | 52441996 | 52442329 | 52442162 | 9  | 14 | 10 | 1.417232979 | 0.185113   | DOK5 | ENSG00000101134 |
| 20 | 52442651 | 52443060 | 52442767 | 8  | 16 | 11 | 1.472347594 | 0.147517   | DOK5 | ENSG00000101134 |
| 20 | 52443568 | 52443765 | 52443666 | 10 | 12 | 7  | 1.688869299 | 0.11395    | DOK5 | ENSG00000101134 |
| 20 | 52445499 | 52445881 | 52445702 | 10 | 18 | 22 | 0.85855563  | 0.691398   | DOK5 | ENSG00000101134 |
| 20 | 52447424 | 52447867 | 52447603 | 10 | 19 | 24 | 0.831443347 | 0.733913   | DOK5 | ENSG00000101134 |
| 20 | 52448247 | 52448560 | 52448423 | 10 | 14 | 11 | 1.29913023  | 0.246308   | DOK5 | ENSG00000101134 |
| 20 | 52449499 | 52450187 | 52450016 | 11 | 27 | 26 | 1.077796932 | 0.39044    | DOK5 | ENSG00000101134 |
| 20 | 52450285 | 52450643 | 52450417 | 9  | 14 | 19 | 0.779478138 | 0.771518   | DOK5 | ENSG00000101134 |
| 20 | 52451608 | 52451816 | 52451712 | 8  | 9  | 8  | 1.154782427 | 0.375434   | DOK5 | ENSG00000101134 |
| 20 | 52451921 | 52452215 | 52452068 | 11 | 13 | 7  | 1.818782322 | 0.0805123  | DOK5 | ENSG00000101134 |
| 20 | 52452278 | 52452612 | 52452442 | 17 | 20 | 7  | 2.728173484 | 0.00469378 | DOK5 | ENSG00000101134 |
| 20 | 52453218 | 52453865 | 52453541 | 12 | 29 | 20 | 1.484720263 | 0.0791637  | DOK5 | ENSG00000101134 |
| 20 | 52453927 | 52454269 | 52454098 | 8  | 14 | 12 | 1.199197136 | 0.313881   | DOK5 | ENSG00000101134 |
| 20 | 52454508 | 52454714 | 52454611 | 9  | 10 | 7  | 1.429043253 | 0.21536    | DOK5 | ENSG00000101134 |
| 20 | 52455252 | 52455579 | 52455424 | 12 | 16 | 26 | 0.654376709 | 0.9196     | DOK5 | ENSG00000101134 |
| 20 | 52457192 | 52457389 | 52457304 | 9  | 9  | 16 | 0.611355402 | 0.899375   | DOK5 | ENSG00000101134 |
| 20 | 52457434 | 52458059 | 52457745 | 12 | 26 | 32 | 0.850339787 | 0.736354   | DOK5 | ENSG00000101134 |
| 20 | 52458071 | 52458598 | 52458250 | 12 | 24 | 23 | 1.082608525 | 0.390382   | DOK5 | ENSG00000101134 |
| 20 | 52458870 | 52459260 | 52459005 | 11 | 16 | 19 | 0.883408557 | 0.649033   | DOK5 | ENSG00000101134 |
| 20 | 52459420 | 52459705 | 52459577 | 9  | 12 | 3  | 3.377738599 | 0.00867157 | DOK5 | ENSG00000101134 |
| 20 | 52460275 | 52460463 | 52460344 | 8  | 8  | 12 | 0.719518281 | 0.783103   | DOK5 | ENSG00000101134 |
| 20 | 52462231 | 52462753 | 52462542 | 14 | 27 | 28 | 1.003466109 | 0.495433   | DOK5 | ENSG00000101134 |
| 20 | 52462794 | 52463531 | 52463125 | 12 | 34 | 36 | 0.98312558  | 0.529542   | DOK5 | ENSG00000101134 |
| 20 | 52464562 | 52465425 | 52465125 | 12 | 38 | 41 | 0.965068171 | 0.564419   | DOK5 | ENSG00000101134 |
| 20 | 52469761 | 52469997 | 52469879 | 14 | 16 | 20 | 0.841341482 | 0.704984   | DOK5 | ENSG00000101134 |
| 20 | 52470171 | 52471003 | 52470600 | 15 | 42 | 43 | 1.015683635 | 0.471485   | DOK5 | ENSG00000101134 |
| 20 | 52472716 | 52472973 | 52472844 | 8  | 9  | 8  | 1.154782427 | 0.375434   | DOK5 | ENSG00000101134 |
| 20 | 52473264 | 52474118 | 52473800 | 12 | 40 | 35 | 1.183651988 | 0.229149   | DOK5 | ENSG00000101134 |
| 20 | 52474491 | 52474823 | 52474657 | 13 | 18 | 12 | 1.518983039 | 0.117837   | DOK5 | ENSG00000101134 |
| 20 | 52476925 | 52477297 | 52477104 | 9  | 18 | 8  | 2.194086611 | 0.0206188  | DOK5 | ENSG00000101134 |

|    |          |          |          |    |    |    |             |           |      |                 |
|----|----------|----------|----------|----|----|----|-------------|-----------|------|-----------------|
| 20 | 52477311 | 52477781 | 52477471 | 9  | 19 | 8  | 2.309564854 | 0.0138337 | DOK5 | ENSG00000101134 |
| 20 | 52479070 | 52479882 | 52479255 | 17 | 41 | 52 | 0.823599542 | 0.828362  | DOK5 | ENSG00000101134 |
| 20 | 52480633 | 52480879 | 52480753 | 9  | 12 | 10 | 1.228268581 | 0.305344  | DOK5 | ENSG00000101134 |
| 20 | 52481232 | 52481412 | 52481306 | 9  | 9  | 19 | 0.519652092 | 0.96137   | DOK5 | ENSG00000101134 |
| 20 | 52481440 | 52481829 | 52481619 | 9  | 18 | 34 | 0.5641937   | 0.980847  | DOK5 | ENSG00000101134 |
| 20 | 52483331 | 52483637 | 52483470 | 9  | 14 | 15 | 0.974347673 | 0.530138  | DOK5 | ENSG00000101134 |
| 20 | 52484702 | 52485587 | 52485086 | 11 | 33 | 35 | 0.981565063 | 0.531809  | DOK5 | ENSG00000101134 |
| 20 | 52486066 | 52486508 | 52486245 | 10 | 18 | 9  | 1.97467795  | 0.0349428 | DOK5 | ENSG00000101134 |
| 20 | 52486884 | 52487315 | 52487136 | 11 | 20 | 26 | 0.808347699 | 0.770998  | DOK5 | ENSG00000101134 |
| 20 | 52487322 | 52487836 | 52487501 | 11 | 23 | 23 | 1.039304184 | 0.447157  | DOK5 | ENSG00000101134 |
| 20 | 52488136 | 52488344 | 52488288 | 9  | 10 | 9  | 1.143234603 | 0.378307  | DOK5 | ENSG00000101134 |
| 20 | 52488574 | 52488756 | 52488641 | 8  | 8  | 6  | 1.336248237 | 0.277651  | DOK5 | ENSG00000101134 |
| 20 | 52488932 | 52489144 | 52489012 | 8  | 9  | 8  | 1.154782427 | 0.375434  | DOK5 | ENSG00000101134 |
| 20 | 52491717 | 52491954 | 52491805 | 8  | 11 | 19 | 0.623582511 | 0.908792  | DOK5 | ENSG00000101134 |
| 20 | 52492742 | 52493209 | 52493101 | 10 | 18 | 17 | 1.097043306 | 0.388692  | DOK5 | ENSG00000101134 |
| 20 | 52495170 | 52495441 | 52495305 | 9  | 14 | 16 | 0.917033104 | 0.598778  | DOK5 | ENSG00000101134 |
| 20 | 52496057 | 52496262 | 52496170 | 10 | 12 | 8  | 1.501217155 | 0.168286  | DOK5 | ENSG00000101134 |
| 20 | 52496515 | 52496812 | 52496692 | 11 | 14 | 5  | 2.598260461 | 0.0167748 | DOK5 | ENSG00000101134 |
| 20 | 52496918 | 52497228 | 52497071 | 8  | 13 | 15 | 0.909391161 | 0.604792  | DOK5 | ENSG00000101134 |
| 20 | 52497290 | 52498165 | 52497435 | 12 | 39 | 54 | 0.755857589 | 0.913419  | DOK5 | ENSG00000101134 |
| 20 | 52498897 | 52499236 | 52499066 | 12 | 17 | 11 | 1.558956276 | 0.111389  | DOK5 | ENSG00000101134 |
| 20 | 52500111 | 52500384 | 52500247 | 11 | 15 | 5  | 2.771477825 | 0.0105836 | DOK5 | ENSG00000101134 |
| 20 | 52500404 | 52500639 | 52500499 | 9  | 10 | 8  | 1.27026067  | 0.293854  | DOK5 | ENSG00000101134 |
| 20 | 52500926 | 52501165 | 52501013 | 11 | 13 | 6  | 2.078608368 | 0.0483393 | DOK5 | ENSG00000101134 |
| 20 | 52501178 | 52501484 | 52501331 | 8  | 13 | 8  | 1.616695398 | 0.123553  | DOK5 | ENSG00000101134 |
| 20 | 52501487 | 52501699 | 52501593 | 8  | 9  | 7  | 1.29913023  | 0.286504  | DOK5 | ENSG00000101134 |
| 20 | 52503149 | 52503846 | 52503684 | 14 | 35 | 23 | 1.558956276 | 0.0432947 | DOK5 | ENSG00000101134 |
| 20 | 52505855 | 52506815 | 52506636 | 35 | 81 | 61 | 1.374563599 | 0.028402  | DOK5 | ENSG00000101134 |
| 20 | 52506863 | 52507227 | 52507042 | 13 | 20 | 23 | 0.909391161 | 0.626666  | DOK5 | ENSG00000101134 |
| 20 | 52507872 | 52508128 | 52508000 | 11 | 13 | 16 | 0.855897563 | 0.670115  | DOK5 | ENSG00000101134 |
| 20 | 52508235 | 52508560 | 52508397 | 10 | 14 | 22 | 0.677807077 | 0.884881  | DOK5 | ENSG00000101134 |
| 20 | 52509327 | 52509748 | 52509659 | 10 | 17 | 13 | 1.336248237 | 0.204556  | DOK5 | ENSG00000101134 |
| 20 | 52510674 | 52511102 | 52510923 | 10 | 20 | 17 | 1.212521548 | 0.272468  | DOK5 | ENSG00000101134 |
| 20 | 52511590 | 52511829 | 52511709 | 10 | 12 | 16 | 0.794762023 | 0.738004  | DOK5 | ENSG00000101134 |



|    |          |          |          |    |    |    |             |             |      |                 |
|----|----------|----------|----------|----|----|----|-------------|-------------|------|-----------------|
| 20 | 52512464 | 52512827 | 52512598 | 10 | 16 | 18 | 0.929903744 | 0.58804     | DOK5 | ENSG00000101134 |
| 20 | 52512889 | 52513311 | 52513068 | 12 | 20 | 19 | 1.091269393 | 0.389566    | DOK5 | ENSG00000101134 |
| 20 | 52513939 | 52514311 | 52514132 | 13 | 20 | 13 | 1.558956276 | 0.0943292   | DOK5 | ENSG00000101134 |
| 20 | 52515946 | 52516417 | 52516238 | 13 | 19 | 24 | 0.831443347 | 0.733913    | DOK5 | ENSG00000101134 |
| 20 | 52516492 | 52516945 | 52516671 | 8  | 16 | 23 | 0.736173797 | 0.837668    | DOK5 | ENSG00000101134 |
| 20 | 52517304 | 52517806 | 52517630 | 12 | 20 | 22 | 0.948929907 | 0.57038     | DOK5 | ENSG00000101134 |
| 20 | 52517870 | 52518499 | 52518284 | 16 | 36 | 33 | 1.131007495 | 0.301525    | DOK5 | ENSG00000101134 |
| 20 | 52519448 | 52519913 | 52519734 | 11 | 21 | 17 | 1.27026067  | 0.223413    | DOK5 | ENSG00000101134 |
| 20 | 52520159 | 52520442 | 52520295 | 9  | 13 | 20 | 0.692869456 | 0.861903    | DOK5 | ENSG00000101134 |
| 20 | 52521218 | 52521686 | 52521388 | 16 | 30 | 11 | 2.684869143 | 0.000957822 | DOK5 | ENSG00000101134 |
| 20 | 52522017 | 52522393 | 52522243 | 13 | 18 | 14 | 1.316451967 | 0.209896    | DOK5 | ENSG00000101134 |
| 20 | 52522726 | 52523013 | 52522874 | 11 | 14 | 19 | 0.779478138 | 0.771518    | DOK5 | ENSG00000101134 |
| 20 | 52524117 | 52525178 | 52524816 | 15 | 50 | 62 | 0.841341482 | 0.822247    | DOK5 | ENSG00000101134 |
| 20 | 52526103 | 52526812 | 52526278 | 14 | 29 | 33 | 0.917033104 | 0.636796    | DOK5 | ENSG00000101134 |
| 20 | 52526830 | 52527317 | 52527009 | 9  | 20 | 17 | 1.212521548 | 0.272468    | DOK5 | ENSG00000101134 |
| 20 | 52528211 | 52528501 | 52528323 | 11 | 14 | 9  | 1.558956276 | 0.132279    | DOK5 | ENSG00000101134 |
| 20 | 52528506 | 52528790 | 52528658 | 9  | 14 | 18 | 0.820503303 | 0.720361    | DOK5 | ENSG00000101134 |
| 20 | 52529308 | 52529993 | 52529653 | 31 | 67 | 53 | 1.308753417 | 0.0687015   | DOK5 | ENSG00000101134 |
| 20 | 52531342 | 52531695 | 52531521 | 12 | 16 | 16 | 1.039304184 | 0.455583    | DOK5 | ENSG00000101134 |
| 20 | 52533435 | 52533637 | 52533501 | 8  | 10 | 8  | 1.27026067  | 0.293854    | DOK5 | ENSG00000101134 |
| 20 | 52533674 | 52534075 | 52533835 | 10 | 18 | 11 | 1.645564958 | 0.0828462   | DOK5 | ENSG00000101134 |
| 20 | 52534377 | 52534713 | 52534537 | 11 | 14 | 10 | 1.417232979 | 0.185113    | DOK5 | ENSG00000101134 |
| 20 | 52536420 | 52536693 | 52536549 | 13 | 13 | 10 | 1.32275078  | 0.240023    | DOK5 | ENSG00000101134 |
| 20 | 52537356 | 52537611 | 52537456 | 8  | 11 | 17 | 0.692869456 | 0.843876    | DOK5 | ENSG00000101134 |
| 20 | 52537669 | 52537854 | 52537756 | 8  | 9  | 8  | 1.154782427 | 0.375434    | DOK5 | ENSG00000101134 |
| 20 | 52538026 | 52538392 | 52538169 | 8  | 14 | 20 | 0.742360132 | 0.815839    | DOK5 | ENSG00000101134 |
| 20 | 52538995 | 52539364 | 52539170 | 11 | 16 | 5  | 2.944695189 | 0.00659886  | DOK5 | ENSG00000101134 |
| 20 | 52539659 | 52539891 | 52539712 | 12 | 15 | 19 | 0.831443347 | 0.712423    | DOK5 | ENSG00000101134 |
| 20 | 52540921 | 52541439 | 52541162 | 8  | 19 | 21 | 0.944821986 | 0.574409    | DOK5 | ENSG00000101134 |
| 20 | 52542061 | 52542350 | 52542217 | 8  | 12 | 7  | 1.688869299 | 0.11395     | DOK5 | ENSG00000101134 |
| 20 | 52543102 | 52543495 | 52543268 | 8  | 15 | 20 | 0.791850807 | 0.763134    | DOK5 | ENSG00000101134 |
| 20 | 52543847 | 52544505 | 52544370 | 11 | 26 | 37 | 0.738452973 | 0.889183    | DOK5 | ENSG00000101134 |
| 20 | 52544818 | 52545474 | 52545178 | 11 | 28 | 24 | 1.205592854 | 0.245174    | DOK5 | ENSG00000101134 |
| 20 | 52546663 | 52547190 | 52546816 | 11 | 24 | 20 | 1.237266886 | 0.234075    | DOK5 | ENSG00000101134 |

|    |          |          |          |    |    |    |             |           |      |                 |
|----|----------|----------|----------|----|----|----|-------------|-----------|------|-----------------|
| 20 | 52547202 | 52547712 | 52547534 | 9  | 20 | 19 | 1.091269393 | 0.389566  | DOK5 | ENSG00000101134 |
| 20 | 52548017 | 52548331 | 52548174 | 8  | 13 | 12 | 1.11925066  | 0.384109  | DOK5 | ENSG00000101134 |
| 20 | 52548383 | 52548621 | 52548468 | 13 | 14 | 11 | 1.29913023  | 0.246308  | DOK5 | ENSG00000101134 |
| 20 | 52549074 | 52549530 | 52549351 | 11 | 20 | 21 | 0.992063085 | 0.511305  | DOK5 | ENSG00000101134 |
| 20 | 52549602 | 52549791 | 52549738 | 10 | 12 | 13 | 0.965068171 | 0.538344  | DOK5 | ENSG00000101134 |
| 20 | 52553281 | 52553513 | 52553352 | 8  | 11 | 4  | 2.494330042 | 0.0324033 | DOK5 | ENSG00000101134 |
| 20 | 52553599 | 52554005 | 52553775 | 11 | 17 | 14 | 1.247165021 | 0.261378  | DOK5 | ENSG00000101134 |
| 20 | 52554403 | 52554726 | 52554551 | 13 | 18 | 17 | 1.097043306 | 0.388692  | DOK5 | ENSG00000101134 |
| 20 | 52554730 | 52555224 | 52554909 | 13 | 24 | 27 | 0.927950164 | 0.608665  | DOK5 | ENSG00000101134 |
| 20 | 52555553 | 52555950 | 52555809 | 15 | 21 | 19 | 1.143234603 | 0.33145   | DOK5 | ENSG00000101134 |
| 20 | 52556010 | 52556197 | 52556139 | 8  | 9  | 10 | 0.944821986 | 0.553851  | DOK5 | ENSG00000101134 |
| 20 | 52556767 | 52557267 | 52557093 | 9  | 18 | 15 | 1.234173719 | 0.265435  | DOK5 | ENSG00000101134 |
| 20 | 52557432 | 52557790 | 52557611 | 12 | 18 | 22 | 0.85855563  | 0.691398  | DOK5 | ENSG00000101134 |
| 20 | 52559185 | 52559470 | 52559363 | 8  | 10 | 4  | 2.286469205 | 0.0509017 | DOK5 | ENSG00000101134 |
| 20 | 52559650 | 52559862 | 52559761 | 11 | 13 | 17 | 0.808347699 | 0.728863  | DOK5 | ENSG00000101134 |
| 20 | 52560002 | 52560415 | 52560137 | 8  | 15 | 6  | 2.375552421 | 0.0212094 | DOK5 | ENSG00000101134 |
| 20 | 52560743 | 52561358 | 52560922 | 13 | 30 | 22 | 1.400801292 | 0.107495  | DOK5 | ENSG00000101134 |
| 20 | 52561526 | 52561974 | 52561621 | 8  | 17 | 32 | 0.566893191 | 0.977151  | DOK5 | ENSG00000101134 |
| 20 | 52562437 | 52563124 | 52562721 | 12 | 31 | 23 | 1.385738912 | 0.110791  | DOK5 | ENSG00000101134 |
| 20 | 52563343 | 52563688 | 52563519 | 17 | 22 | 24 | 0.956159849 | 0.562938  | DOK5 | ENSG00000101134 |
| 20 | 52563922 | 52564459 | 52564066 | 12 | 26 | 34 | 0.801748942 | 0.808783  | DOK5 | ENSG00000101134 |
| 20 | 52564478 | 52564849 | 52564657 | 10 | 17 | 18 | 0.984603964 | 0.519872  | DOK5 | ENSG00000101134 |
| 20 | 52565743 | 52565956 | 52565834 | 9  | 12 | 17 | 0.750608578 | 0.78992   | DOK5 | ENSG00000101134 |
| 20 | 52566922 | 52567236 | 52567083 | 14 | 18 | 14 | 1.316451967 | 0.209896  | DOK5 | ENSG00000101134 |
| 20 | 52567328 | 52567524 | 52567426 | 9  | 10 | 10 | 1.039304184 | 0.464387  | DOK5 | ENSG00000101134 |
| 20 | 52567573 | 52567787 | 52567680 | 8  | 10 | 14 | 0.762156402 | 0.758589  | DOK5 | ENSG00000101134 |
| 20 | 52567849 | 52568071 | 52567960 | 8  | 8  | 11 | 0.779478138 | 0.719708  | DOK5 | ENSG00000101134 |
| 20 | 52569927 | 52570388 | 52570106 | 9  | 18 | 26 | 0.731362204 | 0.856292  | DOK5 | ENSG00000101134 |
| 20 | 52570754 | 52571139 | 52570951 | 14 | 24 | 25 | 0.999330946 | 0.501681  | DOK5 | ENSG00000101134 |
| 20 | 52571619 | 52572126 | 52571798 | 12 | 25 | 25 | 1.039304184 | 0.44499   | DOK5 | ENSG00000101134 |
| 20 | 52573017 | 52573210 | 52573186 | 8  | 9  | 13 | 0.742360132 | 0.770276  | DOK5 | ENSG00000101134 |
| 20 | 52573805 | 52574270 | 52573984 | 8  | 19 | 27 | 0.742360132 | 0.849695  | DOK5 | ENSG00000101134 |
| 20 | 52574316 | 52575085 | 52574618 | 10 | 30 | 29 | 1.073947657 | 0.390181  | DOK5 | ENSG00000101134 |
| 20 | 52575595 | 52576713 | 52576280 | 12 | 48 | 42 | 1.184323373 | 0.208125  | DOK5 | ENSG00000101134 |

|    |          |          |          |    |    |    |             |            |      |                 |
|----|----------|----------|----------|----|----|----|-------------|------------|------|-----------------|
| 20 | 52576867 | 52577663 | 52577484 | 13 | 33 | 35 | 0.981565063 | 0.531809   | DOK5 | ENSG00000101134 |
| 20 | 52578280 | 52578747 | 52578498 | 13 | 25 | 18 | 1.422205726 | 0.118245   | DOK5 | ENSG00000101134 |
| 20 | 52578820 | 52579108 | 52578976 | 16 | 18 | 14 | 1.316451967 | 0.209896   | DOK5 | ENSG00000101134 |
| 20 | 52579639 | 52579825 | 52579732 | 9  | 9  | 9  | 1.039304184 | 0.466079   | DOK5 | ENSG00000101134 |
| 20 | 52581219 | 52581873 | 52581694 | 12 | 29 | 13 | 2.227080395 | 0.00479511 | DOK5 | ENSG00000101134 |
| 20 | 52582003 | 52582316 | 52582148 | 10 | 14 | 22 | 0.677807077 | 0.884881   | DOK5 | ENSG00000101134 |
| 20 | 52582584 | 52583267 | 52582925 | 12 | 33 | 29 | 1.177878075 | 0.255589   | DOK5 | ENSG00000101134 |
| 20 | 52585418 | 52585690 | 52585534 | 9  | 13 | 8  | 1.616695398 | 0.123553   | DOK5 | ENSG00000101134 |
| 20 | 52585692 | 52585958 | 52585861 | 9  | 13 | 14 | 0.970017239 | 0.534076   | DOK5 | ENSG00000101134 |
| 20 | 52585990 | 52586333 | 52586161 | 10 | 15 | 19 | 0.831443347 | 0.712423   | DOK5 | ENSG00000101134 |
| 20 | 52586762 | 52586987 | 52586893 | 9  | 10 | 9  | 1.143234603 | 0.378307   | DOK5 | ENSG00000101134 |
| 20 | 52588236 | 52588431 | 52588407 | 8  | 9  | 9  | 1.039304184 | 0.466079   | DOK5 | ENSG00000101134 |
| 20 | 52588858 | 52589054 | 52588943 | 8  | 9  | 7  | 1.29913023  | 0.286504   | DOK5 | ENSG00000101134 |
| 20 | 52589411 | 52589684 | 52589531 | 10 | 13 | 19 | 0.727512929 | 0.824686   | DOK5 | ENSG00000101134 |
| 20 | 52591163 | 52591357 | 52591260 | 8  | 8  | 9  | 0.935373766 | 0.560286   | DOK5 | ENSG00000101134 |
| 20 | 52591747 | 52592062 | 52591904 | 8  | 11 | 13 | 0.890832158 | 0.618492   | DOK5 | ENSG00000101134 |
| 20 | 52593388 | 52593672 | 52593548 | 11 | 13 | 5  | 2.425043097 | 0.0262442  | DOK5 | ENSG00000101134 |
| 20 | 52596950 | 52597402 | 52597241 | 10 | 20 | 19 | 1.091269393 | 0.389566   | DOK5 | ENSG00000101134 |
| 20 | 52598971 | 52600236 | 52599799 | 16 | 64 | 44 | 1.501217155 | 0.0169698  | DOK5 | ENSG00000101134 |
| 20 | 52600352 | 52600571 | 52600428 | 10 | 10 | 11 | 0.952695502 | 0.548138   | DOK5 | ENSG00000101134 |
| 20 | 52604808 | 52605461 | 52604987 | 10 | 25 | 46 | 0.57493423  | 0.990021   | DOK5 | ENSG00000101134 |
| 20 | 52605810 | 52606290 | 52606122 | 13 | 21 | 24 | 0.914587682 | 0.621823   | DOK5 | ENSG00000101134 |
| 20 | 52607546 | 52608020 | 52607692 | 10 | 20 | 22 | 0.948929907 | 0.57038    | DOK5 | ENSG00000101134 |
| 20 | 52608821 | 52609623 | 52609082 | 12 | 36 | 26 | 1.42423166  | 0.0786584  | DOK5 | ENSG00000101134 |
| 20 | 52611141 | 52611435 | 52611274 | 12 | 15 | 22 | 0.722994215 | 0.845414   | DOK5 | ENSG00000101134 |
| 20 | 52612039 | 52612253 | 52612146 | 10 | 10 | 19 | 0.571617301 | 0.938875   | DOK5 | ENSG00000101134 |
| 20 | 52612676 | 52612930 | 52612803 | 14 | 15 | 10 | 1.511715177 | 0.140236   | DOK5 | ENSG00000101134 |
| 20 | 52614477 | 52614818 | 52614647 | 10 | 16 | 15 | 1.104260696 | 0.387363   | DOK5 | ENSG00000101134 |
| 20 | 52616028 | 52616294 | 52616161 | 11 | 13 | 9  | 1.455025858 | 0.177172   | DOK5 | ENSG00000101134 |
| 20 | 52619514 | 52620057 | 52619659 | 10 | 22 | 19 | 1.195199812 | 0.27834    | DOK5 | ENSG00000101134 |
| 20 | 52620818 | 52621030 | 52620924 | 8  | 9  | 8  | 1.154782427 | 0.375434   | DOK5 | ENSG00000101134 |
| 20 | 52621213 | 52621716 | 52621344 | 10 | 22 | 24 | 0.956159849 | 0.562938   | DOK5 | ENSG00000101134 |
| 20 | 52621760 | 52622041 | 52621900 | 10 | 14 | 13 | 1.113540197 | 0.385405   | DOK5 | ENSG00000101134 |
| 20 | 52622699 | 52622932 | 52622815 | 11 | 12 | 18 | 0.711102863 | 0.834017   | DOK5 | ENSG00000101134 |

|    |          |          |          |    |    |    |             |            |      |                 |
|----|----------|----------|----------|----|----|----|-------------|------------|------|-----------------|
| 20 | 52623742 | 52624458 | 52624070 | 14 | 30 | 32 | 0.976316052 | 0.539065   | DOK5 | ENSG00000101134 |
| 20 | 52624552 | 52624945 | 52624766 | 11 | 18 | 19 | 0.987338975 | 0.516858   | DOK5 | ENSG00000101134 |
| 20 | 52625081 | 52625404 | 52625239 | 15 | 18 | 17 | 1.097043306 | 0.388692   | DOK5 | ENSG00000101134 |
| 20 | 52626481 | 52626821 | 52626651 | 12 | 17 | 15 | 1.169217207 | 0.323156   | DOK5 | ENSG00000101134 |
| 20 | 52627795 | 52628102 | 52627953 | 8  | 13 | 26 | 0.538898466 | 0.974306   | DOK5 | ENSG00000101134 |
| 20 | 52628242 | 52628534 | 52628419 | 8  | 12 | 8  | 1.501217155 | 0.168286   | DOK5 | ENSG00000101134 |
| 20 | 52631079 | 52631411 | 52631245 | 9  | 15 | 4  | 3.32577339  | 0.00462646 | DOK5 | ENSG00000101134 |
| 20 | 52635040 | 52635718 | 52635546 | 17 | 39 | 29 | 1.385738912 | 0.0861361  | DOK5 | ENSG00000101134 |
| 20 | 52636420 | 52636779 | 52636560 | 11 | 15 | 15 | 1.039304184 | 0.456923   | DOK5 | ENSG00000101134 |
| 20 | 52636981 | 52637312 | 52637146 | 11 | 16 | 21 | 0.803098688 | 0.755224   | DOK5 | ENSG00000101134 |
| 20 | 52637529 | 52637751 | 52637665 | 11 | 13 | 7  | 1.818782322 | 0.0805123  | DOK5 | ENSG00000101134 |
| 20 | 52637975 | 52638648 | 52638311 | 10 | 25 | 34 | 0.772054537 | 0.844426   | DOK5 | ENSG00000101134 |
| 20 | 52639491 | 52639975 | 52639670 | 14 | 24 | 20 | 1.237266886 | 0.234075   | DOK5 | ENSG00000101134 |
| 20 | 52640020 | 52640534 | 52640442 | 12 | 24 | 12 | 1.998661893 | 0.0177296  | DOK5 | ENSG00000101134 |
| 20 | 52640993 | 52641175 | 52641084 | 8  | 9  | 13 | 0.742360132 | 0.770276   | DOK5 | ENSG00000101134 |
| 20 | 52641427 | 52642299 | 52641772 | 12 | 42 | 37 | 1.176054735 | 0.232234   | DOK5 | ENSG00000101134 |
| 20 | 52642747 | 52642928 | 52642842 | 9  | 10 | 4  | 2.286469205 | 0.0509017  | DOK5 | ENSG00000101134 |
| 20 | 52644810 | 52645139 | 52644977 | 11 | 14 | 3  | 3.897390691 | 0.00295882 | DOK5 | ENSG00000101134 |
| 20 | 52645470 | 52645840 | 52645555 | 10 | 16 | 27 | 0.631006112 | 0.93773    | DOK5 | ENSG00000101134 |
| 20 | 52646428 | 52646618 | 52646580 | 8  | 11 | 20 | 0.593888105 | 0.931657   | DOK5 | ENSG00000101134 |
| 20 | 52647327 | 52647639 | 52647479 | 12 | 15 | 20 | 0.791850807 | 0.763134   | DOK5 | ENSG00000101134 |
| 20 | 52647700 | 52648366 | 52647879 | 11 | 29 | 30 | 1.005778243 | 0.491622   | DOK5 | ENSG00000101134 |
| 20 | 52648411 | 52648926 | 52648747 | 10 | 23 | 26 | 0.923825942 | 0.612844   | DOK5 | ENSG00000101134 |
| 20 | 52649036 | 52649241 | 52649138 | 9  | 11 | 9  | 1.247165021 | 0.300052   | DOK5 | ENSG00000101134 |
| 20 | 52649353 | 52649830 | 52649532 | 12 | 22 | 20 | 1.138285535 | 0.33303    | DOK5 | ENSG00000101134 |
| 20 | 52649898 | 52650342 | 52650191 | 12 | 22 | 23 | 0.995999843 | 0.506279   | DOK5 | ENSG00000101134 |
| 20 | 52650488 | 52650976 | 52650667 | 12 | 22 | 29 | 0.796799875 | 0.797061   | DOK5 | ENSG00000101134 |
| 20 | 52651483 | 52651719 | 52651601 | 8  | 11 | 20 | 0.593888105 | 0.931657   | DOK5 | ENSG00000101134 |
| 20 | 52651871 | 52652191 | 52652031 | 12 | 16 | 32 | 0.535399125 | 0.984936   | DOK5 | ENSG00000101134 |
| 20 | 52653114 | 52653650 | 52653382 | 12 | 22 | 21 | 1.086545284 | 0.390103   | DOK5 | ENSG00000101134 |
| 20 | 52653714 | 52653956 | 52653835 | 8  | 10 | 7  | 1.429043253 | 0.21536    | DOK5 | ENSG00000101134 |
| 20 | 52654439 | 52654638 | 52654584 | 8  | 9  | 10 | 0.944821986 | 0.553851   | DOK5 | ENSG00000101134 |
| 20 | 52655000 | 52655308 | 52655154 | 10 | 13 | 17 | 0.808347699 | 0.728863   | DOK5 | ENSG00000101134 |
| 20 | 52655340 | 52655527 | 52655382 | 9  | 10 | 13 | 0.816596145 | 0.696946   | DOK5 | ENSG00000101134 |

|    |          |          |          |    |    |    |             |            |      |                 |
|----|----------|----------|----------|----|----|----|-------------|------------|------|-----------------|
| 20 | 52656392 | 52657169 | 52656796 | 10 | 31 | 31 | 1.039304184 | 0.438963   | DOK5 | ENSG00000101134 |
| 20 | 52658220 | 52658654 | 52658513 | 8  | 15 | 11 | 1.385738912 | 0.19225    | DOK5 | ENSG00000101134 |
| 20 | 52659706 | 52659960 | 52659824 | 8  | 10 | 21 | 0.519652092 | 0.967869   | DOK5 | ENSG00000101134 |
| 20 | 52660104 | 52661095 | 52660283 | 12 | 42 | 38 | 1.145899485 | 0.268268   | DOK5 | ENSG00000101134 |
| 20 | 52661644 | 52662230 | 52661807 | 10 | 26 | 23 | 1.169217207 | 0.28753    | DOK5 | ENSG00000101134 |
| 20 | 52662684 | 52662873 | 52662778 | 9  | 9  | 10 | 0.944821986 | 0.553851   | DOK5 | ENSG00000101134 |
| 20 | 52662964 | 52663293 | 52663128 | 8  | 12 | 18 | 0.711102863 | 0.834017   | DOK5 | ENSG00000101134 |
| 20 | 52664107 | 52664600 | 52664262 | 13 | 24 | 23 | 1.082608525 | 0.390382   | DOK5 | ENSG00000101134 |
| 20 | 52664771 | 52664992 | 52664877 | 11 | 11 | 17 | 0.692869456 | 0.843876   | DOK5 | ENSG00000101134 |
| 20 | 52664999 | 52665240 | 52665166 | 9  | 12 | 15 | 0.84443465  | 0.678289   | DOK5 | ENSG00000101134 |
| 20 | 52665274 | 52665647 | 52665451 | 11 | 17 | 9  | 1.870747532 | 0.0498299  | DOK5 | ENSG00000101134 |
| 20 | 52666003 | 52666657 | 52666359 | 9  | 26 | 19 | 1.403060649 | 0.122336   | DOK5 | ENSG00000101134 |
| 20 | 52667558 | 52668203 | 52668082 | 12 | 28 | 23 | 1.255825889 | 0.202607   | DOK5 | ENSG00000101134 |
| 20 | 52669353 | 52669680 | 52669532 | 12 | 16 | 19 | 0.883408557 | 0.649033   | DOK5 | ENSG00000101134 |
| 20 | 52670581 | 52671174 | 52670760 | 15 | 29 | 23 | 1.29913023  | 0.167378   | DOK5 | ENSG00000101134 |
| 20 | 52672201 | 52672520 | 52672351 | 12 | 16 | 14 | 1.177878075 | 0.320433   | DOK5 | ENSG00000101134 |
| 20 | 52672543 | 52672900 | 52672721 | 9  | 15 | 24 | 0.665154678 | 0.903869   | DOK5 | ENSG00000101134 |
| 20 | 52672926 | 52673503 | 52673227 | 8  | 21 | 27 | 0.816596145 | 0.764635   | DOK5 | ENSG00000101134 |
| 20 | 52674093 | 52674718 | 52674270 | 10 | 26 | 37 | 0.738452973 | 0.889183   | DOK5 | ENSG00000101134 |
| 20 | 52674836 | 52675710 | 52675104 | 10 | 38 | 45 | 0.8811492   | 0.721188   | DOK5 | ENSG00000101134 |
| 20 | 52675829 | 52676358 | 52676173 | 10 | 23 | 24 | 0.997732017 | 0.503931   | DOK5 | ENSG00000101134 |
| 20 | 52676714 | 52677109 | 52676935 | 11 | 17 | 20 | 0.890832158 | 0.642922   | DOK5 | ENSG00000101134 |
| 20 | 52677120 | 52677358 | 52677252 | 8  | 11 | 11 | 1.039304184 | 0.462773   | DOK5 | ENSG00000101134 |
| 20 | 52677451 | 52677879 | 52677609 | 12 | 21 | 18 | 1.203404845 | 0.275531   | DOK5 | ENSG00000101134 |
| 20 | 52677913 | 52678153 | 52678084 | 10 | 13 | 17 | 0.808347699 | 0.728863   | DOK5 | ENSG00000101134 |
| 20 | 52678366 | 52679197 | 52678538 | 14 | 47 | 25 | 1.918715417 | 0.00292519 | DOK5 | ENSG00000101134 |
| 20 | 52679497 | 52679940 | 52679669 | 10 | 20 | 27 | 0.779478138 | 0.809588   | DOK5 | ENSG00000101134 |
| 20 | 52680205 | 52680776 | 52680304 | 16 | 28 | 23 | 1.255825889 | 0.202607   | DOK5 | ENSG00000101134 |
| 20 | 52682225 | 52682417 | 52682321 | 9  | 10 | 11 | 0.952695502 | 0.548138   | DOK5 | ENSG00000101134 |
| 20 | 52683506 | 52683712 | 52683627 | 8  | 9  | 17 | 0.577391213 | 0.925885   | DOK5 | ENSG00000101134 |
| 20 | 52686021 | 52686244 | 52686126 | 8  | 9  | 7  | 1.29913023  | 0.286504   | DOK5 | ENSG00000101134 |
| 20 | 52686923 | 52687693 | 52687308 | 10 | 30 | 38 | 0.826113582 | 0.788867   | DOK5 | ENSG00000101134 |
| 20 | 52688321 | 52688554 | 52688437 | 10 | 10 | 22 | 0.497058523 | 0.977096   | DOK5 | ENSG00000101134 |
| 20 | 52689236 | 52689602 | 52689410 | 9  | 15 | 13 | 1.187776211 | 0.317363   | DOK5 | ENSG00000101134 |

|    |          |          |          |    |     |     |             |             |      |                 |
|----|----------|----------|----------|----|-----|-----|-------------|-------------|------|-----------------|
| 20 | 52689670 | 52690877 | 52690424 | 17 | 62  | 48  | 1.336248237 | 0.0626522   | DOK5 | ENSG00000101134 |
| 20 | 52690926 | 52691300 | 52691135 | 11 | 16  | 18  | 0.929903744 | 0.58804     | DOK5 | ENSG00000101134 |
| 20 | 52691887 | 52692320 | 52692147 | 9  | 17  | 18  | 0.984603964 | 0.519872    | DOK5 | ENSG00000101134 |
| 20 | 52693292 | 52694284 | 52694119 | 11 | 40  | 46  | 0.906627054 | 0.678204    | DOK5 | ENSG00000101134 |
| 20 | 52695388 | 52696158 | 52695858 | 13 | 31  | 29  | 1.10859113  | 0.342043    | DOK5 | ENSG00000101134 |
| 20 | 52696612 | 52697247 | 52696929 | 18 | 40  | 55  | 0.760919135 | 0.910493    | DOK5 | ENSG00000101134 |
| 20 | 52697552 | 52698072 | 52697894 | 15 | 31  | 40  | 0.811164241 | 0.815118    | DOK5 | ENSG00000101134 |
| 20 | 52698111 | 52700453 | 52698880 | 61 | 224 | 161 | 1.443478034 | 0.000164517 | DOK5 | ENSG00000101134 |
| 20 | 52701096 | 52701677 | 52701275 | 9  | 23  | 29  | 0.831443347 | 0.752665    | DOK5 | ENSG00000101134 |
| 20 | 52702084 | 52702498 | 52702263 | 9  | 17  | 26  | 0.692869456 | 0.890806    | DOK5 | ENSG00000101134 |
| 20 | 52704062 | 52704343 | 52704204 | 9  | 14  | 18  | 0.820503303 | 0.720361    | DOK5 | ENSG00000101134 |
| 20 | 52704487 | 52704934 | 52704772 | 13 | 20  | 13  | 1.558956276 | 0.0943292   | DOK5 | ENSG00000101134 |
| 20 | 52705577 | 52705807 | 52705692 | 8  | 10  | 9   | 1.143234603 | 0.378307    | DOK5 | ENSG00000101134 |
| 20 | 52707395 | 52707941 | 52707574 | 13 | 27  | 23  | 1.212521548 | 0.242672    | DOK5 | ENSG00000101134 |
| 20 | 52708173 | 52708467 | 52708294 | 8  | 13  | 9   | 1.455025858 | 0.177172    | DOK5 | ENSG00000101134 |
| 20 | 52708747 | 52709261 | 52708990 | 10 | 21  | 41  | 0.54439743  | 0.991484    | DOK5 | ENSG00000101134 |
| 20 | 52709844 | 52710024 | 52709934 | 9  | 10  | 10  | 1.039304184 | 0.464387    | DOK5 | ENSG00000101134 |
| 20 | 52710546 | 52710990 | 52710725 | 9  | 18  | 12  | 1.518983039 | 0.117837    | DOK5 | ENSG00000101134 |
| 20 | 52711674 | 52711863 | 52711768 | 8  | 9   | 11  | 0.86608682  | 0.635181    | DOK5 | ENSG00000101134 |
| 20 | 52713756 | 52714074 | 52713937 | 8  | 12  | 23  | 0.562956433 | 0.958014    | DOK5 | ENSG00000101134 |
| 20 | 52715368 | 52716327 | 52715568 | 12 | 45  | 40  | 1.166048597 | 0.236372    | DOK5 | ENSG00000101134 |
| 20 | 52716976 | 52717176 | 52717076 | 10 | 13  | 13  | 1.039304184 | 0.45974     | DOK5 | ENSG00000101134 |
| 20 | 52717748 | 52718368 | 52718078 | 15 | 36  | 38  | 0.986006534 | 0.525206    |      | ENSG00000210815 |
| 20 | 52718371 | 52719350 | 52718710 | 38 | 76  | 69  | 1.143234603 | 0.208288    |      | ENSG00000210815 |
| 20 | 52720490 | 52721722 | 52721248 | 13 | 56  | 48  | 1.2089865   | 0.163943    |      | ENSG00000210815 |
| 20 | 52721741 | 52722039 | 52721877 | 14 | 17  | 16  | 1.100439724 | 0.388093    |      | ENSG00000210815 |
| 20 | 52722622 | 52722953 | 52722794 | 11 | 16  | 16  | 1.039304184 | 0.455583    |      | ENSG00000210815 |
| 20 | 52723393 | 52724242 | 52724063 | 16 | 44  | 32  | 1.417232979 | 0.062001    |      | ENSG00000210815 |
| 20 | 52724777 | 52725250 | 52725084 | 15 | 25  | 32  | 0.818845721 | 0.77985     |      | ENSG00000210815 |
| 20 | 52725397 | 52725997 | 52725818 | 11 | 25  | 30  | 0.871674477 | 0.699445    |      | ENSG00000210815 |
| 20 | 52726390 | 52726747 | 52726568 | 10 | 15  | 16  | 0.978168644 | 0.526483    |      | ENSG00000210815 |
| 20 | 52727008 | 52728176 | 52727631 | 11 | 52  | 35  | 1.530086716 | 0.0229137   |      | ENSG00000210815 |
| 20 | 52728344 | 52728574 | 52728486 | 8  | 11  | 21  | 0.566893191 | 0.949414    |      | ENSG00000210815 |
| 20 | 52730002 | 52730222 | 52730112 | 13 | 14  | 5   | 2.598260461 | 0.0167748   |      | ENSG00000210815 |

|    |          |          |          |    |     |    |             |           |                 |
|----|----------|----------|----------|----|-----|----|-------------|-----------|-----------------|
| 20 | 52730255 | 52731794 | 52731008 | 26 | 111 | 88 | 1.307888412 | 0.0287071 | ENSG00000210815 |
| 20 | 52731835 | 52732357 | 52732096 | 16 | 28  | 25 | 1.159223898 | 0.291166  | ENSG00000210815 |
| 20 | 52732922 | 52733129 | 52732999 | 10 | 11  | 23 | 0.519652092 | 0.973215  | ENSG00000210815 |
| 20 | 52733196 | 52733520 | 52733361 | 10 | 14  | 13 | 1.113540197 | 0.385405  | ENSG00000210815 |
| 20 | 52733545 | 52733997 | 52733778 | 10 | 20  | 31 | 0.682043371 | 0.91767   | ENSG00000210815 |
| 20 | 52734253 | 52735490 | 52734671 | 48 | 114 | 53 | 2.213332985 | 2.78E-07  | ENSG00000210815 |
| 20 | 52735779 | 52736729 | 52735958 | 10 | 37  | 41 | 0.940322833 | 0.60943   | ENSG00000210815 |
| 20 | 52737361 | 52737641 | 52737474 | 10 | 12  | 10 | 1.228268581 | 0.305344  | ENSG00000210815 |
| 20 | 52738242 | 52739209 | 52738451 | 12 | 43  | 29 | 1.524312804 | 0.0354173 | ENSG00000210815 |
| 20 | 52741183 | 52741729 | 52741388 | 18 | 32  | 34 | 0.979915374 | 0.534148  | ENSG00000210815 |
| 20 | 52741743 | 52742412 | 52742086 | 13 | 30  | 21 | 1.464474078 | 0.0824908 | ENSG00000210815 |
| 20 | 52742834 | 52743296 | 52743009 | 11 | 20  | 29 | 0.727512929 | 0.872335  | ENSG00000210815 |
| 20 | 52743503 | 52743841 | 52743672 | 10 | 15  | 23 | 0.692869456 | 0.877389  | ENSG00000210815 |
| 20 | 52744008 | 52744261 | 52744126 | 9  | 11  | 9  | 1.247165021 | 0.300052  | ENSG00000210815 |
| 20 | 52744601 | 52744850 | 52744725 | 8  | 11  | 10 | 1.133786383 | 0.380636  | ENSG00000210815 |
| 20 | 52745010 | 52745202 | 52745086 | 8  | 10  | 19 | 0.571617301 | 0.938875  | ENSG00000210815 |
| 20 | 52747038 | 52747735 | 52747168 | 11 | 31  | 27 | 1.187776211 | 0.251797  | ENSG00000210815 |
| 20 | 52750793 | 52751108 | 52750950 | 9  | 14  | 18 | 0.820503303 | 0.720361  | ENSG00000210815 |
| 20 | 52751141 | 52751429 | 52751285 | 8  | 10  | 10 | 1.039304184 | 0.464387  | ENSG00000210815 |
| 20 | 52753207 | 52753621 | 52753386 | 8  | 15  | 21 | 0.755857589 | 0.807439  | ENSG00000210815 |
| 20 | 52753979 | 52754606 | 52754427 | 12 | 28  | 22 | 1.310427015 | 0.164056  | ENSG00000210815 |
| 20 | 52755039 | 52755234 | 52755136 | 10 | 11  | 15 | 0.779478138 | 0.747877  | ENSG00000210815 |
| 20 | 52756224 | 52756420 | 52756364 | 10 | 11  | 14 | 0.831443347 | 0.68719   | ENSG00000210815 |
| 20 | 52756550 | 52756926 | 52756807 | 13 | 19  | 11 | 1.73217364  | 0.0607469 | ENSG00000210815 |
| 20 | 52757655 | 52757988 | 52757817 | 10 | 15  | 17 | 0.923825942 | 0.593214  | ENSG00000210815 |
| 20 | 52761160 | 52762108 | 52761755 | 10 | 38  | 39 | 1.01332158  | 0.477007  | ENSG00000210815 |
| 20 | 52762145 | 52762408 | 52762310 | 8  | 11  | 15 | 0.779478138 | 0.747877  | ENSG00000210815 |
| 20 | 52764666 | 52765247 | 52764965 | 10 | 25  | 25 | 1.039304184 | 0.44499   | ENSG00000210815 |
| 20 | 52765272 | 52765614 | 52765443 | 9  | 14  | 16 | 0.917033104 | 0.598778  | ENSG00000210815 |
| 20 | 52765772 | 52766107 | 52765939 | 8  | 13  | 11 | 1.212521548 | 0.309909  | ENSG00000210815 |
| 20 | 52766600 | 52767274 | 52766811 | 13 | 29  | 24 | 1.247165021 | 0.205527  | ENSG00000210815 |
| 20 | 52768116 | 52768546 | 52768243 | 13 | 25  | 16 | 1.589524046 | 0.0646994 | ENSG00000210815 |
| 20 | 52768892 | 52769218 | 52769044 | 8  | 11  | 5  | 2.078608368 | 0.0614303 | ENSG00000210815 |
| 20 | 52769227 | 52769525 | 52769376 | 9  | 13  | 9  | 1.455025858 | 0.177172  | ENSG00000210815 |

|    |          |          |          |    |    |    |             |            |                 |
|----|----------|----------|----------|----|----|----|-------------|------------|-----------------|
| 20 | 52770120 | 52770336 | 52770228 | 10 | 12 | 7  | 1.688869299 | 0.11395    | ENSG00000210815 |
| 20 | 52770392 | 52770683 | 52770540 | 9  | 12 | 9  | 1.35109544  | 0.232899   | ENSG00000210815 |
| 20 | 52771907 | 52772278 | 52772018 | 14 | 20 | 25 | 0.839437995 | 0.727499   | ENSG00000210815 |
| 20 | 52772686 | 52773008 | 52772847 | 8  | 13 | 11 | 1.212521548 | 0.309909   | ENSG00000210815 |
| 20 | 52773110 | 52773435 | 52773272 | 8  | 12 | 10 | 1.228268581 | 0.305344   | ENSG00000210815 |
| 20 | 52773509 | 52773858 | 52773665 | 8  | 12 | 14 | 0.900730293 | 0.611333   | ENSG00000210815 |
| 20 | 52775991 | 52776253 | 52776106 | 8  | 11 | 9  | 1.247165021 | 0.300052   | ENSG00000210815 |
| 20 | 52776641 | 52777352 | 52777027 | 19 | 50 | 44 | 1.177878075 | 0.210824   | ENSG00000210815 |
| 20 | 52779407 | 52779608 | 52779451 | 9  | 11 | 14 | 0.831443347 | 0.68719    | ENSG00000210815 |
| 20 | 52780437 | 52780625 | 52780512 | 8  | 8  | 13 | 0.668124118 | 0.835294   | ENSG00000210815 |
| 20 | 52782530 | 52782739 | 52782635 | 10 | 10 | 11 | 0.952695502 | 0.548138   | ENSG00000210815 |
| 20 | 52783211 | 52783465 | 52783338 | 8  | 10 | 8  | 1.27026067  | 0.293854   | ENSG00000210815 |
| 20 | 52783857 | 52784195 | 52784026 | 12 | 16 | 22 | 0.768181354 | 0.79945    | ENSG00000210815 |
| 20 | 52785442 | 52785734 | 52785588 | 9  | 15 | 19 | 0.831443347 | 0.712423   | ENSG00000210815 |
| 20 | 52786217 | 52786551 | 52786384 | 9  | 13 | 2  | 4.850086193 | 0.00164564 | ENSG00000210815 |
| 20 | 52789655 | 52789928 | 52789815 | 8  | 11 | 14 | 0.831443347 | 0.68719    | ENSG00000210815 |
| 20 | 52790578 | 52791176 | 52790757 | 13 | 29 | 35 | 0.86608682  | 0.721698   | ENSG00000210815 |
| 20 | 52793784 | 52794074 | 52793929 | 9  | 12 | 7  | 1.688869299 | 0.11395    | ENSG00000210815 |
| 20 | 52794479 | 52794917 | 52794617 | 8  | 16 | 15 | 1.104260696 | 0.387363   | ENSG00000210815 |
| 20 | 52797606 | 52797823 | 52797756 | 8  | 9  | 10 | 0.944821986 | 0.553851   | ENSG00000210815 |
| 20 | 52799093 | 52799312 | 52799202 | 8  | 10 | 8  | 1.27026067  | 0.293854   | ENSG00000210815 |
| 20 | 52801087 | 52801320 | 52801227 | 8  | 10 | 14 | 0.762156402 | 0.758589   | ENSG00000210815 |
| 20 | 52809062 | 52809556 | 52809241 | 11 | 22 | 30 | 0.771096653 | 0.831099   | ENSG00000210815 |
| 20 | 52813223 | 52813825 | 52813597 | 13 | 27 | 19 | 1.455025858 | 0.0967688  | ENSG00000210815 |
| 20 | 52813937 | 52814148 | 52814042 | 9  | 10 | 11 | 0.952695502 | 0.548138   | ENSG00000210815 |
| 20 | 52815114 | 52815417 | 52815265 | 10 | 15 | 9  | 1.662886695 | 0.0970566  | ENSG00000210815 |
| 20 | 52815995 | 52816260 | 52816152 | 11 | 14 | 8  | 1.73217364  | 0.0890835  | ENSG00000210815 |
| 20 | 52816298 | 52816619 | 52816454 | 12 | 14 | 12 | 1.199197136 | 0.313881   | ENSG00000210815 |
| 20 | 52817620 | 52817955 | 52817788 | 8  | 10 | 14 | 0.762156402 | 0.758589   | ENSG00000210815 |
| 20 | 52819834 | 52820094 | 52819960 | 10 | 12 | 21 | 0.614134291 | 0.924528   | ENSG00000210815 |
| 20 | 52820832 | 52821082 | 52820931 | 10 | 11 | 25 | 0.479678854 | 0.986393   | ENSG00000210815 |
| 20 | 52821144 | 52821482 | 52821302 | 12 | 16 | 17 | 0.981565063 | 0.523072   | ENSG00000210815 |
| 20 | 52821818 | 52822203 | 52822024 | 10 | 17 | 18 | 0.984603964 | 0.519872   | ENSG00000210815 |
| 20 | 52824413 | 52824652 | 52824509 | 9  | 11 | 8  | 1.385738912 | 0.224757   | ENSG00000210815 |



|    |          |          |          |    |    |    |             |           |                 |
|----|----------|----------|----------|----|----|----|-------------|-----------|-----------------|
| 20 | 52825009 | 52825214 | 52825107 | 8  | 9  | 3  | 2.598260461 | 0.0397929 | ENSG00000210815 |
| 20 | 52825455 | 52825686 | 52825580 | 12 | 12 | 7  | 1.688869299 | 0.11395   | ENSG00000210815 |
| 20 | 52826657 | 52827052 | 52826826 | 16 | 22 | 25 | 0.919384471 | 0.617223  | ENSG00000210815 |
| 20 | 52827800 | 52828136 | 52827963 | 10 | 15 | 19 | 0.831443347 | 0.712423  | ENSG00000210815 |
| 20 | 52828138 | 52828404 | 52828307 | 9  | 12 | 12 | 1.039304184 | 0.461227  | ENSG00000210815 |
| 20 | 52828923 | 52829142 | 52829033 | 10 | 11 | 16 | 0.733626483 | 0.800067  | ENSG00000210815 |
| 20 | 52829252 | 52829514 | 52829383 | 14 | 15 | 19 | 0.831443347 | 0.712423  | ENSG00000210815 |
| 20 | 52831665 | 52832014 | 52831898 | 9  | 13 | 6  | 2.078608368 | 0.0483393 | ENSG00000210815 |
| 20 | 52832335 | 52832514 | 52832449 | 8  | 8  | 6  | 1.336248237 | 0.277651  | ENSG00000210815 |
| 20 | 52839022 | 52839377 | 52839199 | 12 | 18 | 12 | 1.518983039 | 0.117837  | ENSG00000210815 |
| 20 | 52840810 | 52841155 | 52840989 | 8  | 13 | 11 | 1.212521548 | 0.309909  | ENSG00000210815 |
| 20 | 52842359 | 52842934 | 52842538 | 12 | 27 | 20 | 1.385738912 | 0.126232  | ENSG00000210815 |
| 20 | 52843003 | 52843331 | 52843167 | 13 | 19 | 15 | 1.29913023  | 0.214784  | ENSG00000210815 |
| 20 | 52844863 | 52845226 | 52845134 | 9  | 15 | 18 | 0.875203524 | 0.655562  | ENSG00000210815 |
| 20 | 52845801 | 52846045 | 52845881 | 12 | 15 | 7  | 2.078608368 | 0.038229  | ENSG00000210815 |
| 20 | 52849937 | 52850786 | 52850312 | 10 | 32 | 27 | 1.224894217 | 0.213361  | ENSG00000210815 |
| 20 | 52852271 | 52852929 | 52852450 | 17 | 35 | 29 | 1.247165021 | 0.184147  | ENSG00000210815 |
| 20 | 52852942 | 52853199 | 52853070 | 10 | 13 | 4  | 2.910051716 | 0.0125532 | ENSG00000210815 |
| 20 | 52853967 | 52854317 | 52854139 | 17 | 21 | 24 | 0.914587682 | 0.621823  | ENSG00000210815 |
| 20 | 52854490 | 52855259 | 52854669 | 15 | 42 | 38 | 1.145899485 | 0.268268  | ENSG00000210815 |
| 20 | 52856489 | 52857005 | 52856668 | 10 | 19 | 22 | 0.903742769 | 0.631776  | ENSG00000210815 |
| 20 | 52858349 | 52858708 | 52858505 | 9  | 15 | 20 | 0.791850807 | 0.763134  | ENSG00000210815 |
| 20 | 52858907 | 52859332 | 52859170 | 11 | 19 | 11 | 1.73217364  | 0.0607469 | ENSG00000210815 |
| 20 | 52863332 | 52863605 | 52863468 | 9  | 12 | 7  | 1.688869299 | 0.11395   | ENSG00000210815 |
| 20 | 52864464 | 52864723 | 52864620 | 8  | 11 | 4  | 2.494330042 | 0.0324033 | ENSG00000210815 |
| 20 | 52867406 | 52868201 | 52867723 | 11 | 33 | 35 | 0.981565063 | 0.531809  | ENSG00000210815 |
| 20 | 52871533 | 52872103 | 52871924 | 17 | 29 | 16 | 1.834066207 | 0.0198505 | ENSG00000210815 |
| 20 | 52872105 | 52872997 | 52872542 | 13 | 40 | 31 | 1.331608486 | 0.110337  | ENSG00000210815 |
| 20 | 52873062 | 52873448 | 52873241 | 9  | 17 | 16 | 1.100439724 | 0.388093  | ENSG00000210815 |
| 20 | 52875527 | 52875771 | 52875649 | 9  | 10 | 9  | 1.143234603 | 0.378307  | ENSG00000210815 |
| 20 | 52875956 | 52876293 | 52876115 | 14 | 19 | 19 | 1.039304184 | 0.451787  | ENSG00000210815 |
| 20 | 52876814 | 52876993 | 52876903 | 9  | 10 | 7  | 1.429043253 | 0.21536   | ENSG00000210815 |
| 20 | 52877067 | 52877520 | 52877341 | 11 | 19 | 18 | 1.094004404 | 0.389177  | ENSG00000210815 |
| 20 | 52877753 | 52878105 | 52877943 | 13 | 18 | 19 | 0.987338975 | 0.516858  | ENSG00000210815 |

|    |          |          |          |    |    |    |             |           |                 |
|----|----------|----------|----------|----|----|----|-------------|-----------|-----------------|
| 20 | 52878858 | 52879365 | 52879037 | 12 | 22 | 22 | 1.039304184 | 0.448275  | ENSG00000210815 |
| 20 | 52879387 | 52879682 | 52879515 | 10 | 14 | 14 | 1.039304184 | 0.458308  | ENSG00000210815 |
| 20 | 52880871 | 52881289 | 52881022 | 10 | 20 | 16 | 1.283846345 | 0.219275  | ENSG00000210815 |
| 20 | 52881944 | 52882533 | 52882192 | 11 | 23 | 25 | 0.959357709 | 0.559486  | ENSG00000210815 |
| 20 | 52882548 | 52882836 | 52882692 | 12 | 15 | 17 | 0.923825942 | 0.593214  | ENSG00000210815 |
| 20 | 52882943 | 52883252 | 52883076 | 15 | 17 | 19 | 0.935373766 | 0.583208  | ENSG00000210815 |
| 20 | 52883593 | 52884023 | 52883771 | 12 | 18 | 22 | 0.85855563  | 0.691398  | ENSG00000210815 |
| 20 | 52884467 | 52885240 | 52884853 | 9  | 33 | 30 | 1.139882009 | 0.298279  | ENSG00000210815 |
| 20 | 52885553 | 52885763 | 52885687 | 8  | 9  | 6  | 1.484720263 | 0.204387  | ENSG00000210815 |
| 20 | 52886448 | 52887068 | 52886573 | 11 | 26 | 36 | 0.758411161 | 0.865982  | ENSG00000210815 |
| 20 | 52887609 | 52887993 | 52887837 | 15 | 20 | 23 | 0.909391161 | 0.626666  | ENSG00000210815 |
| 20 | 52889171 | 52890089 | 52889759 | 11 | 37 | 35 | 1.097043306 | 0.34492   | ENSG00000210815 |
| 20 | 52891927 | 52892178 | 52892052 | 8  | 11 | 9  | 1.247165021 | 0.300052  | ENSG00000210815 |
| 20 | 52892969 | 52893314 | 52893141 | 13 | 19 | 22 | 0.903742769 | 0.631776  | ENSG00000210815 |
| 20 | 52894453 | 52895144 | 52894817 | 13 | 28 | 18 | 1.586306386 | 0.0554746 | ENSG00000210815 |
| 20 | 52896699 | 52897121 | 52896948 | 12 | 20 | 16 | 1.283846345 | 0.219275  | ENSG00000210815 |
| 20 | 52897712 | 52898013 | 52897862 | 11 | 16 | 11 | 1.472347594 | 0.147517  | ENSG00000210815 |
| 20 | 52898035 | 52898450 | 52898238 | 11 | 20 | 13 | 1.558956276 | 0.0943292 | ENSG00000210815 |
| 20 | 52900781 | 52901098 | 52900950 | 8  | 12 | 6  | 1.930136342 | 0.071303  | ENSG00000210815 |
| 20 | 52901304 | 52902169 | 52901436 | 10 | 34 | 51 | 0.699531662 | 0.951418  | ENSG00000210815 |
| 20 | 52902183 | 52902405 | 52902294 | 9  | 12 | 21 | 0.614134291 | 0.924528  | ENSG00000210815 |
| 20 | 52902498 | 52902835 | 52902666 | 10 | 13 | 14 | 0.970017239 | 0.534076  | ENSG00000210815 |
| 20 | 52902872 | 52903383 | 52903211 | 14 | 25 | 17 | 1.501217155 | 0.0888464 | ENSG00000210815 |
| 20 | 52903673 | 52904186 | 52904007 | 10 | 20 | 22 | 0.948929907 | 0.57038   | ENSG00000210815 |
| 20 | 52904197 | 52904410 | 52904303 | 11 | 12 | 8  | 1.501217155 | 0.168286  | ENSG00000210815 |
| 20 | 52904470 | 52904692 | 52904581 | 9  | 12 | 7  | 1.688869299 | 0.11395   | ENSG00000210815 |
| 20 | 52905613 | 52905931 | 52905772 | 11 | 17 | 16 | 1.100439724 | 0.388093  | ENSG00000210815 |
| 20 | 52906648 | 52907665 | 52907193 | 12 | 44 | 47 | 0.974347673 | 0.550591  | ENSG00000210815 |
| 20 | 52908070 | 52908276 | 52908103 | 8  | 9  | 11 | 0.86608682  | 0.635181  | ENSG00000210815 |
| 20 | 52912038 | 52912279 | 52912141 | 15 | 15 | 20 | 0.791850807 | 0.763134  | ENSG00000210815 |
| 20 | 52912665 | 52913532 | 52912884 | 18 | 48 | 43 | 1.157406932 | 0.240004  | ENSG00000210815 |
| 20 | 52914608 | 52914824 | 52914716 | 8  | 8  | 16 | 0.550219862 | 0.934723  | ENSG00000210815 |
| 20 | 52916179 | 52916441 | 52916309 | 8  | 12 | 8  | 1.501217155 | 0.168286  | ENSG00000210815 |
| 20 | 52916724 | 52916972 | 52916824 | 14 | 15 | 8  | 1.847651883 | 0.0631662 | ENSG00000210815 |

|    |          |          |          |    |    |    |             |            |                 |
|----|----------|----------|----------|----|----|----|-------------|------------|-----------------|
| 20 | 52918315 | 52918874 | 52918592 | 15 | 31 | 14 | 2.21718226  | 0.00388768 | ENSG00000210815 |
| 20 | 52919437 | 52919727 | 52919566 | 9  | 12 | 16 | 0.794762023 | 0.738004   | ENSG00000210815 |
| 20 | 52919810 | 52920092 | 52919955 | 10 | 13 | 22 | 0.632619938 | 0.917511   | ENSG00000210815 |
| 20 | 52922365 | 52923128 | 52922952 | 10 | 28 | 26 | 1.116289679 | 0.339846   | ENSG00000210815 |
| 20 | 52923780 | 52923978 | 52923875 | 9  | 9  | 5  | 1.73217364  | 0.133894   | ENSG00000210815 |
| 20 | 52926568 | 52927334 | 52927155 | 10 | 28 | 21 | 1.369991879 | 0.129943   | ENSG00000210815 |
| 20 | 52927373 | 52927600 | 52927463 | 12 | 13 | 7  | 1.818782322 | 0.0805123  | ENSG00000210815 |
| 20 | 52928471 | 52928779 | 52928618 | 9  | 12 | 12 | 1.039304184 | 0.461227   | ENSG00000210815 |
| 20 | 52929025 | 52929356 | 52929190 | 9  | 12 | 9  | 1.35109544  | 0.232899   | ENSG00000210815 |
| 20 | 52930309 | 52930516 | 52930412 | 8  | 10 | 20 | 0.54439743  | 0.955421   | ENSG00000210815 |
| 20 | 52936587 | 52936837 | 52936704 | 9  | 12 | 16 | 0.794762023 | 0.738004   | ENSG00000210815 |
| 20 | 52937320 | 52937542 | 52937422 | 12 | 13 | 16 | 0.855897563 | 0.670115   | ENSG00000210815 |
| 20 | 52938759 | 52939224 | 52939045 | 9  | 18 | 31 | 0.617086859 | 0.956343   | ENSG00000210815 |
| 20 | 52940166 | 52940716 | 52940422 | 8  | 21 | 23 | 0.952695502 | 0.566563   | ENSG00000210815 |
| 20 | 52942295 | 52942767 | 52942613 | 10 | 21 | 15 | 1.429043253 | 0.134782   | ENSG00000210815 |
| 20 | 52945492 | 52945730 | 52945584 | 10 | 13 | 12 | 1.11925066  | 0.384109   | ENSG00000210815 |
| 20 | 52946032 | 52946229 | 52946130 | 8  | 8  | 10 | 0.850339787 | 0.645072   | ENSG00000210815 |
| 20 | 52946344 | 52946826 | 52946488 | 10 | 20 | 11 | 1.818782322 | 0.04395    | ENSG00000210815 |
| 20 | 52947644 | 52947874 | 52947734 | 8  | 10 | 8  | 1.27026067  | 0.293854   | ENSG00000210815 |
| 20 | 52949135 | 52949561 | 52949268 | 11 | 19 | 15 | 1.29913023  | 0.214784   | ENSG00000210815 |
| 20 | 52957633 | 52957961 | 52957796 | 11 | 14 | 4  | 3.117912553 | 0.00766354 | ENSG00000210815 |
| 20 | 52963218 | 52963525 | 52963359 | 11 | 14 | 14 | 1.039304184 | 0.458308   | ENSG00000210815 |
| 20 | 52964061 | 52964585 | 52964420 | 19 | 35 | 17 | 2.078608368 | 0.00423339 | ENSG00000210815 |
| 20 | 52964913 | 52965735 | 52965201 | 16 | 37 | 34 | 1.1283874   | 0.302474   | ENSG00000210815 |
| 20 | 52965872 | 52966282 | 52966078 | 11 | 20 | 10 | 1.98412617  | 0.0277883  | ENSG00000210815 |
| 20 | 52967777 | 52968324 | 52967956 | 10 | 23 | 11 | 2.078608368 | 0.0154752  | ENSG00000210815 |
| 20 | 52968451 | 52968712 | 52968581 | 17 | 17 | 14 | 1.247165021 | 0.261378   | ENSG00000210815 |
| 20 | 52968842 | 52969023 | 52968898 | 8  | 8  | 13 | 0.668124118 | 0.835294   | ENSG00000210815 |
| 20 | 52969430 | 52969655 | 52969549 | 10 | 12 | 12 | 1.039304184 | 0.461227   | ENSG00000210815 |
| 20 | 52969751 | 52970066 | 52969901 | 9  | 12 | 22 | 0.5874328   | 0.943388   | ENSG00000210815 |
| 20 | 52970444 | 52970769 | 52970606 | 16 | 20 | 16 | 1.283846345 | 0.219275   | ENSG00000210815 |
| 20 | 52970833 | 52971087 | 52970960 | 11 | 14 | 20 | 0.742360132 | 0.815839   | ENSG00000210815 |
| 20 | 52971360 | 52971725 | 52971560 | 8  | 13 | 21 | 0.66137539  | 0.892612   | ENSG00000210815 |
| 20 | 52972305 | 52972534 | 52972419 | 10 | 13 | 10 | 1.32275078  | 0.240023   | ENSG00000210815 |

|    |          |          |          |    |    |    |             |            |                           |
|----|----------|----------|----------|----|----|----|-------------|------------|---------------------------|
| 20 | 52972539 | 52973018 | 52972839 | 13 | 25 | 25 | 1.039304184 | 0.44499    | ENSG00000210815           |
| 20 | 52973225 | 52973686 | 52973469 | 8  | 18 | 23 | 0.822782479 | 0.740651   | ENSG00000210815           |
| 20 | 52974912 | 52975392 | 52975074 | 11 | 19 | 22 | 0.903742769 | 0.631776   | ENSG00000210815           |
| 20 | 52975552 | 52975838 | 52975730 | 9  | 11 | 8  | 1.385738912 | 0.224757   | ENSG00000210815           |
| 20 | 52975990 | 52976266 | 52976128 | 13 | 16 | 8  | 1.963130126 | 0.0441028  | ENSG00000210815           |
| 20 | 52976829 | 52977258 | 52976995 | 11 | 21 | 15 | 1.429043253 | 0.134782   | ENSG00000210815           |
| 20 | 52977424 | 52977653 | 52977538 | 10 | 10 | 9  | 1.143234603 | 0.378307   | ENSG00000210815           |
| 20 | 52980573 | 52980882 | 52980727 | 8  | 13 | 17 | 0.808347699 | 0.728863   | ENSG00000210815           |
| 20 | 52981031 | 52981418 | 52981243 | 8  | 16 | 18 | 0.929903744 | 0.58804    | ENSG00000210815           |
| 20 | 52982793 | 52982991 | 52982937 | 10 | 10 | 16 | 0.672490943 | 0.854309   | ENSG00000210815           |
| 20 | 52983307 | 52983773 | 52983486 | 8  | 17 | 23 | 0.779478138 | 0.791839   | ENSG00000210815           |
| 20 | 52985519 | 52986320 | 52986243 | 9  | 30 | 24 | 1.288737188 | 0.170531   | ENSG00000210815           |
| 20 | 52987271 | 52987943 | 52987648 | 11 | 29 | 29 | 1.039304184 | 0.440902   | ENSG00000210815           |
| 20 | 52988537 | 52989245 | 52988713 | 13 | 31 | 30 | 1.072830126 | 0.39004    | ENSG00000210815           |
| 20 | 52990444 | 52991002 | 52990823 | 12 | 25 | 25 | 1.039304184 | 0.44499    | ENSG00000210815           |
| 20 | 53153980 | 53154213 | 53154096 | 8  | 9  | 1  | 5.196520921 | 0.00490062 | ENSG00000185834           |
| 20 | 53585509 | 53586205 | 53585681 | 16 | 37 | 43 | 0.897580886 | 0.688768   | CBLN4 ENSG00000054803     |
| 20 | 53586251 | 53586792 | 53586521 | 13 | 26 | 22 | 1.220052738 | 0.239999   | CBLN4 ENSG00000054803     |
| 20 | 53587078 | 53587415 | 53587207 | 8  | 13 | 18 | 0.765803083 | 0.780427   | CBLN4 ENSG00000054803     |
| 20 | 53587892 | 53588167 | 53587989 | 12 | 14 | 14 | 1.039304184 | 0.458308   | CBLN4 ENSG00000054803     |
| 20 | 53588363 | 53588601 | 53588482 | 12 | 15 | 12 | 1.279143611 | 0.251893   | CBLN4 ENSG00000054803     |
| 20 | 53588750 | 53588997 | 53588840 | 8  | 12 | 12 | 1.039304184 | 0.461227   | CBLN4 ENSG00000054803     |
| 20 | 53589005 | 53589308 | 53589156 | 11 | 15 | 22 | 0.722994215 | 0.845414   | CBLN4 ENSG00000054803     |
| 20 | 53589340 | 53589630 | 53589485 | 11 | 14 | 17 | 0.86608682  | 0.662567   | CBLN4 ENSG00000054803     |
| 20 | 53589996 | 53590369 | 53590190 | 12 | 18 | 15 | 1.234173719 | 0.265435   | CBLN4 ENSG00000054803     |
| 20 | 53590864 | 53591345 | 53591020 | 10 | 18 | 21 | 0.897580886 | 0.637183   | CBLN4 ENSG00000054803     |
| 20 | 53592747 | 53593194 | 53593015 | 14 | 25 | 27 | 0.965068171 | 0.55304    | CBLN4 ENSG00000054803     |
| 20 | 53593353 | 53593560 | 53593479 | 8  | 8  | 12 | 0.719518281 | 0.783103   | CBLN4 ENSG00000054803     |
| 20 | 53999477 | 53999676 | 53999641 | 8  | 8  | 1  | 4.676868829 | 0.0091584  | CBLN4 ENSG00000054803     |
| 20 | 54005217 | 54005399 | 54005308 | 9  | 9  | 1  | 5.196520921 | 0.00490062 | CBLN4 ENSG00000054803     |
| 20 | 54242939 | 54243211 | 54243085 | 9  | 11 | 3  | 3.117912553 | 0.0146045  | MC3R ENSG00000124089      |
| 20 | 54333791 | 54333988 | 54333889 | 9  | 10 | 2  | 3.810782009 | 0.00936112 | C20orf108 ENSG00000124098 |
| 20 | 54368076 | 54368387 | 54368234 | 8  | 13 | 6  | 2.078608368 | 0.0483393  | C20orf108 ENSG00000124098 |
| 20 | 54400834 | 54401127 | 54400974 | 14 | 18 | 6  | 2.8209685   | 0.00559354 | CSTF1 ENSG00000101138     |

|    |          |          |          |    |    |    |             |             |           |                  |
|----|----------|----------|----------|----|----|----|-------------|-------------|-----------|------------------|
| 20 | 54477034 | 54477321 | 54477168 | 10 | 11 | 6  | 1.781664316 | 0.103344    | C20orf43  | ENSG00000022277  |
| 20 | 54574907 | 54575188 | 54575034 | 13 | 16 | 8  | 1.963130126 | 0.0441028   | C20orf107 | ENSG000000213714 |
| 20 | 54575262 | 54575511 | 54575386 | 8  | 11 | 2  | 4.157216737 | 0.0052913   | C20orf107 | ENSG000000213714 |
| 20 | 54576940 | 54577129 | 54577034 | 9  | 9  | 6  | 1.484720263 | 0.204387    |           | ENSG000000219489 |
| 20 | 54585937 | 54586345 | 54586116 | 10 | 17 | 6  | 2.672496474 | 0.00882337  |           | ENSG000000219489 |
| 20 | 54600816 | 54601127 | 54600971 | 11 | 14 | 4  | 3.117912553 | 0.00766354  |           | ENSG000000219489 |
| 20 | 54614962 | 54615186 | 54615099 | 8  | 11 | 5  | 2.078608368 | 0.0614303   |           | ENSG000000210831 |
| 20 | 54634792 | 54635025 | 54634908 | 8  | 9  | 3  | 2.598260461 | 0.0397929   | TFAP2C    | ENSG00000087510  |
| 20 | 54638380 | 54638706 | 54638543 | 13 | 17 | 6  | 2.672496474 | 0.00882337  | TFAP2C    | ENSG00000087510  |
| 20 | 54697823 | 54698105 | 54697964 | 10 | 14 | 12 | 1.199197136 | 0.313881    |           | ENSG000000210843 |
| 20 | 54700694 | 54700902 | 54700779 | 8  | 9  | 0  | 10.39304184 | 0.000803859 |           | ENSG000000210843 |
| 20 | 54740128 | 54740307 | 54740185 | 8  | 9  | 3  | 2.598260461 | 0.0397929   |           | ENSG000000221416 |
| 20 | 54743426 | 54744200 | 54744085 | 12 | 32 | 16 | 2.017472828 | 0.00740095  |           | ENSG000000221416 |
| 20 | 54757538 | 54757758 | 54757615 | 10 | 10 | 6  | 1.63319229  | 0.146906    |           | ENSG000000221416 |
| 20 | 54758739 | 54758918 | 54758883 | 8  | 8  | 2  | 3.117912553 | 0.0283184   |           | ENSG000000221416 |
| 20 | 54760789 | 54761205 | 54761026 | 15 | 22 | 12 | 1.838768941 | 0.0349935   |           | ENSG000000207158 |
| 20 | 54767188 | 54767648 | 54767361 | 15 | 23 | 13 | 1.781664316 | 0.0385539   |           | ENSG000000207158 |
| 20 | 54774293 | 54774476 | 54774395 | 8  | 8  | 4  | 1.870747532 | 0.118863    |           | ENSG000000207158 |
| 20 | 54791147 | 54791378 | 54791262 | 10 | 10 | 3  | 2.858086507 | 0.0242838   |           | ENSG000000207158 |
| 20 | 54796090 | 54796274 | 54796164 | 8  | 8  | 4  | 1.870747532 | 0.118863    |           | ENSG000000207158 |
| 20 | 54812940 | 54813461 | 54813119 | 12 | 23 | 9  | 2.494330042 | 0.00494866  |           | ENSG000000207158 |
| 20 | 54818178 | 54818460 | 54818319 | 8  | 8  | 2  | 3.117912553 | 0.0283184   |           | ENSG000000207158 |
| 20 | 54820622 | 54820903 | 54820762 | 8  | 10 | 6  | 1.63319229  | 0.146906    |           | ENSG000000207158 |
| 20 | 54824460 | 54824666 | 54824541 | 8  | 9  | 2  | 3.464347281 | 0.0163838   |           | ENSG000000207158 |
| 20 | 54837802 | 54838105 | 54837953 | 9  | 14 | 5  | 2.598260461 | 0.0167748   |           | ENSG000000207158 |
| 20 | 54877051 | 54877343 | 54877215 | 10 | 11 | 4  | 2.494330042 | 0.0324033   |           | ENSG000000207158 |
| 20 | 54898580 | 54898865 | 54898688 | 14 | 17 | 4  | 3.741495063 | 0.00163722  |           | ENSG000000207158 |
| 20 | 54929030 | 54929284 | 54929122 | 10 | 12 | 1  | 6.755477198 | 0.000722752 |           | ENSG000000207158 |
| 20 | 54930904 | 54931389 | 54931095 | 13 | 22 | 9  | 2.390399624 | 0.00747467  |           | ENSG000000207158 |
| 20 | 54968384 | 54968574 | 54968479 | 9  | 9  | 12 | 0.799464757 | 0.707717    |           | ENSG000000207158 |
| 20 | 54982898 | 54983285 | 54983045 | 10 | 16 | 5  | 2.944695189 | 0.00659886  |           | ENSG000000207158 |
| 20 | 54989149 | 54989448 | 54989298 | 9  | 13 | 5  | 2.425043097 | 0.0262442   |           | ENSG000000207158 |
| 20 | 55032896 | 55033340 | 55033222 | 9  | 19 | 4  | 4.157216737 | 0.000560204 |           | ENSG000000207158 |
| 20 | 55055112 | 55055295 | 55055229 | 9  | 10 | 1  | 5.716173013 | 0.00260397  | BMP7      | ENSG00000101144  |

|    |          |          |          |    |    |     |             |            |      |                 |
|----|----------|----------|----------|----|----|-----|-------------|------------|------|-----------------|
| 20 | 55056611 | 55057149 | 55056790 | 10 | 22 | 3   | 5.975999059 | 2.96E-05   | BMP7 | ENSG00000101144 |
| 20 | 55084581 | 55084880 | 55084740 | 8  | 12 | 3   | 3.377738599 | 0.00867157 | BMP7 | ENSG00000101144 |
| 20 | 55098545 | 55098842 | 55098679 | 9  | 10 | 5   | 1.905391004 | 0.0915982  | BMP7 | ENSG00000101144 |
| 20 | 55100654 | 55100878 | 55100760 | 8  | 10 | 4   | 2.286469205 | 0.0509017  | BMP7 | ENSG00000101144 |
| 20 | 55108980 | 55109510 | 55109159 | 13 | 24 | 38  | 0.666220631 | 0.946942   | BMP7 | ENSG00000101144 |
| 20 | 55110025 | 55110271 | 55110153 | 9  | 10 | 19  | 0.571617301 | 0.938875   | BMP7 | ENSG00000101144 |
| 20 | 55110365 | 55110774 | 55110589 | 10 | 19 | 31  | 0.649565115 | 0.939158   | BMP7 | ENSG00000101144 |
| 20 | 55110913 | 55111378 | 55111215 | 11 | 21 | 40  | 0.557675416 | 0.988638   | BMP7 | ENSG00000101144 |
| 20 | 55111474 | 55112032 | 55111755 | 15 | 32 | 47  | 0.714521627 | 0.934204   | BMP7 | ENSG00000101144 |
| 20 | 55112429 | 55112706 | 55112573 | 10 | 13 | 10  | 1.32275078  | 0.240023   | BMP7 | ENSG00000101144 |
| 20 | 55112726 | 55113008 | 55112887 | 8  | 13 | 16  | 0.855897563 | 0.670115   | BMP7 | ENSG00000101144 |
| 20 | 55113035 | 55113240 | 55113134 | 8  | 10 | 19  | 0.571617301 | 0.938875   | BMP7 | ENSG00000101144 |
| 20 | 55113343 | 55113753 | 55113522 | 15 | 26 | 28  | 0.967628034 | 0.550021   | BMP7 | ENSG00000101144 |
| 20 | 55113802 | 55115186 | 55114994 | 15 | 67 | 70  | 0.995389923 | 0.511331   | BMP7 | ENSG00000101144 |
| 20 | 55115191 | 55116189 | 55115720 | 16 | 52 | 66  | 0.822136146 | 0.858483   | BMP7 | ENSG00000101144 |
| 20 | 55116198 | 55117740 | 55116879 | 14 | 86 | 105 | 0.853013812 | 0.865324   | BMP7 | ENSG00000101144 |
| 20 | 55118135 | 55118335 | 55118182 | 11 | 12 | 35  | 0.375304289 | 0.999426   | BMP7 | ENSG00000101144 |
| 20 | 55118396 | 55118825 | 55118672 | 11 | 21 | 30  | 0.737570711 | 0.866474   | BMP7 | ENSG00000101144 |
| 20 | 55119653 | 55120227 | 55119940 | 12 | 26 | 40  | 0.684419829 | 0.940237   | BMP7 | ENSG00000101144 |
| 20 | 55120334 | 55120689 | 55120511 | 15 | 20 | 29  | 0.727512929 | 0.872335   | BMP7 | ENSG00000101144 |
| 20 | 55120895 | 55121486 | 55121307 | 20 | 37 | 31  | 1.234173719 | 0.188755   | BMP7 | ENSG00000101144 |
| 20 | 55121674 | 55122857 | 55122534 | 12 | 50 | 56  | 0.929903744 | 0.648011   | BMP7 | ENSG00000101144 |
| 20 | 55122875 | 55123785 | 55123182 | 14 | 47 | 65  | 0.755857589 | 0.93199    | BMP7 | ENSG00000101144 |
| 20 | 55123854 | 55124178 | 55124012 | 10 | 13 | 27  | 0.519652092 | 0.981283   | BMP7 | ENSG00000101144 |
| 20 | 55124190 | 55124881 | 55124615 | 10 | 30 | 48  | 0.657518974 | 0.968616   | BMP7 | ENSG00000101144 |
| 20 | 55124962 | 55125728 | 55125419 | 19 | 45 | 50  | 0.937411617 | 0.625775   | BMP7 | ENSG00000101144 |
| 20 | 55125779 | 55126013 | 55125896 | 10 | 11 | 15  | 0.779478138 | 0.747877   | BMP7 | ENSG00000101144 |
| 20 | 55127228 | 55127983 | 55127533 | 19 | 42 | 38  | 1.145899485 | 0.268268   | BMP7 | ENSG00000101144 |
| 20 | 55128068 | 55128424 | 55128246 | 10 | 16 | 30  | 0.569941004 | 0.972704   | BMP7 | ENSG00000101144 |
| 20 | 55128444 | 55129514 | 55128555 | 16 | 60 | 72  | 0.868459661 | 0.793336   | BMP7 | ENSG00000101144 |
| 20 | 55129528 | 55130280 | 55130110 | 17 | 40 | 48  | 0.869621868 | 0.747153   | BMP7 | ENSG00000101144 |
| 20 | 55130555 | 55132206 | 55131614 | 17 | 91 | 95  | 0.995999843 | 0.511357   | BMP7 | ENSG00000101144 |
| 20 | 55132246 | 55134141 | 55133471 | 14 | 92 | 83  | 1.150658204 | 0.175083   | BMP7 | ENSG00000101144 |
| 20 | 55134177 | 55134549 | 55134324 | 18 | 23 | 26  | 0.923825942 | 0.612844   | BMP7 | ENSG00000101144 |

|    |          |          |          |    |     |     |             |           |      |                 |
|----|----------|----------|----------|----|-----|-----|-------------|-----------|------|-----------------|
| 20 | 55134605 | 55136304 | 55135739 | 18 | 115 | 96  | 1.242879231 | 0.0563563 | BMP7 | ENSG00000101144 |
| 20 | 55136311 | 55137240 | 55136795 | 17 | 51  | 64  | 0.831443347 | 0.841252  | BMP7 | ENSG00000101144 |
| 20 | 55137418 | 55137978 | 55137632 | 9  | 22  | 33  | 0.703058713 | 0.907926  | BMP7 | ENSG00000101144 |
| 20 | 55138394 | 55138715 | 55138542 | 11 | 16  | 19  | 0.883408557 | 0.649033  | BMP7 | ENSG00000101144 |
| 20 | 55138876 | 55139698 | 55139336 | 14 | 44  | 51  | 0.899397852 | 0.700166  | BMP7 | ENSG00000101144 |
| 20 | 55139939 | 55141053 | 55140807 | 16 | 57  | 60  | 0.988190864 | 0.526384  | BMP7 | ENSG00000101144 |
| 20 | 55141368 | 55141677 | 55141522 | 13 | 19  | 25  | 0.799464757 | 0.777638  | BMP7 | ENSG00000101144 |
| 20 | 55142061 | 55142705 | 55142476 | 14 | 32  | 36  | 0.926946975 | 0.625687  | BMP7 | ENSG00000101144 |
| 20 | 55143010 | 55143341 | 55143175 | 15 | 20  | 33  | 0.641923173 | 0.948808  | BMP7 | ENSG00000101144 |
| 20 | 55143350 | 55143924 | 55143581 | 24 | 49  | 51  | 0.999330946 | 0.501862  | BMP7 | ENSG00000101144 |
| 20 | 55143952 | 55144708 | 55144471 | 15 | 41  | 56  | 0.765803083 | 0.907583  | BMP7 | ENSG00000101144 |
| 20 | 55144712 | 55145088 | 55144936 | 12 | 19  | 34  | 0.593888105 | 0.971942  | BMP7 | ENSG00000101144 |
| 20 | 55145102 | 55145611 | 55145432 | 13 | 27  | 29  | 0.970017239 | 0.547123  | BMP7 | ENSG00000101144 |
| 20 | 55146156 | 55146348 | 55146252 | 8  | 9   | 15  | 0.649565115 | 0.865365  | BMP7 | ENSG00000101144 |
| 20 | 55146356 | 55146573 | 55146525 | 10 | 13  | 22  | 0.632619938 | 0.917511  | BMP7 | ENSG00000101144 |
| 20 | 55146579 | 55147343 | 55146829 | 11 | 36  | 45  | 0.835962061 | 0.793602  | BMP7 | ENSG00000101144 |
| 20 | 55147923 | 55148171 | 55148047 | 9  | 13  | 17  | 0.808347699 | 0.728863  | BMP7 | ENSG00000101144 |
| 20 | 55148209 | 55149667 | 55149062 | 18 | 72  | 106 | 0.709057995 | 0.989002  | BMP7 | ENSG00000101144 |
| 20 | 55149684 | 55149880 | 55149782 | 10 | 11  | 19  | 0.623582511 | 0.908792  | BMP7 | ENSG00000101144 |
| 20 | 55150017 | 55150505 | 55150333 | 12 | 23  | 41  | 0.593888105 | 0.981664  | BMP7 | ENSG00000101144 |
| 20 | 55150717 | 55151376 | 55151244 | 13 | 27  | 38  | 0.746167107 | 0.884665  | BMP7 | ENSG00000101144 |
| 20 | 55151461 | 55152196 | 55151909 | 14 | 38  | 52  | 0.764771003 | 0.900635  | BMP7 | ENSG00000101144 |
| 20 | 55152244 | 55152697 | 55152518 | 14 | 23  | 28  | 0.860113808 | 0.709947  | BMP7 | ENSG00000101144 |
| 20 | 55153550 | 55153916 | 55153724 | 11 | 17  | 15  | 1.169217207 | 0.323156  | BMP7 | ENSG00000101144 |
| 20 | 55153920 | 55154844 | 55154123 | 16 | 47  | 44  | 1.10859113  | 0.309281  | BMP7 | ENSG00000101144 |
| 20 | 55155130 | 55156079 | 55155599 | 13 | 48  | 82  | 0.613565121 | 0.997163  | BMP7 | ENSG00000101144 |
| 20 | 55156306 | 55156682 | 55156467 | 22 | 30  | 42  | 0.749265807 | 0.892735  | BMP7 | ENSG00000101144 |
| 20 | 55157009 | 55157446 | 55157206 | 19 | 28  | 42  | 0.700926078 | 0.933521  | BMP7 | ENSG00000101144 |
| 20 | 55157584 | 55158528 | 55157828 | 15 | 45  | 38  | 1.225845961 | 0.17347   | BMP7 | ENSG00000101144 |
| 20 | 55158654 | 55159357 | 55159124 | 20 | 41  | 40  | 1.064653067 | 0.38767   | BMP7 | ENSG00000101144 |
| 20 | 55159707 | 55160599 | 55160359 | 13 | 37  | 48  | 0.805991    | 0.843182  | BMP7 | ENSG00000101144 |
| 20 | 55161015 | 55161959 | 55161470 | 18 | 48  | 55  | 0.909391161 | 0.687636  | BMP7 | ENSG00000101144 |
| 20 | 55161965 | 55162461 | 55162282 | 10 | 22  | 31  | 0.746999882 | 0.860756  | BMP7 | ENSG00000101144 |
| 20 | 55162817 | 55163478 | 55163147 | 12 | 32  | 57  | 0.591328243 | 0.993207  | BMP7 | ENSG00000101144 |

|    |          |          |          |    |     |     |             |            |      |                 |
|----|----------|----------|----------|----|-----|-----|-------------|------------|------|-----------------|
| 20 | 55163492 | 55163711 | 55163601 | 11 | 12  | 19  | 0.67554772  | 0.870684   | BMP7 | ENSG00000101144 |
| 20 | 55163717 | 55165239 | 55164399 | 13 | 78  | 79  | 1.026312882 | 0.4352     | BMP7 | ENSG00000101144 |
| 20 | 55165377 | 55165573 | 55165475 | 10 | 10  | 23  | 0.476347751 | 0.983843   | BMP7 | ENSG00000101144 |
| 20 | 55165592 | 55166404 | 55165866 | 19 | 49  | 41  | 1.237266886 | 0.153231   | BMP7 | ENSG00000101144 |
| 20 | 55166790 | 55167355 | 55167133 | 9  | 21  | 43  | 0.519652092 | 0.99531    | BMP7 | ENSG00000101144 |
| 20 | 55167358 | 55169381 | 55167894 | 22 | 129 | 138 | 0.972011108 | 0.592448   | BMP7 | ENSG00000101144 |
| 20 | 55169937 | 55170391 | 55170175 | 23 | 35  | 17  | 2.078608368 | 0.00423339 | BMP7 | ENSG00000101144 |
| 20 | 55170515 | 55171567 | 55171021 | 14 | 58  | 80  | 0.757024035 | 0.949672   | BMP7 | ENSG00000101144 |
| 20 | 55171726 | 55172502 | 55172067 | 21 | 48  | 48  | 1.039304184 | 0.424526   | BMP7 | ENSG00000101144 |
| 20 | 55172598 | 55173179 | 55172721 | 8  | 21  | 37  | 0.601702422 | 0.974135   | BMP7 | ENSG00000101144 |
| 20 | 55173709 | 55174441 | 55174120 | 13 | 33  | 51  | 0.679545044 | 0.962488   | BMP7 | ENSG00000101144 |
| 20 | 55174469 | 55174842 | 55174648 | 14 | 21  | 20  | 1.08879486  | 0.389871   | BMP7 | ENSG00000101144 |
| 20 | 55175104 | 55176047 | 55175283 | 18 | 53  | 59  | 0.935373766 | 0.640149   | BMP7 | ENSG00000101144 |
| 20 | 55176070 | 55176362 | 55176229 | 14 | 16  | 18  | 0.929903744 | 0.58804    | BMP7 | ENSG00000101144 |
| 20 | 55176365 | 55176886 | 55176739 | 14 | 26  | 28  | 0.967628034 | 0.550021   | BMP7 | ENSG00000101144 |
| 20 | 55176939 | 55177246 | 55177083 | 24 | 26  | 35  | 0.779478138 | 0.839245   | BMP7 | ENSG00000101144 |
| 20 | 55177304 | 55178115 | 55177582 | 21 | 58  | 63  | 0.958108545 | 0.5945     | BMP7 | ENSG00000101144 |
| 20 | 55178359 | 55179047 | 55178675 | 15 | 35  | 35  | 1.039304184 | 0.435264   | BMP7 | ENSG00000101144 |
| 20 | 55179326 | 55181063 | 55180062 | 19 | 87  | 131 | 0.692869456 | 0.996509   | BMP7 | ENSG00000101144 |
| 20 | 55181067 | 55181604 | 55181425 | 17 | 34  | 44  | 0.808347699 | 0.829904   | BMP7 | ENSG00000101144 |
| 20 | 55181616 | 55182136 | 55181957 | 14 | 25  | 32  | 0.818845721 | 0.77985    | BMP7 | ENSG00000101144 |
| 20 | 55182197 | 55183424 | 55182730 | 24 | 69  | 71  | 1.010434624 | 0.475702   | BMP7 | ENSG00000101144 |
| 20 | 55183531 | 55184324 | 55183851 | 12 | 37  | 35  | 1.097043306 | 0.34492    | BMP7 | ENSG00000101144 |
| 20 | 55184362 | 55184738 | 55184559 | 10 | 17  | 26  | 0.692869456 | 0.890806   | BMP7 | ENSG00000101144 |
| 20 | 55185099 | 55185801 | 55185508 | 13 | 32  | 51  | 0.659558425 | 0.971519   | BMP7 | ENSG00000101144 |
| 20 | 55186322 | 55186594 | 55186457 | 9  | 13  | 27  | 0.519652092 | 0.981283   | BMP7 | ENSG00000101144 |
| 20 | 55186634 | 55186931 | 55186782 | 8  | 12  | 24  | 0.540438176 | 0.969195   | BMP7 | ENSG00000101144 |
| 20 | 55186972 | 55188035 | 55187517 | 13 | 54  | 75  | 0.752128028 | 0.94792    | BMP7 | ENSG00000101144 |
| 20 | 55188127 | 55188598 | 55188306 | 12 | 24  | 24  | 1.039304184 | 0.446062   | BMP7 | ENSG00000101144 |
| 20 | 55188909 | 55189810 | 55189359 | 20 | 50  | 60  | 0.868926449 | 0.772079   | BMP7 | ENSG00000101144 |
| 20 | 55189852 | 55190748 | 55190180 | 16 | 43  | 54  | 0.831443347 | 0.821295   | BMP7 | ENSG00000101144 |
| 20 | 55190760 | 55191422 | 55191243 | 12 | 31  | 46  | 0.707611359 | 0.937196   | BMP7 | ENSG00000101144 |
| 20 | 55191623 | 55193931 | 55193682 | 16 | 122 | 97  | 1.304432803 | 0.0242681  | BMP7 | ENSG00000101144 |
| 20 | 55194028 | 55194309 | 55194204 | 10 | 13  | 21  | 0.66137539  | 0.892612   | BMP7 | ENSG00000101144 |



|    |          |          |          |    |     |     |             |           |      |                 |
|----|----------|----------|----------|----|-----|-----|-------------|-----------|------|-----------------|
| 20 | 55194478 | 55194748 | 55194624 | 12 | 16  | 21  | 0.803098688 | 0.755224  | BMP7 | ENSG00000101144 |
| 20 | 55194811 | 55195643 | 55195426 | 21 | 52  | 68  | 0.798306113 | 0.893167  | BMP7 | ENSG00000101144 |
| 20 | 55195682 | 55196894 | 55196603 | 25 | 80  | 86  | 0.967628034 | 0.584995  | BMP7 | ENSG00000101144 |
| 20 | 55197020 | 55198783 | 55198218 | 21 | 92  | 95  | 1.006825928 | 0.481686  | BMP7 | ENSG00000101144 |
| 20 | 55198866 | 55199161 | 55198987 | 8  | 12  | 10  | 1.228268581 | 0.305344  | BMP7 | ENSG00000101144 |
| 20 | 55199191 | 55199960 | 55199514 | 21 | 53  | 57  | 0.967628034 | 0.56982   | BMP7 | ENSG00000101144 |
| 20 | 55200808 | 55201934 | 55201665 | 19 | 71  | 80  | 0.923825942 | 0.688593  | BMP7 | ENSG00000101144 |
| 20 | 55202182 | 55202554 | 55202419 | 15 | 22  | 26  | 0.885333194 | 0.668299  | BMP7 | ENSG00000101144 |
| 20 | 55202680 | 55203261 | 55202841 | 12 | 26  | 38  | 0.719518281 | 0.909098  | BMP7 | ENSG00000101144 |
| 20 | 55203281 | 55203814 | 55203655 | 15 | 26  | 31  | 0.876912905 | 0.694502  | BMP7 | ENSG00000101144 |
| 20 | 55203891 | 55204291 | 55204068 | 12 | 21  | 20  | 1.08879486  | 0.389871  | BMP7 | ENSG00000101144 |
| 20 | 55204368 | 55205299 | 55205120 | 19 | 59  | 70  | 0.878285226 | 0.771768  | BMP7 | ENSG00000101144 |
| 20 | 55205706 | 55206389 | 55206131 | 17 | 37  | 58  | 0.669382356 | 0.975094  | BMP7 | ENSG00000101144 |
| 20 | 55206465 | 55207291 | 55206872 | 15 | 42  | 39  | 1.117251998 | 0.306409  | BMP7 | ENSG00000101144 |
| 20 | 55207413 | 55208433 | 55207808 | 12 | 48  | 81  | 0.621047622 | 0.996421  | BMP7 | ENSG00000101144 |
| 20 | 55208508 | 55210988 | 55209590 | 19 | 130 | 161 | 0.840424988 | 0.931365  | BMP7 | ENSG00000101144 |
| 20 | 55211225 | 55212043 | 55211714 | 16 | 46  | 45  | 1.061897753 | 0.386081  | BMP7 | ENSG00000101144 |
| 20 | 55212199 | 55213006 | 55212378 | 21 | 52  | 59  | 0.918052029 | 0.676091  | BMP7 | ENSG00000101144 |
| 20 | 55213668 | 55213935 | 55213801 | 10 | 14  | 31  | 0.487173836 | 0.991844  | BMP7 | ENSG00000101144 |
| 20 | 55213976 | 55216349 | 55214343 | 18 | 145 | 152 | 0.99175432  | 0.528863  | BMP7 | ENSG00000101144 |
| 20 | 55216662 | 55217254 | 55216894 | 13 | 32  | 33  | 1.008736414 | 0.486341  | BMP7 | ENSG00000101144 |
| 20 | 55217944 | 55219507 | 55219273 | 18 | 84  | 111 | 0.78875764  | 0.951654  | BMP7 | ENSG00000101144 |
| 20 | 55219515 | 55219962 | 55219783 | 11 | 22  | 28  | 0.824275732 | 0.75853   | BMP7 | ENSG00000101144 |
| 20 | 55219973 | 55220874 | 55220695 | 19 | 64  | 49  | 1.35109544  | 0.0534947 | BMP7 | ENSG00000101144 |
| 20 | 55220882 | 55221199 | 55221040 | 12 | 16  | 29  | 0.588939038 | 0.963731  | BMP7 | ENSG00000101144 |
| 20 | 55221533 | 55221933 | 55221701 | 13 | 18  | 45  | 0.429277815 | 0.999465  | BMP7 | ENSG00000101144 |
| 20 | 55221943 | 55222561 | 55222199 | 15 | 29  | 56  | 0.547002202 | 0.997071  | BMP7 | ENSG00000101144 |
| 20 | 55222721 | 55222981 | 55222826 | 11 | 13  | 22  | 0.632619938 | 0.917511  | BMP7 | ENSG00000101144 |
| 20 | 55223080 | 55224039 | 55223672 | 13 | 52  | 63  | 0.860673778 | 0.792031  | BMP7 | ENSG00000101144 |
| 20 | 55224056 | 55224903 | 55224447 | 16 | 42  | 46  | 0.950852764 | 0.595361  | BMP7 | ENSG00000101144 |
| 20 | 55225231 | 55225556 | 55225378 | 8  | 13  | 25  | 0.55962533  | 0.965065  | BMP7 | ENSG00000101144 |
| 20 | 55225806 | 55226186 | 55226007 | 9  | 15  | 16  | 0.978168644 | 0.526483  | BMP7 | ENSG00000101144 |
| 20 | 55226210 | 55226759 | 55226389 | 15 | 33  | 22  | 1.536362707 | 0.0529465 | BMP7 | ENSG00000101144 |
| 20 | 55226804 | 55226998 | 55226843 | 8  | 10  | 10  | 1.039304184 | 0.464387  | BMP7 | ENSG00000101144 |

|    |          |          |          |     |     |     |             |            |      |                 |
|----|----------|----------|----------|-----|-----|-----|-------------|------------|------|-----------------|
| 20 | 55227725 | 55230909 | 55229355 | 21  | 169 | 233 | 0.755050048 | 0.997507   | BMP7 | ENSG00000101144 |
| 20 | 55230917 | 55231378 | 55231144 | 19  | 31  | 51  | 0.639571806 | 0.978753   | BMP7 | ENSG00000101144 |
| 20 | 55231629 | 55235141 | 55232269 | 36  | 250 | 210 | 1.236328674 | 0.0113724  | BMP7 | ENSG00000101144 |
| 20 | 55235479 | 55235937 | 55235758 | 10  | 19  | 24  | 0.831443347 | 0.733913   | BMP7 | ENSG00000101144 |
| 20 | 55235956 | 55236803 | 55236160 | 21  | 62  | 53  | 1.212521548 | 0.148379   | BMP7 | ENSG00000101144 |
| 20 | 55236880 | 55239116 | 55238497 | 20  | 130 | 144 | 0.938957573 | 0.699972   | BMP7 | ENSG00000101144 |
| 20 | 55239426 | 55239955 | 55239710 | 24  | 43  | 39  | 1.143234603 | 0.269341   | BMP7 | ENSG00000101144 |
| 20 | 55240063 | 55240936 | 55240608 | 12  | 33  | 46  | 0.751837069 | 0.900185   | BMP7 | ENSG00000101144 |
| 20 | 55241082 | 55241818 | 55241400 | 11  | 32  | 51  | 0.659558425 | 0.971519   | BMP7 | ENSG00000101144 |
| 20 | 55242428 | 55243302 | 55242852 | 13  | 43  | 60  | 0.749662035 | 0.9296     | BMP7 | ENSG00000101144 |
| 20 | 55243524 | 55244503 | 55243779 | 18  | 54  | 65  | 0.86608682  | 0.786037   | BMP7 | ENSG00000101144 |
| 20 | 55244506 | 55244696 | 55244601 | 8   | 8   | 11  | 0.779478138 | 0.719708   | BMP7 | ENSG00000101144 |
| 20 | 55244773 | 55246881 | 55245495 | 22  | 128 | 108 | 1.2300022   | 0.0552035  | BMP7 | ENSG00000101144 |
| 20 | 55247153 | 55247447 | 55247300 | 9   | 12  | 7   | 1.688869299 | 0.11395    | BMP7 | ENSG00000101144 |
| 20 | 55247794 | 55247976 | 55247885 | 8   | 9   | 1   | 5.196520921 | 0.00490062 | BMP7 | ENSG00000101144 |
| 20 | 55249112 | 55249836 | 55249506 | 15  | 36  | 30  | 1.240459833 | 0.186503   | BMP7 | ENSG00000101144 |
| 20 | 55249847 | 55250101 | 55249947 | 10  | 12  | 21  | 0.614134291 | 0.924528   | BMP7 | ENSG00000101144 |
| 20 | 55250181 | 55251238 | 55251079 | 16  | 58  | 66  | 0.915208162 | 0.691274   | BMP7 | ENSG00000101144 |
| 20 | 55251577 | 55251827 | 55251679 | 8   | 9   | 16  | 0.611355402 | 0.899375   | BMP7 | ENSG00000101144 |
| 20 | 55251987 | 55254230 | 55253533 | 29  | 172 | 163 | 1.09633917  | 0.199203   | BMP7 | ENSG00000101144 |
| 20 | 55254385 | 55255179 | 55254780 | 16  | 47  | 47  | 1.039304184 | 0.425295   | BMP7 | ENSG00000101144 |
| 20 | 55255506 | 55257293 | 55256354 | 25  | 139 | 140 | 1.031933233 | 0.396246   | BMP7 | ENSG00000101144 |
| 20 | 55257561 | 55258746 | 55258155 | 13  | 59  | 102 | 0.605419913 | 0.999192   | BMP7 | ENSG00000101144 |
| 20 | 55259010 | 55260129 | 55259197 | 25  | 91  | 60  | 1.567475163 | 0.00289758 | BMP7 | ENSG00000101144 |
| 20 | 55260289 | 55262590 | 55261243 | 52  | 220 | 198 | 1.154202134 | 0.0708442  | BMP7 | ENSG00000101144 |
| 20 | 55262661 | 55263665 | 55262919 | 14  | 52  | 62  | 0.874335266 | 0.765901   | BMP7 | ENSG00000101144 |
| 20 | 55263724 | 55263949 | 55263836 | 12  | 15  | 22  | 0.722994215 | 0.845414   | BMP7 | ENSG00000101144 |
| 20 | 55264250 | 55265110 | 55264659 | 21  | 56  | 63  | 0.925630289 | 0.665395   | BMP7 | ENSG00000101144 |
| 20 | 55265280 | 55267015 | 55266558 | 18  | 104 | 116 | 0.932708883 | 0.698581   | BMP7 | ENSG00000101144 |
| 20 | 55267042 | 55267986 | 55267596 | 18  | 68  | 65  | 1.086545284 | 0.314708   | BMP7 | ENSG00000101144 |
| 20 | 55267989 | 55273373 | 55272826 | 131 | 733 | 504 | 1.510592616 | 2.94E-13   | BMP7 | ENSG00000101144 |
| 20 | 55273431 | 55273741 | 55273566 | 14  | 16  | 20  | 0.841341482 | 0.704984   | BMP7 | ENSG00000101144 |
| 20 | 55273855 | 55274558 | 55274206 | 23  | 51  | 42  | 1.256832967 | 0.132336   | BMP7 | ENSG00000101144 |
| 20 | 55274729 | 55279851 | 55278937 | 21  | 331 | 422 | 0.815718651 | 0.997356   | BMP7 | ENSG00000101144 |

|    |          |          |          |    |     |     |             |             |          |                 |
|----|----------|----------|----------|----|-----|-----|-------------|-------------|----------|-----------------|
| 20 | 55279853 | 55281953 | 55281756 | 23 | 142 | 158 | 0.934720115 | 0.721601    | BMP7     | ENSG00000101144 |
| 20 | 55281966 | 55282383 | 55282211 | 13 | 20  | 20  | 1.039304184 | 0.450588    | BMP7     | ENSG00000101144 |
| 20 | 55282605 | 55284990 | 55283515 | 32 | 170 | 211 | 0.838306677 | 0.957534    | BMP7     | ENSG00000101144 |
| 20 | 55285112 | 55287367 | 55285858 | 25 | 153 | 142 | 1.11925066  | 0.16574     | BMP7     | ENSG00000101144 |
| 20 | 55287578 | 55288314 | 55287786 | 11 | 31  | 38  | 0.852762408 | 0.750053    | BMP7     | ENSG00000101144 |
| 20 | 55314264 | 55314577 | 55314420 | 9  | 15  | 9   | 1.662886695 | 0.0970566   |          | ENSG00000217823 |
| 20 | 55334911 | 55335400 | 55335221 | 13 | 24  | 14  | 1.73217364  | 0.0420666   |          | ENSG00000217823 |
| 20 | 55390288 | 55390543 | 55390413 | 9  | 11  | 4   | 2.494330042 | 0.0324033   | RBM38    | ENSG00000132819 |
| 20 | 55399174 | 55399353 | 55399262 | 8  | 8   | 3   | 2.338434415 | 0.0641221   | RBM38    | ENSG00000132819 |
| 20 | 55419365 | 55419544 | 55419465 | 8  | 9   | 3   | 2.598260461 | 0.0397929   | RBM38    | ENSG00000132819 |
| 20 | 55465623 | 55465941 | 55465790 | 10 | 11  | 0   | 12.47165021 | 0.000193293 | HMG1L1   | ENSG00000124097 |
| 20 | 55817072 | 55817319 | 55817165 | 8  | 8   | 3   | 2.338434415 | 0.0641221   | PMEPA1   | ENSG00000124225 |
| 20 | 55900758 | 55901041 | 55900902 | 10 | 10  | 2   | 3.810782009 | 0.00936112  |          | ENSG00000221007 |
| 20 | 56063282 | 56063521 | 56063424 | 8  | 9   | 2   | 3.464347281 | 0.0163838   |          | ENSG00000221385 |
| 20 | 56490149 | 56490376 | 56490262 | 8  | 10  | 4   | 2.286469205 | 0.0509017   | APCDD1L  | ENSG00000198768 |
| 20 | 56619604 | 56619915 | 56619744 | 14 | 17  | 12  | 1.439036563 | 0.154203    |          | ENSG00000221174 |
| 20 | 56654374 | 56654553 | 56654463 | 8  | 8   | 3   | 2.338434415 | 0.0641221   | STX16    | ENSG00000124222 |
| 20 | 56659296 | 56659901 | 56659687 | 23 | 41  | 14  | 2.910051716 | 6.65E-05    | STX16    | ENSG00000124222 |
| 20 | 56832509 | 56832811 | 56832673 | 9  | 10  | 1   | 5.716173013 | 0.00260397  |          | ENSG00000216031 |
| 20 | 56864506 | 56864846 | 56864693 | 14 | 19  | 12  | 1.598929514 | 0.0887417   | GNAS     | ENSG00000087460 |
| 20 | 56883679 | 56883937 | 56883808 | 8  | 9   | 2   | 3.464347281 | 0.0163838   | GNAS     | ENSG00000087460 |
| 20 | 56901399 | 56901618 | 56901508 | 9  | 9   | 0   | 10.39304184 | 0.000803859 | GNAS     | ENSG00000087460 |
| 20 | 56916263 | 56916493 | 56916420 | 8  | 11  | 10  | 1.133786383 | 0.380636    | GNAS     | ENSG00000087460 |
| 20 | 56929288 | 56929558 | 56929410 | 8  | 10  | 0   | 11.43234603 | 0.000394183 | GNAS     | ENSG00000087460 |
| 20 | 56987365 | 56987580 | 56987472 | 10 | 10  | 1   | 5.716173013 | 0.00260397  | TH1L     | ENSG00000101158 |
| 20 | 56989241 | 56989629 | 56989371 | 10 | 16  | 3   | 4.417042783 | 0.00097367  | TH1L     | ENSG00000101158 |
| 20 | 56997681 | 56997860 | 56997770 | 8  | 8   | 2   | 3.117912553 | 0.0283184   | TH1L     | ENSG00000101158 |
| 20 | 57072654 | 57073104 | 57072883 | 27 | 42  | 9   | 4.469007992 | 5.19E-07    | SLMO2    | ENSG00000101166 |
| 20 | 57145822 | 57146001 | 57145935 | 8  | 8   | 3   | 2.338434415 | 0.0641221   | MRPS16P  | ENSG00000220577 |
| 20 | 57211841 | 57212169 | 57212004 | 9  | 11  | 3   | 3.117912553 | 0.0146045   | ZNF831   | ENSG00000124203 |
| 20 | 57340318 | 57340518 | 57340417 | 10 | 11  | 0   | 12.47165021 | 0.000193293 | EDN3     | ENSG00000124205 |
| 20 | 57438149 | 57438328 | 57438229 | 8  | 8   | 3   | 2.338434415 | 0.0641221   | C20orf83 | ENSG00000157033 |
| 20 | 57534037 | 57534400 | 57534224 | 9  | 15  | 7   | 2.078608368 | 0.038229    | PHACTR3  | ENSG00000087495 |
| 20 | 57625557 | 57625899 | 57625720 | 10 | 12  | 6   | 1.930136342 | 0.071303    | PHACTR3  | ENSG00000087495 |

|    |          |          |          |    |    |    |             |             |           |                 |
|----|----------|----------|----------|----|----|----|-------------|-------------|-----------|-----------------|
| 20 | 57934700 | 57934938 | 57934814 | 8  | 8  | 7  | 1.169217207 | 0.371848    | SYCP2     | ENSG00000196074 |
| 20 | 57948404 | 57948830 | 57948669 | 10 | 16 | 9  | 1.766817113 | 0.0700694   | PPP1R3D   | ENSG00000132825 |
| 20 | 57949193 | 57949635 | 57949490 | 9  | 15 | 9  | 1.662886695 | 0.0970566   | C20orf177 | ENSG00000196227 |
| 20 | 57957592 | 57957778 | 57957706 | 8  | 8  | 6  | 1.336248237 | 0.277651    | C20orf177 | ENSG00000196227 |
| 20 | 57978017 | 57978223 | 57978171 | 10 | 11 | 3  | 3.117912553 | 0.0146045   | CDH26     | ENSG00000124215 |
| 20 | 58061568 | 58061747 | 58061657 | 8  | 8  | 4  | 1.870747532 | 0.118863    | C20orf197 | ENSG00000176659 |
| 20 | 58061890 | 58062110 | 58061971 | 9  | 10 | 4  | 2.286469205 | 0.0509017   | C20orf197 | ENSG00000176659 |
| 20 | 58065932 | 58066129 | 58066069 | 9  | 9  | 4  | 2.078608368 | 0.0785659   | C20orf197 | ENSG00000176659 |
| 20 | 58236779 | 58237096 | 58236933 | 17 | 18 | 4  | 3.9493559   | 0.000961379 |           | ENSG00000207802 |
| 20 | 58278683 | 58279109 | 58278952 | 13 | 20 | 19 | 1.091269393 | 0.389566    |           | ENSG00000207802 |
| 20 | 58281290 | 58281469 | 58281409 | 8  | 9  | 7  | 1.29913023  | 0.286504    |           | ENSG00000207802 |
| 20 | 58282328 | 58282547 | 58282443 | 9  | 10 | 0  | 11.43234603 | 0.000394183 |           | ENSG00000207802 |
| 20 | 58360625 | 58360895 | 58360788 | 9  | 11 | 3  | 3.117912553 | 0.0146045   |           | ENSG00000203961 |
| 20 | 59192474 | 59192681 | 59192571 | 8  | 8  | 1  | 4.676868829 | 0.0091584   | CDH4      | ENSG00000179242 |
| 20 | 60240708 | 60241112 | 60240933 | 12 | 18 | 7  | 2.468347438 | 0.0112499   |           | ENSG00000203951 |
| 20 | 60386568 | 60386924 | 60386746 | 9  | 14 | 0  | 15.58956276 | 2.28E-05    | RPS21     | ENSG00000171858 |
| 20 | 60391247 | 60391451 | 60391349 | 8  | 9  | 8  | 1.154782427 | 0.375434    | RPS21     | ENSG00000171858 |
| 20 | 60435872 | 60436275 | 60436124 | 14 | 20 | 8  | 2.425043097 | 0.00917565  | C20orf151 | ENSG00000130701 |
| 20 | 60754493 | 60754722 | 60754603 | 8  | 10 | 4  | 2.286469205 | 0.0509017   | SLCO4A1   | ENSG00000101187 |
| 20 | 60806396 | 60806579 | 60806492 | 8  | 8  | 4  | 1.870747532 | 0.118863    | NTSR1     | ENSG00000101188 |
| 20 | 60930958 | 60931139 | 60930996 | 8  | 8  | 2  | 3.117912553 | 0.0283184   | COL9A3    | ENSG00000092758 |
| 20 | 61121195 | 61121434 | 61121324 | 8  | 8  | 4  | 1.870747532 | 0.118863    |           | ENSG00000203905 |
| 20 | 61357791 | 61358223 | 61357968 | 20 | 28 | 1  | 15.06991067 | 1.67E-08    | NKAIN4    | ENSG00000101198 |
| 20 | 61639607 | 61639977 | 61639786 | 9  | 16 | 3  | 4.417042783 | 0.00097367  | PTK6      | ENSG00000101213 |
| 20 | 61739217 | 61739413 | 61739321 | 8  | 10 | 0  | 11.43234603 | 0.000394183 | GMEB2     | ENSG00000101216 |
| 20 | 61759577 | 61759789 | 61759665 | 8  | 10 | 9  | 1.143234603 | 0.378307    | TNFRSF6B  | ENSG00000026036 |
| 20 | 61766825 | 61767409 | 61767230 | 19 | 36 | 33 | 1.131007495 | 0.301525    | TNFRSF6B  | ENSG00000026036 |
| 21 | 9723909  | 9724099  | 9723937  | 9  | 10 | 6  | 1.63319229  | 0.146906    |           | ENSG00000169861 |
| 21 | 9732988  | 9733266  | 9733127  | 8  | 8  | 0  | 9.353737658 | 0.00163931  |           | ENSG00000169861 |
| 21 | 9772482  | 9772810  | 9772646  | 16 | 17 | 8  | 2.078608368 | 0.0303558   |           | ENSG00000169861 |
| 21 | 9826083  | 9826276  | 9826174  | 9  | 10 | 14 | 0.762156402 | 0.758589    |           | ENSG00000169861 |
| 21 | 10130908 | 10131269 | 10131118 | 12 | 16 | 10 | 1.606197376 | 0.104477    | BAGE4     | ENSG00000187172 |
| 21 | 10134350 | 10134588 | 10134518 | 8  | 10 | 3  | 2.858086507 | 0.0242838   | BAGE4     | ENSG00000187172 |
| 21 | 10152400 | 10152724 | 10152546 | 8  | 12 | 11 | 1.125912866 | 0.382541    | VN1R7P    | ENSG00000217858 |

|    |          |          |          |    |    |   |             |             |           |                 |
|----|----------|----------|----------|----|----|---|-------------|-------------|-----------|-----------------|
| 21 | 10157925 | 10158104 | 10158014 | 8  | 8  | 4 | 1.870747532 | 0.118863    | VN1R7P    | ENSG00000217858 |
| 21 | 10165526 | 10165968 | 10165789 | 9  | 17 | 8 | 2.078608368 | 0.0303558   | VN1R7P    | ENSG00000217858 |
| 21 | 14994298 | 14994527 | 14994412 | 13 | 16 | 0 | 17.66817113 | 5.48E-06    |           | ENSG00000215552 |
| 21 | 15161065 | 15161456 | 15161277 | 24 | 31 | 0 | 33.2577339  | 1.25E-10    |           | ENSG00000217388 |
| 21 | 15458967 | 15459170 | 15459068 | 8  | 10 | 1 | 5.716173013 | 0.00260397  | NRIP1     | ENSG00000180530 |
| 21 | 15504479 | 15504665 | 15504563 | 9  | 9  | 3 | 2.598260461 | 0.0397929   | NRIP1     | ENSG00000180530 |
| 21 | 17517729 | 17517930 | 17517829 | 9  | 9  | 1 | 5.196520921 | 0.00490062  |           | ENSG00000216487 |
| 21 | 17748884 | 17749094 | 17748986 | 10 | 10 | 6 | 1.63319229  | 0.146906    |           | ENSG00000209722 |
| 21 | 17795703 | 17795925 | 17795788 | 9  | 9  | 2 | 3.464347281 | 0.0163838   |           | ENSG00000220521 |
| 21 | 17831584 | 17831832 | 17831708 | 9  | 10 | 1 | 5.716173013 | 0.00260397  | CXADR     | ENSG00000154639 |
| 21 | 17833630 | 17833812 | 17833721 | 8  | 8  | 0 | 9.353737658 | 0.00163931  | CXADR     | ENSG00000154639 |
| 21 | 17901796 | 17902266 | 17902069 | 21 | 32 | 3 | 8.57425952  | 6.31E-08    | BTG3      | ENSG00000154640 |
| 21 | 17961508 | 17961874 | 17961709 | 27 | 31 | 0 | 33.2577339  | 1.25E-10    | BTG3      | ENSG00000154640 |
| 21 | 18002651 | 18003032 | 18002858 | 34 | 42 | 0 | 44.69007992 | 4.92E-14    | BTG3      | ENSG00000154640 |
| 21 | 20886611 | 20886943 | 20886769 | 20 | 23 | 1 | 12.47165021 | 4.94E-07    | RPS3AP1   | ENSG00000189005 |
| 21 | 21533040 | 21533550 | 21533371 | 13 | 23 | 0 | 24.94330042 | 3.74E-08    | NCAM2     | ENSG00000154654 |
| 21 | 22191546 | 22191998 | 22191769 | 23 | 36 | 1 | 19.22712741 | 7.03E-11    | C21orf74  | ENSG00000184856 |
| 21 | 23184929 | 23185148 | 23185038 | 9  | 10 | 0 | 11.43234603 | 0.000394183 |           | ENSG00000219889 |
| 21 | 25196753 | 25196932 | 25196823 | 11 | 11 | 3 | 3.117912553 | 0.0146045   |           | ENSG00000222567 |
| 21 | 26684131 | 26684453 | 26684286 | 11 | 14 | 2 | 5.196520921 | 0.000907371 |           | ENSG00000197934 |
| 21 | 26684465 | 26684731 | 26684616 | 10 | 13 | 4 | 2.910051716 | 0.0125532   |           | ENSG00000197934 |
| 21 | 26735318 | 26735650 | 26735532 | 8  | 12 | 0 | 13.5109544  | 9.48E-05    |           | ENSG00000197934 |
| 21 | 28993798 | 28994077 | 28993937 | 14 | 16 | 0 | 17.66817113 | 5.48E-06    | N6AMT1    | ENSG00000156239 |
| 21 | 29676352 | 29676534 | 29676477 | 9  | 9  | 2 | 3.464347281 | 0.0163838   |           | ENSG00000209835 |
| 21 | 29680459 | 29680657 | 29680585 | 8  | 9  | 8 | 1.154782427 | 0.375434    |           | ENSG00000209835 |
| 21 | 29698118 | 29698473 | 29698295 | 11 | 17 | 1 | 9.353737658 | 2.73E-05    |           | ENSG00000209835 |
| 21 | 29727910 | 29728107 | 29727968 | 8  | 9  | 2 | 3.464347281 | 0.0163838   |           | ENSG00000209835 |
| 21 | 30772194 | 30772482 | 30772350 | 20 | 21 | 2 | 7.621564018 | 1.21E-05    | KRTAP19-1 | ENSG00000184351 |
| 21 | 31148698 | 31148894 | 31148796 | 8  | 8  | 0 | 9.353737658 | 0.00163931  |           | ENSG00000184586 |
| 21 | 32789704 | 32789930 | 32789801 | 10 | 10 | 1 | 5.716173013 | 0.00260397  |           | ENSG00000217054 |
| 21 | 33661354 | 33661798 | 33661581 | 76 | 95 | 1 | 49.88660084 | 9.73E-29    |           | ENSG00000217665 |
| 21 | 34095916 | 34096135 | 34096077 | 9  | 11 | 5 | 2.078608368 | 0.0614303   | ITSN1     | ENSG00000205726 |
| 21 | 34645972 | 34646179 | 34646075 | 10 | 10 | 4 | 2.286469205 | 0.0509017   | KCNE2     | ENSG00000159197 |
| 21 | 34661551 | 34661803 | 34661701 | 9  | 11 | 1 | 6.235825105 | 0.0013754   | KCNE2     | ENSG00000159197 |

|    |          |          |          |    |    |    |             |             |          |                 |
|----|----------|----------|----------|----|----|----|-------------|-------------|----------|-----------------|
| 21 | 34969392 | 34969668 | 34969530 | 17 | 19 | 2  | 6.928694562 | 4.25E-05    | CLIC6    | ENSG00000159212 |
| 21 | 35826254 | 35826437 | 35826345 | 9  | 9  | 2  | 3.464347281 | 0.0163838   | RPL34P3  | ENSG00000217393 |
| 21 | 36363715 | 36363962 | 36363844 | 8  | 10 | 0  | 11.43234603 | 0.000394183 | CBR1     | ENSG00000159228 |
| 21 | 36482274 | 36482638 | 36482499 | 10 | 15 | 3  | 4.157216737 | 0.00170423  | RPL3P1   | ENSG00000219887 |
| 21 | 36487457 | 36487668 | 36487595 | 8  | 9  | 1  | 5.196520921 | 0.00490062  | RPL3P1   | ENSG00000219887 |
| 21 | 36691728 | 36691946 | 36691801 | 8  | 9  | 0  | 10.39304184 | 0.000803859 | ATP5J2LP | ENSG00000219968 |
| 21 | 37561644 | 37561919 | 37561807 | 9  | 9  | 4  | 2.078608368 | 0.0785659   | DSCR3    | ENSG00000157538 |
| 21 | 39005941 | 39006163 | 39006052 | 8  | 9  | 6  | 1.484720263 | 0.204387    | ERG      | ENSG00000157554 |
| 21 | 39081415 | 39081605 | 39081556 | 8  | 9  | 3  | 2.598260461 | 0.0397929   | ETS2     | ENSG00000157557 |
| 21 | 39098909 | 39099169 | 39099039 | 8  | 10 | 4  | 2.286469205 | 0.0509017   | ETS2     | ENSG00000157557 |
| 21 | 39205382 | 39205577 | 39205525 | 10 | 11 | 0  | 12.47165021 | 0.000193293 |          | ENSG00000220397 |
| 21 | 39210768 | 39211038 | 39210884 | 9  | 11 | 3  | 3.117912553 | 0.0146045   |          | ENSG00000205622 |
| 21 | 39233364 | 39233564 | 39233532 | 8  | 8  | 1  | 4.676868829 | 0.0091584   |          | ENSG00000205622 |
| 21 | 39379886 | 39380066 | 39379951 | 8  | 8  | 1  | 4.676868829 | 0.0091584   |          | ENSG00000219254 |
| 21 | 39607430 | 39607657 | 39607560 | 12 | 12 | 1  | 6.755477198 | 0.000722752 | BRWD1    | ENSG00000185658 |
| 21 | 39611191 | 39611446 | 39611327 | 12 | 16 | 5  | 2.944695189 | 0.00659886  | BRWD1    | ENSG00000185658 |
| 21 | 39615178 | 39615639 | 39615398 | 19 | 31 | 11 | 2.771477825 | 0.000623099 | BRWD1    | ENSG00000185658 |
| 21 | 39627469 | 39627762 | 39627615 | 9  | 12 | 8  | 1.501217155 | 0.168286    | HMG1     | ENSG00000205581 |
| 21 | 39674768 | 39675040 | 39674901 | 8  | 10 | 1  | 5.716173013 | 0.00260397  | WRB      | ENSG00000182093 |
| 21 | 39821745 | 39822010 | 39821877 | 9  | 11 | 8  | 1.385738912 | 0.224757    |          | ENSG00000216869 |
| 21 | 39831615 | 39831808 | 39831711 | 8  | 8  | 0  | 9.353737658 | 0.00163931  |          | ENSG00000216869 |
| 21 | 39856717 | 39856907 | 39856812 | 8  | 8  | 4  | 1.870747532 | 0.118863    | B3GALT5  | ENSG00000183778 |
| 21 | 40082033 | 40082568 | 40082172 | 13 | 24 | 13 | 1.855900329 | 0.0279411   | IGSF5    | ENSG00000183067 |
| 21 | 40348258 | 40348555 | 40348403 | 8  | 12 | 10 | 1.228268581 | 0.305344    | PCP4     | ENSG00000183036 |
| 21 | 40424339 | 40424741 | 40424562 | 35 | 48 | 3  | 12.73147626 | 2.12E-12    | PCP4     | ENSG00000183036 |
| 21 | 40437702 | 40437882 | 40437777 | 8  | 8  | 3  | 2.338434415 | 0.0641221   | PCP4     | ENSG00000183036 |
| 21 | 40572187 | 40572584 | 40572413 | 13 | 20 | 4  | 4.365077574 | 0.000324139 |          | ENSG00000207147 |
| 21 | 40612284 | 40612757 | 40612427 | 12 | 21 | 6  | 3.266384579 | 0.0013436   |          | ENSG00000207147 |
| 21 | 40618129 | 40618421 | 40618266 | 14 | 16 | 9  | 1.766817113 | 0.0700694   |          | ENSG00000207147 |
| 21 | 40632744 | 40633285 | 40633109 | 9  | 22 | 11 | 1.991999686 | 0.0221672   |          | ENSG00000207147 |
| 21 | 40666562 | 40666790 | 40666676 | 8  | 11 | 3  | 3.117912553 | 0.0146045   |          | ENSG00000207147 |
| 21 | 40674331 | 40674564 | 40674440 | 9  | 9  | 1  | 5.196520921 | 0.00490062  |          | ENSG00000207147 |
| 21 | 40676582 | 40676963 | 40676761 | 17 | 24 | 9  | 2.598260461 | 0.0032455   |          | ENSG00000207147 |
| 21 | 40678955 | 40679294 | 40679124 | 8  | 11 | 8  | 1.385738912 | 0.224757    |          | ENSG00000207147 |

|    |          |          |          |    |    |    |             |             |           |                 |
|----|----------|----------|----------|----|----|----|-------------|-------------|-----------|-----------------|
| 21 | 40679457 | 40679745 | 40679632 | 9  | 13 | 6  | 2.078608368 | 0.0483393   |           | ENSG00000207147 |
| 21 | 40679751 | 40680023 | 40679887 | 10 | 12 | 11 | 1.125912866 | 0.382541    |           | ENSG00000207147 |
| 21 | 40686988 | 40687291 | 40687164 | 12 | 15 | 1  | 8.314433474 | 0.000102308 |           | ENSG00000207147 |
| 21 | 41317641 | 41317889 | 41317765 | 8  | 10 | 1  | 5.716173013 | 0.00260397  | BACE2     | ENSG00000182240 |
| 21 | 41318116 | 41318427 | 41318271 | 9  | 12 | 2  | 4.503651465 | 0.002963    | BACE2     | ENSG00000182240 |
| 21 | 41615954 | 41616276 | 41616115 | 11 | 14 | 7  | 1.948695345 | 0.0559175   | FAM3B     | ENSG00000183844 |
| 21 | 41830200 | 41830514 | 41830357 | 11 | 15 | 6  | 2.375552421 | 0.0212094   |           | ENSG00000207503 |
| 21 | 41906026 | 41906313 | 41906168 | 8  | 10 | 5  | 1.905391004 | 0.0915982   |           | ENSG00000207503 |
| 21 | 41949760 | 41949995 | 41949867 | 10 | 11 | 1  | 6.235825105 | 0.0013754   | RIPK4     | ENSG00000183421 |
| 21 | 41973819 | 41974168 | 41973993 | 9  | 12 | 9  | 1.35109544  | 0.232899    | RIPK4     | ENSG00000183421 |
| 21 | 41974624 | 41974837 | 41974699 | 9  | 10 | 8  | 1.27026067  | 0.293854    | RIPK4     | ENSG00000183421 |
| 21 | 41999808 | 42000013 | 41999910 | 8  | 8  | 2  | 3.117912553 | 0.0283184   | RIPK4     | ENSG00000183421 |
| 21 | 42044818 | 42045011 | 42044914 | 12 | 12 | 1  | 6.755477198 | 0.000722752 | RIPK4     | ENSG00000183421 |
| 21 | 42054434 | 42054617 | 42054504 | 8  | 8  | 4  | 1.870747532 | 0.118863    | RIPK4     | ENSG00000183421 |
| 21 | 42338294 | 42338489 | 42338339 | 10 | 10 | 4  | 2.286469205 | 0.0509017   | UMODL1    | ENSG00000177398 |
| 21 | 42350062 | 42350492 | 42350313 | 19 | 28 | 6  | 4.305688763 | 3.69E-05    | UMODL1    | ENSG00000177398 |
| 21 | 42372070 | 42372433 | 42372238 | 8  | 13 | 0  | 14.55025858 | 4.65E-05    | UMODL1    | ENSG00000177398 |
| 21 | 42401076 | 42401330 | 42401195 | 12 | 14 | 5  | 2.598260461 | 0.0167748   | C21orf128 | ENSG00000184385 |
| 21 | 42457649 | 42457884 | 42457764 | 8  | 8  | 8  | 1.039304184 | 0.46786     | ABCG1     | ENSG00000160179 |
| 21 | 42494896 | 42495177 | 42495023 | 10 | 12 | 1  | 6.755477198 | 0.000722752 | ABCG1     | ENSG00000160179 |
| 21 | 42502004 | 42502296 | 42502150 | 11 | 12 | 4  | 2.702190879 | 0.0203088   | ABCG1     | ENSG00000160179 |
| 21 | 42502330 | 42502544 | 42502478 | 8  | 9  | 1  | 5.196520921 | 0.00490062  | ABCG1     | ENSG00000160179 |
| 21 | 42531753 | 42531937 | 42531845 | 8  | 8  | 3  | 2.338434415 | 0.0641221   | ABCG1     | ENSG00000160179 |
| 21 | 42631009 | 42631419 | 42631240 | 11 | 18 | 2  | 6.582259834 | 7.91E-05    | TFF2      | ENSG00000160181 |
| 21 | 42650663 | 42650851 | 42650757 | 8  | 9  | 1  | 5.196520921 | 0.00490062  | TFF2      | ENSG00000160181 |
| 21 | 42947723 | 42947902 | 42947812 | 8  | 8  | 2  | 3.117912553 | 0.0283184   | PDE9A     | ENSG00000160191 |
| 21 | 43267044 | 43267418 | 43267175 | 11 | 15 | 6  | 2.375552421 | 0.0212094   | PKNOX1    | ENSG00000160199 |
| 21 | 43577736 | 43577933 | 43577879 | 8  | 9  | 7  | 1.29913023  | 0.286504    | SNF1LK    | ENSG00000142178 |
| 21 | 43588822 | 43589059 | 43588940 | 11 | 13 | 2  | 4.850086193 | 0.00164564  | SNF1LK    | ENSG00000142178 |
| 21 | 43761073 | 43761505 | 43761239 | 12 | 18 | 3  | 4.936694875 | 0.000311102 |           | ENSG00000214326 |
| 21 | 43871819 | 43872033 | 43871926 | 9  | 11 | 1  | 6.235825105 | 0.0013754   | HSF2BP    | ENSG00000160207 |
| 21 | 43890981 | 43891271 | 43891126 | 8  | 10 | 4  | 2.286469205 | 0.0509017   | HSF2BP    | ENSG00000160207 |
| 21 | 43971481 | 43971745 | 43971598 | 8  | 8  | 0  | 9.353737658 | 0.00163931  | PDXK      | ENSG00000160209 |
| 21 | 44183522 | 44183793 | 44183652 | 9  | 10 | 2  | 3.810782009 | 0.00936112  | AGPAT3    | ENSG00000160216 |

|    |          |          |          |     |     |    |             |             |           |                 |
|----|----------|----------|----------|-----|-----|----|-------------|-------------|-----------|-----------------|
| 21 | 44602932 | 44603120 | 44603014 | 8   | 8   | 0  | 9.353737658 | 0.00163931  | TRPM2     | ENSG00000142185 |
| 21 | 44736887 | 44737155 | 44736991 | 8   | 8   | 2  | 3.117912553 | 0.0283184   |           | ENSG00000210065 |
| 21 | 44793394 | 44793764 | 44793566 | 11  | 17  | 1  | 9.353737658 | 2.73E-05    | KRTAP10-2 | ENSG00000205445 |
| 21 | 44838381 | 44838583 | 44838482 | 11  | 11  | 0  | 12.47165021 | 0.000193293 | KRTAP10-6 | ENSG00000188155 |
| 21 | 44842304 | 44842581 | 44842442 | 16  | 16  | 2  | 5.889390377 | 0.000270741 | KRTAP10-7 | ENSG00000205441 |
| 21 | 44954005 | 44954652 | 44954380 | 122 | 158 | 3  | 41.31234132 | 5.81E-45    | C21orf29  | ENSG00000175894 |
| 21 | 44956051 | 44956250 | 44956150 | 9   | 10  | 1  | 5.716173013 | 0.00260397  | C21orf29  | ENSG00000175894 |
| 21 | 44997326 | 44997576 | 44997440 | 8   | 12  | 2  | 4.503651465 | 0.002963    | UBE2G2    | ENSG00000184787 |
| 21 | 45009950 | 45010184 | 45010077 | 8   | 8   | 5  | 1.558956276 | 0.191397    | UBE2G2    | ENSG00000184787 |
| 21 | 45010583 | 45011134 | 45010757 | 51  | 71  | 3  | 18.70747532 | 4.85E-19    | UBE2G2    | ENSG00000184787 |
| 21 | 45012143 | 45012337 | 45012237 | 8   | 9   | 1  | 5.196520921 | 0.00490062  | UBE2G2    | ENSG00000184787 |
| 21 | 45064263 | 45064539 | 45064380 | 10  | 10  | 2  | 3.810782009 | 0.00936112  | SUMO2     | ENSG00000184900 |
| 21 | 45141944 | 45142206 | 45142075 | 8   | 10  | 5  | 1.905391004 | 0.0915982   | ITGB2     | ENSG00000160255 |
| 21 | 45317791 | 45318036 | 45317896 | 12  | 13  | 8  | 1.616695398 | 0.123553    | ADARB1    | ENSG00000197381 |
| 21 | 45373077 | 45373258 | 45373130 | 9   | 9   | 4  | 2.078608368 | 0.0785659   | ADARB1    | ENSG00000197381 |
| 21 | 45877049 | 45877557 | 45877319 | 38  | 58  | 6  | 8.759849553 | 8.79E-13    | PCBP3     | ENSG00000183570 |
| 21 | 45981538 | 45981761 | 45981677 | 11  | 11  | 3  | 3.117912553 | 0.0146045   | PCBP3     | ENSG00000183570 |
| 22 | 16091223 | 16091595 | 16091410 | 72  | 81  | 0  | 85.22294311 | 4.19E-26    | CECR1     | ENSG00000093072 |
| 22 | 16129035 | 16129235 | 16129202 | 8   | 8   | 1  | 4.676868829 | 0.0091584   | CECR1     | ENSG00000093072 |
| 22 | 16189906 | 16190505 | 16190068 | 11  | 23  | 4  | 4.988660084 | 6.05E-05    |           | ENSG00000209324 |
| 22 | 16208626 | 16209104 | 16208950 | 10  | 19  | 4  | 4.157216737 | 0.000560204 |           | ENSG00000209324 |
| 22 | 16570036 | 16570230 | 16570114 | 8   | 9   | 1  | 5.196520921 | 0.00490062  | BCL2L13   | ENSG00000099968 |
| 22 | 16850204 | 16850527 | 16850363 | 9   | 12  | 0  | 13.5109544  | 9.48E-05    |           | ENSG00000207780 |
| 22 | 17258443 | 17258645 | 17258490 | 11  | 11  | 11 | 1.039304184 | 0.462773    | DGCR6     | ENSG00000183628 |
| 22 | 17297014 | 17297444 | 17297229 | 24  | 33  | 0  | 35.33634226 | 3.00E-11    | PRODH     | ENSG00000100033 |
| 22 | 17301403 | 17301682 | 17301542 | 10  | 11  | 2  | 4.157216737 | 0.0052913   | PRODH     | ENSG00000100033 |
| 22 | 17658526 | 17658719 | 17658638 | 8   | 8   | 2  | 3.117912553 | 0.0283184   | CLTCL1    | ENSG00000070371 |
| 22 | 18111369 | 18111566 | 18111495 | 10  | 10  | 0  | 11.43234603 | 0.000394183 | TBX1      | ENSG00000184058 |
| 22 | 18174074 | 18174371 | 18174222 | 17  | 19  | 2  | 6.928694562 | 4.25E-05    |           | ENSG00000219300 |
| 22 | 18217269 | 18217604 | 18217441 | 9   | 13  | 5  | 2.425043097 | 0.0262442   | GNB1L     | ENSG00000185838 |
| 22 | 18236462 | 18236681 | 18236547 | 13  | 13  | 0  | 14.55025858 | 4.65E-05    | GNB1L     | ENSG00000185838 |
| 22 | 18336104 | 18336302 | 18336237 | 9   | 10  | 1  | 5.716173013 | 0.00260397  | COMT      | ENSG00000093010 |
| 22 | 18350502 | 18350751 | 18350626 | 8   | 9   | 0  | 10.39304184 | 0.000803859 | ARVCF     | ENSG00000099889 |
| 22 | 18447316 | 18447534 | 18447425 | 8   | 9   | 8  | 1.154782427 | 0.375434    | DGCR8     | ENSG00000128191 |



|    |          |          |          |    |    |   |             |             |          |                 |
|----|----------|----------|----------|----|----|---|-------------|-------------|----------|-----------------|
| 22 | 18605472 | 18605832 | 18605653 | 29 | 35 | 0 | 37.41495063 | 7.22E-12    |          | ENSG00000221039 |
| 22 | 18606140 | 18606341 | 18606240 | 9  | 9  | 1 | 5.196520921 | 0.00490062  |          | ENSG00000221039 |
| 22 | 19140622 | 19140820 | 19140697 | 8  | 9  | 1 | 5.196520921 | 0.00490062  |          | ENSG00000215493 |
| 22 | 19157264 | 19157488 | 19157403 | 8  | 9  | 3 | 2.598260461 | 0.0397929   |          | ENSG00000206673 |
| 22 | 19251768 | 19252062 | 19251915 | 13 | 16 | 6 | 2.524024447 | 0.0137633   |          | ENSG00000220624 |
| 22 | 19462225 | 19462482 | 19462353 | 9  | 11 | 2 | 4.157216737 | 0.0052913   | SERPIND1 | ENSG00000099937 |
| 22 | 19483880 | 19484061 | 19484022 | 8  | 8  | 3 | 2.338434415 | 0.0641221   | SERPIND1 | ENSG00000099937 |
| 22 | 19527841 | 19528029 | 19527924 | 8  | 9  | 5 | 1.73217364  | 0.133894    | PI4KA    | ENSG00000133511 |
| 22 | 19601293 | 19601655 | 19601476 | 10 | 16 | 4 | 3.533634226 | 0.00276486  | CRKL     | ENSG00000099942 |
| 22 | 19605015 | 19605227 | 19605086 | 9  | 10 | 3 | 2.858086507 | 0.0242838   | CRKL     | ENSG00000099942 |
| 22 | 19640466 | 19640702 | 19640575 | 8  | 11 | 3 | 3.117912553 | 0.0146045   |          | ENSG00000206152 |
| 22 | 19694016 | 19694278 | 19694102 | 9  | 11 | 2 | 4.157216737 | 0.0052913   |          | ENSG00000161149 |
| 22 | 19722170 | 19722412 | 19722258 | 8  | 10 | 4 | 2.286469205 | 0.0509017   |          | ENSG00000207575 |
| 22 | 20256232 | 20256417 | 20256318 | 8  | 9  | 0 | 10.39304184 | 0.000803859 | UBE2L3   | ENSG00000185651 |
| 22 | 20313578 | 20313865 | 20313721 | 8  | 11 | 6 | 1.781664316 | 0.103344    | YDJC     | ENSG00000161179 |
| 22 | 20491880 | 20492161 | 20492020 | 9  | 12 | 3 | 3.377738599 | 0.00867157  |          | ENSG00000200985 |
| 22 | 20622462 | 20622673 | 20622567 | 8  | 9  | 1 | 5.196520921 | 0.00490062  | PPM1F    | ENSG00000100034 |
| 22 | 20631415 | 20631606 | 20631529 | 9  | 9  | 8 | 1.154782427 | 0.375434    | PPM1F    | ENSG00000100034 |
| 22 | 20631721 | 20631900 | 20631810 | 9  | 9  | 0 | 10.39304184 | 0.000803859 | PPM1F    | ENSG00000100034 |
| 22 | 21360725 | 21360906 | 21360825 | 8  | 8  | 1 | 4.676868829 | 0.0091584   |          | ENSG00000216455 |
| 22 | 21819829 | 21820049 | 21819962 | 11 | 12 | 4 | 2.702190879 | 0.0203088   | RAB36    | ENSG00000100228 |
| 22 | 21854936 | 21855119 | 21855011 | 8  | 8  | 3 | 2.338434415 | 0.0641221   | BCR      | ENSG00000186716 |
| 22 | 21941743 | 21941939 | 21941869 | 8  | 9  | 2 | 3.464347281 | 0.0163838   | FBXW4P1  | ENSG00000218644 |
| 22 | 21941979 | 21942167 | 21942048 | 8  | 8  | 1 | 4.676868829 | 0.0091584   | FBXW4P1  | ENSG00000218644 |
| 22 | 22436792 | 22436979 | 22436894 | 8  | 8  | 0 | 9.353737658 | 0.00163931  | C22orf15 | ENSG00000169314 |
| 22 | 22498274 | 22498536 | 22498405 | 19 | 20 | 0 | 21.82538787 | 3.17E-07    | DERL3    | ENSG00000099958 |
| 22 | 22529346 | 22529546 | 22529446 | 8  | 9  | 5 | 1.73217364  | 0.133894    | SLC2A11  | ENSG00000133460 |
| 22 | 23029334 | 23029653 | 23029493 | 18 | 22 | 4 | 4.780799247 | 0.00010647  | ADORA2A  | ENSG00000128271 |
| 22 | 23112914 | 23113115 | 23113032 | 9  | 9  | 6 | 1.484720263 | 0.204387    | ADORA2A  | ENSG00000128271 |
| 22 | 23130948 | 23131247 | 23131097 | 10 | 14 | 5 | 2.598260461 | 0.0167748   | ADORA2A  | ENSG00000128271 |
| 22 | 23147378 | 23147651 | 23147486 | 13 | 14 | 3 | 3.897390691 | 0.00295882  | ADORA2A  | ENSG00000128271 |
| 22 | 23247839 | 23248022 | 23247968 | 9  | 9  | 2 | 3.464347281 | 0.0163838   | UPB1     | ENSG00000100024 |
| 22 | 23251499 | 23251871 | 23251673 | 14 | 19 | 4 | 4.157216737 | 0.000560204 | C22orf13 | ENSG00000138867 |
| 22 | 23252215 | 23252549 | 23252382 | 8  | 13 | 2 | 4.850086193 | 0.00164564  | C22orf13 | ENSG00000138867 |

|    |          |          |          |     |     |    |             |             |         |                 |
|----|----------|----------|----------|-----|-----|----|-------------|-------------|---------|-----------------|
| 22 | 23624037 | 23624247 | 23624125 | 10  | 11  | 0  | 12.47165021 | 0.000193293 |         | ENSG00000199783 |
| 22 | 23774795 | 23775006 | 23774935 | 8   | 9   | 3  | 2.598260461 | 0.0397929   |         | ENSG00000197077 |
| 22 | 23787727 | 23787987 | 23787849 | 9   | 10  | 0  | 11.43234603 | 0.000394183 |         | ENSG00000197077 |
| 22 | 25274953 | 25275349 | 25275161 | 29  | 38  | 3  | 10.1332158  | 1.39E-09    |         | ENSG00000221760 |
| 22 | 25401820 | 25401999 | 25401940 | 8   | 8   | 0  | 9.353737658 | 0.00163931  |         | ENSG00000206028 |
| 22 | 25842409 | 25842626 | 25842552 | 9   | 9   | 2  | 3.464347281 | 0.0163838   |         | ENSG00000200443 |
| 22 | 26445504 | 26445862 | 26445683 | 23  | 29  | 0  | 31.17912553 | 5.19E-10    | MN1     | ENSG00000169184 |
| 22 | 27040949 | 27041269 | 27041109 | 22  | 24  | 2  | 8.660868202 | 1.80E-06    | TTC28   | ENSG00000100154 |
| 22 | 27041916 | 27042460 | 27042198 | 165 | 201 | 0  | 209.9394452 | 3.05E-63    | TTC28   | ENSG00000100154 |
| 22 | 27274398 | 27274642 | 27274535 | 8   | 10  | 1  | 5.716173013 | 0.00260397  |         | ENSG00000209372 |
| 22 | 27467676 | 27467951 | 27467805 | 9   | 12  | 6  | 1.930136342 | 0.071303    | CHEK2   | ENSG00000183765 |
| 22 | 27468429 | 27468722 | 27468569 | 9   | 12  | 3  | 3.377738599 | 0.00867157  | HSCB    | ENSG00000100209 |
| 22 | 27498430 | 27498749 | 27498589 | 9   | 10  | 4  | 2.286469205 | 0.0509017   | CCDC117 | ENSG00000159873 |
| 22 | 27544561 | 27545101 | 27544740 | 15  | 27  | 11 | 2.425043097 | 0.00332497  |         | ENSG00000216570 |
| 22 | 27705266 | 27705458 | 27705352 | 9   | 9   | 1  | 5.196520921 | 0.00490062  | ZNRF3   | ENSG00000183579 |
| 22 | 27709047 | 27709561 | 27709341 | 40  | 60  | 1  | 31.69877762 | 4.25E-18    | ZNRF3   | ENSG00000183579 |
| 22 | 28104048 | 28104295 | 28104167 | 11  | 12  | 2  | 4.503651465 | 0.002963    | AP1B1   | ENSG00000100280 |
| 22 | 28194878 | 28195116 | 28195030 | 13  | 15  | 2  | 5.542955649 | 0.000497081 | NEFH    | ENSG00000100285 |
| 22 | 28329021 | 28329223 | 28329121 | 8   | 8   | 2  | 3.117912553 | 0.0283184   | NF2     | ENSG00000186575 |
| 22 | 28347900 | 28348225 | 28348071 | 8   | 11  | 4  | 2.494330042 | 0.0324033   | NF2     | ENSG00000186575 |
| 22 | 28414055 | 28414379 | 28414217 | 8   | 13  | 10 | 1.32275078  | 0.240023    | CABP7   | ENSG00000100314 |
| 22 | 28521700 | 28521984 | 28521832 | 14  | 16  | 3  | 4.417042783 | 0.00097367  | ZMAT5   | ENSG00000100319 |
| 22 | 28540092 | 28540303 | 28540208 | 8   | 8   | 1  | 4.676868829 | 0.0091584   | ZMAT5   | ENSG00000100319 |
| 22 | 28547317 | 28547559 | 28547438 | 10  | 14  | 1  | 7.794781382 | 0.000197021 | ZMAT5   | ENSG00000100319 |
| 22 | 28971607 | 28972381 | 28971882 | 117 | 164 | 2  | 57.16173013 | 3.14E-48    | LIF     | ENSG00000128342 |
| 22 | 29024377 | 29024596 | 29024500 | 8   | 11  | 9  | 1.247165021 | 0.300052    |         | ENSG00000182482 |
| 22 | 29509085 | 29509340 | 29509212 | 11  | 13  | 1  | 7.27512929  | 0.000378098 | OSBP2   | ENSG00000184792 |
| 22 | 29781547 | 29781885 | 29781716 | 11  | 14  | 4  | 3.117912553 | 0.00766354  |         | ENSG00000209058 |
| 22 | 29857776 | 29858201 | 29857918 | 10  | 16  | 16 | 1.039304184 | 0.455583    | INPP5J  | ENSG00000185133 |
| 22 | 29875001 | 29875237 | 29875160 | 9   | 10  | 1  | 5.716173013 | 0.00260397  |         | ENSG00000214125 |
| 22 | 29886041 | 29886276 | 29886108 | 10  | 10  | 5  | 1.905391004 | 0.0915982   | RNF185  | ENSG00000138942 |
| 22 | 29937502 | 29937696 | 29937599 | 8   | 9   | 3  | 2.598260461 | 0.0397929   | LIMK2   | ENSG00000182541 |
| 22 | 29944927 | 29945284 | 29945105 | 29  | 34  | 2  | 12.12521548 | 2.69E-09    |         | ENSG00000209392 |
| 22 | 29979866 | 29980480 | 29980131 | 62  | 79  | 3  | 20.78608368 | 2.20E-21    | LIMK2   | ENSG00000182541 |

|    |          |          |          |    |    |   |             |             |          |                 |
|----|----------|----------|----------|----|----|---|-------------|-------------|----------|-----------------|
| 22 | 30032546 | 30032781 | 30032663 | 9  | 11 | 3 | 3.117912553 | 0.0146045   |          | ENSG00000212542 |
| 22 | 30039512 | 30039812 | 30039657 | 8  | 11 | 4 | 2.494330042 | 0.0324033   |          | ENSG00000212542 |
| 22 | 30069350 | 30069575 | 30069462 | 11 | 12 | 5 | 2.251825733 | 0.0404733   | PATZ1    | ENSG00000100105 |
| 22 | 30287313 | 30287660 | 30287486 | 11 | 15 | 1 | 8.314433474 | 0.000102308 |          | ENSG00000214093 |
| 22 | 30359913 | 30360203 | 30360058 | 8  | 9  | 3 | 2.598260461 | 0.0397929   | PISD     | ENSG00000100141 |
| 22 | 30409216 | 30409523 | 30409369 | 22 | 24 | 0 | 25.98260461 | 1.83E-08    | PISD     | ENSG00000100141 |
| 22 | 30476193 | 30476487 | 30476340 | 10 | 13 | 2 | 4.850086193 | 0.00164564  | C22orf30 | ENSG00000183530 |
| 22 | 30703288 | 30703471 | 30703351 | 9  | 10 | 4 | 2.286469205 | 0.0509017   |          | ENSG00000209414 |
| 22 | 30833010 | 30833312 | 30833134 | 17 | 21 | 3 | 5.716173013 | 5.37E-05    |          | ENSG00000216309 |
| 22 | 31255055 | 31255280 | 31255203 | 8  | 11 | 3 | 3.117912553 | 0.0146045   | FBXO7    | ENSG00000100225 |
| 22 | 31452603 | 31452797 | 31452700 | 8  | 8  | 1 | 4.676868829 | 0.0091584   | TIMP3    | ENSG00000100234 |
| 22 | 32470600 | 32470779 | 32470645 | 8  | 9  | 0 | 10.39304184 | 0.000803859 |          | ENSG00000209422 |
| 22 | 32578115 | 32578334 | 32578224 | 8  | 8  | 7 | 1.169217207 | 0.371848    | LARGE    | ENSG00000133424 |
| 22 | 32740935 | 32741120 | 32741027 | 9  | 9  | 0 | 10.39304184 | 0.000803859 | LARGE    | ENSG00000133424 |
| 22 | 33626112 | 33626339 | 33626229 | 8  | 9  | 0 | 10.39304184 | 0.000803859 | ISX      | ENSG00000175329 |
| 22 | 33858893 | 33859088 | 33858975 | 8  | 8  | 0 | 9.353737658 | 0.00163931  |          | ENSG00000219612 |
| 22 | 33881038 | 33881217 | 33881118 | 8  | 8  | 1 | 4.676868829 | 0.0091584   |          | ENSG00000219612 |
| 22 | 34098004 | 34098199 | 34098101 | 11 | 11 | 0 | 12.47165021 | 0.000193293 | HMOX1    | ENSG00000100292 |
| 22 | 34348619 | 34348885 | 34348752 | 9  | 11 | 4 | 2.494330042 | 0.0324033   | MB       | ENSG00000198125 |
| 22 | 34382529 | 34382753 | 34382641 | 9  | 12 | 2 | 4.503651465 | 0.002963    |          | ENSG00000221963 |
| 22 | 34569043 | 34569269 | 34569156 | 9  | 12 | 1 | 6.755477198 | 0.000722752 | RBM9     | ENSG00000100320 |
| 22 | 35135817 | 35136021 | 35135952 | 8  | 8  | 2 | 3.117912553 | 0.0283184   |          | ENSG00000219717 |
| 22 | 35534928 | 35535315 | 35535138 | 21 | 28 | 2 | 10.04660711 | 1.36E-07    | PVALB    | ENSG00000100362 |
| 22 | 35704050 | 35704328 | 35704189 | 8  | 8  | 0 | 9.353737658 | 0.00163931  |          | ENSG00000215403 |
| 22 | 36155404 | 36155664 | 36155534 | 8  | 9  | 1 | 5.196520921 | 0.00490062  | ELFN2    | ENSG00000166897 |
| 22 | 36335379 | 36335558 | 36335414 | 8  | 8  | 3 | 2.338434415 | 0.0641221   | GGA1     | ENSG00000100083 |
| 22 | 36436723 | 36436906 | 36436814 | 8  | 8  | 0 | 9.353737658 | 0.00163931  | TRIOBP   | ENSG00000100106 |
| 22 | 36503183 | 36503441 | 36503315 | 8  | 11 | 3 | 3.117912553 | 0.0146045   |          | ENSG00000209462 |
| 22 | 36510782 | 36511038 | 36510910 | 12 | 16 | 2 | 5.889390377 | 0.000270741 |          | ENSG00000209462 |
| 22 | 36624684 | 36625078 | 36624911 | 45 | 53 | 0 | 56.12242595 | 1.94E-17    | MICALL1  | ENSG00000100139 |
| 22 | 37822979 | 37823440 | 37823227 | 31 | 44 | 4 | 9.353737658 | 1.84E-10    | APOBEC3H | ENSG00000100298 |
| 22 | 38018745 | 38019003 | 38018874 | 11 | 13 | 2 | 4.850086193 | 0.00164564  |          | ENSG00000209480 |
| 22 | 38019746 | 38020005 | 38019874 | 8  | 10 | 2 | 3.810782009 | 0.00936112  |          | ENSG00000209480 |
| 22 | 38036932 | 38037149 | 38037040 | 8  | 9  | 1 | 5.196520921 | 0.00490062  |          | ENSG00000209480 |

|    |          |          |          |    |     |    |             |             |          |                 |
|----|----------|----------|----------|----|-----|----|-------------|-------------|----------|-----------------|
| 22 | 38045365 | 38045546 | 38045440 | 8  | 9   | 2  | 3.464347281 | 0.0163838   | RPL3     | ENSG00000100316 |
| 22 | 38087124 | 38087363 | 38087243 | 8  | 10  | 1  | 5.716173013 | 0.00260397  | SYNGR1   | ENSG00000100321 |
| 22 | 38360807 | 38361066 | 38360961 | 10 | 14  | 2  | 5.196520921 | 0.000907371 |          | ENSG00000203593 |
| 22 | 38500070 | 38500297 | 38500181 | 10 | 10  | 0  | 11.43234603 | 0.000394183 |          | ENSG00000209490 |
| 22 | 39402669 | 39402910 | 39402789 | 11 | 14  | 1  | 7.794781382 | 0.000197021 | MCHR1    | ENSG00000128285 |
| 22 | 39421997 | 39422340 | 39422168 | 10 | 12  | 0  | 13.5109544  | 9.48E-05    | MCHR1    | ENSG00000128285 |
| 22 | 39437598 | 39437987 | 39437843 | 11 | 15  | 5  | 2.771477825 | 0.0105836   | MCHR1    | ENSG00000128285 |
| 22 | 39454874 | 39455094 | 39454984 | 11 | 11  | 0  | 12.47165021 | 0.000193293 | MCHR1    | ENSG00000128285 |
| 22 | 39458702 | 39458938 | 39458820 | 8  | 11  | 3  | 3.117912553 | 0.0146045   | SLC25A17 | ENSG00000100372 |
| 22 | 39817663 | 39817858 | 39817760 | 10 | 10  | 0  | 11.43234603 | 0.000394183 |          | ENSG00000221160 |
| 22 | 40006062 | 40006395 | 40006228 | 19 | 23  | 1  | 12.47165021 | 4.94E-07    | RANGAP1  | ENSG00000100401 |
| 22 | 40570550 | 40570834 | 40570692 | 9  | 11  | 4  | 2.494330042 | 0.0324033   |          | ENSG00000184068 |
| 22 | 41170159 | 41170395 | 41170277 | 9  | 11  | 3  | 3.117912553 | 0.0146045   | NFAM1    | ENSG00000213784 |
| 22 | 41341118 | 41341667 | 41341253 | 12 | 23  | 5  | 4.157216737 | 0.000186738 |          | ENSG00000199382 |
| 22 | 41437137 | 41437560 | 41437381 | 19 | 30  | 2  | 10.73947657 | 3.71E-08    | A4GALT   | ENSG00000128274 |
| 22 | 41651985 | 41652253 | 41652119 | 12 | 14  | 5  | 2.598260461 | 0.0167748   | PACSIN2  | ENSG00000100266 |
| 22 | 42117334 | 42117514 | 42117424 | 9  | 10  | 1  | 5.716173013 | 0.00260397  | MPPED1   | ENSG00000186732 |
| 22 | 43460112 | 43460359 | 43460237 | 14 | 15  | 0  | 16.62886695 | 1.12E-05    | PRR5     | ENSG00000186654 |
| 22 | 43534118 | 43534373 | 43534245 | 11 | 14  | 6  | 2.227080395 | 0.0322529   | PRR5     | ENSG00000186654 |
| 22 | 43847694 | 43848060 | 43847873 | 26 | 33  | 0  | 35.33634226 | 3.00E-11    | PHF21B   | ENSG00000056487 |
| 22 | 44244276 | 44244855 | 44244527 | 36 | 56  | 2  | 19.7467795  | 1.05E-15    | FBLN1    | ENSG00000077942 |
| 22 | 44306494 | 44306954 | 44306791 | 11 | 20  | 2  | 7.27512929  | 2.27E-05    | FBLN1    | ENSG00000077942 |
| 22 | 44372255 | 44372448 | 44372353 | 8  | 8   | 5  | 1.558956276 | 0.191397    |          | ENSG00000209587 |
| 22 | 44810016 | 44810195 | 44810105 | 8  | 8   | 3  | 2.338434415 | 0.0641221   |          | ENSG00000197182 |
| 22 | 45517472 | 45517707 | 45517558 | 8  | 11  | 8  | 1.385738912 | 0.224757    | CERK     | ENSG00000100422 |
| 22 | 45548481 | 45548722 | 45548612 | 8  | 11  | 4  | 2.494330042 | 0.0324033   | TBC1D22A | ENSG00000054611 |
| 22 | 45617288 | 45617599 | 45617422 | 21 | 24  | 0  | 25.98260461 | 1.83E-08    |          | ENSG00000221672 |
| 22 | 45904102 | 45904708 | 45904335 | 52 | 74  | 5  | 12.9913023  | 5.42E-18    |          | ENSG00000221672 |
| 22 | 47368524 | 47368757 | 47368618 | 11 | 12  | 4  | 2.702190879 | 0.0203088   |          | ENSG00000170714 |
| 22 | 48539995 | 48540250 | 48540122 | 14 | 14  | 2  | 5.196520921 | 0.000907371 |          | ENSG00000218799 |
| 22 | 49032942 | 49033121 | 49033031 | 8  | 8   | 2  | 3.117912553 | 0.0283184   | HDAC10   | ENSG00000100429 |
| 22 | 49086365 | 49086787 | 49086578 | 29 | 38  | 0  | 40.53286319 | 8.52E-13    | PLXNB2   | ENSG00000196576 |
| 3  | 127496   | 128444   | 127991   | 94 | 140 | 13 | 10.46727786 | 1.03E-29    | CHL1     | ENSG00000134121 |
| 3  | 312301   | 312480   | 312335   | 8  | 8   | 2  | 3.117912553 | 0.0283184   | CHL1     | ENSG00000134121 |

|   |         |         |         |    |    |    |             |             |        |                 |
|---|---------|---------|---------|----|----|----|-------------|-------------|--------|-----------------|
| 3 | 589947  | 590160  | 590074  | 8  | 10 | 7  | 1.429043253 | 0.21536     | CHL1   | ENSG00000134121 |
| 3 | 604341  | 604605  | 604473  | 11 | 11 | 1  | 6.235825105 | 0.0013754   | CHL1   | ENSG00000134121 |
| 3 | 624678  | 624865  | 624726  | 8  | 9  | 5  | 1.73217364  | 0.133894    | CHL1   | ENSG00000134121 |
| 3 | 1085900 | 1086212 | 1086056 | 16 | 20 | 1  | 10.91269393 | 3.71E-06    |        | ENSG00000209700 |
| 3 | 1971509 | 1971719 | 1971614 | 8  | 8  | 1  | 4.676868829 | 0.0091584   |        | ENSG00000214073 |
| 3 | 3212792 | 3213133 | 3212962 | 10 | 13 | 1  | 7.27512929  | 0.000378098 | CRBN   | ENSG00000113851 |
| 3 | 3526386 | 3526587 | 3526545 | 8  | 8  | 2  | 3.117912553 | 0.0283184   |        | ENSG00000223036 |
| 3 | 3576412 | 3576892 | 3576694 | 54 | 79 | 3  | 20.78608368 | 2.20E-21    |        | ENSG00000223036 |
| 3 | 3577002 | 3577183 | 3577134 | 8  | 8  | 0  | 9.353737658 | 0.00163931  |        | ENSG00000223036 |
| 3 | 3653496 | 3654110 | 3653697 | 29 | 47 | 7  | 6.235825105 | 2.92E-09    |        | ENSG00000223036 |
| 3 | 3800041 | 3800257 | 3800159 | 9  | 11 | 1  | 6.235825105 | 0.0013754   | LRRN1  | ENSG00000175928 |
| 3 | 4433794 | 4434020 | 4433897 | 8  | 11 | 2  | 4.157216737 | 0.0052913   | SUMF1  | ENSG00000144455 |
| 3 | 4465121 | 4465328 | 4465224 | 8  | 10 | 0  | 11.43234603 | 0.000394183 | SUMF1  | ENSG00000144455 |
| 3 | 4483395 | 4483682 | 4483518 | 8  | 11 | 4  | 2.494330042 | 0.0324033   | SUMF1  | ENSG00000144455 |
| 3 | 4509899 | 4510322 | 4510160 | 9  | 15 | 11 | 1.385738912 | 0.19225     | ITPR1  | ENSG00000150995 |
| 3 | 4541135 | 4541470 | 4541302 | 10 | 14 | 6  | 2.227080395 | 0.0322529   | ITPR1  | ENSG00000150995 |
| 3 | 4598768 | 4599163 | 4598980 | 35 | 44 | 5  | 7.794781382 | 9.60E-10    | ITPR1  | ENSG00000150995 |
| 3 | 4672732 | 4672987 | 4672859 | 11 | 13 | 11 | 1.212521548 | 0.309909    | ITPR1  | ENSG00000150995 |
| 3 | 4687146 | 4687375 | 4687303 | 10 | 11 | 2  | 4.157216737 | 0.0052913   | ITPR1  | ENSG00000150995 |
| 3 | 4703849 | 4704246 | 4704078 | 25 | 31 | 13 | 2.375552421 | 0.00222578  |        | ENSG00000209718 |
| 3 | 4705066 | 4705505 | 4705238 | 19 | 29 | 14 | 2.078608368 | 0.00804141  |        | ENSG00000209718 |
| 3 | 4729311 | 4729490 | 4729479 | 8  | 8  | 4  | 1.870747532 | 0.118863    |        | ENSG00000209718 |
| 3 | 4737544 | 4737783 | 4737666 | 11 | 11 | 2  | 4.157216737 | 0.0052913   |        | ENSG00000209718 |
| 3 | 4758369 | 4758687 | 4758528 | 11 | 15 | 4  | 3.32577339  | 0.00462646  |        | ENSG00000209718 |
| 3 | 4789840 | 4790048 | 4789896 | 8  | 9  | 2  | 3.464347281 | 0.0163838   |        | ENSG00000209718 |
| 3 | 4793395 | 4793715 | 4793565 | 10 | 12 | 8  | 1.501217155 | 0.168286    |        | ENSG00000209718 |
| 3 | 4796547 | 4796730 | 4796637 | 9  | 10 | 4  | 2.286469205 | 0.0509017   |        | ENSG00000209718 |
| 3 | 4813598 | 4813800 | 4813742 | 8  | 9  | 3  | 2.598260461 | 0.0397929   |        | ENSG00000209718 |
| 3 | 4827487 | 4827734 | 4827563 | 8  | 10 | 3  | 2.858086507 | 0.0242838   |        | ENSG00000209718 |
| 3 | 4862124 | 4862303 | 4862213 | 8  | 8  | 4  | 1.870747532 | 0.118863    |        | ENSG00000209718 |
| 3 | 4917491 | 4917731 | 4917608 | 8  | 10 | 3  | 2.858086507 | 0.0242838   |        | ENSG00000209718 |
| 3 | 4918782 | 4919089 | 4918944 | 9  | 11 | 1  | 6.235825105 | 0.0013754   |        | ENSG00000209718 |
| 3 | 4922885 | 4923111 | 4922957 | 8  | 10 | 8  | 1.27026067  | 0.293854    |        | ENSG00000209718 |
| 3 | 4995291 | 4995604 | 4995447 | 8  | 13 | 2  | 4.850086193 | 0.00164564  | BHLHB2 | ENSG00000134107 |

|   |         |         |         |    |    |    |             |             |         |                 |
|---|---------|---------|---------|----|----|----|-------------|-------------|---------|-----------------|
| 3 | 5003489 | 5003757 | 5003623 | 8  | 10 | 7  | 1.429043253 | 0.21536     | BHLHB2  | ENSG00000134107 |
| 3 | 5003786 | 5004061 | 5003954 | 9  | 10 | 6  | 1.63319229  | 0.146906    | BHLHB2  | ENSG00000134107 |
| 3 | 5016449 | 5016985 | 5016723 | 31 | 50 | 6  | 7.572073342 | 1.17E-10    | BHLHB2  | ENSG00000134107 |
| 3 | 5034880 | 5035093 | 5034986 | 8  | 9  | 7  | 1.29913023  | 0.286504    | BHLHB2  | ENSG00000134107 |
| 3 | 5049729 | 5050123 | 5049908 | 9  | 15 | 9  | 1.662886695 | 0.0970566   |         | ENSG00000207283 |
| 3 | 5074426 | 5074742 | 5074586 | 15 | 17 | 1  | 9.353737658 | 2.73E-05    |         | ENSG00000207283 |
| 3 | 5126450 | 5126629 | 5126496 | 8  | 8  | 1  | 4.676868829 | 0.0091584   | ARL8B   | ENSG00000134108 |
| 3 | 5177836 | 5178034 | 5177962 | 9  | 10 | 5  | 1.905391004 | 0.0915982   | EDEM1   | ENSG00000134109 |
| 3 | 5271423 | 5271650 | 5271541 | 10 | 12 | 6  | 1.930136342 | 0.071303    |         | ENSG00000209727 |
| 3 | 5413491 | 5413731 | 5413666 | 8  | 9  | 2  | 3.464347281 | 0.0163838   |         | ENSG00000209727 |
| 3 | 7287289 | 7287528 | 7287423 | 11 | 11 | 2  | 4.157216737 | 0.0052913   | GRM7    | ENSG00000196277 |
| 3 | 7455135 | 7455321 | 7455274 | 8  | 8  | 1  | 4.676868829 | 0.0091584   |         |                 |
| 3 | 7685991 | 7686258 | 7686127 | 9  | 10 | 1  | 5.716173013 | 0.00260397  |         |                 |
| 3 | 8310998 | 8311297 | 8311150 | 12 | 16 | 7  | 2.208521392 | 0.0257604   |         | ENSG00000209729 |
| 3 | 8368356 | 8368802 | 8368651 | 12 | 20 | 1  | 10.91269393 | 3.71E-06    |         | ENSG00000209729 |
| 3 | 8434004 | 8434253 | 8434144 | 9  | 11 | 2  | 4.157216737 | 0.0052913   |         | ENSG00000209729 |
| 3 | 8461219 | 8461431 | 8461325 | 8  | 8  | 7  | 1.169217207 | 0.371848    | LMCD1   | ENSG00000071282 |
| 3 | 8472836 | 8473407 | 8473236 | 18 | 31 | 7  | 4.157216737 | 2.13E-05    | LMCD1   | ENSG00000071282 |
| 3 | 8517235 | 8517603 | 8517383 | 10 | 15 | 4  | 3.32577339  | 0.00462646  | LMCD1   | ENSG00000071282 |
| 3 | 8518239 | 8518434 | 8518303 | 8  | 8  | 4  | 1.870747532 | 0.118863    | LMCD1   | ENSG00000071282 |
| 3 | 8519316 | 8519501 | 8519408 | 10 | 11 | 2  | 4.157216737 | 0.0052913   | LMCD1   | ENSG00000071282 |
| 3 | 8523561 | 8523740 | 8523650 | 8  | 8  | 3  | 2.338434415 | 0.0641221   | LMCD1   | ENSG00000071282 |
| 3 | 8636197 | 8636652 | 8636443 | 10 | 20 | 3  | 5.456346967 | 9.70E-05    | C3orf32 | ENSG00000125046 |
| 3 | 8732418 | 8732776 | 8732602 | 12 | 16 | 0  | 17.66817113 | 5.48E-06    | CAV3    | ENSG00000182533 |
| 3 | 8980026 | 8980646 | 8980171 | 10 | 23 | 7  | 3.117912553 | 0.00117689  | RAD18   | ENSG00000070950 |
| 3 | 9104174 | 9104353 | 9104194 | 8  | 8  | 3  | 2.338434415 | 0.0641221   | RAD18   | ENSG00000070950 |
| 3 | 9115451 | 9116201 | 9116005 | 10 | 30 | 11 | 2.684869143 | 0.000957822 | RAD18   | ENSG00000070950 |
| 3 | 9165973 | 9166562 | 9166388 | 23 | 40 | 4  | 8.522294311 | 2.26E-09    | SRGAP3  | ENSG00000196220 |
| 3 | 9167390 | 9167611 | 9167530 | 8  | 10 | 4  | 2.286469205 | 0.0509017   | SRGAP3  | ENSG00000196220 |
| 3 | 9202464 | 9202748 | 9202638 | 8  | 11 | 3  | 3.117912553 | 0.0146045   | SRGAP3  | ENSG00000196220 |
| 3 | 9221072 | 9221329 | 9221200 | 9  | 12 | 1  | 6.755477198 | 0.000722752 | SRGAP3  | ENSG00000196220 |
| 3 | 9265367 | 9265582 | 9265474 | 9  | 9  | 3  | 2.598260461 | 0.0397929   | SRGAP3  | ENSG00000196220 |
| 3 | 9266194 | 9266805 | 9266503 | 8  | 21 | 10 | 2.078608368 | 0.0193227   | SRGAP3  | ENSG00000196220 |
| 3 | 9269547 | 9269733 | 9269610 | 10 | 11 | 4  | 2.494330042 | 0.0324033   | SRGAP3  | ENSG00000196220 |

|   |          |          |          |    |    |    |             |             |         |                 |
|---|----------|----------|----------|----|----|----|-------------|-------------|---------|-----------------|
| 3 | 9379768  | 9380148  | 9379947  | 10 | 15 | 8  | 1.847651883 | 0.0631662   | THUMPD3 | ENSG00000134077 |
| 3 | 9413668  | 9414202  | 9413893  | 11 | 24 | 6  | 3.711800658 | 0.000299603 |         | ENSG00000206573 |
| 3 | 9439672  | 9439853  | 9439761  | 8  | 8  | 8  | 1.039304184 | 0.46786     | SETD5   | ENSG00000168137 |
| 3 | 9568807  | 9569045  | 9568942  | 11 | 12 | 2  | 4.503651465 | 0.002963    | LHFPL4  | ENSG00000156959 |
| 3 | 9665797  | 9665977  | 9665888  | 8  | 8  | 3  | 2.338434415 | 0.0641221   | MTMR14  | ENSG00000163719 |
| 3 | 9743776  | 9744154  | 9743952  | 8  | 14 | 7  | 1.948695345 | 0.0559175   | BRPF1   | ENSG00000156983 |
| 3 | 9860841  | 9861087  | 9860961  | 8  | 10 | 5  | 1.905391004 | 0.0915982   | RPUSD3  | ENSG00000156990 |
| 3 | 9950000  | 9950198  | 9950112  | 9  | 10 | 2  | 3.810782009 | 0.00936112  | CRELD1  | ENSG00000163703 |
| 3 | 10043968 | 10044147 | 10044023 | 8  | 8  | 1  | 4.676868829 | 0.0091584   | FANCD2  | ENSG00000144554 |
| 3 | 10337761 | 10337980 | 10337853 | 8  | 9  | 5  | 1.73217364  | 0.133894    | SEC13   | ENSG00000157020 |
| 3 | 10367645 | 10367840 | 10367728 | 9  | 9  | 5  | 1.73217364  | 0.133894    | SEC13   | ENSG00000157020 |
| 3 | 10387895 | 10388212 | 10388052 | 10 | 11 | 2  | 4.157216737 | 0.0052913   |         | ENSG00000216135 |
| 3 | 10622830 | 10623082 | 10622937 | 8  | 10 | 1  | 5.716173013 | 0.00260397  | ATP2B2  | ENSG00000157087 |
| 3 | 10755481 | 10756077 | 10755898 | 8  | 21 | 2  | 7.621564018 | 1.21E-05    | ATP2B2  | ENSG00000157087 |
| 3 | 10919728 | 10920039 | 10919870 | 16 | 21 | 3  | 5.716173013 | 5.37E-05    | SLC6A11 | ENSG00000132164 |
| 3 | 10962375 | 10962593 | 10962484 | 8  | 8  | 4  | 1.870747532 | 0.118863    | SLC6A1  | ENSG00000157103 |
| 3 | 11113838 | 11114027 | 11113933 | 8  | 8  | 1  | 4.676868829 | 0.0091584   | SLC6A1  | ENSG00000157103 |
| 3 | 11202338 | 11202547 | 11202464 | 9  | 11 | 2  | 4.157216737 | 0.0052913   |         | ENSG00000213964 |
| 3 | 11288977 | 11289203 | 11289090 | 9  | 11 | 3  | 3.117912553 | 0.0146045   | ATG7    | ENSG00000197548 |
| 3 | 11289643 | 11289881 | 11289773 | 8  | 8  | 2  | 3.117912553 | 0.0283184   | ATG7    | ENSG00000197548 |
| 3 | 11471030 | 11471258 | 11471153 | 13 | 16 | 3  | 4.417042783 | 0.00097367  | ATG7    | ENSG00000197548 |
| 3 | 11495092 | 11495503 | 11495259 | 13 | 19 | 2  | 6.928694562 | 4.25E-05    | ATG7    | ENSG00000197548 |
| 3 | 11556217 | 11556407 | 11556312 | 8  | 8  | 3  | 2.338434415 | 0.0641221   | VGLL4   | ENSG00000144560 |
| 3 | 11618124 | 11618305 | 11618221 | 9  | 10 | 0  | 11.43234603 | 0.000394183 | VGLL4   | ENSG00000144560 |
| 3 | 11659629 | 11659913 | 11659771 | 8  | 9  | 6  | 1.484720263 | 0.204387    | VGLL4   | ENSG00000144560 |
| 3 | 11660060 | 11660585 | 11660322 | 9  | 20 | 17 | 1.212521548 | 0.272468    | VGLL4   | ENSG00000144560 |
| 3 | 11737297 | 11737539 | 11737375 | 8  | 10 | 3  | 2.858086507 | 0.0242838   | VGLL4   | ENSG00000144560 |
| 3 | 11786835 | 11787850 | 11787333 | 26 | 76 | 11 | 6.668868516 | 3.29E-14    | VGLL4   | ENSG00000144560 |
| 3 | 11792901 | 11793364 | 11793102 | 8  | 17 | 10 | 1.700679574 | 0.0766266   | VGLL4   | ENSG00000144560 |
| 3 | 11815899 | 11816139 | 11816025 | 8  | 10 | 5  | 1.905391004 | 0.0915982   | C3orf31 | ENSG00000144559 |
| 3 | 11820555 | 11820762 | 11820637 | 10 | 11 | 2  | 4.157216737 | 0.0052913   | C3orf31 | ENSG00000144559 |
| 3 | 11863338 | 11863559 | 11863484 | 10 | 11 | 4  | 2.494330042 | 0.0324033   | C3orf31 | ENSG00000144559 |
| 3 | 12151613 | 12151813 | 12151646 | 11 | 11 | 2  | 4.157216737 | 0.0052913   | TIMP4   | ENSG00000157150 |
| 3 | 12173893 | 12174085 | 12174031 | 8  | 8  | 1  | 4.676868829 | 0.0091584   | TIMP4   | ENSG00000157150 |

|   |          |          |          |    |    |    |             |             |        |                 |
|---|----------|----------|----------|----|----|----|-------------|-------------|--------|-----------------|
| 3 | 12388446 | 12388634 | 12388505 | 9  | 9  | 2  | 3.464347281 | 0.0163838   | PPARG  | ENSG00000132170 |
| 3 | 12461559 | 12461804 | 12461664 | 9  | 10 | 2  | 3.810782009 | 0.00936112  | TSEN2  | ENSG00000154743 |
| 3 | 12487608 | 12487799 | 12487712 | 8  | 9  | 0  | 10.39304184 | 0.000803859 | TSEN2  | ENSG00000154743 |
| 3 | 12500488 | 12500805 | 12500644 | 13 | 15 | 6  | 2.375552421 | 0.0212094   | TSEN2  | ENSG00000154743 |
| 3 | 12680623 | 12681223 | 12680784 | 12 | 25 | 13 | 1.930136342 | 0.0200308   | RAF1   | ENSG00000132155 |
| 3 | 12775643 | 12776214 | 12775928 | 18 | 30 | 3  | 8.054607428 | 2.21E-07    | TMEM40 | ENSG00000088726 |
| 3 | 12857199 | 12857379 | 12857287 | 8  | 8  | 5  | 1.558956276 | 0.191397    |        | ENSG00000207496 |
| 3 | 12859856 | 12860035 | 12859945 | 8  | 8  | 2  | 3.117912553 | 0.0283184   | RPL32  | ENSG00000144713 |
| 3 | 12869763 | 12869996 | 12869879 | 9  | 10 | 3  | 2.858086507 | 0.0242838   | RPL32  | ENSG00000144713 |
| 3 | 12962032 | 12962211 | 12962153 | 8  | 8  | 2  | 3.117912553 | 0.0283184   | IQSEC1 | ENSG00000144711 |
| 3 | 12972826 | 12973016 | 12972869 | 8  | 10 | 1  | 5.716173013 | 0.00260397  | IQSEC1 | ENSG00000144711 |
| 3 | 13003564 | 13003912 | 13003705 | 10 | 15 | 9  | 1.662886695 | 0.0970566   | IQSEC1 | ENSG00000144711 |
| 3 | 13011195 | 13011412 | 13011318 | 10 | 10 | 2  | 3.810782009 | 0.00936112  | IQSEC1 | ENSG00000144711 |
| 3 | 13038187 | 13038419 | 13038285 | 9  | 9  | 9  | 1.039304184 | 0.466079    | IQSEC1 | ENSG00000144711 |
| 3 | 13113074 | 13113259 | 13113183 | 8  | 8  | 2  | 3.117912553 | 0.0283184   | IQSEC1 | ENSG00000144711 |
| 3 | 13123409 | 13123626 | 13123471 | 8  | 9  | 2  | 3.464347281 | 0.0163838   | IQSEC1 | ENSG00000144711 |
| 3 | 13176541 | 13176882 | 13176715 | 10 | 14 | 4  | 3.117912553 | 0.00766354  | IQSEC1 | ENSG00000144711 |
| 3 | 13234669 | 13234919 | 13234804 | 9  | 11 | 4  | 2.494330042 | 0.0324033   | NUP210 | ENSG00000132182 |
| 3 | 13246090 | 13246416 | 13246256 | 13 | 17 | 8  | 2.078608368 | 0.0303558   | NUP210 | ENSG00000132182 |
| 3 | 13318108 | 13318509 | 13318332 | 16 | 22 | 2  | 7.967998746 | 6.43E-06    | NUP210 | ENSG00000132182 |
| 3 | 13428036 | 13428238 | 13428100 | 8  | 9  | 0  | 10.39304184 | 0.000803859 | NUP210 | ENSG00000132182 |
| 3 | 13441438 | 13441681 | 13441539 | 9  | 12 | 2  | 4.503651465 | 0.002963    | NUP210 | ENSG00000132182 |
| 3 | 13468316 | 13468580 | 13468448 | 12 | 15 | 8  | 1.847651883 | 0.0631662   | HDAC11 | ENSG00000163517 |
| 3 | 13471601 | 13472187 | 13471907 | 32 | 51 | 1  | 27.02190879 | 2.22E-15    | HDAC11 | ENSG00000163517 |
| 3 | 13480540 | 13480743 | 13480641 | 8  | 8  | 1  | 4.676868829 | 0.0091584   | HDAC11 | ENSG00000163517 |
| 3 | 13492680 | 13492890 | 13492816 | 9  | 9  | 5  | 1.73217364  | 0.133894    | HDAC11 | ENSG00000163517 |
| 3 | 13516678 | 13516972 | 13516798 | 8  | 12 | 2  | 4.503651465 | 0.002963    | HDAC11 | ENSG00000163517 |
| 3 | 13542526 | 13542987 | 13542705 | 27 | 37 | 0  | 39.493559   | 1.74E-12    | FBLN2  | ENSG00000163520 |
| 3 | 13902018 | 13902222 | 13902069 | 11 | 11 | 2  | 4.157216737 | 0.0052913   | WNT7A  | ENSG00000154764 |
| 3 | 13907356 | 13907644 | 13907500 | 16 | 17 | 2  | 6.235825105 | 0.000146695 | WNT7A  | ENSG00000154764 |
| 3 | 13944018 | 13944230 | 13944188 | 8  | 8  | 2  | 3.117912553 | 0.0283184   | TPRXL  | ENSG00000180438 |
| 3 | 14129675 | 14129870 | 14129765 | 8  | 8  | 3  | 2.338434415 | 0.0641221   | CHCHD4 | ENSG00000163528 |
| 3 | 14187495 | 14187705 | 14187600 | 13 | 13 | 3  | 3.637564645 | 0.0050909   | XPC    | ENSG00000154767 |
| 3 | 14194694 | 14195585 | 14195084 | 41 | 76 | 10 | 7.27512929  | 7.96E-15    | XPC    | ENSG00000154767 |



|   |          |          |          |    |    |    |             |             |         |                 |
|---|----------|----------|----------|----|----|----|-------------|-------------|---------|-----------------|
| 3 | 14219905 | 14220141 | 14220023 | 8  | 9  | 3  | 2.598260461 | 0.0397929   | LSM3    | ENSG00000170860 |
| 3 | 14220472 | 14220690 | 14220634 | 8  | 9  | 3  | 2.598260461 | 0.0397929   | LSM3    | ENSG00000170860 |
| 3 | 14257068 | 14257264 | 14257114 | 8  | 9  | 2  | 3.464347281 | 0.0163838   | LSM3    | ENSG00000170860 |
| 3 | 14260257 | 14260635 | 14260461 | 11 | 17 | 2  | 6.235825105 | 0.000146695 | LSM3    | ENSG00000170860 |
| 3 | 14265559 | 14266021 | 14265734 | 10 | 17 | 10 | 1.700679574 | 0.0766266   | LSM3    | ENSG00000170860 |
| 3 | 14282125 | 14282377 | 14282300 | 10 | 13 | 4  | 2.910051716 | 0.0125532   | LSM3    | ENSG00000170860 |
| 3 | 14282381 | 14282638 | 14282475 | 9  | 12 | 1  | 6.755477198 | 0.000722752 | LSM3    | ENSG00000170860 |
| 3 | 14306228 | 14306452 | 14306330 | 9  | 9  | 4  | 2.078608368 | 0.0785659   |         | ENSG00000199609 |
| 3 | 14318847 | 14319026 | 14318987 | 8  | 8  | 6  | 1.336248237 | 0.277651    |         | ENSG00000199609 |
| 3 | 14342373 | 14342635 | 14342504 | 18 | 20 | 5  | 3.637564645 | 0.000902929 |         | ENSG00000199609 |
| 3 | 14386222 | 14386472 | 14386327 | 10 | 12 | 2  | 4.503651465 | 0.002963    |         | ENSG00000199609 |
| 3 | 14388342 | 14388580 | 14388487 | 10 | 11 | 5  | 2.078608368 | 0.0614303   |         | ENSG00000199609 |
| 3 | 14388785 | 14388990 | 14388887 | 9  | 10 | 7  | 1.429043253 | 0.21536     |         | ENSG00000199609 |
| 3 | 14407675 | 14407907 | 14407828 | 8  | 8  | 2  | 3.117912553 | 0.0283184   |         | ENSG00000199609 |
| 3 | 14427500 | 14427719 | 14427638 | 8  | 11 | 6  | 1.781664316 | 0.103344    | SLC6A6  | ENSG00000131389 |
| 3 | 14430368 | 14430633 | 14430500 | 9  | 12 | 2  | 4.503651465 | 0.002963    | SLC6A6  | ENSG00000131389 |
| 3 | 14435486 | 14435706 | 14435661 | 8  | 8  | 3  | 2.338434415 | 0.0641221   | SLC6A6  | ENSG00000131389 |
| 3 | 14448765 | 14449168 | 14448989 | 12 | 21 | 9  | 2.286469205 | 0.0111772   | SLC6A6  | ENSG00000131389 |
| 3 | 14505119 | 14505525 | 14505346 | 31 | 41 | 1  | 21.82538787 | 2.25E-12    |         | ENSG00000207163 |
| 3 | 14577863 | 14578078 | 14577970 | 10 | 11 | 4  | 2.494330042 | 0.0324033   | GRIP2   | ENSG00000144596 |
| 3 | 14604578 | 14604781 | 14604667 | 8  | 8  | 1  | 4.676868829 | 0.0091584   | GRIP2   | ENSG00000144596 |
| 3 | 14622437 | 14622631 | 14622543 | 9  | 9  | 5  | 1.73217364  | 0.133894    | C3orf19 | ENSG00000154781 |
| 3 | 14668003 | 14668258 | 14668086 | 9  | 13 | 9  | 1.455025858 | 0.177172    | C3orf19 | ENSG00000154781 |
| 3 | 14690355 | 14690550 | 14690523 | 9  | 11 | 9  | 1.247165021 | 0.300052    | C3orf20 | ENSG00000131379 |
| 3 | 14797503 | 14797733 | 14797618 | 11 | 13 | 12 | 1.11925066  | 0.384109    | FGD5    | ENSG00000154783 |
| 3 | 14839508 | 14839703 | 14839625 | 8  | 8  | 10 | 0.850339787 | 0.645072    | FGD5    | ENSG00000154783 |
| 3 | 14893609 | 14893868 | 14893698 | 12 | 16 | 3  | 4.417042783 | 0.00097367  | FGD5    | ENSG00000154783 |
| 3 | 14962469 | 14962663 | 14962570 | 8  | 8  | 2  | 3.117912553 | 0.0283184   | NR2C2   | ENSG00000177463 |
| 3 | 15082024 | 15082203 | 15082113 | 8  | 8  | 6  | 1.336248237 | 0.277651    | MRPS25  | ENSG00000131368 |
| 3 | 15115394 | 15115862 | 15115683 | 14 | 27 | 11 | 2.425043097 | 0.00332497  | ZFYVE20 | ENSG00000131381 |
| 3 | 15192095 | 15192321 | 15192208 | 8  | 9  | 5  | 1.73217364  | 0.133894    | CAPN7   | ENSG00000131375 |
| 3 | 15223317 | 15223513 | 15223400 | 9  | 11 | 2  | 4.157216737 | 0.0052913   | CAPN7   | ENSG00000131375 |
| 3 | 15284560 | 15284747 | 15284688 | 8  | 9  | 8  | 1.154782427 | 0.375434    | SH3BP5  | ENSG00000131370 |
| 3 | 15309408 | 15309596 | 15309502 | 8  | 9  | 6  | 1.484720263 | 0.204387    | SH3BP5  | ENSG00000131370 |

|   |          |          |          |    |    |    |             |             |        |                 |
|---|----------|----------|----------|----|----|----|-------------|-------------|--------|-----------------|
| 3 | 15309740 | 15309935 | 15309810 | 9  | 9  | 2  | 3.464347281 | 0.0163838   | SH3BP5 | ENSG00000131370 |
| 3 | 15323631 | 15324008 | 15323790 | 16 | 24 | 1  | 12.9913023  | 2.52E-07    | SH3BP5 | ENSG00000131370 |
| 3 | 15326988 | 15327598 | 15327262 | 10 | 25 | 13 | 1.930136342 | 0.0200308   | SH3BP5 | ENSG00000131370 |
| 3 | 15345916 | 15346095 | 15346005 | 8  | 8  | 2  | 3.117912553 | 0.0283184   | SH3BP5 | ENSG00000131370 |
| 3 | 15349196 | 15349389 | 15349337 | 8  | 8  | 4  | 1.870747532 | 0.118863    | SH3BP5 | ENSG00000131370 |
| 3 | 15352415 | 15352614 | 15352514 | 8  | 8  | 2  | 3.117912553 | 0.0283184   | SH3BP5 | ENSG00000131370 |
| 3 | 15461111 | 15461312 | 15461190 | 8  | 9  | 0  | 10.39304184 | 0.000803859 |        | ENSG00000206926 |
| 3 | 15617843 | 15618104 | 15617935 | 9  | 11 | 9  | 1.247165021 | 0.300052    | HACL1  | ENSG00000131373 |
| 3 | 15650731 | 15650984 | 15650857 | 9  | 10 | 2  | 3.810782009 | 0.00936112  | BTD    | ENSG00000169814 |
| 3 | 15702429 | 15702769 | 15702596 | 16 | 18 | 6  | 2.8209685   | 0.00559354  |        | ENSG00000222873 |
| 3 | 16956224 | 16956406 | 16956315 | 9  | 9  | 0  | 10.39304184 | 0.000803859 | PLCL2  | ENSG00000154822 |
| 3 | 17087200 | 17087402 | 17087273 | 8  | 8  | 5  | 1.558956276 | 0.191397    | PLCL2  | ENSG00000154822 |
| 3 | 17703118 | 17703335 | 17703230 | 10 | 11 | 5  | 2.078608368 | 0.0614303   |        | ENSG00000209905 |
| 3 | 18468567 | 18468746 | 18468638 | 8  | 8  | 1  | 4.676868829 | 0.0091584   | SATB1  | ENSG00000182568 |
| 3 | 18515853 | 18516080 | 18515949 | 8  | 10 | 0  | 11.43234603 | 0.000394183 | SATB1  | ENSG00000182568 |
| 3 | 18620740 | 18621002 | 18620871 | 9  | 9  | 4  | 2.078608368 | 0.0785659   | SATB1  | ENSG00000182568 |
| 3 | 18704643 | 18704846 | 18704744 | 9  | 9  | 1  | 5.196520921 | 0.00490062  | SATB1  | ENSG00000182568 |
| 3 | 18768907 | 18769134 | 18769003 | 8  | 8  | 2  | 3.117912553 | 0.0283184   |        | ENSG00000209918 |
| 3 | 18774582 | 18774940 | 18774761 | 11 | 17 | 5  | 3.117912553 | 0.00407023  |        | ENSG00000209918 |
| 3 | 18857088 | 18857378 | 18857233 | 11 | 14 | 3  | 3.897390691 | 0.00295882  |        | ENSG00000209918 |
| 3 | 18859775 | 18860087 | 18859929 | 11 | 14 | 2  | 5.196520921 | 0.000907371 |        | ENSG00000209918 |
| 3 | 18963167 | 18963379 | 18963302 | 9  | 10 | 3  | 2.858086507 | 0.0242838   |        | ENSG00000209918 |
| 3 | 19163185 | 19163373 | 19163270 | 8  | 9  | 1  | 5.196520921 | 0.00490062  | KCNH8  | ENSG00000183960 |
| 3 | 19365511 | 19365728 | 19365675 | 9  | 10 | 1  | 5.716173013 | 0.00260397  | KCNH8  | ENSG00000183960 |
| 3 | 19883309 | 19883586 | 19883450 | 10 | 11 | 2  | 4.157216737 | 0.0052913   | EFHB   | ENSG00000163576 |
| 3 | 19963130 | 19963564 | 19963449 | 12 | 22 | 9  | 2.390399624 | 0.00747467  | EFHB   | ENSG00000163576 |
| 3 | 20073581 | 20074010 | 20073812 | 13 | 23 | 3  | 6.235825105 | 1.63E-05    | KAT2B  | ENSG00000114166 |
| 3 | 20081386 | 20081624 | 20081561 | 13 | 16 | 2  | 5.889390377 | 0.000270741 | KAT2B  | ENSG00000114166 |
| 3 | 20094812 | 20095258 | 20095024 | 31 | 44 | 3  | 11.69217207 | 2.89E-11    | KAT2B  | ENSG00000114166 |
| 3 | 20120953 | 20121147 | 20121045 | 9  | 9  | 2  | 3.464347281 | 0.0163838   | KAT2B  | ENSG00000114166 |
| 3 | 20129112 | 20129301 | 20129206 | 8  | 8  | 2  | 3.117912553 | 0.0283184   | KAT2B  | ENSG00000114166 |
| 3 | 20202555 | 20202834 | 20202694 | 12 | 15 | 3  | 4.157216737 | 0.00170423  | SGOL1  | ENSG00000129810 |
| 3 | 20202838 | 20203027 | 20202932 | 8  | 9  | 4  | 2.078608368 | 0.0785659   | SGOL1  | ENSG00000129810 |
| 3 | 20355413 | 20355607 | 20355510 | 8  | 8  | 2  | 3.117912553 | 0.0283184   |        | ENSG00000199577 |

|   |          |          |          |    |    |   |             |             |         |                 |
|---|----------|----------|----------|----|----|---|-------------|-------------|---------|-----------------|
| 3 | 23019000 | 23019218 | 23019090 | 8  | 10 | 1 | 5.716173013 | 0.00260397  |         | ENSG00000215016 |
| 3 | 23034289 | 23034468 | 23034439 | 8  | 8  | 4 | 1.870747532 | 0.118863    |         | ENSG00000215016 |
| 3 | 23115605 | 23115912 | 23115758 | 10 | 11 | 1 | 6.235825105 | 0.0013754   |         | ENSG00000215016 |
| 3 | 23131785 | 23132083 | 23131934 | 10 | 12 | 4 | 2.702190879 | 0.0203088   |         | ENSG00000215016 |
| 3 | 23146176 | 23146591 | 23146355 | 8  | 16 | 5 | 2.944695189 | 0.00659886  |         | ENSG00000215016 |
| 3 | 23337460 | 23337640 | 23337565 | 10 | 11 | 0 | 12.47165021 | 0.000193293 |         | ENSG00000206728 |
| 3 | 23616143 | 23616387 | 23616249 | 8  | 9  | 0 | 10.39304184 | 0.000803859 |         | ENSG00000209974 |
| 3 | 23760058 | 23760261 | 23760146 | 9  | 9  | 2 | 3.464347281 | 0.0163838   | UBE2E1  | ENSG00000170142 |
| 3 | 23933619 | 23933854 | 23933736 | 8  | 11 | 3 | 3.117912553 | 0.0146045   | RPL15   | ENSG00000174748 |
| 3 | 25309082 | 25309355 | 25309218 | 15 | 16 | 0 | 17.66817113 | 5.48E-06    |         | ENSG00000213877 |
| 3 | 25310490 | 25310734 | 25310612 | 8  | 9  | 0 | 10.39304184 | 0.000803859 |         | ENSG00000213877 |
| 3 | 25648825 | 25649044 | 25648934 | 8  | 9  | 0 | 10.39304184 | 0.000803859 | TOP2B   | ENSG00000077097 |
| 3 | 25810867 | 25811097 | 25810982 | 8  | 9  | 0 | 10.39304184 | 0.000803859 | OXSM    | ENSG00000151093 |
| 3 | 27108158 | 27108410 | 27108240 | 11 | 12 | 5 | 2.251825733 | 0.0404733   | NEK10   | ENSG00000163491 |
| 3 | 27270443 | 27270663 | 27270527 | 8  | 9  | 2 | 3.464347281 | 0.0163838   |         | ENSG00000207251 |
| 3 | 27784744 | 27784947 | 27784845 | 9  | 9  | 0 | 10.39304184 | 0.000803859 | EOMES   | ENSG00000163508 |
| 3 | 28614765 | 28614987 | 28614860 | 8  | 11 | 2 | 4.157216737 | 0.0052913   | C3orf53 | ENSG00000178811 |
| 3 | 29445485 | 29445678 | 29445644 | 8  | 8  | 1 | 4.676868829 | 0.0091584   | RBMS3   | ENSG00000144642 |
| 3 | 29682448 | 29682631 | 29682539 | 8  | 8  | 2 | 3.117912553 | 0.0283184   | RBMS3   | ENSG00000144642 |
| 3 | 30110168 | 30110470 | 30110336 | 20 | 22 | 3 | 5.975999059 | 2.96E-05    |         | ENSG00000203652 |
| 3 | 30310418 | 30310649 | 30310533 | 9  | 9  | 2 | 3.464347281 | 0.0163838   |         | ENSG00000199927 |
| 3 | 30642440 | 30642646 | 30642543 | 9  | 9  | 1 | 5.196520921 | 0.00490062  | TGFBR2  | ENSG00000163513 |
| 3 | 30785338 | 30785586 | 30785491 | 8  | 8  | 2 | 3.117912553 | 0.0283184   | GADL1   | ENSG00000144644 |
| 3 | 31965194 | 31965379 | 31965297 | 9  | 9  | 0 | 10.39304184 | 0.000803859 | OSBPL10 | ENSG00000144645 |
| 3 | 31996851 | 31997139 | 31997007 | 8  | 10 | 2 | 3.810782009 | 0.00936112  | OSBPL10 | ENSG00000144645 |
| 3 | 32053485 | 32053802 | 32053645 | 12 | 14 | 2 | 5.196520921 | 0.000907371 |         | ENSG00000201701 |
| 3 | 32126797 | 32127191 | 32126976 | 13 | 19 | 6 | 2.969440526 | 0.0035096   | GPD1L   | ENSG00000152642 |
| 3 | 32149290 | 32149494 | 32149392 | 9  | 9  | 1 | 5.196520921 | 0.00490062  | GPD1L   | ENSG00000152642 |
| 3 | 32160771 | 32161017 | 32160894 | 8  | 10 | 4 | 2.286469205 | 0.0509017   |         | ENSG00000210105 |
| 3 | 32352770 | 32353007 | 32352879 | 14 | 16 | 7 | 2.208521392 | 0.0257604   | CMTM7   | ENSG00000153551 |
| 3 | 32423317 | 32423908 | 32423709 | 40 | 59 | 2 | 20.78608368 | 1.37E-16    | CMTM7   | ENSG00000153551 |
| 3 | 33087764 | 33087959 | 33087861 | 10 | 12 | 5 | 2.251825733 | 0.0404733   |         | ENSG00000188167 |
| 3 | 33246741 | 33246926 | 33246801 | 8  | 8  | 1 | 4.676868829 | 0.0091584   | SUSD5   | ENSG00000173705 |
| 3 | 33484284 | 33484708 | 33484473 | 64 | 82 | 0 | 86.26224729 | 2.06E-26    |         | ENSG00000202175 |

|   |          |          |          |    |     |    |             |             |          |                 |
|---|----------|----------|----------|----|-----|----|-------------|-------------|----------|-----------------|
| 3 | 33815488 | 33815688 | 33815588 | 8  | 8   | 3  | 2.338434415 | 0.0641221   | PDCD6IP  | ENSG00000170248 |
| 3 | 33996784 | 33996963 | 33996883 | 8  | 8   | 5  | 1.558956276 | 0.191397    | PDCD6IP  | ENSG00000170248 |
| 3 | 34028624 | 34028819 | 34028721 | 9  | 9   | 2  | 3.464347281 | 0.0163838   | PDCD6IP  | ENSG00000170248 |
| 3 | 34052657 | 34052886 | 34052771 | 8  | 9   | 0  | 10.39304184 | 0.000803859 | PDCD6IP  | ENSG00000170248 |
| 3 | 36949256 | 36949910 | 36949537 | 25 | 48  | 1  | 25.46295251 | 1.78E-14    |          | ENSG00000210181 |
| 3 | 37112841 | 37113050 | 37112919 | 8  | 9   | 2  | 3.464347281 | 0.0163838   |          | ENSG00000206645 |
| 3 | 37215138 | 37215317 | 37215227 | 8  | 8   | 0  | 9.353737658 | 0.00163931  |          | ENSG00000210226 |
| 3 | 37257393 | 37257572 | 37257482 | 8  | 8   | 2  | 3.117912553 | 0.0283184   | GOLGA4   | ENSG00000144674 |
| 3 | 37611940 | 37612136 | 37612030 | 8  | 8   | 0  | 9.353737658 | 0.00163931  | ITGA9    | ENSG00000144668 |
| 3 | 37644655 | 37644865 | 37644760 | 10 | 10  | 0  | 11.43234603 | 0.000394183 | ITGA9    | ENSG00000144668 |
| 3 | 37677203 | 37677547 | 37677375 | 18 | 22  | 2  | 7.967998746 | 6.43E-06    | CTDSPL   | ENSG00000144677 |
| 3 | 38042305 | 38042509 | 38042415 | 11 | 12  | 2  | 4.503651465 | 0.002963    | PLCD1    | ENSG00000187091 |
| 3 | 38181348 | 38181599 | 38181477 | 9  | 9   | 3  | 2.598260461 | 0.0397929   | OXR1     | ENSG00000172939 |
| 3 | 39142366 | 39142629 | 39142513 | 9  | 11  | 4  | 2.494330042 | 0.0324033   | GORASP1  | ENSG00000114745 |
| 3 | 39189243 | 39189441 | 39189342 | 10 | 10  | 2  | 3.810782009 | 0.00936112  | AXUD1    | ENSG00000144655 |
| 3 | 39399671 | 39399963 | 39399812 | 14 | 19  | 7  | 2.598260461 | 0.00730518  | SLC25A38 | ENSG00000144659 |
| 3 | 39400379 | 39400640 | 39400511 | 8  | 9   | 2  | 3.464347281 | 0.0163838   | SLC25A38 | ENSG00000144659 |
| 3 | 40280128 | 40280337 | 40280271 | 8  | 10  | 0  | 11.43234603 | 0.000394183 |          | ENSG00000202517 |
| 3 | 40325736 | 40326167 | 40325988 | 12 | 20  | 2  | 7.27512929  | 2.27E-05    | EIF1B    | ENSG00000114784 |
| 3 | 40469392 | 40469619 | 40469466 | 8  | 9   | 4  | 2.078608368 | 0.0785659   | RPL14    | ENSG00000188846 |
| 3 | 40484618 | 40484827 | 40484722 | 11 | 12  | 10 | 1.228268581 | 0.305344    | ZNF619   | ENSG00000177873 |
| 3 | 40540807 | 40541085 | 40540946 | 11 | 11  | 2  | 4.157216737 | 0.0052913   | ZNF621   | ENSG00000172888 |
| 3 | 42493331 | 42493527 | 42493429 | 8  | 9   | 1  | 5.196520921 | 0.00490062  | VIPR1    | ENSG00000114812 |
| 3 | 42839693 | 42840318 | 42840040 | 91 | 131 | 4  | 27.43763046 | 1.33E-35    | CCBP2    | ENSG00000144648 |
| 3 | 43264988 | 43265177 | 43265114 | 8  | 8   | 3  | 2.338434415 | 0.0641221   |          | ENSG00000210477 |
| 3 | 44017017 | 44017196 | 44017158 | 8  | 8   | 2  | 3.117912553 | 0.0283184   |          | ENSG00000210493 |
| 3 | 44987450 | 44987728 | 44987589 | 8  | 11  | 0  | 12.47165021 | 0.000193293 | ZDHHC3   | ENSG00000163812 |
| 3 | 45609705 | 45609964 | 45609858 | 11 | 12  | 1  | 6.755477198 | 0.000722752 | LIMD1    | ENSG00000144791 |
| 3 | 46646560 | 46646906 | 46646731 | 10 | 15  | 3  | 4.157216737 | 0.00170423  |          | ENSG00000203651 |
| 3 | 46676976 | 46677659 | 46677471 | 54 | 73  | 4  | 15.38170193 | 1.27E-18    | ALS2CL   | ENSG00000178038 |
| 3 | 46779669 | 46779952 | 46779810 | 18 | 21  | 0  | 22.86469205 | 1.55E-07    |          | ENSG00000206549 |
| 3 | 46930119 | 46930300 | 46930278 | 8  | 8   | 0  | 9.353737658 | 0.00163931  | PTHR1    | ENSG00000160801 |
| 3 | 47396964 | 47397332 | 47397198 | 9  | 15  | 10 | 1.511715177 | 0.140236    | PTPN23   | ENSG00000076201 |
| 3 | 47460646 | 47460930 | 47460788 | 12 | 15  | 2  | 5.542955649 | 0.000497081 | SCAP     | ENSG00000114650 |

|   |          |          |          |    |    |    |             |             |         |                 |
|---|----------|----------|----------|----|----|----|-------------|-------------|---------|-----------------|
| 3 | 47798603 | 47798940 | 47798775 | 9  | 12 | 5  | 2.251825733 | 0.0404733   | SMARCC1 | ENSG00000173473 |
| 3 | 48292205 | 48292410 | 48292307 | 8  | 8  | 0  | 9.353737658 | 0.00163931  |         | ENSG00000199476 |
| 3 | 48448906 | 48449441 | 48449059 | 21 | 35 | 0  | 37.41495063 | 7.22E-12    | PLXNB1  | ENSG00000164050 |
| 3 | 48519905 | 48520289 | 48520142 | 8  | 13 | 4  | 2.910051716 | 0.0125532   | SHISA5  | ENSG00000164054 |
| 3 | 48676129 | 48676350 | 48676210 | 8  | 9  | 1  | 5.196520921 | 0.00490062  | SLC26A6 | ENSG00000008300 |
| 3 | 49033769 | 49034043 | 49033929 | 9  | 11 | 1  | 6.235825105 | 0.0013754   | C3orf60 | ENSG00000178057 |
| 3 | 49424515 | 49424838 | 49424681 | 8  | 11 | 4  | 2.494330042 | 0.0324033   | TCTA    | ENSG00000145022 |
| 3 | 49481964 | 49482180 | 49482054 | 8  | 10 | 4  | 2.286469205 | 0.0509017   | DAG1    | ENSG00000173402 |
| 3 | 49799463 | 49799719 | 49799610 | 11 | 12 | 6  | 1.930136342 | 0.071303    | IHPK1   | ENSG00000176095 |
| 3 | 50159075 | 50159260 | 50159167 | 13 | 13 | 0  | 14.55025858 | 4.65E-05    | SEMA3F  | ENSG00000001617 |
| 3 | 50163443 | 50163782 | 50163616 | 9  | 12 | 3  | 3.377738599 | 0.00867157  | SEMA3F  | ENSG00000001617 |
| 3 | 50233034 | 50233228 | 50233131 | 8  | 9  | 1  | 5.196520921 | 0.00490062  | SLC38A3 | ENSG00000188338 |
| 3 | 50281259 | 50281460 | 50281359 | 8  | 8  | 3  | 2.338434415 | 0.0641221   | SEMA3B  | ENSG00000012171 |
| 3 | 50312132 | 50312385 | 50312282 | 10 | 12 | 4  | 2.702190879 | 0.0203088   | HYAL3   | ENSG00000186792 |
| 3 | 50863604 | 50863800 | 50863702 | 9  | 10 | 0  | 11.43234603 | 0.000394183 |         | ENSG00000188420 |
| 3 | 51401193 | 51401440 | 51401319 | 9  | 10 | 4  | 2.286469205 | 0.0509017   | RBM15B  | ENSG00000179837 |
| 3 | 52004909 | 52005165 | 52005037 | 9  | 12 | 4  | 2.702190879 | 0.0203088   | RPL29   | ENSG00000162244 |
| 3 | 52116156 | 52116339 | 52116251 | 8  | 8  | 0  | 9.353737658 | 0.00163931  | C3orf74 | ENSG00000221939 |
| 3 | 52153229 | 52153412 | 52153354 | 8  | 8  | 6  | 1.336248237 | 0.277651    | WDR51A  | ENSG00000164087 |
| 3 | 52615773 | 52615952 | 52615897 | 8  | 8  | 2  | 3.117912553 | 0.0283184   |         | ENSG00000221518 |
| 3 | 53164749 | 53164996 | 53164903 | 9  | 12 | 4  | 2.702190879 | 0.0203088   | PRKCD   | ENSG00000163932 |
| 3 | 53265254 | 53265496 | 53265404 | 8  | 8  | 1  | 4.676868829 | 0.0091584   | TKT     | ENSG00000163931 |
| 3 | 53278943 | 53279394 | 53279168 | 68 | 79 | 1  | 41.57216737 | 7.28E-24    |         | ENSG00000210751 |
| 3 | 53356570 | 53356947 | 53356709 | 9  | 15 | 13 | 1.187776211 | 0.317363    | DCP1A   | ENSG00000162290 |
| 3 | 53527834 | 53528041 | 53527937 | 9  | 10 | 2  | 3.810782009 | 0.00936112  | CACNA1D | ENSG00000157388 |
| 3 | 53532551 | 53532752 | 53532651 | 8  | 9  | 3  | 2.598260461 | 0.0397929   | CACNA1D | ENSG00000157388 |
| 3 | 53540745 | 53541071 | 53540908 | 15 | 18 | 2  | 6.582259834 | 7.91E-05    | CACNA1D | ENSG00000157388 |
| 3 | 54872890 | 54873164 | 54873027 | 13 | 16 | 0  | 17.66817113 | 5.48E-06    | LRTM1   | ENSG00000144771 |
| 3 | 54900722 | 54901000 | 54900861 | 10 | 11 | 4  | 2.494330042 | 0.0324033   | LRTM1   | ENSG00000144771 |
| 3 | 54996784 | 54997049 | 54996916 | 13 | 13 | 2  | 4.850086193 | 0.00164564  | LRTM1   | ENSG00000144771 |
| 3 | 55570789 | 55570993 | 55570938 | 8  | 8  | 0  | 9.353737658 | 0.00163931  | WNT5A   | ENSG00000114251 |
| 3 | 55578252 | 55578534 | 55578400 | 8  | 12 | 4  | 2.702190879 | 0.0203088   | WNT5A   | ENSG00000114251 |
| 3 | 56792601 | 56792868 | 56792727 | 8  | 10 | 0  | 11.43234603 | 0.000394183 | ARHGEF3 | ENSG00000163947 |
| 3 | 56792906 | 56793366 | 56793085 | 51 | 65 | 0  | 68.59407616 | 3.75E-21    | ARHGEF3 | ENSG00000163947 |

|   |          |          |          |    |    |    |             |             |          |                 |
|---|----------|----------|----------|----|----|----|-------------|-------------|----------|-----------------|
| 3 | 56833069 | 56833262 | 56833165 | 8  | 8  | 1  | 4.676868829 | 0.0091584   | ARHGEF3  | ENSG00000163947 |
| 3 | 57024046 | 57024603 | 57024372 | 62 | 95 | 4  | 19.95464034 | 5.37E-25    | ARHGEF3  | ENSG00000163947 |
| 3 | 57516757 | 57517129 | 57516936 | 12 | 19 | 3  | 5.196520921 | 0.000174201 | PDE12    | ENSG00000174840 |
| 3 | 57764427 | 57764667 | 57764582 | 11 | 13 | 2  | 4.850086193 | 0.00164564  | SLMAP    | ENSG00000163681 |
| 3 | 58178291 | 58178516 | 58178403 | 10 | 12 | 3  | 3.377738599 | 0.00867157  | DNASE1L3 | ENSG00000163687 |
| 3 | 58311032 | 58311300 | 58311205 | 8  | 11 | 1  | 6.235825105 | 0.0013754   | PXK      | ENSG00000168297 |
| 3 | 58428027 | 58428303 | 58428165 | 12 | 13 | 2  | 4.850086193 | 0.00164564  | KCTD6    | ENSG00000168301 |
| 3 | 58835143 | 58835455 | 58835299 | 13 | 16 | 1  | 8.834085566 | 5.30E-05    | C3orf67  | ENSG00000163689 |
| 3 | 59280864 | 59281119 | 59280991 | 8  | 11 | 3  | 3.117912553 | 0.0146045   | C3orf67  | ENSG00000163689 |
| 3 | 59354508 | 59354927 | 59354687 | 19 | 29 | 0  | 31.17912553 | 5.19E-10    | C3orf67  | ENSG00000163689 |
| 3 | 59759634 | 59759936 | 59759785 | 14 | 15 | 0  | 16.62886695 | 1.12E-05    |          |                 |
| 3 | 59963346 | 59963691 | 59963518 | 8  | 13 | 4  | 2.910051716 | 0.0125532   |          |                 |
| 3 | 61226737 | 61226972 | 61226904 | 8  | 8  | 1  | 4.676868829 | 0.0091584   |          | ENSG00000201991 |
| 3 | 61583793 | 61584106 | 61583949 | 10 | 13 | 16 | 0.855897563 | 0.670115    | PTPRG    | ENSG00000144724 |
| 3 | 61587112 | 61587403 | 61587257 | 11 | 15 | 9  | 1.662886695 | 0.0970566   | PTPRG    | ENSG00000144724 |
| 3 | 61588554 | 61588884 | 61588719 | 18 | 24 | 14 | 1.73217364  | 0.0420666   | PTPRG    | ENSG00000144724 |
| 3 | 61589591 | 61589947 | 61589730 | 10 | 14 | 11 | 1.29913023  | 0.246308    | PTPRG    | ENSG00000144724 |
| 3 | 61590517 | 61590878 | 61590696 | 9  | 16 | 10 | 1.606197376 | 0.104477    | PTPRG    | ENSG00000144724 |
| 3 | 61591223 | 61591402 | 61591320 | 8  | 10 | 6  | 1.63319229  | 0.146906    | PTPRG    | ENSG00000144724 |
| 3 | 61593683 | 61594203 | 61593812 | 9  | 18 | 19 | 0.987338975 | 0.516858    | PTPRG    | ENSG00000144724 |
| 3 | 61595198 | 61595759 | 61595580 | 28 | 42 | 14 | 2.979338661 | 4.29E-05    | PTPRG    | ENSG00000144724 |
| 3 | 61598095 | 61598528 | 61598240 | 9  | 17 | 17 | 1.039304184 | 0.454282    | PTPRG    | ENSG00000144724 |
| 3 | 61598773 | 61599011 | 61598927 | 8  | 9  | 5  | 1.73217364  | 0.133894    | PTPRG    | ENSG00000144724 |
| 3 | 61603301 | 61603679 | 61603448 | 10 | 16 | 18 | 0.929903744 | 0.58804     | PTPRG    | ENSG00000144724 |
| 3 | 61610355 | 61610627 | 61610450 | 8  | 10 | 12 | 0.879411233 | 0.62639     | PTPRG    | ENSG00000144724 |
| 3 | 61617786 | 61618124 | 61617953 | 9  | 12 | 10 | 1.228268581 | 0.305344    | PTPRG    | ENSG00000144724 |
| 3 | 61621213 | 61621451 | 61621332 | 10 | 12 | 4  | 2.702190879 | 0.0203088   | PTPRG    | ENSG00000144724 |
| 3 | 61624814 | 61625047 | 61624927 | 9  | 11 | 13 | 0.890832158 | 0.618492    | PTPRG    | ENSG00000144724 |
| 3 | 61629730 | 61629954 | 61629830 | 10 | 12 | 6  | 1.930136342 | 0.071303    | PTPRG    | ENSG00000144724 |
| 3 | 61635474 | 61635671 | 61635572 | 8  | 9  | 5  | 1.73217364  | 0.133894    | PTPRG    | ENSG00000144724 |
| 3 | 61645032 | 61645219 | 61645140 | 8  | 9  | 8  | 1.154782427 | 0.375434    | PTPRG    | ENSG00000144724 |
| 3 | 61646283 | 61646462 | 61646372 | 8  | 8  | 5  | 1.558956276 | 0.191397    | PTPRG    | ENSG00000144724 |
| 3 | 61650653 | 61650978 | 61650815 | 8  | 9  | 9  | 1.039304184 | 0.466079    | PTPRG    | ENSG00000144724 |
| 3 | 61657220 | 61657604 | 61657318 | 8  | 15 | 5  | 2.771477825 | 0.0105836   | PTPRG    | ENSG00000144724 |

|   |          |          |          |    |    |    |             |            |       |                 |
|---|----------|----------|----------|----|----|----|-------------|------------|-------|-----------------|
| 3 | 61658081 | 61658496 | 61658317 | 27 | 34 | 7  | 4.546955806 | 4.33E-06   | PTPRG | ENSG00000144724 |
| 3 | 61658633 | 61658814 | 61658703 | 8  | 8  | 6  | 1.336248237 | 0.277651   | PTPRG | ENSG00000144724 |
| 3 | 61660160 | 61660447 | 61660315 | 10 | 12 | 4  | 2.702190879 | 0.0203088  | PTPRG | ENSG00000144724 |
| 3 | 61665802 | 61666009 | 61665905 | 8  | 9  | 13 | 0.742360132 | 0.770276   | PTPRG | ENSG00000144724 |
| 3 | 61666546 | 61666766 | 61666631 | 8  | 10 | 3  | 2.858086507 | 0.0242838  | PTPRG | ENSG00000144724 |
| 3 | 61666782 | 61667290 | 61667137 | 12 | 23 | 16 | 1.467252966 | 0.109416   | PTPRG | ENSG00000144724 |
| 3 | 61670468 | 61670782 | 61670620 | 12 | 16 | 10 | 1.606197376 | 0.104477   | PTPRG | ENSG00000144724 |
| 3 | 61675602 | 61675816 | 61675744 | 9  | 11 | 7  | 1.558956276 | 0.158273   | PTPRG | ENSG00000144724 |
| 3 | 61686886 | 61687153 | 61687019 | 9  | 10 | 6  | 1.63319229  | 0.146906   | PTPRG | ENSG00000144724 |
| 3 | 61694188 | 61694484 | 61694359 | 8  | 12 | 9  | 1.35109544  | 0.232899   | PTPRG | ENSG00000144724 |
| 3 | 61709809 | 61710005 | 61709902 | 8  | 9  | 5  | 1.73217364  | 0.133894   | PTPRG | ENSG00000144724 |
| 3 | 61710691 | 61710951 | 61710836 | 9  | 10 | 4  | 2.286469205 | 0.0509017  | PTPRG | ENSG00000144724 |
| 3 | 61716583 | 61716826 | 61716702 | 8  | 9  | 7  | 1.29913023  | 0.286504   | PTPRG | ENSG00000144724 |
| 3 | 61717535 | 61717751 | 61717671 | 8  | 10 | 6  | 1.63319229  | 0.146906   | PTPRG | ENSG00000144724 |
| 3 | 61719566 | 61719785 | 61719686 | 8  | 9  | 5  | 1.73217364  | 0.133894   | PTPRG | ENSG00000144724 |
| 3 | 61721214 | 61721422 | 61721321 | 8  | 8  | 2  | 3.117912553 | 0.0283184  | PTPRG | ENSG00000144724 |
| 3 | 61729183 | 61729380 | 61729263 | 9  | 9  | 4  | 2.078608368 | 0.0785659  | PTPRG | ENSG00000144724 |
| 3 | 61735585 | 61735768 | 61735664 | 8  | 8  | 1  | 4.676868829 | 0.0091584  | PTPRG | ENSG00000144724 |
| 3 | 61744365 | 61744605 | 61744515 | 8  | 9  | 8  | 1.154782427 | 0.375434   | PTPRG | ENSG00000144724 |
| 3 | 61749505 | 61749687 | 61749562 | 11 | 11 | 9  | 1.247165021 | 0.300052   | PTPRG | ENSG00000144724 |
| 3 | 61754392 | 61754706 | 61754549 | 8  | 13 | 6  | 2.078608368 | 0.0483393  | PTPRG | ENSG00000144724 |
| 3 | 61755814 | 61756027 | 61755886 | 9  | 11 | 9  | 1.247165021 | 0.300052   | PTPRG | ENSG00000144724 |
| 3 | 61760739 | 61761167 | 61760854 | 10 | 16 | 7  | 2.208521392 | 0.0257604  | PTPRG | ENSG00000144724 |
| 3 | 61767063 | 61767242 | 61767151 | 8  | 9  | 10 | 0.944821986 | 0.553851   | PTPRG | ENSG00000144724 |
| 3 | 61767990 | 61768272 | 61768131 | 11 | 15 | 6  | 2.375552421 | 0.0212094  | PTPRG | ENSG00000144724 |
| 3 | 61768447 | 61769048 | 61768635 | 18 | 41 | 21 | 1.98412617  | 0.00356622 | PTPRG | ENSG00000144724 |
| 3 | 61769061 | 61769387 | 61769219 | 13 | 17 | 20 | 0.890832158 | 0.642922   | PTPRG | ENSG00000144724 |
| 3 | 61774919 | 61775540 | 61775089 | 12 | 26 | 12 | 2.158554844 | 0.00861404 | PTPRG | ENSG00000144724 |
| 3 | 61785572 | 61785938 | 61785746 | 8  | 15 | 13 | 1.187776211 | 0.317363   | PTPRG | ENSG00000144724 |
| 3 | 61790047 | 61790335 | 61790180 | 10 | 12 | 12 | 1.039304184 | 0.461227   | PTPRG | ENSG00000144724 |
| 3 | 61793050 | 61793472 | 61793227 | 11 | 18 | 9  | 1.97467795  | 0.0349428  | PTPRG | ENSG00000144724 |
| 3 | 61795782 | 61795967 | 61795874 | 8  | 9  | 3  | 2.598260461 | 0.0397929  | PTPRG | ENSG00000144724 |
| 3 | 61798210 | 61798440 | 61798287 | 8  | 9  | 5  | 1.73217364  | 0.133894   | PTPRG | ENSG00000144724 |
| 3 | 61800058 | 61800269 | 61800163 | 8  | 10 | 2  | 3.810782009 | 0.00936112 | PTPRG | ENSG00000144724 |

|   |          |          |          |    |    |    |             |            |       |                 |
|---|----------|----------|----------|----|----|----|-------------|------------|-------|-----------------|
| 3 | 61802987 | 61803207 | 61803082 | 9  | 9  | 12 | 0.799464757 | 0.707717   | PTPRG | ENSG00000144724 |
| 3 | 61808576 | 61808776 | 61808676 | 8  | 10 | 4  | 2.286469205 | 0.0509017  | PTPRG | ENSG00000144724 |
| 3 | 61813462 | 61813643 | 61813518 | 8  | 8  | 3  | 2.338434415 | 0.0641221  | PTPRG | ENSG00000144724 |
| 3 | 61814238 | 61814435 | 61814278 | 8  | 9  | 3  | 2.598260461 | 0.0397929  | PTPRG | ENSG00000144724 |
| 3 | 61821956 | 61822135 | 61822001 | 9  | 9  | 8  | 1.154782427 | 0.375434   | PTPRG | ENSG00000144724 |
| 3 | 61823524 | 61823722 | 61823675 | 9  | 11 | 8  | 1.385738912 | 0.224757   | PTPRG | ENSG00000144724 |
| 3 | 61827635 | 61827833 | 61827731 | 8  | 9  | 3  | 2.598260461 | 0.0397929  | PTPRG | ENSG00000144724 |
| 3 | 61828386 | 61828662 | 61828492 | 10 | 12 | 13 | 0.965068171 | 0.538344   | PTPRG | ENSG00000144724 |
| 3 | 61843495 | 61843835 | 61843665 | 12 | 16 | 13 | 1.262012224 | 0.256887   | PTPRG | ENSG00000144724 |
| 3 | 61845343 | 61845751 | 61845522 | 10 | 19 | 9  | 2.078608368 | 0.0241848  | PTPRG | ENSG00000144724 |
| 3 | 61861984 | 61862173 | 61862082 | 8  | 9  | 1  | 5.196520921 | 0.00490062 | PTPRG | ENSG00000144724 |
| 3 | 61865149 | 61865353 | 61865267 | 10 | 10 | 8  | 1.27026067  | 0.293854   | PTPRG | ENSG00000144724 |
| 3 | 61865800 | 61866024 | 61865856 | 8  | 9  | 9  | 1.039304184 | 0.466079   | PTPRG | ENSG00000144724 |
| 3 | 61868185 | 61868416 | 61868298 | 9  | 12 | 12 | 1.039304184 | 0.461227   | PTPRG | ENSG00000144724 |
| 3 | 61874943 | 61875122 | 61875087 | 8  | 9  | 5  | 1.73217364  | 0.133894   | PTPRG | ENSG00000144724 |
| 3 | 61892778 | 61892978 | 61892899 | 8  | 8  | 12 | 0.719518281 | 0.783103   | PTPRG | ENSG00000144724 |
| 3 | 61895661 | 61895881 | 61895781 | 8  | 11 | 8  | 1.385738912 | 0.224757   | PTPRG | ENSG00000144724 |
| 3 | 61901100 | 61901358 | 61901229 | 9  | 11 | 3  | 3.117912553 | 0.0146045  | PTPRG | ENSG00000144724 |
| 3 | 61906397 | 61906690 | 61906513 | 9  | 13 | 8  | 1.616695398 | 0.123553   | PTPRG | ENSG00000144724 |
| 3 | 61908006 | 61908210 | 61908113 | 8  | 8  | 7  | 1.169217207 | 0.371848   | PTPRG | ENSG00000144724 |
| 3 | 61909622 | 61909991 | 61909787 | 8  | 13 | 10 | 1.32275078  | 0.240023   | PTPRG | ENSG00000144724 |
| 3 | 61910910 | 61911118 | 61911061 | 12 | 12 | 10 | 1.228268581 | 0.305344   | PTPRG | ENSG00000144724 |
| 3 | 61914467 | 61914759 | 61914630 | 8  | 11 | 15 | 0.779478138 | 0.747877   | PTPRG | ENSG00000144724 |
| 3 | 61921890 | 61922103 | 61921996 | 9  | 10 | 12 | 0.879411233 | 0.62639    | PTPRG | ENSG00000144724 |
| 3 | 61923470 | 61923675 | 61923572 | 8  | 8  | 6  | 1.336248237 | 0.277651   | PTPRG | ENSG00000144724 |
| 3 | 61925205 | 61925493 | 61925383 | 8  | 11 | 10 | 1.133786383 | 0.380636   | PTPRG | ENSG00000144724 |
| 3 | 61927060 | 61927239 | 61927130 | 8  | 8  | 3  | 2.338434415 | 0.0641221  | PTPRG | ENSG00000144724 |
| 3 | 61930175 | 61930533 | 61930422 | 8  | 12 | 6  | 1.930136342 | 0.071303   | PTPRG | ENSG00000144724 |
| 3 | 61941395 | 61941575 | 61941436 | 8  | 8  | 0  | 9.353737658 | 0.00163931 | PTPRG | ENSG00000144724 |
| 3 | 61942287 | 61942564 | 61942439 | 8  | 11 | 9  | 1.247165021 | 0.300052   | PTPRG | ENSG00000144724 |
| 3 | 61955399 | 61955724 | 61955561 | 10 | 14 | 9  | 1.558956276 | 0.132279   | PTPRG | ENSG00000144724 |
| 3 | 61958971 | 61959447 | 61959277 | 13 | 23 | 14 | 1.662886695 | 0.0567474  | PTPRG | ENSG00000144724 |
| 3 | 61962819 | 61963067 | 61962943 | 9  | 12 | 9  | 1.35109544  | 0.232899   | PTPRG | ENSG00000144724 |
| 3 | 61966748 | 61966927 | 61966837 | 8  | 8  | 2  | 3.117912553 | 0.0283184  | PTPRG | ENSG00000144724 |



|   |          |          |          |    |    |    |             |             |         |                 |
|---|----------|----------|----------|----|----|----|-------------|-------------|---------|-----------------|
| 3 | 61967725 | 61968097 | 61967890 | 14 | 19 | 12 | 1.598929514 | 0.0887417   | PTPRG   | ENSG00000144724 |
| 3 | 61968105 | 61968489 | 61968348 | 14 | 21 | 16 | 1.344981885 | 0.176214    | PTPRG   | ENSG00000144724 |
| 3 | 61971788 | 61972063 | 61971910 | 13 | 15 | 13 | 1.187776211 | 0.317363    | PTPRG   | ENSG00000144724 |
| 3 | 61972330 | 61972571 | 61972507 | 8  | 10 | 7  | 1.429043253 | 0.21536     | PTPRG   | ENSG00000144724 |
| 3 | 61973360 | 61973558 | 61973531 | 9  | 11 | 8  | 1.385738912 | 0.224757    | PTPRG   | ENSG00000144724 |
| 3 | 61983993 | 61984307 | 61984150 | 8  | 11 | 10 | 1.133786383 | 0.380636    | PTPRG   | ENSG00000144724 |
| 3 | 61984463 | 61984705 | 61984598 | 13 | 13 | 7  | 1.818782322 | 0.0805123   | PTPRG   | ENSG00000144724 |
| 3 | 61991603 | 61991836 | 61991678 | 8  | 10 | 10 | 1.039304184 | 0.464387    | PTPRG   | ENSG00000144724 |
| 3 | 61995813 | 61996024 | 61995910 | 11 | 11 | 1  | 6.235825105 | 0.0013754   | PTPRG   | ENSG00000144724 |
| 3 | 61998296 | 61998481 | 61998388 | 8  | 8  | 1  | 4.676868829 | 0.0091584   | PTPRG   | ENSG00000144724 |
| 3 | 62015096 | 62015302 | 62015199 | 11 | 12 | 1  | 6.755477198 | 0.000722752 | PTPRG   | ENSG00000144724 |
| 3 | 62030034 | 62030397 | 62030157 | 9  | 14 | 3  | 3.897390691 | 0.00295882  | PTPRG   | ENSG00000144724 |
| 3 | 62035269 | 62035567 | 62035418 | 9  | 13 | 18 | 0.765803083 | 0.780427    | PTPRG   | ENSG00000144724 |
| 3 | 62035900 | 62036234 | 62036064 | 8  | 12 | 7  | 1.688869299 | 0.11395     | PTPRG   | ENSG00000144724 |
| 3 | 62049691 | 62050090 | 62049797 | 8  | 14 | 8  | 1.73217364  | 0.0890835   | PTPRG   | ENSG00000144724 |
| 3 | 62055865 | 62056172 | 62056018 | 10 | 12 | 7  | 1.688869299 | 0.11395     | PTPRG   | ENSG00000144724 |
| 3 | 62080826 | 62081005 | 62080891 | 8  | 8  | 6  | 1.336248237 | 0.277651    | PTPRG   | ENSG00000144724 |
| 3 | 62092450 | 62092887 | 62092675 | 11 | 20 | 9  | 2.182538787 | 0.0165356   | PTPRG   | ENSG00000144724 |
| 3 | 62095277 | 62095504 | 62095420 | 8  | 11 | 3  | 3.117912553 | 0.0146045   | PTPRG   | ENSG00000144724 |
| 3 | 62107553 | 62107748 | 62107671 | 8  | 9  | 7  | 1.29913023  | 0.286504    | PTPRG   | ENSG00000144724 |
| 3 | 62123364 | 62123619 | 62123462 | 10 | 10 | 2  | 3.810782009 | 0.00936112  | C3orf14 | ENSG00000114405 |
| 3 | 62126191 | 62126401 | 62126296 | 8  | 9  | 7  | 1.29913023  | 0.286504    | C3orf14 | ENSG00000114405 |
| 3 | 62128352 | 62128558 | 62128443 | 8  | 8  | 10 | 0.850339787 | 0.645072    | C3orf14 | ENSG00000114405 |
| 3 | 62149556 | 62149868 | 62149698 | 12 | 16 | 11 | 1.472347594 | 0.147517    | C3orf14 | ENSG00000114405 |
| 3 | 62159477 | 62159736 | 62159606 | 8  | 8  | 1  | 4.676868829 | 0.0091584   | C3orf14 | ENSG00000114405 |
| 3 | 62171076 | 62171456 | 62171371 | 9  | 14 | 5  | 2.598260461 | 0.0167748   | C3orf14 | ENSG00000114405 |
| 3 | 62185292 | 62185686 | 62185411 | 9  | 16 | 4  | 3.533634226 | 0.00276486  | C3orf14 | ENSG00000114405 |
| 3 | 62188516 | 62188756 | 62188643 | 10 | 13 | 9  | 1.455025858 | 0.177172    | C3orf14 | ENSG00000114405 |
| 3 | 62194274 | 62194472 | 62194389 | 8  | 8  | 3  | 2.338434415 | 0.0641221   | C3orf14 | ENSG00000114405 |
| 3 | 62196569 | 62196855 | 62196727 | 8  | 9  | 6  | 1.484720263 | 0.204387    | C3orf14 | ENSG00000114405 |
| 3 | 62238294 | 62238485 | 62238405 | 8  | 9  | 3  | 2.598260461 | 0.0397929   | C3orf14 | ENSG00000114405 |
| 3 | 62270593 | 62270783 | 62270688 | 8  | 9  | 5  | 1.73217364  | 0.133894    | C3orf14 | ENSG00000114405 |
| 3 | 62279406 | 62279973 | 62279555 | 13 | 28 | 31 | 0.941869417 | 0.59365     | C3orf14 | ENSG00000114405 |
| 3 | 62279987 | 62280372 | 62280193 | 11 | 19 | 18 | 1.094004404 | 0.389177    | C3orf14 | ENSG00000114405 |

|   |          |          |          |    |    |    |             |            |         |                 |
|---|----------|----------|----------|----|----|----|-------------|------------|---------|-----------------|
| 3 | 62280488 | 62280831 | 62280654 | 13 | 17 | 12 | 1.439036563 | 0.154203   | C3orf14 | ENSG00000114405 |
| 3 | 62335073 | 62335254 | 62335138 | 9  | 9  | 2  | 3.464347281 | 0.0163838  | FEZF2   | ENSG00000153266 |
| 3 | 62339918 | 62340124 | 62340020 | 8  | 10 | 5  | 1.905391004 | 0.0915982  | FEZF2   | ENSG00000153266 |
| 3 | 62390436 | 62390690 | 62390565 | 12 | 12 | 3  | 3.377738599 | 0.00867157 | FEZF2   | ENSG00000153266 |
| 3 | 62397027 | 62397320 | 62397167 | 12 | 14 | 5  | 2.598260461 | 0.0167748  | FEZF2   | ENSG00000153266 |
| 3 | 62401567 | 62401800 | 62401643 | 8  | 9  | 5  | 1.73217364  | 0.133894   | FEZF2   | ENSG00000153266 |
| 3 | 62402470 | 62402732 | 62402601 | 8  | 11 | 12 | 0.959357709 | 0.543005   | FEZF2   | ENSG00000153266 |
| 3 | 62406808 | 62406990 | 62406891 | 9  | 9  | 6  | 1.484720263 | 0.204387   | FEZF2   | ENSG00000153266 |
| 3 | 62407721 | 62407908 | 62407814 | 10 | 11 | 10 | 1.133786383 | 0.380636   | FEZF2   | ENSG00000153266 |
| 3 | 62422376 | 62422664 | 62422502 | 9  | 11 | 6  | 1.781664316 | 0.103344   | FEZF2   | ENSG00000153266 |
| 3 | 62424956 | 62425191 | 62425044 | 9  | 12 | 8  | 1.501217155 | 0.168286   | FEZF2   | ENSG00000153266 |
| 3 | 62434542 | 62434733 | 62434637 | 8  | 9  | 2  | 3.464347281 | 0.0163838  | FEZF2   | ENSG00000153266 |
| 3 | 62436060 | 62436280 | 62436125 | 8  | 9  | 8  | 1.154782427 | 0.375434   | FEZF2   | ENSG00000153266 |
| 3 | 62452338 | 62452539 | 62452483 | 9  | 9  | 3  | 2.598260461 | 0.0397929  | FEZF2   | ENSG00000153266 |
| 3 | 62454052 | 62454361 | 62454210 | 10 | 13 | 8  | 1.616695398 | 0.123553   | FEZF2   | ENSG00000153266 |
| 3 | 62458435 | 62458856 | 62458680 | 9  | 14 | 7  | 1.948695345 | 0.0559175  | FEZF2   | ENSG00000153266 |
| 3 | 62478335 | 62478545 | 62478430 | 9  | 11 | 4  | 2.494330042 | 0.0324033  | FEZF2   | ENSG00000153266 |
| 3 | 62483700 | 62483956 | 62483860 | 9  | 9  | 11 | 0.86608682  | 0.635181   | FEZF2   | ENSG00000153266 |
| 3 | 62490025 | 62490223 | 62490124 | 11 | 12 | 8  | 1.501217155 | 0.168286   | FEZF2   | ENSG00000153266 |
| 3 | 62491361 | 62491607 | 62491471 | 8  | 11 | 7  | 1.558956276 | 0.158273   | FEZF2   | ENSG00000153266 |
| 3 | 62501063 | 62501278 | 62501189 | 9  | 9  | 8  | 1.154782427 | 0.375434   | FEZF2   | ENSG00000153266 |
| 3 | 62510854 | 62511089 | 62510995 | 8  | 10 | 12 | 0.879411233 | 0.62639    | FEZF2   | ENSG00000153266 |
| 3 | 62511695 | 62511925 | 62511794 | 10 | 13 | 6  | 2.078608368 | 0.0483393  | FEZF2   | ENSG00000153266 |
| 3 | 62515129 | 62515324 | 62515303 | 9  | 11 | 10 | 1.133786383 | 0.380636   | FEZF2   | ENSG00000153266 |
| 3 | 62519278 | 62519519 | 62519384 | 9  | 10 | 12 | 0.879411233 | 0.62639    | FEZF2   | ENSG00000153266 |
| 3 | 62520701 | 62520925 | 62520836 | 8  | 10 | 9  | 1.143234603 | 0.378307   | FEZF2   | ENSG00000153266 |
| 3 | 62521077 | 62521305 | 62521200 | 9  | 11 | 10 | 1.133786383 | 0.380636   | FEZF2   | ENSG00000153266 |
| 3 | 62523289 | 62523672 | 62523493 | 9  | 15 | 6  | 2.375552421 | 0.0212094  | FEZF2   | ENSG00000153266 |
| 3 | 62544339 | 62544547 | 62544410 | 10 | 11 | 10 | 1.133786383 | 0.380636   | FEZF2   | ENSG00000153266 |
| 3 | 62551141 | 62551447 | 62551313 | 13 | 17 | 10 | 1.700679574 | 0.0766266  |         | ENSG00000210876 |
| 3 | 62559456 | 62559672 | 62559601 | 8  | 11 | 4  | 2.494330042 | 0.0324033  |         | ENSG00000210876 |
| 3 | 62566426 | 62566768 | 62566597 | 9  | 15 | 11 | 1.385738912 | 0.19225    |         | ENSG00000210876 |
| 3 | 62578607 | 62579016 | 62578837 | 8  | 16 | 7  | 2.208521392 | 0.0257604  |         | ENSG00000210876 |
| 3 | 62583314 | 62583641 | 62583488 | 8  | 11 | 11 | 1.039304184 | 0.462773   |         | ENSG00000210876 |

|   |          |          |          |    |    |    |             |             |       |                 |
|---|----------|----------|----------|----|----|----|-------------|-------------|-------|-----------------|
| 3 | 62584345 | 62584557 | 62584451 | 9  | 9  | 8  | 1.154782427 | 0.375434    |       | ENSG00000210876 |
| 3 | 62584990 | 62585262 | 62585126 | 9  | 11 | 6  | 1.781664316 | 0.103344    |       | ENSG00000210876 |
| 3 | 62598115 | 62598381 | 62598204 | 9  | 11 | 6  | 1.781664316 | 0.103344    |       | ENSG00000210876 |
| 3 | 62622669 | 62622857 | 62622763 | 8  | 8  | 5  | 1.558956276 | 0.191397    |       | ENSG00000210876 |
| 3 | 62626668 | 62627037 | 62626858 | 11 | 18 | 15 | 1.234173719 | 0.265435    |       | ENSG00000210876 |
| 3 | 62631060 | 62631344 | 62631202 | 10 | 15 | 7  | 2.078608368 | 0.038229    |       | ENSG00000210876 |
| 3 | 62639837 | 62640016 | 62639926 | 8  | 8  | 6  | 1.336248237 | 0.277651    |       | ENSG00000210876 |
| 3 | 62642433 | 62642612 | 62642522 | 9  | 9  | 4  | 2.078608368 | 0.0785659   |       | ENSG00000210876 |
| 3 | 62680468 | 62680797 | 62680632 | 11 | 14 | 3  | 3.897390691 | 0.00295882  |       | ENSG00000210876 |
| 3 | 62692311 | 62692700 | 62692521 | 8  | 15 | 6  | 2.375552421 | 0.0212094   |       | ENSG00000210876 |
| 3 | 62699984 | 62700171 | 62700077 | 9  | 9  | 1  | 5.196520921 | 0.00490062  |       | ENSG00000210876 |
| 3 | 62732414 | 62732614 | 62732514 | 8  | 8  | 4  | 1.870747532 | 0.118863    |       | ENSG00000210876 |
| 3 | 62755366 | 62755557 | 62755449 | 10 | 11 | 4  | 2.494330042 | 0.0324033   |       | ENSG00000210876 |
| 3 | 62790686 | 62790972 | 62790817 | 9  | 12 | 9  | 1.35109544  | 0.232899    |       | ENSG00000210884 |
| 3 | 62822324 | 62822627 | 62822475 | 8  | 9  | 7  | 1.29913023  | 0.286504    | CADPS | ENSG00000163618 |
| 3 | 62836674 | 62837189 | 62836853 | 13 | 23 | 9  | 2.494330042 | 0.00494866  | CADPS | ENSG00000163618 |
| 3 | 62844161 | 62844381 | 62844273 | 8  | 8  | 5  | 1.558956276 | 0.191397    | CADPS | ENSG00000163618 |
| 3 | 62848027 | 62848242 | 62848119 | 8  | 8  | 5  | 1.558956276 | 0.191397    | CADPS | ENSG00000163618 |
| 3 | 62848886 | 62849197 | 62849041 | 9  | 13 | 13 | 1.039304184 | 0.45974     | CADPS | ENSG00000163618 |
| 3 | 62861873 | 62862176 | 62862026 | 15 | 17 | 3  | 4.676868829 | 0.000552213 | CADPS | ENSG00000163618 |
| 3 | 62868430 | 62868614 | 62868573 | 8  | 8  | 4  | 1.870747532 | 0.118863    | CADPS | ENSG00000163618 |
| 3 | 62871273 | 62871452 | 62871362 | 8  | 8  | 7  | 1.169217207 | 0.371848    | CADPS | ENSG00000163618 |
| 3 | 62881148 | 62881551 | 62881442 | 9  | 16 | 6  | 2.524024447 | 0.0137633   | CADPS | ENSG00000163618 |
| 3 | 62939198 | 62939459 | 62939332 | 8  | 9  | 0  | 10.39304184 | 0.000803859 | CADPS | ENSG00000163618 |
| 3 | 62958146 | 62958369 | 62958213 | 8  | 11 | 4  | 2.494330042 | 0.0324033   | CADPS | ENSG00000163618 |
| 3 | 62959353 | 62959550 | 62959481 | 8  | 9  | 1  | 5.196520921 | 0.00490062  | CADPS | ENSG00000163618 |
| 3 | 62962038 | 62962343 | 62962195 | 12 | 15 | 7  | 2.078608368 | 0.038229    | CADPS | ENSG00000163618 |
| 3 | 62983562 | 62983782 | 62983719 | 8  | 9  | 2  | 3.464347281 | 0.0163838   | CADPS | ENSG00000163618 |
| 3 | 62985895 | 62986074 | 62985980 | 8  | 8  | 4  | 1.870747532 | 0.118863    | CADPS | ENSG00000163618 |
| 3 | 63004216 | 63004443 | 63004341 | 9  | 11 | 2  | 4.157216737 | 0.0052913   | CADPS | ENSG00000163618 |
| 3 | 63013291 | 63013534 | 63013412 | 8  | 8  | 10 | 0.850339787 | 0.645072    | CADPS | ENSG00000163618 |
| 3 | 63017684 | 63017891 | 63017787 | 8  | 8  | 0  | 9.353737658 | 0.00163931  | CADPS | ENSG00000163618 |
| 3 | 63036990 | 63037390 | 63037225 | 12 | 18 | 13 | 1.41048425  | 0.160361    | CADPS | ENSG00000163618 |
| 3 | 63052911 | 63053116 | 63053013 | 9  | 10 | 1  | 5.716173013 | 0.00260397  | CADPS | ENSG00000163618 |

|   |          |          |          |    |    |    |             |             |       |                 |
|---|----------|----------|----------|----|----|----|-------------|-------------|-------|-----------------|
| 3 | 63069188 | 63069440 | 63069314 | 9  | 12 | 7  | 1.688869299 | 0.11395     |       | ENSG00000222622 |
| 3 | 63082664 | 63082894 | 63082794 | 10 | 12 | 3  | 3.377738599 | 0.00867157  |       | ENSG00000222622 |
| 3 | 63083332 | 63083625 | 63083478 | 12 | 15 | 7  | 2.078608368 | 0.038229    |       | ENSG00000222622 |
| 3 | 63085643 | 63085841 | 63085721 | 8  | 9  | 2  | 3.464347281 | 0.0163838   |       | ENSG00000222622 |
| 3 | 63107217 | 63107486 | 63107351 | 8  | 10 | 1  | 5.716173013 | 0.00260397  |       | ENSG00000222622 |
| 3 | 63117211 | 63117423 | 63117338 | 9  | 10 | 10 | 1.039304184 | 0.464387    |       | ENSG00000222622 |
| 3 | 63141429 | 63141634 | 63141497 | 8  | 9  | 4  | 2.078608368 | 0.0785659   |       | ENSG00000222622 |
| 3 | 63154277 | 63154861 | 63154569 | 13 | 26 | 14 | 1.870747532 | 0.0223642   |       | ENSG00000222622 |
| 3 | 63160047 | 63160355 | 63160201 | 10 | 16 | 9  | 1.766817113 | 0.0700694   |       | ENSG00000222622 |
| 3 | 63162750 | 63163019 | 63162904 | 8  | 10 | 2  | 3.810782009 | 0.00936112  |       | ENSG00000222622 |
| 3 | 63163417 | 63163637 | 63163557 | 10 | 11 | 10 | 1.133786383 | 0.380636    |       | ENSG00000222622 |
| 3 | 63182755 | 63182968 | 63182797 | 8  | 8  | 8  | 1.039304184 | 0.46786     |       | ENSG00000222622 |
| 3 | 63193707 | 63193932 | 63193819 | 9  | 11 | 9  | 1.247165021 | 0.300052    |       | ENSG00000222622 |
| 3 | 63211223 | 63211461 | 63211345 | 9  | 11 | 5  | 2.078608368 | 0.0614303   |       | ENSG00000222622 |
| 3 | 63230766 | 63231019 | 63230892 | 8  | 10 | 9  | 1.143234603 | 0.378307    |       | ENSG00000222622 |
| 3 | 63247197 | 63247376 | 63247235 | 8  | 8  | 3  | 2.338434415 | 0.0641221   |       | ENSG00000222622 |
| 3 | 63251283 | 63251501 | 63251370 | 9  | 9  | 1  | 5.196520921 | 0.00490062  |       | ENSG00000222622 |
| 3 | 63253635 | 63253819 | 63253727 | 8  | 9  | 7  | 1.29913023  | 0.286504    |       | ENSG00000222622 |
| 3 | 63303686 | 63303971 | 63303825 | 8  | 10 | 2  | 3.810782009 | 0.00936112  |       | ENSG00000222622 |
| 3 | 63310416 | 63310722 | 63310569 | 8  | 10 | 14 | 0.762156402 | 0.758589    |       | ENSG00000222622 |
| 3 | 63311768 | 63312161 | 63312034 | 11 | 17 | 12 | 1.439036563 | 0.154203    |       | ENSG00000222622 |
| 3 | 63363120 | 63363482 | 63363293 | 11 | 16 | 5  | 2.944695189 | 0.00659886  |       | ENSG00000222622 |
| 3 | 63364371 | 63364586 | 63364483 | 8  | 10 | 2  | 3.810782009 | 0.00936112  |       | ENSG00000222622 |
| 3 | 63420496 | 63420894 | 63420715 | 10 | 15 | 14 | 1.10859113  | 0.386477    | SYNPR | ENSG00000163630 |
| 3 | 63421962 | 63422146 | 63422054 | 8  | 8  | 4  | 1.870747532 | 0.118863    | SYNPR | ENSG00000163630 |
| 3 | 63432810 | 63432992 | 63432886 | 8  | 8  | 4  | 1.870747532 | 0.118863    | SYNPR | ENSG00000163630 |
| 3 | 63433955 | 63434157 | 63434056 | 8  | 10 | 9  | 1.143234603 | 0.378307    | SYNPR | ENSG00000163630 |
| 3 | 63439427 | 63439615 | 63439551 | 8  | 8  | 0  | 9.353737658 | 0.00163931  | SYNPR | ENSG00000163630 |
| 3 | 63452615 | 63453116 | 63452729 | 8  | 17 | 12 | 1.439036563 | 0.154203    | SYNPR | ENSG00000163630 |
| 3 | 63455960 | 63456167 | 63456033 | 8  | 10 | 0  | 11.43234603 | 0.000394183 | SYNPR | ENSG00000163630 |
| 3 | 63466928 | 63467164 | 63467046 | 8  | 11 | 6  | 1.781664316 | 0.103344    | SYNPR | ENSG00000163630 |
| 3 | 63470850 | 63471112 | 63470981 | 8  | 10 | 6  | 1.63319229  | 0.146906    | SYNPR | ENSG00000163630 |
| 3 | 63473297 | 63473511 | 63473404 | 8  | 11 | 9  | 1.247165021 | 0.300052    |       | ENSG00000210887 |
| 3 | 63482559 | 63482741 | 63482650 | 8  | 8  | 9  | 0.935373766 | 0.560286    |       | ENSG00000210887 |

|   |          |          |          |    |    |    |             |             |                 |
|---|----------|----------|----------|----|----|----|-------------|-------------|-----------------|
| 3 | 63483273 | 63483567 | 63483420 | 10 | 11 | 8  | 1.385738912 | 0.224757    | ENSG00000210887 |
| 3 | 63483582 | 63484088 | 63483761 | 11 | 20 | 17 | 1.212521548 | 0.272468    | ENSG00000210887 |
| 3 | 63492107 | 63492296 | 63492201 | 8  | 9  | 5  | 1.73217364  | 0.133894    | ENSG00000210887 |
| 3 | 63495521 | 63495737 | 63495615 | 8  | 9  | 6  | 1.484720263 | 0.204387    | ENSG00000210887 |
| 3 | 63509925 | 63510261 | 63510085 | 9  | 12 | 1  | 6.755477198 | 0.000722752 | ENSG00000210887 |
| 3 | 63525517 | 63525801 | 63525659 | 10 | 12 | 6  | 1.930136342 | 0.071303    | ENSG00000210887 |
| 3 | 63531751 | 63531969 | 63531859 | 8  | 10 | 3  | 2.858086507 | 0.0242838   | ENSG00000210887 |
| 3 | 63532717 | 63532899 | 63532818 | 8  | 8  | 6  | 1.336248237 | 0.277651    | ENSG00000210887 |
| 3 | 63537539 | 63538064 | 63537701 | 10 | 23 | 11 | 2.078608368 | 0.0154752   | ENSG00000210887 |
| 3 | 63538844 | 63539184 | 63539014 | 8  | 13 | 6  | 2.078608368 | 0.0483393   | ENSG00000210887 |
| 3 | 63557750 | 63557951 | 63557850 | 8  | 8  | 1  | 4.676868829 | 0.0091584   | ENSG00000210887 |
| 3 | 63568422 | 63568624 | 63568523 | 9  | 9  | 13 | 0.742360132 | 0.770276    | ENSG00000188817 |
| 3 | 63592388 | 63592687 | 63592529 | 9  | 11 | 7  | 1.558956276 | 0.158273    | ENSG00000188817 |
| 3 | 63603083 | 63603398 | 63603240 | 9  | 11 | 5  | 2.078608368 | 0.0614303   | ENSG00000188817 |
| 3 | 63604614 | 63605055 | 63604876 | 10 | 21 | 10 | 2.078608368 | 0.0193227   | ENSG00000188817 |
| 3 | 63605548 | 63605884 | 63605722 | 8  | 13 | 6  | 2.078608368 | 0.0483393   | ENSG00000188817 |
| 3 | 63612167 | 63612346 | 63612254 | 8  | 8  | 5  | 1.558956276 | 0.191397    | ENSG00000188817 |
| 3 | 63612782 | 63612974 | 63612878 | 8  | 9  | 0  | 10.39304184 | 0.000803859 | ENSG00000188817 |
| 3 | 63623202 | 63623591 | 63623340 | 8  | 13 | 8  | 1.616695398 | 0.123553    | ENSG00000188817 |
| 3 | 63628722 | 63629130 | 63628878 | 9  | 15 | 14 | 1.10859113  | 0.386477    | ENSG00000188817 |
| 3 | 63638177 | 63638407 | 63638248 | 8  | 11 | 8  | 1.385738912 | 0.224757    | ENSG00000188817 |
| 3 | 63644533 | 63644806 | 63644660 | 11 | 13 | 2  | 4.850086193 | 0.00164564  | ENSG00000188817 |
| 3 | 63662331 | 63662580 | 63662438 | 9  | 11 | 3  | 3.117912553 | 0.0146045   | ENSG00000188817 |
| 3 | 63665172 | 63665383 | 63665298 | 9  | 10 | 4  | 2.286469205 | 0.0509017   | ENSG00000188817 |
| 3 | 63666910 | 63667537 | 63667285 | 10 | 24 | 16 | 1.528388506 | 0.0846311   | ENSG00000188817 |
| 3 | 63670397 | 63670603 | 63670500 | 8  | 10 | 9  | 1.143234603 | 0.378307    | ENSG00000188817 |
| 3 | 63673832 | 63674037 | 63673945 | 8  | 8  | 0  | 9.353737658 | 0.00163931  | ENSG00000188817 |
| 3 | 63678693 | 63678970 | 63678831 | 10 | 11 | 4  | 2.494330042 | 0.0324033   | ENSG00000188817 |
| 3 | 63679249 | 63679428 | 63679338 | 8  | 8  | 11 | 0.779478138 | 0.719708    | ENSG00000188817 |
| 3 | 63679710 | 63679987 | 63679865 | 10 | 13 | 11 | 1.212521548 | 0.309909    | ENSG00000188817 |
| 3 | 63680199 | 63680774 | 63680378 | 11 | 28 | 33 | 0.886465334 | 0.685163    | ENSG00000188817 |
| 3 | 63680852 | 63681669 | 63681072 | 17 | 46 | 49 | 0.976945933 | 0.546418    | ENSG00000188817 |
| 3 | 63681672 | 63682168 | 63681876 | 9  | 20 | 19 | 1.091269393 | 0.389566    | ENSG00000188817 |
| 3 | 63684700 | 63685018 | 63684859 | 11 | 16 | 31 | 0.552130348 | 0.979636    | ENSG00000188817 |

|   |          |          |          |    |    |    |             |            |         |                 |
|---|----------|----------|----------|----|----|----|-------------|------------|---------|-----------------|
| 3 | 63685038 | 63685612 | 63685452 | 13 | 29 | 37 | 0.820503303 | 0.793644   |         | ENSG00000188817 |
| 3 | 63685641 | 63686188 | 63685879 | 12 | 26 | 16 | 1.650659587 | 0.048911   |         | ENSG00000188817 |
| 3 | 63686456 | 63686732 | 63686584 | 10 | 13 | 14 | 0.970017239 | 0.534076   |         | ENSG00000188817 |
| 3 | 63687735 | 63687959 | 63687869 | 11 | 14 | 20 | 0.742360132 | 0.815839   |         | ENSG00000188817 |
| 3 | 63688062 | 63688269 | 63688162 | 10 | 10 | 18 | 0.601702422 | 0.917232   |         | ENSG00000188817 |
| 3 | 63688350 | 63688782 | 63688627 | 13 | 20 | 20 | 1.039304184 | 0.450588   |         | ENSG00000188817 |
| 3 | 63689145 | 63689701 | 63689388 | 10 | 22 | 24 | 0.956159849 | 0.562938   |         | ENSG00000188817 |
| 3 | 63689987 | 63690307 | 63690147 | 9  | 11 | 15 | 0.779478138 | 0.747877   |         | ENSG00000188817 |
| 3 | 63690717 | 63691099 | 63690923 | 15 | 21 | 19 | 1.143234603 | 0.33145    |         | ENSG00000188817 |
| 3 | 63691153 | 63691406 | 63691317 | 8  | 11 | 16 | 0.733626483 | 0.800067   |         | ENSG00000188817 |
| 3 | 63692932 | 63693325 | 63693146 | 10 | 18 | 6  | 2.8209685   | 0.00559354 |         | ENSG00000188817 |
| 3 | 63700576 | 63700901 | 63700741 | 13 | 17 | 18 | 0.984603964 | 0.519872   | C3orf49 | ENSG00000163632 |
| 3 | 63701093 | 63701455 | 63701239 | 8  | 14 | 31 | 0.487173836 | 0.991844   | C3orf49 | ENSG00000163632 |
| 3 | 63701465 | 63701964 | 63701682 | 16 | 27 | 40 | 0.709768711 | 0.922248   | C3orf49 | ENSG00000163632 |
| 3 | 63702514 | 63702810 | 63702671 | 9  | 14 | 20 | 0.742360132 | 0.815839   | C3orf49 | ENSG00000163632 |
| 3 | 63703879 | 63704910 | 63704498 | 13 | 48 | 38 | 1.305792437 | 0.105214   | C3orf49 | ENSG00000163632 |
| 3 | 63704982 | 63705334 | 63705158 | 13 | 19 | 13 | 1.484720263 | 0.123861   | C3orf49 | ENSG00000163632 |
| 3 | 63707138 | 63707863 | 63707341 | 19 | 40 | 37 | 1.121354515 | 0.304982   | C3orf49 | ENSG00000163632 |
| 3 | 63708073 | 63708367 | 63708252 | 9  | 10 | 13 | 0.816596145 | 0.696946   | C3orf49 | ENSG00000163632 |
| 3 | 63708464 | 63709250 | 63709075 | 13 | 33 | 21 | 1.606197376 | 0.0387698  | C3orf49 | ENSG00000163632 |
| 3 | 63709536 | 63709894 | 63709715 | 12 | 18 | 12 | 1.518983039 | 0.117837   | C3orf49 | ENSG00000163632 |
| 3 | 63710914 | 63711284 | 63711113 | 22 | 28 | 11 | 2.511651779 | 0.00221344 | C3orf49 | ENSG00000163632 |
| 3 | 63711509 | 63712076 | 63711922 | 10 | 22 | 42 | 0.555906889 | 0.990434   | C3orf49 | ENSG00000163632 |
| 3 | 63712083 | 63712465 | 63712286 | 10 | 18 | 26 | 0.731362204 | 0.856292   | C3orf49 | ENSG00000163632 |
| 3 | 63713429 | 63713634 | 63713515 | 8  | 10 | 8  | 1.27026067  | 0.293854   | C3orf49 | ENSG00000163632 |
| 3 | 63713732 | 63713990 | 63713861 | 11 | 11 | 9  | 1.247165021 | 0.300052   | C3orf49 | ENSG00000163632 |
| 3 | 63714055 | 63714667 | 63714488 | 37 | 55 | 39 | 1.455025858 | 0.0334769  | C3orf49 | ENSG00000163632 |
| 3 | 63714726 | 63715244 | 63715074 | 16 | 25 | 29 | 0.900730293 | 0.653667   | C3orf49 | ENSG00000163632 |
| 3 | 63715879 | 63716086 | 63715982 | 8  | 10 | 8  | 1.27026067  | 0.293854   | C3orf49 | ENSG00000163632 |
| 3 | 63717925 | 63718104 | 63718014 | 8  | 8  | 2  | 3.117912553 | 0.0283184  | C3orf49 | ENSG00000163632 |
| 3 | 63737614 | 63737888 | 63737751 | 9  | 12 | 17 | 0.750608578 | 0.78992    | C3orf49 | ENSG00000163632 |
| 3 | 63739004 | 63739277 | 63739123 | 8  | 10 | 3  | 2.858086507 | 0.0242838  | C3orf49 | ENSG00000163632 |
| 3 | 63744636 | 63744961 | 63744798 | 8  | 10 | 3  | 2.858086507 | 0.0242838  | C3orf49 | ENSG00000163632 |
| 3 | 63751998 | 63752203 | 63752076 | 9  | 11 | 4  | 2.494330042 | 0.0324033  | C3orf49 | ENSG00000163632 |

|   |          |          |          |    |    |    |             |           |         |                 |
|---|----------|----------|----------|----|----|----|-------------|-----------|---------|-----------------|
| 3 | 63753233 | 63753469 | 63753351 | 9  | 9  | 4  | 2.078608368 | 0.0785659 | C3orf49 | ENSG00000163632 |
| 3 | 63755165 | 63755446 | 63755321 | 10 | 11 | 1  | 6.235825105 | 0.0013754 | C3orf49 | ENSG00000163632 |
| 3 | 63756075 | 63756469 | 63756290 | 12 | 21 | 10 | 2.078608368 | 0.0193227 | C3orf49 | ENSG00000163632 |
| 3 | 63761718 | 63762042 | 63761912 | 8  | 12 | 8  | 1.501217155 | 0.168286  | C3orf49 | ENSG00000163632 |
| 3 | 63771281 | 63771470 | 63771332 | 8  | 8  | 7  | 1.169217207 | 0.371848  | C3orf49 | ENSG00000163632 |
| 3 | 63772806 | 63773448 | 63773138 | 16 | 32 | 2  | 11.43234603 | 1.00E-08  | C3orf49 | ENSG00000163632 |
| 3 | 63775072 | 63775321 | 63775196 | 9  | 10 | 5  | 1.905391004 | 0.0915982 | C3orf49 | ENSG00000163632 |
| 3 | 63779139 | 63779690 | 63779318 | 23 | 39 | 34 | 1.187776211 | 0.227496  | C3orf49 | ENSG00000163632 |
| 3 | 63786941 | 63787290 | 63787115 | 11 | 15 | 8  | 1.847651883 | 0.0631662 | C3orf49 | ENSG00000163632 |
| 3 | 63800364 | 63800610 | 63800487 | 10 | 10 | 5  | 1.905391004 | 0.0915982 | THOC7   | ENSG00000163634 |
| 3 | 63807418 | 63807613 | 63807528 | 8  | 9  | 2  | 3.464347281 | 0.0163838 | THOC7   | ENSG00000163634 |
| 3 | 63819767 | 63820064 | 63819891 | 9  | 12 | 8  | 1.501217155 | 0.168286  | THOC7   | ENSG00000163634 |
| 3 | 63823618 | 63824324 | 63823768 | 8  | 23 | 15 | 1.558956276 | 0.0802366 | THOC7   | ENSG00000163634 |
| 3 | 63825364 | 63825967 | 63825652 | 11 | 26 | 24 | 1.122448519 | 0.337995  | ATXN7   | ENSG00000163635 |
| 3 | 63831326 | 63831552 | 63831446 | 11 | 13 | 3  | 3.637564645 | 0.0050909 | ATXN7   | ENSG00000163635 |
| 3 | 63833029 | 63833522 | 63833343 | 10 | 24 | 16 | 1.528388506 | 0.0846311 | ATXN7   | ENSG00000163635 |
| 3 | 63835636 | 63835838 | 63835771 | 9  | 9  | 2  | 3.464347281 | 0.0163838 | ATXN7   | ENSG00000163635 |
| 3 | 63839262 | 63839541 | 63839397 | 8  | 11 | 14 | 0.831443347 | 0.68719   | ATXN7   | ENSG00000163635 |
| 3 | 63847505 | 63847713 | 63847623 | 8  | 10 | 11 | 0.952695502 | 0.548138  | ATXN7   | ENSG00000163635 |
| 3 | 63855715 | 63855894 | 63855804 | 8  | 8  | 5  | 1.558956276 | 0.191397  | ATXN7   | ENSG00000163635 |
| 3 | 63866254 | 63866537 | 63866395 | 12 | 14 | 9  | 1.558956276 | 0.132279  | ATXN7   | ENSG00000163635 |
| 3 | 63868891 | 63869173 | 63869032 | 15 | 15 | 8  | 1.847651883 | 0.0631662 | ATXN7   | ENSG00000163635 |
| 3 | 63871008 | 63871187 | 63871101 | 8  | 9  | 6  | 1.484720263 | 0.204387  | ATXN7   | ENSG00000163635 |
| 3 | 63873745 | 63874389 | 63874122 | 10 | 28 | 19 | 1.506991067 | 0.0757238 | ATXN7   | ENSG00000163635 |
| 3 | 63874469 | 63874649 | 63874542 | 8  | 8  | 6  | 1.336248237 | 0.277651  | ATXN7   | ENSG00000163635 |
| 3 | 63875020 | 63875321 | 63875177 | 13 | 17 | 13 | 1.336248237 | 0.204556  | ATXN7   | ENSG00000163635 |
| 3 | 63886769 | 63886985 | 63886877 | 9  | 9  | 6  | 1.484720263 | 0.204387  | ATXN7   | ENSG00000163635 |
| 3 | 63893837 | 63894131 | 63894014 | 9  | 11 | 10 | 1.133786383 | 0.380636  | ATXN7   | ENSG00000163635 |
| 3 | 63894771 | 63894990 | 63894910 | 8  | 9  | 7  | 1.29913023  | 0.286504  | ATXN7   | ENSG00000163635 |
| 3 | 63897066 | 63897261 | 63897163 | 8  | 8  | 9  | 0.935373766 | 0.560286  | ATXN7   | ENSG00000163635 |
| 3 | 63897382 | 63897712 | 63897544 | 11 | 15 | 14 | 1.10859113  | 0.386477  | ATXN7   | ENSG00000163635 |
| 3 | 63898270 | 63898550 | 63898394 | 8  | 10 | 9  | 1.143234603 | 0.378307  | ATXN7   | ENSG00000163635 |
| 3 | 63900712 | 63901008 | 63900877 | 9  | 12 | 6  | 1.930136342 | 0.071303  | ATXN7   | ENSG00000163635 |
| 3 | 63901398 | 63901824 | 63901651 | 8  | 14 | 11 | 1.29913023  | 0.246308  | ATXN7   | ENSG00000163635 |

|   |          |          |          |    |    |    |             |           |       |                 |
|---|----------|----------|----------|----|----|----|-------------|-----------|-------|-----------------|
| 3 | 63904295 | 63904553 | 63904424 | 8  | 11 | 8  | 1.385738912 | 0.224757  | ATXN7 | ENSG00000163635 |
| 3 | 63907798 | 63907977 | 63907945 | 8  | 8  | 4  | 1.870747532 | 0.118863  | PSMD6 | ENSG00000163636 |
| 3 | 63953432 | 63953778 | 63953605 | 10 | 16 | 27 | 0.631006112 | 0.93773   | PSMD6 | ENSG00000163636 |
| 3 | 63953862 | 63954110 | 63953909 | 8  | 12 | 18 | 0.711102863 | 0.834017  | PSMD6 | ENSG00000163636 |
| 3 | 63954262 | 63955054 | 63954421 | 22 | 47 | 48 | 1.018093895 | 0.465188  | PSMD6 | ENSG00000163636 |
| 3 | 63955344 | 63955644 | 63955465 | 10 | 14 | 26 | 0.577391213 | 0.96085   | PSMD6 | ENSG00000163636 |
| 3 | 63955663 | 63956336 | 63955807 | 16 | 35 | 34 | 1.06899859  | 0.389269  | PSMD6 | ENSG00000163636 |
| 3 | 63957017 | 63957235 | 63957126 | 9  | 10 | 12 | 0.879411233 | 0.62639   | PSMD6 | ENSG00000163636 |
| 3 | 63957317 | 63957673 | 63957495 | 8  | 13 | 23 | 0.606260774 | 0.937372  | PSMD6 | ENSG00000163636 |
| 3 | 63958078 | 63958533 | 63958407 | 12 | 23 | 33 | 0.733626483 | 0.881043  | PSMD6 | ENSG00000163636 |
| 3 | 63959037 | 63959402 | 63959216 | 11 | 18 | 20 | 0.940322833 | 0.578675  | PSMD6 | ENSG00000163636 |
| 3 | 63959668 | 63960812 | 63960250 | 17 | 64 | 72 | 0.925407835 | 0.676281  | PSMD6 | ENSG00000163636 |
| 3 | 63961137 | 63961463 | 63961300 | 10 | 15 | 22 | 0.722994215 | 0.845414  | PSMD6 | ENSG00000163636 |
| 3 | 63962013 | 63962258 | 63962087 | 14 | 17 | 14 | 1.247165021 | 0.261378  | PSMD6 | ENSG00000163636 |
| 3 | 63963017 | 63963924 | 63963233 | 13 | 41 | 46 | 0.928739909 | 0.637343  | PSMD6 | ENSG00000163636 |
| 3 | 63964241 | 63964640 | 63964381 | 17 | 23 | 25 | 0.959357709 | 0.559486  | PSMD6 | ENSG00000163636 |
| 3 | 63964692 | 63965786 | 63964991 | 18 | 60 | 39 | 1.584938881 | 0.0107629 | PSMD6 | ENSG00000163636 |
| 3 | 63965815 | 63966383 | 63966205 | 10 | 24 | 40 | 0.633722064 | 0.966896  | PSMD6 | ENSG00000163636 |
| 3 | 63966396 | 63967753 | 63966865 | 13 | 63 | 61 | 1.072830126 | 0.346531  | PSMD6 | ENSG00000163636 |
| 3 | 63967777 | 63967967 | 63967829 | 8  | 9  | 15 | 0.649565115 | 0.865365  | PSMD6 | ENSG00000163636 |
| 3 | 63968233 | 63968806 | 63968659 | 13 | 28 | 28 | 1.039304184 | 0.441896  | PSMD6 | ENSG00000163636 |
| 3 | 63969284 | 63970066 | 63969876 | 20 | 48 | 33 | 1.497820736 | 0.0333225 | PSMD6 | ENSG00000163636 |
| 3 | 63970215 | 63970666 | 63970487 | 12 | 21 | 22 | 0.994117046 | 0.508733  | PSMD6 | ENSG00000163636 |
| 3 | 63971706 | 63971934 | 63971820 | 8  | 11 | 8  | 1.385738912 | 0.224757  | PSMD6 | ENSG00000163636 |
| 3 | 63972153 | 63972828 | 63972649 | 15 | 39 | 29 | 1.385738912 | 0.0861361 | PSMD6 | ENSG00000163636 |
| 3 | 63973012 | 63973591 | 63973459 | 12 | 27 | 32 | 0.881833853 | 0.689746  | PSMD6 | ENSG00000163636 |
| 3 | 63973951 | 63974271 | 63974111 | 14 | 19 | 17 | 1.154782427 | 0.327751  | PSMD6 | ENSG00000163636 |
| 3 | 63974383 | 63974873 | 63974544 | 8  | 15 | 23 | 0.692869456 | 0.877389  | PSMD6 | ENSG00000163636 |
| 3 | 63975046 | 63975616 | 63975331 | 10 | 26 | 29 | 0.935373766 | 0.600845  | PSMD6 | ENSG00000163636 |
| 3 | 63975618 | 63976126 | 63975838 | 12 | 24 | 28 | 0.895951883 | 0.65833   | PSMD6 | ENSG00000163636 |
| 3 | 63976246 | 63976600 | 63976394 | 11 | 15 | 9  | 1.662886695 | 0.0970566 | PSMD6 | ENSG00000163636 |
| 3 | 63977946 | 63978246 | 63978084 | 13 | 15 | 9  | 1.662886695 | 0.0970566 | PSMD6 | ENSG00000163636 |
| 3 | 63978291 | 63978705 | 63978551 | 12 | 20 | 9  | 2.182538787 | 0.0165356 | PSMD6 | ENSG00000163636 |
| 3 | 63978736 | 63979576 | 63979363 | 12 | 37 | 37 | 1.039304184 | 0.433494  | PSMD6 | ENSG00000163636 |



|   |          |          |          |    |     |    |             |            |       |                 |
|---|----------|----------|----------|----|-----|----|-------------|------------|-------|-----------------|
| 3 | 63979648 | 63980322 | 63980102 | 19 | 38  | 28 | 1.397684937 | 0.083712   | PSMD6 | ENSG00000163636 |
| 3 | 63981214 | 63981972 | 63981793 | 12 | 34  | 32 | 1.102292317 | 0.343693   | PSMD6 | ENSG00000163636 |
| 3 | 63982434 | 63983122 | 63982887 | 9  | 27  | 35 | 0.808347699 | 0.803596   | PSMD6 | ENSG00000163636 |
| 3 | 63983488 | 63984915 | 63984309 | 38 | 118 | 70 | 1.741932365 | 8.06E-05   | PSMD6 | ENSG00000163636 |
| 3 | 63986407 | 63986738 | 63986572 | 14 | 15  | 4  | 3.32577339  | 0.00462646 | PSMD6 | ENSG00000163636 |
| 3 | 63987718 | 63988004 | 63987850 | 10 | 13  | 12 | 1.11925066  | 0.384109   | PSMD6 | ENSG00000163636 |
| 3 | 63988174 | 63988682 | 63988377 | 11 | 24  | 24 | 1.039304184 | 0.446062   | PSMD6 | ENSG00000163636 |
| 3 | 63988790 | 63989330 | 63989151 | 8  | 20  | 22 | 0.948929907 | 0.57038    | PSMD6 | ENSG00000163636 |
| 3 | 63989662 | 63989893 | 63989723 | 8  | 11  | 13 | 0.890832158 | 0.618492   | PSMD6 | ENSG00000163636 |
| 3 | 63990278 | 63990493 | 63990372 | 10 | 11  | 7  | 1.558956276 | 0.158273   | PSMD6 | ENSG00000163636 |
| 3 | 63990634 | 63992116 | 63991503 | 40 | 108 | 86 | 1.302116737 | 0.0324663  | PSMD6 | ENSG00000163636 |
| 3 | 63992126 | 63993453 | 63992919 | 13 | 57  | 58 | 1.021688859 | 0.454119   | PSMD6 | ENSG00000163636 |
| 3 | 63993856 | 63994202 | 63994050 | 9  | 13  | 8  | 1.616695398 | 0.123553   | PSMD6 | ENSG00000163636 |
| 3 | 63994745 | 63995054 | 63994955 | 12 | 16  | 19 | 0.883408557 | 0.649033   | PSMD6 | ENSG00000163636 |
| 3 | 63995126 | 63995598 | 63995261 | 12 | 20  | 14 | 1.455025858 | 0.129498   | PSMD6 | ENSG00000163636 |
| 3 | 63996828 | 63997185 | 63997006 | 10 | 16  | 19 | 0.883408557 | 0.649033   | PSMD6 | ENSG00000163636 |
| 3 | 63997335 | 63997671 | 63997503 | 8  | 13  | 12 | 1.11925066  | 0.384109   | PSMD6 | ENSG00000163636 |
| 3 | 63997773 | 63998067 | 63997919 | 10 | 14  | 28 | 0.53757113  | 0.978529   | PSMD6 | ENSG00000163636 |
| 3 | 63998915 | 63999783 | 63999094 | 18 | 46  | 37 | 1.285455175 | 0.123233   | PSMD6 | ENSG00000163636 |
| 3 | 63999930 | 64000612 | 64000068 | 16 | 34  | 28 | 1.254332636 | 0.181679   | PSMD6 | ENSG00000163636 |
| 3 | 64000812 | 64001214 | 64001035 | 14 | 22  | 25 | 0.919384471 | 0.617223   | PSMD6 | ENSG00000163636 |
| 3 | 64004723 | 64005437 | 64005080 | 12 | 32  | 36 | 0.926946975 | 0.625687   | PSMD6 | ENSG00000163636 |
| 3 | 64005956 | 64006339 | 64006102 | 10 | 18  | 12 | 1.518983039 | 0.117837   | PSMD6 | ENSG00000163636 |
| 3 | 64006642 | 64006983 | 64006812 | 10 | 15  | 9  | 1.662886695 | 0.0970566  | PSMD6 | ENSG00000163636 |
| 3 | 64006996 | 64007697 | 64007175 | 12 | 33  | 38 | 0.906060058 | 0.664493   | PSMD6 | ENSG00000163636 |
| 3 | 64007873 | 64008289 | 64008052 | 18 | 27  | 19 | 1.455025858 | 0.0967688  | PSMD6 | ENSG00000163636 |
| 3 | 64008809 | 64009099 | 64008944 | 9  | 12  | 21 | 0.614134291 | 0.924528   |       | ENSG00000200222 |
| 3 | 64009191 | 64009833 | 64009654 | 15 | 36  | 27 | 1.373366243 | 0.100282   |       | ENSG00000200222 |
| 3 | 64009933 | 64010384 | 64010222 | 12 | 20  | 23 | 0.909391161 | 0.626666   |       | ENSG00000200222 |
| 3 | 64012122 | 64012394 | 64012257 | 11 | 15  | 18 | 0.875203524 | 0.655562   |       | ENSG00000200222 |
| 3 | 64012583 | 64012864 | 64012723 | 9  | 12  | 24 | 0.540438176 | 0.969195   |       | ENSG00000200222 |
| 3 | 64012991 | 64013417 | 64013170 | 10 | 18  | 28 | 0.680923431 | 0.908117   |       | ENSG00000200222 |
| 3 | 64014201 | 64014510 | 64014355 | 12 | 18  | 26 | 0.731362204 | 0.856292   |       | ENSG00000200222 |
| 3 | 64014736 | 64015414 | 64015002 | 13 | 32  | 42 | 0.797605537 | 0.838401   |       | ENSG00000200222 |

|   |          |          |          |    |    |    |             |           |                 |
|---|----------|----------|----------|----|----|----|-------------|-----------|-----------------|
| 3 | 64015844 | 64016305 | 64016023 | 11 | 20 | 19 | 1.091269393 | 0.389566  | ENSG00000200222 |
| 3 | 64016362 | 64016847 | 64016541 | 10 | 20 | 24 | 0.873015515 | 0.679256  | ENSG00000200222 |
| 3 | 64017223 | 64017585 | 64017479 | 11 | 16 | 17 | 0.981565063 | 0.523072  | ENSG00000200222 |
| 3 | 64018917 | 64019294 | 64019096 | 13 | 20 | 14 | 1.455025858 | 0.129498  | ENSG00000200222 |
| 3 | 64019375 | 64019585 | 64019480 | 8  | 9  | 14 | 0.692869456 | 0.822654  | ENSG00000200222 |
| 3 | 64020310 | 64020881 | 64020771 | 10 | 24 | 23 | 1.082608525 | 0.390382  | ENSG00000200222 |
| 3 | 64021118 | 64021581 | 64021330 | 19 | 31 | 30 | 1.072830126 | 0.39004   | ENSG00000200222 |
| 3 | 64021673 | 64022067 | 64021852 | 10 | 18 | 27 | 0.705242125 | 0.884499  | ENSG00000200222 |
| 3 | 64022288 | 64022920 | 64022747 | 13 | 29 | 57 | 0.53757113  | 0.997795  | ENSG00000200222 |
| 3 | 64023012 | 64023330 | 64023171 | 12 | 15 | 27 | 0.593888105 | 0.956572  | ENSG00000200222 |
| 3 | 64023552 | 64023952 | 64023723 | 12 | 20 | 23 | 0.909391161 | 0.626666  | ENSG00000200222 |
| 3 | 64023970 | 64024483 | 64024289 | 18 | 31 | 28 | 1.14681841  | 0.295725  | ENSG00000200222 |
| 3 | 64024682 | 64024995 | 64024827 | 12 | 15 | 32 | 0.503905059 | 0.990444  | ENSG00000200222 |
| 3 | 64025615 | 64025871 | 64025723 | 13 | 15 | 16 | 0.978168644 | 0.526483  | ENSG00000200222 |
| 3 | 64025875 | 64026156 | 64026008 | 12 | 13 | 8  | 1.616695398 | 0.123553  | ENSG00000200222 |
| 3 | 64026795 | 64027111 | 64026953 | 9  | 14 | 20 | 0.742360132 | 0.815839  | ENSG00000200222 |
| 3 | 64027138 | 64027544 | 64027257 | 9  | 18 | 22 | 0.85855563  | 0.691398  | ENSG00000200222 |
| 3 | 64028079 | 64028333 | 64028206 | 11 | 14 | 9  | 1.558956276 | 0.132279  | ENSG00000200222 |
| 3 | 64028336 | 64029244 | 64028573 | 15 | 47 | 38 | 1.279143611 | 0.125162  | ENSG00000200222 |
| 3 | 64031160 | 64031608 | 64031444 | 11 | 24 | 15 | 1.623912788 | 0.0607838 | ENSG00000200222 |
| 3 | 64032113 | 64032389 | 64032221 | 9  | 11 | 13 | 0.890832158 | 0.618492  | ENSG00000200222 |
| 3 | 64032771 | 64033162 | 64032933 | 8  | 15 | 27 | 0.593888105 | 0.956572  | ENSG00000200222 |
| 3 | 64033959 | 64034514 | 64034130 | 14 | 30 | 38 | 0.826113582 | 0.788867  | ENSG00000200222 |
| 3 | 64034735 | 64035153 | 64034966 | 15 | 25 | 19 | 1.35109544  | 0.152941  | ENSG00000200222 |
| 3 | 64035446 | 64035649 | 64035505 | 8  | 11 | 7  | 1.558956276 | 0.158273  | ENSG00000200222 |
| 3 | 64035741 | 64036070 | 64035955 | 10 | 14 | 13 | 1.113540197 | 0.385405  | ENSG00000200222 |
| 3 | 64037202 | 64037760 | 64037405 | 16 | 28 | 29 | 1.004660711 | 0.493496  | ENSG00000200222 |
| 3 | 64038061 | 64038511 | 64038318 | 9  | 19 | 18 | 1.094004404 | 0.389177  | ENSG00000200222 |
| 3 | 64038949 | 64039938 | 64039058 | 16 | 46 | 39 | 1.221182416 | 0.17523   | ENSG00000200222 |
| 3 | 64040102 | 64040431 | 64040266 | 9  | 14 | 17 | 0.86608682  | 0.662567  | ENSG00000200222 |
| 3 | 64040561 | 64040995 | 64040713 | 13 | 22 | 31 | 0.746999882 | 0.860756  | ENSG00000189196 |
| 3 | 64041066 | 64041492 | 64041405 | 10 | 19 | 33 | 0.611355402 | 0.963374  | ENSG00000189196 |
| 3 | 64041657 | 64042035 | 64041829 | 9  | 14 | 11 | 1.29913023  | 0.246308  | ENSG00000189196 |
| 3 | 64042244 | 64042512 | 64042386 | 10 | 13 | 4  | 2.910051716 | 0.0125532 | ENSG00000189196 |

|   |          |          |          |    |     |    |             |            |                 |
|---|----------|----------|----------|----|-----|----|-------------|------------|-----------------|
| 3 | 64042640 | 64042943 | 64042800 | 8  | 12  | 23 | 0.562956433 | 0.958014   | ENSG00000189196 |
| 3 | 64042953 | 64043433 | 64043132 | 15 | 24  | 38 | 0.666220631 | 0.946942   | ENSG00000189196 |
| 3 | 64043436 | 64044072 | 64043893 | 9  | 24  | 34 | 0.742360132 | 0.875925   | ENSG00000189196 |
| 3 | 64044588 | 64044844 | 64044706 | 13 | 15  | 22 | 0.722994215 | 0.845414   | ENSG00000189196 |
| 3 | 64044846 | 64045072 | 64044970 | 9  | 10  | 15 | 0.714521627 | 0.810948   | ENSG00000189196 |
| 3 | 64045202 | 64045812 | 64045619 | 21 | 39  | 24 | 1.662886695 | 0.0209065  | ENSG00000189196 |
| 3 | 64047047 | 64047538 | 64047262 | 8  | 18  | 24 | 0.78987118  | 0.784577   | ENSG00000189196 |
| 3 | 64047608 | 64048009 | 64047847 | 8  | 15  | 25 | 0.639571806 | 0.925462   | ENSG00000189196 |
| 3 | 64048606 | 64048869 | 64048737 | 8  | 9   | 6  | 1.484720263 | 0.204387   | ENSG00000189196 |
| 3 | 64049417 | 64049747 | 64049577 | 14 | 18  | 16 | 1.161575265 | 0.325582   | ENSG00000189196 |
| 3 | 64049795 | 64050172 | 64049954 | 8  | 15  | 20 | 0.791850807 | 0.763134   | ENSG00000189196 |
| 3 | 64050825 | 64051558 | 64051199 | 9  | 26  | 38 | 0.719518281 | 0.909098   | ENSG00000189196 |
| 3 | 64052723 | 64053179 | 64052990 | 9  | 17  | 15 | 1.169217207 | 0.323156   | ENSG00000189196 |
| 3 | 64053205 | 64053605 | 64053423 | 10 | 19  | 19 | 1.039304184 | 0.451787   | ENSG00000189196 |
| 3 | 64054229 | 64054564 | 64054396 | 13 | 15  | 20 | 0.791850807 | 0.763134   | ENSG00000189196 |
| 3 | 64054650 | 64054955 | 64054802 | 14 | 18  | 15 | 1.234173719 | 0.265435   | ENSG00000189196 |
| 3 | 64055770 | 64057308 | 64056126 | 18 | 69  | 78 | 0.920902442 | 0.693154   | ENSG00000189196 |
| 3 | 64057982 | 64059108 | 64058508 | 19 | 64  | 56 | 1.185171438 | 0.173752   | ENSG00000189196 |
| 3 | 64059138 | 64059392 | 64059272 | 10 | 12  | 7  | 1.688869299 | 0.11395    | ENSG00000189196 |
| 3 | 64059475 | 64059936 | 64059805 | 13 | 19  | 27 | 0.742360132 | 0.849695   | ENSG00000189196 |
| 3 | 64060438 | 64060834 | 64060593 | 10 | 16  | 17 | 0.981565063 | 0.523072   | ENSG00000189196 |
| 3 | 64060979 | 64061816 | 64061344 | 12 | 34  | 27 | 1.29913023  | 0.148943   | ENSG00000189196 |
| 3 | 64062296 | 64062548 | 64062431 | 9  | 12  | 16 | 0.794762023 | 0.738004   | ENSG00000189196 |
| 3 | 64062572 | 64062822 | 64062697 | 9  | 12  | 20 | 0.643378781 | 0.900583   | ENSG00000189196 |
| 3 | 64062989 | 64063251 | 64063159 | 9  | 10  | 8  | 1.27026067  | 0.293854   | ENSG00000189196 |
| 3 | 64063348 | 64063724 | 64063523 | 8  | 13  | 14 | 0.970017239 | 0.534076   | ENSG00000189196 |
| 3 | 64064751 | 64066425 | 64065580 | 24 | 103 | 73 | 1.460643718 | 0.00594203 | ENSG00000189196 |
| 3 | 64067164 | 64067530 | 64067351 | 10 | 17  | 17 | 1.039304184 | 0.454282   | ENSG00000189196 |
| 3 | 64068079 | 64068360 | 64068228 | 9  | 12  | 10 | 1.228268581 | 0.305344   | ENSG00000189196 |
| 3 | 64068561 | 64068776 | 64068657 | 9  | 11  | 6  | 1.781664316 | 0.103344   | ENSG00000189196 |
| 3 | 64069093 | 64069793 | 64069458 | 15 | 37  | 19 | 1.97467795  | 0.00544744 | ENSG00000189196 |
| 3 | 64069879 | 64070209 | 64070056 | 8  | 13  | 14 | 0.970017239 | 0.534076   | ENSG00000189196 |
| 3 | 64070356 | 64071511 | 64070940 | 11 | 49  | 50 | 1.018925671 | 0.462828   | ENSG00000189196 |
| 3 | 64072416 | 64073228 | 64072829 | 26 | 60  | 38 | 1.625578339 | 0.00797675 | ENSG00000189196 |

|   |          |          |          |    |    |    |             |           |                 |
|---|----------|----------|----------|----|----|----|-------------|-----------|-----------------|
| 3 | 64073514 | 64073816 | 64073665 | 10 | 13 | 11 | 1.212521548 | 0.309909  | ENSG00000189196 |
| 3 | 64074613 | 64074808 | 64074710 | 8  | 9  | 2  | 3.464347281 | 0.0163838 | ENSG00000189196 |
| 3 | 64081081 | 64081527 | 64081260 | 8  | 17 | 23 | 0.779478138 | 0.791839  | ENSG00000189196 |
| 3 | 64081591 | 64082206 | 64082070 | 12 | 26 | 29 | 0.935373766 | 0.600845  | ENSG00000189196 |
| 3 | 64082329 | 64082922 | 64082743 | 19 | 37 | 28 | 1.361846862 | 0.102919  | ENSG00000189196 |
| 3 | 64083127 | 64083327 | 64083227 | 8  | 9  | 6  | 1.484720263 | 0.204387  | ENSG00000189196 |
| 3 | 64086837 | 64087119 | 64086978 | 11 | 12 | 9  | 1.35109544  | 0.232899  | ENSG00000189196 |
| 3 | 64088218 | 64088645 | 64088480 | 12 | 21 | 24 | 0.914587682 | 0.621823  | ENSG00000189196 |
| 3 | 64088948 | 64089129 | 64089064 | 9  | 10 | 6  | 1.63319229  | 0.146906  | ENSG00000189196 |
| 3 | 64090137 | 64090534 | 64090245 | 10 | 17 | 16 | 1.100439724 | 0.388093  | ENSG00000189196 |
| 3 | 64090892 | 64091191 | 64091051 | 8  | 12 | 18 | 0.711102863 | 0.834017  | ENSG00000189196 |
| 3 | 64091593 | 64092294 | 64092125 | 15 | 35 | 25 | 1.439036563 | 0.0760253 | ENSG00000189196 |
| 3 | 64092447 | 64093347 | 64093042 | 12 | 41 | 33 | 1.283846345 | 0.137648  | ENSG00000189196 |
| 3 | 64093797 | 64094485 | 64094149 | 22 | 49 | 36 | 1.404465114 | 0.0568132 | ENSG00000189196 |
| 3 | 64094782 | 64095320 | 64095163 | 14 | 31 | 24 | 1.330309356 | 0.140086  | ENSG00000189196 |
| 3 | 64096019 | 64096540 | 64096198 | 8  | 18 | 16 | 1.161575265 | 0.325582  | ENSG00000189196 |
| 3 | 64096911 | 64097281 | 64097090 | 10 | 17 | 25 | 0.719518281 | 0.863101  | ENSG00000189196 |
| 3 | 64098145 | 64098334 | 64098239 | 8  | 9  | 6  | 1.484720263 | 0.204387  | ENSG00000189196 |
| 3 | 64098507 | 64098744 | 64098625 | 9  | 12 | 11 | 1.125912866 | 0.382541  | ENSG00000189196 |
| 3 | 64098751 | 64099036 | 64098885 | 8  | 12 | 18 | 0.711102863 | 0.834017  | ENSG00000189196 |
| 3 | 64099122 | 64099351 | 64099236 | 8  | 9  | 18 | 0.547002202 | 0.94615   | ENSG00000189196 |
| 3 | 64099781 | 64100300 | 64100128 | 11 | 24 | 19 | 1.29913023  | 0.189     | ENSG00000189196 |
| 3 | 64101775 | 64102604 | 64102425 | 11 | 36 | 23 | 1.602260617 | 0.0334796 | ENSG00000189196 |
| 3 | 64102629 | 64103070 | 64102808 | 11 | 20 | 11 | 1.818782322 | 0.04395   | ENSG00000189196 |
| 3 | 64103458 | 64103691 | 64103632 | 9  | 11 | 7  | 1.558956276 | 0.158273  | ENSG00000189196 |
| 3 | 64104602 | 64105060 | 64104881 | 15 | 24 | 14 | 1.73217364  | 0.0420666 | ENSG00000189196 |
| 3 | 64107772 | 64108111 | 64107941 | 12 | 18 | 8  | 2.194086611 | 0.0206188 | ENSG00000189196 |
| 3 | 64109636 | 64109849 | 64109765 | 9  | 10 | 9  | 1.143234603 | 0.378307  | ENSG00000189196 |
| 3 | 64110178 | 64110372 | 64110315 | 9  | 10 | 10 | 1.039304184 | 0.464387  | ENSG00000189196 |
| 3 | 64110386 | 64110674 | 64110530 | 9  | 13 | 6  | 2.078608368 | 0.0483393 | ENSG00000189196 |
| 3 | 64110845 | 64111333 | 64111024 | 8  | 17 | 25 | 0.719518281 | 0.863101  | ENSG00000189196 |
| 3 | 64111396 | 64112140 | 64111790 | 30 | 54 | 50 | 1.120818238 | 0.278245  | ENSG00000189196 |
| 3 | 64112181 | 64112584 | 64112326 | 11 | 17 | 26 | 0.692869456 | 0.890806  | ENSG00000189196 |
| 3 | 64112615 | 64113644 | 64112794 | 15 | 51 | 54 | 0.982614865 | 0.536761  | ENSG00000189196 |

|   |          |          |          |    |     |     |             |            |                          |
|---|----------|----------|----------|----|-----|-----|-------------|------------|--------------------------|
| 3 | 64116959 | 64117208 | 64117083 | 8  | 11  | 10  | 1.133786383 | 0.380636   | ENSG00000189196          |
| 3 | 64117612 | 64119740 | 64118248 | 52 | 204 | 150 | 1.410975879 | 0.00061093 | PRICKLE2 ENSG00000163637 |
| 3 | 64120098 | 64120479 | 64120277 | 10 | 17  | 18  | 0.984603964 | 0.519872   | PRICKLE2 ENSG00000163637 |
| 3 | 64120560 | 64121208 | 64120734 | 9  | 23  | 27  | 0.890832158 | 0.663202   | PRICKLE2 ENSG00000163637 |
| 3 | 64121799 | 64122412 | 64122021 | 15 | 32  | 36  | 0.926946975 | 0.625687   | PRICKLE2 ENSG00000163637 |
| 3 | 64122419 | 64123047 | 64122639 | 22 | 51  | 40  | 1.318141892 | 0.0913738  | PRICKLE2 ENSG00000163637 |
| 3 | 64123279 | 64123497 | 64123424 | 9  | 11  | 19  | 0.623582511 | 0.908792   | PRICKLE2 ENSG00000163637 |
| 3 | 64123830 | 64124095 | 64123962 | 9  | 12  | 10  | 1.228268581 | 0.305344   | PRICKLE2 ENSG00000163637 |
| 3 | 64124602 | 64124785 | 64124693 | 8  | 9   | 6   | 1.484720263 | 0.204387   | PRICKLE2 ENSG00000163637 |
| 3 | 64126947 | 64127910 | 64127624 | 24 | 58  | 43  | 1.393612429 | 0.0463307  | PRICKLE2 ENSG00000163637 |
| 3 | 64128073 | 64128640 | 64128315 | 8  | 21  | 19  | 1.143234603 | 0.33145    | PRICKLE2 ENSG00000163637 |
| 3 | 64129422 | 64129831 | 64129601 | 9  | 16  | 13  | 1.262012224 | 0.256887   | PRICKLE2 ENSG00000163637 |
| 3 | 64129921 | 64130465 | 64130286 | 10 | 21  | 17  | 1.27026067  | 0.223413   | PRICKLE2 ENSG00000163637 |
| 3 | 64131023 | 64131249 | 64131136 | 8  | 10  | 10  | 1.039304184 | 0.464387   | PRICKLE2 ENSG00000163637 |
| 3 | 64131979 | 64132454 | 64132158 | 13 | 27  | 22  | 1.265239876 | 0.199511   | PRICKLE2 ENSG00000163637 |
| 3 | 64132864 | 64133082 | 64132973 | 9  | 12  | 10  | 1.228268581 | 0.305344   | PRICKLE2 ENSG00000163637 |
| 3 | 64134372 | 64134795 | 64134551 | 10 | 17  | 7   | 2.338434415 | 0.0171287  | PRICKLE2 ENSG00000163637 |
| 3 | 64134940 | 64135122 | 64135068 | 8  | 8   | 5   | 1.558956276 | 0.191397   | PRICKLE2 ENSG00000163637 |
| 3 | 64137320 | 64137556 | 64137398 | 8  | 11  | 7   | 1.558956276 | 0.158273   | PRICKLE2 ENSG00000163637 |
| 3 | 64138774 | 64139396 | 64139207 | 12 | 28  | 25  | 1.159223898 | 0.291166   | PRICKLE2 ENSG00000163637 |
| 3 | 64140100 | 64140783 | 64140279 | 12 | 27  | 29  | 0.970017239 | 0.547123   | PRICKLE2 ENSG00000163637 |
| 3 | 64141494 | 64141781 | 64141644 | 9  | 11  | 13  | 0.890832158 | 0.618492   | PRICKLE2 ENSG00000163637 |
| 3 | 64144740 | 64145032 | 64144871 | 8  | 11  | 14  | 0.831443347 | 0.68719    | PRICKLE2 ENSG00000163637 |
| 3 | 64145505 | 64145797 | 64145651 | 9  | 12  | 10  | 1.228268581 | 0.305344   | PRICKLE2 ENSG00000163637 |
| 3 | 64146968 | 64147358 | 64147116 | 10 | 17  | 4   | 3.741495063 | 0.00163722 | PRICKLE2 ENSG00000163637 |
| 3 | 64147481 | 64148191 | 64147832 | 26 | 61  | 26  | 2.386550349 | 3.77E-05   | PRICKLE2 ENSG00000163637 |
| 3 | 64148543 | 64148888 | 64148715 | 11 | 16  | 13  | 1.262012224 | 0.256887   | PRICKLE2 ENSG00000163637 |
| 3 | 64149331 | 64149841 | 64149662 | 13 | 25  | 31  | 0.84443465  | 0.741591   | PRICKLE2 ENSG00000163637 |
| 3 | 64149892 | 64150240 | 64150066 | 12 | 18  | 18  | 1.039304184 | 0.453018   | PRICKLE2 ENSG00000163637 |
| 3 | 64151225 | 64151675 | 64151496 | 9  | 16  | 14  | 1.177878075 | 0.320433   | PRICKLE2 ENSG00000163637 |
| 3 | 64151969 | 64152322 | 64152186 | 9  | 13  | 19  | 0.727512929 | 0.824686   | PRICKLE2 ENSG00000163637 |
| 3 | 64153707 | 64154115 | 64153946 | 12 | 18  | 12  | 1.518983039 | 0.117837   | PRICKLE2 ENSG00000163637 |
| 3 | 64155783 | 64155975 | 64155833 | 9  | 10  | 6   | 1.63319229  | 0.146906   | PRICKLE2 ENSG00000163637 |
| 3 | 64156971 | 64157165 | 64157105 | 8  | 8   | 12  | 0.719518281 | 0.783103   | PRICKLE2 ENSG00000163637 |

|   |          |          |          |    |    |    |             |           |          |                 |
|---|----------|----------|----------|----|----|----|-------------|-----------|----------|-----------------|
| 3 | 64157316 | 64157704 | 64157430 | 8  | 15 | 7  | 2.078608368 | 0.038229  | PRICKLE2 | ENSG00000163637 |
| 3 | 64163863 | 64164086 | 64163997 | 12 | 13 | 10 | 1.32275078  | 0.240023  | PRICKLE2 | ENSG00000163637 |
| 3 | 64164910 | 64165189 | 64165063 | 13 | 13 | 17 | 0.808347699 | 0.728863  | PRICKLE2 | ENSG00000163637 |
| 3 | 64165300 | 64165649 | 64165474 | 14 | 18 | 33 | 0.580787632 | 0.974583  | PRICKLE2 | ENSG00000163637 |
| 3 | 64168359 | 64168983 | 64168538 | 11 | 27 | 34 | 0.831443347 | 0.769295  | PRICKLE2 | ENSG00000163637 |
| 3 | 64170562 | 64170917 | 64170739 | 10 | 16 | 14 | 1.177878075 | 0.320433  | PRICKLE2 | ENSG00000163637 |
| 3 | 64171215 | 64171481 | 64171348 | 8  | 10 | 10 | 1.039304184 | 0.464387  | PRICKLE2 | ENSG00000163637 |
| 3 | 64173056 | 64173269 | 64173184 | 8  | 8  | 6  | 1.336248237 | 0.277651  | PRICKLE2 | ENSG00000163637 |
| 3 | 64174299 | 64174524 | 64174411 | 9  | 11 | 10 | 1.133786383 | 0.380636  | PRICKLE2 | ENSG00000163637 |
| 3 | 64175006 | 64175584 | 64175115 | 12 | 26 | 14 | 1.870747532 | 0.0223642 | PRICKLE2 | ENSG00000163637 |
| 3 | 64175786 | 64176069 | 64175963 | 9  | 13 | 16 | 0.855897563 | 0.670115  | PRICKLE2 | ENSG00000163637 |
| 3 | 64177184 | 64177403 | 64177254 | 8  | 10 | 11 | 0.952695502 | 0.548138  | PRICKLE2 | ENSG00000163637 |
| 3 | 64177527 | 64177796 | 64177624 | 8  | 10 | 8  | 1.27026067  | 0.293854  | PRICKLE2 | ENSG00000163637 |
| 3 | 64179149 | 64179413 | 64179277 | 10 | 13 | 3  | 3.637564645 | 0.0050909 | PRICKLE2 | ENSG00000163637 |
| 3 | 64179714 | 64180315 | 64180023 | 13 | 27 | 29 | 0.970017239 | 0.547123  | PRICKLE2 | ENSG00000163637 |
| 3 | 64180380 | 64180627 | 64180503 | 8  | 9  | 14 | 0.692869456 | 0.822654  | PRICKLE2 | ENSG00000163637 |
| 3 | 64180701 | 64181282 | 64180844 | 16 | 29 | 26 | 1.154782427 | 0.292794  | PRICKLE2 | ENSG00000163637 |
| 3 | 64181534 | 64181849 | 64181688 | 9  | 13 | 16 | 0.855897563 | 0.670115  | PRICKLE2 | ENSG00000163637 |
| 3 | 64182844 | 64183114 | 64182961 | 9  | 11 | 16 | 0.733626483 | 0.800067  | PRICKLE2 | ENSG00000163637 |
| 3 | 64183399 | 64183641 | 64183532 | 8  | 9  | 9  | 1.039304184 | 0.466079  | PRICKLE2 | ENSG00000163637 |
| 3 | 64183774 | 64184169 | 64184004 | 9  | 14 | 16 | 0.917033104 | 0.598778  | PRICKLE2 | ENSG00000163637 |
| 3 | 64185115 | 64185392 | 64185252 | 8  | 9  | 22 | 0.451871384 | 0.986686  | PRICKLE2 | ENSG00000163637 |
| 3 | 64185514 | 64185726 | 64185624 | 9  | 11 | 7  | 1.558956276 | 0.158273  | PRICKLE2 | ENSG00000163637 |
| 3 | 64185843 | 64186212 | 64186022 | 8  | 15 | 8  | 1.847651883 | 0.0631662 | PRICKLE2 | ENSG00000163637 |
| 3 | 64186215 | 64186766 | 64186394 | 13 | 29 | 16 | 1.834066207 | 0.0198505 | PRICKLE2 | ENSG00000163637 |
| 3 | 64187337 | 64187785 | 64187514 | 13 | 21 | 18 | 1.203404845 | 0.275531  | PRICKLE2 | ENSG00000163637 |
| 3 | 64188028 | 64188453 | 64188276 | 12 | 20 | 17 | 1.212521548 | 0.272468  | PRICKLE2 | ENSG00000163637 |
| 3 | 64188985 | 64189531 | 64189181 | 9  | 22 | 22 | 1.039304184 | 0.448275  | PRICKLE2 | ENSG00000163637 |
| 3 | 64189604 | 64190100 | 64189921 | 11 | 22 | 26 | 0.885333194 | 0.668299  | PRICKLE2 | ENSG00000163637 |
| 3 | 64191344 | 64191891 | 64191824 | 8  | 20 | 23 | 0.909391161 | 0.626666  | PRICKLE2 | ENSG00000163637 |
| 3 | 64193531 | 64193710 | 64193620 | 8  | 8  | 14 | 0.623582511 | 0.877092  | PRICKLE2 | ENSG00000163637 |
| 3 | 64193865 | 64194330 | 64194082 | 10 | 19 | 17 | 1.154782427 | 0.327751  | PRICKLE2 | ENSG00000163637 |
| 3 | 64195900 | 64196177 | 64196038 | 9  | 12 | 8  | 1.501217155 | 0.168286  | PRICKLE2 | ENSG00000163637 |
| 3 | 64196504 | 64196705 | 64196604 | 9  | 10 | 13 | 0.816596145 | 0.696946  | PRICKLE2 | ENSG00000163637 |

|   |          |          |          |    |     |    |             |            |          |                 |
|---|----------|----------|----------|----|-----|----|-------------|------------|----------|-----------------|
| 3 | 64197130 | 64197334 | 64197159 | 8  | 10  | 9  | 1.143234603 | 0.378307   | PRICKLE2 | ENSG00000163637 |
| 3 | 64198114 | 64198328 | 64198221 | 8  | 9   | 9  | 1.039304184 | 0.466079   | PRICKLE2 | ENSG00000163637 |
| 3 | 64199281 | 64199543 | 64199412 | 12 | 14  | 11 | 1.29913023  | 0.246308   | PRICKLE2 | ENSG00000163637 |
| 3 | 64199584 | 64199773 | 64199651 | 9  | 10  | 16 | 0.672490943 | 0.854309   | PRICKLE2 | ENSG00000163637 |
| 3 | 64200109 | 64200302 | 64200156 | 10 | 10  | 8  | 1.27026067  | 0.293854   | PRICKLE2 | ENSG00000163637 |
| 3 | 64201341 | 64201701 | 64201519 | 10 | 16  | 18 | 0.929903744 | 0.58804    | PRICKLE2 | ENSG00000163637 |
| 3 | 64202865 | 64203658 | 64203296 | 16 | 36  | 20 | 1.831154991 | 0.0114352  | PRICKLE2 | ENSG00000163637 |
| 3 | 64203987 | 64204329 | 64204158 | 13 | 17  | 7  | 2.338434415 | 0.0171287  | PRICKLE2 | ENSG00000163637 |
| 3 | 64204941 | 64205401 | 64205259 | 14 | 21  | 35 | 0.635130335 | 0.95689    | PRICKLE2 | ENSG00000163637 |
| 3 | 64207633 | 64207981 | 64207794 | 12 | 17  | 7  | 2.338434415 | 0.0171287  | PRICKLE2 | ENSG00000163637 |
| 3 | 64210376 | 64210655 | 64210543 | 14 | 17  | 5  | 3.117912553 | 0.00407023 | PRICKLE2 | ENSG00000163637 |
| 3 | 64210991 | 64211202 | 64211075 | 8  | 11  | 12 | 0.959357709 | 0.543005   | PRICKLE2 | ENSG00000163637 |
| 3 | 64212187 | 64212704 | 64212392 | 14 | 26  | 30 | 0.905200419 | 0.649195   | PRICKLE2 | ENSG00000163637 |
| 3 | 64214313 | 64214545 | 64214425 | 10 | 12  | 12 | 1.039304184 | 0.461227   | PRICKLE2 | ENSG00000163637 |
| 3 | 64214728 | 64215065 | 64214895 | 8  | 12  | 17 | 0.750608578 | 0.78992    | PRICKLE2 | ENSG00000163637 |
| 3 | 64215201 | 64215488 | 64215321 | 8  | 13  | 14 | 0.970017239 | 0.534076   | PRICKLE2 | ENSG00000163637 |
| 3 | 64215570 | 64215981 | 64215742 | 8  | 16  | 22 | 0.768181354 | 0.79945    | PRICKLE2 | ENSG00000163637 |
| 3 | 64216030 | 64216566 | 64216364 | 14 | 28  | 27 | 1.076422191 | 0.390384   | PRICKLE2 | ENSG00000163637 |
| 3 | 64216844 | 64217243 | 64216975 | 8  | 15  | 17 | 0.923825942 | 0.593214   | PRICKLE2 | ENSG00000163637 |
| 3 | 64217301 | 64217612 | 64217455 | 10 | 13  | 11 | 1.212521548 | 0.309909   | PRICKLE2 | ENSG00000163637 |
| 3 | 64220756 | 64221035 | 64220866 | 9  | 10  | 14 | 0.762156402 | 0.758589   | PRICKLE2 | ENSG00000163637 |
| 3 | 64221083 | 64221262 | 64221210 | 8  | 8   | 26 | 0.346434728 | 0.998636   | PRICKLE2 | ENSG00000163637 |
| 3 | 64221288 | 64221714 | 64221501 | 8  | 18  | 33 | 0.580787632 | 0.974583   | PRICKLE2 | ENSG00000163637 |
| 3 | 64221987 | 64222990 | 64222128 | 12 | 37  | 31 | 1.234173719 | 0.188755   | PRICKLE2 | ENSG00000163637 |
| 3 | 64223137 | 64224303 | 64223797 | 16 | 64  | 56 | 1.185171438 | 0.173752   | PRICKLE2 | ENSG00000163637 |
| 3 | 64224430 | 64224757 | 64224591 | 8  | 12  | 17 | 0.750608578 | 0.78992    | PRICKLE2 | ENSG00000163637 |
| 3 | 64224789 | 64226028 | 64225315 | 33 | 102 | 60 | 1.754890672 | 0.0001913  | PRICKLE2 | ENSG00000163637 |
| 3 | 64226164 | 64227037 | 64226660 | 15 | 40  | 47 | 0.887738991 | 0.713849   | PRICKLE2 | ENSG00000163637 |
| 3 | 64227168 | 64227619 | 64227347 | 18 | 26  | 24 | 1.122448519 | 0.337995   | PRICKLE2 | ENSG00000163637 |
| 3 | 64227911 | 64228227 | 64228069 | 10 | 13  | 11 | 1.212521548 | 0.309909   | PRICKLE2 | ENSG00000163637 |
| 3 | 64229415 | 64230060 | 64229594 | 11 | 24  | 25 | 0.999330946 | 0.501681   | PRICKLE2 | ENSG00000163637 |
| 3 | 64230790 | 64231154 | 64230979 | 8  | 14  | 16 | 0.917033104 | 0.598778   | PRICKLE2 | ENSG00000163637 |
| 3 | 64232217 | 64232430 | 64232315 | 8  | 9   | 13 | 0.742360132 | 0.770276   | PRICKLE2 | ENSG00000163637 |
| 3 | 64233089 | 64233471 | 64233268 | 9  | 16  | 15 | 1.104260696 | 0.387363   | PRICKLE2 | ENSG00000163637 |

|   |          |          |          |    |     |    |             |            |          |                 |
|---|----------|----------|----------|----|-----|----|-------------|------------|----------|-----------------|
| 3 | 64233613 | 64234087 | 64233792 | 8  | 19  | 14 | 1.385738912 | 0.166049   | PRICKLE2 | ENSG00000163637 |
| 3 | 64234170 | 64234849 | 64234347 | 15 | 37  | 23 | 1.645564958 | 0.0256747  | PRICKLE2 | ENSG00000163637 |
| 3 | 64235082 | 64235273 | 64235186 | 8  | 9   | 1  | 5.196520921 | 0.00490062 | PRICKLE2 | ENSG00000163637 |
| 3 | 64236436 | 64236637 | 64236542 | 8  | 9   | 11 | 0.86608682  | 0.635181   | PRICKLE2 | ENSG00000163637 |
| 3 | 64236707 | 64237596 | 64237034 | 60 | 104 | 33 | 3.209615863 | 7.29E-11   | PRICKLE2 | ENSG00000163637 |
| 3 | 64238648 | 64239096 | 64238845 | 12 | 23  | 25 | 0.959357709 | 0.559486   | PRICKLE2 | ENSG00000163637 |
| 3 | 64240525 | 64240883 | 64240704 | 9  | 13  | 7  | 1.818782322 | 0.0805123  | PRICKLE2 | ENSG00000163637 |
| 3 | 64241152 | 64241913 | 64241327 | 10 | 30  | 28 | 1.110980335 | 0.341379   | PRICKLE2 | ENSG00000163637 |
| 3 | 64246744 | 64247136 | 64246923 | 8  | 15  | 23 | 0.692869456 | 0.877389   | PRICKLE2 | ENSG00000163637 |
| 3 | 64247917 | 64248265 | 64248095 | 8  | 13  | 9  | 1.455025858 | 0.177172   | PRICKLE2 | ENSG00000163637 |
| 3 | 64249007 | 64249188 | 64249128 | 9  | 9   | 14 | 0.692869456 | 0.822654   | PRICKLE2 | ENSG00000163637 |
| 3 | 64251553 | 64251835 | 64251694 | 10 | 13  | 12 | 1.11925066  | 0.384109   | PRICKLE2 | ENSG00000163637 |
| 3 | 64252115 | 64252399 | 64252253 | 8  | 13  | 9  | 1.455025858 | 0.177172   | PRICKLE2 | ENSG00000163637 |
| 3 | 64254869 | 64255103 | 64254986 | 8  | 12  | 10 | 1.228268581 | 0.305344   | PRICKLE2 | ENSG00000163637 |
| 3 | 64255144 | 64255329 | 64255225 | 9  | 9   | 12 | 0.799464757 | 0.707717   | PRICKLE2 | ENSG00000163637 |
| 3 | 64257614 | 64258108 | 64257793 | 8  | 19  | 16 | 1.222710805 | 0.269115   | PRICKLE2 | ENSG00000163637 |
| 3 | 64259936 | 64260233 | 64260107 | 12 | 16  | 9  | 1.766817113 | 0.0700694  | PRICKLE2 | ENSG00000163637 |
| 3 | 64263496 | 64263849 | 64263672 | 9  | 14  | 17 | 0.86608682  | 0.662567   | PRICKLE2 | ENSG00000163637 |
| 3 | 64265725 | 64265975 | 64265850 | 8  | 11  | 14 | 0.831443347 | 0.68719    | PRICKLE2 | ENSG00000163637 |
| 3 | 64266585 | 64266789 | 64266687 | 9  | 10  | 3  | 2.858086507 | 0.0242838  | PRICKLE2 | ENSG00000163637 |
| 3 | 64266796 | 64267017 | 64266862 | 8  | 11  | 8  | 1.385738912 | 0.224757   | PRICKLE2 | ENSG00000163637 |
| 3 | 64267531 | 64267781 | 64267656 | 8  | 11  | 15 | 0.779478138 | 0.747877   | PRICKLE2 | ENSG00000163637 |
| 3 | 64268067 | 64268865 | 64268432 | 10 | 31  | 27 | 1.187776211 | 0.251797   | PRICKLE2 | ENSG00000163637 |
| 3 | 64274361 | 64274566 | 64274407 | 8  | 9   | 14 | 0.692869456 | 0.822654   | PRICKLE2 | ENSG00000163637 |
| 3 | 64274801 | 64275052 | 64274926 | 8  | 10  | 11 | 0.952695502 | 0.548138   | PRICKLE2 | ENSG00000163637 |
| 3 | 64276675 | 64276896 | 64276752 | 8  | 9   | 5  | 1.73217364  | 0.133894   | PRICKLE2 | ENSG00000163637 |
| 3 | 64277698 | 64278106 | 64277927 | 16 | 24  | 13 | 1.855900329 | 0.0279411  | PRICKLE2 | ENSG00000163637 |
| 3 | 64278119 | 64278405 | 64278262 | 11 | 15  | 3  | 4.157216737 | 0.00170423 | PRICKLE2 | ENSG00000163637 |
| 3 | 64279516 | 64279717 | 64279597 | 8  | 11  | 9  | 1.247165021 | 0.300052   | PRICKLE2 | ENSG00000163637 |
| 3 | 64280122 | 64280537 | 64280301 | 9  | 17  | 20 | 0.890832158 | 0.642922   | PRICKLE2 | ENSG00000163637 |
| 3 | 64282392 | 64282748 | 64282570 | 13 | 19  | 12 | 1.598929514 | 0.0887417  | PRICKLE2 | ENSG00000163637 |
| 3 | 64282784 | 64283017 | 64282875 | 10 | 12  | 11 | 1.125912866 | 0.382541   | PRICKLE2 | ENSG00000163637 |
| 3 | 64284626 | 64284891 | 64284732 | 8  | 9   | 4  | 2.078608368 | 0.0785659  | PRICKLE2 | ENSG00000163637 |
| 3 | 64286228 | 64286549 | 64286388 | 9  | 12  | 8  | 1.501217155 | 0.168286   | PRICKLE2 | ENSG00000163637 |



|   |          |          |          |    |    |    |             |           |          |                 |
|---|----------|----------|----------|----|----|----|-------------|-----------|----------|-----------------|
| 3 | 64288237 | 64288755 | 64288416 | 10 | 21 | 13 | 1.63319229  | 0.0708832 | PRICKLE2 | ENSG00000163637 |
| 3 | 64289707 | 64290163 | 64290054 | 14 | 22 | 23 | 0.995999843 | 0.506279  | PRICKLE2 | ENSG00000163637 |
| 3 | 64291595 | 64291880 | 64291717 | 13 | 15 | 10 | 1.511715177 | 0.140236  | PRICKLE2 | ENSG00000163637 |
| 3 | 64292177 | 64292589 | 64292356 | 12 | 20 | 28 | 0.752599582 | 0.843303  | PRICKLE2 | ENSG00000163637 |
| 3 | 64292794 | 64293170 | 64292973 | 8  | 14 | 23 | 0.649565115 | 0.910621  | PRICKLE2 | ENSG00000163637 |
| 3 | 64293259 | 64293683 | 64293528 | 10 | 17 | 15 | 1.169217207 | 0.323156  | PRICKLE2 | ENSG00000163637 |
| 3 | 64301109 | 64301545 | 64301366 | 12 | 19 | 16 | 1.222710805 | 0.269115  | PRICKLE2 | ENSG00000163637 |
| 3 | 64301568 | 64301822 | 64301684 | 9  | 11 | 13 | 0.890832158 | 0.618492  | PRICKLE2 | ENSG00000163637 |
| 3 | 64302488 | 64302783 | 64302620 | 9  | 14 | 13 | 1.113540197 | 0.385405  | PRICKLE2 | ENSG00000163637 |
| 3 | 64302808 | 64303156 | 64302982 | 8  | 13 | 10 | 1.32275078  | 0.240023  | PRICKLE2 | ENSG00000163637 |
| 3 | 64303602 | 64303985 | 64303781 | 11 | 17 | 11 | 1.558956276 | 0.111389  | PRICKLE2 | ENSG00000163637 |
| 3 | 64304588 | 64304909 | 64304748 | 8  | 13 | 12 | 1.11925066  | 0.384109  | PRICKLE2 | ENSG00000163637 |
| 3 | 64305196 | 64305406 | 64305367 | 8  | 11 | 13 | 0.890832158 | 0.618492  | PRICKLE2 | ENSG00000163637 |
| 3 | 64305514 | 64305900 | 64305804 | 8  | 15 | 13 | 1.187776211 | 0.317363  | PRICKLE2 | ENSG00000163637 |
| 3 | 64306116 | 64306365 | 64306240 | 8  | 10 | 9  | 1.143234603 | 0.378307  | PRICKLE2 | ENSG00000163637 |
| 3 | 64306415 | 64306745 | 64306575 | 8  | 13 | 6  | 2.078608368 | 0.0483393 | PRICKLE2 | ENSG00000163637 |
| 3 | 64307613 | 64307874 | 64307743 | 8  | 10 | 9  | 1.143234603 | 0.378307  | PRICKLE2 | ENSG00000163637 |
| 3 | 64311031 | 64311394 | 64311218 | 9  | 15 | 21 | 0.755857589 | 0.807439  | PRICKLE2 | ENSG00000163637 |
| 3 | 64312567 | 64313087 | 64312908 | 11 | 24 | 18 | 1.367505506 | 0.148798  | PRICKLE2 | ENSG00000163637 |
| 3 | 64315807 | 64316618 | 64316102 | 12 | 33 | 32 | 1.07079825  | 0.389692  | PRICKLE2 | ENSG00000163637 |
| 3 | 64317170 | 64317560 | 64317335 | 9  | 17 | 16 | 1.100439724 | 0.388093  | PRICKLE2 | ENSG00000163637 |
| 3 | 64318073 | 64318549 | 64318382 | 8  | 16 | 20 | 0.841341482 | 0.704984  | PRICKLE2 | ENSG00000163637 |
| 3 | 64319540 | 64319979 | 64319759 | 10 | 19 | 16 | 1.222710805 | 0.269115  | PRICKLE2 | ENSG00000163637 |
| 3 | 64320529 | 64320829 | 64320700 | 9  | 13 | 8  | 1.616695398 | 0.123553  | PRICKLE2 | ENSG00000163637 |
| 3 | 64323766 | 64323974 | 64323869 | 9  | 10 | 10 | 1.039304184 | 0.464387  | PRICKLE2 | ENSG00000163637 |
| 3 | 64326291 | 64326631 | 64326457 | 10 | 13 | 19 | 0.727512929 | 0.824686  | PRICKLE2 | ENSG00000163637 |
| 3 | 64326634 | 64327012 | 64326807 | 11 | 17 | 19 | 0.935373766 | 0.583208  | PRICKLE2 | ENSG00000163637 |
| 3 | 64327329 | 64327677 | 64327503 | 8  | 13 | 14 | 0.970017239 | 0.534076  | PRICKLE2 | ENSG00000163637 |
| 3 | 64327955 | 64328190 | 64328072 | 12 | 12 | 14 | 0.900730293 | 0.611333  | PRICKLE2 | ENSG00000163637 |
| 3 | 64328984 | 64329163 | 64329008 | 8  | 9  | 11 | 0.86608682  | 0.635181  | PRICKLE2 | ENSG00000163637 |
| 3 | 64329647 | 64329893 | 64329770 | 10 | 11 | 12 | 0.959357709 | 0.543005  |          | ENSG00000212340 |
| 3 | 64330283 | 64330666 | 64330462 | 9  | 17 | 12 | 1.439036563 | 0.154203  |          | ENSG00000212340 |
| 3 | 64330807 | 64330998 | 64330924 | 9  | 10 | 6  | 1.63319229  | 0.146906  |          | ENSG00000212340 |
| 3 | 64332941 | 64333131 | 64333100 | 8  | 8  | 6  | 1.336248237 | 0.277651  |          | ENSG00000212340 |

|   |          |          |          |    |    |    |             |             |                 |
|---|----------|----------|----------|----|----|----|-------------|-------------|-----------------|
| 3 | 64338864 | 64339165 | 64339014 | 11 | 15 | 13 | 1.187776211 | 0.317363    | ENSG00000212340 |
| 3 | 64340742 | 64341070 | 64340906 | 10 | 15 | 13 | 1.187776211 | 0.317363    | ENSG00000212340 |
| 3 | 64341098 | 64341398 | 64341248 | 13 | 16 | 16 | 1.039304184 | 0.455583    | ENSG00000212340 |
| 3 | 64342886 | 64343350 | 64343065 | 11 | 20 | 17 | 1.212521548 | 0.272468    | ENSG00000212340 |
| 3 | 64344843 | 64345136 | 64344989 | 8  | 11 | 9  | 1.247165021 | 0.300052    | ENSG00000212340 |
| 3 | 64345202 | 64345572 | 64345393 | 13 | 20 | 23 | 0.909391161 | 0.626666    | ENSG00000212340 |
| 3 | 64345989 | 64346380 | 64346160 | 13 | 19 | 21 | 0.944821986 | 0.574409    | ENSG00000212340 |
| 3 | 64349384 | 64349638 | 64349541 | 9  | 11 | 14 | 0.831443347 | 0.68719     | ENSG00000212340 |
| 3 | 64349652 | 64349905 | 64349820 | 8  | 10 | 7  | 1.429043253 | 0.21536     | ENSG00000212340 |
| 3 | 64350233 | 64350538 | 64350385 | 12 | 16 | 6  | 2.524024447 | 0.0137633   | ENSG00000212340 |
| 3 | 64351718 | 64351917 | 64351817 | 8  | 9  | 6  | 1.484720263 | 0.204387    | ENSG00000212340 |
| 3 | 64352152 | 64352373 | 64352262 | 8  | 11 | 9  | 1.247165021 | 0.300052    | ENSG00000212340 |
| 3 | 64353066 | 64353385 | 64353192 | 10 | 14 | 9  | 1.558956276 | 0.132279    | ENSG00000212340 |
| 3 | 64353887 | 64354212 | 64354049 | 8  | 12 | 13 | 0.965068171 | 0.538344    | ENSG00000212340 |
| 3 | 64357737 | 64357937 | 64357837 | 8  | 10 | 12 | 0.879411233 | 0.62639     | ENSG00000212340 |
| 3 | 64358349 | 64358583 | 64358459 | 8  | 11 | 8  | 1.385738912 | 0.224757    | ENSG00000212340 |
| 3 | 64359846 | 64360458 | 64360064 | 18 | 39 | 34 | 1.187776211 | 0.227496    | ENSG00000212340 |
| 3 | 64360697 | 64360938 | 64360868 | 8  | 10 | 0  | 11.43234603 | 0.000394183 | ENSG00000212340 |
| 3 | 64361780 | 64362058 | 64361943 | 10 | 10 | 9  | 1.143234603 | 0.378307    | ENSG00000212340 |
| 3 | 64362517 | 64362788 | 64362695 | 9  | 11 | 9  | 1.247165021 | 0.300052    | ENSG00000212340 |
| 3 | 64364771 | 64364958 | 64364828 | 8  | 8  | 7  | 1.169217207 | 0.371848    | ENSG00000212340 |
| 3 | 64367264 | 64367618 | 64367441 | 12 | 18 | 12 | 1.518983039 | 0.117837    | ENSG00000212340 |
| 3 | 64368446 | 64368689 | 64368567 | 16 | 17 | 14 | 1.247165021 | 0.261378    | ENSG00000212340 |
| 3 | 64368808 | 64369007 | 64368878 | 8  | 9  | 7  | 1.29913023  | 0.286504    | ENSG00000212340 |
| 3 | 64369407 | 64369601 | 64369481 | 8  | 10 | 5  | 1.905391004 | 0.0915982   | ENSG00000212340 |
| 3 | 64369635 | 64369899 | 64369767 | 15 | 17 | 8  | 2.078608368 | 0.0303558   | ENSG00000212340 |
| 3 | 64370973 | 64371369 | 64371190 | 8  | 16 | 8  | 1.963130126 | 0.0441028   | ENSG00000212340 |
| 3 | 64371979 | 64372175 | 64372068 | 10 | 10 | 5  | 1.905391004 | 0.0915982   | ENSG00000212340 |
| 3 | 64375508 | 64375719 | 64375613 | 8  | 9  | 8  | 1.154782427 | 0.375434    | ENSG00000212340 |
| 3 | 64379980 | 64380179 | 64380076 | 9  | 11 | 9  | 1.247165021 | 0.300052    | ENSG00000212340 |
| 3 | 64380335 | 64380945 | 64380640 | 14 | 30 | 19 | 1.610921486 | 0.0449624   | ENSG00000212340 |
| 3 | 64381158 | 64381412 | 64381272 | 8  | 10 | 12 | 0.879411233 | 0.62639     | ENSG00000212340 |
| 3 | 64382714 | 64383074 | 64382915 | 12 | 18 | 16 | 1.161575265 | 0.325582    | ENSG00000212340 |
| 3 | 64383746 | 64384056 | 64383901 | 11 | 17 | 13 | 1.336248237 | 0.204556    | ENSG00000212340 |

|   |          |          |          |    |    |    |             |            |                 |
|---|----------|----------|----------|----|----|----|-------------|------------|-----------------|
| 3 | 64384610 | 64384911 | 64384763 | 11 | 15 | 11 | 1.385738912 | 0.19225    | ENSG00000212340 |
| 3 | 64385773 | 64386103 | 64385986 | 9  | 14 | 6  | 2.227080395 | 0.0322529  | ENSG00000212340 |
| 3 | 64387104 | 64387339 | 64387221 | 9  | 12 | 8  | 1.501217155 | 0.168286   | ENSG00000212340 |
| 3 | 64392863 | 64393163 | 64393013 | 8  | 12 | 14 | 0.900730293 | 0.611333   | ENSG00000212340 |
| 3 | 64393217 | 64393543 | 64393367 | 9  | 14 | 12 | 1.199197136 | 0.313881   | ENSG00000212340 |
| 3 | 64397684 | 64398158 | 64397979 | 8  | 19 | 18 | 1.094004404 | 0.389177   | ENSG00000212340 |
| 3 | 64399347 | 64399869 | 64399696 | 14 | 27 | 12 | 2.23850132  | 0.00591854 | ENSG00000212340 |
| 3 | 64400871 | 64401529 | 64401392 | 13 | 32 | 26 | 1.27026067  | 0.176378   | ENSG00000212340 |
| 3 | 64403205 | 64403396 | 64403292 | 8  | 9  | 17 | 0.577391213 | 0.925885   | ENSG00000212340 |
| 3 | 64404440 | 64404621 | 64404530 | 8  | 8  | 11 | 0.779478138 | 0.719708   | ENSG00000212340 |
| 3 | 64406452 | 64406696 | 64406574 | 12 | 14 | 8  | 1.73217364  | 0.0890835  | ENSG00000212340 |
| 3 | 64407352 | 64407563 | 64407522 | 9  | 9  | 10 | 0.944821986 | 0.553851   | ENSG00000212340 |
| 3 | 64408572 | 64408783 | 64408632 | 8  | 9  | 8  | 1.154782427 | 0.375434   | ENSG00000212340 |
| 3 | 64409678 | 64410259 | 64409819 | 13 | 27 | 13 | 2.078608368 | 0.00998554 | ENSG00000212340 |
| 3 | 64410261 | 64410493 | 64410377 | 8  | 10 | 7  | 1.429043253 | 0.21536    | ENSG00000212340 |
| 3 | 64411461 | 64411850 | 64411719 | 11 | 20 | 15 | 1.364086742 | 0.171319   | ENSG00000212340 |
| 3 | 64413984 | 64414184 | 64414052 | 8  | 9  | 6  | 1.484720263 | 0.204387   | ENSG00000212340 |
| 3 | 64415589 | 64415899 | 64415744 | 10 | 14 | 6  | 2.227080395 | 0.0322529  | ENSG00000212340 |
| 3 | 64415956 | 64416269 | 64416107 | 9  | 12 | 8  | 1.501217155 | 0.168286   | ENSG00000212340 |
| 3 | 64416539 | 64416718 | 64416592 | 8  | 9  | 4  | 2.078608368 | 0.0785659  | ENSG00000212340 |
| 3 | 64417848 | 64418153 | 64418001 | 8  | 13 | 16 | 0.855897563 | 0.670115   | ENSG00000212340 |
| 3 | 64418478 | 64418682 | 64418580 | 11 | 11 | 7  | 1.558956276 | 0.158273   | ENSG00000212340 |
| 3 | 64421195 | 64421621 | 64421449 | 10 | 17 | 13 | 1.336248237 | 0.204556   | ENSG00000212340 |
| 3 | 64422290 | 64422579 | 64422426 | 11 | 14 | 10 | 1.417232979 | 0.185113   | ENSG00000212340 |
| 3 | 64424311 | 64424589 | 64424490 | 9  | 12 | 15 | 0.84443465  | 0.678289   | ENSG00000212340 |
| 3 | 64425890 | 64426074 | 64425996 | 8  | 9  | 11 | 0.86608682  | 0.635181   | ENSG00000212340 |
| 3 | 64426464 | 64426792 | 64426637 | 8  | 12 | 11 | 1.125912866 | 0.382541   | ENSG00000212340 |
| 3 | 64427643 | 64427981 | 64427809 | 8  | 13 | 12 | 1.11925066  | 0.384109   | ENSG00000212340 |
| 3 | 64428166 | 64428468 | 64428302 | 9  | 10 | 12 | 0.879411233 | 0.62639    | ENSG00000212340 |
| 3 | 64428471 | 64428653 | 64428562 | 8  | 10 | 15 | 0.714521627 | 0.810948   | ENSG00000212340 |
| 3 | 64429325 | 64429666 | 64429493 | 9  | 14 | 10 | 1.417232979 | 0.185113   | ENSG00000212340 |
| 3 | 64431090 | 64431411 | 64431250 | 9  | 11 | 6  | 1.781664316 | 0.103344   | ENSG00000212340 |
| 3 | 64432321 | 64432651 | 64432486 | 8  | 14 | 4  | 3.117912553 | 0.00766354 | ENSG00000212340 |
| 3 | 64433343 | 64433559 | 64433456 | 8  | 10 | 10 | 1.039304184 | 0.464387   | ENSG00000212340 |

|   |          |          |          |    |    |    |             |             |                 |
|---|----------|----------|----------|----|----|----|-------------|-------------|-----------------|
| 3 | 64435267 | 64435446 | 64435332 | 8  | 8  | 9  | 0.935373766 | 0.560286    | ENSG00000212340 |
| 3 | 64435852 | 64436137 | 64436011 | 10 | 13 | 8  | 1.616695398 | 0.123553    | ENSG00000212340 |
| 3 | 64436146 | 64436478 | 64436345 | 8  | 12 | 10 | 1.228268581 | 0.305344    | ENSG00000212340 |
| 3 | 64443782 | 64444097 | 64443931 | 10 | 12 | 6  | 1.930136342 | 0.071303    | ENSG00000212340 |
| 3 | 64445034 | 64445721 | 64445275 | 25 | 46 | 39 | 1.221182416 | 0.17523     | ENSG00000212340 |
| 3 | 64447715 | 64447977 | 64447846 | 13 | 15 | 20 | 0.791850807 | 0.763134    | ENSG00000212340 |
| 3 | 64449323 | 64449503 | 64449437 | 8  | 9  | 18 | 0.547002202 | 0.94615     | ENSG00000212340 |
| 3 | 64449536 | 64449959 | 64449780 | 10 | 18 | 27 | 0.705242125 | 0.884499    | ENSG00000212340 |
| 3 | 64450036 | 64450244 | 64450074 | 11 | 13 | 13 | 1.039304184 | 0.45974     | ENSG00000212340 |
| 3 | 64450893 | 64451268 | 64451072 | 9  | 16 | 11 | 1.472347594 | 0.147517    | ENSG00000212340 |
| 3 | 64451691 | 64452123 | 64451848 | 12 | 21 | 31 | 0.714521627 | 0.891579    | ENSG00000212340 |
| 3 | 64452329 | 64452727 | 64452508 | 16 | 24 | 31 | 0.811956394 | 0.785392    | ENSG00000212340 |
| 3 | 64453040 | 64453315 | 64453179 | 11 | 15 | 23 | 0.692869456 | 0.877389    | ENSG00000212340 |
| 3 | 64455663 | 64455877 | 64455779 | 8  | 11 | 16 | 0.733626483 | 0.800067    | ENSG00000212340 |
| 3 | 64457363 | 64457564 | 64457467 | 8  | 10 | 9  | 1.143234603 | 0.378307    | ENSG00000212340 |
| 3 | 64461675 | 64462967 | 64462324 | 23 | 78 | 58 | 1.391610687 | 0.02641     | ENSG00000212340 |
| 3 | 64463063 | 64463598 | 64463349 | 12 | 23 | 18 | 1.312805285 | 0.185024    | ENSG00000212340 |
| 3 | 64463696 | 64463914 | 64463831 | 10 | 10 | 7  | 1.429043253 | 0.21536     | ENSG00000212340 |
| 3 | 64464285 | 64464733 | 64464417 | 8  | 16 | 7  | 2.208521392 | 0.0257604   | ENSG00000212340 |
| 3 | 64468791 | 64469500 | 64469151 | 17 | 35 | 17 | 2.078608368 | 0.00423339  | ENSG00000212340 |
| 3 | 64470189 | 64470723 | 64470331 | 11 | 24 | 14 | 1.73217364  | 0.0420666   | ENSG00000212340 |
| 3 | 64473635 | 64473993 | 64473822 | 8  | 12 | 18 | 0.711102863 | 0.834017    | ENSG00000212340 |
| 3 | 64475771 | 64476318 | 64475946 | 8  | 20 | 22 | 0.948929907 | 0.57038     | ENSG00000212340 |
| 3 | 64484343 | 64484706 | 64484608 | 8  | 13 | 14 | 0.970017239 | 0.534076    | ENSG00000212340 |
| 3 | 64489390 | 64489654 | 64489522 | 8  | 9  | 4  | 2.078608368 | 0.0785659   | ENSG00000212340 |
| 3 | 64490821 | 64491771 | 64491290 | 17 | 48 | 21 | 2.314813865 | 0.000307138 | ENSG00000212340 |
| 3 | 64493399 | 64493639 | 64493530 | 9  | 11 | 14 | 0.831443347 | 0.68719     | ENSG00000212340 |
| 3 | 64494009 | 64495123 | 64494433 | 24 | 78 | 62 | 1.303254453 | 0.0573782   | ENSG00000212340 |
| 3 | 64496723 | 64497081 | 64496902 | 13 | 19 | 18 | 1.094004404 | 0.389177    | ENSG00000212340 |
| 3 | 64498241 | 64498487 | 64498364 | 8  | 9  | 10 | 0.944821986 | 0.553851    | ENSG00000212340 |
| 3 | 64498772 | 64499076 | 64498942 | 8  | 11 | 15 | 0.779478138 | 0.747877    | ENSG00000212340 |
| 3 | 64499913 | 64500137 | 64500060 | 10 | 12 | 12 | 1.039304184 | 0.461227    | ENSG00000212340 |
| 3 | 64500150 | 64500917 | 64500533 | 12 | 33 | 22 | 1.536362707 | 0.0529465   | ENSG00000212340 |
| 3 | 64500994 | 64501228 | 64501162 | 9  | 12 | 13 | 0.965068171 | 0.538344    | ENSG00000212340 |

|   |          |          |          |    |    |    |             |            |                 |
|---|----------|----------|----------|----|----|----|-------------|------------|-----------------|
| 3 | 64501376 | 64501563 | 64501469 | 9  | 9  | 14 | 0.692869456 | 0.822654   | ENSG00000212340 |
| 3 | 64501996 | 64502370 | 64502175 | 11 | 17 | 12 | 1.439036563 | 0.154203   | ENSG00000212340 |
| 3 | 64509370 | 64509600 | 64509466 | 11 | 12 | 9  | 1.35109544  | 0.232899   | ENSG00000212340 |
| 3 | 64509661 | 64510119 | 64509840 | 10 | 19 | 16 | 1.222710805 | 0.269115   | ENSG00000212340 |
| 3 | 64510552 | 64510908 | 64510730 | 11 | 16 | 15 | 1.104260696 | 0.387363   | ENSG00000212340 |
| 3 | 64511037 | 64511546 | 64511388 | 12 | 20 | 18 | 1.148704625 | 0.329698   | ENSG00000212340 |
| 3 | 64513517 | 64513713 | 64513615 | 9  | 10 | 6  | 1.63319229  | 0.146906   | ENSG00000212340 |
| 3 | 64513881 | 64514085 | 64513925 | 8  | 9  | 10 | 0.944821986 | 0.553851   | ENSG00000212340 |
| 3 | 64515241 | 64515668 | 64515420 | 12 | 19 | 22 | 0.903742769 | 0.631776   | ENSG00000212340 |
| 3 | 64517248 | 64517443 | 64517360 | 10 | 10 | 7  | 1.429043253 | 0.21536    | ENSG00000212340 |
| 3 | 64518092 | 64518333 | 64518178 | 9  | 11 | 8  | 1.385738912 | 0.224757   | ENSG00000212340 |
| 3 | 64519852 | 64520575 | 64520213 | 13 | 33 | 24 | 1.413453691 | 0.0918299  | ENSG00000212340 |
| 3 | 64520596 | 64521294 | 64520994 | 14 | 34 | 41 | 0.86608682  | 0.737018   | ENSG00000212340 |
| 3 | 64521349 | 64521568 | 64521458 | 10 | 12 | 7  | 1.688869299 | 0.11395    | ENSG00000212340 |
| 3 | 64522078 | 64522627 | 64522257 | 16 | 30 | 15 | 2.013651857 | 0.00918451 | ENSG00000212340 |
| 3 | 64523096 | 64523592 | 64523254 | 10 | 19 | 14 | 1.385738912 | 0.166049   | ENSG00000212340 |
| 3 | 64524148 | 64524596 | 64524327 | 12 | 22 | 13 | 1.707428303 | 0.0525925  | ENSG00000212340 |
| 3 | 64524750 | 64525063 | 64524906 | 11 | 13 | 11 | 1.212521548 | 0.309909   | ENSG00000212340 |
| 3 | 64525389 | 64525953 | 64525792 | 19 | 34 | 16 | 2.139743909 | 0.00367586 | ENSG00000212340 |
| 3 | 64527045 | 64527282 | 64527193 | 11 | 11 | 26 | 0.461912971 | 0.990438   | ENSG00000212340 |
| 3 | 64527886 | 64528261 | 64528082 | 10 | 17 | 19 | 0.935373766 | 0.583208   | ENSG00000212340 |
| 3 | 64528444 | 64528745 | 64528594 | 9  | 13 | 28 | 0.501733054 | 0.986489   | ENSG00000212340 |
| 3 | 64528790 | 64529541 | 64529362 | 11 | 29 | 36 | 0.842679068 | 0.759384   | ENSG00000212340 |
| 3 | 64529866 | 64530125 | 64529995 | 8  | 10 | 18 | 0.601702422 | 0.917232   | ENSG00000212340 |
| 3 | 64530805 | 64531192 | 64530984 | 10 | 17 | 21 | 0.850339787 | 0.697991   | ENSG00000212340 |
| 3 | 64532873 | 64533236 | 64533029 | 9  | 15 | 22 | 0.722994215 | 0.845414   | ENSG00000212340 |
| 3 | 64533830 | 64534289 | 64533993 | 12 | 19 | 14 | 1.385738912 | 0.166049   | ENSG00000212340 |
| 3 | 64534330 | 64534565 | 64534405 | 8  | 10 | 12 | 0.879411233 | 0.62639    | ENSG00000212340 |
| 3 | 64535413 | 64535631 | 64535488 | 11 | 13 | 9  | 1.455025858 | 0.177172   | ENSG00000212340 |
| 3 | 64536022 | 64536509 | 64536330 | 9  | 20 | 38 | 0.55962533  | 0.986493   | ENSG00000212340 |
| 3 | 64536579 | 64536838 | 64536708 | 8  | 11 | 21 | 0.566893191 | 0.949414   | ENSG00000212340 |
| 3 | 64537868 | 64538225 | 64538069 | 8  | 13 | 20 | 0.692869456 | 0.861903   | ENSG00000212340 |
| 3 | 64538327 | 64538609 | 64538468 | 13 | 16 | 18 | 0.929903744 | 0.58804    | ENSG00000212340 |
| 3 | 64538967 | 64539726 | 64539194 | 11 | 33 | 29 | 1.177878075 | 0.255589   | ENSG00000212340 |

|   |          |          |          |    |    |    |             |           |                         |
|---|----------|----------|----------|----|----|----|-------------|-----------|-------------------------|
| 3 | 64539772 | 64540061 | 64539916 | 8  | 13 | 14 | 0.970017239 | 0.534076  | ENSG00000212340         |
| 3 | 64540559 | 64540912 | 64540735 | 9  | 15 | 13 | 1.187776211 | 0.317363  | ENSG00000212340         |
| 3 | 64541192 | 64541617 | 64541438 | 11 | 21 | 19 | 1.143234603 | 0.33145   | ENSG00000212340         |
| 3 | 64541665 | 64542048 | 64541904 | 9  | 15 | 13 | 1.187776211 | 0.317363  | ENSG00000212340         |
| 3 | 64542763 | 64543106 | 64542934 | 11 | 16 | 15 | 1.104260696 | 0.387363  | ENSG00000212340         |
| 3 | 64543253 | 64543649 | 64543474 | 10 | 17 | 16 | 1.100439724 | 0.388093  | ENSG00000212340         |
| 3 | 64544230 | 64544638 | 64544409 | 16 | 26 | 21 | 1.275509681 | 0.196223  | ENSG00000212340         |
| 3 | 64544969 | 64545220 | 64545059 | 9  | 12 | 13 | 0.965068171 | 0.538344  | ENSG00000212340         |
| 3 | 64547063 | 64547341 | 64547202 | 9  | 12 | 17 | 0.750608578 | 0.78992   | ENSG00000212340         |
| 3 | 64547523 | 64547923 | 64547678 | 9  | 16 | 11 | 1.472347594 | 0.147517  | ENSG00000212340         |
| 3 | 64548953 | 64549470 | 64549322 | 13 | 23 | 24 | 0.997732017 | 0.503931  | ENSG00000212340         |
| 3 | 64550087 | 64550306 | 64550174 | 8  | 10 | 14 | 0.762156402 | 0.758589  | ENSG00000212340         |
| 3 | 64551491 | 64551743 | 64551617 | 11 | 16 | 11 | 1.472347594 | 0.147517  | ENSG00000212340         |
| 3 | 64552251 | 64552507 | 64552351 | 10 | 12 | 6  | 1.930136342 | 0.071303  | ENSG00000212340         |
| 3 | 64554311 | 64554674 | 64554453 | 11 | 16 | 20 | 0.841341482 | 0.704984  | ENSG00000212340         |
| 3 | 64556829 | 64557017 | 64556923 | 8  | 9  | 5  | 1.73217364  | 0.133894  | ENSG00000212340         |
| 3 | 64557075 | 64557393 | 64557227 | 8  | 11 | 9  | 1.247165021 | 0.300052  | ENSG00000212340         |
| 3 | 64557633 | 64558201 | 64557788 | 13 | 28 | 26 | 1.116289679 | 0.339846  | ENSG00000212340         |
| 3 | 64558250 | 64558677 | 64558479 | 11 | 21 | 16 | 1.344981885 | 0.176214  | ENSG00000212340         |
| 3 | 64560032 | 64560516 | 64560274 | 9  | 20 | 21 | 0.992063085 | 0.511305  | ENSG00000212340         |
| 3 | 64560785 | 64561294 | 64560964 | 12 | 25 | 28 | 0.931789958 | 0.604671  | ADAMTS9 ENSG00000163638 |
| 3 | 64562758 | 64563451 | 64563253 | 14 | 37 | 24 | 1.57974236  | 0.0354022 | ADAMTS9 ENSG00000163638 |
| 3 | 64564331 | 64564578 | 64564454 | 9  | 11 | 9  | 1.247165021 | 0.300052  | ADAMTS9 ENSG00000163638 |
| 3 | 64564668 | 64564859 | 64564743 | 9  | 10 | 15 | 0.714521627 | 0.810948  | ADAMTS9 ENSG00000163638 |
| 3 | 64565450 | 64565934 | 64565619 | 13 | 24 | 12 | 1.998661893 | 0.0177296 | ADAMTS9 ENSG00000163638 |
| 3 | 64566920 | 64567100 | 64567010 | 8  | 9  | 14 | 0.692869456 | 0.822654  | ADAMTS9 ENSG00000163638 |
| 3 | 64567602 | 64567893 | 64567735 | 12 | 14 | 27 | 0.556770099 | 0.97087   | ADAMTS9 ENSG00000163638 |
| 3 | 64568410 | 64568717 | 64568563 | 9  | 14 | 11 | 1.29913023  | 0.246308  | ADAMTS9 ENSG00000163638 |
| 3 | 64572021 | 64572263 | 64572142 | 8  | 8  | 7  | 1.169217207 | 0.371848  | ADAMTS9 ENSG00000163638 |
| 3 | 64572355 | 64572749 | 64572509 | 10 | 15 | 11 | 1.385738912 | 0.19225   | ADAMTS9 ENSG00000163638 |
| 3 | 64573236 | 64573472 | 64573334 | 8  | 10 | 11 | 0.952695502 | 0.548138  | ADAMTS9 ENSG00000163638 |
| 3 | 64573506 | 64574396 | 64573903 | 16 | 48 | 46 | 1.083529894 | 0.347017  | ADAMTS9 ENSG00000163638 |
| 3 | 64575064 | 64575628 | 64575421 | 11 | 25 | 20 | 1.286757561 | 0.192726  | ADAMTS9 ENSG00000163638 |
| 3 | 64575854 | 64576300 | 64576033 | 9  | 18 | 24 | 0.78987118  | 0.784577  | ADAMTS9 ENSG00000163638 |

|   |          |          |          |    |    |    |             |             |         |                 |
|---|----------|----------|----------|----|----|----|-------------|-------------|---------|-----------------|
| 3 | 64576474 | 64577253 | 64576971 | 17 | 42 | 29 | 1.489669331 | 0.0447371   | ADAMTS9 | ENSG00000163638 |
| 3 | 64577562 | 64577790 | 64577676 | 9  | 10 | 13 | 0.816596145 | 0.696946    | ADAMTS9 | ENSG00000163638 |
| 3 | 64578376 | 64578699 | 64578537 | 9  | 13 | 6  | 2.078608368 | 0.0483393   | ADAMTS9 | ENSG00000163638 |
| 3 | 64578750 | 64579104 | 64578927 | 8  | 14 | 1  | 7.794781382 | 0.000197021 | ADAMTS9 | ENSG00000163638 |
| 3 | 64580766 | 64580985 | 64580917 | 9  | 10 | 11 | 0.952695502 | 0.548138    | ADAMTS9 | ENSG00000163638 |
| 3 | 64581123 | 64581501 | 64581299 | 13 | 19 | 17 | 1.154782427 | 0.327751    | ADAMTS9 | ENSG00000163638 |
| 3 | 64581863 | 64582047 | 64581955 | 8  | 8  | 14 | 0.623582511 | 0.877092    | ADAMTS9 | ENSG00000163638 |
| 3 | 64582923 | 64583556 | 64583397 | 15 | 33 | 29 | 1.177878075 | 0.255589    | ADAMTS9 | ENSG00000163638 |
| 3 | 64584608 | 64584994 | 64584836 | 16 | 22 | 12 | 1.838768941 | 0.0349935   | ADAMTS9 | ENSG00000163638 |
| 3 | 64585788 | 64586247 | 64585928 | 9  | 18 | 26 | 0.731362204 | 0.856292    | ADAMTS9 | ENSG00000163638 |
| 3 | 64587876 | 64588181 | 64588031 | 10 | 13 | 19 | 0.727512929 | 0.824686    | ADAMTS9 | ENSG00000163638 |
| 3 | 64588223 | 64588521 | 64588372 | 11 | 15 | 11 | 1.385738912 | 0.19225     | ADAMTS9 | ENSG00000163638 |
| 3 | 64588528 | 64588809 | 64588727 | 14 | 18 | 19 | 0.987338975 | 0.516858    | ADAMTS9 | ENSG00000163638 |
| 3 | 64588837 | 64589854 | 64588906 | 11 | 41 | 28 | 1.505199163 | 0.0429127   | ADAMTS9 | ENSG00000163638 |
| 3 | 64589985 | 64590285 | 64590135 | 11 | 13 | 21 | 0.66137539  | 0.892612    | ADAMTS9 | ENSG00000163638 |
| 3 | 64590460 | 64591012 | 64590732 | 9  | 20 | 11 | 1.818782322 | 0.04395     | ADAMTS9 | ENSG00000163638 |
| 3 | 64592581 | 64593105 | 64592884 | 10 | 23 | 15 | 1.558956276 | 0.0802366   | ADAMTS9 | ENSG00000163638 |
| 3 | 64593122 | 64593631 | 64593322 | 12 | 25 | 19 | 1.35109544  | 0.152941    | ADAMTS9 | ENSG00000163638 |
| 3 | 64593681 | 64593982 | 64593831 | 12 | 16 | 16 | 1.039304184 | 0.455583    | ADAMTS9 | ENSG00000163638 |
| 3 | 64594477 | 64594898 | 64594742 | 9  | 16 | 30 | 0.569941004 | 0.972704    | ADAMTS9 | ENSG00000163638 |
| 3 | 64595649 | 64596076 | 64595828 | 9  | 18 | 25 | 0.759491519 | 0.823082    | ADAMTS9 | ENSG00000163638 |
| 3 | 64596426 | 64596828 | 64596649 | 14 | 22 | 12 | 1.838768941 | 0.0349935   | ADAMTS9 | ENSG00000163638 |
| 3 | 64597220 | 64597399 | 64597309 | 8  | 9  | 16 | 0.611355402 | 0.899375    | ADAMTS9 | ENSG00000163638 |
| 3 | 64598130 | 64598376 | 64598253 | 9  | 10 | 16 | 0.672490943 | 0.854309    | ADAMTS9 | ENSG00000163638 |
| 3 | 64599362 | 64599646 | 64599467 | 9  | 12 | 12 | 1.039304184 | 0.461227    | ADAMTS9 | ENSG00000163638 |
| 3 | 64599952 | 64600280 | 64600116 | 8  | 13 | 17 | 0.808347699 | 0.728863    | ADAMTS9 | ENSG00000163638 |
| 3 | 64601619 | 64601798 | 64601754 | 8  | 8  | 9  | 0.935373766 | 0.560286    | ADAMTS9 | ENSG00000163638 |
| 3 | 64602615 | 64602948 | 64602781 | 12 | 17 | 8  | 2.078608368 | 0.0303558   | ADAMTS9 | ENSG00000163638 |
| 3 | 64605047 | 64605504 | 64605341 | 12 | 22 | 17 | 1.327999791 | 0.180771    | ADAMTS9 | ENSG00000163638 |
| 3 | 64606426 | 64606815 | 64606711 | 12 | 18 | 19 | 0.987338975 | 0.516858    | ADAMTS9 | ENSG00000163638 |
| 3 | 64607175 | 64607595 | 64607424 | 12 | 19 | 16 | 1.222710805 | 0.269115    | ADAMTS9 | ENSG00000163638 |
| 3 | 64609754 | 64610103 | 64609928 | 12 | 17 | 20 | 0.890832158 | 0.642922    | ADAMTS9 | ENSG00000163638 |
| 3 | 64610348 | 64610642 | 64610495 | 9  | 11 | 16 | 0.733626483 | 0.800067    | ADAMTS9 | ENSG00000163638 |
| 3 | 64610900 | 64611145 | 64611022 | 10 | 13 | 20 | 0.692869456 | 0.861903    | ADAMTS9 | ENSG00000163638 |

|   |          |          |          |    |    |    |             |           |         |                 |
|---|----------|----------|----------|----|----|----|-------------|-----------|---------|-----------------|
| 3 | 64612270 | 64612778 | 64612449 | 14 | 26 | 29 | 0.935373766 | 0.600845  | ADAMTS9 | ENSG00000163638 |
| 3 | 64613785 | 64613976 | 64613842 | 8  | 11 | 7  | 1.558956276 | 0.158273  | ADAMTS9 | ENSG00000163638 |
| 3 | 64616297 | 64616931 | 64616752 | 17 | 35 | 25 | 1.439036563 | 0.0760253 | ADAMTS9 | ENSG00000163638 |
| 3 | 64618567 | 64618821 | 64618694 | 8  | 11 | 18 | 0.656402643 | 0.879847  | ADAMTS9 | ENSG00000163638 |
| 3 | 64618864 | 64619066 | 64618965 | 8  | 10 | 6  | 1.63319229  | 0.146906  | ADAMTS9 | ENSG00000163638 |
| 3 | 64621259 | 64621536 | 64621436 | 9  | 12 | 10 | 1.228268581 | 0.305344  | ADAMTS9 | ENSG00000163638 |
| 3 | 64622694 | 64622874 | 64622784 | 8  | 9  | 8  | 1.154782427 | 0.375434  | ADAMTS9 | ENSG00000163638 |
| 3 | 64626240 | 64626598 | 64626419 | 10 | 16 | 10 | 1.606197376 | 0.104477  | ADAMTS9 | ENSG00000163638 |
| 3 | 64626820 | 64627205 | 64627095 | 8  | 13 | 18 | 0.765803083 | 0.780427  | ADAMTS9 | ENSG00000163638 |
| 3 | 64627467 | 64628004 | 64627825 | 13 | 22 | 13 | 1.707428303 | 0.0525925 | ADAMTS9 | ENSG00000163638 |
| 3 | 64628140 | 64628595 | 64628307 | 10 | 20 | 12 | 1.67887599  | 0.0659142 | ADAMTS9 | ENSG00000163638 |
| 3 | 64629114 | 64629332 | 64629223 | 14 | 14 | 15 | 0.974347673 | 0.530138  | ADAMTS9 | ENSG00000163638 |
| 3 | 64630172 | 64630581 | 64630337 | 8  | 16 | 8  | 1.963130126 | 0.0441028 | ADAMTS9 | ENSG00000163638 |
| 3 | 64632547 | 64632889 | 64632718 | 11 | 16 | 17 | 0.981565063 | 0.523072  | ADAMTS9 | ENSG00000163638 |
| 3 | 64633962 | 64634344 | 64634141 | 10 | 19 | 12 | 1.598929514 | 0.0887417 | ADAMTS9 | ENSG00000163638 |
| 3 | 64634972 | 64635712 | 64635290 | 8  | 26 | 14 | 1.870747532 | 0.0223642 | ADAMTS9 | ENSG00000163638 |
| 3 | 64638809 | 64639136 | 64638966 | 10 | 15 | 15 | 1.039304184 | 0.456923  | ADAMTS9 | ENSG00000163638 |
| 3 | 64640446 | 64641321 | 64640837 | 9  | 35 | 31 | 1.169217207 | 0.258967  | ADAMTS9 | ENSG00000163638 |
| 3 | 64641343 | 64641580 | 64641461 | 11 | 12 | 9  | 1.35109544  | 0.232899  | ADAMTS9 | ENSG00000163638 |
| 3 | 64641710 | 64641974 | 64641842 | 10 | 12 | 13 | 0.965068171 | 0.538344  | ADAMTS9 | ENSG00000163638 |
| 3 | 64642527 | 64642948 | 64642692 | 10 | 17 | 19 | 0.935373766 | 0.583208  | ADAMTS9 | ENSG00000163638 |
| 3 | 64643094 | 64643596 | 64643333 | 10 | 19 | 31 | 0.649565115 | 0.939158  | ADAMTS9 | ENSG00000163638 |
| 3 | 64644031 | 64644300 | 64644179 | 9  | 11 | 16 | 0.733626483 | 0.800067  | ADAMTS9 | ENSG00000163638 |
| 3 | 64645015 | 64645450 | 64645232 | 13 | 22 | 18 | 1.258105065 | 0.227238  | ADAMTS9 | ENSG00000163638 |
| 3 | 64646419 | 64647914 | 64647380 | 14 | 71 | 52 | 1.41188493  | 0.0272304 | ADAMTS9 | ENSG00000163638 |
| 3 | 64647943 | 64648139 | 64648021 | 9  | 9  | 6  | 1.484720263 | 0.204387  | ADAMTS9 | ENSG00000163638 |
| 3 | 64648779 | 64649632 | 64649085 | 15 | 47 | 44 | 1.10859113  | 0.309281  | ADAMTS9 | ENSG00000163638 |
| 3 | 64649980 | 64650175 | 64650136 | 8  | 10 | 6  | 1.63319229  | 0.146906  | ADAMTS9 | ENSG00000163638 |
| 3 | 64651435 | 64651848 | 64651669 | 11 | 20 | 11 | 1.818782322 | 0.04395   | ADAMTS9 | ENSG00000163638 |
| 3 | 64651898 | 64652146 | 64652052 | 8  | 12 | 11 | 1.125912866 | 0.382541  | ADAMTS9 | ENSG00000163638 |
| 3 | 64652805 | 64653332 | 64653153 | 8  | 19 | 25 | 0.799464757 | 0.777638  | ADAMTS9 | ENSG00000163638 |
| 3 | 64655284 | 64655524 | 64655406 | 9  | 10 | 14 | 0.762156402 | 0.758589  | ADAMTS9 | ENSG00000163638 |
| 3 | 64657714 | 64658020 | 64657867 | 8  | 12 | 13 | 0.965068171 | 0.538344  | ADAMTS9 | ENSG00000163638 |
| 3 | 64659523 | 64659997 | 64659882 | 10 | 20 | 24 | 0.873015515 | 0.679256  | ADAMTS9 | ENSG00000163638 |



|   |          |          |          |    |    |    |             |           |         |                 |
|---|----------|----------|----------|----|----|----|-------------|-----------|---------|-----------------|
| 3 | 64660280 | 64660520 | 64660400 | 11 | 12 | 15 | 0.84443465  | 0.678289  | ADAMTS9 | ENSG00000163638 |
| 3 | 64661537 | 64661940 | 64661716 | 10 | 16 | 26 | 0.654376709 | 0.9196    | ADAMTS9 | ENSG00000163638 |
| 3 | 64662731 | 64662936 | 64662833 | 11 | 14 | 10 | 1.417232979 | 0.185113  | ADAMTS9 | ENSG00000163638 |
| 3 | 64666514 | 64666693 | 64666572 | 8  | 8  | 6  | 1.336248237 | 0.277651  | ADAMTS9 | ENSG00000163638 |
| 3 | 64667748 | 64667985 | 64667859 | 9  | 12 | 11 | 1.125912866 | 0.382541  | ADAMTS9 | ENSG00000163638 |
| 3 | 64668452 | 64668781 | 64668616 | 13 | 17 | 8  | 2.078608368 | 0.0303558 | ADAMTS9 | ENSG00000163638 |
| 3 | 64669488 | 64669680 | 64669584 | 10 | 10 | 12 | 0.879411233 | 0.62639   | ADAMTS9 | ENSG00000163638 |
| 3 | 64670128 | 64670414 | 64670286 | 8  | 11 | 21 | 0.566893191 | 0.949414  | ADAMTS9 | ENSG00000163638 |
| 3 | 64670931 | 64671228 | 64671079 | 9  | 14 | 9  | 1.558956276 | 0.132279  | ADAMTS9 | ENSG00000163638 |
| 3 | 64671231 | 64671591 | 64671378 | 9  | 15 | 17 | 0.923825942 | 0.593214  | ADAMTS9 | ENSG00000163638 |
| 3 | 64671620 | 64671923 | 64671785 | 13 | 17 | 11 | 1.558956276 | 0.111389  | ADAMTS9 | ENSG00000163638 |
| 3 | 64672361 | 64672764 | 64672494 | 16 | 22 | 19 | 1.195199812 | 0.27834   | ADAMTS9 | ENSG00000163638 |
| 3 | 64672941 | 64673218 | 64673060 | 13 | 17 | 18 | 0.984603964 | 0.519872  | ADAMTS9 | ENSG00000163638 |
| 3 | 64673873 | 64674296 | 64673962 | 8  | 16 | 19 | 0.883408557 | 0.649033  | ADAMTS9 | ENSG00000163638 |
| 3 | 64675916 | 64676204 | 64676051 | 14 | 17 | 17 | 1.039304184 | 0.454282  | ADAMTS9 | ENSG00000163638 |
| 3 | 64677764 | 64678065 | 64677914 | 11 | 15 | 7  | 2.078608368 | 0.038229  | ADAMTS9 | ENSG00000163638 |
| 3 | 64678397 | 64679093 | 64678848 | 10 | 27 | 21 | 1.32275078  | 0.160553  | ADAMTS9 | ENSG00000163638 |
| 3 | 64679252 | 64679504 | 64679378 | 9  | 10 | 12 | 0.879411233 | 0.62639   | ADAMTS9 | ENSG00000163638 |
| 3 | 64679919 | 64680249 | 64680084 | 12 | 17 | 16 | 1.100439724 | 0.388093  | ADAMTS9 | ENSG00000163638 |
| 3 | 64680254 | 64680547 | 64680405 | 9  | 11 | 18 | 0.656402643 | 0.879847  | ADAMTS9 | ENSG00000163638 |
| 3 | 64682204 | 64682825 | 64682359 | 9  | 22 | 26 | 0.885333194 | 0.668299  | ADAMTS9 | ENSG00000163638 |
| 3 | 64682944 | 64683287 | 64683115 | 8  | 14 | 15 | 0.974347673 | 0.530138  | ADAMTS9 | ENSG00000163638 |
| 3 | 64684009 | 64684334 | 64684167 | 10 | 13 | 7  | 1.818782322 | 0.0805123 | ADAMTS9 | ENSG00000163638 |
| 3 | 64686866 | 64687180 | 64687023 | 9  | 14 | 13 | 1.113540197 | 0.385405  | ADAMTS9 | ENSG00000163638 |
| 3 | 64687586 | 64687834 | 64687692 | 8  | 11 | 18 | 0.656402643 | 0.879847  | ADAMTS9 | ENSG00000163638 |
| 3 | 64688207 | 64688434 | 64688347 | 10 | 12 | 7  | 1.688869299 | 0.11395   | ADAMTS9 | ENSG00000163638 |
| 3 | 64689328 | 64689730 | 64689515 | 11 | 19 | 13 | 1.484720263 | 0.123861  | ADAMTS9 | ENSG00000163638 |
| 3 | 64691506 | 64691947 | 64691618 | 14 | 27 | 20 | 1.385738912 | 0.126232  | ADAMTS9 | ENSG00000163638 |
| 3 | 64691956 | 64692286 | 64692121 | 11 | 14 | 12 | 1.199197136 | 0.313881  | ADAMTS9 | ENSG00000163638 |
| 3 | 64694224 | 64694483 | 64694349 | 10 | 11 | 9  | 1.247165021 | 0.300052  | ADAMTS9 | ENSG00000163638 |
| 3 | 64696524 | 64696725 | 64696564 | 9  | 11 | 11 | 1.039304184 | 0.462773  | ADAMTS9 | ENSG00000163638 |
| 3 | 64697814 | 64698111 | 64697962 | 10 | 13 | 14 | 0.970017239 | 0.534076  | ADAMTS9 | ENSG00000163638 |
| 3 | 64698534 | 64698874 | 64698704 | 11 | 17 | 15 | 1.169217207 | 0.323156  | ADAMTS9 | ENSG00000163638 |
| 3 | 64699367 | 64699691 | 64699529 | 12 | 16 | 6  | 2.524024447 | 0.0137633 | ADAMTS9 | ENSG00000163638 |

|   |          |          |          |    |    |    |             |           |         |                 |
|---|----------|----------|----------|----|----|----|-------------|-----------|---------|-----------------|
| 3 | 64700720 | 64700949 | 64700818 | 9  | 12 | 9  | 1.35109544  | 0.232899  | ADAMTS9 | ENSG00000163638 |
| 3 | 64701058 | 64701318 | 64701226 | 9  | 12 | 8  | 1.501217155 | 0.168286  | ADAMTS9 | ENSG00000163638 |
| 3 | 64701325 | 64701522 | 64701371 | 8  | 9  | 6  | 1.484720263 | 0.204387  | ADAMTS9 | ENSG00000163638 |
| 3 | 64701571 | 64701843 | 64701730 | 8  | 9  | 16 | 0.611355402 | 0.899375  | ADAMTS9 | ENSG00000163638 |
| 3 | 64704280 | 64704561 | 64704441 | 10 | 12 | 10 | 1.228268581 | 0.305344  | ADAMTS9 | ENSG00000163638 |
| 3 | 64704999 | 64705299 | 64705166 | 10 | 13 | 11 | 1.212521548 | 0.309909  | ADAMTS9 | ENSG00000163638 |
| 3 | 64706825 | 64707374 | 64707064 | 11 | 24 | 11 | 2.16521705  | 0.0106896 | ADAMTS9 | ENSG00000163638 |
| 3 | 64708036 | 64709083 | 64708215 | 14 | 47 | 41 | 1.187776211 | 0.206696  | ADAMTS9 | ENSG00000163638 |
| 3 | 64709166 | 64709345 | 64709255 | 8  | 9  | 15 | 0.649565115 | 0.865365  | ADAMTS9 | ENSG00000163638 |
| 3 | 64710488 | 64710692 | 64710606 | 8  | 10 | 5  | 1.905391004 | 0.0915982 | ADAMTS9 | ENSG00000163638 |
| 3 | 64711635 | 64712029 | 64711850 | 18 | 26 | 27 | 1.002186178 | 0.497439  | ADAMTS9 | ENSG00000163638 |
| 3 | 64714567 | 64715395 | 64714932 | 11 | 40 | 31 | 1.331608486 | 0.110337  | ADAMTS9 | ENSG00000163638 |
| 3 | 64715555 | 64716026 | 64715847 | 9  | 18 | 7  | 2.468347438 | 0.0112499 | ADAMTS9 | ENSG00000163638 |
| 3 | 64716782 | 64717667 | 64717136 | 17 | 54 | 34 | 1.63319229  | 0.0104805 | ADAMTS9 | ENSG00000163638 |
| 3 | 64719200 | 64719506 | 64719354 | 10 | 14 | 10 | 1.417232979 | 0.185113  | ADAMTS9 | ENSG00000163638 |
| 3 | 64719584 | 64719879 | 64719731 | 11 | 14 | 10 | 1.417232979 | 0.185113  | ADAMTS9 | ENSG00000163638 |
| 3 | 64721157 | 64721750 | 64721480 | 17 | 38 | 35 | 1.125912866 | 0.303364  | ADAMTS9 | ENSG00000163638 |
| 3 | 64721838 | 64722118 | 64721954 | 10 | 11 | 23 | 0.519652092 | 0.973215  | ADAMTS9 | ENSG00000163638 |
| 3 | 64722539 | 64722839 | 64722702 | 11 | 14 | 13 | 1.113540197 | 0.385405  | ADAMTS9 | ENSG00000163638 |
| 3 | 64723454 | 64723644 | 64723575 | 8  | 8  | 8  | 1.039304184 | 0.46786   | ADAMTS9 | ENSG00000163638 |
| 3 | 64723653 | 64724169 | 64723915 | 11 | 24 | 17 | 1.443478034 | 0.113942  | ADAMTS9 | ENSG00000163638 |
| 3 | 64724289 | 64724557 | 64724423 | 10 | 12 | 13 | 0.965068171 | 0.538344  | ADAMTS9 | ENSG00000163638 |
| 3 | 64724609 | 64724876 | 64724778 | 8  | 12 | 17 | 0.750608578 | 0.78992   | ADAMTS9 | ENSG00000163638 |
| 3 | 64725322 | 64725786 | 64725494 | 14 | 24 | 36 | 0.702232557 | 0.917534  | ADAMTS9 | ENSG00000163638 |
| 3 | 64726073 | 64726527 | 64726379 | 11 | 18 | 27 | 0.705242125 | 0.884499  | ADAMTS9 | ENSG00000163638 |
| 3 | 64729391 | 64729580 | 64729484 | 9  | 10 | 12 | 0.879411233 | 0.62639   | ADAMTS9 | ENSG00000163638 |
| 3 | 64730123 | 64730443 | 64730283 | 9  | 15 | 21 | 0.755857589 | 0.807439  | ADAMTS9 | ENSG00000163638 |
| 3 | 64731009 | 64731324 | 64731205 | 8  | 13 | 12 | 1.11925066  | 0.384109  | ADAMTS9 | ENSG00000163638 |
| 3 | 64732929 | 64733133 | 64733031 | 11 | 11 | 12 | 0.959357709 | 0.543005  | ADAMTS9 | ENSG00000163638 |
| 3 | 64734142 | 64734396 | 64734278 | 14 | 17 | 15 | 1.169217207 | 0.323156  | ADAMTS9 | ENSG00000163638 |
| 3 | 64735433 | 64735686 | 64735528 | 12 | 12 | 9  | 1.35109544  | 0.232899  | ADAMTS9 | ENSG00000163638 |
| 3 | 64736071 | 64736286 | 64736178 | 8  | 9  | 12 | 0.799464757 | 0.707717  | ADAMTS9 | ENSG00000163638 |
| 3 | 64736556 | 64737022 | 64736843 | 13 | 25 | 13 | 1.930136342 | 0.0200308 | ADAMTS9 | ENSG00000163638 |
| 3 | 64744146 | 64744364 | 64744226 | 10 | 11 | 8  | 1.385738912 | 0.224757  | ADAMTS9 | ENSG00000163638 |

|   |          |          |          |    |    |    |             |           |         |                 |
|---|----------|----------|----------|----|----|----|-------------|-----------|---------|-----------------|
| 3 | 64745126 | 64745567 | 64745246 | 8  | 15 | 15 | 1.039304184 | 0.456923  | ADAMTS9 | ENSG00000163638 |
| 3 | 64749945 | 64750688 | 64750247 | 10 | 30 | 27 | 1.150658204 | 0.29431   | ADAMTS9 | ENSG00000163638 |
| 3 | 64752704 | 64752883 | 64752793 | 8  | 8  | 7  | 1.169217207 | 0.371848  | ADAMTS9 | ENSG00000163638 |
| 3 | 64752977 | 64753160 | 64753068 | 11 | 11 | 15 | 0.779478138 | 0.747877  | ADAMTS9 | ENSG00000163638 |
| 3 | 64753349 | 64753657 | 64753503 | 8  | 12 | 17 | 0.750608578 | 0.78992   | ADAMTS9 | ENSG00000163638 |
| 3 | 64755686 | 64755954 | 64755820 | 10 | 13 | 4  | 2.910051716 | 0.0125532 | ADAMTS9 | ENSG00000163638 |
| 3 | 64757550 | 64757825 | 64757707 | 9  | 12 | 10 | 1.228268581 | 0.305344  | ADAMTS9 | ENSG00000163638 |
| 3 | 64757869 | 64758092 | 64757980 | 8  | 10 | 9  | 1.143234603 | 0.378307  | ADAMTS9 | ENSG00000163638 |
| 3 | 64758504 | 64758891 | 64758712 | 8  | 15 | 15 | 1.039304184 | 0.456923  | ADAMTS9 | ENSG00000163638 |
| 3 | 64759697 | 64760561 | 64760055 | 15 | 46 | 43 | 1.110165833 | 0.308777  | ADAMTS9 | ENSG00000163638 |
| 3 | 64760650 | 64760854 | 64760788 | 9  | 10 | 8  | 1.27026067  | 0.293854  | ADAMTS9 | ENSG00000163638 |
| 3 | 64762495 | 64762986 | 64762807 | 9  | 20 | 25 | 0.839437995 | 0.727499  | ADAMTS9 | ENSG00000163638 |
| 3 | 64763474 | 64763659 | 64763566 | 8  | 10 | 14 | 0.762156402 | 0.758589  | ADAMTS9 | ENSG00000163638 |
| 3 | 64764405 | 64764634 | 64764502 | 9  | 10 | 11 | 0.952695502 | 0.548138  | ADAMTS9 | ENSG00000163638 |
| 3 | 64764727 | 64765116 | 64764974 | 10 | 17 | 22 | 0.813368492 | 0.747743  | ADAMTS9 | ENSG00000163638 |
| 3 | 64765668 | 64765973 | 64765807 | 9  | 12 | 17 | 0.750608578 | 0.78992   | ADAMTS9 | ENSG00000163638 |
| 3 | 64767979 | 64768416 | 64768047 | 12 | 21 | 6  | 3.266384579 | 0.0013436 | ADAMTS9 | ENSG00000163638 |
| 3 | 64768557 | 64768841 | 64768724 | 19 | 20 | 10 | 1.98412617  | 0.0277883 | ADAMTS9 | ENSG00000163638 |
| 3 | 64769722 | 64769992 | 64769858 | 12 | 12 | 10 | 1.228268581 | 0.305344  | ADAMTS9 | ENSG00000163638 |
| 3 | 64770718 | 64771381 | 64771202 | 11 | 29 | 30 | 1.005778243 | 0.491622  | ADAMTS9 | ENSG00000163638 |
| 3 | 64772009 | 64772318 | 64772155 | 10 | 12 | 7  | 1.688869299 | 0.11395   | ADAMTS9 | ENSG00000163638 |
| 3 | 64774210 | 64774486 | 64774327 | 13 | 15 | 19 | 0.831443347 | 0.712423  | ADAMTS9 | ENSG00000163638 |
| 3 | 64774493 | 64774938 | 64774797 | 9  | 17 | 33 | 0.550219862 | 0.982935  | ADAMTS9 | ENSG00000163638 |
| 3 | 64775413 | 64775605 | 64775509 | 10 | 10 | 16 | 0.672490943 | 0.854309  | ADAMTS9 | ENSG00000163638 |
| 3 | 64775779 | 64776735 | 64775992 | 23 | 68 | 29 | 2.390399624 | 1.46E-05  | ADAMTS9 | ENSG00000163638 |
| 3 | 64776770 | 64777137 | 64776949 | 12 | 19 | 11 | 1.73217364  | 0.0607469 | ADAMTS9 | ENSG00000163638 |
| 3 | 64777286 | 64777771 | 64777465 | 9  | 18 | 18 | 1.039304184 | 0.453018  | ADAMTS9 | ENSG00000163638 |
| 3 | 64778425 | 64778710 | 64778567 | 9  | 11 | 9  | 1.247165021 | 0.300052  | ADAMTS9 | ENSG00000163638 |
| 3 | 64779164 | 64779435 | 64779299 | 8  | 11 | 7  | 1.558956276 | 0.158273  | ADAMTS9 | ENSG00000163638 |
| 3 | 64781567 | 64781873 | 64781715 | 8  | 13 | 9  | 1.455025858 | 0.177172  | ADAMTS9 | ENSG00000163638 |
| 3 | 64784206 | 64784520 | 64784372 | 9  | 13 | 15 | 0.909391161 | 0.604792  | ADAMTS9 | ENSG00000163638 |
| 3 | 64785112 | 64785351 | 64785264 | 11 | 14 | 11 | 1.29913023  | 0.246308  | ADAMTS9 | ENSG00000163638 |
| 3 | 64786535 | 64786730 | 64786672 | 9  | 10 | 13 | 0.816596145 | 0.696946  | ADAMTS9 | ENSG00000163638 |
| 3 | 64786767 | 64786950 | 64786851 | 8  | 9  | 7  | 1.29913023  | 0.286504  | ADAMTS9 | ENSG00000163638 |

|   |          |          |          |     |     |    |             |           |         |                 |
|---|----------|----------|----------|-----|-----|----|-------------|-----------|---------|-----------------|
| 3 | 64787047 | 64787328 | 64787184 | 9   | 10  | 19 | 0.571617301 | 0.938875  | ADAMTS9 | ENSG00000163638 |
| 3 | 64788213 | 64788798 | 64788448 | 13  | 29  | 39 | 0.779478138 | 0.851784  | ADAMTS9 | ENSG00000163638 |
| 3 | 64789707 | 64790286 | 64790092 | 10  | 24  | 21 | 1.181027482 | 0.2833    | ADAMTS9 | ENSG00000163638 |
| 3 | 64791181 | 64791662 | 64791502 | 13  | 22  | 21 | 1.086545284 | 0.390103  | ADAMTS9 | ENSG00000163638 |
| 3 | 64791727 | 64792181 | 64791896 | 17  | 24  | 28 | 0.895951883 | 0.65833   | ADAMTS9 | ENSG00000163638 |
| 3 | 64793257 | 64793768 | 64793436 | 10  | 23  | 15 | 1.558956276 | 0.0802366 | ADAMTS9 | ENSG00000163638 |
| 3 | 64793803 | 64794156 | 64793979 | 9   | 14  | 10 | 1.417232979 | 0.185113  | ADAMTS9 | ENSG00000163638 |
| 3 | 64795173 | 64795496 | 64795345 | 12  | 15  | 19 | 0.831443347 | 0.712423  | ADAMTS9 | ENSG00000163638 |
| 3 | 64795592 | 64796035 | 64795876 | 13  | 21  | 21 | 1.039304184 | 0.449418  | ADAMTS9 | ENSG00000163638 |
| 3 | 64796254 | 64796561 | 64796417 | 11  | 14  | 11 | 1.29913023  | 0.246308  | ADAMTS9 | ENSG00000163638 |
| 3 | 64796626 | 64797802 | 64797002 | 107 | 203 | 29 | 7.067268453 | 2.27E-35  | ADAMTS9 | ENSG00000163638 |
| 3 | 64797804 | 64798434 | 64798074 | 13  | 33  | 26 | 1.308753417 | 0.146119  | ADAMTS9 | ENSG00000163638 |
| 3 | 64800003 | 64800365 | 64800186 | 10  | 17  | 11 | 1.558956276 | 0.111389  | ADAMTS9 | ENSG00000163638 |
| 3 | 64800446 | 64800901 | 64800658 | 15  | 24  | 11 | 2.16521705  | 0.0106896 | ADAMTS9 | ENSG00000163638 |
| 3 | 64801796 | 64802038 | 64801917 | 11  | 13  | 13 | 1.039304184 | 0.45974   | ADAMTS9 | ENSG00000163638 |
| 3 | 64802954 | 64803216 | 64803091 | 11  | 14  | 7  | 1.948695345 | 0.0559175 | ADAMTS9 | ENSG00000163638 |
| 3 | 64803566 | 64803828 | 64803667 | 10  | 12  | 7  | 1.688869299 | 0.11395   | ADAMTS9 | ENSG00000163638 |
| 3 | 64803854 | 64804147 | 64803969 | 10  | 13  | 10 | 1.32275078  | 0.240023  | ADAMTS9 | ENSG00000163638 |
| 3 | 64804390 | 64804613 | 64804450 | 9   | 11  | 14 | 0.831443347 | 0.68719   | ADAMTS9 | ENSG00000163638 |
| 3 | 64804648 | 64804989 | 64804768 | 8   | 13  | 13 | 1.039304184 | 0.45974   | ADAMTS9 | ENSG00000163638 |
| 3 | 64805632 | 64806316 | 64805785 | 18  | 33  | 19 | 1.766817113 | 0.0191523 | ADAMTS9 | ENSG00000163638 |
| 3 | 64807532 | 64807898 | 64807852 | 11  | 17  | 20 | 0.890832158 | 0.642922  | ADAMTS9 | ENSG00000163638 |
| 3 | 64807944 | 64808211 | 64808077 | 11  | 13  | 10 | 1.32275078  | 0.240023  | ADAMTS9 | ENSG00000163638 |
| 3 | 64808841 | 64809407 | 64809020 | 9   | 23  | 24 | 0.997732017 | 0.503931  | ADAMTS9 | ENSG00000163638 |
| 3 | 64809572 | 64809971 | 64809800 | 9   | 15  | 7  | 2.078608368 | 0.038229  | ADAMTS9 | ENSG00000163638 |
| 3 | 64811395 | 64811879 | 64811700 | 12  | 21  | 30 | 0.737570711 | 0.866474  | ADAMTS9 | ENSG00000163638 |
| 3 | 64814105 | 64814842 | 64814473 | 12  | 29  | 26 | 1.154782427 | 0.292794  | ADAMTS9 | ENSG00000163638 |
| 3 | 64816484 | 64816688 | 64816590 | 8   | 9   | 12 | 0.799464757 | 0.707717  | ADAMTS9 | ENSG00000163638 |
| 3 | 64817064 | 64817343 | 64817196 | 9   | 12  | 11 | 1.125912866 | 0.382541  | ADAMTS9 | ENSG00000163638 |
| 3 | 64819666 | 64819903 | 64819768 | 8   | 11  | 9  | 1.247165021 | 0.300052  | ADAMTS9 | ENSG00000163638 |
| 3 | 64821185 | 64821600 | 64821364 | 10  | 19  | 24 | 0.831443347 | 0.733913  | ADAMTS9 | ENSG00000163638 |
| 3 | 64822619 | 64823108 | 64822929 | 10  | 21  | 24 | 0.914587682 | 0.621823  | ADAMTS9 | ENSG00000163638 |
| 3 | 64823467 | 64823721 | 64823634 | 13  | 16  | 11 | 1.472347594 | 0.147517  | ADAMTS9 | ENSG00000163638 |
| 3 | 64823924 | 64824249 | 64824089 | 9   | 13  | 19 | 0.727512929 | 0.824686  | ADAMTS9 | ENSG00000163638 |

|   |          |          |          |    |    |    |             |           |         |                 |
|---|----------|----------|----------|----|----|----|-------------|-----------|---------|-----------------|
| 3 | 64824262 | 64824900 | 64824734 | 15 | 32 | 26 | 1.27026067  | 0.176378  | ADAMTS9 | ENSG00000163638 |
| 3 | 64825331 | 64825517 | 64825414 | 9  | 10 | 10 | 1.039304184 | 0.464387  | ADAMTS9 | ENSG00000163638 |
| 3 | 64826955 | 64827251 | 64827091 | 9  | 12 | 5  | 2.251825733 | 0.0404733 | ADAMTS9 | ENSG00000163638 |
| 3 | 64828523 | 64828703 | 64828667 | 8  | 8  | 8  | 1.039304184 | 0.46786   | ADAMTS9 | ENSG00000163638 |
| 3 | 64831708 | 64832028 | 64831813 | 11 | 15 | 18 | 0.875203524 | 0.655562  | ADAMTS9 | ENSG00000163638 |
| 3 | 64833112 | 64834154 | 64833291 | 15 | 56 | 34 | 1.6925811   | 0.006226  | ADAMTS9 | ENSG00000163638 |
| 3 | 64834838 | 64835182 | 64835010 | 11 | 17 | 18 | 0.984603964 | 0.519872  | ADAMTS9 | ENSG00000163638 |
| 3 | 64835307 | 64835718 | 64835547 | 10 | 18 | 20 | 0.940322833 | 0.578675  | ADAMTS9 | ENSG00000163638 |
| 3 | 64836373 | 64836584 | 64836478 | 10 | 12 | 8  | 1.501217155 | 0.168286  | ADAMTS9 | ENSG00000163638 |
| 3 | 64842202 | 64842405 | 64842295 | 10 | 11 | 9  | 1.247165021 | 0.300052  | ADAMTS9 | ENSG00000163638 |
| 3 | 64842488 | 64843022 | 64842656 | 12 | 27 | 20 | 1.385738912 | 0.126232  | ADAMTS9 | ENSG00000163638 |
| 3 | 64843098 | 64843289 | 64843261 | 8  | 10 | 9  | 1.143234603 | 0.378307  | ADAMTS9 | ENSG00000163638 |
| 3 | 64843963 | 64844189 | 64844091 | 8  | 10 | 13 | 0.816596145 | 0.696946  | ADAMTS9 | ENSG00000163638 |
| 3 | 64844395 | 64844850 | 64844645 | 10 | 20 | 15 | 1.364086742 | 0.171319  | ADAMTS9 | ENSG00000163638 |
| 3 | 64844919 | 64845111 | 64845015 | 8  | 10 | 7  | 1.429043253 | 0.21536   | ADAMTS9 | ENSG00000163638 |
| 3 | 64845311 | 64845761 | 64845479 | 11 | 17 | 17 | 1.039304184 | 0.454282  | ADAMTS9 | ENSG00000163638 |
| 3 | 64847239 | 64847581 | 64847410 | 8  | 14 | 12 | 1.199197136 | 0.313881  | ADAMTS9 | ENSG00000163638 |
| 3 | 64850719 | 64850975 | 64850801 | 12 | 15 | 9  | 1.662886695 | 0.0970566 | ADAMTS9 | ENSG00000163638 |
| 3 | 64851031 | 64851564 | 64851311 | 16 | 30 | 22 | 1.400801292 | 0.107495  | ADAMTS9 | ENSG00000163638 |
| 3 | 64851839 | 64852080 | 64851942 | 13 | 14 | 11 | 1.29913023  | 0.246308  | ADAMTS9 | ENSG00000163638 |
| 3 | 64852976 | 64853514 | 64853361 | 10 | 20 | 23 | 0.909391161 | 0.626666  | ADAMTS9 | ENSG00000163638 |
| 3 | 64854151 | 64854351 | 64854280 | 8  | 9  | 11 | 0.86608682  | 0.635181  | ADAMTS9 | ENSG00000163638 |
| 3 | 64855182 | 64855375 | 64855318 | 10 | 11 | 8  | 1.385738912 | 0.224757  | ADAMTS9 | ENSG00000163638 |
| 3 | 64855951 | 64856240 | 64856075 | 8  | 12 | 20 | 0.643378781 | 0.900583  | ADAMTS9 | ENSG00000163638 |
| 3 | 64856254 | 64856614 | 64856403 | 10 | 16 | 18 | 0.929903744 | 0.58804   | ADAMTS9 | ENSG00000163638 |
| 3 | 64857312 | 64857543 | 64857442 | 11 | 12 | 13 | 0.965068171 | 0.538344  | ADAMTS9 | ENSG00000163638 |
| 3 | 64858064 | 64858419 | 64858241 | 12 | 18 | 21 | 0.897580886 | 0.637183  | ADAMTS9 | ENSG00000163638 |
| 3 | 64858432 | 64858695 | 64858576 | 9  | 12 | 6  | 1.930136342 | 0.071303  | ADAMTS9 | ENSG00000163638 |
| 3 | 64859085 | 64859272 | 64859178 | 8  | 9  | 12 | 0.799464757 | 0.707717  | ADAMTS9 | ENSG00000163638 |
| 3 | 64860536 | 64860909 | 64860735 | 12 | 18 | 11 | 1.645564958 | 0.0828462 | ADAMTS9 | ENSG00000163638 |
| 3 | 64860995 | 64861256 | 64861149 | 10 | 13 | 8  | 1.616695398 | 0.123553  | ADAMTS9 | ENSG00000163638 |
| 3 | 64861426 | 64861813 | 64861649 | 11 | 18 | 15 | 1.234173719 | 0.265435  | ADAMTS9 | ENSG00000163638 |
| 3 | 64862083 | 64862428 | 64862255 | 9  | 14 | 13 | 1.113540197 | 0.385405  | ADAMTS9 | ENSG00000163638 |
| 3 | 64862775 | 64862964 | 64862862 | 10 | 12 | 6  | 1.930136342 | 0.071303  | ADAMTS9 | ENSG00000163638 |

|   |          |          |          |    |    |    |             |            |         |                 |
|---|----------|----------|----------|----|----|----|-------------|------------|---------|-----------------|
| 3 | 64862977 | 64863264 | 64863144 | 14 | 18 | 7  | 2.468347438 | 0.0112499  | ADAMTS9 | ENSG00000163638 |
| 3 | 64865628 | 64865908 | 64865773 | 12 | 15 | 12 | 1.279143611 | 0.251893   | ADAMTS9 | ENSG00000163638 |
| 3 | 64866138 | 64866405 | 64866280 | 11 | 13 | 12 | 1.11925066  | 0.384109   | ADAMTS9 | ENSG00000163638 |
| 3 | 64866564 | 64866789 | 64866667 | 8  | 9  | 10 | 0.944821986 | 0.553851   | ADAMTS9 | ENSG00000163638 |
| 3 | 64867288 | 64867709 | 64867436 | 18 | 27 | 21 | 1.32275078  | 0.160553   | ADAMTS9 | ENSG00000163638 |
| 3 | 64868276 | 64869102 | 64868675 | 13 | 36 | 33 | 1.131007495 | 0.301525   | ADAMTS9 | ENSG00000163638 |
| 3 | 64869117 | 64869586 | 64869296 | 10 | 19 | 21 | 0.944821986 | 0.574409   | ADAMTS9 | ENSG00000163638 |
| 3 | 64869865 | 64870047 | 64869956 | 9  | 9  | 18 | 0.547002202 | 0.94615    | ADAMTS9 | ENSG00000163638 |
| 3 | 64870197 | 64870533 | 64870365 | 16 | 21 | 18 | 1.203404845 | 0.275531   | ADAMTS9 | ENSG00000163638 |
| 3 | 64870577 | 64872534 | 64872271 | 12 | 75 | 53 | 1.462724407 | 0.015412   | ADAMTS9 | ENSG00000163638 |
| 3 | 64873323 | 64873604 | 64873492 | 10 | 12 | 10 | 1.228268581 | 0.305344   | ADAMTS9 | ENSG00000163638 |
| 3 | 64873990 | 64874415 | 64874196 | 10 | 19 | 19 | 1.039304184 | 0.451787   | ADAMTS9 | ENSG00000163638 |
| 3 | 64874812 | 64875069 | 64874912 | 9  | 12 | 11 | 1.125912866 | 0.382541   | ADAMTS9 | ENSG00000163638 |
| 3 | 64875115 | 64875744 | 64875573 | 10 | 24 | 31 | 0.811956394 | 0.785392   | ADAMTS9 | ENSG00000163638 |
| 3 | 64876839 | 64877146 | 64876968 | 9  | 12 | 17 | 0.750608578 | 0.78992    | ADAMTS9 | ENSG00000163638 |
| 3 | 64877272 | 64877492 | 64877350 | 10 | 11 | 12 | 0.959357709 | 0.543005   | ADAMTS9 | ENSG00000163638 |
| 3 | 64879217 | 64879464 | 64879340 | 12 | 13 | 13 | 1.039304184 | 0.45974    | ADAMTS9 | ENSG00000163638 |
| 3 | 64879585 | 64879837 | 64879711 | 9  | 10 | 11 | 0.952695502 | 0.548138   | ADAMTS9 | ENSG00000163638 |
| 3 | 64879965 | 64880414 | 64880112 | 10 | 16 | 24 | 0.706726845 | 0.870131   | ADAMTS9 | ENSG00000163638 |
| 3 | 64881500 | 64881755 | 64881597 | 10 | 13 | 20 | 0.692869456 | 0.861903   | ADAMTS9 | ENSG00000163638 |
| 3 | 64881974 | 64882516 | 64882337 | 12 | 26 | 31 | 0.876912905 | 0.694502   | ADAMTS9 | ENSG00000163638 |
| 3 | 64883017 | 64883308 | 64883155 | 9  | 13 | 15 | 0.909391161 | 0.604792   | ADAMTS9 | ENSG00000163638 |
| 3 | 64884362 | 64884588 | 64884484 | 13 | 15 | 14 | 1.10859113  | 0.386477   | ADAMTS9 | ENSG00000163638 |
| 3 | 64884820 | 64885062 | 64884924 | 9  | 11 | 15 | 0.779478138 | 0.747877   | ADAMTS9 | ENSG00000163638 |
| 3 | 64885335 | 64886492 | 64885686 | 12 | 46 | 52 | 0.921647107 | 0.65928    | ADAMTS9 | ENSG00000163638 |
| 3 | 64886515 | 64886767 | 64886607 | 10 | 13 | 18 | 0.765803083 | 0.780427   | ADAMTS9 | ENSG00000163638 |
| 3 | 64887226 | 64887594 | 64887416 | 12 | 18 | 21 | 0.897580886 | 0.637183   | ADAMTS9 | ENSG00000163638 |
| 3 | 64887788 | 64888083 | 64887946 | 12 | 13 | 22 | 0.632619938 | 0.917511   | ADAMTS9 | ENSG00000163638 |
| 3 | 64889421 | 64889675 | 64889548 | 9  | 10 | 28 | 0.394218829 | 0.99754    | ADAMTS9 | ENSG00000163638 |
| 3 | 64891104 | 64891482 | 64891360 | 11 | 17 | 26 | 0.692869456 | 0.890806   | ADAMTS9 | ENSG00000163638 |
| 3 | 64892201 | 64892421 | 64892311 | 9  | 10 | 4  | 2.286469205 | 0.0509017  | ADAMTS9 | ENSG00000163638 |
| 3 | 64892773 | 64893078 | 64892934 | 10 | 14 | 13 | 1.113540197 | 0.385405   | ADAMTS9 | ENSG00000163638 |
| 3 | 64893814 | 64894048 | 64893931 | 12 | 14 | 3  | 3.897390691 | 0.00295882 | ADAMTS9 | ENSG00000163638 |
| 3 | 64894073 | 64894265 | 64894162 | 9  | 9  | 7  | 1.29913023  | 0.286504   | ADAMTS9 | ENSG00000163638 |

|   |          |          |          |     |     |    |             |            |         |                 |
|---|----------|----------|----------|-----|-----|----|-------------|------------|---------|-----------------|
| 3 | 64895137 | 64895470 | 64895303 | 11  | 16  | 10 | 1.606197376 | 0.104477   | ADAMTS9 | ENSG00000163638 |
| 3 | 64895809 | 64896113 | 64895949 | 13  | 16  | 19 | 0.883408557 | 0.649033   | ADAMTS9 | ENSG00000163638 |
| 3 | 64896132 | 64896523 | 64896295 | 10  | 19  | 19 | 1.039304184 | 0.451787   | ADAMTS9 | ENSG00000163638 |
| 3 | 64897517 | 64897740 | 64897608 | 8   | 8   | 10 | 0.850339787 | 0.645072   | ADAMTS9 | ENSG00000163638 |
| 3 | 64898158 | 64898537 | 64898365 | 8   | 14  | 10 | 1.417232979 | 0.185113   | ADAMTS9 | ENSG00000163638 |
| 3 | 64899045 | 64899338 | 64899191 | 10  | 14  | 20 | 0.742360132 | 0.815839   | ADAMTS9 | ENSG00000163638 |
| 3 | 64899991 | 64900594 | 64900426 | 12  | 26  | 26 | 1.039304184 | 0.44394    | ADAMTS9 | ENSG00000163638 |
| 3 | 64900701 | 64900884 | 64900736 | 8   | 9   | 7  | 1.29913023  | 0.286504   | ADAMTS9 | ENSG00000163638 |
| 3 | 64901188 | 64901508 | 64901357 | 8   | 11  | 24 | 0.498866008 | 0.980815   | ADAMTS9 | ENSG00000163638 |
| 3 | 64901672 | 64901973 | 64901822 | 9   | 13  | 20 | 0.692869456 | 0.861903   | ADAMTS9 | ENSG00000163638 |
| 3 | 64902008 | 64902303 | 64902182 | 10  | 14  | 15 | 0.974347673 | 0.530138   | ADAMTS9 | ENSG00000163638 |
| 3 | 64903422 | 64903758 | 64903590 | 9   | 13  | 13 | 1.039304184 | 0.45974    | ADAMTS9 | ENSG00000163638 |
| 3 | 64904407 | 64906406 | 64905346 | 111 | 204 | 74 | 2.84076477  | 7.93E-17   | ADAMTS9 | ENSG00000163638 |
| 3 | 64906418 | 64906829 | 64906664 | 11  | 18  | 15 | 1.234173719 | 0.265435   | ADAMTS9 | ENSG00000163638 |
| 3 | 64908130 | 64908961 | 64908638 | 10  | 31  | 21 | 1.511715177 | 0.0647459  | ADAMTS9 | ENSG00000163638 |
| 3 | 64910120 | 64910356 | 64910230 | 8   | 11  | 5  | 2.078608368 | 0.0614303  | ADAMTS9 | ENSG00000163638 |
| 3 | 64911699 | 64912219 | 64912048 | 10  | 21  | 26 | 0.846840446 | 0.721382   | ADAMTS9 | ENSG00000163638 |
| 3 | 64912579 | 64912775 | 64912696 | 12  | 13  | 8  | 1.616695398 | 0.123553   | ADAMTS9 | ENSG00000163638 |
| 3 | 64913203 | 64913816 | 64913637 | 13  | 28  | 23 | 1.255825889 | 0.202607   | ADAMTS9 | ENSG00000163638 |
| 3 | 64914264 | 64914466 | 64914434 | 8   | 10  | 13 | 0.816596145 | 0.696946   | ADAMTS9 | ENSG00000163638 |
| 3 | 64914520 | 64914794 | 64914624 | 9   | 13  | 16 | 0.855897563 | 0.670115   | ADAMTS9 | ENSG00000163638 |
| 3 | 64915645 | 64916511 | 64916348 | 14  | 42  | 38 | 1.145899485 | 0.268268   | ADAMTS9 | ENSG00000163638 |
| 3 | 64916575 | 64917281 | 64917080 | 12  | 32  | 33 | 1.008736414 | 0.486341   | ADAMTS9 | ENSG00000163638 |
| 3 | 64917638 | 64918394 | 64918058 | 16  | 37  | 25 | 1.518983039 | 0.0476968  | ADAMTS9 | ENSG00000163638 |
| 3 | 64918837 | 64919073 | 64918955 | 10  | 12  | 23 | 0.562956433 | 0.958014   | ADAMTS9 | ENSG00000163638 |
| 3 | 64919410 | 64919645 | 64919528 | 11  | 14  | 17 | 0.86608682  | 0.662567   | ADAMTS9 | ENSG00000163638 |
| 3 | 64920159 | 64920972 | 64920338 | 14  | 37  | 33 | 1.161575265 | 0.261988   | ADAMTS9 | ENSG00000163638 |
| 3 | 64922630 | 64922963 | 64922796 | 13  | 18  | 14 | 1.316451967 | 0.209896   | ADAMTS9 | ENSG00000163638 |
| 3 | 64923086 | 64923428 | 64923256 | 13  | 18  | 22 | 0.85855563  | 0.691398   | ADAMTS9 | ENSG00000163638 |
| 3 | 64923767 | 64923963 | 64923859 | 8   | 8   | 9  | 0.935373766 | 0.560286   | ADAMTS9 | ENSG00000163638 |
| 3 | 64925838 | 64926211 | 64926032 | 11  | 18  | 6  | 2.8209685   | 0.00559354 | ADAMTS9 | ENSG00000163638 |
| 3 | 64926289 | 64926561 | 64926425 | 8   | 12  | 7  | 1.688869299 | 0.11395    | ADAMTS9 | ENSG00000163638 |
| 3 | 65100595 | 65100785 | 65100690 | 8   | 8   | 0  | 9.353737658 | 0.00163931 |         | ENSG00000203649 |
| 3 | 66505934 | 66506115 | 66506024 | 8   | 8   | 1  | 4.676868829 | 0.0091584  |         | ENSG00000222156 |

|   |          |          |          |    |     |    |             |             |         |                 |
|---|----------|----------|----------|----|-----|----|-------------|-------------|---------|-----------------|
| 3 | 66949345 | 66949579 | 66949462 | 8  | 8   | 1  | 4.676868829 | 0.0091584   |         | ENSG00000214560 |
| 3 | 69216642 | 69216838 | 69216722 | 11 | 12  | 0  | 13.5109544  | 9.48E-05    | ARL6IP5 | ENSG00000144746 |
| 3 | 70935802 | 70936066 | 70935934 | 8  | 9   | 3  | 2.598260461 | 0.0397929   |         | ENSG00000206939 |
| 3 | 70986113 | 70986511 | 70986292 | 23 | 35  | 1  | 18.70747532 | 1.40E-10    |         | ENSG00000221382 |
| 3 | 71579670 | 71579857 | 71579763 | 8  | 8   | 0  | 9.353737658 | 0.00163931  |         | ENSG00000221264 |
| 3 | 72309217 | 72309496 | 72309353 | 15 | 17  | 1  | 9.353737658 | 2.73E-05    |         | ENSG00000212070 |
| 3 | 72692843 | 72693300 | 72693035 | 10 | 18  | 1  | 9.87338975  | 1.41E-05    |         | ENSG00000199469 |
| 3 | 72759824 | 72760008 | 72759933 | 8  | 9   | 5  | 1.73217364  | 0.133894    |         | ENSG00000199469 |
| 3 | 72760013 | 72760209 | 72760111 | 9  | 9   | 2  | 3.464347281 | 0.0163838   |         | ENSG00000199469 |
| 3 | 72793046 | 72793241 | 72793185 | 9  | 9   | 5  | 1.73217364  | 0.133894    |         | ENSG00000211012 |
| 3 | 73242472 | 73242819 | 73242645 | 16 | 17  | 7  | 2.338434415 | 0.0171287   |         | ENSG00000223247 |
| 3 | 74743509 | 74743735 | 74743672 | 8  | 8   | 1  | 4.676868829 | 0.0091584   | CNTN3   | ENSG00000113805 |
| 3 | 75356365 | 75356549 | 75356457 | 8  | 9   | 2  | 3.464347281 | 0.0163838   |         | ENSG00000222549 |
| 3 | 75758836 | 75759039 | 75758937 | 11 | 11  | 0  | 12.47165021 | 0.000193293 |         | ENSG00000172971 |
| 3 | 80017263 | 80017618 | 80017411 | 9  | 14  | 2  | 5.196520921 | 0.000907371 | ROBO1   | ENSG00000169855 |
| 3 | 80828262 | 80828514 | 80828370 | 15 | 15  | 6  | 2.375552421 | 0.0212094   |         | ENSG00000211100 |
| 3 | 81628562 | 81628944 | 81628734 | 10 | 14  | 8  | 1.73217364  | 0.0890835   |         | ENSG00000222389 |
| 3 | 81893443 | 81893640 | 81893552 | 8  | 10  | 4  | 2.286469205 | 0.0509017   | GBE1    | ENSG00000114480 |
| 3 | 82232311 | 82232650 | 82232480 | 16 | 22  | 1  | 11.95199812 | 9.69E-07    | GBE1    | ENSG00000114480 |
| 3 | 82599285 | 82599476 | 82599391 | 9  | 10  | 2  | 3.810782009 | 0.00936112  |         |                 |
| 3 | 83456409 | 83456634 | 83456521 | 8  | 8   | 1  | 4.676868829 | 0.0091584   |         | ENSG00000223141 |
| 3 | 83558298 | 83558586 | 83558413 | 8  | 11  | 3  | 3.117912553 | 0.0146045   |         | ENSG00000223141 |
| 3 | 83566270 | 83566484 | 83566377 | 8  | 10  | 1  | 5.716173013 | 0.00260397  |         | ENSG00000223141 |
| 3 | 83700113 | 83700419 | 83700266 | 8  | 11  | 3  | 3.117912553 | 0.0146045   |         | ENSG00000223141 |
| 3 | 83733525 | 83733704 | 83733593 | 8  | 8   | 3  | 2.338434415 | 0.0641221   |         | ENSG00000223141 |
| 3 | 84066113 | 84066921 | 84066491 | 81 | 120 | 3  | 31.43895157 | 1.50E-33    |         | ENSG00000223141 |
| 3 | 87201750 | 87202274 | 87202068 | 16 | 29  | 11 | 2.598260461 | 0.00146165  | VGLL3   | ENSG00000206538 |
| 3 | 87359537 | 87359770 | 87359653 | 9  | 9   | 1  | 5.196520921 | 0.00490062  | CHMP2B  | ENSG00000083937 |
| 3 | 87465282 | 87465761 | 87465461 | 11 | 22  | 5  | 3.983999373 | 0.000317941 |         | ENSG00000211155 |
| 3 | 87482465 | 87482810 | 87482637 | 11 | 13  | 7  | 1.818782322 | 0.0805123   |         | ENSG00000211155 |
| 3 | 87491732 | 87491913 | 87491822 | 8  | 9   | 7  | 1.29913023  | 0.286504    |         | ENSG00000211155 |
| 3 | 87499653 | 87499877 | 87499765 | 10 | 11  | 3  | 3.117912553 | 0.0146045   |         | ENSG00000211155 |
| 3 | 87930113 | 87930292 | 87930202 | 8  | 8   | 1  | 4.676868829 | 0.0091584   |         | ENSG00000200703 |
| 3 | 88135047 | 88135235 | 88135141 | 8  | 9   | 4  | 2.078608368 | 0.0785659   | HTR1F   | ENSG00000179097 |



|   |           |           |           |    |    |     |             |             |          |                 |
|---|-----------|-----------|-----------|----|----|-----|-------------|-------------|----------|-----------------|
| 3 | 88208029  | 88208254  | 88208157  | 8  | 9  | 1   | 5.196520921 | 0.00490062  | CGGBP1   | ENSG00000163320 |
| 3 | 88281524  | 88281896  | 88281691  | 19 | 24 | 5   | 4.330434101 | 0.000108998 | C3orf38  | ENSG00000179021 |
| 3 | 89129169  | 89129483  | 89129310  | 15 | 17 | 1   | 9.353737658 | 2.73E-05    | EPHA3    | ENSG00000044524 |
| 3 | 90427192  | 90427371  | 90427342  | 10 | 10 | 8   | 1.27026067  | 0.293854    |          | ENSG00000189002 |
| 3 | 90475056  | 90475297  | 90475206  | 8  | 8  | 4   | 1.870747532 | 0.118863    |          | ENSG00000189002 |
| 3 | 90530478  | 90530821  | 90530649  | 90 | 90 | 100 | 0.93640278  | 0.676081    |          | ENSG00000189002 |
| 3 | 90573322  | 90573652  | 90573487  | 18 | 18 | 23  | 0.822782479 | 0.740651    |          | ENSG00000189002 |
| 3 | 95264341  | 95264555  | 95264479  | 12 | 12 | 7   | 1.688869299 | 0.11395     | NSUN3    | ENSG00000178694 |
| 3 | 96162988  | 96163208  | 96163098  | 11 | 12 | 2   | 4.503651465 | 0.002963    | WDR82P1  | ENSG00000185141 |
| 3 | 98434295  | 98434498  | 98434393  | 10 | 10 | 4   | 2.286469205 | 0.0509017   | EPHA6    | ENSG00000080224 |
| 3 | 99647420  | 99647842  | 99647561  | 17 | 22 | 2   | 7.967998746 | 6.43E-06    | OR5K1    | ENSG00000185408 |
| 3 | 101019139 | 101019410 | 101019274 | 11 | 13 | 2   | 4.850086193 | 0.00164564  | C3orf26  | ENSG00000184220 |
| 3 | 101127216 | 101127497 | 101127356 | 9  | 11 | 2   | 4.157216737 | 0.0052913   | FILIP1L  | ENSG00000168386 |
| 3 | 102714676 | 102714867 | 102714805 | 8  | 9  | 2   | 3.464347281 | 0.0163838   | SENP7    | ENSG00000138468 |
| 3 | 102775753 | 102776108 | 102775930 | 16 | 22 | 3   | 5.975999059 | 2.96E-05    | PCNP     | ENSG00000081154 |
| 3 | 103331384 | 103331563 | 103331439 | 8  | 8  | 1   | 4.676868829 | 0.0091584   | ZPLD1    | ENSG00000170044 |
| 3 | 103364579 | 103364877 | 103364736 | 9  | 11 | 1   | 6.235825105 | 0.0013754   | ZPLD1    | ENSG00000170044 |
| 3 | 103894289 | 103894657 | 103894468 | 12 | 19 | 0   | 20.78608368 | 6.46E-07    |          | ENSG00000201065 |
| 3 | 106069048 | 106069281 | 106069164 | 9  | 11 | 1   | 6.235825105 | 0.0013754   |          | ENSG00000211384 |
| 3 | 106424341 | 106424605 | 106424473 | 8  | 12 | 4   | 2.702190879 | 0.0203088   | ALCAM    | ENSG00000170017 |
| 3 | 106570228 | 106570587 | 106570378 | 8  | 14 | 10  | 1.417232979 | 0.185113    | ALCAM    | ENSG00000170017 |
| 3 | 106573960 | 106574305 | 106574132 | 8  | 13 | 3   | 3.637564645 | 0.0050909   | ALCAM    | ENSG00000170017 |
| 3 | 107811373 | 107811571 | 107811492 | 10 | 10 | 1   | 5.716173013 | 0.00260397  |          | ENSG00000200361 |
| 3 | 107882341 | 107882669 | 107882499 | 8  | 11 | 2   | 4.157216737 | 0.0052913   |          | ENSG00000200361 |
| 3 | 107885460 | 107885830 | 107885637 | 8  | 14 | 1   | 7.794781382 | 0.000197021 |          | ENSG00000200361 |
| 3 | 108466400 | 108466765 | 108466586 | 17 | 24 | 6   | 3.711800658 | 0.000299603 |          | ENSG00000220989 |
| 3 | 109086707 | 109087048 | 109086877 | 12 | 18 | 2   | 6.582259834 | 7.91E-05    | CD47     | ENSG00000196776 |
| 3 | 109183196 | 109183472 | 109183359 | 11 | 13 | 7   | 1.818782322 | 0.0805123   | CD47     | ENSG00000196776 |
| 3 | 109188222 | 109188444 | 109188333 | 10 | 10 | 3   | 2.858086507 | 0.0242838   | CD47     | ENSG00000196776 |
| 3 | 109201026 | 109201278 | 109201152 | 8  | 8  | 6   | 1.336248237 | 0.277651    | CD47     | ENSG00000196776 |
| 3 | 109207630 | 109207985 | 109207766 | 10 | 14 | 4   | 3.117912553 | 0.00766354  | CD47     | ENSG00000196776 |
| 3 | 109220285 | 109220464 | 109220374 | 8  | 8  | 0   | 9.353737658 | 0.00163931  | CD47     | ENSG00000196776 |
| 3 | 109522456 | 109522700 | 109522596 | 8  | 9  | 1   | 5.196520921 | 0.00490062  |          | ENSG00000221724 |
| 3 | 109790749 | 109791338 | 109790928 | 12 | 26 | 11  | 2.338434415 | 0.00495238  | KIAA1524 | ENSG00000163507 |

|   |           |           |           |    |    |    |             |             |          |                 |
|---|-----------|-----------|-----------|----|----|----|-------------|-------------|----------|-----------------|
| 3 | 109821858 | 109822122 | 109821995 | 14 | 15 | 7  | 2.078608368 | 0.038229    | DZIP3    | ENSG00000198919 |
| 3 | 110116277 | 110116876 | 110116437 | 15 | 33 | 3  | 8.834085566 | 3.36E-08    | GUCA1C   | ENSG00000138472 |
| 3 | 110161932 | 110162111 | 110162040 | 8  | 8  | 2  | 3.117912553 | 0.0283184   | GUCA1C   | ENSG00000138472 |
| 3 | 112710903 | 112711230 | 112711066 | 14 | 18 | 2  | 6.582259834 | 7.91E-05    | CD96     | ENSG00000153283 |
| 3 | 112963008 | 112963370 | 112963194 | 9  | 16 | 6  | 2.524024447 | 0.0137633   | PLCXD2   | ENSG00000144824 |
| 3 | 112983406 | 112983863 | 112983585 | 16 | 25 | 8  | 3.00243431  | 0.0010168   | PLCXD2   | ENSG00000144824 |
| 3 | 113088638 | 113088825 | 113088731 | 8  | 8  | 7  | 1.169217207 | 0.371848    | PLCXD2   | ENSG00000144824 |
| 3 | 113120157 | 113120349 | 113120253 | 8  | 8  | 5  | 1.558956276 | 0.191397    | PLCXD2   | ENSG00000144824 |
| 3 | 113169278 | 113169506 | 113169369 | 11 | 12 | 9  | 1.35109544  | 0.232899    | ABHD10   | ENSG00000144827 |
| 3 | 113276495 | 113276959 | 113276780 | 13 | 22 | 4  | 4.780799247 | 0.00010647  | C3orf52  | ENSG00000114529 |
| 3 | 113521083 | 113521336 | 113521210 | 8  | 9  | 1  | 5.196520921 | 0.00490062  | CD200    | ENSG00000091972 |
| 3 | 113844596 | 113844775 | 113844719 | 8  | 8  | 2  | 3.117912553 | 0.0283184   | CCDC80   | ENSG00000091986 |
| 3 | 114102625 | 114103007 | 114102828 | 22 | 29 | 1  | 15.58956276 | 8.46E-09    | CD200R1L | ENSG00000206531 |
| 3 | 114177385 | 114177564 | 114177474 | 8  | 8  | 2  | 3.117912553 | 0.0283184   | CD200R1  | ENSG00000163606 |
| 3 | 114192360 | 114192619 | 114192489 | 10 | 12 | 2  | 4.503651465 | 0.002963    | GTPBP8   | ENSG00000163607 |
| 3 | 114312876 | 114313115 | 114312995 | 8  | 8  | 4  | 1.870747532 | 0.118863    | C3orf17  | ENSG00000163608 |
| 3 | 114349932 | 114350231 | 114350094 | 11 | 15 | 2  | 5.542955649 | 0.000497081 | BOC      | ENSG00000144857 |
| 3 | 114738032 | 114738479 | 114738300 | 12 | 20 | 7  | 2.728173484 | 0.00469378  | SIDT1    | ENSG00000072858 |
| 3 | 114814678 | 114814966 | 114814793 | 9  | 10 | 3  | 2.858086507 | 0.0242838   |          | ENSG00000209204 |
| 3 | 114947866 | 114948502 | 114948139 | 12 | 31 | 11 | 2.771477825 | 0.000623099 | NAT13    | ENSG00000121579 |
| 3 | 114955561 | 114955852 | 114955735 | 9  | 12 | 0  | 13.5109544  | 9.48E-05    | ATP6V1A  | ENSG00000114573 |
| 3 | 115016764 | 115016996 | 115016893 | 8  | 9  | 0  | 10.39304184 | 0.000803859 | GRAMD1C  | ENSG00000178075 |
| 3 | 115258267 | 115258469 | 115258368 | 9  | 10 | 2  | 3.810782009 | 0.00936112  | QTRTD1   | ENSG00000151576 |
| 3 | 115338335 | 115338524 | 115338434 | 8  | 9  | 4  | 2.078608368 | 0.0785659   | DRD3     | ENSG00000151577 |
| 3 | 115501014 | 115501215 | 115501076 | 8  | 9  | 1  | 5.196520921 | 0.00490062  | TIGIT    | ENSG00000181847 |
| 3 | 115585372 | 115585623 | 115585497 | 10 | 11 | 5  | 2.078608368 | 0.0614303   | ZBTB20   | ENSG00000181722 |
| 3 | 115651135 | 115651447 | 115651285 | 15 | 17 | 1  | 9.353737658 | 2.73E-05    | ZBTB20   | ENSG00000181722 |
| 3 | 116293699 | 116293912 | 116293773 | 8  | 8  | 5  | 1.558956276 | 0.191397    |          | ENSG00000212786 |
| 3 | 116348869 | 116349088 | 116348963 | 8  | 9  | 4  | 2.078608368 | 0.0785659   | ZBTB20   | ENSG00000181722 |
| 3 | 116349311 | 116349553 | 116349422 | 9  | 10 | 3  | 2.858086507 | 0.0242838   | ZBTB20   | ENSG00000181722 |
| 3 | 117395064 | 117395365 | 117395214 | 9  | 13 | 1  | 7.27512929  | 0.000378098 | LSAMP    | ENSG00000185565 |
| 3 | 117972530 | 117972728 | 117972629 | 8  | 9  | 2  | 3.464347281 | 0.0163838   | BZW1L1   | ENSG00000198406 |
| 3 | 118065801 | 118065997 | 118065863 | 9  | 10 | 5  | 1.905391004 | 0.0915982   |          | ENSG00000196797 |
| 3 | 118220602 | 118220838 | 118220720 | 9  | 11 | 3  | 3.117912553 | 0.0146045   |          | ENSG00000200372 |

|   |           |           |           |    |    |    |             |             |         |                 |
|---|-----------|-----------|-----------|----|----|----|-------------|-------------|---------|-----------------|
| 3 | 118292014 | 118292310 | 118292162 | 8  | 9  | 0  | 10.39304184 | 0.000803859 |         | ENSG00000200372 |
| 3 | 120086263 | 120086550 | 120086426 | 8  | 11 | 2  | 4.157216737 | 0.0052913   | IGSF11  | ENSG00000144847 |
| 3 | 120699877 | 120700212 | 120700044 | 10 | 15 | 9  | 1.662886695 | 0.0970566   | C3orf1  | ENSG00000113845 |
| 3 | 120840455 | 120840938 | 120840696 | 12 | 23 | 7  | 3.117912553 | 0.00117689  | POPDC2  | ENSG00000121577 |
| 3 | 121506928 | 121507127 | 121507027 | 8  | 8  | 3  | 2.338434415 | 0.0641221   | LRRRC58 | ENSG00000163428 |
| 3 | 121895216 | 121895407 | 121895294 | 8  | 9  | 1  | 5.196520921 | 0.00490062  | HGD     | ENSG00000113924 |
| 3 | 121944046 | 121944357 | 121944202 | 10 | 13 | 6  | 2.078608368 | 0.0483393   | GTF2E1  | ENSG00000153767 |
| 3 | 122070298 | 122070485 | 122070391 | 8  | 9  | 1  | 5.196520921 | 0.00490062  | STXBP5L | ENSG00000145087 |
| 3 | 122109454 | 122109726 | 122109600 | 9  | 9  | 0  | 10.39304184 | 0.000803859 | STXBP5L | ENSG00000145087 |
| 3 | 122432800 | 122433064 | 122432957 | 8  | 9  | 4  | 2.078608368 | 0.0785659   | POLQ    | ENSG00000051341 |
| 3 | 122523091 | 122523314 | 122523202 | 8  | 8  | 1  | 4.676868829 | 0.0091584   | POLQ    | ENSG00000051341 |
| 3 | 122932889 | 122933225 | 122933066 | 11 | 16 | 2  | 5.889390377 | 0.000270741 | GOLGB1  | ENSG00000173230 |
| 3 | 123036457 | 123036826 | 123036658 | 8  | 14 | 5  | 2.598260461 | 0.0167748   | IQCB1   | ENSG00000173226 |
| 3 | 123053833 | 123054129 | 123053997 | 12 | 13 | 2  | 4.850086193 | 0.00164564  | EAF2    | ENSG00000145088 |
| 3 | 123312472 | 123312651 | 123312588 | 8  | 8  | 3  | 2.338434415 | 0.0641221   | CD86    | ENSG00000114013 |
| 3 | 123460446 | 123460647 | 123460546 | 8  | 8  | 4  | 1.870747532 | 0.118863    | CASR    | ENSG00000036828 |
| 3 | 123507405 | 123507742 | 123507573 | 9  | 12 | 2  | 4.503651465 | 0.002963    | CSTA    | ENSG00000121552 |
| 3 | 123526718 | 123526897 | 123526807 | 8  | 9  | 2  | 3.464347281 | 0.0163838   | CSTA    | ENSG00000121552 |
| 3 | 123554917 | 123555141 | 123555011 | 12 | 13 | 3  | 3.637564645 | 0.0050909   | CSTA    | ENSG00000121552 |
| 3 | 123595709 | 123596125 | 123595921 | 57 | 74 | 0  | 77.94781382 | 6.15E-24    | FAM162A | ENSG00000114023 |
| 3 | 123697998 | 123698412 | 123698205 | 34 | 44 | 4  | 9.353737658 | 1.84E-10    | KPNA1   | ENSG00000114030 |
| 3 | 123735447 | 123735772 | 123735626 | 11 | 14 | 7  | 1.948695345 | 0.0559175   | KPNA1   | ENSG00000114030 |
| 3 | 123765710 | 123765912 | 123765811 | 9  | 9  | 7  | 1.29913023  | 0.286504    | DTX3L   | ENSG00000163840 |
| 3 | 123805593 | 123805798 | 123805670 | 9  | 10 | 0  | 11.43234603 | 0.000394183 | PARP15  | ENSG00000173200 |
| 3 | 124091778 | 124092185 | 124091957 | 60 | 68 | 3  | 17.92799718 | 3.64E-18    |         | ENSG00000221211 |
| 3 | 124100060 | 124100371 | 124100215 | 8  | 12 | 6  | 1.930136342 | 0.071303    |         | ENSG00000221211 |
| 3 | 124118926 | 124119127 | 124119015 | 8  | 10 | 2  | 3.810782009 | 0.00936112  |         | ENSG00000221211 |
| 3 | 124135858 | 124136151 | 124135997 | 24 | 25 | 1  | 13.5109544  | 1.28E-07    |         | ENSG00000221211 |
| 3 | 124570412 | 124570641 | 124570526 | 9  | 9  | 6  | 1.484720263 | 0.204387    | ADCY5   | ENSG00000173175 |
| 3 | 124667361 | 124667566 | 124667462 | 8  | 8  | 0  | 9.353737658 | 0.00163931  | ADCY5   | ENSG00000173175 |
| 3 | 124787040 | 124787253 | 124787146 | 8  | 11 | 11 | 1.039304184 | 0.462773    | PTPLB   | ENSG00000206527 |
| 3 | 124807491 | 124807758 | 124807580 | 9  | 11 | 5  | 2.078608368 | 0.0614303   | PTPLB   | ENSG00000206527 |
| 3 | 124925047 | 124925231 | 124925139 | 9  | 9  | 5  | 1.73217364  | 0.133894    |         | ENSG00000207002 |
| 3 | 125374504 | 125374706 | 125374583 | 8  | 8  | 1  | 4.676868829 | 0.0091584   | KALRN   | ENSG00000160145 |

|   |           |           |           |    |     |    |             |             |         |                 |
|---|-----------|-----------|-----------|----|-----|----|-------------|-------------|---------|-----------------|
| 3 | 125419091 | 125419461 | 125419288 | 17 | 22  | 5  | 3.983999373 | 0.000317941 | KALRN   | ENSG00000160145 |
| 3 | 125468095 | 125468422 | 125468243 | 13 | 17  | 7  | 2.338434415 | 0.0171287   | KALRN   | ENSG00000160145 |
| 3 | 125500599 | 125500901 | 125500759 | 12 | 14  | 0  | 15.58956276 | 2.28E-05    | KALRN   | ENSG00000160145 |
| 3 | 125584611 | 125584867 | 125584707 | 13 | 15  | 1  | 8.314433474 | 0.000102308 | KALRN   | ENSG00000160145 |
| 3 | 125593509 | 125593868 | 125593722 | 17 | 22  | 2  | 7.967998746 | 6.43E-06    | KALRN   | ENSG00000160145 |
| 3 | 125597477 | 125597919 | 125597753 | 18 | 27  | 10 | 2.64550156  | 0.00175911  | KALRN   | ENSG00000160145 |
| 3 | 125598424 | 125598990 | 125598771 | 40 | 56  | 8  | 6.582259834 | 6.04E-11    | KALRN   | ENSG00000160145 |
| 3 | 125630622 | 125630961 | 125630786 | 27 | 30  | 7  | 4.027303714 | 3.60E-05    | KALRN   | ENSG00000160145 |
| 3 | 125669521 | 125669705 | 125669558 | 8  | 8   | 0  | 9.353737658 | 0.00163931  | KALRN   | ENSG00000160145 |
| 3 | 125751938 | 125752246 | 125752092 | 12 | 12  | 1  | 6.755477198 | 0.000722752 | KALRN   | ENSG00000160145 |
| 3 | 125753889 | 125754185 | 125754037 | 13 | 14  | 6  | 2.227080395 | 0.0322529   | KALRN   | ENSG00000160145 |
| 3 | 125758915 | 125759305 | 125759088 | 9  | 15  | 3  | 4.157216737 | 0.00170423  | KALRN   | ENSG00000160145 |
| 3 | 125775558 | 125775937 | 125775758 | 21 | 29  | 0  | 31.17912553 | 5.19E-10    | KALRN   | ENSG00000160145 |
| 3 | 125794161 | 125794517 | 125794339 | 15 | 21  | 5  | 3.810782009 | 0.000537724 | KALRN   | ENSG00000160145 |
| 3 | 125834335 | 125834613 | 125834451 | 12 | 13  | 5  | 2.425043097 | 0.0262442   | KALRN   | ENSG00000160145 |
| 3 | 125988342 | 125988680 | 125988513 | 9  | 14  | 2  | 5.196520921 | 0.000907371 | UMPS    | ENSG00000114491 |
| 3 | 126010996 | 126011310 | 126011133 | 8  | 12  | 3  | 3.377738599 | 0.00867157  | ITGB5   | ENSG00000082781 |
| 3 | 126016282 | 126016515 | 126016414 | 13 | 15  | 6  | 2.375552421 | 0.0212094   | ITGB5   | ENSG00000082781 |
| 3 | 126018068 | 126018269 | 126018178 | 9  | 10  | 5  | 1.905391004 | 0.0915982   | ITGB5   | ENSG00000082781 |
| 3 | 126022051 | 126022281 | 126022166 | 8  | 8   | 3  | 2.338434415 | 0.0641221   | ITGB5   | ENSG00000082781 |
| 3 | 126036523 | 126036879 | 126036701 | 8  | 11  | 7  | 1.558956276 | 0.158273    | ITGB5   | ENSG00000082781 |
| 3 | 126039297 | 126039750 | 126039504 | 12 | 21  | 11 | 1.905391004 | 0.031399    | ITGB5   | ENSG00000082781 |
| 3 | 126055091 | 126055294 | 126055209 | 8  | 9   | 5  | 1.73217364  | 0.133894    | ITGB5   | ENSG00000082781 |
| 3 | 126075109 | 126075317 | 126075213 | 9  | 10  | 4  | 2.286469205 | 0.0509017   | ITGB5   | ENSG00000082781 |
| 3 | 126174148 | 126174413 | 126174248 | 17 | 19  | 1  | 10.39304184 | 7.23E-06    | MUC13   | ENSG00000173702 |
| 3 | 126208191 | 126208398 | 126208294 | 8  | 9   | 5  | 1.73217364  | 0.133894    | HEG1    | ENSG00000173706 |
| 3 | 126258597 | 126258792 | 126258719 | 9  | 10  | 3  | 2.858086507 | 0.0242838   | HEG1    | ENSG00000173706 |
| 3 | 126264724 | 126265049 | 126264895 | 13 | 16  | 2  | 5.889390377 | 0.000270741 |         | ENSG00000209255 |
| 3 | 126318252 | 126318482 | 126318374 | 10 | 12  | 1  | 6.755477198 | 0.000722752 |         | ENSG00000199327 |
| 3 | 126577558 | 126577872 | 126577714 | 11 | 12  | 0  | 13.5109544  | 9.48E-05    | ZNF148  | ENSG00000163848 |
| 3 | 126585750 | 126585940 | 126585810 | 8  | 8   | 2  | 3.117912553 | 0.0283184   | ZNF148  | ENSG00000163848 |
| 3 | 126721870 | 126722103 | 126721989 | 8  | 11  | 2  | 4.157216737 | 0.0052913   | SNX4    | ENSG00000114520 |
| 3 | 127320877 | 127321513 | 127321089 | 73 | 105 | 4  | 22.03324871 | 6.33E-28    | SLC41A3 | ENSG00000114544 |
| 3 | 127591039 | 127591237 | 127591138 | 9  | 9   | 5  | 1.73217364  | 0.133894    | CCDC37  | ENSG00000163885 |

|   |           |           |           |    |    |    |             |             |         |                 |
|---|-----------|-----------|-----------|----|----|----|-------------|-------------|---------|-----------------|
| 3 | 127723796 | 127724102 | 127723924 | 12 | 15 | 2  | 5.542955649 | 0.000497081 | CHST13  | ENSG00000180767 |
| 3 | 128745434 | 128745654 | 128745560 | 9  | 10 | 0  | 11.43234603 | 0.000394183 | GPR175  | ENSG00000163870 |
| 3 | 128745826 | 128746019 | 128745889 | 9  | 9  | 3  | 2.598260461 | 0.0397929   | GPR175  | ENSG00000163870 |
| 3 | 128833941 | 128834217 | 128834079 | 9  | 11 | 8  | 1.385738912 | 0.224757    | PODXL2  | ENSG00000114631 |
| 3 | 128948805 | 128948990 | 128948897 | 8  | 8  | 0  | 9.353737658 | 0.00163931  | MGLL    | ENSG00000074416 |
| 3 | 129209176 | 129209492 | 129209319 | 16 | 18 | 1  | 9.87338975  | 1.41E-05    |         | ENSG00000201210 |
| 3 | 129212747 | 129212988 | 129212888 | 10 | 10 | 3  | 2.858086507 | 0.0242838   | SEC61A1 | ENSG00000058262 |
| 3 | 129253471 | 129253668 | 129253545 | 12 | 14 | 1  | 7.794781382 | 0.000197021 | SEC61A1 | ENSG00000058262 |
| 3 | 129296715 | 129297133 | 129296917 | 33 | 43 | 6  | 6.532769158 | 7.68E-09    |         | ENSG00000222627 |
| 3 | 129325387 | 129325672 | 129325555 | 9  | 12 | 7  | 1.688869299 | 0.11395     | RUVBL1  | ENSG00000175792 |
| 3 | 129537075 | 129537314 | 129537194 | 8  | 9  | 5  | 1.73217364  | 0.133894    |         | ENSG00000221067 |
| 3 | 129585211 | 129585420 | 129585273 | 8  | 9  | 0  | 10.39304184 | 0.000803859 |         | ENSG00000221067 |
| 3 | 129761162 | 129761341 | 129761229 | 8  | 9  | 2  | 3.464347281 | 0.0163838   | C3orf27 | ENSG00000198685 |
| 3 | 129785939 | 129786197 | 129786084 | 8  | 9  | 5  | 1.73217364  | 0.133894    | C3orf27 | ENSG00000198685 |
| 3 | 129850434 | 129850648 | 129850541 | 8  | 8  | 1  | 4.676868829 | 0.0091584   | RPN1    | ENSG00000163902 |
| 3 | 129911405 | 129911680 | 129911542 | 19 | 23 | 7  | 3.117912553 | 0.00117689  |         | ENSG00000207130 |
| 3 | 130228481 | 130228751 | 130228616 | 8  | 8  | 3  | 2.338434415 | 0.0641221   | CCDC48  | ENSG00000114654 |
| 3 | 130255107 | 130255286 | 130255196 | 8  | 8  | 2  | 3.117912553 | 0.0283184   | GP9     | ENSG00000169704 |
| 3 | 130362116 | 130362338 | 130362271 | 8  | 9  | 3  | 2.598260461 | 0.0397929   | ISY1    | ENSG00000221812 |
| 3 | 130362510 | 130362933 | 130362678 | 21 | 28 | 4  | 6.027964269 | 3.34E-06    | ISY1    | ENSG00000221812 |
| 3 | 130385805 | 130386062 | 130385914 | 9  | 10 | 17 | 0.635130335 | 0.889407    | CNBP    | ENSG00000169714 |
| 3 | 130426616 | 130426901 | 130426757 | 8  | 12 | 8  | 1.501217155 | 0.168286    | COPG    | ENSG00000181789 |
| 3 | 130428011 | 130428230 | 130428120 | 8  | 9  | 6  | 1.484720263 | 0.204387    | COPG    | ENSG00000181789 |
| 3 | 130447363 | 130447580 | 130447471 | 8  | 10 | 2  | 3.810782009 | 0.00936112  | COPG    | ENSG00000181789 |
| 3 | 130451964 | 130452222 | 130452046 | 10 | 13 | 1  | 7.27512929  | 0.000378098 | COPG    | ENSG00000181789 |
| 3 | 130601225 | 130601423 | 130601288 | 9  | 9  | 4  | 2.078608368 | 0.0785659   | RPL32P3 | ENSG00000183611 |
| 3 | 130641591 | 130641855 | 130641725 | 8  | 9  | 2  | 3.464347281 | 0.0163838   | IFT122  | ENSG00000163913 |
| 3 | 130827600 | 130827806 | 130827747 | 8  | 8  | 3  | 2.338434415 | 0.0641221   | PLXND1  | ENSG00000004399 |
| 3 | 130829758 | 130829988 | 130829873 | 13 | 14 | 2  | 5.196520921 | 0.000907371 | PLXND1  | ENSG00000004399 |
| 3 | 130864548 | 130865035 | 130864837 | 11 | 22 | 6  | 3.414856605 | 0.000820885 | TMCC1   | ENSG00000172765 |
| 3 | 130970458 | 130970713 | 130970607 | 9  | 11 | 0  | 12.47165021 | 0.000193293 |         | ENSG00000202412 |
| 3 | 131907024 | 131907339 | 131907181 | 10 | 13 | 2  | 4.850086193 | 0.00164564  | PIK3R4  | ENSG00000196455 |
| 3 | 132551611 | 132551852 | 132551756 | 9  | 10 | 1  | 5.716173013 | 0.00260397  | NUDT16P | ENSG00000206369 |
| 3 | 132555140 | 132555331 | 132555225 | 8  | 10 | 1  | 5.716173013 | 0.00260397  | NUDT16P | ENSG00000206369 |

|   |           |           |           |    |    |   |             |             |         |                 |
|---|-----------|-----------|-----------|----|----|---|-------------|-------------|---------|-----------------|
| 3 | 132555371 | 132555584 | 132555477 | 8  | 9  | 1 | 5.196520921 | 0.00490062  | NUDT16P | ENSG00000206369 |
| 3 | 132704372 | 132704783 | 132704551 | 11 | 19 | 4 | 4.157216737 | 0.000560204 | MRPL3   | ENSG00000114686 |
| 3 | 132912832 | 132913049 | 132912888 | 9  | 10 | 5 | 1.905391004 | 0.0915982   | MRPL3   | ENSG00000114686 |
| 3 | 133230810 | 133231050 | 133230872 | 12 | 15 | 5 | 2.771477825 | 0.0105836   | CPNE4   | ENSG00000196353 |
| 3 | 133381993 | 133382207 | 133382136 | 9  | 9  | 6 | 1.484720263 | 0.204387    | ACPP    | ENSG00000014257 |
| 3 | 133397670 | 133398028 | 133397849 | 15 | 20 | 9 | 2.182538787 | 0.0165356   | ACPP    | ENSG00000014257 |
| 3 | 133398523 | 133398710 | 133398604 | 8  | 8  | 2 | 3.117912553 | 0.0283184   | ACPP    | ENSG00000014257 |
| 3 | 133433261 | 133433501 | 133433381 | 9  | 12 | 0 | 13.5109544  | 9.48E-05    | ACPP    | ENSG00000014257 |
| 3 | 133518896 | 133519484 | 133519305 | 9  | 22 | 9 | 2.390399624 | 0.00747467  | ACPP    | ENSG00000014257 |
| 3 | 133828456 | 133828800 | 133828625 | 23 | 28 | 4 | 6.027964269 | 3.34E-06    | CCRL1   | ENSG00000129048 |
| 3 | 133870599 | 133870796 | 133870697 | 8  | 10 | 2 | 3.810782009 | 0.00936112  | UBA5    | ENSG00000081307 |
| 3 | 134019862 | 134020041 | 134019951 | 8  | 9  | 5 | 1.73217364  | 0.133894    | ACAD11  | ENSG00000113971 |
| 3 | 134022156 | 134022423 | 134022289 | 11 | 12 | 0 | 13.5109544  | 9.48E-05    | ACAD11  | ENSG00000113971 |
| 3 | 134036037 | 134036239 | 134036138 | 10 | 11 | 4 | 2.494330042 | 0.0324033   | ACAD11  | ENSG00000113971 |
| 3 | 134242522 | 134242728 | 134242623 | 8  | 8  | 4 | 1.870747532 | 0.118863    | TMEM108 | ENSG00000144868 |
| 3 | 134489891 | 134490070 | 134489980 | 8  | 8  | 1 | 4.676868829 | 0.0091584   | TMEM108 | ENSG00000144868 |
| 3 | 134614673 | 134614859 | 134614829 | 8  | 8  | 5 | 1.558956276 | 0.191397    | BFSP2   | ENSG00000170819 |
| 3 | 134648381 | 134648618 | 134648519 | 8  | 9  | 0 | 10.39304184 | 0.000803859 |         | ENSG00000208917 |
| 3 | 134654107 | 134654336 | 134654178 | 8  | 9  | 3 | 2.598260461 | 0.0397929   |         | ENSG00000208917 |
| 3 | 134654452 | 134654856 | 134654684 | 16 | 22 | 6 | 3.414856605 | 0.000820885 |         | ENSG00000208917 |
| 3 | 134672760 | 134672956 | 134672866 | 8  | 8  | 0 | 9.353737658 | 0.00163931  |         | ENSG00000208917 |
| 3 | 134845286 | 134845539 | 134845412 | 9  | 11 | 1 | 6.235825105 | 0.0013754   | TOPBP1  | ENSG00000163781 |
| 3 | 134863388 | 134863736 | 134863517 | 13 | 17 | 3 | 4.676868829 | 0.000552213 | TOPBP1  | ENSG00000163781 |
| 3 | 135184786 | 135185065 | 135184927 | 8  | 9  | 1 | 5.196520921 | 0.00490062  | SLCO2A1 | ENSG00000174640 |
| 3 | 135542922 | 135543273 | 135543097 | 36 | 42 | 3 | 11.17251998 | 1.06E-10    | RPL39P5 | ENSG00000214289 |
| 3 | 135583257 | 135583544 | 135583400 | 9  | 10 | 4 | 2.286469205 | 0.0509017   | AMOTL2  | ENSG00000114019 |
| 3 | 135583641 | 135583866 | 135583753 | 8  | 9  | 2 | 3.464347281 | 0.0163838   | AMOTL2  | ENSG00000114019 |
| 3 | 135609191 | 135609403 | 135609297 | 8  | 8  | 1 | 4.676868829 | 0.0091584   |         | ENSG00000221313 |
| 3 | 135676525 | 135676795 | 135676657 | 15 | 18 | 0 | 19.7467795  | 1.32E-06    | CEP63   | ENSG00000182923 |
| 3 | 135687136 | 135687347 | 135687241 | 8  | 9  | 4 | 2.078608368 | 0.0785659   | CEP63   | ENSG00000182923 |
| 3 | 135694793 | 135694972 | 135694882 | 8  | 8  | 1 | 4.676868829 | 0.0091584   | CEP63   | ENSG00000182923 |
| 3 | 135906270 | 135906469 | 135906369 | 8  | 10 | 1 | 5.716173013 | 0.00260397  | KY      | ENSG00000174611 |
| 3 | 136876163 | 136876537 | 136876326 | 23 | 28 | 3 | 7.534955336 | 7.67E-07    | PPP2R3A | ENSG00000073711 |
| 3 | 137006270 | 137006563 | 137006389 | 8  | 11 | 4 | 2.494330042 | 0.0324033   | PPP2R3A | ENSG00000073711 |

|   |           |           |           |    |    |   |             |             |         |                 |
|---|-----------|-----------|-----------|----|----|---|-------------|-------------|---------|-----------------|
| 3 | 137107067 | 137107319 | 137107149 | 9  | 12 | 2 | 4.503651465 | 0.002963    | PPP2R3A | ENSG00000073711 |
| 3 | 137109325 | 137109634 | 137109472 | 16 | 20 | 8 | 2.425043097 | 0.00917565  | PPP2R3A | ENSG00000073711 |
| 3 | 137119750 | 137120041 | 137119895 | 8  | 10 | 3 | 2.858086507 | 0.0242838   | PPP2R3A | ENSG00000073711 |
| 3 | 137128637 | 137129056 | 137128792 | 13 | 20 | 7 | 2.728173484 | 0.00469378  | PPP2R3A | ENSG00000073711 |
| 3 | 137224175 | 137224672 | 137224425 | 46 | 66 | 7 | 8.704172543 | 3.28E-14    | PPP2R3A | ENSG00000073711 |
| 3 | 137343728 | 137343949 | 137343838 | 11 | 12 | 4 | 2.702190879 | 0.0203088   | MSL2    | ENSG00000174579 |
| 3 | 137344266 | 137344578 | 137344422 | 11 | 14 | 1 | 7.794781382 | 0.000197021 | MSL2    | ENSG00000174579 |
| 3 | 137378173 | 137378352 | 137378262 | 8  | 8  | 2 | 3.117912553 | 0.0283184   | MSL2    | ENSG00000174579 |
| 3 | 137393017 | 137393479 | 137393153 | 9  | 15 | 4 | 3.32577339  | 0.00462646  | MSL2    | ENSG00000174579 |
| 3 | 137397778 | 137398392 | 137398129 | 14 | 33 | 8 | 3.926260252 | 2.05E-05    | MSL2    | ENSG00000174579 |
| 3 | 137445023 | 137445202 | 137445173 | 8  | 8  | 1 | 4.676868829 | 0.0091584   | PCCB    | ENSG00000114054 |
| 3 | 137452114 | 137452385 | 137452254 | 9  | 10 | 8 | 1.27026067  | 0.293854    | PCCB    | ENSG00000114054 |
| 3 | 137452500 | 137452700 | 137452630 | 11 | 11 | 5 | 2.078608368 | 0.0614303   | PCCB    | ENSG00000114054 |
| 3 | 137478882 | 137479229 | 137479055 | 8  | 12 | 7 | 1.688869299 | 0.11395     | PCCB    | ENSG00000114054 |
| 3 | 137479332 | 137479598 | 137479446 | 8  | 11 | 6 | 1.781664316 | 0.103344    | PCCB    | ENSG00000114054 |
| 3 | 137545436 | 137545648 | 137545541 | 8  | 9  | 9 | 1.039304184 | 0.466079    |         | ENSG00000200571 |
| 3 | 137593301 | 137593487 | 137593394 | 8  | 8  | 1 | 4.676868829 | 0.0091584   |         | ENSG00000200571 |
| 3 | 137953795 | 137954092 | 137953943 | 10 | 14 | 2 | 5.196520921 | 0.000907371 | STAG1   | ENSG00000118007 |
| 3 | 137954235 | 137954436 | 137954317 | 9  | 10 | 1 | 5.716173013 | 0.00260397  | STAG1   | ENSG00000118007 |
| 3 | 138196459 | 138196745 | 138196609 | 10 | 12 | 3 | 3.377738599 | 0.00867157  | IL20RB  | ENSG00000174564 |
| 3 | 138256435 | 138256800 | 138256639 | 29 | 34 | 2 | 12.12521548 | 2.69E-09    | IL20RB  | ENSG00000174564 |
| 3 | 138666175 | 138666521 | 138666348 | 9  | 14 | 4 | 3.117912553 | 0.00766354  |         | ENSG00000201325 |
| 3 | 139147879 | 139148132 | 139148005 | 9  | 11 | 5 | 2.078608368 | 0.0614303   | CLDN18  | ENSG00000066405 |
| 3 | 139172607 | 139172807 | 139172707 | 8  | 11 | 3 | 3.117912553 | 0.0146045   | CLDN18  | ENSG00000066405 |
| 3 | 139253741 | 139253991 | 139253866 | 9  | 10 | 3 | 2.858086507 | 0.0242838   | CLDN18  | ENSG00000066405 |
| 3 | 139327225 | 139327436 | 139327368 | 8  | 8  | 5 | 1.558956276 | 0.191397    | A4GNT   | ENSG00000118017 |
| 3 | 139376249 | 139376576 | 139376412 | 14 | 19 | 4 | 4.157216737 | 0.000560204 | DBR1    | ENSG00000138231 |
| 3 | 139390018 | 139390248 | 139390133 | 8  | 9  | 1 | 5.196520921 | 0.00490062  | ARMC8   | ENSG00000114098 |
| 3 | 139585593 | 139585913 | 139585751 | 8  | 12 | 2 | 4.503651465 | 0.002963    | MRAS    | ENSG00000158186 |
| 3 | 139600710 | 139600889 | 139600751 | 8  | 8  | 2 | 3.117912553 | 0.0283184   | FAM62C  | ENSG00000158220 |
| 3 | 139681110 | 139681305 | 139681137 | 8  | 8  | 3 | 2.338434415 | 0.0641221   | FAM62C  | ENSG00000158220 |
| 3 | 139795562 | 139795945 | 139795741 | 8  | 16 | 3 | 4.417042783 | 0.00097367  | CEP70   | ENSG00000114107 |
| 3 | 139888369 | 139888559 | 139888496 | 10 | 11 | 7 | 1.558956276 | 0.158273    |         | ENSG00000174715 |
| 3 | 140142942 | 140143195 | 140143091 | 10 | 10 | 5 | 1.905391004 | 0.0915982   | FOXL2   | ENSG00000183770 |

|   |           |           |           |    |     |    |             |             |          |                 |
|---|-----------|-----------|-----------|----|-----|----|-------------|-------------|----------|-----------------|
| 3 | 140328947 | 140329183 | 140329054 | 8  | 10  | 4  | 2.286469205 | 0.0509017   |          | ENSG00000206260 |
| 3 | 140425254 | 140425609 | 140425431 | 25 | 30  | 1  | 16.10921486 | 4.28E-09    | MRPS22   | ENSG00000175110 |
| 3 | 140530911 | 140531158 | 140531015 | 8  | 9   | 2  | 3.464347281 | 0.0163838   | MRPS22   | ENSG00000175110 |
| 3 | 140590981 | 140591502 | 140591142 | 9  | 21  | 13 | 1.63319229  | 0.0708832   | COPB2    | ENSG00000184432 |
| 3 | 140736539 | 140736859 | 140736705 | 11 | 13  | 4  | 2.910051716 | 0.0125532   | RBP1     | ENSG00000114115 |
| 3 | 140803062 | 140803242 | 140803152 | 8  | 8   | 4  | 1.870747532 | 0.118863    |          | ENSG00000208855 |
| 3 | 140917241 | 140917642 | 140917417 | 31 | 44  | 1  | 23.38434415 | 2.83E-13    | NMNAT3   | ENSG00000163864 |
| 3 | 141515227 | 141515406 | 141515306 | 8  | 8   | 1  | 4.676868829 | 0.0091584   |          | ENSG00000216184 |
| 3 | 141515753 | 141515950 | 141515857 | 8  | 8   | 1  | 4.676868829 | 0.0091584   |          | ENSG00000216184 |
| 3 | 141624807 | 141625442 | 141625231 | 74 | 108 | 1  | 56.64207804 | 1.04E-32    |          | ENSG00000216184 |
| 3 | 141938737 | 141938916 | 141938818 | 8  | 8   | 4  | 1.870747532 | 0.118863    | TRIM42   | ENSG00000155890 |
| 3 | 142056606 | 142056821 | 142056698 | 9  | 9   | 2  | 3.464347281 | 0.0163838   | SLC25A36 | ENSG00000114120 |
| 3 | 142129234 | 142129553 | 142129388 | 9  | 13  | 7  | 1.818782322 | 0.0805123   | SLC25A36 | ENSG00000114120 |
| 3 | 142142874 | 142143363 | 142143119 | 8  | 16  | 9  | 1.766817113 | 0.0700694   | SLC25A36 | ENSG00000114120 |
| 3 | 142307382 | 142307593 | 142307470 | 8  | 9   | 2  | 3.464347281 | 0.0163838   | SPSB4    | ENSG00000175093 |
| 3 | 142510271 | 142510563 | 142510433 | 14 | 17  | 5  | 3.117912553 | 0.00407023  | ZBTB38   | ENSG00000177311 |
| 3 | 142513525 | 142513713 | 142513619 | 8  | 9   | 6  | 1.484720263 | 0.204387    | ZBTB38   | ENSG00000177311 |
| 3 | 142562577 | 142562882 | 142562786 | 8  | 12  | 10 | 1.228268581 | 0.305344    | ZBTB38   | ENSG00000177311 |
| 3 | 142603314 | 142603493 | 142603435 | 8  | 8   | 5  | 1.558956276 | 0.191397    | ZBTB38   | ENSG00000177311 |
| 3 | 142656544 | 142656743 | 142656613 | 8  | 10  | 4  | 2.286469205 | 0.0509017   | RASA2    | ENSG00000155903 |
| 3 | 142938821 | 142939041 | 142938931 | 9  | 9   | 6  | 1.484720263 | 0.204387    | RNF7     | ENSG00000114125 |
| 3 | 142939486 | 142939681 | 142939552 | 8  | 9   | 7  | 1.29913023  | 0.286504    | RNF7     | ENSG00000114125 |
| 3 | 143141616 | 143141801 | 143141685 | 8  | 10  | 3  | 2.858086507 | 0.0242838   |          | ENSG00000200389 |
| 3 | 143143271 | 143143468 | 143143384 | 8  | 8   | 0  | 9.353737658 | 0.00163931  |          | ENSG00000214271 |
| 3 | 143780262 | 143780512 | 143780397 | 8  | 12  | 2  | 4.503651465 | 0.002963    | ATR      | ENSG00000175054 |
| 3 | 143788414 | 143788726 | 143788570 | 8  | 11  | 4  | 2.494330042 | 0.0324033   | ATR      | ENSG00000175054 |
| 3 | 144202975 | 144203321 | 144203148 | 13 | 19  | 12 | 1.598929514 | 0.0887417   |          | ENSG00000163714 |
| 3 | 144360732 | 144360974 | 144360819 | 8  | 9   | 1  | 5.196520921 | 0.00490062  |          | ENSG00000181814 |
| 3 | 144450575 | 144450964 | 144450788 | 16 | 23  | 1  | 12.47165021 | 4.94E-07    |          | ENSG00000181814 |
| 3 | 144465350 | 144465761 | 144465518 | 11 | 18  | 4  | 3.9493559   | 0.000961379 |          | ENSG00000181814 |
| 3 | 144803345 | 144803933 | 144803754 | 34 | 49  | 5  | 8.660868202 | 4.42E-11    | SLC9A9   | ENSG00000181804 |
| 3 | 144969506 | 144969717 | 144969618 | 9  | 9   | 3  | 2.598260461 | 0.0397929   | SLC9A9   | ENSG00000181804 |
| 3 | 145084888 | 145085101 | 145084994 | 8  | 10  | 2  | 3.810782009 | 0.00936112  | SLC9A9   | ENSG00000181804 |
| 3 | 145173173 | 145173466 | 145173319 | 8  | 12  | 3  | 3.377738599 | 0.00867157  | C3orf58  | ENSG00000181744 |



|   |           |           |           |    |    |    |             |             |         |                 |
|---|-----------|-----------|-----------|----|----|----|-------------|-------------|---------|-----------------|
| 3 | 145585866 | 145586081 | 145586041 | 9  | 9  | 4  | 2.078608368 | 0.0785659   |         | ENSG00000212780 |
| 3 | 146081813 | 146081999 | 146081906 | 9  | 9  | 2  | 3.464347281 | 0.0163838   |         | ENSG00000212780 |
| 3 | 146444911 | 146445098 | 146445004 | 8  | 8  | 1  | 4.676868829 | 0.0091584   |         |                 |
| 3 | 146554719 | 146554898 | 146554808 | 8  | 8  | 0  | 9.353737658 | 0.00163931  |         |                 |
| 3 | 146558252 | 146558623 | 146558431 | 22 | 28 | 2  | 10.04660711 | 1.36E-07    |         |                 |
| 3 | 146828749 | 146828988 | 146828873 | 11 | 12 | 0  | 13.5109544  | 9.48E-05    |         | ENSG00000222350 |
| 3 | 147622301 | 147622606 | 147622447 | 11 | 14 | 8  | 1.73217364  | 0.0890835   | PLSCR2  | ENSG00000163746 |
| 3 | 147782497 | 147783050 | 147782770 | 52 | 76 | 2  | 26.67547406 | 1.21E-21    |         | ENSG00000199812 |
| 3 | 149087491 | 149087710 | 149087600 | 10 | 12 | 8  | 1.501217155 | 0.168286    |         | ENSG00000221431 |
| 3 | 149428052 | 149428343 | 149428197 | 16 | 18 | 5  | 3.291129917 | 0.00248584  |         | ENSG00000205412 |
| 3 | 149560684 | 149560863 | 149560733 | 8  | 8  | 2  | 3.117912553 | 0.0283184   |         | ENSG00000205412 |
| 3 | 150112678 | 150112937 | 150112807 | 8  | 9  | 5  | 1.73217364  | 0.133894    | CPA3    | ENSG00000163751 |
| 3 | 150156801 | 150157103 | 150156952 | 8  | 10 | 3  | 2.858086507 | 0.0242838   |         | ENSG00000174995 |
| 3 | 150286843 | 150287296 | 150287001 | 10 | 18 | 15 | 1.234173719 | 0.265435    | HLTF    | ENSG00000071794 |
| 3 | 150392428 | 150392797 | 150392604 | 23 | 30 | 0  | 32.21842971 | 2.55E-10    | CP      | ENSG00000047457 |
| 3 | 150448503 | 150448851 | 150448651 | 13 | 18 | 5  | 3.291129917 | 0.00248584  | CP      | ENSG00000047457 |
| 3 | 150473681 | 150473907 | 150473775 | 8  | 8  | 4  | 1.870747532 | 0.118863    | CP      | ENSG00000047457 |
| 3 | 150475698 | 150475883 | 150475729 | 8  | 9  | 2  | 3.464347281 | 0.0163838   | CP      | ENSG00000047457 |
| 3 | 150477869 | 150478335 | 150478156 | 18 | 26 | 8  | 3.117912553 | 0.000638503 | CP      | ENSG00000047457 |
| 3 | 150480441 | 150480738 | 150480594 | 12 | 15 | 10 | 1.511715177 | 0.140236    | TM4SF18 | ENSG00000163762 |
| 3 | 150483223 | 150483651 | 150483402 | 23 | 32 | 7  | 4.28712976  | 1.26E-05    | TM4SF18 | ENSG00000163762 |
| 3 | 150483931 | 150484200 | 150484073 | 12 | 13 | 4  | 2.910051716 | 0.0125532   | TM4SF18 | ENSG00000163762 |
| 3 | 150500509 | 150501134 | 150500753 | 18 | 35 | 14 | 2.494330042 | 0.000827091 | TM4SF18 | ENSG00000163762 |
| 3 | 150507361 | 150507613 | 150507487 | 9  | 10 | 3  | 2.858086507 | 0.0242838   | TM4SF18 | ENSG00000163762 |
| 3 | 150540412 | 150540726 | 150540566 | 11 | 14 | 6  | 2.227080395 | 0.0322529   | TM4SF18 | ENSG00000163762 |
| 3 | 150571708 | 150571919 | 150571813 | 8  | 9  | 4  | 2.078608368 | 0.0785659   | TM4SF1  | ENSG00000169908 |
| 3 | 150579254 | 150579433 | 150579388 | 9  | 9  | 2  | 3.464347281 | 0.0163838   | TM4SF1  | ENSG00000169908 |
| 3 | 150589569 | 150589749 | 150589655 | 10 | 10 | 1  | 5.716173013 | 0.00260397  | TM4SF1  | ENSG00000169908 |
| 3 | 150596278 | 150596481 | 150596342 | 11 | 12 | 11 | 1.125912866 | 0.382541    | TM4SF1  | ENSG00000169908 |
| 3 | 150602090 | 150602333 | 150602216 | 17 | 18 | 4  | 3.9493559   | 0.000961379 | TM4SF1  | ENSG00000169908 |
| 3 | 150674123 | 150674348 | 150674251 | 10 | 12 | 5  | 2.251825733 | 0.0404733   | TM4SF4  | ENSG00000169903 |
| 3 | 150690746 | 150690925 | 150690820 | 8  | 9  | 1  | 5.196520921 | 0.00490062  | TM4SF4  | ENSG00000169903 |
| 3 | 150694785 | 150694985 | 150694885 | 8  | 9  | 2  | 3.464347281 | 0.0163838   | TM4SF4  | ENSG00000169903 |
| 3 | 150708154 | 150708537 | 150708322 | 9  | 15 | 8  | 1.847651883 | 0.0631662   | TM4SF4  | ENSG00000169903 |

|   |           |           |           |    |    |    |             |             |         |                 |
|---|-----------|-----------|-----------|----|----|----|-------------|-------------|---------|-----------------|
| 3 | 150764626 | 150764868 | 150764757 | 8  | 8  | 3  | 2.338434415 | 0.0641221   | TM4SF4  | ENSG00000169903 |
| 3 | 150858556 | 150858851 | 150858675 | 10 | 14 | 4  | 3.117912553 | 0.00766354  | WWTR1   | ENSG00000018408 |
| 3 | 150952766 | 150953175 | 150953013 | 20 | 28 | 5  | 5.023303557 | 1.20E-05    | COMMD2  | ENSG00000114744 |
| 3 | 150984226 | 150984600 | 150984405 | 17 | 24 | 2  | 8.660868202 | 1.80E-06    | C3orf16 | ENSG00000206199 |
| 3 | 151013940 | 151014272 | 151014106 | 16 | 20 | 4  | 4.365077574 | 0.000324139 | RNF13   | ENSG00000082996 |
| 3 | 151169604 | 151169934 | 151169764 | 11 | 15 | 3  | 4.157216737 | 0.00170423  | PFN2    | ENSG00000070087 |
| 3 | 151170395 | 151170683 | 151170565 | 9  | 11 | 3  | 3.117912553 | 0.0146045   | PFN2    | ENSG00000070087 |
| 3 | 151272845 | 151273028 | 151272936 | 8  | 8  | 2  | 3.117912553 | 0.0283184   |         | ENSG00000208756 |
| 3 | 151438002 | 151438244 | 151438142 | 11 | 14 | 7  | 1.948695345 | 0.0559175   |         | ENSG00000222269 |
| 3 | 151438706 | 151439231 | 151439005 | 18 | 31 | 19 | 1.662886695 | 0.0341423   |         | ENSG00000222269 |
| 3 | 151468018 | 151468216 | 151468087 | 9  | 9  | 1  | 5.196520921 | 0.00490062  |         | ENSG00000222269 |
| 3 | 151469493 | 151469785 | 151469653 | 8  | 11 | 2  | 4.157216737 | 0.0052913   |         | ENSG00000222269 |
| 3 | 151487111 | 151487475 | 151487290 | 9  | 17 | 4  | 3.741495063 | 0.00163722  |         | ENSG00000222269 |
| 3 | 151515144 | 151515496 | 151515306 | 18 | 23 | 4  | 4.988660084 | 6.05E-05    |         | ENSG00000222269 |
| 3 | 151518070 | 151518309 | 151518207 | 9  | 12 | 7  | 1.688869299 | 0.11395     |         | ENSG00000222269 |
| 3 | 151520434 | 151520702 | 151520565 | 9  | 11 | 1  | 6.235825105 | 0.0013754   |         | ENSG00000222269 |
| 3 | 151545619 | 151545958 | 151545779 | 19 | 23 | 6  | 3.563328632 | 0.000497701 | TSC22D2 | ENSG00000196428 |
| 3 | 151550408 | 151550636 | 151550523 | 8  | 10 | 4  | 2.286469205 | 0.0509017   | TSC22D2 | ENSG00000196428 |
| 3 | 151569760 | 151569989 | 151569874 | 9  | 11 | 5  | 2.078608368 | 0.0614303   | TSC22D2 | ENSG00000196428 |
| 3 | 151600030 | 151600285 | 151600157 | 9  | 12 | 4  | 2.702190879 | 0.0203088   | TSC22D2 | ENSG00000196428 |
| 3 | 151611760 | 151612074 | 151611938 | 11 | 13 | 0  | 14.55025858 | 4.65E-05    | TSC22D2 | ENSG00000196428 |
| 3 | 151643006 | 151643432 | 151643253 | 18 | 26 | 5  | 4.676868829 | 3.65E-05    | TSC22D2 | ENSG00000196428 |
| 3 | 151673170 | 151673349 | 151673203 | 8  | 8  | 2  | 3.117912553 | 0.0283184   | TSC22D2 | ENSG00000196428 |
| 3 | 151698372 | 151698748 | 151698523 | 8  | 13 | 8  | 1.616695398 | 0.123553    | SERP1   | ENSG00000120742 |
| 3 | 151747033 | 151747377 | 151747187 | 10 | 14 | 1  | 7.794781382 | 0.000197021 | EIF2A   | ENSG00000144895 |
| 3 | 151803525 | 151803975 | 151803642 | 9  | 18 | 3  | 4.936694875 | 0.000311102 |         | ENSG00000198843 |
| 3 | 151804662 | 151804885 | 151804773 | 10 | 11 | 5  | 2.078608368 | 0.0614303   |         | ENSG00000198843 |
| 3 | 151868655 | 151868907 | 151868774 | 12 | 12 | 3  | 3.377738599 | 0.00867157  | C3orf44 | ENSG00000163645 |
| 3 | 151923252 | 151923628 | 151923459 | 8  | 13 | 4  | 2.910051716 | 0.0125532   | C3orf44 | ENSG00000163645 |
| 3 | 151936784 | 151936974 | 151936842 | 8  | 8  | 8  | 1.039304184 | 0.46786     | SIAH2   | ENSG00000181788 |
| 3 | 151937781 | 151938225 | 151937987 | 20 | 32 | 10 | 3.117912553 | 0.000190324 | SIAH2   | ENSG00000181788 |
| 3 | 151957192 | 151957516 | 151957354 | 9  | 14 | 3  | 3.897390691 | 0.00295882  | SIAH2   | ENSG00000181788 |
| 3 | 151964028 | 151964415 | 151964227 | 12 | 20 | 5  | 3.637564645 | 0.000902929 | SIAH2   | ENSG00000181788 |
| 3 | 152045133 | 152045312 | 152045224 | 9  | 9  | 8  | 1.154782427 | 0.375434    |         | ENSG00000214237 |

|   |           |           |           |     |     |    |             |             |         |                 |
|---|-----------|-----------|-----------|-----|-----|----|-------------|-------------|---------|-----------------|
| 3 | 152287224 | 152287403 | 152287313 | 8   | 8   | 1  | 4.676868829 | 0.0091584   | MED12L  | ENSG00000144893 |
| 3 | 152505546 | 152506093 | 152505707 | 14  | 25  | 7  | 3.377738599 | 0.000449165 | GPR87   | ENSG00000138271 |
| 3 | 152516350 | 152516745 | 152516547 | 67  | 77  | 2  | 27.02190879 | 6.10E-22    | GPR87   | ENSG00000138271 |
| 3 | 152516978 | 152517423 | 152517157 | 10  | 19  | 5  | 3.464347281 | 0.00150447  | GPR87   | ENSG00000138271 |
| 3 | 152535848 | 152536027 | 152535937 | 8   | 8   | 1  | 4.676868829 | 0.0091584   | P2RY13  | ENSG00000181631 |
| 3 | 152640038 | 152640433 | 152640254 | 10  | 18  | 5  | 3.291129917 | 0.00248584  | IGSF10  | ENSG00000152580 |
| 3 | 152990576 | 152990816 | 152990696 | 11  | 11  | 12 | 0.959357709 | 0.543005    | AADAC   | ENSG00000114771 |
| 3 | 153037679 | 153037998 | 153037838 | 12  | 15  | 4  | 3.32577339  | 0.00462646  | AADAC   | ENSG00000114771 |
| 3 | 153102246 | 153102540 | 153102393 | 9   | 11  | 3  | 3.117912553 | 0.0146045   | SUCNR1  | ENSG00000198829 |
| 3 | 153118781 | 153119036 | 153118912 | 8   | 8   | 3  | 2.338434415 | 0.0641221   | SUCNR1  | ENSG00000198829 |
| 3 | 153470059 | 153470358 | 153470208 | 9   | 12  | 3  | 3.377738599 | 0.00867157  | MBNL1   | ENSG00000152601 |
| 3 | 153944301 | 153944513 | 153944410 | 8   | 10  | 5  | 1.905391004 | 0.0915982   | P2RY1   | ENSG00000169860 |
| 3 | 154081118 | 154081371 | 154081277 | 8   | 10  | 6  | 1.63319229  | 0.146906    |         | ENSG00000208726 |
| 3 | 154339260 | 154339487 | 154339336 | 8   | 10  | 4  | 2.286469205 | 0.0509017   |         | ENSG00000208713 |
| 3 | 154360848 | 154362225 | 154361274 | 183 | 291 | 11 | 25.28973515 | 1.10E-74    | RAP2B   | ENSG00000181467 |
| 3 | 154411250 | 154411429 | 154411340 | 8   | 8   | 6  | 1.336248237 | 0.277651    |         | ENSG00000222228 |
| 3 | 154416317 | 154416516 | 154416416 | 8   | 10  | 0  | 11.43234603 | 0.000394183 |         | ENSG00000222228 |
| 3 | 154484831 | 154485010 | 154484920 | 8   | 8   | 3  | 2.338434415 | 0.0641221   |         | ENSG00000222228 |
| 3 | 154514078 | 154514580 | 154514383 | 48  | 67  | 4  | 14.13453691 | 6.62E-17    |         | ENSG00000222228 |
| 3 | 154644250 | 154644429 | 154644339 | 8   | 8   | 0  | 9.353737658 | 0.00163931  |         | ENSG00000207323 |
| 3 | 154814914 | 154815593 | 154815272 | 110 | 150 | 5  | 26.15582197 | 4.75E-40    |         | ENSG00000200162 |
| 3 | 155260199 | 155260639 | 155260471 | 14  | 23  | 4  | 4.988660084 | 6.05E-05    |         | ENSG00000201398 |
| 3 | 155290017 | 155290261 | 155290139 | 16  | 17  | 7  | 2.338434415 | 0.0171287   |         | ENSG00000114790 |
| 3 | 155333463 | 155333812 | 155333637 | 13  | 18  | 4  | 3.9493559   | 0.000961379 |         | ENSG00000114790 |
| 3 | 155357867 | 155358051 | 155357898 | 8   | 10  | 0  | 11.43234603 | 0.000394183 |         | ENSG00000114790 |
| 3 | 155362347 | 155362527 | 155362437 | 8   | 9   | 4  | 2.078608368 | 0.0785659   |         | ENSG00000114790 |
| 3 | 155424936 | 155425147 | 155425041 | 8   | 8   | 3  | 2.338434415 | 0.0641221   | DHX36   | ENSG00000174953 |
| 3 | 155711722 | 155711955 | 155711818 | 11  | 13  | 3  | 3.637564645 | 0.0050909   | GPR149  | ENSG00000174948 |
| 3 | 155752930 | 155753181 | 155753045 | 10  | 10  | 1  | 5.716173013 | 0.00260397  | GPR149  | ENSG00000174948 |
| 3 | 156582932 | 156583146 | 156583039 | 9   | 10  | 5  | 1.905391004 | 0.0915982   |         | ENSG00000208662 |
| 3 | 156627381 | 156627644 | 156627534 | 17  | 20  | 0  | 21.82538787 | 3.17E-07    |         | ENSG00000208662 |
| 3 | 156779681 | 156779860 | 156779732 | 8   | 8   | 2  | 3.117912553 | 0.0283184   | PLCH1   | ENSG00000114805 |
| 3 | 156836002 | 156836192 | 156836097 | 8   | 8   | 0  | 9.353737658 | 0.00163931  | PLCH1   | ENSG00000114805 |
| 3 | 156945522 | 156945795 | 156945653 | 12  | 15  | 3  | 4.157216737 | 0.00170423  | C3orf33 | ENSG00000174928 |

|   |           |           |           |    |    |    |             |            |         |                 |
|---|-----------|-----------|-----------|----|----|----|-------------|------------|---------|-----------------|
| 3 | 157054803 | 157055548 | 157055038 | 15 | 39 | 13 | 2.969440526 | 7.78E-05   | SLC33A1 | ENSG00000169359 |
| 3 | 157196155 | 157196339 | 157196247 | 9  | 10 | 7  | 1.429043253 | 0.21536    |         | ENSG00000208661 |
| 3 | 157217933 | 157218146 | 157217988 | 8  | 9  | 1  | 5.196520921 | 0.00490062 | CASRL1  | ENSG00000174930 |
| 3 | 157350930 | 157351267 | 157351096 | 13 | 17 | 5  | 3.117912553 | 0.00407023 | KCNAB1  | ENSG00000169282 |
| 3 | 157562038 | 157562217 | 157562127 | 9  | 9  | 1  | 5.196520921 | 0.00490062 | KCNAB1  | ENSG00000169282 |
| 3 | 157585042 | 157585252 | 157585206 | 8  | 10 | 3  | 2.858086507 | 0.0242838  | KCNAB1  | ENSG00000169282 |
| 3 | 157648812 | 157648992 | 157648902 | 8  | 8  | 4  | 1.870747532 | 0.118863   | SSR3    | ENSG00000114850 |
| 3 | 157755769 | 157755996 | 157755893 | 12 | 13 | 7  | 1.818782322 | 0.0805123  | SSR3    | ENSG00000114850 |
| 3 | 157830959 | 157831189 | 157831074 | 8  | 9  | 3  | 2.598260461 | 0.0397929  | TIPARP  | ENSG00000163659 |
| 3 | 157874948 | 157875214 | 157875081 | 9  | 12 | 7  | 1.688869299 | 0.11395    | TIPARP  | ENSG00000163659 |
| 3 | 157876547 | 157876825 | 157876678 | 8  | 10 | 6  | 1.63319229  | 0.146906   | TIPARP  | ENSG00000163659 |
| 3 | 157910788 | 157911000 | 157910894 | 9  | 9  | 3  | 2.598260461 | 0.0397929  |         | ENSG00000174912 |
| 3 | 158006412 | 158006621 | 158006516 | 8  | 8  | 1  | 4.676868829 | 0.0091584  |         | ENSG00000213198 |
| 3 | 158288965 | 158289209 | 158289087 | 11 | 11 | 6  | 1.781664316 | 0.103344   |         | ENSG00000201778 |
| 3 | 158289774 | 158290009 | 158289869 | 8  | 9  | 2  | 3.464347281 | 0.0163838  |         | ENSG00000201778 |
| 3 | 158308281 | 158308494 | 158308446 | 8  | 8  | 0  | 9.353737658 | 0.00163931 |         | ENSG00000201778 |
| 3 | 158360670 | 158361007 | 158360840 | 10 | 15 | 12 | 1.279143611 | 0.251893   | CCNL1   | ENSG00000163660 |
| 3 | 158375174 | 158375905 | 158375529 | 12 | 35 | 10 | 3.401359148 | 4.64E-05   |         | ENSG00000208656 |
| 3 | 158695183 | 158695372 | 158695294 | 8  | 9  | 8  | 1.154782427 | 0.375434   | VEPH1   | ENSG00000197415 |
| 3 | 158699858 | 158700123 | 158699990 | 9  | 12 | 6  | 1.930136342 | 0.071303   | VEPH1   | ENSG00000197415 |
| 3 | 158700153 | 158700498 | 158700325 | 10 | 15 | 6  | 2.375552421 | 0.0212094  | VEPH1   | ENSG00000197415 |
| 3 | 158733251 | 158733463 | 158733357 | 10 | 10 | 5  | 1.905391004 | 0.0915982  | C3orf55 | ENSG00000174899 |
| 3 | 158807178 | 158807478 | 158807328 | 12 | 15 | 4  | 3.32577339  | 0.00462646 | C3orf55 | ENSG00000174899 |
| 3 | 158827275 | 158827607 | 158827445 | 11 | 15 | 9  | 1.662886695 | 0.0970566  | C3orf55 | ENSG00000174899 |
| 3 | 159065952 | 159066143 | 159066066 | 10 | 10 | 7  | 1.429043253 | 0.21536    |         | ENSG00000208653 |
| 3 | 159304427 | 159304751 | 159304587 | 10 | 15 | 5  | 2.771477825 | 0.0105836  | SHOX2   | ENSG00000168779 |
| 3 | 159310042 | 159310314 | 159310163 | 11 | 14 | 9  | 1.558956276 | 0.132279   | RSRC1   | ENSG00000174891 |
| 3 | 159310372 | 159310589 | 159310489 | 8  | 10 | 7  | 1.429043253 | 0.21536    | RSRC1   | ENSG00000174891 |
| 3 | 159310928 | 159311241 | 159311084 | 10 | 14 | 5  | 2.598260461 | 0.0167748  | RSRC1   | ENSG00000174891 |
| 3 | 159634957 | 159635225 | 159635065 | 9  | 10 | 1  | 5.716173013 | 0.00260397 | MLF1    | ENSG00000178053 |
| 3 | 159844898 | 159845110 | 159845047 | 11 | 11 | 2  | 4.157216737 | 0.0052913  | GFM1    | ENSG00000168827 |
| 3 | 159872947 | 159873315 | 159873110 | 9  | 15 | 4  | 3.32577339  | 0.00462646 | LXN     | ENSG00000079257 |
| 3 | 159923594 | 159923881 | 159923737 | 10 | 13 | 8  | 1.616695398 | 0.123553   | RARRES1 | ENSG00000118849 |
| 3 | 159973654 | 159973932 | 159973824 | 8  | 11 | 4  | 2.494330042 | 0.0324033  | MFSD1   | ENSG00000118855 |

|   |           |           |           |     |     |    |             |             |          |                 |
|---|-----------|-----------|-----------|-----|-----|----|-------------|-------------|----------|-----------------|
| 3 | 160118548 | 160118855 | 160118701 | 8   | 13  | 2  | 4.850086193 | 0.00164564  | MFSD1    | ENSG00000118855 |
| 3 | 160527585 | 160527873 | 160527710 | 9   | 11  | 2  | 4.157216737 | 0.0052913   | SCHIP1   | ENSG00000151967 |
| 3 | 160630089 | 160630487 | 160630309 | 9   | 15  | 0  | 16.62886695 | 1.12E-05    | SCHIP1   | ENSG00000151967 |
| 3 | 160921919 | 160922140 | 160922029 | 8   | 8   | 3  | 2.338434415 | 0.0641221   |          | ENSG00000208651 |
| 3 | 160969089 | 160969342 | 160969215 | 8   | 11  | 3  | 3.117912553 | 0.0146045   |          | ENSG00000208651 |
| 3 | 160987649 | 160987859 | 160987754 | 10  | 11  | 3  | 3.117912553 | 0.0146045   |          | ENSG00000208651 |
| 3 | 161030032 | 161030434 | 161030211 | 184 | 204 | 6  | 30.4367654  | 7.40E-55    |          | ENSG00000208651 |
| 3 | 161082215 | 161082635 | 161082467 | 16  | 23  | 4  | 4.988660084 | 6.05E-05    |          | ENSG00000208651 |
| 3 | 161766655 | 161766834 | 161766689 | 8   | 10  | 3  | 2.858086507 | 0.0242838   | KPNA4    | ENSG00000186432 |
| 3 | 161955731 | 161955967 | 161955834 | 9   | 11  | 3  | 3.117912553 | 0.0146045   | PPM1L    | ENSG00000163590 |
| 3 | 162229099 | 162229355 | 162229227 | 9   | 10  | 9  | 1.143234603 | 0.378307    | B3GALNT1 | ENSG00000169255 |
| 3 | 162270578 | 162270815 | 162270682 | 8   | 9   | 1  | 5.196520921 | 0.00490062  | B3GALNT1 | ENSG00000169255 |
| 3 | 162307728 | 162308037 | 162307900 | 10  | 14  | 5  | 2.598260461 | 0.0167748   | B3GALNT1 | ENSG00000169255 |
| 3 | 162354986 | 162355192 | 162355034 | 8   | 9   | 1  | 5.196520921 | 0.00490062  | B3GALNT1 | ENSG00000169255 |
| 3 | 162357989 | 162358211 | 162358100 | 9   | 9   | 1  | 5.196520921 | 0.00490062  | B3GALNT1 | ENSG00000169255 |
| 3 | 162421188 | 162421474 | 162421331 | 8   | 11  | 5  | 2.078608368 | 0.0614303   | NMD3     | ENSG00000169251 |
| 3 | 162476494 | 162476754 | 162476639 | 12  | 15  | 1  | 8.314433474 | 0.000102308 | NMD3     | ENSG00000169251 |
| 3 | 162525851 | 162526031 | 162525941 | 9   | 9   | 2  | 3.464347281 | 0.0163838   | C3orf57  | ENSG00000196542 |
| 3 | 162540062 | 162540449 | 162540272 | 8   | 14  | 12 | 1.199197136 | 0.313881    | C3orf57  | ENSG00000196542 |
| 3 | 162547249 | 162547506 | 162547374 | 11  | 11  | 1  | 6.235825105 | 0.0013754   | C3orf57  | ENSG00000196542 |
| 3 | 162572087 | 162572570 | 162572322 | 20  | 30  | 11 | 2.684869143 | 0.000957822 | C3orf57  | ENSG00000196542 |
| 3 | 162603844 | 162604117 | 162603955 | 8   | 9   | 3  | 2.598260461 | 0.0397929   |          | ENSG00000129973 |
| 3 | 162605063 | 162605288 | 162605175 | 10  | 10  | 5  | 1.905391004 | 0.0915982   |          | ENSG00000129973 |
| 3 | 162605910 | 162606201 | 162606055 | 11  | 12  | 5  | 2.251825733 | 0.0404733   |          | ENSG00000129973 |
| 3 | 162613090 | 162613299 | 162613234 | 8   | 8   | 3  | 2.338434415 | 0.0641221   |          | ENSG00000129973 |
| 3 | 162621079 | 162621672 | 162621432 | 23  | 41  | 11 | 3.637564645 | 6.05E-06    |          | ENSG00000129973 |
| 3 | 162917126 | 162917338 | 162917199 | 8   | 9   | 0  | 10.39304184 | 0.000803859 |          | ENSG00000182447 |
| 3 | 163049295 | 163049556 | 163049425 | 8   | 9   | 5  | 1.73217364  | 0.133894    |          | ENSG00000182447 |
| 3 | 163165821 | 163166002 | 163165911 | 8   | 8   | 1  | 4.676868829 | 0.0091584   |          | ENSG00000182447 |
| 3 | 164245013 | 164245256 | 164245122 | 8   | 9   | 0  | 10.39304184 | 0.000803859 |          | ENSG00000221205 |
| 3 | 164272240 | 164272619 | 164272440 | 11  | 17  | 9  | 1.870747532 | 0.0498299   |          | ENSG00000221205 |
| 3 | 165140344 | 165140730 | 165140626 | 8   | 13  | 6  | 2.078608368 | 0.0483393   |          | ENSG00000214210 |
| 3 | 165580696 | 165581000 | 165580848 | 8   | 10  | 8  | 1.27026067  | 0.293854    |          | ENSG00000221755 |
| 3 | 165882694 | 165882950 | 165882825 | 10  | 11  | 2  | 4.157216737 | 0.0052913   |          | ENSG00000221755 |

|   |           |           |           |    |    |    |             |             |          |                 |
|---|-----------|-----------|-----------|----|----|----|-------------|-------------|----------|-----------------|
| 3 | 165884122 | 165884364 | 165884197 | 8  | 9  | 16 | 0.611355402 | 0.899375    |          | ENSG00000221755 |
| 3 | 166493145 | 166493363 | 166493224 | 9  | 10 | 1  | 5.716173013 | 0.00260397  | SLITRK3  | ENSG00000121871 |
| 3 | 166733453 | 166733652 | 166733553 | 9  | 10 | 3  | 2.858086507 | 0.0242838   | BCHE     | ENSG00000114200 |
| 3 | 167319063 | 167319242 | 167319152 | 8  | 8  | 0  | 9.353737658 | 0.00163931  |          | ENSG00000208614 |
| 3 | 167625650 | 167625849 | 167625755 | 8  | 9  | 3  | 2.598260461 | 0.0397929   |          | ENSG00000208601 |
| 3 | 167935159 | 167935550 | 167935371 | 20 | 27 | 5  | 4.850086193 | 2.10E-05    |          | ENSG00000208599 |
| 3 | 168008678 | 168008864 | 168008730 | 9  | 9  | 1  | 5.196520921 | 0.00490062  |          | ENSG00000185790 |
| 3 | 168030488 | 168030751 | 168030619 | 13 | 15 | 4  | 3.32577339  | 0.00462646  |          | ENSG00000185790 |
| 3 | 168123589 | 168123919 | 168123744 | 8  | 8  | 5  | 1.558956276 | 0.191397    |          | ENSG00000215922 |
| 3 | 168396557 | 168396762 | 168396672 | 9  | 11 | 3  | 3.117912553 | 0.0146045   |          | ENSG00000220343 |
| 3 | 168455297 | 168455504 | 168455400 | 9  | 9  | 2  | 3.464347281 | 0.0163838   | ZBBX     | ENSG00000169064 |
| 3 | 168580429 | 168581040 | 168580671 | 17 | 36 | 11 | 3.204521235 | 6.58E-05    | ZBBX     | ENSG00000169064 |
| 3 | 168827032 | 168827264 | 168827186 | 10 | 10 | 2  | 3.810782009 | 0.00936112  | WDR49    | ENSG00000174776 |
| 3 | 168935255 | 168935522 | 168935395 | 8  | 12 | 5  | 2.251825733 | 0.0404733   | PDCD10   | ENSG00000114209 |
| 3 | 168936198 | 168936383 | 168936290 | 8  | 9  | 8  | 1.154782427 | 0.375434    | SERPINI1 | ENSG00000163536 |
| 3 | 169015217 | 169015425 | 169015317 | 8  | 10 | 5  | 1.905391004 | 0.0915982   | SERPINI1 | ENSG00000163536 |
| 3 | 169016296 | 169016498 | 169016388 | 8  | 9  | 2  | 3.464347281 | 0.0163838   | SERPINI1 | ENSG00000163536 |
| 3 | 169099862 | 169100125 | 169099993 | 11 | 14 | 3  | 3.897390691 | 0.00295882  | SERPINI1 | ENSG00000163536 |
| 3 | 169140751 | 169141054 | 169140902 | 15 | 17 | 3  | 4.676868829 | 0.000552213 | GOLIM4   | ENSG00000173905 |
| 3 | 169178414 | 169178858 | 169178591 | 8  | 15 | 9  | 1.662886695 | 0.0970566   | GOLIM4   | ENSG00000173905 |
| 3 | 169191817 | 169192218 | 169191989 | 10 | 16 | 4  | 3.533634226 | 0.00276486  | GOLIM4   | ENSG00000173905 |
| 3 | 169247731 | 169248040 | 169247884 | 16 | 18 | 12 | 1.518983039 | 0.117837    | GOLIM4   | ENSG00000173905 |
| 3 | 169296584 | 169297017 | 169296849 | 13 | 22 | 3  | 5.975999059 | 2.96E-05    | GOLIM4   | ENSG00000173905 |
| 3 | 169354724 | 169354911 | 169354765 | 8  | 9  | 3  | 2.598260461 | 0.0397929   | GOLIM4   | ENSG00000173905 |
| 3 | 169366210 | 169366462 | 169366336 | 9  | 11 | 3  | 3.117912553 | 0.0146045   | GOLIM4   | ENSG00000173905 |
| 3 | 169681080 | 169681310 | 169681154 | 9  | 10 | 2  | 3.810782009 | 0.00936112  |          | ENSG00000222357 |
| 3 | 169749367 | 169749610 | 169749488 | 11 | 13 | 1  | 7.27512929  | 0.000378098 |          | ENSG00000207717 |
| 3 | 169871622 | 169871924 | 169871757 | 22 | 24 | 4  | 5.196520921 | 3.42E-05    |          | ENSG00000207717 |
| 3 | 170078346 | 170078705 | 170078525 | 28 | 35 | 8  | 4.157216737 | 7.29E-06    | C3orf50  | ENSG00000206120 |
| 3 | 170090208 | 170090472 | 170090337 | 8  | 12 | 6  | 1.930136342 | 0.071303    | C3orf50  | ENSG00000206120 |
| 3 | 170286369 | 170286634 | 170286488 | 12 | 14 | 3  | 3.897390691 | 0.00295882  | EVI1     | ENSG00000085276 |
| 3 | 170425696 | 170426035 | 170425871 | 17 | 20 | 1  | 10.91269393 | 3.71E-06    | EVI1     | ENSG00000085276 |
| 3 | 170469520 | 170469711 | 170469615 | 9  | 9  | 2  | 3.464347281 | 0.0163838   | MDS1     | ENSG00000206115 |
| 3 | 170491299 | 170491570 | 170491444 | 10 | 12 | 2  | 4.503651465 | 0.002963    | MDS1     | ENSG00000206115 |

|   |           |           |           |    |    |    |             |             |         |                 |
|---|-----------|-----------|-----------|----|----|----|-------------|-------------|---------|-----------------|
| 3 | 170549977 | 170550165 | 170550068 | 8  | 8  | 5  | 1.558956276 | 0.191397    | MDS1    | ENSG00000206115 |
| 3 | 170590735 | 170590937 | 170590898 | 9  | 10 | 1  | 5.716173013 | 0.00260397  | MDS1    | ENSG00000206115 |
| 3 | 170661232 | 170661411 | 170661362 | 8  | 8  | 3  | 2.338434415 | 0.0641221   |         | ENSG00000213178 |
| 3 | 170787811 | 170787995 | 170787941 | 9  | 10 | 4  | 2.286469205 | 0.0509017   |         | ENSG00000213178 |
| 3 | 170809700 | 170809928 | 170809817 | 8  | 8  | 5  | 1.558956276 | 0.191397    |         | ENSG00000184531 |
| 3 | 170958859 | 170959094 | 170959015 | 10 | 11 | 1  | 6.235825105 | 0.0013754   |         | ENSG00000200182 |
| 3 | 170963469 | 170963784 | 170963626 | 11 | 15 | 3  | 4.157216737 | 0.00170423  |         | ENSG00000200182 |
| 3 | 170973885 | 170974295 | 170974042 | 9  | 16 | 9  | 1.766817113 | 0.0700694   | MYNN    | ENSG00000085274 |
| 3 | 171247162 | 171247448 | 171247321 | 12 | 15 | 6  | 2.375552421 | 0.0212094   | GPR160  | ENSG00000173890 |
| 3 | 171250038 | 171250270 | 171250118 | 8  | 11 | 4  | 2.494330042 | 0.0324033   |         | ENSG00000201342 |
| 3 | 171250289 | 171250531 | 171250393 | 10 | 11 | 1  | 6.235825105 | 0.0013754   |         | ENSG00000201342 |
| 3 | 171254645 | 171254915 | 171254768 | 10 | 10 | 6  | 1.63319229  | 0.146906    |         | ENSG00000201342 |
| 3 | 171558930 | 171559123 | 171559026 | 8  | 8  | 4  | 1.870747532 | 0.118863    | SKIL    | ENSG00000136603 |
| 3 | 171666717 | 171666941 | 171666861 | 9  | 10 | 7  | 1.429043253 | 0.21536     | CLDN11  | ENSG00000013297 |
| 3 | 171674064 | 171674255 | 171674132 | 9  | 9  | 6  | 1.484720263 | 0.204387    | CLDN11  | ENSG00000013297 |
| 3 | 171687508 | 171687700 | 171687619 | 9  | 9  | 8  | 1.154782427 | 0.375434    | CLDN11  | ENSG00000013297 |
| 3 | 171693346 | 171693785 | 171693637 | 12 | 21 | 10 | 2.078608368 | 0.0193227   | CLDN11  | ENSG00000013297 |
| 3 | 171700242 | 171700454 | 171700348 | 8  | 8  | 6  | 1.336248237 | 0.277651    | CLDN11  | ENSG00000013297 |
| 3 | 171889794 | 171890263 | 171889945 | 15 | 27 | 4  | 5.820103432 | 6.01E-06    |         | ENSG00000213174 |
| 3 | 171941803 | 171941993 | 171941898 | 8  | 8  | 5  | 1.558956276 | 0.191397    |         | ENSG00000213174 |
| 3 | 172065406 | 172065802 | 172065623 | 9  | 17 | 3  | 4.676868829 | 0.000552213 | RPL22L1 | ENSG00000163584 |
| 3 | 172070186 | 172070507 | 172070331 | 11 | 15 | 15 | 1.039304184 | 0.456923    | RPL22L1 | ENSG00000163584 |
| 3 | 172070521 | 172070969 | 172070741 | 17 | 28 | 15 | 1.883738834 | 0.0179382   | RPL22L1 | ENSG00000163584 |
| 3 | 172193401 | 172193636 | 172193518 | 10 | 11 | 2  | 4.157216737 | 0.0052913   |         | ENSG00000199488 |
| 3 | 172224696 | 172224881 | 172224788 | 8  | 8  | 2  | 3.117912553 | 0.0283184   | SLC2A2  | ENSG00000163581 |
| 3 | 172367927 | 172368146 | 172368029 | 8  | 9  | 2  | 3.464347281 | 0.0163838   |         | ENSG00000207963 |
| 3 | 172577757 | 172577941 | 172577881 | 8  | 8  | 1  | 4.676868829 | 0.0091584   |         | ENSG00000222506 |
| 3 | 172660938 | 172661362 | 172661219 | 8  | 13 | 5  | 2.425043097 | 0.0262442   | TNIK    | ENSG00000154310 |
| 3 | 172687865 | 172688046 | 172687955 | 9  | 9  | 1  | 5.196520921 | 0.00490062  |         | ENSG00000207114 |
| 3 | 172760336 | 172760529 | 172760411 | 9  | 9  | 2  | 3.464347281 | 0.0163838   |         | ENSG00000207114 |
| 3 | 172840978 | 172841290 | 172841134 | 11 | 15 | 5  | 2.771477825 | 0.0105836   |         | ENSG00000208522 |
| 3 | 172953491 | 172953670 | 172953543 | 8  | 9  | 6  | 1.484720263 | 0.204387    |         | ENSG00000183657 |
| 3 | 172989324 | 172989558 | 172989453 | 8  | 10 | 1  | 5.716173013 | 0.00260397  |         | ENSG00000183657 |
| 3 | 173016488 | 173016708 | 173016598 | 8  | 10 | 3  | 2.858086507 | 0.0242838   | PLD1    | ENSG00000075651 |

|   |           |           |           |    |    |    |             |             |          |                 |
|---|-----------|-----------|-----------|----|----|----|-------------|-------------|----------|-----------------|
| 3 | 173072201 | 173072410 | 173072330 | 8  | 9  | 2  | 3.464347281 | 0.0163838   | TMEM212  | ENSG00000186329 |
| 3 | 173235591 | 173235835 | 173235713 | 9  | 12 | 5  | 2.251825733 | 0.0404733   | FNDC3B   | ENSG00000075420 |
| 3 | 173239890 | 173240142 | 173239978 | 9  | 13 | 7  | 1.818782322 | 0.0805123   | FNDC3B   | ENSG00000075420 |
| 3 | 173241556 | 173241756 | 173241635 | 8  | 8  | 3  | 2.338434415 | 0.0641221   | FNDC3B   | ENSG00000075420 |
| 3 | 173335788 | 173336016 | 173335902 | 11 | 12 | 3  | 3.377738599 | 0.00867157  | FNDC3B   | ENSG00000075420 |
| 3 | 173341068 | 173341416 | 173341246 | 9  | 13 | 10 | 1.32275078  | 0.240023    |          | ENSG00000222342 |
| 3 | 173342602 | 173343204 | 173342900 | 12 | 27 | 6  | 4.157216737 | 6.29E-05    |          | ENSG00000222342 |
| 3 | 173419498 | 173419680 | 173419558 | 8  | 9  | 3  | 2.598260461 | 0.0397929   |          | ENSG00000222342 |
| 3 | 173448237 | 173448416 | 173448370 | 8  | 8  | 2  | 3.117912553 | 0.0283184   |          | ENSG00000208521 |
| 3 | 173509540 | 173509770 | 173509634 | 8  | 8  | 1  | 4.676868829 | 0.0091584   |          | ENSG00000208521 |
| 3 | 173516680 | 173516939 | 173516809 | 8  | 8  | 2  | 3.117912553 | 0.0283184   |          | ENSG00000208521 |
| 3 | 173677822 | 173678064 | 173677958 | 10 | 11 | 4  | 2.494330042 | 0.0324033   | GHSR     | ENSG00000121853 |
| 3 | 173678490 | 173678801 | 173678636 | 10 | 12 | 5  | 2.251825733 | 0.0404733   | GHSR     | ENSG00000121853 |
| 3 | 173717327 | 173717683 | 173717505 | 14 | 19 | 14 | 1.385738912 | 0.166049    | TNFSF10  | ENSG00000121858 |
| 3 | 173737151 | 173737914 | 173737629 | 15 | 44 | 7  | 5.846086036 | 1.65E-08    | TNFSF10  | ENSG00000121858 |
| 3 | 173749645 | 173749883 | 173749780 | 9  | 10 | 1  | 5.716173013 | 0.00260397  | TNFSF10  | ENSG00000121858 |
| 3 | 173791753 | 173791932 | 173791842 | 8  | 8  | 2  | 3.117912553 | 0.0283184   | TNFSF10  | ENSG00000121858 |
| 3 | 173823704 | 173823911 | 173823807 | 10 | 10 | 3  | 2.858086507 | 0.0242838   |          | ENSG00000208518 |
| 3 | 173824289 | 173824631 | 173824454 | 17 | 21 | 8  | 2.540521339 | 0.00602138  |          | ENSG00000208518 |
| 3 | 173838502 | 173838736 | 173838648 | 12 | 12 | 3  | 3.377738599 | 0.00867157  |          | ENSG00000208518 |
| 3 | 173848475 | 173848767 | 173848683 | 8  | 12 | 9  | 1.35109544  | 0.232899    |          | ENSG00000208518 |
| 3 | 173873931 | 173874262 | 173874096 | 8  | 11 | 1  | 6.235825105 | 0.0013754   |          | ENSG00000208518 |
| 3 | 173885807 | 173886406 | 173886167 | 21 | 38 | 6  | 5.790409026 | 1.41E-07    |          | ENSG00000208518 |
| 3 | 173892509 | 173892703 | 173892606 | 8  | 8  | 1  | 4.676868829 | 0.0091584   |          | ENSG00000208518 |
| 3 | 173911502 | 173912258 | 173911864 | 12 | 34 | 13 | 2.598260461 | 0.000664816 | AADAACL1 | ENSG00000144959 |
| 3 | 173950815 | 173951119 | 173950967 | 14 | 17 | 8  | 2.078608368 | 0.0303558   | ECT2     | ENSG00000114346 |
| 3 | 174732249 | 174732436 | 174732310 | 8  | 9  | 2  | 3.464347281 | 0.0163838   | NLGN1    | ENSG00000169760 |
| 3 | 174891188 | 174891404 | 174891296 | 8  | 10 | 5  | 1.905391004 | 0.0915982   | NLGN1    | ENSG00000169760 |
| 3 | 174912143 | 174912460 | 174912304 | 20 | 23 | 1  | 12.47165021 | 4.94E-07    | NLGN1    | ENSG00000169760 |
| 3 | 175329337 | 175329724 | 175329545 | 21 | 30 | 0  | 32.21842971 | 2.55E-10    | NLGN1    | ENSG00000169760 |
| 3 | 175407741 | 175407952 | 175407846 | 11 | 11 | 1  | 6.235825105 | 0.0013754   | NLGN1    | ENSG00000169760 |
| 3 | 175426807 | 175427021 | 175426929 | 10 | 10 | 1  | 5.716173013 | 0.00260397  | NLGN1    | ENSG00000169760 |
| 3 | 175493670 | 175493906 | 175493801 | 8  | 9  | 1  | 5.196520921 | 0.00490062  | NLGN1    | ENSG00000169760 |
| 3 | 175619167 | 175619346 | 175619256 | 8  | 8  | 2  | 3.117912553 | 0.0283184   |          | ENSG00000213169 |



|   |           |           |           |    |    |    |             |             |          |                 |
|---|-----------|-----------|-----------|----|----|----|-------------|-------------|----------|-----------------|
| 3 | 176062639 | 176062943 | 176062781 | 13 | 18 | 4  | 3.9493559   | 0.000961379 | NAALADL2 | ENSG00000177694 |
| 3 | 176063935 | 176064325 | 176064150 | 10 | 16 | 6  | 2.524024447 | 0.0137633   | NAALADL2 | ENSG00000177694 |
| 3 | 176150045 | 176150321 | 176150183 | 8  | 9  | 1  | 5.196520921 | 0.00490062  | NAALADL2 | ENSG00000177694 |
| 3 | 176155982 | 176156340 | 176156161 | 12 | 17 | 5  | 3.117912553 | 0.00407023  | NAALADL2 | ENSG00000177694 |
| 3 | 176327849 | 176328032 | 176327885 | 9  | 9  | 3  | 2.598260461 | 0.0397929   | NAALADL2 | ENSG00000177694 |
| 3 | 176351437 | 176351643 | 176351576 | 9  | 11 | 8  | 1.385738912 | 0.224757    | NAALADL2 | ENSG00000177694 |
| 3 | 176413100 | 176413339 | 176413246 | 9  | 9  | 2  | 3.464347281 | 0.0163838   | NAALADL2 | ENSG00000177694 |
| 3 | 176425347 | 176425591 | 176425476 | 12 | 14 | 0  | 15.58956276 | 2.28E-05    | NAALADL2 | ENSG00000177694 |
| 3 | 176470946 | 176471372 | 176471204 | 8  | 16 | 6  | 2.524024447 | 0.0137633   |          | ENSG00000199792 |
| 3 | 176485299 | 176485478 | 176485388 | 8  | 8  | 0  | 9.353737658 | 0.00163931  |          | ENSG00000199792 |
| 3 | 176513159 | 176513338 | 176513273 | 8  | 8  | 2  | 3.117912553 | 0.0283184   |          | ENSG00000199792 |
| 3 | 176513341 | 176513692 | 176513516 | 13 | 19 | 6  | 2.969440526 | 0.0035096   |          | ENSG00000199792 |
| 3 | 176517203 | 176517680 | 176517508 | 8  | 17 | 5  | 3.117912553 | 0.00407023  |          | ENSG00000199792 |
| 3 | 176536936 | 176537162 | 176537098 | 9  | 10 | 10 | 1.039304184 | 0.464387    |          | ENSG00000199792 |
| 3 | 176539217 | 176539601 | 176539473 | 16 | 22 | 10 | 2.173090567 | 0.0132845   |          | ENSG00000199792 |
| 3 | 176547479 | 176547765 | 176547639 | 8  | 11 | 4  | 2.494330042 | 0.0324033   |          | ENSG00000199792 |
| 3 | 176549148 | 176549454 | 176549301 | 9  | 11 | 7  | 1.558956276 | 0.158273    |          | ENSG00000199792 |
| 3 | 176692028 | 176692333 | 176692180 | 9  | 13 | 0  | 14.55025858 | 4.65E-05    |          | ENSG00000199792 |
| 3 | 176751586 | 176751822 | 176751689 | 9  | 12 | 1  | 6.755477198 | 0.000722752 |          | ENSG00000201648 |
| 3 | 176771679 | 176771956 | 176771834 | 10 | 12 | 6  | 1.930136342 | 0.071303    |          | ENSG00000201648 |
| 3 | 176848058 | 176848257 | 176848157 | 9  | 9  | 2  | 3.464347281 | 0.0163838   |          | ENSG00000201648 |
| 3 | 176857074 | 176857407 | 176857240 | 10 | 14 | 8  | 1.73217364  | 0.0890835   |          | ENSG00000201648 |
| 3 | 176883117 | 176883613 | 176883450 | 13 | 26 | 3  | 7.015303244 | 2.63E-06    | UBE2V1P2 | ENSG00000214192 |
| 3 | 176895671 | 176895881 | 176895776 | 8  | 8  | 4  | 1.870747532 | 0.118863    | UBE2V1P2 | ENSG00000214192 |
| 3 | 176932117 | 176932361 | 176932239 | 10 | 11 | 7  | 1.558956276 | 0.158273    |          | ENSG00000208500 |
| 3 | 176936470 | 176936691 | 176936587 | 13 | 13 | 3  | 3.637564645 | 0.0050909   |          | ENSG00000208500 |
| 3 | 176978021 | 176978236 | 176978117 | 9  | 10 | 1  | 5.716173013 | 0.00260397  |          | ENSG00000201452 |
| 3 | 177157490 | 177157754 | 177157622 | 10 | 11 | 3  | 3.117912553 | 0.0146045   |          | ENSG00000201452 |
| 3 | 177367853 | 177368152 | 177367998 | 8  | 12 | 13 | 0.965068171 | 0.538344    |          | ENSG00000201452 |
| 3 | 177834117 | 177834326 | 177834183 | 9  | 10 | 2  | 3.810782009 | 0.00936112  |          | ENSG00000208490 |
| 3 | 177946506 | 177946685 | 177946564 | 8  | 8  | 4  | 1.870747532 | 0.118863    |          | ENSG00000208490 |
| 3 | 178014778 | 178015038 | 178014908 | 9  | 11 | 1  | 6.235825105 | 0.0013754   |          | ENSG00000208490 |
| 3 | 178056357 | 178056787 | 178056498 | 14 | 19 | 5  | 3.464347281 | 0.00150447  |          | ENSG00000208490 |
| 3 | 178097221 | 178097427 | 178097324 | 8  | 9  | 3  | 2.598260461 | 0.0397929   |          | ENSG00000208490 |

|   |           |           |           |    |     |   |             |             |        |                 |
|---|-----------|-----------|-----------|----|-----|---|-------------|-------------|--------|-----------------|
| 3 | 178560454 | 178560694 | 178560574 | 13 | 15  | 0 | 16.62886695 | 1.12E-05    |        | ENSG00000208471 |
| 3 | 178653546 | 178653725 | 178653634 | 8  | 8   | 3 | 2.338434415 | 0.0641221   |        | ENSG00000208471 |
| 3 | 178721858 | 178722065 | 178721961 | 10 | 10  | 6 | 1.63319229  | 0.146906    |        | ENSG00000208471 |
| 3 | 178791573 | 178791768 | 178791670 | 8  | 8   | 2 | 3.117912553 | 0.0283184   |        | ENSG00000203635 |
| 3 | 178791986 | 178792184 | 178792066 | 9  | 10  | 0 | 11.43234603 | 0.000394183 |        | ENSG00000203635 |
| 3 | 178801606 | 178801853 | 178801729 | 11 | 11  | 3 | 3.117912553 | 0.0146045   |        | ENSG00000203635 |
| 3 | 178803362 | 178803675 | 178803514 | 12 | 14  | 3 | 3.897390691 | 0.00295882  |        | ENSG00000203635 |
| 3 | 178823159 | 178823396 | 178823310 | 12 | 14  | 3 | 3.897390691 | 0.00295882  |        | ENSG00000200288 |
| 3 | 178885688 | 178885878 | 178885849 | 8  | 8   | 1 | 4.676868829 | 0.0091584   |        | ENSG00000200288 |
| 3 | 179010556 | 179010895 | 179010720 | 9  | 13  | 6 | 2.078608368 | 0.0483393   |        | ENSG00000200288 |
| 3 | 179635741 | 179635925 | 179635818 | 8  | 8   | 1 | 4.676868829 | 0.0091584   |        | ENSG00000208463 |
| 3 | 179806754 | 179806946 | 179806849 | 8  | 8   | 0 | 9.353737658 | 0.00163931  |        | ENSG00000208463 |
| 3 | 180054650 | 180054829 | 180054692 | 8  | 8   | 1 | 4.676868829 | 0.0091584   | KCNMB2 | ENSG00000197584 |
| 3 | 180269785 | 180269991 | 180269913 | 9  | 9   | 0 | 10.39304184 | 0.000803859 | ZMAT3  | ENSG00000172667 |
| 3 | 180270449 | 180271052 | 180270695 | 96 | 129 | 5 | 22.51825733 | 7.24E-34    | ZMAT3  | ENSG00000172667 |
| 3 | 180309079 | 180309351 | 180309253 | 8  | 8   | 0 | 9.353737658 | 0.00163931  |        | ENSG00000200616 |
| 3 | 180348372 | 180348738 | 180348551 | 10 | 16  | 6 | 2.524024447 | 0.0137633   | PIK3CA | ENSG00000121879 |
| 3 | 180523849 | 180524115 | 180523982 | 10 | 12  | 4 | 2.702190879 | 0.0203088   | ZNF639 | ENSG00000121864 |
| 3 | 180804915 | 180805257 | 180805086 | 8  | 12  | 9 | 1.35109544  | 0.232899    | MRPL47 | ENSG00000136522 |
| 3 | 181170004 | 181170397 | 181170209 | 40 | 50  | 0 | 53.0045134  | 1.65E-16    | PEX5L  | ENSG00000114757 |
| 3 | 181268809 | 181269071 | 181268940 | 10 | 10  | 4 | 2.286469205 | 0.0509017   | PEX5L  | ENSG00000114757 |
| 3 | 181435992 | 181436247 | 181436119 | 9  | 12  | 1 | 6.755477198 | 0.000722752 |        | ENSG00000213158 |
| 3 | 181496359 | 181496610 | 181496459 | 12 | 14  | 1 | 7.794781382 | 0.000197021 |        | ENSG00000213158 |
| 3 | 181507300 | 181507492 | 181507444 | 8  | 9   | 4 | 2.078608368 | 0.0785659   |        | ENSG00000213158 |
| 3 | 182316963 | 182317181 | 182317072 | 8  | 9   | 6 | 1.484720263 | 0.204387    |        | ENSG00000206932 |
| 3 | 183051509 | 183051806 | 183051658 | 10 | 12  | 4 | 2.702190879 | 0.0203088   |        | ENSG00000213155 |
| 3 | 183088097 | 183088294 | 183088228 | 8  | 9   | 2 | 3.464347281 | 0.0163838   |        | ENSG00000213155 |
| 3 | 183148935 | 183149117 | 183149026 | 8  | 8   | 2 | 3.117912553 | 0.0283184   |        | ENSG00000213155 |
| 3 | 183174798 | 183174988 | 183174825 | 8  | 8   | 3 | 2.338434415 | 0.0641221   |        | ENSG00000213155 |
| 3 | 183220191 | 183220547 | 183220369 | 10 | 15  | 3 | 4.157216737 | 0.00170423  |        | ENSG00000213155 |
| 3 | 183532549 | 183532802 | 183532675 | 8  | 8   | 1 | 4.676868829 | 0.0091584   | ATP11B | ENSG00000058063 |
| 3 | 183685900 | 183686104 | 183685953 | 8  | 8   | 2 | 3.117912553 | 0.0283184   | ATP11B | ENSG00000058063 |
| 3 | 183798060 | 183798304 | 183798210 | 9  | 11  | 2 | 4.157216737 | 0.0052913   | ATP11B | ENSG00000058063 |
| 3 | 183830779 | 183831040 | 183830893 | 9  | 9   | 4 | 2.078608368 | 0.0785659   | ATP11B | ENSG00000058063 |

|   |           |           |           |    |    |    |             |             |         |                 |
|---|-----------|-----------|-----------|----|----|----|-------------|-------------|---------|-----------------|
| 3 | 183939691 | 183939940 | 183939815 | 16 | 17 | 5  | 3.117912553 | 0.00407023  | ATP11B  | ENSG00000058063 |
| 3 | 183941252 | 183941499 | 183941371 | 9  | 10 | 2  | 3.810782009 | 0.00936112  | ATP11B  | ENSG00000058063 |
| 3 | 184308467 | 184308658 | 184308563 | 9  | 10 | 6  | 1.63319229  | 0.146906    | MCCC1   | ENSG00000078070 |
| 3 | 184394213 | 184394541 | 184394377 | 13 | 17 | 7  | 2.338434415 | 0.0171287   |         | ENSG00000208403 |
| 3 | 184492138 | 184492484 | 184492311 | 13 | 18 | 9  | 1.97467795  | 0.0349428   |         | ENSG00000202502 |
| 3 | 184495783 | 184496187 | 184495962 | 13 | 20 | 9  | 2.182538787 | 0.0165356   |         | ENSG00000202502 |
| 3 | 184550067 | 184550387 | 184550227 | 8  | 12 | 2  | 4.503651465 | 0.002963    | MCF2L2  | ENSG00000053524 |
| 3 | 184648069 | 184648478 | 184648299 | 12 | 20 | 5  | 3.637564645 | 0.000902929 |         | ENSG00000201229 |
| 3 | 184915243 | 184915426 | 184915361 | 8  | 8  | 0  | 9.353737658 | 0.00163931  | YEATS2  | ENSG00000163872 |
| 3 | 185013610 | 185013841 | 185013764 | 10 | 12 | 5  | 2.251825733 | 0.0404733   |         | ENSG00000212778 |
| 3 | 185085341 | 185085702 | 185085457 | 9  | 14 | 7  | 1.948695345 | 0.0559175   | PARL    | ENSG00000175193 |
| 3 | 185095848 | 185096063 | 185095969 | 11 | 11 | 5  | 2.078608368 | 0.0614303   | PARL    | ENSG00000175193 |
| 3 | 185112632 | 185112814 | 185112706 | 9  | 9  | 1  | 5.196520921 | 0.00490062  | PARL    | ENSG00000175193 |
| 3 | 185166826 | 185167090 | 185166928 | 15 | 16 | 4  | 3.533634226 | 0.00276486  | ABCC5   | ENSG00000114770 |
| 3 | 185206527 | 185206896 | 185206667 | 15 | 20 | 8  | 2.425043097 | 0.00917565  | ABCC5   | ENSG00000114770 |
| 3 | 185211662 | 185211935 | 185211798 | 8  | 11 | 10 | 1.133786383 | 0.380636    | ABCC5   | ENSG00000114770 |
| 3 | 185334566 | 185334941 | 185334851 | 8  | 14 | 5  | 2.598260461 | 0.0167748   | EIF2B5  | ENSG00000145191 |
| 3 | 185335725 | 185336114 | 185335956 | 12 | 19 | 7  | 2.598260461 | 0.00730518  | EIF2B5  | ENSG00000145191 |
| 3 | 185374877 | 185375178 | 185375033 | 9  | 13 | 0  | 14.55025858 | 4.65E-05    | AP2M1   | ENSG00000161203 |
| 3 | 185449355 | 185449590 | 185449417 | 8  | 11 | 4  | 2.494330042 | 0.0324033   | ALG3    | ENSG00000214160 |
| 3 | 185450787 | 185451004 | 185450891 | 9  | 11 | 5  | 2.078608368 | 0.0614303   | ECE2    | ENSG00000145194 |
| 3 | 185501334 | 185501513 | 185501380 | 8  | 9  | 7  | 1.29913023  | 0.286504    | PSMD2   | ENSG00000175166 |
| 3 | 185546228 | 185546487 | 185546357 | 10 | 11 | 7  | 1.558956276 | 0.158273    | FAM131A | ENSG00000175182 |
| 3 | 185563585 | 185564126 | 185563855 | 9  | 21 | 5  | 3.810782009 | 0.000537724 | POLR2H  | ENSG00000163882 |
| 3 | 185571909 | 185572281 | 185572037 | 10 | 15 | 7  | 2.078608368 | 0.038229    | THPO    | ENSG00000090534 |
| 3 | 185618363 | 185618644 | 185618503 | 9  | 11 | 3  | 3.117912553 | 0.0146045   | CHRD    | ENSG00000090539 |
| 3 | 185640599 | 185641018 | 185640891 | 9  | 14 | 9  | 1.558956276 | 0.132279    | CHRD    | ENSG00000090539 |
| 3 | 185644428 | 185644689 | 185644558 | 11 | 11 | 2  | 4.157216737 | 0.0052913   | CHRD    | ENSG00000090539 |
| 3 | 185669004 | 185669284 | 185669158 | 8  | 11 | 1  | 6.235825105 | 0.0013754   | CHRD    | ENSG00000090539 |
| 3 | 185672037 | 185672362 | 185672199 | 12 | 17 | 2  | 6.235825105 | 0.000146695 | CHRD    | ENSG00000090539 |
| 3 | 185714242 | 185714515 | 185714346 | 8  | 10 | 3  | 2.858086507 | 0.0242838   | EPHB3   | ENSG00000182580 |
| 3 | 185741594 | 185741787 | 185741690 | 8  | 8  | 1  | 4.676868829 | 0.0091584   | EPHB3   | ENSG00000182580 |
| 3 | 185766175 | 185766609 | 185766508 | 10 | 17 | 10 | 1.700679574 | 0.0766266   | EPHB3   | ENSG00000182580 |
| 3 | 185927911 | 185928172 | 185928004 | 9  | 11 | 6  | 1.781664316 | 0.103344    | MAGEF1  | ENSG00000177383 |

|   |           |           |           |    |    |    |             |             |         |                 |
|---|-----------|-----------|-----------|----|----|----|-------------|-------------|---------|-----------------|
| 3 | 185960920 | 185961179 | 185961045 | 8  | 10 | 0  | 11.43234603 | 0.000394183 | MAGEF1  | ENSG00000177383 |
| 3 | 185967064 | 185967503 | 185967320 | 33 | 50 | 3  | 13.25112835 | 5.72E-13    | VPS8    | ENSG00000156931 |
| 3 | 185978386 | 185978579 | 185978482 | 8  | 8  | 2  | 3.117912553 | 0.0283184   | VPS8    | ENSG00000156931 |
| 3 | 185982866 | 185983197 | 185983031 | 16 | 19 | 0  | 20.78608368 | 6.46E-07    | VPS8    | ENSG00000156931 |
| 3 | 186013526 | 186013725 | 186013572 | 8  | 8  | 1  | 4.676868829 | 0.0091584   | VPS8    | ENSG00000156931 |
| 3 | 186075677 | 186075856 | 186075766 | 8  | 8  | 2  | 3.117912553 | 0.0283184   | VPS8    | ENSG00000156931 |
| 3 | 186110783 | 186110964 | 186110873 | 8  | 8  | 0  | 9.353737658 | 0.00163931  | VPS8    | ENSG00000156931 |
| 3 | 186365585 | 186365782 | 186365681 | 8  | 8  | 4  | 1.870747532 | 0.118863    | C3orf70 | ENSG00000187068 |
| 3 | 186471041 | 186471231 | 186471136 | 8  | 8  | 0  | 9.353737658 | 0.00163931  | EHHADH  | ENSG00000113790 |
| 3 | 186481373 | 186481578 | 186481506 | 10 | 10 | 5  | 1.905391004 | 0.0915982   | EHHADH  | ENSG00000113790 |
| 3 | 186536231 | 186536635 | 186536410 | 10 | 17 | 5  | 3.117912553 | 0.00407023  | MAP3K13 | ENSG00000073803 |
| 3 | 186563118 | 186563327 | 186563222 | 9  | 9  | 2  | 3.464347281 | 0.0163838   | MAP3K13 | ENSG00000073803 |
| 3 | 186699415 | 186699696 | 186699584 | 9  | 13 | 12 | 1.11925066  | 0.384109    | TMEM41A | ENSG00000163900 |
| 3 | 186786337 | 186786646 | 186786491 | 8  | 12 | 10 | 1.228268581 | 0.305344    | SENP2   | ENSG00000163904 |
| 3 | 186873169 | 186873348 | 186873258 | 9  | 9  | 1  | 5.196520921 | 0.00490062  | C3orf65 | ENSG00000163915 |
| 3 | 186918257 | 186918802 | 186918436 | 44 | 63 | 6  | 9.502209684 | 3.93E-14    | C3orf65 | ENSG00000163915 |
| 3 | 186961541 | 186961721 | 186961703 | 8  | 8  | 1  | 4.676868829 | 0.0091584   | C3orf65 | ENSG00000163915 |
| 3 | 187047269 | 187047453 | 187047404 | 8  | 9  | 0  | 10.39304184 | 0.000803859 | IGF2BP2 | ENSG00000073792 |
| 3 | 187137599 | 187137813 | 187137706 | 10 | 11 | 4  | 2.494330042 | 0.0324033   | SFRS10  | ENSG00000136527 |
| 3 | 187144030 | 187144279 | 187144133 | 10 | 10 | 3  | 2.858086507 | 0.0242838   | SFRS10  | ENSG00000136527 |
| 3 | 187251531 | 187251766 | 187251644 | 8  | 8  | 0  | 9.353737658 | 0.00163931  |         | ENSG00000208376 |
| 3 | 187276465 | 187276789 | 187276623 | 27 | 28 | 1  | 15.06991067 | 1.67E-08    |         | ENSG00000208376 |
| 3 | 187508074 | 187508373 | 187508226 | 8  | 11 | 6  | 1.781664316 | 0.103344    | DGKG    | ENSG00000058866 |
| 3 | 187569300 | 187569520 | 187569410 | 13 | 13 | 2  | 4.850086193 | 0.00164564  | DGKG    | ENSG00000058866 |
| 3 | 187673191 | 187673468 | 187673294 | 8  | 10 | 5  | 1.905391004 | 0.0915982   | CRYGS   | ENSG00000213139 |
| 3 | 187676709 | 187677112 | 187676888 | 32 | 42 | 2  | 14.89669331 | 1.32E-11    | CRYGS   | ENSG00000213139 |
| 3 | 187815404 | 187815634 | 187815509 | 15 | 16 | 7  | 2.208521392 | 0.0257604   | AHSG    | ENSG00000145192 |
| 3 | 187922940 | 187923166 | 187923087 | 8  | 9  | 3  | 2.598260461 | 0.0397929   | KNG1    | ENSG00000113889 |
| 3 | 187960908 | 187961288 | 187961065 | 10 | 15 | 3  | 4.157216737 | 0.00170423  |         | ENSG00000207505 |
| 3 | 187983758 | 187984031 | 187983870 | 17 | 21 | 6  | 3.266384579 | 0.0013436   | EIF4A2  | ENSG00000156976 |
| 3 | 187984047 | 187984280 | 187984163 | 8  | 9  | 3  | 2.598260461 | 0.0397929   | EIF4A2  | ENSG00000156976 |
| 3 | 187991045 | 187991280 | 187991137 | 11 | 13 | 6  | 2.078608368 | 0.0483393   |         | ENSG00000199430 |
| 3 | 188006756 | 188007050 | 188006898 | 8  | 10 | 4  | 2.286469205 | 0.0509017   | RFC4    | ENSG00000163918 |
| 3 | 188042115 | 188042407 | 188042279 | 13 | 15 | 4  | 3.32577339  | 0.00462646  | ADIPOQ  | ENSG00000181092 |

|   |           |           |           |    |    |    |             |             |         |                 |
|---|-----------|-----------|-----------|----|----|----|-------------|-------------|---------|-----------------|
| 3 | 188056415 | 188056609 | 188056512 | 8  | 8  | 3  | 2.338434415 | 0.0641221   | ADIPOQ  | ENSG00000181092 |
| 3 | 188123367 | 188123700 | 188123537 | 8  | 11 | 7  | 1.558956276 | 0.158273    | ST6GAL1 | ENSG00000073849 |
| 3 | 188264325 | 188264554 | 188264439 | 10 | 13 | 2  | 4.850086193 | 0.00164564  | ST6GAL1 | ENSG00000073849 |
| 3 | 188267183 | 188267399 | 188267286 | 10 | 11 | 4  | 2.494330042 | 0.0324033   | ST6GAL1 | ENSG00000073849 |
| 3 | 188313772 | 188314123 | 188313947 | 12 | 18 | 1  | 9.87338975  | 1.41E-05    | RPL39L  | ENSG00000163923 |
| 3 | 188383661 | 188384050 | 188383871 | 57 | 67 | 0  | 70.67268453 | 9.02E-22    | RTP1    | ENSG00000175077 |
| 3 | 188452378 | 188452584 | 188452497 | 8  | 11 | 1  | 6.235825105 | 0.0013754   | MASP1   | ENSG00000127241 |
| 3 | 188945720 | 188946184 | 188946084 | 9  | 17 | 5  | 3.117912553 | 0.00407023  | BCL6    | ENSG00000113916 |
| 3 | 188946344 | 188946702 | 188946523 | 9  | 15 | 4  | 3.32577339  | 0.00462646  | BCL6    | ENSG00000113916 |
| 3 | 188948554 | 188948898 | 188948730 | 8  | 12 | 4  | 2.702190879 | 0.0203088   | BCL6    | ENSG00000113916 |
| 3 | 188950636 | 188951042 | 188950911 | 10 | 18 | 5  | 3.291129917 | 0.00248584  | BCL6    | ENSG00000113916 |
| 3 | 188965038 | 188965251 | 188965138 | 8  | 9  | 1  | 5.196520921 | 0.00490062  | BCL6    | ENSG00000113916 |
| 3 | 188989663 | 188989931 | 188989793 | 10 | 12 | 1  | 6.755477198 | 0.000722752 | BCL6    | ENSG00000113916 |
| 3 | 189008999 | 189009241 | 189009127 | 8  | 11 | 1  | 6.235825105 | 0.0013754   | BCL6    | ENSG00000113916 |
| 3 | 189009495 | 189010103 | 189009644 | 12 | 22 | 8  | 2.655999582 | 0.0039122   | BCL6    | ENSG00000113916 |
| 3 | 189102998 | 189103178 | 189103088 | 10 | 10 | 1  | 5.716173013 | 0.00260397  | BCL6    | ENSG00000113916 |
| 3 | 189133415 | 189133606 | 189133472 | 9  | 11 | 3  | 3.117912553 | 0.0146045   | BCL6    | ENSG00000113916 |
| 3 | 189237028 | 189237232 | 189237130 | 9  | 9  | 2  | 3.464347281 | 0.0163838   |         | ENSG00000213132 |
| 3 | 189237664 | 189237984 | 189237824 | 16 | 20 | 7  | 2.728173484 | 0.00469378  |         | ENSG00000213132 |
| 3 | 189399167 | 189399346 | 189399256 | 8  | 8  | 1  | 4.676868829 | 0.0091584   | LPP     | ENSG00000145012 |
| 3 | 189562689 | 189562912 | 189562749 | 8  | 10 | 3  | 2.858086507 | 0.0242838   | LPP     | ENSG00000145012 |
| 3 | 189562984 | 189563213 | 189563098 | 9  | 11 | 5  | 2.078608368 | 0.0614303   | LPP     | ENSG00000145012 |
| 3 | 190039741 | 190040065 | 190039915 | 8  | 12 | 8  | 1.501217155 | 0.168286    |         | ENSG00000207651 |
| 3 | 190155148 | 190155330 | 190155258 | 8  | 8  | 1  | 4.676868829 | 0.0091584   | TPRG1   | ENSG00000188001 |
| 3 | 190176958 | 190177381 | 190177130 | 28 | 35 | 1  | 18.70747532 | 1.40E-10    | TPRG1   | ENSG00000188001 |
| 3 | 190296804 | 190297006 | 190296908 | 10 | 11 | 4  | 2.494330042 | 0.0324033   | TPRG1   | ENSG00000188001 |
| 3 | 190299481 | 190299680 | 190299590 | 8  | 9  | 4  | 2.078608368 | 0.0785659   | TPRG1   | ENSG00000188001 |
| 3 | 190339433 | 190339636 | 190339502 | 8  | 8  | 2  | 3.117912553 | 0.0283184   | TPRG1   | ENSG00000188001 |
| 3 | 190504965 | 190505686 | 190505423 | 13 | 34 | 19 | 1.818782322 | 0.0141578   | TPRG1   | ENSG00000188001 |
| 3 | 190658998 | 190659453 | 190659121 | 12 | 18 | 14 | 1.316451967 | 0.209896    |         | ENSG00000208357 |
| 3 | 190956811 | 190957022 | 190956974 | 10 | 10 | 5  | 1.905391004 | 0.0915982   | TP63    | ENSG00000073282 |
| 3 | 190957218 | 190957476 | 190957355 | 11 | 13 | 8  | 1.616695398 | 0.123553    | TP63    | ENSG00000073282 |
| 3 | 190966963 | 190967352 | 190967138 | 11 | 16 | 7  | 2.208521392 | 0.0257604   | TP63    | ENSG00000073282 |
| 3 | 191042399 | 191042652 | 191042525 | 8  | 10 | 6  | 1.63319229  | 0.146906    |         | ENSG00000216058 |

|   |           |           |           |    |    |    |             |            |         |                 |
|---|-----------|-----------|-----------|----|----|----|-------------|------------|---------|-----------------|
| 3 | 191144953 | 191145162 | 191145008 | 8  | 8  | 9  | 0.935373766 | 0.560286   |         | ENSG00000216058 |
| 3 | 191238534 | 191239017 | 191238713 | 29 | 39 | 4  | 8.314433474 | 4.21E-09   | LEPREL1 | ENSG00000090530 |
| 3 | 191317167 | 191317589 | 191317377 | 50 | 63 | 8  | 7.390607532 | 9.62E-13   | LEPREL1 | ENSG00000090530 |
| 3 | 191356747 | 191356926 | 191356836 | 8  | 8  | 1  | 4.676868829 | 0.0091584  |         | ENSG00000212489 |
| 3 | 191367896 | 191368082 | 191367989 | 8  | 8  | 0  | 9.353737658 | 0.00163931 |         | ENSG00000212489 |
| 3 | 191526589 | 191526939 | 191526730 | 8  | 13 | 2  | 4.850086193 | 0.00164564 | CLDN1   | ENSG00000163347 |
| 3 | 192358117 | 192358434 | 192358275 | 22 | 26 | 1  | 14.03060649 | 6.50E-08   | OSTN    | ENSG00000188729 |
| 3 | 192530353 | 192530532 | 192530442 | 8  | 8  | 6  | 1.336248237 | 0.277651   | CCDC50  | ENSG00000152492 |
| 3 | 192617548 | 192617786 | 192617653 | 10 | 11 | 3  | 3.117912553 | 0.0146045  | PYDC2   | ENSG00000221856 |
| 3 | 192670577 | 192670756 | 192670608 | 8  | 8  | 1  | 4.676868829 | 0.0091584  | PYDC2   | ENSG00000221856 |
| 3 | 192699736 | 192699955 | 192699845 | 8  | 8  | 4  | 1.870747532 | 0.118863   | PYDC2   | ENSG00000221856 |
| 3 | 193388844 | 193389056 | 193388892 | 9  | 9  | 10 | 0.944821986 | 0.553851   |         | ENSG00000222583 |
| 3 | 193474197 | 193474489 | 193474325 | 9  | 10 | 2  | 3.810782009 | 0.00936112 | FGF12   | ENSG00000114279 |
| 3 | 193649451 | 193649668 | 193649581 | 8  | 9  | 3  | 2.598260461 | 0.0397929  | FGF12   | ENSG00000114279 |
| 3 | 193667797 | 193668138 | 193667967 | 10 | 13 | 9  | 1.455025858 | 0.177172   | FGF12   | ENSG00000114279 |
| 3 | 193767380 | 193767567 | 193767473 | 8  | 9  | 5  | 1.73217364  | 0.133894   |         | ENSG00000208337 |
| 3 | 193771775 | 193772009 | 193771892 | 11 | 11 | 10 | 1.133786383 | 0.380636   |         | ENSG00000208337 |
| 3 | 193798020 | 193798483 | 193798208 | 19 | 32 | 17 | 1.905391004 | 0.0116023  |         | ENSG00000208337 |
| 3 | 193807771 | 193807952 | 193807861 | 8  | 8  | 2  | 3.117912553 | 0.0283184  |         | ENSG00000208337 |
| 3 | 193928157 | 193928373 | 193928265 | 8  | 10 | 2  | 3.810782009 | 0.00936112 |         | ENSG00000200184 |
| 3 | 193939230 | 193939467 | 193939378 | 10 | 11 | 4  | 2.494330042 | 0.0324033  |         | ENSG00000200184 |
| 3 | 193950856 | 193951081 | 193950995 | 8  | 8  | 2  | 3.117912553 | 0.0283184  |         | ENSG00000200184 |
| 3 | 194013314 | 194013723 | 194013539 | 10 | 18 | 7  | 2.468347438 | 0.0112499  |         | ENSG00000200184 |
| 3 | 194016362 | 194016687 | 194016524 | 10 | 14 | 8  | 1.73217364  | 0.0890835  |         | ENSG00000200184 |
| 3 | 194016847 | 194017098 | 194016972 | 10 | 12 | 4  | 2.702190879 | 0.0203088  |         | ENSG00000200184 |
| 3 | 194019442 | 194019764 | 194019620 | 9  | 13 | 4  | 2.910051716 | 0.0125532  |         | ENSG00000200184 |
| 3 | 194052365 | 194052629 | 194052497 | 12 | 15 | 13 | 1.187776211 | 0.317363   | C3orf59 | ENSG00000180611 |
| 3 | 194052676 | 194053000 | 194052838 | 12 | 16 | 3  | 4.417042783 | 0.00097367 | C3orf59 | ENSG00000180611 |
| 3 | 194080185 | 194080521 | 194080353 | 13 | 17 | 6  | 2.672496474 | 0.00882337 | C3orf59 | ENSG00000180611 |
| 3 | 194082010 | 194082189 | 194082182 | 8  | 8  | 1  | 4.676868829 | 0.0091584  | C3orf59 | ENSG00000180611 |
| 3 | 194097363 | 194097763 | 194097611 | 16 | 25 | 4  | 5.404381758 | 1.92E-05   | C3orf59 | ENSG00000180611 |
| 3 | 194100926 | 194101119 | 194101061 | 9  | 10 | 6  | 1.63319229  | 0.146906   | C3orf59 | ENSG00000180611 |
| 3 | 194108434 | 194108718 | 194108586 | 12 | 15 | 6  | 2.375552421 | 0.0212094  | C3orf59 | ENSG00000180611 |
| 3 | 194118542 | 194118751 | 194118648 | 9  | 9  | 6  | 1.484720263 | 0.204387   | C3orf59 | ENSG00000180611 |

|   |           |           |           |    |    |    |             |             |         |                 |
|---|-----------|-----------|-----------|----|----|----|-------------|-------------|---------|-----------------|
| 3 | 194241645 | 194241887 | 194241768 | 9  | 10 | 2  | 3.810782009 | 0.00936112  |         | ENSG00000220985 |
| 3 | 194287123 | 194287430 | 194287294 | 10 | 12 | 4  | 2.702190879 | 0.0203088   |         | ENSG00000220985 |
| 3 | 194287966 | 194288173 | 194288062 | 8  | 8  | 2  | 3.117912553 | 0.0283184   |         | ENSG00000220985 |
| 3 | 194309669 | 194309867 | 194309811 | 9  | 11 | 2  | 4.157216737 | 0.0052913   |         | ENSG00000220985 |
| 3 | 194338359 | 194338562 | 194338460 | 8  | 11 | 1  | 6.235825105 | 0.0013754   |         | ENSG00000220985 |
| 3 | 194431687 | 194432044 | 194431902 | 9  | 13 | 6  | 2.078608368 | 0.0483393   | HRASLS  | ENSG00000127252 |
| 3 | 194475864 | 194476043 | 194475953 | 9  | 9  | 2  | 3.464347281 | 0.0163838   | ATP13A5 | ENSG00000187527 |
| 3 | 194492744 | 194492963 | 194492873 | 9  | 9  | 3  | 2.598260461 | 0.0397929   | ATP13A5 | ENSG00000187527 |
| 3 | 194700569 | 194700924 | 194700850 | 9  | 13 | 8  | 1.616695398 | 0.123553    | ATP13A4 | ENSG00000127249 |
| 3 | 194793233 | 194793839 | 194793660 | 28 | 43 | 5  | 7.621564018 | 1.77E-09    | OPA1    | ENSG00000198836 |
| 3 | 194882213 | 194882392 | 194882302 | 8  | 9  | 9  | 1.039304184 | 0.466079    |         | ENSG00000207370 |
| 3 | 194928888 | 194929111 | 194928999 | 9  | 11 | 0  | 12.47165021 | 0.000193293 |         | ENSG00000208326 |
| 3 | 194987594 | 194987895 | 194987744 | 13 | 16 | 0  | 17.66817113 | 5.48E-06    |         | ENSG00000208326 |
| 3 | 194991998 | 194992453 | 194992209 | 18 | 29 | 15 | 1.948695345 | 0.0128944   |         | ENSG00000208326 |
| 3 | 195005993 | 195006400 | 195006196 | 15 | 25 | 20 | 1.286757561 | 0.192726    |         | ENSG00000208326 |
| 3 | 195015170 | 195015385 | 195015267 | 8  | 9  | 1  | 5.196520921 | 0.00490062  |         | ENSG00000208326 |
| 3 | 195026940 | 195027284 | 195027112 | 9  | 13 | 9  | 1.455025858 | 0.177172    |         | ENSG00000208326 |
| 3 | 195027764 | 195027989 | 195027846 | 8  | 11 | 2  | 4.157216737 | 0.0052913   |         | ENSG00000208326 |
| 3 | 195029055 | 195029359 | 195029207 | 21 | 25 | 10 | 2.456537163 | 0.00405907  |         | ENSG00000208326 |
| 3 | 195030286 | 195030624 | 195030457 | 16 | 18 | 5  | 3.291129917 | 0.00248584  |         | ENSG00000208326 |
| 3 | 195037953 | 195038151 | 195038038 | 8  | 9  | 8  | 1.154782427 | 0.375434    |         | ENSG00000208326 |
| 3 | 195049451 | 195049762 | 195049617 | 17 | 18 | 4  | 3.9493559   | 0.000961379 |         | ENSG00000208326 |
| 3 | 195052056 | 195052316 | 195052186 | 13 | 14 | 4  | 3.117912553 | 0.00766354  |         | ENSG00000208326 |
| 3 | 195054105 | 195054439 | 195054272 | 8  | 13 | 4  | 2.910051716 | 0.0125532   |         | ENSG00000208326 |
| 3 | 195072726 | 195073133 | 195072940 | 23 | 33 | 15 | 2.208521392 | 0.00315413  |         | ENSG00000214146 |
| 3 | 195079561 | 195079740 | 195079695 | 8  | 8  | 6  | 1.336248237 | 0.277651    |         | ENSG00000214146 |
| 3 | 195080018 | 195080277 | 195080154 | 11 | 14 | 9  | 1.558956276 | 0.132279    |         | ENSG00000214146 |
| 3 | 195085457 | 195085674 | 195085580 | 8  | 9  | 1  | 5.196520921 | 0.00490062  |         | ENSG00000214146 |
| 3 | 195111471 | 195111826 | 195111695 | 25 | 30 | 12 | 2.478340747 | 0.00182253  |         | ENSG00000214146 |
| 3 | 195122767 | 195123320 | 195123042 | 18 | 33 | 12 | 2.718180174 | 0.000523509 |         | ENSG00000214146 |
| 3 | 195170732 | 195170932 | 195170808 | 9  | 10 | 4  | 2.286469205 | 0.0509017   |         | ENSG00000214146 |
| 3 | 195203749 | 195204312 | 195204024 | 9  | 22 | 9  | 2.390399624 | 0.00747467  |         | ENSG00000214146 |
| 3 | 195271099 | 195271369 | 195271264 | 11 | 13 | 5  | 2.425043097 | 0.0262442   | HES1    | ENSG00000114315 |
| 3 | 195276080 | 195276259 | 195276237 | 9  | 9  | 10 | 0.944821986 | 0.553851    | HES1    | ENSG00000114315 |

|   |           |           |           |    |    |    |             |             |         |                 |
|---|-----------|-----------|-----------|----|----|----|-------------|-------------|---------|-----------------|
| 3 | 195305629 | 195305837 | 195305726 | 8  | 9  | 3  | 2.598260461 | 0.0397929   | HES1    | ENSG00000114315 |
| 3 | 195332909 | 195333284 | 195333105 | 10 | 16 | 7  | 2.208521392 | 0.0257604   | HES1    | ENSG00000114315 |
| 3 | 195335308 | 195335498 | 195335393 | 8  | 8  | 8  | 1.039304184 | 0.46786     | HES1    | ENSG00000114315 |
| 3 | 195336264 | 195336944 | 195336556 | 14 | 34 | 15 | 2.273477903 | 0.00217414  | HES1    | ENSG00000114315 |
| 3 | 195342519 | 195342698 | 195342605 | 8  | 8  | 9  | 0.935373766 | 0.560286    |         | ENSG00000223332 |
| 3 | 195348824 | 195349164 | 195348994 | 9  | 13 | 10 | 1.32275078  | 0.240023    |         | ENSG00000208324 |
| 3 | 195350866 | 195351224 | 195351045 | 8  | 13 | 4  | 2.910051716 | 0.0125532   |         | ENSG00000208324 |
| 3 | 195355255 | 195355453 | 195355354 | 8  | 8  | 2  | 3.117912553 | 0.0283184   |         | ENSG00000208324 |
| 3 | 195359293 | 195359846 | 195359513 | 17 | 30 | 20 | 1.534210939 | 0.0617334   |         | ENSG00000208323 |
| 3 | 195377811 | 195378005 | 195377888 | 10 | 10 | 5  | 1.905391004 | 0.0915982   |         | ENSG00000208323 |
| 3 | 195404902 | 195405552 | 195405318 | 42 | 65 | 9  | 6.859407616 | 1.25E-12    |         | ENSG00000208323 |
| 3 | 195413609 | 195413813 | 195413716 | 11 | 11 | 4  | 2.494330042 | 0.0324033   |         | ENSG00000208323 |
| 3 | 195515886 | 195516193 | 195516039 | 8  | 12 | 7  | 1.688869299 | 0.11395     |         | ENSG00000214145 |
| 3 | 195572592 | 195572797 | 195572759 | 8  | 10 | 6  | 1.63319229  | 0.146906    | LRRRC15 | ENSG00000172061 |
| 3 | 195684643 | 195684829 | 195684736 | 8  | 9  | 0  | 10.39304184 | 0.000803859 | ATP13A3 | ENSG00000133657 |
| 3 | 195696941 | 195697253 | 195697104 | 11 | 15 | 11 | 1.385738912 | 0.19225     |         | ENSG00000198579 |
| 3 | 195796833 | 195797107 | 195796970 | 10 | 12 | 12 | 1.039304184 | 0.461227    | TMEM44  | ENSG00000145014 |
| 3 | 195859750 | 195859944 | 195859898 | 9  | 9  | 6  | 1.484720263 | 0.204387    |         | ENSG00000221718 |
| 3 | 195874236 | 195874620 | 195874453 | 21 | 30 | 13 | 2.301316408 | 0.00328017  | LSG1    | ENSG00000041802 |
| 3 | 195884681 | 195884908 | 195884794 | 9  | 9  | 4  | 2.078608368 | 0.0785659   | FAM43A  | ENSG00000185112 |
| 3 | 195887746 | 195888031 | 195887898 | 9  | 13 | 3  | 3.637564645 | 0.0050909   | FAM43A  | ENSG00000185112 |
| 3 | 195888433 | 195888714 | 195888572 | 10 | 12 | 3  | 3.377738599 | 0.00867157  | FAM43A  | ENSG00000185112 |
| 3 | 195893745 | 195893924 | 195893824 | 8  | 8  | 1  | 4.676868829 | 0.0091584   | FAM43A  | ENSG00000185112 |
| 3 | 195971253 | 195971562 | 195971407 | 8  | 13 | 7  | 1.818782322 | 0.0805123   | FAM43A  | ENSG00000185112 |
| 3 | 196073449 | 196073647 | 196073483 | 8  | 9  | 9  | 1.039304184 | 0.466079    | FAM43A  | ENSG00000185112 |
| 3 | 196073681 | 196074098 | 196073919 | 12 | 20 | 13 | 1.558956276 | 0.0943292   | FAM43A  | ENSG00000185112 |
| 3 | 196135695 | 196135905 | 196135788 | 8  | 9  | 7  | 1.29913023  | 0.286504    | C3orf21 | ENSG00000173950 |
| 3 | 196139246 | 196139457 | 196139382 | 8  | 8  | 3  | 2.338434415 | 0.0641221   | C3orf21 | ENSG00000173950 |
| 3 | 196187133 | 196187389 | 196187261 | 9  | 14 | 2  | 5.196520921 | 0.000907371 | C3orf21 | ENSG00000173950 |
| 3 | 196216847 | 196217036 | 196216941 | 8  | 8  | 0  | 9.353737658 | 0.00163931  | C3orf21 | ENSG00000173950 |
| 3 | 196233001 | 196233425 | 196233157 | 10 | 20 | 10 | 1.98412617  | 0.0277883   | C3orf21 | ENSG00000173950 |
| 3 | 196304591 | 196304991 | 196304724 | 9  | 15 | 8  | 1.847651883 | 0.0631662   | C3orf21 | ENSG00000173950 |
| 3 | 196307359 | 196307607 | 196307483 | 13 | 14 | 14 | 1.039304184 | 0.458308    | C3orf21 | ENSG00000173950 |
| 3 | 196307998 | 196308218 | 196308100 | 9  | 10 | 0  | 11.43234603 | 0.000394183 | C3orf21 | ENSG00000173950 |



|   |           |           |           |     |     |    |             |             |          |                 |
|---|-----------|-----------|-----------|-----|-----|----|-------------|-------------|----------|-----------------|
| 3 | 196311132 | 196311311 | 196311213 | 9   | 9   | 7  | 1.29913023  | 0.286504    | C3orf21  | ENSG00000173950 |
| 3 | 196346824 | 196347003 | 196346858 | 8   | 8   | 1  | 4.676868829 | 0.0091584   |          | ENSG00000222825 |
| 3 | 196389407 | 196390392 | 196389815 | 108 | 168 | 5  | 29.27373452 | 2.21E-45    | C3orf21  | ENSG00000173950 |
| 3 | 196466133 | 196466312 | 196466222 | 8   | 8   | 5  | 1.558956276 | 0.191397    | C3orf21  | ENSG00000173950 |
| 3 | 196473754 | 196474155 | 196473998 | 9   | 14  | 3  | 3.897390691 | 0.00295882  | C3orf21  | ENSG00000173950 |
| 3 | 196759649 | 196760009 | 196759802 | 8   | 13  | 1  | 7.27512929  | 0.000378098 | PPP1R2P3 | ENSG00000184203 |
| 3 | 196792386 | 196792762 | 196792550 | 18  | 24  | 1  | 12.9913023  | 2.52E-07    | APOD     | ENSG00000189058 |
| 3 | 196910684 | 196910943 | 196910812 | 9   | 10  | 4  | 2.286469205 | 0.0509017   |          | ENSG00000207650 |
| 3 | 196916695 | 196916963 | 196916829 | 8   | 10  | 9  | 1.143234603 | 0.378307    |          | ENSG00000205814 |
| 3 | 196921947 | 196922161 | 196922054 | 8   | 9   | 6  | 1.484720263 | 0.204387    |          | ENSG00000205814 |
| 3 | 196987537 | 196987759 | 196987648 | 10  | 10  | 3  | 2.858086507 | 0.0242838   | MUC4     | ENSG00000145113 |
| 3 | 197062218 | 197062518 | 197062355 | 14  | 15  | 10 | 1.511715177 | 0.140236    | MUC4     | ENSG00000145113 |
| 3 | 197132916 | 197133189 | 197133093 | 8   | 9   | 4  | 2.078608368 | 0.0785659   | TNK2     | ENSG00000061938 |
| 3 | 197284767 | 197284954 | 197284860 | 8   | 8   | 9  | 0.935373766 | 0.560286    | TFRC     | ENSG00000072274 |
| 3 | 197293180 | 197293442 | 197293332 | 8   | 10  | 1  | 5.716173013 | 0.00260397  | TFRC     | ENSG00000072274 |
| 3 | 197319318 | 197319547 | 197319432 | 8   | 11  | 7  | 1.558956276 | 0.158273    | TFRC     | ENSG00000072274 |
| 3 | 197321790 | 197322064 | 197321958 | 10  | 11  | 2  | 4.157216737 | 0.0052913   | TFRC     | ENSG00000072274 |
| 3 | 197324712 | 197324952 | 197324832 | 11  | 14  | 1  | 7.794781382 | 0.000197021 | TFRC     | ENSG00000072274 |
| 3 | 197347145 | 197347329 | 197347237 | 8   | 10  | 4  | 2.286469205 | 0.0509017   | TFRC     | ENSG00000072274 |
| 3 | 197347359 | 197348082 | 197347851 | 64  | 98  | 12 | 7.914701095 | 3.14E-19    | TFRC     | ENSG00000072274 |
| 3 | 197353656 | 197353982 | 197353819 | 12  | 16  | 9  | 1.766817113 | 0.0700694   |          | ENSG00000208298 |
| 3 | 197354327 | 197354651 | 197354476 | 9   | 12  | 7  | 1.688869299 | 0.11395     |          | ENSG00000208298 |
| 3 | 197358354 | 197358611 | 197358480 | 10  | 12  | 4  | 2.702190879 | 0.0203088   |          | ENSG00000208298 |
| 3 | 197380299 | 197380517 | 197380420 | 9   | 10  | 6  | 1.63319229  | 0.146906    |          | ENSG00000208298 |
| 3 | 197407972 | 197408155 | 197408063 | 8   | 8   | 2  | 3.117912553 | 0.0283184   |          | ENSG00000208298 |
| 3 | 197446746 | 197447030 | 197446888 | 9   | 13  | 2  | 4.850086193 | 0.00164564  |          | ENSG00000163959 |
| 3 | 197464646 | 197464937 | 197464791 | 8   | 9   | 6  | 1.484720263 | 0.204387    | PCYT1A   | ENSG00000161217 |
| 3 | 197489180 | 197489488 | 197489334 | 12  | 15  | 1  | 8.314433474 | 0.000102308 | PCYT1A   | ENSG00000161217 |
| 3 | 197490832 | 197491088 | 197490934 | 9   | 12  | 5  | 2.251825733 | 0.0404733   | PCYT1A   | ENSG00000161217 |
| 3 | 197498524 | 197498829 | 197498654 | 9   | 14  | 2  | 5.196520921 | 0.000907371 | PCYT1A   | ENSG00000161217 |
| 3 | 197498847 | 197499308 | 197499048 | 21  | 31  | 6  | 4.751104842 | 7.27E-06    | PCYT1A   | ENSG00000161217 |
| 3 | 197531352 | 197531759 | 197531526 | 29  | 39  | 2  | 13.85738912 | 9.79E-11    | TCTEX1D2 | ENSG00000213123 |
| 3 | 197554284 | 197554515 | 197554399 | 11  | 13  | 6  | 2.078608368 | 0.0483393   |          | ENSG00000212146 |
| 3 | 197570476 | 197570667 | 197570572 | 8   | 9   | 2  | 3.464347281 | 0.0163838   |          | ENSG00000212146 |

|   |           |           |           |    |    |    |             |             |         |                 |
|---|-----------|-----------|-----------|----|----|----|-------------|-------------|---------|-----------------|
| 3 | 197643879 | 197644215 | 197644047 | 9  | 13 | 11 | 1.212521548 | 0.309909    | UBXN7   | ENSG00000163960 |
| 3 | 197683005 | 197683213 | 197683071 | 8  | 8  | 1  | 4.676868829 | 0.0091584   | RNF168  | ENSG00000163961 |
| 3 | 197714801 | 197715233 | 197714949 | 14 | 23 | 5  | 4.157216737 | 0.000186738 | RNF168  | ENSG00000163961 |
| 3 | 197811254 | 197811622 | 197811505 | 8  | 15 | 4  | 3.32577339  | 0.00462646  | FBXO45  | ENSG00000174013 |
| 3 | 197820598 | 197820864 | 197820735 | 8  | 10 | 8  | 1.27026067  | 0.293854    | LRRRC33 | ENSG00000174004 |
| 3 | 197843707 | 197843932 | 197843804 | 9  | 10 | 5  | 1.905391004 | 0.0915982   | LRRRC33 | ENSG00000174004 |
| 3 | 197844887 | 197845100 | 197844962 | 9  | 10 | 2  | 3.810782009 | 0.00936112  | LRRRC33 | ENSG00000174004 |
| 3 | 197862147 | 197862455 | 197862301 | 17 | 19 | 5  | 3.464347281 | 0.00150447  | LRRRC33 | ENSG00000174004 |
| 3 | 197871713 | 197871982 | 197871847 | 10 | 11 | 9  | 1.247165021 | 0.300052    | LRRRC33 | ENSG00000174004 |
| 3 | 197873326 | 197873537 | 197873410 | 10 | 11 | 2  | 4.157216737 | 0.0052913   | LRRRC33 | ENSG00000174004 |
| 3 | 197896081 | 197896401 | 197896238 | 10 | 10 | 14 | 0.762156402 | 0.758589    |         | ENSG00000201441 |
| 3 | 197919832 | 197920100 | 197920011 | 11 | 15 | 6  | 2.375552421 | 0.0212094   |         | ENSG00000201441 |
| 3 | 197955378 | 197955581 | 197955479 | 9  | 10 | 3  | 2.858086507 | 0.0242838   |         | ENSG00000202181 |
| 3 | 197999002 | 197999429 | 197999181 | 13 | 21 | 15 | 1.429043253 | 0.134782    |         | ENSG00000206892 |
| 3 | 198004292 | 198004854 | 198004655 | 17 | 32 | 16 | 2.017472828 | 0.00740095  |         | ENSG00000206892 |
| 3 | 198161765 | 198161944 | 198161854 | 8  | 8  | 1  | 4.676868829 | 0.0091584   | NCBP2   | ENSG00000114503 |
| 3 | 198163321 | 198163500 | 198163410 | 9  | 9  | 2  | 3.464347281 | 0.0163838   | NCBP2   | ENSG00000114503 |
| 3 | 198189997 | 198190215 | 198190091 | 8  | 8  | 6  | 1.336248237 | 0.277651    | PIGZ    | ENSG00000119227 |
| 3 | 198217520 | 198217701 | 198217607 | 8  | 8  | 0  | 9.353737658 | 0.00163931  | MFI2    | ENSG00000163975 |
| 3 | 198312038 | 198312291 | 198312138 | 8  | 11 | 11 | 1.039304184 | 0.462773    | MFI2    | ENSG00000163975 |
| 3 | 198435391 | 198435589 | 198435490 | 9  | 10 | 9  | 1.143234603 | 0.378307    | DLG1    | ENSG00000075711 |
| 3 | 198510539 | 198510796 | 198510667 | 9  | 11 | 2  | 4.157216737 | 0.0052913   | DLG1    | ENSG00000075711 |
| 3 | 198578820 | 198579043 | 198578931 | 9  | 9  | 0  | 10.39304184 | 0.000803859 | DLG1    | ENSG00000075711 |
| 3 | 198583613 | 198583802 | 198583707 | 8  | 8  | 1  | 4.676868829 | 0.0091584   | DLG1    | ENSG00000075711 |
| 3 | 198614489 | 198614769 | 198614629 | 12 | 14 | 2  | 5.196520921 | 0.000907371 | DLG1    | ENSG00000075711 |
| 3 | 198639658 | 198639895 | 198639736 | 8  | 10 | 1  | 5.716173013 | 0.00260397  | BDH1    | ENSG00000161267 |
| 3 | 198678312 | 198678492 | 198678343 | 8  | 9  | 4  | 2.078608368 | 0.0785659   | BDH1    | ENSG00000161267 |
| 3 | 198694643 | 198694921 | 198694792 | 13 | 16 | 6  | 2.524024447 | 0.0137633   | BDH1    | ENSG00000161267 |
| 3 | 198699282 | 198699734 | 198699588 | 13 | 22 | 6  | 3.414856605 | 0.000820885 | BDH1    | ENSG00000161267 |
| 3 | 198714885 | 198715259 | 198715036 | 12 | 17 | 3  | 4.676868829 | 0.000552213 | BDH1    | ENSG00000161267 |
| 3 | 198716008 | 198716189 | 198716128 | 8  | 10 | 3  | 2.858086507 | 0.0242838   | BDH1    | ENSG00000161267 |
| 3 | 198721111 | 198721359 | 198721216 | 8  | 10 | 3  | 2.858086507 | 0.0242838   | BDH1    | ENSG00000161267 |
| 3 | 198734194 | 198734373 | 198734221 | 8  | 8  | 2  | 3.117912553 | 0.0283184   | BDH1    | ENSG00000161267 |
| 3 | 198750190 | 198750395 | 198750235 | 8  | 10 | 3  | 2.858086507 | 0.0242838   | BDH1    | ENSG00000161267 |

|   |           |           |           |     |     |    |             |            |          |                 |
|---|-----------|-----------|-----------|-----|-----|----|-------------|------------|----------|-----------------|
| 3 | 198751091 | 198751372 | 198751214 | 12  | 14  | 6  | 2.227080395 | 0.0322529  | BDH1     | ENSG00000161267 |
| 3 | 198752379 | 198752691 | 198752549 | 10  | 15  | 14 | 1.10859113  | 0.386477   | BDH1     | ENSG00000161267 |
| 3 | 198765818 | 198766118 | 198765968 | 12  | 16  | 5  | 2.944695189 | 0.00659886 | BDH1     | ENSG00000161267 |
| 3 | 198786699 | 198786985 | 198786821 | 11  | 13  | 7  | 1.818782322 | 0.0805123  | BDH1     | ENSG00000161267 |
| 3 | 198810290 | 198810493 | 198810434 | 10  | 11  | 7  | 1.558956276 | 0.158273   | BDH1     | ENSG00000161267 |
| 3 | 198869767 | 198870065 | 198869916 | 10  | 10  | 8  | 1.27026067  | 0.293854   |          | ENSG00000216042 |
| 3 | 198870485 | 198870847 | 198870672 | 14  | 20  | 13 | 1.558956276 | 0.0943292  |          | ENSG00000216042 |
| 3 | 198881847 | 198882026 | 198881916 | 8   | 8   | 1  | 4.676868829 | 0.0091584  |          | ENSG00000216042 |
| 3 | 198923605 | 198923954 | 198923779 | 10  | 15  | 6  | 2.375552421 | 0.0212094  | KIAA0226 | ENSG00000145016 |
| 3 | 199003170 | 199003469 | 199003330 | 8   | 9   | 1  | 5.196520921 | 0.00490062 | LRCH3    | ENSG00000186001 |
| 3 | 199117365 | 199117686 | 199117540 | 8   | 12  | 12 | 1.039304184 | 0.461227   |          | ENSG00000199306 |
| 3 | 199161218 | 199161679 | 199161569 | 10  | 22  | 12 | 1.838768941 | 0.0349935  | RPL35A   | ENSG00000182899 |
| 3 | 199167691 | 199167873 | 199167860 | 8   | 10  | 2  | 3.810782009 | 0.00936112 | IQCG     | ENSG00000114473 |
| 3 | 199227818 | 199227997 | 199227934 | 8   | 9   | 4  | 2.078608368 | 0.0785659  |          | ENSG00000201622 |
| 3 | 199282855 | 199283038 | 199282900 | 8   | 8   | 1  | 4.676868829 | 0.0091584  |          | ENSG00000212297 |
| 4 | 6293      | 6800      | 6505      | 138 | 154 | 3  | 40.27303714 | 9.33E-44   | ZNF595   | ENSG00000197701 |
| 4 | 19226     | 19456     | 19356     | 12  | 12  | 5  | 2.251825733 | 0.0404733  | ZNF595   | ENSG00000197701 |
| 4 | 34460     | 34655     | 34606     | 9   | 11  | 6  | 1.781664316 | 0.103344   | ZNF595   | ENSG00000197701 |
| 4 | 35010     | 35256     | 35133     | 8   | 10  | 5  | 1.905391004 | 0.0915982  | ZNF595   | ENSG00000197701 |
| 4 | 42864     | 43398     | 43236     | 12  | 24  | 22 | 1.129678461 | 0.335754   | ZNF595   | ENSG00000197701 |
| 4 | 45824     | 46132     | 45964     | 8   | 10  | 13 | 0.816596145 | 0.696946   | ZNF718   | ENSG00000215383 |
| 4 | 47136     | 47358     | 47200     | 9   | 12  | 9  | 1.35109544  | 0.232899   | ZNF718   | ENSG00000215383 |
| 4 | 48913     | 49255     | 49087     | 9   | 14  | 4  | 3.117912553 | 0.00766354 | ZNF718   | ENSG00000215383 |
| 4 | 197824    | 198022    | 197956    | 9   | 9   | 1  | 5.196520921 | 0.00490062 | ZNF732   | ENSG00000198155 |
| 4 | 789287    | 789592    | 789439    | 8   | 8   | 2  | 3.117912553 | 0.0283184  | CPLX1    | ENSG00000168993 |
| 4 | 1526795   | 1527043   | 1526951   | 10  | 13  | 5  | 2.425043097 | 0.0262442  |          | ENSG00000207009 |
| 4 | 1742332   | 1742656   | 1742501   | 20  | 24  | 1  | 12.9913023  | 2.52E-07   | FGFR3    | ENSG00000068078 |
| 4 | 2359931   | 2360124   | 2360009   | 8   | 8   | 0  | 9.353737658 | 0.00163931 | ZFYVE28  | ENSG00000159733 |
| 4 | 2555050   | 2555394   | 2555221   | 12  | 15  | 4  | 3.32577339  | 0.00462646 |          | ENSG00000206738 |
| 4 | 3163526   | 3163944   | 3163774   | 16  | 23  | 3  | 6.235825105 | 1.63E-05   | C4orf44  | ENSG00000188981 |
| 4 | 3186895   | 3187142   | 3186988   | 8   | 9   | 4  | 2.078608368 | 0.0785659  | C4orf44  | ENSG00000188981 |
| 4 | 3408413   | 3408831   | 3408596   | 85  | 100 | 3  | 26.24243065 | 1.37E-27   | HGFAC    | ENSG00000109758 |
| 4 | 3412519   | 3412741   | 3412639   | 8   | 8   | 3  | 2.338434415 | 0.0641221  | HGFAC    | ENSG00000109758 |
| 4 | 3457550   | 3457813   | 3457681   | 9   | 10  | 1  | 5.716173013 | 0.00260397 | DOK7     | ENSG00000175920 |

|   |          |          |          |    |    |   |             |             |         |                 |
|---|----------|----------|----------|----|----|---|-------------|-------------|---------|-----------------|
| 4 | 3756032  | 3756344  | 3756183  | 16 | 18 | 0 | 19.7467795  | 1.32E-06    | ADRA2C  | ENSG00000184160 |
| 4 | 3992726  | 3992977  | 3992857  | 16 | 18 | 0 | 19.7467795  | 1.32E-06    |         | ENSG00000151539 |
| 4 | 5038553  | 5038864  | 5038714  | 25 | 25 | 1 | 13.5109544  | 1.28E-07    | CYTL1   | ENSG00000170891 |
| 4 | 5175429  | 5175608  | 5175445  | 8  | 8  | 1 | 4.676868829 | 0.0091584   | STK32B  | ENSG00000152953 |
| 4 | 5418466  | 5418647  | 5418556  | 8  | 8  | 0 | 9.353737658 | 0.00163931  |         | ENSG00000201496 |
| 4 | 5825759  | 5826200  | 5826021  | 37 | 46 | 0 | 48.84729666 | 2.85E-15    | EVC     | ENSG00000072840 |
| 4 | 5965179  | 5965647  | 5965428  | 22 | 35 | 7 | 4.676868829 | 2.52E-06    | CRMP1   | ENSG00000072832 |
| 4 | 6064362  | 6064579  | 6064481  | 9  | 10 | 0 | 11.43234603 | 0.000394183 |         | ENSG00000181215 |
| 4 | 6080635  | 6080817  | 6080663  | 8  | 8  | 0 | 9.353737658 | 0.00163931  |         | ENSG00000181215 |
| 4 | 6317308  | 6317653  | 6317480  | 18 | 24 | 0 | 25.98260461 | 1.83E-08    | WFS1    | ENSG00000109501 |
| 4 | 6380074  | 6380253  | 6380199  | 8  | 8  | 2 | 3.117912553 | 0.0283184   | PPP2R2C | ENSG00000074211 |
| 4 | 6693178  | 6693357  | 6693315  | 8  | 8  | 1 | 4.676868829 | 0.0091584   | MRFAP1  | ENSG00000179010 |
| 4 | 6726550  | 6726765  | 6726651  | 9  | 11 | 3 | 3.117912553 | 0.0146045   |         | ENSG00000170846 |
| 4 | 6740627  | 6740897  | 6740775  | 12 | 12 | 5 | 2.251825733 | 0.0404733   | S100P   | ENSG00000163993 |
| 4 | 6741448  | 6741775  | 6741570  | 8  | 13 | 0 | 14.55025858 | 4.65E-05    | S100P   | ENSG00000163993 |
| 4 | 6748359  | 6748780  | 6748522  | 8  | 14 | 9 | 1.558956276 | 0.132279    | S100P   | ENSG00000163993 |
| 4 | 7039491  | 7039692  | 7039603  | 8  | 8  | 1 | 4.676868829 | 0.0091584   |         | ENSG00000202392 |
| 4 | 7308311  | 7308494  | 7308402  | 8  | 8  | 0 | 9.353737658 | 0.00163931  | SORCS2  | ENSG00000184985 |
| 4 | 7754696  | 7755160  | 7754958  | 24 | 35 | 1 | 18.70747532 | 1.40E-10    | AFAP1   | ENSG00000196526 |
| 4 | 7858182  | 7858501  | 7858341  | 8  | 13 | 2 | 4.850086193 | 0.00164564  | AFAP1   | ENSG00000196526 |
| 4 | 7992636  | 7992853  | 7992769  | 10 | 10 | 2 | 3.810782009 | 0.00936112  | AFAP1   | ENSG00000196526 |
| 4 | 8116331  | 8116670  | 8116491  | 32 | 36 | 1 | 19.22712741 | 7.03E-11    |         | ENSG00000207807 |
| 4 | 8235996  | 8236232  | 8236080  | 8  | 11 | 6 | 1.781664316 | 0.103344    | SH3TC1  | ENSG00000125089 |
| 4 | 8335014  | 8335208  | 8335173  | 9  | 9  | 0 | 10.39304184 | 0.000803859 | HTRA3   | ENSG00000170801 |
| 4 | 8639269  | 8639474  | 8639371  | 10 | 10 | 2 | 3.810782009 | 0.00936112  | CPZ     | ENSG00000109625 |
| 4 | 8772245  | 8772479  | 8772362  | 8  | 9  | 3 | 2.598260461 | 0.0397929   | CPZ     | ENSG00000109625 |
| 4 | 9726690  | 9727008  | 9726849  | 9  | 14 | 1 | 7.794781382 | 0.000197021 | WDR1    | ENSG00000071127 |
| 4 | 9785087  | 9785285  | 9785209  | 10 | 10 | 4 | 2.286469205 | 0.0509017   | WDR1    | ENSG00000071127 |
| 4 | 10826860 | 10827076 | 10826968 | 8  | 8  | 0 | 9.353737658 | 0.00163931  |         | ENSG00000207716 |
| 4 | 10909761 | 10910015 | 10909895 | 8  | 10 | 2 | 3.810782009 | 0.00936112  |         | ENSG00000207716 |
| 4 | 11077506 | 11077699 | 11077532 | 8  | 8  | 2 | 3.117912553 | 0.0283184   | HS3ST1  | ENSG00000002587 |
| 4 | 13444108 | 13444343 | 13444225 | 8  | 10 | 0 | 11.43234603 | 0.000394183 | FAM44A  | ENSG00000038219 |
| 4 | 14611902 | 14612313 | 14612081 | 21 | 30 | 0 | 32.21842971 | 2.55E-10    | CPEB2   | ENSG00000137449 |
| 4 | 14613241 | 14613426 | 14613299 | 8  | 8  | 2 | 3.117912553 | 0.0283184   | CPEB2   | ENSG00000137449 |

|   |          |          |          |     |     |   |             |             |         |                 |
|---|----------|----------|----------|-----|-----|---|-------------|-------------|---------|-----------------|
| 4 | 14842151 | 14842398 | 14842297 | 9   | 10  | 2 | 3.810782009 | 0.00936112  | C1QTNF7 | ENSG00000163145 |
| 4 | 14849615 | 14849860 | 14849694 | 11  | 14  | 1 | 7.794781382 | 0.000197021 | C1QTNF7 | ENSG00000163145 |
| 4 | 15291930 | 15292646 | 15292235 | 47  | 77  | 5 | 13.5109544  | 7.70E-19    | BST1    | ENSG00000109743 |
| 4 | 15567050 | 15567242 | 15567157 | 8   | 8   | 0 | 9.353737658 | 0.00163931  | FGFBP2  | ENSG00000137441 |
| 4 | 15612073 | 15612431 | 15612252 | 9   | 14  | 9 | 1.558956276 | 0.132279    |         | ENSG00000209943 |
| 4 | 15761970 | 15762149 | 15762084 | 8   | 8   | 0 | 9.353737658 | 0.00163931  | PROM1   | ENSG00000007062 |
| 4 | 17633377 | 17633635 | 17633539 | 9   | 9   | 1 | 5.196520921 | 0.00490062  | LCORL   | ENSG00000178177 |
| 4 | 21080283 | 21080491 | 21080399 | 12  | 12  | 2 | 4.503651465 | 0.002963    | KCNIP4  | ENSG00000185774 |
| 4 | 22132788 | 22132967 | 22132877 | 8   | 8   | 1 | 4.676868829 | 0.0091584   | GPR125  | ENSG00000152990 |
| 4 | 24242833 | 24243027 | 24242930 | 8   | 8   | 1 | 4.676868829 | 0.0091584   | DHX15   | ENSG00000109606 |
| 4 | 24298084 | 24298301 | 24298249 | 8   | 10  | 5 | 1.905391004 | 0.0915982   | DHX15   | ENSG00000109606 |
| 4 | 24374404 | 24374767 | 24374588 | 18  | 25  | 0 | 27.02190879 | 8.98E-09    | SOD3    | ENSG00000109610 |
| 4 | 24474271 | 24474535 | 24474431 | 11  | 12  | 1 | 6.755477198 | 0.000722752 | CCDC149 | ENSG00000181982 |
| 4 | 24479785 | 24479972 | 24479878 | 8   | 9   | 1 | 5.196520921 | 0.00490062  | CCDC149 | ENSG00000181982 |
| 4 | 24584190 | 24584401 | 24584340 | 13  | 14  | 4 | 3.117912553 | 0.00766354  | CCDC149 | ENSG00000181982 |
| 4 | 24631992 | 24632308 | 24632144 | 12  | 14  | 1 | 7.794781382 | 0.000197021 | LGI2    | ENSG00000153012 |
| 4 | 24884306 | 24884491 | 24884345 | 8   | 8   | 0 | 9.353737658 | 0.00163931  |         | ENSG00000222358 |
| 4 | 25270469 | 25270648 | 25270558 | 8   | 8   | 0 | 9.353737658 | 0.00163931  | SLC34A2 | ENSG00000157765 |
| 4 | 25931285 | 25931571 | 25931428 | 10  | 12  | 2 | 4.503651465 | 0.002963    | RBPJ    | ENSG00000168214 |
| 4 | 26017417 | 26017734 | 26017586 | 37  | 40  | 3 | 10.65286789 | 3.85E-10    | RBPJ    | ENSG00000168214 |
| 4 | 26194634 | 26194843 | 26194738 | 8   | 9   | 2 | 3.464347281 | 0.0163838   | TBC1D19 | ENSG00000109680 |
| 4 | 26558833 | 26559024 | 26558928 | 8   | 8   | 0 | 9.353737658 | 0.00163931  | STIM2   | ENSG00000109689 |
| 4 | 26705593 | 26705873 | 26705733 | 9   | 12  | 4 | 2.702190879 | 0.0203088   |         | ENSG00000205830 |
| 4 | 27295317 | 27295504 | 27295410 | 8   | 8   | 3 | 2.338434415 | 0.0641221   |         | ENSG00000221807 |
| 4 | 27925177 | 27925384 | 27925280 | 8   | 8   | 4 | 1.870747532 | 0.118863    |         | ENSG00000210070 |
| 4 | 27962482 | 27962882 | 27962703 | 24  | 31  | 3 | 8.314433474 | 1.18E-07    |         | ENSG00000210070 |
| 4 | 29110853 | 29111111 | 29111006 | 14  | 17  | 1 | 9.353737658 | 2.73E-05    |         | ENSG00000209052 |
| 4 | 29493768 | 29493947 | 29493857 | 8   | 9   | 2 | 3.464347281 | 0.0163838   |         | ENSG00000212045 |
| 4 | 32968636 | 32968921 | 32968804 | 8   | 9   | 1 | 5.196520921 | 0.00490062  |         |                 |
| 4 | 33425107 | 33425343 | 33425225 | 10  | 10  | 3 | 2.858086507 | 0.0242838   |         |                 |
| 4 | 34924991 | 34925318 | 34925157 | 8   | 12  | 3 | 3.377738599 | 0.00867157  |         | ENSG00000206665 |
| 4 | 35178851 | 35179200 | 35179025 | 17  | 23  | 1 | 12.47165021 | 4.94E-07    |         | ENSG00000206665 |
| 4 | 35197958 | 35198473 | 35198294 | 117 | 134 | 4 | 28.06121297 | 1.72E-36    |         | ENSG00000206665 |
| 4 | 36677961 | 36678262 | 36678125 | 9   | 12  | 0 | 13.5109544  | 9.48E-05    |         | ENSG00000215243 |

|   |          |          |          |    |    |    |             |             |         |                 |
|---|----------|----------|----------|----|----|----|-------------|-------------|---------|-----------------|
| 4 | 37206246 | 37206474 | 37206368 | 9  | 9  | 2  | 3.464347281 | 0.0163838   | C4orf19 | ENSG00000154274 |
| 4 | 37480180 | 37480359 | 37480266 | 8  | 8  | 2  | 3.117912553 | 0.0283184   | PGM2    | ENSG00000169299 |
| 4 | 37513979 | 37514280 | 37514143 | 8  | 8  | 0  | 9.353737658 | 0.00163931  | PGM2    | ENSG00000169299 |
| 4 | 38209256 | 38209435 | 38209341 | 8  | 8  | 2  | 3.117912553 | 0.0283184   |         | ENSG00000211560 |
| 4 | 38243372 | 38243554 | 38243463 | 8  | 8  | 1  | 4.676868829 | 0.0091584   |         | ENSG00000211560 |
| 4 | 38248127 | 38248376 | 38248243 | 10 | 11 | 0  | 12.47165021 | 0.000193293 |         | ENSG00000211560 |
| 4 | 38281170 | 38281349 | 38281259 | 8  | 8  | 1  | 4.676868829 | 0.0091584   | KLF3    | ENSG00000109787 |
| 4 | 38845028 | 38845547 | 38845276 | 24 | 39 | 0  | 41.57216737 | 4.18E-13    | WDR19   | ENSG00000157796 |
| 4 | 39136680 | 39136877 | 39136778 | 9  | 9  | 1  | 5.196520921 | 0.00490062  | RPL9    | ENSG00000163682 |
| 4 | 39147455 | 39147693 | 39147574 | 9  | 10 | 5  | 1.905391004 | 0.0915982   | LIAS    | ENSG00000121897 |
| 4 | 39934451 | 39934644 | 39934547 | 8  | 8  | 3  | 2.338434415 | 0.0641221   | RHOH    | ENSG00000168421 |
| 4 | 40014017 | 40014212 | 40014106 | 8  | 10 | 6  | 1.63319229  | 0.146906    | CHRNA9  | ENSG00000174343 |
| 4 | 40279284 | 40279463 | 40279373 | 8  | 8  | 0  | 9.353737658 | 0.00163931  | RBM47   | ENSG00000163694 |
| 4 | 40326623 | 40326967 | 40326795 | 9  | 13 | 3  | 3.637564645 | 0.0050909   | RBM47   | ENSG00000163694 |
| 4 | 40327122 | 40327301 | 40327211 | 8  | 8  | 3  | 2.338434415 | 0.0641221   | RBM47   | ENSG00000163694 |
| 4 | 40605594 | 40605773 | 40605683 | 8  | 9  | 5  | 1.73217364  | 0.133894    |         | ENSG00000210261 |
| 4 | 40829026 | 40829369 | 40829194 | 21 | 24 | 4  | 5.196520921 | 3.42E-05    |         | ENSG00000207198 |
| 4 | 40841596 | 40842184 | 40841775 | 37 | 55 | 0  | 58.20103432 | 4.67E-18    |         | ENSG00000207198 |
| 4 | 40892526 | 40892705 | 40892615 | 8  | 8  | 0  | 9.353737658 | 0.00163931  | APBB2   | ENSG00000163697 |
| 4 | 40913281 | 40913592 | 40913436 | 8  | 11 | 3  | 3.117912553 | 0.0146045   | APBB2   | ENSG00000163697 |
| 4 | 41015680 | 41015915 | 41015797 | 9  | 10 | 1  | 5.716173013 | 0.00260397  |         | ENSG00000207481 |
| 4 | 41686843 | 41687084 | 41686963 | 8  | 8  | 2  | 3.117912553 | 0.0283184   | SLC30A9 | ENSG00000014824 |
| 4 | 42020555 | 42020969 | 42020792 | 14 | 22 | 2  | 7.967998746 | 6.43E-06    | SHISA3  | ENSG00000178343 |
| 4 | 42354065 | 42354307 | 42354187 | 10 | 10 | 0  | 11.43234603 | 0.000394183 | ATP8A1  | ENSG00000124406 |
| 4 | 47818060 | 47818253 | 47818211 | 8  | 8  | 2  | 3.117912553 | 0.0283184   |         | ENSG00000210391 |
| 4 | 48037774 | 48037975 | 48037915 | 9  | 9  | 4  | 2.078608368 | 0.0785659   | SLAIN2  | ENSG00000109171 |
| 4 | 48476851 | 48477098 | 48477026 | 8  | 10 | 1  | 5.716173013 | 0.00260397  | FRYL    | ENSG00000075539 |
| 4 | 48498957 | 48499136 | 48499046 | 8  | 8  | 2  | 3.117912553 | 0.0283184   | FRYL    | ENSG00000075539 |
| 4 | 48541723 | 48541928 | 48541778 | 8  | 11 | 0  | 12.47165021 | 0.000193293 | OCIAD1  | ENSG00000109180 |
| 4 | 48659901 | 48660131 | 48660008 | 10 | 11 | 5  | 2.078608368 | 0.0614303   |         | ENSG00000109182 |
| 4 | 48794277 | 48794456 | 48794427 | 8  | 8  | 6  | 1.336248237 | 0.277651    |         | ENSG00000222437 |
| 4 | 48804557 | 48804886 | 48804721 | 17 | 17 | 13 | 1.336248237 | 0.204556    |         | ENSG00000222437 |
| 4 | 48816077 | 48816406 | 48816241 | 9  | 10 | 7  | 1.429043253 | 0.21536     |         | ENSG00000222437 |
| 4 | 48846365 | 48846702 | 48846533 | 59 | 59 | 73 | 0.842679068 | 0.839363    |         | ENSG00000222437 |

|   |          |          |          |    |     |     |             |             |         |                 |
|---|----------|----------|----------|----|-----|-----|-------------|-------------|---------|-----------------|
| 4 | 48850241 | 48850579 | 48850410 | 36 | 38  | 38  | 1.039304184 | 0.432628    |         | ENSG00000222437 |
| 4 | 49191702 | 49192030 | 49191872 | 23 | 23  | 0   | 24.94330042 | 3.74E-08    |         | ENSG00000221256 |
| 4 | 49336204 | 49336386 | 49336232 | 14 | 14  | 10  | 1.417232979 | 0.185113    |         | ENSG00000223099 |
| 4 | 49347369 | 49347702 | 49347535 | 19 | 20  | 24  | 0.873015515 | 0.679256    |         | ENSG00000223099 |
| 4 | 52405613 | 52405833 | 52405710 | 9  | 9   | 3   | 2.598260461 | 0.0397929   | DCUN1D4 | ENSG00000109184 |
| 4 | 52612762 | 52613195 | 52612936 | 43 | 52  | 2   | 18.36104059 | 1.58E-14    | SPATA18 | ENSG00000163071 |
| 4 | 53529149 | 53529454 | 53529304 | 10 | 12  | 1   | 6.755477198 | 0.000722752 | RASL11B | ENSG00000128045 |
| 4 | 54152532 | 54152779 | 54152655 | 8  | 10  | 3   | 2.858086507 | 0.0242838   | LNX1    | ENSG00000072201 |
| 4 | 54205652 | 54205859 | 54205736 | 8  | 9   | 3   | 2.598260461 | 0.0397929   | LNX1    | ENSG00000072201 |
| 4 | 54980675 | 54981035 | 54980854 | 24 | 31  | 1   | 16.62886695 | 2.16E-09    | PDGFRA  | ENSG00000134853 |
| 4 | 55219742 | 55219929 | 55219848 | 8  | 8   | 2   | 3.117912553 | 0.0283184   | KIT     | ENSG00000157404 |
| 4 | 55404070 | 55404435 | 55404236 | 10 | 14  | 3   | 3.897390691 | 0.00295882  | KIT     | ENSG00000157404 |
| 4 | 57724533 | 57724791 | 57724662 | 11 | 11  | 0   | 12.47165021 | 0.000193293 | IGFBP7  | ENSG00000163453 |
| 4 | 67946748 | 67947443 | 67946926 | 66 | 111 | 119 | 0.970017239 | 0.592117    |         | ENSG00000206629 |
| 4 | 67947930 | 67948684 | 67948149 | 72 | 168 | 213 | 0.820758912 | 0.973079    |         | ENSG00000206629 |
| 4 | 67948778 | 67949307 | 67948956 | 13 | 24  | 39  | 0.649565115 | 0.957933    |         | ENSG00000206629 |
| 4 | 69969491 | 69969703 | 69969594 | 9  | 10  | 1   | 5.716173013 | 0.00260397  | UGT2B7  | ENSG00000171234 |
| 4 | 70331255 | 70331476 | 70331365 | 13 | 13  | 10  | 1.32275078  | 0.240023    |         | ENSG00000210783 |
| 4 | 70549933 | 70550212 | 70550072 | 12 | 15  | 0   | 16.62886695 | 1.12E-05    | UGT2A1  | ENSG00000173610 |
| 4 | 70608192 | 70608538 | 70608365 | 8  | 13  | 1   | 7.27512929  | 0.000378098 | SULT1B1 | ENSG00000173597 |
| 4 | 70723841 | 70724088 | 70723924 | 11 | 13  | 0   | 14.55025858 | 4.65E-05    | SULT1E1 | ENSG00000109193 |
| 4 | 71098236 | 71098416 | 71098299 | 9  | 10  | 3   | 2.858086507 | 0.0242838   | ODAM    | ENSG00000109205 |
| 4 | 71170079 | 71170282 | 71170180 | 9  | 10  | 0   | 11.43234603 | 0.000394183 | CSN3    | ENSG00000171209 |
| 4 | 71772748 | 71773059 | 71772887 | 16 | 19  | 6   | 2.969440526 | 0.0035096   | UTP3    | ENSG00000132467 |
| 4 | 71785946 | 71786218 | 71786082 | 16 | 17  | 4   | 3.741495063 | 0.00163722  |         | ENSG00000207448 |
| 4 | 72077804 | 72078075 | 72077920 | 10 | 13  | 3   | 3.637564645 | 0.0050909   | DCK     | ENSG00000156136 |
| 4 | 72242788 | 72243026 | 72242936 | 8  | 11  | 0   | 12.47165021 | 0.000193293 | SLC4A4  | ENSG00000080493 |
| 4 | 72739039 | 72739277 | 72739158 | 8  | 9   | 1   | 5.196520921 | 0.00490062  |         | ENSG00000210828 |
| 4 | 73478862 | 73479143 | 73479002 | 8  | 10  | 3   | 2.858086507 | 0.0242838   | ADAMTS3 | ENSG00000156140 |
| 4 | 74044035 | 74044241 | 74044138 | 10 | 11  | 2   | 4.157216737 | 0.0052913   |         | ENSG00000210833 |
| 4 | 74370461 | 74370686 | 74370573 | 8  | 10  | 4   | 2.286469205 | 0.0509017   |         | ENSG00000221639 |
| 4 | 75500339 | 75500519 | 75500429 | 10 | 10  | 1   | 5.716173013 | 0.00260397  | AREG    | ENSG00000109321 |
| 4 | 76030731 | 76031122 | 76030926 | 80 | 93  | 1   | 48.84729666 | 3.96E-28    |         | ENSG00000169116 |
| 4 | 76262292 | 76262600 | 76262449 | 9  | 12  | 1   | 6.755477198 | 0.000722752 |         | ENSG00000179272 |

|   |          |          |          |     |     |    |             |             |          |                 |
|---|----------|----------|----------|-----|-----|----|-------------|-------------|----------|-----------------|
| 4 | 76796884 | 76797074 | 76796979 | 8   | 8   | 2  | 3.117912553 | 0.0283184   |          | ENSG00000201644 |
| 4 | 77026067 | 77026401 | 77026234 | 17  | 17  | 13 | 1.336248237 | 0.204556    |          | ENSG00000210905 |
| 4 | 77053538 | 77053717 | 77053627 | 8   | 8   | 0  | 9.353737658 | 0.00163931  | PPEF2    | ENSG00000156194 |
| 4 | 77136033 | 77136317 | 77136175 | 19  | 21  | 0  | 22.86469205 | 1.55E-07    | SDAD1    | ENSG00000198301 |
| 4 | 77288402 | 77288727 | 77288564 | 9   | 14  | 7  | 1.948695345 | 0.0559175   | NUP54    | ENSG00000138750 |
| 4 | 77348589 | 77348824 | 77348698 | 8   | 8   | 0  | 9.353737658 | 0.00163931  | SCARB2   | ENSG00000138760 |
| 4 | 77528650 | 77528941 | 77528806 | 16  | 17  | 0  | 18.70747532 | 2.69E-06    |          | ENSG00000210916 |
| 4 | 77720170 | 77720604 | 77720459 | 8   | 12  | 1  | 6.755477198 | 0.000722752 |          | ENSG00000207307 |
| 4 | 77922066 | 77922419 | 77922314 | 17  | 21  | 4  | 4.572938411 | 0.000186332 | SHROOM3  | ENSG00000138771 |
| 4 | 78106126 | 78106339 | 78106281 | 9   | 9   | 0  | 10.39304184 | 0.000803859 |          | ENSG00000186210 |
| 4 | 78473093 | 78473475 | 78473272 | 45  | 53  | 0  | 56.12242595 | 1.94E-17    | CCNG2    | ENSG00000138764 |
| 4 | 78482586 | 78482983 | 78482788 | 27  | 35  | 0  | 37.41495063 | 7.22E-12    | CXCL13   | ENSG00000156234 |
| 4 | 78484174 | 78484547 | 78484368 | 44  | 52  | 5  | 9.180520294 | 6.83E-12    | CXCL13   | ENSG00000156234 |
| 4 | 78704623 | 78704902 | 78704762 | 8   | 11  | 4  | 2.494330042 | 0.0324033   | CXCL13   | ENSG00000156234 |
| 4 | 78958445 | 78958734 | 78958589 | 11  | 14  | 3  | 3.897390691 | 0.00295882  | CNOT6L   | ENSG00000138767 |
| 4 | 79002764 | 79003188 | 79002976 | 10  | 18  | 10 | 1.795161773 | 0.055383    | MRPL1    | ENSG00000169288 |
| 4 | 79020885 | 79021406 | 79021169 | 31  | 47  | 2  | 16.62886695 | 4.62E-13    | MRPL1    | ENSG00000169288 |
| 4 | 80492568 | 80492869 | 80492718 | 10  | 12  | 17 | 0.750608578 | 0.78992     | ARD1B    | ENSG00000156269 |
| 4 | 83514233 | 83514413 | 83514335 | 8   | 8   | 2  | 3.117912553 | 0.0283184   | HNRNPD   | ENSG00000138668 |
| 4 | 83683467 | 83683757 | 83683612 | 9   | 11  | 3  | 3.117912553 | 0.0146045   |          | ENSG00000213632 |
| 4 | 83817664 | 83817862 | 83817763 | 8   | 8   | 2  | 3.117912553 | 0.0283184   |          | ENSG00000198594 |
| 4 | 84174905 | 84175521 | 84175078 | 11  | 23  | 5  | 4.157216737 | 0.000186738 | COPS4    | ENSG00000138663 |
| 4 | 84250521 | 84250916 | 84250779 | 9   | 16  | 4  | 3.533634226 | 0.00276486  | PLAC8    | ENSG00000145287 |
| 4 | 84311104 | 84311743 | 84311367 | 109 | 139 | 1  | 72.7512929  | 3.40E-42    | PLAC8    | ENSG00000145287 |
| 4 | 86106709 | 86106960 | 86106834 | 9   | 12  | 1  | 6.755477198 | 0.000722752 | C4orf12  | ENSG00000180769 |
| 4 | 87459599 | 87459931 | 87459764 | 42  | 43  | 4  | 9.145876821 | 3.46E-10    | MAPK10   | ENSG00000109339 |
| 4 | 87727633 | 87727859 | 87727761 | 10  | 12  | 0  | 13.5109544  | 9.48E-05    | PTPN13   | ENSG00000163629 |
| 4 | 88117916 | 88118138 | 88118027 | 9   | 9   | 6  | 1.484720263 | 0.204387    |          | ENSG00000152575 |
| 4 | 88381514 | 88381818 | 88381666 | 16  | 17  | 2  | 6.235825105 | 0.000146695 | KLHL8    | ENSG00000145332 |
| 4 | 88382048 | 88382240 | 88382144 | 8   | 8   | 1  | 4.676868829 | 0.0091584   | KLHL8    | ENSG00000145332 |
| 4 | 88444877 | 88445140 | 88444979 | 13  | 14  | 2  | 5.196520921 | 0.000907371 | HSD17B13 | ENSG00000170509 |
| 4 | 89245185 | 89245485 | 89245335 | 11  | 14  | 2  | 5.196520921 | 0.000907371 | ABCG2    | ENSG00000118777 |
| 4 | 89285122 | 89285380 | 89285281 | 12  | 14  | 2  | 5.196520921 | 0.000907371 | ABCG2    | ENSG00000118777 |
| 4 | 89424794 | 89425113 | 89424953 | 9   | 13  | 2  | 4.850086193 | 0.00164564  | PPM1K    | ENSG00000163644 |



|   |           |           |           |     |     |   |             |             |          |                 |
|---|-----------|-----------|-----------|-----|-----|---|-------------|-------------|----------|-----------------|
| 4 | 89595646  | 89595878  | 89595710  | 9   | 10  | 0 | 11.43234603 | 0.000394183 | HERC5    | ENSG00000138646 |
| 4 | 90821313  | 90821883  | 90821545  | 113 | 145 | 4 | 30.34768218 | 9.18E-40    | SNCA     | ENSG00000145335 |
| 4 | 91277549  | 91277737  | 91277643  | 9   | 10  | 1 | 5.716173013 | 0.00260397  |          | ENSG00000184305 |
| 4 | 91981023  | 91981334  | 91981191  | 15  | 18  | 1 | 9.87338975  | 1.41E-05    | TMSL3    | ENSG00000187653 |
| 4 | 93137309  | 93137513  | 93137418  | 8   | 9   | 0 | 10.39304184 | 0.000803859 |          | ENSG00000214910 |
| 4 | 93846153  | 93846334  | 93846238  | 8   | 8   | 2 | 3.117912553 | 0.0283184   |          | ENSG00000211179 |
| 4 | 94725671  | 94725988  | 94725825  | 10  | 13  | 0 | 14.55025858 | 4.65E-05    |          | ENSG00000209063 |
| 4 | 96331310  | 96331542  | 96331459  | 8   | 9   | 1 | 5.196520921 | 0.00490062  | BMP1B    | ENSG00000138696 |
| 4 | 97883650  | 97883975  | 97883812  | 11  | 13  | 0 | 14.55025858 | 4.65E-05    |          | ENSG00000109238 |
| 4 | 98072155  | 98072362  | 98072258  | 10  | 11  | 5 | 2.078608368 | 0.0614303   |          | ENSG00000109238 |
| 4 | 98131240  | 98131419  | 98131329  | 8   | 8   | 2 | 3.117912553 | 0.0283184   |          | ENSG00000109238 |
| 4 | 98730354  | 98730585  | 98730489  | 9   | 10  | 1 | 5.716173013 | 0.00260397  |          | ENSG00000216036 |
| 4 | 99383165  | 99383360  | 99383232  | 9   | 10  | 2 | 3.810782009 | 0.00936112  | RAP1GDS1 | ENSG00000138698 |
| 4 | 99714113  | 99714304  | 99714201  | 9   | 10  | 6 | 1.63319229  | 0.146906    |          | ENSG00000203420 |
| 4 | 100103679 | 100103916 | 100103751 | 13  | 15  | 1 | 8.314433474 | 0.000102308 | FAM177A2 | ENSG00000214886 |
| 4 | 100187519 | 100187698 | 100187608 | 8   | 8   | 3 | 2.338434415 | 0.0641221   | METAP1   | ENSG00000164024 |
| 4 | 101328039 | 101328241 | 101328088 | 8   | 8   | 1 | 4.676868829 | 0.0091584   | DDIT4L   | ENSG00000145358 |
| 4 | 101920440 | 101920623 | 101920531 | 8   | 8   | 3 | 2.338434415 | 0.0641221   | EMCN     | ENSG00000164035 |
| 4 | 101949036 | 101949284 | 101949114 | 10  | 10  | 2 | 3.810782009 | 0.00936112  | EMCN     | ENSG00000164035 |
| 4 | 102185799 | 102186031 | 102185910 | 8   | 9   | 0 | 10.39304184 | 0.000803859 |          | ENSG00000214865 |
| 4 | 102229396 | 102229594 | 102229486 | 9   | 10  | 0 | 11.43234603 | 0.000394183 |          | ENSG00000214865 |
| 4 | 102309468 | 102309792 | 102309624 | 13  | 15  | 1 | 8.314433474 | 0.000102308 |          | ENSG00000197473 |
| 4 | 102341694 | 102341950 | 102341851 | 9   | 11  | 2 | 4.157216737 | 0.0052913   |          | ENSG00000197473 |
| 4 | 103121869 | 103122117 | 103121993 | 10  | 11  | 5 | 2.078608368 | 0.0614303   | BANK1    | ENSG00000153064 |
| 4 | 103805772 | 103805982 | 103805877 | 10  | 10  | 0 | 11.43234603 | 0.000394183 |          | ENSG00000213538 |
| 4 | 103819306 | 103819500 | 103819403 | 9   | 10  | 0 | 11.43234603 | 0.000394183 |          | ENSG00000213538 |
| 4 | 104649972 | 104650380 | 104650151 | 10  | 18  | 0 | 19.7467795  | 1.32E-06    |          | ENSG00000221522 |
| 4 | 106020095 | 106020290 | 106020169 | 8   | 8   | 4 | 1.870747532 | 0.118863    |          | ENSG00000211278 |
| 4 | 106112055 | 106112519 | 106112340 | 25  | 34  | 1 | 18.18782322 | 2.77E-10    |          | ENSG00000211278 |
| 4 | 106163940 | 106164246 | 106164107 | 9   | 10  | 9 | 1.143234603 | 0.378307    |          | ENSG00000211278 |
| 4 | 106285791 | 106286216 | 106286037 | 10  | 20  | 3 | 5.456346967 | 9.70E-05    | TET2     | ENSG00000168769 |
| 4 | 106333575 | 106333754 | 106333664 | 9   | 9   | 2 | 3.464347281 | 0.0163838   | TET2     | ENSG00000168769 |
| 4 | 106735343 | 106735569 | 106735456 | 15  | 17  | 2 | 6.235825105 | 0.000146695 |          | ENSG00000138784 |
| 4 | 106754010 | 106754213 | 106754106 | 9   | 9   | 4 | 2.078608368 | 0.0785659   |          | ENSG00000138784 |

|   |           |           |           |    |    |   |             |             |         |                 |
|---|-----------|-----------|-----------|----|----|---|-------------|-------------|---------|-----------------|
| 4 | 106773945 | 106774223 | 106774084 | 14 | 14 | 1 | 7.794781382 | 0.000197021 | INTS12  | ENSG00000138785 |
| 4 | 106823665 | 106824001 | 106823837 | 12 | 16 | 2 | 5.889390377 | 0.000270741 | INTS12  | ENSG00000138785 |
| 4 | 106848962 | 106849251 | 106849089 | 9  | 12 | 1 | 6.755477198 | 0.000722752 | INTS12  | ENSG00000138785 |
| 4 | 106849268 | 106849456 | 106849337 | 10 | 11 | 0 | 12.47165021 | 0.000193293 | GSTCD   | ENSG00000138780 |
| 4 | 107034913 | 107035254 | 107035084 | 19 | 24 | 3 | 6.495651151 | 8.89E-06    | NPNT    | ENSG00000168743 |
| 4 | 107040622 | 107040808 | 107040712 | 9  | 9  | 1 | 5.196520921 | 0.00490062  | NPNT    | ENSG00000168743 |
| 4 | 107075576 | 107075776 | 107075676 | 10 | 10 | 1 | 5.716173013 | 0.00260397  | NPNT    | ENSG00000168743 |
| 4 | 107097632 | 107097892 | 107097718 | 9  | 10 | 3 | 2.858086507 | 0.0242838   | NPNT    | ENSG00000168743 |
| 4 | 107106792 | 107107080 | 107106945 | 8  | 10 | 1 | 5.716173013 | 0.00260397  | NPNT    | ENSG00000168743 |
| 4 | 107116900 | 107117179 | 107117011 | 10 | 11 | 3 | 3.117912553 | 0.0146045   | NPNT    | ENSG00000168743 |
| 4 | 107155133 | 107155338 | 107155235 | 8  | 8  | 0 | 9.353737658 | 0.00163931  | NPNT    | ENSG00000168743 |
| 4 | 107375795 | 107375980 | 107375887 | 9  | 9  | 0 | 10.39304184 | 0.000803859 | SCYE1   | ENSG00000164022 |
| 4 | 107456890 | 107457194 | 107457057 | 9  | 12 | 4 | 2.702190879 | 0.0203088   | SCYE1   | ENSG00000164022 |
| 4 | 108519933 | 108520373 | 108520194 | 28 | 40 | 1 | 21.30573578 | 4.48E-12    |         | ENSG00000211308 |
| 4 | 109490970 | 109491404 | 109491145 | 9  | 16 | 4 | 3.533634226 | 0.00276486  | LEF1    | ENSG00000138795 |
| 4 | 111029552 | 111029758 | 111029722 | 8  | 8  | 1 | 4.676868829 | 0.0091584   | EGF     | ENSG00000138798 |
| 4 | 111908513 | 111908726 | 111908619 | 9  | 9  | 1 | 5.196520921 | 0.00490062  |         | ENSG00000216134 |
| 4 | 112782733 | 112783076 | 112782897 | 12 | 14 | 3 | 3.897390691 | 0.00295882  |         | ENSG00000200963 |
| 4 | 112915302 | 112915545 | 112915423 | 9  | 9  | 3 | 2.598260461 | 0.0397929   | C4orf32 | ENSG00000174749 |
| 4 | 114493566 | 114493899 | 114493732 | 11 | 15 | 3 | 4.157216737 | 0.00170423  |         | ENSG00000209187 |
| 4 | 114701771 | 114702159 | 114701955 | 15 | 23 | 2 | 8.314433474 | 3.41E-06    |         | ENSG00000206820 |
| 4 | 114786600 | 114786793 | 114786696 | 9  | 9  | 3 | 2.598260461 | 0.0397929   | CAMK2D  | ENSG00000145349 |
| 4 | 115198373 | 115198606 | 115198501 | 9  | 11 | 0 | 12.47165021 | 0.000193293 | ARSJ    | ENSG00000180801 |
| 4 | 116565460 | 116565697 | 116565584 | 10 | 11 | 2 | 4.157216737 | 0.0052913   | NDST4   | ENSG00000138653 |
| 4 | 116722236 | 116722435 | 116722303 | 8  | 9  | 0 | 10.39304184 | 0.000803859 | NDST4   | ENSG00000138653 |
| 4 | 116985037 | 116985216 | 116985126 | 8  | 9  | 1 | 5.196520921 | 0.00490062  |         | ENSG00000209247 |
| 4 | 117110423 | 117110731 | 117110577 | 14 | 16 | 1 | 8.834085566 | 5.30E-05    |         | ENSG00000209247 |
| 4 | 119537878 | 119538221 | 119538049 | 22 | 27 | 0 | 29.10051716 | 2.16E-09    | PRSS12  | ENSG00000164099 |
| 4 | 119626441 | 119626740 | 119626590 | 11 | 13 | 0 | 14.55025858 | 4.65E-05    | CEP170L | ENSG00000154608 |
| 4 | 119904214 | 119904393 | 119904303 | 8  | 8  | 0 | 9.353737658 | 0.00163931  | SEC24D  | ENSG00000150961 |
| 4 | 120006518 | 120006733 | 120006656 | 9  | 10 | 1 | 5.716173013 | 0.00260397  | SYNPO2  | ENSG00000172403 |
| 4 | 122366933 | 122367254 | 122367102 | 30 | 33 | 1 | 17.66817113 | 5.50E-10    |         | ENSG00000212169 |
| 4 | 123743872 | 123744200 | 123744045 | 26 | 28 | 1 | 15.06991067 | 1.67E-08    | IL21    | ENSG00000138684 |
| 4 | 123917578 | 123917925 | 123917751 | 28 | 32 | 0 | 34.29703808 | 6.12E-11    | BBS12   | ENSG00000181004 |

|   |           |           |           |    |     |   |             |             |         |                 |
|---|-----------|-----------|-----------|----|-----|---|-------------|-------------|---------|-----------------|
| 4 | 123938688 | 123939231 | 123938988 | 83 | 108 | 3 | 28.32103902 | 5.72E-30    | FGF2    | ENSG00000138685 |
| 4 | 124979117 | 124979376 | 124979246 | 9  | 10  | 3 | 2.858086507 | 0.0242838   |         | ENSG00000213466 |
| 4 | 125853648 | 125853830 | 125853742 | 8  | 8   | 0 | 9.353737658 | 0.00163931  | ANKRD50 | ENSG00000151458 |
| 4 | 126028425 | 126028662 | 126028525 | 11 | 11  | 7 | 1.558956276 | 0.158273    | ANKRD50 | ENSG00000151458 |
| 4 | 126054096 | 126054523 | 126054327 | 33 | 48  | 0 | 50.92590503 | 6.85E-16    | ANKRD50 | ENSG00000151458 |
| 4 | 128402104 | 128402494 | 128402306 | 42 | 52  | 1 | 27.54156088 | 1.11E-15    |         | ENSG00000199862 |
| 4 | 128923916 | 128924299 | 128924130 | 26 | 33  | 1 | 17.66817113 | 5.50E-10    | HSPA4L  | ENSG00000164070 |
| 4 | 129429434 | 129429623 | 129429528 | 8  | 8   | 3 | 2.338434415 | 0.0641221   | PGRMC2  | ENSG00000164040 |
| 4 | 129826661 | 129827047 | 129826886 | 20 | 27  | 1 | 14.55025858 | 3.30E-08    |         | ENSG00000209148 |
| 4 | 132951139 | 132951518 | 132951306 | 33 | 39  | 1 | 20.78608368 | 8.93E-12    |         | ENSG00000209132 |
| 4 | 133199860 | 133200108 | 133199988 | 11 | 14  | 0 | 15.58956276 | 2.28E-05    |         | ENSG00000209132 |
| 4 | 134530930 | 134531136 | 134531033 | 8  | 8   | 0 | 9.353737658 | 0.00163931  |         | ENSG00000221637 |
| 4 | 136277303 | 136277652 | 136277477 | 8  | 12  | 4 | 2.702190879 | 0.0203088   |         | ENSG00000221569 |
| 4 | 138670362 | 138670548 | 138670485 | 9  | 9   | 0 | 10.39304184 | 0.000803859 | PCDH18  | ENSG00000189184 |
| 4 | 140051465 | 140051725 | 140051593 | 10 | 12  | 2 | 4.503651465 | 0.002963    |         | ENSG00000208970 |
| 4 | 140120495 | 140120752 | 140120622 | 17 | 17  | 0 | 18.70747532 | 2.69E-06    |         | ENSG00000208970 |
| 4 | 140384111 | 140384355 | 140384229 | 10 | 11  | 0 | 12.47165021 | 0.000193293 |         | ENSG00000206722 |
| 4 | 140594076 | 140594389 | 140594247 | 8  | 11  | 3 | 3.117912553 | 0.0146045   | RAB33B  | ENSG00000172007 |
| 4 | 140817601 | 140817947 | 140817774 | 34 | 40  | 1 | 21.30573578 | 4.48E-12    |         | ENSG00000201533 |
| 4 | 141281896 | 141282116 | 141282006 | 8  | 9   | 0 | 10.39304184 | 0.000803859 | SCOC    | ENSG00000153130 |
| 4 | 141868698 | 141868929 | 141868813 | 8  | 9   | 0 | 10.39304184 | 0.000803859 |         | ENSG00000207155 |
| 4 | 143041319 | 143041525 | 143041422 | 11 | 12  | 2 | 4.503651465 | 0.002963    | IL15    | ENSG00000164136 |
| 4 | 144441498 | 144441701 | 144441616 | 10 | 10  | 1 | 5.716173013 | 0.00260397  |         | ENSG00000200049 |
| 4 | 144476567 | 144476790 | 144476678 | 10 | 12  | 1 | 6.755477198 | 0.000722752 | GAB1    | ENSG00000109458 |
| 4 | 147382702 | 147382934 | 147382803 | 8  | 9   | 0 | 10.39304184 | 0.000803859 | LSM6    | ENSG00000164167 |
| 4 | 148348901 | 148349082 | 148349075 | 8  | 8   | 0 | 9.353737658 | 0.00163931  |         | ENSG00000221369 |
| 4 | 148824609 | 148825054 | 148824886 | 9  | 15  | 4 | 3.32577339  | 0.00462646  |         | ENSG00000164169 |
| 4 | 149187917 | 149188402 | 149188223 | 15 | 23  | 2 | 8.314433474 | 3.41E-06    |         | ENSG00000208847 |
| 4 | 150905151 | 150905343 | 150905247 | 9  | 9   | 0 | 10.39304184 | 0.000803859 |         | ENSG00000208833 |
| 4 | 151356386 | 151356591 | 151356422 | 8  | 9   | 2 | 3.464347281 | 0.0163838   | DCLK2   | ENSG00000170390 |
| 4 | 153399531 | 153399918 | 153399790 | 22 | 31  | 0 | 33.2577339  | 1.25E-10    |         | ENSG00000208788 |
| 4 | 153493129 | 153493429 | 153493279 | 12 | 16  | 1 | 8.834085566 | 5.30E-05    | FBXW7   | ENSG00000109670 |
| 4 | 157911887 | 157912406 | 157912184 | 67 | 88  | 3 | 23.1245181  | 4.91E-24    | PDGFC   | ENSG00000145431 |
| 4 | 159311747 | 159312223 | 159312003 | 37 | 50  | 1 | 26.5022567  | 4.44E-15    | C4orf18 | ENSG00000164125 |

|   |           |           |           |    |    |   |             |             |          |                 |
|---|-----------|-----------|-----------|----|----|---|-------------|-------------|----------|-----------------|
| 4 | 160824717 | 160824954 | 160824799 | 11 | 12 | 1 | 6.755477198 | 0.000722752 |          | ENSG00000208635 |
| 4 | 161459836 | 161460088 | 161459962 | 8  | 8  | 8 | 1.039304184 | 0.46786     |          | ENSG00000208632 |
| 4 | 163478851 | 163479127 | 163479011 | 12 | 14 | 2 | 5.196520921 | 0.000907371 |          | ENSG00000208630 |
| 4 | 164635103 | 164635297 | 164635200 | 8  | 8  | 5 | 1.558956276 | 0.191397    | C4orf43  | ENSG00000198498 |
| 4 | 165677439 | 165677737 | 165677565 | 21 | 23 | 0 | 24.94330042 | 3.74E-08    |          | ENSG00000223037 |
| 4 | 166969570 | 166969761 | 166969665 | 9  | 9  | 0 | 10.39304184 | 0.000803859 | TLL1     | ENSG00000038295 |
| 4 | 169054889 | 169055303 | 169055060 | 37 | 47 | 2 | 16.62886695 | 4.62E-13    |          | ENSG00000221576 |
| 4 | 169699579 | 169699784 | 169699723 | 8  | 8  | 0 | 9.353737658 | 0.00163931  | PALLD    | ENSG00000129116 |
| 4 | 169943185 | 169943364 | 169943251 | 9  | 9  | 4 | 2.078608368 | 0.0785659   |          | ENSG00000214676 |
| 4 | 170191523 | 170191772 | 170191647 | 11 | 12 | 5 | 2.251825733 | 0.0404733   | CBR4     | ENSG00000145439 |
| 4 | 170227756 | 170227973 | 170227864 | 13 | 15 | 3 | 4.157216737 | 0.00170423  | CBR4     | ENSG00000145439 |
| 4 | 170729192 | 170729428 | 170729304 | 10 | 10 | 0 | 11.43234603 | 0.000394183 | NEK1     | ENSG00000137601 |
| 4 | 174139963 | 174140408 | 174140185 | 27 | 39 | 3 | 10.39304184 | 7.32E-10    |          | ENSG00000205182 |
| 4 | 174325512 | 174325867 | 174325639 | 9  | 13 | 2 | 4.850086193 | 0.00164564  | GALNT7   | ENSG00000109586 |
| 4 | 177477694 | 177477879 | 177477786 | 8  | 8  | 4 | 1.870747532 | 0.118863    | SPCS3    | ENSG00000129128 |
| 4 | 178669797 | 178670104 | 178669950 | 27 | 29 | 3 | 7.794781382 | 4.12E-07    |          | ENSG00000221499 |
| 4 | 187857497 | 187857963 | 187857676 | 25 | 33 | 0 | 35.33634226 | 3.00E-11    | FAT1     | ENSG00000083857 |
| 4 | 188078662 | 188079027 | 188078841 | 18 | 24 | 0 | 25.98260461 | 1.83E-08    | FAT1     | ENSG00000083857 |
| 4 | 190812168 | 190812347 | 190812257 | 8  | 8  | 1 | 4.676868829 | 0.0091584   |          | ENSG00000202215 |
| 5 | 67609     | 67987     | 67808     | 45 | 54 | 0 | 57.16173013 | 9.52E-18    | PLEKHG4B | ENSG00000153404 |
| 5 | 148986    | 149194    | 149085    | 8  | 8  | 3 | 2.338434415 | 0.0641221   | PLEKHG4B | ENSG00000153404 |
| 5 | 972529    | 972809    | 972669    | 12 | 16 | 2 | 5.889390377 | 0.000270741 | TRIP13   | ENSG00000071539 |
| 5 | 1126509   | 1126908   | 1126686   | 20 | 25 | 0 | 27.02190879 | 8.98E-09    | NKD2     | ENSG00000145506 |
| 5 | 1257986   | 1258245   | 1258085   | 8  | 9  | 2 | 3.464347281 | 0.0163838   | SLC6A19  | ENSG00000174358 |
| 5 | 1300004   | 1300241   | 1300122   | 9  | 9  | 0 | 10.39304184 | 0.000803859 | SLC6A18  | ENSG00000164363 |
| 5 | 1853652   | 1853932   | 1853792   | 8  | 10 | 0 | 11.43234603 | 0.000394183 | NDUFS6   | ENSG00000145494 |
| 5 | 1997522   | 1997810   | 1997660   | 10 | 10 | 3 | 2.858086507 | 0.0242838   | IRX4     | ENSG00000113430 |
| 5 | 2253703   | 2254068   | 2253889   | 8  | 14 | 4 | 3.117912553 | 0.00766354  |          | ENSG00000201026 |
| 5 | 2833561   | 2833765   | 2833695   | 13 | 13 | 0 | 14.55025858 | 4.65E-05    |          | ENSG00000215233 |
| 5 | 4072553   | 4072942   | 4072804   | 14 | 21 | 0 | 22.86469205 | 1.55E-07    |          | ENSG00000221195 |
| 5 | 6549084   | 6549276   | 6549180   | 9  | 10 | 0 | 11.43234603 | 0.000394183 |          | ENSG00000215218 |
| 5 | 6552215   | 6552394   | 6552304   | 8  | 8  | 1 | 4.676868829 | 0.0091584   |          | ENSG00000215218 |
| 5 | 6729137   | 6729527   | 6729286   | 22 | 28 | 0 | 30.13982134 | 1.06E-09    | POLS     | ENSG00000112941 |
| 5 | 6818824   | 6819099   | 6818933   | 17 | 19 | 9 | 2.078608368 | 0.0241848   | POLS     | ENSG00000112941 |

|   |          |          |          |    |    |   |             |             |          |                 |
|---|----------|----------|----------|----|----|---|-------------|-------------|----------|-----------------|
| 5 | 8510277  | 8510463  | 8510348  | 8  | 8  | 1 | 4.676868829 | 0.0091584   |          | ENSG00000209923 |
| 5 | 10360523 | 10360775 | 10360649 | 10 | 12 | 4 | 2.702190879 | 0.0203088   | CMBL     | ENSG00000164237 |
| 5 | 10363528 | 10363749 | 10363638 | 9  | 11 | 1 | 6.235825105 | 0.0013754   | CMBL     | ENSG00000164237 |
| 5 | 10406162 | 10406569 | 10406319 | 8  | 13 | 1 | 7.27512929  | 0.000378098 | 6-Mar    | ENSG00000145495 |
| 5 | 10406783 | 10407024 | 10406903 | 8  | 10 | 1 | 5.716173013 | 0.00260397  | 6-Mar    | ENSG00000145495 |
| 5 | 10581403 | 10581938 | 10581741 | 40 | 59 | 1 | 31.17912553 | 8.52E-18    |          | ENSG00000214179 |
| 5 | 10592147 | 10592458 | 10592302 | 14 | 17 | 4 | 3.741495063 | 0.00163722  |          | ENSG00000214179 |
| 5 | 10643744 | 10644035 | 10643889 | 9  | 11 | 1 | 6.235825105 | 0.0013754   | ANKRD33B | ENSG00000164236 |
| 5 | 14381584 | 14381770 | 14381677 | 8  | 8  | 2 | 3.117912553 | 0.0283184   | TRIO     | ENSG00000038382 |
| 5 | 14780500 | 14780745 | 14780622 | 8  | 10 | 9 | 1.143234603 | 0.378307    |          | ENSG00000212736 |
| 5 | 14847035 | 14847407 | 14847194 | 8  | 13 | 3 | 3.637564645 | 0.0050909   | ANKH     | ENSG00000154122 |
| 5 | 14999821 | 15000287 | 15000124 | 30 | 41 | 4 | 8.730155148 | 1.21E-09    |          | ENSG00000212036 |
| 5 | 16605541 | 16605750 | 16605648 | 8  | 9  | 0 | 10.39304184 | 0.000803859 | FAM134B  | ENSG00000154153 |
| 5 | 16802912 | 16803161 | 16803022 | 8  | 10 | 2 | 3.810782009 | 0.00936112  |          | ENSG00000210038 |
| 5 | 17359432 | 17359621 | 17359526 | 11 | 12 | 7 | 1.688869299 | 0.11395     |          | ENSG00000185296 |
| 5 | 17365461 | 17365738 | 17365599 | 15 | 15 | 4 | 3.32577339  | 0.00462646  |          | ENSG00000185296 |
| 5 | 17383496 | 17383771 | 17383633 | 9  | 12 | 0 | 13.5109544  | 9.48E-05    |          | ENSG00000201715 |
| 5 | 17393932 | 17394294 | 17394121 | 9  | 14 | 6 | 2.227080395 | 0.0322529   |          | ENSG00000201715 |
| 5 | 17479537 | 17479724 | 17479630 | 8  | 9  | 0 | 10.39304184 | 0.000803859 |          | ENSG00000185041 |
| 5 | 18542916 | 18543264 | 18543106 | 10 | 14 | 2 | 5.196520921 | 0.000907371 |          | ENSG00000210087 |
| 5 | 19358599 | 19359007 | 19358763 | 21 | 29 | 2 | 10.39304184 | 7.12E-08    |          | ENSG00000210097 |
| 5 | 19436936 | 19437227 | 19437081 | 16 | 19 | 4 | 4.157216737 | 0.000560204 | CDH18    | ENSG00000145526 |
| 5 | 19599578 | 19599777 | 19599715 | 9  | 9  | 0 | 10.39304184 | 0.000803859 | CDH18    | ENSG00000145526 |
| 5 | 19820126 | 19820410 | 19820294 | 19 | 20 | 2 | 7.27512929  | 2.27E-05    | CDH18    | ENSG00000145526 |
| 5 | 19916696 | 19916927 | 19916811 | 10 | 12 | 3 | 3.377738599 | 0.00867157  | CDH18    | ENSG00000145526 |
| 5 | 20145153 | 20145585 | 20145503 | 8  | 16 | 6 | 2.524024447 | 0.0137633   | CDH18    | ENSG00000145526 |
| 5 | 23244837 | 23245016 | 23244970 | 8  | 8  | 2 | 3.117912553 | 0.0283184   |          | ENSG00000206912 |
| 5 | 24484016 | 24484203 | 24484063 | 8  | 8  | 2 | 3.117912553 | 0.0283184   | CDH10    | ENSG00000040731 |
| 5 | 27507867 | 27508157 | 27508011 | 12 | 15 | 0 | 16.62886695 | 1.12E-05    |          | ENSG00000207261 |
| 5 | 28891581 | 28891829 | 28891705 | 8  | 9  | 0 | 10.39304184 | 0.000803859 |          | ENSG00000210223 |
| 5 | 32266692 | 32266891 | 32266772 | 8  | 8  | 6 | 1.336248237 | 0.277651    |          | ENSG00000199731 |
| 5 | 32952531 | 32952745 | 32952638 | 8  | 9  | 5 | 1.73217364  | 0.133894    | C5orf23  | ENSG00000181495 |
| 5 | 34742824 | 34743053 | 34742949 | 8  | 10 | 7 | 1.429043253 | 0.21536     | RAI14    | ENSG00000039560 |
| 5 | 35039301 | 35039522 | 35039472 | 8  | 11 | 2 | 4.157216737 | 0.0052913   |          | ENSG00000212082 |

|   |          |          |          |     |     |   |             |             |        |                 |
|---|----------|----------|----------|-----|-----|---|-------------|-------------|--------|-----------------|
| 5 | 35223972 | 35224244 | 35224080 | 14  | 16  | 6 | 2.524024447 | 0.0137633   | PRLR   | ENSG00000113494 |
| 5 | 35233589 | 35233844 | 35233716 | 11  | 13  | 1 | 7.27512929  | 0.000378098 | PRLR   | ENSG00000113494 |
| 5 | 35234046 | 35234451 | 35234190 | 9   | 17  | 2 | 6.235825105 | 0.000146695 | PRLR   | ENSG00000113494 |
| 5 | 35249420 | 35249788 | 35249609 | 16  | 23  | 9 | 2.494330042 | 0.00494866  | PRLR   | ENSG00000113494 |
| 5 | 35249983 | 35250363 | 35250190 | 14  | 20  | 5 | 3.637564645 | 0.000902929 | PRLR   | ENSG00000113494 |
| 5 | 35266182 | 35266510 | 35266341 | 9   | 13  | 5 | 2.425043097 | 0.0262442   | PRLR   | ENSG00000113494 |
| 5 | 35342633 | 35342873 | 35342715 | 9   | 11  | 3 | 3.117912553 | 0.0146045   | PRLR   | ENSG00000113494 |
| 5 | 35512667 | 35512902 | 35512784 | 8   | 8   | 4 | 1.870747532 | 0.118863    |        | ENSG00000201368 |
| 5 | 35887147 | 35887425 | 35887310 | 8   | 11  | 2 | 4.157216737 | 0.0052913   | IL7R   | ENSG00000168685 |
| 5 | 36187730 | 36187946 | 36187838 | 9   | 10  | 1 | 5.716173013 | 0.00260397  | LMBRD2 | ENSG00000164187 |
| 5 | 36478091 | 36478931 | 36478411 | 191 | 273 | 9 | 28.47693465 | 1.08E-71    |        | ENSG00000222178 |
| 5 | 36732012 | 36732202 | 36732024 | 9   | 11  | 3 | 3.117912553 | 0.0146045   | SLC1A3 | ENSG00000079215 |
| 5 | 36780958 | 36781371 | 36781211 | 12  | 18  | 7 | 2.468347438 | 0.0112499   | NIPBL  | ENSG00000164190 |
| 5 | 36913922 | 36914225 | 36914162 | 8   | 12  | 2 | 4.503651465 | 0.002963    | NIPBL  | ENSG00000164190 |
| 5 | 37704473 | 37704781 | 37704628 | 9   | 13  | 6 | 2.078608368 | 0.0483393   |        | ENSG00000206743 |
| 5 | 37883696 | 37884191 | 37883927 | 92  | 115 | 3 | 30.13982134 | 4.68E-32    | GDNF   | ENSG00000168621 |
| 5 | 38462957 | 38463555 | 38463255 | 35  | 58  | 2 | 20.43964896 | 2.70E-16    | EGFLAM | ENSG00000164318 |
| 5 | 38728788 | 38728968 | 38728829 | 8   | 9   | 3 | 2.598260461 | 0.0397929   | LIFR   | ENSG00000113594 |
| 5 | 38766940 | 38767180 | 38767060 | 12  | 12  | 3 | 3.377738599 | 0.00867157  |        | ENSG00000205785 |
| 5 | 38866940 | 38867265 | 38867096 | 11  | 15  | 5 | 2.771477825 | 0.0105836   |        | ENSG00000205783 |
| 5 | 39752475 | 39752697 | 39752586 | 9   | 11  | 3 | 3.117912553 | 0.0146045   | DAB2   | ENSG00000153071 |
| 5 | 40296653 | 40296832 | 40296753 | 8   | 8   | 1 | 4.676868829 | 0.0091584   |        | ENSG00000199361 |
| 5 | 40637165 | 40637461 | 40637294 | 17  | 19  | 4 | 4.157216737 | 0.000560204 |        | ENSG00000199552 |
| 5 | 40714916 | 40715182 | 40715064 | 10  | 11  | 5 | 2.078608368 | 0.0614303   | PTGER4 | ENSG00000171522 |
| 5 | 40733142 | 40733321 | 40733170 | 8   | 8   | 0 | 9.353737658 | 0.00163931  | PTGER4 | ENSG00000171522 |
| 5 | 40791036 | 40791277 | 40791197 | 11  | 13  | 0 | 14.55025858 | 4.65E-05    | TTC33  | ENSG00000113638 |
| 5 | 40871122 | 40871433 | 40871266 | 9   | 13  | 6 | 2.078608368 | 0.0483393   | RPL37  | ENSG00000145592 |
| 5 | 40940610 | 40940829 | 40940713 | 15  | 17  | 3 | 4.676868829 | 0.000552213 | C7     | ENSG00000112936 |
| 5 | 41158394 | 41158829 | 41158568 | 22  | 29  | 3 | 7.794781382 | 4.12E-07    |        | ENSG00000171495 |
| 5 | 41481144 | 41481345 | 41481244 | 9   | 9   | 0 | 10.39304184 | 0.000803859 | PLCXD3 | ENSG00000182836 |
| 5 | 42072333 | 42072525 | 42072429 | 9   | 9   | 8 | 1.154782427 | 0.375434    |        | ENSG00000199487 |
| 5 | 42619136 | 42619440 | 42619288 | 11  | 14  | 4 | 3.117912553 | 0.00766354  |        | ENSG00000215083 |
| 5 | 42634157 | 42634574 | 42634365 | 46  | 57  | 3 | 15.06991067 | 5.62E-15    |        | ENSG00000215083 |
| 5 | 42635054 | 42635233 | 42635143 | 8   | 9   | 7 | 1.29913023  | 0.286504    |        | ENSG00000215083 |

|   |          |          |          |    |    |    |             |             |         |                 |
|---|----------|----------|----------|----|----|----|-------------|-------------|---------|-----------------|
| 5 | 42691904 | 42692101 | 42692002 | 11 | 11 | 0  | 12.47165021 | 0.000193293 | CCDC152 | ENSG00000198865 |
| 5 | 43043219 | 43043787 | 43043533 | 68 | 99 | 3  | 25.98260461 | 2.71E-27    |         | ENSG00000177738 |
| 5 | 43078033 | 43078212 | 43078156 | 8  | 9  | 2  | 3.464347281 | 0.0163838   |         | ENSG00000215068 |
| 5 | 43141560 | 43141793 | 43141645 | 9  | 10 | 5  | 1.905391004 | 0.0915982   | ZNF131  | ENSG00000172262 |
| 5 | 43244394 | 43244882 | 43244537 | 13 | 24 | 5  | 4.330434101 | 0.000108998 |         | ENSG00000177453 |
| 5 | 43465597 | 43465849 | 43465723 | 16 | 17 | 2  | 6.235825105 | 0.000146695 | CCL28   | ENSG00000151882 |
| 5 | 43550824 | 43551009 | 43550950 | 8  | 9  | 4  | 2.078608368 | 0.0785659   | C5orf34 | ENSG00000172244 |
| 5 | 43618307 | 43618488 | 43618397 | 8  | 8  | 0  | 9.353737658 | 0.00163931  |         | ENSG00000213960 |
| 5 | 43995575 | 43995754 | 43995607 | 8  | 8  | 0  | 9.353737658 | 0.00163931  |         | ENSG00000212561 |
| 5 | 44038484 | 44038751 | 44038603 | 10 | 12 | 3  | 3.377738599 | 0.00867157  |         | ENSG00000212561 |
| 5 | 44071596 | 44071823 | 44071704 | 8  | 9  | 0  | 10.39304184 | 0.000803859 |         | ENSG00000212561 |
| 5 | 44572431 | 44572749 | 44572590 | 12 | 16 | 3  | 4.417042783 | 0.00097367  | FGF10   | ENSG00000070193 |
| 5 | 44764125 | 44764419 | 44764272 | 10 | 11 | 0  | 12.47165021 | 0.000193293 |         | ENSG00000222995 |
| 5 | 44844588 | 44844832 | 44844710 | 9  | 10 | 7  | 1.429043253 | 0.21536     | MRPS30  | ENSG00000112996 |
| 5 | 45302870 | 45303069 | 45302969 | 8  | 8  | 0  | 9.353737658 | 0.00163931  |         | ENSG00000222945 |
| 5 | 46433326 | 46433654 | 46433490 | 14 | 14 | 14 | 1.039304184 | 0.458308    |         |                 |
| 5 | 49486215 | 49486551 | 49486383 | 32 | 32 | 41 | 0.816596145 | 0.81062     | EMB     | ENSG00000170571 |
| 5 | 49537848 | 49538030 | 49537875 | 12 | 12 | 12 | 1.039304184 | 0.461227    | EMB     | ENSG00000170571 |
| 5 | 49755065 | 49755305 | 49755174 | 10 | 11 | 0  | 12.47165021 | 0.000193293 | EMB     | ENSG00000170571 |
| 5 | 49987589 | 49987787 | 49987695 | 8  | 8  | 2  | 3.117912553 | 0.0283184   | PARP8   | ENSG00000151883 |
| 5 | 52280154 | 52280359 | 52280259 | 8  | 11 | 5  | 2.078608368 | 0.0614303   | ITGA2   | ENSG00000164171 |
| 5 | 52822108 | 52822619 | 52822440 | 37 | 46 | 4  | 9.769459332 | 5.21E-11    | FST     | ENSG00000134363 |
| 5 | 53114386 | 53114635 | 53114494 | 9  | 10 | 1  | 5.716173013 | 0.00260397  |         | ENSG00000222077 |
| 5 | 53233416 | 53233595 | 53233531 | 8  | 8  | 3  | 2.338434415 | 0.0641221   |         | ENSG00000222960 |
| 5 | 53288369 | 53288566 | 53288467 | 8  | 8  | 1  | 4.676868829 | 0.0091584   |         | ENSG00000207627 |
| 5 | 53736128 | 53736448 | 53736288 | 25 | 27 | 0  | 29.10051716 | 2.16E-09    | HSPB3   | ENSG00000169271 |
| 5 | 53772145 | 53772498 | 53772321 | 10 | 16 | 0  | 17.66817113 | 5.48E-06    | HSPB3   | ENSG00000169271 |
| 5 | 54221445 | 54221661 | 54221580 | 8  | 8  | 0  | 9.353737658 | 0.00163931  |         | ENSG00000221073 |
| 5 | 54236051 | 54236306 | 54236180 | 9  | 10 | 4  | 2.286469205 | 0.0509017   |         | ENSG00000221073 |
| 5 | 54924709 | 54925063 | 54924908 | 10 | 14 | 1  | 7.794781382 | 0.000197021 | PPAP2A  | ENSG00000067113 |
| 5 | 55326748 | 55326928 | 55326837 | 8  | 9  | 1  | 5.196520921 | 0.00490062  | IL6ST   | ENSG00000134352 |
| 5 | 55452572 | 55452780 | 55452676 | 8  | 8  | 0  | 9.353737658 | 0.00163931  |         | ENSG00000210667 |
| 5 | 55767097 | 55767310 | 55767194 | 8  | 8  | 3  | 2.338434415 | 0.0641221   |         | ENSG00000216408 |
| 5 | 55792301 | 55792621 | 55792447 | 8  | 11 | 11 | 1.039304184 | 0.462773    |         | ENSG00000216408 |

|   |          |          |          |     |     |    |             |             |          |                 |
|---|----------|----------|----------|-----|-----|----|-------------|-------------|----------|-----------------|
| 5 | 56152343 | 56152680 | 56152511 | 15  | 20  | 4  | 4.365077574 | 0.000324139 | MAP3K1   | ENSG00000095015 |
| 5 | 56193734 | 56193978 | 56193862 | 9   | 11  | 2  | 4.157216737 | 0.0052913   | C5orf35  | ENSG00000155542 |
| 5 | 56241573 | 56241845 | 56241709 | 9   | 10  | 5  | 1.905391004 | 0.0915982   | C5orf35  | ENSG00000155542 |
| 5 | 56399123 | 56399573 | 56399313 | 94  | 113 | 0  | 118.480677  | 5.24E-36    |          | ENSG00000218706 |
| 5 | 56505367 | 56505744 | 56505535 | 9   | 15  | 4  | 3.32577339  | 0.00462646  | GPBP1    | ENSG00000062194 |
| 5 | 56826199 | 56826696 | 56826472 | 46  | 63  | 3  | 16.62886695 | 1.03E-16    | ACTBL2   | ENSG00000169067 |
| 5 | 57166674 | 57167230 | 57167002 | 124 | 160 | 1  | 83.66398683 | 1.24E-48    |          | ENSG00000209041 |
| 5 | 57193955 | 57194623 | 57194262 | 13  | 33  | 9  | 3.533634226 | 5.15E-05    |          | ENSG00000209041 |
| 5 | 57285339 | 57285605 | 57285472 | 10  | 11  | 3  | 3.117912553 | 0.0146045   |          | ENSG00000209041 |
| 5 | 57412303 | 57412515 | 57412409 | 10  | 11  | 3  | 3.117912553 | 0.0146045   |          | ENSG00000209041 |
| 5 | 57476021 | 57476201 | 57476111 | 8   | 8   | 3  | 2.338434415 | 0.0641221   |          | ENSG00000209041 |
| 5 | 57519858 | 57520082 | 57519971 | 9   | 11  | 3  | 3.117912553 | 0.0146045   |          | ENSG00000209041 |
| 5 | 57793590 | 57794049 | 57793870 | 80  | 92  | 0  | 96.65528913 | 1.65E-29    | PLK2     | ENSG00000145632 |
| 5 | 57914490 | 57914768 | 57914605 | 12  | 13  | 4  | 2.910051716 | 0.0125532   | RAB3C    | ENSG00000152932 |
| 5 | 58144901 | 58145092 | 58144996 | 9   | 10  | 2  | 3.810782009 | 0.00936112  | PDE4D    | ENSG00000113448 |
| 5 | 58633440 | 58633718 | 58633594 | 13  | 15  | 2  | 5.542955649 | 0.000497081 | PDE4D    | ENSG00000113448 |
| 5 | 58648912 | 58649091 | 58649052 | 8   | 8   | 1  | 4.676868829 | 0.0091584   | PDE4D    | ENSG00000113448 |
| 5 | 59819706 | 59819927 | 59819816 | 12  | 14  | 3  | 3.897390691 | 0.00295882  |          | ENSG00000152931 |
| 5 | 59980957 | 59981193 | 59981075 | 11  | 14  | 7  | 1.948695345 | 0.0559175   | DEPDC1B  | ENSG00000035499 |
| 5 | 60031227 | 60031568 | 60031397 | 9   | 13  | 3  | 3.637564645 | 0.0050909   | DEPDC1B  | ENSG00000035499 |
| 5 | 60277522 | 60277734 | 60277628 | 8   | 8   | 2  | 3.117912553 | 0.0283184   | NDUFAF2  | ENSG00000164182 |
| 5 | 60494405 | 60494593 | 60494564 | 8   | 9   | 8  | 1.154782427 | 0.375434    | C5orf43  | ENSG00000188725 |
| 5 | 60494948 | 60495184 | 60495066 | 10  | 12  | 7  | 1.688869299 | 0.11395     | C5orf43  | ENSG00000188725 |
| 5 | 60540003 | 60540254 | 60540128 | 11  | 12  | 2  | 4.503651465 | 0.002963    | C5orf43  | ENSG00000188725 |
| 5 | 60952569 | 60952925 | 60952747 | 9   | 15  | 10 | 1.511715177 | 0.140236    |          | ENSG00000212215 |
| 5 | 60952995 | 60953200 | 60953097 | 8   | 8   | 2  | 3.117912553 | 0.0283184   |          | ENSG00000212215 |
| 5 | 60986636 | 60986866 | 60986756 | 8   | 10  | 1  | 5.716173013 | 0.00260397  |          | ENSG00000212215 |
| 5 | 61136726 | 61136991 | 61136858 | 21  | 24  | 5  | 4.330434101 | 0.000108998 |          | ENSG00000178722 |
| 5 | 61149429 | 61149699 | 61149564 | 10  | 10  | 1  | 5.716173013 | 0.00260397  |          | ENSG00000178722 |
| 5 | 61342020 | 61342245 | 61342132 | 8   | 8   | 0  | 9.353737658 | 0.00163931  | KIF2A    | ENSG00000068796 |
| 5 | 61611648 | 61612316 | 61611927 | 33  | 56  | 1  | 29.62016925 | 6.88E-17    | KIF2A    | ENSG00000068796 |
| 5 | 61735663 | 61735891 | 61735762 | 9   | 9   | 11 | 0.86608682  | 0.635181    | DIMT1L   | ENSG00000086189 |
| 5 | 64100318 | 64100537 | 64100387 | 10  | 12  | 5  | 2.251825733 | 0.0404733   | SDCCAG10 | ENSG00000153015 |
| 5 | 65690387 | 65690609 | 65690541 | 8   | 8   | 1  | 4.676868829 | 0.0091584   |          | ENSG00000210801 |



|   |          |          |          |     |     |     |             |             |         |                 |
|---|----------|----------|----------|-----|-----|-----|-------------|-------------|---------|-----------------|
| 5 | 65750109 | 65750288 | 65750198 | 9   | 9   | 1   | 5.196520921 | 0.00490062  |         | ENSG00000176228 |
| 5 | 65929100 | 65929376 | 65929238 | 11  | 13  | 1   | 7.27512929  | 0.000378098 | MAST4   | ENSG00000069020 |
| 5 | 66426345 | 66426740 | 66426542 | 19  | 28  | 0   | 30.13982134 | 1.06E-09    | MAST4   | ENSG00000069020 |
| 5 | 66497706 | 66497928 | 66497817 | 8   | 9   | 1   | 5.196520921 | 0.00490062  | CD180   | ENSG00000134061 |
| 5 | 67841004 | 67841219 | 67841111 | 9   | 9   | 3   | 2.598260461 | 0.0397929   | PIK3R1  | ENSG00000145675 |
| 5 | 67880911 | 67881126 | 67881018 | 12  | 12  | 1   | 6.755477198 | 0.000722752 | PIK3R1  | ENSG00000145675 |
| 5 | 68374721 | 68375058 | 68374893 | 9   | 12  | 2   | 4.503651465 | 0.002963    | SLC30A5 | ENSG00000145740 |
| 5 | 68425339 | 68425518 | 68425428 | 9   | 9   | 0   | 10.39304184 | 0.000803859 | SLC30A5 | ENSG00000145740 |
| 5 | 71182350 | 71182844 | 71182527 | 101 | 142 | 105 | 1.402080173 | 0.00394834  |         | ENSG00000210845 |
| 5 | 71204960 | 71205292 | 71205134 | 20  | 23  | 1   | 12.47165021 | 4.94E-07    |         | ENSG00000210845 |
| 5 | 71238766 | 71239112 | 71238939 | 28  | 34  | 3   | 9.093911612 | 1.78E-08    |         | ENSG00000210845 |
| 5 | 71951358 | 71951547 | 71951429 | 8   | 9   | 0   | 10.39304184 | 0.000803859 | ZNF366  | ENSG00000178175 |
| 5 | 72150692 | 72150873 | 72150772 | 9   | 9   | 2   | 3.464347281 | 0.0163838   | TNPO1   | ENSG00000083312 |
| 5 | 72286704 | 72287093 | 72286914 | 23  | 33  | 3   | 8.834085566 | 3.36E-08    | FCHO2   | ENSG00000157107 |
| 5 | 72287164 | 72287478 | 72287341 | 11  | 14  | 3   | 3.897390691 | 0.00295882  | FCHO2   | ENSG00000157107 |
| 5 | 72568148 | 72568474 | 72568320 | 13  | 18  | 0   | 19.7467795  | 1.32E-06    | TMEM174 | ENSG00000164325 |
| 5 | 72829773 | 72830016 | 72829885 | 9   | 11  | 10  | 1.133786383 | 0.380636    | BTF3    | ENSG00000145741 |
| 5 | 72896762 | 72897121 | 72896945 | 19  | 25  | 3   | 6.755477198 | 4.84E-06    | ANKRA2  | ENSG00000164331 |
| 5 | 73531470 | 73531659 | 73531571 | 8   | 8   | 1   | 4.676868829 | 0.0091584   |         | ENSG00000210914 |
| 5 | 73572575 | 73572870 | 73572707 | 14  | 17  | 10  | 1.700679574 | 0.0766266   |         | ENSG00000222551 |
| 5 | 73658633 | 73658816 | 73658754 | 9   | 9   | 1   | 5.196520921 | 0.00490062  |         | ENSG00000210920 |
| 5 | 73978683 | 73979054 | 73978878 | 29  | 36  | 0   | 38.45425482 | 3.54E-12    | ENC1    | ENSG00000171617 |
| 5 | 74098571 | 74098875 | 74098712 | 12  | 17  | 1   | 9.353737658 | 2.73E-05    | GFM2    | ENSG00000164347 |
| 5 | 74099510 | 74099749 | 74099629 | 9   | 10  | 1   | 5.716173013 | 0.00260397  |         | ENSG00000164346 |
| 5 | 74368796 | 74369142 | 74368969 | 8   | 12  | 0   | 13.5109544  | 9.48E-05    | GCNT4   | ENSG00000176928 |
| 5 | 74378010 | 74378454 | 74378170 | 31  | 40  | 1   | 21.30573578 | 4.48E-12    | GCNT4   | ENSG00000176928 |
| 5 | 74574817 | 74575002 | 74574925 | 9   | 9   | 1   | 5.196520921 | 0.00490062  | ANKRD31 | ENSG00000145700 |
| 5 | 75621832 | 75622057 | 75621924 | 11  | 12  | 4   | 2.702190879 | 0.0203088   |         | ENSG00000171601 |
| 5 | 76500437 | 76500825 | 76500590 | 11  | 17  | 7   | 2.338434415 | 0.0171287   |         | ENSG00000222316 |
| 5 | 77536037 | 77536288 | 77536128 | 8   | 10  | 4   | 2.286469205 | 0.0509017   | AP3B1   | ENSG00000132842 |
| 5 | 77626473 | 77626685 | 77626605 | 8   | 10  | 4   | 2.286469205 | 0.0509017   | AP3B1   | ENSG00000132842 |
| 5 | 77677151 | 77677726 | 77677485 | 55  | 83  | 4   | 17.4603103  | 1.66E-21    | SCAMP1  | ENSG00000085365 |
| 5 | 77926680 | 77926881 | 77926756 | 9   | 9   | 3   | 2.598260461 | 0.0397929   | LHFPL2  | ENSG00000145685 |
| 5 | 77939291 | 77939477 | 77939310 | 9   | 10  | 2   | 3.810782009 | 0.00936112  | LHFPL2  | ENSG00000145685 |

|   |          |          |          |    |    |    |             |             |          |                 |
|---|----------|----------|----------|----|----|----|-------------|-------------|----------|-----------------|
| 5 | 78010677 | 78010934 | 78010805 | 11 | 11 | 9  | 1.247165021 | 0.300052    | LHFPL2   | ENSG00000145685 |
| 5 | 78306674 | 78306919 | 78306796 | 10 | 11 | 2  | 4.157216737 | 0.0052913   | ARSB     | ENSG00000113273 |
| 5 | 78488895 | 78489101 | 78489006 | 8  | 9  | 2  | 3.464347281 | 0.0163838   |          | ENSG00000201955 |
| 5 | 78505212 | 78505628 | 78505449 | 10 | 18 | 2  | 6.582259834 | 7.91E-05    |          | ENSG00000201955 |
| 5 | 78525324 | 78525695 | 78525465 | 16 | 21 | 3  | 5.716173013 | 5.37E-05    |          | ENSG00000201955 |
| 5 | 78567164 | 78567358 | 78567249 | 8  | 9  | 5  | 1.73217364  | 0.133894    |          | ENSG00000152409 |
| 5 | 78844758 | 78844966 | 78844862 | 8  | 10 | 5  | 1.905391004 | 0.0915982   | HOMER1   | ENSG00000152413 |
| 5 | 78910389 | 78910804 | 78910640 | 13 | 17 | 1  | 9.353737658 | 2.73E-05    | PAPD4    | ENSG00000164329 |
| 5 | 79021687 | 79021971 | 79021829 | 13 | 14 | 3  | 3.897390691 | 0.00295882  | CMYA5    | ENSG00000164309 |
| 5 | 79270151 | 79270516 | 79270330 | 21 | 28 | 1  | 15.06991067 | 1.67E-08    | MTX3     | ENSG00000177034 |
| 5 | 79407160 | 79407400 | 79407280 | 9  | 10 | 0  | 11.43234603 | 0.000394183 | THBS4    | ENSG00000113296 |
| 5 | 79414323 | 79414502 | 79414397 | 8  | 8  | 1  | 4.676868829 | 0.0091584   | THBS4    | ENSG00000113296 |
| 5 | 79586676 | 79586921 | 79586798 | 12 | 14 | 1  | 7.794781382 | 0.000197021 |          | ENSG00000211056 |
| 5 | 79586942 | 79587175 | 79587019 | 10 | 11 | 1  | 6.235825105 | 0.0013754   |          | ENSG00000211056 |
| 5 | 79798273 | 79798596 | 79798434 | 9  | 11 | 3  | 3.117912553 | 0.0146045   | FAM151B  | ENSG00000152380 |
| 5 | 79798731 | 79799168 | 79798989 | 26 | 37 | 2  | 13.16451967 | 3.70E-10    | FAM151B  | ENSG00000152380 |
| 5 | 79937509 | 79937715 | 79937560 | 8  | 8  | 2  | 3.117912553 | 0.0283184   | ANKRD34B | ENSG00000189127 |
| 5 | 80037764 | 80037997 | 80037880 | 8  | 8  | 0  | 9.353737658 | 0.00163931  | MSH3     | ENSG00000113318 |
| 5 | 80676705 | 80676891 | 80676798 | 8  | 9  | 1  | 5.196520921 | 0.00490062  | ZCCHC9   | ENSG00000131732 |
| 5 | 81082757 | 81083128 | 81082936 | 14 | 21 | 2  | 7.621564018 | 1.21E-05    | SSBP2    | ENSG00000145687 |
| 5 | 81183308 | 81183783 | 81183617 | 10 | 18 | 10 | 1.795161773 | 0.055383    |          | ENSG00000214857 |
| 5 | 81187252 | 81187547 | 81187393 | 20 | 23 | 0  | 24.94330042 | 3.74E-08    |          | ENSG00000214857 |
| 5 | 81683465 | 81683767 | 81683616 | 10 | 13 | 4  | 2.910051716 | 0.0125532   |          | ENSG00000205462 |
| 5 | 81790760 | 81791089 | 81790924 | 9  | 11 | 3  | 3.117912553 | 0.0146045   |          | ENSG00000205462 |
| 5 | 82762093 | 82762296 | 82762162 | 12 | 13 | 4  | 2.910051716 | 0.0125532   | VCAN     | ENSG00000038427 |
| 5 | 82805095 | 82805484 | 82805244 | 11 | 15 | 7  | 2.078608368 | 0.038229    | VCAN     | ENSG00000038427 |
| 5 | 82839000 | 82839296 | 82839148 | 9  | 12 | 6  | 1.930136342 | 0.071303    | VCAN     | ENSG00000038427 |
| 5 | 82895343 | 82895573 | 82895458 | 10 | 13 | 3  | 3.637564645 | 0.0050909   | VCAN     | ENSG00000038427 |
| 5 | 83319555 | 83319788 | 83319672 | 10 | 10 | 2  | 3.810782009 | 0.00936112  |          | ENSG00000216125 |
| 5 | 83612170 | 83612359 | 83612264 | 8  | 10 | 2  | 3.810782009 | 0.00936112  |          | ENSG00000211127 |
| 5 | 83619566 | 83619804 | 83619685 | 9  | 11 | 2  | 4.157216737 | 0.0052913   |          | ENSG00000211127 |
| 5 | 83713107 | 83713317 | 83713212 | 10 | 11 | 0  | 12.47165021 | 0.000193293 | EDIL3    | ENSG00000164176 |
| 5 | 84259073 | 84259309 | 84259226 | 9  | 10 | 0  | 11.43234603 | 0.000394183 |          | ENSG00000214853 |
| 5 | 86248701 | 86248912 | 86248817 | 8  | 8  | 5  | 1.558956276 | 0.191397    |          | ENSG00000221694 |

|   |          |          |          |    |    |   |             |             |         |                 |
|---|----------|----------|----------|----|----|---|-------------|-------------|---------|-----------------|
| 5 | 86542493 | 86542711 | 86542590 | 8  | 8  | 4 | 1.870747532 | 0.118863    |         | ENSG00000196836 |
| 5 | 86573789 | 86574101 | 86573945 | 24 | 25 | 2 | 9.00730293  | 9.47E-07    |         | ENSG00000196836 |
| 5 | 86902520 | 86902757 | 86902634 | 8  | 8  | 3 | 2.338434415 | 0.0641221   |         | ENSG00000211203 |
| 5 | 87112745 | 87112952 | 87112810 | 8  | 11 | 6 | 1.781664316 | 0.103344    |         | ENSG00000211203 |
| 5 | 87992722 | 87993107 | 87992914 | 9  | 17 | 4 | 3.741495063 | 0.00163722  |         | ENSG00000207570 |
| 5 | 88297455 | 88297716 | 88297604 | 8  | 9  | 0 | 10.39304184 | 0.000803859 | MEF2C   | ENSG00000081189 |
| 5 | 89890117 | 89890407 | 89890275 | 12 | 15 | 8 | 1.847651883 | 0.0631662   | GPR98   | ENSG00000164199 |
| 5 | 90326325 | 90326629 | 90326484 | 13 | 14 | 2 | 5.196520921 | 0.000907371 |         | ENSG00000199643 |
| 5 | 90494360 | 90494553 | 90494456 | 8  | 10 | 3 | 2.858086507 | 0.0242838   |         | ENSG00000199643 |
| 5 | 90645783 | 90645963 | 90645873 | 9  | 9  | 6 | 1.484720263 | 0.204387    |         | ENSG00000211248 |
| 5 | 90711546 | 90711747 | 90711614 | 8  | 9  | 0 | 10.39304184 | 0.000803859 | ARRDC3  | ENSG00000113369 |
| 5 | 90714769 | 90714951 | 90714849 | 8  | 8  | 2 | 3.117912553 | 0.0283184   | ARRDC3  | ENSG00000113369 |
| 5 | 90715115 | 90715495 | 90715294 | 9  | 17 | 5 | 3.117912553 | 0.00407023  | ARRDC3  | ENSG00000113369 |
| 5 | 90716517 | 90716696 | 90716606 | 8  | 8  | 3 | 2.338434415 | 0.0641221   | ARRDC3  | ENSG00000113369 |
| 5 | 91271326 | 91271630 | 91271498 | 11 | 13 | 3 | 3.637564645 | 0.0050909   |         | ENSG00000213731 |
| 5 | 92101850 | 92102035 | 92101900 | 8  | 9  | 0 | 10.39304184 | 0.000803859 |         | ENSG00000221810 |
| 5 | 92396749 | 92396928 | 92396868 | 8  | 9  | 6 | 1.484720263 | 0.204387    | CCT7P2  | ENSG00000214816 |
| 5 | 92665869 | 92666081 | 92665975 | 8  | 8  | 0 | 9.353737658 | 0.00163931  |         | ENSG00000213730 |
| 5 | 93038909 | 93039149 | 93039005 | 11 | 12 | 3 | 3.377738599 | 0.00867157  |         | ENSG00000205434 |
| 5 | 93256051 | 93256230 | 93256165 | 8  | 8  | 4 | 1.870747532 | 0.118863    | FAM172A | ENSG00000113391 |
| 5 | 93505112 | 93505355 | 93505235 | 11 | 11 | 2 | 4.157216737 | 0.0052913   | FAM172A | ENSG00000113391 |
| 5 | 93728250 | 93728718 | 93728539 | 17 | 25 | 2 | 9.00730293  | 9.47E-07    |         | ENSG00000218494 |
| 5 | 93979708 | 93979911 | 93979809 | 10 | 11 | 2 | 4.157216737 | 0.0052913   | ANKRD32 | ENSG00000133302 |
| 5 | 94215262 | 94215533 | 94215397 | 12 | 13 | 2 | 4.850086193 | 0.00164564  | MCTP1   | ENSG00000175471 |
| 5 | 94648924 | 94649151 | 94649022 | 8  | 8  | 1 | 4.676868829 | 0.0091584   | MCTP1   | ENSG00000175471 |
| 5 | 95008529 | 95008826 | 95008677 | 8  | 10 | 2 | 3.810782009 | 0.00936112  | RFESD   | ENSG00000175449 |
| 5 | 95059788 | 95060100 | 95059955 | 12 | 15 | 3 | 4.157216737 | 0.00170423  | SPATA9  | ENSG00000145757 |
| 5 | 95089423 | 95089682 | 95089552 | 10 | 13 | 8 | 1.616695398 | 0.123553    | RHOBTB3 | ENSG00000164292 |
| 5 | 95092280 | 95092509 | 95092387 | 13 | 14 | 3 | 3.897390691 | 0.00295882  | RHOBTB3 | ENSG00000164292 |
| 5 | 95113756 | 95113937 | 95113846 | 9  | 9  | 2 | 3.464347281 | 0.0163838   | RHOBTB3 | ENSG00000164292 |
| 5 | 95142495 | 95142787 | 95142653 | 12 | 14 | 6 | 2.227080395 | 0.0322529   | GLRX    | ENSG00000173221 |
| 5 | 95208249 | 95208709 | 95208554 | 12 | 18 | 8 | 2.194086611 | 0.0206188   | GLRX    | ENSG00000173221 |
| 5 | 95286245 | 95286465 | 95286355 | 9  | 10 | 0 | 11.43234603 | 0.000394183 | ELL2    | ENSG00000118985 |
| 5 | 95327529 | 95327740 | 95327634 | 9  | 10 | 5 | 1.905391004 | 0.0915982   | ELL2    | ENSG00000118985 |

|   |           |           |           |    |    |    |             |             |         |                 |
|---|-----------|-----------|-----------|----|----|----|-------------|-------------|---------|-----------------|
| 5 | 95455352  | 95455651  | 95455501  | 8  | 10 | 1  | 5.716173013 | 0.00260397  |         | ENSG00000207578 |
| 5 | 95511158  | 95511351  | 95511254  | 12 | 12 | 2  | 4.503651465 | 0.002963    |         | ENSG00000206997 |
| 5 | 96296102  | 96296415  | 96296258  | 9  | 14 | 4  | 3.117912553 | 0.00766354  | LNPEP   | ENSG00000113441 |
| 5 | 96297340  | 96297576  | 96297442  | 9  | 10 | 5  | 1.905391004 | 0.0915982   | LNPEP   | ENSG00000113441 |
| 5 | 96544675  | 96545064  | 96544849  | 10 | 17 | 4  | 3.741495063 | 0.00163722  | RIOK2   | ENSG00000058729 |
| 5 | 97622736  | 97622940  | 97622838  | 8  | 8  | 0  | 9.353737658 | 0.00163931  |         | ENSG00000176183 |
| 5 | 97770511  | 97770721  | 97770621  | 8  | 8  | 1  | 4.676868829 | 0.0091584   |         | ENSG00000211349 |
| 5 | 98135234  | 98135519  | 98135394  | 11 | 14 | 1  | 7.794781382 | 0.000197021 | RGMB    | ENSG00000174136 |
| 5 | 98136694  | 98137094  | 98136873  | 9  | 17 | 6  | 2.672496474 | 0.00882337  | RGMB    | ENSG00000174136 |
| 5 | 98138220  | 98138446  | 98138377  | 9  | 10 | 3  | 2.858086507 | 0.0242838   | RGMB    | ENSG00000174136 |
| 5 | 98210186  | 98210530  | 98210354  | 32 | 34 | 1  | 18.18782322 | 2.77E-10    |         | ENSG00000211353 |
| 5 | 98331794  | 98331973  | 98331883  | 8  | 8  | 1  | 4.676868829 | 0.0091584   |         | ENSG00000200351 |
| 5 | 98813267  | 98813546  | 98813422  | 16 | 18 | 1  | 9.87338975  | 1.41E-05    |         |                 |
| 5 | 99545537  | 99545906  | 99545734  | 40 | 47 | 5  | 8.314433474 | 1.52E-10    |         | ENSG00000207077 |
| 5 | 100001792 | 100002093 | 100001948 | 16 | 19 | 2  | 6.928694562 | 4.25E-05    |         | ENSG00000207269 |
| 5 | 100011062 | 100011428 | 100011208 | 14 | 19 | 3  | 5.196520921 | 0.000174201 |         | ENSG00000207269 |
| 5 | 100413481 | 100413769 | 100413625 | 8  | 10 | 0  | 11.43234603 | 0.000394183 |         | ENSG00000203447 |
| 5 | 100854370 | 100854729 | 100854550 | 12 | 19 | 0  | 20.78608368 | 6.46E-07    |         | ENSG00000222929 |
| 5 | 100881415 | 100881707 | 100881548 | 13 | 15 | 1  | 8.314433474 | 0.000102308 |         | ENSG00000222929 |
| 5 | 101027000 | 101027461 | 101027306 | 16 | 25 | 3  | 6.755477198 | 4.84E-06    |         | ENSG00000222929 |
| 5 | 101359330 | 101359581 | 101359455 | 9  | 11 | 5  | 2.078608368 | 0.0614303   |         | ENSG00000199786 |
| 5 | 102335428 | 102335624 | 102335561 | 9  | 10 | 2  | 3.810782009 | 0.00936112  |         | ENSG00000175749 |
| 5 | 102483673 | 102484109 | 102483852 | 18 | 29 | 14 | 2.078608368 | 0.00804141  | HISPPD1 | ENSG00000145725 |
| 5 | 102621905 | 102622136 | 102622077 | 10 | 12 | 4  | 2.702190879 | 0.0203088   | C5orf30 | ENSG00000181751 |
| 5 | 102807925 | 102808353 | 102808130 | 16 | 28 | 9  | 3.013982134 | 0.000552057 | NUDT12  | ENSG00000112874 |
| 5 | 102809273 | 102809614 | 102809443 | 10 | 16 | 11 | 1.472347594 | 0.147517    | NUDT12  | ENSG00000112874 |
| 5 | 103035805 | 103035984 | 103035894 | 8  | 8  | 1  | 4.676868829 | 0.0091584   | NUDT12  | ENSG00000112874 |
| 5 | 103056223 | 103056423 | 103056319 | 8  | 8  | 0  | 9.353737658 | 0.00163931  | NUDT12  | ENSG00000112874 |
| 5 | 103680219 | 103680608 | 103680365 | 11 | 16 | 1  | 8.834085566 | 5.30E-05    |         | ENSG00000209151 |
| 5 | 103734283 | 103734475 | 103734379 | 8  | 8  | 1  | 4.676868829 | 0.0091584   |         | ENSG00000209151 |
| 5 | 103791152 | 103791354 | 103791261 | 9  | 9  | 0  | 10.39304184 | 0.000803859 |         | ENSG00000209151 |
| 5 | 104980259 | 104980699 | 104980469 | 11 | 21 | 8  | 2.540521339 | 0.00602138  |         | ENSG00000201790 |
| 5 | 105457830 | 105458096 | 105457963 | 14 | 16 | 6  | 2.524024447 | 0.0137633   |         | ENSG00000201790 |
| 5 | 105605062 | 105605604 | 105605230 | 10 | 24 | 14 | 1.73217364  | 0.0420666   |         | ENSG00000209251 |

|   |           |           |           |     |     |    |             |             |          |                 |
|---|-----------|-----------|-----------|-----|-----|----|-------------|-------------|----------|-----------------|
| 5 | 105654308 | 105654576 | 105654435 | 10  | 11  | 2  | 4.157216737 | 0.0052913   |          | ENSG00000209251 |
| 5 | 106144005 | 106144274 | 106144135 | 9   | 12  | 6  | 1.930136342 | 0.071303    |          | ENSG00000209177 |
| 5 | 106836294 | 106836724 | 106836459 | 13  | 21  | 8  | 2.540521339 | 0.00602138  | EFNA5    | ENSG00000184349 |
| 5 | 106931850 | 106932204 | 106932029 | 13  | 18  | 0  | 19.7467795  | 1.32E-06    | EFNA5    | ENSG00000184349 |
| 5 | 107341315 | 107341498 | 107341383 | 8   | 9   | 5  | 1.73217364  | 0.133894    |          | ENSG00000209157 |
| 5 | 107360630 | 107360809 | 107360703 | 8   | 8   | 2  | 3.117912553 | 0.0283184   |          | ENSG00000209157 |
| 5 | 107447663 | 107448121 | 107447828 | 11  | 18  | 1  | 9.87338975  | 1.41E-05    |          | ENSG00000209157 |
| 5 | 108536909 | 108537160 | 108537042 | 9   | 10  | 3  | 2.858086507 | 0.0242838   |          | ENSG00000176857 |
| 5 | 108893637 | 108893912 | 108893774 | 12  | 13  | 1  | 7.27512929  | 0.000378098 |          | ENSG00000214794 |
| 5 | 109054674 | 109054903 | 109054825 | 8   | 8   | 3  | 2.338434415 | 0.0641221   | MAN2A1   | ENSG00000112893 |
| 5 | 109175790 | 109176020 | 109175927 | 8   | 8   | 1  | 4.676868829 | 0.0091584   |          | ENSG00000202512 |
| 5 | 109183496 | 109183728 | 109183632 | 10  | 10  | 3  | 2.858086507 | 0.0242838   |          | ENSG00000202512 |
| 5 | 110065464 | 110065669 | 110065566 | 8   | 9   | 3  | 2.598260461 | 0.0397929   |          | ENSG00000207177 |
| 5 | 110455646 | 110455962 | 110455804 | 9   | 13  | 4  | 2.910051716 | 0.0125532   | WDR36    | ENSG00000134987 |
| 5 | 110835025 | 110835401 | 110835187 | 8   | 15  | 5  | 2.771477825 | 0.0105836   | STARD4   | ENSG00000164211 |
| 5 | 110857918 | 110858599 | 110858371 | 178 | 227 | 2  | 78.987118   | 1.89E-67    | STARD4   | ENSG00000164211 |
| 5 | 111121858 | 111122046 | 111122007 | 8   | 8   | 1  | 4.676868829 | 0.0091584   | C5orf13  | ENSG00000134986 |
| 5 | 111574337 | 111574519 | 111574352 | 8   | 9   | 2  | 3.464347281 | 0.0163838   | EPB41L4A | ENSG00000129595 |
| 5 | 111591542 | 111591786 | 111591690 | 9   | 9   | 0  | 10.39304184 | 0.000803859 | EPB41L4A | ENSG00000129595 |
| 5 | 111592378 | 111592598 | 111592448 | 9   | 9   | 1  | 5.196520921 | 0.00490062  | EPB41L4A | ENSG00000129595 |
| 5 | 111603650 | 111603894 | 111603808 | 10  | 11  | 4  | 2.494330042 | 0.0324033   | EPB41L4A | ENSG00000129595 |
| 5 | 111702570 | 111702766 | 111702648 | 8   | 9   | 4  | 2.078608368 | 0.0785659   | EPB41L4A | ENSG00000129595 |
| 5 | 111779279 | 111779478 | 111779368 | 10  | 10  | 5  | 1.905391004 | 0.0915982   | EPB41L4A | ENSG00000129595 |
| 5 | 111842962 | 111843354 | 111843200 | 35  | 41  | 0  | 43.65077574 | 1.00E-13    | EPB41L4A | ENSG00000129595 |
| 5 | 111999858 | 112000188 | 112000027 | 13  | 16  | 2  | 5.889390377 | 0.000270741 | APC      | ENSG00000134982 |
| 5 | 112070939 | 112071230 | 112071112 | 12  | 15  | 4  | 3.32577339  | 0.00462646  | APC      | ENSG00000134982 |
| 5 | 112187354 | 112187658 | 112187512 | 12  | 15  | 5  | 2.771477825 | 0.0105836   | SRP19    | ENSG00000153037 |
| 5 | 112211868 | 112212088 | 112212003 | 9   | 11  | 6  | 1.781664316 | 0.103344    | SRP19    | ENSG00000153037 |
| 5 | 112224564 | 112225042 | 112224863 | 11  | 21  | 7  | 2.858086507 | 0.0029864   | SRP19    | ENSG00000153037 |
| 5 | 112228265 | 112228444 | 112228373 | 8   | 9   | 1  | 5.196520921 | 0.00490062  | SRP19    | ENSG00000153037 |
| 5 | 112284517 | 112284800 | 112284658 | 10  | 12  | 7  | 1.688869299 | 0.11395     | REEP5    | ENSG00000129625 |
| 5 | 112321947 | 112322368 | 112322194 | 22  | 31  | 7  | 4.157216737 | 2.13E-05    | DCP2     | ENSG00000172795 |
| 5 | 112340003 | 112340182 | 112340090 | 8   | 8   | 10 | 0.850339787 | 0.645072    | DCP2     | ENSG00000172795 |
| 5 | 112344586 | 112344931 | 112344758 | 17  | 21  | 0  | 22.86469205 | 1.55E-07    | DCP2     | ENSG00000172795 |

|   |           |           |           |     |     |    |             |             |         |                 |
|---|-----------|-----------|-----------|-----|-----|----|-------------|-------------|---------|-----------------|
| 5 | 112531622 | 112531971 | 112531838 | 20  | 25  | 3  | 6.755477198 | 4.84E-06    | MCC     | ENSG00000171444 |
| 5 | 112658649 | 112658828 | 112658675 | 8   | 8   | 3  | 2.338434415 | 0.0641221   | MCC     | ENSG00000171444 |
| 5 | 113038614 | 113039125 | 113038946 | 26  | 43  | 7  | 5.716173013 | 2.92E-08    | YTHDC2  | ENSG00000047188 |
| 5 | 113042641 | 113042874 | 113042768 | 9   | 10  | 6  | 1.63319229  | 0.146906    | YTHDC2  | ENSG00000047188 |
| 5 | 113210579 | 113211073 | 113210731 | 11  | 20  | 7  | 2.728173484 | 0.00469378  | YTHDC2  | ENSG00000047188 |
| 5 | 114024758 | 114025002 | 114024881 | 8   | 9   | 0  | 10.39304184 | 0.000803859 | KCNN2   | ENSG00000080709 |
| 5 | 114288396 | 114288702 | 114288549 | 16  | 20  | 4  | 4.365077574 | 0.000324139 | TRIM36  | ENSG00000152503 |
| 5 | 114396326 | 114396676 | 114396501 | 31  | 36  | 1  | 19.22712741 | 7.03E-11    | TRIM36  | ENSG00000152503 |
| 5 | 114729896 | 114730259 | 114730048 | 12  | 16  | 5  | 2.944695189 | 0.00659886  |         | ENSG00000177962 |
| 5 | 114950091 | 114950325 | 114950208 | 8   | 9   | 3  | 2.598260461 | 0.0397929   | TICAM2  | ENSG00000134970 |
| 5 | 115112689 | 115112948 | 115112796 | 15  | 16  | 0  | 17.66817113 | 5.48E-06    |         | ENSG00000222598 |
| 5 | 115221515 | 115221814 | 115221664 | 10  | 12  | 3  | 3.377738599 | 0.00867157  | AP3S1   | ENSG00000177879 |
| 5 | 115663588 | 115664013 | 115663844 | 11  | 15  | 6  | 2.375552421 | 0.0212094   |         | ENSG00000197255 |
| 5 | 115854245 | 115854424 | 115854334 | 8   | 8   | 2  | 3.117912553 | 0.0283184   | SEMA6A  | ENSG00000092421 |
| 5 | 115882093 | 115882422 | 115882247 | 26  | 28  | 3  | 7.534955336 | 7.67E-07    | SEMA6A  | ENSG00000092421 |
| 5 | 116221191 | 116221390 | 116221232 | 8   | 9   | 1  | 5.196520921 | 0.00490062  | RPS17P2 | ENSG00000197575 |
| 5 | 116311504 | 116311801 | 116311669 | 20  | 23  | 4  | 4.988660084 | 6.05E-05    | RPS17P2 | ENSG00000197575 |
| 5 | 116818819 | 116819121 | 116818956 | 8   | 10  | 5  | 1.905391004 | 0.0915982   |         | ENSG00000182152 |
| 5 | 116850397 | 116850927 | 116850785 | 17  | 29  | 11 | 2.598260461 | 0.00146165  |         | ENSG00000182152 |
| 5 | 117346483 | 117346743 | 117346657 | 12  | 16  | 9  | 1.766817113 | 0.0700694   |         | ENSG00000182152 |
| 5 | 117373436 | 117373875 | 117373615 | 9   | 17  | 7  | 2.338434415 | 0.0171287   |         | ENSG00000182152 |
| 5 | 117385685 | 117386010 | 117385834 | 8   | 12  | 7  | 1.688869299 | 0.11395     |         | ENSG00000182152 |
| 5 | 117894982 | 117895234 | 117895065 | 12  | 15  | 6  | 2.375552421 | 0.0212094   |         | ENSG00000197744 |
| 5 | 118163425 | 118163843 | 118163581 | 23  | 28  | 3  | 7.534955336 | 7.67E-07    |         | ENSG00000197744 |
| 5 | 118351606 | 118351878 | 118351780 | 9   | 11  | 3  | 3.117912553 | 0.0146045   | DTWD2   | ENSG00000169570 |
| 5 | 118418922 | 118419130 | 118419026 | 9   | 9   | 2  | 3.464347281 | 0.0163838   |         | ENSG00000209207 |
| 5 | 118607883 | 118608129 | 118608008 | 8   | 11  | 1  | 6.235825105 | 0.0013754   |         | ENSG00000222450 |
| 5 | 118686092 | 118686446 | 118686269 | 9   | 14  | 1  | 7.794781382 | 0.000197021 |         | ENSG00000222450 |
| 5 | 118687195 | 118687666 | 118687466 | 102 | 122 | 2  | 42.61147155 | 1.75E-35    |         | ENSG00000222450 |
| 5 | 118751559 | 118751738 | 118751674 | 8   | 8   | 0  | 9.353737658 | 0.00163931  | TNFAIP8 | ENSG00000145779 |
| 5 | 118751960 | 118752237 | 118752098 | 8   | 10  | 0  | 11.43234603 | 0.000394183 | TNFAIP8 | ENSG00000145779 |
| 5 | 118877667 | 118877860 | 118877771 | 8   | 8   | 0  | 9.353737658 | 0.00163931  |         | ENSG00000213663 |
| 5 | 118893608 | 118893885 | 118893746 | 9   | 10  | 6  | 1.63319229  | 0.146906    |         | ENSG00000213663 |
| 5 | 121166026 | 121166217 | 121166117 | 8   | 8   | 0  | 9.353737658 | 0.00163931  | FTMT    | ENSG00000181867 |

|   |           |           |           |    |    |    |             |             |         |                 |
|---|-----------|-----------|-----------|----|----|----|-------------|-------------|---------|-----------------|
| 5 | 121325351 | 121325561 | 121325456 | 12 | 13 | 3  | 3.637564645 | 0.0050909   | SRFBP1  | ENSG00000151304 |
| 5 | 121842615 | 121842947 | 121842781 | 9  | 14 | 8  | 1.73217364  | 0.0890835   |         | ENSG00000197462 |
| 5 | 121868065 | 121868295 | 121868120 | 8  | 8  | 1  | 4.676868829 | 0.0091584   |         | ENSG00000197462 |
| 5 | 122138646 | 122138917 | 122138800 | 11 | 13 | 3  | 3.637564645 | 0.0050909   | SNX2    | ENSG00000205302 |
| 5 | 122786791 | 122787170 | 122786991 | 10 | 16 | 3  | 4.417042783 | 0.00097367  | CEP120  | ENSG00000168944 |
| 5 | 122875437 | 122875645 | 122875504 | 8  | 9  | 4  | 2.078608368 | 0.0785659   | CSNK1G3 | ENSG00000151292 |
| 5 | 122875705 | 122875928 | 122875832 | 10 | 11 | 5  | 2.078608368 | 0.0614303   | CSNK1G3 | ENSG00000151292 |
| 5 | 123246657 | 123246836 | 123246729 | 8  | 9  | 0  | 10.39304184 | 0.000803859 |         | ENSG00000222901 |
| 5 | 123496332 | 123496698 | 123496537 | 17 | 23 | 3  | 6.235825105 | 1.63E-05    |         | ENSG00000214750 |
| 5 | 123605999 | 123606532 | 123606170 | 14 | 24 | 2  | 8.660868202 | 1.80E-06    |         | ENSG00000214750 |
| 5 | 124010087 | 124010578 | 124010229 | 24 | 36 | 4  | 7.690850963 | 2.68E-08    | ZNF608  | ENSG00000168916 |
| 5 | 124019385 | 124019841 | 124019519 | 8  | 16 | 9  | 1.766817113 | 0.0700694   | ZNF608  | ENSG00000168916 |
| 5 | 124116570 | 124116778 | 124116674 | 9  | 9  | 0  | 10.39304184 | 0.000803859 | ZNF608  | ENSG00000168916 |
| 5 | 124377967 | 124378186 | 124378076 | 8  | 8  | 3  | 2.338434415 | 0.0641221   |         | ENSG00000214748 |
| 5 | 124411623 | 124411802 | 124411712 | 8  | 8  | 1  | 4.676868829 | 0.0091584   |         | ENSG00000214748 |
| 5 | 124613347 | 124613547 | 124613425 | 8  | 8  | 0  | 9.353737658 | 0.00163931  |         | ENSG00000208973 |
| 5 | 124773654 | 124773941 | 124773797 | 10 | 14 | 10 | 1.417232979 | 0.185113    |         | ENSG00000208973 |
| 5 | 125729349 | 125729904 | 125729593 | 11 | 24 | 2  | 8.660868202 | 1.80E-06    | GRAMD3  | ENSG00000155324 |
| 5 | 125731999 | 125732388 | 125732189 | 14 | 24 | 9  | 2.598260461 | 0.0032455   | GRAMD3  | ENSG00000155324 |
| 5 | 125732466 | 125732664 | 125732567 | 9  | 9  | 1  | 5.196520921 | 0.00490062  | GRAMD3  | ENSG00000155324 |
| 5 | 125786756 | 125786982 | 125786869 | 9  | 12 | 6  | 1.930136342 | 0.071303    | GRAMD3  | ENSG00000155324 |
| 5 | 125800849 | 125801090 | 125800960 | 8  | 10 | 2  | 3.810782009 | 0.00936112  | GRAMD3  | ENSG00000155324 |
| 5 | 125879051 | 125879257 | 125879128 | 9  | 9  | 3  | 2.598260461 | 0.0397929   |         | ENSG00000200347 |
| 5 | 125879779 | 125879990 | 125879884 | 15 | 17 | 3  | 4.676868829 | 0.000552213 |         | ENSG00000200347 |
| 5 | 125880541 | 125880833 | 125880667 | 11 | 15 | 6  | 2.375552421 | 0.0212094   |         | ENSG00000200347 |
| 5 | 125902747 | 125902984 | 125902828 | 9  | 12 | 6  | 1.930136342 | 0.071303    |         | ENSG00000200347 |
| 5 | 125907804 | 125908052 | 125907923 | 8  | 11 | 2  | 4.157216737 | 0.0052913   |         | ENSG00000200347 |
| 5 | 126039772 | 126040117 | 126039944 | 14 | 19 | 5  | 3.464347281 | 0.00150447  |         | ENSG00000213630 |
| 5 | 126040818 | 126041096 | 126040957 | 18 | 19 | 8  | 2.309564854 | 0.0138337   |         | ENSG00000213630 |
| 5 | 126140075 | 126140337 | 126140177 | 8  | 11 | 9  | 1.247165021 | 0.300052    | LMNB1   | ENSG00000113368 |
| 5 | 126143855 | 126144098 | 126143976 | 12 | 12 | 6  | 1.930136342 | 0.071303    | LMNB1   | ENSG00000113368 |
| 5 | 126475897 | 126476315 | 126476106 | 12 | 20 | 2  | 7.27512929  | 2.27E-05    |         | ENSG00000214743 |
| 5 | 126881232 | 126881442 | 126881337 | 8  | 8  | 3  | 2.338434415 | 0.0641221   | PRRC1   | ENSG00000164244 |
| 5 | 127239155 | 127239476 | 127239324 | 9  | 12 | 5  | 2.251825733 | 0.0404733   | SLC12A2 | ENSG00000064651 |

|   |           |           |           |     |     |    |             |             |           |                 |
|---|-----------|-----------|-----------|-----|-----|----|-------------|-------------|-----------|-----------------|
| 5 | 127298451 | 127298858 | 127298679 | 10  | 19  | 7  | 2.598260461 | 0.00730518  | SLC12A2   | ENSG00000064651 |
| 5 | 127400655 | 127400839 | 127400810 | 8   | 8   | 3  | 2.338434415 | 0.0641221   | SLC12A2   | ENSG00000064651 |
| 5 | 127517622 | 127517964 | 127517742 | 15  | 20  | 0  | 21.82538787 | 3.17E-07    | SLC12A2   | ENSG00000064651 |
| 5 | 127902949 | 127903130 | 127903075 | 8   | 8   | 1  | 4.676868829 | 0.0091584   | FBN2      | ENSG00000138829 |
| 5 | 128490076 | 128490455 | 128490246 | 15  | 20  | 8  | 2.425043097 | 0.00917565  | ISOC1     | ENSG00000066583 |
| 5 | 128541114 | 128541594 | 128541335 | 103 | 124 | 14 | 8.660868202 | 1.08E-24    | ISOC1     | ENSG00000066583 |
| 5 | 128605361 | 128605720 | 128605577 | 23  | 27  | 7  | 3.637564645 | 0.000166657 | ISOC1     | ENSG00000066583 |
| 5 | 129131495 | 129131786 | 129131647 | 10  | 13  | 4  | 2.910051716 | 0.0125532   | KIAA1024L | ENSG00000186367 |
| 5 | 129333530 | 129333980 | 129333805 | 8   | 15  | 4  | 3.32577339  | 0.00462646  |           | ENSG00000208941 |
| 5 | 130534266 | 130534944 | 130534768 | 10  | 28  | 6  | 4.305688763 | 3.69E-05    | LYRM7     | ENSG00000186687 |
| 5 | 130535166 | 130535371 | 130535243 | 8   | 9   | 3  | 2.598260461 | 0.0397929   | LYRM7     | ENSG00000186687 |
| 5 | 130731145 | 130731402 | 130731273 | 9   | 13  | 2  | 4.850086193 | 0.00164564  | CDC42SE2  | ENSG00000158985 |
| 5 | 130817530 | 130817717 | 130817651 | 8   | 8   | 3  | 2.338434415 | 0.0641221   | RAPGEF6   | ENSG00000158987 |
| 5 | 130884988 | 130885210 | 130885143 | 10  | 11  | 2  | 4.157216737 | 0.0052913   | RAPGEF6   | ENSG00000158987 |
| 5 | 130948380 | 130948567 | 130948464 | 8   | 9   | 1  | 5.196520921 | 0.00490062  | RAPGEF6   | ENSG00000158987 |
| 5 | 130998932 | 130999233 | 130999090 | 10  | 14  | 5  | 2.598260461 | 0.0167748   | RAPGEF6   | ENSG00000158987 |
| 5 | 131035857 | 131036261 | 131035974 | 14  | 20  | 1  | 10.91269393 | 3.71E-06    |           | ENSG00000177622 |
| 5 | 131359846 | 131360036 | 131359925 | 8   | 10  | 3  | 2.858086507 | 0.0242838   | ACSL6     | ENSG00000164398 |
| 5 | 131371473 | 131371697 | 131371548 | 8   | 10  | 0  | 11.43234603 | 0.000394183 | ACSL6     | ENSG00000164398 |
| 5 | 131454399 | 131454643 | 131454513 | 8   | 11  | 4  | 2.494330042 | 0.0324033   | CSF2      | ENSG00000164400 |
| 5 | 131457538 | 131457742 | 131457640 | 8   | 9   | 0  | 10.39304184 | 0.000803859 | CSF2      | ENSG00000164400 |
| 5 | 131494262 | 131494448 | 131494317 | 8   | 9   | 0  | 10.39304184 | 0.000803859 |           | ENSG00000216782 |
| 5 | 131673463 | 131673759 | 131673611 | 8   | 10  | 1  | 5.716173013 | 0.00260397  | SLC22A4   | ENSG00000197208 |
| 5 | 131742264 | 131742539 | 131742381 | 12  | 13  | 8  | 1.616695398 | 0.123553    | SLC22A5   | ENSG00000197375 |
| 5 | 131753321 | 131753559 | 131753440 | 10  | 10  | 2  | 3.810782009 | 0.00936112  | SLC22A5   | ENSG00000197375 |
| 5 | 131814101 | 131814612 | 131814264 | 10  | 18  | 1  | 9.87338975  | 1.41E-05    |           | ENSG00000202533 |
| 5 | 131853157 | 131853385 | 131853223 | 8   | 9   | 3  | 2.598260461 | 0.0397929   | IRF1      | ENSG00000125347 |
| 5 | 132163136 | 132163382 | 132163268 | 11  | 14  | 6  | 2.227080395 | 0.0322529   | ANKRD43   | ENSG00000198944 |
| 5 | 132208613 | 132208805 | 132208709 | 8   | 8   | 6  | 1.336248237 | 0.277651    |           | ENSG00000201274 |
| 5 | 132229881 | 132230318 | 132230151 | 12  | 20  | 3  | 5.456346967 | 9.70E-05    | UQCRQ     | ENSG00000164405 |
| 5 | 132400381 | 132400726 | 132400553 | 11  | 13  | 0  | 14.55025858 | 4.65E-05    | ZCCHC10   | ENSG00000155329 |
| 5 | 132404251 | 132404464 | 132404372 | 10  | 10  | 5  | 1.905391004 | 0.0915982   | HSPA4     | ENSG00000170606 |
| 5 | 132404788 | 132405108 | 132404967 | 11  | 15  | 0  | 16.62886695 | 1.12E-05    | HSPA4     | ENSG00000170606 |
| 5 | 132609335 | 132609616 | 132609446 | 12  | 13  | 2  | 4.850086193 | 0.00164564  |           | ENSG00000221287 |



|   |           |           |           |    |    |    |             |             |           |                 |
|---|-----------|-----------|-----------|----|----|----|-------------|-------------|-----------|-----------------|
| 5 | 132662768 | 132662947 | 132662857 | 8  | 8  | 0  | 9.353737658 | 0.00163931  |           | ENSG00000221287 |
| 5 | 132679968 | 132680198 | 132680076 | 8  | 10 | 5  | 1.905391004 | 0.0915982   |           | ENSG00000221287 |
| 5 | 132787369 | 132787577 | 132787476 | 8  | 8  | 2  | 3.117912553 | 0.0283184   |           | ENSG00000221287 |
| 5 | 132974564 | 132974794 | 132974668 | 9  | 10 | 1  | 5.716173013 | 0.00260397  | FSTL4     | ENSG00000053108 |
| 5 | 132999724 | 132999919 | 132999821 | 8  | 8  | 0  | 9.353737658 | 0.00163931  | FSTL4     | ENSG00000053108 |
| 5 | 133204476 | 133204715 | 133204595 | 8  | 8  | 1  | 4.676868829 | 0.0091584   |           | ENSG00000208898 |
| 5 | 133211857 | 133212121 | 133211966 | 9  | 11 | 4  | 2.494330042 | 0.0324033   |           | ENSG00000208898 |
| 5 | 133276585 | 133276840 | 133276712 | 8  | 9  | 3  | 2.598260461 | 0.0397929   | C5orf15   | ENSG00000113583 |
| 5 | 133357263 | 133357491 | 133357359 | 10 | 12 | 2  | 4.503651465 | 0.002963    | VDAC1     | ENSG00000213585 |
| 5 | 133403229 | 133403433 | 133403331 | 10 | 10 | 4  | 2.286469205 | 0.0509017   | VDAC1     | ENSG00000213585 |
| 5 | 133441425 | 133441604 | 133441509 | 8  | 8  | 1  | 4.676868829 | 0.0091584   | TCF7      | ENSG00000081059 |
| 5 | 133452466 | 133452797 | 133452644 | 9  | 13 | 2  | 4.850086193 | 0.00164564  | TCF7      | ENSG00000081059 |
| 5 | 133465509 | 133465865 | 133465646 | 9  | 13 | 0  | 14.55025858 | 4.65E-05    | TCF7      | ENSG00000081059 |
| 5 | 133472037 | 133472237 | 133472139 | 11 | 11 | 0  | 12.47165021 | 0.000193293 | TCF7      | ENSG00000081059 |
| 5 | 133610350 | 133610573 | 133610478 | 9  | 10 | 2  | 3.810782009 | 0.00936112  | PPP2CA    | ENSG00000113575 |
| 5 | 133643388 | 133643605 | 133643496 | 8  | 8  | 6  | 1.336248237 | 0.277651    | PPP2CA    | ENSG00000113575 |
| 5 | 133814834 | 133815034 | 133814934 | 8  | 9  | 3  | 2.598260461 | 0.0397929   | CDKN2AIPM | ENSG00000145835 |
| 5 | 133829921 | 133830296 | 133830160 | 8  | 13 | 9  | 1.455025858 | 0.177172    |           | ENSG00000207222 |
| 5 | 133830445 | 133830634 | 133830539 | 9  | 9  | 2  | 3.464347281 | 0.0163838   |           | ENSG00000207222 |
| 5 | 133890499 | 133890757 | 133890663 | 12 | 12 | 3  | 3.377738599 | 0.00867157  | PHF15     | ENSG00000043143 |
| 5 | 133996312 | 133996564 | 133996438 | 10 | 13 | 3  | 3.637564645 | 0.0050909   | SAR1B     | ENSG00000152700 |
| 5 | 134101142 | 134101504 | 134101412 | 9  | 15 | 3  | 4.157216737 | 0.00170423  | CAMLG     | ENSG00000164615 |
| 5 | 134214924 | 134215129 | 134215026 | 8  | 9  | 2  | 3.464347281 | 0.0163838   | C5orf24   | ENSG00000181904 |
| 5 | 134268082 | 134268288 | 134268192 | 8  | 8  | 1  | 4.676868829 | 0.0091584   | PCBD2     | ENSG00000132570 |
| 5 | 134287997 | 134288346 | 134288171 | 63 | 63 | 54 | 1.209372142 | 0.149617    |           | ENSG00000208861 |
| 5 | 134290491 | 134290822 | 134290656 | 14 | 15 | 22 | 0.722994215 | 0.845414    |           | ENSG00000208849 |
| 5 | 134331718 | 134331977 | 134331858 | 12 | 13 | 6  | 2.078608368 | 0.0483393   | CATSPER3  | ENSG00000152705 |
| 5 | 134700677 | 134701067 | 134700828 | 33 | 38 | 2  | 13.5109544  | 1.90E-10    | H2AFY     | ENSG00000113648 |
| 5 | 134820955 | 134821402 | 134821178 | 8  | 17 | 6  | 2.672496474 | 0.00882337  | TIFAB     | ENSG00000214707 |
| 5 | 134830146 | 134830325 | 134830235 | 8  | 8  | 4  | 1.870747532 | 0.118863    | TIFAB     | ENSG00000214707 |
| 5 | 134924478 | 134924773 | 134924632 | 10 | 12 | 1  | 6.755477198 | 0.000722752 | CXCL14    | ENSG00000145824 |
| 5 | 135221397 | 135221676 | 135221536 | 8  | 11 | 1  | 6.235825105 | 0.0013754   |           | ENSG00000145832 |
| 5 | 135471731 | 135472312 | 135471944 | 54 | 95 | 5  | 16.62886695 | 5.58E-24    | SMAD5     | ENSG00000113658 |
| 5 | 135575795 | 135575988 | 135575891 | 8  | 8  | 1  | 4.676868829 | 0.0091584   | SMAD5OS   | ENSG00000164621 |

|   |           |           |           |     |     |    |             |             |         |                 |
|---|-----------|-----------|-----------|-----|-----|----|-------------|-------------|---------|-----------------|
| 5 | 135728738 | 135729017 | 135728868 | 8   | 10  | 13 | 0.816596145 | 0.696946    | TRPC7   | ENSG00000069018 |
| 5 | 135788575 | 135788819 | 135788696 | 8   | 9   | 3  | 2.598260461 | 0.0397929   |         | ENSG00000213568 |
| 5 | 136076215 | 136076407 | 136076311 | 9   | 9   | 3  | 2.598260461 | 0.0397929   |         | ENSG00000214684 |
| 5 | 136702783 | 136702962 | 136702785 | 8   | 8   | 0  | 9.353737658 | 0.00163931  | SPOCK1  | ENSG00000152377 |
| 5 | 137142407 | 137142736 | 137142560 | 9   | 13  | 5  | 2.425043097 | 0.0262442   | HNRNPA0 | ENSG00000177733 |
| 5 | 137197123 | 137197353 | 137197238 | 9   | 10  | 7  | 1.429043253 | 0.21536     | NPY6R   | ENSG00000159279 |
| 5 | 137396779 | 137397008 | 137396893 | 10  | 11  | 2  | 4.157216737 | 0.0052913   | FAM13B1 | ENSG00000031003 |
| 5 | 137399666 | 137399893 | 137399786 | 8   | 9   | 3  | 2.598260461 | 0.0397929   | FAM13B1 | ENSG00000031003 |
| 5 | 137542366 | 137542772 | 137542545 | 8   | 15  | 5  | 2.771477825 | 0.0105836   | KIF20A  | ENSG00000112984 |
| 5 | 137601852 | 137602031 | 137601885 | 8   | 9   | 5  | 1.73217364  | 0.133894    | CDC23   | ENSG00000094880 |
| 5 | 137646723 | 137647011 | 137646858 | 9   | 11  | 2  | 4.157216737 | 0.0052913   | GFRA3   | ENSG00000146013 |
| 5 | 137669445 | 137669806 | 137669602 | 38  | 43  | 4  | 9.145876821 | 3.46E-10    | CDC25C  | ENSG00000158402 |
| 5 | 137701033 | 137701248 | 137701132 | 8   | 9   | 5  | 1.73217364  | 0.133894    | FAM53C  | ENSG00000120709 |
| 5 | 137827525 | 137827736 | 137827670 | 8   | 10  | 5  | 1.905391004 | 0.0915982   | EGR1    | ENSG00000120738 |
| 5 | 137906922 | 137907272 | 137907091 | 8   | 13  | 3  | 3.637564645 | 0.0050909   | ETF1    | ENSG00000120705 |
| 5 | 137972645 | 137972993 | 137972819 | 12  | 18  | 8  | 2.194086611 | 0.0206188   |         | ENSG00000208810 |
| 5 | 137973017 | 137973515 | 137973266 | 11  | 23  | 7  | 3.117912553 | 0.00117689  |         | ENSG00000208810 |
| 5 | 137993097 | 137993362 | 137993267 | 9   | 9   | 1  | 5.196520921 | 0.00490062  |         | ENSG00000208810 |
| 5 | 137994920 | 137995159 | 137995039 | 9   | 9   | 4  | 2.078608368 | 0.0785659   |         | ENSG00000208810 |
| 5 | 137996742 | 137996995 | 137996844 | 13  | 15  | 3  | 4.157216737 | 0.00170423  |         | ENSG00000208810 |
| 5 | 138068633 | 138069174 | 138068903 | 13  | 25  | 14 | 1.801460586 | 0.0308364   | CTNNA1  | ENSG00000044115 |
| 5 | 138088293 | 138088547 | 138088420 | 8   | 10  | 4  | 2.286469205 | 0.0509017   | CTNNA1  | ENSG00000044115 |
| 5 | 138088760 | 138089431 | 138088985 | 16  | 36  | 5  | 6.409042469 | 1.18E-07    | CTNNA1  | ENSG00000044115 |
| 5 | 138234376 | 138234591 | 138234483 | 12  | 13  | 3  | 3.637564645 | 0.0050909   | LRRTM2  | ENSG00000146006 |
| 5 | 138426209 | 138426547 | 138426378 | 8   | 12  | 4  | 2.702190879 | 0.0203088   |         | ENSG00000201532 |
| 5 | 138428339 | 138428634 | 138428486 | 10  | 13  | 8  | 1.616695398 | 0.123553    |         | ENSG00000201532 |
| 5 | 138464451 | 138464668 | 138464516 | 10  | 13  | 5  | 2.425043097 | 0.0262442   |         | ENSG00000201532 |
| 5 | 138512023 | 138512306 | 138512156 | 15  | 18  | 3  | 4.936694875 | 0.000311102 | SIL1    | ENSG00000120725 |
| 5 | 138512325 | 138512514 | 138512419 | 9   | 10  | 0  | 11.43234603 | 0.000394183 | SIL1    | ENSG00000120725 |
| 5 | 138595743 | 138596329 | 138595949 | 135 | 178 | 0  | 186.035449  | 4.01E-56    |         | ENSG00000208799 |
| 5 | 138597439 | 138597667 | 138597590 | 12  | 14  | 3  | 3.897390691 | 0.00295882  |         | ENSG00000208799 |
| 5 | 138657782 | 138657962 | 138657925 | 8   | 9   | 1  | 5.196520921 | 0.00490062  | MATR3   | ENSG00000015479 |
| 5 | 138767187 | 138767371 | 138767305 | 8   | 9   | 2  | 3.464347281 | 0.0163838   |         | ENSG00000170469 |
| 5 | 139098891 | 139099302 | 139099130 | 12  | 20  | 3  | 5.456346967 | 9.70E-05    |         | ENSG00000200756 |

|   |           |           |           |    |    |    |             |             |          |                 |
|---|-----------|-----------|-----------|----|----|----|-------------|-------------|----------|-----------------|
| 5 | 139204221 | 139204445 | 139204333 | 9  | 9  | 2  | 3.464347281 | 0.0163838   | PSD2     | ENSG00000146005 |
| 5 | 139474649 | 139474845 | 139474747 | 11 | 11 | 3  | 3.117912553 | 0.0146045   | PURA     | ENSG00000185129 |
| 5 | 139535685 | 139535864 | 139535769 | 8  | 8  | 2  | 3.117912553 | 0.0283184   | C5orf32  | ENSG00000120306 |
| 5 | 139613824 | 139614064 | 139613940 | 9  | 9  | 0  | 10.39304184 | 0.000803859 | PFDN1    | ENSG00000113068 |
| 5 | 139655205 | 139655384 | 139655325 | 8  | 8  | 3  | 2.338434415 | 0.0641221   | PFDN1    | ENSG00000113068 |
| 5 | 139900275 | 139900461 | 139900374 | 8  | 8  | 2  | 3.117912553 | 0.0283184   | ANKHD1   | ENSG00000131503 |
| 5 | 139917118 | 139917476 | 139917297 | 23 | 29 | 4  | 6.235825105 | 1.85E-06    | SRA1     | ENSG00000213523 |
| 5 | 140024360 | 140024648 | 140024520 | 8  | 10 | 2  | 3.810782009 | 0.00936112  | WDR55    | ENSG00000120314 |
| 5 | 140027310 | 140027505 | 140027406 | 8  | 8  | 5  | 1.558956276 | 0.191397    | WDR55    | ENSG00000120314 |
| 5 | 140051073 | 140051315 | 140051194 | 11 | 13 | 6  | 2.078608368 | 0.0483393   |          | ENSG00000112855 |
| 5 | 140070982 | 140071230 | 140071106 | 17 | 19 | 5  | 3.464347281 | 0.00150447  |          | ENSG00000199990 |
| 5 | 140077918 | 140078246 | 140078082 | 11 | 15 | 1  | 8.314433474 | 0.000102308 |          | ENSG00000202111 |
| 5 | 140078576 | 140078886 | 140078731 | 13 | 16 | 11 | 1.472347594 | 0.147517    |          | ENSG00000202111 |
| 5 | 140085908 | 140086125 | 140086016 | 9  | 12 | 4  | 2.702190879 | 0.0203088   |          | ENSG00000202515 |
| 5 | 140228576 | 140228779 | 140228647 | 8  | 9  | 3  | 2.598260461 | 0.0397929   | PCDHA11  | ENSG00000214608 |
| 5 | 140288620 | 140288887 | 140288789 | 9  | 12 | 2  | 4.503651465 | 0.002963    | PCDHA10  | ENSG00000081842 |
| 5 | 140400095 | 140400290 | 140400231 | 9  | 10 | 6  | 1.63319229  | 0.146906    | PCDHB1   | ENSG00000171815 |
| 5 | 140444394 | 140444658 | 140444526 | 11 | 13 | 5  | 2.425043097 | 0.0262442   | PCDHB2   | ENSG00000112852 |
| 5 | 140509441 | 140509632 | 140509546 | 8  | 8  | 2  | 3.117912553 | 0.0283184   | PCDHB6   | ENSG00000113211 |
| 5 | 140532263 | 140532527 | 140532395 | 8  | 9  | 1  | 5.196520921 | 0.00490062  | PCDHB7   | ENSG00000113212 |
| 5 | 140552005 | 140552218 | 140552099 | 8  | 9  | 1  | 5.196520921 | 0.00490062  | PCDHB9   | ENSG00000120324 |
| 5 | 140836296 | 140836486 | 140836425 | 8  | 8  | 3  | 2.338434415 | 0.0641221   | PCDHGC4  | ENSG00000081853 |
| 5 | 140923936 | 140924207 | 140924071 | 16 | 19 | 2  | 6.928694562 | 4.25E-05    | DIAPH1   | ENSG00000131504 |
| 5 | 140977893 | 140978146 | 140977980 | 10 | 10 | 3  | 2.858086507 | 0.0242838   | DIAPH1   | ENSG00000131504 |
| 5 | 141034372 | 141034574 | 141034473 | 8  | 8  | 2  | 3.117912553 | 0.0283184   | ARAP3    | ENSG00000120318 |
| 5 | 141064459 | 141064680 | 141064600 | 8  | 9  | 3  | 2.598260461 | 0.0397929   | ARAP3    | ENSG00000120318 |
| 5 | 141073824 | 141074113 | 141073935 | 10 | 13 | 4  | 2.910051716 | 0.0125532   | ARAP3    | ENSG00000120318 |
| 5 | 141209509 | 141209804 | 141209669 | 9  | 13 | 5  | 2.425043097 | 0.0262442   | PCDH1    | ENSG00000156453 |
| 5 | 141225848 | 141226181 | 141226015 | 16 | 18 | 4  | 3.9493559   | 0.000961379 | PCDH1    | ENSG00000156453 |
| 5 | 141236836 | 141237016 | 141236926 | 8  | 8  | 5  | 1.558956276 | 0.191397    | PCDH1    | ENSG00000156453 |
| 5 | 141295276 | 141295455 | 141295339 | 8  | 8  | 0  | 9.353737658 | 0.00163931  | KIAA0141 | ENSG00000081791 |
| 5 | 141363867 | 141364292 | 141364046 | 15 | 24 | 5  | 4.330434101 | 0.000108998 | GNPDA1   | ENSG00000113552 |
| 5 | 141581225 | 141581480 | 141581339 | 8  | 10 | 3  | 2.858086507 | 0.0242838   | SPRY4    | ENSG00000187678 |
| 5 | 141763420 | 141763719 | 141763553 | 15 | 17 | 3  | 4.676868829 | 0.000552213 | SPRY4    | ENSG00000187678 |

|   |           |           |           |    |     |    |             |             |          |                 |
|---|-----------|-----------|-----------|----|-----|----|-------------|-------------|----------|-----------------|
| 5 | 141928763 | 141929000 | 141928881 | 9  | 10  | 0  | 11.43234603 | 0.000394183 |          | ENSG00000219227 |
| 5 | 141947128 | 141947307 | 141947217 | 8  | 8   | 4  | 1.870747532 | 0.118863    |          | ENSG00000219227 |
| 5 | 142072717 | 142073017 | 142072862 | 8  | 11  | 4  | 2.494330042 | 0.0324033   | FGF1     | ENSG00000113578 |
| 5 | 142100339 | 142100534 | 142100436 | 8  | 9   | 6  | 1.484720263 | 0.204387    | ARHGAP26 | ENSG00000145819 |
| 5 | 142225055 | 142225317 | 142225151 | 9  | 10  | 1  | 5.716173013 | 0.00260397  | ARHGAP26 | ENSG00000145819 |
| 5 | 142342554 | 142342744 | 142342666 | 8  | 9   | 0  | 10.39304184 | 0.000803859 | ARHGAP26 | ENSG00000145819 |
| 5 | 142362986 | 142363228 | 142363063 | 8  | 9   | 9  | 1.039304184 | 0.466079    | ARHGAP26 | ENSG00000145819 |
| 5 | 142371274 | 142371453 | 142371331 | 8  | 8   | 2  | 3.117912553 | 0.0283184   | ARHGAP26 | ENSG00000145819 |
| 5 | 142434238 | 142434815 | 142434570 | 54 | 74  | 6  | 11.13540197 | 3.78E-17    | ARHGAP26 | ENSG00000145819 |
| 5 | 142446470 | 142446708 | 142446589 | 9  | 11  | 2  | 4.157216737 | 0.0052913   | ARHGAP26 | ENSG00000145819 |
| 5 | 142502889 | 142503097 | 142502993 | 8  | 8   | 2  | 3.117912553 | 0.0283184   | NR3C1    | ENSG00000113580 |
| 5 | 142542799 | 142543189 | 142543107 | 8  | 14  | 8  | 1.73217364  | 0.0890835   | NR3C1    | ENSG00000113580 |
| 5 | 142545315 | 142545505 | 142545410 | 8  | 8   | 3  | 2.338434415 | 0.0641221   | NR3C1    | ENSG00000113580 |
| 5 | 142560451 | 142560878 | 142560616 | 13 | 19  | 1  | 10.39304184 | 7.23E-06    | NR3C1    | ENSG00000113580 |
| 5 | 142566164 | 142566391 | 142566265 | 9  | 12  | 3  | 3.377738599 | 0.00867157  | NR3C1    | ENSG00000113580 |
| 5 | 142582648 | 142582915 | 142582789 | 9  | 11  | 9  | 1.247165021 | 0.300052    | NR3C1    | ENSG00000113580 |
| 5 | 142605797 | 142606263 | 142605976 | 10 | 18  | 5  | 3.291129917 | 0.00248584  | NR3C1    | ENSG00000113580 |
| 5 | 142907420 | 142907639 | 142907517 | 10 | 10  | 4  | 2.286469205 | 0.0509017   | NR3C1    | ENSG00000113580 |
| 5 | 142931244 | 142931441 | 142931385 | 9  | 11  | 4  | 2.494330042 | 0.0324033   | NR3C1    | ENSG00000113580 |
| 5 | 142954508 | 142955365 | 142954857 | 44 | 102 | 13 | 7.646309355 | 1.30E-19    | NR3C1    | ENSG00000113580 |
| 5 | 142956047 | 142956366 | 142956206 | 8  | 11  | 2  | 4.157216737 | 0.0052913   | NR3C1    | ENSG00000113580 |
| 5 | 143019440 | 143019634 | 143019537 | 11 | 13  | 7  | 1.818782322 | 0.0805123   | HMHB1    | ENSG00000158497 |
| 5 | 143220150 | 143220362 | 143220256 | 10 | 10  | 2  | 3.810782009 | 0.00936112  | HMHB1    | ENSG00000158497 |
| 5 | 143235183 | 143235362 | 143235271 | 8  | 8   | 1  | 4.676868829 | 0.0091584   | HMHB1    | ENSG00000158497 |
| 5 | 143258169 | 143258348 | 143258213 | 8  | 8   | 0  | 9.353737658 | 0.00163931  | HMHB1    | ENSG00000158497 |
| 5 | 143530351 | 143530708 | 143530529 | 9  | 14  | 5  | 2.598260461 | 0.0167748   | YIPF5    | ENSG00000145817 |
| 5 | 143693254 | 143693607 | 143693430 | 17 | 23  | 0  | 24.94330042 | 3.74E-08    | KCTD16   | ENSG00000183775 |
| 5 | 143793612 | 143793791 | 143793701 | 8  | 8   | 2  | 3.117912553 | 0.0283184   |          | ENSG00000213488 |
| 5 | 144607258 | 144607539 | 144607397 | 9  | 10  | 0  | 11.43234603 | 0.000394183 |          | ENSG00000213487 |
| 5 | 144891210 | 144891452 | 144891331 | 8  | 9   | 3  | 2.598260461 | 0.0397929   |          | ENSG00000213487 |
| 5 | 145185594 | 145185773 | 145185683 | 8  | 8   | 6  | 1.336248237 | 0.277651    | PRELID2  | ENSG00000186314 |
| 5 | 145195021 | 145195237 | 145195147 | 9  | 9   | 2  | 3.464347281 | 0.0163838   | PRELID2  | ENSG00000186314 |
| 5 | 145430070 | 145430301 | 145430224 | 8  | 8   | 4  | 1.870747532 | 0.118863    | PLAC8L1  | ENSG00000173261 |
| 5 | 145431517 | 145431750 | 145431638 | 14 | 14  | 2  | 5.196520921 | 0.000907371 | PLAC8L1  | ENSG00000173261 |

|   |           |           |           |    |    |    |             |             |          |                 |
|---|-----------|-----------|-----------|----|----|----|-------------|-------------|----------|-----------------|
| 5 | 145542169 | 145542566 | 145542444 | 9  | 17 | 11 | 1.558956276 | 0.111389    | LARS     | ENSG00000133706 |
| 5 | 145652483 | 145652706 | 145652574 | 11 | 11 | 0  | 12.47165021 | 0.000193293 | POU4F3   | ENSG00000091010 |
| 5 | 146094641 | 146094837 | 146094723 | 9  | 10 | 8  | 1.27026067  | 0.293854    |          | ENSG00000222212 |
| 5 | 146815037 | 146815218 | 146815131 | 8  | 9  | 2  | 3.464347281 | 0.0163838   | DPYSL3   | ENSG00000113657 |
| 5 | 147485523 | 147485728 | 147485625 | 9  | 9  | 3  | 2.598260461 | 0.0397929   |          | ENSG00000196800 |
| 5 | 147661424 | 147661657 | 147661497 | 8  | 9  | 1  | 5.196520921 | 0.00490062  | SPINK7   | ENSG00000145879 |
| 5 | 147743373 | 147743792 | 147743552 | 12 | 22 | 3  | 5.975999059 | 2.96E-05    | FBXO38   | ENSG00000145868 |
| 5 | 147881932 | 147882289 | 147882125 | 24 | 28 | 0  | 30.13982134 | 1.06E-09    | HTR4     | ENSG00000164270 |
| 5 | 147912892 | 147913106 | 147913050 | 8  | 11 | 3  | 3.117912553 | 0.0146045   | HTR4     | ENSG00000164270 |
| 5 | 148180675 | 148180901 | 148180816 | 8  | 8  | 7  | 1.169217207 | 0.371848    | ADRB2    | ENSG00000169252 |
| 5 | 148185818 | 148186170 | 148185994 | 19 | 24 | 1  | 12.9913023  | 2.52E-07    | ADRB2    | ENSG00000169252 |
| 5 | 148265408 | 148265589 | 148265498 | 8  | 9  | 2  | 3.464347281 | 0.0163838   | ADRB2    | ENSG00000169252 |
| 5 | 148485382 | 148485720 | 148485607 | 10 | 15 | 4  | 3.32577339  | 0.00462646  |          | ENSG00000200161 |
| 5 | 148488949 | 148489281 | 148489108 | 12 | 16 | 8  | 1.963130126 | 0.0441028   | ABLIM3   | ENSG00000173210 |
| 5 | 148684934 | 148685203 | 148685068 | 11 | 13 | 3  | 3.637564645 | 0.0050909   | GRPEL2   | ENSG00000164284 |
| 5 | 148704992 | 148705259 | 148705137 | 12 | 13 | 10 | 1.32275078  | 0.240023    | GRPEL2   | ENSG00000164284 |
| 5 | 148727196 | 148727571 | 148727407 | 9  | 14 | 3  | 3.897390691 | 0.00295882  | PCYOX1L  | ENSG00000145882 |
| 5 | 148794259 | 148794503 | 148794381 | 8  | 10 | 3  | 2.858086507 | 0.0242838   |          | ENSG00000207700 |
| 5 | 148845445 | 148845966 | 148845757 | 11 | 21 | 4  | 4.572938411 | 0.000186332 |          | ENSG00000207700 |
| 5 | 148906687 | 148907122 | 148906943 | 14 | 20 | 4  | 4.365077574 | 0.000324139 |          | ENSG00000214490 |
| 5 | 148911318 | 148911716 | 148911537 | 12 | 19 | 8  | 2.309564854 | 0.0138337   | CSNK1A1  | ENSG00000113712 |
| 5 | 149124784 | 149125131 | 149124957 | 26 | 31 | 1  | 16.62886695 | 2.16E-09    | PPARGC1B | ENSG00000155846 |
| 5 | 149230053 | 149230290 | 149230206 | 9  | 11 | 3  | 3.117912553 | 0.0146045   | PPARGC1B | ENSG00000155846 |
| 5 | 149237859 | 149238126 | 149238020 | 15 | 15 | 12 | 1.279143611 | 0.251893    | PPARGC1B | ENSG00000155846 |
| 5 | 149240938 | 149241164 | 149241031 | 16 | 18 | 0  | 19.7467795  | 1.32E-06    |          | ENSG00000200334 |
| 5 | 149246498 | 149246745 | 149246636 | 12 | 14 | 4  | 3.117912553 | 0.00766354  |          | ENSG00000200334 |
| 5 | 149261947 | 149262201 | 149262074 | 11 | 12 | 6  | 1.930136342 | 0.071303    |          | ENSG00000200334 |
| 5 | 149264058 | 149264240 | 149264149 | 8  | 8  | 2  | 3.117912553 | 0.0283184   |          | ENSG00000200334 |
| 5 | 149264807 | 149265060 | 149264921 | 9  | 12 | 7  | 1.688869299 | 0.11395     |          | ENSG00000200334 |
| 5 | 149275431 | 149275702 | 149275566 | 13 | 15 | 3  | 4.157216737 | 0.00170423  |          | ENSG00000200334 |
| 5 | 149297420 | 149297678 | 149297559 | 8  | 10 | 7  | 1.429043253 | 0.21536     |          | ENSG00000200334 |
| 5 | 149319179 | 149319579 | 149319358 | 12 | 20 | 3  | 5.456346967 | 9.70E-05    | SLC26A2  | ENSG00000155850 |
| 5 | 149321745 | 149322132 | 149321962 | 9  | 16 | 9  | 1.766817113 | 0.0700694   | SLC26A2  | ENSG00000155850 |
| 5 | 149336542 | 149336749 | 149336692 | 9  | 9  | 4  | 2.078608368 | 0.0785659   | SLC26A2  | ENSG00000155850 |

|   |           |           |           |    |    |    |             |             |         |                 |
|---|-----------|-----------|-----------|----|----|----|-------------|-------------|---------|-----------------|
| 5 | 149487949 | 149488425 | 149488127 | 22 | 35 | 1  | 18.70747532 | 1.40E-10    | CSF1R   | ENSG00000182578 |
| 5 | 149632386 | 149632565 | 149632522 | 8  | 8  | 0  | 9.353737658 | 0.00163931  | CAMK2A  | ENSG00000070808 |
| 5 | 149670065 | 149670281 | 149670173 | 8  | 9  | 0  | 10.39304184 | 0.000803859 | ARSI    | ENSG00000183876 |
| 5 | 149709476 | 149709696 | 149709536 | 8  | 8  | 0  | 9.353737658 | 0.00163931  | TCOF1   | ENSG00000070814 |
| 5 | 149798882 | 149799061 | 149798941 | 8  | 8  | 2  | 3.117912553 | 0.0283184   | RPS14   | ENSG00000164587 |
| 5 | 149844980 | 149845174 | 149845038 | 8  | 9  | 6  | 1.484720263 | 0.204387    | RPS14   | ENSG00000164587 |
| 5 | 149904530 | 149904807 | 149904679 | 8  | 10 | 2  | 3.810782009 | 0.00936112  |         | ENSG00000208629 |
| 5 | 149921808 | 149921988 | 149921898 | 9  | 9  | 1  | 5.196520921 | 0.00490062  |         | ENSG00000208629 |
| 5 | 149964087 | 149964425 | 149964256 | 9  | 12 | 1  | 6.755477198 | 0.000722752 | SYNPO   | ENSG00000171992 |
| 5 | 149975745 | 149975953 | 149975812 | 8  | 8  | 6  | 1.336248237 | 0.277651    | SYNPO   | ENSG00000171992 |
| 5 | 150138034 | 150138263 | 150138148 | 10 | 11 | 2  | 4.157216737 | 0.0052913   |         | ENSG00000181368 |
| 5 | 150516366 | 150516546 | 150516523 | 9  | 10 | 2  | 3.810782009 | 0.00936112  | ANXA6   | ENSG00000197043 |
| 5 | 150561383 | 150561562 | 150561520 | 8  | 8  | 0  | 9.353737658 | 0.00163931  | CCDC69  | ENSG00000198624 |
| 5 | 150562722 | 150562919 | 150562824 | 9  | 9  | 1  | 5.196520921 | 0.00490062  | CCDC69  | ENSG00000198624 |
| 5 | 150634431 | 150634696 | 150634565 | 9  | 11 | 4  | 2.494330042 | 0.0324033   | GM2A    | ENSG00000196743 |
| 5 | 150766026 | 150766205 | 150766122 | 9  | 9  | 4  | 2.078608368 | 0.0785659   | SLC36A1 | ENSG00000123643 |
| 5 | 150930370 | 150930679 | 150930524 | 13 | 16 | 4  | 3.533634226 | 0.00276486  | FAT2    | ENSG00000086570 |
| 5 | 150977802 | 150978203 | 150977981 | 14 | 20 | 13 | 1.558956276 | 0.0943292   | FAT2    | ENSG00000086570 |
| 5 | 150979549 | 150979776 | 150979662 | 10 | 12 | 4  | 2.702190879 | 0.0203088   | FAT2    | ENSG00000086570 |
| 5 | 151078165 | 151078368 | 151078233 | 9  | 11 | 1  | 6.235825105 | 0.0013754   |         | ENSG00000222102 |
| 5 | 151117328 | 151117654 | 151117489 | 9  | 13 | 4  | 2.910051716 | 0.0125532   | ATOX1   | ENSG00000177556 |
| 5 | 151131019 | 151131335 | 151131177 | 8  | 12 | 3  | 3.377738599 | 0.00867157  | G3BP1   | ENSG00000145907 |
| 5 | 151132713 | 151132892 | 151132769 | 9  | 9  | 7  | 1.29913023  | 0.286504    | G3BP1   | ENSG00000145907 |
| 5 | 151177141 | 151177320 | 151177240 | 8  | 8  | 3  | 2.338434415 | 0.0641221   | G3BP1   | ENSG00000145907 |
| 5 | 151251678 | 151251970 | 151251799 | 8  | 9  | 1  | 5.196520921 | 0.00490062  |         | ENSG00000222308 |
| 5 | 151283619 | 151283808 | 151283713 | 8  | 8  | 3  | 2.338434415 | 0.0641221   | GLRA1   | ENSG00000145888 |
| 5 | 151297515 | 151297882 | 151297694 | 9  | 15 | 6  | 2.375552421 | 0.0212094   | GLRA1   | ENSG00000145888 |
| 5 | 151476750 | 151476975 | 151476914 | 9  | 9  | 3  | 2.598260461 | 0.0397929   | GLRA1   | ENSG00000145888 |
| 5 | 151589895 | 151590315 | 151590136 | 13 | 20 | 2  | 7.27512929  | 2.27E-05    | NMUR2   | ENSG00000132911 |
| 5 | 151971254 | 151971443 | 151971355 | 9  | 9  | 1  | 5.196520921 | 0.00490062  | NMUR2   | ENSG00000132911 |
| 5 | 152171746 | 152172126 | 152171925 | 36 | 44 | 3  | 11.69217207 | 2.89E-11    | NMUR2   | ENSG00000132911 |
| 5 | 153251527 | 153251748 | 153251648 | 11 | 11 | 1  | 6.235825105 | 0.0013754   |         | ENSG00000208592 |
| 5 | 153523833 | 153524165 | 153523999 | 10 | 11 | 0  | 12.47165021 | 0.000193293 | GALNT10 | ENSG00000164574 |
| 5 | 153643615 | 153643794 | 153643752 | 8  | 8  | 0  | 9.353737658 | 0.00163931  |         | ENSG00000221070 |

|   |           |           |           |    |    |    |             |             |         |                 |
|---|-----------|-----------|-----------|----|----|----|-------------|-------------|---------|-----------------|
| 5 | 153656544 | 153656786 | 153656665 | 17 | 18 | 7  | 2.468347438 | 0.0112499   |         | ENSG00000221070 |
| 5 | 153713340 | 153713519 | 153713443 | 9  | 9  | 2  | 3.464347281 | 0.0163838   |         | ENSG00000223089 |
| 5 | 153805493 | 153805674 | 153805583 | 8  | 8  | 5  | 1.558956276 | 0.191397    | SAP30L  | ENSG00000164576 |
| 5 | 153947416 | 153947610 | 153947468 | 9  | 11 | 2  | 4.157216737 | 0.0052913   |         | ENSG00000221552 |
| 5 | 154042253 | 154042449 | 154042364 | 9  | 9  | 4  | 2.078608368 | 0.0785659   |         | ENSG00000221552 |
| 5 | 154060968 | 154061181 | 154061074 | 9  | 11 | 5  | 2.078608368 | 0.0614303   |         | ENSG00000208575 |
| 5 | 154114757 | 154114947 | 154114852 | 9  | 9  | 2  | 3.464347281 | 0.0163838   | LARP1   | ENSG00000155506 |
| 5 | 154169213 | 154169454 | 154169315 | 10 | 11 | 0  | 12.47165021 | 0.000193293 | C5orf4  | ENSG00000170271 |
| 5 | 154203075 | 154203366 | 154203238 | 9  | 12 | 6  | 1.930136342 | 0.071303    | C5orf4  | ENSG00000170271 |
| 5 | 154204496 | 154205032 | 154204764 | 14 | 24 | 7  | 3.247825576 | 0.000729793 | C5orf4  | ENSG00000170271 |
| 5 | 154218014 | 154218408 | 154218193 | 12 | 19 | 3  | 5.196520921 | 0.000174201 | CNOT8   | ENSG00000155508 |
| 5 | 154237779 | 154238101 | 154237952 | 39 | 41 | 4  | 8.730155148 | 1.21E-09    | CNOT8   | ENSG00000155508 |
| 5 | 154300687 | 154301090 | 154300851 | 11 | 17 | 11 | 1.558956276 | 0.111389    | MRPL22  | ENSG00000082515 |
| 5 | 154650869 | 154651133 | 154650980 | 12 | 13 | 0  | 14.55025858 | 4.65E-05    |         | ENSG00000208570 |
| 5 | 154944365 | 154944626 | 154944495 | 18 | 19 | 0  | 20.78608368 | 6.46E-07    |         | ENSG00000208570 |
| 5 | 155330447 | 155330626 | 155330508 | 8  | 8  | 3  | 2.338434415 | 0.0641221   |         | ENSG00000208554 |
| 5 | 156201154 | 156201333 | 156201243 | 8  | 8  | 1  | 4.676868829 | 0.0091584   |         | ENSG00000196360 |
| 5 | 156227416 | 156227611 | 156227513 | 8  | 8  | 0  | 9.353737658 | 0.00163931  |         | ENSG00000196360 |
| 5 | 156508612 | 156508816 | 156508738 | 8  | 8  | 4  | 1.870747532 | 0.118863    | MED7    | ENSG00000155868 |
| 5 | 156720699 | 156720878 | 156720795 | 8  | 8  | 0  | 9.353737658 | 0.00163931  | C5orf40 | ENSG00000172568 |
| 5 | 157886037 | 157886275 | 157886156 | 8  | 9  | 3  | 2.598260461 | 0.0397929   |         | ENSG00000212796 |
| 5 | 157954475 | 157954809 | 157954642 | 10 | 13 | 5  | 2.425043097 | 0.0262442   |         | ENSG00000212796 |
| 5 | 158130019 | 158130377 | 158130198 | 12 | 17 | 4  | 3.741495063 | 0.00163722  |         | ENSG00000212796 |
| 5 | 158535218 | 158535528 | 158535381 | 17 | 20 | 5  | 3.637564645 | 0.000902929 | RNF145  | ENSG00000145860 |
| 5 | 158701507 | 158701756 | 158701613 | 8  | 10 | 0  | 11.43234603 | 0.000394183 | IL12B   | ENSG00000113302 |
| 5 | 158869984 | 158870231 | 158870119 | 10 | 12 | 6  | 1.930136342 | 0.071303    | IL12B   | ENSG00000113302 |
| 5 | 158871107 | 158871431 | 158871278 | 12 | 15 | 3  | 4.157216737 | 0.00170423  | IL12B   | ENSG00000113302 |
| 5 | 158931529 | 158931820 | 158931674 | 12 | 15 | 5  | 2.771477825 | 0.0105836   | IL12B   | ENSG00000113302 |
| 5 | 159325346 | 159325557 | 159325406 | 8  | 8  | 2  | 3.117912553 | 0.0283184   |         | ENSG00000199398 |
| 5 | 159424920 | 159425116 | 159425018 | 9  | 10 | 0  | 11.43234603 | 0.000394183 | PWWP2A  | ENSG00000170234 |
| 5 | 159515016 | 159515207 | 159515111 | 8  | 9  | 7  | 1.29913023  | 0.286504    | FABP6   | ENSG00000170231 |
| 5 | 159564762 | 159565173 | 159565015 | 11 | 18 | 1  | 9.87338975  | 1.41E-05    | FABP6   | ENSG00000170231 |
| 5 | 159993406 | 159993622 | 159993483 | 9  | 11 | 1  | 6.235825105 | 0.0013754   | ATP10B  | ENSG00000118322 |
| 5 | 162276266 | 162276445 | 162276319 | 8  | 8  | 0  | 9.353737658 | 0.00163931  |         | ENSG00000208481 |

|   |           |           |           |    |    |    |             |             |        |                 |
|---|-----------|-----------|-----------|----|----|----|-------------|-------------|--------|-----------------|
| 5 | 162797117 | 162797706 | 162797472 | 35 | 63 | 3  | 16.62886695 | 1.03E-16    | CCNG1  | ENSG00000113328 |
| 5 | 162798746 | 162798966 | 162798856 | 9  | 10 | 0  | 11.43234603 | 0.000394183 | CCNG1  | ENSG00000113328 |
| 5 | 162819063 | 162819487 | 162819313 | 8  | 16 | 2  | 5.889390377 | 0.000270741 | NUDCD2 | ENSG00000170584 |
| 5 | 162865545 | 162865724 | 162865634 | 8  | 8  | 6  | 1.336248237 | 0.277651    | MAT2B  | ENSG00000038274 |
| 5 | 162869008 | 162869281 | 162869128 | 11 | 15 | 4  | 3.32577339  | 0.00462646  | MAT2B  | ENSG00000038274 |
| 5 | 162925722 | 162925906 | 162925814 | 8  | 8  | 0  | 9.353737658 | 0.00163931  | MAT2B  | ENSG00000038274 |
| 5 | 163173765 | 163173954 | 163173859 | 8  | 8  | 0  | 9.353737658 | 0.00163931  |        | ENSG00000208477 |
| 5 | 163479440 | 163479952 | 163479653 | 50 | 62 | 1  | 32.7380818  | 1.05E-18    |        | ENSG00000208477 |
| 5 | 166943345 | 166943524 | 166943434 | 8  | 8  | 0  | 9.353737658 | 0.00163931  |        | ENSG00000221741 |
| 5 | 167650525 | 167650708 | 167650616 | 8  | 8  | 2  | 3.117912553 | 0.0283184   | WWC1   | ENSG00000113645 |
| 5 | 167675908 | 167676209 | 167676059 | 12 | 12 | 6  | 1.930136342 | 0.071303    | WWC1   | ENSG00000113645 |
| 5 | 167684467 | 167684763 | 167684631 | 9  | 11 | 2  | 4.157216737 | 0.0052913   | WWC1   | ENSG00000113645 |
| 5 | 167689066 | 167689261 | 167689163 | 9  | 10 | 1  | 5.716173013 | 0.00260397  | WWC1   | ENSG00000113645 |
| 5 | 167845907 | 167846151 | 167846070 | 13 | 15 | 5  | 2.771477825 | 0.0105836   | RARS   | ENSG00000113643 |
| 5 | 167939207 | 167939445 | 167939343 | 13 | 13 | 2  | 4.850086193 | 0.00164564  | PANK3  | ENSG00000120137 |
| 5 | 167951598 | 167952019 | 167951777 | 16 | 26 | 11 | 2.338434415 | 0.00495238  | PANK3  | ENSG00000120137 |
| 5 | 167960002 | 167960352 | 167960177 | 14 | 18 | 9  | 1.97467795  | 0.0349428   | PANK3  | ENSG00000120137 |
| 5 | 168018117 | 168018501 | 168018329 | 19 | 26 | 6  | 4.008744711 | 0.000106454 | PANK3  | ENSG00000120137 |
| 5 | 168030603 | 168030782 | 168030692 | 8  | 8  | 0  | 9.353737658 | 0.00163931  | PANK3  | ENSG00000120137 |
| 5 | 168056941 | 168057245 | 168057093 | 14 | 18 | 11 | 1.645564958 | 0.0828462   |        | ENSG00000207739 |
| 5 | 168329169 | 168329360 | 168329264 | 8  | 8  | 3  | 2.338434415 | 0.0641221   |        | ENSG00000202345 |
| 5 | 168460396 | 168460715 | 168460555 | 8  | 11 | 6  | 1.781664316 | 0.103344    |        | ENSG00000208441 |
| 5 | 168508974 | 168509153 | 168509118 | 8  | 9  | 4  | 2.078608368 | 0.0785659   |        | ENSG00000208441 |
| 5 | 168536920 | 168537143 | 168537031 | 9  | 9  | 2  | 3.464347281 | 0.0163838   |        | ENSG00000208441 |
| 5 | 168582556 | 168582799 | 168582682 | 8  | 9  | 1  | 5.196520921 | 0.00490062  |        | ENSG00000208441 |
| 5 | 168646677 | 168646965 | 168646811 | 11 | 12 | 2  | 4.503651465 | 0.002963    | SLIT3  | ENSG00000184347 |
| 5 | 168943505 | 168943723 | 168943614 | 8  | 9  | 1  | 5.196520921 | 0.00490062  | CCDC99 | ENSG00000040275 |
| 5 | 169000891 | 169001107 | 169000999 | 9  | 10 | 0  | 11.43234603 | 0.000394183 | DOCK2  | ENSG00000134516 |
| 5 | 169012432 | 169012633 | 169012532 | 8  | 8  | 1  | 4.676868829 | 0.0091584   | DOCK2  | ENSG00000134516 |
| 5 | 169338883 | 169339080 | 169338981 | 8  | 8  | 0  | 9.353737658 | 0.00163931  |        | ENSG00000204767 |
| 5 | 169340070 | 169340275 | 169340172 | 8  | 10 | 4  | 2.286469205 | 0.0509017   |        | ENSG00000204767 |
| 5 | 169377607 | 169377803 | 169377651 | 8  | 9  | 7  | 1.29913023  | 0.286504    |        | ENSG00000204767 |
| 5 | 169460016 | 169460245 | 169460130 | 13 | 13 | 3  | 3.637564645 | 0.0050909   | FOXI1  | ENSG00000168269 |
| 5 | 169585555 | 169585796 | 169585675 | 9  | 10 | 4  | 2.286469205 | 0.0509017   |        | ENSG00000198424 |



|   |           |           |           |    |     |    |             |             |         |                 |
|---|-----------|-----------|-----------|----|-----|----|-------------|-------------|---------|-----------------|
| 5 | 169788712 | 169788957 | 169788834 | 23 | 24  | 0  | 25.98260461 | 1.83E-08    | KCNMB1  | ENSG00000145936 |
| 5 | 169926928 | 169927171 | 169927026 | 9  | 10  | 3  | 2.858086507 | 0.0242838   | KCNIP1  | ENSG00000182132 |
| 5 | 170428945 | 170429206 | 170429070 | 8  | 10  | 0  | 11.43234603 | 0.000394183 |         | ENSG00000208431 |
| 5 | 170633006 | 170633200 | 170633103 | 8  | 9   | 2  | 3.464347281 | 0.0163838   | TLX3    | ENSG00000164438 |
| 5 | 170746997 | 170747297 | 170747147 | 8  | 11  | 6  | 1.781664316 | 0.103344    | NPM1    | ENSG00000181163 |
| 5 | 170843542 | 170843910 | 170843807 | 8  | 13  | 3  | 3.637564645 | 0.0050909   | FGF18   | ENSG00000156427 |
| 5 | 171194645 | 171194837 | 171194741 | 8  | 8   | 1  | 4.676868829 | 0.0091584   | C5orf50 | ENSG00000185662 |
| 5 | 171271732 | 171272032 | 171271905 | 12 | 16  | 2  | 5.889390377 | 0.000270741 | FBXW11  | ENSG00000072803 |
| 5 | 171366510 | 171366845 | 171366681 | 15 | 19  | 9  | 2.078608368 | 0.0241848   | FBXW11  | ENSG00000072803 |
| 5 | 171419381 | 171419580 | 171419480 | 9  | 10  | 2  | 3.810782009 | 0.00936112  | FBXW11  | ENSG00000072803 |
| 5 | 171466317 | 171466568 | 171466442 | 9  | 12  | 3  | 3.377738599 | 0.00867157  | STK10   | ENSG00000072786 |
| 5 | 171513931 | 171514212 | 171514107 | 8  | 12  | 2  | 4.503651465 | 0.002963    | STK10   | ENSG00000072786 |
| 5 | 171626686 | 171626884 | 171626780 | 8  | 8   | 1  | 4.676868829 | 0.0091584   |         | ENSG00000222732 |
| 5 | 171653135 | 171653384 | 171653257 | 11 | 12  | 3  | 3.377738599 | 0.00867157  |         | ENSG00000204762 |
| 5 | 171801717 | 171801909 | 171801839 | 8  | 8   | 3  | 2.338434415 | 0.0641221   |         | ENSG00000216127 |
| 5 | 171996314 | 171997215 | 171996782 | 71 | 125 | 12 | 10.07325594 | 2.08E-26    |         | ENSG00000214357 |
| 5 | 172021727 | 172021964 | 172021863 | 10 | 13  | 1  | 7.27512929  | 0.000378098 |         | ENSG00000214357 |
| 5 | 172048636 | 172048924 | 172048756 | 10 | 13  | 6  | 2.078608368 | 0.0483393   |         | ENSG00000214357 |
| 5 | 172292175 | 172292429 | 172292349 | 8  | 11  | 1  | 6.235825105 | 0.0013754   |         | ENSG00000204758 |
| 5 | 172318865 | 172319174 | 172319019 | 11 | 14  | 11 | 1.29913023  | 0.246308    | RPL26L1 | ENSG00000037241 |
| 5 | 172398728 | 172398938 | 172398838 | 8  | 9   | 0  | 10.39304184 | 0.000803859 |         | ENSG00000207210 |
| 5 | 172416723 | 172416911 | 172416817 | 9  | 9   | 6  | 1.484720263 | 0.204387    | C5orf41 | ENSG00000164463 |
| 5 | 172503915 | 172504332 | 172504094 | 14 | 21  | 11 | 1.905391004 | 0.031399    | BNIP1   | ENSG00000113734 |
| 5 | 172651870 | 172652421 | 172652199 | 63 | 89  | 4  | 18.70747532 | 3.01E-23    |         | ENSG00000208394 |
| 5 | 172653531 | 172653710 | 172653620 | 8  | 8   | 2  | 3.117912553 | 0.0283184   |         | ENSG00000208394 |
| 5 | 172662341 | 172662859 | 172662600 | 12 | 21  | 8  | 2.540521339 | 0.00602138  |         | ENSG00000208394 |
| 5 | 172675795 | 172675978 | 172675916 | 8  | 8   | 3  | 2.338434415 | 0.0641221   | STC2    | ENSG00000113739 |
| 5 | 172688719 | 172688932 | 172688822 | 8  | 9   | 7  | 1.29913023  | 0.286504    | STC2    | ENSG00000113739 |
| 5 | 172810768 | 172811002 | 172810845 | 10 | 10  | 2  | 3.810782009 | 0.00936112  |         | ENSG00000199219 |
| 5 | 172819366 | 172819604 | 172819482 | 8  | 8   | 1  | 4.676868829 | 0.0091584   |         | ENSG00000199219 |
| 5 | 172925325 | 172925532 | 172925468 | 8  | 8   | 2  | 3.117912553 | 0.0283184   | FAM44B  | ENSG00000145919 |
| 5 | 172927146 | 172927486 | 172927277 | 10 | 15  | 5  | 2.771477825 | 0.0105836   | FAM44B  | ENSG00000145919 |
| 5 | 172929127 | 172929600 | 172929421 | 21 | 31  | 5  | 5.542955649 | 2.18E-06    | FAM44B  | ENSG00000145919 |
| 5 | 172941493 | 172941674 | 172941583 | 11 | 11  | 5  | 2.078608368 | 0.0614303   | FAM44B  | ENSG00000145919 |

|   |           |           |           |     |     |    |             |             |        |                 |
|---|-----------|-----------|-----------|-----|-----|----|-------------|-------------|--------|-----------------|
| 5 | 172975429 | 172975612 | 172975520 | 9   | 9   | 6  | 1.484720263 | 0.204387    | FAM44B | ENSG00000145919 |
| 5 | 172975673 | 172975955 | 172975814 | 8   | 8   | 2  | 3.117912553 | 0.0283184   | FAM44B | ENSG00000145919 |
| 5 | 172978629 | 172978834 | 172978686 | 9   | 9   | 18 | 0.547002202 | 0.94615     | FAM44B | ENSG00000145919 |
| 5 | 173036207 | 173036467 | 173036325 | 8   | 9   | 6  | 1.484720263 | 0.204387    | FAM44B | ENSG00000145919 |
| 5 | 173153416 | 173153660 | 173153518 | 8   | 11  | 1  | 6.235825105 | 0.0013754   | CPEB4  | ENSG00000113742 |
| 5 | 173183762 | 173184152 | 173183941 | 20  | 28  | 11 | 2.511651779 | 0.00221344  | CPEB4  | ENSG00000113742 |
| 5 | 173243816 | 173244162 | 173243989 | 14  | 20  | 4  | 4.365077574 | 0.000324139 | CPEB4  | ENSG00000113742 |
| 5 | 173247608 | 173247932 | 173247771 | 10  | 13  | 3  | 3.637564645 | 0.0050909   | CPEB4  | ENSG00000113742 |
| 5 | 173284802 | 173284981 | 173284886 | 8   | 9   | 1  | 5.196520921 | 0.00490062  | CPEB4  | ENSG00000113742 |
| 5 | 173285136 | 173285421 | 173285302 | 8   | 8   | 1  | 4.676868829 | 0.0091584   | CPEB4  | ENSG00000113742 |
| 5 | 173526363 | 173526668 | 173526507 | 10  | 11  | 0  | 12.47165021 | 0.000193293 |        | ENSG00000170091 |
| 5 | 173687112 | 173687588 | 173687442 | 11  | 21  | 5  | 3.810782009 | 0.000537724 |        | ENSG00000213376 |
| 5 | 173687649 | 173687904 | 173687769 | 8   | 10  | 2  | 3.810782009 | 0.00936112  |        | ENSG00000213376 |
| 5 | 173688048 | 173688935 | 173688467 | 324 | 432 | 6  | 64.2883874  | 1.68E-123   |        | ENSG00000213376 |
| 5 | 173698005 | 173698257 | 173698103 | 12  | 14  | 0  | 15.58956276 | 2.28E-05    |        | ENSG00000213376 |
| 5 | 173698303 | 173698569 | 173698436 | 9   | 10  | 2  | 3.810782009 | 0.00936112  |        | ENSG00000213376 |
| 5 | 173784891 | 173785142 | 173785064 | 10  | 14  | 1  | 7.794781382 | 0.000197021 |        | ENSG00000213376 |
| 5 | 173820961 | 173821237 | 173821073 | 11  | 13  | 4  | 2.910051716 | 0.0125532   |        | ENSG00000213376 |
| 5 | 173843098 | 173843308 | 173843203 | 10  | 10  | 4  | 2.286469205 | 0.0509017   |        | ENSG00000213376 |
| 5 | 173883535 | 173883735 | 173883633 | 8   | 8   | 2  | 3.117912553 | 0.0283184   |        | ENSG00000213376 |
| 5 | 173892111 | 173892450 | 173892280 | 12  | 18  | 7  | 2.468347438 | 0.0112499   |        | ENSG00000213376 |
| 5 | 173931268 | 173931749 | 173931447 | 11  | 20  | 10 | 1.98412617  | 0.0277883   |        | ENSG00000213376 |
| 5 | 174058877 | 174059186 | 174059026 | 9   | 12  | 4  | 2.702190879 | 0.0203088   | MSX2   | ENSG00000120149 |
| 5 | 174136776 | 174137001 | 174136838 | 9   | 9   | 6  | 1.484720263 | 0.204387    |        | ENSG00000222422 |
| 5 | 174295544 | 174295804 | 174295717 | 9   | 12  | 2  | 4.503651465 | 0.002963    |        | ENSG00000204754 |
| 5 | 174332192 | 174332425 | 174332294 | 10  | 11  | 5  | 2.078608368 | 0.0614303   |        | ENSG00000204754 |
| 5 | 174349551 | 174349748 | 174349649 | 8   | 8   | 7  | 1.169217207 | 0.371848    |        | ENSG00000204754 |
| 5 | 174359211 | 174359431 | 174359323 | 8   | 8   | 2  | 3.117912553 | 0.0283184   |        | ENSG00000204754 |
| 5 | 174374808 | 174374988 | 174374894 | 8   | 9   | 5  | 1.73217364  | 0.133894    |        | ENSG00000204754 |
| 5 | 174474199 | 174474535 | 174474367 | 10  | 13  | 14 | 0.970017239 | 0.534076    |        | ENSG00000204754 |
| 5 | 174644438 | 174644787 | 174644613 | 13  | 18  | 10 | 1.795161773 | 0.055383    | DRD1   | ENSG00000184845 |
| 5 | 174646437 | 174646624 | 174646530 | 8   | 8   | 0  | 9.353737658 | 0.00163931  | DRD1   | ENSG00000184845 |
| 5 | 174647717 | 174648096 | 174647980 | 8   | 14  | 10 | 1.417232979 | 0.185113    | DRD1   | ENSG00000184845 |
| 5 | 174738080 | 174738442 | 174738326 | 9   | 14  | 2  | 5.196520921 | 0.000907371 | DRD1   | ENSG00000184845 |

|   |           |           |           |    |    |    |             |             |          |                 |
|---|-----------|-----------|-----------|----|----|----|-------------|-------------|----------|-----------------|
| 5 | 174894099 | 174894278 | 174894172 | 9  | 9  | 1  | 5.196520921 | 0.00490062  | SFXN1    | ENSG00000164466 |
| 5 | 175017403 | 175017663 | 175017533 | 8  | 9  | 5  | 1.73217364  | 0.133894    | HRH2     | ENSG00000113749 |
| 5 | 175138788 | 175139164 | 175138952 | 11 | 17 | 7  | 2.338434415 | 0.0171287   | CPLX2    | ENSG00000145920 |
| 5 | 175169230 | 175169676 | 175169518 | 10 | 17 | 3  | 4.676868829 | 0.000552213 | CPLX2    | ENSG00000145920 |
| 5 | 175681981 | 175682160 | 175682070 | 8  | 8  | 2  | 3.117912553 | 0.0283184   | C5orf25  | ENSG00000170085 |
| 5 | 175721406 | 175721642 | 175721531 | 8  | 9  | 7  | 1.29913023  | 0.286504    | KIAA1191 | ENSG00000122203 |
| 5 | 175748085 | 175748357 | 175748220 | 11 | 12 | 3  | 3.377738599 | 0.00867157  | NOP16    | ENSG00000048162 |
| 5 | 175748438 | 175748761 | 175748594 | 12 | 16 | 2  | 5.889390377 | 0.000270741 | HIGD2A   | ENSG00000146066 |
| 5 | 175807726 | 175807915 | 175807861 | 8  | 8  | 8  | 1.039304184 | 0.46786     | FAF2     | ENSG00000113194 |
| 5 | 175900290 | 175900469 | 175900379 | 9  | 9  | 0  | 10.39304184 | 0.000803859 | RNF44    | ENSG00000146083 |
| 5 | 176154559 | 176154742 | 176154632 | 8  | 8  | 5  | 1.558956276 | 0.191397    | UNC5A    | ENSG00000113763 |
| 5 | 176176216 | 176176416 | 176176327 | 10 | 11 | 0  | 12.47165021 | 0.000193293 | UNC5A    | ENSG00000113763 |
| 5 | 176197264 | 176197598 | 176197431 | 14 | 19 | 6  | 2.969440526 | 0.0035096   | UNC5A    | ENSG00000113763 |
| 5 | 176365360 | 176365687 | 176365511 | 12 | 17 | 6  | 2.672496474 | 0.00882337  | UIMC1    | ENSG00000087206 |
| 5 | 176366430 | 176366665 | 176366547 | 9  | 9  | 4  | 2.078608368 | 0.0785659   | UIMC1    | ENSG00000087206 |
| 5 | 176382005 | 176382244 | 176382155 | 9  | 9  | 8  | 1.154782427 | 0.375434    | ZNF346   | ENSG00000113761 |
| 5 | 176445826 | 176446133 | 176445979 | 11 | 14 | 5  | 2.598260461 | 0.0167748   | FGFR4    | ENSG00000160867 |
| 5 | 176661161 | 176661442 | 176661301 | 12 | 16 | 11 | 1.472347594 | 0.147517    | RAB24    | ENSG00000169228 |
| 5 | 176661490 | 176661740 | 176661615 | 16 | 17 | 7  | 2.338434415 | 0.0171287   | RAB24    | ENSG00000169228 |
| 5 | 176695867 | 176696125 | 176695982 | 8  | 8  | 4  | 1.870747532 | 0.118863    | LMAN2    | ENSG00000169223 |
| 5 | 176711243 | 176711553 | 176711398 | 11 | 13 | 10 | 1.32275078  | 0.240023    | LMAN2    | ENSG00000169223 |
| 5 | 176748031 | 176748257 | 176748144 | 8  | 9  | 1  | 5.196520921 | 0.00490062  | SLC34A1  | ENSG00000131183 |
| 5 | 176761916 | 176762115 | 176762034 | 8  | 8  | 6  | 1.336248237 | 0.277651    | PFN3     | ENSG00000196570 |
| 5 | 176762118 | 176762542 | 176762297 | 15 | 25 | 15 | 1.688869299 | 0.0455215   | PFN3     | ENSG00000196570 |
| 5 | 176762705 | 176762904 | 176762790 | 8  | 8  | 5  | 1.558956276 | 0.191397    | PFN3     | ENSG00000196570 |
| 5 | 176785602 | 176785885 | 176785781 | 14 | 19 | 6  | 2.969440526 | 0.0035096   | GRK6     | ENSG00000198055 |
| 5 | 176857468 | 176857713 | 176857598 | 11 | 12 | 2  | 4.503651465 | 0.002963    | PDLIM7   | ENSG00000196923 |
| 5 | 176860538 | 176860802 | 176860670 | 8  | 8  | 6  | 1.336248237 | 0.277651    | PDLIM7   | ENSG00000196923 |
| 5 | 176876499 | 176876979 | 176876658 | 19 | 26 | 8  | 3.117912553 | 0.000638503 | DDX41    | ENSG00000183258 |
| 5 | 176935793 | 176936117 | 176935968 | 31 | 34 | 2  | 12.12521548 | 2.69E-09    | TMED9    | ENSG00000184840 |
| 5 | 177217294 | 177217476 | 177217462 | 8  | 8  | 1  | 4.676868829 | 0.0091584   |          | ENSG00000170089 |
| 5 | 177435526 | 177435876 | 177435701 | 10 | 16 | 13 | 1.262012224 | 0.256887    |          | ENSG00000218227 |
| 5 | 177435879 | 177436108 | 177435947 | 10 | 11 | 10 | 1.133786383 | 0.380636    |          | ENSG00000218227 |
| 5 | 177437863 | 177438263 | 177438084 | 8  | 14 | 16 | 0.917033104 | 0.598778    |          | ENSG00000218227 |

|   |           |           |           |    |    |    |             |             |         |                 |
|---|-----------|-----------|-----------|----|----|----|-------------|-------------|---------|-----------------|
| 5 | 177441233 | 177441527 | 177441378 | 10 | 13 | 8  | 1.616695398 | 0.123553    |         | ENSG00000218227 |
| 5 | 177443744 | 177444011 | 177443877 | 9  | 12 | 2  | 4.503651465 | 0.002963    |         | ENSG00000218227 |
| 5 | 177458398 | 177458601 | 177458542 | 11 | 13 | 4  | 2.910051716 | 0.0125532   |         | ENSG00000145911 |
| 5 | 177467923 | 177468147 | 177468028 | 9  | 12 | 3  | 3.377738599 | 0.00867157  |         | ENSG00000145911 |
| 5 | 177480470 | 177480804 | 177480637 | 12 | 16 | 11 | 1.472347594 | 0.147517    |         | ENSG00000145911 |
| 5 | 177483430 | 177484441 | 177483968 | 22 | 61 | 32 | 1.952632104 | 0.000689782 | RMND5B  | ENSG00000145916 |
| 5 | 177505563 | 177506297 | 177505858 | 10 | 29 | 15 | 1.948695345 | 0.0128944   | NHP2    | ENSG00000145912 |
| 5 | 177511399 | 177511809 | 177511498 | 9  | 15 | 9  | 1.662886695 | 0.0970566   | NHP2    | ENSG00000145912 |
| 5 | 177513304 | 177513862 | 177513609 | 15 | 30 | 11 | 2.684869143 | 0.000957822 | NHP2    | ENSG00000145912 |
| 5 | 177621903 | 177622108 | 177622005 | 9  | 10 | 3  | 2.858086507 | 0.0242838   | AGXT2L2 | ENSG00000175309 |
| 5 | 177648476 | 177648949 | 177648792 | 8  | 17 | 13 | 1.336248237 | 0.204556    | AGXT2L2 | ENSG00000175309 |
| 5 | 177667905 | 177668104 | 177667999 | 9  | 10 | 1  | 5.716173013 | 0.00260397  |         | ENSG00000223150 |
| 5 | 177738223 | 177738402 | 177738312 | 8  | 8  | 1  | 4.676868829 | 0.0091584   |         | ENSG00000223150 |
| 5 | 177986457 | 177986665 | 177986593 | 8  | 8  | 4  | 1.870747532 | 0.118863    | CLK4    | ENSG00000113240 |
| 5 | 177994813 | 177995015 | 177994906 | 9  | 11 | 3  | 3.117912553 | 0.0146045   | CLK4    | ENSG00000113240 |
| 5 | 178002254 | 178002594 | 178002416 | 10 | 14 | 7  | 1.948695345 | 0.0559175   | CLK4    | ENSG00000113240 |
| 5 | 178035648 | 178035864 | 178035756 | 9  | 11 | 2  | 4.157216737 | 0.0052913   | CLK4    | ENSG00000113240 |
| 5 | 178059615 | 178060042 | 178059754 | 8  | 14 | 6  | 2.227080395 | 0.0322529   | ZNF354A | ENSG00000169131 |
| 5 | 178090276 | 178090587 | 178090431 | 11 | 14 | 2  | 5.196520921 | 0.000907371 | ZNF354A | ENSG00000169131 |
| 5 | 178383911 | 178384101 | 178384006 | 9  | 10 | 1  | 5.716173013 | 0.00260397  | GRM6    | ENSG00000113262 |
| 5 | 178467215 | 178467586 | 178467386 | 8  | 13 | 1  | 7.27512929  | 0.000378098 | ZNF354C | ENSG00000177932 |
| 5 | 178577559 | 178577751 | 178577655 | 8  | 8  | 0  | 9.353737658 | 0.00163931  | ADAMTS2 | ENSG00000087116 |
| 5 | 178721262 | 178721496 | 178721370 | 10 | 10 | 4  | 2.286469205 | 0.0509017   | ADAMTS2 | ENSG00000087116 |
| 5 | 178722325 | 178722504 | 178722401 | 8  | 8  | 2  | 3.117912553 | 0.0283184   | ADAMTS2 | ENSG00000087116 |
| 5 | 178983351 | 178983542 | 178983460 | 8  | 9  | 3  | 2.598260461 | 0.0397929   | HNRNPH1 | ENSG00000169045 |
| 5 | 179079953 | 179080197 | 179080089 | 9  | 10 | 9  | 1.143234603 | 0.378307    | MAML1   | ENSG00000161021 |
| 5 | 179092039 | 179092328 | 179092216 | 8  | 13 | 14 | 0.970017239 | 0.534076    | MAML1   | ENSG00000161021 |
| 5 | 179092333 | 179092512 | 179092395 | 8  | 8  | 7  | 1.169217207 | 0.371848    | MAML1   | ENSG00000161021 |
| 5 | 179181046 | 179181256 | 179181151 | 8  | 9  | 6  | 1.484720263 | 0.204387    | SQSTM1  | ENSG00000161011 |
| 5 | 179181334 | 179181621 | 179181468 | 9  | 13 | 9  | 1.455025858 | 0.177172    | SQSTM1  | ENSG00000161011 |
| 5 | 179181661 | 179181895 | 179181742 | 8  | 10 | 6  | 1.63319229  | 0.146906    | SQSTM1  | ENSG00000161011 |
| 5 | 179218119 | 179218452 | 179218295 | 14 | 17 | 8  | 2.078608368 | 0.0303558   | C5orf45 | ENSG00000161010 |
| 5 | 179255512 | 179255692 | 179255602 | 8  | 8  | 4  | 1.870747532 | 0.118863    | TBC1D9B | ENSG00000197226 |
| 5 | 179444166 | 179444396 | 179444250 | 9  | 11 | 7  | 1.558956276 | 0.158273    |         | ENSG00000213306 |

|   |           |           |           |    |    |    |             |             |        |                 |
|---|-----------|-----------|-----------|----|----|----|-------------|-------------|--------|-----------------|
| 5 | 179617331 | 179617764 | 179617593 | 18 | 28 | 5  | 5.023303557 | 1.20E-05    | MAPK9  | ENSG00000050748 |
| 5 | 179648967 | 179649472 | 179649145 | 8  | 17 | 10 | 1.700679574 | 0.0766266   | MAPK9  | ENSG00000050748 |
| 5 | 179688326 | 179688546 | 179688436 | 8  | 9  | 3  | 2.598260461 | 0.0397929   | GFPT2  | ENSG00000131459 |
| 5 | 179691979 | 179692184 | 179692081 | 8  | 8  | 0  | 9.353737658 | 0.00163931  | GFPT2  | ENSG00000131459 |
| 5 | 179853610 | 179853816 | 179853713 | 9  | 10 | 7  | 1.429043253 | 0.21536     | CNOT6  | ENSG00000113300 |
| 5 | 180169835 | 180170066 | 180169950 | 11 | 11 | 5  | 2.078608368 | 0.0614303   | MGAT1  | ENSG00000131446 |
| 5 | 180220361 | 180220725 | 180220550 | 10 | 15 | 10 | 1.511715177 | 0.140236    |        | ENSG00000214302 |
| 5 | 180228666 | 180228896 | 180228727 | 9  | 12 | 11 | 1.125912866 | 0.382541    |        | ENSG00000214302 |
| 5 | 180274861 | 180275050 | 180274955 | 9  | 9  | 5  | 1.73217364  | 0.133894    |        | ENSG00000208346 |
| 5 | 180471383 | 180471717 | 180471552 | 18 | 20 | 2  | 7.27512929  | 2.27E-05    |        | ENSG00000214293 |
| 5 | 180472070 | 180472490 | 180472316 | 9  | 15 | 1  | 8.314433474 | 0.000102308 |        | ENSG00000214293 |
| 5 | 180474759 | 180474955 | 180474828 | 8  | 8  | 7  | 1.169217207 | 0.371848    |        | ENSG00000214293 |
| 5 | 180533130 | 180533518 | 180533349 | 10 | 16 | 6  | 2.524024447 | 0.0137633   |        | ENSG00000208343 |
| 5 | 180541601 | 180541993 | 180541766 | 10 | 17 | 7  | 2.338434415 | 0.0171287   |        | ENSG00000208343 |
| 5 | 180551116 | 180551510 | 180551295 | 13 | 20 | 7  | 2.728173484 | 0.00469378  | TRIM7  | ENSG00000146054 |
| 5 | 180566188 | 180566398 | 180566291 | 8  | 9  | 6  | 1.484720263 | 0.204387    | TRIM7  | ENSG00000146054 |
| 5 | 180566461 | 180566707 | 180566584 | 8  | 9  | 7  | 1.29913023  | 0.286504    | TRIM7  | ENSG00000146054 |
| 5 | 180567263 | 180567576 | 180567408 | 16 | 21 | 18 | 1.203404845 | 0.275531    | TRIM7  | ENSG00000146054 |
| 5 | 180575738 | 180575958 | 180575880 | 9  | 11 | 5  | 2.078608368 | 0.0614303   | TRIM41 | ENSG00000146063 |
| 5 | 180575966 | 180576248 | 180576137 | 8  | 11 | 7  | 1.558956276 | 0.158273    | TRIM41 | ENSG00000146063 |
| 5 | 180577585 | 180578017 | 180577846 | 9  | 18 | 16 | 1.161575265 | 0.325582    | TRIM41 | ENSG00000146063 |
| 5 | 180581688 | 180582058 | 180581841 | 18 | 23 | 18 | 1.312805285 | 0.185024    | TRIM41 | ENSG00000146063 |
| 5 | 180582592 | 180582945 | 180582768 | 10 | 15 | 10 | 1.511715177 | 0.140236    | TRIM41 | ENSG00000146063 |
| 5 | 180583010 | 180583481 | 180583134 | 15 | 23 | 4  | 4.988660084 | 6.05E-05    | TRIM41 | ENSG00000146063 |
| 5 | 180603462 | 180603775 | 180603618 | 14 | 17 | 11 | 1.558956276 | 0.111389    | GNB2L1 | ENSG00000204628 |
| 5 | 180603835 | 180604082 | 180603958 | 10 | 12 | 8  | 1.501217155 | 0.168286    | GNB2L1 | ENSG00000204628 |
| 6 | 562544    | 562752    | 562672    | 11 | 12 | 6  | 1.930136342 | 0.071303    | HUS1B  | ENSG00000188996 |
| 6 | 625704    | 625965    | 625823    | 12 | 15 | 0  | 16.62886695 | 1.12E-05    |        | ENSG00000219712 |
| 6 | 1586629   | 1586828   | 1586728   | 11 | 11 | 3  | 3.117912553 | 0.0146045   |        | ENSG00000203569 |
| 6 | 2154554   | 2154759   | 2154656   | 9  | 10 | 1  | 5.716173013 | 0.00260397  | GMDS   | ENSG00000112699 |
| 6 | 2334042   | 2334221   | 2334131   | 8  | 8  | 3  | 2.338434415 | 0.0641221   |        | ENSG00000205779 |
| 6 | 2393986   | 2394277   | 2394131   | 8  | 8  | 3  | 2.338434415 | 0.0641221   |        | ENSG00000203564 |
| 6 | 2452254   | 2452612   | 2452435   | 12 | 16 | 0  | 17.66817113 | 5.48E-06    |        | ENSG00000203564 |
| 6 | 2710038   | 2710297   | 2710213   | 8  | 12 | 1  | 6.755477198 | 0.000722752 | WRNIP1 | ENSG00000124535 |

|   |          |          |          |    |    |   |             |             |          |                 |
|---|----------|----------|----------|----|----|---|-------------|-------------|----------|-----------------|
| 6 | 2791624  | 2791844  | 2791776  | 13 | 14 | 4 | 3.117912553 | 0.00766354  | SERPINB1 | ENSG00000021355 |
| 6 | 2933712  | 2933965  | 2933889  | 8  | 11 | 9 | 1.247165021 | 0.300052    |          | ENSG00000215076 |
| 6 | 2934945  | 2935292  | 2935073  | 10 | 14 | 6 | 2.227080395 | 0.0322529   |          | ENSG00000215076 |
| 6 | 2944643  | 2944845  | 2944768  | 9  | 9  | 3 | 2.598260461 | 0.0397929   | NQO2     | ENSG00000124588 |
| 6 | 3148829  | 3149047  | 3148938  | 10 | 11 | 2 | 4.157216737 | 0.0052913   |          | ENSG00000221674 |
| 6 | 3378377  | 3378612  | 3378523  | 9  | 11 | 3 | 3.117912553 | 0.0146045   | SLC22A23 | ENSG00000137266 |
| 6 | 3415350  | 3415895  | 3415622  | 25 | 44 | 5 | 7.794781382 | 9.60E-10    | SLC22A23 | ENSG00000137266 |
| 6 | 3456778  | 3457012  | 3456884  | 9  | 10 | 4 | 2.286469205 | 0.0509017   | SLC22A23 | ENSG00000137266 |
| 6 | 3660621  | 3660881  | 3660782  | 8  | 10 | 3 | 2.858086507 | 0.0242838   | C6orf145 | ENSG00000168994 |
| 6 | 3964111  | 3964297  | 3964143  | 8  | 10 | 6 | 1.63319229  | 0.146906    |          | ENSG00000215066 |
| 6 | 4199143  | 4199355  | 4199213  | 9  | 9  | 9 | 1.039304184 | 0.466079    |          | ENSG00000216307 |
| 6 | 4268173  | 4268392  | 4268282  | 9  | 9  | 6 | 1.484720263 | 0.204387    |          | ENSG00000201185 |
| 6 | 4303978  | 4304218  | 4304098  | 10 | 14 | 5 | 2.598260461 | 0.0167748   |          | ENSG00000201185 |
| 6 | 4329050  | 4329567  | 4329273  | 30 | 40 | 2 | 14.20382385 | 5.03E-11    |          | ENSG00000201185 |
| 6 | 4975808  | 4975987  | 4975968  | 8  | 8  | 3 | 2.338434415 | 0.0641221   |          | ENSG00000209924 |
| 6 | 5851301  | 5851559  | 5851426  | 12 | 13 | 0 | 14.55025858 | 4.65E-05    |          | ENSG00000222735 |
| 6 | 6703618  | 6703797  | 6703707  | 8  | 8  | 0 | 9.353737658 | 0.00163931  |          | ENSG00000219986 |
| 6 | 6704542  | 6704795  | 6704668  | 10 | 13 | 0 | 14.55025858 | 4.65E-05    |          | ENSG00000219986 |
| 6 | 6704865  | 6705085  | 6704926  | 8  | 8  | 0 | 9.353737658 | 0.00163931  |          | ENSG00000219986 |
| 6 | 7146498  | 7146719  | 7146593  | 10 | 13 | 1 | 7.27512929  | 0.000378098 | RREB1    | ENSG00000124782 |
| 6 | 7207495  | 7207769  | 7207616  | 10 | 13 | 3 | 3.637564645 | 0.0050909   | RREB1    | ENSG00000124782 |
| 6 | 7268420  | 7268731  | 7268553  | 24 | 28 | 2 | 10.04660711 | 1.36E-07    | ATP5GP1  | ENSG00000219375 |
| 6 | 7363529  | 7363773  | 7363628  | 13 | 16 | 6 | 2.524024447 | 0.0137633   | RIOK1    | ENSG00000124784 |
| 6 | 7408945  | 7409385  | 7409166  | 49 | 64 | 2 | 22.51825733 | 4.52E-18    |          | ENSG00000215042 |
| 6 | 7425124  | 7425483  | 7425304  | 8  | 15 | 3 | 4.157216737 | 0.00170423  |          | ENSG00000215042 |
| 6 | 7477608  | 7477798  | 7477703  | 10 | 10 | 0 | 11.43234603 | 0.000394183 | DSP      | ENSG00000096696 |
| 6 | 7506432  | 7507201  | 7506768  | 10 | 27 | 9 | 2.910051716 | 0.000869703 | DSP      | ENSG00000096696 |
| 6 | 7618315  | 7618531  | 7618423  | 8  | 9  | 3 | 2.598260461 | 0.0397929   |          | ENSG00000216985 |
| 6 | 9619486  | 9619732  | 9619605  | 11 | 11 | 2 | 4.157216737 | 0.0052913   |          | ENSG00000222597 |
| 6 | 10207143 | 10207424 | 10207275 | 8  | 9  | 2 | 3.464347281 | 0.0163838   |          | ENSG00000216368 |
| 6 | 10271220 | 10271855 | 10271610 | 20 | 41 | 3 | 10.91269393 | 2.02E-10    |          | ENSG00000216368 |
| 6 | 10424720 | 10425028 | 10424874 | 9  | 14 | 2 | 5.196520921 | 0.000907371 |          | ENSG00000216781 |
| 6 | 10456047 | 10456266 | 10456156 | 12 | 15 | 0 | 16.62886695 | 1.12E-05    |          | ENSG00000216781 |
| 6 | 10539694 | 10539971 | 10539866 | 16 | 19 | 0 | 20.78608368 | 6.46E-07    | C6orf218 | ENSG00000183674 |

|   |          |          |          |    |    |   |             |             |          |                 |
|---|----------|----------|----------|----|----|---|-------------|-------------|----------|-----------------|
| 6 | 10629528 | 10629707 | 10629614 | 8  | 8  | 1 | 4.676868829 | 0.0091584   | GCNT2    | ENSG00000111846 |
| 6 | 10802674 | 10803114 | 10802994 | 16 | 25 | 5 | 4.503651465 | 6.33E-05    |          | ENSG00000137434 |
| 6 | 10826855 | 10827229 | 10827053 | 35 | 42 | 3 | 11.17251998 | 1.06E-10    | TMEM14C  | ENSG00000111843 |
| 6 | 10855587 | 10855956 | 10855742 | 12 | 17 | 4 | 3.741495063 | 0.00163722  | TMEM14B  | ENSG00000137210 |
| 6 | 11076070 | 11076311 | 11076160 | 9  | 9  | 1 | 5.196520921 | 0.00490062  | ELOVL2   | ENSG00000197977 |
| 6 | 11098004 | 11098266 | 11098135 | 8  | 8  | 2 | 3.117912553 | 0.0283184   | ELOVL2   | ENSG00000197977 |
| 6 | 11175588 | 11175955 | 11175776 | 8  | 14 | 6 | 2.227080395 | 0.0322529   |          | ENSG00000209088 |
| 6 | 11252803 | 11253042 | 11252884 | 9  | 10 | 5 | 1.905391004 | 0.0915982   |          | ENSG00000212121 |
| 6 | 11337946 | 11338225 | 11338085 | 8  | 12 | 3 | 3.377738599 | 0.00867157  | NEDD9    | ENSG00000111859 |
| 6 | 11542979 | 11543206 | 11543085 | 12 | 13 | 2 | 4.850086193 | 0.00164564  |          | ENSG00000202313 |
| 6 | 11871072 | 11871251 | 11871154 | 8  | 8  | 2 | 3.117912553 | 0.0283184   | C6orf105 | ENSG00000111863 |
| 6 | 12399582 | 12399825 | 12399688 | 8  | 10 | 2 | 3.810782009 | 0.00936112  | EDN1     | ENSG00000078401 |
| 6 | 12710607 | 12711005 | 12710836 | 13 | 20 | 8 | 2.425043097 | 0.00917565  | RPL15P3  | ENSG00000212802 |
| 6 | 12711662 | 12711866 | 12711764 | 11 | 11 | 2 | 4.157216737 | 0.0052913   | RPL15P3  | ENSG00000212802 |
| 6 | 12746442 | 12746623 | 12746541 | 9  | 9  | 4 | 2.078608368 | 0.0785659   | PHACTR1  | ENSG00000112137 |
| 6 | 12924424 | 12924894 | 12924632 | 16 | 29 | 4 | 6.235825105 | 1.85E-06    |          | ENSG00000223291 |
| 6 | 13116312 | 13116515 | 13116413 | 8  | 8  | 3 | 2.338434415 | 0.0641221   | PHACTR1  | ENSG00000112137 |
| 6 | 13145859 | 13146051 | 13145889 | 8  | 8  | 5 | 1.558956276 | 0.191397    | PHACTR1  | ENSG00000112137 |
| 6 | 13356104 | 13356600 | 13356425 | 25 | 33 | 0 | 35.33634226 | 3.00E-11    | PHACTR1  | ENSG00000112137 |
| 6 | 13487051 | 13487247 | 13487149 | 9  | 9  | 1 | 5.196520921 | 0.00490062  | GFOD1    | ENSG00000145990 |
| 6 | 13833914 | 13834142 | 13834019 | 9  | 10 | 2 | 3.810782009 | 0.00936112  | RANBP9   | ENSG00000010017 |
| 6 | 13981979 | 13982224 | 13982085 | 8  | 10 | 1 | 5.716173013 | 0.00260397  | RNF182   | ENSG00000180537 |
| 6 | 14175106 | 14175355 | 14175263 | 9  | 10 | 3 | 2.858086507 | 0.0242838   | CD83     | ENSG00000112149 |
| 6 | 14213741 | 14214007 | 14213874 | 10 | 13 | 2 | 4.850086193 | 0.00164564  | CD83     | ENSG00000112149 |
| 6 | 14482966 | 14483220 | 14483093 | 8  | 9  | 0 | 10.39304184 | 0.000803859 | CD83     | ENSG00000112149 |
| 6 | 14871556 | 14871749 | 14871571 | 8  | 10 | 2 | 3.810782009 | 0.00936112  |          | ENSG00000206960 |
| 6 | 15254012 | 15254191 | 15254101 | 8  | 8  | 0 | 9.353737658 | 0.00163931  |          | ENSG00000210050 |
| 6 | 15799567 | 15799889 | 15799731 | 11 | 14 | 6 | 2.227080395 | 0.0322529   | DTNBP1   | ENSG00000047579 |
| 6 | 16359903 | 16360275 | 16360082 | 11 | 18 | 2 | 6.582259834 | 7.91E-05    | GMPR     | ENSG00000137198 |
| 6 | 16908241 | 16908439 | 16908320 | 8  | 8  | 2 | 3.117912553 | 0.0283184   |          | ENSG00000215019 |
| 6 | 17072922 | 17073202 | 17073100 | 9  | 12 | 7 | 1.688869299 | 0.11395     |          | ENSG00000215019 |
| 6 | 17120727 | 17120935 | 17120831 | 10 | 10 | 5 | 1.905391004 | 0.0915982   |          | ENSG00000209103 |
| 6 | 17424955 | 17425197 | 17425076 | 8  | 9  | 0 | 10.39304184 | 0.000803859 | RBM24    | ENSG00000112183 |
| 6 | 17497517 | 17497912 | 17497726 | 16 | 25 | 0 | 27.02190879 | 8.98E-09    | CAP2     | ENSG00000112186 |

|   |          |          |          |    |    |   |             |             |          |                 |
|---|----------|----------|----------|----|----|---|-------------|-------------|----------|-----------------|
| 6 | 17502377 | 17502575 | 17502476 | 8  | 9  | 3 | 2.598260461 | 0.0397929   | CAP2     | ENSG00000112186 |
| 6 | 17708275 | 17708538 | 17708406 | 12 | 14 | 4 | 3.117912553 | 0.00766354  | FAM8A1   | ENSG00000137414 |
| 6 | 17732827 | 17733040 | 17732972 | 9  | 9  | 3 | 2.598260461 | 0.0397929   |          | ENSG00000206881 |
| 6 | 17815156 | 17815365 | 17815260 | 10 | 10 | 1 | 5.716173013 | 0.00260397  | NUP153   | ENSG00000124789 |
| 6 | 18136514 | 18136835 | 18136675 | 25 | 28 | 0 | 30.13982134 | 1.06E-09    |          | ENSG00000210163 |
| 6 | 18198539 | 18198915 | 18198718 | 23 | 30 | 1 | 16.10921486 | 4.28E-09    | NHLRC1   | ENSG00000187566 |
| 6 | 18434275 | 18434590 | 18434445 | 21 | 22 | 2 | 7.967998746 | 6.43E-06    |          | ENSG00000200681 |
| 6 | 18495454 | 18495823 | 18495680 | 9  | 16 | 4 | 3.533634226 | 0.00276486  | RNF144B  | ENSG00000137393 |
| 6 | 18704598 | 18704894 | 18704748 | 9  | 11 | 2 | 4.157216737 | 0.0052913   |          | ENSG00000207775 |
| 6 | 18954058 | 18954497 | 18954279 | 31 | 48 | 0 | 50.92590503 | 6.85E-16    |          | ENSG00000207775 |
| 6 | 20000578 | 20000924 | 20000745 | 13 | 18 | 3 | 4.936694875 | 0.000311102 | ID4      | ENSG00000172201 |
| 6 | 20096834 | 20097133 | 20096986 | 18 | 21 | 2 | 7.621564018 | 1.21E-05    |          | ENSG00000177246 |
| 6 | 20479034 | 20479267 | 20479161 | 9  | 10 | 3 | 2.858086507 | 0.0242838   | E2F3     | ENSG00000112242 |
| 6 | 20870588 | 20870809 | 20870698 | 8  | 9  | 1 | 5.196520921 | 0.00490062  |          | ENSG00000216591 |
| 6 | 20967583 | 20967781 | 20967650 | 8  | 9  | 2 | 3.464347281 | 0.0163838   |          | ENSG00000216591 |
| 6 | 20974877 | 20975417 | 20975056 | 44 | 66 | 7 | 8.704172543 | 3.28E-14    |          | ENSG00000216591 |
| 6 | 21296776 | 21297056 | 21296916 | 17 | 20 | 1 | 10.91269393 | 3.71E-06    | CXorf29  | ENSG00000205147 |
| 6 | 21541949 | 21542195 | 21542085 | 8  | 9  | 3 | 2.598260461 | 0.0397929   | SOX4     | ENSG00000124766 |
| 6 | 22471438 | 22471636 | 22471548 | 9  | 9  | 3 | 2.598260461 | 0.0397929   | PRL      | ENSG00000172179 |
| 6 | 22529378 | 22529559 | 22529455 | 8  | 8  | 2 | 3.117912553 | 0.0283184   | PRL      | ENSG00000172179 |
| 6 | 22551004 | 22551506 | 22551286 | 70 | 92 | 0 | 96.65528913 | 1.65E-29    | HDGFL1   | ENSG00000112273 |
| 6 | 24391700 | 24391900 | 24391783 | 9  | 10 | 4 | 2.286469205 | 0.0509017   | KAAG1    | ENSG00000146049 |
| 6 | 24712441 | 24712620 | 24712576 | 8  | 8  | 3 | 2.338434415 | 0.0641221   |          | ENSG00000218186 |
| 6 | 24829890 | 24830099 | 24829994 | 9  | 9  | 3 | 2.598260461 | 0.0397929   | C6orf62  | ENSG00000112308 |
| 6 | 24871839 | 24872080 | 24872003 | 11 | 12 | 0 | 13.5109544  | 9.48E-05    | GMNN     | ENSG00000112312 |
| 6 | 24882926 | 24883241 | 24883082 | 8  | 11 | 4 | 2.494330042 | 0.0324033   | GMNN     | ENSG00000112312 |
| 6 | 24935412 | 24935856 | 24935609 | 64 | 82 | 4 | 17.25244946 | 3.23E-21    | FAM65B   | ENSG00000111913 |
| 6 | 25045302 | 25045485 | 25045393 | 8  | 8  | 0 | 9.353737658 | 0.00163931  |          | ENSG00000217083 |
| 6 | 25093617 | 25093946 | 25093770 | 21 | 24 | 4 | 5.196520921 | 3.42E-05    |          | ENSG00000214975 |
| 6 | 25279556 | 25279813 | 25279728 | 10 | 14 | 9 | 1.558956276 | 0.132279    |          | ENSG00000217805 |
| 6 | 25557402 | 25557740 | 25557571 | 15 | 21 | 2 | 7.621564018 | 1.21E-05    |          | ENSG00000210368 |
| 6 | 26066918 | 26067176 | 26067090 | 13 | 16 | 0 | 17.66817113 | 5.48E-06    | TRIM38   | ENSG00000112343 |
| 6 | 26128623 | 26128854 | 26128710 | 8  | 9  | 1 | 5.196520921 | 0.00490062  | HIST1H3A | ENSG00000198366 |
| 6 | 26129735 | 26129958 | 26129851 | 8  | 9  | 7 | 1.29913023  | 0.286504    | HIST1H4A | ENSG00000196176 |



|   |          |          |          |    |    |    |             |             |           |                 |
|---|----------|----------|----------|----|----|----|-------------|-------------|-----------|-----------------|
| 6 | 26135299 | 26135676 | 26135541 | 15 | 21 | 9  | 2.286469205 | 0.0111772   | HIST1H4B  | ENSG00000124529 |
| 6 | 26140122 | 26140480 | 26140301 | 12 | 17 | 9  | 1.870747532 | 0.0498299   | HIST1H3B  | ENSG00000124693 |
| 6 | 26162908 | 26163134 | 26163049 | 9  | 11 | 3  | 3.117912553 | 0.0146045   | HIST1H1C  | ENSG00000187837 |
| 6 | 26163525 | 26163896 | 26163797 | 9  | 15 | 11 | 1.385738912 | 0.19225     | HIST1H1C  | ENSG00000187837 |
| 6 | 26231346 | 26231533 | 26231439 | 8  | 8  | 5  | 1.558956276 | 0.191397    | HIST1H2BC | ENSG00000180596 |
| 6 | 26264378 | 26264901 | 26264645 | 10 | 21 | 6  | 3.266384579 | 0.0013436   | HIST1H1E  | ENSG00000168298 |
| 6 | 26297343 | 26297522 | 26297432 | 8  | 9  | 7  | 1.29913023  | 0.286504    | HIST1H4D  | ENSG00000188987 |
| 6 | 26312658 | 26312878 | 26312768 | 10 | 11 | 10 | 1.133786383 | 0.380636    | HIST1H4E  | ENSG00000198518 |
| 6 | 26380717 | 26381272 | 26381093 | 10 | 22 | 4  | 4.780799247 | 0.00010647  | HIST1H2BI | ENSG00000168242 |
| 6 | 26393576 | 26393817 | 26393662 | 9  | 11 | 8  | 1.385738912 | 0.224757    | HIST1H4H  | ENSG00000158406 |
| 6 | 26394492 | 26394859 | 26394635 | 8  | 13 | 11 | 1.212521548 | 0.309909    | HIST1H4H  | ENSG00000158406 |
| 6 | 26419211 | 26419643 | 26419314 | 8  | 17 | 5  | 3.117912553 | 0.00407023  | H3F3AP1   | ENSG00000220875 |
| 6 | 26435715 | 26435921 | 26435766 | 11 | 12 | 9  | 1.35109544  | 0.232899    | H3F3AP1   | ENSG00000220875 |
| 6 | 26449822 | 26450172 | 26449997 | 9  | 13 | 7  | 1.818782322 | 0.0805123   |           | ENSG00000210378 |
| 6 | 26645626 | 26645840 | 26645733 | 10 | 10 | 7  | 1.429043253 | 0.21536     | HMG4      | ENSG00000182952 |
| 6 | 26704005 | 26704268 | 26704136 | 11 | 12 | 2  | 4.503651465 | 0.002963    | ABT1      | ENSG00000146109 |
| 6 | 26795041 | 26795395 | 26795218 | 17 | 22 | 0  | 23.90399624 | 7.62E-08    |           | ENSG00000210409 |
| 6 | 26813262 | 26813457 | 26813342 | 9  | 9  | 2  | 3.464347281 | 0.0163838   |           | ENSG00000210409 |
| 6 | 27095933 | 27096233 | 27096097 | 10 | 13 | 4  | 2.910051716 | 0.0125532   |           | ENSG00000220581 |
| 6 | 27207563 | 27207962 | 27207742 | 17 | 25 | 3  | 6.755477198 | 4.84E-06    | HIST1H2BJ | ENSG00000124635 |
| 6 | 27209677 | 27209856 | 27209758 | 8  | 8  | 4  | 1.870747532 | 0.118863    | HIST1H2AC | ENSG00000196787 |
| 6 | 27221457 | 27222046 | 27221745 | 9  | 23 | 11 | 2.078608368 | 0.0154752   | HIST1H2BK | ENSG00000197903 |
| 6 | 27238068 | 27238370 | 27238219 | 10 | 16 | 7  | 2.208521392 | 0.0257604   | HIST1H2AF | ENSG00000184825 |
| 6 | 27306265 | 27306510 | 27306360 | 11 | 13 | 7  | 1.818782322 | 0.0805123   | PRSS16    | ENSG00000112812 |
| 6 | 27313084 | 27313464 | 27313312 | 13 | 17 | 8  | 2.078608368 | 0.0303558   | PRSS16    | ENSG00000112812 |
| 6 | 27356007 | 27356397 | 27356157 | 9  | 15 | 3  | 4.157216737 | 0.00170423  |           | ENSG00000210450 |
| 6 | 27371145 | 27371432 | 27371316 | 10 | 12 | 0  | 13.5109544  | 9.48E-05    |           | ENSG00000210452 |
| 6 | 27464495 | 27464760 | 27464630 | 8  | 11 | 2  | 4.157216737 | 0.0052913   | ZNF391    | ENSG00000124613 |
| 6 | 27548760 | 27549150 | 27548977 | 11 | 18 | 3  | 4.936694875 | 0.000311102 | ZNF184    | ENSG00000096654 |
| 6 | 27555309 | 27555569 | 27555439 | 8  | 11 | 6  | 1.781664316 | 0.103344    | ZNF184    | ENSG00000096654 |
| 6 | 27617507 | 27617719 | 27617604 | 9  | 10 | 5  | 1.905391004 | 0.0915982   |           | ENSG00000218347 |
| 6 | 27623425 | 27623627 | 27623537 | 8  | 10 | 10 | 1.039304184 | 0.464387    |           | ENSG00000219738 |
| 6 | 27659140 | 27659346 | 27659243 | 9  | 11 | 4  | 2.494330042 | 0.0324033   |           | ENSG00000206671 |
| 6 | 27668409 | 27668722 | 27668552 | 10 | 13 | 8  | 1.616695398 | 0.123553    |           | ENSG00000206671 |

|   |          |          |          |    |    |    |             |             |           |                 |
|---|----------|----------|----------|----|----|----|-------------|-------------|-----------|-----------------|
| 6 | 27681465 | 27681682 | 27681560 | 8  | 8  | 11 | 0.779478138 | 0.719708    |           | ENSG00000206671 |
| 6 | 27693526 | 27693720 | 27693653 | 9  | 9  | 4  | 2.078608368 | 0.0785659   |           | ENSG00000206671 |
| 6 | 27726585 | 27726764 | 27726674 | 8  | 8  | 7  | 1.169217207 | 0.371848    |           | ENSG00000216676 |
| 6 | 27743613 | 27743882 | 27743747 | 8  | 12 | 6  | 1.930136342 | 0.071303    |           | ENSG00000216676 |
| 6 | 27744205 | 27744523 | 27744366 | 8  | 12 | 6  | 1.930136342 | 0.071303    |           | ENSG00000216676 |
| 6 | 27746229 | 27746496 | 27746362 | 8  | 10 | 9  | 1.143234603 | 0.378307    |           | ENSG00000216676 |
| 6 | 27763645 | 27764315 | 27763932 | 10 | 26 | 8  | 3.117912553 | 0.000638503 |           | ENSG00000216676 |
| 6 | 27796671 | 27797066 | 27796892 | 8  | 15 | 5  | 2.771477825 | 0.0105836   |           | ENSG00000216915 |
| 6 | 27885597 | 27885881 | 27885748 | 10 | 13 | 3  | 3.637564645 | 0.0050909   | HIST1H3H  | ENSG00000203813 |
| 6 | 27913114 | 27913297 | 27913191 | 8  | 8  | 4  | 1.870747532 | 0.118863    | HIST1H2AK | ENSG00000184348 |
| 6 | 27914007 | 27914187 | 27914097 | 8  | 9  | 1  | 5.196520921 | 0.00490062  | HIST1H2AK | ENSG00000184348 |
| 6 | 27943149 | 27943339 | 27943294 | 9  | 10 | 3  | 2.858086507 | 0.0242838   | HIST1H1B  | ENSG00000184357 |
| 6 | 27966163 | 27966495 | 27966329 | 9  | 14 | 5  | 2.598260461 | 0.0167748   | HIST1H3J  | ENSG00000197153 |
| 6 | 28288655 | 28288993 | 28288854 | 10 | 15 | 2  | 5.542955649 | 0.000497081 |           | ENSG00000176933 |
| 6 | 28550236 | 28550505 | 28550370 | 15 | 17 | 4  | 3.741495063 | 0.00163722  |           | ENSG00000210498 |
| 6 | 28618226 | 28618602 | 28618405 | 10 | 17 | 4  | 3.741495063 | 0.00163722  | GPX6      | ENSG00000198704 |
| 6 | 28618611 | 28618836 | 28618682 | 8  | 11 | 7  | 1.558956276 | 0.158273    | GPX6      | ENSG00000198704 |
| 6 | 33787240 | 33787436 | 33787338 | 9  | 9  | 4  | 2.078608368 | 0.0785659   | C6orf125  | ENSG00000137288 |
| 6 | 33807717 | 33807954 | 33807821 | 11 | 13 | 4  | 2.910051716 | 0.0125532   | IHPK3     | ENSG00000161896 |
| 6 | 33820244 | 33820604 | 33820423 | 25 | 32 | 0  | 34.29703808 | 6.12E-11    | IHPK3     | ENSG00000161896 |
| 6 | 33821469 | 33821822 | 33821645 | 8  | 11 | 3  | 3.117912553 | 0.0146045   | IHPK3     | ENSG00000161896 |
| 6 | 33828005 | 33828434 | 33828255 | 10 | 17 | 4  | 3.741495063 | 0.00163722  | IHPK3     | ENSG00000161896 |
| 6 | 33915865 | 33916143 | 33916022 | 8  | 11 | 5  | 2.078608368 | 0.0614303   | MLN       | ENSG00000096395 |
| 6 | 34064110 | 34064336 | 34064213 | 10 | 12 | 1  | 6.755477198 | 0.000722752 |           | ENSG00000221697 |
| 6 | 34131873 | 34132094 | 34131948 | 8  | 8  | 2  | 3.117912553 | 0.0283184   |           | ENSG00000221697 |
| 6 | 34468703 | 34468922 | 34468812 | 8  | 9  | 1  | 5.196520921 | 0.00490062  | NUDT3     | ENSG00000112664 |
| 6 | 34541851 | 34542112 | 34541983 | 8  | 9  | 2  | 3.464347281 | 0.0163838   | PACSN1    | ENSG00000124507 |
| 6 | 34612282 | 34612676 | 34612435 | 12 | 19 | 11 | 1.73217364  | 0.0607469   | SPDEF     | ENSG00000124664 |
| 6 | 34622912 | 34623112 | 34623040 | 9  | 10 | 0  | 11.43234603 | 0.000394183 | SPDEF     | ENSG00000124664 |
| 6 | 34628898 | 34629127 | 34629012 | 12 | 13 | 1  | 7.27512929  | 0.000378098 | SPDEF     | ENSG00000124664 |
| 6 | 34674449 | 34674653 | 34674508 | 8  | 8  | 0  | 9.353737658 | 0.00163931  |           | ENSG00000216636 |
| 6 | 34833079 | 34833423 | 34833251 | 11 | 15 | 5  | 2.771477825 | 0.0105836   | SNRPC     | ENSG00000124562 |
| 6 | 34963601 | 34963798 | 34963699 | 8  | 8  | 5  | 1.558956276 | 0.191397    | TAF11     | ENSG00000064995 |
| 6 | 35215756 | 35215940 | 35215853 | 8  | 9  | 0  | 10.39304184 | 0.000803859 | TCP11     | ENSG00000124678 |

|   |          |          |          |     |     |    |             |             |          |                 |
|---|----------|----------|----------|-----|-----|----|-------------|-------------|----------|-----------------|
| 6 | 35335152 | 35335453 | 35335322 | 10  | 13  | 3  | 3.637564645 | 0.0050909   | ZNF76    | ENSG00000065029 |
| 6 | 35373390 | 35373590 | 35373505 | 8   | 8   | 4  | 1.870747532 | 0.118863    | DEF6     | ENSG00000023892 |
| 6 | 35417882 | 35418217 | 35418050 | 15  | 17  | 5  | 3.117912553 | 0.00407023  | PPARD    | ENSG00000112033 |
| 6 | 35422519 | 35422726 | 35422647 | 8   | 8   | 6  | 1.336248237 | 0.277651    | PPARD    | ENSG00000112033 |
| 6 | 35537096 | 35537314 | 35537216 | 15  | 16  | 3  | 4.417042783 | 0.00097367  | RPL10A   | ENSG00000198755 |
| 6 | 35561814 | 35562046 | 35561930 | 10  | 11  | 1  | 6.235825105 | 0.0013754   | TEAD3    | ENSG00000007866 |
| 6 | 35598679 | 35598979 | 35598825 | 9   | 12  | 3  | 3.377738599 | 0.00867157  | TULP1    | ENSG00000112041 |
| 6 | 36103197 | 36103639 | 36103376 | 13  | 20  | 1  | 10.91269393 | 3.71E-06    | MAPK14   | ENSG00000112062 |
| 6 | 36208705 | 36209043 | 36208874 | 8   | 12  | 2  | 4.503651465 | 0.002963    | MAPK13   | ENSG00000156711 |
| 6 | 36230118 | 36230378 | 36230248 | 14  | 15  | 2  | 5.542955649 | 0.000497081 |          | ENSG00000221743 |
| 6 | 36321541 | 36321725 | 36321642 | 8   | 9   | 2  | 3.464347281 | 0.0163838   | PNPLA1   | ENSG00000180316 |
| 6 | 36462547 | 36462809 | 36462701 | 11  | 14  | 5  | 2.598260461 | 0.0167748   | ETV7     | ENSG00000010030 |
| 6 | 36669334 | 36669588 | 36669455 | 8   | 9   | 2  | 3.464347281 | 0.0163838   | SFRS3    | ENSG00000112081 |
| 6 | 36683875 | 36684247 | 36684052 | 14  | 20  | 2  | 7.27512929  | 2.27E-05    | SFRS3    | ENSG00000112081 |
| 6 | 36742684 | 36743305 | 36743007 | 135 | 166 | 3  | 43.39094969 | 2.25E-47    |          | ENSG00000213500 |
| 6 | 36751897 | 36753361 | 36752233 | 404 | 677 | 15 | 44.04051481 | 1.65E-184   | CDKN1A   | ENSG00000124762 |
| 6 | 36753447 | 36753772 | 36753603 | 11  | 14  | 2  | 5.196520921 | 0.000907371 | CDKN1A   | ENSG00000124762 |
| 6 | 36754143 | 36754366 | 36754254 | 11  | 13  | 1  | 7.27512929  | 0.000378098 | CDKN1A   | ENSG00000124762 |
| 6 | 36754482 | 36754674 | 36754535 | 8   | 8   | 2  | 3.117912553 | 0.0283184   | CDKN1A   | ENSG00000124762 |
| 6 | 36756164 | 36756562 | 36756383 | 12  | 19  | 1  | 10.39304184 | 7.23E-06    | CDKN1A   | ENSG00000124762 |
| 6 | 36757855 | 36758064 | 36757890 | 8   | 11  | 5  | 2.078608368 | 0.0614303   | CDKN1A   | ENSG00000124762 |
| 6 | 36758080 | 36758637 | 36758392 | 57  | 78  | 5  | 13.68417176 | 4.01E-19    | CDKN1A   | ENSG00000124762 |
| 6 | 36961496 | 36961679 | 36961587 | 8   | 8   | 1  | 4.676868829 | 0.0091584   | C6orf89  | ENSG00000198663 |
| 6 | 37099119 | 37099375 | 37099239 | 8   | 10  | 1  | 5.716173013 | 0.00260397  |          | ENSG00000146192 |
| 6 | 37217817 | 37218099 | 37217958 | 10  | 10  | 2  | 3.810782009 | 0.00936112  | PIM1     | ENSG00000137193 |
| 6 | 37248058 | 37248302 | 37248177 | 13  | 14  | 3  | 3.897390691 | 0.00295882  | PIM1     | ENSG00000137193 |
| 6 | 37320587 | 37320932 | 37320759 | 29  | 33  | 2  | 11.77878075 | 5.19E-09    |          | ENSG00000210733 |
| 6 | 37457342 | 37457553 | 37457447 | 9   | 9   | 4  | 2.078608368 | 0.0785659   |          | ENSG00000223195 |
| 6 | 37549234 | 37549458 | 37549353 | 9   | 10  | 6  | 1.63319229  | 0.146906    | C6orf129 | ENSG00000198937 |
| 6 | 37867164 | 37867405 | 37867284 | 9   | 12  | 4  | 2.702190879 | 0.0203088   | ZFAND3   | ENSG00000156639 |
| 6 | 37883979 | 37884270 | 37884120 | 8   | 11  | 6  | 1.781664316 | 0.103344    | ZFAND3   | ENSG00000156639 |
| 6 | 37884843 | 37885022 | 37884923 | 9   | 9   | 4  | 2.078608368 | 0.0785659   | ZFAND3   | ENSG00000156639 |
| 6 | 37894859 | 37895089 | 37894974 | 11  | 12  | 3  | 3.377738599 | 0.00867157  | ZFAND3   | ENSG00000156639 |
| 6 | 37965317 | 37965626 | 37965471 | 12  | 13  | 1  | 7.27512929  | 0.000378098 |          | ENSG00000200597 |

|   |          |          |          |    |     |   |             |             |          |                 |
|---|----------|----------|----------|----|-----|---|-------------|-------------|----------|-----------------|
| 6 | 38180910 | 38181100 | 38181019 | 8  | 9   | 1 | 5.196520921 | 0.00490062  |          | ENSG00000218521 |
| 6 | 38470395 | 38470610 | 38470459 | 8  | 10  | 2 | 3.810782009 | 0.00936112  | BTBD9    | ENSG00000183826 |
| 6 | 38507245 | 38507443 | 38507350 | 8  | 8   | 0 | 9.353737658 | 0.00163931  |          | ENSG00000199938 |
| 6 | 38715010 | 38715311 | 38715173 | 8  | 10  | 6 | 1.63319229  | 0.146906    | BTBD9    | ENSG00000183826 |
| 6 | 38831057 | 38831254 | 38831153 | 8  | 9   | 2 | 3.464347281 | 0.0163838   |          | ENSG00000219273 |
| 6 | 38849107 | 38849384 | 38849250 | 9  | 11  | 1 | 6.235825105 | 0.0013754   |          | ENSG00000219273 |
| 6 | 38852360 | 38852631 | 38852495 | 9  | 10  | 3 | 2.858086507 | 0.0242838   |          | ENSG00000219273 |
| 6 | 38968328 | 38968563 | 38968442 | 9  | 10  | 0 | 11.43234603 | 0.000394183 | DNAH8    | ENSG00000124721 |
| 6 | 39084571 | 39084778 | 39084674 | 10 | 11  | 3 | 3.117912553 | 0.0146045   |          | ENSG00000220556 |
| 6 | 39173055 | 39173264 | 39173171 | 8  | 8   | 2 | 3.117912553 | 0.0283184   | C6orf64  | ENSG00000112167 |
| 6 | 39645510 | 39645689 | 39645634 | 8  | 8   | 0 | 9.353737658 | 0.00163931  |          | ENSG00000218939 |
| 6 | 40008234 | 40008424 | 40008329 | 9  | 9   | 0 | 10.39304184 | 0.000803859 | MOCS1    | ENSG00000124615 |
| 6 | 40259751 | 40260080 | 40259915 | 14 | 17  | 3 | 4.676868829 | 0.000552213 |          | ENSG00000204092 |
| 6 | 40472355 | 40472840 | 40472586 | 33 | 53  | 9 | 5.612242595 | 1.26E-09    |          | ENSG00000210787 |
| 6 | 40599175 | 40599564 | 40599366 | 15 | 23  | 1 | 12.47165021 | 4.94E-07    | LRFN2    | ENSG00000156564 |
| 6 | 40724631 | 40724910 | 40724770 | 8  | 10  | 4 | 2.286469205 | 0.0509017   | LRFN2    | ENSG00000156564 |
| 6 | 40744636 | 40744815 | 40744689 | 8  | 8   | 0 | 9.353737658 | 0.00163931  | LRFN2    | ENSG00000156564 |
| 6 | 40774814 | 40774994 | 40774858 | 8  | 8   | 1 | 4.676868829 | 0.0091584   | LRFN2    | ENSG00000156564 |
| 6 | 40790640 | 40790819 | 40790679 | 8  | 8   | 3 | 2.338434415 | 0.0641221   | LRFN2    | ENSG00000156564 |
| 6 | 41147321 | 41147536 | 41147425 | 9  | 10  | 3 | 2.858086507 | 0.0242838   | C6orf130 | ENSG00000124596 |
| 6 | 41265555 | 41265932 | 41265734 | 19 | 27  | 2 | 9.700172386 | 2.61E-07    | TREML2   | ENSG00000112195 |
| 6 | 41689358 | 41689562 | 41689432 | 8  | 9   | 2 | 3.464347281 | 0.0163838   |          | ENSG00000214738 |
| 6 | 41811390 | 41811626 | 41811488 | 9  | 9   | 0 | 10.39304184 | 0.000803859 | TFEB     | ENSG00000112561 |
| 6 | 41842866 | 41843278 | 41843154 | 16 | 22  | 6 | 3.414856605 | 0.000820885 | FRS3     | ENSG00000137218 |
| 6 | 41844448 | 41844795 | 41844626 | 16 | 20  | 0 | 21.82538787 | 3.17E-07    | FRS3     | ENSG00000137218 |
| 6 | 41855663 | 41855882 | 41855730 | 8  | 10  | 3 | 2.858086507 | 0.0242838   | FRS3     | ENSG00000137218 |
| 6 | 41863175 | 41863650 | 41863388 | 8  | 17  | 8 | 2.078608368 | 0.0303558   | TOMM6    | ENSG00000214736 |
| 6 | 41922233 | 41922850 | 41922467 | 67 | 105 | 4 | 22.03324871 | 6.33E-28    |          | ENSG00000206977 |
| 6 | 41996765 | 41997131 | 41996952 | 10 | 17  | 2 | 6.235825105 | 0.000146695 | BYSL     | ENSG00000112578 |
| 6 | 42120012 | 42120253 | 42120167 | 10 | 13  | 9 | 1.455025858 | 0.177172    | CCND3    | ENSG00000112576 |
| 6 | 42293423 | 42293714 | 42293581 | 8  | 10  | 3 | 2.858086507 | 0.0242838   | MRPS10   | ENSG00000048544 |
| 6 | 42468985 | 42469219 | 42469124 | 8  | 9   | 0 | 10.39304184 | 0.000803859 |          | ENSG00000210840 |
| 6 | 43135027 | 43135214 | 43135145 | 9  | 10  | 1 | 5.716173013 | 0.00260397  | MRPL2    | ENSG00000112651 |
| 6 | 43172065 | 43172707 | 43172419 | 48 | 70  | 3 | 18.44764927 | 9.50E-19    |          | ENSG00000223079 |

|   |          |          |          |    |    |   |             |             |          |                 |
|---|----------|----------|----------|----|----|---|-------------|-------------|----------|-----------------|
| 6 | 43503321 | 43503502 | 43503393 | 9  | 9  | 4 | 2.078608368 | 0.0785659   | ABCC10   | ENSG00000124574 |
| 6 | 43651834 | 43652155 | 43651994 | 31 | 36 | 1 | 19.22712741 | 7.03E-11    | POLH     | ENSG00000170734 |
| 6 | 43743998 | 43744577 | 43744257 | 13 | 29 | 2 | 10.39304184 | 7.12E-08    |          | ENSG00000210930 |
| 6 | 43763326 | 43763515 | 43763454 | 8  | 8  | 4 | 1.870747532 | 0.118863    | MRPS18A  | ENSG00000096080 |
| 6 | 43874606 | 43874785 | 43874718 | 9  | 9  | 2 | 3.464347281 | 0.0163838   | VEGFA    | ENSG00000112715 |
| 6 | 44042299 | 44042499 | 44042346 | 10 | 10 | 2 | 3.810782009 | 0.00936112  | C6orf223 | ENSG00000181577 |
| 6 | 44150203 | 44150500 | 44150357 | 8  | 12 | 0 | 13.5109544  | 9.48E-05    |          | ENSG00000183239 |
| 6 | 44204450 | 44204682 | 44204566 | 14 | 16 | 1 | 8.834085566 | 5.30E-05    | TMEM63B  | ENSG00000137216 |
| 6 | 44209450 | 44209631 | 44209584 | 8  | 8  | 5 | 1.558956276 | 0.191397    | TMEM63B  | ENSG00000137216 |
| 6 | 44313213 | 44313562 | 44313380 | 11 | 15 | 0 | 16.62886695 | 1.12E-05    | HSP90AB1 | ENSG00000096384 |
| 6 | 44322227 | 44322464 | 44322336 | 8  | 10 | 5 | 1.905391004 | 0.0915982   | HSP90AB1 | ENSG00000096384 |
| 6 | 44322669 | 44323011 | 44322840 | 10 | 16 | 2 | 5.889390377 | 0.000270741 | HSP90AB1 | ENSG00000096384 |
| 6 | 44388977 | 44389346 | 44389098 | 10 | 16 | 4 | 3.533634226 | 0.00276486  | AARS2    | ENSG00000124608 |
| 6 | 44760920 | 44761315 | 44761099 | 79 | 87 | 2 | 30.48625607 | 6.20E-25    | SUPT3H   | ENSG00000196284 |
| 6 | 46897356 | 46897692 | 46897524 | 16 | 21 | 1 | 11.43234603 | 1.90E-06    | MEP1A    | ENSG00000112818 |
| 6 | 47210346 | 47210540 | 47210457 | 8  | 9  | 4 | 2.078608368 | 0.0785659   | GPR110   | ENSG00000153292 |
| 6 | 47557477 | 47557855 | 47557725 | 16 | 20 | 3 | 5.456346967 | 9.70E-05    | CD2AP    | ENSG00000198087 |
| 6 | 48186708 | 48187102 | 48186877 | 35 | 43 | 1 | 22.86469205 | 5.66E-13    |          | ENSG00000214653 |
| 6 | 51445943 | 51446320 | 51446152 | 10 | 14 | 7 | 1.948695345 | 0.0559175   |          | ENSG00000212532 |
| 6 | 52257430 | 52257711 | 52257576 | 8  | 9  | 3 | 2.598260461 | 0.0397929   | MCM3     | ENSG00000112118 |
| 6 | 52967815 | 52968085 | 52967950 | 11 | 14 | 6 | 2.227080395 | 0.0322529   | GSTA4    | ENSG00000170899 |
| 6 | 53085309 | 53085489 | 53085400 | 8  | 9  | 2 | 3.464347281 | 0.0163838   |          | ENSG00000211047 |
| 6 | 53144761 | 53145043 | 53144886 | 8  | 9  | 2 | 3.464347281 | 0.0163838   | GCM1     | ENSG00000137270 |
| 6 | 53299296 | 53299665 | 53299501 | 10 | 16 | 3 | 4.417042783 | 0.00097367  |          | ENSG00000217527 |
| 6 | 53383487 | 53383700 | 53383593 | 9  | 10 | 5 | 1.905391004 | 0.0915982   |          | ENSG00000211072 |
| 6 | 53438480 | 53438830 | 53438654 | 13 | 15 | 7 | 2.078608368 | 0.038229    |          | ENSG00000212065 |
| 6 | 53445735 | 53446046 | 53445890 | 24 | 27 | 0 | 29.10051716 | 2.16E-09    |          | ENSG00000212065 |
| 6 | 53520731 | 53521179 | 53521006 | 8  | 15 | 1 | 8.314433474 | 0.000102308 | GCLC     | ENSG00000001084 |
| 6 | 53691709 | 53691984 | 53691857 | 8  | 9  | 8 | 1.154782427 | 0.375434    | KLHL31   | ENSG00000124743 |
| 6 | 53842758 | 53843048 | 53842913 | 10 | 13 | 5 | 2.425043097 | 0.0262442   | LRRRC1   | ENSG00000137269 |
| 6 | 53928986 | 53929180 | 53929104 | 8  | 9  | 4 | 2.078608368 | 0.0785659   |          | ENSG00000218143 |
| 6 | 54088639 | 54089136 | 54088972 | 27 | 39 | 3 | 10.39304184 | 7.32E-10    | C6orf142 | ENSG00000146147 |
| 6 | 54817424 | 54817645 | 54817534 | 10 | 10 | 0 | 11.43234603 | 0.000394183 | FAM83B   | ENSG00000168143 |
| 6 | 54819024 | 54819630 | 54819333 | 11 | 24 | 8 | 2.886956067 | 0.00160675  | FAM83B   | ENSG00000168143 |

|   |          |          |          |     |      |      |             |             |          |                 |
|---|----------|----------|----------|-----|------|------|-------------|-------------|----------|-----------------|
| 6 | 54851972 | 54852197 | 54852084 | 9   | 9    | 5    | 1.73217364  | 0.133894    | FAM83B   | ENSG00000168143 |
| 6 | 55185021 | 55185312 | 55185175 | 9   | 12   | 1    | 6.755477198 | 0.000722752 | HCRTR2   | ENSG00000137252 |
| 6 | 55609276 | 55609456 | 55609444 | 8   | 8    | 2    | 3.117912553 | 0.0283184   |          | ENSG00000220725 |
| 6 | 55868794 | 55869033 | 55868903 | 10  | 11   | 3    | 3.117912553 | 0.0146045   | BMP5     | ENSG00000112175 |
| 6 | 56342975 | 56343184 | 56343130 | 8   | 11   | 2    | 4.157216737 | 0.0052913   | COL21A1  | ENSG00000124749 |
| 6 | 56824629 | 56824858 | 56824743 | 8   | 9    | 2    | 3.464347281 | 0.0163838   | DST      | ENSG00000151914 |
| 6 | 57002064 | 57002279 | 57002171 | 10  | 12   | 5    | 2.251825733 | 0.0404733   | KIAA1586 | ENSG00000168116 |
| 6 | 57062452 | 57062851 | 57062631 | 13  | 19   | 2    | 6.928694562 | 4.25E-05    | ZNF451   | ENSG00000112200 |
| 6 | 57162973 | 57163152 | 57163043 | 8   | 9    | 3    | 2.598260461 | 0.0397929   | BAG2     | ENSG00000112208 |
| 6 | 57464794 | 57465013 | 57464844 | 10  | 12   | 1    | 6.755477198 | 0.000722752 | PRIM2    | ENSG00000146143 |
| 6 | 57482323 | 57482596 | 57482482 | 9   | 10   | 3    | 2.858086507 | 0.0242838   | PRIM2    | ENSG00000146143 |
| 6 | 57550693 | 57550966 | 57550833 | 8   | 10   | 5    | 1.905391004 | 0.0915982   |          | ENSG00000214566 |
| 6 | 57553658 | 57553844 | 57553765 | 8   | 9    | 6    | 1.484720263 | 0.204387    |          | ENSG00000214566 |
| 6 | 57573777 | 57574080 | 57573931 | 17  | 19   | 2    | 6.928694562 | 4.25E-05    |          | ENSG00000214566 |
| 6 | 58881682 | 58882037 | 58881859 | 29  | 33   | 40   | 0.861862006 | 0.741243    |          | ENSG00000214561 |
| 6 | 58882336 | 58882678 | 58882507 | 54  | 54   | 44   | 1.27026067  | 0.11562     |          | ENSG00000214561 |
| 6 | 58882796 | 58883129 | 58882962 | 37  | 39   | 19   | 2.078608368 | 0.00277514  |          | ENSG00000214561 |
| 6 | 58884051 | 58887390 | 58886888 | 248 | 2129 | 2308 | 0.958734479 | 0.919747    |          | ENSG00000214561 |
| 6 | 58887624 | 58887960 | 58887792 | 24  | 25   | 22   | 1.1748656   | 0.285497    |          | ENSG00000214561 |
| 6 | 61958643 | 61958973 | 61958808 | 32  | 32   | 44   | 0.762156402 | 0.884833    |          | ENSG00000220030 |
| 6 | 61959521 | 61959848 | 61959692 | 11  | 11   | 12   | 0.959357709 | 0.543005    |          | ENSG00000220030 |
| 6 | 61971328 | 61971511 | 61971482 | 8   | 8    | 6    | 1.336248237 | 0.277651    |          | ENSG00000220030 |
| 6 | 64328898 | 64329168 | 64329054 | 10  | 12   | 1    | 6.755477198 | 0.000722752 | PTP4A1   | ENSG00000112245 |
| 6 | 64341407 | 64341906 | 64341617 | 141 | 167  | 4    | 34.92062059 | 2.47E-46    | PTP4A1   | ENSG00000112245 |
| 6 | 64342182 | 64342467 | 64342324 | 9   | 11   | 2    | 4.157216737 | 0.0052913   | PTP4A1   | ENSG00000112245 |
| 6 | 64366520 | 64366736 | 64366666 | 9   | 9    | 8    | 1.154782427 | 0.375434    |          | ENSG00000213309 |
| 6 | 65517566 | 65517813 | 65517689 | 17  | 19   | 0    | 20.78608368 | 6.46E-07    |          | ENSG00000219332 |
| 6 | 69006038 | 69006303 | 69006170 | 10  | 13   | 0    | 14.55025858 | 4.65E-05    |          | ENSG00000218834 |
| 6 | 69734941 | 69735121 | 69735030 | 8   | 8    | 0    | 9.353737658 | 0.00163931  |          | ENSG00000211141 |
| 6 | 72133937 | 72134578 | 72134347 | 168 | 203  | 3    | 53.0045134  | 1.44E-58    |          | ENSG00000199094 |
| 6 | 72134661 | 72135100 | 72134921 | 9   | 18   | 5    | 3.291129917 | 0.00248584  |          | ENSG00000199094 |
| 6 | 73554206 | 73554385 | 73554295 | 8   | 8    | 2    | 3.117912553 | 0.0283184   | KCNQ5    | ENSG00000185760 |
| 6 | 76038638 | 76038966 | 76038788 | 17  | 21   | 1    | 11.43234603 | 1.90E-06    | TMEM30A  | ENSG00000112697 |
| 6 | 76290938 | 76291133 | 76291041 | 8   | 9    | 2    | 3.464347281 | 0.0163838   |          | ENSG00000219722 |

|   |           |           |           |     |     |   |             |             |          |                 |
|---|-----------|-----------|-----------|-----|-----|---|-------------|-------------|----------|-----------------|
| 6 | 79019520  | 79019700  | 79019610  | 8   | 8   | 0 | 9.353737658 | 0.00163931  |          |                 |
| 6 | 79901393  | 79901637  | 79901516  | 8   | 9   | 0 | 10.39304184 | 0.000803859 | PHIP     | ENSG00000146247 |
| 6 | 80220012  | 80220291  | 80220151  | 13  | 15  | 0 | 16.62886695 | 1.12E-05    |          | ENSG00000218748 |
| 6 | 80311472  | 80311707  | 80311555  | 9   | 11  | 3 | 3.117912553 | 0.0146045   | LCA5     | ENSG00000135338 |
| 6 | 80995252  | 80995533  | 80995392  | 8   | 11  | 0 | 12.47165021 | 0.000193293 | BCKDHB   | ENSG00000083123 |
| 6 | 81302643  | 81303073  | 81302861  | 37  | 51  | 2 | 18.01460586 | 3.11E-14    |          | ENSG00000216352 |
| 6 | 82526284  | 82526694  | 82526463  | 24  | 33  | 0 | 35.33634226 | 3.00E-11    |          | ENSG00000206886 |
| 6 | 83250579  | 83250779  | 83250669  | 9   | 10  | 0 | 11.43234603 | 0.000394183 | TPBG     | ENSG00000146242 |
| 6 | 83336573  | 83336790  | 83336749  | 9   | 12  | 3 | 3.377738599 | 0.00867157  | TPBG     | ENSG00000146242 |
| 6 | 88157808  | 88158065  | 88157936  | 9   | 10  | 0 | 11.43234603 | 0.000394183 | C6orf164 | ENSG00000203871 |
| 6 | 88188043  | 88188348  | 88188195  | 12  | 16  | 4 | 3.533634226 | 0.00276486  |          | ENSG00000216324 |
| 6 | 89697153  | 89697332  | 89697243  | 8   | 8   | 0 | 9.353737658 | 0.00163931  |          | ENSG00000221224 |
| 6 | 94715467  | 94715723  | 94715605  | 8   | 10  | 1 | 5.716173013 | 0.00260397  |          | ENSG00000220370 |
| 6 | 94911284  | 94911655  | 94911484  | 59  | 64  | 3 | 16.88869299 | 5.30E-17    |          | ENSG00000220370 |
| 6 | 96711054  | 96711413  | 96711236  | 30  | 34  | 4 | 7.27512929  | 9.12E-08    |          | ENSG00000223167 |
| 6 | 100391155 | 100391410 | 100391313 | 11  | 11  | 2 | 4.157216737 | 0.0052913   | MCHR2    | ENSG00000152034 |
| 6 | 100551826 | 100552052 | 100551939 | 8   | 8   | 1 | 4.676868829 | 0.0091584   | MCHR2    | ENSG00000152034 |
| 6 | 100995538 | 100995729 | 100995641 | 9   | 9   | 0 | 10.39304184 | 0.000803859 | SIM1     | ENSG00000112246 |
| 6 | 101047757 | 101048016 | 101047884 | 9   | 11  | 2 | 4.157216737 | 0.0052913   | SIM1     | ENSG00000112246 |
| 6 | 101073241 | 101073463 | 101073352 | 10  | 10  | 3 | 2.858086507 | 0.0242838   |          | ENSG00000220695 |
| 6 | 102953596 | 102953957 | 102953796 | 13  | 19  | 0 | 20.78608368 | 6.46E-07    |          | ENSG00000219757 |
| 6 | 104449550 | 104449757 | 104449651 | 8   | 9   | 0 | 10.39304184 | 0.000803859 |          | ENSG00000216817 |
| 6 | 106652987 | 106653389 | 106653164 | 36  | 43  | 2 | 15.24312804 | 6.77E-12    | PRDM1    | ENSG00000057657 |
| 6 | 107656724 | 107657025 | 107656860 | 16  | 19  | 0 | 20.78608368 | 6.46E-07    |          | ENSG00000203285 |
| 6 | 107658396 | 107658824 | 107658572 | 48  | 59  | 5 | 10.39304184 | 8.31E-14    |          | ENSG00000220237 |
| 6 | 109325172 | 109325701 | 109325489 | 126 | 162 | 1 | 84.70329102 | 3.01E-49    |          | ENSG00000185796 |
| 6 | 109436613 | 109437176 | 109436859 | 22  | 39  | 6 | 5.938881053 | 7.94E-08    | SESN1    | ENSG00000080546 |
| 6 | 109811086 | 109811302 | 109811194 | 8   | 8   | 5 | 1.558956276 | 0.191397    | CD164    | ENSG00000135535 |
| 6 | 109812405 | 109812639 | 109812522 | 8   | 11  | 1 | 6.235825105 | 0.0013754   | CD164    | ENSG00000135535 |
| 6 | 110310064 | 110310421 | 110310243 | 19  | 24  | 1 | 12.9913023  | 2.52E-07    | GPR6     | ENSG00000146360 |
| 6 | 110493274 | 110493491 | 110493392 | 8   | 8   | 0 | 9.353737658 | 0.00163931  | GPR6     | ENSG00000146360 |
| 6 | 110818966 | 110819191 | 110819054 | 8   | 8   | 1 | 4.676868829 | 0.0091584   | DDO      | ENSG00000203797 |
| 6 | 111386454 | 111386841 | 111386735 | 9   | 13  | 4 | 2.910051716 | 0.0125532   | GTF3C6   | ENSG00000155115 |
| 6 | 111534971 | 111535376 | 111535171 | 48  | 62  | 0 | 65.47616361 | 3.18E-20    |          | ENSG00000200926 |

|   |           |           |           |     |     |     |             |             |          |                 |
|---|-----------|-----------|-----------|-----|-----|-----|-------------|-------------|----------|-----------------|
| 6 | 111911741 | 111912320 | 111912023 | 142 | 195 | 2   | 67.9012067  | 1.12E-57    | REV3L    | ENSG00000009413 |
| 6 | 111979353 | 111979576 | 111979464 | 8   | 8   | 2   | 3.117912553 | 0.0283184   | TRAF3IP2 | ENSG00000056972 |
| 6 | 112019377 | 112019861 | 112019526 | 9   | 18  | 8   | 2.194086611 | 0.0206188   | TRAF3IP2 | ENSG00000056972 |
| 6 | 112415274 | 112415537 | 112415380 | 16  | 17  | 1   | 9.353737658 | 2.73E-05    | WISP3    | ENSG00000112761 |
| 6 | 114070934 | 114071136 | 114071083 | 11  | 12  | 2   | 4.503651465 | 0.002963    |          | ENSG00000221559 |
| 6 | 114422825 | 114423028 | 114422891 | 10  | 10  | 0   | 11.43234603 | 0.000394183 | HDAC2    | ENSG00000196591 |
| 6 | 115498757 | 115499153 | 115498936 | 25  | 35  | 1   | 18.70747532 | 1.40E-10    |          | ENSG00000208800 |
| 6 | 116672242 | 116672432 | 116672337 | 10  | 10  | 2   | 3.810782009 | 0.00936112  | TSPYL4   | ENSG00000187189 |
| 6 | 116961622 | 116961817 | 116961713 | 8   | 8   | 1   | 4.676868829 | 0.0091584   | FAM26D   | ENSG00000164451 |
| 6 | 119001790 | 119002280 | 119002043 | 35  | 45  | 1   | 23.90399624 | 1.42E-13    |          | ENSG00000217330 |
| 6 | 119467150 | 119467329 | 119467239 | 8   | 8   | 2   | 3.117912553 | 0.0283184   | FAM184A  | ENSG00000111879 |
| 6 | 119600133 | 119600549 | 119600372 | 201 | 241 | 167 | 1.497092932 | 2.48E-05    |          | ENSG00000216316 |
| 6 | 120127864 | 120128126 | 120127977 | 10  | 10  | 0   | 11.43234603 | 0.000394183 | MAN1A1   | ENSG00000111885 |
| 6 | 120219074 | 120219254 | 120219164 | 8   | 8   | 1   | 4.676868829 | 0.0091584   |          | ENSG00000208766 |
| 6 | 122972708 | 122972961 | 122972834 | 8   | 11  | 2   | 4.157216737 | 0.0052913   | PKIB     | ENSG00000135549 |
| 6 | 123003219 | 123003538 | 123003371 | 20  | 23  | 2   | 8.314433474 | 3.41E-06    | PKIB     | ENSG00000135549 |
| 6 | 123055013 | 123055210 | 123055111 | 8   | 8   | 3   | 2.338434415 | 0.0641221   | PKIB     | ENSG00000135549 |
| 6 | 125408937 | 125409177 | 125409057 | 13  | 13  | 1   | 7.27512929  | 0.000378098 | RNF217   | ENSG00000146373 |
| 6 | 125517767 | 125517971 | 125517869 | 10  | 11  | 4   | 2.494330042 | 0.0324033   | TPD52L1  | ENSG00000111907 |
| 6 | 125564772 | 125565379 | 125565219 | 12  | 25  | 8   | 3.00243431  | 0.0010168   | TPD52L1  | ENSG00000111907 |
| 6 | 125947368 | 125947788 | 125947531 | 12  | 20  | 2   | 7.27512929  | 2.27E-05    | HEY2     | ENSG00000135547 |
| 6 | 126372894 | 126373101 | 126373050 | 9   | 9   | 0   | 10.39304184 | 0.000803859 | TRMT11   | ENSG00000066651 |
| 6 | 128870921 | 128871160 | 128871076 | 8   | 8   | 0   | 9.353737658 | 0.00163931  | PTPRK    | ENSG00000152894 |
| 6 | 129081385 | 129081606 | 129081514 | 8   | 8   | 1   | 4.676868829 | 0.0091584   |          | ENSG00000208672 |
| 6 | 130030540 | 130030759 | 130030606 | 8   | 9   | 3   | 2.598260461 | 0.0397929   | ARHGAP18 | ENSG00000146376 |
| 6 | 132366477 | 132366729 | 132366610 | 10  | 10  | 0   | 11.43234603 | 0.000394183 | CTGF     | ENSG00000118523 |
| 6 | 133161849 | 133162037 | 133161943 | 8   | 8   | 2   | 3.117912553 | 0.0283184   | C6orf192 | ENSG00000146409 |
| 6 | 133635621 | 133635956 | 133635788 | 18  | 21  | 23  | 0.952695502 | 0.566563    |          | ENSG00000208647 |
| 6 | 133702447 | 133702797 | 133702622 | 8   | 10  | 0   | 11.43234603 | 0.000394183 |          | ENSG00000208647 |
| 6 | 134363714 | 134363919 | 134363782 | 9   | 10  | 0   | 11.43234603 | 0.000394183 | TBPL1    | ENSG00000208839 |
| 6 | 134420336 | 134420662 | 134420484 | 16  | 20  | 0   | 21.82538787 | 3.17E-07    | SLC2A12  | ENSG00000146411 |
| 6 | 136652481 | 136652661 | 136652571 | 8   | 9   | 2   | 3.464347281 | 0.0163838   | BCLAF1   | ENSG00000209363 |
| 6 | 137952231 | 137952444 | 137952360 | 8   | 10  | 3   | 2.858086507 | 0.0242838   |          | ENSG00000213108 |
| 6 | 138041332 | 138041511 | 138041421 | 8   | 8   | 2   | 3.117912553 | 0.0283184   |          | ENSG00000220412 |



|   |           |           |           |    |    |    |             |             |           |                 |
|---|-----------|-----------|-----------|----|----|----|-------------|-------------|-----------|-----------------|
| 6 | 138397834 | 138398248 | 138398041 | 64 | 78 | 3  | 20.52625764 | 4.32E-21    |           | ENSG00000219463 |
| 6 | 138750538 | 138750731 | 138750651 | 9  | 9  | 2  | 3.464347281 | 0.0163838   |           | ENSG00000218499 |
| 6 | 139738252 | 139738458 | 139738375 | 10 | 10 | 3  | 2.858086507 | 0.0242838   | CITED2    | ENSG00000164442 |
| 6 | 139794101 | 139794440 | 139794268 | 15 | 18 | 4  | 3.9493559   | 0.000961379 | CITED2    | ENSG00000164442 |
| 6 | 139799597 | 139799835 | 139799727 | 8  | 9  | 5  | 1.73217364  | 0.133894    | CITED2    | ENSG00000164442 |
| 6 | 141915426 | 141915709 | 141915583 | 10 | 11 | 2  | 4.157216737 | 0.0052913   |           | ENSG00000222764 |
| 6 | 142352146 | 142352390 | 142352268 | 12 | 12 | 2  | 4.503651465 | 0.002963    | NMBR      | ENSG00000135577 |
| 6 | 143813539 | 143813718 | 143813660 | 8  | 8  | 1  | 4.676868829 | 0.0091584   | PEX3      | ENSG00000034693 |
| 6 | 147407076 | 147407411 | 147407243 | 25 | 29 | 0  | 31.17912553 | 5.19E-10    |           | ENSG00000216063 |
| 6 | 149248848 | 149249144 | 149249010 | 16 | 18 | 4  | 3.9493559   | 0.000961379 |           | ENSG00000203725 |
| 6 | 149442655 | 149443072 | 149442827 | 38 | 45 | 6  | 6.829713211 | 2.35E-09    |           | ENSG00000219487 |
| 6 | 149699444 | 149699836 | 149699623 | 46 | 55 | 2  | 19.40034477 | 2.07E-15    | MAP3K7IP2 | ENSG00000055208 |
| 6 | 149741889 | 149742192 | 149742040 | 13 | 14 | 1  | 7.794781382 | 0.000197021 | SUMO4     | ENSG00000177688 |
| 6 | 149841546 | 149841801 | 149841699 | 13 | 13 | 0  | 14.55025858 | 4.65E-05    | ZC3H12D   | ENSG00000178199 |
| 6 | 150510342 | 150510581 | 150510461 | 15 | 17 | 1  | 9.353737658 | 2.73E-05    | PPP1R14C  | ENSG00000198729 |
| 6 | 151220024 | 151220350 | 151220176 | 27 | 29 | 0  | 31.17912553 | 5.19E-10    | MTHFD1L   | ENSG00000120254 |
| 6 | 151815068 | 151815343 | 151815211 | 12 | 14 | 4  | 3.117912553 | 0.00766354  | C6orf211  | ENSG00000146476 |
| 6 | 151886755 | 151887298 | 151887066 | 34 | 48 | 0  | 50.92590503 | 6.85E-16    | C6orf97   | ENSG00000120262 |
| 6 | 151920897 | 151921189 | 151921043 | 16 | 18 | 0  | 19.7467795  | 1.32E-06    |           | ENSG00000207422 |
| 6 | 152020859 | 152021236 | 152021024 | 16 | 22 | 10 | 2.173090567 | 0.0132845   | ESR1      | ENSG00000091831 |
| 6 | 152021602 | 152021847 | 152021741 | 9  | 10 | 3  | 2.858086507 | 0.0242838   | ESR1      | ENSG00000091831 |
| 6 | 152029613 | 152029792 | 152029702 | 8  | 8  | 6  | 1.336248237 | 0.277651    | ESR1      | ENSG00000091831 |
| 6 | 152038680 | 152038948 | 152038814 | 9  | 13 | 7  | 1.818782322 | 0.0805123   | ESR1      | ENSG00000091831 |
| 6 | 152040087 | 152040286 | 152040186 | 8  | 8  | 2  | 3.117912553 | 0.0283184   | ESR1      | ENSG00000091831 |
| 6 | 152126952 | 152127151 | 152127054 | 9  | 9  | 3  | 2.598260461 | 0.0397929   | ESR1      | ENSG00000091831 |
| 6 | 152128284 | 152128704 | 152128445 | 30 | 38 | 2  | 13.5109544  | 1.90E-10    | ESR1      | ENSG00000091831 |
| 6 | 152454146 | 152454326 | 152454236 | 8  | 8  | 1  | 4.676868829 | 0.0091584   | C6orf98   | ENSG00000222029 |
| 6 | 152584671 | 152585037 | 152584876 | 25 | 31 | 0  | 33.2577339  | 1.25E-10    | SYNE1     | ENSG00000131018 |
| 6 | 152676903 | 152677188 | 152677050 | 23 | 24 | 0  | 25.98260461 | 1.83E-08    | SYNE1     | ENSG00000131018 |
| 6 | 154655880 | 154656207 | 154656043 | 8  | 11 | 3  | 3.117912553 | 0.0146045   |           | ENSG00000074706 |
| 6 | 154873356 | 154873635 | 154873495 | 8  | 9  | 2  | 3.464347281 | 0.0163838   | CNKSR3    | ENSG00000153721 |
| 6 | 157989369 | 157989869 | 157989690 | 11 | 22 | 0  | 23.90399624 | 7.62E-08    | ZDHHHC14  | ENSG00000175048 |
| 6 | 158381402 | 158381731 | 158381566 | 16 | 19 | 4  | 4.157216737 | 0.000560204 | SYNJ2     | ENSG00000078269 |
| 6 | 158390560 | 158390887 | 158390731 | 19 | 22 | 5  | 3.983999373 | 0.000317941 | SYNJ2     | ENSG00000078269 |

|   |           |           |           |    |    |   |             |             |         |                 |
|---|-----------|-----------|-----------|----|----|---|-------------|-------------|---------|-----------------|
| 6 | 158463214 | 158463411 | 158463341 | 9  | 9  | 2 | 3.464347281 | 0.0163838   | SYNJ2   | ENSG00000078269 |
| 6 | 159001408 | 159001636 | 159001526 | 9  | 10 | 2 | 3.810782009 | 0.00936112  | SYTL3   | ENSG00000164674 |
| 6 | 159122498 | 159122683 | 159122590 | 8  | 8  | 1 | 4.676868829 | 0.0091584   | EZR     | ENSG00000092820 |
| 6 | 159238354 | 159238698 | 159238526 | 20 | 25 | 0 | 27.02190879 | 8.98E-09    |         | ENSG00000213076 |
| 6 | 159251526 | 159251708 | 159251609 | 8  | 8  | 1 | 4.676868829 | 0.0091584   |         | ENSG00000213076 |
| 6 | 159593955 | 159594335 | 159594134 | 25 | 32 | 2 | 11.43234603 | 1.00E-08    | FNDC1   | ENSG00000164694 |
| 6 | 159974221 | 159974446 | 159974330 | 10 | 12 | 1 | 6.755477198 | 0.000722752 | SOD2    | ENSG00000112096 |
| 6 | 163728371 | 163728677 | 163728536 | 30 | 33 | 0 | 35.33634226 | 3.00E-11    |         | ENSG00000217514 |
| 6 | 163975544 | 163976099 | 163975858 | 56 | 81 | 1 | 42.61147155 | 1.79E-24    |         | ENSG00000222470 |
| 6 | 164162627 | 164162834 | 164162730 | 8  | 9  | 5 | 1.73217364  | 0.133894    |         | ENSG00000222470 |
| 6 | 165714238 | 165714425 | 165714331 | 8  | 9  | 0 | 10.39304184 | 0.000803859 |         | ENSG00000199523 |
| 6 | 166025926 | 166026105 | 166026015 | 8  | 8  | 0 | 9.353737658 | 0.00163931  |         | ENSG00000206681 |
| 6 | 169037205 | 169037437 | 169037321 | 13 | 13 | 0 | 14.55025858 | 4.65E-05    | SMOC2   | ENSG00000112562 |
| 6 | 169539351 | 169539652 | 169539501 | 9  | 9  | 0 | 10.39304184 | 0.000803859 |         | ENSG00000219031 |
| 6 | 170183689 | 170183933 | 170183840 | 9  | 12 | 4 | 2.702190879 | 0.0203088   |         | ENSG00000218716 |
| 6 | 170383553 | 170383802 | 170383681 | 17 | 18 | 0 | 19.7467795  | 1.32E-06    |         | ENSG00000218716 |
| 6 | 170495972 | 170496160 | 170496022 | 9  | 9  | 1 | 5.196520921 | 0.00490062  | FAM120B | ENSG00000112584 |
| 6 | 170524050 | 170524318 | 170524177 | 10 | 11 | 1 | 6.235825105 | 0.0013754   | FAM120B | ENSG00000112584 |
| 6 | 170680890 | 170681069 | 170681040 | 8  | 8  | 7 | 1.169217207 | 0.371848    | PSMB1   | ENSG00000008018 |
| 7 | 544382    | 544685    | 544533    | 11 | 15 | 3 | 4.157216737 | 0.00170423  | PDGFA   | ENSG00000197461 |
| 7 | 545666    | 545848    | 545757    | 10 | 10 | 2 | 3.810782009 | 0.00936112  | PDGFA   | ENSG00000197461 |
| 7 | 545989    | 546946    | 546156    | 49 | 90 | 6 | 13.5109544  | 1.27E-21    | PDGFA   | ENSG00000197461 |
| 7 | 628096    | 628610    | 628242    | 10 | 20 | 4 | 4.365077574 | 0.000324139 | PRKAR1B | ENSG00000188191 |
| 7 | 647498    | 647685    | 647593    | 8  | 9  | 0 | 10.39304184 | 0.000803859 | PRKAR1B | ENSG00000188191 |
| 7 | 711668    | 711892    | 711780    | 10 | 12 | 3 | 3.377738599 | 0.00867157  | PRKAR1B | ENSG00000188191 |
| 7 | 842660    | 842848    | 842754    | 8  | 8  | 2 | 3.117912553 | 0.0283184   | UNC84A  | ENSG00000164828 |
| 7 | 887661    | 887939    | 887800    | 11 | 13 | 8 | 1.616695398 | 0.123553    | C7orf20 | ENSG00000105972 |
| 7 | 933532    | 933767    | 933649    | 9  | 11 | 3 | 3.117912553 | 0.0146045   | ADAP1   | ENSG00000105963 |
| 7 | 1035069   | 1035268   | 1035168   | 10 | 10 | 5 | 1.905391004 | 0.0915982   |         | ENSG00000199023 |
| 7 | 1050405   | 1050593   | 1050499   | 9  | 9  | 5 | 1.73217364  | 0.133894    |         | ENSG00000212776 |
| 7 | 1053143   | 1053335   | 1053159   | 8  | 10 | 4 | 2.286469205 | 0.0509017   |         | ENSG00000212776 |
| 7 | 1053603   | 1053782   | 1053712   | 8  | 8  | 7 | 1.169217207 | 0.371848    |         | ENSG00000212776 |
| 7 | 1102717   | 1102916   | 1102781   | 9  | 9  | 1 | 5.196520921 | 0.00490062  | GPER    | ENSG00000164850 |
| 7 | 1308944   | 1309395   | 1309188   | 36 | 48 | 0 | 50.92590503 | 6.85E-16    | UNCX    | ENSG00000164853 |

|   |         |         |         |     |     |    |             |             |          |                 |
|---|---------|---------|---------|-----|-----|----|-------------|-------------|----------|-----------------|
| 7 | 1419337 | 1419658 | 1419497 | 12  | 14  | 3  | 3.897390691 | 0.00295882  | MICALL2  | ENSG00000164877 |
| 7 | 1562412 | 1562813 | 1562634 | 8   | 14  | 5  | 2.598260461 | 0.0167748   | TMEM184A | ENSG00000215155 |
| 7 | 1898508 | 1898768 | 1898628 | 15  | 17  | 3  | 4.676868829 | 0.000552213 |          | ENSG00000215135 |
| 7 | 1902564 | 1902827 | 1902738 | 19  | 21  | 0  | 22.86469205 | 1.55E-07    |          | ENSG00000215135 |
| 7 | 1928421 | 1928770 | 1928693 | 8   | 12  | 0  | 13.5109544  | 9.48E-05    |          | ENSG00000215135 |
| 7 | 1944568 | 1944859 | 1944713 | 10  | 12  | 3  | 3.377738599 | 0.00867157  |          | ENSG00000215135 |
| 7 | 2176074 | 2176596 | 2176306 | 121 | 161 | 3  | 42.09181946 | 7.24E-46    | MAD1L1   | ENSG00000002822 |
| 7 | 2179145 | 2179369 | 2179257 | 12  | 14  | 5  | 2.598260461 | 0.0167748   | MAD1L1   | ENSG00000002822 |
| 7 | 2235630 | 2235915 | 2235809 | 8   | 8   | 1  | 4.676868829 | 0.0091584   | MAD1L1   | ENSG00000002822 |
| 7 | 2243477 | 2243793 | 2243635 | 8   | 13  | 3  | 3.637564645 | 0.0050909   | FTSJ2    | ENSG00000122687 |
| 7 | 2251509 | 2251730 | 2251611 | 8   | 8   | 6  | 1.336248237 | 0.277651    | NUDT1    | ENSG00000106268 |
| 7 | 2277929 | 2278142 | 2278059 | 8   | 8   | 2  | 3.117912553 | 0.0283184   | CHST12   | ENSG00000136213 |
| 7 | 2406274 | 2406507 | 2406390 | 8   | 10  | 5  | 1.905391004 | 0.0915982   | CHST12   | ENSG00000136213 |
| 7 | 2447199 | 2447500 | 2447349 | 11  | 13  | 3  | 3.637564645 | 0.0050909   |          | ENSG00000175873 |
| 7 | 2518709 | 2518939 | 2518819 | 8   | 9   | 1  | 5.196520921 | 0.00490062  | LFNG     | ENSG00000106003 |
| 7 | 2677159 | 2677367 | 2677234 | 9   | 11  | 3  | 3.117912553 | 0.0146045   | AMZ1     | ENSG00000174945 |
| 7 | 3004504 | 3004722 | 3004613 | 12  | 12  | 0  | 13.5109544  | 9.48E-05    |          | ENSG00000201794 |
| 7 | 3222031 | 3222593 | 3222364 | 15  | 27  | 12 | 2.23850132  | 0.00591854  |          | ENSG00000217455 |
| 7 | 3410709 | 3410977 | 3410843 | 14  | 16  | 1  | 8.834085566 | 5.30E-05    |          | ENSG00000211544 |
| 7 | 3634861 | 3635132 | 3634996 | 10  | 11  | 1  | 6.235825105 | 0.0013754   |          | ENSG00000211544 |
| 7 | 4159923 | 4160109 | 4159997 | 9   | 9   | 4  | 2.078608368 | 0.0785659   | SDK1     | ENSG00000146555 |
| 7 | 4838076 | 4838269 | 4838172 | 8   | 9   | 9  | 1.039304184 | 0.466079    |          | ENSG00000206895 |
| 7 | 5095218 | 5095461 | 5095384 | 14  | 16  | 5  | 2.944695189 | 0.00659886  | RBAK     | ENSG00000146587 |
| 7 | 5403324 | 5403731 | 5403503 | 16  | 25  | 4  | 5.404381758 | 1.92E-05    |          | ENSG00000182095 |
| 7 | 5418814 | 5419067 | 5418940 | 11  | 11  | 0  | 12.47165021 | 0.000193293 |          | ENSG00000182095 |
| 7 | 5430148 | 5430327 | 5430237 | 8   | 8   | 3  | 2.338434415 | 0.0641221   |          | ENSG00000182095 |
| 7 | 5431712 | 5431918 | 5431841 | 11  | 11  | 2  | 4.157216737 | 0.0052913   |          | ENSG00000182095 |
| 7 | 5432180 | 5432405 | 5432290 | 10  | 11  | 6  | 1.781664316 | 0.103344    |          | ENSG00000182095 |
| 7 | 5532044 | 5532551 | 5532365 | 35  | 51  | 1  | 27.02190879 | 2.22E-15    | ACTB     | ENSG00000075624 |
| 7 | 5562872 | 5563156 | 5563022 | 8   | 11  | 1  | 6.235825105 | 0.0013754   |          | ENSG00000169549 |
| 7 | 5569817 | 5570029 | 5569923 | 10  | 10  | 3  | 2.858086507 | 0.0242838   |          | ENSG00000169549 |
| 7 | 5653032 | 5653400 | 5653211 | 21  | 26  | 1  | 14.03060649 | 6.50E-08    |          | ENSG00000215059 |
| 7 | 5833985 | 5834196 | 5834137 | 8   | 10  | 1  | 5.716173013 | 0.00260397  |          | ENSG00000222897 |
| 7 | 6001479 | 6002242 | 6001858 | 13  | 35  | 11 | 3.117912553 | 0.000104429 |          | ENSG00000201990 |

|   |          |          |          |    |     |    |             |             |        |                 |
|---|----------|----------|----------|----|-----|----|-------------|-------------|--------|-----------------|
| 7 | 6104128  | 6104307  | 6104217  | 8  | 9   | 0  | 10.39304184 | 0.000803859 | USP42  | ENSG00000106346 |
| 7 | 6391666  | 6391924  | 6391789  | 13 | 13  | 5  | 2.425043097 | 0.0262442   | RAC1   | ENSG00000136238 |
| 7 | 6409281  | 6409460  | 6409346  | 8  | 8   | 4  | 1.870747532 | 0.118863    | RAC1   | ENSG00000136238 |
| 7 | 6509909  | 6510192  | 6510075  | 10 | 13  | 7  | 1.818782322 | 0.0805123   | KDEL2  | ENSG00000136240 |
| 7 | 6636481  | 6636774  | 6636627  | 10 | 13  | 5  | 2.425043097 | 0.0262442   | ZNF316 | ENSG00000205903 |
| 7 | 6713090  | 6713348  | 6713219  | 8  | 9   | 5  | 1.73217364  | 0.133894    | ZNF12  | ENSG00000164631 |
| 7 | 7144557  | 7144746  | 7144651  | 8  | 8   | 4  | 1.870747532 | 0.118863    |        | ENSG00000201218 |
| 7 | 7327757  | 7328288  | 7328015  | 8  | 19  | 6  | 2.969440526 | 0.0035096   |        | ENSG00000218370 |
| 7 | 7333693  | 7334070  | 7333872  | 13 | 19  | 2  | 6.928694562 | 4.25E-05    |        | ENSG00000218370 |
| 7 | 7360913  | 7361209  | 7361043  | 12 | 15  | 7  | 2.078608368 | 0.038229    |        | ENSG00000218370 |
| 7 | 7570511  | 7570769  | 7570645  | 8  | 10  | 8  | 1.27026067  | 0.293854    |        | ENSG00000164654 |
| 7 | 7645951  | 7646253  | 7646109  | 8  | 12  | 5  | 2.251825733 | 0.0404733   | RPA3   | ENSG00000106399 |
| 7 | 7687439  | 7687693  | 7687566  | 8  | 9   | 1  | 5.196520921 | 0.00490062  | RPA3   | ENSG00000106399 |
| 7 | 7802136  | 7802317  | 7802226  | 8  | 8   | 1  | 4.676868829 | 0.0091584   |        | ENSG00000219545 |
| 7 | 8002601  | 8002975  | 8002840  | 13 | 17  | 3  | 4.676868829 | 0.000552213 |        | ENSG00000217142 |
| 7 | 8160463  | 8160764  | 8160618  | 9  | 11  | 5  | 2.078608368 | 0.0614303   | ICA1   | ENSG00000003147 |
| 7 | 8297132  | 8297464  | 8297298  | 14 | 18  | 14 | 1.316451967 | 0.209896    | ICA1   | ENSG00000003147 |
| 7 | 8332110  | 8332341  | 8332228  | 8  | 10  | 10 | 1.039304184 | 0.464387    | ICA1   | ENSG00000003147 |
| 7 | 8395937  | 8396126  | 8395982  | 8  | 9   | 5  | 1.73217364  | 0.133894    | NXPH1  | ENSG00000122584 |
| 7 | 11088807 | 11089351 | 11089081 | 83 | 113 | 0  | 118.480677  | 5.24E-36    |        | ENSG00000219777 |
| 7 | 11176268 | 11176534 | 11176401 | 11 | 12  | 2  | 4.503651465 | 0.002963    |        | ENSG00000220166 |
| 7 | 11205752 | 11205932 | 11205787 | 8  | 9   | 2  | 3.464347281 | 0.0163838   |        | ENSG00000220166 |
| 7 | 11267604 | 11267915 | 11267738 | 10 | 12  | 9  | 1.35109544  | 0.232899    |        | ENSG00000220166 |
| 7 | 11347521 | 11347743 | 11347623 | 9  | 10  | 1  | 5.716173013 | 0.00260397  |        | ENSG00000220166 |
| 7 | 12563502 | 12563982 | 12563735 | 67 | 89  | 1  | 46.76868829 | 6.57E-27    | SCIN   | ENSG00000006747 |
| 7 | 12692526 | 12692714 | 12692620 | 8  | 8   | 0  | 9.353737658 | 0.00163931  | ARL4A  | ENSG00000122644 |
| 7 | 12808142 | 12808566 | 12808387 | 9  | 17  | 1  | 9.353737658 | 2.73E-05    |        | ENSG00000222974 |
| 7 | 12815640 | 12815945 | 12815792 | 9  | 13  | 1  | 7.27512929  | 0.000378098 |        | ENSG00000222974 |
| 7 | 12957735 | 12957929 | 12957819 | 9  | 9   | 3  | 2.598260461 | 0.0397929   |        | ENSG00000216374 |
| 7 | 13748915 | 13749263 | 13749089 | 10 | 13  | 3  | 3.637564645 | 0.0050909   |        | ENSG00000213875 |
| 7 | 13926480 | 13926660 | 13926541 | 8  | 8   | 5  | 1.558956276 | 0.191397    |        | ENSG00000213875 |
| 7 | 15701583 | 15701848 | 15701727 | 9  | 9   | 2  | 3.464347281 | 0.0163838   |        | ENSG00000216759 |
| 7 | 16427944 | 16428250 | 16428097 | 11 | 14  | 0  | 15.58956276 | 2.28E-05    |        | ENSG00000214960 |
| 7 | 16651686 | 16651909 | 16651782 | 11 | 11  | 1  | 6.235825105 | 0.0013754   | ANKMY2 | ENSG00000106524 |

|   |          |          |          |    |    |    |             |             |         |                 |
|---|----------|----------|----------|----|----|----|-------------|-------------|---------|-----------------|
| 7 | 16659083 | 16659342 | 16659191 | 11 | 14 | 2  | 5.196520921 | 0.000907371 | BZW2    | ENSG00000136261 |
| 7 | 16853552 | 16853756 | 16853606 | 10 | 11 | 7  | 1.558956276 | 0.158273    |         | ENSG00000219389 |
| 7 | 16897557 | 16897848 | 16897701 | 9  | 13 | 3  | 3.637564645 | 0.0050909   |         | ENSG00000217531 |
| 7 | 16996170 | 16996438 | 16996304 | 10 | 12 | 6  | 1.930136342 | 0.071303    |         | ENSG00000219142 |
| 7 | 17310965 | 17311328 | 17311192 | 9  | 14 | 2  | 5.196520921 | 0.000907371 | AHR     | ENSG00000106546 |
| 7 | 17496205 | 17496505 | 17496355 | 27 | 27 | 2  | 9.700172386 | 2.61E-07    |         | ENSG00000199473 |
| 7 | 17624762 | 17624997 | 17624879 | 9  | 12 | 12 | 1.039304184 | 0.461227    |         | ENSG00000199473 |
| 7 | 17680537 | 17680753 | 17680645 | 9  | 10 | 2  | 3.810782009 | 0.00936112  | SNX13   | ENSG00000071189 |
| 7 | 17777250 | 17777486 | 17777368 | 11 | 12 | 0  | 13.5109544  | 9.48E-05    | SNX13   | ENSG00000071189 |
| 7 | 18192329 | 18192534 | 18192507 | 8  | 10 | 2  | 3.810782009 | 0.00936112  |         | ENSG00000221393 |
| 7 | 18389433 | 18389728 | 18389580 | 10 | 10 | 1  | 5.716173013 | 0.00260397  |         | ENSG00000223030 |
| 7 | 18426927 | 18427296 | 18427103 | 33 | 41 | 4  | 8.730155148 | 1.21E-09    | HDAC9   | ENSG00000048052 |
| 7 | 22679358 | 22679683 | 22679520 | 10 | 14 | 11 | 1.29913023  | 0.246308    |         | ENSG00000179460 |
| 7 | 23081165 | 23081383 | 23081208 | 9  | 12 | 5  | 2.251825733 | 0.0404733   | KLHL7   | ENSG00000122550 |
| 7 | 23340849 | 23341145 | 23340993 | 12 | 15 | 3  | 4.157216737 | 0.00170423  | C7orf30 | ENSG00000156928 |
| 7 | 23603440 | 23603653 | 23603585 | 8  | 9  | 1  | 5.196520921 | 0.00490062  | CCDC126 | ENSG00000169193 |
| 7 | 23869454 | 23869656 | 23869576 | 10 | 10 | 1  | 5.716173013 | 0.00260397  |         | ENSG00000210311 |
| 7 | 24887714 | 24888053 | 24887883 | 8  | 9  | 2  | 3.464347281 | 0.0163838   | OSBPL3  | ENSG00000070882 |
| 7 | 24977384 | 24977719 | 24977551 | 17 | 22 | 1  | 11.95199812 | 9.69E-07    | OSBPL3  | ENSG00000070882 |
| 7 | 26067795 | 26068111 | 26067953 | 10 | 13 | 5  | 2.425043097 | 0.0262442   | NFE2L3  | ENSG00000050344 |
| 7 | 26089393 | 26089646 | 26089519 | 11 | 12 | 2  | 4.503651465 | 0.002963    | NFE2L3  | ENSG00000050344 |
| 7 | 26090390 | 26090625 | 26090498 | 8  | 9  | 0  | 10.39304184 | 0.000803859 | NFE2L3  | ENSG00000050344 |
| 7 | 26090746 | 26090998 | 26090852 | 9  | 11 | 0  | 12.47165021 | 0.000193293 | NFE2L3  | ENSG00000050344 |
| 7 | 26207139 | 26207515 | 26207361 | 11 | 17 | 7  | 2.338434415 | 0.0171287   | CBX3    | ENSG00000122565 |
| 7 | 26208703 | 26209009 | 26208852 | 8  | 9  | 3  | 2.598260461 | 0.0397929   | CBX3    | ENSG00000122565 |
| 7 | 26290774 | 26290960 | 26290867 | 8  | 8  | 0  | 9.353737658 | 0.00163931  | SNX10   | ENSG00000086300 |
| 7 | 26291188 | 26291478 | 26291327 | 9  | 10 | 2  | 3.810782009 | 0.00936112  | SNX10   | ENSG00000086300 |
| 7 | 26668794 | 26669038 | 26668916 | 8  | 9  | 0  | 10.39304184 | 0.000803859 |         | ENSG00000222004 |
| 7 | 26870942 | 26871329 | 26871150 | 15 | 19 | 3  | 5.196520921 | 0.000174201 | SKAP2   | ENSG00000005020 |
| 7 | 27266421 | 27266622 | 27266541 | 10 | 10 | 5  | 1.905391004 | 0.0915982   |         | ENSG00000213783 |
| 7 | 27790511 | 27790742 | 27790626 | 9  | 11 | 4  | 2.494330042 | 0.0324033   | TAX1BP1 | ENSG00000106052 |
| 7 | 27927382 | 27927582 | 27927477 | 8  | 9  | 2  | 3.464347281 | 0.0163838   | TAX1BP1 | ENSG00000106052 |
| 7 | 28624516 | 28624776 | 28624676 | 11 | 13 | 2  | 4.850086193 | 0.00164564  |         | ENSG00000205786 |
| 7 | 28780217 | 28780479 | 28780369 | 8  | 10 | 3  | 2.858086507 | 0.0242838   | CREB5   | ENSG00000146592 |

|   |          |          |          |     |     |    |             |             |           |                 |
|---|----------|----------|----------|-----|-----|----|-------------|-------------|-----------|-----------------|
| 7 | 29334857 | 29335103 | 29334980 | 11  | 12  | 1  | 6.755477198 | 0.000722752 | CHN2      | ENSG00000106069 |
| 7 | 29456103 | 29456377 | 29456240 | 10  | 13  | 2  | 4.850086193 | 0.00164564  | CHN2      | ENSG00000106069 |
| 7 | 29569346 | 29569531 | 29569438 | 8   | 9   | 6  | 1.484720263 | 0.204387    | PRR15     | ENSG00000176532 |
| 7 | 29851452 | 29851698 | 29851591 | 10  | 10  | 0  | 11.43234603 | 0.000394183 | WIPF3     | ENSG00000122574 |
| 7 | 30179023 | 30179471 | 30179317 | 10  | 18  | 5  | 3.291129917 | 0.00248584  | C7orf41   | ENSG00000180354 |
| 7 | 30354341 | 30354548 | 30354447 | 9   | 9   | 5  | 1.73217364  | 0.133894    |           | ENSG00000207771 |
| 7 | 30355396 | 30355603 | 30355499 | 9   | 9   | 2  | 3.464347281 | 0.0163838   |           | ENSG00000207771 |
| 7 | 30557312 | 30557816 | 30557637 | 39  | 54  | 8  | 6.351303348 | 1.94E-10    |           | ENSG00000196295 |
| 7 | 30600760 | 30601100 | 30600937 | 9   | 13  | 5  | 2.425043097 | 0.0262442   | GARS      | ENSG00000106105 |
| 7 | 31051403 | 31051656 | 31051546 | 9   | 9   | 0  | 10.39304184 | 0.000803859 | ADCYAP1R1 | ENSG00000078549 |
| 7 | 31390128 | 31390358 | 31390243 | 10  | 12  | 2  | 4.503651465 | 0.002963    | NEUROD6   | ENSG00000164600 |
| 7 | 31711675 | 31711879 | 31711777 | 8   | 9   | 5  | 1.73217364  | 0.133894    | C7orf16   | ENSG00000106341 |
| 7 | 31778634 | 31778885 | 31778784 | 8   | 9   | 4  | 2.078608368 | 0.0785659   |           | ENSG00000223070 |
| 7 | 31978039 | 31978218 | 31978148 | 8   | 9   | 0  | 10.39304184 | 0.000803859 | PDE1C     | ENSG00000154678 |
| 7 | 32136755 | 32136934 | 32136844 | 8   | 8   | 4  | 1.870747532 | 0.118863    | PDE1C     | ENSG00000154678 |
| 7 | 32170821 | 32171039 | 32170903 | 11  | 12  | 1  | 6.755477198 | 0.000722752 | PDE1C     | ENSG00000154678 |
| 7 | 32210485 | 32210786 | 32210608 | 9   | 12  | 0  | 13.5109544  | 9.48E-05    | PDE1C     | ENSG00000154678 |
| 7 | 32388871 | 32389060 | 32388974 | 8   | 10  | 2  | 3.810782009 | 0.00936112  | PDE1C     | ENSG00000154678 |
| 7 | 32433902 | 32434130 | 32434016 | 10  | 12  | 7  | 1.688869299 | 0.11395     |           | ENSG00000177329 |
| 7 | 32496471 | 32496745 | 32496594 | 17  | 19  | 7  | 2.598260461 | 0.00730518  | LSM5      | ENSG00000106355 |
| 7 | 32540007 | 32540280 | 32540139 | 8   | 9   | 1  | 5.196520921 | 0.00490062  | AVL9      | ENSG00000105778 |
| 7 | 32898108 | 32898333 | 32898239 | 9   | 10  | 0  | 11.43234603 | 0.000394183 | KBTBD2    | ENSG00000170852 |
| 7 | 32957050 | 32957289 | 32957158 | 8   | 12  | 2  | 4.503651465 | 0.002963    | FKBP9     | ENSG00000122642 |
| 7 | 33064966 | 33065149 | 33065118 | 8   | 8   | 0  | 9.353737658 | 0.00163931  | NT5C3     | ENSG00000122643 |
| 7 | 33293893 | 33294471 | 33294145 | 127 | 166 | 3  | 43.39094969 | 2.25E-47    |           | ENSG00000222741 |
| 7 | 33357799 | 33358301 | 33357985 | 32  | 53  | 3  | 14.03060649 | 7.92E-14    |           | ENSG00000222741 |
| 7 | 33722755 | 33723027 | 33722919 | 13  | 15  | 2  | 5.542955649 | 0.000497081 |           | ENSG00000173862 |
| 7 | 33814087 | 33814354 | 33814238 | 10  | 12  | 6  | 1.930136342 | 0.071303    |           | ENSG00000203495 |
| 7 | 33939176 | 33939366 | 33939271 | 8   | 8   | 10 | 0.850339787 | 0.645072    | BMPER     | ENSG00000164619 |
| 7 | 33940792 | 33941025 | 33940908 | 8   | 9   | 2  | 3.464347281 | 0.0163838   | BMPER     | ENSG00000164619 |
| 7 | 34040877 | 34041235 | 34041056 | 28  | 33  | 6  | 5.048048895 | 2.40E-06    | BMPER     | ENSG00000164619 |
| 7 | 34043162 | 34043421 | 34043315 | 8   | 9   | 5  | 1.73217364  | 0.133894    | BMPER     | ENSG00000164619 |
| 7 | 34106892 | 34107204 | 34107048 | 13  | 17  | 5  | 3.117912553 | 0.00407023  | BMPER     | ENSG00000164619 |
| 7 | 34363716 | 34363895 | 34363854 | 8   | 8   | 0  | 9.353737658 | 0.00163931  |           | ENSG00000202431 |

|   |          |          |          |     |     |    |             |             |          |                 |
|---|----------|----------|----------|-----|-----|----|-------------|-------------|----------|-----------------|
| 7 | 34765580 | 34765799 | 34765689 | 12  | 12  | 4  | 2.702190879 | 0.0203088   |          | ENSG00000197085 |
| 7 | 35031823 | 35032033 | 35031928 | 9   | 11  | 7  | 1.558956276 | 0.158273    | DPY19L1  | ENSG00000173852 |
| 7 | 35237494 | 35237763 | 35237628 | 8   | 11  | 4  | 2.494330042 | 0.0324033   | TBX20    | ENSG00000164532 |
| 7 | 35806457 | 35806661 | 35806567 | 9   | 9   | 5  | 1.73217364  | 0.133894    | 7-Sep    | ENSG00000122545 |
| 7 | 36043492 | 36043698 | 36043569 | 9   | 9   | 4  | 2.078608368 | 0.0785659   |          | ENSG00000205745 |
| 7 | 36054190 | 36054449 | 36054319 | 8   | 10  | 4  | 2.286469205 | 0.0509017   |          | ENSG00000205745 |
| 7 | 36680676 | 36680922 | 36680835 | 10  | 11  | 1  | 6.235825105 | 0.0013754   |          | ENSG00000221561 |
| 7 | 37000769 | 37001229 | 37001050 | 10  | 20  | 0  | 21.82538787 | 3.17E-07    | ELMO1    | ENSG00000155849 |
| 7 | 37359034 | 37359423 | 37359245 | 9   | 14  | 12 | 1.199197136 | 0.313881    |          | ENSG00000222869 |
| 7 | 37494630 | 37494914 | 37494772 | 22  | 25  | 2  | 9.00730293  | 9.47E-07    | ELMO1    | ENSG00000155849 |
| 7 | 37598482 | 37598864 | 37598685 | 29  | 36  | 2  | 12.81808494 | 7.17E-10    |          | ENSG00000178503 |
| 7 | 38112092 | 38112298 | 38112195 | 10  | 10  | 3  | 2.858086507 | 0.0242838   | STARD3NL | ENSG00000010270 |
| 7 | 39400687 | 39400927 | 39400807 | 11  | 11  | 4  | 2.494330042 | 0.0324033   |          | ENSG00000206947 |
| 7 | 39739433 | 39739783 | 39739550 | 9   | 13  | 3  | 3.637564645 | 0.0050909   |          | ENSG00000210544 |
| 7 | 39956292 | 39956559 | 39956425 | 9   | 11  | 3  | 3.117912553 | 0.0146045   | CDC2L5   | ENSG00000065883 |
| 7 | 40532037 | 40532230 | 40532133 | 8   | 8   | 2  | 3.117912553 | 0.0283184   | C7orf10  | ENSG00000175600 |
| 7 | 40542523 | 40542702 | 40542647 | 9   | 9   | 1  | 5.196520921 | 0.00490062  | C7orf10  | ENSG00000175600 |
| 7 | 40723307 | 40723844 | 40723610 | 185 | 218 | 1  | 113.8038082 | 1.88E-66    |          |                 |
| 7 | 40766207 | 40766428 | 40766317 | 8   | 10  | 2  | 3.810782009 | 0.00936112  |          |                 |
| 7 | 40849766 | 40850104 | 40849935 | 12  | 15  | 1  | 8.314433474 | 0.000102308 |          |                 |
| 7 | 40905411 | 40905621 | 40905512 | 11  | 11  | 1  | 6.235825105 | 0.0013754   |          |                 |
| 7 | 41065791 | 41066034 | 41065868 | 8   | 9   | 1  | 5.196520921 | 0.00490062  |          |                 |
| 7 | 41113576 | 41113811 | 41113693 | 8   | 10  | 1  | 5.716173013 | 0.00260397  |          |                 |
| 7 | 41230787 | 41230999 | 41230830 | 8   | 8   | 0  | 9.353737658 | 0.00163931  | INHBA    | ENSG00000122641 |
| 7 | 41961985 | 41962224 | 41962085 | 11  | 13  | 2  | 4.850086193 | 0.00164564  |          | ENSG00000213721 |
| 7 | 42243548 | 42243759 | 42243632 | 8   | 9   | 6  | 1.484720263 | 0.204387    | GLI3     | ENSG00000106571 |
| 7 | 42407224 | 42407449 | 42407336 | 12  | 13  | 0  | 14.55025858 | 4.65E-05    | GLI3     | ENSG00000106571 |
| 7 | 42500939 | 42501249 | 42501092 | 8   | 12  | 0  | 13.5109544  | 9.48E-05    | GLI3     | ENSG00000106571 |
| 7 | 42602916 | 42603215 | 42603073 | 13  | 16  | 1  | 8.834085566 | 5.30E-05    | C7orf25  | ENSG00000136197 |
| 7 | 42603422 | 42603765 | 42603598 | 26  | 31  | 3  | 8.314433474 | 1.18E-07    | C7orf25  | ENSG00000136197 |
| 7 | 43583597 | 43583956 | 43583777 | 63  | 69  | 4  | 14.55025858 | 1.78E-17    | STK17A   | ENSG00000164543 |
| 7 | 43735411 | 43735942 | 43735561 | 9   | 19  | 3  | 5.196520921 | 0.000174201 | C7orf44  | ENSG00000106603 |
| 7 | 43771122 | 43771366 | 43771242 | 11  | 13  | 4  | 2.910051716 | 0.0125532   | BLVRA    | ENSG00000106605 |
| 7 | 43805819 | 43806059 | 43805987 | 14  | 15  | 0  | 16.62886695 | 1.12E-05    | BLVRA    | ENSG00000106605 |

|   |          |          |          |    |    |    |             |             |        |                 |
|---|----------|----------|----------|----|----|----|-------------|-------------|--------|-----------------|
| 7 | 44159859 | 44160070 | 44159962 | 10 | 11 | 2  | 4.157216737 | 0.0052913   | GCK    | ENSG00000106633 |
| 7 | 44220589 | 44220784 | 44220686 | 10 | 10 | 0  | 11.43234603 | 0.000394183 | YKT6   | ENSG00000106636 |
| 7 | 44497108 | 44497304 | 44497211 | 8  | 8  | 3  | 2.338434415 | 0.0641221   | NUDCD3 | ENSG00000015676 |
| 7 | 44549993 | 44550226 | 44550109 | 8  | 10 | 4  | 2.286469205 | 0.0509017   | NPC1L1 | ENSG00000015520 |
| 7 | 44550273 | 44550591 | 44550419 | 18 | 20 | 4  | 4.365077574 | 0.000324139 | NPC1L1 | ENSG00000015520 |
| 7 | 44580002 | 44580216 | 44580114 | 8  | 10 | 4  | 2.286469205 | 0.0509017   | DDX56  | ENSG00000136271 |
| 7 | 45031007 | 45031186 | 45031096 | 8  | 8  | 3  | 2.338434415 | 0.0641221   | CCM2   | ENSG00000136280 |
| 7 | 45039957 | 45040306 | 45040135 | 18 | 22 | 1  | 11.95199812 | 9.69E-07    | CCM2   | ENSG00000136280 |
| 7 | 45160640 | 45160830 | 45160735 | 8  | 9  | 0  | 10.39304184 | 0.000803859 | RAMP3  | ENSG00000122679 |
| 7 | 45353993 | 45354270 | 45354131 | 9  | 11 | 5  | 2.078608368 | 0.0614303   | RAMP3  | ENSG00000122679 |
| 7 | 46413226 | 46413481 | 46413360 | 9  | 10 | 6  | 1.63319229  | 0.146906    | IGFBP3 | ENSG00000146674 |
| 7 | 46461248 | 46461431 | 46461382 | 8  | 9  | 0  | 10.39304184 | 0.000803859 |        |                 |
| 7 | 47208331 | 47208513 | 47208422 | 8  | 9  | 3  | 2.598260461 | 0.0397929   |        | ENSG00000214754 |
| 7 | 47386067 | 47386246 | 47386140 | 8  | 8  | 0  | 9.353737658 | 0.00163931  | TNS3   | ENSG00000136205 |
| 7 | 47582046 | 47582417 | 47582248 | 12 | 18 | 12 | 1.518983039 | 0.117837    | TNS3   | ENSG00000136205 |
| 7 | 47641159 | 47641440 | 47641299 | 10 | 11 | 8  | 1.385738912 | 0.224757    |        | ENSG00000221845 |
| 7 | 47699539 | 47699748 | 47699643 | 8  | 9  | 3  | 2.598260461 | 0.0397929   |        | ENSG00000221845 |
| 7 | 47792694 | 47792903 | 47792798 | 9  | 9  | 0  | 10.39304184 | 0.000803859 |        | ENSG00000136275 |
| 7 | 49025062 | 49025334 | 49025169 | 10 | 11 | 0  | 12.47165021 | 0.000193293 |        | ENSG00000218305 |
| 7 | 51360371 | 51360702 | 51360537 | 16 | 19 | 1  | 10.39304184 | 7.23E-06    | COBL   | ENSG00000106078 |
| 7 | 52219266 | 52219558 | 52219413 | 13 | 14 | 1  | 7.794781382 | 0.000197021 |        | ENSG00000210739 |
| 7 | 54809463 | 54809667 | 54809565 | 8  | 10 | 2  | 3.810782009 | 0.00936112  | SEC61G | ENSG00000132432 |
| 7 | 55609630 | 55609931 | 55609780 | 9  | 13 | 0  | 14.55025858 | 4.65E-05    |        | ENSG00000154978 |
| 7 | 55809984 | 55810262 | 55810147 | 10 | 11 | 1  | 6.235825105 | 0.0013754   |        | ENSG00000206729 |
| 7 | 56109284 | 56109539 | 56109424 | 9  | 10 | 0  | 11.43234603 | 0.000394183 | SUMF2  | ENSG00000129103 |
| 7 | 56111990 | 56112172 | 56112024 | 8  | 8  | 2  | 3.117912553 | 0.0283184   | SUMF2  | ENSG00000129103 |
| 7 | 61082958 | 61083220 | 61083121 | 10 | 12 | 3  | 3.377738599 | 0.00867157  |        |                 |
| 7 | 61083416 | 61083743 | 61083579 | 10 | 11 | 13 | 0.890832158 | 0.618492    |        |                 |
| 7 | 61083985 | 61084164 | 61084135 | 8  | 9  | 6  | 1.484720263 | 0.204387    |        |                 |
| 7 | 61255312 | 61255491 | 61255401 | 8  | 8  | 15 | 0.584608604 | 0.909754    |        |                 |
| 7 | 61268288 | 61268624 | 61268456 | 34 | 34 | 30 | 1.17340795  | 0.257326    |        |                 |
| 7 | 61285328 | 61285547 | 61285397 | 9  | 9  | 8  | 1.154782427 | 0.375434    |        |                 |
| 7 | 61432028 | 61432211 | 61432054 | 9  | 9  | 11 | 0.86608682  | 0.635181    |        |                 |
| 7 | 61605548 | 61605729 | 61605686 | 8  | 8  | 8  | 1.039304184 | 0.46786     |        |                 |



|   |          |          |          |     |     |     |             |             |         |                 |
|---|----------|----------|----------|-----|-----|-----|-------------|-------------|---------|-----------------|
| 7 | 61606235 | 61607134 | 61606786 | 186 | 283 | 329 | 0.89443148  | 0.916422    |         |                 |
| 7 | 61607658 | 61607837 | 61607808 | 8   | 8   | 12  | 0.719518281 | 0.783103    |         |                 |
| 7 | 61608439 | 61608618 | 61608589 | 11  | 11  | 6   | 1.781664316 | 0.103344    |         |                 |
| 7 | 61610816 | 61611035 | 61610886 | 8   | 9   | 9   | 1.039304184 | 0.466079    |         | ENSG00000207443 |
| 7 | 61614718 | 61614897 | 61614746 | 8   | 8   | 13  | 0.668124118 | 0.835294    |         | ENSG00000207443 |
| 7 | 61623632 | 61623832 | 61623663 | 10  | 10  | 3   | 2.858086507 | 0.0242838   |         | ENSG00000207443 |
| 7 | 61632299 | 61632627 | 61632458 | 16  | 16  | 11  | 1.472347594 | 0.147517    |         | ENSG00000207443 |
| 7 | 63737373 | 63737667 | 63737520 | 10  | 12  | 2   | 4.503651465 | 0.002963    | ZNF107  | ENSG00000196247 |
| 7 | 66405035 | 66405224 | 66405102 | 8   | 8   | 1   | 4.676868829 | 0.0091584   | STAG3L4 | ENSG00000106610 |
| 7 | 66447195 | 66447600 | 66447429 | 15  | 23  | 0   | 24.94330042 | 3.74E-08    | STAG3L4 | ENSG00000106610 |
| 7 | 69939299 | 69939494 | 69939396 | 8   | 9   | 0   | 10.39304184 | 0.000803859 | WBSCR17 | ENSG00000185274 |
| 7 | 69952341 | 69952831 | 69952652 | 31  | 41  | 3   | 10.91269393 | 2.02E-10    | WBSCR17 | ENSG00000185274 |
| 7 | 70591219 | 70591629 | 70591460 | 20  | 25  | 0   | 27.02190879 | 8.98E-09    |         | ENSG00000199940 |
| 7 | 72410405 | 72410648 | 72410516 | 10  | 10  | 5   | 1.905391004 | 0.0915982   |         | ENSG00000206709 |
| 7 | 72794572 | 72794997 | 72794730 | 16  | 23  | 1   | 12.47165021 | 4.94E-07    | ABHD11  | ENSG00000106077 |
| 7 | 72795196 | 72795442 | 72795308 | 8   | 10  | 7   | 1.429043253 | 0.21536     | ABHD11  | ENSG00000106077 |
| 7 | 72795595 | 72795836 | 72795715 | 10  | 10  | 0   | 11.43234603 | 0.000394183 | ABHD11  | ENSG00000106077 |
| 7 | 72798649 | 72798997 | 72798820 | 9   | 14  | 4   | 3.117912553 | 0.00766354  | ABHD11  | ENSG00000106077 |
| 7 | 72822610 | 72822830 | 72822707 | 10  | 11  | 3   | 3.117912553 | 0.0146045   | CLDN3   | ENSG00000165215 |
| 7 | 72885718 | 72885897 | 72885807 | 8   | 8   | 2   | 3.117912553 | 0.0283184   | CLDN4   | ENSG00000189143 |
| 7 | 73664578 | 73665031 | 73664745 | 11  | 16  | 5   | 2.944695189 | 0.00659886  | GTF2I   | ENSG00000077809 |
| 7 | 73708613 | 73708947 | 73708778 | 9   | 13  | 9   | 1.455025858 | 0.177172    | GTF2I   | ENSG00000077809 |
| 7 | 75195527 | 75196000 | 75195706 | 9   | 18  | 2   | 6.582259834 | 7.91E-05    | HIP1    | ENSG00000127946 |
| 7 | 75382003 | 75382211 | 75382107 | 8   | 8   | 1   | 4.676868829 | 0.0091584   | POR     | ENSG00000127948 |
| 7 | 75383502 | 75383732 | 75383649 | 10  | 10  | 0   | 11.43234603 | 0.000394183 | POR     | ENSG00000127948 |
| 7 | 75758809 | 75759125 | 75758964 | 13  | 16  | 14  | 1.177878075 | 0.320433    |         | ENSG00000177679 |
| 7 | 75781531 | 75781800 | 75781666 | 11  | 13  | 11  | 1.212521548 | 0.309909    | HSPB1   | ENSG00000106211 |
| 7 | 76966392 | 76966617 | 76966527 | 8   | 10  | 2   | 3.810782009 | 0.00936112  | PTPN12  | ENSG00000127947 |
| 7 | 77010238 | 77010433 | 77010335 | 9   | 9   | 4   | 2.078608368 | 0.0785659   | PTPN12  | ENSG00000127947 |
| 7 | 77265832 | 77266109 | 77265946 | 8   | 11  | 4   | 2.494330042 | 0.0324033   | PHTF2   | ENSG00000006576 |
| 7 | 77552262 | 77552558 | 77552410 | 8   | 13  | 0   | 14.55025858 | 4.65E-05    |         | ENSG00000211483 |
| 7 | 77724298 | 77724509 | 77724368 | 8   | 8   | 2   | 3.117912553 | 0.0283184   |         | ENSG00000211483 |
| 7 | 77988640 | 77988823 | 77988720 | 8   | 9   | 1   | 5.196520921 | 0.00490062  |         | ENSG00000209138 |
| 7 | 78001179 | 78001381 | 78001268 | 8   | 8   | 0   | 9.353737658 | 0.00163931  |         | ENSG00000209138 |

|   |          |          |          |    |    |    |             |             |        |                 |
|---|----------|----------|----------|----|----|----|-------------|-------------|--------|-----------------|
| 7 | 78255109 | 78255523 | 78255303 | 38 | 47 | 1  | 24.94330042 | 3.55E-14    |        | ENSG00000209138 |
| 7 | 78748393 | 78748581 | 78748491 | 8  | 9  | 0  | 10.39304184 | 0.000803859 |        | ENSG00000212482 |
| 7 | 79618269 | 79618683 | 79618504 | 17 | 25 | 3  | 6.755477198 | 4.84E-06    | GNAI1  | ENSG00000127955 |
| 7 | 79895825 | 79896036 | 79895930 | 9  | 9  | 2  | 3.464347281 | 0.0163838   | GNAT3  | ENSG00000214415 |
| 7 | 80005364 | 80005710 | 80005524 | 41 | 45 | 3  | 11.95199812 | 1.51E-11    | GNAT3  | ENSG00000214415 |
| 7 | 80009768 | 80010017 | 80009892 | 12 | 13 | 8  | 1.616695398 | 0.123553    | GNAT3  | ENSG00000214415 |
| 7 | 80078948 | 80079406 | 80079180 | 10 | 19 | 11 | 1.73217364  | 0.0607469   | CD36   | ENSG00000135218 |
| 7 | 80110922 | 80111130 | 80111000 | 8  | 8  | 3  | 2.338434415 | 0.0641221   | CD36   | ENSG00000135218 |
| 7 | 80132796 | 80133210 | 80133020 | 27 | 36 | 0  | 38.45425482 | 3.54E-12    | CD36   | ENSG00000135218 |
| 7 | 80202751 | 80203045 | 80202898 | 13 | 17 | 0  | 18.70747532 | 2.69E-06    | CD36   | ENSG00000135218 |
| 7 | 80241238 | 80241534 | 80241343 | 8  | 12 | 4  | 2.702190879 | 0.0203088   | CD36   | ENSG00000135218 |
| 7 | 80248871 | 80249121 | 80248982 | 8  | 10 | 5  | 1.905391004 | 0.0915982   | SEMA3C | ENSG00000075223 |
| 7 | 80350858 | 80351180 | 80351013 | 16 | 20 | 6  | 3.117912553 | 0.00218114  | SEMA3C | ENSG00000075223 |
| 7 | 80378713 | 80379014 | 80378863 | 25 | 28 | 2  | 10.04660711 | 1.36E-07    | SEMA3C | ENSG00000075223 |
| 7 | 80386026 | 80386346 | 80386200 | 13 | 16 | 10 | 1.606197376 | 0.104477    | SEMA3C | ENSG00000075223 |
| 7 | 80387360 | 80387625 | 80387492 | 10 | 14 | 5  | 2.598260461 | 0.0167748   | SEMA3C | ENSG00000075223 |
| 7 | 80388447 | 80388813 | 80388626 | 9  | 16 | 11 | 1.472347594 | 0.147517    | SEMA3C | ENSG00000075223 |
| 7 | 80389615 | 80389816 | 80389715 | 11 | 11 | 6  | 1.781664316 | 0.103344    | SEMA3C | ENSG00000075223 |
| 7 | 80407637 | 80408054 | 80407890 | 15 | 25 | 5  | 4.503651465 | 6.33E-05    | SEMA3C | ENSG00000075223 |
| 7 | 80409471 | 80409941 | 80409638 | 36 | 47 | 7  | 6.235825105 | 2.92E-09    | SEMA3C | ENSG00000075223 |
| 7 | 80410167 | 80410366 | 80410335 | 9  | 11 | 6  | 1.781664316 | 0.103344    | SEMA3C | ENSG00000075223 |
| 7 | 80540850 | 80541282 | 80541023 | 17 | 26 | 8  | 3.117912553 | 0.000638503 | SEMA3C | ENSG00000075223 |
| 7 | 80600706 | 80601083 | 80600876 | 14 | 21 | 1  | 11.43234603 | 1.90E-06    |        | ENSG00000209303 |
| 7 | 80906460 | 80906639 | 80906557 | 8  | 8  | 1  | 4.676868829 | 0.0091584   |        | ENSG00000209220 |
| 7 | 81071622 | 81071909 | 81071796 | 9  | 10 | 1  | 5.716173013 | 0.00260397  | HGF    | ENSG00000019991 |
| 7 | 81090517 | 81091023 | 81090755 | 44 | 66 | 3  | 17.40834509 | 1.39E-17    | HGF    | ENSG00000019991 |
| 7 | 81145440 | 81145657 | 81145552 | 10 | 10 | 2  | 3.810782009 | 0.00936112  | HGF    | ENSG00000019991 |
| 7 | 82171384 | 82171627 | 82171520 | 9  | 9  | 2  | 3.464347281 | 0.0163838   |        | ENSG00000213530 |
| 7 | 82280072 | 82280267 | 82280205 | 9  | 10 | 3  | 2.858086507 | 0.0242838   |        | ENSG00000214408 |
| 7 | 82452405 | 82452607 | 82452483 | 8  | 8  | 7  | 1.169217207 | 0.371848    |        | ENSG00000202281 |
| 7 | 82630371 | 82630607 | 82630461 | 8  | 10 | 2  | 3.810782009 | 0.00936112  | PCLO   | ENSG00000186472 |
| 7 | 82935682 | 82935882 | 82935782 | 9  | 9  | 4  | 2.078608368 | 0.0785659   | SEMA3E | ENSG00000170381 |
| 7 | 83014822 | 83015284 | 83015052 | 10 | 18 | 8  | 2.194086611 | 0.0206188   | SEMA3E | ENSG00000170381 |
| 7 | 83079821 | 83080158 | 83079998 | 15 | 18 | 3  | 4.936694875 | 0.000311102 | SEMA3E | ENSG00000170381 |

|   |          |          |          |    |    |    |             |            |           |                 |
|---|----------|----------|----------|----|----|----|-------------|------------|-----------|-----------------|
| 7 | 83123333 | 83123522 | 83123424 | 8  | 8  | 0  | 9.353737658 | 0.00163931 | SEMA3E    | ENSG00000170381 |
| 7 | 83152141 | 83152543 | 83152364 | 10 | 16 | 7  | 2.208521392 | 0.0257604  | SEMA3E    | ENSG00000170381 |
| 7 | 83176089 | 83176457 | 83176278 | 41 | 49 | 4  | 10.39304184 | 7.73E-12   | SEMA3E    | ENSG00000170381 |
| 7 | 83403402 | 83403613 | 83403561 | 9  | 10 | 4  | 2.286469205 | 0.0509017  |           | ENSG00000222994 |
| 7 | 83646078 | 83646357 | 83646217 | 8  | 9  | 1  | 5.196520921 | 0.00490062 | SEMA3A    | ENSG00000075213 |
| 7 | 84003321 | 84003530 | 84003474 | 9  | 10 | 2  | 3.810782009 | 0.00936112 |           | ENSG00000146736 |
| 7 | 84056344 | 84056565 | 84056467 | 10 | 12 | 2  | 4.503651465 | 0.002963   |           | ENSG00000146736 |
| 7 | 84789613 | 84789792 | 84789682 | 8  | 8  | 5  | 1.558956276 | 0.191397   | SEMA3D    | ENSG00000153993 |
| 7 | 85937036 | 85937276 | 85937156 | 8  | 9  | 4  | 2.078608368 | 0.0785659  | GRM3      | ENSG00000198822 |
| 7 | 86318865 | 86319117 | 86318977 | 9  | 11 | 3  | 3.117912553 | 0.0146045  | KIAA1324L | ENSG00000164659 |
| 7 | 86558872 | 86559134 | 86559003 | 9  | 11 | 10 | 1.133786383 | 0.380636   |           | ENSG00000214406 |
| 7 | 86619372 | 86619581 | 86619467 | 8  | 8  | 6  | 1.336248237 | 0.277651   | DMTF1     | ENSG00000135164 |
| 7 | 86619701 | 86619887 | 86619794 | 8  | 9  | 1  | 5.196520921 | 0.00490062 | DMTF1     | ENSG00000135164 |
| 7 | 86643599 | 86643841 | 86643724 | 8  | 9  | 6  | 1.484720263 | 0.204387   | DMTF1     | ENSG00000135164 |
| 7 | 86779672 | 86779908 | 86779732 | 8  | 9  | 4  | 2.078608368 | 0.0785659  | TP53AP1   | ENSG00000182165 |
| 7 | 86784144 | 86784788 | 86784323 | 16 | 36 | 7  | 4.806781852 | 1.46E-06   | TP53AP1   | ENSG00000182165 |
| 7 | 86790282 | 86790630 | 86790457 | 13 | 16 | 5  | 2.944695189 | 0.00659886 | TP53AP1   | ENSG00000182165 |
| 7 | 86798185 | 86798616 | 86798440 | 29 | 46 | 0  | 48.84729666 | 2.85E-15   | TP53AP1   | ENSG00000182165 |
| 7 | 86811754 | 86812094 | 86811924 | 41 | 44 | 4  | 9.353737658 | 1.84E-10   | TP53AP1   | ENSG00000182165 |
| 7 | 86812187 | 86812446 | 86812316 | 8  | 10 | 7  | 1.429043253 | 0.21536    | TP53AP1   | ENSG00000182165 |
| 7 | 86812502 | 86812756 | 86812629 | 11 | 13 | 5  | 2.425043097 | 0.0262442  | TP53AP1   | ENSG00000182165 |
| 7 | 86860369 | 86860548 | 86860458 | 8  | 8  | 1  | 4.676868829 | 0.0091584  | CROT      | ENSG00000005469 |
| 7 | 87008775 | 87008954 | 87008892 | 8  | 8  | 2  | 3.117912553 | 0.0283184  | ABCB4     | ENSG00000005471 |
| 7 | 87169572 | 87169839 | 87169722 | 10 | 13 | 5  | 2.425043097 | 0.0262442  | ABCB1     | ENSG00000085563 |
| 7 | 87235212 | 87235407 | 87235309 | 9  | 10 | 8  | 1.27026067  | 0.293854   | ABCB1     | ENSG00000085563 |
| 7 | 87343405 | 87343633 | 87343514 | 13 | 13 | 5  | 2.425043097 | 0.0262442  | DBF4      | ENSG00000006634 |
| 7 | 87687599 | 87687814 | 87687706 | 9  | 12 | 3  | 3.377738599 | 0.00867157 | SRI       | ENSG00000075142 |
| 7 | 87694071 | 87694391 | 87694231 | 9  | 13 | 8  | 1.616695398 | 0.123553   | SRI       | ENSG00000075142 |
| 7 | 87710689 | 87711056 | 87710865 | 10 | 16 | 9  | 1.766817113 | 0.0700694  | SRI       | ENSG00000075142 |
| 7 | 87792749 | 87792942 | 87792851 | 8  | 8  | 0  | 9.353737658 | 0.00163931 | STEAP4    | ENSG00000127954 |
| 7 | 87859746 | 87860235 | 87860057 | 11 | 20 | 8  | 2.425043097 | 0.00917565 |           | ENSG00000207094 |
| 7 | 88256870 | 88257056 | 88256980 | 9  | 10 | 1  | 5.716173013 | 0.00260397 | C7orf62   | ENSG00000164645 |
| 7 | 88969495 | 88969735 | 88969620 | 9  | 10 | 4  | 2.286469205 | 0.0509017  |           | ENSG00000164645 |
| 7 | 89870370 | 89870551 | 89870495 | 8  | 8  | 2  | 3.117912553 | 0.0283184  | CLDN12    | ENSG00000157224 |

|   |          |          |          |    |    |    |             |             |         |                 |
|---|----------|----------|----------|----|----|----|-------------|-------------|---------|-----------------|
| 7 | 89870615 | 89870808 | 89870674 | 8  | 9  | 4  | 2.078608368 | 0.0785659   | CLDN12  | ENSG00000157224 |
| 7 | 90647297 | 90647527 | 90647412 | 9  | 10 | 3  | 2.858086507 | 0.0242838   |         | ENSG00000220307 |
| 7 | 90698956 | 90699135 | 90699045 | 9  | 9  | 1  | 5.196520921 | 0.00490062  | FZD1    | ENSG00000157240 |
| 7 | 90731534 | 90731780 | 90731657 | 11 | 13 | 3  | 3.637564645 | 0.0050909   | FZD1    | ENSG00000157240 |
| 7 | 90881056 | 90881261 | 90881093 | 8  | 8  | 5  | 1.558956276 | 0.191397    | FZD1    | ENSG00000157240 |
| 7 | 91047666 | 91047903 | 91047784 | 8  | 8  | 3  | 2.338434415 | 0.0641221   | MTERF   | ENSG00000127989 |
| 7 | 91073102 | 91073509 | 91073256 | 13 | 17 | 0  | 18.70747532 | 2.69E-06    | MTERF   | ENSG00000127989 |
| 7 | 91347836 | 91348348 | 91348003 | 21 | 35 | 14 | 2.494330042 | 0.000827091 | MTERF   | ENSG00000127989 |
| 7 | 91365960 | 91366244 | 91366102 | 12 | 13 | 0  | 14.55025858 | 4.65E-05    | MTERF   | ENSG00000127989 |
| 7 | 91407647 | 91408026 | 91407886 | 10 | 16 | 4  | 3.533634226 | 0.00276486  | AKAP9   | ENSG00000127914 |
| 7 | 91515362 | 91515918 | 91515604 | 50 | 92 | 3  | 24.16382228 | 3.22E-25    | AKAP9   | ENSG00000127914 |
| 7 | 91524610 | 91525027 | 91524822 | 10 | 19 | 11 | 1.73217364  | 0.0607469   | AKAP9   | ENSG00000127914 |
| 7 | 91543804 | 91544079 | 91543941 | 8  | 10 | 6  | 1.63319229  | 0.146906    | AKAP9   | ENSG00000127914 |
| 7 | 91602065 | 91602349 | 91602207 | 9  | 11 | 6  | 1.781664316 | 0.103344    | CYP51A1 | ENSG00000001630 |
| 7 | 91631877 | 91632144 | 91632010 | 10 | 11 | 7  | 1.558956276 | 0.158273    |         | ENSG00000188693 |
| 7 | 91712665 | 91713013 | 91712826 | 14 | 19 | 9  | 2.078608368 | 0.0241848   | KRIT1   | ENSG00000001631 |
| 7 | 91713084 | 91713339 | 91713225 | 10 | 14 | 11 | 1.29913023  | 0.246308    | KRIT1   | ENSG00000001631 |
| 7 | 91742103 | 91742316 | 91742209 | 8  | 9  | 2  | 3.464347281 | 0.0163838   | ANKIB1  | ENSG00000001629 |
| 7 | 91913941 | 91914152 | 91914066 | 10 | 10 | 3  | 2.858086507 | 0.0242838   | GATAD1  | ENSG00000157259 |
| 7 | 91931689 | 91932157 | 91931978 | 13 | 22 | 8  | 2.655999582 | 0.0039122   | ERVWE1  | ENSG00000197604 |
| 7 | 91995910 | 91996207 | 91996078 | 13 | 15 | 6  | 2.375552421 | 0.0212094   | C7orf64 | ENSG00000127993 |
| 7 | 92043313 | 92043492 | 92043402 | 9  | 9  | 1  | 5.196520921 | 0.00490062  | C7orf64 | ENSG00000127993 |
| 7 | 92141388 | 92141579 | 92141510 | 9  | 9  | 5  | 1.73217364  | 0.133894    |         | ENSG00000214343 |
| 7 | 92233820 | 92234082 | 92233951 | 9  | 11 | 6  | 1.781664316 | 0.103344    |         | ENSG00000206763 |
| 7 | 92401445 | 92401640 | 92401479 | 8  | 10 | 5  | 1.905391004 | 0.0915982   |         | ENSG00000222576 |
| 7 | 92422530 | 92422762 | 92422661 | 10 | 10 | 5  | 1.905391004 | 0.0915982   |         | ENSG00000222576 |
| 7 | 92496343 | 92496612 | 92496489 | 10 | 10 | 1  | 5.716173013 | 0.00260397  |         | ENSG00000222576 |
| 7 | 92699265 | 92699692 | 92699450 | 11 | 21 | 6  | 3.266384579 | 0.0013436   | CCDC132 | ENSG00000004766 |
| 7 | 93029389 | 93029665 | 93029527 | 12 | 13 | 1  | 7.27512929  | 0.000378098 | CALCR   | ENSG00000004948 |
| 7 | 93143511 | 93143761 | 93143591 | 8  | 10 | 5  | 1.905391004 | 0.0915982   | CALCR   | ENSG00000004948 |
| 7 | 93170242 | 93170421 | 93170331 | 8  | 8  | 4  | 1.870747532 | 0.118863    | CALCR   | ENSG00000004948 |
| 7 | 93370209 | 93370410 | 93370309 | 8  | 10 | 3  | 2.858086507 | 0.0242838   | GNGT1   | ENSG00000127928 |
| 7 | 93459990 | 93460192 | 93460074 | 8  | 9  | 3  | 2.598260461 | 0.0397929   | BET1    | ENSG00000105829 |
| 7 | 93578202 | 93578651 | 93578381 | 33 | 48 | 2  | 16.97530168 | 2.36E-13    | BET1    | ENSG00000105829 |

|   |          |          |          |    |    |    |             |             |          |                 |
|---|----------|----------|----------|----|----|----|-------------|-------------|----------|-----------------|
| 7 | 93756343 | 93756607 | 93756475 | 8  | 10 | 10 | 1.039304184 | 0.464387    | COL1A2   | ENSG00000164692 |
| 7 | 94301740 | 94302017 | 94301895 | 9  | 14 | 4  | 3.117912553 | 0.00766354  |          | ENSG00000219807 |
| 7 | 94375634 | 94375902 | 94375812 | 10 | 11 | 5  | 2.078608368 | 0.0614303   | PPP1R9A  | ENSG00000158528 |
| 7 | 94843074 | 94843536 | 94843250 | 27 | 40 | 3  | 10.65286789 | 3.85E-10    | PON3     | ENSG00000105852 |
| 7 | 94896867 | 94897097 | 94896982 | 10 | 10 | 2  | 3.810782009 | 0.00936112  | PON2     | ENSG00000105854 |
| 7 | 94901646 | 94901960 | 94901787 | 10 | 13 | 5  | 2.425043097 | 0.0262442   | PON2     | ENSG00000105854 |
| 7 | 94959148 | 94959434 | 94959316 | 10 | 13 | 3  | 3.637564645 | 0.0050909   | ASB4     | ENSG00000005981 |
| 7 | 95012350 | 95012582 | 95012514 | 8  | 10 | 1  | 5.716173013 | 0.00260397  | PDK4     | ENSG00000004799 |
| 7 | 95338580 | 95338867 | 95338723 | 12 | 14 | 1  | 7.794781382 | 0.000197021 | DYNC1I1  | ENSG00000158560 |
| 7 | 95480981 | 95481165 | 95481127 | 8  | 8  | 2  | 3.117912553 | 0.0283184   |          | ENSG00000208025 |
| 7 | 95514150 | 95514363 | 95514253 | 9  | 11 | 2  | 4.157216737 | 0.0052913   |          | ENSG00000208025 |
| 7 | 95602631 | 95602821 | 95602726 | 8  | 9  | 2  | 3.464347281 | 0.0163838   |          | ENSG00000208025 |
| 7 | 95797340 | 95797866 | 95797623 | 70 | 92 | 2  | 32.21842971 | 1.96E-26    |          | ENSG00000207045 |
| 7 | 96417089 | 96417293 | 96417212 | 8  | 8  | 2  | 3.117912553 | 0.0283184   |          | ENSG00000222415 |
| 7 | 96635023 | 96635301 | 96635187 | 18 | 21 | 4  | 4.572938411 | 0.000186332 |          | ENSG00000208926 |
| 7 | 97020317 | 97020496 | 97020406 | 8  | 8  | 2  | 3.117912553 | 0.0283184   |          | ENSG00000199475 |
| 7 | 97094113 | 97094292 | 97094243 | 8  | 8  | 1  | 4.676868829 | 0.0091584   |          | ENSG00000199475 |
| 7 | 97553550 | 97553839 | 97553694 | 10 | 14 | 2  | 5.196520921 | 0.000907371 | LMTK2    | ENSG00000164715 |
| 7 | 97600922 | 97601202 | 97601062 | 9  | 11 | 2  | 4.157216737 | 0.0052913   |          | ENSG00000208904 |
| 7 | 97718761 | 97719276 | 97718876 | 9  | 20 | 6  | 3.117912553 | 0.00218114  |          | ENSG00000205356 |
| 7 | 97748221 | 97748513 | 97748362 | 10 | 14 | 3  | 3.897390691 | 0.00295882  | BRI3     | ENSG00000164713 |
| 7 | 97762091 | 97762295 | 97762182 | 8  | 9  | 5  | 1.73217364  | 0.133894    | BRI3     | ENSG00000164713 |
| 7 | 97782853 | 97783141 | 97783020 | 15 | 17 | 4  | 3.741495063 | 0.00163722  | BRI3     | ENSG00000164713 |
| 7 | 97821630 | 97822100 | 97821895 | 14 | 25 | 13 | 1.930136342 | 0.0200308   |          | ENSG00000205871 |
| 7 | 97888258 | 97888462 | 97888327 | 8  | 10 | 4  | 2.286469205 | 0.0509017   | BAIAP2L1 | ENSG00000006453 |
| 7 | 98113471 | 98113669 | 98113566 | 10 | 11 | 1  | 6.235825105 | 0.0013754   | NPTX2    | ENSG00000106236 |
| 7 | 98446789 | 98446970 | 98446879 | 8  | 8  | 1  | 4.676868829 | 0.0091584   |          | ENSG00000214328 |
| 7 | 98534670 | 98534923 | 98534797 | 8  | 10 | 6  | 1.63319229  | 0.146906    | SMURF1   | ENSG00000198742 |
| 7 | 98748578 | 98748761 | 98748669 | 8  | 8  | 9  | 0.935373766 | 0.560286    | ARPC1A   | ENSG00000013455 |
| 7 | 98761141 | 98761324 | 98761232 | 8  | 9  | 9  | 1.039304184 | 0.466079    | ARPC1A   | ENSG00000013455 |
| 7 | 98901560 | 98901941 | 98901739 | 11 | 18 | 3  | 4.936694875 | 0.000311102 | ATP5J2   | ENSG00000160916 |
| 7 | 98908193 | 98908377 | 98908288 | 9  | 11 | 2  | 4.157216737 | 0.0052913   | ZNF789   | ENSG00000198556 |
| 7 | 98935741 | 98936073 | 98935916 | 16 | 19 | 8  | 2.309564854 | 0.0138337   | ZNF394   | ENSG00000160908 |
| 7 | 98940194 | 98940507 | 98940371 | 8  | 12 | 6  | 1.930136342 | 0.071303    | ZKSCAN5  | ENSG00000196652 |

|   |           |           |           |    |    |    |             |             |         |                 |
|---|-----------|-----------|-----------|----|----|----|-------------|-------------|---------|-----------------|
| 7 | 98998514  | 98998700  | 98998607  | 8  | 8  | 2  | 3.117912553 | 0.0283184   | ZNF655  | ENSG00000197343 |
| 7 | 99052255  | 99052611  | 99052433  | 8  | 14 | 6  | 2.227080395 | 0.0322529   | ZNF498  | ENSG00000197037 |
| 7 | 99173205  | 99173655  | 99173443  | 70 | 89 | 6  | 13.36248237 | 2.43E-21    | CYP3A7  | ENSG00000160870 |
| 7 | 99218163  | 99218349  | 99218304  | 8  | 8  | 5  | 1.558956276 | 0.191397    | CYP3A4  | ENSG00000160868 |
| 7 | 99429842  | 99430075  | 99429958  | 10 | 12 | 2  | 4.503651465 | 0.002963    |         | ENSG00000214313 |
| 7 | 99450728  | 99451204  | 99451079  | 11 | 21 | 7  | 2.858086507 | 0.0029864   | ZKSCAN1 | ENSG00000106261 |
| 7 | 99451593  | 99451803  | 99451668  | 9  | 10 | 3  | 2.858086507 | 0.0242838   | ZKSCAN1 | ENSG00000106261 |
| 7 | 99516456  | 99516635  | 99516545  | 8  | 8  | 2  | 3.117912553 | 0.0283184   | ZNF3    | ENSG00000166526 |
| 7 | 99525115  | 99525393  | 99525254  | 8  | 12 | 1  | 6.755477198 | 0.000722752 | COPS6   | ENSG00000168090 |
| 7 | 99536926  | 99537135  | 99537012  | 8  | 10 | 5  | 1.905391004 | 0.0915982   | AP4M1   | ENSG00000221838 |
| 7 | 99551679  | 99551858  | 99551768  | 8  | 8  | 5  | 1.558956276 | 0.191397    | TAF6    | ENSG00000106290 |
| 7 | 99554684  | 99555130  | 99554863  | 8  | 17 | 15 | 1.169217207 | 0.323156    | TAF6    | ENSG00000106290 |
| 7 | 99555553  | 99555793  | 99555689  | 10 | 11 | 5  | 2.078608368 | 0.0614303   | CNPY4   | ENSG00000166997 |
| 7 | 99557643  | 99558003  | 99557822  | 9  | 15 | 8  | 1.847651883 | 0.0631662   | CNPY4   | ENSG00000166997 |
| 7 | 99562464  | 99562748  | 99562592  | 8  | 11 | 5  | 2.078608368 | 0.0614303   |         | ENSG00000214309 |
| 7 | 99593368  | 99593633  | 99593537  | 8  | 9  | 11 | 0.86608682  | 0.635181    | C7orf43 | ENSG00000146826 |
| 7 | 99598589  | 99598791  | 99598679  | 8  | 8  | 2  | 3.117912553 | 0.0283184   | C7orf43 | ENSG00000146826 |
| 7 | 99863619  | 99864133  | 99863798  | 11 | 23 | 12 | 1.918715417 | 0.0250463   | ZCWPW1  | ENSG00000078487 |
| 7 | 99891394  | 99891582  | 99891496  | 9  | 9  | 3  | 2.598260461 | 0.0397929   | C7orf61 | ENSG00000185955 |
| 7 | 100047715 | 100047932 | 100047823 | 11 | 13 | 8  | 1.616695398 | 0.123553    | MOSPD3  | ENSG00000106330 |
| 7 | 100077409 | 100077588 | 100077521 | 8  | 8  | 1  | 4.676868829 | 0.0091584   | TFR2    | ENSG00000106327 |
| 7 | 100109032 | 100109278 | 100109155 | 12 | 14 | 7  | 1.948695345 | 0.0559175   | GNB2    | ENSG00000172354 |
| 7 | 100141229 | 100141723 | 100141408 | 14 | 23 | 6  | 3.563328632 | 0.000497701 | POP7    | ENSG00000172336 |
| 7 | 100205442 | 100205710 | 100205576 | 11 | 14 | 5  | 2.598260461 | 0.0167748   | ZAN     | ENSG00000146839 |
| 7 | 100237404 | 100238081 | 100237651 | 38 | 65 | 14 | 4.572938411 | 5.62E-10    | EPHB4   | ENSG00000196411 |
| 7 | 100263313 | 100263514 | 100263368 | 8  | 9  | 2  | 3.464347281 | 0.0163838   | EPHB4   | ENSG00000196411 |
| 7 | 100294317 | 100294503 | 100294444 | 9  | 10 | 2  | 3.810782009 | 0.00936112  | SLC12A9 | ENSG00000146828 |
| 7 | 100365043 | 100365400 | 100365221 | 14 | 18 | 3  | 4.936694875 | 0.000311102 | MUC3B   | ENSG00000169894 |
| 7 | 100388595 | 100388919 | 100388757 | 16 | 16 | 11 | 1.472347594 | 0.147517    | MUC3B   | ENSG00000169894 |
| 7 | 100389078 | 100389303 | 100389192 | 9  | 13 | 7  | 1.818782322 | 0.0805123   | MUC3B   | ENSG00000169894 |
| 7 | 100462519 | 100462749 | 100462646 | 8  | 9  | 4  | 2.078608368 | 0.0785659   | MUC17   | ENSG00000169876 |
| 7 | 100524917 | 100525162 | 100525039 | 8  | 10 | 2  | 3.810782009 | 0.00936112  | TRIM56  | ENSG00000169871 |
| 7 | 100574125 | 100574310 | 100574221 | 8  | 8  | 1  | 4.676868829 | 0.0091584   | AP1S1   | ENSG00000106367 |
| 7 | 100593447 | 100593647 | 100593542 | 9  | 10 | 3  | 2.858086507 | 0.0242838   | VGF     | ENSG00000128564 |

|   |           |           |           |    |    |    |             |             |         |                 |
|---|-----------|-----------|-----------|----|----|----|-------------|-------------|---------|-----------------|
| 7 | 100647768 | 100648193 | 100647913 | 11 | 18 | 8  | 2.194086611 | 0.0206188   | PLOD3   | ENSG00000106397 |
| 7 | 100674261 | 100674657 | 100674424 | 9  | 15 | 6  | 2.375552421 | 0.0212094   | FIS1    | ENSG00000214253 |
| 7 | 100675182 | 100675394 | 100675288 | 10 | 11 | 6  | 1.781664316 | 0.103344    | FIS1    | ENSG00000214253 |
| 7 | 100682246 | 100682540 | 100682373 | 18 | 20 | 10 | 1.98412617  | 0.0277883   | FIS1    | ENSG00000214253 |
| 7 | 100832205 | 100832440 | 100832322 | 12 | 15 | 6  | 2.375552421 | 0.0212094   | EMID2   | ENSG00000160963 |
| 7 | 100948630 | 100948809 | 100948719 | 8  | 8  | 1  | 4.676868829 | 0.0091584   |         | ENSG00000214248 |
| 7 | 101013405 | 101013687 | 101013551 | 11 | 14 | 2  | 5.196520921 | 0.000907371 |         | ENSG00000106436 |
| 7 | 101038876 | 101039139 | 101039007 | 19 | 23 | 10 | 2.267572766 | 0.00903625  |         | ENSG00000106436 |
| 7 | 101286776 | 101287169 | 101286991 | 10 | 16 | 15 | 1.104260696 | 0.387363    | CUX1    | ENSG00000160967 |
| 7 | 101300642 | 101301206 | 101300899 | 11 | 25 | 9  | 2.702190879 | 0.00210968  | CUX1    | ENSG00000160967 |
| 7 | 101312894 | 101313212 | 101313037 | 8  | 12 | 11 | 1.125912866 | 0.382541    | CUX1    | ENSG00000160967 |
| 7 | 101434187 | 101434749 | 101434465 | 9  | 18 | 11 | 1.645564958 | 0.0828462   |         | ENSG00000203383 |
| 7 | 101443891 | 101444102 | 101443996 | 9  | 10 | 5  | 1.905391004 | 0.0915982   |         | ENSG00000203383 |
| 7 | 101674593 | 101675038 | 101674772 | 10 | 15 | 9  | 1.662886695 | 0.0970566   |         | ENSG00000160999 |
| 7 | 101745925 | 101746250 | 101746087 | 10 | 14 | 5  | 2.598260461 | 0.0167748   |         | ENSG00000208804 |
| 7 | 101832079 | 101832304 | 101832244 | 8  | 8  | 7  | 1.169217207 | 0.371848    |         | ENSG00000221510 |
| 7 | 102263879 | 102264173 | 102264026 | 8  | 12 | 5  | 2.251825733 | 0.0404733   |         | ENSG00000208781 |
| 7 | 102345403 | 102345620 | 102345511 | 9  | 11 | 4  | 2.494330042 | 0.0324033   | LRRRC17 | ENSG00000128606 |
| 7 | 102502218 | 102502414 | 102502340 | 8  | 9  | 1  | 5.196520921 | 0.00490062  | FBXL13  | ENSG00000161040 |
| 7 | 102576566 | 102576937 | 102576790 | 8  | 13 | 10 | 1.32275078  | 0.240023    | NAPEPLD | ENSG00000161048 |
| 7 | 102724826 | 102725184 | 102725005 | 10 | 16 | 7  | 2.208521392 | 0.0257604   | PMPCB   | ENSG00000105819 |
| 7 | 102772358 | 102772717 | 102772537 | 15 | 21 | 7  | 2.858086507 | 0.0029864   | DNAJC2  | ENSG00000105821 |
| 7 | 102775304 | 102775801 | 102775474 | 14 | 23 | 7  | 3.117912553 | 0.00117689  | PSMC2   | ENSG00000161057 |
| 7 | 102834621 | 102834862 | 102834721 | 10 | 11 | 9  | 1.247165021 | 0.300052    | SLC26A5 | ENSG00000170615 |
| 7 | 103080688 | 103080959 | 103080823 | 8  | 9  | 2  | 3.464347281 | 0.0163838   |         | ENSG00000222386 |
| 7 | 103524434 | 103524695 | 103524527 | 12 | 14 | 8  | 1.73217364  | 0.0890835   | RELN    | ENSG00000189056 |
| 7 | 103537042 | 103537221 | 103537131 | 8  | 8  | 0  | 9.353737658 | 0.00163931  | ORC5L   | ENSG00000164815 |
| 7 | 103550377 | 103550556 | 103550468 | 8  | 9  | 2  | 3.464347281 | 0.0163838   | ORC5L   | ENSG00000164815 |
| 7 | 103619934 | 103620117 | 103620025 | 8  | 9  | 6  | 1.484720263 | 0.204387    | ORC5L   | ENSG00000164815 |
| 7 | 103635705 | 103635950 | 103635848 | 9  | 13 | 3  | 3.637564645 | 0.0050909   | ORC5L   | ENSG00000164815 |
| 7 | 103656290 | 103656469 | 103656402 | 8  | 8  | 2  | 3.117912553 | 0.0283184   | ORC5L   | ENSG00000164815 |
| 7 | 103769153 | 103769493 | 103769294 | 9  | 13 | 5  | 2.425043097 | 0.0262442   | LHFPL3  | ENSG00000187416 |
| 7 | 104049019 | 104049204 | 104049082 | 8  | 8  | 2  | 3.117912553 | 0.0283184   |         | ENSG00000197258 |
| 7 | 104235582 | 104235835 | 104235708 | 9  | 10 | 8  | 1.27026067  | 0.293854    |         | ENSG00000208761 |

|   |           |           |           |    |    |    |             |             |         |                 |
|---|-----------|-----------|-----------|----|----|----|-------------|-------------|---------|-----------------|
| 7 | 104315139 | 104315388 | 104315263 | 8  | 8  | 4  | 1.870747532 | 0.118863    |         | ENSG00000208761 |
| 7 | 104323929 | 104324187 | 104324062 | 11 | 13 | 2  | 4.850086193 | 0.00164564  |         | ENSG00000208761 |
| 7 | 104407086 | 104407288 | 104407187 | 8  | 11 | 11 | 1.039304184 | 0.462773    |         | ENSG00000208754 |
| 7 | 104410137 | 104410475 | 104410306 | 13 | 18 | 8  | 2.194086611 | 0.0206188   |         | ENSG00000208754 |
| 7 | 104434423 | 104434602 | 104434510 | 8  | 8  | 2  | 3.117912553 | 0.0283184   | MLL5    | ENSG00000005483 |
| 7 | 104439928 | 104440204 | 104440094 | 12 | 15 | 5  | 2.771477825 | 0.0105836   | MLL5    | ENSG00000005483 |
| 7 | 104440338 | 104440684 | 104440509 | 15 | 19 | 3  | 5.196520921 | 0.000174201 | MLL5    | ENSG00000005483 |
| 7 | 104441336 | 104441810 | 104441515 | 14 | 24 | 16 | 1.528388506 | 0.0846311   | MLL5    | ENSG00000005483 |
| 7 | 104452245 | 104452434 | 104452307 | 9  | 9  | 2  | 3.464347281 | 0.0163838   | MLL5    | ENSG00000005483 |
| 7 | 104452546 | 104452745 | 104452630 | 8  | 8  | 3  | 2.338434415 | 0.0641221   | MLL5    | ENSG00000005483 |
| 7 | 104534175 | 104534354 | 104534264 | 8  | 8  | 2  | 3.117912553 | 0.0283184   | MLL5    | ENSG00000005483 |
| 7 | 104536664 | 104536991 | 104536842 | 8  | 11 | 5  | 2.078608368 | 0.0614303   | MLL5    | ENSG00000005483 |
| 7 | 104538017 | 104538264 | 104538107 | 8  | 8  | 7  | 1.169217207 | 0.371848    | MLL5    | ENSG00000005483 |
| 7 | 104550950 | 104551179 | 104551064 | 8  | 8  | 2  | 3.117912553 | 0.0283184   | MLL5    | ENSG00000005483 |
| 7 | 104568890 | 104569069 | 104569000 | 8  | 8  | 9  | 0.935373766 | 0.560286    | MLL5    | ENSG00000005483 |
| 7 | 104648924 | 104649104 | 104649036 | 8  | 10 | 4  | 2.286469205 | 0.0509017   | SRPK2   | ENSG00000135250 |
| 7 | 104660880 | 104661075 | 104660969 | 8  | 10 | 2  | 3.810782009 | 0.00936112  |         | ENSG00000213361 |
| 7 | 104732198 | 104732430 | 104732314 | 9  | 11 | 1  | 6.235825105 | 0.0013754   |         | ENSG00000208751 |
| 7 | 104804606 | 104804808 | 104804707 | 9  | 9  | 1  | 5.196520921 | 0.00490062  | SRPK2   | ENSG00000135250 |
| 7 | 104948857 | 104949334 | 104949161 | 8  | 17 | 7  | 2.338434415 | 0.0171287   | PUS7    | ENSG00000091127 |
| 7 | 104950046 | 104950254 | 104950170 | 10 | 10 | 3  | 2.858086507 | 0.0242838   | PUS7    | ENSG00000091127 |
| 7 | 104959216 | 104959396 | 104959345 | 8  | 8  | 4  | 1.870747532 | 0.118863    | RINT1   | ENSG00000135249 |
| 7 | 104960378 | 104960562 | 104960469 | 8  | 9  | 4  | 2.078608368 | 0.0785659   | RINT1   | ENSG00000135249 |
| 7 | 104992990 | 104993173 | 104993081 | 9  | 9  | 4  | 2.078608368 | 0.0785659   | EFCAB10 | ENSG00000185055 |
| 7 | 105001393 | 105001590 | 105001473 | 8  | 8  | 5  | 1.558956276 | 0.191397    | EFCAB10 | ENSG00000185055 |
| 7 | 105009114 | 105009574 | 105009311 | 28 | 41 | 7  | 5.456346967 | 9.08E-08    | EFCAB10 | ENSG00000185055 |
| 7 | 105017056 | 105017310 | 105017183 | 9  | 11 | 10 | 1.133786383 | 0.380636    | EFCAB10 | ENSG00000185055 |
| 7 | 105066322 | 105066508 | 105066464 | 9  | 10 | 2  | 3.810782009 | 0.00936112  | EFCAB10 | ENSG00000185055 |
| 7 | 105075238 | 105075605 | 105075383 | 9  | 13 | 1  | 7.27512929  | 0.000378098 | EFCAB10 | ENSG00000185055 |
| 7 | 105079927 | 105080274 | 105080195 | 8  | 13 | 5  | 2.425043097 | 0.0262442   | EFCAB10 | ENSG00000185055 |
| 7 | 105082752 | 105082960 | 105082853 | 9  | 11 | 1  | 6.235825105 | 0.0013754   | EFCAB10 | ENSG00000185055 |
| 7 | 105092678 | 105092865 | 105092755 | 8  | 9  | 6  | 1.484720263 | 0.204387    | EFCAB10 | ENSG00000185055 |
| 7 | 105118299 | 105118511 | 105118461 | 8  | 9  | 3  | 2.598260461 | 0.0397929   | EFCAB10 | ENSG00000185055 |
| 7 | 105119185 | 105119737 | 105119411 | 15 | 32 | 7  | 4.28712976  | 1.26E-05    | EFCAB10 | ENSG00000185055 |



|   |           |           |           |    |    |    |             |             |         |                 |
|---|-----------|-----------|-----------|----|----|----|-------------|-------------|---------|-----------------|
| 7 | 105145264 | 105145496 | 105145406 | 8  | 8  | 5  | 1.558956276 | 0.191397    | EFCAB10 | ENSG00000185055 |
| 7 | 105162081 | 105162325 | 105162203 | 9  | 11 | 8  | 1.385738912 | 0.224757    | ATXN7L1 | ENSG00000146776 |
| 7 | 105179703 | 105179912 | 105179790 | 8  | 8  | 1  | 4.676868829 | 0.0091584   | ATXN7L1 | ENSG00000146776 |
| 7 | 105343112 | 105343312 | 105343196 | 8  | 9  | 1  | 5.196520921 | 0.00490062  | ATXN7L1 | ENSG00000146776 |
| 7 | 105362342 | 105362641 | 105362491 | 9  | 10 | 8  | 1.27026067  | 0.293854    |         | ENSG00000128536 |
| 7 | 105426829 | 105427189 | 105427020 | 11 | 16 | 4  | 3.533634226 | 0.00276486  |         | ENSG00000128536 |
| 7 | 105455218 | 105455539 | 105455378 | 12 | 15 | 3  | 4.157216737 | 0.00170423  |         | ENSG00000128536 |
| 7 | 105470509 | 105470818 | 105470677 | 8  | 12 | 10 | 1.228268581 | 0.305344    | SYPL1   | ENSG00000008282 |
| 7 | 105486100 | 105486592 | 105486279 | 16 | 27 | 10 | 2.64550156  | 0.00175911  | SYPL1   | ENSG00000008282 |
| 7 | 105496724 | 105497032 | 105496878 | 13 | 16 | 9  | 1.766817113 | 0.0700694   | SYPL1   | ENSG00000008282 |
| 7 | 105499696 | 105500007 | 105499851 | 13 | 17 | 7  | 2.338434415 | 0.0171287   | SYPL1   | ENSG00000008282 |
| 7 | 105539772 | 105539988 | 105539880 | 10 | 10 | 3  | 2.858086507 | 0.0242838   | SYPL1   | ENSG00000008282 |
| 7 | 105583249 | 105583428 | 105583380 | 8  | 8  | 4  | 1.870747532 | 0.118863    | SYPL1   | ENSG00000008282 |
| 7 | 105845084 | 105845465 | 105845308 | 11 | 17 | 6  | 2.672496474 | 0.00882337  | NAMPT   | ENSG00000105835 |
| 7 | 105970285 | 105970492 | 105970388 | 12 | 12 | 3  | 3.377738599 | 0.00867157  |         | ENSG00000177820 |
| 7 | 105991093 | 105991512 | 105991344 | 9  | 14 | 7  | 1.948695345 | 0.0559175   |         | ENSG00000177820 |
| 7 | 105998958 | 105999144 | 105999066 | 8  | 8  | 3  | 2.338434415 | 0.0641221   |         | ENSG00000177820 |
| 7 | 106012711 | 106012890 | 106012783 | 8  | 8  | 1  | 4.676868829 | 0.0091584   |         | ENSG00000177820 |
| 7 | 106164293 | 106164511 | 106164458 | 8  | 11 | 6  | 1.781664316 | 0.103344    |         | ENSG00000177820 |
| 7 | 106220820 | 106221119 | 106220973 | 10 | 12 | 3  | 3.377738599 | 0.00867157  | PIK3CG  | ENSG00000105851 |
| 7 | 106385498 | 106385763 | 106385630 | 8  | 10 | 4  | 2.286469205 | 0.0509017   | PRKAR2B | ENSG00000005249 |
| 7 | 106596352 | 106596681 | 106596520 | 11 | 16 | 8  | 1.963130126 | 0.0441028   | HBP1    | ENSG00000105856 |
| 7 | 106597429 | 106597839 | 106597608 | 10 | 17 | 9  | 1.870747532 | 0.0498299   | HBP1    | ENSG00000105856 |
| 7 | 106934236 | 106934574 | 106934415 | 15 | 20 | 10 | 1.98412617  | 0.0277883   | GPR22   | ENSG00000172209 |
| 7 | 106934648 | 106934967 | 106934807 | 10 | 13 | 5  | 2.425043097 | 0.0262442   | GPR22   | ENSG00000172209 |
| 7 | 106987404 | 106987583 | 106987464 | 8  | 8  | 4  | 1.870747532 | 0.118863    | DUS4L   | ENSG00000105865 |
| 7 | 107007596 | 107007854 | 107007725 | 10 | 13 | 0  | 14.55025858 | 4.65E-05    | BCAP29  | ENSG00000075790 |
| 7 | 107089653 | 107089905 | 107089779 | 9  | 12 | 6  | 1.930136342 | 0.071303    | SLC26A4 | ENSG00000091137 |
| 7 | 107140676 | 107140976 | 107140823 | 15 | 18 | 4  | 3.9493559   | 0.000961379 | CBLL1   | ENSG00000105879 |
| 7 | 107171099 | 107171487 | 107171310 | 15 | 21 | 9  | 2.286469205 | 0.0111772   | CBLL1   | ENSG00000105879 |
| 7 | 107172023 | 107172266 | 107172122 | 11 | 11 | 8  | 1.385738912 | 0.224757    | CBLL1   | ENSG00000105879 |
| 7 | 107313234 | 107313464 | 107313349 | 8  | 8  | 0  | 9.353737658 | 0.00163931  | DLD     | ENSG00000091140 |
| 7 | 107322135 | 107322377 | 107322256 | 8  | 10 | 6  | 1.63319229  | 0.146906    | DLD     | ENSG00000091140 |
| 7 | 107380036 | 107380642 | 107380340 | 27 | 45 | 15 | 2.98799953  | 2.37E-05    |         | ENSG00000208718 |

|   |           |           |           |     |     |    |             |             |        |                 |
|---|-----------|-----------|-----------|-----|-----|----|-------------|-------------|--------|-----------------|
| 7 | 107423013 | 107423542 | 107423288 | 12  | 23  | 11 | 2.078608368 | 0.0154752   |        | ENSG00000208718 |
| 7 | 107432468 | 107432889 | 107432550 | 10  | 18  | 5  | 3.291129917 | 0.00248584  | LAMB1  | ENSG00000091136 |
| 7 | 107483362 | 107483594 | 107483478 | 8   | 11  | 1  | 6.235825105 | 0.0013754   |        | ENSG00000216085 |
| 7 | 107519131 | 107519487 | 107519309 | 13  | 19  | 8  | 2.309564854 | 0.0138337   | LAMB4  | ENSG00000091128 |
| 7 | 107525477 | 107525742 | 107525591 | 8   | 12  | 4  | 2.702190879 | 0.0203088   | LAMB4  | ENSG00000091128 |
| 7 | 107631586 | 107631786 | 107631708 | 8   | 8   | 3  | 2.338434415 | 0.0641221   | NRCAM  | ENSG00000091129 |
| 7 | 107650193 | 107650445 | 107650319 | 8   | 8   | 5  | 1.558956276 | 0.191397    | NRCAM  | ENSG00000091129 |
| 7 | 107665565 | 107665782 | 107665673 | 9   | 9   | 2  | 3.464347281 | 0.0163838   | NRCAM  | ENSG00000091129 |
| 7 | 107779414 | 107779690 | 107779552 | 10  | 12  | 3  | 3.377738599 | 0.00867157  | NRCAM  | ENSG00000091129 |
| 7 | 107786373 | 107786587 | 107786450 | 12  | 12  | 4  | 2.702190879 | 0.0203088   | NRCAM  | ENSG00000091129 |
| 7 | 107786725 | 107786964 | 107786844 | 8   | 9   | 1  | 5.196520921 | 0.00490062  | NRCAM  | ENSG00000091129 |
| 7 | 107813745 | 107813960 | 107813852 | 8   | 8   | 0  | 9.353737658 | 0.00163931  | NRCAM  | ENSG00000091129 |
| 7 | 107997397 | 107997667 | 107997489 | 10  | 13  | 6  | 2.078608368 | 0.0483393   | DNAJB9 | ENSG00000128590 |
| 7 | 108023192 | 108023449 | 108023320 | 8   | 9   | 4  | 2.078608368 | 0.0785659   | DNAJB9 | ENSG00000128590 |
| 7 | 108039020 | 108039315 | 108039167 | 11  | 16  | 5  | 2.944695189 | 0.00659886  | DNAJB9 | ENSG00000128590 |
| 7 | 108041466 | 108041715 | 108041591 | 8   | 10  | 14 | 0.762156402 | 0.758589    | DNAJB9 | ENSG00000128590 |
| 7 | 108106336 | 108106662 | 108106499 | 8   | 9   | 3  | 2.598260461 | 0.0397929   | DNAJB9 | ENSG00000128590 |
| 7 | 108270644 | 108270834 | 108270790 | 9   | 9   | 2  | 3.464347281 | 0.0163838   |        | ENSG00000205174 |
| 7 | 108401608 | 108401818 | 108401713 | 8   | 8   | 6  | 1.336248237 | 0.277651    |        | ENSG00000205174 |
| 7 | 108437125 | 108437357 | 108437232 | 8   | 9   | 3  | 2.598260461 | 0.0397929   |        | ENSG00000205174 |
| 7 | 108501072 | 108501305 | 108501188 | 9   | 9   | 3  | 2.598260461 | 0.0397929   |        | ENSG00000205174 |
| 7 | 109026871 | 109027451 | 109027289 | 9   | 21  | 4  | 4.572938411 | 0.000186332 |        |                 |
| 7 | 109434623 | 109435000 | 109434802 | 48  | 57  | 4  | 12.05592854 | 4.51E-14    |        |                 |
| 7 | 109435017 | 109435233 | 109435057 | 9   | 11  | 3  | 3.117912553 | 0.0146045   |        |                 |
| 7 | 109477886 | 109478066 | 109477945 | 8   | 9   | 3  | 2.598260461 | 0.0397929   |        |                 |
| 7 | 109708798 | 109708999 | 109708939 | 9   | 9   | 2  | 3.464347281 | 0.0163838   |        |                 |
| 7 | 109710282 | 109710780 | 109710601 | 15  | 24  | 7  | 3.247825576 | 0.000729793 |        |                 |
| 7 | 109827028 | 109827224 | 109827139 | 8   | 9   | 2  | 3.464347281 | 0.0163838   |        |                 |
| 7 | 109869663 | 109870018 | 109869840 | 15  | 20  | 7  | 2.728173484 | 0.00469378  |        | ENSG00000221279 |
| 7 | 109950040 | 109950682 | 109950335 | 16  | 34  | 9  | 3.637564645 | 3.15E-05    |        | ENSG00000221279 |
| 7 | 109961492 | 109962511 | 109962027 | 345 | 503 | 25 | 20.14651188 | 2.34E-121   |        | ENSG00000221279 |
| 7 | 110021515 | 110021792 | 110021653 | 10  | 12  | 2  | 4.503651465 | 0.002963    |        | ENSG00000221279 |
| 7 | 110106408 | 110106595 | 110106552 | 8   | 8   | 1  | 4.676868829 | 0.0091584   |        | ENSG00000221279 |
| 7 | 110204501 | 110204680 | 110204614 | 8   | 8   | 4  | 1.870747532 | 0.118863    |        | ENSG00000221279 |

|   |           |           |           |    |    |    |             |             |         |                 |
|---|-----------|-----------|-----------|----|----|----|-------------|-------------|---------|-----------------|
| 7 | 110213777 | 110213970 | 110213873 | 8  | 10 | 5  | 1.905391004 | 0.0915982   |         | ENSG00000221279 |
| 7 | 110271021 | 110271234 | 110271127 | 8  | 8  | 5  | 1.558956276 | 0.191397    |         | ENSG00000221279 |
| 7 | 110351447 | 110351626 | 110351482 | 8  | 8  | 2  | 3.117912553 | 0.0283184   |         | ENSG00000221279 |
| 7 | 110591561 | 110591840 | 110591700 | 9  | 13 | 0  | 14.55025858 | 4.65E-05    |         | ENSG00000208701 |
| 7 | 110682886 | 110683150 | 110683018 | 8  | 9  | 1  | 5.196520921 | 0.00490062  |         | ENSG00000208701 |
| 7 | 110743448 | 110743668 | 110743525 | 8  | 8  | 1  | 4.676868829 | 0.0091584   | IMMP2L  | ENSG00000184903 |
| 7 | 110785092 | 110785332 | 110785210 | 10 | 12 | 4  | 2.702190879 | 0.0203088   | IMMP2L  | ENSG00000184903 |
| 7 | 110810472 | 110810749 | 110810585 | 14 | 14 | 2  | 5.196520921 | 0.000907371 | IMMP2L  | ENSG00000184903 |
| 7 | 110856662 | 110856865 | 110856788 | 14 | 15 | 4  | 3.32577339  | 0.00462646  | IMMP2L  | ENSG00000184903 |
| 7 | 110926327 | 110926695 | 110926504 | 18 | 24 | 10 | 2.362054964 | 0.00608507  | IMMP2L  | ENSG00000184903 |
| 7 | 110988239 | 110988435 | 110988362 | 10 | 10 | 4  | 2.286469205 | 0.0509017   | IMMP2L  | ENSG00000184903 |
| 7 | 110989851 | 110990217 | 110990038 | 10 | 15 | 13 | 1.187776211 | 0.317363    | IMMP2L  | ENSG00000184903 |
| 7 | 110992519 | 110992702 | 110992610 | 9  | 9  | 0  | 10.39304184 | 0.000803859 | IMMP2L  | ENSG00000184903 |
| 7 | 111115596 | 111115783 | 111115698 | 8  | 8  | 4  | 1.870747532 | 0.118863    | IMMP2L  | ENSG00000184903 |
| 7 | 111169124 | 111169358 | 111169194 | 8  | 10 | 6  | 1.63319229  | 0.146906    | IMMP2L  | ENSG00000184903 |
| 7 | 111177286 | 111177743 | 111177572 | 20 | 34 | 12 | 2.79812665  | 0.00034067  | IMMP2L  | ENSG00000184903 |
| 7 | 111179534 | 111179811 | 111179672 | 14 | 15 | 4  | 3.32577339  | 0.00462646  | IMMP2L  | ENSG00000184903 |
| 7 | 111190503 | 111190764 | 111190629 | 11 | 12 | 5  | 2.251825733 | 0.0404733   |         | ENSG00000208691 |
| 7 | 111212382 | 111212592 | 111212494 | 9  | 9  | 4  | 2.078608368 | 0.0785659   |         | ENSG00000208691 |
| 7 | 111298499 | 111298782 | 111298649 | 9  | 11 | 2  | 4.157216737 | 0.0052913   |         | ENSG00000208691 |
| 7 | 111323818 | 111324079 | 111323948 | 10 | 10 | 7  | 1.429043253 | 0.21536     |         | ENSG00000208691 |
| 7 | 111364660 | 111364851 | 111364755 | 9  | 9  | 2  | 3.464347281 | 0.0163838   |         | ENSG00000208691 |
| 7 | 111587356 | 111587607 | 111587462 | 8  | 9  | 6  | 1.484720263 | 0.204387    | ZNF277  | ENSG00000198839 |
| 7 | 111588034 | 111588404 | 111588211 | 10 | 16 | 8  | 1.963130126 | 0.0441028   | ZNF277  | ENSG00000198839 |
| 7 | 111589061 | 111589285 | 111589234 | 9  | 11 | 1  | 6.235825105 | 0.0013754   | ZNF277  | ENSG00000198839 |
| 7 | 111638693 | 111638938 | 111638815 | 8  | 9  | 0  | 10.39304184 | 0.000803859 | ZNF277  | ENSG00000198839 |
| 7 | 111750618 | 111750804 | 111750711 | 8  | 8  | 7  | 1.169217207 | 0.371848    |         | ENSG00000202406 |
| 7 | 111776462 | 111776641 | 111776495 | 8  | 8  | 7  | 1.169217207 | 0.371848    |         | ENSG00000208679 |
| 7 | 111815032 | 111815220 | 111815172 | 10 | 13 | 2  | 4.850086193 | 0.00164564  |         | ENSG00000208671 |
| 7 | 111847746 | 111847963 | 111847918 | 8  | 9  | 9  | 1.039304184 | 0.466079    | IFRD1   | ENSG00000006652 |
| 7 | 111877345 | 111877552 | 111877488 | 12 | 14 | 7  | 1.948695345 | 0.0559175   | IFRD1   | ENSG00000006652 |
| 7 | 111877557 | 111877876 | 111877796 | 9  | 13 | 6  | 2.078608368 | 0.0483393   | IFRD1   | ENSG00000006652 |
| 7 | 111907773 | 111907980 | 111907887 | 9  | 9  | 10 | 0.944821986 | 0.553851    | C7orf53 | ENSG00000181016 |
| 7 | 111908975 | 111909542 | 111909273 | 14 | 26 | 18 | 1.476905946 | 0.0928898   | C7orf53 | ENSG00000181016 |

|   |           |           |           |    |    |    |             |             |         |                 |
|---|-----------|-----------|-----------|----|----|----|-------------|-------------|---------|-----------------|
| 7 | 111910737 | 111910975 | 111910817 | 12 | 12 | 6  | 1.930136342 | 0.071303    | C7orf53 | ENSG00000181016 |
| 7 | 111923235 | 111923426 | 111923308 | 9  | 9  | 15 | 0.649565115 | 0.865365    | C7orf53 | ENSG00000181016 |
| 7 | 111924620 | 111924840 | 111924750 | 9  | 11 | 3  | 3.117912553 | 0.0146045   | C7orf53 | ENSG00000181016 |
| 7 | 111999953 | 112000271 | 112000127 | 14 | 19 | 3  | 5.196520921 | 0.000174201 |         | ENSG00000182965 |
| 7 | 112011575 | 112012002 | 112011775 | 48 | 58 | 6  | 8.759849553 | 8.79E-13    |         | ENSG00000182965 |
| 7 | 112024279 | 112024481 | 112024370 | 8  | 9  | 4  | 2.078608368 | 0.0785659   |         | ENSG00000182965 |
| 7 | 112105057 | 112105386 | 112105216 | 12 | 14 | 7  | 1.948695345 | 0.0559175   | TMEM168 | ENSG00000146802 |
| 7 | 112171083 | 112171497 | 112171262 | 13 | 20 | 3  | 5.456346967 | 9.70E-05    | TMEM168 | ENSG00000146802 |
| 7 | 112197371 | 112197716 | 112197543 | 34 | 38 | 9  | 4.053286319 | 4.19E-06    | TMEM168 | ENSG00000146802 |
| 7 | 112209775 | 112210100 | 112209948 | 22 | 26 | 4  | 5.612242595 | 1.08E-05    | TMEM168 | ENSG00000146802 |
| 7 | 112217097 | 112217646 | 112217417 | 8  | 20 | 16 | 1.283846345 | 0.219275    | TMEM168 | ENSG00000146802 |
| 7 | 112279596 | 112279782 | 112279689 | 10 | 10 | 3  | 2.858086507 | 0.0242838   | TMEM168 | ENSG00000146802 |
| 7 | 112296534 | 112296939 | 112296685 | 8  | 16 | 13 | 1.262012224 | 0.256887    | C7orf60 | ENSG00000164603 |
| 7 | 112367117 | 112367356 | 112367246 | 8  | 9  | 9  | 1.039304184 | 0.466079    | C7orf60 | ENSG00000164603 |
| 7 | 112367540 | 112367785 | 112367662 | 10 | 11 | 2  | 4.157216737 | 0.0052913   | C7orf60 | ENSG00000164603 |
| 7 | 112526590 | 112526978 | 112526807 | 14 | 18 | 6  | 2.8209685   | 0.00559354  | GPR85   | ENSG00000164604 |
| 7 | 112545645 | 112546015 | 112545824 | 12 | 19 | 11 | 1.73217364  | 0.0607469   |         | ENSG00000214194 |
| 7 | 112546033 | 112546368 | 112546204 | 15 | 20 | 8  | 2.425043097 | 0.00917565  |         | ENSG00000214194 |
| 7 | 112557958 | 112558161 | 112558059 | 8  | 9  | 0  | 10.39304184 | 0.000803859 |         | ENSG00000214194 |
| 7 | 112564599 | 112564800 | 112564654 | 9  | 10 | 1  | 5.716173013 | 0.00260397  |         | ENSG00000214194 |
| 7 | 112579307 | 112579665 | 112579486 | 8  | 14 | 1  | 7.794781382 | 0.000197021 |         | ENSG00000214194 |
| 7 | 112587119 | 112587381 | 112587250 | 11 | 12 | 3  | 3.377738599 | 0.00867157  |         | ENSG00000214194 |
| 7 | 112696573 | 112696760 | 112696672 | 8  | 8  | 1  | 4.676868829 | 0.0091584   |         | ENSG00000214194 |
| 7 | 112707037 | 112707295 | 112707166 | 10 | 11 | 1  | 6.235825105 | 0.0013754   |         | ENSG00000214194 |
| 7 | 112707830 | 112708074 | 112708004 | 9  | 12 | 11 | 1.125912866 | 0.382541    |         | ENSG00000214194 |
| 7 | 112709172 | 112709418 | 112709321 | 8  | 9  | 3  | 2.598260461 | 0.0397929   |         | ENSG00000214194 |
| 7 | 112722629 | 112722875 | 112722749 | 11 | 11 | 3  | 3.117912553 | 0.0146045   |         | ENSG00000214194 |
| 7 | 112777039 | 112777315 | 112777203 | 8  | 8  | 1  | 4.676868829 | 0.0091584   |         | ENSG00000214194 |
| 7 | 112796253 | 112796451 | 112796352 | 9  | 9  | 8  | 1.154782427 | 0.375434    |         | ENSG00000214194 |
| 7 | 112846010 | 112846241 | 112846125 | 8  | 9  | 5  | 1.73217364  | 0.133894    |         | ENSG00000214194 |
| 7 | 112849052 | 112849264 | 112849124 | 8  | 10 | 9  | 1.143234603 | 0.378307    |         | ENSG00000214194 |
| 7 | 113104951 | 113105151 | 113105013 | 8  | 9  | 2  | 3.464347281 | 0.0163838   | PPP1R3A | ENSG00000154415 |
| 7 | 113137664 | 113137970 | 113137800 | 9  | 12 | 6  | 1.930136342 | 0.071303    | PPP1R3A | ENSG00000154415 |
| 7 | 113190511 | 113191150 | 113190748 | 12 | 27 | 18 | 1.531606166 | 0.072168    | PPP1R3A | ENSG00000154415 |

|   |           |           |           |    |    |   |             |             |         |                 |
|---|-----------|-----------|-----------|----|----|---|-------------|-------------|---------|-----------------|
| 7 | 113220829 | 113221131 | 113220957 | 10 | 11 | 1 | 6.235825105 | 0.0013754   | PPP1R3A | ENSG00000154415 |
| 7 | 113372432 | 113372702 | 113372561 | 9  | 10 | 4 | 2.286469205 | 0.0509017   | PPP1R3A | ENSG00000154415 |
| 7 | 113439912 | 113440182 | 113440047 | 9  | 13 | 3 | 3.637564645 | 0.0050909   | PPP1R3A | ENSG00000154415 |
| 7 | 113448491 | 113448684 | 113448616 | 8  | 9  | 5 | 1.73217364  | 0.133894    | PPP1R3A | ENSG00000154415 |
| 7 | 113448689 | 113448888 | 113448788 | 9  | 9  | 7 | 1.29913023  | 0.286504    | PPP1R3A | ENSG00000154415 |
| 7 | 113512936 | 113513232 | 113513084 | 12 | 17 | 8 | 2.078608368 | 0.0303558   |         | ENSG00000208668 |
| 7 | 113610672 | 113610894 | 113610783 | 8  | 9  | 0 | 10.39304184 | 0.000803859 |         | ENSG00000208668 |
| 7 | 113854267 | 113854446 | 113854406 | 8  | 8  | 3 | 2.338434415 | 0.0641221   | FOXP2   | ENSG00000128573 |
| 7 | 115598252 | 115598489 | 115598370 | 9  | 9  | 2 | 3.464347281 | 0.0163838   | TES     | ENSG00000135269 |
| 7 | 115867405 | 115867606 | 115867481 | 8  | 8  | 0 | 9.353737658 | 0.00163931  | CAV2    | ENSG00000105971 |
| 7 | 115869451 | 115869689 | 115869606 | 12 | 13 | 4 | 2.910051716 | 0.0125532   | CAV2    | ENSG00000105971 |
| 7 | 115874791 | 115875023 | 115874907 | 8  | 8  | 0 | 9.353737658 | 0.00163931  | CAV2    | ENSG00000105971 |
| 7 | 116208442 | 116208701 | 116208528 | 9  | 12 | 2 | 4.503651465 | 0.002963    | CAPZA2  | ENSG00000198898 |
| 7 | 117057835 | 117058227 | 117058009 | 32 | 41 | 1 | 21.82538787 | 2.25E-12    |         | ENSG00000216672 |
| 7 | 117611228 | 117611474 | 117611389 | 10 | 11 | 4 | 2.494330042 | 0.0324033   | LSM8    | ENSG00000128534 |
| 7 | 120933115 | 120933451 | 120933283 | 37 | 39 | 0 | 41.57216737 | 4.18E-13    |         | ENSG00000221690 |
| 7 | 120938427 | 120938865 | 120938606 | 36 | 46 | 0 | 48.84729666 | 2.85E-15    |         | ENSG00000221690 |
| 7 | 123087721 | 123087904 | 123087794 | 9  | 9  | 1 | 5.196520921 | 0.00490062  | LMOD2   | ENSG00000170807 |
| 7 | 123673720 | 123674067 | 123673893 | 38 | 43 | 0 | 45.72938411 | 2.41E-14    |         | ENSG00000213296 |
| 7 | 124357110 | 124357319 | 124357220 | 8  | 9  | 5 | 1.73217364  | 0.133894    | POT1    | ENSG00000128513 |
| 7 | 126982046 | 126982235 | 126982095 | 8  | 8  | 0 | 9.353737658 | 0.00163931  | GCC1    | ENSG00000179562 |
| 7 | 127411173 | 127411487 | 127411330 | 8  | 9  | 1 | 5.196520921 | 0.00490062  | C7orf54 | ENSG00000221922 |
| 7 | 127694092 | 127694296 | 127694194 | 8  | 11 | 4 | 2.494330042 | 0.0324033   |         | ENSG00000221429 |
| 7 | 127771084 | 127771360 | 127771222 | 15 | 16 | 2 | 5.889390377 | 0.000270741 | RBM28   | ENSG00000106344 |
| 7 | 127829122 | 127829350 | 127829236 | 8  | 10 | 1 | 5.716173013 | 0.00260397  | IMPDH1  | ENSG00000106348 |
| 7 | 128558763 | 128558958 | 128558840 | 8  | 9  | 0 | 10.39304184 | 0.000803859 | TSPAN33 | ENSG00000158457 |
| 7 | 128850834 | 128851027 | 128850957 | 8  | 8  | 1 | 4.676868829 | 0.0091584   | FAM40B  | ENSG00000128578 |
| 7 | 129280961 | 129281196 | 129281078 | 11 | 12 | 0 | 13.5109544  | 9.48E-05    |         | ENSG00000207691 |
| 7 | 129376274 | 129376472 | 129376420 | 9  | 10 | 2 | 3.810782009 | 0.00936112  | UBE2H   | ENSG00000186591 |
| 7 | 129396948 | 129397237 | 129397092 | 13 | 16 | 6 | 2.524024447 | 0.0137633   |         | ENSG00000207184 |
| 7 | 129438010 | 129438215 | 129438112 | 12 | 15 | 5 | 2.771477825 | 0.0105836   |         | ENSG00000201109 |
| 7 | 129478301 | 129478480 | 129478407 | 8  | 8  | 7 | 1.169217207 | 0.371848    | ZC3HC1  | ENSG00000091732 |
| 7 | 129705187 | 129705409 | 129705289 | 8  | 10 | 4 | 2.286469205 | 0.0509017   | CPA2    | ENSG00000158516 |
| 7 | 129800935 | 129801181 | 129801065 | 8  | 10 | 3 | 2.858086507 | 0.0242838   | CPA1    | ENSG00000091704 |

|   |           |           |           |    |    |    |             |             |          |                 |
|---|-----------|-----------|-----------|----|----|----|-------------|-------------|----------|-----------------|
| 7 | 129900624 | 129900961 | 129900782 | 9  | 11 | 2  | 4.157216737 | 0.0052913   | MEST     | ENSG00000106484 |
| 7 | 130186765 | 130187033 | 130186865 | 9  | 12 | 0  | 13.5109544  | 9.48E-05    |          | ENSG00000198981 |
| 7 | 130276717 | 130277271 | 130276994 | 10 | 19 | 8  | 2.309564854 | 0.0138337   |          | ENSG00000207748 |
| 7 | 130408078 | 130408289 | 130408222 | 10 | 10 | 0  | 11.43234603 | 0.000394183 |          | ENSG00000199627 |
| 7 | 130489660 | 130489961 | 130489830 | 8  | 12 | 0  | 13.5109544  | 9.48E-05    |          | ENSG00000199627 |
| 7 | 130682522 | 130682844 | 130682693 | 10 | 13 | 0  | 14.55025858 | 4.65E-05    | MKLN1    | ENSG00000128585 |
| 7 | 131109974 | 131110412 | 131110216 | 37 | 58 | 0  | 61.31894687 | 5.50E-19    |          | ENSG00000172400 |
| 7 | 131365460 | 131365786 | 131365628 | 11 | 14 | 7  | 1.948695345 | 0.0559175   |          | ENSG00000205067 |
| 7 | 131574991 | 131575194 | 131575125 | 8  | 9  | 0  | 10.39304184 | 0.000803859 | PLXNA4   | ENSG00000221866 |
| 7 | 132312547 | 132312726 | 132312636 | 8  | 8  | 1  | 4.676868829 | 0.0091584   | CHCHD3   | ENSG00000106554 |
| 7 | 132925302 | 132925632 | 132925467 | 22 | 22 | 1  | 11.95199812 | 9.69E-07    |          | ENSG00000208439 |
| 7 | 133881312 | 133881715 | 133881549 | 17 | 22 | 0  | 23.90399624 | 7.62E-08    | AKR1B10  | ENSG00000198074 |
| 7 | 133958571 | 133958871 | 133958702 | 10 | 12 | 0  | 13.5109544  | 9.48E-05    | BPGM     | ENSG00000172331 |
| 7 | 134180701 | 134181086 | 134180885 | 73 | 83 | 6  | 12.47165021 | 1.18E-19    | CALD1    | ENSG00000122786 |
| 7 | 134671237 | 134671416 | 134671326 | 8  | 8  | 3  | 2.338434415 | 0.0641221   | STRA8    | ENSG00000146857 |
| 7 | 134996550 | 134996747 | 134996653 | 8  | 8  | 0  | 9.353737658 | 0.00163931  |          | ENSG00000212303 |
| 7 | 134997611 | 134997975 | 134997829 | 8  | 12 | 8  | 1.501217155 | 0.168286    |          | ENSG00000212303 |
| 7 | 135109539 | 135109733 | 135109700 | 8  | 8  | 4  | 1.870747532 | 0.118863    |          | ENSG00000222219 |
| 7 | 135312635 | 135312847 | 135312741 | 8  | 9  | 8  | 1.154782427 | 0.375434    | MTPN     | ENSG00000105887 |
| 7 | 137314513 | 137314695 | 137314604 | 8  | 8  | 4  | 1.870747532 | 0.118863    | CREB3L2  | ENSG00000182158 |
| 7 | 137496862 | 137497119 | 137496990 | 9  | 11 | 3  | 3.117912553 | 0.0146045   |          | ENSG00000222912 |
| 7 | 137500022 | 137500455 | 137500196 | 46 | 62 | 2  | 21.82538787 | 1.77E-17    |          | ENSG00000222912 |
| 7 | 137523838 | 137524097 | 137523933 | 12 | 13 | 0  | 14.55025858 | 4.65E-05    |          | ENSG00000201465 |
| 7 | 137639057 | 137639239 | 137639201 | 9  | 9  | 1  | 5.196520921 | 0.00490062  |          | ENSG00000213238 |
| 7 | 137639290 | 137639542 | 137639380 | 9  | 12 | 3  | 3.377738599 | 0.00867157  |          | ENSG00000213238 |
| 7 | 137766734 | 137767155 | 137766976 | 30 | 40 | 1  | 21.30573578 | 4.48E-12    |          | ENSG00000202072 |
| 7 | 138074074 | 138074359 | 138074216 | 17 | 20 | 3  | 5.456346967 | 9.70E-05    | ATP6V0A4 | ENSG00000105929 |
| 7 | 138109260 | 138109454 | 138109362 | 8  | 8  | 1  | 4.676868829 | 0.0091584   | ATP6V0A4 | ENSG00000105929 |
| 7 | 138453492 | 138453703 | 138453636 | 8  | 8  | 1  | 4.676868829 | 0.0091584   | ZC3HAV1  | ENSG00000105939 |
| 7 | 138643724 | 138644015 | 138643869 | 11 | 15 | 0  | 16.62886695 | 1.12E-05    |          | ENSG00000206843 |
| 7 | 138675505 | 138675693 | 138675599 | 8  | 9  | 5  | 1.73217364  | 0.133894    | FMC1     | ENSG00000164898 |
| 7 | 138675766 | 138676142 | 138675917 | 8  | 13 | 16 | 0.855897563 | 0.670115    | FMC1     | ENSG00000164898 |
| 7 | 138696059 | 138696327 | 138696193 | 11 | 14 | 1  | 7.794781382 | 0.000197021 | LUC7L2   | ENSG00000146963 |
| 7 | 138808986 | 138809166 | 138809076 | 8  | 8  | 0  | 9.353737658 | 0.00163931  | KLRG2    | ENSG00000188883 |

|   |           |           |           |    |    |   |             |             |         |                 |
|---|-----------|-----------|-----------|----|----|---|-------------|-------------|---------|-----------------|
| 7 | 139374317 | 139374539 | 139374446 | 8  | 8  | 1 | 4.676868829 | 0.0091584   | PARP12  | ENSG00000059378 |
| 7 | 139521489 | 139521967 | 139521647 | 9  | 17 | 9 | 1.870747532 | 0.0498299   | JHDM1D  | ENSG00000006459 |
| 7 | 139546506 | 139546741 | 139546643 | 10 | 11 | 5 | 2.078608368 | 0.0614303   |         | ENSG00000199971 |
| 7 | 139887688 | 139887922 | 139887845 | 9  | 10 | 1 | 5.716173013 | 0.00260397  |         | ENSG00000221732 |
| 7 | 140043575 | 140043796 | 140043685 | 8  | 9  | 0 | 10.39304184 | 0.000803859 | NDUFB2  | ENSG00000090266 |
| 7 | 140213881 | 140214141 | 140213987 | 8  | 9  | 1 | 5.196520921 | 0.00490062  |         | ENSG00000207040 |
| 7 | 140214163 | 140214438 | 140214304 | 21 | 22 | 0 | 23.90399624 | 7.62E-08    |         | ENSG00000207040 |
| 7 | 140215269 | 140215448 | 140215358 | 8  | 8  | 0 | 9.353737658 | 0.00163931  |         | ENSG00000207040 |
| 7 | 140361018 | 140361343 | 140361179 | 8  | 10 | 6 | 1.63319229  | 0.146906    | MRPS33  | ENSG00000090263 |
| 7 | 140996284 | 140996490 | 140996387 | 9  | 9  | 3 | 2.598260461 | 0.0397929   |         | ENSG00000219583 |
| 7 | 141084272 | 141084702 | 141084523 | 16 | 25 | 6 | 3.860272684 | 0.00017915  | SSBP1   | ENSG00000106028 |
| 7 | 141789133 | 141789328 | 141789234 | 8  | 9  | 2 | 3.464347281 | 0.0163838   |         | ENSG00000211719 |
| 7 | 142351141 | 142351381 | 142351260 | 13 | 14 | 2 | 5.196520921 | 0.000907371 | C7orf34 | ENSG00000165131 |
| 7 | 142564636 | 142564853 | 142564744 | 10 | 10 | 1 | 5.716173013 | 0.00260397  | PIP     | ENSG00000159763 |
| 7 | 143229723 | 143229923 | 143229834 | 11 | 12 | 1 | 6.755477198 | 0.000722752 | FAM115A | ENSG00000198420 |
| 7 | 143230091 | 143230429 | 143230260 | 10 | 16 | 2 | 5.889390377 | 0.000270741 | FAM115A | ENSG00000198420 |
| 7 | 143391700 | 143391957 | 143391791 | 10 | 12 | 4 | 2.702190879 | 0.0203088   | OR2A25  | ENSG00000221933 |
| 7 | 143999445 | 143999859 | 143999680 | 43 | 53 | 2 | 18.70747532 | 8.04E-15    |         | ENSG00000214036 |
| 7 | 144059778 | 144059957 | 144059883 | 8  | 8  | 3 | 2.338434415 | 0.0641221   |         | ENSG00000214036 |
| 7 | 147570441 | 147570682 | 147570536 | 11 | 12 | 4 | 2.702190879 | 0.0203088   |         | ENSG00000199370 |
| 7 | 147590713 | 147591028 | 147590870 | 9  | 10 | 1 | 5.716173013 | 0.00260397  |         | ENSG00000199370 |
| 7 | 147667201 | 147667628 | 147667449 | 15 | 22 | 2 | 7.967998746 | 6.43E-06    |         | ENSG00000199370 |
| 7 | 147730130 | 147730649 | 147730385 | 48 | 68 | 0 | 71.71198871 | 4.42E-22    |         | ENSG00000199370 |
| 7 | 147903711 | 147903919 | 147903836 | 11 | 14 | 3 | 3.897390691 | 0.00295882  |         | ENSG00000213210 |
| 7 | 148000155 | 148000429 | 148000257 | 18 | 20 | 0 | 21.82538787 | 3.17E-07    | CUL1    | ENSG00000055130 |
| 7 | 148124861 | 148125075 | 148124968 | 8  | 9  | 1 | 5.196520921 | 0.00490062  |         | ENSG00000208293 |
| 7 | 148269421 | 148269799 | 148269576 | 11 | 16 | 9 | 1.766817113 | 0.0700694   |         | ENSG00000208290 |
| 7 | 148311639 | 148312194 | 148311873 | 10 | 22 | 3 | 5.975999059 | 2.96E-05    |         | ENSG00000202354 |
| 7 | 148315133 | 148315323 | 148315228 | 8  | 10 | 4 | 2.286469205 | 0.0509017   |         | ENSG00000201098 |
| 7 | 148356994 | 148357397 | 148357218 | 9  | 16 | 7 | 2.208521392 | 0.0257604   | PDIA4   | ENSG00000155660 |
| 7 | 148393277 | 148393508 | 148393444 | 8  | 9  | 4 | 2.078608368 | 0.0785659   |         | ENSG00000216832 |
| 7 | 148393923 | 148394132 | 148394027 | 10 | 11 | 8 | 1.385738912 | 0.224757    |         | ENSG00000216832 |
| 7 | 148419665 | 148419909 | 148419801 | 8  | 9  | 6 | 1.484720263 | 0.204387    | ZNF786  | ENSG00000197362 |
| 7 | 148454415 | 148454652 | 148454532 | 9  | 11 | 9 | 1.247165021 | 0.300052    | ZNF425  | ENSG00000204947 |

|   |           |           |           |    |    |    |             |             |        |                 |
|---|-----------|-----------|-----------|----|----|----|-------------|-------------|--------|-----------------|
| 7 | 148455249 | 148455471 | 148455360 | 9  | 11 | 7  | 1.558956276 | 0.158273    | ZNF425 | ENSG00000204947 |
| 7 | 148472892 | 148473384 | 148473233 | 12 | 25 | 6  | 3.860272684 | 0.00017915  | ZNF398 | ENSG00000197024 |
| 7 | 148482169 | 148482450 | 148482326 | 13 | 13 | 3  | 3.637564645 | 0.0050909   | ZNF398 | ENSG00000197024 |
| 7 | 148495153 | 148495390 | 148495271 | 10 | 11 | 6  | 1.781664316 | 0.103344    | ZNF398 | ENSG00000197024 |
| 7 | 148510366 | 148510561 | 148510499 | 10 | 10 | 7  | 1.429043253 | 0.21536     | ZNF282 | ENSG00000170265 |
| 7 | 148534081 | 148534325 | 148534213 | 8  | 10 | 8  | 1.27026067  | 0.293854    | ZNF282 | ENSG00000170265 |
| 7 | 148556924 | 148557103 | 148557013 | 8  | 8  | 5  | 1.558956276 | 0.191397    | ZNF212 | ENSG00000170260 |
| 7 | 148567311 | 148567664 | 148567487 | 10 | 16 | 11 | 1.472347594 | 0.147517    | ZNF212 | ENSG00000170260 |
| 7 | 148638436 | 148638642 | 148638604 | 9  | 11 | 8  | 1.385738912 | 0.224757    |        | ENSG00000219420 |
| 7 | 148683886 | 148684094 | 148683990 | 8  | 8  | 1  | 4.676868829 | 0.0091584   |        | ENSG00000208278 |
| 7 | 148722354 | 148722598 | 148722459 | 8  | 10 | 1  | 5.716173013 | 0.00260397  |        | ENSG00000208277 |
| 7 | 148817497 | 148817676 | 148817586 | 8  | 8  | 1  | 4.676868829 | 0.0091584   | ZNF746 | ENSG00000181220 |
| 7 | 148972878 | 148973142 | 148972990 | 11 | 12 | 6  | 1.930136342 | 0.071303    |        | ENSG00000208271 |
| 7 | 149019165 | 149019353 | 149019275 | 8  | 9  | 6  | 1.484720263 | 0.204387    | KRBA1  | ENSG00000133619 |
| 7 | 149070119 | 149070473 | 149070296 | 11 | 16 | 7  | 2.208521392 | 0.0257604   | ZNF467 | ENSG00000181444 |
| 7 | 149073065 | 149073244 | 149073154 | 8  | 8  | 2  | 3.117912553 | 0.0283184   | ZNF467 | ENSG00000181444 |
| 7 | 149081720 | 149081940 | 149081809 | 9  | 9  | 3  | 2.598260461 | 0.0397929   | ZNF467 | ENSG00000181444 |
| 7 | 149110659 | 149110910 | 149110784 | 8  | 9  | 7  | 1.29913023  | 0.286504    |        | ENSG00000197558 |
| 7 | 149121997 | 149122207 | 149122065 | 10 | 10 | 3  | 2.858086507 | 0.0242838   |        | ENSG00000197558 |
| 7 | 149166247 | 149166506 | 149166387 | 11 | 13 | 4  | 2.910051716 | 0.0125532   | ZNF862 | ENSG00000106479 |
| 7 | 149182734 | 149183041 | 149182890 | 12 | 13 | 6  | 2.078608368 | 0.0483393   | ZNF862 | ENSG00000106479 |
| 7 | 149200829 | 149201020 | 149200878 | 9  | 10 | 0  | 11.43234603 | 0.000394183 |        | ENSG00000171130 |
| 7 | 149344982 | 149345167 | 149345042 | 8  | 8  | 0  | 9.353737658 | 0.00163931  |        | ENSG00000204934 |
| 7 | 149429060 | 149429271 | 149429165 | 8  | 8  | 2  | 3.117912553 | 0.0283184   |        | ENSG00000106526 |
| 7 | 149697690 | 149697870 | 149697732 | 8  | 8  | 5  | 1.558956276 | 0.191397    | REPIN1 | ENSG00000214022 |
| 7 | 149733377 | 149733556 | 149733473 | 8  | 8  | 4  | 1.870747532 | 0.118863    | ZNF775 | ENSG00000196456 |
| 7 | 150205242 | 150205434 | 150205338 | 8  | 8  | 1  | 4.676868829 | 0.0091584   | ABP1   | ENSG00000002726 |
| 7 | 150226618 | 150226848 | 150226733 | 8  | 10 | 1  | 5.716173013 | 0.00260397  | ABP1   | ENSG00000002726 |
| 7 | 150385997 | 150386216 | 150386073 | 10 | 10 | 3  | 2.858086507 | 0.0242838   | CDK5   | ENSG00000164885 |
| 7 | 150444203 | 150444528 | 150444373 | 11 | 13 | 4  | 2.910051716 | 0.0125532   | AGAP3  | ENSG00000133612 |
| 7 | 150460759 | 150460943 | 150460851 | 8  | 8  | 0  | 9.353737658 | 0.00163931  |        | ENSG00000223157 |
| 7 | 150555340 | 150555650 | 150555515 | 8  | 11 | 5  | 2.078608368 | 0.0614303   | ABCF2  | ENSG00000033050 |
| 7 | 150696181 | 150696407 | 150696279 | 8  | 10 | 5  | 1.905391004 | 0.0915982   | NUB1   | ENSG00000013374 |
| 7 | 150880344 | 150880751 | 150880523 | 8  | 16 | 6  | 2.524024447 | 0.0137633   | RHEB   | ENSG00000106615 |



|   |           |           |           |    |    |    |             |             |         |                 |
|---|-----------|-----------|-----------|----|----|----|-------------|-------------|---------|-----------------|
| 7 | 151016100 | 151016511 | 151016299 | 25 | 34 | 1  | 18.18782322 | 2.77E-10    | PRKAG2  | ENSG00000106617 |
| 7 | 151103653 | 151103832 | 151103776 | 8  | 8  | 1  | 4.676868829 | 0.0091584   | PRKAG2  | ENSG00000106617 |
| 7 | 151147244 | 151147621 | 151147354 | 13 | 18 | 13 | 1.41048425  | 0.160361    | PRKAG2  | ENSG00000106617 |
| 7 | 151179177 | 151179410 | 151179293 | 10 | 11 | 5  | 2.078608368 | 0.0614303   | PRKAG2  | ENSG00000106617 |
| 7 | 151400453 | 151400898 | 151400632 | 64 | 77 | 2  | 27.02190879 | 6.10E-22    |         | ENSG00000208254 |
| 7 | 151410524 | 151410795 | 151410671 | 10 | 11 | 0  | 12.47165021 | 0.000193293 | GALNT11 | ENSG00000178234 |
| 7 | 151414589 | 151414778 | 151414744 | 8  | 9  | 3  | 2.598260461 | 0.0397929   | GALNT11 | ENSG00000178234 |
| 7 | 151818650 | 151818843 | 151818739 | 8  | 9  | 1  | 5.196520921 | 0.00490062  | CCT8L1  | ENSG00000020219 |
| 7 | 151832476 | 151832726 | 151832625 | 15 | 15 | 3  | 4.157216737 | 0.00170423  | CCT8L1  | ENSG00000020219 |
| 7 | 151948377 | 151948556 | 151948466 | 8  | 8  | 2  | 3.117912553 | 0.0283184   |         | ENSG00000212590 |
| 7 | 152061494 | 152061932 | 152061771 | 31 | 41 | 1  | 21.82538787 | 2.25E-12    |         | ENSG00000214003 |
| 7 | 152260362 | 152260580 | 152260456 | 9  | 9  | 3  | 2.598260461 | 0.0397929   | ACTR3B  | ENSG00000133627 |
| 7 | 152317676 | 152318225 | 152317992 | 29 | 45 | 6  | 6.829713211 | 2.35E-09    |         | ENSG00000217267 |
| 7 | 153163439 | 153163621 | 153163465 | 8  | 8  | 1  | 4.676868829 | 0.0091584   | DPP6    | ENSG00000130226 |
| 7 | 153576870 | 153577150 | 153577009 | 9  | 12 | 0  | 13.5109544  | 9.48E-05    | DPP6    | ENSG00000130226 |
| 7 | 154152134 | 154152313 | 154152230 | 8  | 8  | 0  | 9.353737658 | 0.00163931  |         | ENSG00000221099 |
| 7 | 154227028 | 154227243 | 154227135 | 8  | 8  | 1  | 4.676868829 | 0.0091584   | DPP6    | ENSG00000130226 |
| 7 | 154647120 | 154647468 | 154647290 | 30 | 35 | 1  | 18.70747532 | 1.40E-10    |         | ENSG00000217825 |
| 7 | 154723171 | 154723389 | 154723211 | 8  | 10 | 4  | 2.286469205 | 0.0509017   | INSIG1  | ENSG00000186480 |
| 7 | 154865684 | 154865943 | 154865813 | 9  | 11 | 5  | 2.078608368 | 0.0614303   |         | ENSG00000218672 |
| 7 | 154968085 | 154968275 | 154968150 | 8  | 8  | 0  | 9.353737658 | 0.00163931  | EN2     | ENSG00000164778 |
| 7 | 155145973 | 155146167 | 155146010 | 12 | 12 | 1  | 6.755477198 | 0.000722752 | RBM33   | ENSG00000184863 |
| 7 | 155163856 | 155164035 | 155163945 | 8  | 9  | 4  | 2.078608368 | 0.0785659   | RBM33   | ENSG00000184863 |
| 7 | 155337372 | 155337656 | 155337506 | 11 | 12 | 0  | 13.5109544  | 9.48E-05    |         | ENSG00000221113 |
| 7 | 155346266 | 155346877 | 155346441 | 15 | 28 | 15 | 1.883738834 | 0.0179382   |         | ENSG00000221113 |
| 7 | 155351452 | 155351944 | 155351711 | 13 | 22 | 9  | 2.390399624 | 0.00747467  |         | ENSG00000221113 |
| 7 | 155352797 | 155353046 | 155352921 | 18 | 21 | 8  | 2.540521339 | 0.00602138  |         | ENSG00000221113 |
| 7 | 155353086 | 155353345 | 155353215 | 8  | 10 | 4  | 2.286469205 | 0.0509017   |         | ENSG00000221113 |
| 7 | 155694909 | 155695121 | 155695000 | 9  | 11 | 2  | 4.157216737 | 0.0052913   |         | ENSG00000207061 |
| 7 | 156254556 | 156254788 | 156254671 | 8  | 11 | 4  | 2.494330042 | 0.0324033   |         | ENSG00000206938 |
| 7 | 156315211 | 156315394 | 156315295 | 9  | 9  | 7  | 1.29913023  | 0.286504    |         | ENSG00000206938 |
| 7 | 156440262 | 156440576 | 156440419 | 13 | 16 | 1  | 8.834085566 | 5.30E-05    | NOM1    | ENSG00000146909 |
| 7 | 156493502 | 156493703 | 156493602 | 8  | 8  | 1  | 4.676868829 | 0.0091584   | MNX1    | ENSG00000130675 |
| 7 | 156739405 | 156739656 | 156739530 | 9  | 10 | 7  | 1.429043253 | 0.21536     |         | ENSG00000213990 |

|   |           |           |           |    |     |    |             |             |         |                 |
|---|-----------|-----------|-----------|----|-----|----|-------------|-------------|---------|-----------------|
| 7 | 156762686 | 156762995 | 156762848 | 8  | 12  | 4  | 2.702190879 | 0.0203088   |         | ENSG00000213990 |
| 7 | 156787907 | 156788096 | 156788032 | 8  | 8   | 0  | 9.353737658 | 0.00163931  |         | ENSG00000208243 |
| 7 | 156890461 | 156890766 | 156890613 | 13 | 17  | 1  | 9.353737658 | 2.73E-05    | DNAJB6  | ENSG00000105993 |
| 7 | 156978450 | 156978793 | 156978621 | 14 | 19  | 1  | 10.39304184 | 7.23E-06    |         | ENSG00000178158 |
| 7 | 157810273 | 157810473 | 157810373 | 8  | 8   | 0  | 9.353737658 | 0.00163931  |         | ENSG00000208234 |
| 7 | 158057668 | 158057901 | 158057784 | 9  | 10  | 2  | 3.810782009 | 0.00936112  | PTPRN2  | ENSG00000155093 |
| 7 | 158080543 | 158080735 | 158080639 | 18 | 18  | 13 | 1.41048425  | 0.160361    | PTPRN2  | ENSG00000155093 |
| 7 | 158266431 | 158266661 | 158266579 | 9  | 10  | 1  | 5.716173013 | 0.00260397  | FAM62B  | ENSG00000117868 |
| 7 | 158268258 | 158268479 | 158268323 | 8  | 10  | 5  | 1.905391004 | 0.0915982   | FAM62B  | ENSG00000117868 |
| 7 | 158288750 | 158288975 | 158288862 | 8  | 9   | 4  | 2.078608368 | 0.0785659   | FAM62B  | ENSG00000117868 |
| 7 | 158304165 | 158304508 | 158304336 | 12 | 18  | 3  | 4.936694875 | 0.000311102 | FAM62B  | ENSG00000117868 |
| 7 | 158309614 | 158309801 | 158309707 | 9  | 9   | 2  | 3.464347281 | 0.0163838   | FAM62B  | ENSG00000117868 |
| 7 | 158313379 | 158313689 | 158313534 | 8  | 9   | 4  | 2.078608368 | 0.0785659   | FAM62B  | ENSG00000117868 |
| 7 | 158501014 | 158501308 | 158501161 | 10 | 14  | 9  | 1.558956276 | 0.132279    | VIPR2   | ENSG00000106018 |
| 7 | 158516061 | 158516264 | 158516162 | 8  | 9   | 7  | 1.29913023  | 0.286504    | VIPR2   | ENSG00000106018 |
| 7 | 158703767 | 158704010 | 158703884 | 10 | 11  | 6  | 1.781664316 | 0.103344    |         | ENSG00000220691 |
| 7 | 158796217 | 158796661 | 158796484 | 31 | 39  | 0  | 41.57216737 | 4.18E-13    |         | ENSG00000220691 |
| 8 | 154535    | 154880    | 154707    | 26 | 30  | 1  | 16.10921486 | 4.28E-09    | ZNF596  | ENSG00000172748 |
| 8 | 1191074   | 1191322   | 1191195   | 9  | 12  | 3  | 3.377738599 | 0.00867157  | DLGAP2  | ENSG00000198010 |
| 8 | 2339776   | 2340039   | 2339921   | 8  | 9   | 0  | 10.39304184 | 0.000803859 | MYOM2   | ENSG00000036448 |
| 8 | 3163990   | 3164279   | 3164149   | 8  | 8   | 2  | 3.117912553 | 0.0283184   | CSMD1   | ENSG00000183117 |
| 8 | 4907282   | 4907530   | 4907418   | 9  | 9   | 2  | 3.464347281 | 0.0163838   |         | ENSG00000206661 |
| 8 | 6183985   | 6184192   | 6184088   | 12 | 12  | 0  | 13.5109544  | 9.48E-05    | MCPH1   | ENSG00000147316 |
| 8 | 8257694   | 8258095   | 8257849   | 88 | 100 | 2  | 34.98990754 | 7.68E-29    |         | ENSG00000182319 |
| 8 | 8276195   | 8276377   | 8276286   | 10 | 10  | 0  | 11.43234603 | 0.000394183 |         | ENSG00000182319 |
| 8 | 8301698   | 8301884   | 8301808   | 9  | 9   | 0  | 10.39304184 | 0.000803859 |         | ENSG00000182319 |
| 8 | 8302129   | 8302808   | 8302405   | 65 | 91  | 4  | 19.12319699 | 7.87E-24    |         | ENSG00000182319 |
| 8 | 8349661   | 8349951   | 8349805   | 11 | 13  | 4  | 2.910051716 | 0.0125532   |         | ENSG00000182319 |
| 8 | 8402987   | 8403199   | 8403093   | 9  | 10  | 2  | 3.810782009 | 0.00936112  |         | ENSG00000222487 |
| 8 | 8550714   | 8550941   | 8550827   | 10 | 10  | 4  | 2.286469205 | 0.0509017   |         | ENSG00000176305 |
| 8 | 8763423   | 8763602   | 8763534   | 8  | 8   | 1  | 4.676868829 | 0.0091584   | MFHAS1  | ENSG00000147324 |
| 8 | 8908258   | 8908573   | 8908410   | 9  | 13  | 5  | 2.425043097 | 0.0262442   | THEX1   | ENSG00000104626 |
| 8 | 8924830   | 8925009   | 8924985   | 8  | 8   | 2  | 3.117912553 | 0.0283184   | THEX1   | ENSG00000104626 |
| 8 | 9021262   | 9021580   | 9021421   | 12 | 16  | 0  | 17.66817113 | 5.48E-06    | PPP1R3B | ENSG00000173281 |

|   |          |          |          |     |     |   |             |             |           |                 |
|---|----------|----------|----------|-----|-----|---|-------------|-------------|-----------|-----------------|
| 8 | 11369230 | 11369415 | 11369322 | 10  | 11  | 1 | 6.235825105 | 0.0013754   | FAM167A   | ENSG00000154319 |
| 8 | 11684487 | 11684725 | 11684565 | 8   | 10  | 2 | 3.810782009 | 0.00936112  | FDFT1     | ENSG00000079459 |
| 8 | 16874638 | 16874817 | 16874727 | 8   | 8   | 2 | 3.117912553 | 0.0283184   | FGF20     | ENSG00000078579 |
| 8 | 17549402 | 17549614 | 17549528 | 10  | 11  | 5 | 2.078608368 | 0.0614303   | MTUS1     | ENSG00000129422 |
| 8 | 18464836 | 18465145 | 18464980 | 9   | 13  | 4 | 2.910051716 | 0.0125532   | PSD3      | ENSG00000156011 |
| 8 | 18905483 | 18905854 | 18905675 | 10  | 17  | 2 | 6.235825105 | 0.000146695 | PSD3      | ENSG00000156011 |
| 8 | 18943293 | 18943750 | 18943521 | 151 | 171 | 5 | 29.79338661 | 2.84E-46    | PSD3      | ENSG00000156011 |
| 8 | 20030705 | 20031002 | 20030839 | 11  | 12  | 3 | 3.377738599 | 0.00867157  | SLC18A1   | ENSG00000036565 |
| 8 | 20329868 | 20330190 | 20330024 | 23  | 27  | 0 | 29.10051716 | 2.16E-09    |           | ENSG00000210340 |
| 8 | 21476034 | 21476246 | 21476145 | 8   | 8   | 0 | 9.353737658 | 0.00163931  |           | ENSG00000210349 |
| 8 | 22462676 | 22462908 | 22462793 | 9   | 10  | 2 | 3.810782009 | 0.00936112  | SORBS3    | ENSG00000120896 |
| 8 | 22669496 | 22669678 | 22669622 | 10  | 10  | 1 | 5.716173013 | 0.00260397  | EGR3      | ENSG00000179388 |
| 8 | 22927896 | 22928118 | 22928007 | 9   | 11  | 2 | 4.157216737 | 0.0052913   | RHOBTB2   | ENSG00000008853 |
| 8 | 22981520 | 22981733 | 22981596 | 9   | 11  | 0 | 12.47165021 | 0.000193293 | TNFRSF10B | ENSG00000120889 |
| 8 | 22981852 | 22982611 | 22982104 | 14  | 35  | 1 | 18.70747532 | 1.40E-10    | TNFRSF10B | ENSG00000120889 |
| 8 | 23557222 | 23557458 | 23557346 | 8   | 8   | 1 | 4.676868829 | 0.0091584   | NKX3-1    | ENSG00000167034 |
| 8 | 25232724 | 25232967 | 25232852 | 8   | 11  | 1 | 6.235825105 | 0.0013754   |           | ENSG00000215293 |
| 8 | 25321951 | 25322150 | 25322062 | 9   | 9   | 2 | 3.464347281 | 0.0163838   |           | ENSG00000215293 |
| 8 | 25825002 | 25825181 | 25825153 | 8   | 8   | 0 | 9.353737658 | 0.00163931  |           | ENSG00000218407 |
| 8 | 27152182 | 27152386 | 27152288 | 8   | 8   | 2 | 3.117912553 | 0.0283184   | STMN4     | ENSG00000015592 |
| 8 | 27530749 | 27530969 | 27530820 | 8   | 9   | 1 | 5.196520921 | 0.00490062  | CLU       | ENSG00000120885 |
| 8 | 27564539 | 27564718 | 27564611 | 8   | 8   | 0 | 9.353737658 | 0.00163931  | SCARA3    | ENSG00000168077 |
| 8 | 28203632 | 28203811 | 28203724 | 8   | 8   | 2 | 3.117912553 | 0.0283184   | PNOC      | ENSG00000168081 |
| 8 | 28608376 | 28608567 | 28608471 | 12  | 12  | 0 | 13.5109544  | 9.48E-05    | EXTL3     | ENSG00000012232 |
| 8 | 29083995 | 29084182 | 29084088 | 8   | 8   | 0 | 9.353737658 | 0.00163931  | KIF13B    | ENSG00000197892 |
| 8 | 29200219 | 29200521 | 29200358 | 11  | 15  | 1 | 8.314433474 | 0.000102308 |           | ENSG00000212034 |
| 8 | 29665751 | 29666022 | 29665886 | 9   | 11  | 3 | 3.117912553 | 0.0146045   |           | ENSG00000221003 |
| 8 | 29673266 | 29673456 | 29673338 | 8   | 8   | 0 | 9.353737658 | 0.00163931  |           | ENSG00000221003 |
| 8 | 29683810 | 29684299 | 29684059 | 298 | 324 | 3 | 84.44346497 | 2.04E-95    |           | ENSG00000221003 |
| 8 | 30425491 | 30425731 | 30425617 | 8   | 9   | 0 | 10.39304184 | 0.000803859 | RBPM5     | ENSG00000157110 |
| 8 | 30679948 | 30680187 | 30680066 | 9   | 10  | 1 | 5.716173013 | 0.00260397  | GSR       | ENSG00000104687 |
| 8 | 30700043 | 30700488 | 30700161 | 12  | 19  | 3 | 5.196520921 | 0.000174201 | GSR       | ENSG00000104687 |
| 8 | 30780506 | 30780739 | 30780622 | 13  | 14  | 2 | 5.196520921 | 0.000907371 | PPP2CB    | ENSG00000104695 |
| 8 | 31149494 | 31149871 | 31149714 | 26  | 33  | 0 | 35.33634226 | 3.00E-11    | PURG      | ENSG00000172733 |

|   |          |          |          |     |     |     |             |             |         |                 |
|---|----------|----------|----------|-----|-----|-----|-------------|-------------|---------|-----------------|
| 8 | 32762256 | 32762495 | 32762374 | 12  | 12  | 2   | 4.503651465 | 0.002963    |         | ENSG00000210559 |
| 8 | 33106569 | 33106832 | 33106700 | 22  | 23  | 1   | 12.47165021 | 4.94E-07    |         | ENSG00000210596 |
| 8 | 37571557 | 37571954 | 37571736 | 29  | 37  | 4   | 7.8987118   | 1.45E-08    |         | ENSG00000223215 |
| 8 | 37575279 | 37575674 | 37575400 | 12  | 17  | 2   | 6.235825105 | 0.000146695 |         | ENSG00000223215 |
| 8 | 37892918 | 37893126 | 37893022 | 9   | 10  | 3   | 2.858086507 | 0.0242838   |         | ENSG00000210679 |
| 8 | 38769772 | 38770047 | 38769897 | 11  | 12  | 8   | 1.501217155 | 0.168286    | TACC1   | ENSG00000147526 |
| 8 | 40080758 | 40080937 | 40080847 | 8   | 9   | 0   | 10.39304184 | 0.000803859 | C8orf4  | ENSG00000176907 |
| 8 | 40151563 | 40151812 | 40151677 | 11  | 13  | 1   | 7.27512929  | 0.000378098 | C8orf4  | ENSG00000176907 |
| 8 | 40178596 | 40178796 | 40178688 | 8   | 8   | 5   | 1.558956276 | 0.191397    | C8orf4  | ENSG00000176907 |
| 8 | 40337027 | 40337236 | 40337089 | 8   | 11  | 2   | 4.157216737 | 0.0052913   | C8orf4  | ENSG00000176907 |
| 8 | 41747323 | 41747669 | 41747496 | 11  | 14  | 1   | 7.794781382 | 0.000197021 | ANK1    | ENSG00000029534 |
| 8 | 41795374 | 41795825 | 41795616 | 105 | 132 | 0   | 138.2274565 | 6.90E-42    |         | ENSG00000207101 |
| 8 | 42726218 | 42726527 | 42726372 | 21  | 24  | 0   | 25.98260461 | 1.83E-08    | CHRNA6  | ENSG00000147434 |
| 8 | 42875185 | 42875387 | 42875286 | 9   | 9   | 0   | 10.39304184 | 0.000803859 | HOOK3   | ENSG00000168172 |
| 8 | 43211912 | 43212604 | 43212076 | 74  | 111 | 154 | 0.750981088 | 0.990032    | A26A1   | ENSG00000188877 |
| 8 | 43214079 | 43214540 | 43214258 | 24  | 35  | 27  | 1.336248237 | 0.122755    | A26A1   | ENSG00000188877 |
| 8 | 43214767 | 43215304 | 43215108 | 48  | 65  | 105 | 0.647113926 | 0.997602    | A26A1   | ENSG00000188877 |
| 8 | 43215448 | 43216059 | 43215743 | 21  | 33  | 59  | 0.588939038 | 0.994241    | A26A1   | ENSG00000188877 |
| 8 | 43880933 | 43881270 | 43881101 | 42  | 42  | 28  | 1.541037239 | 0.0338156   |         | ENSG00000221295 |
| 8 | 43887390 | 43887719 | 43887554 | 22  | 23  | 33  | 0.733626483 | 0.881043    |         | ENSG00000221295 |
| 8 | 43913626 | 43913951 | 43913788 | 11  | 11  | 10  | 1.133786383 | 0.380636    |         | ENSG00000221295 |
| 8 | 43939561 | 43939883 | 43939722 | 10  | 10  | 18  | 0.601702422 | 0.917232    |         | ENSG00000221295 |
| 8 | 43943399 | 43943734 | 43943566 | 15  | 15  | 14  | 1.10859113  | 0.386477    |         | ENSG00000221295 |
| 8 | 46964425 | 46964767 | 46964596 | 79  | 79  | 48  | 1.696823158 | 0.00149193  |         | ENSG00000210854 |
| 8 | 46971494 | 46971824 | 46971659 | 18  | 18  | 24  | 0.78987118  | 0.784577    |         | ENSG00000210854 |
| 8 | 46988337 | 46988517 | 46988366 | 8   | 8   | 9   | 0.935373766 | 0.560286    |         | ENSG00000210854 |
| 8 | 47847418 | 47847597 | 47847507 | 8   | 8   | 1   | 4.676868829 | 0.0091584   |         | ENSG00000210859 |
| 8 | 47987832 | 47988019 | 47987925 | 9   | 10  | 5   | 1.905391004 | 0.0915982   |         | ENSG00000215179 |
| 8 | 48123300 | 48123479 | 48123389 | 8   | 8   | 0   | 9.353737658 | 0.00163931  |         | ENSG00000210917 |
| 8 | 49017183 | 49017513 | 49017351 | 10  | 15  | 2   | 5.542955649 | 0.000497081 | PRKDC   | ENSG00000121031 |
| 8 | 50185494 | 50185982 | 50185719 | 31  | 43  | 3   | 11.43234603 | 5.53E-11    | C8orf22 | ENSG00000168333 |
| 8 | 52999893 | 53000143 | 53000033 | 11  | 11  | 2   | 4.157216737 | 0.0052913   | PCMTD1  | ENSG00000168300 |
| 8 | 53000270 | 53000679 | 53000447 | 88  | 99  | 0   | 103.9304184 | 1.13E-31    | PCMTD1  | ENSG00000168300 |
| 8 | 53071076 | 53071368 | 53071207 | 9   | 11  | 4   | 2.494330042 | 0.0324033   | PCMTD1  | ENSG00000168300 |

|   |          |          |          |    |    |    |             |             |         |                 |
|---|----------|----------|----------|----|----|----|-------------|-------------|---------|-----------------|
| 8 | 53415431 | 53415820 | 53415641 | 8  | 15 | 1  | 8.314433474 | 0.000102308 | ST18    | ENSG00000147488 |
| 8 | 53621293 | 53621768 | 53621589 | 17 | 26 | 0  | 28.06121297 | 4.41E-09    | FAM150A | ENSG00000196711 |
| 8 | 53704505 | 53704912 | 53704684 | 32 | 42 | 3  | 11.17251998 | 1.06E-10    | FAM150A | ENSG00000196711 |
| 8 | 54348076 | 54348429 | 54348251 | 27 | 32 | 1  | 17.14851904 | 1.09E-09    | OPRK1   | ENSG00000082556 |
| 8 | 54933632 | 54933849 | 54933764 | 8  | 8  | 1  | 4.676868829 | 0.0091584   | RGS20   | ENSG00000147509 |
| 8 | 55020059 | 55020279 | 55020153 | 11 | 15 | 1  | 8.314433474 | 0.000102308 | RGS20   | ENSG00000147509 |
| 8 | 55020482 | 55020849 | 55020724 | 8  | 13 | 3  | 3.637564645 | 0.0050909   | RGS20   | ENSG00000147509 |
| 8 | 56285975 | 56286168 | 56286074 | 9  | 9  | 0  | 10.39304184 | 0.000803859 | XKR4    | ENSG00000206579 |
| 8 | 56441346 | 56441525 | 56441435 | 8  | 8  | 1  | 4.676868829 | 0.0091584   |         | ENSG00000215123 |
| 8 | 56847340 | 56847892 | 56847494 | 15 | 27 | 0  | 29.10051716 | 2.16E-09    | TGS1    | ENSG00000137574 |
| 8 | 56847912 | 56848152 | 56848007 | 9  | 12 | 1  | 6.755477198 | 0.000722752 | TGS1    | ENSG00000137574 |
| 8 | 56848624 | 56848807 | 56848686 | 8  | 9  | 1  | 5.196520921 | 0.00490062  | TMEM68  | ENSG00000167904 |
| 8 | 56917594 | 56918018 | 56917770 | 26 | 32 | 16 | 2.017472828 | 0.00740095  |         | ENSG00000211045 |
| 8 | 56961768 | 56961994 | 56961834 | 10 | 11 | 2  | 4.157216737 | 0.0052913   | LYN     | ENSG00000147507 |
| 8 | 57085765 | 57086053 | 57085921 | 8  | 11 | 1  | 6.235825105 | 0.0013754   |         | ENSG00000211063 |
| 8 | 57149539 | 57149772 | 57149624 | 8  | 10 | 5  | 1.905391004 | 0.0915982   | RPS20   | ENSG00000008988 |
| 8 | 57286837 | 57287038 | 57286946 | 9  | 9  | 3  | 2.598260461 | 0.0397929   | CHCHD7  | ENSG00000170791 |
| 8 | 57547068 | 57547318 | 57547193 | 8  | 8  | 1  | 4.676868829 | 0.0091584   | PENK    | ENSG00000181195 |
| 8 | 57676278 | 57676484 | 57676313 | 9  | 9  | 1  | 5.196520921 | 0.00490062  | PENK    | ENSG00000181195 |
| 8 | 57981117 | 57981413 | 57981265 | 21 | 23 | 0  | 24.94330042 | 3.74E-08    |         | ENSG00000206975 |
| 8 | 58027481 | 58027855 | 58027676 | 16 | 23 | 1  | 12.47165021 | 4.94E-07    |         | ENSG00000197334 |
| 8 | 58587874 | 58588053 | 58588028 | 8  | 8  | 1  | 4.676868829 | 0.0091584   |         | ENSG00000202265 |
| 8 | 58612193 | 58612373 | 58612261 | 8  | 8  | 0  | 9.353737658 | 0.00163931  |         | ENSG00000202265 |
| 8 | 58662431 | 58662660 | 58662545 | 12 | 14 | 8  | 1.73217364  | 0.0890835   |         | ENSG00000202265 |
| 8 | 59106085 | 59106290 | 59106177 | 9  | 10 | 3  | 2.858086507 | 0.0242838   | FAM110B | ENSG00000169122 |
| 8 | 59796104 | 59796294 | 59796199 | 8  | 9  | 1  | 5.196520921 | 0.00490062  |         | ENSG00000211109 |
| 8 | 61422965 | 61423150 | 61423081 | 8  | 9  | 1  | 5.196520921 | 0.00490062  | CA8     | ENSG00000178538 |
| 8 | 61800700 | 61800906 | 61800803 | 10 | 10 | 1  | 5.716173013 | 0.00260397  |         | ENSG00000222462 |
| 8 | 61944828 | 61945007 | 61944839 | 8  | 8  | 0  | 9.353737658 | 0.00163931  |         | ENSG00000222462 |
| 8 | 61986625 | 61986927 | 61986770 | 12 | 12 | 2  | 4.503651465 | 0.002963    |         | ENSG00000222462 |
| 8 | 62129676 | 62129972 | 62129824 | 9  | 12 | 7  | 1.688869299 | 0.11395     |         | ENSG00000213881 |
| 8 | 62765071 | 62765250 | 62765229 | 8  | 8  | 4  | 1.870747532 | 0.118863    | ASPH    | ENSG00000198363 |
| 8 | 66707848 | 66708029 | 66707938 | 9  | 9  | 2  | 3.464347281 | 0.0163838   | ARMC1   | ENSG00000104442 |
| 8 | 67023410 | 67023733 | 67023567 | 11 | 16 | 5  | 2.944695189 | 0.00659886  | DNAJC5B | ENSG00000147570 |

|   |          |          |          |     |     |   |             |             |         |                 |
|---|----------|----------|----------|-----|-----|---|-------------|-------------|---------|-----------------|
| 8 | 67040100 | 67040333 | 67040216 | 9   | 11  | 3 | 3.117912553 | 0.0146045   | DNAJC5B | ENSG00000147570 |
| 8 | 67095730 | 67096063 | 67095896 | 9   | 11  | 7 | 1.558956276 | 0.158273    | DNAJC5B | ENSG00000147570 |
| 8 | 67101318 | 67101611 | 67101448 | 8   | 11  | 8 | 1.385738912 | 0.224757    | DNAJC5B | ENSG00000147570 |
| 8 | 67139885 | 67140080 | 67139982 | 13  | 13  | 3 | 3.637564645 | 0.0050909   | DNAJC5B | ENSG00000147570 |
| 8 | 67187975 | 67188656 | 67188381 | 108 | 143 | 9 | 14.96598025 | 6.68E-34    |         | ENSG00000209078 |
| 8 | 67188707 | 67189154 | 67188975 | 12  | 25  | 2 | 9.00730293  | 9.47E-07    |         | ENSG00000209078 |
| 8 | 67199078 | 67199370 | 67199224 | 13  | 17  | 0 | 18.70747532 | 2.69E-06    | TRIM55  | ENSG00000147573 |
| 8 | 67514079 | 67514338 | 67514208 | 9   | 12  | 8 | 1.501217155 | 0.168286    | ADHFE1  | ENSG00000147576 |
| 8 | 67597258 | 67597566 | 67597414 | 13  | 16  | 6 | 2.524024447 | 0.0137633   |         | ENSG00000206949 |
| 8 | 67616893 | 67617080 | 67616986 | 9   | 9   | 5 | 1.73217364  | 0.133894    |         | ENSG00000206949 |
| 8 | 67617232 | 67617461 | 67617346 | 8   | 8   | 4 | 1.870747532 | 0.118863    |         | ENSG00000206949 |
| 8 | 67665084 | 67665429 | 67665256 | 17  | 22  | 1 | 11.95199812 | 9.69E-07    |         | ENSG00000219180 |
| 8 | 68000282 | 68000587 | 68000419 | 8   | 10  | 1 | 5.716173013 | 0.00260397  |         | ENSG00000201719 |
| 8 | 68136887 | 68137273 | 68137105 | 10  | 17  | 9 | 1.870747532 | 0.0498299   | COPS5   | ENSG00000121022 |
| 8 | 68455798 | 68456168 | 68455966 | 14  | 18  | 3 | 4.936694875 | 0.000311102 | ARFGEF1 | ENSG00000066777 |
| 8 | 69096889 | 69097136 | 69097000 | 10  | 10  | 0 | 11.43234603 | 0.000394183 | PREX2   | ENSG00000046889 |
| 8 | 69705557 | 69705740 | 69705648 | 9   | 10  | 0 | 11.43234603 | 0.000394183 | C8orf34 | ENSG00000165084 |
| 8 | 69774113 | 69774432 | 69774273 | 9   | 12  | 4 | 2.702190879 | 0.0203088   |         | ENSG00000211280 |
| 8 | 69929329 | 69929594 | 69929451 | 9   | 12  | 0 | 13.5109544  | 9.48E-05    |         | ENSG00000211281 |
| 8 | 71017274 | 71017489 | 71017381 | 11  | 11  | 4 | 2.494330042 | 0.0324033   |         | ENSG00000223293 |
| 8 | 71371906 | 71372085 | 71371976 | 8   | 9   | 1 | 5.196520921 | 0.00490062  |         | ENSG00000213003 |
| 8 | 71914536 | 71914775 | 71914707 | 9   | 10  | 4 | 2.286469205 | 0.0509017   |         | ENSG00000223220 |
| 8 | 73513593 | 73513911 | 73513752 | 8   | 10  | 2 | 3.810782009 | 0.00936112  |         | ENSG00000212989 |
| 8 | 74045253 | 74045464 | 74045358 | 9   | 10  | 0 | 11.43234603 | 0.000394183 | TERF1   | ENSG00000147601 |
| 8 | 74083224 | 74083452 | 74083338 | 10  | 12  | 4 | 2.702190879 | 0.0203088   | TERF1   | ENSG00000147601 |
| 8 | 74249275 | 74249519 | 74249397 | 8   | 9   | 2 | 3.464347281 | 0.0163838   |         | ENSG00000164764 |
| 8 | 74250160 | 74250694 | 74250436 | 21  | 37  | 2 | 13.16451967 | 3.70E-10    |         | ENSG00000164764 |
| 8 | 74431041 | 74431346 | 74431196 | 11  | 13  | 6 | 2.078608368 | 0.0483393   | RPL7    | ENSG00000147604 |
| 8 | 74822505 | 74822695 | 74822633 | 8   | 9   | 2 | 3.464347281 | 0.0163838   | STAU2   | ENSG00000040341 |
| 8 | 75046883 | 75047111 | 75046987 | 9   | 10  | 3 | 2.858086507 | 0.0242838   | TCEB1   | ENSG00000154582 |
| 8 | 75379248 | 75379486 | 75379367 | 13  | 14  | 0 | 15.58956276 | 2.28E-05    | JPH1    | ENSG00000104369 |
| 8 | 75425140 | 75425401 | 75425276 | 11  | 11  | 7 | 1.558956276 | 0.158273    | GDAP1   | ENSG00000104381 |
| 8 | 75651217 | 75651570 | 75651393 | 12  | 17  | 2 | 6.235825105 | 0.000146695 |         | ENSG00000207417 |
| 8 | 76300685 | 76300965 | 76300825 | 13  | 15  | 2 | 5.542955649 | 0.000497081 | HNF4G   | ENSG00000164749 |

|   |          |          |          |    |     |    |             |             |           |                 |
|---|----------|----------|----------|----|-----|----|-------------|-------------|-----------|-----------------|
| 8 | 78625429 | 78625740 | 78625581 | 21 | 24  | 3  | 6.495651151 | 8.89E-06    |           |                 |
| 8 | 80042224 | 80042403 | 80042285 | 8  | 8   | 1  | 4.676868829 | 0.0091584   | IL7       | ENSG00000104432 |
| 8 | 80047640 | 80047837 | 80047778 | 8  | 10  | 4  | 2.286469205 | 0.0509017   | IL7       | ENSG00000104432 |
| 8 | 80199035 | 80199344 | 80199121 | 9  | 13  | 0  | 14.55025858 | 4.65E-05    | IL7       | ENSG00000104432 |
| 8 | 80965498 | 80965745 | 80965573 | 9  | 12  | 2  | 4.503651465 | 0.002963    | HEY1      | ENSG00000164683 |
| 8 | 81104398 | 81104626 | 81104466 | 11 | 11  | 2  | 4.157216737 | 0.0052913   | MRPS28    | ENSG00000147586 |
| 8 | 81105022 | 81105258 | 81105140 | 9  | 10  | 8  | 1.27026067  | 0.293854    | MRPS28    | ENSG00000147586 |
| 8 | 81143185 | 81143806 | 81143456 | 75 | 101 | 2  | 35.33634226 | 3.84E-29    | TPD52     | ENSG00000076554 |
| 8 | 81156043 | 81156331 | 81156187 | 8  | 10  | 8  | 1.27026067  | 0.293854    | TPD52     | ENSG00000076554 |
| 8 | 81159025 | 81159401 | 81159222 | 14 | 21  | 4  | 4.572938411 | 0.000186332 | TPD52     | ENSG00000076554 |
| 8 | 81166448 | 81166843 | 81166627 | 13 | 21  | 7  | 2.858086507 | 0.0029864   | TPD52     | ENSG00000076554 |
| 8 | 81219191 | 81219409 | 81219305 | 8  | 12  | 3  | 3.377738599 | 0.00867157  |           | ENSG00000209175 |
| 8 | 81248400 | 81248765 | 81248567 | 8  | 13  | 11 | 1.212521548 | 0.309909    |           | ENSG00000209175 |
| 8 | 81305589 | 81305838 | 81305713 | 8  | 11  | 2  | 4.157216737 | 0.0052913   |           | ENSG00000209175 |
| 8 | 81441611 | 81441944 | 81441775 | 12 | 16  | 12 | 1.359090087 | 0.198699    |           | ENSG00000206649 |
| 8 | 81510876 | 81511095 | 81511016 | 8  | 8   | 0  | 9.353737658 | 0.00163931  | ZBTB10    | ENSG00000205189 |
| 8 | 81560167 | 81560481 | 81560324 | 8  | 13  | 9  | 1.455025858 | 0.177172    | ZBTB10    | ENSG00000205189 |
| 8 | 81565542 | 81565724 | 81565659 | 8  | 9   | 4  | 2.078608368 | 0.0785659   | ZBTB10    | ENSG00000205189 |
| 8 | 81575999 | 81576408 | 81576198 | 17 | 27  | 2  | 9.700172386 | 2.61E-07    | ZBTB10    | ENSG00000205189 |
| 8 | 81640567 | 81640746 | 81640656 | 8  | 8   | 1  | 4.676868829 | 0.0091584   |           | ENSG00000188856 |
| 8 | 81643172 | 81643546 | 81643412 | 8  | 13  | 3  | 3.637564645 | 0.0050909   |           | ENSG00000188856 |
| 8 | 81656338 | 81656721 | 81656542 | 25 | 32  | 4  | 6.859407616 | 3.06E-07    |           | ENSG00000223327 |
| 8 | 81658394 | 81658582 | 81658488 | 8  | 9   | 3  | 2.598260461 | 0.0397929   |           | ENSG00000223327 |
| 8 | 81827814 | 81828068 | 81827941 | 11 | 12  | 3  | 3.377738599 | 0.00867157  |           | ENSG00000212429 |
| 8 | 81828111 | 81828383 | 81828250 | 8  | 9   | 3  | 2.598260461 | 0.0397929   |           | ENSG00000212429 |
| 8 | 81842651 | 81842939 | 81842771 | 12 | 14  | 6  | 2.227080395 | 0.0322529   |           | ENSG00000209154 |
| 8 | 81882644 | 81882907 | 81882787 | 10 | 11  | 5  | 2.078608368 | 0.0614303   |           | ENSG00000209154 |
| 8 | 82040350 | 82040619 | 82040477 | 12 | 15  | 1  | 8.314433474 | 0.000102308 |           | ENSG00000215844 |
| 8 | 82807075 | 82807499 | 82807214 | 8  | 14  | 0  | 15.58956276 | 2.28E-05    | CHMP4C    | ENSG00000164695 |
| 8 | 82917163 | 82917503 | 82917333 | 29 | 29  | 26 | 1.154782427 | 0.292794    | SNX16     | ENSG00000104497 |
| 8 | 83237328 | 83237610 | 83237471 | 14 | 17  | 2  | 6.235825105 | 0.000146695 | HNRNPA1P2 | ENSG00000206228 |
| 8 | 86319540 | 86319809 | 86319644 | 10 | 12  | 2  | 4.503651465 | 0.002963    |           | ENSG00000176731 |
| 8 | 86529018 | 86529199 | 86529047 | 8  | 9   | 4  | 2.078608368 | 0.0785659   | CA3       | ENSG00000164879 |
| 8 | 86541401 | 86541583 | 86541550 | 9  | 9   | 1  | 5.196520921 | 0.00490062  | CA3       | ENSG00000164879 |

|   |          |          |          |    |    |    |             |             |          |                 |
|---|----------|----------|----------|----|----|----|-------------|-------------|----------|-----------------|
| 8 | 86552216 | 86552479 | 86552347 | 10 | 13 | 2  | 4.850086193 | 0.00164564  | CA2      | ENSG00000104267 |
| 8 | 86562643 | 86562975 | 86562751 | 8  | 12 | 5  | 2.251825733 | 0.0404733   | CA2      | ENSG00000104267 |
| 8 | 87001090 | 87001400 | 87001235 | 11 | 13 | 4  | 2.910051716 | 0.0125532   |          | ENSG00000205162 |
| 8 | 87041293 | 87041491 | 87041372 | 10 | 10 | 2  | 3.810782009 | 0.00936112  | PSKH2    | ENSG00000147613 |
| 8 | 87093053 | 87093263 | 87093158 | 9  | 10 | 1  | 5.716173013 | 0.00260397  | PSKH2    | ENSG00000147613 |
| 8 | 87115741 | 87115981 | 87115872 | 9  | 9  | 3  | 2.598260461 | 0.0397929   | PSKH2    | ENSG00000147613 |
| 8 | 87179977 | 87180210 | 87180112 | 8  | 10 | 3  | 2.858086507 | 0.0242838   | ATP6V0D2 | ENSG00000147614 |
| 8 | 87205396 | 87205635 | 87205516 | 8  | 9  | 2  | 3.464347281 | 0.0163838   | ATP6V0D2 | ENSG00000147614 |
| 8 | 87206513 | 87206792 | 87206652 | 9  | 12 | 2  | 4.503651465 | 0.002963    | ATP6V0D2 | ENSG00000147614 |
| 8 | 87229385 | 87229650 | 87229522 | 8  | 9  | 6  | 1.484720263 | 0.204387    | ATP6V0D2 | ENSG00000147614 |
| 8 | 87339775 | 87340224 | 87339950 | 12 | 19 | 12 | 1.598929514 | 0.0887417   | SLC7A13  | ENSG00000164893 |
| 8 | 87348125 | 87348339 | 87348251 | 9  | 10 | 6  | 1.63319229  | 0.146906    | SLC7A13  | ENSG00000164893 |
| 8 | 87382632 | 87382840 | 87382736 | 9  | 9  | 9  | 1.039304184 | 0.466079    | SLC7A13  | ENSG00000164893 |
| 8 | 87423601 | 87423916 | 87423758 | 12 | 15 | 10 | 1.511715177 | 0.140236    | WWP1     | ENSG00000123124 |
| 8 | 87442182 | 87442412 | 87442297 | 9  | 9  | 1  | 5.196520921 | 0.00490062  | WWP1     | ENSG00000123124 |
| 8 | 87481084 | 87481284 | 87481174 | 10 | 10 | 4  | 2.286469205 | 0.0509017   | WWP1     | ENSG00000123124 |
| 8 | 87511584 | 87512019 | 87511763 | 20 | 34 | 3  | 9.093911612 | 1.78E-08    |          | ENSG00000214965 |
| 8 | 87525891 | 87526070 | 87525952 | 8  | 9  | 1  | 5.196520921 | 0.00490062  |          | ENSG00000214965 |
| 8 | 87576428 | 87576663 | 87576545 | 8  | 8  | 4  | 1.870747532 | 0.118863    |          | ENSG00000214963 |
| 8 | 87589404 | 87589691 | 87589550 | 10 | 15 | 7  | 2.078608368 | 0.038229    | FAM82B   | ENSG00000176623 |
| 8 | 87595402 | 87595727 | 87595581 | 9  | 12 | 1  | 6.755477198 | 0.000722752 |          | ENSG00000209264 |
| 8 | 87784721 | 87784996 | 87784858 | 15 | 17 | 9  | 1.870747532 | 0.0498299   | CNGB3    | ENSG00000170289 |
| 8 | 87899279 | 87899458 | 87899341 | 8  | 8  | 3  | 2.338434415 | 0.0641221   | CNBD1    | ENSG00000176571 |
| 8 | 87952313 | 87952675 | 87952465 | 9  | 13 | 7  | 1.818782322 | 0.0805123   | CNBD1    | ENSG00000176571 |
| 8 | 87974316 | 87974676 | 87974550 | 8  | 13 | 10 | 1.32275078  | 0.240023    | CNBD1    | ENSG00000176571 |
| 8 | 87981082 | 87981315 | 87981252 | 8  | 10 | 1  | 5.716173013 | 0.00260397  | CNBD1    | ENSG00000176571 |
| 8 | 88000657 | 88000836 | 88000821 | 8  | 8  | 8  | 1.039304184 | 0.46786     | CNBD1    | ENSG00000176571 |
| 8 | 88025223 | 88025507 | 88025401 | 9  | 13 | 1  | 7.27512929  | 0.000378098 | CNBD1    | ENSG00000176571 |
| 8 | 88128411 | 88128590 | 88128500 | 8  | 8  | 2  | 3.117912553 | 0.0283184   | CNBD1    | ENSG00000176571 |
| 8 | 88184329 | 88184512 | 88184413 | 8  | 10 | 3  | 2.858086507 | 0.0242838   | CNBD1    | ENSG00000176571 |
| 8 | 88247738 | 88247951 | 88247831 | 9  | 10 | 3  | 2.858086507 | 0.0242838   | CNBD1    | ENSG00000176571 |
| 8 | 88641675 | 88641861 | 88641807 | 9  | 9  | 2  | 3.464347281 | 0.0163838   | WDR21C   | ENSG00000176566 |
| 8 | 88661282 | 88661551 | 88661411 | 8  | 8  | 4  | 1.870747532 | 0.118863    | WDR21C   | ENSG00000176566 |
| 8 | 88744075 | 88744345 | 88744201 | 17 | 18 | 2  | 6.582259834 | 7.91E-05    | WDR21C   | ENSG00000176566 |



|   |          |          |          |    |    |    |             |             |        |                 |
|---|----------|----------|----------|----|----|----|-------------|-------------|--------|-----------------|
| 8 | 88796155 | 88796456 | 88796308 | 8  | 11 | 6  | 1.781664316 | 0.103344    | WDR21C | ENSG00000176566 |
| 8 | 88932179 | 88932429 | 88932297 | 8  | 8  | 2  | 3.117912553 | 0.0283184   | WDR21C | ENSG00000176566 |
| 8 | 89079182 | 89079361 | 89079271 | 8  | 9  | 1  | 5.196520921 | 0.00490062  |        | ENSG00000176562 |
| 8 | 89084294 | 89084571 | 89084429 | 8  | 9  | 1  | 5.196520921 | 0.00490062  |        | ENSG00000176562 |
| 8 | 89170504 | 89170779 | 89170641 | 8  | 10 | 3  | 2.858086507 | 0.0242838   |        | ENSG00000176562 |
| 8 | 89371108 | 89371474 | 89371295 | 11 | 17 | 6  | 2.672496474 | 0.00882337  | MMP16  | ENSG00000156103 |
| 8 | 89407985 | 89408382 | 89408164 | 10 | 17 | 5  | 3.117912553 | 0.00407023  | MMP16  | ENSG00000156103 |
| 8 | 89408532 | 89408798 | 89408676 | 9  | 11 | 2  | 4.157216737 | 0.0052913   | MMP16  | ENSG00000156103 |
| 8 | 89409547 | 89409739 | 89409643 | 8  | 9  | 1  | 5.196520921 | 0.00490062  | MMP16  | ENSG00000156103 |
| 8 | 89409886 | 89410517 | 89410187 | 17 | 37 | 14 | 2.632903933 | 0.000365839 | MMP16  | ENSG00000156103 |
| 8 | 89496789 | 89497206 | 89496968 | 21 | 30 | 17 | 1.789912762 | 0.021784    |        | ENSG00000209292 |
| 8 | 89497615 | 89497850 | 89497723 | 12 | 12 | 9  | 1.35109544  | 0.232899    |        | ENSG00000209292 |
| 8 | 89501831 | 89502043 | 89501937 | 8  | 8  | 4  | 1.870747532 | 0.118863    |        | ENSG00000209292 |
| 8 | 89516159 | 89516392 | 89516286 | 8  | 10 | 6  | 1.63319229  | 0.146906    |        | ENSG00000209292 |
| 8 | 89518673 | 89519026 | 89518849 | 11 | 17 | 4  | 3.741495063 | 0.00163722  |        | ENSG00000209292 |
| 8 | 89635780 | 89636137 | 89635946 | 12 | 17 | 8  | 2.078608368 | 0.0303558   |        | ENSG00000209292 |
| 8 | 89666414 | 89666649 | 89666531 | 8  | 9  | 2  | 3.464347281 | 0.0163838   |        | ENSG00000209292 |
| 8 | 89679973 | 89680208 | 89680090 | 13 | 14 | 5  | 2.598260461 | 0.0167748   |        | ENSG00000209292 |
| 8 | 89742745 | 89742924 | 89742834 | 9  | 10 | 3  | 2.858086507 | 0.0242838   |        | ENSG00000209292 |
| 8 | 89797224 | 89797450 | 89797308 | 10 | 10 | 1  | 5.716173013 | 0.00260397  |        | ENSG00000209292 |
| 8 | 89851953 | 89852137 | 89852045 | 9  | 9  | 1  | 5.196520921 | 0.00490062  |        | ENSG00000209292 |
| 8 | 89977674 | 89977982 | 89977826 | 8  | 10 | 1  | 5.716173013 | 0.00260397  |        | ENSG00000209292 |
| 8 | 89978536 | 89978758 | 89978647 | 8  | 10 | 3  | 2.858086507 | 0.0242838   |        |                 |
| 8 | 90141725 | 90141904 | 90141843 | 8  | 8  | 3  | 2.338434415 | 0.0641221   |        | ENSG00000213771 |
| 8 | 90408538 | 90408742 | 90408632 | 9  | 10 | 0  | 11.43234603 | 0.000394183 |        | ENSG00000213771 |
| 8 | 90477345 | 90477524 | 90477434 | 8  | 8  | 0  | 9.353737658 | 0.00163931  |        | ENSG00000213771 |
| 8 | 90706226 | 90706485 | 90706379 | 9  | 10 | 2  | 3.810782009 | 0.00936112  | RIPK2  | ENSG00000104312 |
| 8 | 90771399 | 90771593 | 90771496 | 8  | 8  | 1  | 4.676868829 | 0.0091584   | RIPK2  | ENSG00000104312 |
| 8 | 90807219 | 90807455 | 90807373 | 10 | 12 | 7  | 1.688869299 | 0.11395     | RIPK2  | ENSG00000104312 |
| 8 | 90838842 | 90839024 | 90838890 | 8  | 8  | 4  | 1.870747532 | 0.118863    | RIPK2  | ENSG00000104312 |
| 8 | 90893872 | 90894051 | 90893981 | 8  | 8  | 5  | 1.558956276 | 0.191397    | RIPK2  | ENSG00000104312 |
| 8 | 90915306 | 90915485 | 90915360 | 8  | 8  | 10 | 0.850339787 | 0.645072    |        | ENSG00000207359 |
| 8 | 90918802 | 90919028 | 90918915 | 11 | 11 | 1  | 6.235825105 | 0.0013754   |        | ENSG00000207359 |
| 8 | 90943378 | 90943582 | 90943472 | 10 | 10 | 4  | 2.286469205 | 0.0509017   |        | ENSG00000207359 |

|   |          |          |          |    |    |    |             |             |         |                 |
|---|----------|----------|----------|----|----|----|-------------|-------------|---------|-----------------|
| 8 | 90963920 | 90964411 | 90964232 | 14 | 26 | 12 | 2.158554844 | 0.00861404  |         | ENSG00000207359 |
| 8 | 90983102 | 90983411 | 90983256 | 12 | 17 | 13 | 1.336248237 | 0.204556    | OSGIN2  | ENSG00000164823 |
| 8 | 90994781 | 90994966 | 90994927 | 8  | 8  | 0  | 9.353737658 | 0.00163931  | OSGIN2  | ENSG00000164823 |
| 8 | 91001458 | 91001773 | 91001614 | 9  | 11 | 6  | 1.781664316 | 0.103344    | OSGIN2  | ENSG00000164823 |
| 8 | 91029850 | 91030148 | 91029990 | 8  | 10 | 0  | 11.43234603 | 0.000394183 | NBN     | ENSG00000104320 |
| 8 | 91065512 | 91066094 | 91065915 | 15 | 28 | 20 | 1.435229588 | 0.100491    | NBN     | ENSG00000104320 |
| 8 | 91082089 | 91082474 | 91082309 | 9  | 17 | 2  | 6.235825105 | 0.000146695 | DECR1   | ENSG00000104325 |
| 8 | 91088589 | 91088788 | 91088681 | 8  | 9  | 0  | 10.39304184 | 0.000803859 | DECR1   | ENSG00000104325 |
| 8 | 91164229 | 91164447 | 91164388 | 8  | 10 | 6  | 1.63319229  | 0.146906    | CALB1   | ENSG00000104327 |
| 8 | 91210184 | 91210504 | 91210303 | 10 | 14 | 1  | 7.794781382 | 0.000197021 |         | ENSG00000209140 |
| 8 | 91238358 | 91238620 | 91238488 | 8  | 8  | 5  | 1.558956276 | 0.191397    |         | ENSG00000209140 |
| 8 | 91396561 | 91396771 | 91396666 | 8  | 9  | 5  | 1.73217364  | 0.133894    |         | ENSG00000199354 |
| 8 | 91553963 | 91554175 | 91554050 | 9  | 10 | 7  | 1.429043253 | 0.21536     |         | ENSG00000199354 |
| 8 | 91617341 | 91617539 | 91617518 | 8  | 8  | 2  | 3.117912553 | 0.0283184   |         | ENSG00000199354 |
| 8 | 91623228 | 91623522 | 91623393 | 12 | 12 | 5  | 2.251825733 | 0.0404733   |         | ENSG00000199354 |
| 8 | 91675027 | 91675240 | 91675139 | 12 | 12 | 6  | 1.930136342 | 0.071303    |         | ENSG00000209319 |
| 8 | 91724816 | 91725016 | 91724884 | 9  | 10 | 5  | 1.905391004 | 0.0915982   | TMEM64  | ENSG00000180694 |
| 8 | 91726094 | 91726440 | 91726267 | 17 | 22 | 5  | 3.983999373 | 0.000317941 | TMEM64  | ENSG00000180694 |
| 8 | 92034367 | 92034618 | 92034446 | 8  | 8  | 1  | 4.676868829 | 0.0091584   |         | ENSG00000209252 |
| 8 | 92115318 | 92115548 | 92115433 | 11 | 12 | 5  | 2.251825733 | 0.0404733   | TMEM55A | ENSG00000155099 |
| 8 | 92151289 | 92151630 | 92151459 | 10 | 14 | 3  | 3.897390691 | 0.00295882  | OTUD6B  | ENSG00000155100 |
| 8 | 92151700 | 92151931 | 92151867 | 9  | 10 | 4  | 2.286469205 | 0.0509017   | OTUD6B  | ENSG00000155100 |
| 8 | 92309898 | 92310119 | 92310019 | 8  | 10 | 4  | 2.286469205 | 0.0509017   | SLC26A7 | ENSG00000147606 |
| 8 | 92334709 | 92334923 | 92334816 | 8  | 9  | 6  | 1.484720263 | 0.204387    | SLC26A7 | ENSG00000147606 |
| 8 | 92405992 | 92406281 | 92406136 | 11 | 13 | 5  | 2.425043097 | 0.0262442   | SLC26A7 | ENSG00000147606 |
| 8 | 93616671 | 93617006 | 93616838 | 13 | 18 | 2  | 6.582259834 | 7.91E-05    |         | ENSG00000221172 |
| 8 | 93683987 | 93684170 | 93684078 | 8  | 8  | 2  | 3.117912553 | 0.0283184   |         | ENSG00000221172 |
| 8 | 93709782 | 93709993 | 93709887 | 8  | 8  | 1  | 4.676868829 | 0.0091584   |         | ENSG00000221172 |
| 8 | 94046188 | 94046538 | 94046365 | 23 | 28 | 10 | 2.739983758 | 0.00114395  | C8orf83 | ENSG00000205133 |
| 8 | 94046838 | 94047075 | 94046916 | 8  | 11 | 7  | 1.558956276 | 0.158273    | C8orf83 | ENSG00000205133 |
| 8 | 94149803 | 94150224 | 94149955 | 11 | 17 | 13 | 1.336248237 | 0.204556    | C8orf83 | ENSG00000205133 |
| 8 | 94442615 | 94442836 | 94442725 | 9  | 9  | 3  | 2.598260461 | 0.0397929   |         | ENSG00000209199 |
| 8 | 94600649 | 94600966 | 94600807 | 13 | 16 | 4  | 3.533634226 | 0.00276486  |         | ENSG00000209199 |
| 8 | 94832517 | 94832837 | 94832668 | 20 | 25 | 2  | 9.00730293  | 9.47E-07    | TMEM67  | ENSG00000164953 |

|   |          |          |          |    |     |    |             |             |          |                 |
|---|----------|----------|----------|----|-----|----|-------------|-------------|----------|-----------------|
| 8 | 94876492 | 94876689 | 94876590 | 9  | 9   | 1  | 5.196520921 | 0.00490062  | TMEM67   | ENSG00000164953 |
| 8 | 95042254 | 95042447 | 95042296 | 9  | 9   | 5  | 1.73217364  | 0.133894    | PPM2C    | ENSG00000164951 |
| 8 | 95072234 | 95072612 | 95072434 | 50 | 58  | 3  | 15.32973672 | 2.89E-15    | PPM2C    | ENSG00000164951 |
| 8 | 95072762 | 95073178 | 95073012 | 17 | 25  | 9  | 2.702190879 | 0.00210968  | PPM2C    | ENSG00000164951 |
| 8 | 95117905 | 95118118 | 95118011 | 8  | 9   | 3  | 2.598260461 | 0.0397929   | PPM2C    | ENSG00000164951 |
| 8 | 95199293 | 95199582 | 95199458 | 8  | 9   | 4  | 2.078608368 | 0.0785659   | CDH17    | ENSG00000079112 |
| 8 | 95237926 | 95238155 | 95238043 | 8  | 11  | 3  | 3.117912553 | 0.0146045   | CDH17    | ENSG00000079112 |
| 8 | 95248603 | 95248849 | 95248737 | 10 | 13  | 1  | 7.27512929  | 0.000378098 | CDH17    | ENSG00000079112 |
| 8 | 95326473 | 95326741 | 95326607 | 8  | 11  | 1  | 6.235825105 | 0.0013754   | GEM      | ENSG00000164949 |
| 8 | 95368442 | 95368668 | 95368555 | 8  | 9   | 5  | 1.73217364  | 0.133894    | GEM      | ENSG00000164949 |
| 8 | 95499188 | 95499377 | 95499282 | 9  | 9   | 2  | 3.464347281 | 0.0163838   |          | ENSG00000197065 |
| 8 | 95528669 | 95528915 | 95528792 | 9  | 9   | 3  | 2.598260461 | 0.0397929   |          | ENSG00000197065 |
| 8 | 95561175 | 95561370 | 95561315 | 8  | 9   | 2  | 3.464347281 | 0.0163838   | RAD54B   | ENSG00000197275 |
| 8 | 95610096 | 95610459 | 95610283 | 22 | 27  | 5  | 4.850086193 | 2.10E-05    |          | ENSG00000212997 |
| 8 | 95634518 | 95635447 | 95634884 | 9  | 33  | 14 | 2.355756151 | 0.00181986  | KIAA1429 | ENSG00000164944 |
| 8 | 95677341 | 95677533 | 95677443 | 8  | 8   | 1  | 4.676868829 | 0.0091584   | KIAA1429 | ENSG00000164944 |
| 8 | 95720453 | 95720832 | 95720668 | 15 | 22  | 5  | 3.983999373 | 0.000317941 | RBM35A   | ENSG00000104413 |
| 8 | 95721657 | 95722118 | 95721804 | 9  | 17  | 12 | 1.439036563 | 0.154203    | RBM35A   | ENSG00000104413 |
| 8 | 95722222 | 95722656 | 95722401 | 14 | 23  | 16 | 1.467252966 | 0.109416    | RBM35A   | ENSG00000104413 |
| 8 | 95723789 | 95724017 | 95723903 | 13 | 15  | 5  | 2.771477825 | 0.0105836   | RBM35A   | ENSG00000104413 |
| 8 | 95738447 | 95739298 | 95739022 | 75 | 138 | 16 | 8.497840095 | 5.31E-27    |          | ENSG00000209267 |
| 8 | 95800821 | 95801172 | 95801000 | 13 | 18  | 4  | 3.9493559   | 0.000961379 | DPY19L4  | ENSG00000156162 |
| 8 | 95801543 | 95801848 | 95801685 | 8  | 11  | 3  | 3.117912553 | 0.0146045   | DPY19L4  | ENSG00000156162 |
| 8 | 95894652 | 95894959 | 95894805 | 11 | 15  | 7  | 2.078608368 | 0.038229    | INTS8    | ENSG00000164941 |
| 8 | 95905128 | 95905389 | 95905258 | 10 | 12  | 0  | 13.5109544  | 9.48E-05    | INTS8    | ENSG00000164941 |
| 8 | 96030818 | 96031341 | 96031003 | 61 | 79  | 1  | 41.57216737 | 7.28E-24    | TP53INP1 | ENSG00000164938 |
| 8 | 96032568 | 96033266 | 96032716 | 9  | 27  | 11 | 2.425043097 | 0.00332497  | TP53INP1 | ENSG00000164938 |
| 8 | 96049542 | 96049743 | 96049604 | 8  | 9   | 3  | 2.598260461 | 0.0397929   | TP53INP1 | ENSG00000164938 |
| 8 | 96072341 | 96072956 | 96072713 | 21 | 36  | 12 | 2.958019601 | 0.000141555 | C8orf38  | ENSG00000156170 |
| 8 | 96086537 | 96086716 | 96086626 | 8  | 8   | 7  | 1.169217207 | 0.371848    | C8orf38  | ENSG00000156170 |
| 8 | 96106019 | 96106379 | 96106220 | 8  | 13  | 4  | 2.910051716 | 0.0125532   | C8orf38  | ENSG00000156170 |
| 8 | 96138381 | 96138598 | 96138455 | 8  | 9   | 3  | 2.598260461 | 0.0397929   |          | ENSG00000200525 |
| 8 | 96148786 | 96149183 | 96149010 | 8  | 16  | 6  | 2.524024447 | 0.0137633   |          | ENSG00000200525 |
| 8 | 96155901 | 96156169 | 96156001 | 8  | 11  | 0  | 12.47165021 | 0.000193293 |          | ENSG00000200525 |

|   |          |          |          |    |    |    |             |             |         |                 |
|---|----------|----------|----------|----|----|----|-------------|-------------|---------|-----------------|
| 8 | 96167095 | 96167515 | 96167295 | 12 | 22 | 7  | 2.98799953  | 0.00188278  |         | ENSG00000200525 |
| 8 | 96177546 | 96177927 | 96177724 | 14 | 18 | 5  | 3.291129917 | 0.00248584  | PLEKHF2 | ENSG00000175895 |
| 8 | 96177974 | 96178458 | 96178216 | 8  | 17 | 2  | 6.235825105 | 0.000146695 | PLEKHF2 | ENSG00000175895 |
| 8 | 96193987 | 96194679 | 96194288 | 19 | 39 | 20 | 1.979627018 | 0.00440536  | PLEKHF2 | ENSG00000175895 |
| 8 | 96194767 | 96195171 | 96194969 | 14 | 24 | 10 | 2.362054964 | 0.00608507  | PLEKHF2 | ENSG00000175895 |
| 8 | 96196186 | 96196453 | 96196319 | 9  | 9  | 2  | 3.464347281 | 0.0163838   | PLEKHF2 | ENSG00000175895 |
| 8 | 96214508 | 96215036 | 96214831 | 13 | 23 | 6  | 3.563328632 | 0.000497701 | PLEKHF2 | ENSG00000175895 |
| 8 | 96215953 | 96216291 | 96216122 | 9  | 14 | 9  | 1.558956276 | 0.132279    | PLEKHF2 | ENSG00000175895 |
| 8 | 96232057 | 96232402 | 96232225 | 10 | 14 | 3  | 3.897390691 | 0.00295882  | PLEKHF2 | ENSG00000175895 |
| 8 | 96253567 | 96253748 | 96253705 | 8  | 9  | 7  | 1.29913023  | 0.286504    | PLEKHF2 | ENSG00000175895 |
| 8 | 96274190 | 96274778 | 96274572 | 15 | 31 | 22 | 1.44598843  | 0.0857085   | PLEKHF2 | ENSG00000175895 |
| 8 | 96281552 | 96281732 | 96281670 | 8  | 8  | 4  | 1.870747532 | 0.118863    | PLEKHF2 | ENSG00000175895 |
| 8 | 96306757 | 96307349 | 96307093 | 37 | 61 | 9  | 6.443685942 | 1.30E-11    | C8orf37 | ENSG00000156172 |
| 8 | 96307596 | 96307775 | 96307682 | 8  | 8  | 5  | 1.558956276 | 0.191397    | C8orf37 | ENSG00000156172 |
| 8 | 96330178 | 96330468 | 96330345 | 8  | 11 | 5  | 2.078608368 | 0.0614303   | C8orf37 | ENSG00000156172 |
| 8 | 96350810 | 96351205 | 96351026 | 12 | 20 | 17 | 1.212521548 | 0.272468    | C8orf37 | ENSG00000156172 |
| 8 | 96351580 | 96351762 | 96351671 | 8  | 9  | 3  | 2.598260461 | 0.0397929   | C8orf37 | ENSG00000156172 |
| 8 | 96479666 | 96479877 | 96479821 | 9  | 10 | 1  | 5.716173013 | 0.00260397  | C8orf37 | ENSG00000156172 |
| 8 | 96854475 | 96854816 | 96854653 | 23 | 27 | 6  | 4.157216737 | 6.29E-05    |         | ENSG00000223297 |
| 8 | 97174833 | 97175012 | 97174892 | 8  | 8  | 1  | 4.676868829 | 0.0091584   |         | ENSG00000183663 |
| 8 | 97409312 | 97409631 | 97409462 | 10 | 11 | 7  | 1.558956276 | 0.158273    |         | ENSG00000199732 |
| 8 | 97414632 | 97414811 | 97414782 | 8  | 8  | 4  | 1.870747532 | 0.118863    |         | ENSG00000199732 |
| 8 | 97551352 | 97551593 | 97551504 | 8  | 10 | 6  | 1.63319229  | 0.146906    | SDC2    | ENSG00000169439 |
| 8 | 97591186 | 97591365 | 97591296 | 9  | 9  | 3  | 2.598260461 | 0.0397929   | SDC2    | ENSG00000169439 |
| 8 | 98025004 | 98025210 | 98025107 | 8  | 8  | 1  | 4.676868829 | 0.0091584   |         | ENSG00000104324 |
| 8 | 98251663 | 98251938 | 98251800 | 8  | 8  | 2  | 3.117912553 | 0.0283184   | TSPYL5  | ENSG00000180543 |
| 8 | 98252041 | 98252230 | 98252135 | 8  | 8  | 1  | 4.676868829 | 0.0091584   | TSPYL5  | ENSG00000180543 |
| 8 | 98347636 | 98347815 | 98347759 | 8  | 8  | 3  | 2.338434415 | 0.0641221   | TSPYL5  | ENSG00000180543 |
| 8 | 98500332 | 98500511 | 98500421 | 8  | 8  | 1  | 4.676868829 | 0.0091584   |         | ENSG00000207215 |
| 8 | 98505498 | 98505706 | 98505602 | 12 | 13 | 3  | 3.637564645 | 0.0050909   |         | ENSG00000207215 |
| 8 | 98520151 | 98520343 | 98520247 | 8  | 10 | 0  | 11.43234603 | 0.000394183 |         | ENSG00000207215 |
| 8 | 98677294 | 98677501 | 98677407 | 10 | 11 | 2  | 4.157216737 | 0.0052913   |         | ENSG00000213750 |
| 8 | 98921277 | 98921753 | 98921574 | 8  | 17 | 0  | 18.70747532 | 2.69E-06    | MATN2   | ENSG00000132561 |
| 8 | 99007276 | 99007529 | 99007443 | 8  | 10 | 4  | 2.286469205 | 0.0509017   | MATN2   | ENSG00000132561 |

|   |           |           |           |    |    |    |             |             |         |                 |
|---|-----------|-----------|-----------|----|----|----|-------------|-------------|---------|-----------------|
| 8 | 99094904  | 99095083  | 99095014  | 8  | 8  | 9  | 0.935373766 | 0.560286    |         | ENSG00000207067 |
| 8 | 99126654  | 99127141  | 99126922  | 10 | 19 | 8  | 2.309564854 | 0.0138337   | RPL30   | ENSG00000156482 |
| 8 | 99166876  | 99167200  | 99167038  | 11 | 14 | 8  | 1.73217364  | 0.0890835   | C8orf47 | ENSG00000177459 |
| 8 | 99198410  | 99198841  | 99198625  | 8  | 17 | 6  | 2.672496474 | 0.00882337  | HRSP12  | ENSG00000132541 |
| 8 | 99241030  | 99241245  | 99241190  | 10 | 10 | 2  | 3.810782009 | 0.00936112  |         | ENSG00000208954 |
| 8 | 99245222  | 99245403  | 99245312  | 8  | 9  | 4  | 2.078608368 | 0.0785659   |         | ENSG00000208954 |
| 8 | 99246075  | 99246303  | 99246154  | 8  | 10 | 6  | 1.63319229  | 0.146906    |         | ENSG00000208954 |
| 8 | 99298248  | 99298429  | 99298338  | 8  | 9  | 2  | 3.464347281 | 0.0163838   |         | ENSG00000208954 |
| 8 | 99321554  | 99321777  | 99321672  | 12 | 12 | 1  | 6.755477198 | 0.000722752 | NPAL2   | ENSG00000104361 |
| 8 | 99340992  | 99341301  | 99341131  | 13 | 16 | 6  | 2.524024447 | 0.0137633   | NPAL2   | ENSG00000104361 |
| 8 | 99863546  | 99863759  | 99863652  | 8  | 9  | 3  | 2.598260461 | 0.0397929   | STK3    | ENSG00000104375 |
| 8 | 99898878  | 99899168  | 99899023  | 15 | 15 | 9  | 1.662886695 | 0.0970566   | STK3    | ENSG00000104375 |
| 8 | 99907454  | 99907644  | 99907554  | 8  | 9  | 4  | 2.078608368 | 0.0785659   | STK3    | ENSG00000104375 |
| 8 | 99915220  | 99915399  | 99915309  | 8  | 8  | 3  | 2.338434415 | 0.0641221   | STK3    | ENSG00000104375 |
| 8 | 99922229  | 99922471  | 99922350  | 8  | 11 | 2  | 4.157216737 | 0.0052913   | STK3    | ENSG00000104375 |
| 8 | 99957057  | 99957288  | 99957191  | 8  | 8  | 5  | 1.558956276 | 0.191397    |         | ENSG00000213745 |
| 8 | 100036655 | 100036834 | 100036744 | 8  | 8  | 0  | 9.353737658 | 0.00163931  | OSR2    | ENSG00000164920 |
| 8 | 100047862 | 100048243 | 100048007 | 11 | 17 | 6  | 2.672496474 | 0.00882337  | OSR2    | ENSG00000164920 |
| 8 | 100094420 | 100094678 | 100094551 | 16 | 18 | 7  | 2.468347438 | 0.0112499   | VPS13B  | ENSG00000132549 |
| 8 | 100577135 | 100577470 | 100577302 | 17 | 18 | 23 | 0.822782479 | 0.740651    |         | ENSG00000206699 |
| 8 | 100756444 | 100756642 | 100756509 | 8  | 8  | 1  | 4.676868829 | 0.0091584   |         | ENSG00000220387 |
| 8 | 100787301 | 100787594 | 100787478 | 11 | 15 | 10 | 1.511715177 | 0.140236    |         | ENSG00000220387 |
| 8 | 100872501 | 100872803 | 100872652 | 9  | 11 | 2  | 4.157216737 | 0.0052913   |         | ENSG00000220387 |
| 8 | 100885719 | 100886032 | 100885885 | 11 | 13 | 8  | 1.616695398 | 0.123553    | COX6C   | ENSG00000164919 |
| 8 | 100941243 | 100941518 | 100941399 | 10 | 13 | 13 | 1.039304184 | 0.45974     | COX6C   | ENSG00000164919 |
| 8 | 100974900 | 100975283 | 100975104 | 12 | 19 | 5  | 3.464347281 | 0.00150447  | COX6C   | ENSG00000164919 |
| 8 | 100986008 | 100986753 | 100986605 | 11 | 28 | 8  | 3.348869038 | 0.000246424 | COX6C   | ENSG00000164919 |
| 8 | 101003411 | 101003626 | 101003533 | 8  | 10 | 2  | 3.810782009 | 0.00936112  | COX6C   | ENSG00000164919 |
| 8 | 101088661 | 101088988 | 101088823 | 15 | 19 | 3  | 5.196520921 | 0.000174201 |         | ENSG00000212414 |
| 8 | 101204646 | 101204969 | 101204793 | 10 | 14 | 8  | 1.73217364  | 0.0890835   | RGS22   | ENSG00000132554 |
| 8 | 101227292 | 101227477 | 101227454 | 9  | 10 | 5  | 1.905391004 | 0.0915982   | FBXO43  | ENSG00000156509 |
| 8 | 101231861 | 101232138 | 101231990 | 10 | 13 | 13 | 1.039304184 | 0.45974     | POLR2K  | ENSG00000147669 |
| 8 | 101239797 | 101240003 | 101239908 | 8  | 10 | 3  | 2.858086507 | 0.0242838   | SPAG1   | ENSG00000104450 |
| 8 | 101340400 | 101340611 | 101340485 | 11 | 12 | 6  | 1.930136342 | 0.071303    | RNF19A  | ENSG00000034677 |

|   |           |           |           |    |    |    |             |             |         |                 |
|---|-----------|-----------|-----------|----|----|----|-------------|-------------|---------|-----------------|
| 8 | 101342202 | 101342381 | 101342291 | 8  | 8  | 1  | 4.676868829 | 0.0091584   | RNF19A  | ENSG00000034677 |
| 8 | 101343527 | 101343890 | 101343748 | 8  | 13 | 3  | 3.637564645 | 0.0050909   | RNF19A  | ENSG00000034677 |
| 8 | 101362511 | 101362694 | 101362602 | 10 | 11 | 1  | 6.235825105 | 0.0013754   | RNF19A  | ENSG00000034677 |
| 8 | 101477320 | 101477614 | 101477444 | 12 | 13 | 3  | 3.637564645 | 0.0050909   | RNF19A  | ENSG00000034677 |
| 8 | 101495418 | 101495667 | 101495542 | 8  | 9  | 4  | 2.078608368 | 0.0785659   | RNF19A  | ENSG00000034677 |
| 8 | 101497340 | 101497595 | 101497488 | 10 | 11 | 1  | 6.235825105 | 0.0013754   | RNF19A  | ENSG00000034677 |
| 8 | 101526118 | 101526372 | 101526242 | 14 | 15 | 2  | 5.542955649 | 0.000497081 | ANKRD46 | ENSG00000186106 |
| 8 | 101537063 | 101537301 | 101537150 | 8  | 10 | 0  | 11.43234603 | 0.000394183 | ANKRD46 | ENSG00000186106 |
| 8 | 101545305 | 101545574 | 101545433 | 9  | 9  | 5  | 1.73217364  | 0.133894    | ANKRD46 | ENSG00000186106 |
| 8 | 101553547 | 101554043 | 101553699 | 9  | 18 | 7  | 2.468347438 | 0.0112499   | ANKRD46 | ENSG00000186106 |
| 8 | 101566385 | 101566592 | 101566483 | 9  | 10 | 0  | 11.43234603 | 0.000394183 | ANKRD46 | ENSG00000186106 |
| 8 | 101569295 | 101569641 | 101569465 | 22 | 27 | 6  | 4.157216737 | 6.29E-05    | ANKRD46 | ENSG00000186106 |
| 8 | 101591592 | 101591909 | 101591751 | 12 | 16 | 4  | 3.533634226 | 0.00276486  | ANKRD46 | ENSG00000186106 |
| 8 | 101608337 | 101608584 | 101608480 | 8  | 10 | 4  | 2.286469205 | 0.0509017   | ANKRD46 | ENSG00000186106 |
| 8 | 101624233 | 101624469 | 101624362 | 8  | 10 | 0  | 11.43234603 | 0.000394183 | ANKRD46 | ENSG00000186106 |
| 8 | 101707075 | 101707283 | 101707179 | 8  | 9  | 1  | 5.196520921 | 0.00490062  | SNX31   | ENSG00000174226 |
| 8 | 101723707 | 101724111 | 101723884 | 9  | 15 | 8  | 1.847651883 | 0.0631662   | SNX31   | ENSG00000174226 |
| 8 | 101748877 | 101749450 | 101749180 | 8  | 22 | 5  | 3.983999373 | 0.000317941 |         | ENSG00000208885 |
| 8 | 101754913 | 101755312 | 101755055 | 14 | 22 | 2  | 7.967998746 | 6.43E-06    |         | ENSG00000208885 |
| 8 | 101788278 | 101788526 | 101788366 | 9  | 9  | 3  | 2.598260461 | 0.0397929   | PABPC1  | ENSG00000070756 |
| 8 | 101801555 | 101801740 | 101801667 | 8  | 9  | 4  | 2.078608368 | 0.0785659   | PABPC1  | ENSG00000070756 |
| 8 | 101803254 | 101803440 | 101803395 | 8  | 10 | 2  | 3.810782009 | 0.00936112  | PABPC1  | ENSG00000070756 |
| 8 | 101803455 | 101803646 | 101803550 | 8  | 9  | 3  | 2.598260461 | 0.0397929   | PABPC1  | ENSG00000070756 |
| 8 | 101803908 | 101804139 | 101804028 | 9  | 11 | 6  | 1.781664316 | 0.103344    | PABPC1  | ENSG00000070756 |
| 8 | 101827565 | 101828093 | 101827917 | 18 | 29 | 12 | 2.398394271 | 0.00272121  |         | ENSG00000208882 |
| 8 | 101829406 | 101829829 | 101829585 | 10 | 18 | 11 | 1.645564958 | 0.0828462   |         | ENSG00000202001 |
| 8 | 101843727 | 101843950 | 101843838 | 9  | 10 | 2  | 3.810782009 | 0.00936112  |         | ENSG00000202001 |
| 8 | 101862285 | 101862506 | 101862403 | 8  | 9  | 1  | 5.196520921 | 0.00490062  |         | ENSG00000202001 |
| 8 | 101879914 | 101880158 | 101880036 | 8  | 11 | 1  | 6.235825105 | 0.0013754   |         | ENSG00000222795 |
| 8 | 101906088 | 101906275 | 101906114 | 8  | 10 | 2  | 3.810782009 | 0.00936112  |         | ENSG00000222795 |
| 8 | 101908328 | 101908622 | 101908448 | 11 | 13 | 4  | 2.910051716 | 0.0125532   |         | ENSG00000222795 |
| 8 | 101928738 | 101928966 | 101928858 | 9  | 9  | 6  | 1.484720263 | 0.204387    |         | ENSG00000222795 |
| 8 | 101944080 | 101944263 | 101944162 | 8  | 8  | 1  | 4.676868829 | 0.0091584   |         | ENSG00000222795 |
| 8 | 101963462 | 101963775 | 101963621 | 8  | 12 | 1  | 6.755477198 | 0.000722752 | RPS26P6 | ENSG00000212994 |

|   |           |           |           |    |    |    |             |             |         |                 |
|---|-----------|-----------|-----------|----|----|----|-------------|-------------|---------|-----------------|
| 8 | 101981727 | 101982087 | 101981962 | 8  | 13 | 1  | 7.27512929  | 0.000378098 | RPS26P6 | ENSG00000212994 |
| 8 | 102014350 | 102014570 | 102014457 | 10 | 10 | 3  | 2.858086507 | 0.0242838   | YWHAZ   | ENSG00000164924 |
| 8 | 102034240 | 102034829 | 102034534 | 11 | 21 | 8  | 2.540521339 | 0.00602138  | YWHAZ   | ENSG00000164924 |
| 8 | 102133307 | 102133548 | 102133471 | 10 | 13 | 9  | 1.455025858 | 0.177172    |         | ENSG00000202360 |
| 8 | 102135160 | 102135617 | 102135443 | 10 | 17 | 3  | 4.676868829 | 0.000552213 |         | ENSG00000202360 |
| 8 | 102143571 | 102143815 | 102143728 | 12 | 12 | 4  | 2.702190879 | 0.0203088   |         | ENSG00000202360 |
| 8 | 102159618 | 102159959 | 102159788 | 9  | 12 | 9  | 1.35109544  | 0.232899    |         | ENSG00000202360 |
| 8 | 102160812 | 102161140 | 102160981 | 8  | 11 | 8  | 1.385738912 | 0.224757    |         | ENSG00000202360 |
| 8 | 102162381 | 102162911 | 102162601 | 8  | 19 | 11 | 1.73217364  | 0.0607469   |         | ENSG00000202360 |
| 8 | 102408411 | 102408639 | 102408539 | 8  | 10 | 8  | 1.27026067  | 0.293854    |         | ENSG00000180230 |
| 8 | 102414238 | 102414602 | 102414417 | 10 | 17 | 8  | 2.078608368 | 0.0303558   |         | ENSG00000180230 |
| 8 | 102442187 | 102442893 | 102442366 | 11 | 27 | 20 | 1.385738912 | 0.126232    |         | ENSG00000180230 |
| 8 | 102443046 | 102443260 | 102443153 | 8  | 8  | 7  | 1.169217207 | 0.371848    |         | ENSG00000180230 |
| 8 | 102450346 | 102450542 | 102450444 | 8  | 9  | 1  | 5.196520921 | 0.00490062  |         | ENSG00000180230 |
| 8 | 102457358 | 102457748 | 102457569 | 9  | 17 | 11 | 1.558956276 | 0.111389    |         | ENSG00000180230 |
| 8 | 102467390 | 102467642 | 102467516 | 10 | 14 | 2  | 5.196520921 | 0.000907371 |         | ENSG00000208832 |
| 8 | 102491255 | 102491667 | 102491488 | 12 | 20 | 14 | 1.455025858 | 0.129498    |         | ENSG00000222841 |
| 8 | 102518324 | 102519078 | 102518661 | 35 | 59 | 21 | 2.834465957 | 3.86E-06    |         | ENSG00000222841 |
| 8 | 102519754 | 102520357 | 102520055 | 24 | 40 | 16 | 2.50655715  | 0.000378378 |         | ENSG00000222841 |
| 8 | 102523125 | 102523315 | 102523220 | 8  | 8  | 2  | 3.117912553 | 0.0283184   |         | ENSG00000222841 |
| 8 | 102527693 | 102527989 | 102527841 | 10 | 13 | 6  | 2.078608368 | 0.0483393   | GRHL2   | ENSG00000083307 |
| 8 | 102532634 | 102532813 | 102532704 | 8  | 8  | 5  | 1.558956276 | 0.191397    | GRHL2   | ENSG00000083307 |
| 8 | 102533048 | 102533499 | 102533227 | 11 | 20 | 12 | 1.67887599  | 0.0659142   | GRHL2   | ENSG00000083307 |
| 8 | 102534088 | 102534353 | 102534174 | 9  | 12 | 7  | 1.688869299 | 0.11395     | GRHL2   | ENSG00000083307 |
| 8 | 102539154 | 102539363 | 102539288 | 8  | 8  | 2  | 3.117912553 | 0.0283184   | GRHL2   | ENSG00000083307 |
| 8 | 102540741 | 102540933 | 102540787 | 8  | 9  | 1  | 5.196520921 | 0.00490062  | GRHL2   | ENSG00000083307 |
| 8 | 102542296 | 102542526 | 102542411 | 9  | 10 | 10 | 1.039304184 | 0.464387    | GRHL2   | ENSG00000083307 |
| 8 | 102547988 | 102548848 | 102548333 | 14 | 41 | 10 | 3.96825234  | 2.40E-06    | GRHL2   | ENSG00000083307 |
| 8 | 102551695 | 102551946 | 102551827 | 8  | 12 | 2  | 4.503651465 | 0.002963    | GRHL2   | ENSG00000083307 |
| 8 | 102555521 | 102555941 | 102555740 | 27 | 37 | 4  | 7.8987118   | 1.45E-08    | GRHL2   | ENSG00000083307 |
| 8 | 102562884 | 102563140 | 102563012 | 8  | 11 | 6  | 1.781664316 | 0.103344    | GRHL2   | ENSG00000083307 |
| 8 | 102565597 | 102565820 | 102565708 | 8  | 8  | 1  | 4.676868829 | 0.0091584   | GRHL2   | ENSG00000083307 |
| 8 | 102566296 | 102566510 | 102566397 | 8  | 9  | 7  | 1.29913023  | 0.286504    | GRHL2   | ENSG00000083307 |
| 8 | 102570114 | 102570443 | 102570278 | 10 | 14 | 7  | 1.948695345 | 0.0559175   | GRHL2   | ENSG00000083307 |

|   |           |           |           |     |     |    |             |             |       |                 |
|---|-----------|-----------|-----------|-----|-----|----|-------------|-------------|-------|-----------------|
| 8 | 102573469 | 102574277 | 102574117 | 27  | 57  | 24 | 2.411185707 | 5.55E-05    | GRHL2 | ENSG00000083307 |
| 8 | 102575438 | 102576048 | 102575746 | 9   | 24  | 13 | 1.855900329 | 0.0279411   | GRHL2 | ENSG00000083307 |
| 8 | 102579220 | 102579455 | 102579353 | 8   | 11  | 1  | 6.235825105 | 0.0013754   | GRHL2 | ENSG00000083307 |
| 8 | 102582833 | 102583114 | 102582996 | 8   | 11  | 5  | 2.078608368 | 0.0614303   | GRHL2 | ENSG00000083307 |
| 8 | 102586102 | 102586402 | 102586241 | 12  | 16  | 5  | 2.944695189 | 0.00659886  | GRHL2 | ENSG00000083307 |
| 8 | 102603216 | 102603437 | 102603326 | 13  | 14  | 8  | 1.73217364  | 0.0890835   |       | ENSG00000208823 |
| 8 | 102684942 | 102685369 | 102685121 | 35  | 46  | 11 | 4.070608055 | 4.97E-07    |       | ENSG00000222247 |
| 8 | 102689364 | 102690082 | 102689652 | 14  | 29  | 13 | 2.227080395 | 0.00479511  |       | ENSG00000222247 |
| 8 | 102716687 | 102716935 | 102716816 | 9   | 10  | 1  | 5.716173013 | 0.00260397  |       | ENSG00000222247 |
| 8 | 102717154 | 102717409 | 102717278 | 14  | 15  | 5  | 2.771477825 | 0.0105836   |       | ENSG00000222247 |
| 8 | 102732323 | 102732502 | 102732412 | 9   | 9   | 6  | 1.484720263 | 0.204387    |       | ENSG00000222247 |
| 8 | 102752119 | 102752318 | 102752257 | 8   | 10  | 4  | 2.286469205 | 0.0509017   |       | ENSG00000222247 |
| 8 | 102784051 | 102784249 | 102784164 | 9   | 10  | 2  | 3.810782009 | 0.00936112  |       | ENSG00000222247 |
| 8 | 102820082 | 102820274 | 102820218 | 8   | 8   | 2  | 3.117912553 | 0.0283184   | NCALD | ENSG00000104490 |
| 8 | 103034856 | 103035035 | 103034945 | 8   | 8   | 6  | 1.336248237 | 0.277651    |       | ENSG00000208818 |
| 8 | 103242448 | 103242703 | 103242575 | 10  | 10  | 1  | 5.716173013 | 0.00260397  | NCALD | ENSG00000104490 |
| 8 | 103278879 | 103279178 | 103279028 | 13  | 16  | 10 | 1.606197376 | 0.104477    | RRM2B | ENSG00000048392 |
| 8 | 103312636 | 103313051 | 103312931 | 12  | 17  | 5  | 3.117912553 | 0.00407023  | RRM2B | ENSG00000048392 |
| 8 | 103318006 | 103318655 | 103318270 | 167 | 206 | 9  | 21.51359661 | 4.99E-52    | RRM2B | ENSG00000048392 |
| 8 | 103318881 | 103319125 | 103318947 | 10  | 11  | 1  | 6.235825105 | 0.0013754   | RRM2B | ENSG00000048392 |
| 8 | 103353912 | 103354120 | 103354016 | 8   | 8   | 4  | 1.870747532 | 0.118863    | RRM2B | ENSG00000048392 |
| 8 | 103451168 | 103451433 | 103451294 | 9   | 12  | 1  | 6.755477198 | 0.000722752 |       | ENSG00000208813 |
| 8 | 103464662 | 103464841 | 103464795 | 8   | 8   | 5  | 1.558956276 | 0.191397    |       | ENSG00000208813 |
| 8 | 103494280 | 103494540 | 103494416 | 9   | 13  | 7  | 1.818782322 | 0.0805123   | UBR5  | ENSG00000104517 |
| 8 | 103508420 | 103508857 | 103508590 | 17  | 25  | 1  | 13.5109544  | 1.28E-07    |       | ENSG00000221387 |
| 8 | 103538216 | 103538489 | 103538352 | 8   | 12  | 1  | 6.755477198 | 0.000722752 |       | ENSG00000214885 |
| 8 | 103658247 | 103658653 | 103658521 | 12  | 18  | 9  | 1.97467795  | 0.0349428   | ODF1  | ENSG00000155087 |
| 8 | 103666565 | 103666875 | 103666720 | 13  | 18  | 0  | 19.7467795  | 1.32E-06    | ODF1  | ENSG00000155087 |
| 8 | 103682018 | 103682616 | 103682427 | 15  | 37  | 15 | 2.468347438 | 0.000682071 | ODF1  | ENSG00000155087 |
| 8 | 103683888 | 103684108 | 103683998 | 8   | 8   | 1  | 4.676868829 | 0.0091584   | ODF1  | ENSG00000155087 |
| 8 | 103698420 | 103698681 | 103698548 | 11  | 13  | 5  | 2.425043097 | 0.0262442   | KLF10 | ENSG00000155090 |
| 8 | 103735006 | 103735284 | 103735145 | 10  | 13  | 6  | 2.078608368 | 0.0483393   | KLF10 | ENSG00000155090 |
| 8 | 103736908 | 103737118 | 103736966 | 9   | 9   | 4  | 2.078608368 | 0.0785659   | KLF10 | ENSG00000155090 |
| 8 | 103740055 | 103740265 | 103740135 | 8   | 9   | 1  | 5.196520921 | 0.00490062  | KLF10 | ENSG00000155090 |



|   |           |           |           |    |    |    |             |             |        |                 |
|---|-----------|-----------|-----------|----|----|----|-------------|-------------|--------|-----------------|
| 8 | 103754261 | 103754496 | 103754378 | 8  | 8  | 1  | 4.676868829 | 0.0091584   | KLF10  | ENSG00000155090 |
| 8 | 103799928 | 103800168 | 103800048 | 8  | 9  | 1  | 5.196520921 | 0.00490062  | KLF10  | ENSG00000155090 |
| 8 | 103821381 | 103821662 | 103821521 | 11 | 12 | 4  | 2.702190879 | 0.0203088   |        | ENSG00000217620 |
| 8 | 103849687 | 103849885 | 103849781 | 9  | 9  | 4  | 2.078608368 | 0.0785659   |        | ENSG00000217620 |
| 8 | 103887659 | 103887912 | 103887821 | 9  | 11 | 9  | 1.247165021 | 0.300052    |        | ENSG00000217620 |
| 8 | 103888853 | 103889255 | 103889032 | 16 | 24 | 9  | 2.598260461 | 0.0032455   |        | ENSG00000217620 |
| 8 | 103890400 | 103890880 | 103890702 | 18 | 27 | 7  | 3.637564645 | 0.000166657 |        | ENSG00000217620 |
| 8 | 103892353 | 103892559 | 103892456 | 11 | 11 | 0  | 12.47165021 | 0.000193293 |        | ENSG00000217620 |
| 8 | 103896018 | 103896447 | 103896193 | 13 | 20 | 7  | 2.728173484 | 0.00469378  |        | ENSG00000217620 |
| 8 | 103945352 | 103945675 | 103945513 | 10 | 16 | 7  | 2.208521392 | 0.0257604   | AZIN1  | ENSG00000155096 |
| 8 | 104003339 | 104003575 | 104003457 | 8  | 9  | 1  | 5.196520921 | 0.00490062  |        | ENSG00000201216 |
| 8 | 104042953 | 104043174 | 104043063 | 12 | 13 | 6  | 2.078608368 | 0.0483393   |        | ENSG00000201216 |
| 8 | 104061620 | 104061810 | 104061715 | 10 | 10 | 0  | 11.43234603 | 0.000394183 |        | ENSG00000201216 |
| 8 | 104151397 | 104151576 | 104151486 | 8  | 9  | 2  | 3.464347281 | 0.0163838   |        | ENSG00000208794 |
| 8 | 104155371 | 104155696 | 104155533 | 13 | 18 | 3  | 4.936694875 | 0.000311102 |        | ENSG00000208794 |
| 8 | 104201748 | 104202061 | 104201904 | 12 | 15 | 4  | 3.32577339  | 0.00462646  | BAALC  | ENSG00000164929 |
| 8 | 104217503 | 104217709 | 104217640 | 12 | 13 | 14 | 0.970017239 | 0.534076    | BAALC  | ENSG00000164929 |
| 8 | 104218584 | 104218785 | 104218684 | 8  | 10 | 3  | 2.858086507 | 0.0242838   | BAALC  | ENSG00000164929 |
| 8 | 104291855 | 104292124 | 104291989 | 23 | 26 | 3  | 7.015303244 | 2.63E-06    | BAALC  | ENSG00000164929 |
| 8 | 104363619 | 104363798 | 104363699 | 9  | 9  | 3  | 2.598260461 | 0.0397929   |        | ENSG00000205066 |
| 8 | 104380720 | 104380899 | 104380797 | 8  | 8  | 1  | 4.676868829 | 0.0091584   | FZD6   | ENSG00000164930 |
| 8 | 104430635 | 104430859 | 104430686 | 8  | 9  | 1  | 5.196520921 | 0.00490062  | CTHRC1 | ENSG00000164932 |
| 8 | 104435125 | 104435304 | 104435214 | 8  | 8  | 4  | 1.870747532 | 0.118863    | CTHRC1 | ENSG00000164932 |
| 8 | 104496485 | 104496908 | 104496720 | 10 | 18 | 12 | 1.518983039 | 0.117837    | WDSOF1 | ENSG00000164934 |
| 8 | 104543039 | 104543285 | 104543149 | 8  | 10 | 5  | 1.905391004 | 0.0915982   | RIMS2  | ENSG00000176406 |
| 8 | 104556942 | 104557121 | 104557071 | 8  | 8  | 1  | 4.676868829 | 0.0091584   | RIMS2  | ENSG00000176406 |
| 8 | 104583085 | 104583327 | 104583206 | 9  | 9  | 9  | 1.039304184 | 0.466079    | RIMS2  | ENSG00000176406 |
| 8 | 104725503 | 104725682 | 104725606 | 8  | 8  | 5  | 1.558956276 | 0.191397    |        | ENSG00000208758 |
| 8 | 104876978 | 104877274 | 104877115 | 12 | 15 | 6  | 2.375552421 | 0.0212094   | RIMS2  | ENSG00000176406 |
| 8 | 105378785 | 105379023 | 105378940 | 8  | 10 | 3  | 2.858086507 | 0.0242838   | TM7SF4 | ENSG00000164935 |
| 8 | 105396110 | 105396319 | 105396262 | 9  | 9  | 2  | 3.464347281 | 0.0163838   | TM7SF4 | ENSG00000164935 |
| 8 | 105461851 | 105462108 | 105461979 | 10 | 10 | 7  | 1.429043253 | 0.21536     |        | ENSG00000220279 |
| 8 | 105499420 | 105499958 | 105499588 | 16 | 26 | 12 | 2.158554844 | 0.00861404  |        | ENSG00000179577 |
| 8 | 105544755 | 105544962 | 105544858 | 9  | 9  | 8  | 1.154782427 | 0.375434    | DPYS   | ENSG00000147647 |

|   |           |           |           |    |    |    |             |             |        |                 |
|---|-----------|-----------|-----------|----|----|----|-------------|-------------|--------|-----------------|
| 8 | 105653617 | 105653851 | 105653707 | 9  | 12 | 2  | 4.503651465 | 0.002963    | LRP12  | ENSG00000147650 |
| 8 | 105670644 | 105670907 | 105670775 | 11 | 11 | 1  | 6.235825105 | 0.0013754   | LRP12  | ENSG00000147650 |
| 8 | 105841009 | 105841382 | 105841183 | 9  | 16 | 6  | 2.524024447 | 0.0137633   | LRP12  | ENSG00000147650 |
| 8 | 105858357 | 105858657 | 105858503 | 8  | 8  | 9  | 0.935373766 | 0.560286    | LRP12  | ENSG00000147650 |
| 8 | 105874795 | 105875099 | 105874956 | 13 | 15 | 3  | 4.157216737 | 0.00170423  | LRP12  | ENSG00000147650 |
| 8 | 106852490 | 106852728 | 106852609 | 8  | 8  | 3  | 2.338434415 | 0.0641221   | ZFPM2  | ENSG00000169946 |
| 8 | 107240458 | 107240637 | 107240547 | 8  | 8  | 3  | 2.338434415 | 0.0641221   |        | ENSG00000213708 |
| 8 | 107241283 | 107241568 | 107241420 | 8  | 8  | 5  | 1.558956276 | 0.191397    |        | ENSG00000213708 |
| 8 | 107479423 | 107479602 | 107479469 | 8  | 8  | 1  | 4.676868829 | 0.0091584   |        | ENSG00000213708 |
| 8 | 107636650 | 107636880 | 107636765 | 8  | 10 | 0  | 11.43234603 | 0.000394183 | OXR1   | ENSG00000164830 |
| 8 | 107689771 | 107690497 | 107690119 | 63 | 95 | 9  | 9.977320169 | 1.49E-20    | OXR1   | ENSG00000164830 |
| 8 | 107738822 | 107739317 | 107739082 | 14 | 25 | 10 | 2.456537163 | 0.00405907  | OXR1   | ENSG00000164830 |
| 8 | 107739754 | 107740077 | 107739899 | 12 | 16 | 6  | 2.524024447 | 0.0137633   | OXR1   | ENSG00000164830 |
| 8 | 107844358 | 107844575 | 107844466 | 10 | 11 | 5  | 2.078608368 | 0.0614303   | ABRA   | ENSG00000174429 |
| 8 | 107937974 | 107938190 | 107938078 | 8  | 9  | 5  | 1.73217364  | 0.133894    | ABRA   | ENSG00000174429 |
| 8 | 108608375 | 108608567 | 108608471 | 8  | 8  | 0  | 9.353737658 | 0.00163931  | ANGPT1 | ENSG00000154188 |
| 8 | 108761383 | 108761625 | 108761504 | 8  | 9  | 2  | 3.464347281 | 0.0163838   | ANGPT1 | ENSG00000154188 |
| 8 | 108837837 | 108838116 | 108837976 | 8  | 10 | 0  | 11.43234603 | 0.000394183 |        | ENSG00000200806 |
| 8 | 108920198 | 108920458 | 108920337 | 8  | 8  | 0  | 9.353737658 | 0.00163931  |        | ENSG00000200806 |
| 8 | 109111723 | 109111902 | 109111812 | 8  | 8  | 5  | 1.558956276 | 0.191397    | RSPO2  | ENSG00000147655 |
| 8 | 109127494 | 109127705 | 109127599 | 11 | 12 | 1  | 6.755477198 | 0.000722752 | RSPO2  | ENSG00000147655 |
| 8 | 109166225 | 109166423 | 109166324 | 9  | 9  | 1  | 5.196520921 | 0.00490062  | RSPO2  | ENSG00000147655 |
| 8 | 109280738 | 109280937 | 109280837 | 8  | 9  | 4  | 2.078608368 | 0.0785659   | EIF3E  | ENSG00000104408 |
| 8 | 109281235 | 109281422 | 109281328 | 8  | 8  | 2  | 3.117912553 | 0.0283184   | EIF3E  | ENSG00000104408 |
| 8 | 109302966 | 109303146 | 109303089 | 8  | 8  | 2  | 3.117912553 | 0.0283184   | EIF3E  | ENSG00000104408 |
| 8 | 109329881 | 109330216 | 109330048 | 16 | 22 | 4  | 4.780799247 | 0.00010647  | EIF3E  | ENSG00000104408 |
| 8 | 109348572 | 109348801 | 109348686 | 8  | 8  | 2  | 3.117912553 | 0.0283184   | EIF3E  | ENSG00000104408 |
| 8 | 109653829 | 109654312 | 109654102 | 13 | 22 | 4  | 4.780799247 | 0.00010647  | TTC35  | ENSG00000104412 |
| 8 | 109769761 | 109769979 | 109769848 | 8  | 8  | 5  | 1.558956276 | 0.191397    | TMEM74 | ENSG00000164841 |
| 8 | 109776962 | 109777378 | 109777260 | 9  | 16 | 5  | 2.944695189 | 0.00659886  | TMEM74 | ENSG00000164841 |
| 8 | 109999811 | 110000143 | 109999977 | 14 | 17 | 7  | 2.338434415 | 0.0171287   | TMEM74 | ENSG00000164841 |
| 8 | 110211257 | 110211500 | 110211365 | 8  | 9  | 6  | 1.484720263 | 0.204387    | TRHR   | ENSG00000174417 |
| 8 | 110264408 | 110264732 | 110264579 | 8  | 11 | 5  | 2.078608368 | 0.0614303   | TRHR   | ENSG00000174417 |
| 8 | 110341032 | 110341339 | 110341191 | 9  | 9  | 3  | 2.598260461 | 0.0397929   | NUDCD1 | ENSG00000120526 |

|   |           |           |           |    |    |    |             |             |        |                 |
|---|-----------|-----------|-----------|----|----|----|-------------|-------------|--------|-----------------|
| 8 | 110415412 | 110415992 | 110415584 | 16 | 32 | 19 | 1.714851904 | 0.0256863   | NUDCD1 | ENSG00000120526 |
| 8 | 110607845 | 110608024 | 110607925 | 8  | 9  | 1  | 5.196520921 | 0.00490062  | EBAG9  | ENSG00000147654 |
| 8 | 110620677 | 110621110 | 110620844 | 10 | 17 | 7  | 2.338434415 | 0.0171287   | EBAG9  | ENSG00000147654 |
| 8 | 110621330 | 110621820 | 110621641 | 12 | 23 | 10 | 2.267572766 | 0.00903625  | EBAG9  | ENSG00000147654 |
| 8 | 110657368 | 110657648 | 110657508 | 8  | 12 | 4  | 2.702190879 | 0.0203088   | EBAG9  | ENSG00000147654 |
| 8 | 110658669 | 110658865 | 110658787 | 8  | 8  | 6  | 1.336248237 | 0.277651    | EBAG9  | ENSG00000147654 |
| 8 | 110666069 | 110666483 | 110666317 | 9  | 17 | 7  | 2.338434415 | 0.0171287   | EBAG9  | ENSG00000147654 |
| 8 | 110667422 | 110667601 | 110667511 | 8  | 8  | 2  | 3.117912553 | 0.0283184   | EBAG9  | ENSG00000147654 |
| 8 | 110686356 | 110686535 | 110686445 | 8  | 8  | 2  | 3.117912553 | 0.0283184   |        | ENSG00000147642 |
| 8 | 110771664 | 110772012 | 110771838 | 12 | 16 | 6  | 2.524024447 | 0.0137633   |        | ENSG00000147642 |
| 8 | 111575139 | 111575364 | 111575251 | 9  | 10 | 2  | 3.810782009 | 0.00936112  |        | ENSG00000208705 |
| 8 | 112302669 | 112302848 | 112302758 | 8  | 8  | 3  | 2.338434415 | 0.0641221   |        | ENSG00000208693 |
| 8 | 112343949 | 112344128 | 112344085 | 8  | 8  | 2  | 3.117912553 | 0.0283184   |        | ENSG00000208693 |
| 8 | 112969502 | 112969681 | 112969591 | 8  | 9  | 0  | 10.39304184 | 0.000803859 |        | ENSG00000222146 |
| 8 | 113045843 | 113046022 | 113045924 | 8  | 9  | 3  | 2.598260461 | 0.0397929   |        | ENSG00000222146 |
| 8 | 113831947 | 113832198 | 113832074 | 15 | 16 | 0  | 17.66817113 | 5.48E-06    |        | ENSG00000208686 |
| 8 | 113882673 | 113882852 | 113882762 | 8  | 8  | 1  | 4.676868829 | 0.0091584   |        | ENSG00000208686 |
| 8 | 114928318 | 114928582 | 114928450 | 11 | 11 | 1  | 6.235825105 | 0.0013754   |        | ENSG00000206719 |
| 8 | 115535981 | 115536214 | 115536096 | 8  | 8  | 2  | 3.117912553 | 0.0283184   |        |                 |
| 8 | 116192851 | 116193176 | 116193011 | 19 | 22 | 1  | 11.95199812 | 9.69E-07    |        |                 |
| 8 | 116244758 | 116244937 | 116244847 | 8  | 8  | 1  | 4.676868829 | 0.0091584   |        |                 |
| 8 | 116652237 | 116652420 | 116652328 | 8  | 8  | 2  | 3.117912553 | 0.0283184   | TRPS1  | ENSG00000104447 |
| 8 | 116748901 | 116749092 | 116749020 | 8  | 8  | 3  | 2.338434415 | 0.0641221   | TRPS1  | ENSG00000104447 |
| 8 | 116750188 | 116750423 | 116750331 | 10 | 11 | 1  | 6.235825105 | 0.0013754   | TRPS1  | ENSG00000104447 |
| 8 | 116919620 | 116920143 | 116919923 | 27 | 40 | 7  | 5.326433944 | 1.59E-07    | TRPS1  | ENSG00000104447 |
| 8 | 116948729 | 116948917 | 116948823 | 8  | 8  | 1  | 4.676868829 | 0.0091584   |        | ENSG00000199450 |
| 8 | 116949033 | 116949269 | 116949145 | 11 | 12 | 1  | 6.755477198 | 0.000722752 |        | ENSG00000199450 |
| 8 | 117020241 | 117020725 | 117020451 | 8  | 17 | 16 | 1.100439724 | 0.388093    |        | ENSG00000199450 |
| 8 | 117030836 | 117031027 | 117030944 | 8  | 9  | 5  | 1.73217364  | 0.133894    |        | ENSG00000199450 |
| 8 | 117069235 | 117069600 | 117069421 | 11 | 17 | 13 | 1.336248237 | 0.204556    |        | ENSG00000199450 |
| 8 | 117079839 | 117080068 | 117079948 | 11 | 14 | 7  | 1.948695345 | 0.0559175   |        | ENSG00000199450 |
| 8 | 117308660 | 117308863 | 117308773 | 8  | 9  | 3  | 2.598260461 | 0.0397929   |        | ENSG00000221793 |
| 8 | 117433082 | 117433289 | 117433185 | 8  | 8  | 0  | 9.353737658 | 0.00163931  |        | ENSG00000221793 |
| 8 | 117487501 | 117487704 | 117487600 | 8  | 9  | 0  | 10.39304184 | 0.000803859 |        | ENSG00000221793 |

|   |           |           |           |    |    |    |             |             |           |                 |
|---|-----------|-----------|-----------|----|----|----|-------------|-------------|-----------|-----------------|
| 8 | 117509062 | 117509247 | 117509154 | 8  | 8  | 1  | 4.676868829 | 0.0091584   |           | ENSG00000221793 |
| 8 | 117553212 | 117553466 | 117553339 | 9  | 9  | 7  | 1.29913023  | 0.286504    | EIF3H     | ENSG00000147677 |
| 8 | 117584333 | 117584606 | 117584469 | 10 | 12 | 7  | 1.688869299 | 0.11395     | EIF3H     | ENSG00000147677 |
| 8 | 117866309 | 117866696 | 117866575 | 11 | 18 | 1  | 9.87338975  | 1.41E-05    | UTP23     | ENSG00000147679 |
| 8 | 117881707 | 117882165 | 117881986 | 13 | 23 | 5  | 4.157216737 | 0.000186738 | UTP23     | ENSG00000147679 |
| 8 | 117919386 | 117919583 | 117919484 | 8  | 9  | 1  | 5.196520921 | 0.00490062  | RAD21     | ENSG00000164754 |
| 8 | 117968717 | 117969038 | 117968878 | 9  | 13 | 3  | 3.637564645 | 0.0050909   | RAD21     | ENSG00000164754 |
| 8 | 117972771 | 117972964 | 117972867 | 8  | 8  | 2  | 3.117912553 | 0.0283184   | RAD21     | ENSG00000164754 |
| 8 | 118215219 | 118215488 | 118215352 | 8  | 10 | 4  | 2.286469205 | 0.0509017   |           | ENSG00000208663 |
| 8 | 118257559 | 118257757 | 118257658 | 8  | 8  | 5  | 1.558956276 | 0.191397    |           | ENSG00000208663 |
| 8 | 118697823 | 118698112 | 118697970 | 8  | 12 | 2  | 4.503651465 | 0.002963    | MED30     | ENSG00000164758 |
| 8 | 118803952 | 118804168 | 118804062 | 10 | 12 | 0  | 13.5109544  | 9.48E-05    | MED30     | ENSG00000164758 |
| 8 | 119170171 | 119170425 | 119170299 | 9  | 11 | 4  | 2.494330042 | 0.0324033   | EXT1      | ENSG00000182197 |
| 8 | 119546070 | 119546249 | 119546186 | 8  | 8  | 2  | 3.117912553 | 0.0283184   | SAMD12    | ENSG00000177570 |
| 8 | 119612259 | 119612508 | 119612391 | 8  | 9  | 0  | 10.39304184 | 0.000803859 | SAMD12    | ENSG00000177570 |
| 8 | 119702227 | 119702453 | 119702405 | 9  | 11 | 8  | 1.385738912 | 0.224757    | SAMD12    | ENSG00000177570 |
| 8 | 119931397 | 119931769 | 119931590 | 28 | 35 | 4  | 7.482990127 | 4.95E-08    | TNFRSF11B | ENSG00000164761 |
| 8 | 119943697 | 119943967 | 119943843 | 11 | 12 | 0  | 13.5109544  | 9.48E-05    | TNFRSF11B | ENSG00000164761 |
| 8 | 120022695 | 120022884 | 120022789 | 8  | 8  | 3  | 2.338434415 | 0.0641221   | TNFRSF11B | ENSG00000164761 |
| 8 | 120282235 | 120282475 | 120282355 | 9  | 10 | 3  | 2.858086507 | 0.0242838   | MAL2      | ENSG00000147676 |
| 8 | 120307814 | 120308102 | 120307964 | 11 | 12 | 4  | 2.702190879 | 0.0203088   | MAL2      | ENSG00000147676 |
| 8 | 120309126 | 120309374 | 120309226 | 8  | 8  | 1  | 4.676868829 | 0.0091584   | MAL2      | ENSG00000147676 |
| 8 | 120591172 | 120591365 | 120591268 | 8  | 9  | 3  | 2.598260461 | 0.0397929   |           | ENSG00000213690 |
| 8 | 120702174 | 120702576 | 120702397 | 13 | 20 | 2  | 7.27512929  | 2.27E-05    | ENPP2     | ENSG00000136960 |
| 8 | 120722946 | 120723137 | 120723075 | 8  | 9  | 2  | 3.464347281 | 0.0163838   | ENPP2     | ENSG00000136960 |
| 8 | 120914042 | 120914295 | 120914169 | 8  | 11 | 3  | 3.117912553 | 0.0146045   | TAF2      | ENSG00000064313 |
| 8 | 120937566 | 120937818 | 120937689 | 11 | 12 | 10 | 1.228268581 | 0.305344    | DSCC1     | ENSG00000136982 |
| 8 | 121064244 | 121064631 | 121064459 | 13 | 20 | 3  | 5.456346967 | 9.70E-05    |           | ENSG00000202356 |
| 8 | 121512938 | 121513143 | 121513001 | 9  | 11 | 3  | 3.117912553 | 0.0146045   | MRPL13    | ENSG00000172172 |
| 8 | 121519392 | 121519651 | 121519521 | 10 | 10 | 1  | 5.716173013 | 0.00260397  | MRPL13    | ENSG00000172172 |
| 8 | 121526521 | 121526740 | 121526606 | 9  | 10 | 5  | 1.905391004 | 0.0915982   | MRPL13    | ENSG00000172172 |
| 8 | 121643139 | 121643363 | 121643251 | 8  | 9  | 4  | 2.078608368 | 0.0785659   | MTBP      | ENSG00000172167 |
| 8 | 121657114 | 121657335 | 121657224 | 8  | 8  | 6  | 1.336248237 | 0.277651    | MTBP      | ENSG00000172167 |
| 8 | 121713611 | 121713793 | 121713652 | 8  | 10 | 0  | 11.43234603 | 0.000394183 | SNTB1     | ENSG00000172164 |

|   |           |           |           |    |    |    |             |             |       |                 |
|---|-----------|-----------|-----------|----|----|----|-------------|-------------|-------|-----------------|
| 8 | 121784200 | 121784414 | 121784307 | 8  | 8  | 0  | 9.353737658 | 0.00163931  | SNTB1 | ENSG00000172164 |
| 8 | 121799885 | 121800071 | 121799971 | 8  | 8  | 2  | 3.117912553 | 0.0283184   | SNTB1 | ENSG00000172164 |
| 8 | 121826650 | 121826829 | 121826743 | 8  | 8  | 3  | 2.338434415 | 0.0641221   | SNTB1 | ENSG00000172164 |
| 8 | 121984064 | 121984258 | 121984235 | 8  | 9  | 4  | 2.078608368 | 0.0785659   | SNTB1 | ENSG00000172164 |
| 8 | 122018081 | 122018575 | 122018326 | 37 | 54 | 5  | 9.526955022 | 1.95E-12    | SNTB1 | ENSG00000172164 |
| 8 | 122020433 | 122020860 | 122020681 | 12 | 20 | 9  | 2.182538787 | 0.0165356   | SNTB1 | ENSG00000172164 |
| 8 | 122032585 | 122032913 | 122032749 | 12 | 17 | 3  | 4.676868829 | 0.000552213 | SNTB1 | ENSG00000172164 |
| 8 | 122068987 | 122069237 | 122069112 | 8  | 11 | 6  | 1.781664316 | 0.103344    | SNTB1 | ENSG00000172164 |
| 8 | 122211217 | 122211396 | 122211303 | 8  | 8  | 0  | 9.353737658 | 0.00163931  |       | ENSG00000221644 |
| 8 | 122226894 | 122227569 | 122227057 | 12 | 26 | 9  | 2.806121297 | 0.00135991  |       | ENSG00000221644 |
| 8 | 122232373 | 122232716 | 122232566 | 20 | 25 | 13 | 1.930136342 | 0.0200308   |       | ENSG00000221644 |
| 8 | 122235853 | 122236255 | 122236000 | 9  | 16 | 7  | 2.208521392 | 0.0257604   |       | ENSG00000221644 |
| 8 | 122245131 | 122245316 | 122245255 | 8  | 9  | 2  | 3.464347281 | 0.0163838   |       | ENSG00000221644 |
| 8 | 122246565 | 122247090 | 122246827 | 12 | 23 | 10 | 2.267572766 | 0.00903625  |       | ENSG00000221644 |
| 8 | 122254579 | 122254759 | 122254669 | 8  | 8  | 4  | 1.870747532 | 0.118863    |       | ENSG00000221644 |
| 8 | 122279683 | 122279877 | 122279743 | 8  | 9  | 2  | 3.464347281 | 0.0163838   |       | ENSG00000221644 |
| 8 | 122289542 | 122289746 | 122289644 | 8  | 8  | 0  | 9.353737658 | 0.00163931  |       | ENSG00000221644 |
| 8 | 122322084 | 122322353 | 122322218 | 8  | 11 | 2  | 4.157216737 | 0.0052913   |       | ENSG00000221644 |
| 8 | 122342433 | 122342701 | 122342567 | 11 | 14 | 7  | 1.948695345 | 0.0559175   |       | ENSG00000221644 |
| 8 | 122508458 | 122508642 | 122508550 | 8  | 9  | 2  | 3.464347281 | 0.0163838   |       | ENSG00000222786 |
| 8 | 122513714 | 122514039 | 122513878 | 8  | 12 | 4  | 2.702190879 | 0.0203088   |       | ENSG00000222786 |
| 8 | 122536226 | 122536408 | 122536317 | 8  | 8  | 1  | 4.676868829 | 0.0091584   |       | ENSG00000222786 |
| 8 | 122553274 | 122553453 | 122553363 | 8  | 8  | 5  | 1.558956276 | 0.191397    |       | ENSG00000222786 |
| 8 | 122612904 | 122613162 | 122613006 | 10 | 12 | 4  | 2.702190879 | 0.0203088   |       | ENSG00000222786 |
| 8 | 122723762 | 122723951 | 122723856 | 8  | 9  | 5  | 1.73217364  | 0.133894    | HAS2  | ENSG00000170961 |
| 8 | 122752267 | 122752466 | 122752366 | 9  | 9  | 3  | 2.598260461 | 0.0397929   | HAS2  | ENSG00000170961 |
| 8 | 122820194 | 122820428 | 122820264 | 9  | 10 | 1  | 5.716173013 | 0.00260397  | HAS2  | ENSG00000170961 |
| 8 | 122823178 | 122823487 | 122823327 | 9  | 12 | 13 | 0.965068171 | 0.538344    | HAS2  | ENSG00000170961 |
| 8 | 122852648 | 122852861 | 122852718 | 8  | 9  | 1  | 5.196520921 | 0.00490062  | HAS2  | ENSG00000170961 |
| 8 | 122857700 | 122858082 | 122857916 | 8  | 13 | 9  | 1.455025858 | 0.177172    | HAS2  | ENSG00000170961 |
| 8 | 122867781 | 122867967 | 122867831 | 9  | 9  | 3  | 2.598260461 | 0.0397929   | HAS2  | ENSG00000170961 |
| 8 | 122899040 | 122899294 | 122899215 | 8  | 10 | 1  | 5.716173013 | 0.00260397  | HAS2  | ENSG00000170961 |
| 8 | 123210789 | 123211024 | 123210906 | 10 | 10 | 0  | 11.43234603 | 0.000394183 | HAS2  | ENSG00000170961 |
| 8 | 123221313 | 123221504 | 123221408 | 9  | 9  | 8  | 1.154782427 | 0.375434    | HAS2  | ENSG00000170961 |

|   |           |           |           |    |    |    |             |             |       |                 |
|---|-----------|-----------|-----------|----|----|----|-------------|-------------|-------|-----------------|
| 8 | 123383122 | 123383319 | 123383263 | 9  | 10 | 1  | 5.716173013 | 0.00260397  |       | ENSG00000208620 |
| 8 | 123420458 | 123420946 | 123420732 | 15 | 26 | 2  | 9.353737658 | 4.98E-07    |       | ENSG00000208620 |
| 8 | 123461009 | 123461232 | 123461120 | 10 | 11 | 5  | 2.078608368 | 0.0614303   |       | ENSG00000208620 |
| 8 | 123548567 | 123548774 | 123548701 | 8  | 8  | 8  | 1.039304184 | 0.46786     |       | ENSG00000208620 |
| 8 | 123579949 | 123580194 | 123580037 | 9  | 9  | 3  | 2.598260461 | 0.0397929   |       | ENSG00000208620 |
| 8 | 123592391 | 123592618 | 123592504 | 9  | 10 | 5  | 1.905391004 | 0.0915982   |       | ENSG00000208620 |
| 8 | 123720578 | 123720833 | 123720725 | 8  | 10 | 2  | 3.810782009 | 0.00936112  |       | ENSG00000208620 |
| 8 | 123725127 | 123725314 | 123725220 | 8  | 9  | 8  | 1.154782427 | 0.375434    |       | ENSG00000208620 |
| 8 | 123736538 | 123736822 | 123736675 | 8  | 8  | 4  | 1.870747532 | 0.118863    |       | ENSG00000208620 |
| 8 | 123762322 | 123762501 | 123762411 | 8  | 8  | 5  | 1.558956276 | 0.191397    |       | ENSG00000208620 |
| 8 | 123765106 | 123765495 | 123765285 | 9  | 15 | 8  | 1.847651883 | 0.0631662   |       | ENSG00000208620 |
| 8 | 123811007 | 123811186 | 123811096 | 9  | 9  | 0  | 10.39304184 | 0.000803859 |       | ENSG00000217845 |
| 8 | 123834046 | 123834225 | 123834135 | 9  | 9  | 3  | 2.598260461 | 0.0397929   |       | ENSG00000217845 |
| 8 | 123837320 | 123837499 | 123837398 | 8  | 8  | 1  | 4.676868829 | 0.0091584   |       | ENSG00000217845 |
| 8 | 123860304 | 123860483 | 123860393 | 8  | 8  | 1  | 4.676868829 | 0.0091584   | ZHX2  | ENSG00000178764 |
| 8 | 123861569 | 123861942 | 123861763 | 9  | 16 | 10 | 1.606197376 | 0.104477    | ZHX2  | ENSG00000178764 |
| 8 | 123862583 | 123863005 | 123862807 | 9  | 17 | 8  | 2.078608368 | 0.0303558   | ZHX2  | ENSG00000178764 |
| 8 | 123867151 | 123867752 | 123867357 | 27 | 46 | 21 | 2.220331666 | 0.000637679 | ZHX2  | ENSG00000178764 |
| 8 | 123867768 | 123867970 | 123867860 | 10 | 10 | 7  | 1.429043253 | 0.21536     | ZHX2  | ENSG00000178764 |
| 8 | 123871763 | 123871942 | 123871852 | 8  | 8  | 4  | 1.870747532 | 0.118863    | ZHX2  | ENSG00000178764 |
| 8 | 123887179 | 123887363 | 123887290 | 8  | 8  | 2  | 3.117912553 | 0.0283184   | ZHX2  | ENSG00000178764 |
| 8 | 123896608 | 123896816 | 123896712 | 9  | 9  | 6  | 1.484720263 | 0.204387    |       | ENSG00000221542 |
| 8 | 123922606 | 123922797 | 123922640 | 9  | 9  | 0  | 10.39304184 | 0.000803859 |       | ENSG00000221542 |
| 8 | 123925431 | 123925632 | 123925532 | 8  | 8  | 3  | 2.338434415 | 0.0641221   |       | ENSG00000221542 |
| 8 | 123944680 | 123944898 | 123944850 | 8  | 9  | 2  | 3.464347281 | 0.0163838   |       | ENSG00000221542 |
| 8 | 123946185 | 123946461 | 123946323 | 9  | 12 | 3  | 3.377738599 | 0.00867157  |       | ENSG00000221542 |
| 8 | 123947724 | 123947903 | 123947785 | 10 | 10 | 0  | 11.43234603 | 0.000394183 |       | ENSG00000221542 |
| 8 | 123965744 | 123965939 | 123965804 | 10 | 10 | 1  | 5.716173013 | 0.00260397  |       | ENSG00000221542 |
| 8 | 123990904 | 123991121 | 123991046 | 10 | 11 | 1  | 6.235825105 | 0.0013754   |       | ENSG00000221542 |
| 8 | 123991128 | 123991374 | 123991205 | 12 | 14 | 2  | 5.196520921 | 0.000907371 |       | ENSG00000221542 |
| 8 | 124123274 | 124123454 | 124123339 | 8  | 8  | 7  | 1.169217207 | 0.371848    | DERL1 | ENSG00000136986 |
| 8 | 124123732 | 124124251 | 124124048 | 12 | 27 | 16 | 1.711795127 | 0.0365811   | DERL1 | ENSG00000136986 |
| 8 | 124153648 | 124154127 | 124153827 | 14 | 23 | 8  | 2.771477825 | 0.00251818  | WDR67 | ENSG00000156787 |
| 8 | 124154312 | 124154520 | 124154375 | 8  | 10 | 7  | 1.429043253 | 0.21536     | WDR67 | ENSG00000156787 |

|   |           |           |           |     |     |    |             |            |         |                 |
|---|-----------|-----------|-----------|-----|-----|----|-------------|------------|---------|-----------------|
| 8 | 124177931 | 124178202 | 124178040 | 10  | 12  | 3  | 3.377738599 | 0.00867157 | WDR67   | ENSG00000156787 |
| 8 | 124238429 | 124238956 | 124238777 | 22  | 39  | 18 | 2.188008809 | 0.00169081 |         | ENSG00000208612 |
| 8 | 124249043 | 124249323 | 124249174 | 10  | 11  | 5  | 2.078608368 | 0.0614303  |         | ENSG00000208612 |
| 8 | 124263677 | 124264095 | 124263916 | 11  | 20  | 12 | 1.67887599  | 0.0659142  | FAM83A  | ENSG00000147689 |
| 8 | 124302215 | 124302457 | 124302336 | 10  | 12  | 3  | 3.377738599 | 0.00867157 |         | ENSG00000204949 |
| 8 | 124321876 | 124322406 | 124322189 | 9   | 20  | 10 | 1.98412617  | 0.0277883  | C8orf76 | ENSG00000189376 |
| 8 | 124354506 | 124354685 | 124354595 | 10  | 10  | 7  | 1.429043253 | 0.21536    | ZHX1    | ENSG00000165156 |
| 8 | 124476986 | 124477394 | 124477165 | 8   | 15  | 9  | 1.662886695 | 0.0970566  | ATAD2   | ENSG00000156802 |
| 8 | 124477901 | 124478441 | 124478068 | 16  | 30  | 15 | 2.013651857 | 0.00918451 | ATAD2   | ENSG00000156802 |
| 8 | 124497652 | 124497962 | 124497807 | 9   | 13  | 7  | 1.818782322 | 0.0805123  | WDYHV1  | ENSG00000156795 |
| 8 | 124524762 | 124524978 | 124524870 | 9   | 10  | 3  | 2.858086507 | 0.0242838  |         | ENSG00000222694 |
| 8 | 124535264 | 124535450 | 124535371 | 8   | 8   | 2  | 3.117912553 | 0.0283184  |         | ENSG00000222694 |
| 8 | 124571502 | 124571759 | 124571581 | 9   | 11  | 4  | 2.494330042 | 0.0324033  |         | ENSG00000222694 |
| 8 | 124574872 | 124575069 | 124574970 | 8   | 8   | 5  | 1.558956276 | 0.191397   |         | ENSG00000222694 |
| 8 | 124642267 | 124642548 | 124642407 | 9   | 12  | 2  | 4.503651465 | 0.002963   | FBXO32  | ENSG00000156804 |
| 8 | 124642648 | 124642854 | 124642751 | 8   | 8   | 1  | 4.676868829 | 0.0091584  | FBXO32  | ENSG00000156804 |
| 8 | 124645409 | 124645847 | 124645610 | 18  | 27  | 24 | 1.164020686 | 0.289415   |         | ENSG00000208595 |
| 8 | 124646590 | 124646773 | 124646711 | 8   | 9   | 3  | 2.598260461 | 0.0397929  |         | ENSG00000208595 |
| 8 | 124693730 | 124694343 | 124693963 | 135 | 175 | 2  | 60.97251214 | 1.41E-51   |         | ENSG00000208595 |
| 8 | 124714008 | 124714234 | 124714182 | 8   | 11  | 5  | 2.078608368 | 0.0614303  | KLHL38  | ENSG00000175946 |
| 8 | 124737486 | 124737680 | 124737590 | 9   | 9   | 1  | 5.196520921 | 0.00490062 | KLHL38  | ENSG00000175946 |
| 8 | 124771919 | 124772098 | 124772008 | 8   | 9   | 2  | 3.464347281 | 0.0163838  | ANXA13  | ENSG00000104537 |
| 8 | 124801529 | 124801871 | 124801700 | 23  | 26  | 4  | 5.612242595 | 1.08E-05   | ANXA13  | ENSG00000104537 |
| 8 | 124844949 | 124845172 | 124845060 | 9   | 10  | 8  | 1.27026067  | 0.293854   | FAM91A1 | ENSG00000176853 |
| 8 | 124847726 | 124847995 | 124847823 | 8   | 12  | 13 | 0.965068171 | 0.538344   | FAM91A1 | ENSG00000176853 |
| 8 | 124848985 | 124849559 | 124849390 | 9   | 21  | 14 | 1.524312804 | 0.0996258  | FAM91A1 | ENSG00000176853 |
| 8 | 124849796 | 124850027 | 124849911 | 9   | 10  | 4  | 2.286469205 | 0.0509017  | FAM91A1 | ENSG00000176853 |
| 8 | 124876069 | 124876271 | 124876170 | 8   | 8   | 1  | 4.676868829 | 0.0091584  | FAM91A1 | ENSG00000176853 |
| 8 | 124909344 | 124909527 | 124909435 | 8   | 8   | 3  | 2.338434415 | 0.0641221  | FAM91A1 | ENSG00000176853 |
| 8 | 124925897 | 124926785 | 124926389 | 366 | 441 | 3  | 114.8431124 | 3.14E-131  | FAM91A1 | ENSG00000176853 |
| 8 | 124979260 | 124979462 | 124979368 | 9   | 9   | 1  | 5.196520921 | 0.00490062 | FER1L6  | ENSG00000214814 |
| 8 | 125008455 | 125008642 | 125008547 | 8   | 9   | 5  | 1.73217364  | 0.133894   | FER1L6  | ENSG00000214814 |
| 8 | 125034912 | 125035114 | 125035024 | 8   | 10  | 5  | 1.905391004 | 0.0915982  | FER1L6  | ENSG00000214814 |
| 8 | 125088178 | 125088392 | 125088247 | 9   | 10  | 4  | 2.286469205 | 0.0509017  | C8orf54 | ENSG00000181171 |

|   |           |           |           |    |    |    |             |             |         |                 |
|---|-----------|-----------|-----------|----|----|----|-------------|-------------|---------|-----------------|
| 8 | 125097251 | 125097478 | 125097425 | 9  | 10 | 0  | 11.43234603 | 0.000394183 | C8orf54 | ENSG00000181171 |
| 8 | 125186354 | 125186598 | 125186481 | 9  | 9  | 4  | 2.078608368 | 0.0785659   | C8orf54 | ENSG00000181171 |
| 8 | 125219605 | 125219981 | 125219781 | 23 | 29 | 9  | 3.117912553 | 0.000347956 | C8orf54 | ENSG00000181171 |
| 8 | 125247366 | 125247681 | 125247526 | 11 | 13 | 9  | 1.455025858 | 0.177172    |         | ENSG00000214803 |
| 8 | 125261749 | 125262173 | 125262007 | 16 | 24 | 6  | 3.711800658 | 0.000299603 |         | ENSG00000214803 |
| 8 | 125262469 | 125262672 | 125262537 | 9  | 10 | 1  | 5.716173013 | 0.00260397  |         | ENSG00000214803 |
| 8 | 125272829 | 125273014 | 125272921 | 8  | 8  | 1  | 4.676868829 | 0.0091584   |         | ENSG00000214803 |
| 8 | 125281485 | 125282278 | 125281689 | 20 | 50 | 19 | 2.65022567  | 4.34E-05    |         | ENSG00000214803 |
| 8 | 125286938 | 125287128 | 125286986 | 10 | 10 | 6  | 1.63319229  | 0.146906    |         | ENSG00000214803 |
| 8 | 125330175 | 125330392 | 125330247 | 8  | 9  | 2  | 3.464347281 | 0.0163838   |         | ENSG00000214803 |
| 8 | 125452911 | 125453095 | 125453003 | 8  | 9  | 1  | 5.196520921 | 0.00490062  | TMEM65  | ENSG00000164983 |
| 8 | 125507428 | 125507715 | 125507567 | 14 | 16 | 7  | 2.208521392 | 0.0257604   | TRMT12  | ENSG00000183665 |
| 8 | 125529417 | 125529659 | 125529538 | 9  | 9  | 2  | 3.464347281 | 0.0163838   | TRMT12  | ENSG00000183665 |
| 8 | 125532001 | 125532477 | 125532161 | 11 | 22 | 16 | 1.406117426 | 0.139742    | TRMT12  | ENSG00000183665 |
| 8 | 125555643 | 125556357 | 125555948 | 12 | 27 | 15 | 1.818782322 | 0.0247174   | RNF139  | ENSG00000170881 |
| 8 | 125556602 | 125556886 | 125556724 | 11 | 14 | 7  | 1.948695345 | 0.0559175   | RNF139  | ENSG00000170881 |
| 8 | 125556965 | 125557260 | 125557113 | 9  | 14 | 6  | 2.227080395 | 0.0322529   | RNF139  | ENSG00000170881 |
| 8 | 125557503 | 125557718 | 125557604 | 9  | 9  | 9  | 1.039304184 | 0.466079    | RNF139  | ENSG00000170881 |
| 8 | 125572643 | 125573089 | 125572822 | 16 | 26 | 23 | 1.169217207 | 0.28753     | RNF139  | ENSG00000170881 |
| 8 | 125593966 | 125594184 | 125594075 | 8  | 8  | 4  | 1.870747532 | 0.118863    | TATDN1  | ENSG00000147687 |
| 8 | 125619823 | 125620759 | 125620439 | 15 | 51 | 18 | 2.844411452 | 1.47E-05    | TATDN1  | ENSG00000147687 |
| 8 | 125622047 | 125622314 | 125622188 | 9  | 9  | 1  | 5.196520921 | 0.00490062  | NDUFB9  | ENSG00000147684 |
| 8 | 125631828 | 125632115 | 125631997 | 10 | 14 | 7  | 1.948695345 | 0.0559175   | NDUFB9  | ENSG00000147684 |
| 8 | 125674473 | 125674684 | 125674578 | 8  | 10 | 7  | 1.429043253 | 0.21536     | MTSS1   | ENSG00000170873 |
| 8 | 125736806 | 125737022 | 125736911 | 9  | 9  | 6  | 1.484720263 | 0.204387    | MTSS1   | ENSG00000170873 |
| 8 | 125760678 | 125760917 | 125760797 | 11 | 14 | 5  | 2.598260461 | 0.0167748   | MTSS1   | ENSG00000170873 |
| 8 | 125808281 | 125808559 | 125808458 | 9  | 12 | 2  | 4.503651465 | 0.002963    | MTSS1   | ENSG00000170873 |
| 8 | 125820131 | 125820333 | 125820250 | 8  | 8  | 1  | 4.676868829 | 0.0091584   | MTSS1   | ENSG00000170873 |
| 8 | 125820967 | 125821152 | 125821092 | 10 | 11 | 3  | 3.117912553 | 0.0146045   | MTSS1   | ENSG00000170873 |
| 8 | 125912937 | 125913116 | 125913046 | 8  | 8  | 2  | 3.117912553 | 0.0283184   | MTSS1   | ENSG00000170873 |
| 8 | 125938125 | 125938648 | 125938370 | 12 | 25 | 4  | 5.404381758 | 1.92E-05    | ZNF572  | ENSG00000180938 |
| 8 | 125939537 | 125939788 | 125939662 | 8  | 8  | 6  | 1.336248237 | 0.277651    | ZNF572  | ENSG00000180938 |
| 8 | 126005650 | 126005911 | 126005780 | 10 | 11 | 3  | 3.117912553 | 0.0146045   | ZNF572  | ENSG00000180938 |
| 8 | 126074377 | 126074633 | 126074505 | 10 | 11 | 2  | 4.157216737 | 0.0052913   | SQLE    | ENSG00000104549 |



|   |           |           |           |    |    |    |             |             |          |                 |
|---|-----------|-----------|-----------|----|----|----|-------------|-------------|----------|-----------------|
| 8 | 126079214 | 126079630 | 126079451 | 9  | 19 | 7  | 2.598260461 | 0.00730518  | SQLE     | ENSG00000104549 |
| 8 | 126082753 | 126083044 | 126082922 | 8  | 10 | 7  | 1.429043253 | 0.21536     | SQLE     | ENSG00000104549 |
| 8 | 126091520 | 126091715 | 126091617 | 9  | 9  | 1  | 5.196520921 | 0.00490062  | SQLE     | ENSG00000104549 |
| 8 | 126103631 | 126103845 | 126103700 | 8  | 9  | 4  | 2.078608368 | 0.0785659   | SQLE     | ENSG00000104549 |
| 8 | 126142716 | 126142952 | 126142834 | 8  | 10 | 3  | 2.858086507 | 0.0242838   | KIAA0196 | ENSG00000164961 |
| 8 | 126151585 | 126151829 | 126151712 | 9  | 11 | 3  | 3.117912553 | 0.0146045   | KIAA0196 | ENSG00000164961 |
| 8 | 126151911 | 126152199 | 126152025 | 8  | 12 | 6  | 1.930136342 | 0.071303    | KIAA0196 | ENSG00000164961 |
| 8 | 126152610 | 126152801 | 126152705 | 9  | 10 | 6  | 1.63319229  | 0.146906    | KIAA0196 | ENSG00000164961 |
| 8 | 126173154 | 126173391 | 126173322 | 10 | 12 | 6  | 1.930136342 | 0.071303    | NSMCE2   | ENSG00000156831 |
| 8 | 126191811 | 126192100 | 126191946 | 8  | 10 | 5  | 1.905391004 | 0.0915982   | NSMCE2   | ENSG00000156831 |
| 8 | 126199888 | 126200093 | 126199990 | 8  | 9  | 5  | 1.73217364  | 0.133894    | NSMCE2   | ENSG00000156831 |
| 8 | 126269775 | 126269972 | 126269873 | 9  | 9  | 5  | 1.73217364  | 0.133894    |          | ENSG00000222813 |
| 8 | 126270040 | 126270260 | 126270150 | 8  | 10 | 3  | 2.858086507 | 0.0242838   |          | ENSG00000222813 |
| 8 | 126270695 | 126271075 | 126270872 | 55 | 64 | 3  | 16.88869299 | 5.30E-17    |          | ENSG00000222813 |
| 8 | 126309929 | 126310145 | 126310037 | 10 | 11 | 5  | 2.078608368 | 0.0614303   |          | ENSG00000222813 |
| 8 | 126329566 | 126329807 | 126329686 | 8  | 9  | 2  | 3.464347281 | 0.0163838   |          | ENSG00000222813 |
| 8 | 126334611 | 126334970 | 126334855 | 8  | 14 | 4  | 3.117912553 | 0.00766354  |          | ENSG00000222813 |
| 8 | 126370762 | 126371019 | 126370890 | 15 | 15 | 8  | 1.847651883 | 0.0631662   |          | ENSG00000222813 |
| 8 | 126508615 | 126508801 | 126508705 | 10 | 10 | 3  | 2.858086507 | 0.0242838   | TRIB1    | ENSG00000173334 |
| 8 | 126511515 | 126511901 | 126511722 | 21 | 32 | 9  | 3.429703808 | 8.38E-05    | TRIB1    | ENSG00000173334 |
| 8 | 126513199 | 126513738 | 126513581 | 15 | 26 | 6  | 4.008744711 | 0.000106454 | TRIB1    | ENSG00000173334 |
| 8 | 126528197 | 126528429 | 126528279 | 9  | 10 | 1  | 5.716173013 | 0.00260397  | TRIB1    | ENSG00000173334 |
| 8 | 126533453 | 126533883 | 126533632 | 13 | 22 | 9  | 2.390399624 | 0.00747467  | TRIB1    | ENSG00000173334 |
| 8 | 126547242 | 126547428 | 126547400 | 8  | 8  | 9  | 0.935373766 | 0.560286    | TRIB1    | ENSG00000173334 |
| 8 | 126576709 | 126576945 | 126576827 | 8  | 9  | 2  | 3.464347281 | 0.0163838   | TRIB1    | ENSG00000173334 |
| 8 | 126628755 | 126629219 | 126628898 | 9  | 18 | 8  | 2.194086611 | 0.0206188   | TRIB1    | ENSG00000173334 |
| 8 | 126641628 | 126641893 | 126641753 | 8  | 8  | 4  | 1.870747532 | 0.118863    | TRIB1    | ENSG00000173334 |
| 8 | 126657128 | 126657430 | 126657261 | 9  | 12 | 5  | 2.251825733 | 0.0404733   | TRIB1    | ENSG00000173334 |
| 8 | 126695853 | 126696037 | 126695991 | 8  | 10 | 2  | 3.810782009 | 0.00936112  | TRIB1    | ENSG00000173334 |
| 8 | 126712906 | 126713184 | 126713036 | 10 | 12 | 2  | 4.503651465 | 0.002963    | TRIB1    | ENSG00000173334 |
| 8 | 126717990 | 126718178 | 126718058 | 8  | 8  | 1  | 4.676868829 | 0.0091584   | TRIB1    | ENSG00000173334 |
| 8 | 126725929 | 126726290 | 126726108 | 14 | 21 | 12 | 1.758822466 | 0.048324    | TRIB1    | ENSG00000173334 |
| 8 | 126735428 | 126735607 | 126735493 | 8  | 8  | 3  | 2.338434415 | 0.0641221   | TRIB1    | ENSG00000173334 |
| 8 | 126745929 | 126746202 | 126746065 | 12 | 15 | 5  | 2.771477825 | 0.0105836   | TRIB1    | ENSG00000173334 |

|   |           |           |           |     |     |    |             |             |          |                 |
|---|-----------|-----------|-----------|-----|-----|----|-------------|-------------|----------|-----------------|
| 8 | 126767625 | 126767889 | 126767736 | 8   | 9   | 2  | 3.464347281 | 0.0163838   |          | ENSG00000206695 |
| 8 | 126787616 | 126787916 | 126787766 | 8   | 9   | 8  | 1.154782427 | 0.375434    |          | ENSG00000206695 |
| 8 | 126919891 | 126920170 | 126920022 | 8   | 9   | 1  | 5.196520921 | 0.00490062  |          | ENSG00000206695 |
| 8 | 126963127 | 126963330 | 126963302 | 8   | 10  | 2  | 3.810782009 | 0.00936112  |          | ENSG00000206695 |
| 8 | 126998665 | 126998853 | 126998702 | 9   | 9   | 5  | 1.73217364  | 0.133894    |          | ENSG00000206695 |
| 8 | 127012218 | 127012442 | 127012330 | 8   | 9   | 4  | 2.078608368 | 0.0785659   |          | ENSG00000206695 |
| 8 | 127260984 | 127261240 | 127261111 | 8   | 9   | 3  | 2.598260461 | 0.0397929   |          | ENSG00000221706 |
| 8 | 127382377 | 127382647 | 127382512 | 10  | 13  | 8  | 1.616695398 | 0.123553    |          | ENSG00000221706 |
| 8 | 127458155 | 127458334 | 127458295 | 8   | 8   | 2  | 3.117912553 | 0.0283184   |          | ENSG00000207138 |
| 8 | 127465120 | 127465380 | 127465238 | 9   | 11  | 10 | 1.133786383 | 0.380636    |          | ENSG00000207138 |
| 8 | 127533519 | 127533842 | 127533680 | 19  | 22  | 6  | 3.414856605 | 0.000820885 |          | ENSG00000207138 |
| 8 | 127582702 | 127582947 | 127582824 | 8   | 9   | 8  | 1.154782427 | 0.375434    |          | ENSG00000207138 |
| 8 | 127591735 | 127592034 | 127591868 | 12  | 14  | 7  | 1.948695345 | 0.0559175   |          | ENSG00000207138 |
| 8 | 127603074 | 127603285 | 127603221 | 11  | 12  | 2  | 4.503651465 | 0.002963    |          | ENSG00000207138 |
| 8 | 127638994 | 127639913 | 127639337 | 18  | 51  | 23 | 2.251825733 | 0.000296805 | FAM84B   | ENSG00000168672 |
| 8 | 127640046 | 127640356 | 127640199 | 11  | 14  | 10 | 1.417232979 | 0.185113    | FAM84B   | ENSG00000168672 |
| 8 | 127640428 | 127640637 | 127640584 | 8   | 9   | 10 | 0.944821986 | 0.553851    | FAM84B   | ENSG00000168672 |
| 8 | 127645771 | 127646140 | 127645961 | 15  | 21  | 11 | 1.905391004 | 0.031399    | FAM84B   | ENSG00000168672 |
| 8 | 127646146 | 127646325 | 127646264 | 8   | 8   | 6  | 1.336248237 | 0.277651    | FAM84B   | ENSG00000168672 |
| 8 | 127647791 | 127647970 | 127647857 | 8   | 8   | 2  | 3.117912553 | 0.0283184   | FAM84B   | ENSG00000168672 |
| 8 | 127651900 | 127652319 | 127652216 | 14  | 22  | 7  | 2.98799953  | 0.00188278  | FAM84B   | ENSG00000168672 |
| 8 | 127652835 | 127653311 | 127652994 | 14  | 28  | 13 | 2.152844382 | 0.00695052  | FAM84B   | ENSG00000168672 |
| 8 | 127653313 | 127653539 | 127653426 | 10  | 13  | 4  | 2.910051716 | 0.0125532   | FAM84B   | ENSG00000168672 |
| 8 | 127661135 | 127662041 | 127661607 | 192 | 264 | 12 | 21.18581606 | 1.04E-65    | FAM84B   | ENSG00000168672 |
| 8 | 127666224 | 127666416 | 127666338 | 9   | 9   | 4  | 2.078608368 | 0.0785659   | FAM84B   | ENSG00000168672 |
| 8 | 127680276 | 127680455 | 127680365 | 8   | 8   | 0  | 9.353737658 | 0.00163931  | FAM84B   | ENSG00000168672 |
| 8 | 127690863 | 127691286 | 127691009 | 10  | 18  | 11 | 1.645564958 | 0.0828462   | FAM84B   | ENSG00000168672 |
| 8 | 127780477 | 127780660 | 127780495 | 8   | 10  | 4  | 2.286469205 | 0.0509017   |          | ENSG00000212451 |
| 8 | 127792946 | 127793125 | 127793081 | 8   | 8   | 6  | 1.336248237 | 0.277651    |          | ENSG00000212451 |
| 8 | 127812079 | 127812361 | 127812205 | 8   | 9   | 2  | 3.464347281 | 0.0163838   |          | ENSG00000212451 |
| 8 | 127891398 | 127891577 | 127891491 | 8   | 8   | 5  | 1.558956276 | 0.191397    |          | ENSG00000212451 |
| 8 | 127958107 | 127958469 | 127958290 | 18  | 25  | 3  | 6.755477198 | 4.84E-06    |          | ENSG00000212451 |
| 8 | 128120174 | 128120397 | 128120263 | 8   | 8   | 1  | 4.676868829 | 0.0091584   |          | ENSG00000212451 |
| 8 | 128282026 | 128282229 | 128282184 | 8   | 9   | 0  | 10.39304184 | 0.000803859 | POU5F1P1 | ENSG00000212993 |

|   |           |           |           |    |    |    |             |             |          |                 |
|---|-----------|-----------|-----------|----|----|----|-------------|-------------|----------|-----------------|
| 8 | 128288425 | 128288765 | 128288590 | 13 | 18 | 6  | 2.8209685   | 0.00559354  | POU5F1P1 | ENSG00000212993 |
| 8 | 128295835 | 128296293 | 128295992 | 8  | 15 | 10 | 1.511715177 | 0.140236    | POU5F1P1 | ENSG00000212993 |
| 8 | 128296410 | 128296957 | 128296589 | 10 | 24 | 13 | 1.855900329 | 0.0279411   | POU5F1P1 | ENSG00000212993 |
| 8 | 128297639 | 128297935 | 128297794 | 13 | 16 | 1  | 8.834085566 | 5.30E-05    | POU5F1P1 | ENSG00000212993 |
| 8 | 128307088 | 128307365 | 128307226 | 10 | 11 | 7  | 1.558956276 | 0.158273    | POU5F1P1 | ENSG00000212993 |
| 8 | 128350303 | 128350553 | 128350414 | 14 | 17 | 1  | 9.353737658 | 2.73E-05    | POU5F1P1 | ENSG00000212993 |
| 8 | 128352464 | 128352707 | 128352550 | 9  | 12 | 9  | 1.35109544  | 0.232899    | POU5F1P1 | ENSG00000212993 |
| 8 | 128410276 | 128410562 | 128410411 | 8  | 10 | 6  | 1.63319229  | 0.146906    | POU5F1P1 | ENSG00000212993 |
| 8 | 128413237 | 128413555 | 128413413 | 10 | 13 | 6  | 2.078608368 | 0.0483393   | POU5F1P1 | ENSG00000212993 |
| 8 | 128423578 | 128423766 | 128423696 | 8  | 9  | 3  | 2.598260461 | 0.0397929   | POU5F1P1 | ENSG00000212993 |
| 8 | 128439045 | 128439224 | 128439134 | 8  | 8  | 3  | 2.338434415 | 0.0641221   | POU5F1P1 | ENSG00000212993 |
| 8 | 128459420 | 128459658 | 128459539 | 9  | 10 | 4  | 2.286469205 | 0.0509017   | POU5F1P1 | ENSG00000212993 |
| 8 | 128479385 | 128479656 | 128479561 | 8  | 12 | 4  | 2.702190879 | 0.0203088   | POU5F1P1 | ENSG00000212993 |
| 8 | 128485138 | 128485473 | 128485297 | 9  | 14 | 7  | 1.948695345 | 0.0559175   | POU5F1P1 | ENSG00000212993 |
| 8 | 128490965 | 128491191 | 128491111 | 8  | 9  | 4  | 2.078608368 | 0.0785659   | POU5F1P1 | ENSG00000212993 |
| 8 | 128530981 | 128531160 | 128531073 | 8  | 8  | 5  | 1.558956276 | 0.191397    | POU5F1P1 | ENSG00000212993 |
| 8 | 128634016 | 128634506 | 128634187 | 11 | 21 | 11 | 1.905391004 | 0.031399    | POU5F1P1 | ENSG00000212993 |
| 8 | 128654786 | 128655027 | 128654920 | 10 | 10 | 7  | 1.429043253 | 0.21536     | POU5F1P1 | ENSG00000212993 |
| 8 | 128655050 | 128655286 | 128655177 | 9  | 11 | 2  | 4.157216737 | 0.0052913   | POU5F1P1 | ENSG00000212993 |
| 8 | 128701701 | 128701911 | 128701840 | 9  | 12 | 2  | 4.503651465 | 0.002963    | MYC      | ENSG00000136997 |
| 8 | 128707034 | 128707247 | 128707176 | 8  | 9  | 3  | 2.598260461 | 0.0397929   | MYC      | ENSG00000136997 |
| 8 | 128724192 | 128724490 | 128724341 | 10 | 13 | 5  | 2.425043097 | 0.0262442   | MYC      | ENSG00000136997 |
| 8 | 128742805 | 128743049 | 128742921 | 8  | 8  | 5  | 1.558956276 | 0.191397    | MYC      | ENSG00000136997 |
| 8 | 128748861 | 128749087 | 128748974 | 8  | 8  | 6  | 1.336248237 | 0.277651    | MYC      | ENSG00000136997 |
| 8 | 128749878 | 128750144 | 128750030 | 10 | 13 | 16 | 0.855897563 | 0.670115    | MYC      | ENSG00000136997 |
| 8 | 128750146 | 128750821 | 128750504 | 15 | 38 | 24 | 1.621314527 | 0.0273137   | MYC      | ENSG00000136997 |
| 8 | 128794660 | 128794919 | 128794825 | 10 | 10 | 7  | 1.429043253 | 0.21536     | MYC      | ENSG00000136997 |
| 8 | 128808701 | 128808966 | 128808847 | 9  | 12 | 2  | 4.503651465 | 0.002963    | MYC      | ENSG00000136997 |
| 8 | 128815385 | 128815937 | 128815574 | 18 | 38 | 21 | 1.842402872 | 0.00924621  | MYC      | ENSG00000136997 |
| 8 | 128816099 | 128816665 | 128816278 | 10 | 25 | 7  | 3.377738599 | 0.000449165 | MYC      | ENSG00000136997 |
| 8 | 128817121 | 128817342 | 128817193 | 10 | 11 | 9  | 1.247165021 | 0.300052    | MYC      | ENSG00000136997 |
| 8 | 128817399 | 128817580 | 128817527 | 8  | 9  | 5  | 1.73217364  | 0.133894    | MYC      | ENSG00000136997 |
| 8 | 128819286 | 128819913 | 128819564 | 11 | 27 | 10 | 2.64550156  | 0.00175911  | MYC      | ENSG00000136997 |
| 8 | 128828426 | 128828698 | 128828551 | 9  | 10 | 9  | 1.143234603 | 0.378307    | MYC      | ENSG00000136997 |

|   |           |           |           |     |     |    |             |             |        |                 |
|---|-----------|-----------|-----------|-----|-----|----|-------------|-------------|--------|-----------------|
| 8 | 128833199 | 128833453 | 128833326 | 9   | 12  | 10 | 1.228268581 | 0.305344    | MYC    | ENSG00000136997 |
| 8 | 128849153 | 128849347 | 128849261 | 9   | 9   | 2  | 3.464347281 | 0.0163838   |        | ENSG00000214789 |
| 8 | 128864035 | 128864339 | 128864119 | 13  | 17  | 8  | 2.078608368 | 0.0303558   |        | ENSG00000214789 |
| 8 | 128875359 | 128875585 | 128875509 | 9   | 10  | 3  | 2.858086507 | 0.0242838   |        | ENSG00000214789 |
| 8 | 128876090 | 128876347 | 128876218 | 9   | 10  | 4  | 2.286469205 | 0.0509017   |        | ENSG00000214789 |
| 8 | 128876426 | 128877671 | 128877204 | 406 | 628 | 23 | 27.2384305  | 5.79E-160   |        | ENSG00000221315 |
| 8 | 128877753 | 128878025 | 128877889 | 11  | 15  | 5  | 2.771477825 | 0.0105836   |        | ENSG00000221315 |
| 8 | 128882032 | 128882437 | 128882258 | 21  | 29  | 14 | 2.078608368 | 0.00804141  |        | ENSG00000221315 |
| 8 | 128884025 | 128884259 | 128884114 | 12  | 14  | 5  | 2.598260461 | 0.0167748   |        | ENSG00000221315 |
| 8 | 128890830 | 128891103 | 128890966 | 9   | 11  | 7  | 1.558956276 | 0.158273    |        | ENSG00000221315 |
| 8 | 128891127 | 128891392 | 128891283 | 9   | 11  | 7  | 1.558956276 | 0.158273    |        | ENSG00000221315 |
| 8 | 128901303 | 128901602 | 128901452 | 8   | 13  | 8  | 1.616695398 | 0.123553    |        | ENSG00000221315 |
| 8 | 128901609 | 128901909 | 128901754 | 9   | 12  | 7  | 1.688869299 | 0.11395     |        | ENSG00000221315 |
| 8 | 128922215 | 128922404 | 128922329 | 8   | 9   | 2  | 3.464347281 | 0.0163838   |        | ENSG00000221315 |
| 8 | 128930768 | 128931002 | 128930885 | 13  | 14  | 16 | 0.917033104 | 0.598778    |        | ENSG00000221315 |
| 8 | 128933529 | 128933832 | 128933671 | 12  | 15  | 10 | 1.511715177 | 0.140236    |        | ENSG00000221315 |
| 8 | 128935764 | 128936025 | 128935913 | 9   | 12  | 6  | 1.930136342 | 0.071303    |        | ENSG00000221315 |
| 8 | 128940834 | 128941073 | 128940905 | 8   | 10  | 6  | 1.63319229  | 0.146906    |        | ENSG00000221315 |
| 8 | 128941105 | 128941709 | 128941530 | 19  | 36  | 16 | 2.262014989 | 0.00177076  |        | ENSG00000221315 |
| 8 | 128944969 | 128945228 | 128945098 | 8   | 10  | 5  | 1.905391004 | 0.0915982   |        | ENSG00000221315 |
| 8 | 128945453 | 128945959 | 128945780 | 10  | 18  | 11 | 1.645564958 | 0.0828462   |        | ENSG00000221315 |
| 8 | 128946445 | 128946774 | 128946609 | 9   | 14  | 11 | 1.29913023  | 0.246308    |        | ENSG00000221315 |
| 8 | 128947304 | 128947608 | 128947464 | 11  | 14  | 11 | 1.29913023  | 0.246308    |        | ENSG00000221315 |
| 8 | 128948120 | 128948508 | 128948329 | 8   | 15  | 8  | 1.847651883 | 0.0631662   |        | ENSG00000221315 |
| 8 | 128949210 | 128949509 | 128949360 | 10  | 13  | 8  | 1.616695398 | 0.123553    |        | ENSG00000221315 |
| 8 | 128951847 | 128952299 | 128952026 | 14  | 24  | 12 | 1.998661893 | 0.0177296   |        | ENSG00000221315 |
| 8 | 128980507 | 128980739 | 128980622 | 8   | 12  | 5  | 2.251825733 | 0.0404733   | TMEM75 | ENSG00000184090 |
| 8 | 128986484 | 128986676 | 128986580 | 8   | 9   | 2  | 3.464347281 | 0.0163838   | TMEM75 | ENSG00000184090 |
| 8 | 129018066 | 129018253 | 129018159 | 9   | 9   | 3  | 2.598260461 | 0.0397929   | TMEM75 | ENSG00000184090 |
| 8 | 129031029 | 129031274 | 129031151 | 8   | 10  | 0  | 11.43234603 | 0.000394183 | TMEM75 | ENSG00000184090 |
| 8 | 129033596 | 129034072 | 129033746 | 14  | 25  | 12 | 2.078608368 | 0.0124196   | TMEM75 | ENSG00000184090 |
| 8 | 129042008 | 129042355 | 129042181 | 8   | 12  | 7  | 1.688869299 | 0.11395     |        | ENSG00000221771 |
| 8 | 129066987 | 129067271 | 129067140 | 9   | 10  | 4  | 2.286469205 | 0.0509017   |        | ENSG00000207110 |
| 8 | 129067523 | 129067736 | 129067649 | 8   | 9   | 2  | 3.464347281 | 0.0163838   |        | ENSG00000207110 |

|   |           |           |           |    |    |    |             |             |                 |
|---|-----------|-----------|-----------|----|----|----|-------------|-------------|-----------------|
| 8 | 129069659 | 129069904 | 129069758 | 9  | 12 | 2  | 4.503651465 | 0.002963    | ENSG00000207110 |
| 8 | 129083998 | 129084258 | 129084132 | 8  | 8  | 2  | 3.117912553 | 0.0283184   | ENSG00000207110 |
| 8 | 129091332 | 129091789 | 129091658 | 8  | 15 | 8  | 1.847651883 | 0.0631662   | ENSG00000222501 |
| 8 | 129092150 | 129092349 | 129092249 | 8  | 8  | 4  | 1.870747532 | 0.118863    | ENSG00000222501 |
| 8 | 129094042 | 129094363 | 129094202 | 11 | 16 | 6  | 2.524024447 | 0.0137633   | ENSG00000222501 |
| 8 | 129096280 | 129096459 | 129096367 | 8  | 8  | 12 | 0.719518281 | 0.783103    | ENSG00000222501 |
| 8 | 129107026 | 129107380 | 129107203 | 9  | 13 | 8  | 1.616695398 | 0.123553    | ENSG00000222501 |
| 8 | 129114462 | 129114778 | 129114620 | 14 | 20 | 4  | 4.365077574 | 0.000324139 | ENSG00000221176 |
| 8 | 129116718 | 129116915 | 129116817 | 8  | 9  | 2  | 3.464347281 | 0.0163838   | ENSG00000221176 |
| 8 | 129119089 | 129119296 | 129119192 | 9  | 9  | 8  | 1.154782427 | 0.375434    | ENSG00000221176 |
| 8 | 129120193 | 129120440 | 129120312 | 9  | 11 | 4  | 2.494330042 | 0.0324033   | ENSG00000221176 |
| 8 | 129123463 | 129123691 | 129123638 | 11 | 13 | 11 | 1.212521548 | 0.309909    | ENSG00000221176 |
| 8 | 129129593 | 129129778 | 129129689 | 8  | 9  | 2  | 3.464347281 | 0.0163838   | ENSG00000221176 |
| 8 | 129138485 | 129138907 | 129138729 | 12 | 19 | 13 | 1.484720263 | 0.123861    | ENSG00000221176 |
| 8 | 129144249 | 129144445 | 129144312 | 9  | 9  | 4  | 2.078608368 | 0.0785659   | ENSG00000221176 |
| 8 | 129146190 | 129146619 | 129146369 | 8  | 16 | 9  | 1.766817113 | 0.0700694   | ENSG00000221176 |
| 8 | 129148200 | 129148379 | 129148328 | 8  | 8  | 6  | 1.336248237 | 0.277651    | ENSG00000221176 |
| 8 | 129159103 | 129159369 | 129159201 | 9  | 11 | 0  | 12.47165021 | 0.000193293 | ENSG00000221176 |
| 8 | 129164210 | 129164391 | 129164300 | 9  | 9  | 2  | 3.464347281 | 0.0163838   | ENSG00000221176 |
| 8 | 129168208 | 129168590 | 129168371 | 9  | 15 | 7  | 2.078608368 | 0.038229    | ENSG00000221176 |
| 8 | 129169996 | 129170427 | 129170160 | 13 | 23 | 18 | 1.312805285 | 0.185024    | ENSG00000221176 |
| 8 | 129174429 | 129174658 | 129174543 | 10 | 10 | 10 | 1.039304184 | 0.464387    | ENSG00000221176 |
| 8 | 129175993 | 129176258 | 129176125 | 13 | 16 | 10 | 1.606197376 | 0.104477    | ENSG00000221176 |
| 8 | 129185058 | 129185240 | 129185149 | 8  | 8  | 7  | 1.169217207 | 0.371848    | ENSG00000221261 |
| 8 | 129190372 | 129190567 | 129190503 | 8  | 10 | 7  | 1.429043253 | 0.21536     | ENSG00000221261 |
| 8 | 129192375 | 129192654 | 129192529 | 10 | 13 | 7  | 1.818782322 | 0.0805123   | ENSG00000221261 |
| 8 | 129195405 | 129195641 | 129195523 | 8  | 9  | 2  | 3.464347281 | 0.0163838   | ENSG00000221261 |
| 8 | 129203596 | 129203926 | 129203761 | 12 | 14 | 5  | 2.598260461 | 0.0167748   | ENSG00000221261 |
| 8 | 129204400 | 129204812 | 129204636 | 11 | 18 | 4  | 3.9493559   | 0.000961379 | ENSG00000221261 |
| 8 | 129205359 | 129205636 | 129205497 | 9  | 10 | 7  | 1.429043253 | 0.21536     | ENSG00000221261 |
| 8 | 129205753 | 129206145 | 129205966 | 8  | 15 | 7  | 2.078608368 | 0.038229    | ENSG00000221261 |
| 8 | 129208684 | 129209182 | 129208863 | 14 | 26 | 23 | 1.169217207 | 0.28753     | ENSG00000221261 |
| 8 | 129219048 | 129219553 | 129219227 | 12 | 22 | 13 | 1.707428303 | 0.0525925   | ENSG00000221261 |
| 8 | 129220521 | 129221767 | 129221461 | 21 | 69 | 45 | 1.581549846 | 0.00712162  | ENSG00000221261 |

|   |           |           |           |    |     |    |             |            |                 |
|---|-----------|-----------|-----------|----|-----|----|-------------|------------|-----------------|
| 8 | 129222800 | 129224107 | 129223495 | 80 | 170 | 45 | 3.863500337 | 7.23E-20   | ENSG00000221261 |
| 8 | 129224718 | 129224931 | 129224833 | 8  | 9   | 12 | 0.799464757 | 0.707717   | ENSG00000221261 |
| 8 | 129226300 | 129226650 | 129226475 | 10 | 15  | 10 | 1.511715177 | 0.140236   | ENSG00000221261 |
| 8 | 129228798 | 129229044 | 129228947 | 8  | 11  | 10 | 1.133786383 | 0.380636   | ENSG00000221261 |
| 8 | 129229823 | 129230123 | 129229954 | 9  | 11  | 2  | 4.157216737 | 0.0052913  | ENSG00000221261 |
| 8 | 129230429 | 129230848 | 129230669 | 10 | 17  | 7  | 2.338434415 | 0.0171287  | ENSG00000221261 |
| 8 | 129231794 | 129232068 | 129231948 | 8  | 11  | 8  | 1.385738912 | 0.224757   | ENSG00000221261 |
| 8 | 129232194 | 129232495 | 129232337 | 14 | 18  | 10 | 1.795161773 | 0.055383   | ENSG00000221261 |
| 8 | 129232662 | 129232883 | 129232780 | 8  | 11  | 7  | 1.558956276 | 0.158273   | ENSG00000221261 |
| 8 | 129233186 | 129233430 | 129233272 | 9  | 13  | 8  | 1.616695398 | 0.123553   | ENSG00000221261 |
| 8 | 129233541 | 129233915 | 129233720 | 9  | 16  | 11 | 1.472347594 | 0.147517   | ENSG00000221261 |
| 8 | 129234138 | 129235264 | 129234635 | 30 | 78  | 37 | 2.160658699 | 2.55E-05   | ENSG00000221261 |
| 8 | 129235471 | 129235735 | 129235616 | 8  | 11  | 13 | 0.890832158 | 0.618492   | ENSG00000221261 |
| 8 | 129236368 | 129236565 | 129236466 | 9  | 11  | 1  | 6.235825105 | 0.0013754  | ENSG00000221261 |
| 8 | 129238775 | 129239164 | 129238919 | 11 | 17  | 16 | 1.100439724 | 0.388093   | ENSG00000221261 |
| 8 | 129242115 | 129242414 | 129242264 | 8  | 12  | 15 | 0.84443465  | 0.678289   | ENSG00000221261 |
| 8 | 129245843 | 129246191 | 129246017 | 10 | 16  | 10 | 1.606197376 | 0.104477   | ENSG00000221261 |
| 8 | 129247794 | 129248064 | 129247929 | 10 | 11  | 4  | 2.494330042 | 0.0324033  | ENSG00000221261 |
| 8 | 129248146 | 129248412 | 129248318 | 9  | 12  | 14 | 0.900730293 | 0.611333   | ENSG00000221261 |
| 8 | 129248903 | 129249462 | 129249078 | 15 | 31  | 20 | 1.583701614 | 0.047672   | ENSG00000221261 |
| 8 | 129249625 | 129250229 | 129250008 | 16 | 32  | 35 | 0.952695502 | 0.580789   | ENSG00000221261 |
| 8 | 129251027 | 129251439 | 129251177 | 10 | 17  | 21 | 0.850339787 | 0.697991   | ENSG00000221261 |
| 8 | 129251968 | 129252475 | 129252140 | 9  | 18  | 8  | 2.194086611 | 0.0206188  | ENSG00000221261 |
| 8 | 129257940 | 129258542 | 129258243 | 11 | 27  | 18 | 1.531606166 | 0.072168   | ENSG00000221261 |
| 8 | 129258780 | 129259005 | 129258882 | 10 | 12  | 11 | 1.125912866 | 0.382541   | ENSG00000221261 |
| 8 | 129259474 | 129259676 | 129259548 | 8  | 8   | 5  | 1.558956276 | 0.191397   | ENSG00000221261 |
| 8 | 129260808 | 129261080 | 129260943 | 8  | 9   | 5  | 1.73217364  | 0.133894   | ENSG00000221261 |
| 8 | 129264435 | 129264628 | 129264537 | 8  | 9   | 1  | 5.196520921 | 0.00490062 | ENSG00000221261 |
| 8 | 129265040 | 129265260 | 129265107 | 8  | 9   | 8  | 1.154782427 | 0.375434   | ENSG00000221261 |
| 8 | 129266122 | 129266361 | 129266241 | 8  | 11  | 6  | 1.781664316 | 0.103344   | ENSG00000221261 |
| 8 | 129272558 | 129272862 | 129272686 | 8  | 11  | 6  | 1.781664316 | 0.103344   | ENSG00000201782 |
| 8 | 129273178 | 129273401 | 129273349 | 8  | 11  | 5  | 2.078608368 | 0.0614303  | ENSG00000201782 |
| 8 | 129273418 | 129273622 | 129273520 | 8  | 8   | 11 | 0.779478138 | 0.719708   | ENSG00000201782 |
| 8 | 129274966 | 129275145 | 129275055 | 8  | 8   | 6  | 1.336248237 | 0.277651   | ENSG00000201782 |

|   |           |           |           |    |    |    |             |            |                 |
|---|-----------|-----------|-----------|----|----|----|-------------|------------|-----------------|
| 8 | 129277142 | 129277574 | 129277302 | 11 | 18 | 16 | 1.161575265 | 0.325582   | ENSG00000201782 |
| 8 | 129278275 | 129279649 | 129279267 | 22 | 78 | 44 | 1.824556235 | 0.00048944 | ENSG00000201782 |
| 8 | 129282676 | 129282909 | 129282806 | 9  | 12 | 6  | 1.930136342 | 0.071303   | ENSG00000201782 |
| 8 | 129284716 | 129285284 | 129285018 | 12 | 23 | 7  | 3.117912553 | 0.00117689 | ENSG00000201782 |
| 8 | 129287108 | 129287315 | 129287173 | 8  | 10 | 7  | 1.429043253 | 0.21536    | ENSG00000201782 |
| 8 | 129288291 | 129288511 | 129288401 | 9  | 9  | 10 | 0.944821986 | 0.553851   | ENSG00000201782 |
| 8 | 129291917 | 129292343 | 129292093 | 9  | 17 | 12 | 1.439036563 | 0.154203   | ENSG00000201782 |
| 8 | 129296202 | 129296405 | 129296352 | 10 | 11 | 5  | 2.078608368 | 0.0614303  | ENSG00000201782 |
| 8 | 129298008 | 129298187 | 129298140 | 8  | 8  | 3  | 2.338434415 | 0.0641221  | ENSG00000201782 |
| 8 | 129318589 | 129318770 | 129318636 | 8  | 8  | 5  | 1.558956276 | 0.191397   | ENSG00000201782 |
| 8 | 129327728 | 129328065 | 129327896 | 9  | 13 | 5  | 2.425043097 | 0.0262442  | ENSG00000201782 |
| 8 | 129330252 | 129330579 | 129330415 | 9  | 12 | 11 | 1.125912866 | 0.382541   | ENSG00000201782 |
| 8 | 129333239 | 129333486 | 129333352 | 9  | 10 | 6  | 1.63319229  | 0.146906   | ENSG00000201782 |
| 8 | 129333774 | 129333953 | 129333832 | 8  | 8  | 11 | 0.779478138 | 0.719708   | ENSG00000201782 |
| 8 | 129340837 | 129341062 | 129340949 | 8  | 9  | 8  | 1.154782427 | 0.375434   | ENSG00000201782 |
| 8 | 129351228 | 129351554 | 129351392 | 8  | 12 | 5  | 2.251825733 | 0.0404733  | ENSG00000201782 |
| 8 | 129352828 | 129353317 | 129353003 | 11 | 19 | 14 | 1.385738912 | 0.166049   | ENSG00000201782 |
| 8 | 129366002 | 129366187 | 129366094 | 8  | 8  | 4  | 1.870747532 | 0.118863   | ENSG00000201782 |
| 8 | 129383435 | 129383657 | 129383558 | 9  | 9  | 3  | 2.598260461 | 0.0397929  | ENSG00000201782 |
| 8 | 129393212 | 129393391 | 129393301 | 8  | 8  | 1  | 4.676868829 | 0.0091584  | ENSG00000201782 |
| 8 | 129395081 | 129395324 | 129395202 | 9  | 10 | 5  | 1.905391004 | 0.0915982  | ENSG00000201782 |
| 8 | 129403745 | 129403972 | 129403850 | 8  | 8  | 2  | 3.117912553 | 0.0283184  | ENSG00000201782 |
| 8 | 129411194 | 129411511 | 129411309 | 11 | 15 | 7  | 2.078608368 | 0.038229   | ENSG00000201782 |
| 8 | 129424173 | 129424548 | 129424369 | 12 | 19 | 9  | 2.078608368 | 0.0241848  | ENSG00000201782 |
| 8 | 129437563 | 129437803 | 129437651 | 9  | 11 | 4  | 2.494330042 | 0.0324033  | ENSG00000201782 |
| 8 | 129441653 | 129441869 | 129441761 | 9  | 9  | 3  | 2.598260461 | 0.0397929  | ENSG00000201782 |
| 8 | 129465521 | 129465766 | 129465627 | 9  | 10 | 6  | 1.63319229  | 0.146906   | ENSG00000201782 |
| 8 | 129471043 | 129471323 | 129471185 | 9  | 11 | 5  | 2.078608368 | 0.0614303  | ENSG00000201782 |
| 8 | 129509456 | 129509946 | 129509767 | 11 | 20 | 6  | 3.117912553 | 0.00218114 | ENSG00000201782 |
| 8 | 129595822 | 129596095 | 129595957 | 10 | 10 | 4  | 2.286469205 | 0.0509017  | ENSG00000201782 |
| 8 | 129681899 | 129682088 | 129682047 | 8  | 8  | 7  | 1.169217207 | 0.371848   | ENSG00000221351 |
| 8 | 129747521 | 129747751 | 129747671 | 8  | 8  | 1  | 4.676868829 | 0.0091584  | ENSG00000221351 |
| 8 | 129777776 | 129777993 | 129777884 | 8  | 8  | 5  | 1.558956276 | 0.191397   | ENSG00000221351 |
| 8 | 129813773 | 129814098 | 129813935 | 9  | 11 | 2  | 4.157216737 | 0.0052913  | ENSG00000221351 |

|   |           |           |           |    |    |    |             |             |        |                 |
|---|-----------|-----------|-----------|----|----|----|-------------|-------------|--------|-----------------|
| 8 | 129867956 | 129868135 | 129868048 | 8  | 8  | 3  | 2.338434415 | 0.0641221   |        | ENSG00000221351 |
| 8 | 130812662 | 130812946 | 130812804 | 8  | 11 | 2  | 4.157216737 | 0.0052913   | GSDMC  | ENSG00000147697 |
| 8 | 131021914 | 131022093 | 131022003 | 9  | 9  | 4  | 2.078608368 | 0.0785659   | FAM49B | ENSG00000153310 |
| 8 | 131034642 | 131034906 | 131034766 | 9  | 10 | 4  | 2.286469205 | 0.0509017   | FAM49B | ENSG00000153310 |
| 8 | 131070550 | 131070758 | 131070584 | 8  | 10 | 7  | 1.429043253 | 0.21536     | FAM49B | ENSG00000153310 |
| 8 | 131070822 | 131071001 | 131070907 | 9  | 9  | 3  | 2.598260461 | 0.0397929   | FAM49B | ENSG00000153310 |
| 8 | 131078094 | 131078390 | 131078242 | 12 | 15 | 14 | 1.10859113  | 0.386477    | FAM49B | ENSG00000153310 |
| 8 | 131116349 | 131116556 | 131116458 | 10 | 10 | 8  | 1.27026067  | 0.293854    | FAM49B | ENSG00000153310 |
| 8 | 131123709 | 131124158 | 131123912 | 13 | 23 | 11 | 2.078608368 | 0.0154752   | FAM49B | ENSG00000153310 |
| 8 | 131176344 | 131176768 | 131176609 | 10 | 16 | 8  | 1.963130126 | 0.0441028   |        | ENSG00000203377 |
| 8 | 131368738 | 131368943 | 131368797 | 8  | 9  | 0  | 10.39304184 | 0.000803859 | ASAP1  | ENSG00000153317 |
| 8 | 131383960 | 131384203 | 131384081 | 9  | 12 | 4  | 2.702190879 | 0.0203088   | ASAP1  | ENSG00000153317 |
| 8 | 131387229 | 131387471 | 131387350 | 11 | 13 | 2  | 4.850086193 | 0.00164564  | ASAP1  | ENSG00000153317 |
| 8 | 131525331 | 131525646 | 131525477 | 10 | 12 | 4  | 2.702190879 | 0.0203088   | ASAP1  | ENSG00000153317 |
| 8 | 131564573 | 131565170 | 131564994 | 9  | 21 | 5  | 3.810782009 | 0.000537724 | ASAP1  | ENSG00000153317 |
| 8 | 131580850 | 131581187 | 131581029 | 8  | 11 | 2  | 4.157216737 | 0.0052913   | ASAP1  | ENSG00000153317 |
| 8 | 131708928 | 131709131 | 131709073 | 8  | 8  | 5  | 1.558956276 | 0.191397    |        | ENSG00000208512 |
| 8 | 131766925 | 131767269 | 131767097 | 25 | 30 | 0  | 32.21842971 | 2.55E-10    |        | ENSG00000208512 |
| 8 | 131831100 | 131831331 | 131831215 | 8  | 9  | 4  | 2.078608368 | 0.0785659   |        | ENSG00000208512 |
| 8 | 131870666 | 131870871 | 131870768 | 9  | 11 | 0  | 12.47165021 | 0.000193293 |        | ENSG00000208512 |
| 8 | 132696840 | 132697073 | 132696962 | 11 | 11 | 1  | 6.235825105 | 0.0013754   | EFR3A  | ENSG00000132294 |
| 8 | 132943676 | 132943976 | 132943808 | 8  | 10 | 1  | 5.716173013 | 0.00260397  | EFR3A  | ENSG00000132294 |
| 8 | 133106681 | 133107022 | 133106860 | 30 | 33 | 0  | 35.33634226 | 3.00E-11    | OC90   | ENSG00000132297 |
| 8 | 133136961 | 133137195 | 133137089 | 9  | 12 | 6  | 1.930136342 | 0.071303    | OC90   | ENSG00000132297 |
| 8 | 133481168 | 133481349 | 133481190 | 8  | 8  | 1  | 4.676868829 | 0.0091584   | KCNQ3  | ENSG00000184156 |
| 8 | 133485299 | 133485571 | 133485460 | 12 | 15 | 2  | 5.542955649 | 0.000497081 | KCNQ3  | ENSG00000184156 |
| 8 | 133571009 | 133571193 | 133571108 | 9  | 9  | 6  | 1.484720263 | 0.204387    | KCNQ3  | ENSG00000184156 |
| 8 | 133976635 | 133976885 | 133976777 | 8  | 10 | 2  | 3.810782009 | 0.00936112  | TG     | ENSG00000042832 |
| 8 | 133980452 | 133980662 | 133980557 | 9  | 10 | 0  | 11.43234603 | 0.000394183 | TG     | ENSG00000042832 |
| 8 | 134284251 | 134284511 | 134284400 | 10 | 11 | 2  | 4.157216737 | 0.0052913   | WISP1  | ENSG00000104415 |
| 8 | 134286472 | 134286705 | 134286584 | 9  | 11 | 2  | 4.157216737 | 0.0052913   | WISP1  | ENSG00000104415 |
| 8 | 134331096 | 134331609 | 134331259 | 12 | 21 | 7  | 2.858086507 | 0.0029864   | NDRG1  | ENSG00000104419 |
| 8 | 134472466 | 134472707 | 134472582 | 12 | 15 | 3  | 4.157216737 | 0.00170423  |        | ENSG00000213627 |
| 8 | 134562680 | 134562873 | 134562776 | 8  | 9  | 3  | 2.598260461 | 0.0397929   |        | ENSG00000212992 |



|   |           |           |           |    |    |   |             |             |         |                 |
|---|-----------|-----------|-----------|----|----|---|-------------|-------------|---------|-----------------|
| 8 | 134653223 | 134653416 | 134653273 | 9  | 10 | 1 | 5.716173013 | 0.00260397  | ST3GAL1 | ENSG00000008513 |
| 8 | 134767408 | 134767621 | 134767476 | 8  | 8  | 6 | 1.336248237 | 0.277651    |         | ENSG00000212273 |
| 8 | 134778023 | 134778247 | 134778151 | 8  | 8  | 2 | 3.117912553 | 0.0283184   |         | ENSG00000212273 |
| 8 | 134850344 | 134850531 | 134850467 | 8  | 8  | 4 | 1.870747532 | 0.118863    |         | ENSG00000208501 |
| 8 | 134944954 | 134945383 | 134945242 | 9  | 15 | 5 | 2.771477825 | 0.0105836   |         | ENSG00000208501 |
| 8 | 135772799 | 135773070 | 135772932 | 11 | 13 | 5 | 2.425043097 | 0.0262442   | ZFAT    | ENSG00000066827 |
| 8 | 135793769 | 135793979 | 135793930 | 9  | 10 | 4 | 2.286469205 | 0.0509017   | ZFAT    | ENSG00000066827 |
| 8 | 135816253 | 135816452 | 135816347 | 8  | 9  | 6 | 1.484720263 | 0.204387    | ZFAT    | ENSG00000066827 |
| 8 | 135835585 | 135835860 | 135835756 | 8  | 10 | 1 | 5.716173013 | 0.00260397  | ZFAT    | ENSG00000066827 |
| 8 | 135913916 | 135914383 | 135914090 | 10 | 18 | 3 | 4.936694875 | 0.000311102 |         | ENSG00000199153 |
| 8 | 136430011 | 136430192 | 136430101 | 9  | 9  | 3 | 2.598260461 | 0.0397929   | KHDRBS3 | ENSG00000131773 |
| 8 | 136696574 | 136696783 | 136696640 | 8  | 8  | 0 | 9.353737658 | 0.00163931  |         | ENSG00000199652 |
| 8 | 136773154 | 136773376 | 136773230 | 9  | 9  | 1 | 5.196520921 | 0.00490062  |         | ENSG00000199652 |
| 8 | 137472088 | 137472312 | 137472200 | 8  | 8  | 2 | 3.117912553 | 0.0283184   |         |                 |
| 8 | 140017691 | 140017885 | 140017786 | 8  | 9  | 4 | 2.078608368 | 0.0785659   | COL22A1 | ENSG00000169436 |
| 8 | 140026494 | 140026750 | 140026622 | 9  | 9  | 7 | 1.29913023  | 0.286504    | COL22A1 | ENSG00000169436 |
| 8 | 140315957 | 140316136 | 140316046 | 8  | 8  | 1 | 4.676868829 | 0.0091584   | COL22A1 | ENSG00000169436 |
| 8 | 140579994 | 140580329 | 140580162 | 12 | 12 | 4 | 2.702190879 | 0.0203088   | KCNK9   | ENSG00000169427 |
| 8 | 140976192 | 140976547 | 140976369 | 10 | 16 | 2 | 5.889390377 | 0.000270741 | C8orf17 | ENSG00000211505 |
| 8 | 141149287 | 141149508 | 141149453 | 8  | 8  | 3 | 2.338434415 | 0.0641221   | C8orf17 | ENSG00000211505 |
| 8 | 141176265 | 141176459 | 141176352 | 9  | 9  | 3 | 2.598260461 | 0.0397929   | C8orf17 | ENSG00000211505 |
| 8 | 141375199 | 141375511 | 141375350 | 12 | 14 | 5 | 2.598260461 | 0.0167748   | TRAPPC9 | ENSG00000167632 |
| 8 | 141469748 | 141469978 | 141469863 | 8  | 8  | 1 | 4.676868829 | 0.0091584   | TRAPPC9 | ENSG00000167632 |
| 8 | 141715708 | 141715946 | 141715827 | 9  | 10 | 5 | 1.905391004 | 0.0915982   | EIF2C2  | ENSG00000123908 |
| 8 | 142080742 | 142080934 | 142080885 | 8  | 8  | 4 | 1.870747532 | 0.118863    | PTK2    | ENSG00000169398 |
| 8 | 142120807 | 142120994 | 142120948 | 8  | 9  | 3 | 2.598260461 | 0.0397929   | PTK2    | ENSG00000169398 |
| 8 | 142136965 | 142137156 | 142137024 | 9  | 10 | 3 | 2.858086507 | 0.0242838   | PTK2    | ENSG00000169398 |
| 8 | 142163070 | 142163261 | 142163192 | 9  | 11 | 1 | 6.235825105 | 0.0013754   | DENND3  | ENSG00000105339 |
| 8 | 142240245 | 142240439 | 142240342 | 8  | 8  | 2 | 3.117912553 | 0.0283184   |         | ENSG00000214762 |
| 8 | 142417993 | 142418198 | 142418074 | 9  | 10 | 1 | 5.716173013 | 0.00260397  | GPR20   | ENSG00000204882 |
| 8 | 142938084 | 142938263 | 142938173 | 8  | 8  | 0 | 9.353737658 | 0.00163931  |         | ENSG00000221123 |
| 8 | 143021371 | 143021778 | 143021511 | 9  | 14 | 7 | 1.948695345 | 0.0559175   |         | ENSG00000221123 |
| 8 | 143086711 | 143086901 | 143086806 | 8  | 9  | 2 | 3.464347281 | 0.0163838   |         | ENSG00000221123 |
| 8 | 143209709 | 143210050 | 143209879 | 13 | 18 | 0 | 19.7467795  | 1.32E-06    |         | ENSG00000222423 |

|   |           |           |           |     |     |    |             |             |         |                 |
|---|-----------|-----------|-----------|-----|-----|----|-------------|-------------|---------|-----------------|
| 8 | 143300079 | 143300290 | 143300191 | 8   | 8   | 5  | 1.558956276 | 0.191397    |         | ENSG00000222423 |
| 8 | 143559752 | 143559987 | 143559866 | 8   | 9   | 3  | 2.598260461 | 0.0397929   | BAI1    | ENSG00000181790 |
| 8 | 143754299 | 143754482 | 143754347 | 8   | 8   | 1  | 4.676868829 | 0.0091584   | PSCA    | ENSG00000167653 |
| 8 | 143754518 | 143754793 | 143754669 | 18  | 20  | 4  | 4.365077574 | 0.000324139 | PSCA    | ENSG00000167653 |
| 8 | 143783613 | 143783889 | 143783782 | 12  | 12  | 1  | 6.755477198 | 0.000722752 | LY6K    | ENSG00000160886 |
| 8 | 143835655 | 143835853 | 143835696 | 8   | 9   | 2  | 3.464347281 | 0.0163838   | LYPD2   | ENSG00000197353 |
| 8 | 143866820 | 143867048 | 143866908 | 11  | 13  | 5  | 2.425043097 | 0.0262442   | LY6D    | ENSG00000167656 |
| 8 | 143893683 | 143894996 | 143894280 | 414 | 595 | 9  | 61.94252938 | 2.35E-168   | GML     | ENSG00000104499 |
| 8 | 144191823 | 144192018 | 144191990 | 9   | 11  | 3  | 3.117912553 | 0.0146045   | C8orf31 | ENSG00000177335 |
| 8 | 144223773 | 144223965 | 144223869 | 8   | 9   | 4  | 2.078608368 | 0.0785659   |         | ENSG00000203366 |
| 8 | 144260856 | 144261080 | 144260968 | 9   | 9   | 0  | 10.39304184 | 0.000803859 |         | ENSG00000203366 |
| 8 | 144261560 | 144261751 | 144261652 | 9   | 9   | 1  | 5.196520921 | 0.00490062  |         | ENSG00000203366 |
| 8 | 144268360 | 144268539 | 144268403 | 8   | 8   | 1  | 4.676868829 | 0.0091584   |         | ENSG00000203366 |
| 8 | 144269717 | 144270800 | 144270176 | 119 | 190 | 15 | 12.4066937  | 7.88E-42    |         | ENSG00000203366 |
| 8 | 144327867 | 144328159 | 144327996 | 9   | 10  | 0  | 11.43234603 | 0.000394183 | LY6H    | ENSG00000176956 |
| 8 | 144435013 | 144435412 | 144435271 | 15  | 23  | 6  | 3.563328632 | 0.000497701 | GLI4    | ENSG00000221850 |
| 8 | 144749522 | 144749701 | 144749611 | 8   | 8   | 3  | 2.338434415 | 0.0641221   | EEF1D   | ENSG00000104529 |
| 8 | 144872999 | 144873185 | 144873109 | 8   | 8   | 7  | 1.169217207 | 0.371848    | MAPK15  | ENSG00000181085 |
| 8 | 144892737 | 144892970 | 144892851 | 9   | 10  | 1  | 5.716173013 | 0.00260397  | FAM83H  | ENSG00000180921 |
| 8 | 144893339 | 144893710 | 144893531 | 14  | 22  | 7  | 2.98799953  | 0.00188278  | FAM83H  | ENSG00000180921 |
| 8 | 144927459 | 144927657 | 144927591 | 12  | 12  | 2  | 4.503651465 | 0.002963    |         | ENSG00000214733 |
| 8 | 144969057 | 144969437 | 144969258 | 17  | 22  | 6  | 3.414856605 | 0.000820885 | SCRIB   | ENSG00000180900 |
| 8 | 144975494 | 144975815 | 144975654 | 8   | 10  | 0  | 11.43234603 | 0.000394183 | SCRIB   | ENSG00000180900 |
| 8 | 144990642 | 144990841 | 144990715 | 10  | 10  | 0  | 11.43234603 | 0.000394183 | NRBP2   | ENSG00000185189 |
| 8 | 145000816 | 145001124 | 145000979 | 10  | 14  | 0  | 15.58956276 | 2.28E-05    | NRBP2   | ENSG00000185189 |
| 8 | 145032319 | 145032539 | 145032429 | 12  | 13  | 0  | 14.55025858 | 4.65E-05    | NRBP2   | ENSG00000185189 |
| 8 | 145089329 | 145089782 | 145089508 | 9   | 17  | 3  | 4.676868829 | 0.000552213 | PLEC1   | ENSG00000178209 |
| 8 | 145098288 | 145098474 | 145098393 | 8   | 8   | 4  | 1.870747532 | 0.118863    | PLEC1   | ENSG00000178209 |
| 8 | 145099679 | 145099860 | 145099792 | 9   | 9   | 5  | 1.73217364  | 0.133894    | PLEC1   | ENSG00000178209 |
| 8 | 145102642 | 145103221 | 145102810 | 8   | 21  | 5  | 3.810782009 | 0.000537724 | PLEC1   | ENSG00000178209 |
| 8 | 145120915 | 145121152 | 145121065 | 10  | 13  | 6  | 2.078608368 | 0.0483393   | PLEC1   | ENSG00000178209 |
| 8 | 145149539 | 145149893 | 145149716 | 8   | 14  | 12 | 1.199197136 | 0.313881    | SPATC1  | ENSG00000186583 |
| 8 | 145151333 | 145151958 | 145151518 | 83  | 107 | 9  | 11.22448519 | 7.83E-24    | SPATC1  | ENSG00000186583 |
| 8 | 145205265 | 145205575 | 145205401 | 8   | 13  | 7  | 1.818782322 | 0.0805123   | EXOSC4  | ENSG00000178896 |

|   |           |           |           |    |    |    |             |             |          |                 |
|---|-----------|-----------|-----------|----|----|----|-------------|-------------|----------|-----------------|
| 8 | 145230000 | 145230188 | 145230077 | 8  | 9  | 0  | 10.39304184 | 0.000803859 | SHARPIN  | ENSG00000179526 |
| 8 | 145506869 | 145507086 | 145507030 | 9  | 10 | 1  | 5.716173013 | 0.00260397  | DGAT1    | ENSG00000185000 |
| 8 | 145644409 | 145644704 | 145644544 | 12 | 14 | 1  | 7.794781382 | 0.000197021 | NFKBIL2  | ENSG00000160949 |
| 8 | 145651440 | 145651740 | 145651572 | 16 | 17 | 0  | 18.70747532 | 2.69E-06    |          | ENSG00000204763 |
| 8 | 145660025 | 145660373 | 145660199 | 12 | 17 | 4  | 3.741495063 | 0.00163722  | CYHR1    | ENSG00000187954 |
| 8 | 145668323 | 145668693 | 145668523 | 9  | 15 | 2  | 5.542955649 | 0.000497081 | FOXH1    | ENSG00000160973 |
| 8 | 145706126 | 145706305 | 145706178 | 8  | 8  | 4  | 1.870747532 | 0.118863    | MFSD3    | ENSG00000167700 |
| 8 | 145725622 | 145725879 | 145725754 | 8  | 10 | 1  | 5.716173013 | 0.00260397  | C8orf82  | ENSG00000213563 |
| 8 | 145897988 | 145898419 | 145898214 | 38 | 53 | 6  | 8.017489421 | 1.90E-11    |          | ENSG00000204756 |
| 8 | 145983481 | 145983798 | 145983622 | 10 | 13 | 1  | 7.27512929  | 0.000378098 | ZNF34    | ENSG00000196378 |
| 8 | 145986940 | 145987137 | 145987048 | 9  | 9  | 2  | 3.464347281 | 0.0163838   |          | ENSG00000161016 |
| 8 | 146222916 | 146223113 | 146223029 | 9  | 10 | 11 | 0.952695502 | 0.548138    | C8orf33  | ENSG00000182307 |
| 9 | 325999    | 326269    | 326136    | 11 | 13 | 3  | 3.637564645 | 0.0050909   | DOCK8    | ENSG00000107099 |
| 9 | 674042    | 674315    | 674201    | 8  | 10 | 2  | 3.810782009 | 0.00936112  | KANK1    | ENSG00000107104 |
| 9 | 743620    | 743799    | 743709    | 8  | 8  | 3  | 2.338434415 | 0.0641221   | KANK1    | ENSG00000107104 |
| 9 | 925440    | 925721    | 925598    | 9  | 10 | 5  | 1.905391004 | 0.0915982   | DMRT3    | ENSG00000064218 |
| 9 | 999152    | 999736    | 999424    | 39 | 79 | 6  | 11.87776211 | 1.54E-18    |          | ENSG00000216922 |
| 9 | 1697300   | 1697656   | 1697492   | 33 | 38 | 1  | 20.26643159 | 1.78E-11    |          | ENSG00000218148 |
| 9 | 2282620   | 2282799   | 2282759   | 8  | 8  | 1  | 4.676868829 | 0.0091584   |          | ENSG00000222973 |
| 9 | 3499073   | 3499350   | 3499225   | 13 | 14 | 1  | 7.794781382 | 0.000197021 | RFX3     | ENSG00000080298 |
| 9 | 4733249   | 4733573   | 4733400   | 15 | 19 | 1  | 10.39304184 | 7.23E-06    | AK3      | ENSG00000147853 |
| 9 | 4782451   | 4782718   | 4782584   | 10 | 10 | 1  | 5.716173013 | 0.00260397  | RCL1     | ENSG00000120158 |
| 9 | 4856194   | 4856519   | 4856386   | 8  | 13 | 2  | 4.850086193 | 0.00164564  |          | ENSG00000199065 |
| 9 | 4911573   | 4911860   | 4911739   | 10 | 11 | 0  | 12.47165021 | 0.000193293 |          | ENSG00000214204 |
| 9 | 5787031   | 5787333   | 5787182   | 17 | 19 | 1  | 10.39304184 | 7.23E-06    | ERMP1    | ENSG00000099219 |
| 9 | 6077310   | 6077660   | 6077485   | 20 | 25 | 0  | 27.02190879 | 8.98E-09    | RANBP6   | ENSG00000137040 |
| 9 | 6854392   | 6854847   | 6854611   | 14 | 29 | 2  | 10.39304184 | 7.12E-08    |          | ENSG00000220077 |
| 9 | 7424152   | 7424342   | 7424247   | 8  | 8  | 3  | 2.338434415 | 0.0641221   |          | ENSG00000216892 |
| 9 | 11090829  | 11091020  | 11090944  | 8  | 9  | 0  | 10.39304184 | 0.000803859 |          | ENSG00000220830 |
| 9 | 12730441  | 12730652  | 12730546  | 8  | 8  | 1  | 4.676868829 | 0.0091584   |          | ENSG00000210274 |
| 9 | 12788181  | 12788371  | 12788265  | 8  | 8  | 1  | 4.676868829 | 0.0091584   | C9orf150 | ENSG00000153714 |
| 9 | 13043558  | 13043747  | 13043652  | 8  | 9  | 1  | 5.196520921 | 0.00490062  |          | ENSG00000216614 |
| 9 | 14321409  | 14321624  | 14321488  | 9  | 11 | 4  | 2.494330042 | 0.0324033   | NFIB     | ENSG00000147862 |
| 9 | 14455526  | 14455793  | 14455698  | 13 | 14 | 2  | 5.196520921 | 0.000907371 |          | ENSG00000217828 |

|   |          |          |          |     |     |    |             |             |          |                 |
|---|----------|----------|----------|-----|-----|----|-------------|-------------|----------|-----------------|
| 9 | 19894806 | 19895003 | 19894904 | 8   | 8   | 3  | 2.338434415 | 0.0641221   | SLC24A2  | ENSG00000155886 |
| 9 | 22124480 | 22124754 | 22124616 | 17  | 19  | 0  | 20.78608368 | 6.46E-07    |          | ENSG00000215221 |
| 9 | 23642906 | 23643085 | 23642965 | 8   | 8   | 1  | 4.676868829 | 0.0091584   |          | ENSG00000217432 |
| 9 | 25603754 | 25604040 | 25603923 | 9   | 12  | 1  | 6.755477198 | 0.000722752 | TUSC1    | ENSG00000198680 |
| 9 | 26966534 | 26966850 | 26966677 | 12  | 14  | 1  | 7.794781382 | 0.000197021 | IFT74    | ENSG00000096872 |
| 9 | 27352506 | 27352786 | 27352646 | 13  | 14  | 0  | 15.58956276 | 2.28E-05    | C9orf11  | ENSG00000120160 |
| 9 | 30018090 | 30018269 | 30018179 | 8   | 8   | 1  | 4.676868829 | 0.0091584   |          | ENSG00000210600 |
| 9 | 31035860 | 31036144 | 31036010 | 8   | 9   | 2  | 3.464347281 | 0.0163838   |          | ENSG00000217724 |
| 9 | 32284075 | 32284405 | 32284228 | 8   | 13  | 3  | 3.637564645 | 0.0050909   |          | ENSG00000210615 |
| 9 | 33151632 | 33151961 | 33151796 | 11  | 15  | 1  | 8.314433474 | 0.000102308 | B4GALT1  | ENSG00000086062 |
| 9 | 33201929 | 33202109 | 33202008 | 8   | 8   | 0  | 9.353737658 | 0.00163931  | SPINK4   | ENSG00000122711 |
| 9 | 33219439 | 33219767 | 33219603 | 17  | 20  | 6  | 3.117912553 | 0.00218114  | SPINK4   | ENSG00000122711 |
| 9 | 33224087 | 33224391 | 33224213 | 8   | 11  | 2  | 4.157216737 | 0.0052913   | SPINK4   | ENSG00000122711 |
| 9 | 33254854 | 33255050 | 33254905 | 8   | 8   | 0  | 9.353737658 | 0.00163931  | CHMP5    | ENSG00000086065 |
| 9 | 33364864 | 33365130 | 33365002 | 10  | 11  | 1  | 6.235825105 | 0.0013754   | AQP7     | ENSG00000165269 |
| 9 | 33405690 | 33405942 | 33405794 | 15  | 18  | 3  | 4.936694875 | 0.000311102 | AQP7     | ENSG00000165269 |
| 9 | 33550283 | 33550542 | 33550444 | 15  | 15  | 0  | 16.62886695 | 1.12E-05    |          | ENSG00000219282 |
| 9 | 33611185 | 33611398 | 33611291 | 8   | 8   | 1  | 4.676868829 | 0.0091584   |          | ENSG00000216740 |
| 9 | 34062371 | 34062956 | 34062605 | 128 | 161 | 5  | 28.06121297 | 2.64E-43    |          | ENSG00000210706 |
| 9 | 34367089 | 34367297 | 34367193 | 8   | 8   | 2  | 3.117912553 | 0.0283184   | KIAA1161 | ENSG00000164976 |
| 9 | 34979155 | 34979334 | 34979232 | 8   | 8   | 2  | 3.117912553 | 0.0283184   | DNAJB5   | ENSG00000137094 |
| 9 | 35086206 | 35086561 | 35086384 | 9   | 13  | 5  | 2.425043097 | 0.0262442   | PIGO     | ENSG00000165282 |
| 9 | 35816060 | 35816424 | 35816239 | 23  | 30  | 2  | 10.73947657 | 3.71E-08    | C9orf128 | ENSG00000204930 |
| 9 | 36013556 | 36013740 | 36013643 | 8   | 8   | 2  | 3.117912553 | 0.0283184   |          | ENSG00000217675 |
| 9 | 36402160 | 36402339 | 36402212 | 8   | 8   | 0  | 9.353737658 | 0.00163931  | RNF38    | ENSG00000137075 |
| 9 | 36409879 | 36410160 | 36410019 | 9   | 13  | 1  | 7.27512929  | 0.000378098 | RNF38    | ENSG00000137075 |
| 9 | 36876386 | 36876668 | 36876527 | 11  | 13  | 1  | 7.27512929  | 0.000378098 | PAX5     | ENSG00000196092 |
| 9 | 37380784 | 37381023 | 37380906 | 8   | 8   | 3  | 2.338434415 | 0.0641221   | GRHPR    | ENSG00000137106 |
| 9 | 37582551 | 37582759 | 37582629 | 8   | 8   | 0  | 9.353737658 | 0.00163931  | TOMM5    | ENSG00000175768 |
| 9 | 38084875 | 38085054 | 38085006 | 8   | 8   | 0  | 9.353737658 | 0.00163931  | SHB      | ENSG00000107338 |
| 9 | 38262348 | 38262550 | 38262449 | 8   | 9   | 4  | 2.078608368 | 0.0785659   |          | ENSG00000210816 |
| 9 | 66583502 | 66583830 | 66583666 | 14  | 14  | 5  | 2.598260461 | 0.0167748   | ANKRD36  | ENSG00000158185 |
| 9 | 67902651 | 67903262 | 67902951 | 15  | 30  | 11 | 2.684869143 | 0.000957822 |          | ENSG00000219132 |
| 9 | 67903671 | 67904399 | 67903842 | 20  | 41  | 20 | 2.078608368 | 0.00224993  |          | ENSG00000217091 |

|   |          |          |          |    |     |    |             |             |         |                 |
|---|----------|----------|----------|----|-----|----|-------------|-------------|---------|-----------------|
| 9 | 67907014 | 67907215 | 67907073 | 11 | 13  | 15 | 0.909391161 | 0.604792    |         | ENSG00000217091 |
| 9 | 67908331 | 67908621 | 67908474 | 11 | 14  | 22 | 0.677807077 | 0.884881    |         | ENSG00000217091 |
| 9 | 67909218 | 67909527 | 67909386 | 11 | 15  | 15 | 1.039304184 | 0.456923    |         | ENSG00000217091 |
| 9 | 67909998 | 67910204 | 67910121 | 8  | 9   | 19 | 0.519652092 | 0.96137     |         | ENSG00000217091 |
| 9 | 67910406 | 67910708 | 67910563 | 14 | 17  | 16 | 1.100439724 | 0.388093    |         | ENSG00000217091 |
| 9 | 67911097 | 67911389 | 67911260 | 10 | 14  | 10 | 1.417232979 | 0.185113    |         | ENSG00000217091 |
| 9 | 67913842 | 67914053 | 67913936 | 8  | 9   | 22 | 0.451871384 | 0.986686    |         | ENSG00000217091 |
| 9 | 67915612 | 67915878 | 67915766 | 11 | 13  | 11 | 1.212521548 | 0.309909    |         | ENSG00000217091 |
| 9 | 70260200 | 70260451 | 70260325 | 15 | 15  | 1  | 8.314433474 | 0.000102308 | C9orf71 | ENSG00000181778 |
| 9 | 70754165 | 70754416 | 70754290 | 8  | 11  | 0  | 12.47165021 | 0.000193293 |         | ENSG00000207000 |
| 9 | 71781045 | 71781290 | 71781173 | 8  | 10  | 1  | 5.716173013 | 0.00260397  | MAMDC2  | ENSG00000165072 |
| 9 | 72223577 | 72223804 | 72223690 | 10 | 11  | 5  | 2.078608368 | 0.0614303   | KLF9    | ENSG00000119138 |
| 9 | 73472814 | 73472993 | 73472832 | 8  | 9   | 0  | 10.39304184 | 0.000803859 | TMEM2   | ENSG00000135048 |
| 9 | 73588258 | 73588465 | 73588341 | 8  | 9   | 10 | 0.944821986 | 0.553851    | TMEM2   | ENSG00000135048 |
| 9 | 74236253 | 74236495 | 74236398 | 15 | 15  | 1  | 8.314433474 | 0.000102308 |         | ENSG00000217630 |
| 9 | 75489043 | 75489424 | 75489217 | 34 | 42  | 3  | 11.17251998 | 1.06E-10    |         | ENSG00000219821 |
| 9 | 76859939 | 76860118 | 76860026 | 9  | 9   | 0  | 10.39304184 | 0.000803859 | C9orf41 | ENSG00000156017 |
| 9 | 76868993 | 76869188 | 76869090 | 8  | 9   | 1  | 5.196520921 | 0.00490062  | C9orf95 | ENSG00000106733 |
| 9 | 77420134 | 77420376 | 77420255 | 8  | 10  | 0  | 11.43234603 | 0.000394183 |         | ENSG00000211133 |
| 9 | 78198373 | 78198636 | 78198504 | 8  | 11  | 1  | 6.235825105 | 0.0013754   | RFK     | ENSG00000135002 |
| 9 | 78376328 | 78376542 | 78376435 | 39 | 39  | 18 | 2.188008809 | 0.00169081  |         | ENSG00000211139 |
| 9 | 78376554 | 78376803 | 78376678 | 13 | 14  | 5  | 2.598260461 | 0.0167748   |         | ENSG00000211139 |
| 9 | 79261785 | 79261967 | 79261834 | 8  | 9   | 1  | 5.196520921 | 0.00490062  |         | ENSG00000218284 |
| 9 | 79384326 | 79384568 | 79384454 | 10 | 11  | 5  | 2.078608368 | 0.0614303   |         | ENSG00000218284 |
| 9 | 79782604 | 79782908 | 79782768 | 9  | 9   | 2  | 3.464347281 | 0.0163838   | GNAQ    | ENSG00000156052 |
| 9 | 79786165 | 79786346 | 79786255 | 8  | 8   | 2  | 3.117912553 | 0.0283184   | GNAQ    | ENSG00000156052 |
| 9 | 79870306 | 79870533 | 79870419 | 13 | 13  | 1  | 7.27512929  | 0.000378098 | GNAQ    | ENSG00000156052 |
| 9 | 80093316 | 80093547 | 80093401 | 11 | 12  | 2  | 4.503651465 | 0.002963    | PSAT1   | ENSG00000135069 |
| 9 | 80831004 | 80831466 | 80831183 | 30 | 43  | 5  | 7.621564018 | 1.77E-09    |         | ENSG00000220535 |
| 9 | 81294338 | 81294639 | 81294495 | 9  | 12  | 3  | 3.377738599 | 0.00867157  | TLE4    | ENSG00000106829 |
| 9 | 83125842 | 83126092 | 83126008 | 8  | 11  | 3  | 3.117912553 | 0.0146045   |         | ENSG00000218379 |
| 9 | 83397007 | 83397361 | 83397184 | 18 | 23  | 1  | 12.47165021 | 4.94E-07    | TLE1    | ENSG00000196781 |
| 9 | 83825968 | 83826439 | 83826144 | 84 | 102 | 1  | 53.52416549 | 7.11E-31    |         | ENSG00000214929 |
| 9 | 84739809 | 84740040 | 84739891 | 12 | 13  | 2  | 4.850086193 | 0.00164564  | RASEF   | ENSG00000165105 |

|   |          |          |          |     |     |    |             |             |         |                 |
|---|----------|----------|----------|-----|-----|----|-------------|-------------|---------|-----------------|
| 9 | 85024509 | 85024734 | 85024621 | 10  | 10  | 6  | 1.63319229  | 0.146906    | FRMD3   | ENSG00000172159 |
| 9 | 85236475 | 85236663 | 85236569 | 8   | 9   | 2  | 3.464347281 | 0.0163838   |         | ENSG00000211262 |
| 9 | 85513096 | 85513312 | 85513204 | 9   | 10  | 12 | 0.879411233 | 0.62639     | UBQLN1  | ENSG00000135018 |
| 9 | 85785296 | 85785486 | 85785391 | 8   | 10  | 5  | 1.905391004 | 0.0915982   | HNRNPK  | ENSG00000165119 |
| 9 | 86043309 | 86043893 | 86043644 | 75  | 98  | 2  | 34.29703808 | 3.07E-28    |         | ENSG00000221282 |
| 9 | 86317296 | 86317635 | 86317456 | 19  | 23  | 2  | 8.314433474 | 3.41E-06    |         | ENSG00000217944 |
| 9 | 86593795 | 86593990 | 86593822 | 8   | 8   | 5  | 1.558956276 | 0.191397    | NTRK2   | ENSG00000148053 |
| 9 | 86656614 | 86656995 | 86656816 | 71  | 79  | 1  | 41.57216737 | 7.28E-24    | NTRK2   | ENSG00000148053 |
| 9 | 86821197 | 86821410 | 86821303 | 9   | 9   | 4  | 2.078608368 | 0.0785659   |         | ENSG00000218863 |
| 9 | 88157682 | 88157995 | 88157838 | 10  | 12  | 1  | 6.755477198 | 0.000722752 | ZCCHC6  | ENSG00000083223 |
| 9 | 88296026 | 88296274 | 88296159 | 8   | 9   | 0  | 10.39304184 | 0.000803859 |         | ENSG00000222293 |
| 9 | 88500855 | 88501047 | 88500951 | 8   | 9   | 1  | 5.196520921 | 0.00490062  | GAS1    | ENSG00000180447 |
| 9 | 88526100 | 88526306 | 88526203 | 10  | 10  | 0  | 11.43234603 | 0.000394183 | GAS1    | ENSG00000180447 |
| 9 | 88924068 | 88924585 | 88924406 | 9   | 21  | 10 | 2.078608368 | 0.0193227   |         | ENSG00000204446 |
| 9 | 89504882 | 89505164 | 89505040 | 13  | 16  | 2  | 5.889390377 | 0.000270741 | CTSL1   | ENSG00000135047 |
| 9 | 89571510 | 89571816 | 89571659 | 15  | 17  | 4  | 3.741495063 | 0.00163722  | CTSL3   | ENSG00000188029 |
| 9 | 89638390 | 89638569 | 89638479 | 8   | 8   | 1  | 4.676868829 | 0.0091584   |         | ENSG00000219238 |
| 9 | 90324627 | 90324972 | 90324800 | 22  | 26  | 2  | 9.353737658 | 4.98E-07    | NXNL2   | ENSG00000130045 |
| 9 | 90805691 | 90805875 | 90805821 | 8   | 9   | 4  | 2.078608368 | 0.0785659   | S1PR3   | ENSG00000213694 |
| 9 | 91115627 | 91115816 | 91115718 | 8   | 8   | 2  | 3.117912553 | 0.0283184   | CKS2    | ENSG00000123975 |
| 9 | 91251770 | 91252068 | 91251914 | 8   | 9   | 1  | 5.196520921 | 0.00490062  |         | ENSG00000219641 |
| 9 | 91402988 | 91403175 | 91403081 | 8   | 9   | 3  | 2.598260461 | 0.0397929   | GADD45G | ENSG00000130222 |
| 9 | 91411288 | 91411509 | 91411417 | 8   | 9   | 4  | 2.078608368 | 0.0785659   | GADD45G | ENSG00000130222 |
| 9 | 91416823 | 91417017 | 91416875 | 8   | 10  | 0  | 11.43234603 | 0.000394183 | GADD45G | ENSG00000130222 |
| 9 | 91469629 | 91470005 | 91469832 | 18  | 23  | 7  | 3.117912553 | 0.00117689  | GADD45G | ENSG00000130222 |
| 9 | 91490786 | 91491311 | 91491105 | 145 | 174 | 6  | 25.98260461 | 5.64E-46    | GADD45G | ENSG00000130222 |
| 9 | 91600832 | 91601089 | 91600960 | 10  | 13  | 3  | 3.637564645 | 0.0050909   | GADD45G | ENSG00000130222 |
| 9 | 91608957 | 91609286 | 91609112 | 18  | 21  | 0  | 22.86469205 | 1.55E-07    | GADD45G | ENSG00000130222 |
| 9 | 91624680 | 91624872 | 91624814 | 8   | 9   | 0  | 10.39304184 | 0.000803859 | GADD45G | ENSG00000130222 |
| 9 | 91971673 | 91971863 | 91971778 | 9   | 9   | 1  | 5.196520921 | 0.00490062  |         | ENSG00000185074 |
| 9 | 92161509 | 92161688 | 92161604 | 8   | 8   | 2  | 3.117912553 | 0.0283184   |         | ENSG00000105061 |
| 9 | 92167773 | 92168101 | 92167927 | 11  | 14  | 1  | 7.794781382 | 0.000197021 |         | ENSG00000105061 |
| 9 | 92179822 | 92180049 | 92179935 | 8   | 11  | 0  | 12.47165021 | 0.000193293 |         | ENSG00000105061 |
| 9 | 92235581 | 92235879 | 92235730 | 10  | 14  | 7  | 1.948695345 | 0.0559175   |         | ENSG00000105061 |

|   |          |          |          |     |     |   |             |             |           |                 |
|---|----------|----------|----------|-----|-----|---|-------------|-------------|-----------|-----------------|
| 9 | 92257281 | 92257803 | 92257445 | 12  | 23  | 5 | 4.157216737 | 0.000186738 | DIRAS2    | ENSG00000165023 |
| 9 | 92319302 | 92319508 | 92319405 | 8   | 9   | 1 | 5.196520921 | 0.00490062  | DIRAS2    | ENSG00000165023 |
| 9 | 92479563 | 92479752 | 92479657 | 8   | 8   | 3 | 2.338434415 | 0.0641221   | DIRAS2    | ENSG00000165023 |
| 9 | 92603992 | 92604264 | 92604170 | 9   | 12  | 2 | 4.503651465 | 0.002963    | SYK       | ENSG00000165025 |
| 9 | 92749223 | 92749408 | 92749323 | 10  | 10  | 5 | 1.905391004 | 0.0915982   | SYK       | ENSG00000165025 |
| 9 | 92839415 | 92839624 | 92839526 | 8   | 9   | 5 | 1.73217364  | 0.133894    |           | ENSG00000219788 |
| 9 | 93766024 | 93766222 | 93766123 | 8   | 8   | 0 | 9.353737658 | 0.00163931  | ROR2      | ENSG00000169071 |
| 9 | 93949341 | 93950082 | 93949586 | 224 | 259 | 1 | 135.109544  | 4.57E-79    |           | ENSG00000209034 |
| 9 | 93954254 | 93954497 | 93954371 | 21  | 22  | 3 | 5.975999059 | 2.96E-05    |           | ENSG00000209034 |
| 9 | 94095779 | 94096077 | 94095939 | 12  | 16  | 4 | 3.533634226 | 0.00276486  | IARS      | ENSG00000196305 |
| 9 | 94115068 | 94115356 | 94115186 | 19  | 20  | 3 | 5.456346967 | 9.70E-05    | NOL8      | ENSG00000198000 |
| 9 | 94129631 | 94130005 | 94129806 | 10  | 15  | 4 | 3.32577339  | 0.00462646  | CENPP     | ENSG00000188312 |
| 9 | 94265067 | 94265246 | 94265156 | 8   | 8   | 3 | 2.338434415 | 0.0641221   | ASPN      | ENSG00000106819 |
| 9 | 94409775 | 94409956 | 94409865 | 9   | 9   | 0 | 10.39304184 | 0.000803859 | CENPP     | ENSG00000188312 |
| 9 | 94602385 | 94602797 | 94602562 | 78  | 83  | 4 | 17.4603103  | 1.66E-21    | ANKRD19   | ENSG00000218940 |
| 9 | 94776357 | 94776559 | 94776452 | 8   | 8   | 1 | 4.676868829 | 0.0091584   | FGD3      | ENSG00000127084 |
| 9 | 94777648 | 94777827 | 94777737 | 8   | 8   | 1 | 4.676868829 | 0.0091584   | FGD3      | ENSG00000127084 |
| 9 | 94790150 | 94791001 | 94790502 | 96  | 144 | 4 | 30.13982134 | 1.82E-39    | FGD3      | ENSG00000127084 |
| 9 | 94893937 | 94894205 | 94894050 | 10  | 11  | 1 | 6.235825105 | 0.0013754   | C9orf89   | ENSG00000165233 |
| 9 | 94934765 | 94935136 | 94934944 | 19  | 27  | 1 | 14.55025858 | 3.30E-08    | NINJ1     | ENSG00000131669 |
| 9 | 95114828 | 95115031 | 95114940 | 11  | 12  | 6 | 1.930136342 | 0.071303    | WNK2      | ENSG00000165238 |
| 9 | 95115161 | 95115465 | 95115299 | 14  | 16  | 1 | 8.834085566 | 5.30E-05    | WNK2      | ENSG00000165238 |
| 9 | 95255942 | 95256183 | 95256016 | 8   | 9   | 4 | 2.078608368 | 0.0785659   | FAM120AOS | ENSG00000188938 |
| 9 | 95326853 | 95327035 | 95326944 | 8   | 8   | 0 | 9.353737658 | 0.00163931  | PHF2      | ENSG00000197724 |
| 9 | 95581284 | 95581463 | 95581365 | 8   | 8   | 0 | 9.353737658 | 0.00163931  | BARX1     | ENSG00000131668 |
| 9 | 96356456 | 96356635 | 96356545 | 8   | 8   | 2 | 3.117912553 | 0.0283184   | FBP2      | ENSG00000130957 |
| 9 | 96585307 | 96585583 | 96585445 | 8   | 10  | 3 | 2.858086507 | 0.0242838   | C9orf3    | ENSG00000148120 |
| 9 | 96621459 | 96621788 | 96621623 | 17  | 21  | 0 | 22.86469205 | 1.55E-07    | C9orf3    | ENSG00000148120 |
| 9 | 96716407 | 96716605 | 96716506 | 10  | 10  | 6 | 1.63319229  | 0.146906    | C9orf3    | ENSG00000148120 |
| 9 | 96719002 | 96719205 | 96719056 | 8   | 10  | 2 | 3.810782009 | 0.00936112  | C9orf3    | ENSG00000148120 |
| 9 | 96999731 | 97000284 | 96999962 | 48  | 63  | 3 | 16.62886695 | 1.03E-16    |           | ENSG00000209183 |
| 9 | 97567113 | 97567400 | 97567256 | 9   | 13  | 0 | 14.55025858 | 4.65E-05    |           | ENSG00000175611 |
| 9 | 97677999 | 97678258 | 97678128 | 8   | 10  | 3 | 2.858086507 | 0.0242838   | C9orf130  | ENSG00000214847 |
| 9 | 97739239 | 97739594 | 97739416 | 25  | 30  | 1 | 16.10921486 | 4.28E-09    |           | ENSG00000217452 |

|   |           |           |           |     |     |    |             |             |          |                 |
|---|-----------|-----------|-----------|-----|-----|----|-------------|-------------|----------|-----------------|
| 9 | 97796427  | 97796606  | 97796556  | 8   | 8   | 1  | 4.676868829 | 0.0091584   |          | ENSG00000204330 |
| 9 | 98068948  | 98069224  | 98069074  | 14  | 17  | 0  | 18.70747532 | 2.69E-06    |          | ENSG00000207276 |
| 9 | 98911457  | 98911636  | 98911485  | 8   | 8   | 2  | 3.117912553 | 0.0283184   |          | ENSG00000213612 |
| 9 | 98970296  | 98970616  | 98970456  | 21  | 24  | 2  | 8.660868202 | 1.80E-06    |          | ENSG00000209181 |
| 9 | 99694450  | 99694629  | 99694539  | 8   | 8   | 0  | 9.353737658 | 0.00163931  | C9orf156 | ENSG00000136932 |
| 9 | 99974827  | 99975081  | 99974912  | 8   | 11  | 7  | 1.558956276 | 0.158273    | CORO2A   | ENSG00000106789 |
| 9 | 100108640 | 100108850 | 100108745 | 11  | 11  | 3  | 3.117912553 | 0.0146045   | TBC1D2   | ENSG00000095383 |
| 9 | 100257525 | 100257802 | 100257663 | 8   | 9   | 0  | 10.39304184 | 0.000803859 |          | ENSG00000217589 |
| 9 | 100567420 | 100567745 | 100567582 | 11  | 14  | 0  | 15.58956276 | 2.28E-05    | ANKS6    | ENSG00000165138 |
| 9 | 100593330 | 100593550 | 100593440 | 9   | 9   | 0  | 10.39304184 | 0.000803859 | ANKS6    | ENSG00000165138 |
| 9 | 101101745 | 101101994 | 101101858 | 8   | 9   | 1  | 5.196520921 | 0.00490062  |          | ENSG00000222026 |
| 9 | 101215821 | 101216022 | 101215921 | 8   | 9   | 1  | 5.196520921 | 0.00490062  |          | ENSG00000222026 |
| 9 | 101830389 | 101830623 | 101830461 | 10  | 11  | 2  | 4.157216737 | 0.0052913   |          | ENSG00000218959 |
| 9 | 102177842 | 102178176 | 102178009 | 30  | 35  | 0  | 37.41495063 | 7.22E-12    | TEX10    | ENSG00000136891 |
| 9 | 102238145 | 102238324 | 102238234 | 8   | 8   | 0  | 9.353737658 | 0.00163931  | C9orf30  | ENSG00000066697 |
| 9 | 102492622 | 102492812 | 102492717 | 9   | 9   | 0  | 10.39304184 | 0.000803859 |          | ENSG00000219293 |
| 9 | 103086989 | 103087179 | 103087085 | 8   | 8   | 0  | 9.353737658 | 0.00163931  |          | ENSG00000220569 |
| 9 | 106103922 | 106104101 | 106104011 | 8   | 8   | 0  | 9.353737658 | 0.00163931  |          | ENSG00000218103 |
| 9 | 106959221 | 106959402 | 106959311 | 9   | 9   | 3  | 2.598260461 | 0.0397929   |          | ENSG00000205741 |
| 9 | 107046341 | 107046579 | 107046432 | 11  | 11  | 1  | 6.235825105 | 0.0013754   | SLC44A1  | ENSG00000070214 |
| 9 | 107215658 | 107215872 | 107215756 | 9   | 9   | 2  | 3.464347281 | 0.0163838   | FSD1L    | ENSG00000106701 |
| 9 | 107228029 | 107228213 | 107228090 | 8   | 8   | 2  | 3.117912553 | 0.0283184   | FSD1L    | ENSG00000106701 |
| 9 | 107666589 | 107666853 | 107666721 | 9   | 12  | 1  | 6.755477198 | 0.000722752 |          | ENSG00000218063 |
| 9 | 107714978 | 107715271 | 107715102 | 11  | 14  | 4  | 3.117912553 | 0.00766354  |          | ENSG00000218063 |
| 9 | 107913406 | 107913742 | 107913574 | 12  | 16  | 4  | 3.533634226 | 0.00276486  |          | ENSG00000218063 |
| 9 | 108472667 | 108472878 | 108472804 | 10  | 11  | 1  | 6.235825105 | 0.0013754   |          | ENSG00000200131 |
| 9 | 108596265 | 108596564 | 108596414 | 9   | 13  | 2  | 4.850086193 | 0.00164564  |          | ENSG00000212276 |
| 9 | 109045926 | 109046300 | 109046105 | 17  | 24  | 11 | 2.16521705  | 0.0106896   | RAD23B   | ENSG00000119318 |
| 9 | 109051254 | 109051692 | 109051467 | 75  | 89  | 4  | 18.70747532 | 3.01E-23    | RAD23B   | ENSG00000119318 |
| 9 | 109139164 | 109139350 | 109139265 | 8   | 8   | 1  | 4.676868829 | 0.0091584   | RAD23B   | ENSG00000119318 |
| 9 | 109143330 | 109143559 | 109143471 | 15  | 15  | 4  | 3.32577339  | 0.00462646  | RAD23B   | ENSG00000119318 |
| 9 | 109224382 | 109224574 | 109224490 | 8   | 9   | 7  | 1.29913023  | 0.286504    |          | ENSG00000213558 |
| 9 | 109539998 | 109540770 | 109540318 | 113 | 171 | 5  | 29.79338661 | 2.84E-46    |          | ENSG00000208975 |
| 9 | 109541840 | 109542148 | 109541994 | 15  | 19  | 0  | 20.78608368 | 6.46E-07    |          | ENSG00000208975 |



|   |           |           |           |    |    |   |             |             |         |                 |
|---|-----------|-----------|-----------|----|----|---|-------------|-------------|---------|-----------------|
| 9 | 109557308 | 109557690 | 109557476 | 12 | 19 | 5 | 3.464347281 | 0.00150447  |         | ENSG00000208975 |
| 9 | 110169835 | 110170165 | 110169988 | 15 | 19 | 0 | 20.78608368 | 6.46E-07    |         | ENSG00000222512 |
| 9 | 110291766 | 110292027 | 110291896 | 9  | 11 | 2 | 4.157216737 | 0.0052913   |         | ENSG00000222512 |
| 9 | 110370115 | 110370485 | 110370294 | 18 | 26 | 3 | 7.015303244 | 2.63E-06    |         | ENSG00000169253 |
| 9 | 110587317 | 110587540 | 110587430 | 8  | 8  | 0 | 9.353737658 | 0.00163931  |         | ENSG00000217990 |
| 9 | 110922088 | 110922387 | 110922237 | 9  | 12 | 8 | 1.501217155 | 0.168286    | C9orf5  | ENSG00000106771 |
| 9 | 111151655 | 111151861 | 111151758 | 9  | 9  | 1 | 5.196520921 | 0.00490062  |         | ENSG00000207329 |
| 9 | 111339846 | 111340025 | 111339935 | 8  | 8  | 0 | 9.353737658 | 0.00163931  |         | ENSG00000213539 |
| 9 | 111860590 | 111860843 | 111860690 | 11 | 12 | 5 | 2.251825733 | 0.0404733   | AKAP2   | ENSG00000157654 |
| 9 | 111891730 | 111892024 | 111891877 | 10 | 12 | 6 | 1.930136342 | 0.071303    | AKAP2   | ENSG00000157654 |
| 9 | 113424323 | 113424566 | 113424480 | 9  | 10 | 1 | 5.716173013 | 0.00260397  | C9orf29 | ENSG00000204173 |
| 9 | 113433131 | 113433444 | 113433299 | 9  | 11 | 6 | 1.781664316 | 0.103344    | C9orf29 | ENSG00000204173 |
| 9 | 113659710 | 113659890 | 113659782 | 8  | 8  | 3 | 2.338434415 | 0.0641221   |         | ENSG00000206907 |
| 9 | 113669828 | 113670013 | 113669905 | 8  | 8  | 0 | 9.353737658 | 0.00163931  |         | ENSG00000206907 |
| 9 | 113698266 | 113698467 | 113698366 | 8  | 8  | 3 | 2.338434415 | 0.0641221   | UGCG    | ENSG00000148154 |
| 9 | 113812648 | 113812829 | 113812689 | 8  | 8  | 1 | 4.676868829 | 0.0091584   |         | ENSG00000208841 |
| 9 | 113814111 | 113814629 | 113814450 | 10 | 22 | 9 | 2.390399624 | 0.00747467  |         | ENSG00000208841 |
| 9 | 113864213 | 113864504 | 113864358 | 16 | 18 | 1 | 9.87338975  | 1.41E-05    |         | ENSG00000208841 |
| 9 | 113946769 | 113947294 | 113947052 | 54 | 74 | 1 | 38.97390691 | 2.41E-22    |         | ENSG00000208835 |
| 9 | 114101714 | 114101998 | 114101866 | 11 | 12 | 0 | 13.5109544  | 9.48E-05    | ROD1    | ENSG00000119314 |
| 9 | 114567070 | 114567253 | 114567139 | 8  | 8  | 3 | 2.338434415 | 0.0641221   | SNX30   | ENSG00000148158 |
| 9 | 115024098 | 115024307 | 115024209 | 9  | 10 | 3 | 2.858086507 | 0.0242838   | SLC31A1 | ENSG00000136868 |
| 9 | 115096147 | 115096378 | 115096251 | 10 | 10 | 3 | 2.858086507 | 0.0242838   | RNF183  | ENSG00000165188 |
| 9 | 115212301 | 115212596 | 115212432 | 8  | 11 | 3 | 3.117912553 | 0.0146045   | POLE3   | ENSG00000148229 |
| 9 | 115212600 | 115212945 | 115212772 | 9  | 15 | 5 | 2.771477825 | 0.0105836   | POLE3   | ENSG00000148229 |
| 9 | 115218467 | 115218646 | 115218534 | 8  | 8  | 1 | 4.676868829 | 0.0091584   | C9orf43 | ENSG00000157653 |
| 9 | 115267571 | 115267848 | 115267707 | 9  | 12 | 5 | 2.251825733 | 0.0404733   | RGS3    | ENSG00000138835 |
| 9 | 115343874 | 115344076 | 115343992 | 8  | 9  | 2 | 3.464347281 | 0.0163838   | RGS3    | ENSG00000138835 |
| 9 | 115723628 | 115723807 | 115723717 | 8  | 8  | 2 | 3.117912553 | 0.0283184   | ZNF618  | ENSG00000157657 |
| 9 | 116078873 | 116079174 | 116079020 | 11 | 15 | 0 | 16.62886695 | 1.12E-05    | ORM1    | ENSG00000187681 |
| 9 | 116191505 | 116191734 | 116191661 | 11 | 12 | 1 | 6.755477198 | 0.000722752 | AKNA    | ENSG00000106948 |
| 9 | 116206447 | 116206626 | 116206536 | 9  | 9  | 0 | 10.39304184 | 0.000803859 | AKNA    | ENSG00000106948 |
| 9 | 116289666 | 116289927 | 116289796 | 8  | 9  | 1 | 5.196520921 | 0.00490062  | DFNB31  | ENSG00000095397 |
| 9 | 116354153 | 116354344 | 116354255 | 8  | 9  | 1 | 5.196520921 | 0.00490062  |         | ENSG00000208798 |

|   |           |           |           |     |     |    |             |             |          |                 |
|---|-----------|-----------|-----------|-----|-----|----|-------------|-------------|----------|-----------------|
| 9 | 116389243 | 116389489 | 116389319 | 8   | 11  | 0  | 12.47165021 | 0.000193293 | ATP6V1G1 | ENSG00000136888 |
| 9 | 116709960 | 116711057 | 116710650 | 138 | 231 | 18 | 12.69045109 | 1.12E-50    | TNFSF8   | ENSG00000106952 |
| 9 | 117746134 | 117746832 | 117746406 | 119 | 152 | 3  | 39.75338505 | 3.73E-43    | C9orf27  | ENSG00000204148 |
| 9 | 118441671 | 118441995 | 118441826 | 8   | 9   | 2  | 3.464347281 | 0.0163838   | ASTN2    | ENSG00000148219 |
| 9 | 118489110 | 118489435 | 118489272 | 29  | 32  | 0  | 34.29703808 | 6.12E-11    | ASTN2    | ENSG00000148219 |
| 9 | 118587768 | 118588015 | 118587886 | 10  | 10  | 2  | 3.810782009 | 0.00936112  | TRIM32   | ENSG00000119401 |
| 9 | 118790463 | 118790679 | 118790563 | 9   | 9   | 3  | 2.598260461 | 0.0397929   | RPL10P3  | ENSG00000216739 |
| 9 | 121214562 | 121214998 | 121214650 | 8   | 15  | 11 | 1.385738912 | 0.19225     | DBC1     | ENSG00000078725 |
| 9 | 121231219 | 121231557 | 121231378 | 10  | 14  | 2  | 5.196520921 | 0.000907371 | DBC1     | ENSG00000078725 |
| 9 | 121255561 | 121255765 | 121255663 | 9   | 10  | 1  | 5.716173013 | 0.00260397  | DBC1     | ENSG00000078725 |
| 9 | 122382187 | 122382482 | 122382334 | 11  | 12  | 6  | 1.930136342 | 0.071303    | CDK5RAP2 | ENSG00000136861 |
| 9 | 122447859 | 122448038 | 122447948 | 9   | 9   | 3  | 2.598260461 | 0.0397929   | CDK5RAP2 | ENSG00000136861 |
| 9 | 122738742 | 122738941 | 122738836 | 10  | 10  | 0  | 11.43234603 | 0.000394183 | TRAF1    | ENSG00000056558 |
| 9 | 122996999 | 122997213 | 122997106 | 11  | 12  | 3  | 3.377738599 | 0.00867157  | RAB14    | ENSG00000119396 |
| 9 | 123122250 | 123122434 | 123122342 | 8   | 9   | 2  | 3.464347281 | 0.0163838   | GSN      | ENSG00000148180 |
| 9 | 123124341 | 123124924 | 123124646 | 251 | 294 | 6  | 43.79924776 | 8.85E-82    | GSN      | ENSG00000148180 |
| 9 | 123128470 | 123128708 | 123128589 | 8   | 9   | 0  | 10.39304184 | 0.000803859 | GSN      | ENSG00000148180 |
| 9 | 123321234 | 123321508 | 123321400 | 31  | 32  | 1  | 17.14851904 | 1.09E-09    |          | ENSG00000213467 |
| 9 | 123400209 | 123400486 | 123400347 | 9   | 12  | 3  | 3.377738599 | 0.00867157  | DAB2IP   | ENSG00000136848 |
| 9 | 124301414 | 124301844 | 124301679 | 11  | 17  | 0  | 18.70747532 | 2.69E-06    | OR1J2    | ENSG00000197233 |
| 9 | 124353522 | 124353849 | 124353685 | 20  | 21  | 0  | 22.86469205 | 1.55E-07    | OR1N2    | ENSG00000171501 |
| 9 | 124733516 | 124733768 | 124733642 | 10  | 11  | 4  | 2.494330042 | 0.0324033   | ZBTB26   | ENSG00000171448 |
| 9 | 124892797 | 124893034 | 124892906 | 10  | 10  | 1  | 5.716173013 | 0.00260397  |          | ENSG00000207740 |
| 9 | 125129685 | 125130023 | 125129854 | 10  | 16  | 7  | 2.208521392 | 0.0257604   | CRB2     | ENSG00000148204 |
| 9 | 125187660 | 125187840 | 125187748 | 8   | 8   | 2  | 3.117912553 | 0.0283184   | CRB2     | ENSG00000148204 |
| 9 | 125762952 | 125763225 | 125763081 | 8   | 8   | 1  | 4.676868829 | 0.0091584   | DENND1A  | ENSG00000119522 |
| 9 | 126061573 | 126061804 | 126061719 | 8   | 10  | 4  | 2.286469205 | 0.0509017   | NEK6     | ENSG00000119408 |
| 9 | 126217493 | 126217763 | 126217611 | 15  | 18  | 5  | 3.291129917 | 0.00248584  | PSMB7    | ENSG00000136930 |
| 9 | 126353807 | 126354032 | 126353955 | 9   | 9   | 2  | 3.464347281 | 0.0163838   | NR5A1    | ENSG00000136931 |
| 9 | 126404295 | 126404632 | 126404464 | 21  | 26  | 5  | 4.676868829 | 3.65E-05    |          | ENSG00000217017 |
| 9 | 126406095 | 126406663 | 126406379 | 42  | 60  | 6  | 9.056793606 | 2.55E-13    |          | ENSG00000223143 |
| 9 | 126514088 | 126514383 | 126514241 | 11  | 13  | 2  | 4.850086193 | 0.00164564  |          | ENSG00000207737 |
| 9 | 127043138 | 127043410 | 127043287 | 8   | 8   | 2  | 3.117912553 | 0.0283184   | HSPA5    | ENSG00000044574 |
| 9 | 127043615 | 127044019 | 127043743 | 9   | 16  | 5  | 2.944695189 | 0.00659886  | HSPA5    | ENSG00000044574 |

|   |           |           |           |    |    |   |             |             |          |                 |
|---|-----------|-----------|-----------|----|----|---|-------------|-------------|----------|-----------------|
| 9 | 127099039 | 127099307 | 127099173 | 10 | 13 | 1 | 7.27512929  | 0.000378098 | GAPVD1   | ENSG00000165219 |
| 9 | 127251830 | 127252029 | 127251929 | 8  | 9  | 5 | 1.73217364  | 0.133894    |          | ENSG00000208649 |
| 9 | 127312489 | 127312832 | 127312660 | 8  | 10 | 2 | 3.810782009 | 0.00936112  |          | ENSG00000208649 |
| 9 | 127314390 | 127314656 | 127314523 | 9  | 10 | 4 | 2.286469205 | 0.0509017   |          | ENSG00000208649 |
| 9 | 127340271 | 127340542 | 127340373 | 14 | 17 | 4 | 3.741495063 | 0.00163722  |          | ENSG00000222288 |
| 9 | 128013543 | 128014030 | 128013786 | 13 | 23 | 0 | 24.94330042 | 3.74E-08    | FAM125B  | ENSG00000196814 |
| 9 | 128303053 | 128303251 | 128303146 | 8  | 9  | 1 | 5.196520921 | 0.00490062  |          | ENSG00000221768 |
| 9 | 128435258 | 128435471 | 128435397 | 10 | 10 | 4 | 2.286469205 | 0.0509017   | LMX1B    | ENSG00000136944 |
| 9 | 128445073 | 128445316 | 128445197 | 13 | 13 | 8 | 1.616695398 | 0.123553    | LMX1B    | ENSG00000136944 |
| 9 | 128463784 | 128464015 | 128463898 | 8  | 8  | 1 | 4.676868829 | 0.0091584   | LMX1B    | ENSG00000136944 |
| 9 | 128596206 | 128596492 | 128596369 | 10 | 11 | 2 | 4.157216737 | 0.0052913   | ZBTB43   | ENSG00000169155 |
| 9 | 129097131 | 129097530 | 129097305 | 27 | 36 | 1 | 19.22712741 | 7.03E-11    |          | ENSG00000220303 |
| 9 | 129131433 | 129131760 | 129131598 | 10 | 13 | 4 | 2.910051716 | 0.0125532   |          | ENSG00000220303 |
| 9 | 129138930 | 129139228 | 129139049 | 12 | 16 | 2 | 5.889390377 | 0.000270741 |          | ENSG00000220303 |
| 9 | 129219275 | 129219505 | 129219413 | 14 | 14 | 0 | 15.58956276 | 2.28E-05    | ZNF79    | ENSG00000196152 |
| 9 | 129221375 | 129221627 | 129221525 | 8  | 8  | 2 | 3.117912553 | 0.0283184   | ZNF79    | ENSG00000196152 |
| 9 | 129226155 | 129226435 | 129226295 | 8  | 13 | 5 | 2.425043097 | 0.0262442   | ZNF79    | ENSG00000196152 |
| 9 | 129226480 | 129226920 | 129226659 | 26 | 37 | 8 | 4.388173222 | 2.55E-06    | ZNF79    | ENSG00000196152 |
| 9 | 129253600 | 129253898 | 129253749 | 8  | 11 | 5 | 2.078608368 | 0.0614303   | LRSAM1   | ENSG00000148356 |
| 9 | 129363799 | 129364261 | 129364101 | 14 | 24 | 2 | 8.660868202 | 1.80E-06    | FAM129B  | ENSG00000136830 |
| 9 | 129369192 | 129369424 | 129369342 | 9  | 11 | 3 | 3.117912553 | 0.0146045   | FAM129B  | ENSG00000136830 |
| 9 | 129371744 | 129371949 | 129371834 | 8  | 9  | 4 | 2.078608368 | 0.0785659   | FAM129B  | ENSG00000136830 |
| 9 | 129376622 | 129376908 | 129376762 | 12 | 15 | 8 | 1.847651883 | 0.0631662   | FAM129B  | ENSG00000136830 |
| 9 | 129386405 | 129386687 | 129386546 | 17 | 18 | 0 | 19.7467795  | 1.32E-06    | FAM129B  | ENSG00000136830 |
| 9 | 129502708 | 129502959 | 129502845 | 9  | 10 | 3 | 2.858086507 | 0.0242838   | TTC16    | ENSG00000167094 |
| 9 | 129537436 | 129537661 | 129537548 | 8  | 9  | 8 | 1.154782427 | 0.375434    | TOR2A    | ENSG00000160404 |
| 9 | 129771711 | 129772108 | 129771890 | 12 | 19 | 9 | 2.078608368 | 0.0241848   | FAM102A  | ENSG00000167106 |
| 9 | 129849392 | 129849600 | 129849496 | 9  | 9  | 3 | 2.598260461 | 0.0397929   | NAIF1    | ENSG00000171169 |
| 9 | 129874556 | 129874768 | 129874668 | 8  | 9  | 0 | 10.39304184 | 0.000803859 | SLC25A25 | ENSG00000148339 |
| 9 | 129919848 | 129920027 | 129919926 | 8  | 8  | 8 | 1.039304184 | 0.46786     | PTGES2   | ENSG00000148334 |
| 9 | 130100813 | 130101020 | 130100916 | 9  | 10 | 4 | 2.286469205 | 0.0509017   | C9orf119 | ENSG00000175854 |
| 9 | 130124644 | 130124864 | 130124757 | 9  | 11 | 4 | 2.494330042 | 0.0324033   | COQ4     | ENSG00000167113 |
| 9 | 130130944 | 130131430 | 130131251 | 36 | 52 | 1 | 27.54156088 | 1.11E-15    | COQ4     | ENSG00000167113 |
| 9 | 130142204 | 130142502 | 130142355 | 10 | 13 | 4 | 2.910051716 | 0.0125532   | SLC27A4  | ENSG00000167114 |

|   |           |           |           |    |    |   |             |             |          |                 |
|---|-----------|-----------|-----------|----|----|---|-------------|-------------|----------|-----------------|
| 9 | 130143541 | 130143734 | 130143637 | 8  | 8  | 0 | 9.353737658 | 0.00163931  | SLC27A4  | ENSG00000167114 |
| 9 | 130459074 | 130459333 | 130459209 | 8  | 9  | 3 | 2.598260461 | 0.0397929   | WDR34    | ENSG00000119333 |
| 9 | 130487074 | 130487309 | 130487171 | 8  | 8  | 2 | 3.117912553 | 0.0283184   | SET      | ENSG00000119335 |
| 9 | 130838198 | 130838445 | 130838330 | 9  | 11 | 3 | 3.117912553 | 0.0146045   | FAM73B   | ENSG00000148343 |
| 9 | 130905232 | 130905451 | 130905341 | 8  | 9  | 0 | 10.39304184 | 0.000803859 |          | ENSG00000221521 |
| 9 | 130941845 | 130942163 | 130942012 | 12 | 15 | 7 | 2.078608368 | 0.038229    | PPP2R4   | ENSG00000119383 |
| 9 | 130943291 | 130943571 | 130943429 | 9  | 9  | 0 | 10.39304184 | 0.000803859 | PPP2R4   | ENSG00000119383 |
| 9 | 131122985 | 131123184 | 131123069 | 8  | 8  | 4 | 1.870747532 | 0.118863    | C9orf106 | ENSG00000179082 |
| 9 | 131136186 | 131136564 | 131136385 | 8  | 15 | 5 | 2.771477825 | 0.0105836   | C9orf106 | ENSG00000179082 |
| 9 | 131164398 | 131164755 | 131164623 | 21 | 25 | 2 | 9.00730293  | 9.47E-07    |          | ENSG00000223137 |
| 9 | 131262448 | 131262678 | 131262563 | 9  | 9  | 0 | 10.39304184 | 0.000803859 |          | ENSG00000204054 |
| 9 | 131291052 | 131291243 | 131291147 | 8  | 8  | 4 | 1.870747532 | 0.118863    |          | ENSG00000204054 |
| 9 | 131449022 | 131449331 | 131449176 | 9  | 14 | 3 | 3.897390691 | 0.00295882  | ASB6     | ENSG00000148331 |
| 9 | 131687781 | 131688052 | 131687914 | 8  | 12 | 0 | 13.5109544  | 9.48E-05    |          | ENSG00000216693 |
| 9 | 132316830 | 132317053 | 132316943 | 8  | 10 | 3 | 2.858086507 | 0.0242838   |          | ENSG00000208562 |
| 9 | 132572594 | 132572837 | 132572715 | 9  | 9  | 2 | 3.464347281 | 0.0163838   | ABL1     | ENSG00000097007 |
| 9 | 132636261 | 132636517 | 132636378 | 8  | 11 | 1 | 6.235825105 | 0.0013754   |          | ENSG00000218774 |
| 9 | 132731647 | 132732032 | 132731853 | 14 | 19 | 4 | 4.157216737 | 0.000560204 | QRFP     | ENSG00000188710 |
| 9 | 132857651 | 132858039 | 132857847 | 41 | 50 | 8 | 5.889390377 | 1.94E-09    | LAMC3    | ENSG00000050555 |
| 9 | 132990490 | 132991100 | 132990902 | 11 | 26 | 7 | 3.507651622 | 0.000274507 | NUP214   | ENSG00000126883 |
| 9 | 133215320 | 133215557 | 133215416 | 8  | 11 | 5 | 2.078608368 | 0.0614303   | BAT2L    | ENSG00000130723 |
| 9 | 133261094 | 133261349 | 133261252 | 9  | 10 | 5 | 1.905391004 | 0.0915982   | BAT2L    | ENSG00000130723 |
| 9 | 133598689 | 133598997 | 133598854 | 13 | 14 | 5 | 2.598260461 | 0.0167748   | RAPGEF1  | ENSG00000107263 |
| 9 | 134007973 | 134008161 | 134008067 | 8  | 8  | 1 | 4.676868829 | 0.0091584   | NTNG2    | ENSG00000196358 |
| 9 | 134809822 | 134810092 | 134809957 | 10 | 12 | 5 | 2.251825733 | 0.0404733   | TSC1     | ENSG00000165699 |
| 9 | 134842991 | 134843189 | 134843120 | 8  | 9  | 1 | 5.196520921 | 0.00490062  | GFI1B    | ENSG00000165702 |
| 9 | 134887655 | 134887862 | 134887765 | 8  | 10 | 5 | 1.905391004 | 0.0915982   | GTF3C5   | ENSG00000148308 |
| 9 | 134896004 | 134896195 | 134896089 | 8  | 9  | 1 | 5.196520921 | 0.00490062  | GTF3C5   | ENSG00000148308 |
| 9 | 134926456 | 134926681 | 134926546 | 13 | 13 | 0 | 14.55025858 | 4.65E-05    | CEL      | ENSG00000170835 |
| 9 | 134998854 | 134999274 | 134999055 | 16 | 25 | 3 | 6.755477198 | 4.84E-06    | RALGDS   | ENSG00000160271 |
| 9 | 135192847 | 135193094 | 135192974 | 8  | 10 | 4 | 2.286469205 | 0.0509017   | SURF6    | ENSG00000148296 |
| 9 | 135243330 | 135243685 | 135243507 | 13 | 18 | 2 | 6.582259834 | 7.91E-05    | C9orf96  | ENSG00000198870 |
| 9 | 135272991 | 135273329 | 135273160 | 8  | 14 | 1 | 7.794781382 | 0.000197021 | REXO4    | ENSG00000148300 |
| 9 | 135637103 | 135637400 | 135637251 | 10 | 10 | 0 | 11.43234603 | 0.000394183 | SARDH    | ENSG00000123453 |

|   |           |           |           |     |     |   |             |             |          |                 |
|---|-----------|-----------|-----------|-----|-----|---|-------------|-------------|----------|-----------------|
| 9 | 135729004 | 135729308 | 135729162 | 20  | 22  | 2 | 7.967998746 | 6.43E-06    | VAV2     | ENSG00000160293 |
| 9 | 135729418 | 135729607 | 135729533 | 9   | 9   | 1 | 5.196520921 | 0.00490062  | VAV2     | ENSG00000160293 |
| 9 | 135735868 | 135736738 | 135736255 | 274 | 355 | 4 | 73.99845792 | 3.13E-103   | VAV2     | ENSG00000160293 |
| 9 | 135736767 | 135736962 | 135736855 | 9   | 10  | 2 | 3.810782009 | 0.00936112  | VAV2     | ENSG00000160293 |
| 9 | 135743338 | 135743557 | 135743484 | 8   | 10  | 2 | 3.810782009 | 0.00936112  | VAV2     | ENSG00000160293 |
| 9 | 136388625 | 136388889 | 136388757 | 9   | 12  | 0 | 13.5109544  | 9.48E-05    | RXRA     | ENSG00000186350 |
| 9 | 136388905 | 136389124 | 136389014 | 9   | 10  | 1 | 5.716173013 | 0.00260397  | RXRA     | ENSG00000186350 |
| 9 | 136399452 | 136399787 | 136399619 | 15  | 20  | 5 | 3.637564645 | 0.000902929 | RXRA     | ENSG00000186350 |
| 9 | 136438122 | 136438323 | 136438283 | 8   | 10  | 0 | 11.43234603 | 0.000394183 |          | ENSG00000214473 |
| 9 | 136831552 | 136831804 | 136831670 | 9   | 10  | 0 | 11.43234603 | 0.000394183 | COL5A1   | ENSG00000130635 |
| 9 | 136927404 | 136927634 | 136927522 | 10  | 11  | 3 | 3.117912553 | 0.0146045   | FCN2     | ENSG00000160339 |
| 9 | 137055081 | 137055277 | 137055238 | 9   | 9   | 5 | 1.73217364  | 0.133894    | OLFM1    | ENSG00000130558 |
| 9 | 137402416 | 137402750 | 137402586 | 35  | 36  | 1 | 19.22712741 | 7.03E-11    | C9orf62  | ENSG00000178243 |
| 9 | 137424324 | 137424558 | 137424481 | 8   | 11  | 1 | 6.235825105 | 0.0013754   | C9orf62  | ENSG00000178243 |
| 9 | 137425264 | 137425547 | 137425385 | 15  | 19  | 5 | 3.464347281 | 0.00150447  | C9orf62  | ENSG00000178243 |
| 9 | 137920468 | 137920676 | 137920572 | 8   | 9   | 0 | 10.39304184 | 0.000803859 | CAMSAP1  | ENSG00000130559 |
| 9 | 138003732 | 138003919 | 138003825 | 8   | 8   | 4 | 1.870747532 | 0.118863    | UBAC1    | ENSG00000130560 |
| 9 | 138140066 | 138140335 | 138140175 | 14  | 14  | 3 | 3.897390691 | 0.00295882  | NACC2    | ENSG00000148411 |
| 9 | 138140960 | 138141732 | 138141518 | 66  | 88  | 7 | 11.56225905 | 3.28E-20    | NACC2    | ENSG00000148411 |
| 9 | 138203177 | 138203465 | 138203321 | 9   | 13  | 1 | 7.27512929  | 0.000378098 | LHX3     | ENSG00000107187 |
| 9 | 138466018 | 138466301 | 138466176 | 8   | 10  | 5 | 1.905391004 | 0.0915982   | SEC16A   | ENSG00000148396 |
| 9 | 138564656 | 138565410 | 138564835 | 110 | 154 | 3 | 40.27303714 | 9.33E-44    | NOTCH1   | ENSG00000148400 |
| 9 | 138615926 | 138616234 | 138616066 | 8   | 10  | 2 | 3.810782009 | 0.00936112  |          | ENSG00000203275 |
| 9 | 138636918 | 138637218 | 138637068 | 14  | 19  | 2 | 6.928694562 | 4.25E-05    |          | ENSG00000203275 |
| 9 | 138637419 | 138637613 | 138637516 | 9   | 9   | 1 | 5.196520921 | 0.00490062  |          | ENSG00000203275 |
| 9 | 138645733 | 138645993 | 138645858 | 10  | 12  | 3 | 3.377738599 | 0.00867157  |          | ENSG00000203275 |
| 9 | 138693835 | 138694028 | 138693928 | 9   | 10  | 1 | 5.716173013 | 0.00260397  | AGPAT2   | ENSG00000169692 |
| 9 | 138863458 | 138863967 | 138863807 | 40  | 62  | 3 | 16.3690409  | 2.02E-16    | PHPT1    | ENSG00000054148 |
| 9 | 139212233 | 139212502 | 139212367 | 8   | 10  | 5 | 1.905391004 | 0.0915982   | C9orf75  | ENSG00000176058 |
| 9 | 139237781 | 139237979 | 139237895 | 8   | 9   | 1 | 5.196520921 | 0.00490062  | C9orf169 | ENSG00000197191 |
| 9 | 139240258 | 139240570 | 139240405 | 15  | 19  | 3 | 5.196520921 | 0.000174201 | C9orf169 | ENSG00000197191 |
| 9 | 139315037 | 139315257 | 139315097 | 8   | 9   | 3 | 2.598260461 | 0.0397929   | NRARP    | ENSG00000198435 |
| 9 | 139549080 | 139549550 | 139549244 | 14  | 20  | 7 | 2.728173484 | 0.00469378  | PNPLA7   | ENSG00000130653 |
| 9 | 139564665 | 139564844 | 139564754 | 8   | 8   | 3 | 2.338434415 | 0.0641221   | PNPLA7   | ENSG00000130653 |

|    |           |           |           |     |       |      |             |             |           |                 |
|----|-----------|-----------|-----------|-----|-------|------|-------------|-------------|-----------|-----------------|
| 9  | 139695363 | 139695558 | 139695404 | 10  | 10    | 4    | 2.286469205 | 0.0509017   | EHMT1     | ENSG00000181090 |
| 9  | 139734704 | 139734918 | 139734855 | 9   | 9     | 0    | 10.39304184 | 0.000803859 | EHMT1     | ENSG00000181090 |
| MT | 1         | 7325      | 280       | 473 | 5530  | 8260 | 0.695846924 |             | 1         | ENSG00000223073 |
| MT | 7344      | 16711     | 16222     | 785 | 10504 | ###  | 0.695717228 |             | 1         | ENSG00000210196 |
| X  | 3304201   | 3304459   | 3304330   | 9   | 10    | 0    | 11.43234603 | 0.000394183 |           | ENSG00000215325 |
| X  | 4638602   | 4639050   | 4638811   | 130 | 145   | 0    | 151.7384109 | 6.54E-46    |           | ENSG00000222834 |
| X  | 6657696   | 6657877   | 6657807   | 8   | 8     | 1    | 4.676868829 | 0.0091584   | VCX3A     | ENSG00000169059 |
| X  | 7060644   | 7060823   | 7060733   | 8   | 8     | 3    | 2.338434415 | 0.0641221   | HDHD1A    | ENSG00000130021 |
| X  | 7529471   | 7529776   | 7529623   | 8   | 10    | 1    | 5.716173013 | 0.00260397  | VCX       | ENSG00000182583 |
| X  | 7625079   | 7625310   | 7625194   | 8   | 9     | 0    | 10.39304184 | 0.000803859 | VCX       | ENSG00000182583 |
| X  | 7639239   | 7639437   | 7639394   | 12  | 13    | 0    | 14.55025858 | 4.65E-05    | VCX       | ENSG00000182583 |
| X  | 10689564  | 10689831  | 10689688  | 16  | 17    | 0    | 18.70747532 | 2.69E-06    | MID1      | ENSG00000101871 |
| X  | 13574105  | 13574356  | 13574230  | 9   | 11    | 2    | 4.157216737 | 0.0052913   |           | ENSG00000176896 |
| X  | 16517943  | 16518150  | 16518046  | 8   | 8     | 0    | 9.353737658 | 0.00163931  |           | ENSG00000222290 |
| X  | 16590479  | 16590855  | 16590676  | 12  | 18    | 7    | 2.468347438 | 0.0112499   | S100G     | ENSG00000169906 |
| X  | 16714170  | 16714439  | 16714321  | 9   | 11    | 3    | 3.117912553 | 0.0146045   | CXorf15   | ENSG00000086712 |
| X  | 17219609  | 17219788  | 17219698  | 8   | 8     | 1    | 4.676868829 | 0.0091584   |           | ENSG00000214321 |
| X  | 17475785  | 17476138  | 17475952  | 16  | 21    | 5    | 3.810782009 | 0.000537724 |           | ENSG00000221408 |
| X  | 18721743  | 18722004  | 18721867  | 20  | 22    | 0    | 23.90399624 | 7.62E-08    |           | ENSG00000203503 |
| X  | 19815882  | 19816086  | 19815997  | 8   | 8     | 0    | 9.353737658 | 0.00163931  | SH3KBP1   | ENSG00000147010 |
| X  | 19835917  | 19836145  | 19836049  | 10  | 10    | 1    | 5.716173013 | 0.00260397  | SH3KBP1   | ENSG00000147010 |
| X  | 19902345  | 19902531  | 19902438  | 8   | 8     | 2    | 3.117912553 | 0.0283184   | CXorf23   | ENSG00000173681 |
| X  | 22128971  | 22129155  | 22129075  | 8   | 8     | 5    | 1.558956276 | 0.191397    | ZNF645    | ENSG00000175809 |
| X  | 23046724  | 23046908  | 23046819  | 8   | 10    | 1    | 5.716173013 | 0.00260397  |           | ENSG00000221786 |
| X  | 24077036  | 24077251  | 24077180  | 9   | 10    | 2    | 3.810782009 | 0.00936112  | ZFX       | ENSG00000005889 |
| X  | 27662255  | 27662434  | 27662344  | 8   | 8     | 0    | 9.353737658 | 0.00163931  |           | ENSG00000218243 |
| X  | 30724033  | 30724250  | 30724141  | 8   | 9     | 2    | 3.464347281 | 0.0163838   | MAP3K7IP3 | ENSG00000157625 |
| X  | 30726853  | 30727217  | 30727029  | 20  | 27    | 1    | 14.55025858 | 3.30E-08    | MAP3K7IP3 | ENSG00000157625 |
| X  | 30727436  | 30727616  | 30727526  | 8   | 8     | 0    | 9.353737658 | 0.00163931  | MAP3K7IP3 | ENSG00000157625 |
| X  | 30728990  | 30729332  | 30729161  | 16  | 20    | 0    | 21.82538787 | 3.17E-07    | MAP3K7IP3 | ENSG00000157625 |
| X  | 30823369  | 30823573  | 30823486  | 9   | 9     | 3    | 2.598260461 | 0.0397929   | MAP3K7IP3 | ENSG00000157625 |
| X  | 30832411  | 30832637  | 30832524  | 10  | 12    | 0    | 13.5109544  | 9.48E-05    | MAP3K7IP3 | ENSG00000157625 |
| X  | 30832785  | 30833015  | 30832894  | 11  | 12    | 2    | 4.503651465 | 0.002963    | MAP3K7IP3 | ENSG00000157625 |
| X  | 33088420  | 33088760  | 33088590  | 15  | 19    | 0    | 20.78608368 | 6.46E-07    | DMD       | ENSG00000198947 |

|   |          |          |          |    |    |    |             |             |        |                 |
|---|----------|----------|----------|----|----|----|-------------|-------------|--------|-----------------|
| X | 33884368 | 33884720 | 33884544 | 12 | 17 | 2  | 6.235825105 | 0.000146695 | FAM47A | ENSG00000185448 |
| X | 34487443 | 34487732 | 34487602 | 18 | 19 | 0  | 20.78608368 | 6.46E-07    |        | ENSG00000222668 |
| X | 40262404 | 40262592 | 40262498 | 8  | 8  | 2  | 3.117912553 | 0.0283184   |        | ENSG00000216880 |
| X | 40937176 | 40937428 | 40937302 | 15 | 15 | 4  | 3.32577339  | 0.00462646  |        | ENSG00000199564 |
| X | 42720875 | 42721196 | 42721035 | 16 | 20 | 0  | 21.82538787 | 3.17E-07    |        | ENSG00000102055 |
| X | 44419607 | 44419882 | 44419744 | 13 | 16 | 1  | 8.834085566 | 5.30E-05    |        | ENSG00000214017 |
| X | 44719888 | 44720120 | 44720001 | 13 | 14 | 0  | 15.58956276 | 2.28E-05    |        | ENSG00000203505 |
| X | 46536972 | 46537176 | 46537074 | 9  | 10 | 0  | 11.43234603 | 0.000394183 | SLC9A7 | ENSG00000065923 |
| X | 46703132 | 46703499 | 46703322 | 14 | 19 | 0  | 20.78608368 | 6.46E-07    | PHF16  | ENSG00000102221 |
| X | 47560222 | 47560608 | 47560429 | 40 | 46 | 0  | 48.84729666 | 2.85E-15    | WASF4  | ENSG00000188459 |
| X | 47563356 | 47563671 | 47563517 | 22 | 25 | 0  | 27.02190879 | 8.98E-09    | ZNF81  | ENSG00000197779 |
| X | 53427193 | 53427639 | 53427401 | 19 | 31 | 2  | 11.0859113  | 1.93E-08    | SMC1A  | ENSG00000072501 |
| X | 58507445 | 58507773 | 58507609 | 9  | 9  | 7  | 1.29913023  | 0.286504    |        | ENSG00000219753 |
| X | 58529417 | 58529597 | 58529446 | 9  | 9  | 3  | 2.598260461 | 0.0397929   |        |                 |
| X | 58568334 | 58568664 | 58568499 | 17 | 17 | 9  | 1.870747532 | 0.0498299   |        |                 |
| X | 58577954 | 58578310 | 58578131 | 29 | 33 | 34 | 1.009609779 | 0.484681    |        |                 |
| X | 61622415 | 61622594 | 61622567 | 8  | 8  | 10 | 0.850339787 | 0.645072    |        | ENSG00000216395 |
| X | 61676849 | 61677185 | 61677017 | 42 | 42 | 39 | 1.117251998 | 0.306409    |        | ENSG00000216395 |
| X | 61685054 | 61685234 | 61685205 | 8  | 8  | 9  | 0.935373766 | 0.560286    |        | ENSG00000216395 |
| X | 61731732 | 61732060 | 61731896 | 12 | 13 | 8  | 1.616695398 | 0.123553    |        | ENSG00000216395 |
| X | 61755869 | 61756200 | 61756034 | 34 | 35 | 44 | 0.831443347 | 0.797718    |        | ENSG00000216395 |
| X | 61764083 | 61764265 | 61764250 | 10 | 10 | 6  | 1.63319229  | 0.146906    |        | ENSG00000216395 |
| X | 61813999 | 61814328 | 61814163 | 17 | 17 | 6  | 2.672496474 | 0.00882337  |        | ENSG00000216395 |
| X | 62541019 | 62541202 | 62541110 | 8  | 8  | 1  | 4.676868829 | 0.0091584   | SPIN4  | ENSG00000186767 |
| X | 65774979 | 65775606 | 65775293 | 61 | 86 | 2  | 30.13982134 | 1.24E-24    | EDA2R  | ENSG00000131080 |
| X | 67539326 | 67539509 | 67539454 | 9  | 9  | 0  | 10.39304184 | 0.000803859 | OPHN1  | ENSG00000079482 |
| X | 69247747 | 69248079 | 69247913 | 16 | 21 | 0  | 22.86469205 | 1.55E-07    |        | ENSG00000219613 |
| X | 71263324 | 71263542 | 71263433 | 8  | 9  | 0  | 10.39304184 | 0.000803859 | NHSL2  | ENSG00000204131 |
| X | 74410612 | 74410797 | 74410696 | 8  | 8  | 0  | 9.353737658 | 0.00163931  | UPRT   | ENSG00000094841 |
| X | 83876691 | 83876978 | 83876834 | 27 | 30 | 0  | 32.21842971 | 2.55E-10    |        | ENSG00000219196 |
| X | 84451639 | 84451891 | 84451793 | 8  | 9  | 0  | 10.39304184 | 0.000803859 |        | ENSG00000209072 |
| X | 86407182 | 86407492 | 86407340 | 12 | 13 | 0  | 14.55025858 | 4.65E-05    |        | ENSG00000200422 |
| X | 93502570 | 93503153 | 93502748 | 21 | 35 | 4  | 7.482990127 | 4.95E-08    |        | ENSG00000209165 |
| X | 93542170 | 93542590 | 93542372 | 34 | 43 | 1  | 22.86469205 | 5.66E-13    |        | ENSG00000209165 |

|   |           |           |           |    |    |    |             |             |          |                 |
|---|-----------|-----------|-----------|----|----|----|-------------|-------------|----------|-----------------|
| X | 96367820  | 96368041  | 96367930  | 8  | 10 | 0  | 11.43234603 | 0.000394183 |          | ENSG00000222977 |
| X | 96817032  | 96817211  | 96817121  | 8  | 8  | 0  | 9.353737658 | 0.00163931  |          | ENSG00000209212 |
| X | 97506916  | 97507095  | 97506996  | 8  | 8  | 0  | 9.353737658 | 0.00163931  |          | ENSG00000217946 |
| X | 99756701  | 99757170  | 99756934  | 38 | 53 | 5  | 9.353737658 | 3.65E-12    | TSPAN6   | ENSG00000000003 |
| X | 99961536  | 99961785  | 99961666  | 8  | 10 | 1  | 5.716173013 | 0.00260397  | CSTF2    | ENSG00000101811 |
| X | 100532303 | 100532830 | 100532482 | 10 | 21 | 3  | 5.716173013 | 5.37E-05    | HNRNPH2  | ENSG00000126945 |
| X | 103501576 | 103501835 | 103501702 | 9  | 10 | 2  | 3.810782009 | 0.00936112  | ESX1     | ENSG00000123576 |
| X | 103934619 | 103934878 | 103934726 | 8  | 10 | 3  | 2.858086507 | 0.0242838   |          | ENSG00000219091 |
| X | 104148951 | 104149306 | 104149128 | 26 | 31 | 0  | 33.2577339  | 1.25E-10    | TEX13A   | ENSG00000133149 |
| X | 105932444 | 105932644 | 105932537 | 8  | 8  | 3  | 2.338434415 | 0.0641221   | TBC1D8B  | ENSG00000133138 |
| X | 106806972 | 106807282 | 106807127 | 8  | 11 | 2  | 4.157216737 | 0.0052913   | PRPS1L1  | ENSG00000147224 |
| X | 106855817 | 106856064 | 106855928 | 10 | 12 | 3  | 3.377738599 | 0.00867157  | TSC22D3  | ENSG00000157514 |
| X | 107130657 | 107131080 | 107130907 | 16 | 24 | 0  | 25.98260461 | 1.83E-08    | TEX13B   | ENSG00000170925 |
| X | 107252649 | 107253246 | 107252883 | 38 | 56 | 1  | 29.62016925 | 6.88E-17    | ATG4A    | ENSG00000101844 |
| X | 107400091 | 107400501 | 107400275 | 29 | 40 | 1  | 21.30573578 | 4.48E-12    |          | ENSG00000189372 |
| X | 107442851 | 107443294 | 107443115 | 20 | 30 | 1  | 16.10921486 | 4.28E-09    |          | ENSG00000189372 |
| X | 107465676 | 107465862 | 107465769 | 8  | 9  | 1  | 5.196520921 | 0.00490062  |          | ENSG00000189372 |
| X | 108183915 | 108184638 | 108184463 | 37 | 57 | 44 | 1.339547615 | 0.0690642   |          | ENSG00000219692 |
| X | 108893765 | 108894033 | 108893908 | 12 | 14 | 1  | 7.794781382 | 0.000197021 | ACSL4    | ENSG00000068366 |
| X | 108992307 | 108992524 | 108992415 | 8  | 8  | 0  | 9.353737658 | 0.00163931  |          | ENSG00000179418 |
| X | 110308122 | 110308313 | 110308217 | 8  | 8  | 2  | 3.117912553 | 0.0283184   |          | ENSG00000220220 |
| X | 111400397 | 111400576 | 111400491 | 8  | 8  | 1  | 4.676868829 | 0.0091584   |          | ENSG00000213534 |
| X | 111809403 | 111809616 | 111809509 | 10 | 10 | 2  | 3.810782009 | 0.00936112  | LHFPL1   | ENSG00000182508 |
| X | 113200997 | 113201282 | 113201139 | 13 | 17 | 0  | 18.70747532 | 2.69E-06    |          | ENSG00000212611 |
| X | 113222551 | 113222730 | 113222697 | 8  | 8  | 1  | 4.676868829 | 0.0091584   |          | ENSG00000212611 |
| X | 113401207 | 113401567 | 113401424 | 16 | 21 | 0  | 22.86469205 | 1.55E-07    |          | ENSG00000219648 |
| X | 114171505 | 114171797 | 114171666 | 16 | 18 | 2  | 6.582259834 | 7.91E-05    |          | ENSG00000208831 |
| X | 115768044 | 115768407 | 115768223 | 30 | 36 | 1  | 19.22712741 | 7.03E-11    |          | ENSG00000217238 |
| X | 117453054 | 117453335 | 117453194 | 9  | 9  | 0  | 10.39304184 | 0.000803859 | WDR44    | ENSG00000131725 |
| X | 118033497 | 118033806 | 118033642 | 9  | 12 | 4  | 2.702190879 | 0.0203088   | LONRF3   | ENSG00000175556 |
| X | 118419502 | 118419825 | 118419660 | 10 | 13 | 1  | 7.27512929  | 0.000378098 | SLC25A43 | ENSG00000077713 |
| X | 118477727 | 118478067 | 118477896 | 18 | 19 | 2  | 6.928694562 | 4.25E-05    | SLC25A5  | ENSG00000005022 |
| X | 118810072 | 118810251 | 118810161 | 8  | 8  | 1  | 4.676868829 | 0.0091584   | RPL39    | ENSG00000198918 |
| X | 118961652 | 118961907 | 118961831 | 15 | 16 | 4  | 3.533634226 | 0.00276486  | NKAP     | ENSG00000101882 |



|   |           |           |           |    |     |    |             |             |         |                 |
|---|-----------|-----------|-----------|----|-----|----|-------------|-------------|---------|-----------------|
| X | 119278453 | 119278659 | 119278513 | 9  | 9   | 2  | 3.464347281 | 0.0163838   | ZBTB33  | ENSG00000177485 |
| X | 119975073 | 119975404 | 119975241 | 21 | 25  | 1  | 13.5109544  | 1.28E-07    |         | ENSG00000215359 |
| X | 120784945 | 120785282 | 120785113 | 11 | 15  | 0  | 16.62886695 | 1.12E-05    |         | ENSG00000213498 |
| X | 122394056 | 122394236 | 122394142 | 8  | 8   | 1  | 4.676868829 | 0.0091584   |         | ENSG00000179101 |
| X | 122531631 | 122531831 | 122531731 | 10 | 11  | 1  | 6.235825105 | 0.0013754   |         | ENSG00000207655 |
| X | 122764867 | 122765180 | 122765023 | 12 | 17  | 5  | 3.117912553 | 0.00407023  |         | ENSG00000213737 |
| X | 122794929 | 122795179 | 122795054 | 10 | 12  | 4  | 2.702190879 | 0.0203088   |         | ENSG00000199705 |
| X | 123074385 | 123074564 | 123074494 | 8  | 8   | 0  | 9.353737658 | 0.00163931  |         | ENSG00000219856 |
| X | 128468410 | 128468745 | 128468577 | 14 | 17  | 0  | 18.70747532 | 2.69E-06    | SMARCA1 | ENSG00000102038 |
| X | 128568591 | 128568846 | 128568734 | 9  | 9   | 2  | 3.464347281 | 0.0163838   | APLN    | ENSG00000171388 |
| X | 128943868 | 128944077 | 128943972 | 8  | 9   | 3  | 2.598260461 | 0.0397929   | BCORL1  | ENSG00000085185 |
| X | 129127835 | 129128096 | 129127965 | 10 | 11  | 3  | 3.117912553 | 0.0146045   | AIFM1   | ENSG00000156709 |
| X | 130527627 | 130527843 | 130527735 | 10 | 10  | 0  | 11.43234603 | 0.000394183 |         | ENSG00000219078 |
| X | 130569545 | 130569872 | 130569708 | 33 | 37  | 1  | 19.7467795  | 3.54E-11    |         | ENSG00000219221 |
| X | 131081343 | 131081522 | 131081454 | 8  | 9   | 2  | 3.464347281 | 0.0163838   | FRMD7   | ENSG00000165694 |
| X | 131133240 | 131133515 | 131133364 | 8  | 11  | 6  | 1.781664316 | 0.103344    |         | ENSG00000219713 |
| X | 131150011 | 131150324 | 131150189 | 18 | 21  | 0  | 22.86469205 | 1.55E-07    | RAP2C   | ENSG00000123728 |
| X | 131291827 | 131292117 | 131291972 | 9  | 11  | 0  | 12.47165021 | 0.000193293 | MBNL3   | ENSG00000076770 |
| X | 131837504 | 131837727 | 131837615 | 9  | 10  | 2  | 3.810782009 | 0.00936112  |         | ENSG00000218958 |
| X | 131839795 | 131840311 | 131840074 | 85 | 102 | 1  | 53.52416549 | 7.11E-31    |         | ENSG00000218958 |
| X | 131910719 | 131911002 | 131910887 | 8  | 8   | 6  | 1.336248237 | 0.277651    | HS6ST2  | ENSG00000171004 |
| X | 132406637 | 132406816 | 132406677 | 8  | 9   | 0  | 10.39304184 | 0.000803859 | GPC4    | ENSG00000076716 |
| X | 132748065 | 132748447 | 132748268 | 24 | 31  | 0  | 33.2577339  | 1.25E-10    |         | ENSG00000219153 |
| X | 132754157 | 132754550 | 132754336 | 12 | 20  | 4  | 4.365077574 | 0.000324139 |         | ENSG00000219153 |
| X | 133588243 | 133588443 | 133588307 | 8  | 9   | 4  | 2.078608368 | 0.0785659   |         | ENSG00000218119 |
| X | 135014064 | 135014292 | 135014197 | 8  | 9   | 0  | 10.39304184 | 0.000803859 |         | ENSG00000218223 |
| X | 136211934 | 136212149 | 136212025 | 9  | 10  | 0  | 11.43234603 | 0.000394183 |         | ENSG00000217721 |
| X | 136327954 | 136328203 | 136328078 | 9  | 9   | 5  | 1.73217364  | 0.133894    |         | ENSG00000134598 |
| X | 136347927 | 136348279 | 136348103 | 34 | 37  | 42 | 0.91845486  | 0.650155    |         | ENSG00000134598 |
| X | 136994984 | 136995264 | 136995124 | 17 | 20  | 0  | 21.82538787 | 3.17E-07    |         | ENSG00000208536 |
| X | 137680580 | 137680760 | 137680670 | 8  | 8   | 1  | 4.676868829 | 0.0091584   | FGF13   | ENSG00000129682 |
| X | 138590249 | 138590476 | 138590362 | 11 | 12  | 2  | 4.503651465 | 0.002963    | MCF2    | ENSG00000101977 |
| X | 139402010 | 139402426 | 139402253 | 14 | 21  | 5  | 3.810782009 | 0.000537724 | SOX3    | ENSG00000134595 |
| X | 141129657 | 141129879 | 141129768 | 8  | 8   | 1  | 4.676868829 | 0.0091584   | MAGEC2  | ENSG00000046774 |

|   |           |           |           |    |    |    |             |             |         |                 |
|---|-----------|-----------|-----------|----|----|----|-------------|-------------|---------|-----------------|
| X | 148400694 | 148400882 | 148400709 | 8  | 9  | 2  | 3.464347281 | 0.0163838   | IDS     | ENSG00000010404 |
| X | 148586801 | 148587057 | 148586957 | 8  | 11 | 1  | 6.235825105 | 0.0013754   | MAGEA11 | ENSG00000185247 |
| X | 150462878 | 150463243 | 150463029 | 40 | 44 | 0  | 46.76868829 | 1.18E-14    | PASD1   | ENSG00000166049 |
| X | 151131623 | 151131802 | 151131687 | 8  | 8  | 0  | 9.353737658 | 0.00163931  | MAGEA10 | ENSG00000124260 |
| X | 152359985 | 152360322 | 152360147 | 46 | 50 | 2  | 17.66817113 | 6.11E-14    | TREX2   | ENSG00000183479 |
| X | 152682559 | 152682837 | 152682710 | 9  | 13 | 4  | 2.910051716 | 0.0125532   | PLXNB3  | ENSG00000198753 |
| X | 152865953 | 152866170 | 152866061 | 8  | 9  | 0  | 10.39304184 | 0.000803859 | RENBP   | ENSG00000102032 |
| X | 153255185 | 153255501 | 153255347 | 11 | 14 | 3  | 3.897390691 | 0.00295882  | FLNA    | ENSG00000196924 |
| X | 153408215 | 153408776 | 153408401 | 16 | 32 | 7  | 4.28712976  | 1.26E-05    | FAM3A   | ENSG00000071889 |
| X | 153422417 | 153422787 | 153422639 | 10 | 15 | 2  | 5.542955649 | 0.000497081 | IKBKG   | ENSG00000073009 |
| X | 154703083 | 154703492 | 154703313 | 18 | 28 | 1  | 15.06991067 | 1.67E-08    |         | ENSG00000219128 |
| X | 154851048 | 154851391 | 154851221 | 23 | 27 | 0  | 29.10051716 | 2.16E-09    |         | ENSG00000220501 |
| Y | 10594361  | 10594675  | 10594518  | 11 | 14 | 6  | 2.227080395 | 0.0322529   |         | ENSG00000219679 |
| Y | 10629217  | 10629708  | 10629390  | 25 | 32 | 57 | 0.591328243 | 0.993207    |         | ENSG00000219584 |
| Y | 10629769  | 10630097  | 10629933  | 12 | 12 | 12 | 1.039304184 | 0.461227    |         | ENSG00000219584 |
| Y | 10630432  | 10630820  | 10630642  | 27 | 33 | 26 | 1.308753417 | 0.146119    |         | ENSG00000219584 |
| Y | 10632173  | 10632704  | 10632468  | 36 | 46 | 37 | 1.285455175 | 0.123233    |         | ENSG00000218597 |
| Y | 10633018  | 10633394  | 10633365  | 13 | 24 | 25 | 0.999330946 | 0.501681    |         | ENSG00000218597 |
| Y | 10634103  | 10634283  | 10634132  | 8  | 8  | 12 | 0.719518281 | 0.783103    |         | ENSG00000218597 |
| Y | 10635030  | 10635406  | 10635228  | 18 | 27 | 33 | 0.855897563 | 0.7313      |         | ENSG00000218597 |
| Y | 10636559  | 10636895  | 10636727  | 13 | 17 | 14 | 1.247165021 | 0.261378    |         | ENSG00000218597 |
| Y | 10637393  | 10637721  | 10637557  | 16 | 16 | 21 | 0.803098688 | 0.755224    |         | ENSG00000218597 |
| Y | 10639385  | 10639824  | 10639648  | 39 | 48 | 55 | 0.909391161 | 0.687636    |         | ENSG00000218597 |
| Y | 10641269  | 10641605  | 10641437  | 8  | 13 | 17 | 0.808347699 | 0.728863    |         | ENSG00000218597 |
| Y | 10641811  | 10642159  | 10641985  | 14 | 19 | 11 | 1.73217364  | 0.0607469   |         | ENSG00000221022 |
| Y | 10643375  | 10643703  | 10643539  | 20 | 20 | 17 | 1.212521548 | 0.272468    |         | ENSG00000221022 |
| Y | 10644898  | 10645244  | 10645071  | 27 | 32 | 33 | 1.008736414 | 0.486341    |         | ENSG00000223068 |
| Y | 10645450  | 10645635  | 10645480  | 11 | 13 | 17 | 0.808347699 | 0.728863    |         | ENSG00000223068 |
| Y | 10645678  | 10645857  | 10645767  | 8  | 8  | 10 | 0.850339787 | 0.645072    |         | ENSG00000223068 |
| Y | 10645893  | 10646289  | 10646117  | 17 | 26 | 31 | 0.876912905 | 0.694502    |         | ENSG00000219313 |
| Y | 10646398  | 10646727  | 10646576  | 20 | 22 | 8  | 2.655999582 | 0.0039122   |         | ENSG00000219313 |
| Y | 10647614  | 10648020  | 10647835  | 49 | 64 | 54 | 1.228268581 | 0.129828    |         | ENSG00000222088 |
| Y | 11243325  | 11243655  | 11243490  | 21 | 21 | 9  | 2.286469205 | 0.0111772   |         |                 |
| Y | 11247678  | 11248012  | 11247845  | 31 | 35 | 23 | 1.558956276 | 0.0432947   |         |                 |

|       |          |          |          |    |    |    |             |             |                 |
|-------|----------|----------|----------|----|----|----|-------------|-------------|-----------------|
| Y     | 11654994 | 11655173 | 11655023 | 9  | 9  | 3  | 2.598260461 | 0.0397929   | ENSG00000221738 |
| Y     | 11771876 | 11772055 | 11771959 | 8  | 8  | 6  | 1.336248237 | 0.277651    | ENSG00000221738 |
| Y     | 11918275 | 11918607 | 11918441 | 26 | 26 | 16 | 1.650659587 | 0.048911    | ENSG00000206163 |
| Y     | 11920730 | 11921180 | 11920907 | 21 | 29 | 44 | 0.692869456 | 0.943176    | ENSG00000206163 |
| Y     | 11924413 | 11924784 | 11924582 | 8  | 13 | 15 | 0.909391161 | 0.604792    | ENSG00000206161 |
| Y     | 11925891 | 11926137 | 11926046 | 11 | 14 | 4  | 3.117912553 | 0.00766354  | ENSG00000206161 |
| Y     | 11927643 | 11928128 | 11927949 | 17 | 30 | 39 | 0.805460743 | 0.819719    | ENSG00000206161 |
| Y     | 11936416 | 11936738 | 11936577 | 9  | 12 | 13 | 0.965068171 | 0.538344    | ENSG00000217642 |
| Y     | 11941373 | 11941717 | 11941545 | 16 | 21 | 28 | 0.788437657 | 0.803211    | ENSG00000217642 |
| Y     | 11941763 | 11942095 | 11941929 | 16 | 21 | 25 | 0.879411233 | 0.673643    | ENSG00000217642 |
| Y     | 11942130 | 11942309 | 11942193 | 9  | 9  | 16 | 0.611355402 | 0.899375    | ENSG00000217642 |
| Y     | 11943192 | 11943373 | 11943245 | 8  | 9  | 4  | 2.078608368 | 0.0785659   | ENSG00000217642 |
| Y     | 11944433 | 11944924 | 11944608 | 18 | 25 | 28 | 0.931789958 | 0.604671    | ENSG00000217642 |
| Y     | 11945263 | 11945607 | 11945435 | 37 | 39 | 47 | 0.86608682  | 0.750895    | ENSG00000217642 |
| Y     | 12110662 | 12110991 | 12110826 | 10 | 10 | 13 | 0.816596145 | 0.696946    | ENSG00000183704 |
| Y     | 12127268 | 12127597 | 12127432 | 10 | 12 | 8  | 1.501217155 | 0.168286    | ENSG00000183704 |
| Y     | 12128533 | 12128862 | 12128697 | 21 | 21 | 14 | 1.524312804 | 0.0996258   | ENSG00000183704 |
| Y     | 12138442 | 12138621 | 12138471 | 8  | 8  | 6  | 1.336248237 | 0.277651    | ENSG00000183704 |
| Y     | 12312122 | 12312450 | 12312286 | 8  | 8  | 14 | 0.623582511 | 0.877092    | ENSG00000220799 |
| Y     | 12314651 | 12315022 | 12314829 | 13 | 19 | 14 | 1.385738912 | 0.166049    | ENSG00000220799 |
| Y     | 12320106 | 12320435 | 12320270 | 14 | 16 | 23 | 0.736173797 | 0.837668    | ENSG00000220799 |
| Y     | 12323329 | 12323862 | 12323683 | 20 | 29 | 26 | 1.154782427 | 0.292794    | ENSG00000220799 |
| Y     | 12327788 | 12328118 | 12327953 | 18 | 18 | 13 | 1.41048425  | 0.160361    | ENSG00000220799 |
| Y     | 12334249 | 12334429 | 12334277 | 9  | 9  | 22 | 0.451871384 | 0.986686    | ENSG00000220799 |
| Y     | 12361509 | 12361693 | 12361662 | 11 | 12 | 16 | 0.794762023 | 0.738004    | ENSG00000220799 |
| Y     | 12372449 | 12372777 | 12372613 | 19 | 19 | 23 | 0.86608682  | 0.685164    | ENSG00000220799 |
| Y     | 12372959 | 12373296 | 12373127 | 27 | 28 | 34 | 0.861137753 | 0.726418    | ENSG00000220799 |
| Y     | 12375093 | 12375272 | 12375122 | 8  | 8  | 9  | 0.935373766 | 0.560286    | ENSG00000220799 |
| Y     | 27209320 | 27209642 | 27209484 | 9  | 9  | 9  | 1.039304184 | 0.466079    | ENSG00000219871 |
| Y     | 57289644 | 57289973 | 57289808 | 8  | 8  | 3  | 2.338434415 | 0.0641221   | ENSG00000217042 |
| Y     | 57381662 | 57381997 | 57381829 | 21 | 21 | 31 | 0.714521627 | 0.891579    | ENSG00000217042 |
| Y     | 57394862 | 57395152 | 57395024 | 10 | 11 | 15 | 0.779478138 | 0.747877    | ENSG00000217042 |
| Y     | 57397696 | 57397975 | 57397835 | 8  | 12 | 1  | 6.755477198 | 0.000722752 | ENSG00000217042 |
| c6_Qt | 31429455 | 31429656 | 31429555 | 12 | 12 | 1  | 6.755477198 | 0.000722752 | ENSG00000219118 |

|       |          |          |          |   |   |   |             |             |                 |
|-------|----------|----------|----------|---|---|---|-------------|-------------|-----------------|
| c6_Qf | 31437992 | 31438171 | 31438081 | 9 | 9 | 0 | 10.39304184 | 0.000803859 | ENSG00000206450 |
|-------|----------|----------|----------|---|---|---|-------------|-------------|-----------------|
